# Supplementary material for: Causal role of immune cells in aplastic anemia: Mendelian randomization (MR) study
Source: PubMed Central journal article supplement — Sci Rep. 2024 Aug 3;14:18010. doi: 10.1038/s41598-024-69104-0 (PMC11297992; doi:10.1038/s41598-024-69104-0), 2024-08-03

Supplementary figure1 : Leave one out analyses of all MR analyses of 731 immunophenotypes on aplastic anemia.

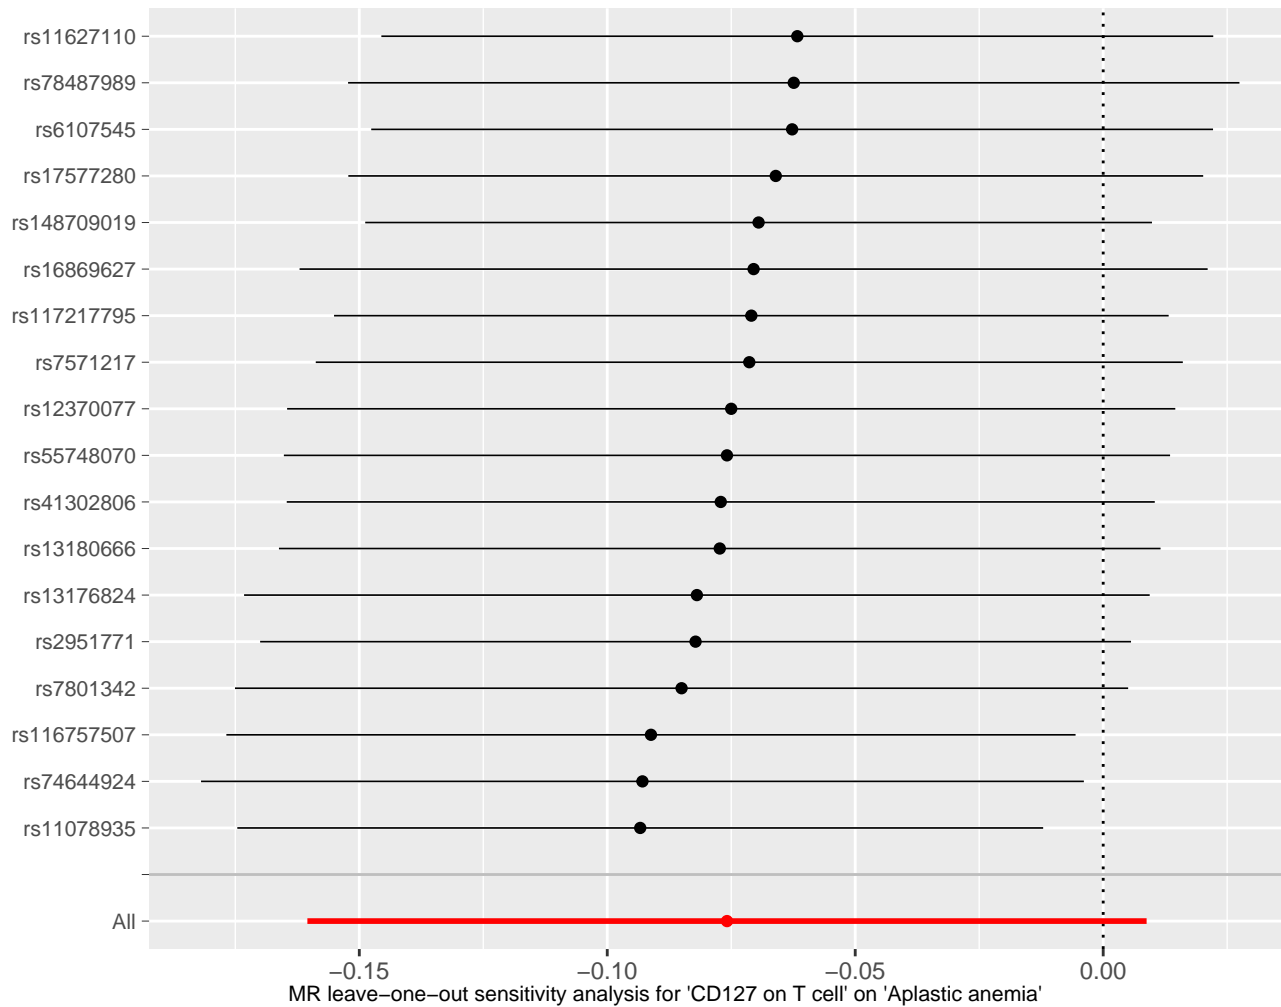

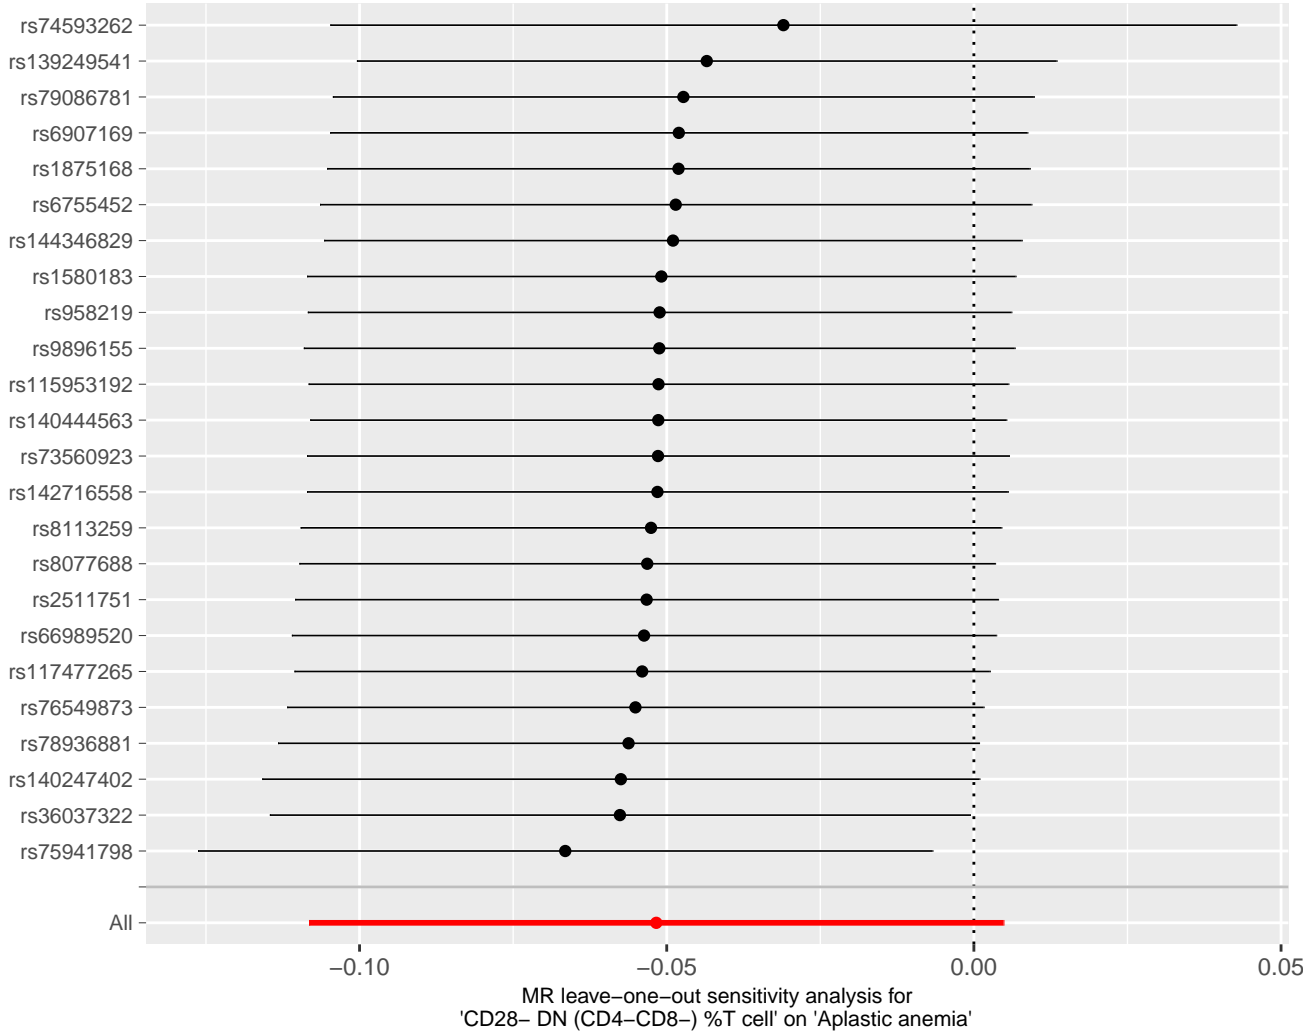

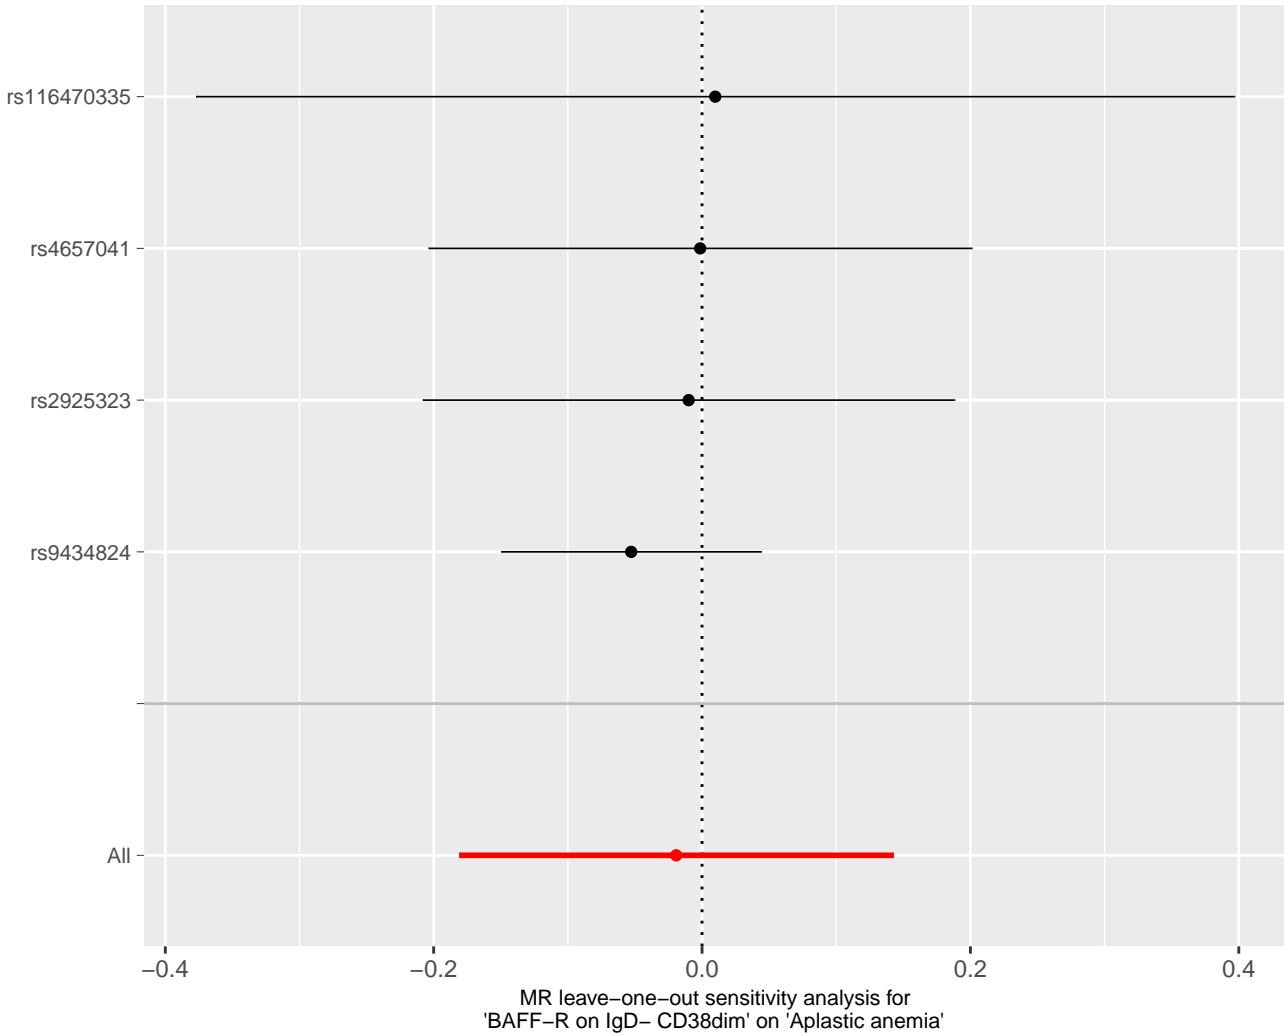

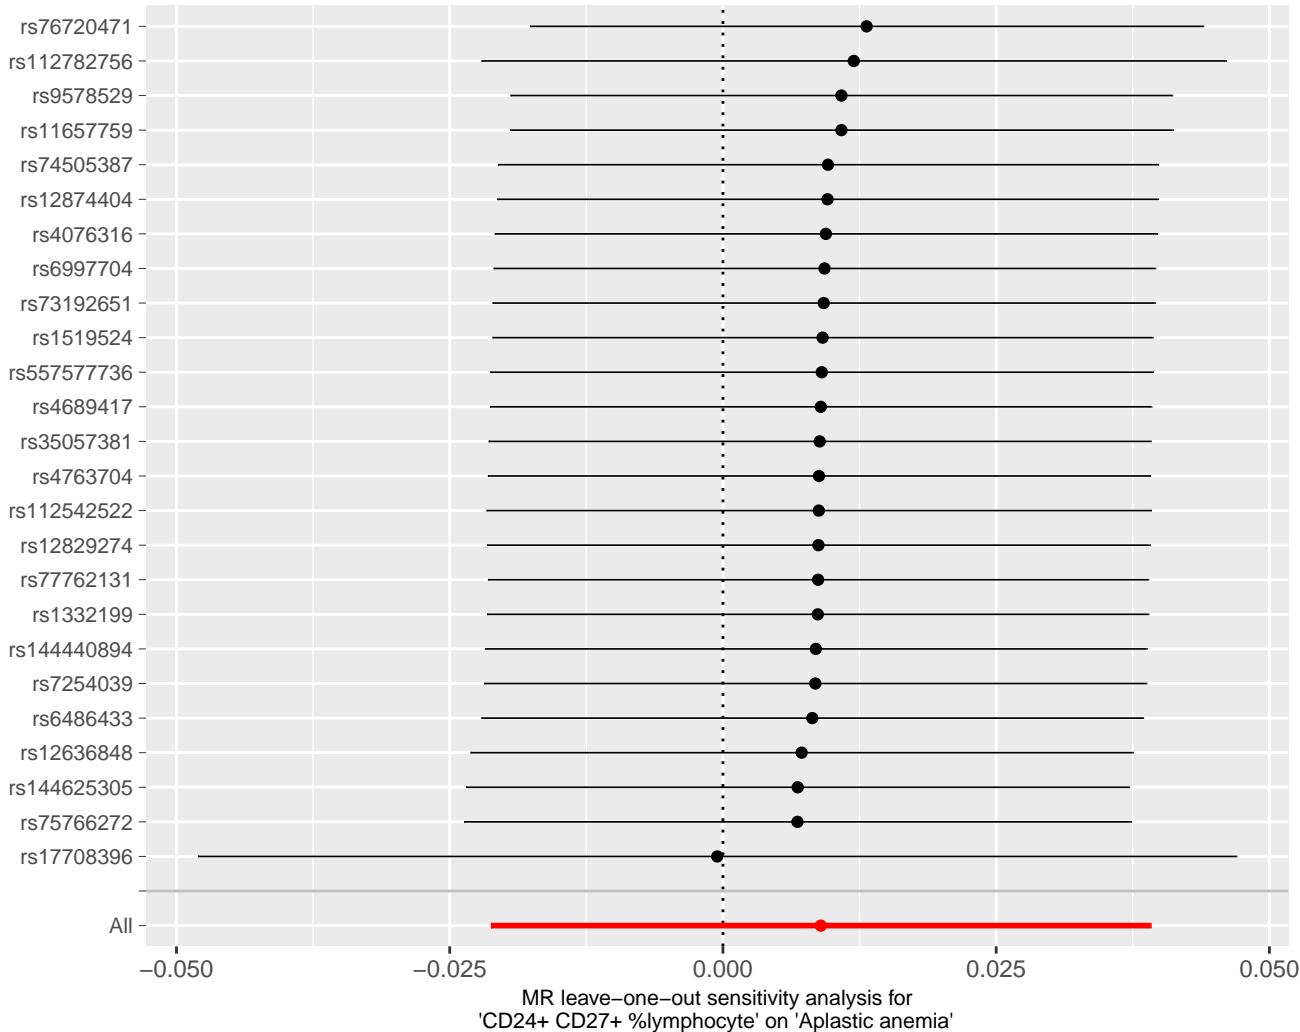

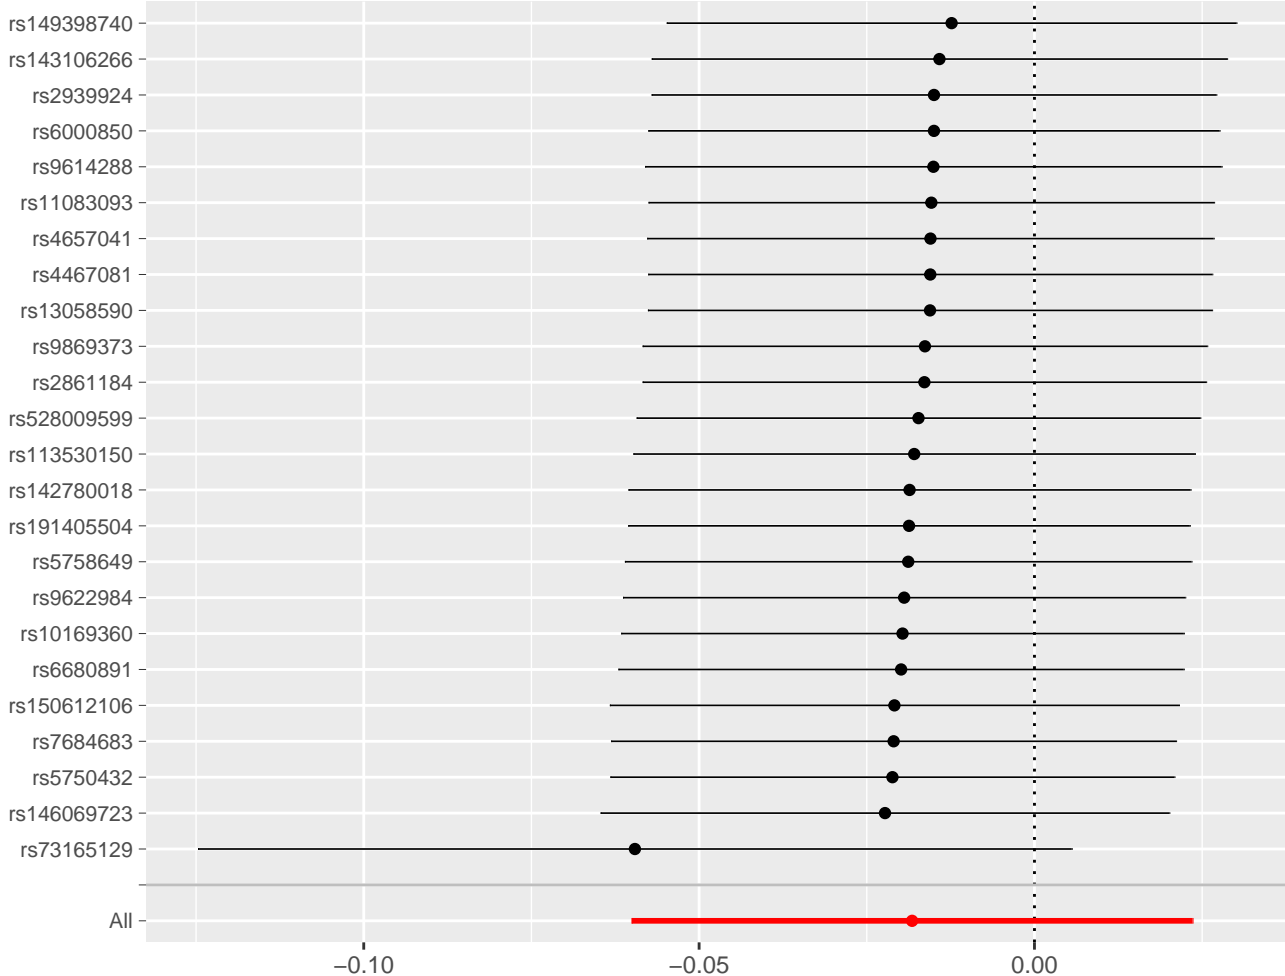

MR leave-one-out sensitivity analysis for 'BAFF-R on IgD- CD24-' on 'Aplastic anemia'

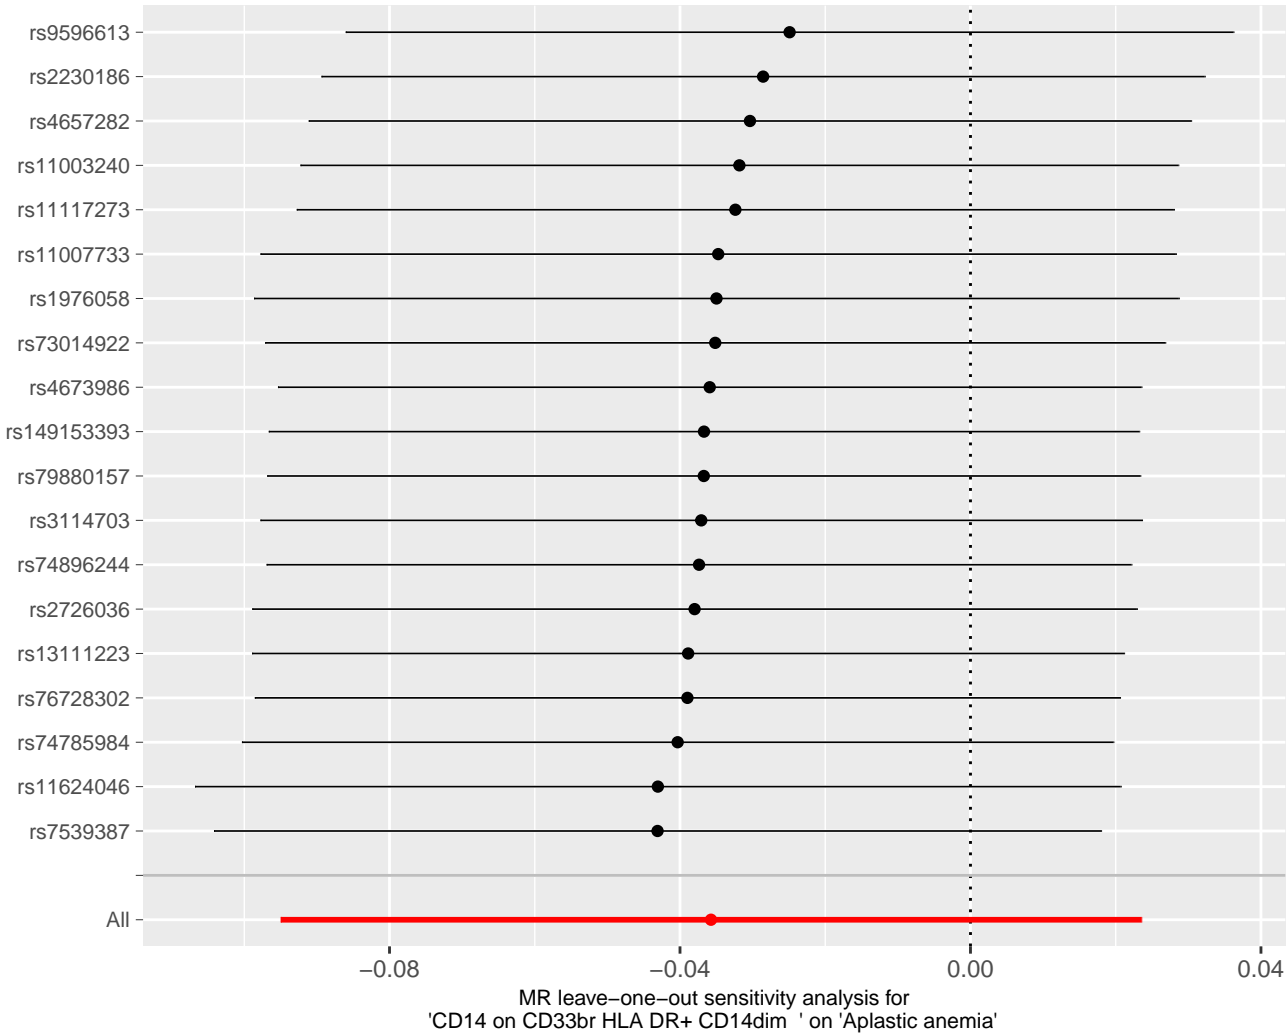

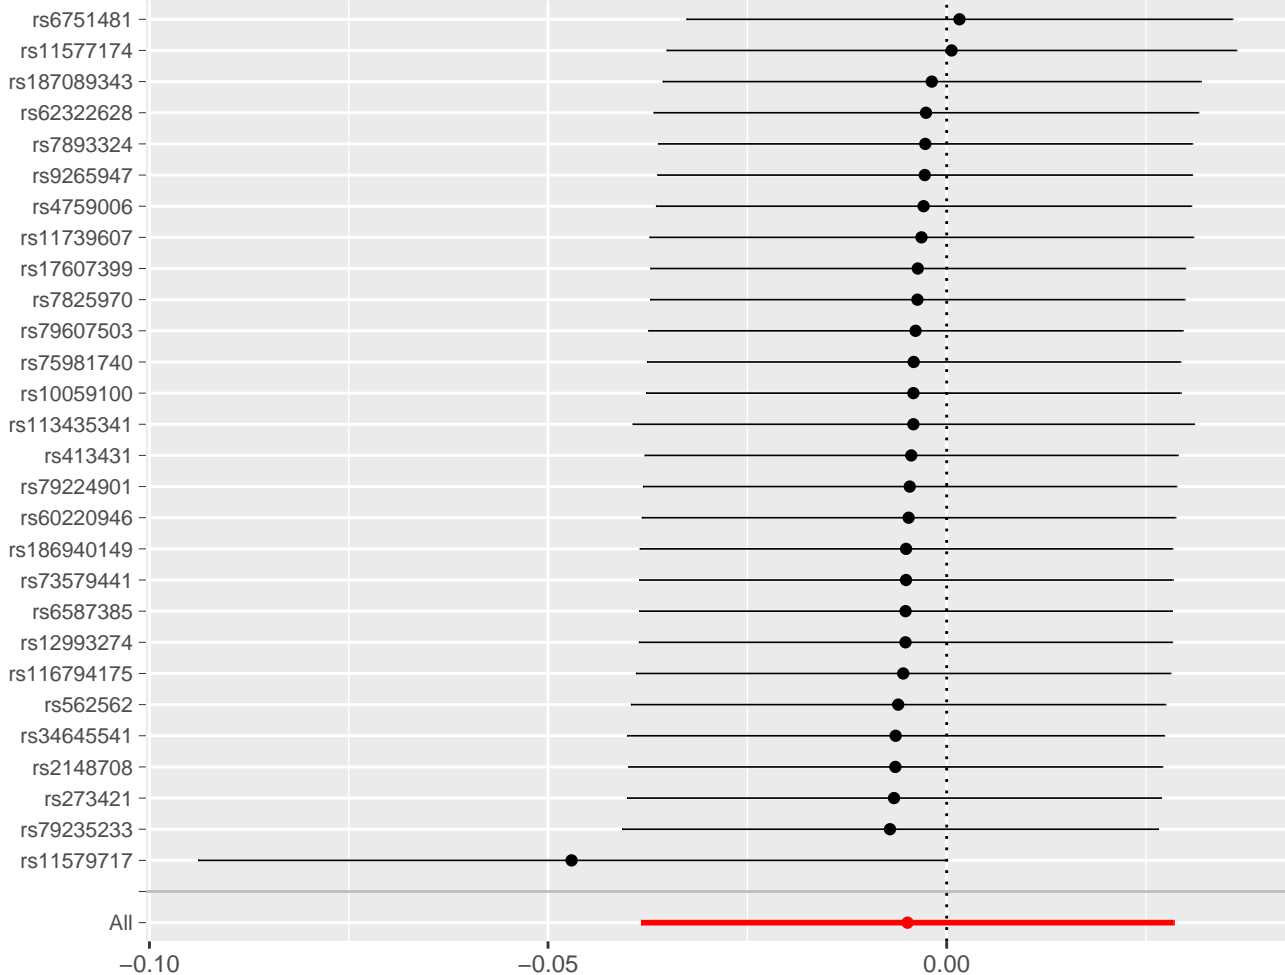

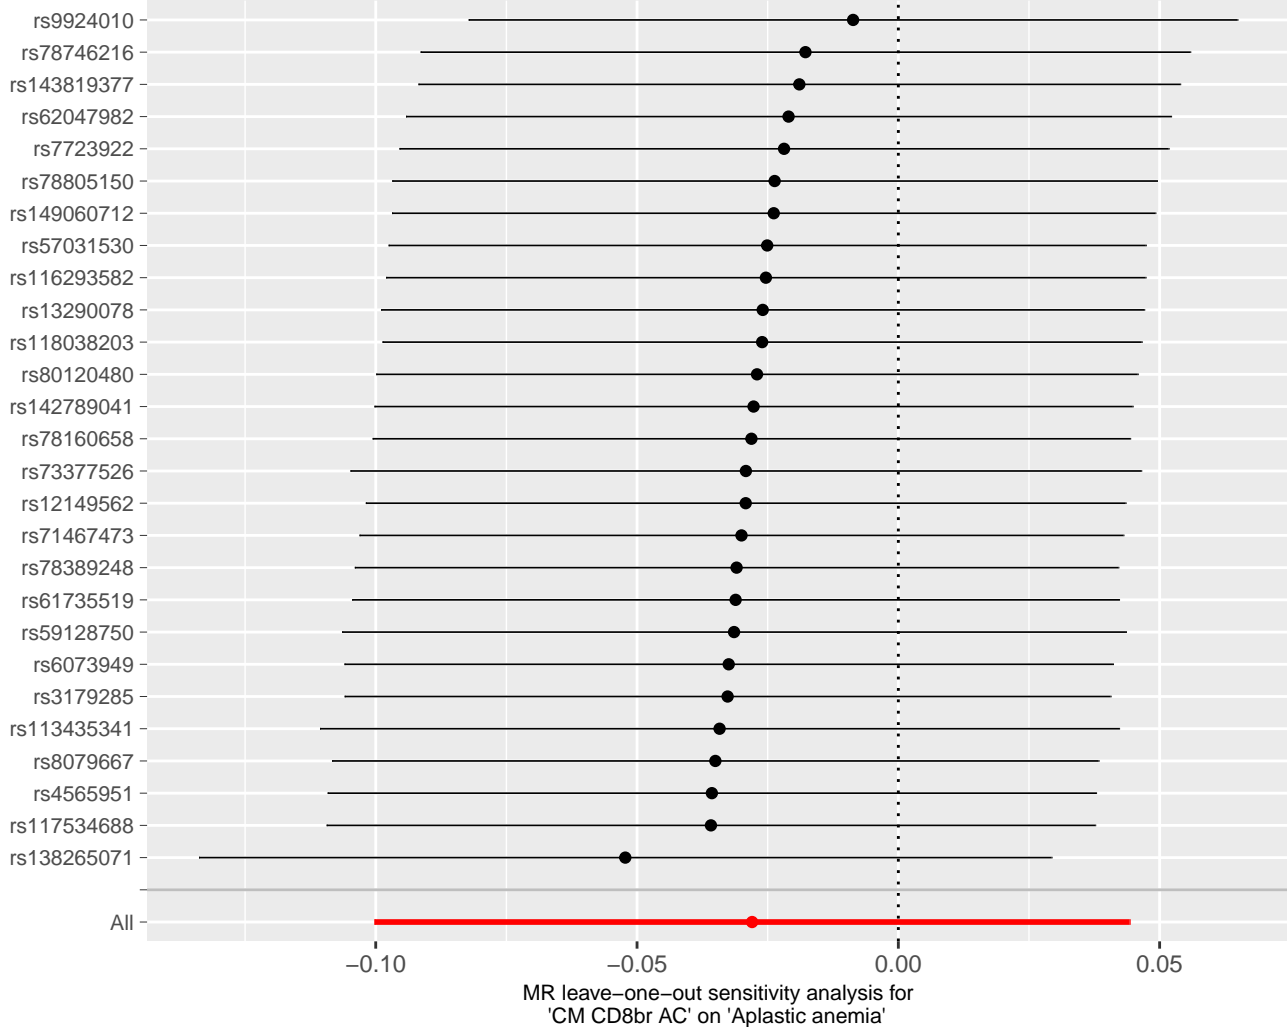



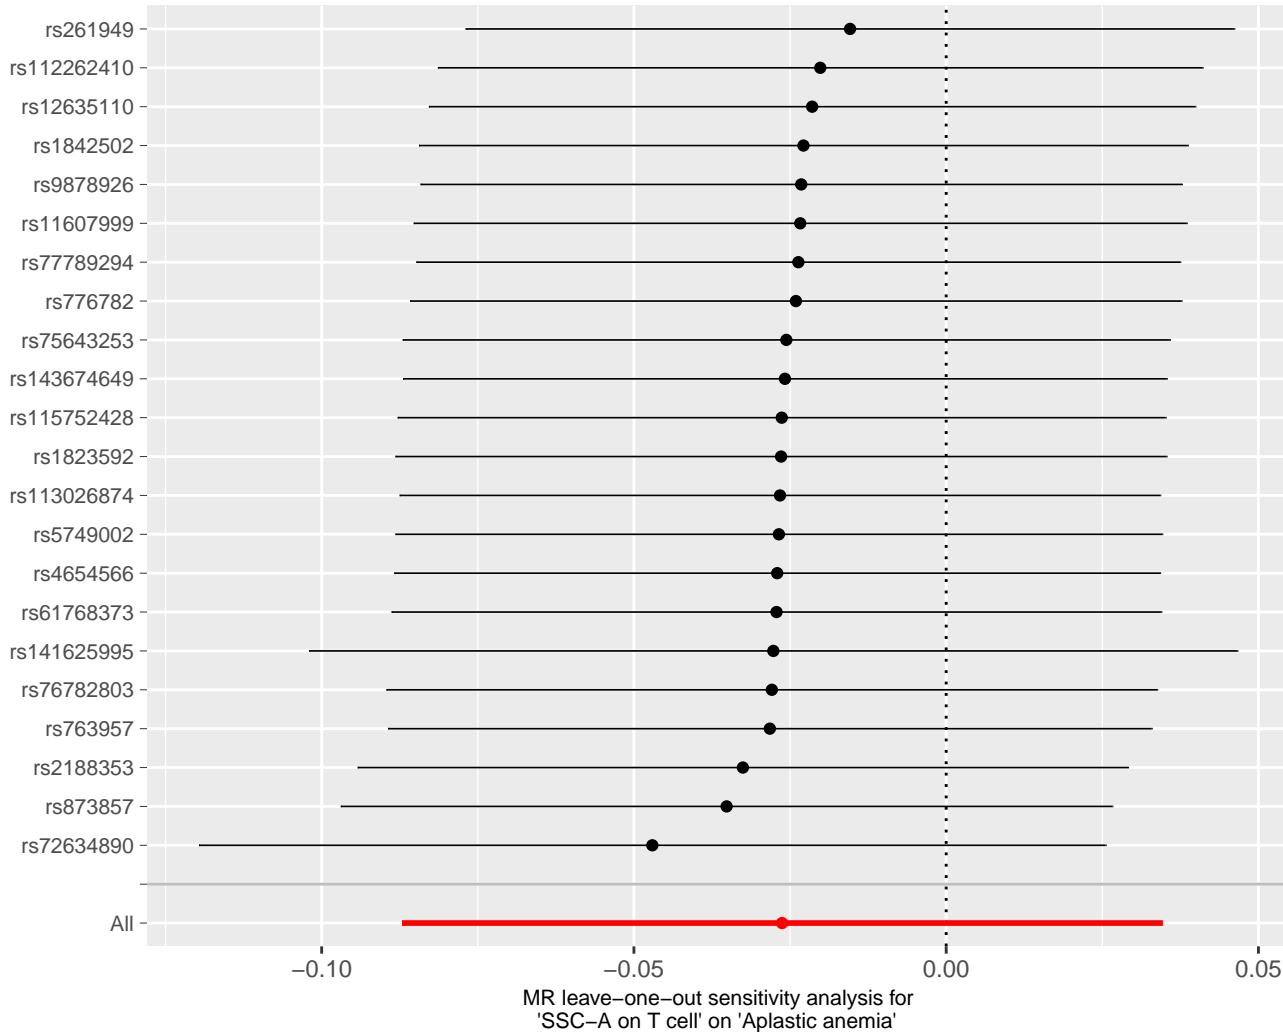

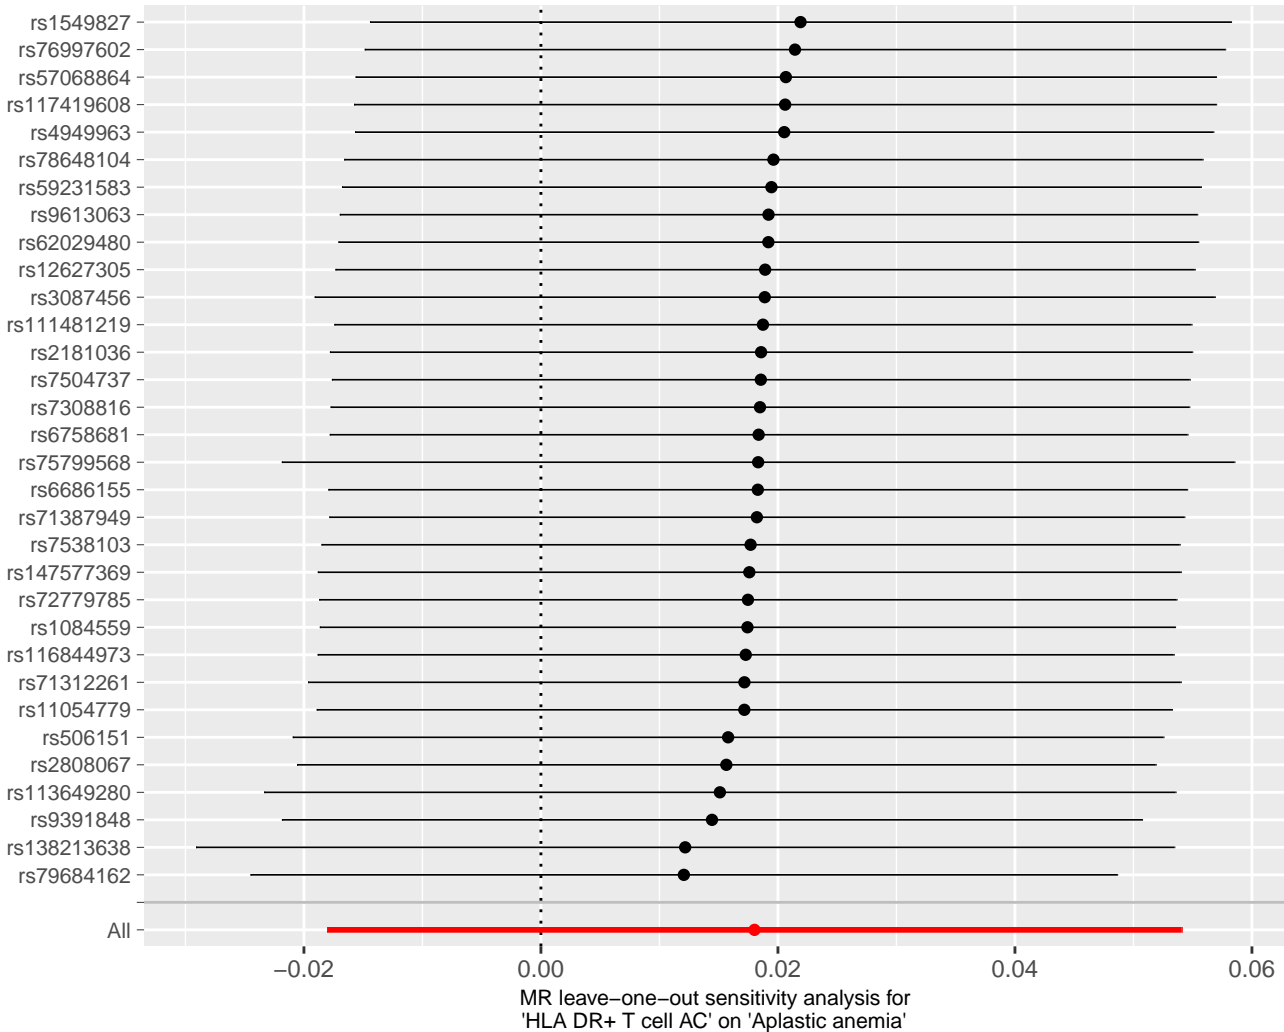

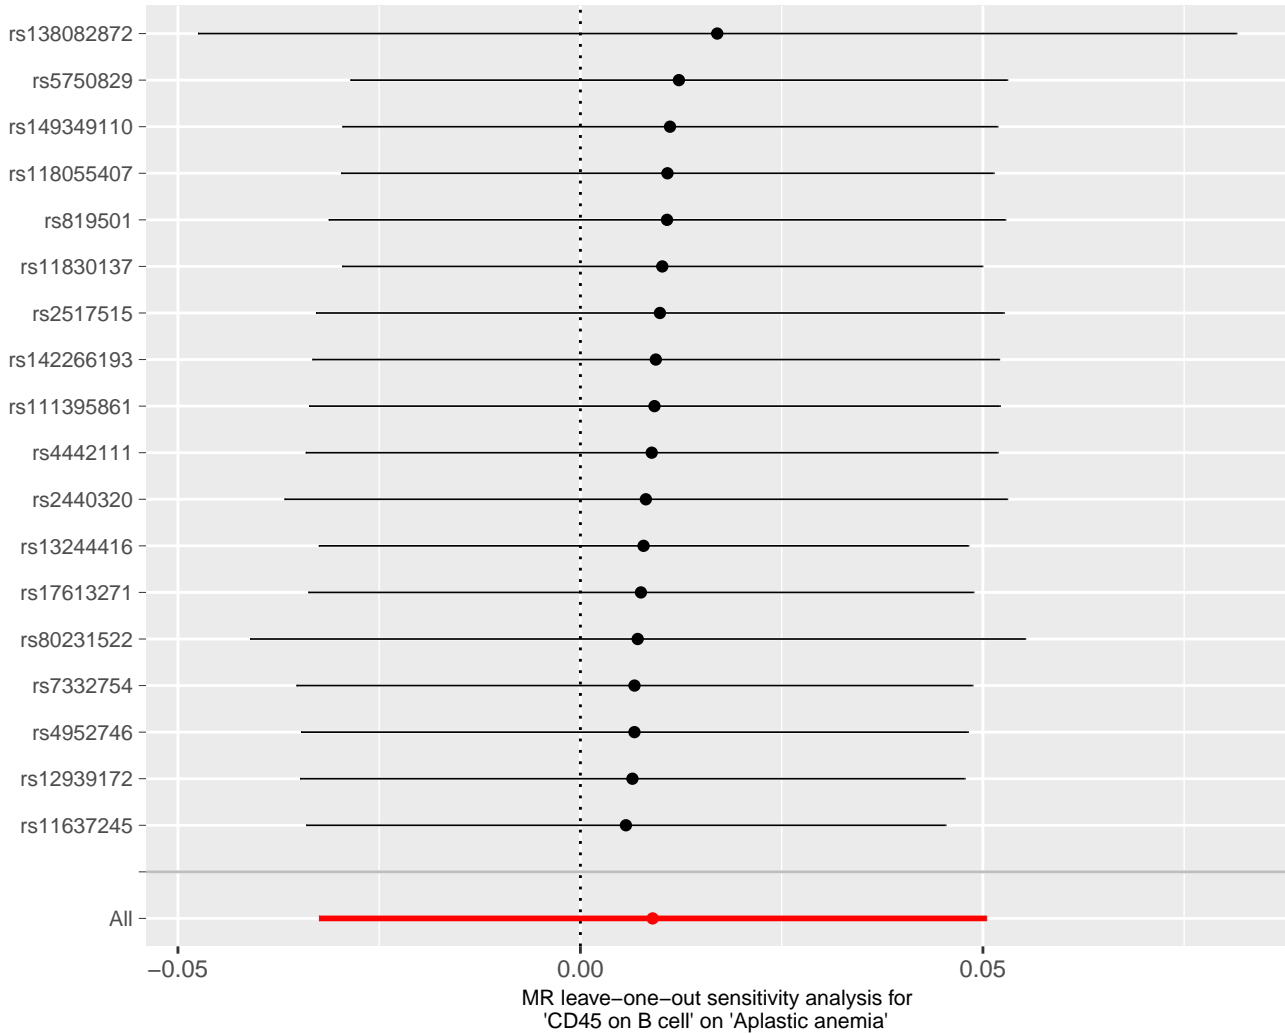

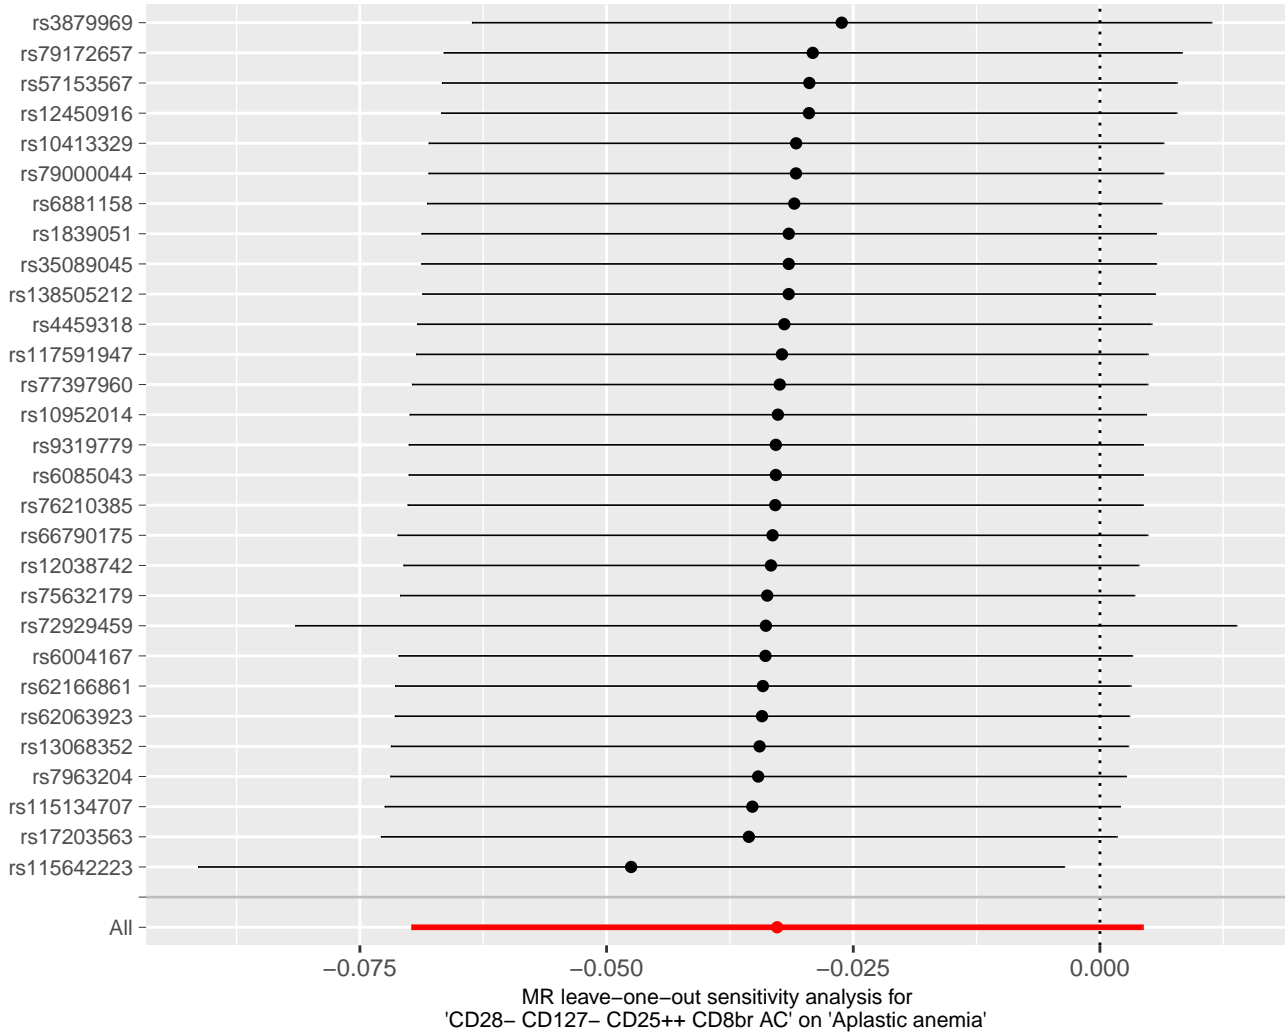

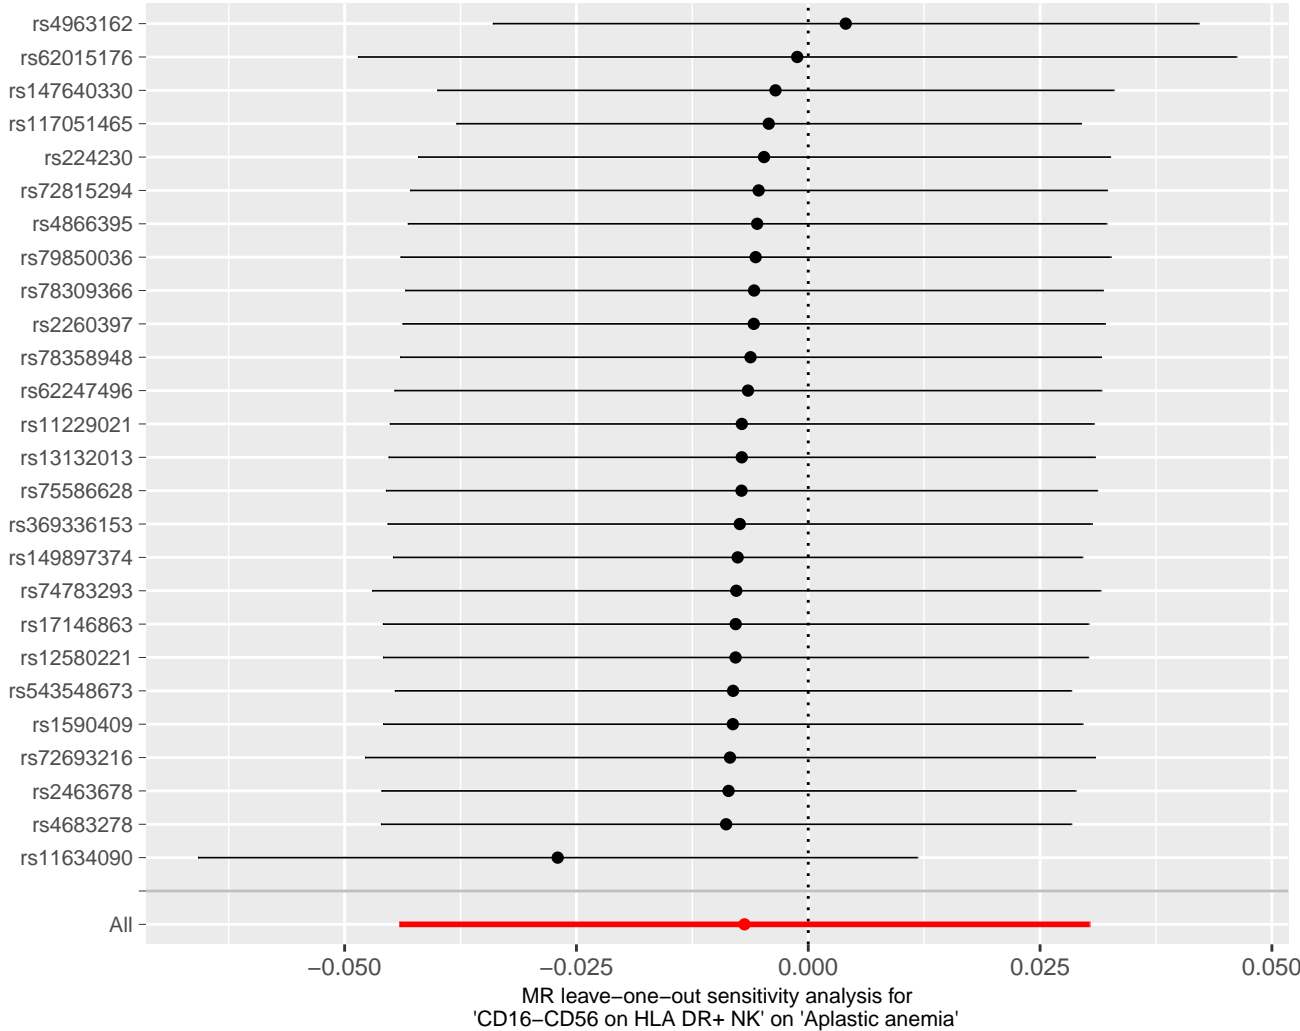

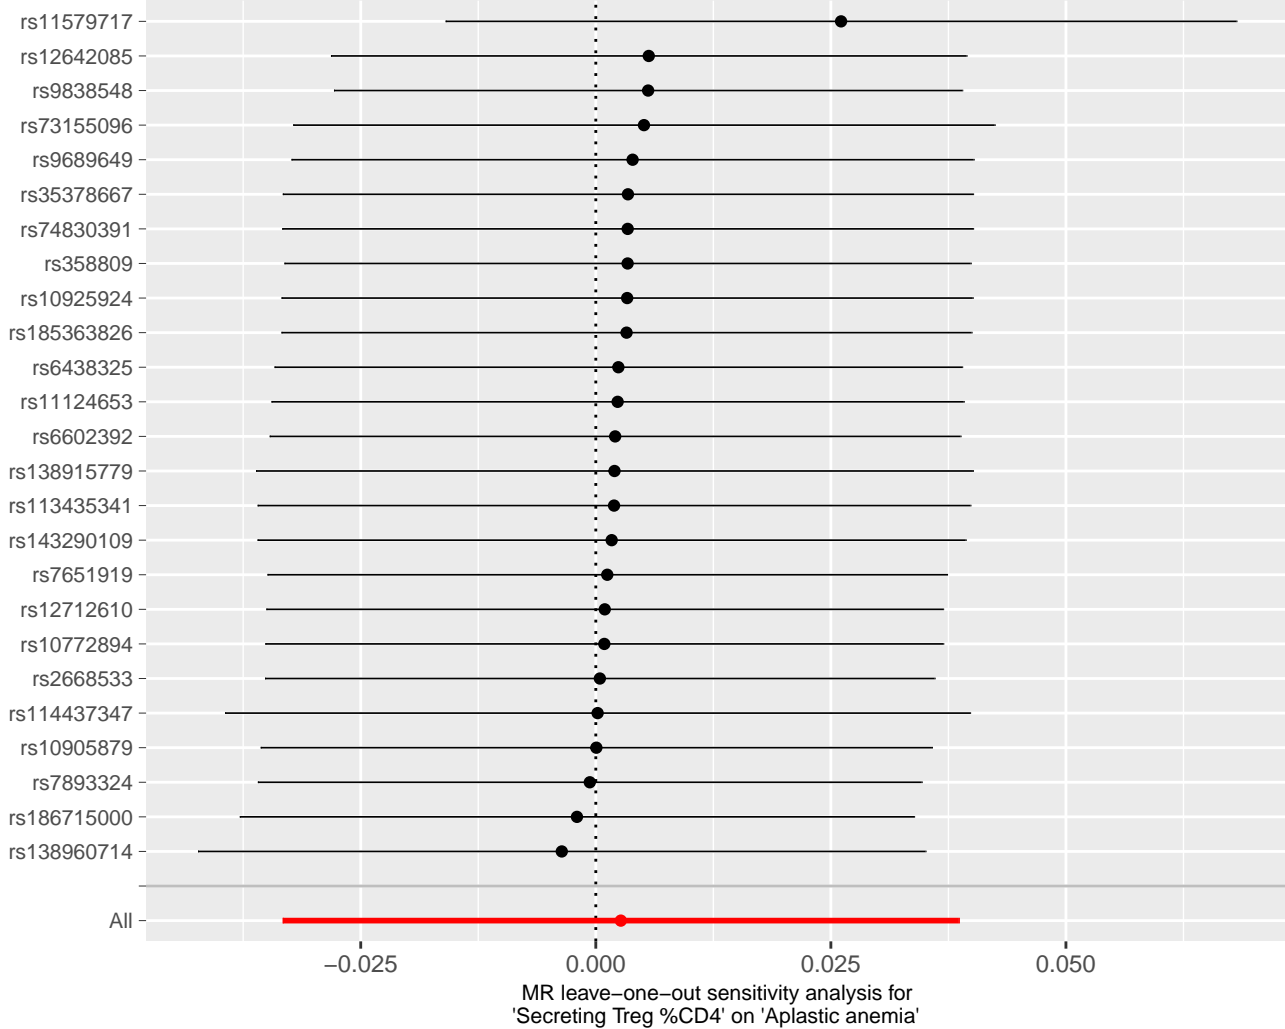

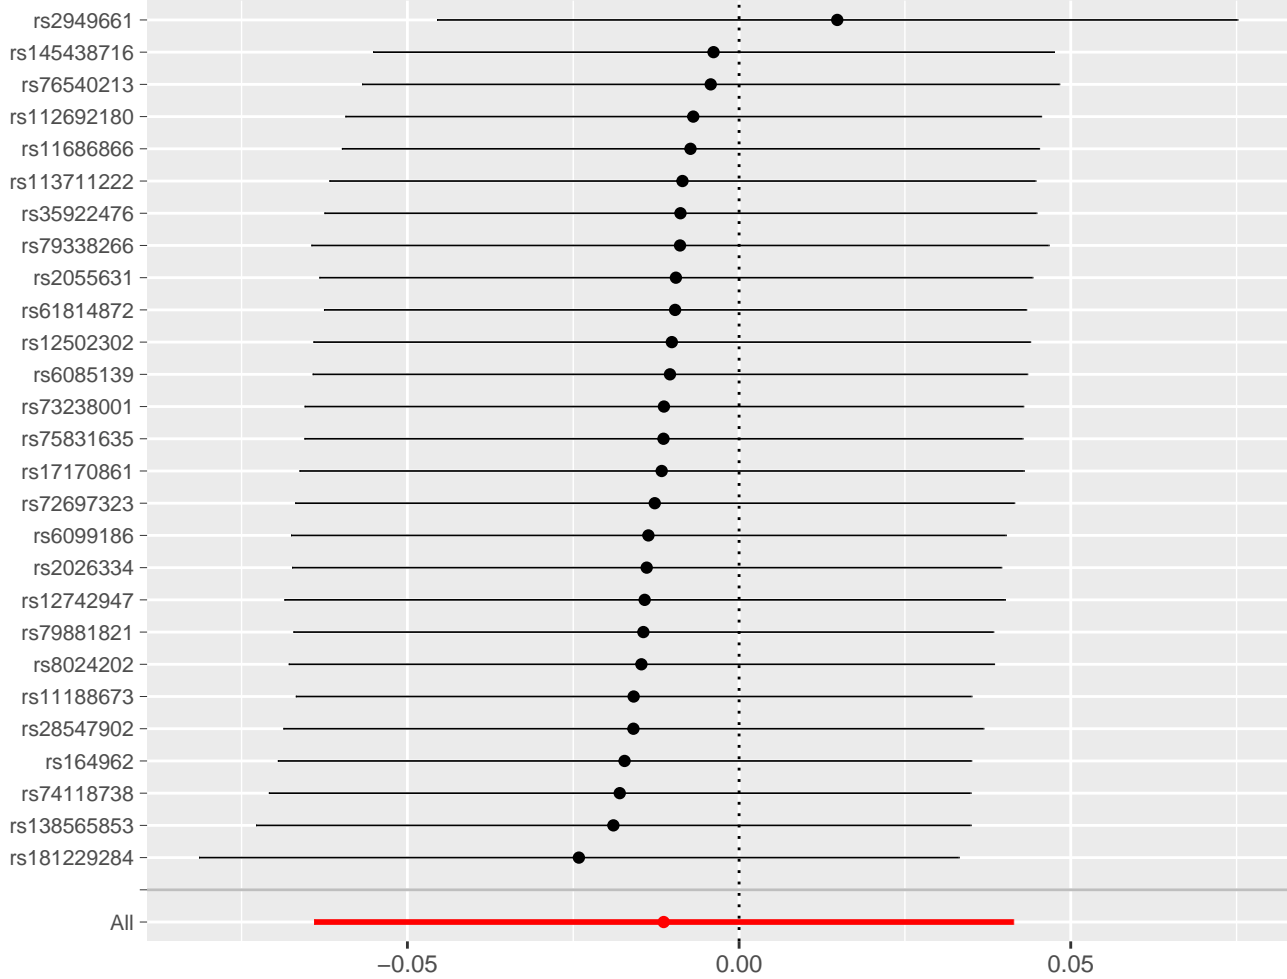

MR leave-one-out sensitivity analysis for 'CD3 on CD39+ secreting Treg' on 'Aplastic anemia'

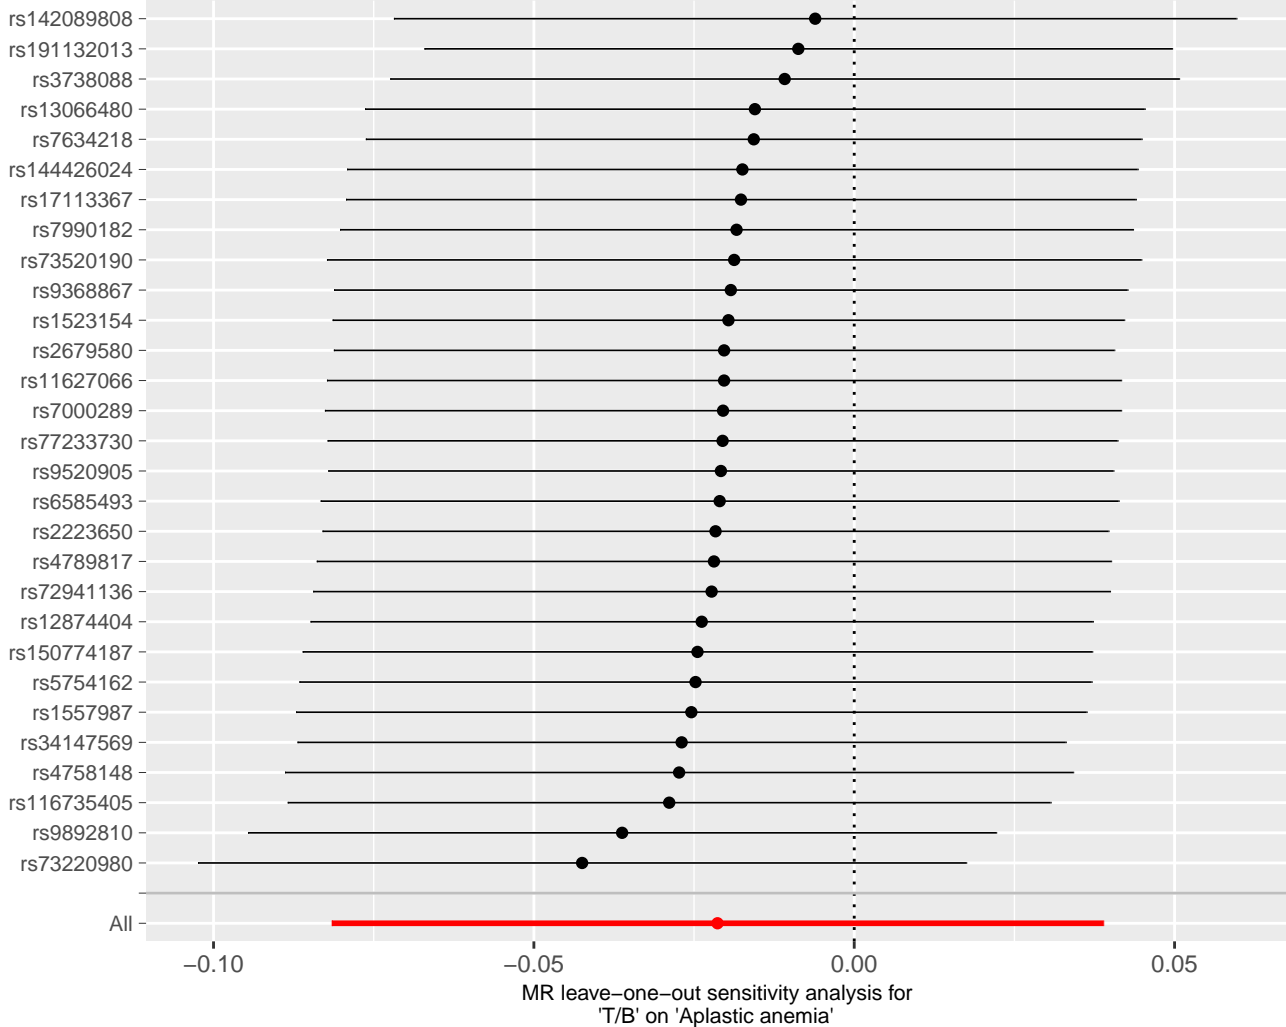



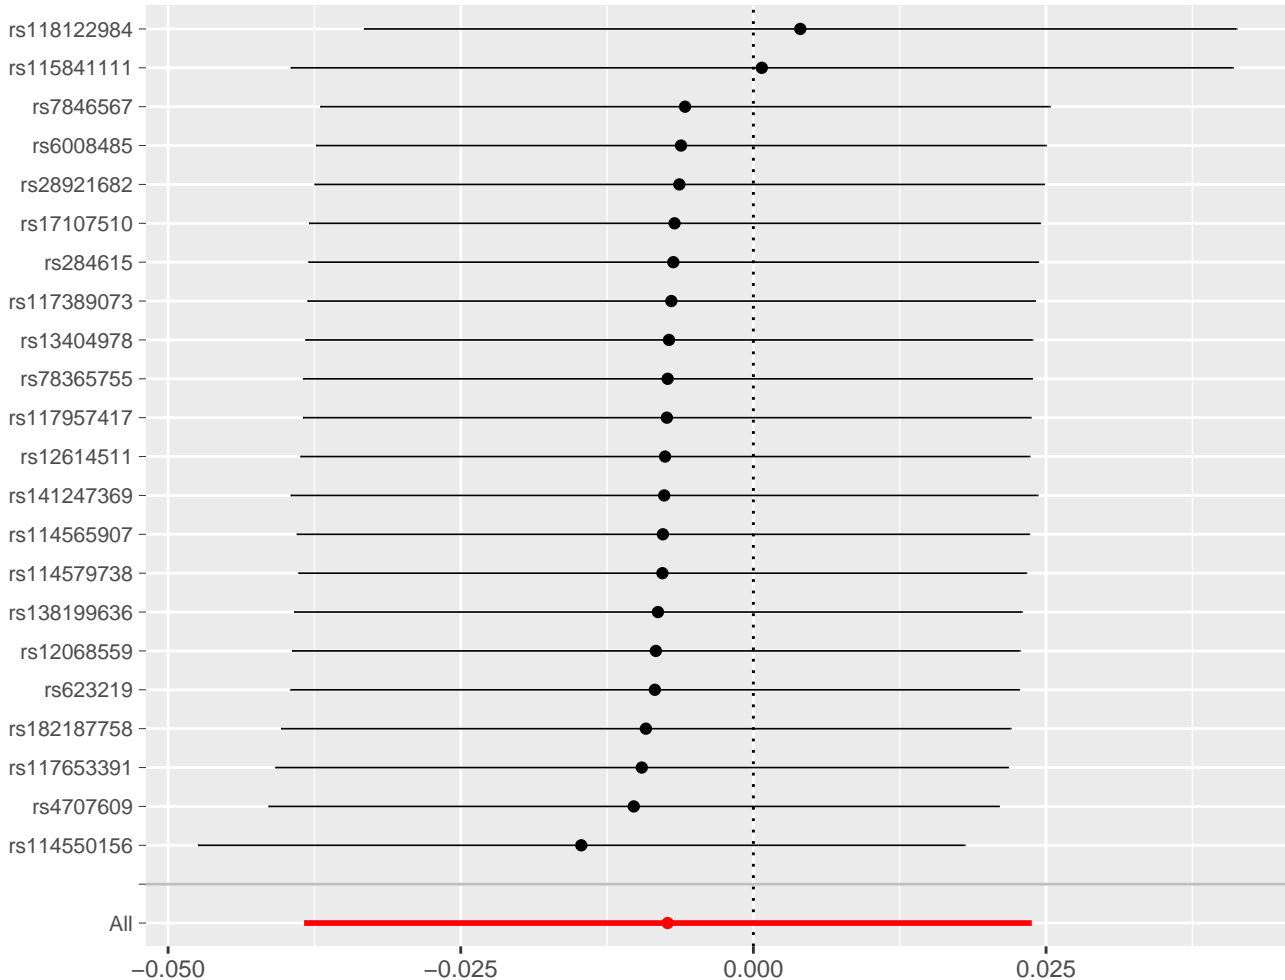

MR leave-one-out sensitivity analysis for 'CD28 on CD39+ resting Treg' on 'Aplastic anemia'

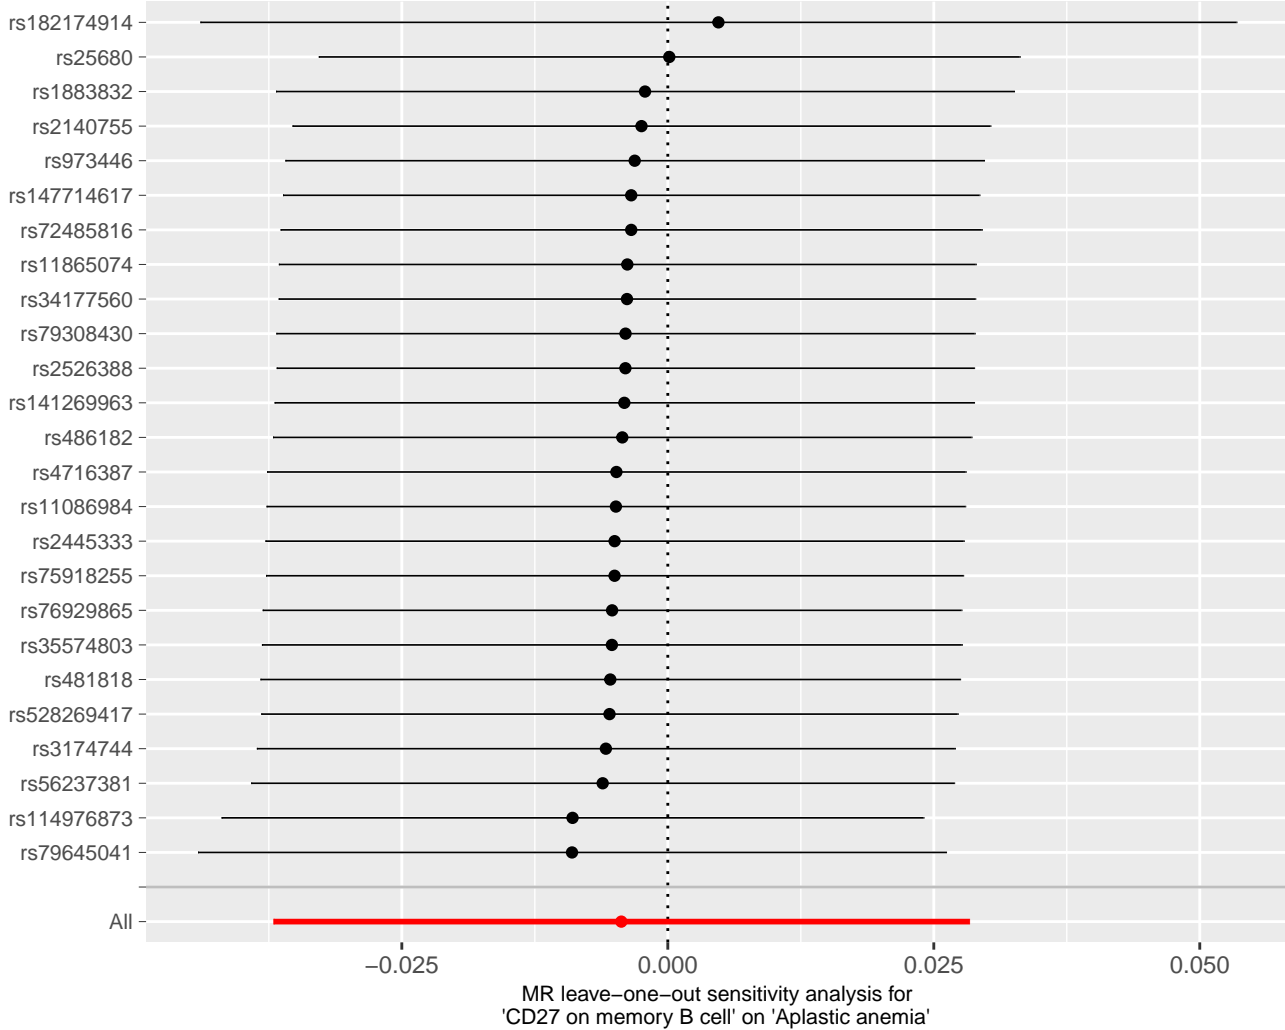

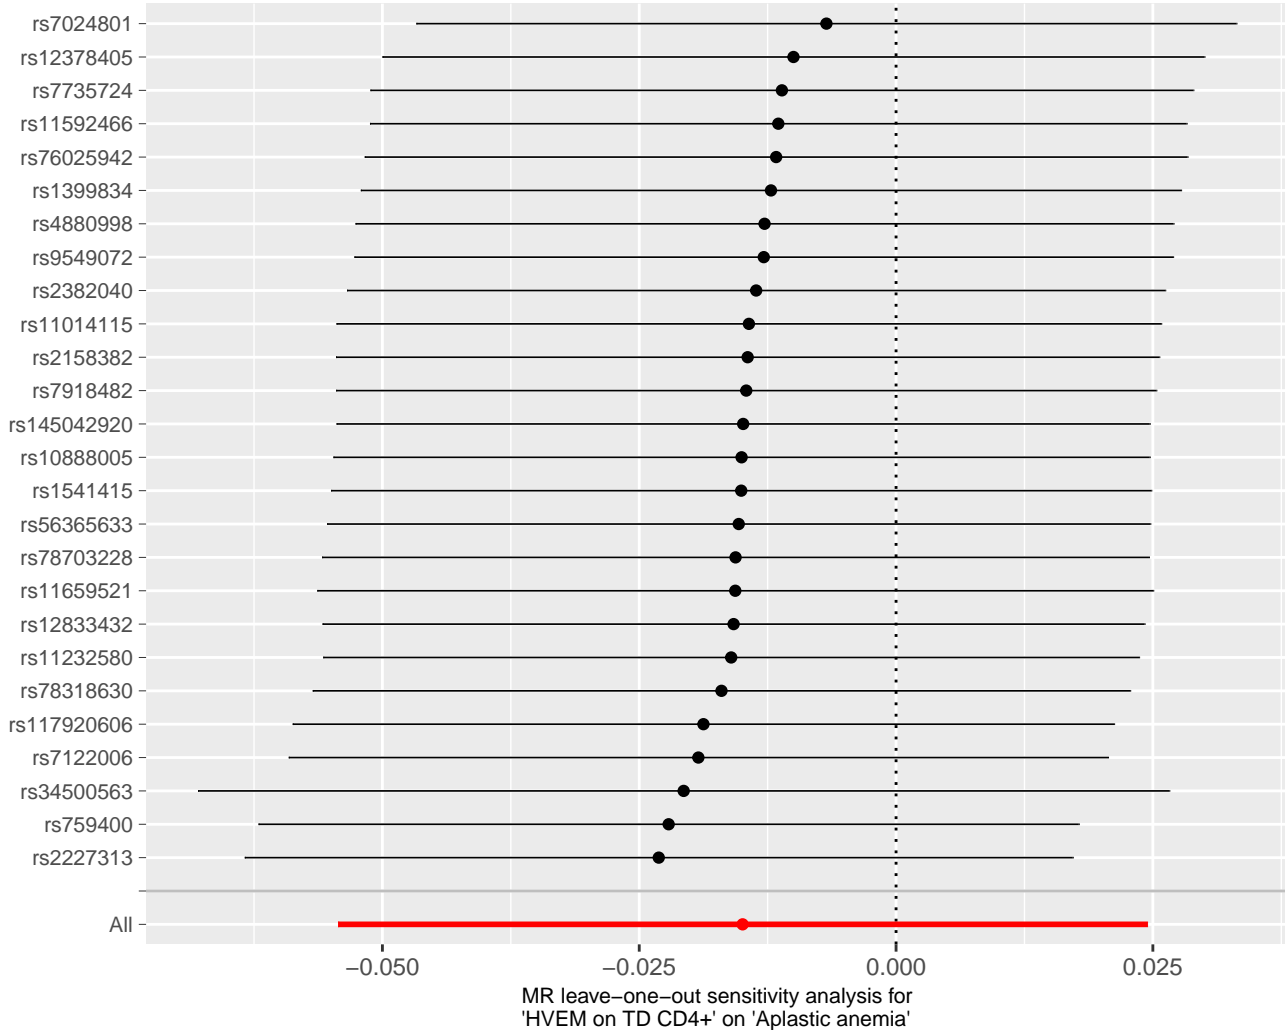

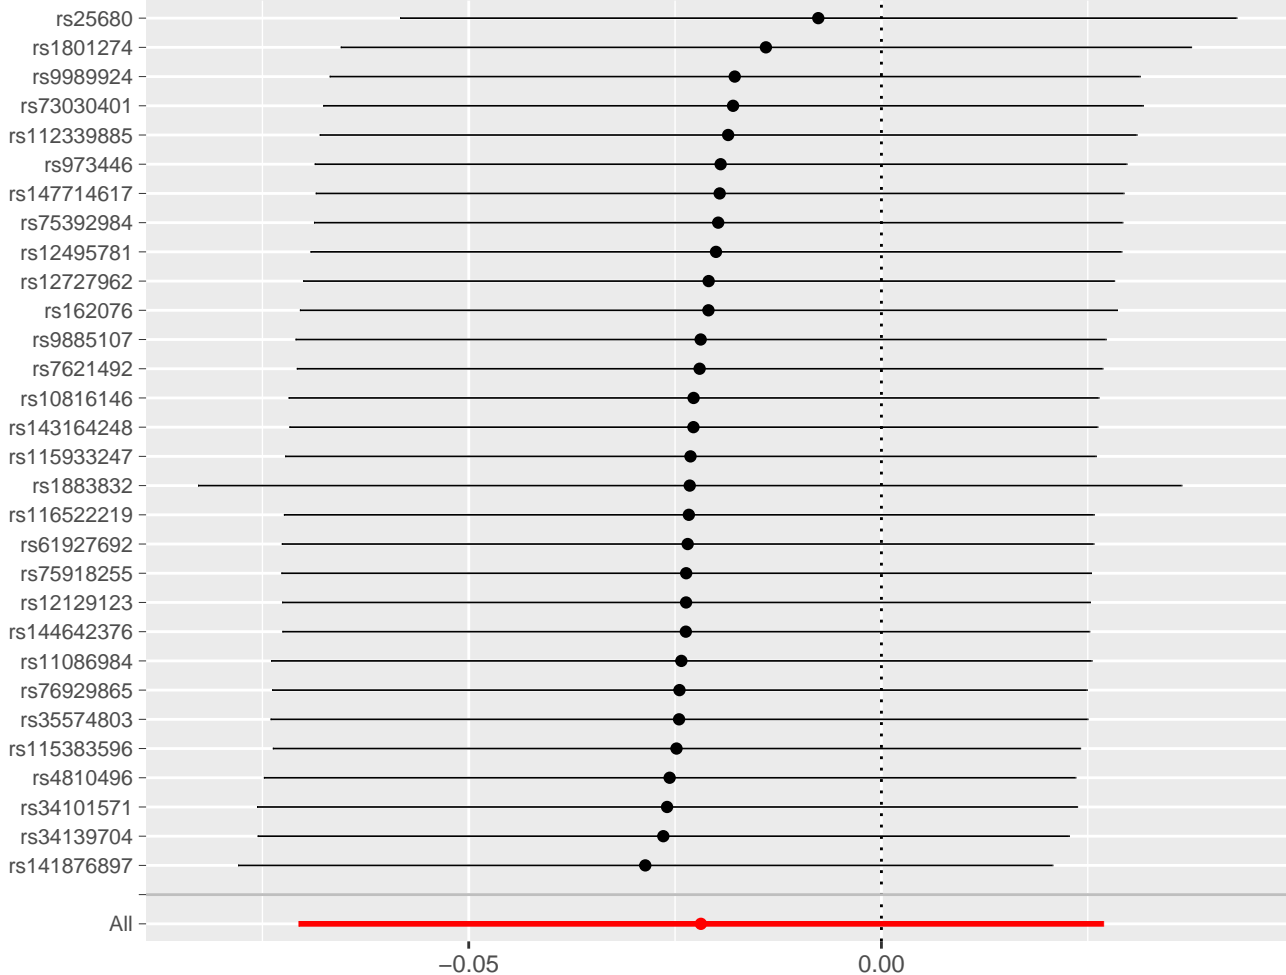

MR leave-one-out sensitivity analysis for 'CD27 on sw mem' on 'Aplastic anemia'

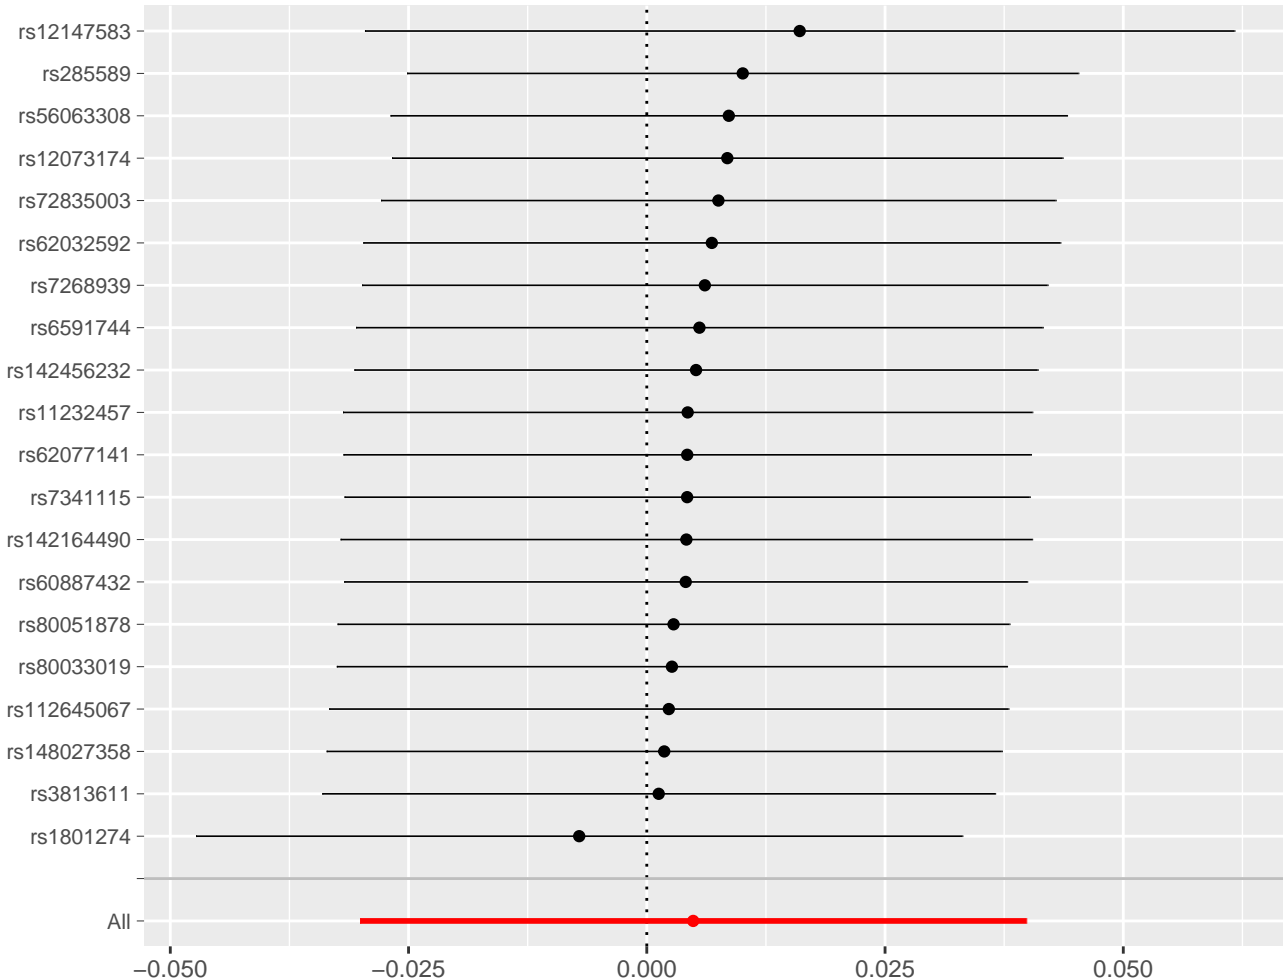

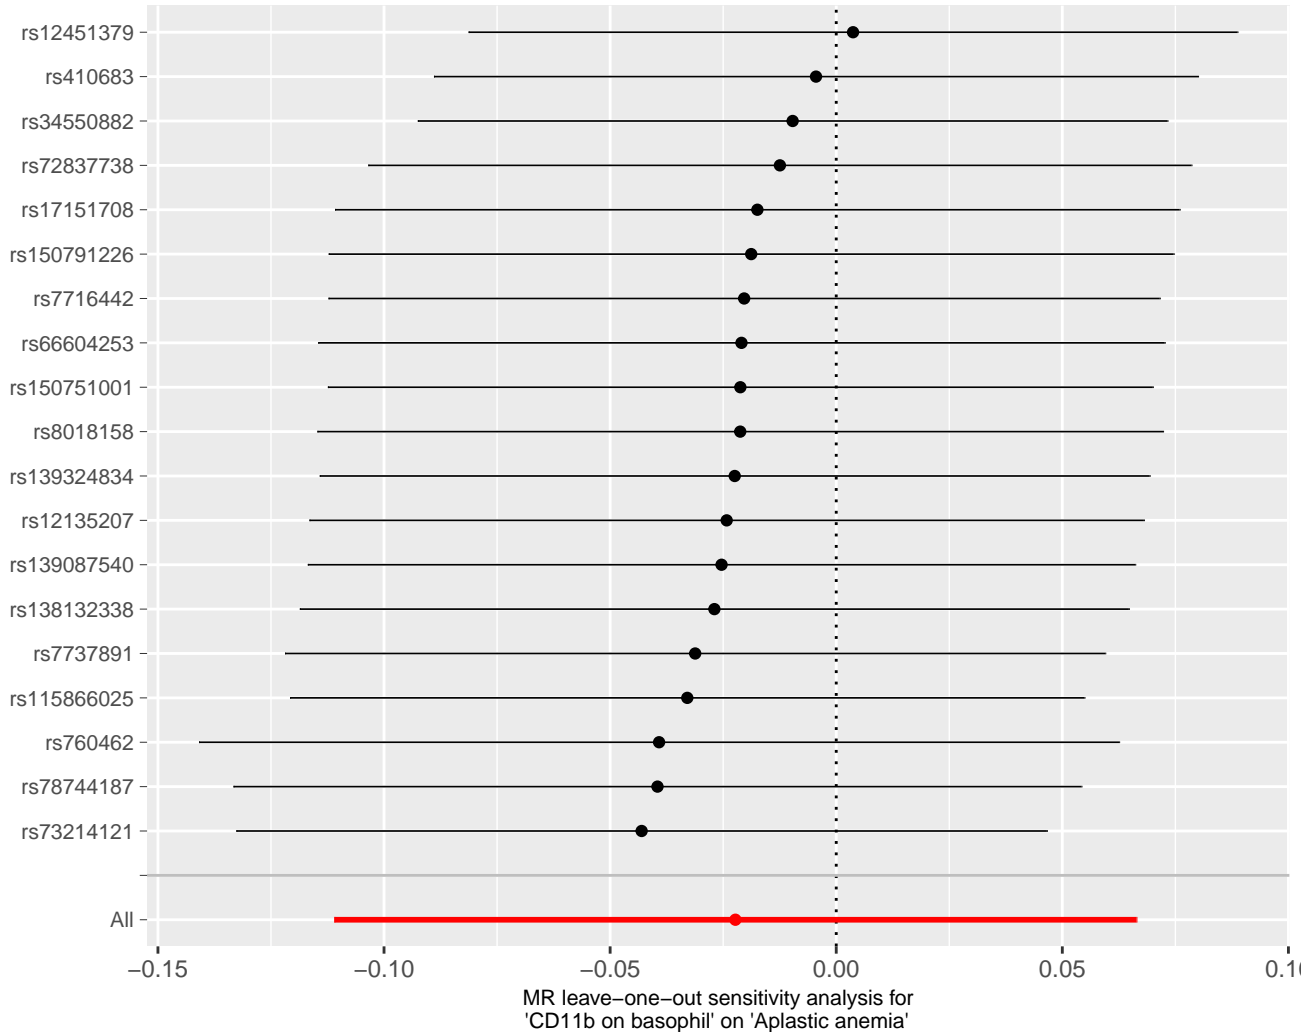

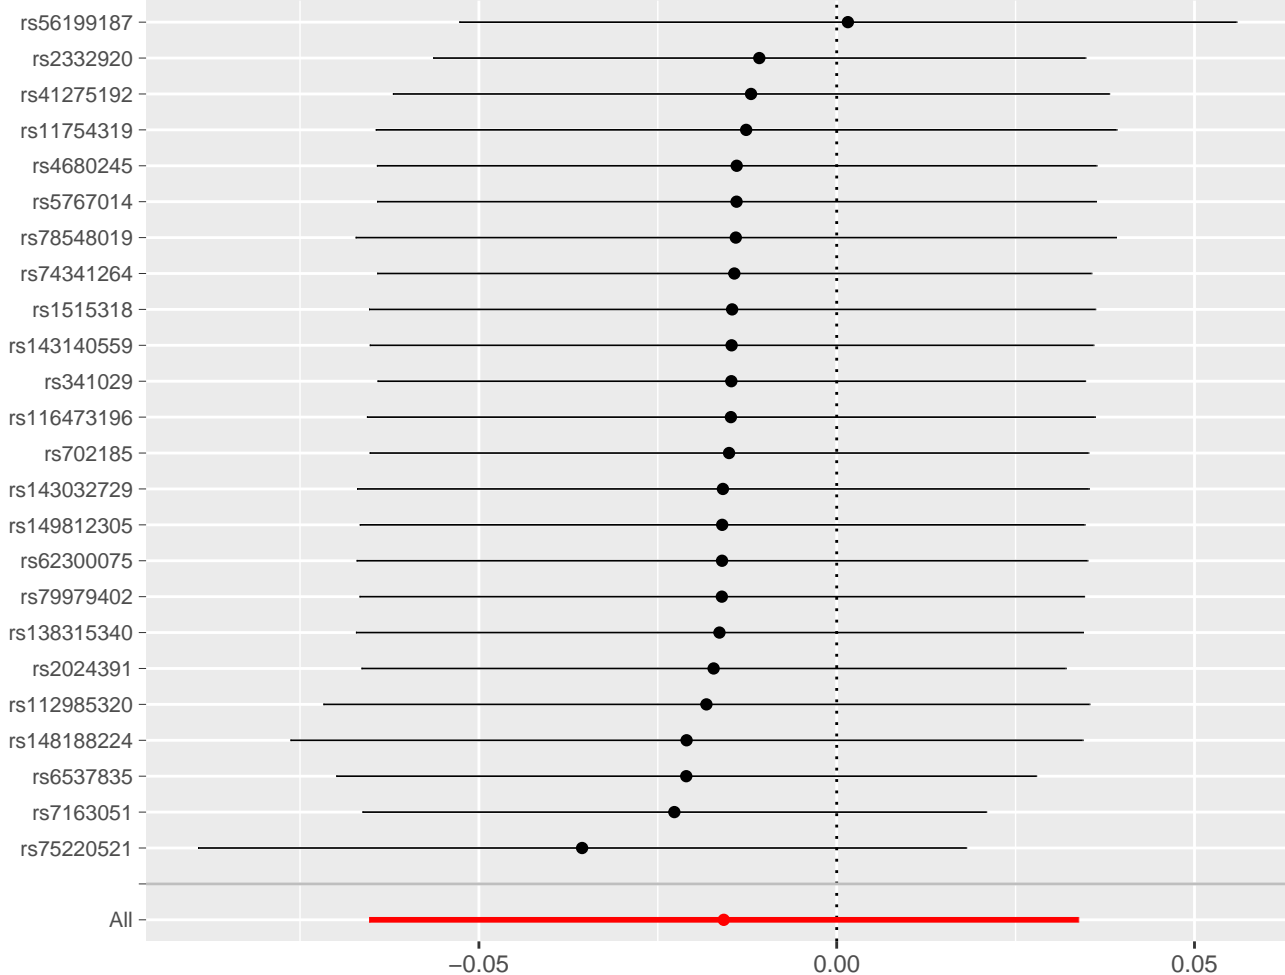

MR leave-one-out sensitivity analysis for 'CD62L- DC %DC' on 'Aplastic anemia'

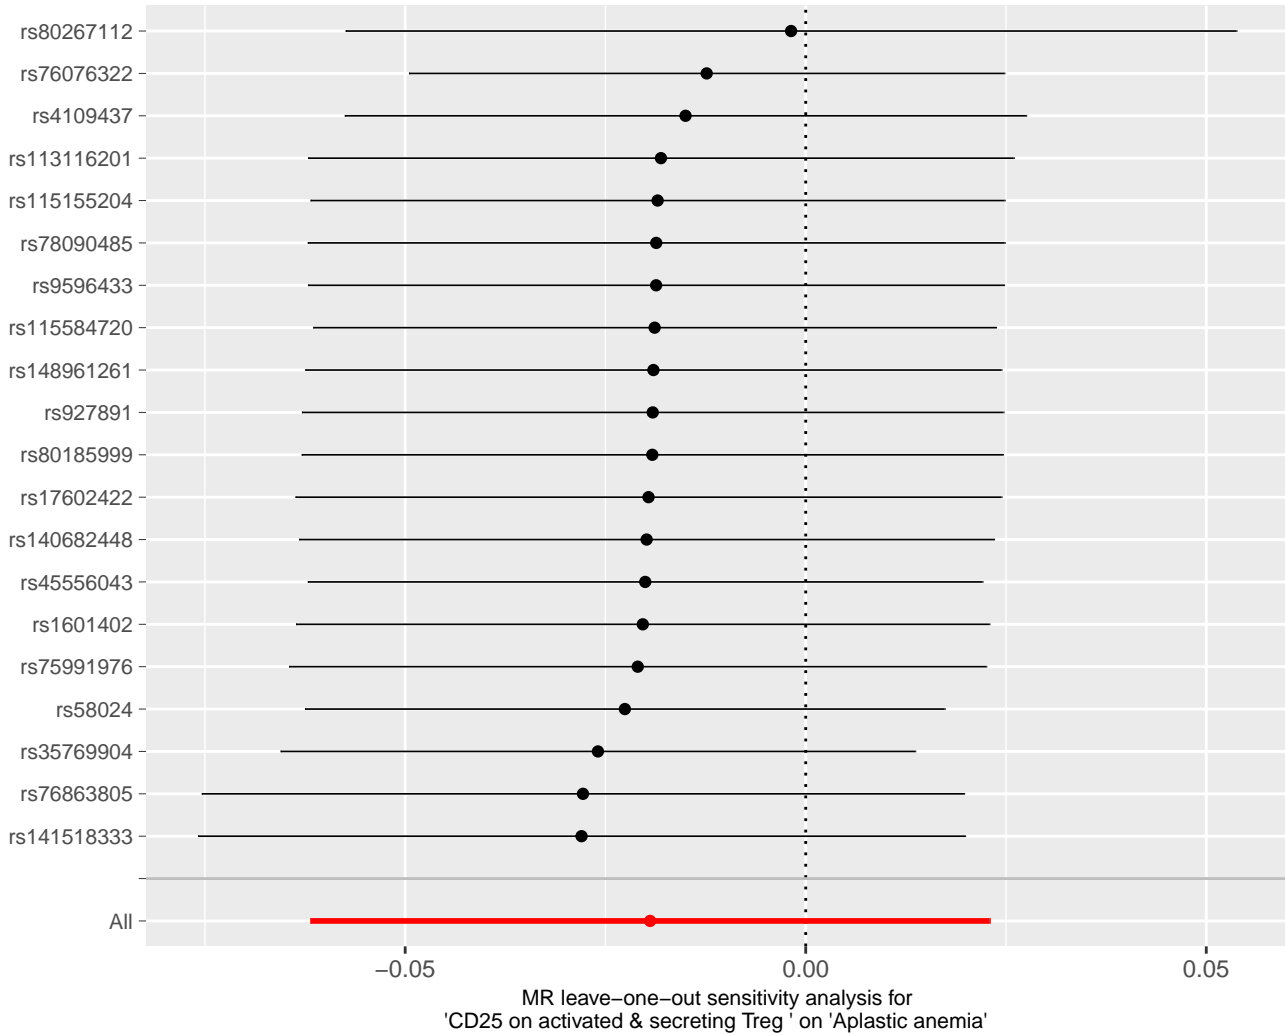



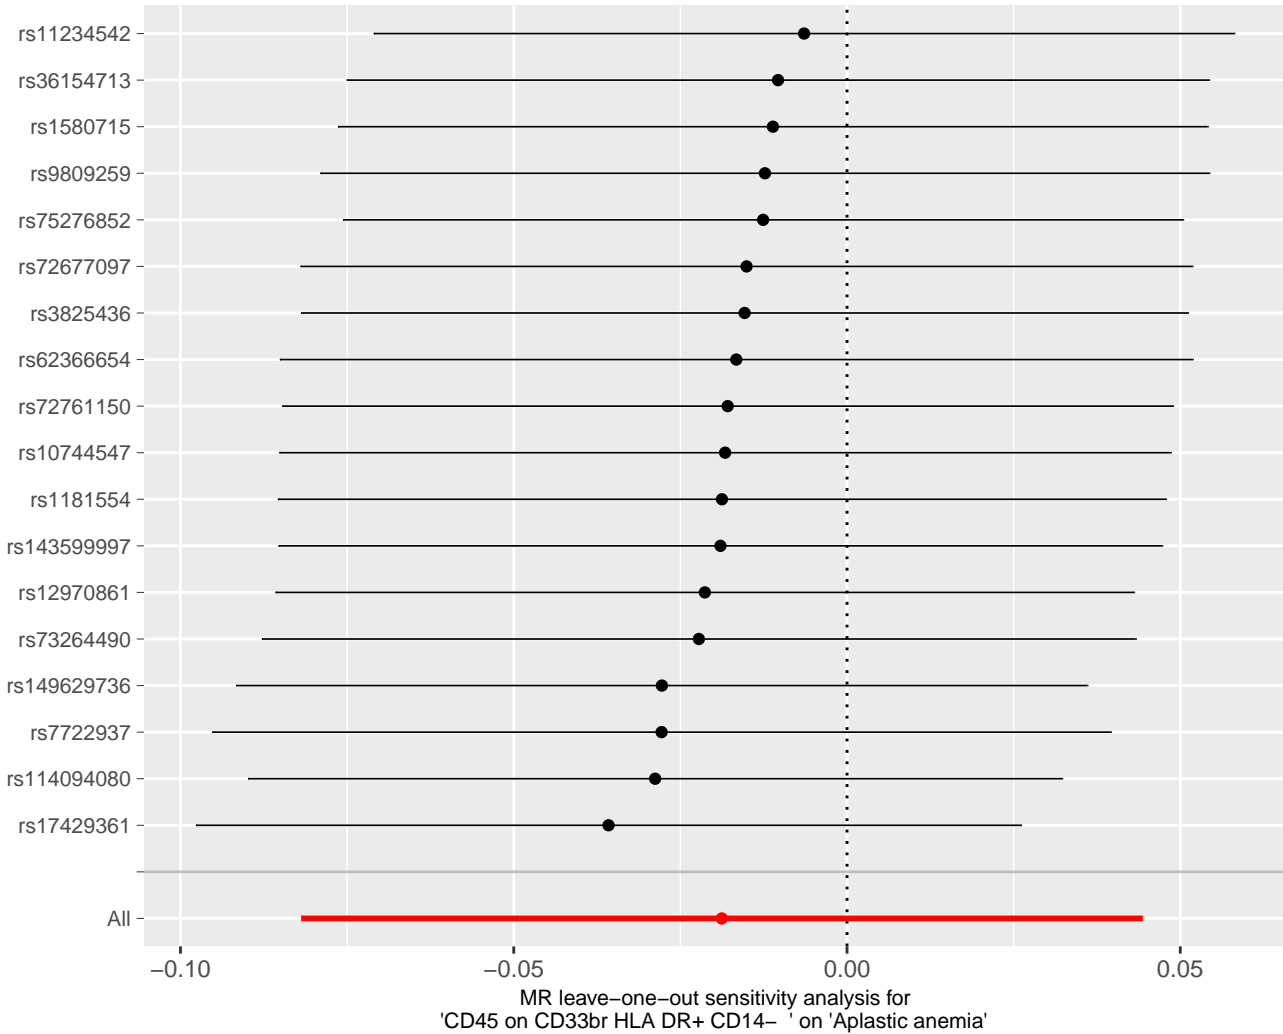

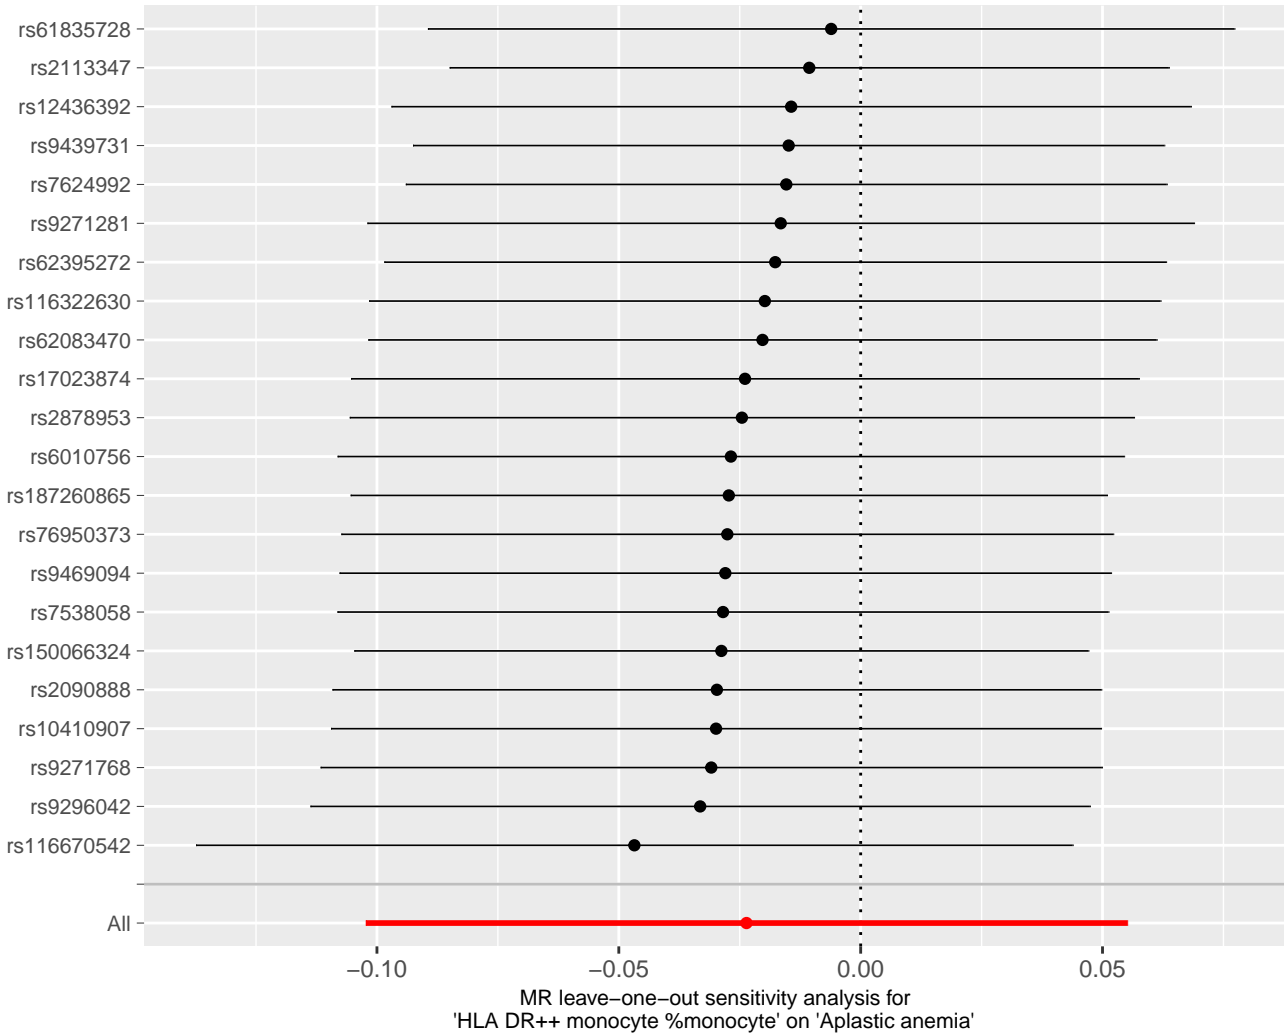

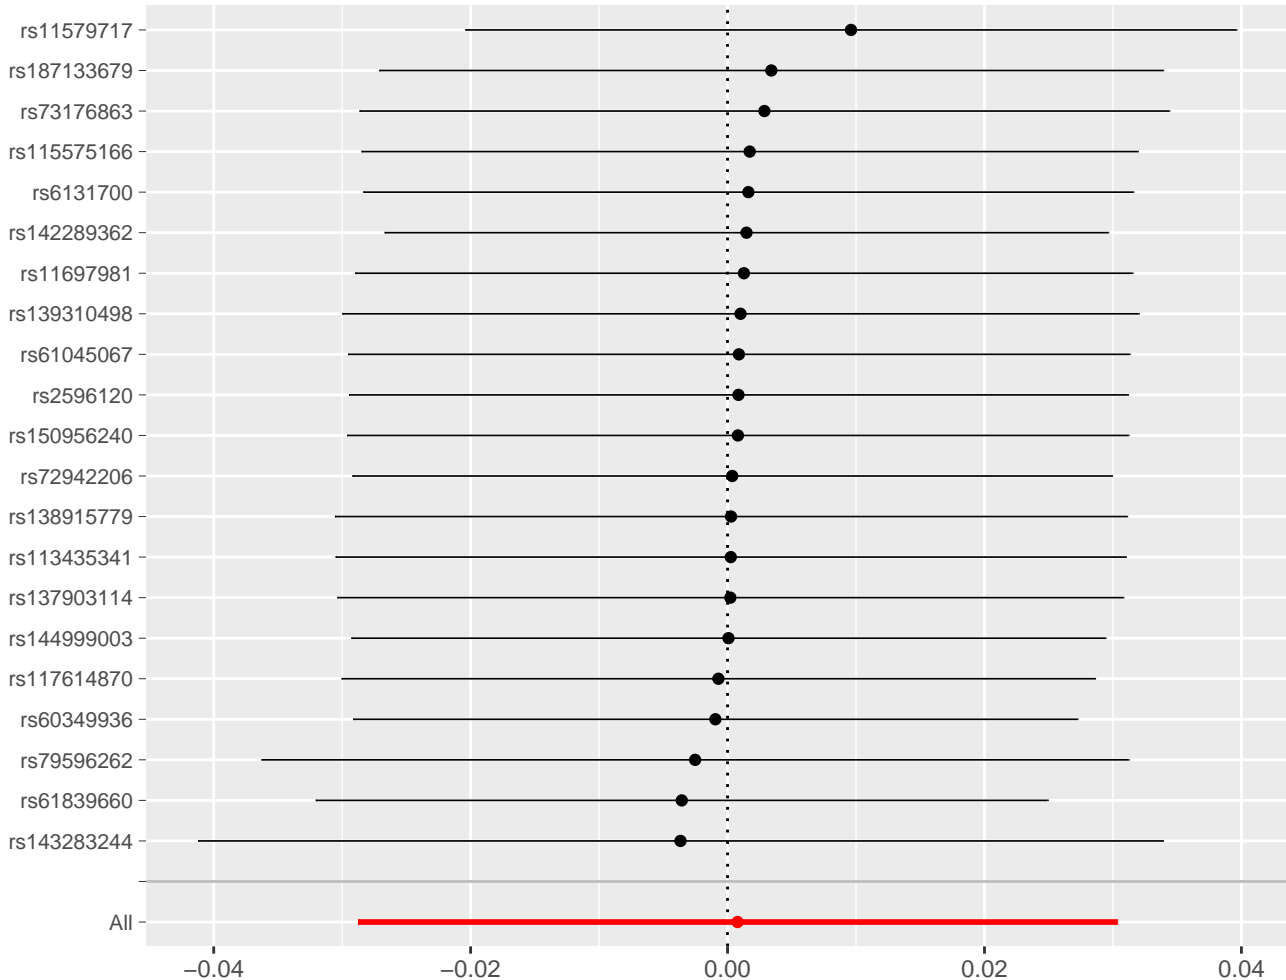

MR leave-one-out sensitivity analysis for 'CD25hi CD45RA- CD4 not Treg AC' on 'Aplastic anemia'

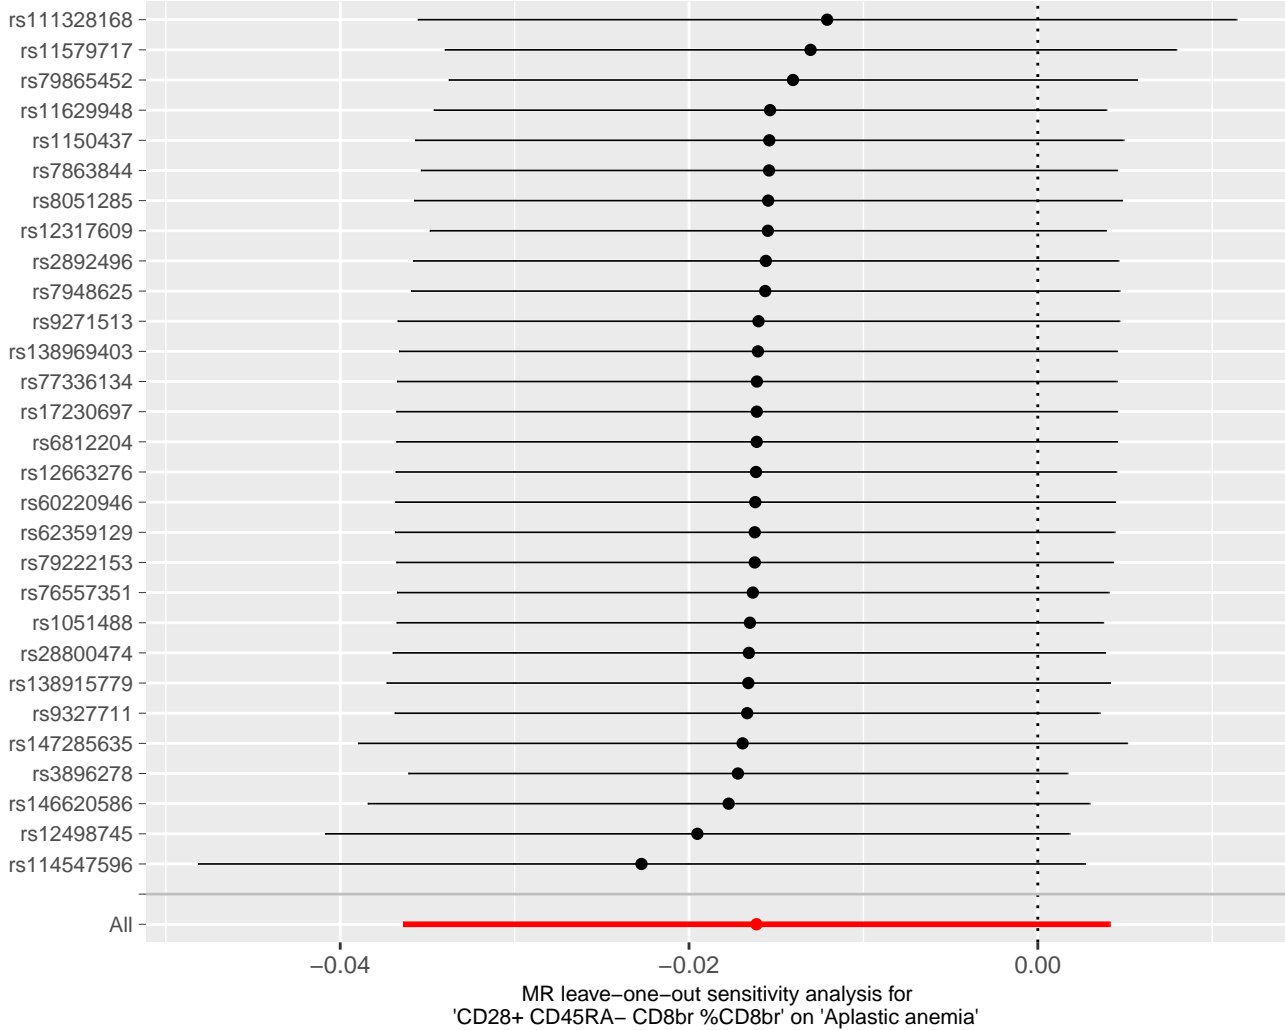

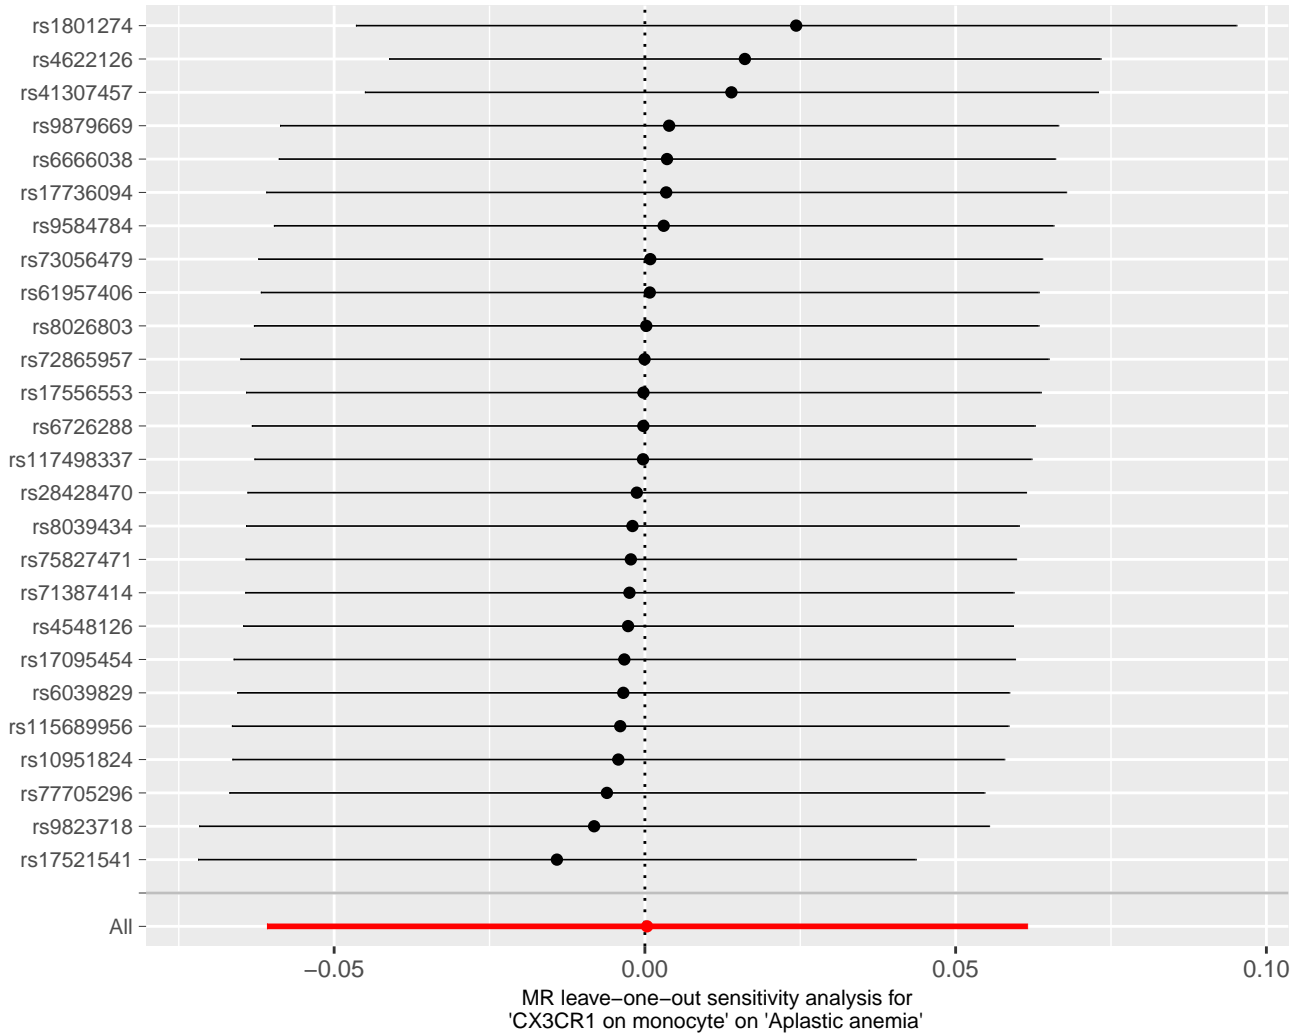

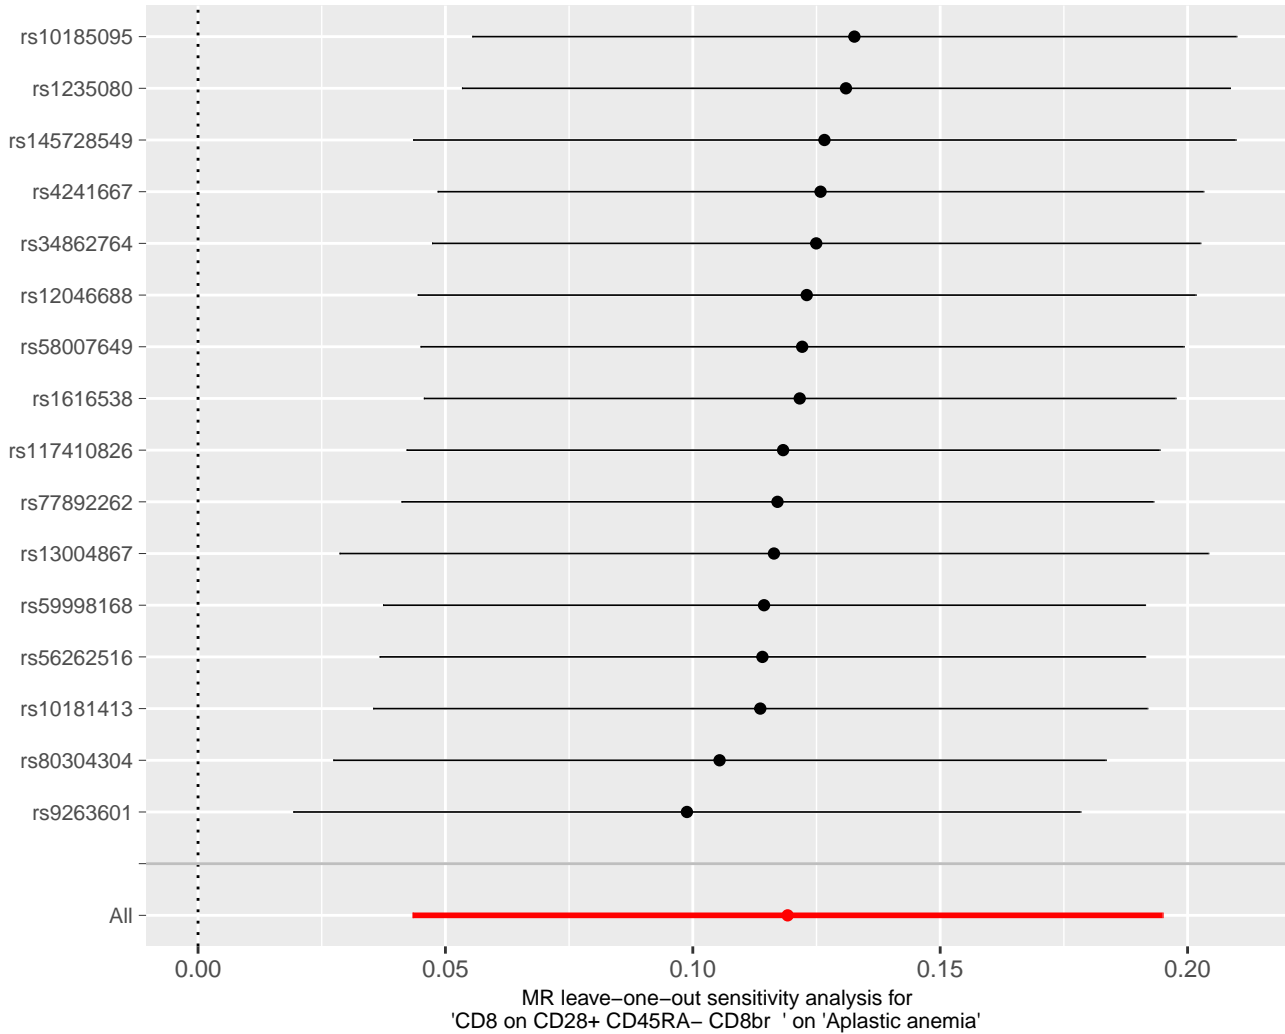

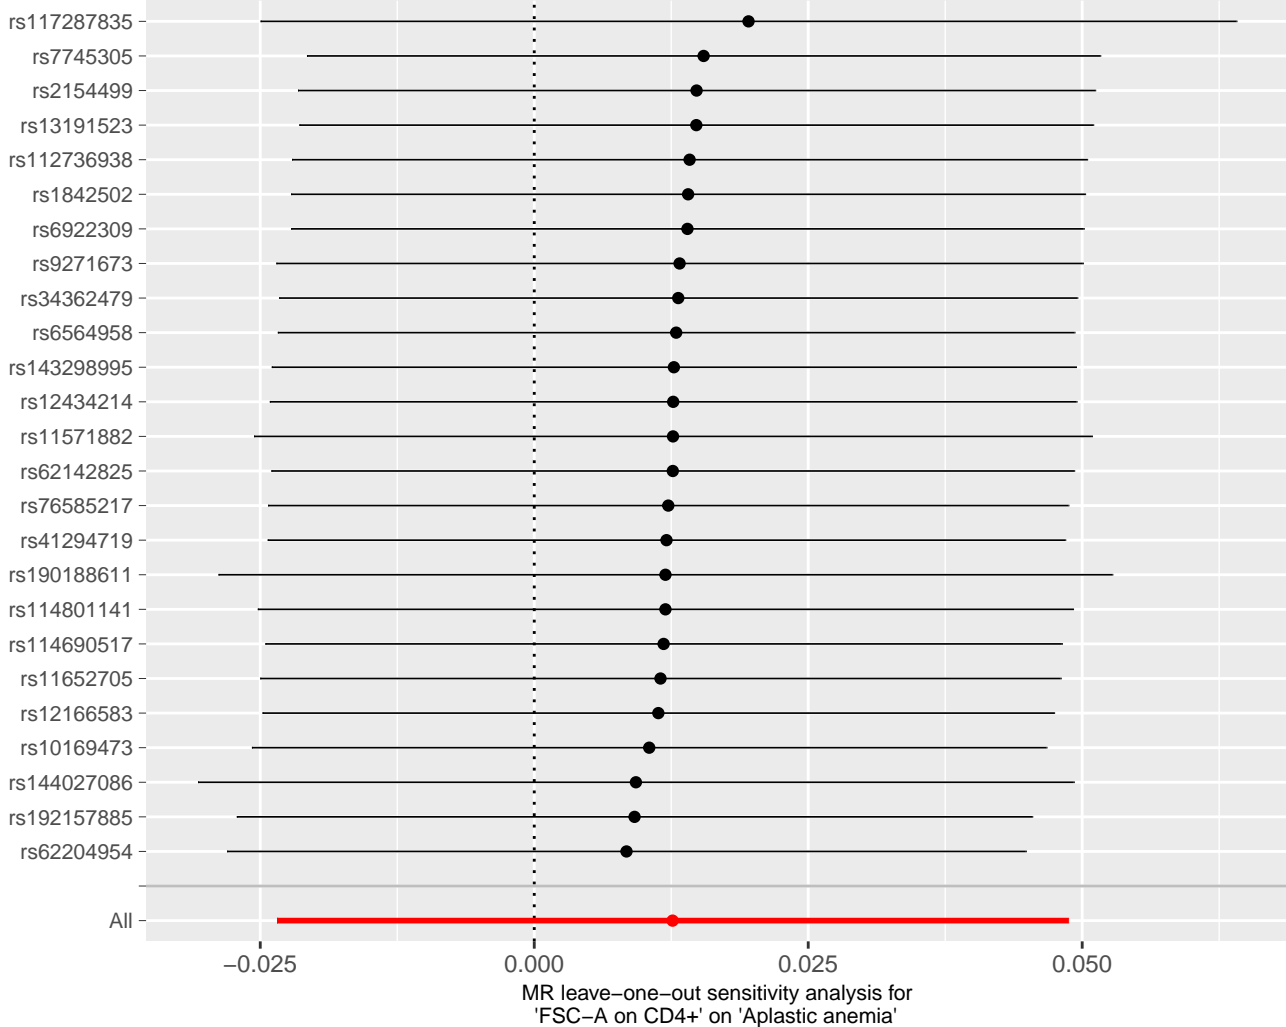

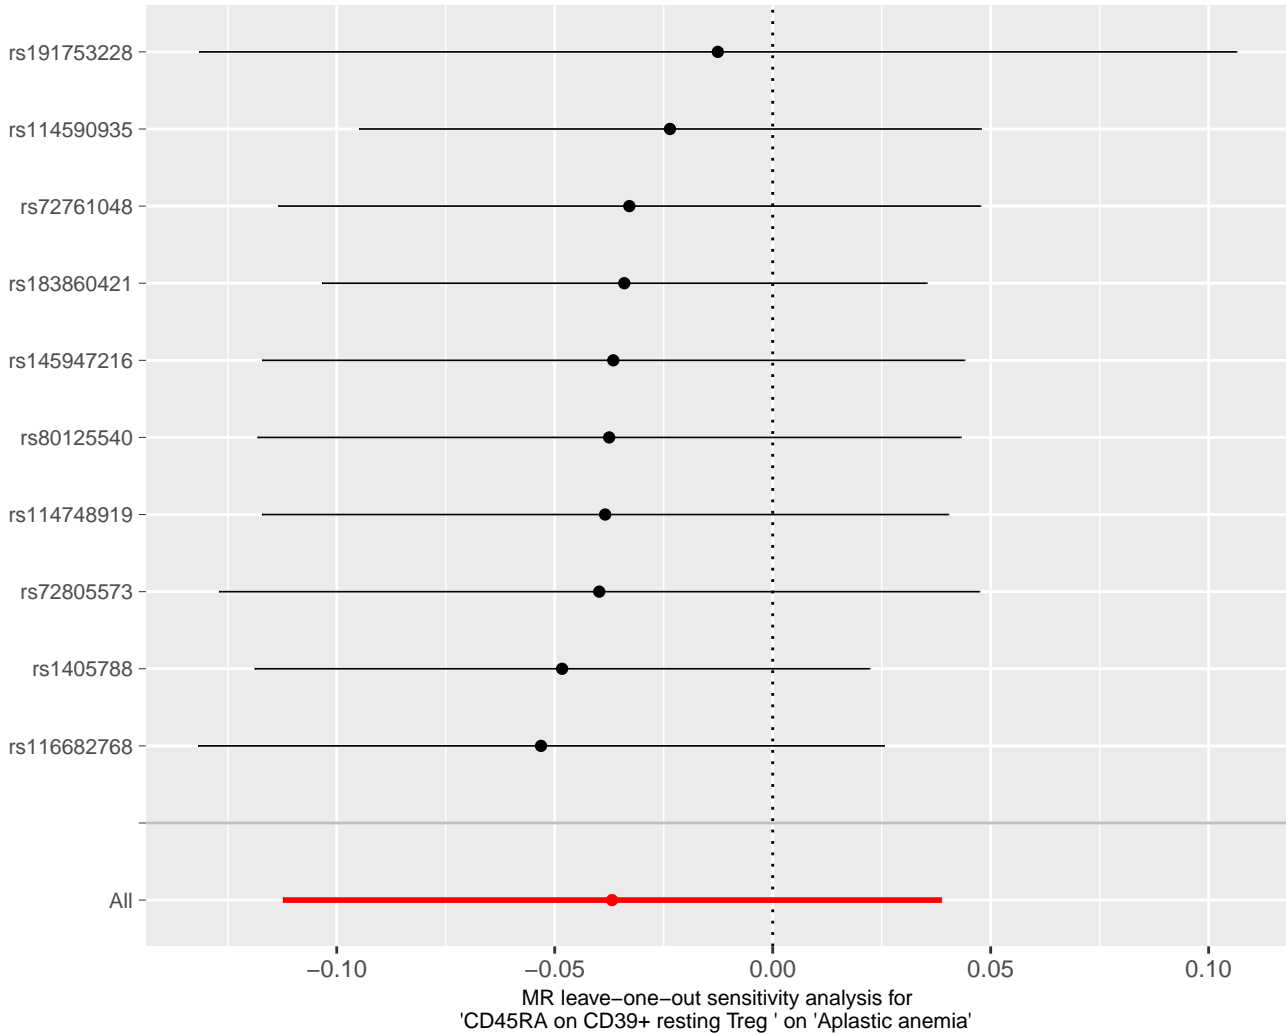



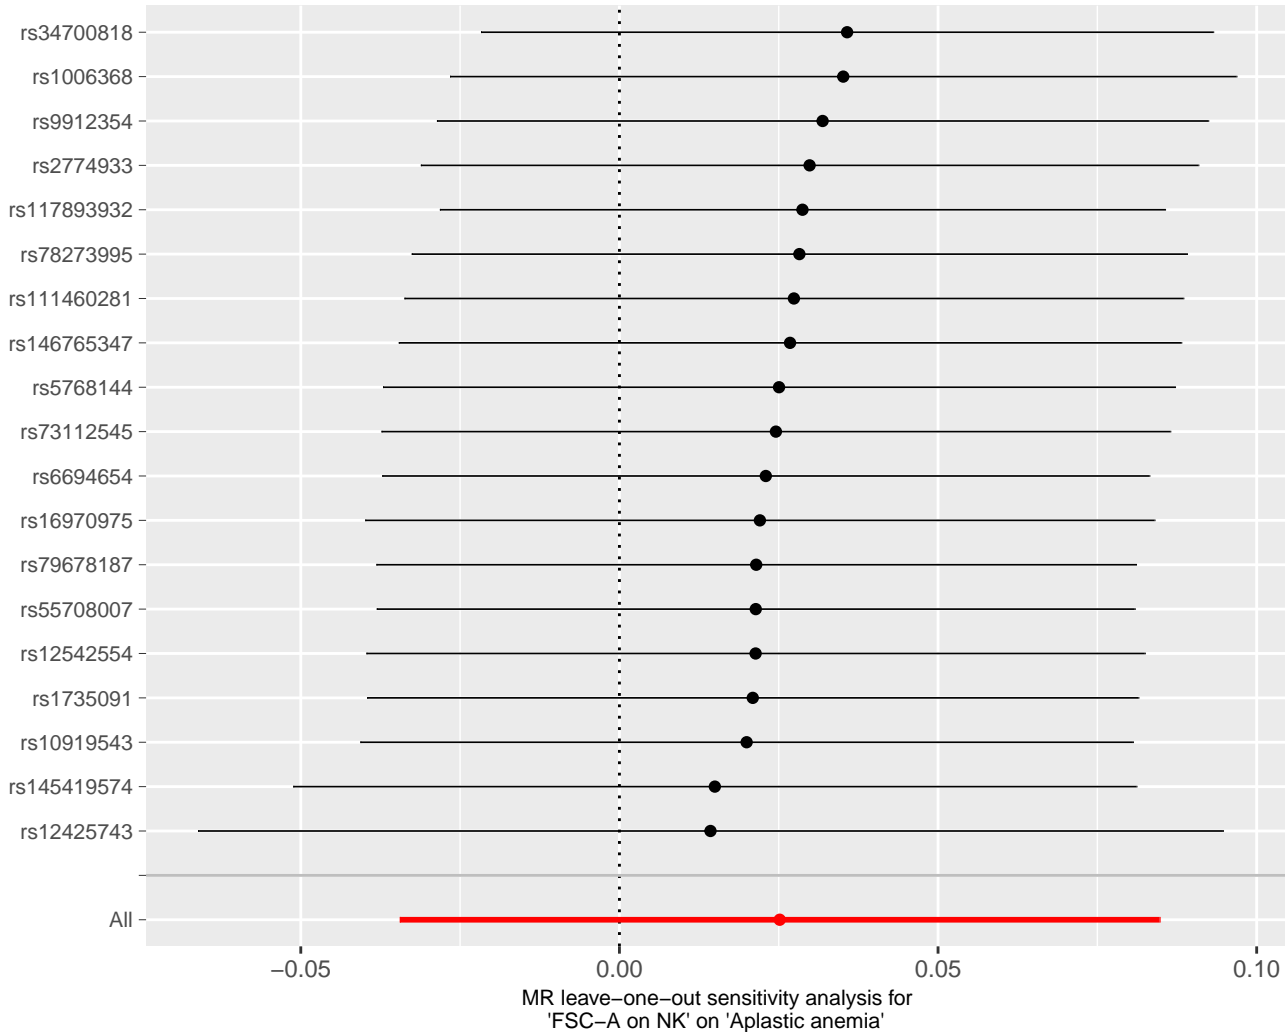

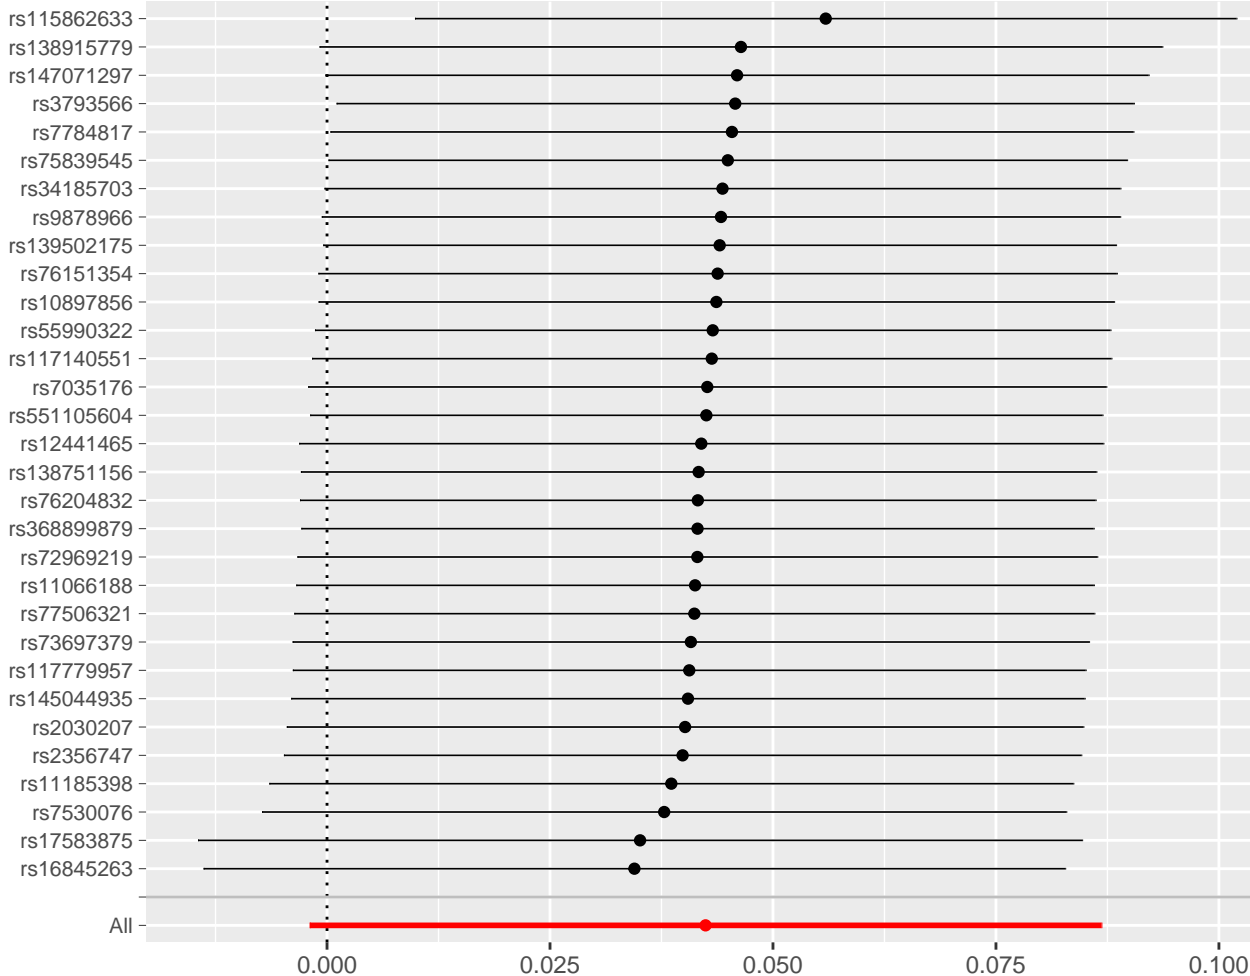

MR leave-one-out sensitivity analysis for 'Activated Treg %CD4 Treg' on 'Aplastic anemia'

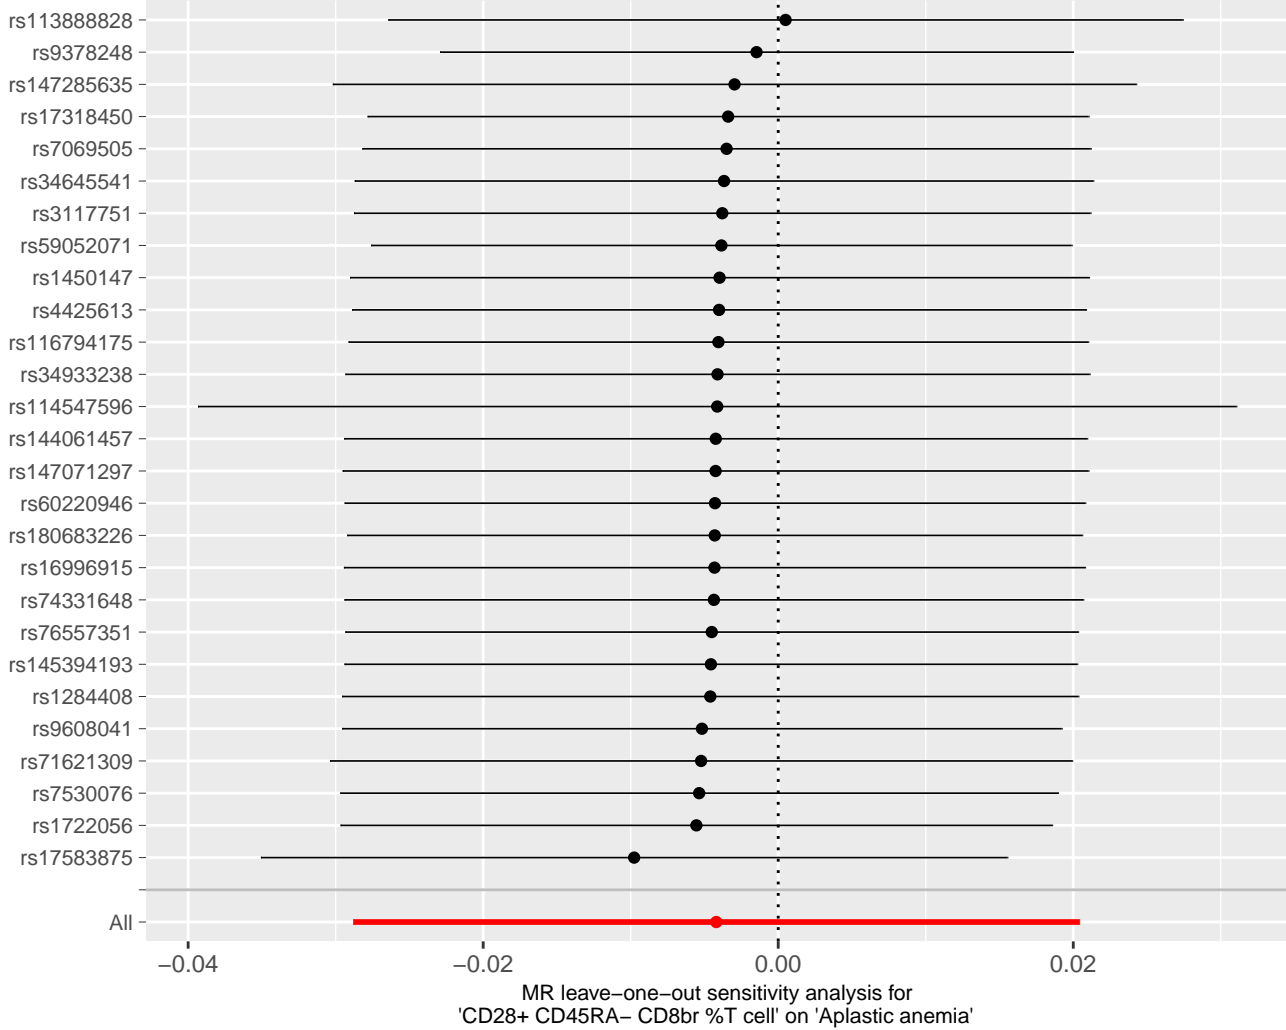

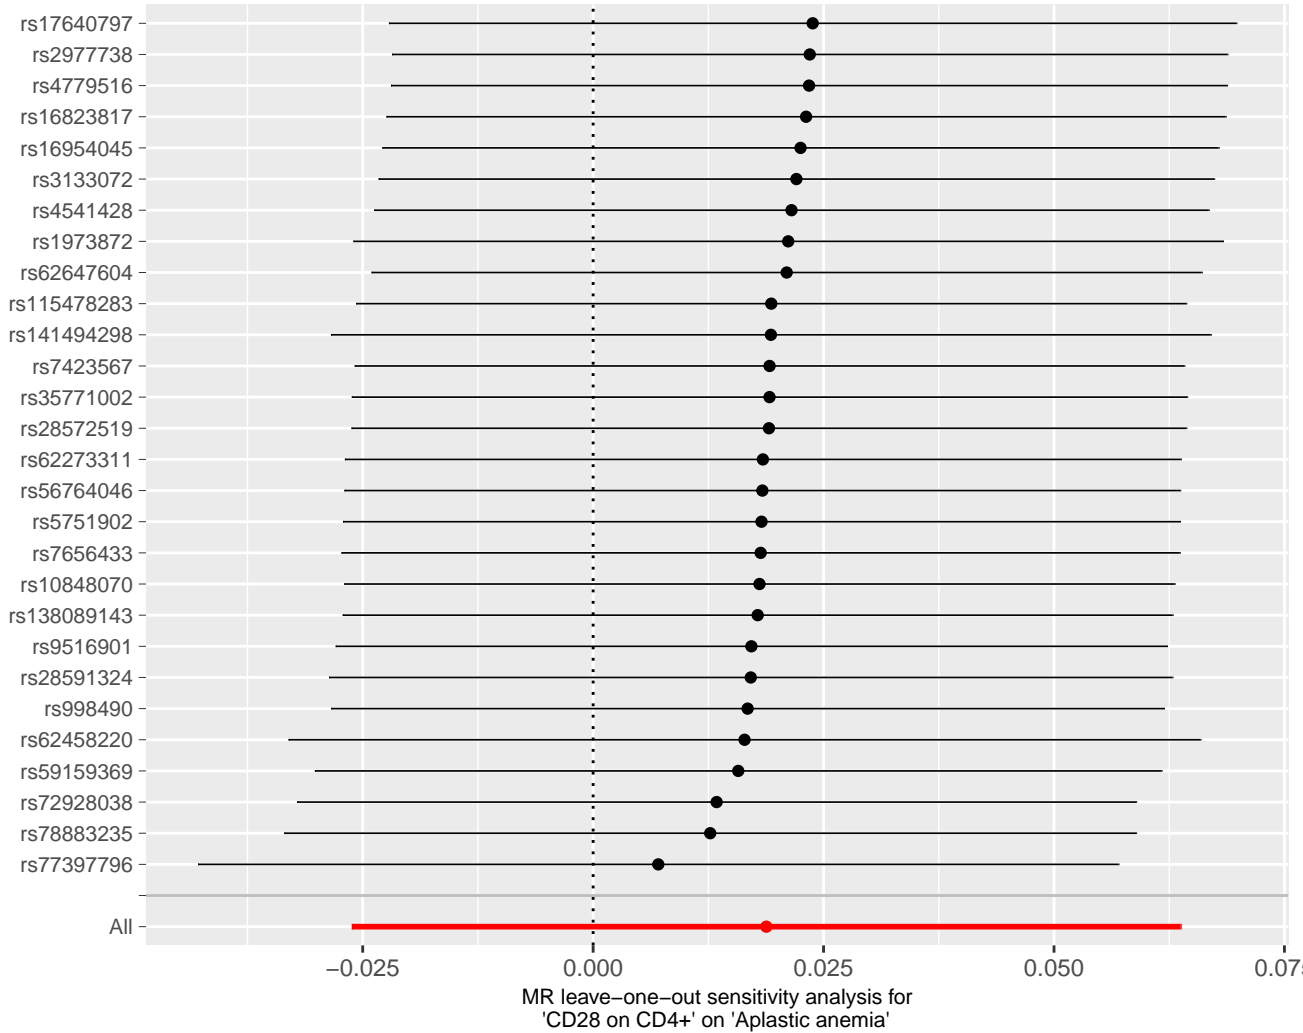

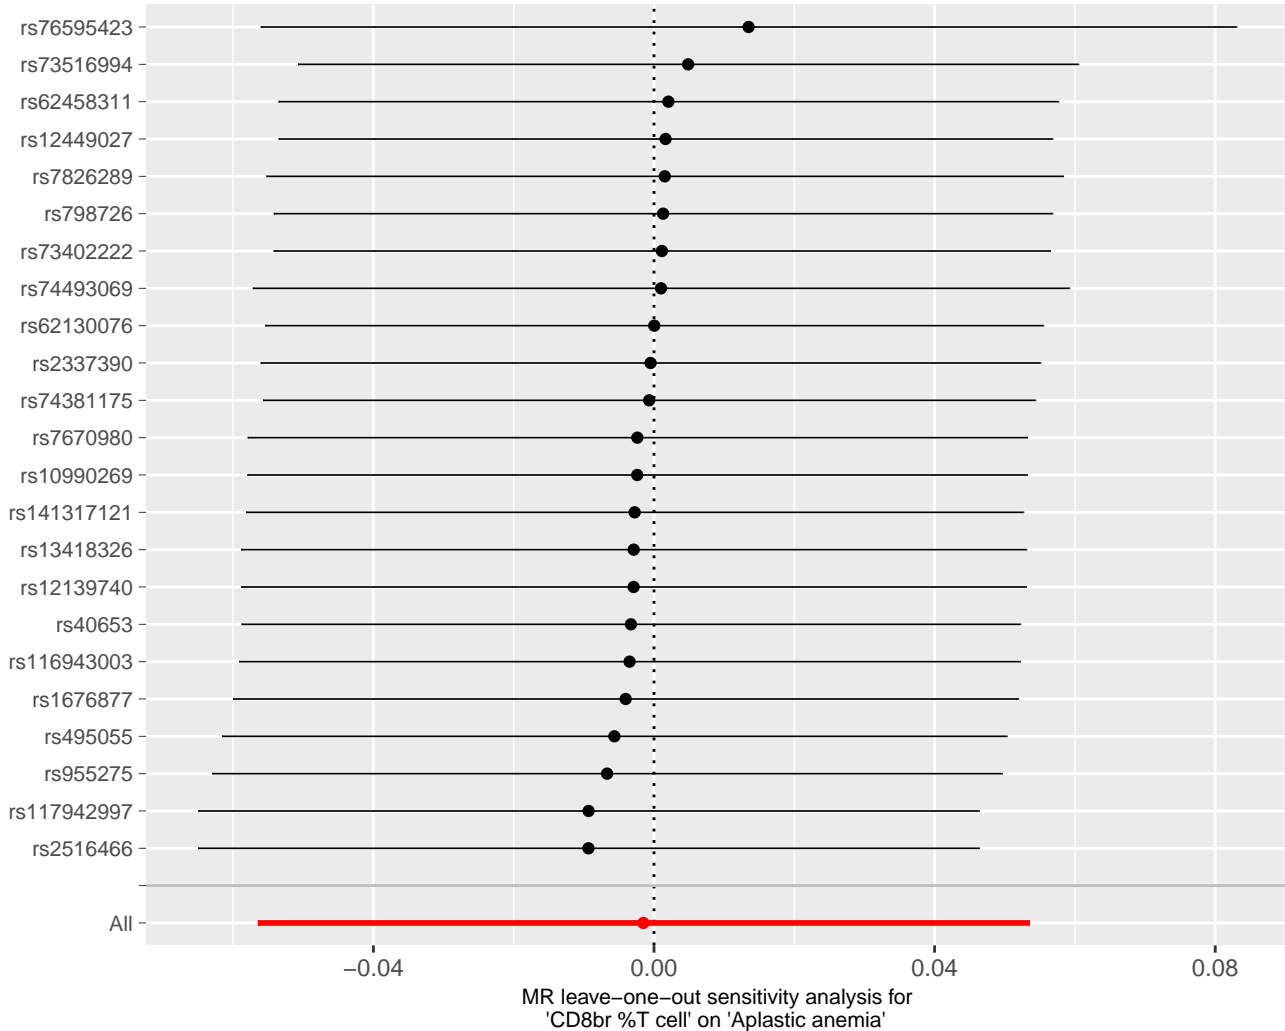

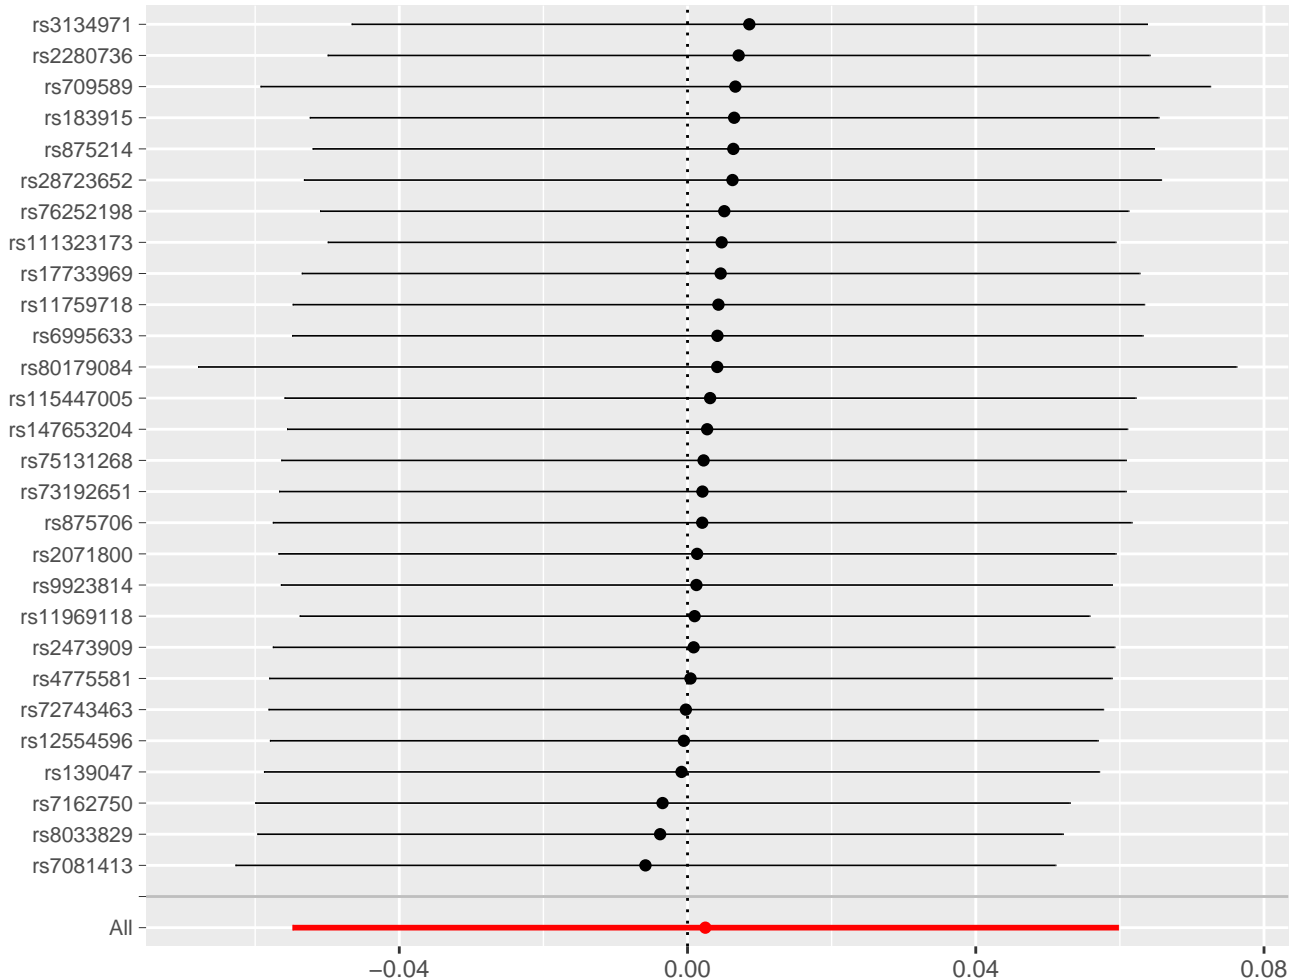

MR leave-one-out sensitivity analysis for 'IgD on IgD+ CD38-' on 'Aplastic anemia'

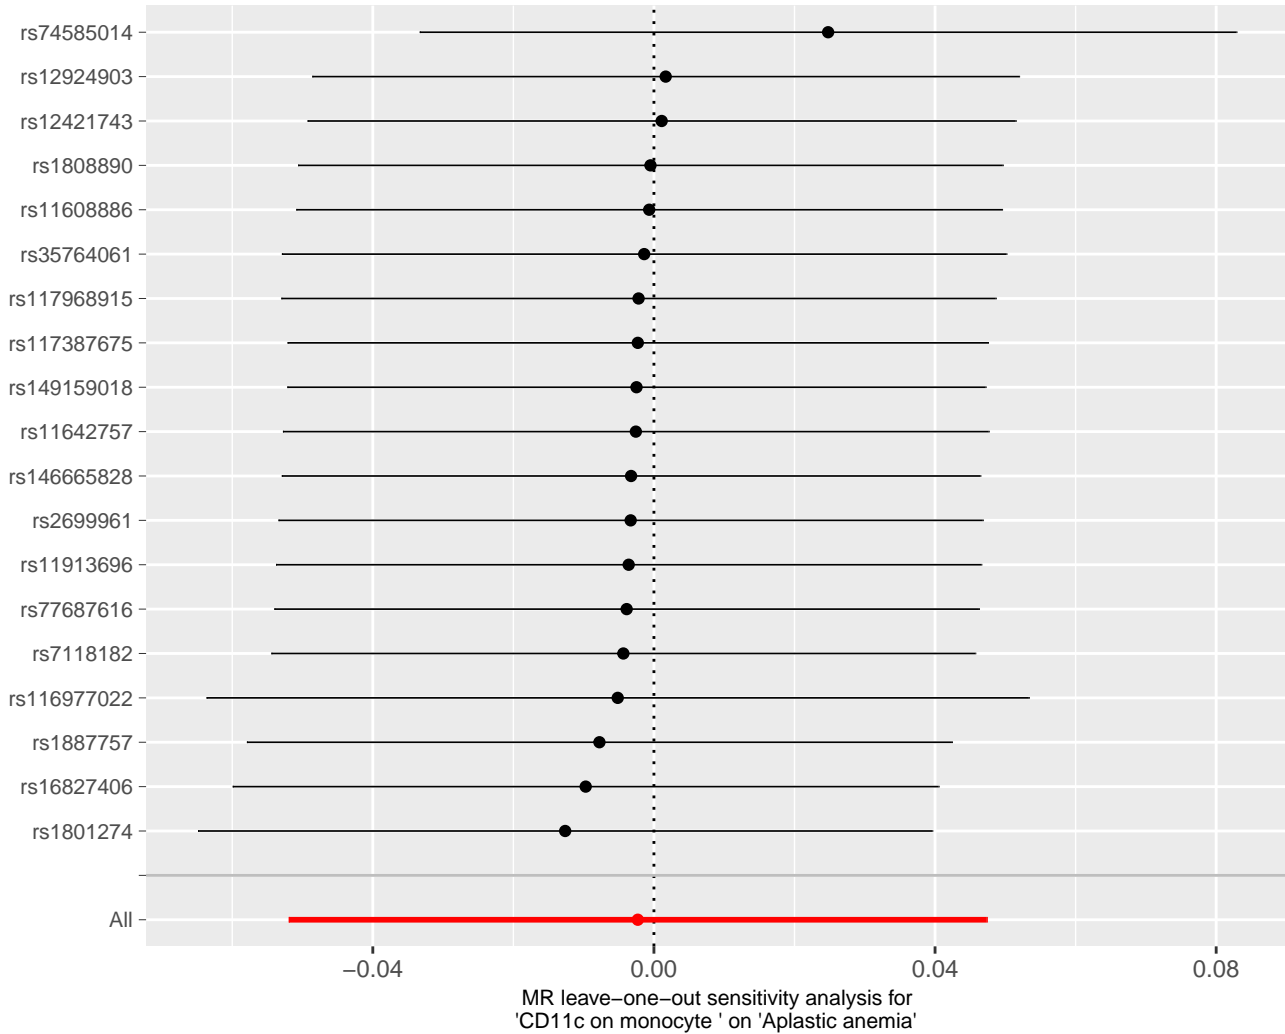

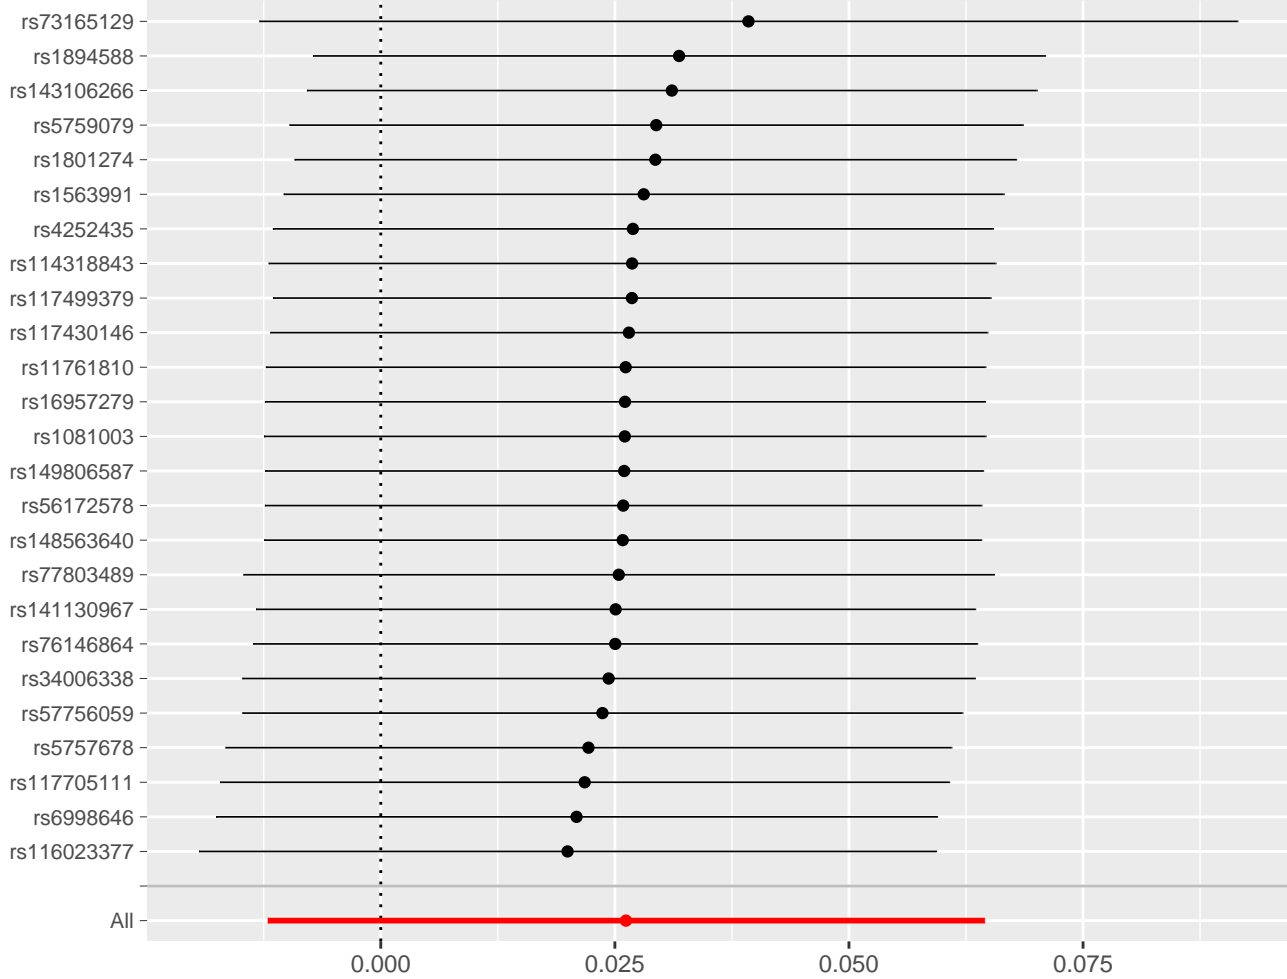

MR leave-one-out sensitivity analysis for 'BAFF-R on transitional' on 'Aplastic anemia'



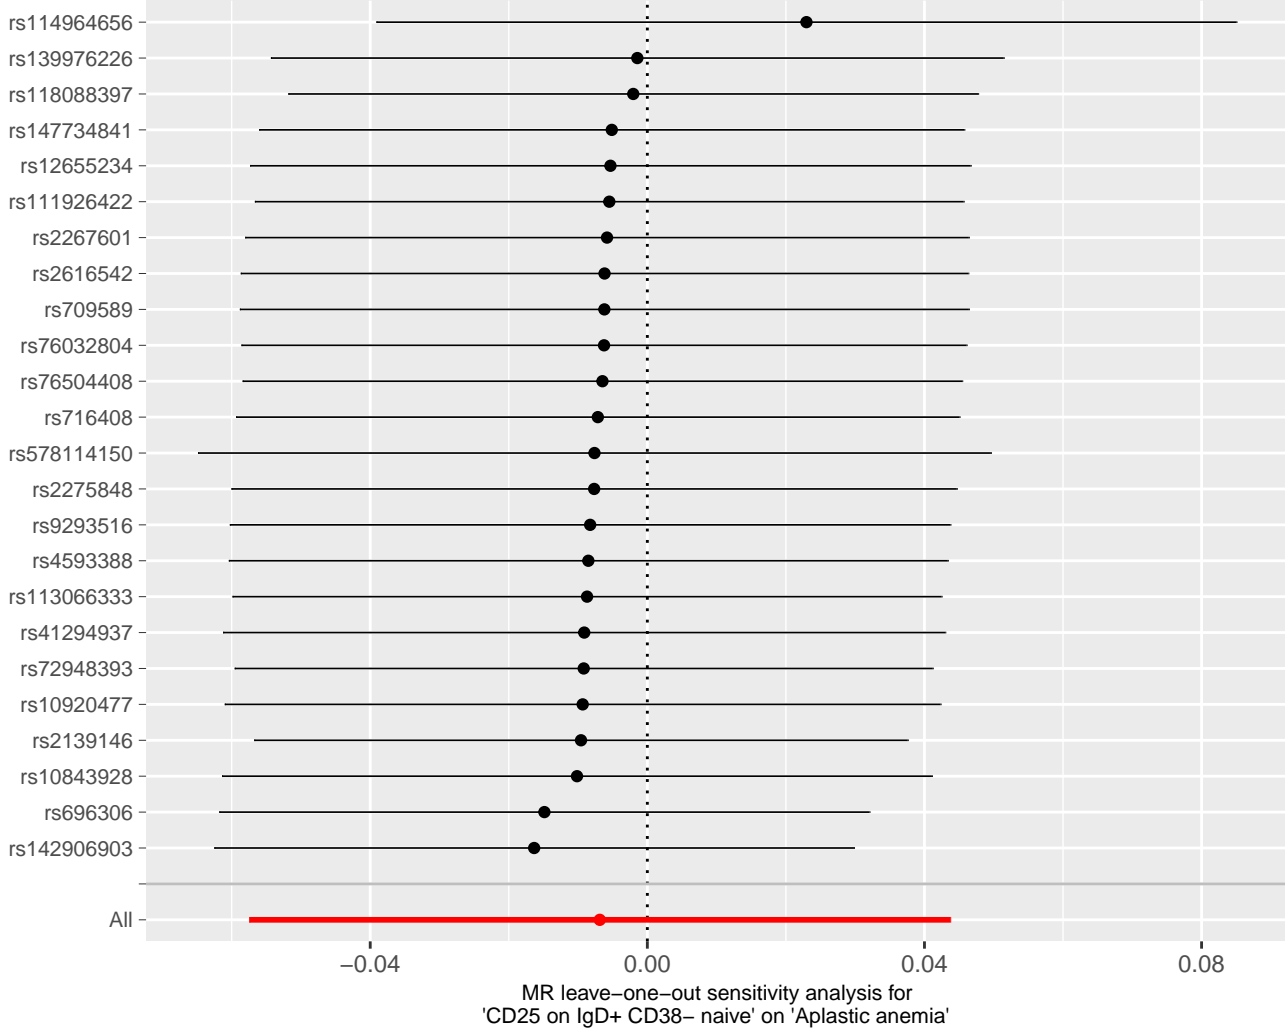

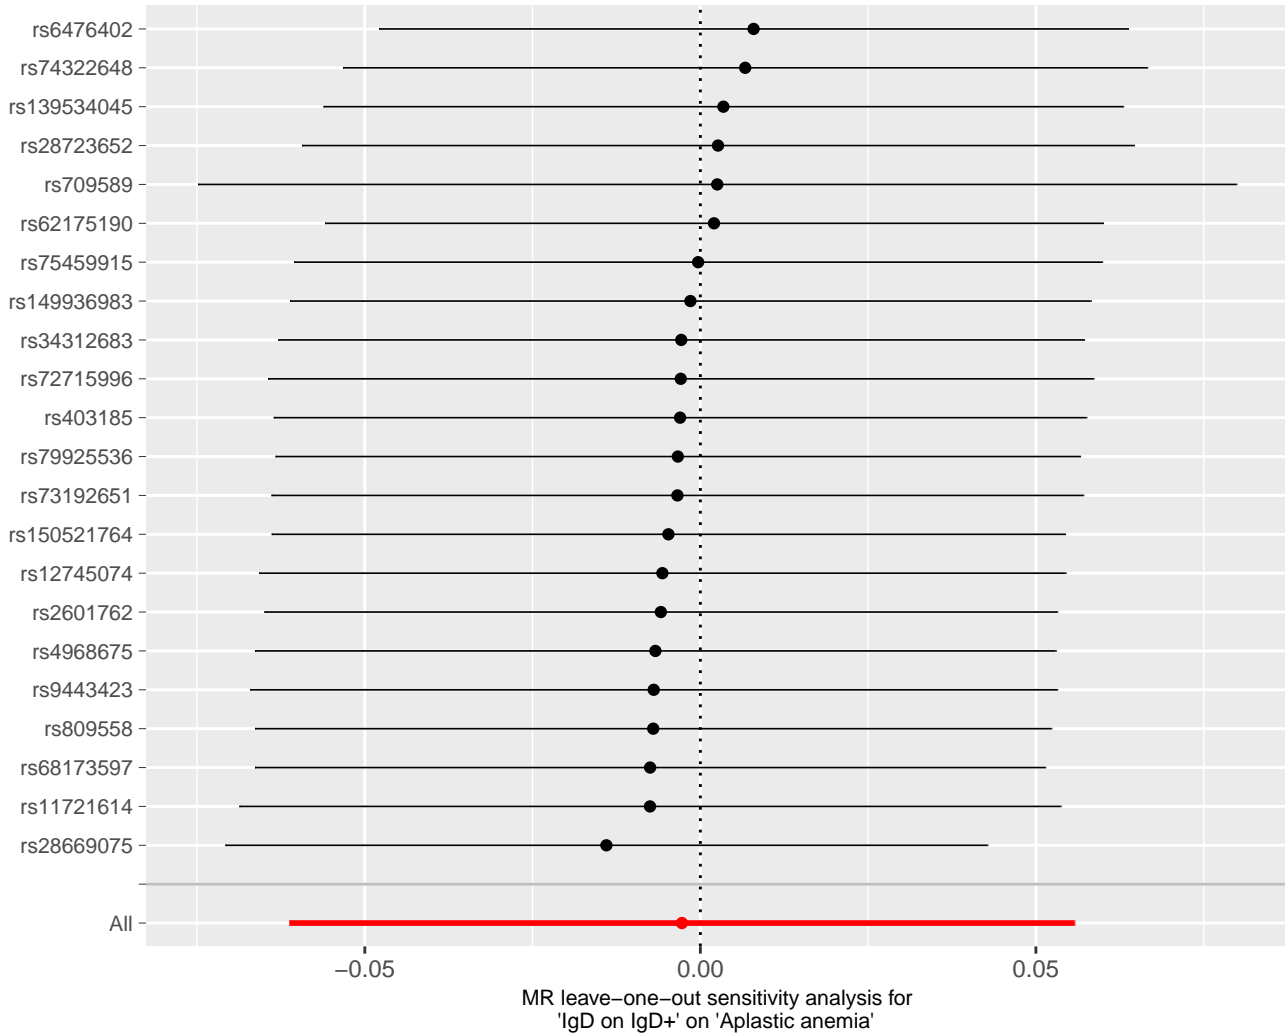

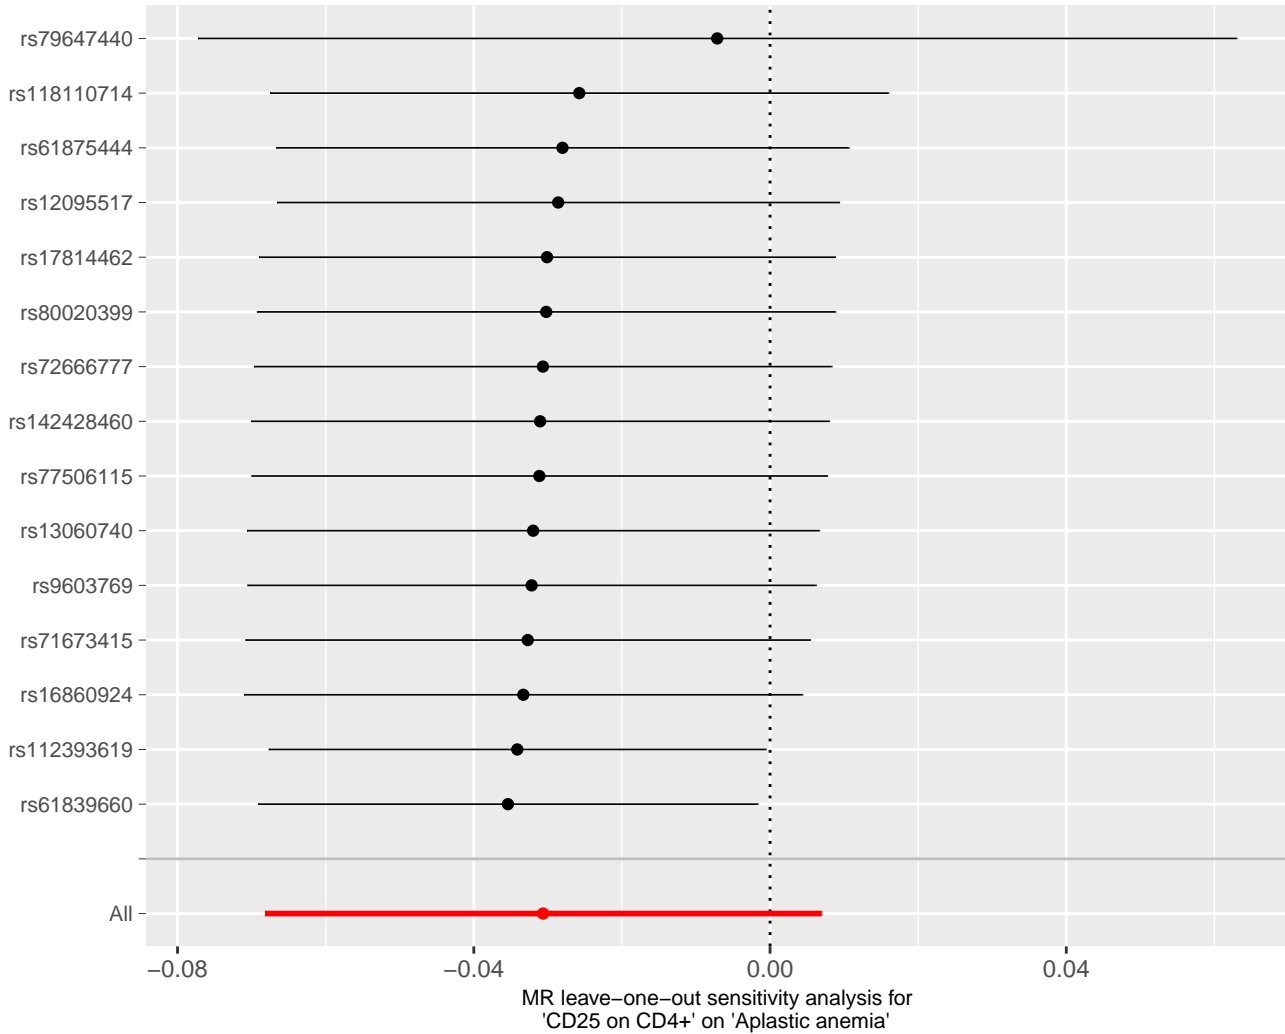

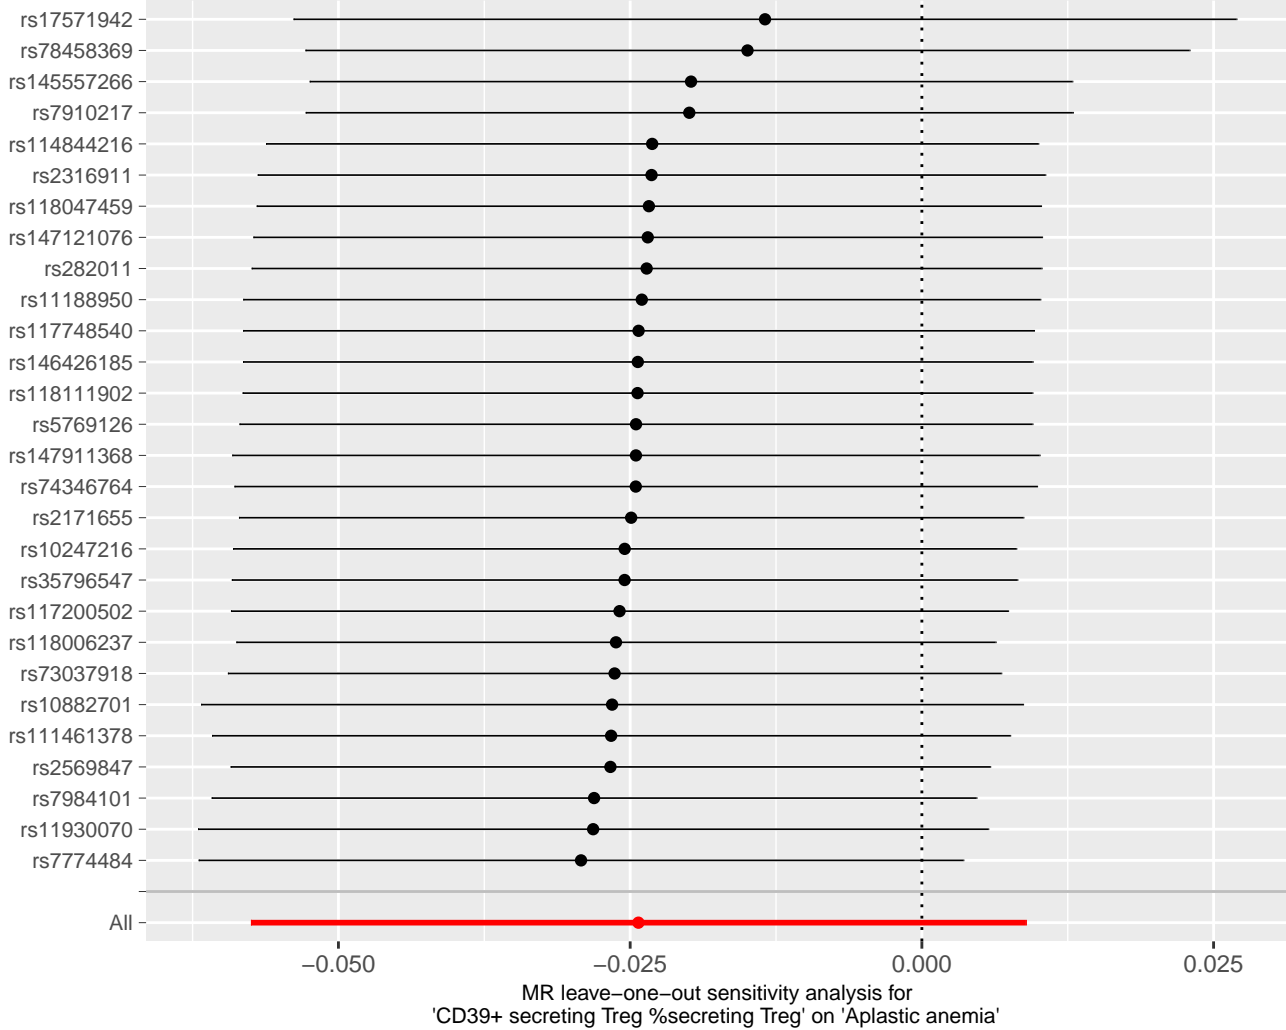

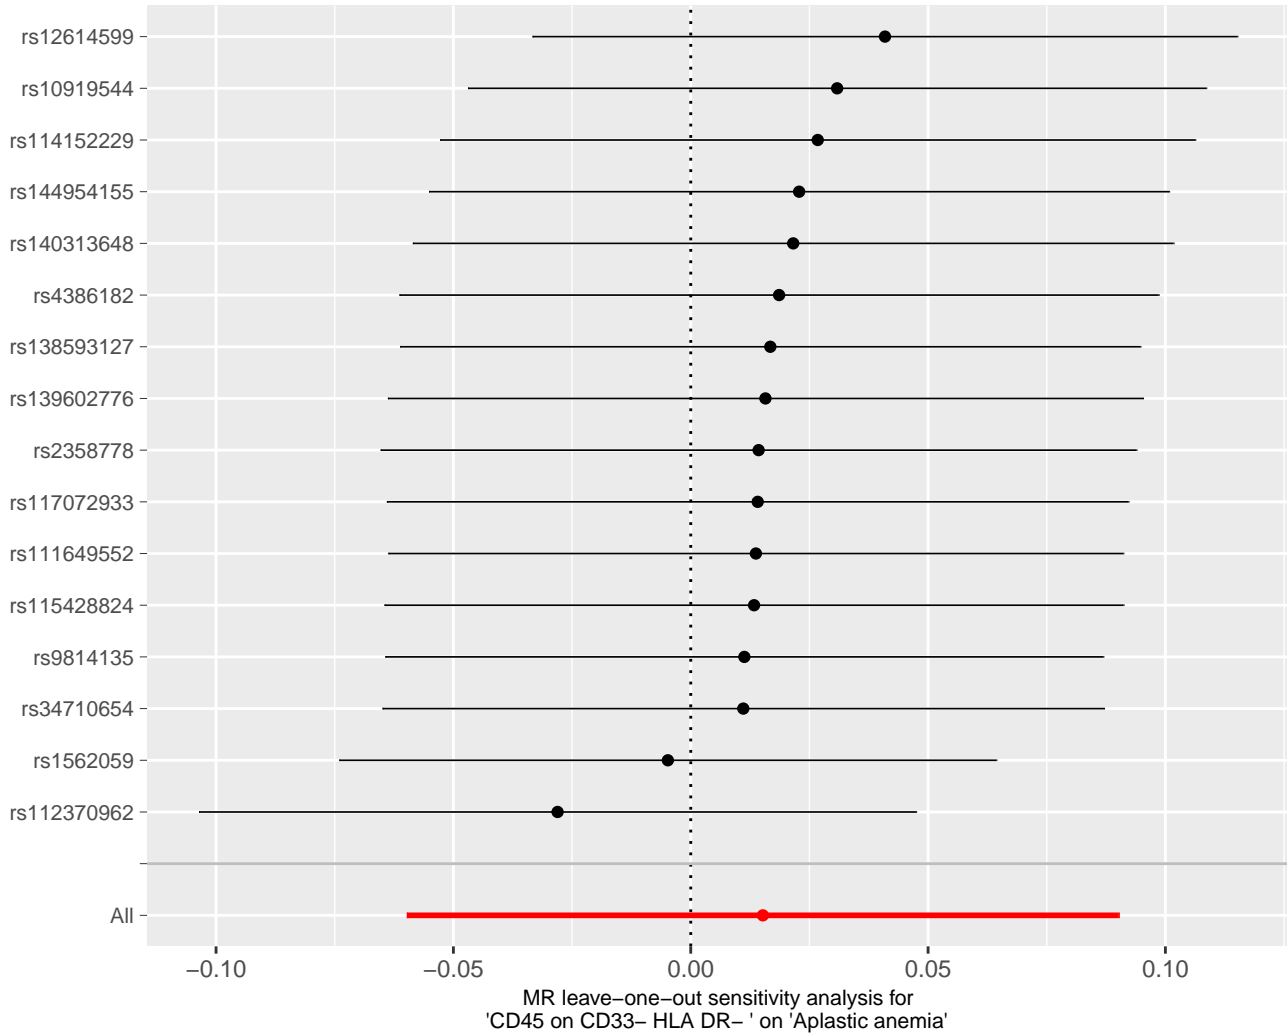

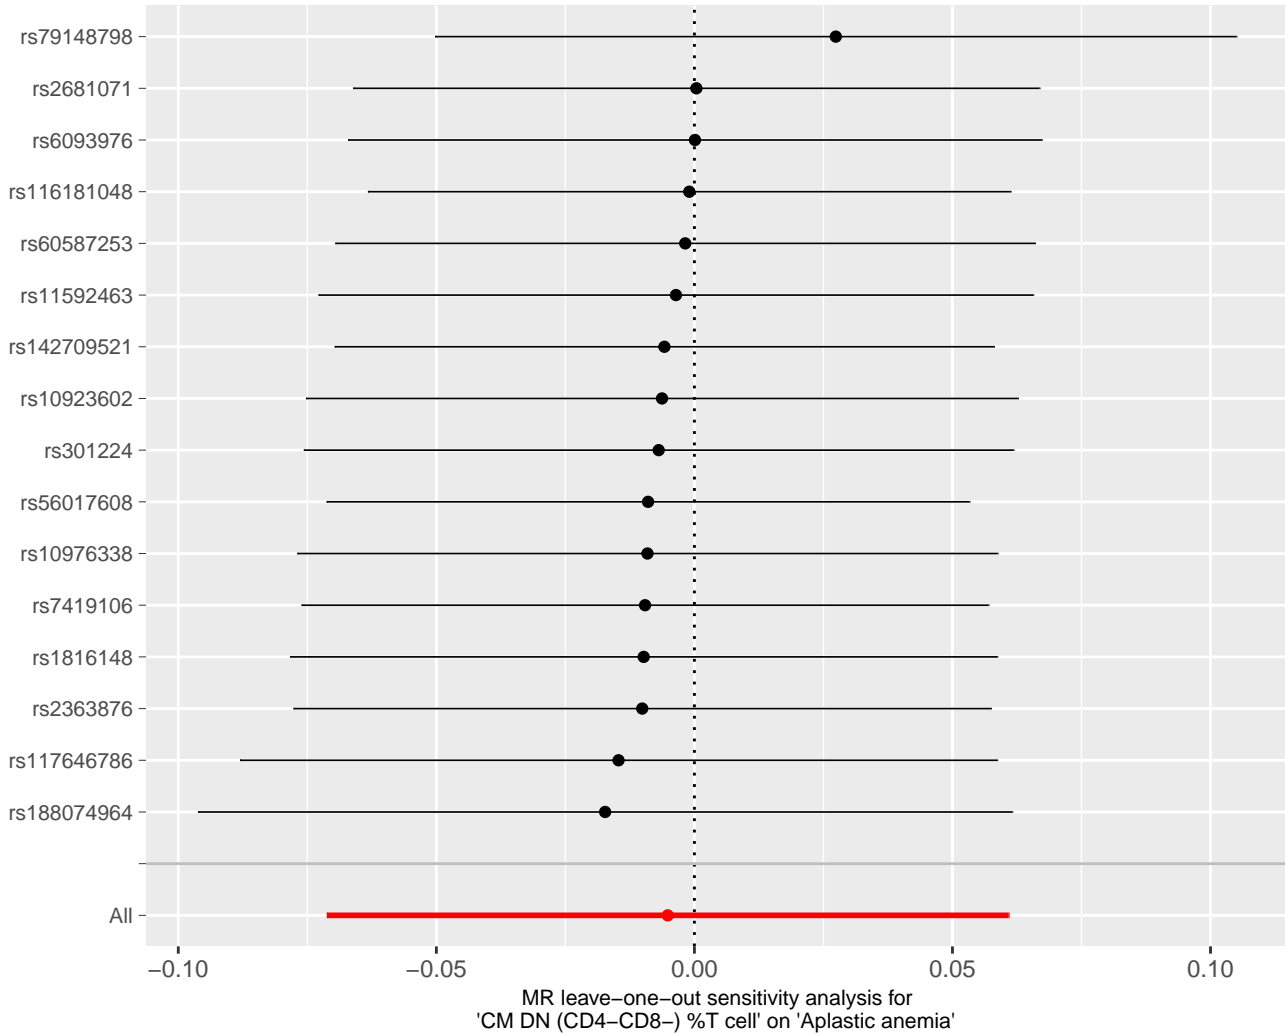

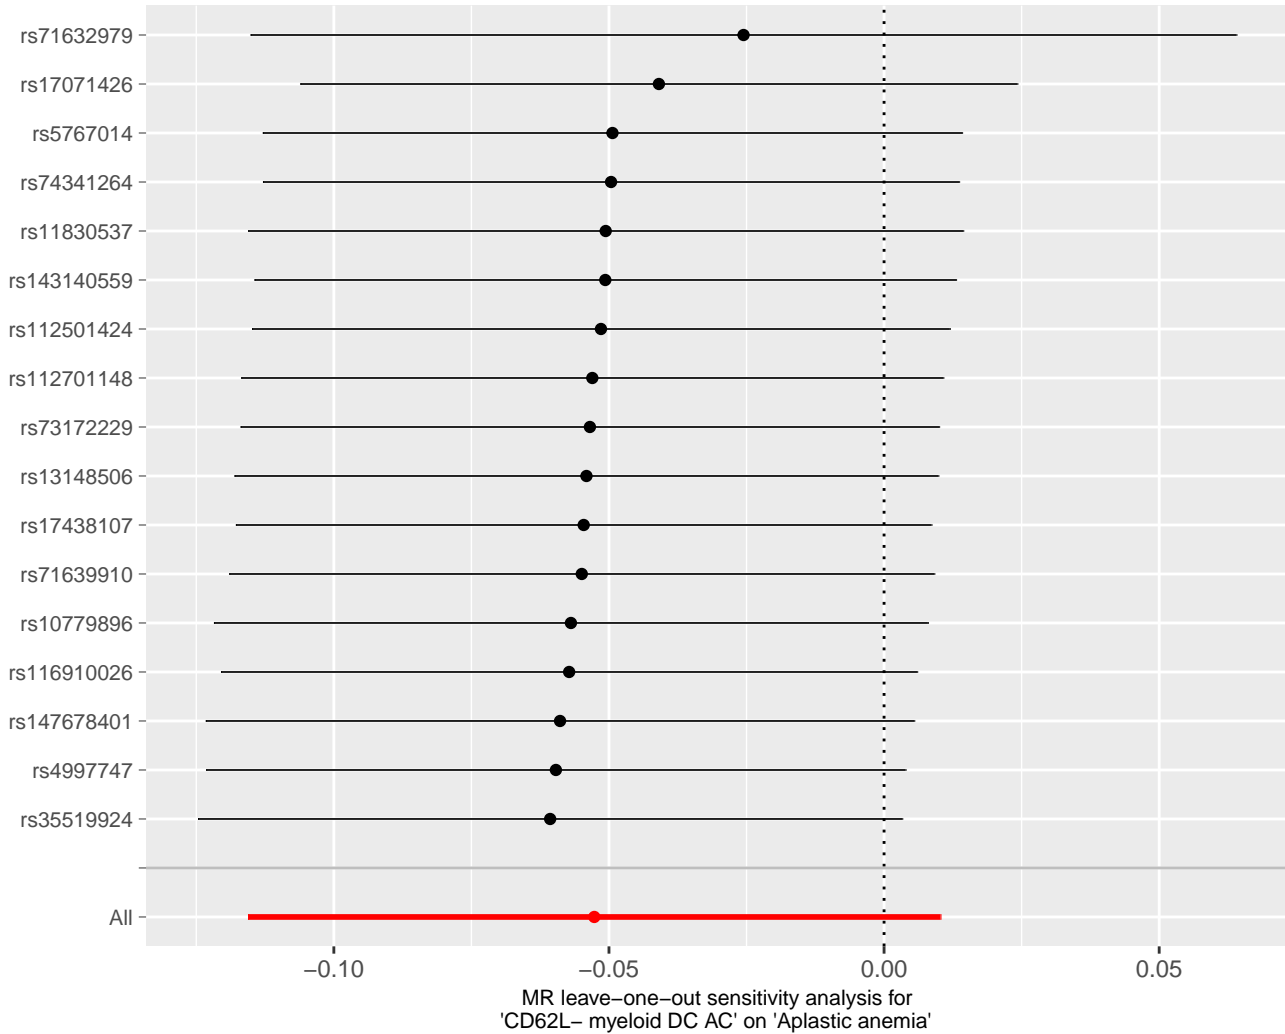

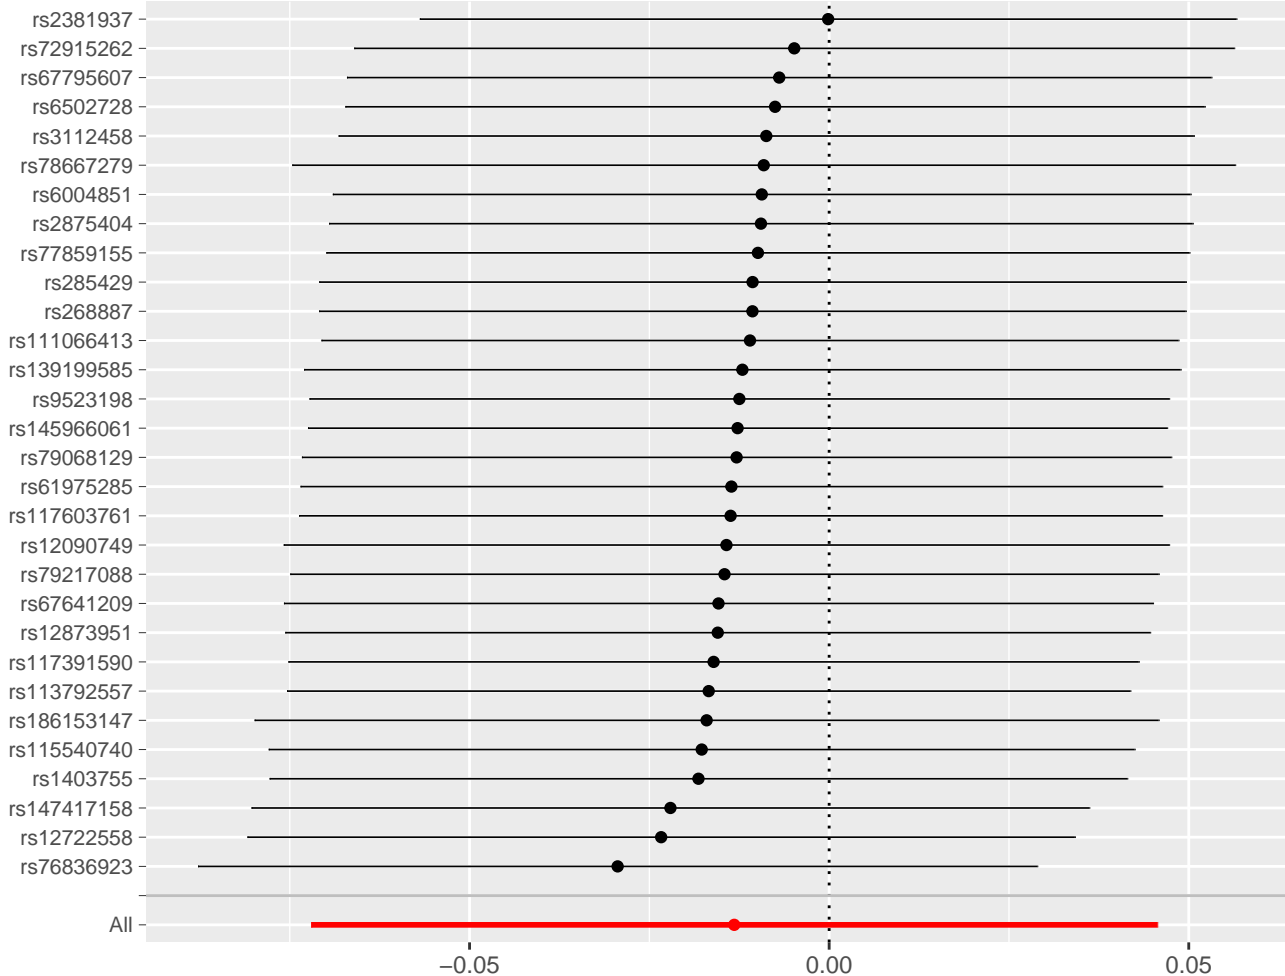

MR leave-one-out sensitivity analysis for 'CD25++ CD8br AC' on 'Aplastic anemia'



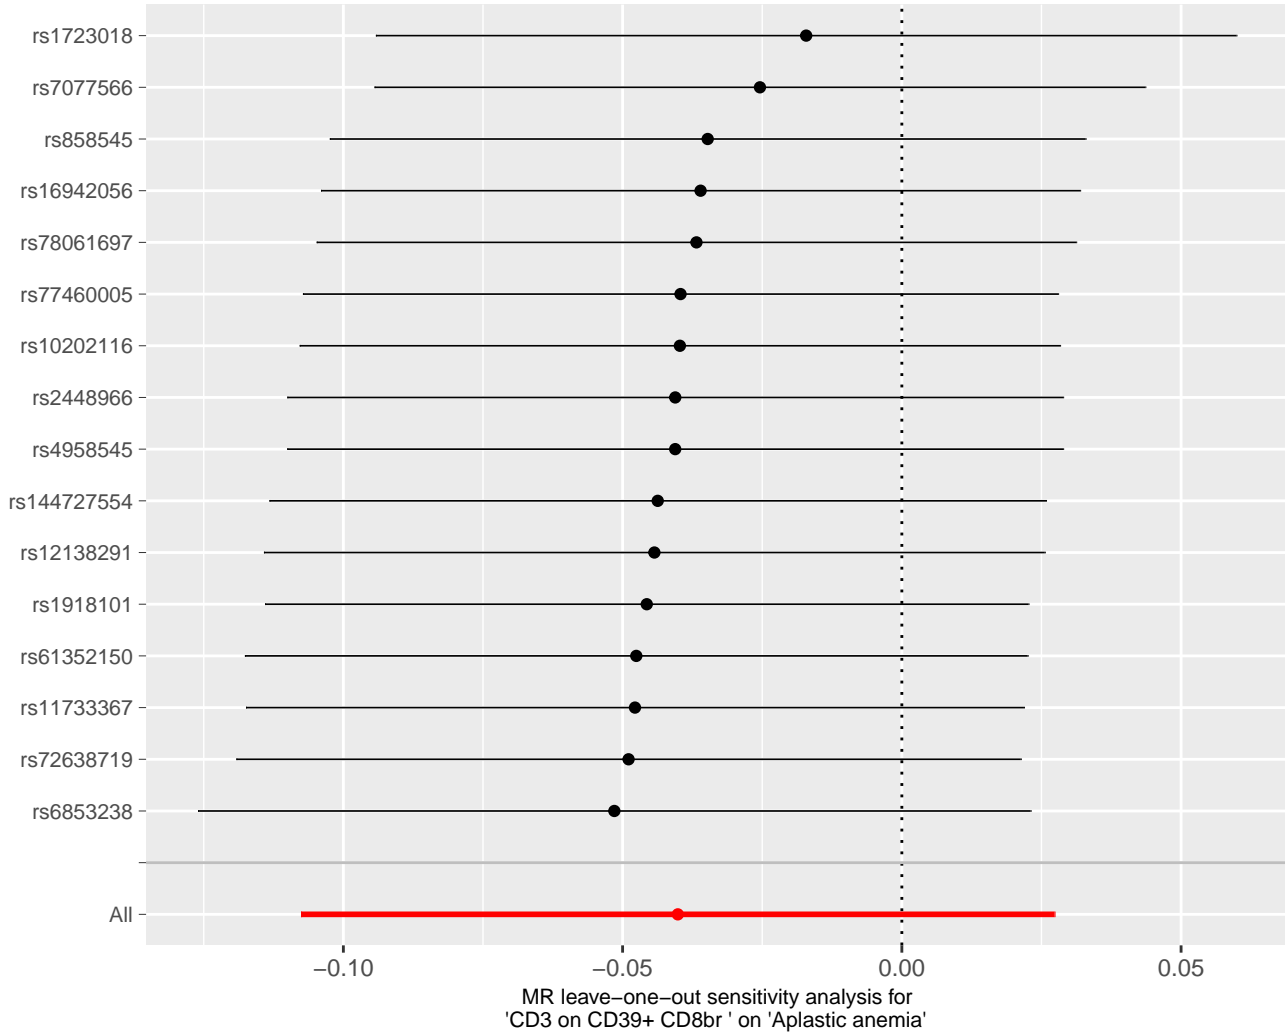

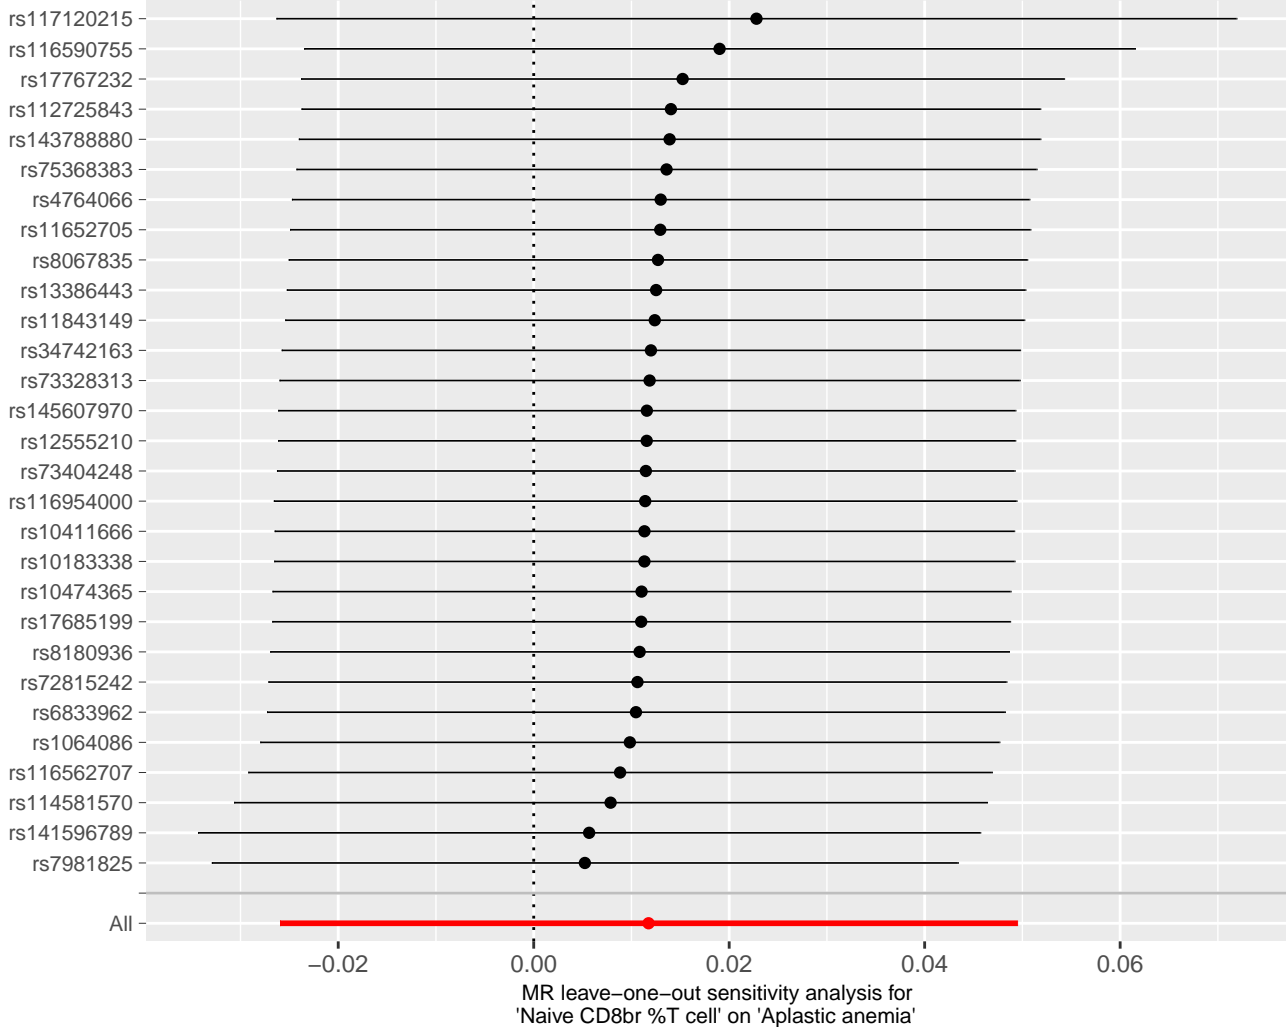

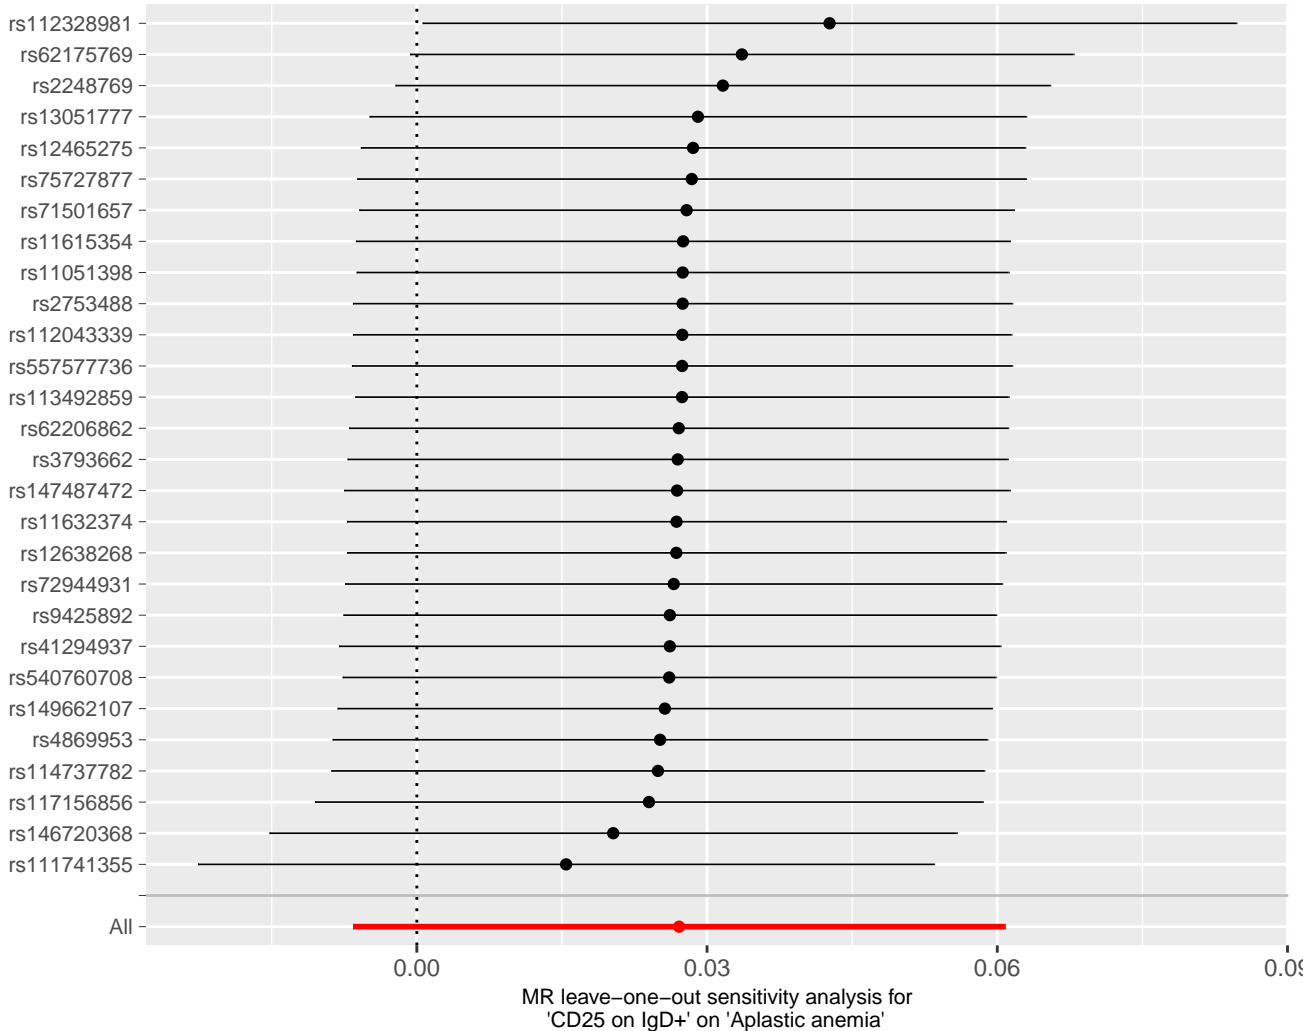

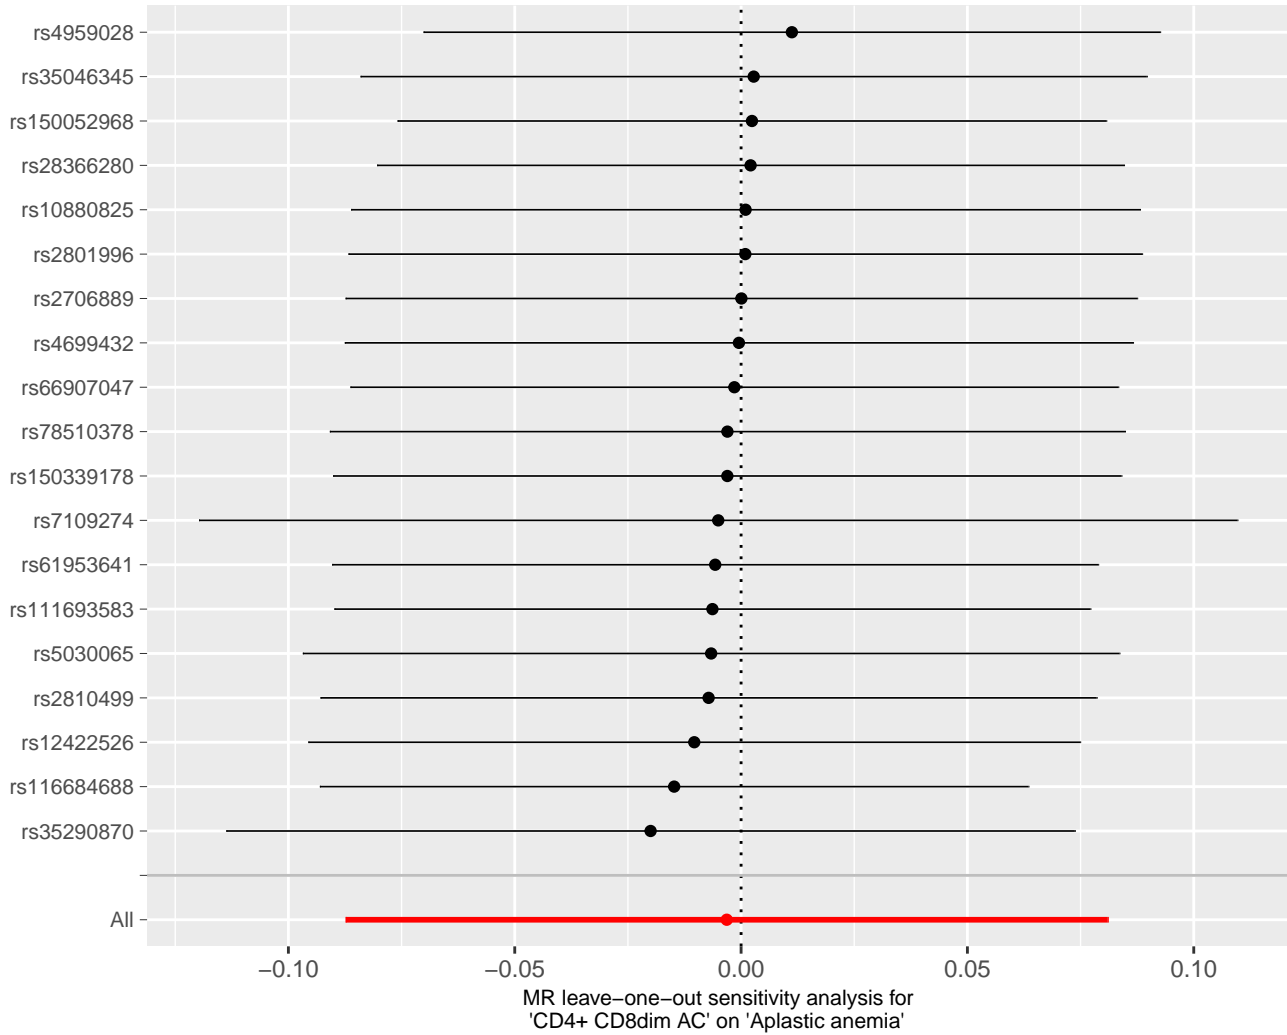

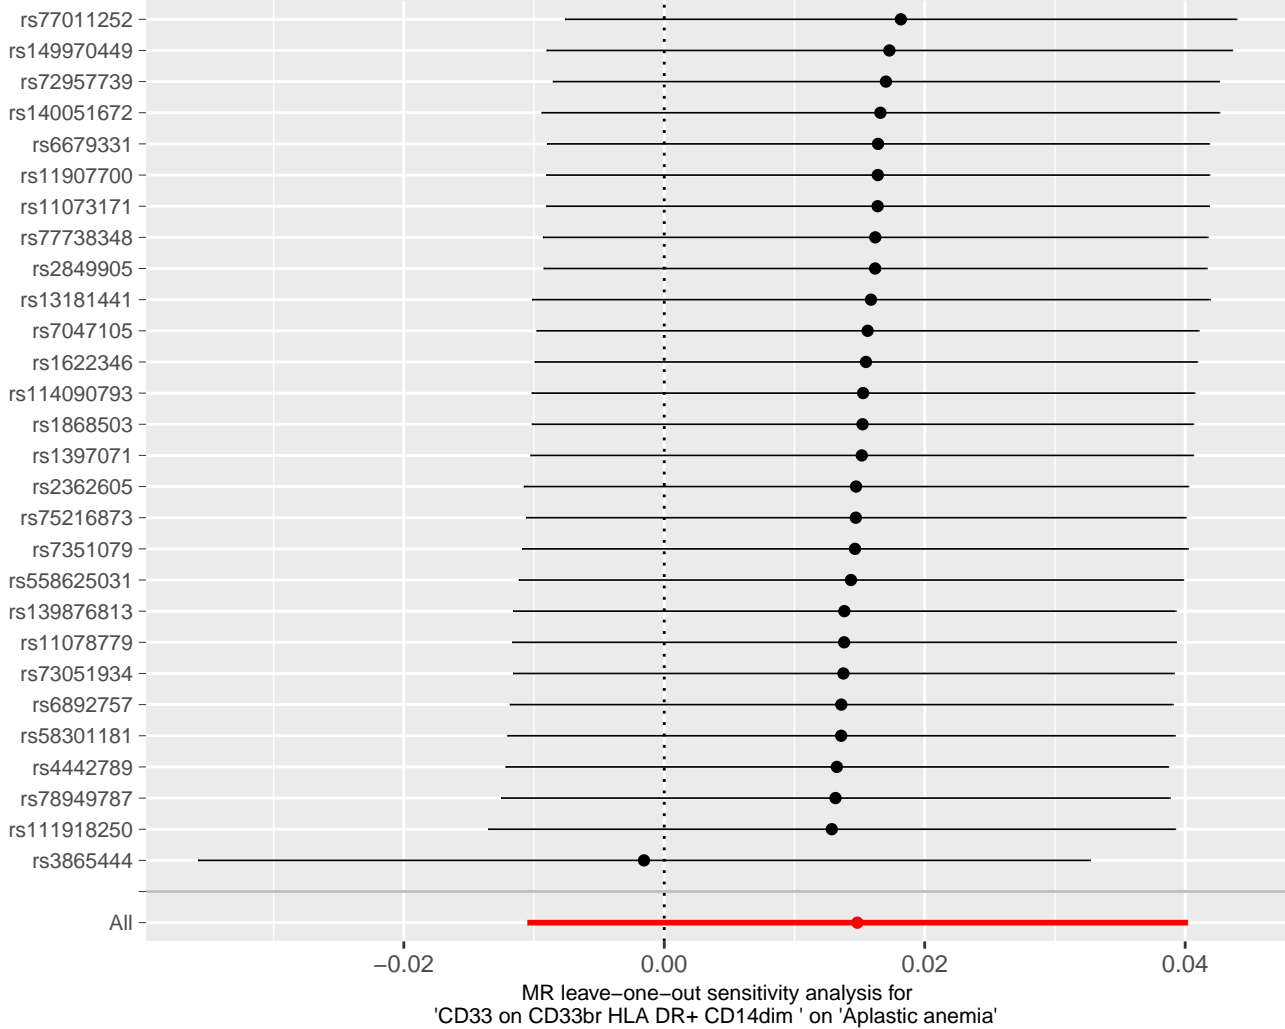

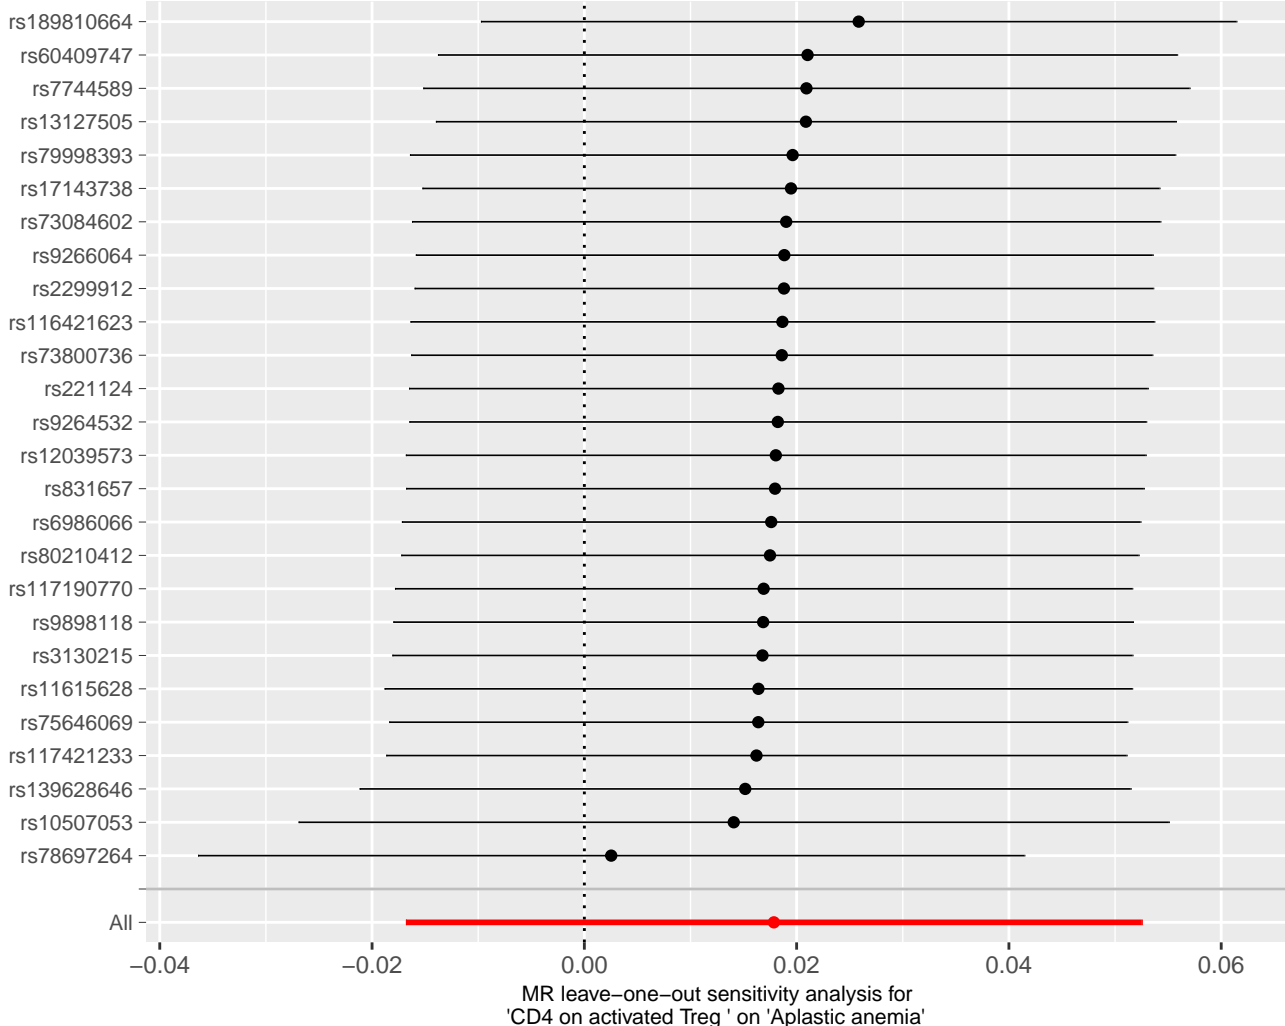

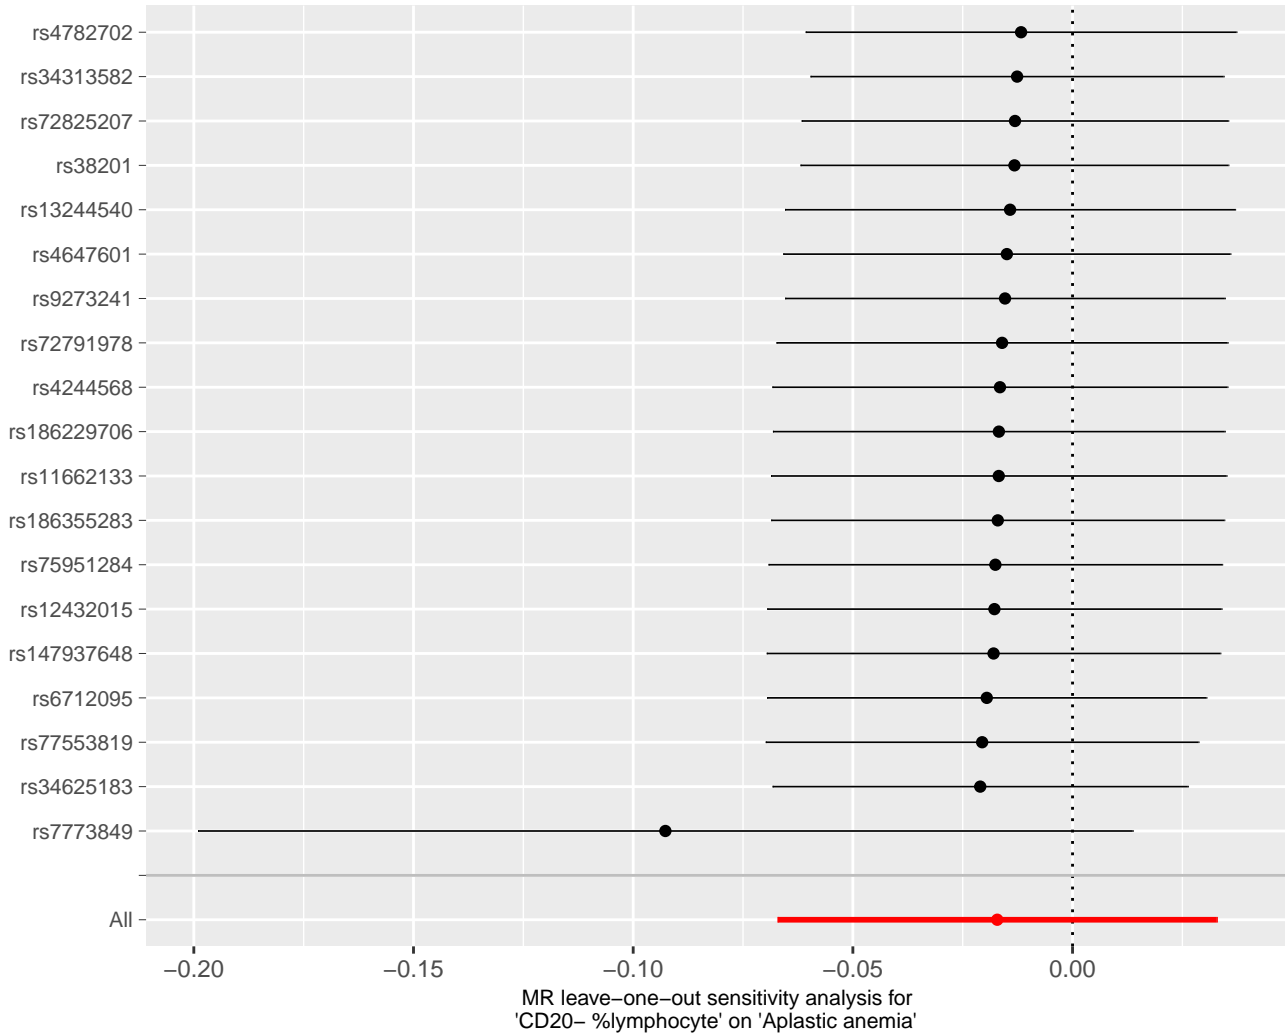

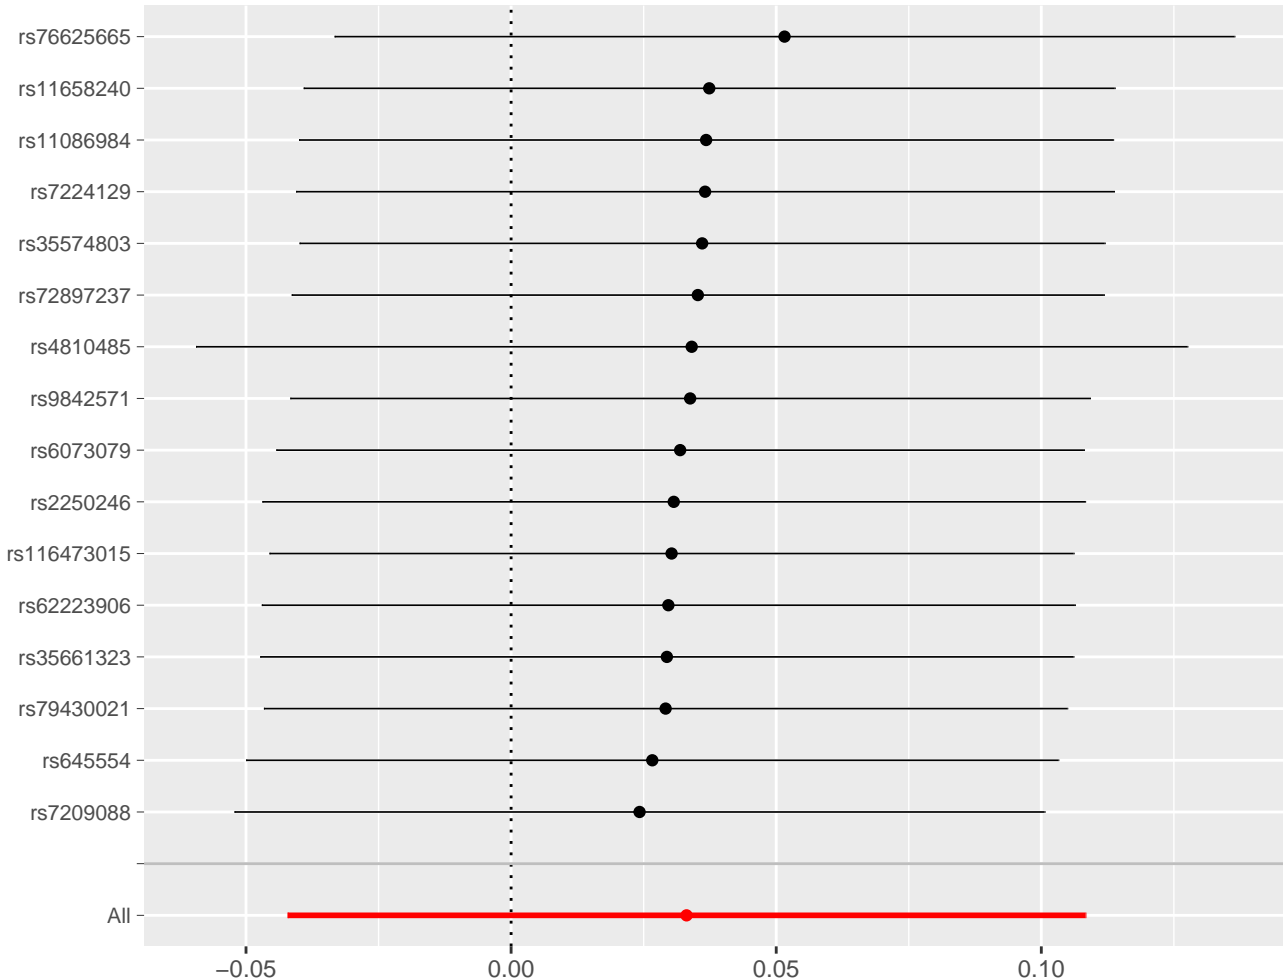

MR leave-one-out sensitivity analysis for 'IgD- CD27- %B cell' on 'Aplastic anemia'



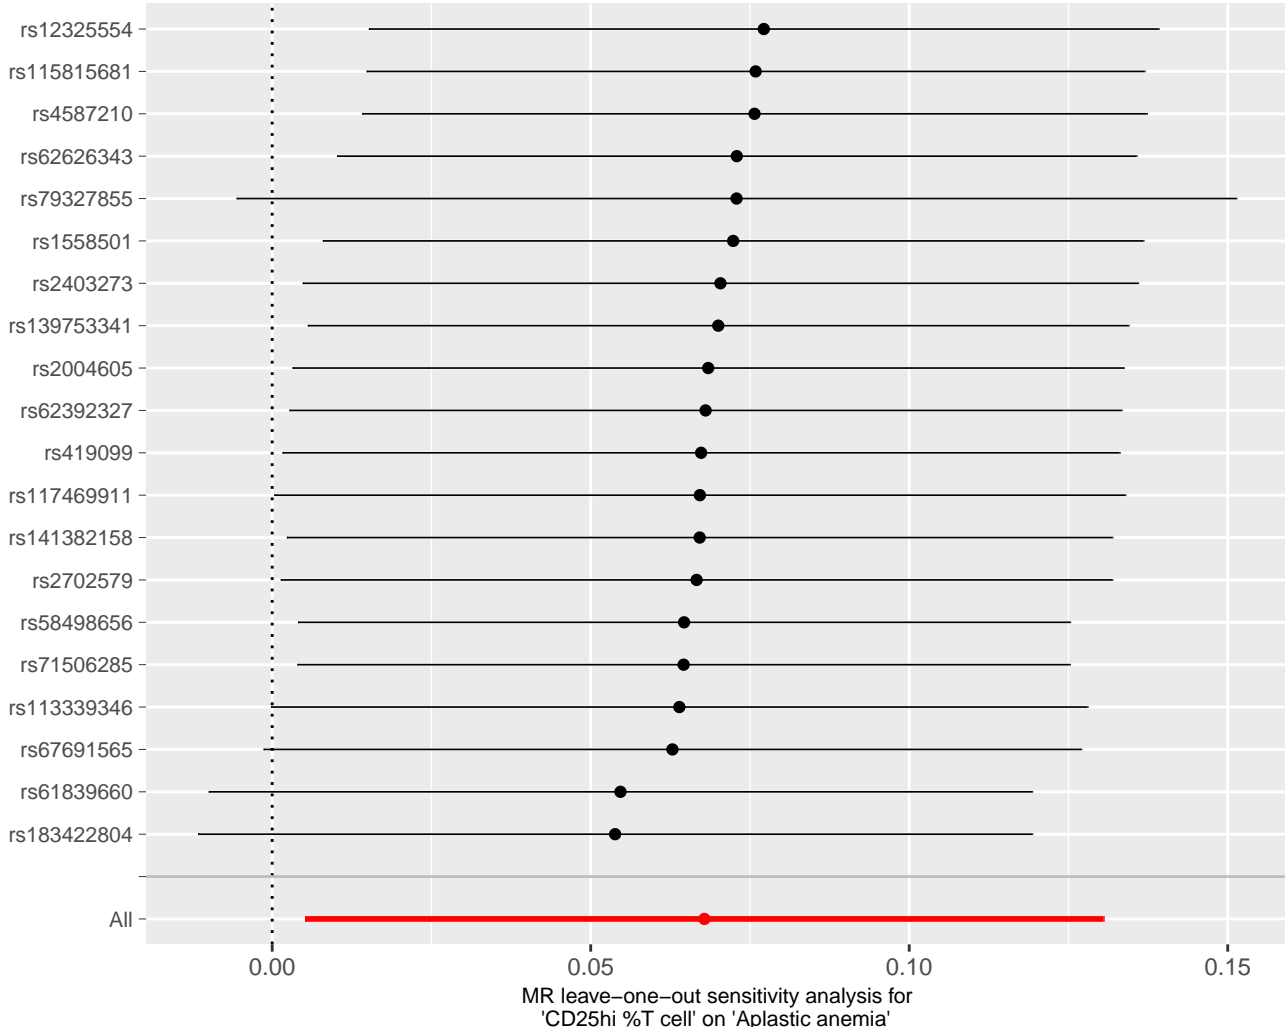

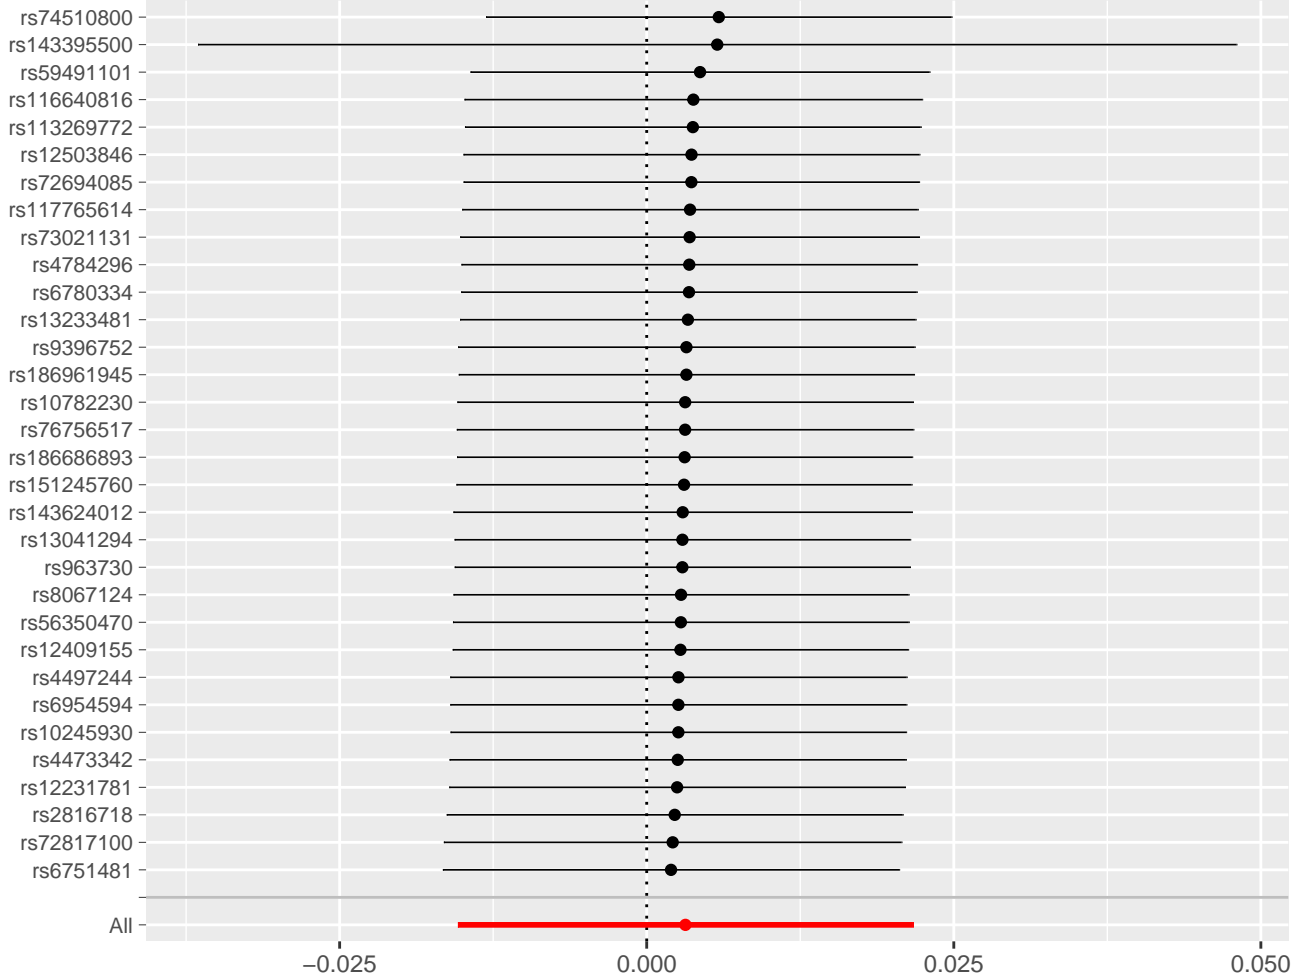

MR leave-one-out sensitivity analysis for 'CM CD4+ %CD4+' on 'Aplastic anemia'

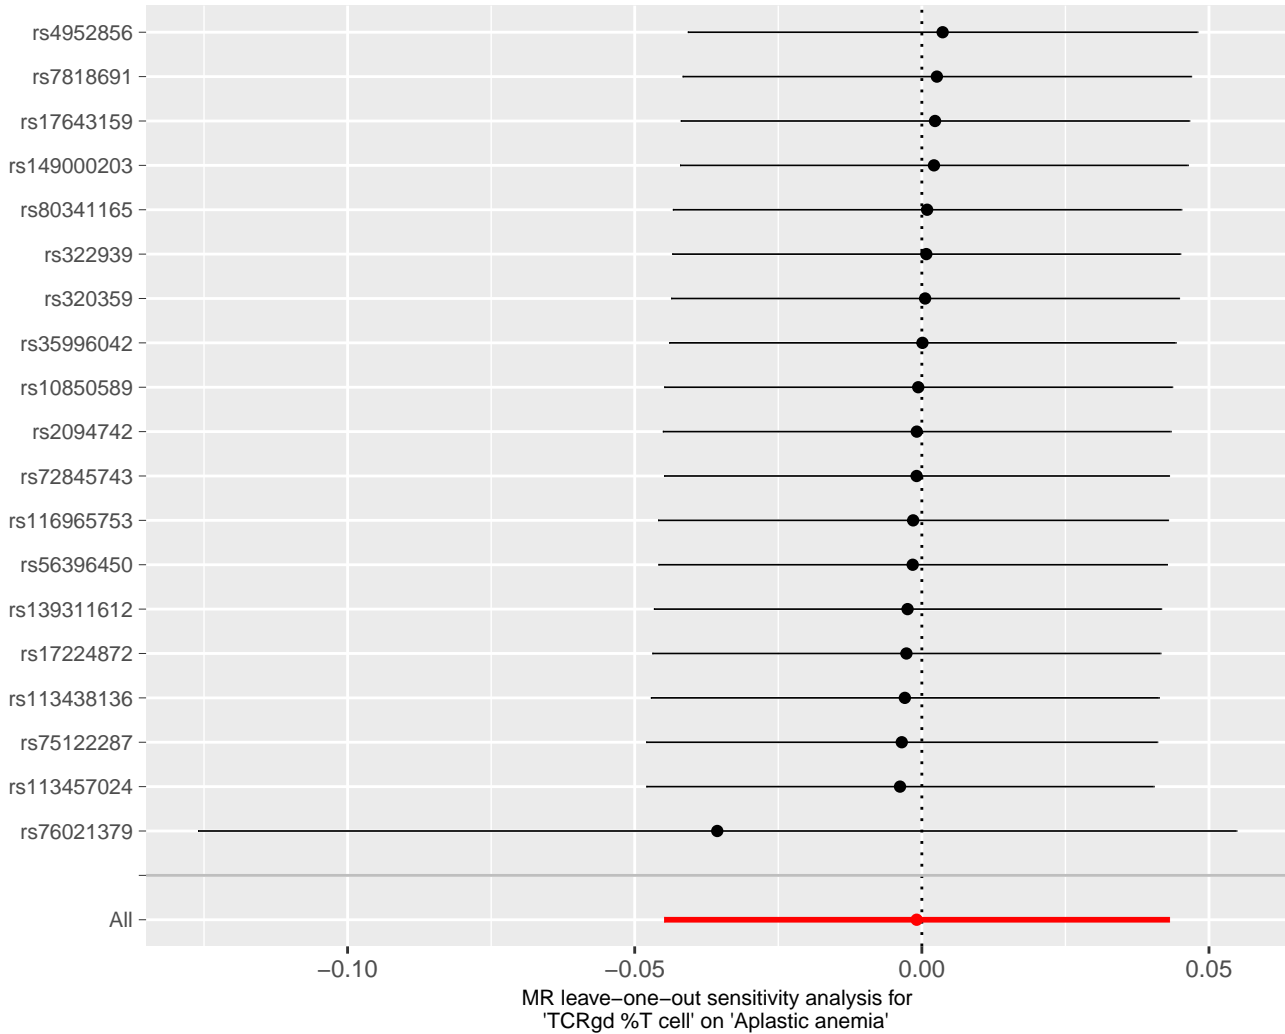

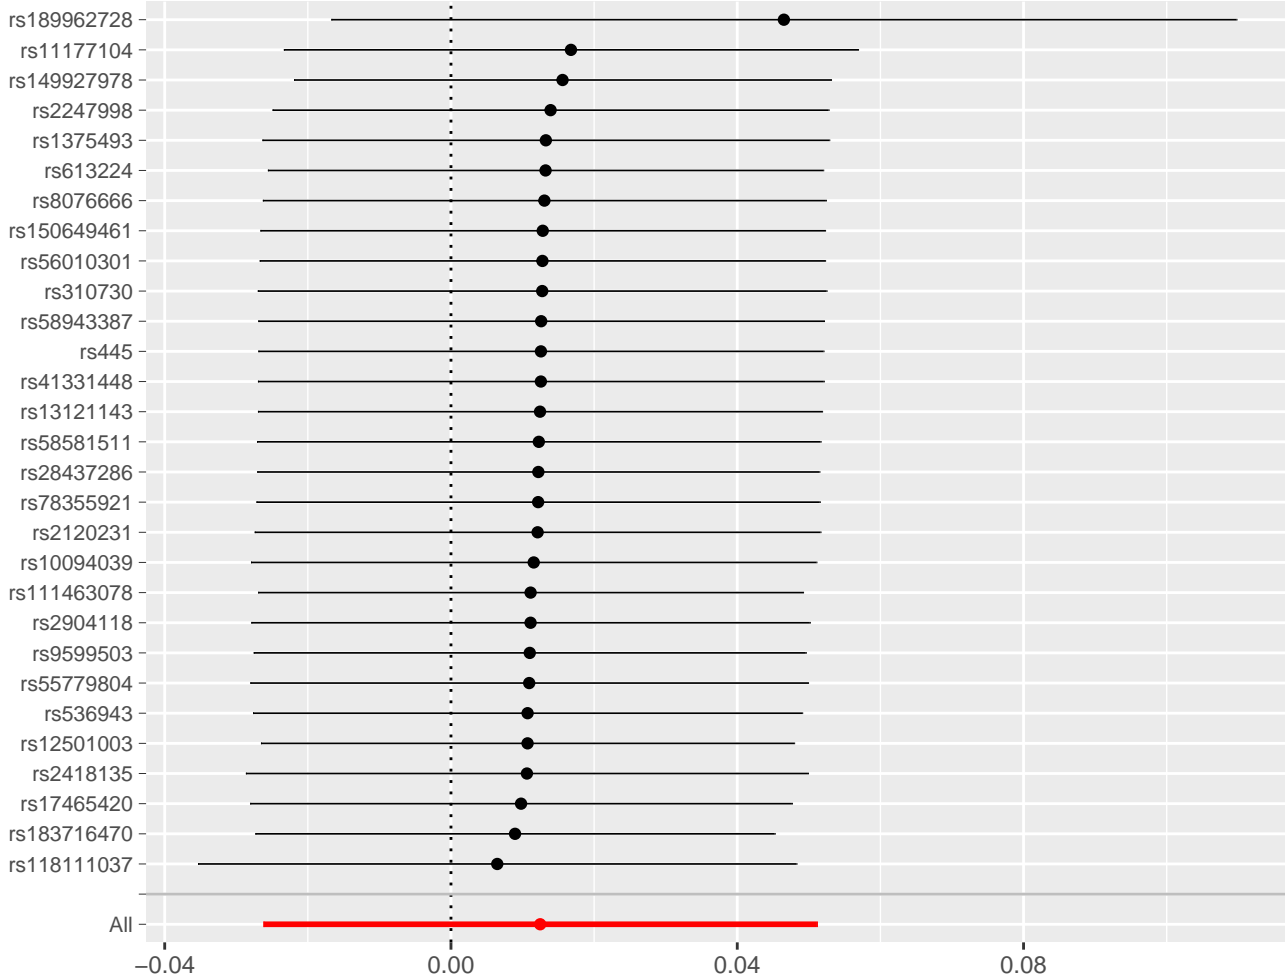

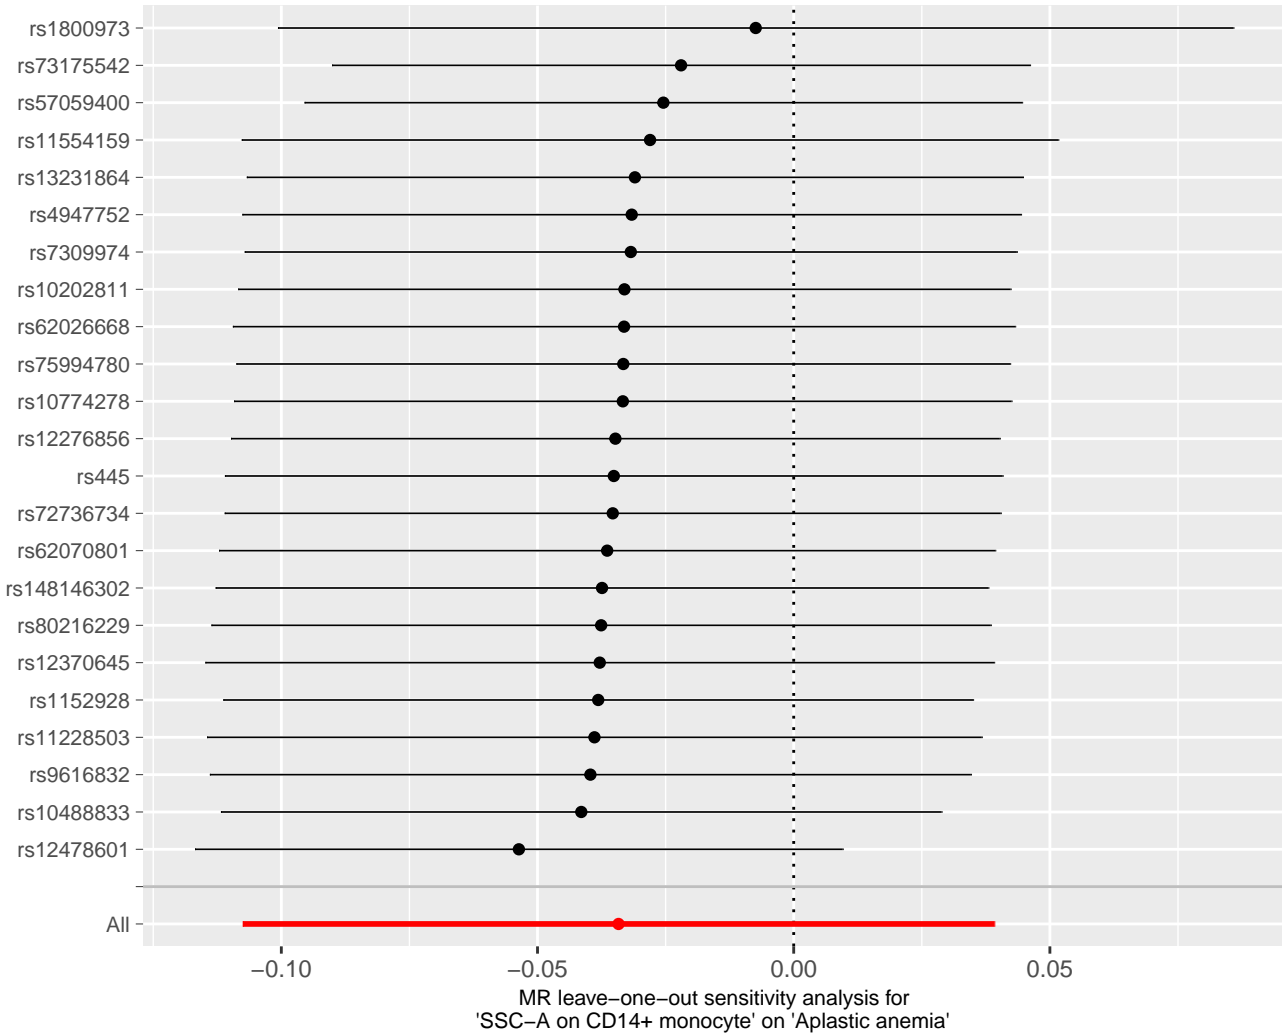

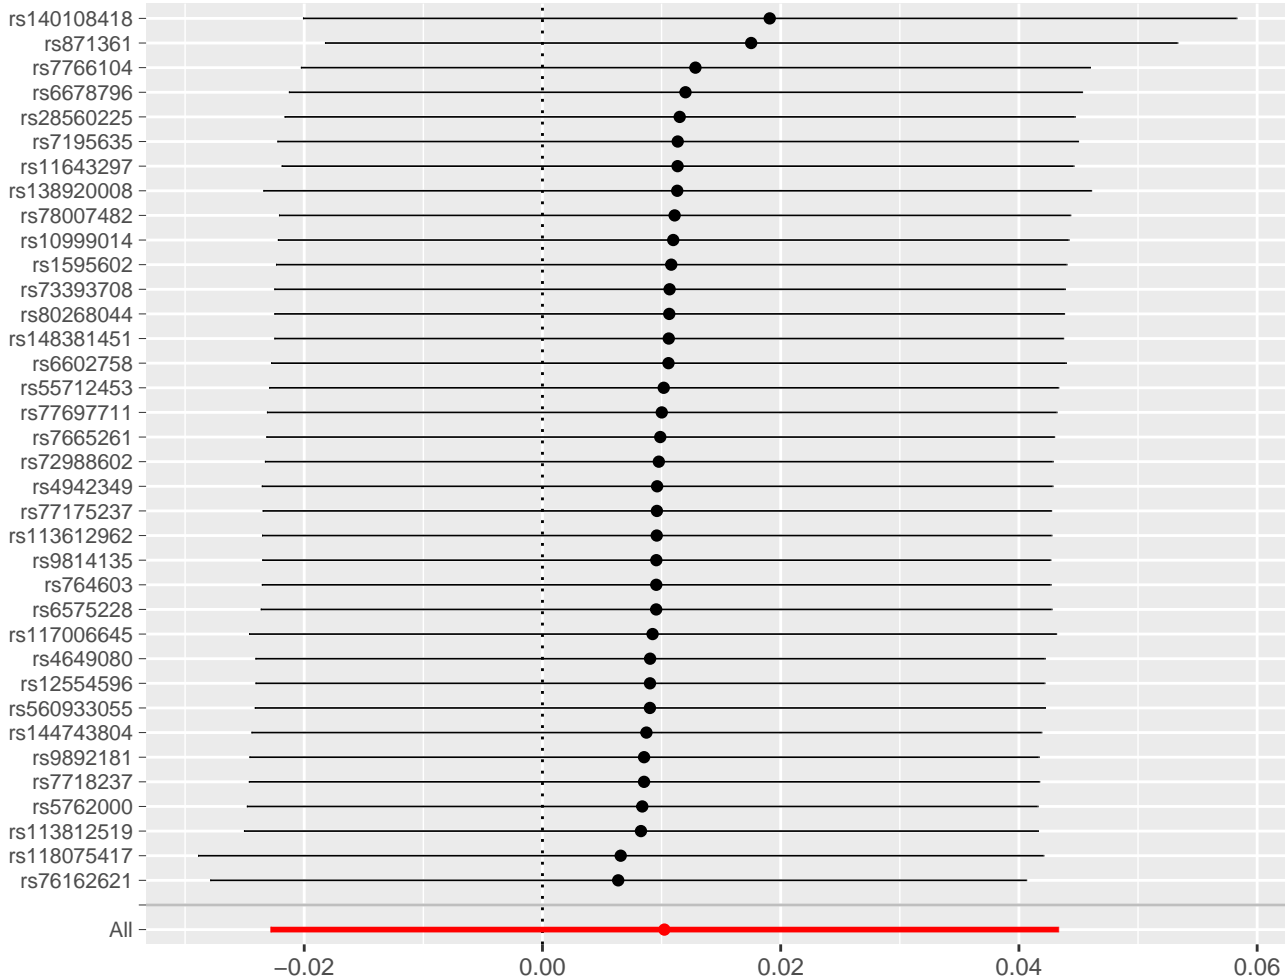

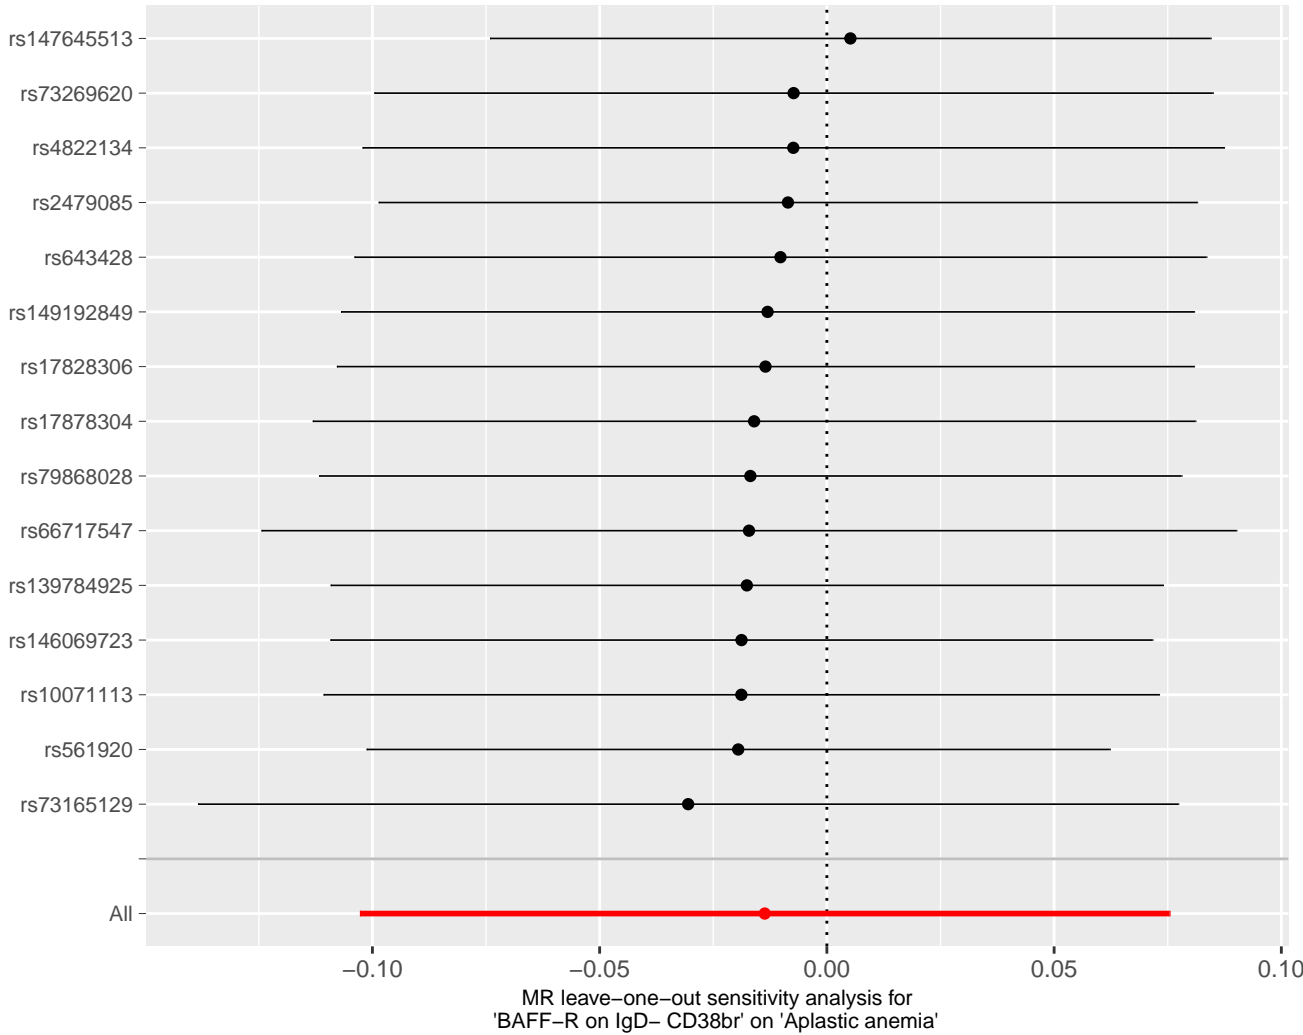

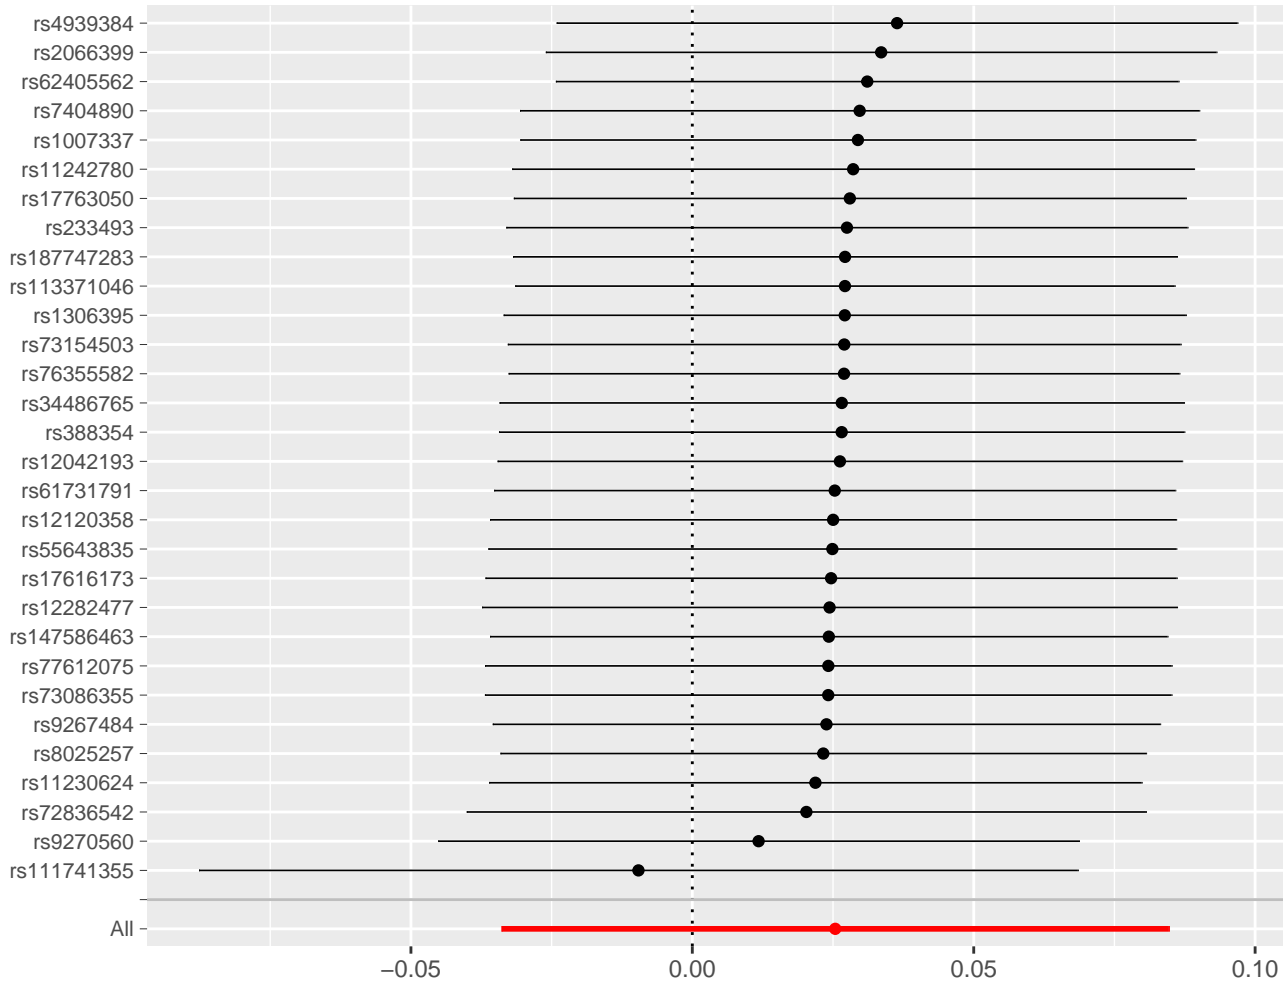

MR leave-one-out sensitivity analysis for 'CD20 on IgD+ CD38dim' on 'Aplastic anemia'



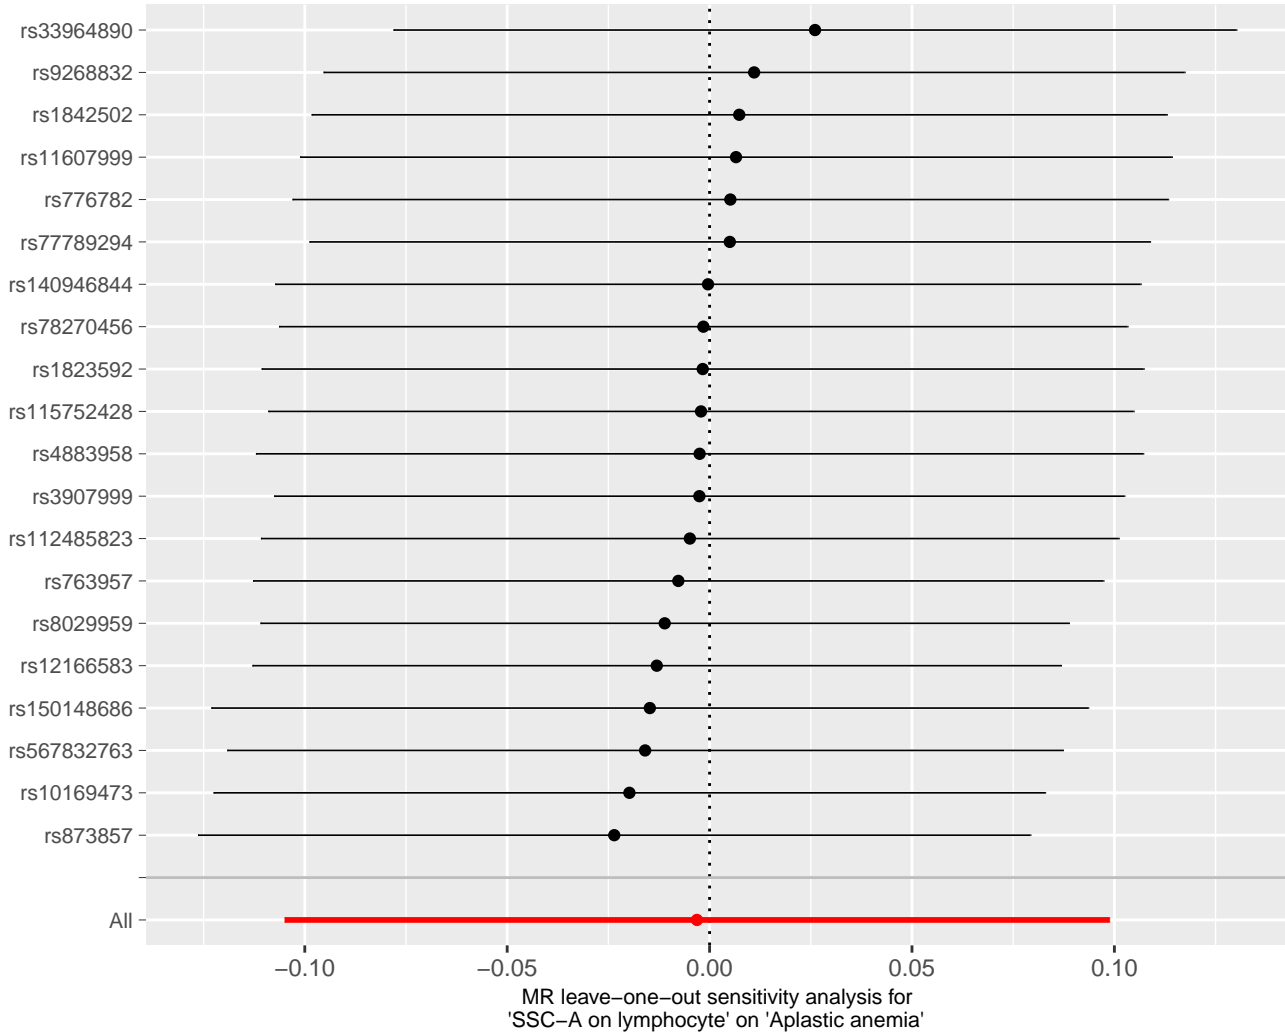

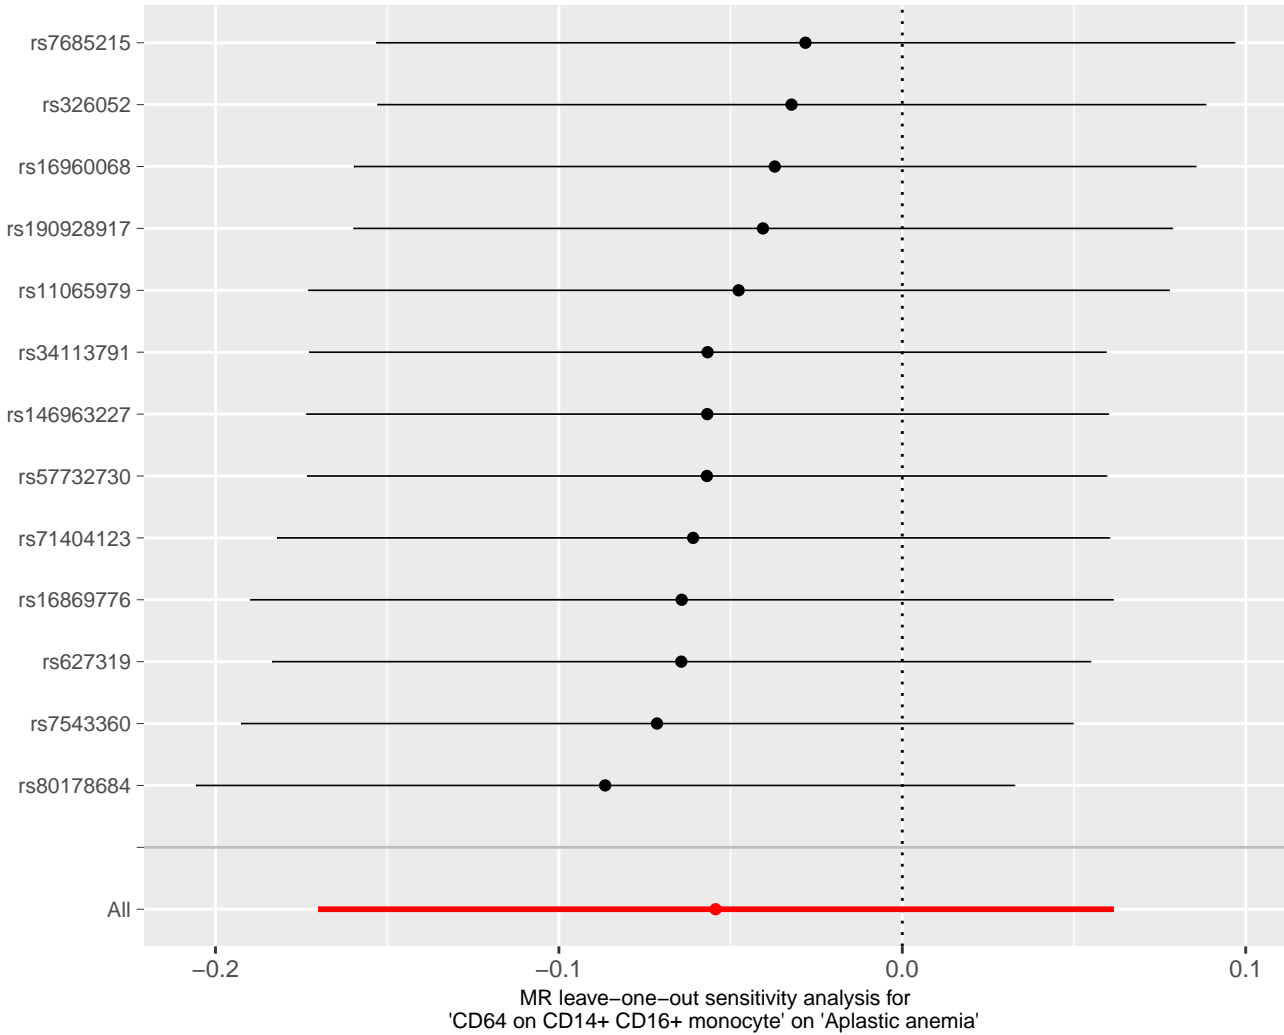

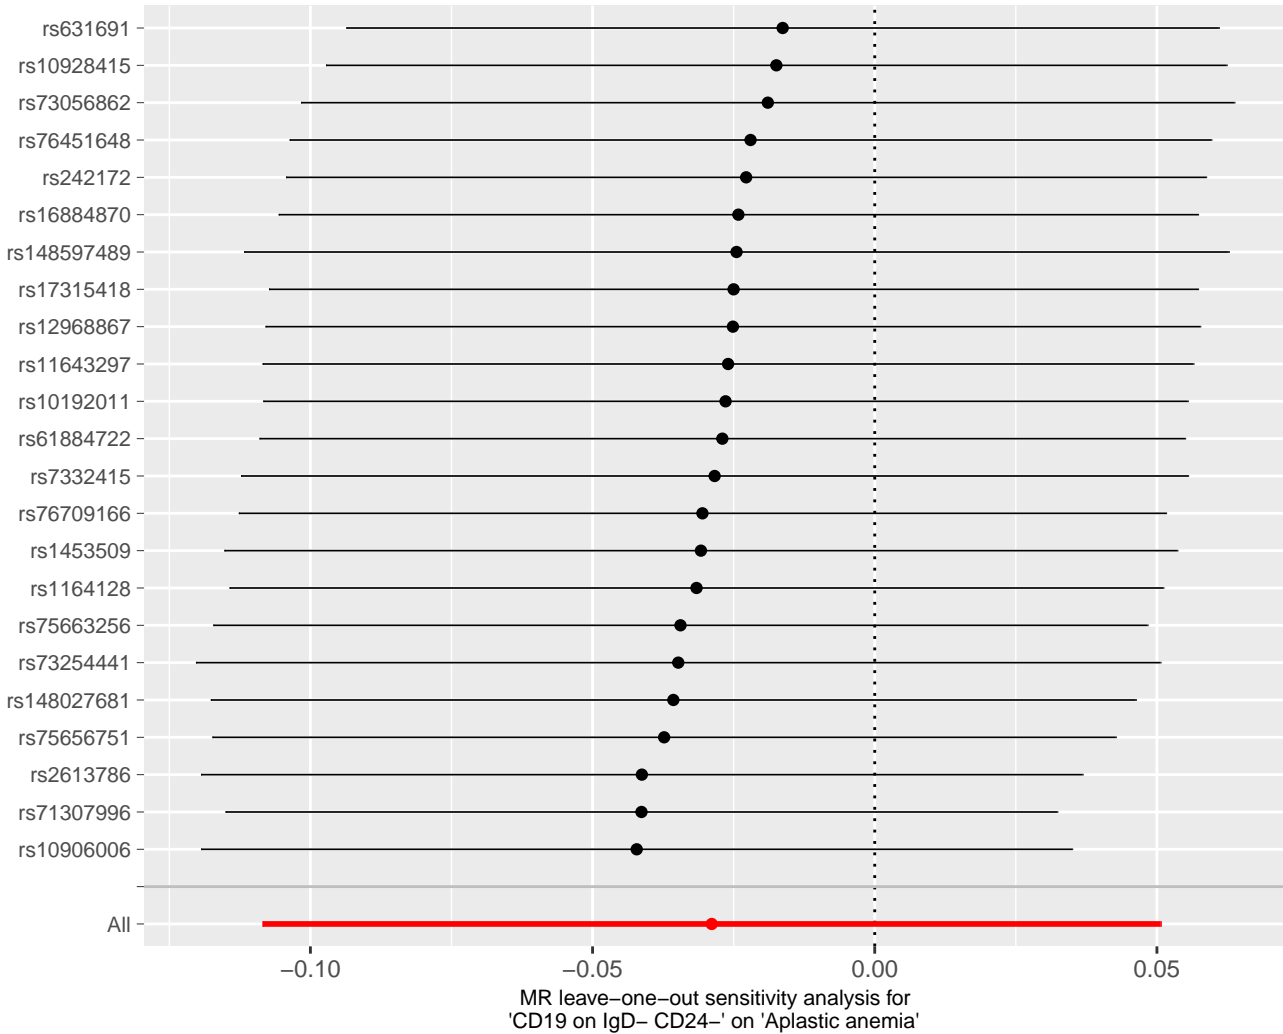

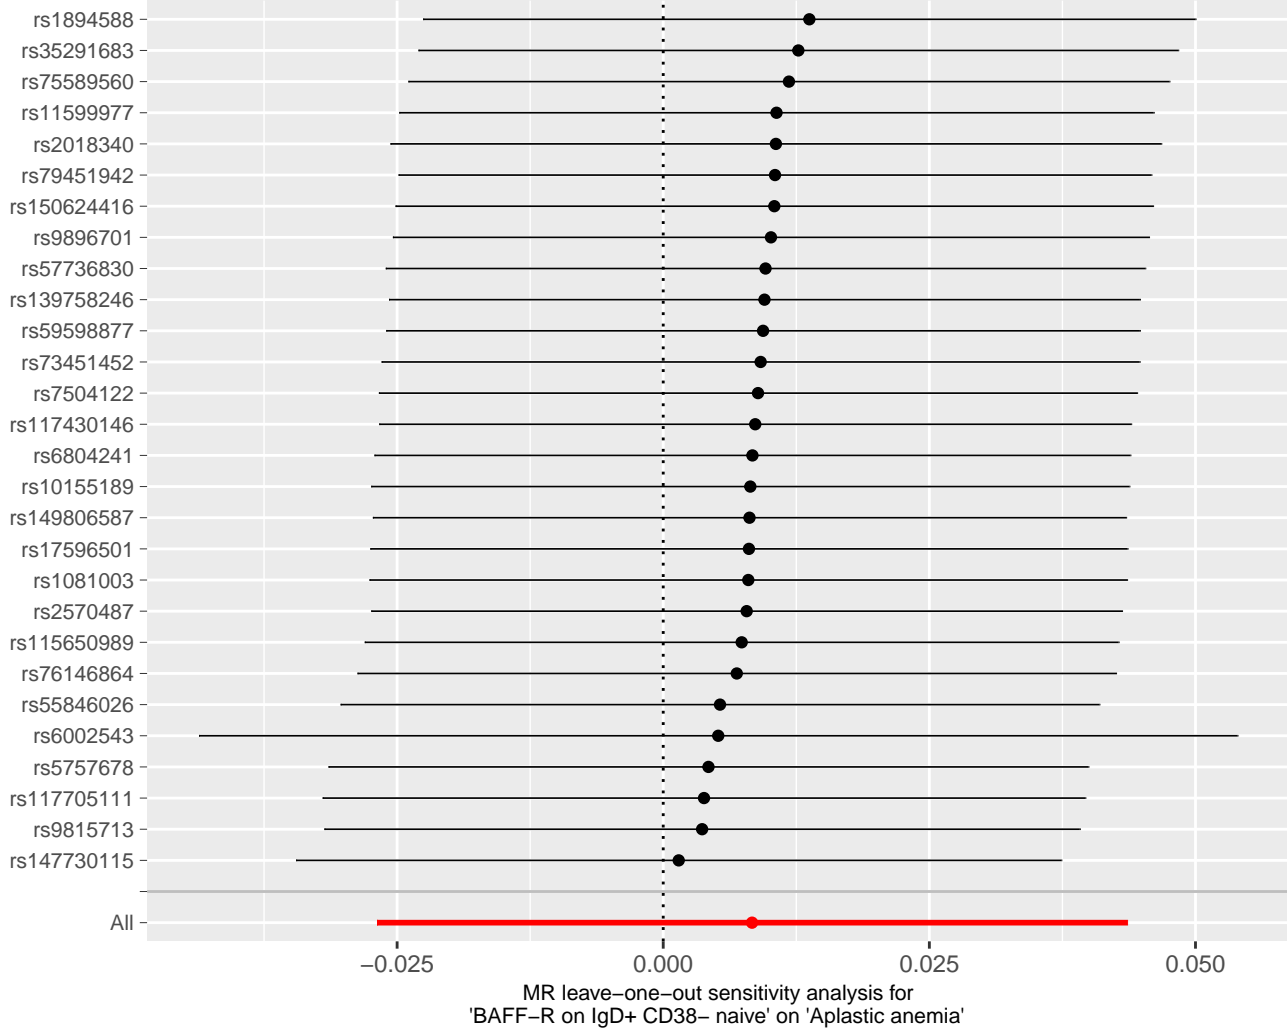

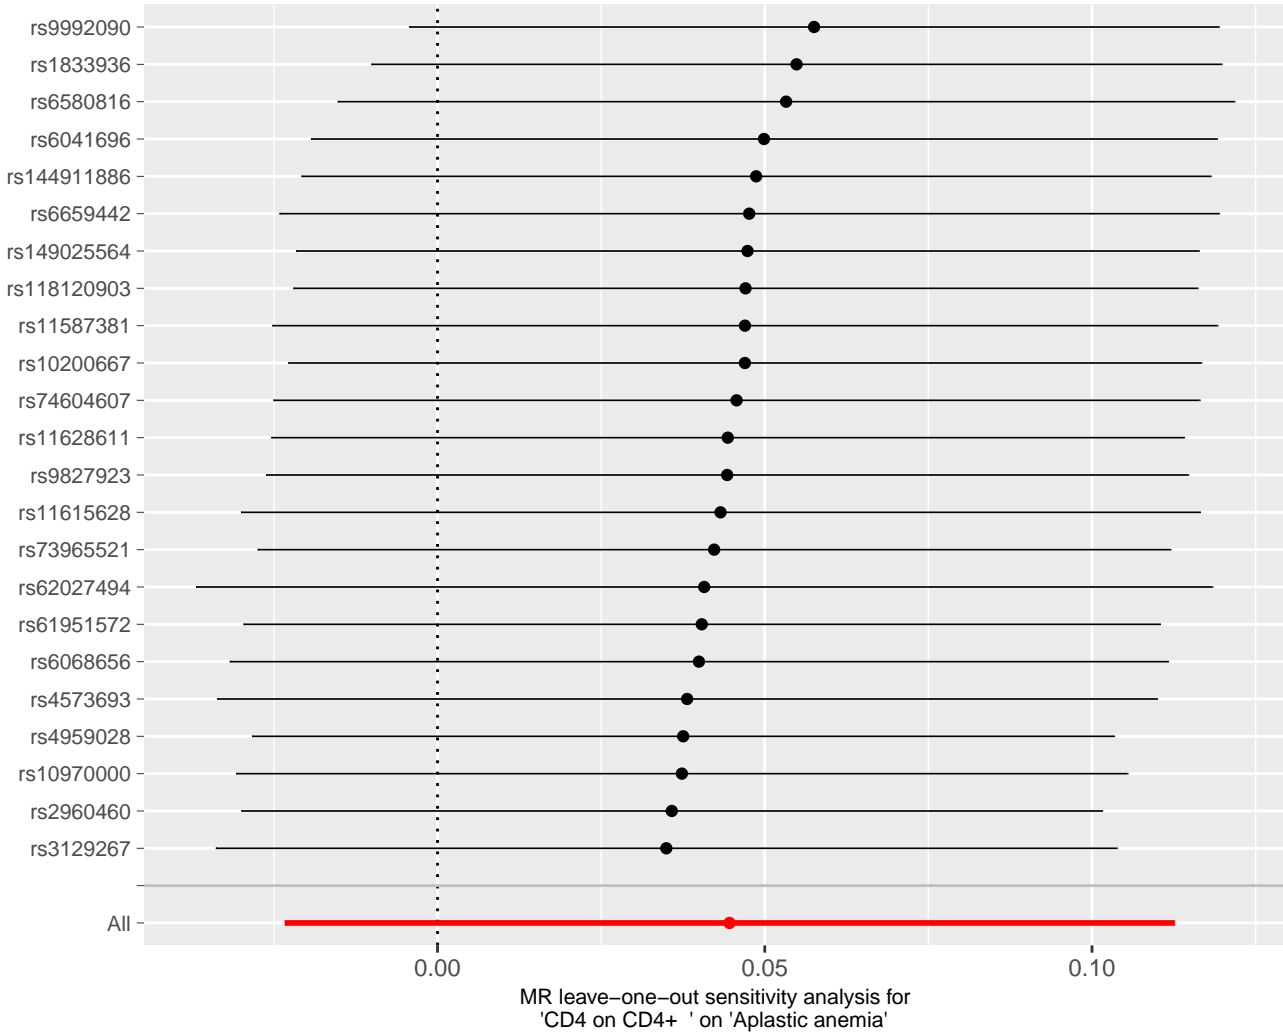

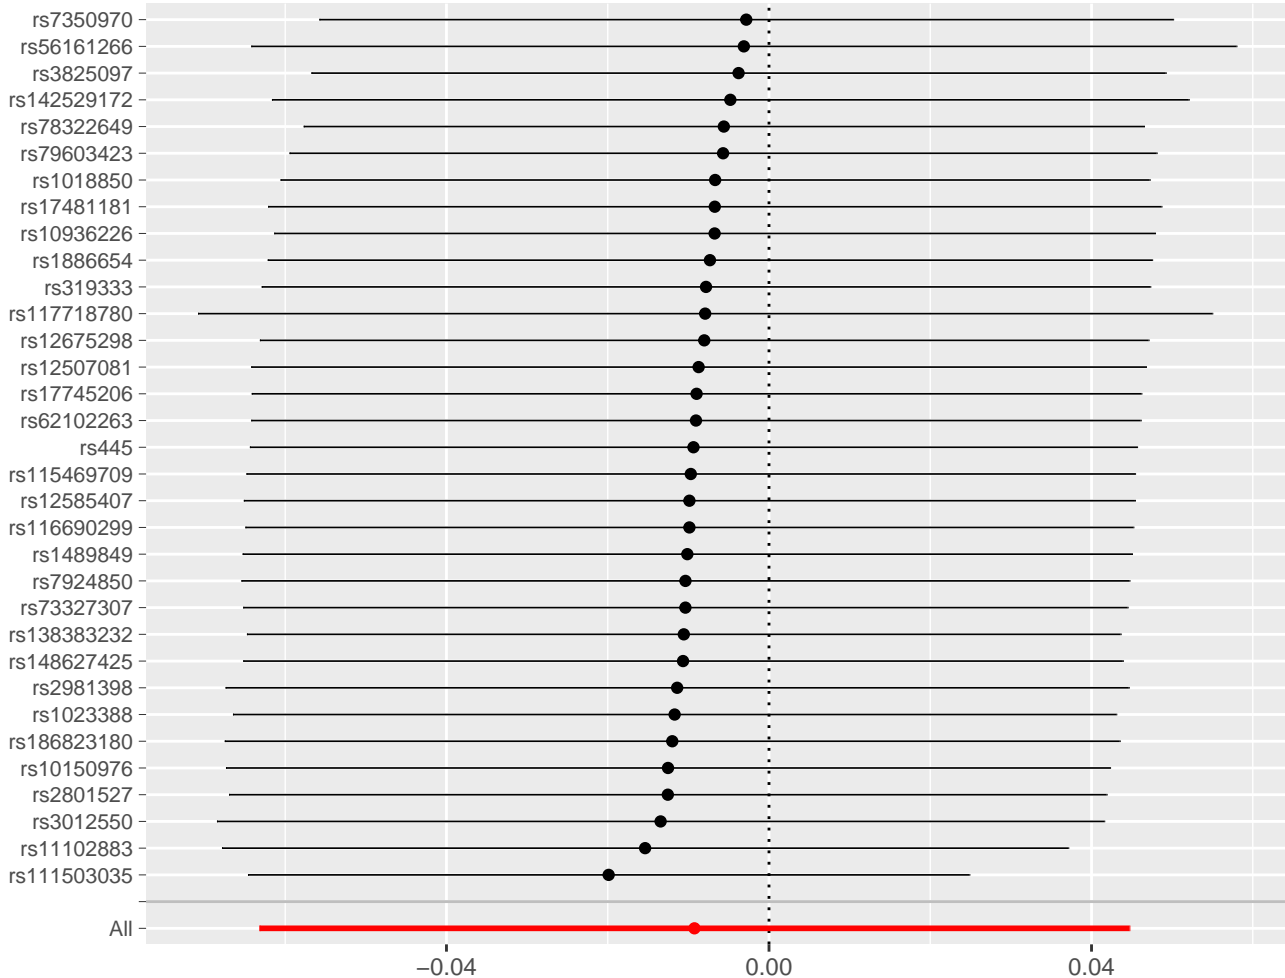

MR leave-one-out sensitivity analysis for 'CD80 on granulocyte' on 'Aplastic anemia'

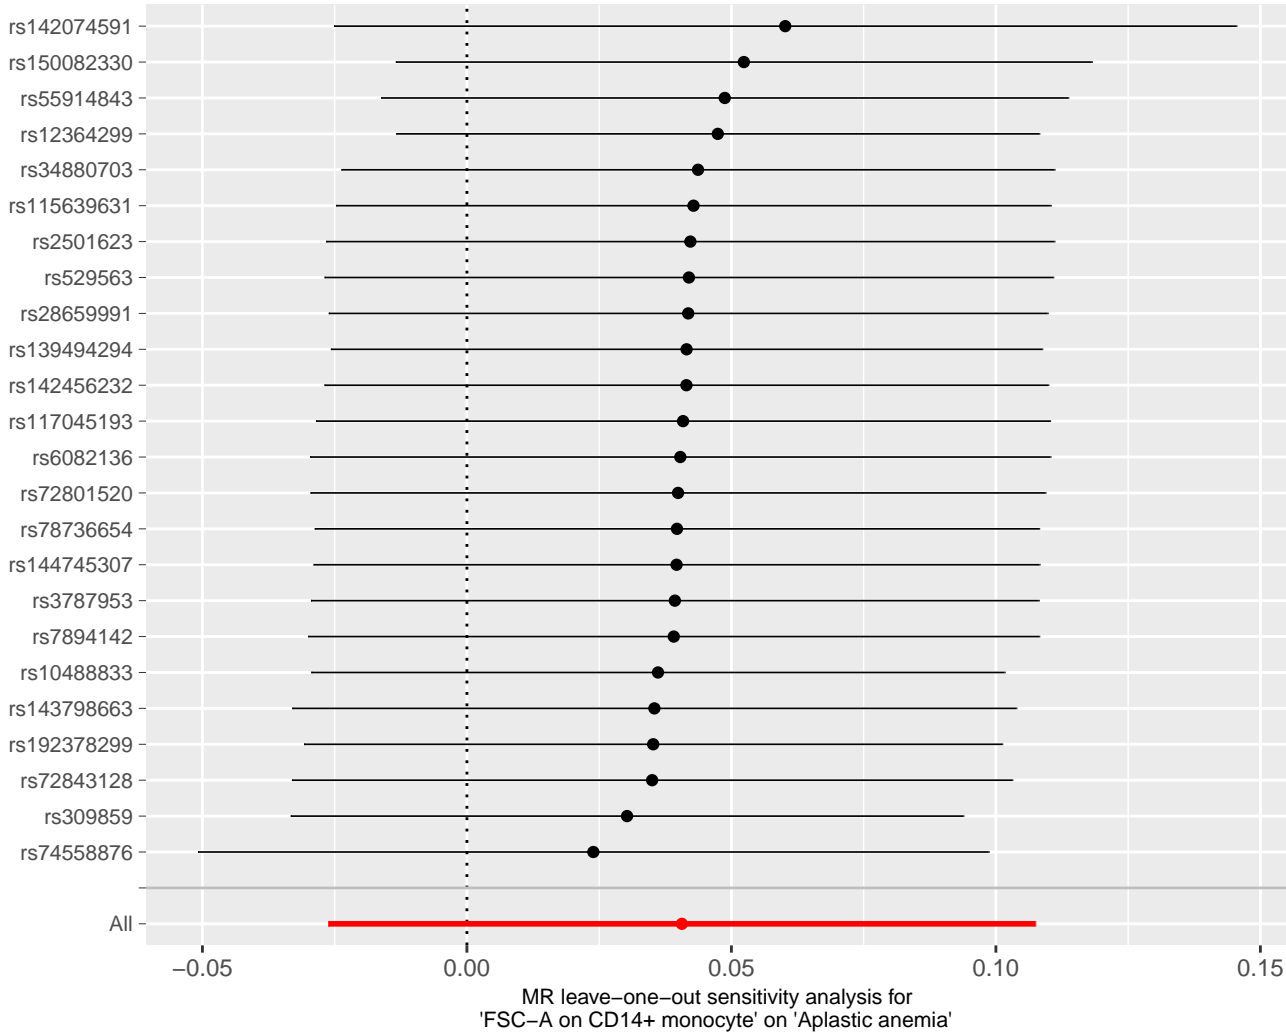

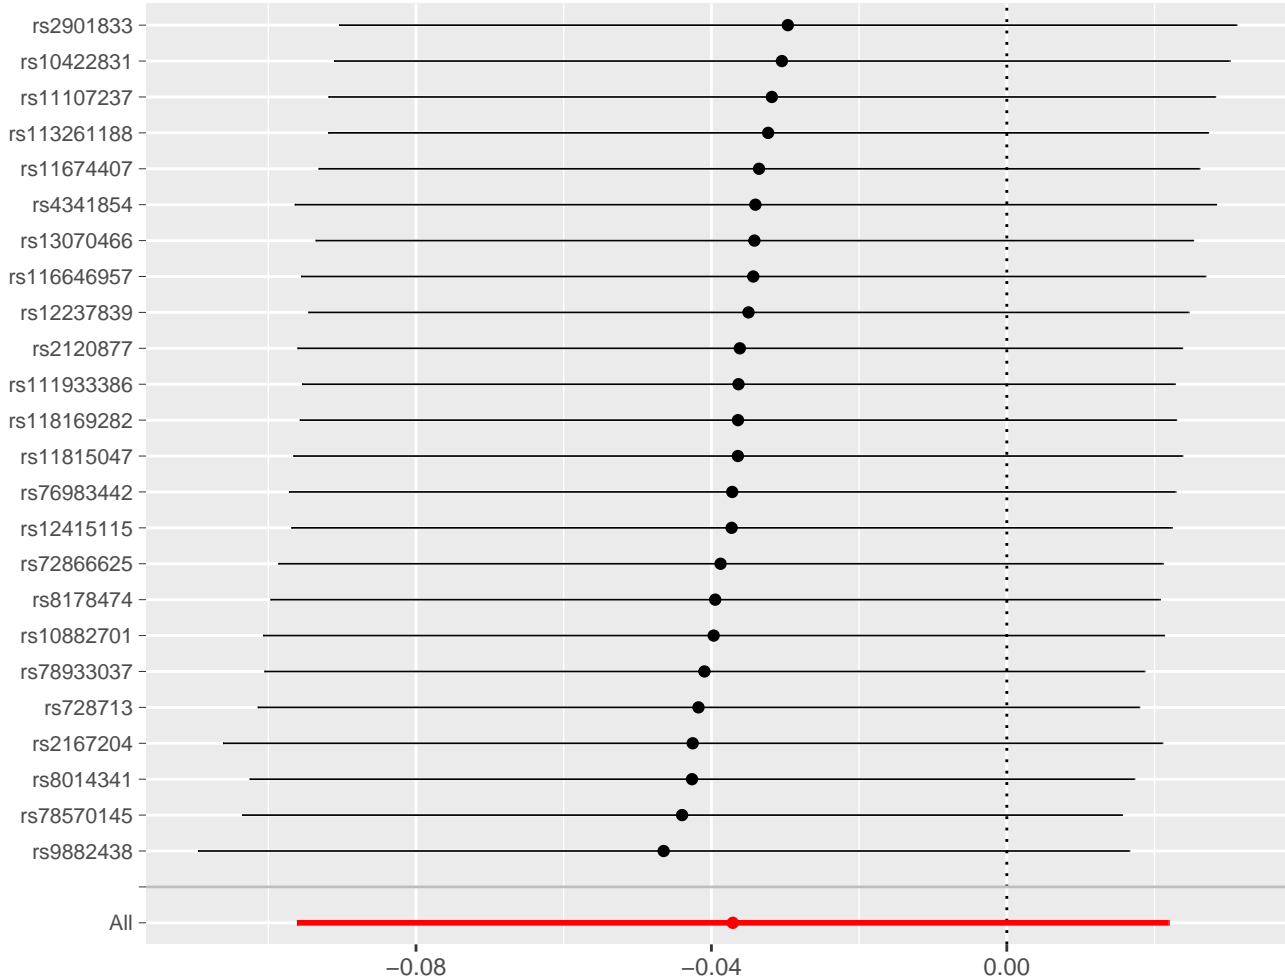

MR leave-one-out sensitivity analysis for 'CD39 on CD39+ CD8br ' on 'Aplastic anemia'



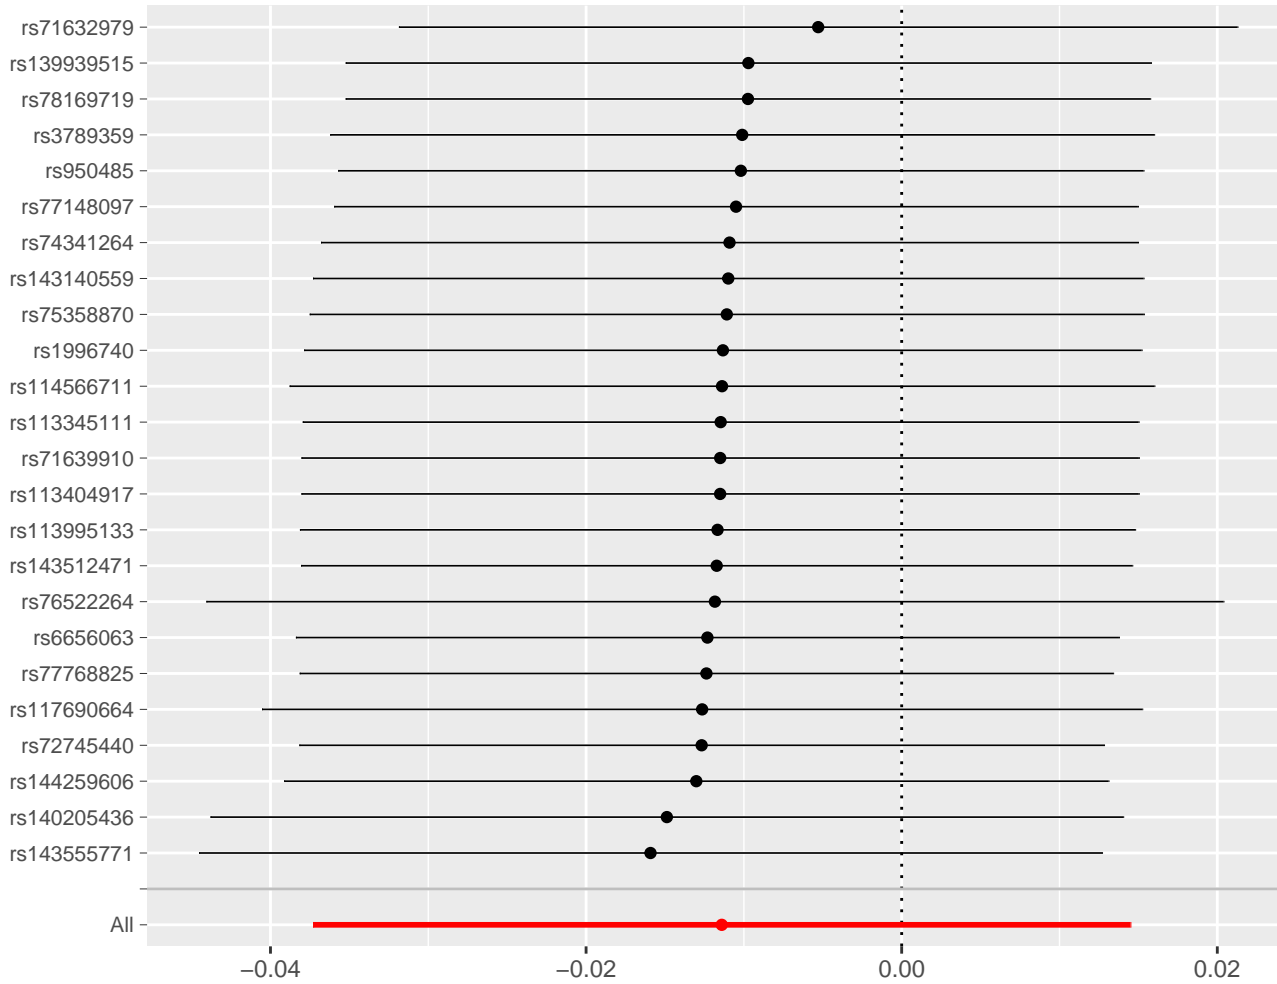

MR leave-one-out sensitivity analysis for 'CD86+ myeloid DC %DC' on 'Aplastic anemia'

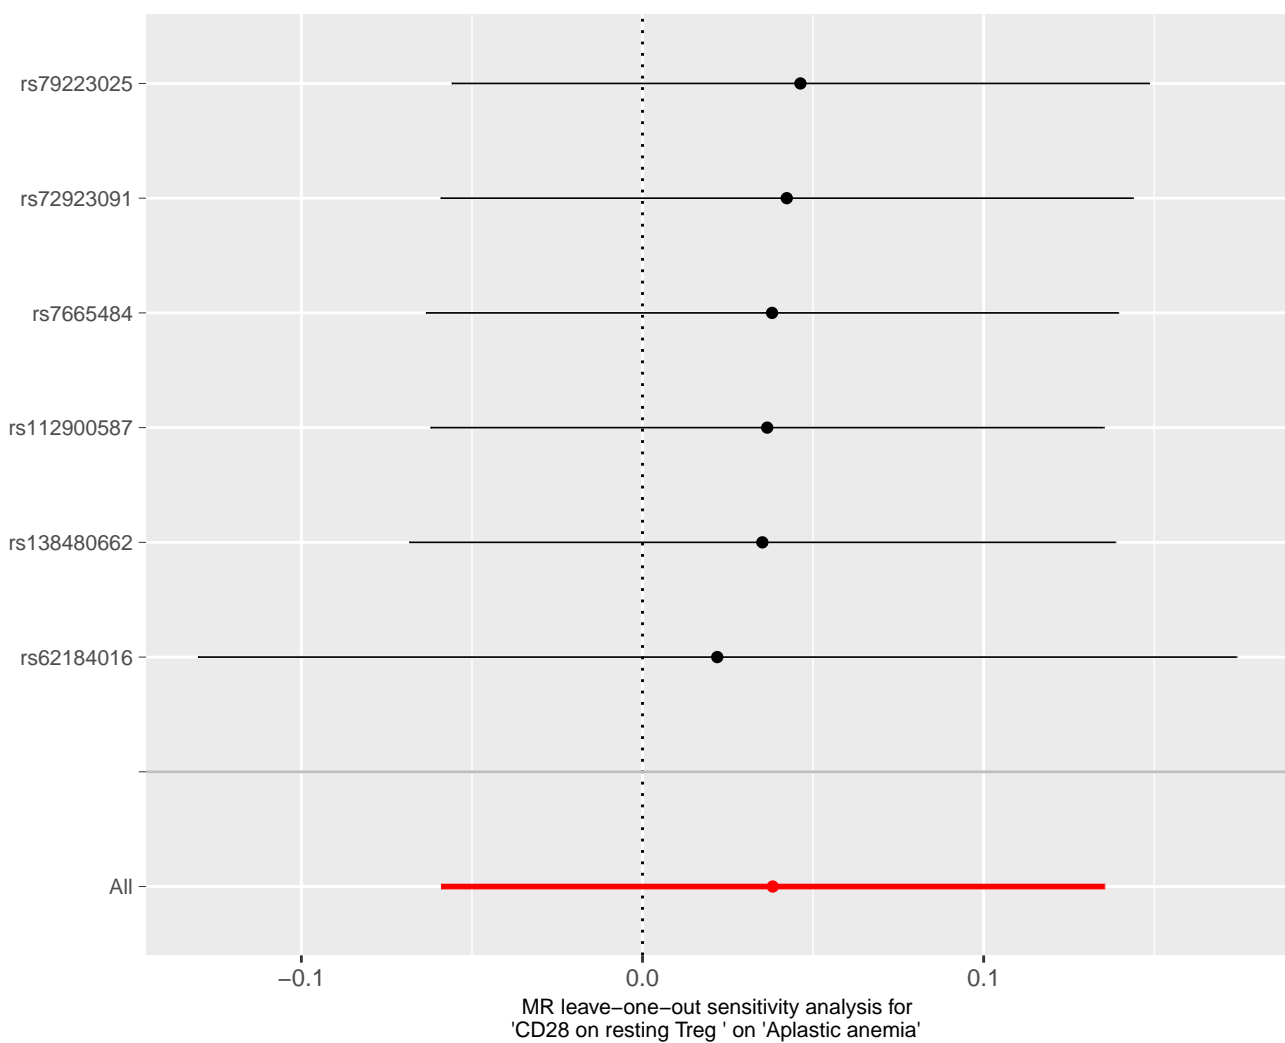

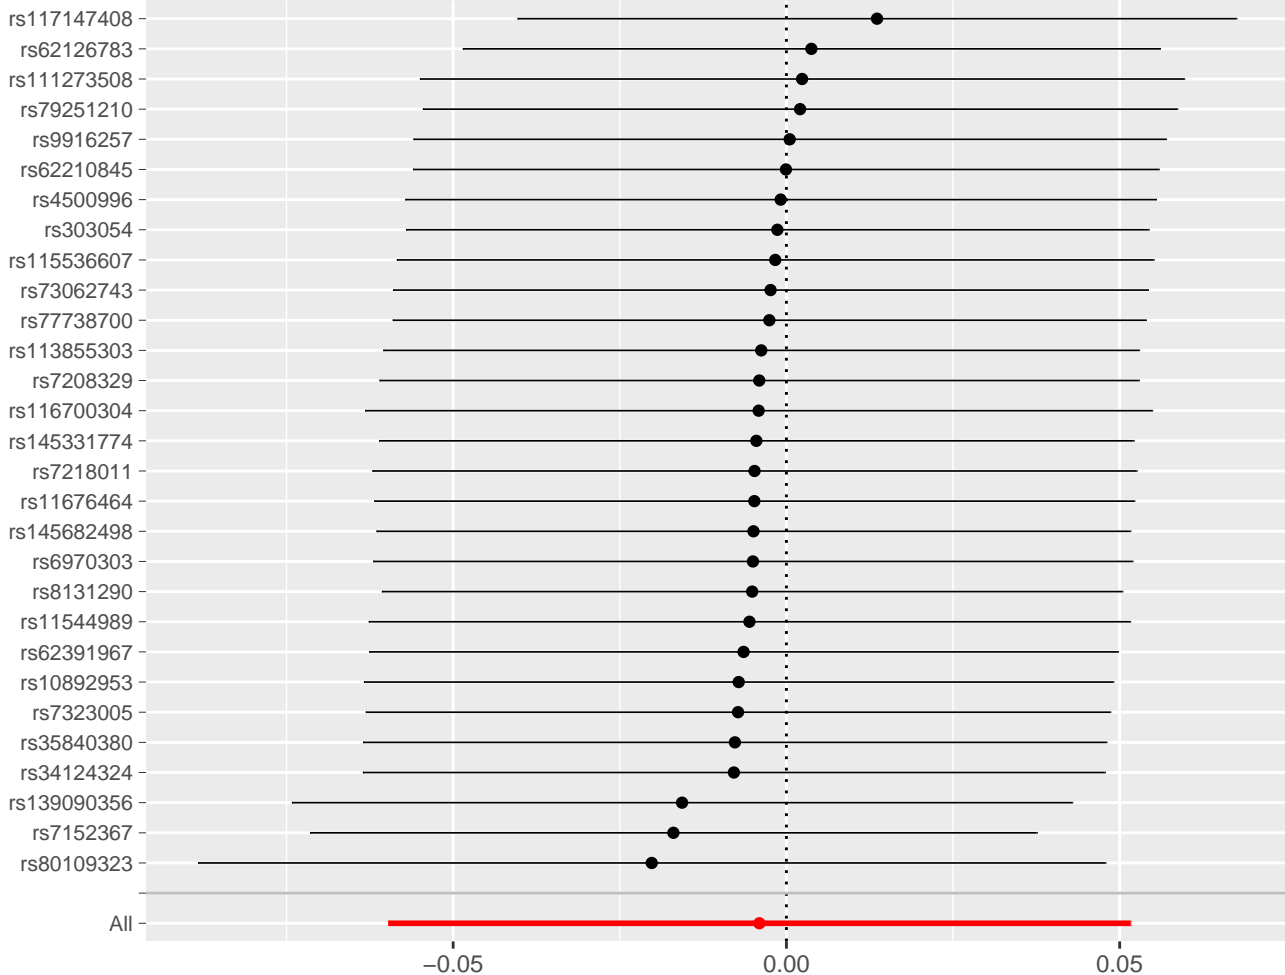

MR leave-one-out sensitivity analysis for 'CD8dim NKT AC' on 'Aplastic anemia'

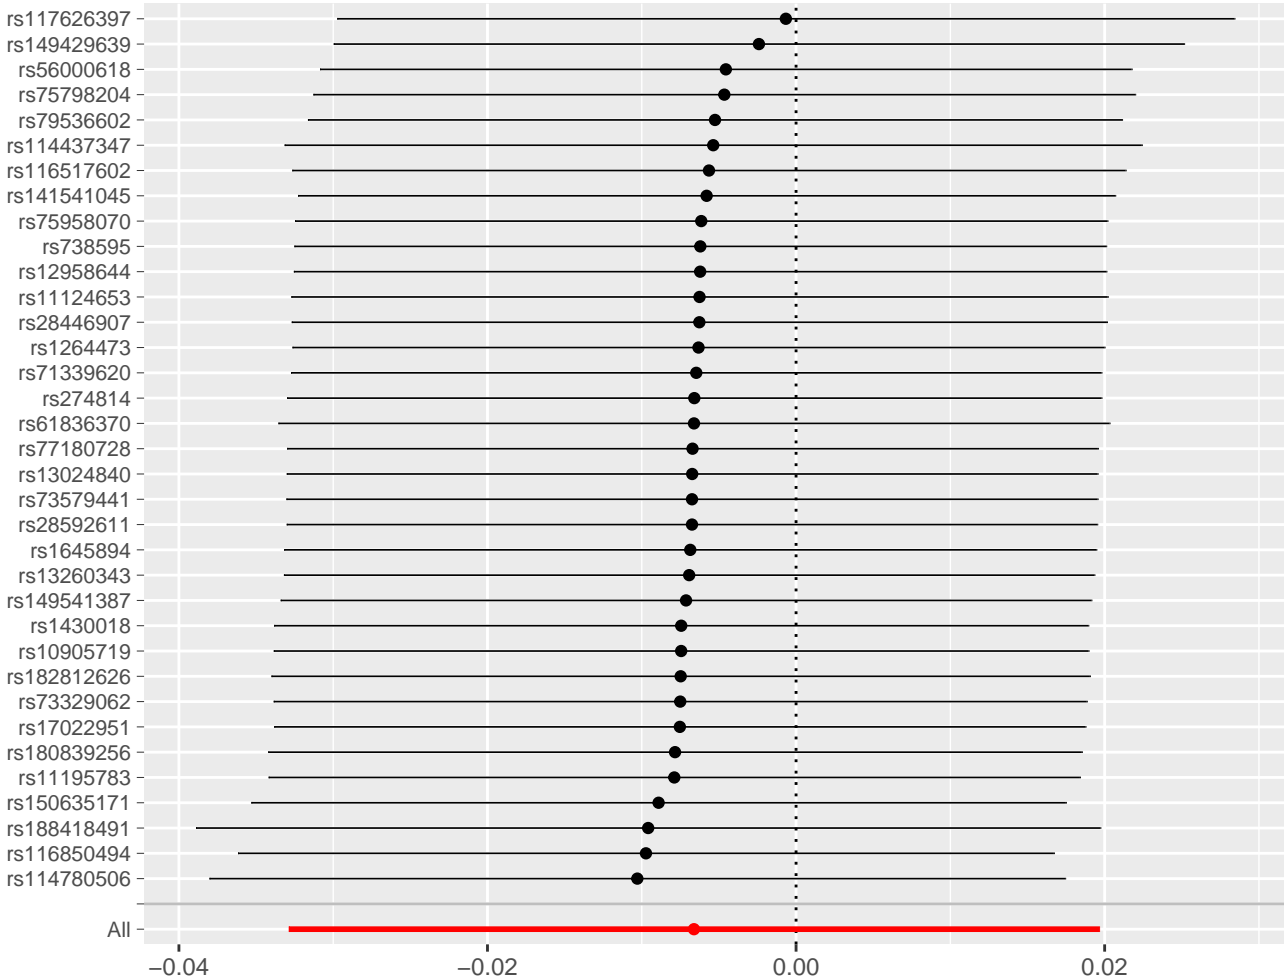

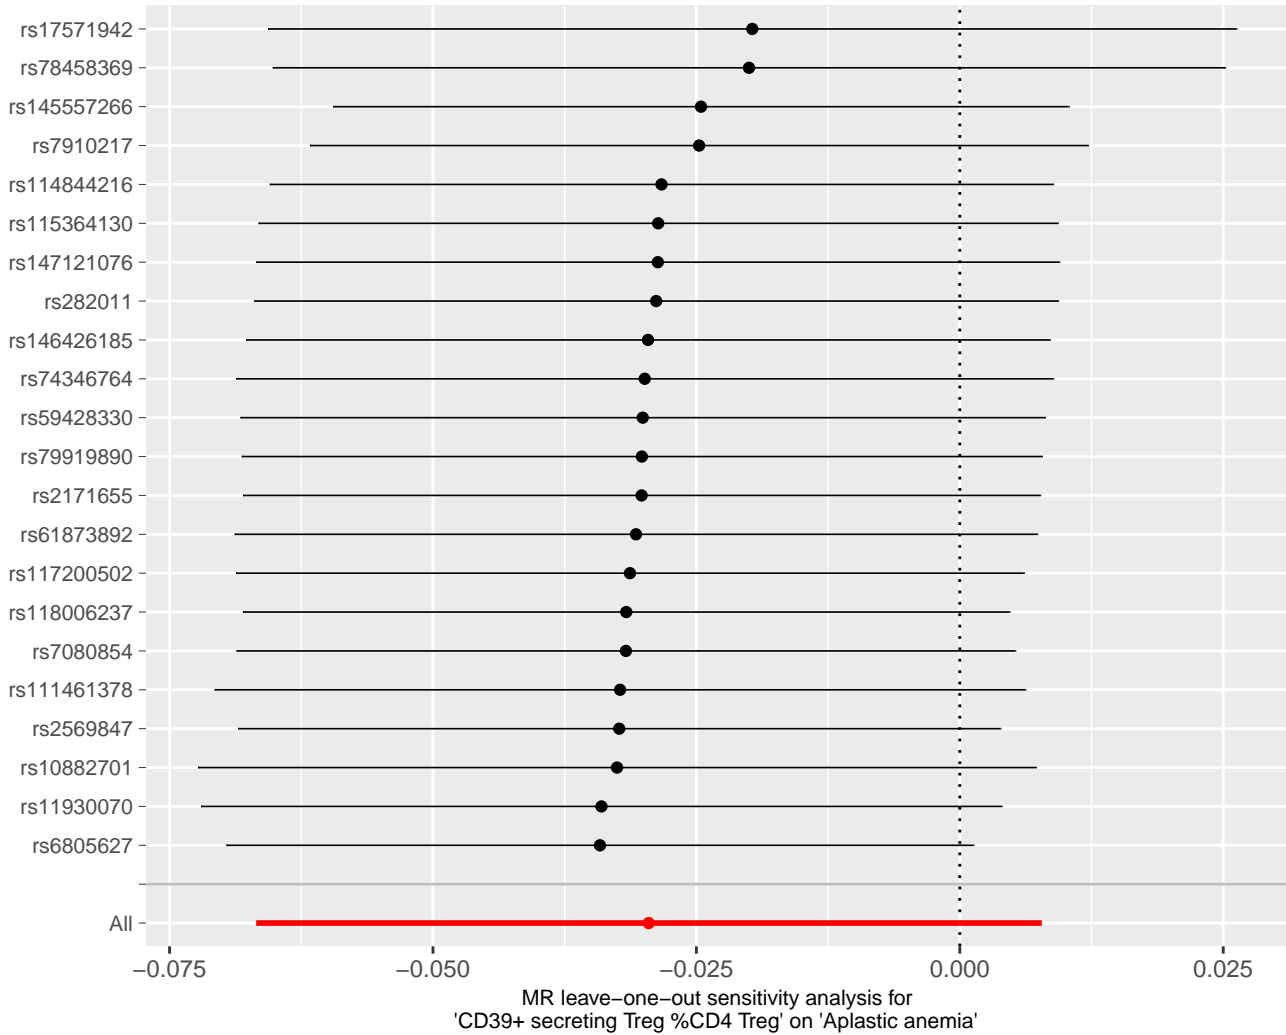

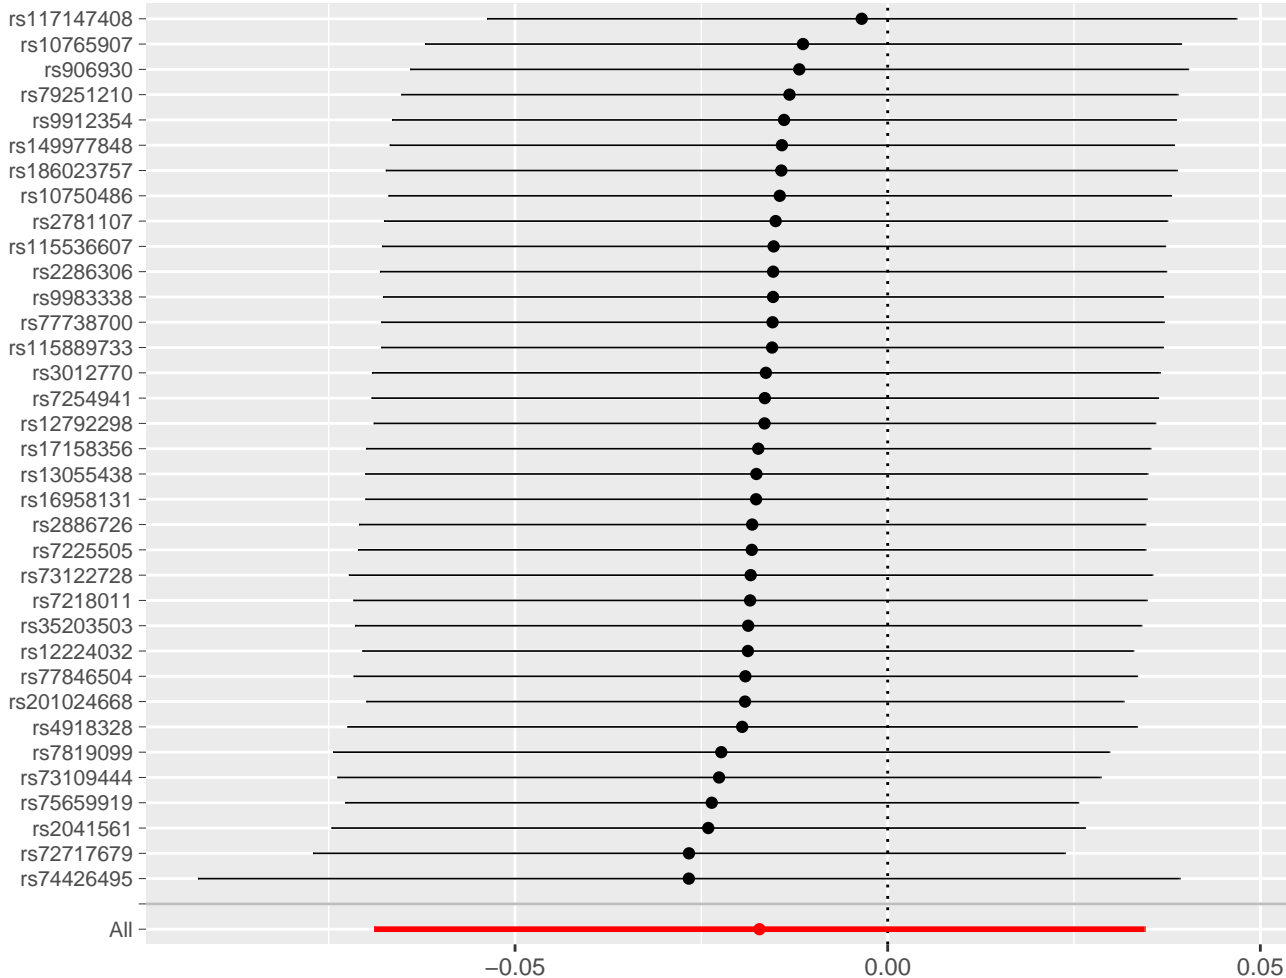

MR leave-one-out sensitivity analysis for 'NKT %lymphocyte' on 'Aplastic anemia'

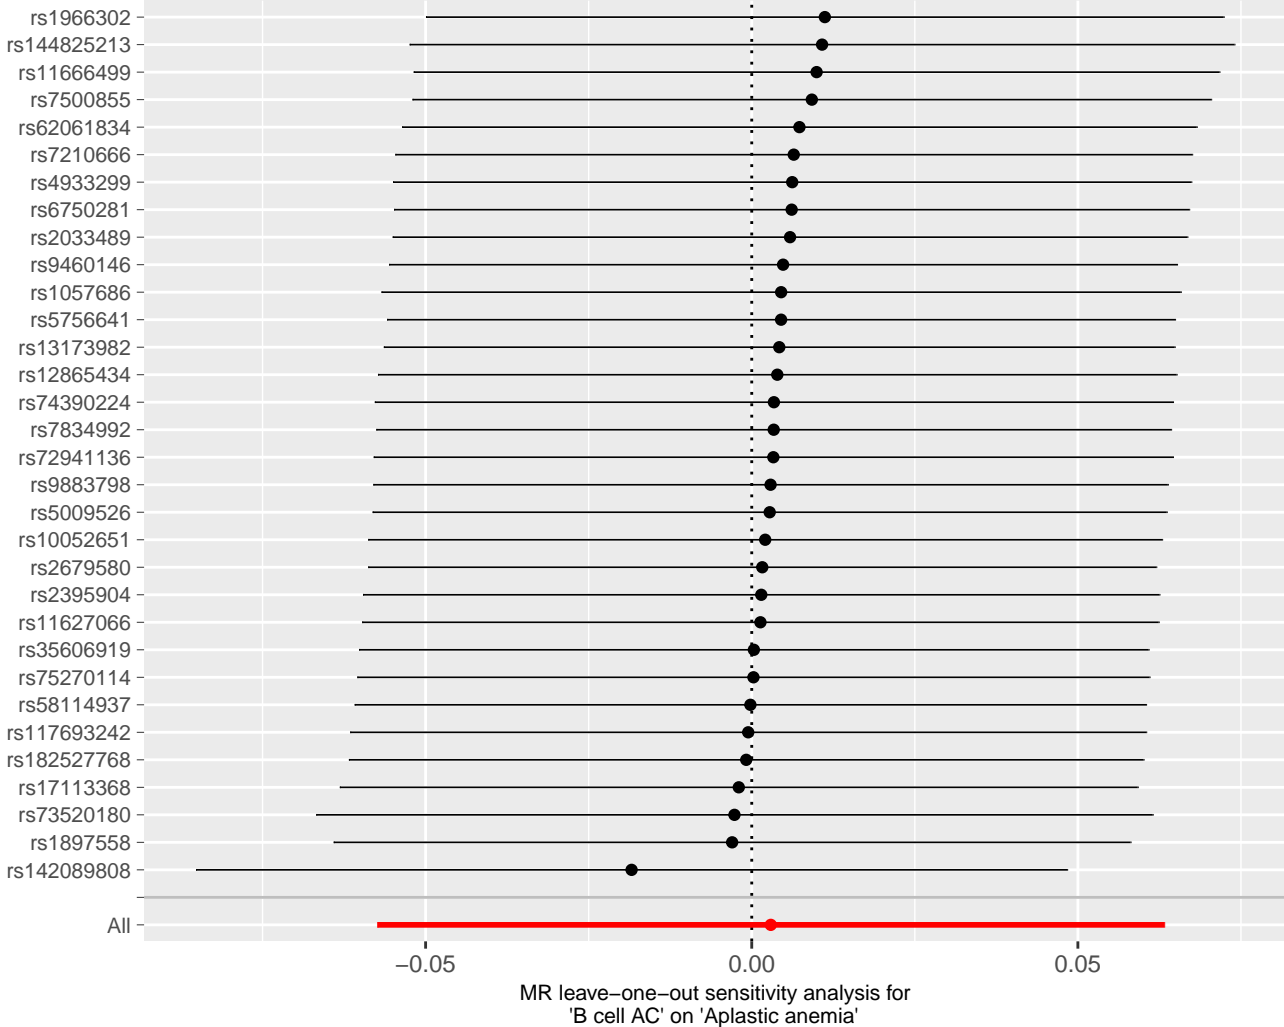

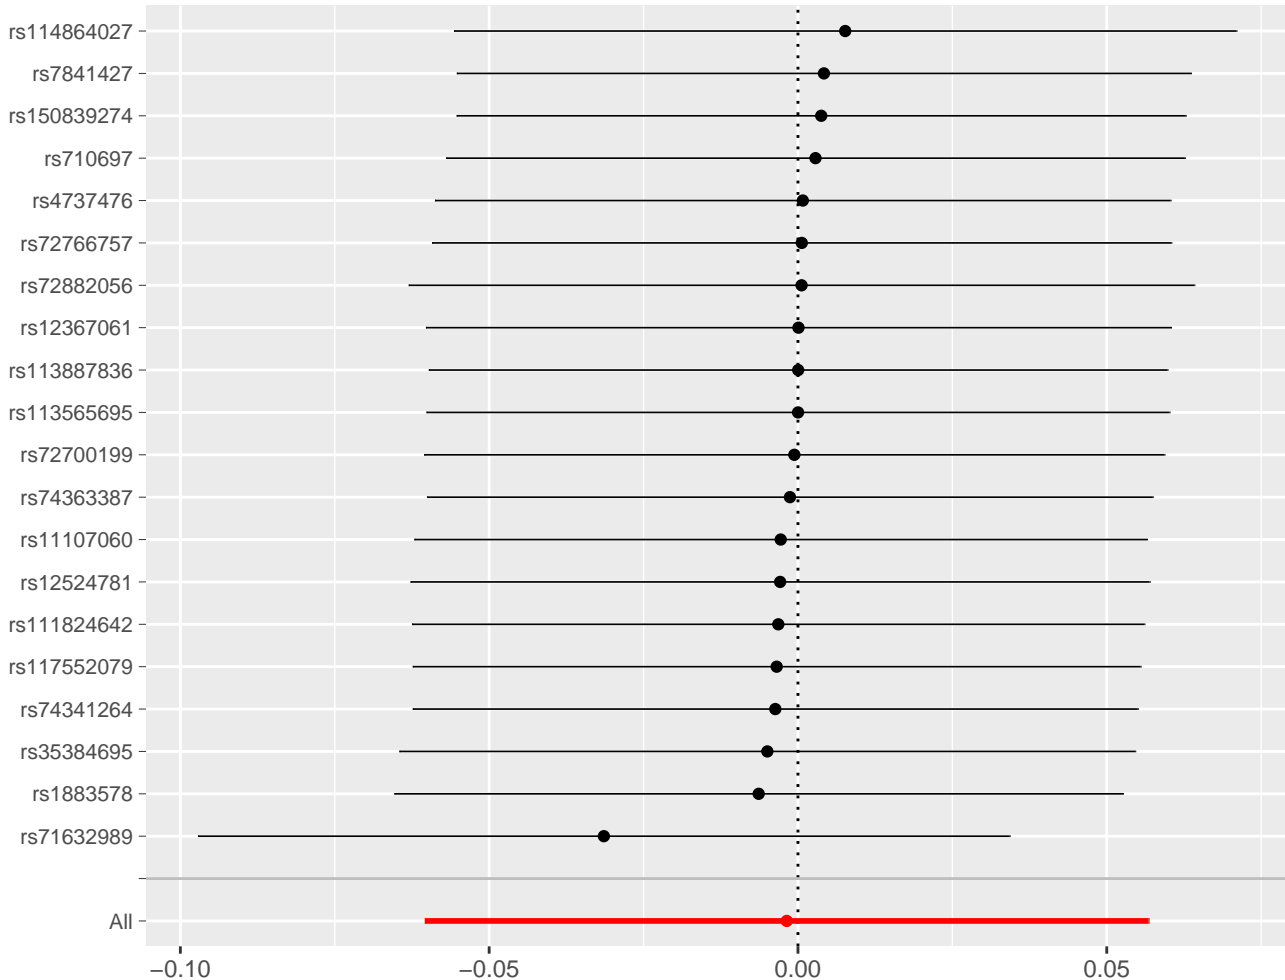

MR leave-one-out sensitivity analysis for 'PDL-1 on CD14- CD16+ monocyte' on 'Aplastic anemia'



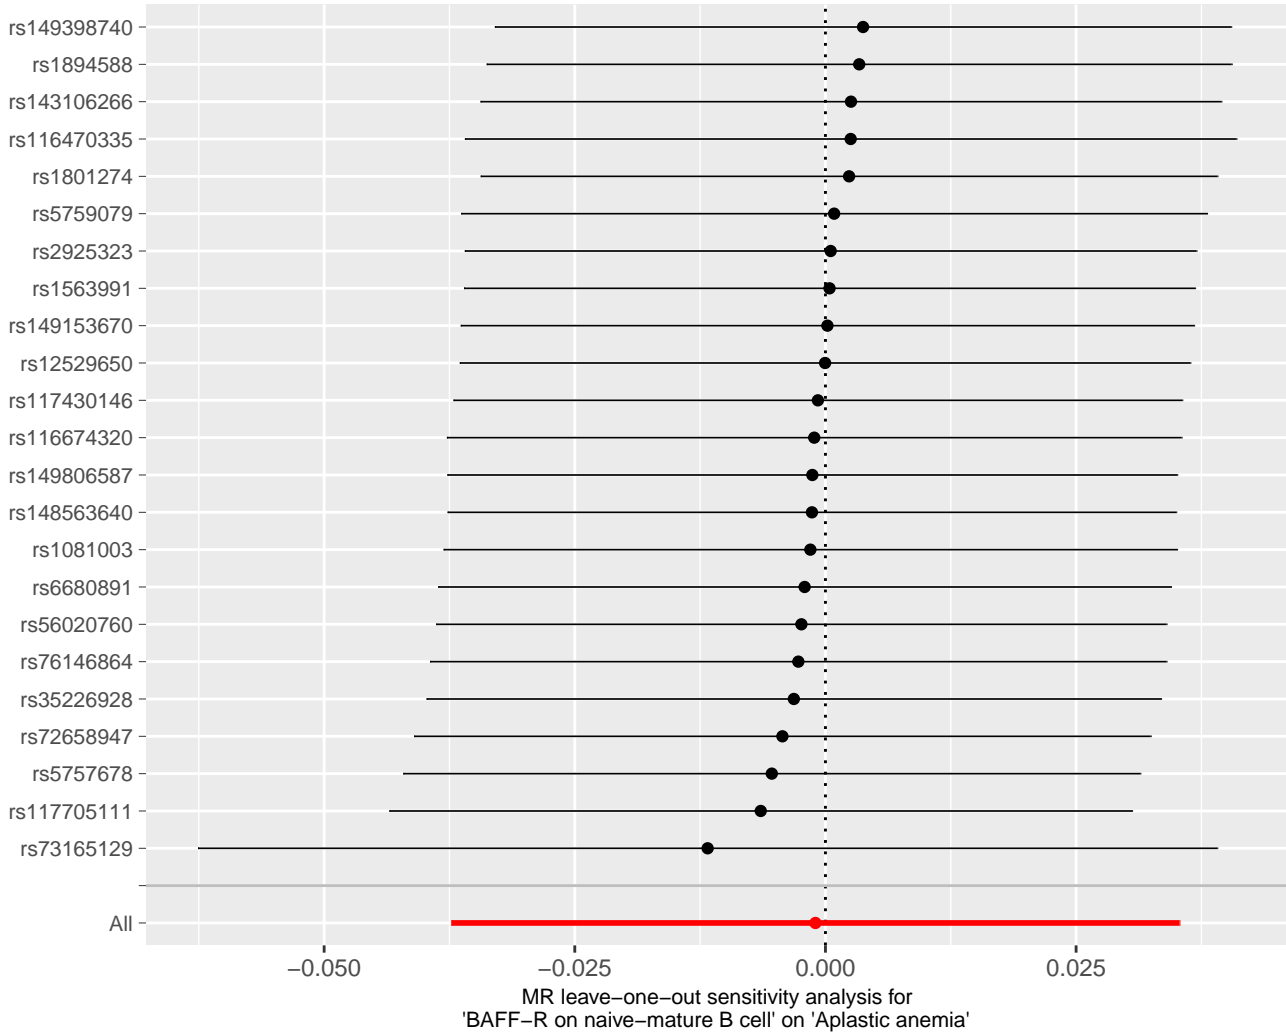

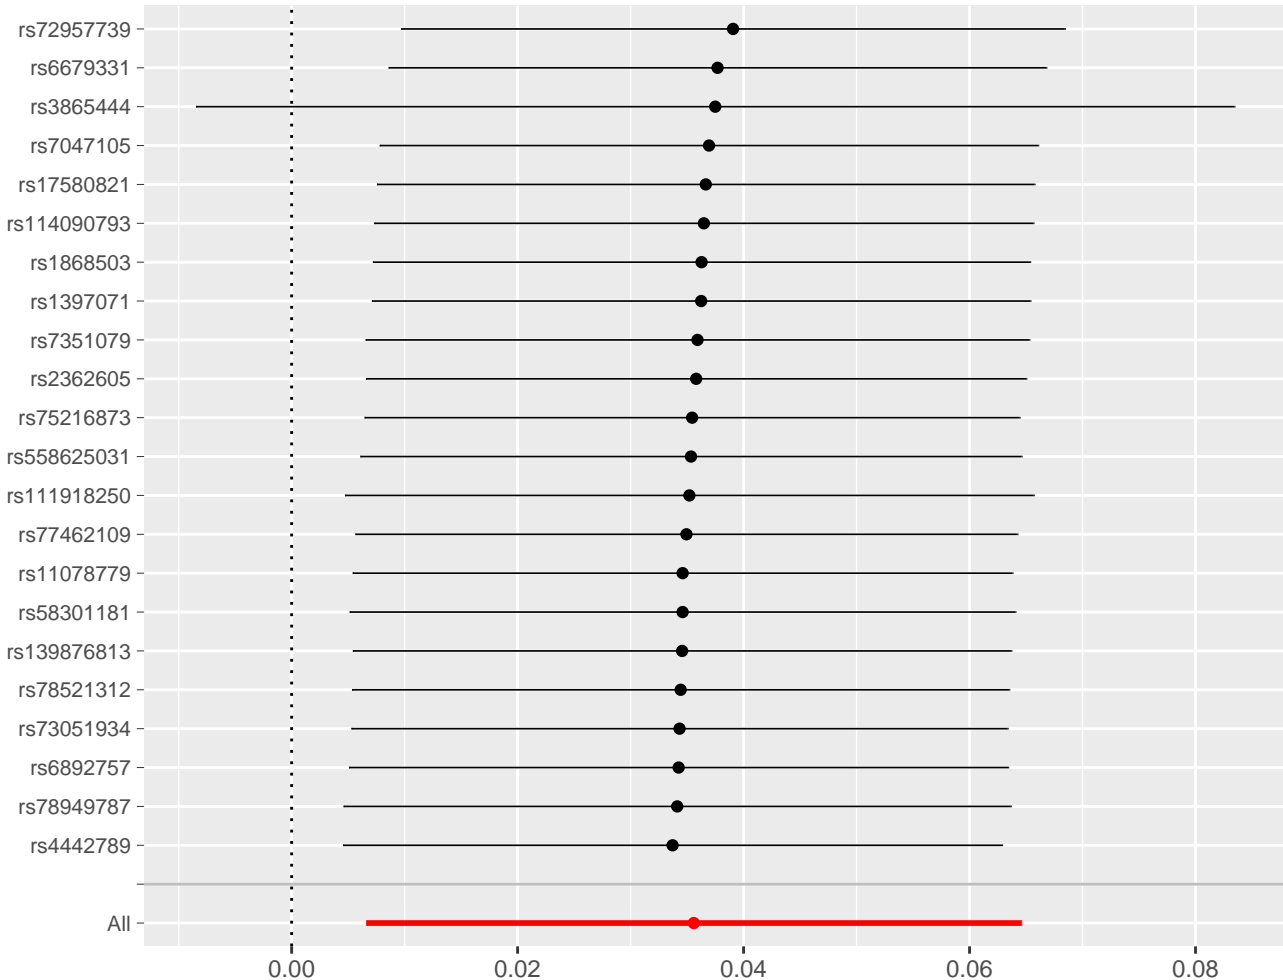

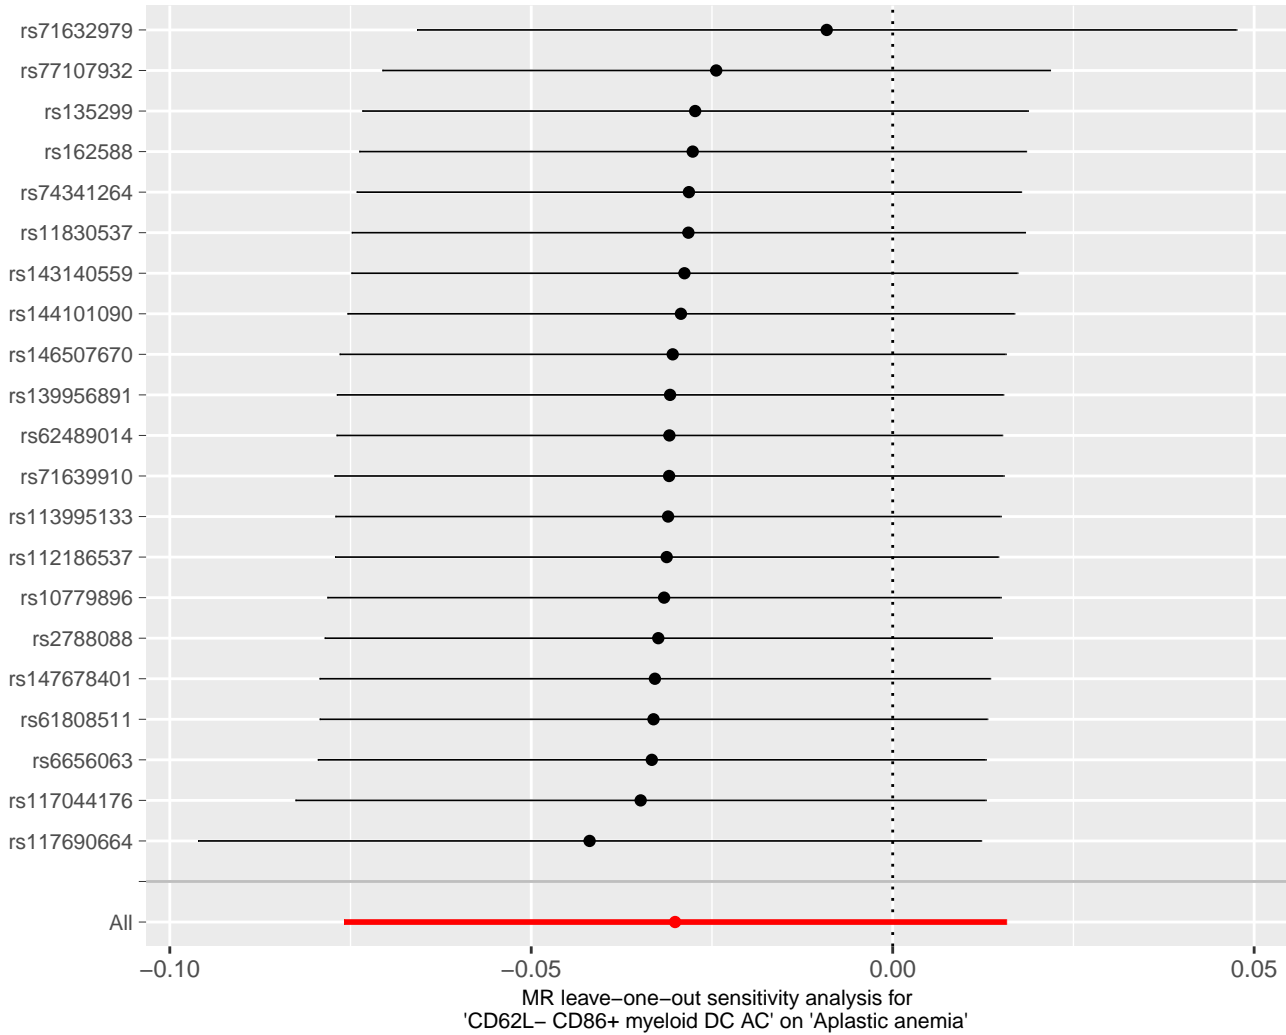

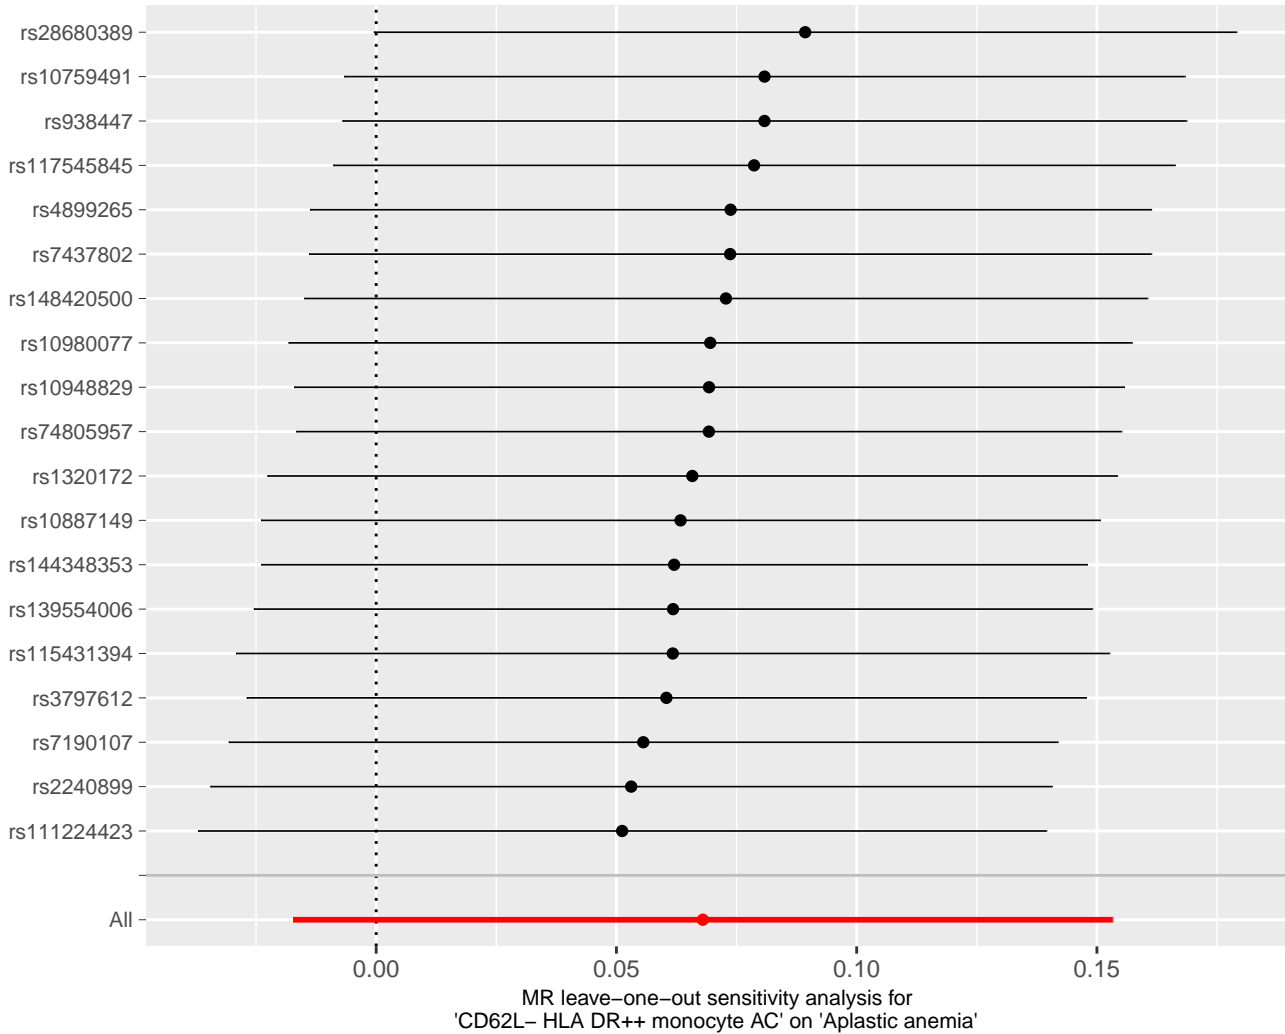

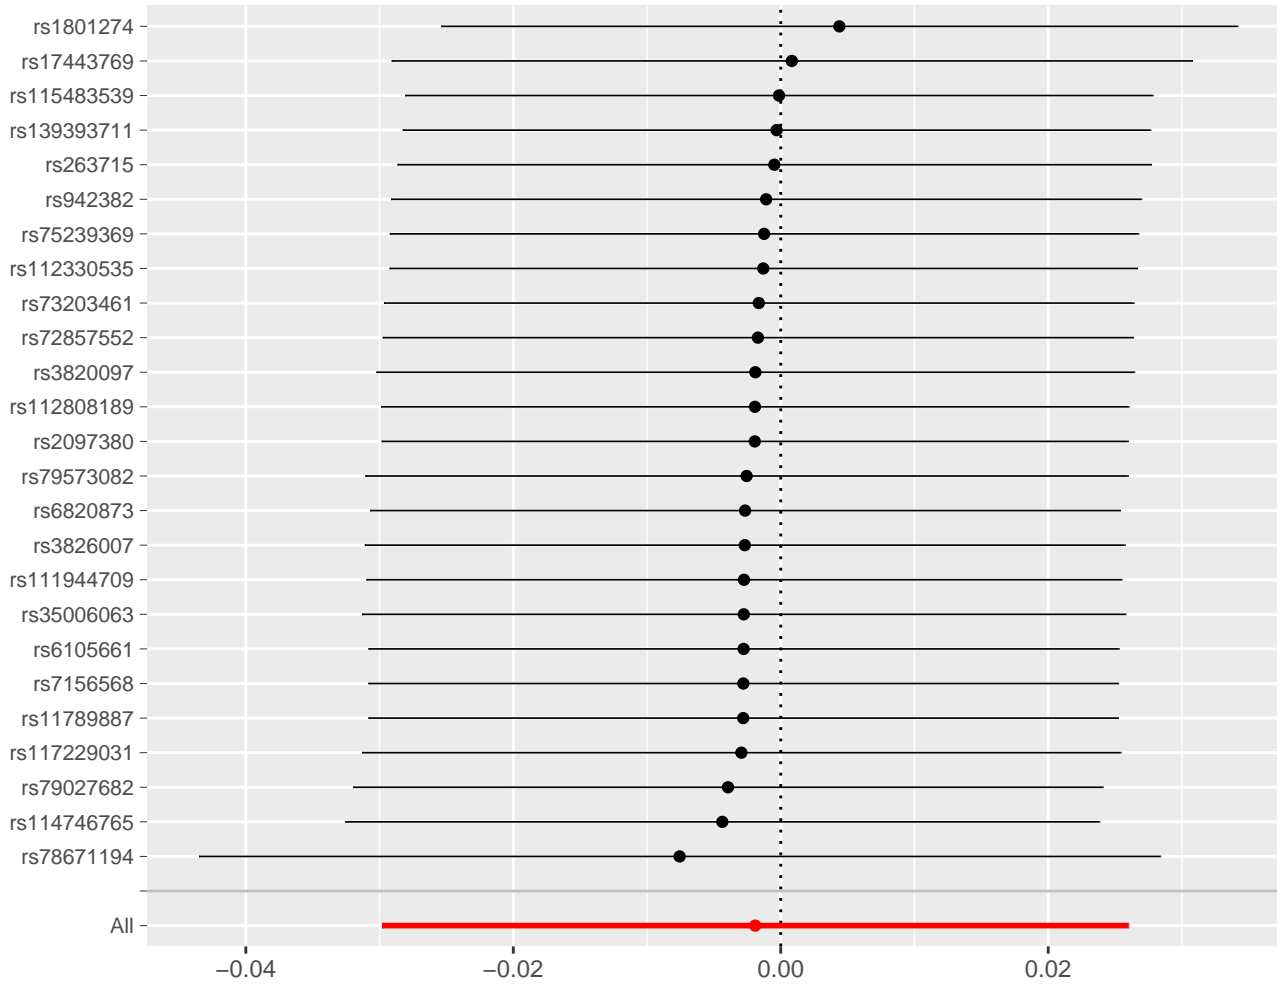

MR leave-one-out sensitivity analysis for 'CD33dim HLA DR+ CD11b- %CD33dim HLA DR+' on 'Aplastic anemia'

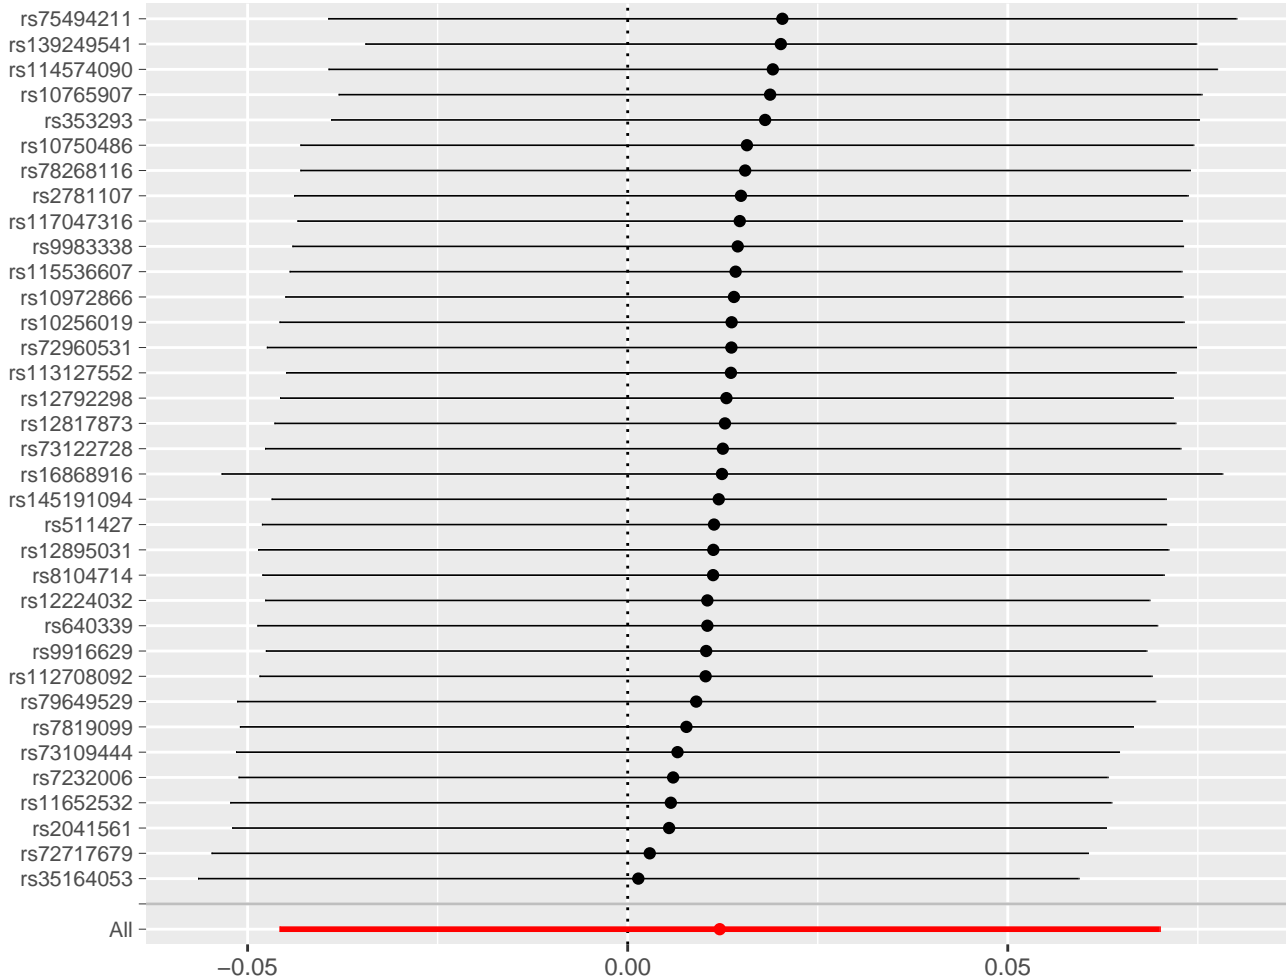

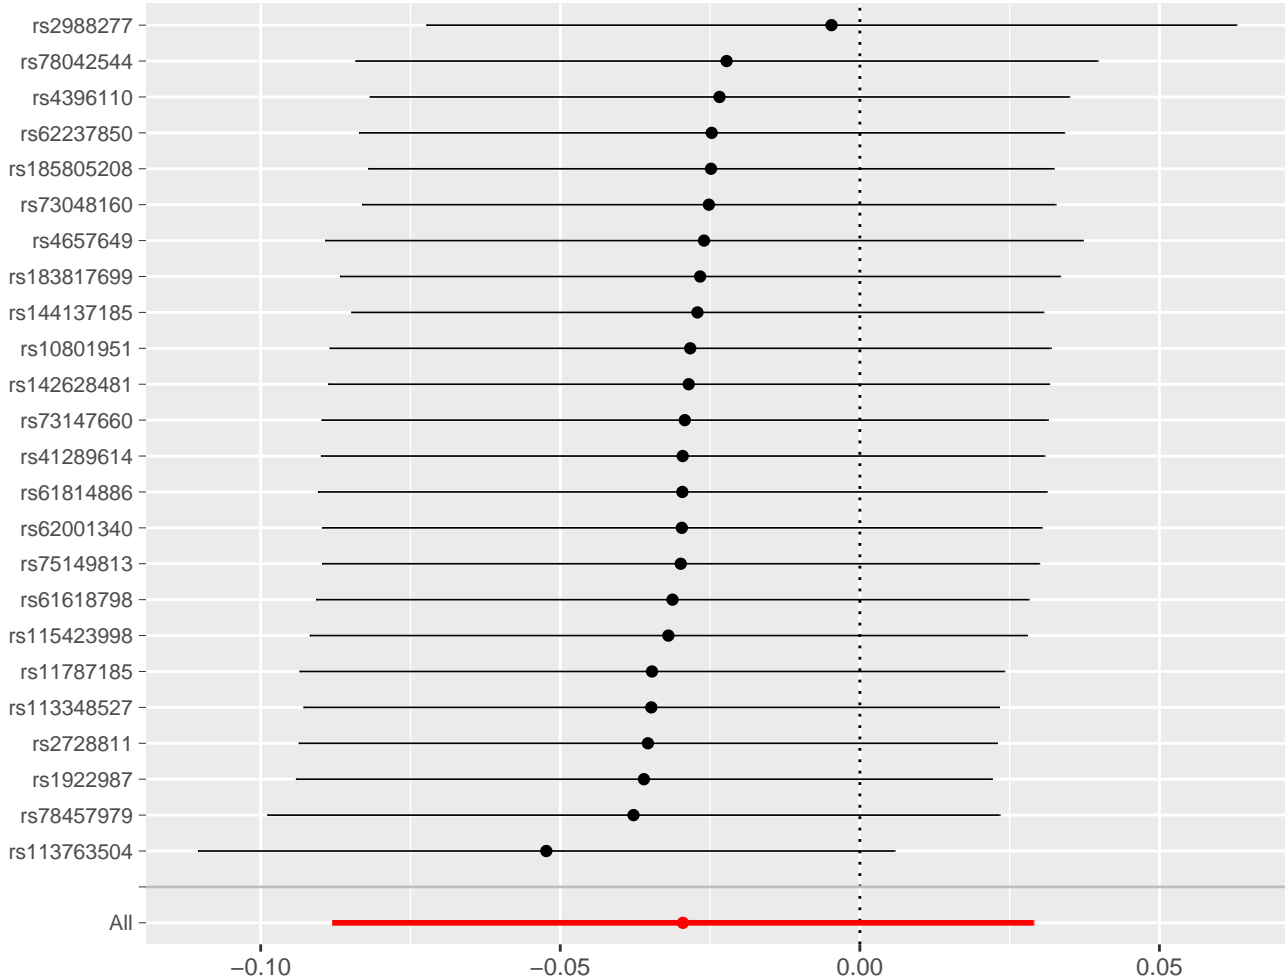

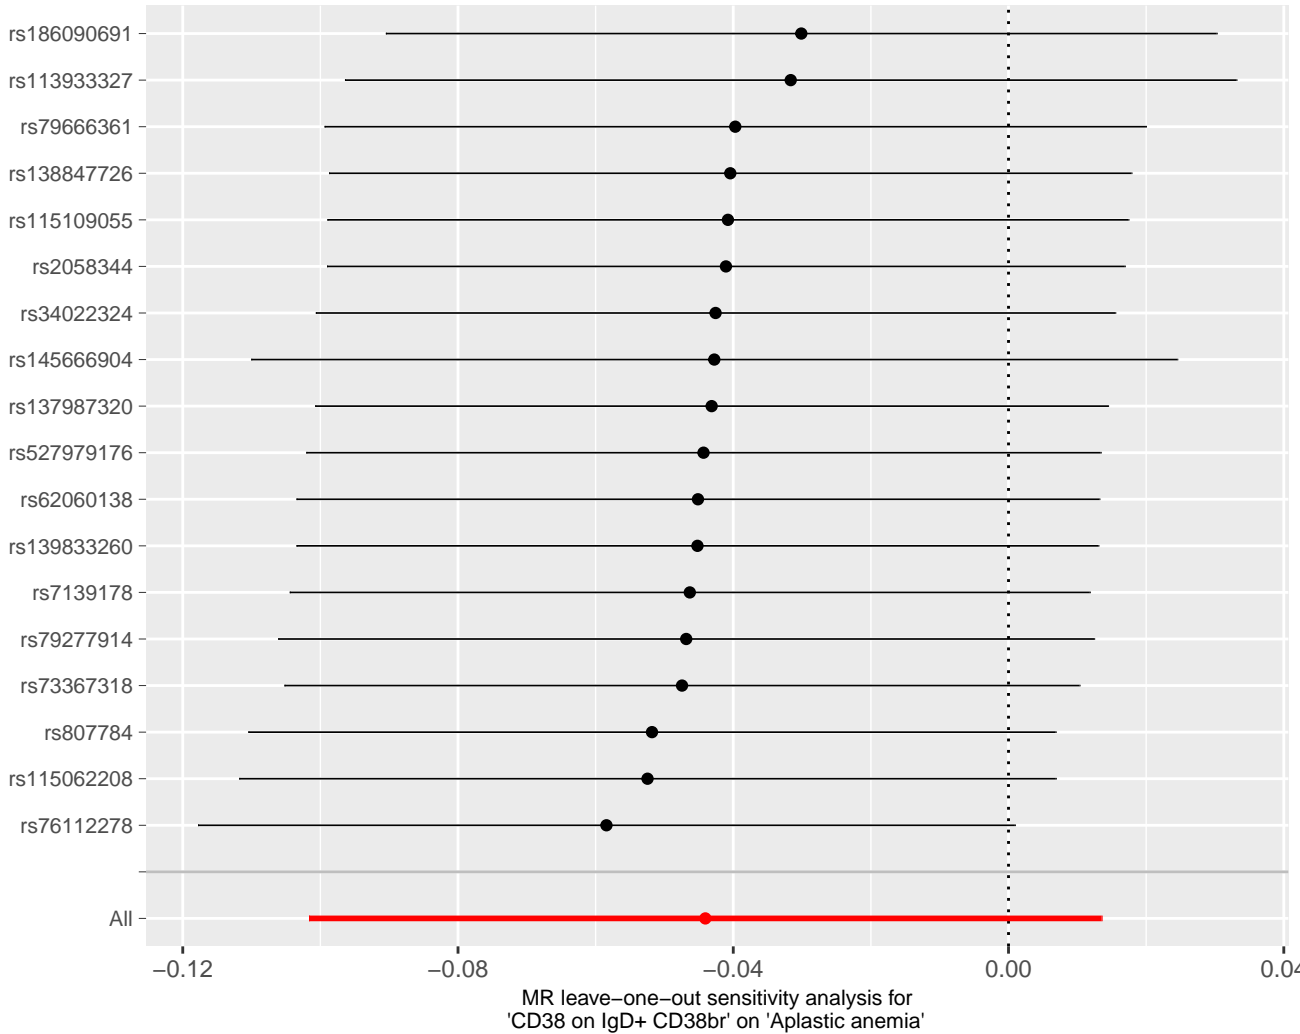



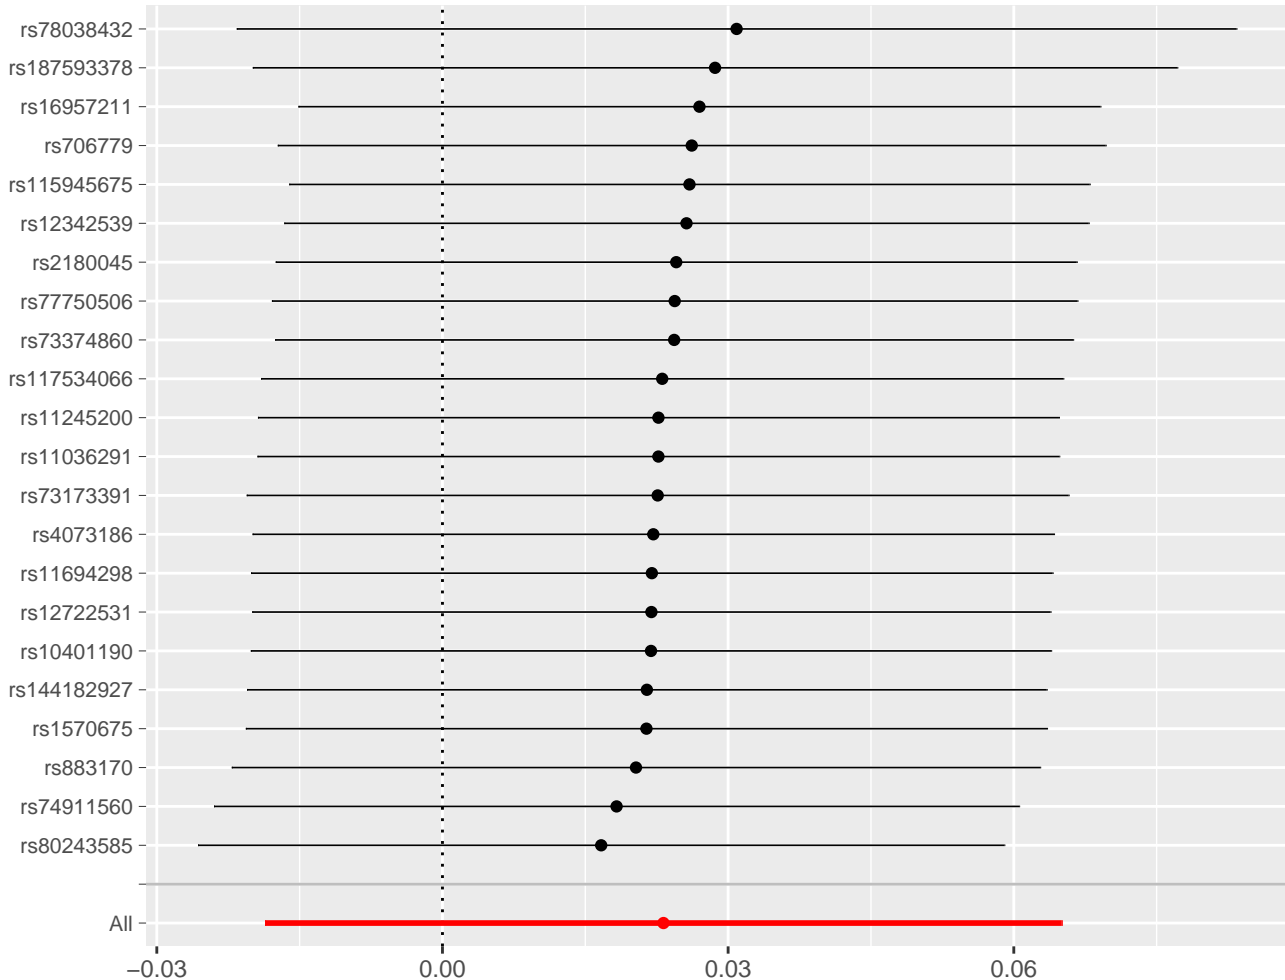

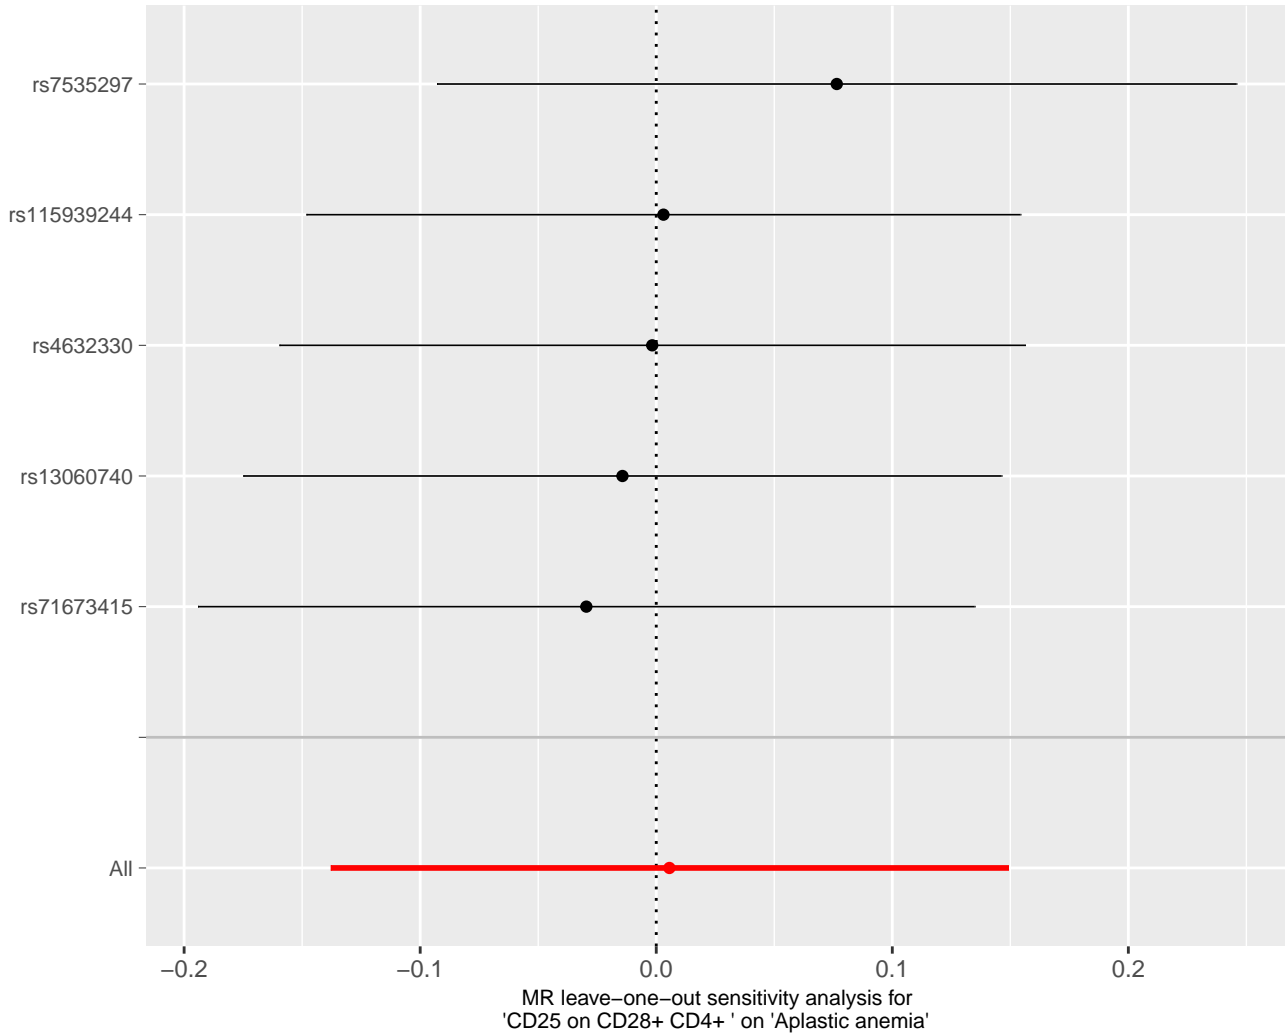

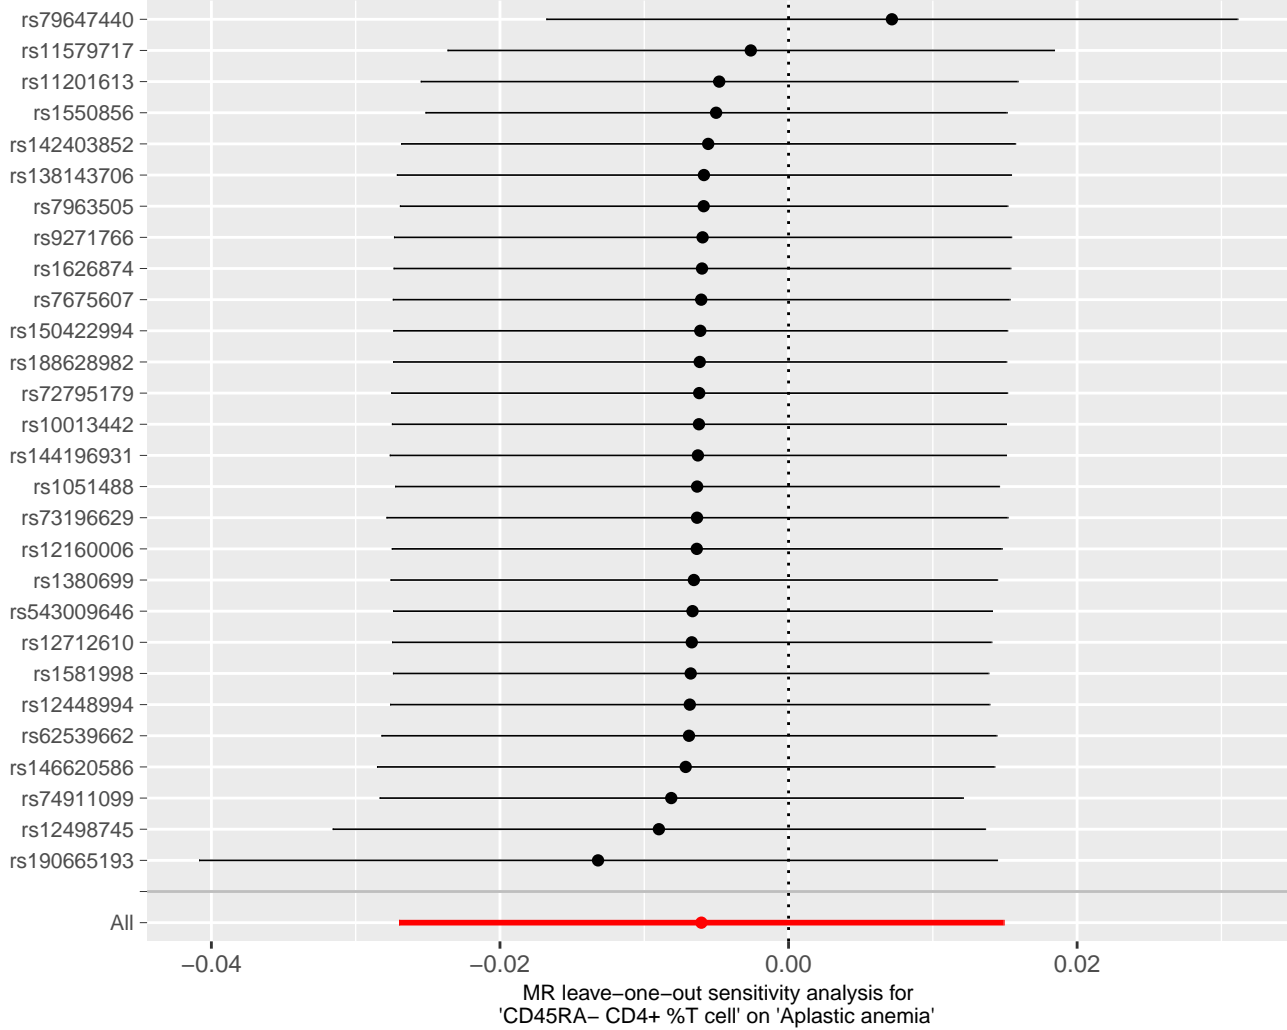

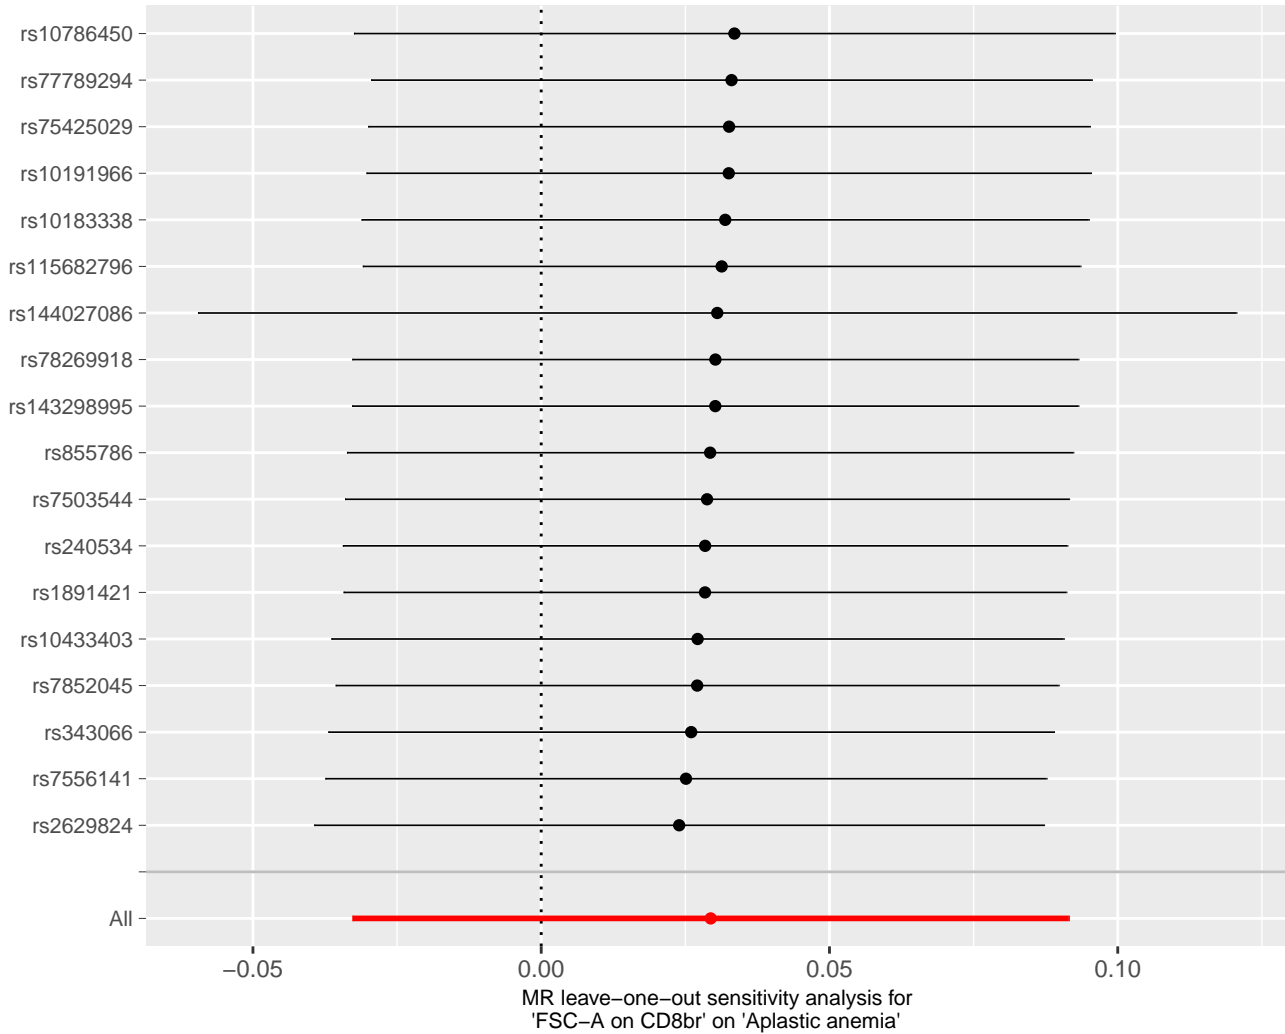

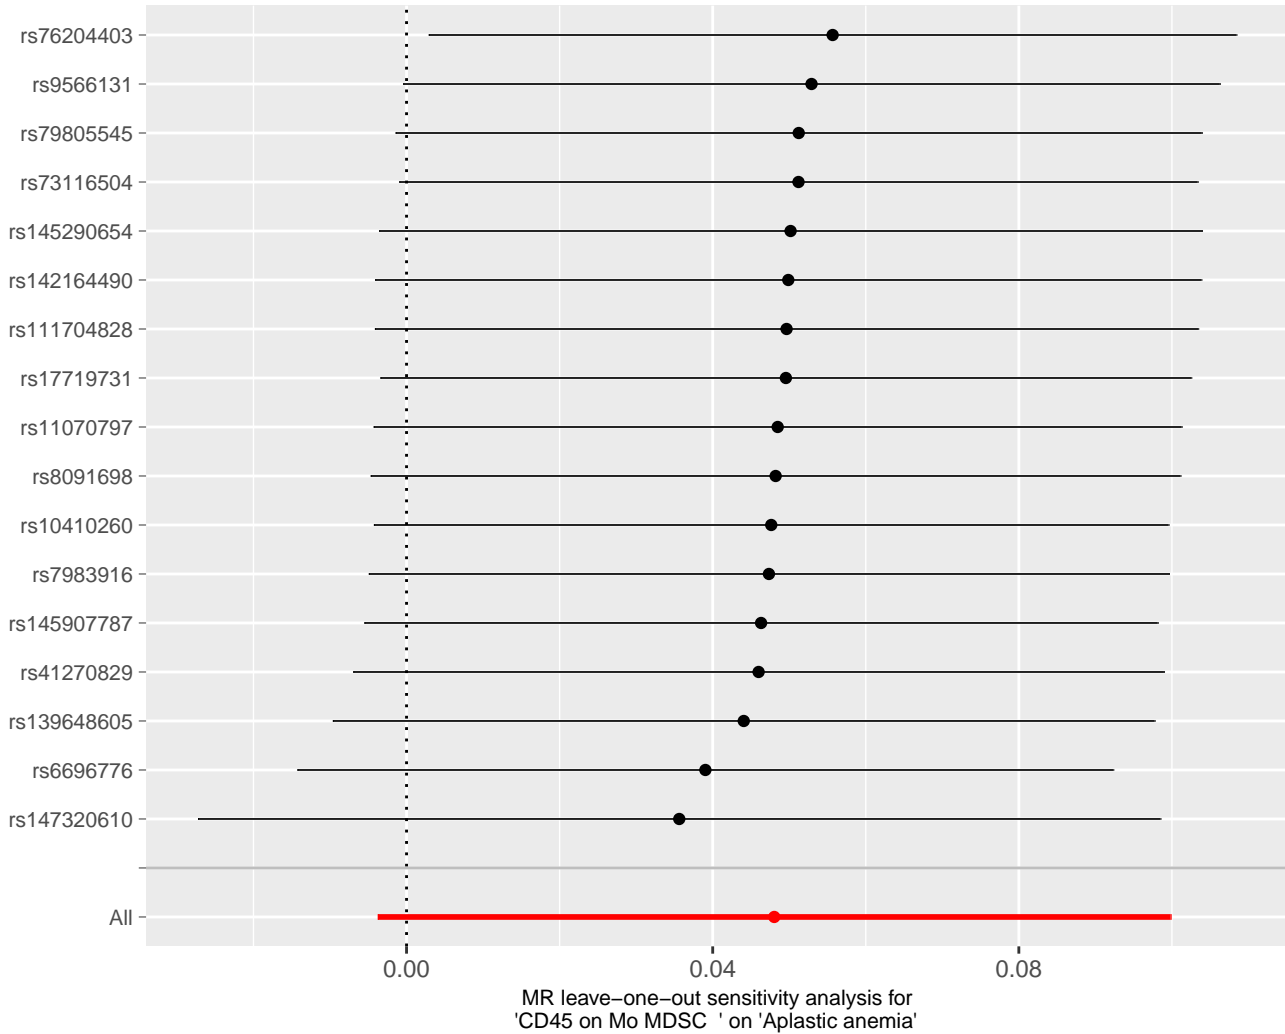

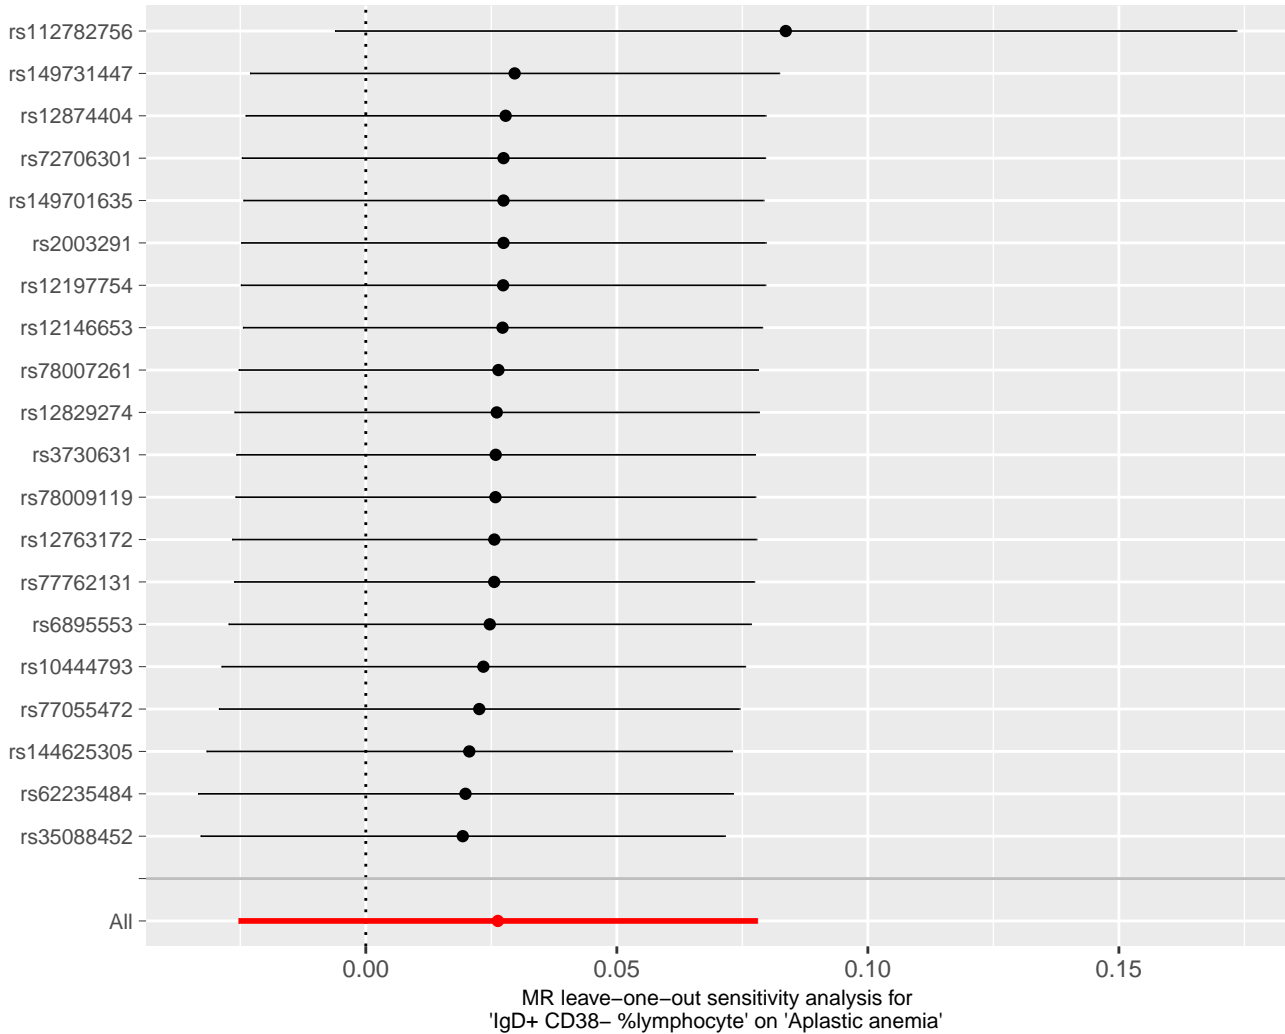

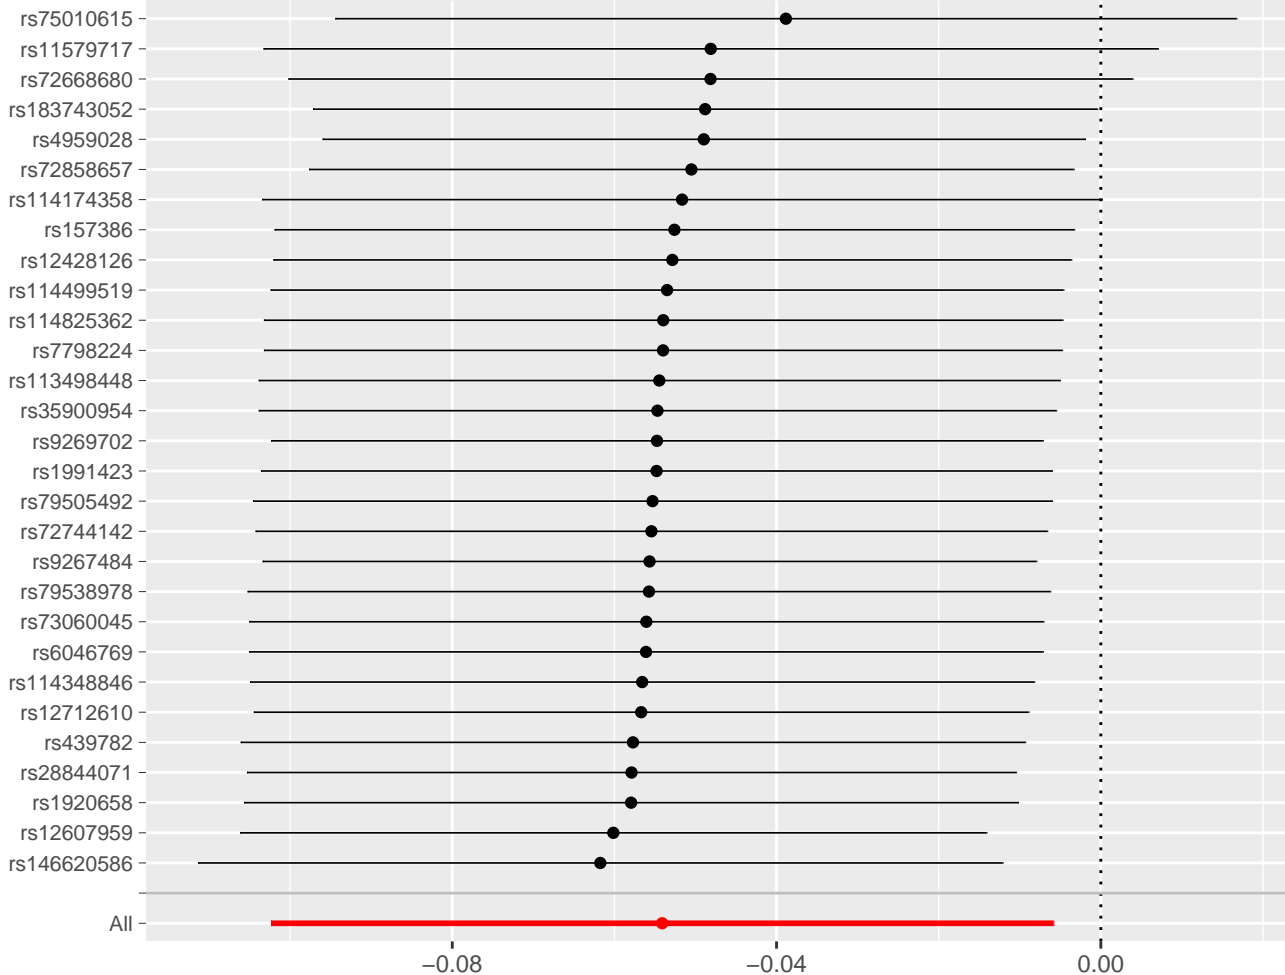

MR leave-one-out sensitivity analysis for 'EM CD4+ %CD4+' on 'Aplastic anemia'

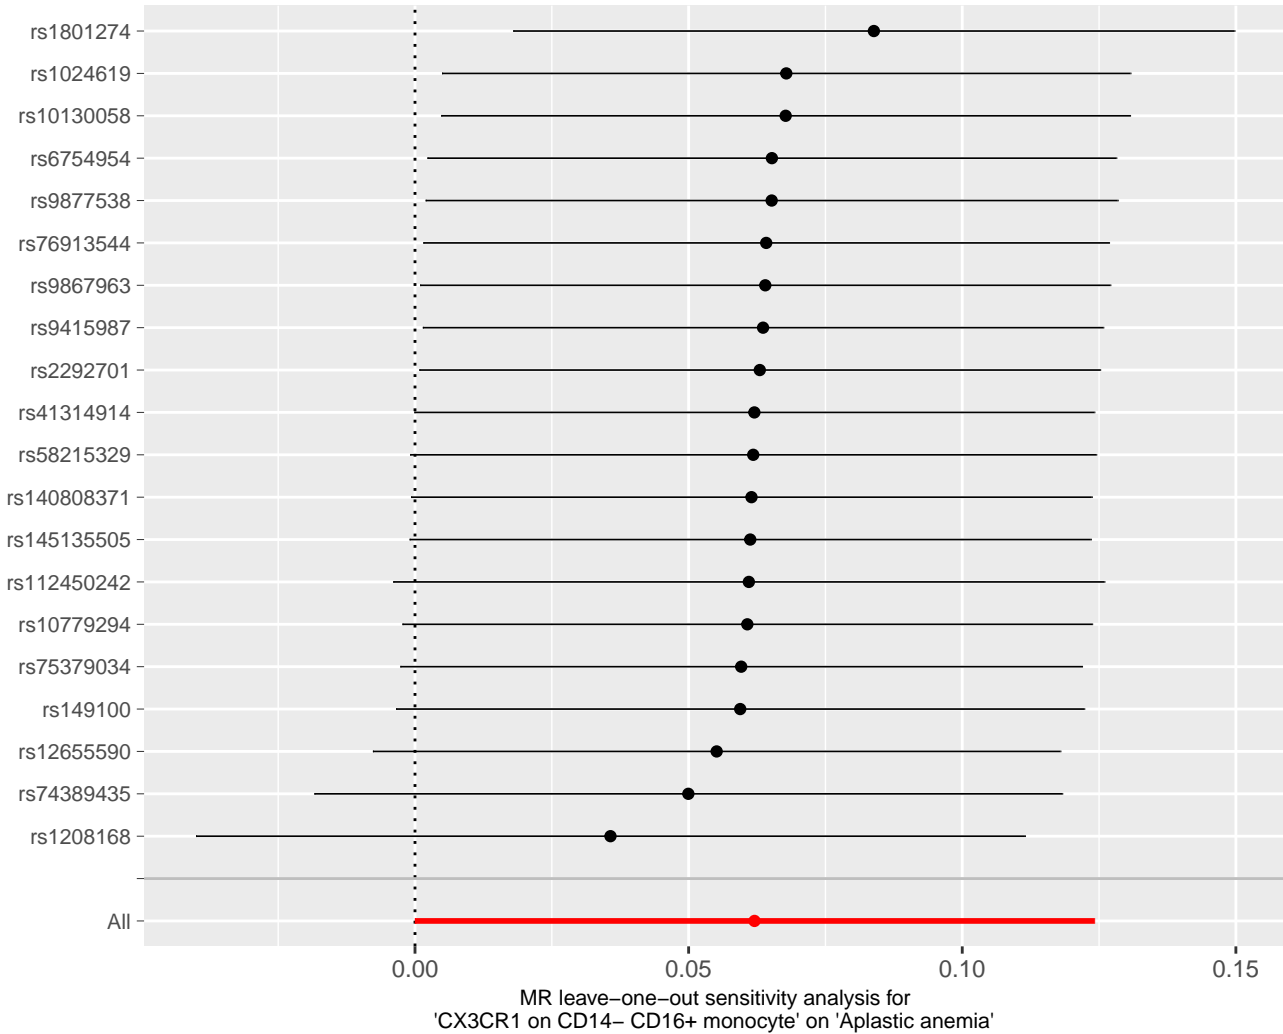



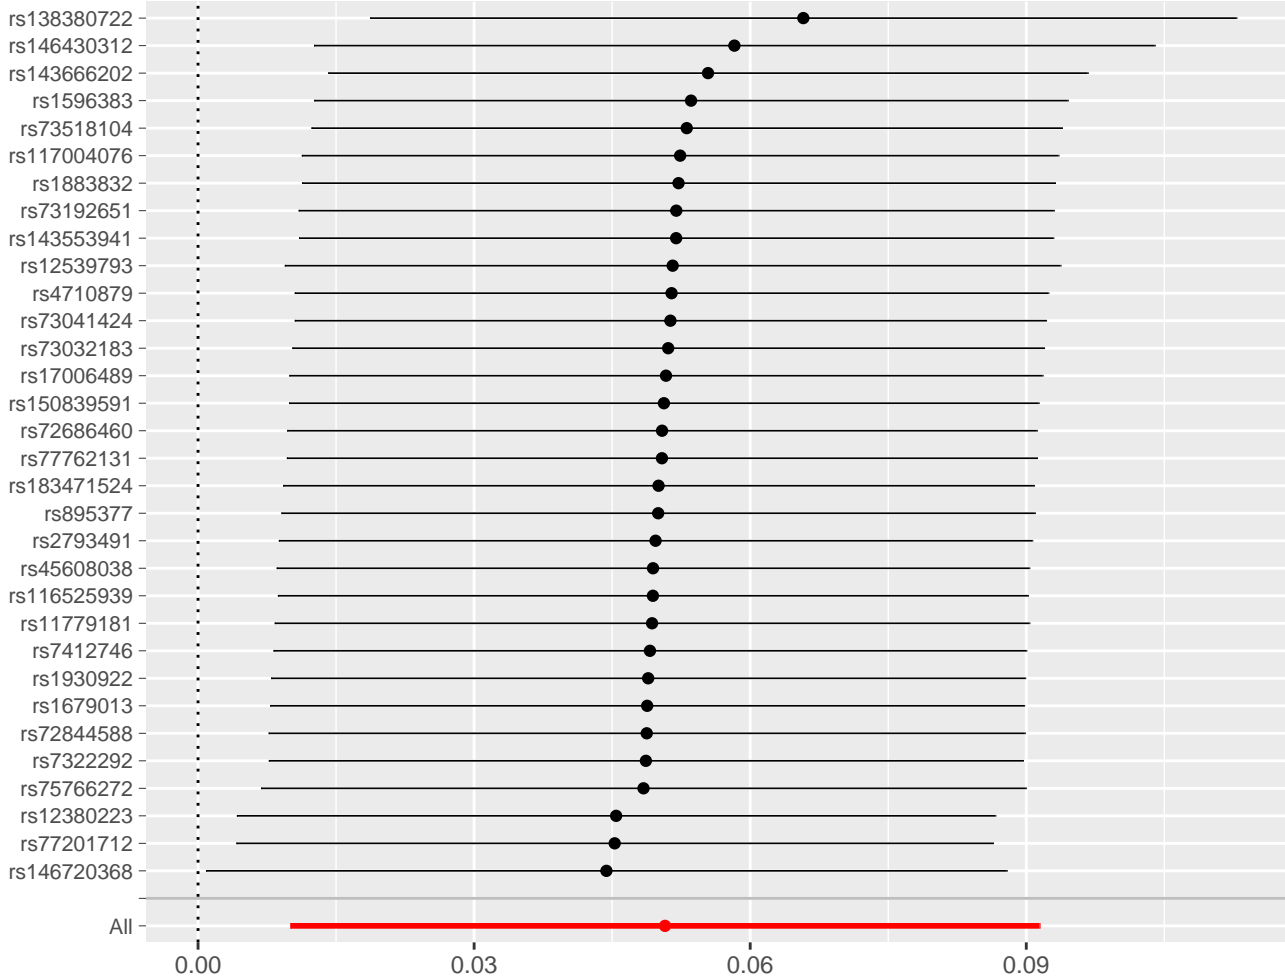

MR leave-one-out sensitivity analysis for 'Unsw mem %B cell' on 'Aplastic anemia'

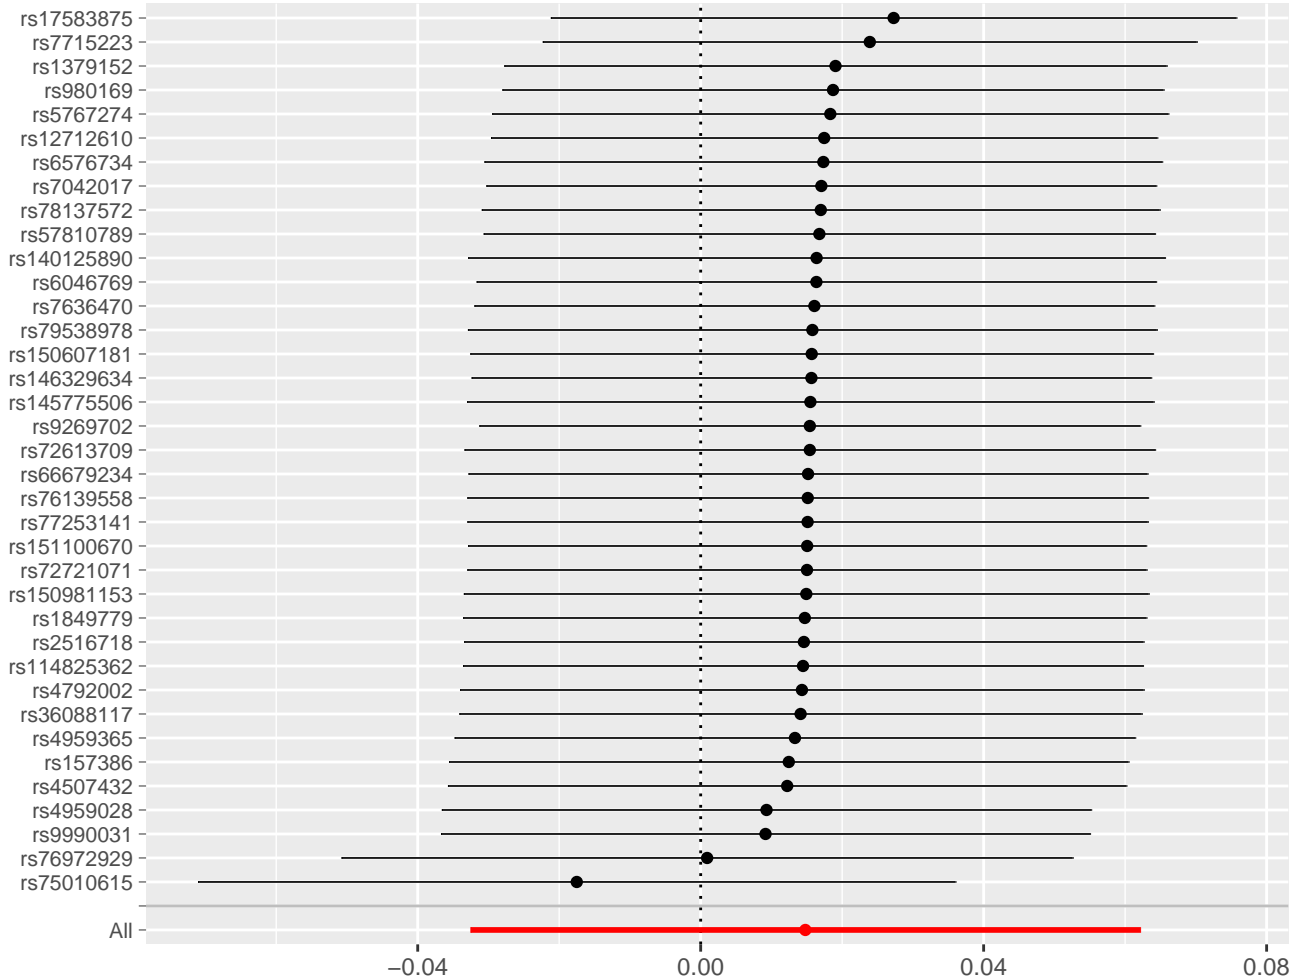

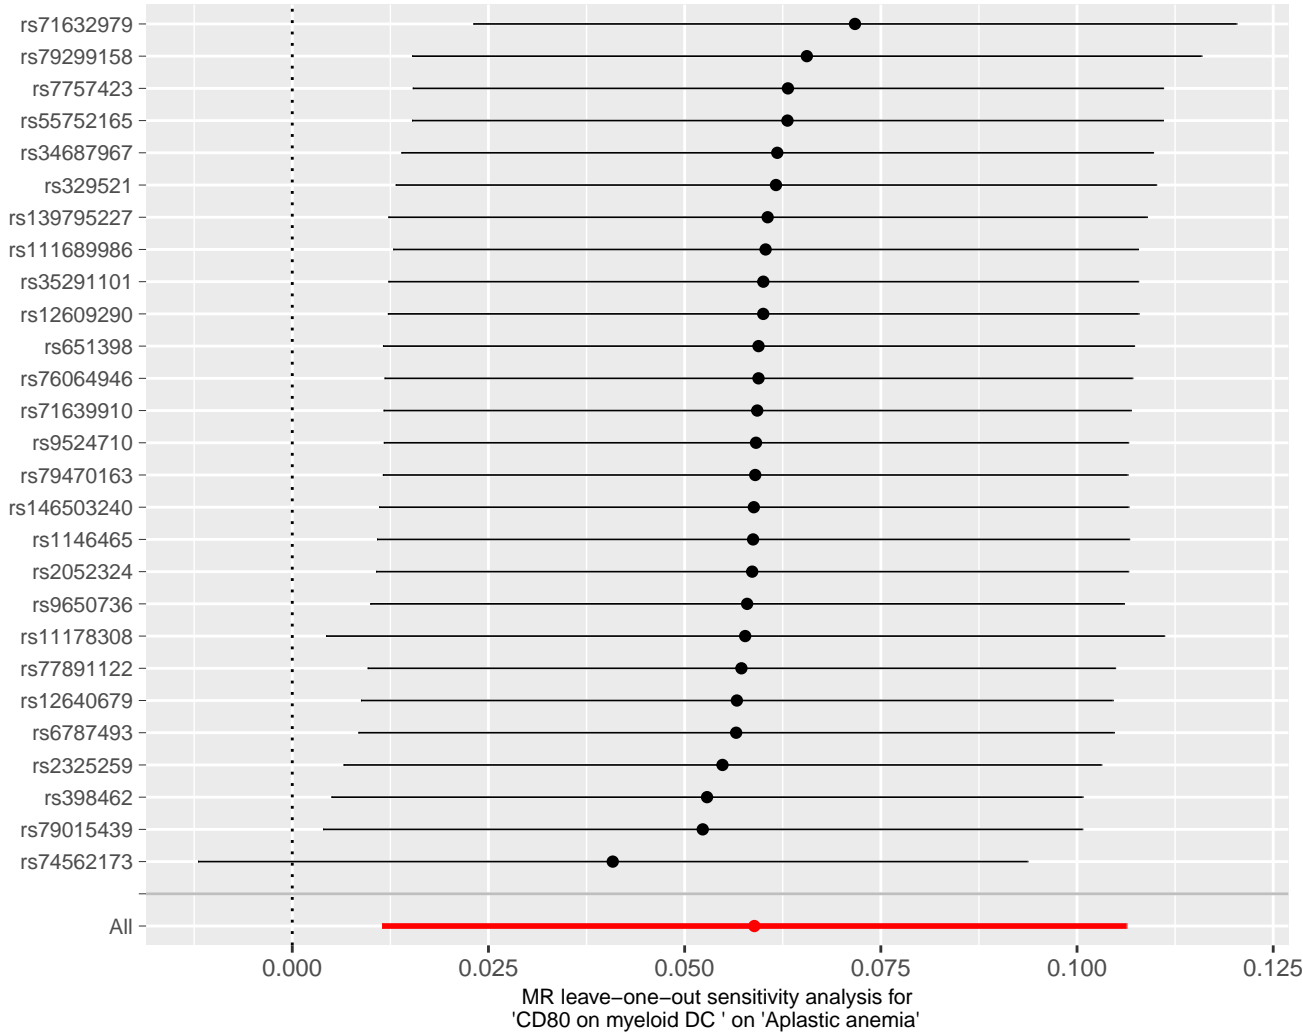

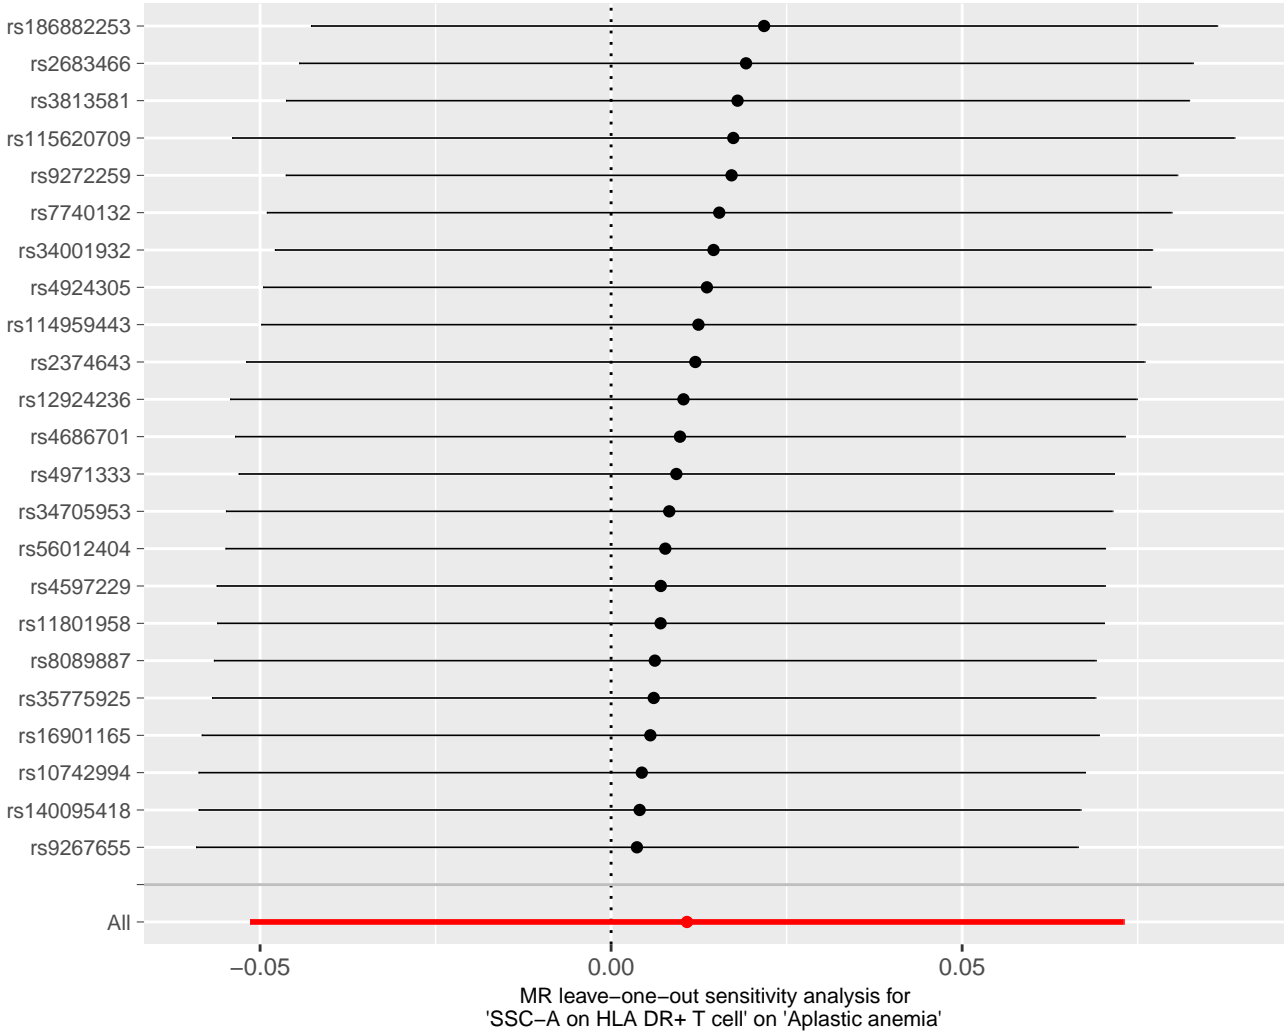

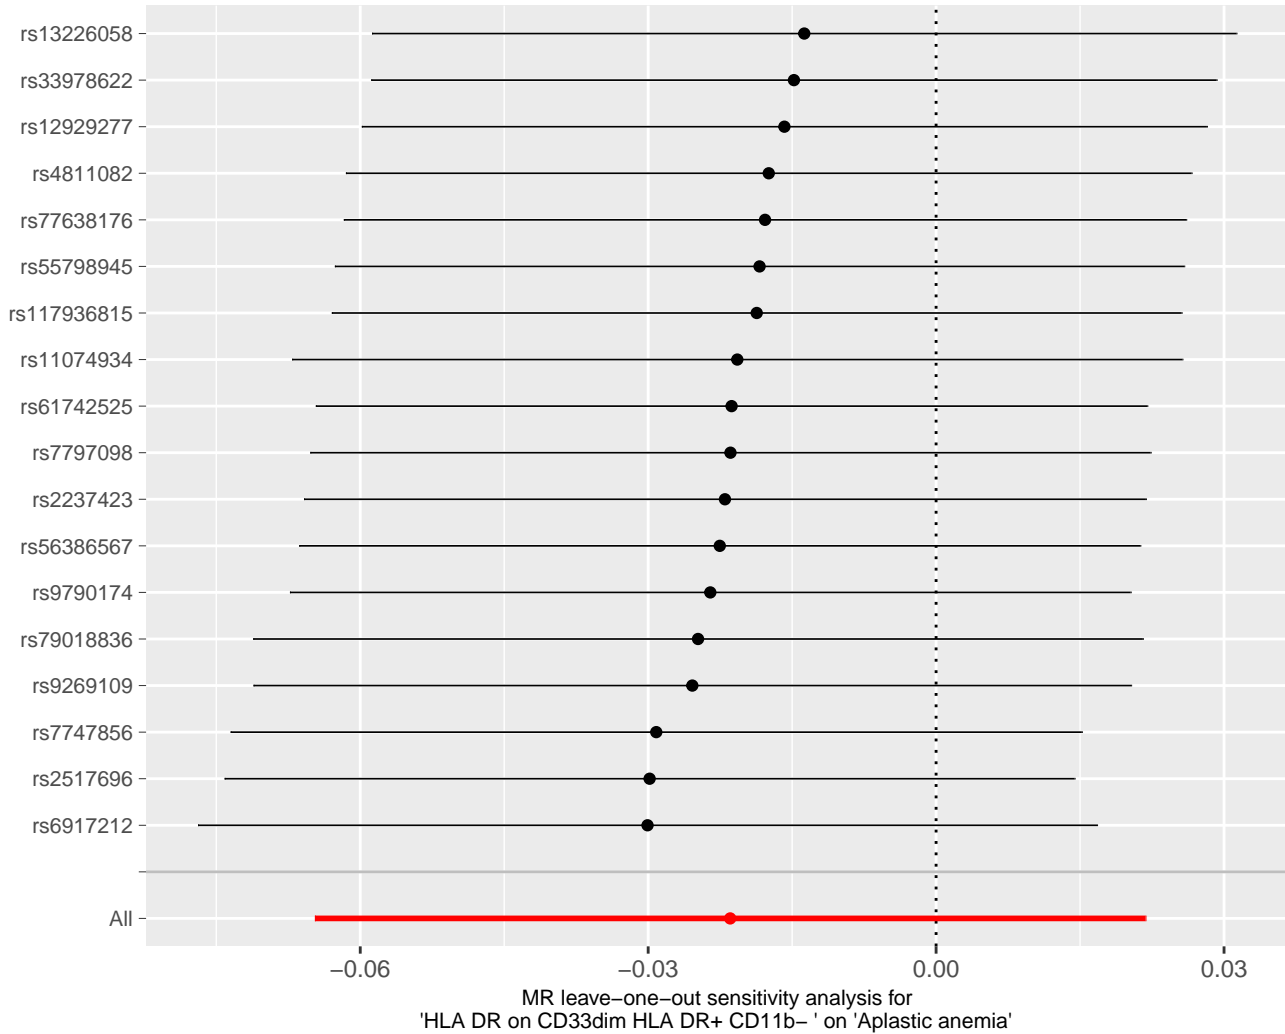

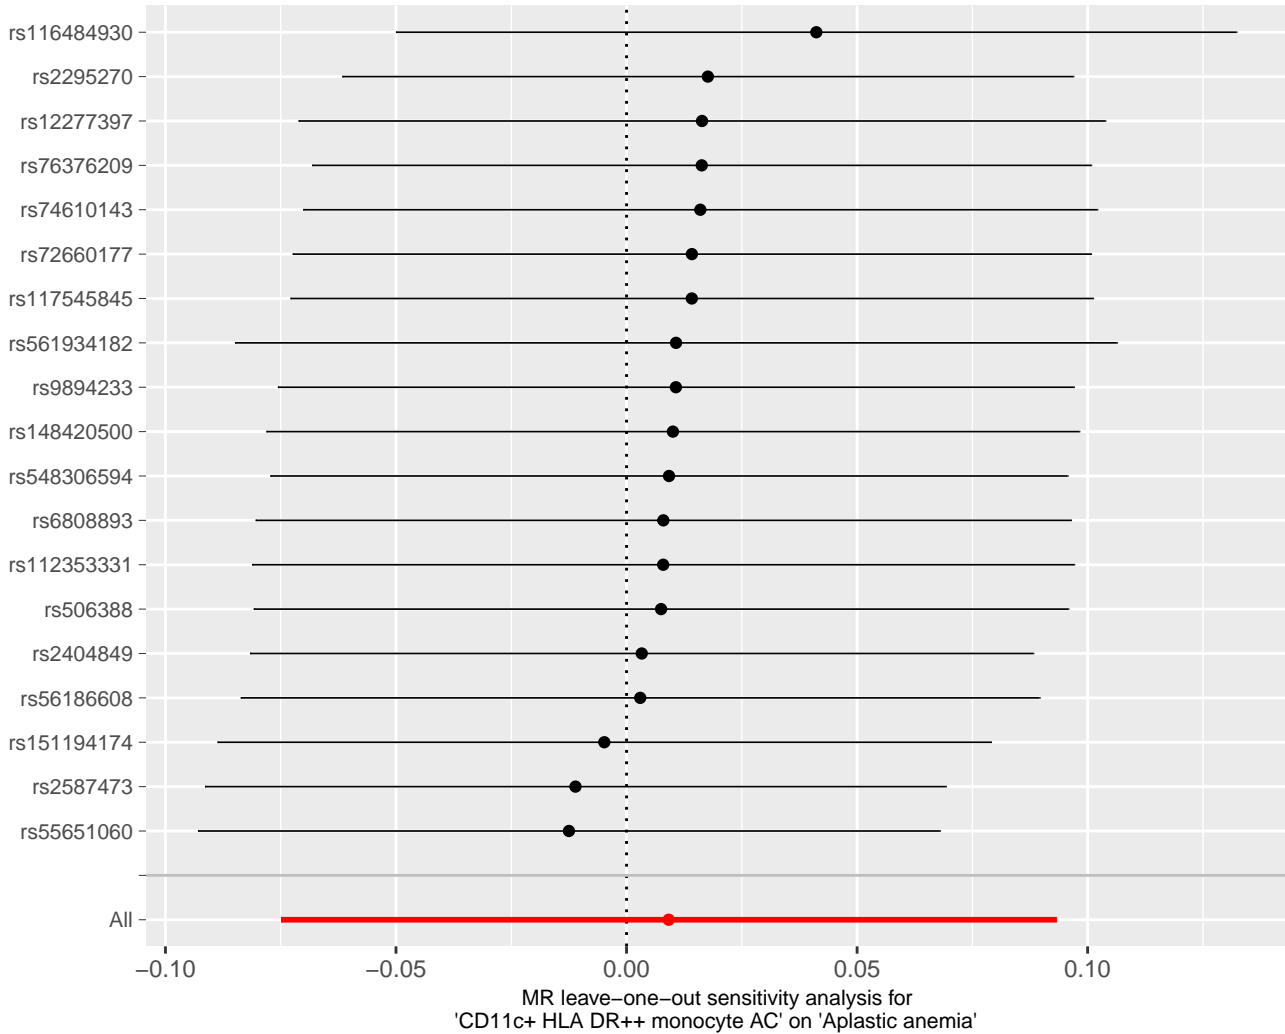

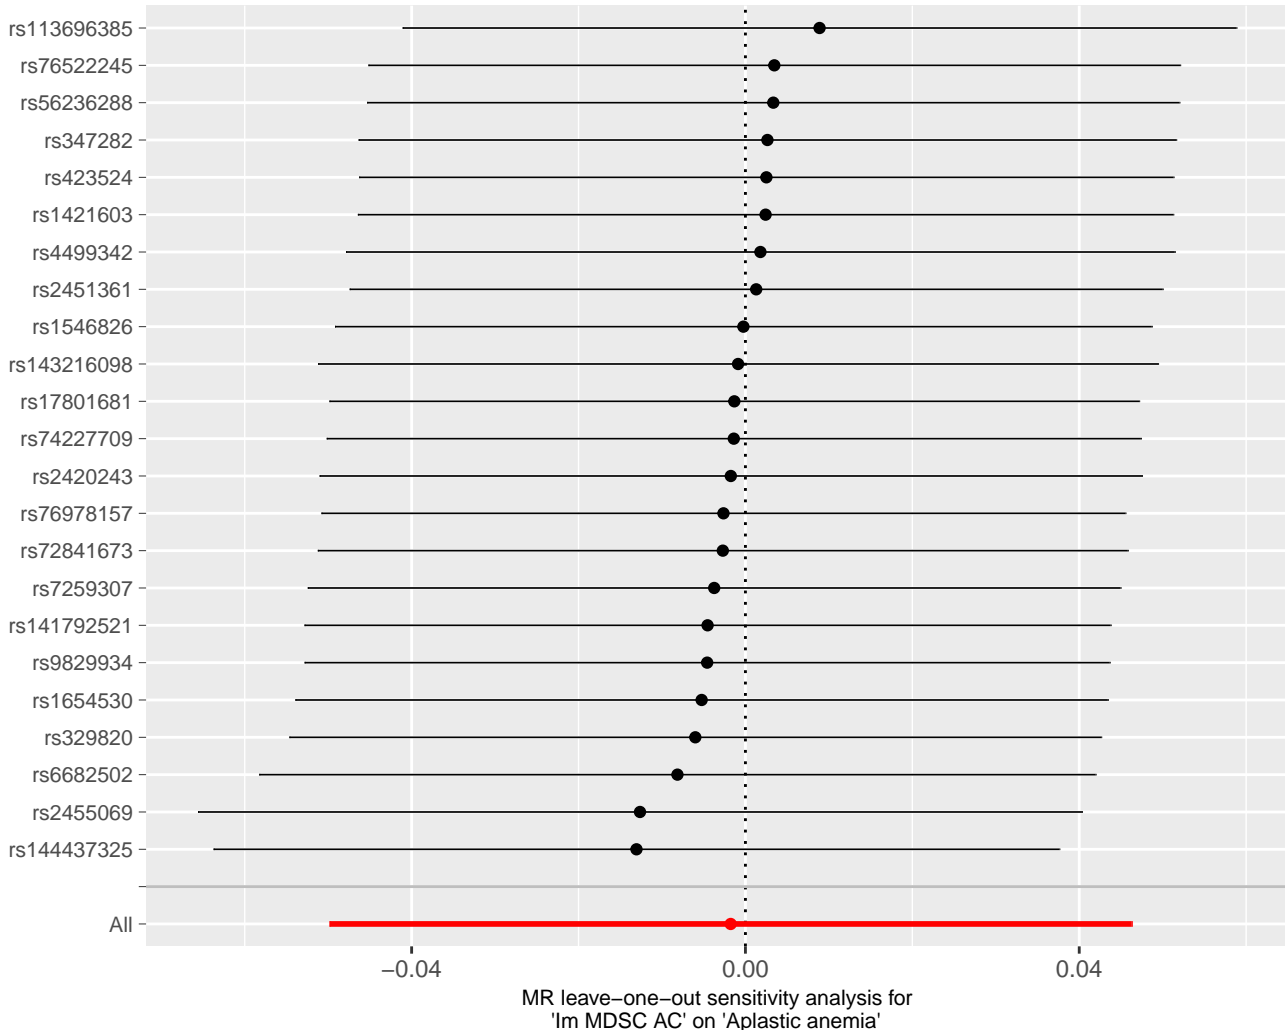

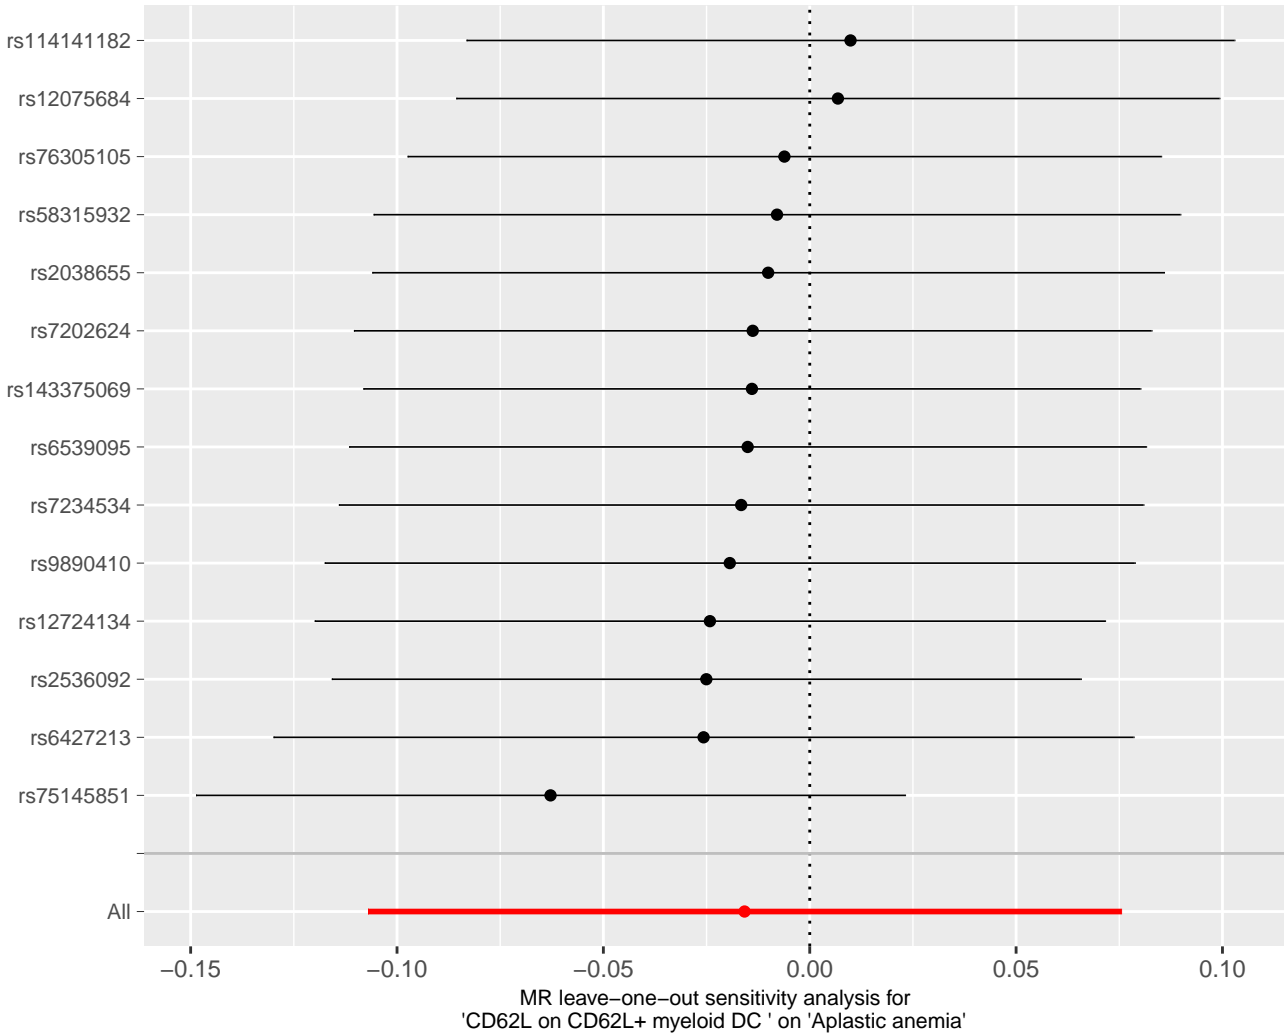



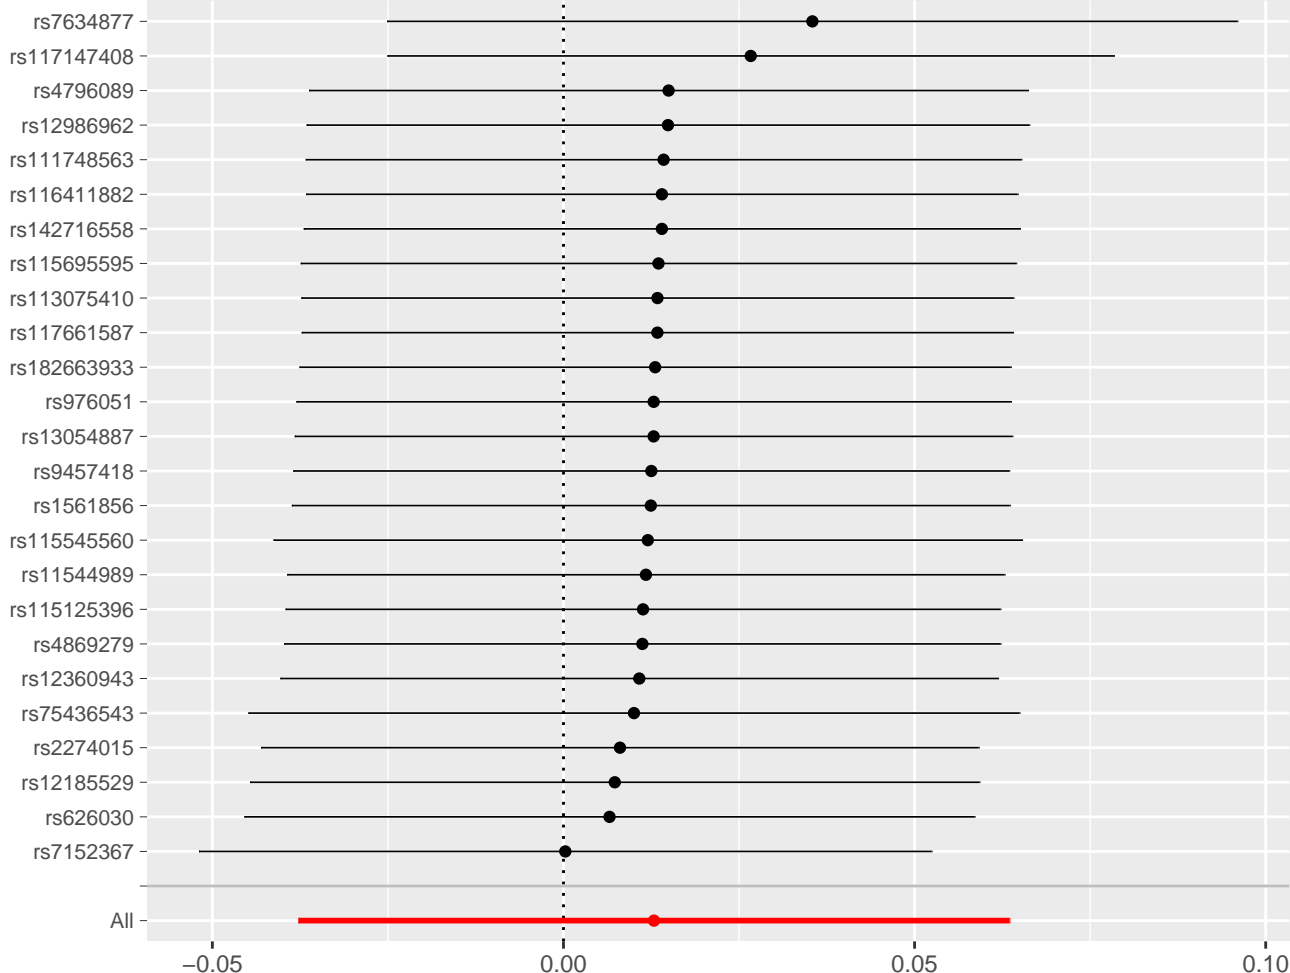

MR leave-one-out sensitivity analysis for 'CD28- CD8dim %T cell' on 'Aplastic anemia'

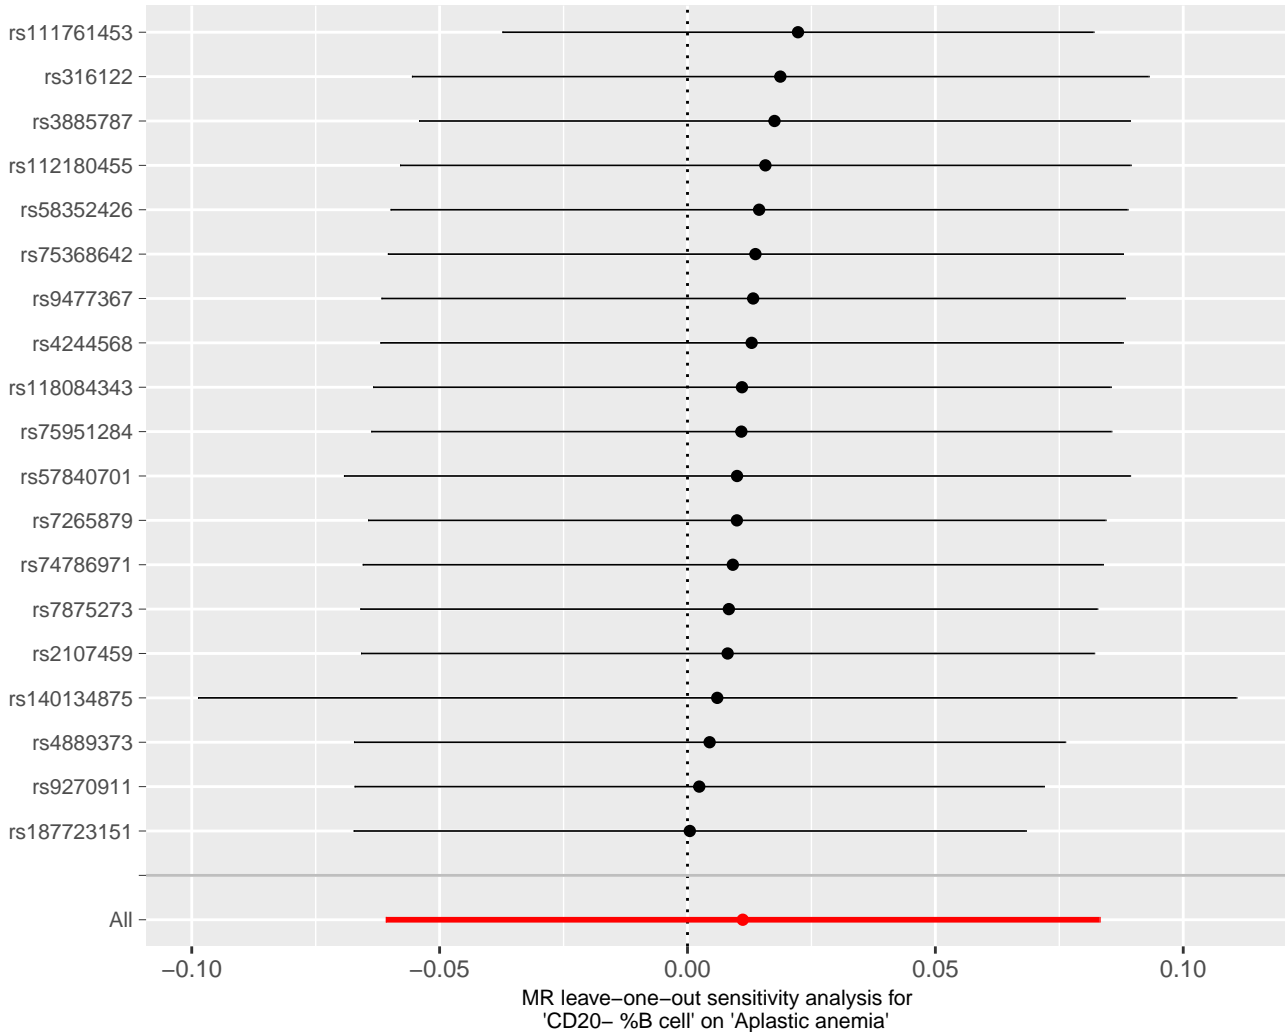

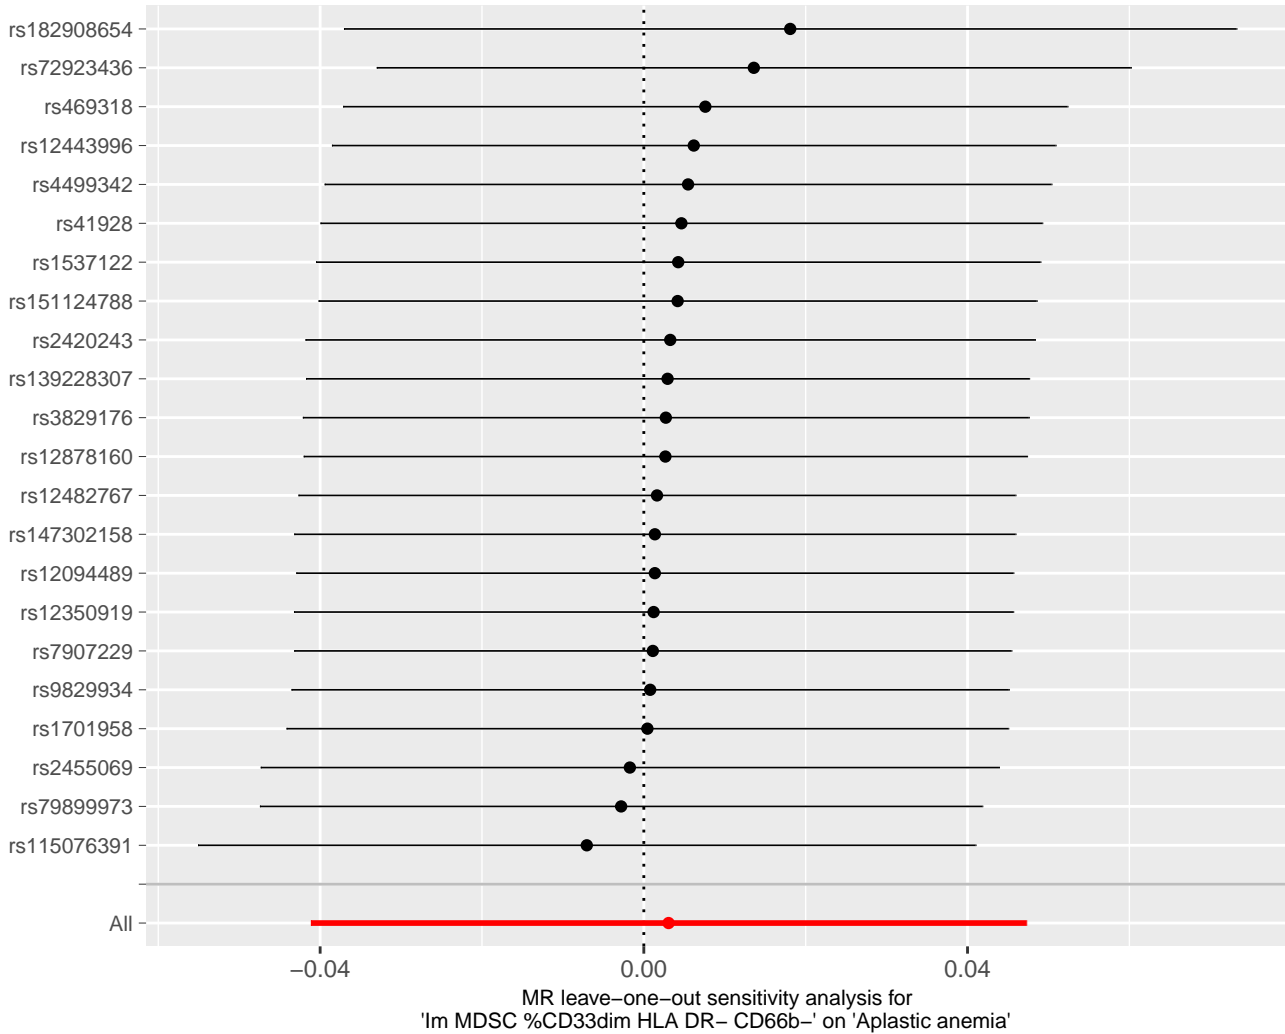

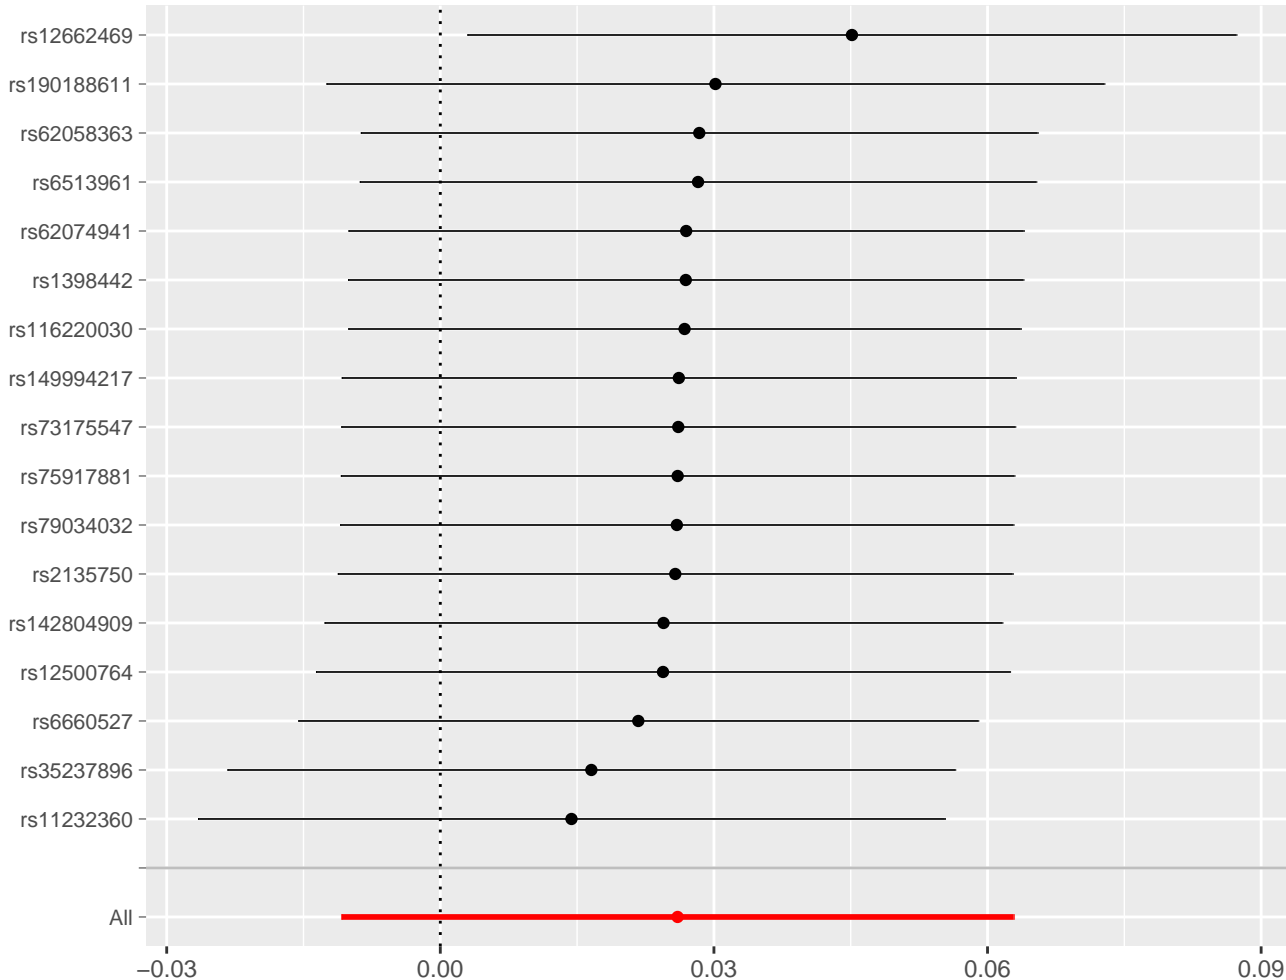

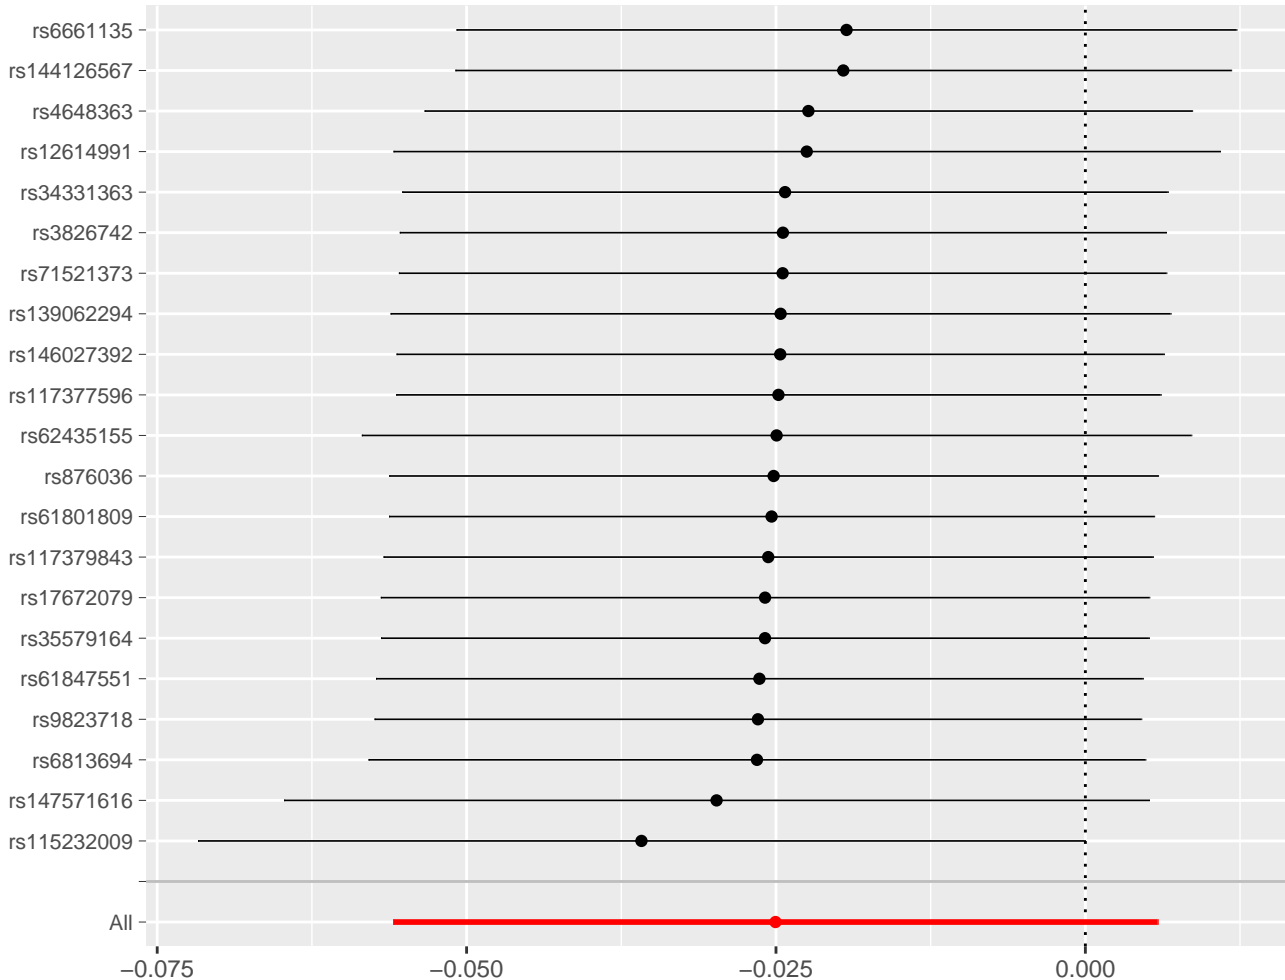

MR leave-one-out sensitivity analysis for 'CX3CR1 on CD14- CD16- ' on 'Aplastic anemia'

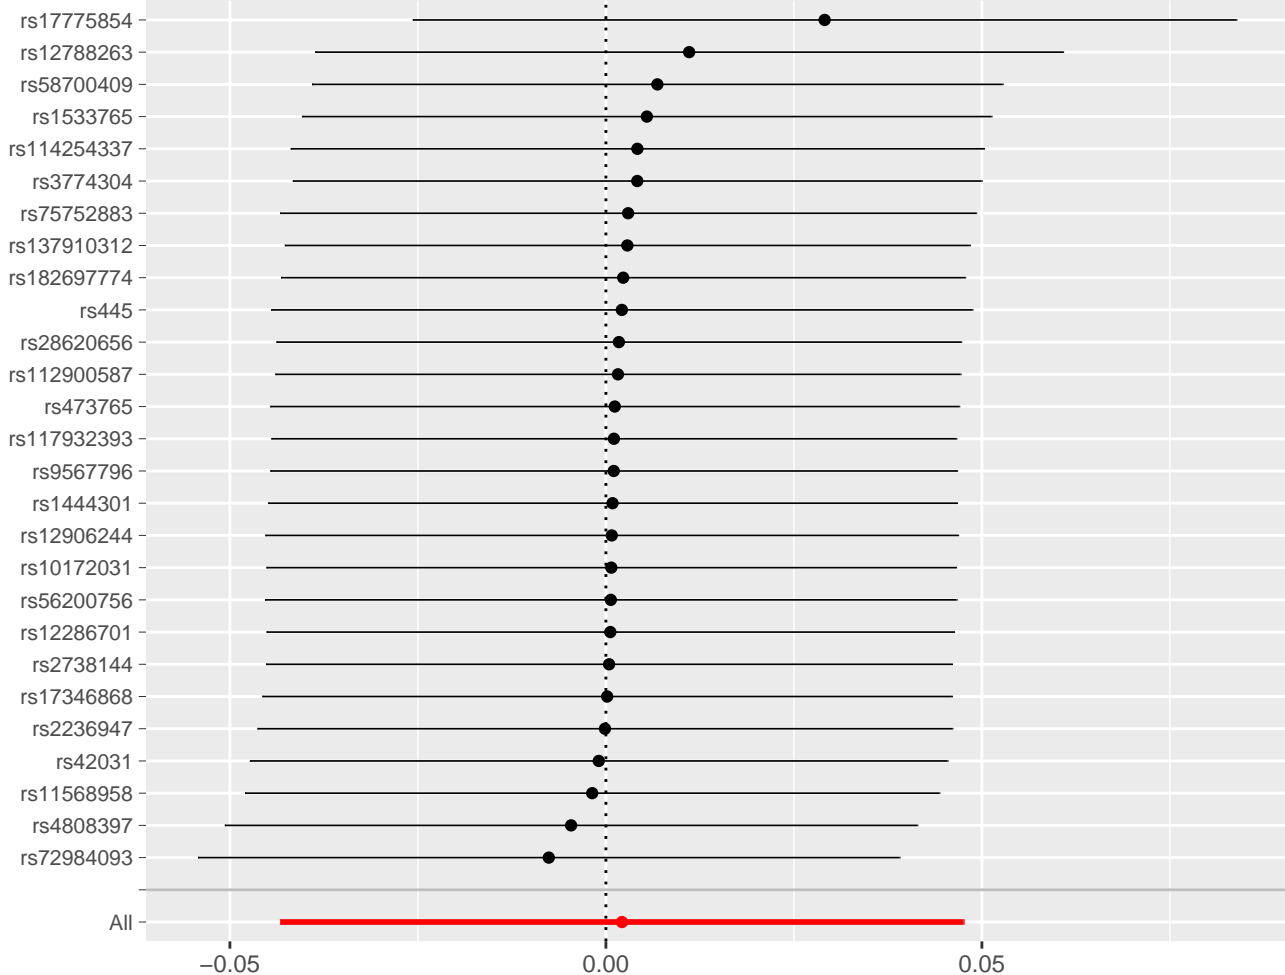

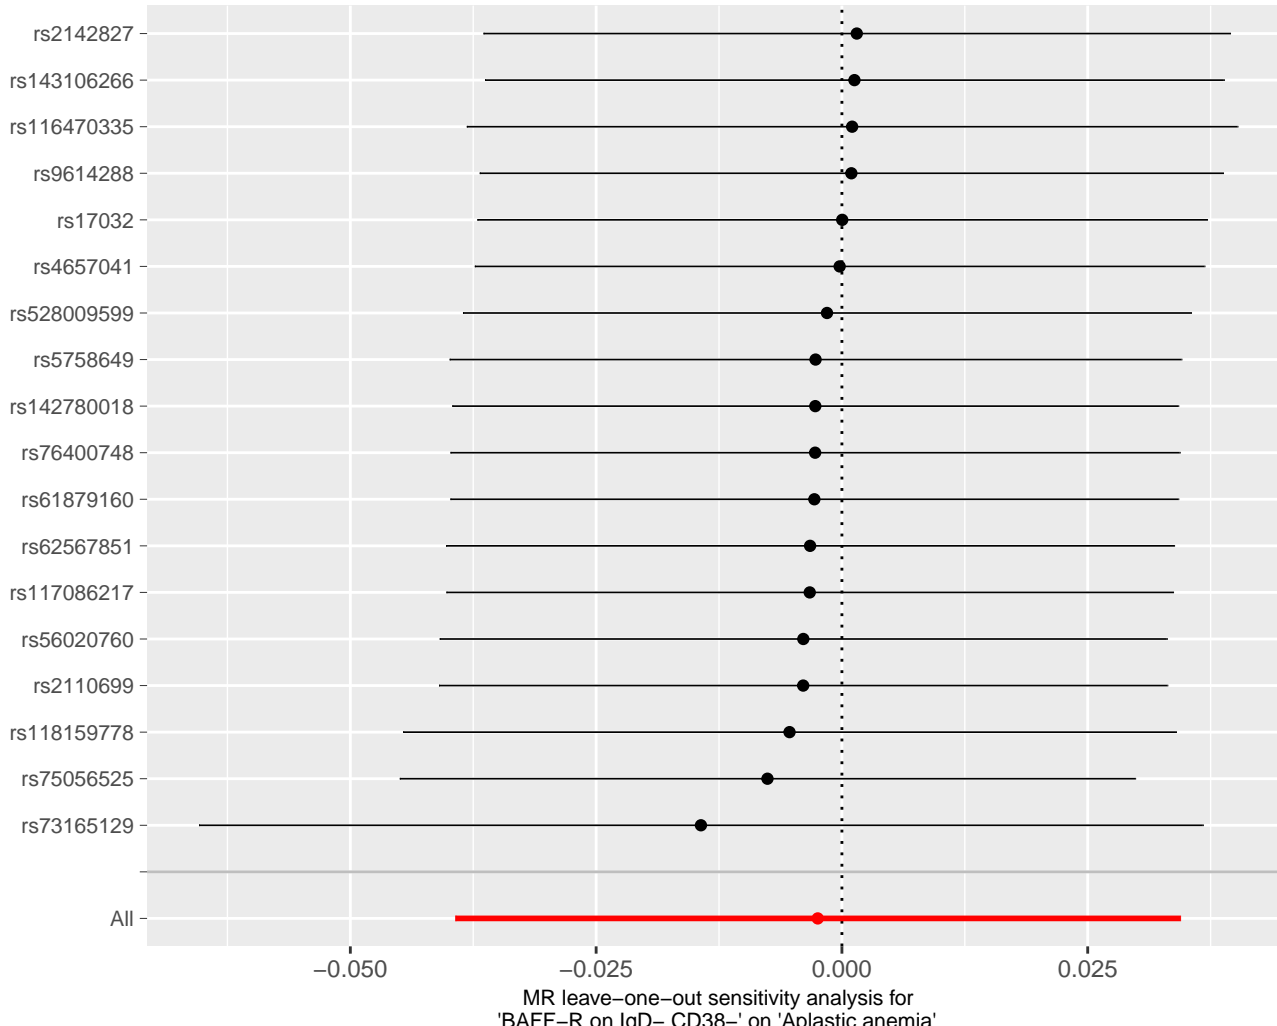

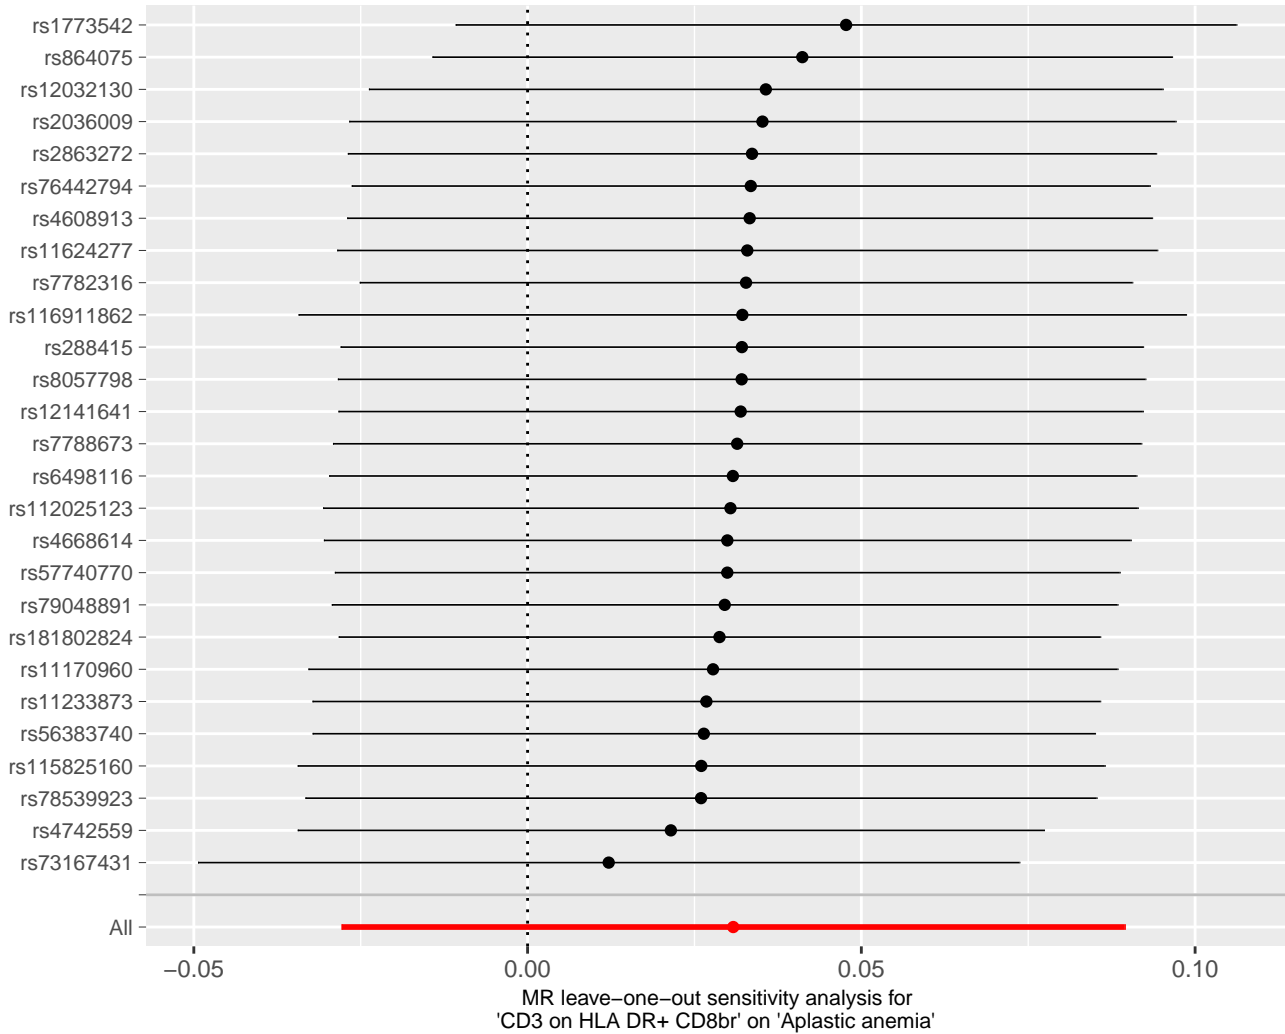



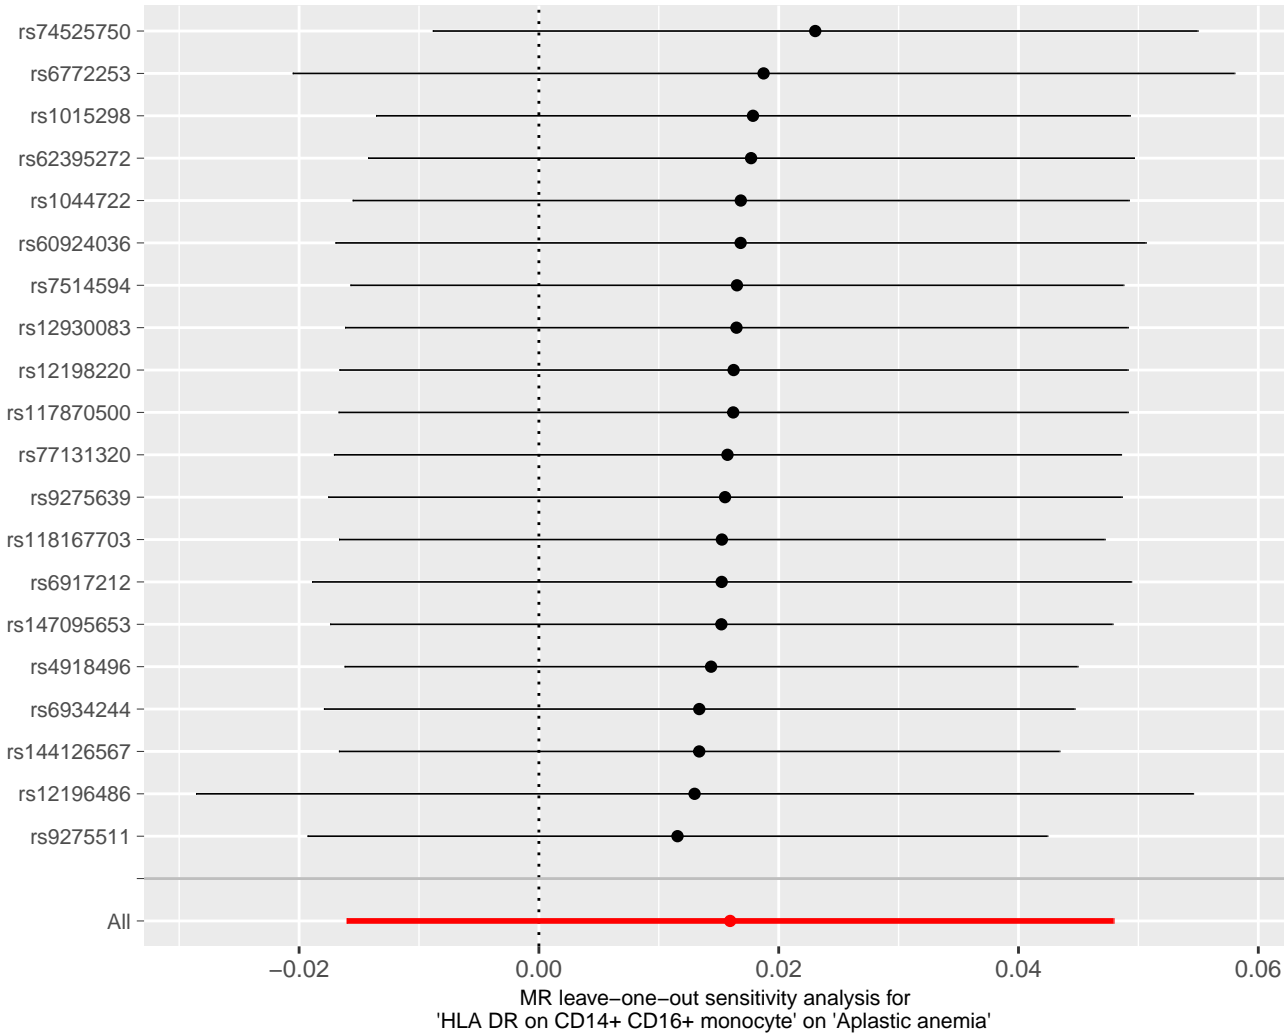

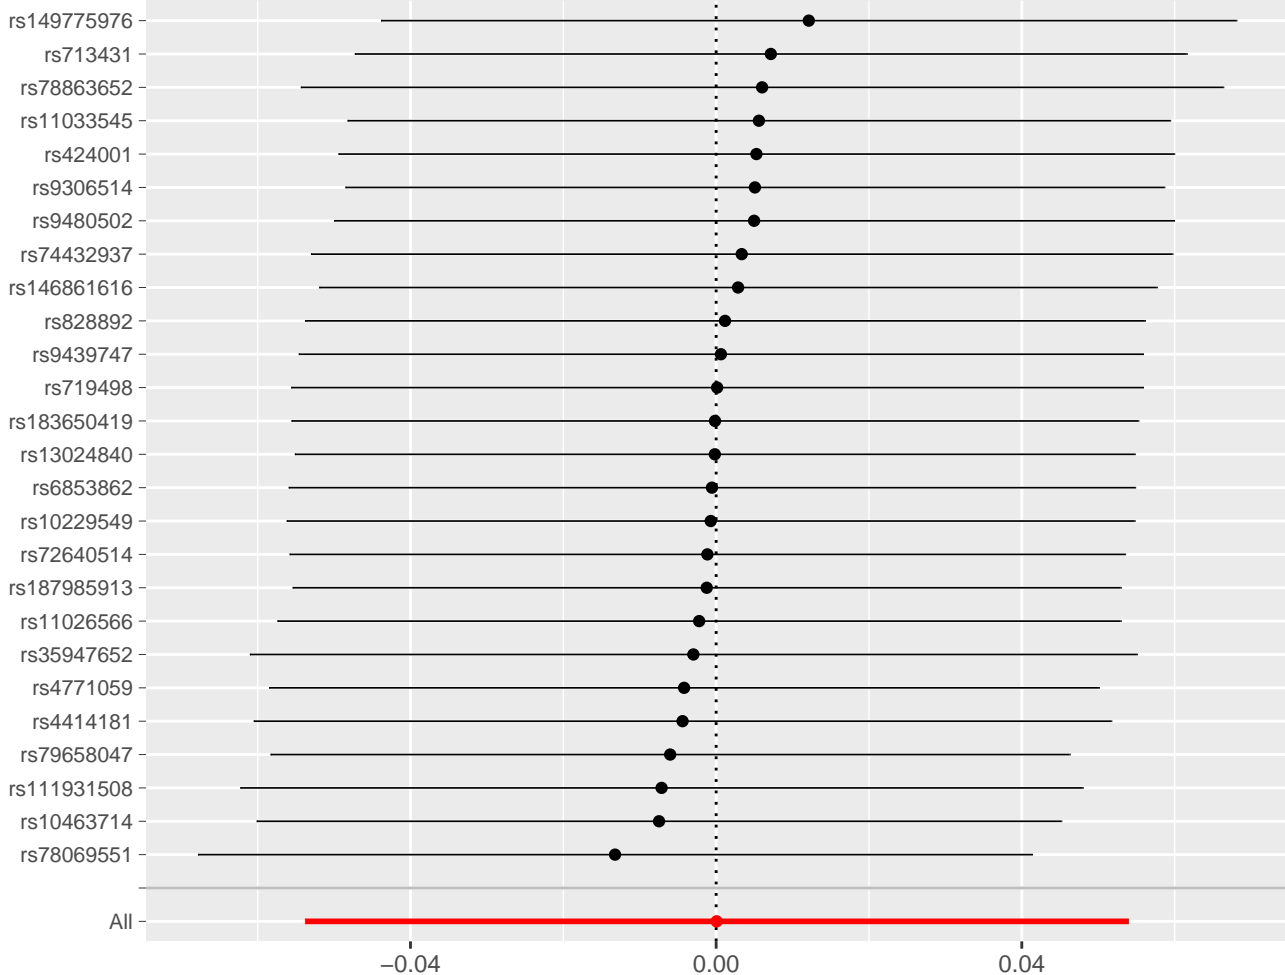

MR leave-one-out sensitivity analysis for 'CD4 on TD CD4+' on 'Aplastic anemia'

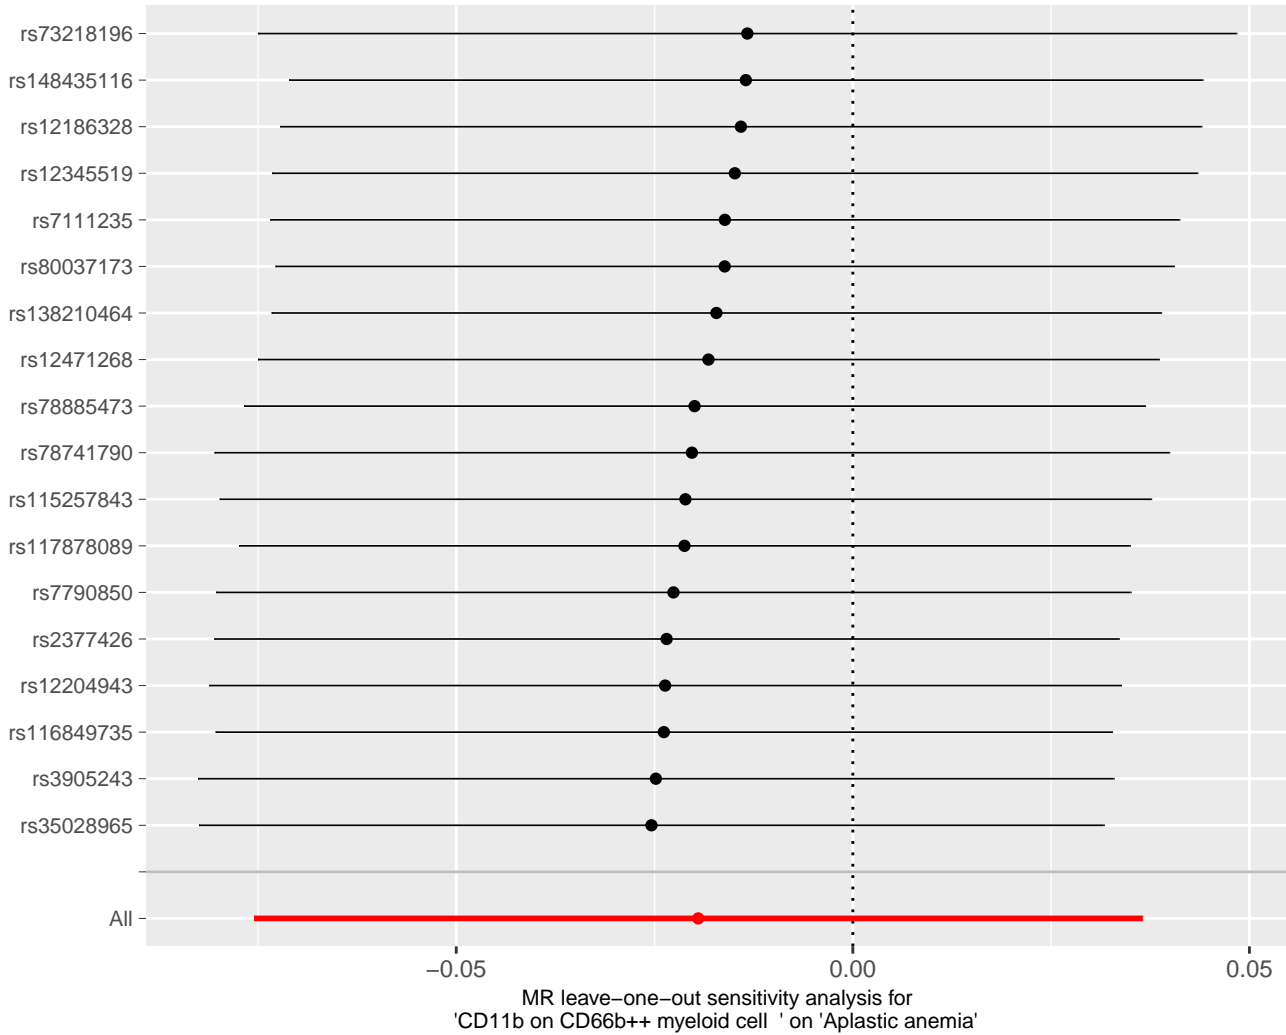

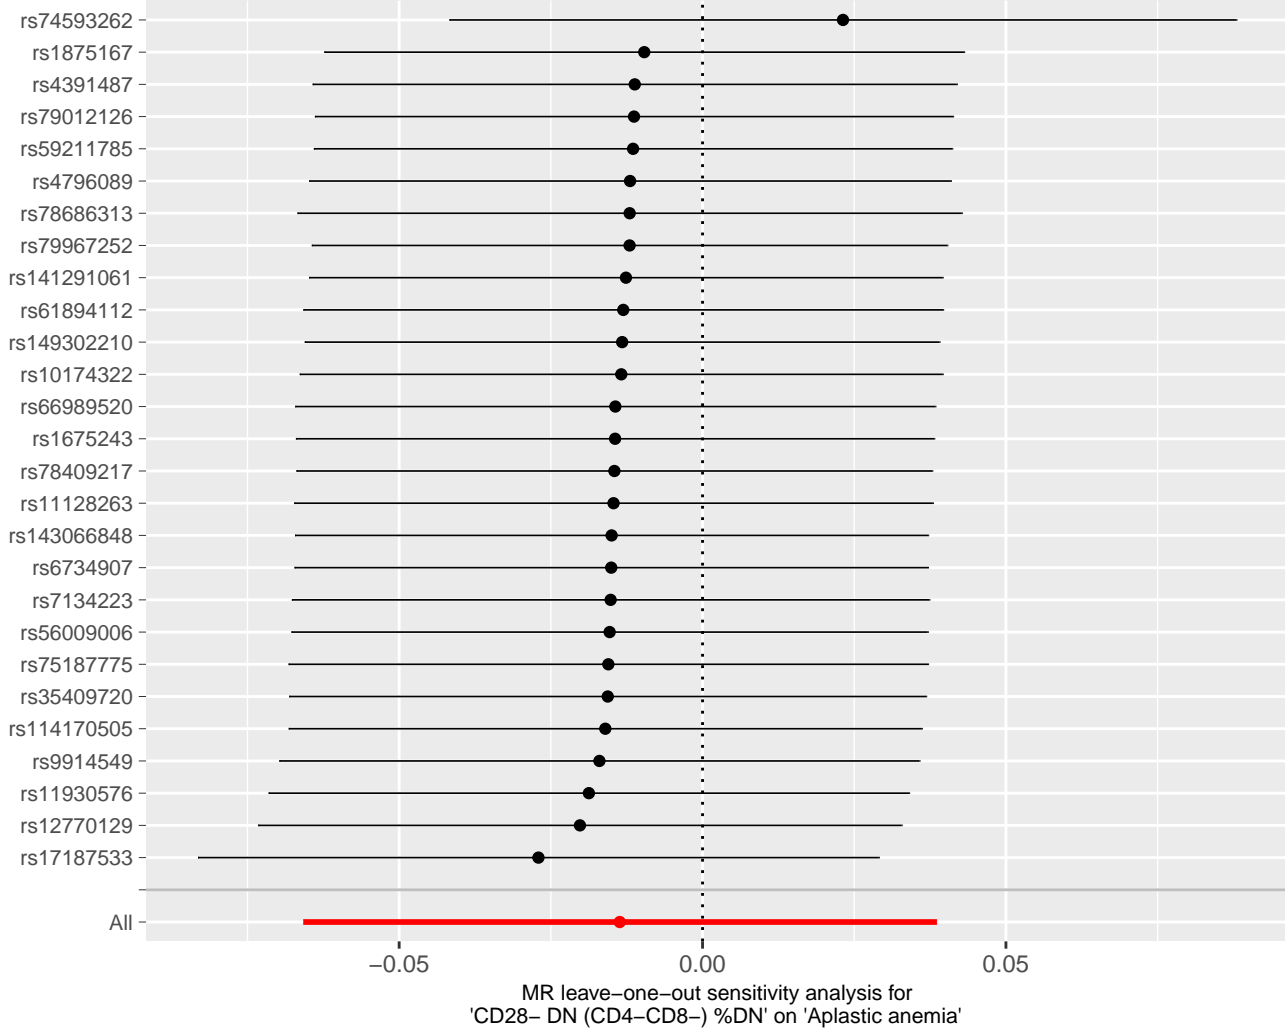

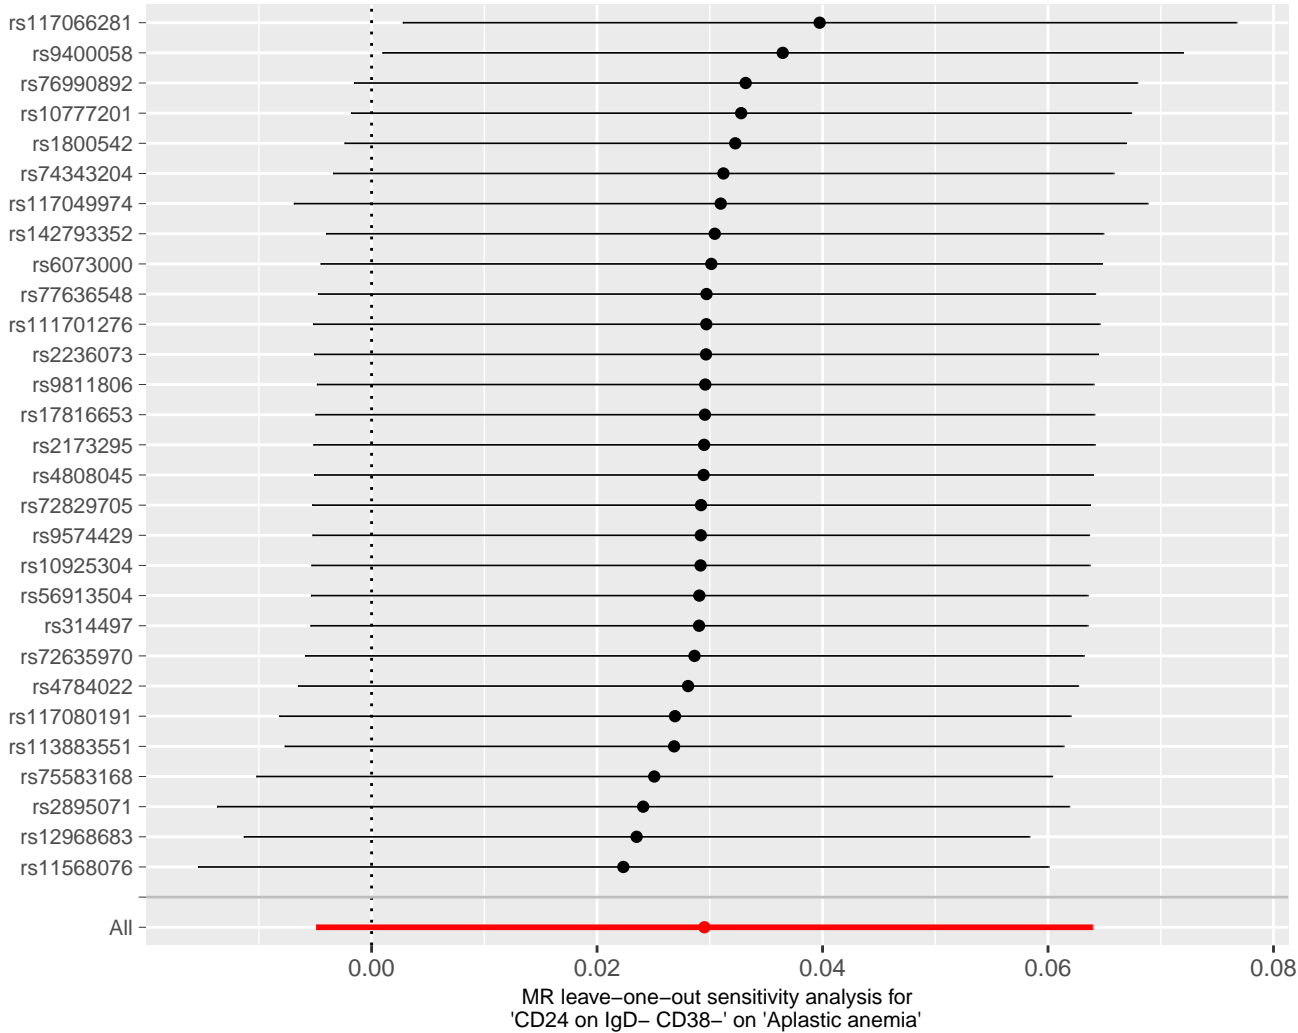

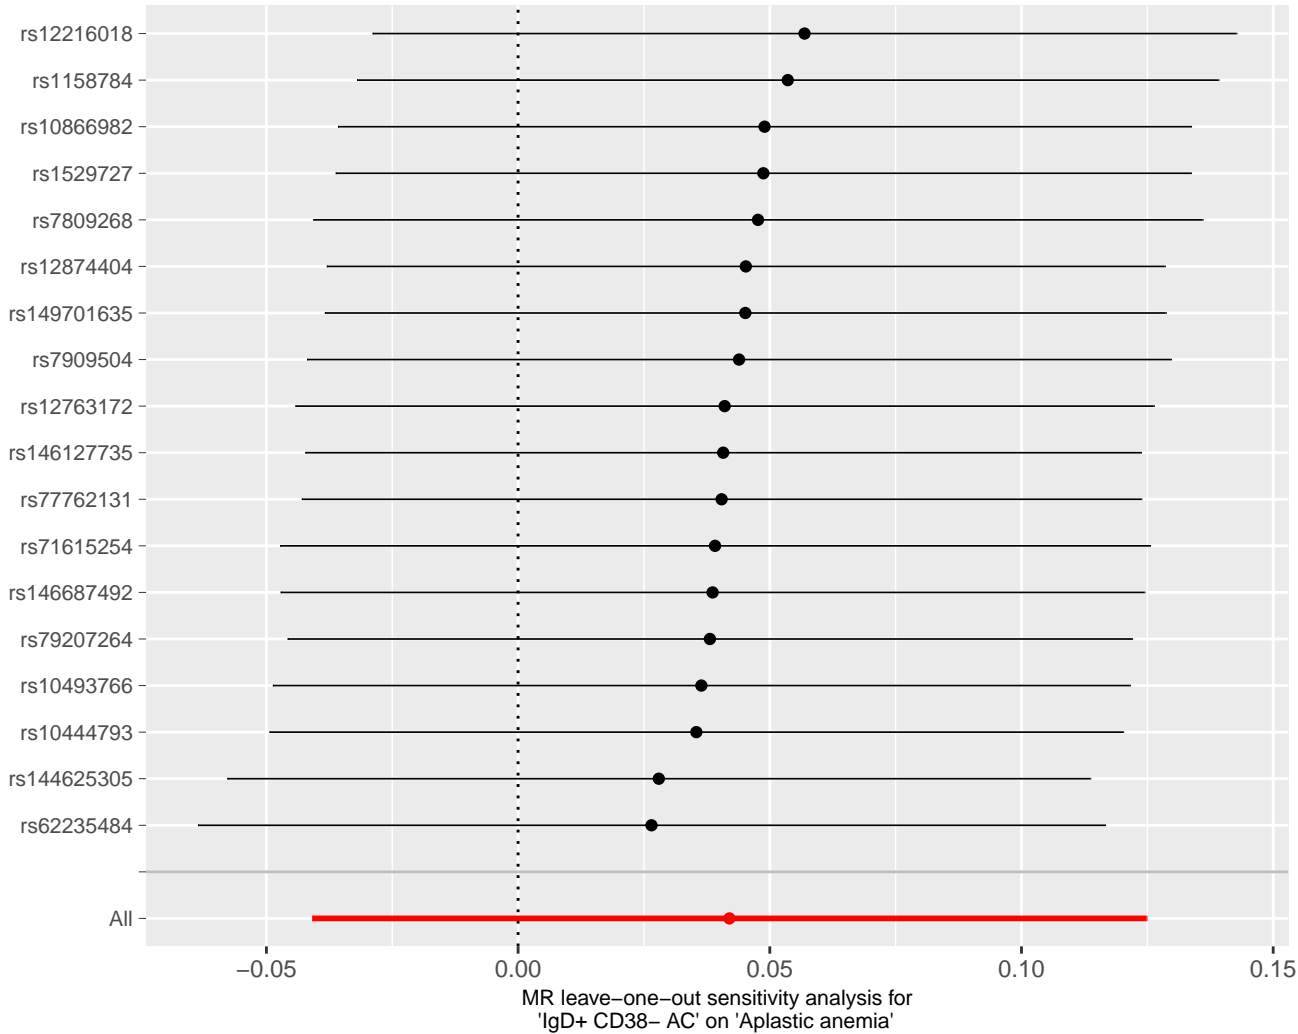

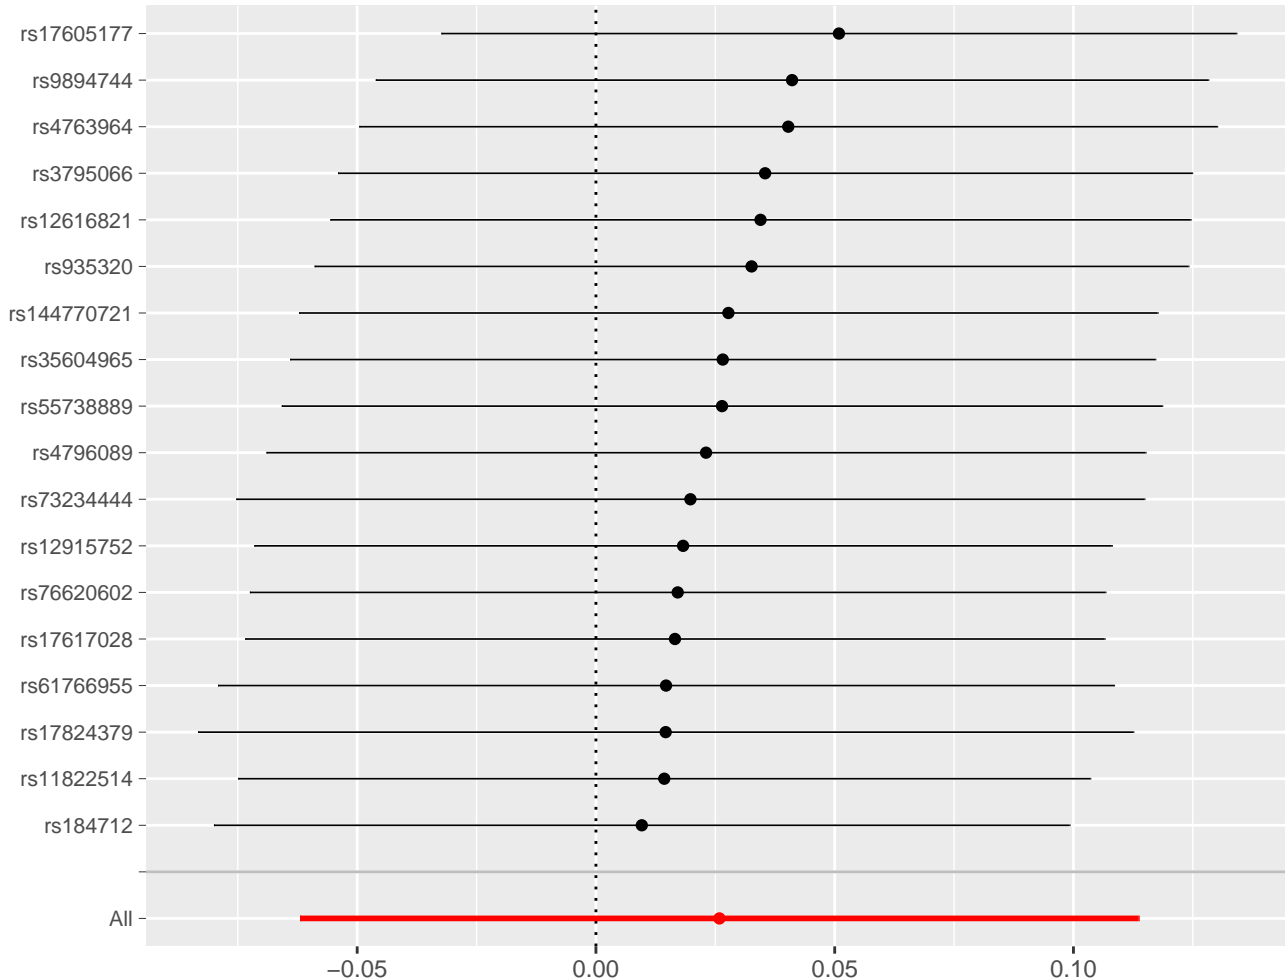

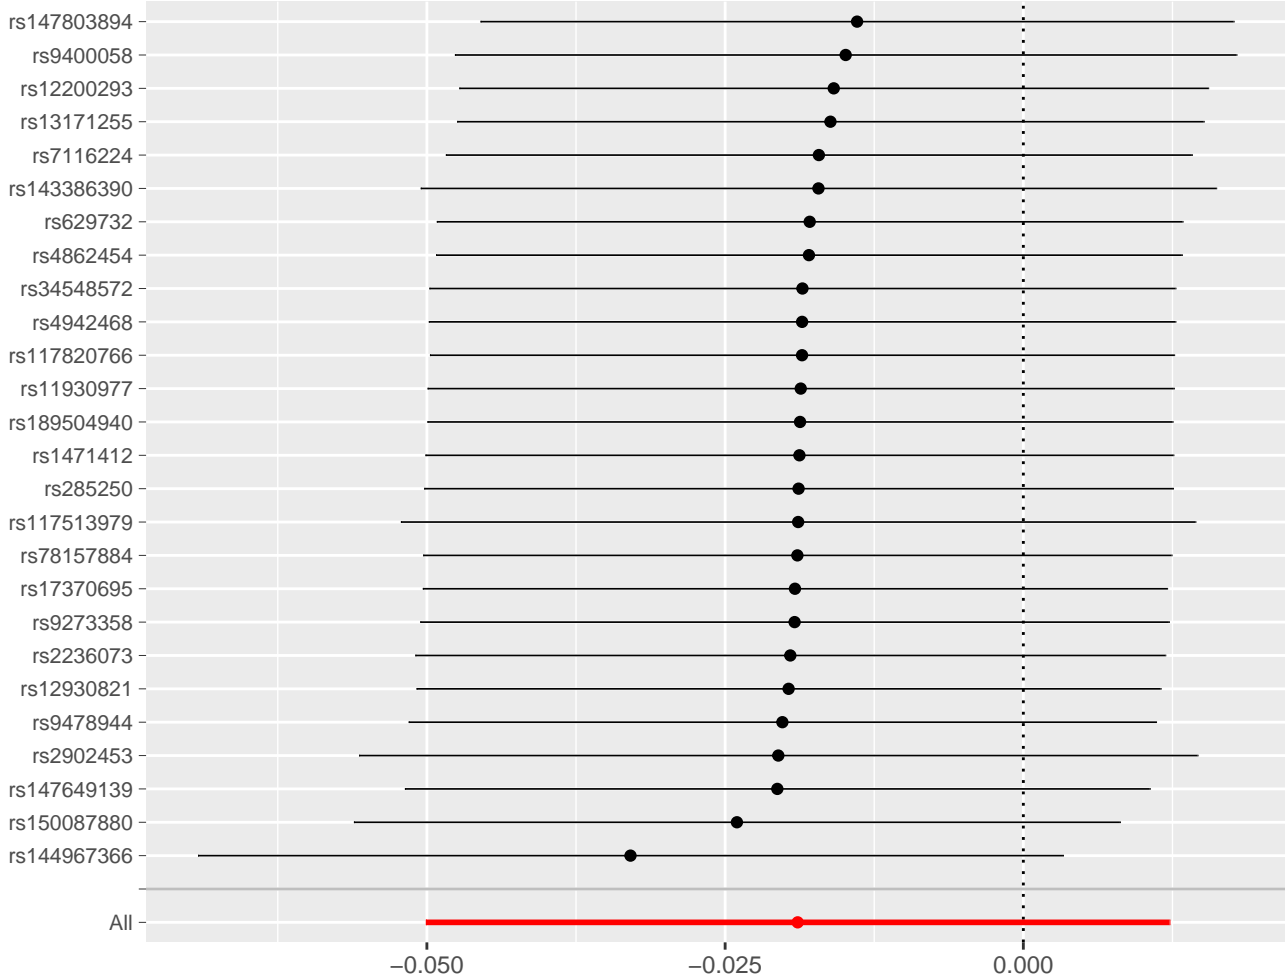

MR leave-one-out sensitivity analysis for 'CD24 on IgD+ CD24+' on 'Aplastic anemia'



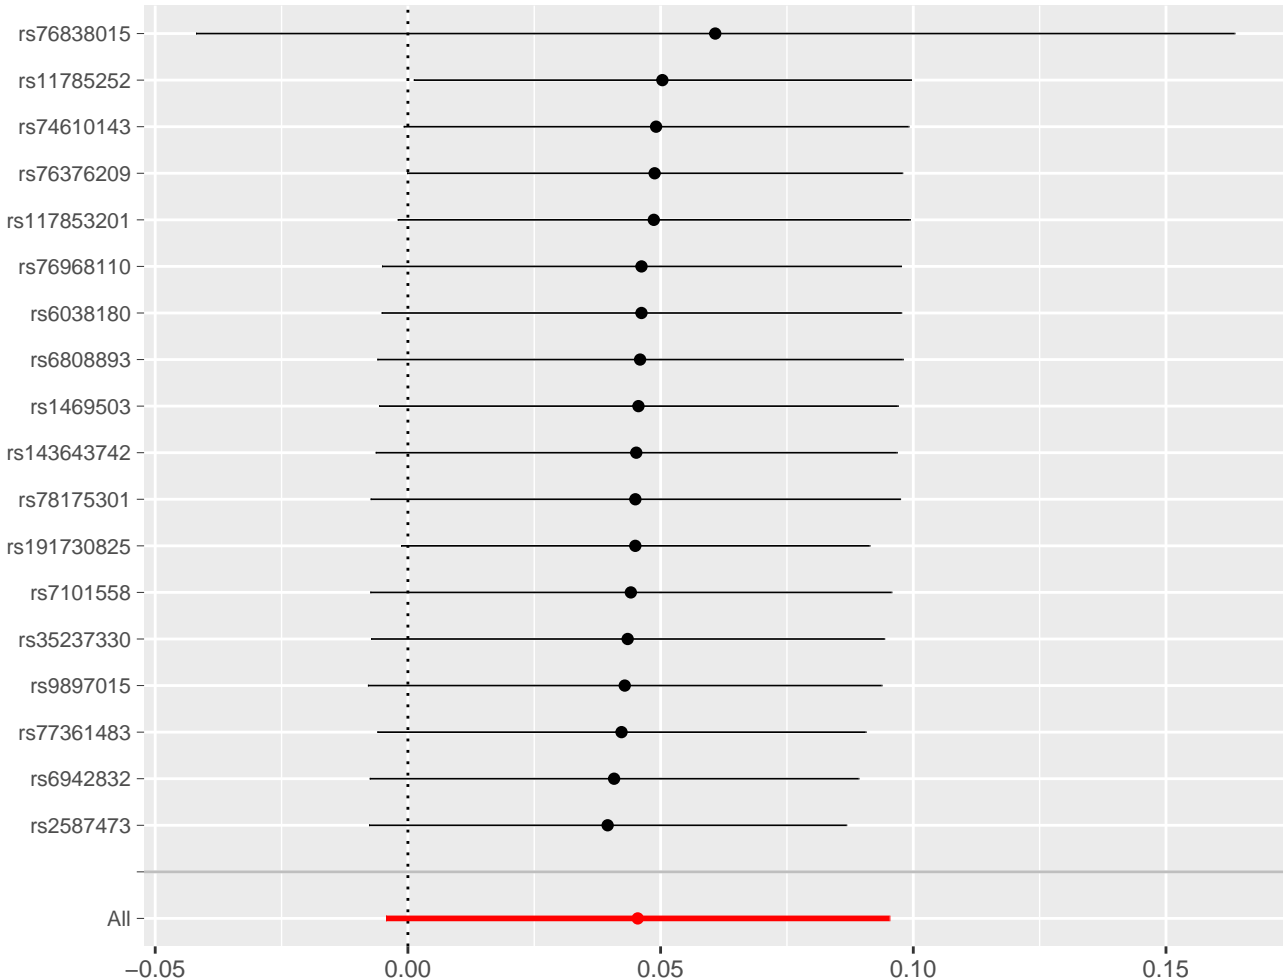

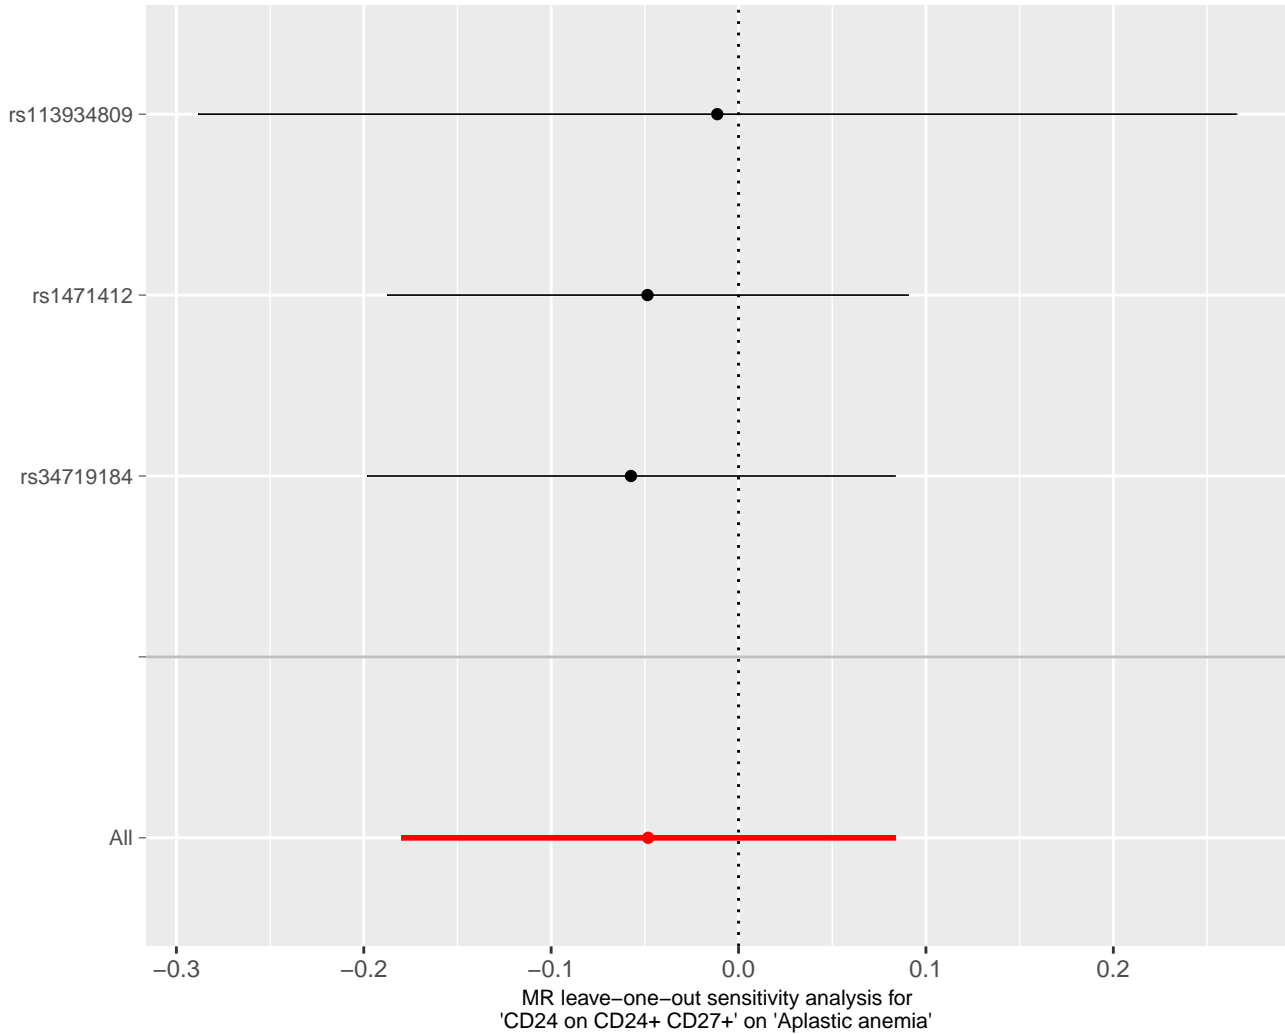

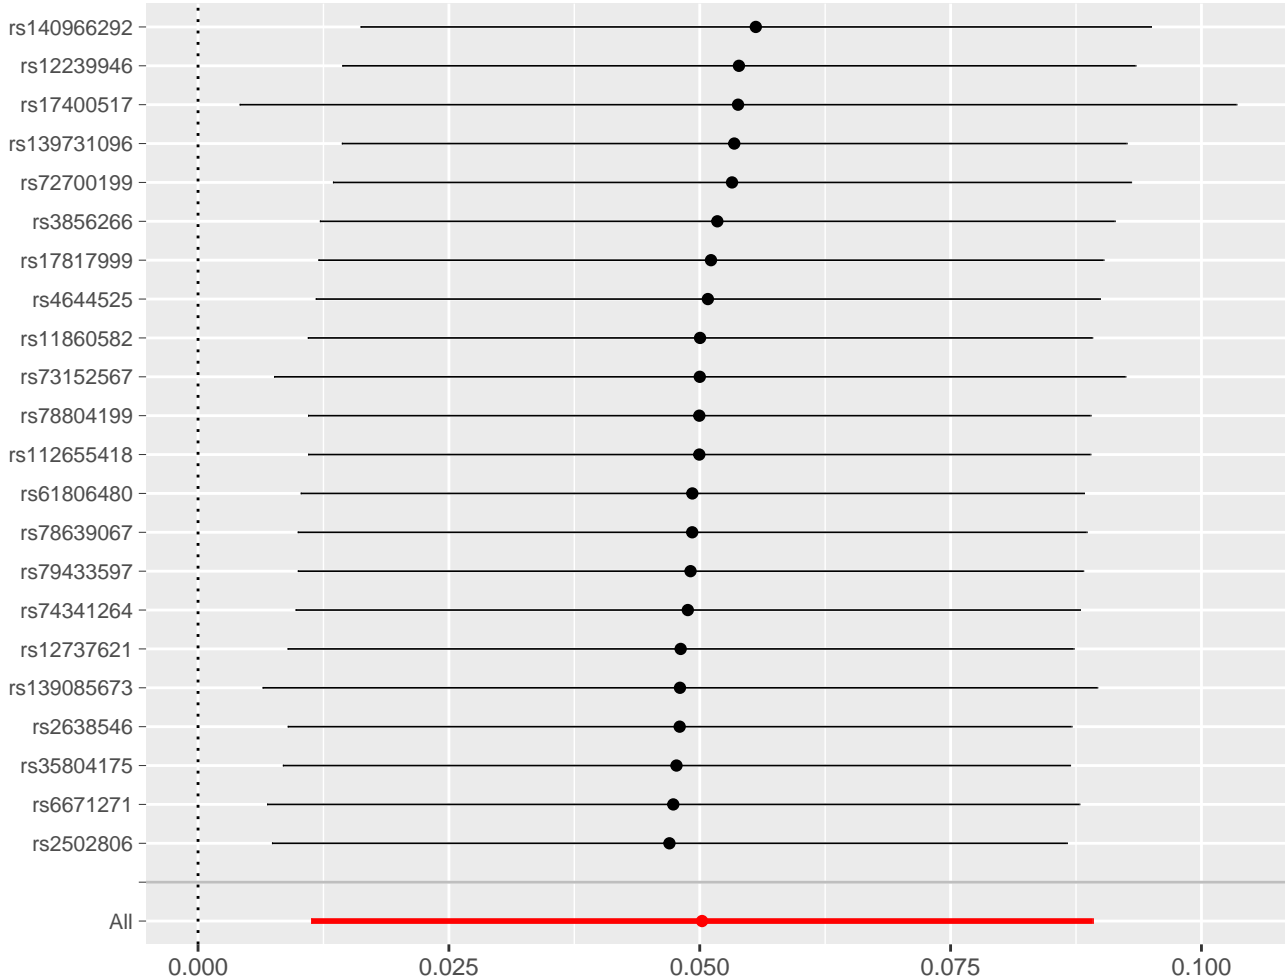

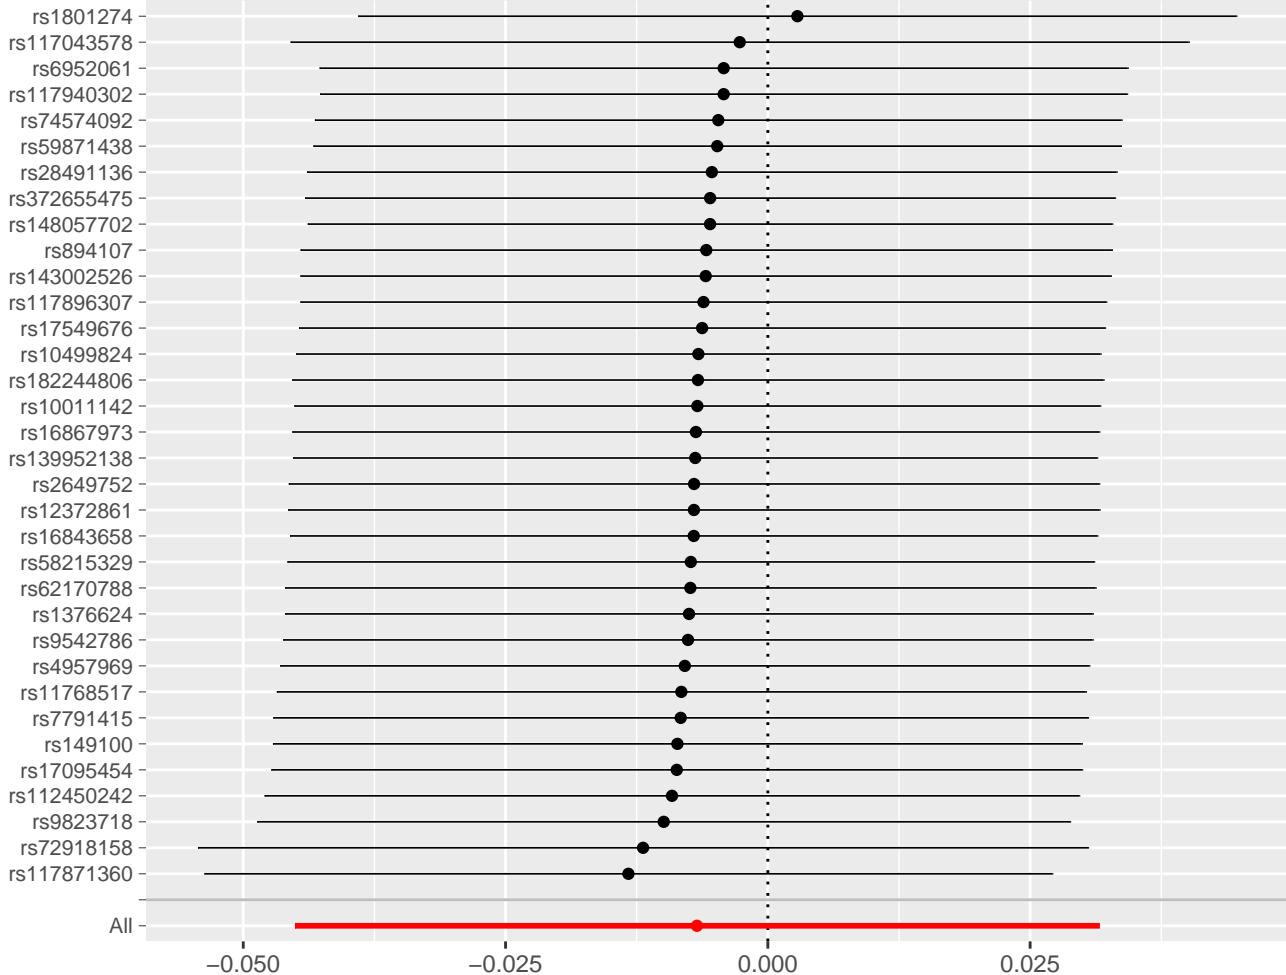

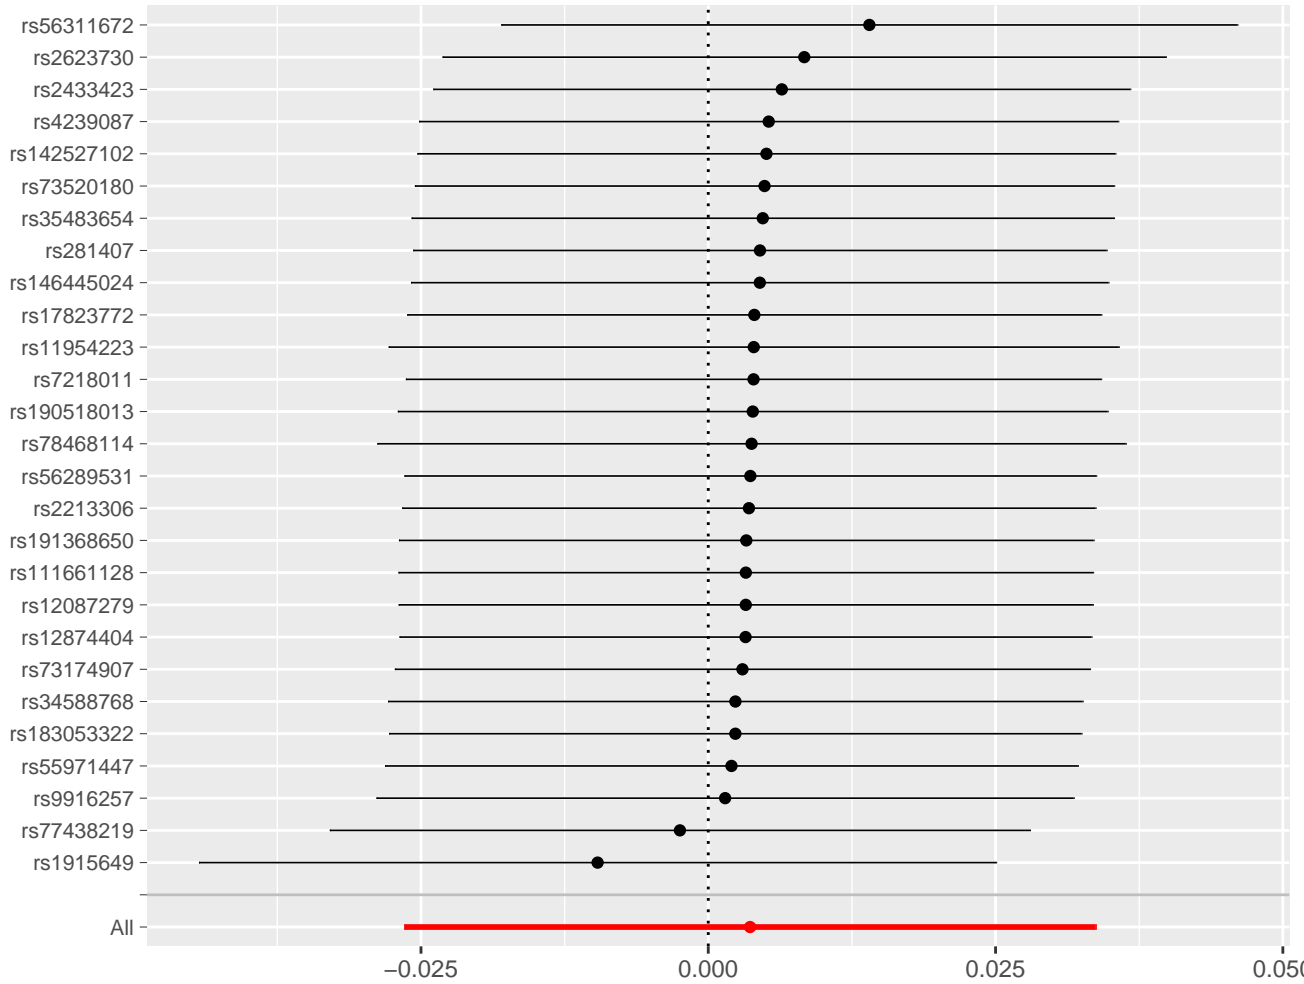

MR leave-one-out sensitivity analysis for 'NK %CD3- lymphocyte' on 'Aplastic anemia'

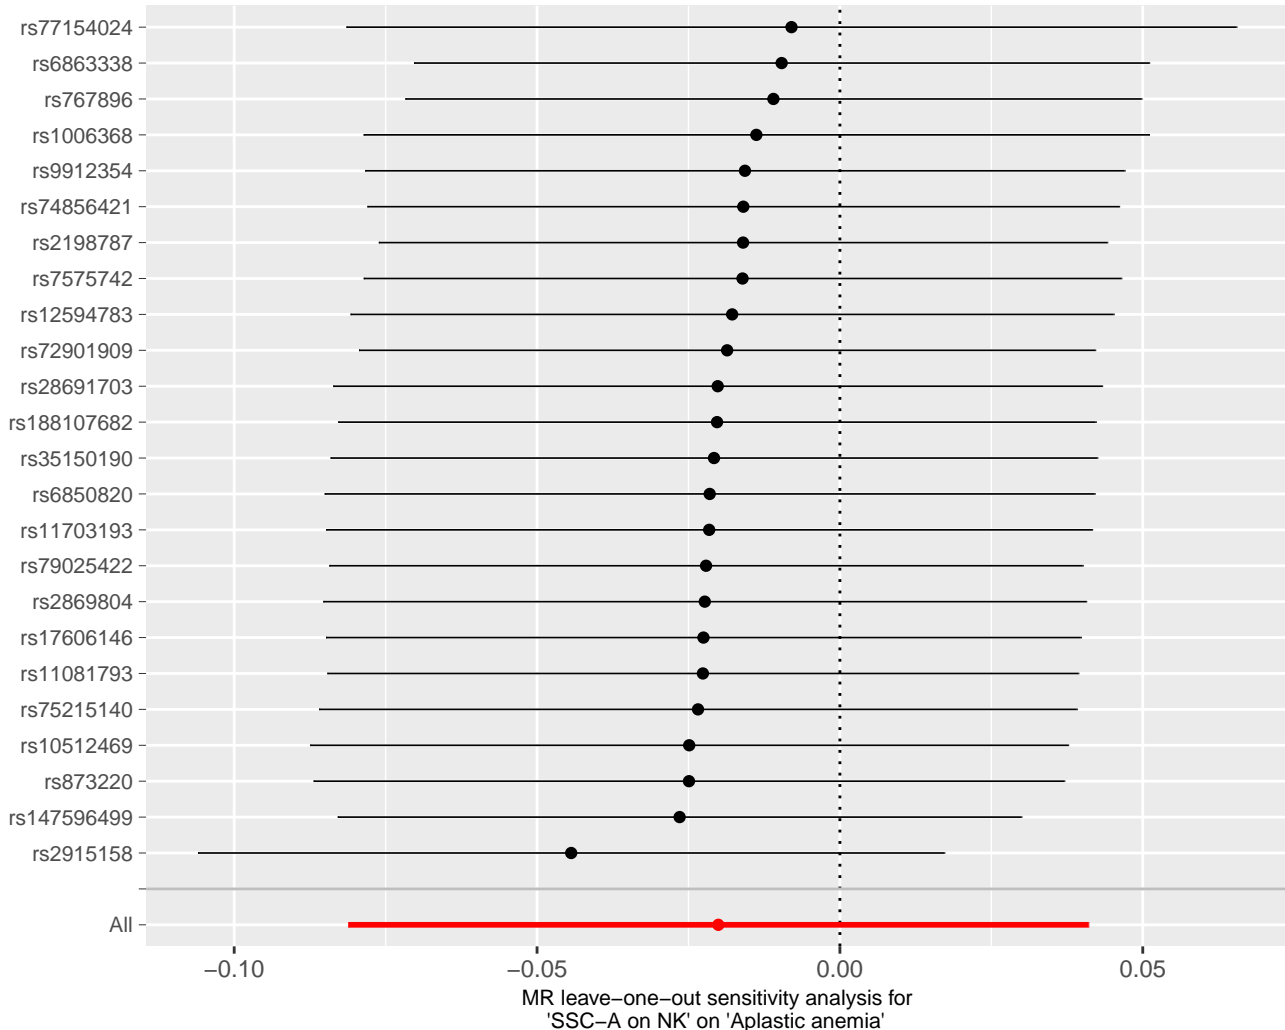

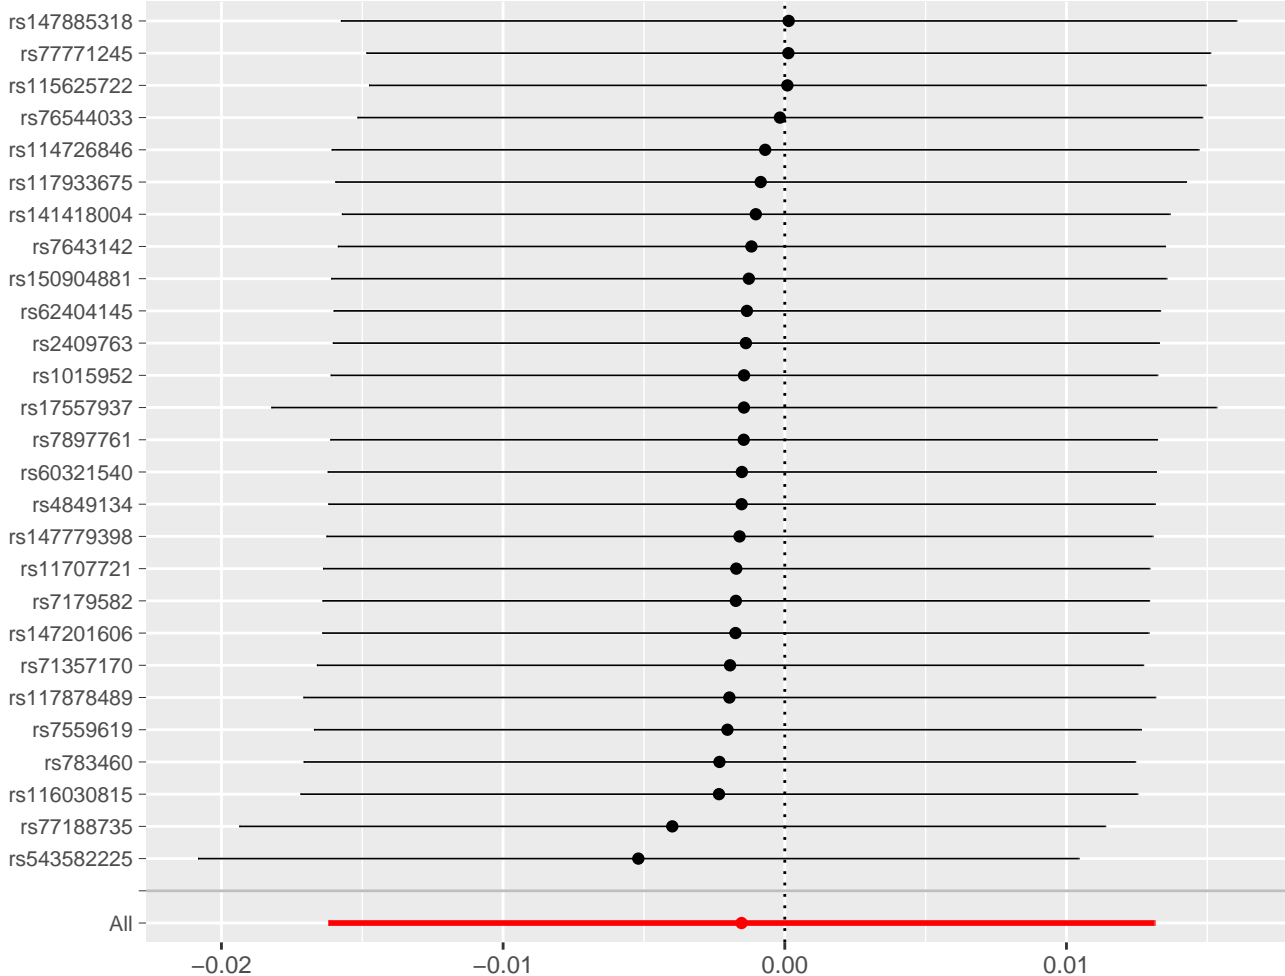

MR leave-one-out sensitivity analysis for 'CD45 on CD8br' on 'Aplastic anemia'

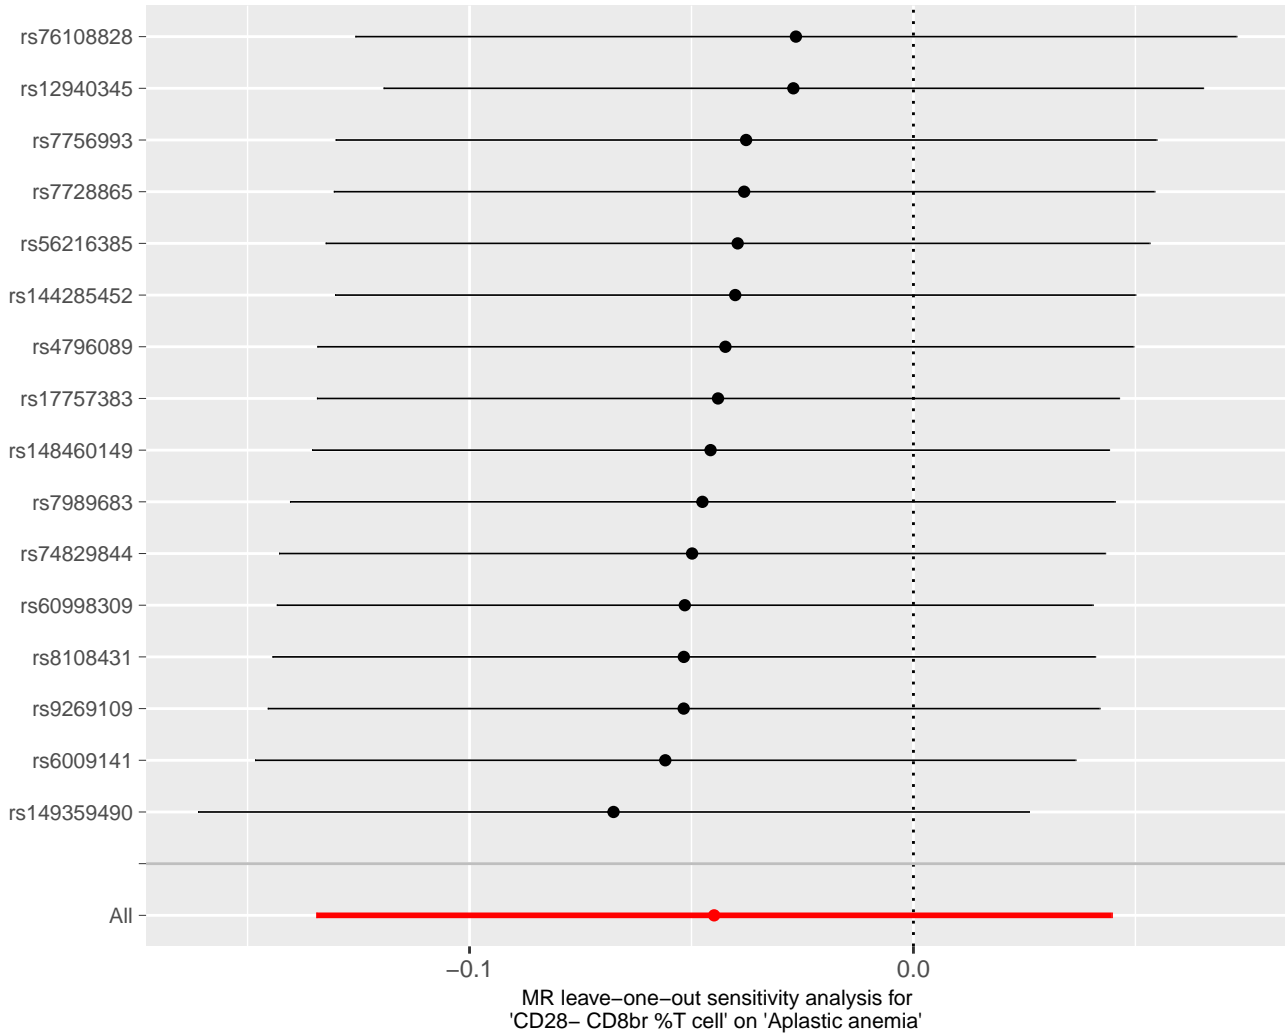



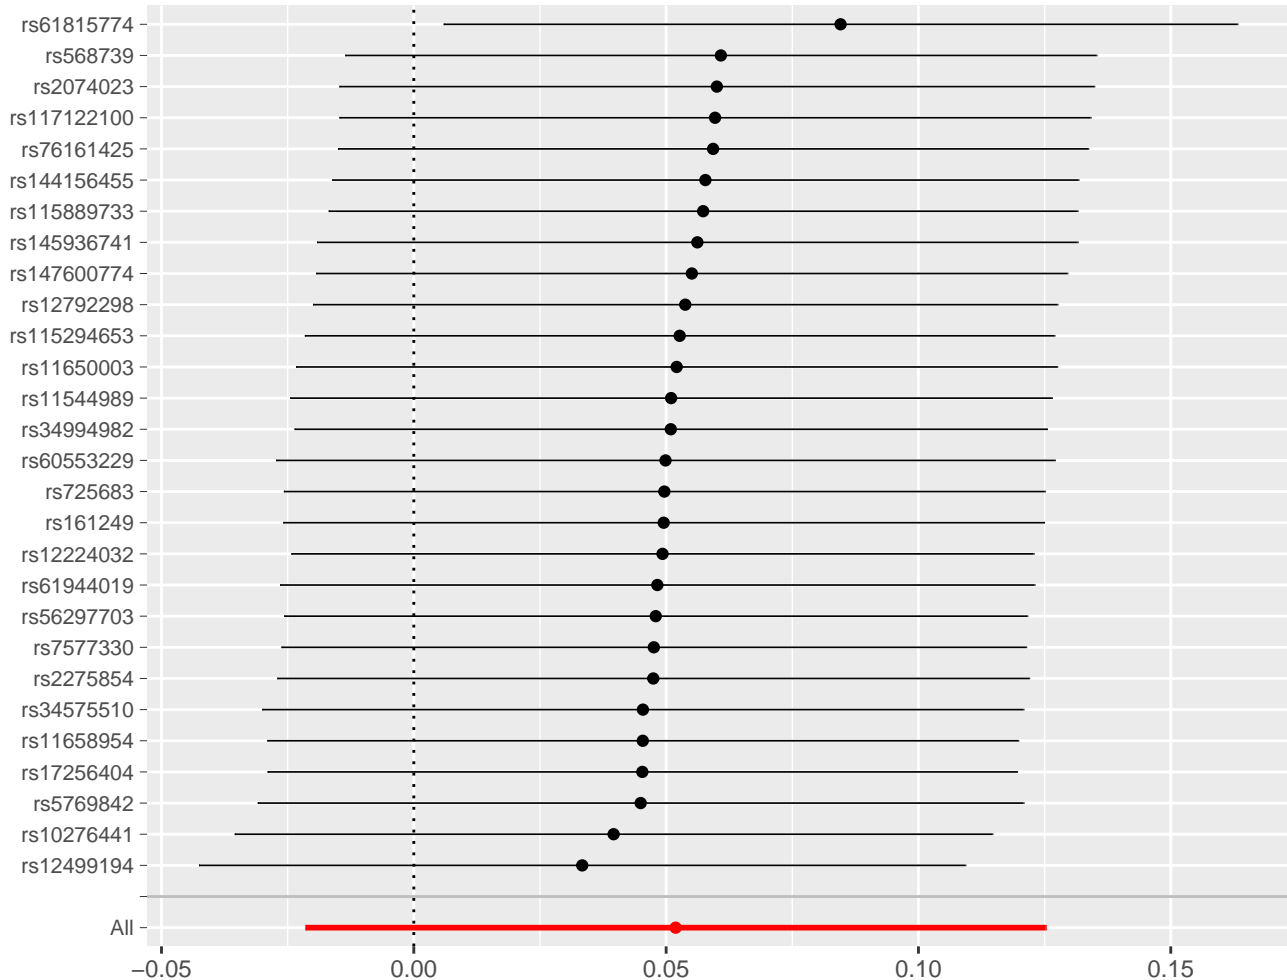

MR leave-one-out sensitivity analysis for 'CD8br NKT %T cell' on 'Aplastic anemia'

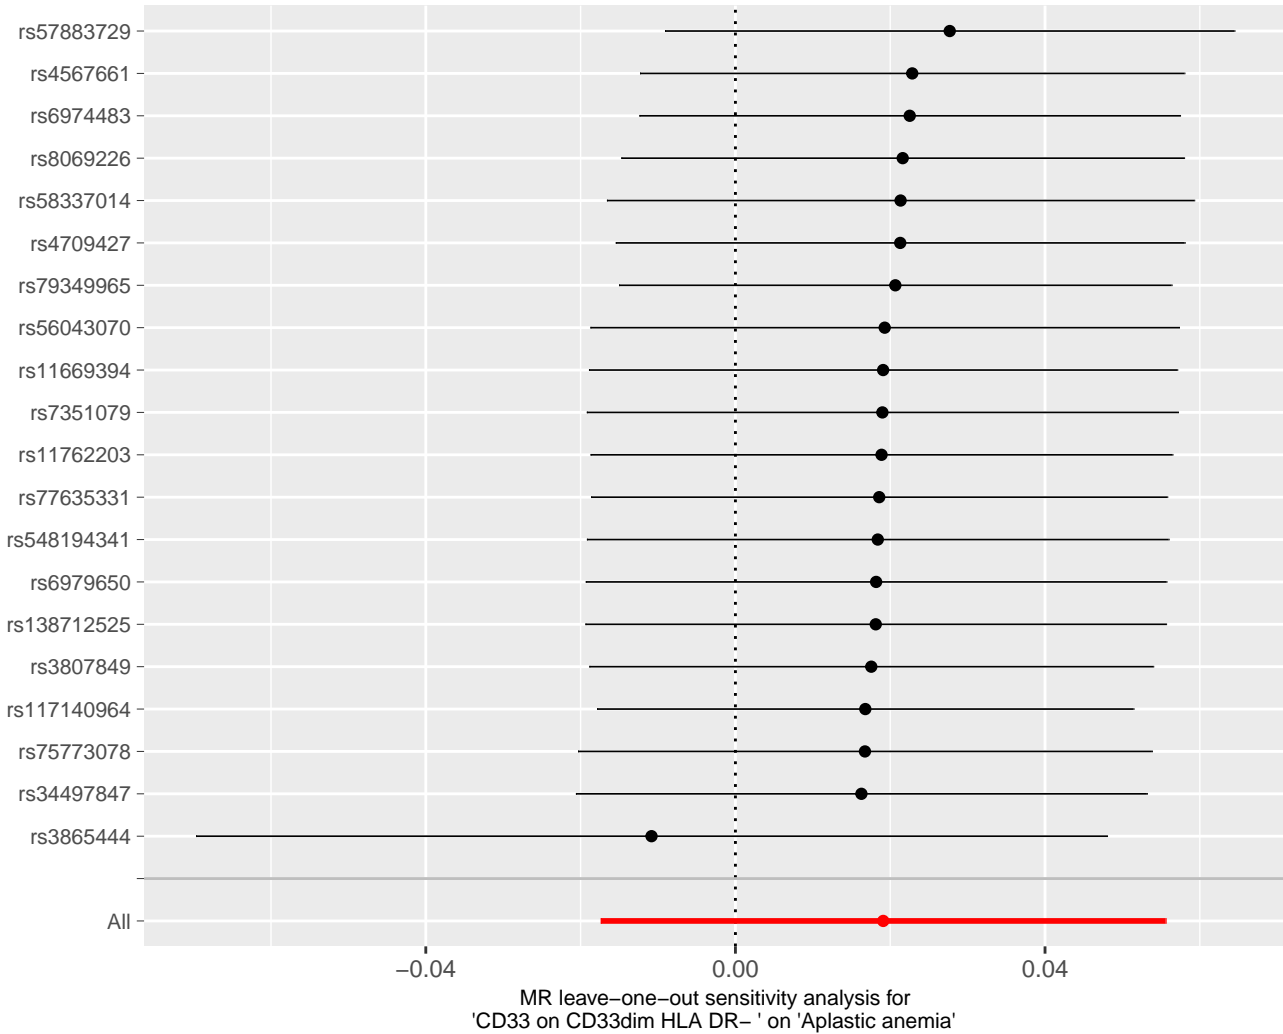

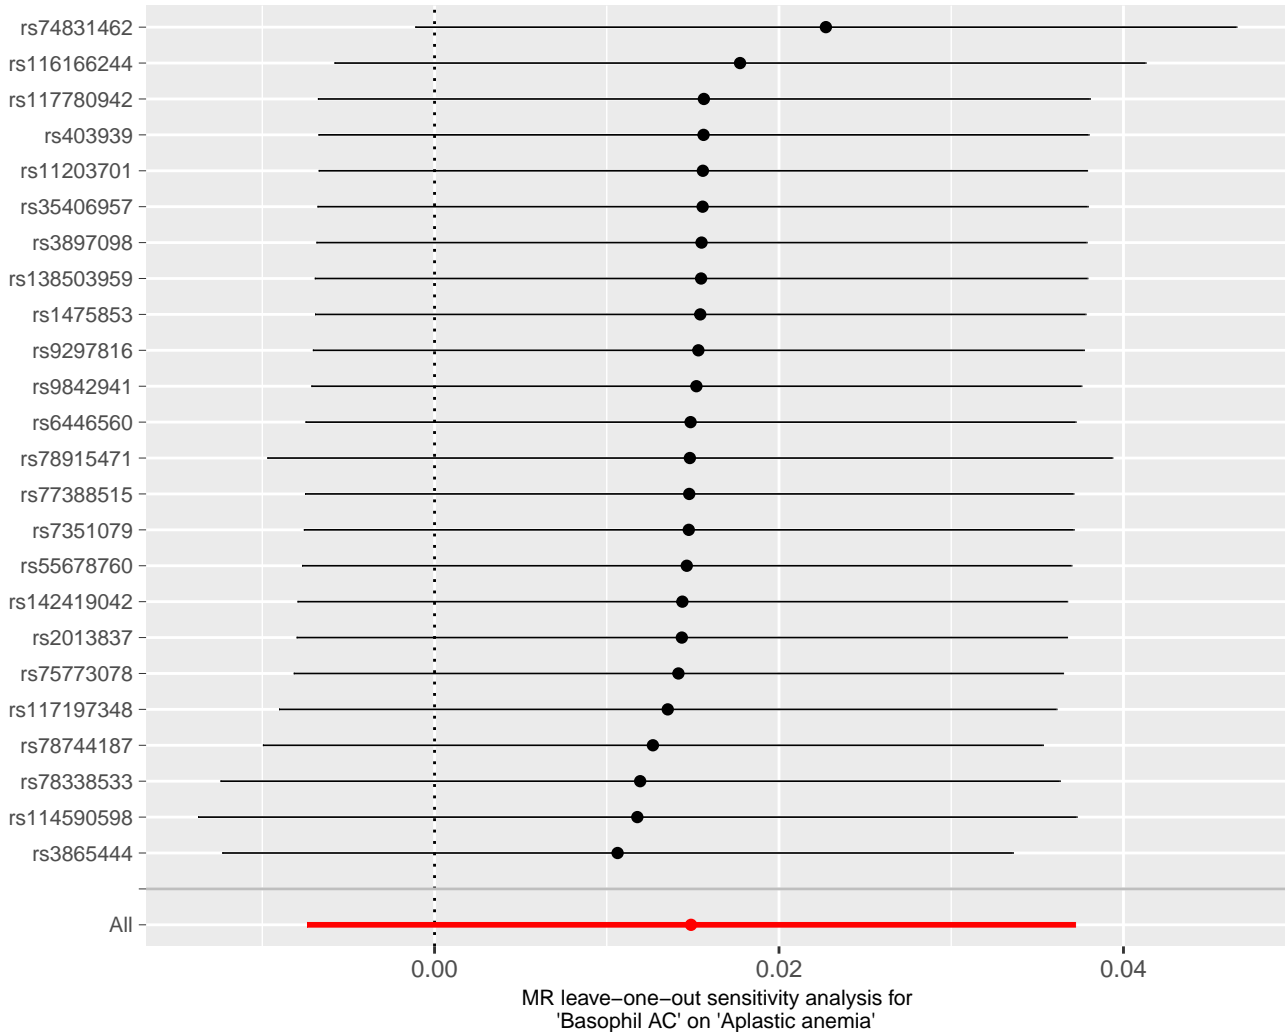

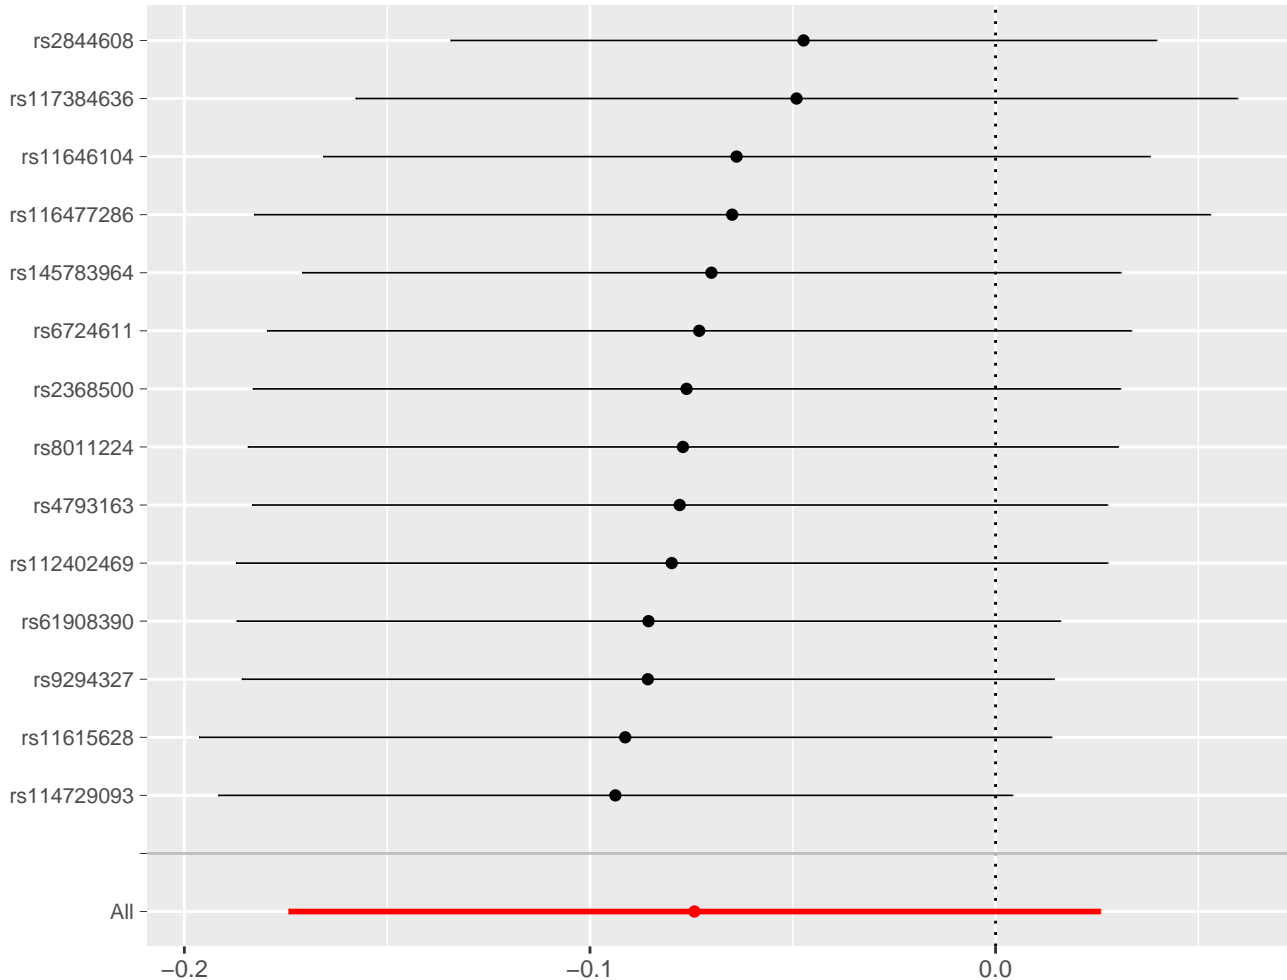

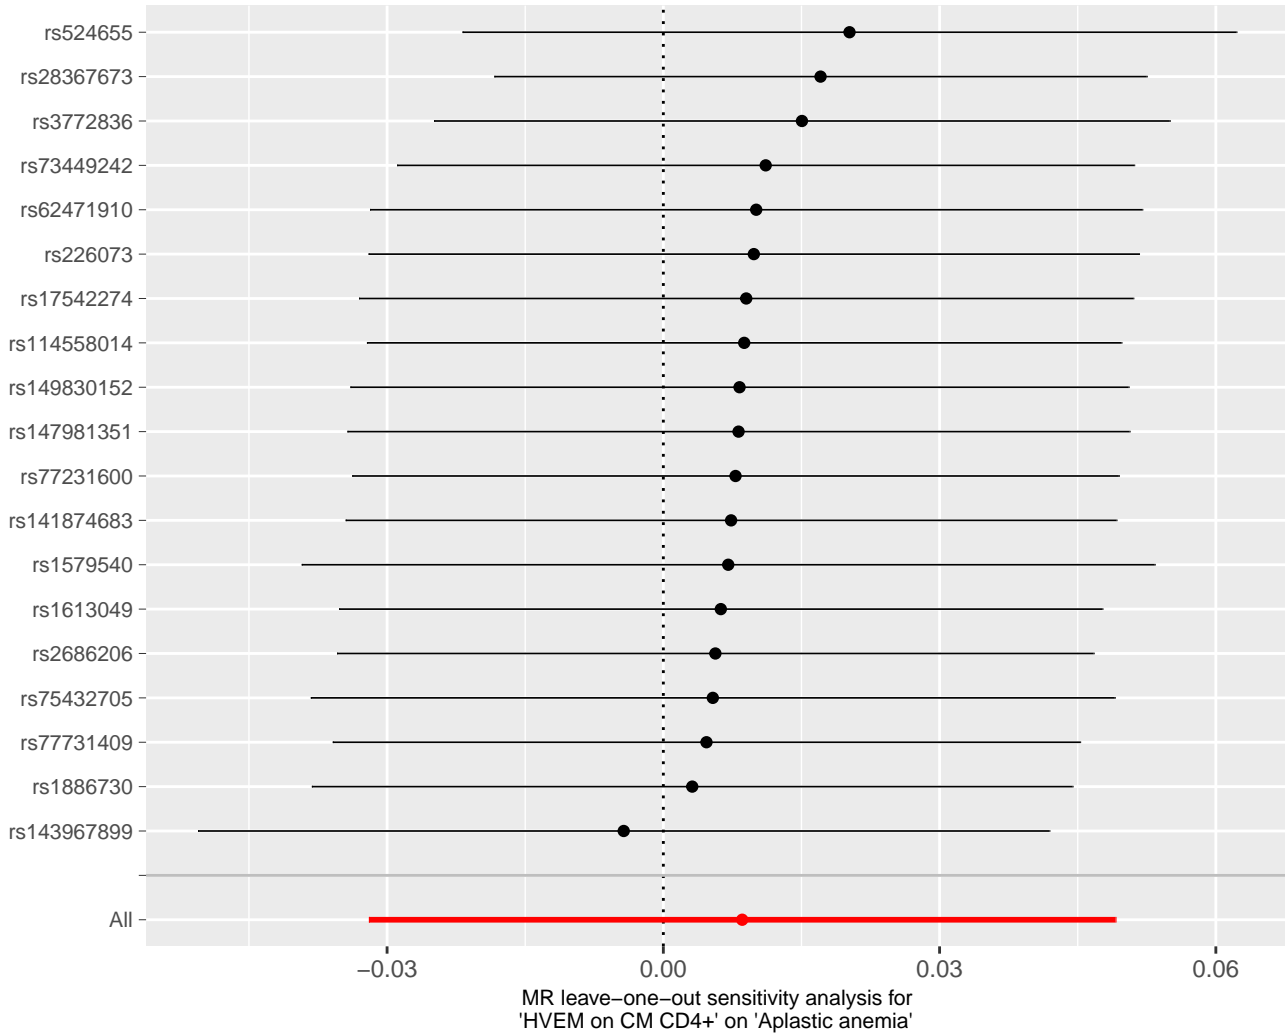

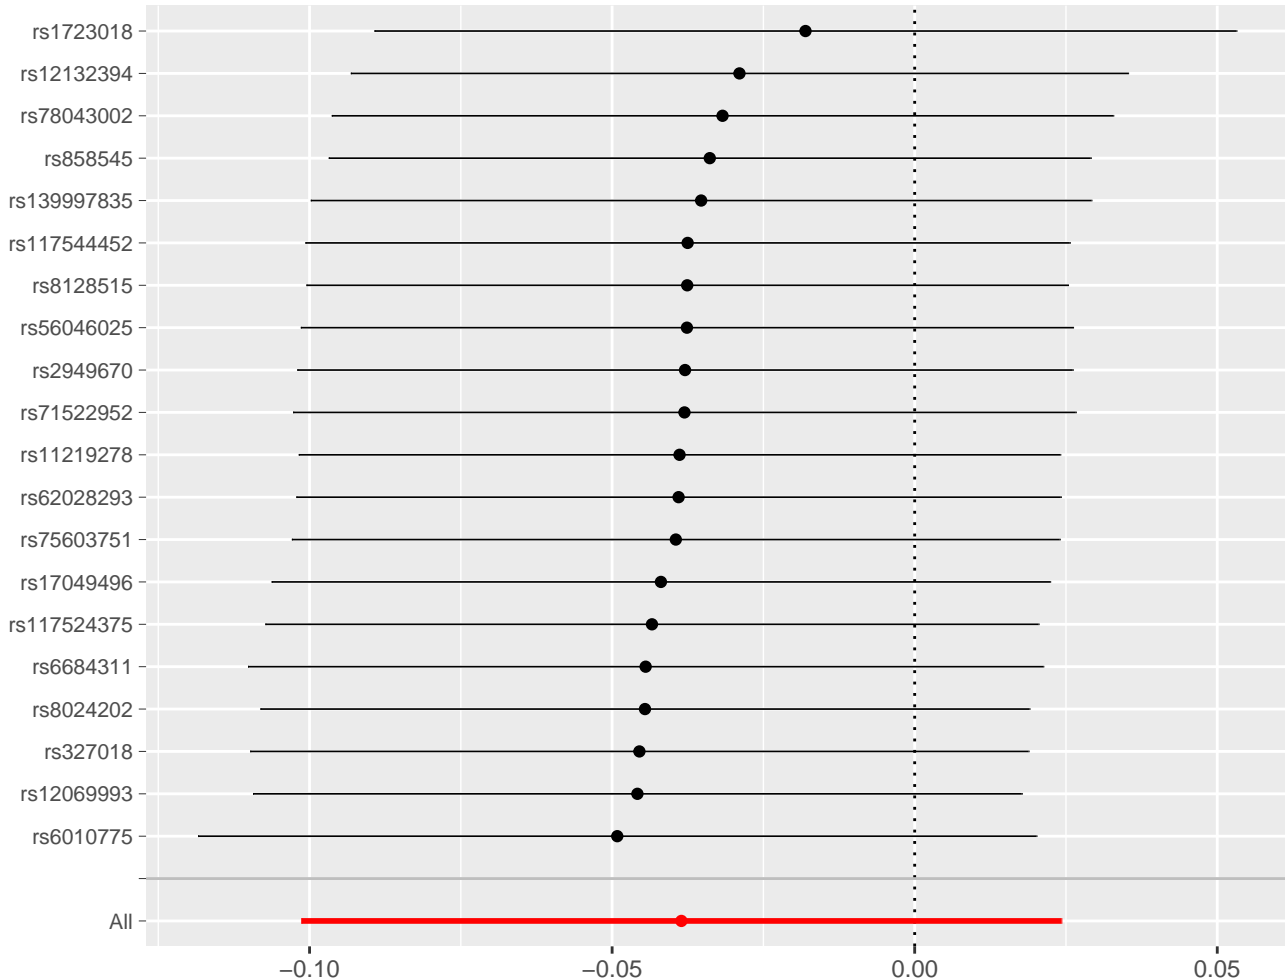

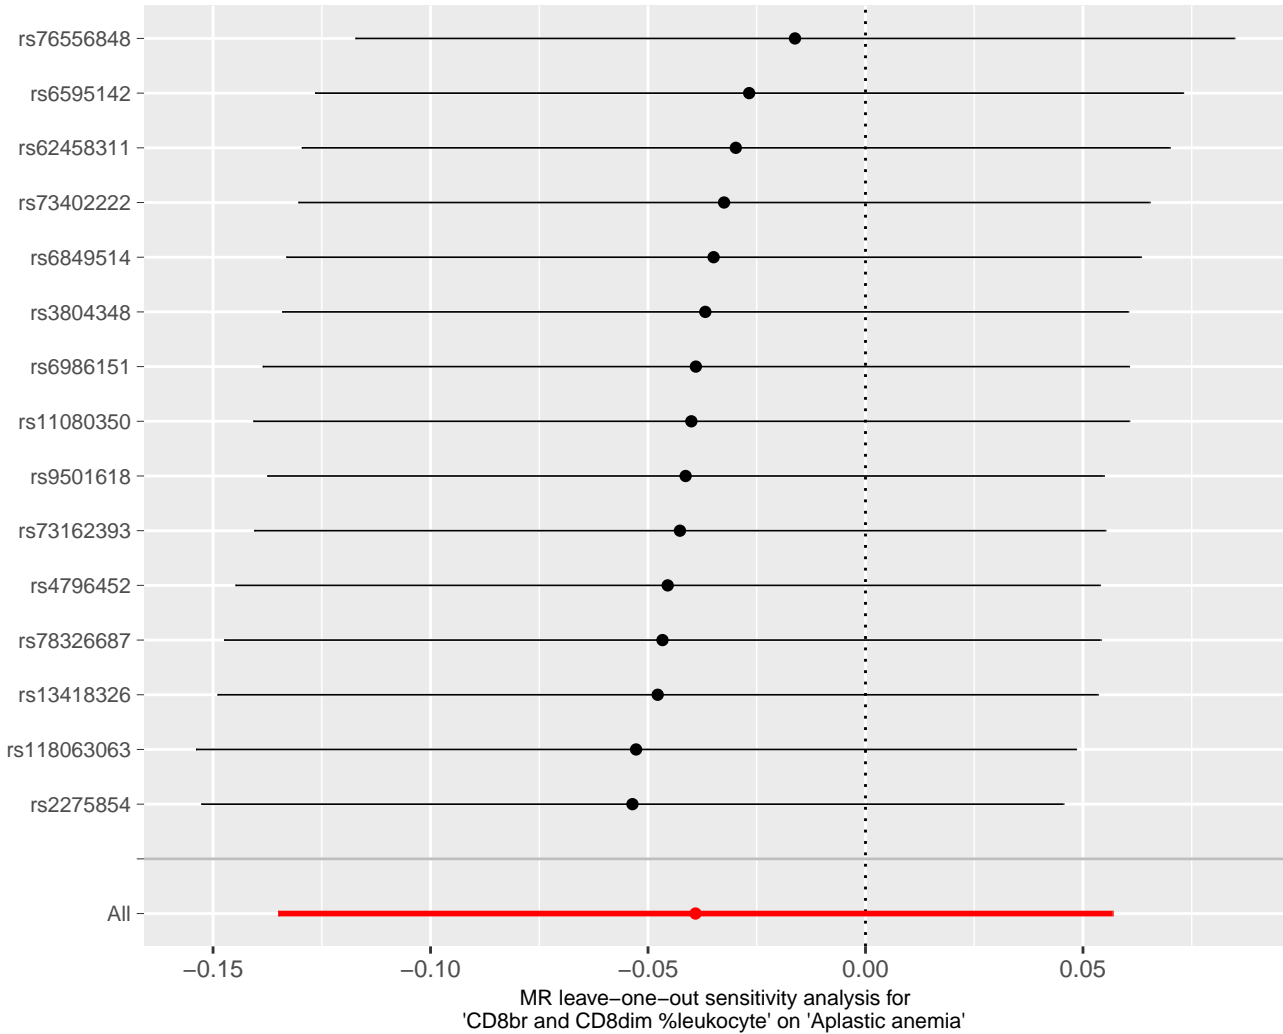

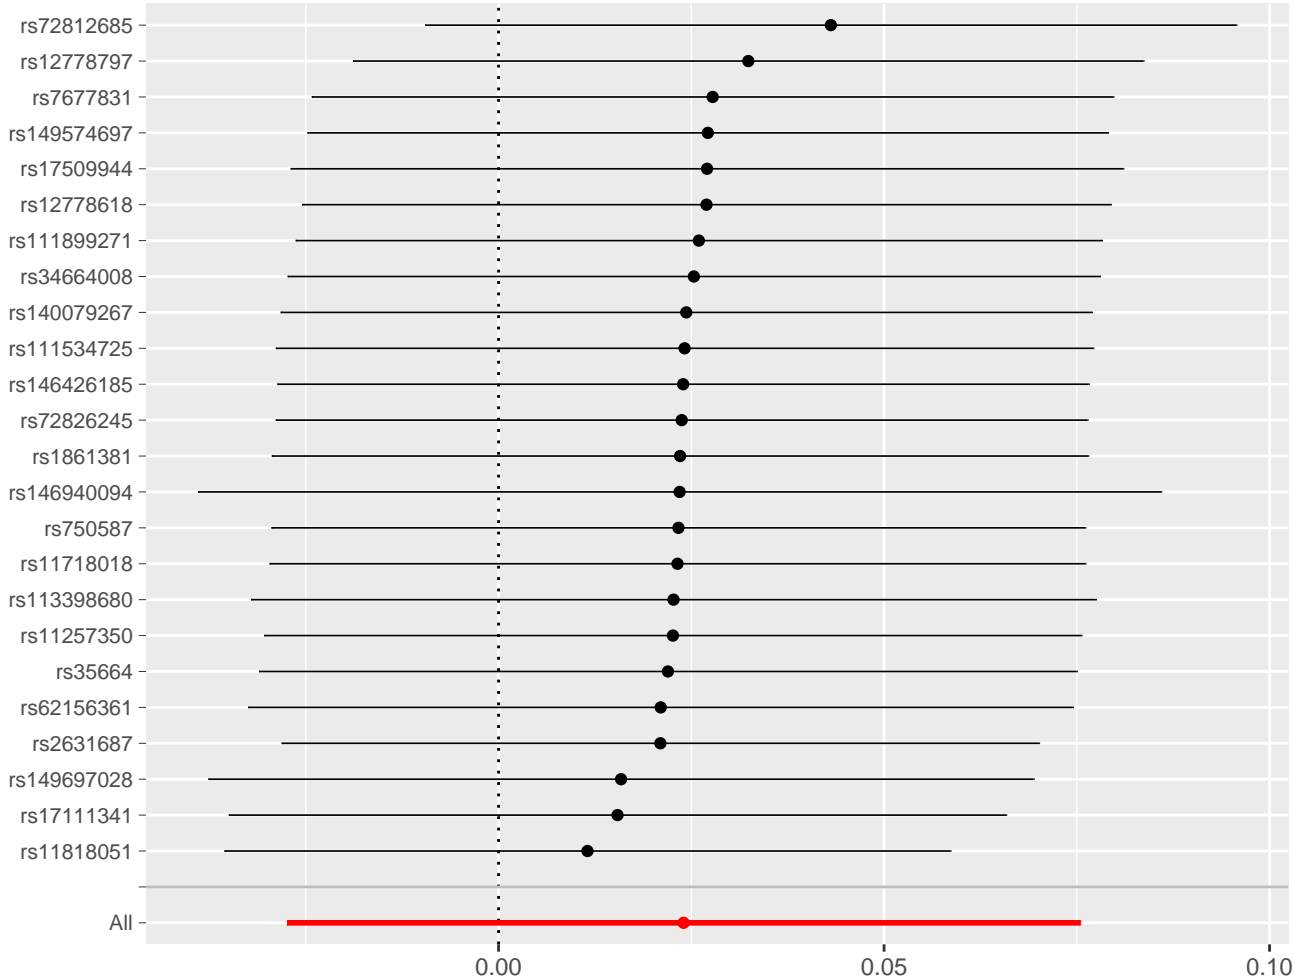

MR leave-one-out sensitivity analysis for 'CD39+ CD8br AC' on 'Aplastic anemia'



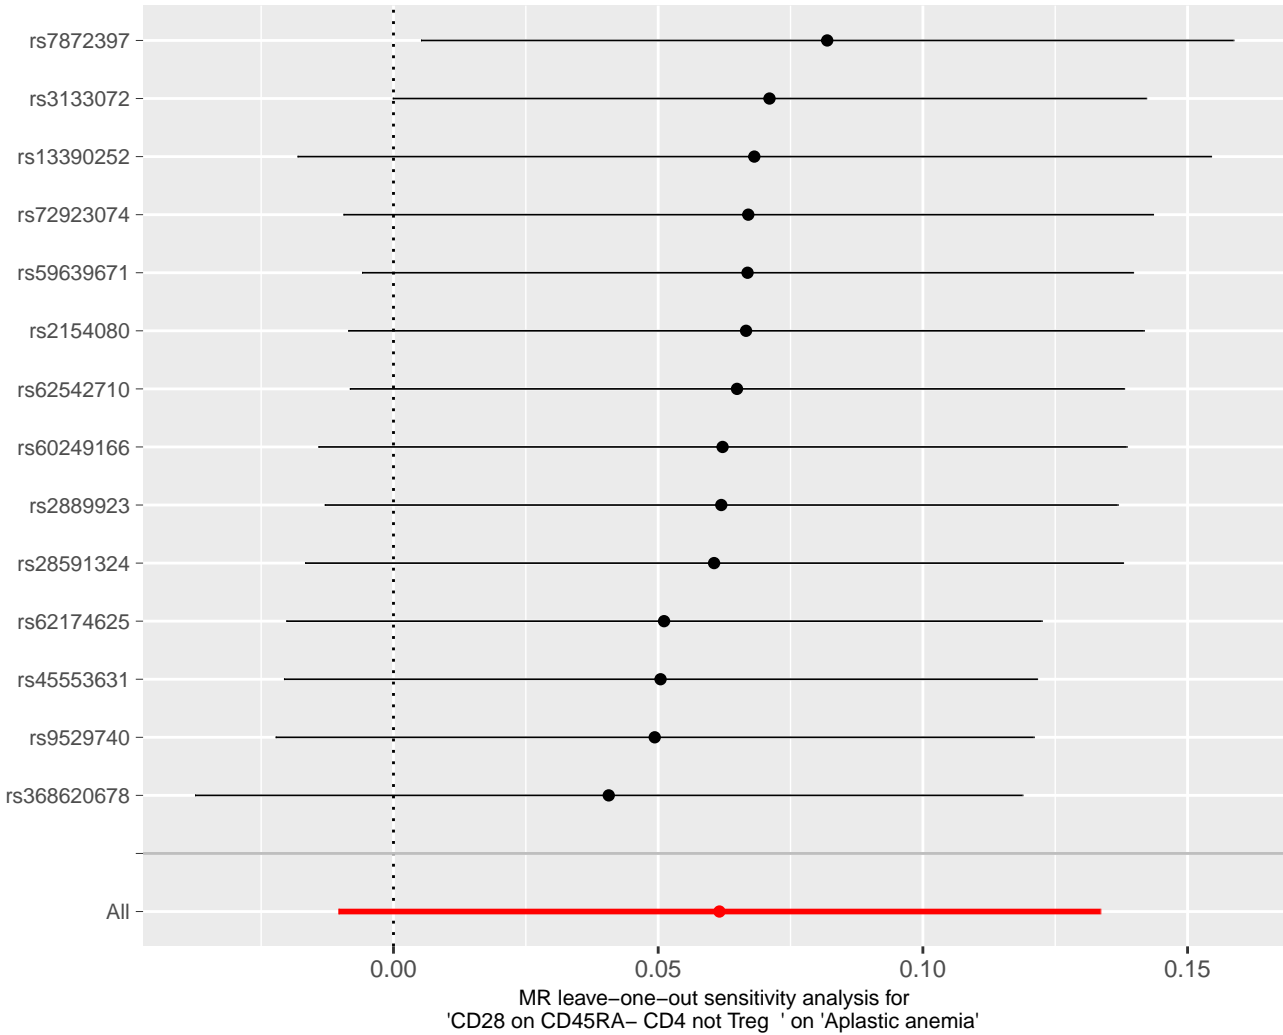

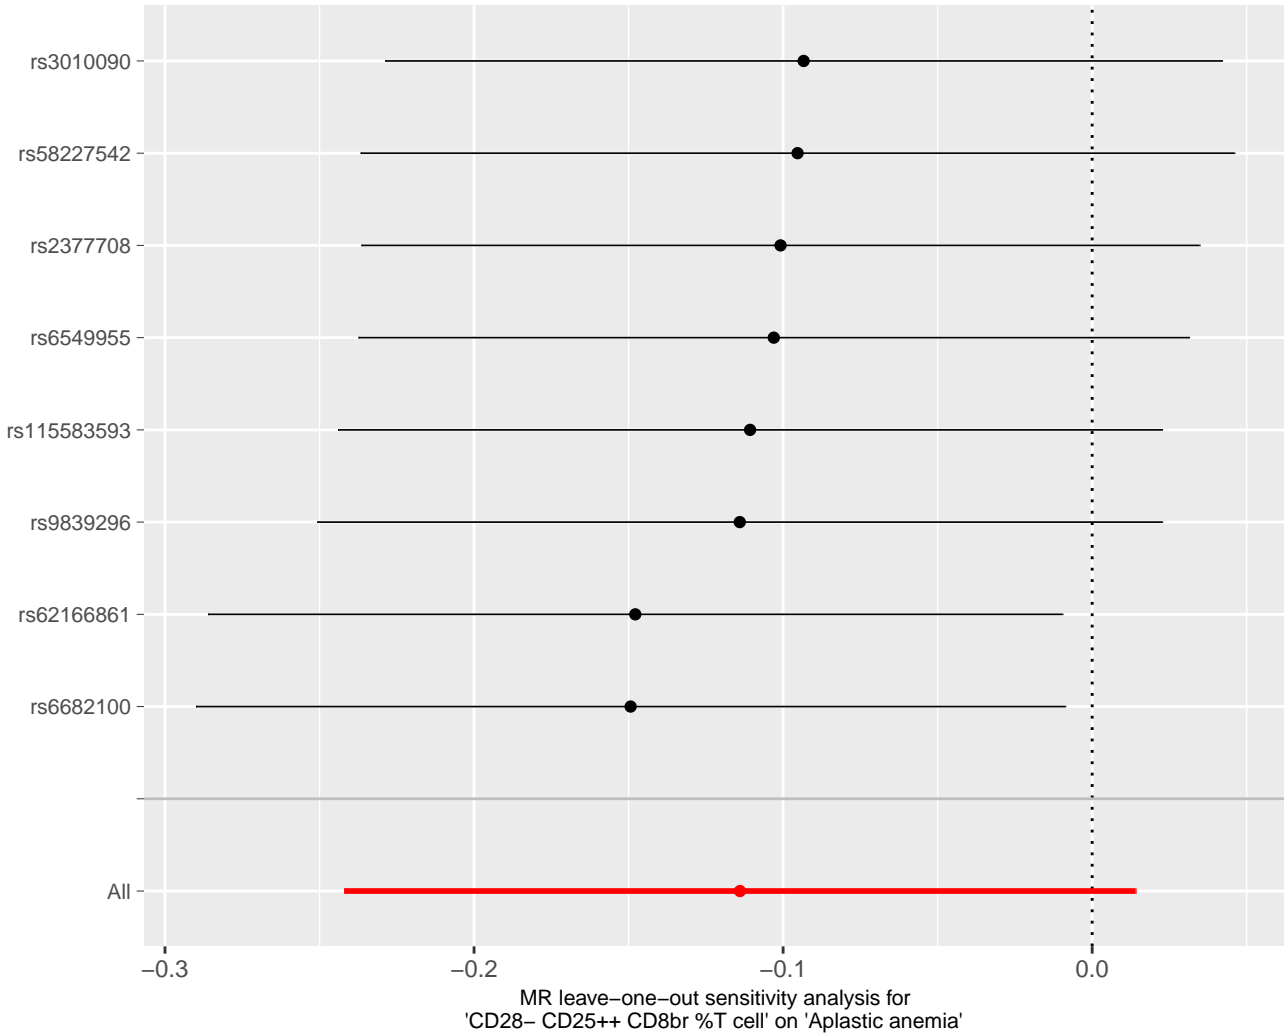

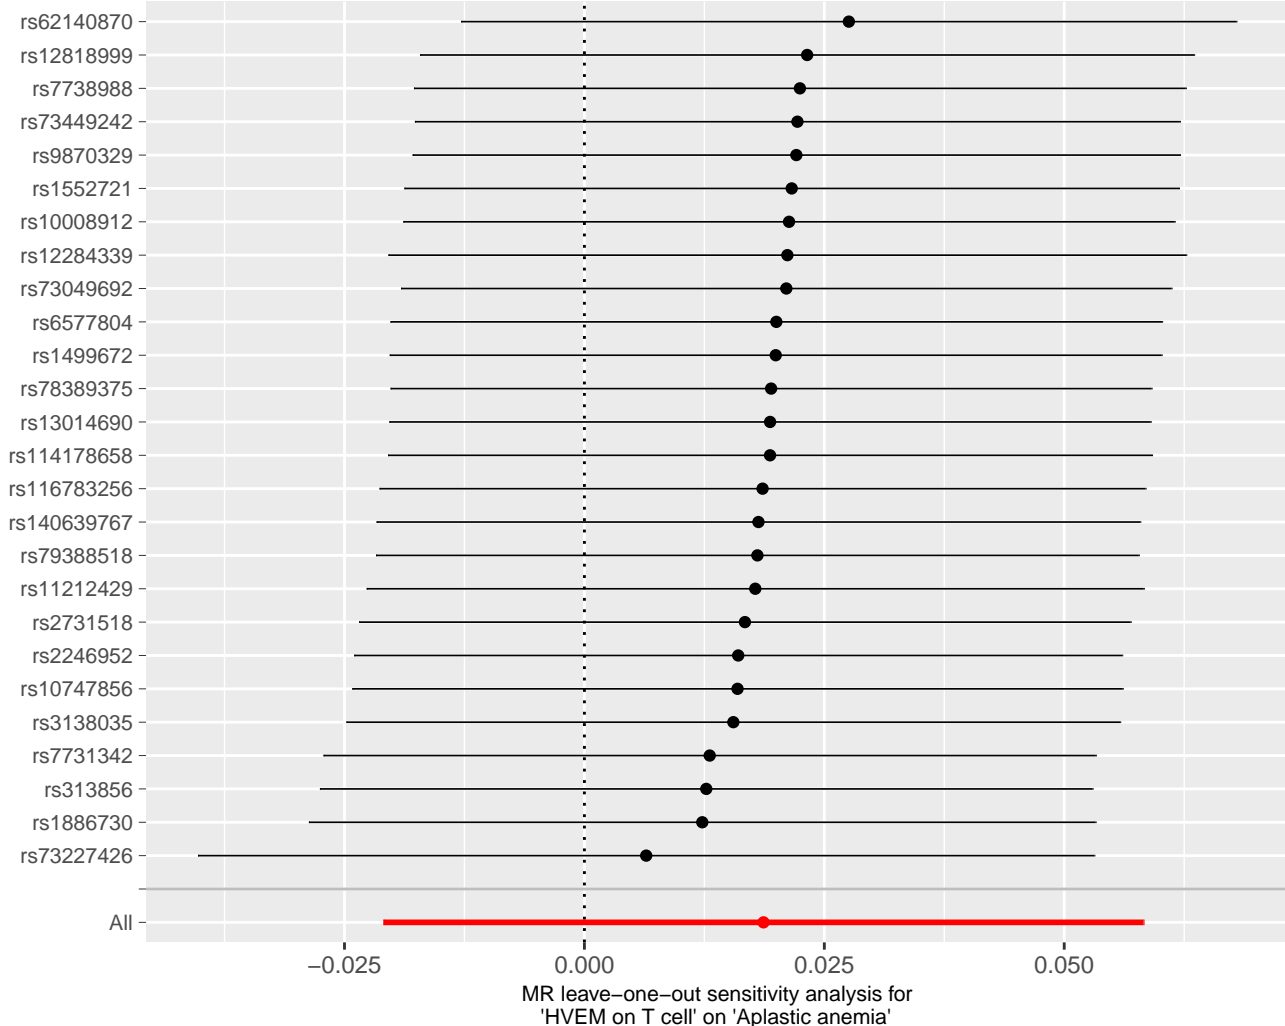

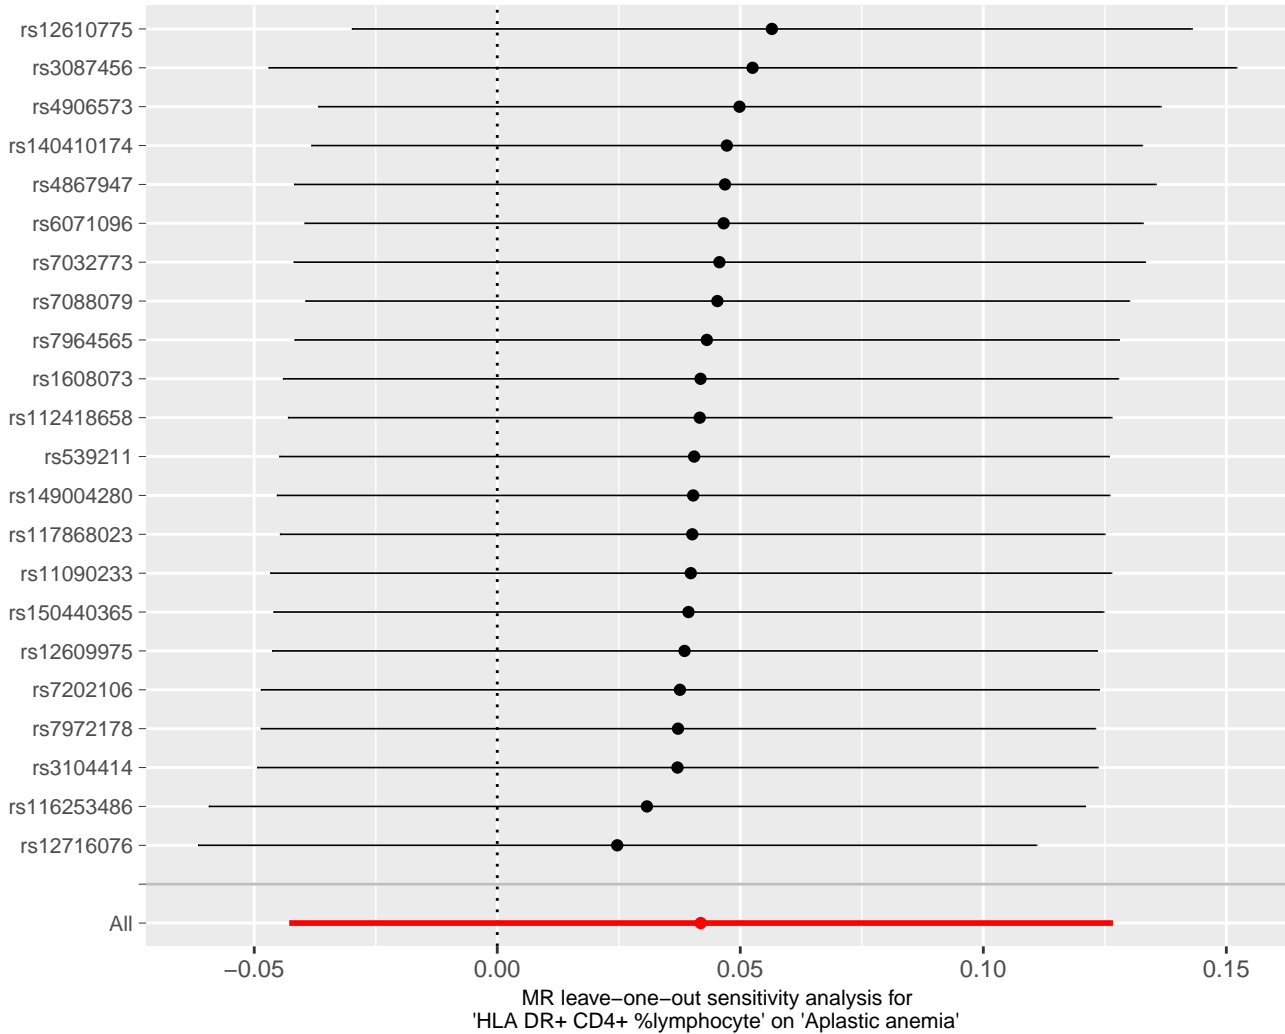

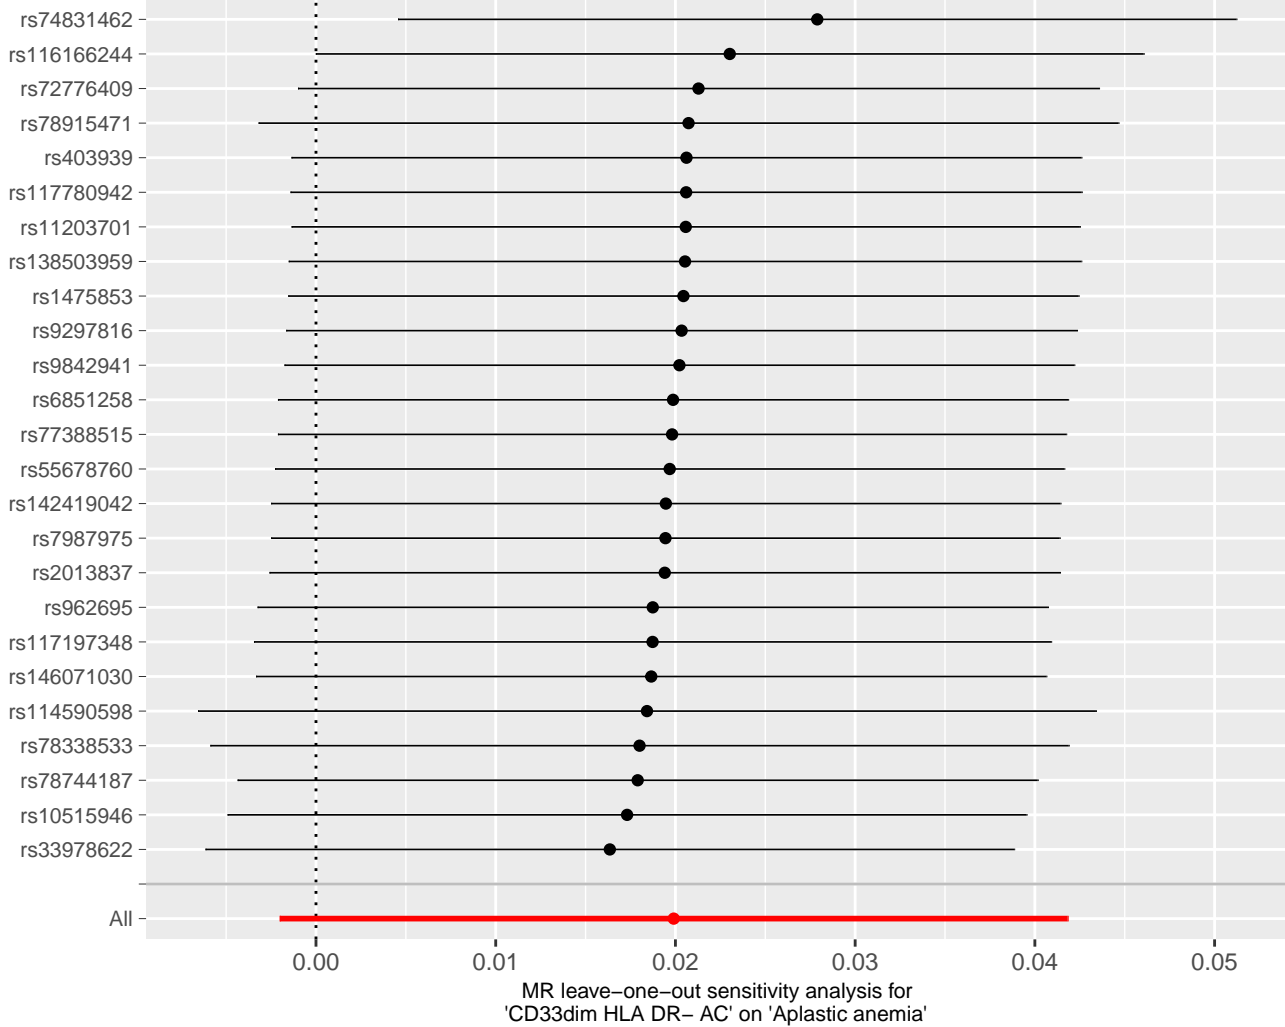

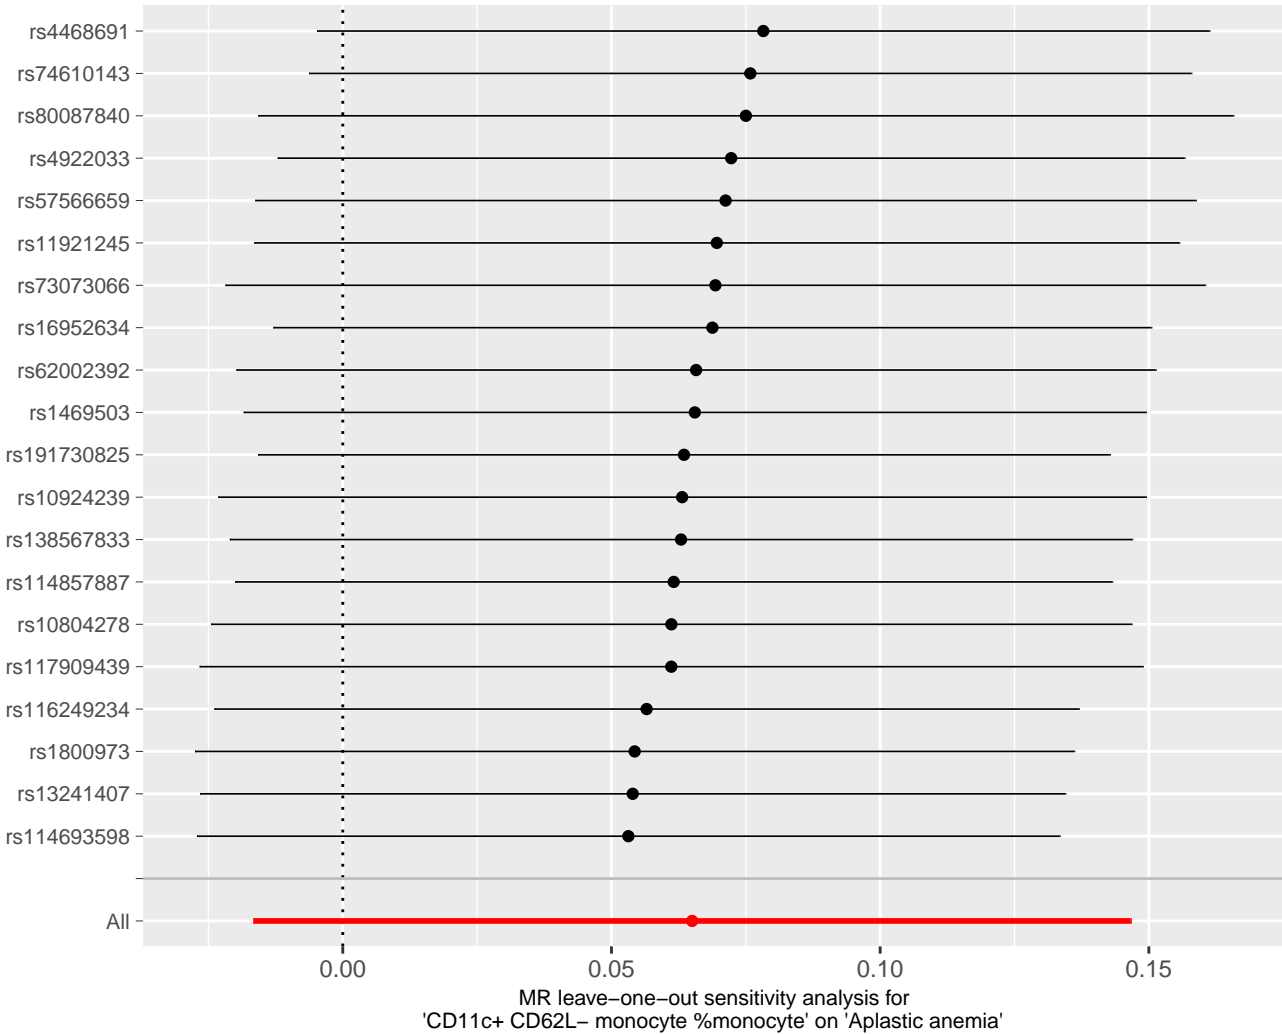

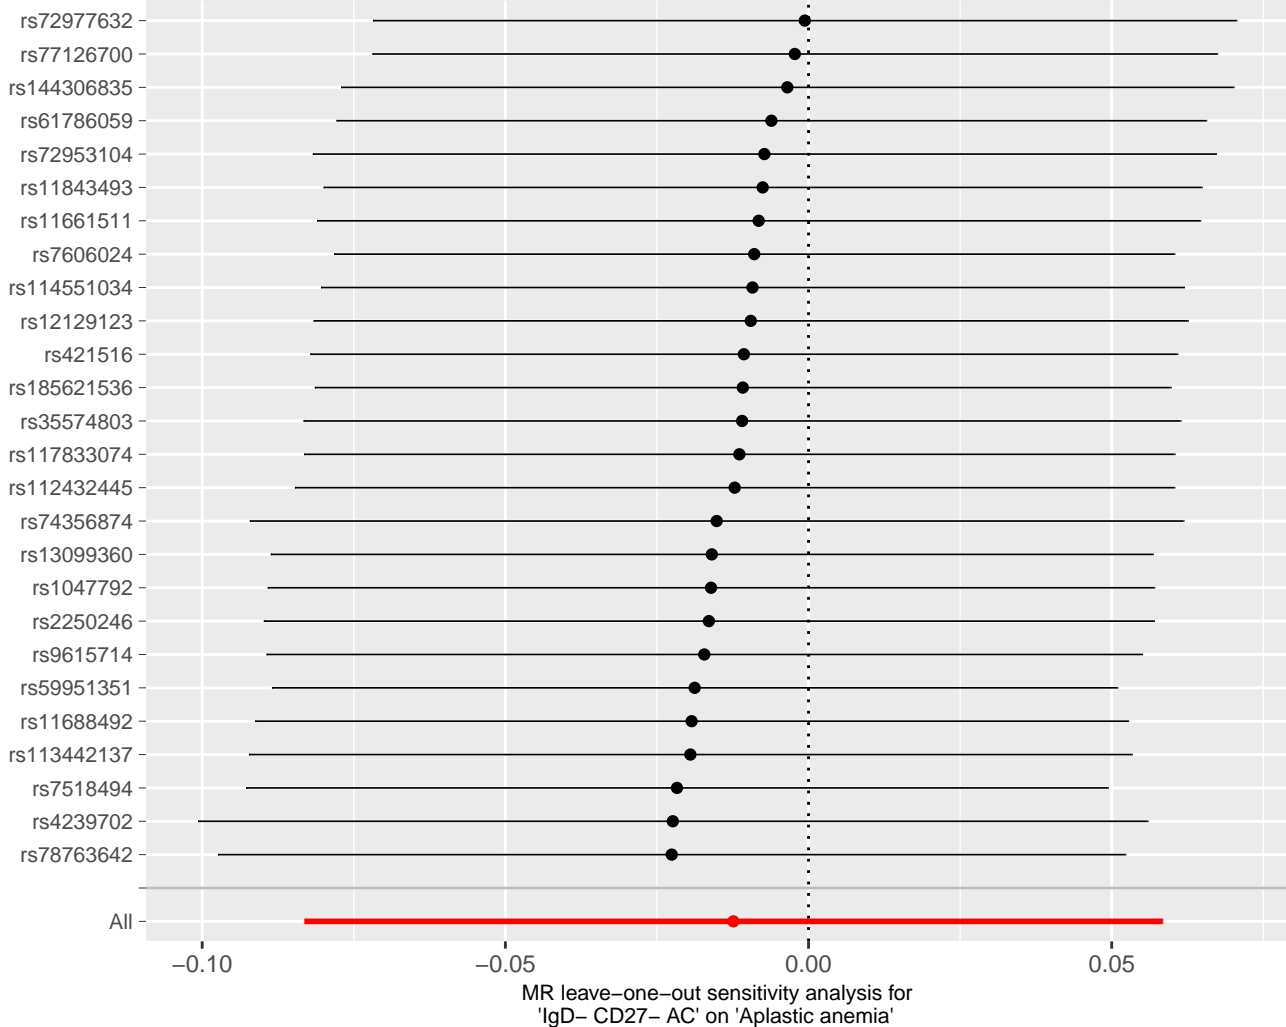

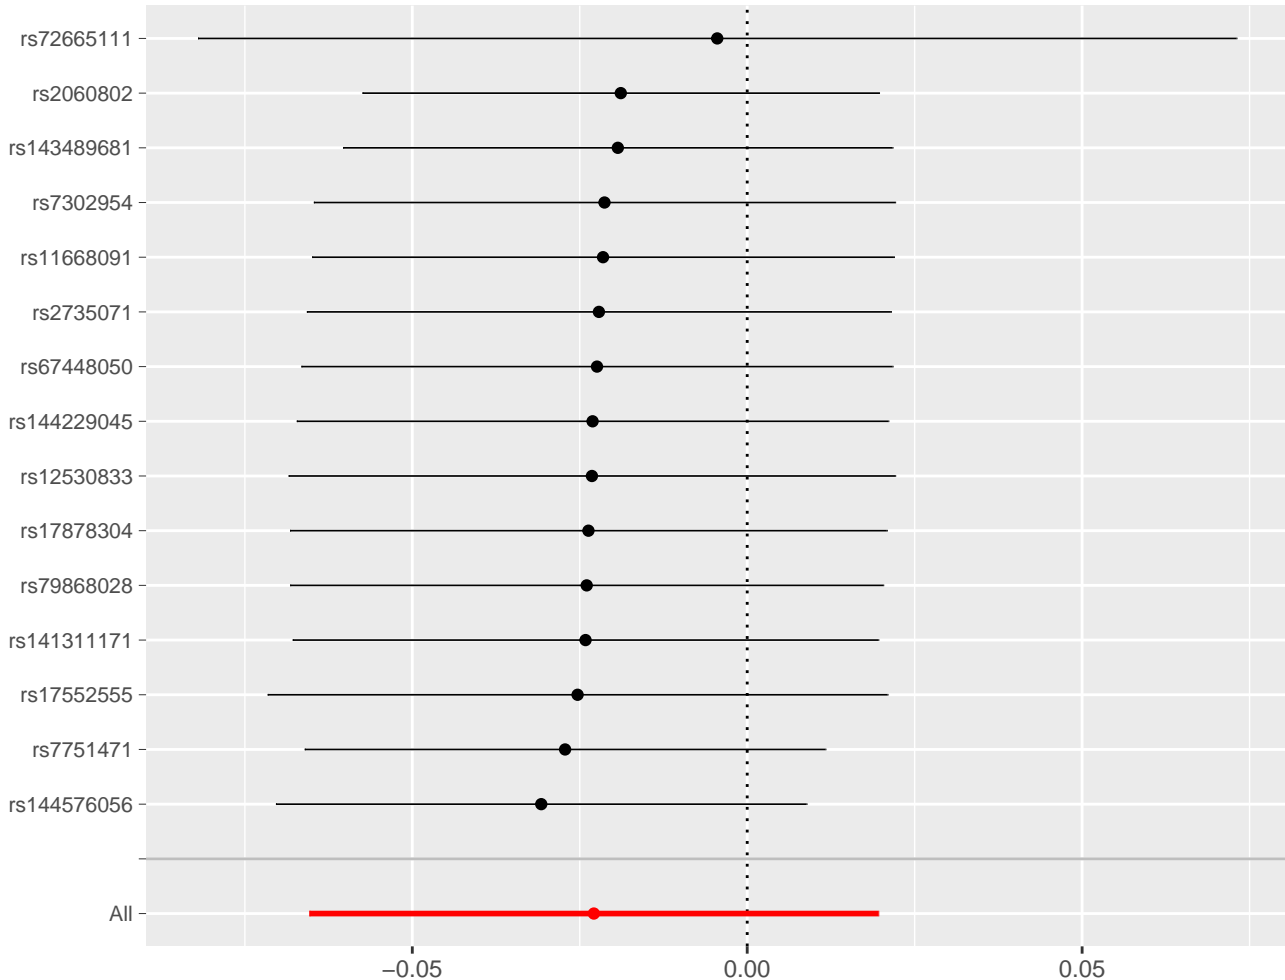



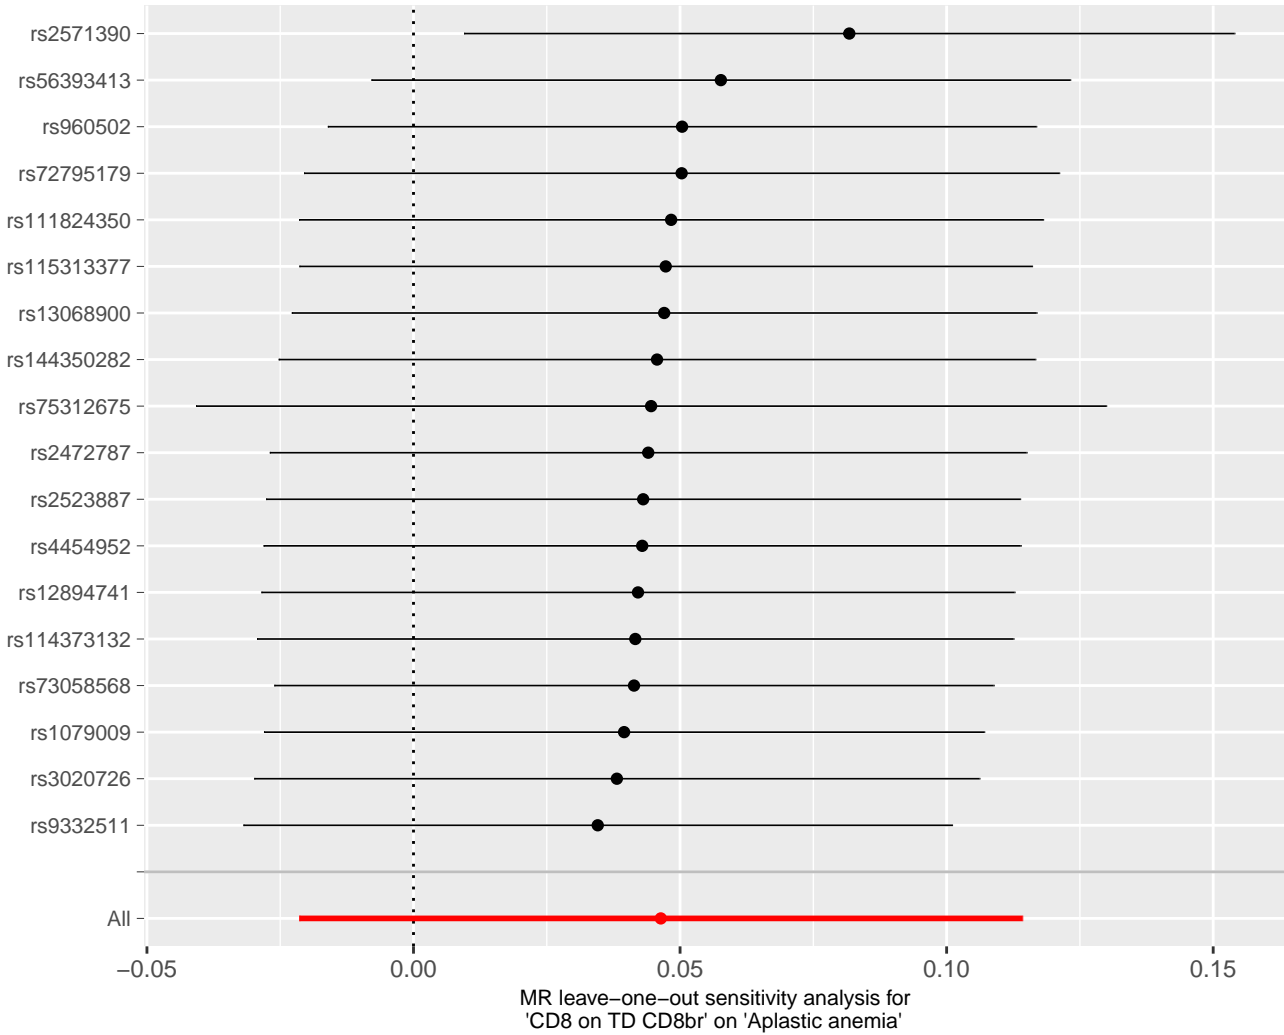

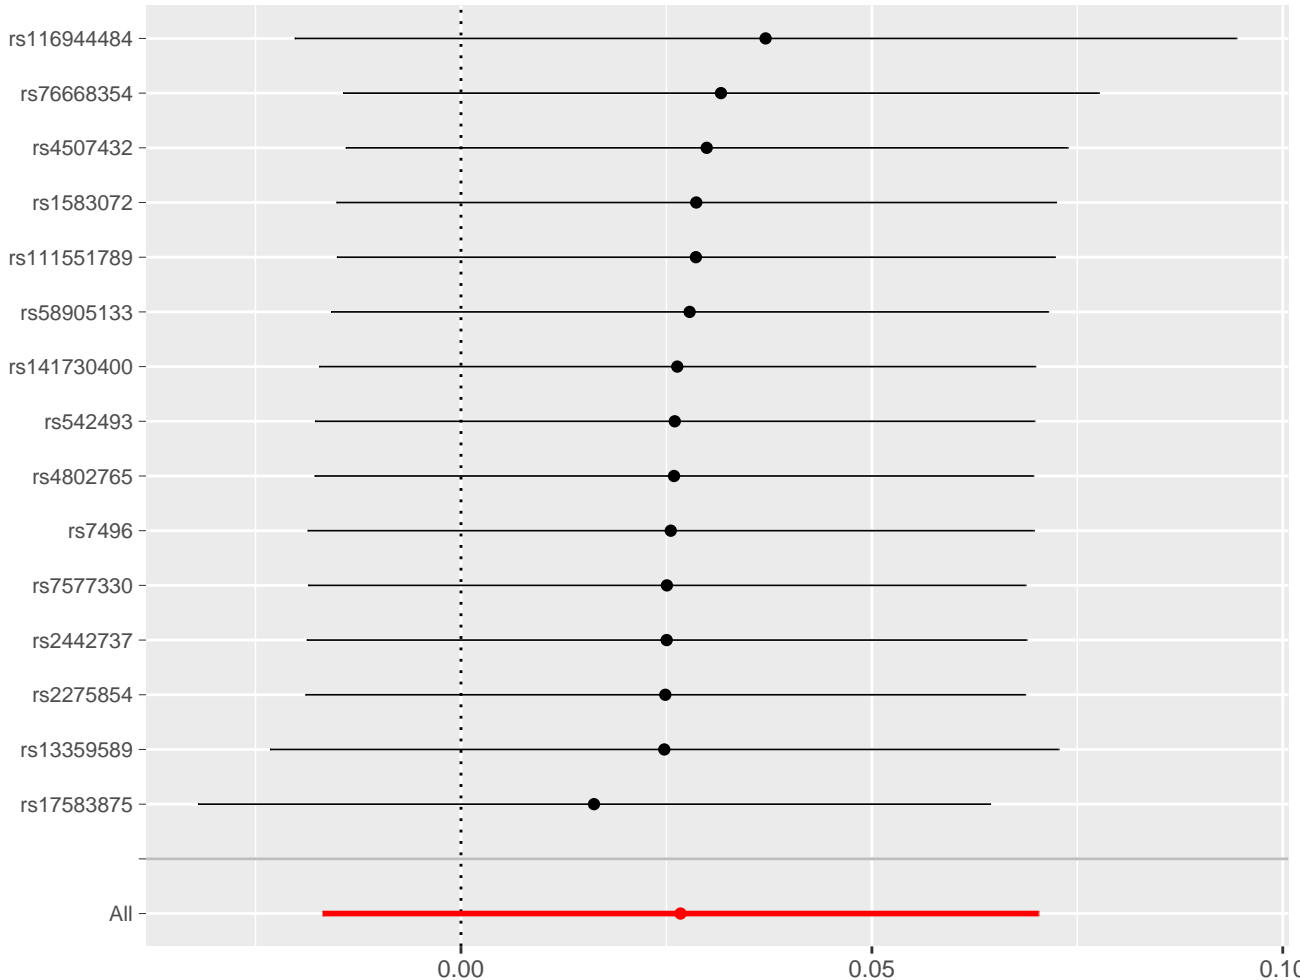

MR leave-one-out sensitivity analysis for 'EM CD8br %T cell' on 'Aplastic anemia'

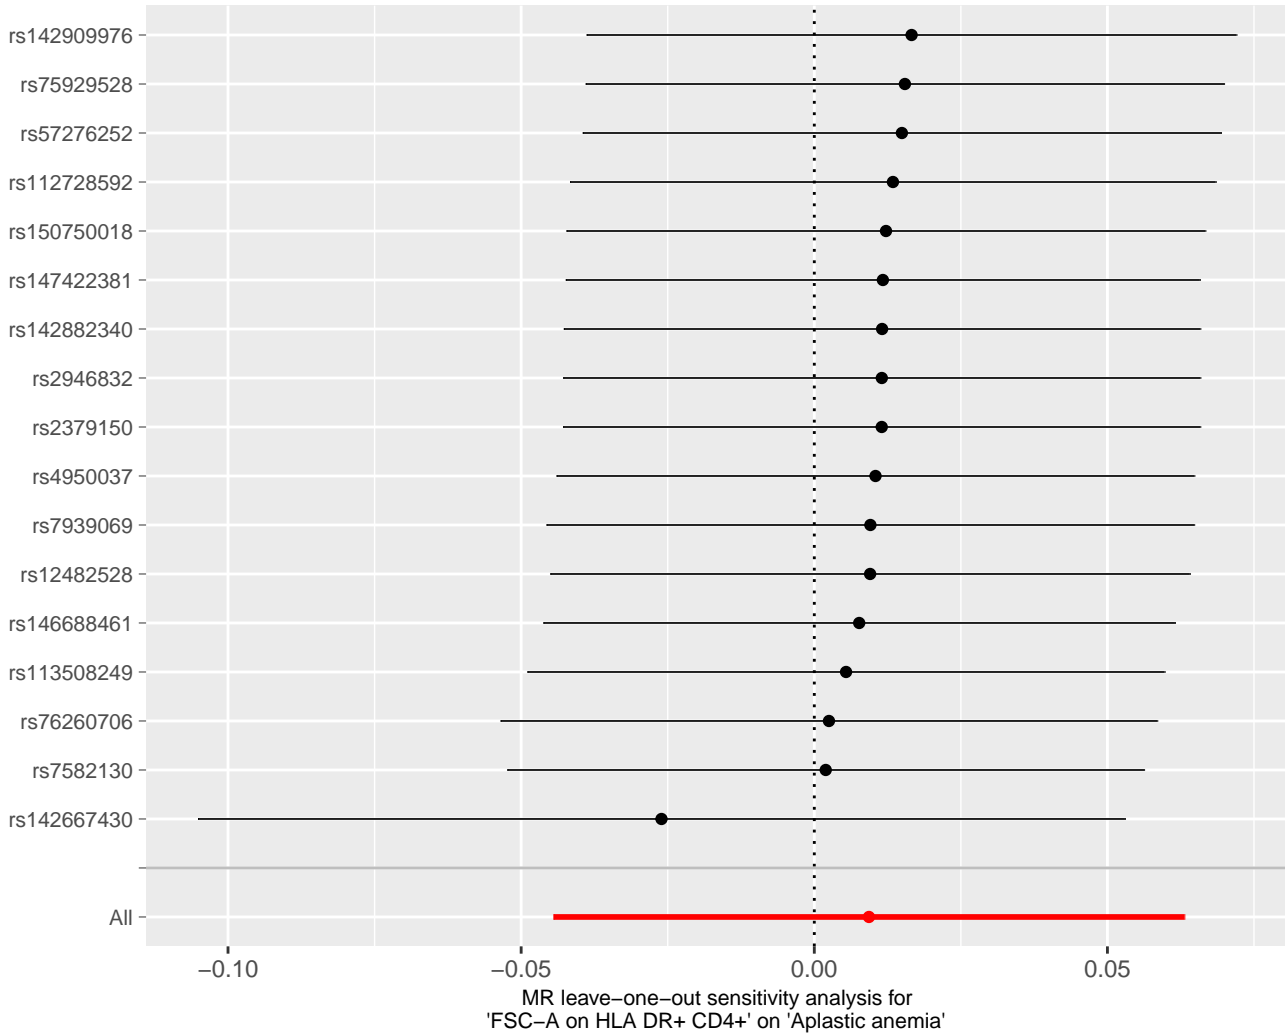

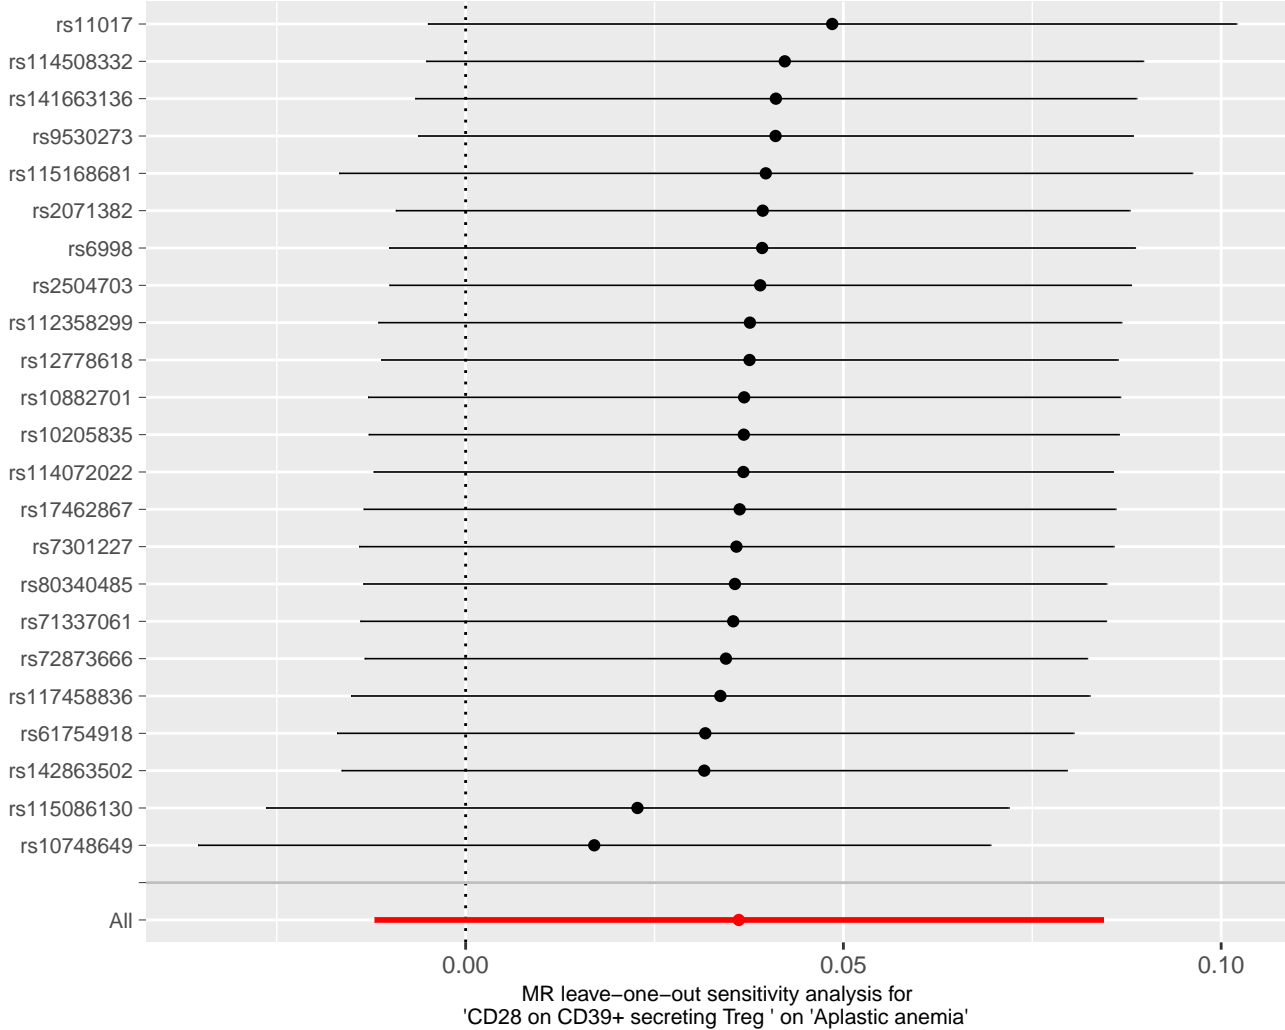

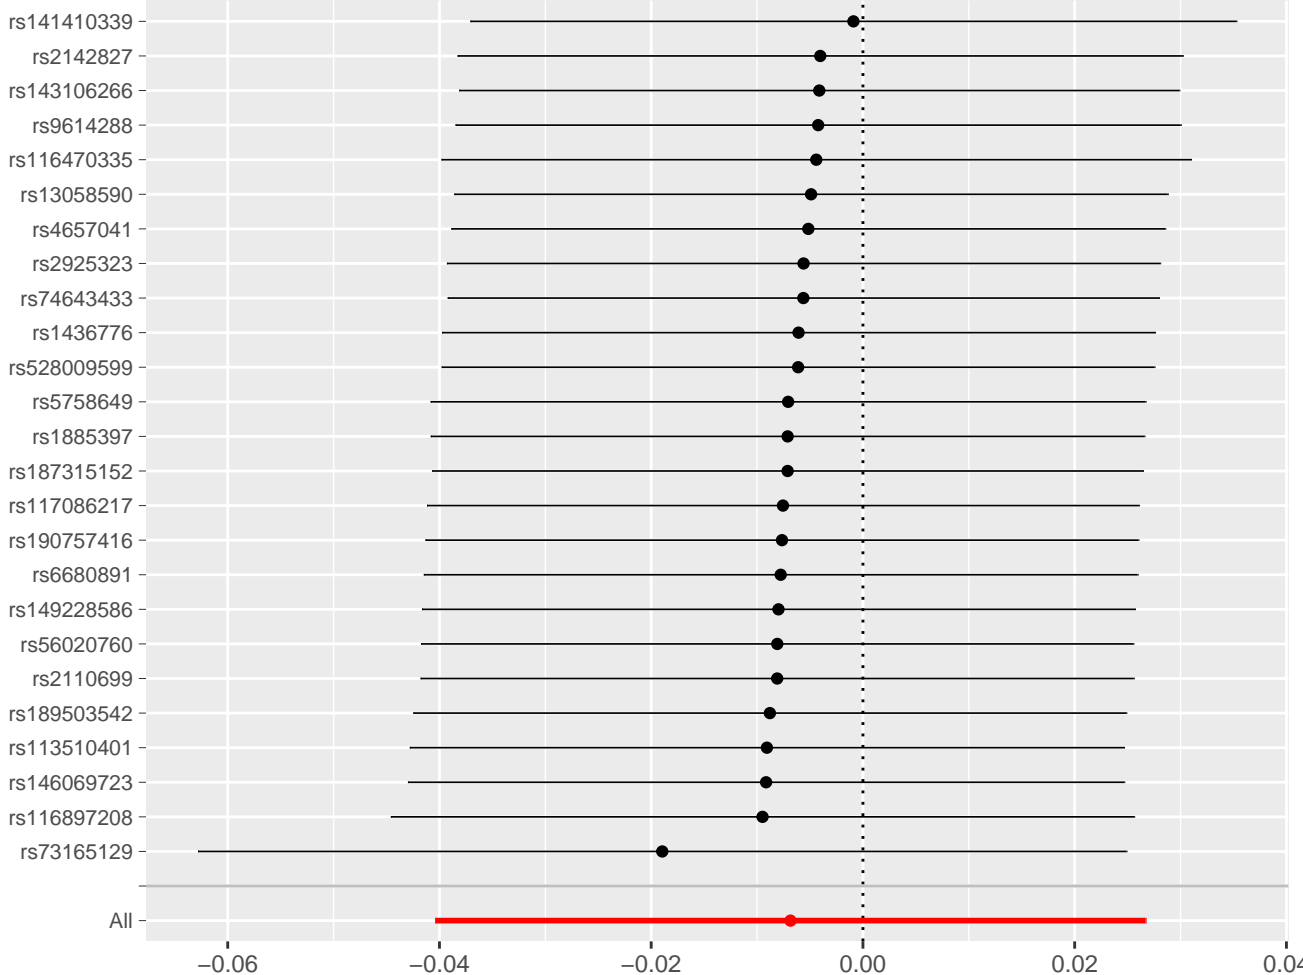

MR leave-one-out sensitivity analysis for 'BAFF-R on unsw mem' on 'Aplastic anemia'

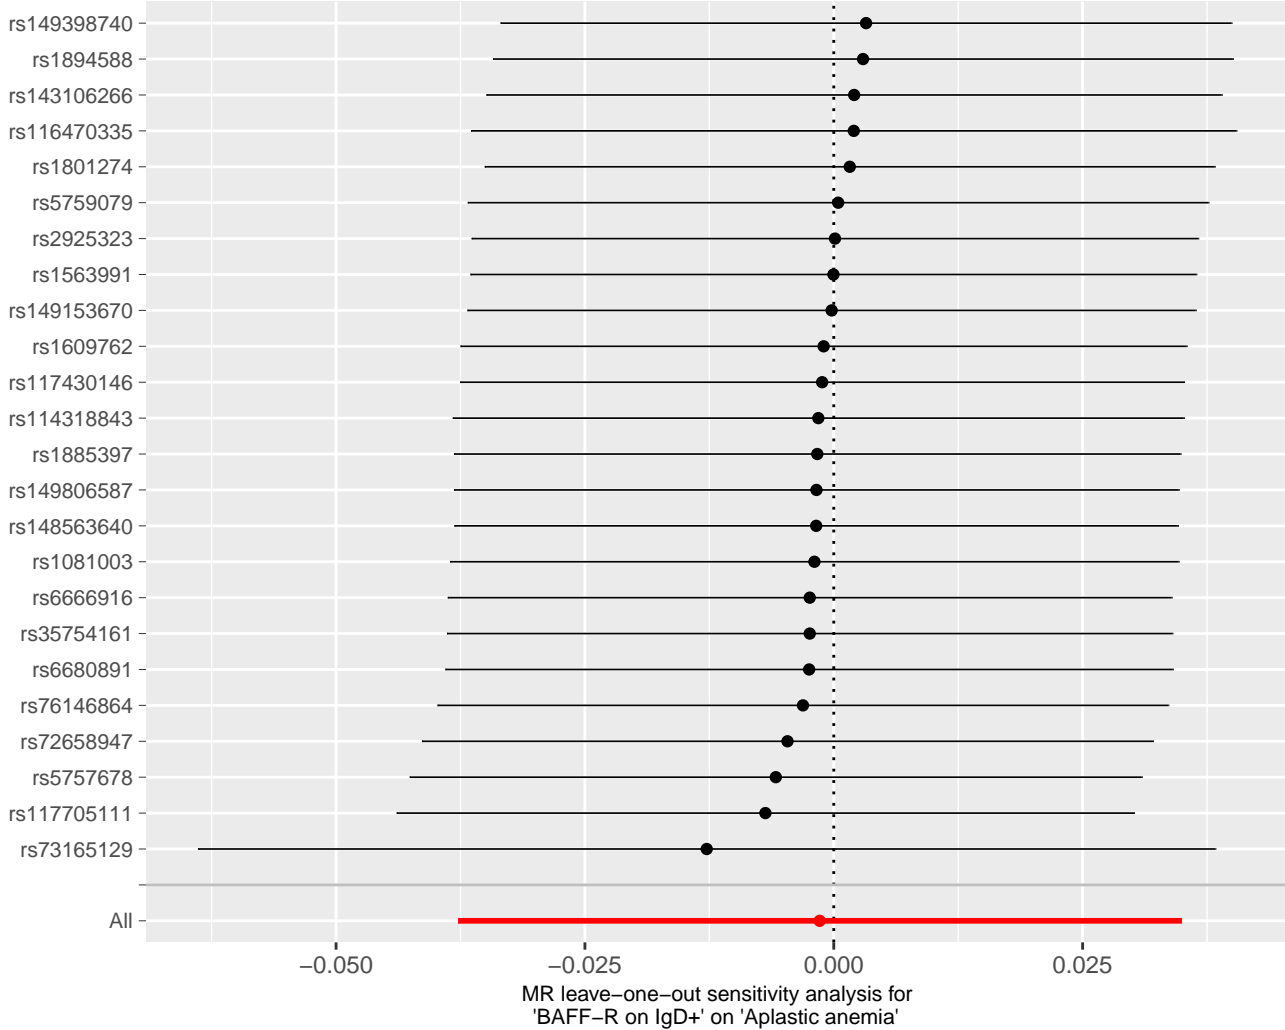

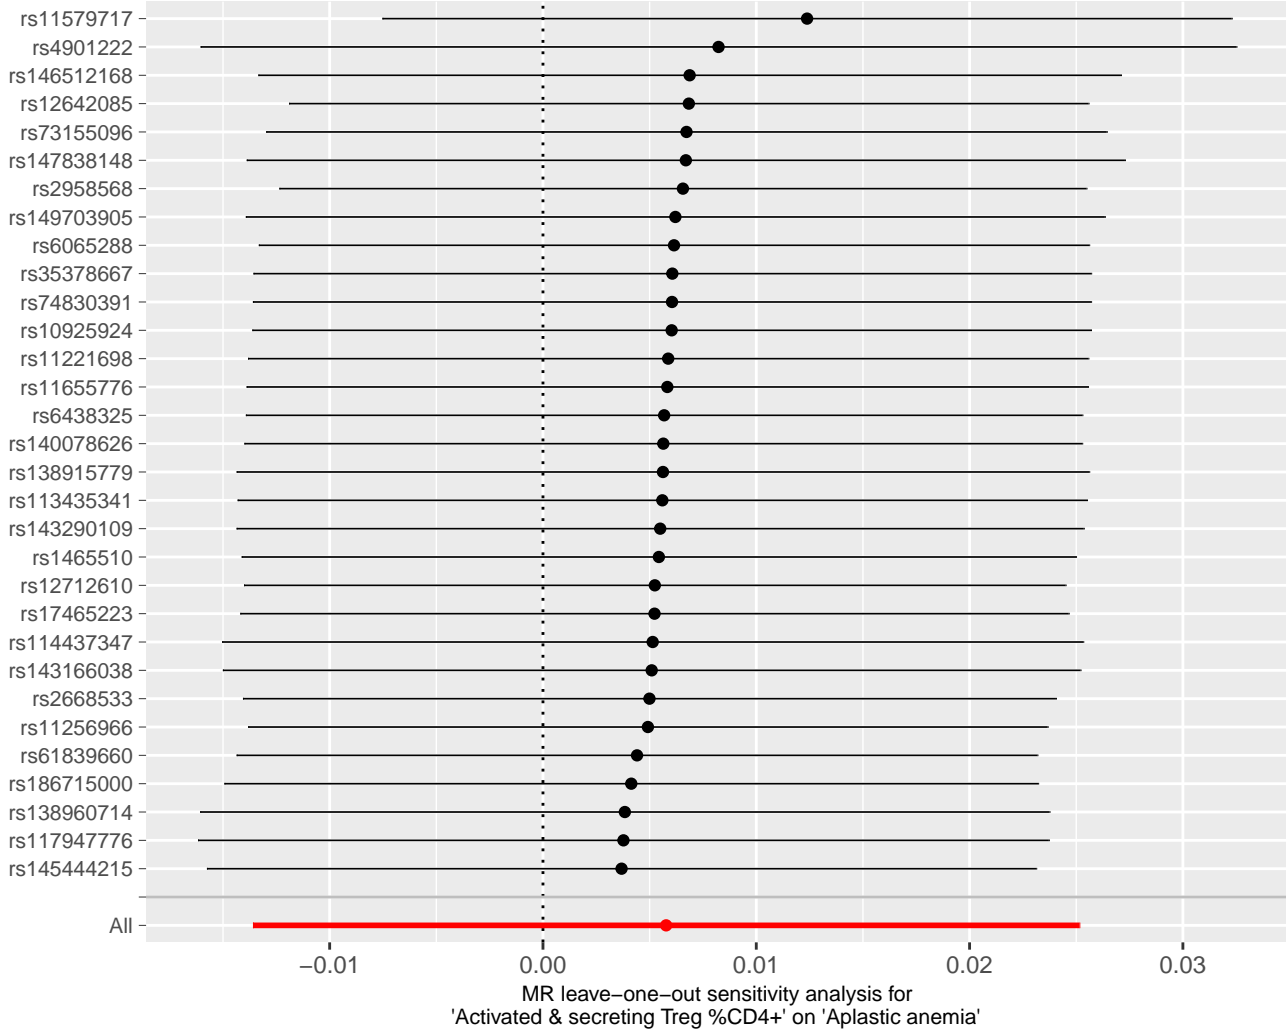

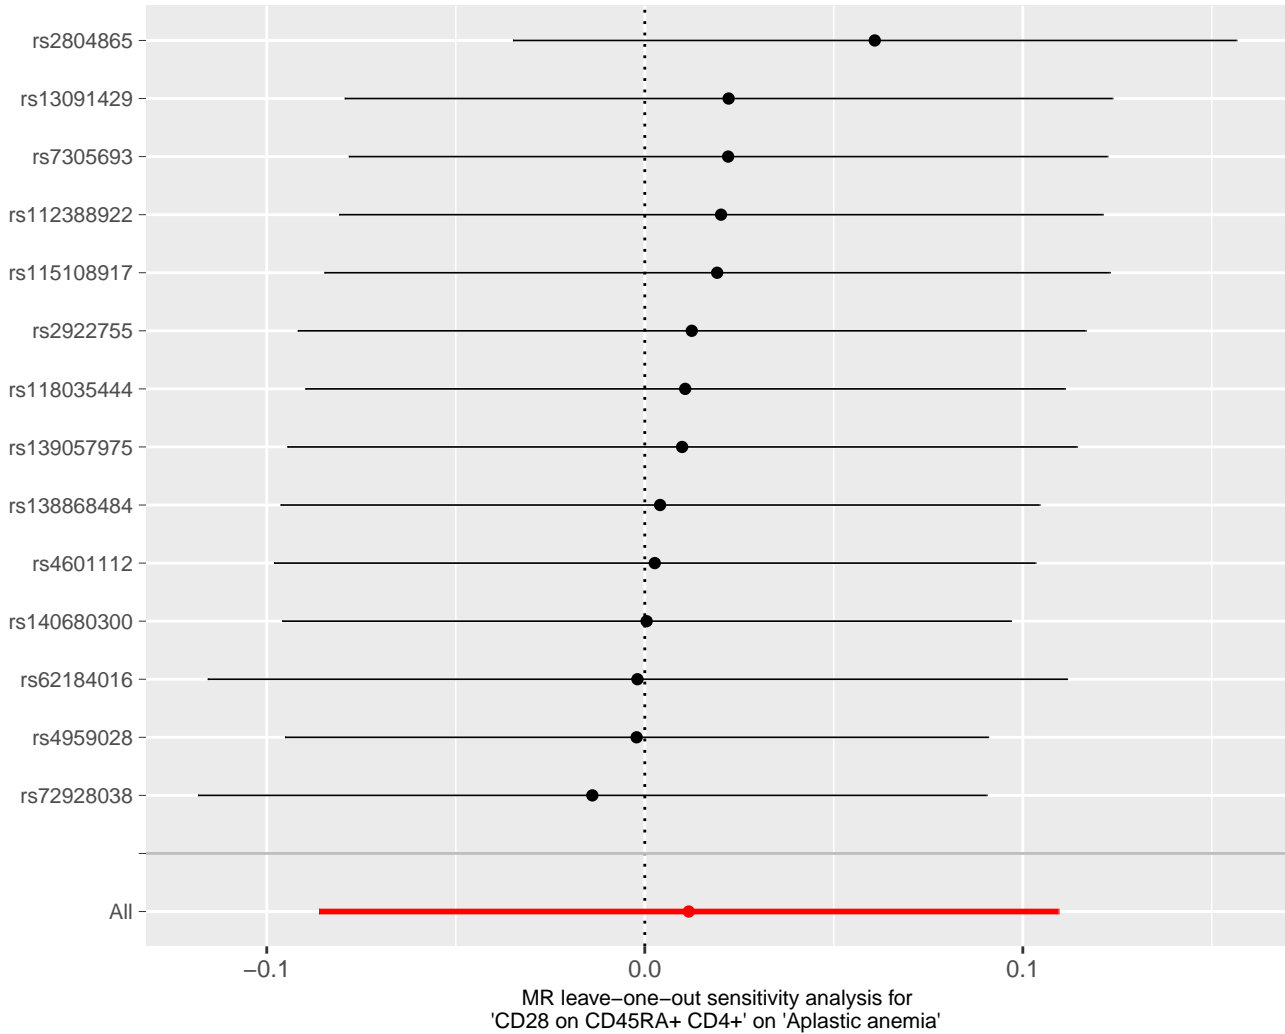



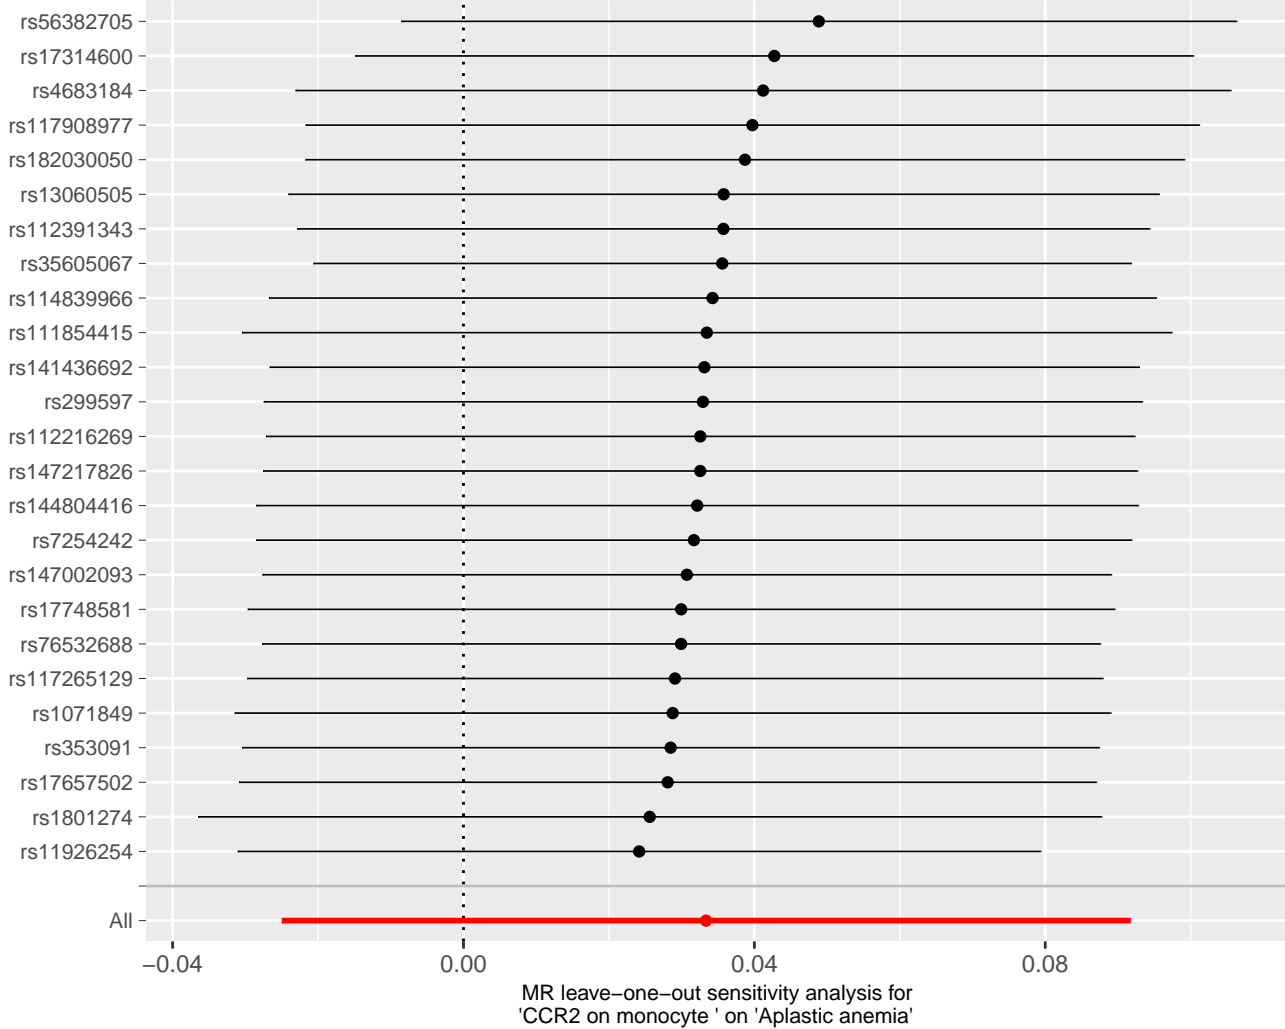

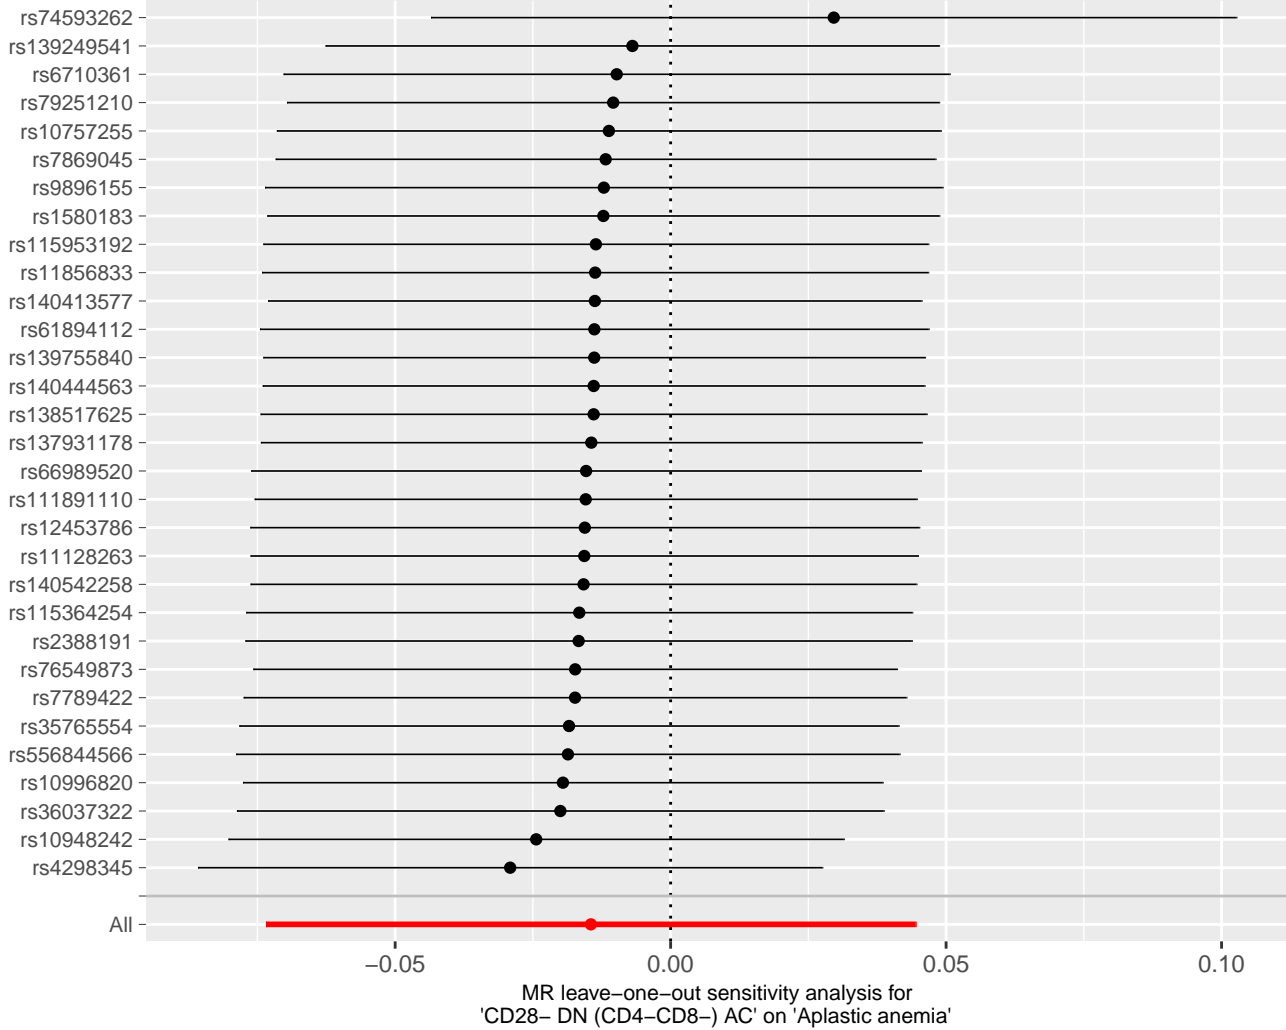

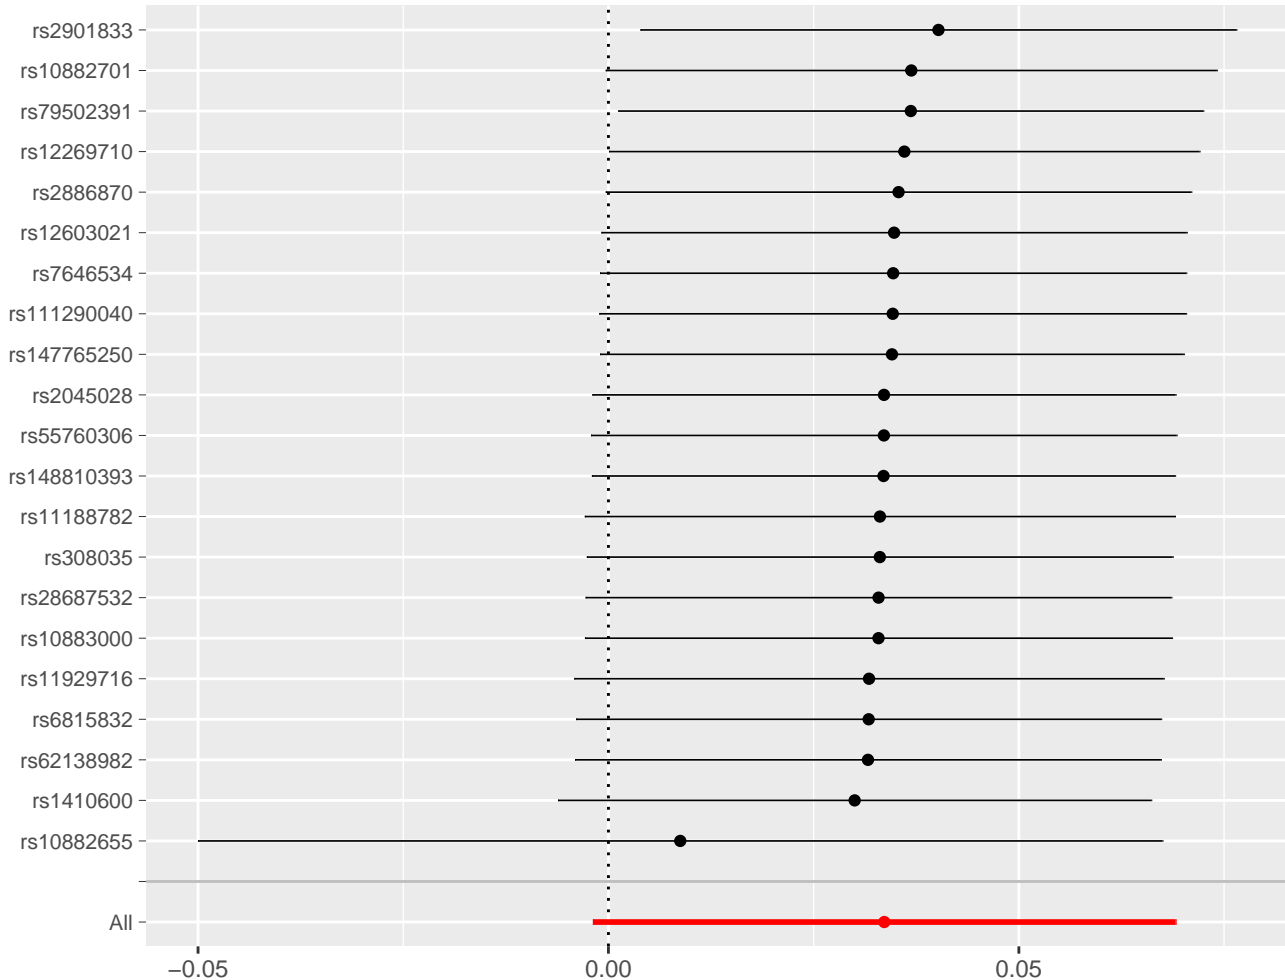

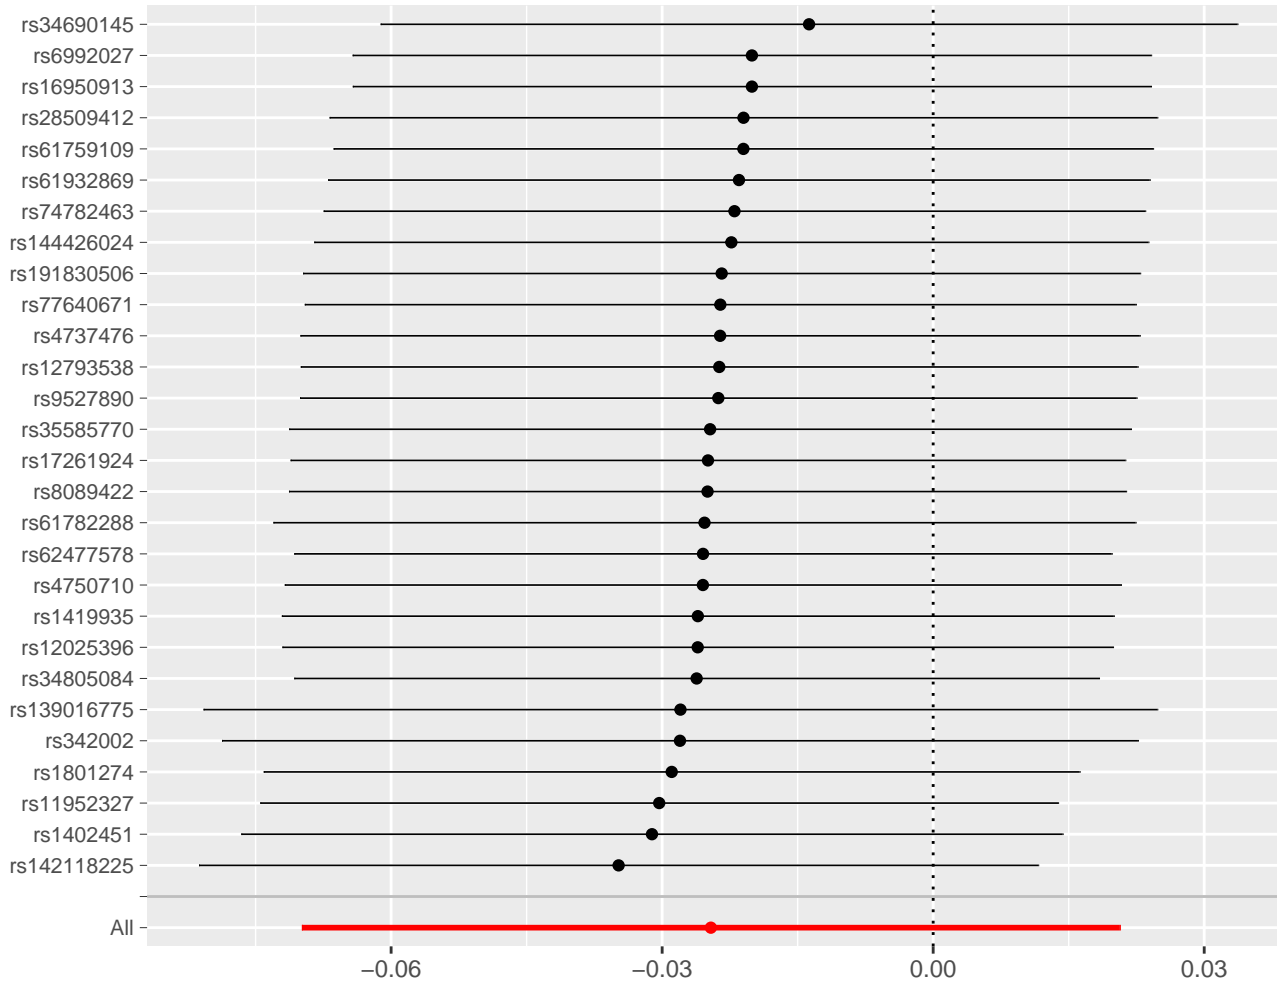

MR leave-one-out sensitivity analysis for 'PDL-1 on CD14+ CD16+ monocyte' on 'Aplastic anemia'

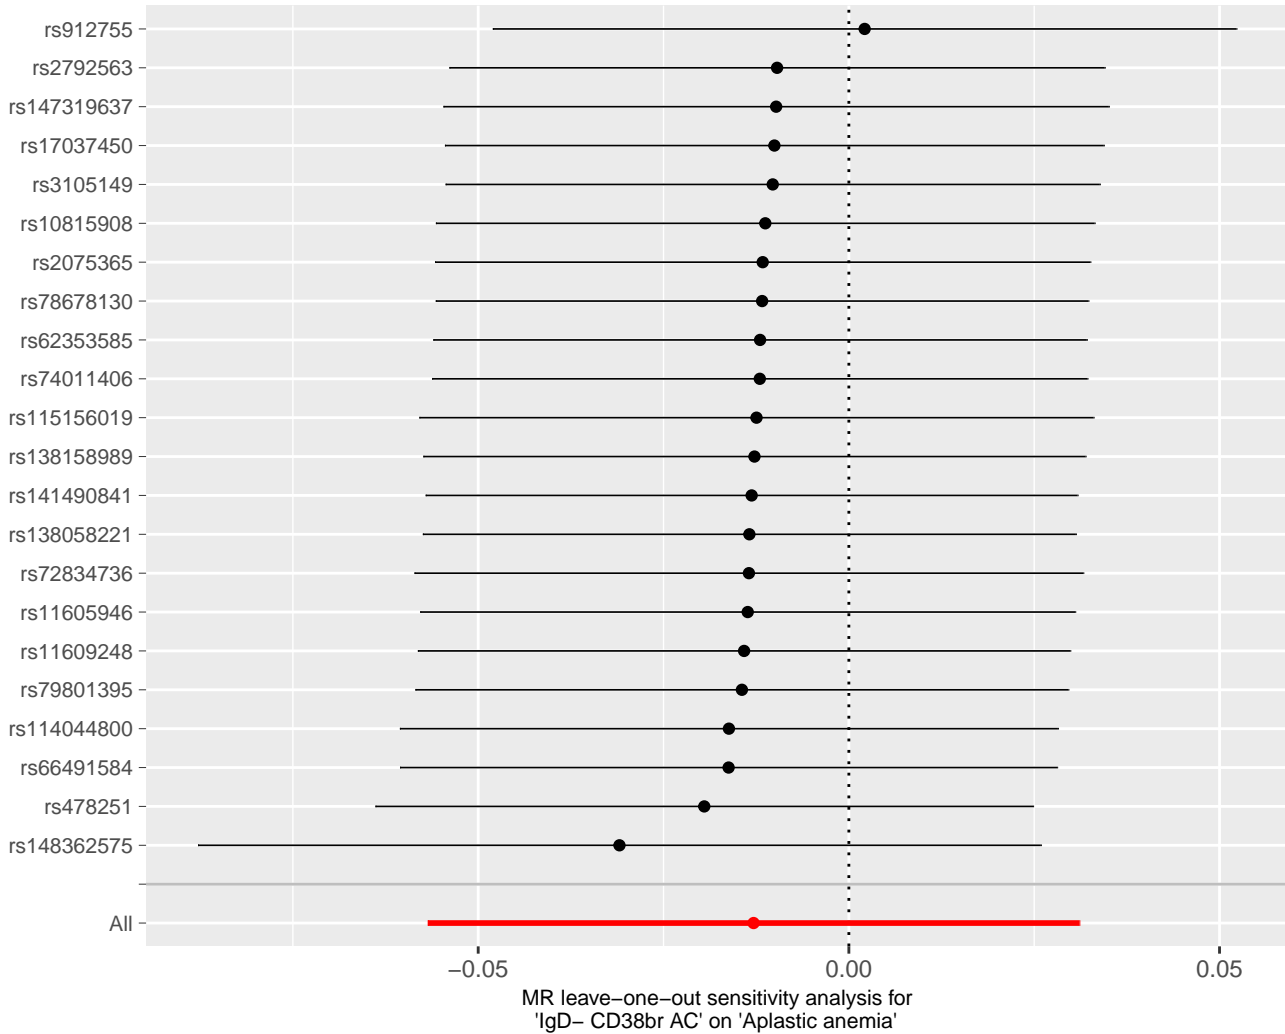

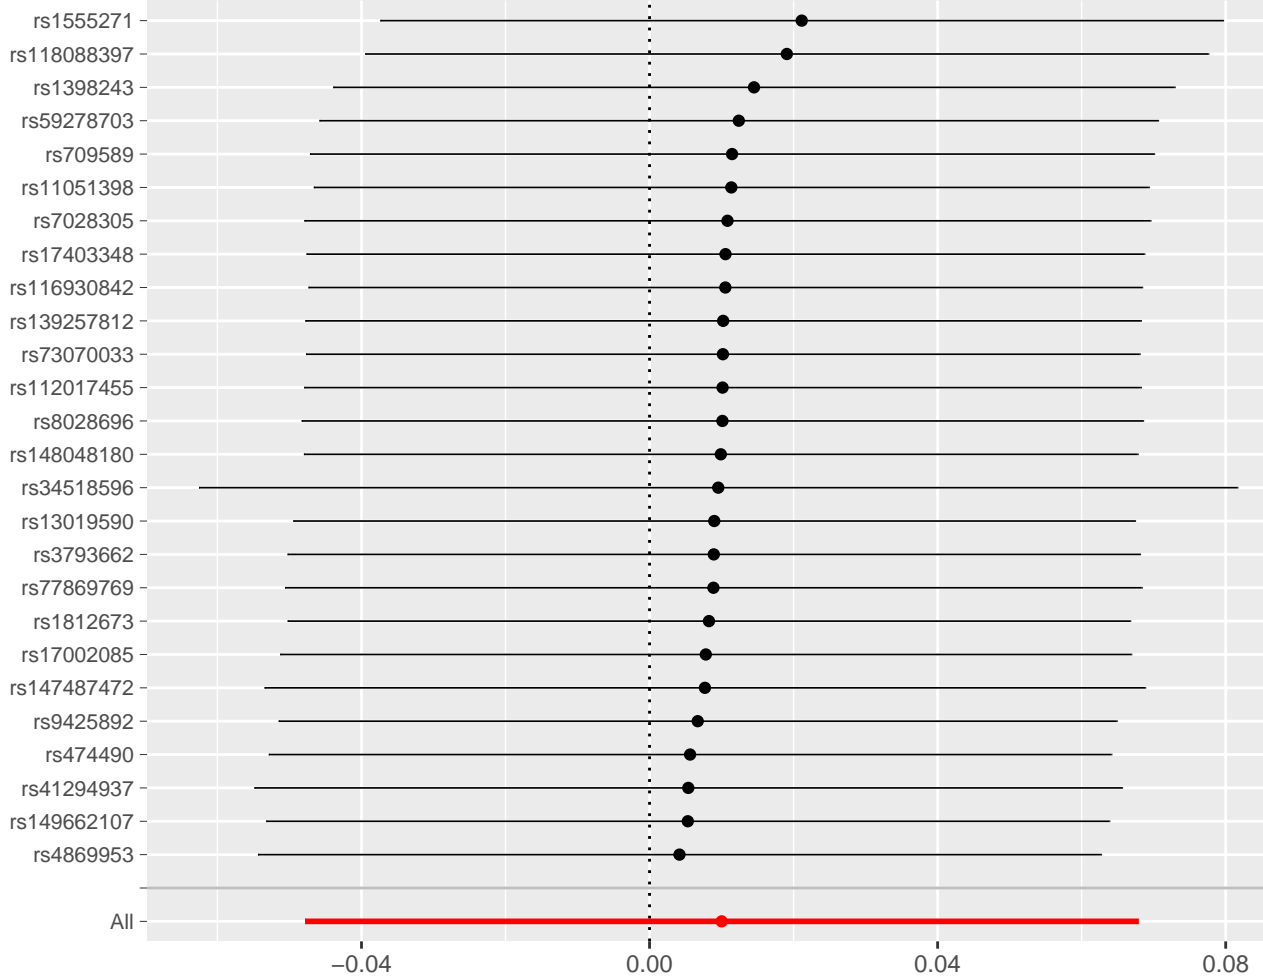

MR leave-one-out sensitivity analysis for 'CD25 on naive-mature B cell' on 'Aplastic anemia'

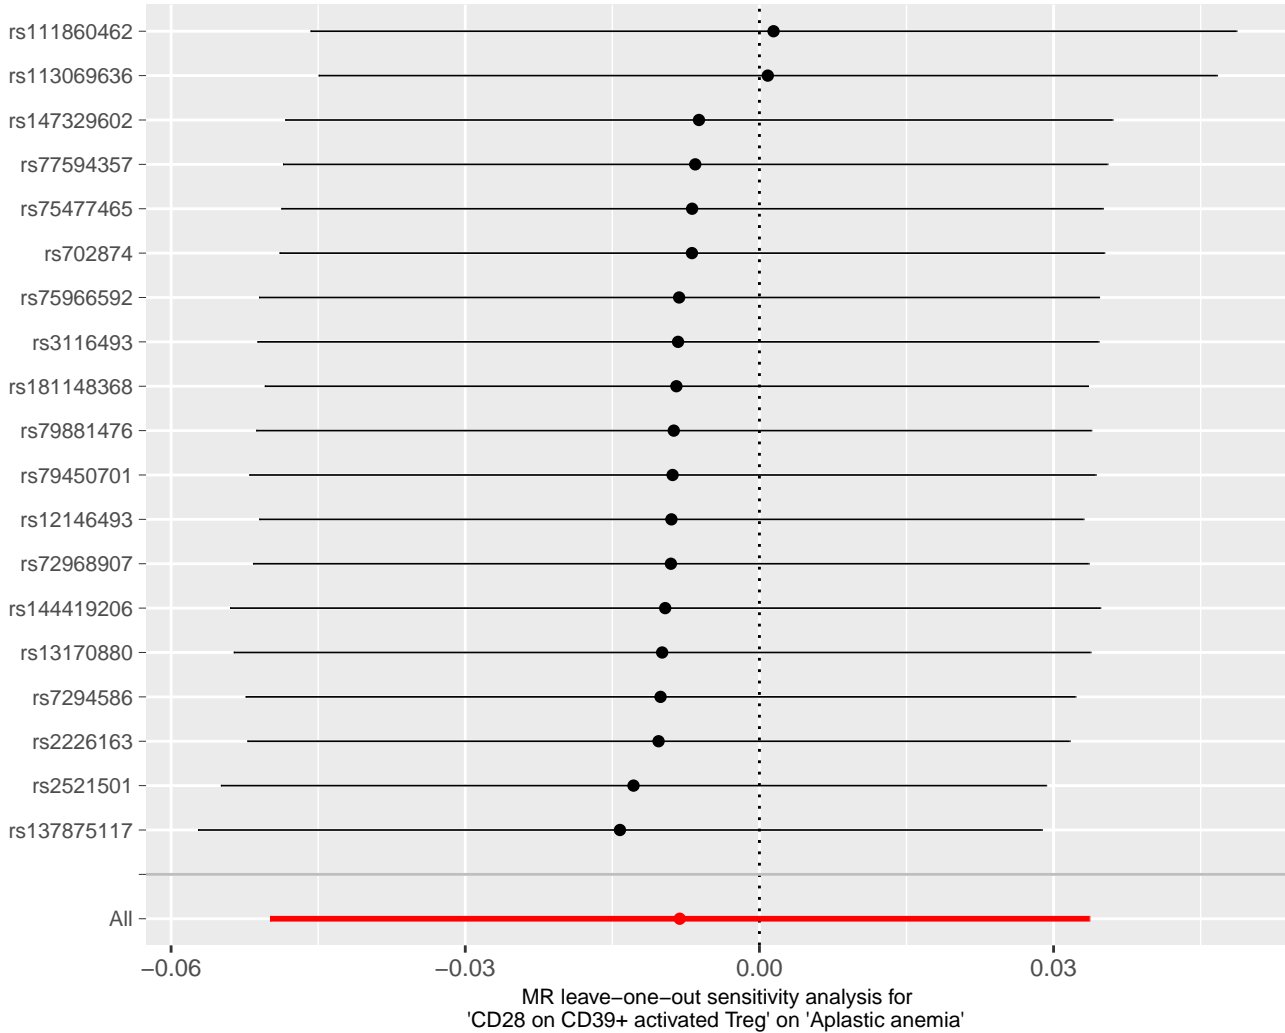

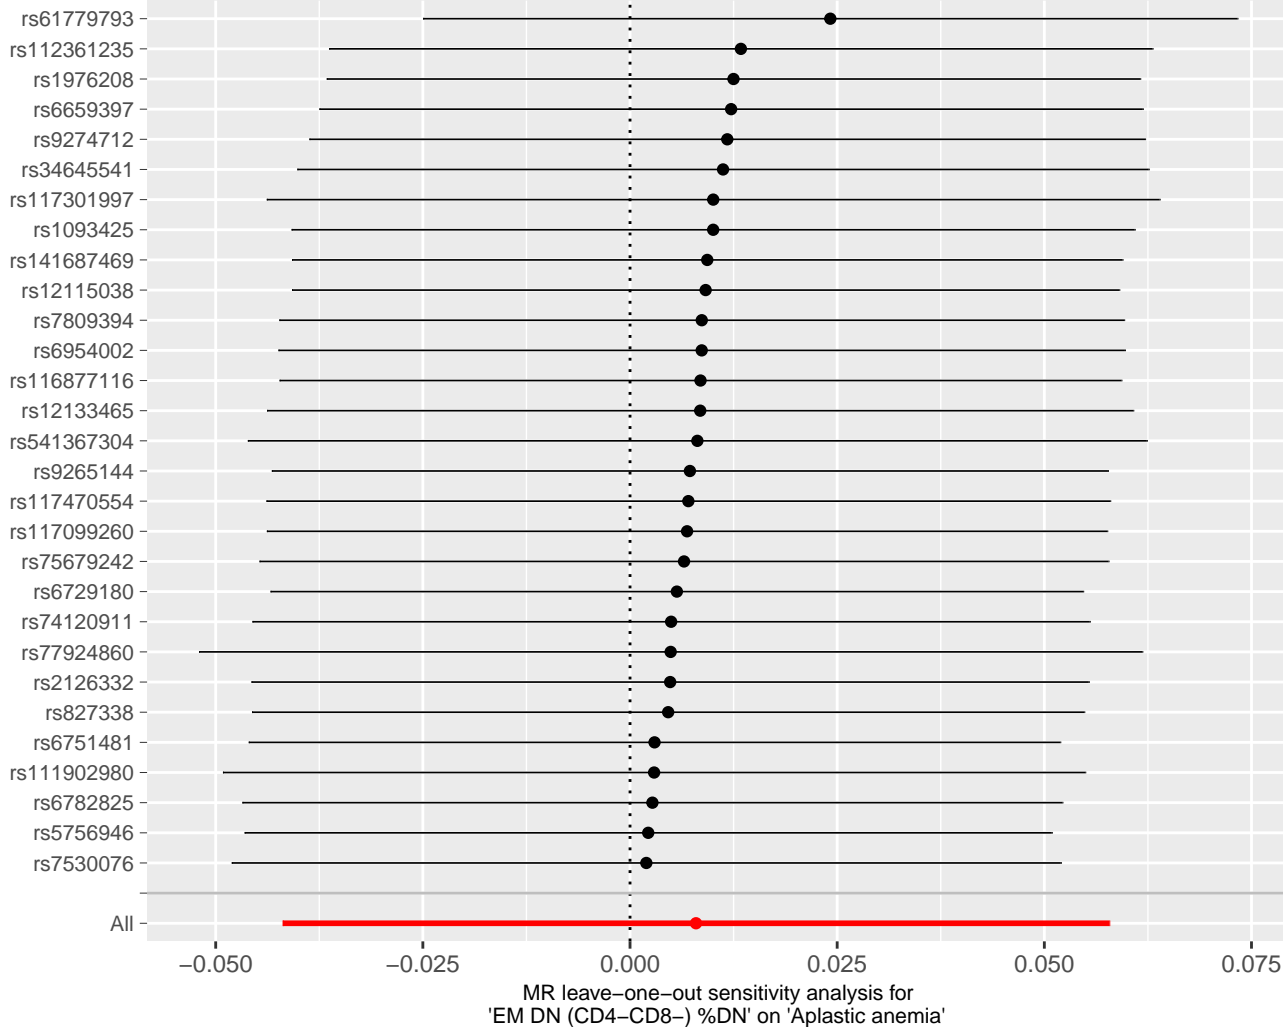



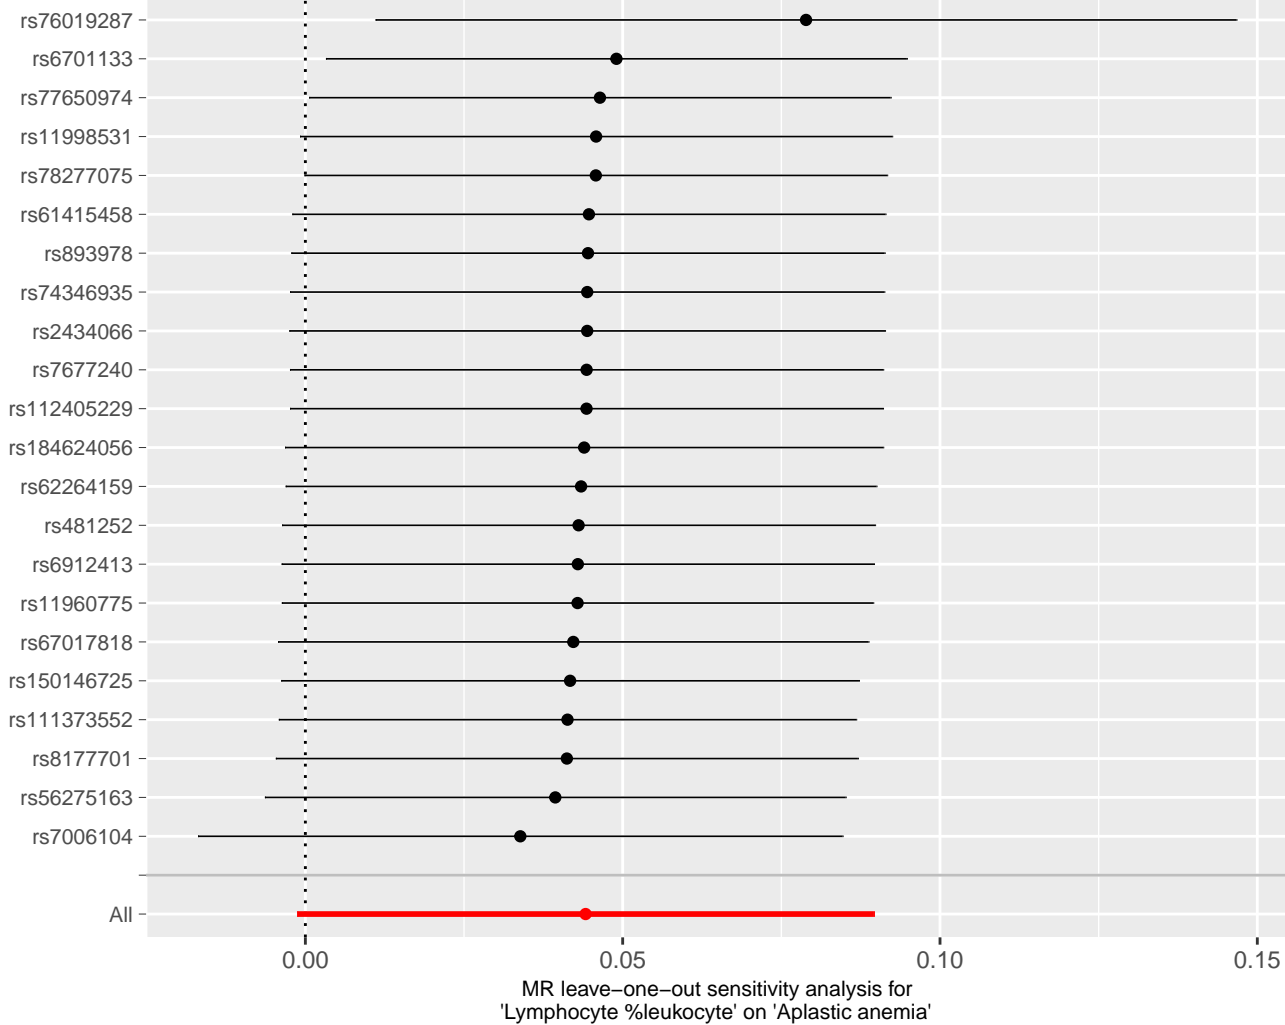

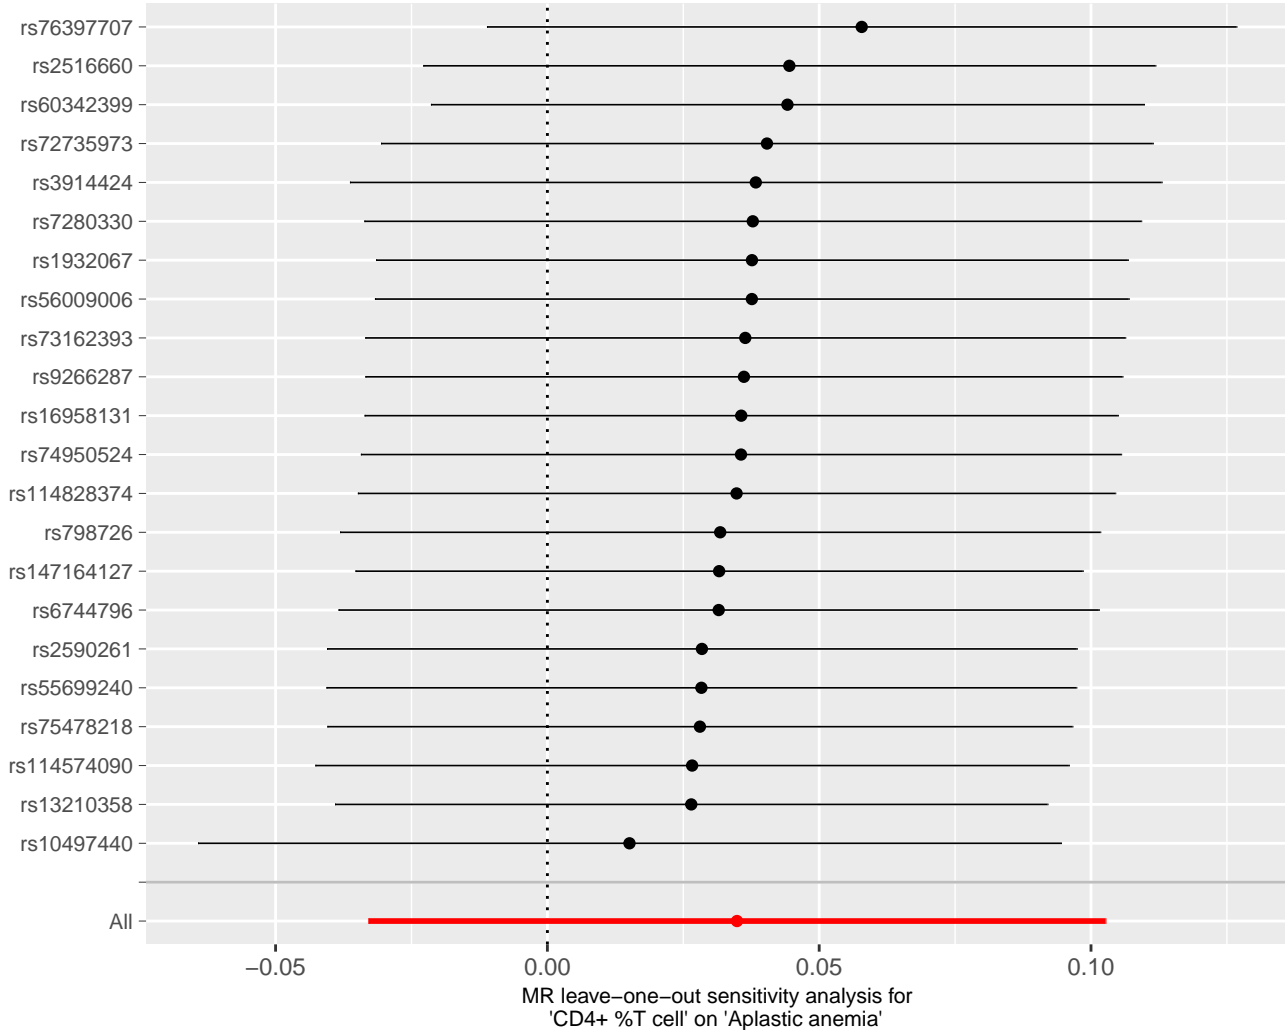

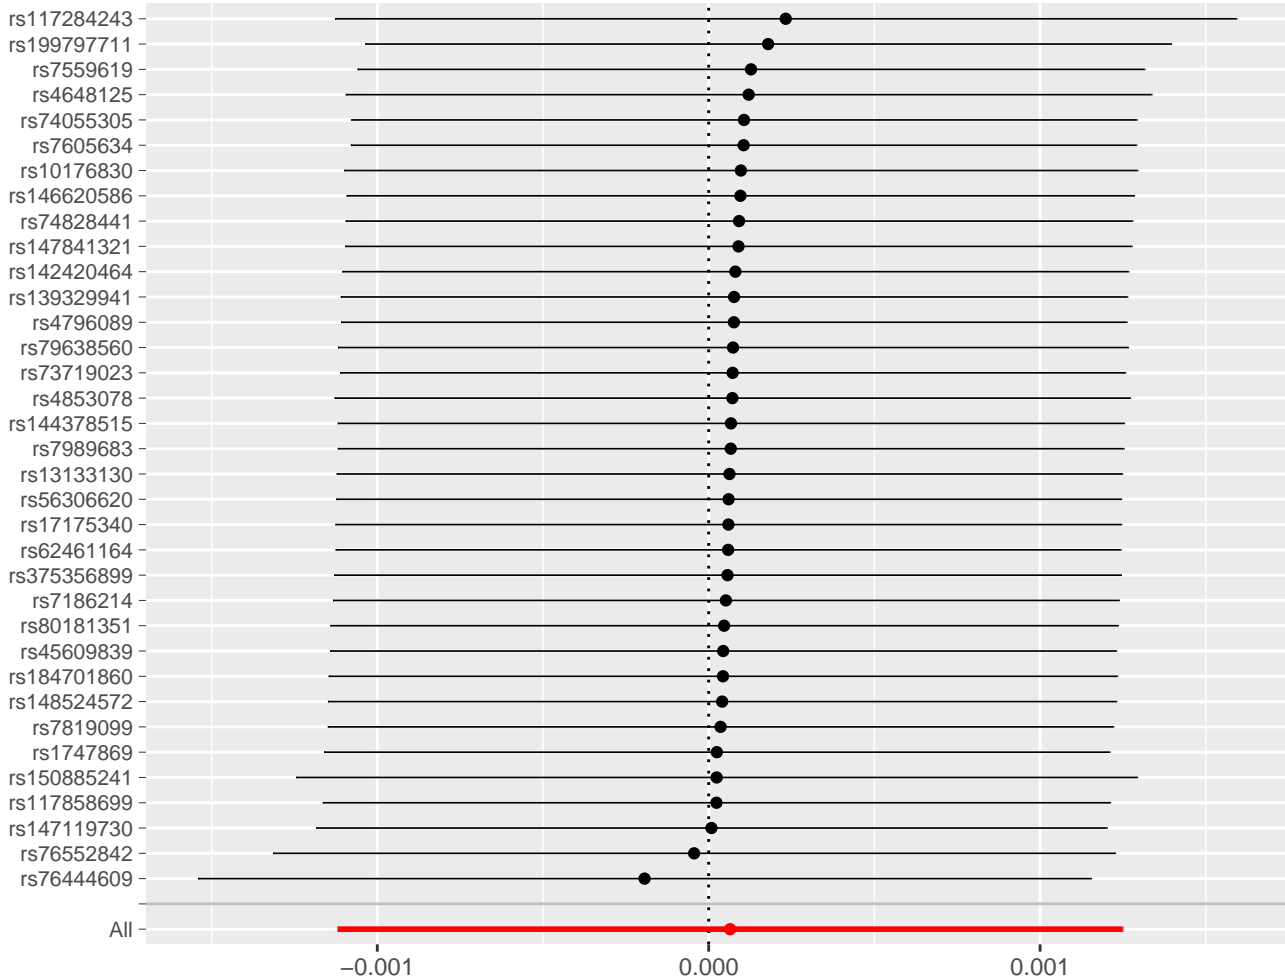

MR leave-one-out sensitivity analysis for 'CD45RA+ CD28- CD8br %CD8br' on 'Aplastic anemia'

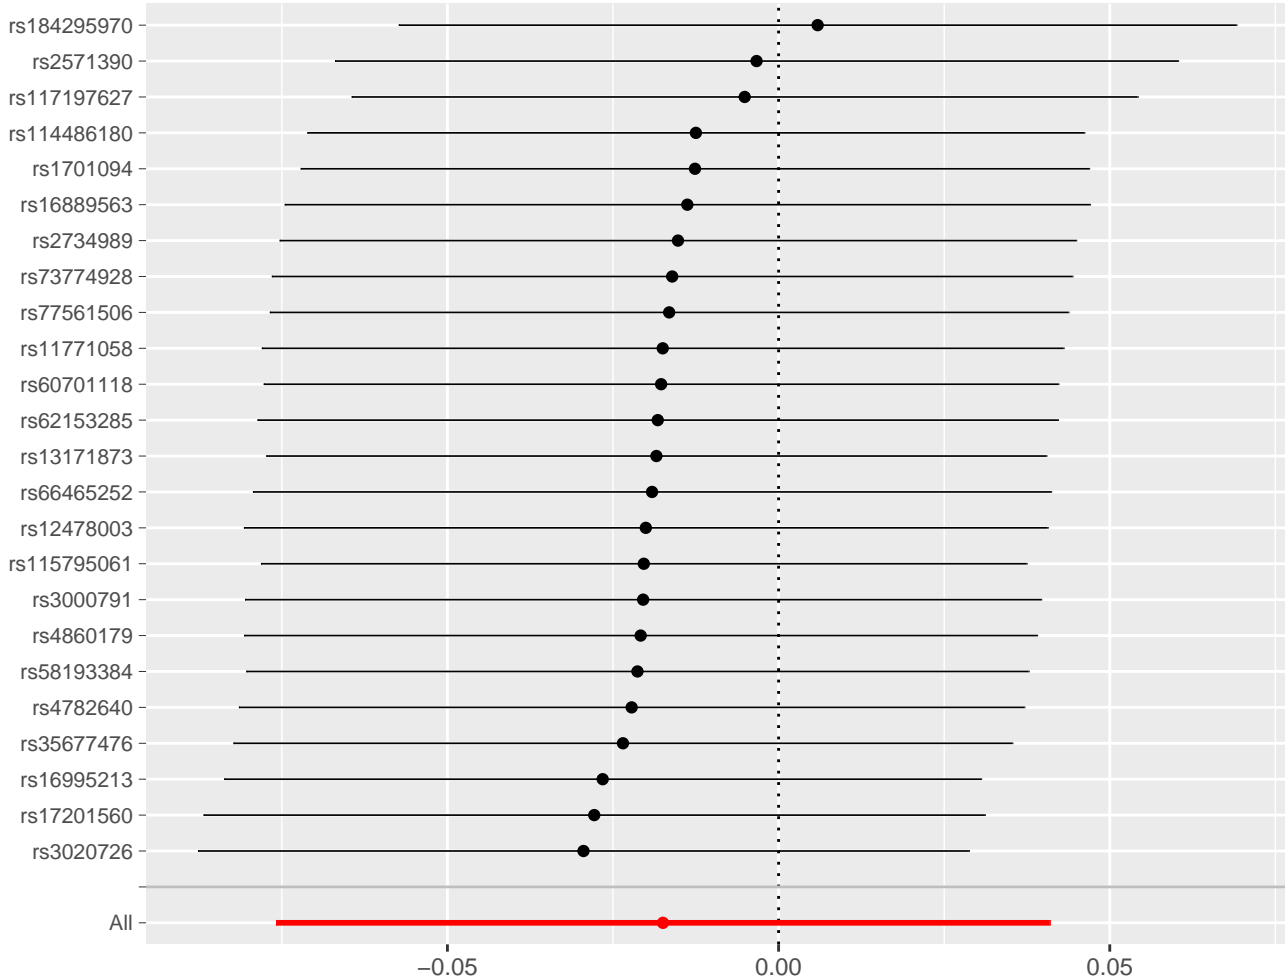

MR leave-one-out sensitivity analysis for 'CD8 on EM CD8br ' on 'Aplastic anemia'

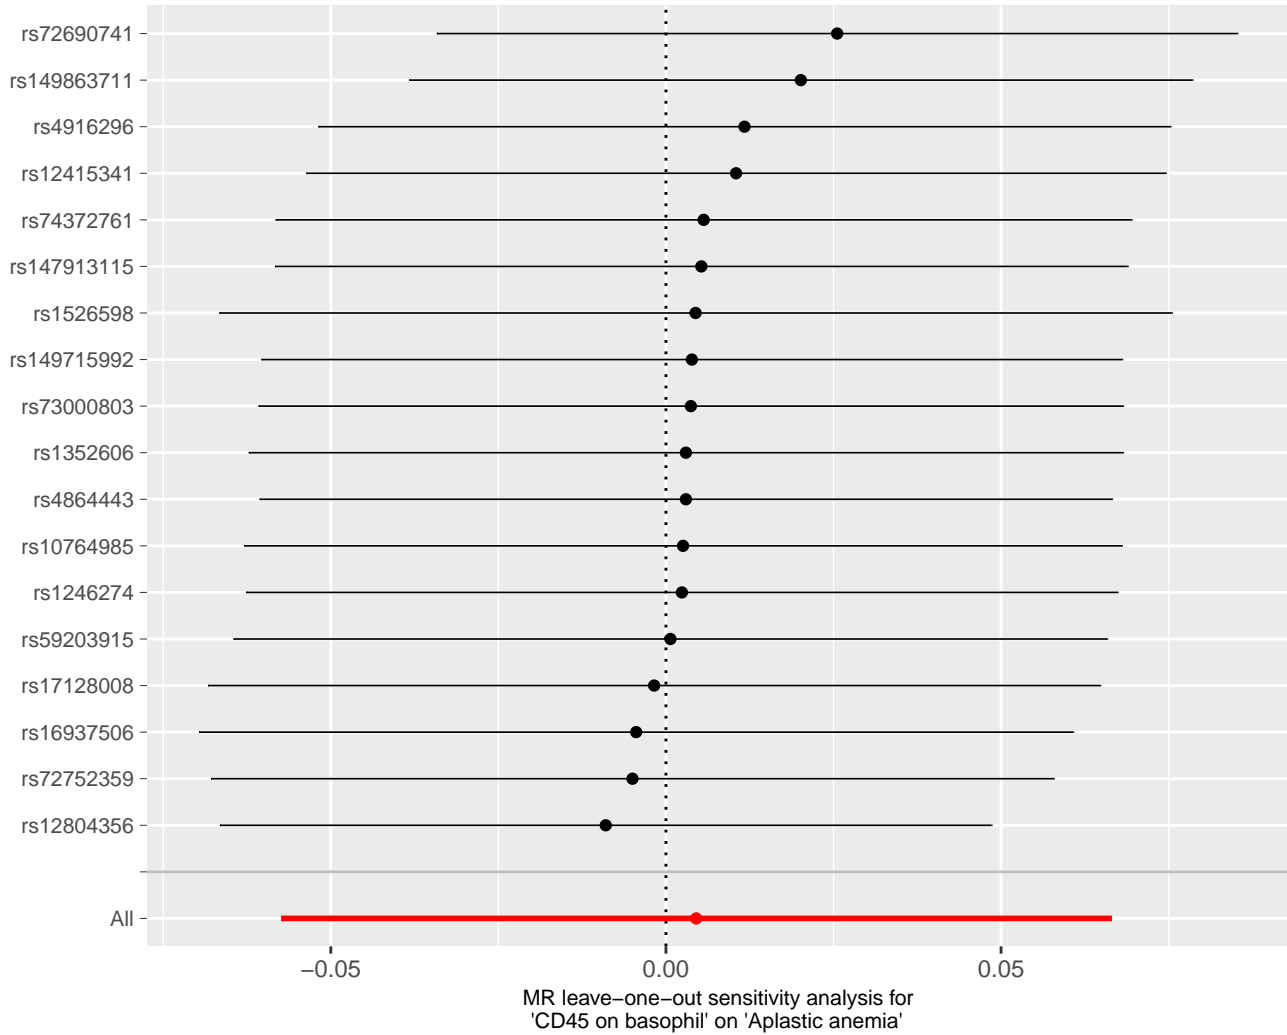

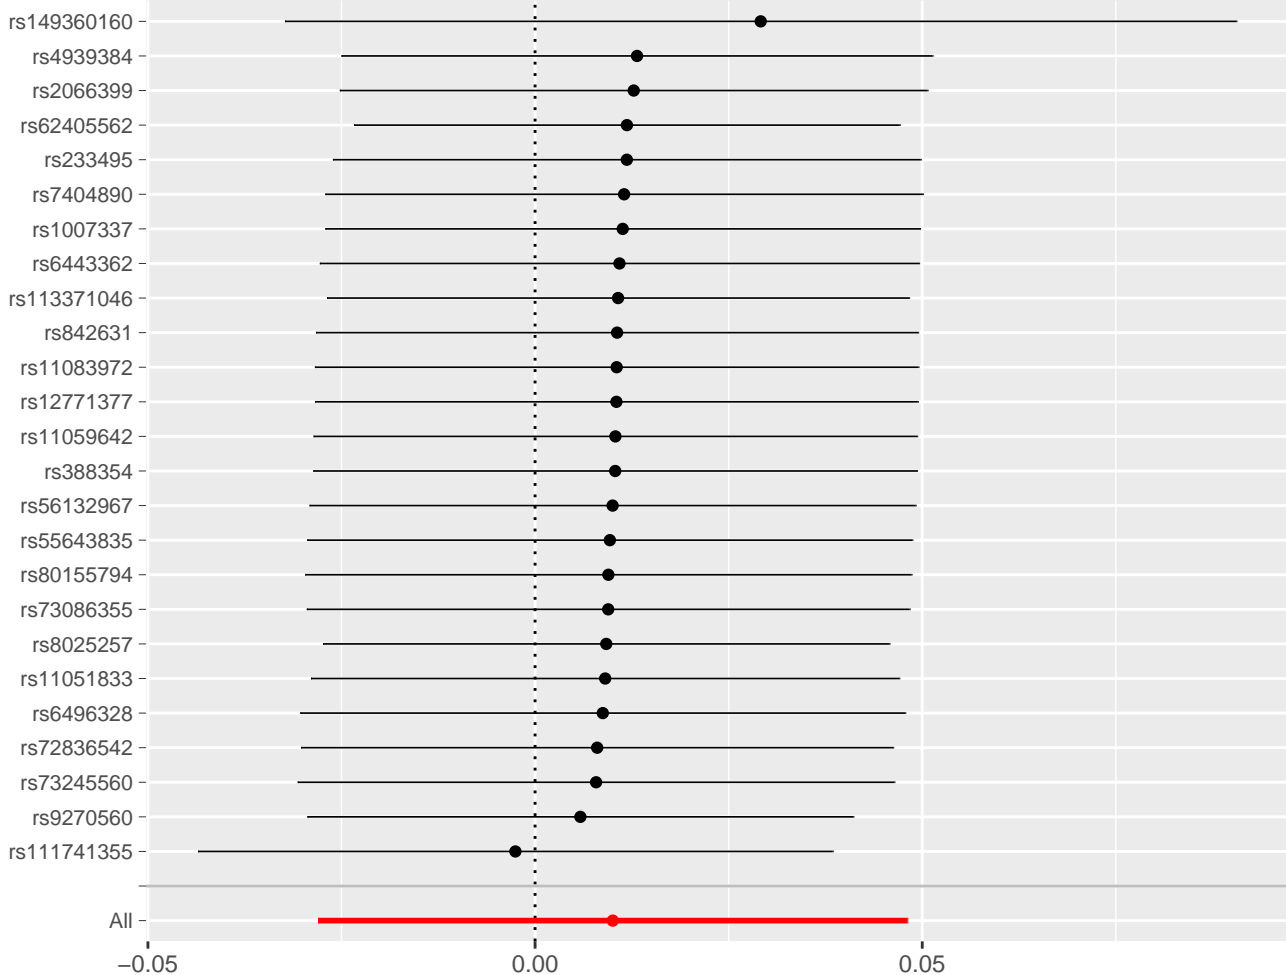

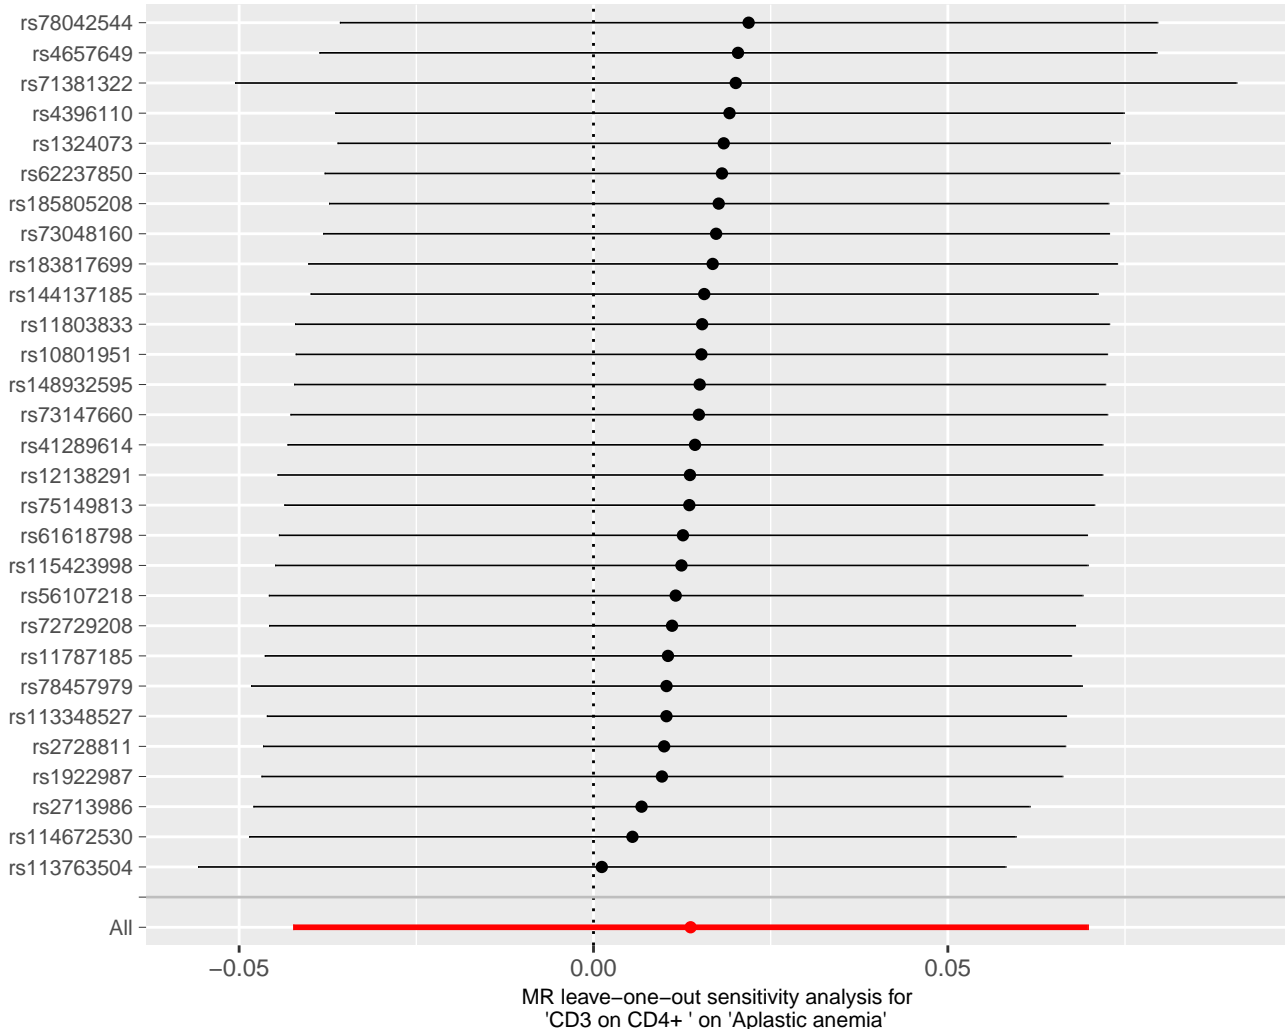

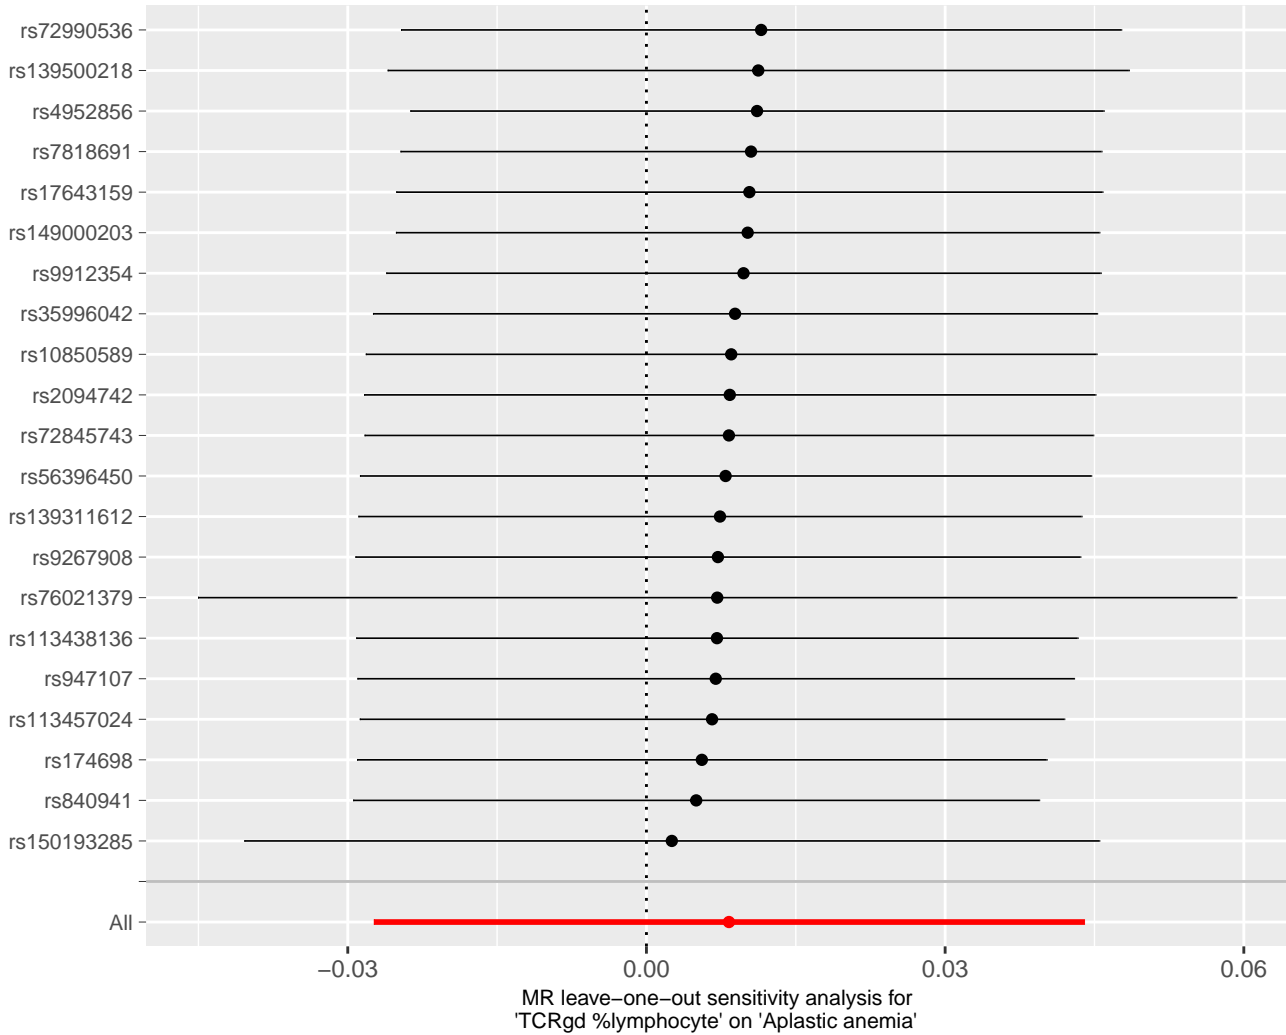



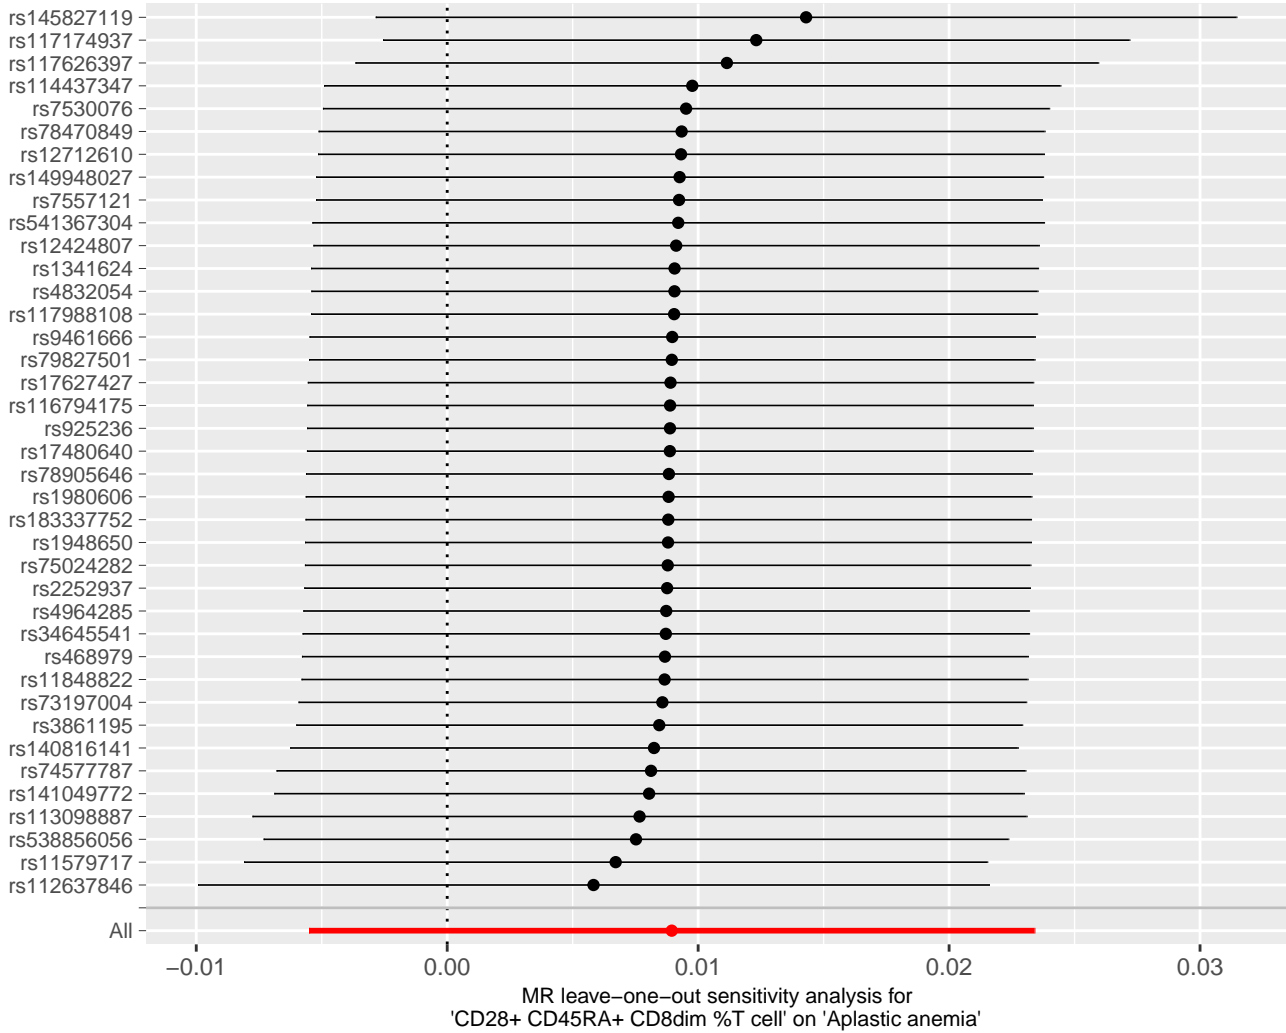

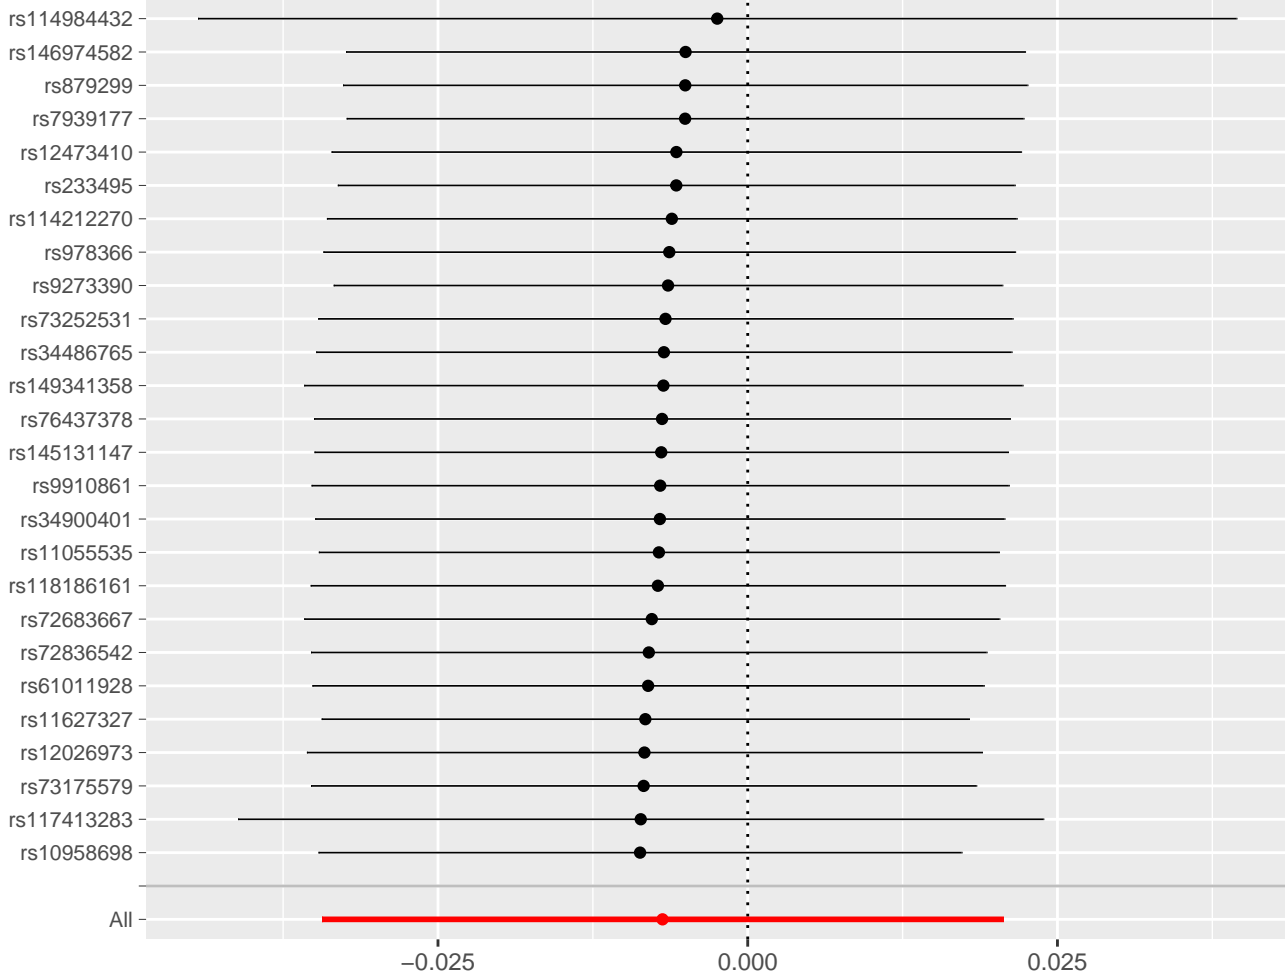

MR leave-one-out sensitivity analysis for 'CD20 on transitional' on 'Aplastic anemia'

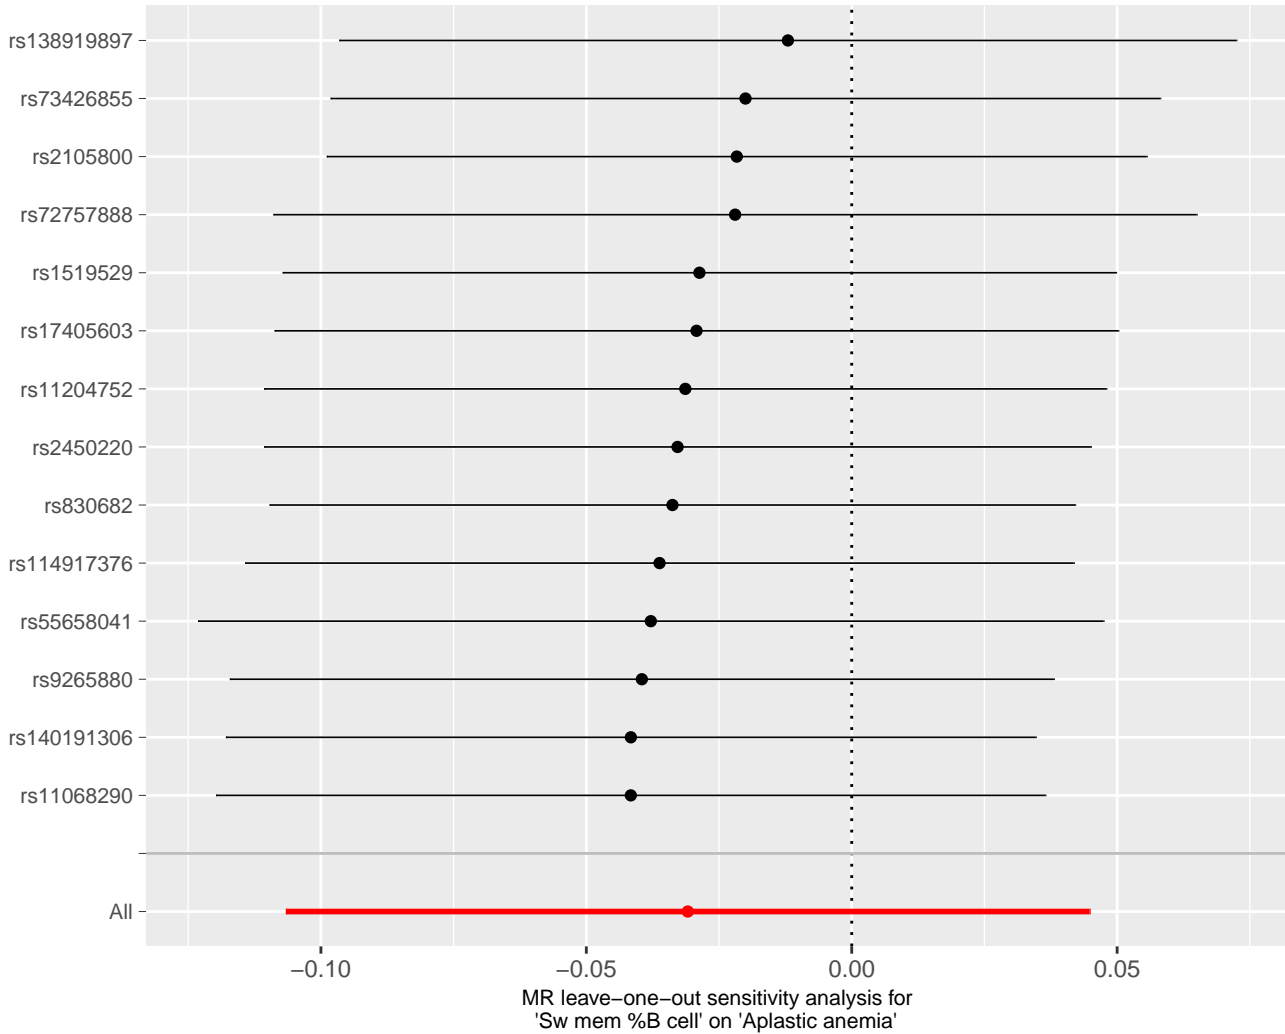

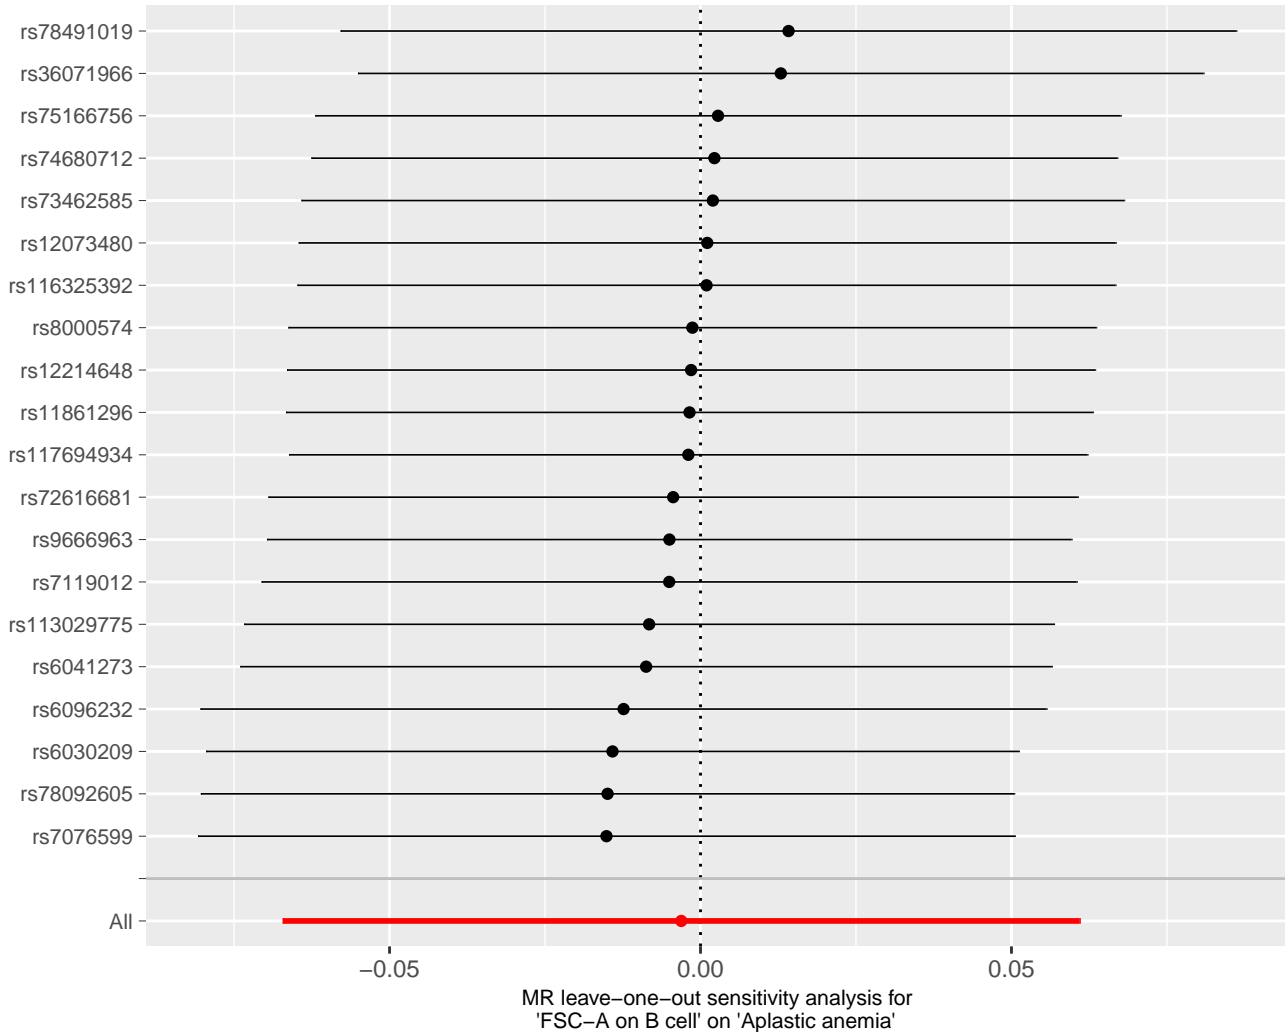

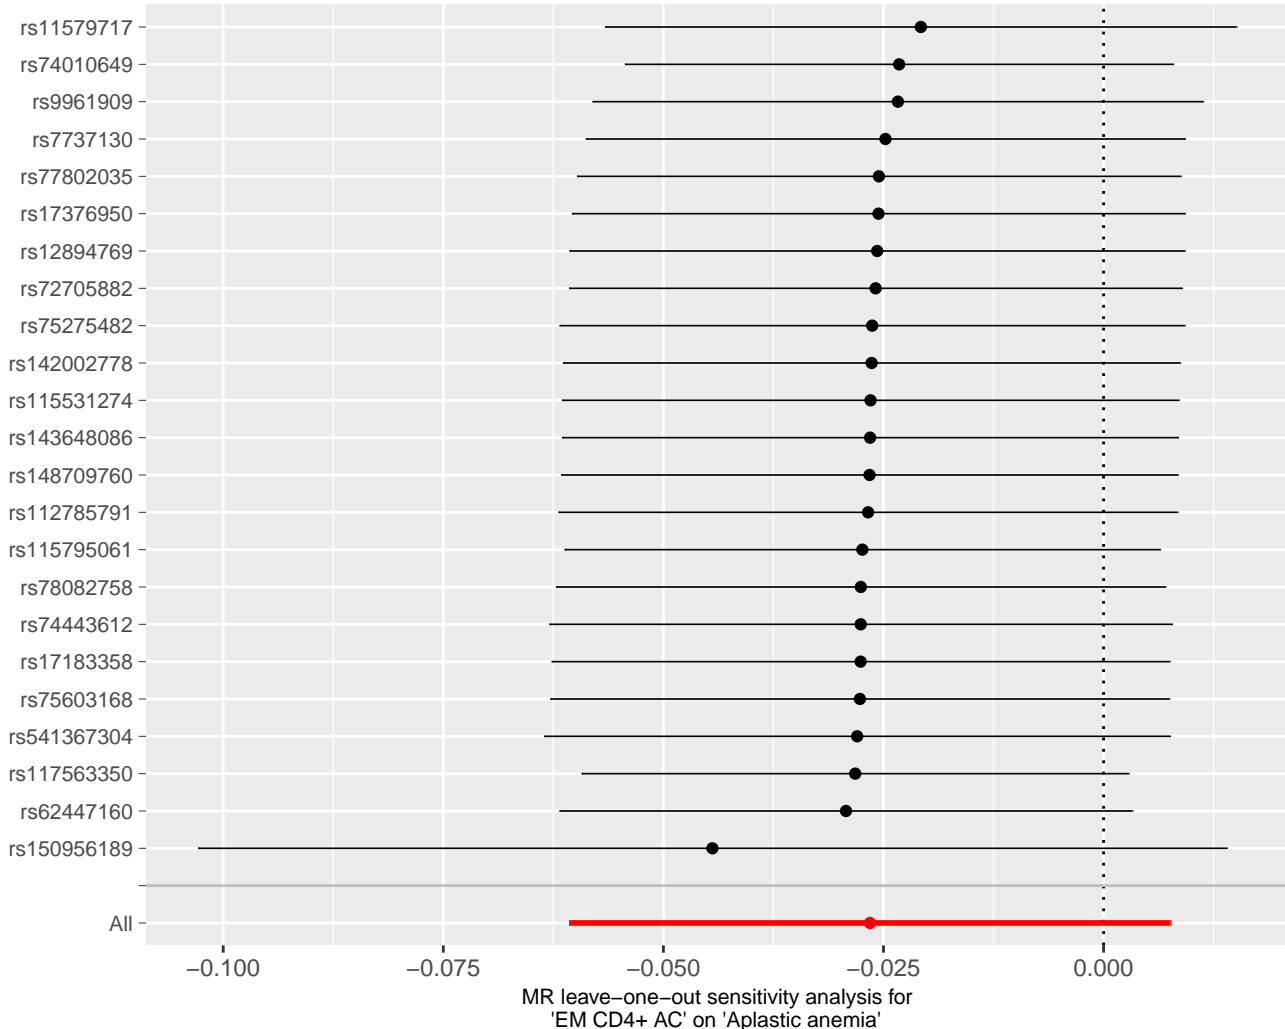

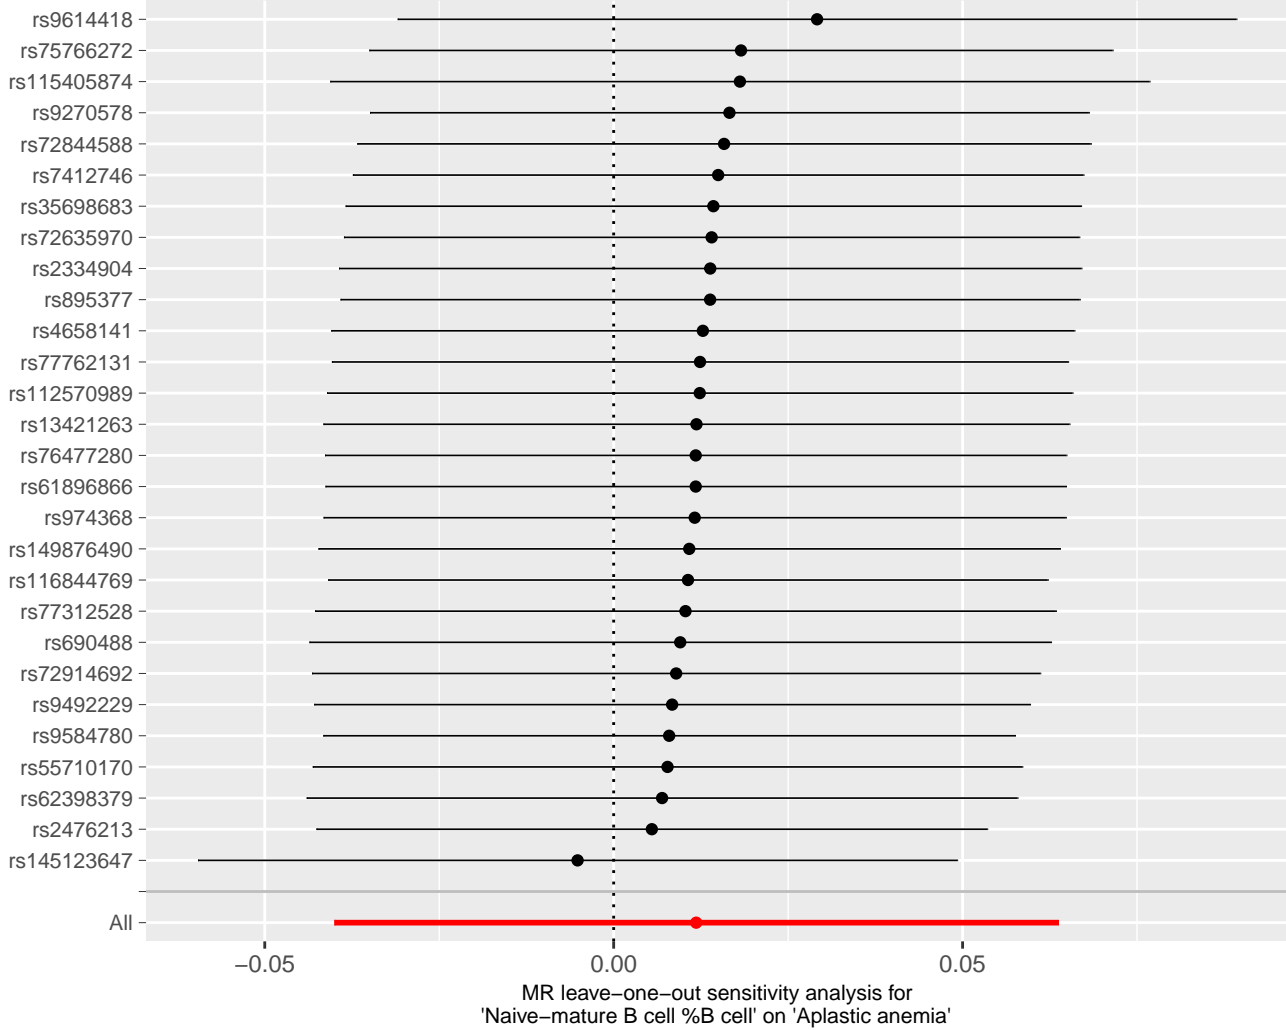

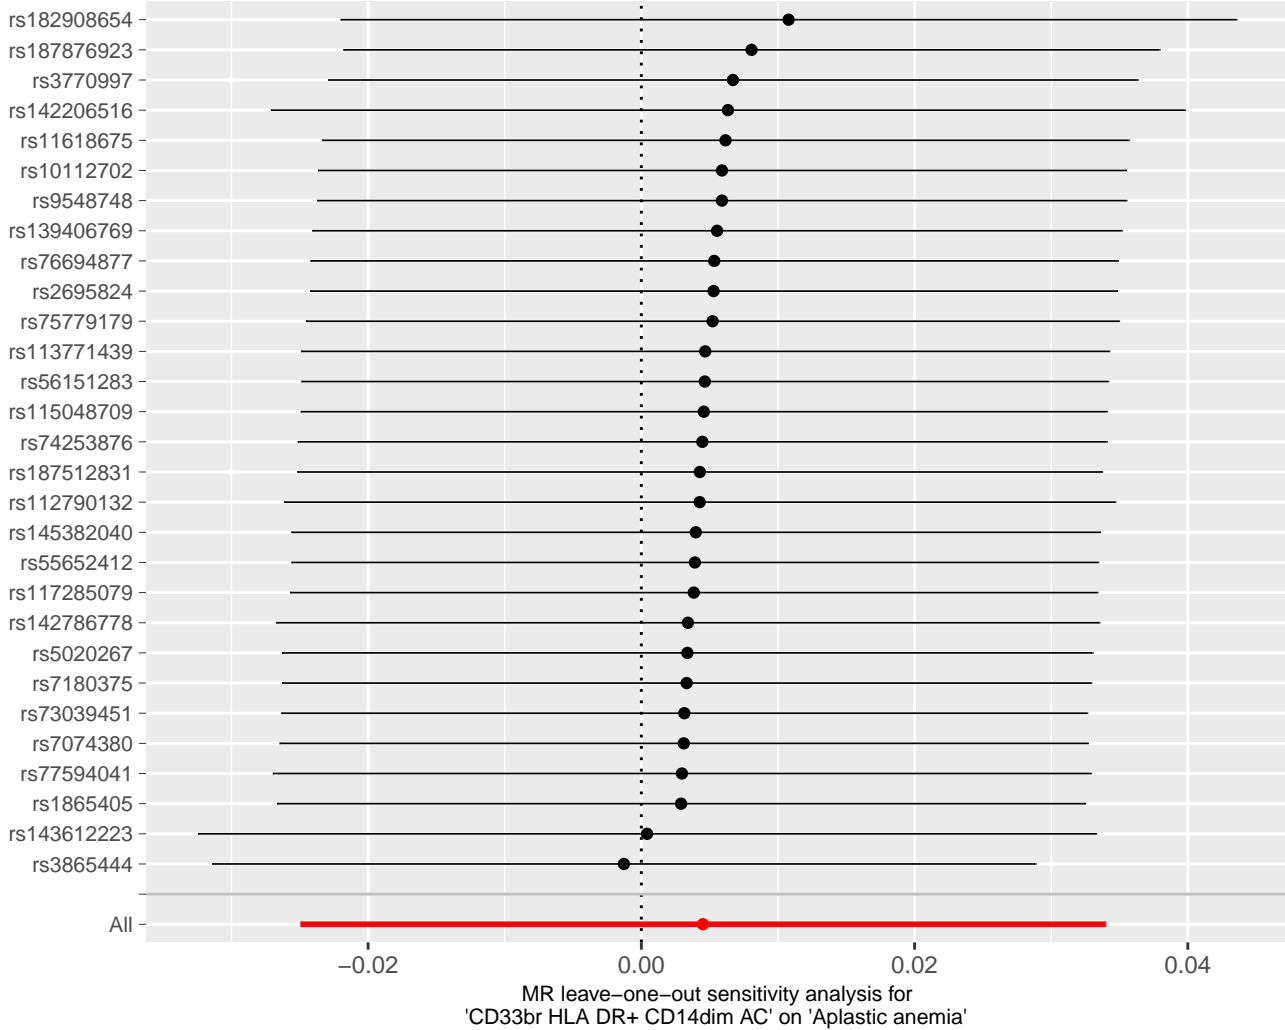

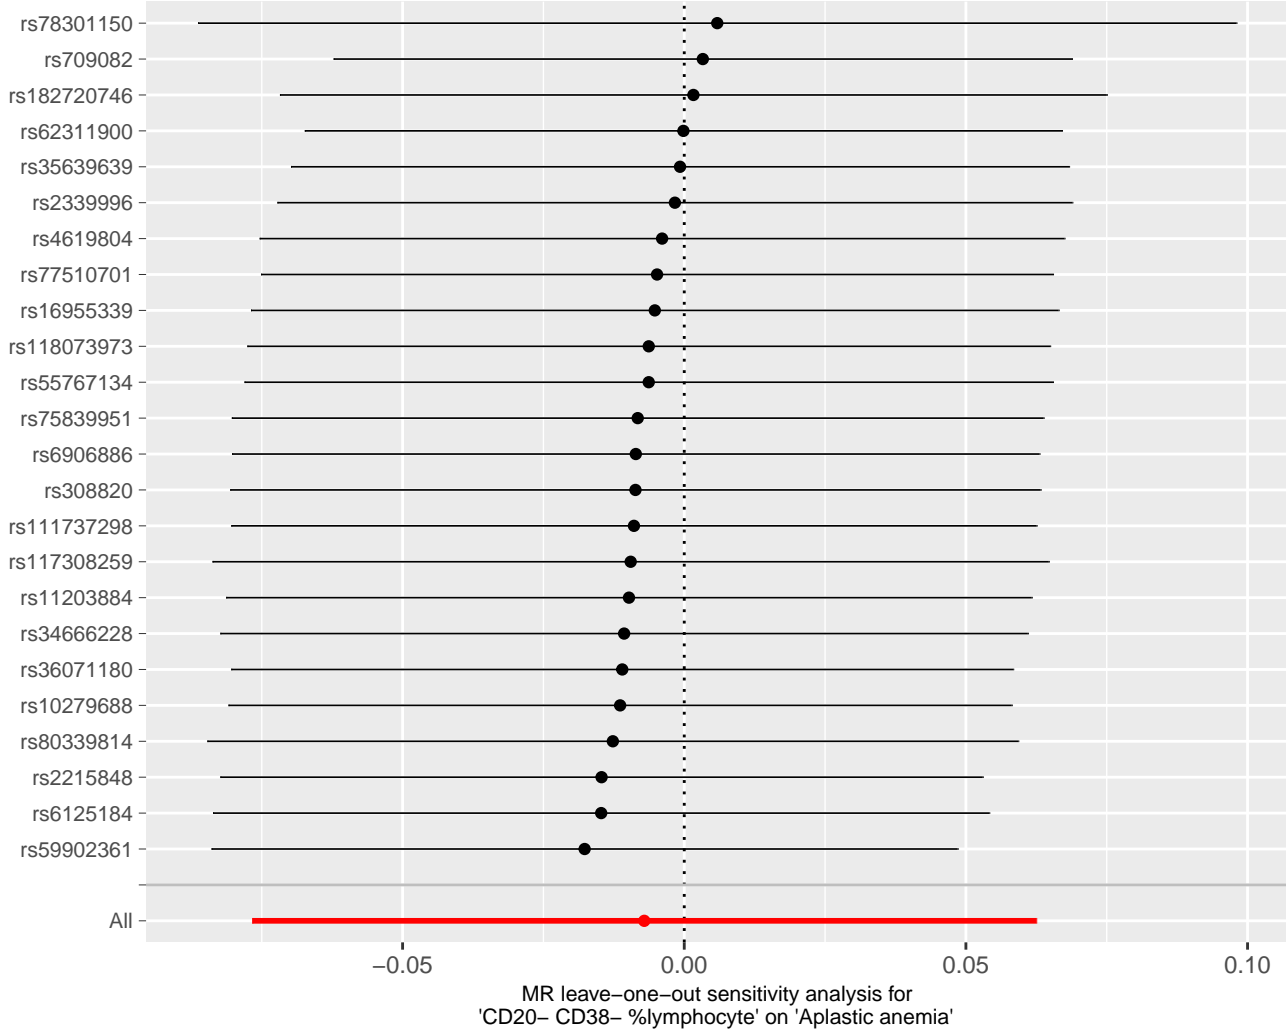



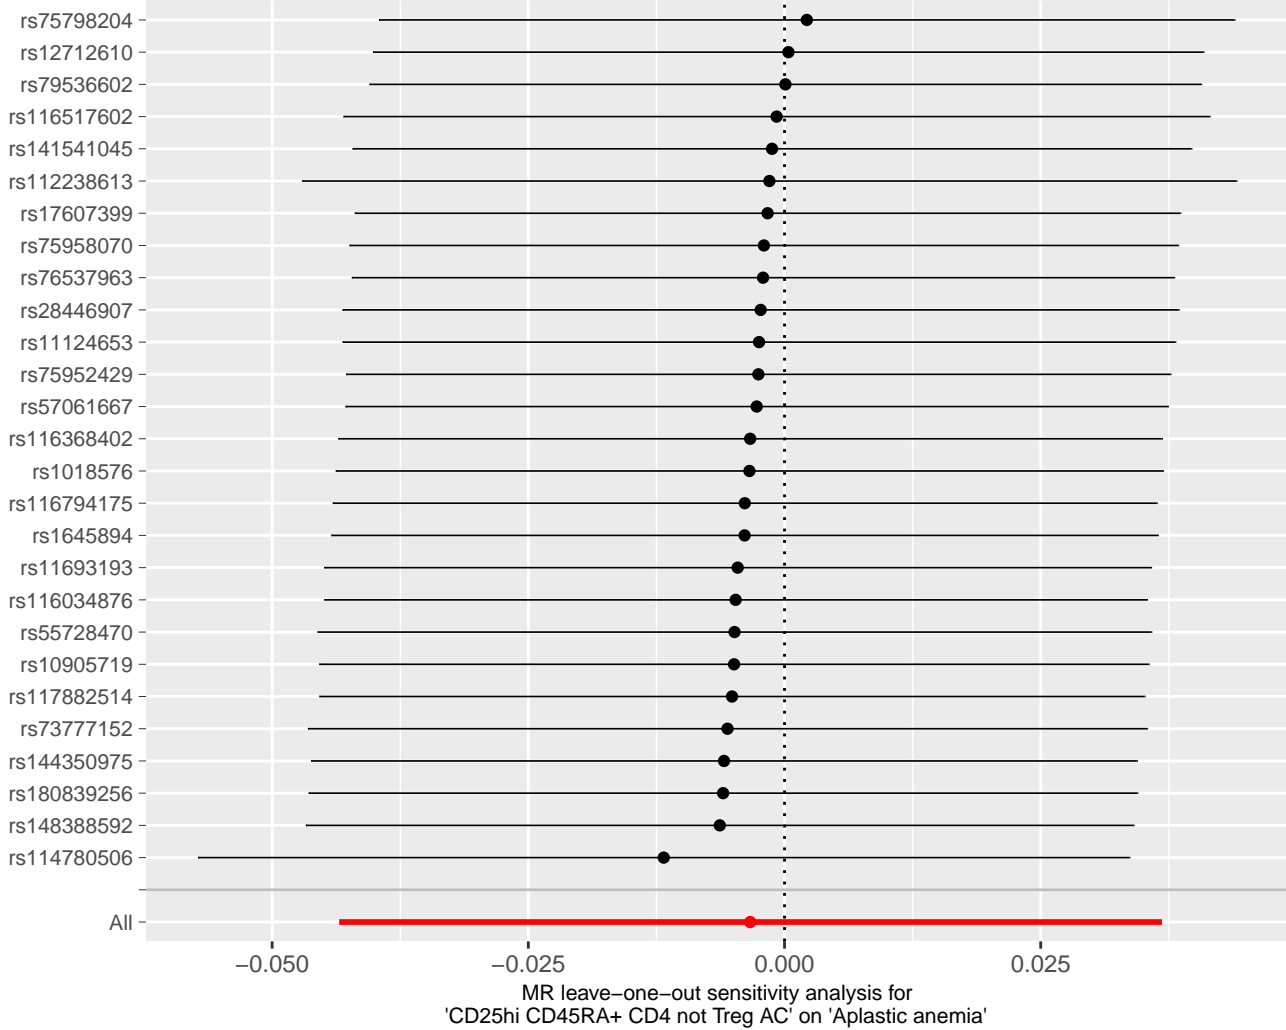

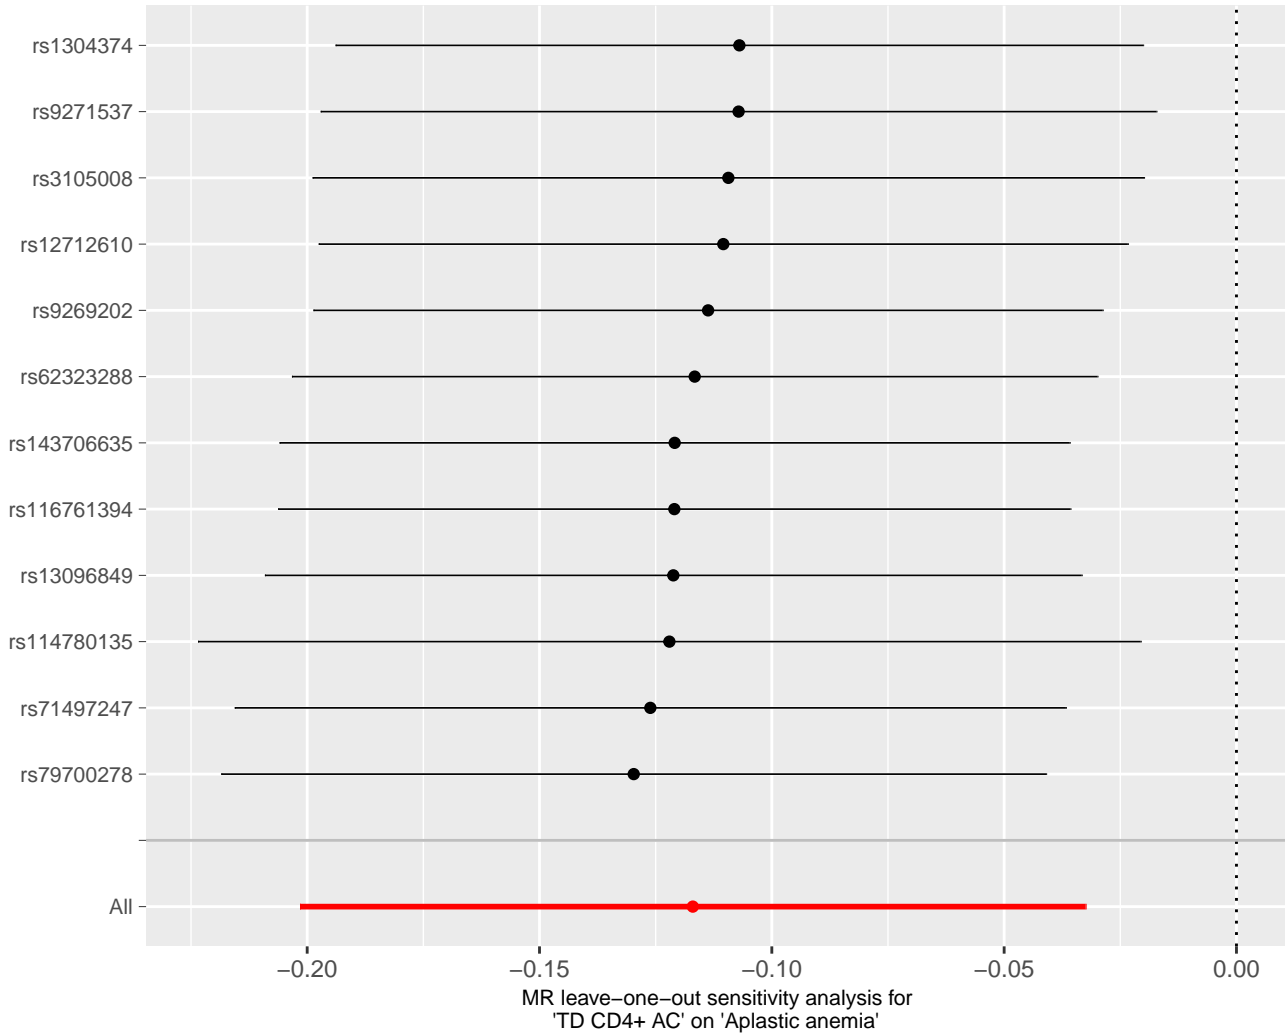

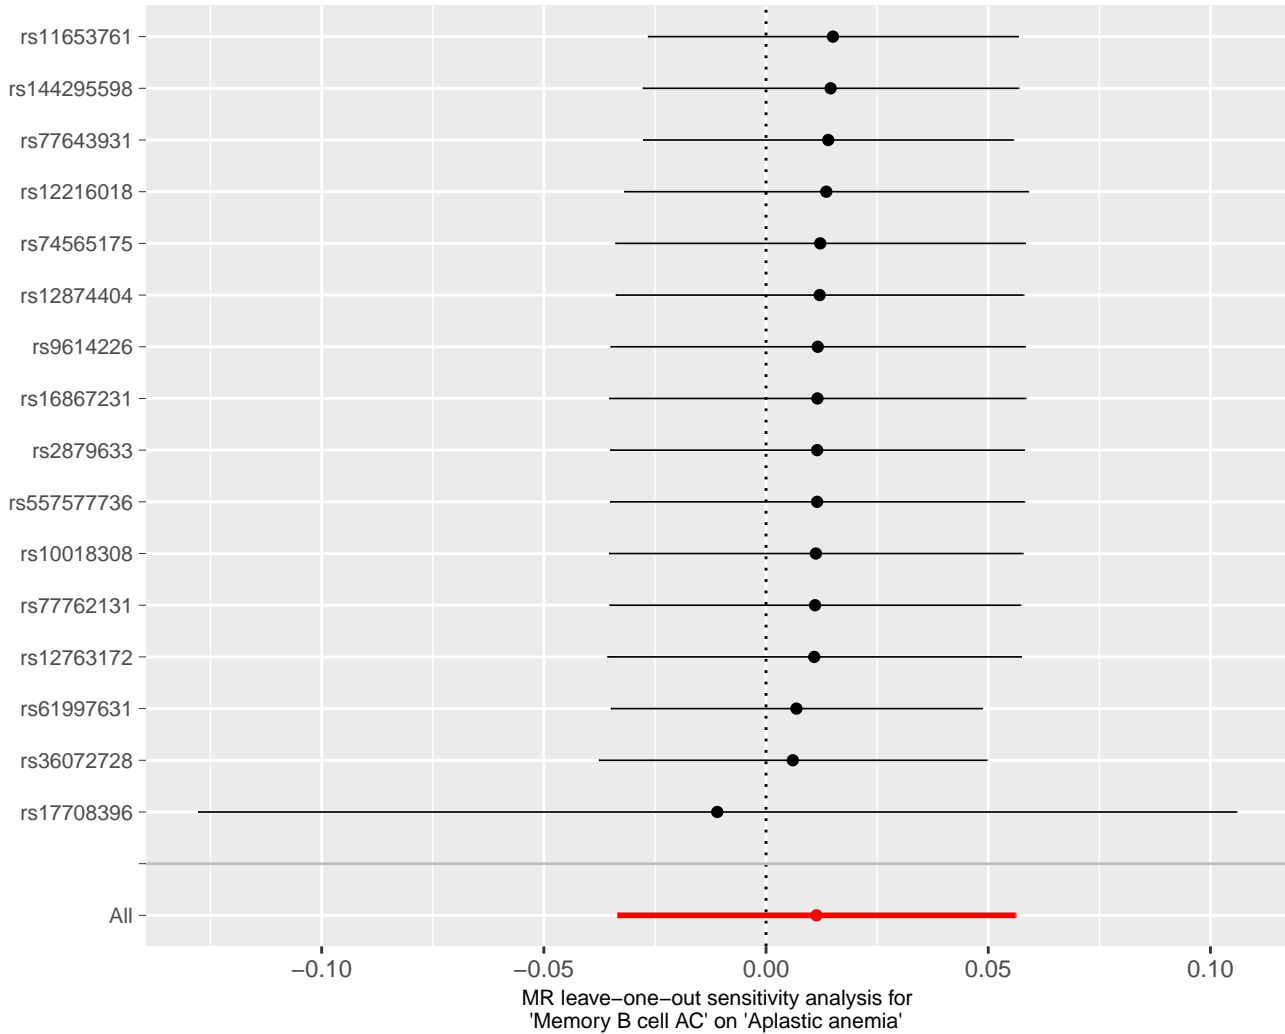

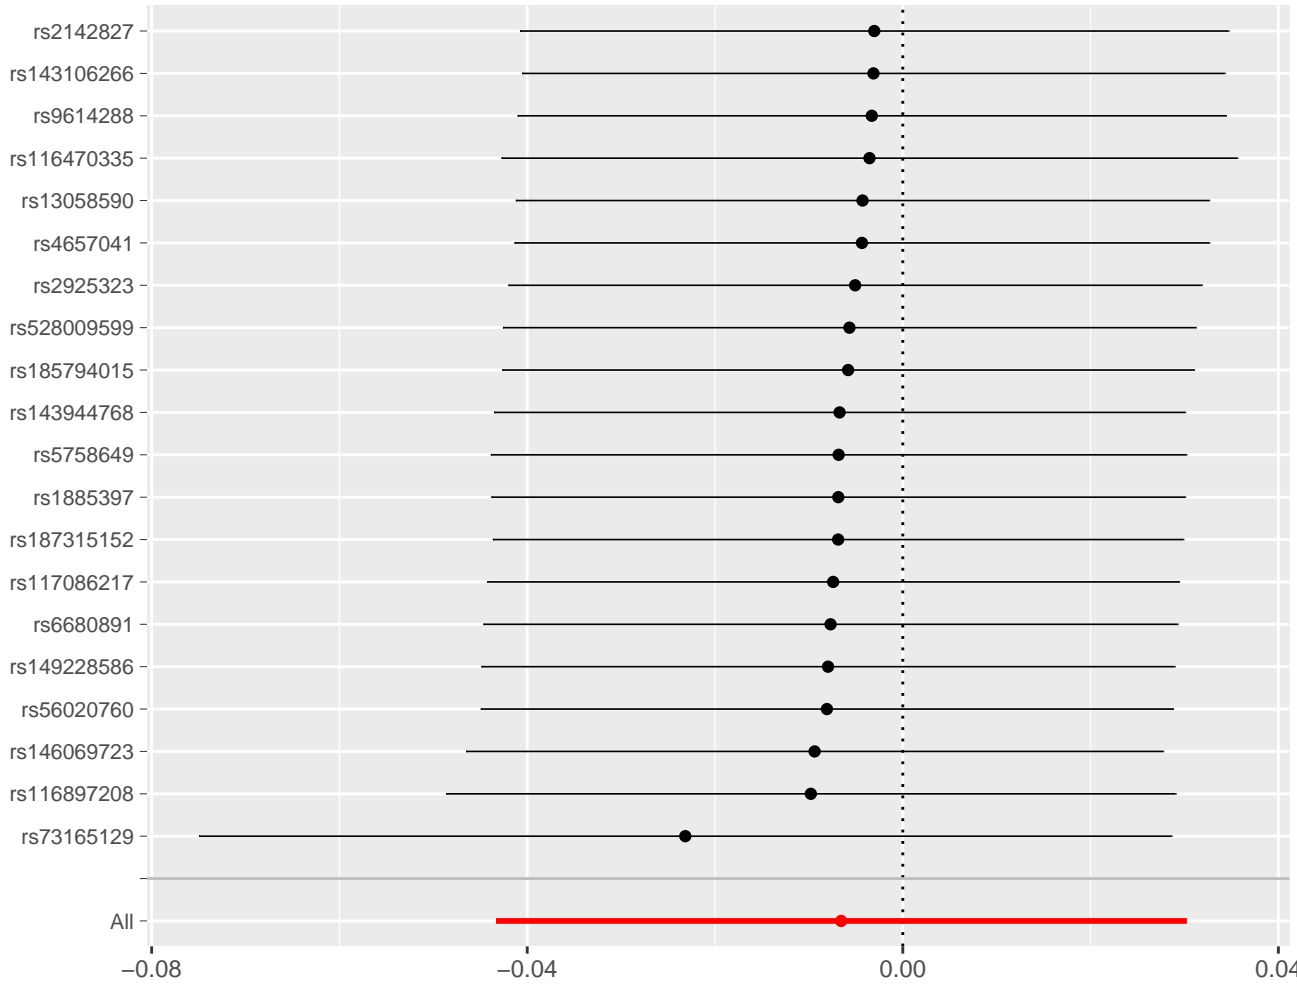

MR leave-one-out sensitivity analysis for 'BAFF-R on CD24+ CD27+' on 'Aplastic anemia'

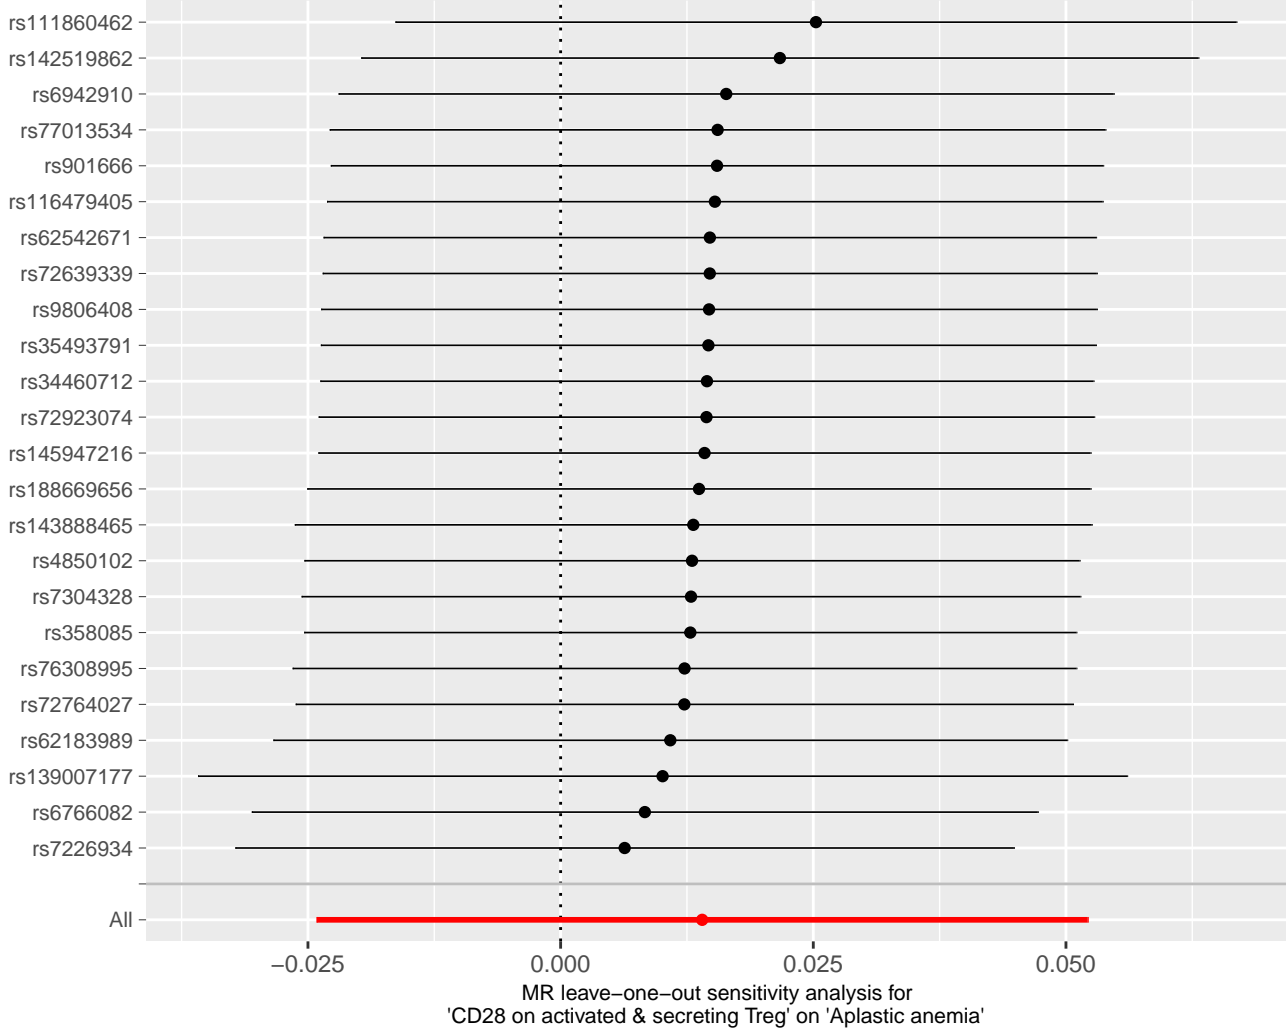

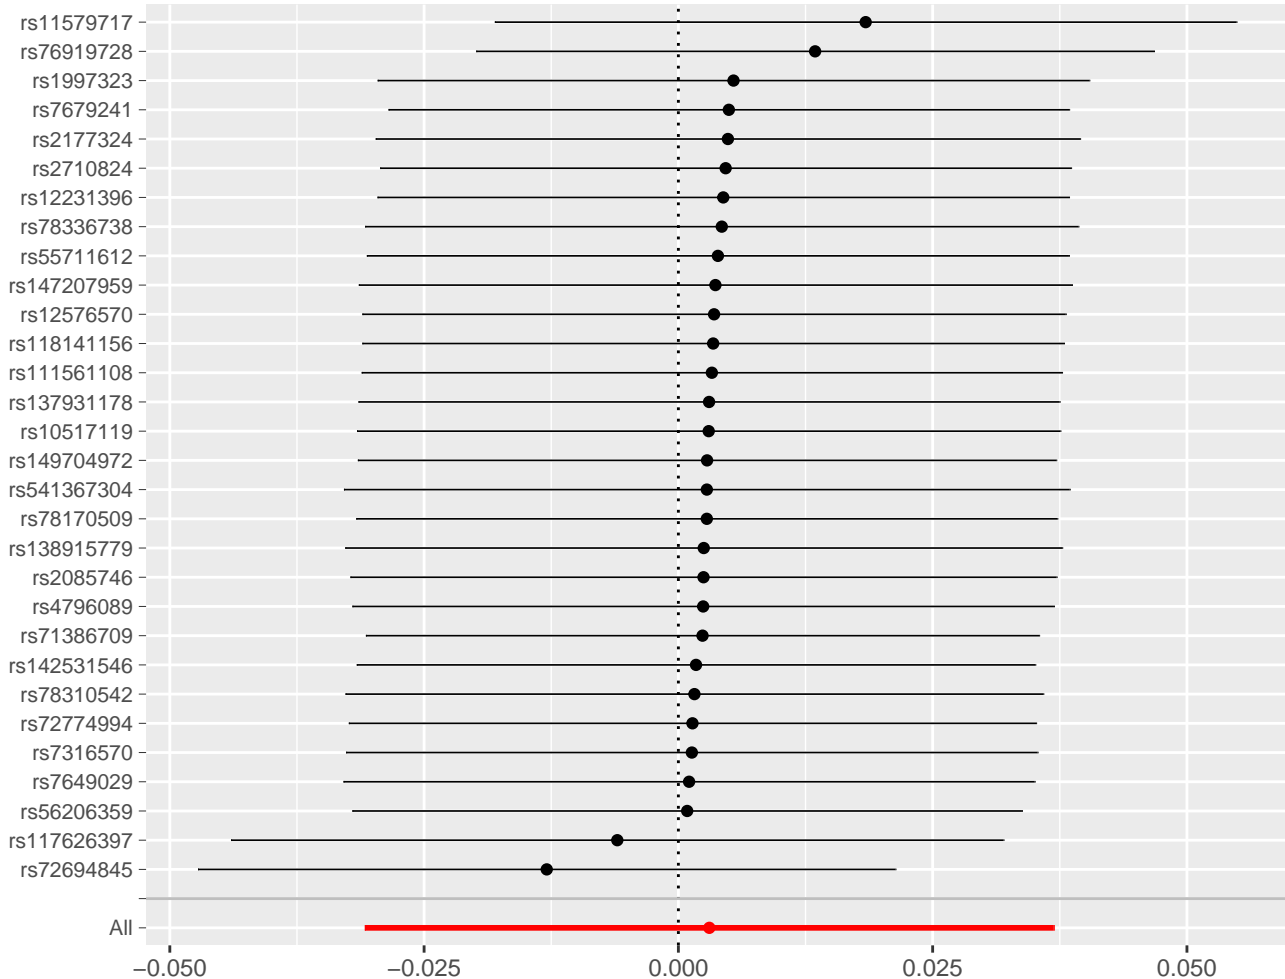

MR leave-one-out sensitivity analysis for 'CD28+ CD45RA- CD8dim %CD8dim' on 'Aplastic anemia'

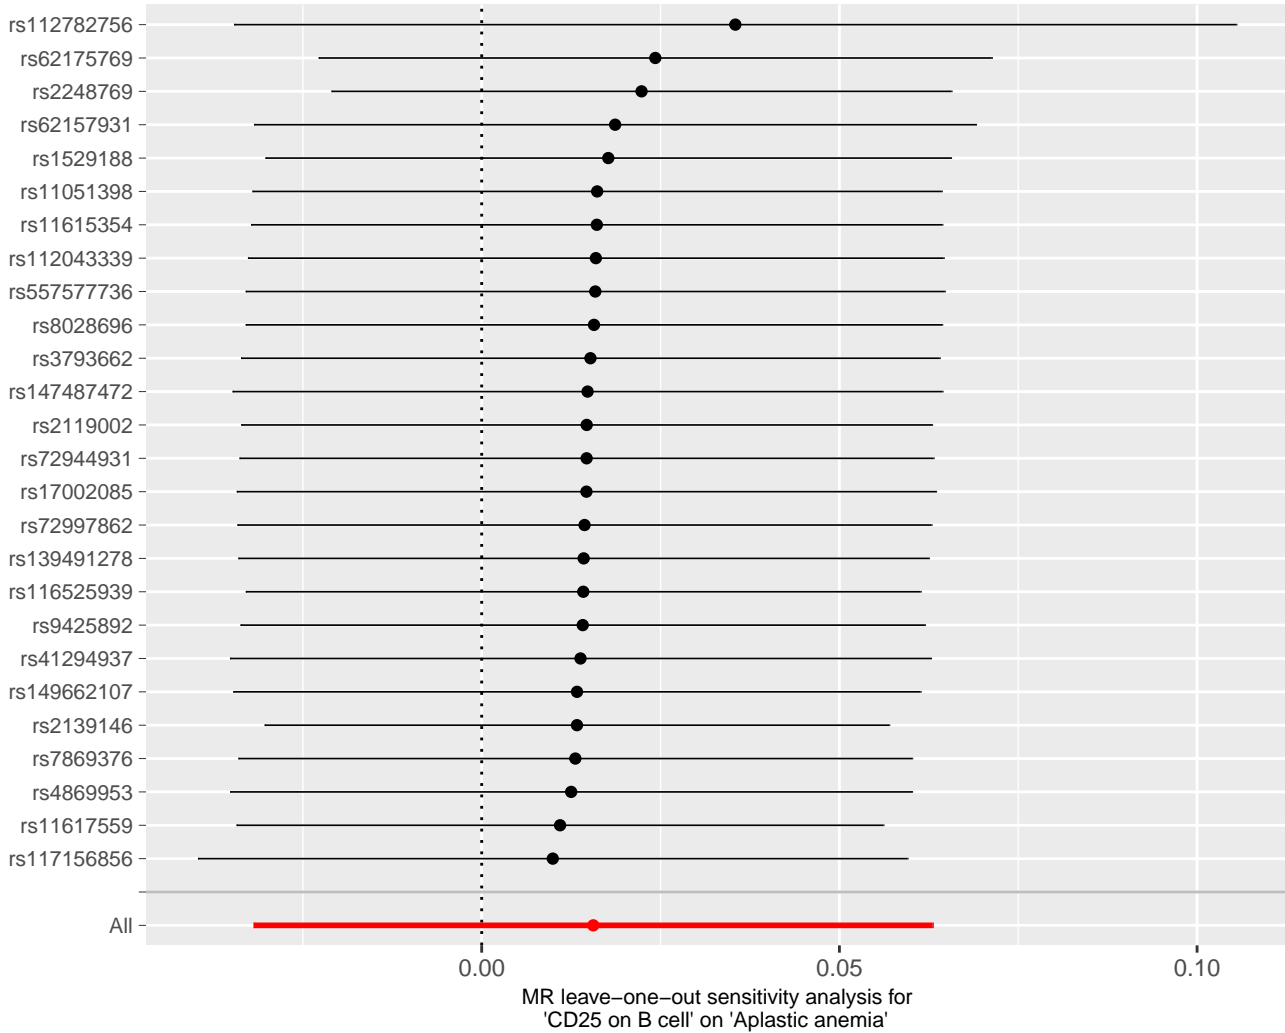

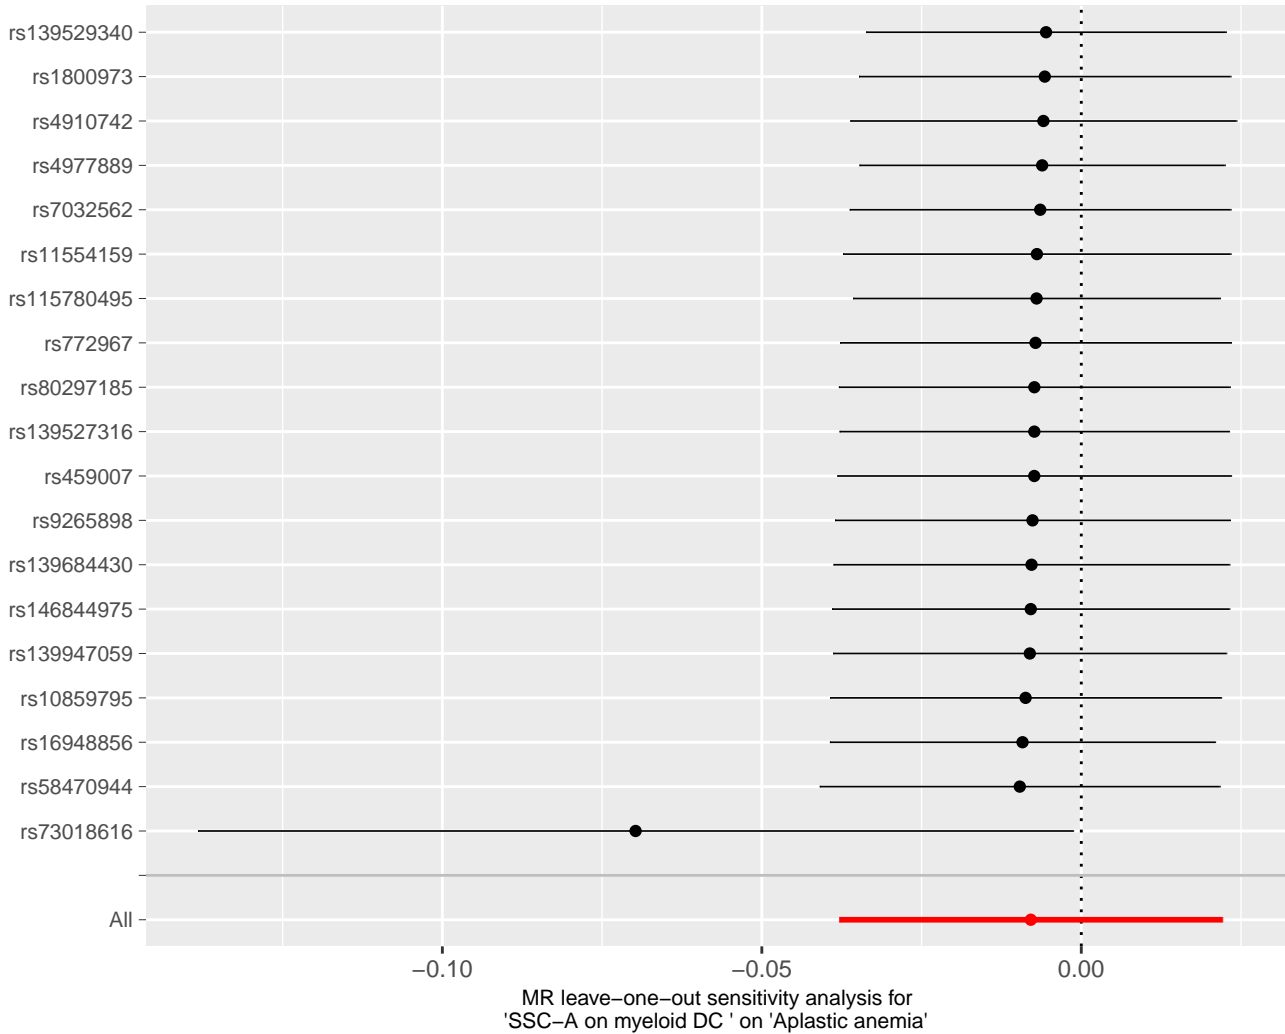



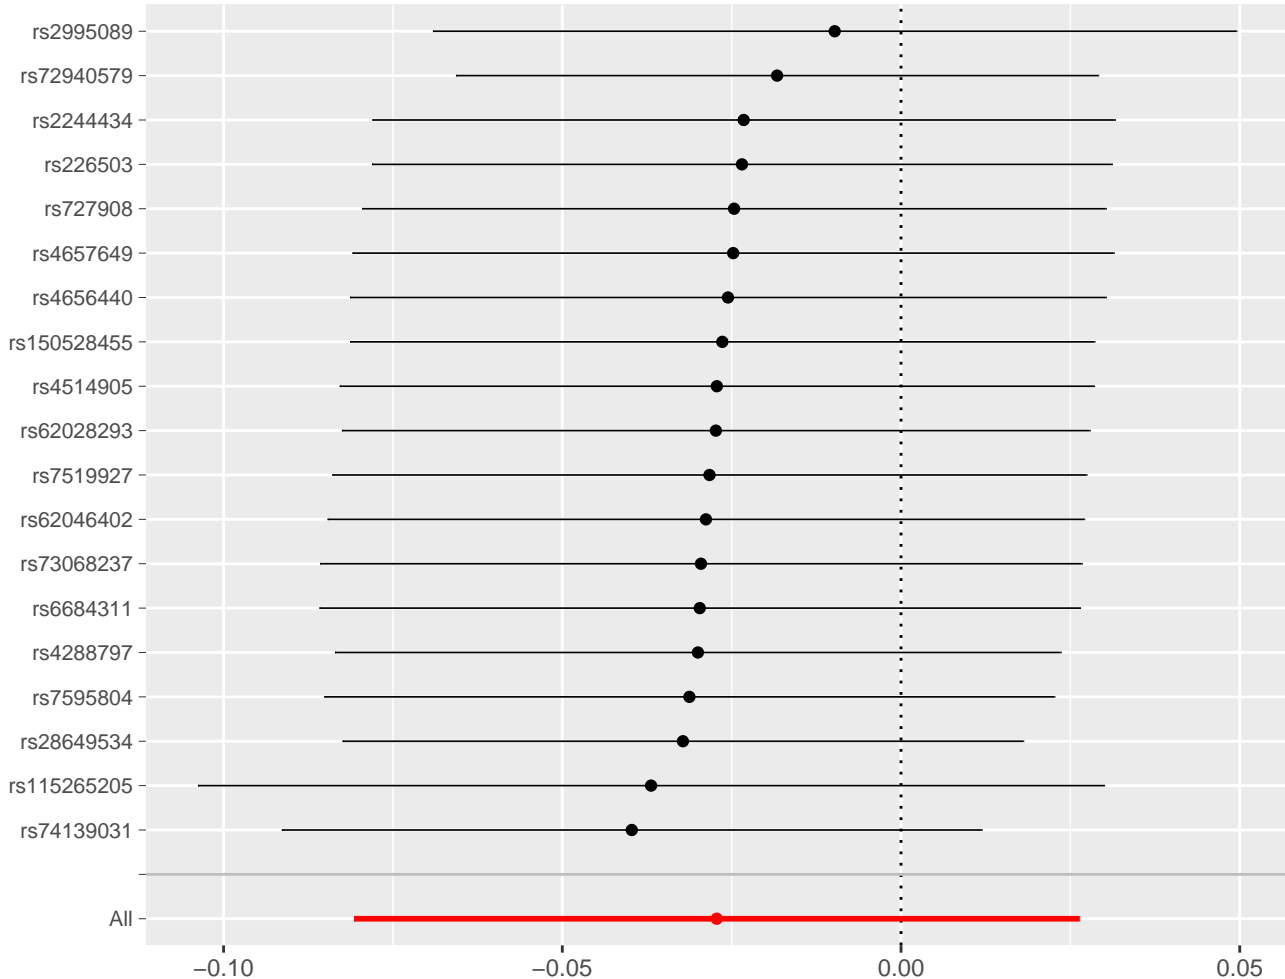

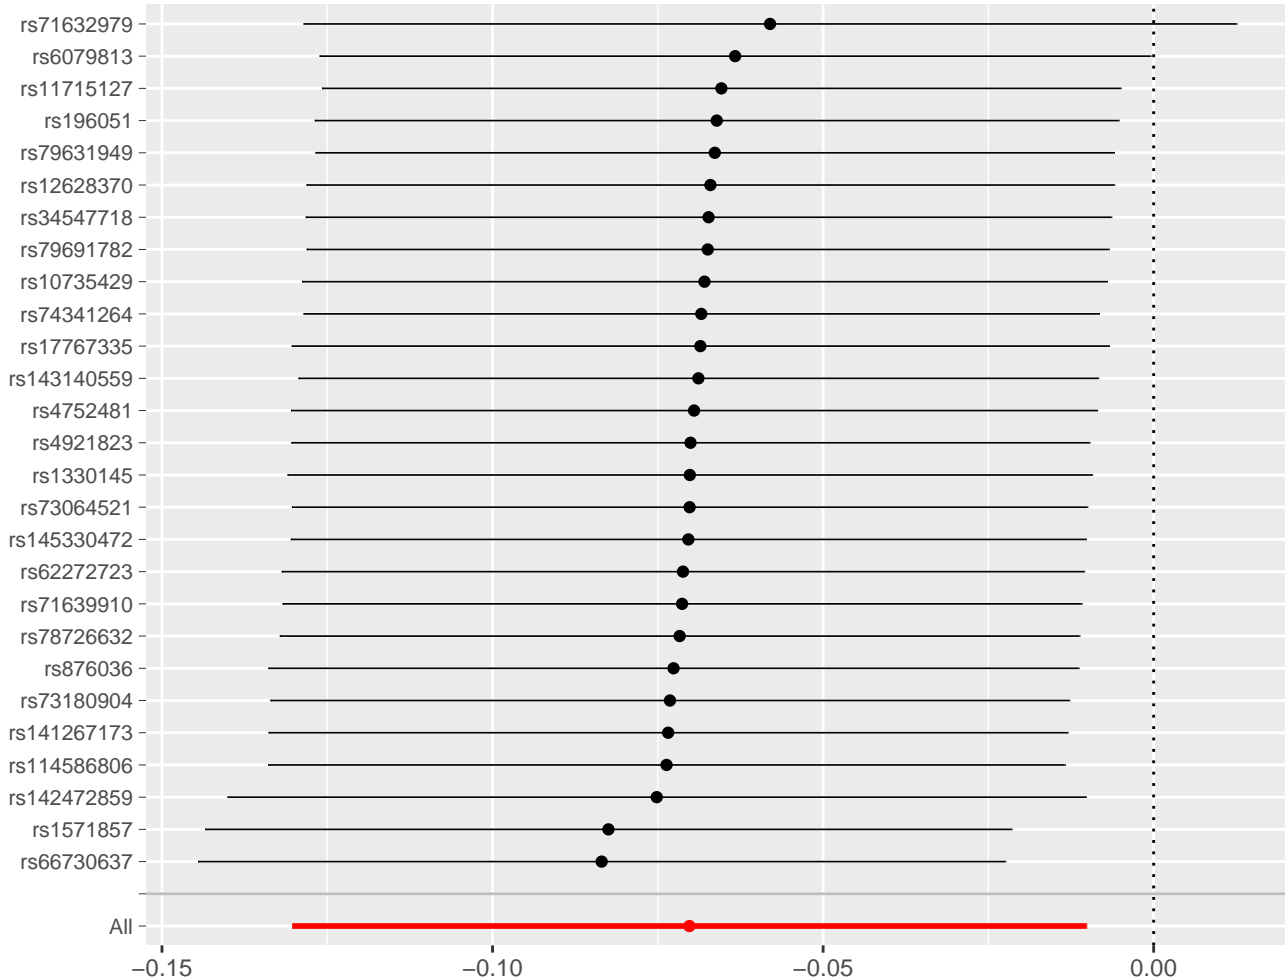

MR leave-one-out sensitivity analysis for 'Myeloid DC %DC' on 'Aplastic anemia'

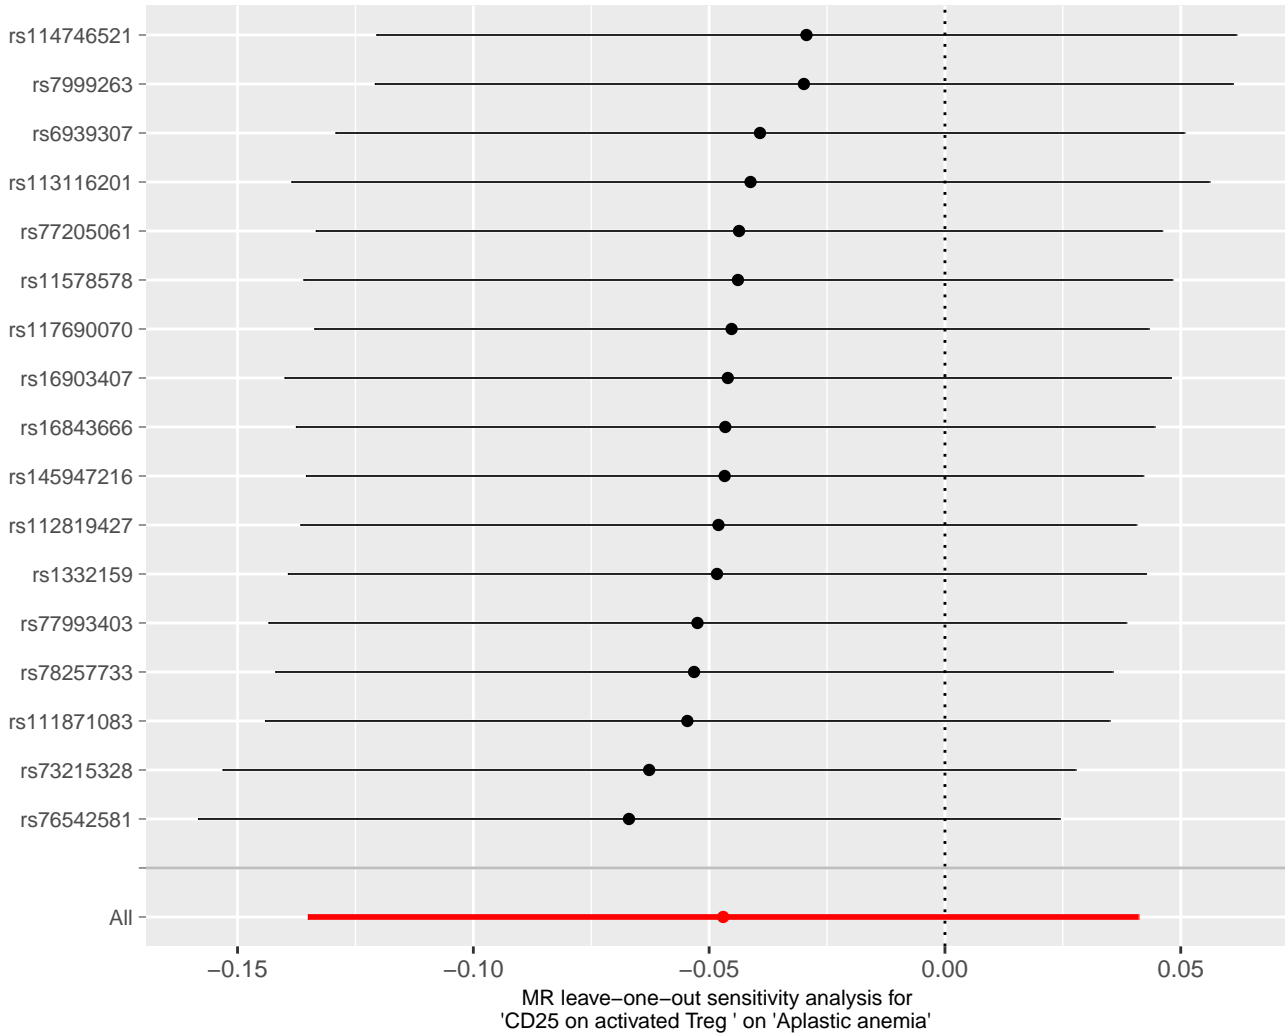

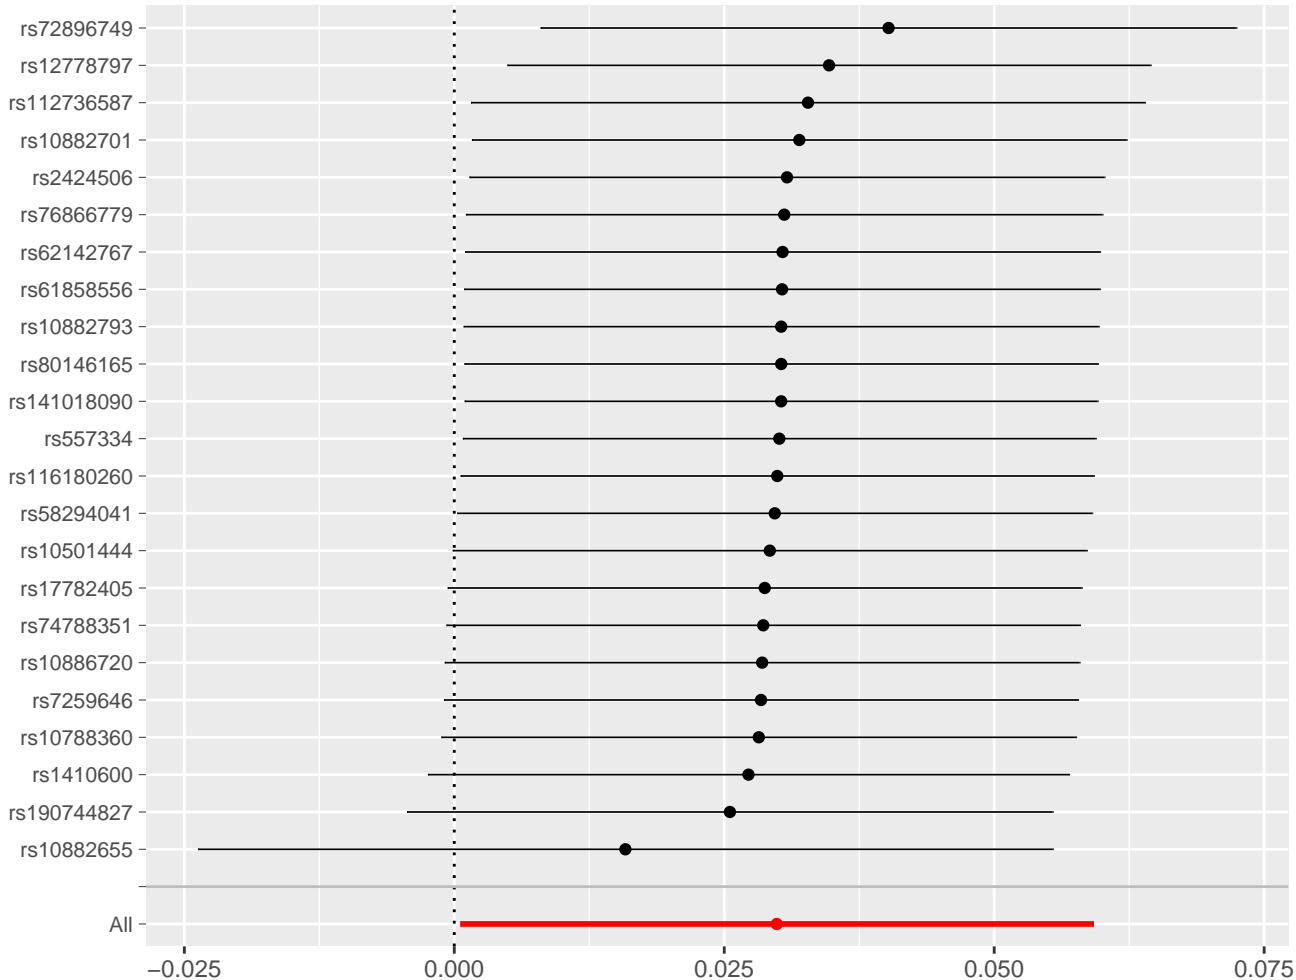

MR leave-one-out sensitivity analysis for 'CD39 on CD39+ secreting Treg' on 'Aplastic anemia'

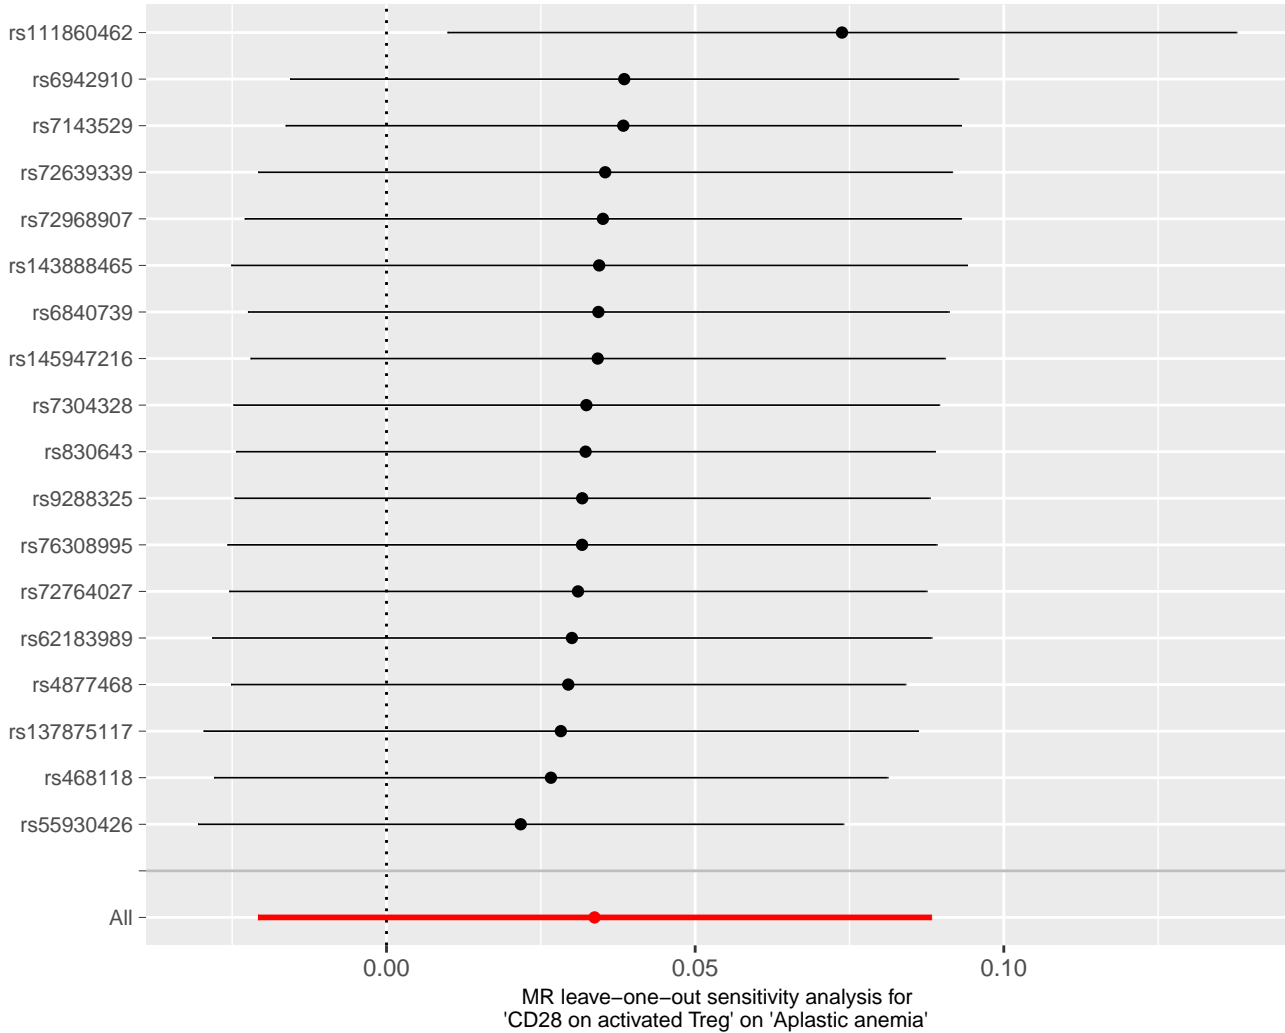

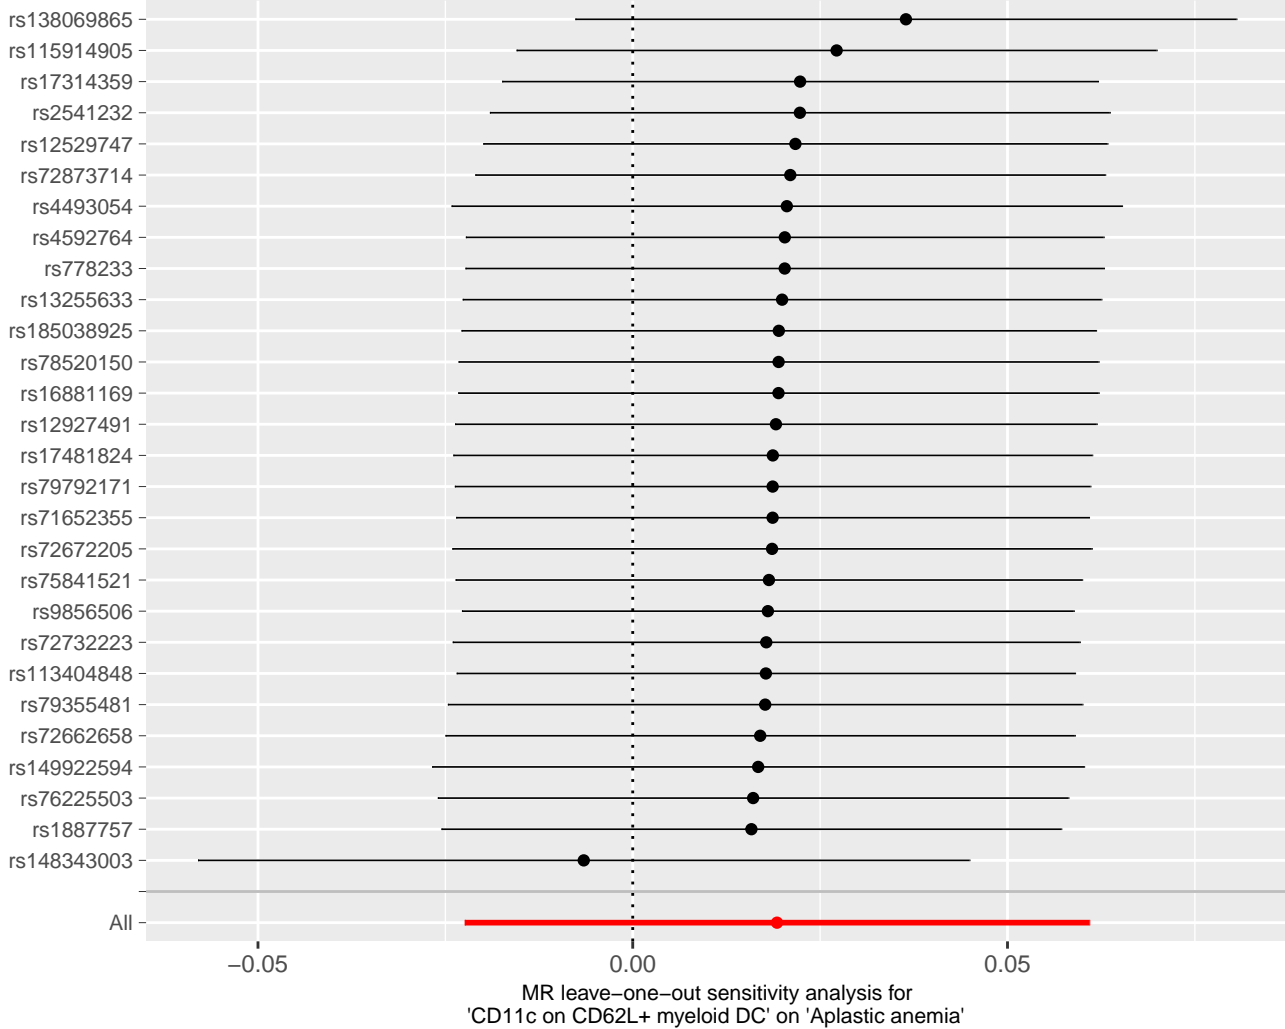

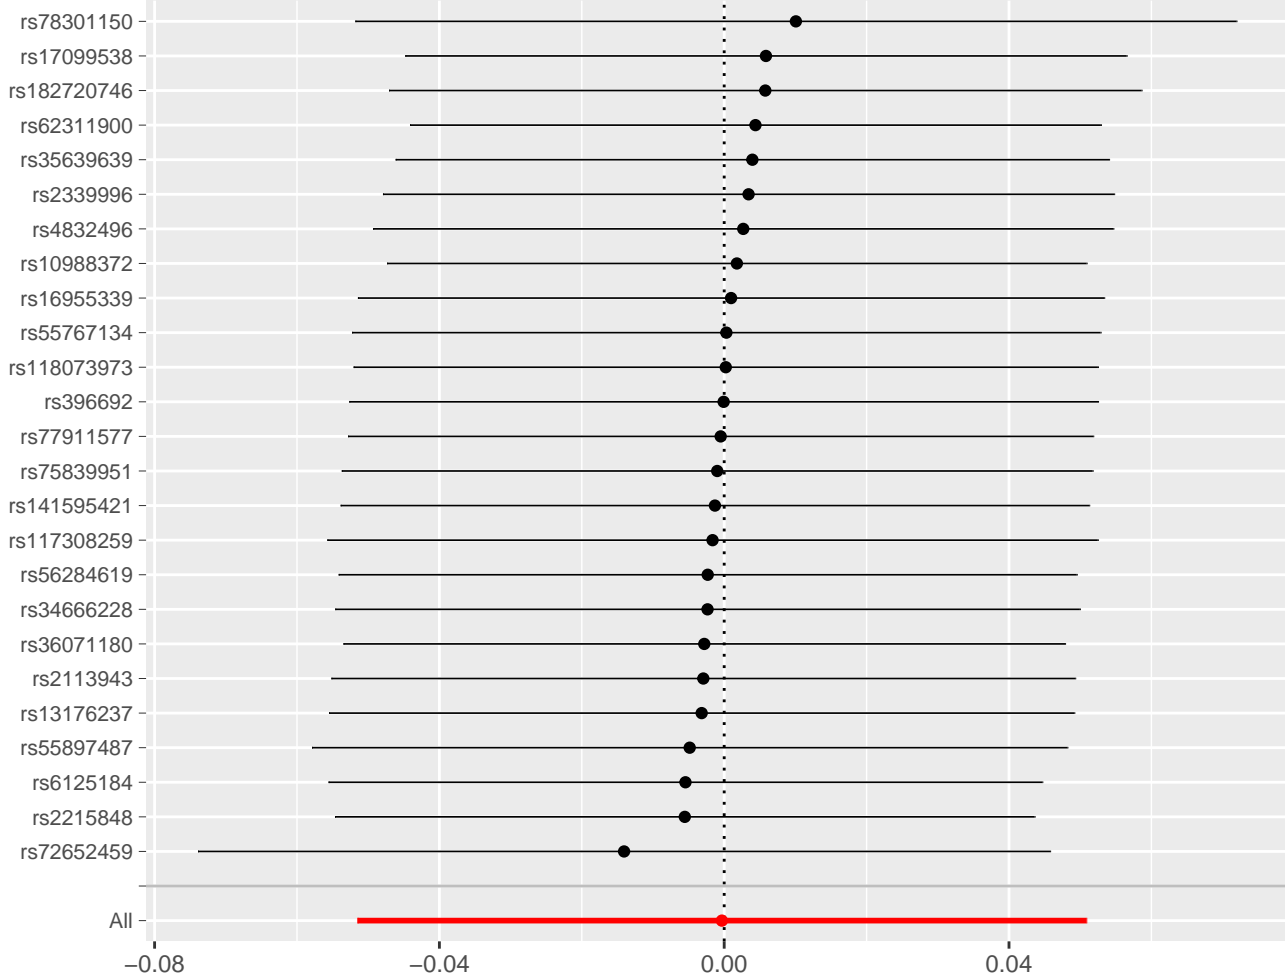

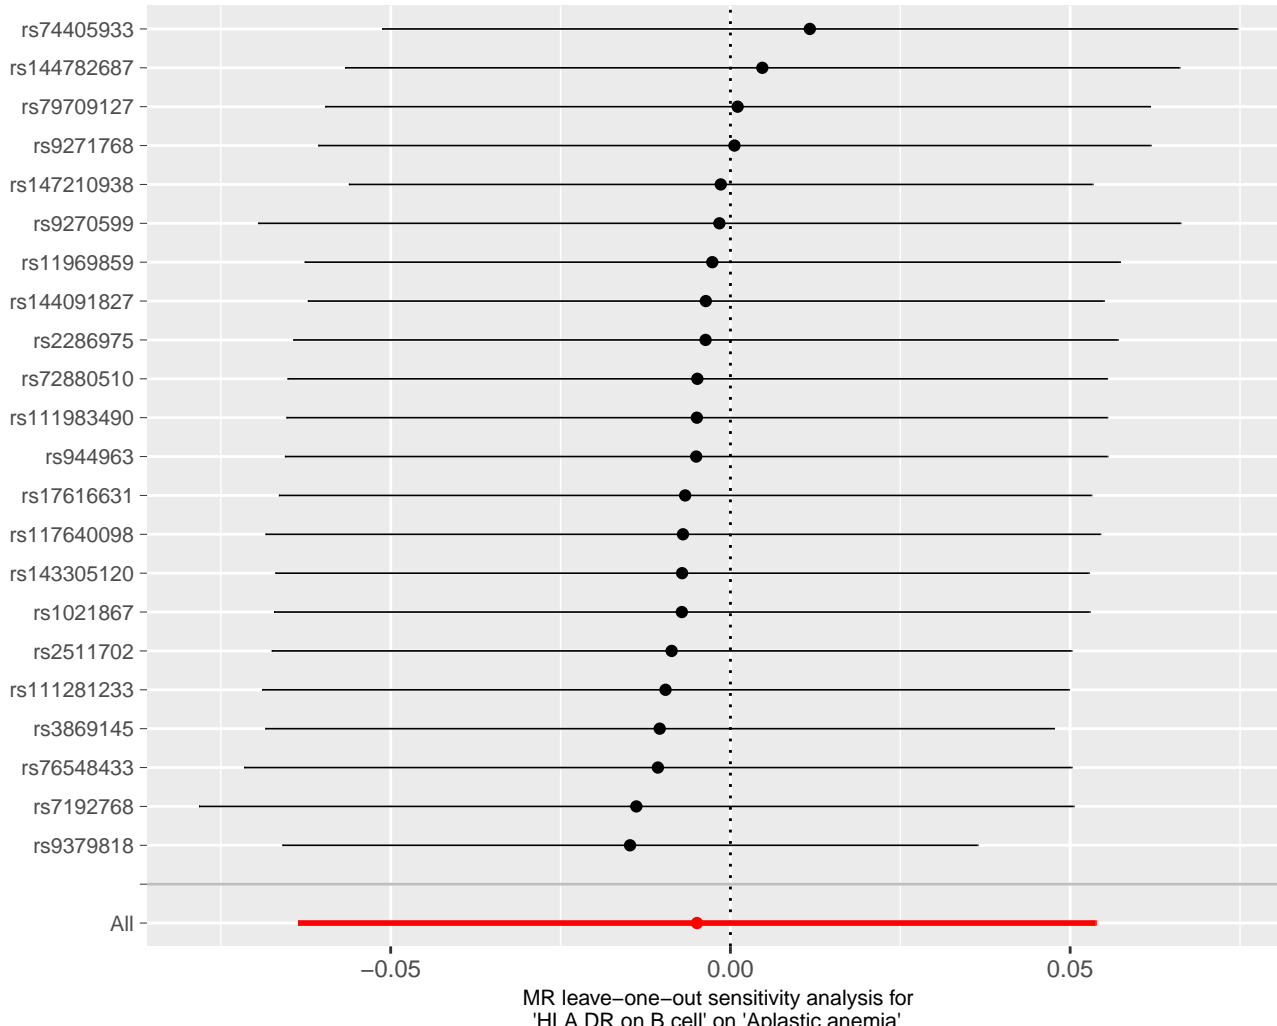



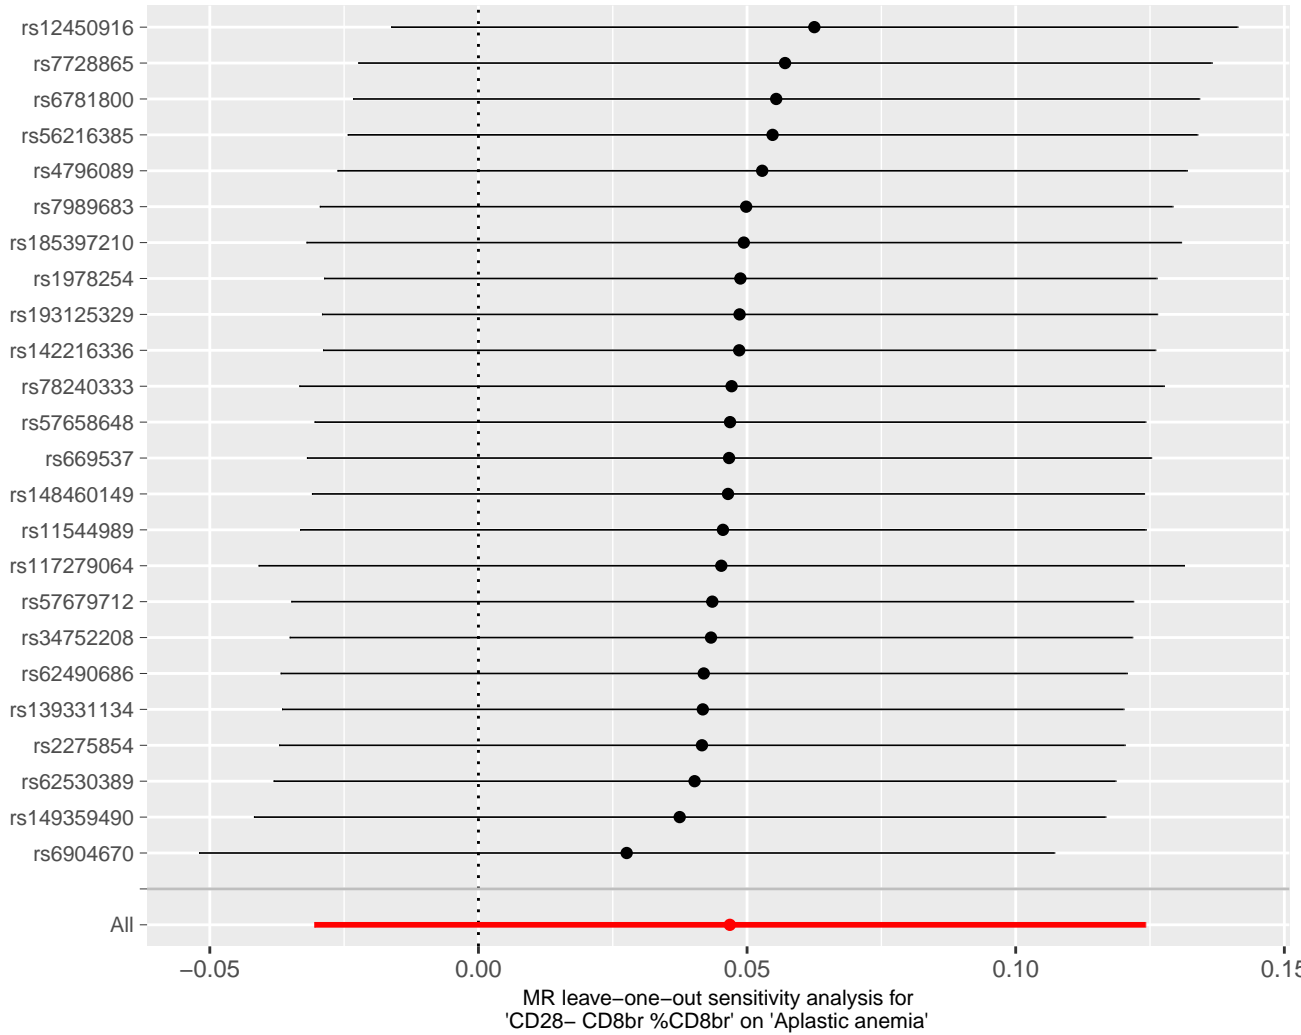

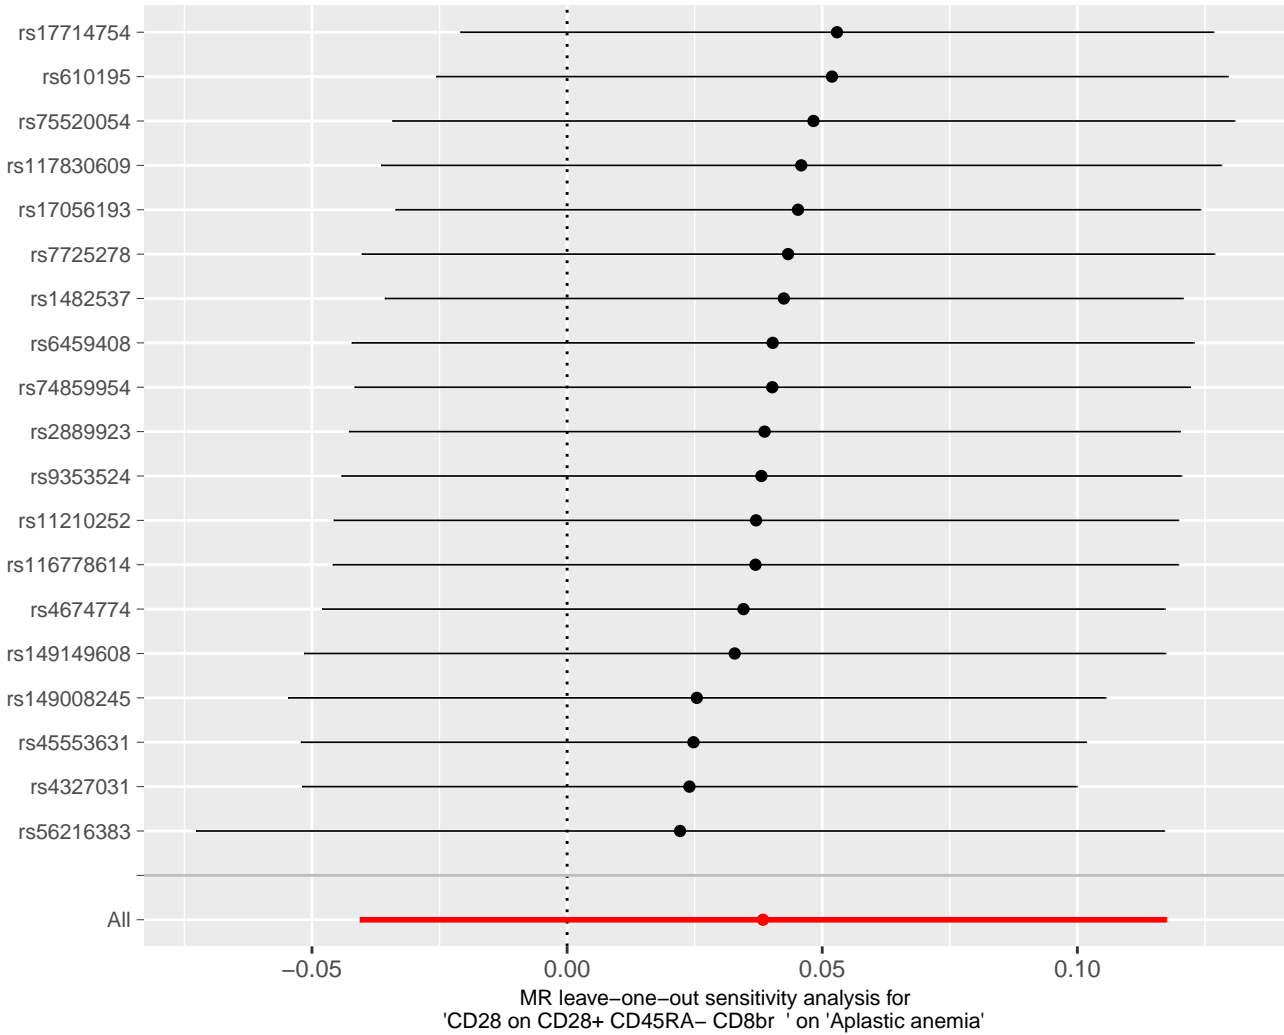

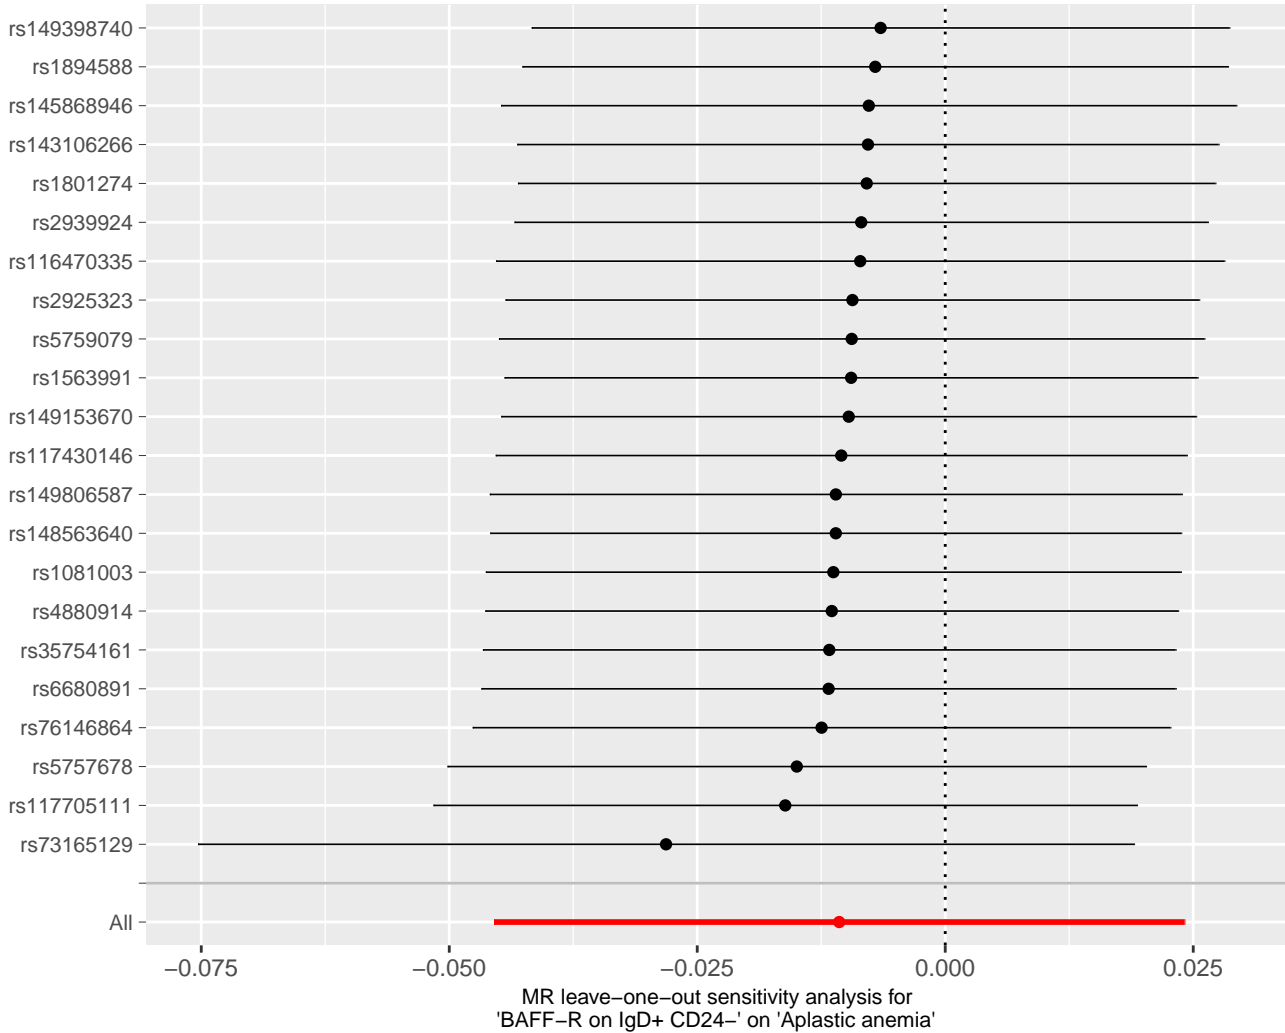

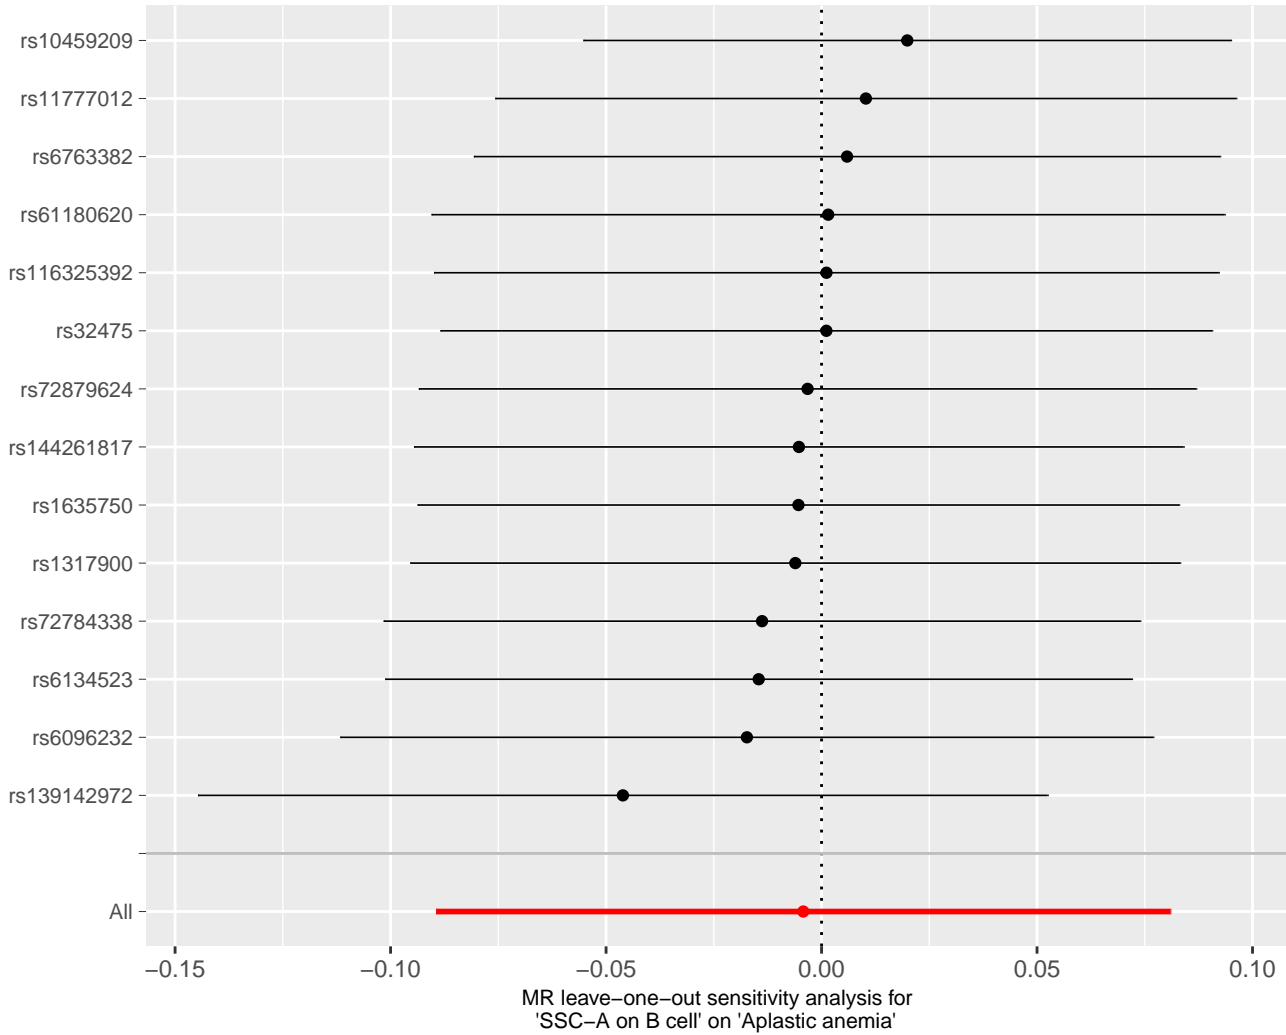

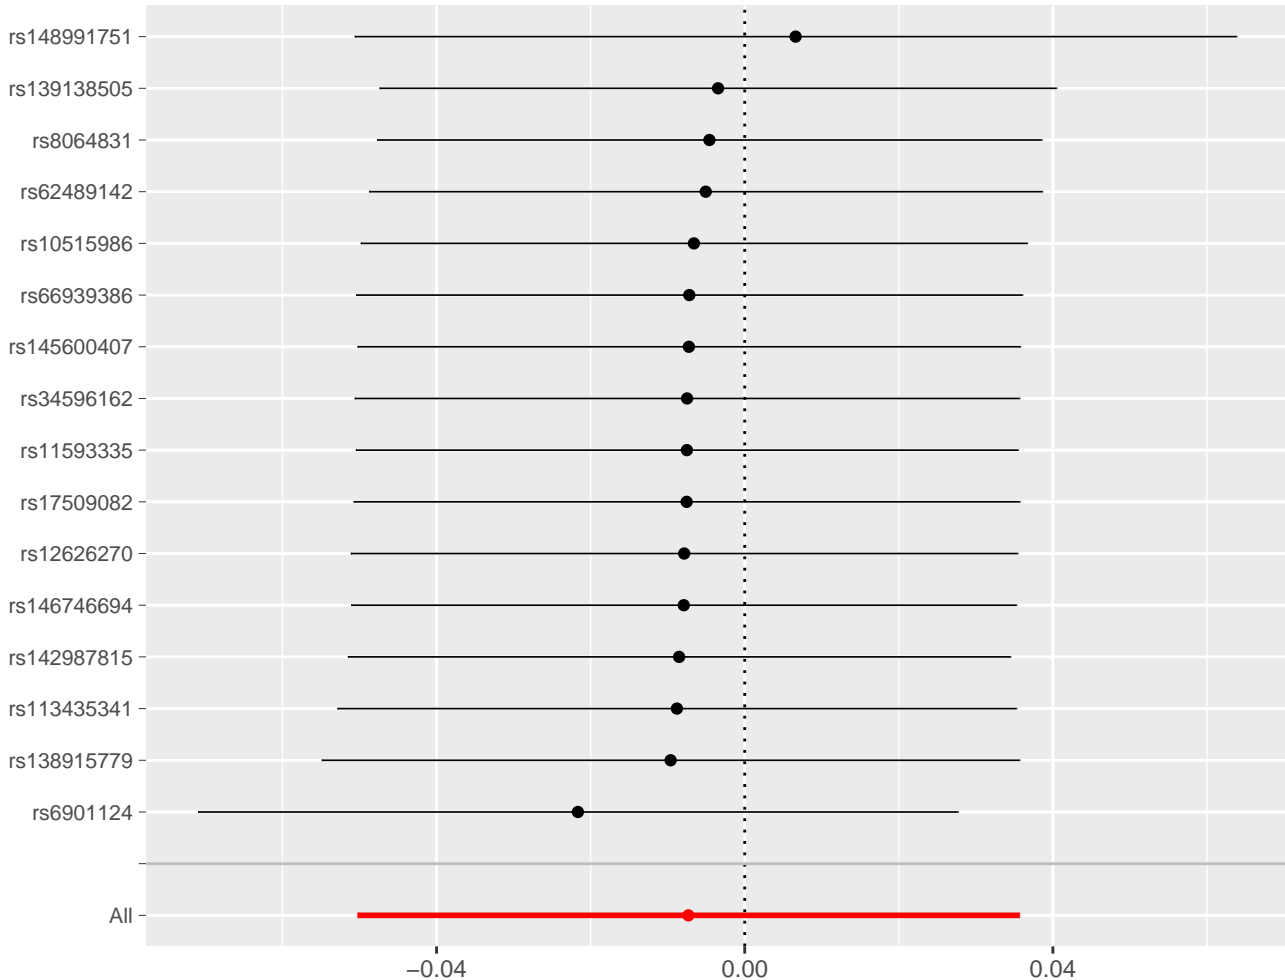

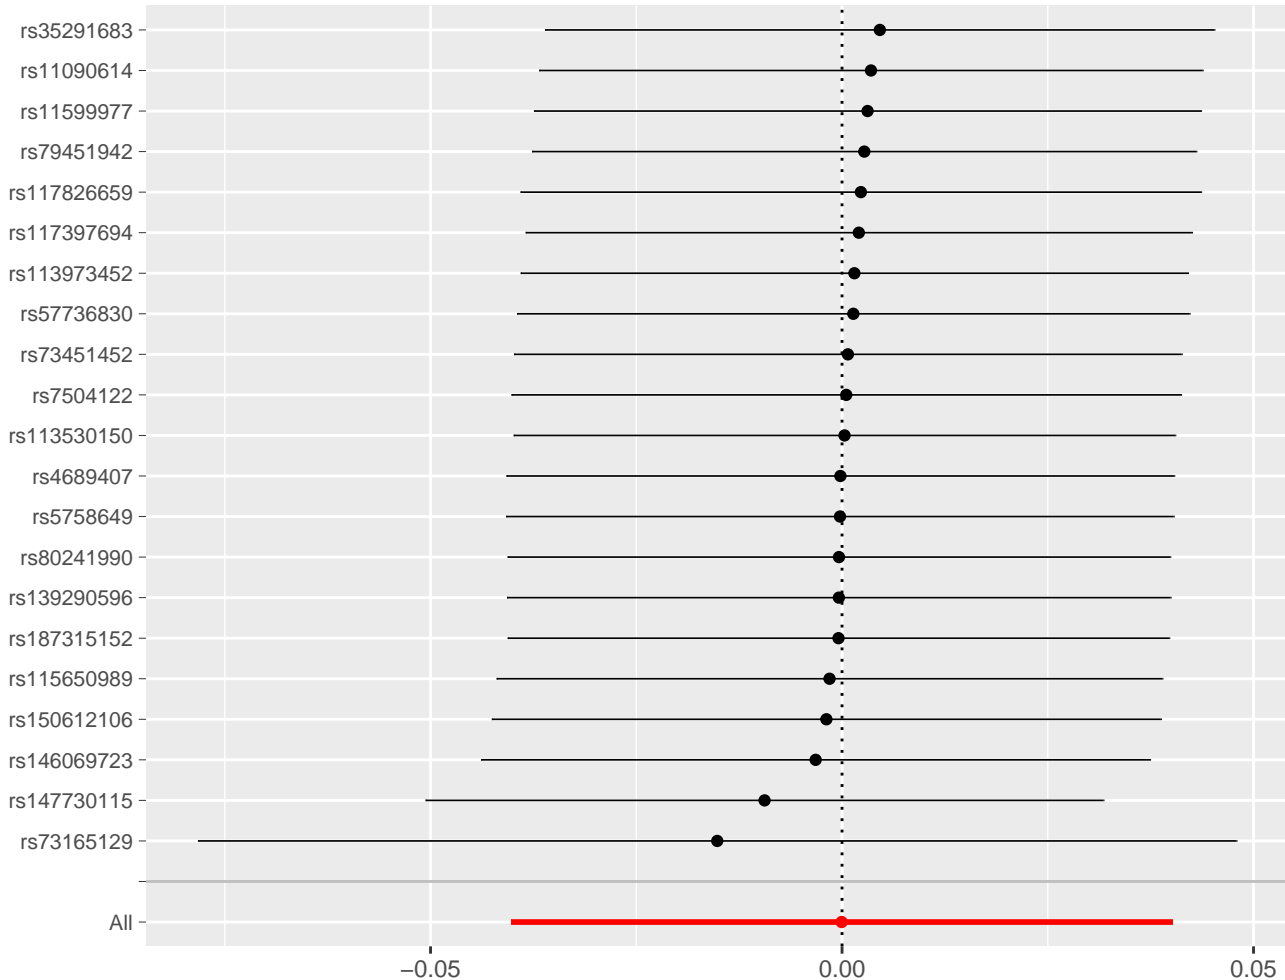

MR leave-one-out sensitivity analysis for 'BAFF-R on IgD+ CD38- unsw mem' on 'Aplastic anemia'

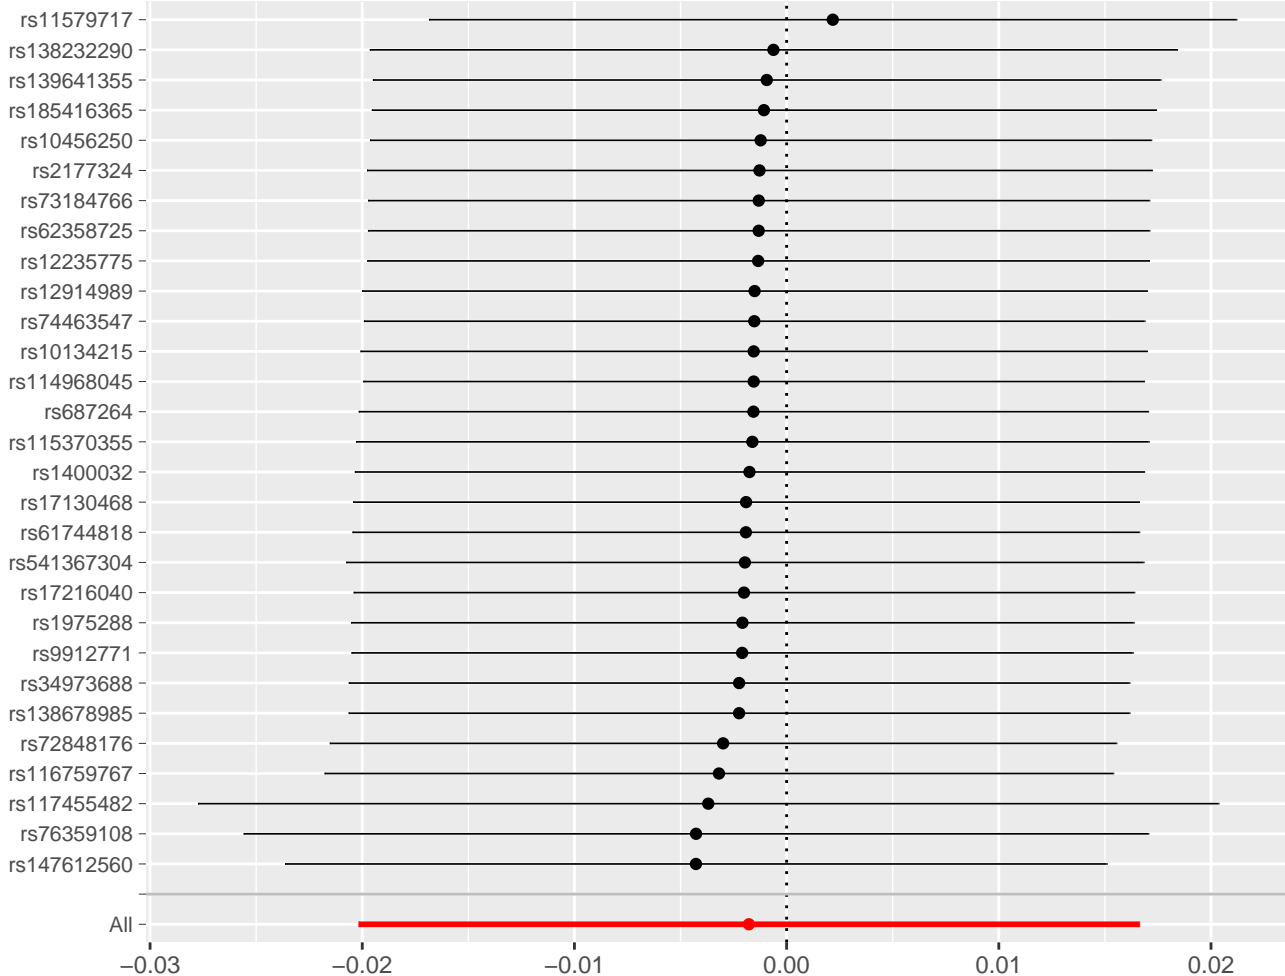

MR leave-one-out sensitivity analysis for 'CD28+ CD45RA- CD8dim %T cell' on 'Aplastic anemia'

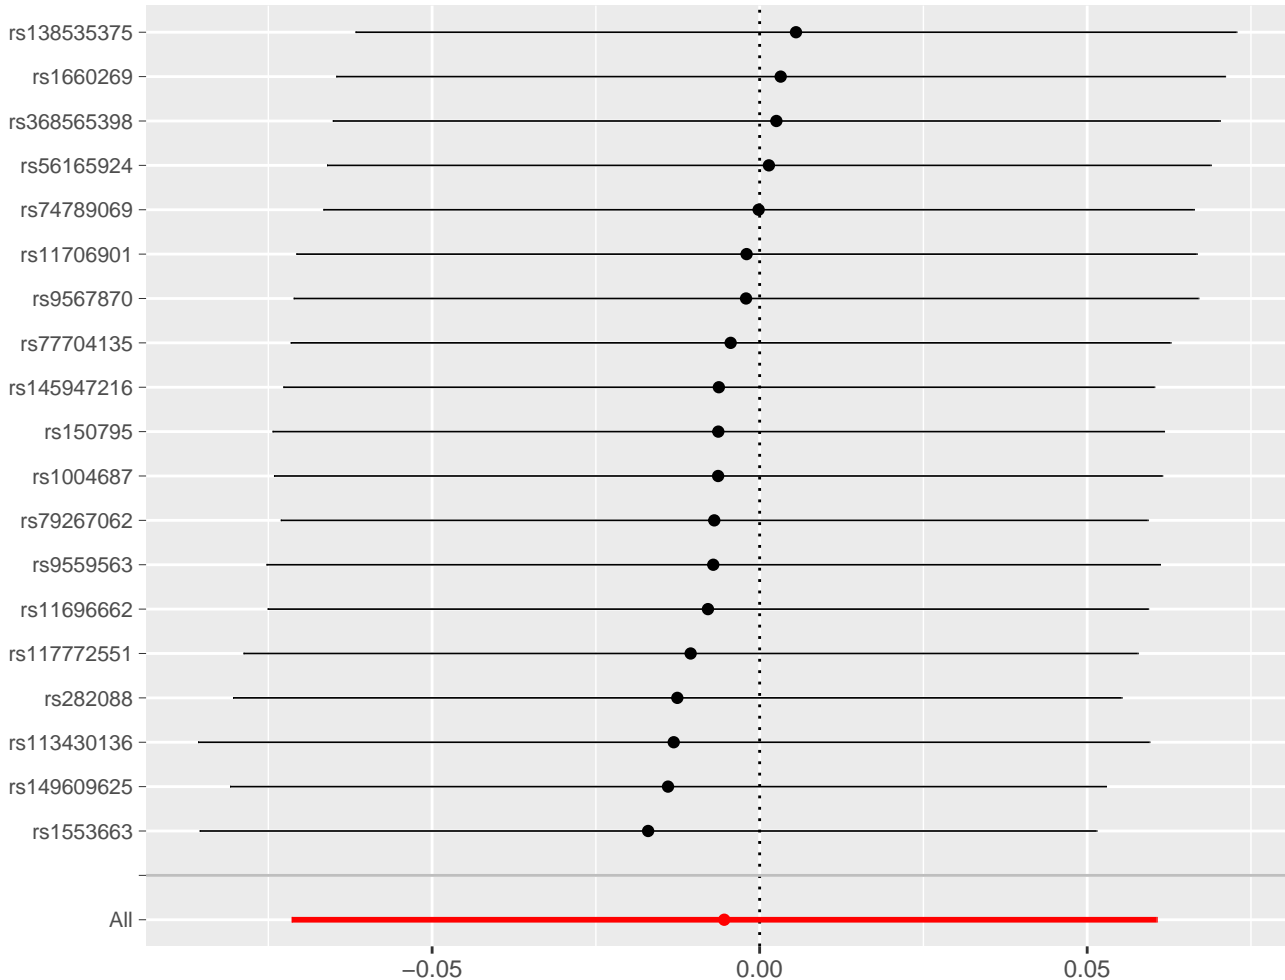



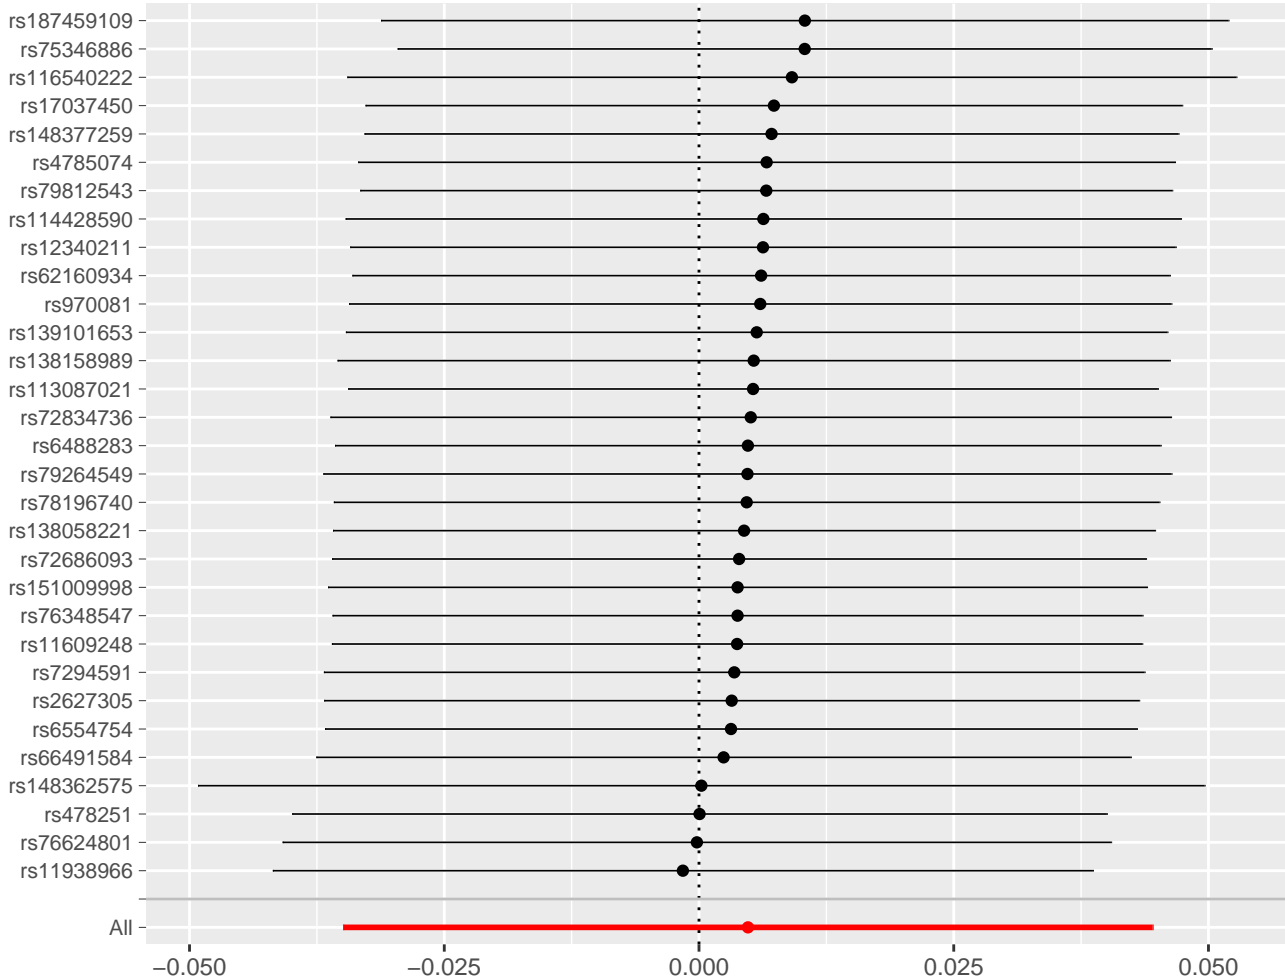

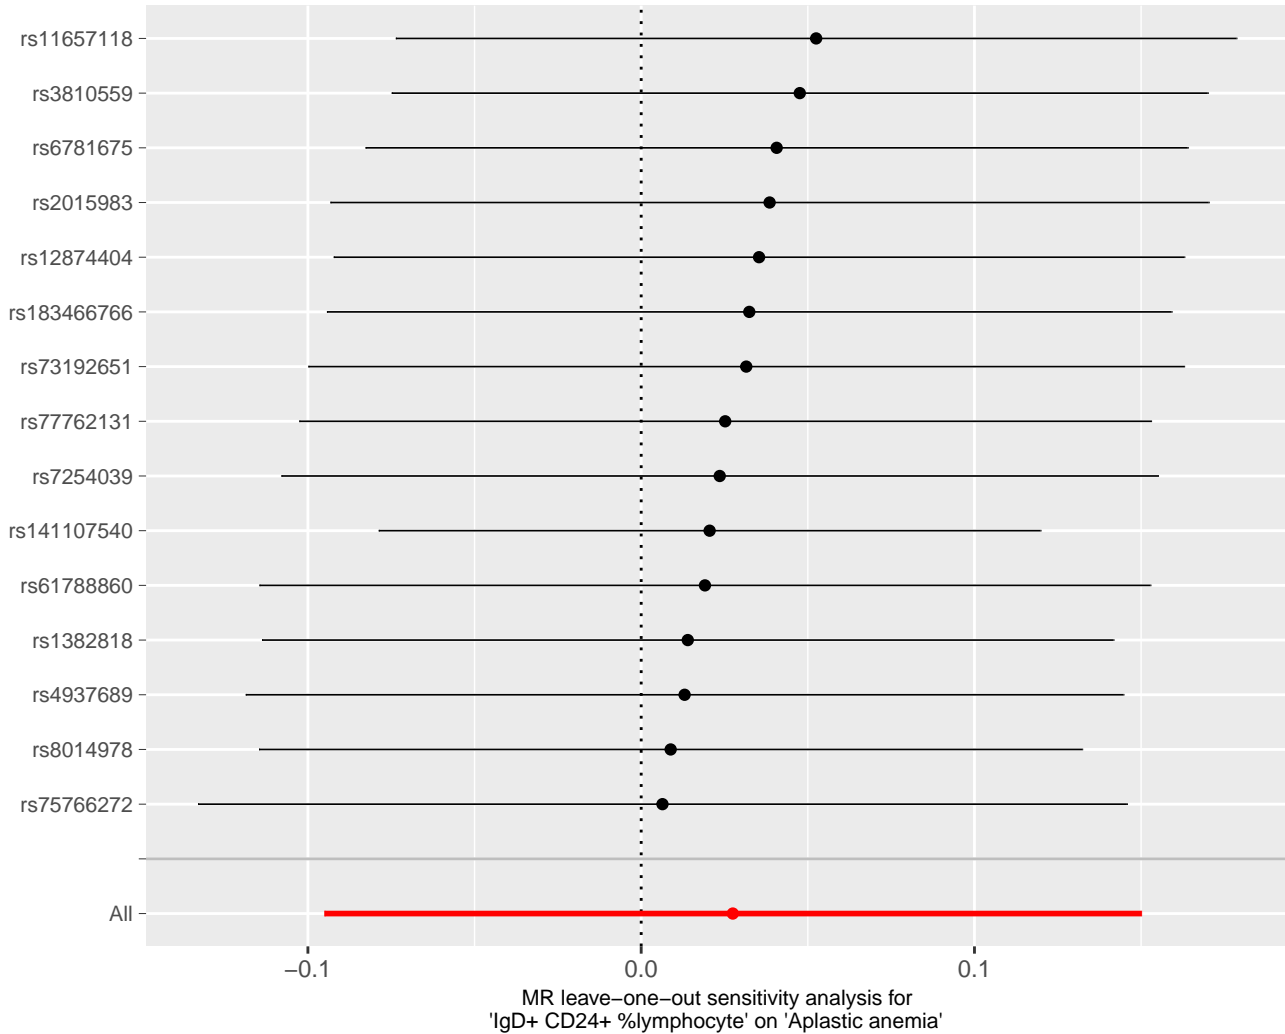

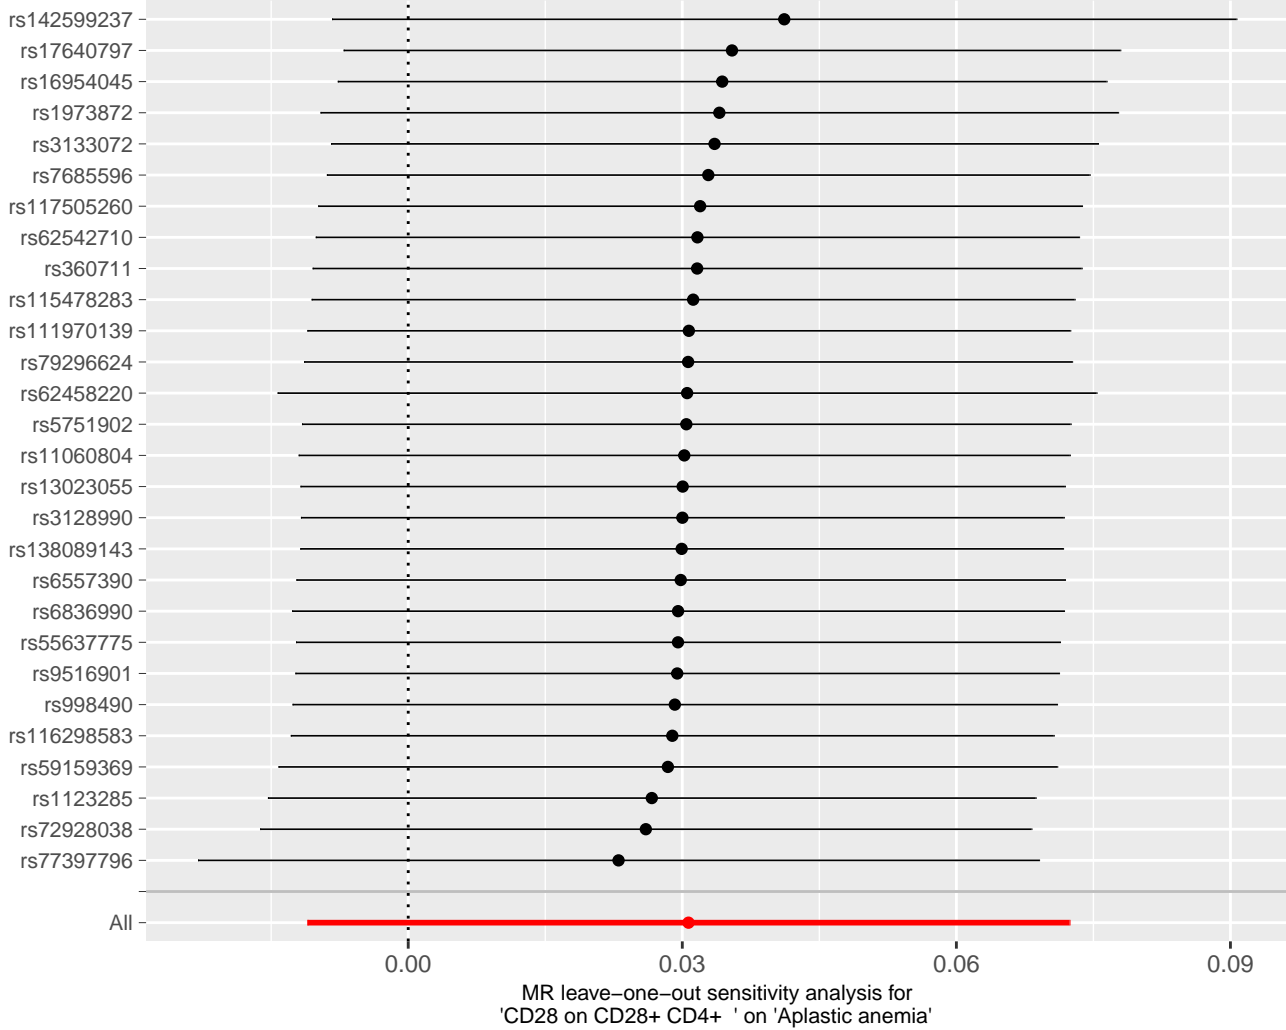

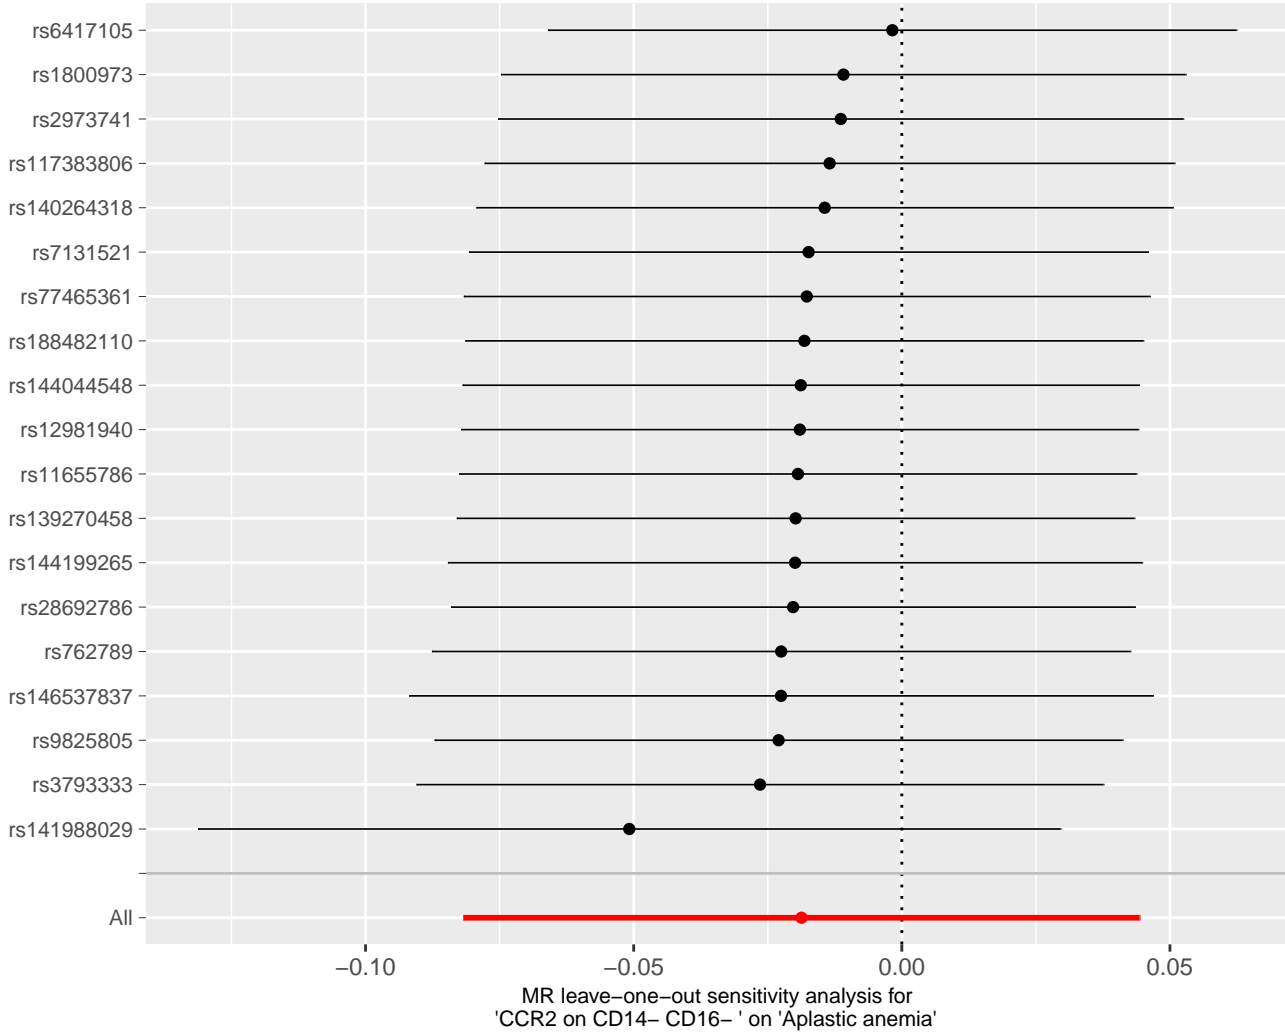

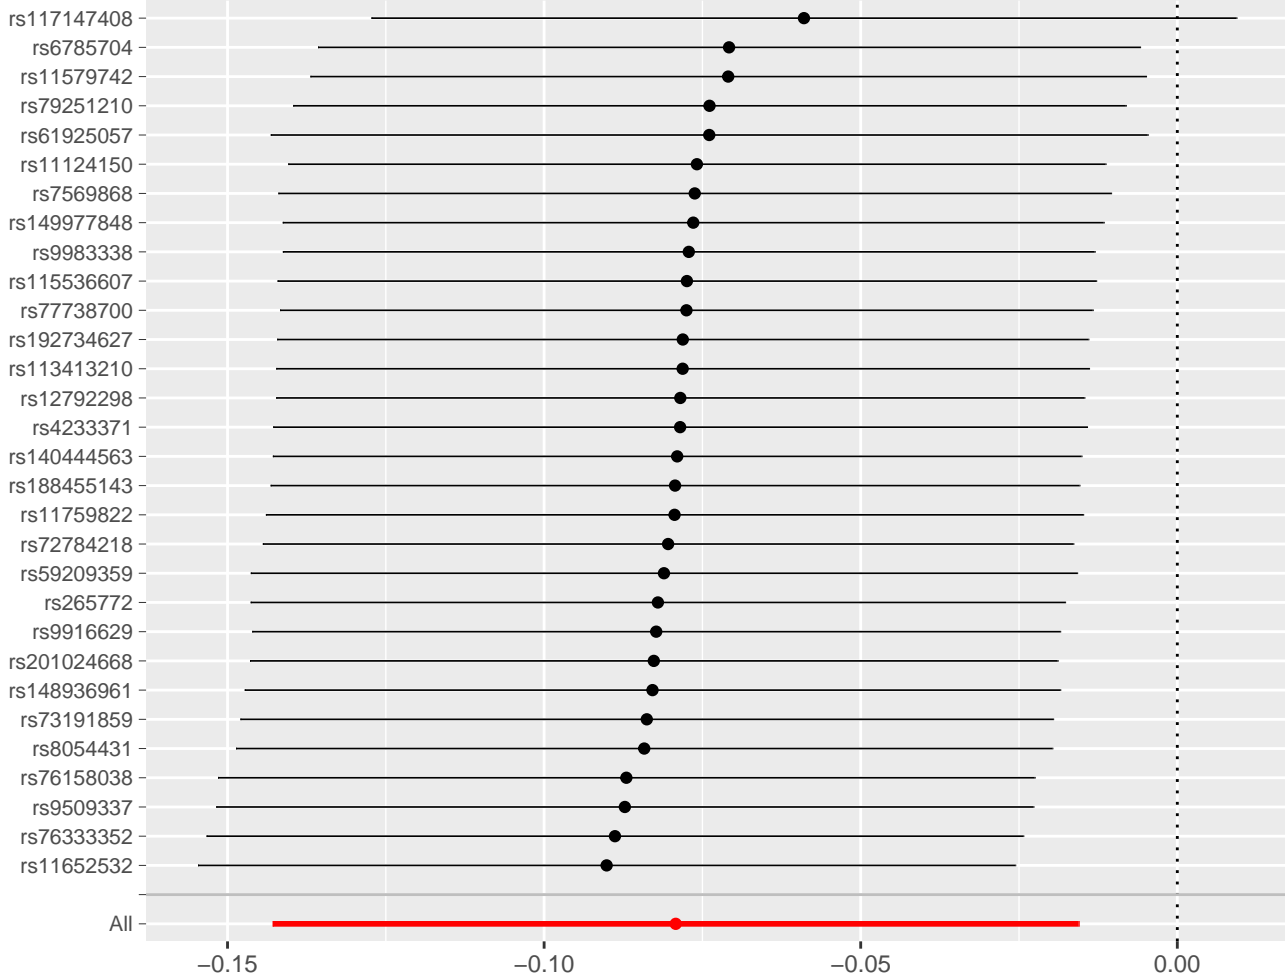

MR leave-one-out sensitivity analysis for 'DN (CD4-CD8-) NKT %lymphocyte' on 'Aplastic anemia'

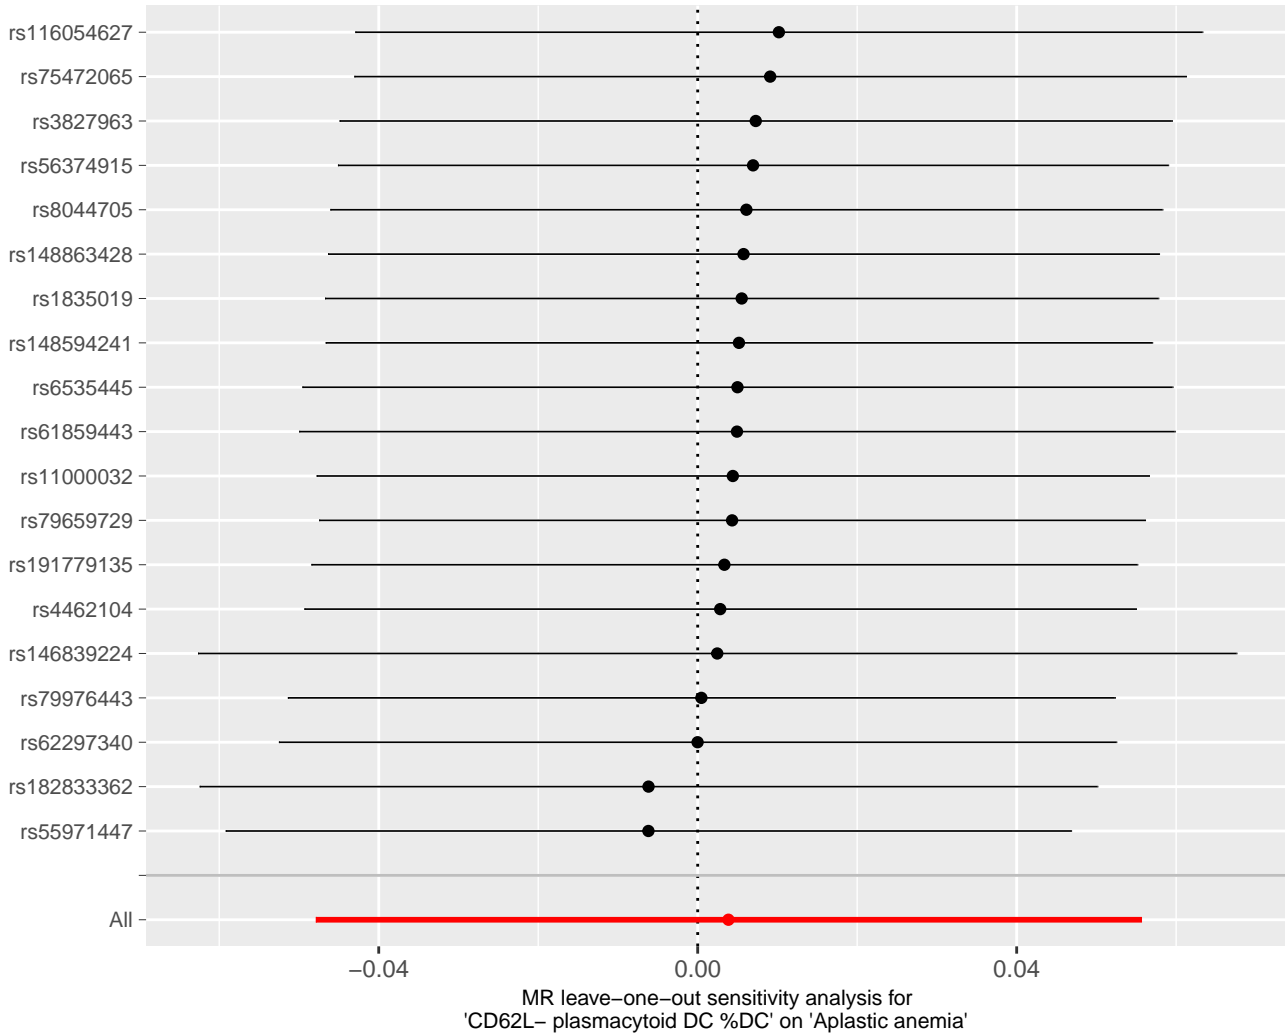

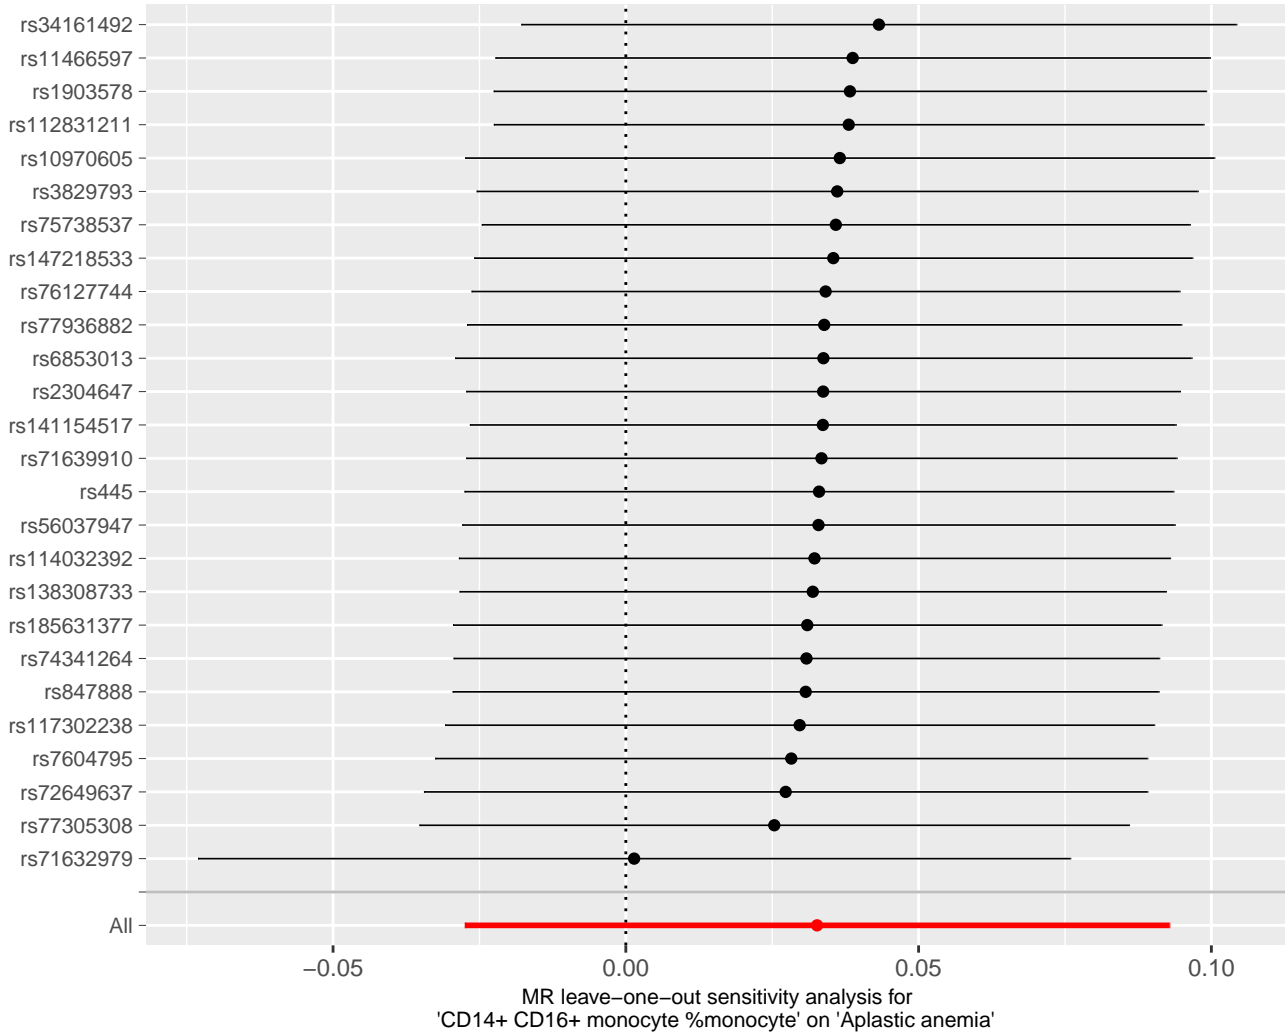

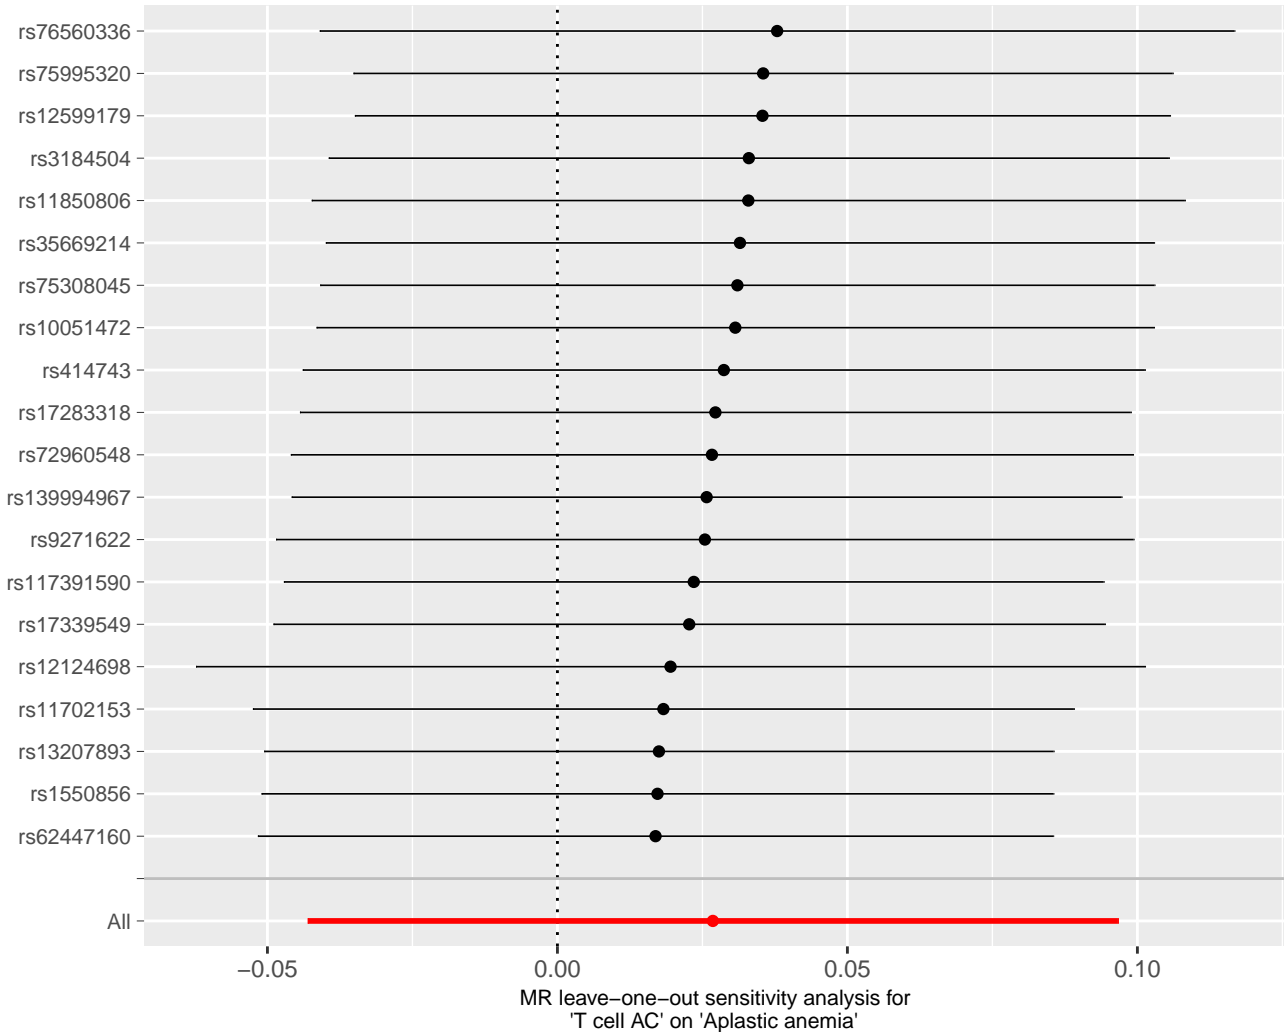



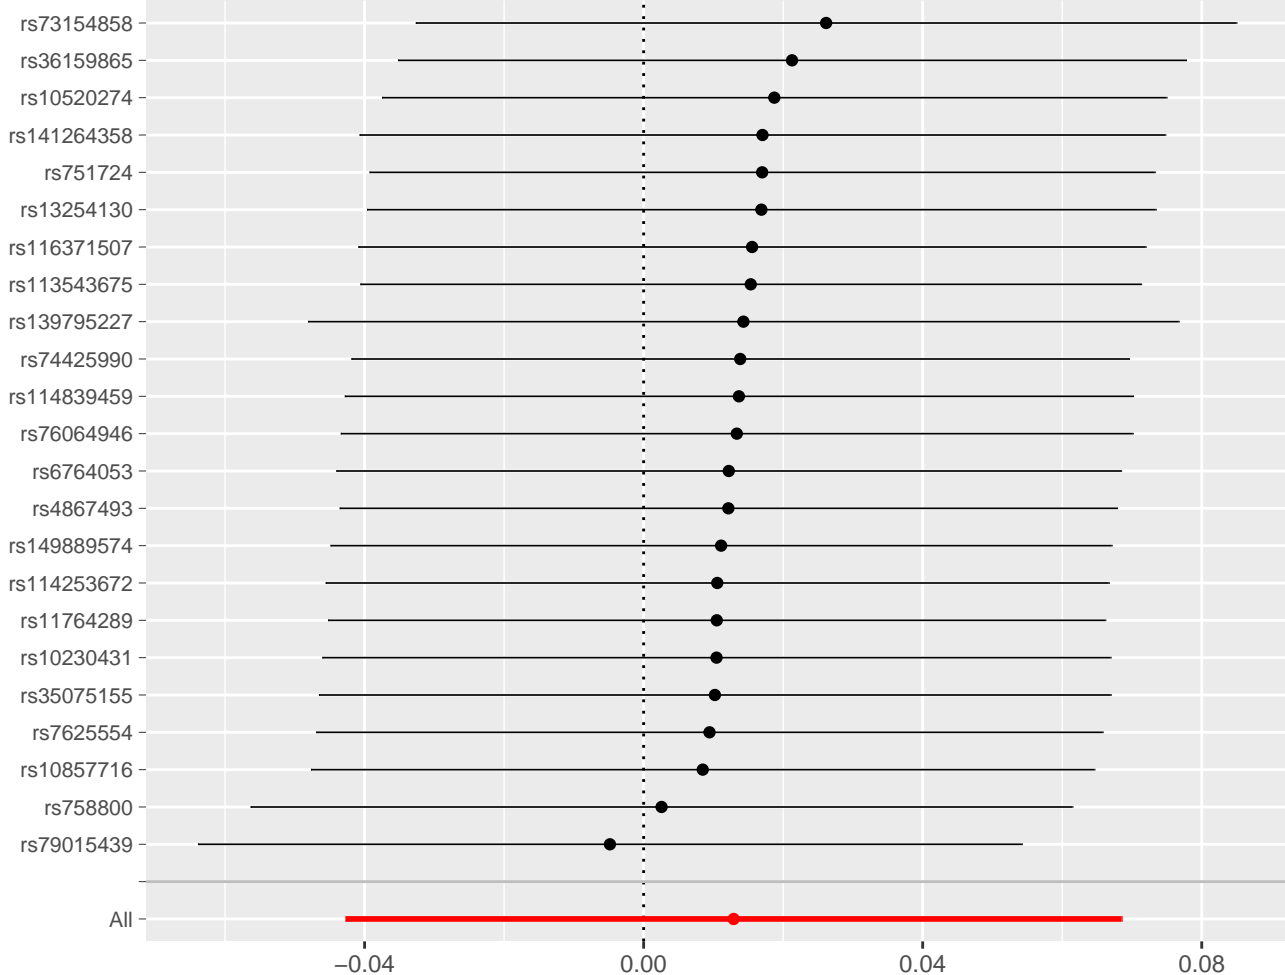

MR leave-one-out sensitivity analysis for 'CD80 on monocyte' on 'Aplastic anemia'

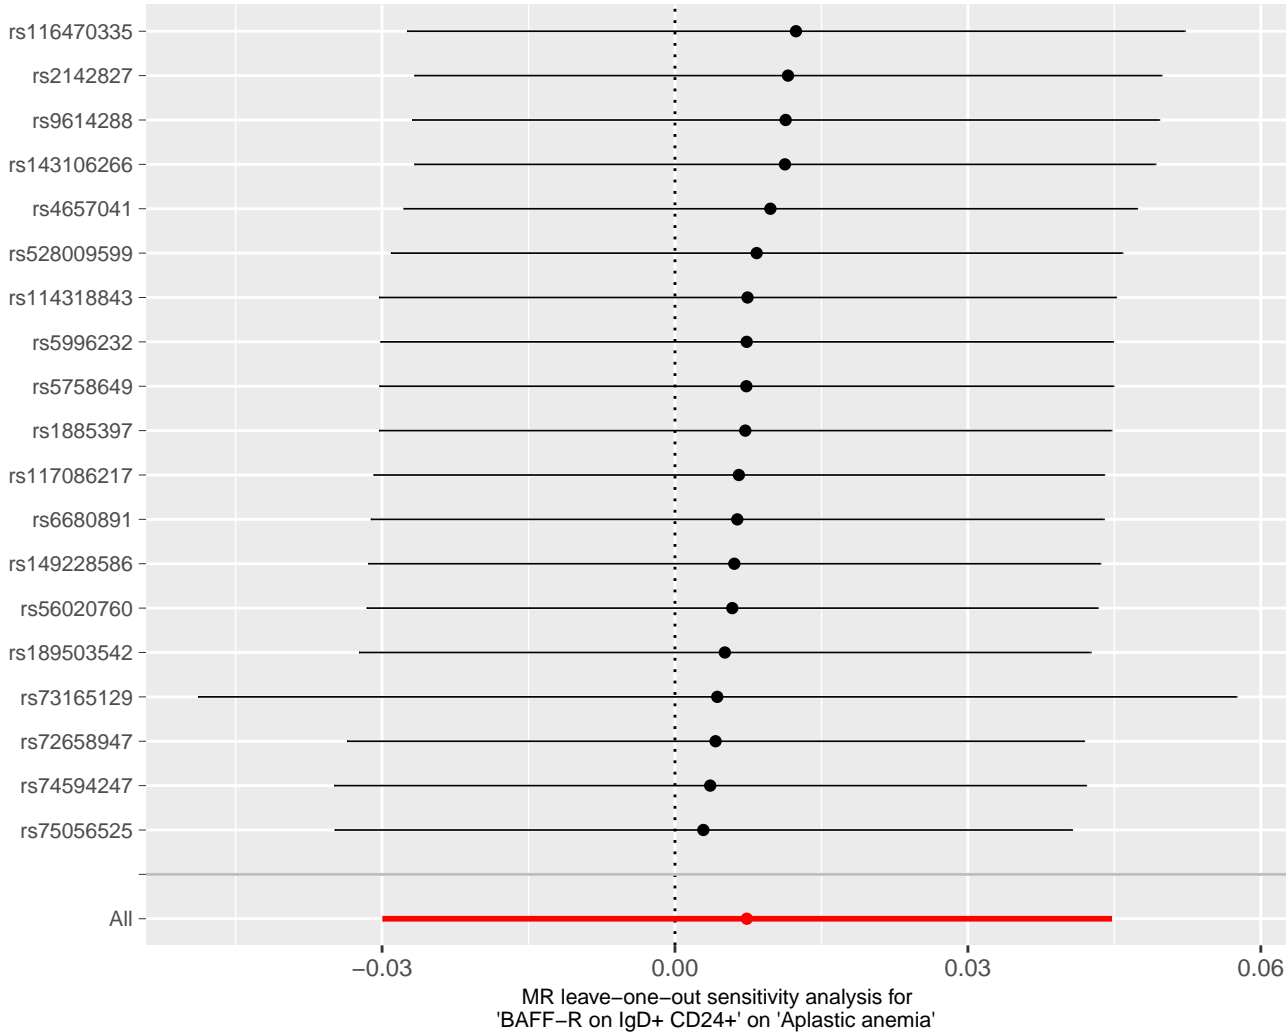

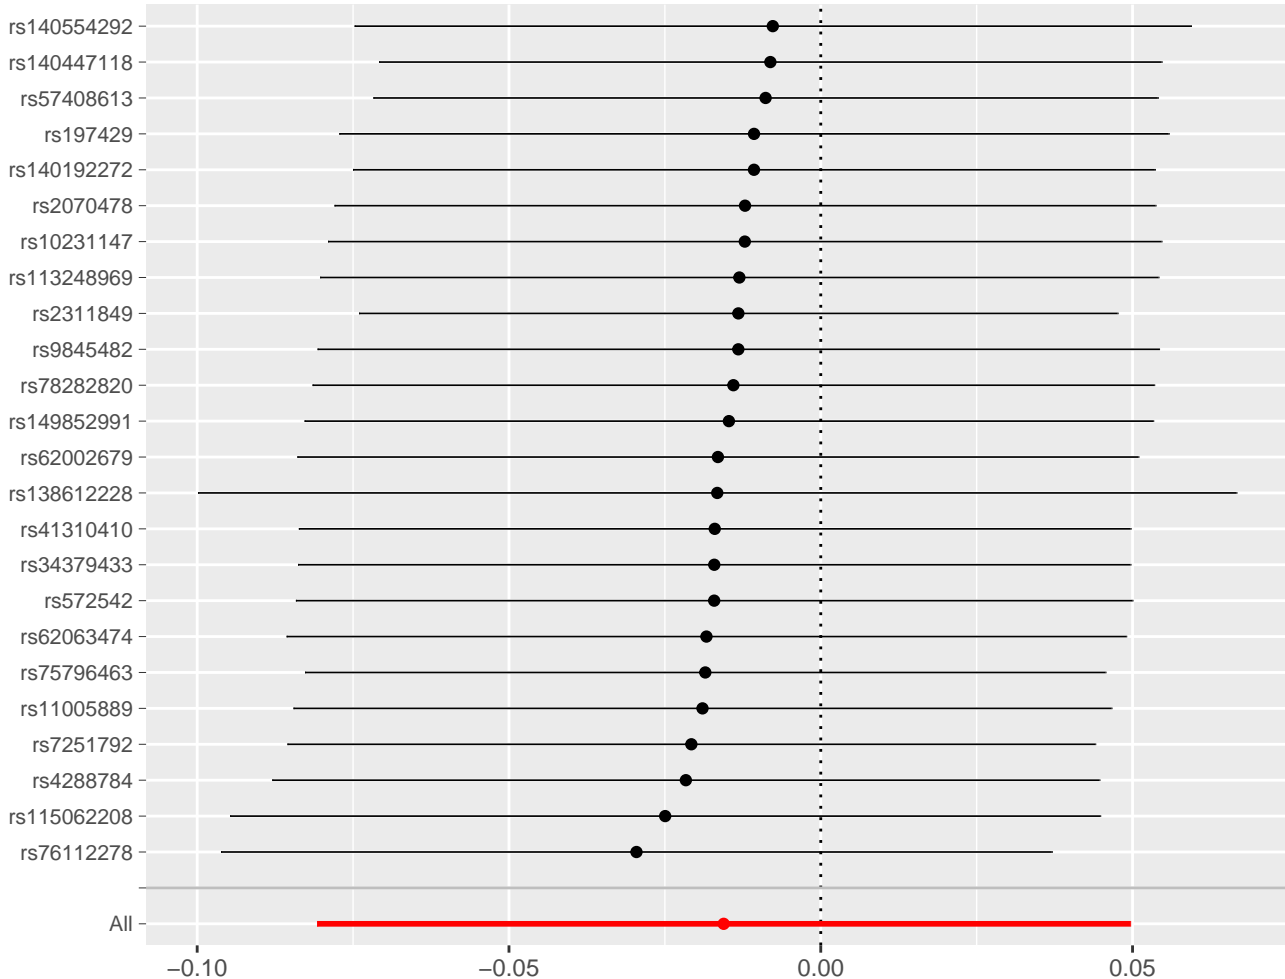

MR leave-one-out sensitivity analysis for 'CD38 on transitional' on 'Aplastic anemia'

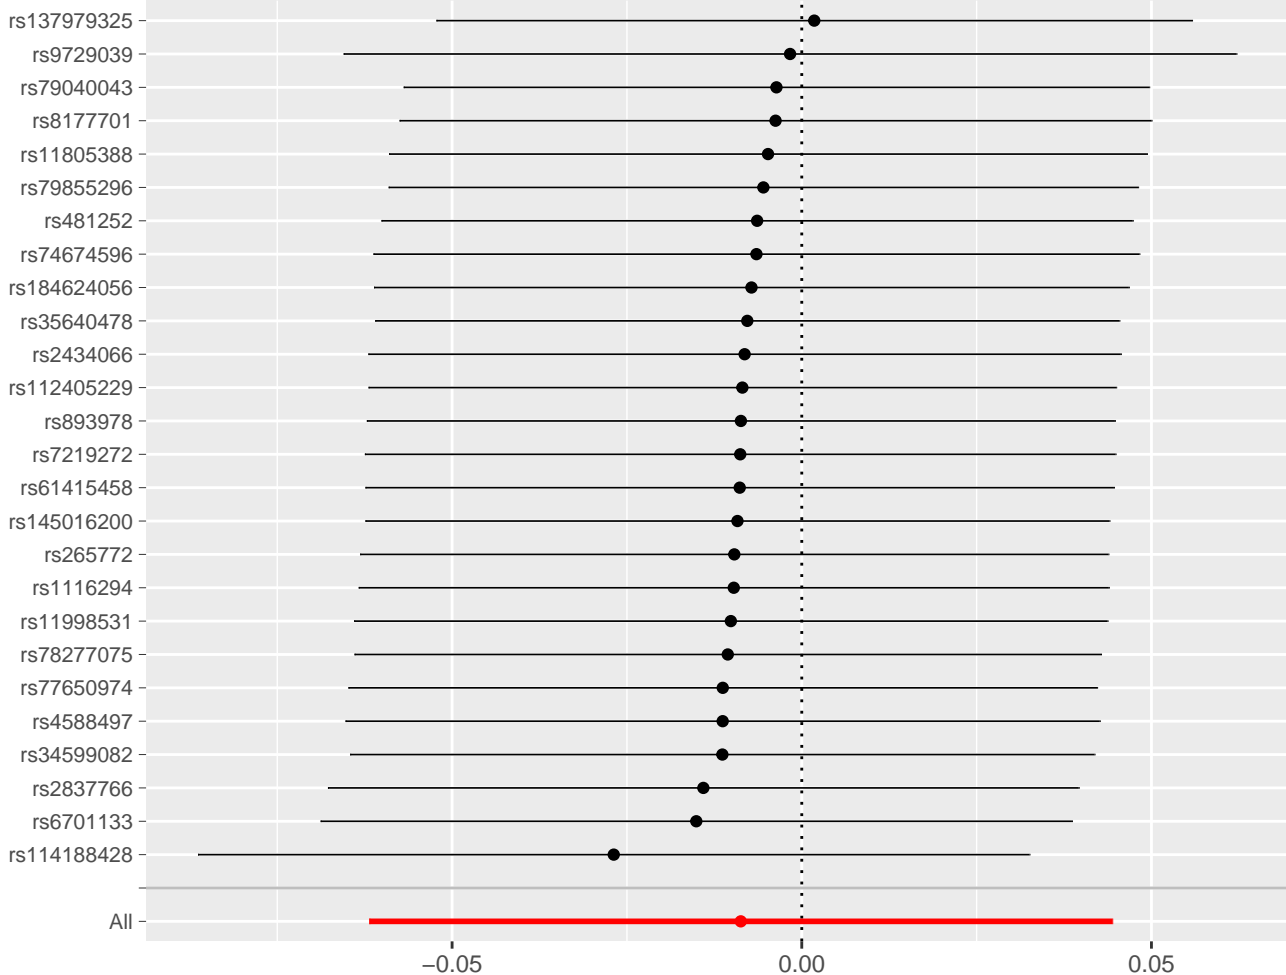

MR leave-one-out sensitivity analysis for 'Granulocyte %leukocyte' on 'Aplastic anemia'

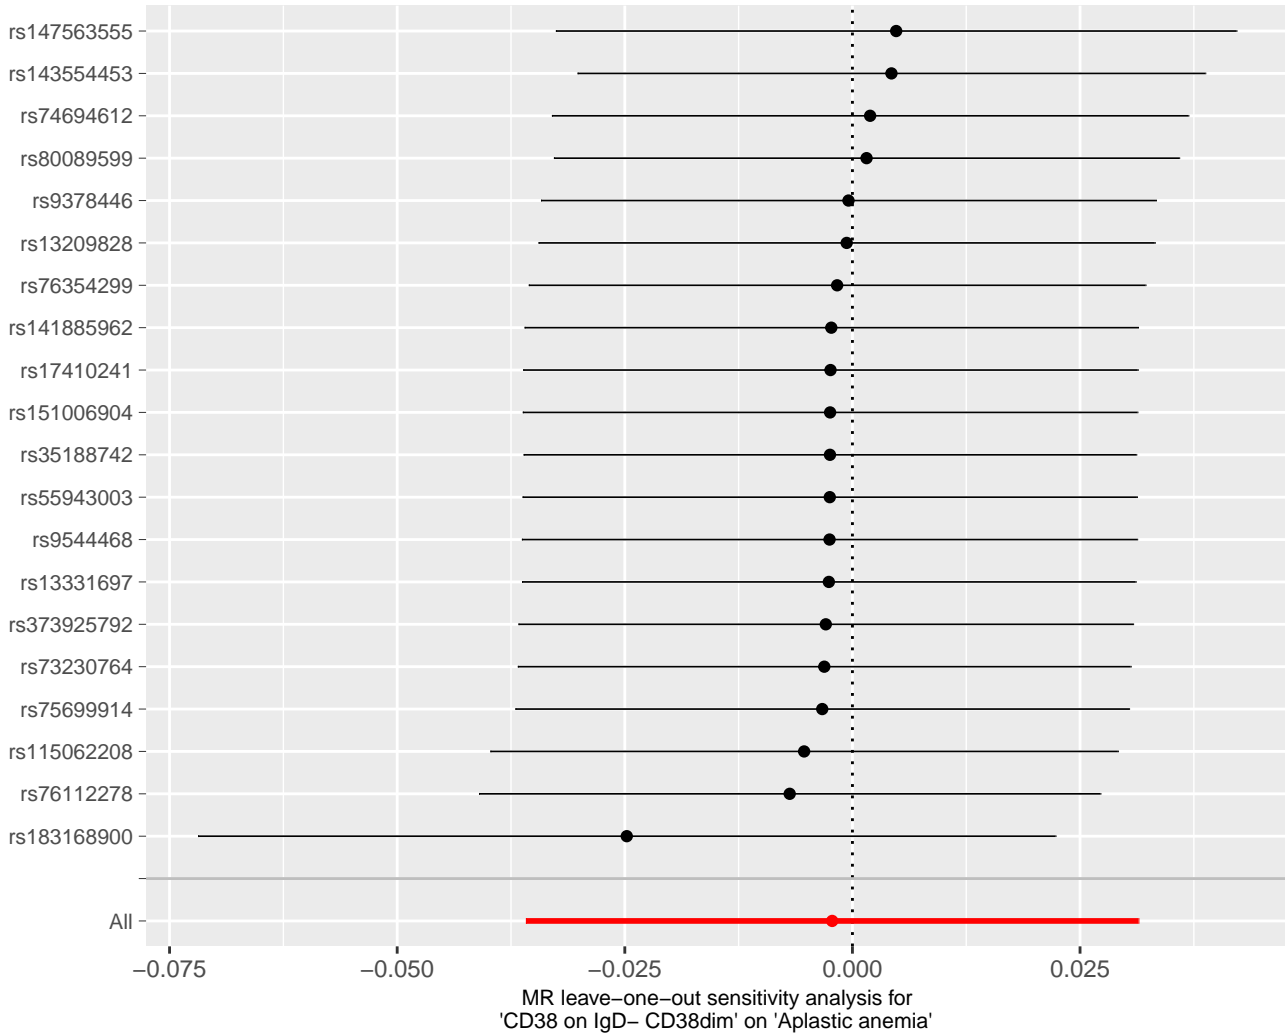

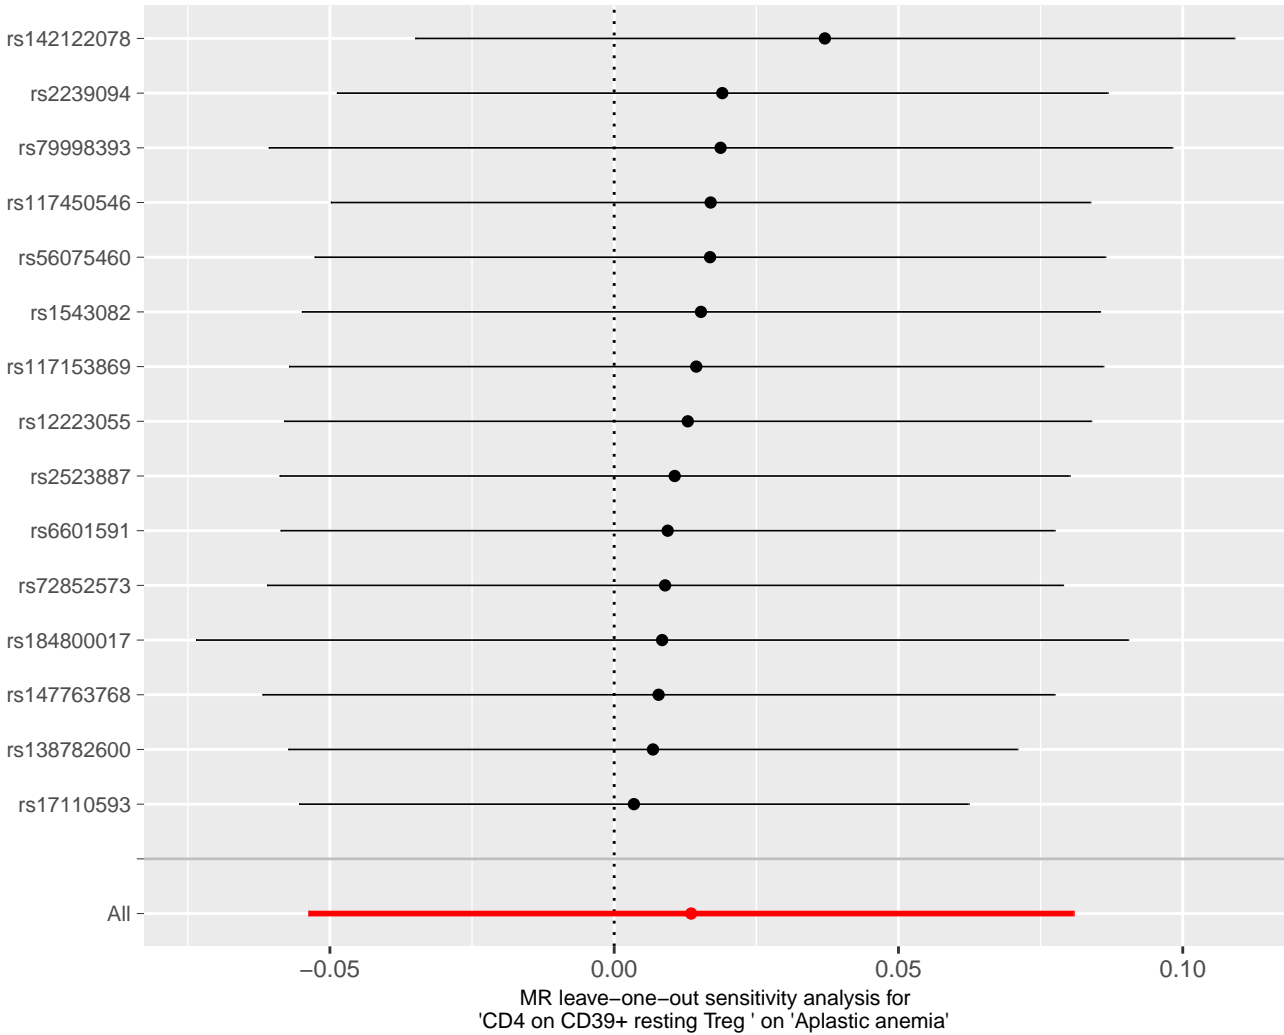

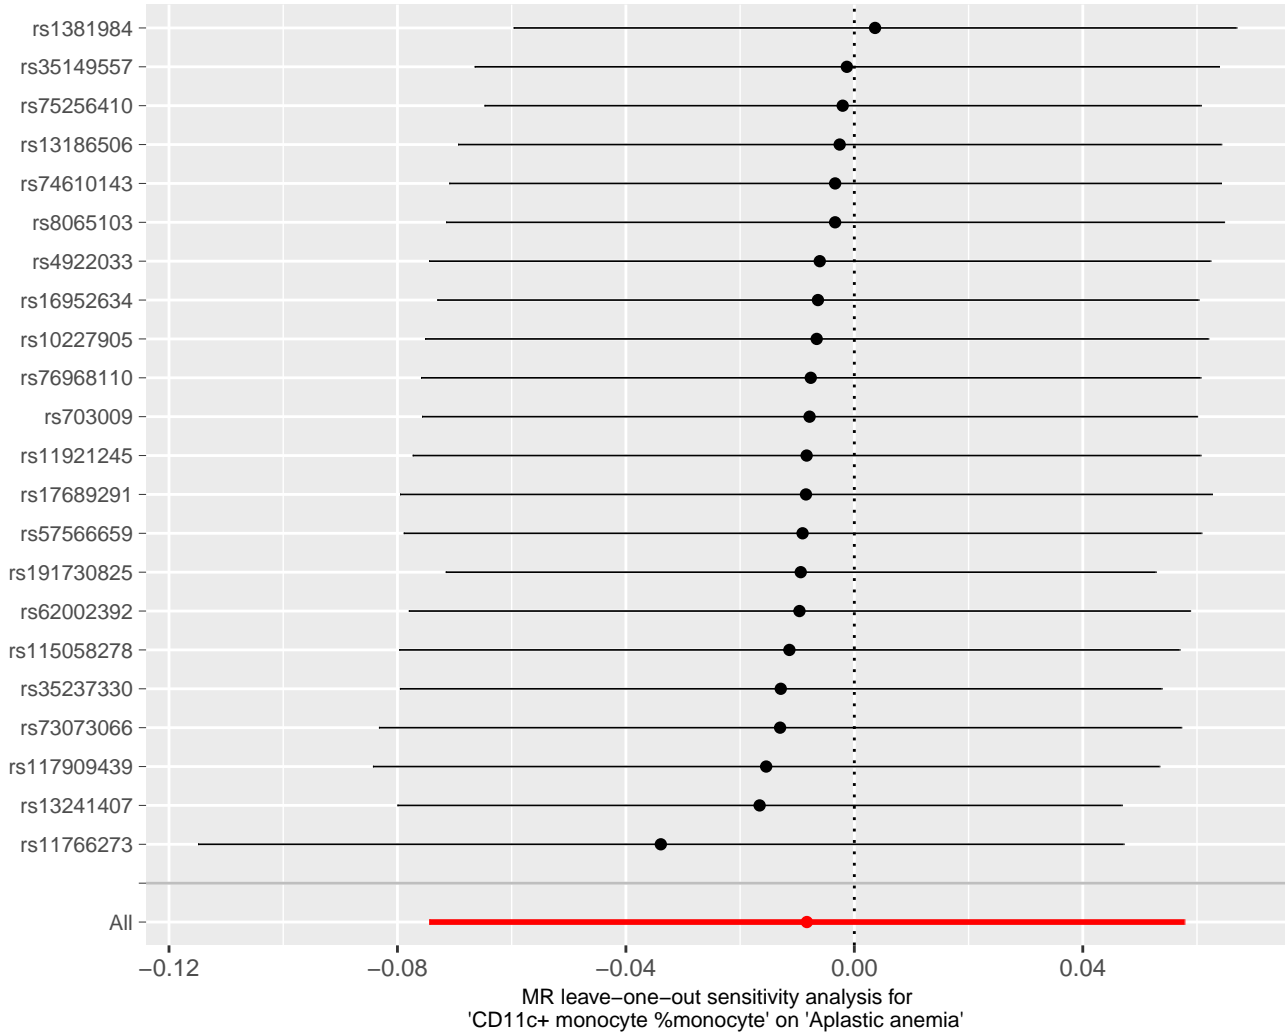

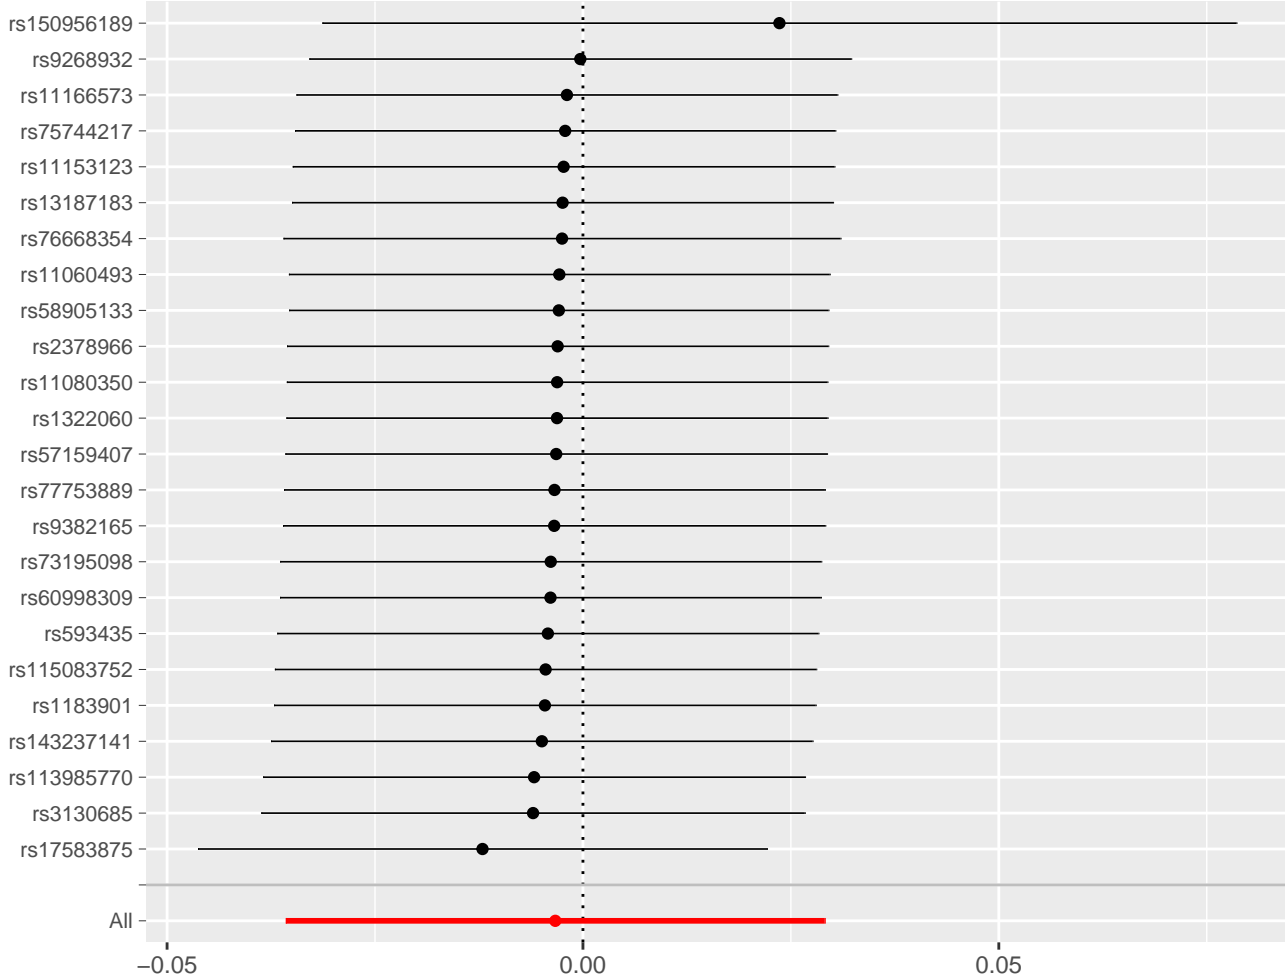

MR leave-one-out sensitivity analysis for 'EM CD8br AC' on 'Aplastic anemia'



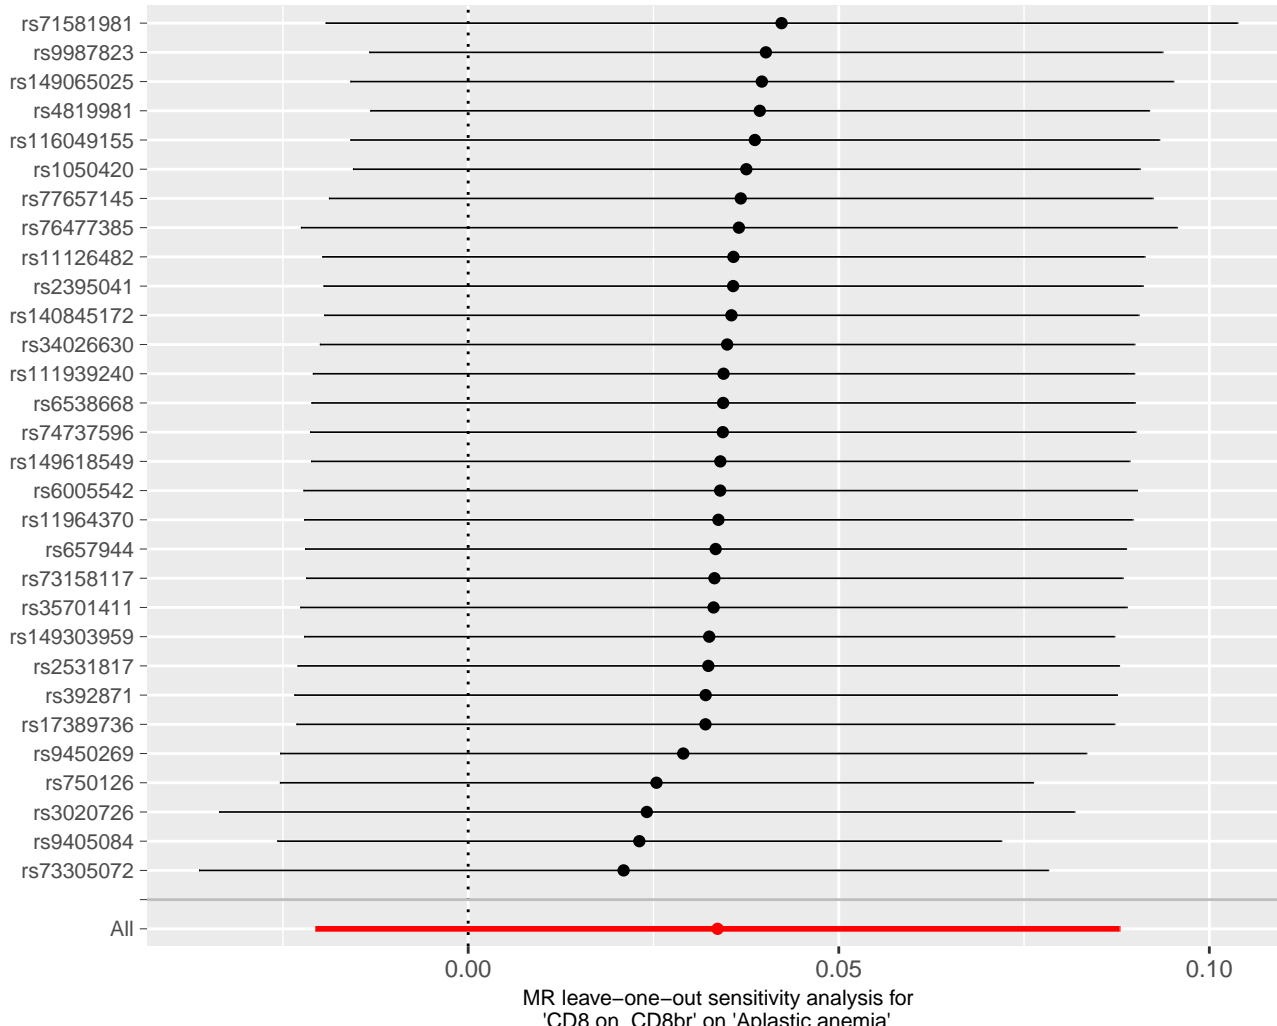

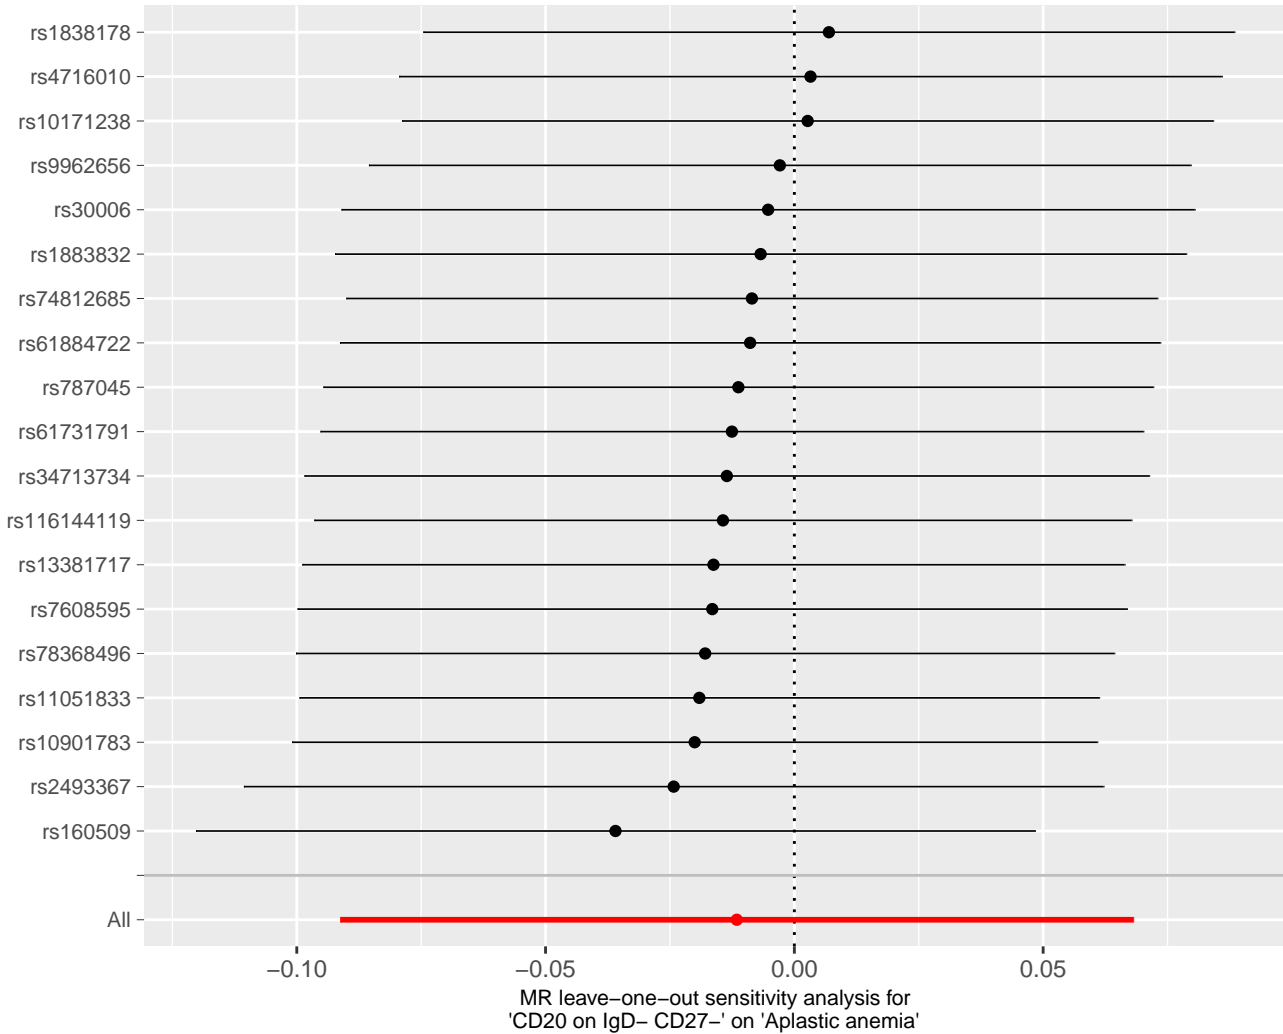

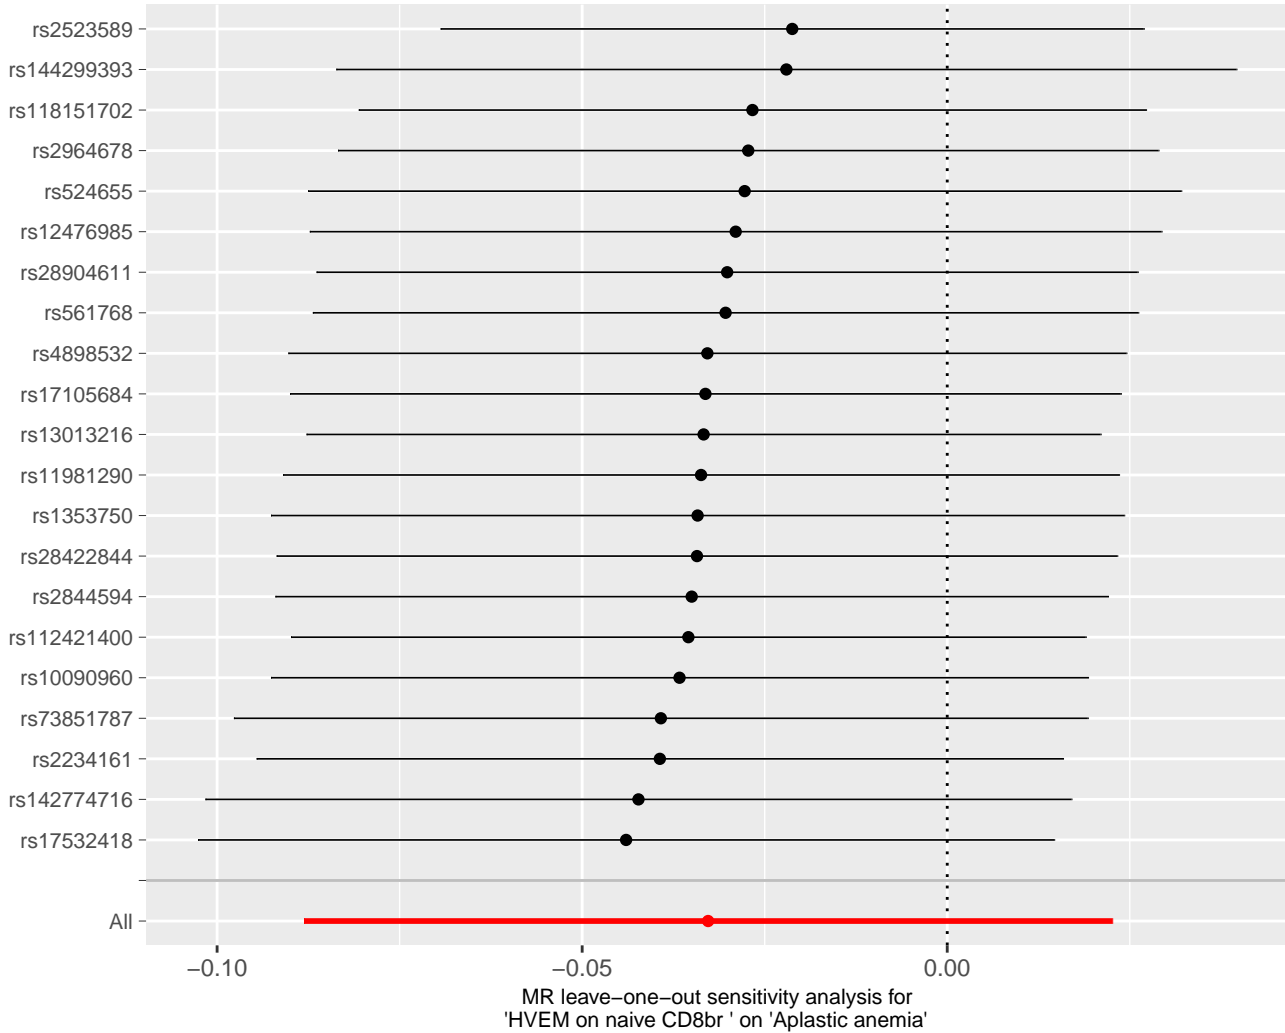

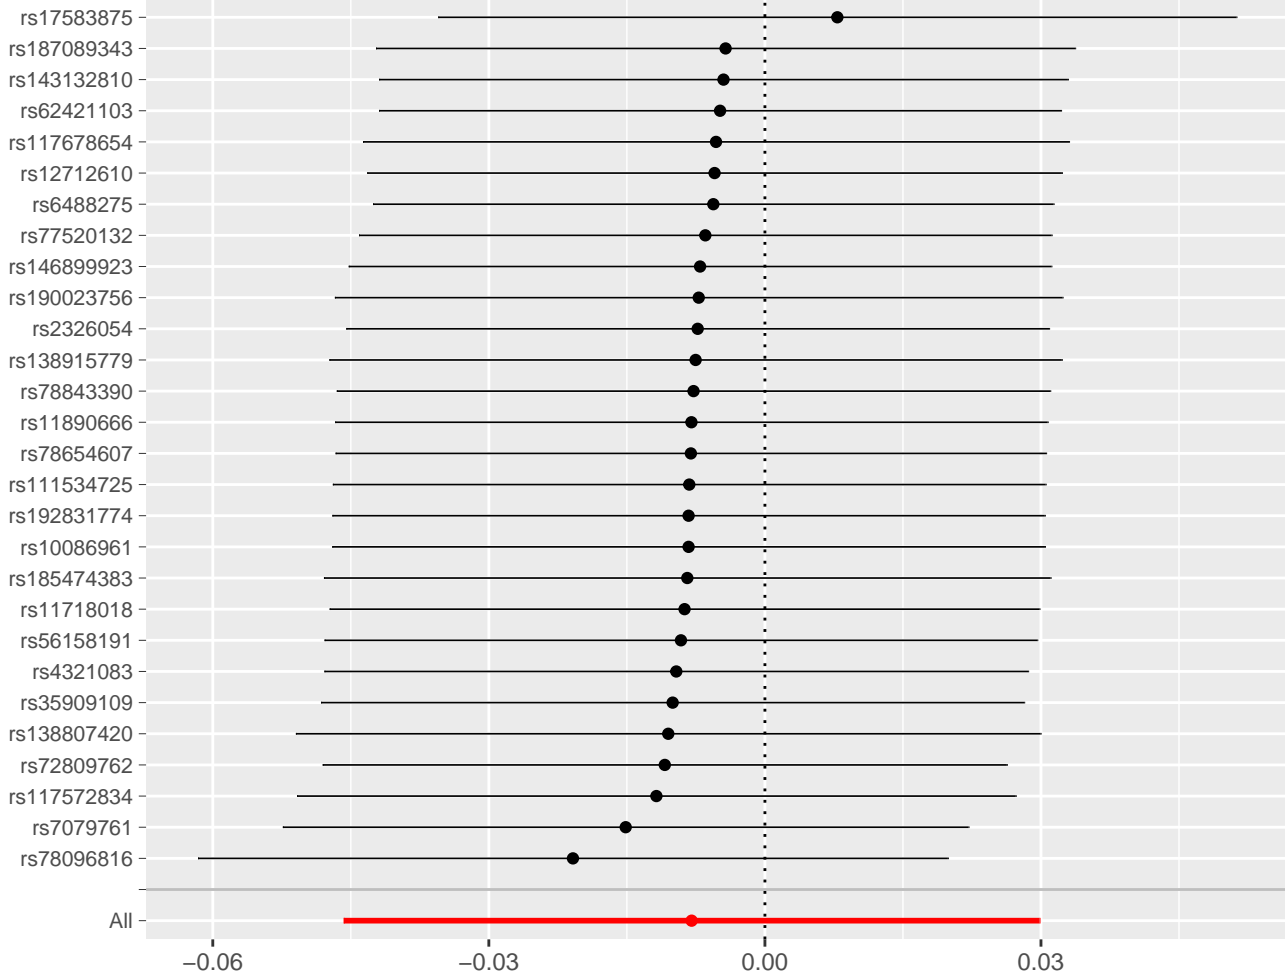

MR leave-one-out sensitivity analysis for 'CD39+ resting Treg AC' on 'Aplastic anemia'

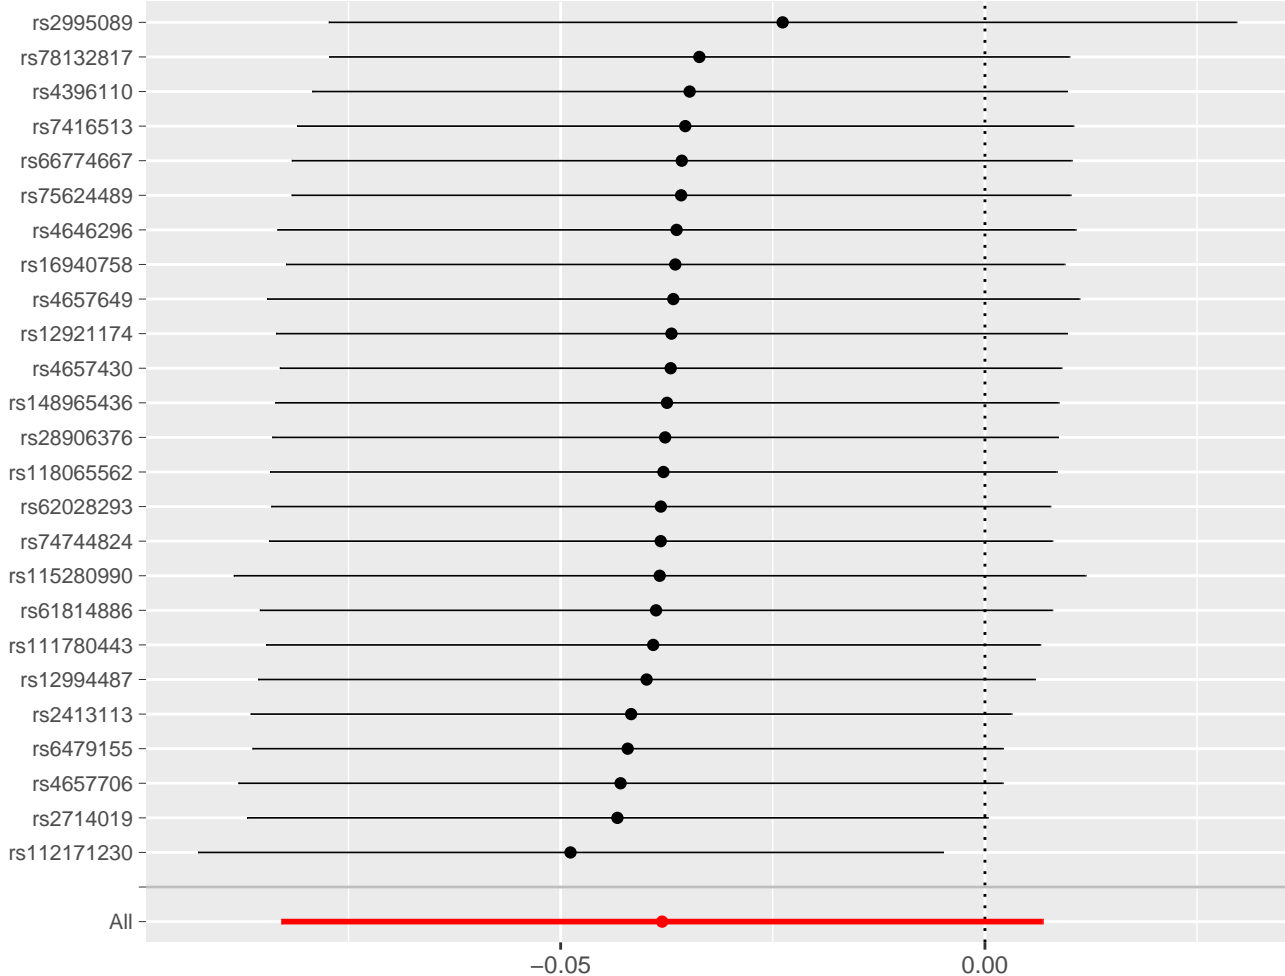

MR leave-one-out sensitivity analysis for 'CD3 on naive CD8br ' on 'Aplastic anemia'

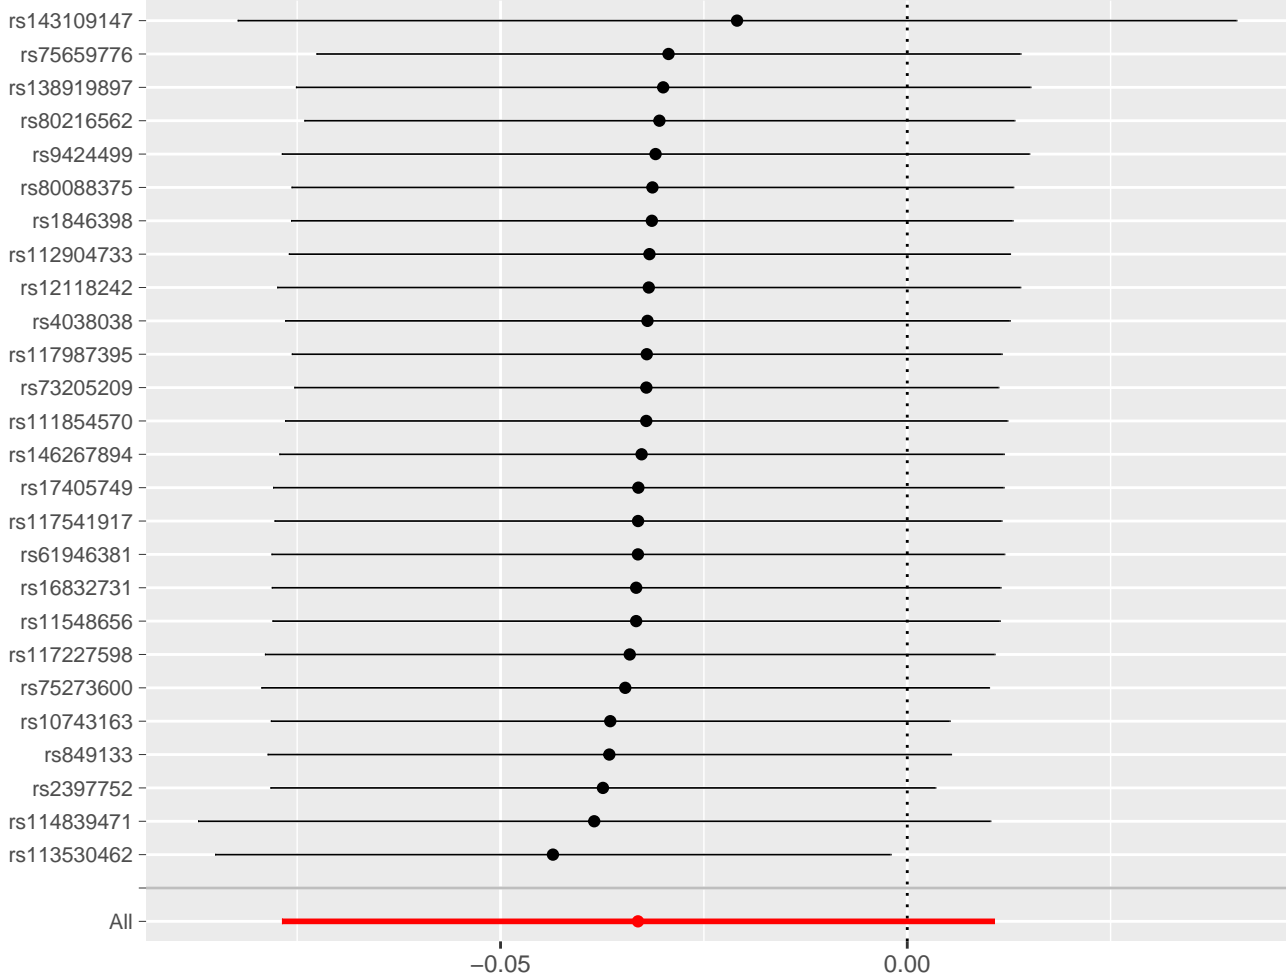

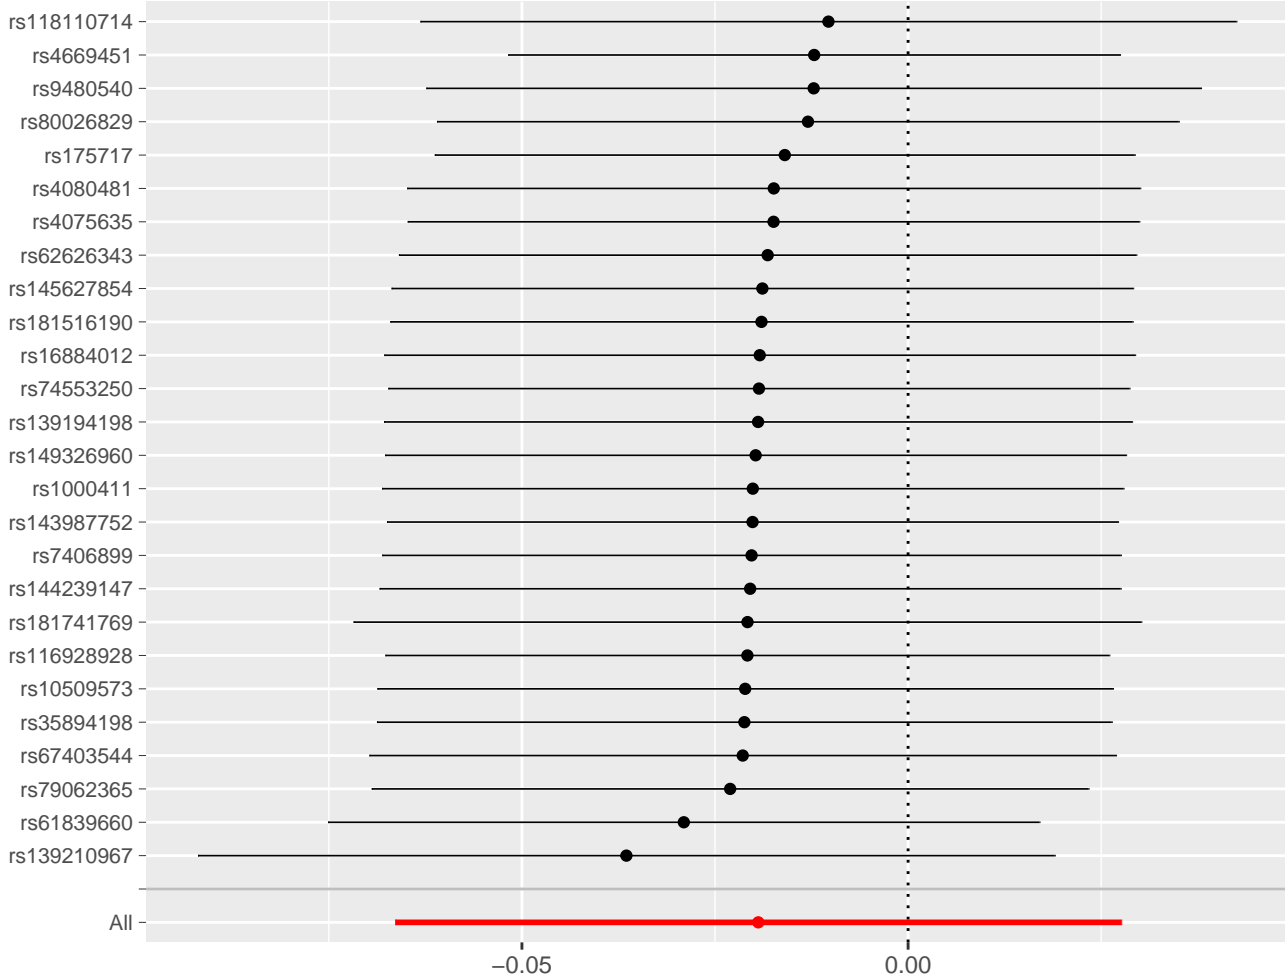

MR leave-one-out sensitivity analysis for 'CD25 on CD45RA- CD4 not Treg' on 'Aplastic anemia'

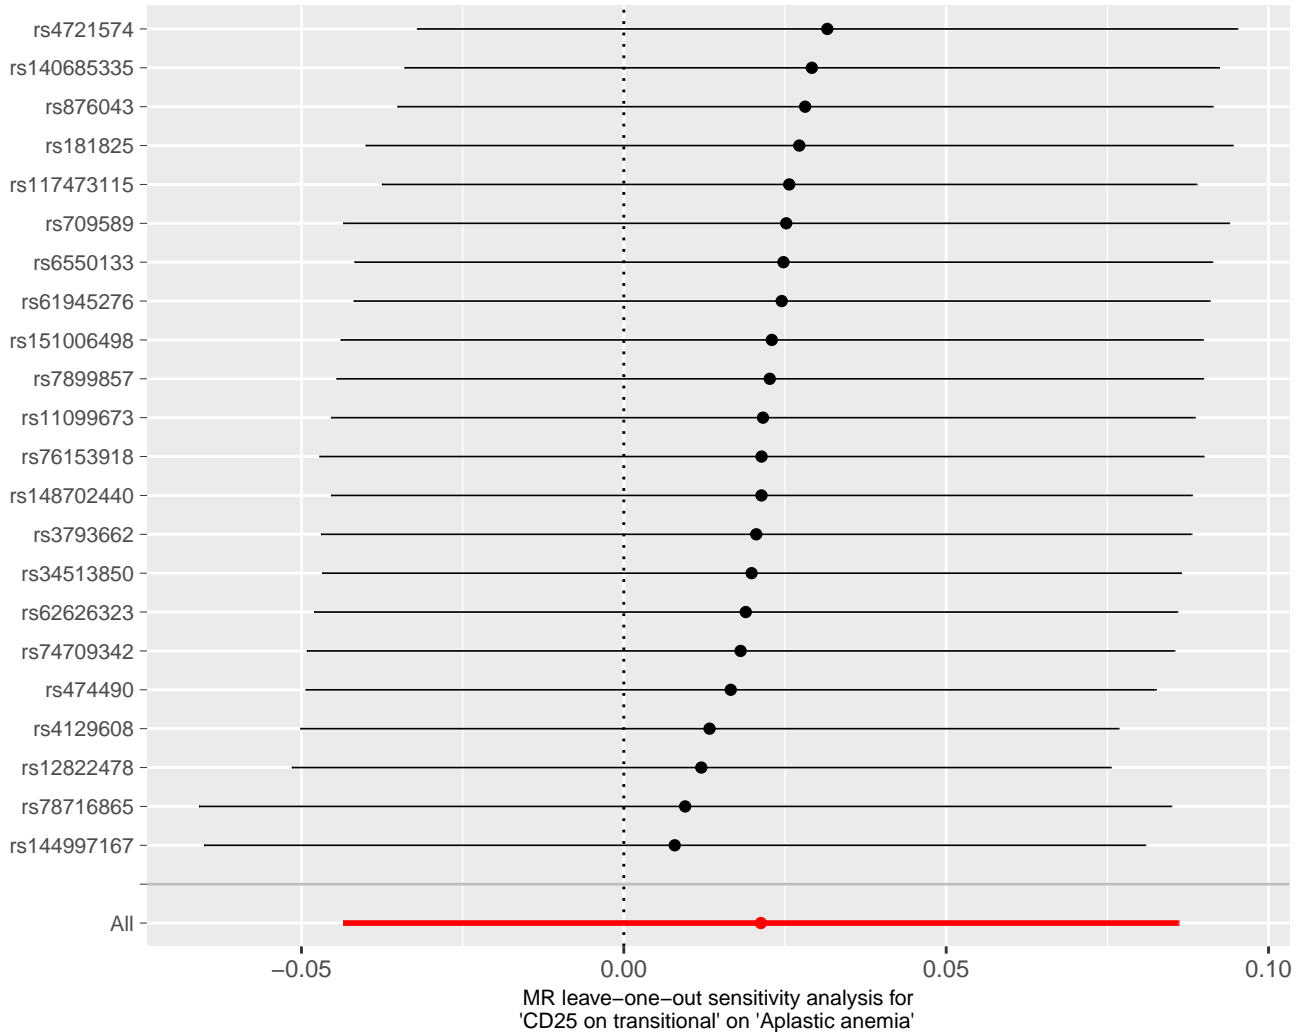



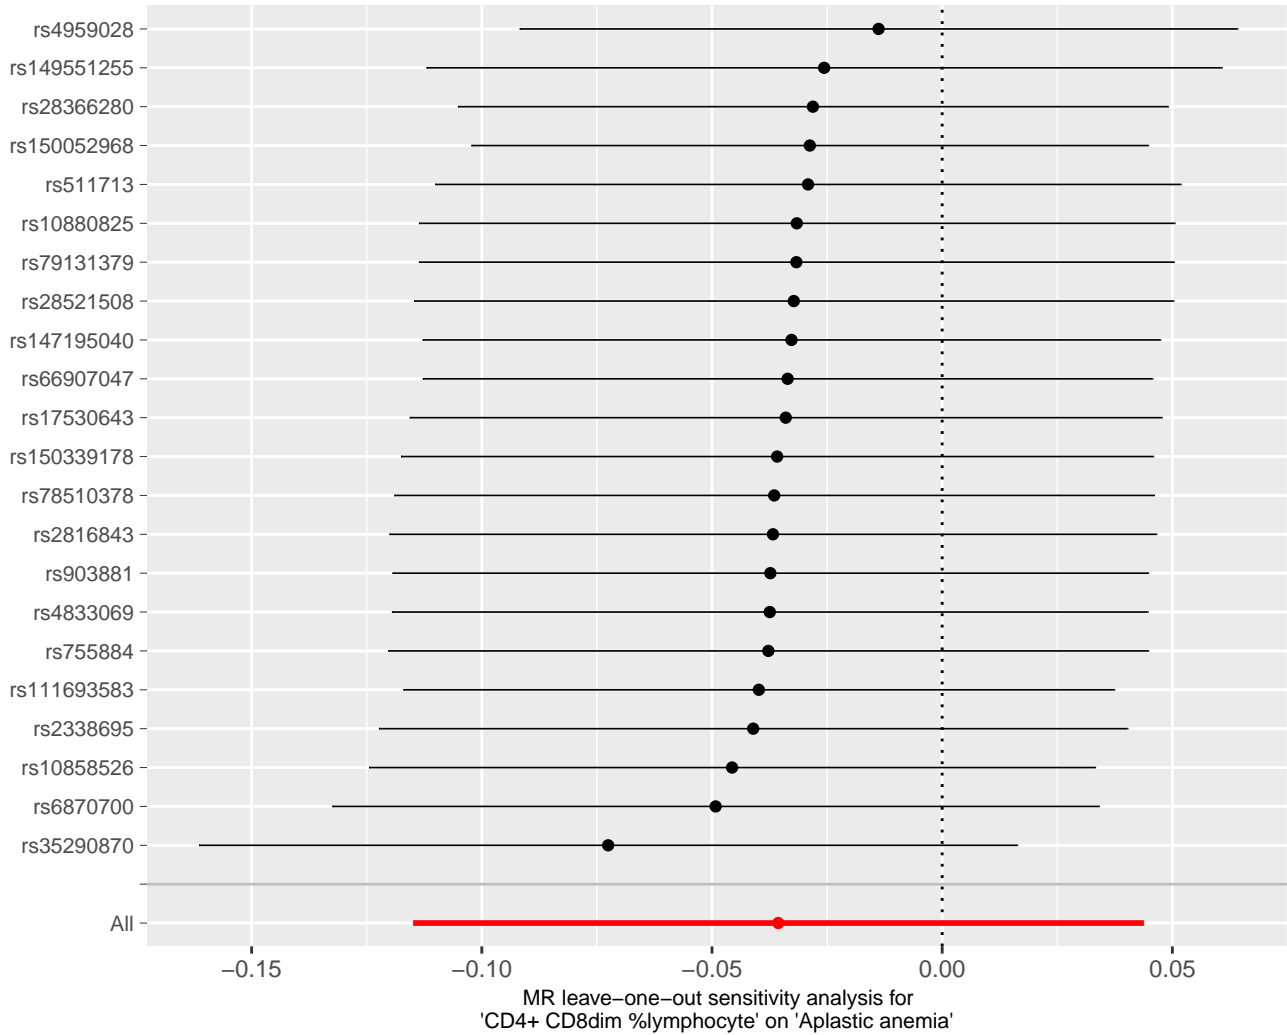

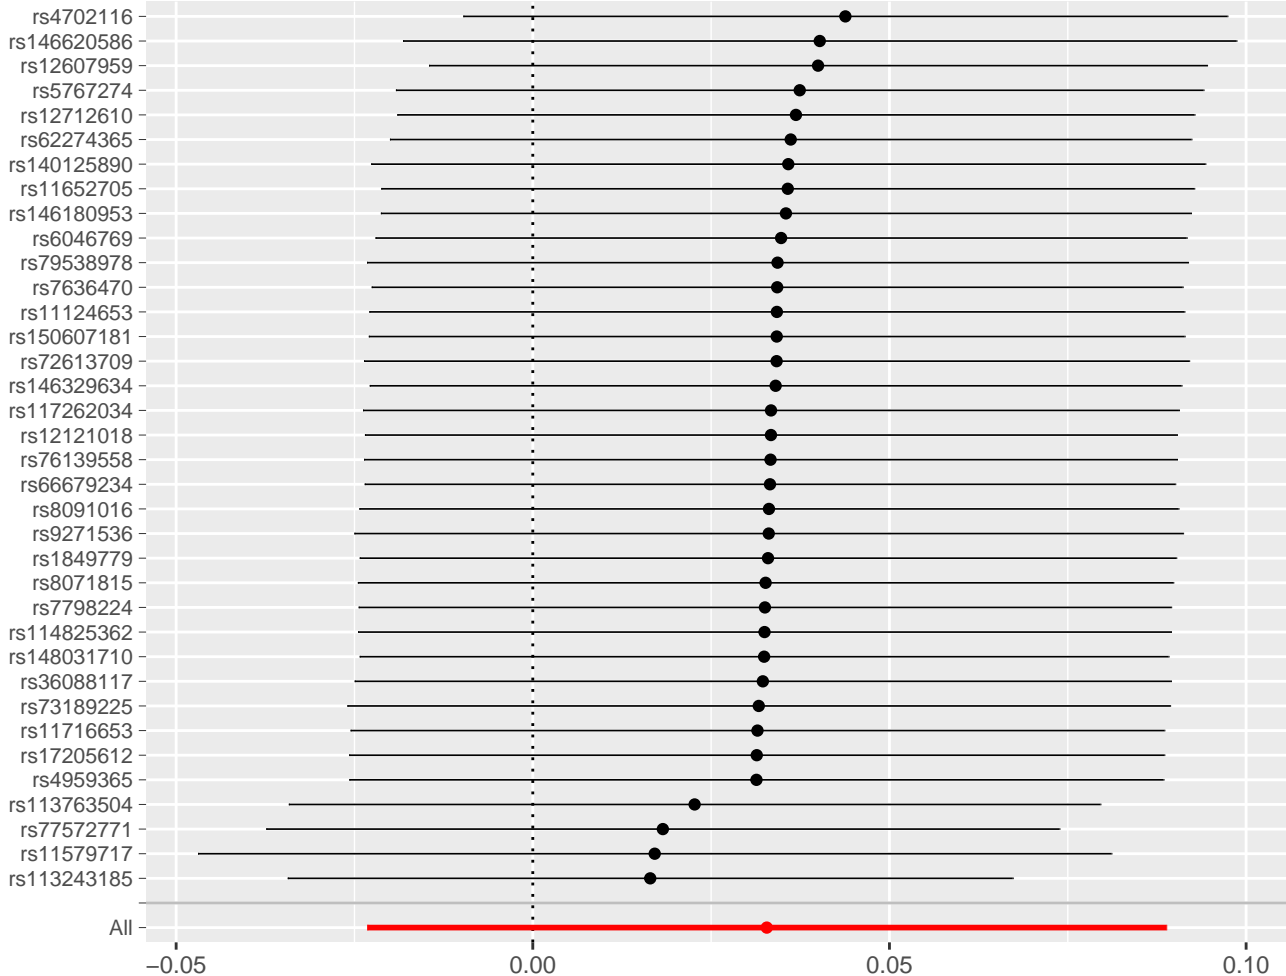

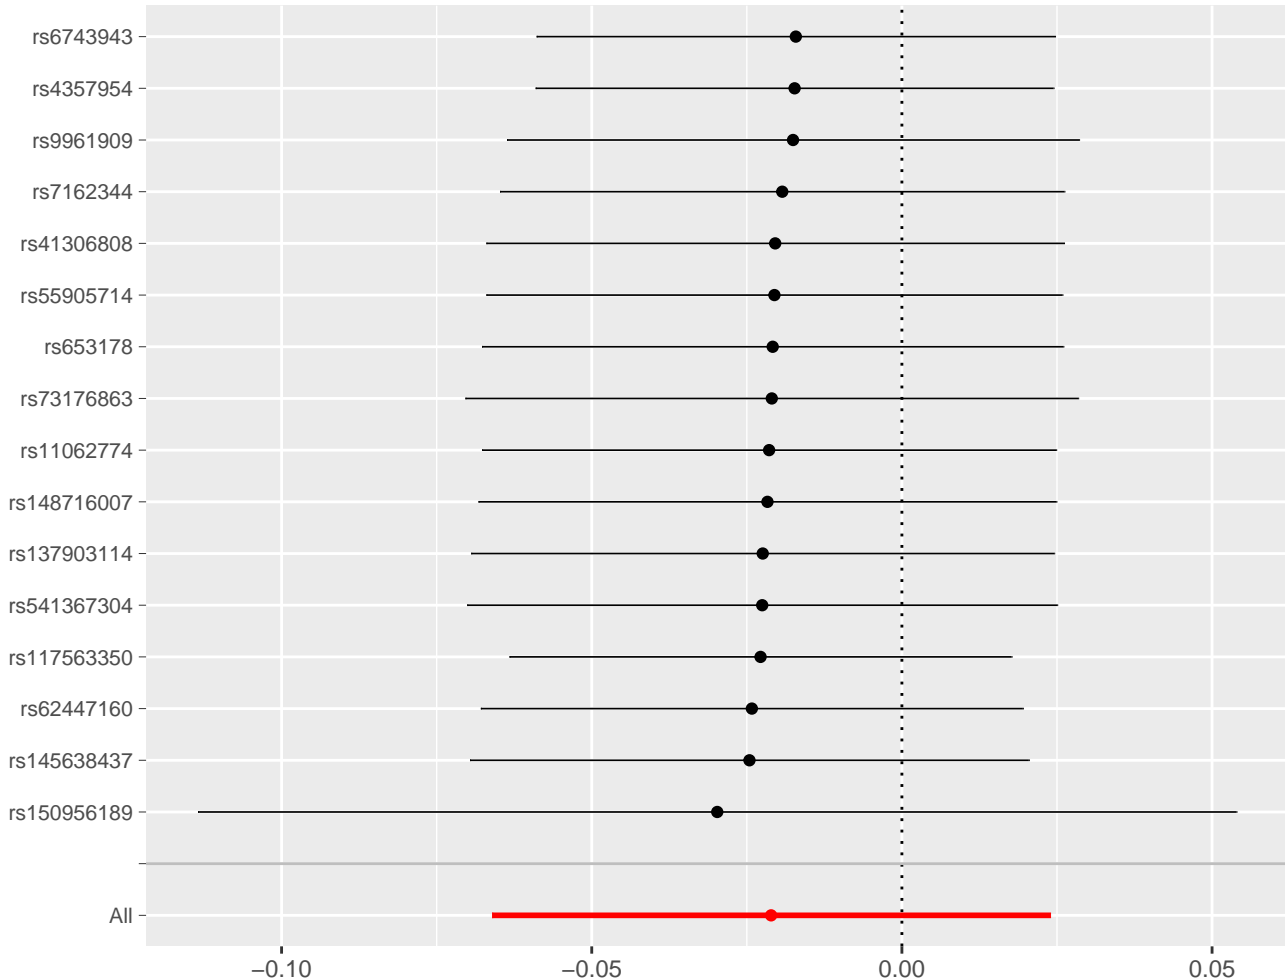

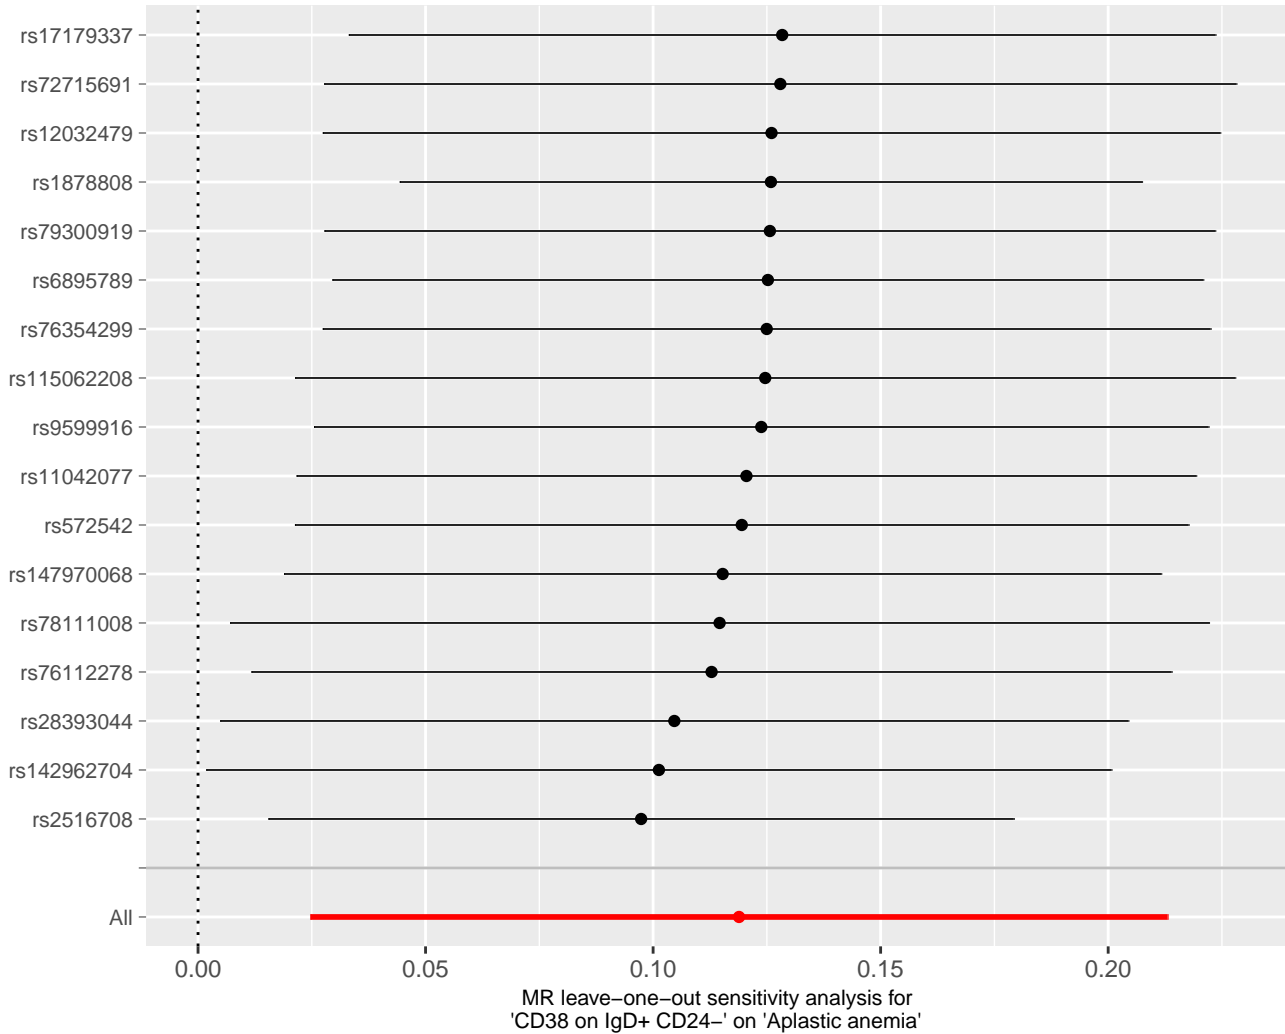

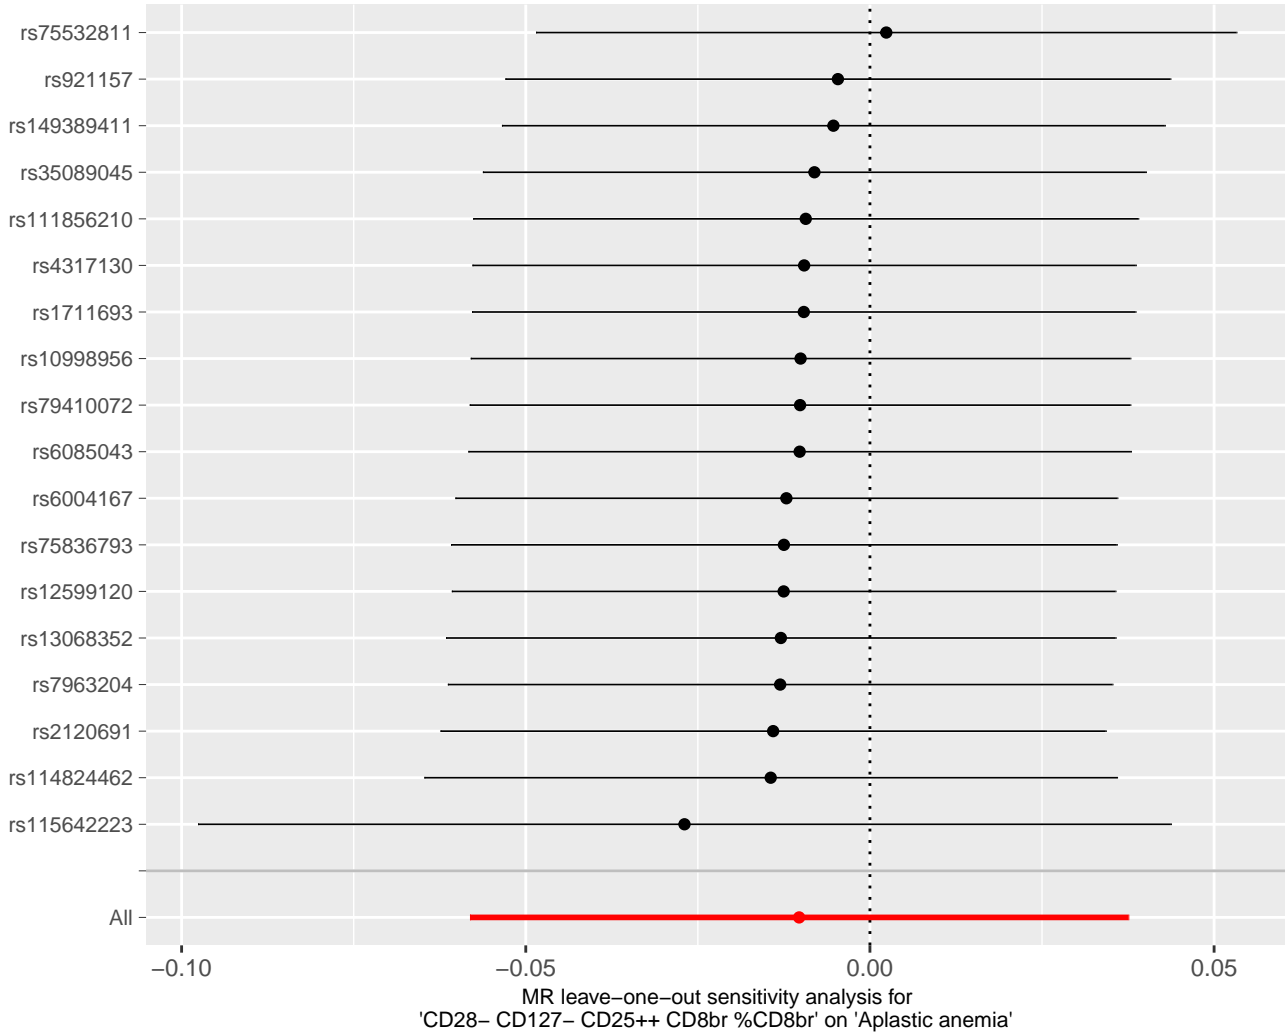

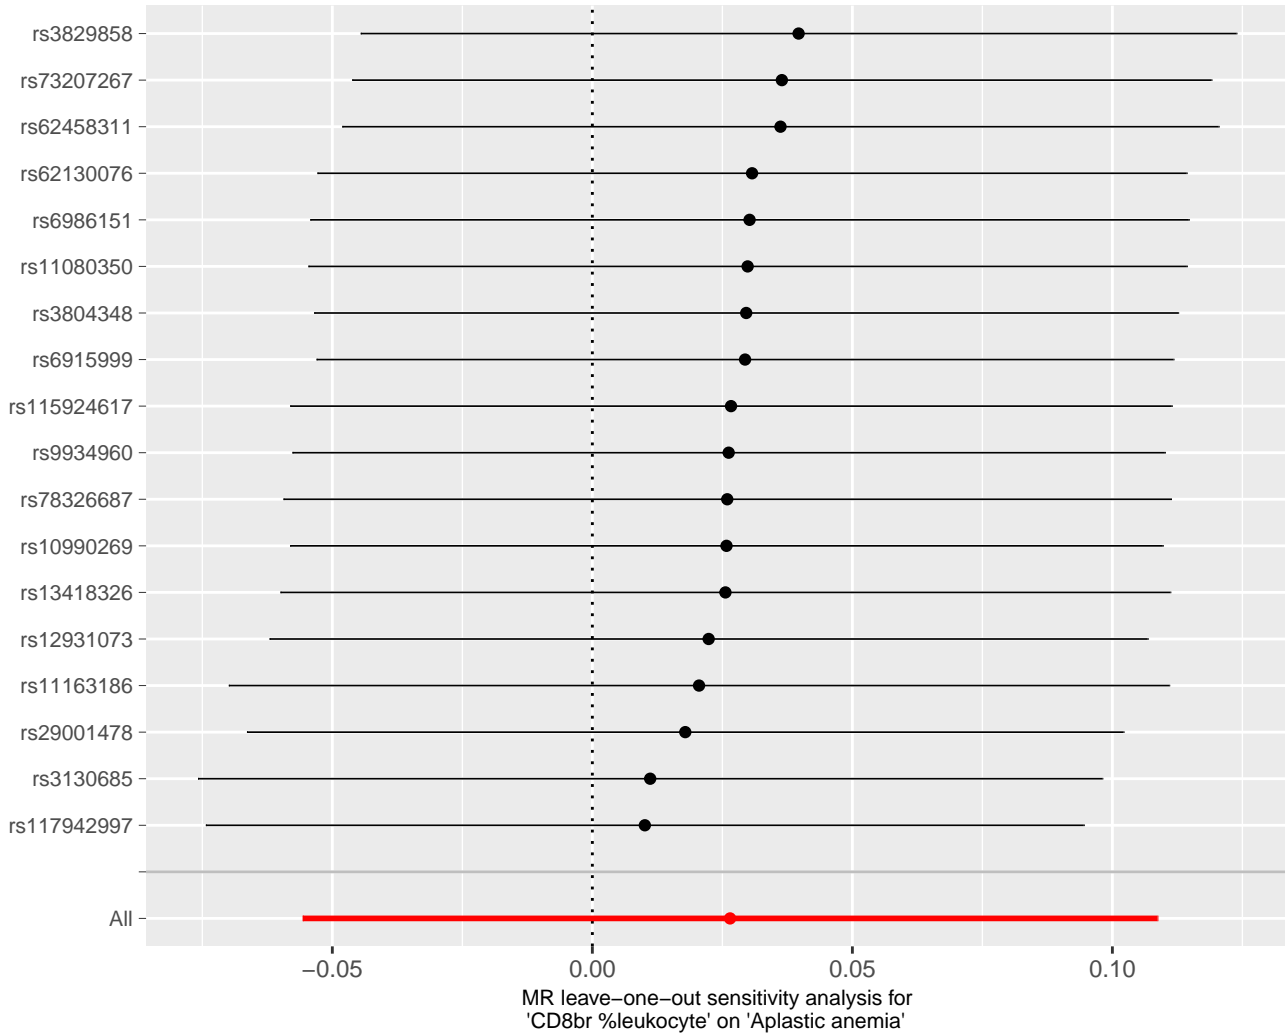

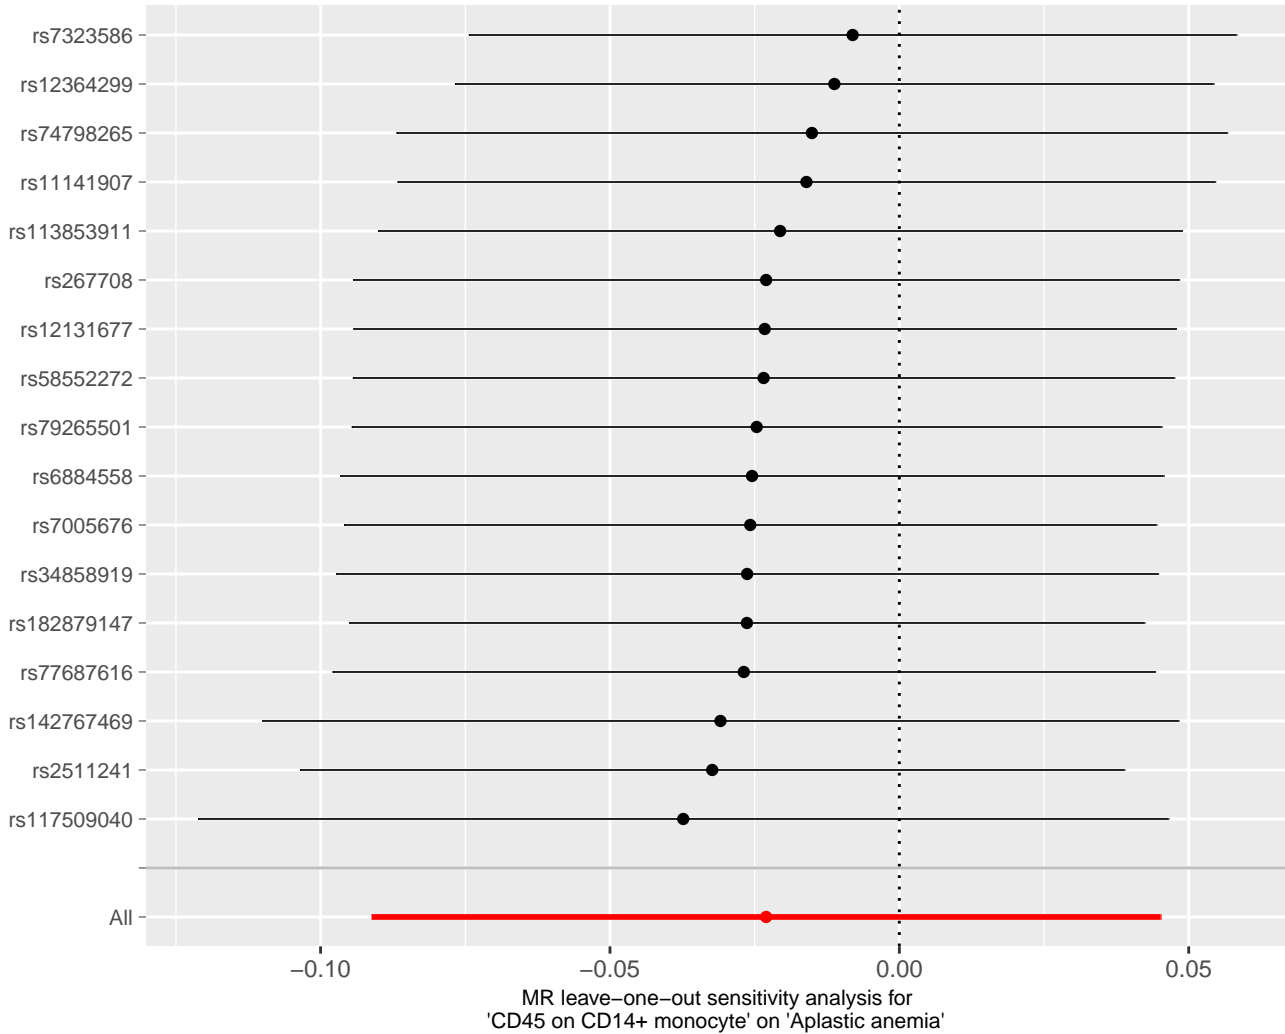

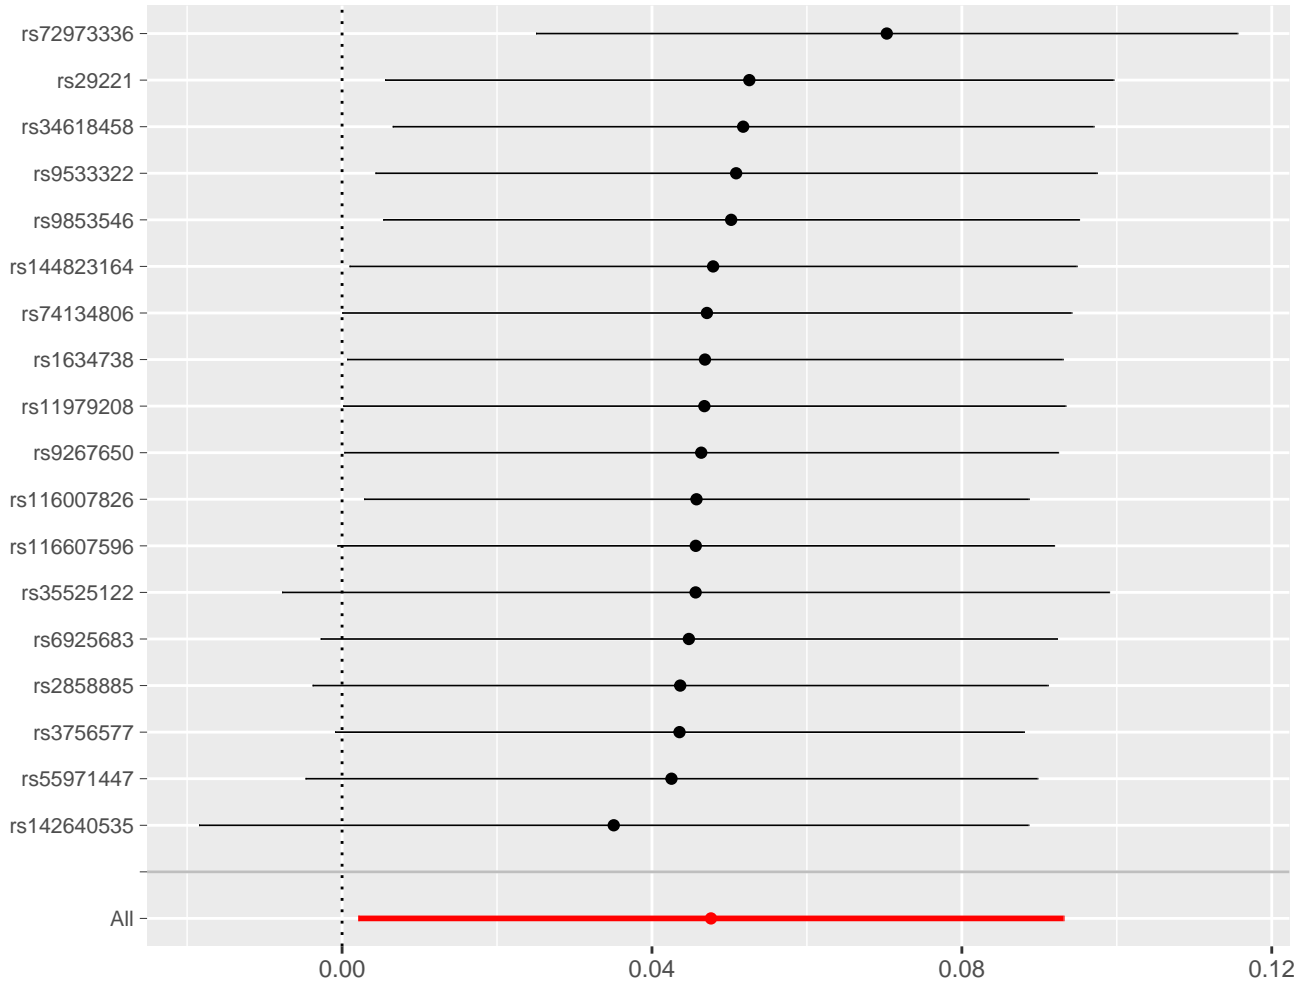

MR leave-one-out sensitivity analysis for 'HLA DR on myeloid DC' on 'Aplastic anemia'



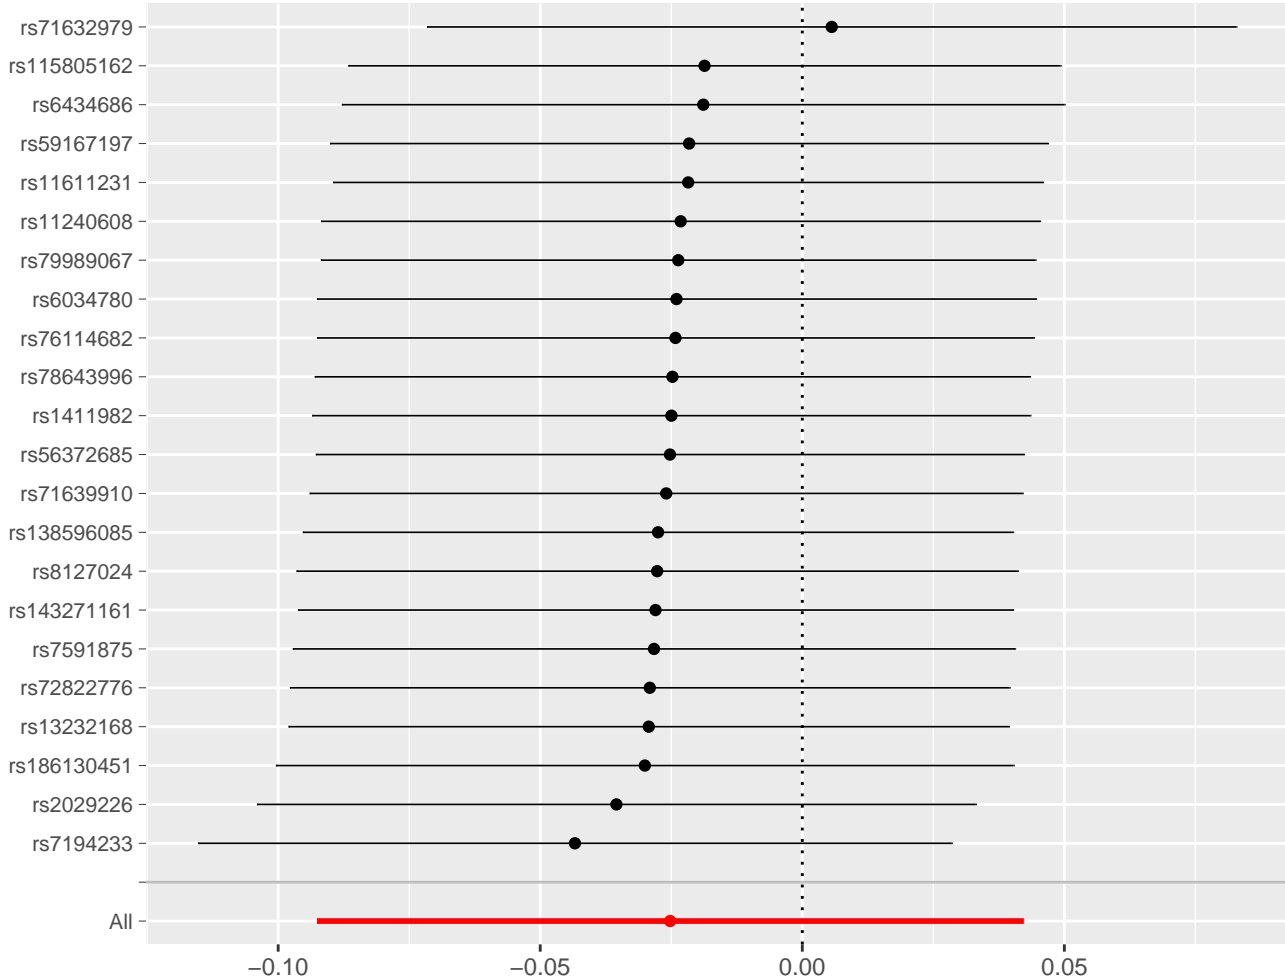

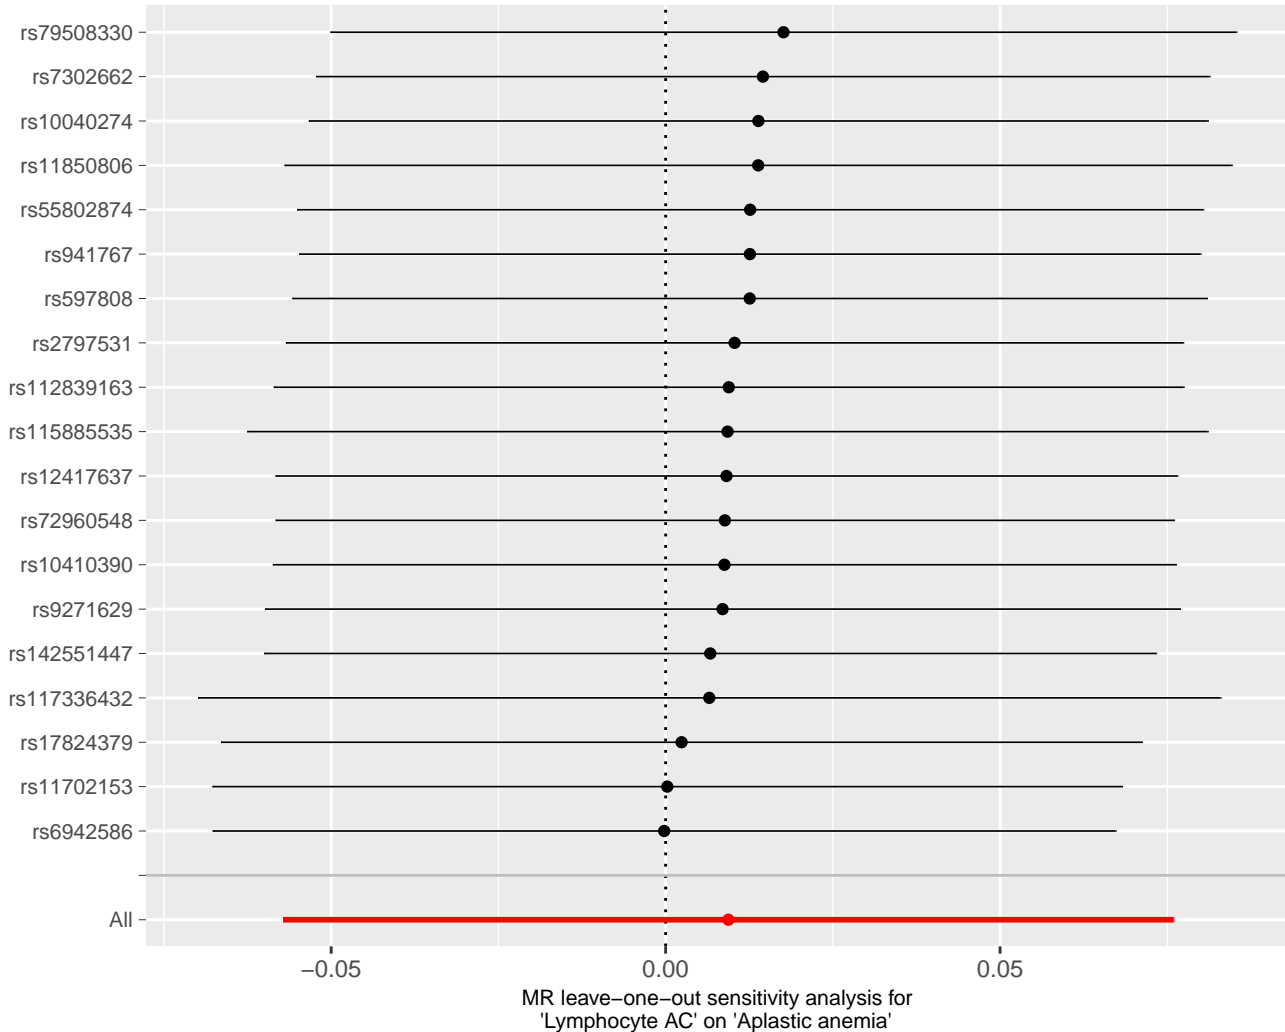

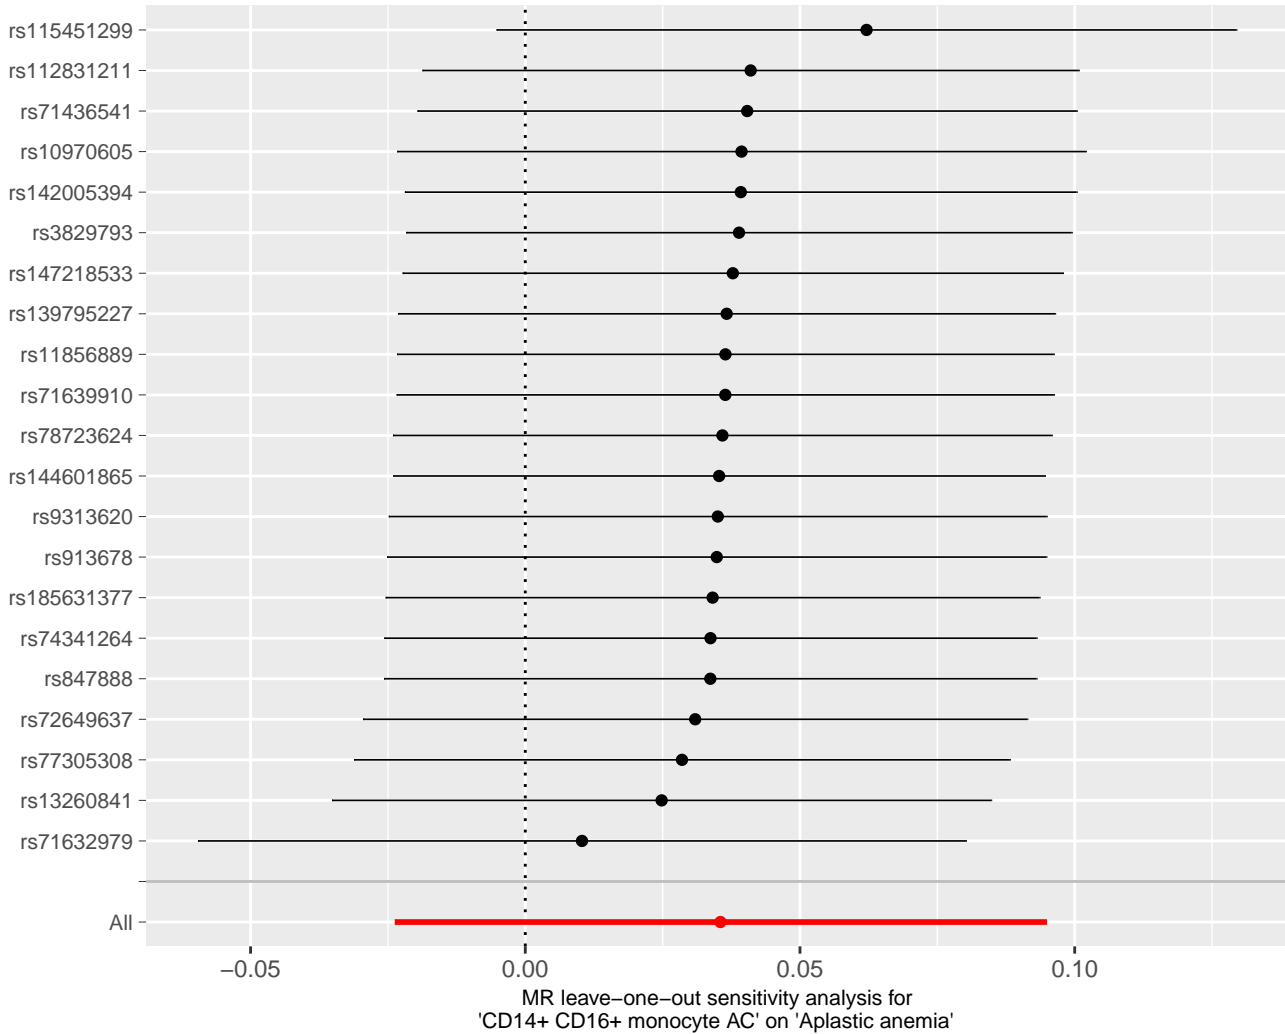

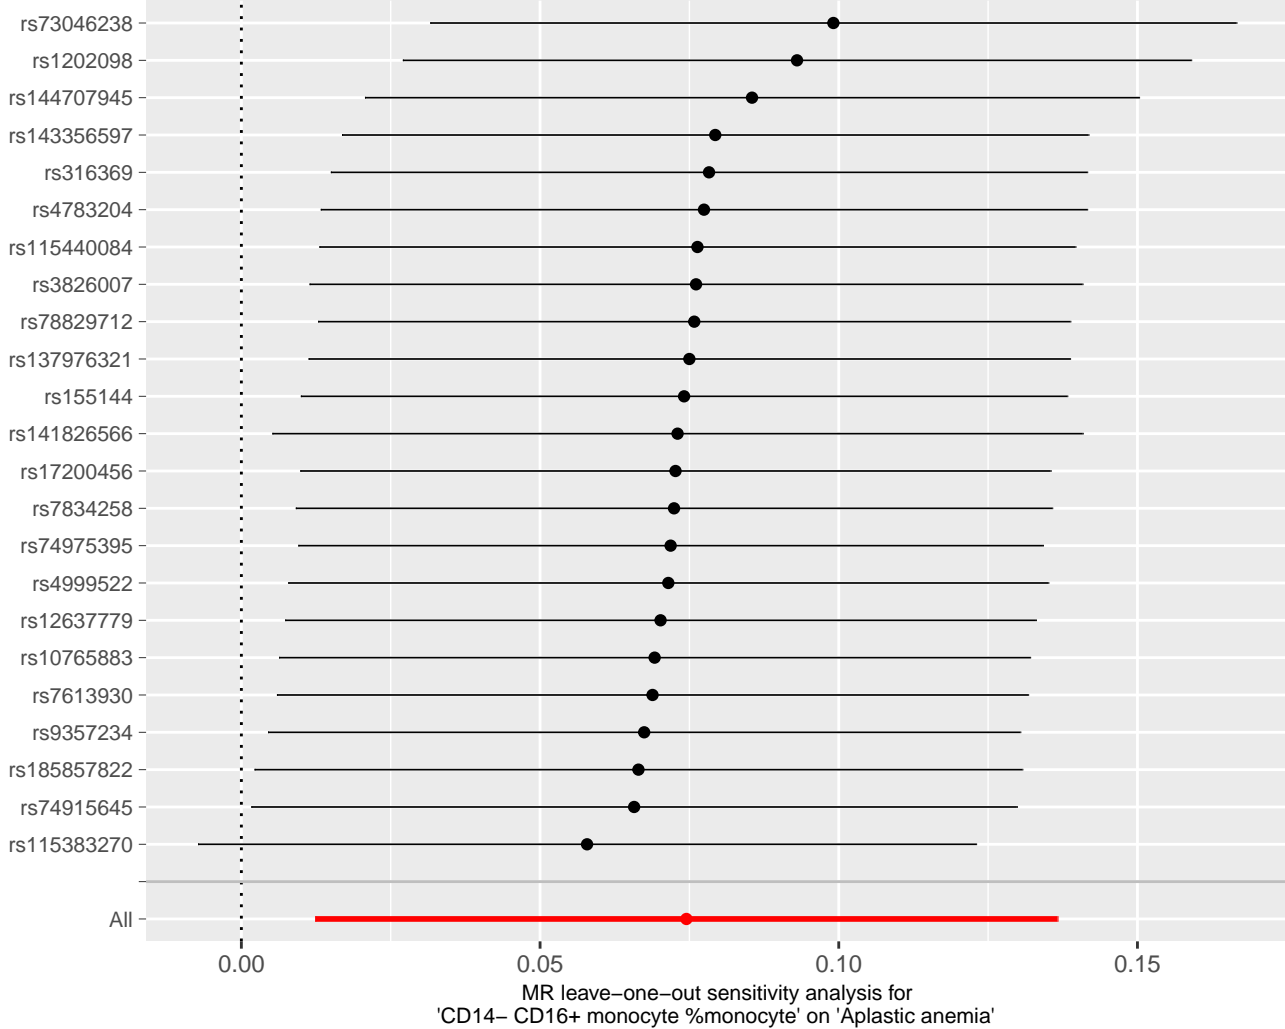

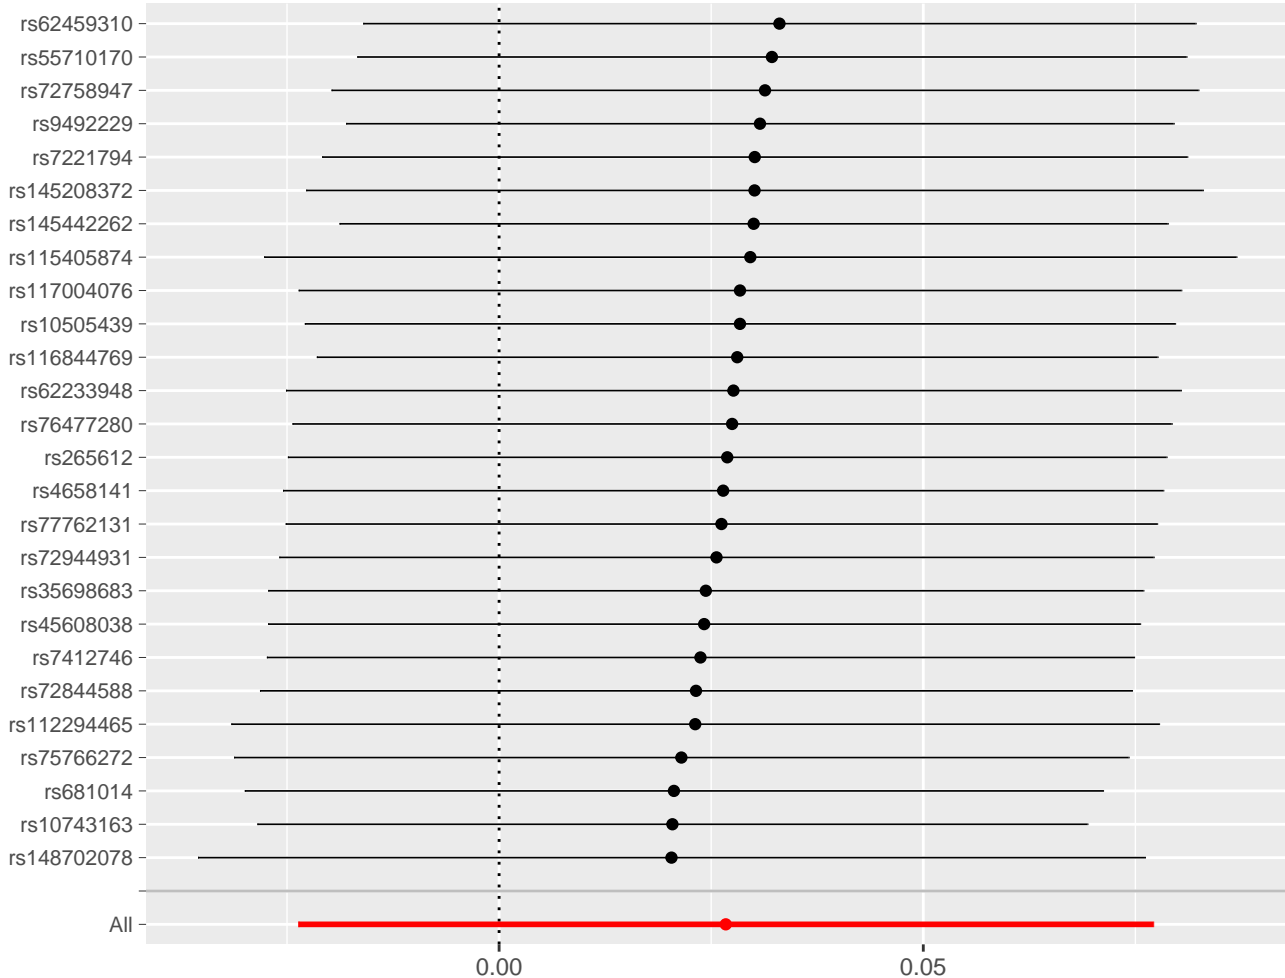

0.00

0.05

MR leave-one-out sensitivity analysis for 'CD24+ CD27+ %B cell' on 'Aplastic anemia'

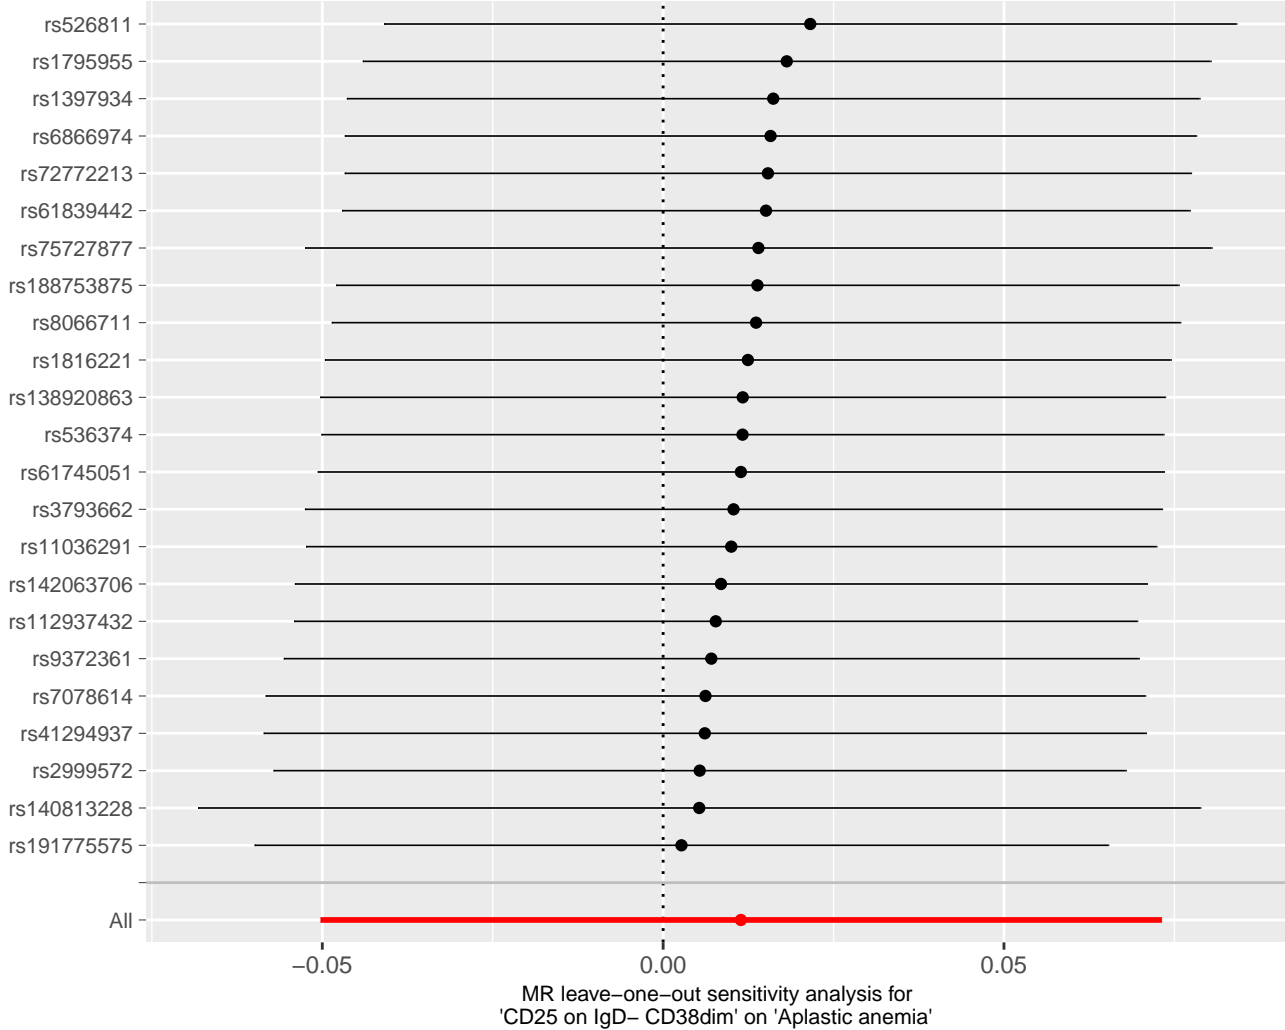

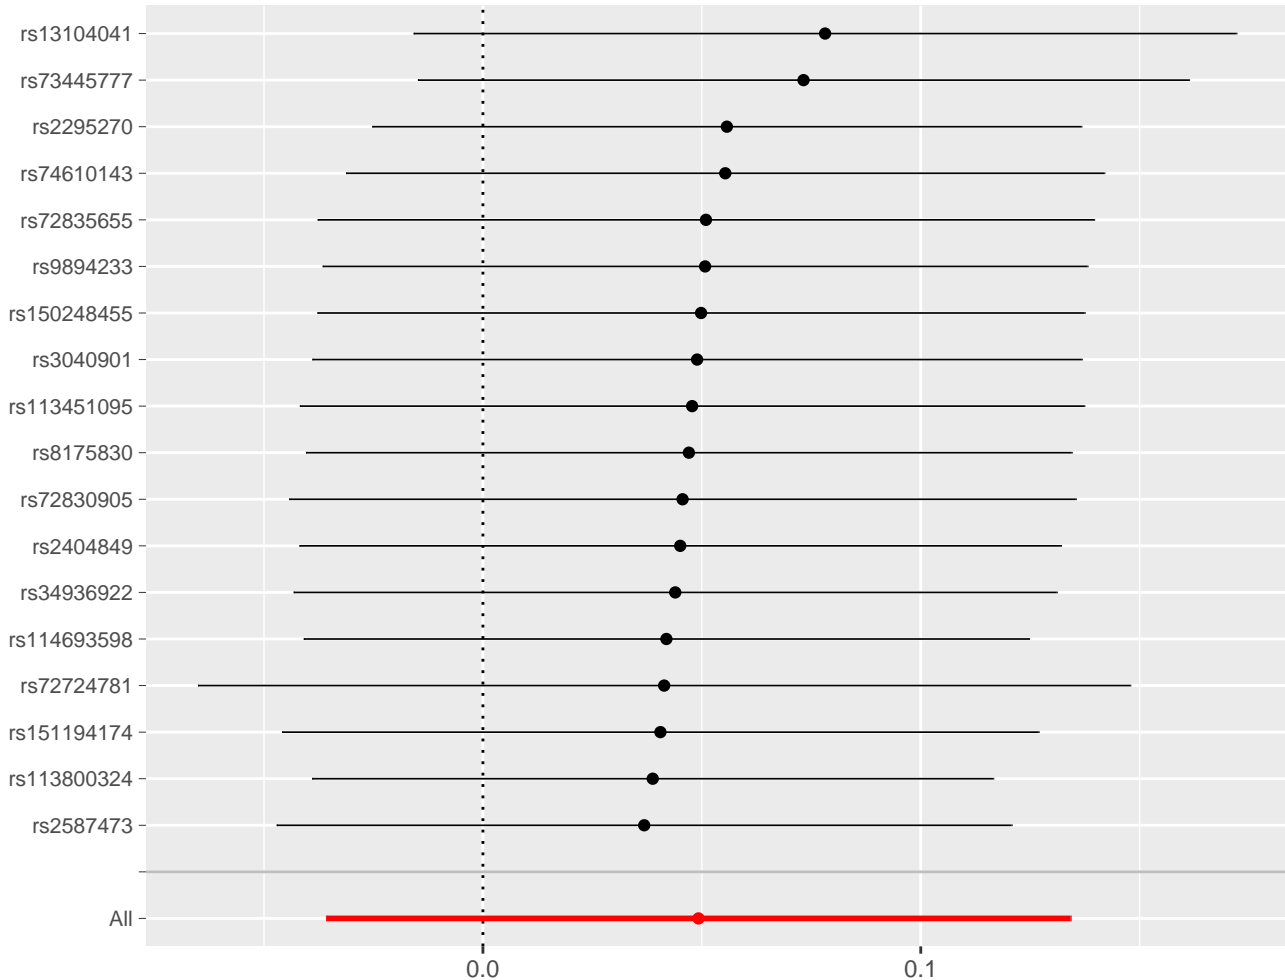

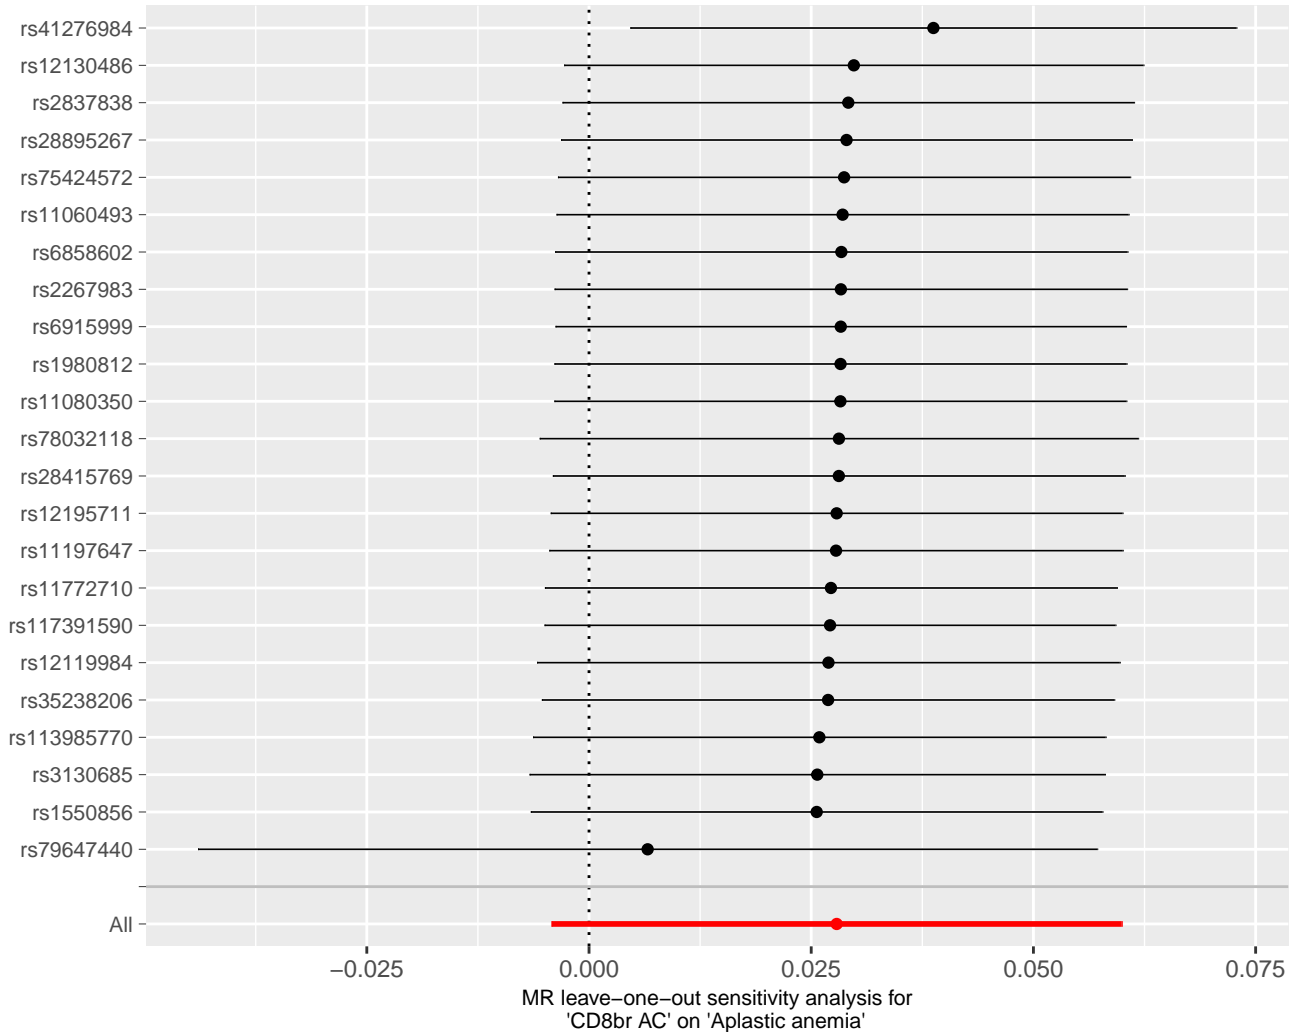



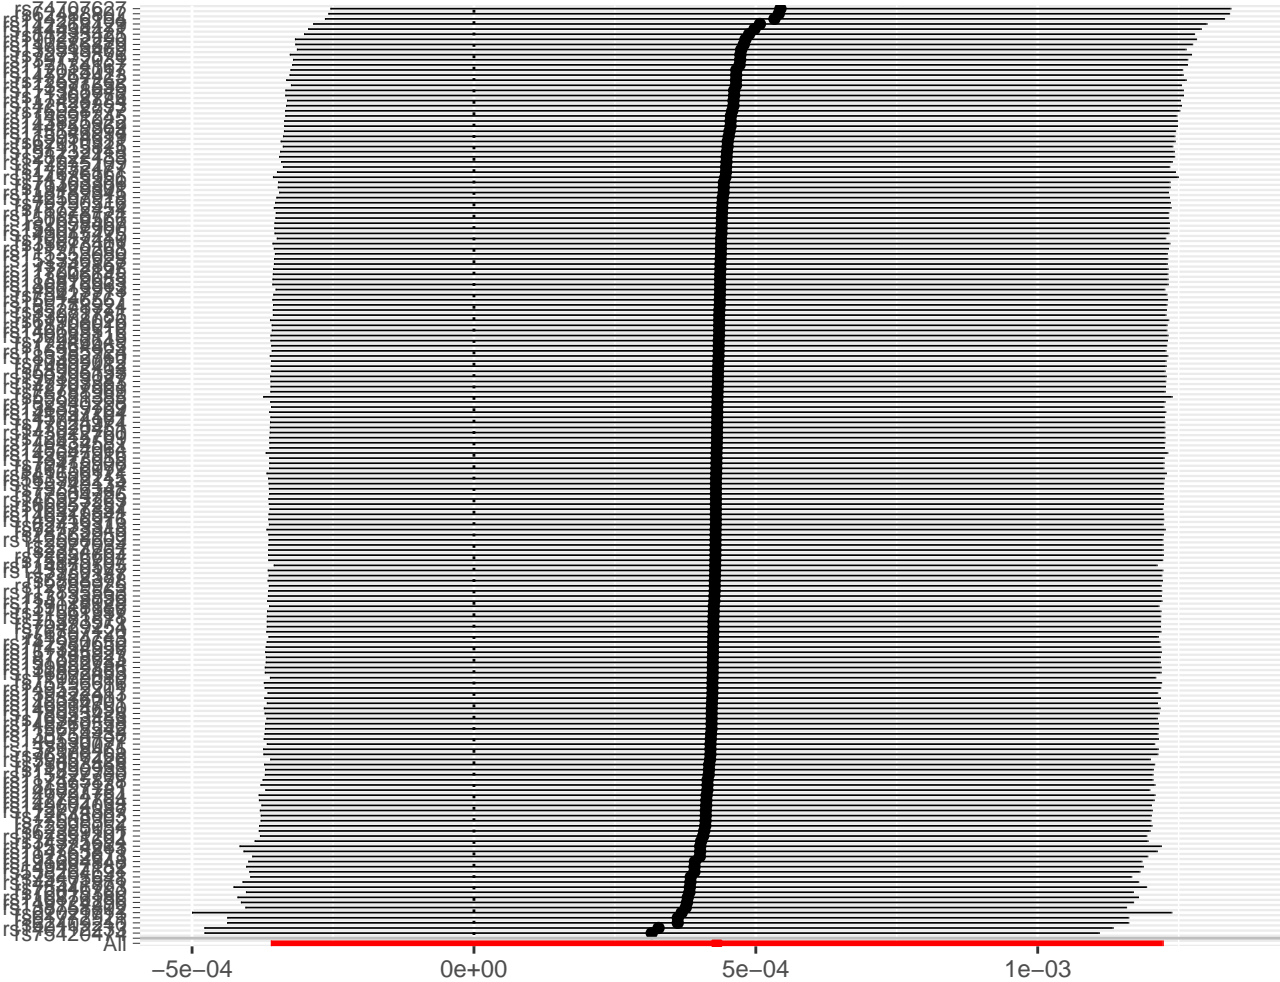

MR leave-one-out sensitivity analysis for  
'CD45RA- CD28- CD8br %T cell' on 'Aplastic anemia'

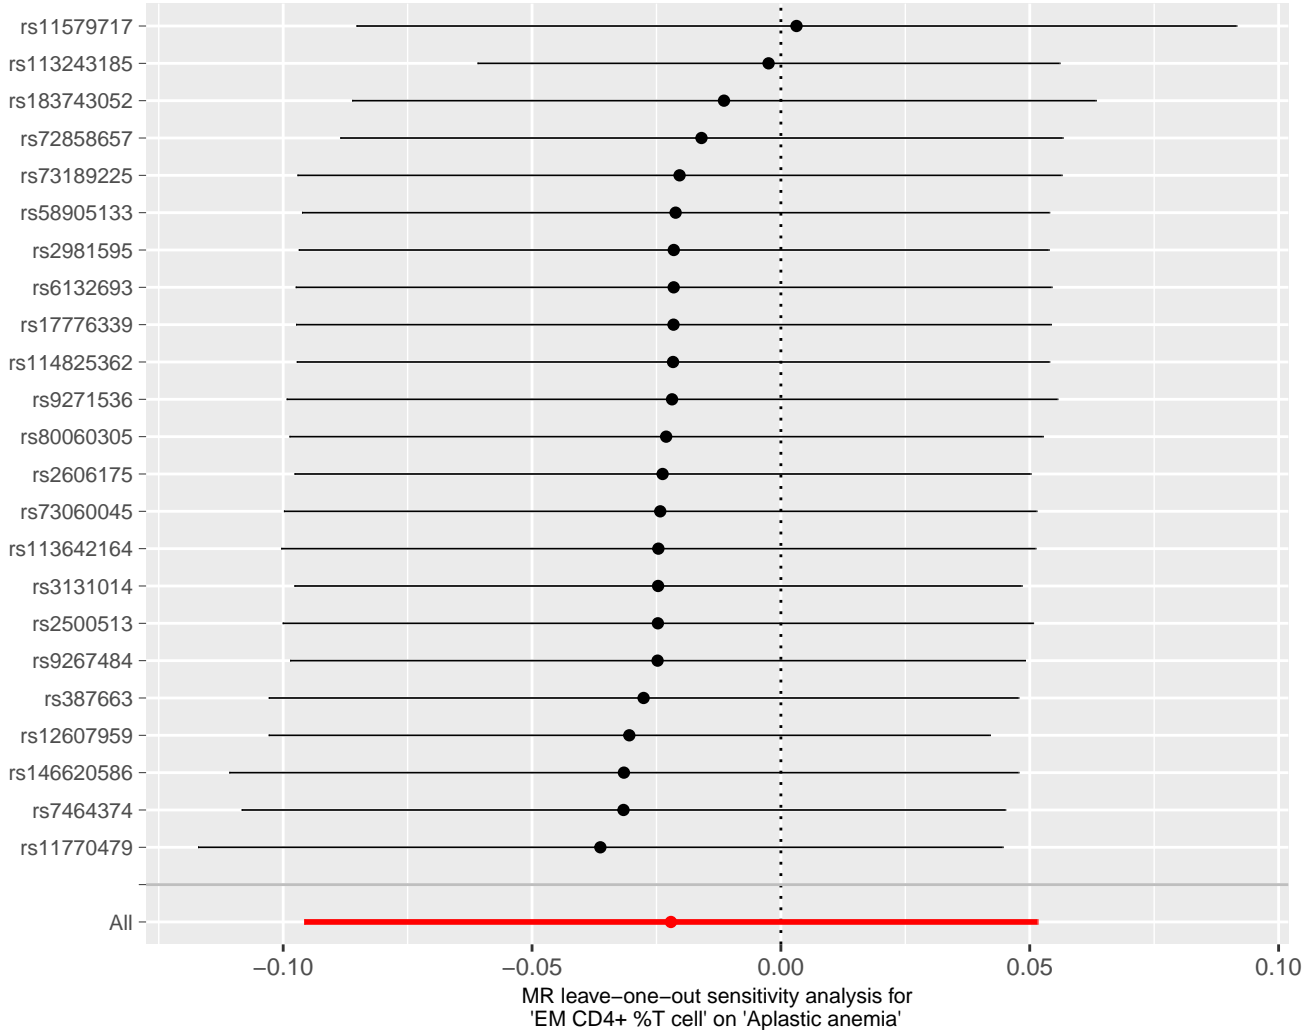

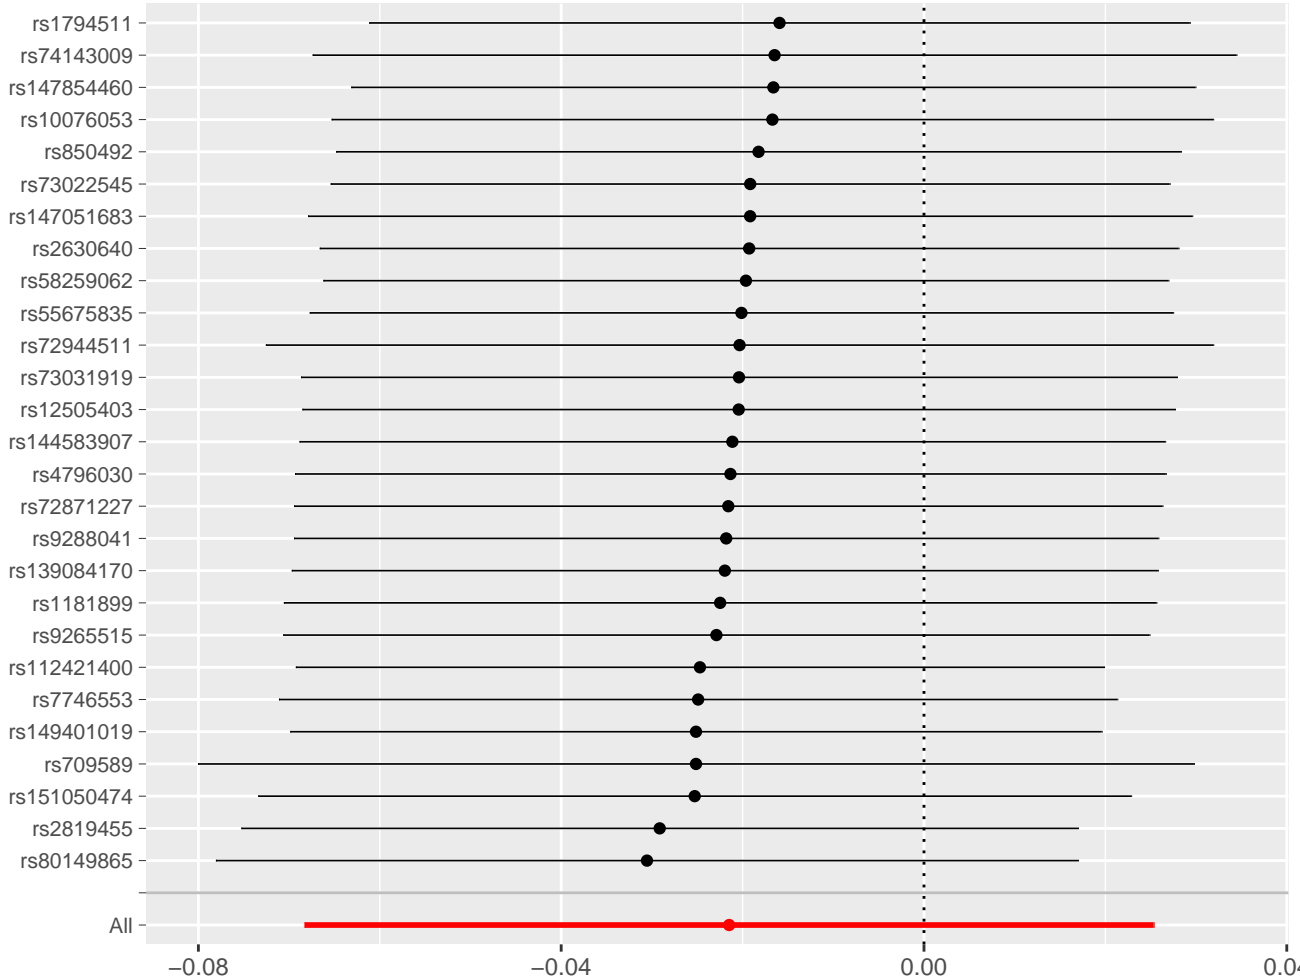

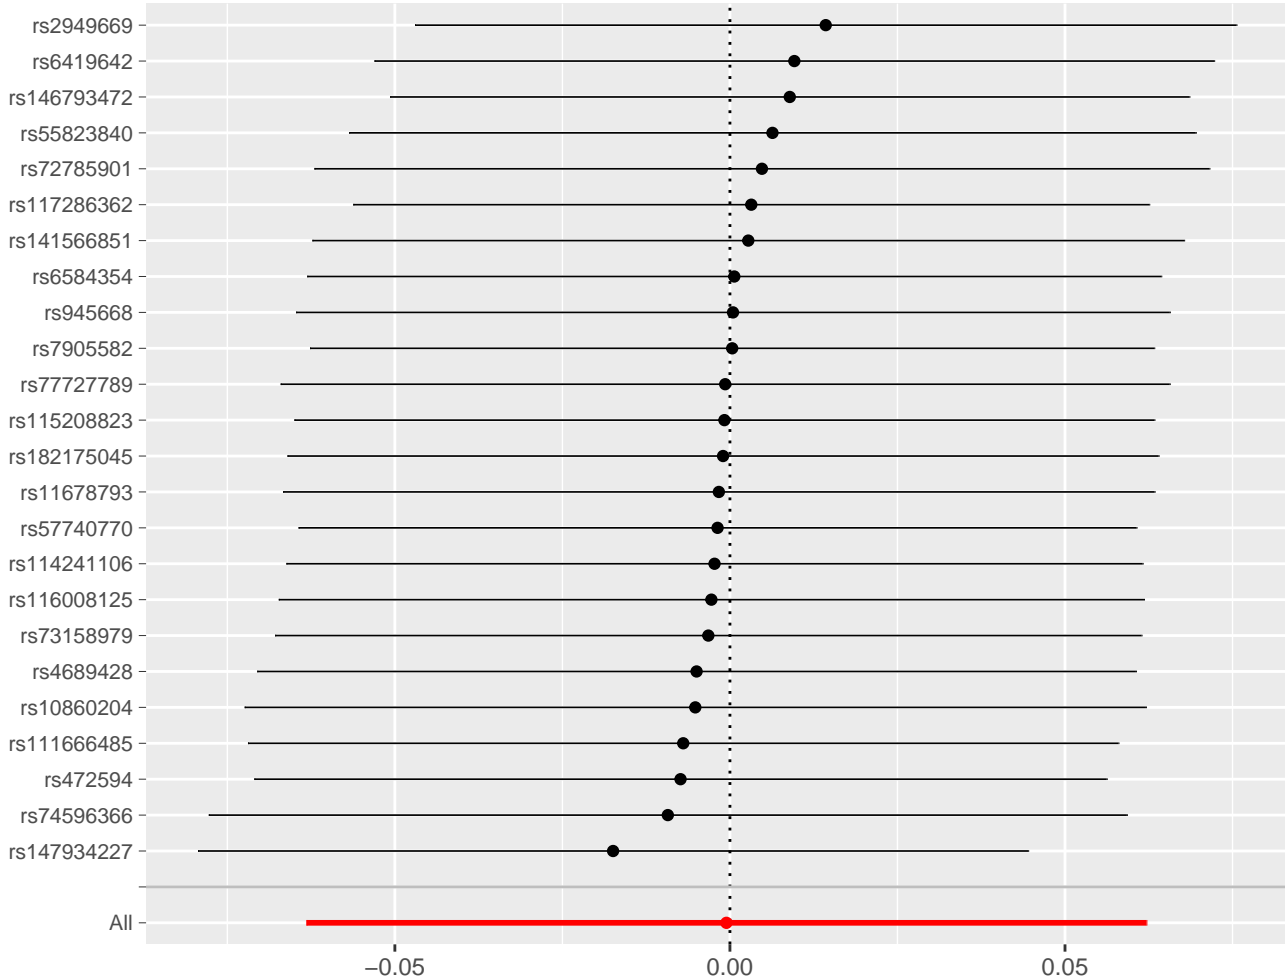

MR leave-one-out sensitivity analysis for 'CD3 on TD CD8br' on 'Aplastic anemia'

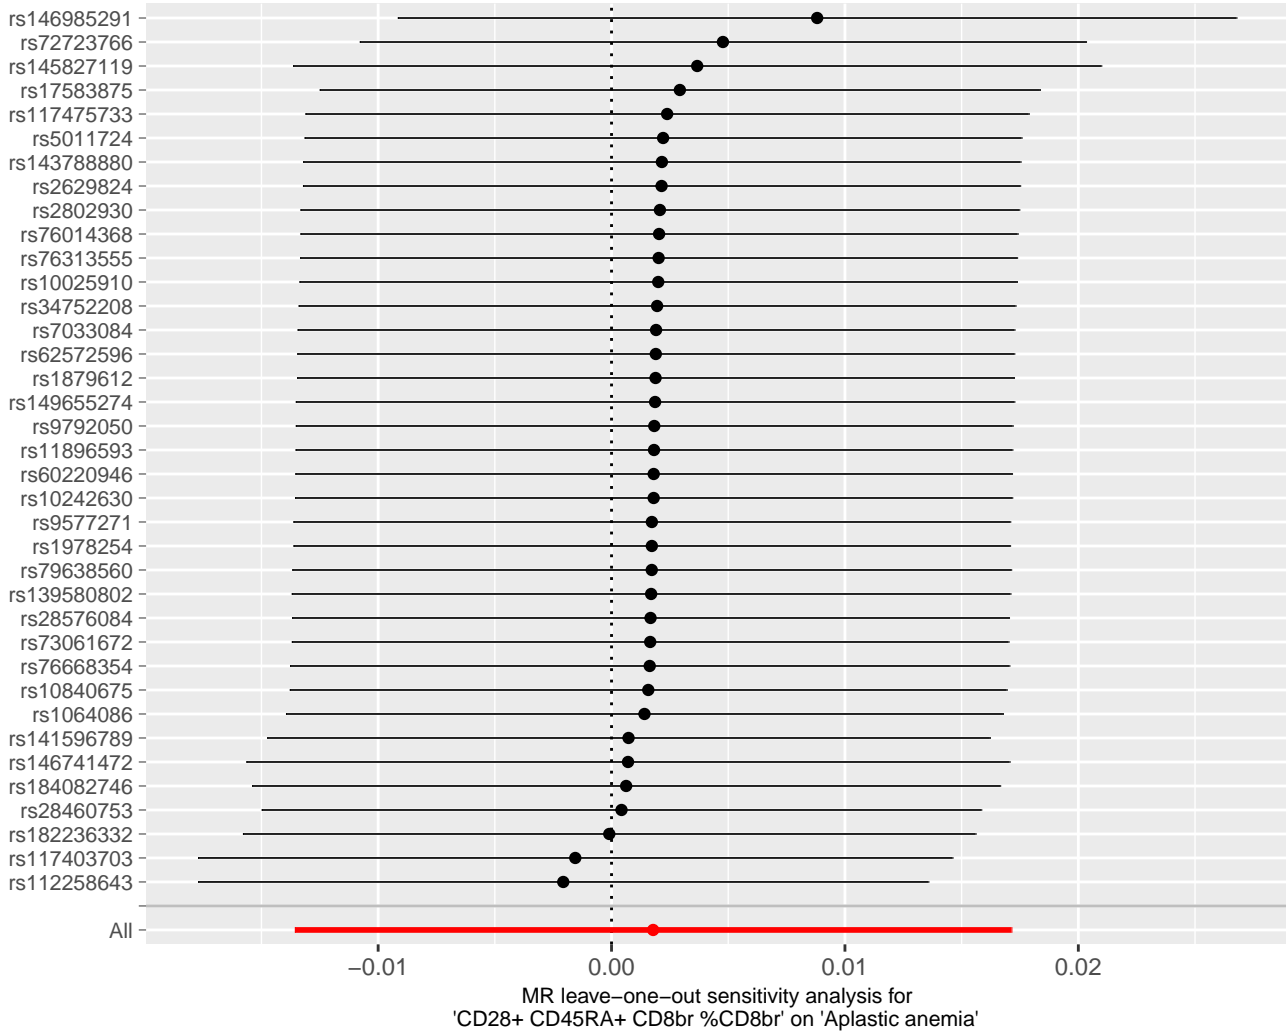

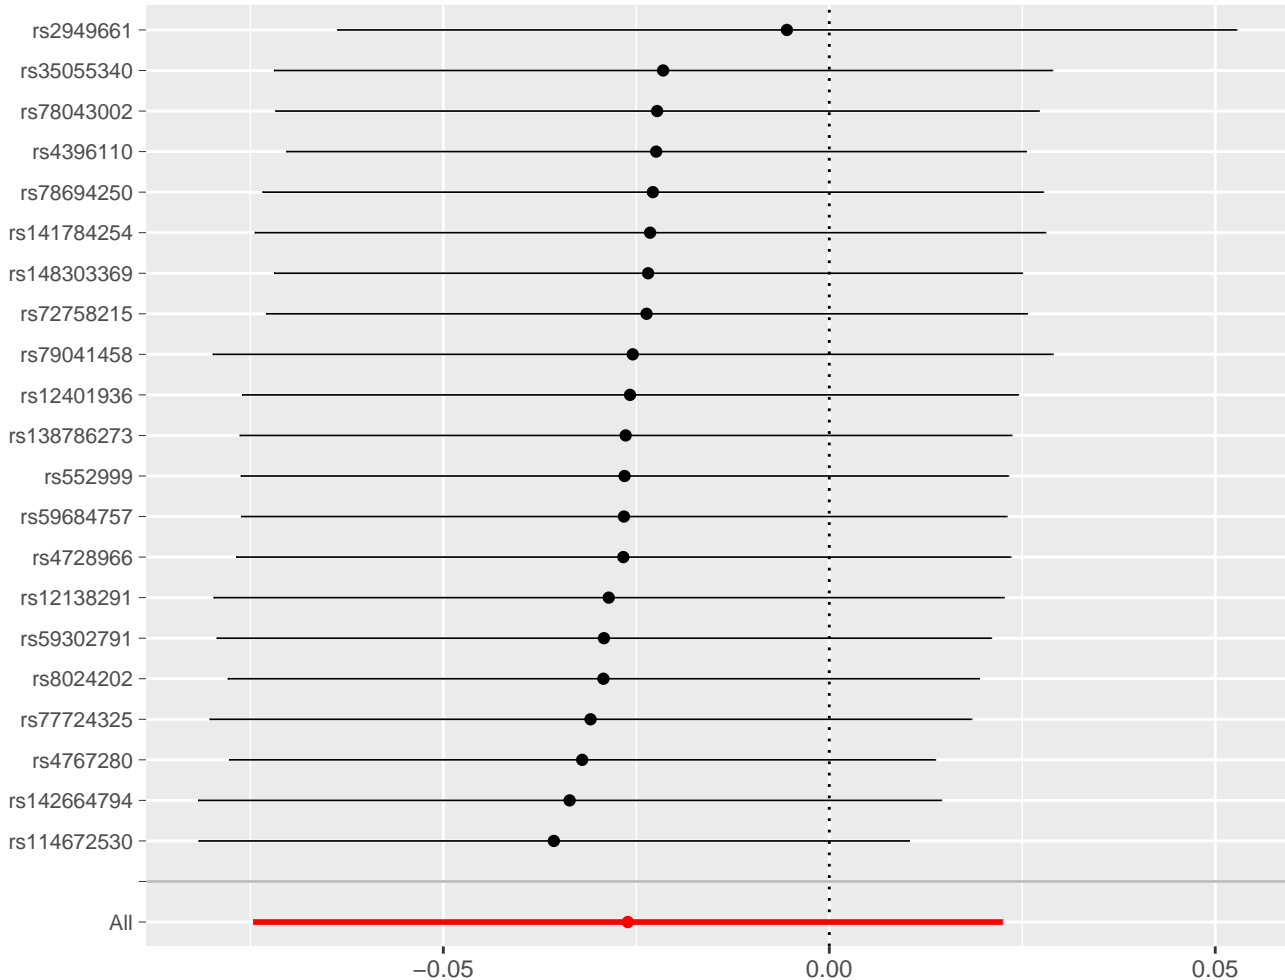

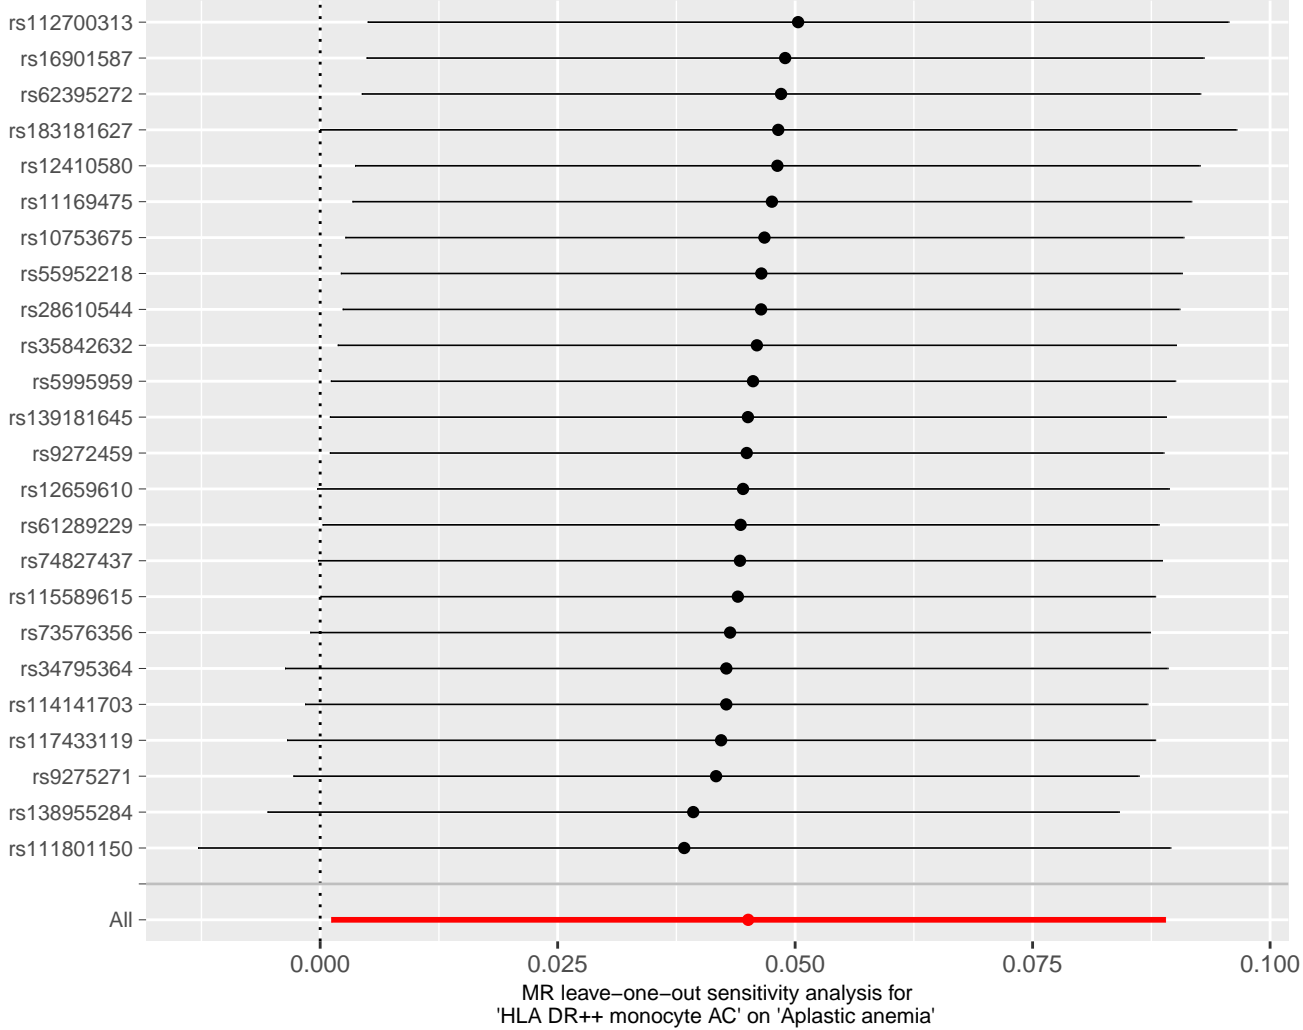

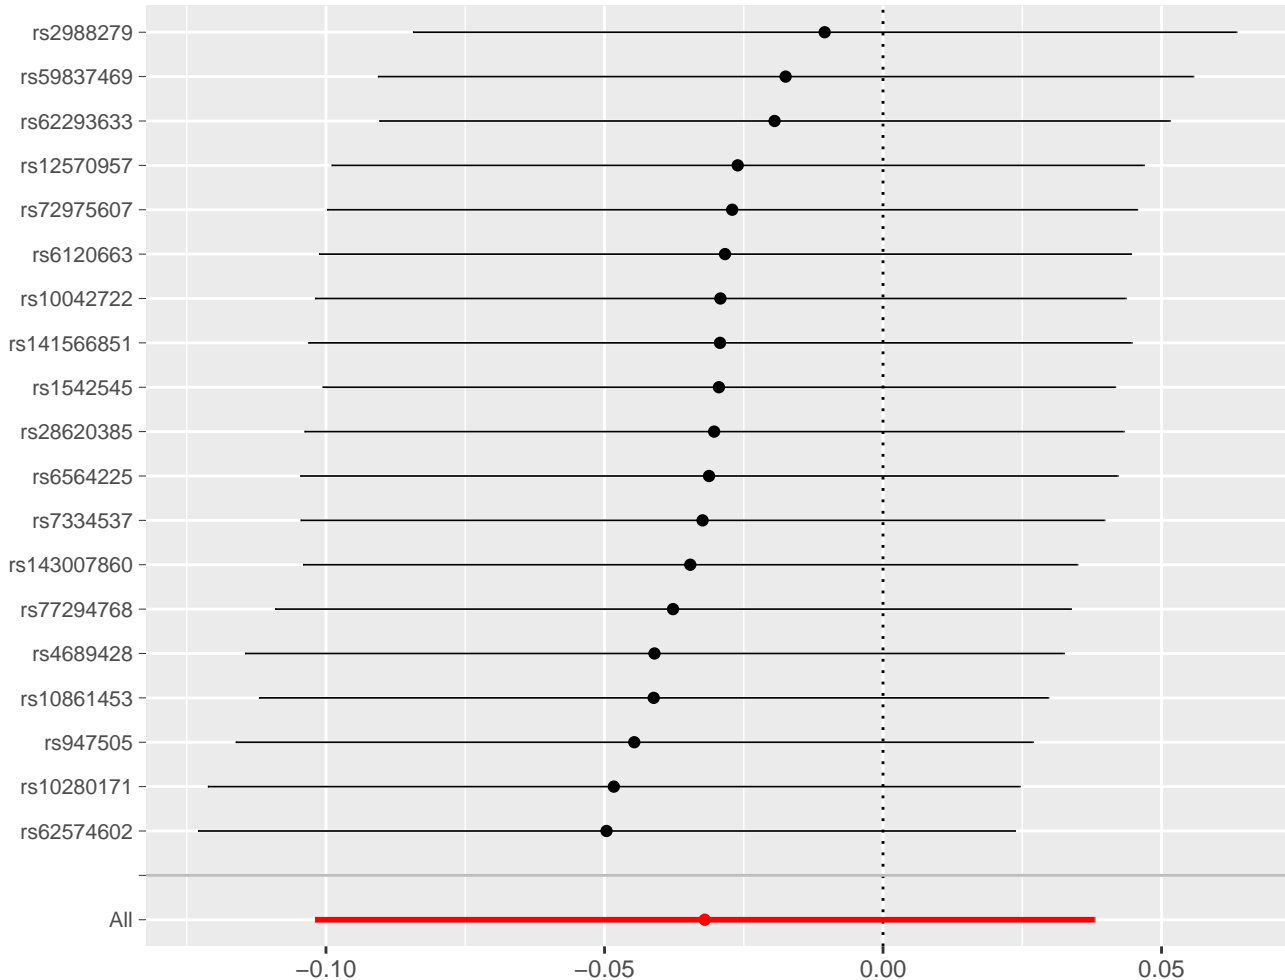

MR leave-one-out sensitivity analysis for 'CD3 on CD28- CD8br ' on 'Aplastic anemia'



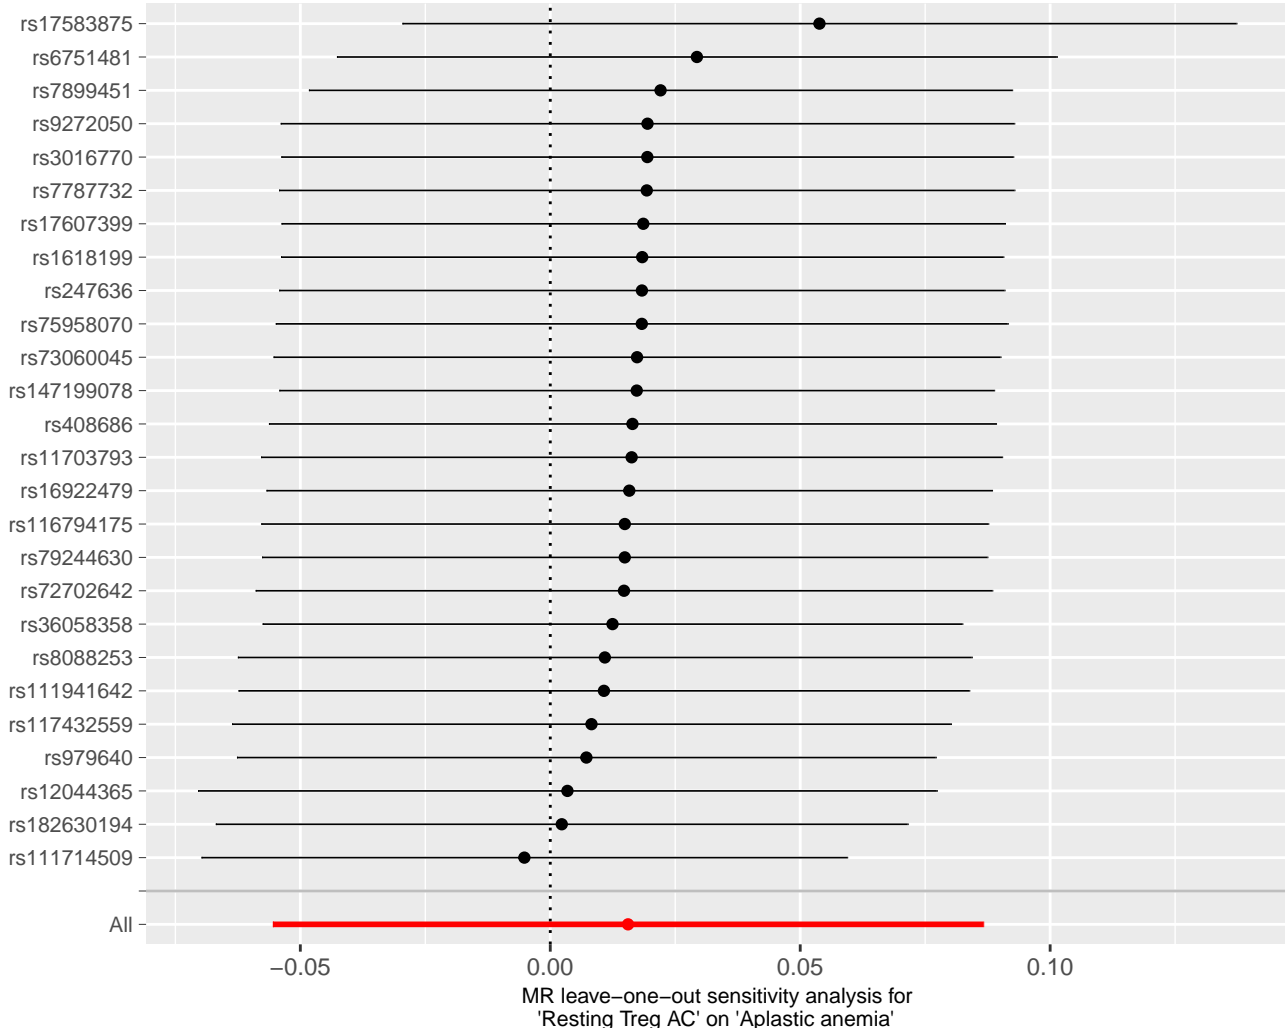

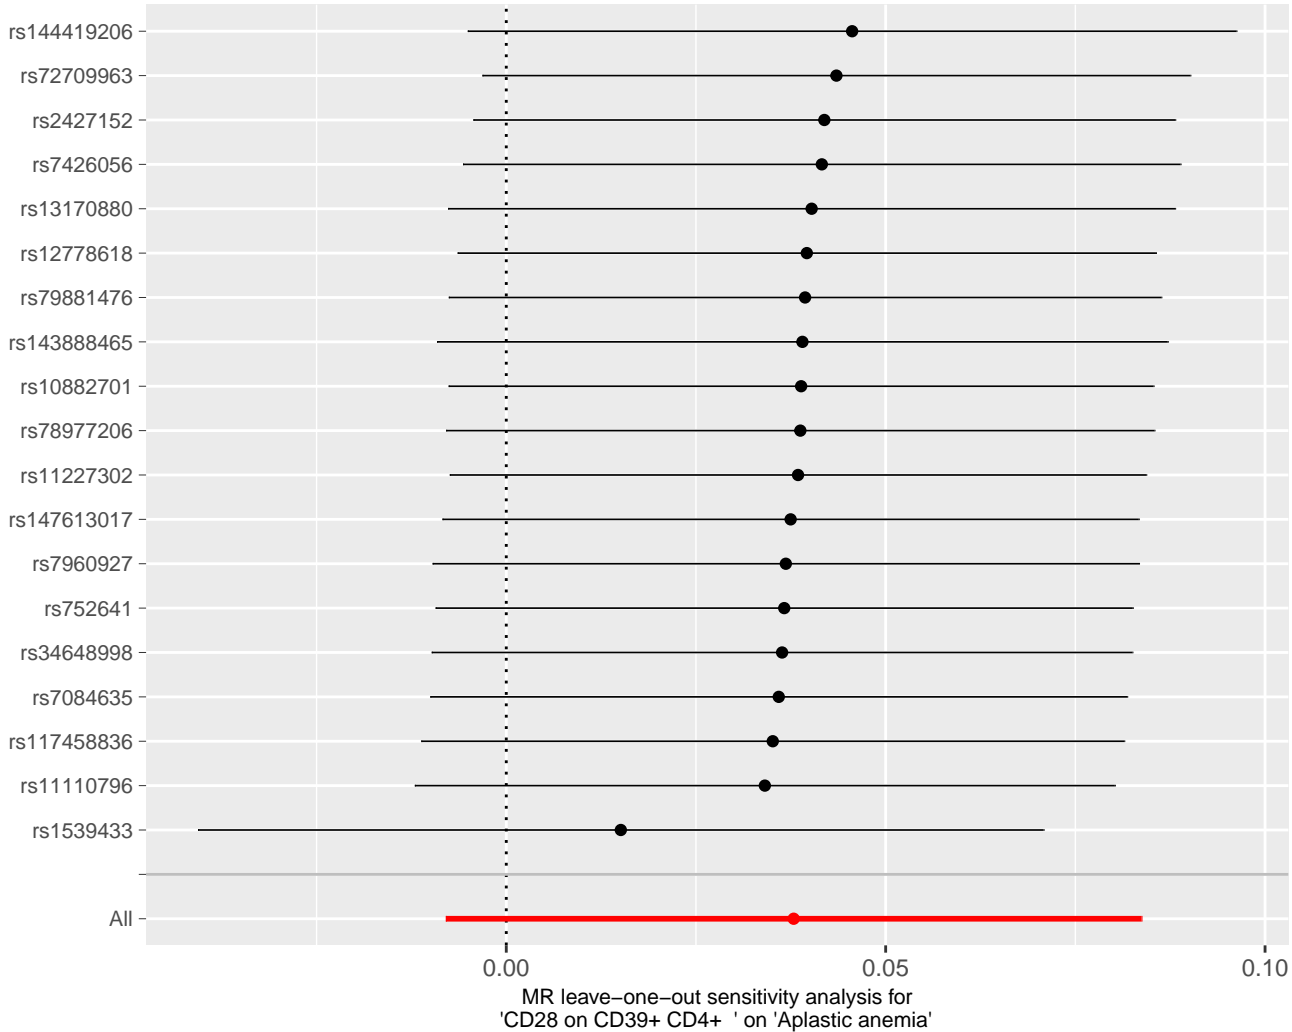

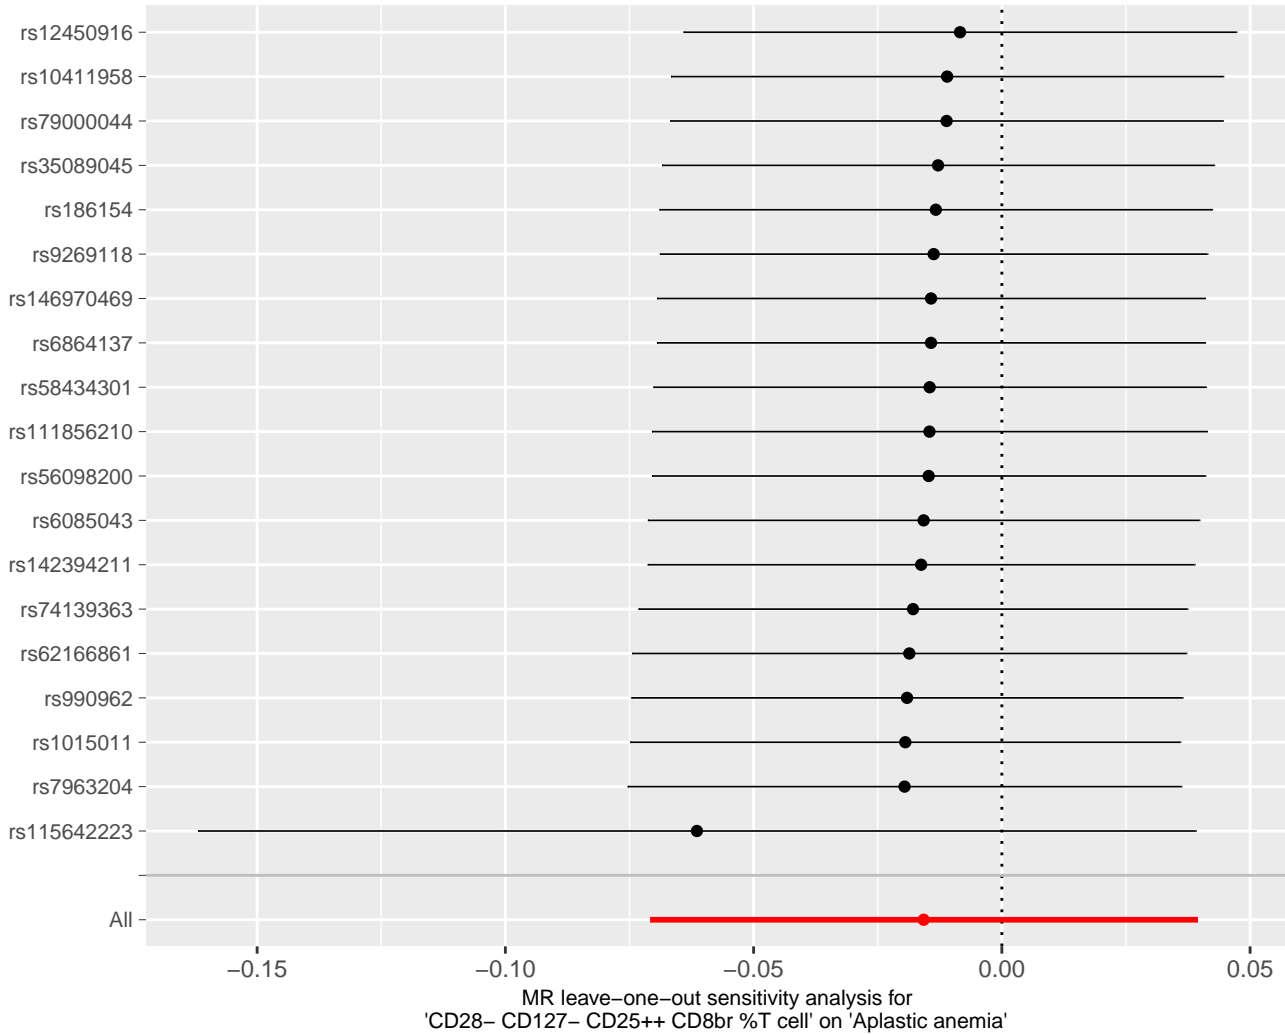

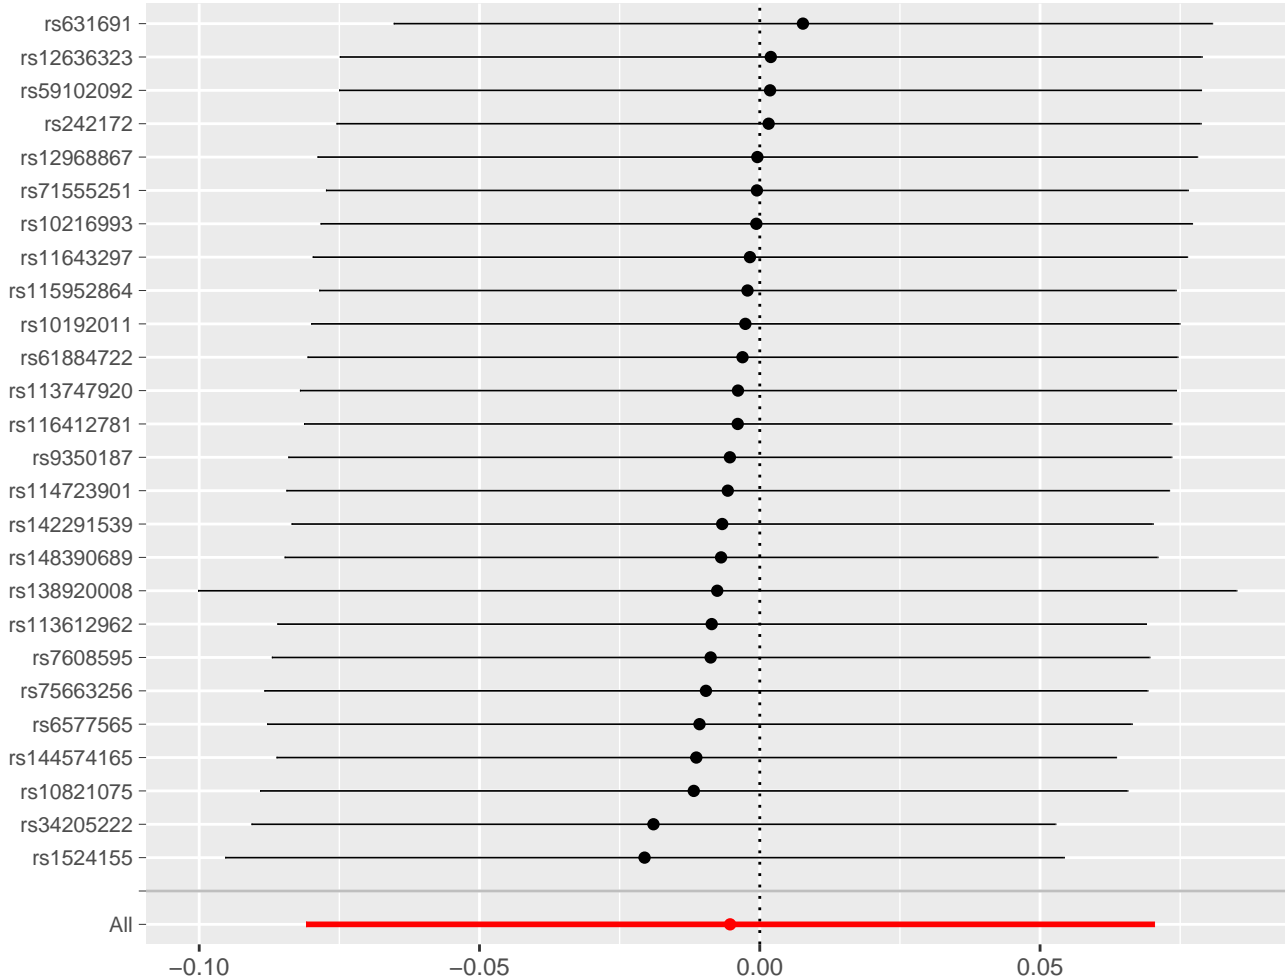

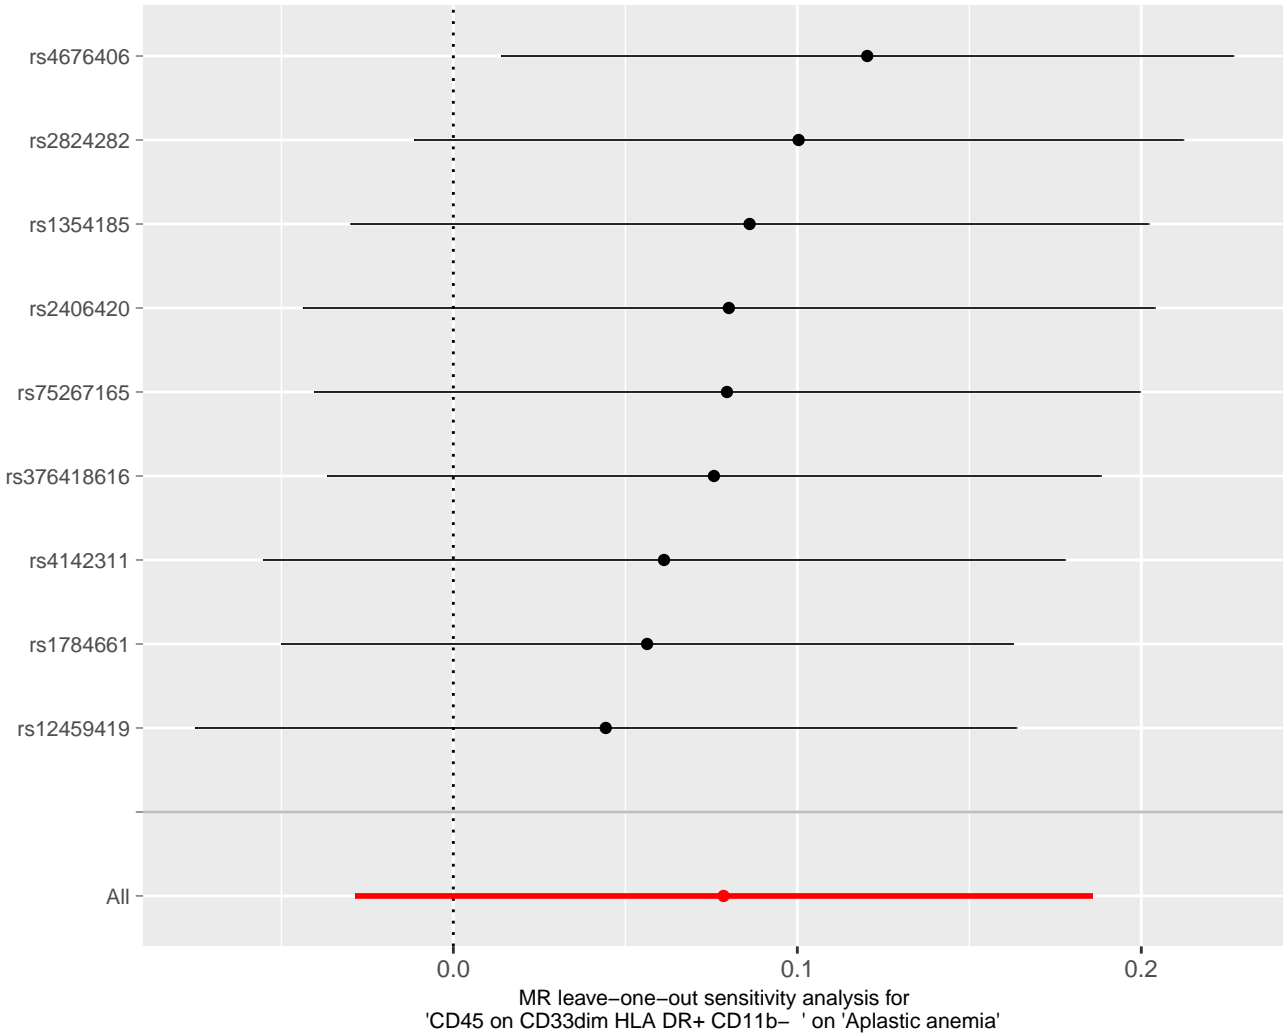

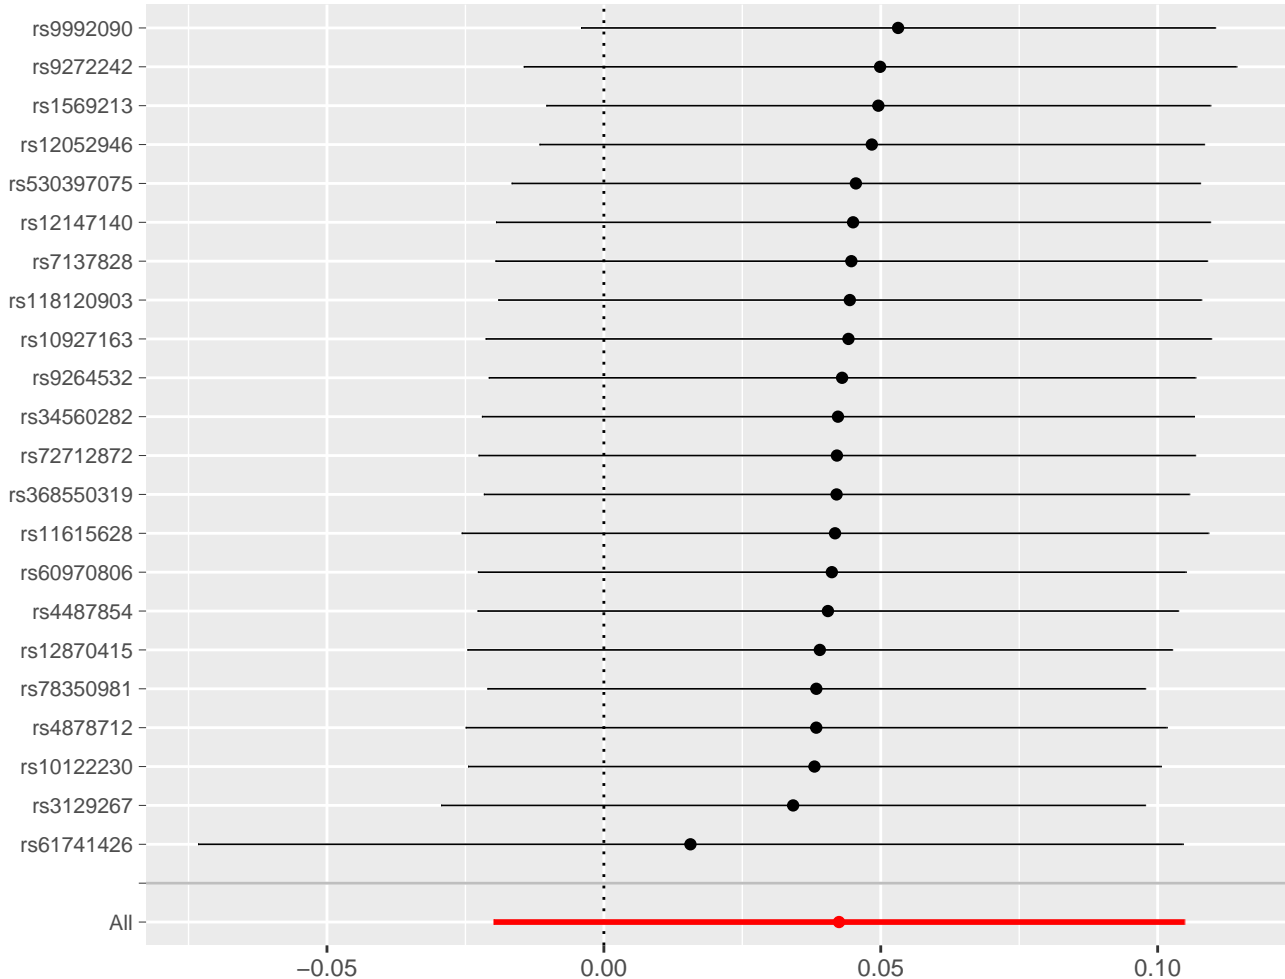

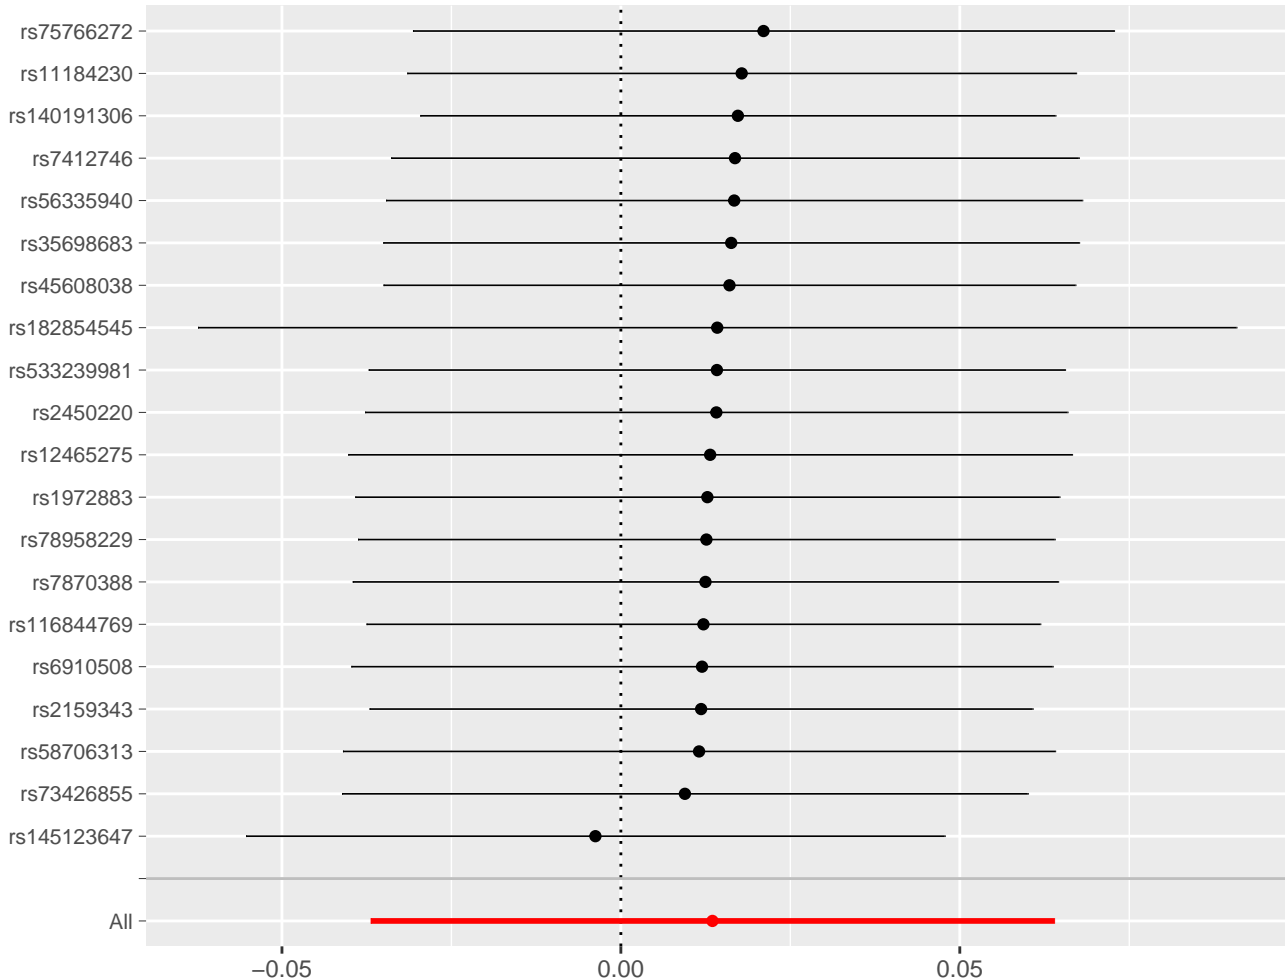

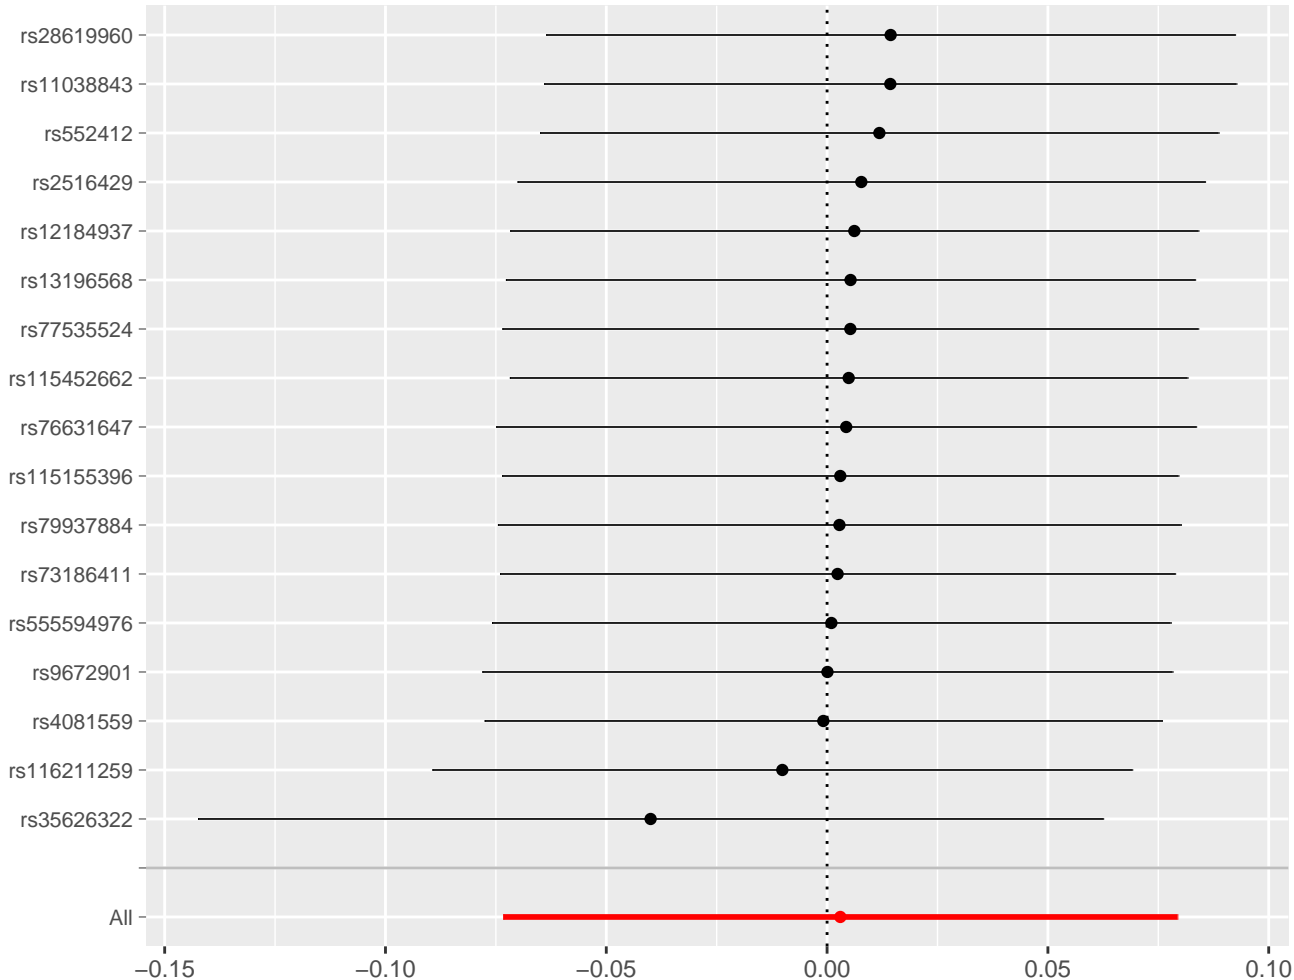



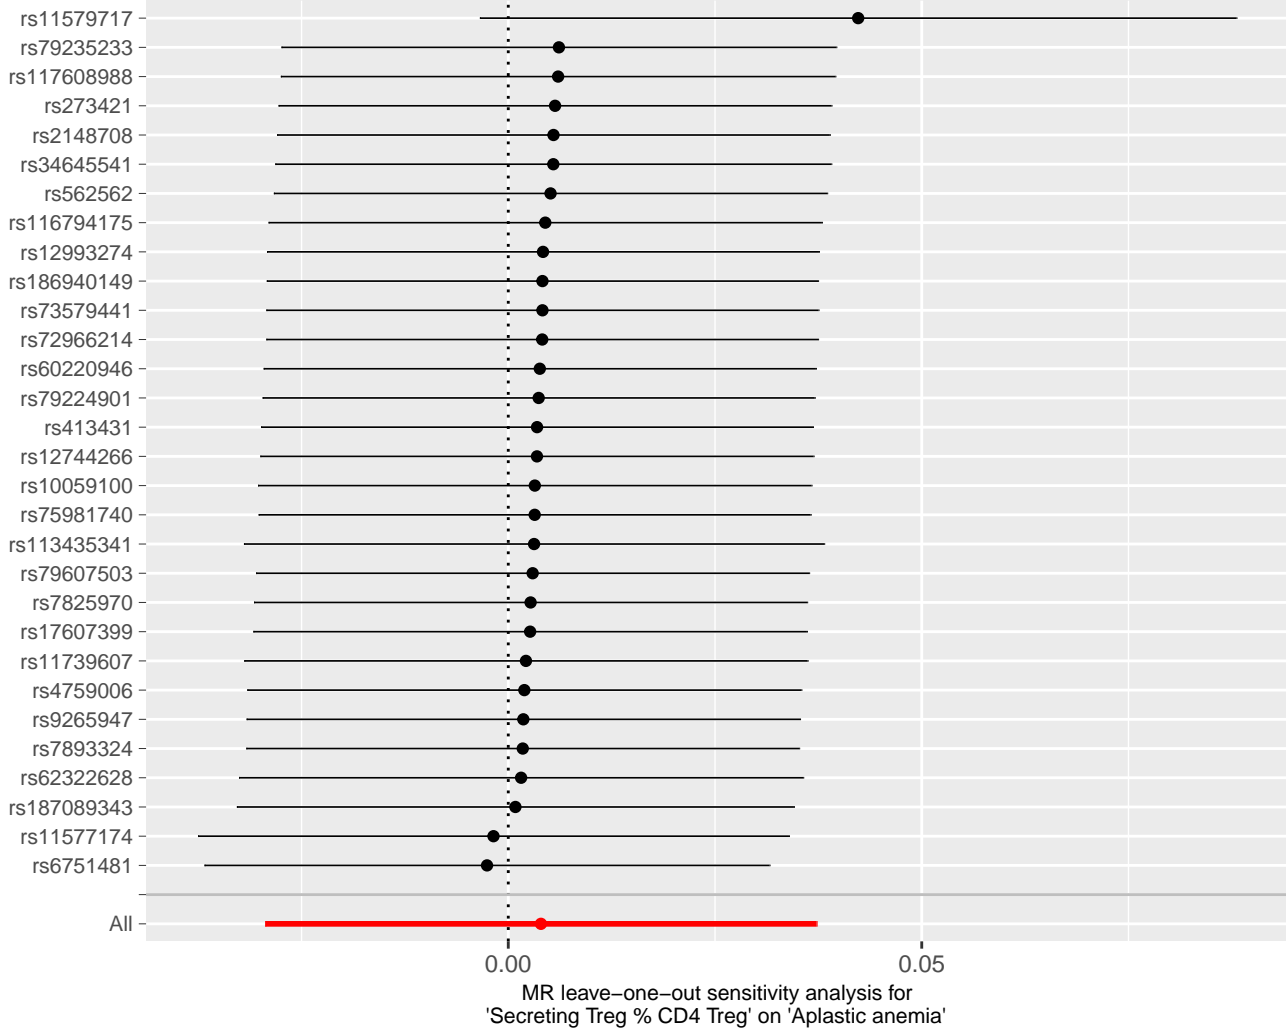

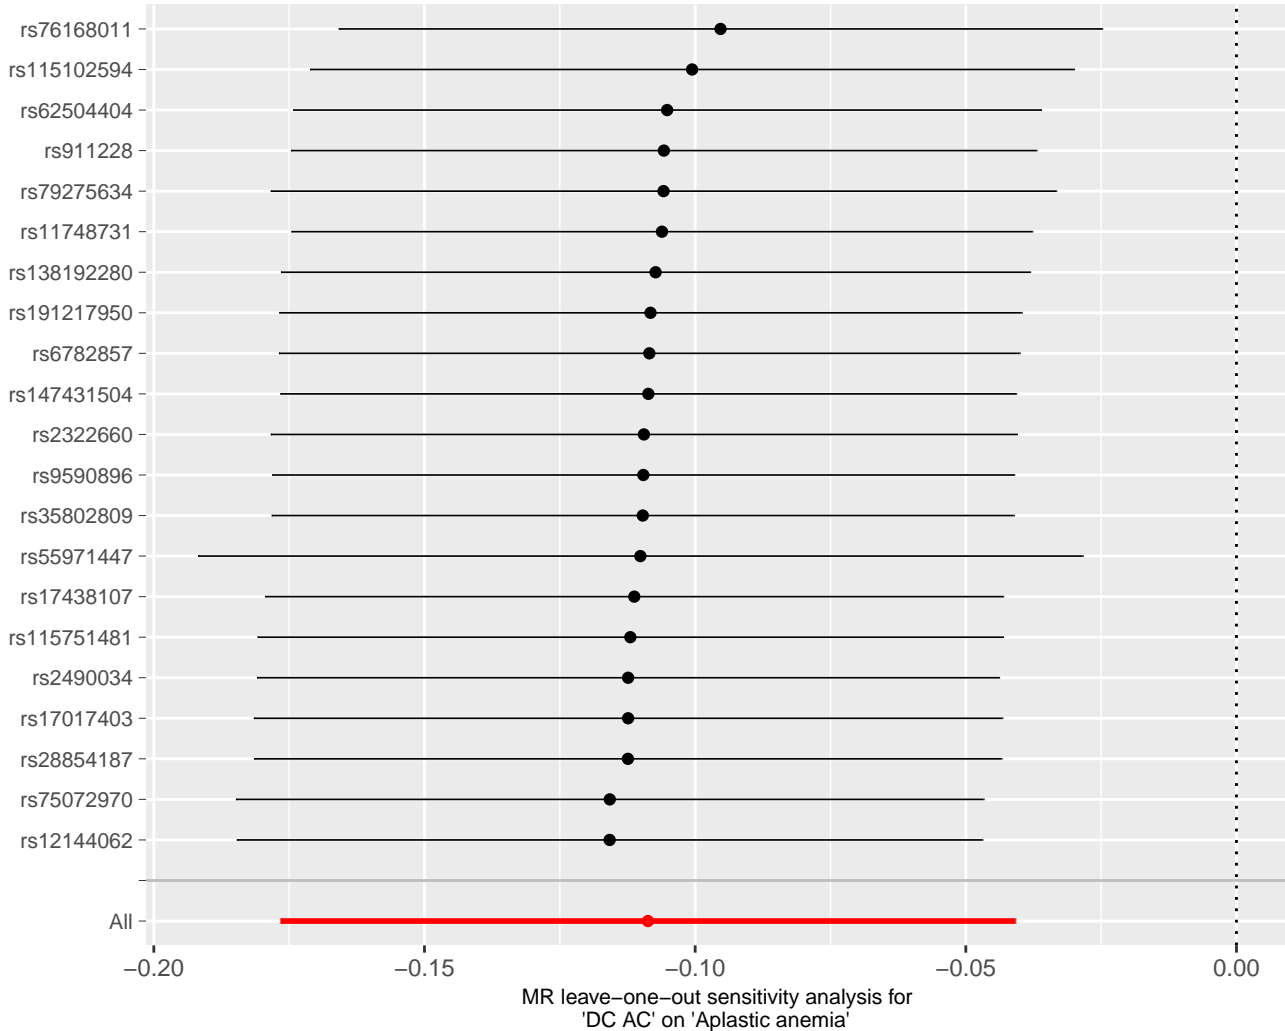

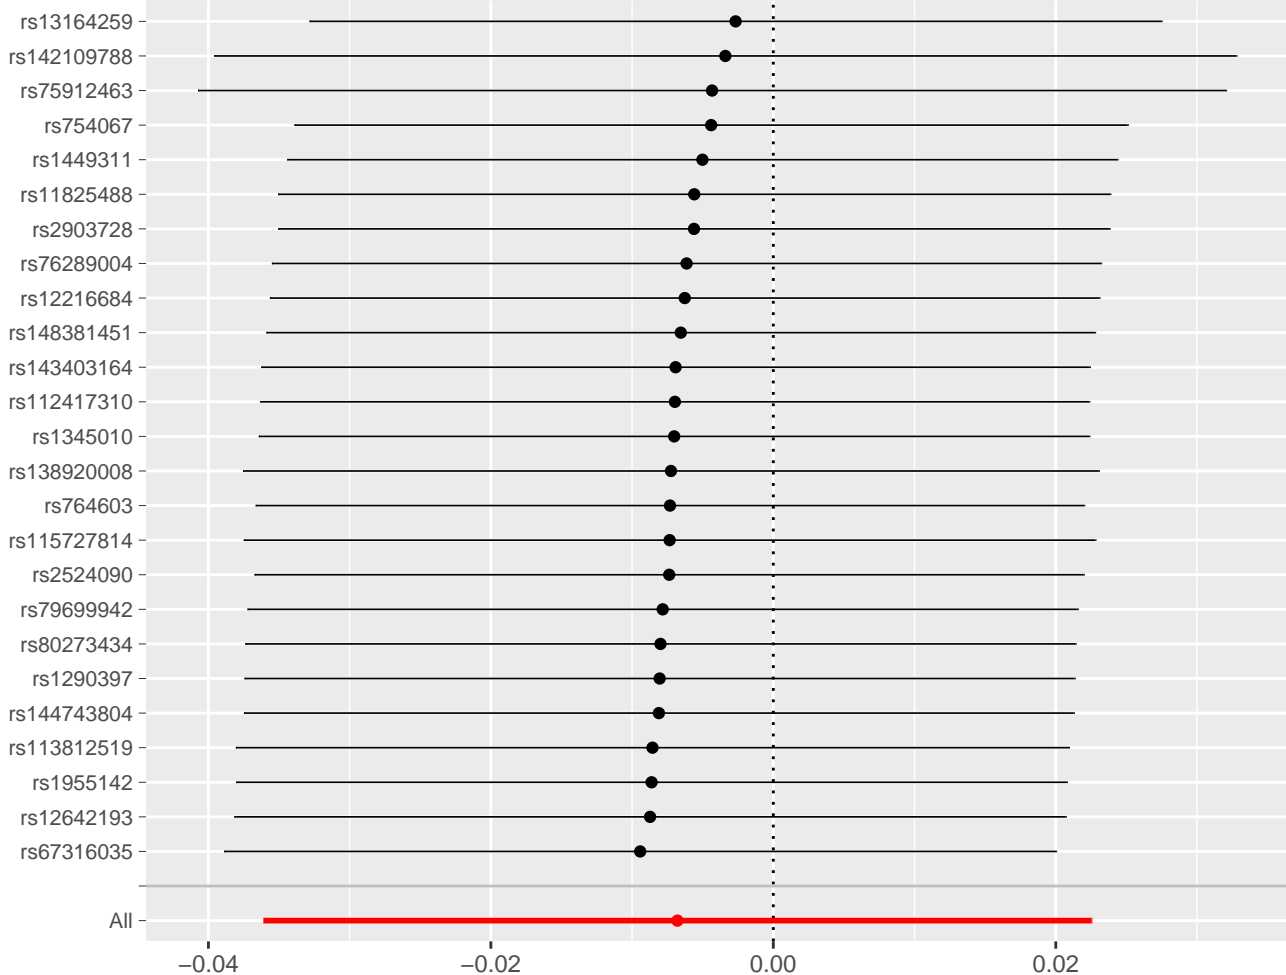

MR leave-one-out sensitivity analysis for 'CD19 on IgD+ CD38dim' on 'Aplastic anemia'

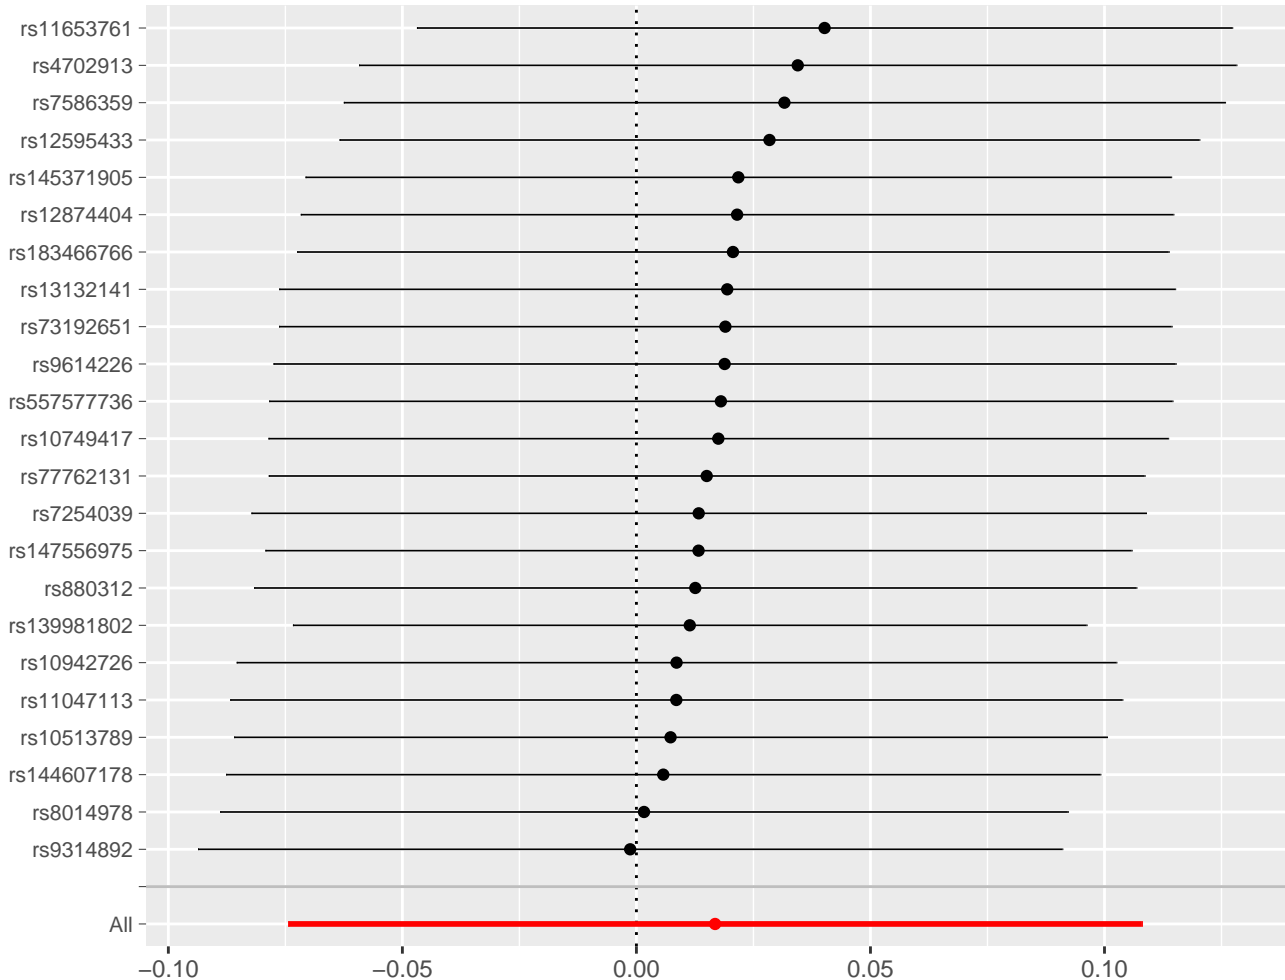

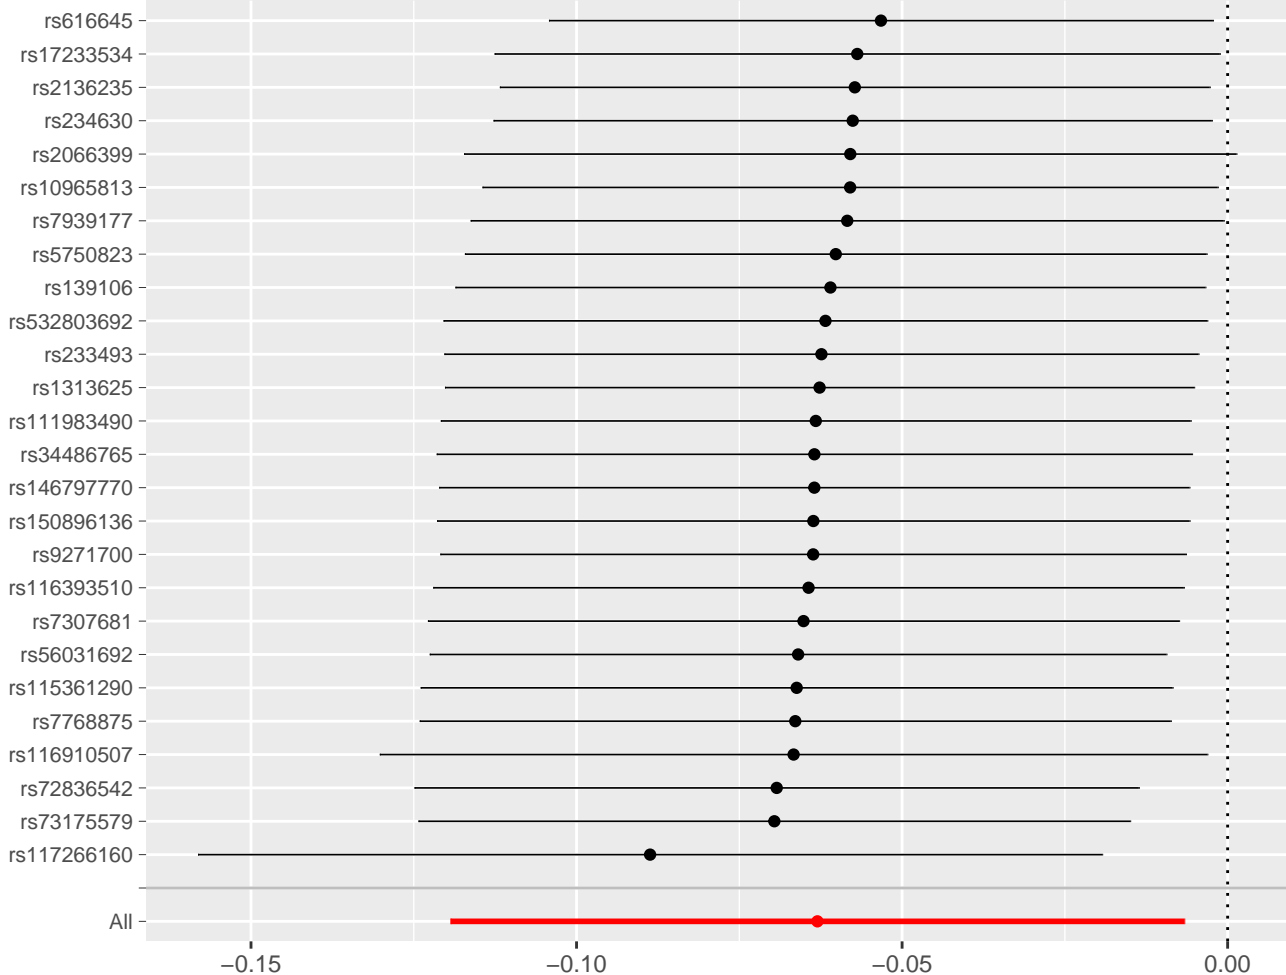

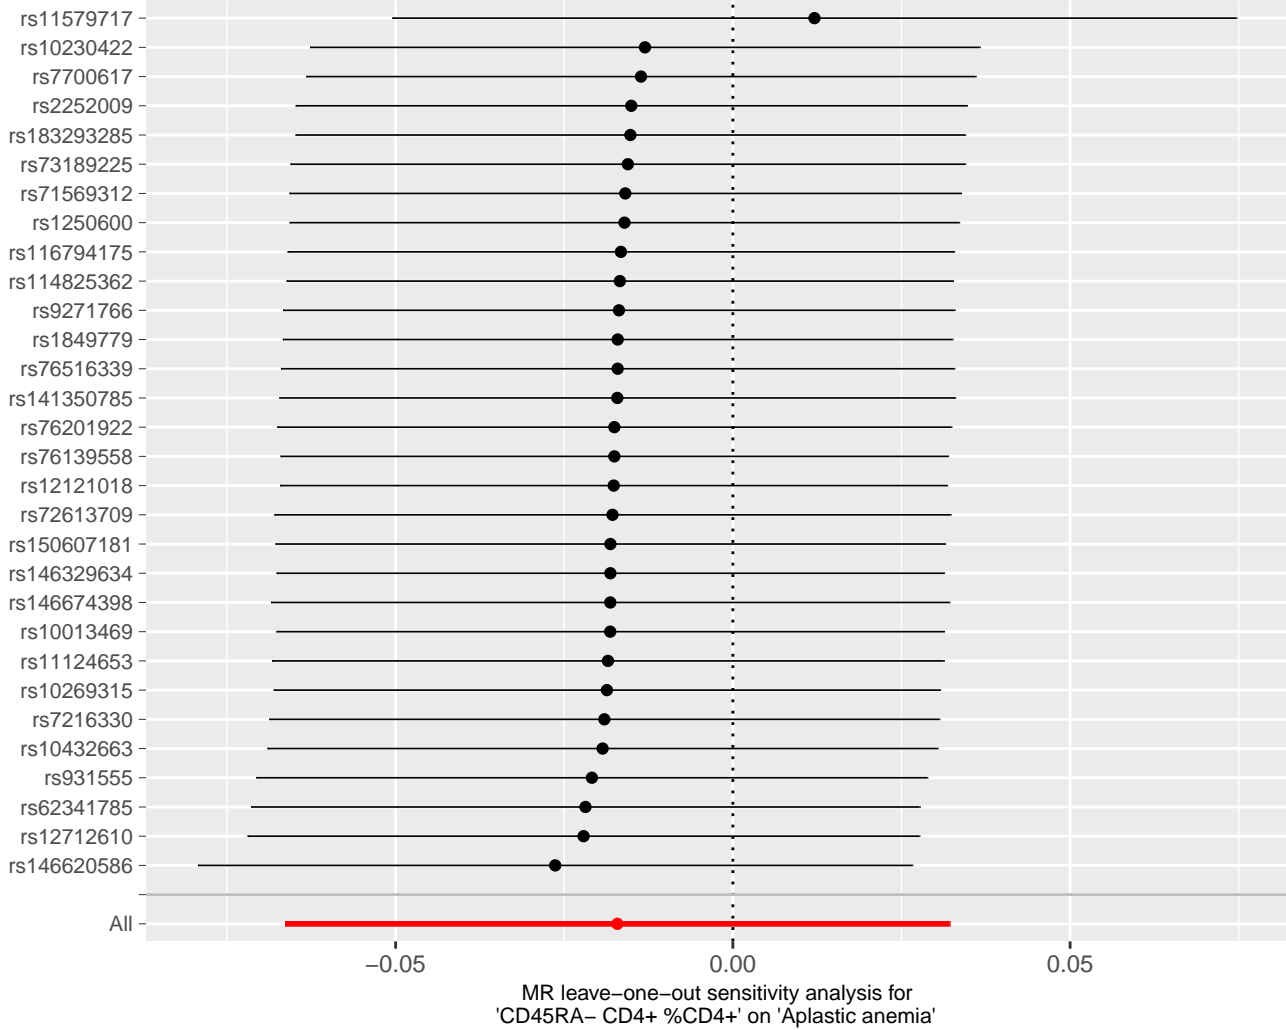

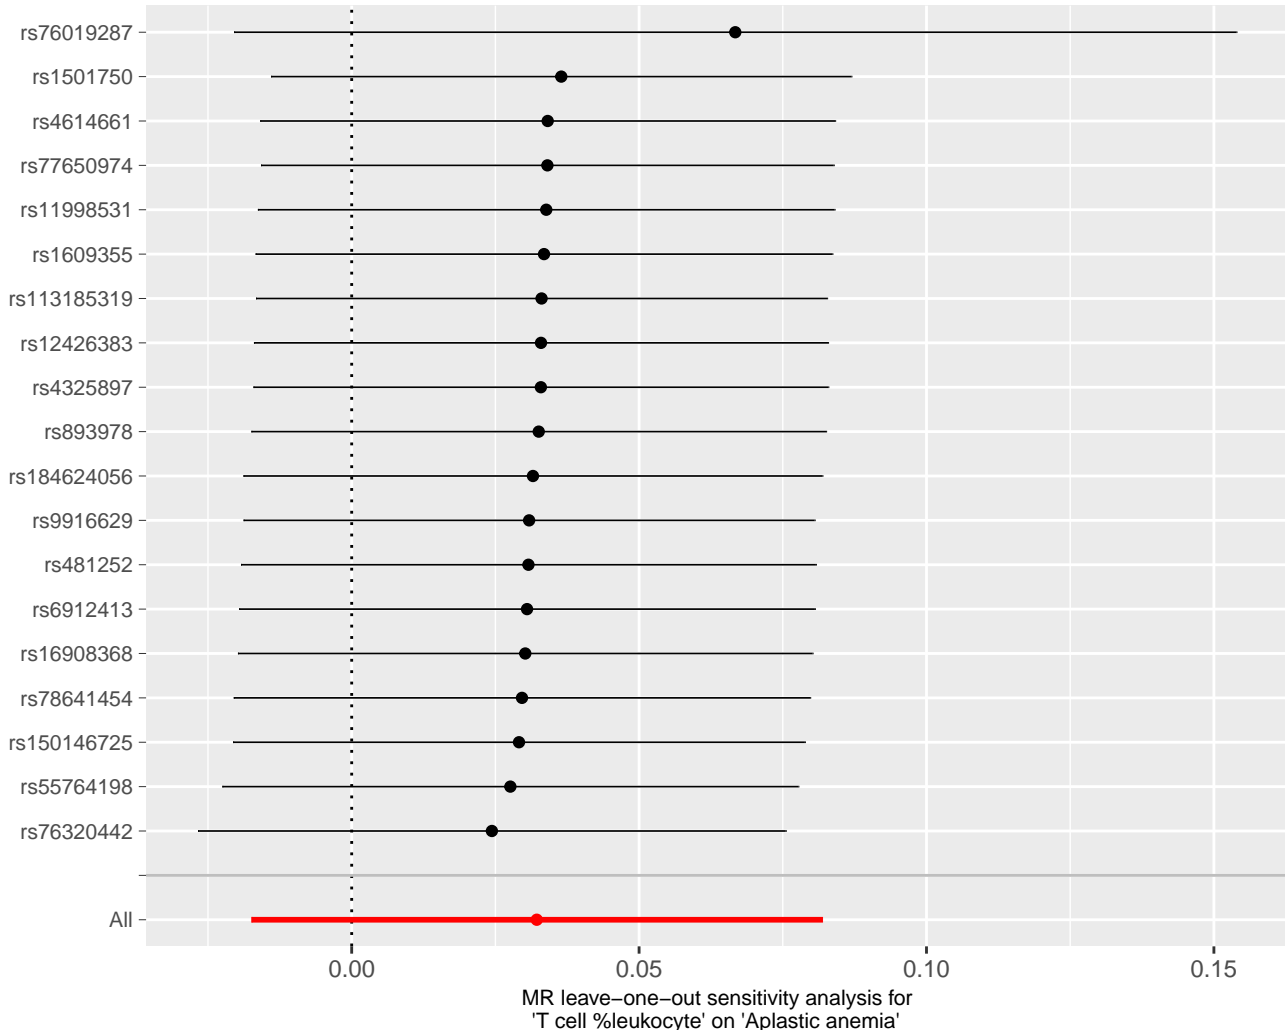

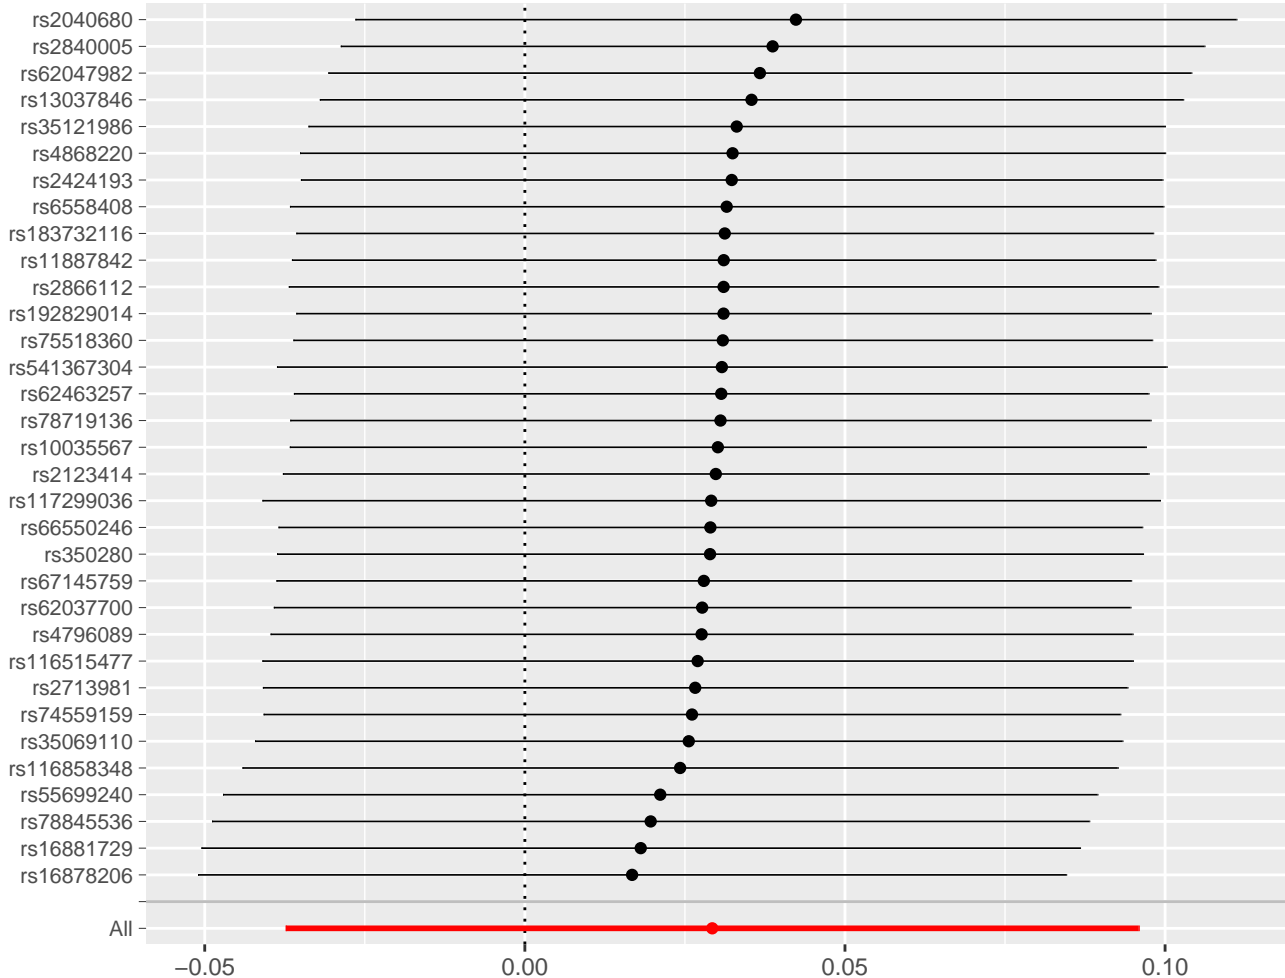

MR leave-one-out sensitivity analysis for 'CM CD8br %CD8br' on 'Aplastic anemia'



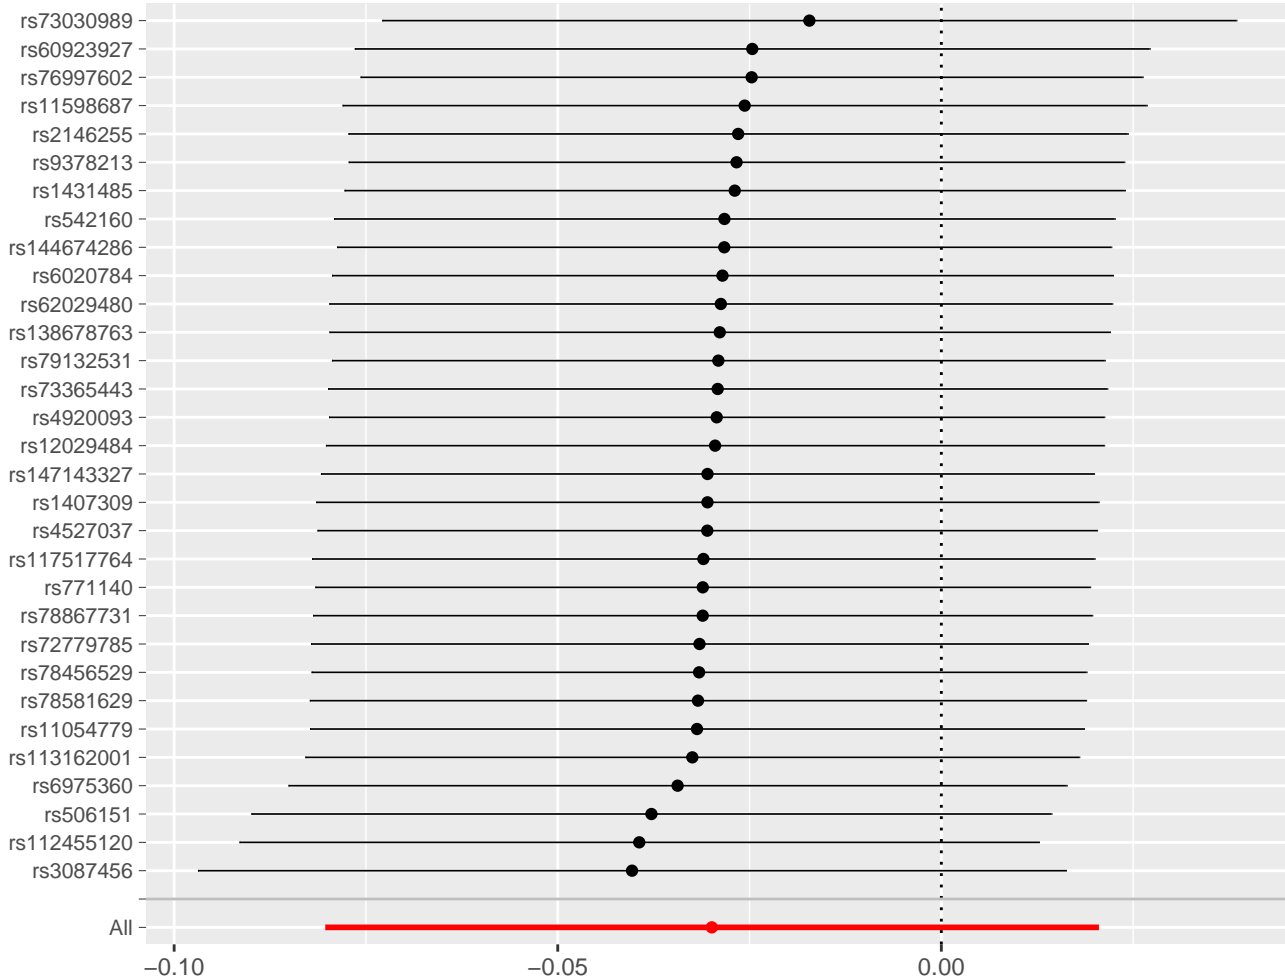

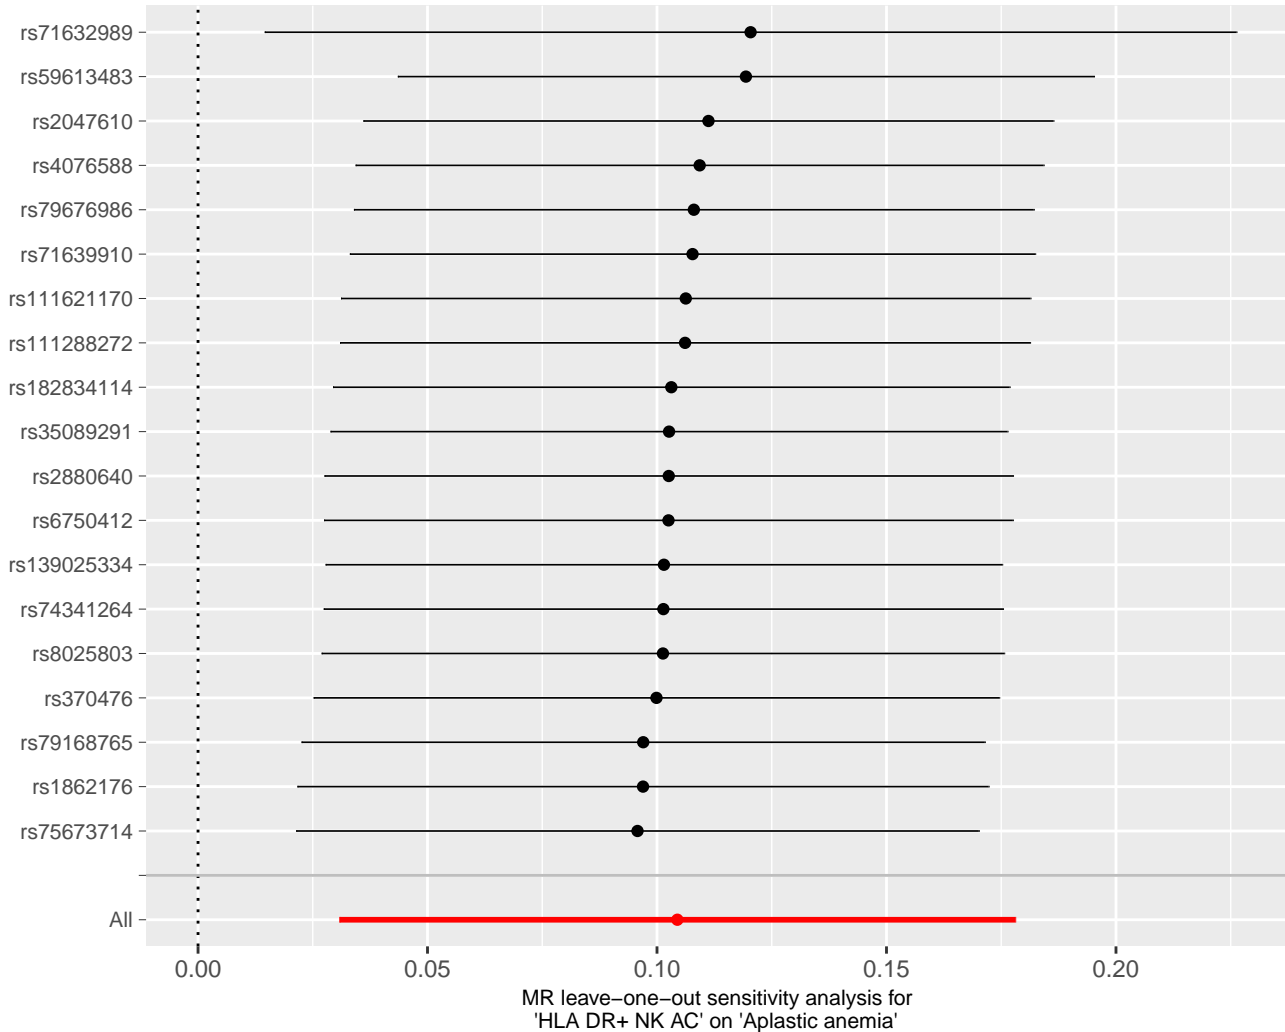

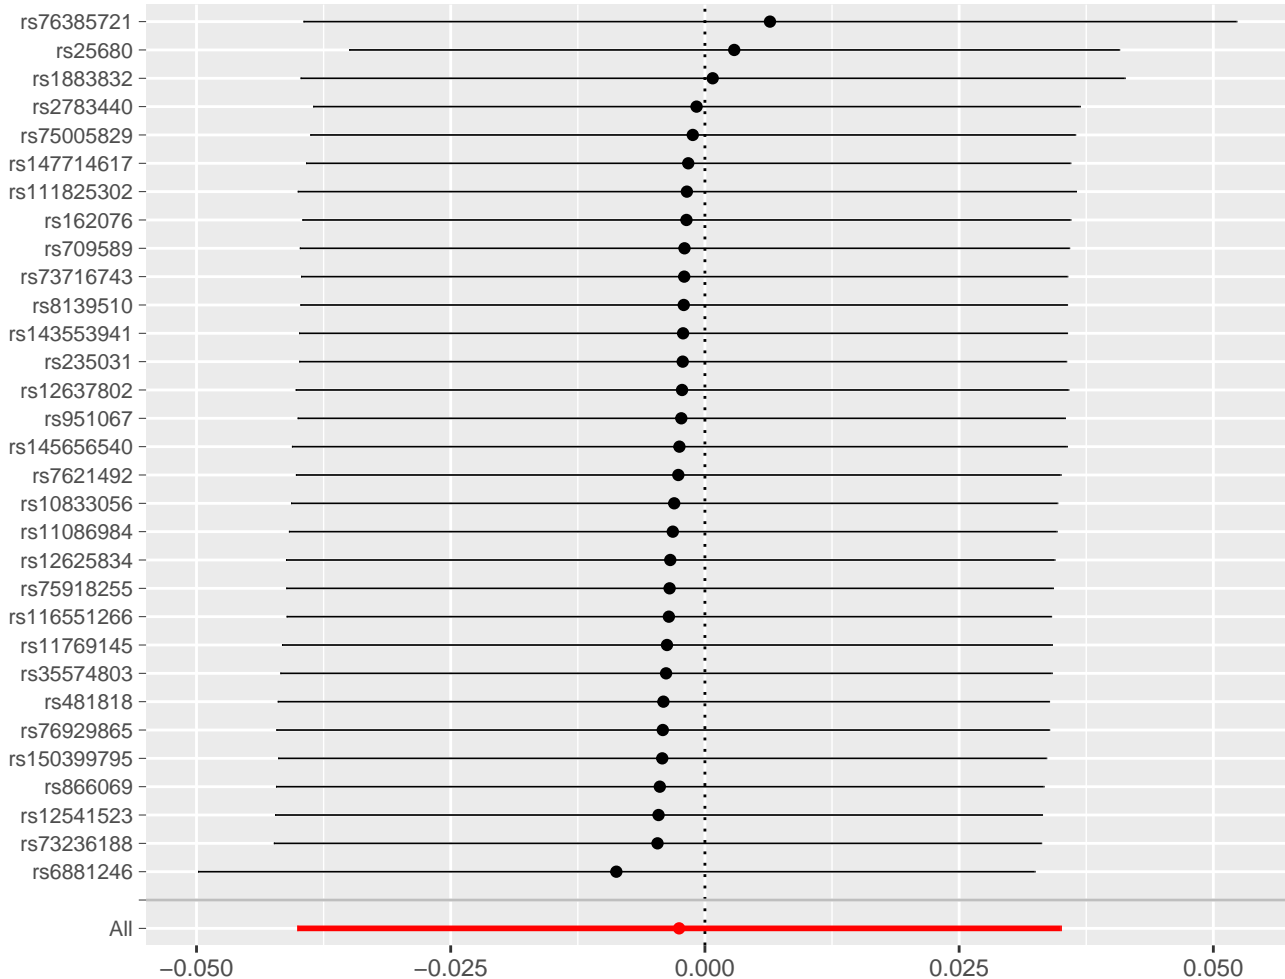

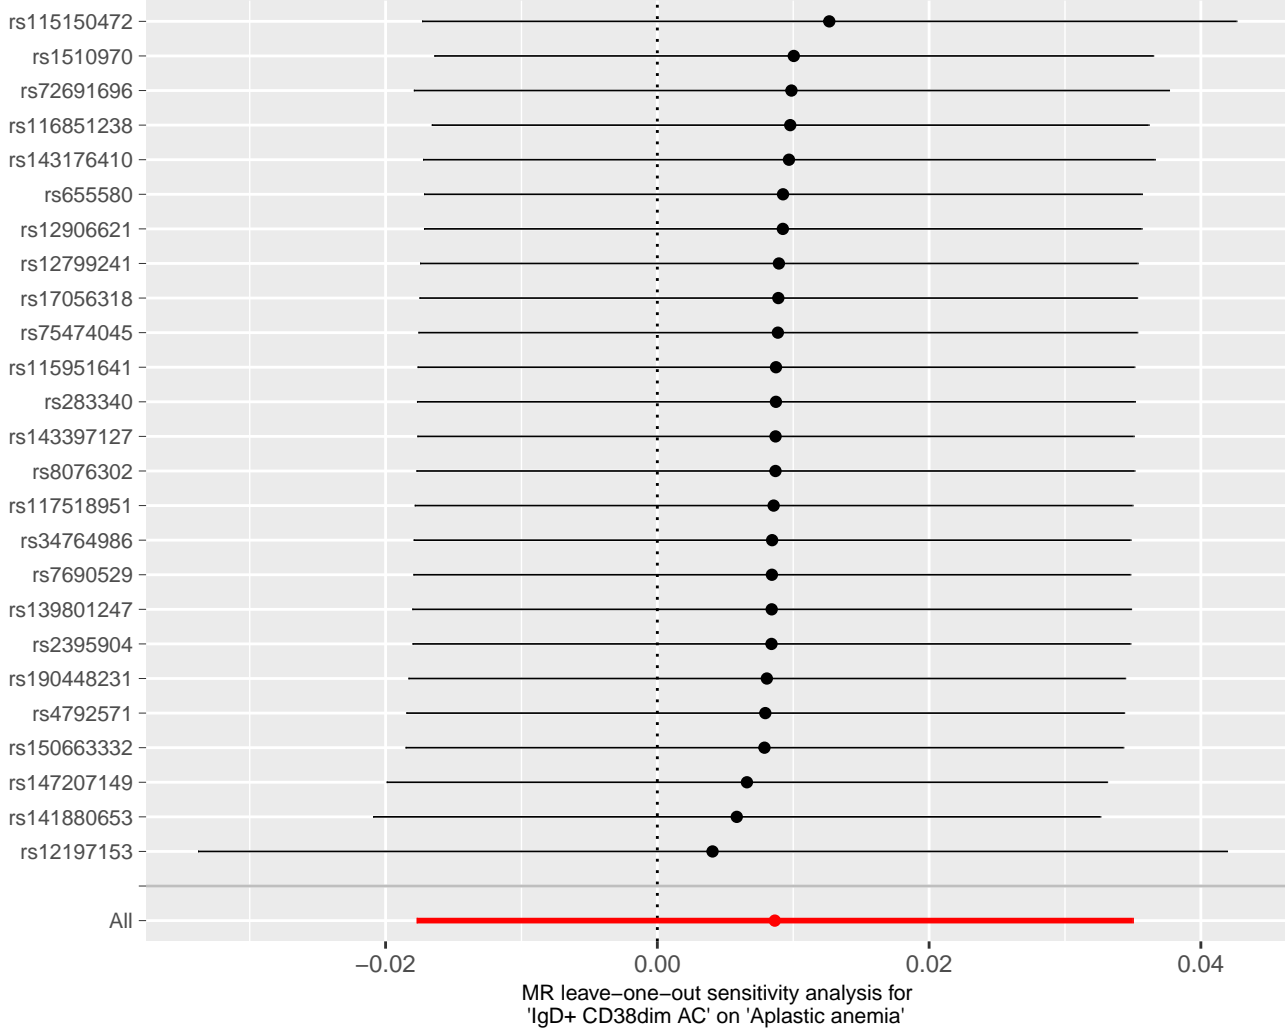

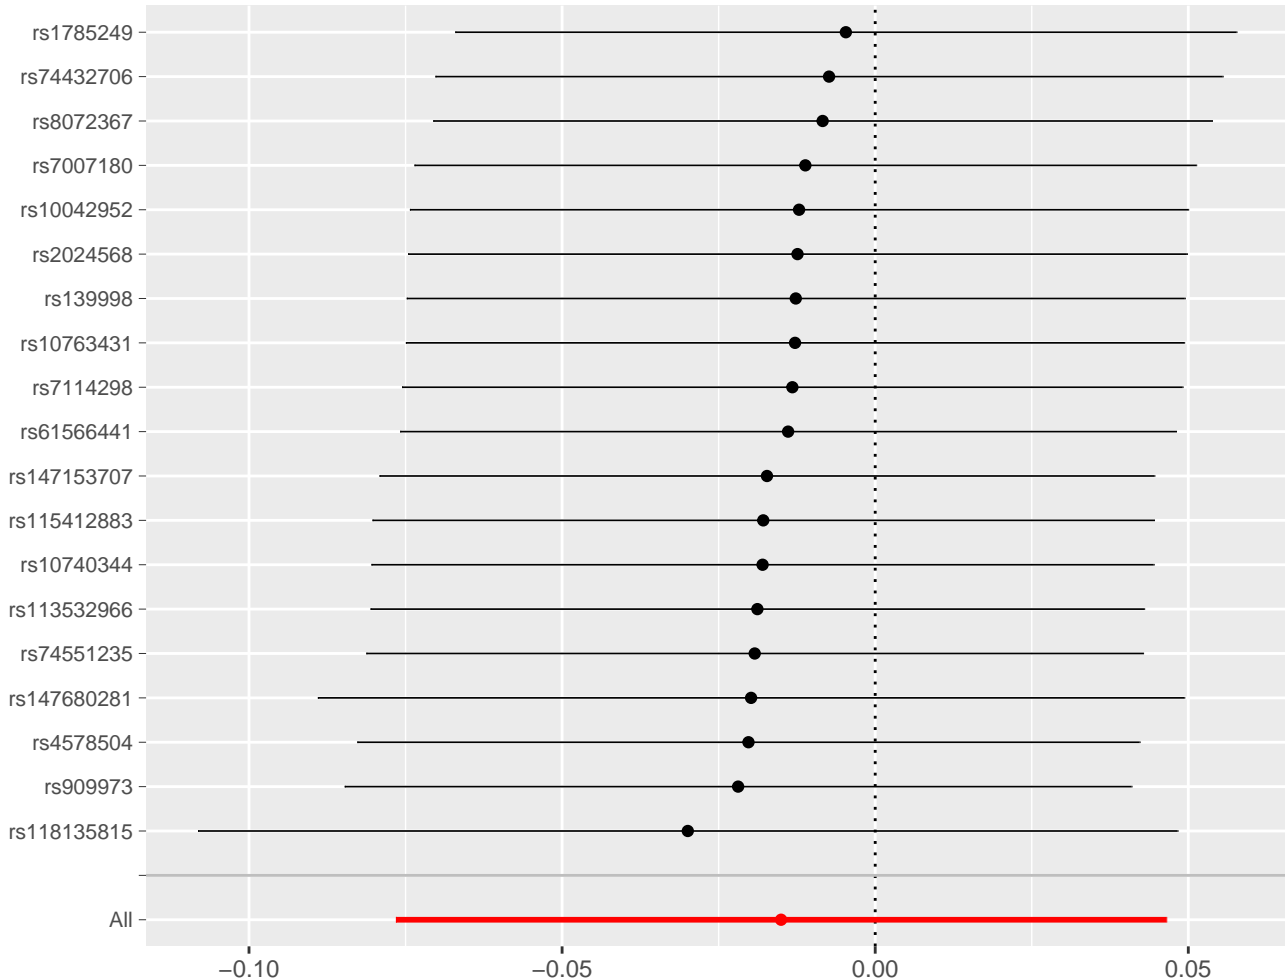

MR leave-one-out sensitivity analysis for 'CD27 on CD20- CD38-' on 'Aplastic anemia'

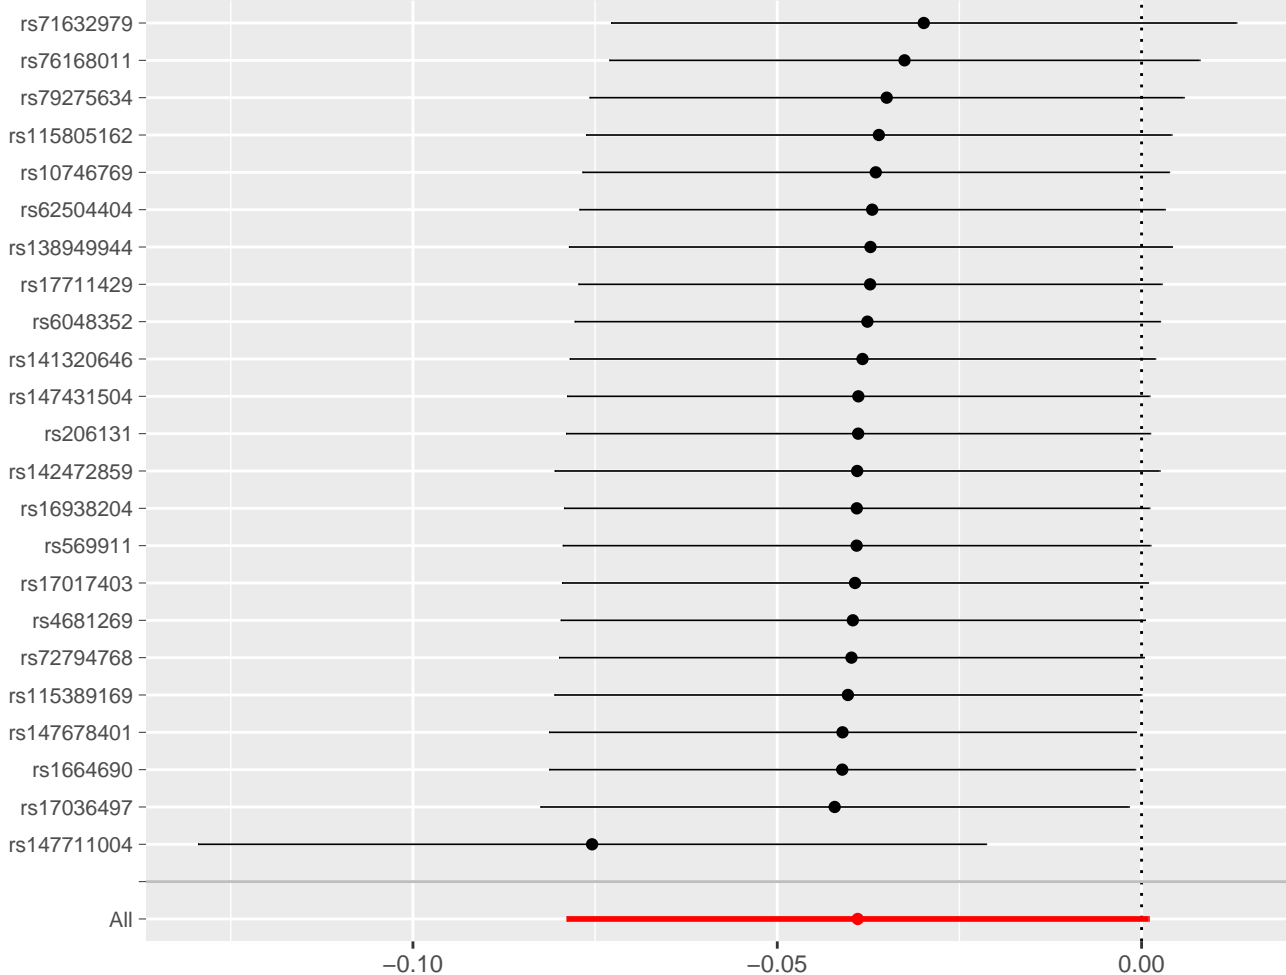

MR leave-one-out sensitivity analysis for 'Myeloid DC AC' on 'Aplastic anemia'

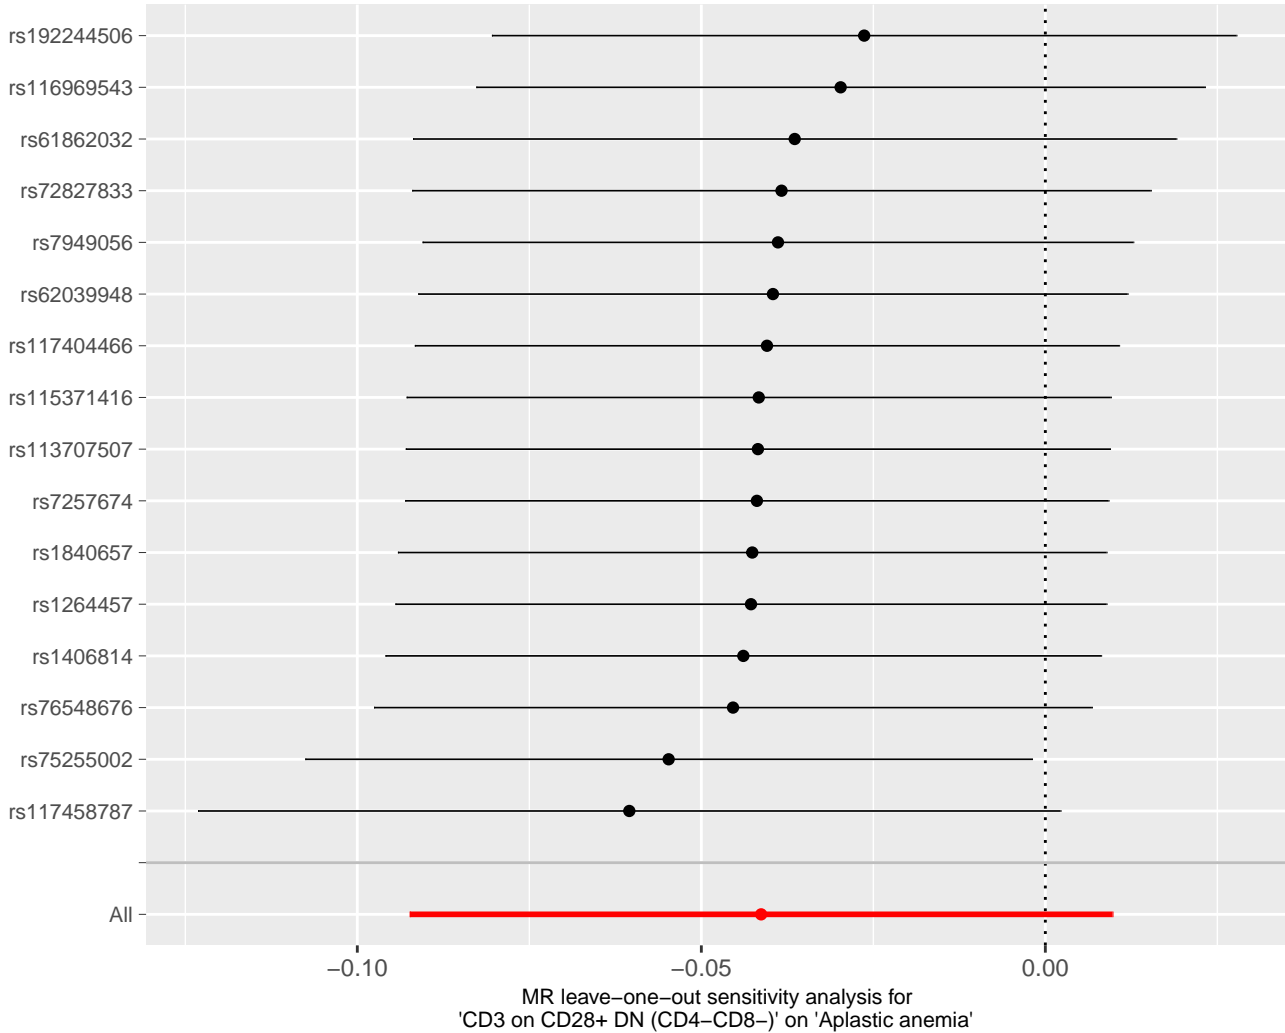

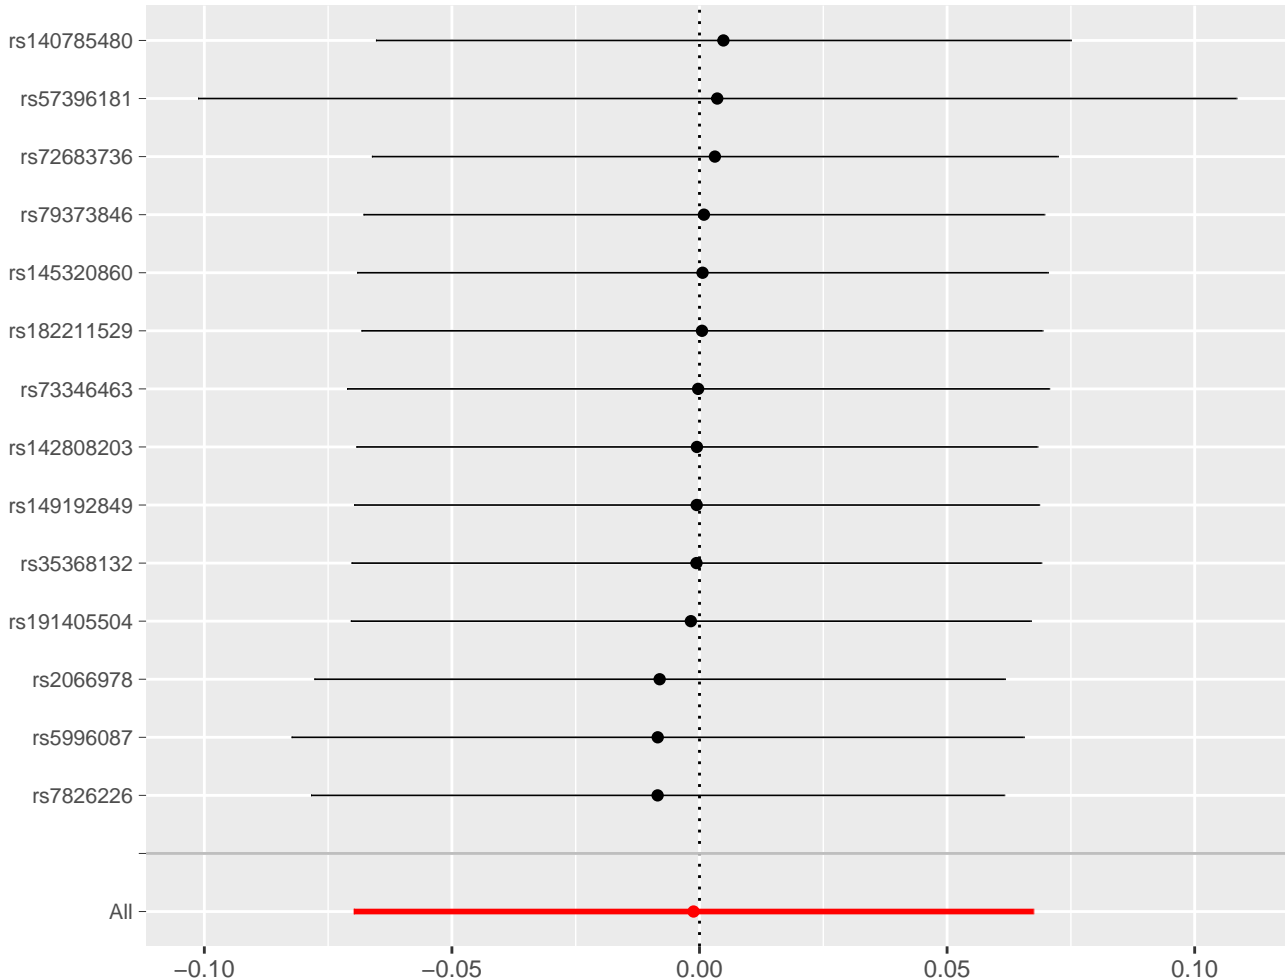



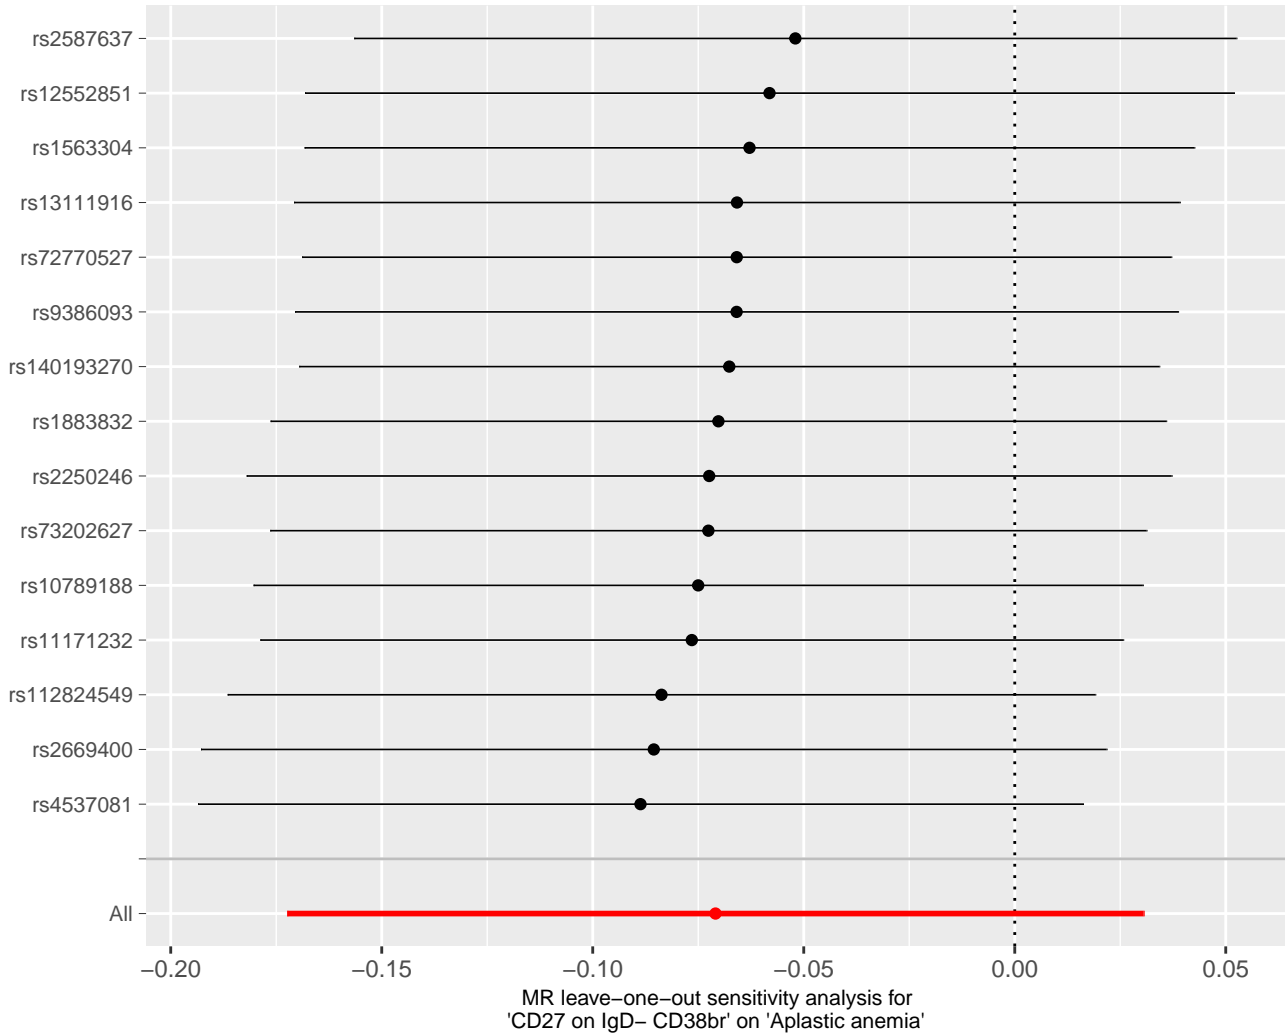

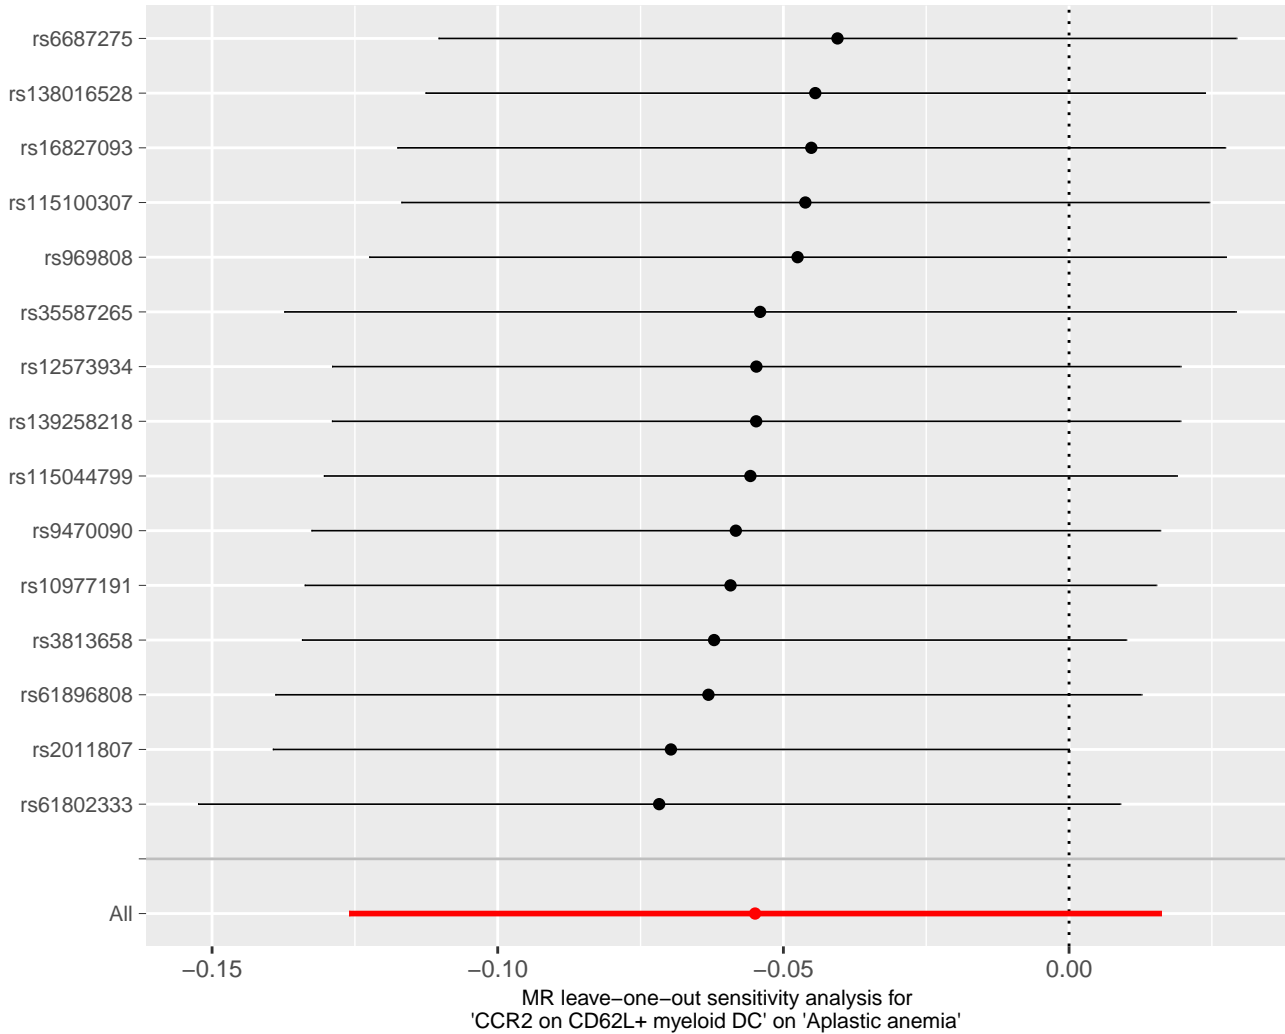

rs149297162

rs71592595

rs62107683

rs149764572

All

-0.10

-0.05

0.00

0.05

MR leave-one-out sensitivity analysis for  
'CM DN (CD4-CD8-) AC' on 'Aplastic anemia'

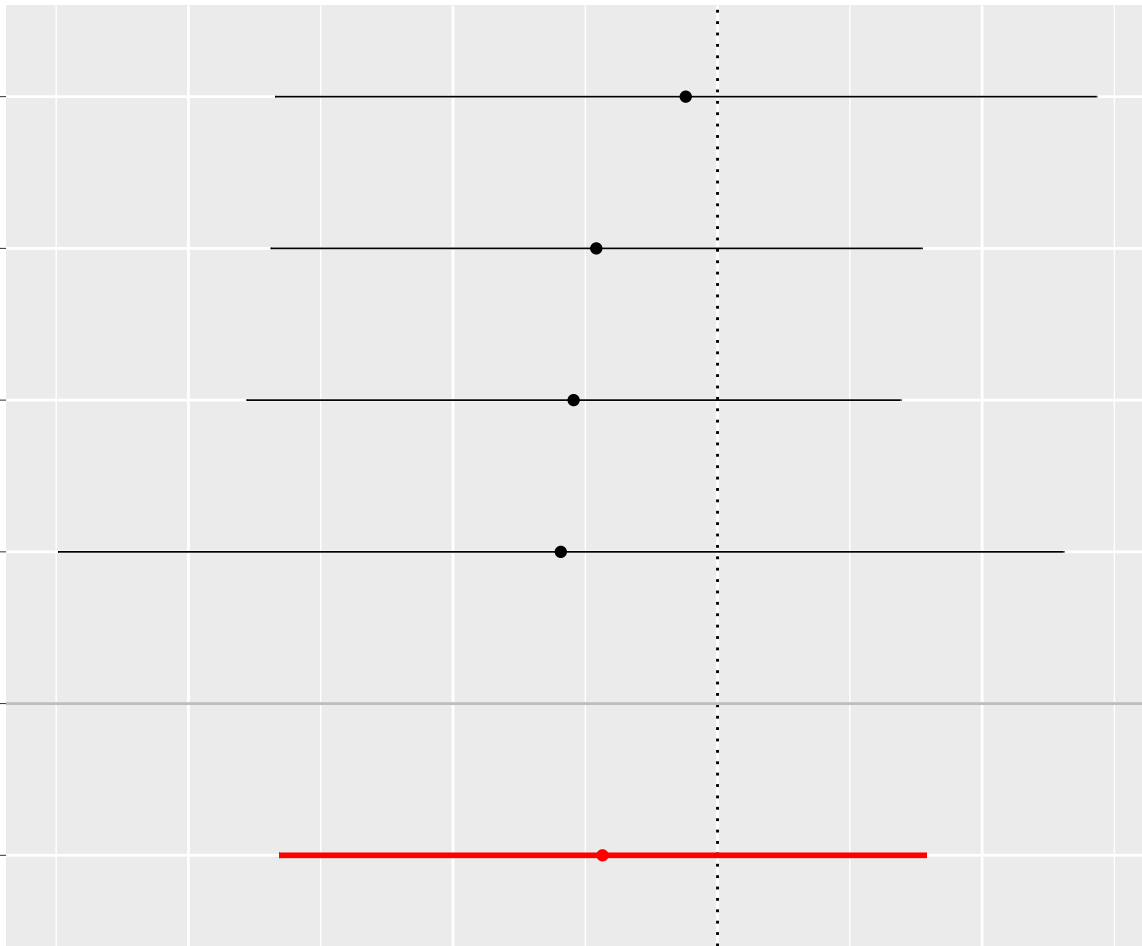

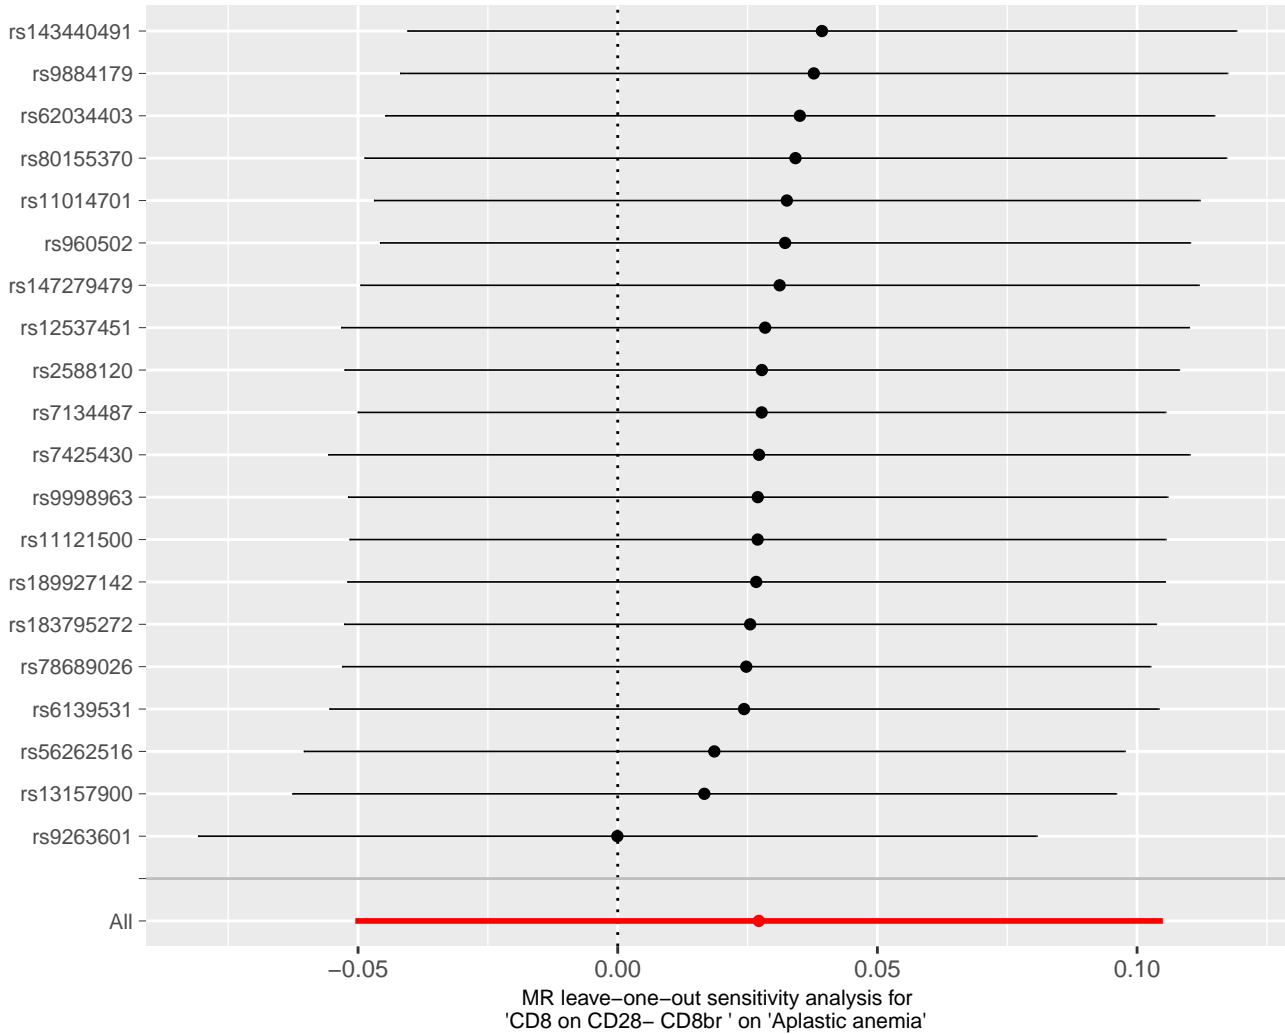

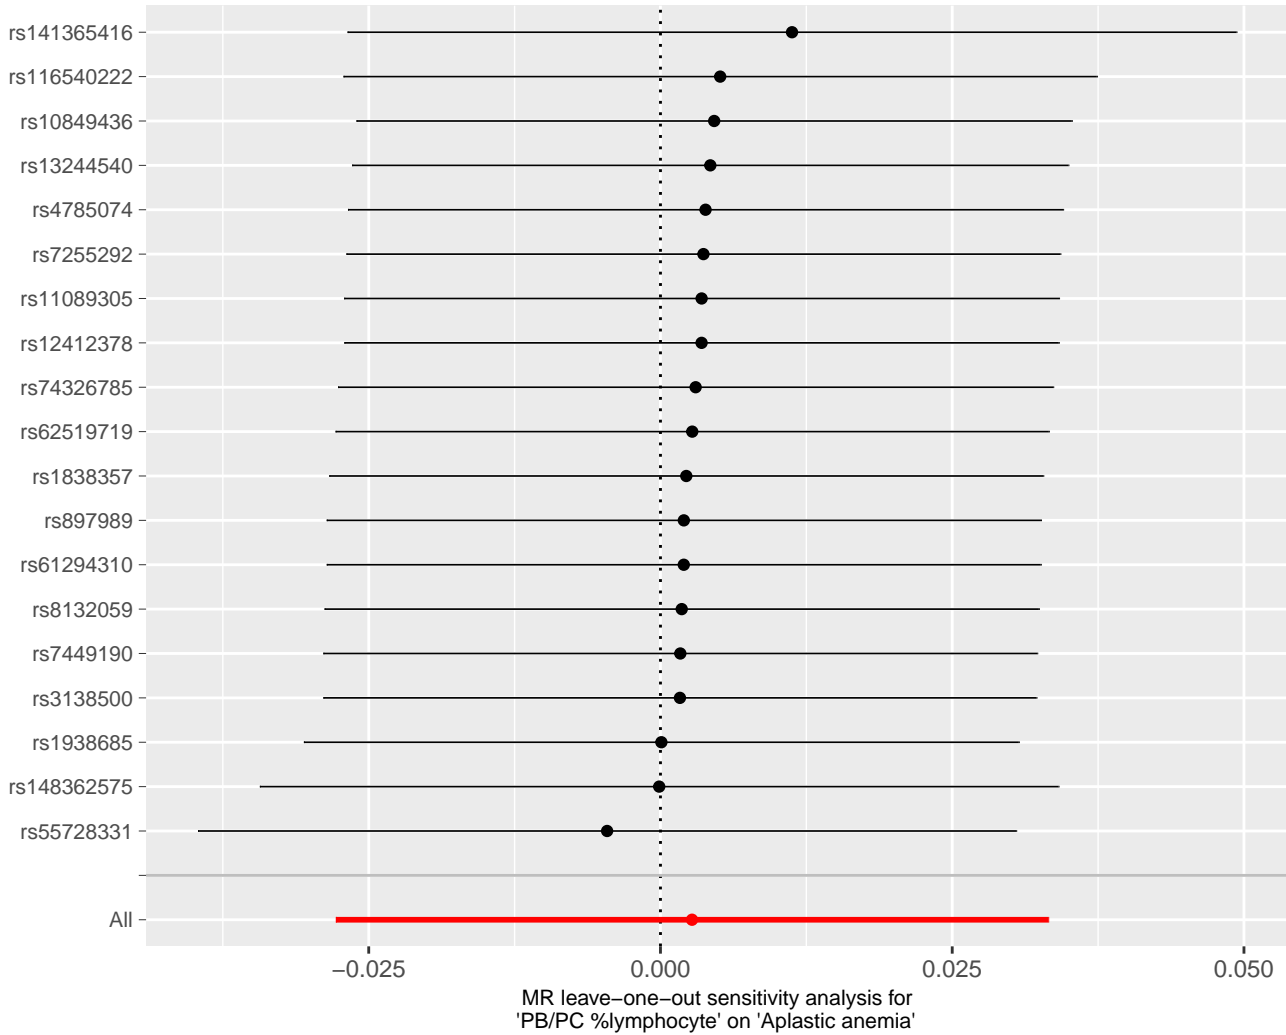

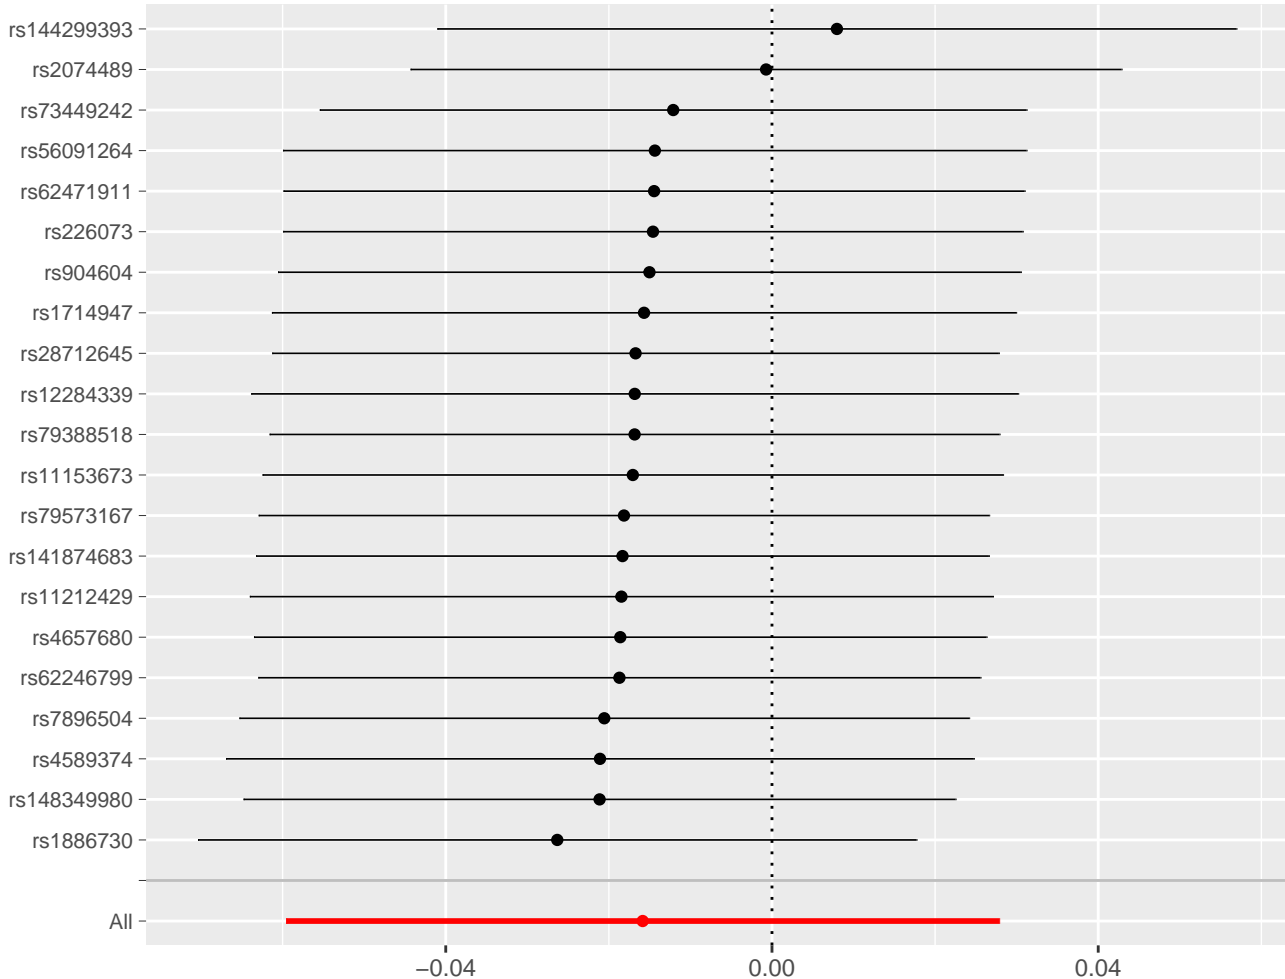

MR leave-one-out sensitivity analysis for 'HVEM on CD4+' on 'Aplastic anemia'

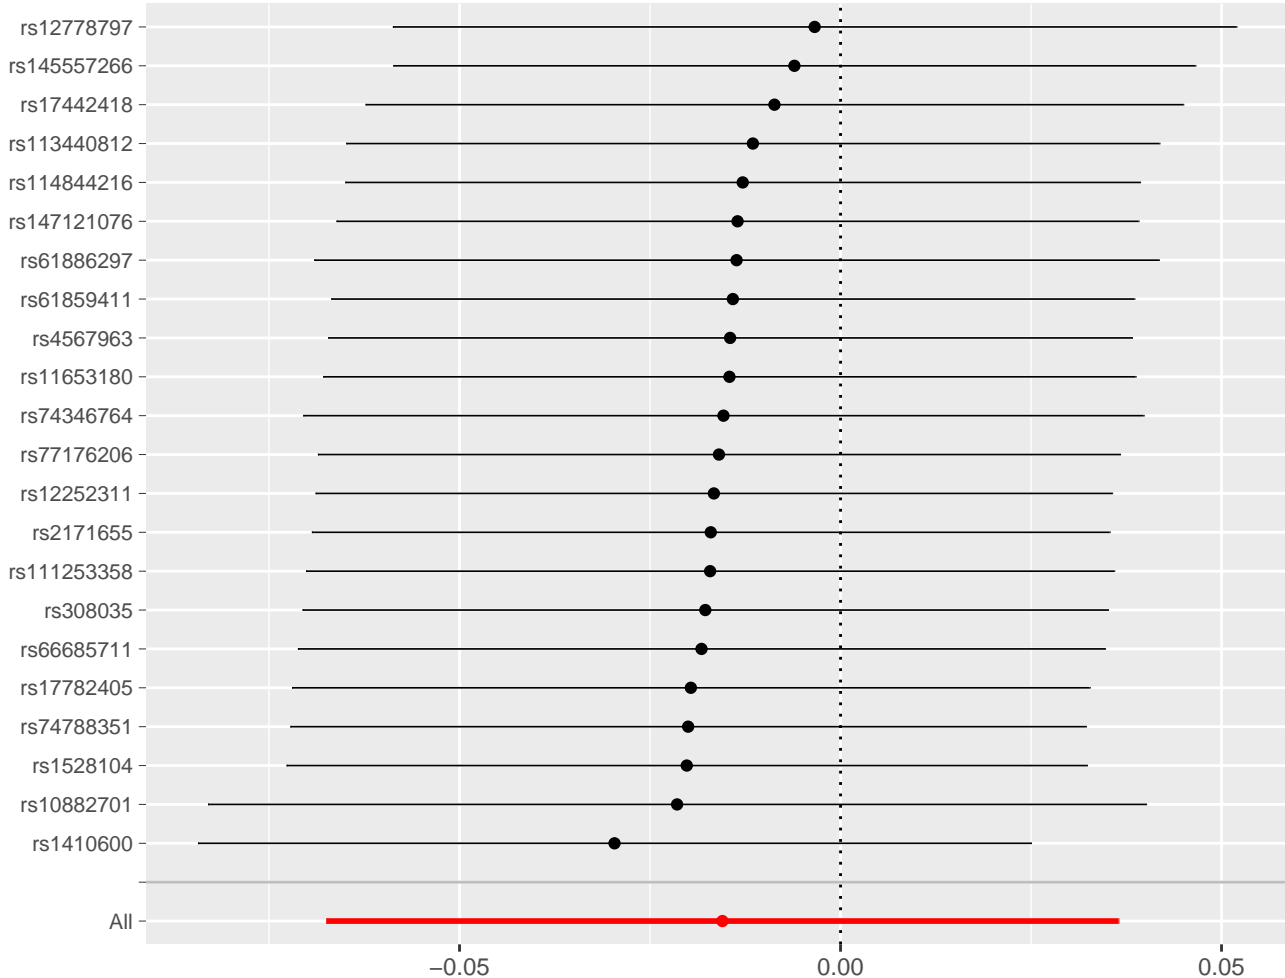

MR leave-one-out sensitivity analysis for 'CD39 on CD39+ activated Treg' on 'Aplastic anemia'

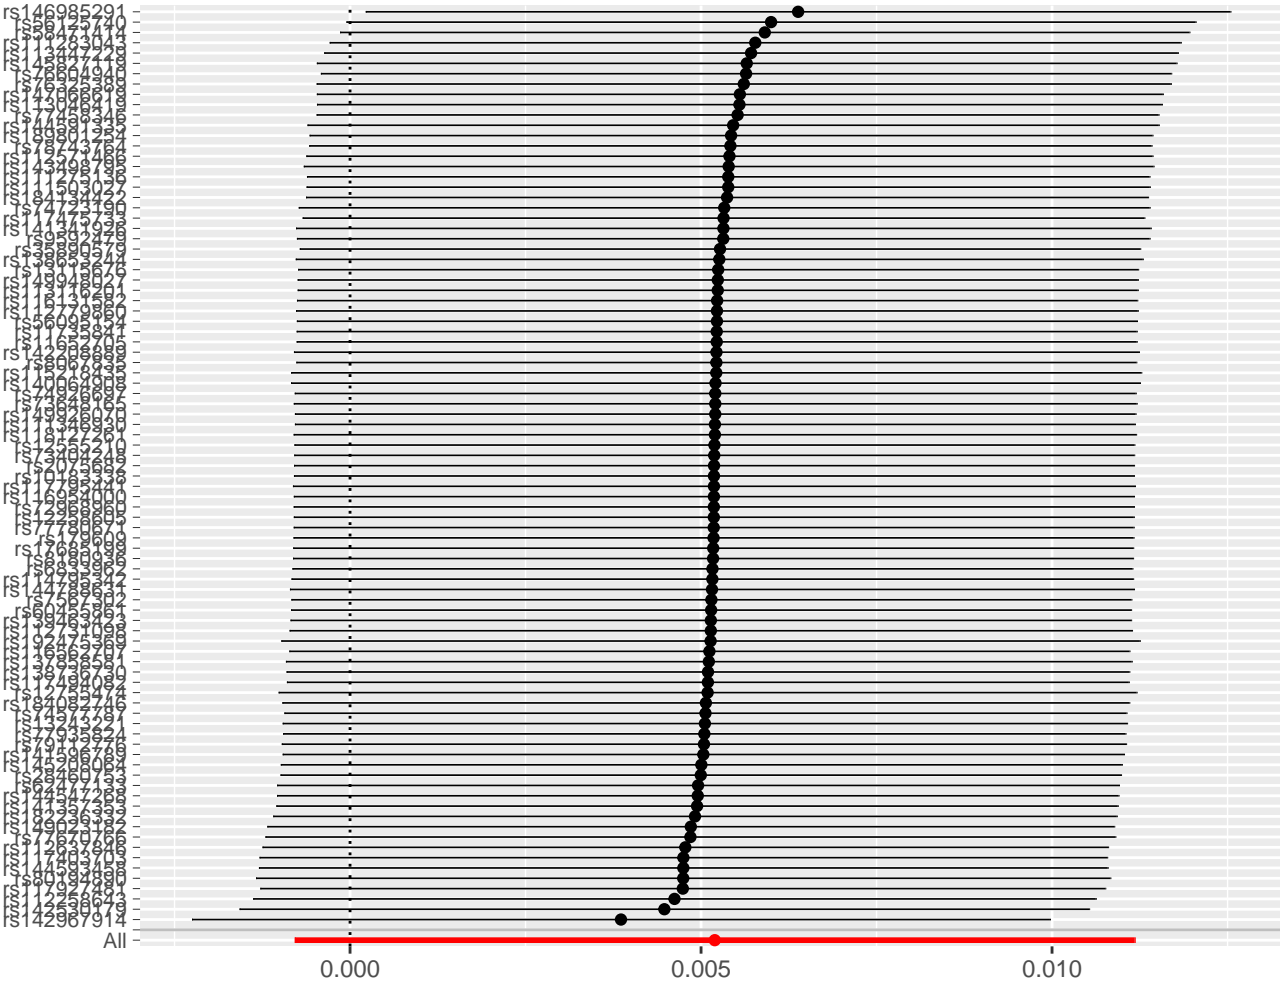

MR leave-one-out sensitivity analysis for 'CD28+ CD45RA+ CD8br %T cell' on 'Aplastic anemia'



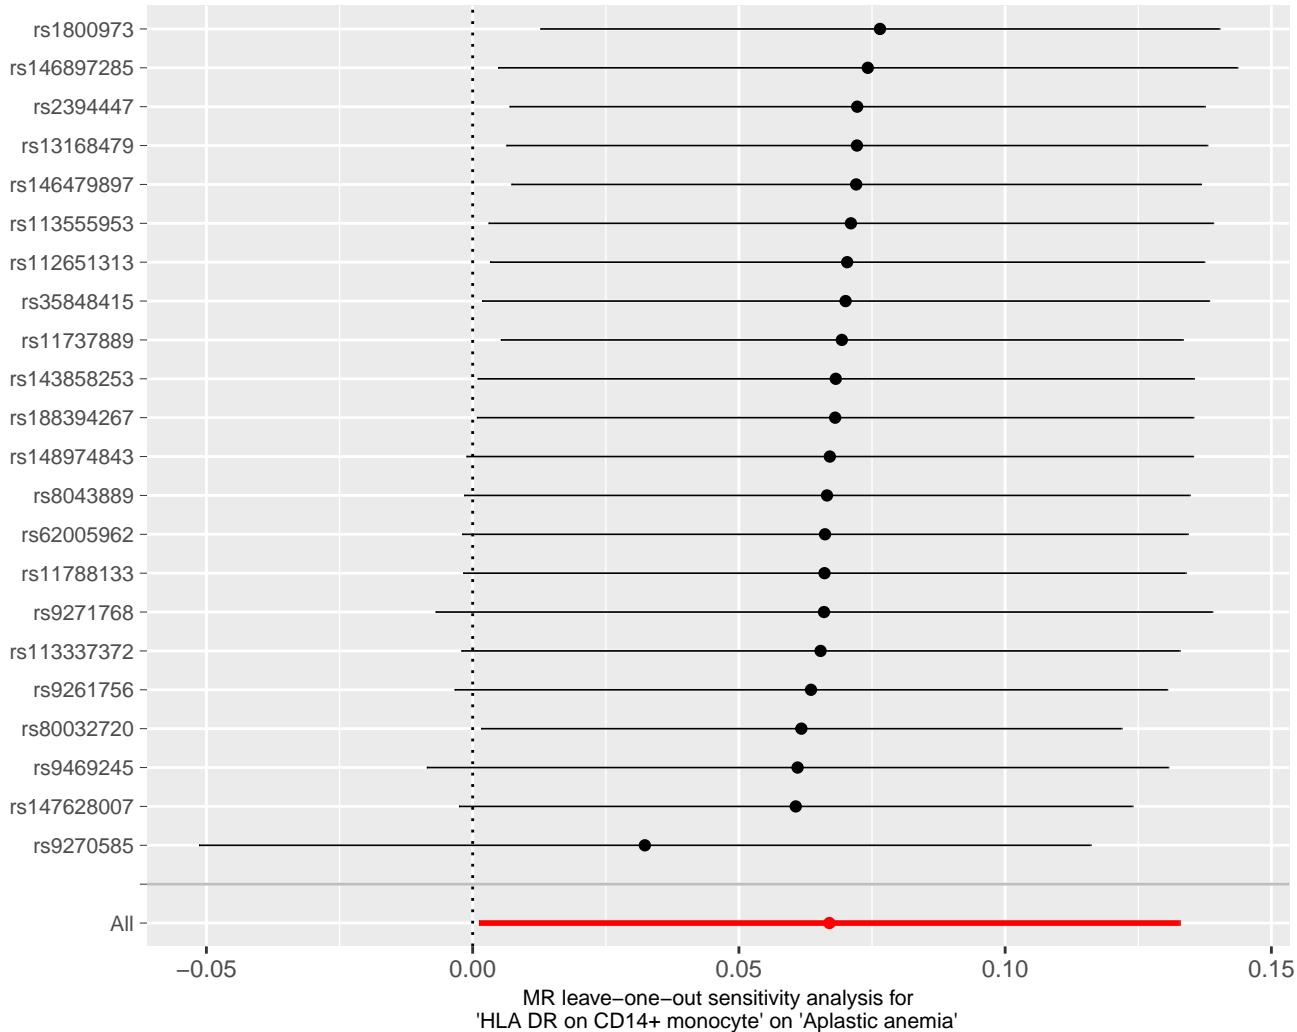

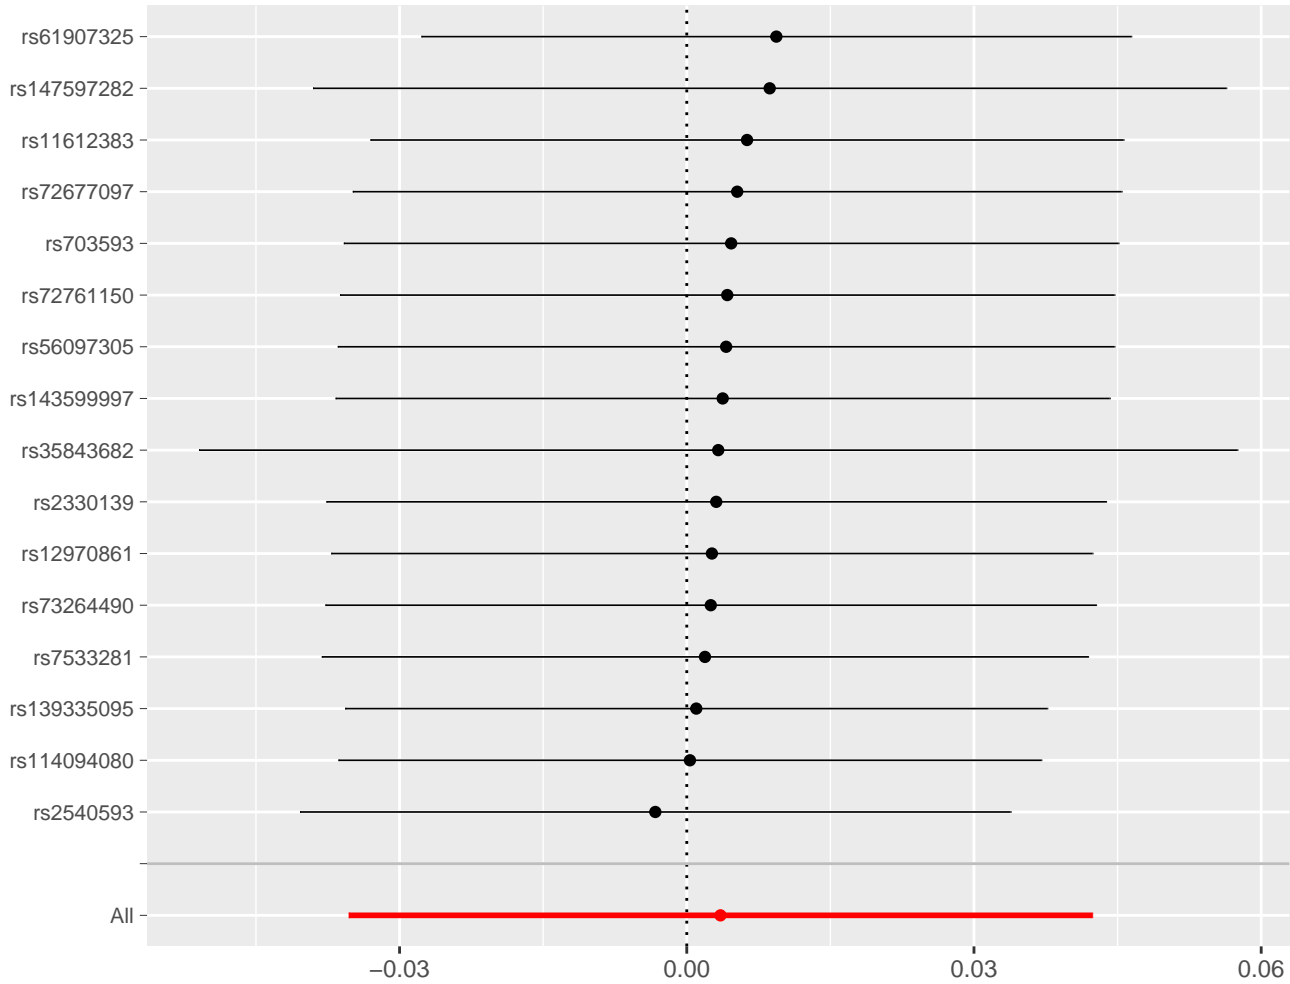

MR leave-one-out sensitivity analysis for 'CD45 on CD33br HLA DR+ ' on 'Aplastic anemia'

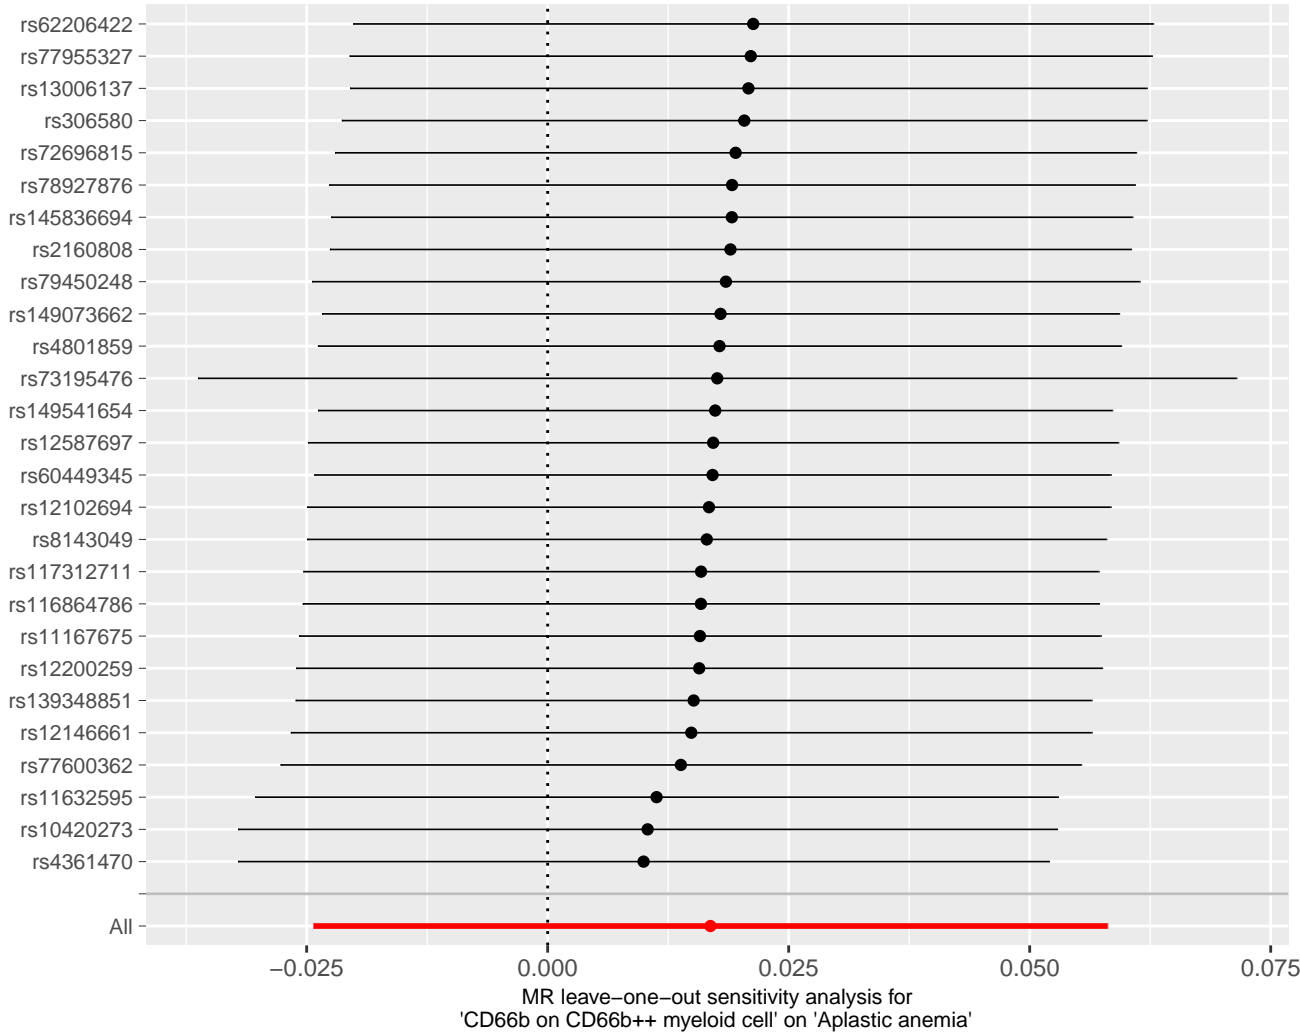

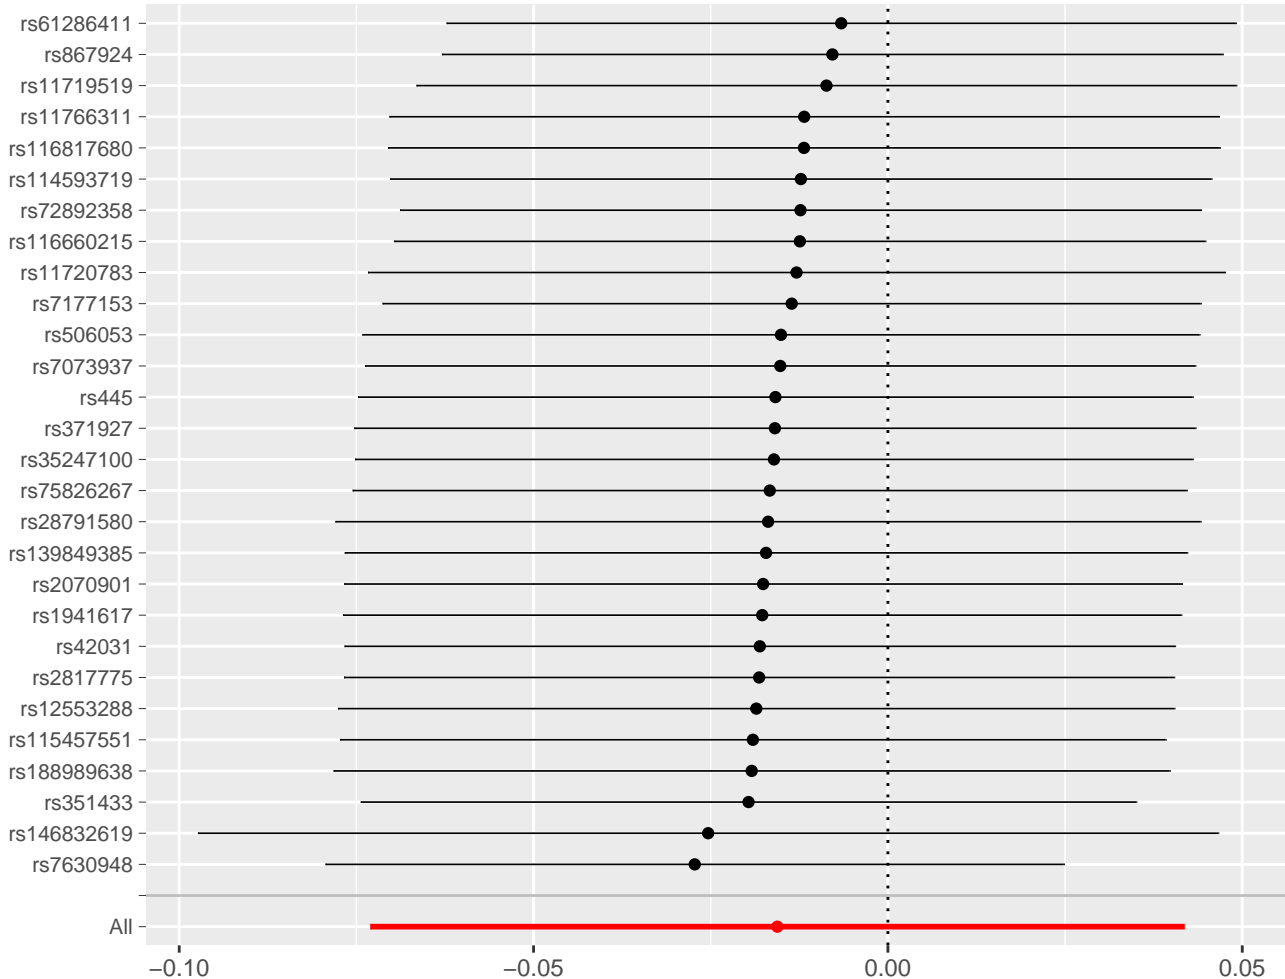

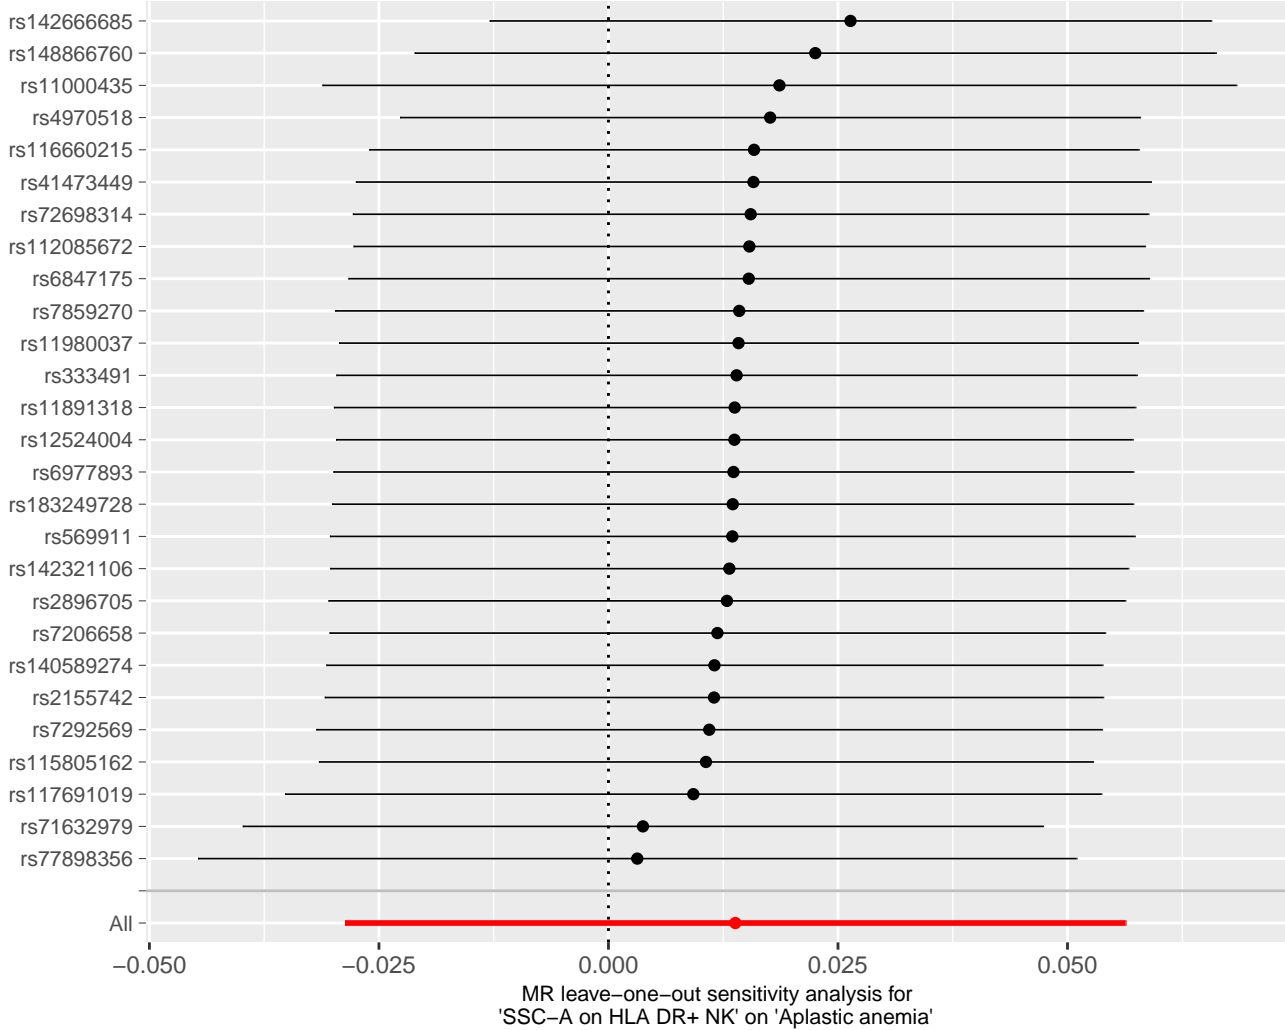

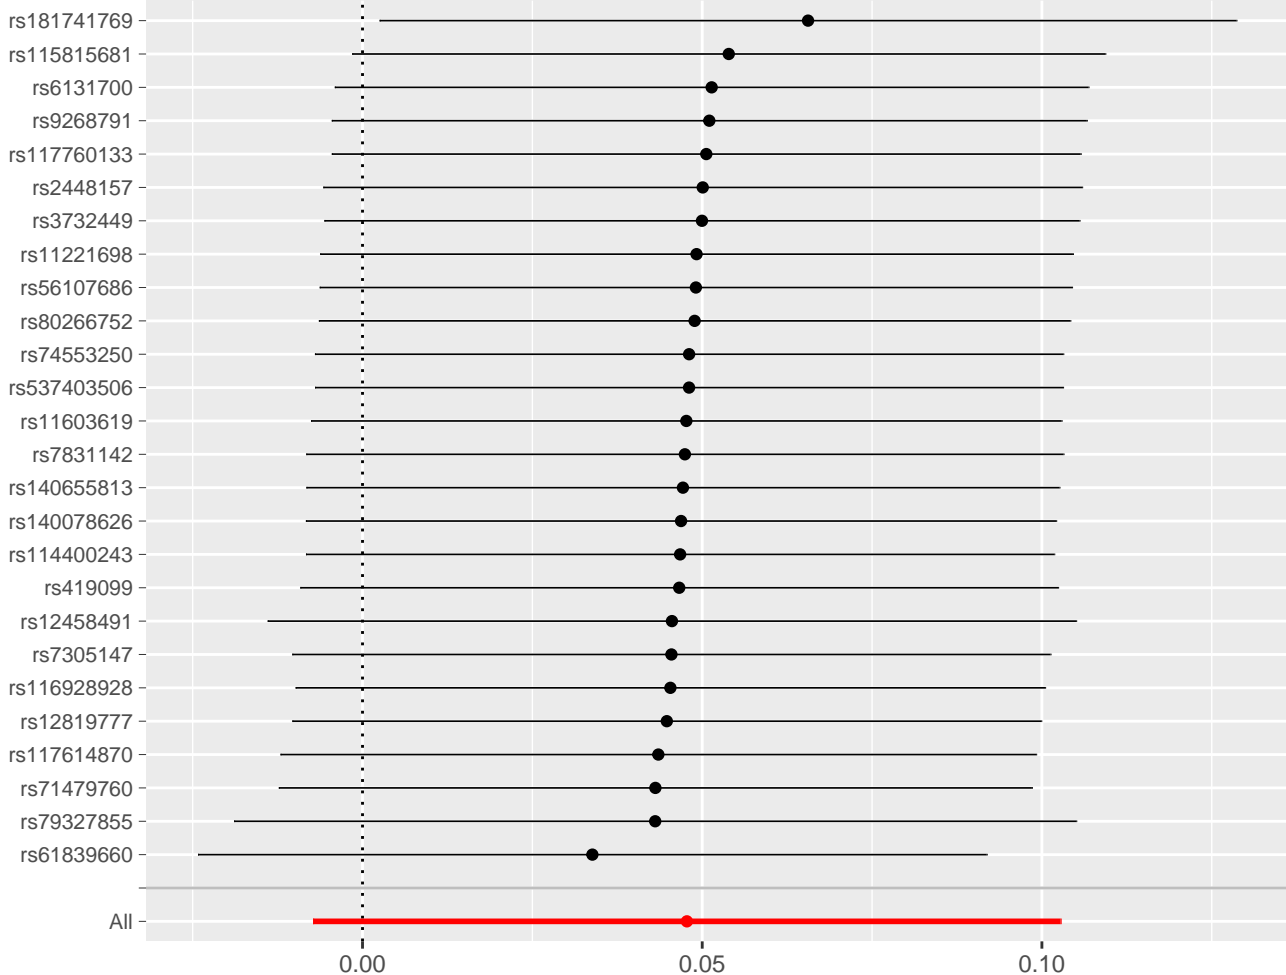

MR leave-one-out sensitivity analysis for 'CD25hi %CD4+' on 'Aplastic anemia'

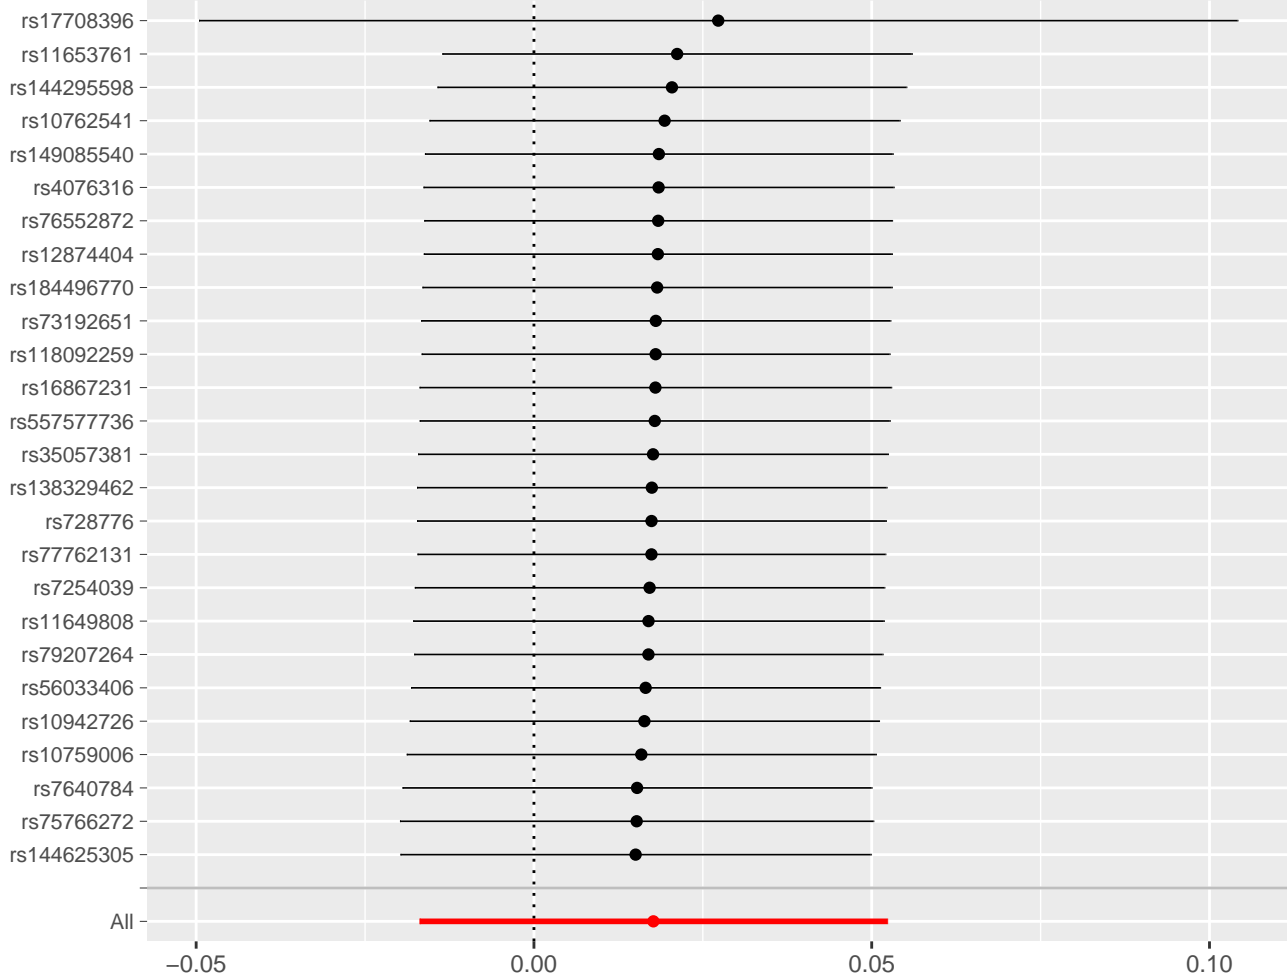

MR leave-one-out sensitivity analysis for 'CD24+ CD27+ AC' on 'Aplastic anemia'

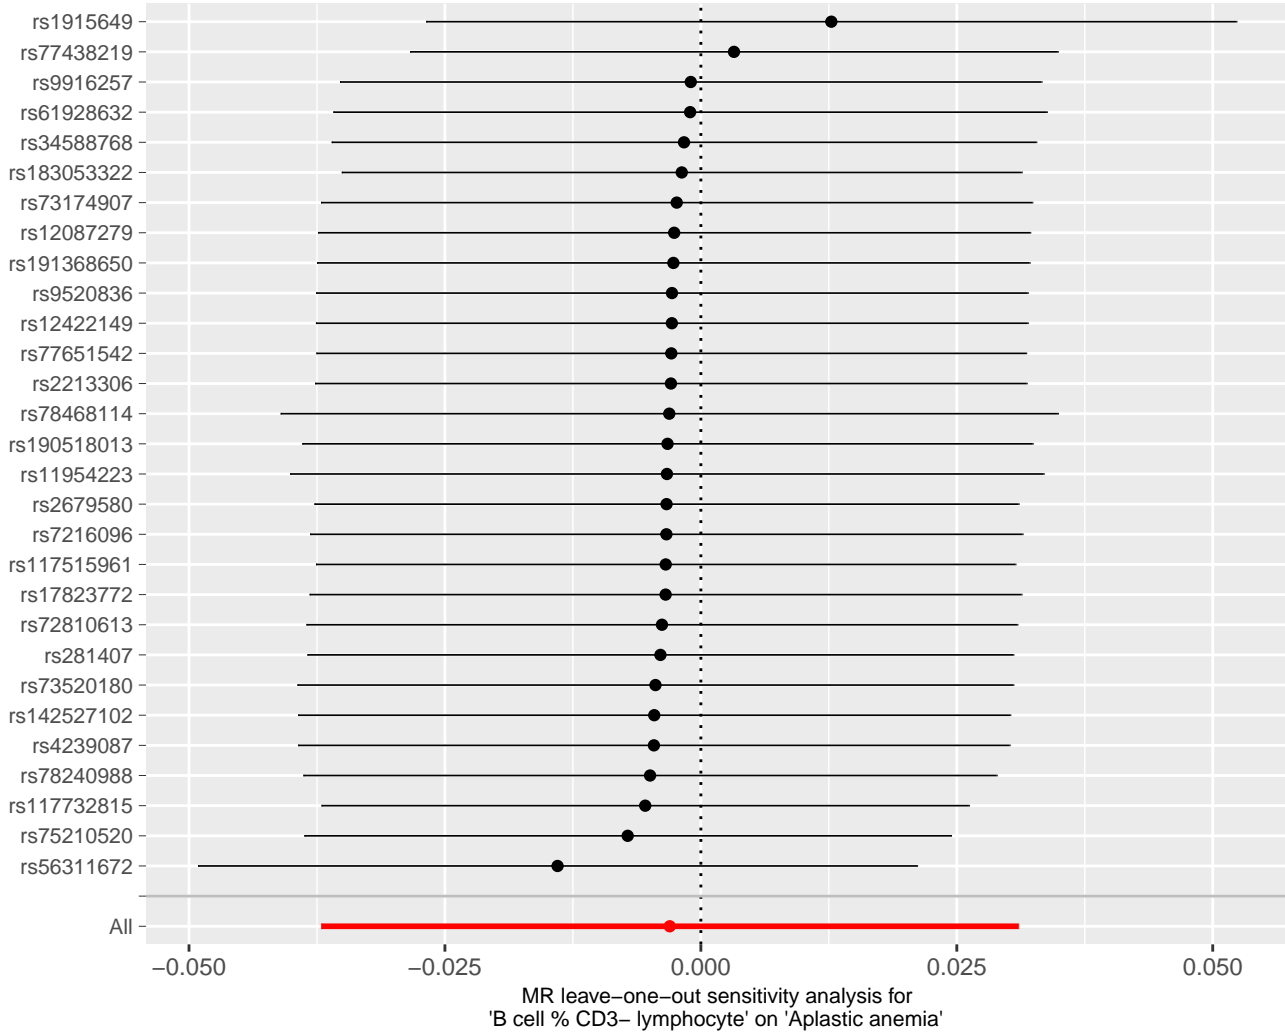



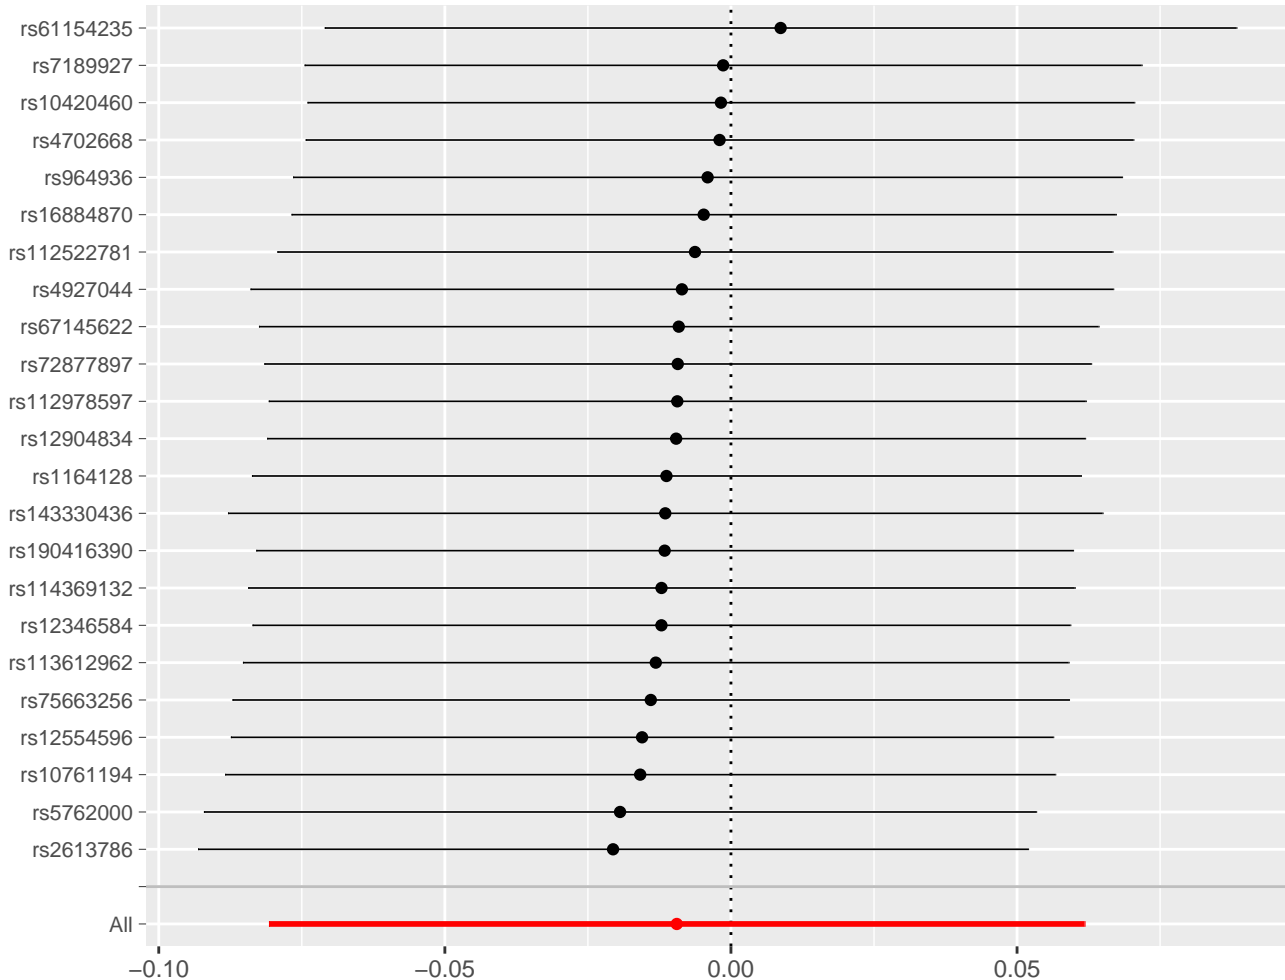

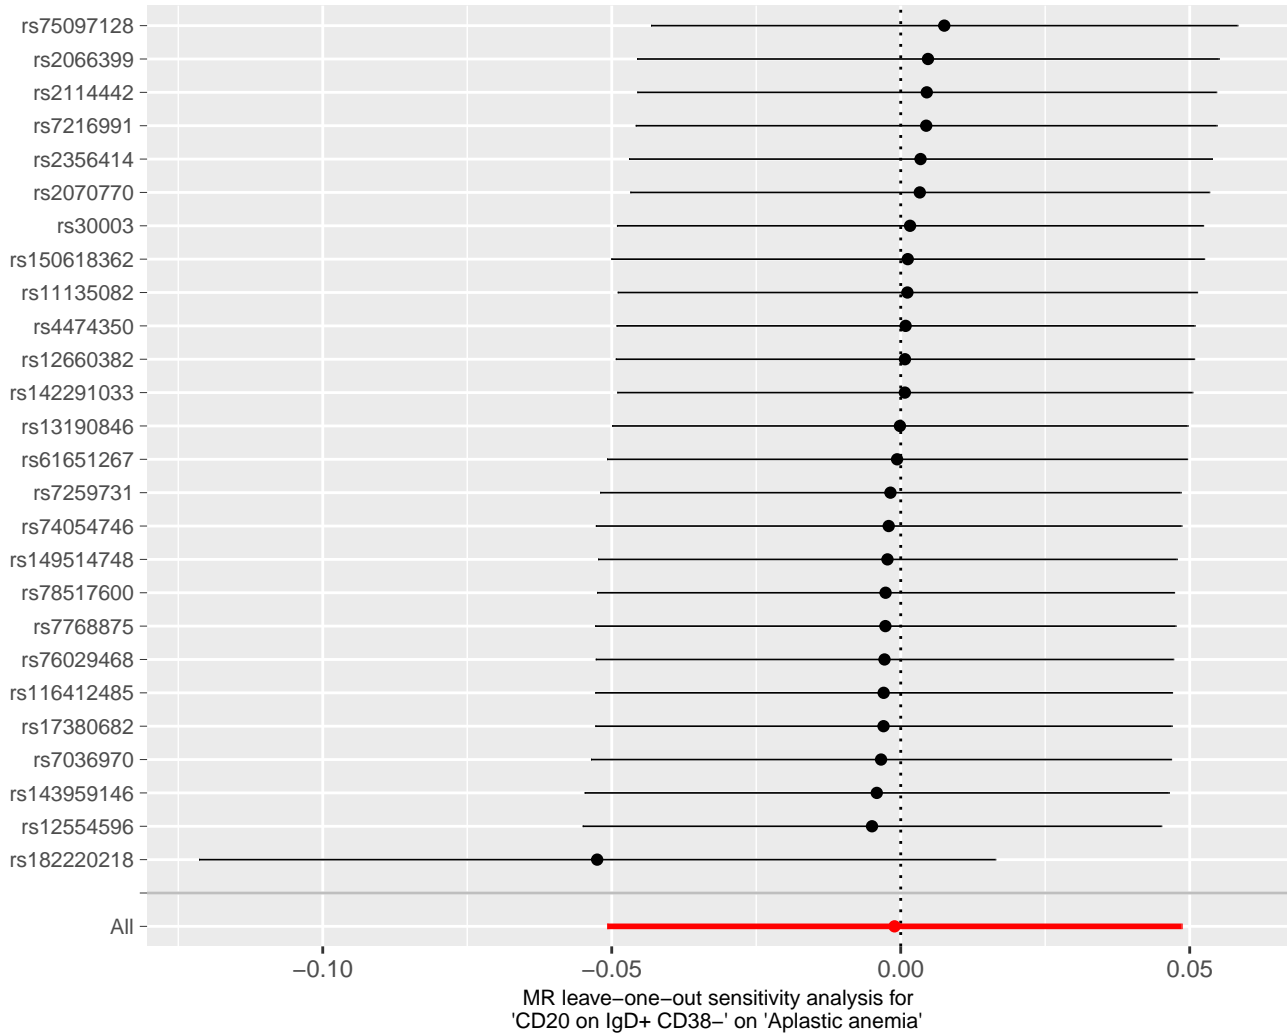

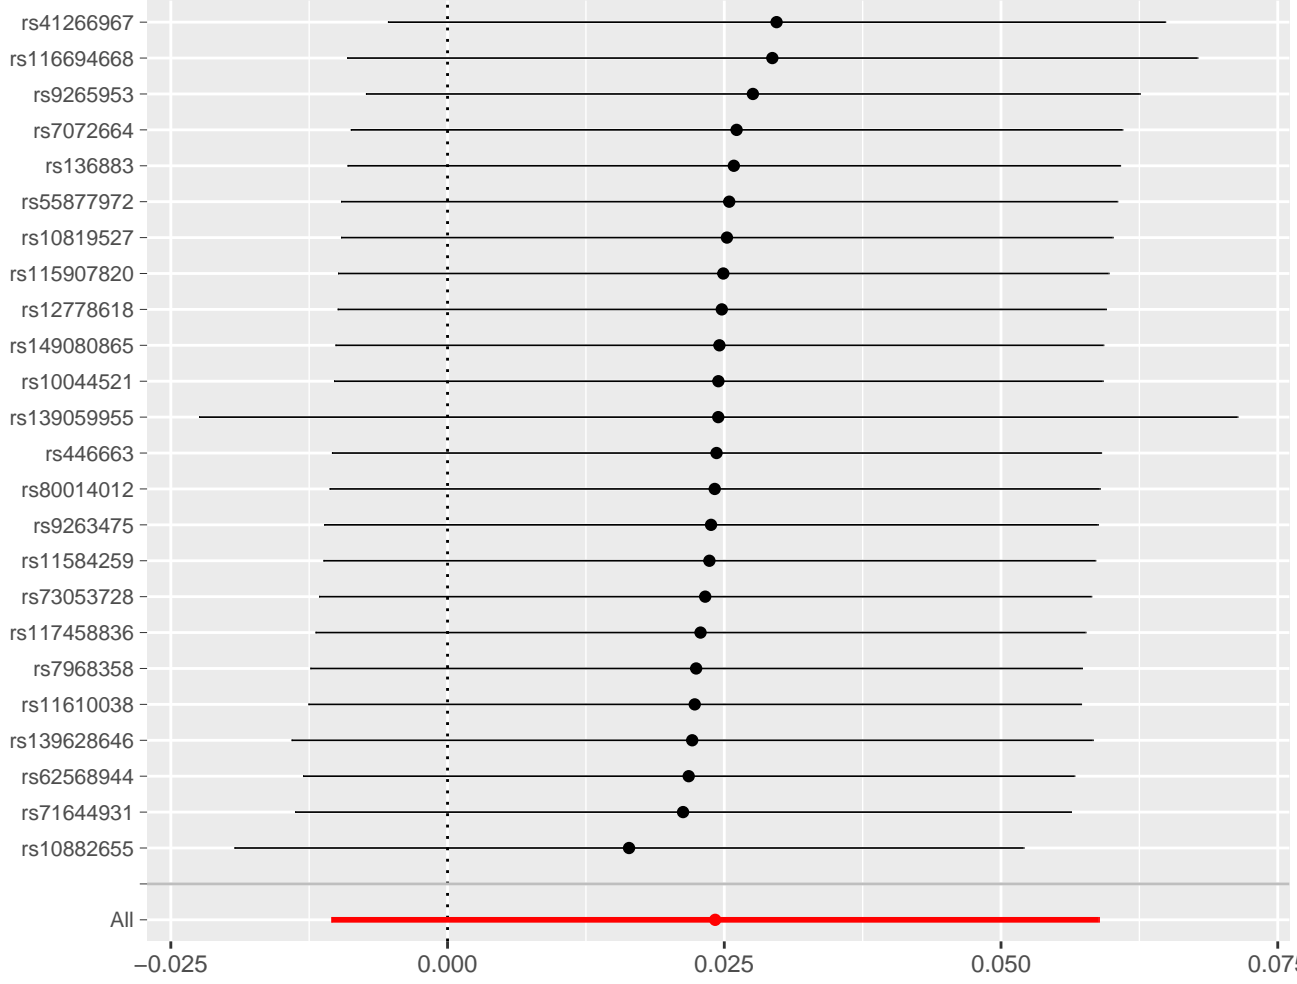

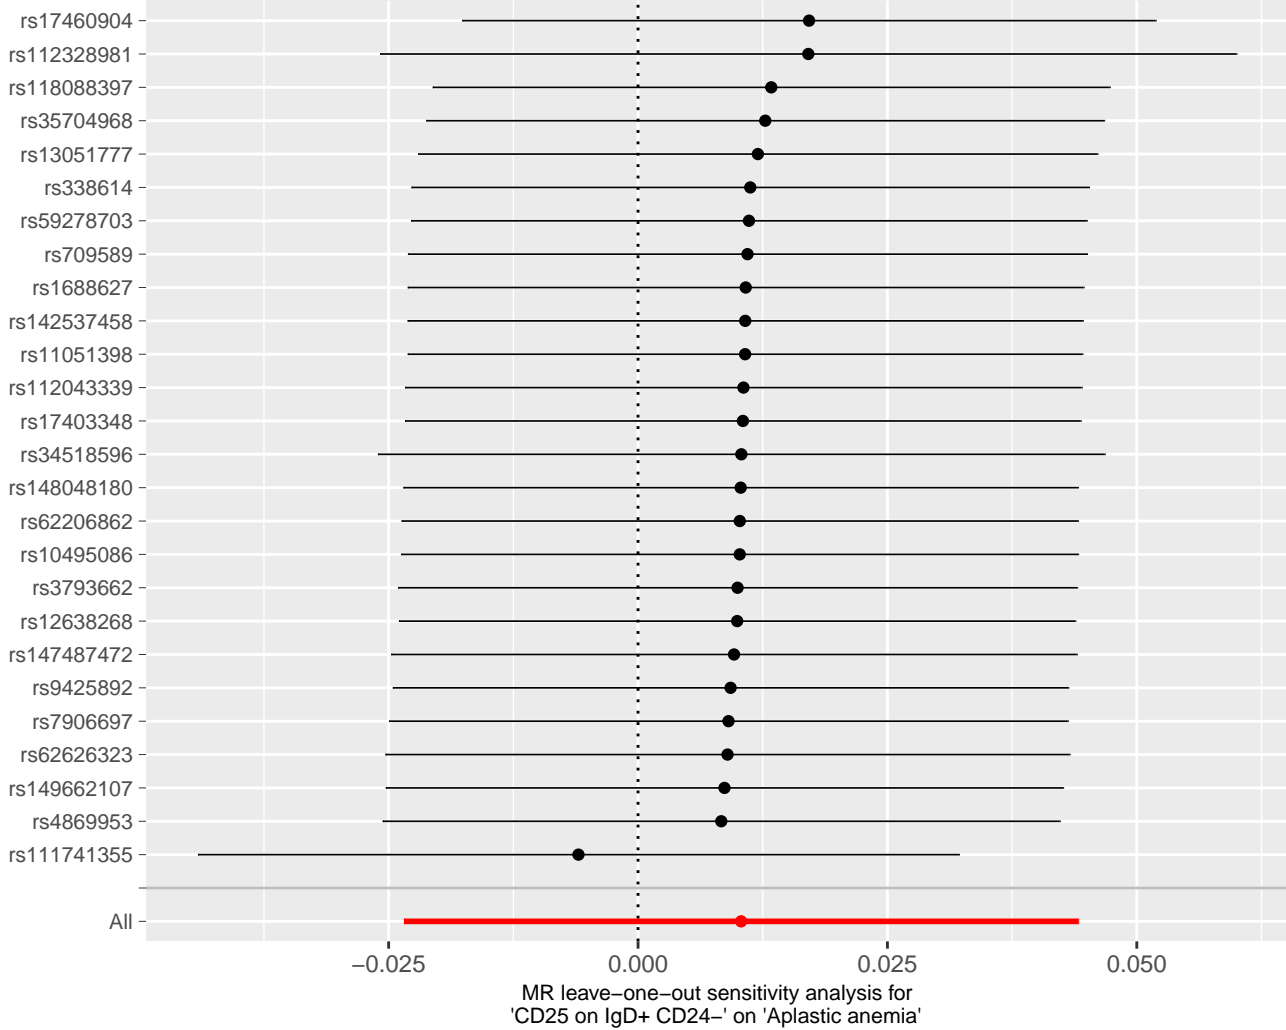

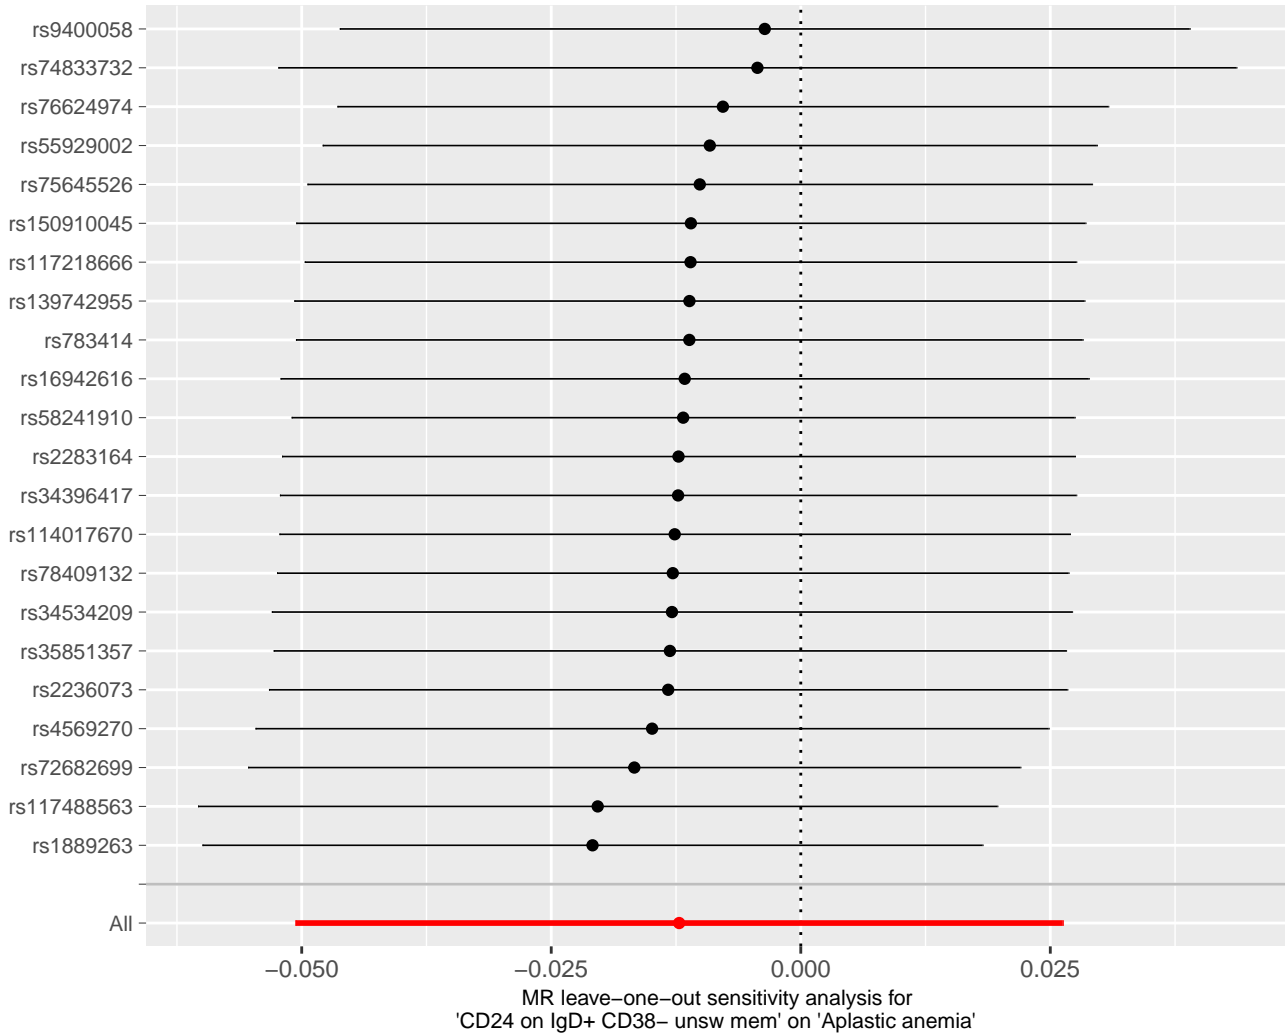

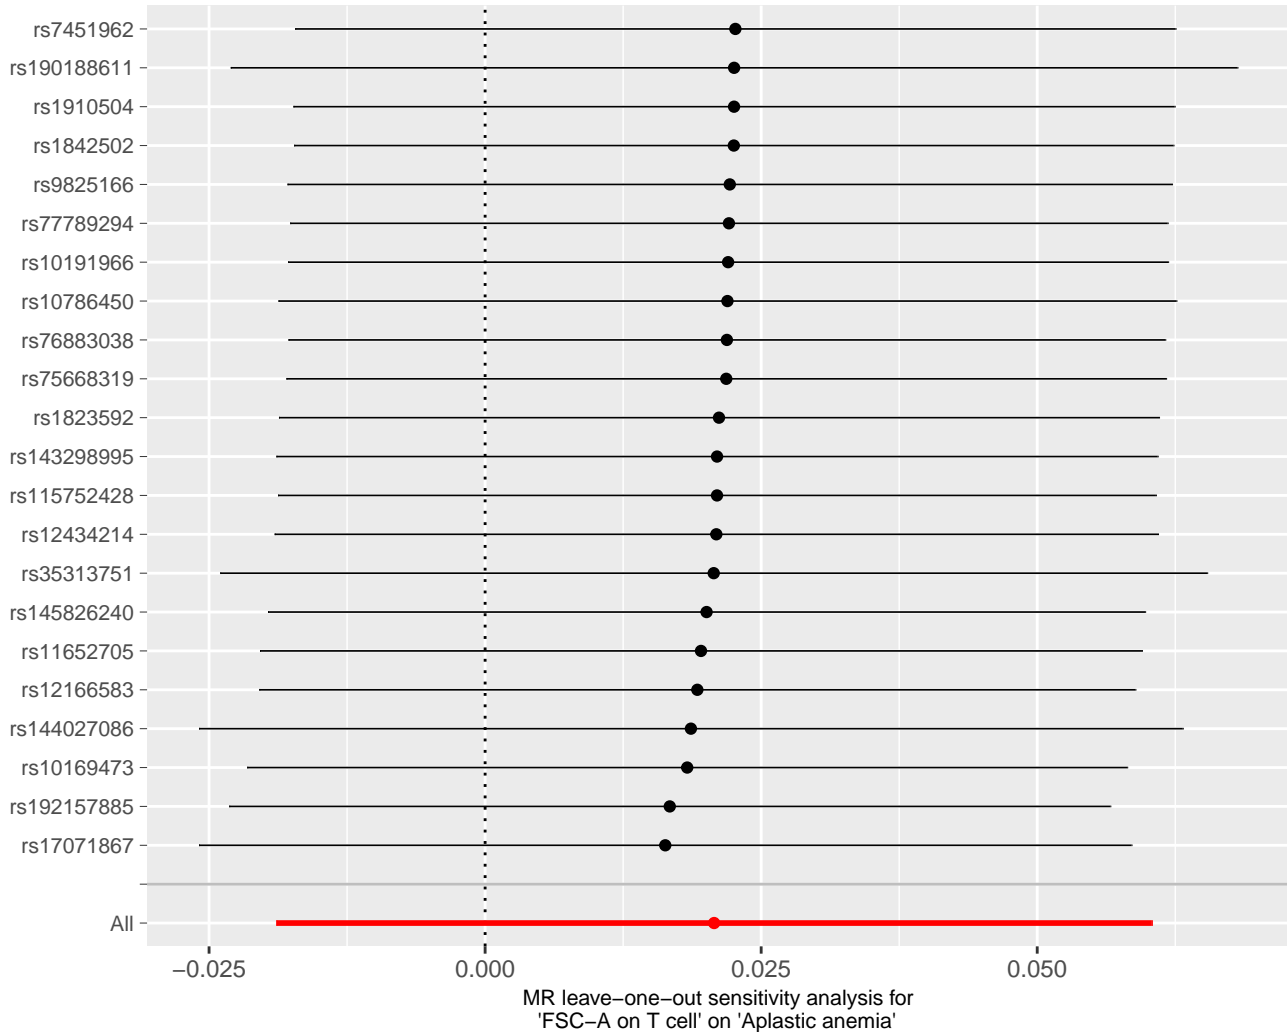

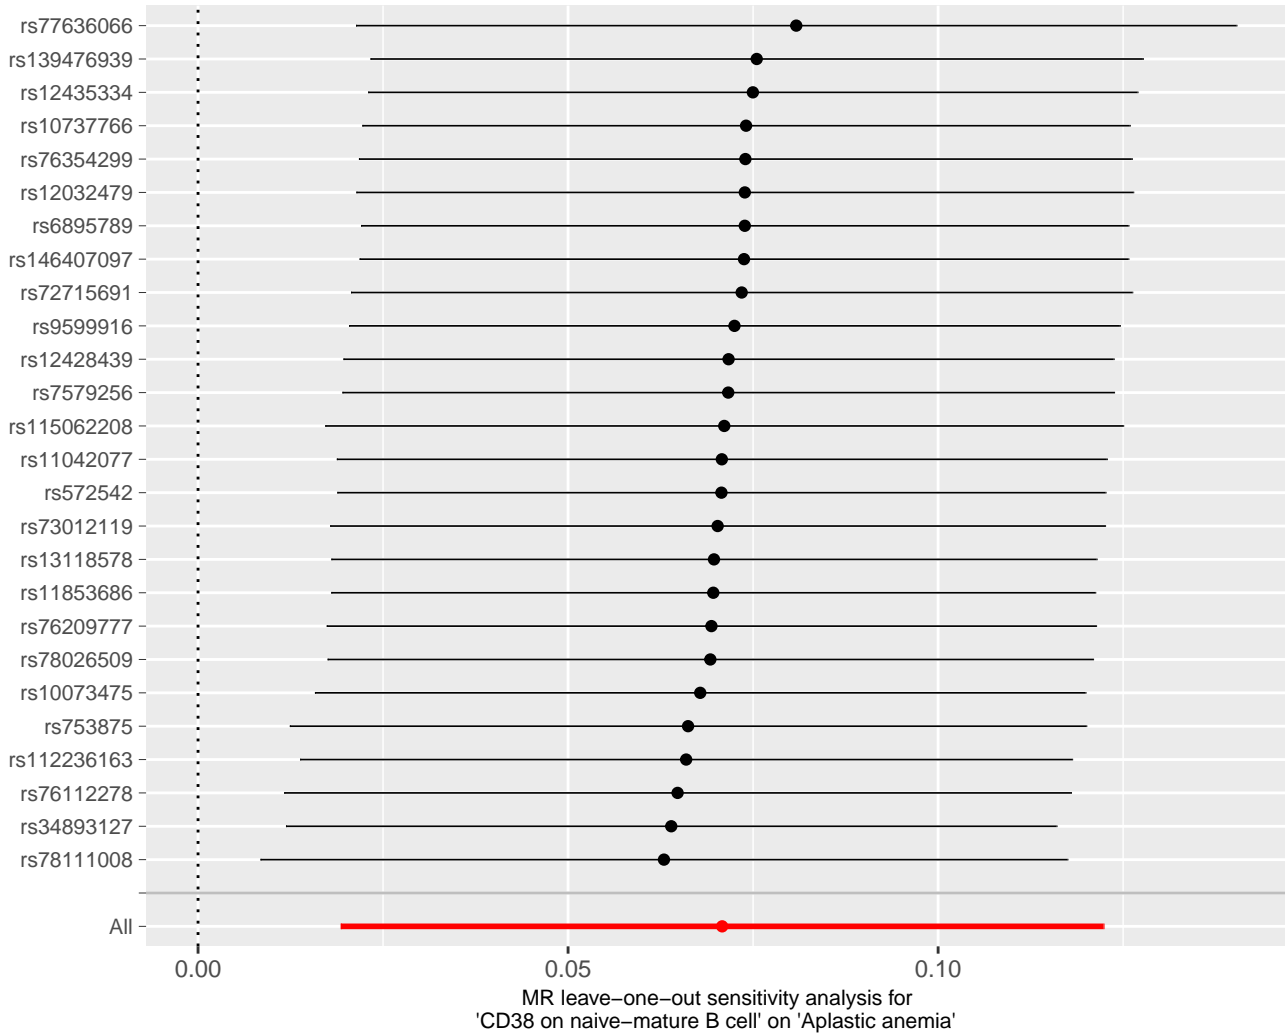

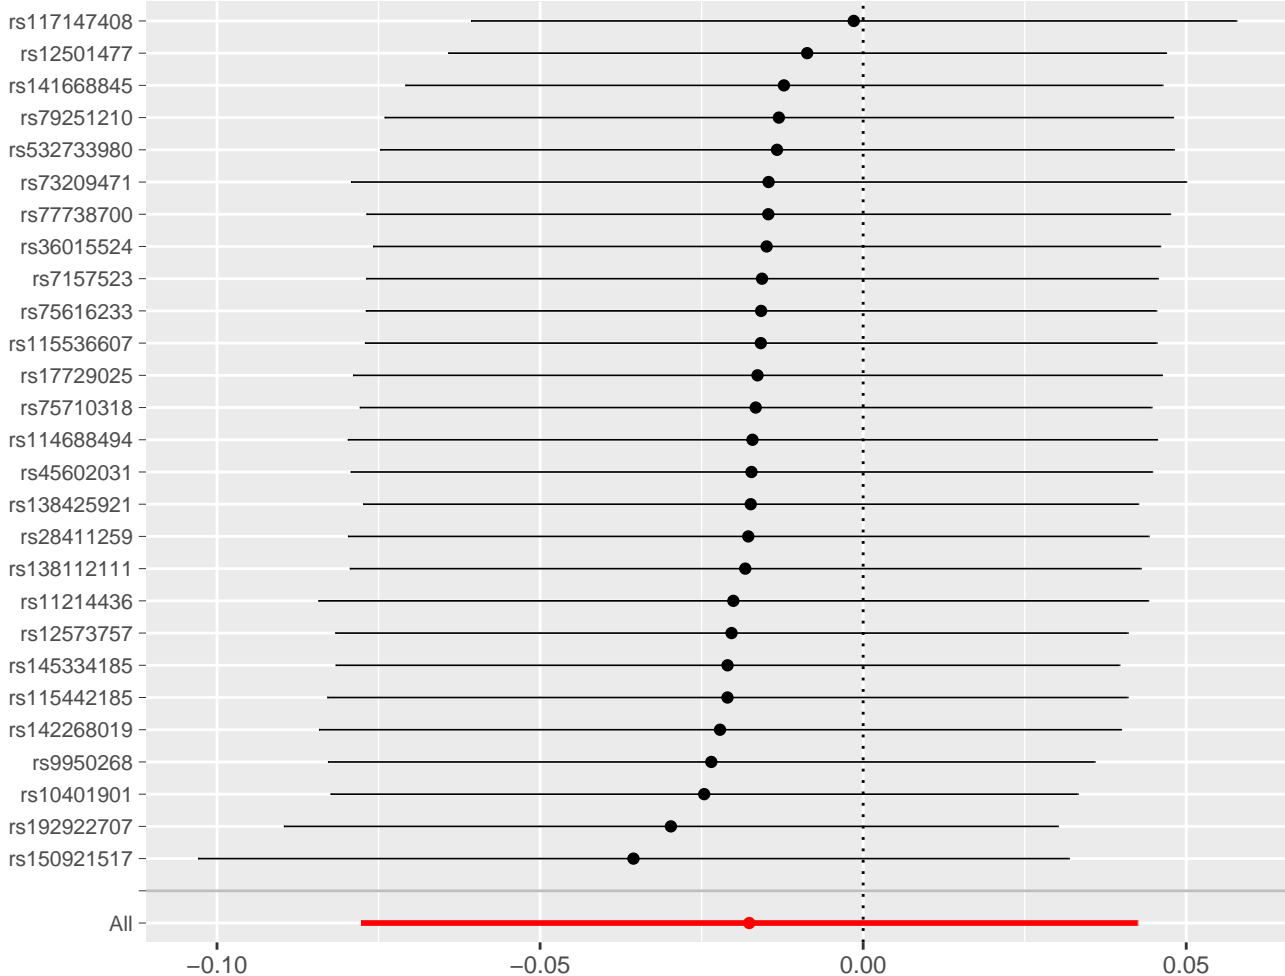

MR leave-one-out sensitivity analysis for 'CD16-CD56 on NKT' on 'Aplastic anemia'



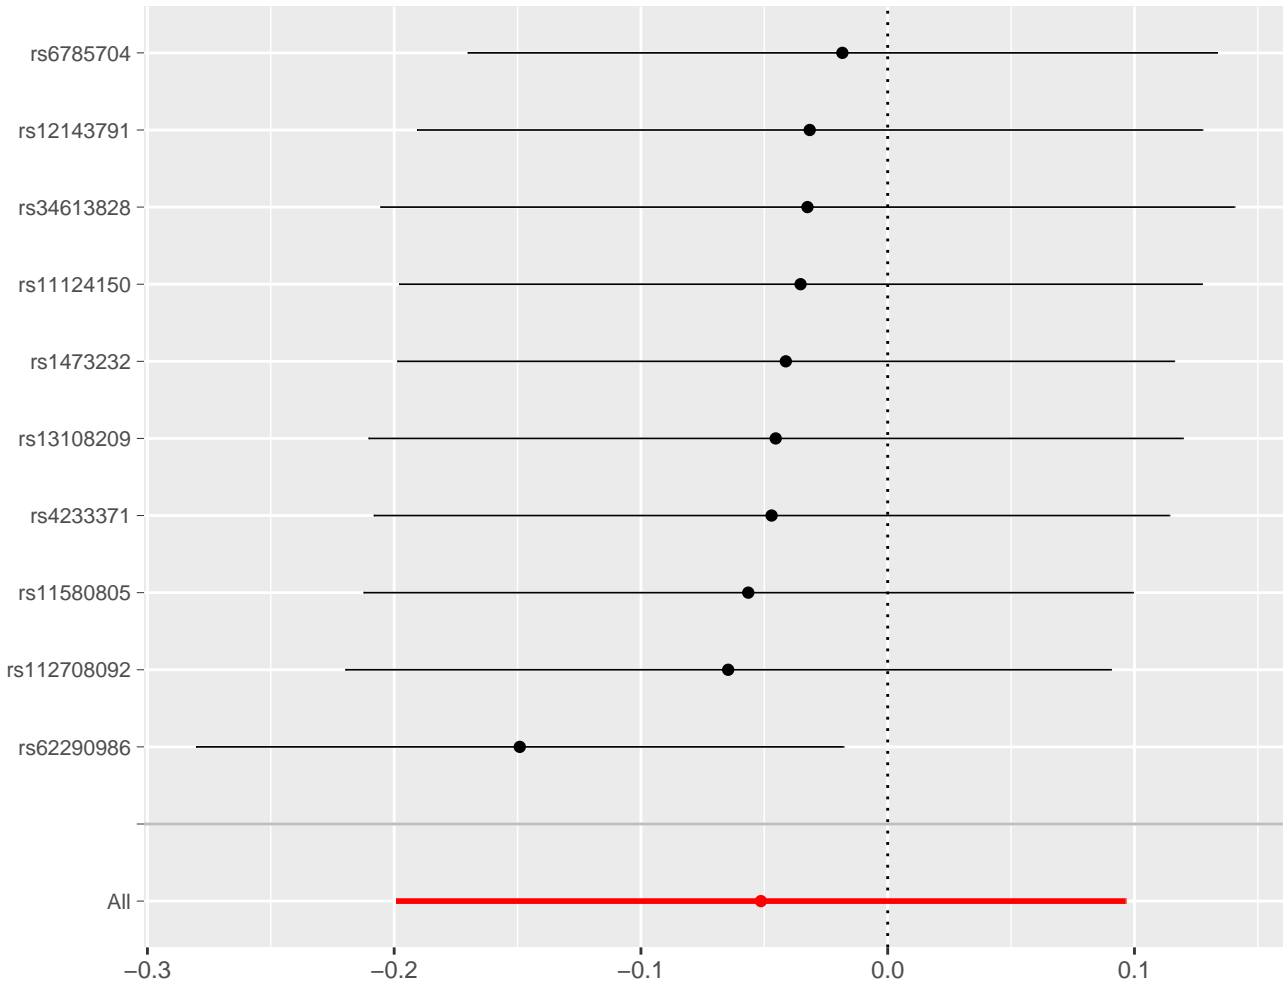

MR leave-one-out sensitivity analysis for  
'DN (CD4-CD8-) NKT AC' on 'Aplastic anemia'

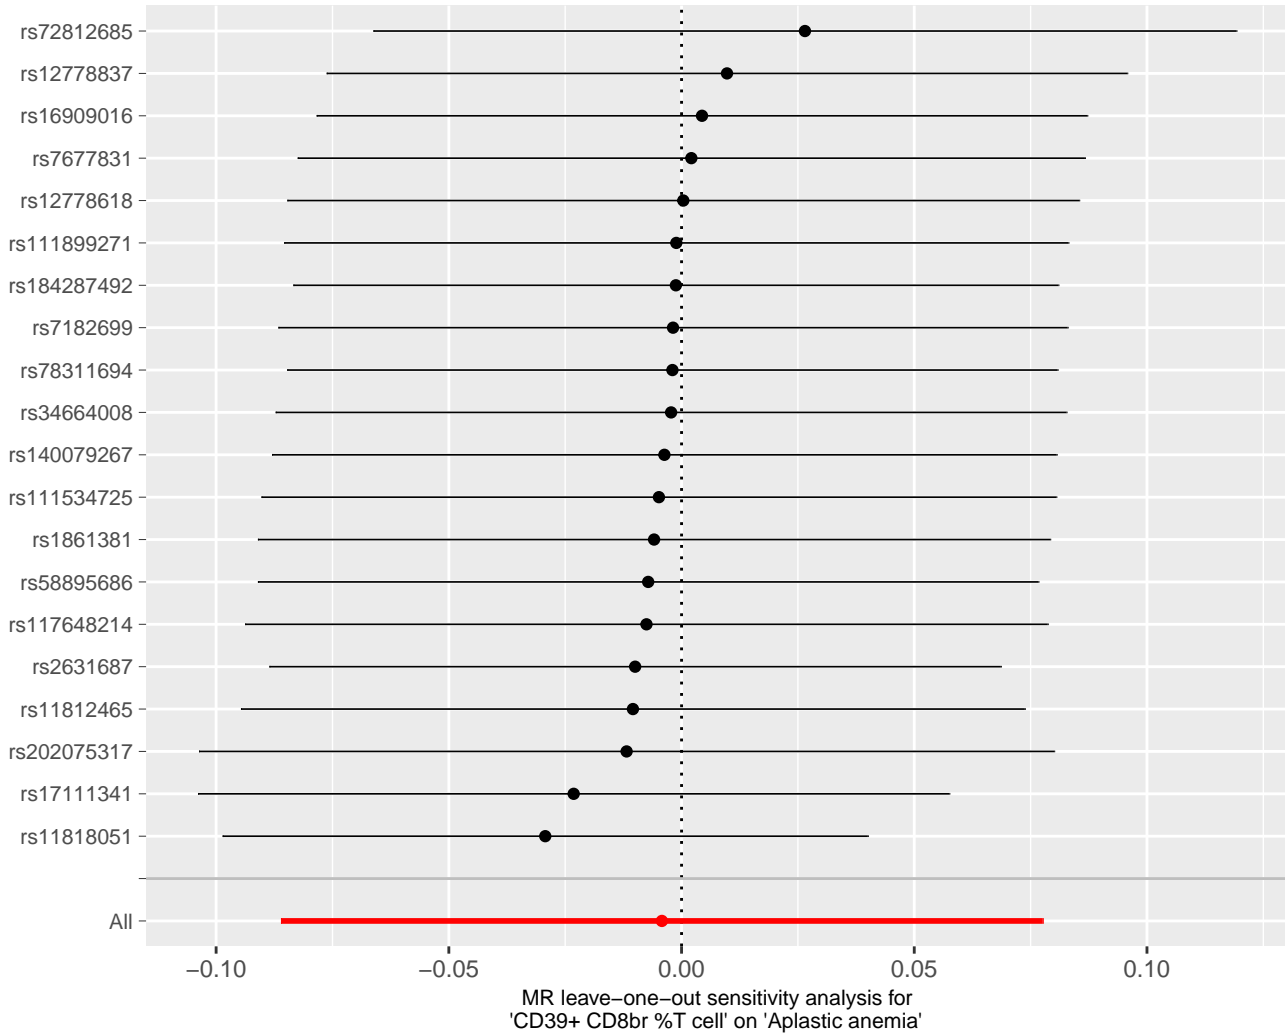

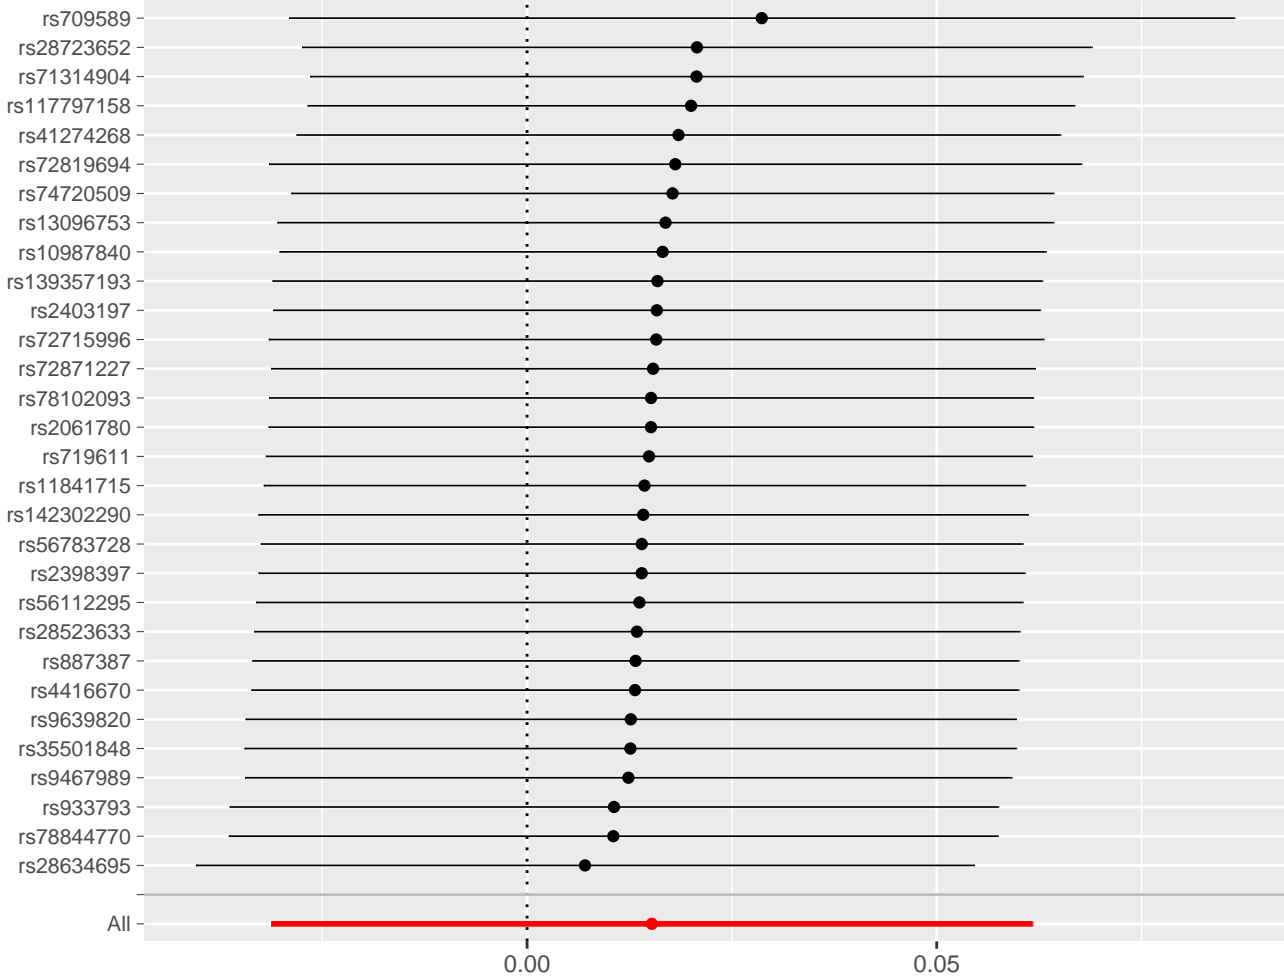

MR leave-one-out sensitivity analysis for 'IgD on IgD+ CD24-' on 'Aplastic anemia'

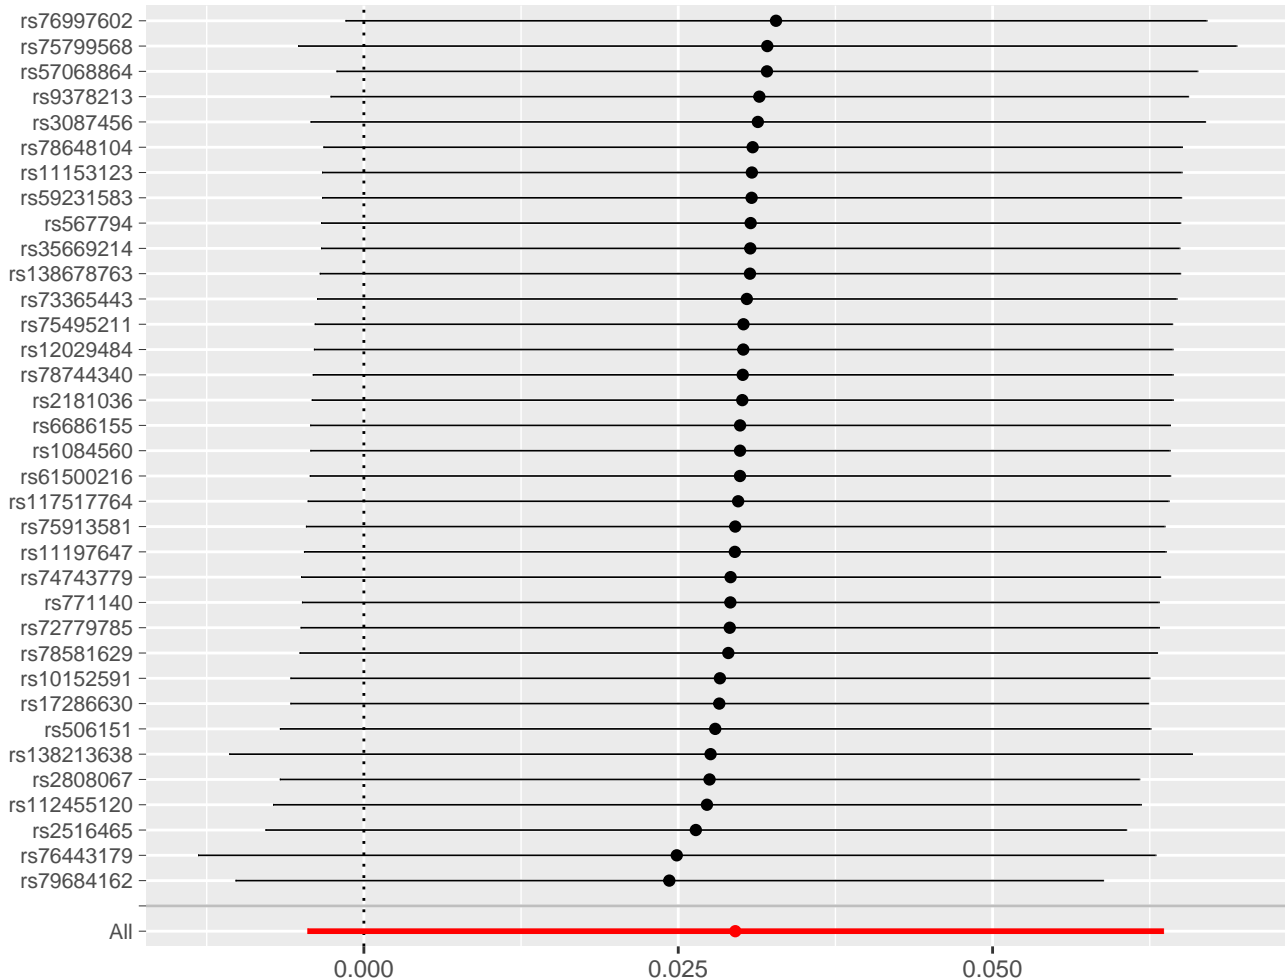

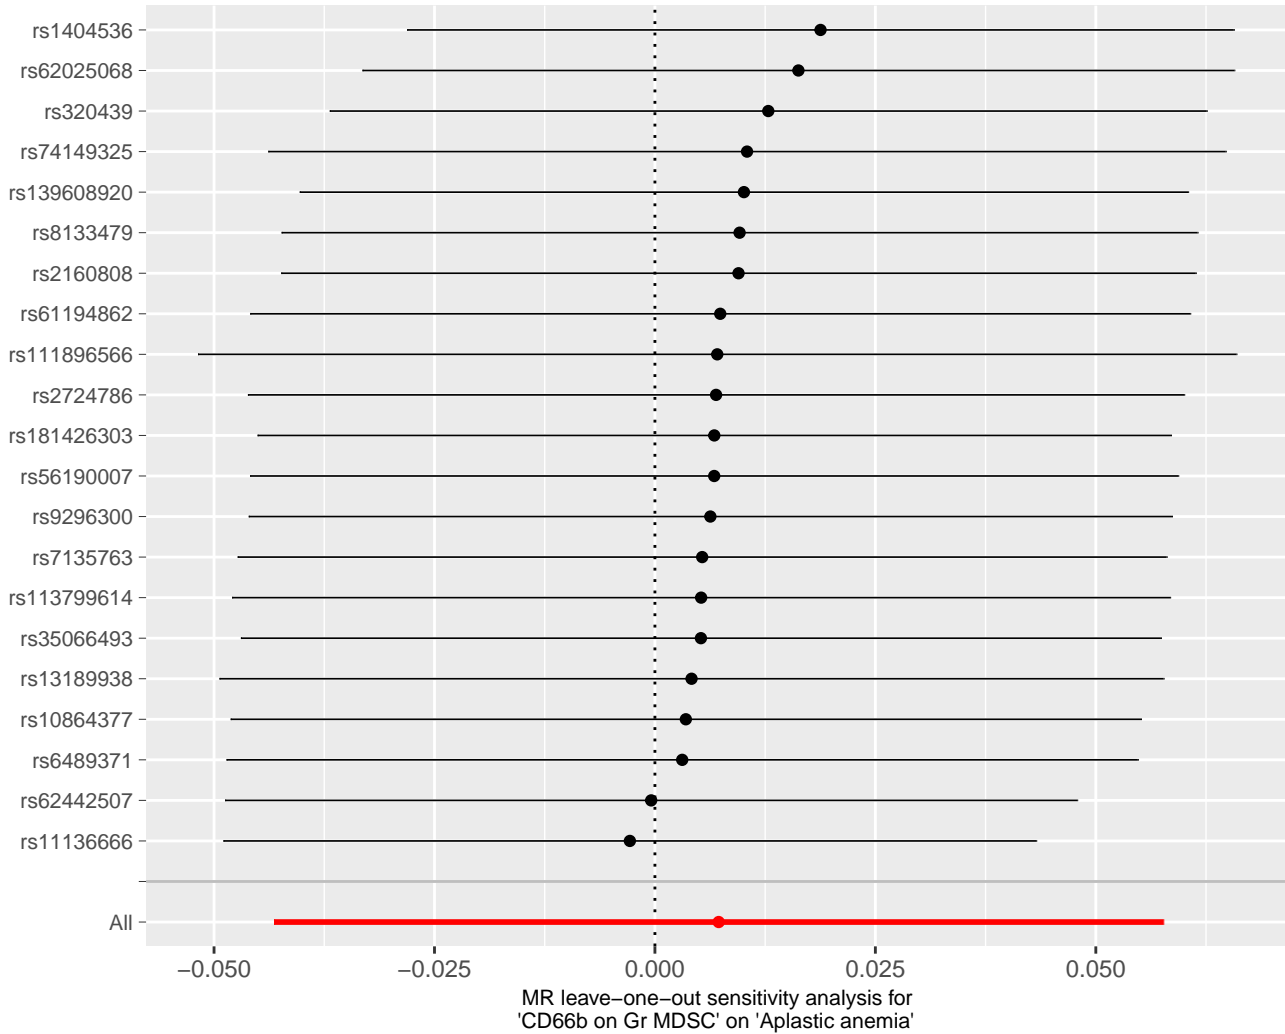

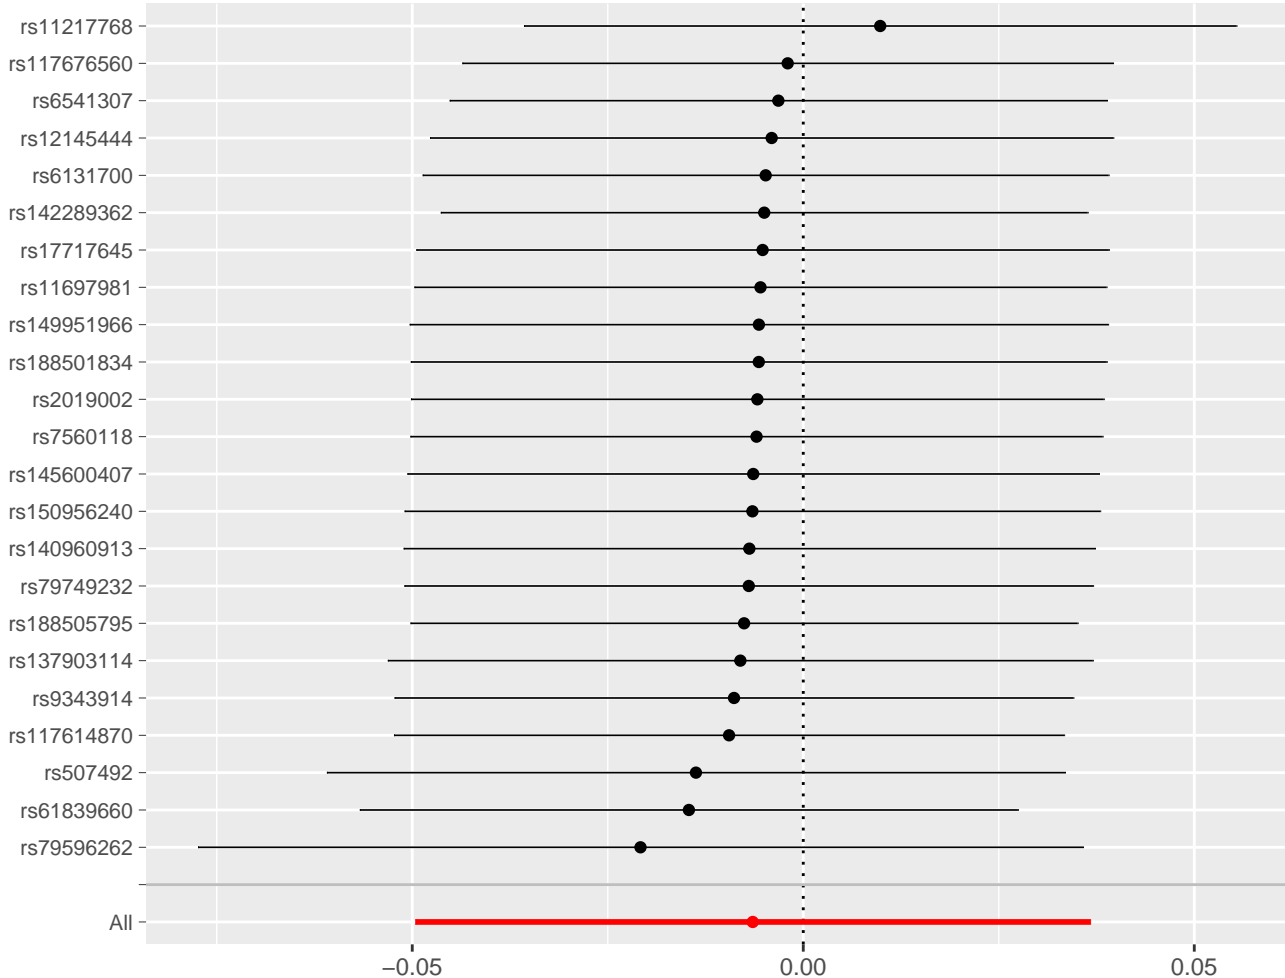

MR leave-one-out sensitivity analysis for 'CD25hi AC' on 'Aplastic anemia'

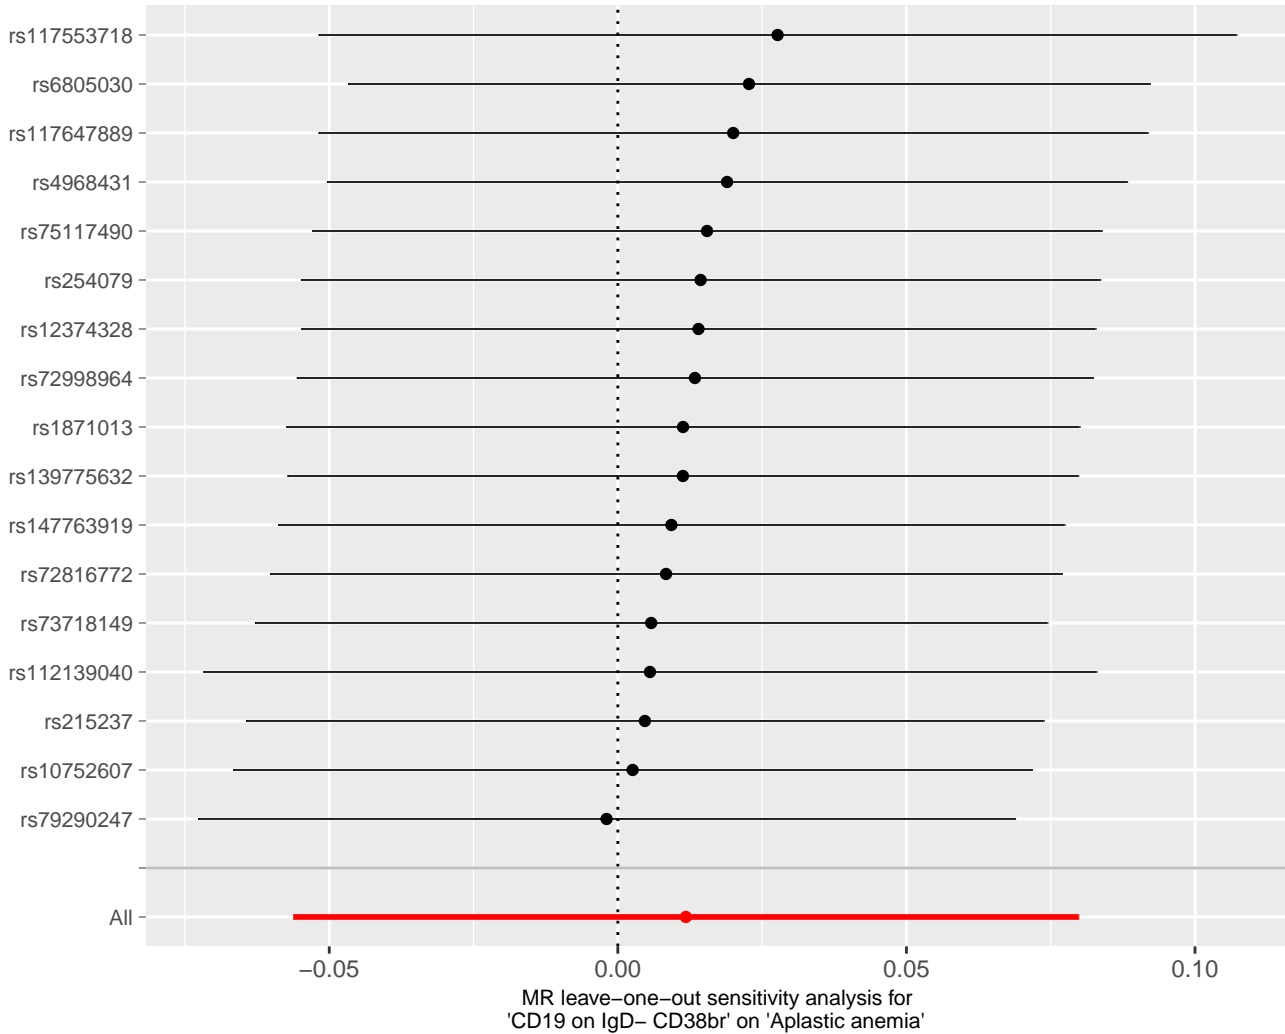

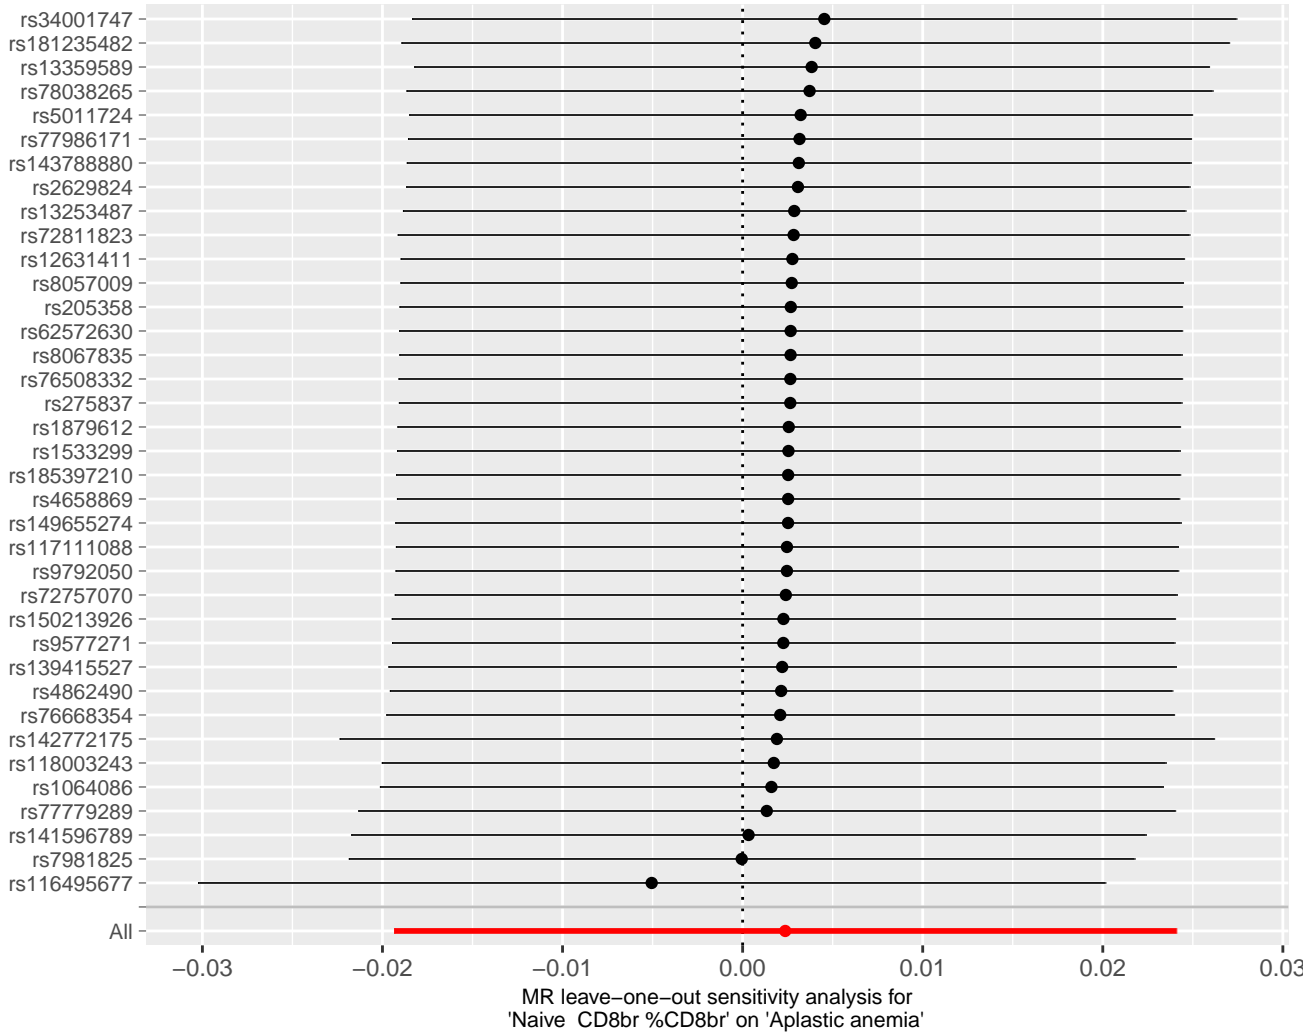



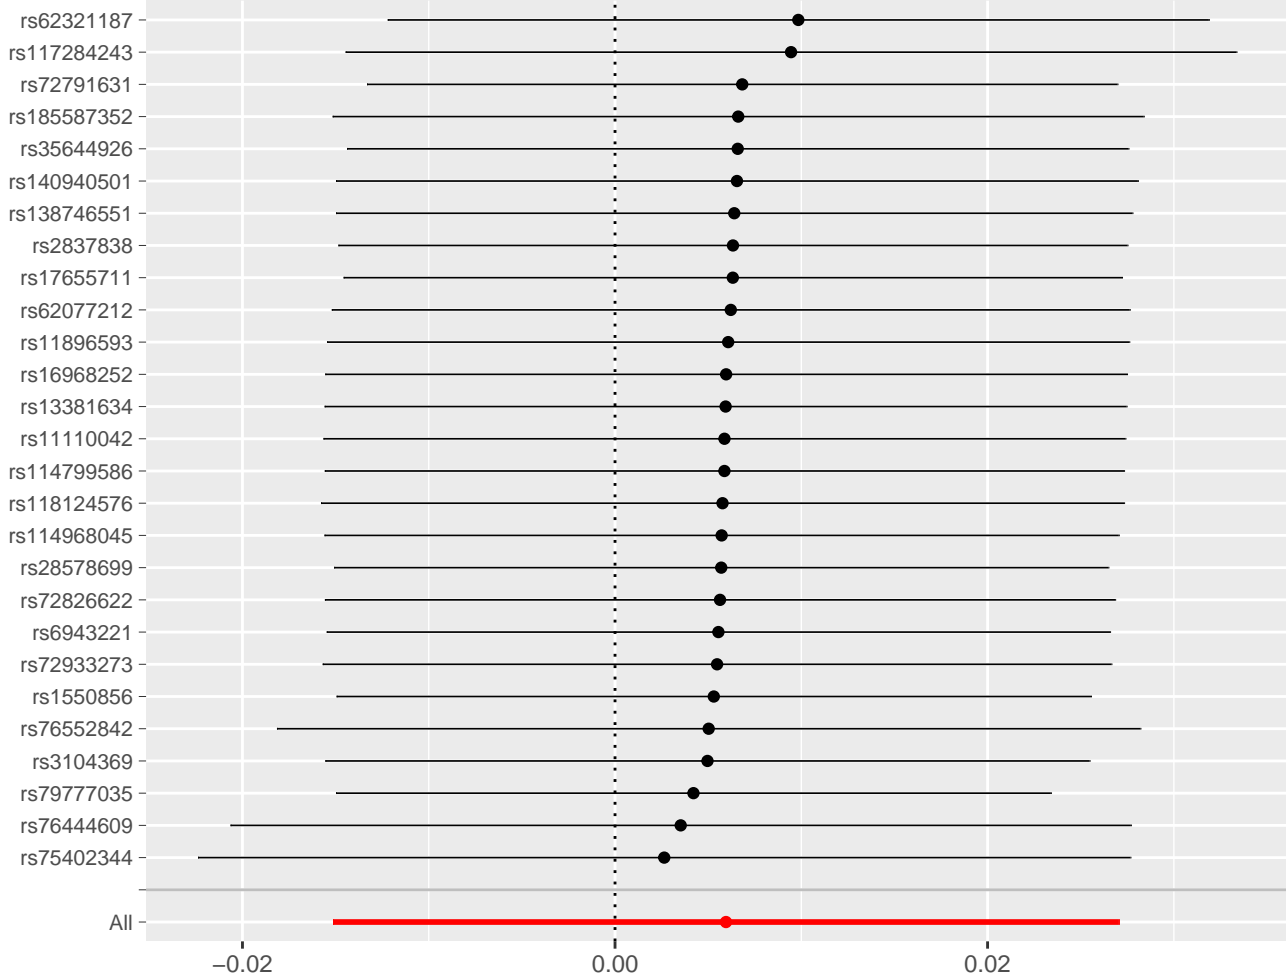

MR leave-one-out sensitivity analysis for 'CD45RA+ CD8br AC' on 'Aplastic anemia'

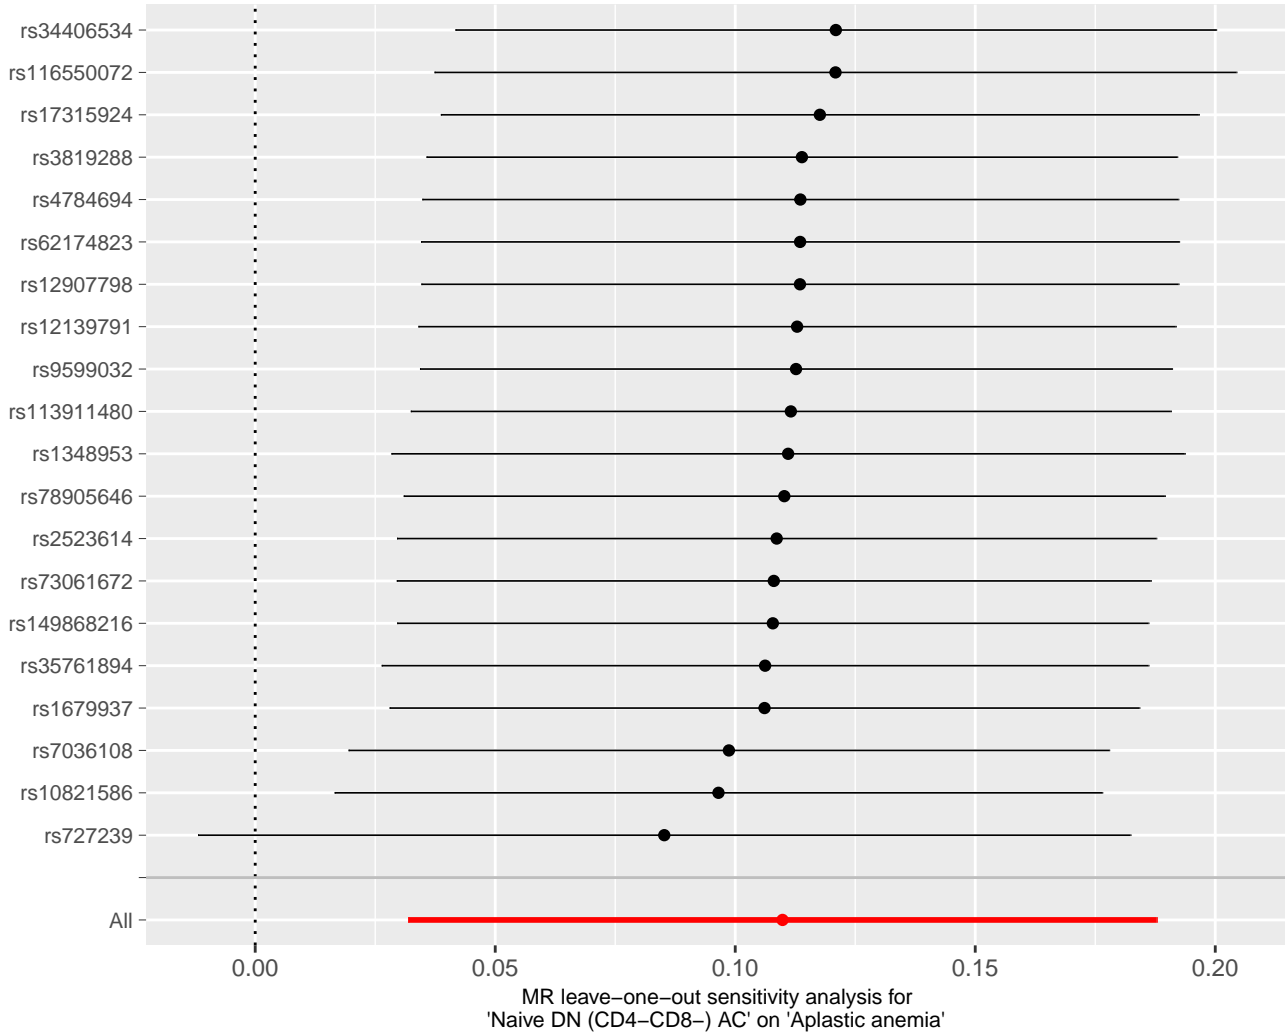

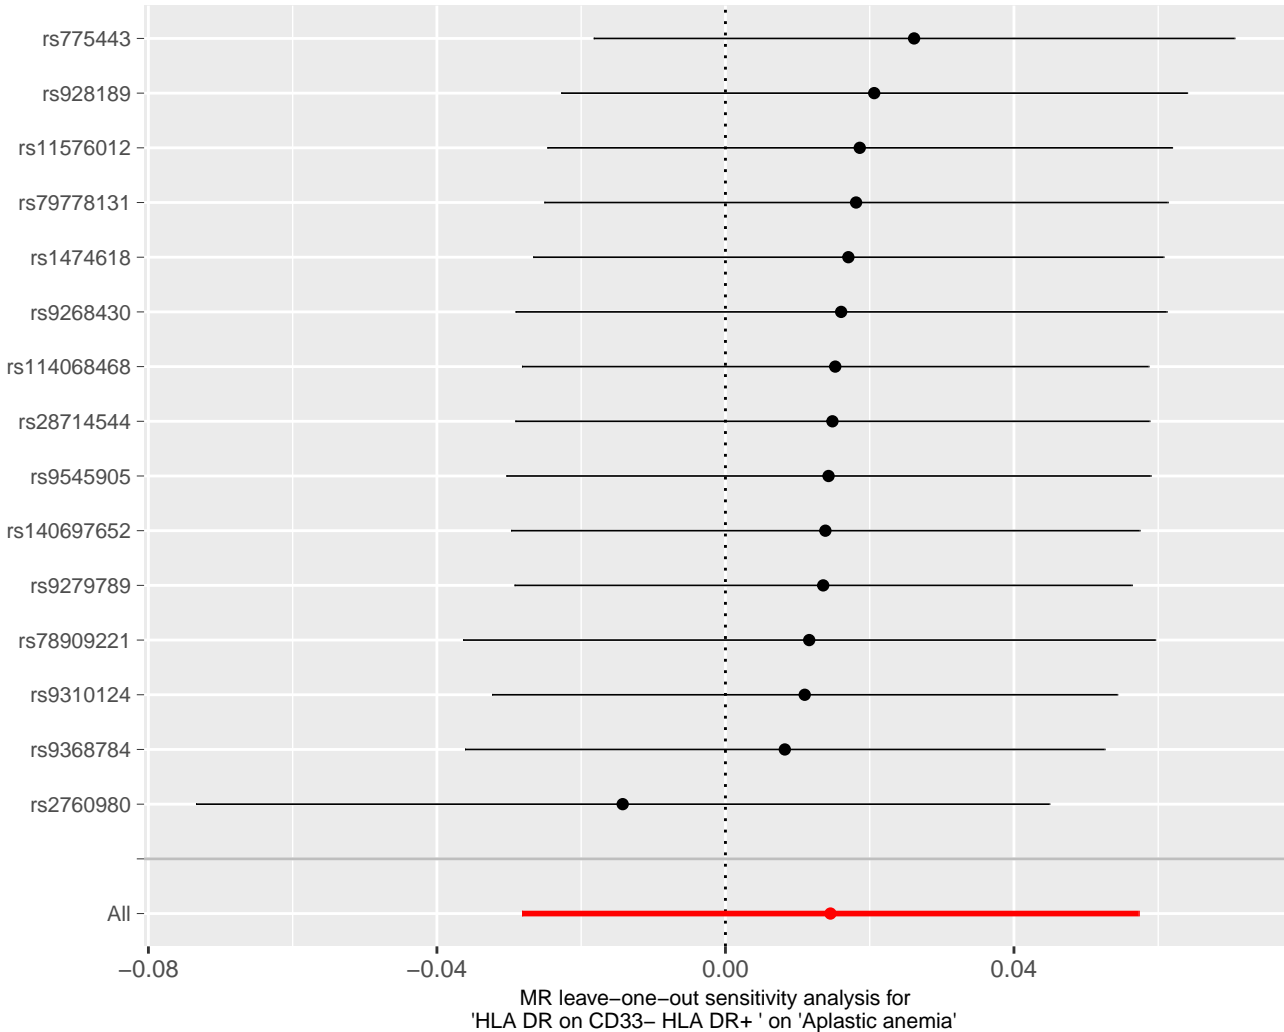

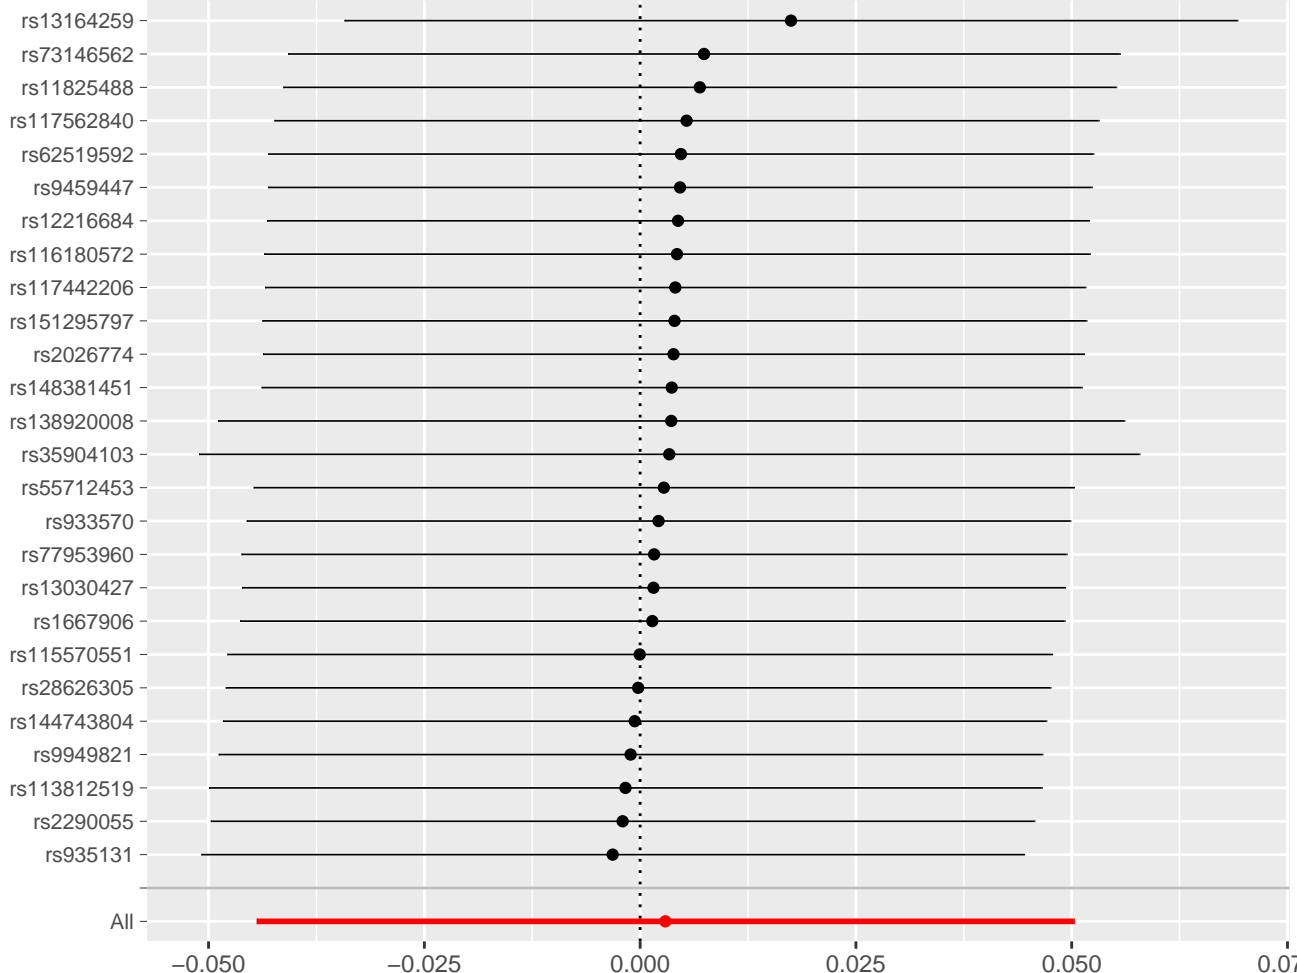

MR leave-one-out sensitivity analysis for 'CD19 on transitional' on 'Aplastic anemia'

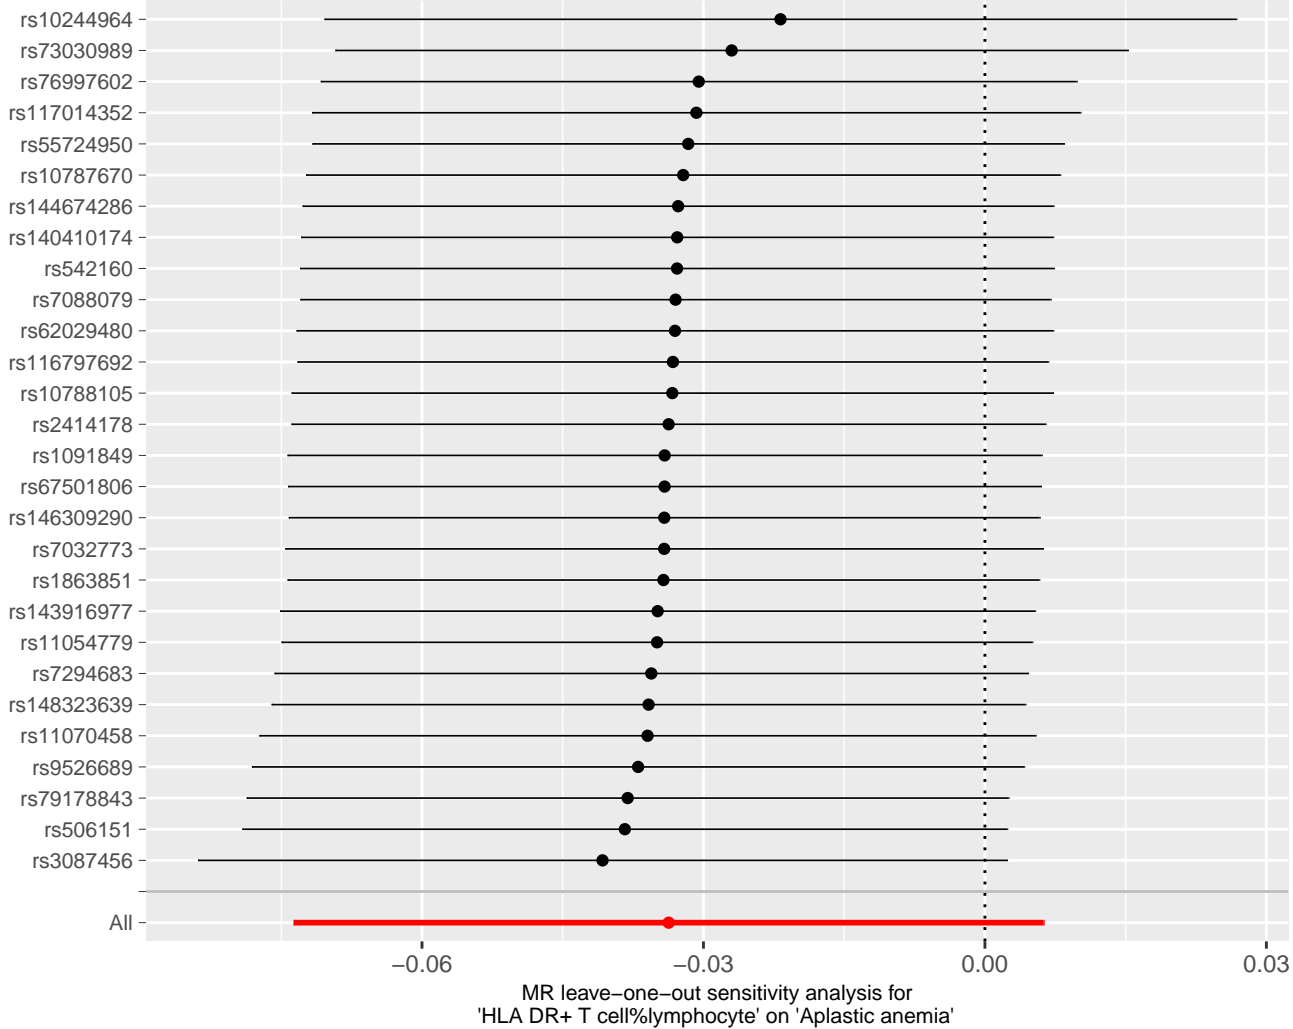

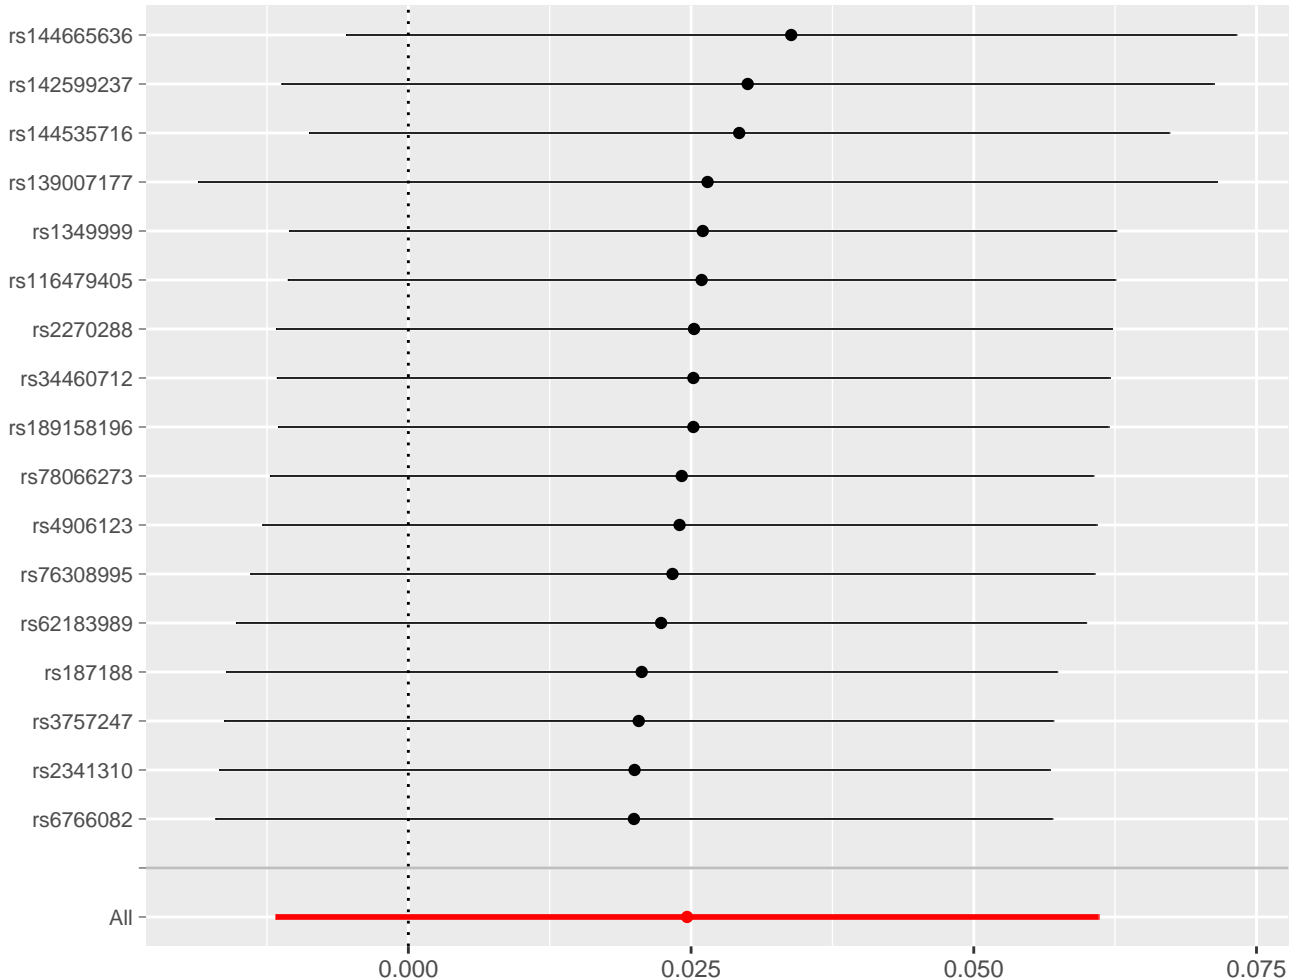

MR leave-one-out sensitivity analysis for 'CD28 on secreting Treg' on 'Aplastic anemia'

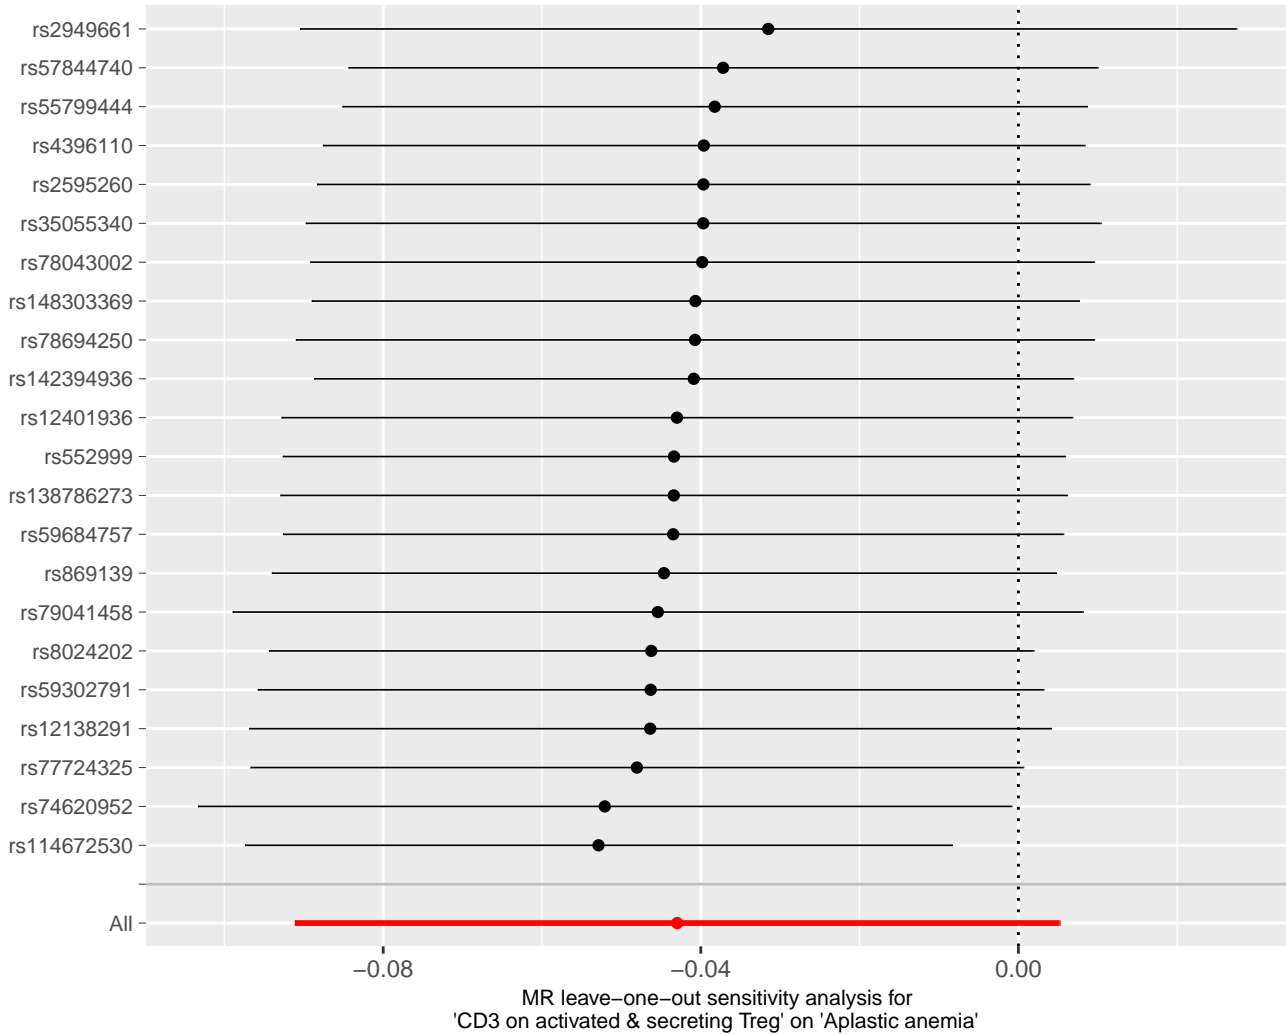

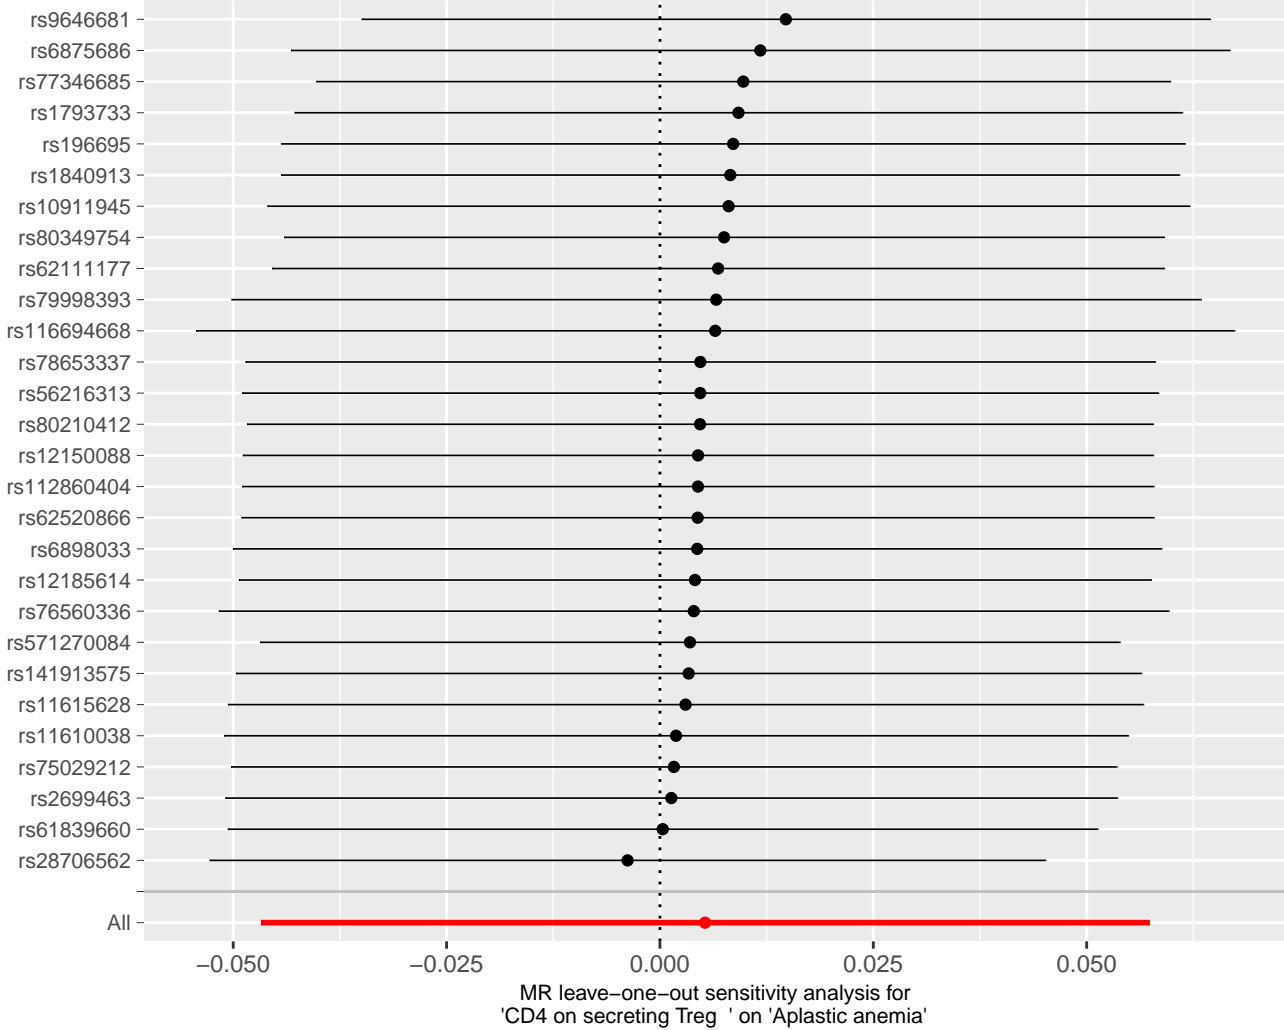



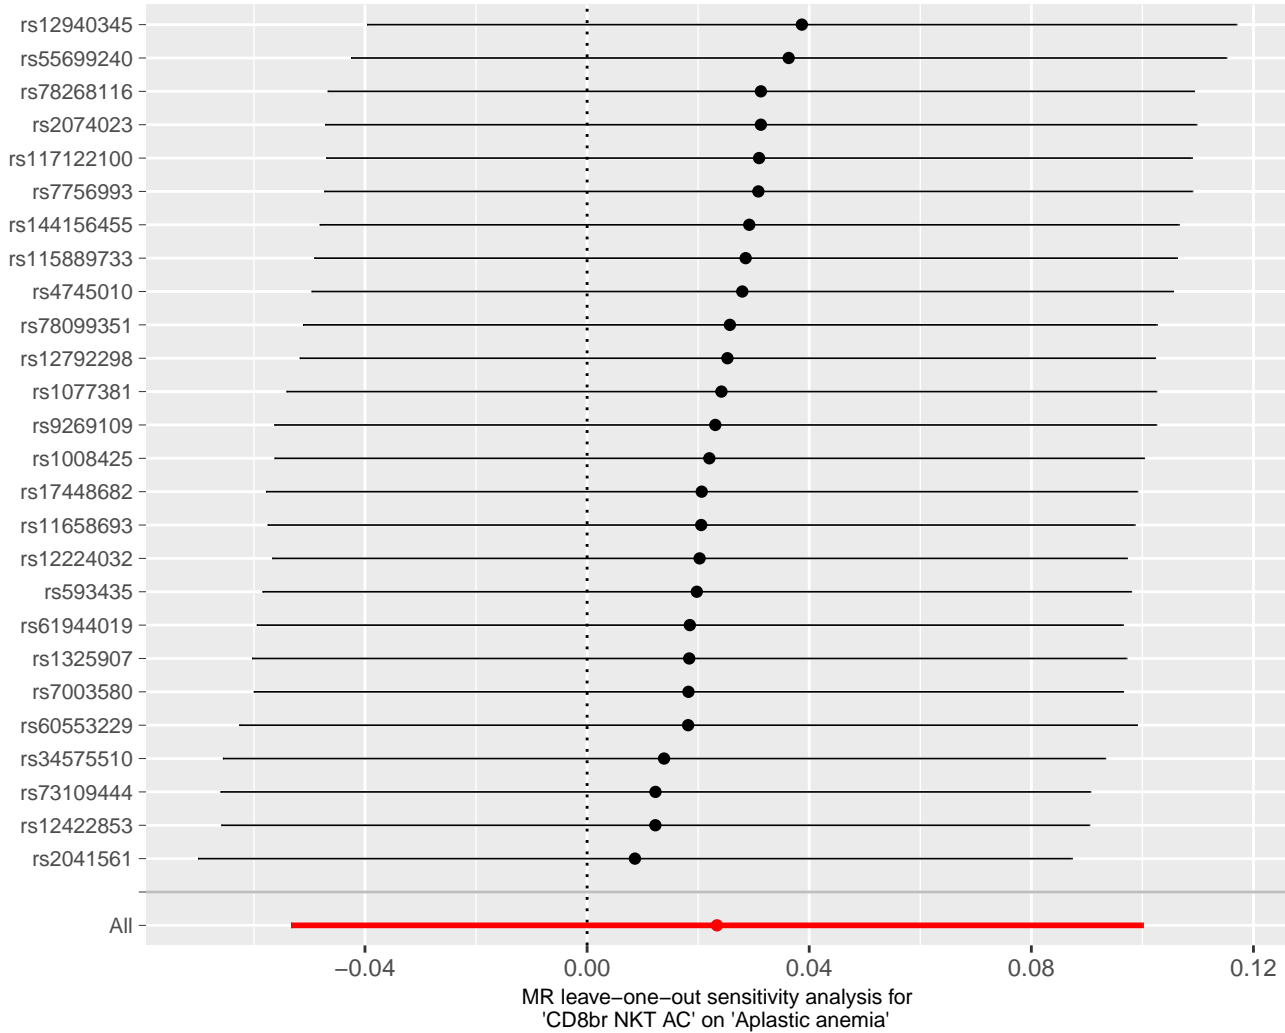

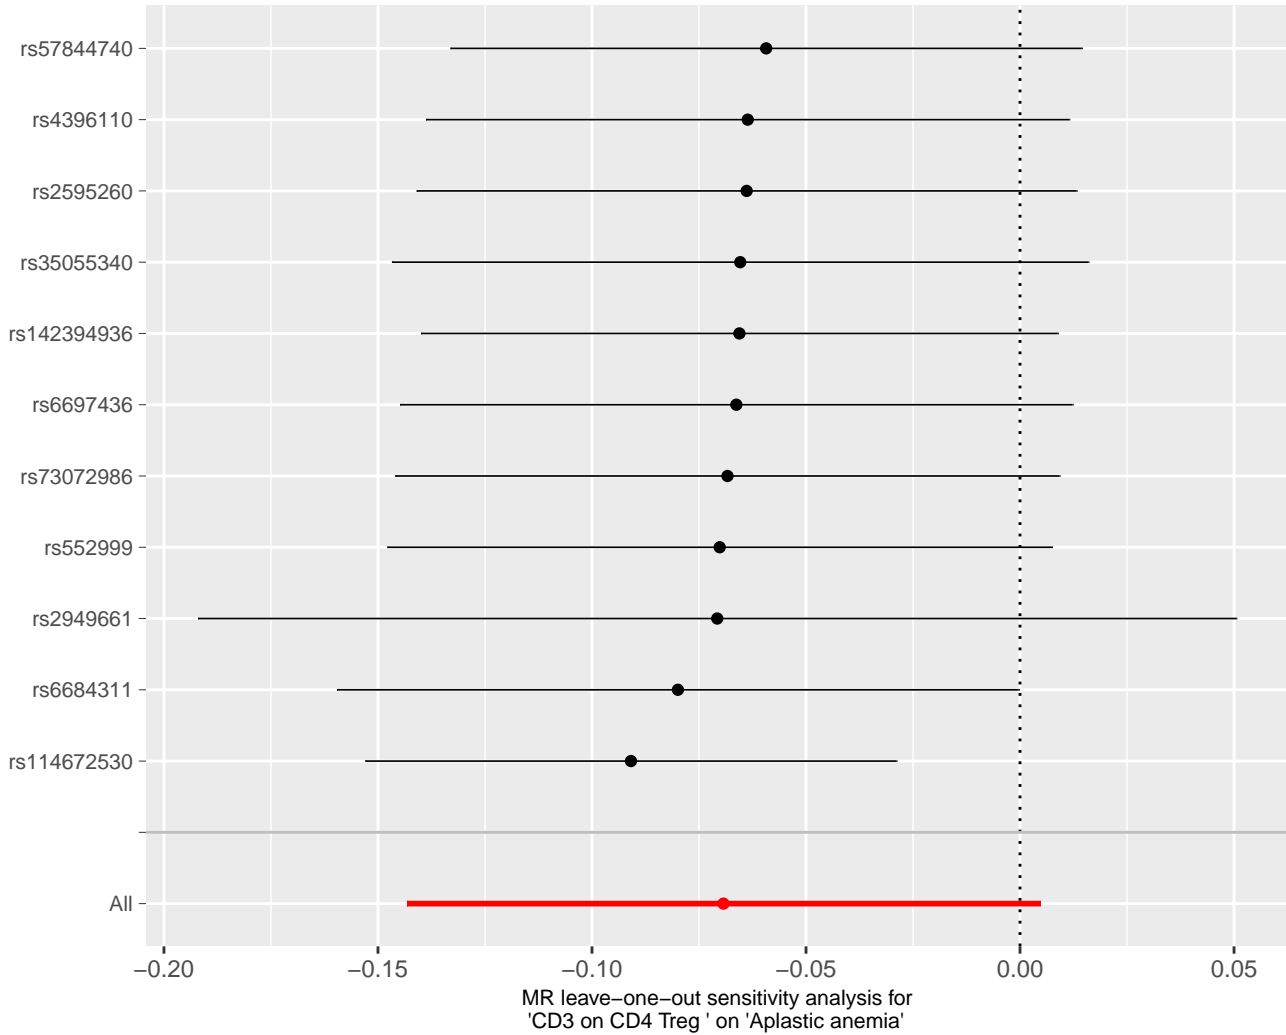

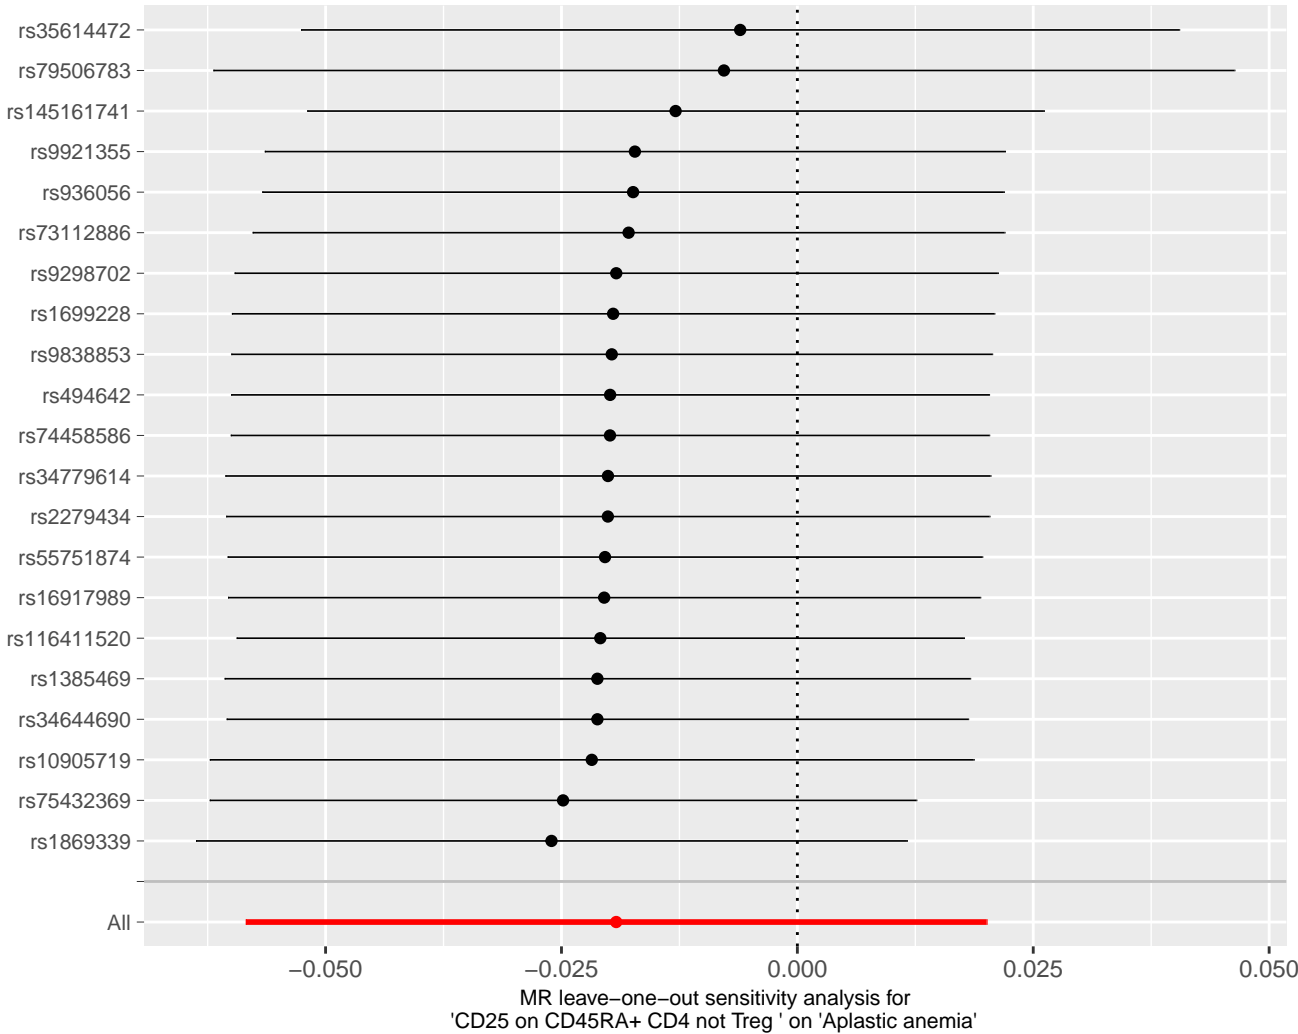

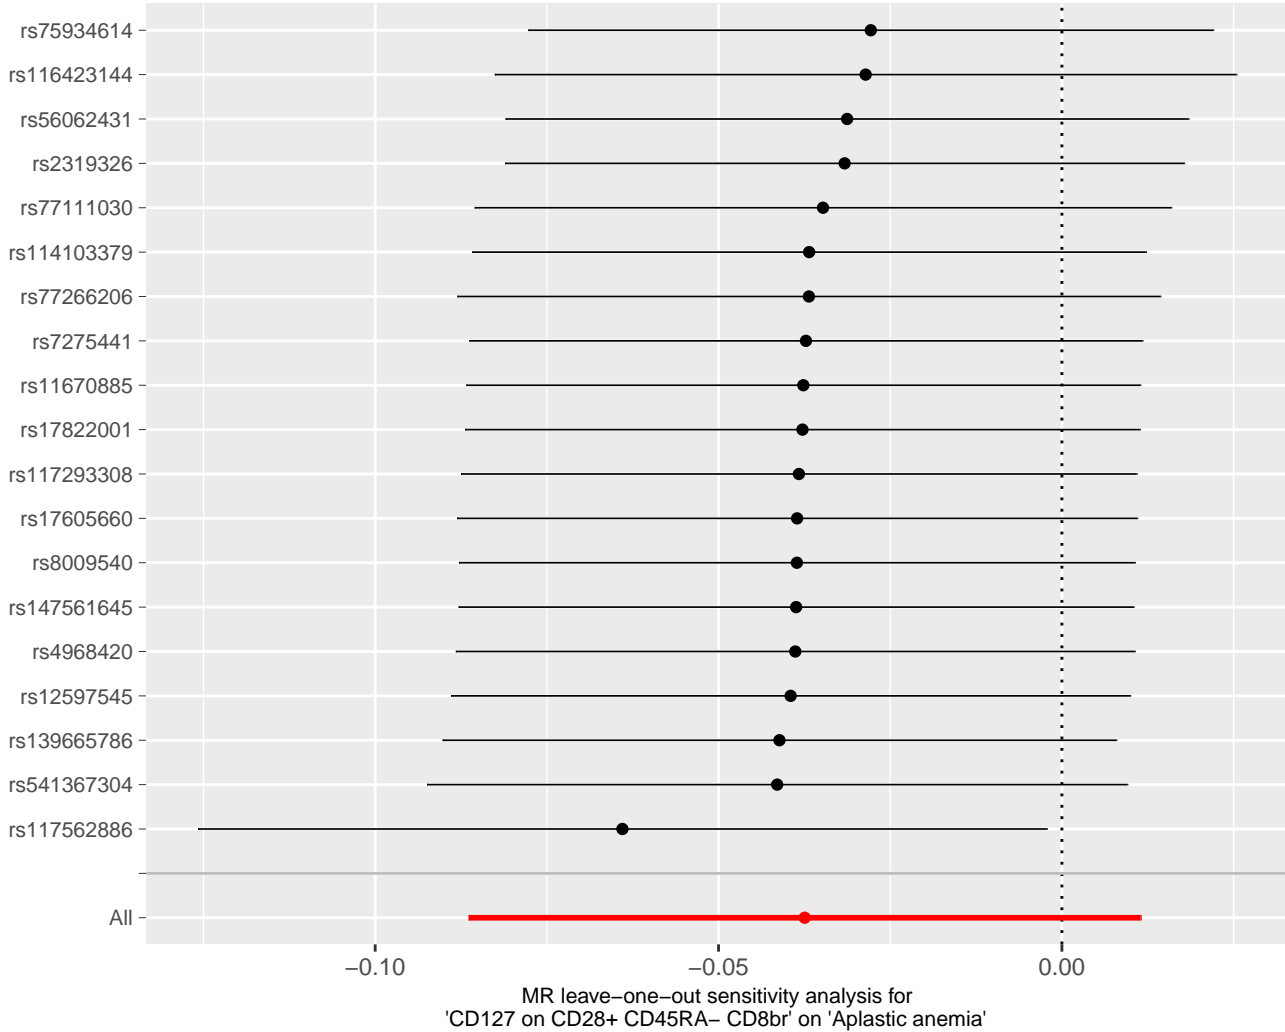

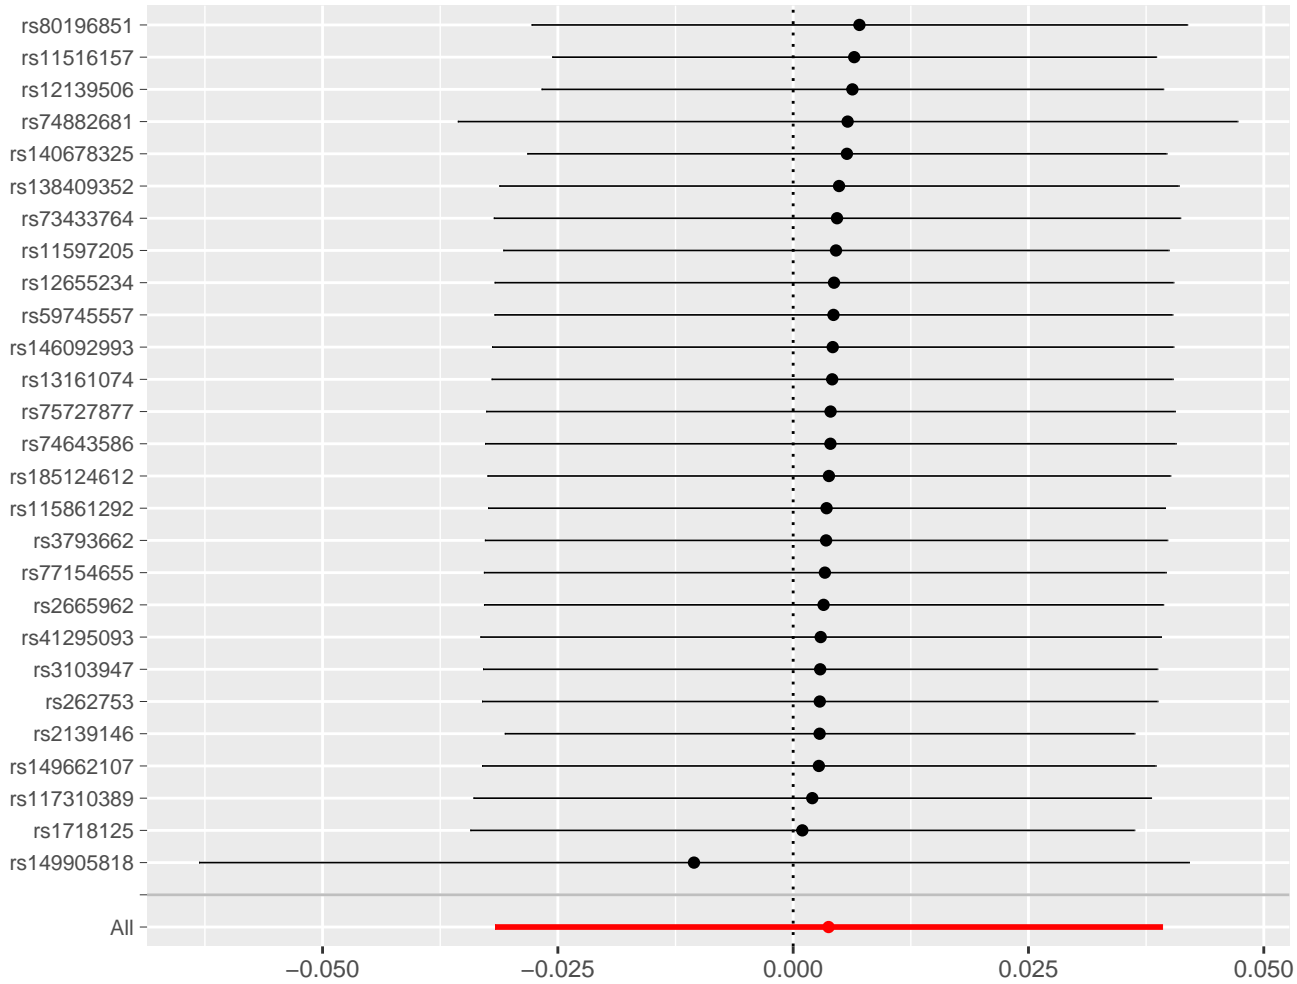

MR leave-one-out sensitivity analysis for 'CD25 on IgD+ CD38-' on 'Aplastic anemia'

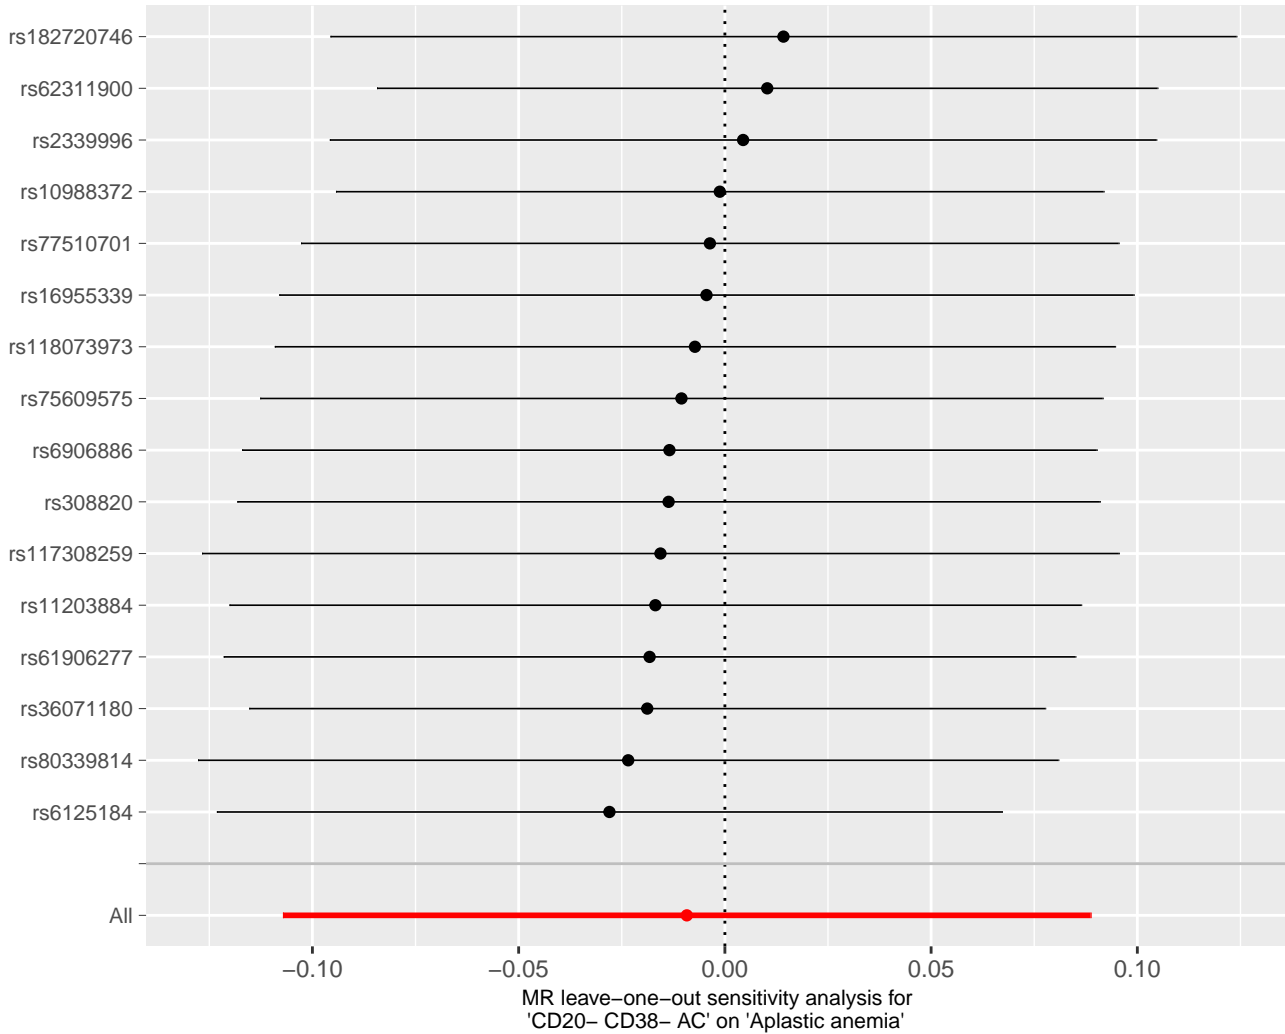

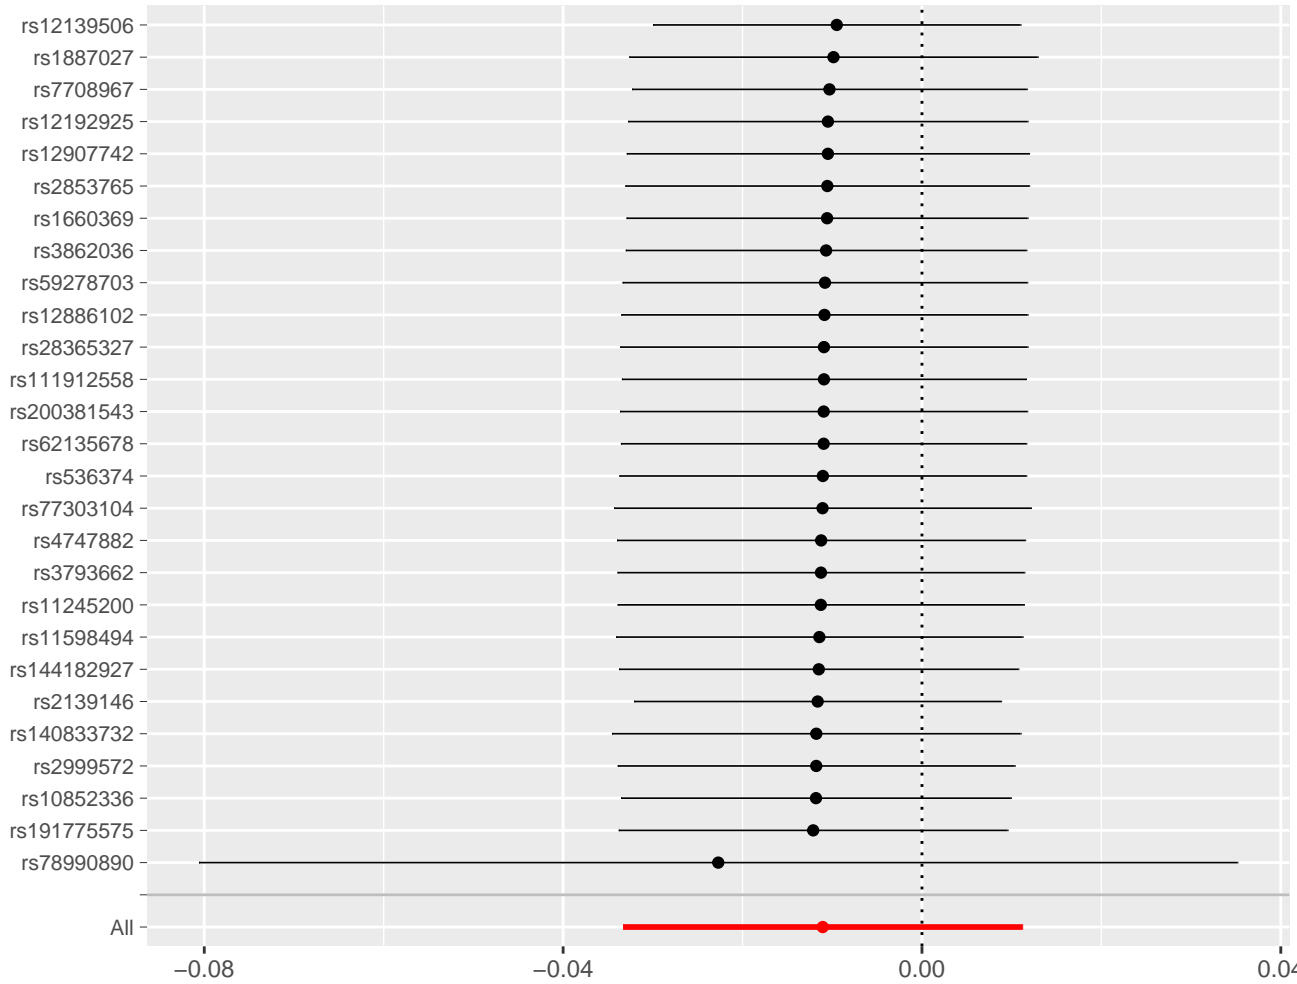

MR leave-one-out sensitivity analysis for 'CD25 on CD24+ CD27+' on 'Aplastic anemia'

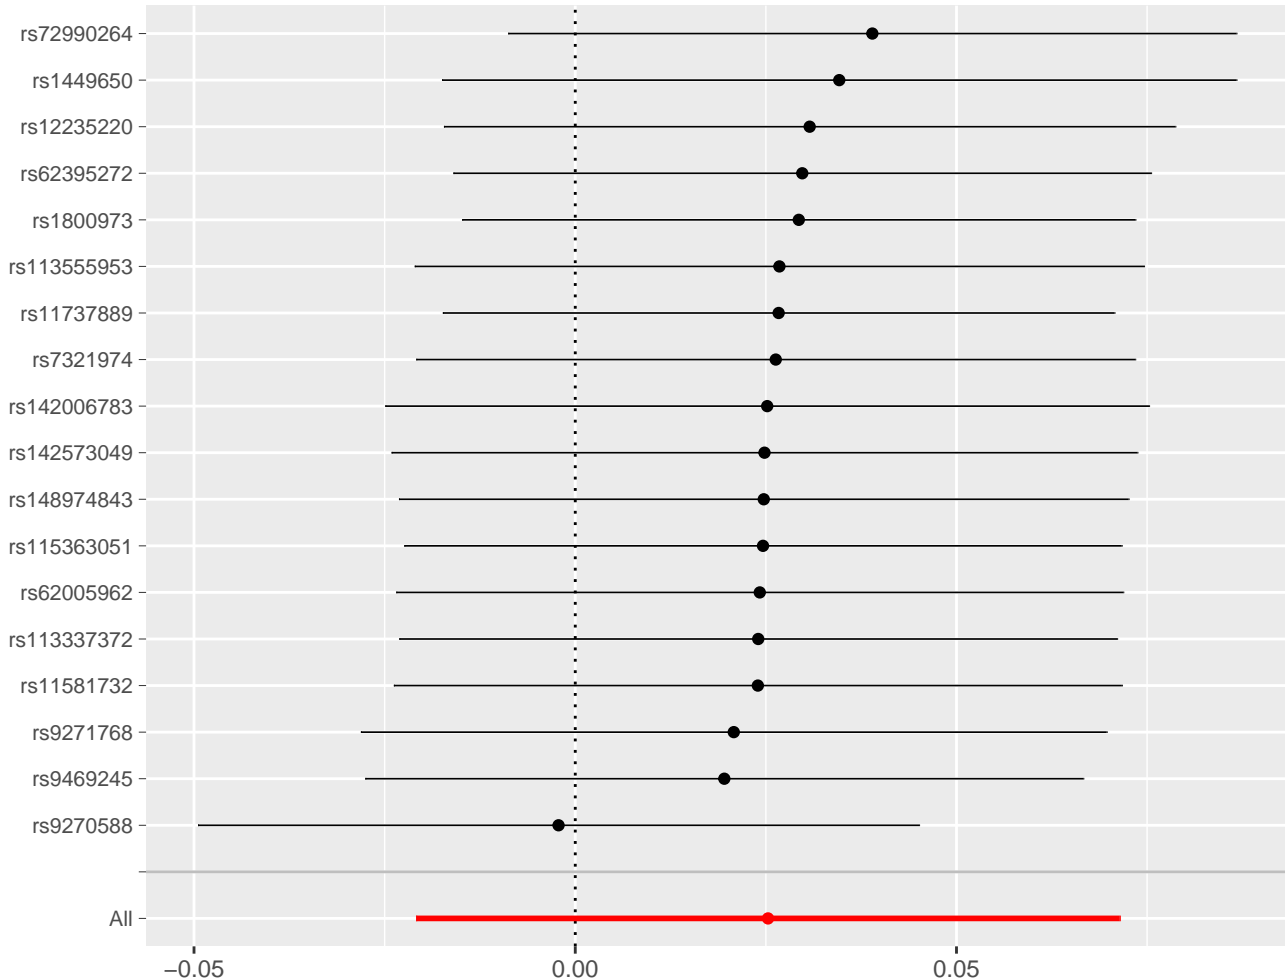



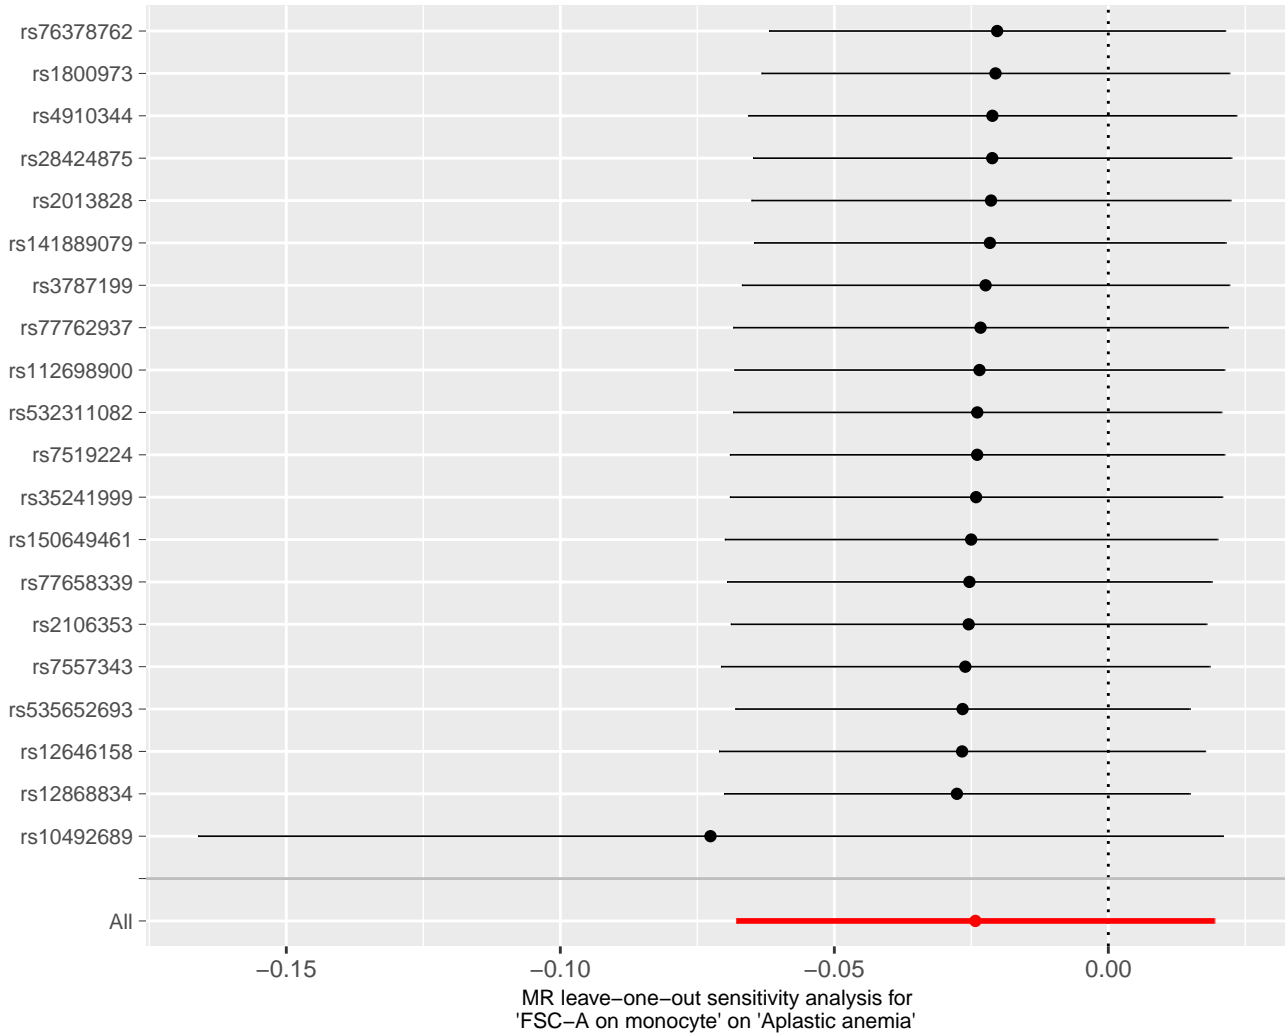

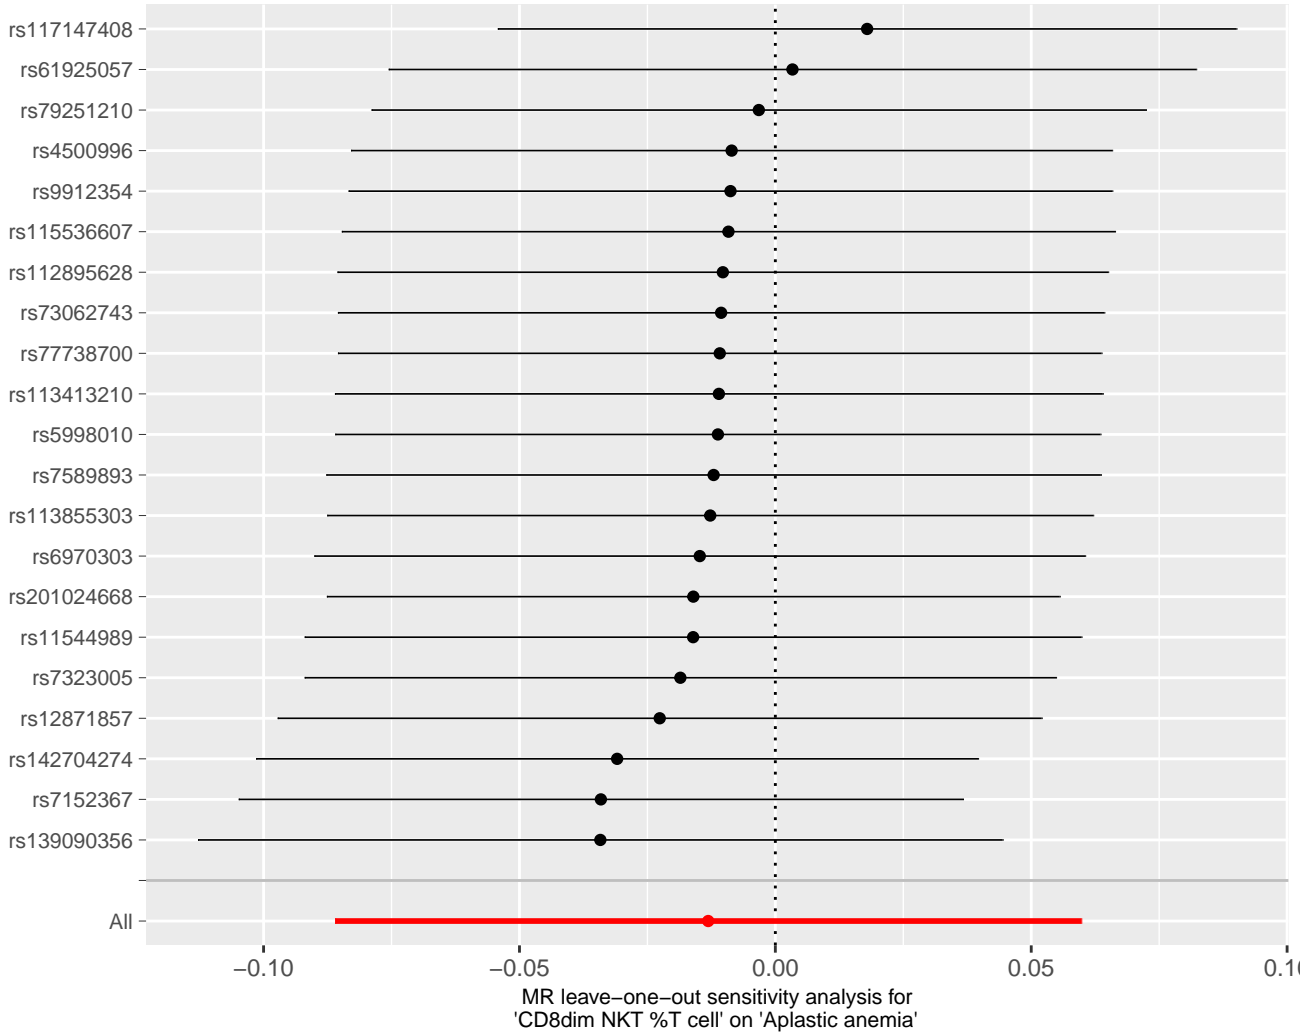

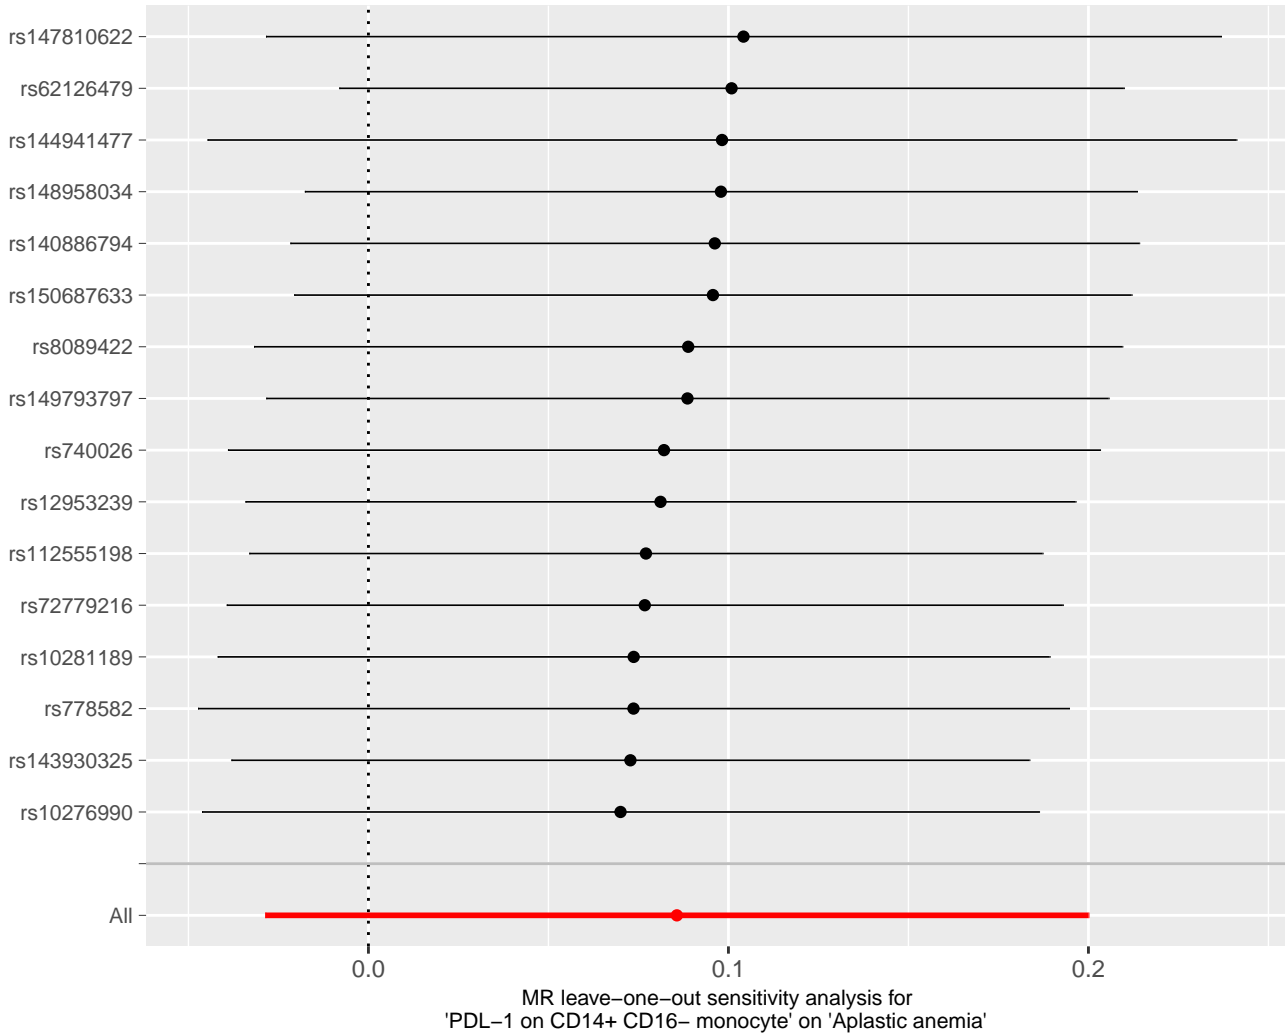

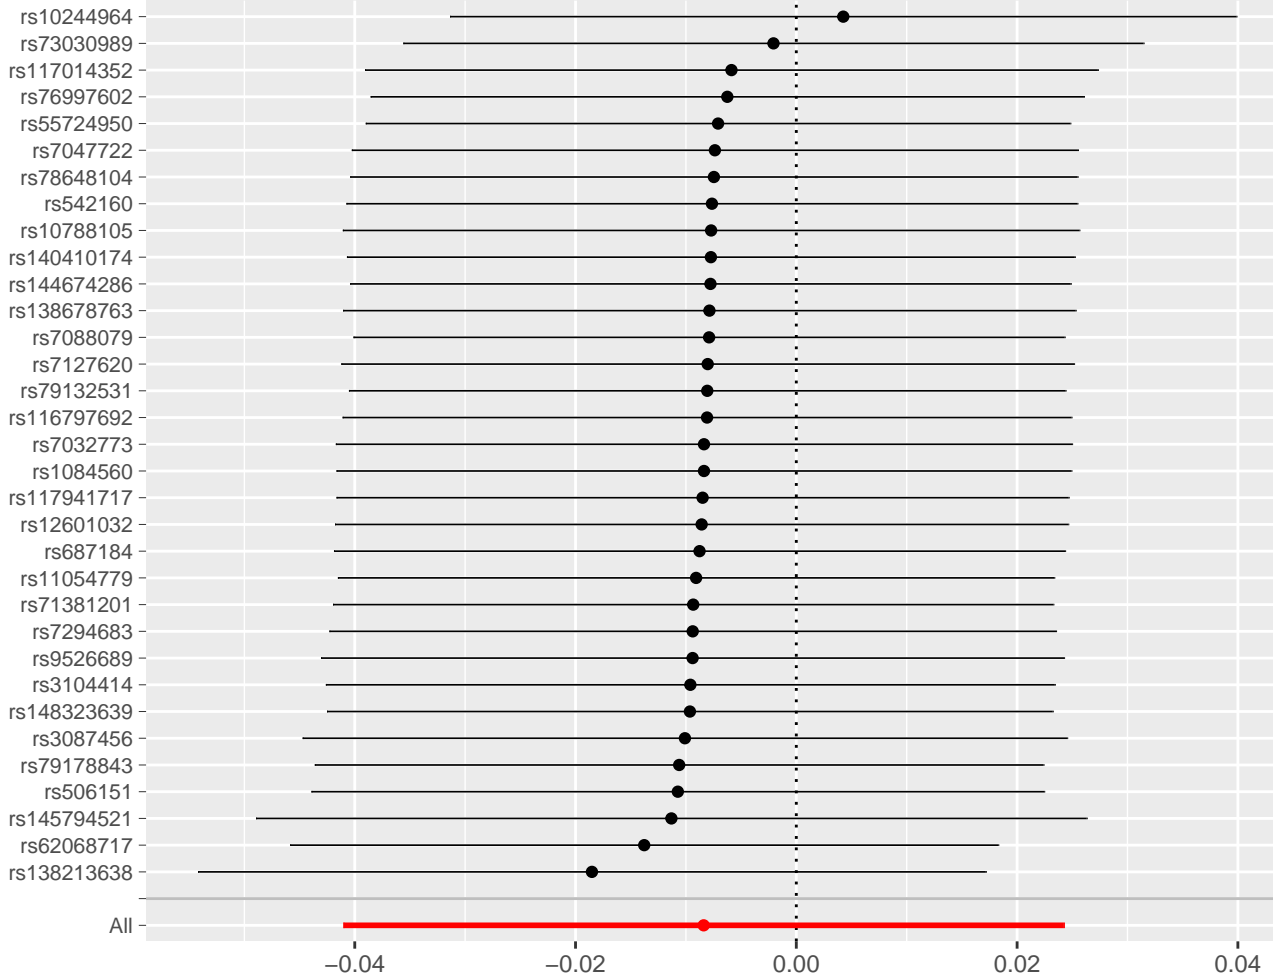

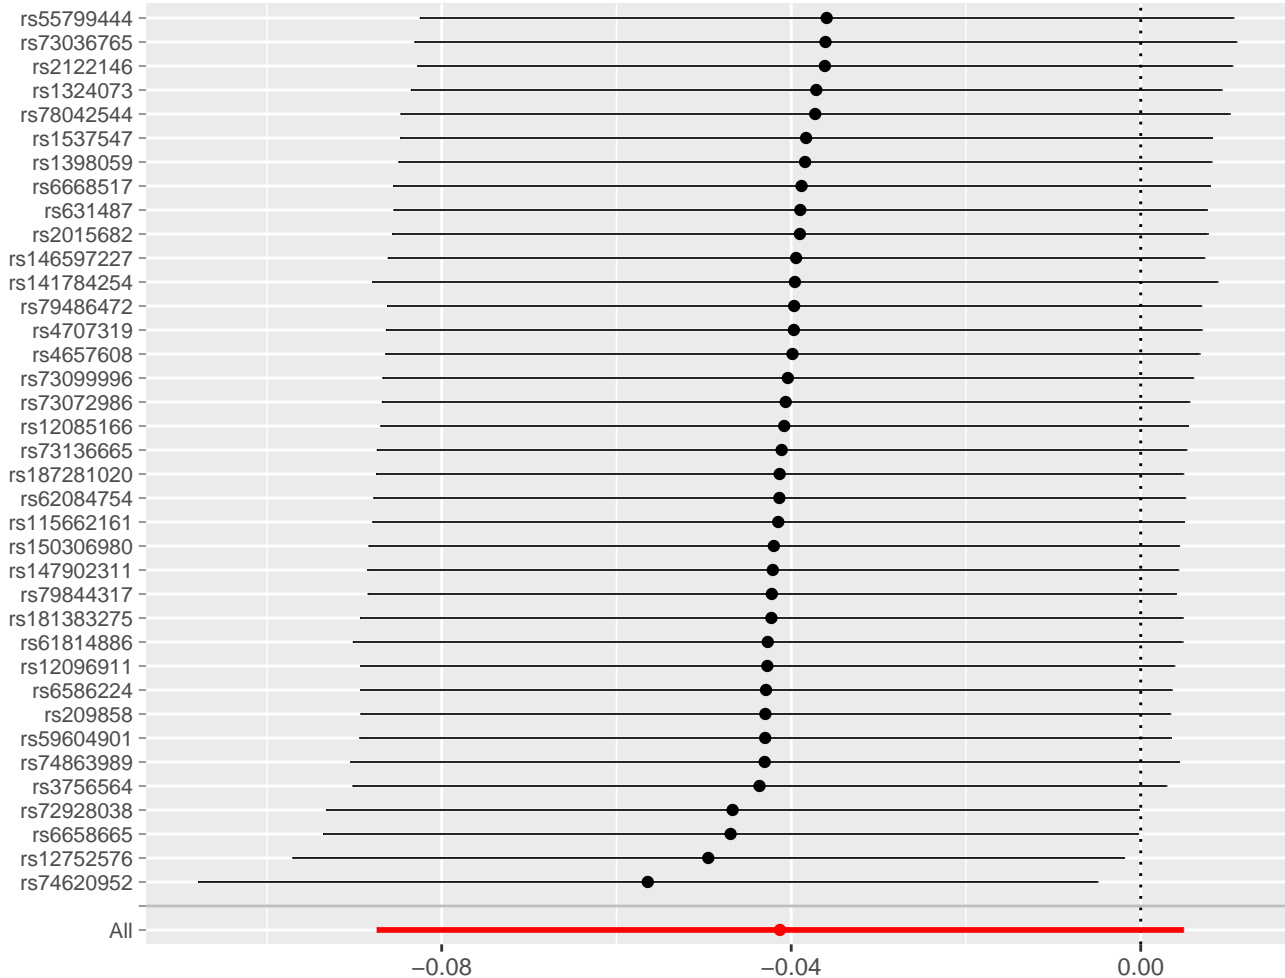

MR leave-one-out sensitivity analysis for 'CD3 on resting Treg' on 'Aplastic anemia'

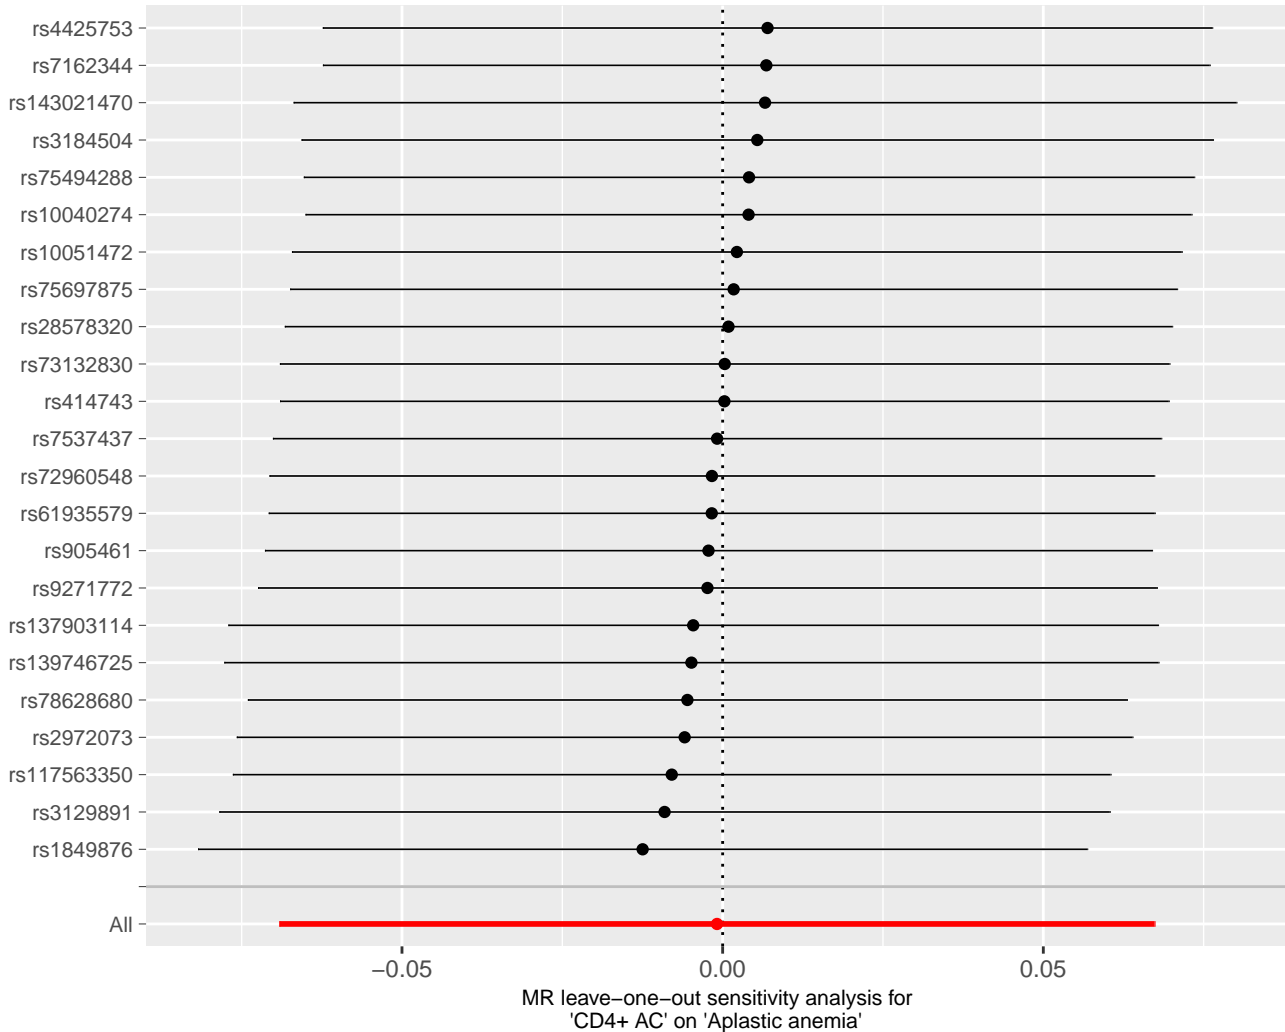

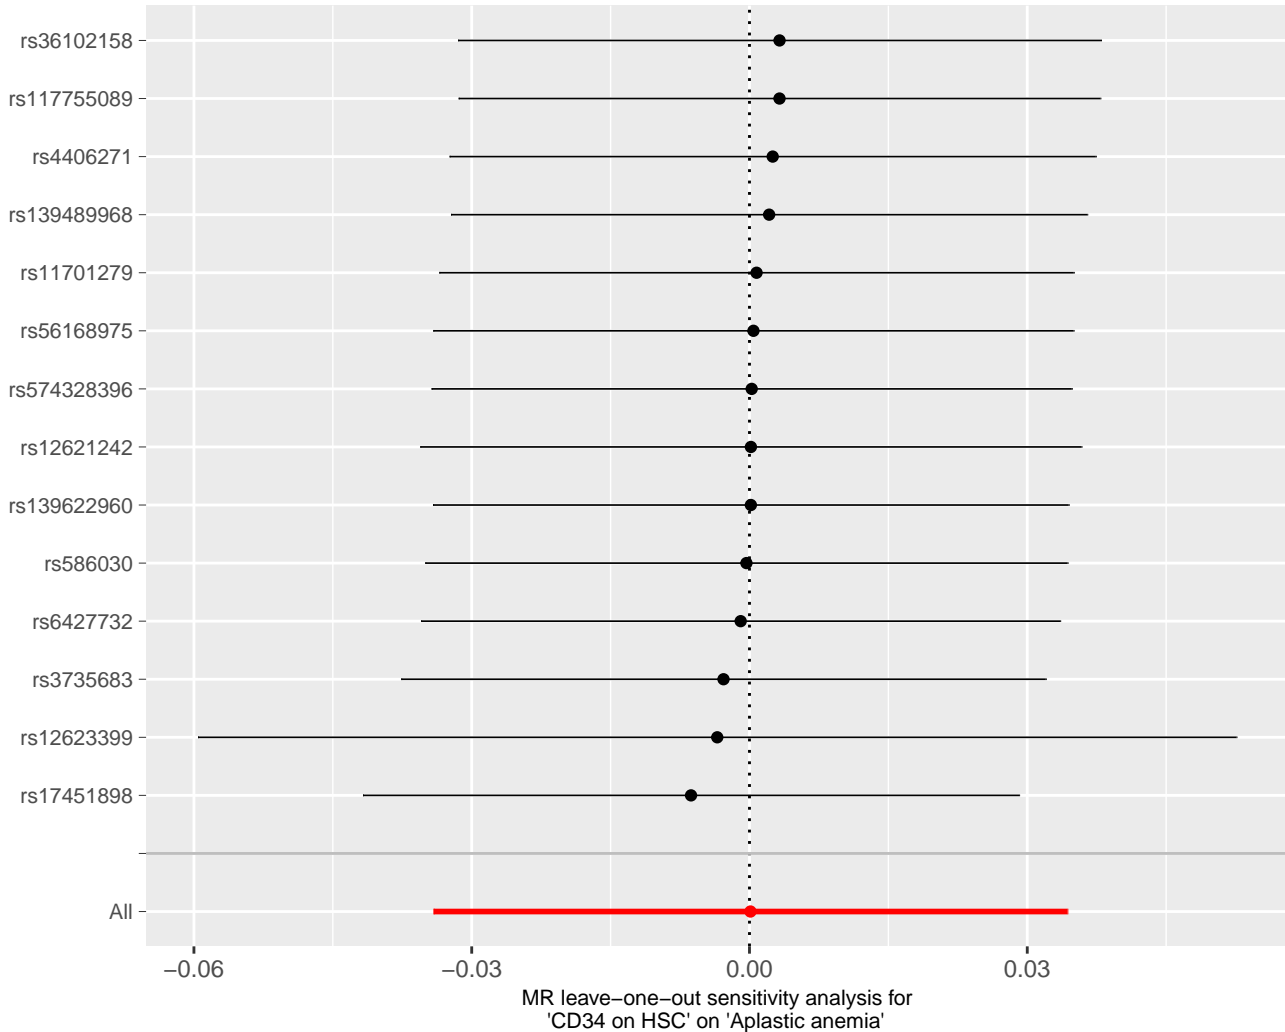

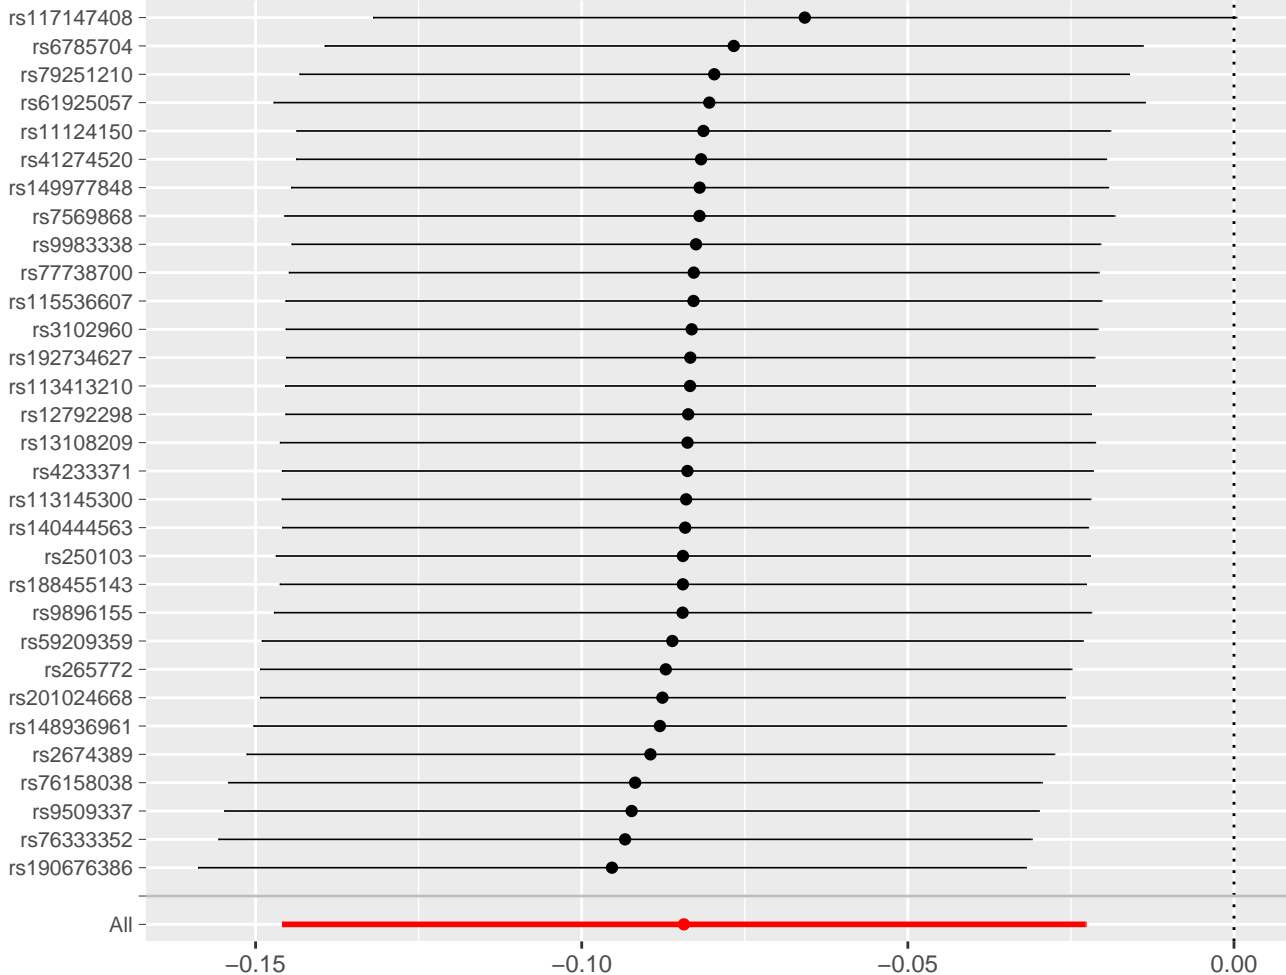



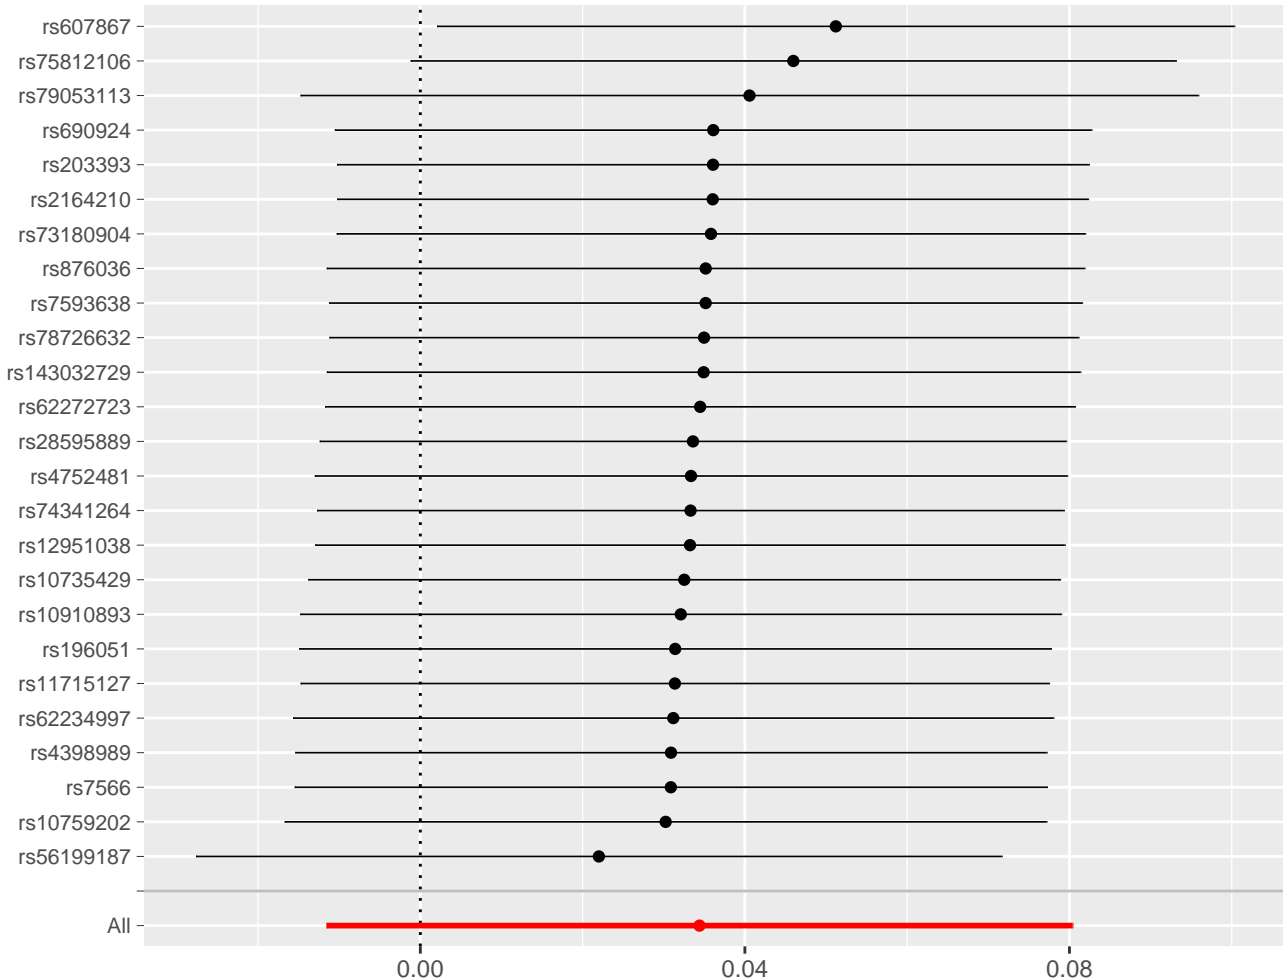

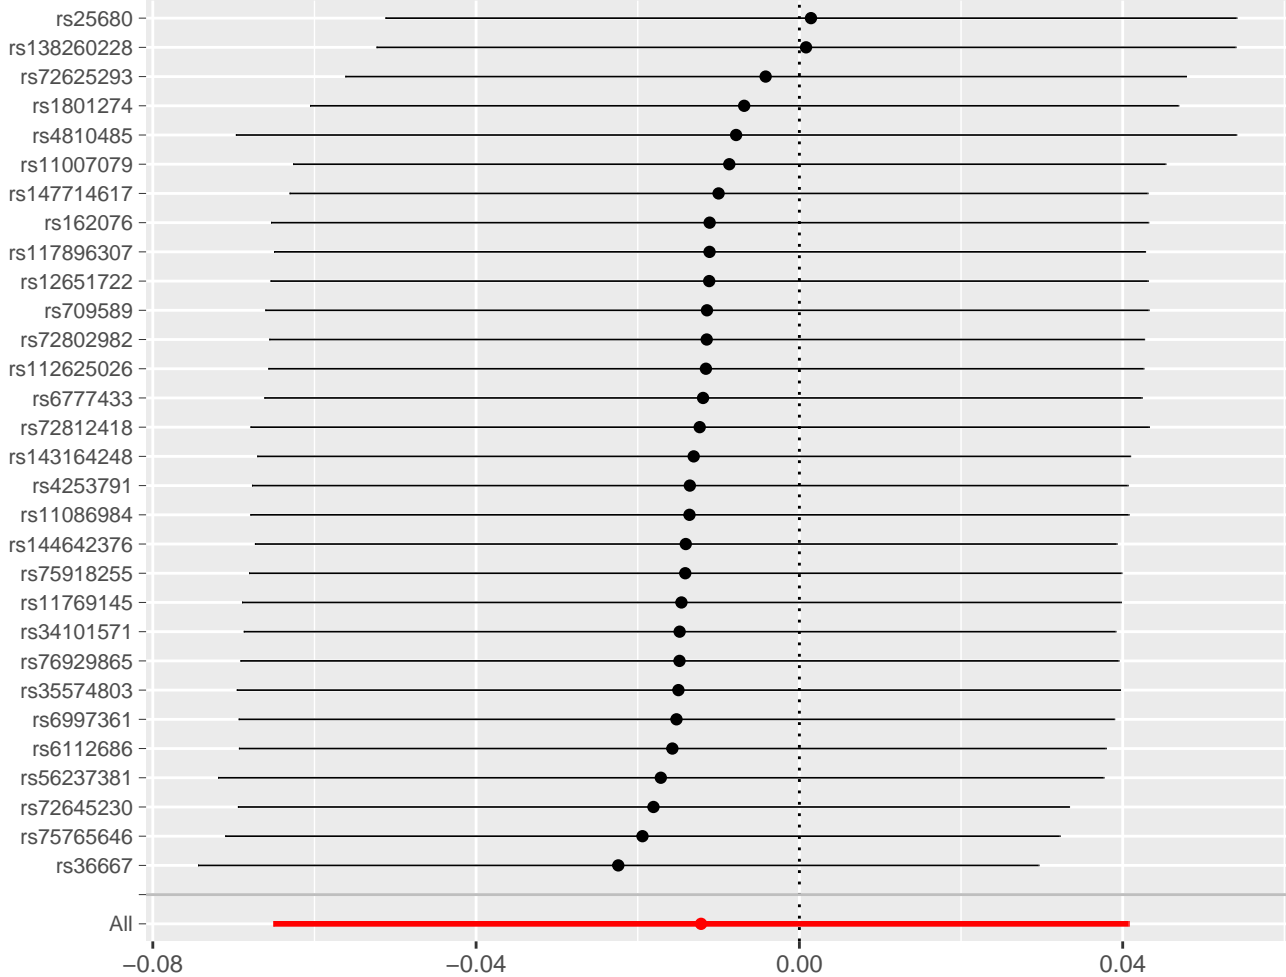

MR leave-one-out sensitivity analysis for 'CD27 on unsw mem' on 'Aplastic anemia'

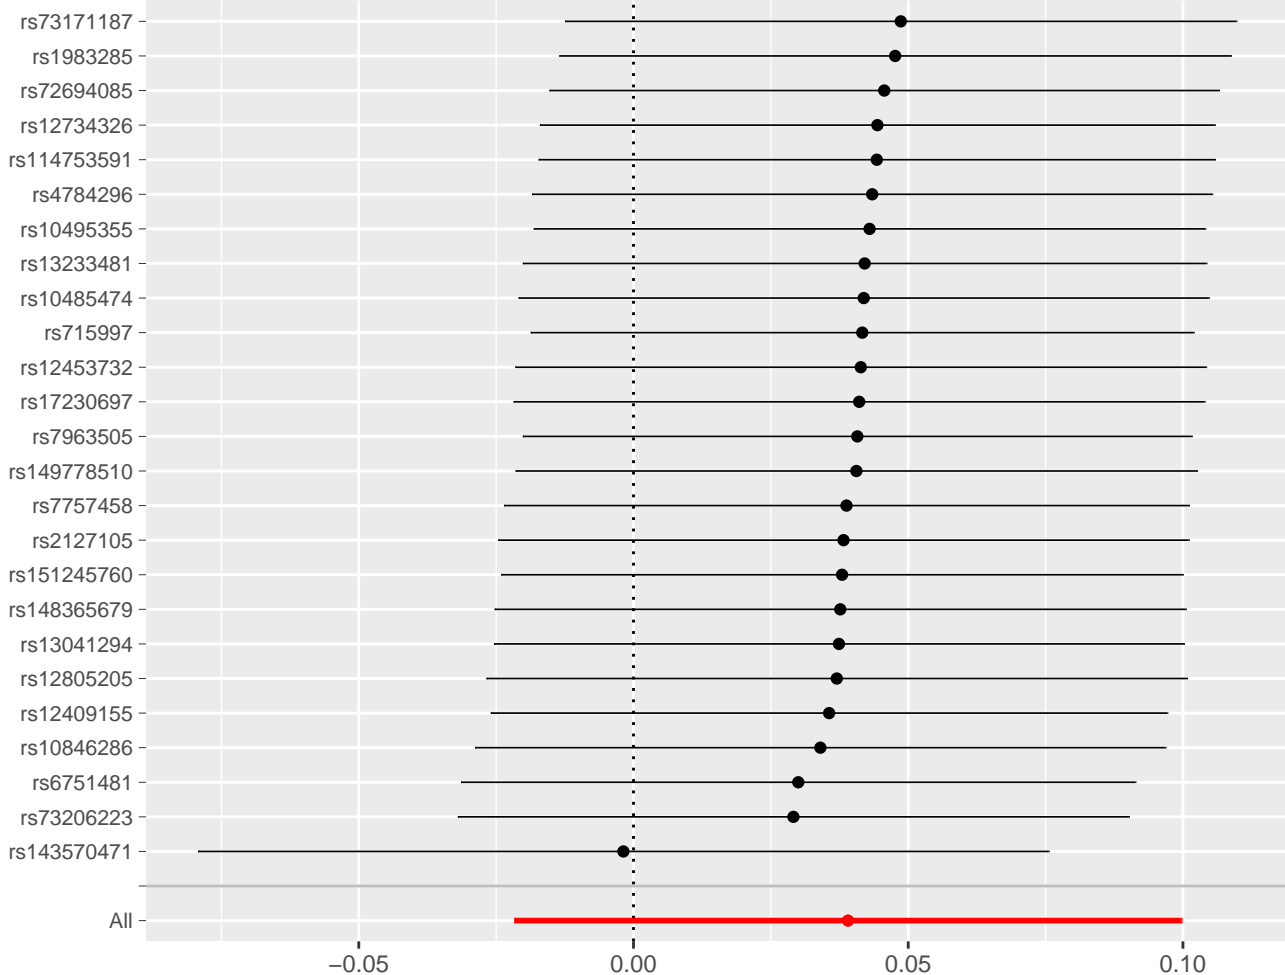

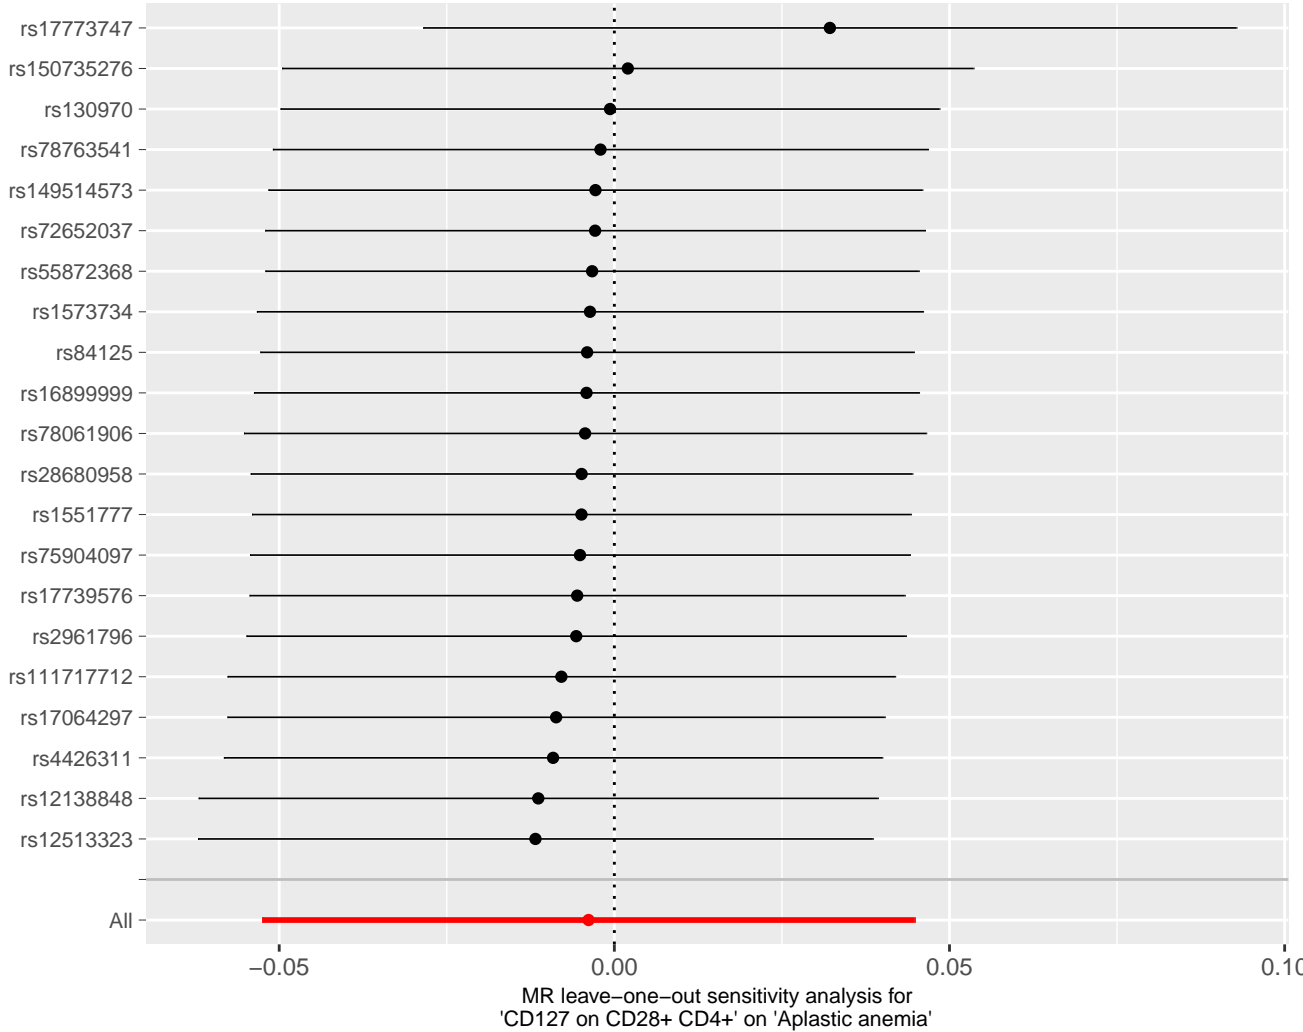

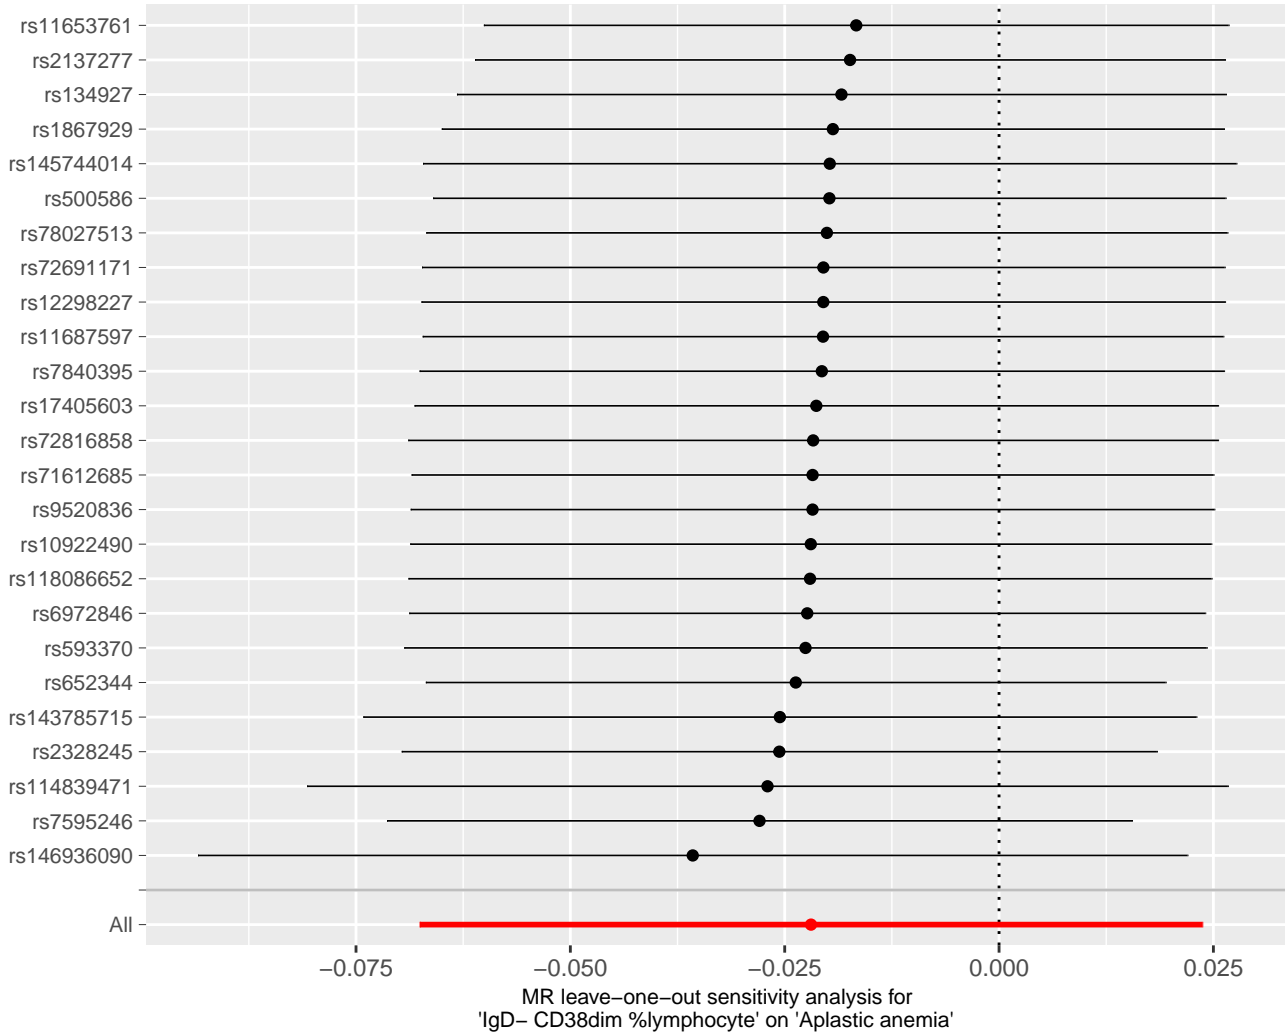

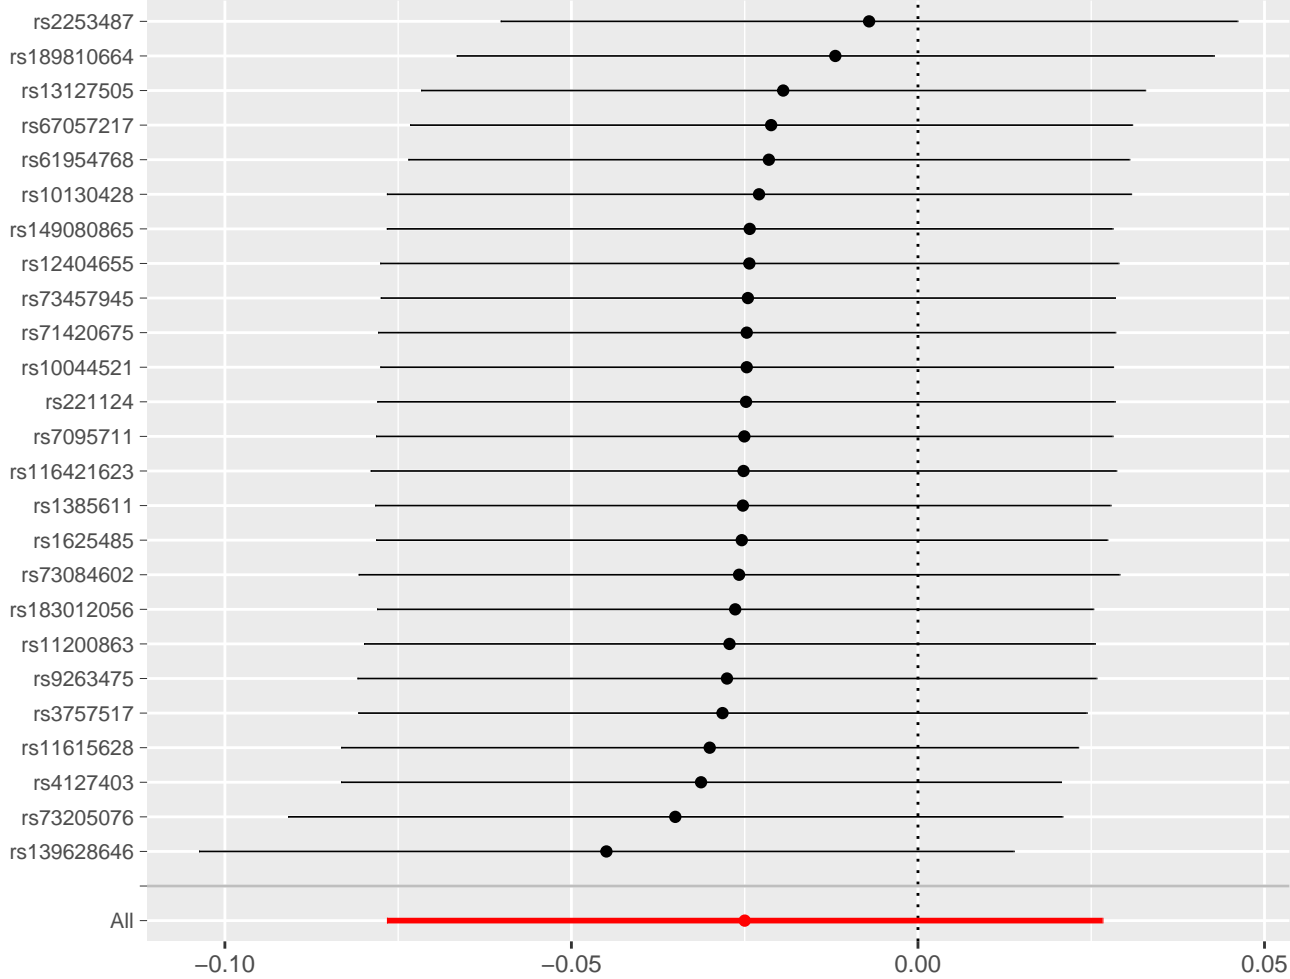

MR leave-one-out sensitivity analysis for 'CD4 on CD39+ activated Treg' on 'Aplastic anemia'

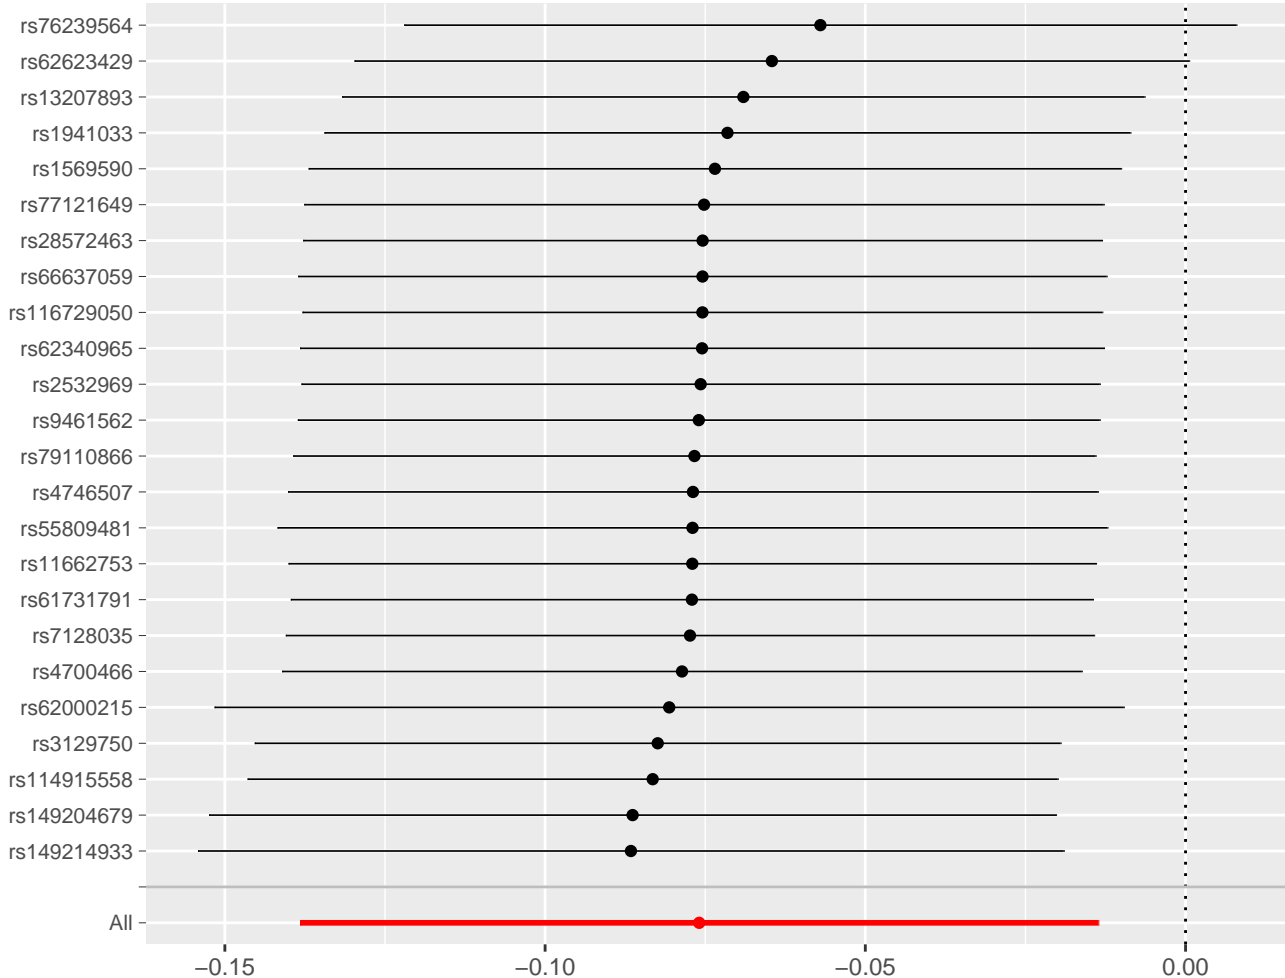

MR leave-one-out sensitivity analysis for 'CD20 on IgD+ CD24+' on 'Aplastic anemia'

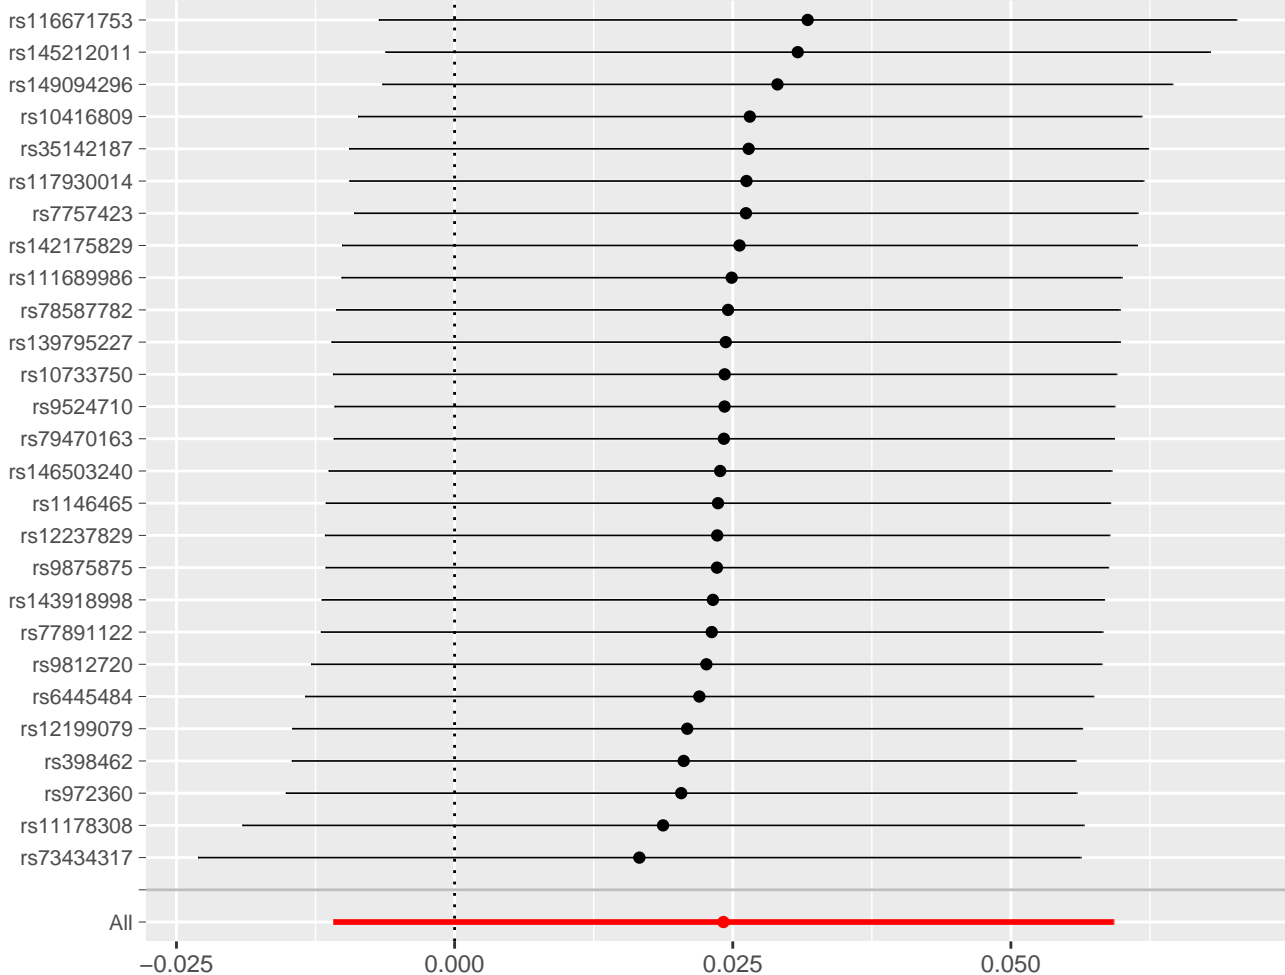



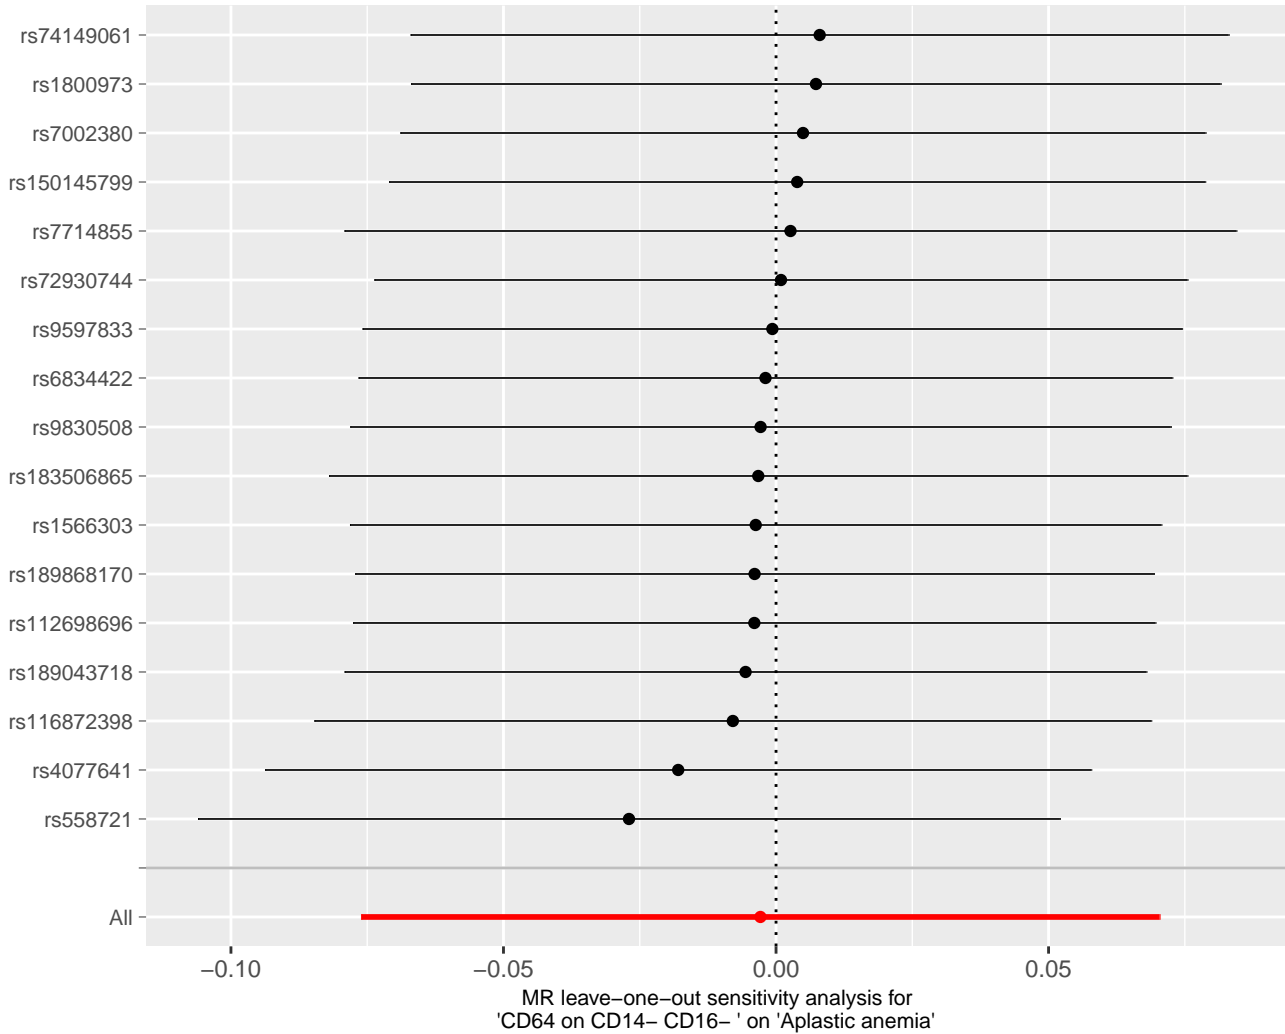

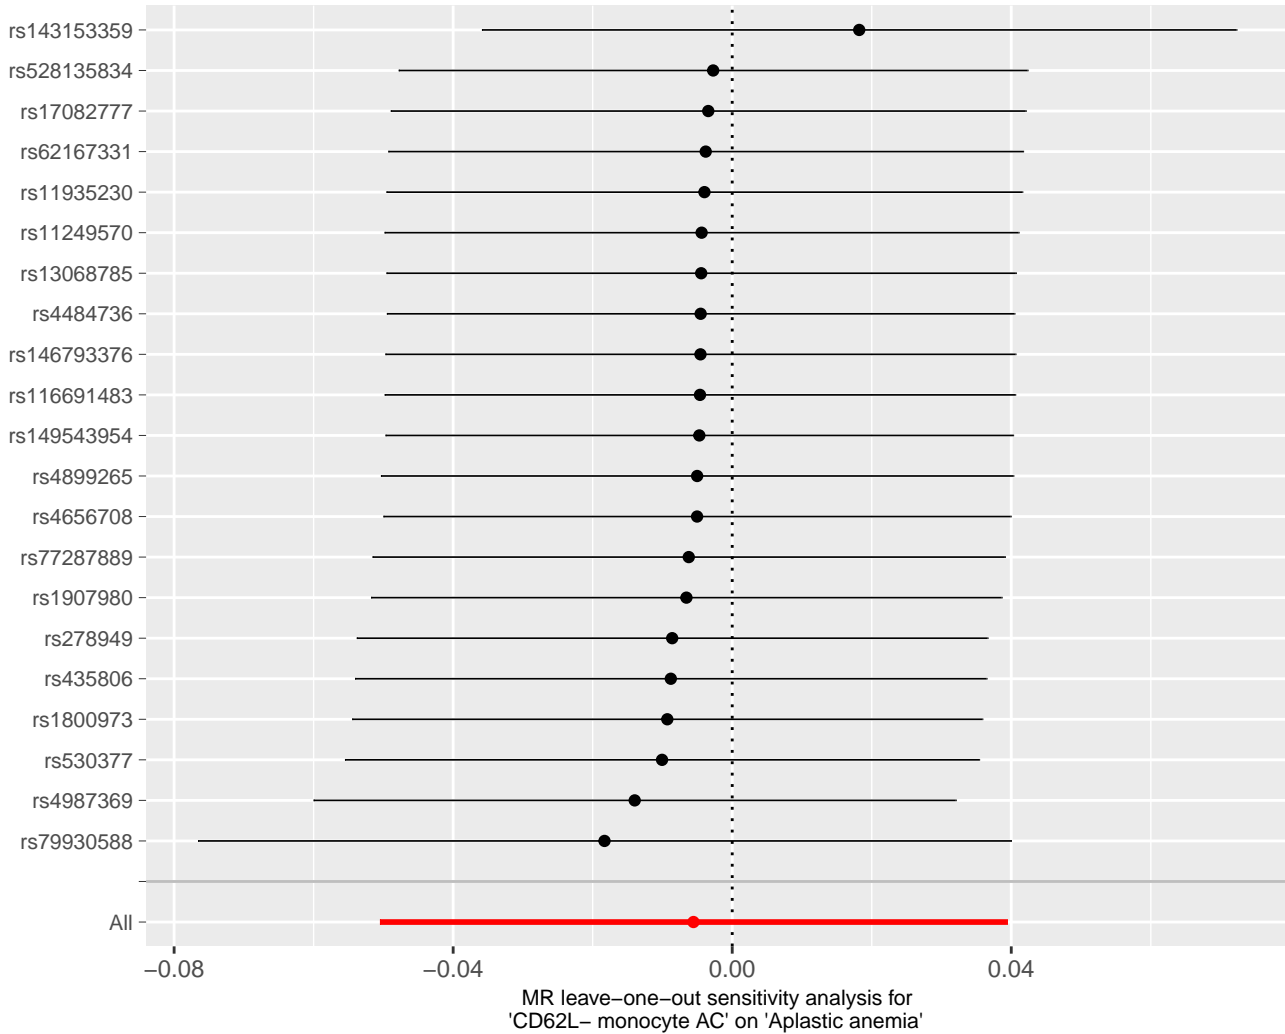

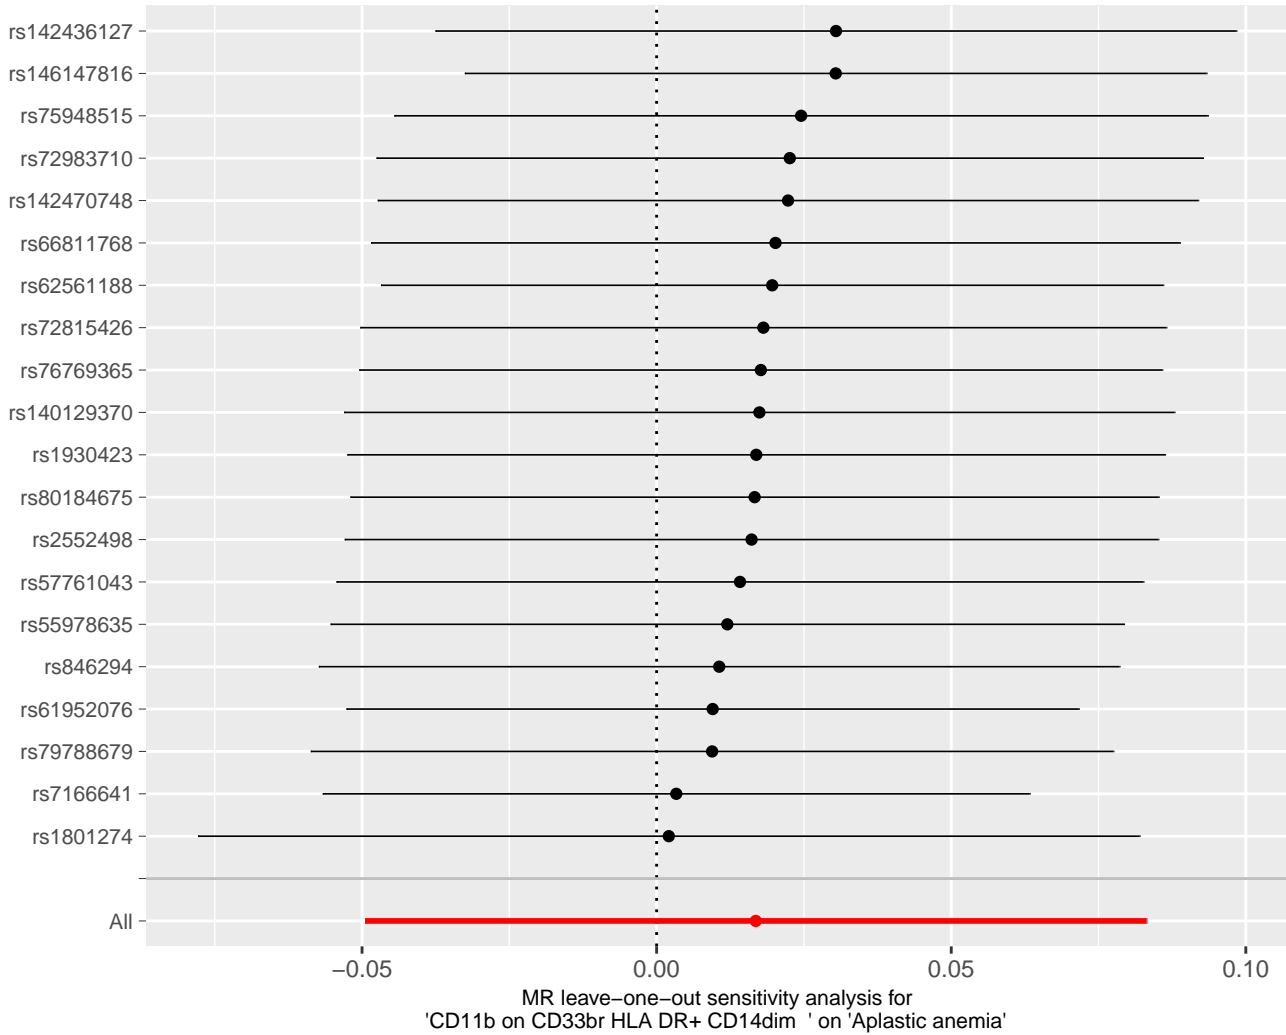

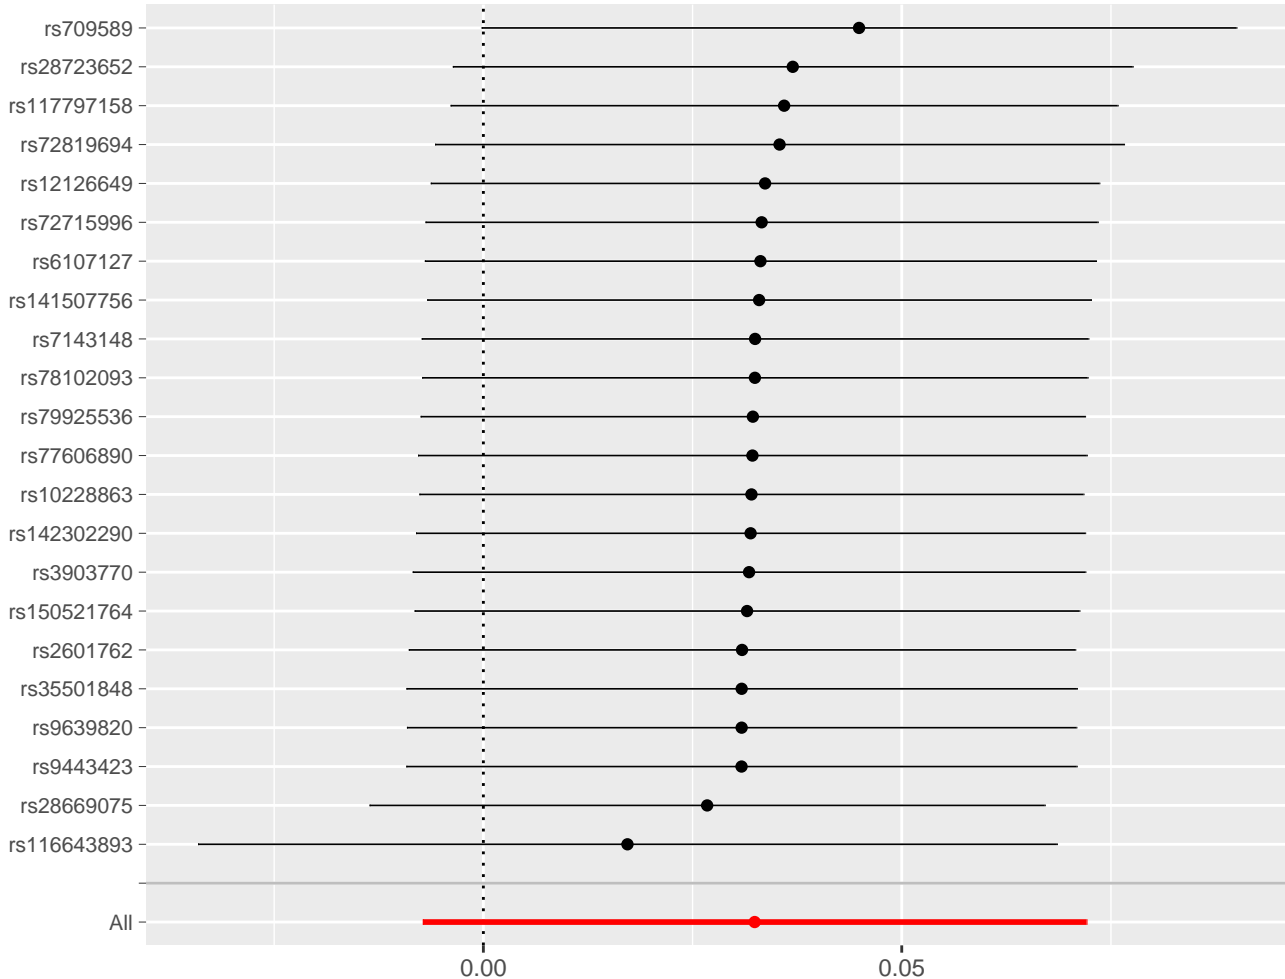

MR leave-one-out sensitivity analysis for 'IgD on IgD+ CD38dim' on 'Aplastic anemia'

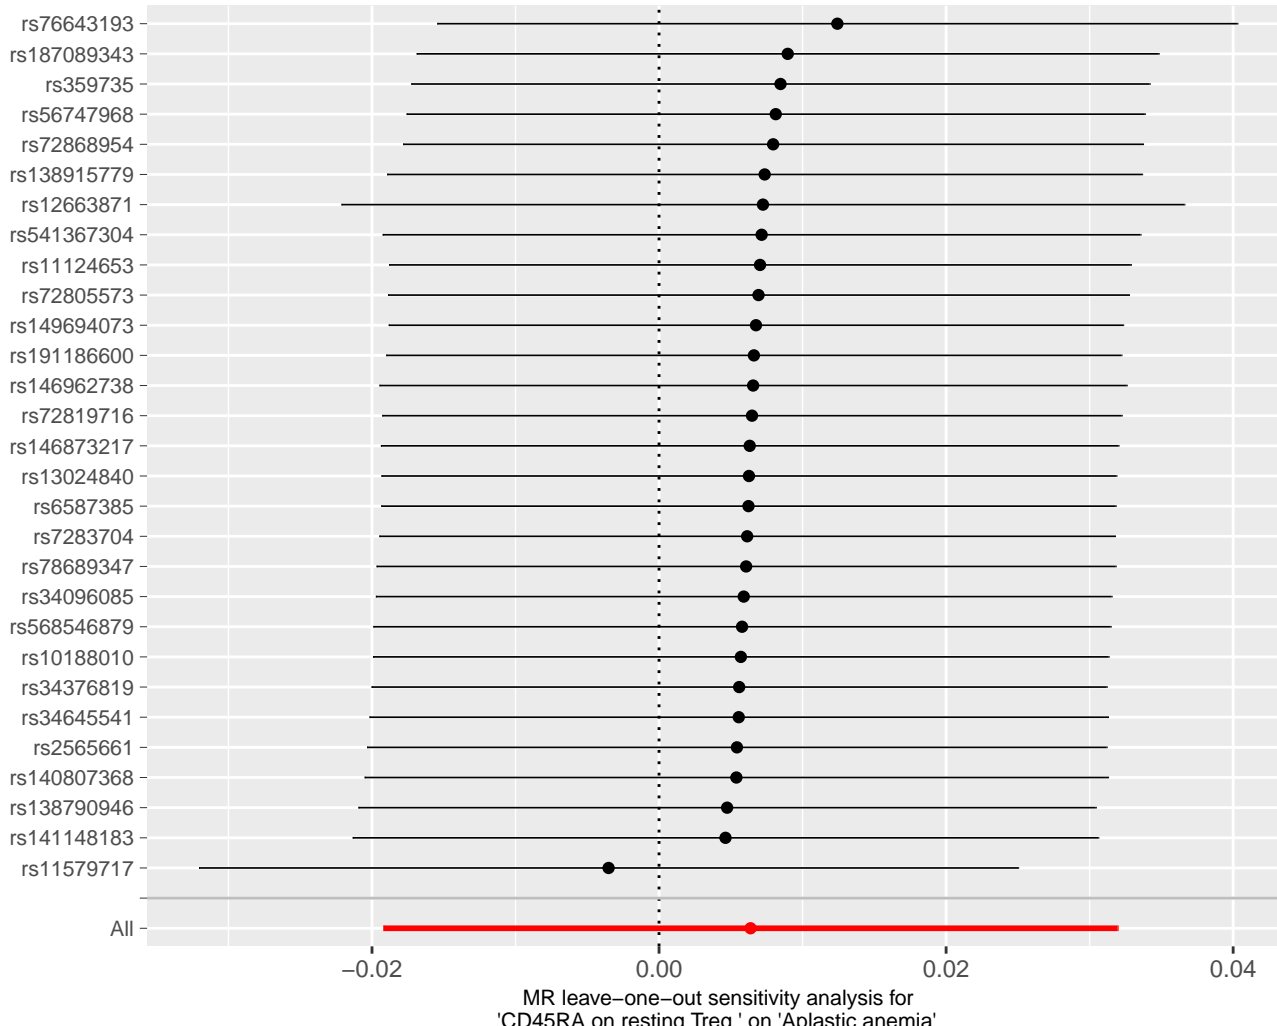

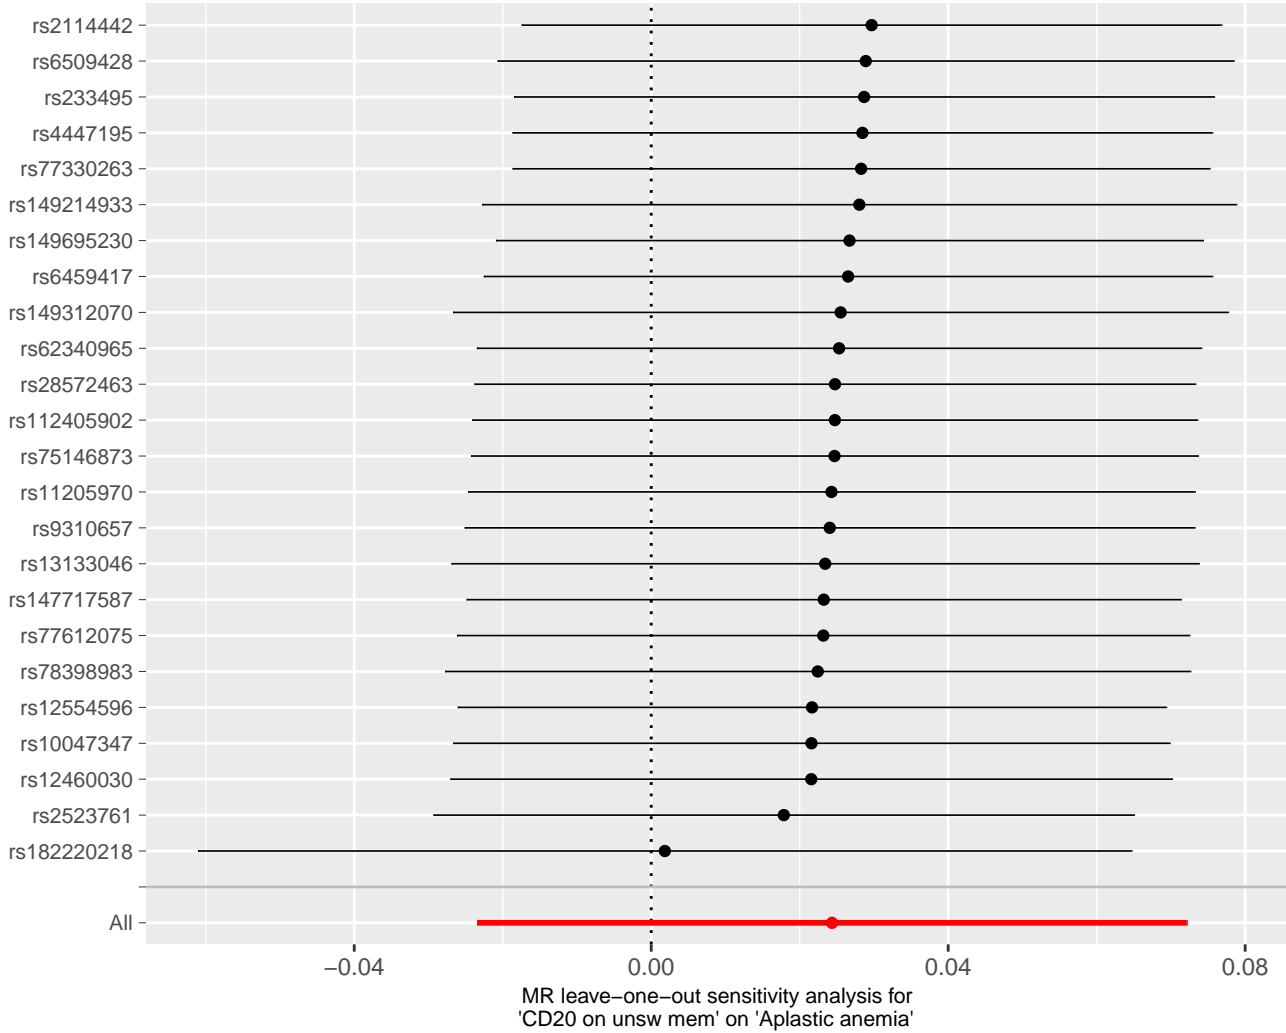

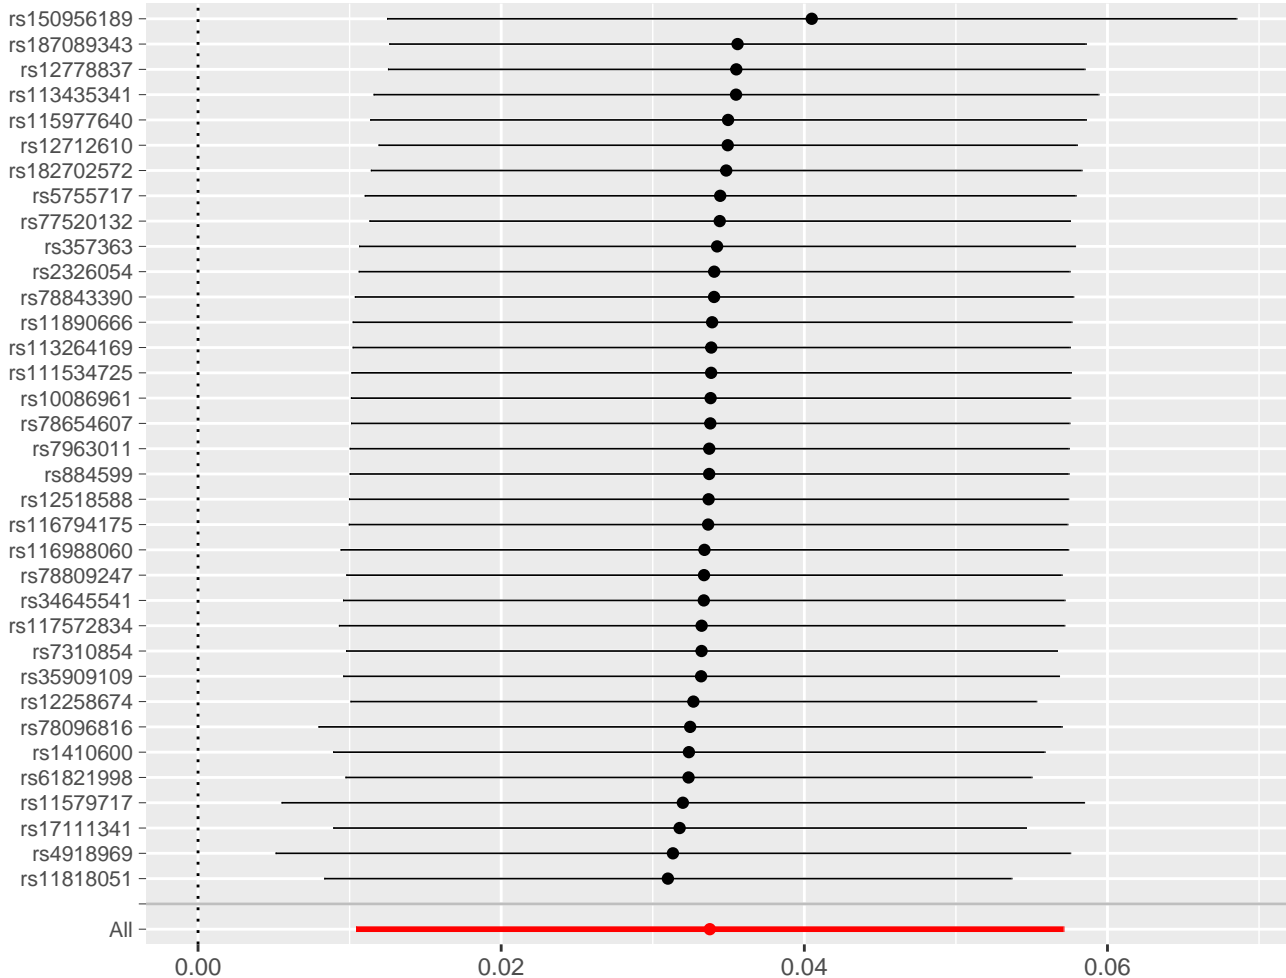

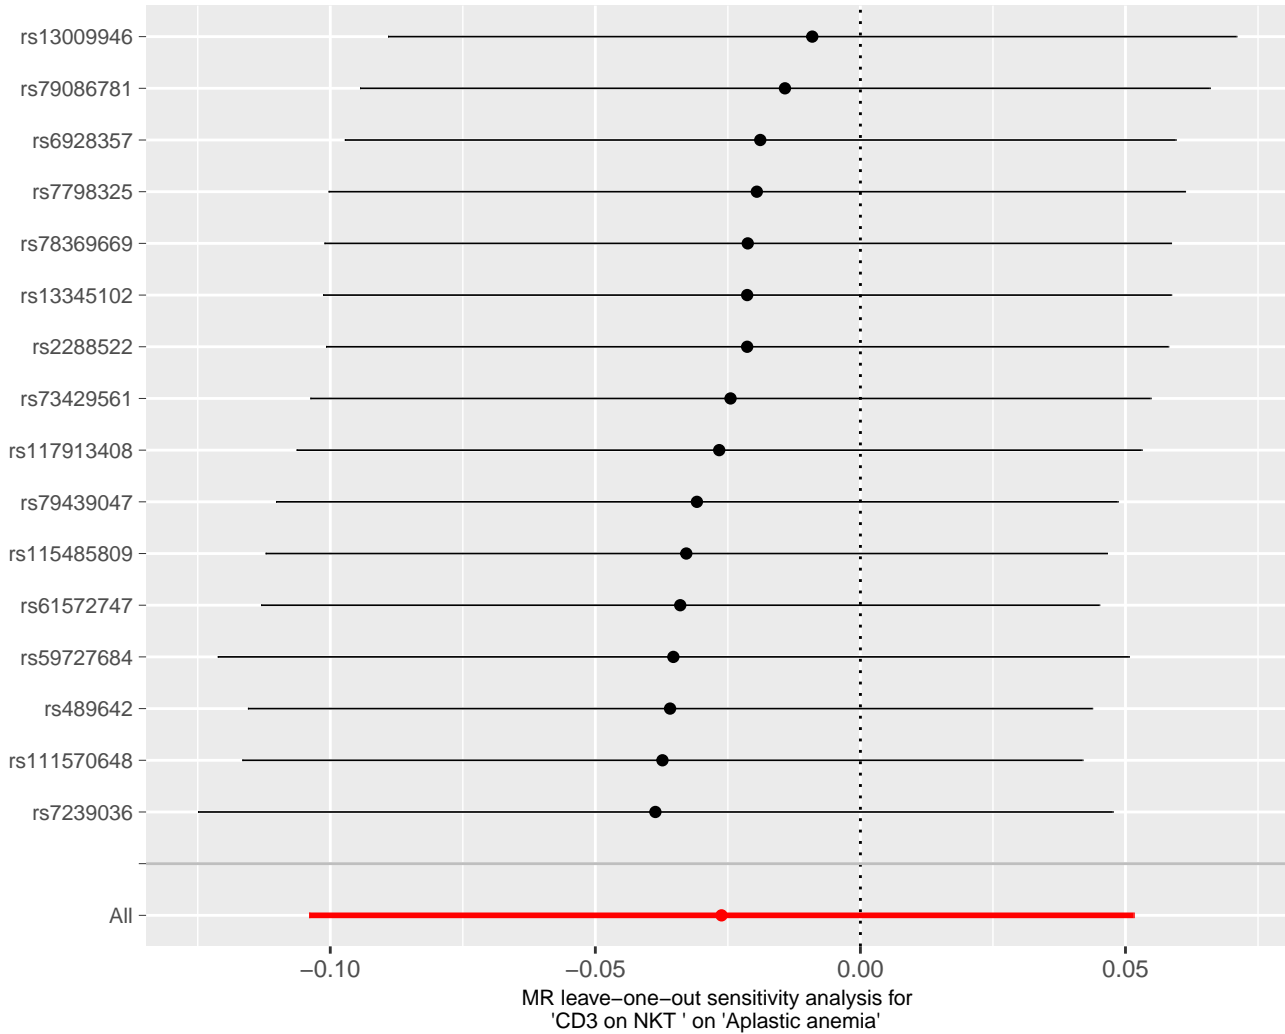



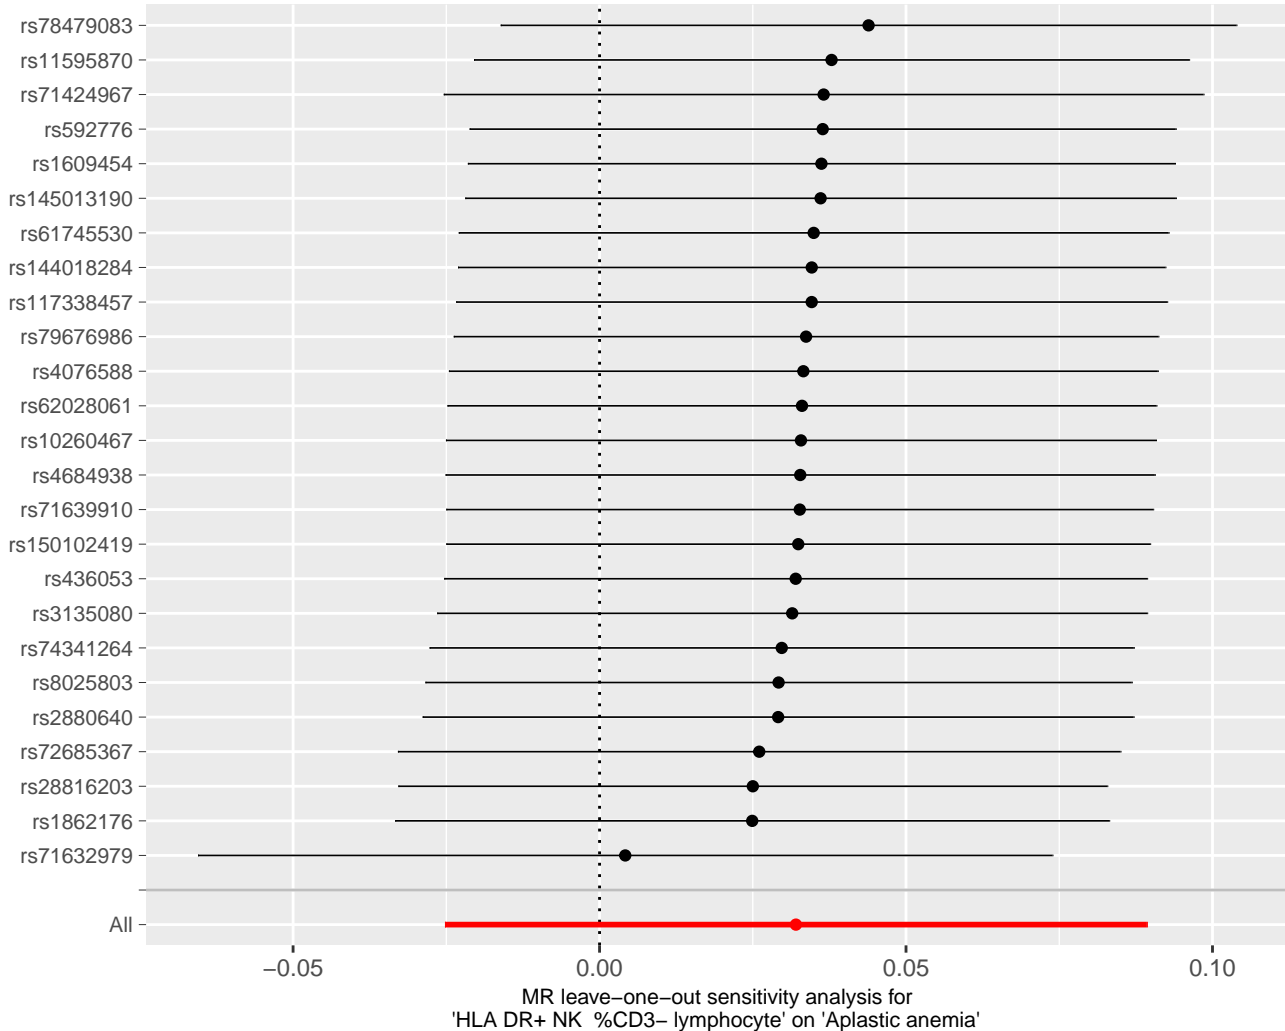

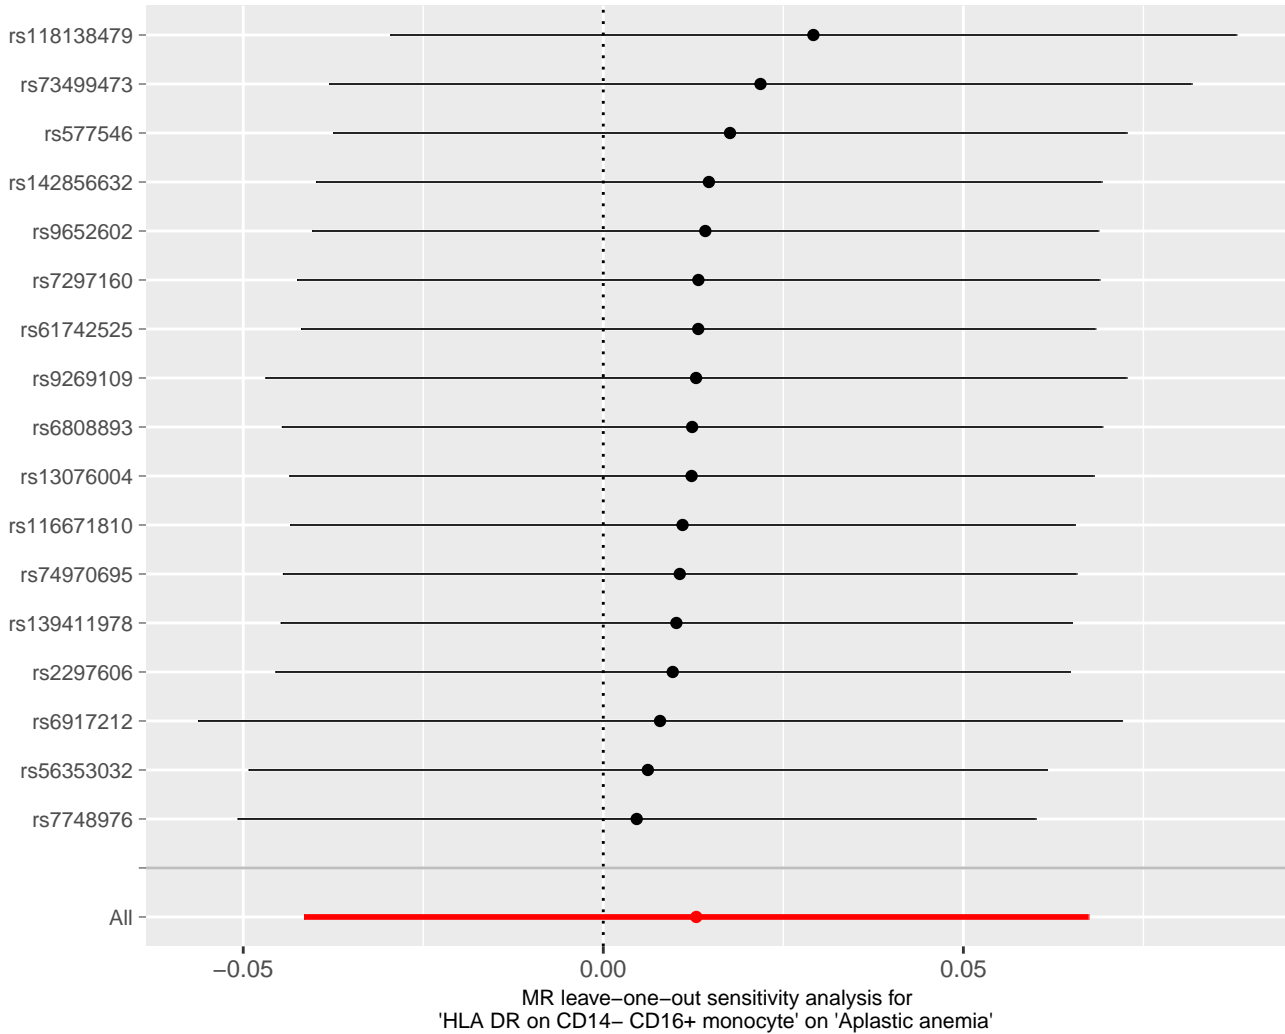

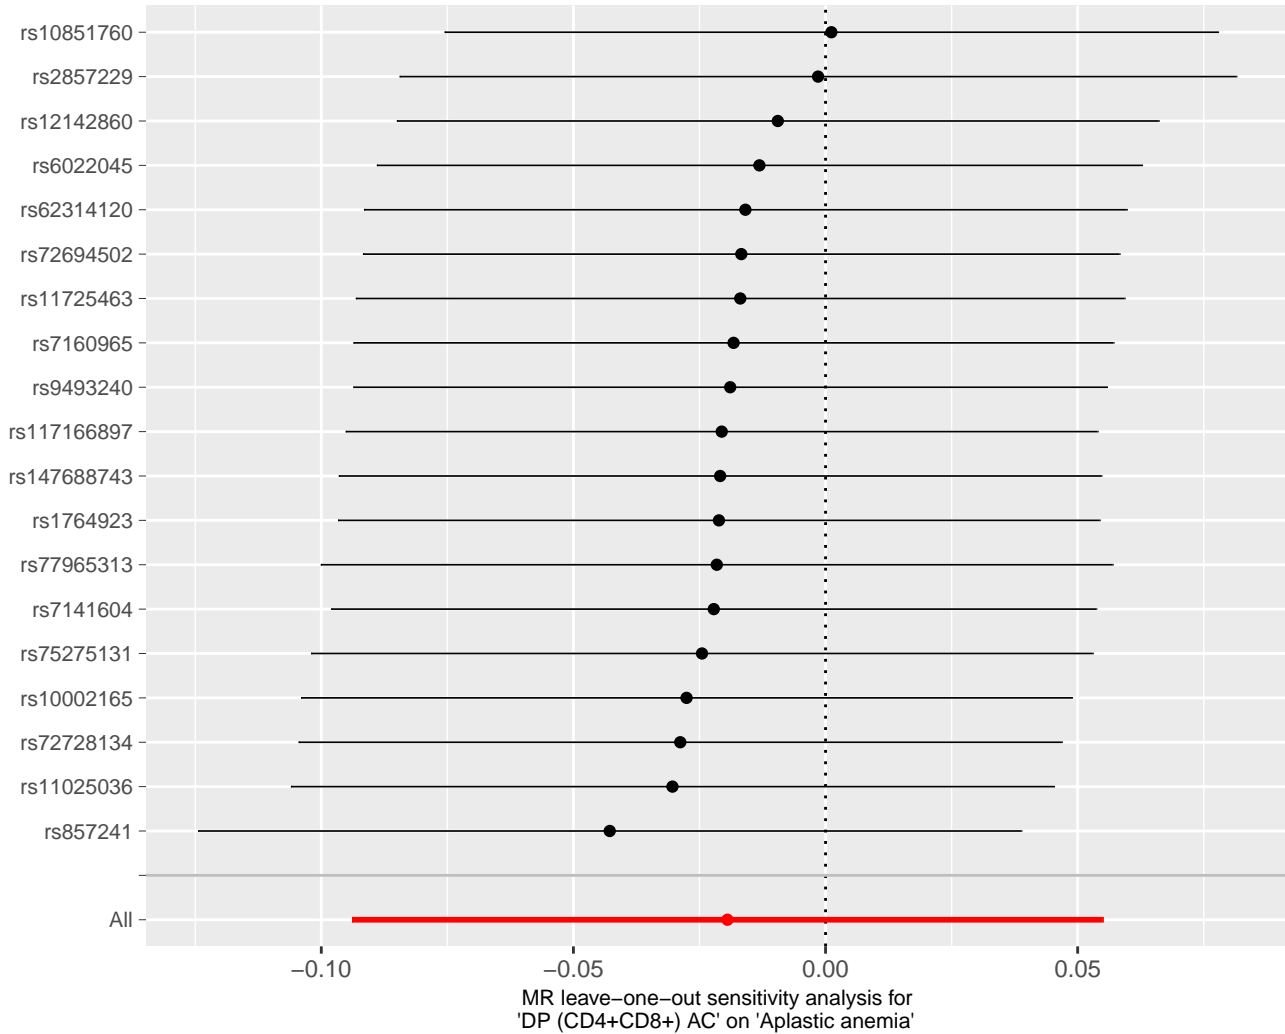

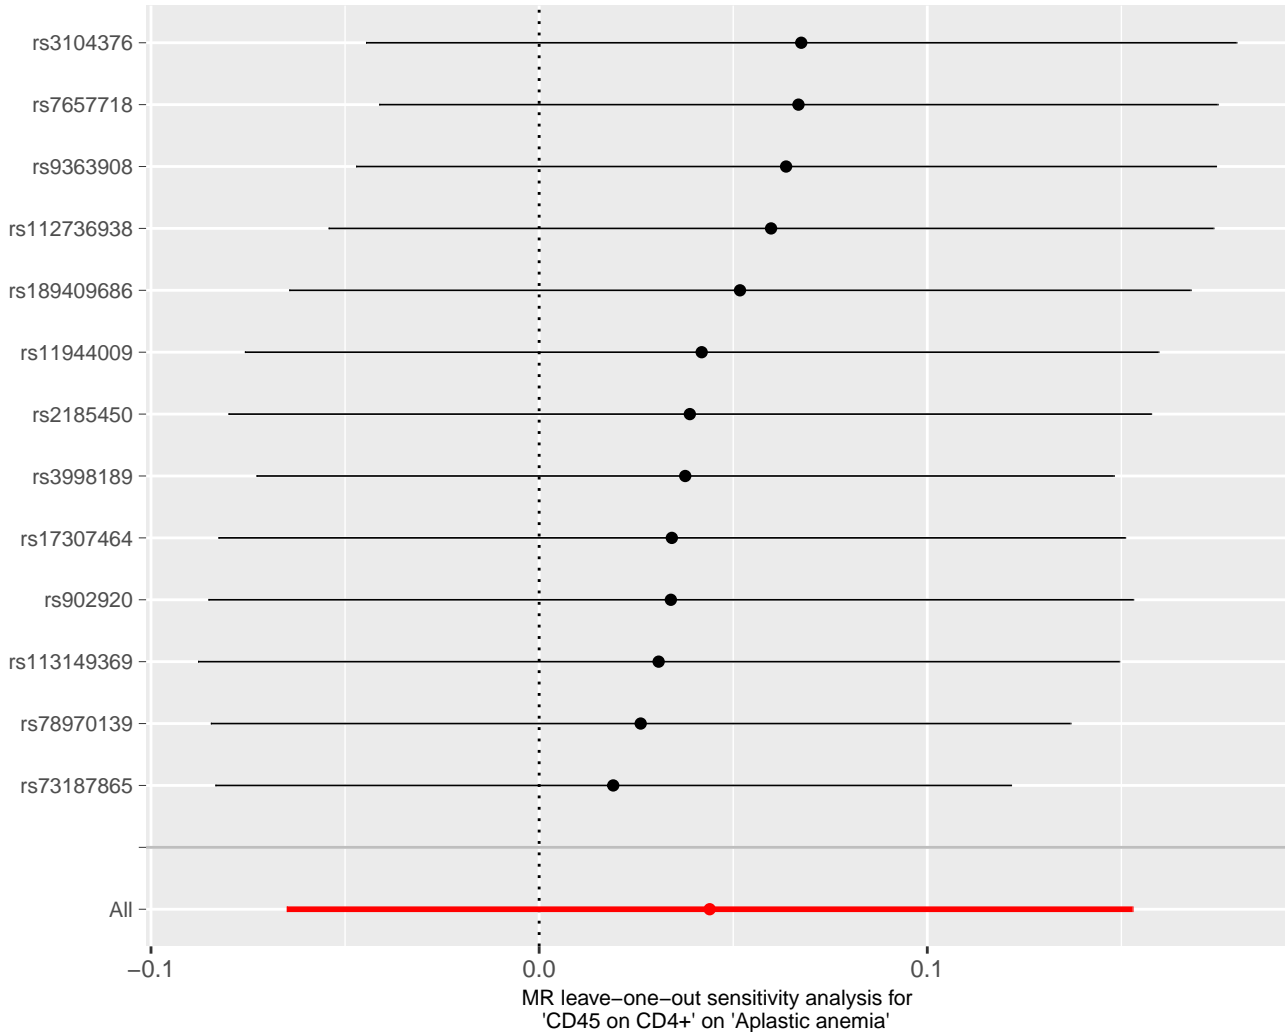

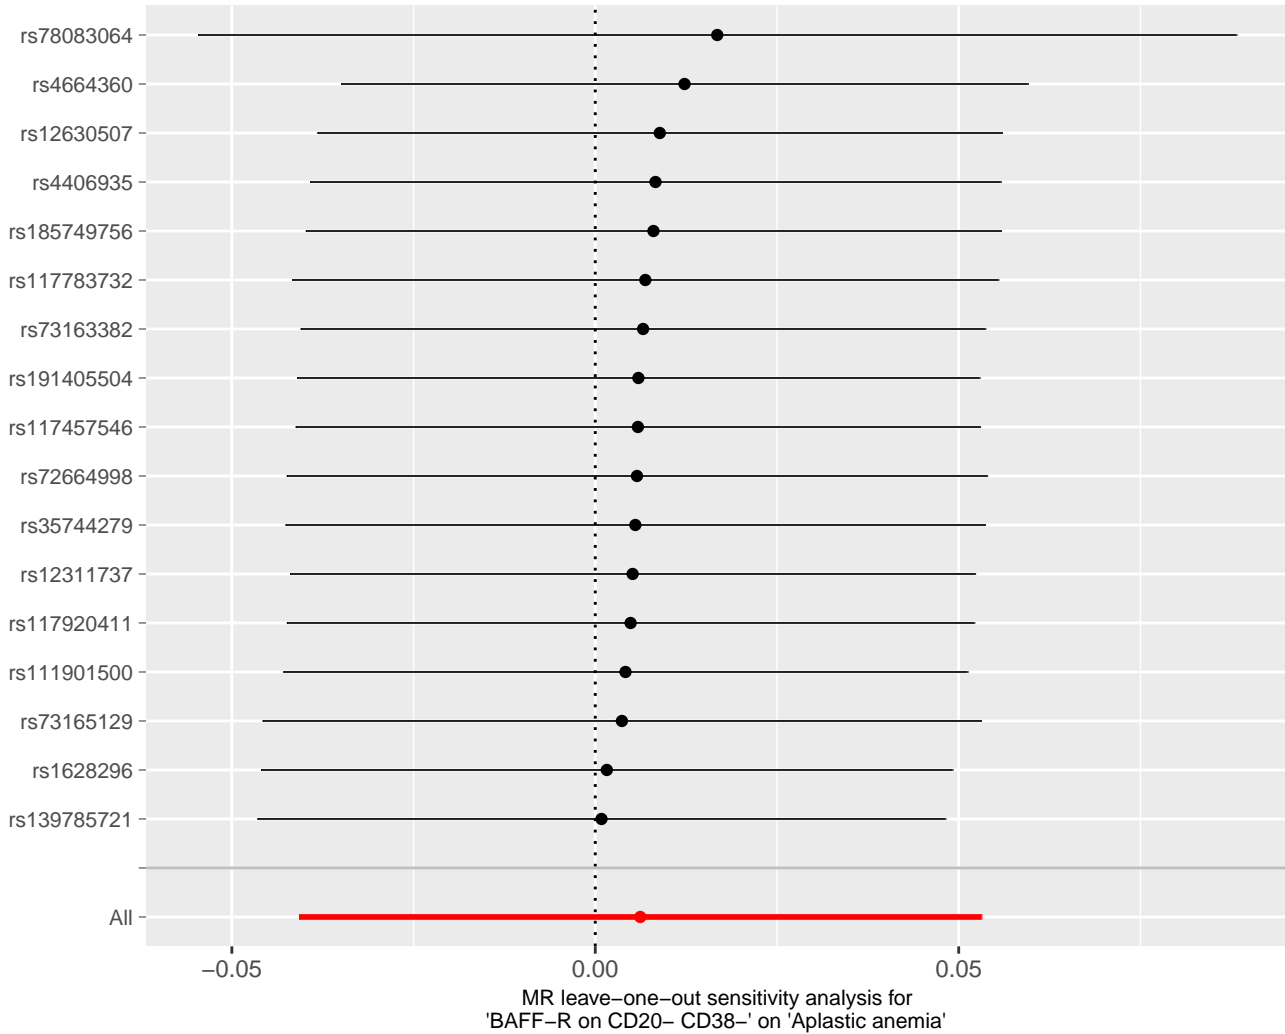

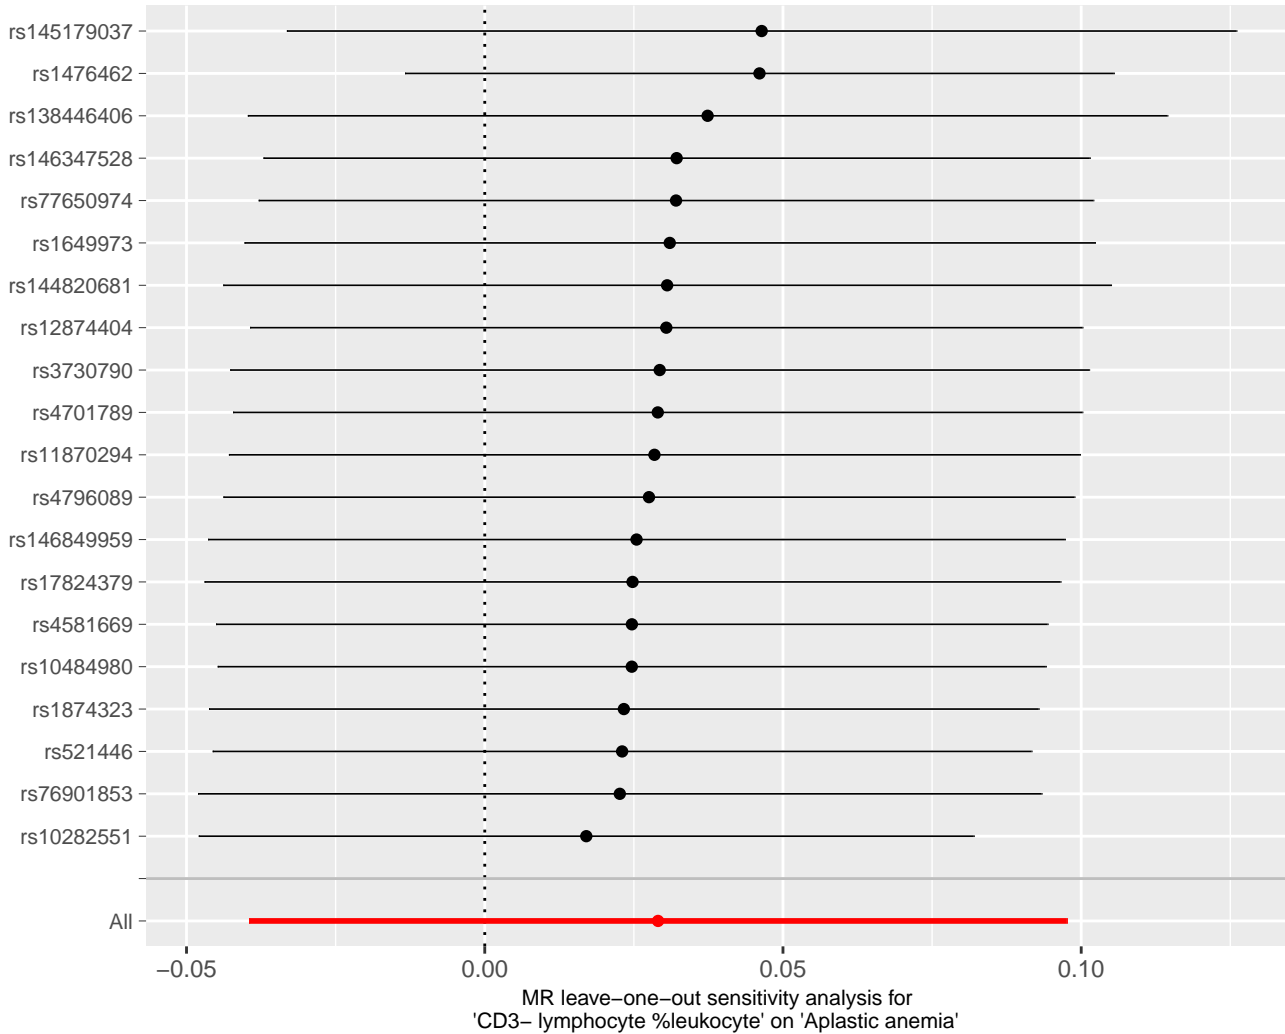

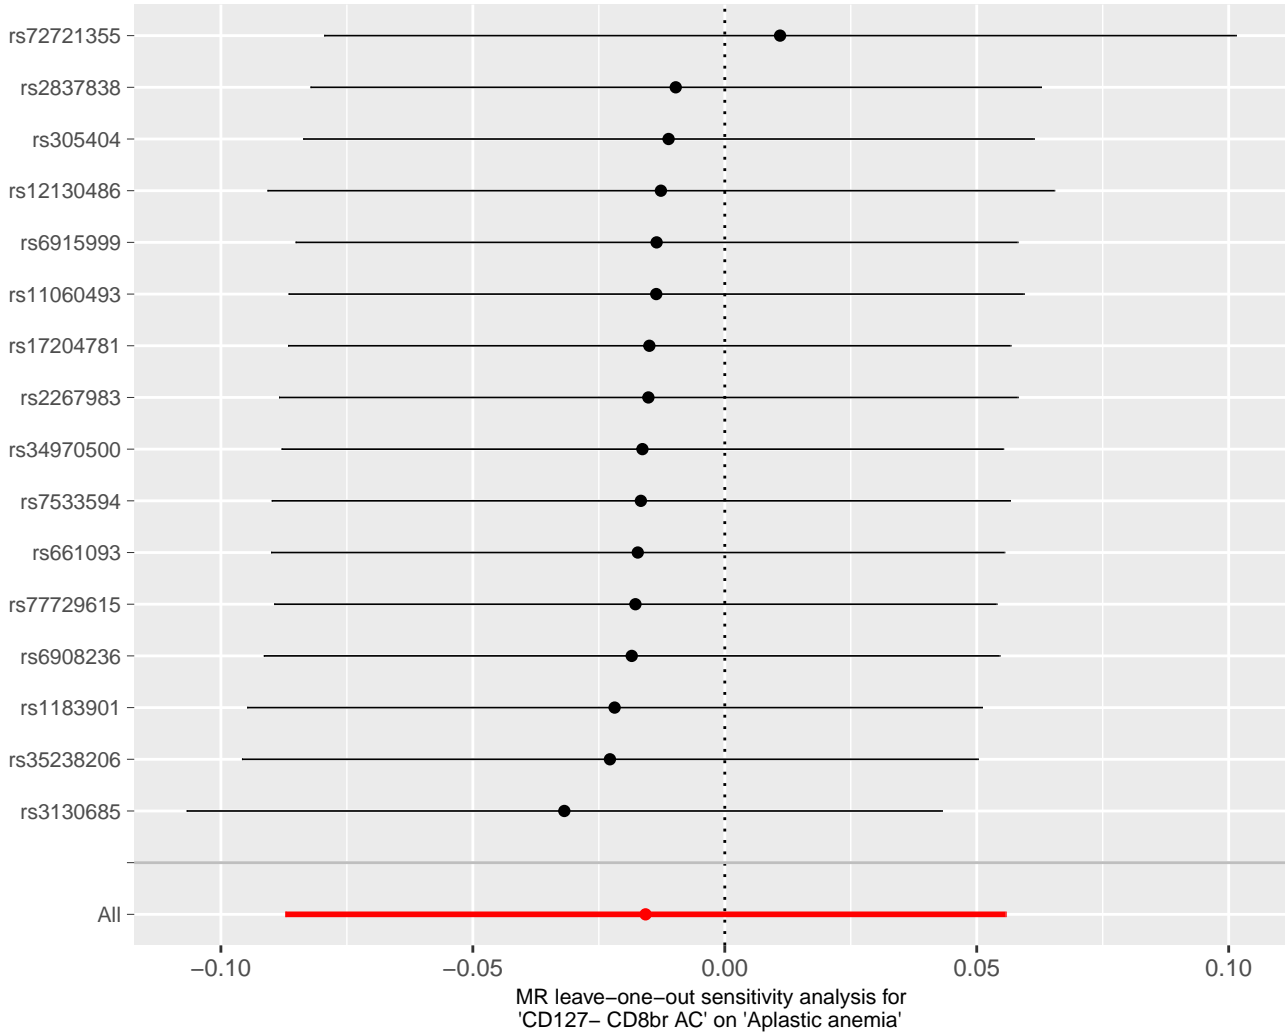

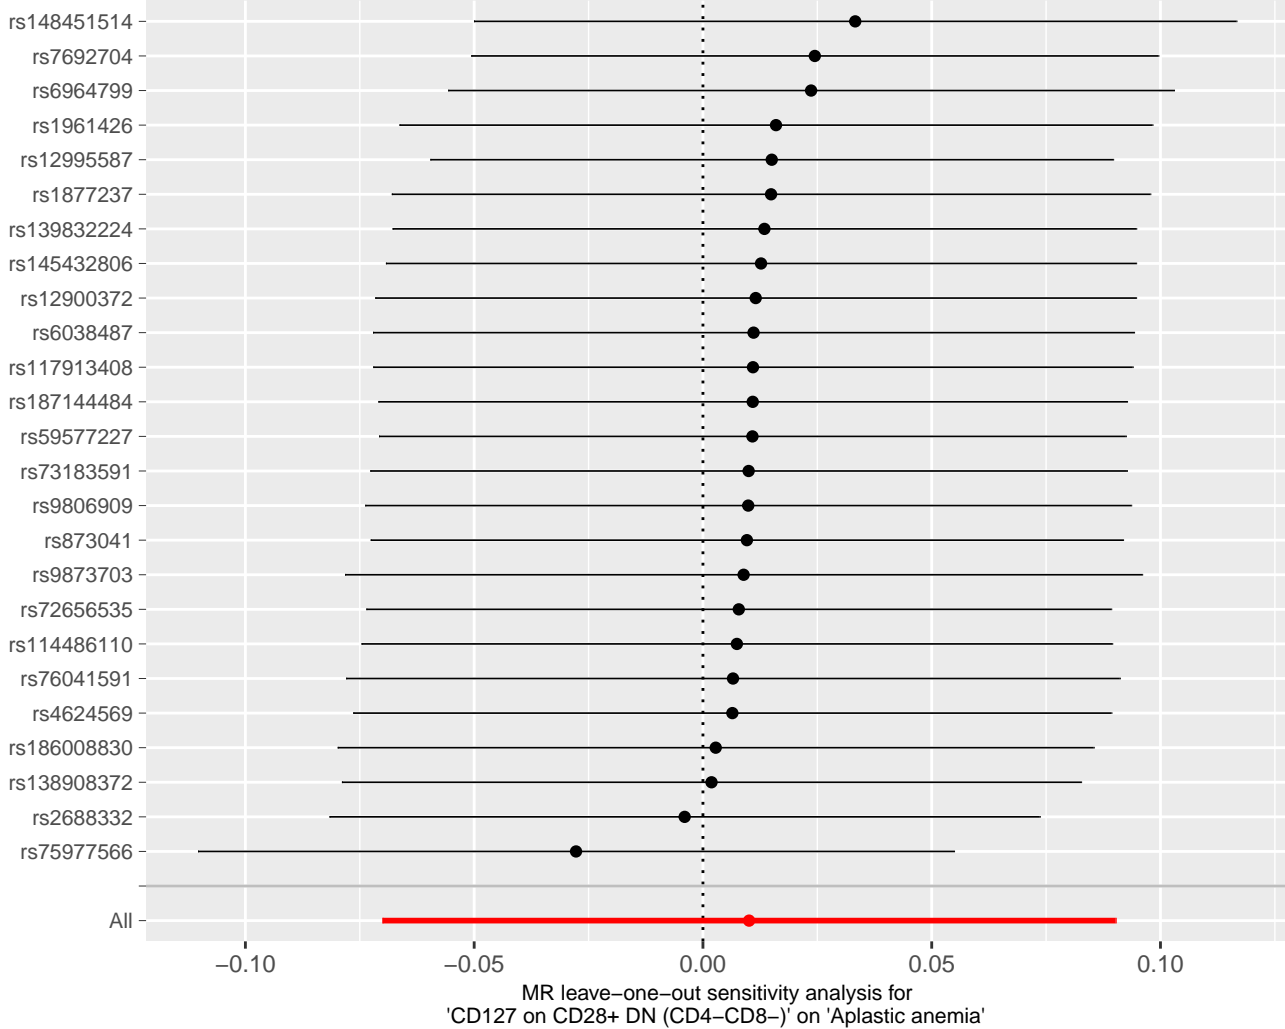



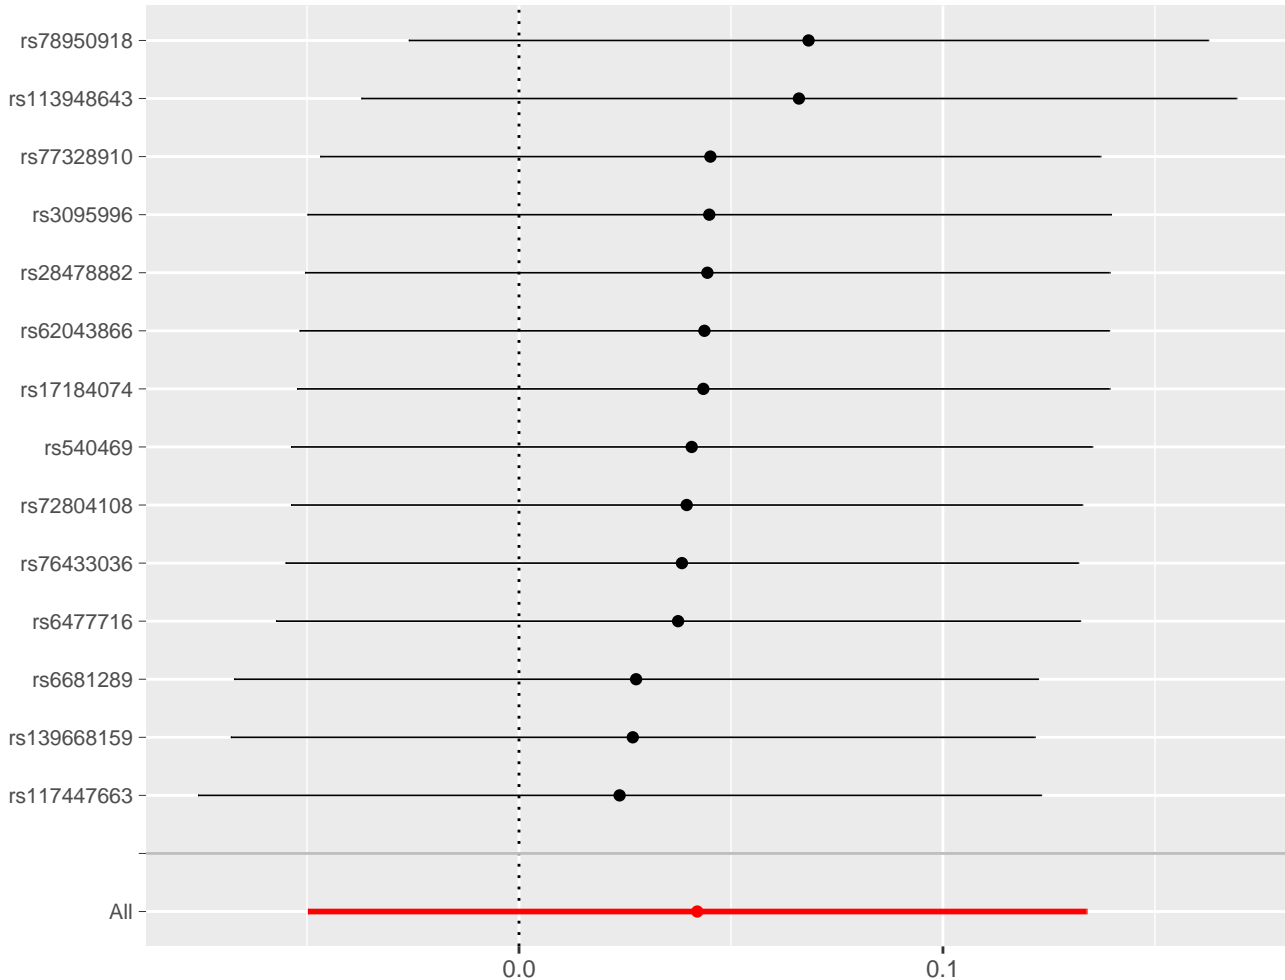

MR leave-one-out sensitivity analysis for 'CD25 on CD39+ resting Treg' on 'Aplastic anemia'

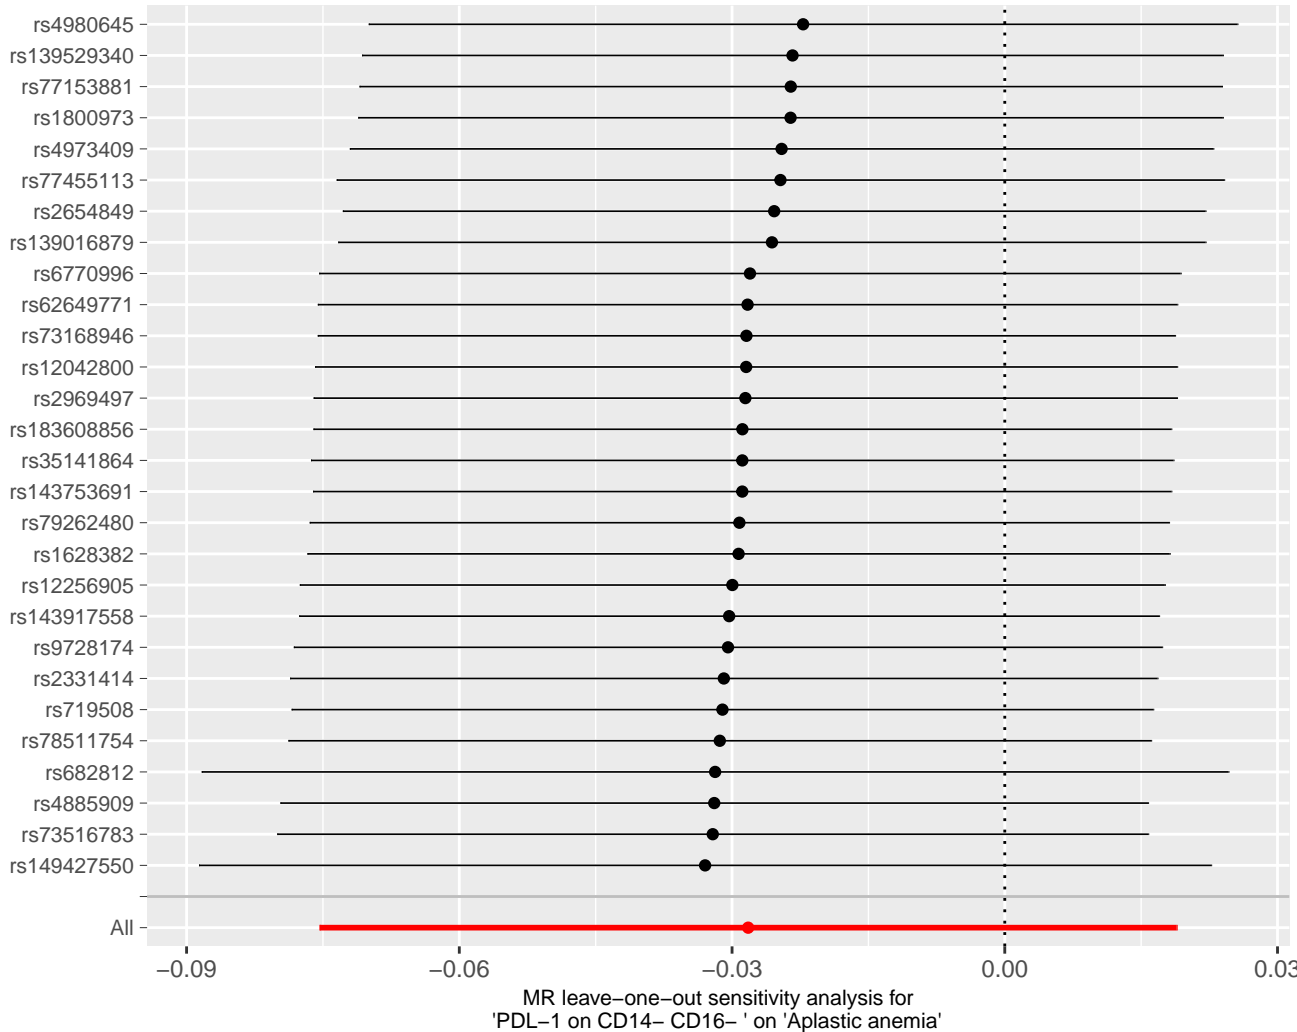

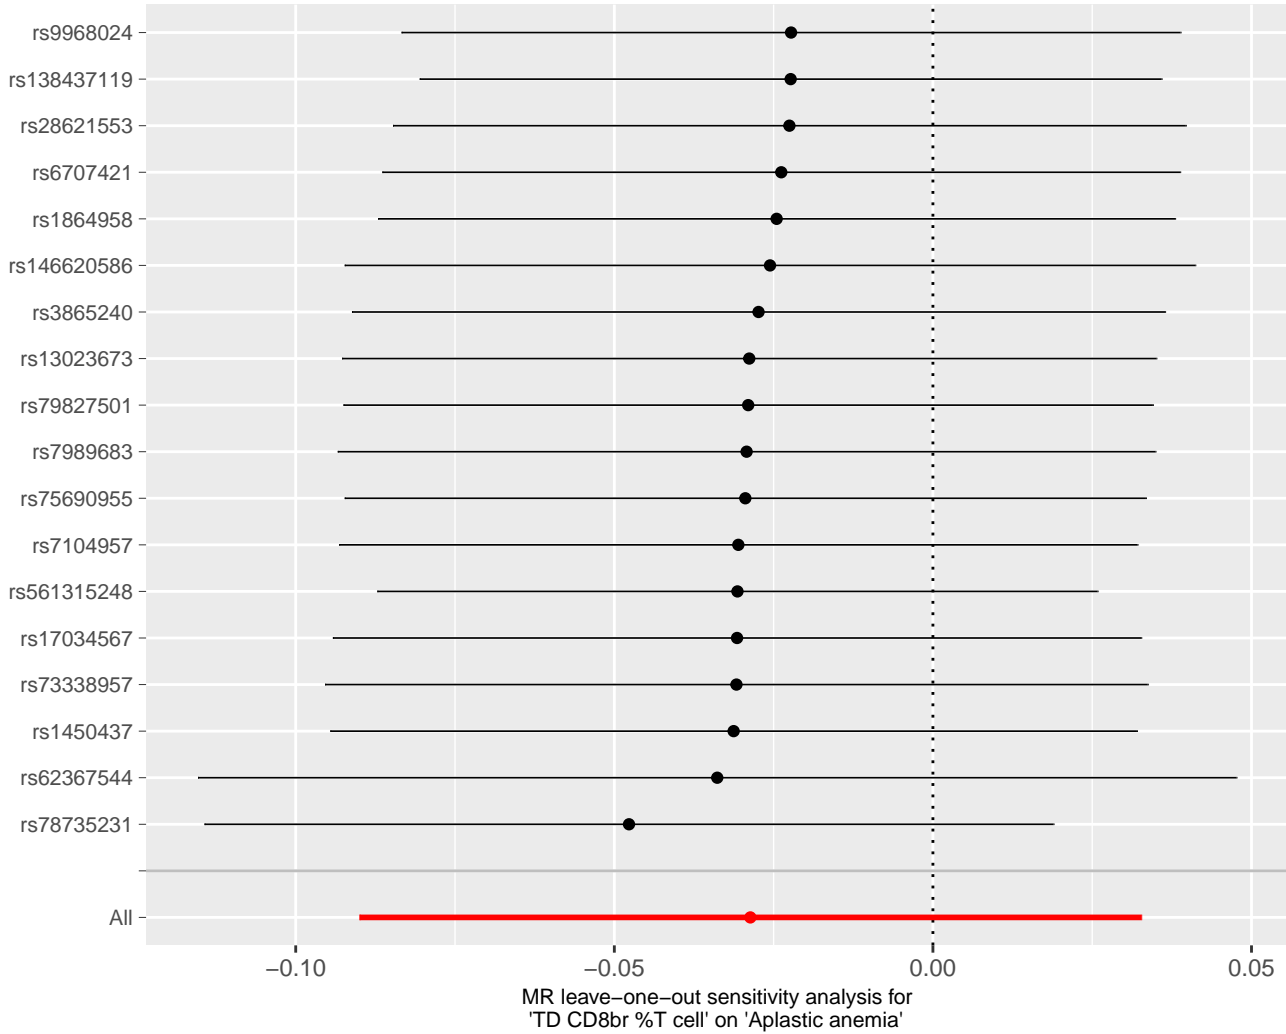

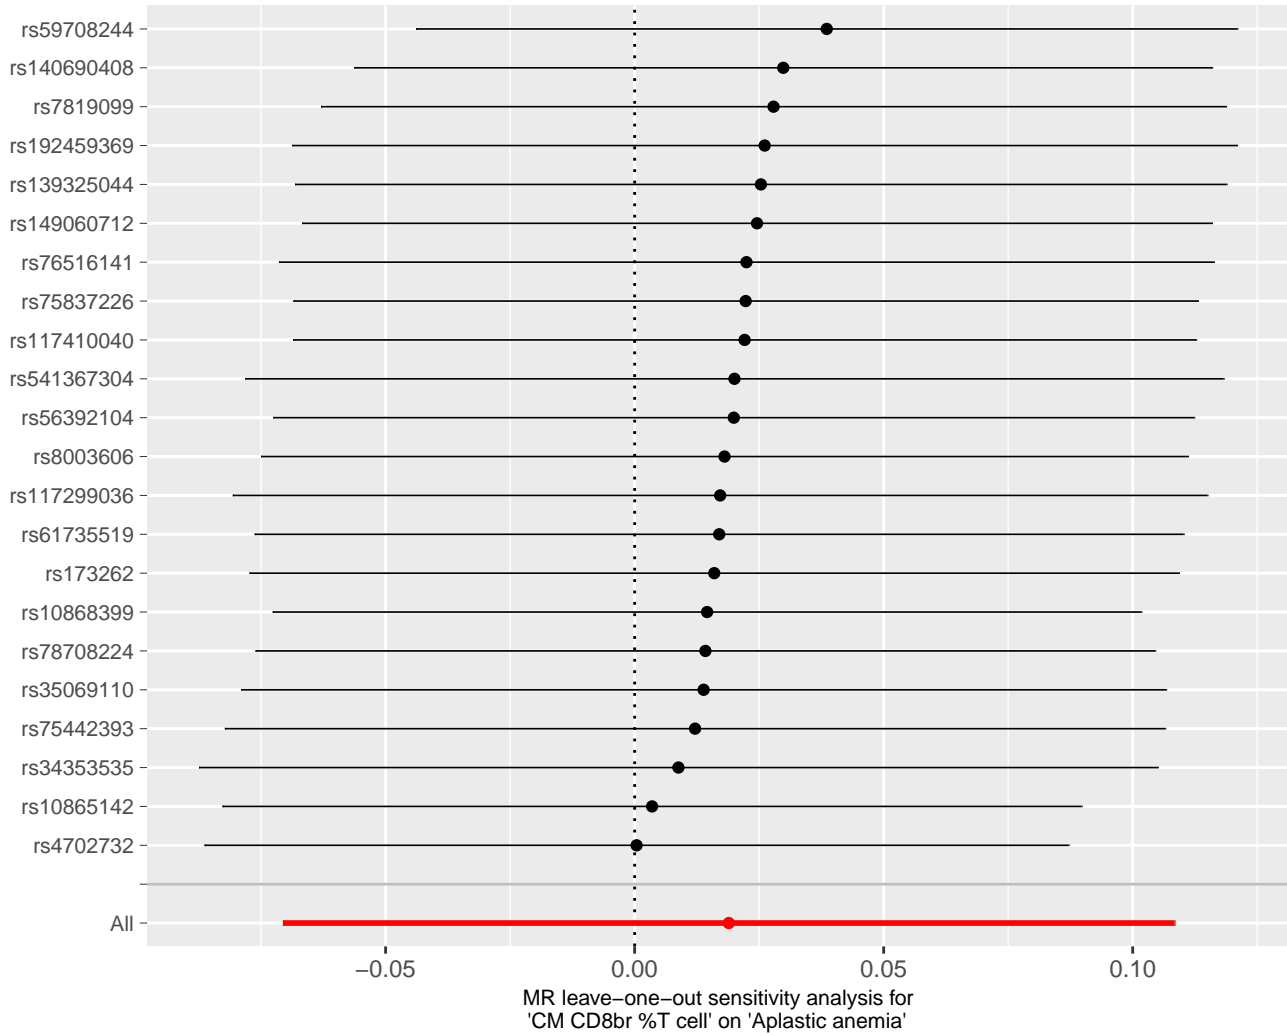

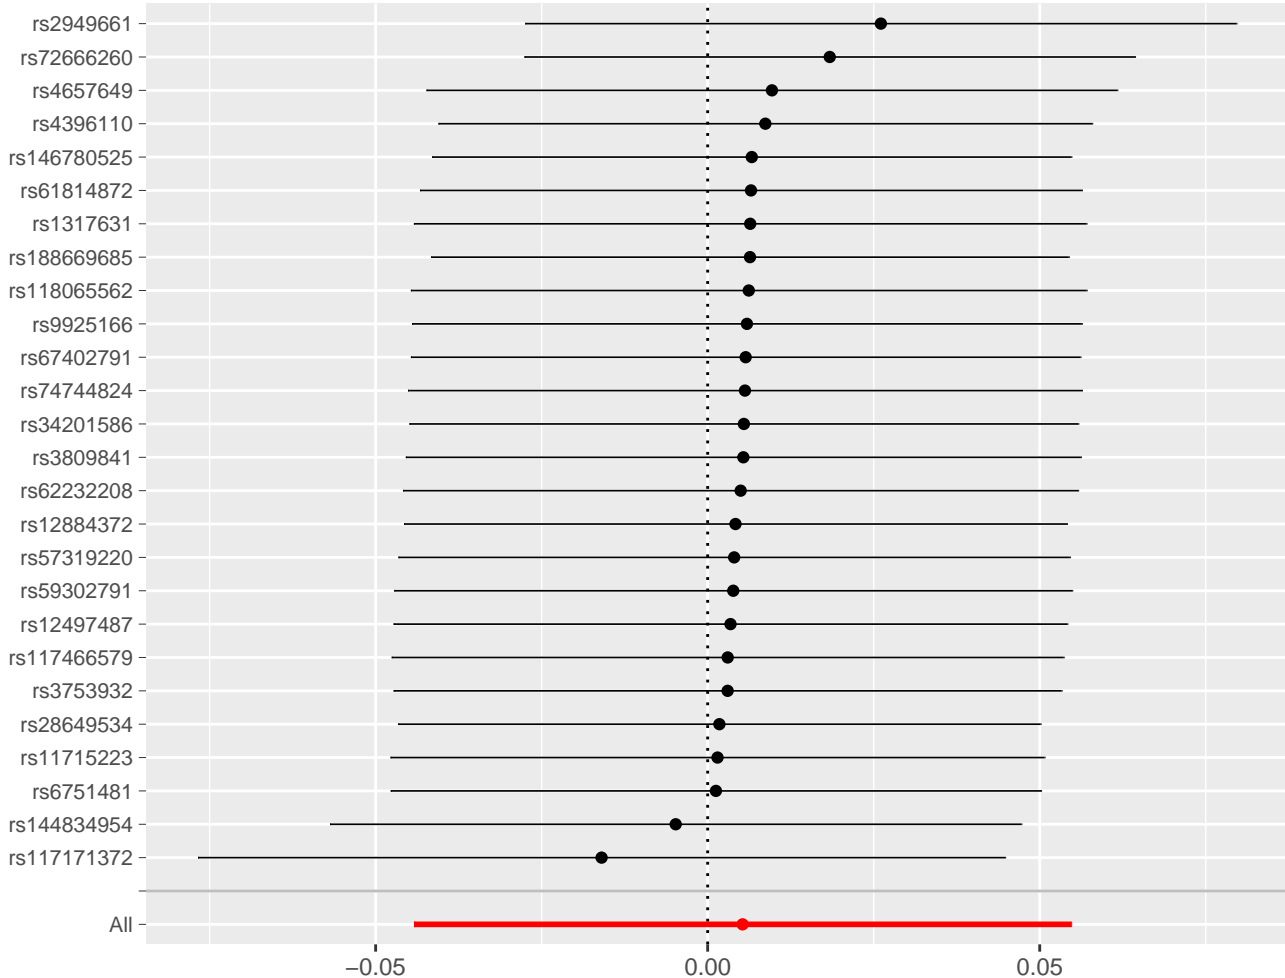

MR leave-one-out sensitivity analysis for 'CD3 on CM CD4+' on 'Aplastic anemia'

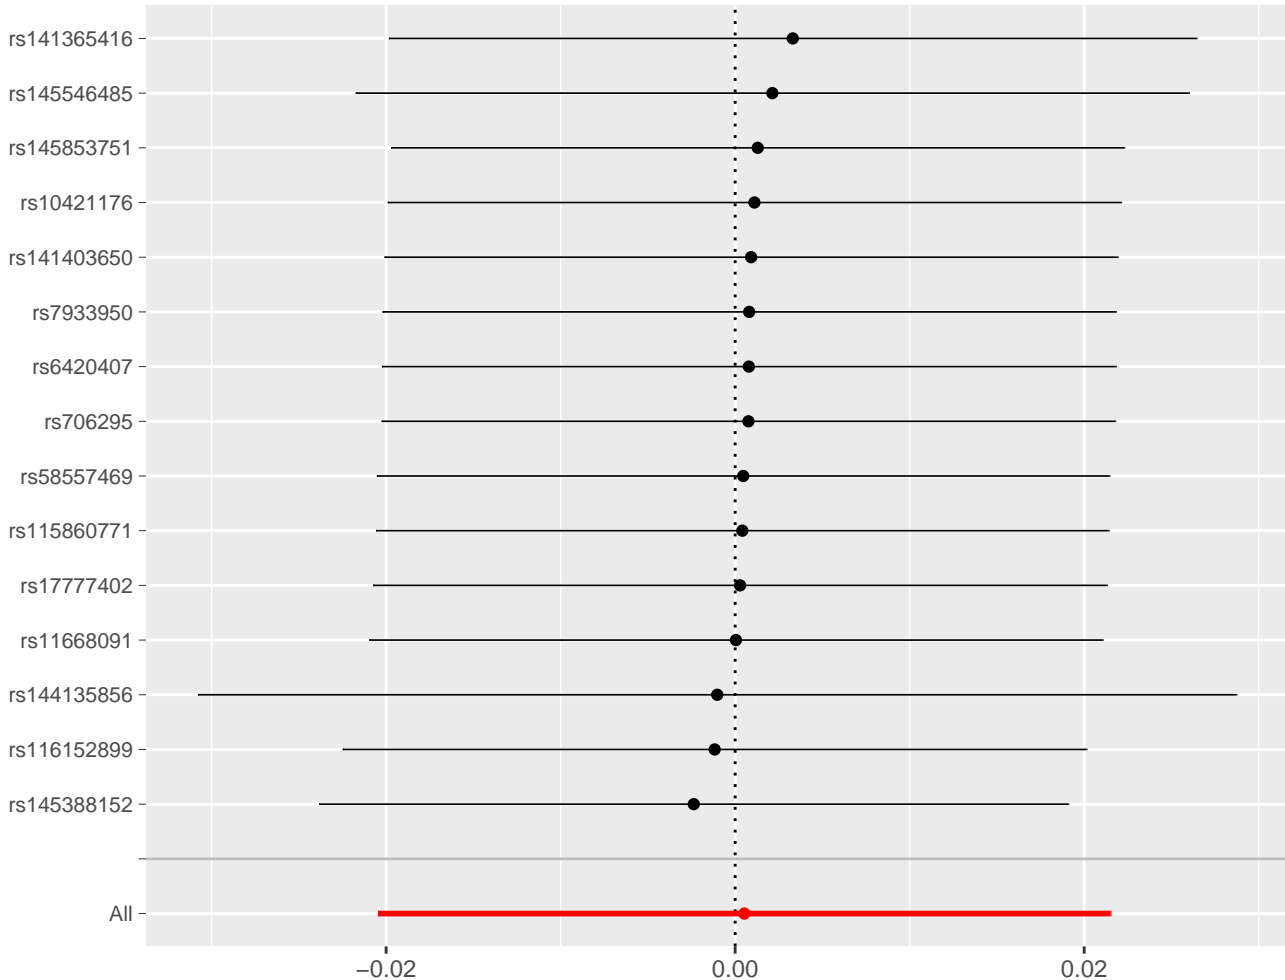

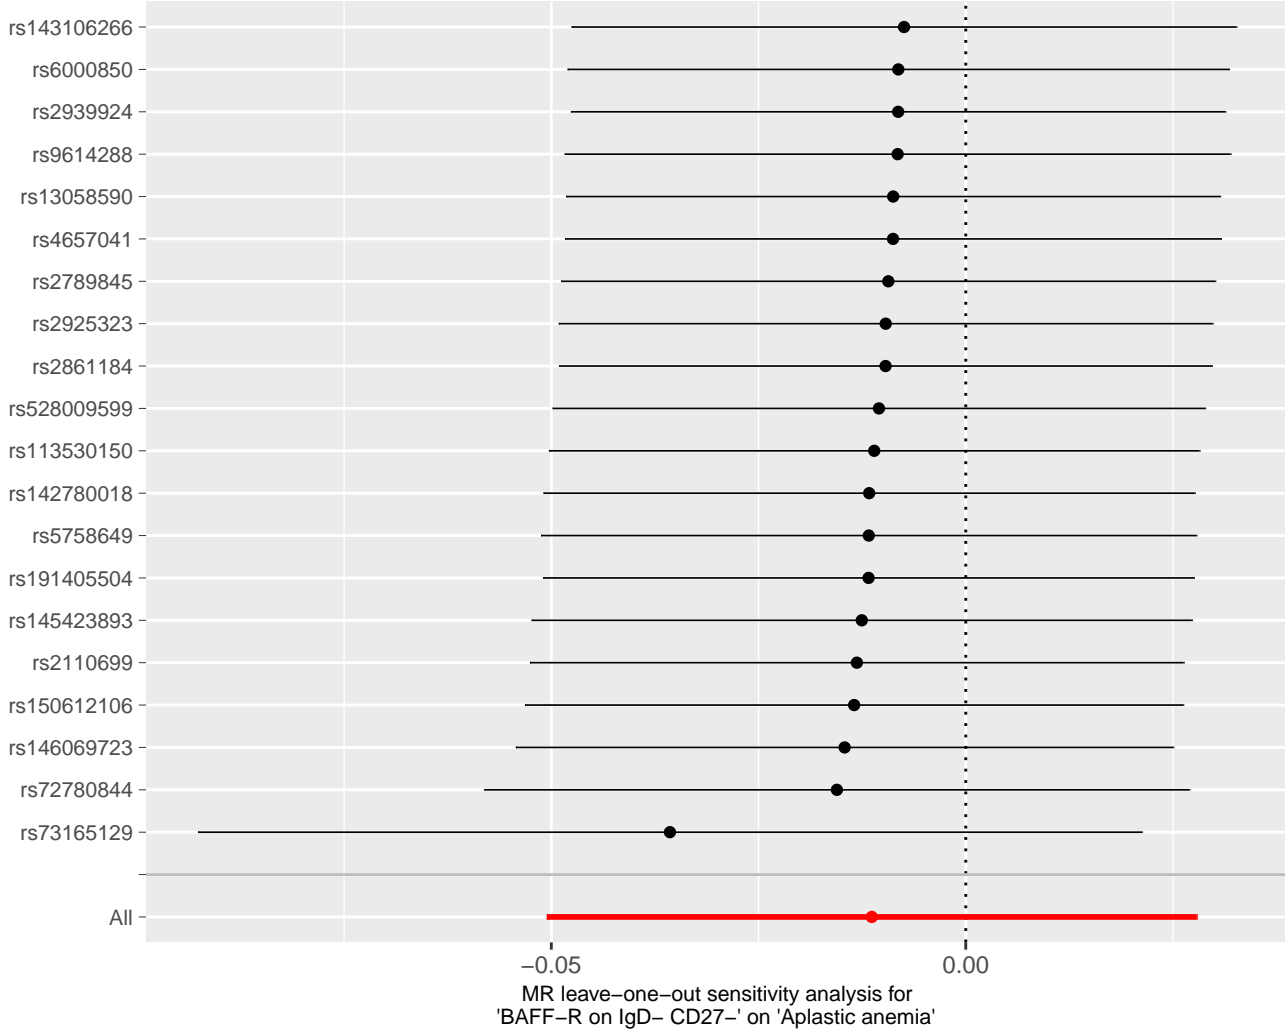

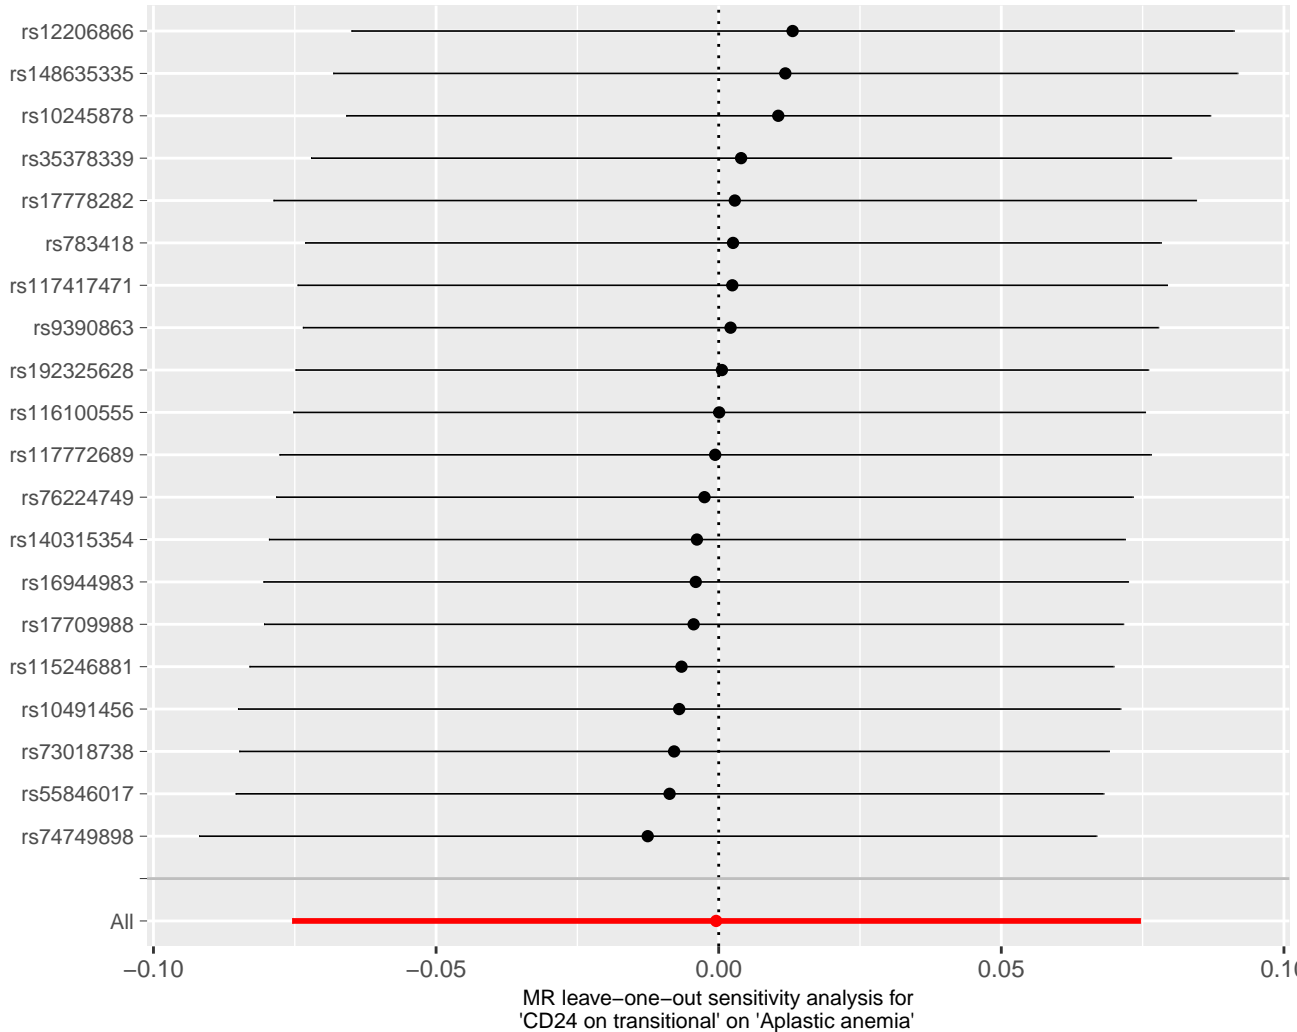



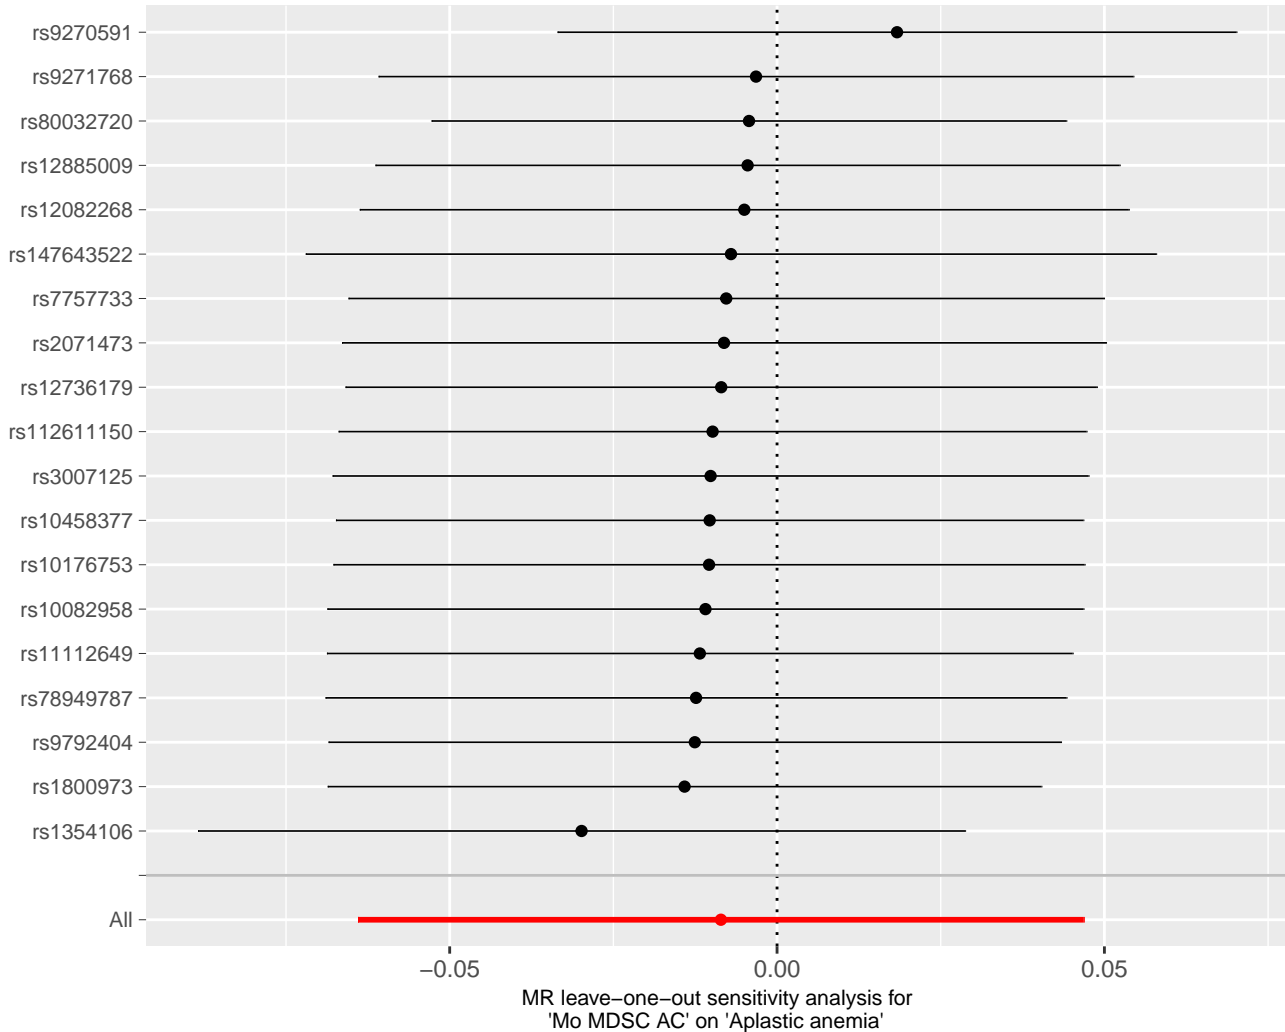

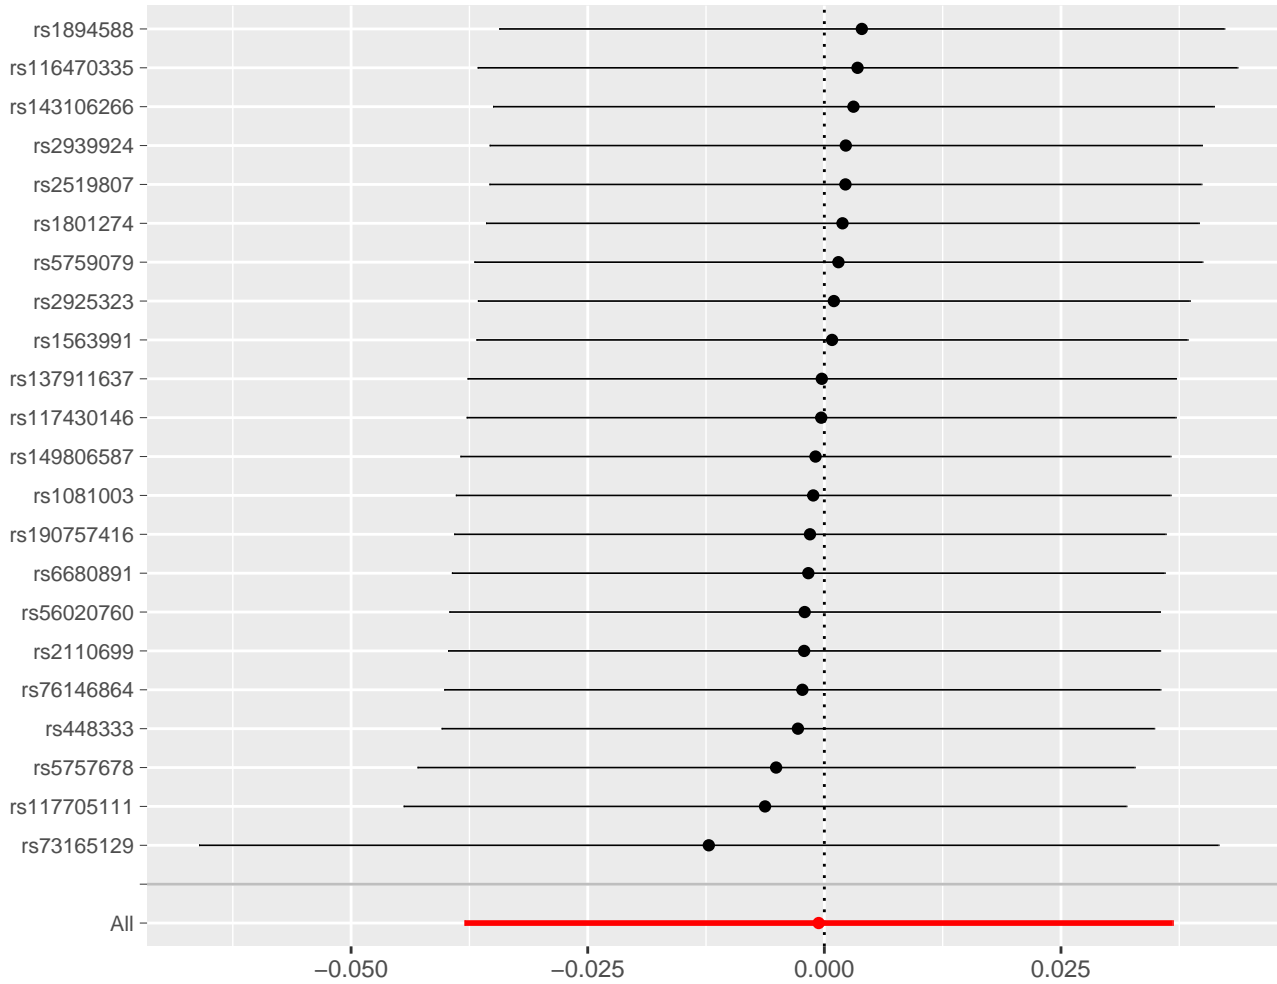

MR leave-one-out sensitivity analysis for 'BAFF-R on IgD+ CD38-' on 'Aplastic anemia'

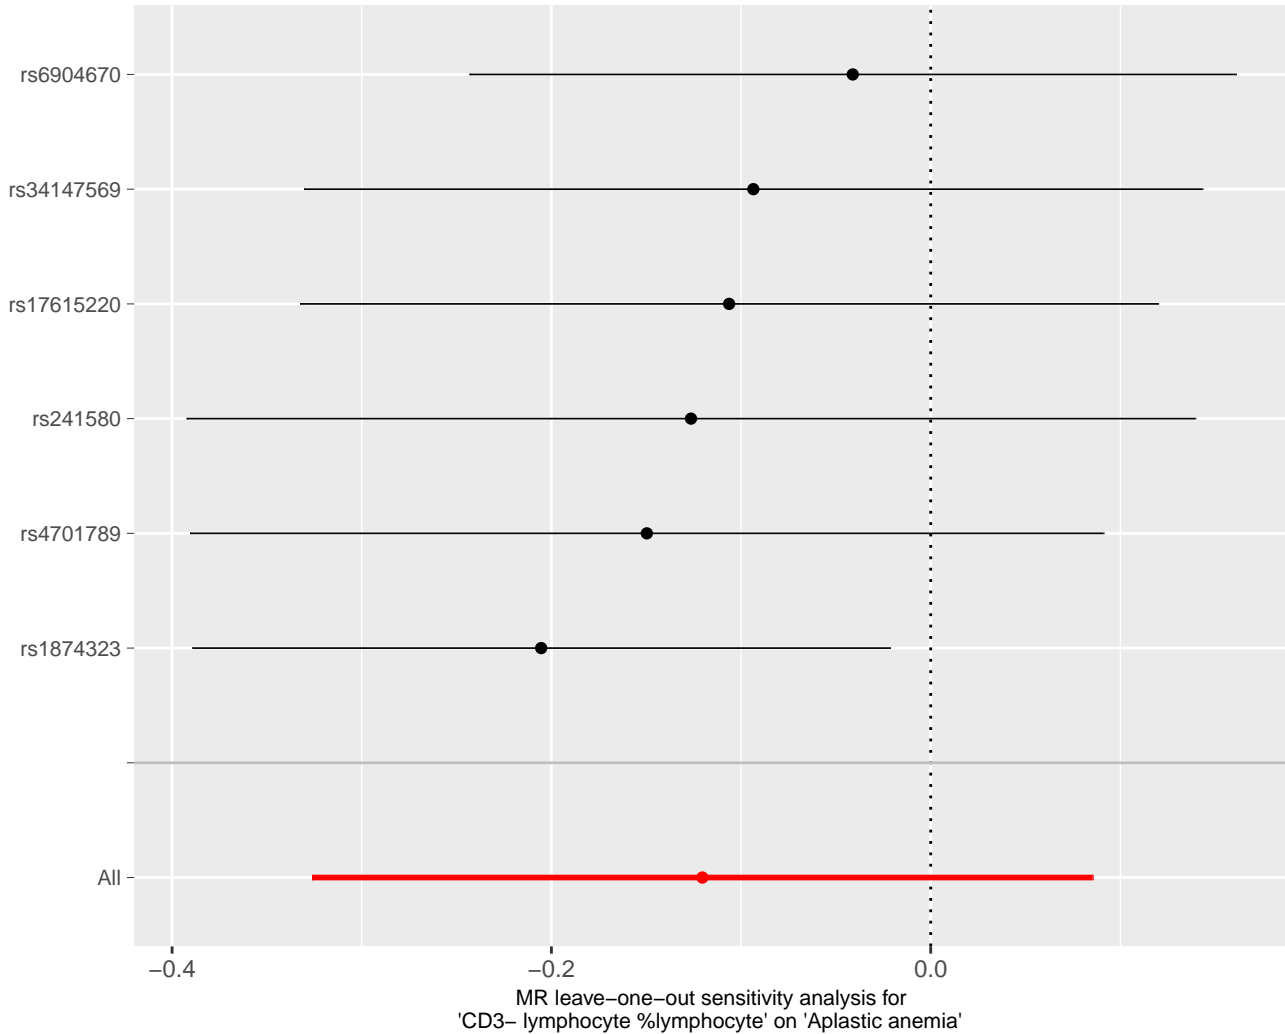

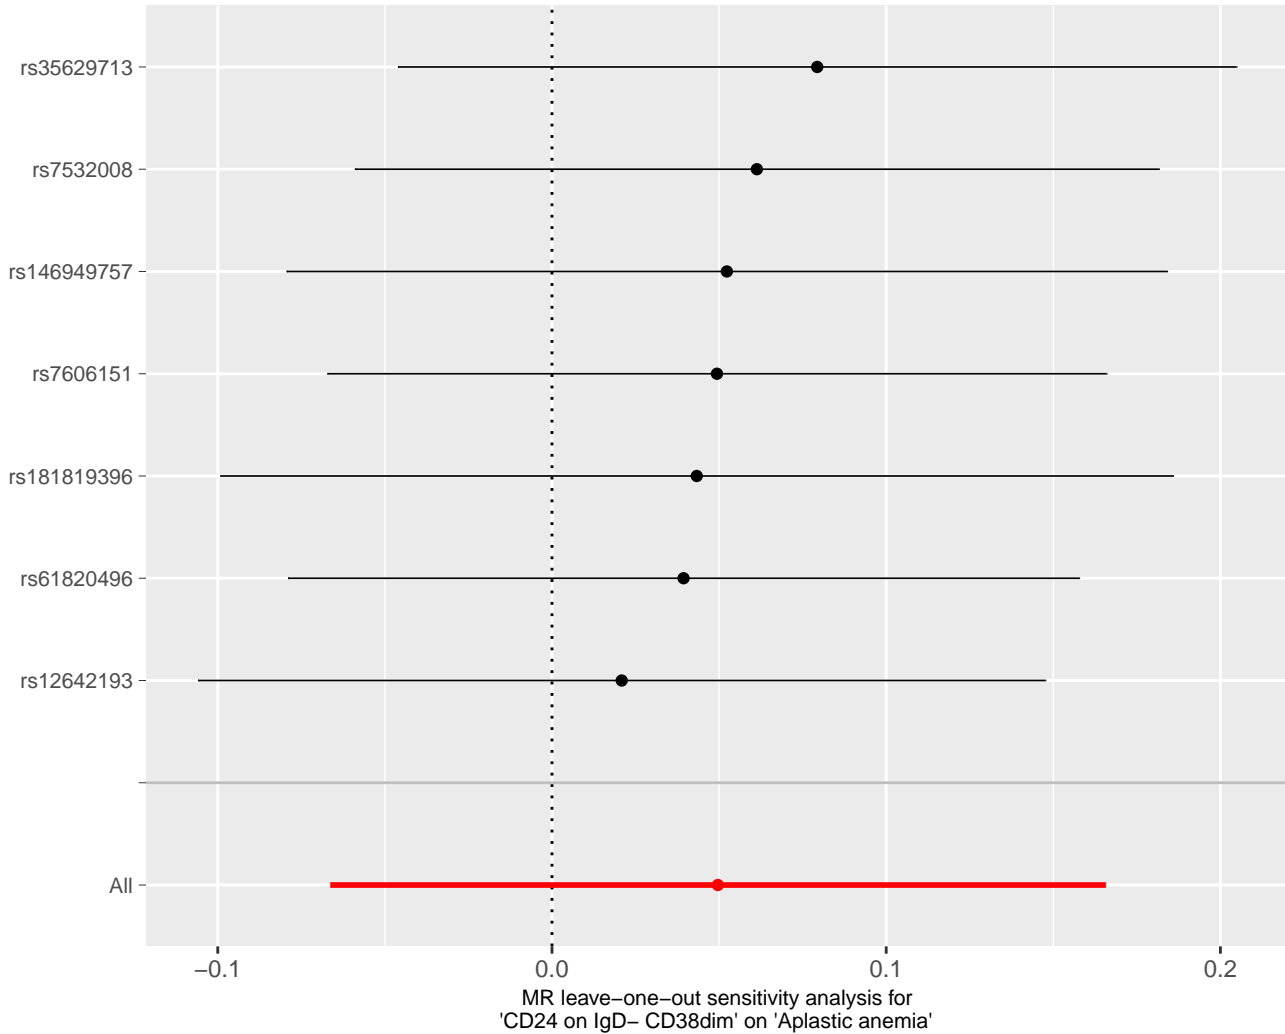

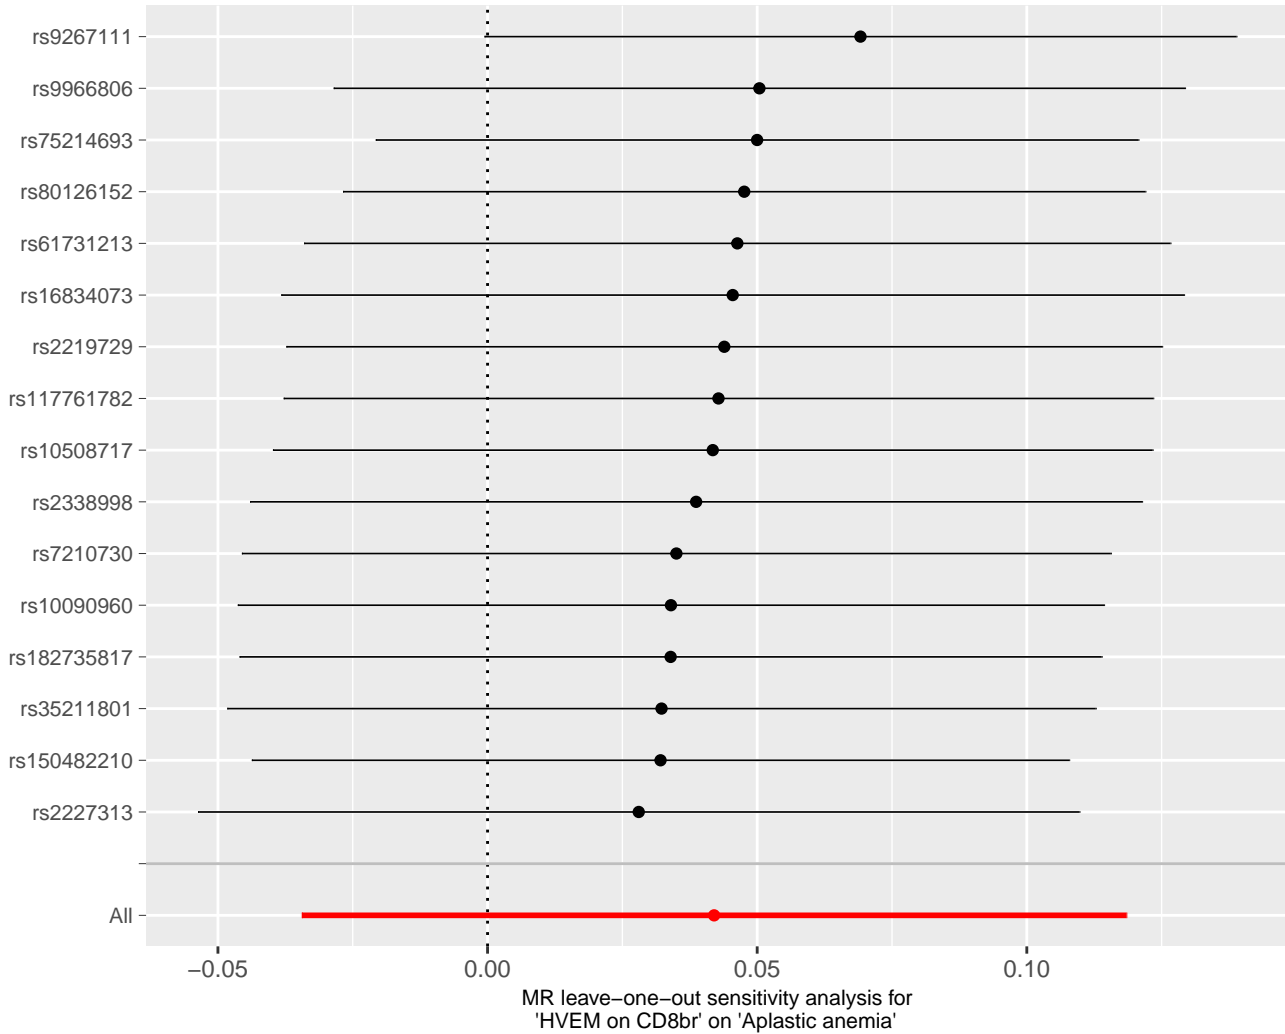

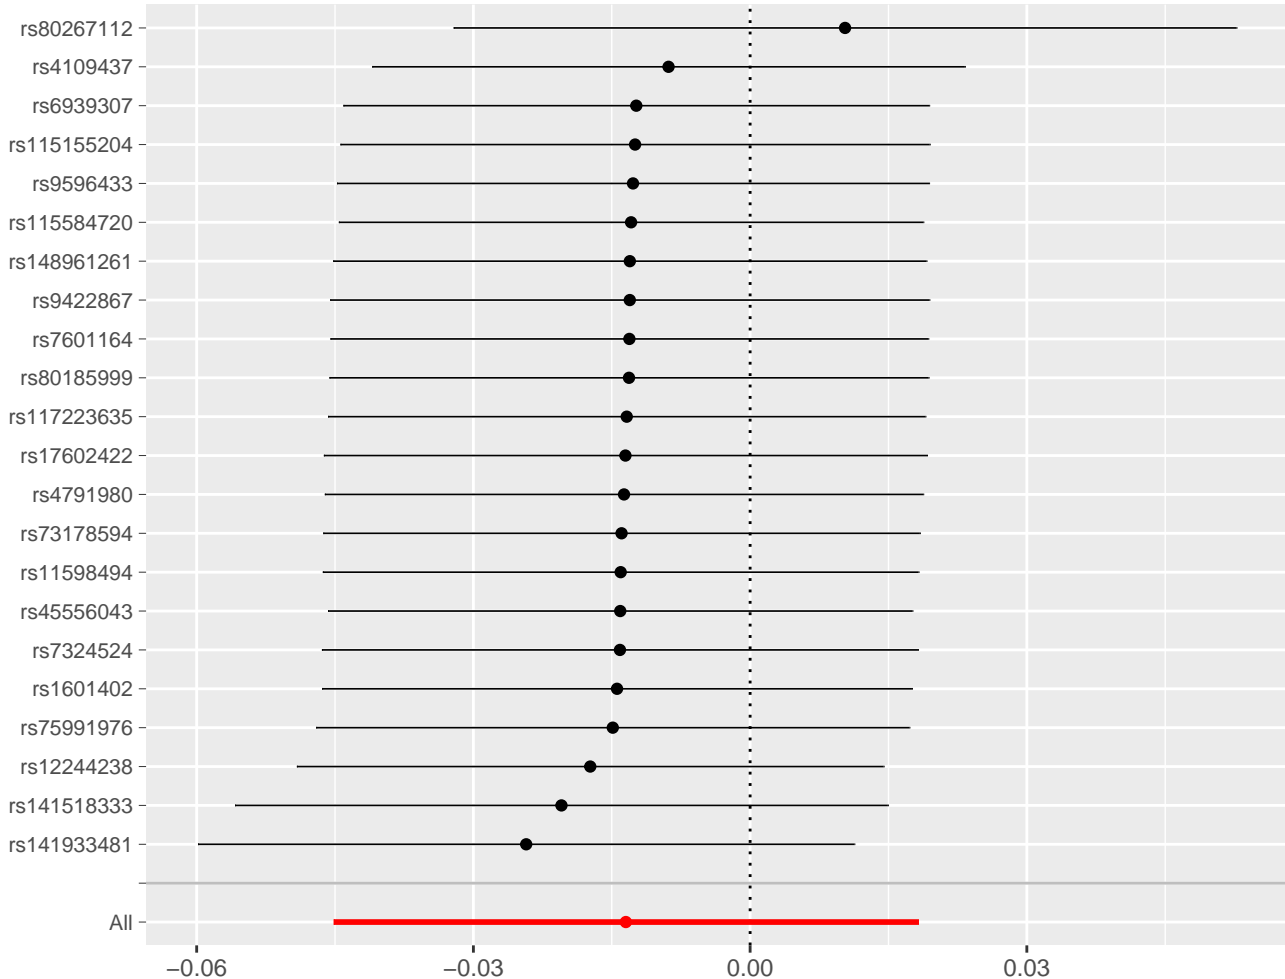

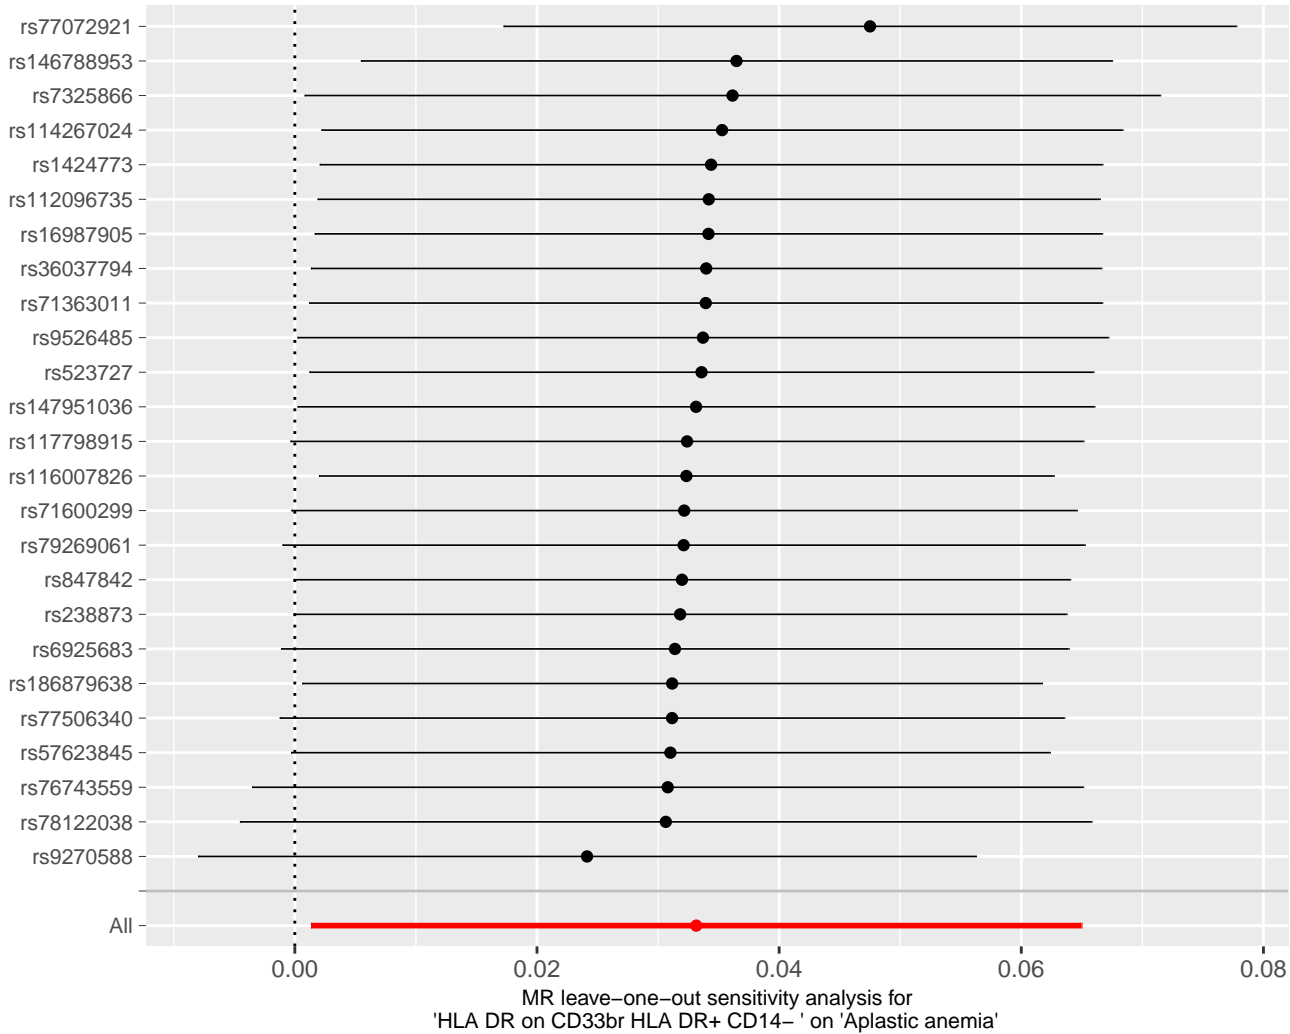

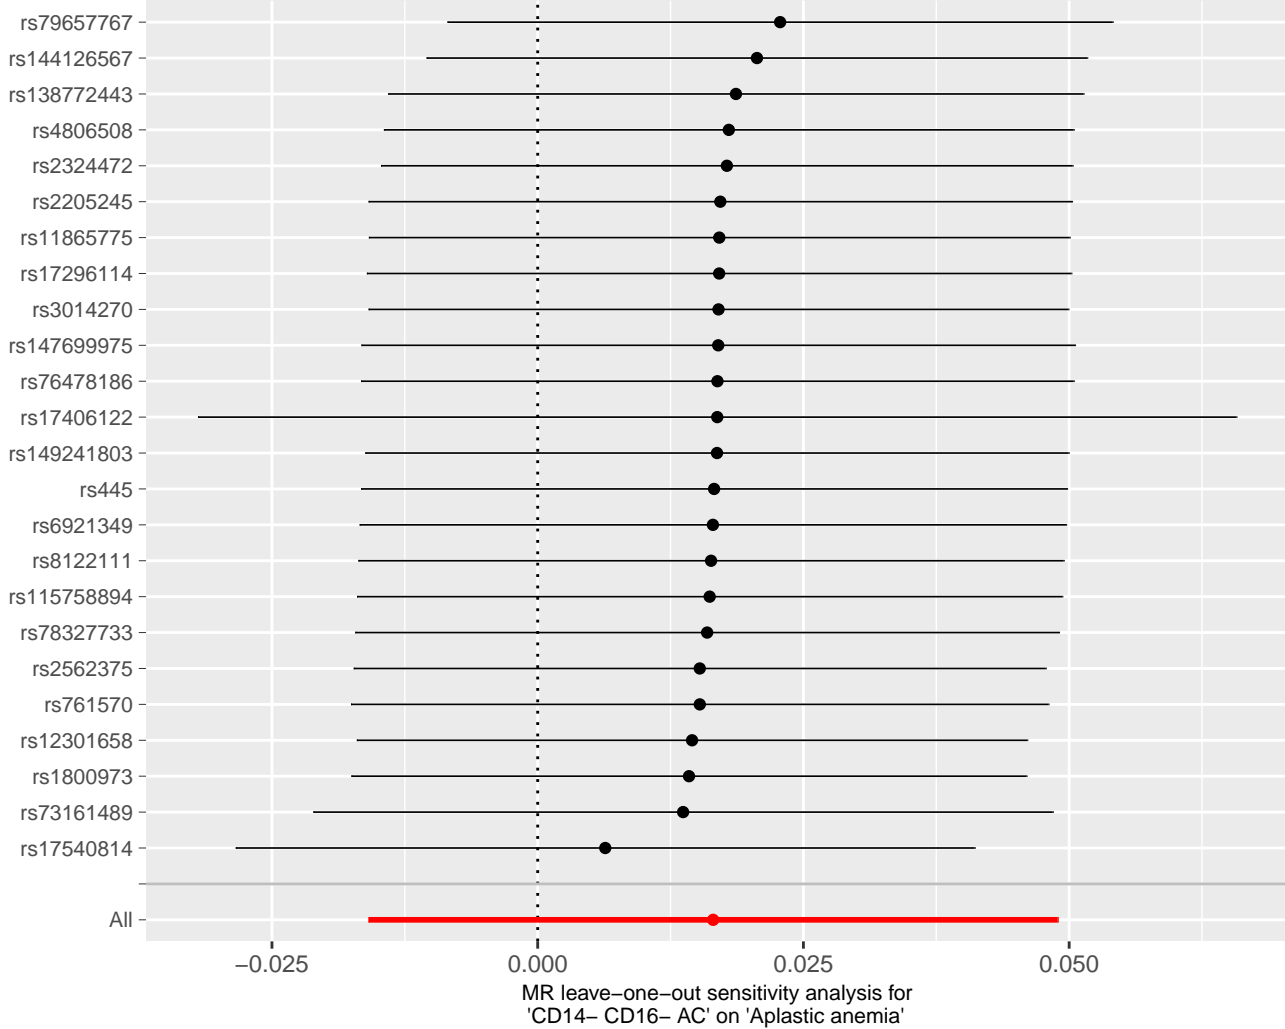



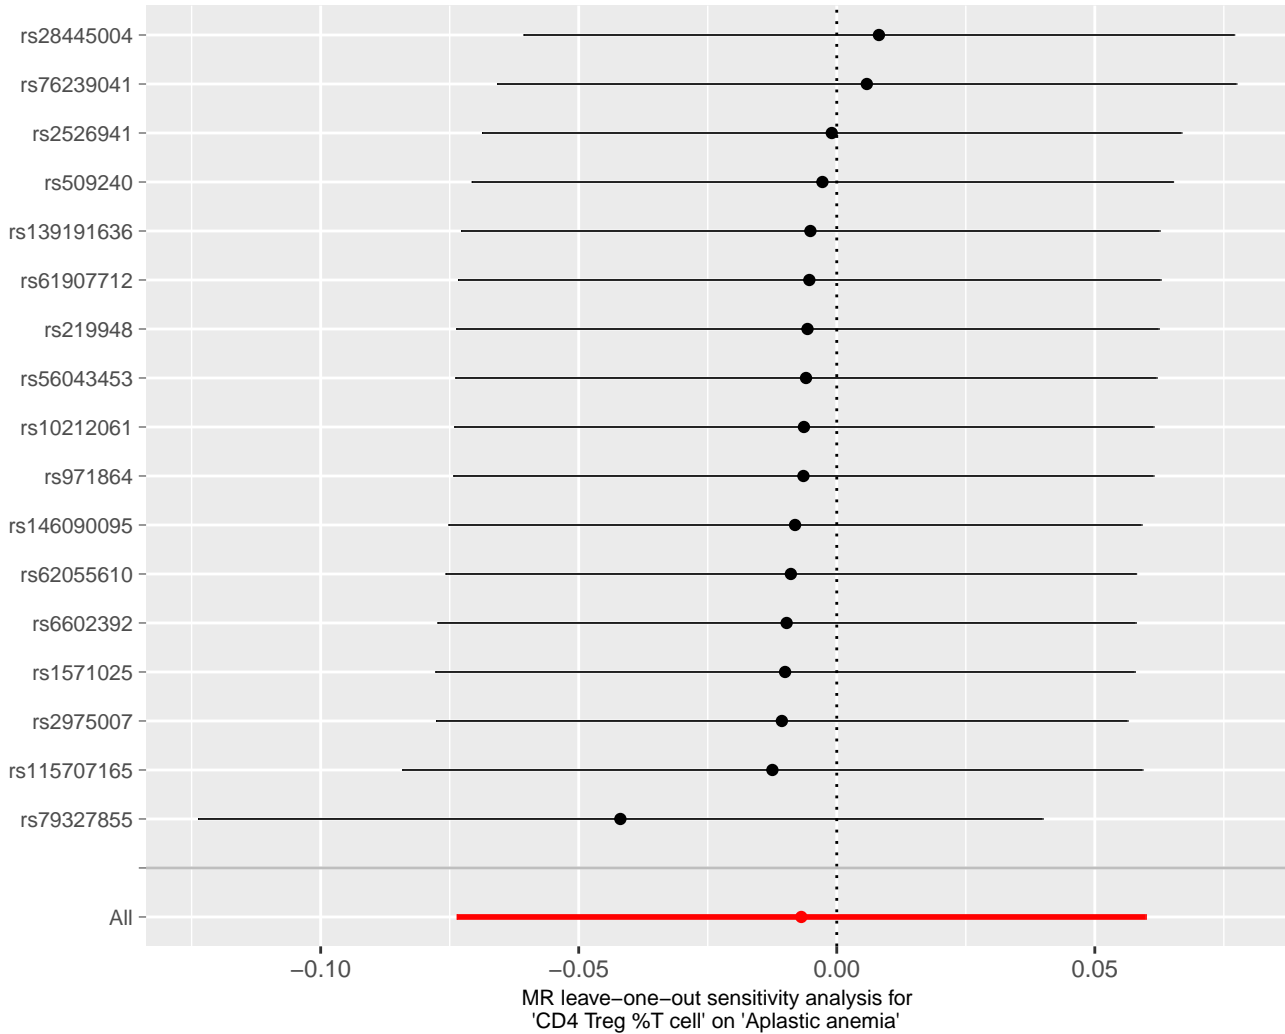

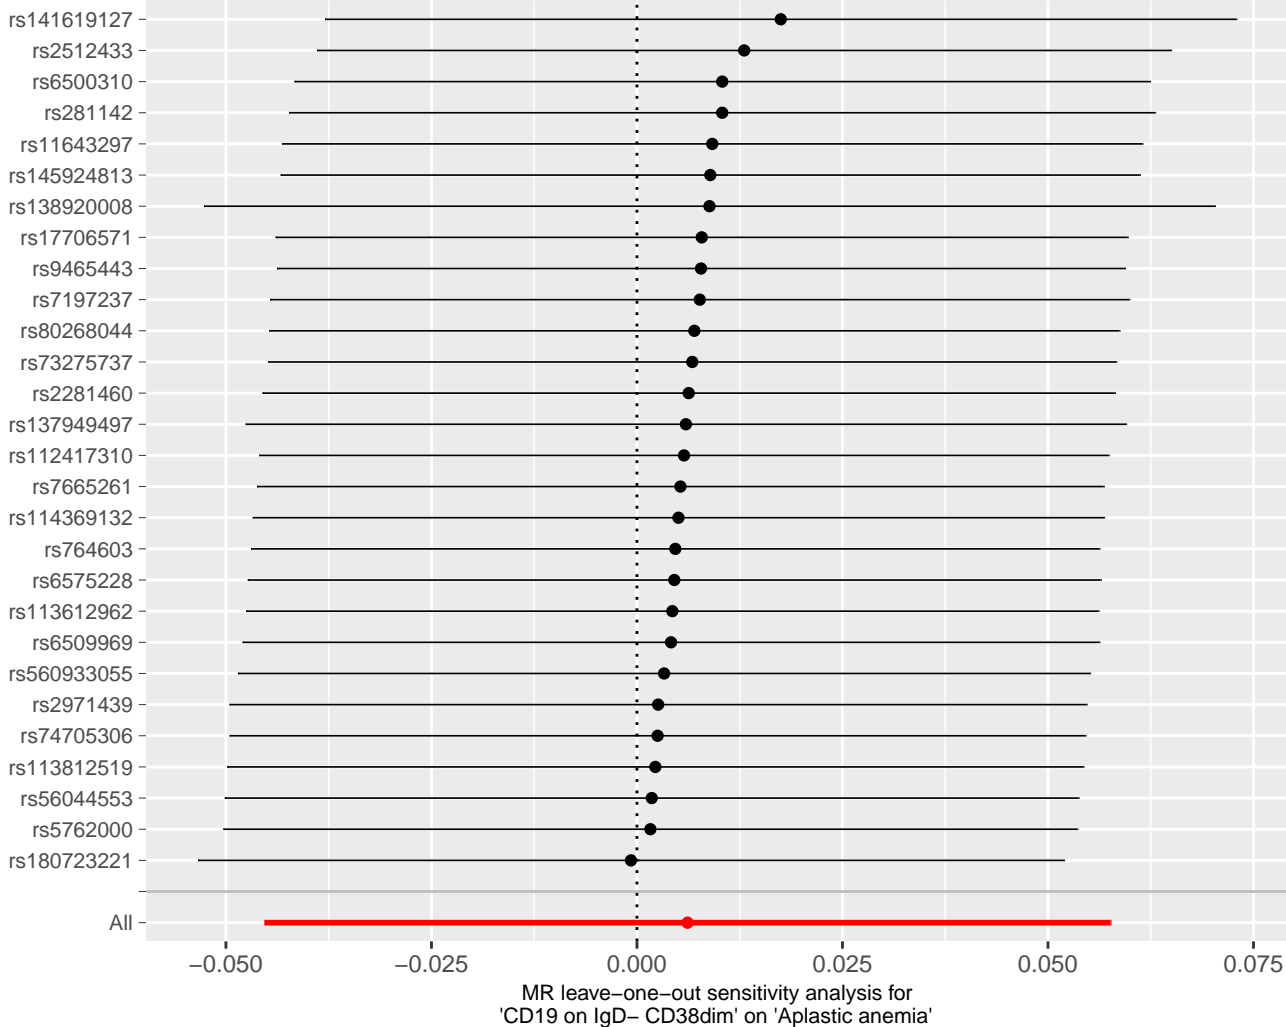

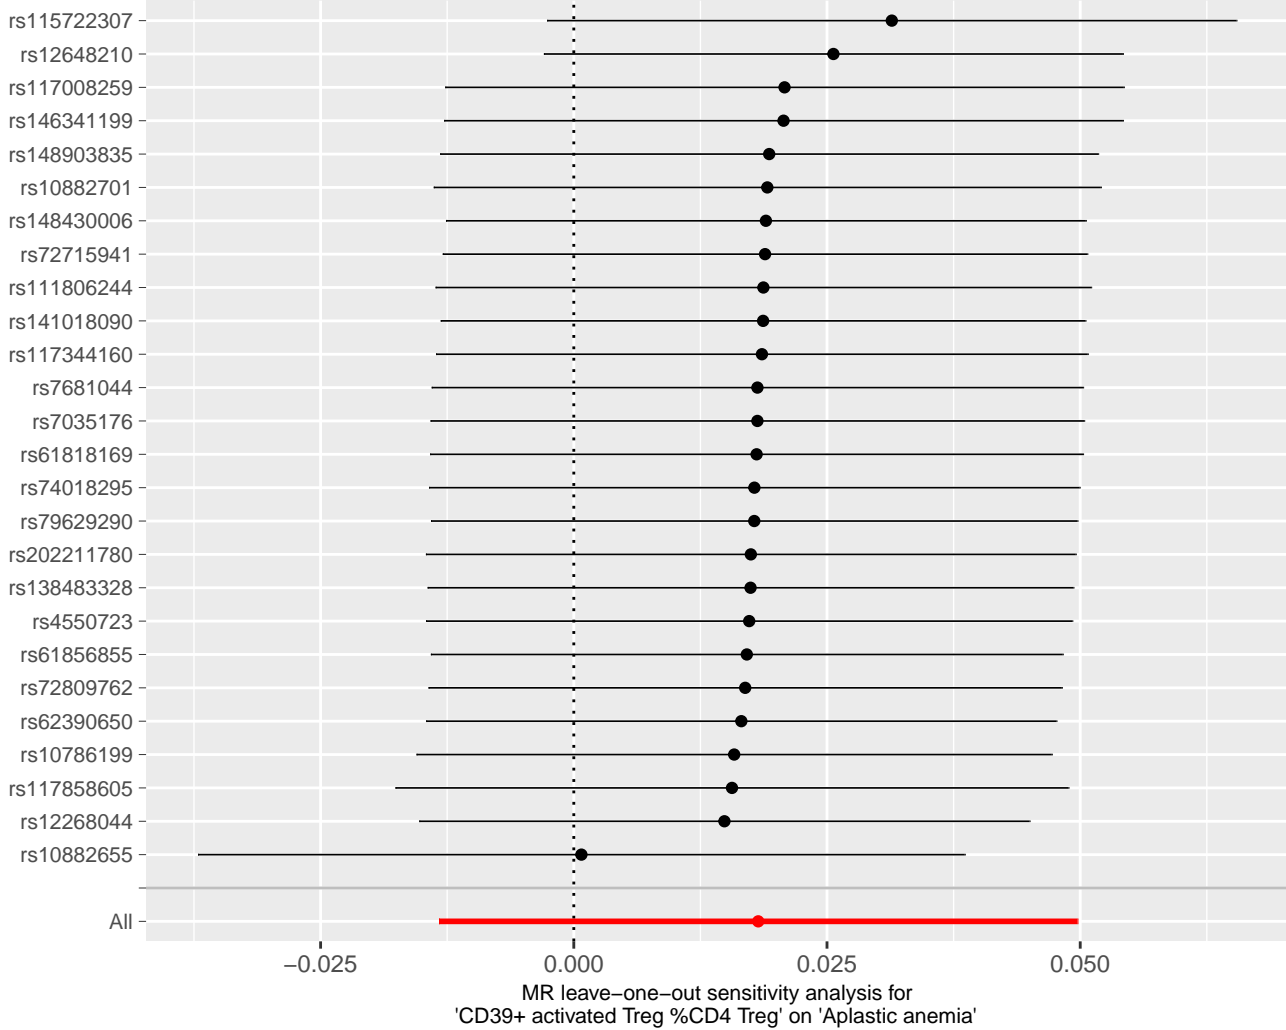

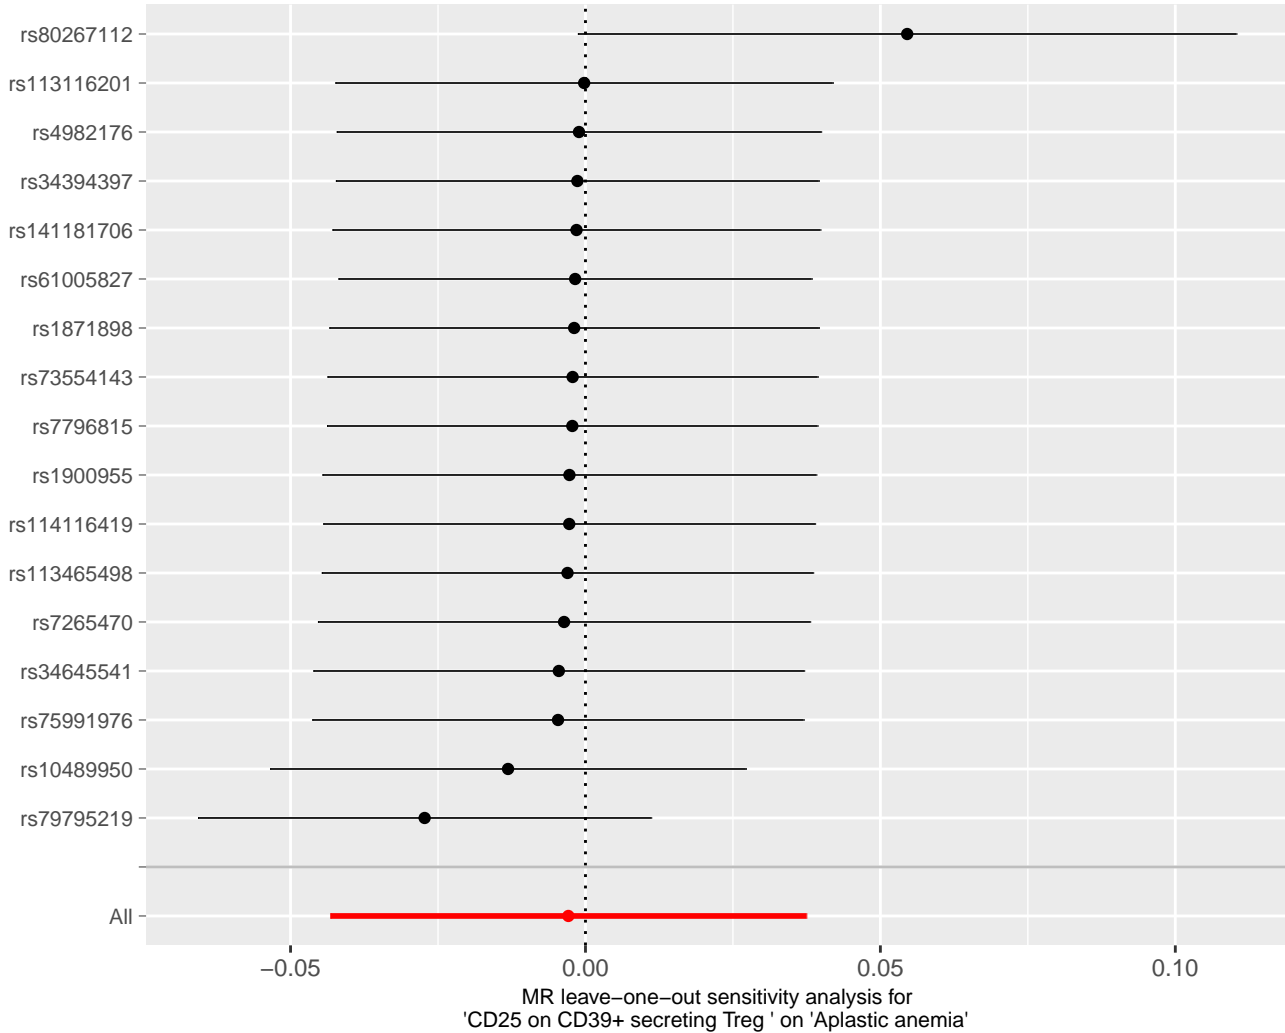

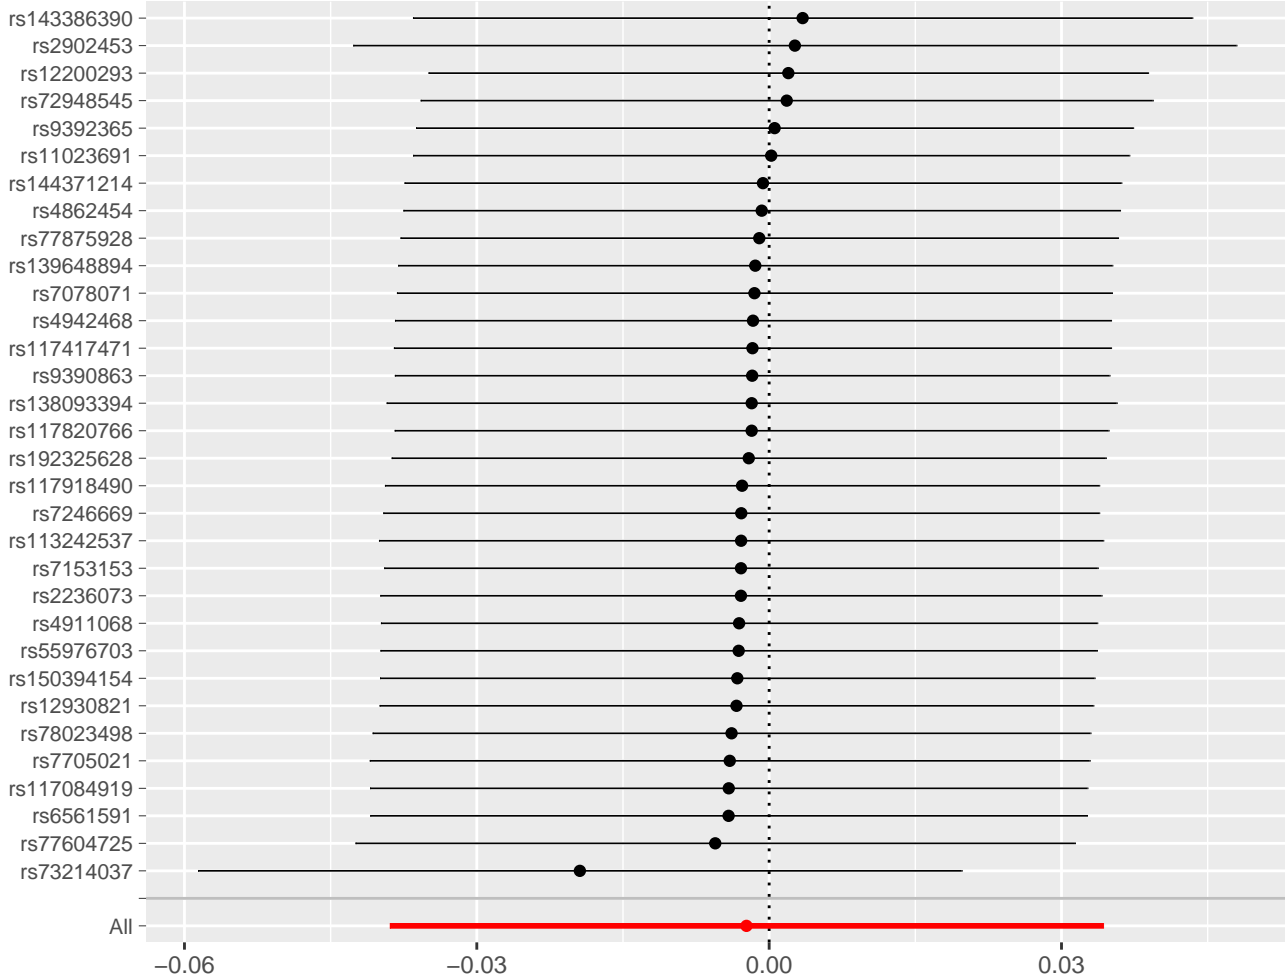

MR leave-one-out sensitivity analysis for 'CD24 on memory B cell' on 'Aplastic anemia'

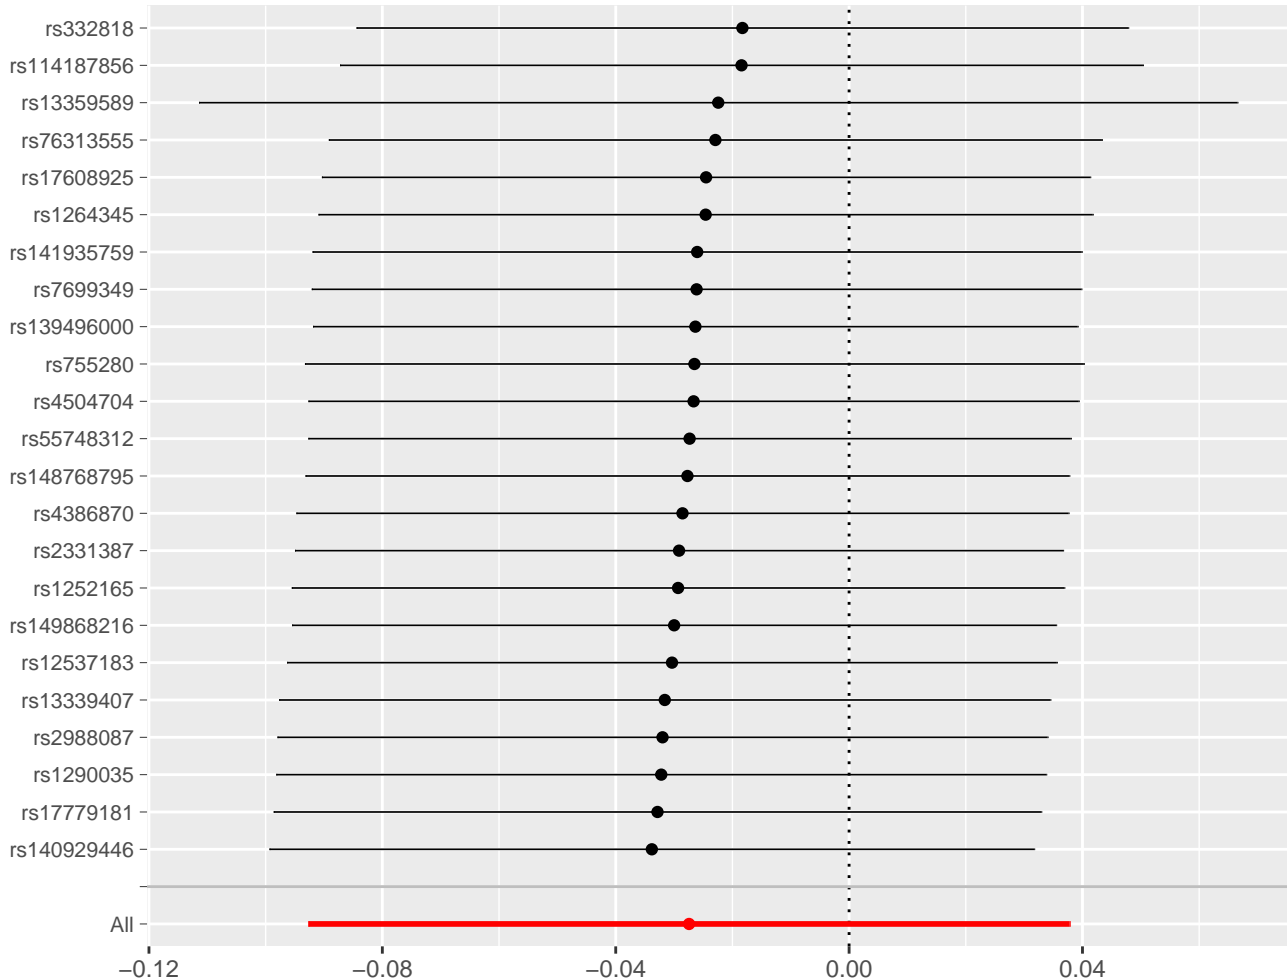

MR leave-one-out sensitivity analysis for 'Naive DN (CD4-CD8-) %DN' on 'Aplastic anemia'

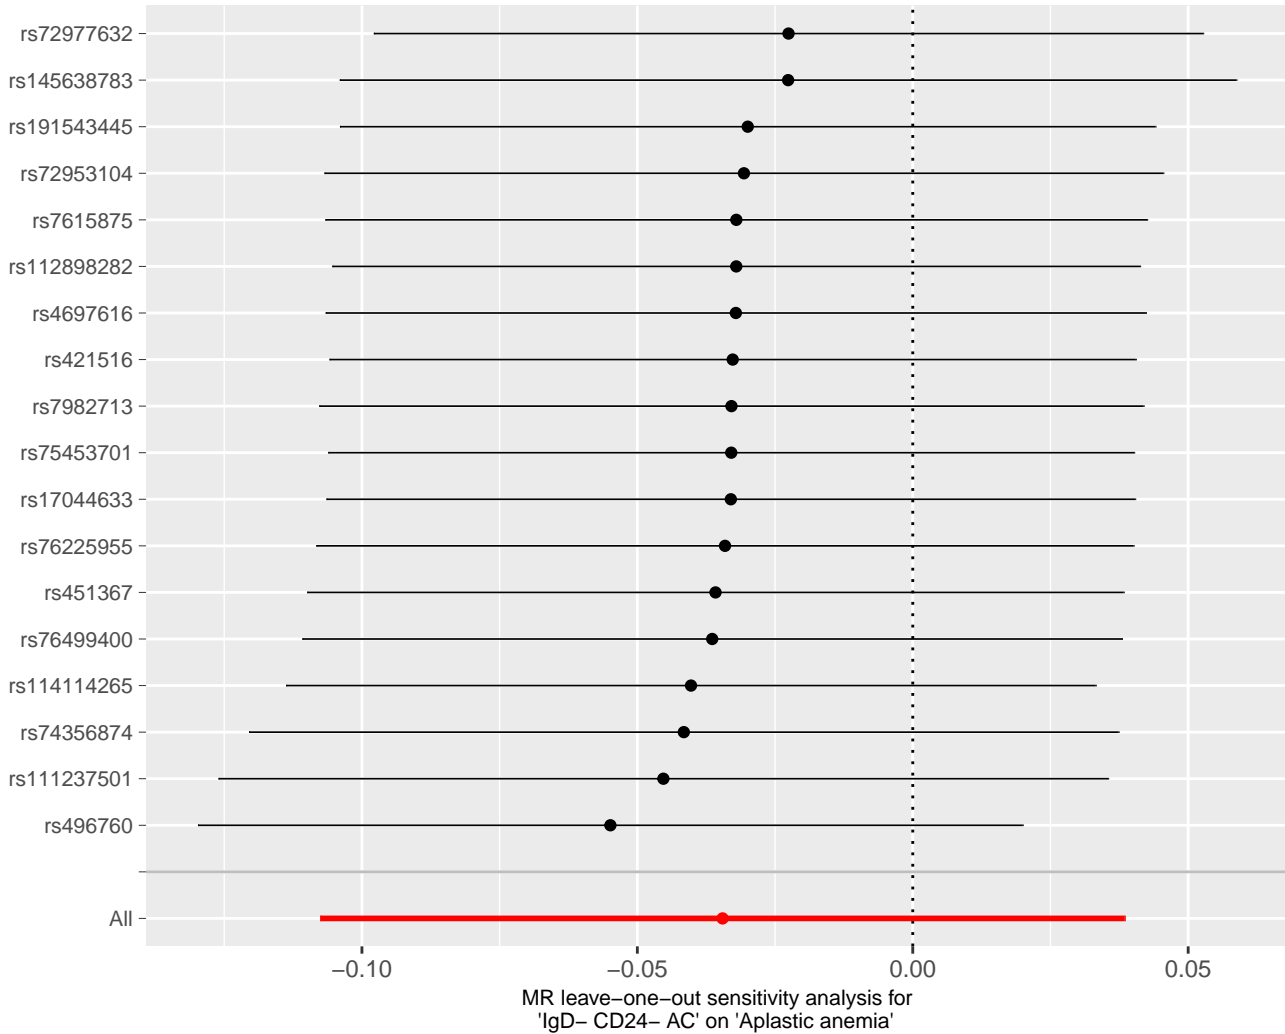

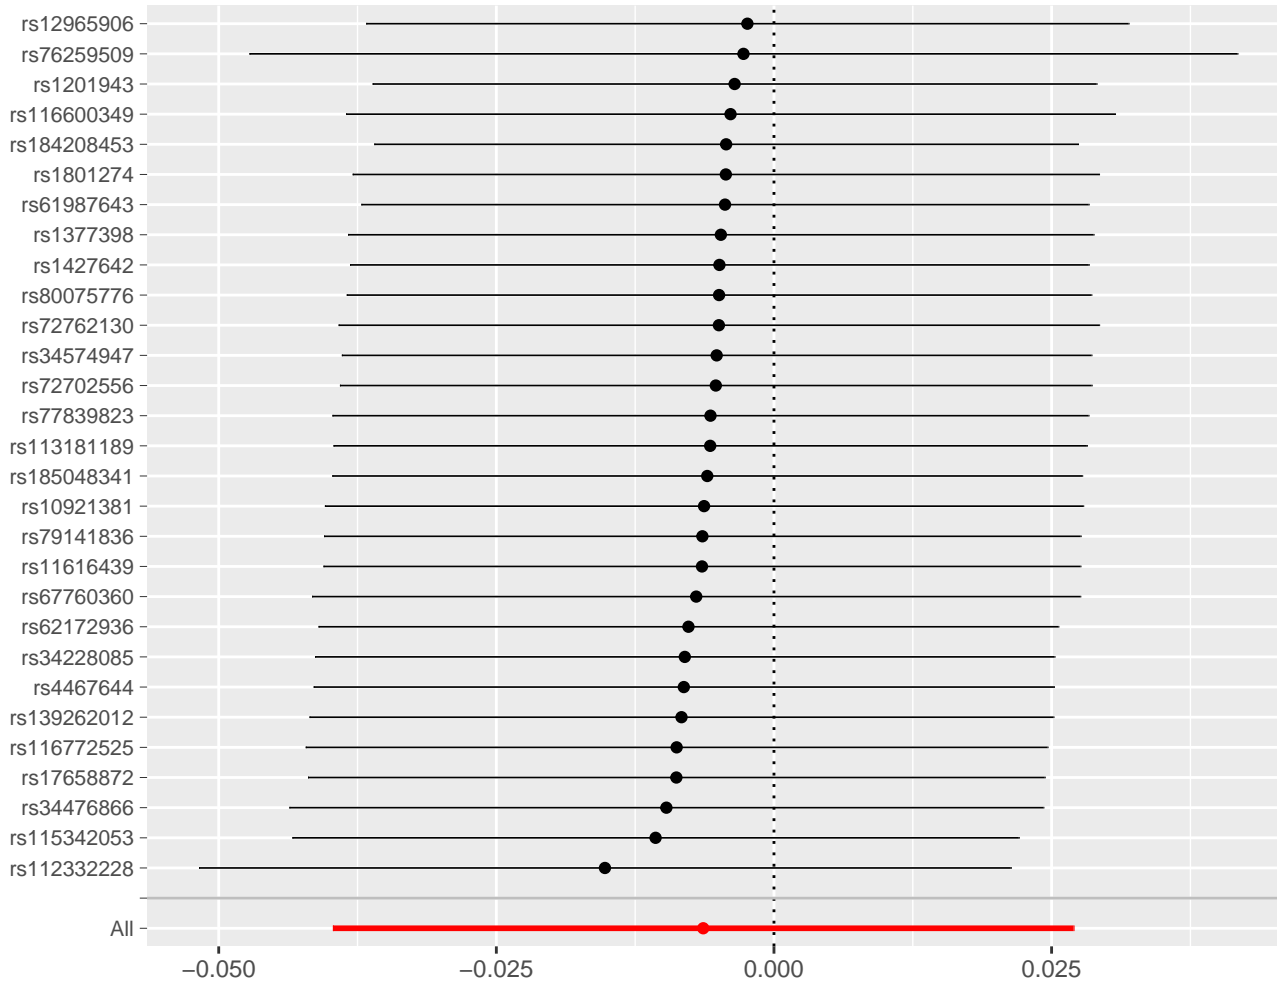

MR leave-one-out sensitivity analysis for 'CD33dim HLA DR+ CD11b- AC' on 'Aplastic anemia'



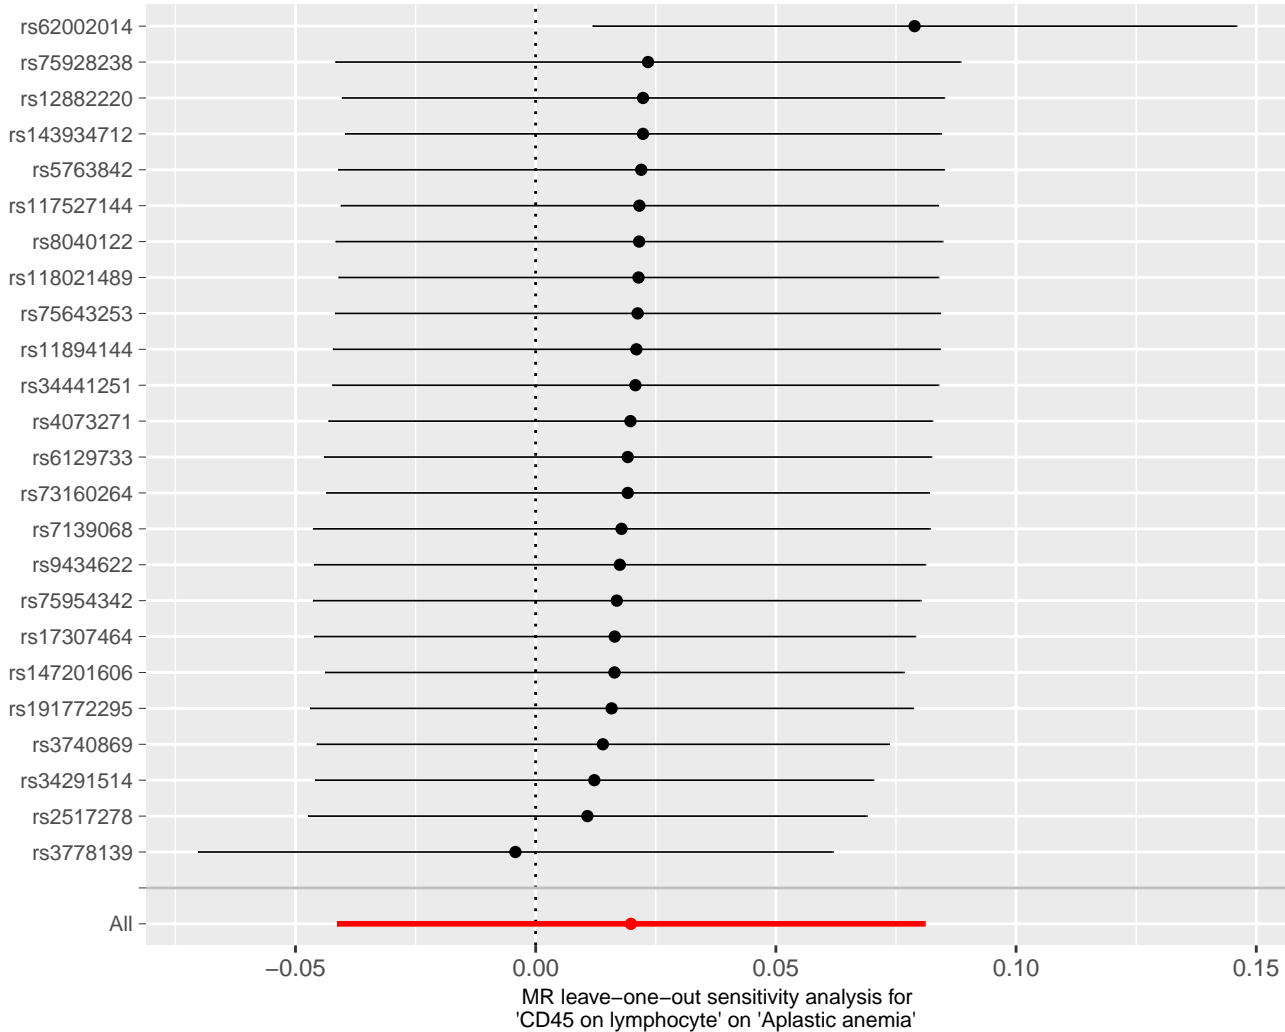

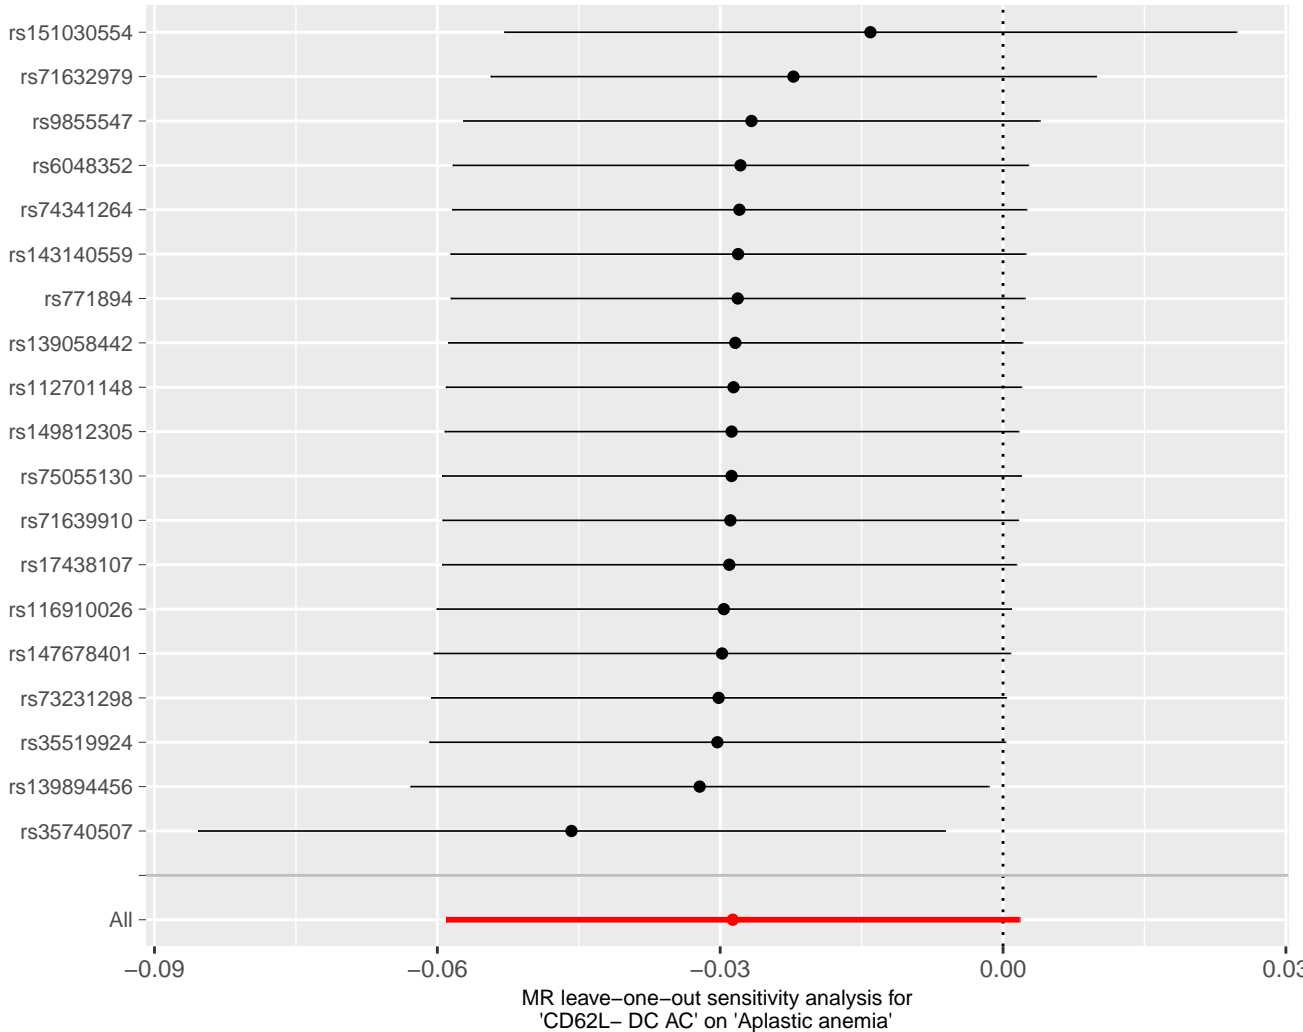

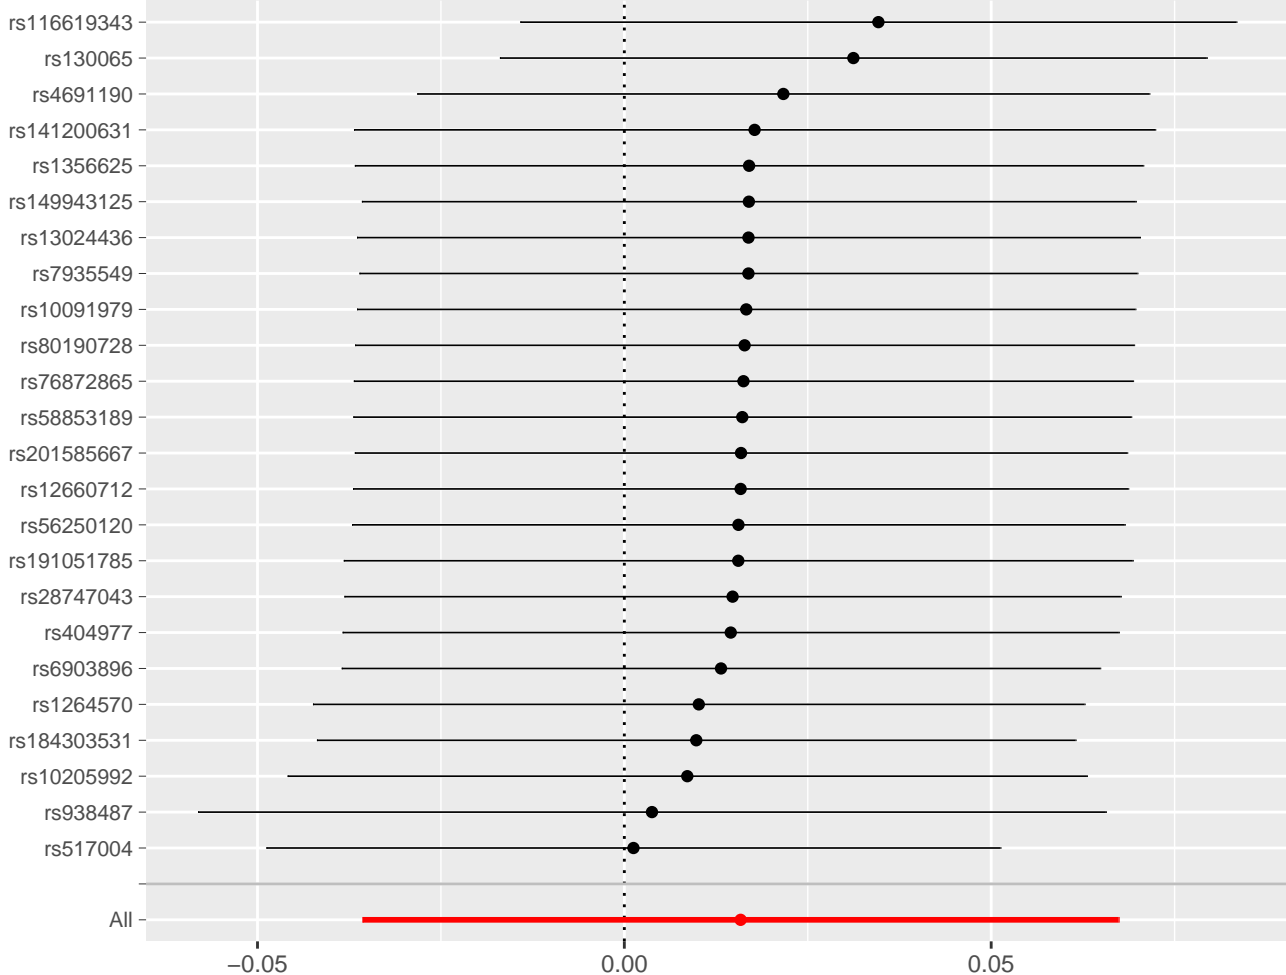

MR leave-one-out sensitivity analysis for 'CD8 on CD28+ CD45RA+ CD8br' on 'Aplastic anemia'

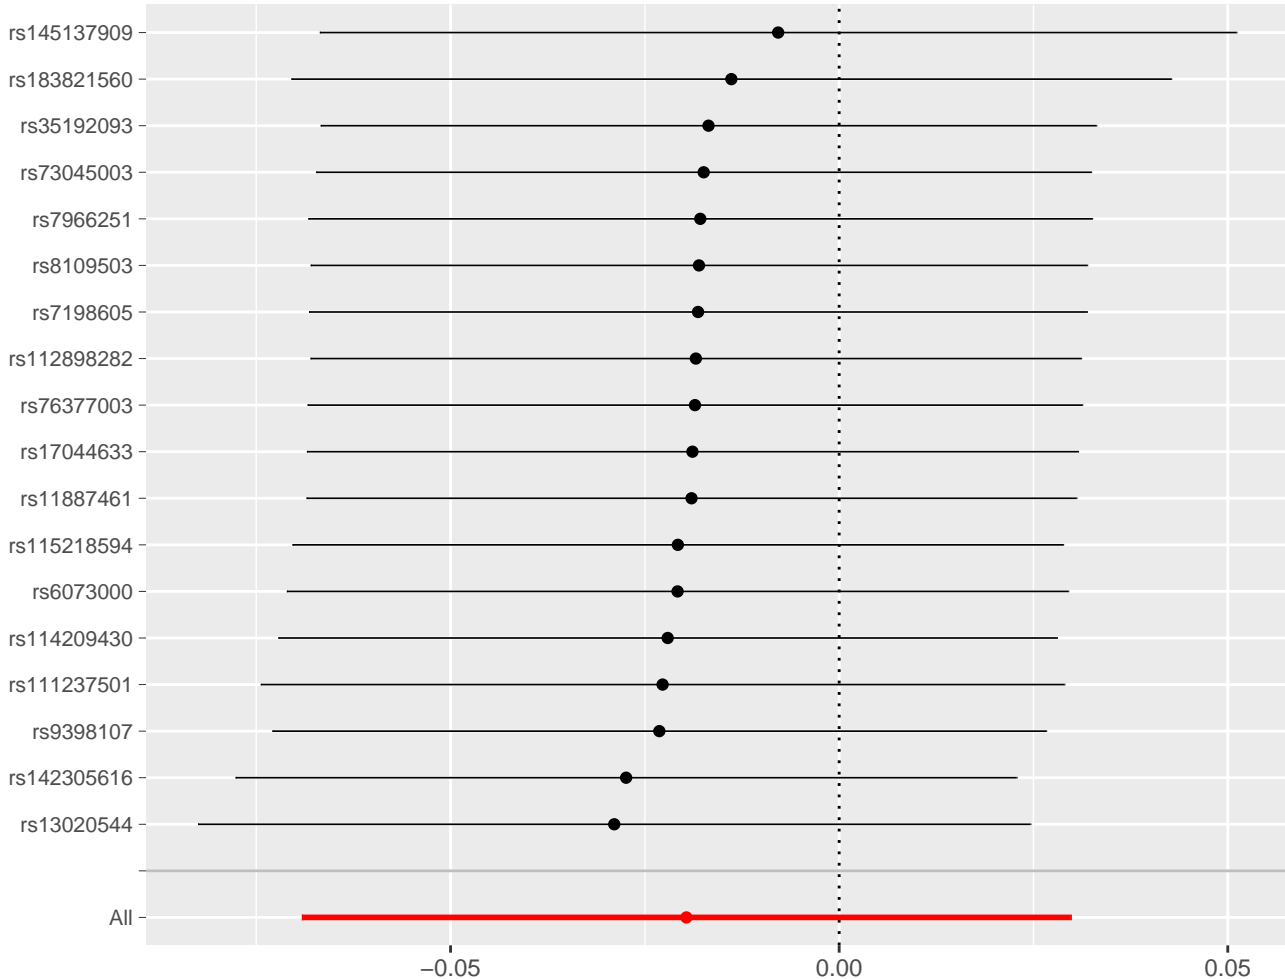

MR leave-one-out sensitivity analysis for 'IgD- CD24- %B cell' on 'Aplastic anemia'

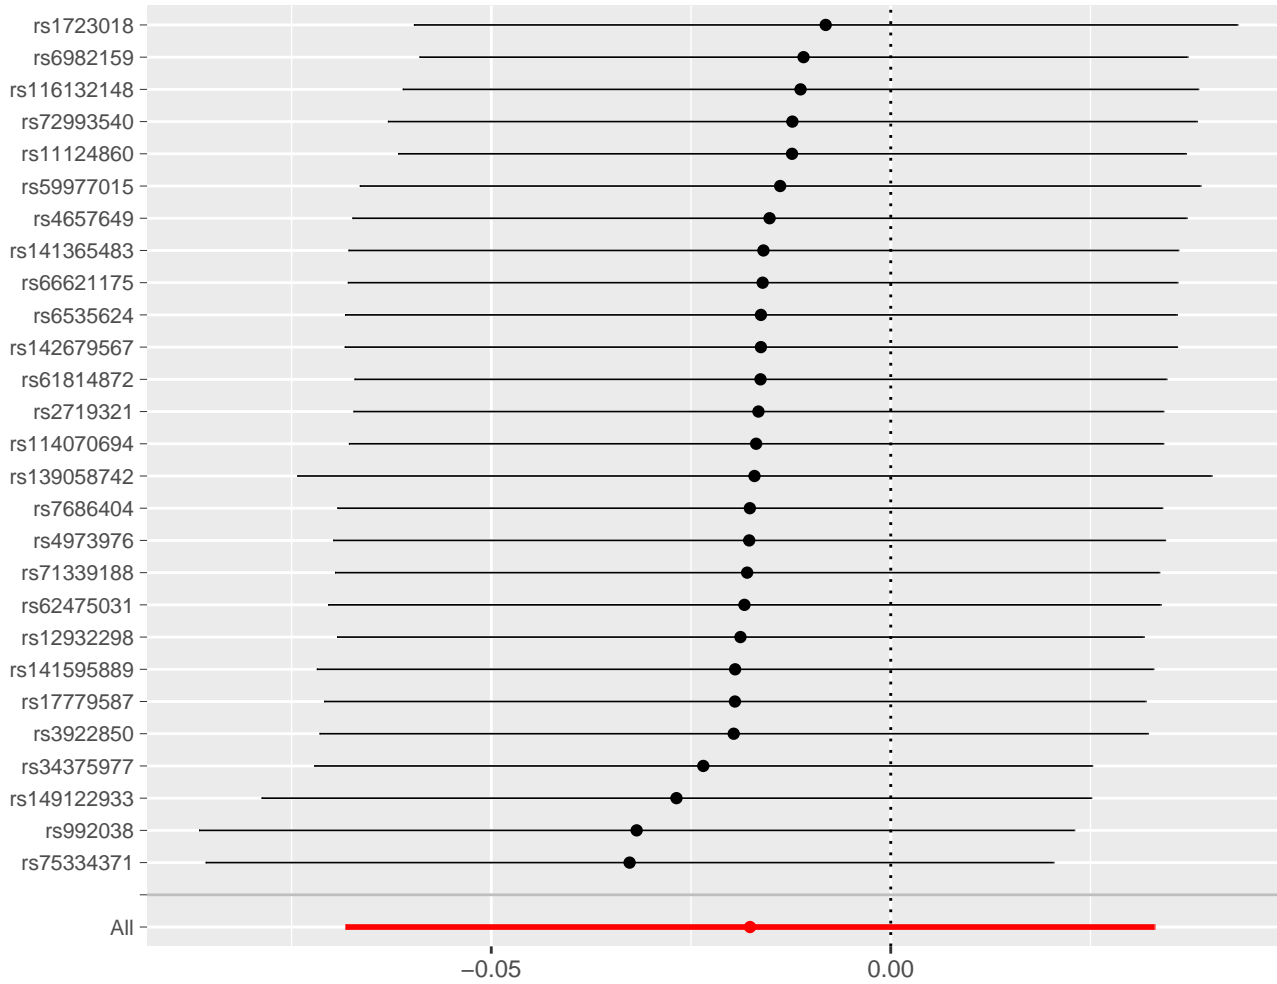

MR leave-one-out sensitivity analysis for 'CD3 on TD CD4+' on 'Aplastic anemia'

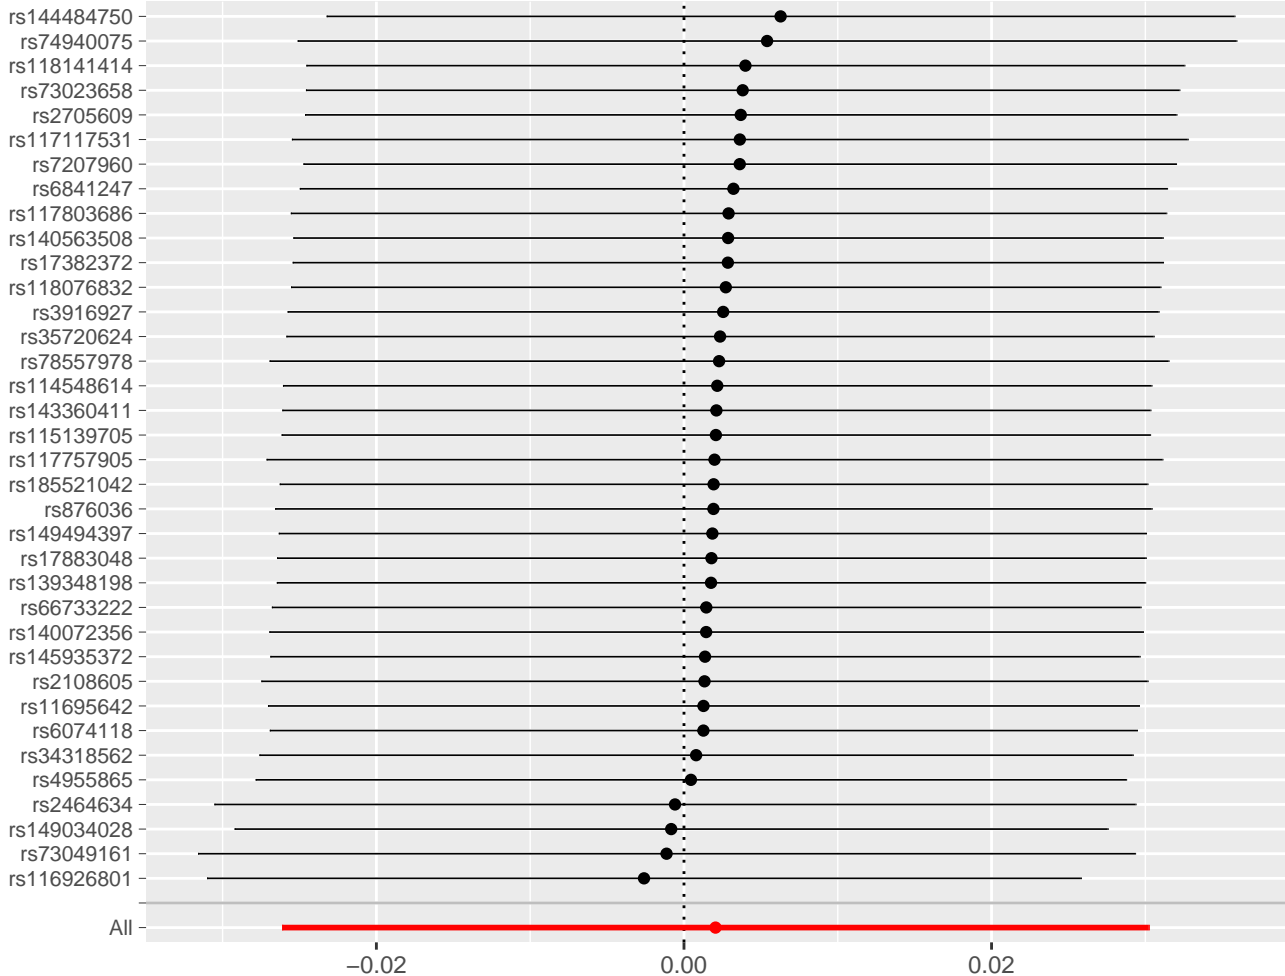

MR leave-one-out sensitivity analysis for 'CD33- HLA DR+ AC' on 'Aplastic anemia'

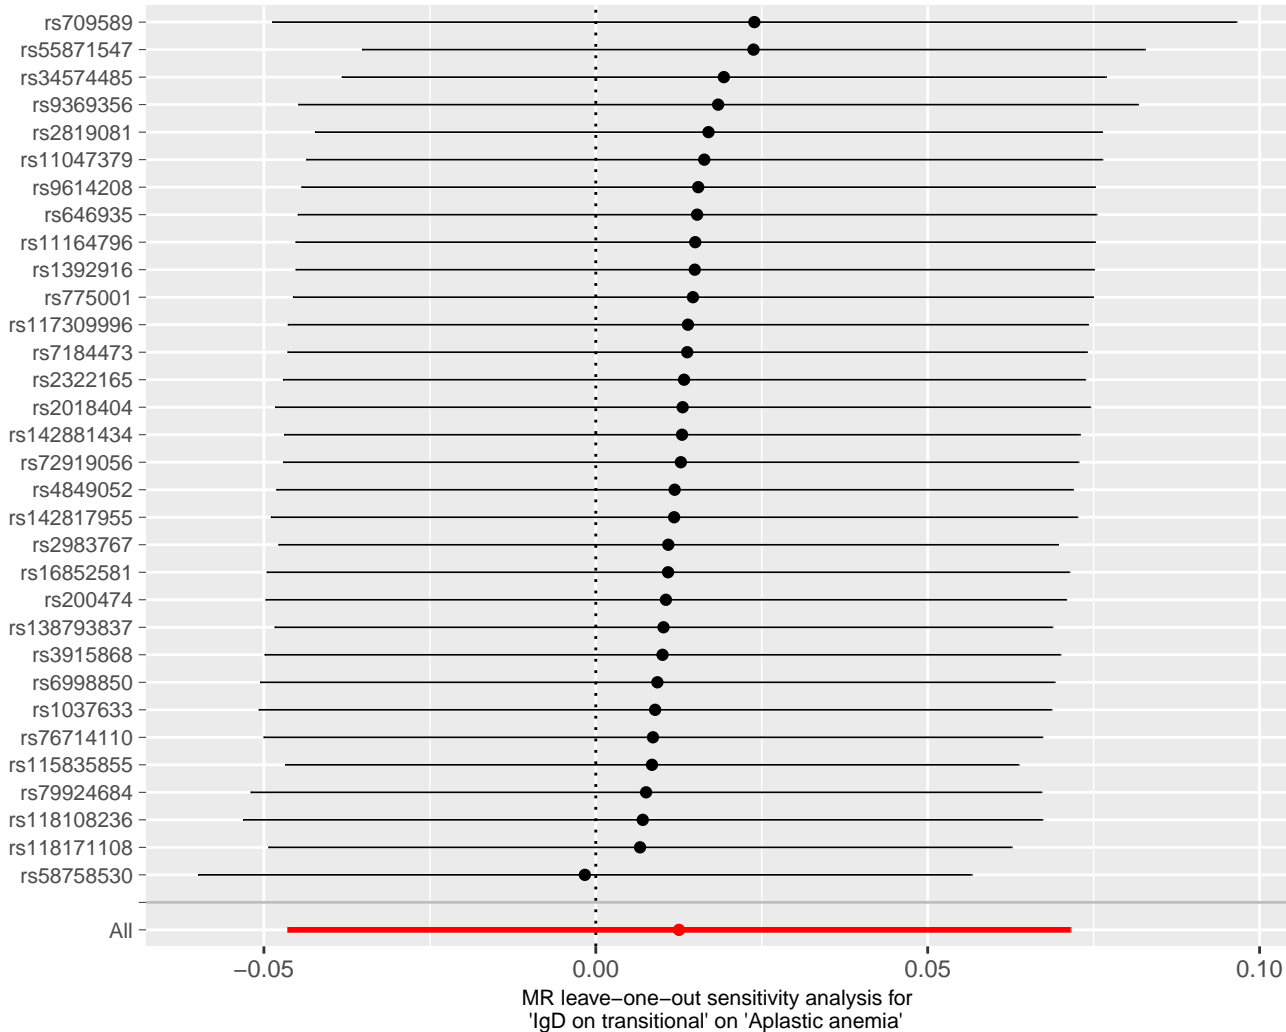

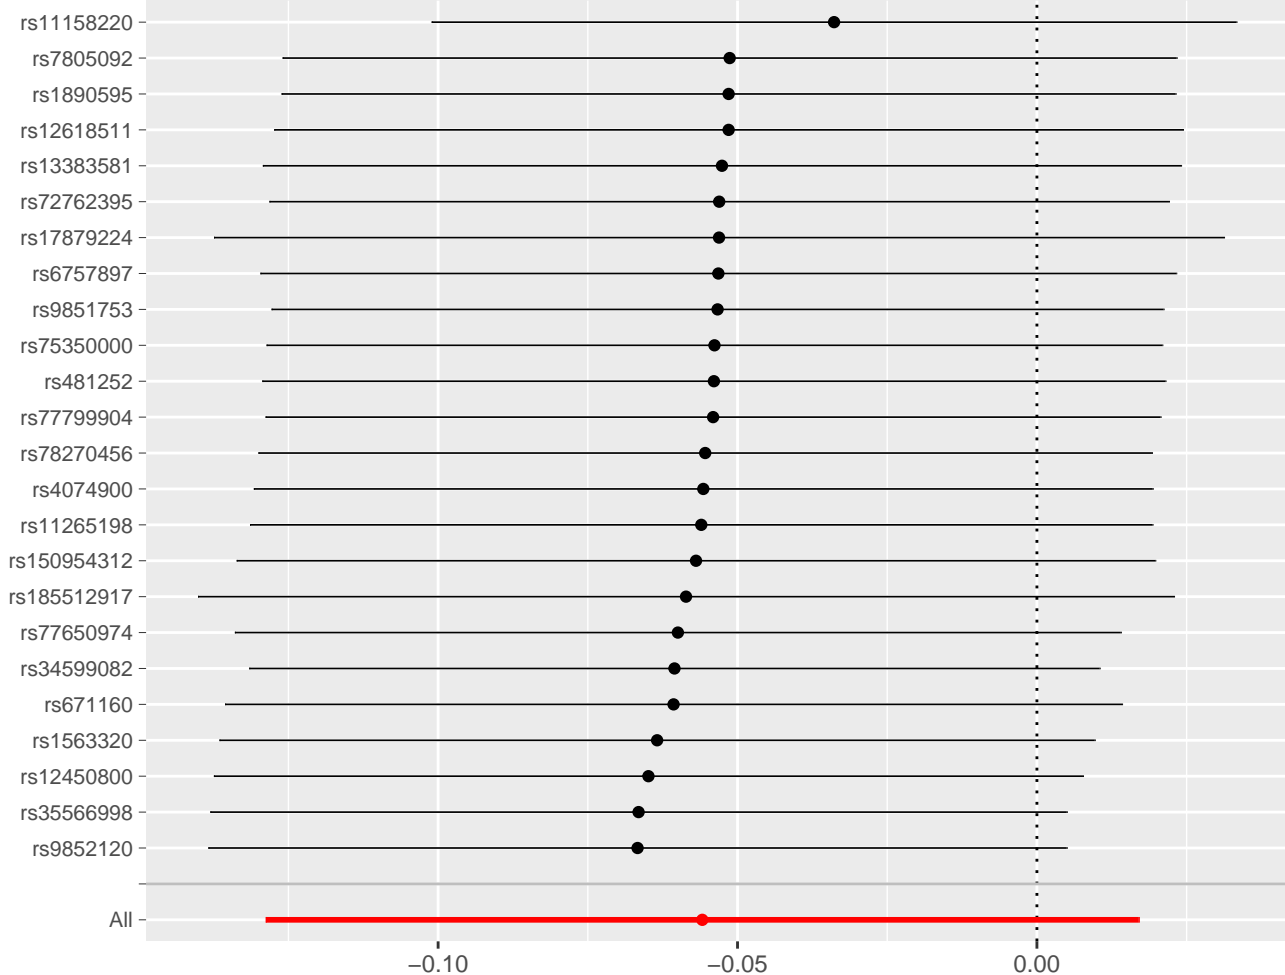



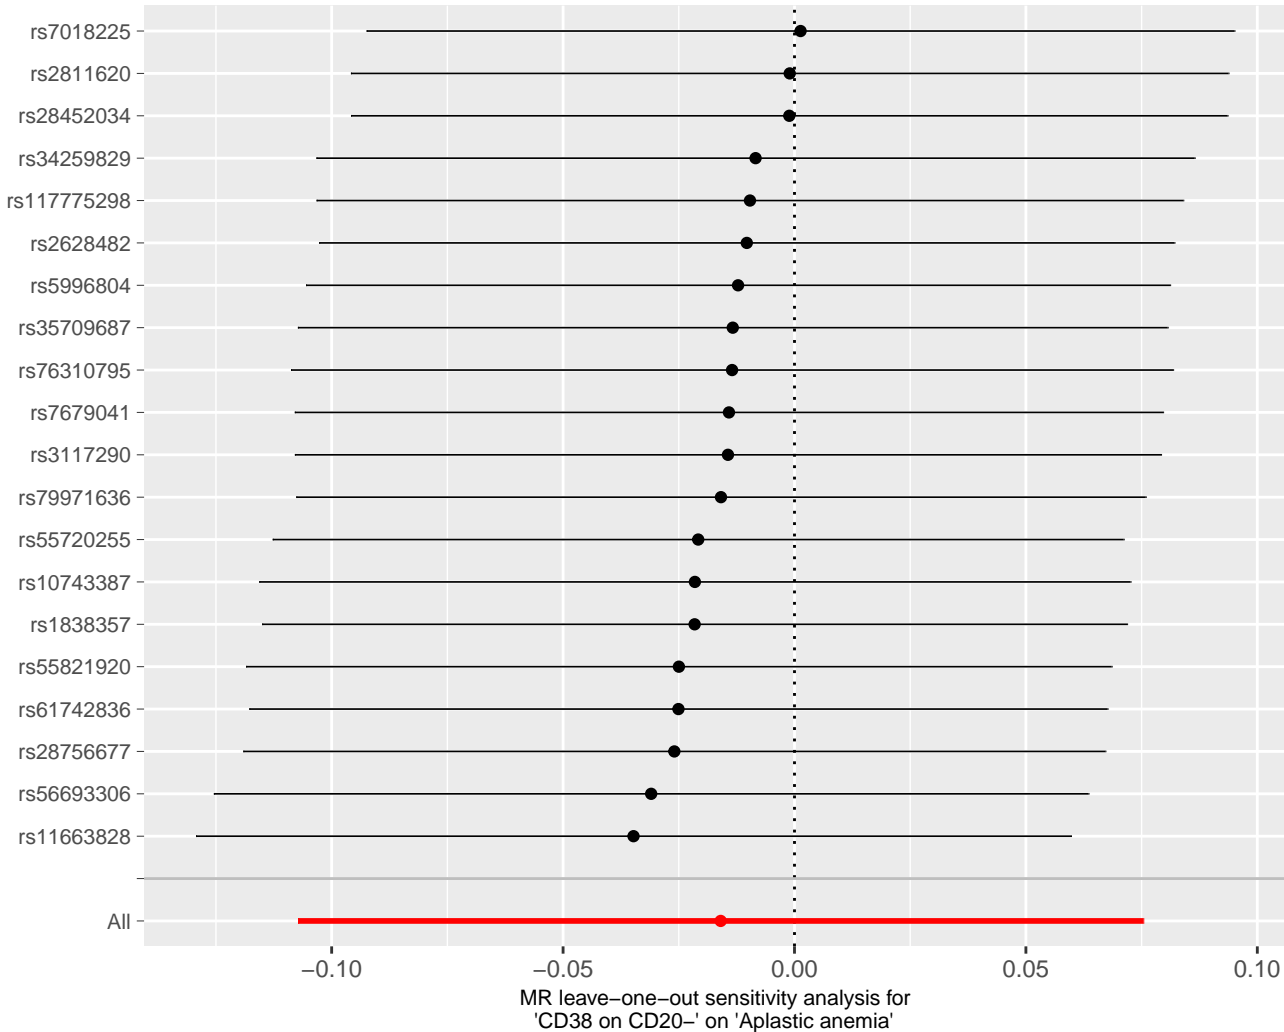

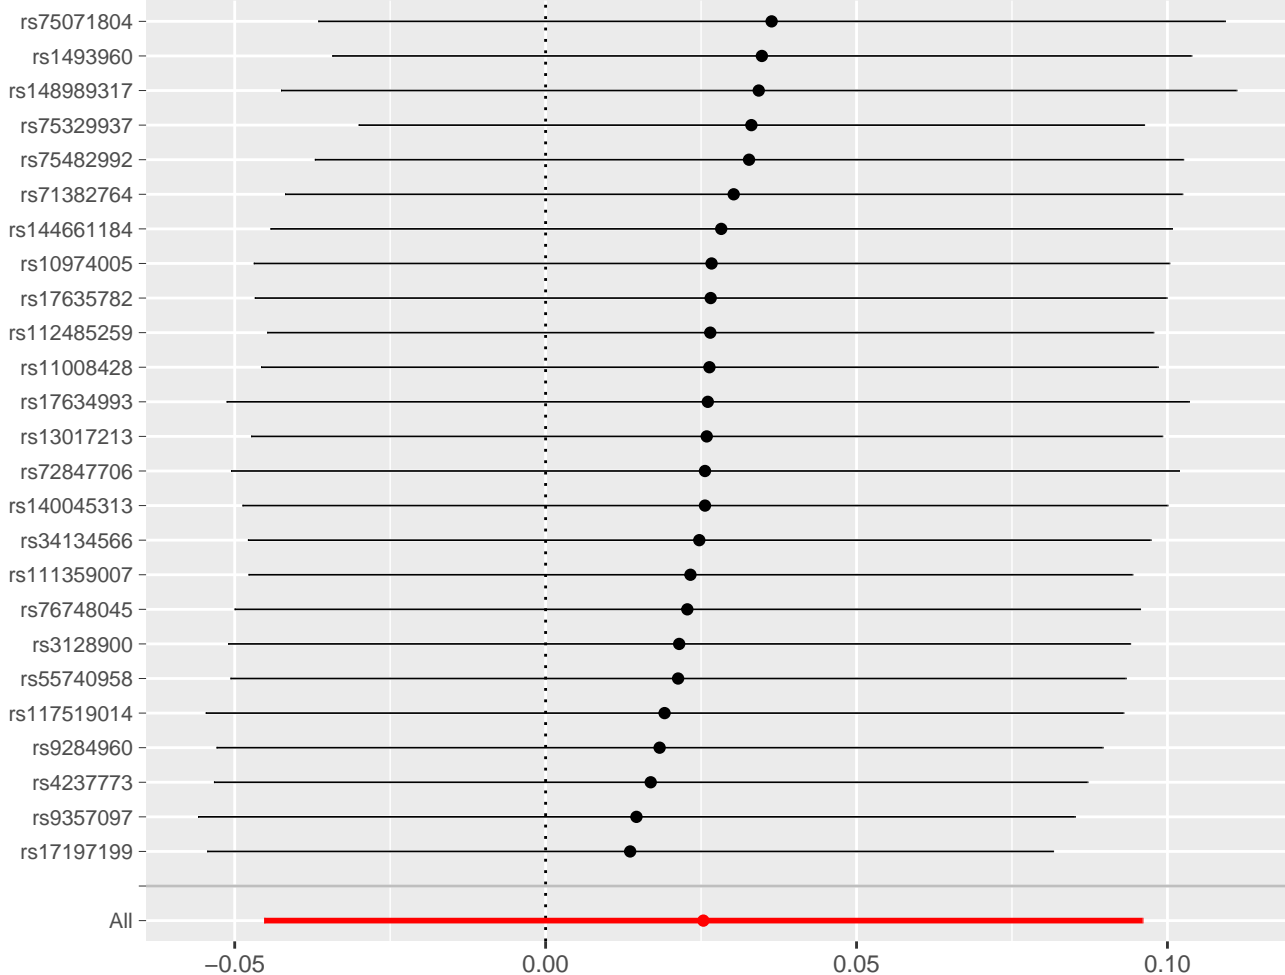

MR leave-one-out sensitivity analysis for 'CD8 on CD39+ CD8br' on 'Aplastic anemia'

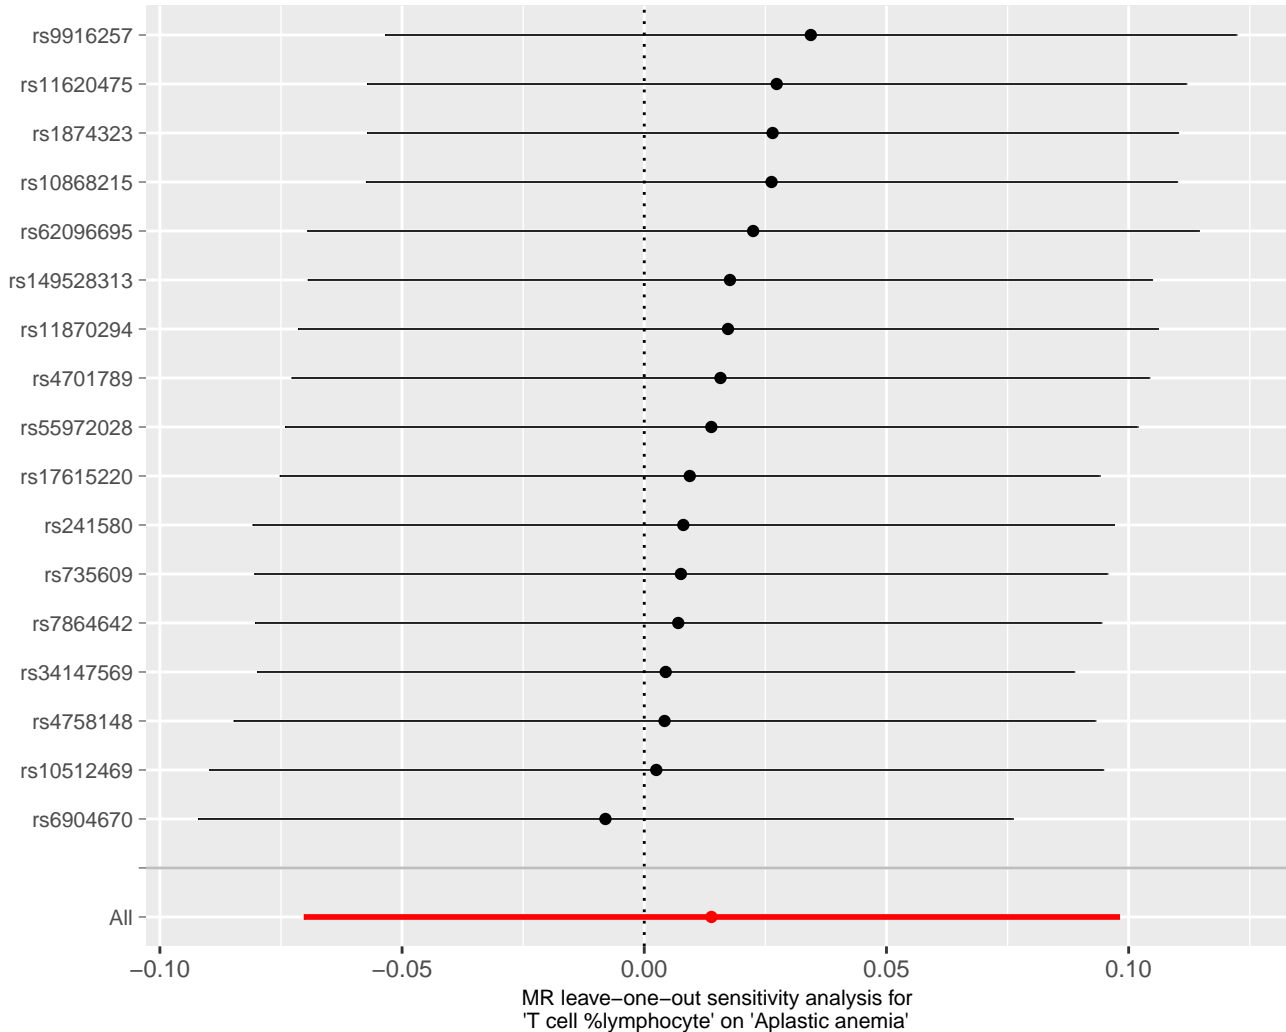

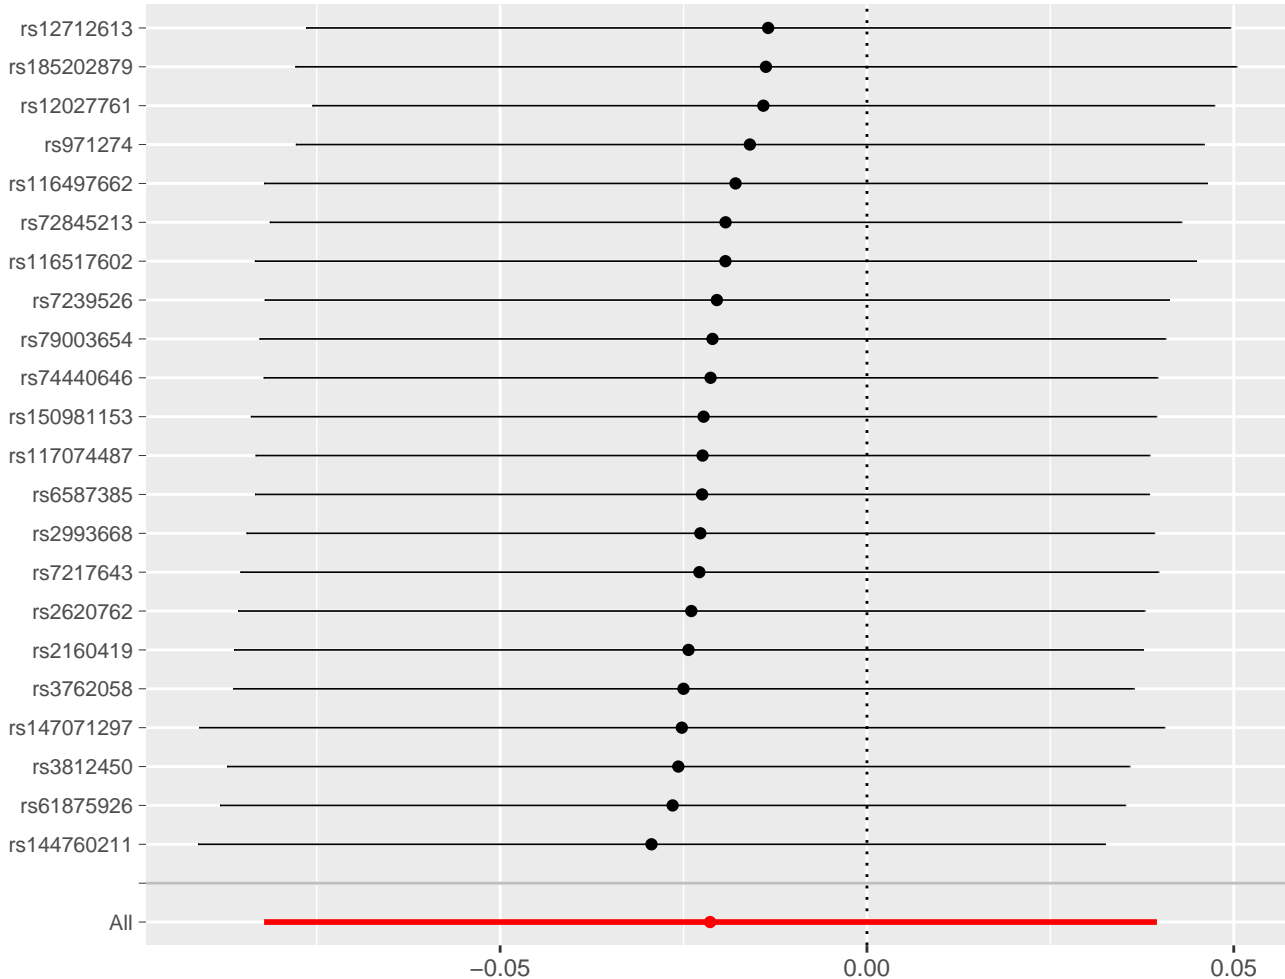

MR leave-one-out sensitivity analysis for 'CD45RA on naive CD8br' on 'Aplastic anemia'

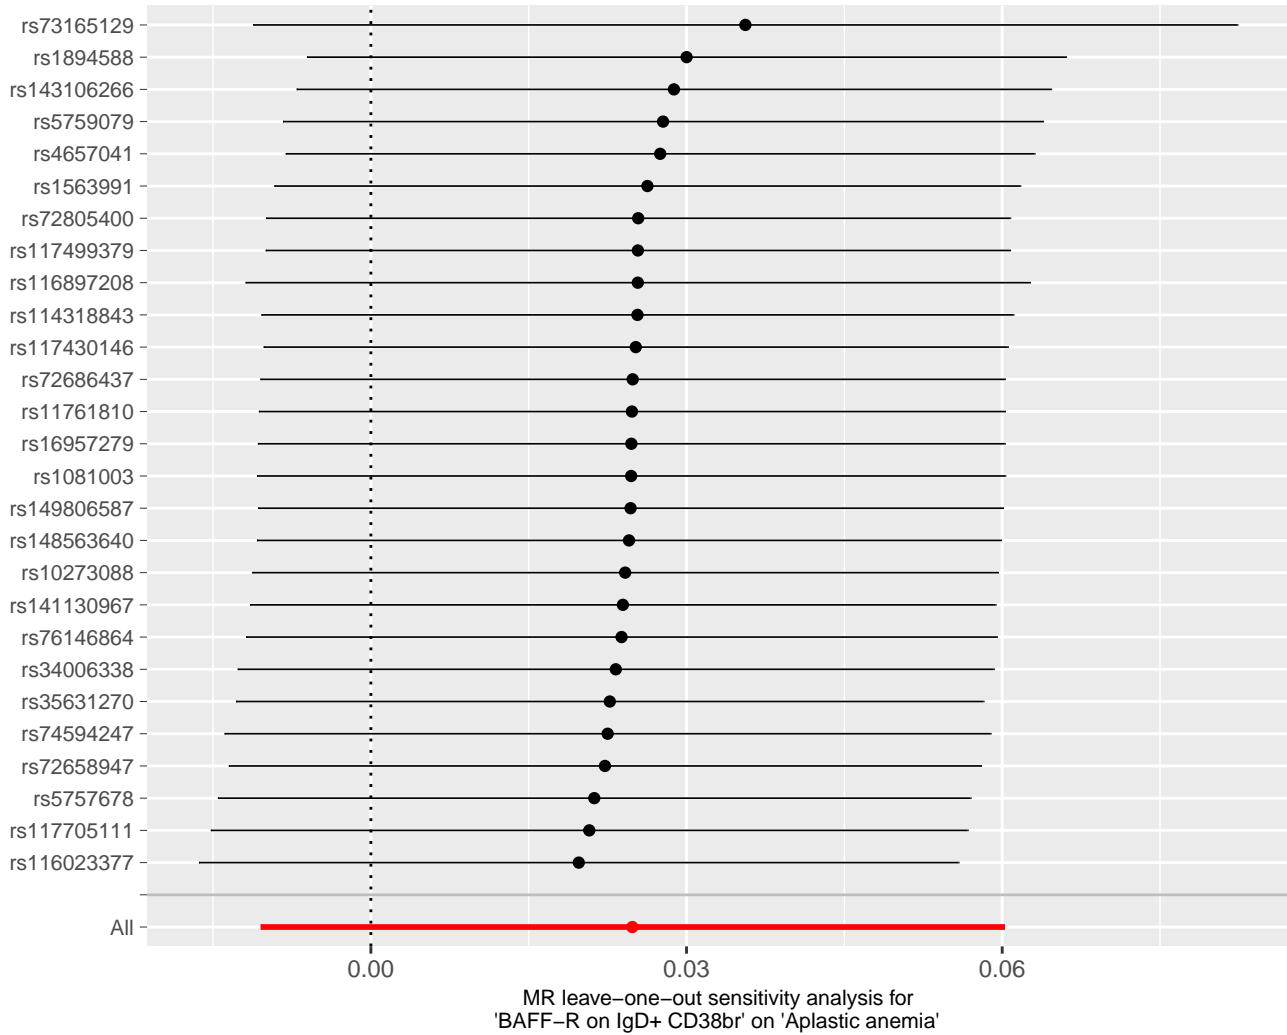

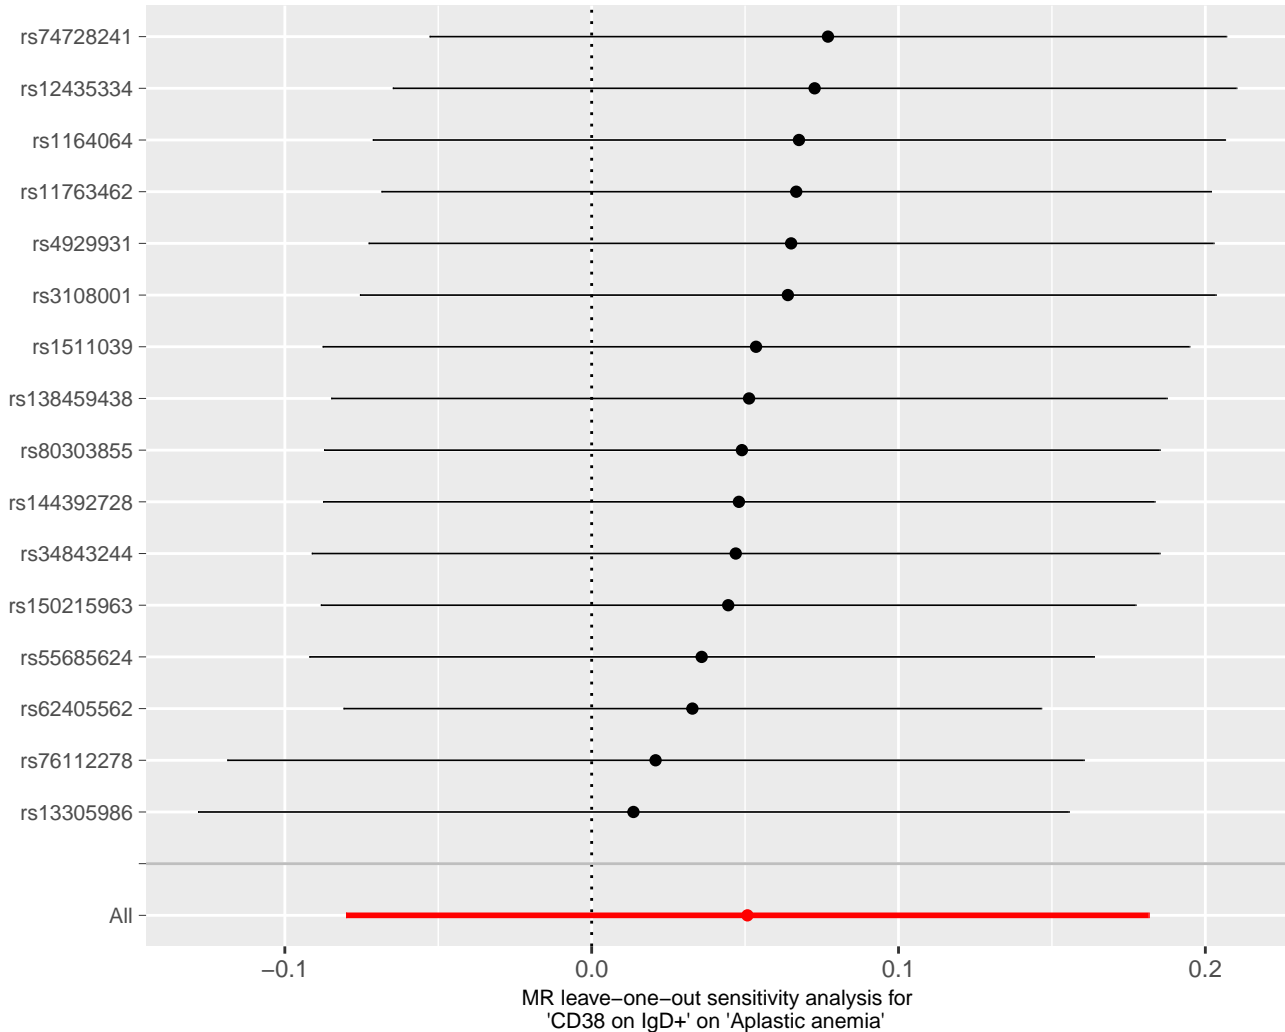

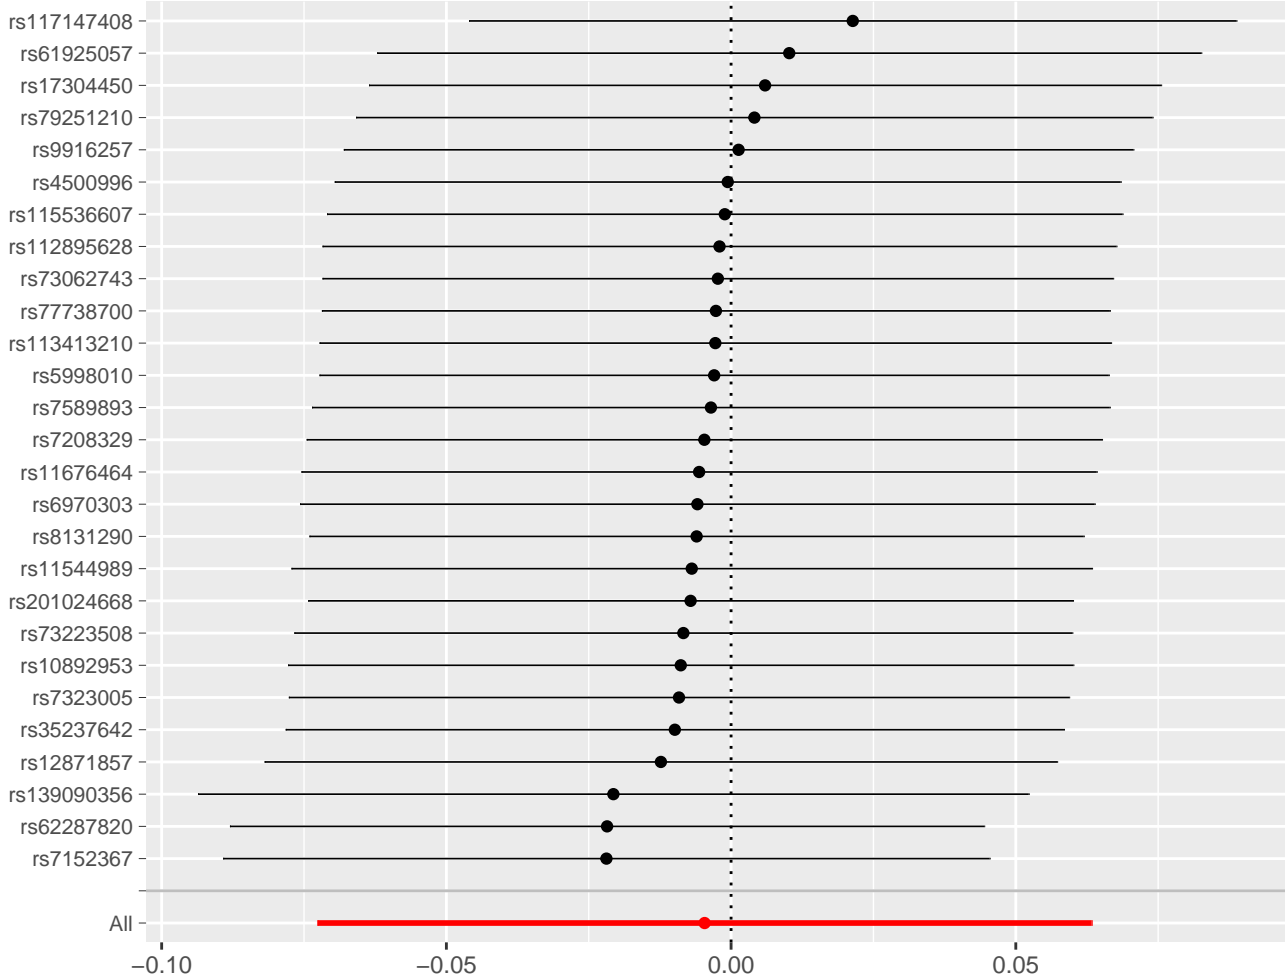

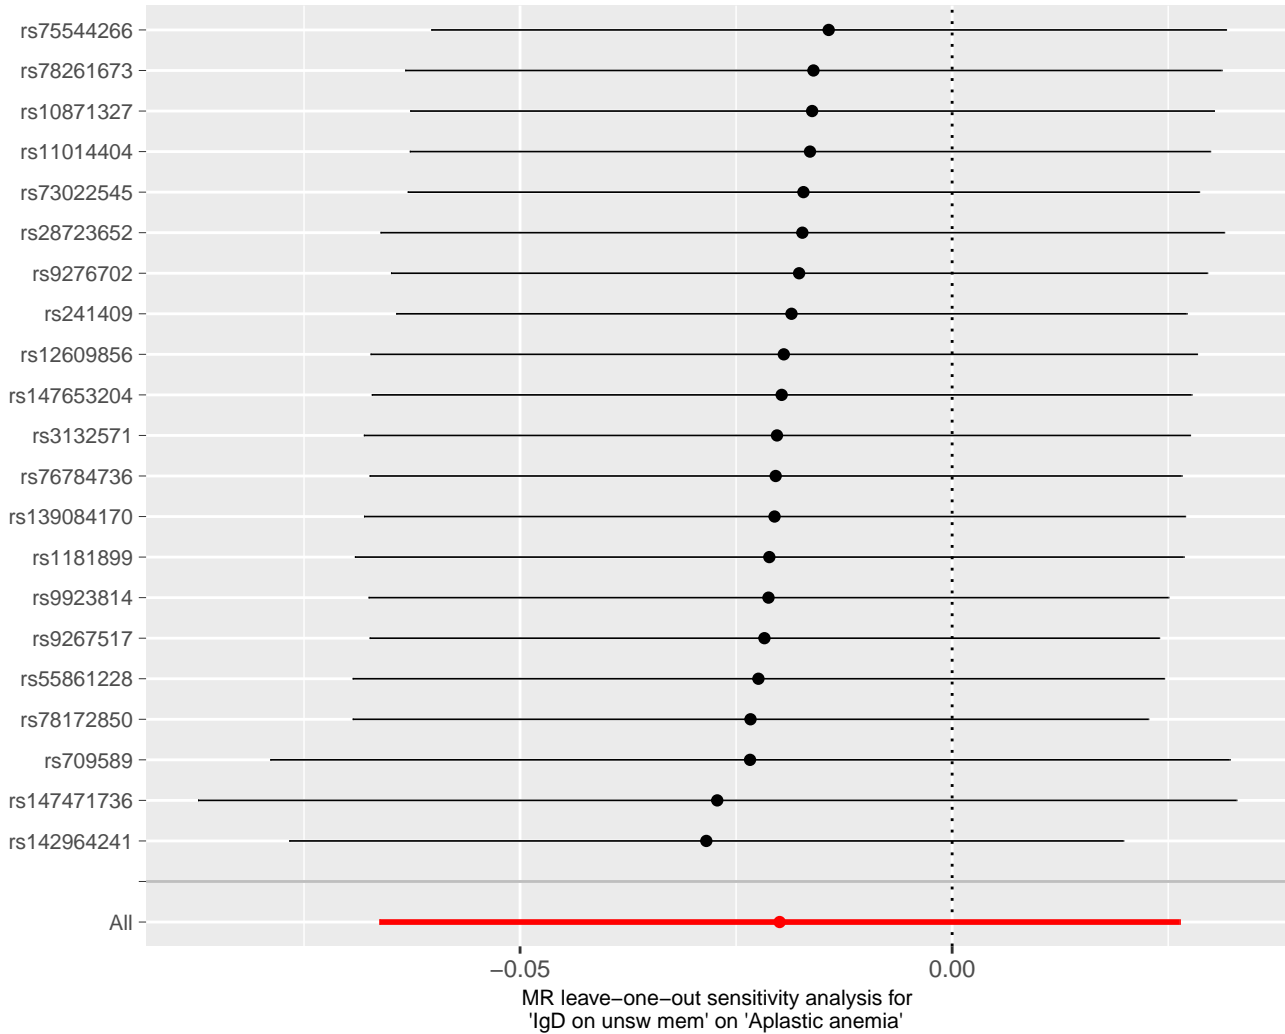



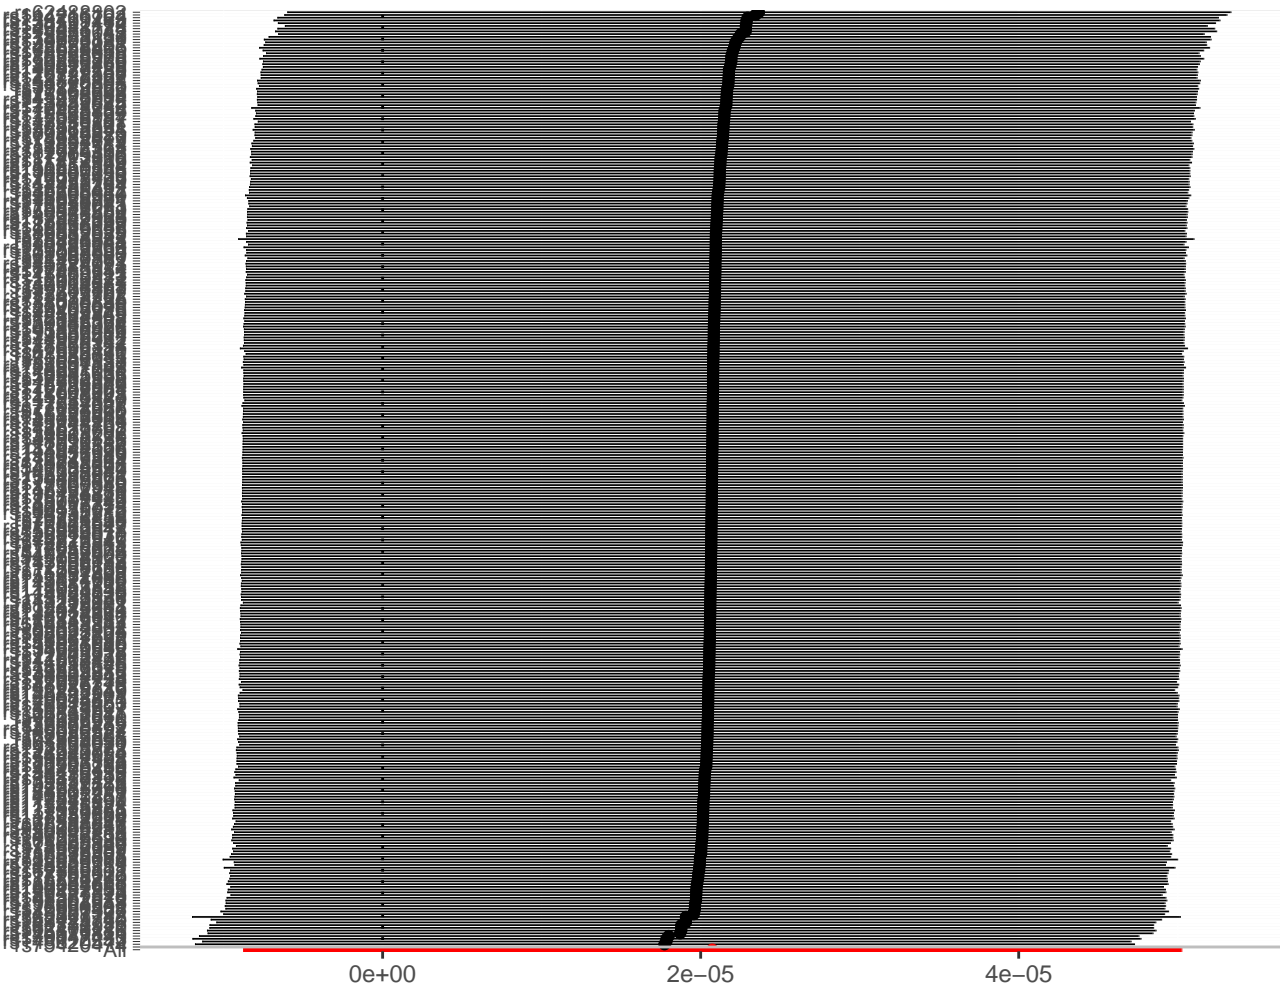

MR leave-one-out sensitivity analysis for 'CD45RA- CD28- CD8br AC' on 'Aplastic anemia'

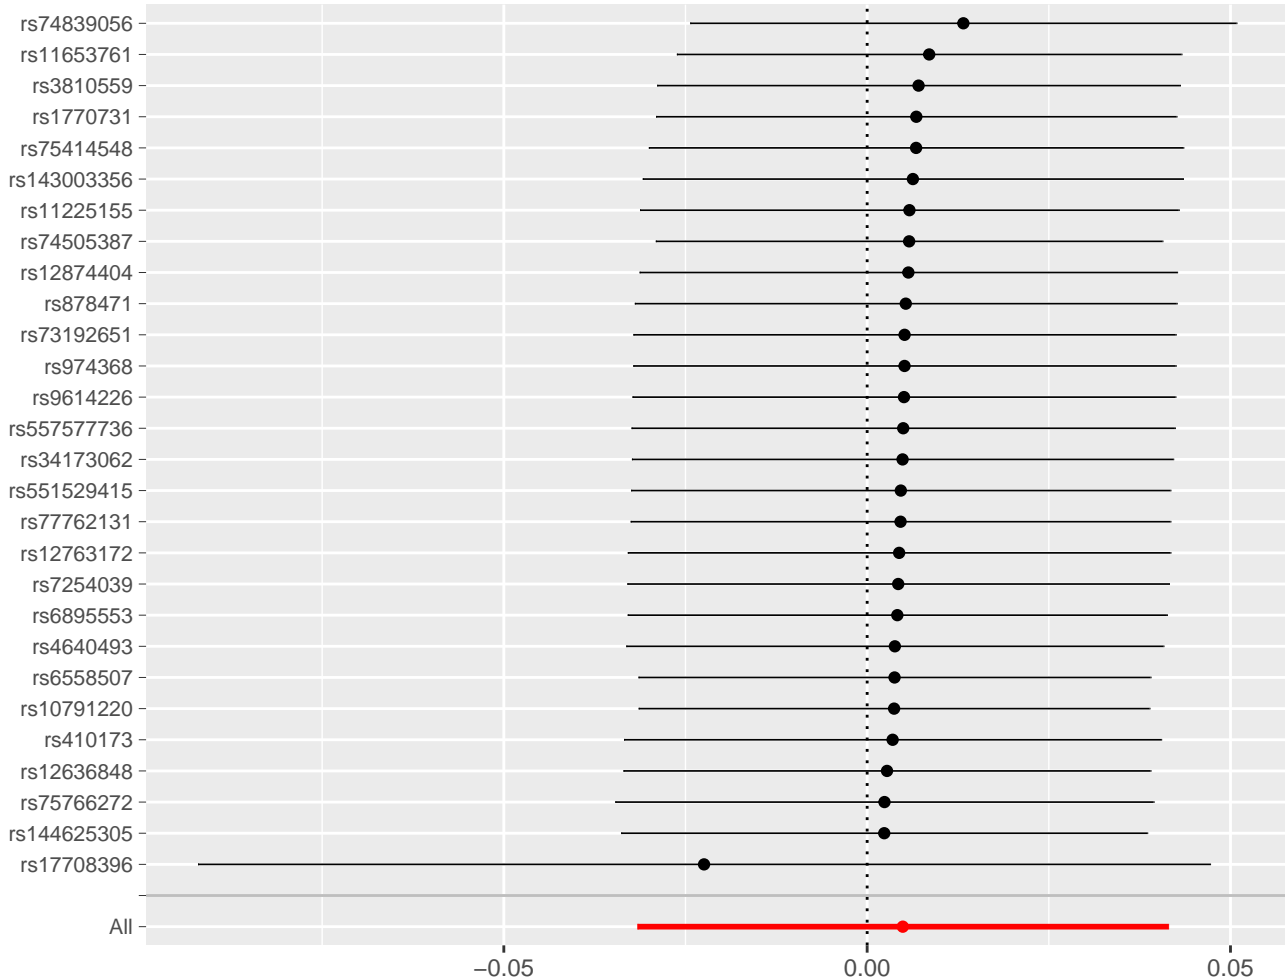

MR leave-one-out sensitivity analysis for 'Memory B cell %lymphocyte' on 'Aplastic anemia'

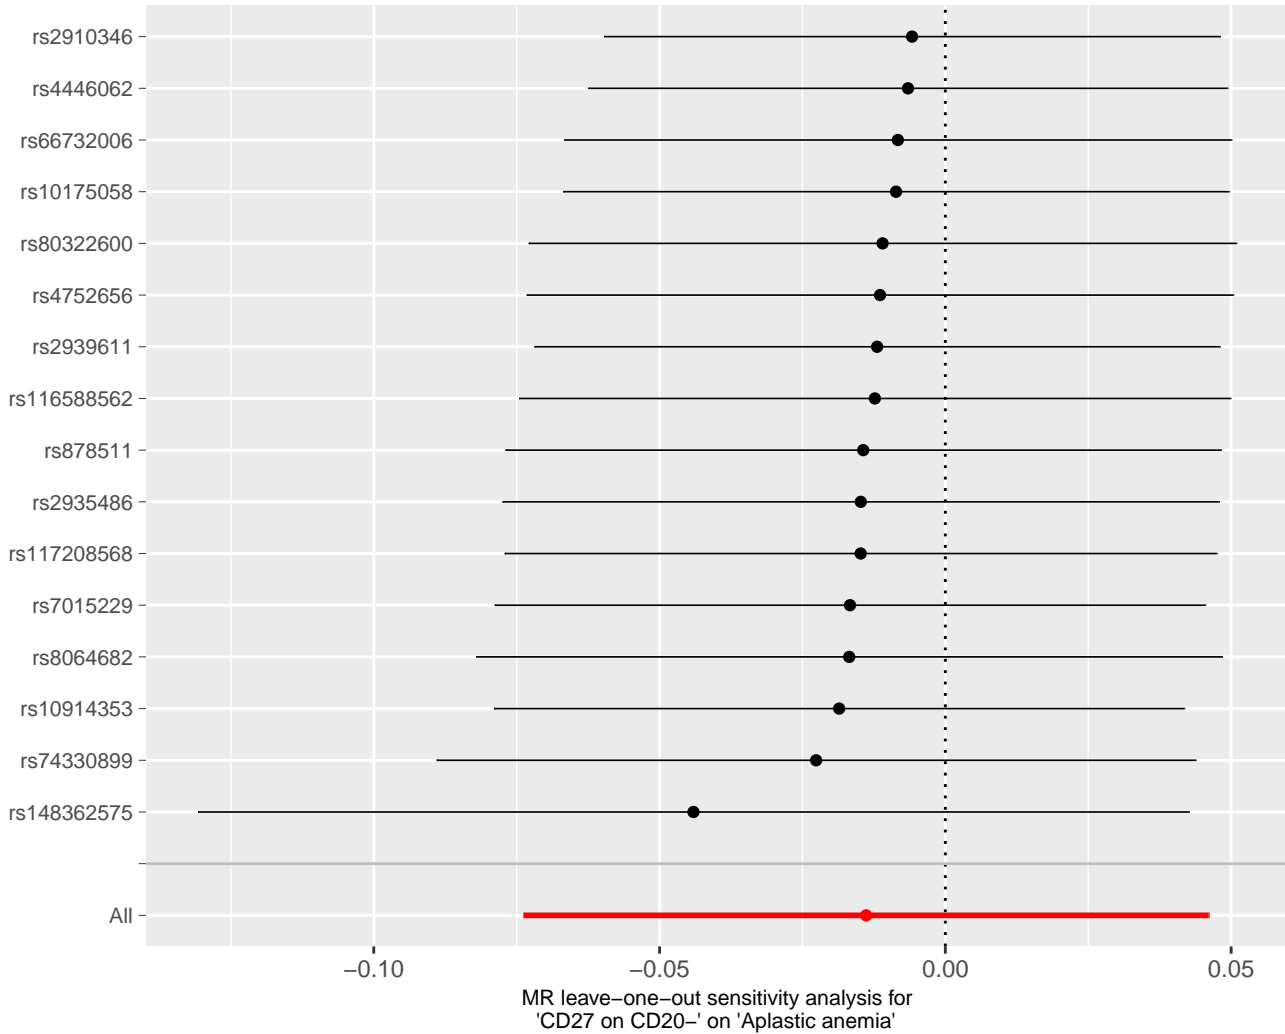

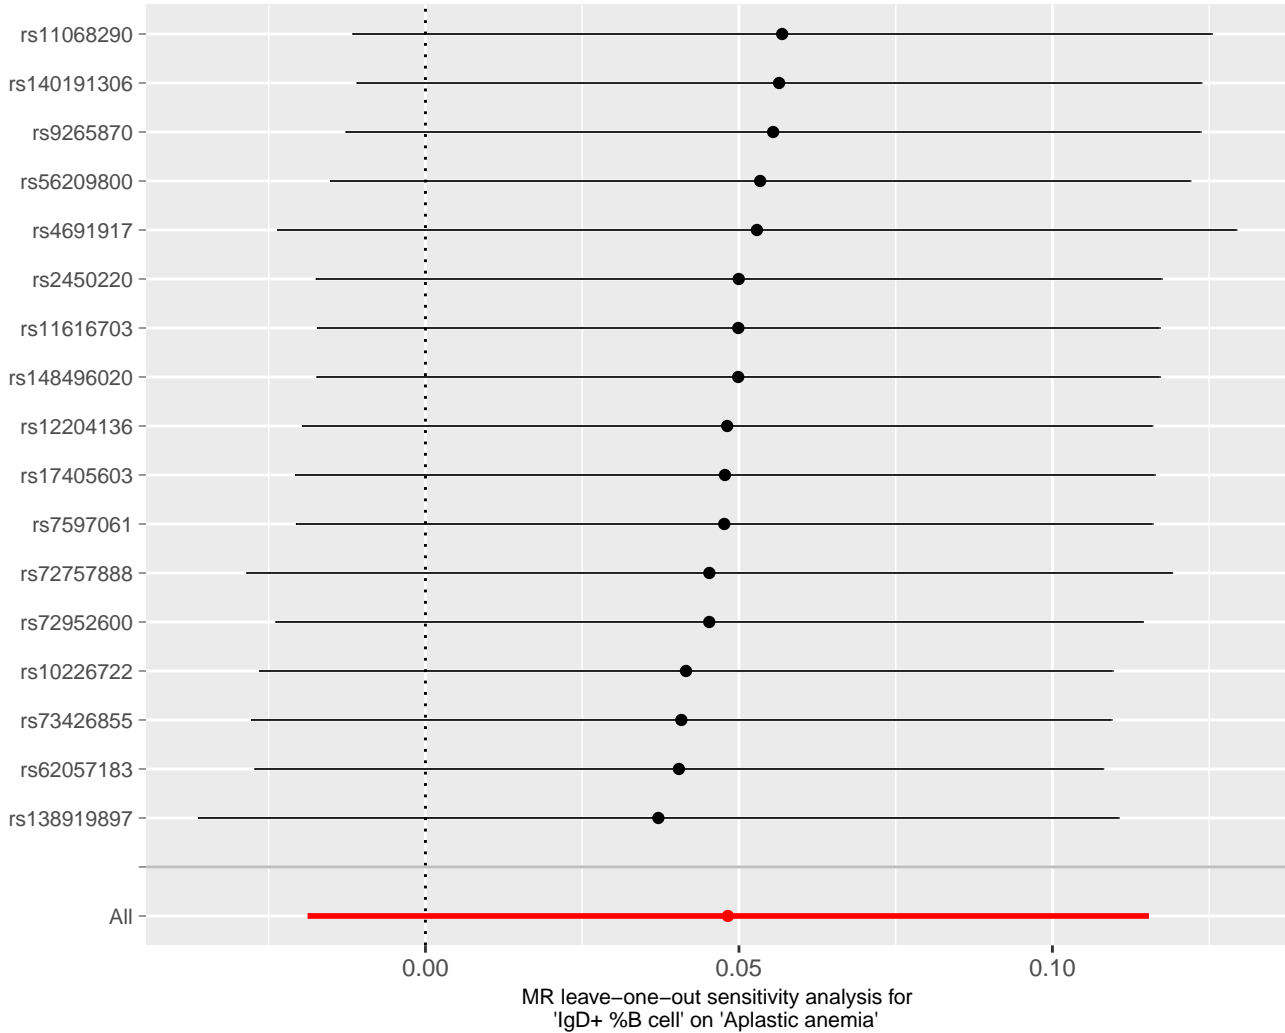

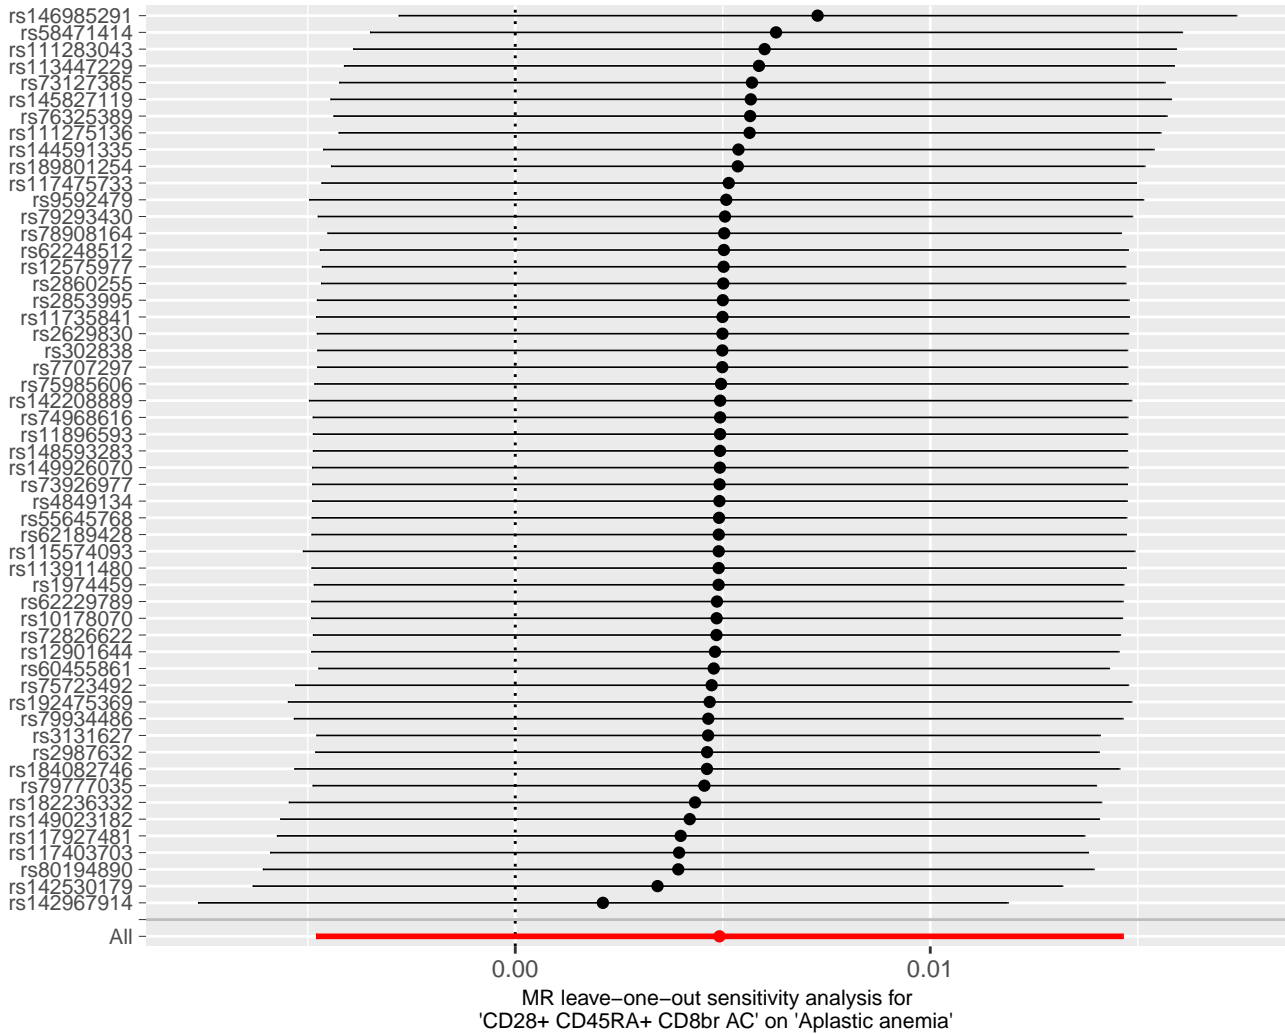

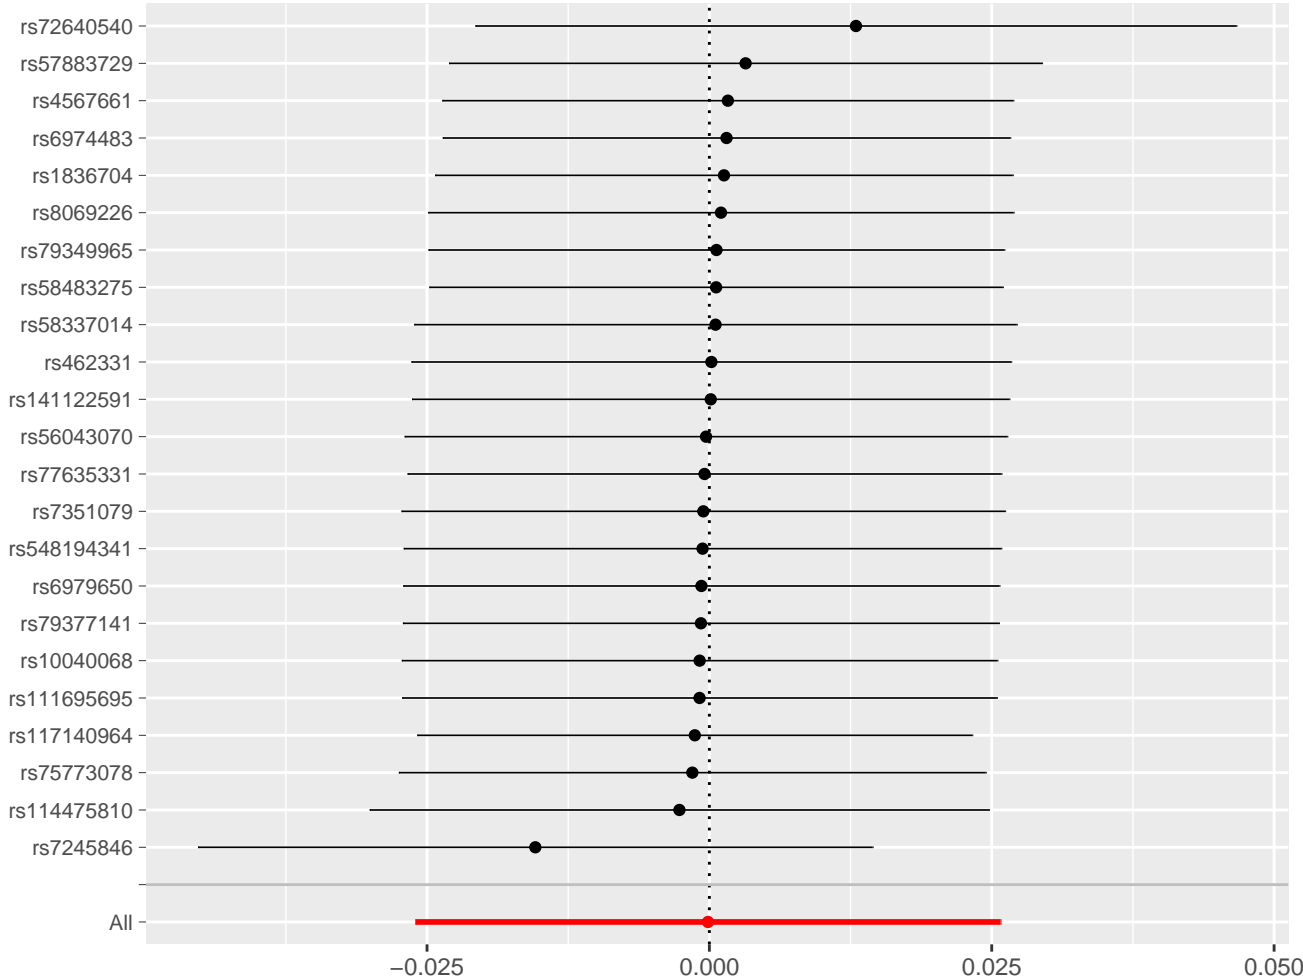

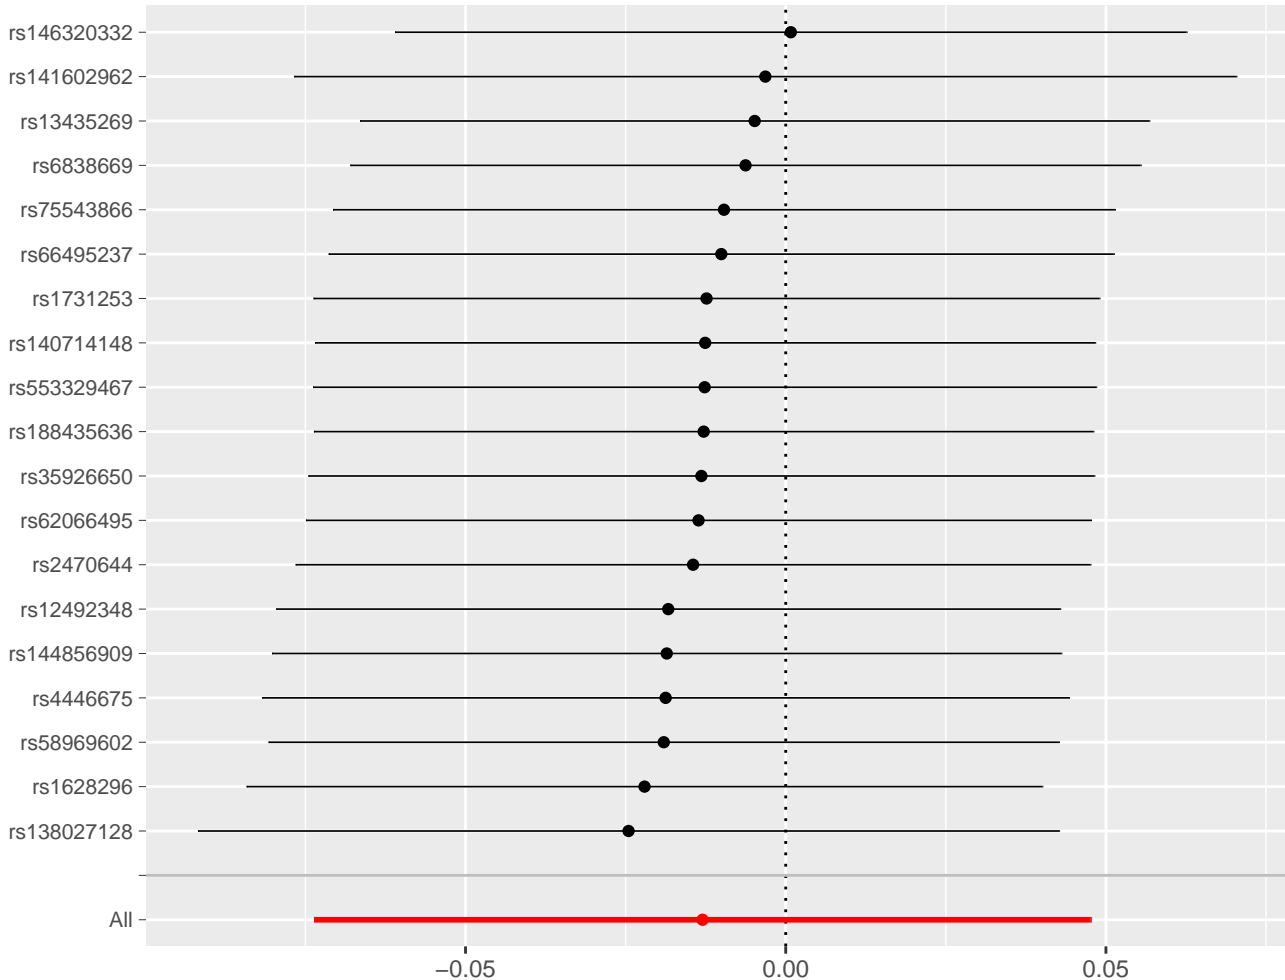

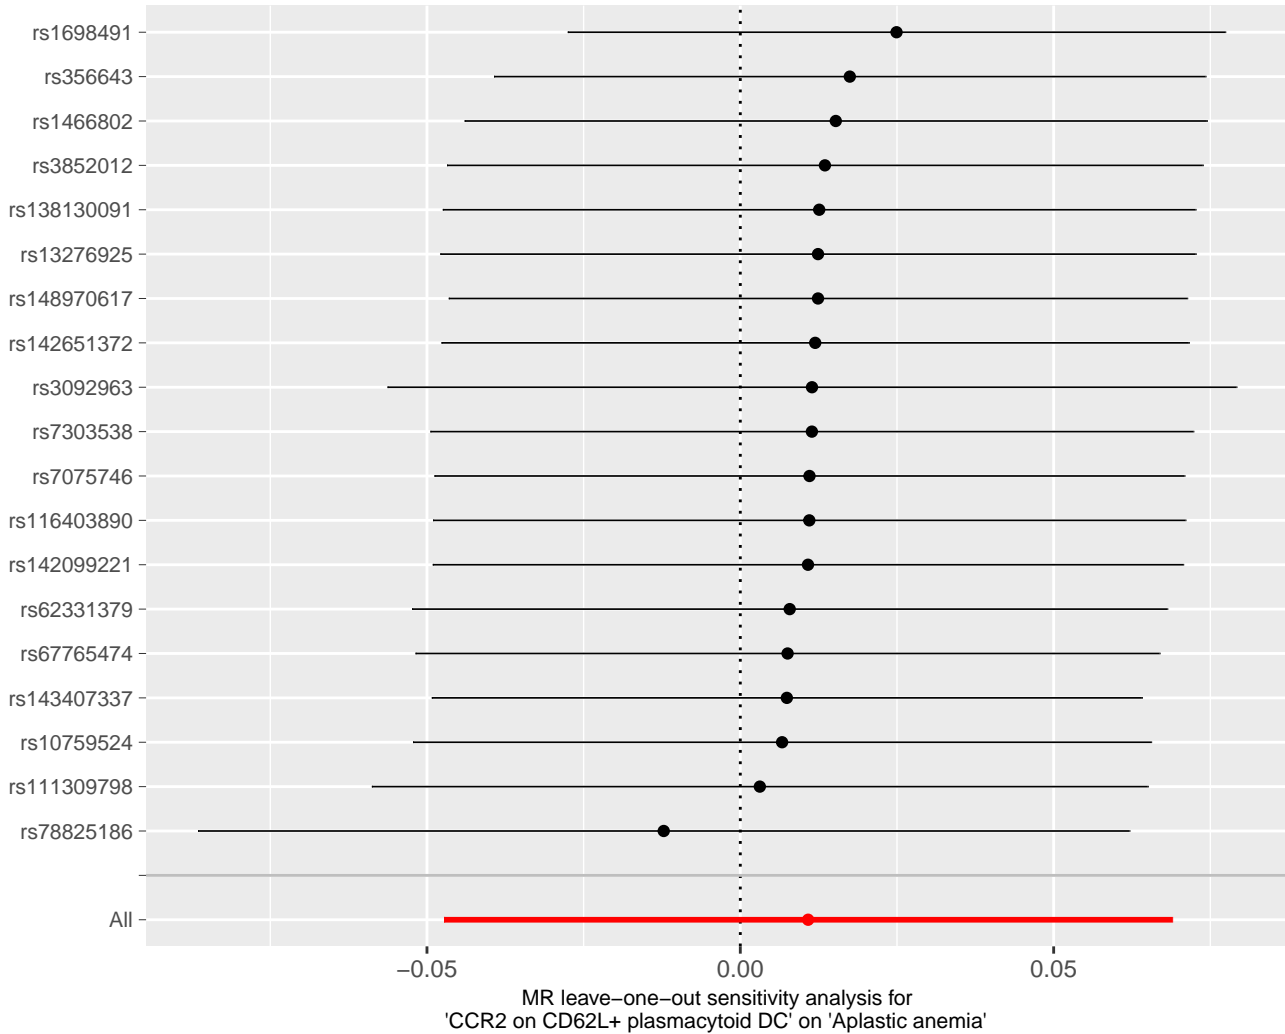



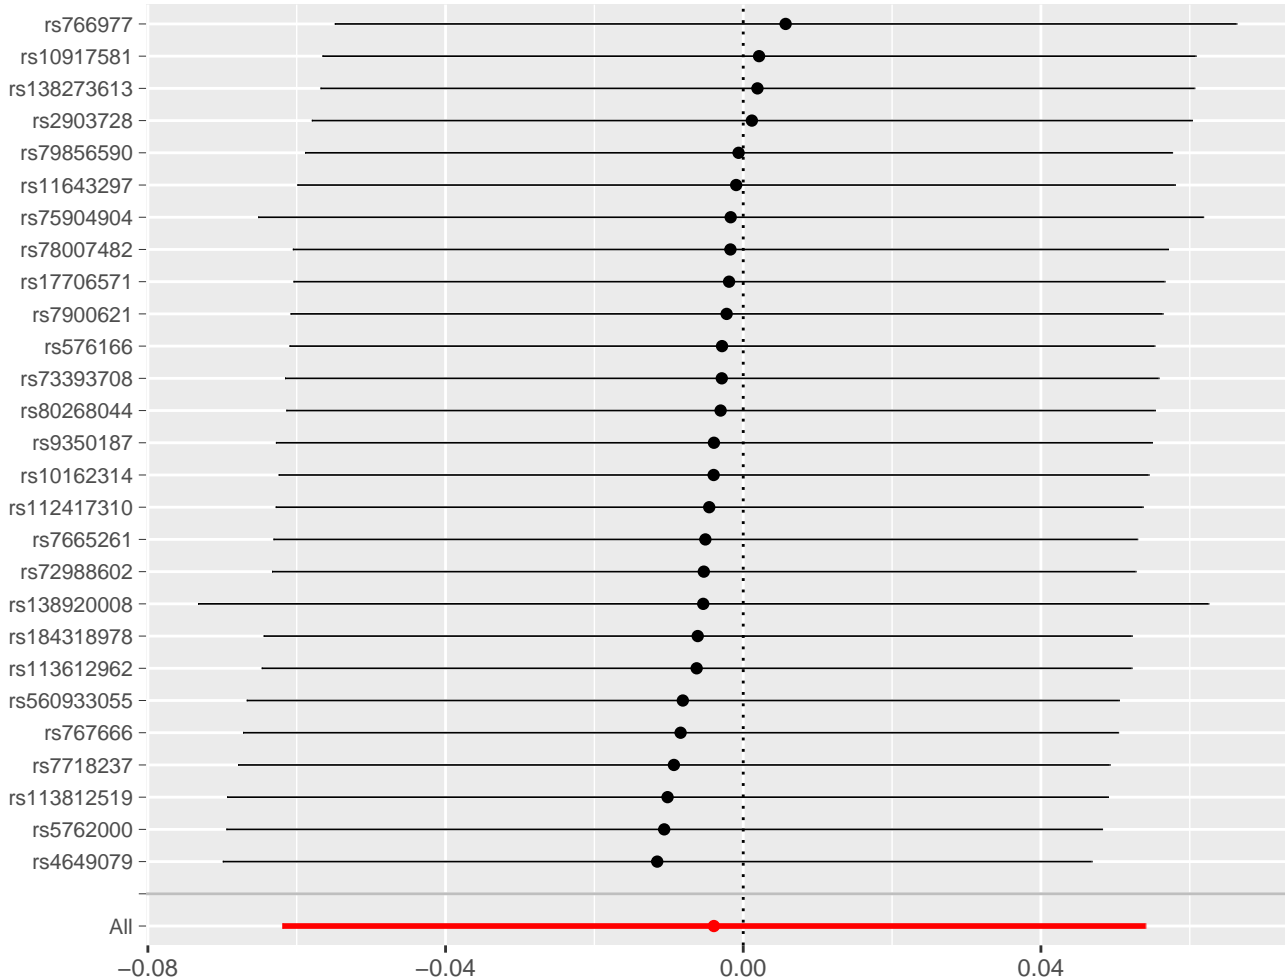

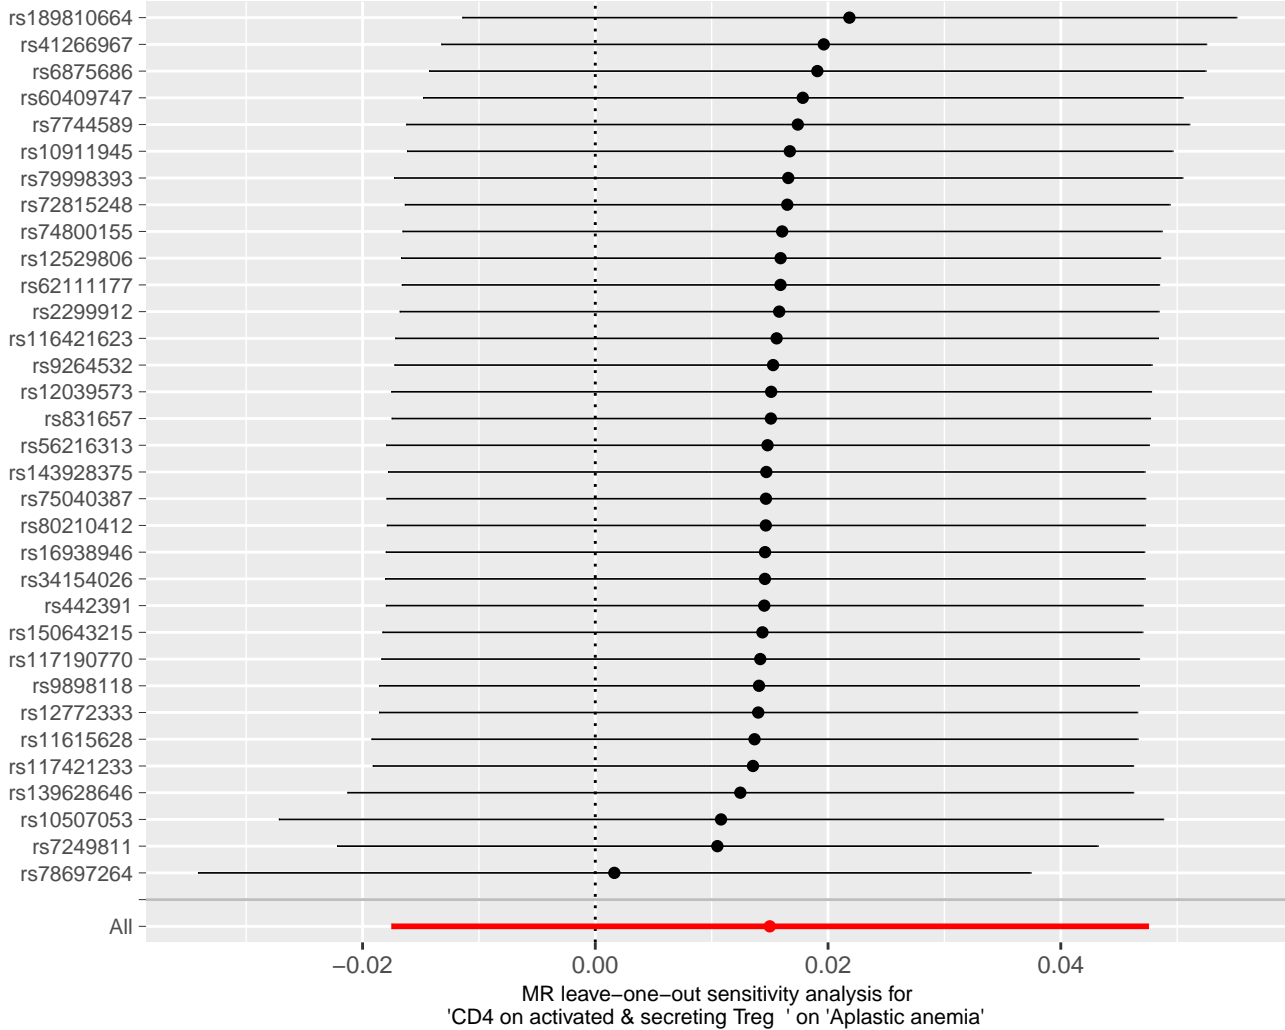

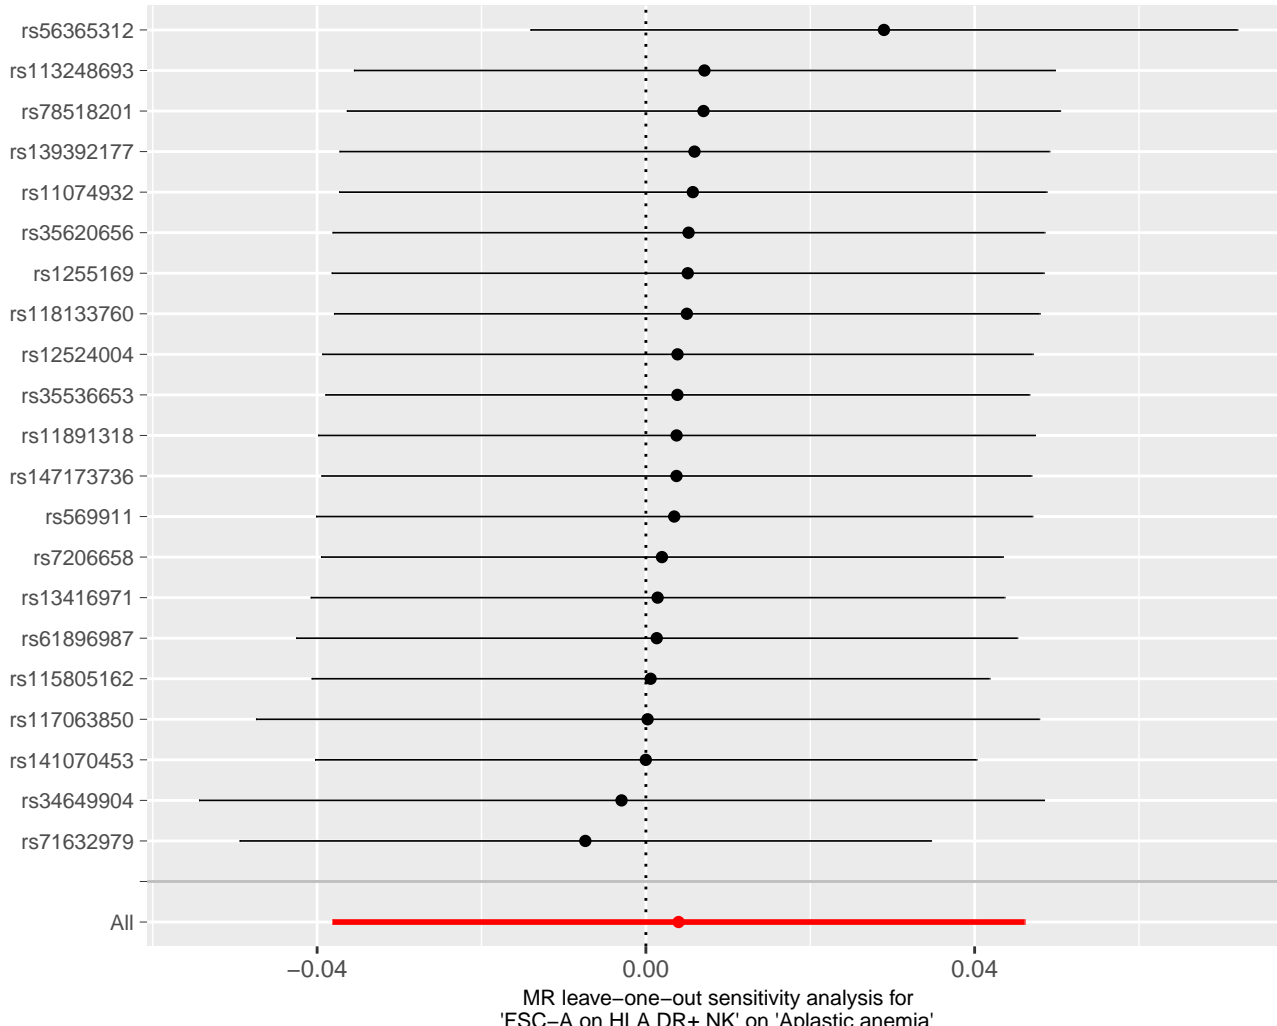

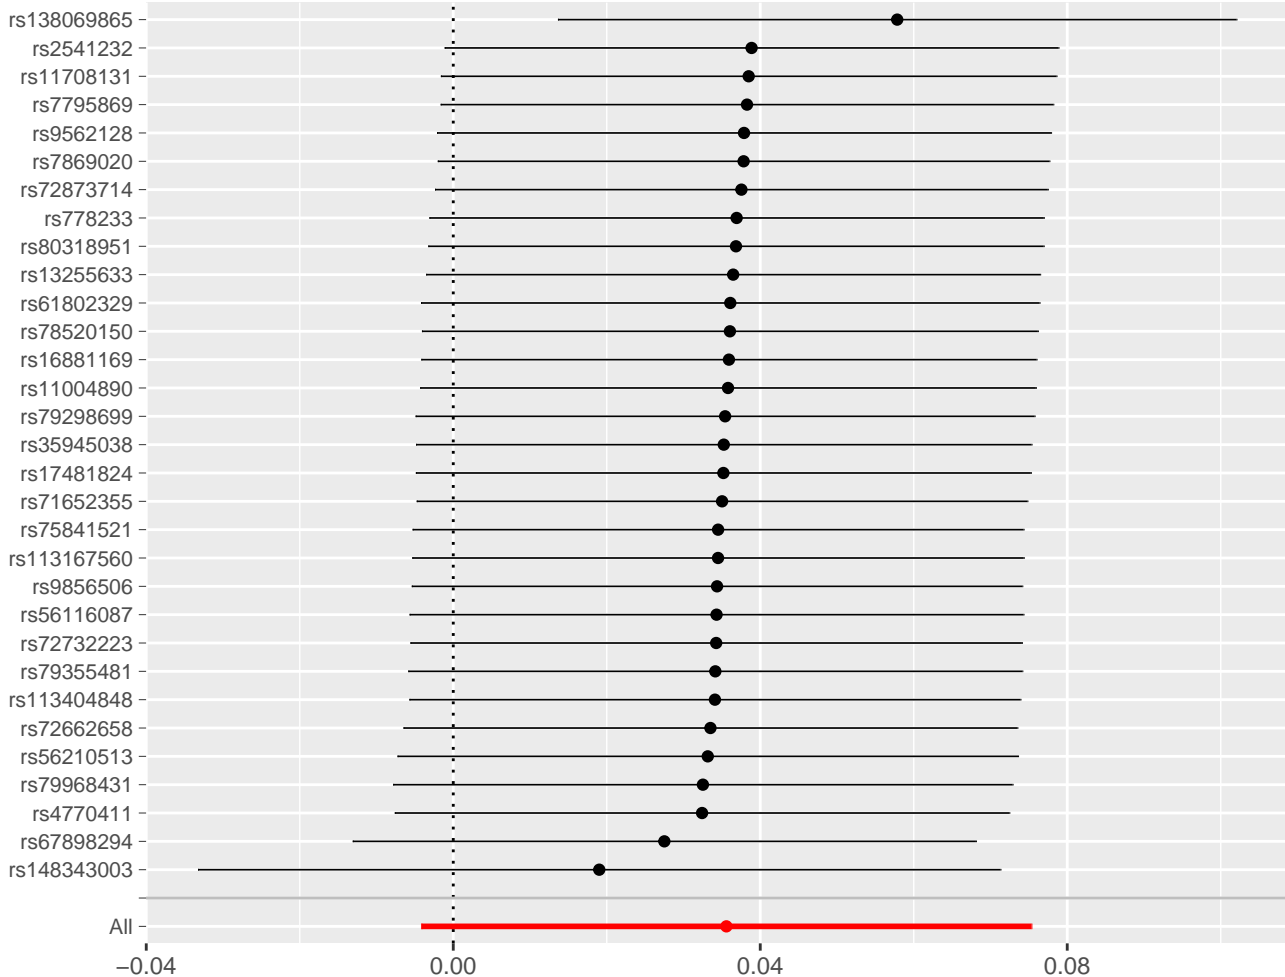

MR leave-one-out sensitivity analysis for 'CD11c on myeloid DC' on 'Aplastic anemia'

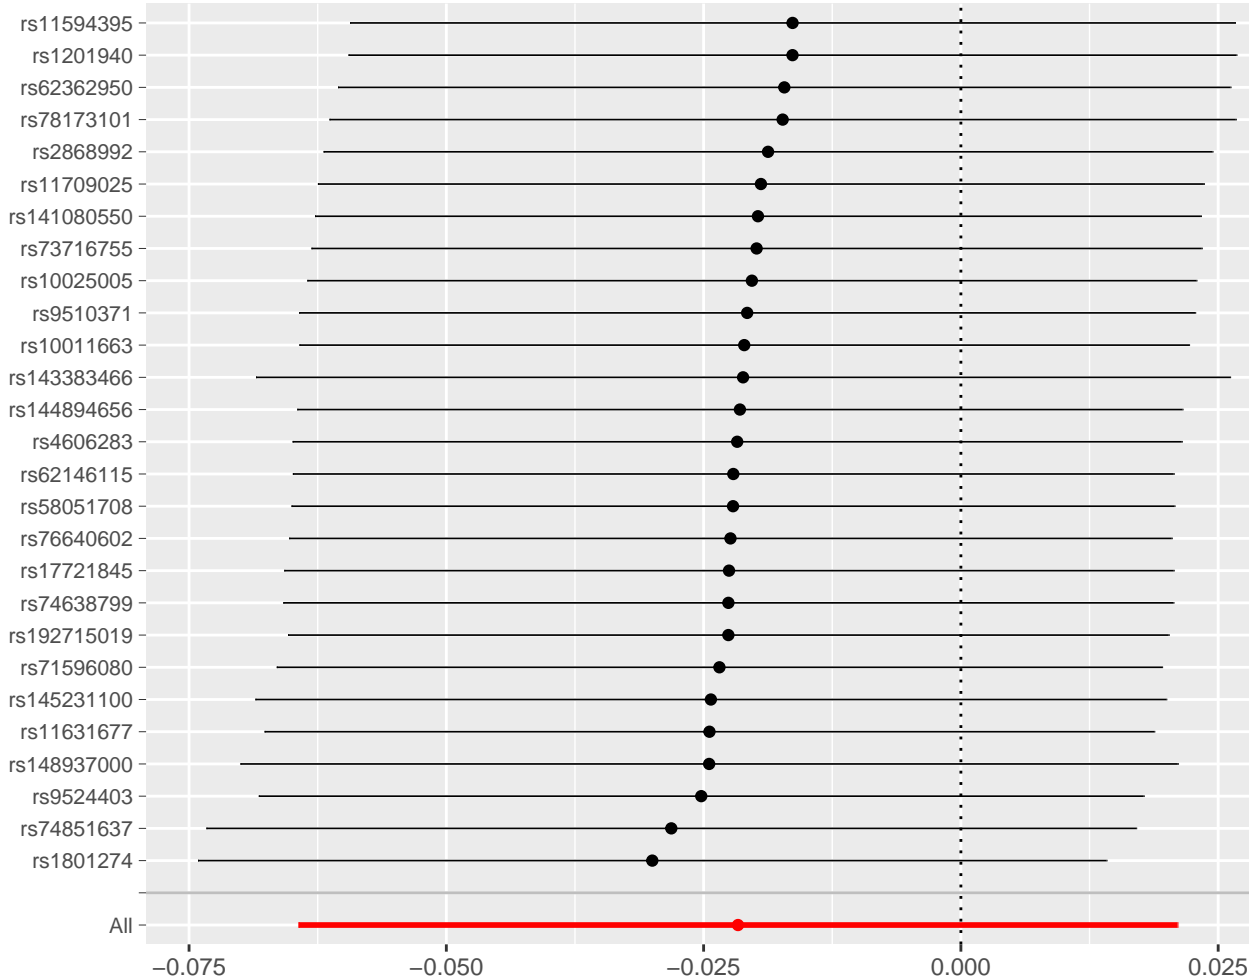

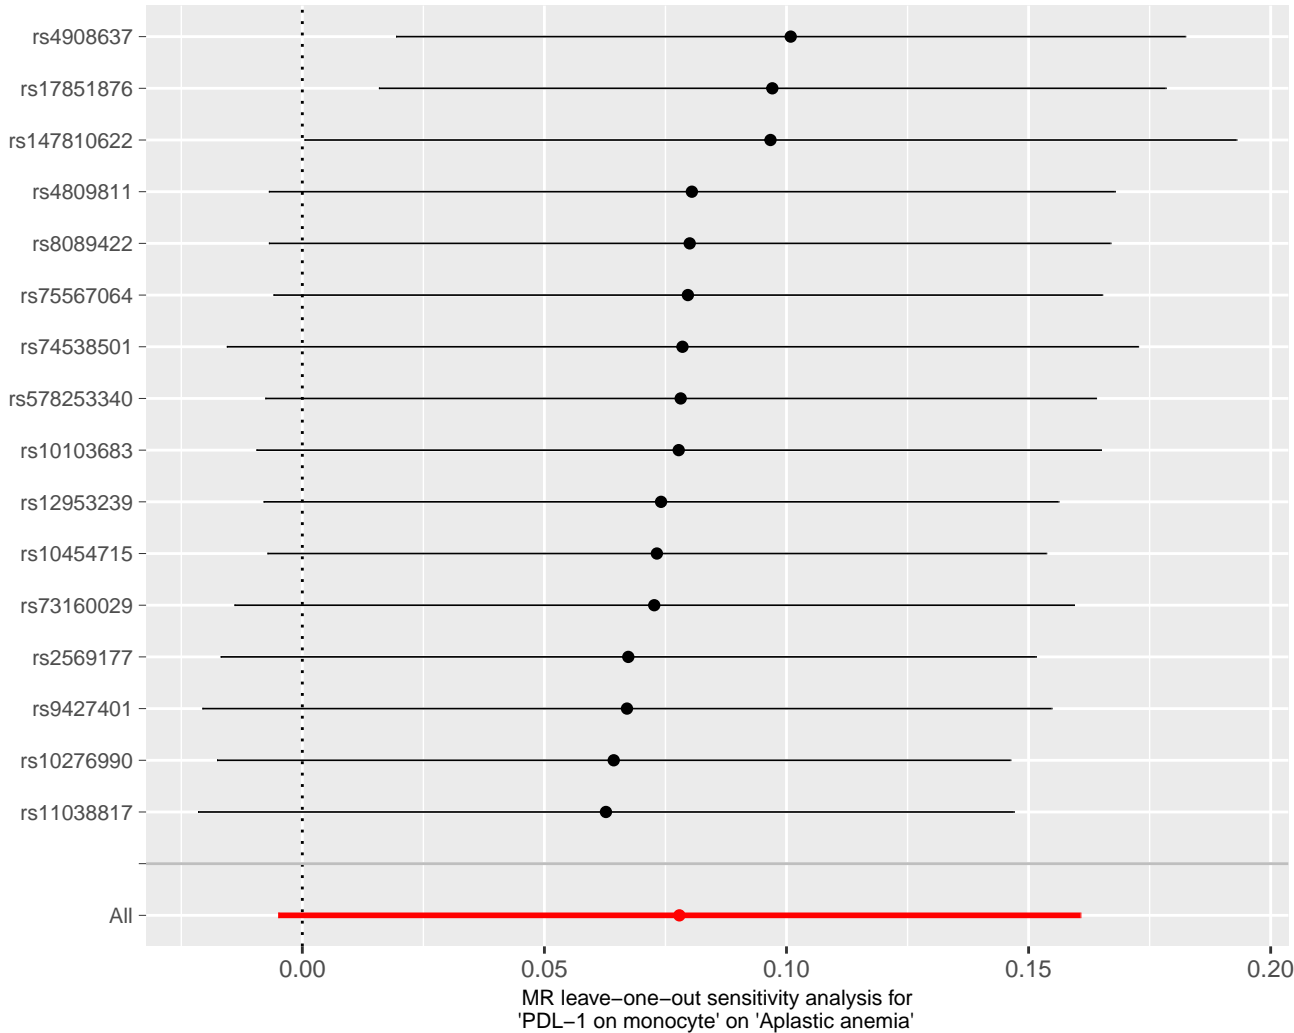

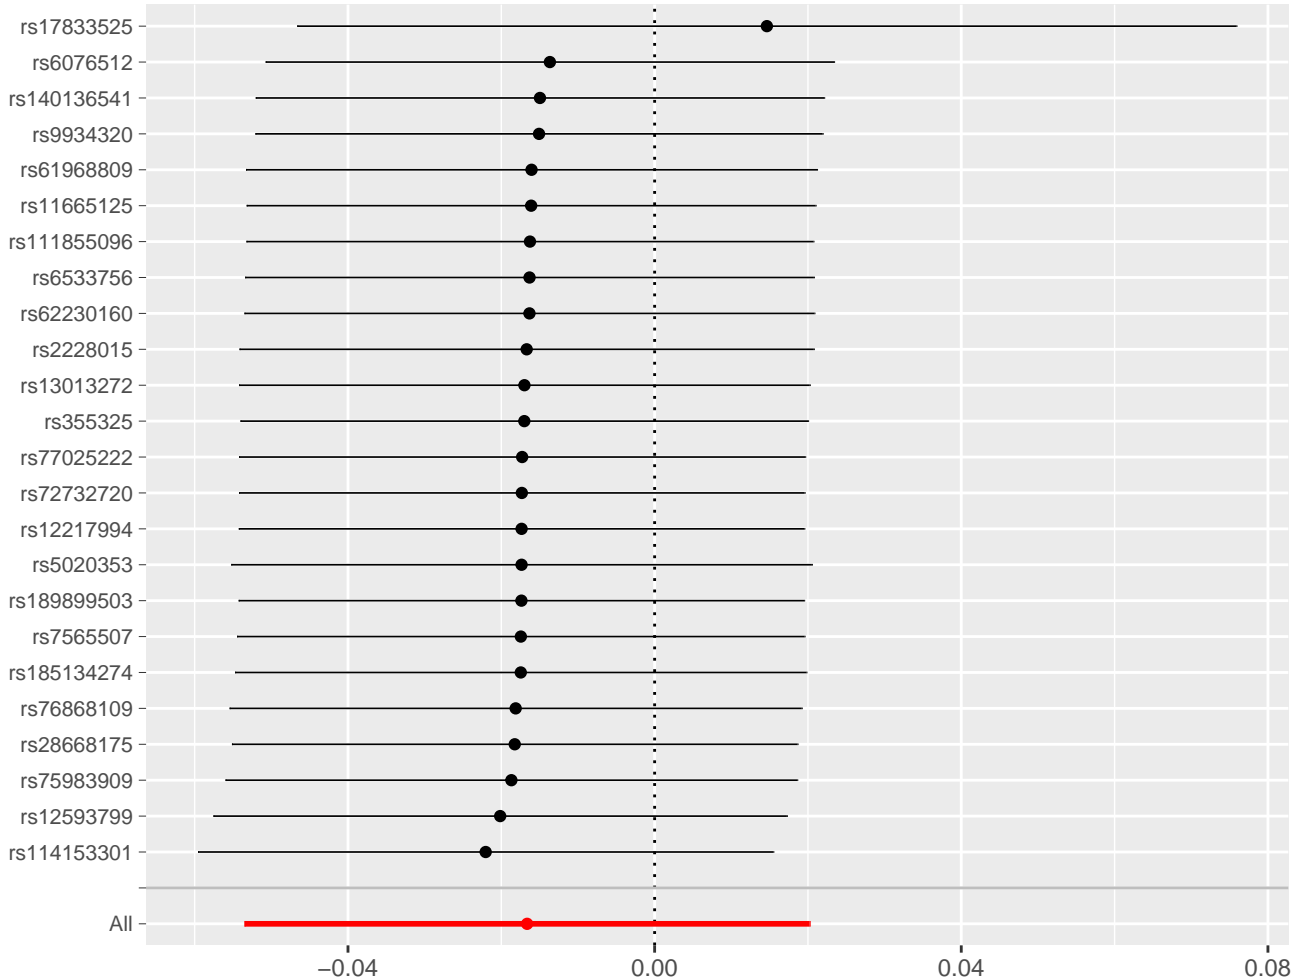

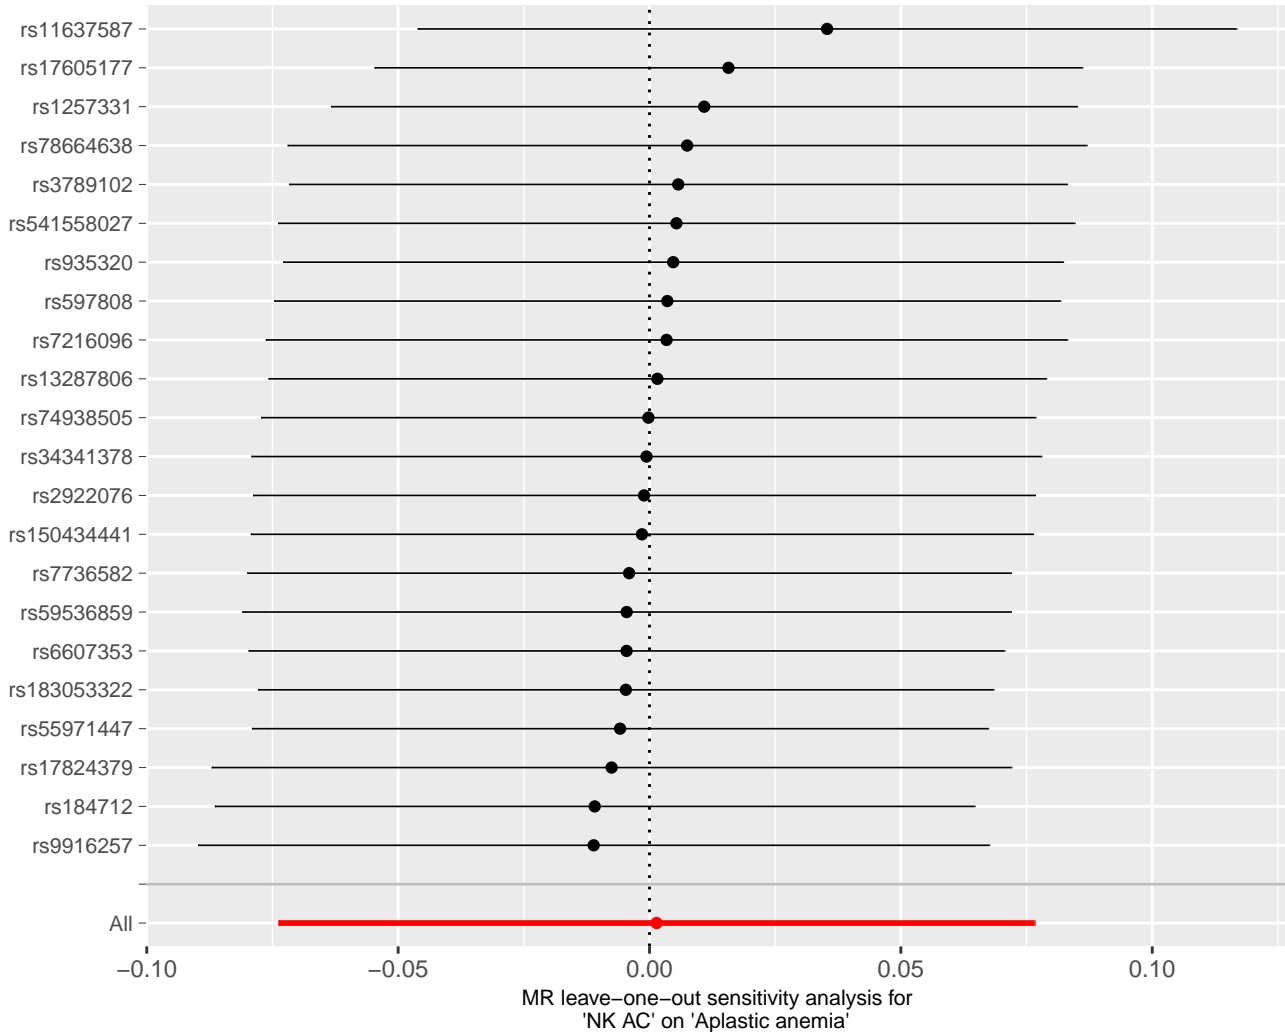



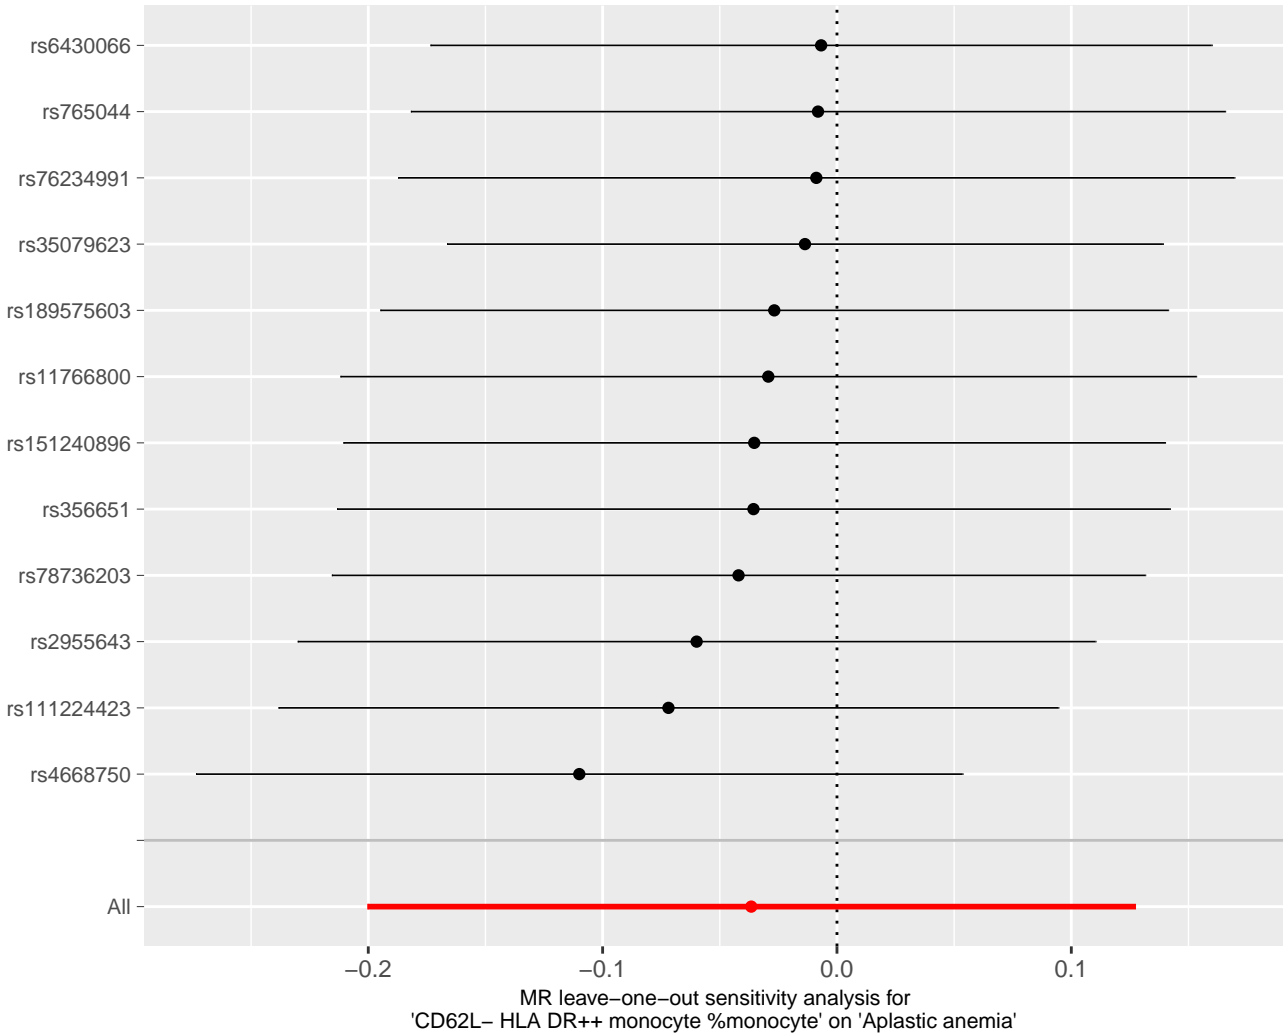

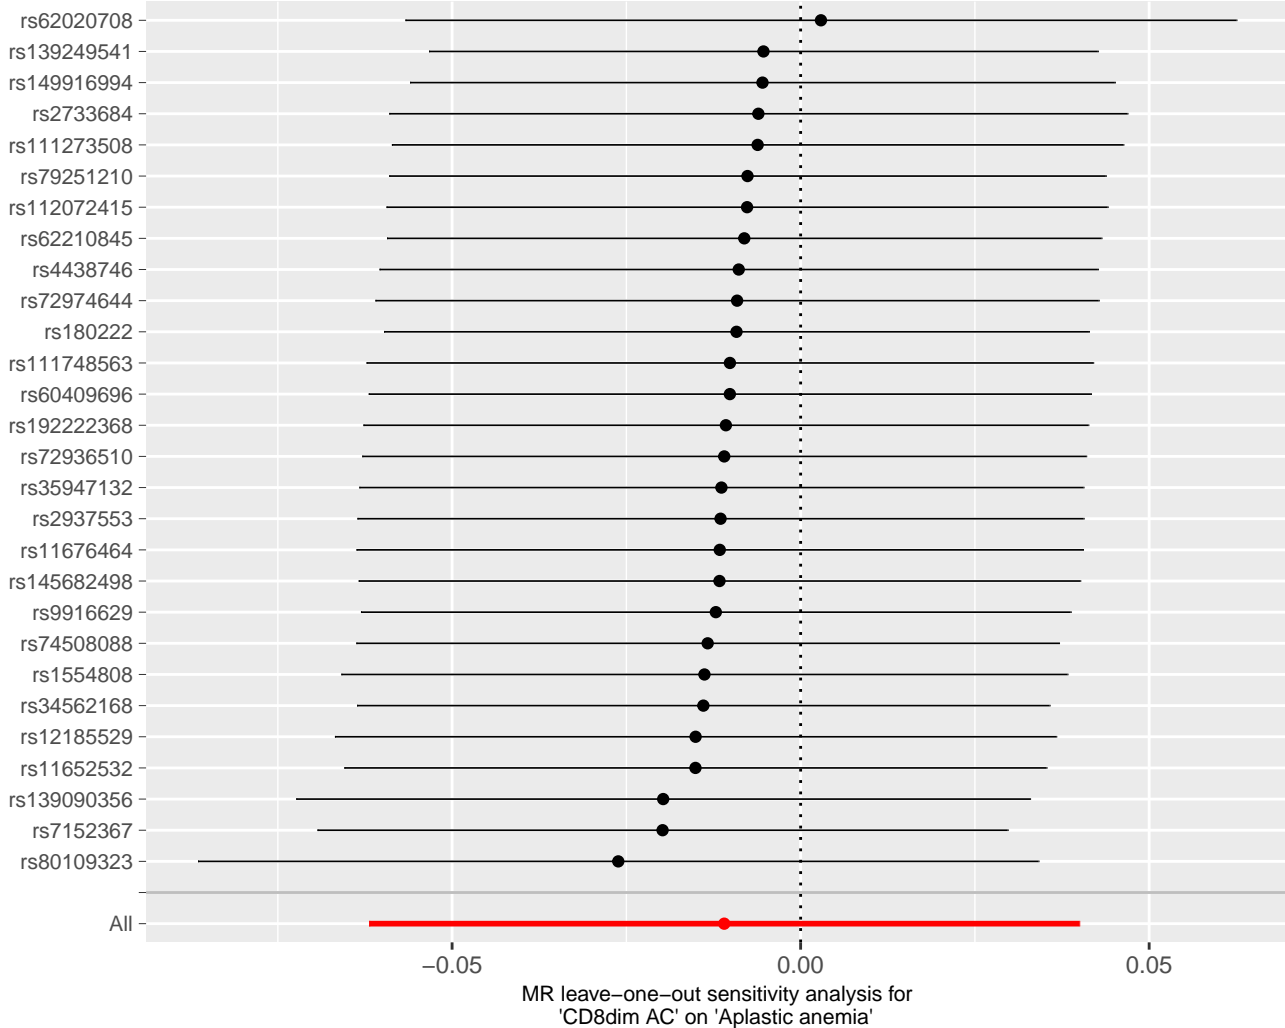

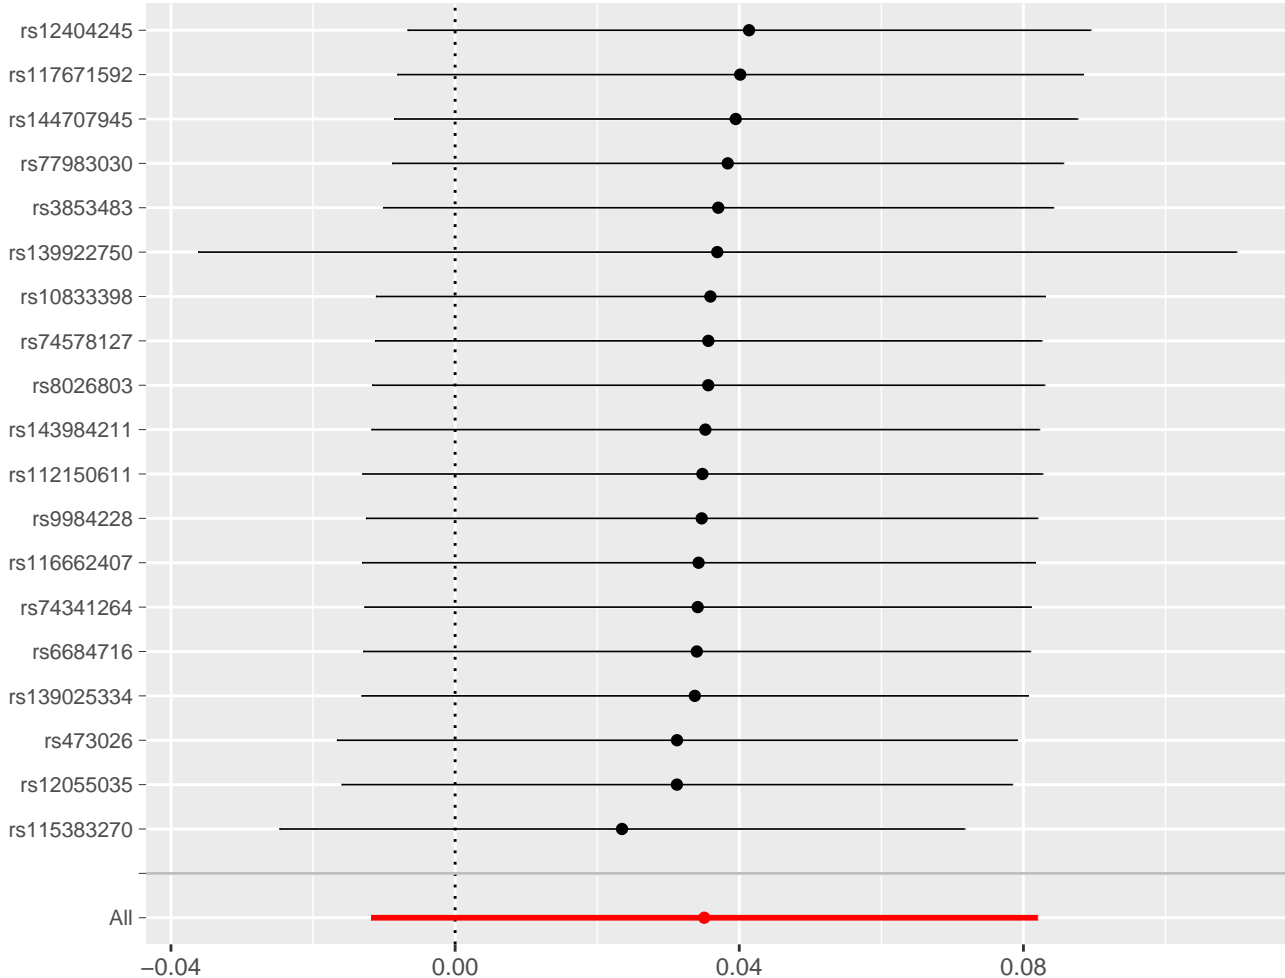

MR leave-one-out sensitivity analysis for 'CD14- CD16+ monocyte AC' on 'Aplastic anemia'

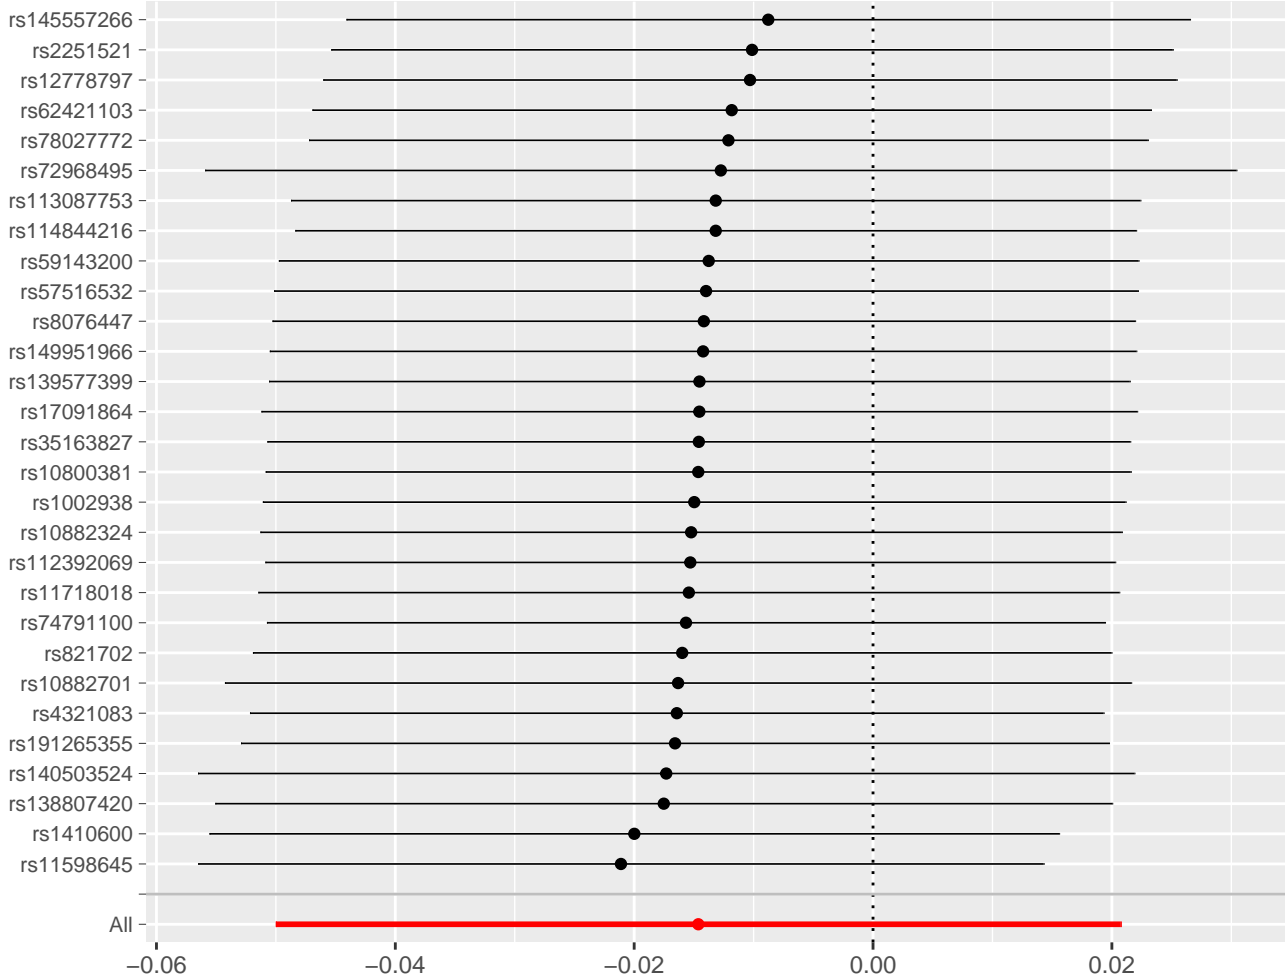

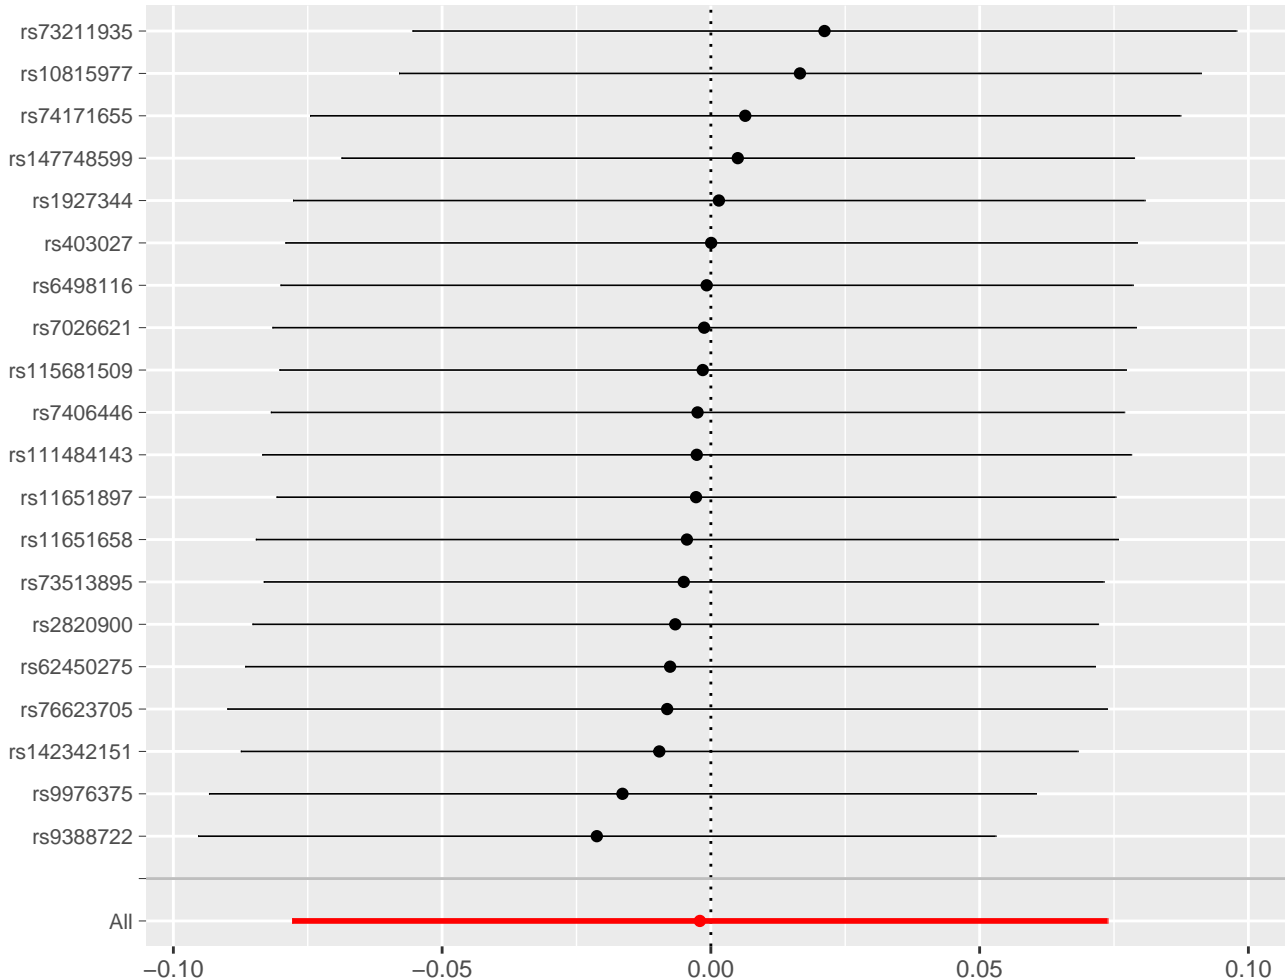

MR leave-one-out sensitivity analysis for 'HLA DR on HLA DR+ CD8br' on 'Aplastic anemia'

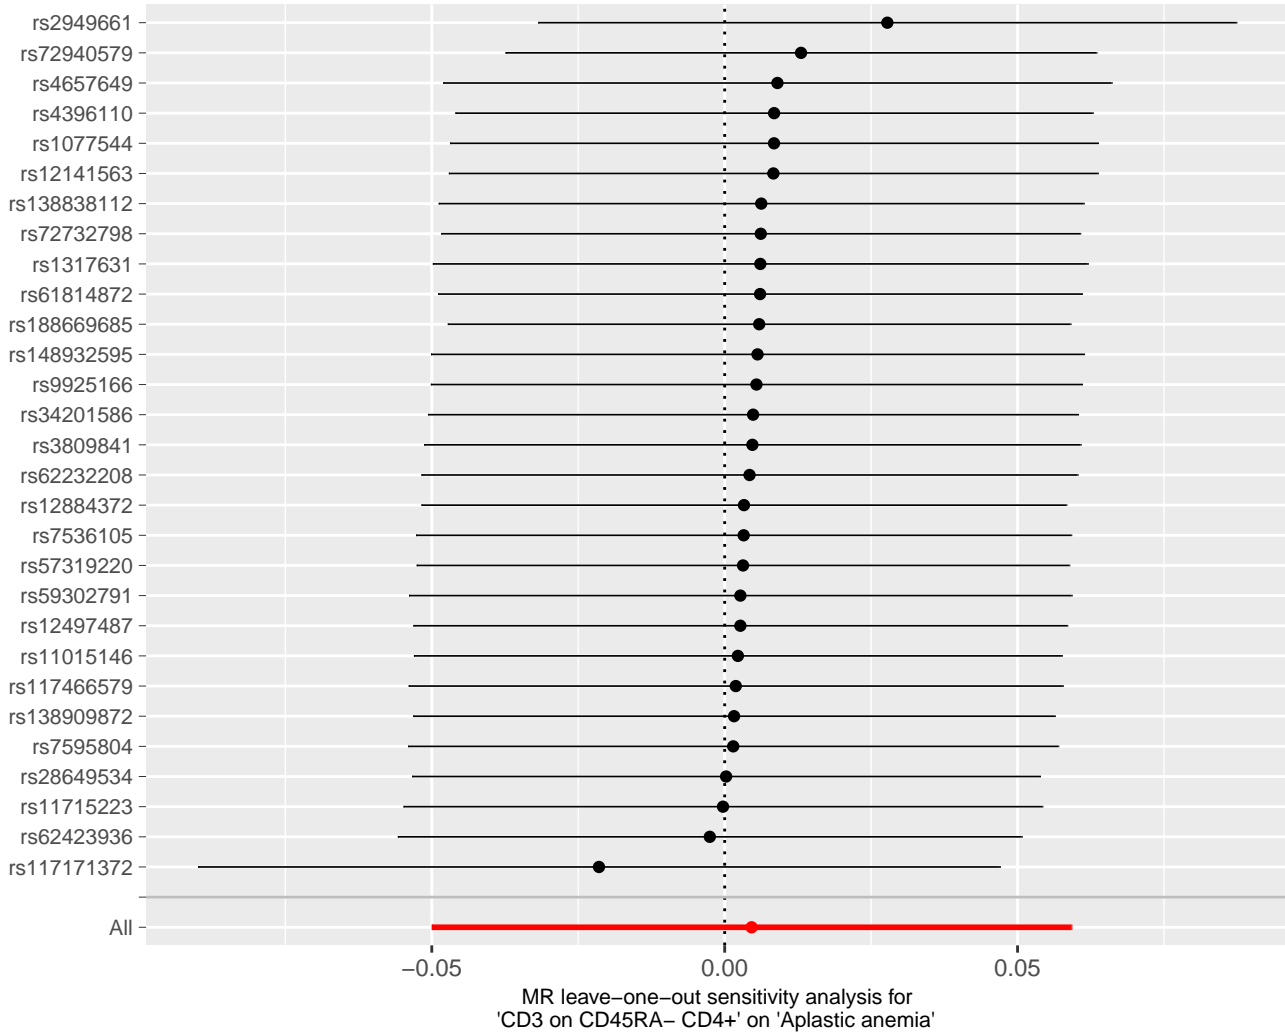

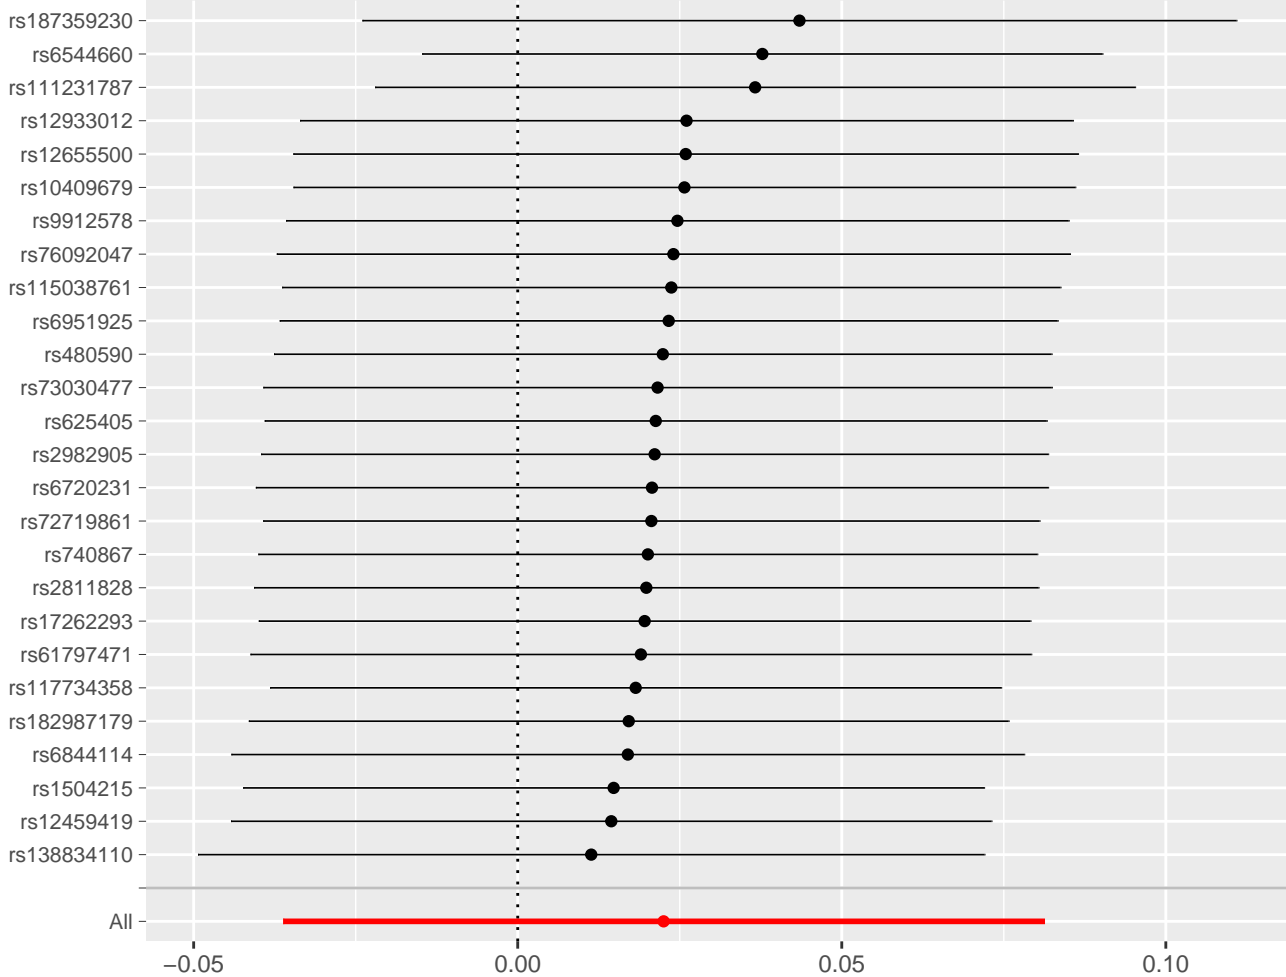

MR leave-one-out sensitivity analysis for 'CD33br HLA DR+ CD14dim %CD33br HLA DR+' on 'Aplastic anemia'

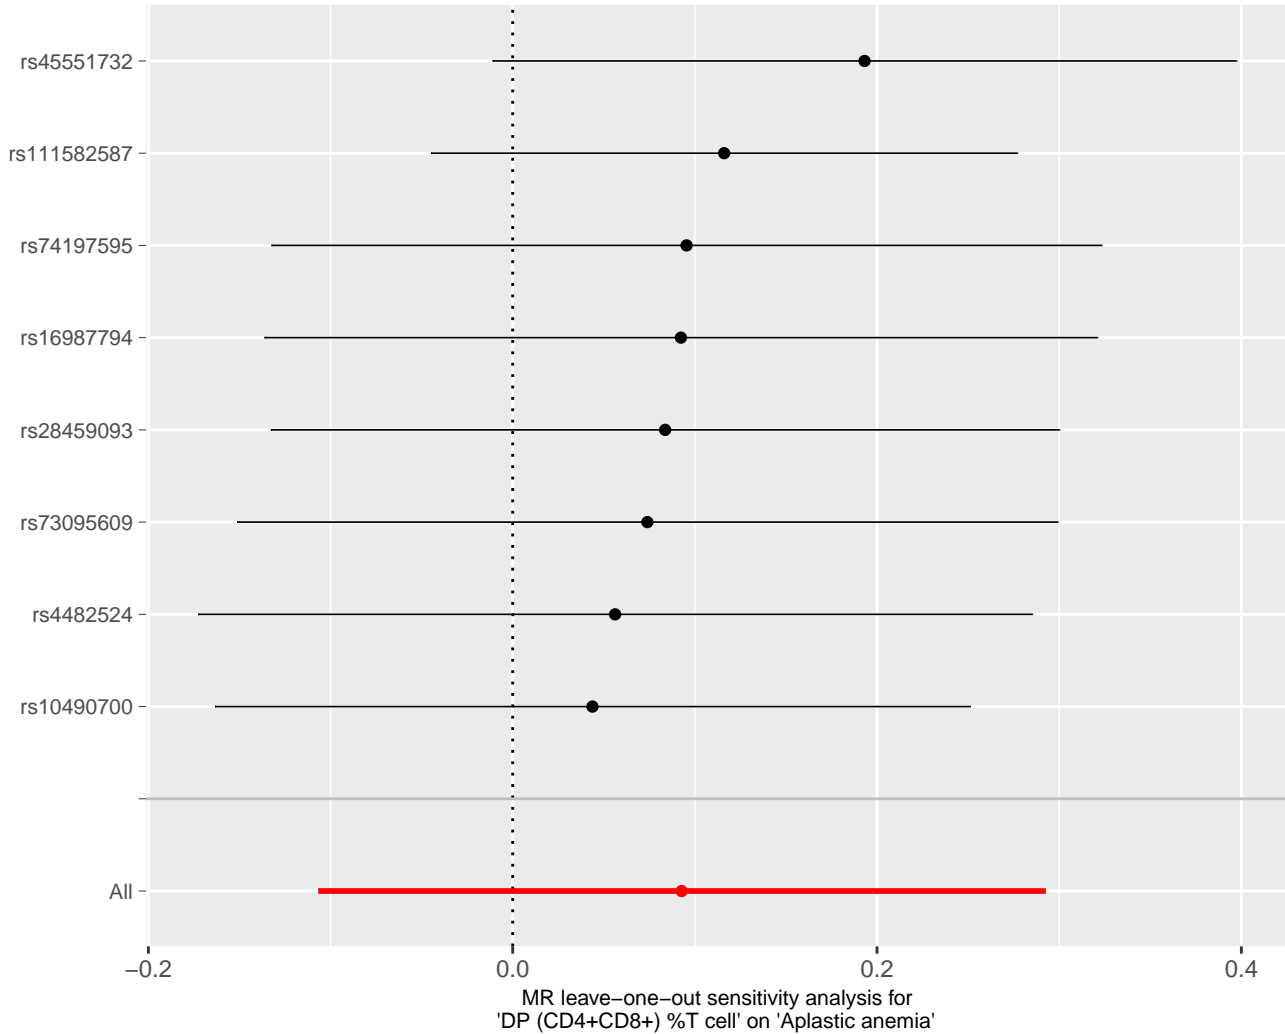



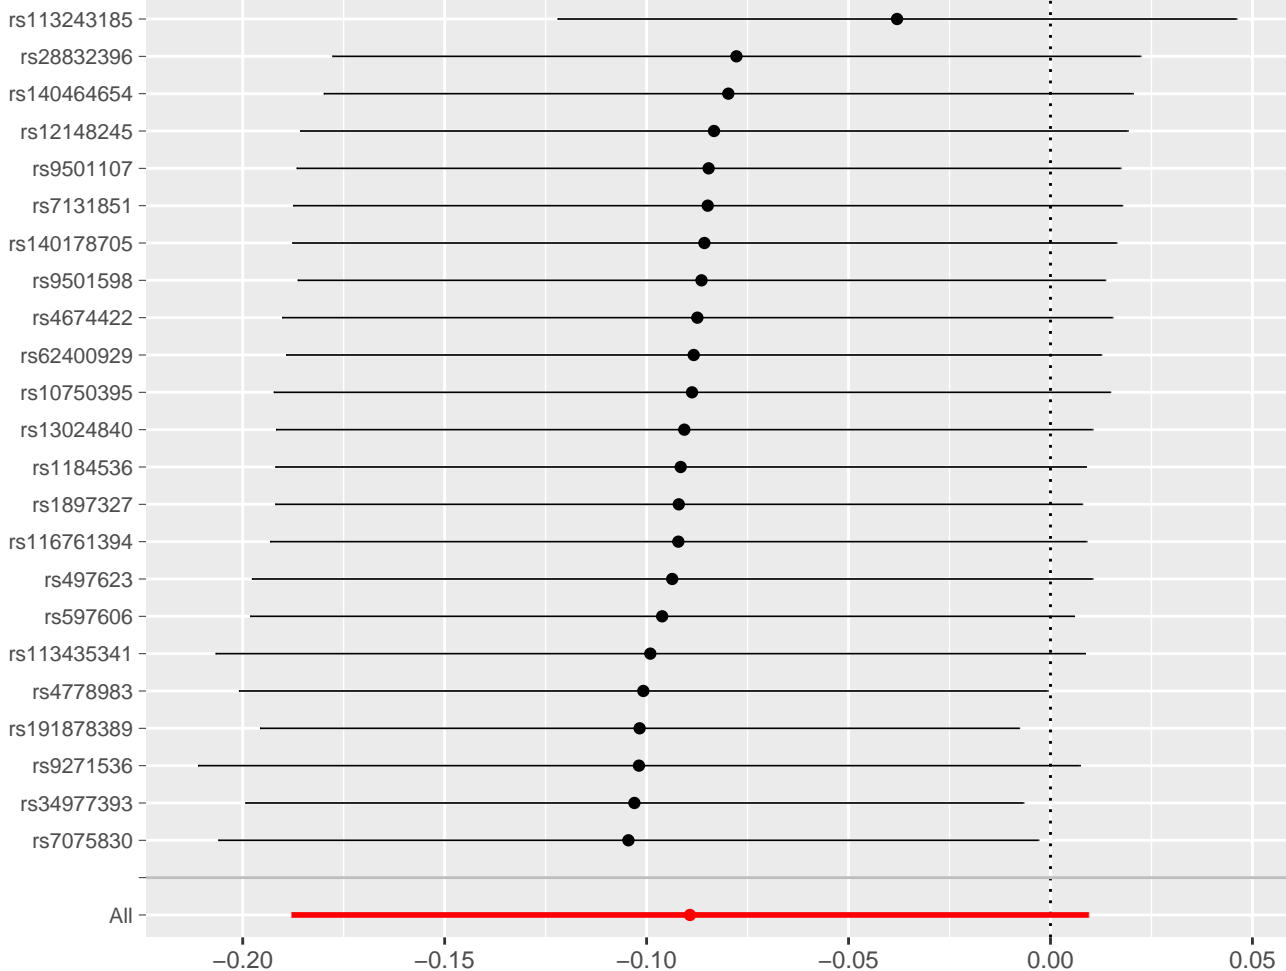

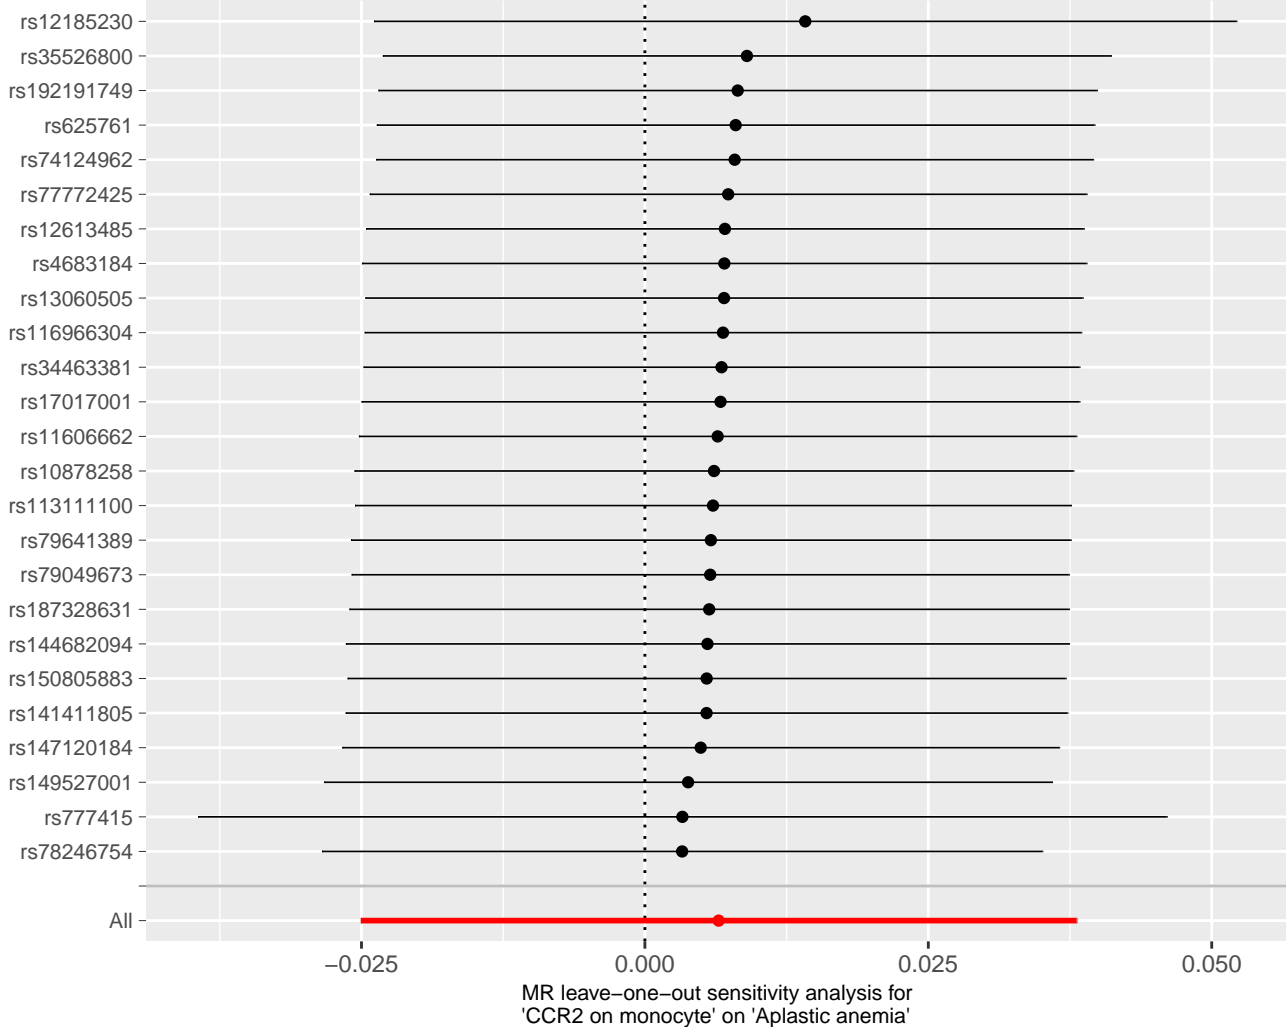

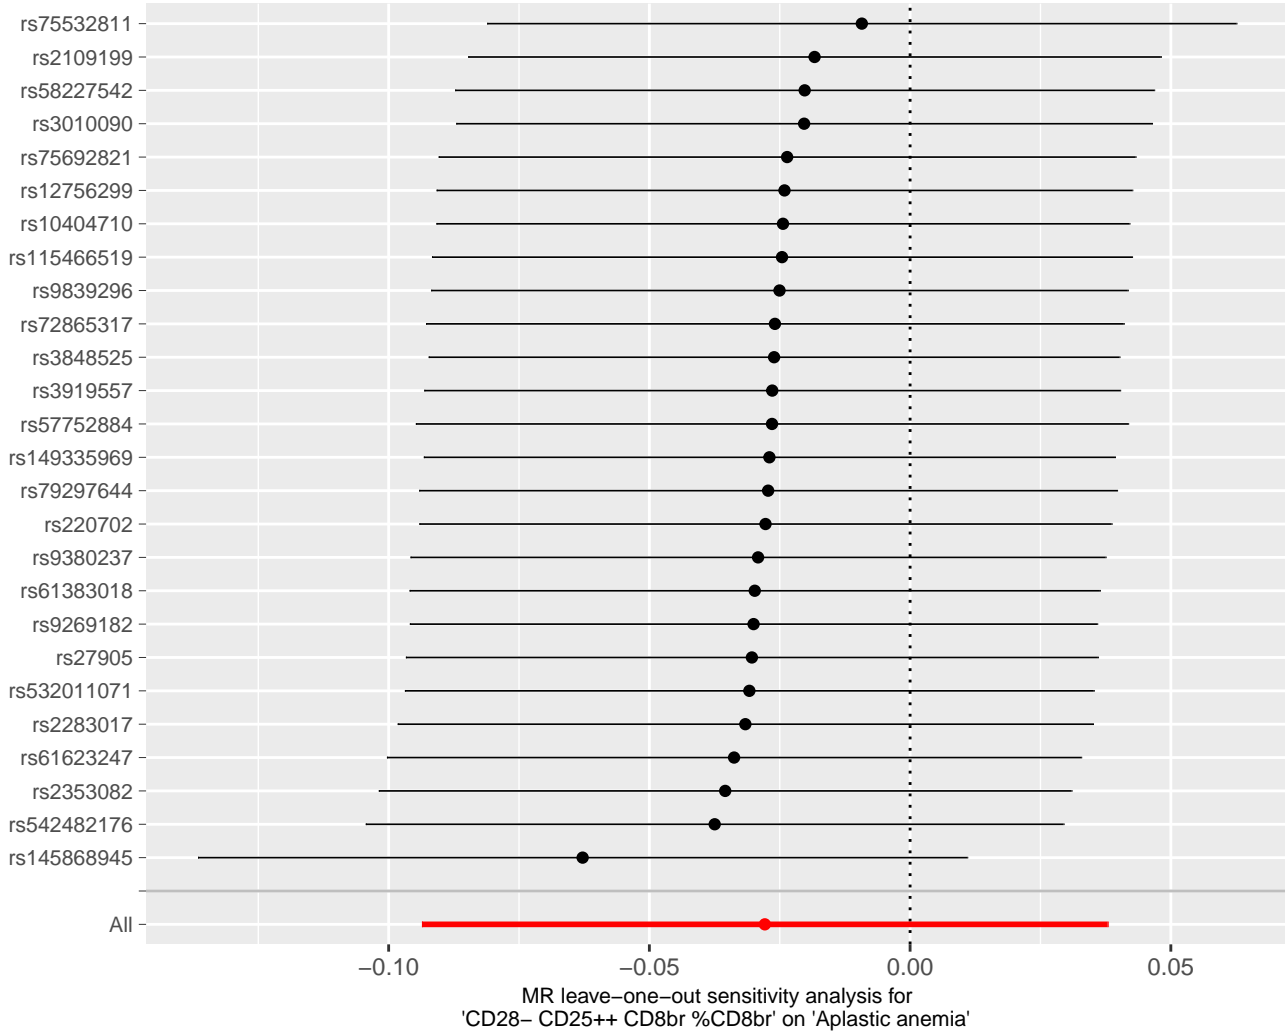

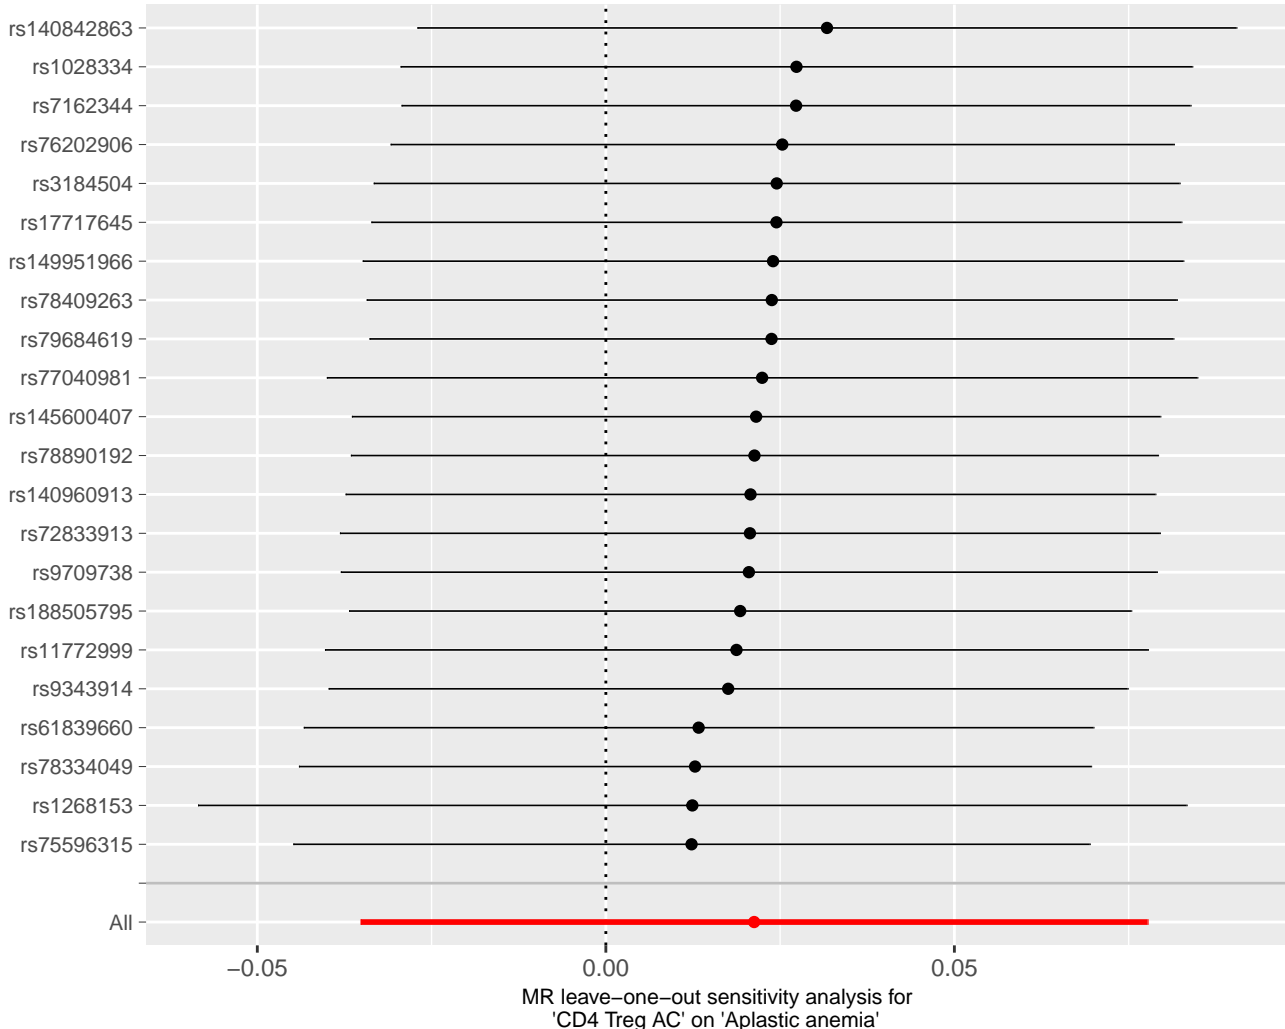

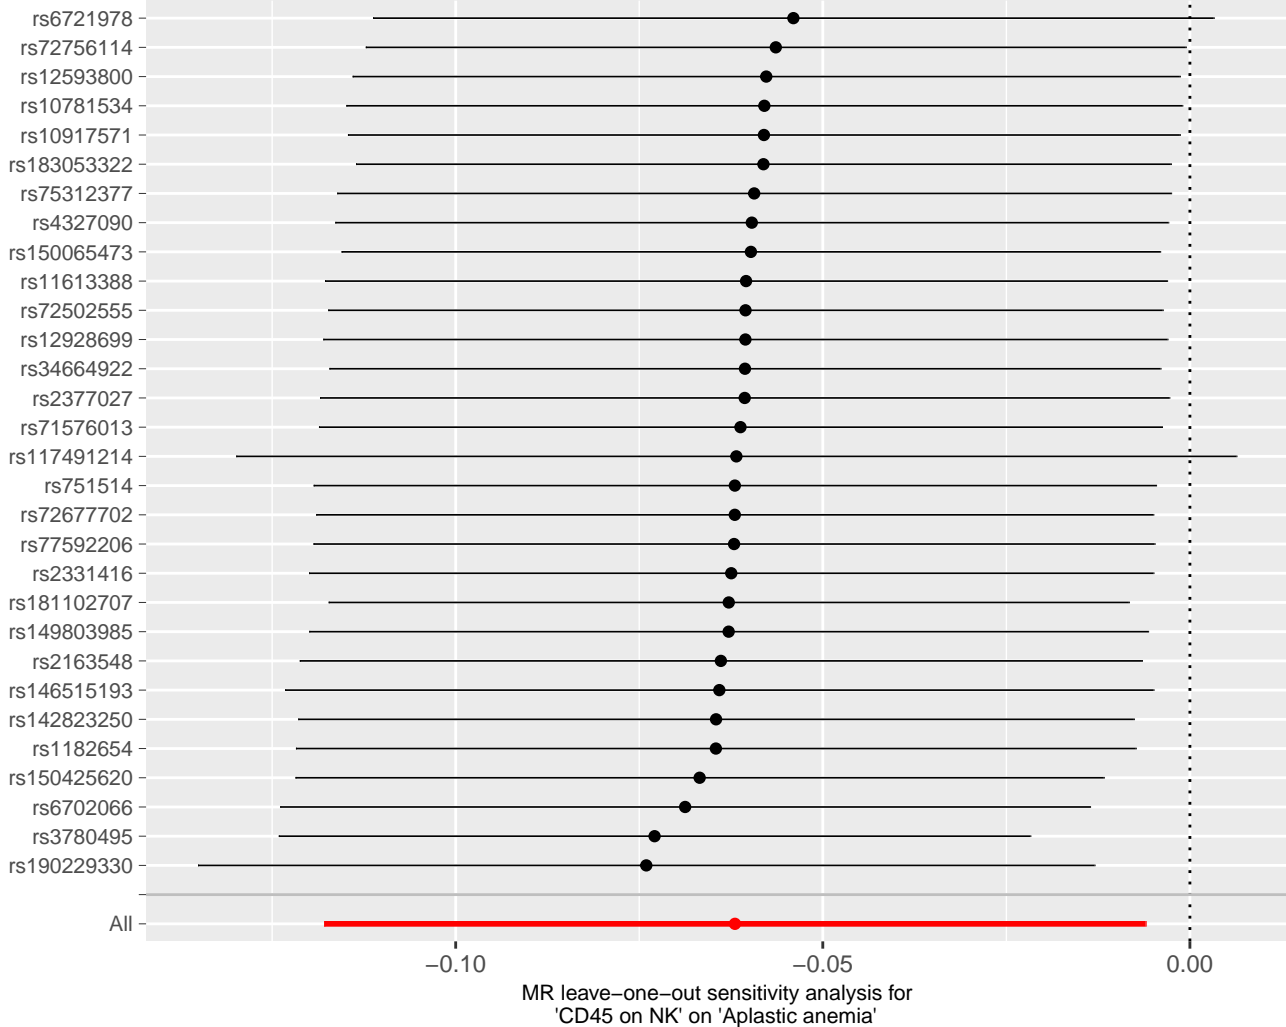

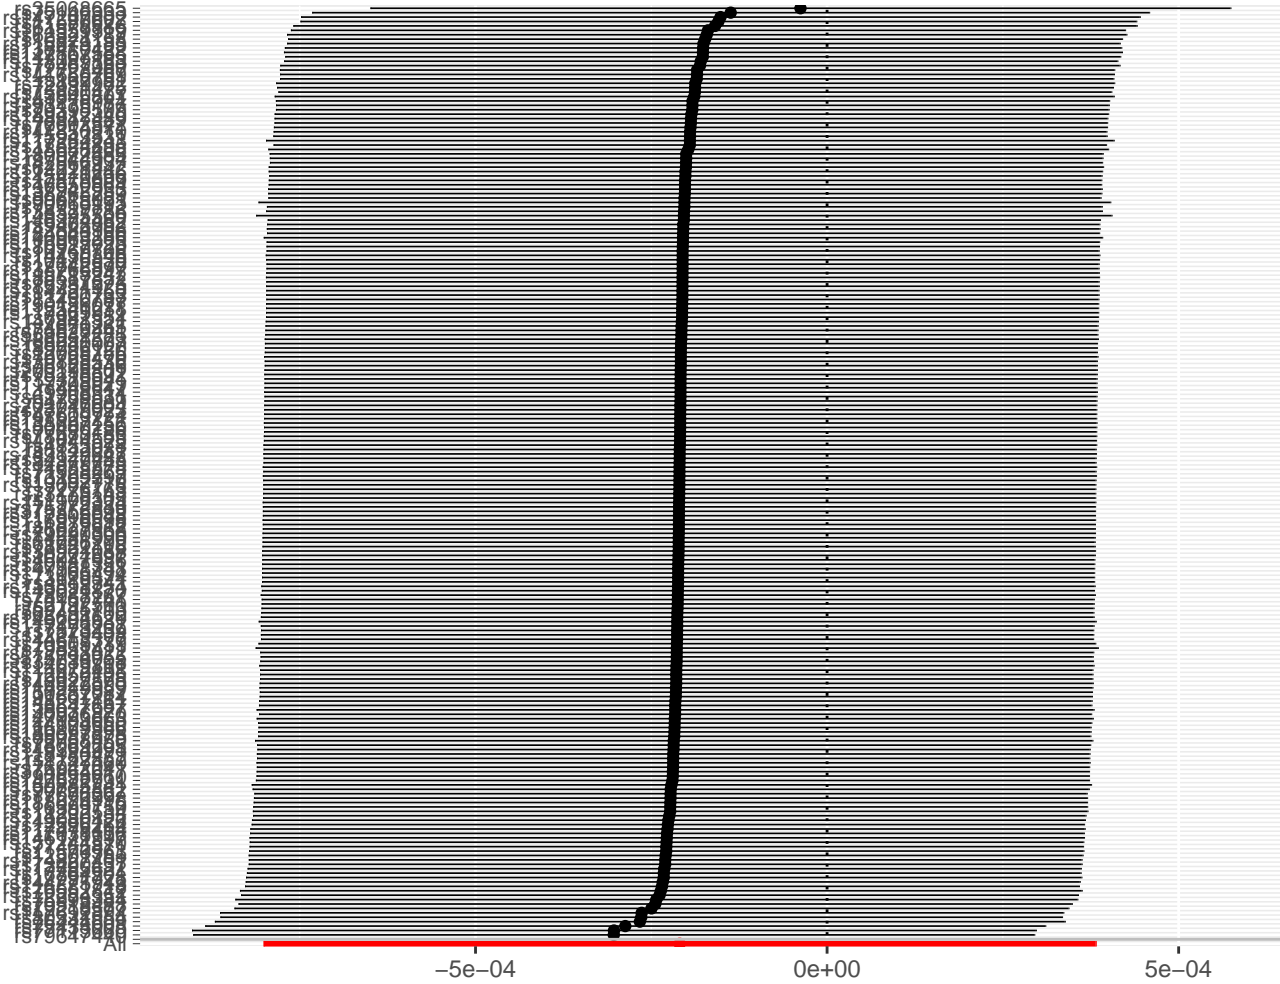

MR leave-one-out sensitivity analysis for  
'CD45RA+ CD28- CD8br %T cell' on 'Aplastic anemia'

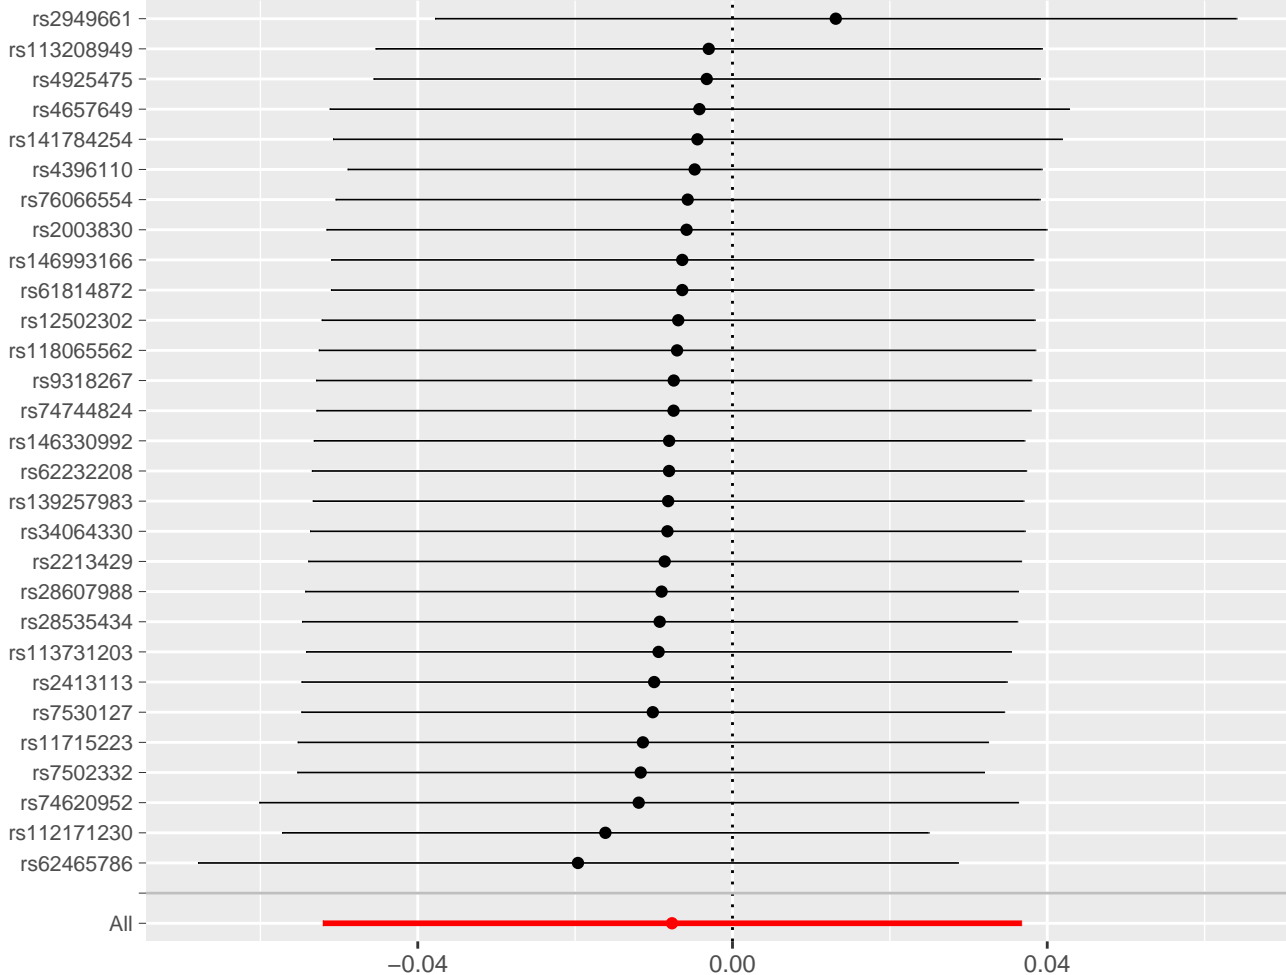

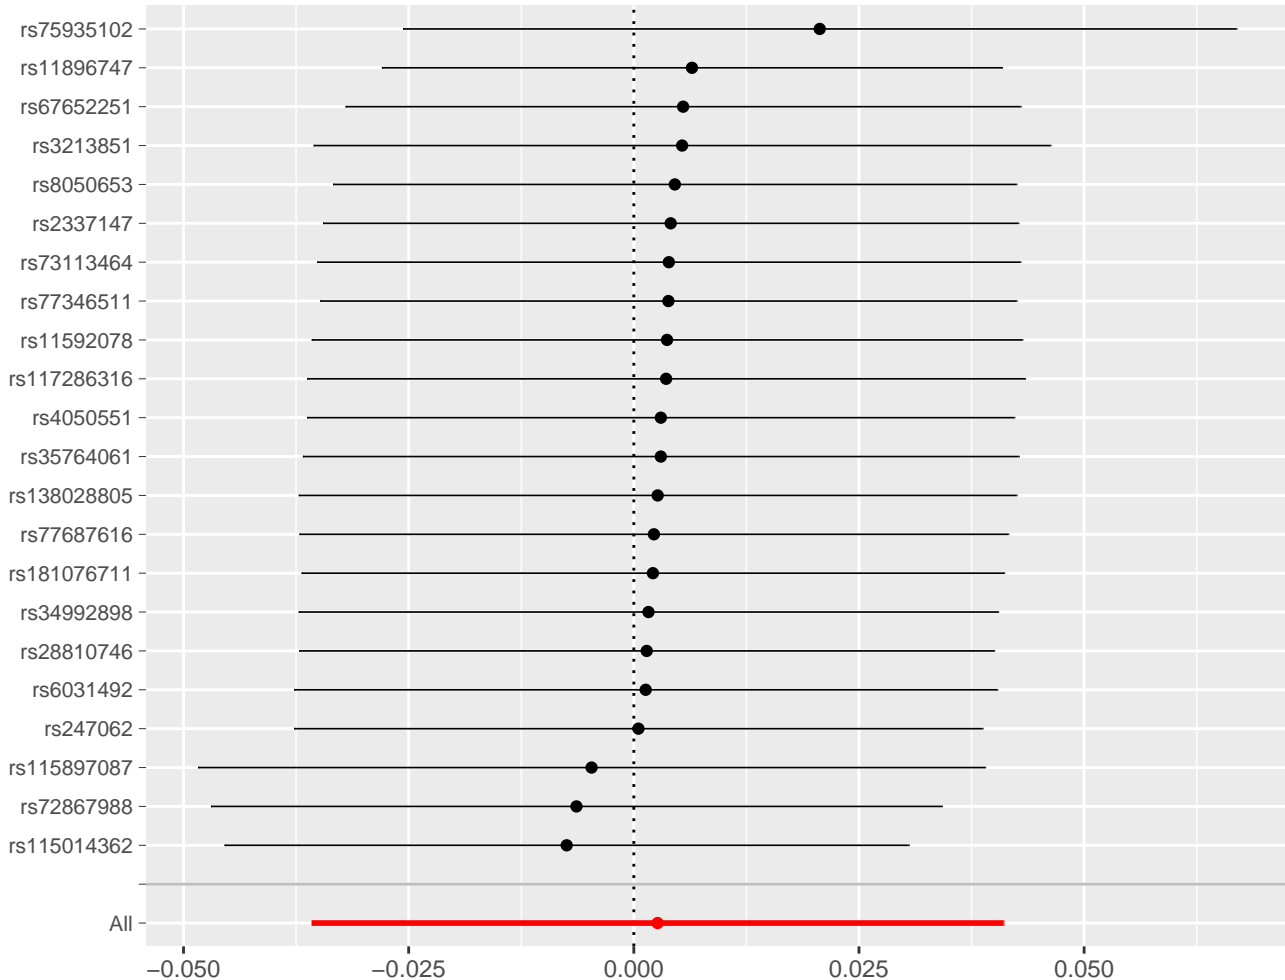



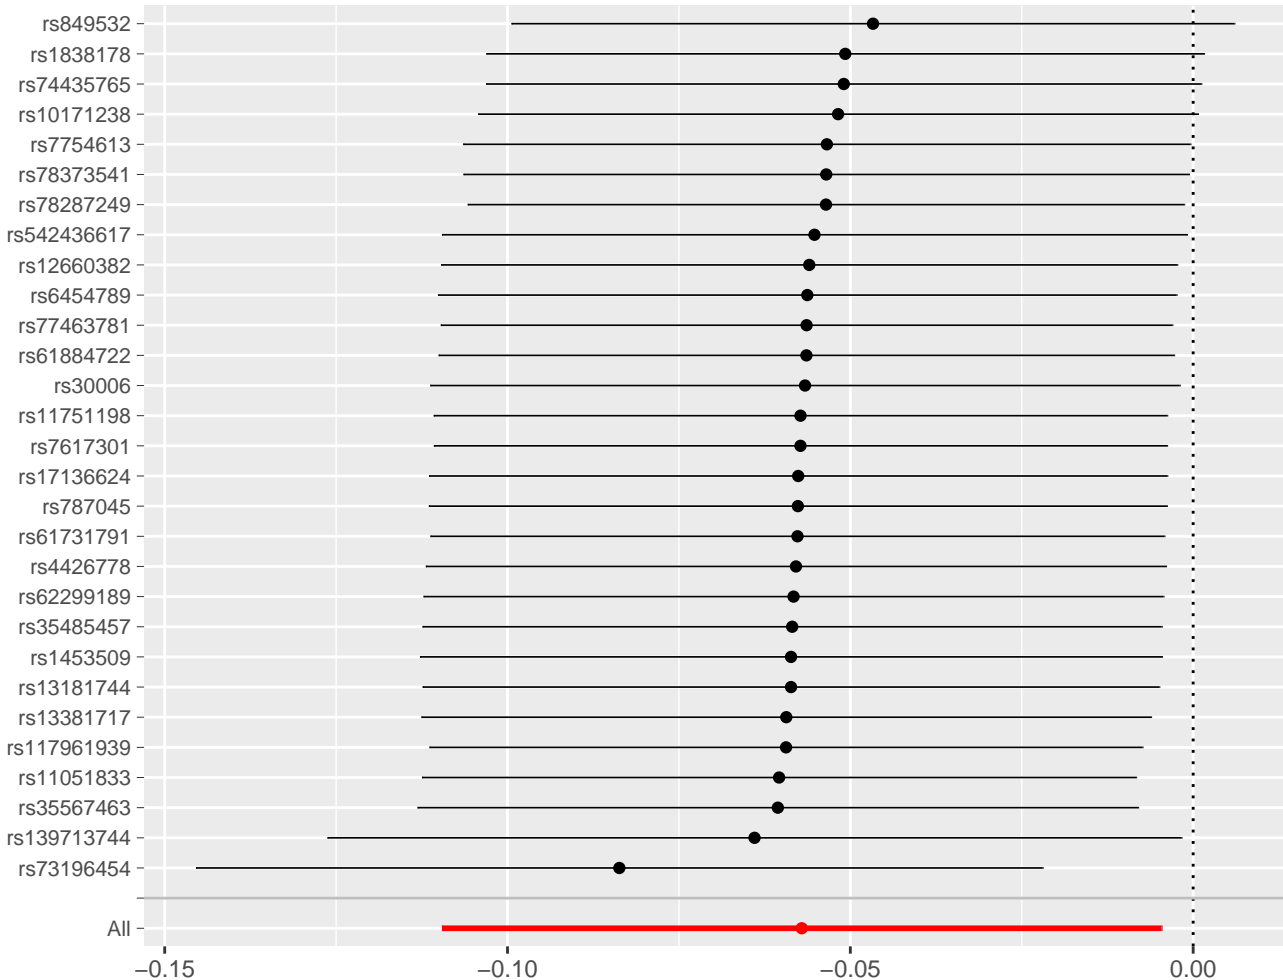

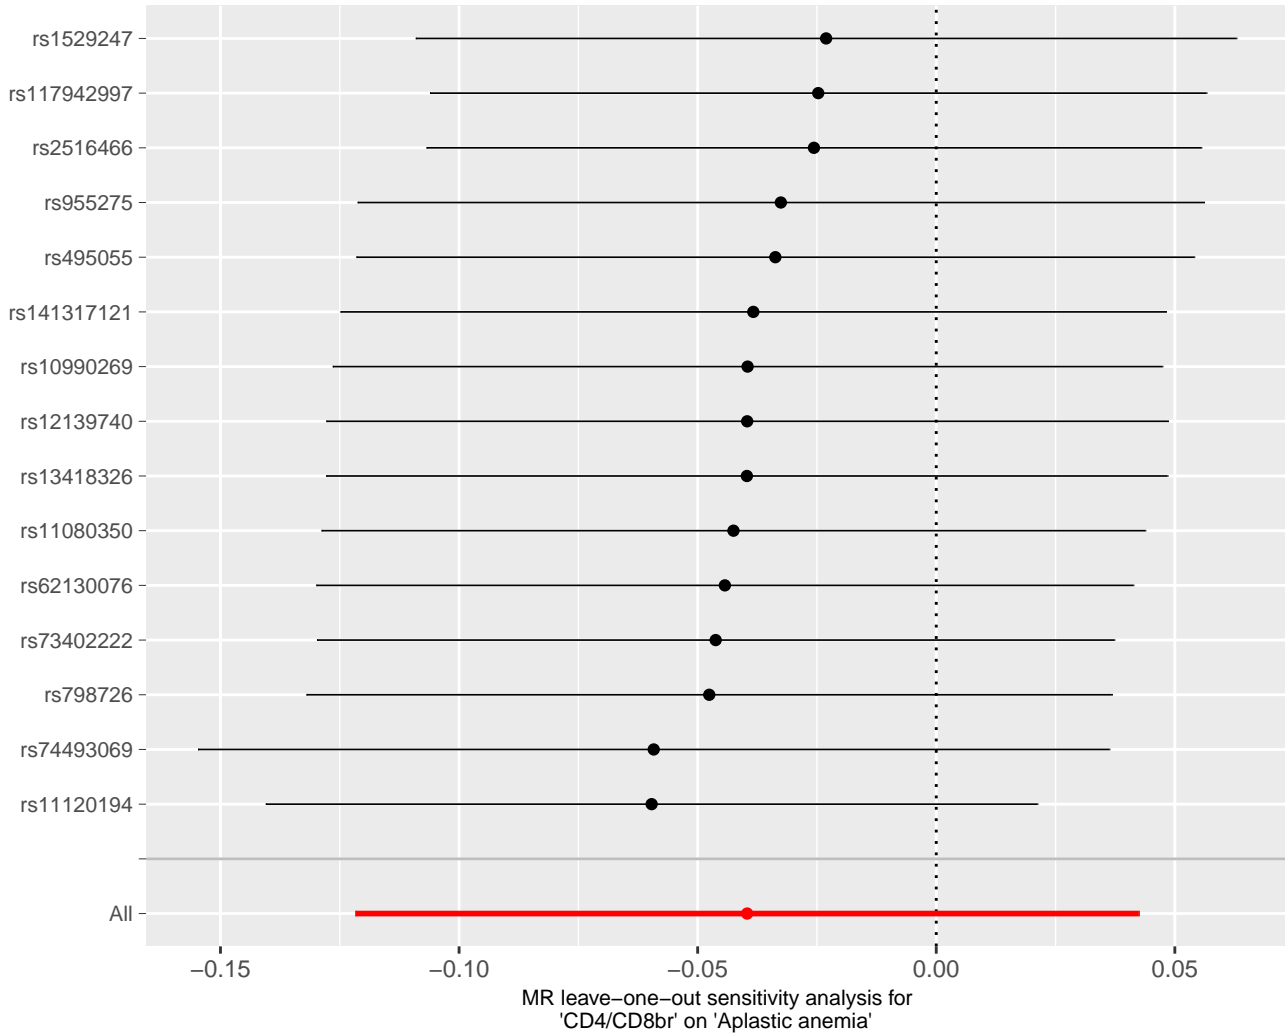

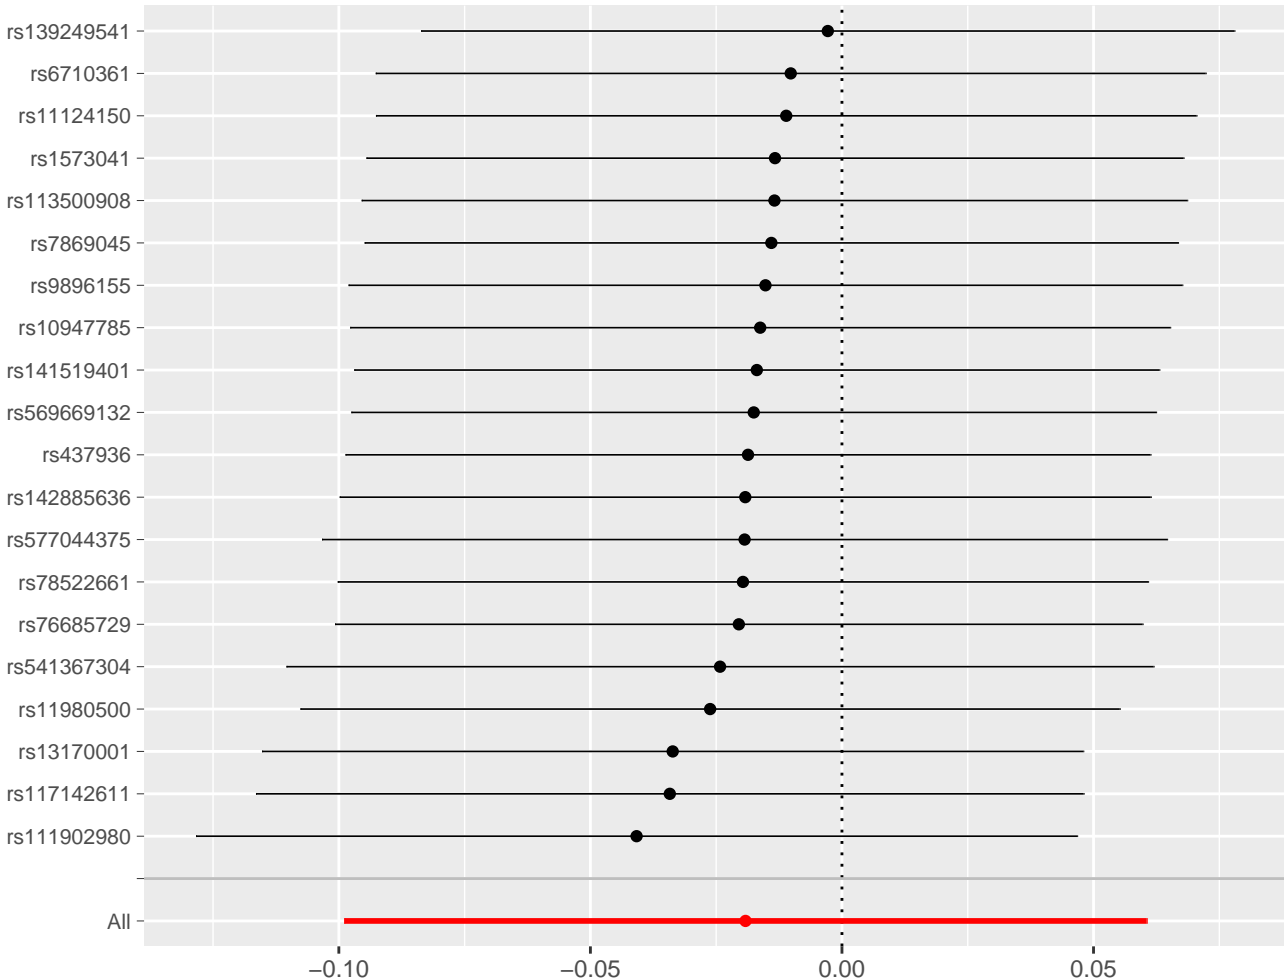

MR leave-one-out sensitivity analysis for 'EM DN (CD4-CD8-) AC' on 'Aplastic anemia'

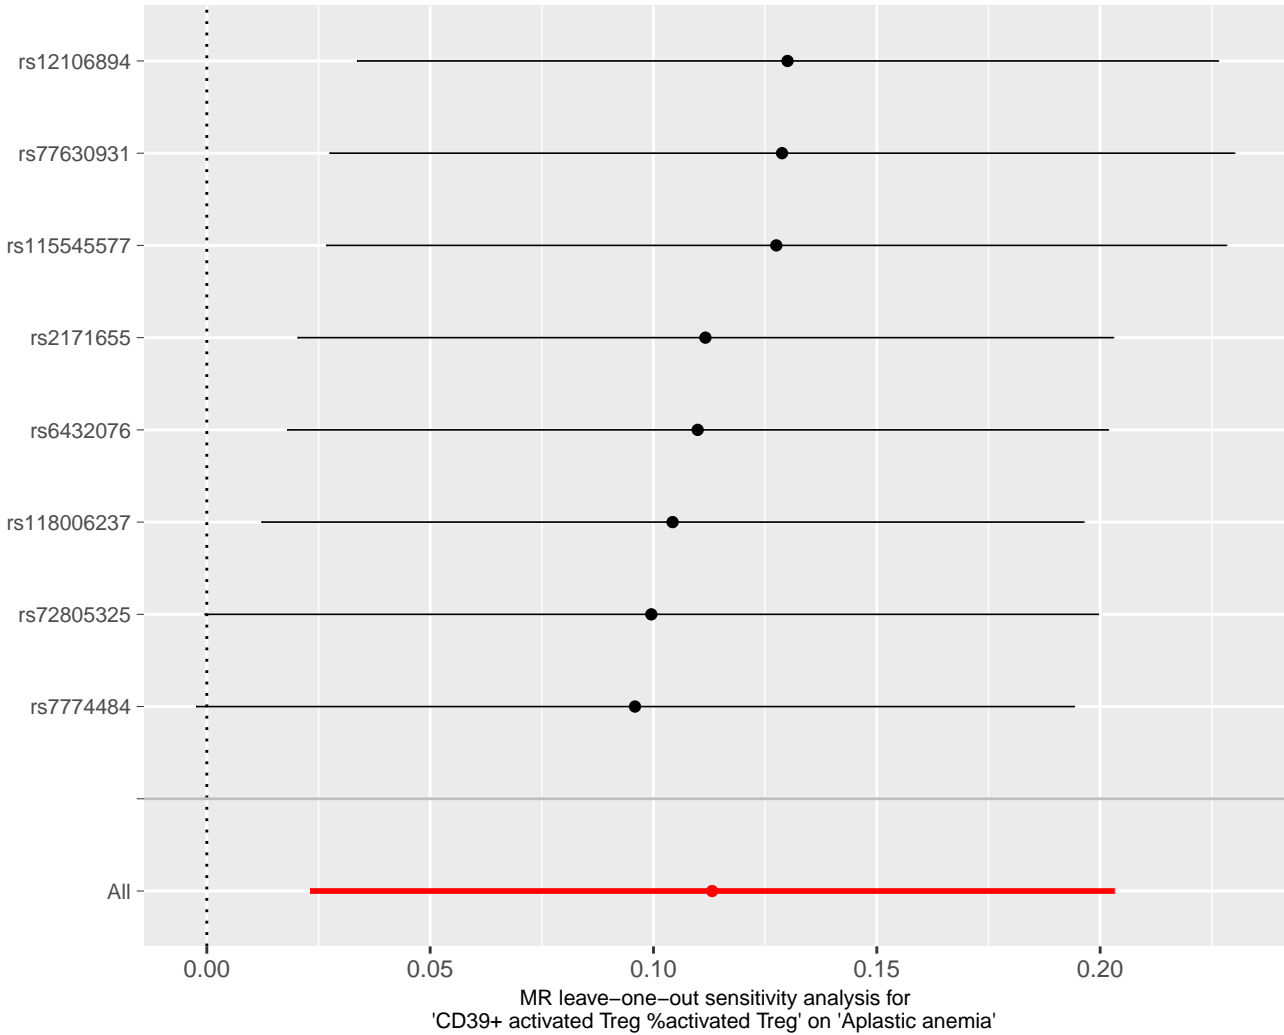

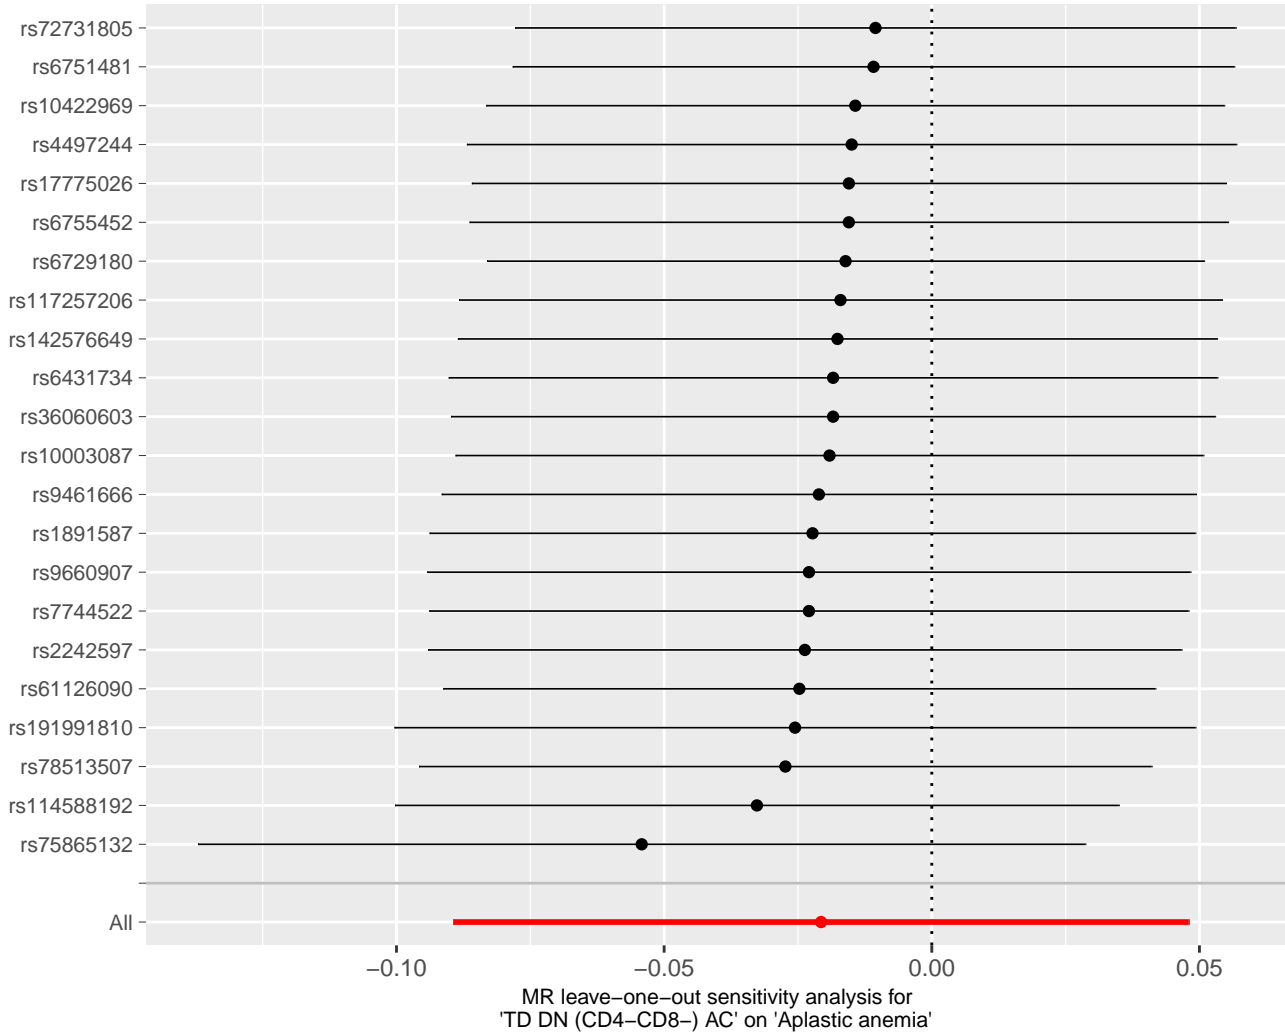

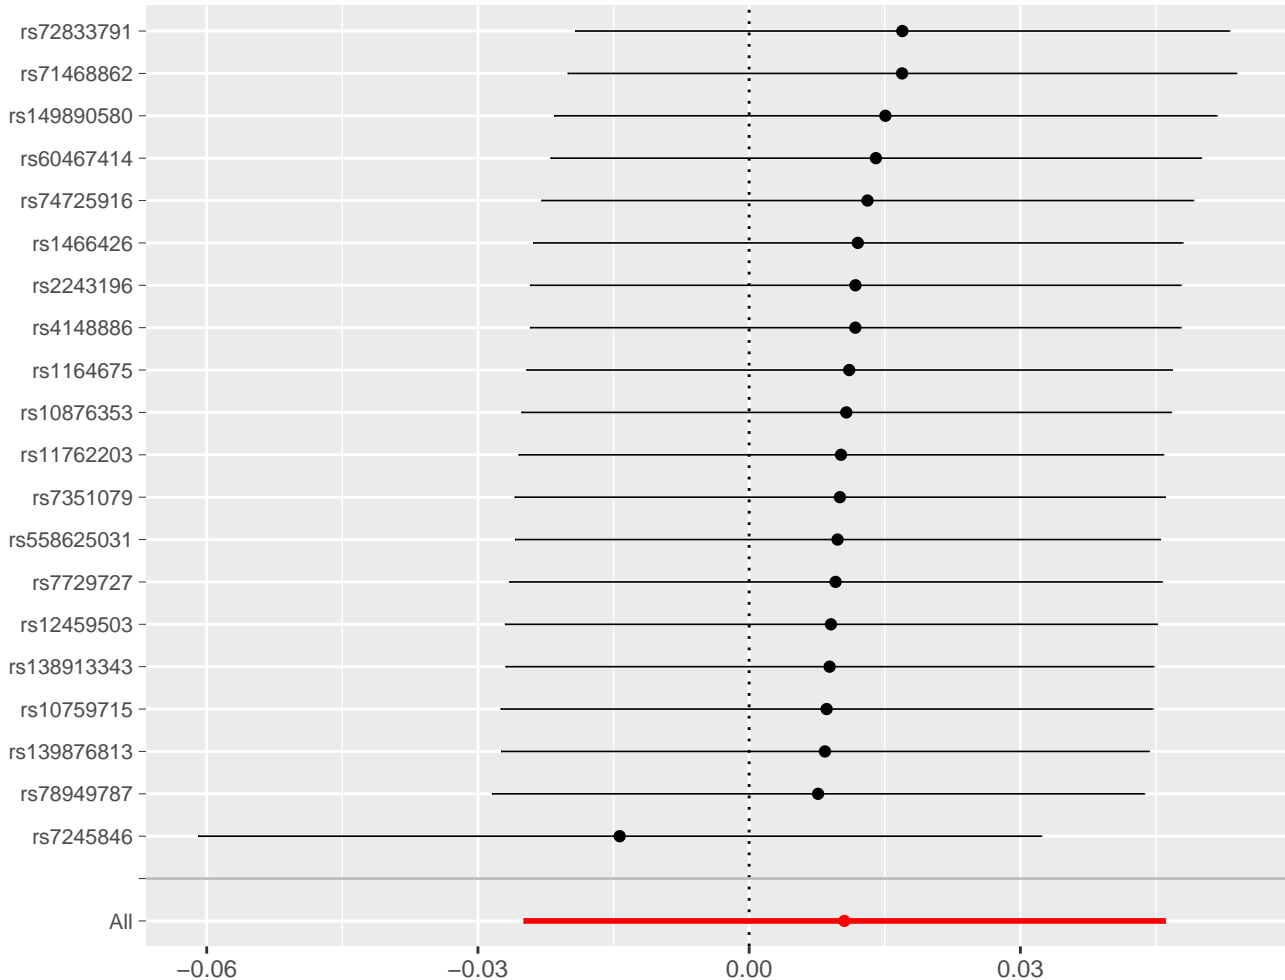

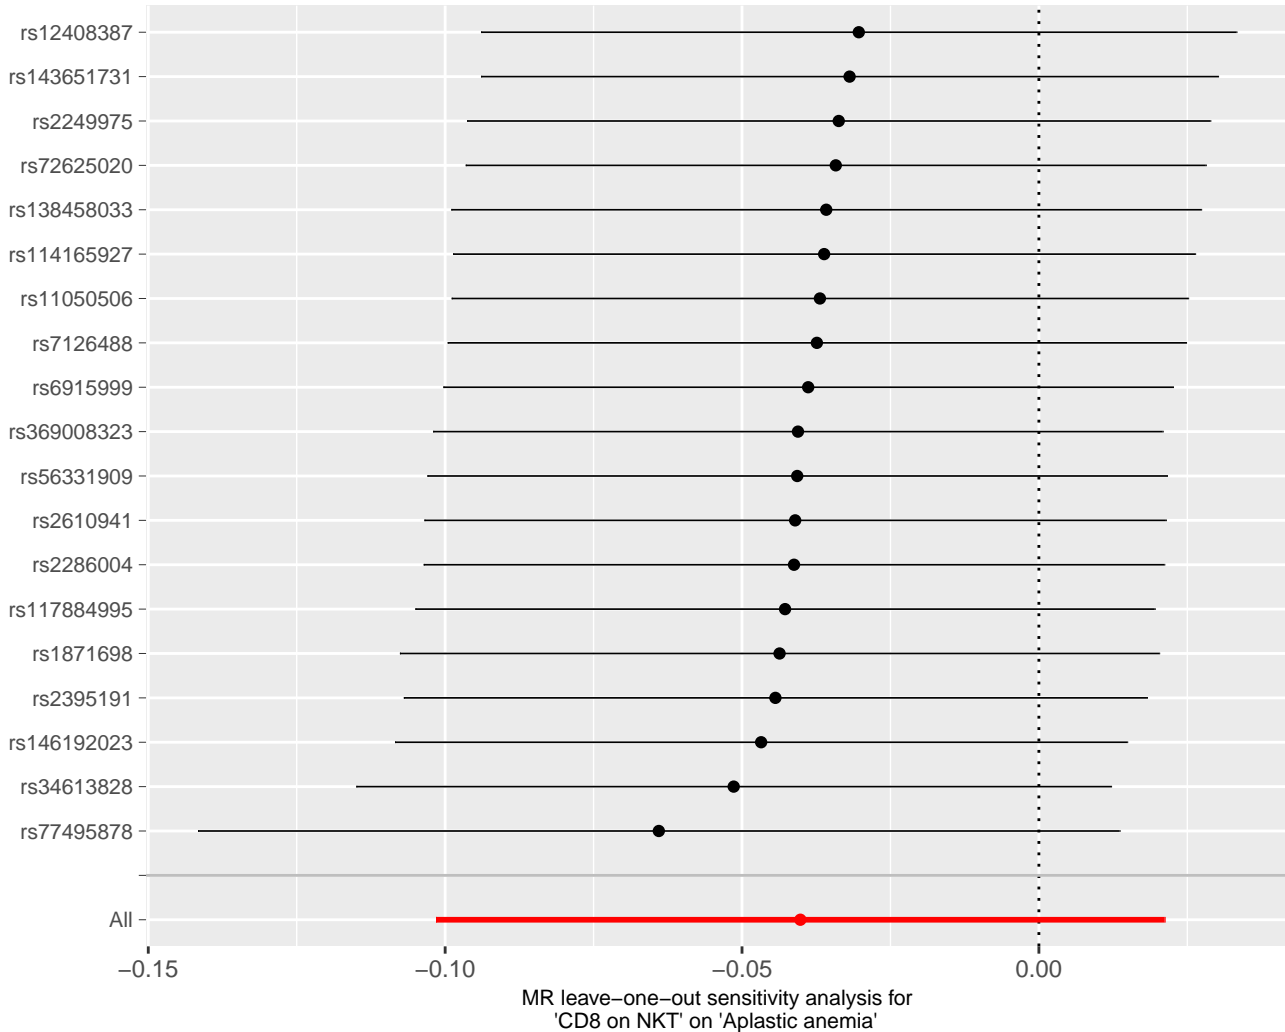

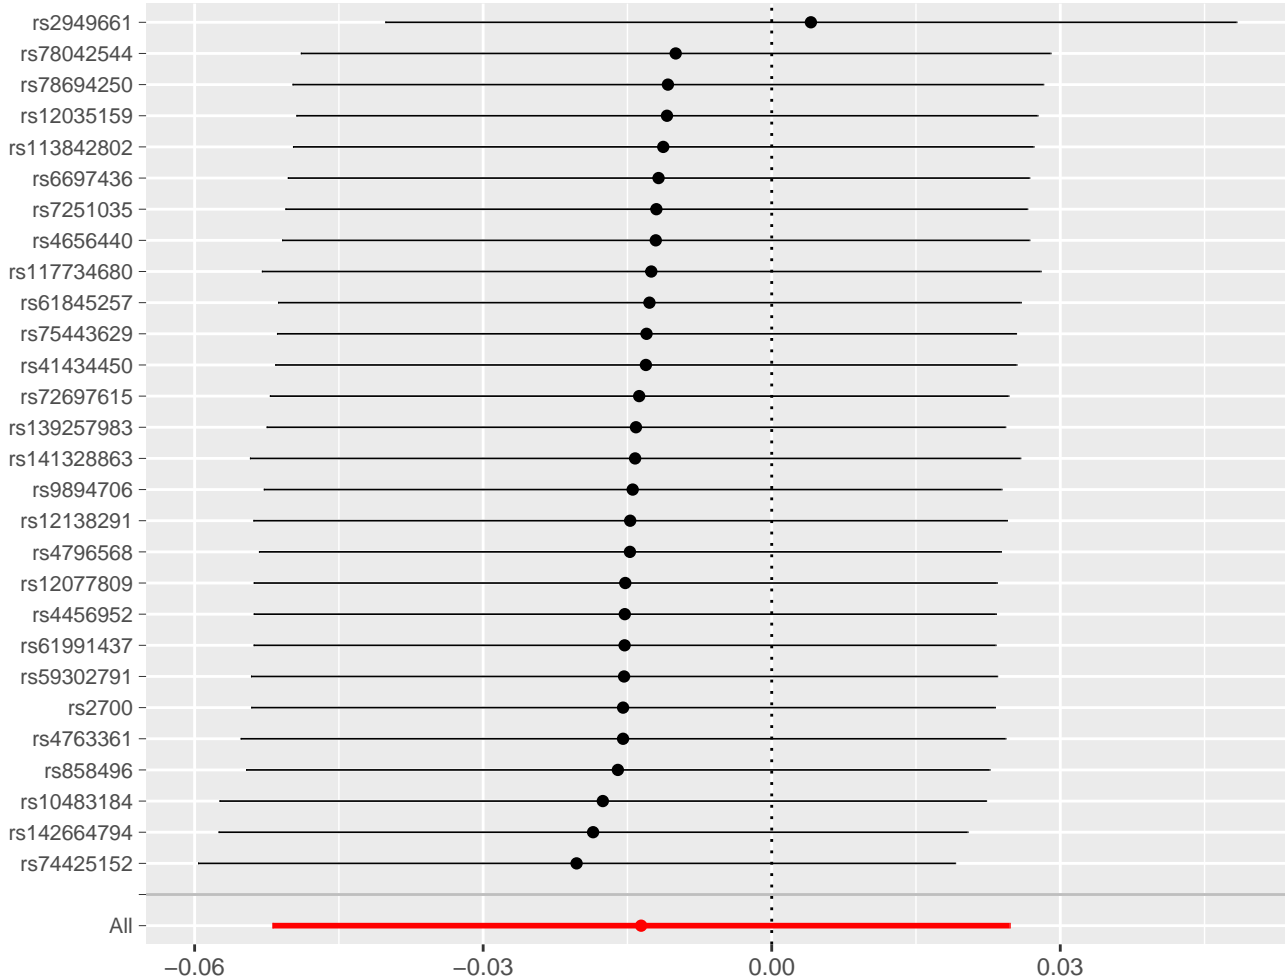

MR leave-one-out sensitivity analysis for 'CD3 on CD39+ CD4+' on 'Aplastic anemia'



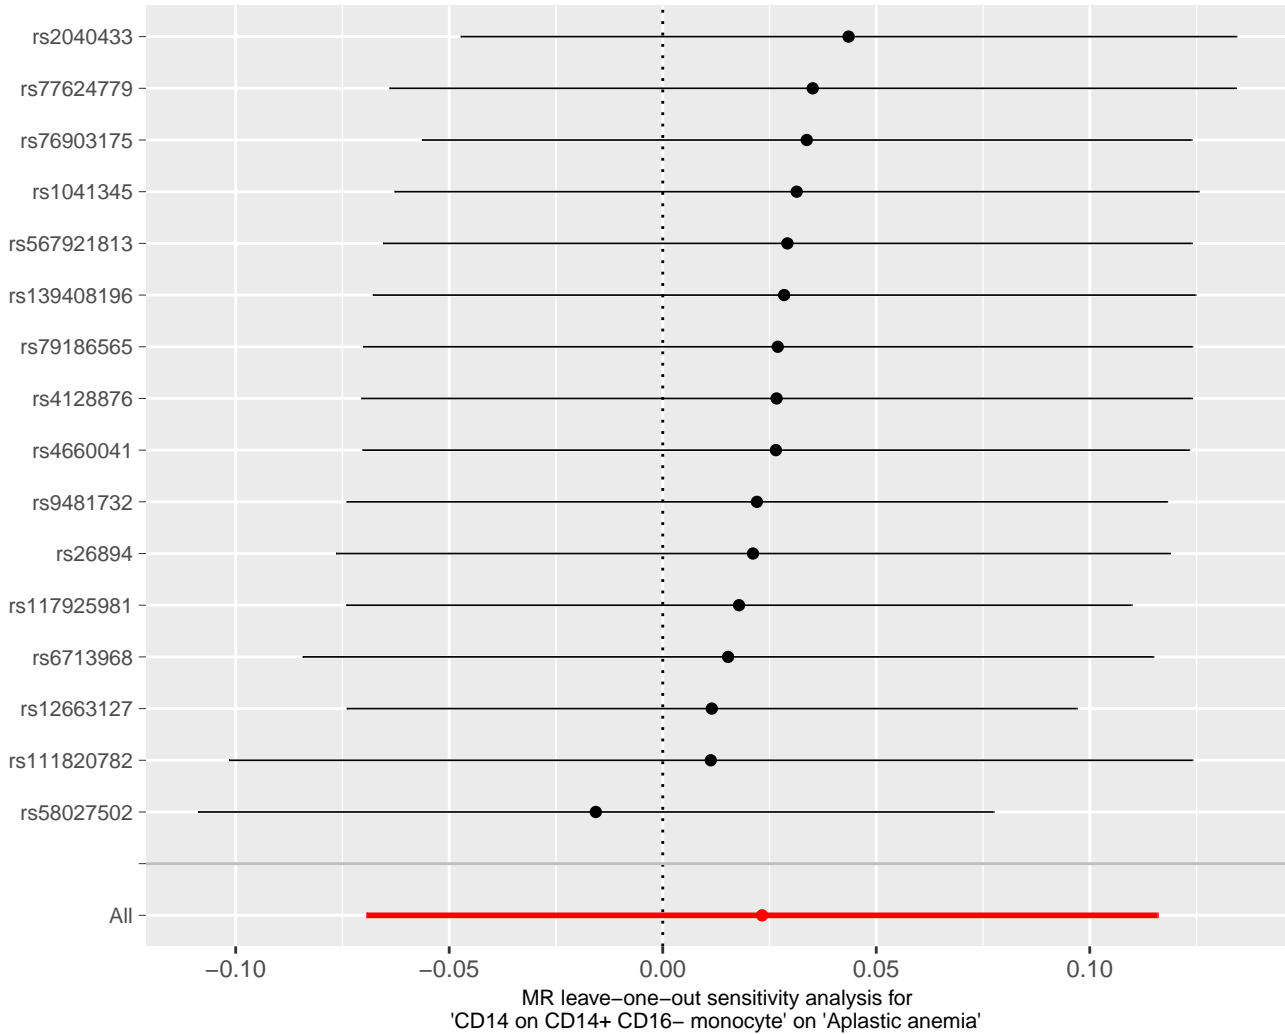

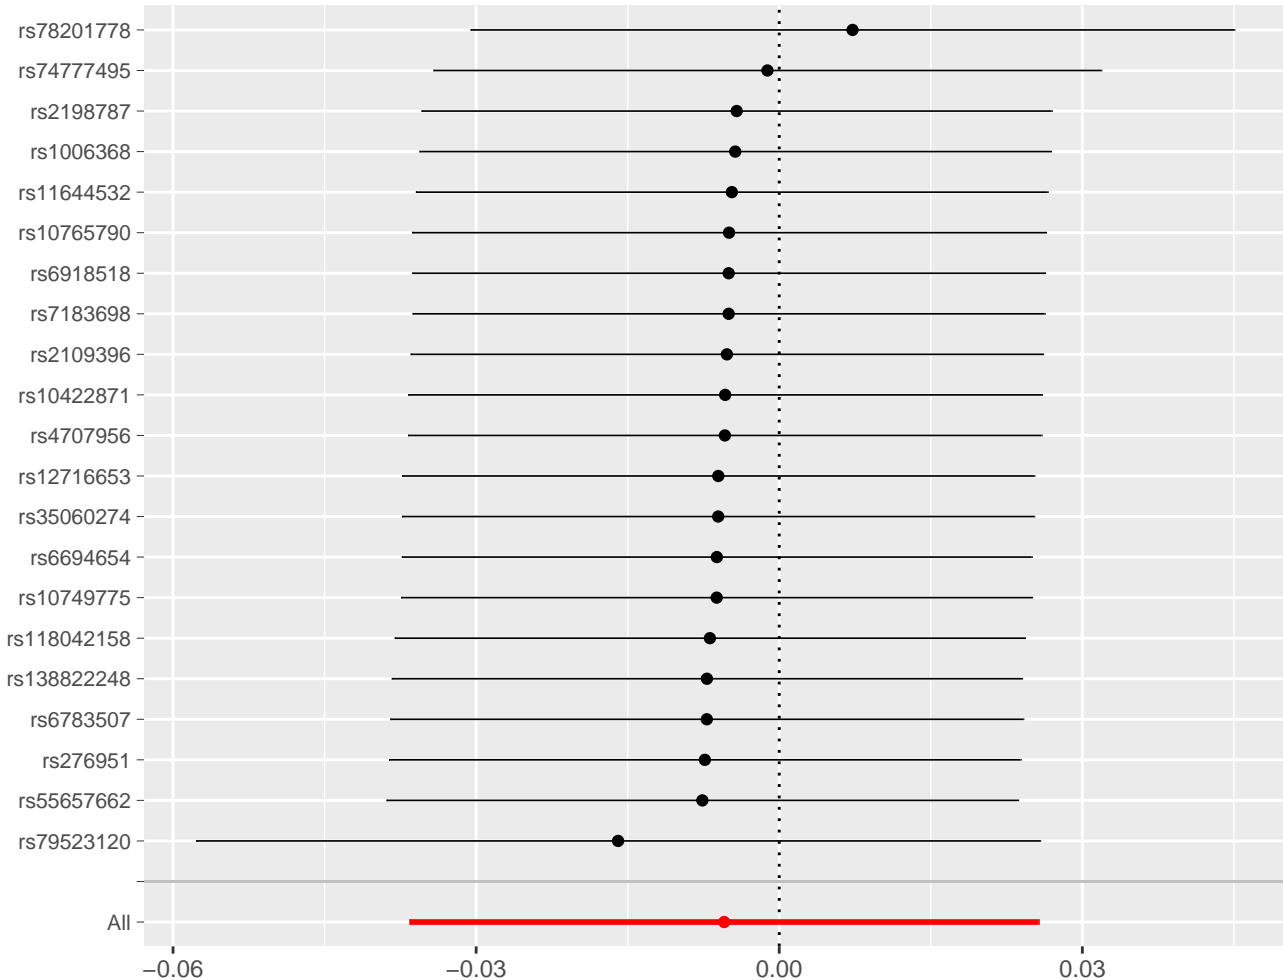

MR leave-one-out sensitivity analysis for 'SSC-A on NKT' on 'Aplastic anemia'

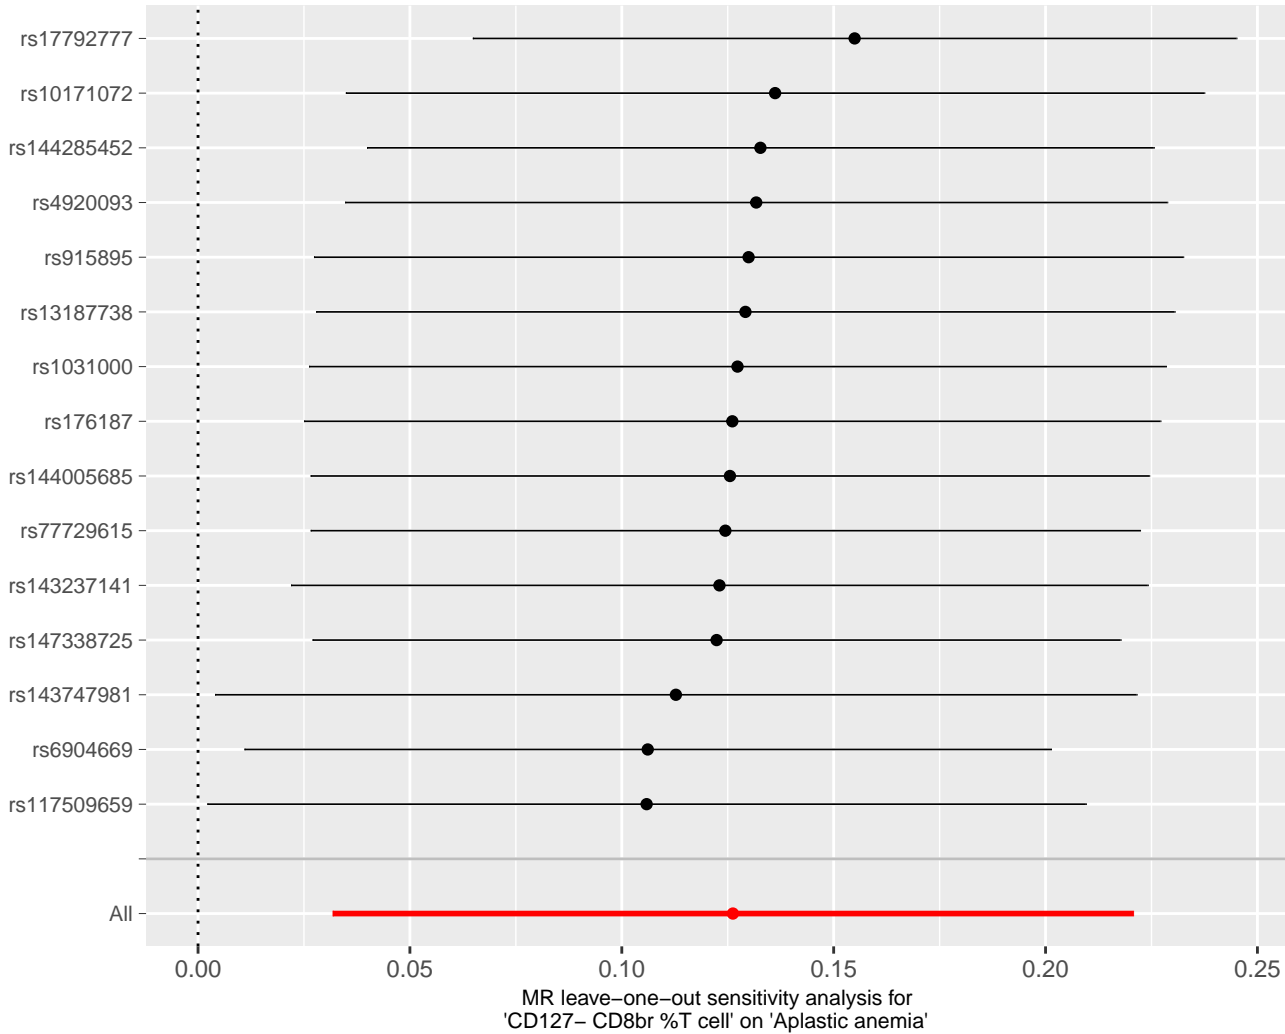

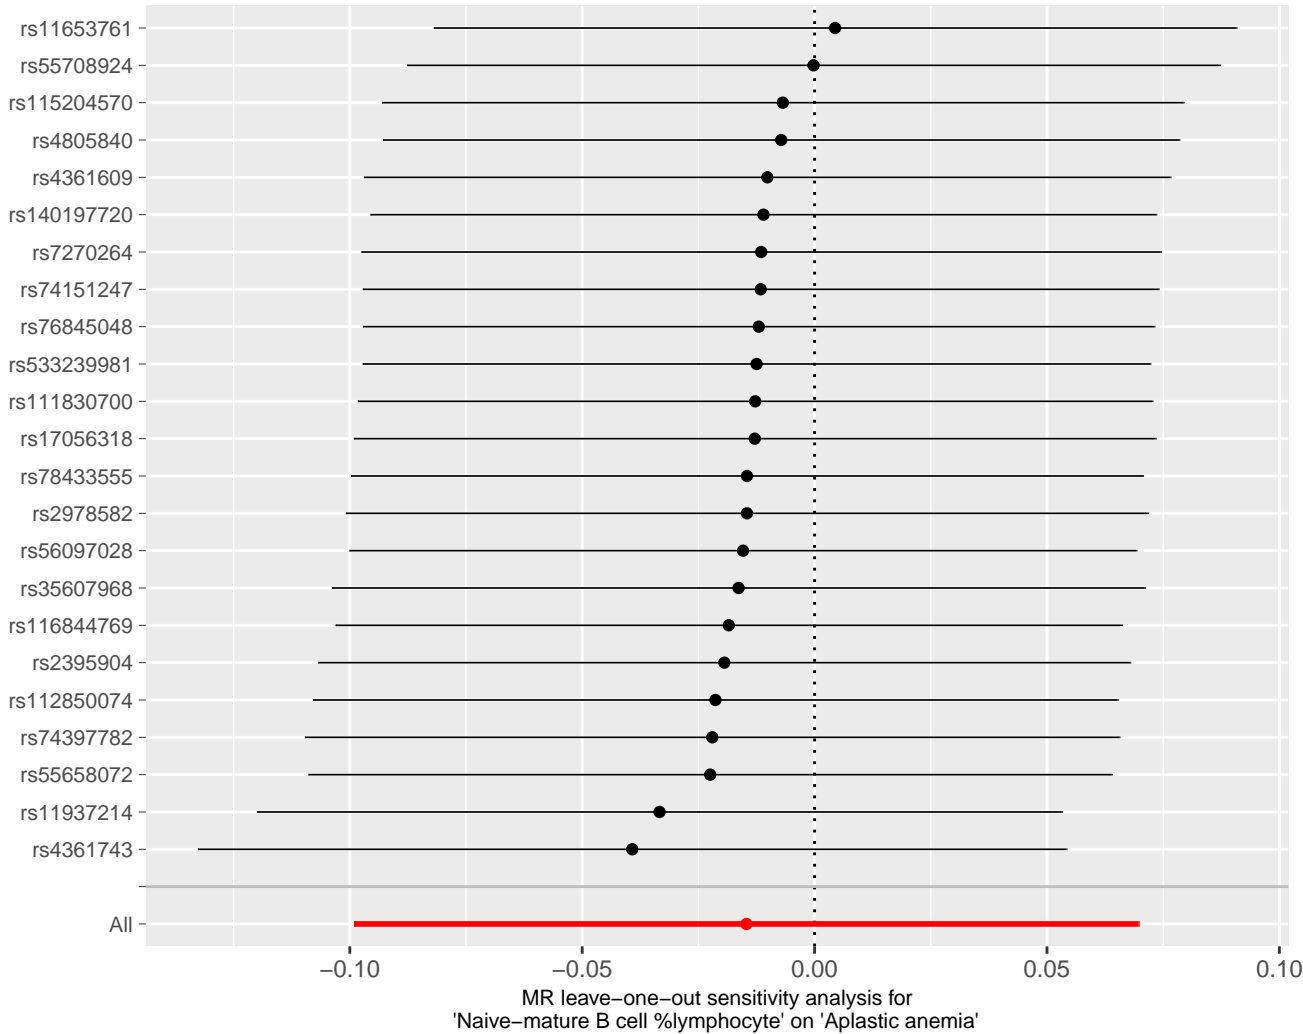

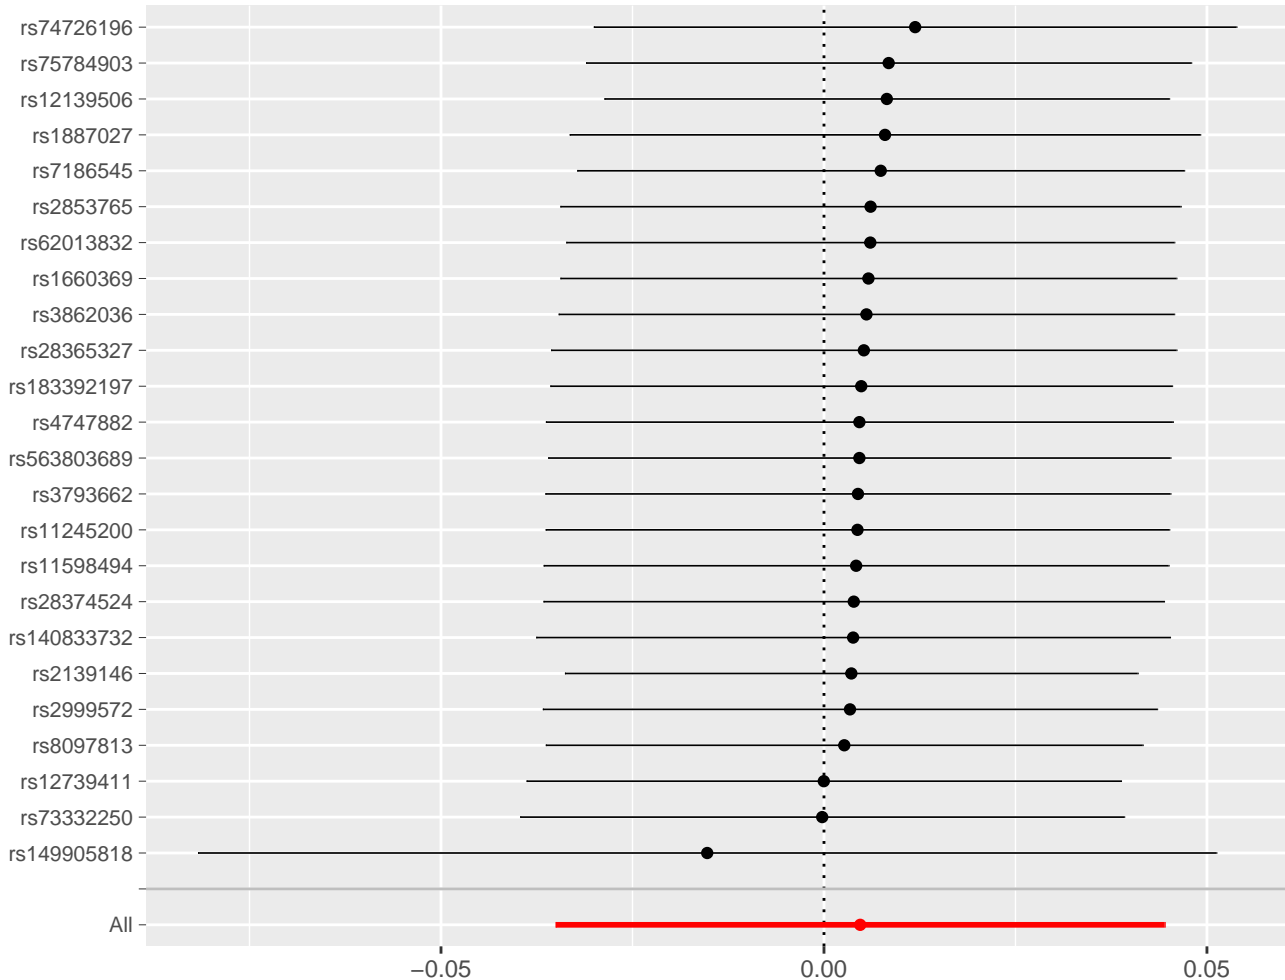

MR leave-one-out sensitivity analysis for 'CD25 on unsw mem' on 'Aplastic anemia'

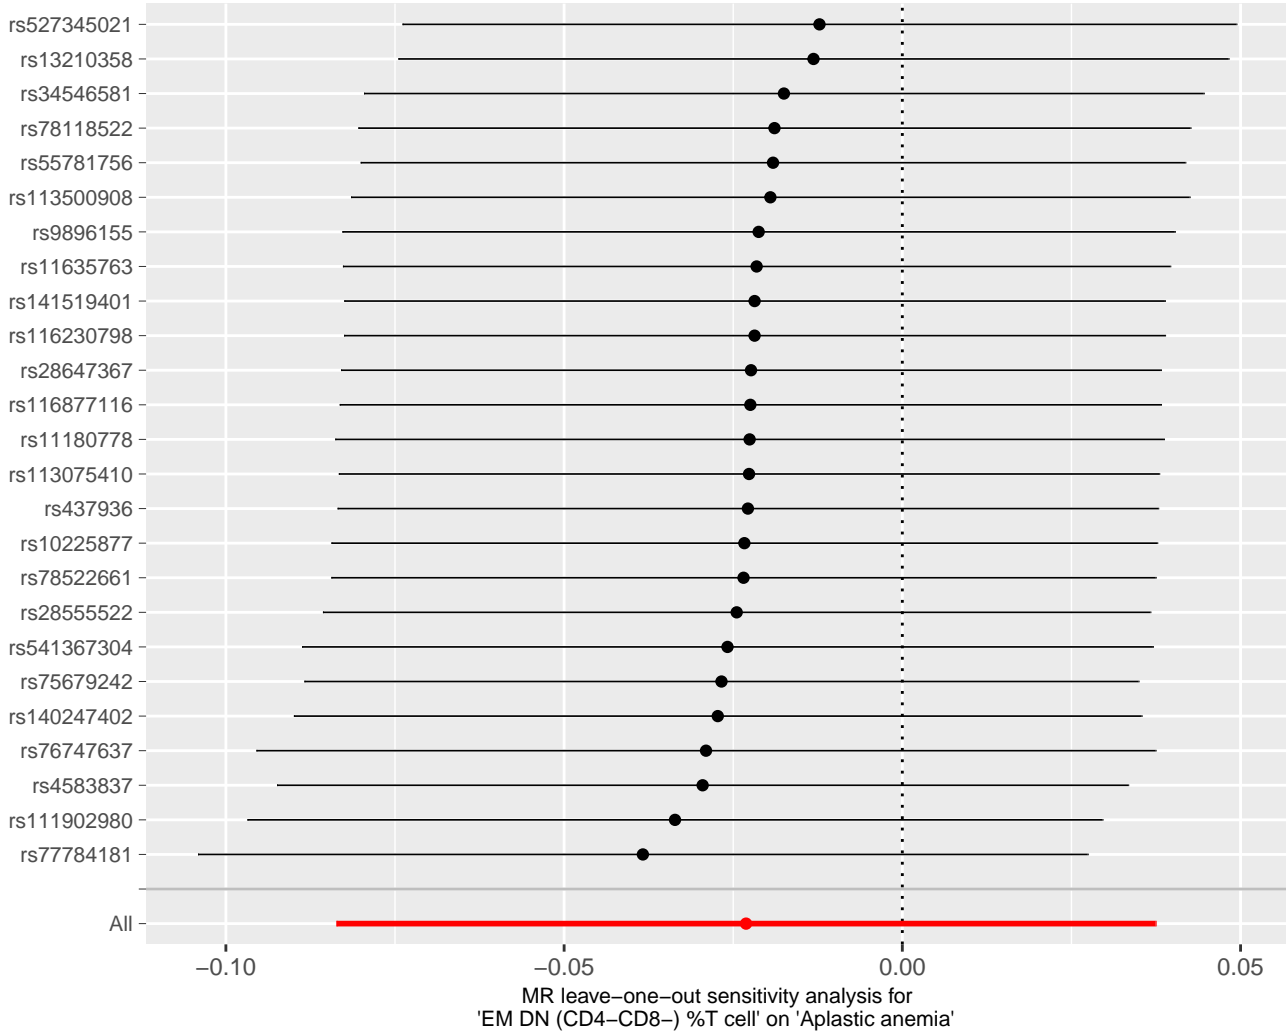

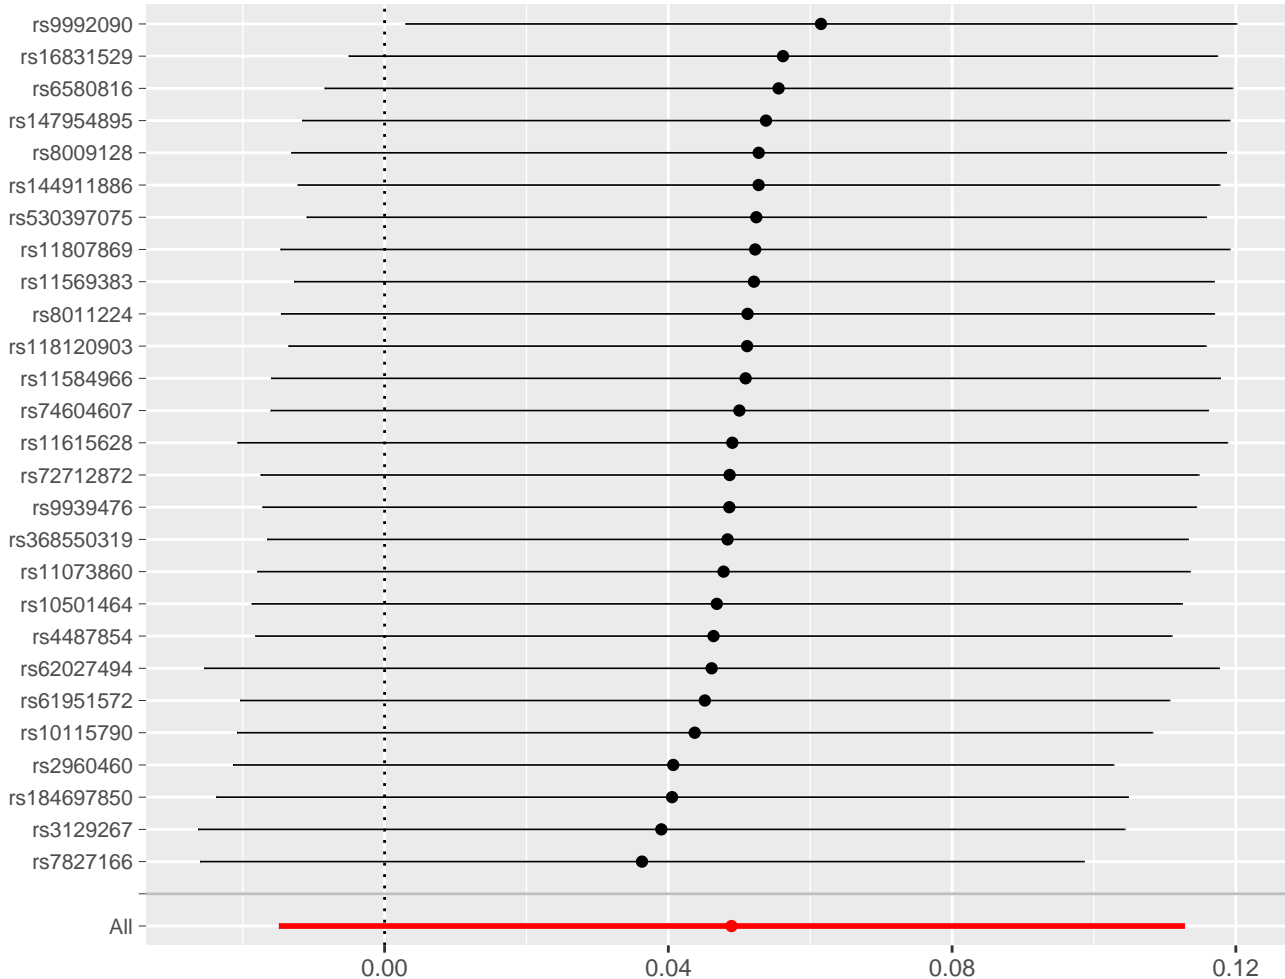

MR leave-one-out sensitivity analysis for  
'CD4 on CD45RA+ CD4+' on 'Aplastic anemia'

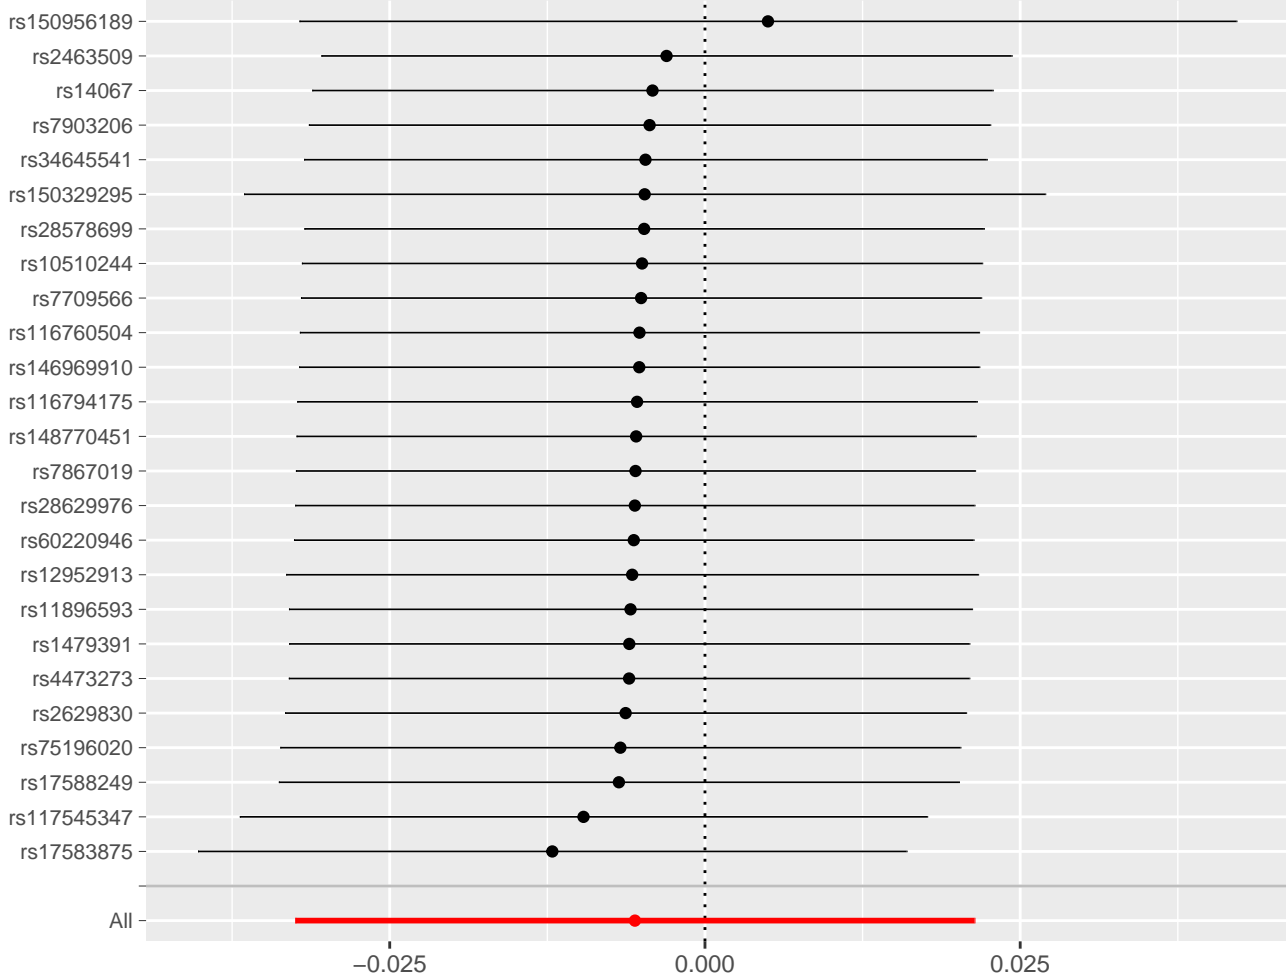



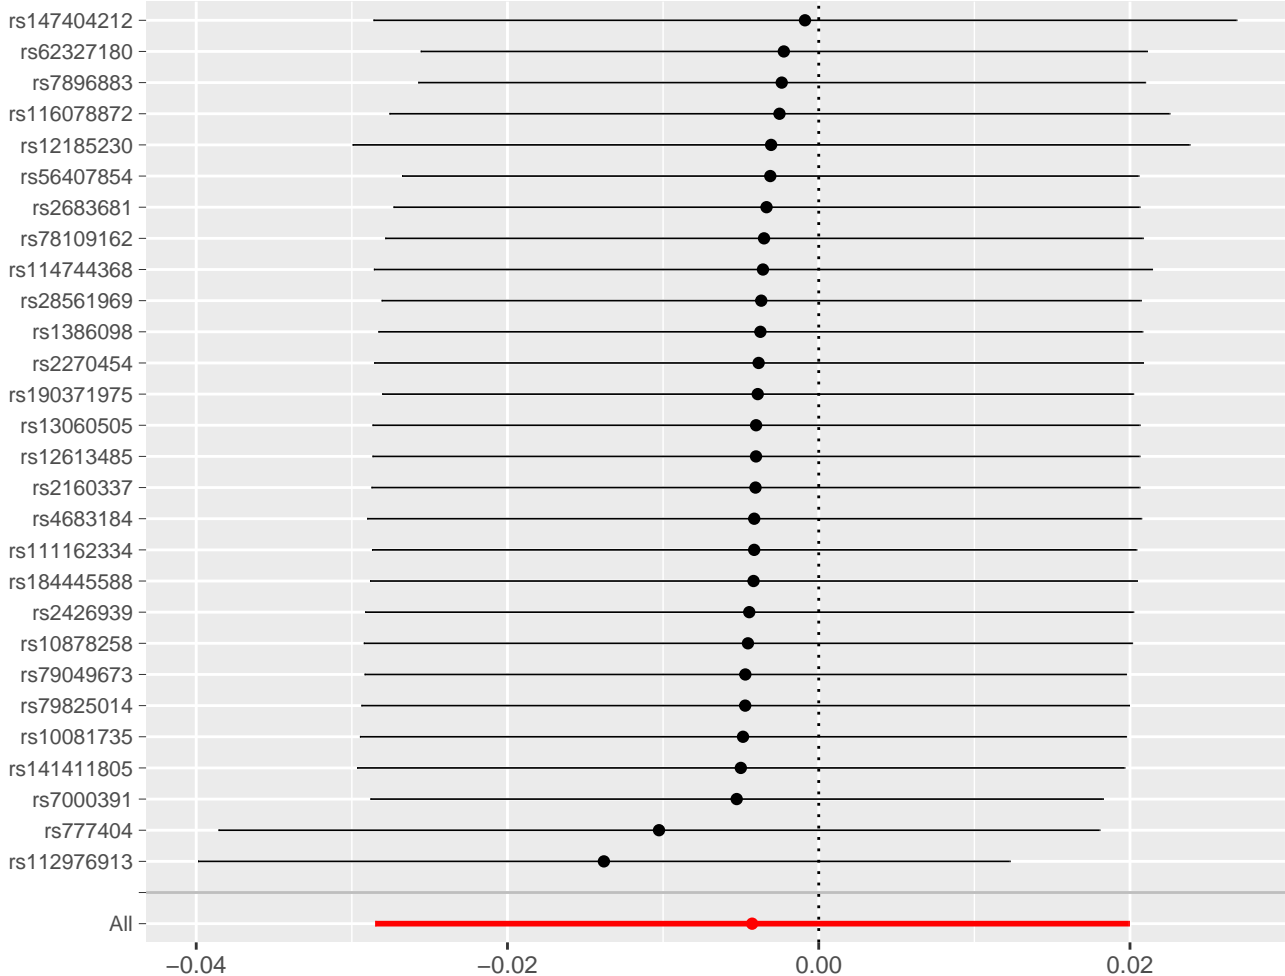

MR leave-one-out sensitivity analysis for 'CCR2 on CD14+ CD16- monocyte' on 'Aplastic anemia'

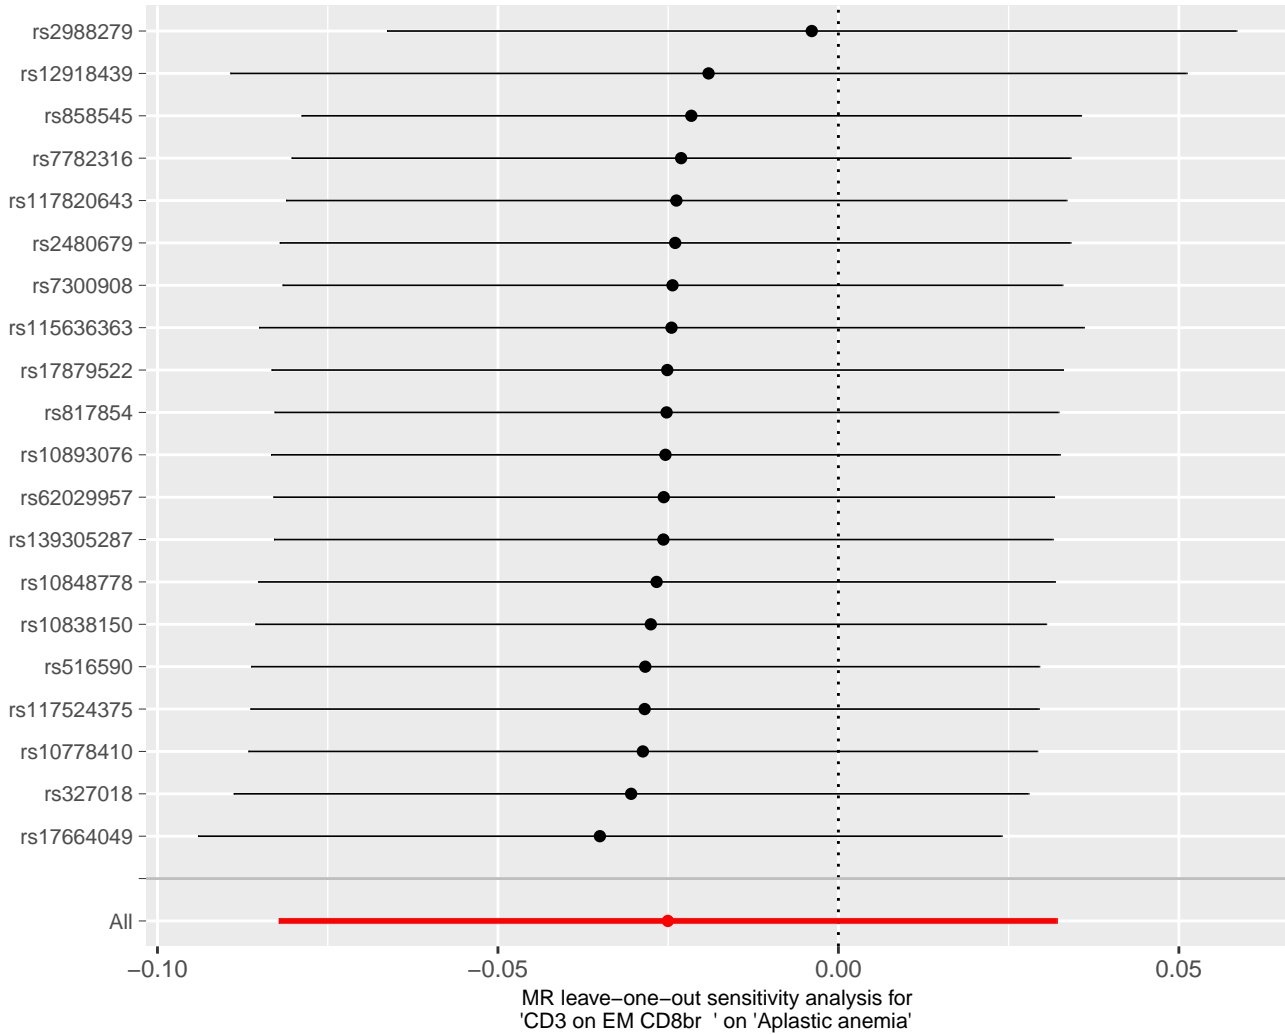

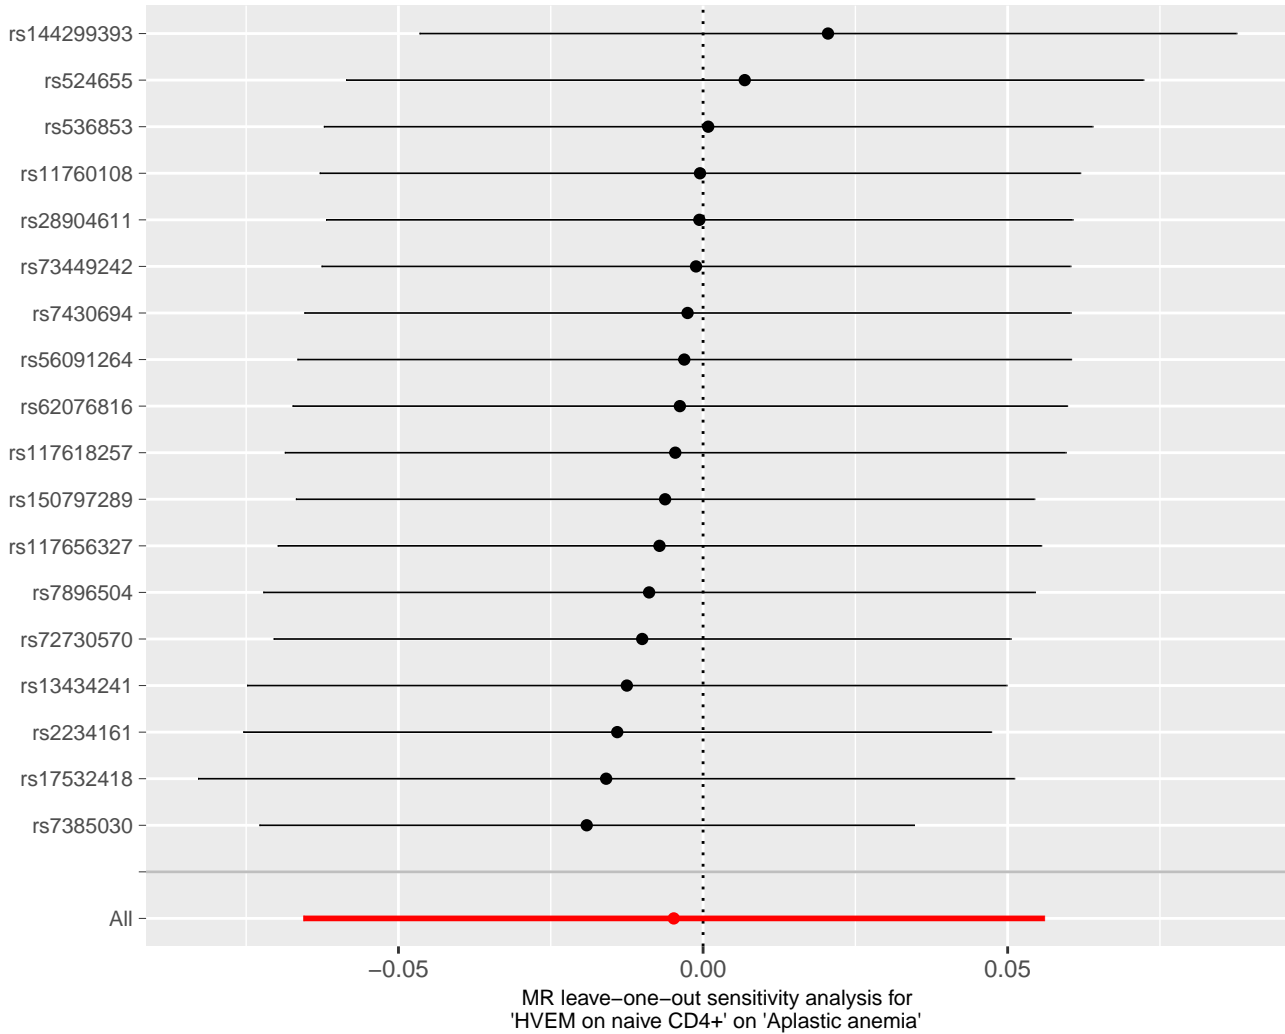

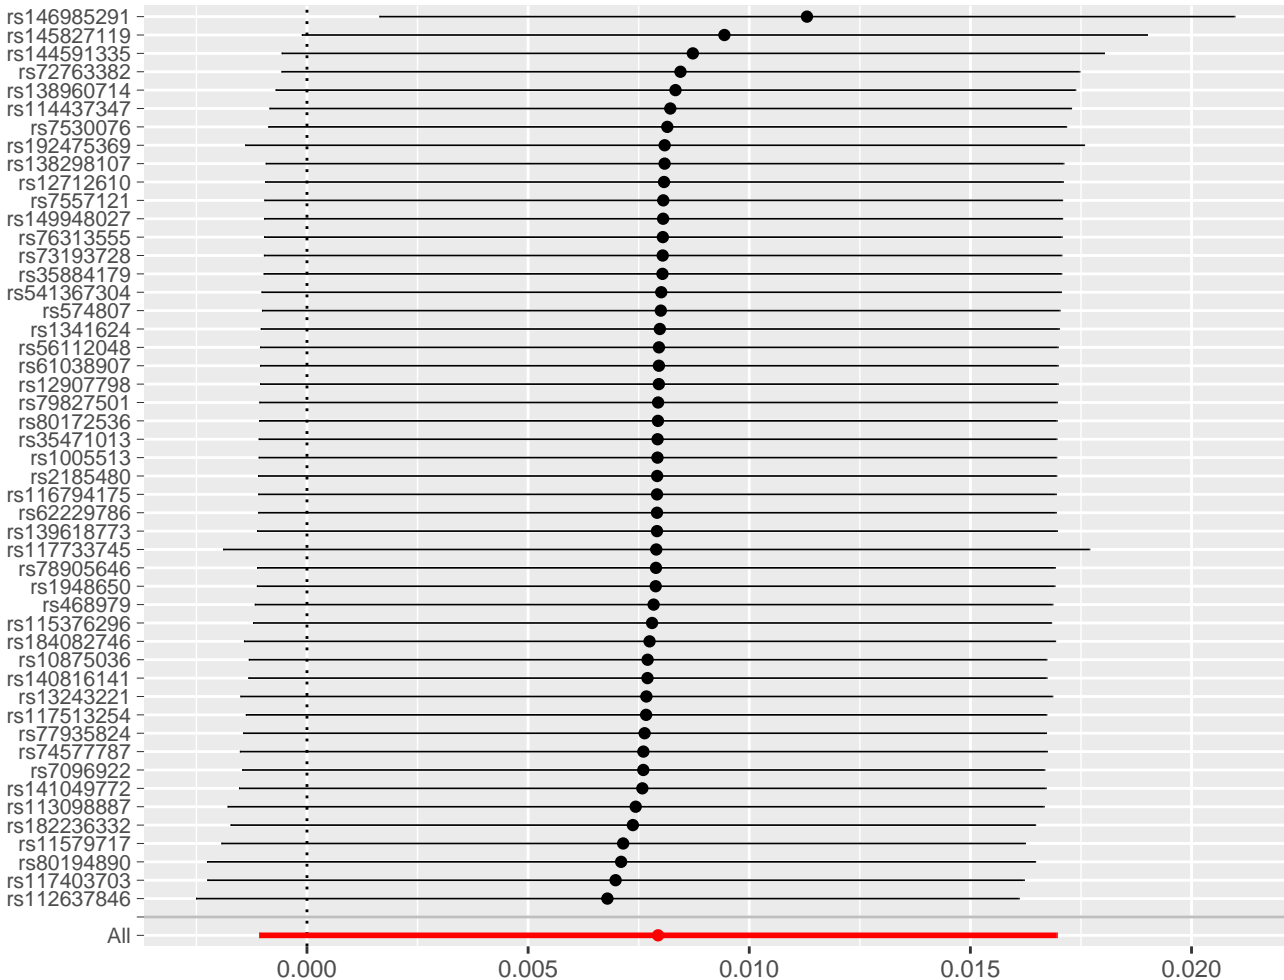

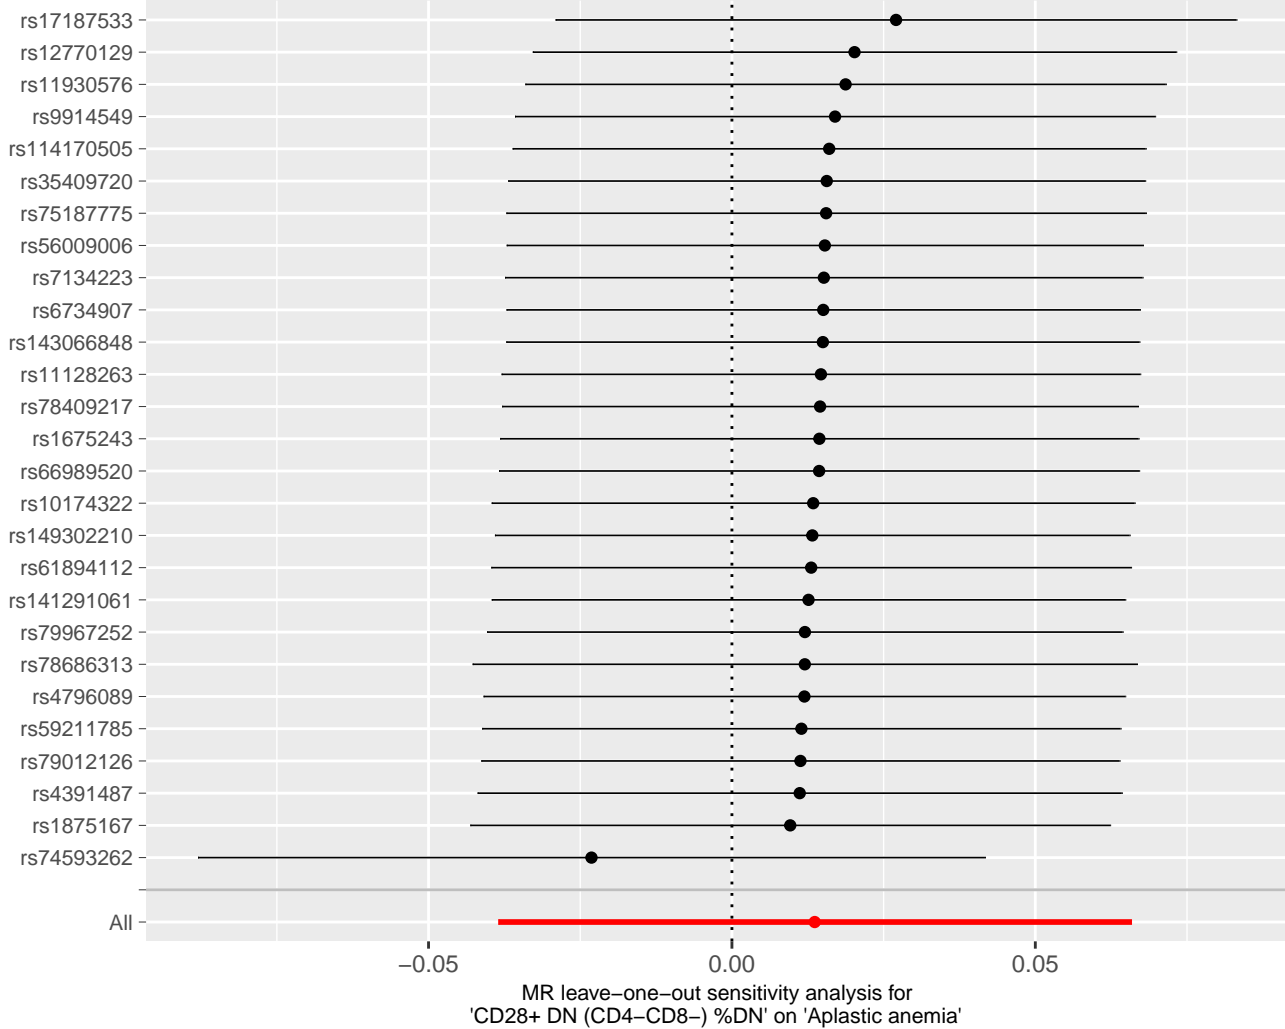

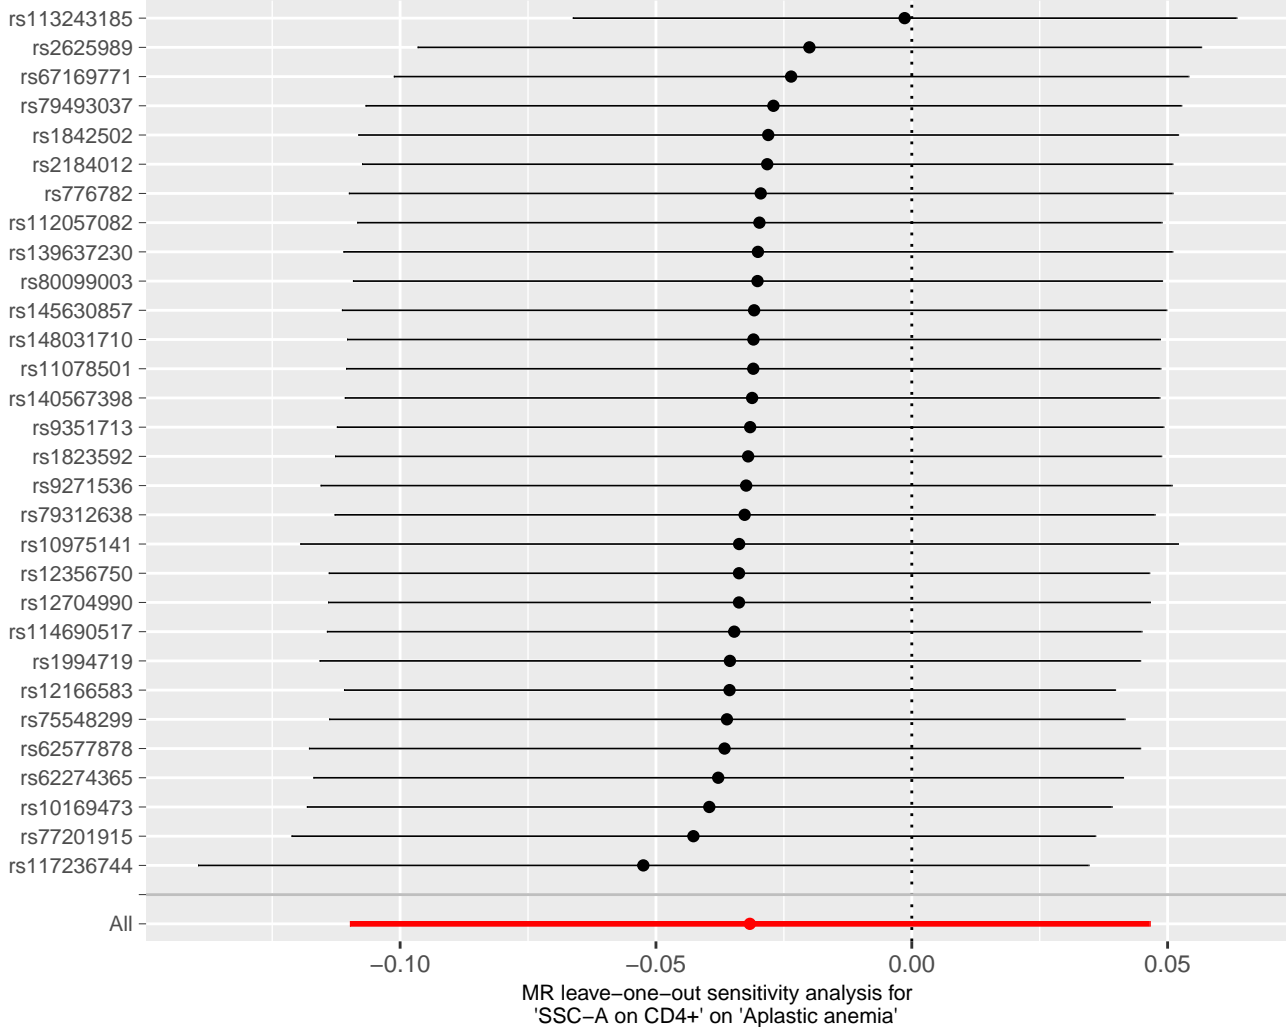

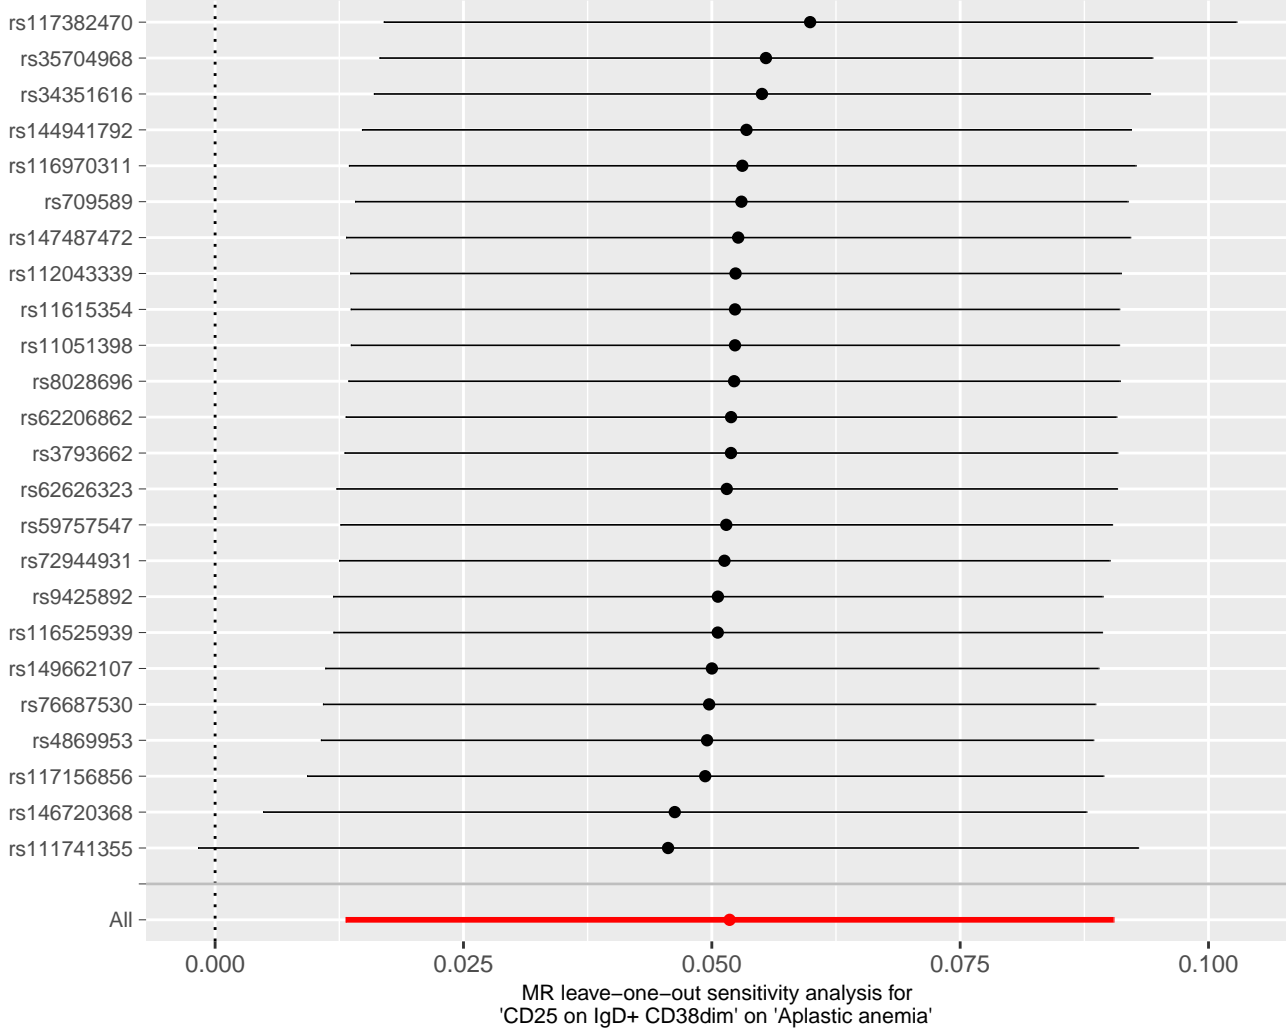

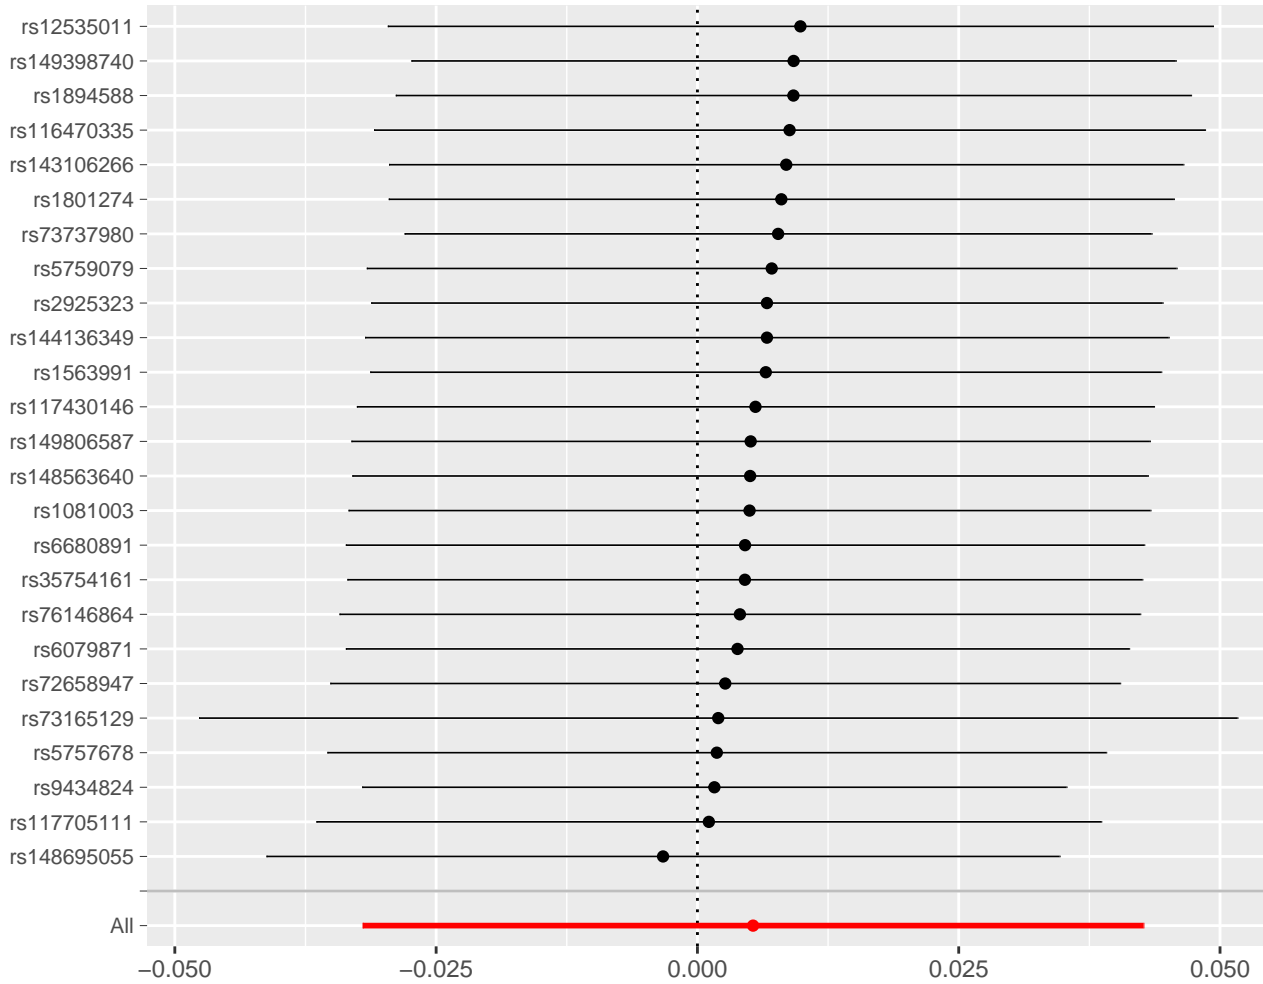

MR leave-one-out sensitivity analysis for 'BAFF-R on IgD+ CD38dim' on 'Aplastic anemia'



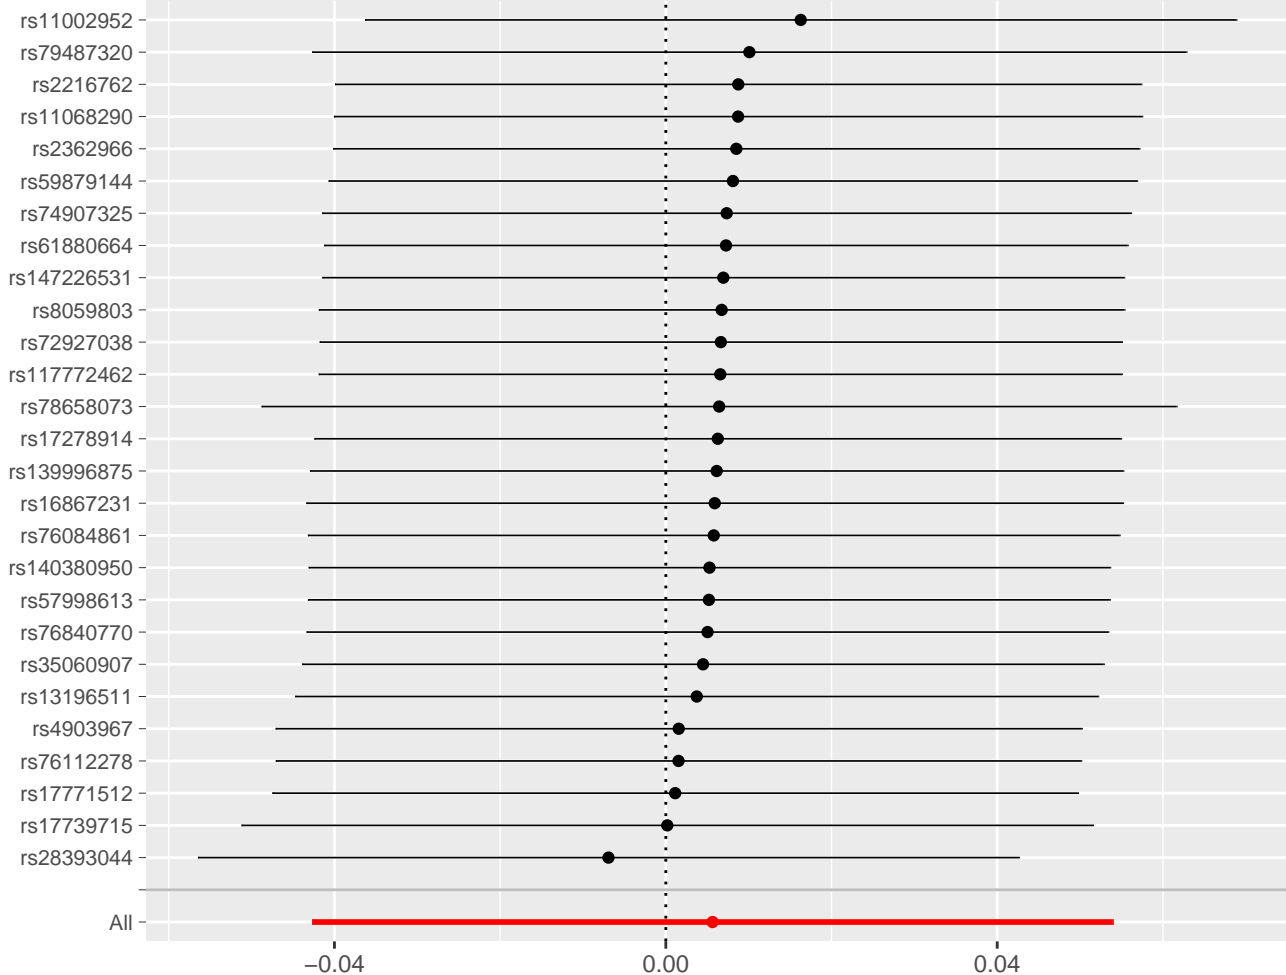

MR leave-one-out sensitivity analysis for 'lgD+ CD38br %B cell' on 'Aplastic anemia'

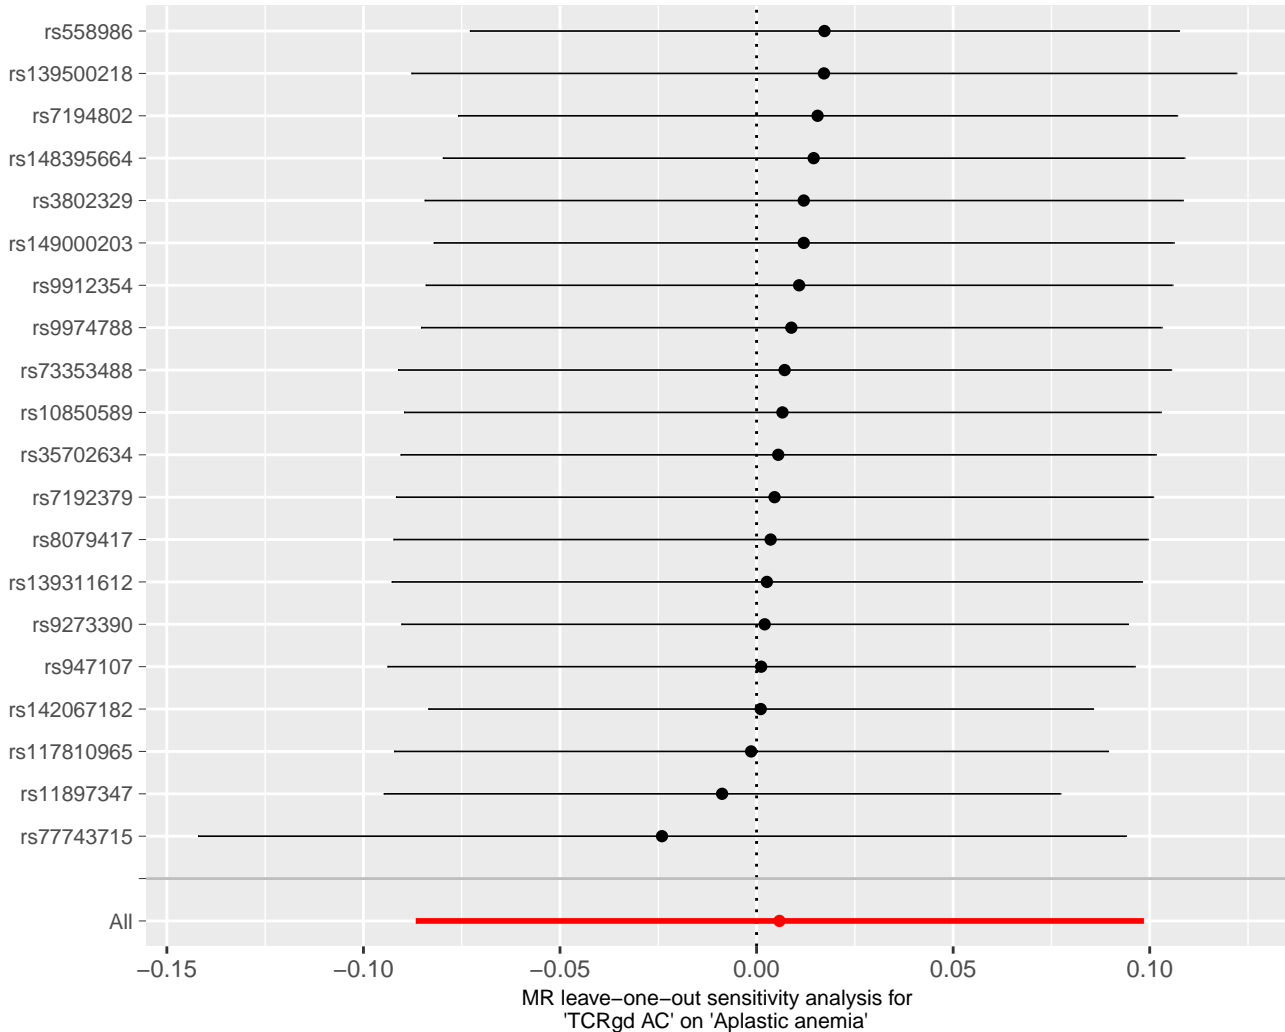

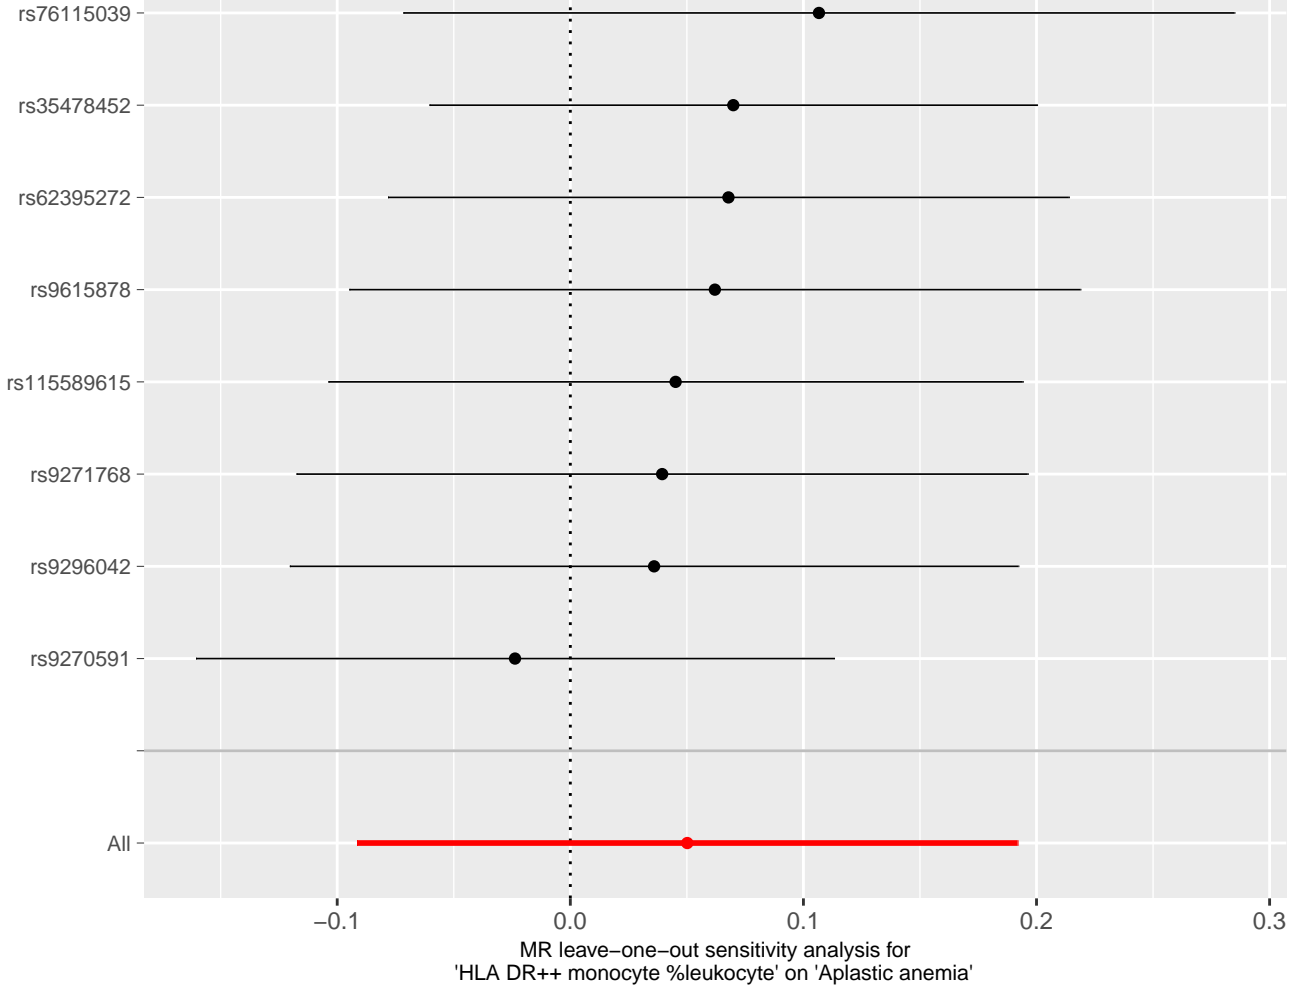

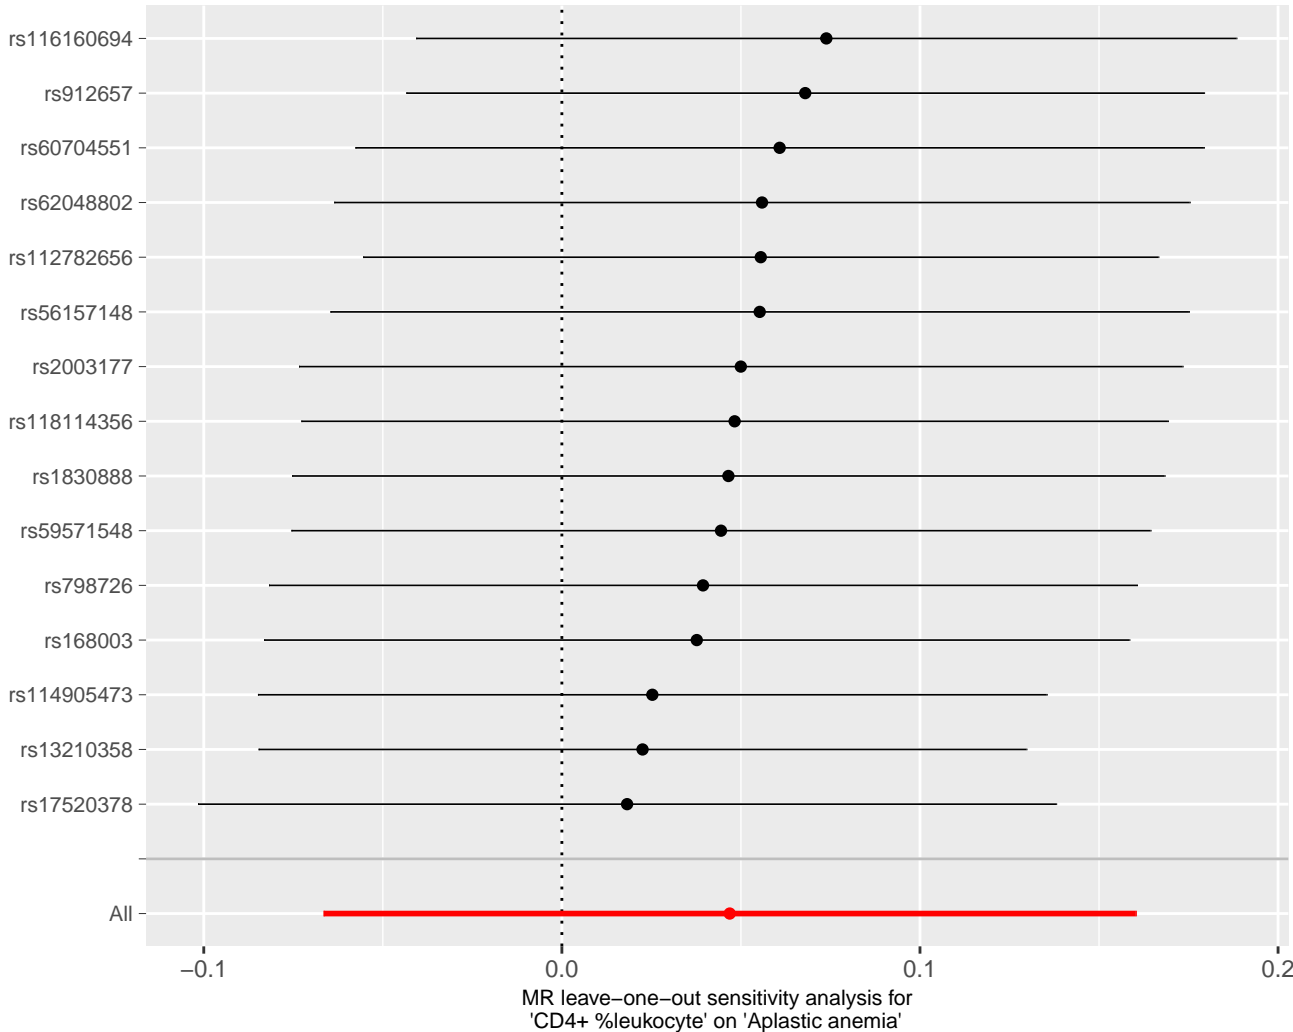

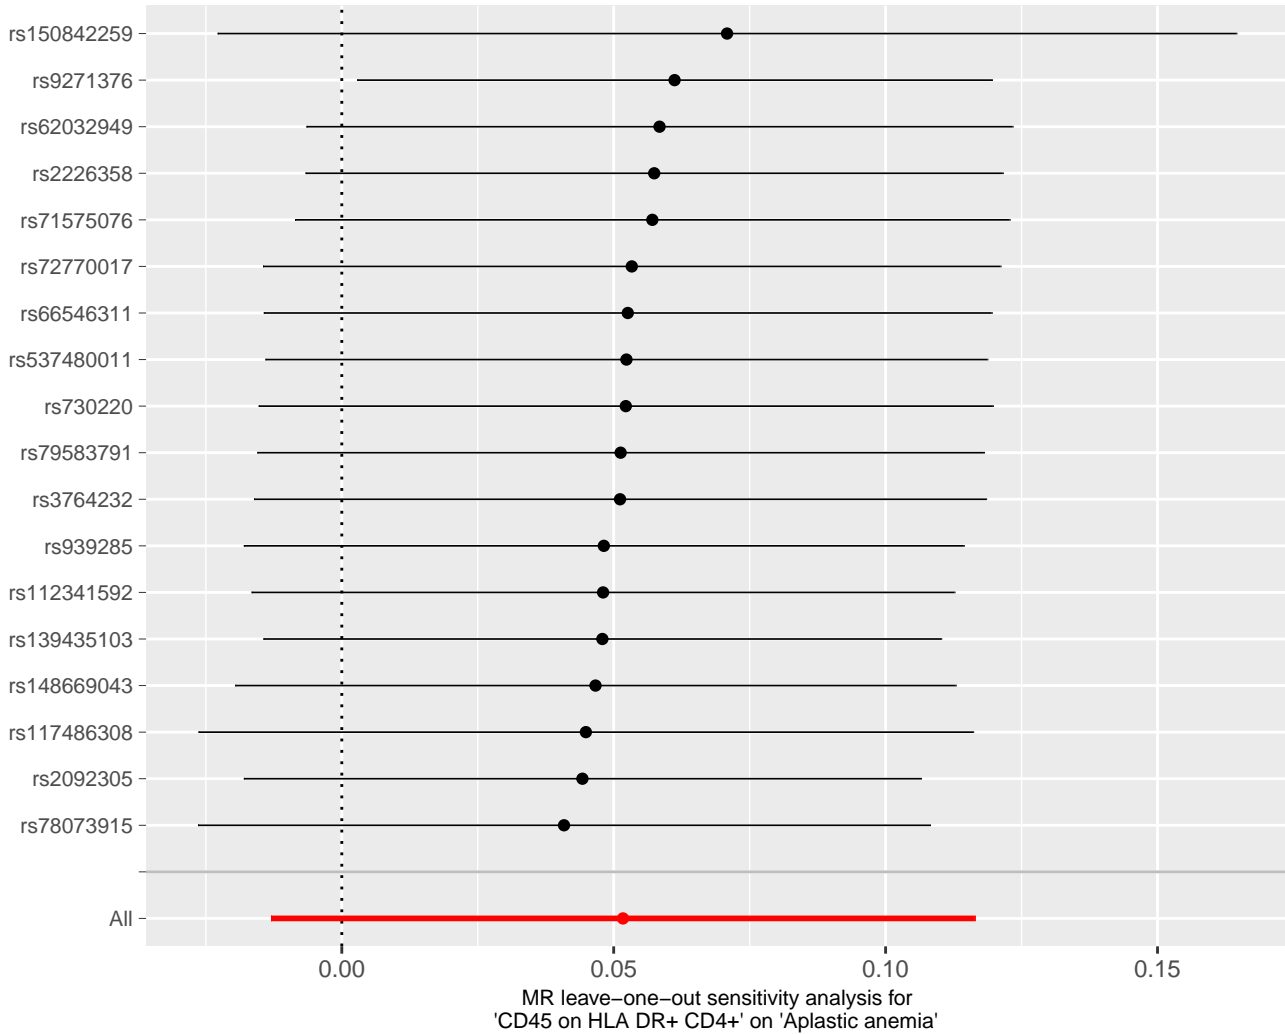

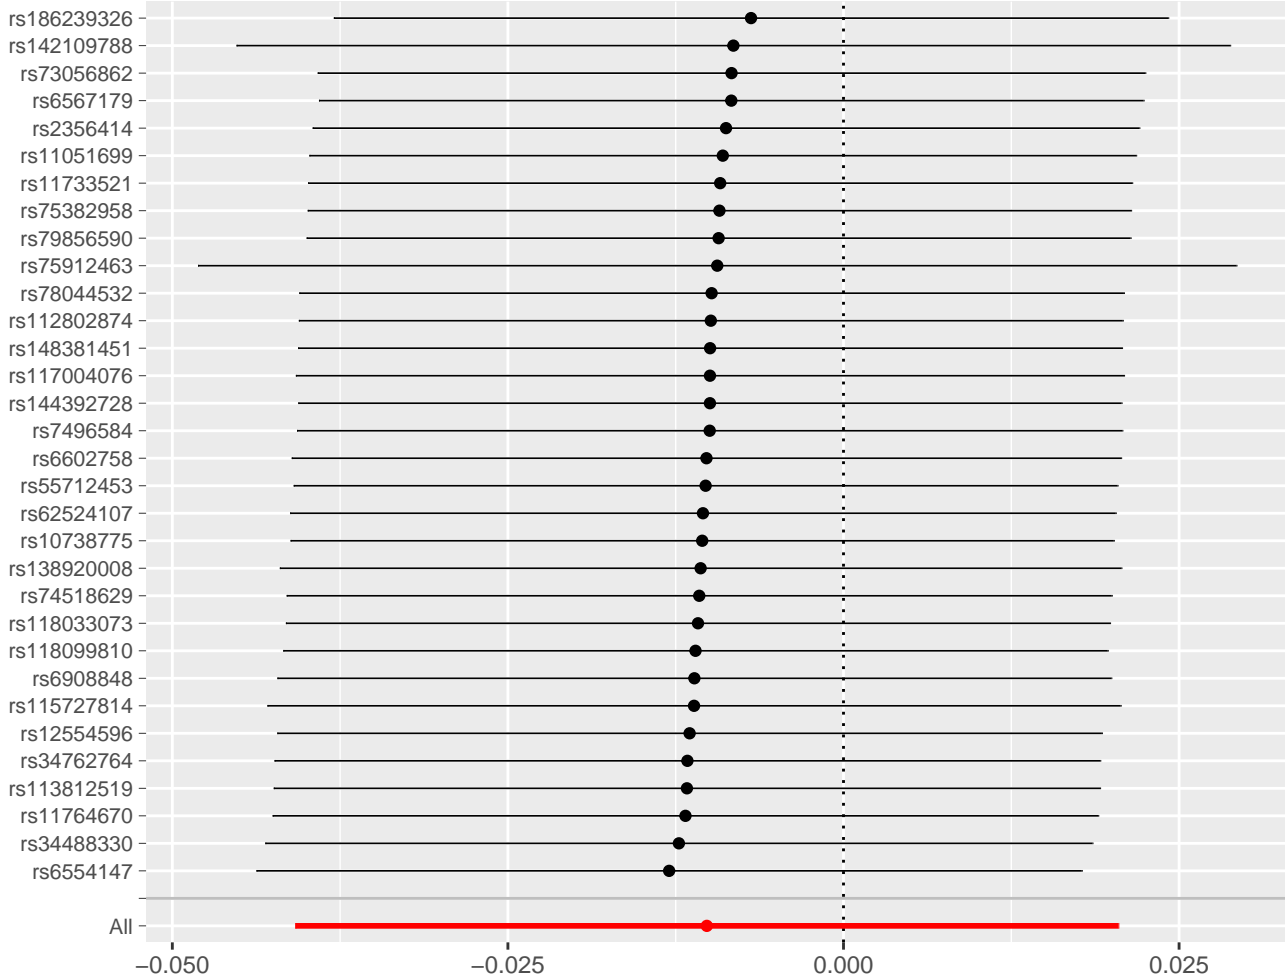

MR leave-one-out sensitivity analysis for 'CD19 on IgD+ CD38-' on 'Aplastic anemia'

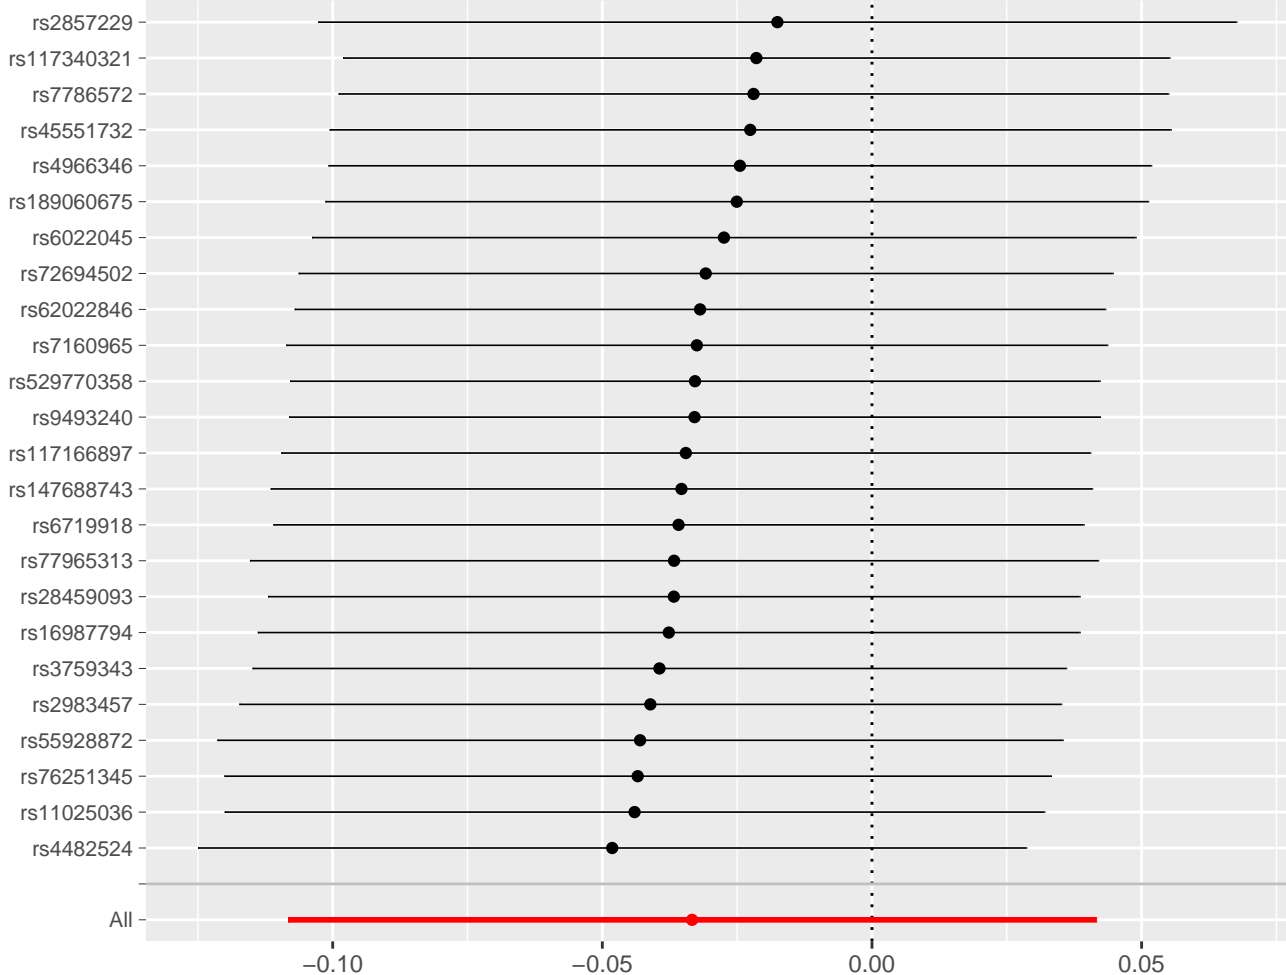

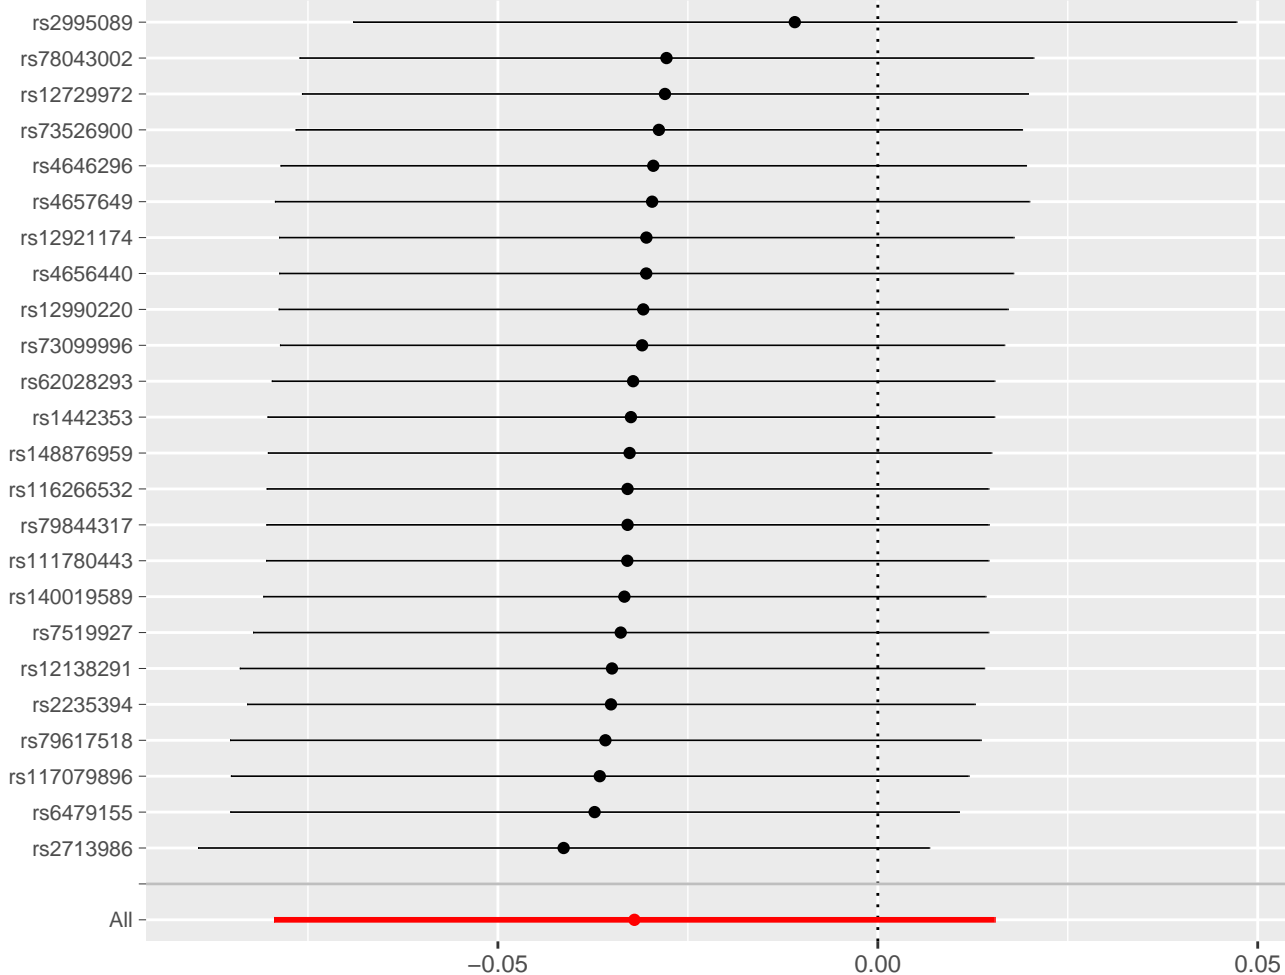

MR leave-one-out sensitivity analysis for 'CD3 on CD28+ CD45RA+ CD8br' on 'Aplastic anemia'



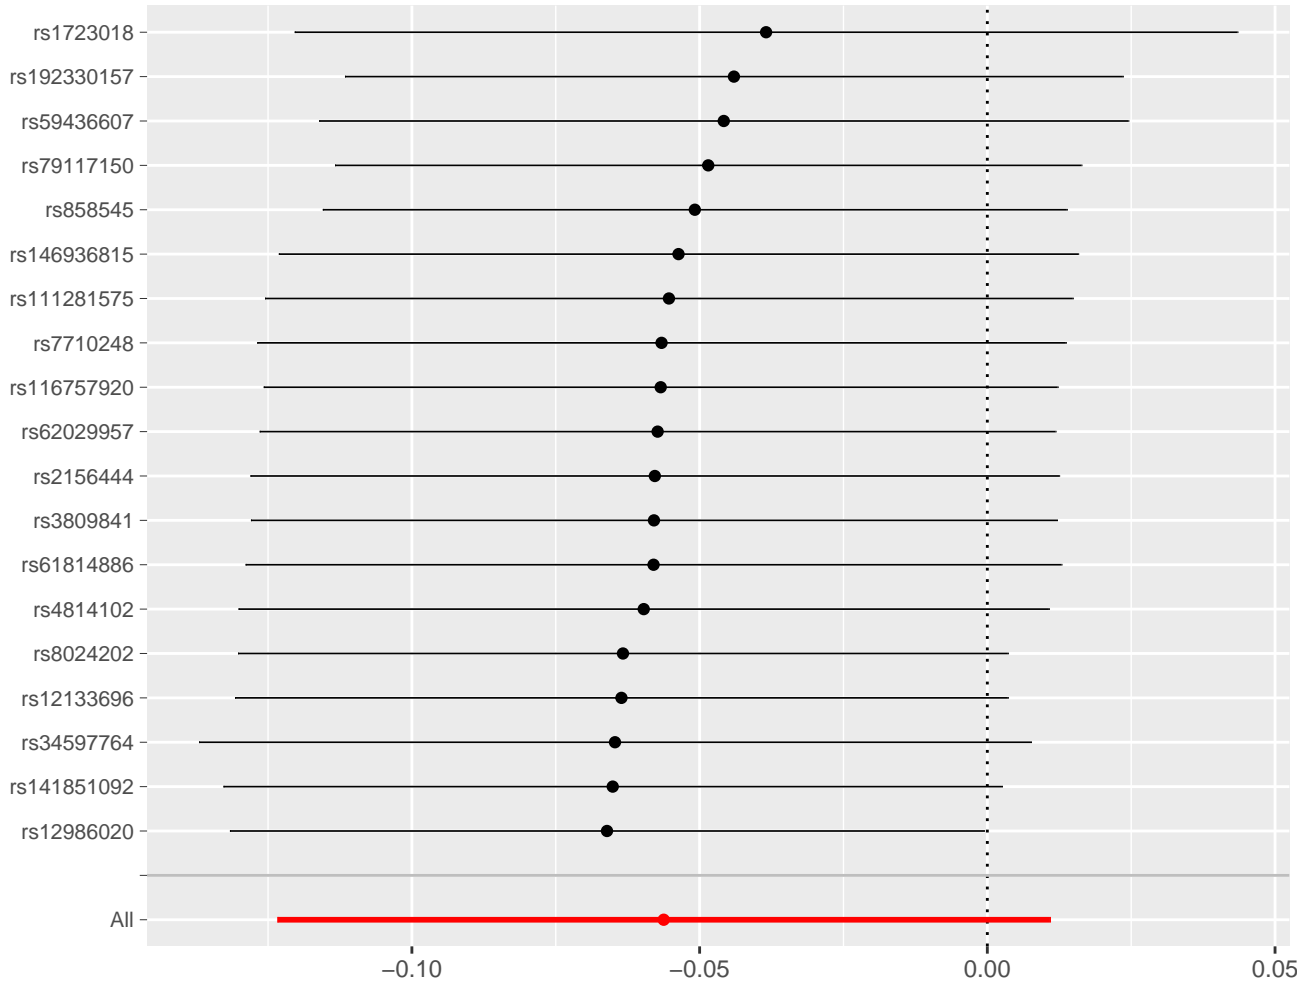

MR leave-one-out sensitivity analysis for 'CD3 on CM CD8br ' on 'Aplastic anemia'

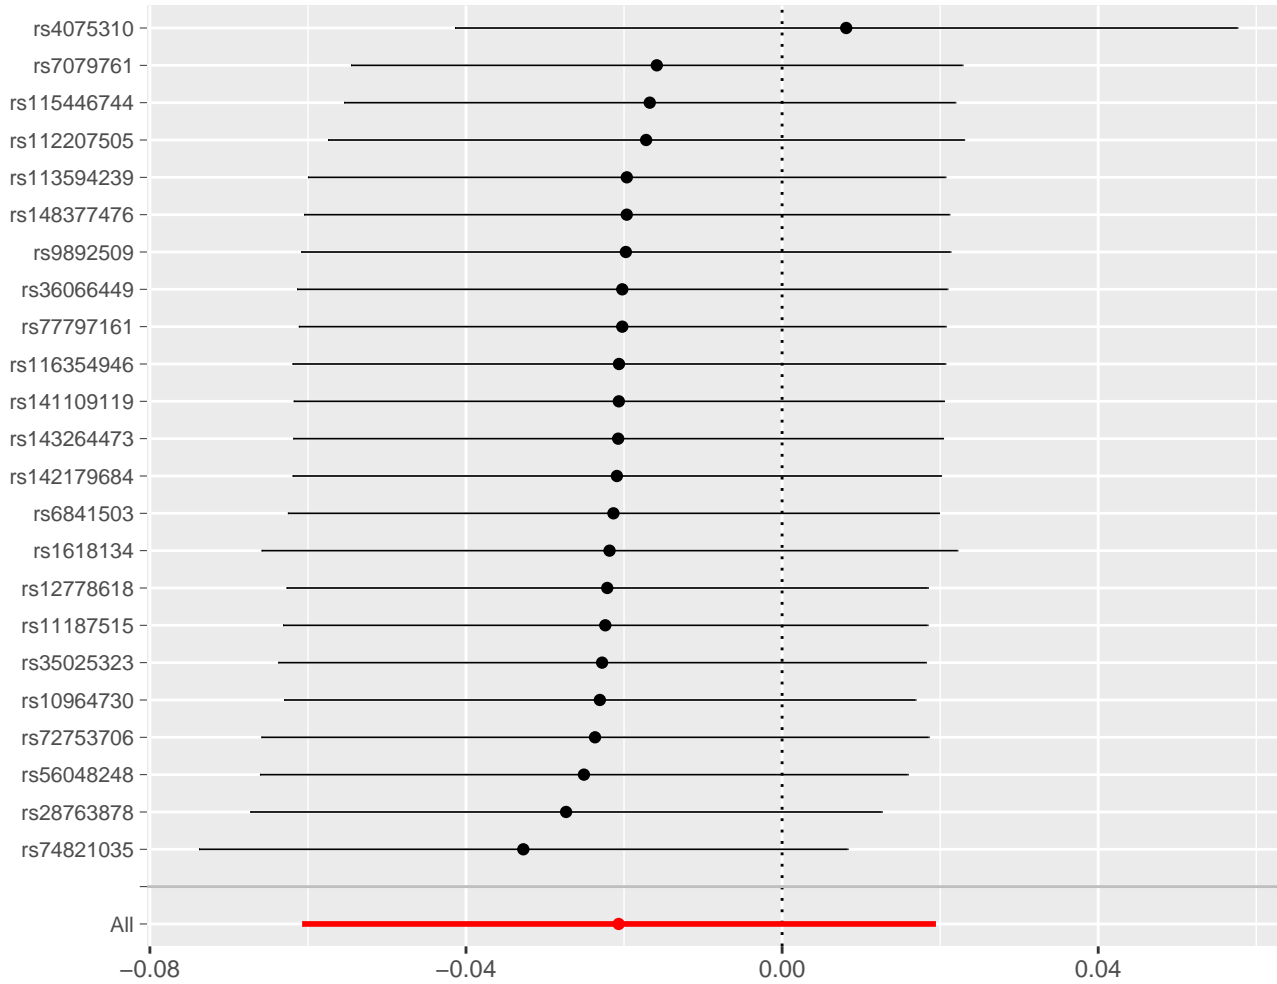

MR leave-one-out sensitivity analysis for 'CD25 on CD39+ CD4+' on 'Aplastic anemia'

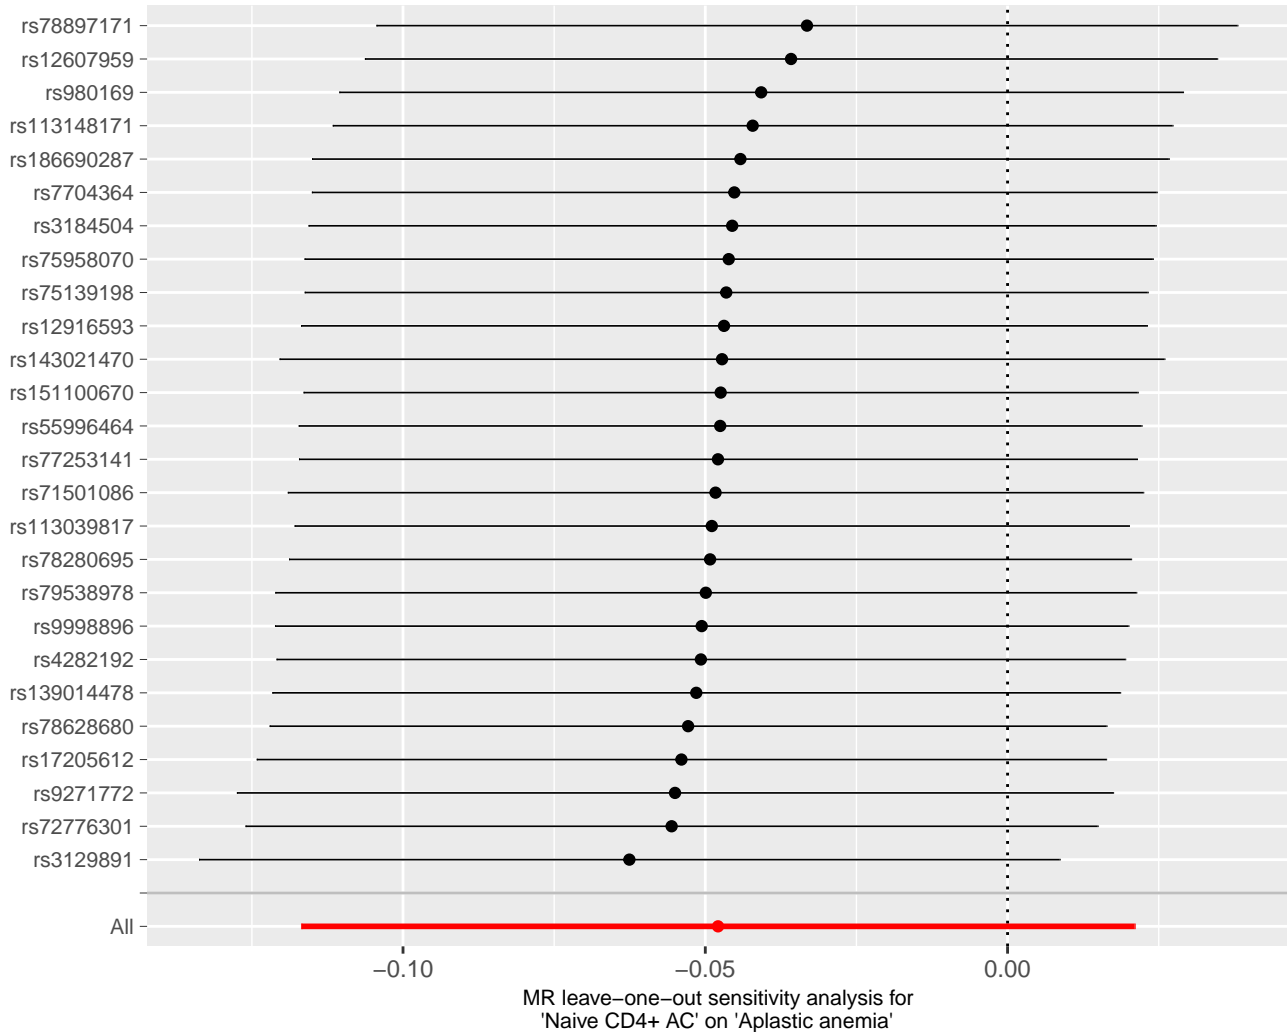

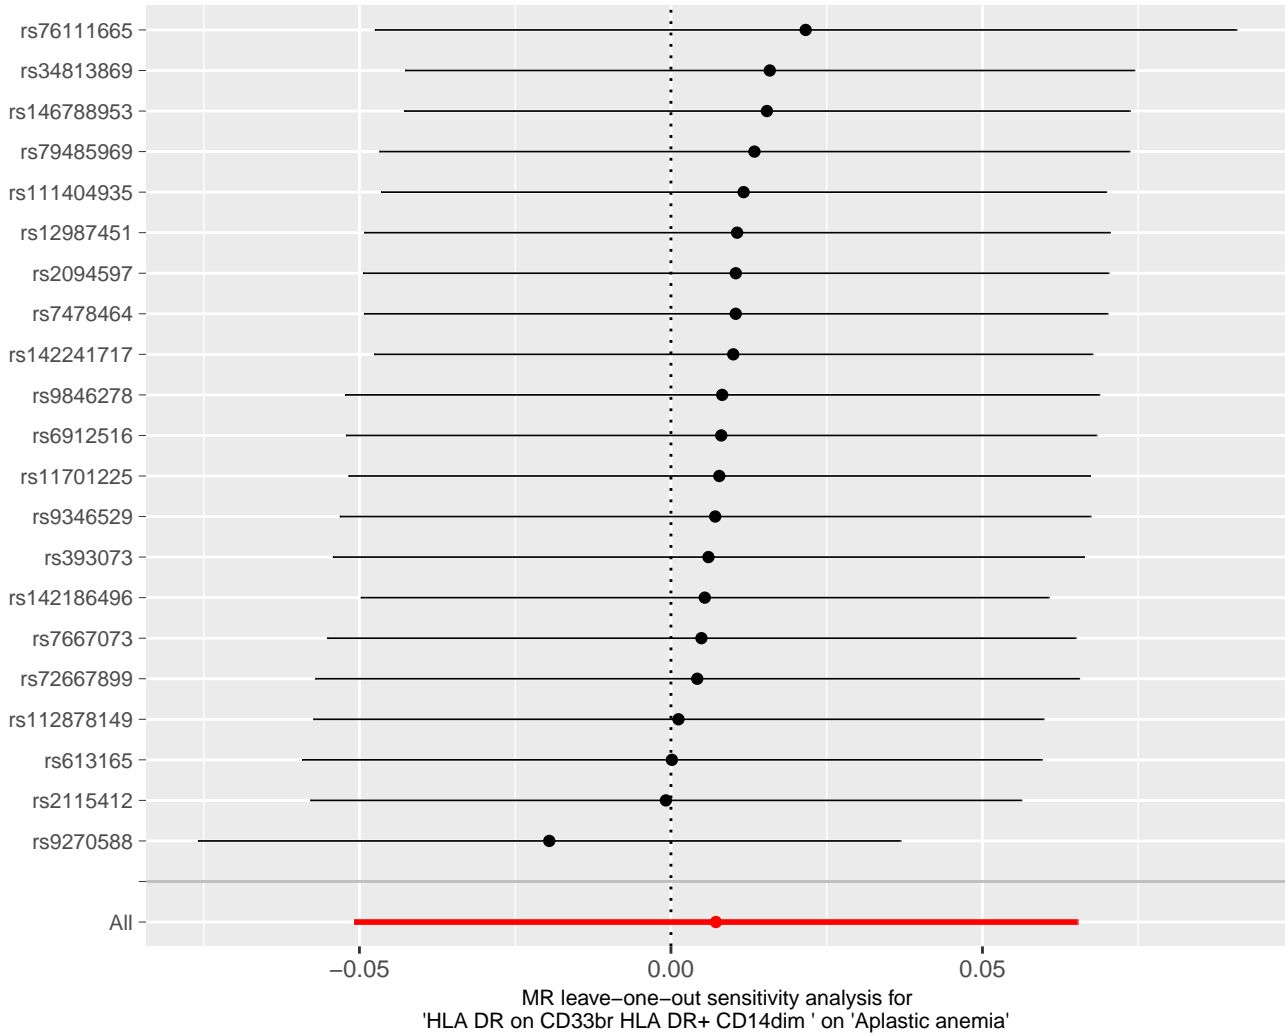

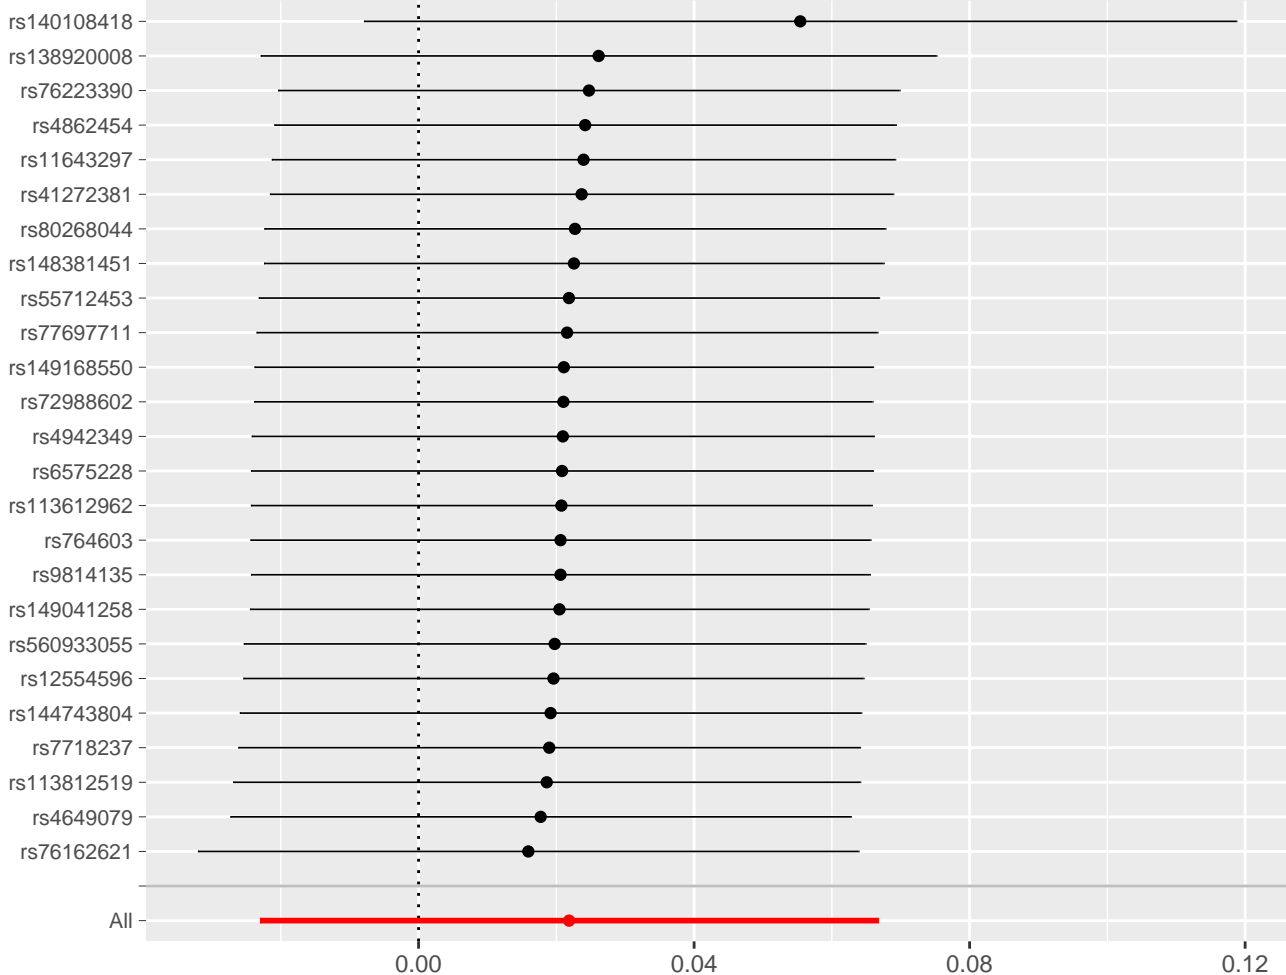

MR leave-one-out sensitivity analysis for 'CD19 on unsw mem' on 'Aplastic anemia'

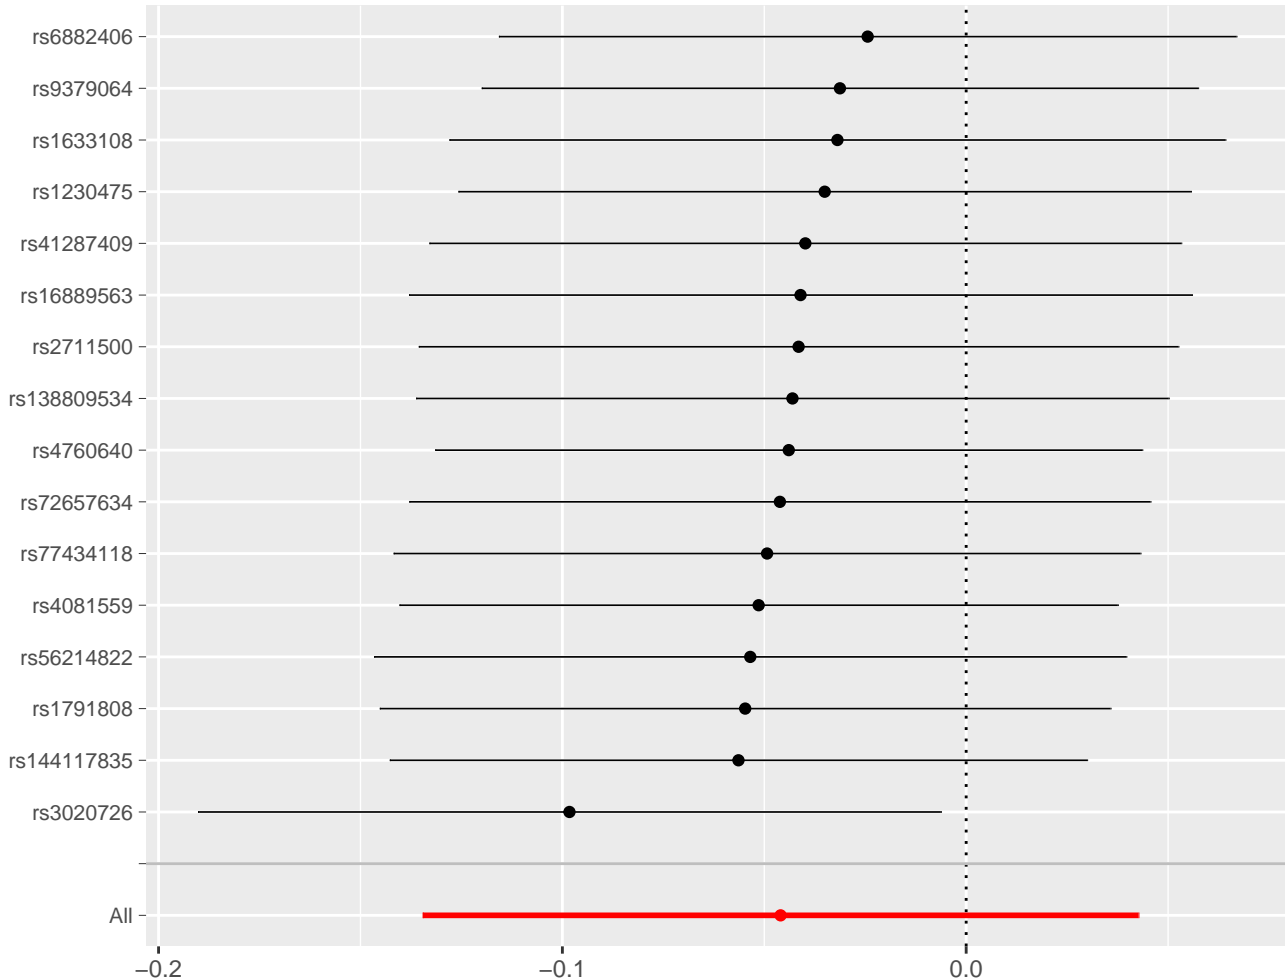

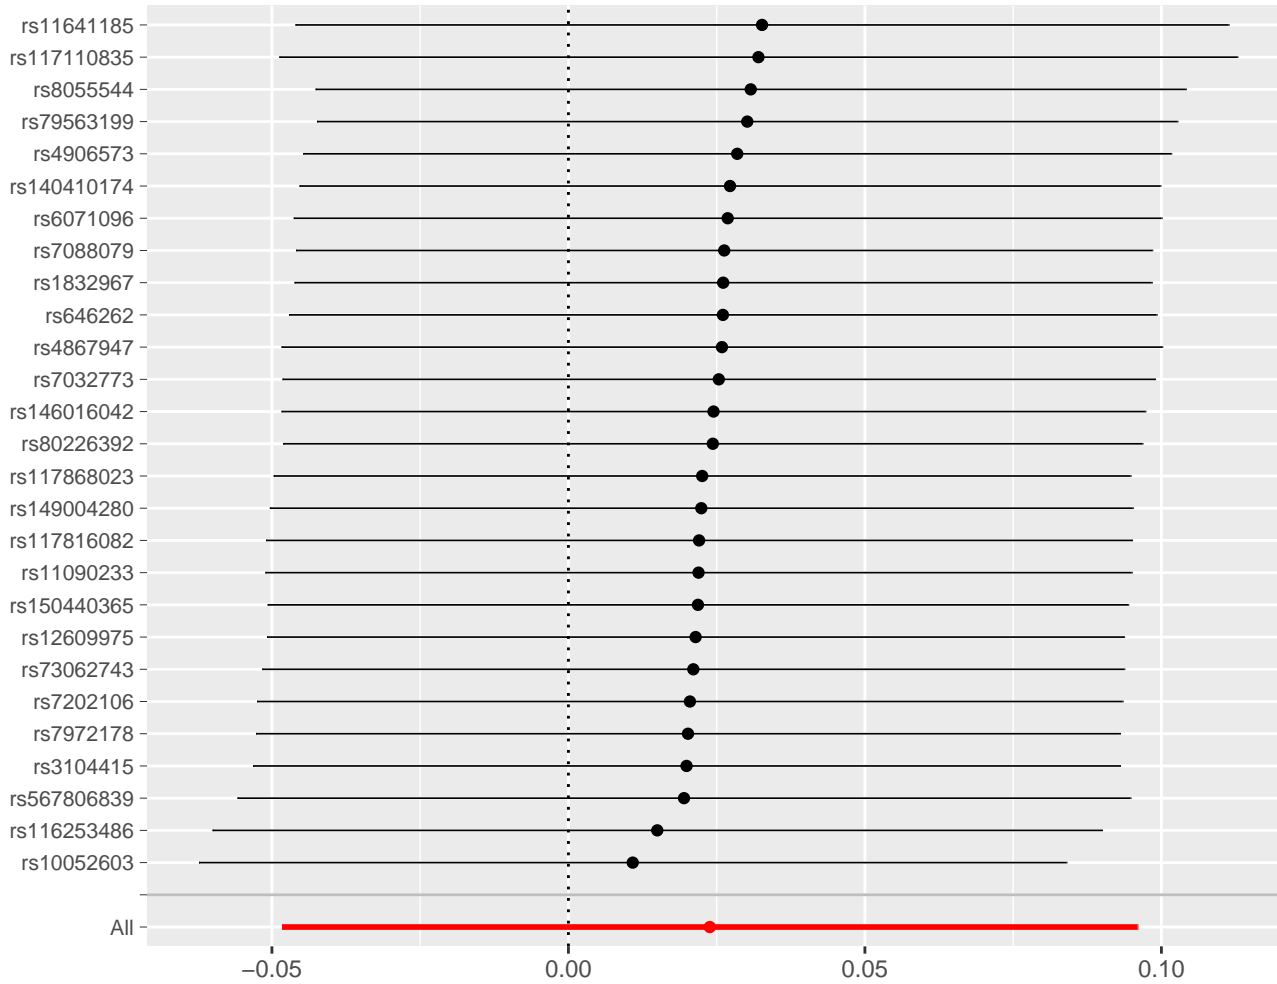

MR leave-one-out sensitivity analysis for 'HLA DR+ CD4+ %T cell' on 'Aplastic anemia'

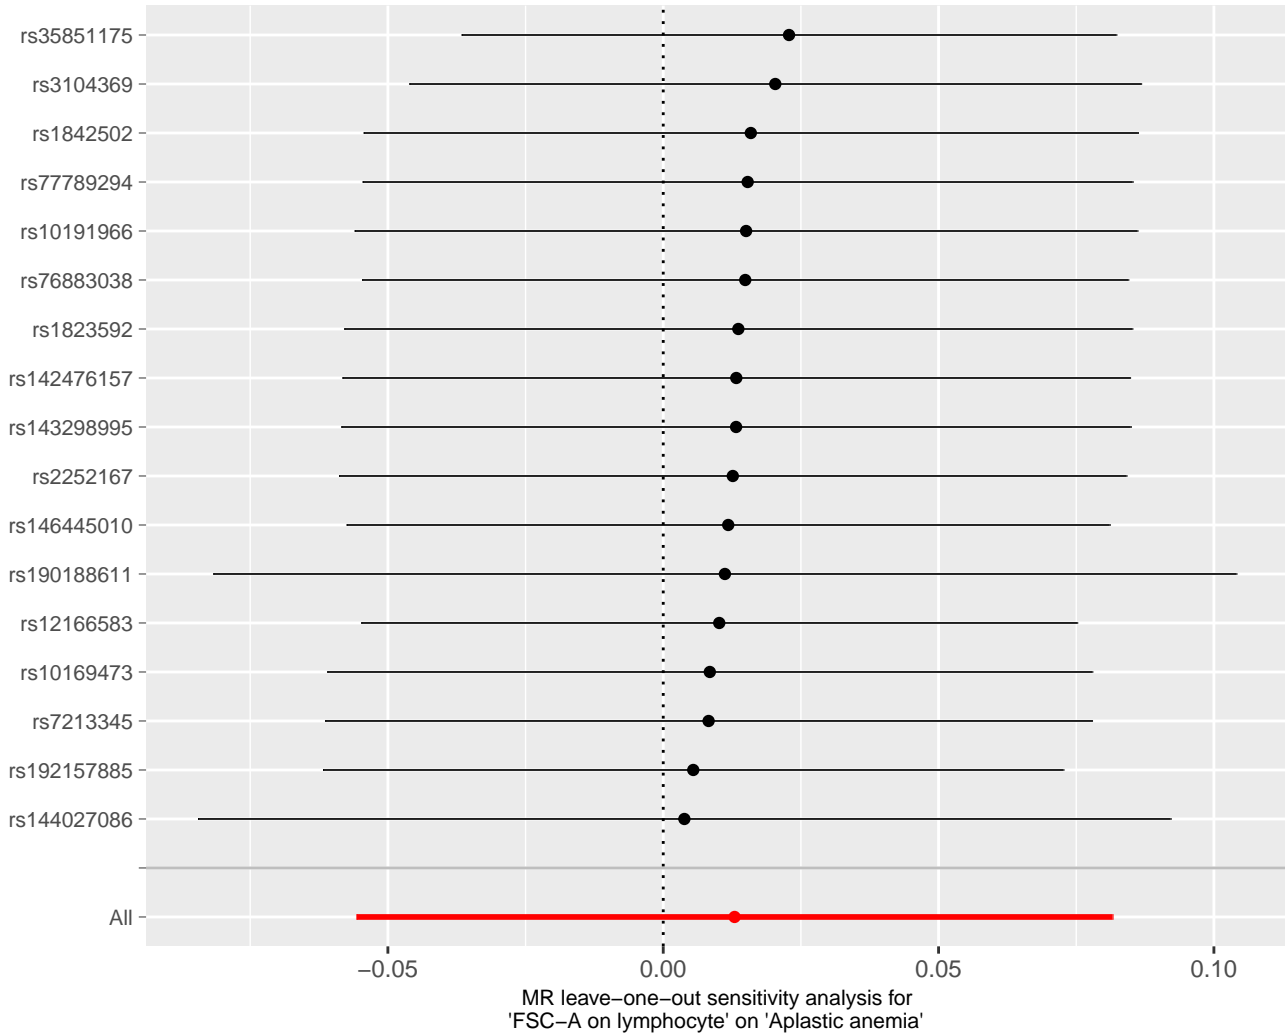



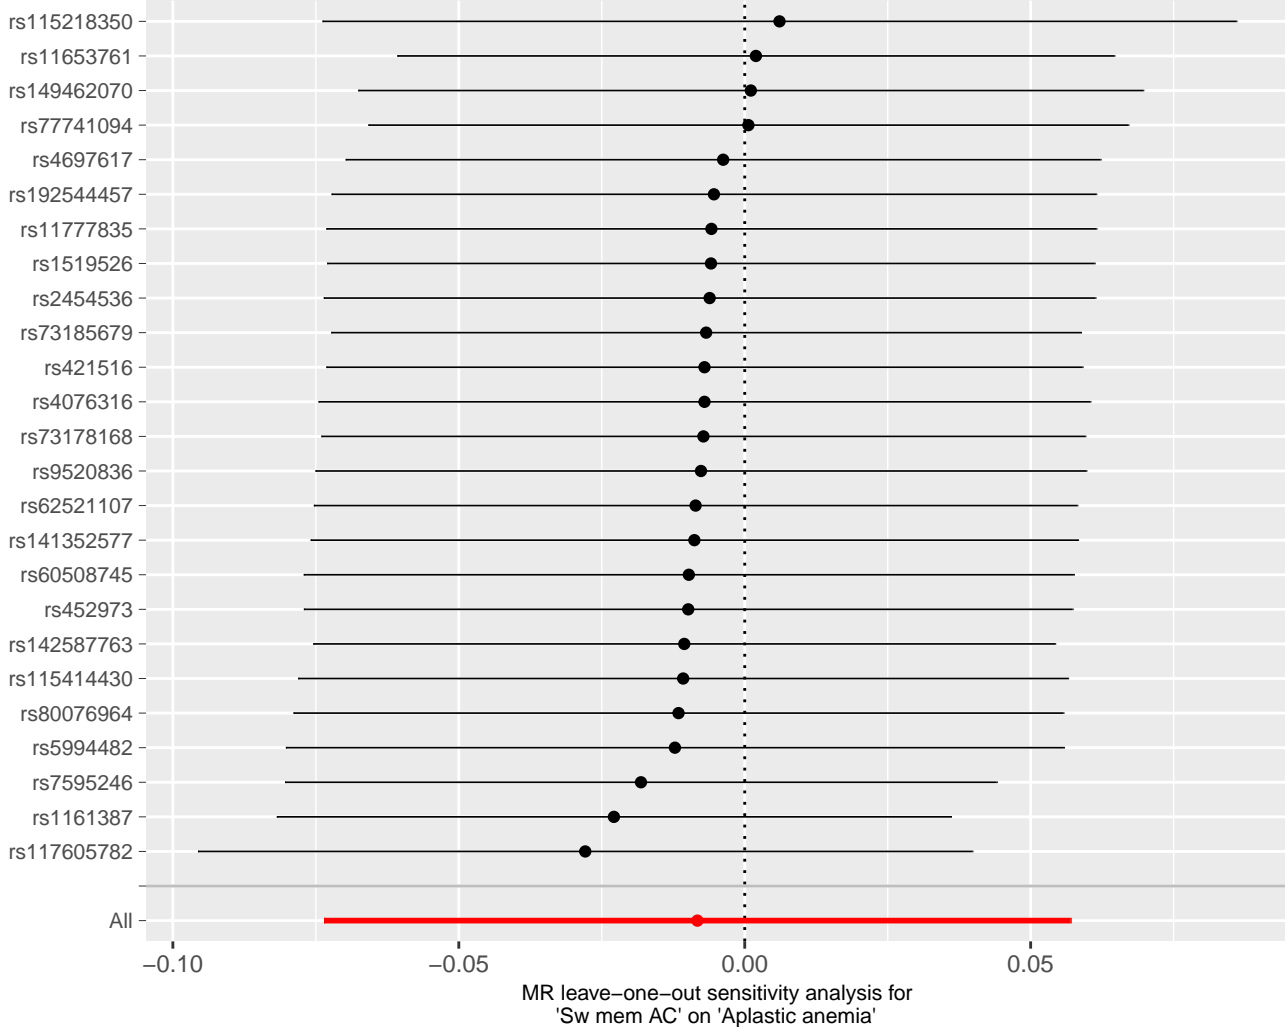

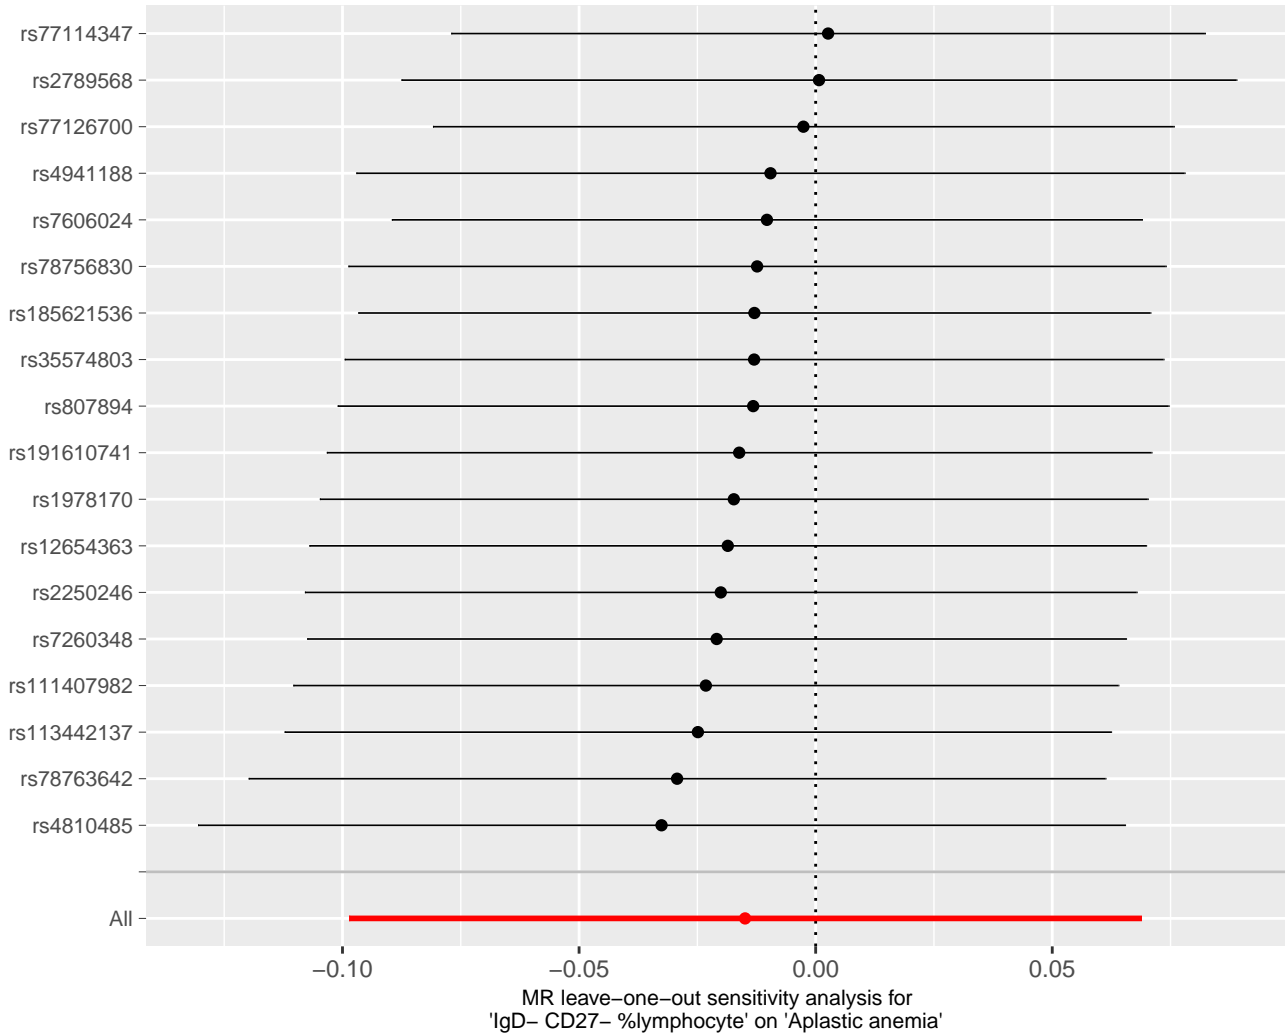

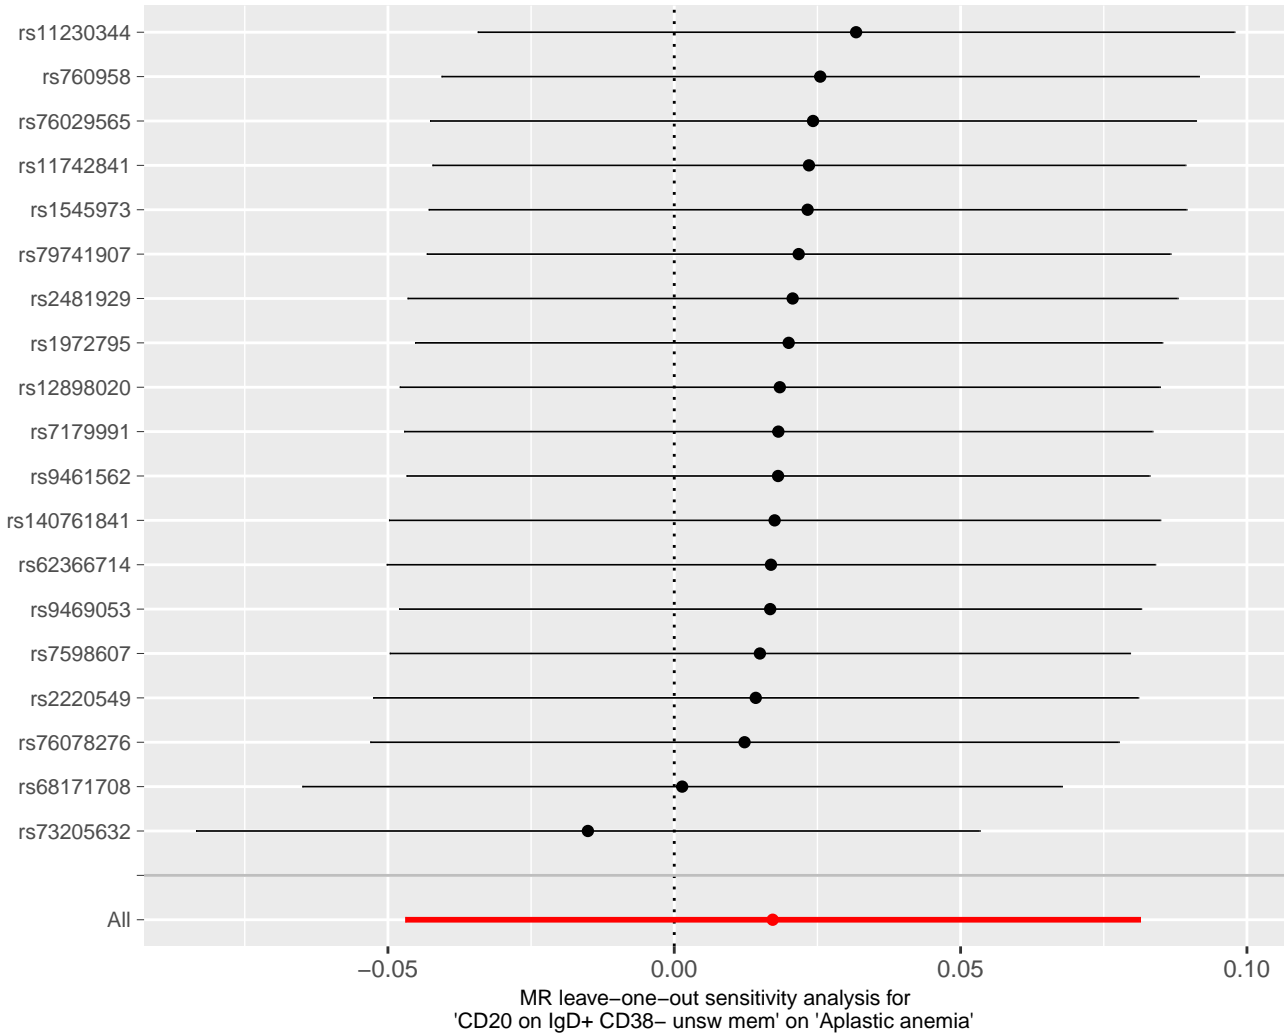

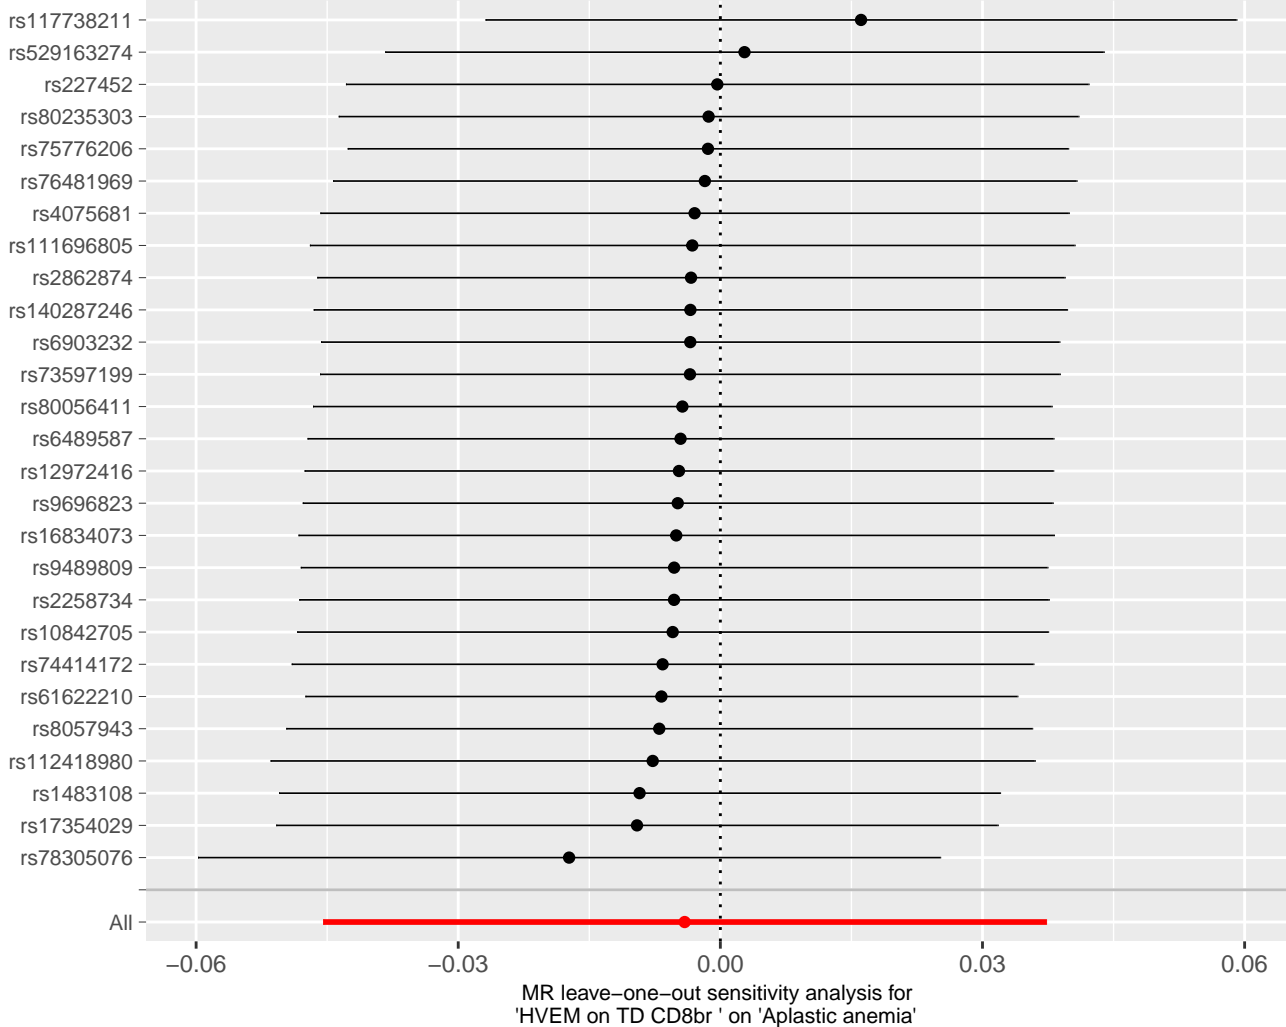

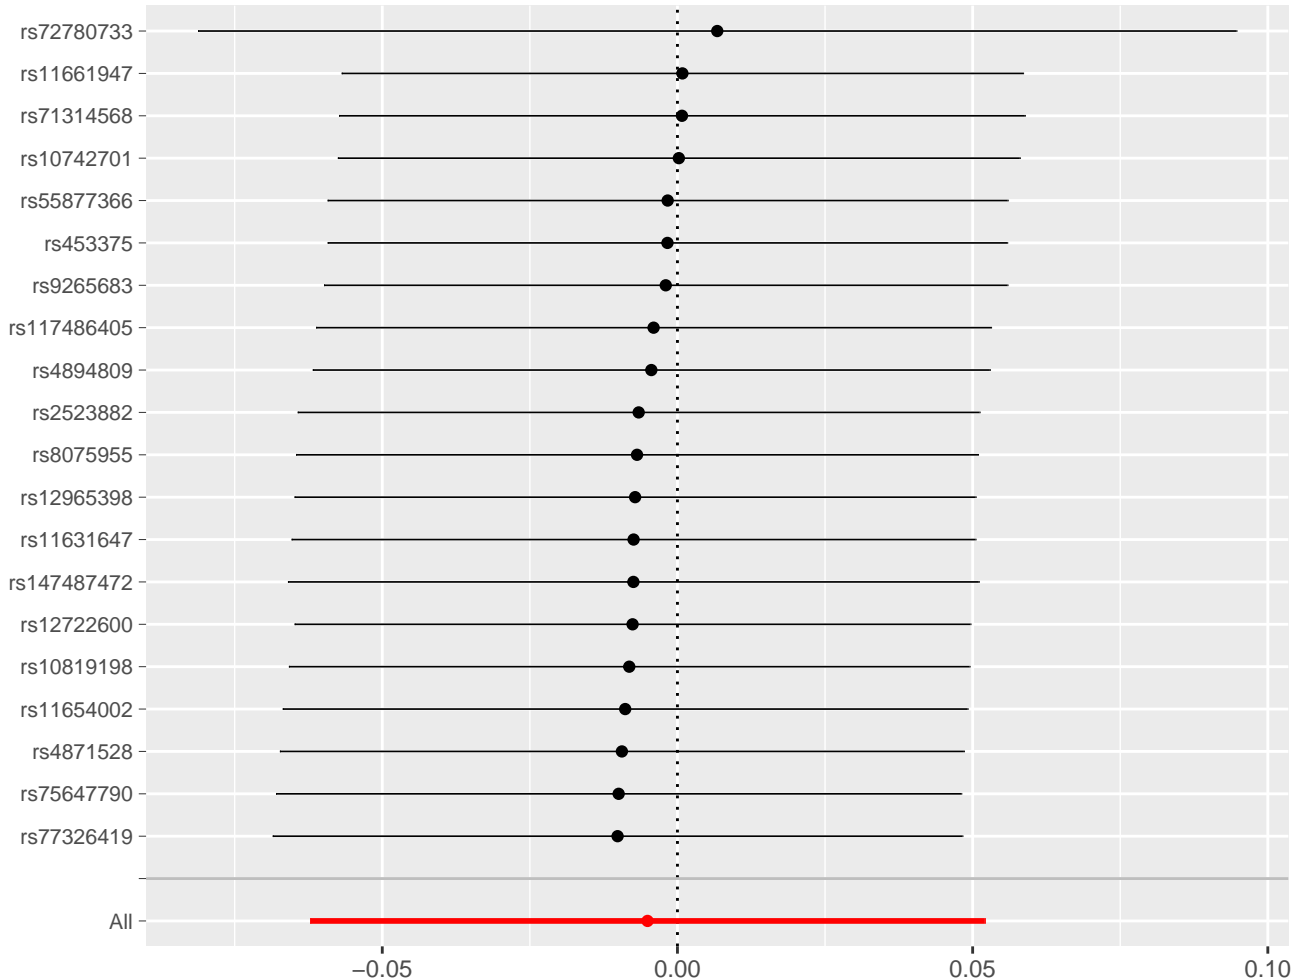

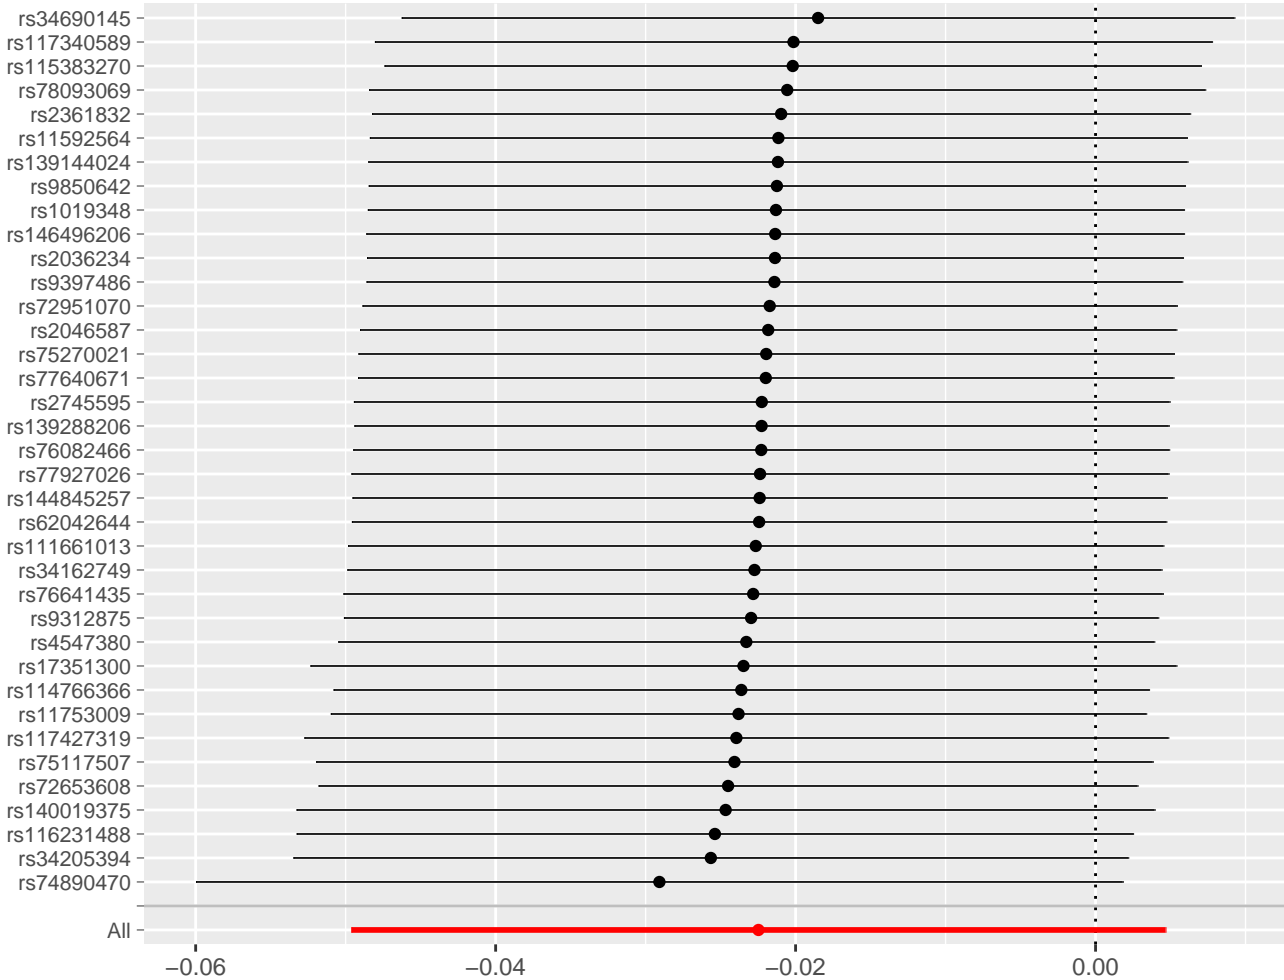

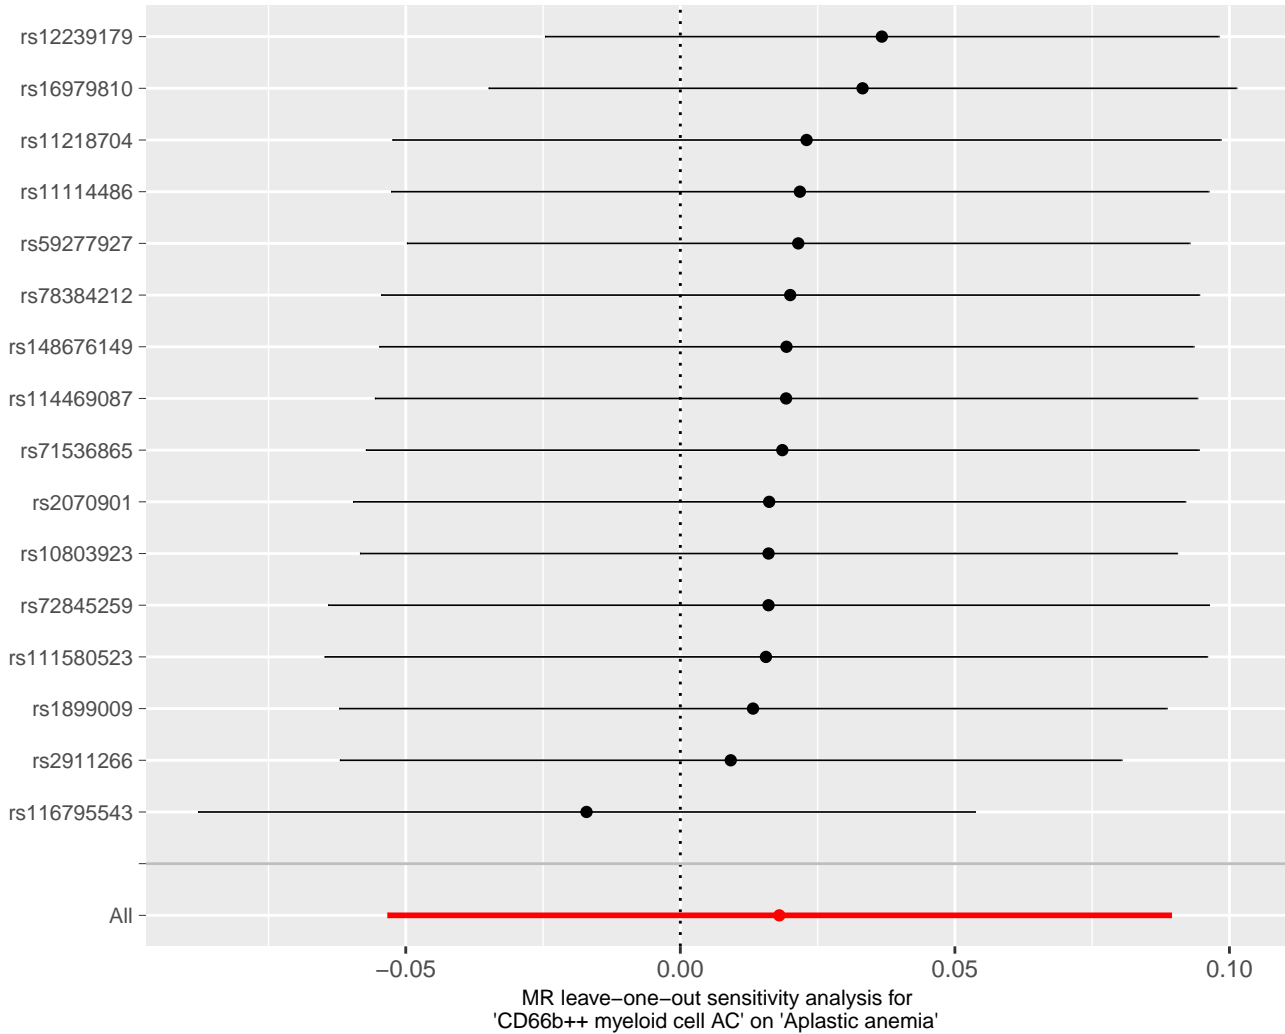

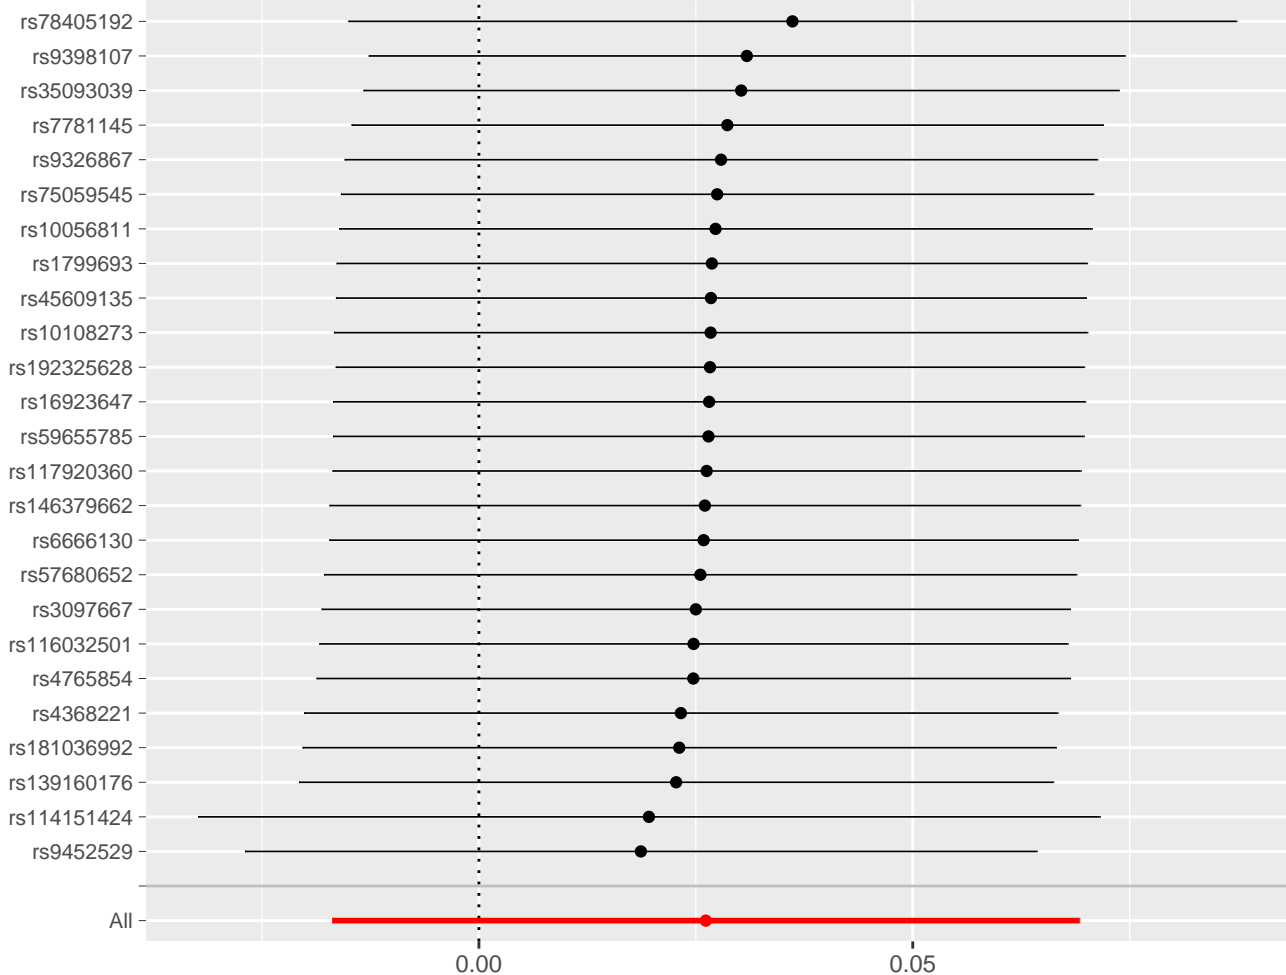

0.00

0.05

MR leave-one-out sensitivity analysis for  
'CD24 on IgD+ CD38br' on 'Aplastic anemia'



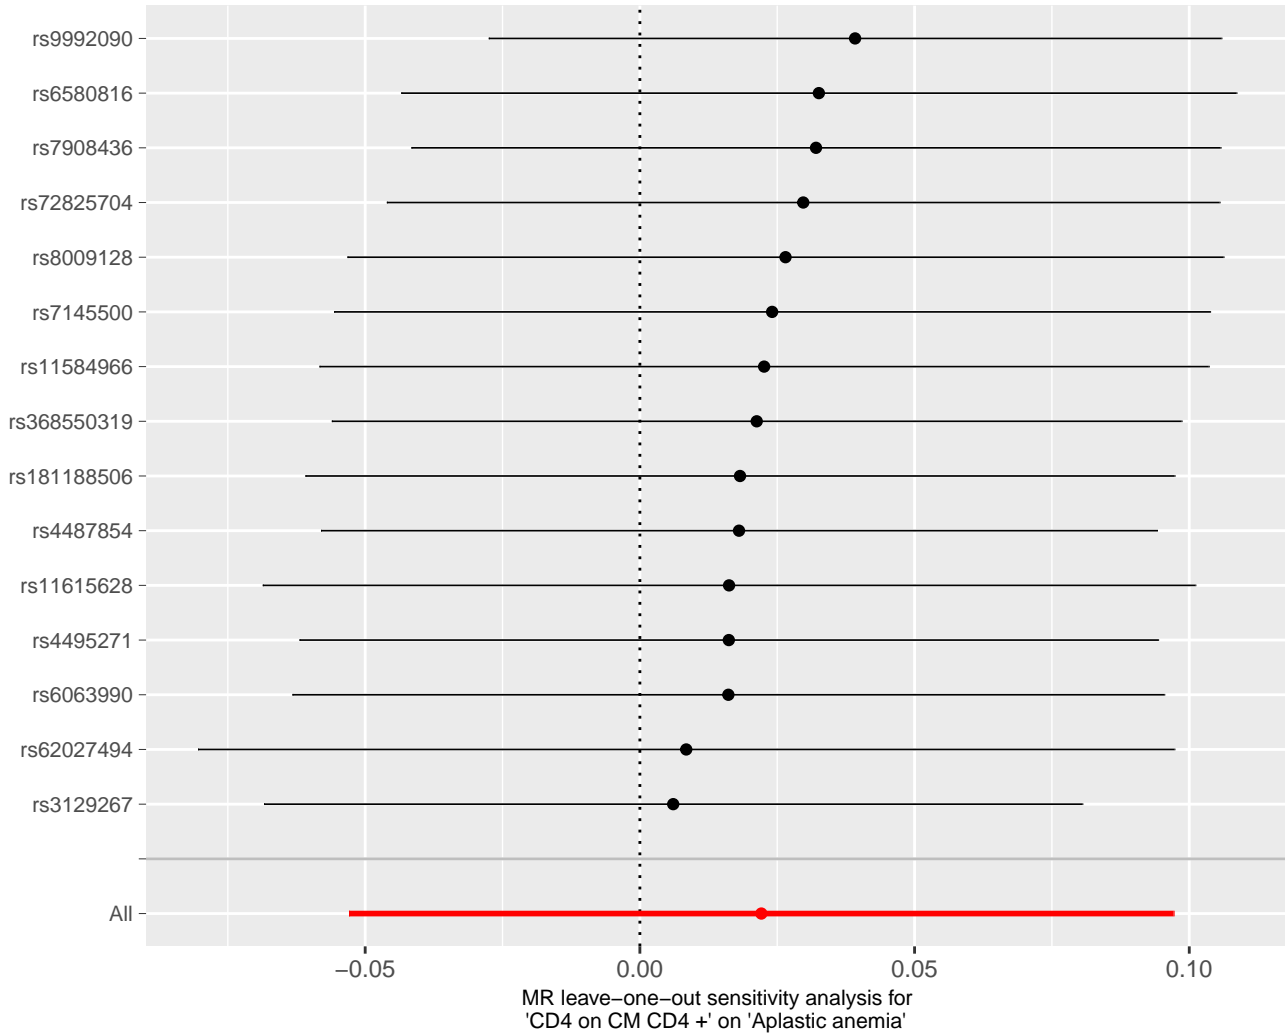

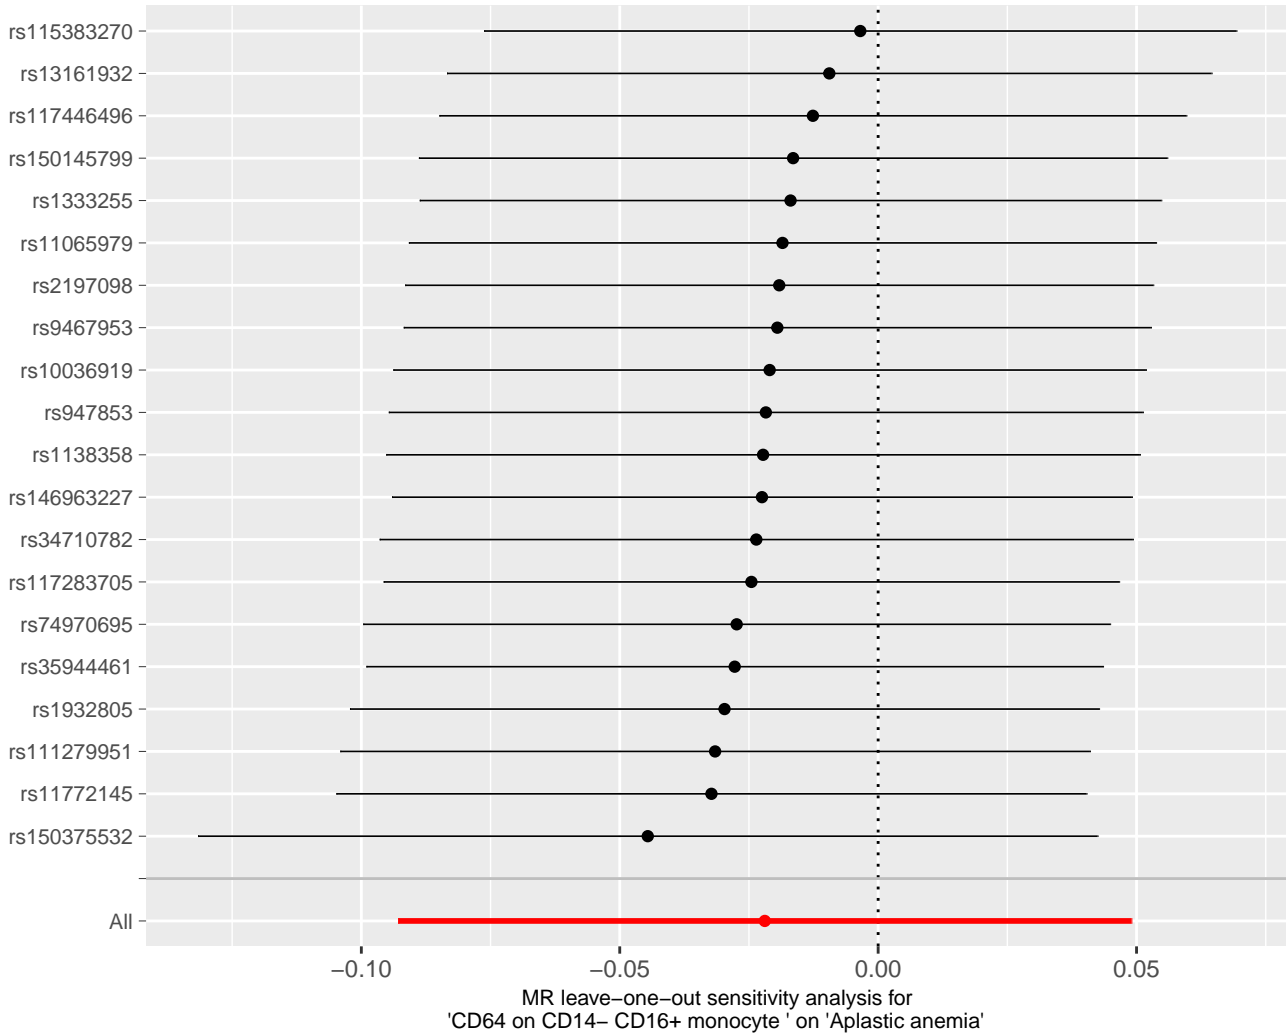

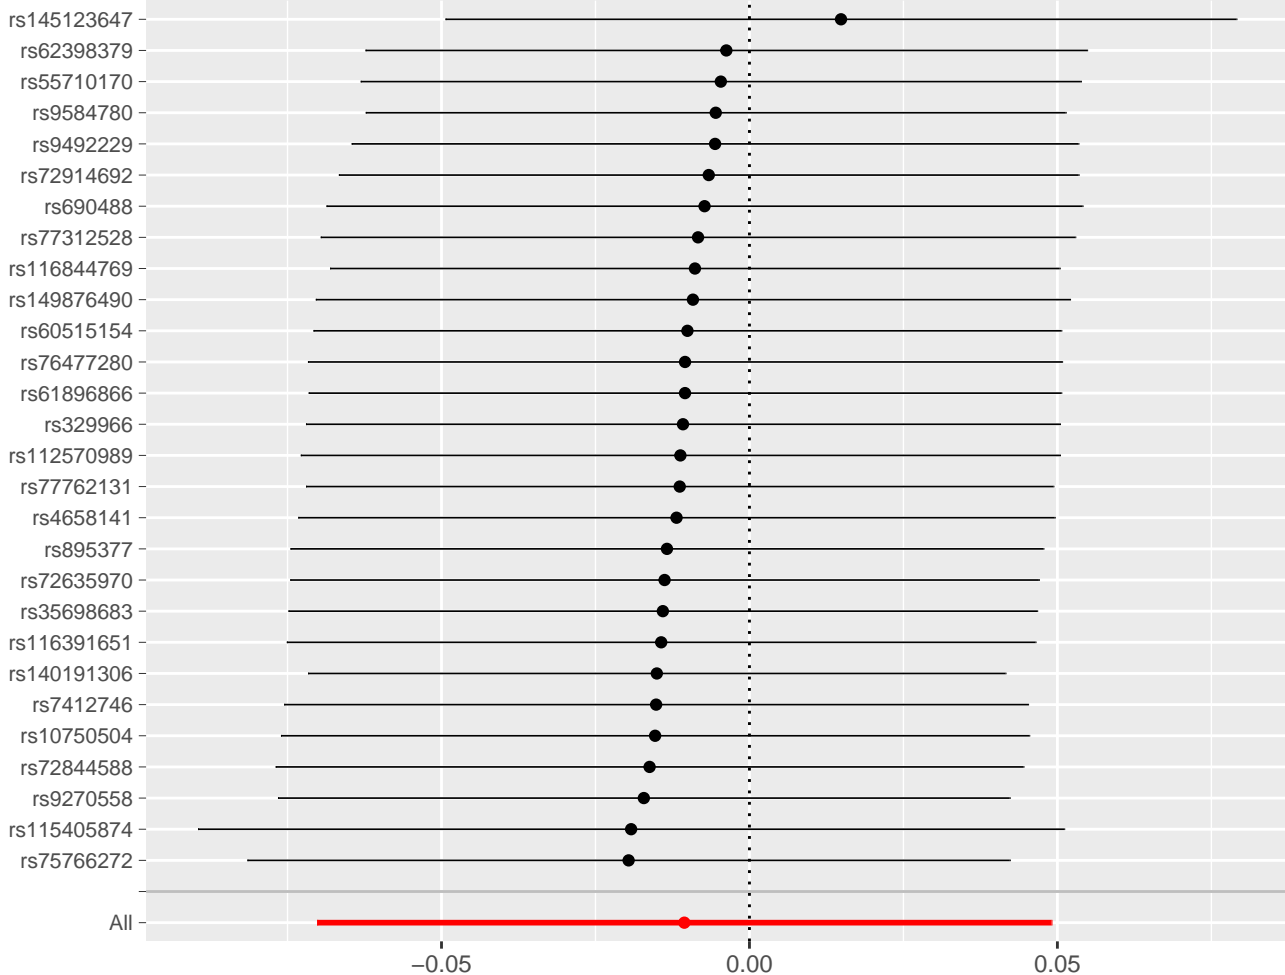

MR leave-one-out sensitivity analysis for 'Memory B cell %B cell' on 'Aplastic anemia'

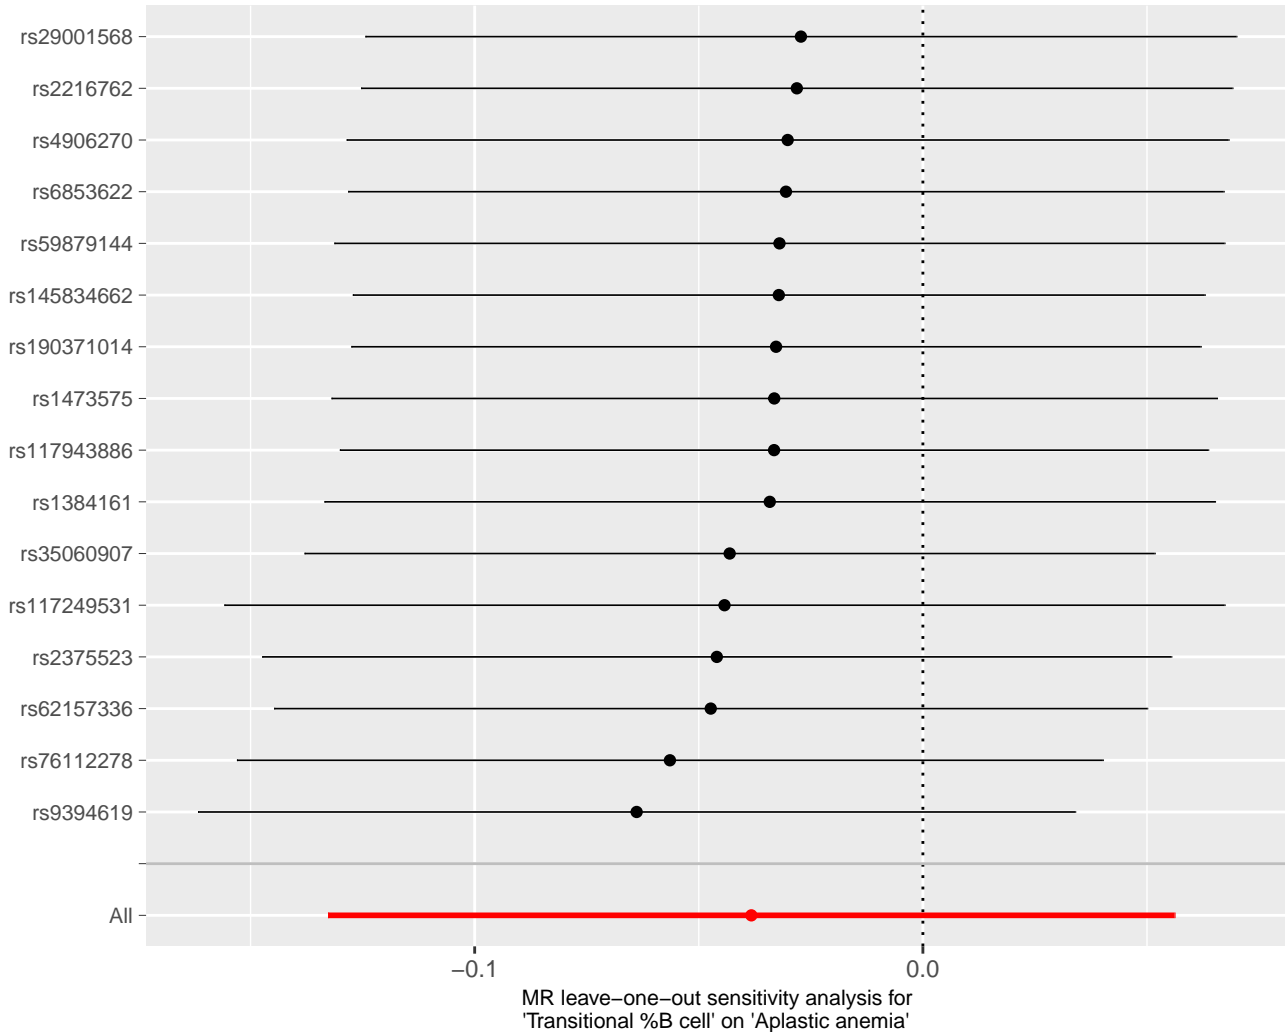

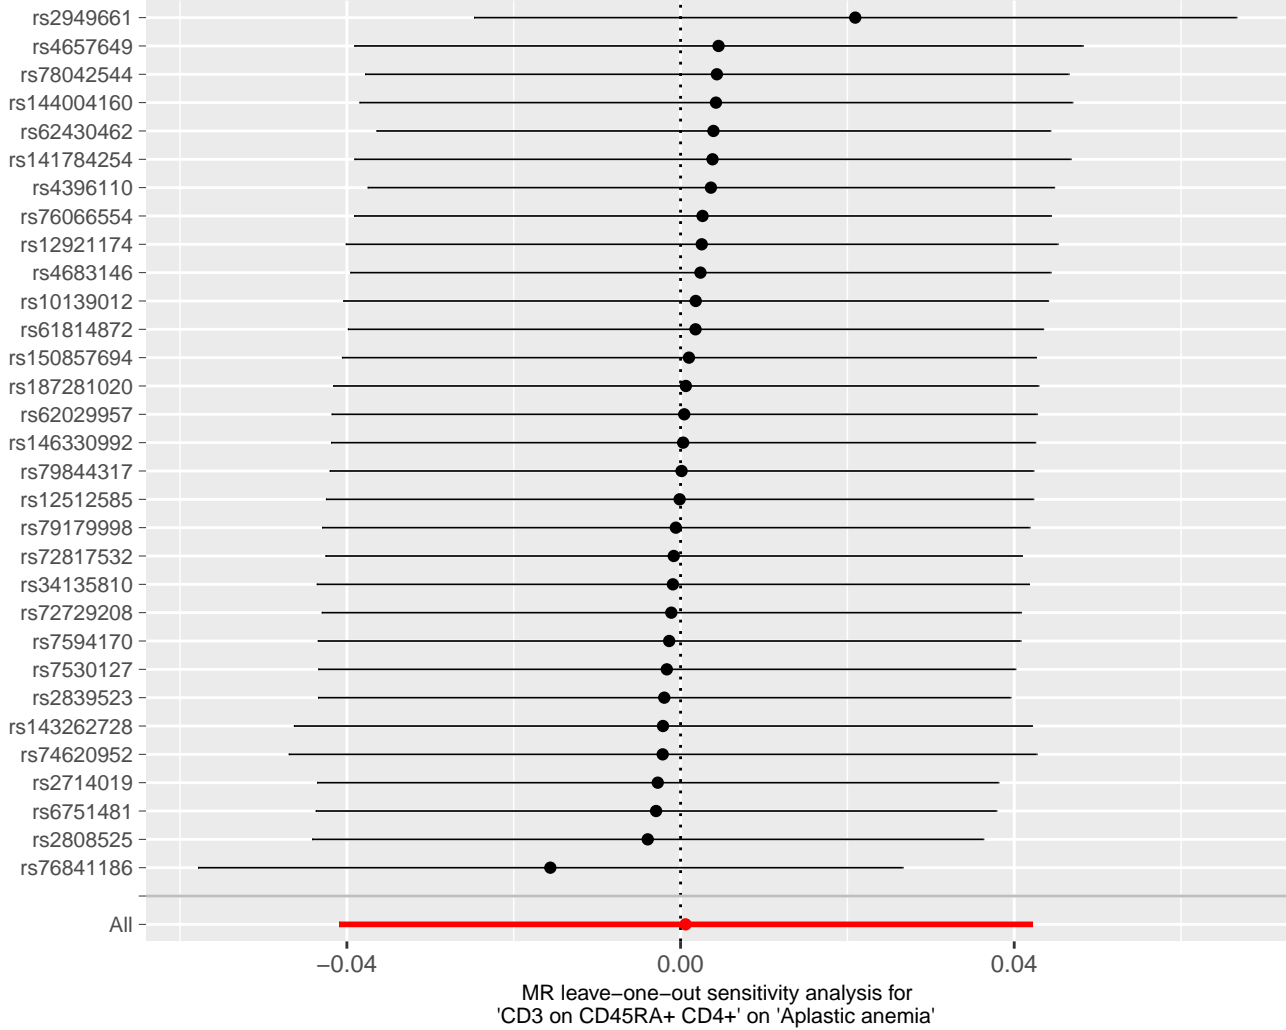

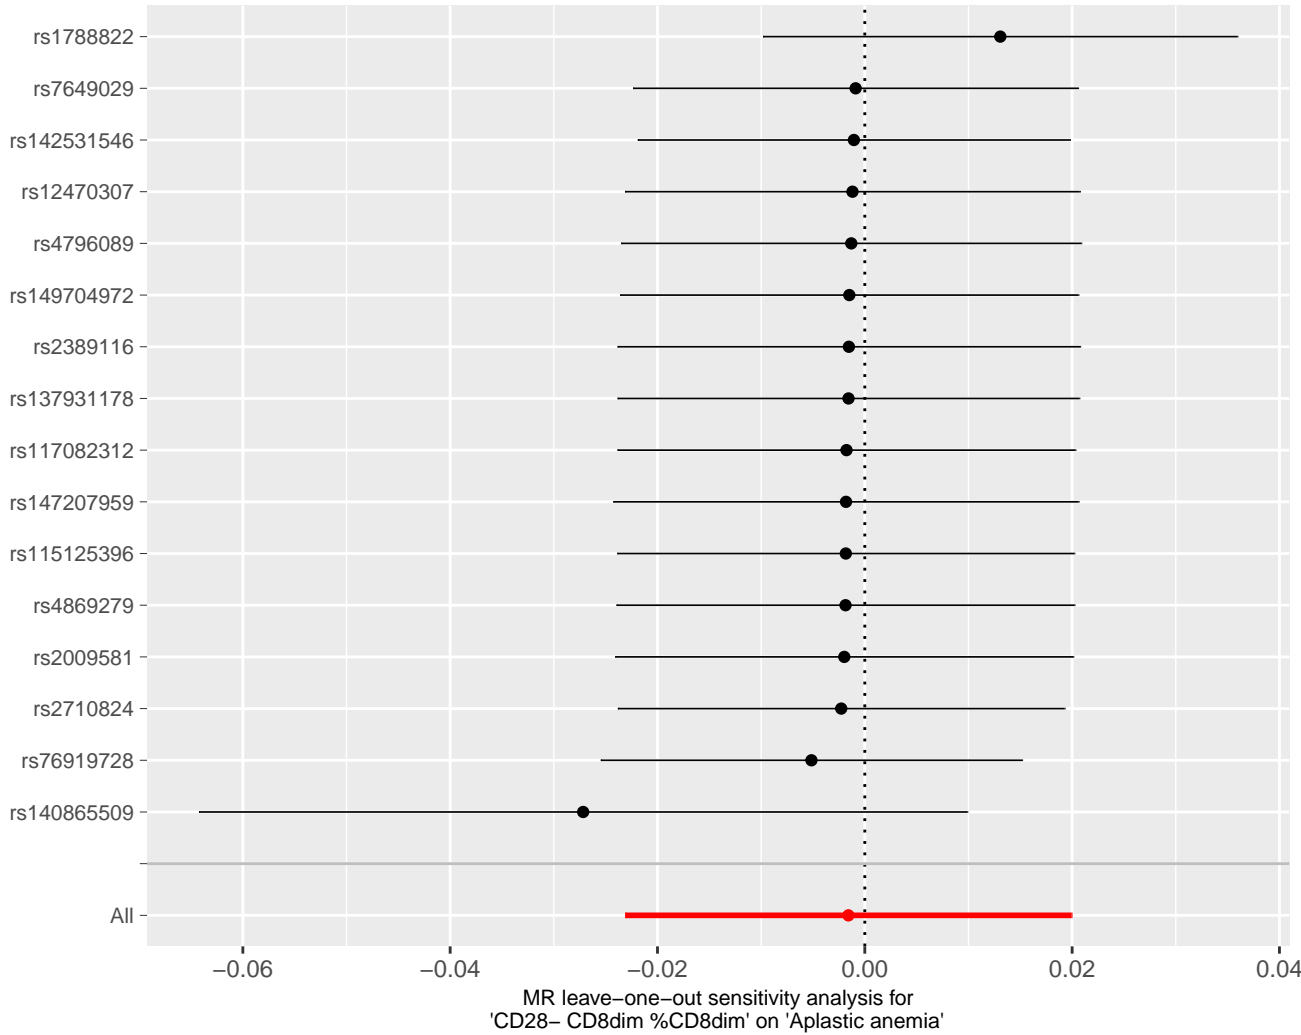

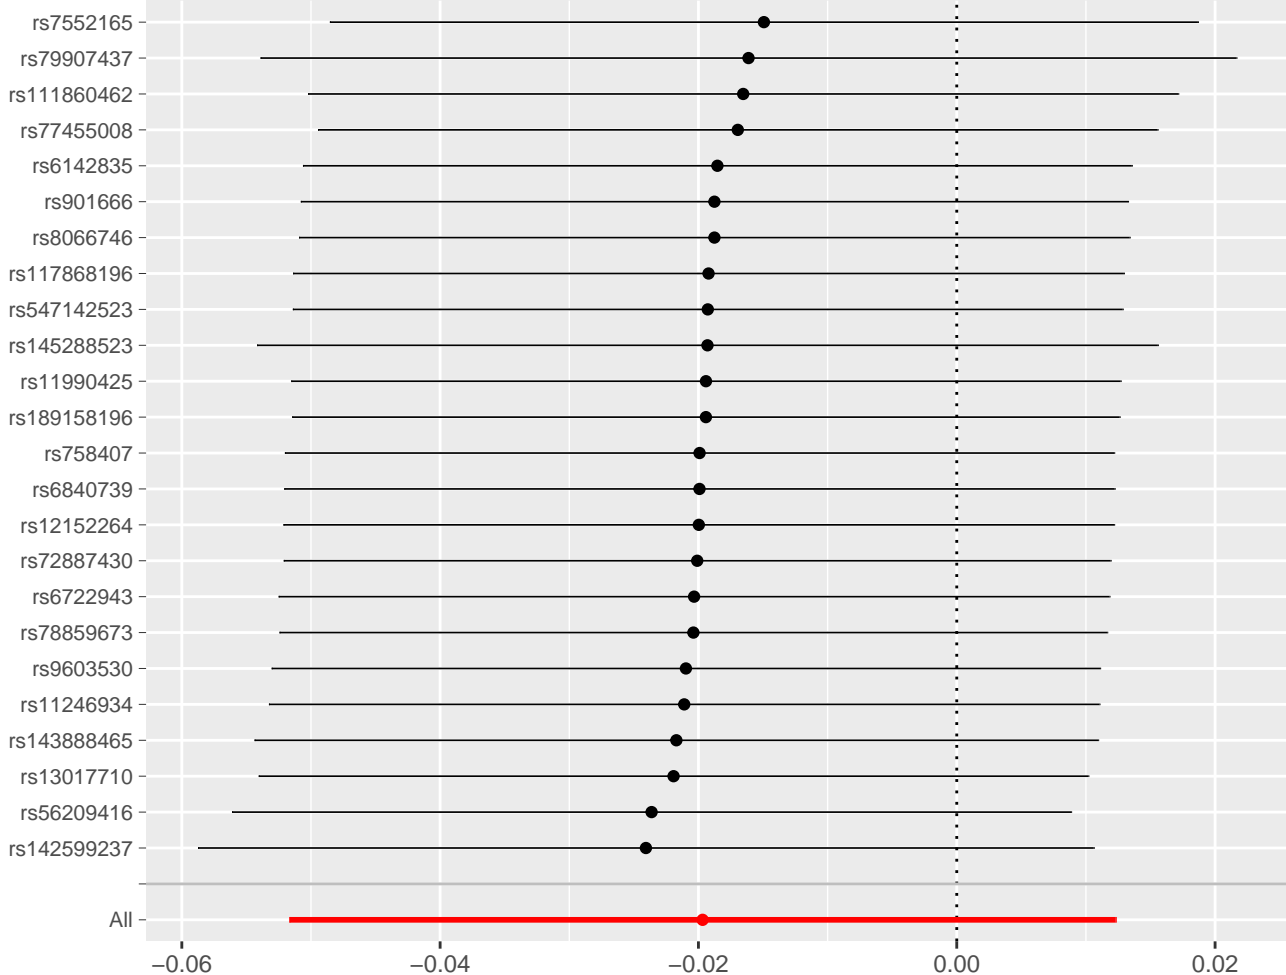

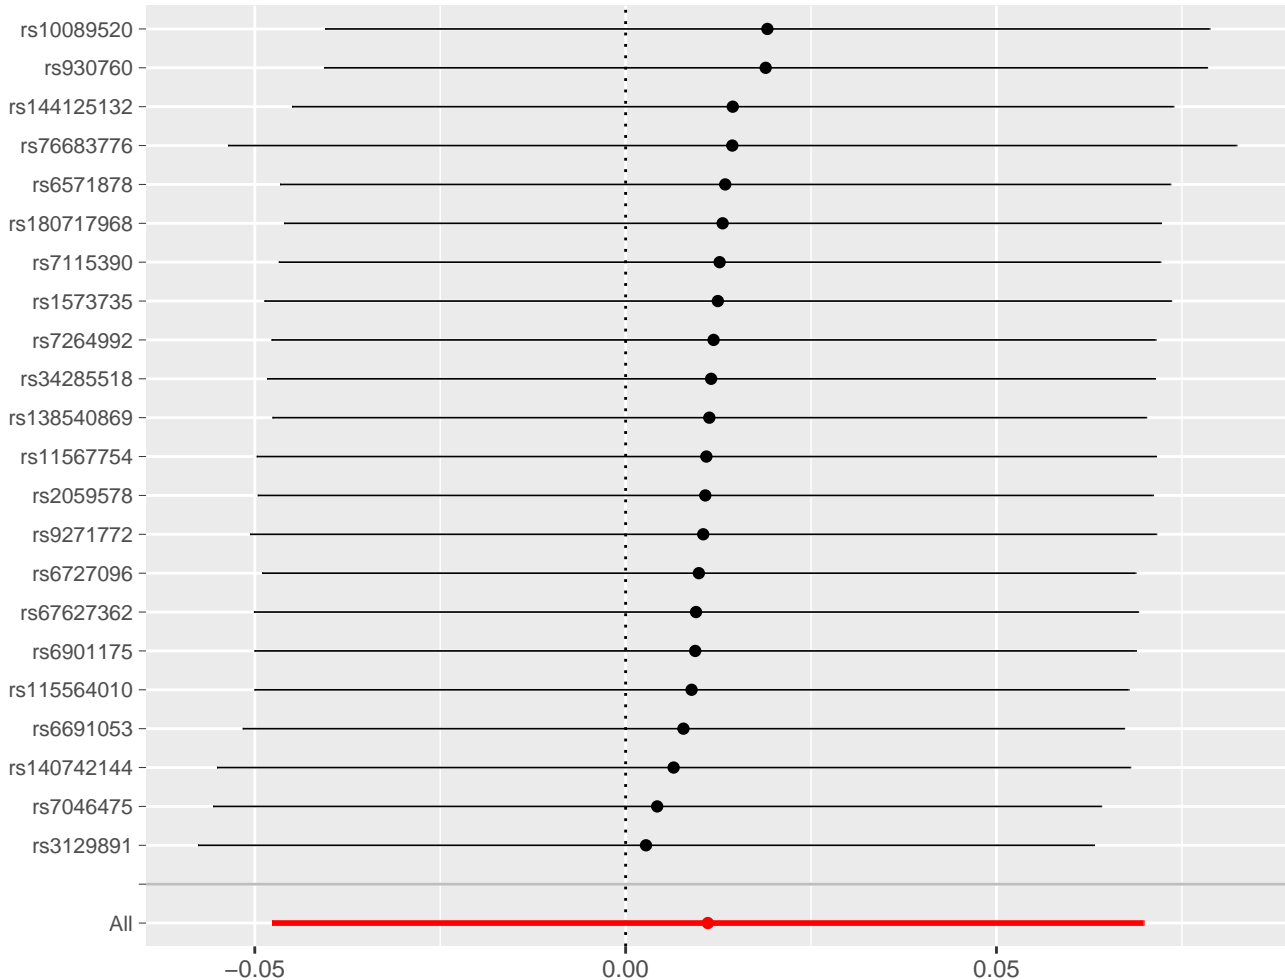



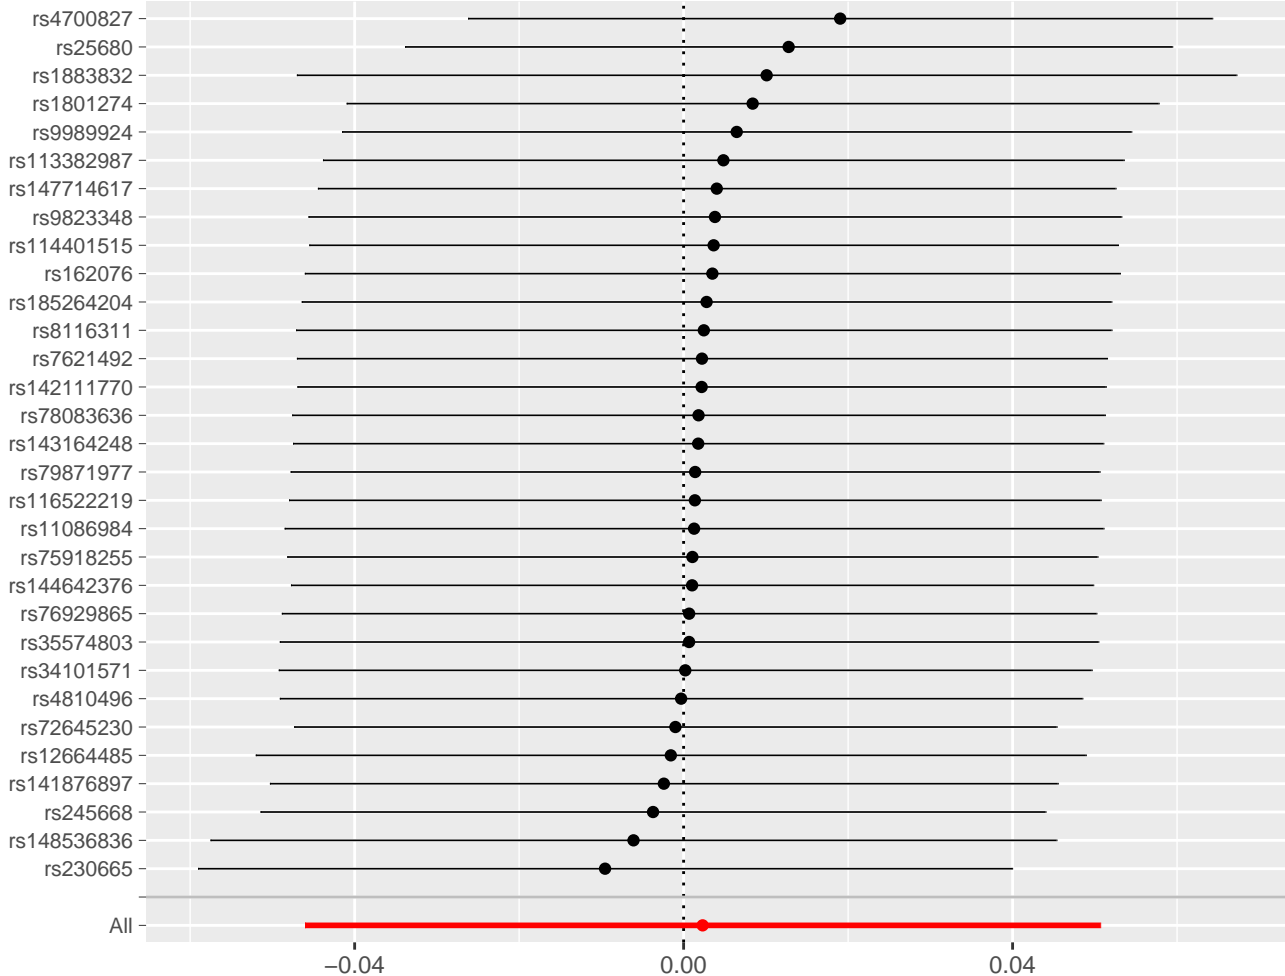

MR leave-one-out sensitivity analysis for 'CD27 on CD24+ CD27+' on 'Aplastic anemia'

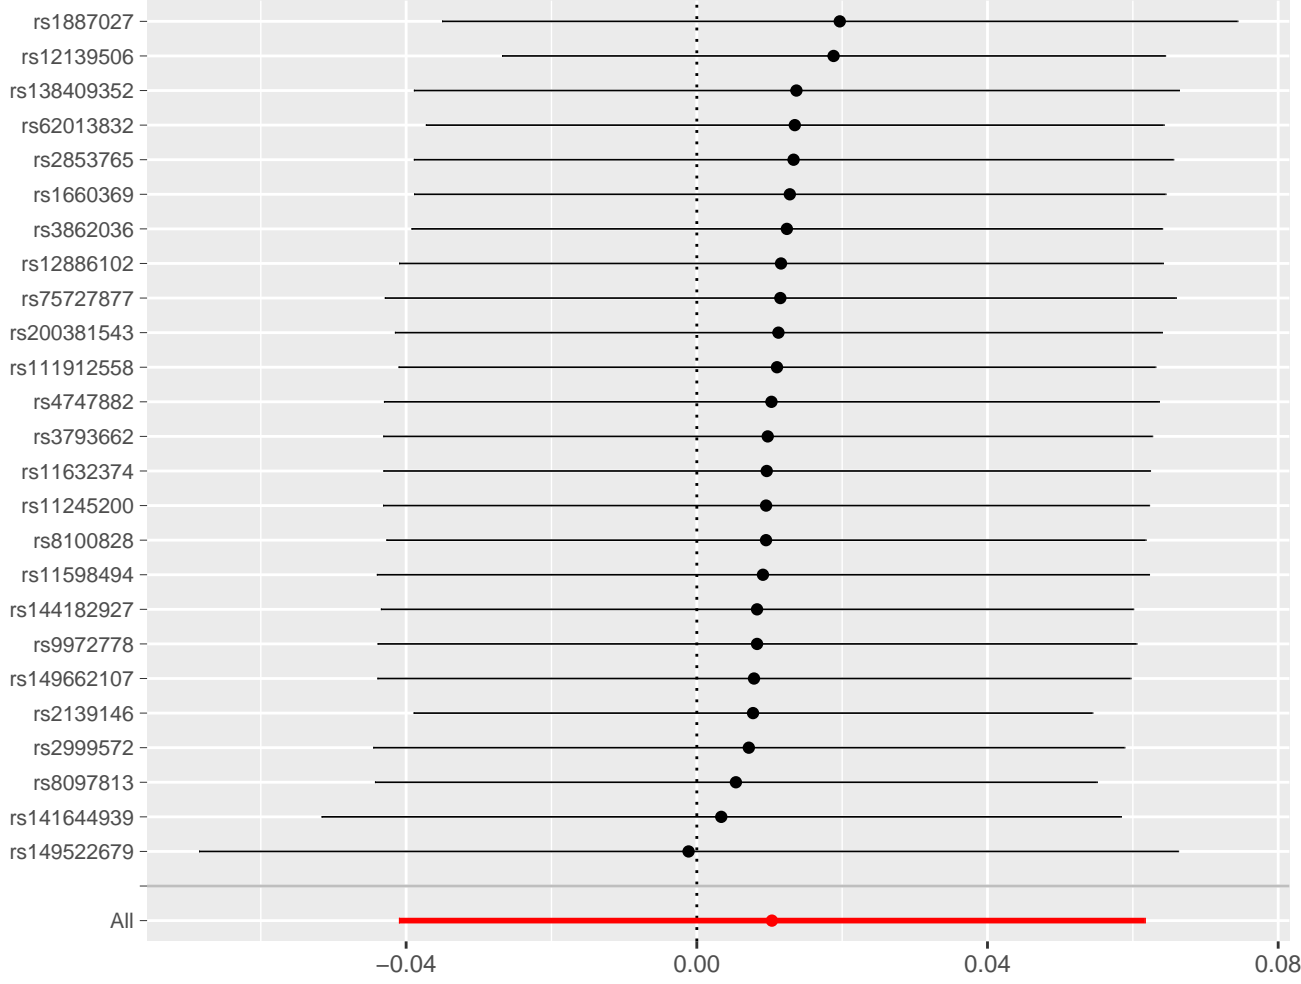

MR leave-one-out sensitivity analysis for 'CD25 on memory B cell' on 'Aplastic anemia'

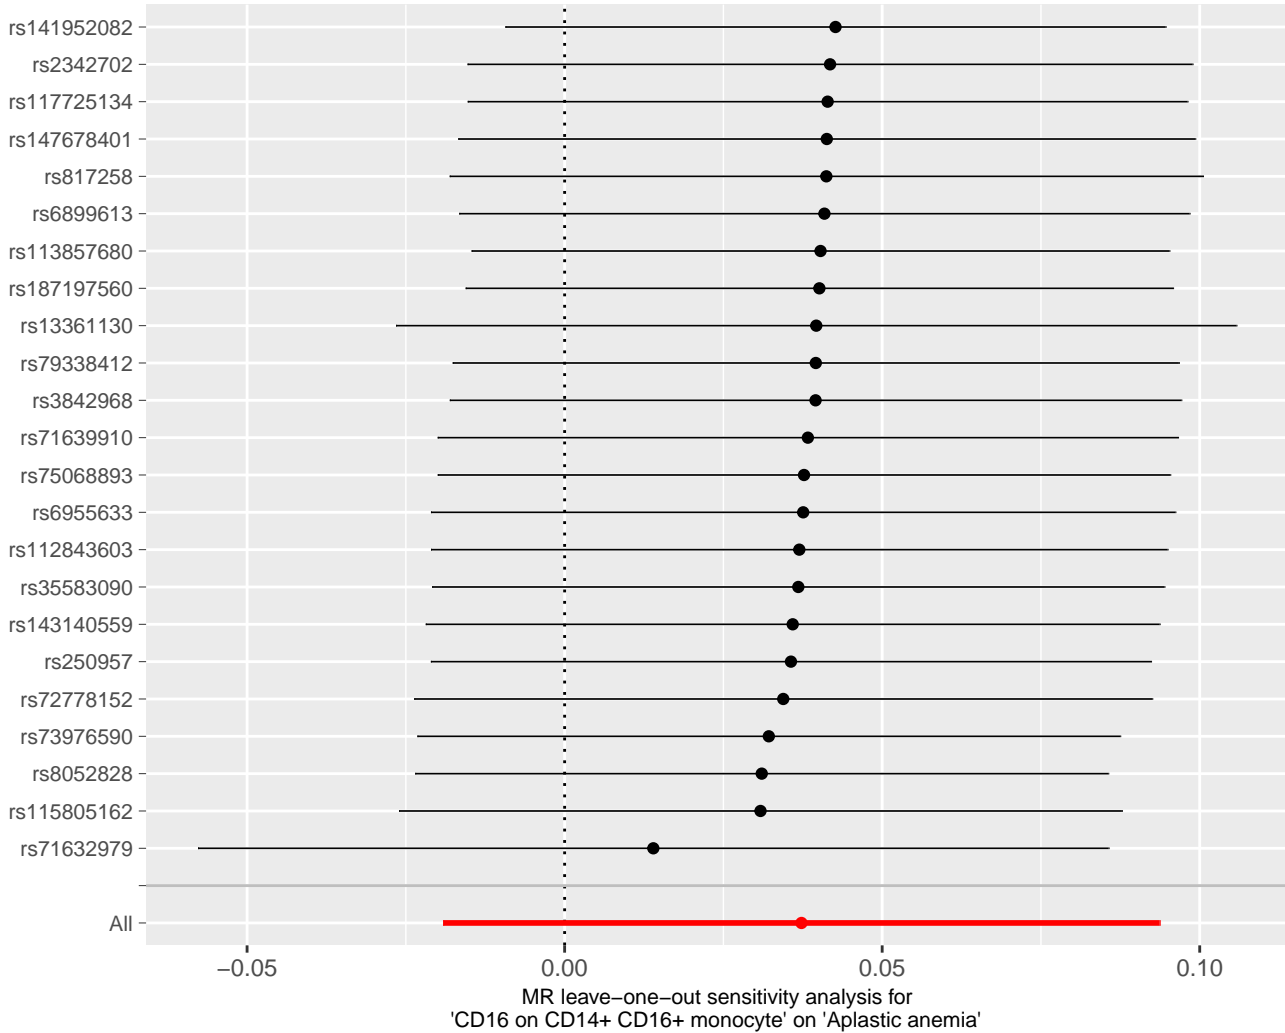

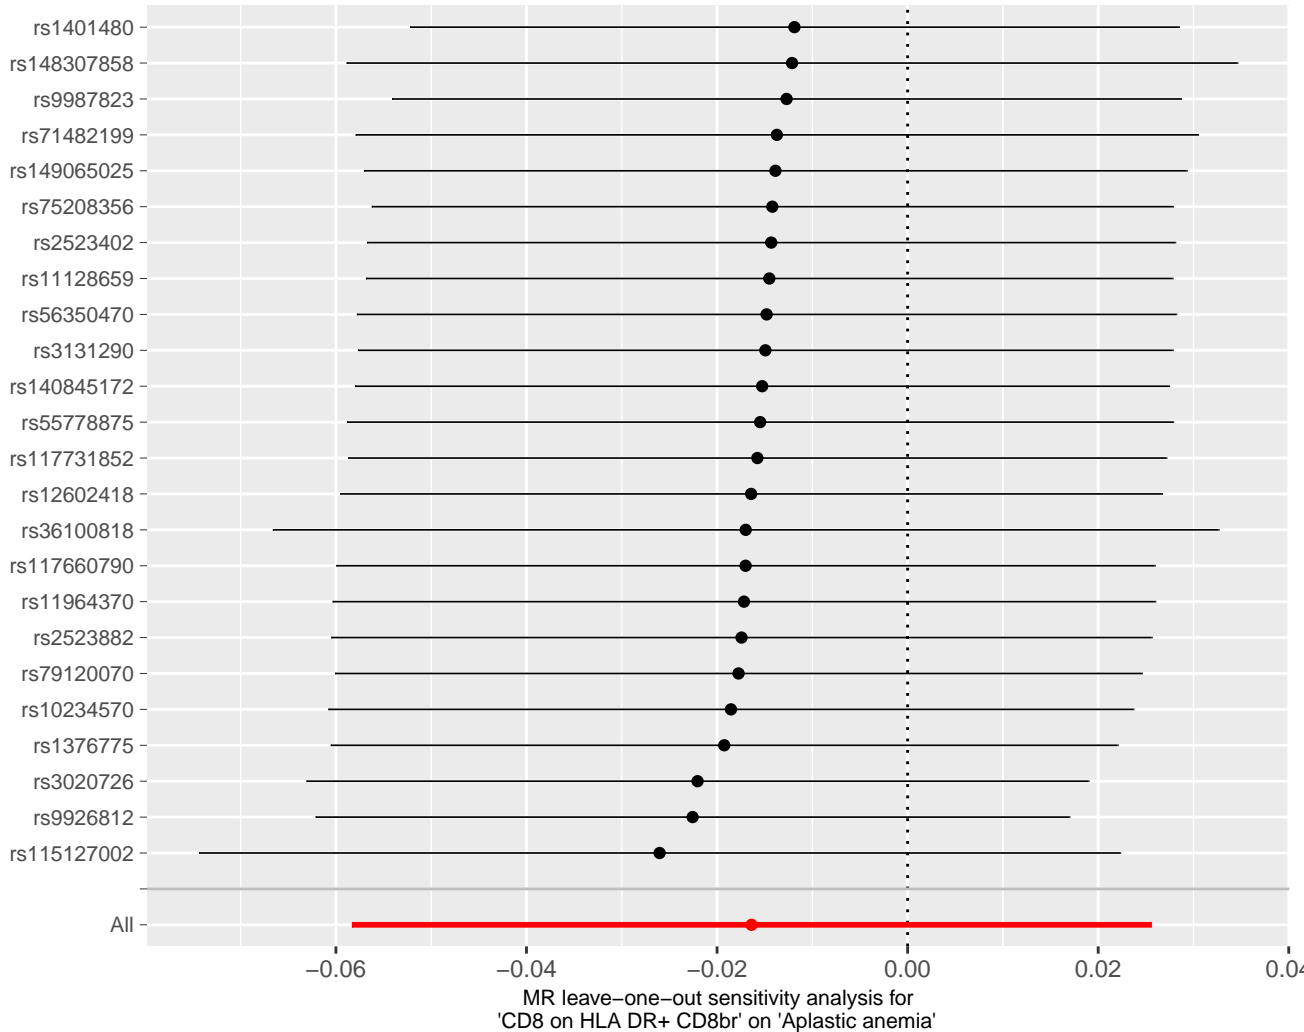

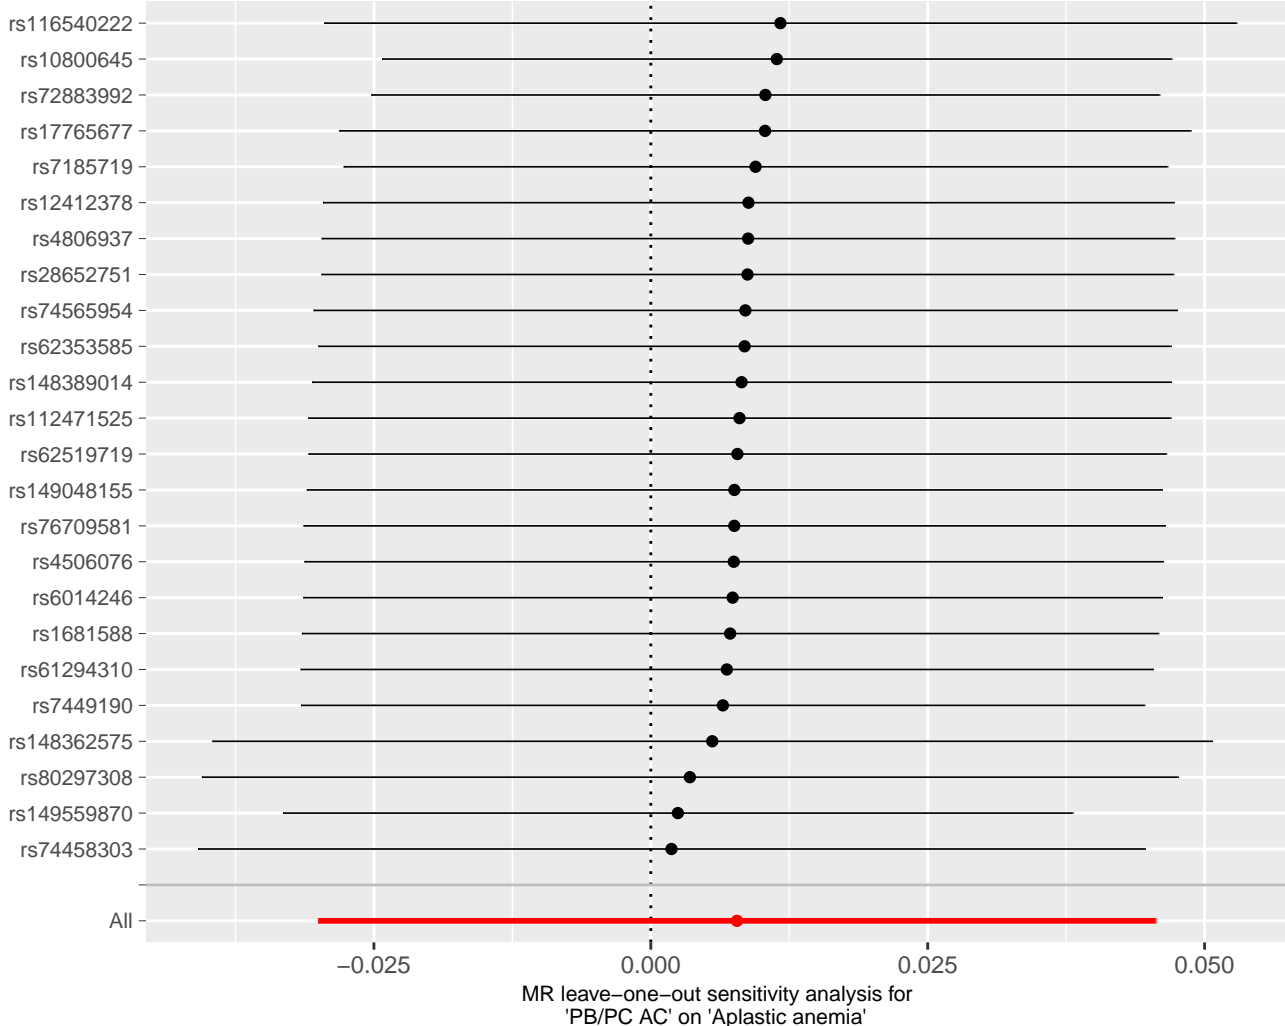

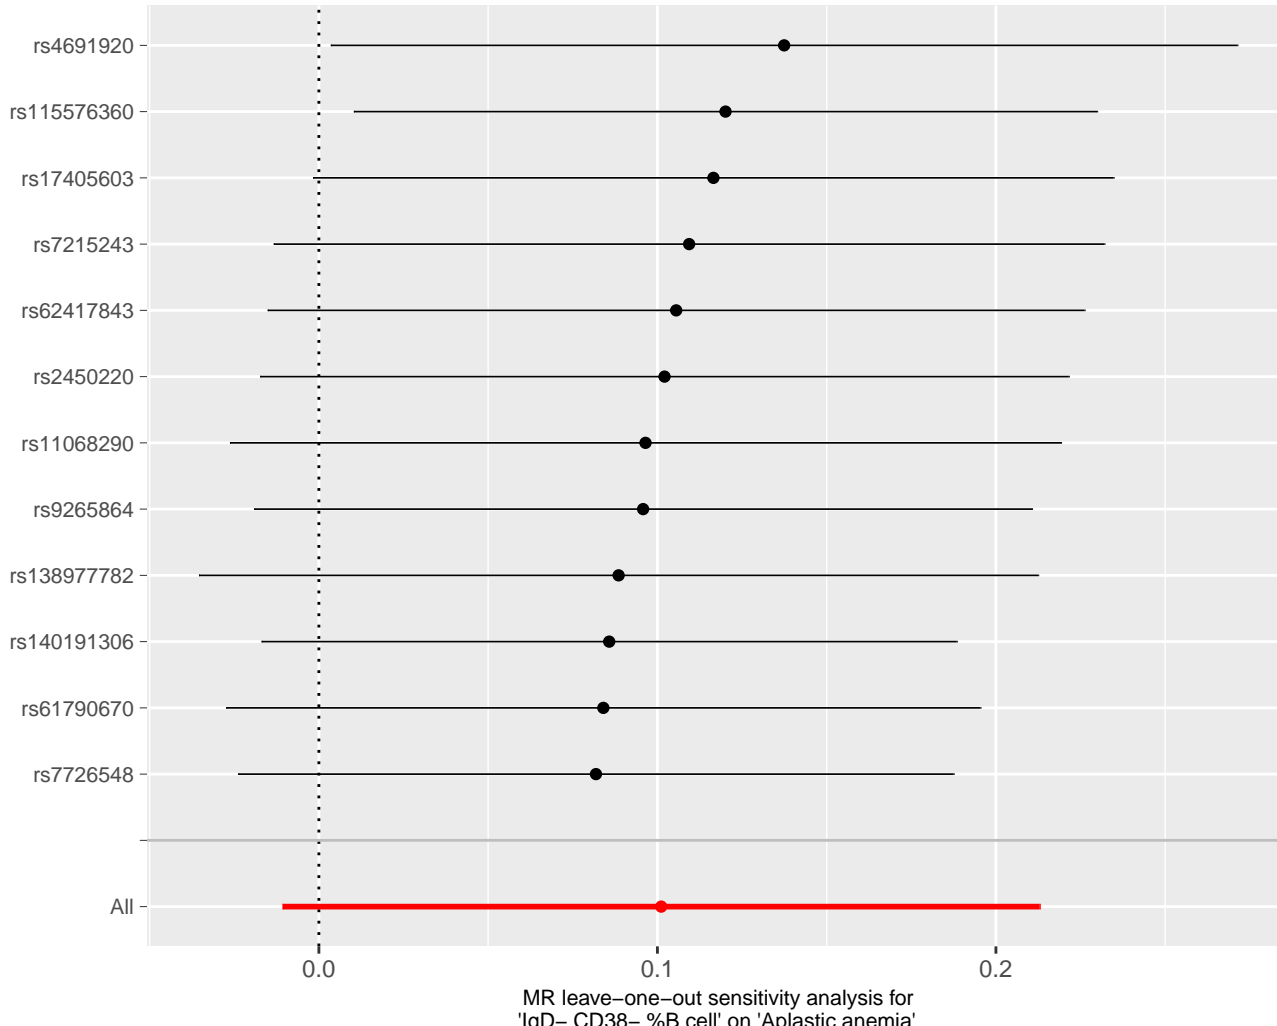

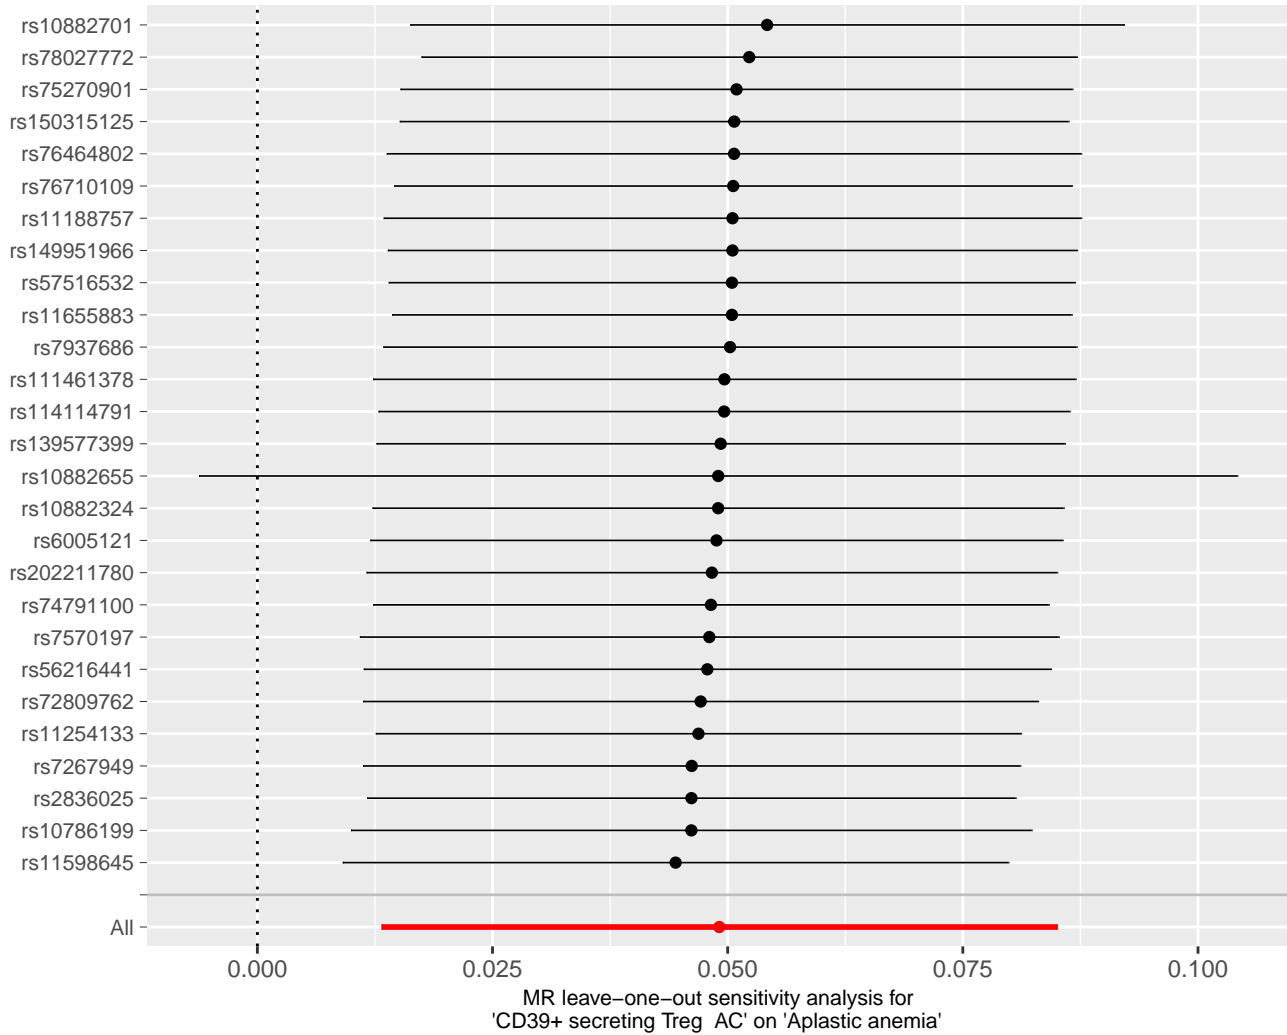

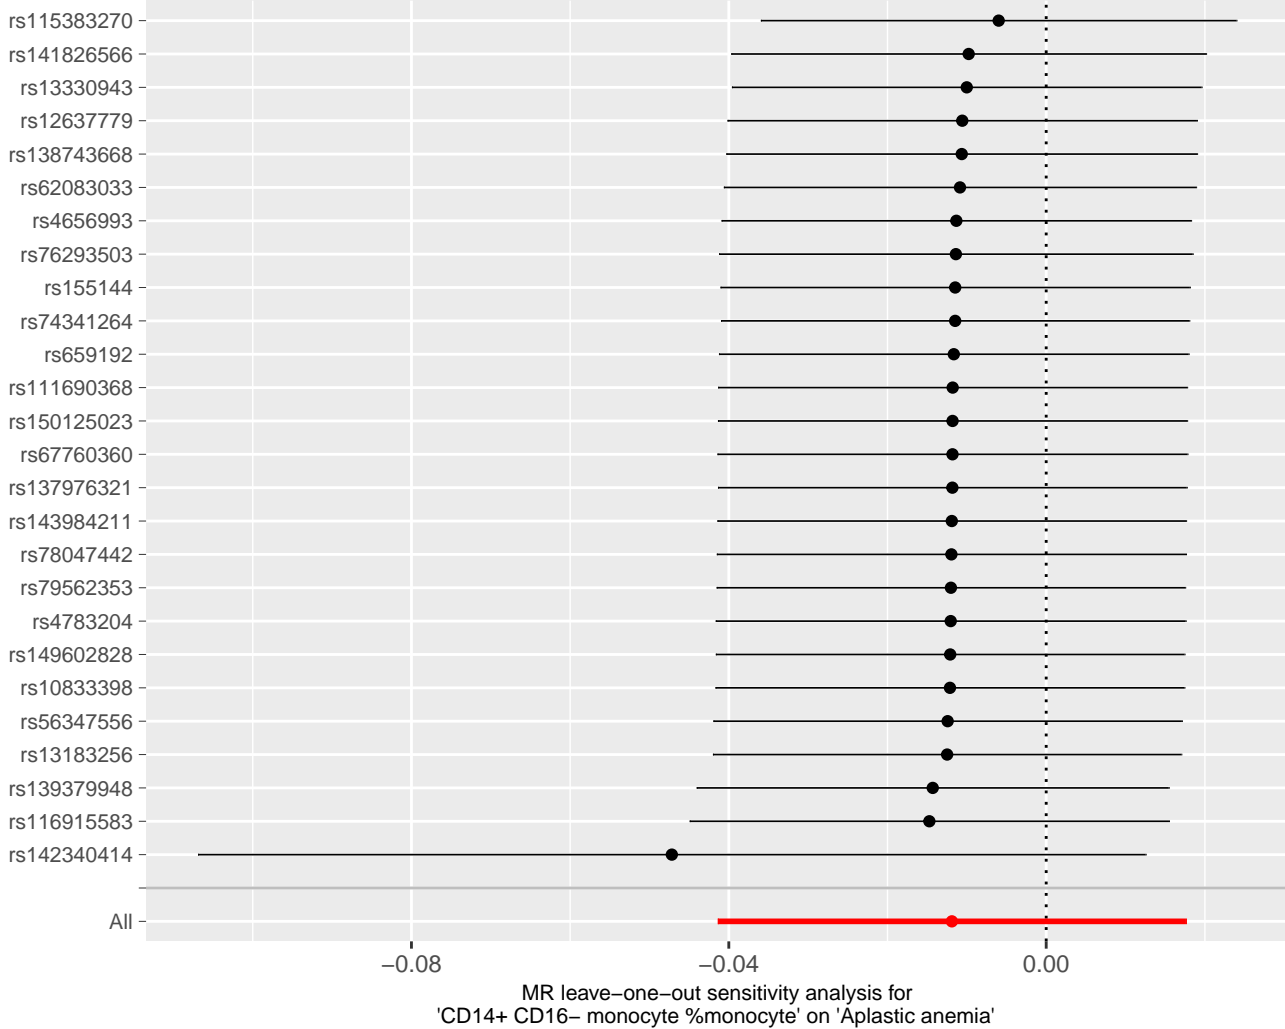



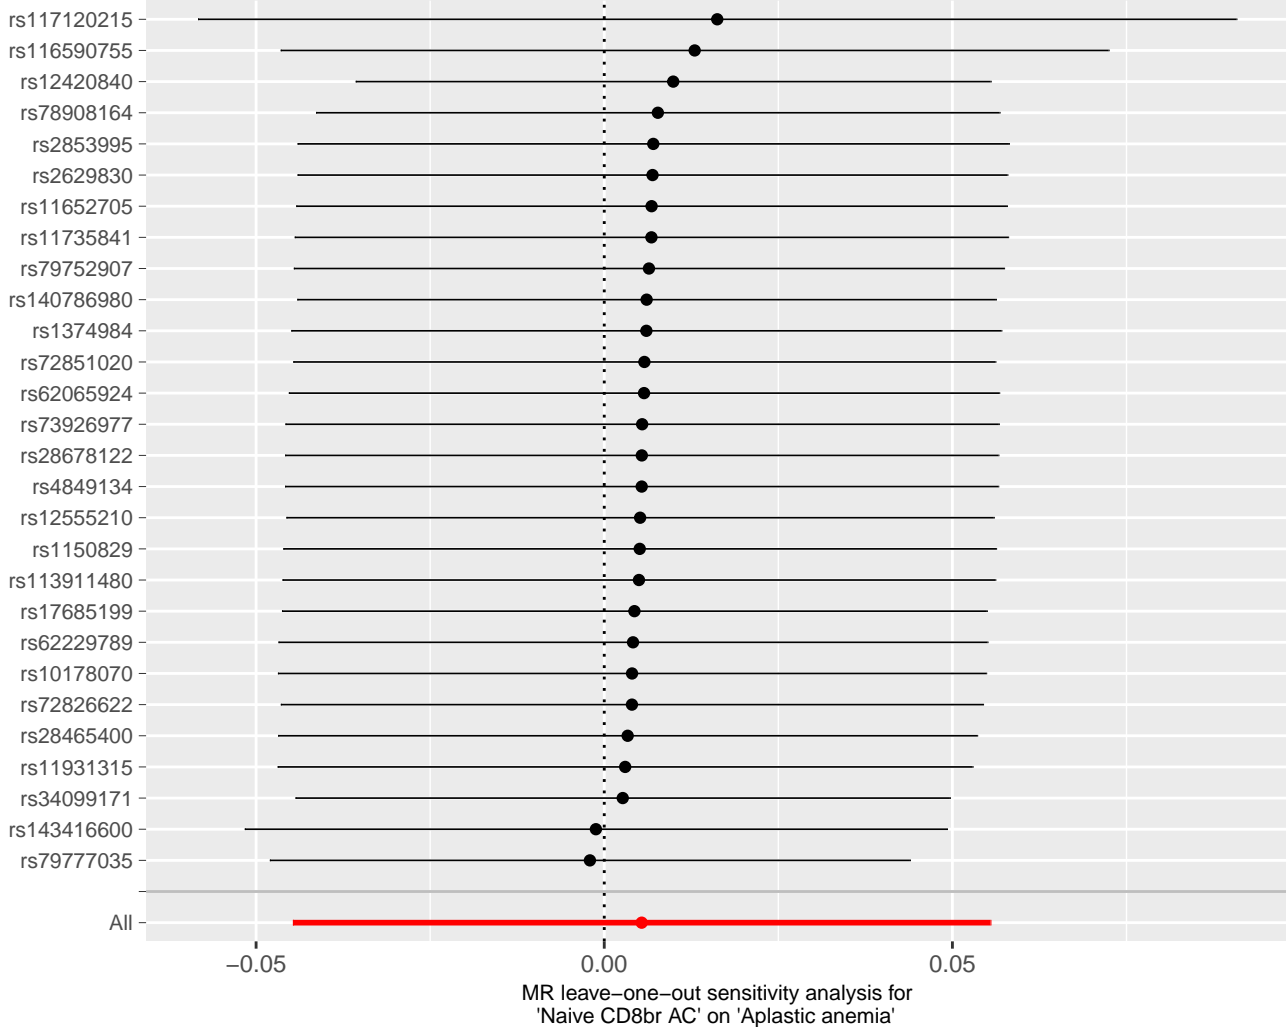

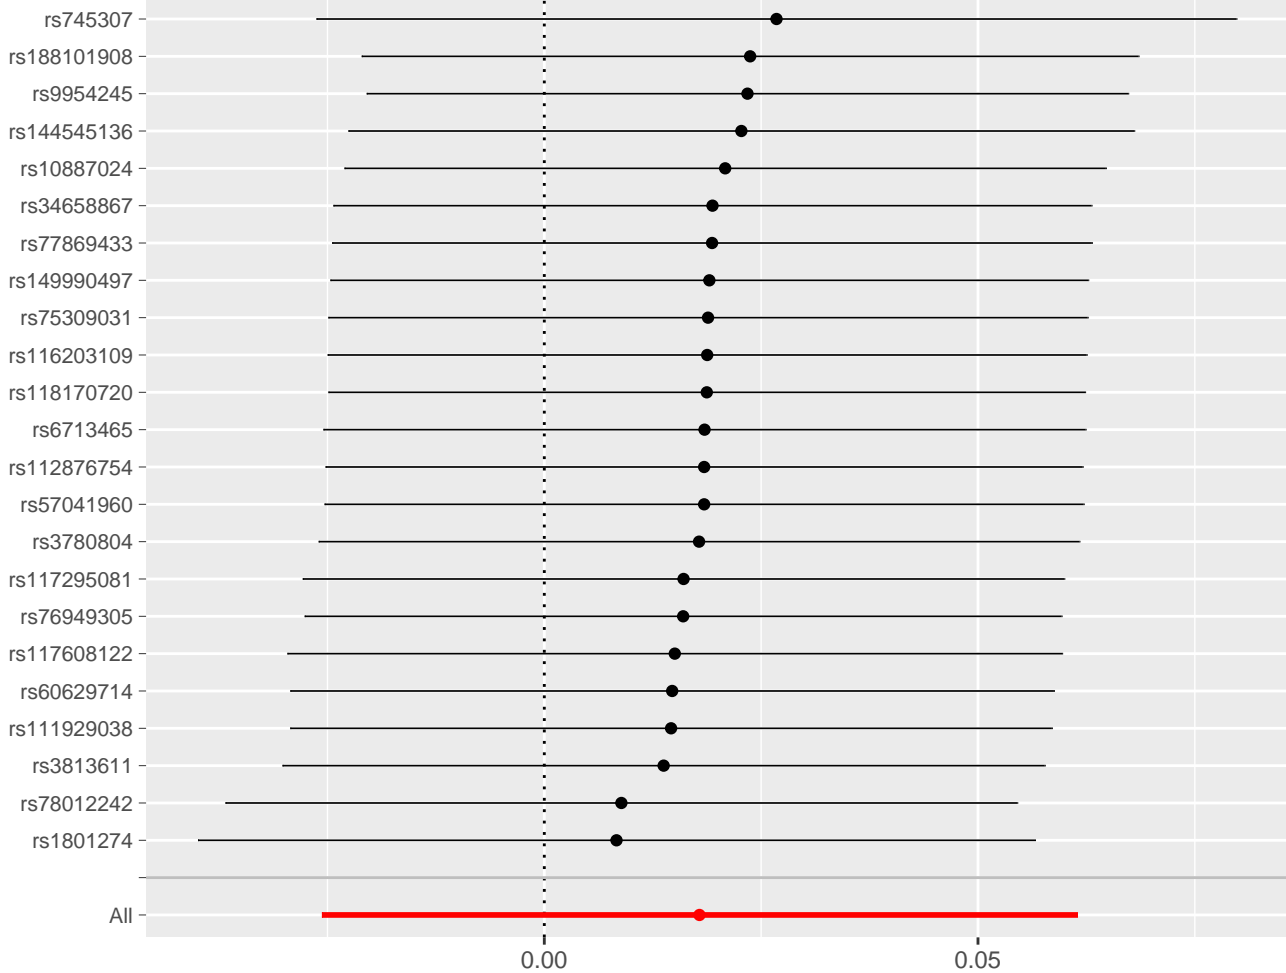

MR leave-one-out sensitivity analysis for 'CD40 on CD14+ CD16- monocyte' on 'Aplastic anemia'

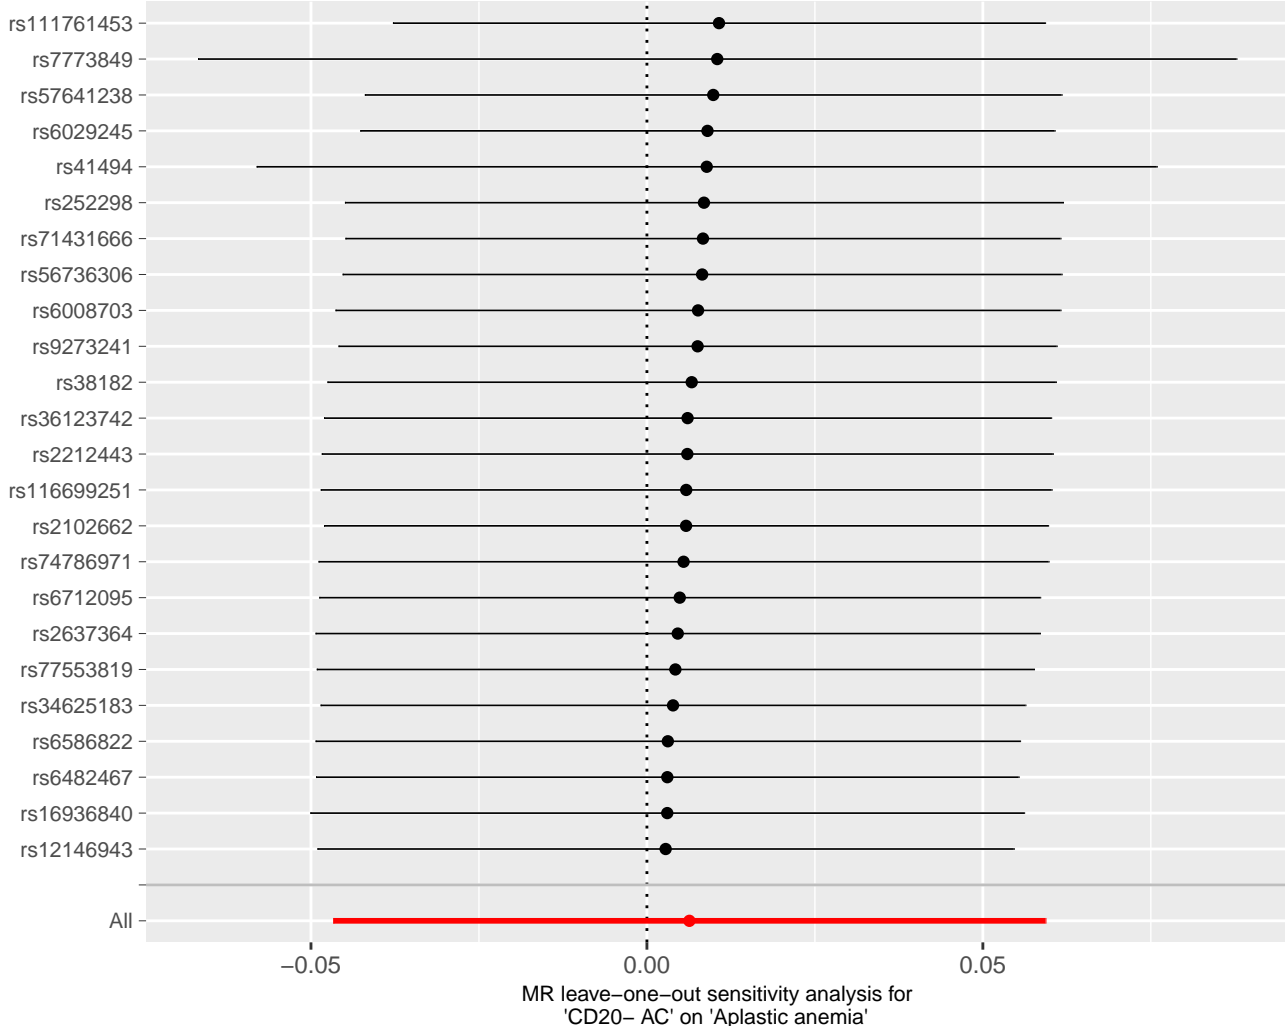

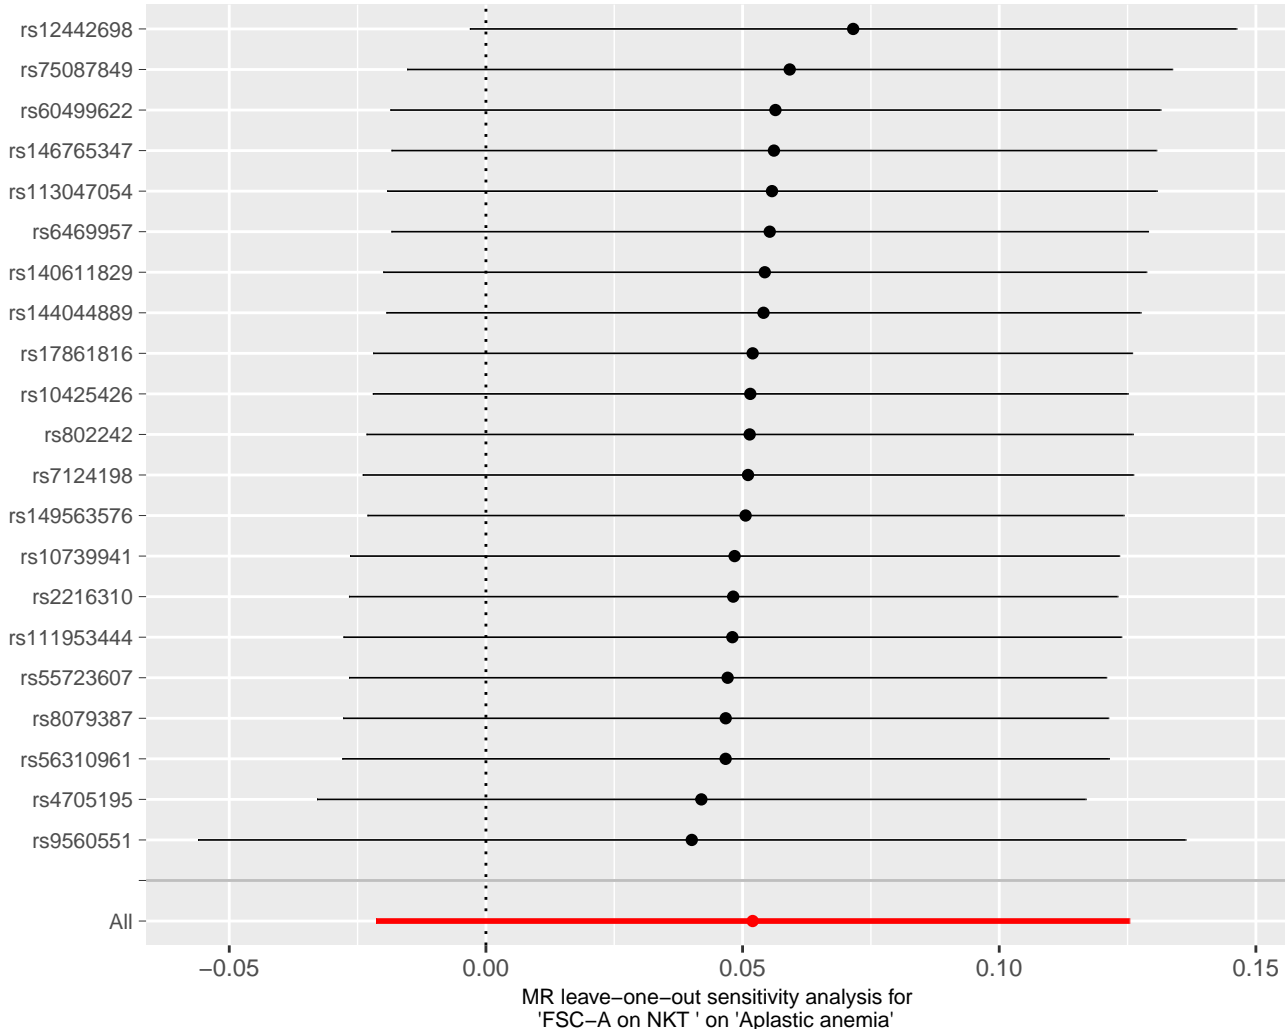

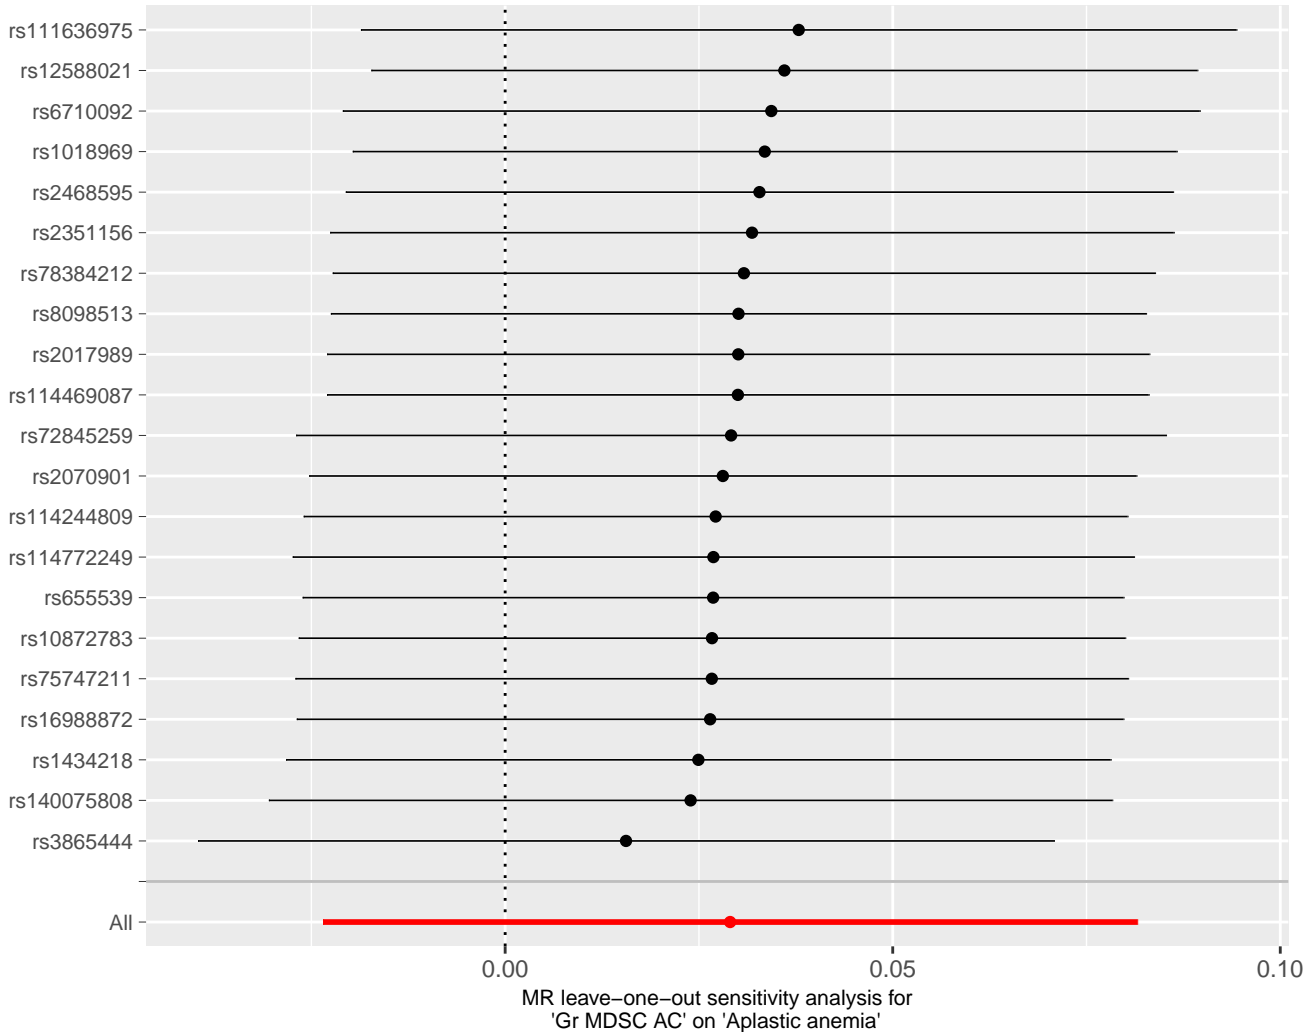

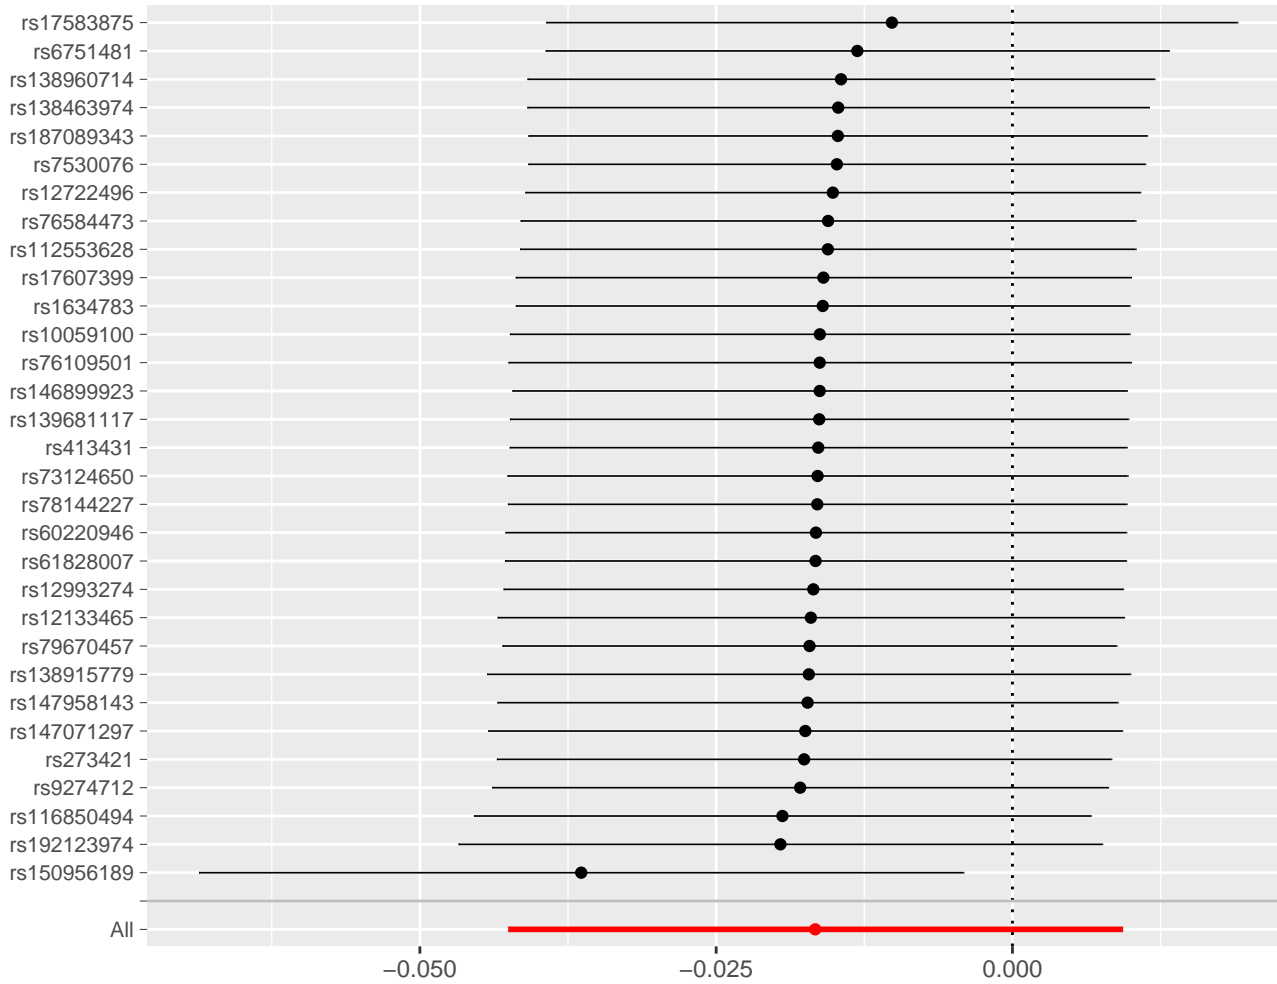

MR leave-one-out sensitivity analysis for 'Resting Treg % CD4 Treg' on 'Aplastic anemia'

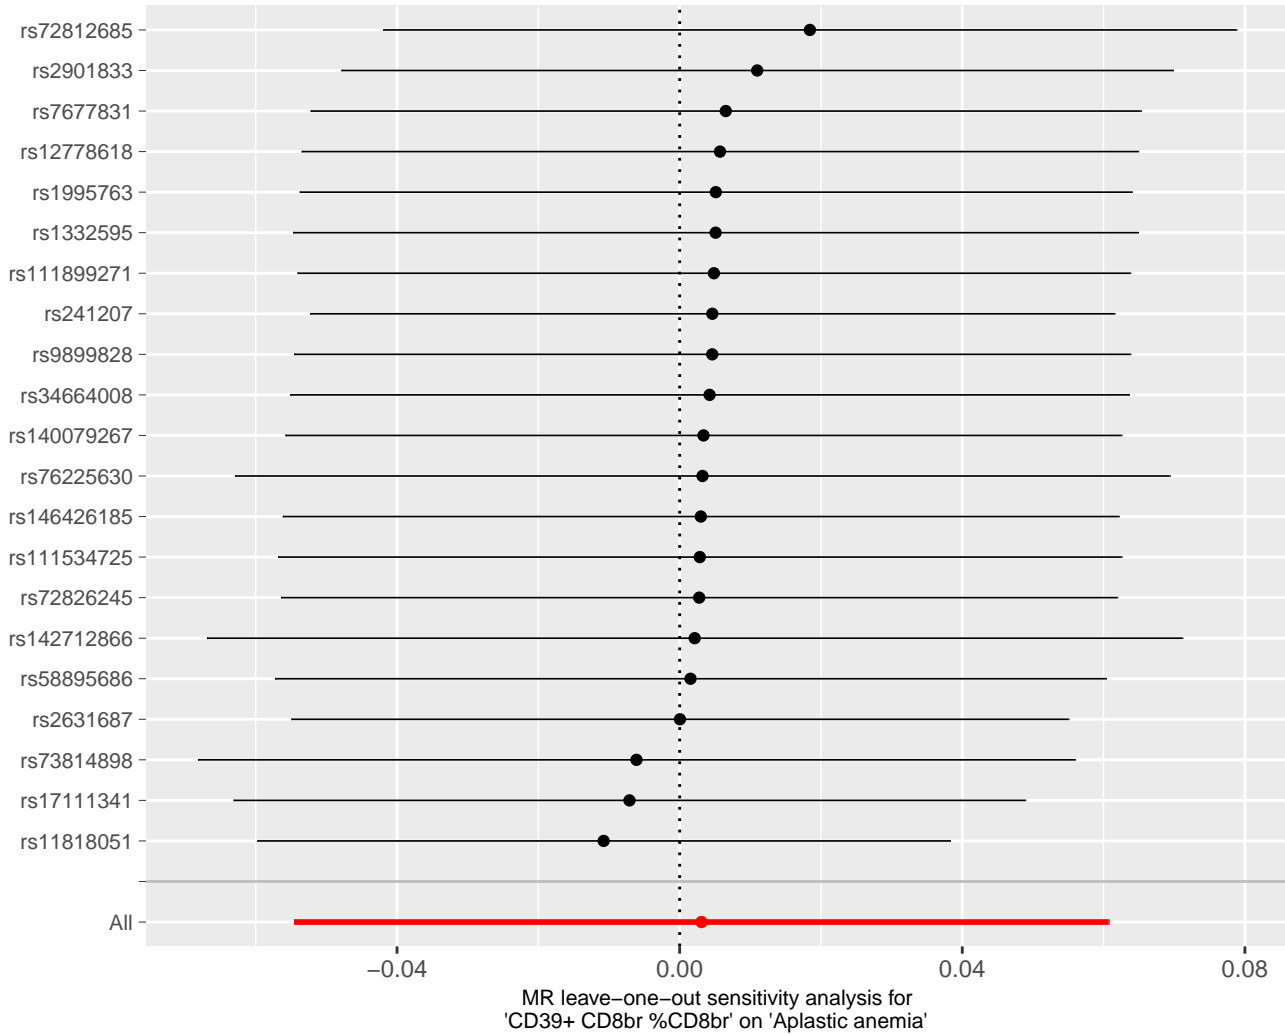

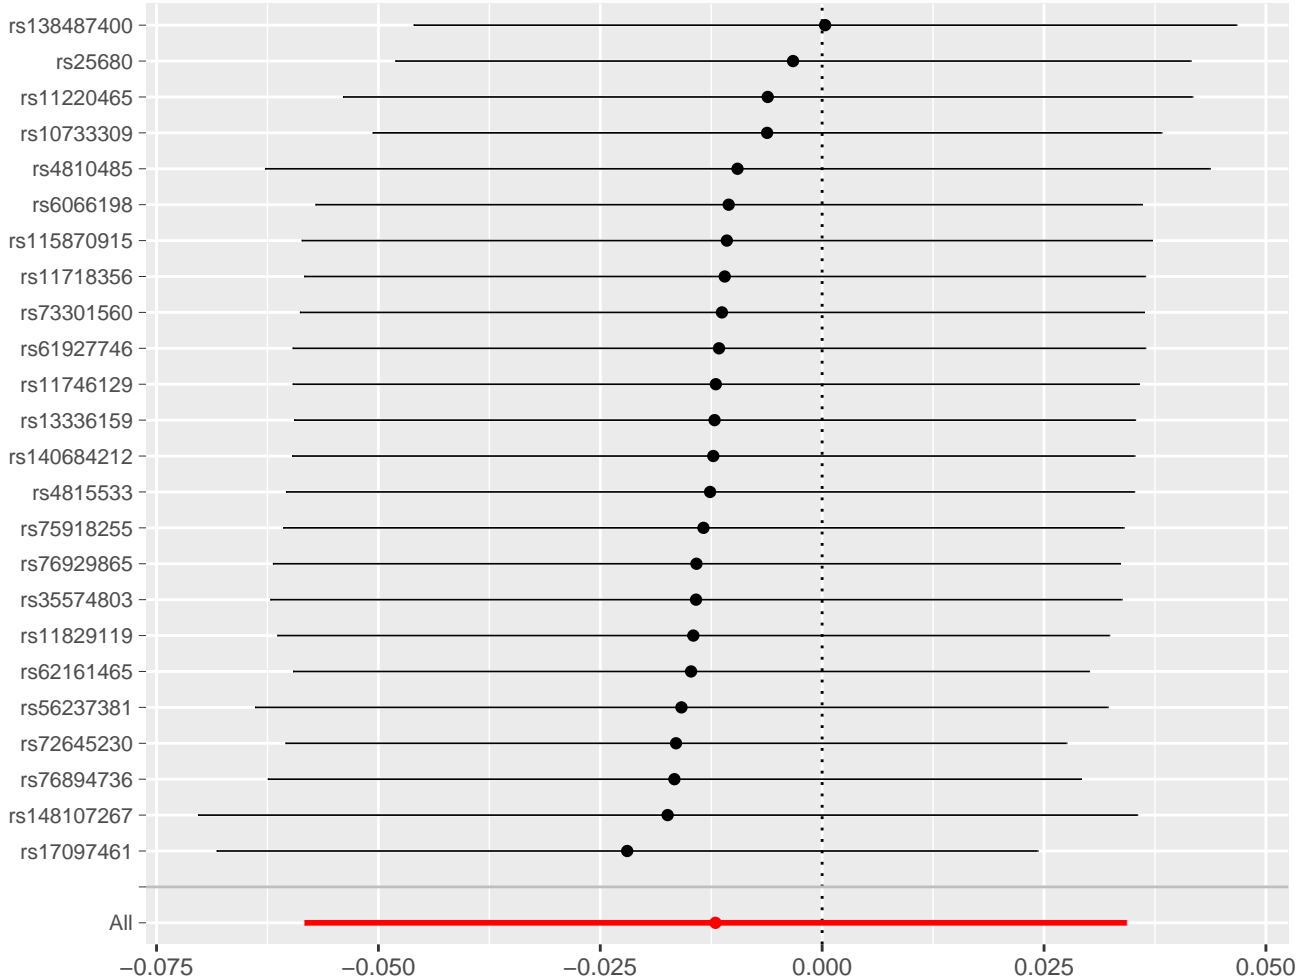



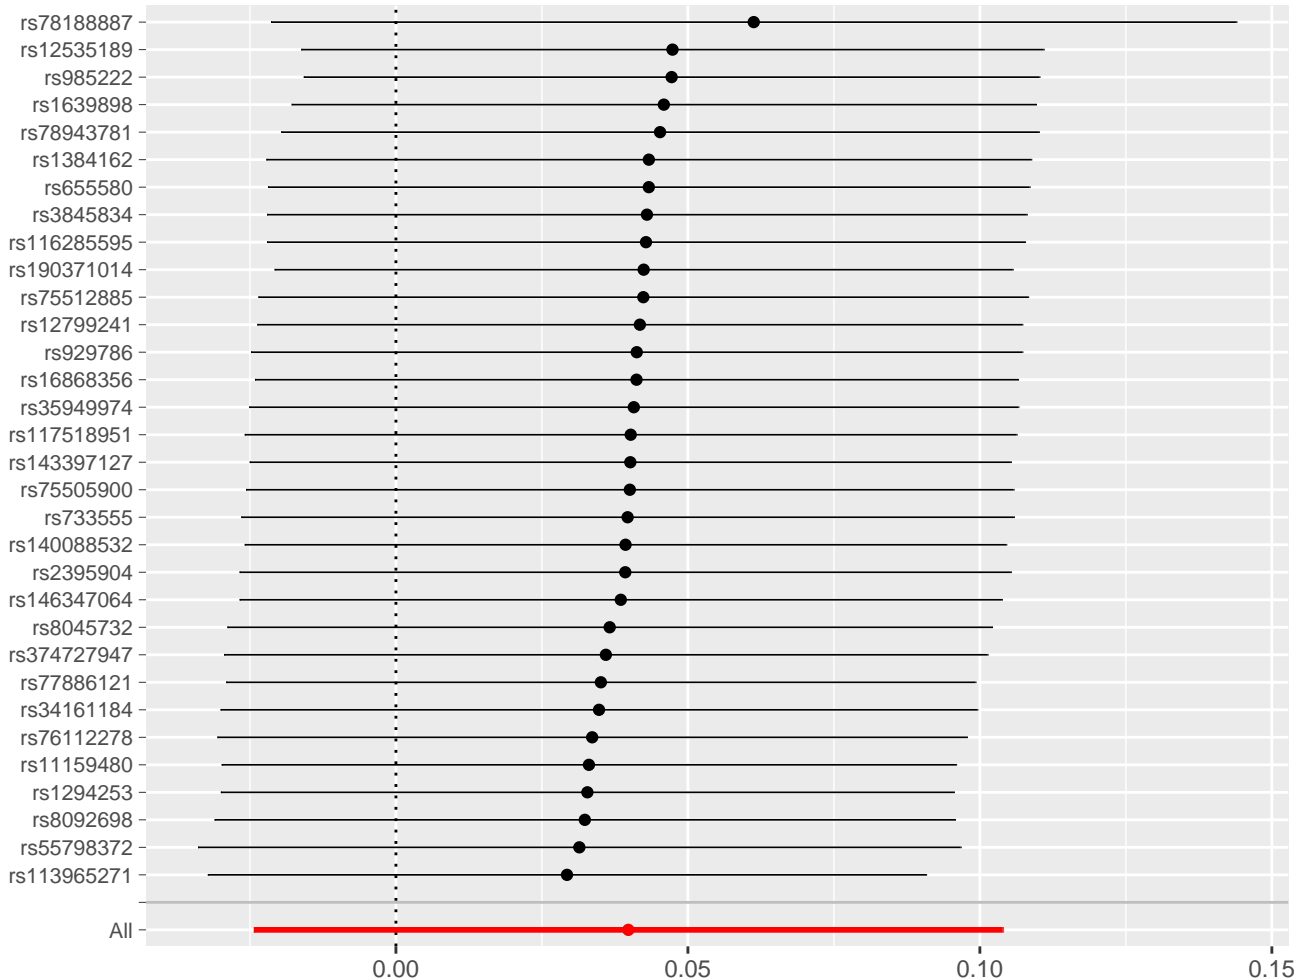

MR leave-one-out sensitivity analysis for 'Transitional AC' on 'Aplastic anemia'

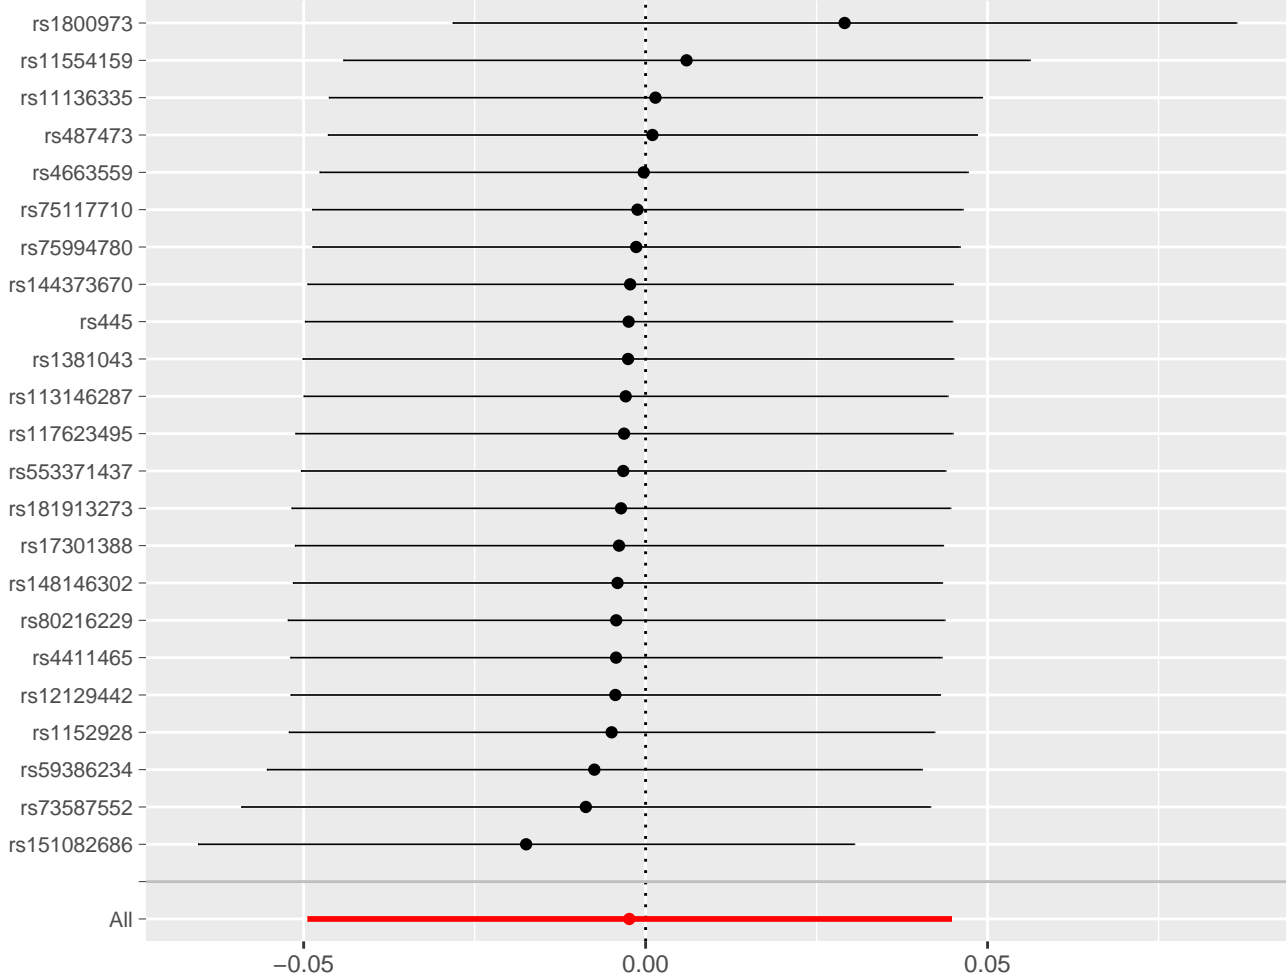

MR leave-one-out sensitivity analysis for 'SSC-A on monocyte' on 'Aplastic anemia'

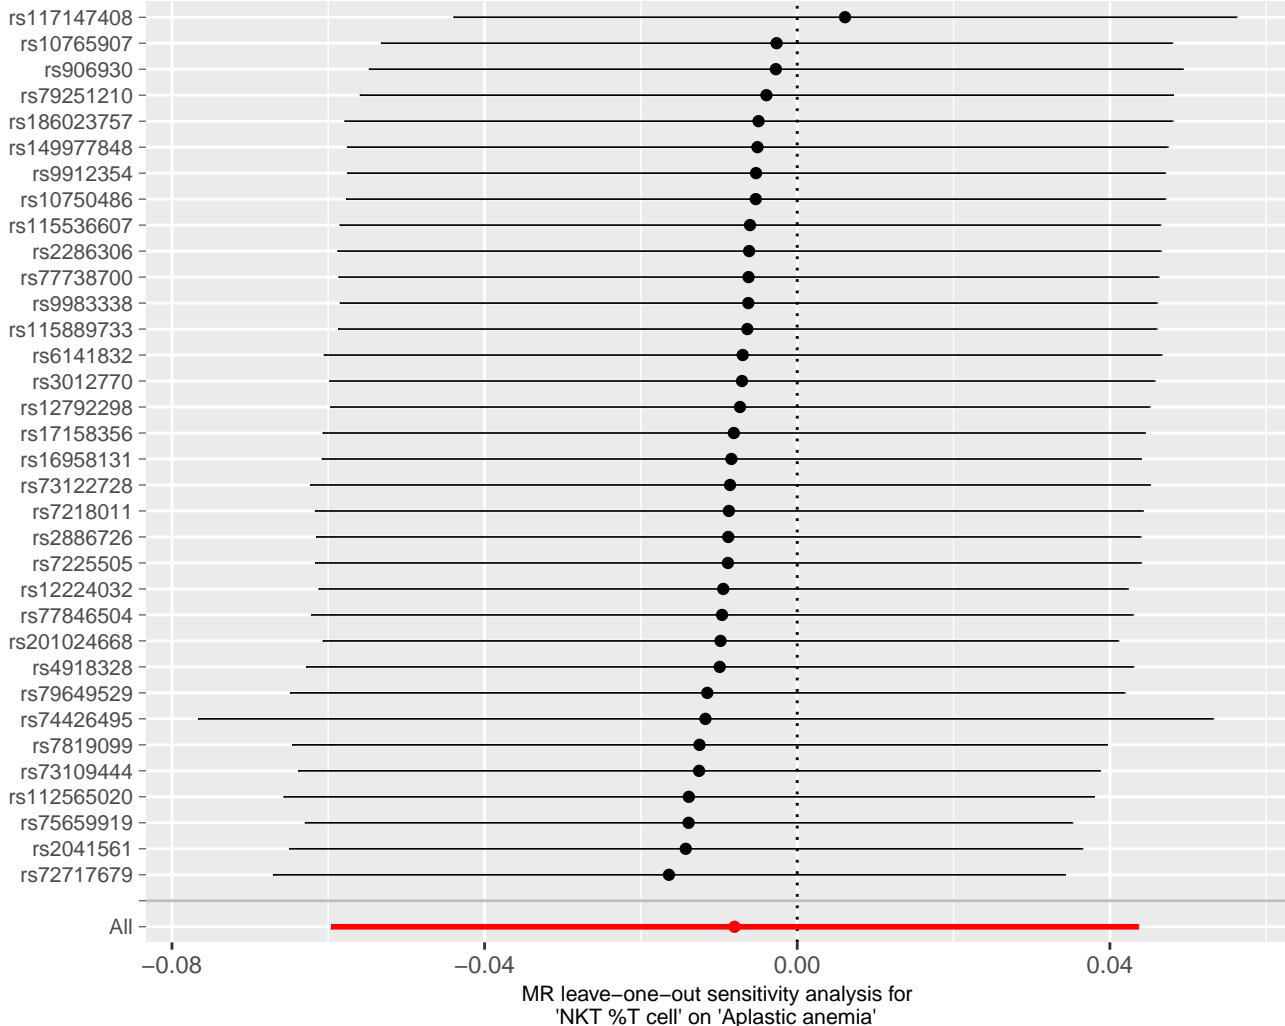

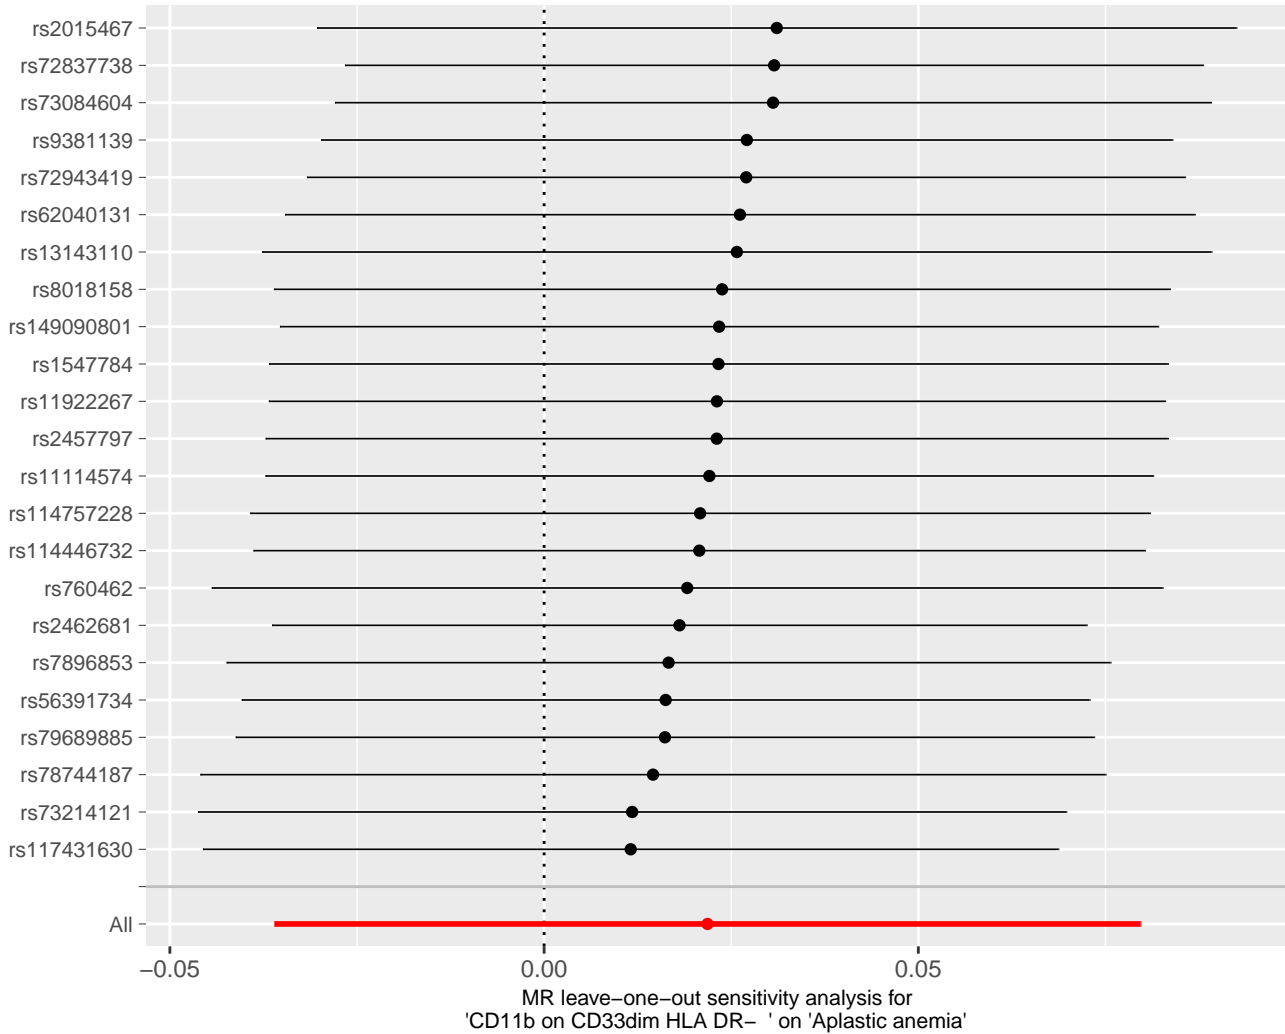

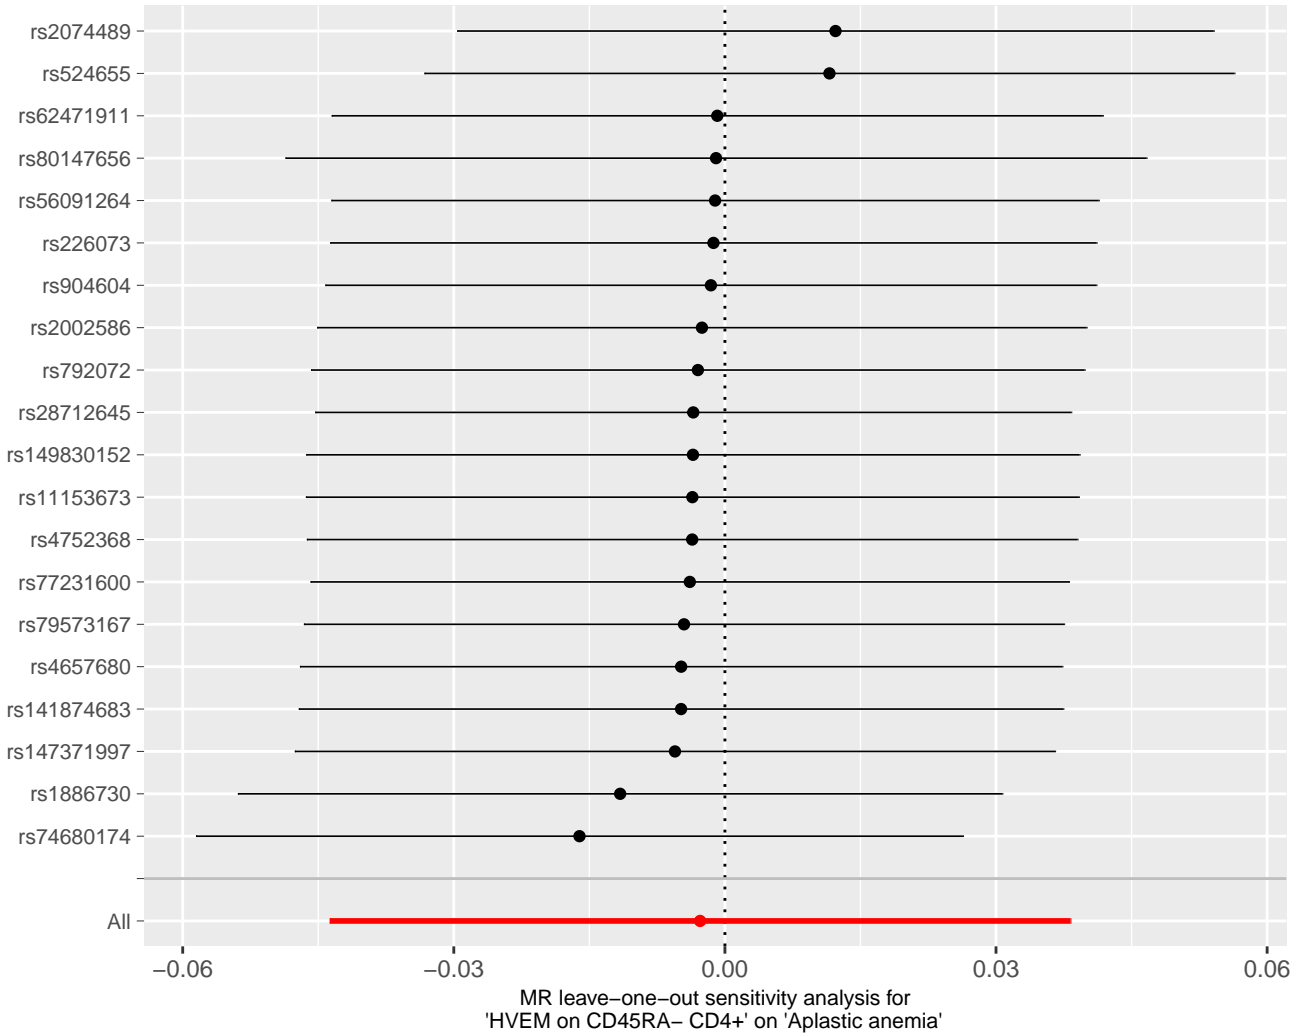

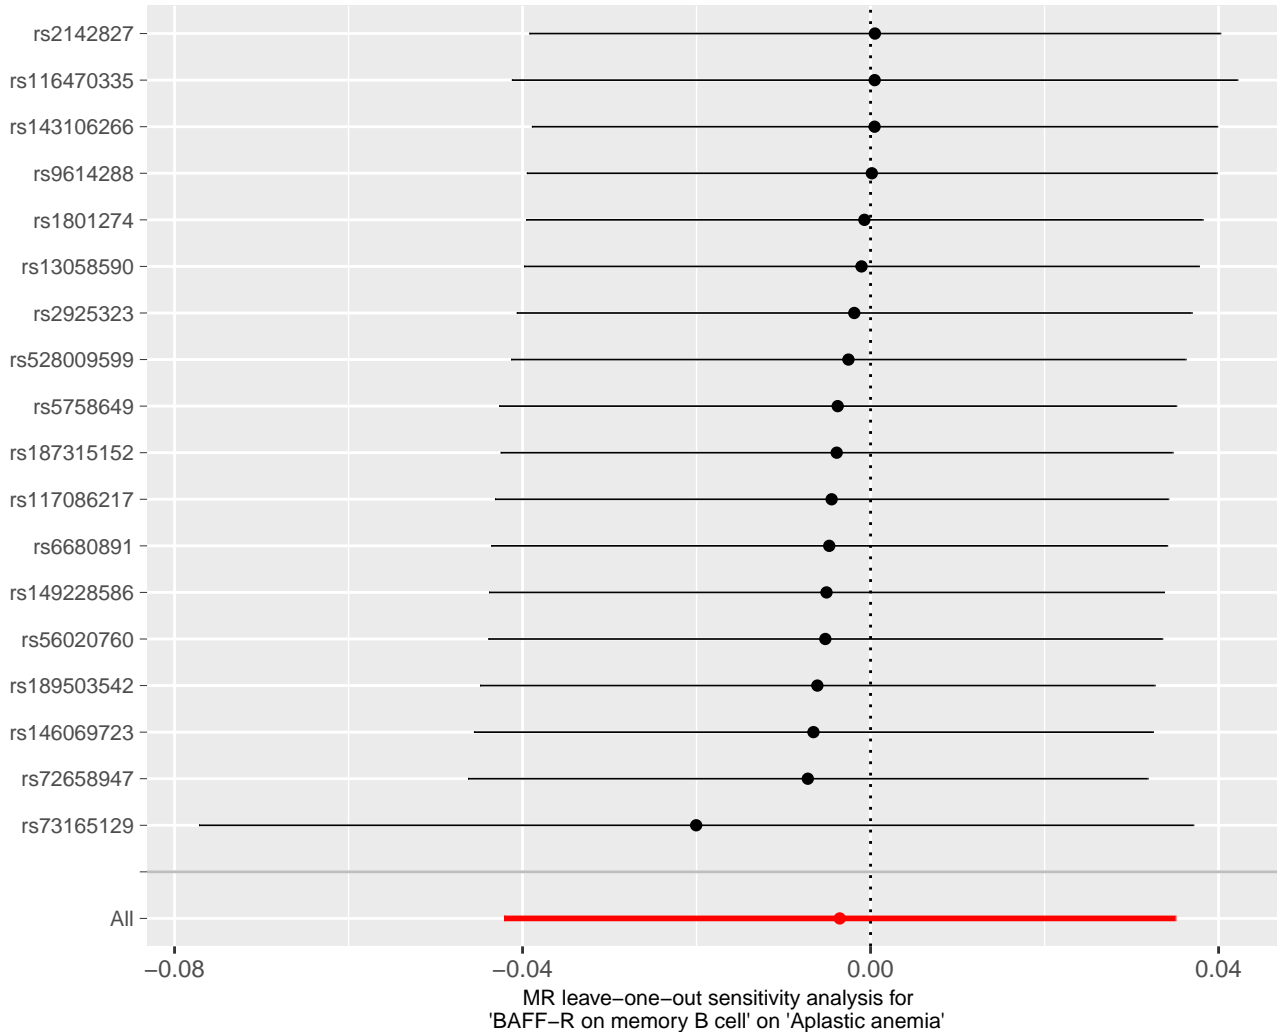

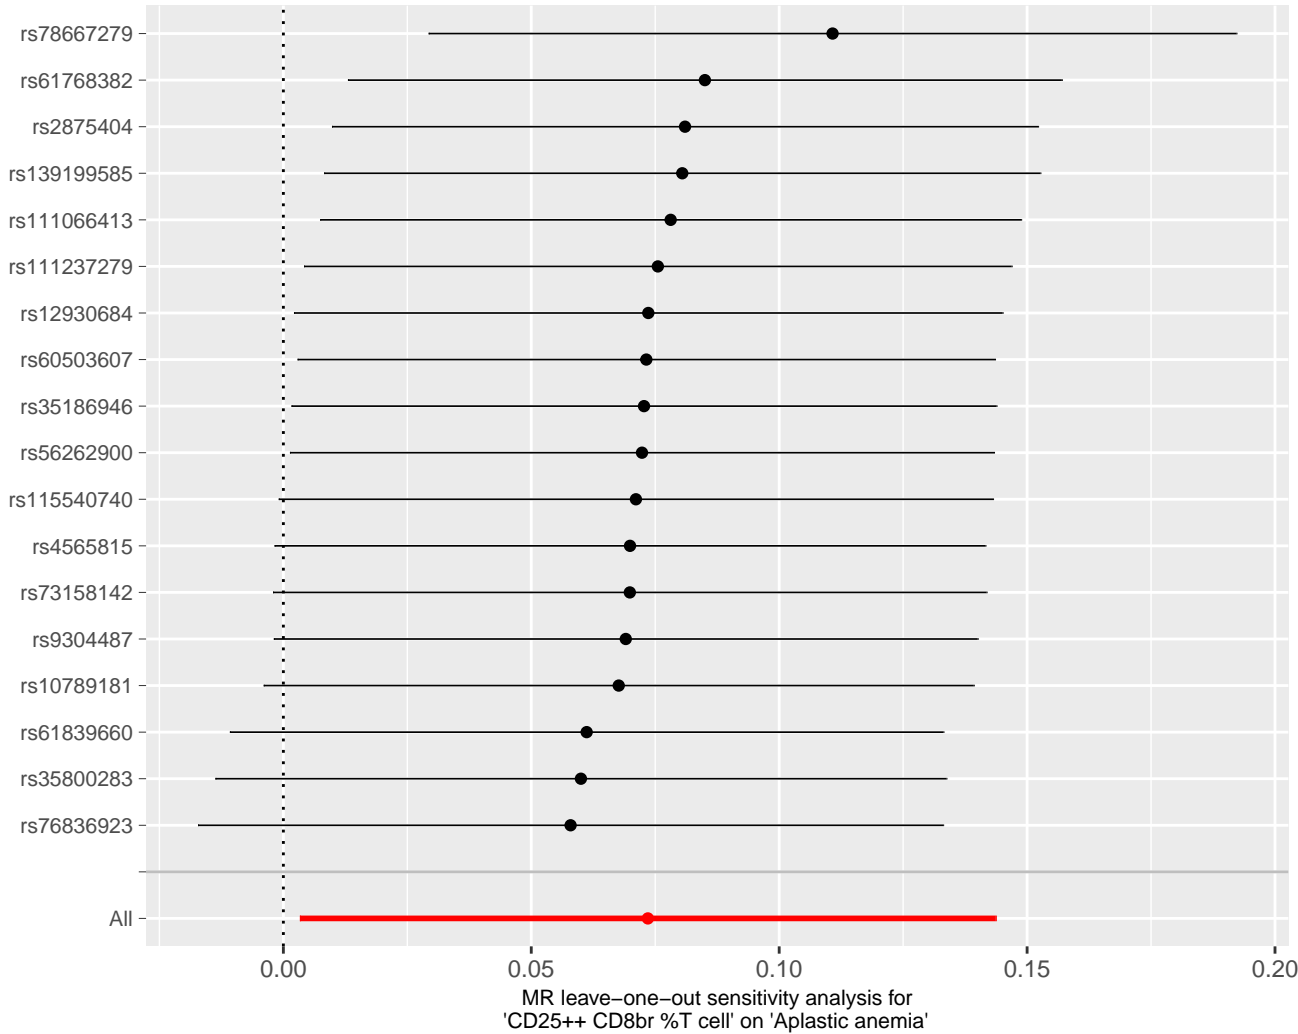

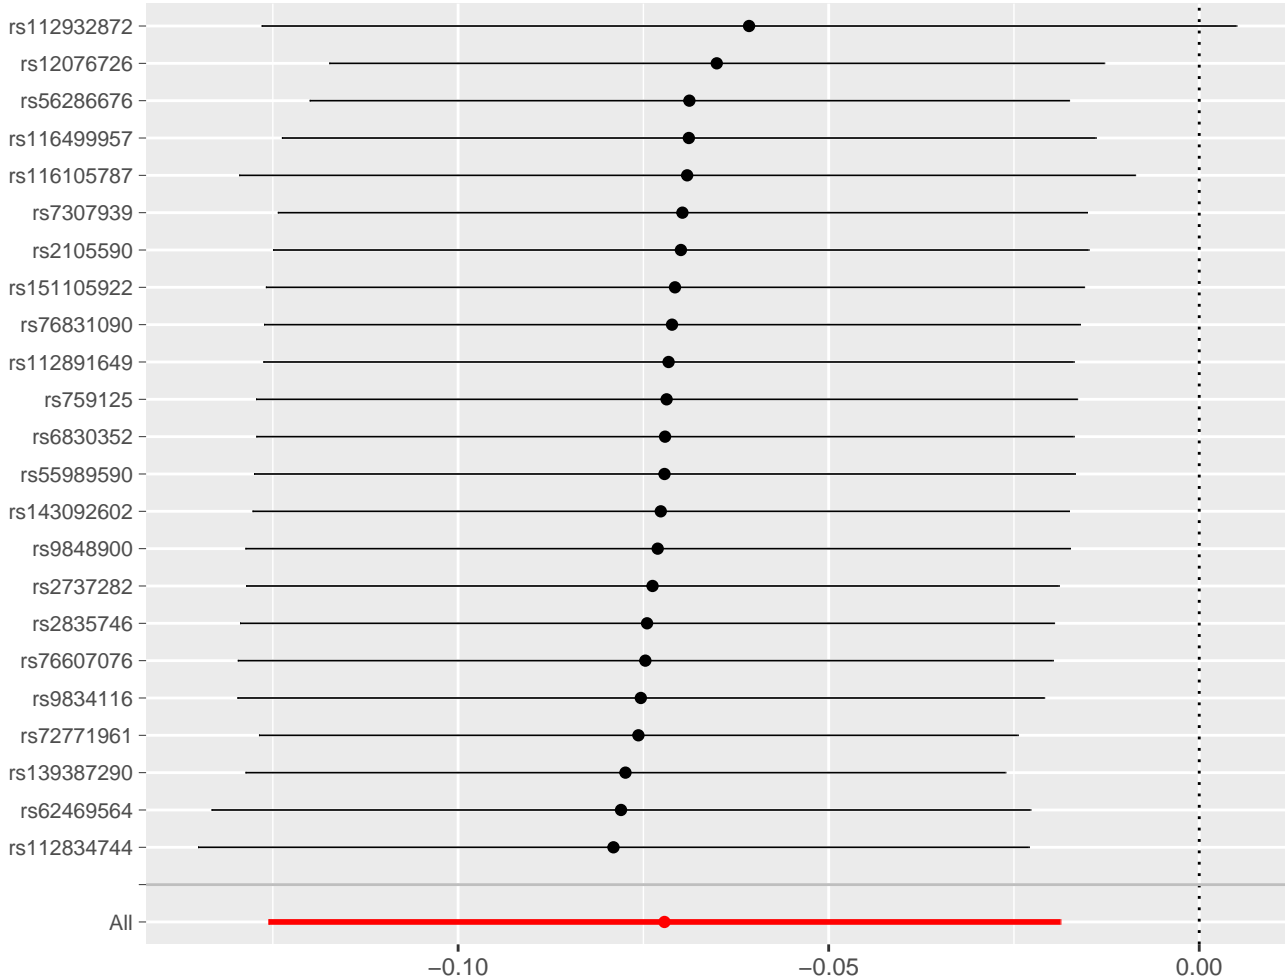

MR leave-one-out sensitivity analysis for 'CD86 on CD62L+ myeloid DC' on 'Aplastic anemia'



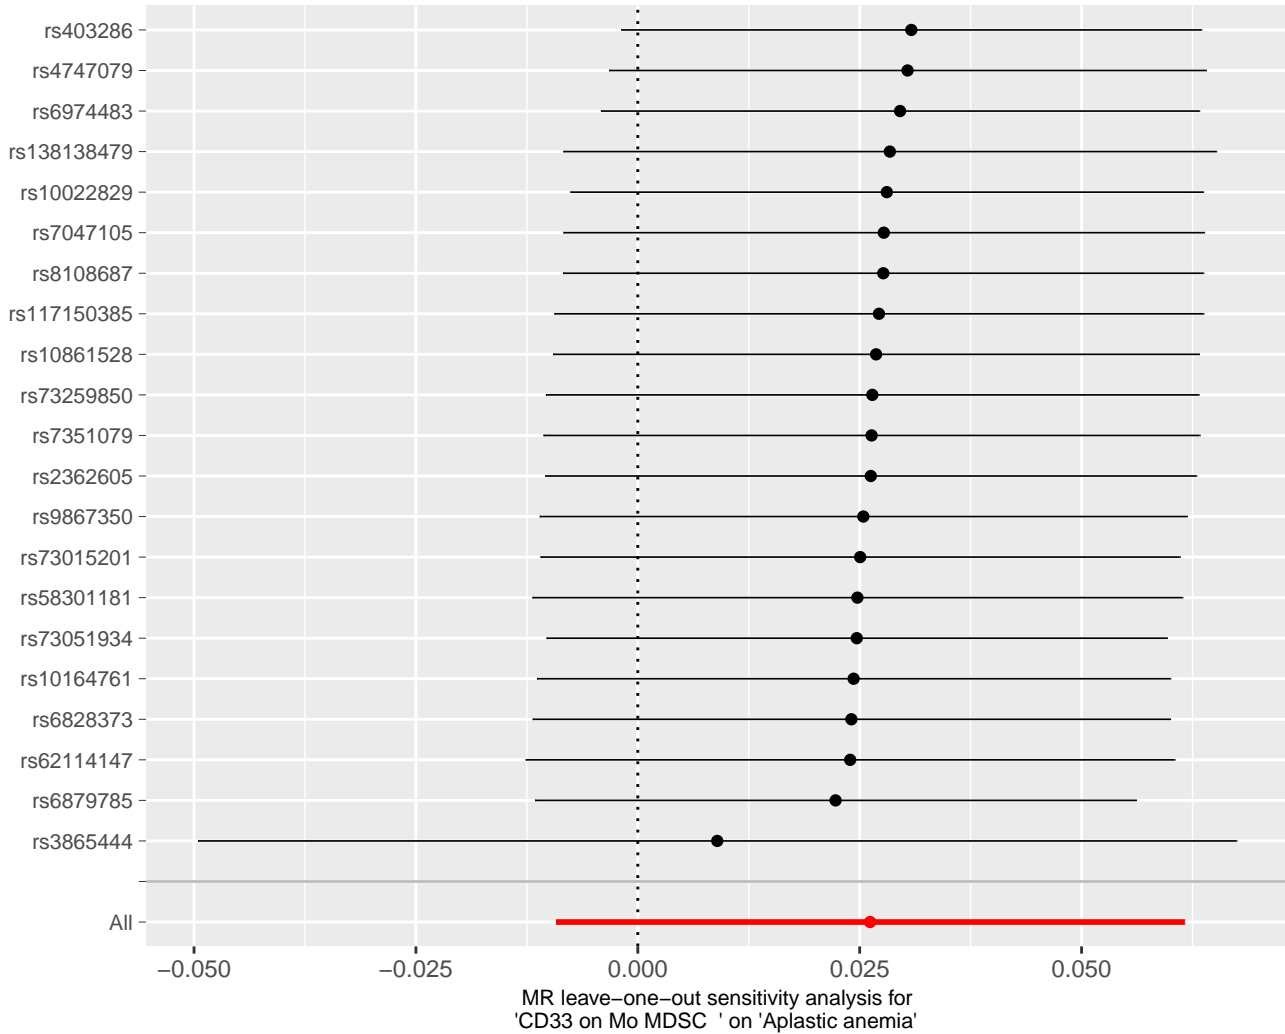

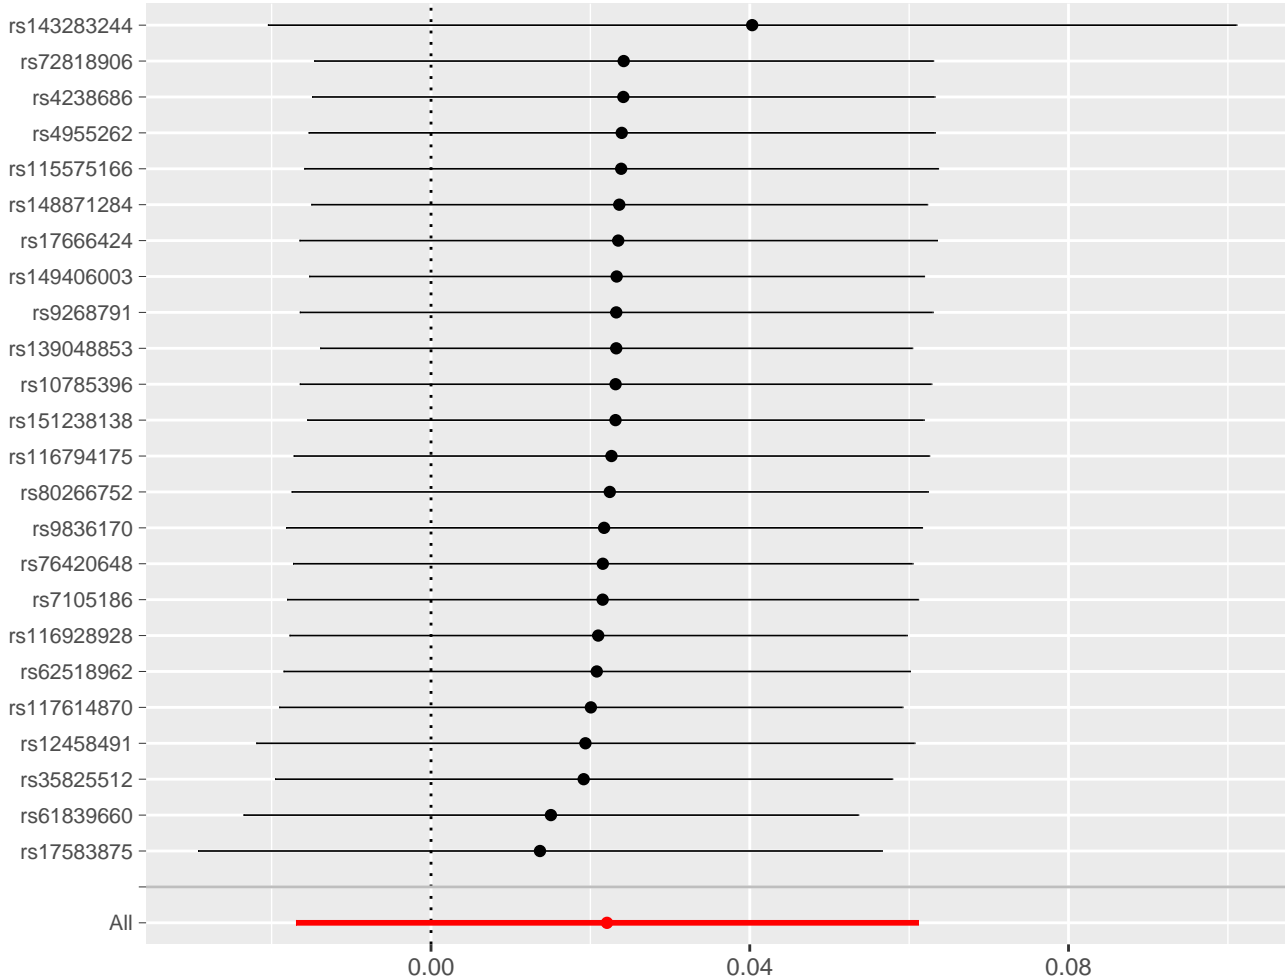

MR leave-one-out sensitivity analysis for 'CD25hi CD45RA- CD4 not Treg %CD4+' on 'Aplastic anemia'

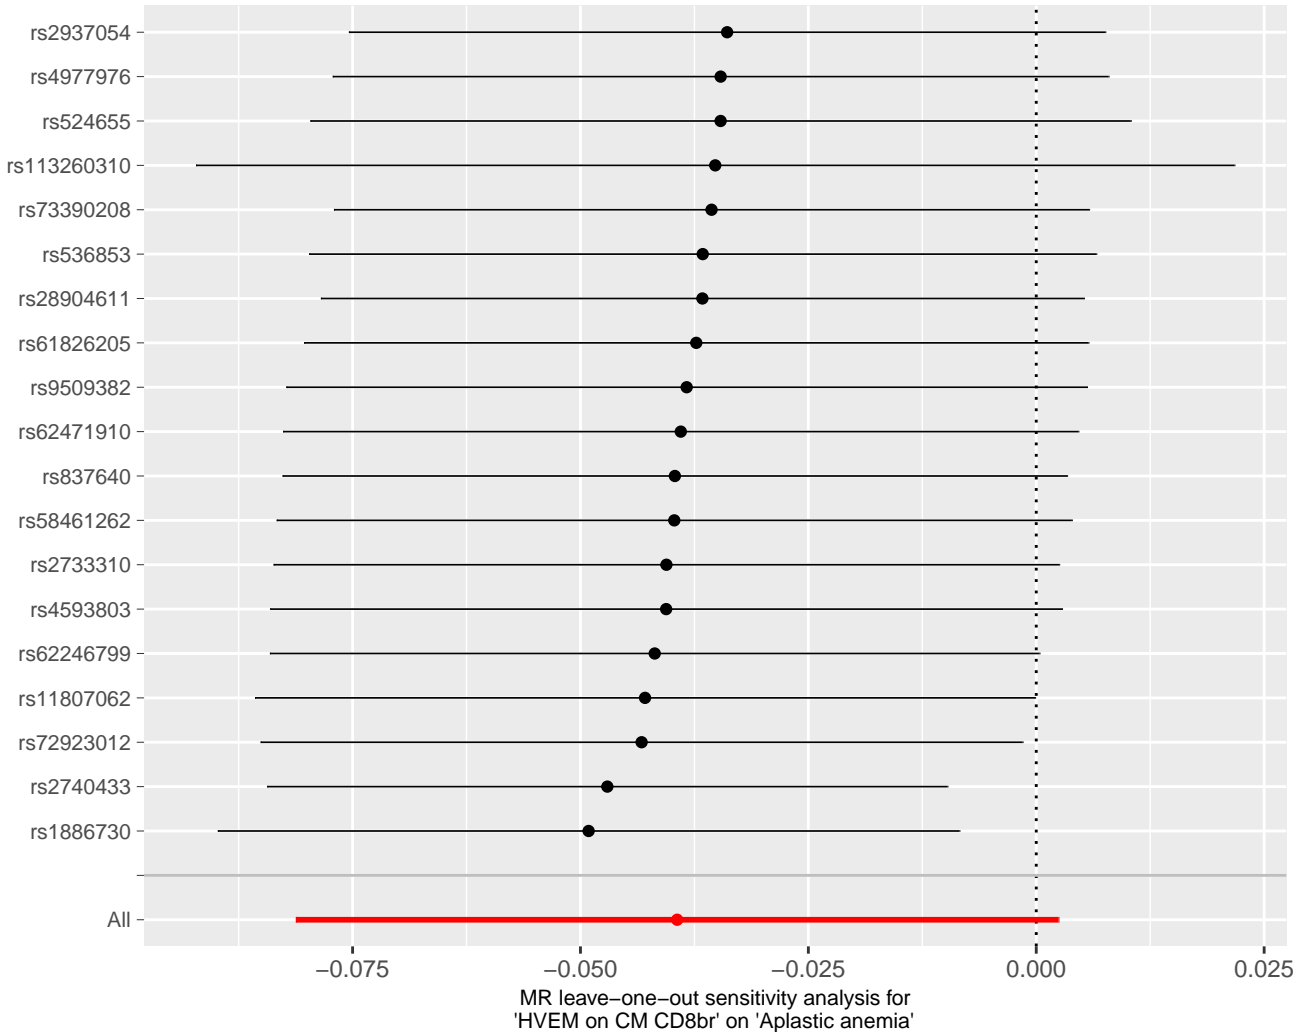

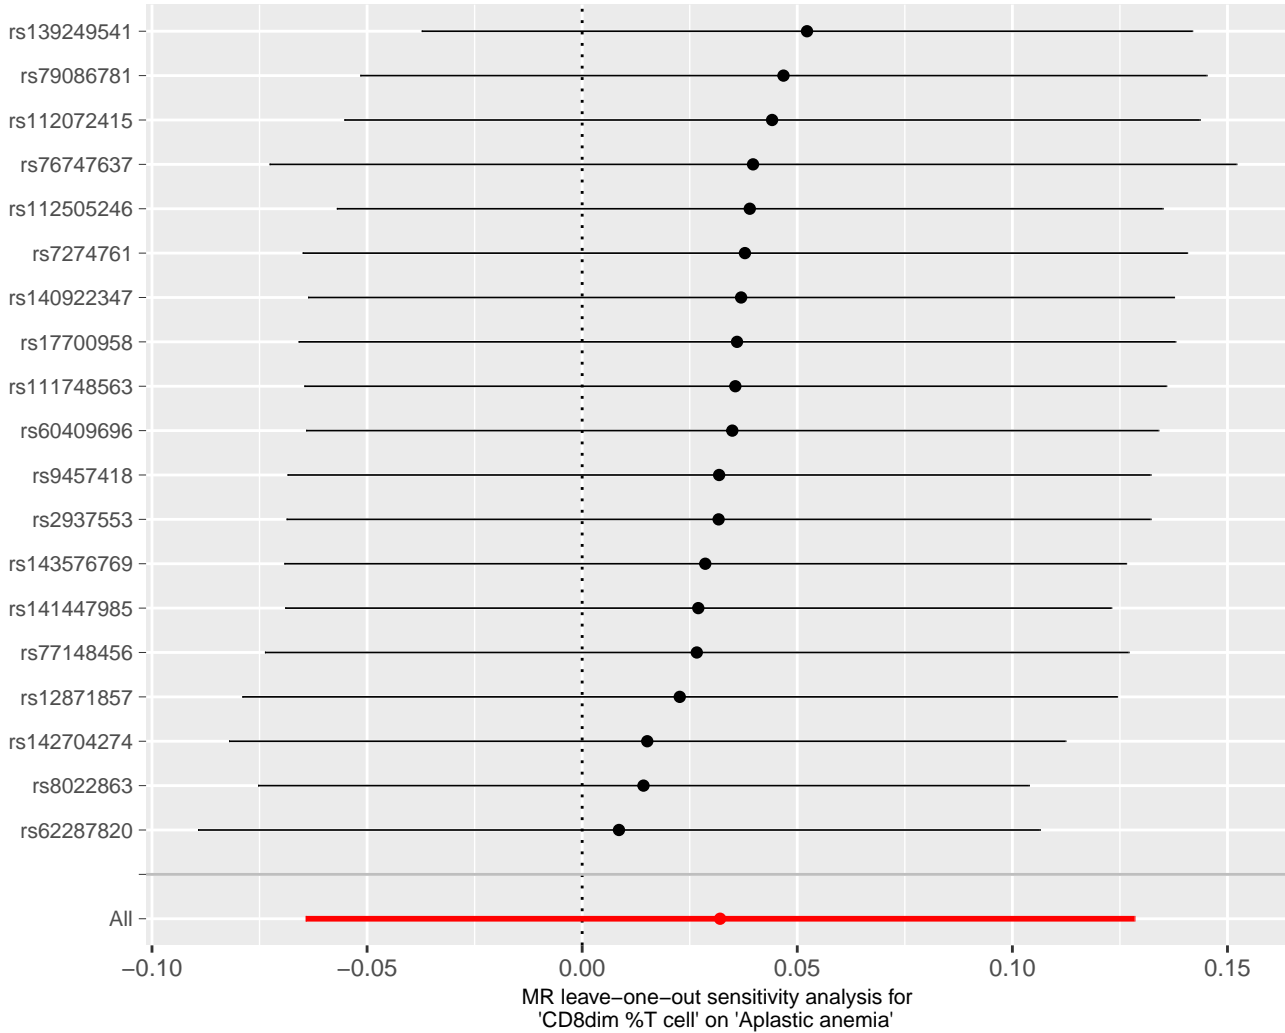

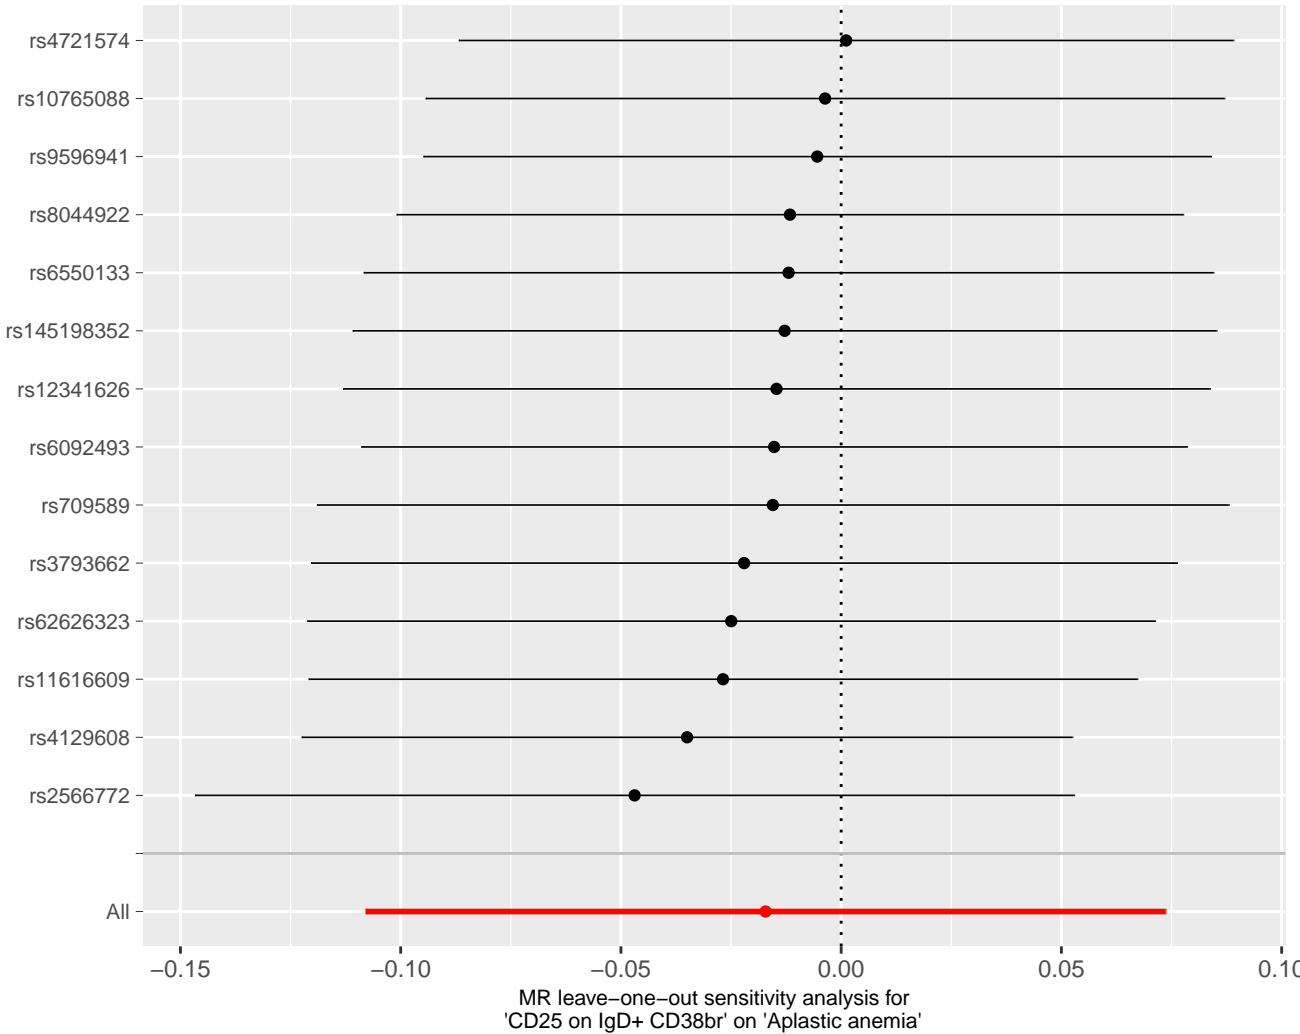

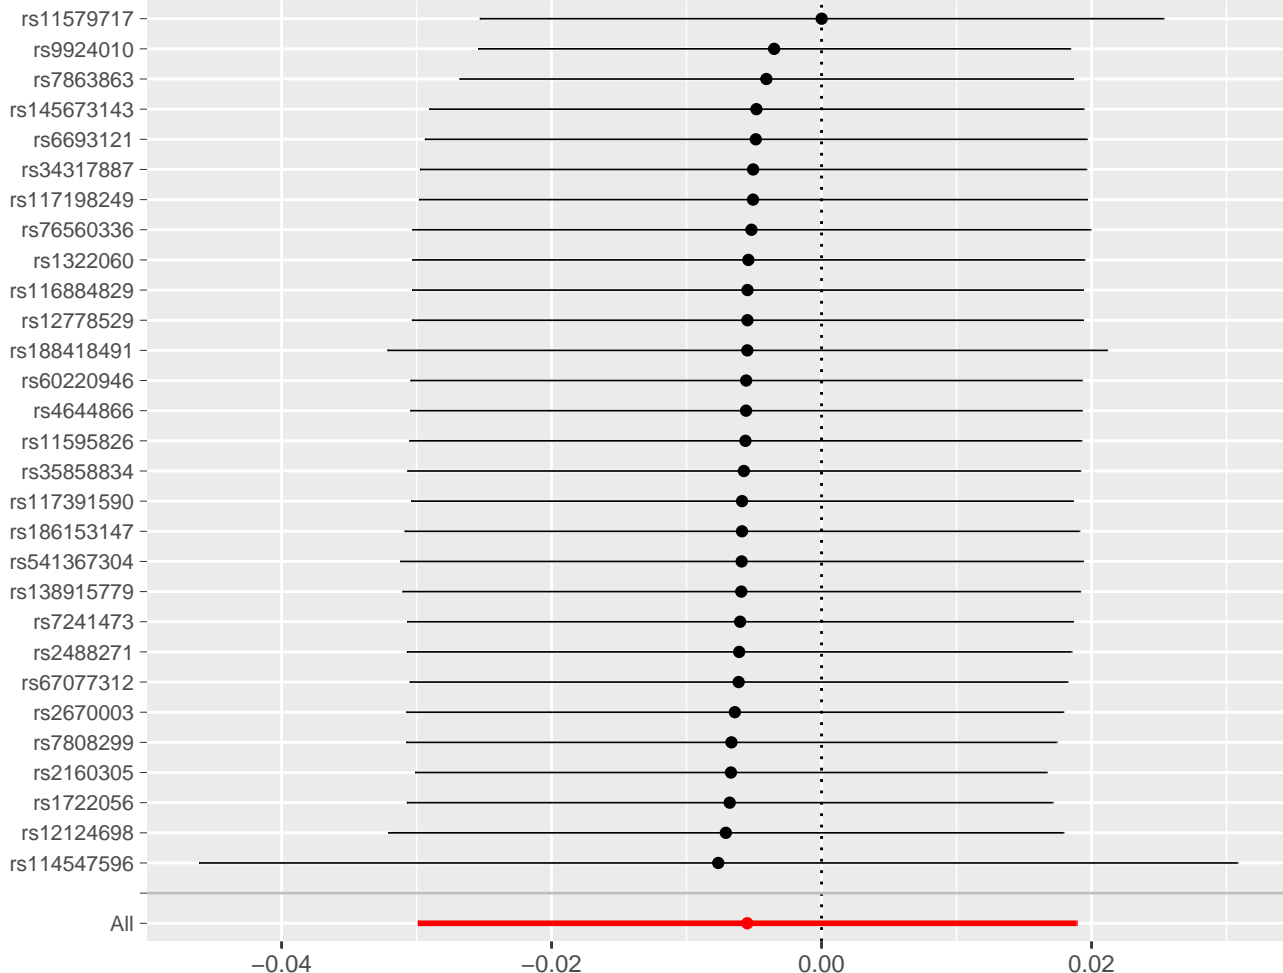

MR leave-one-out sensitivity analysis for 'CD28+ CD45RA- CD8br AC' on 'Aplastic anemia'

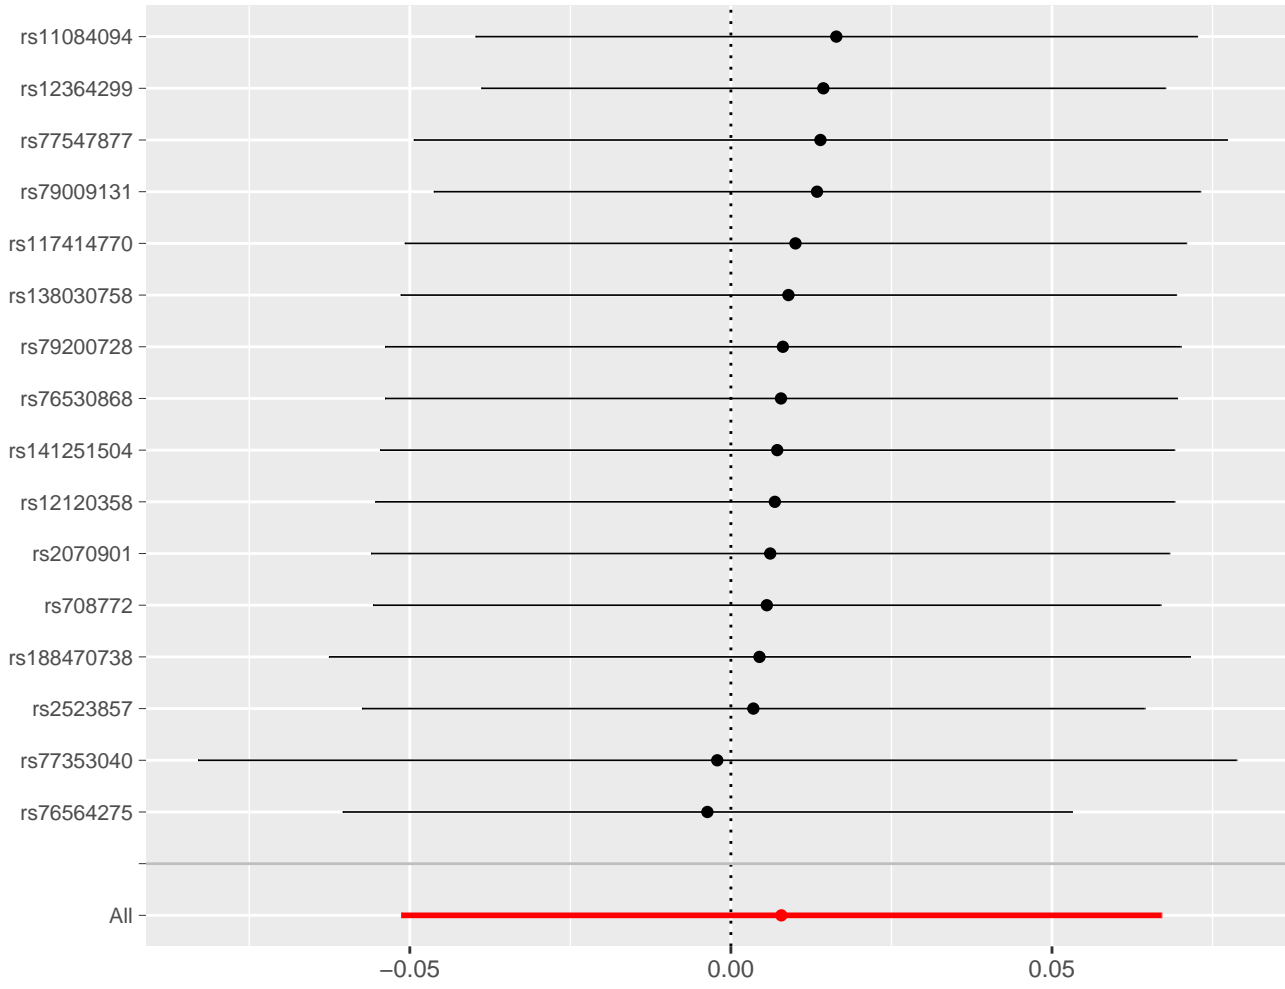

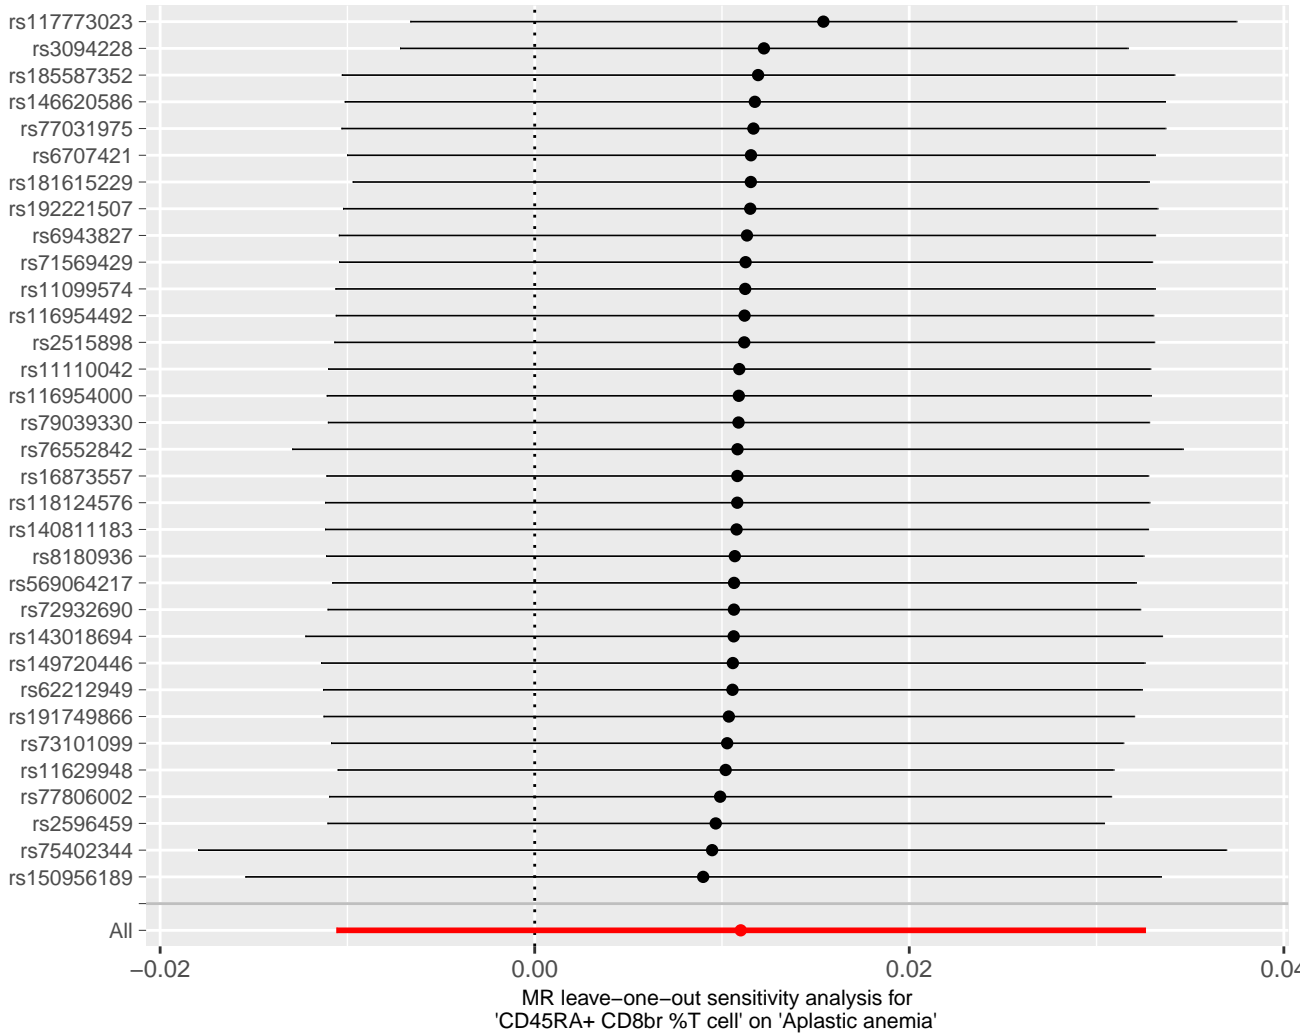



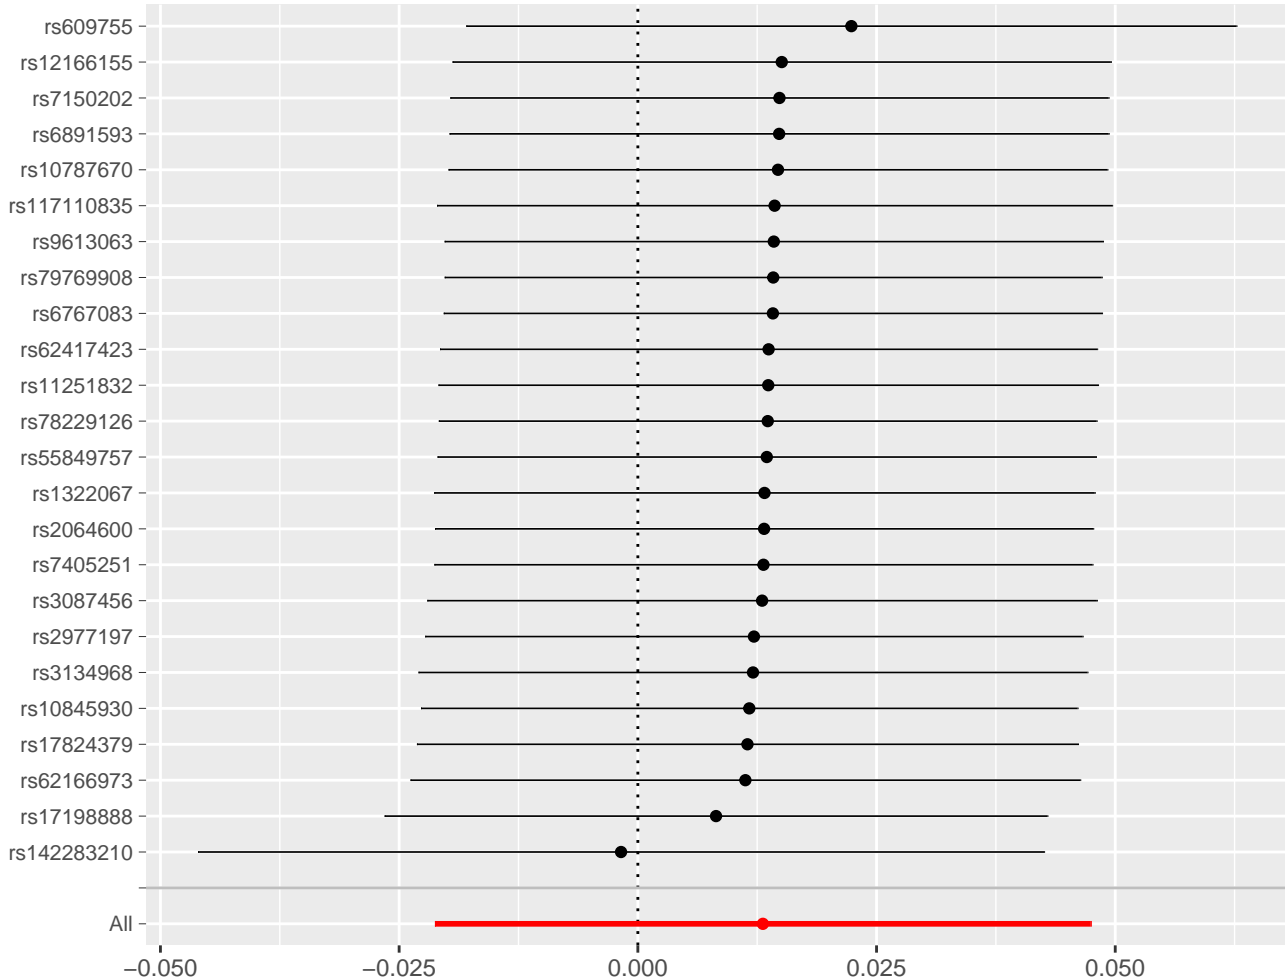

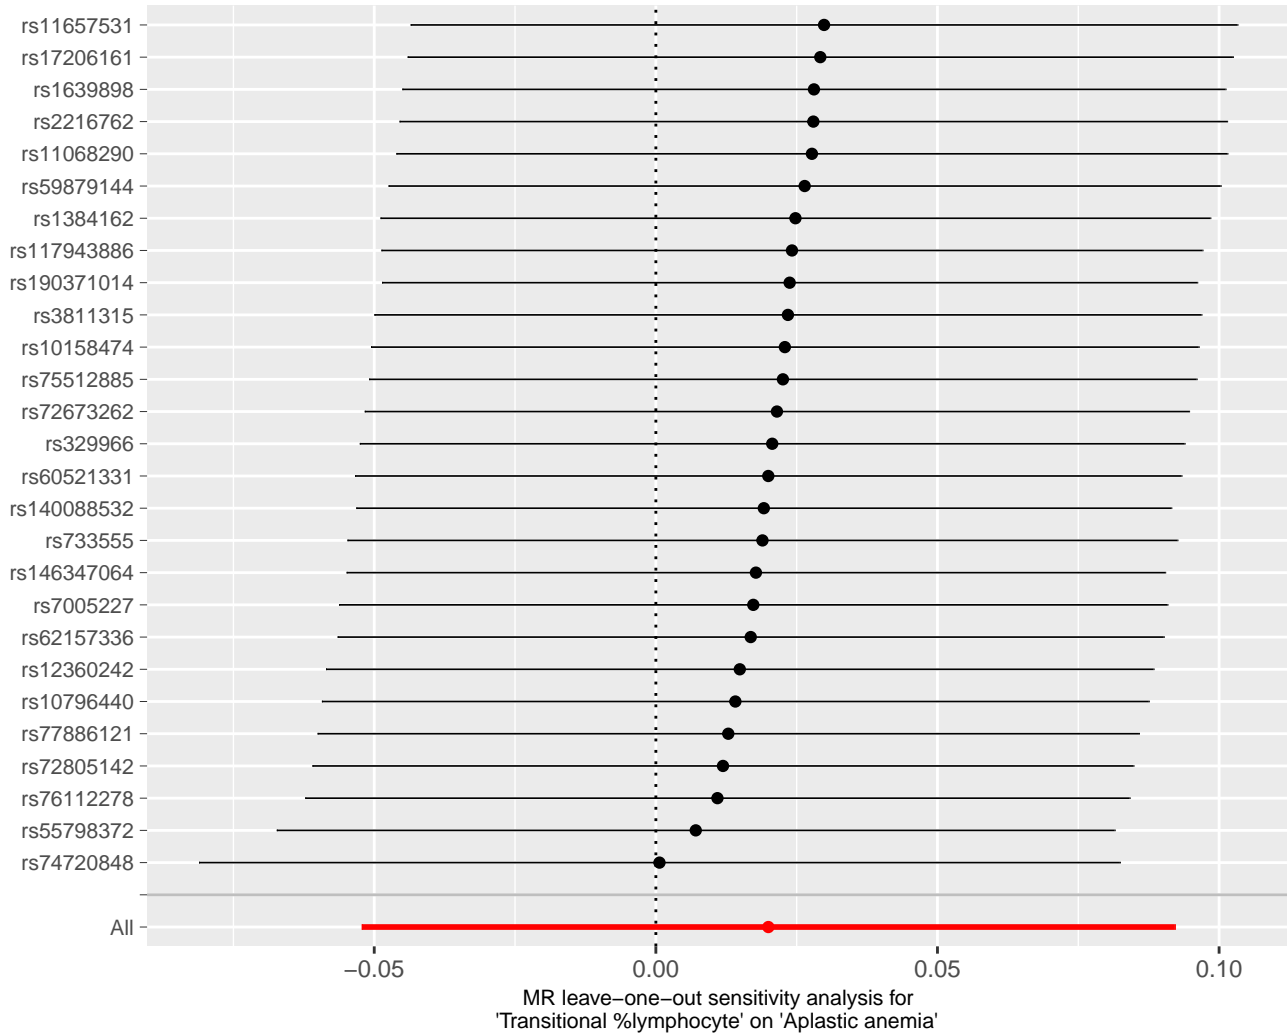

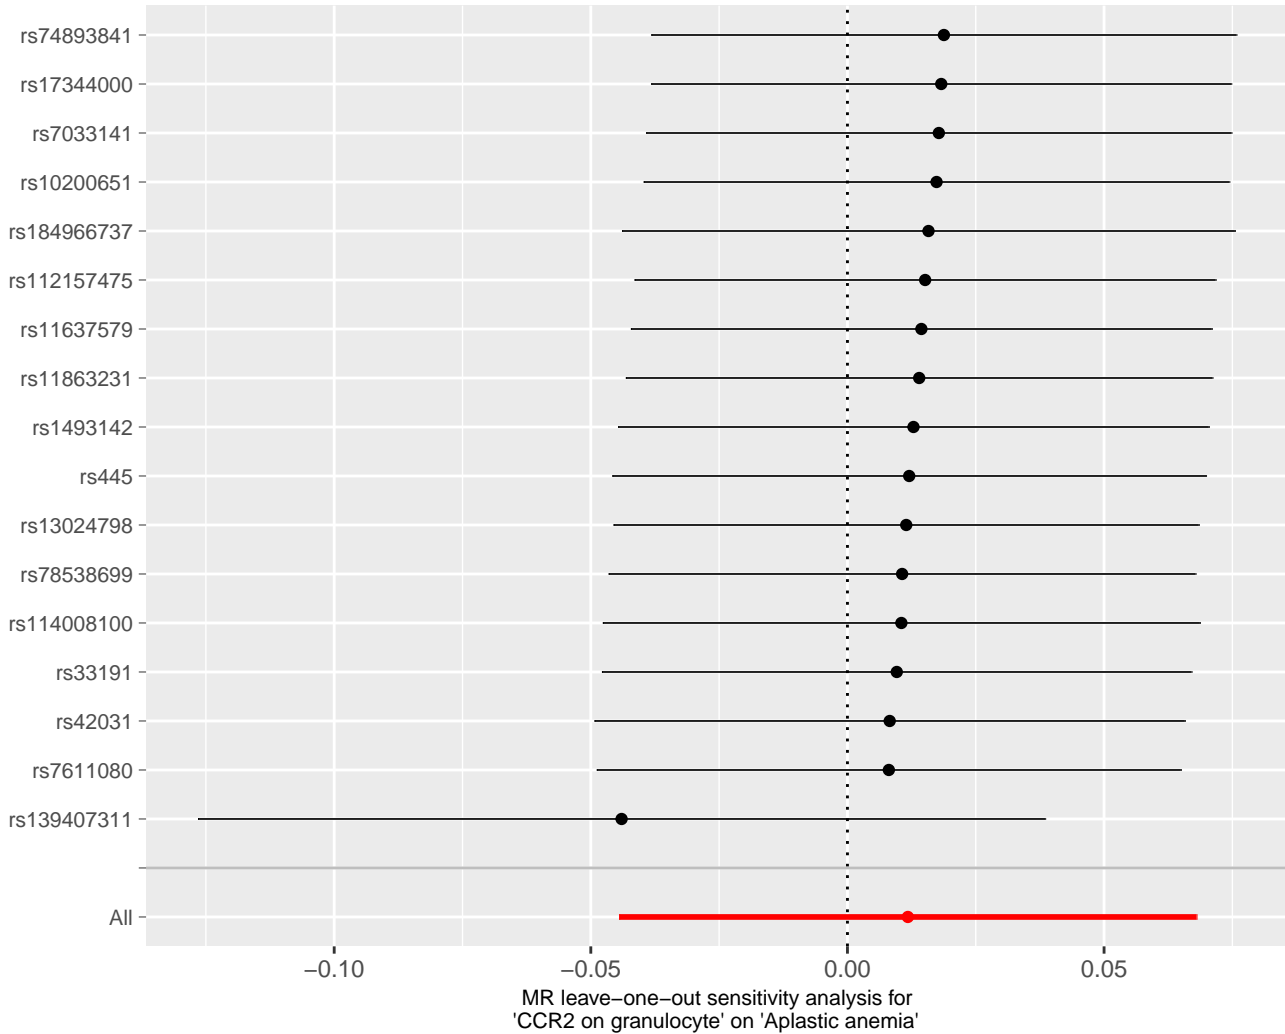

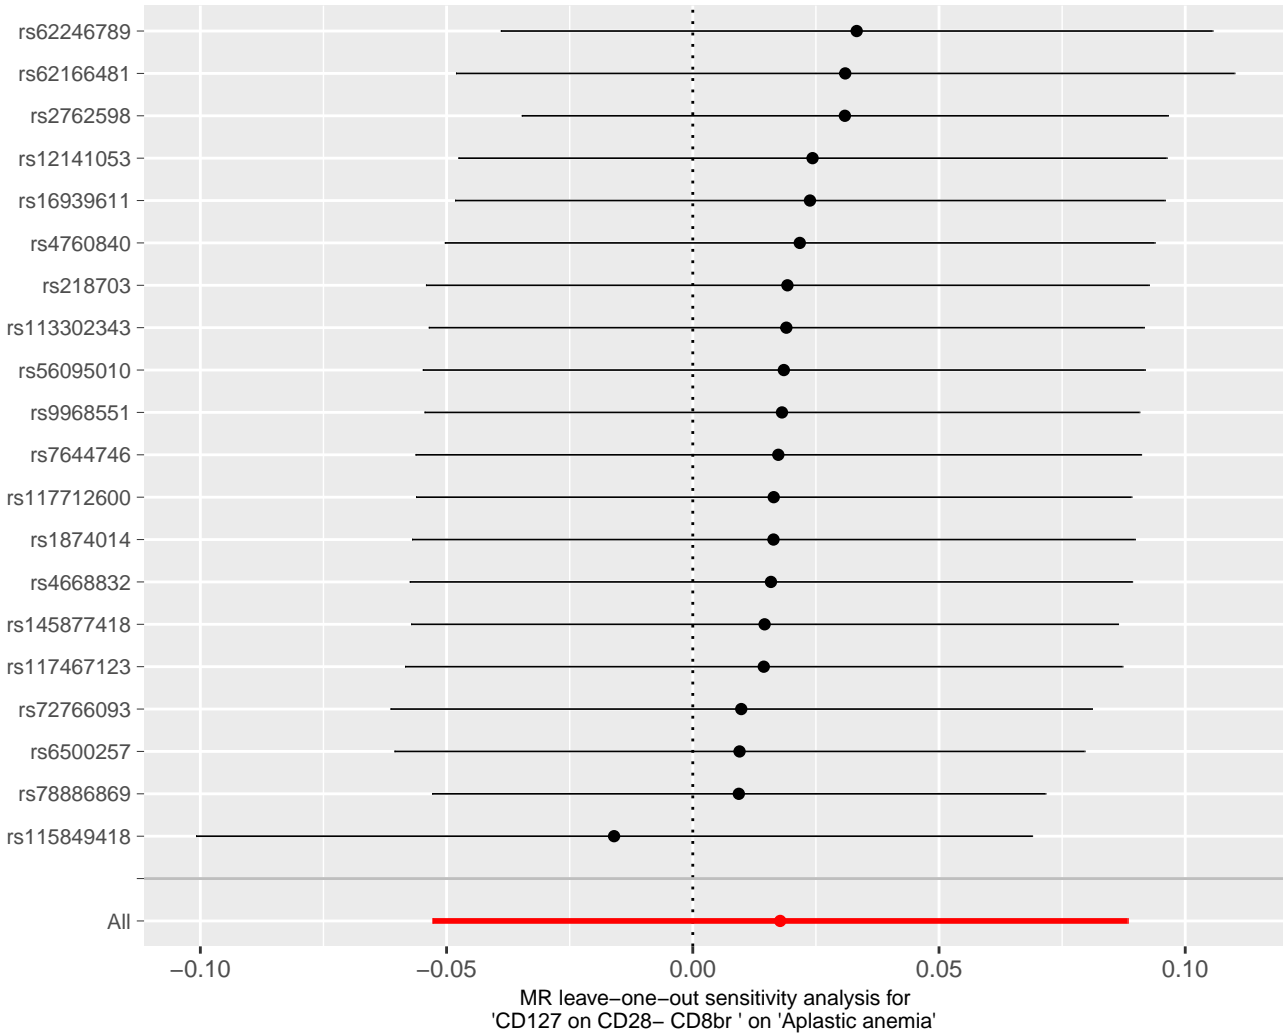

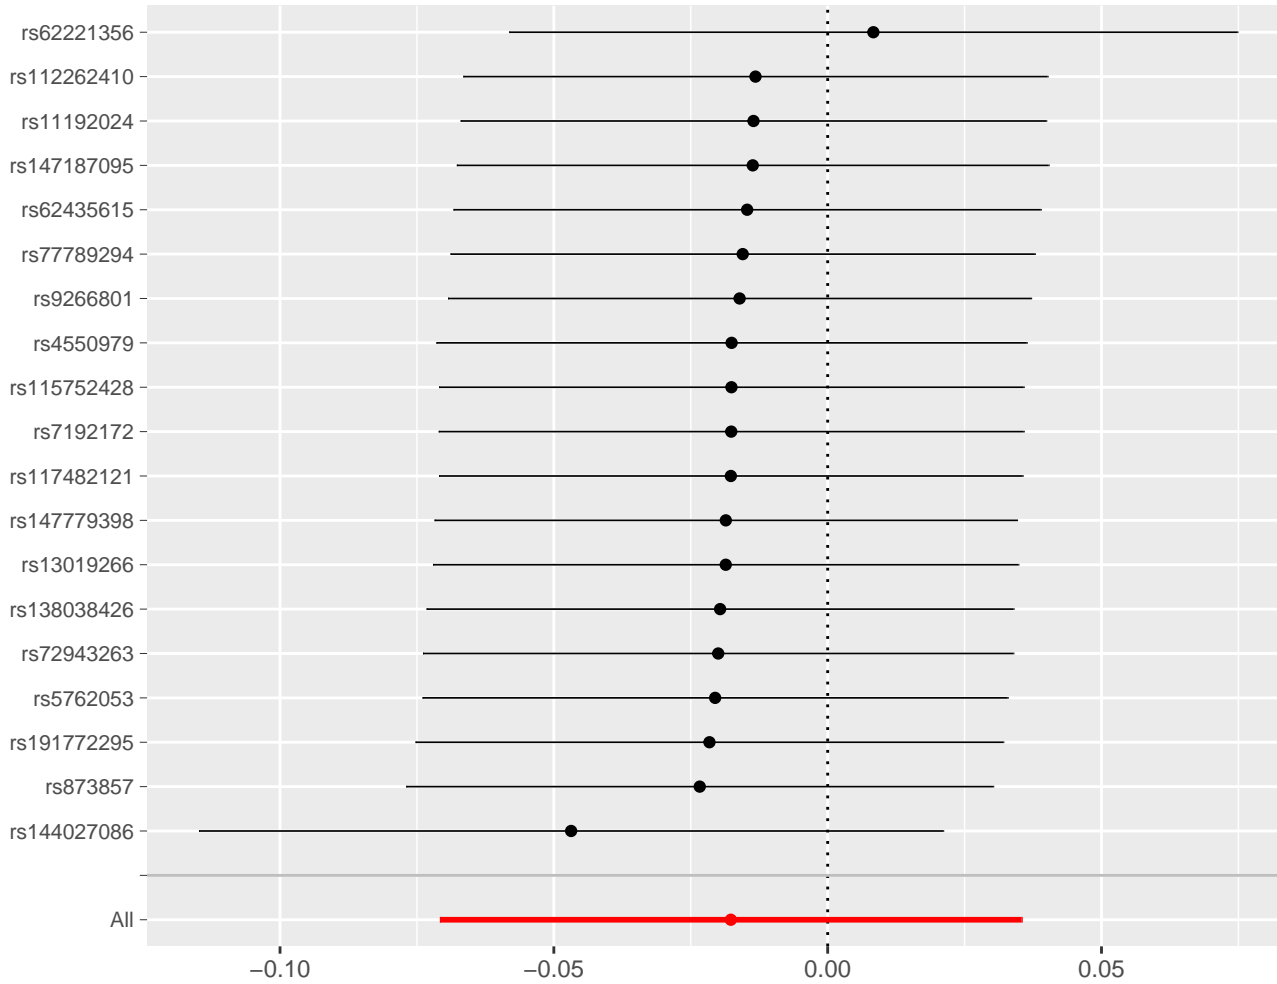

MR leave-one-out sensitivity analysis for 'SSC-A on CD8br' on 'Aplastic anemia'

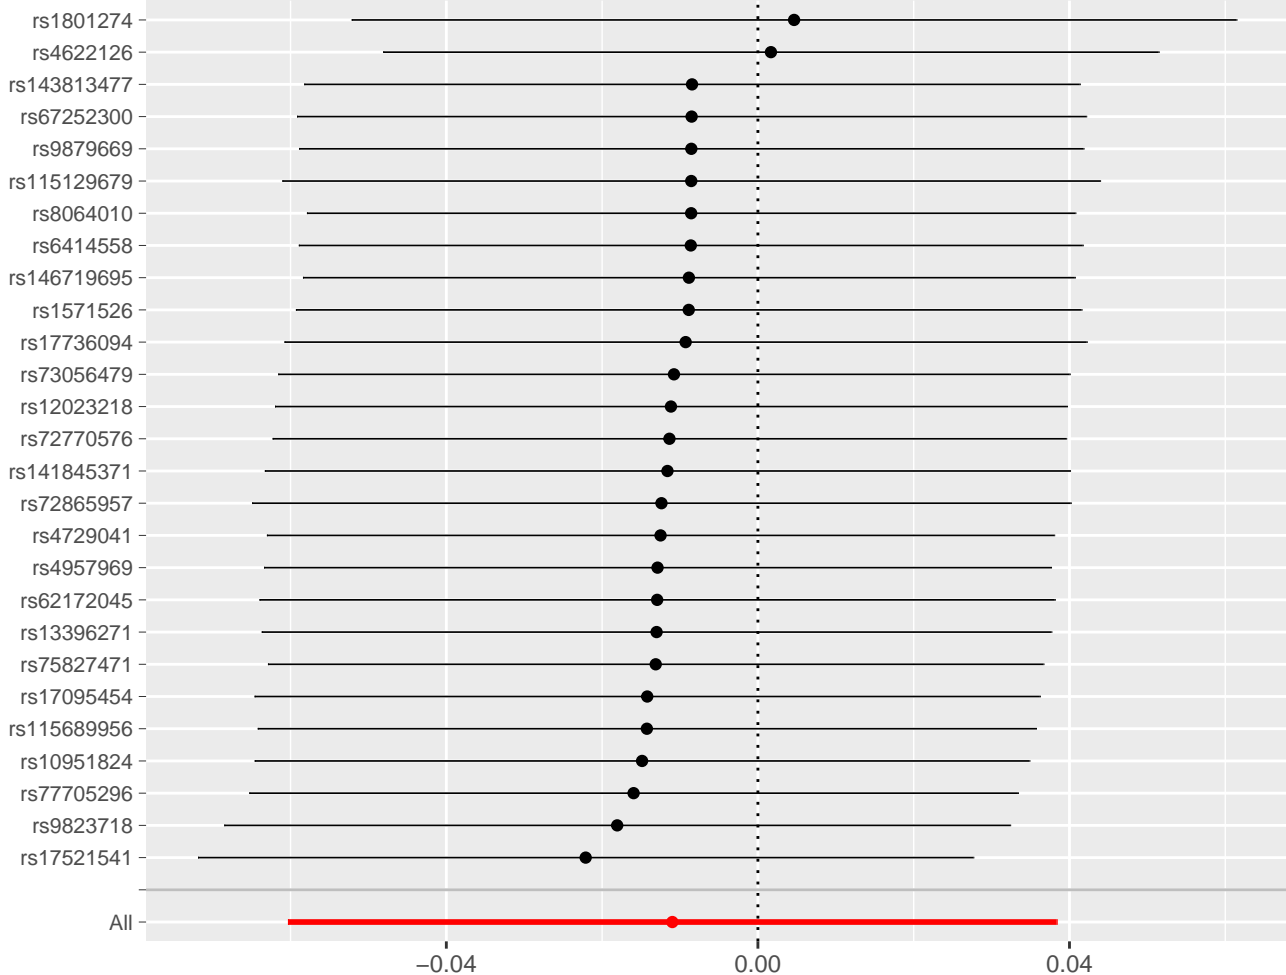

MR leave-one-out sensitivity analysis for  
'CX3CR1 on CD14+ CD16- monocyte' on 'Aplastic anemia'

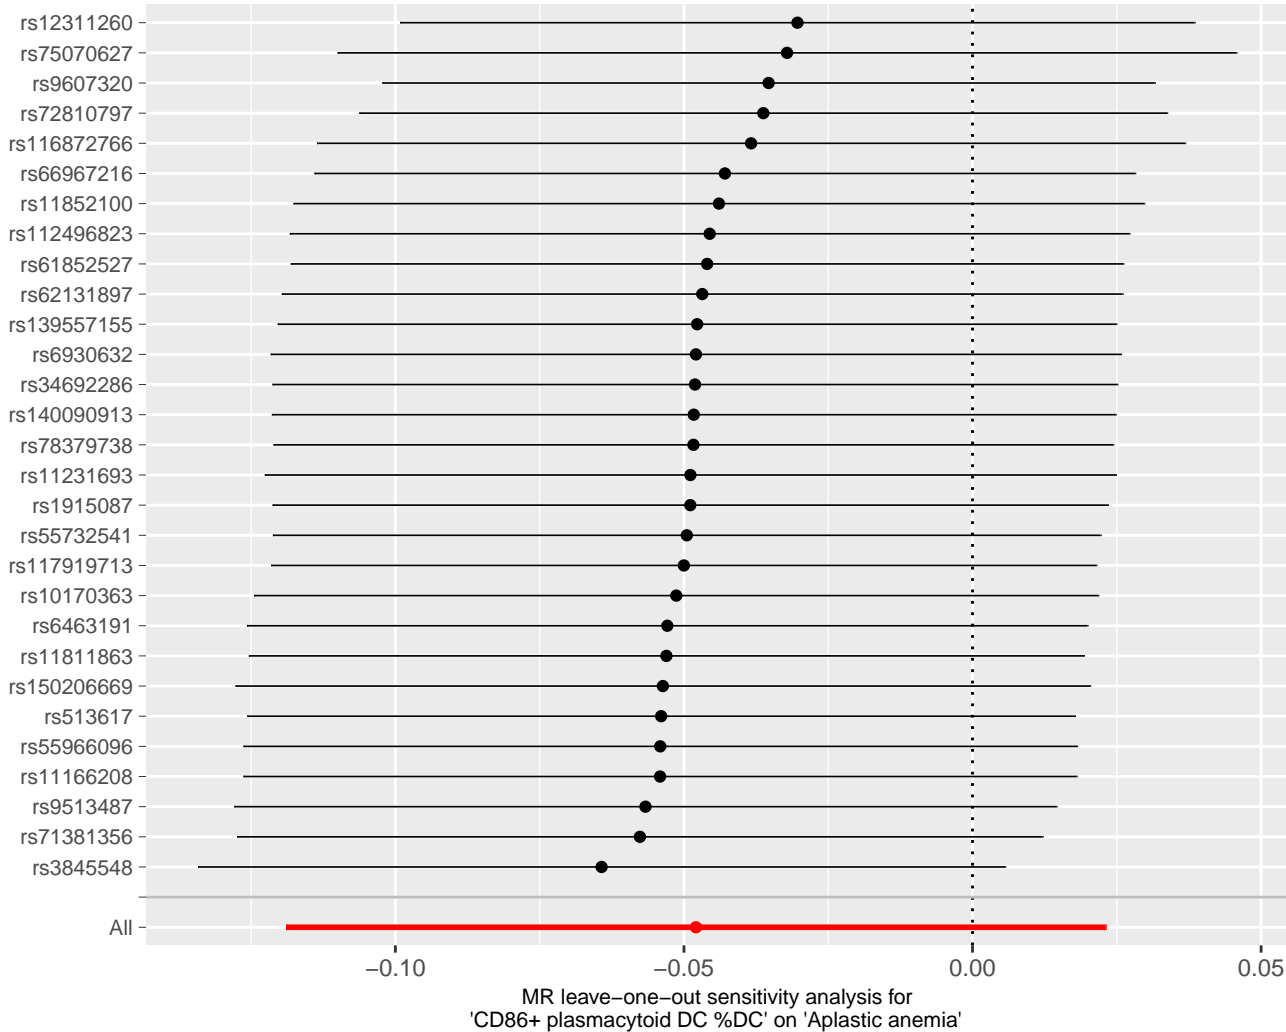

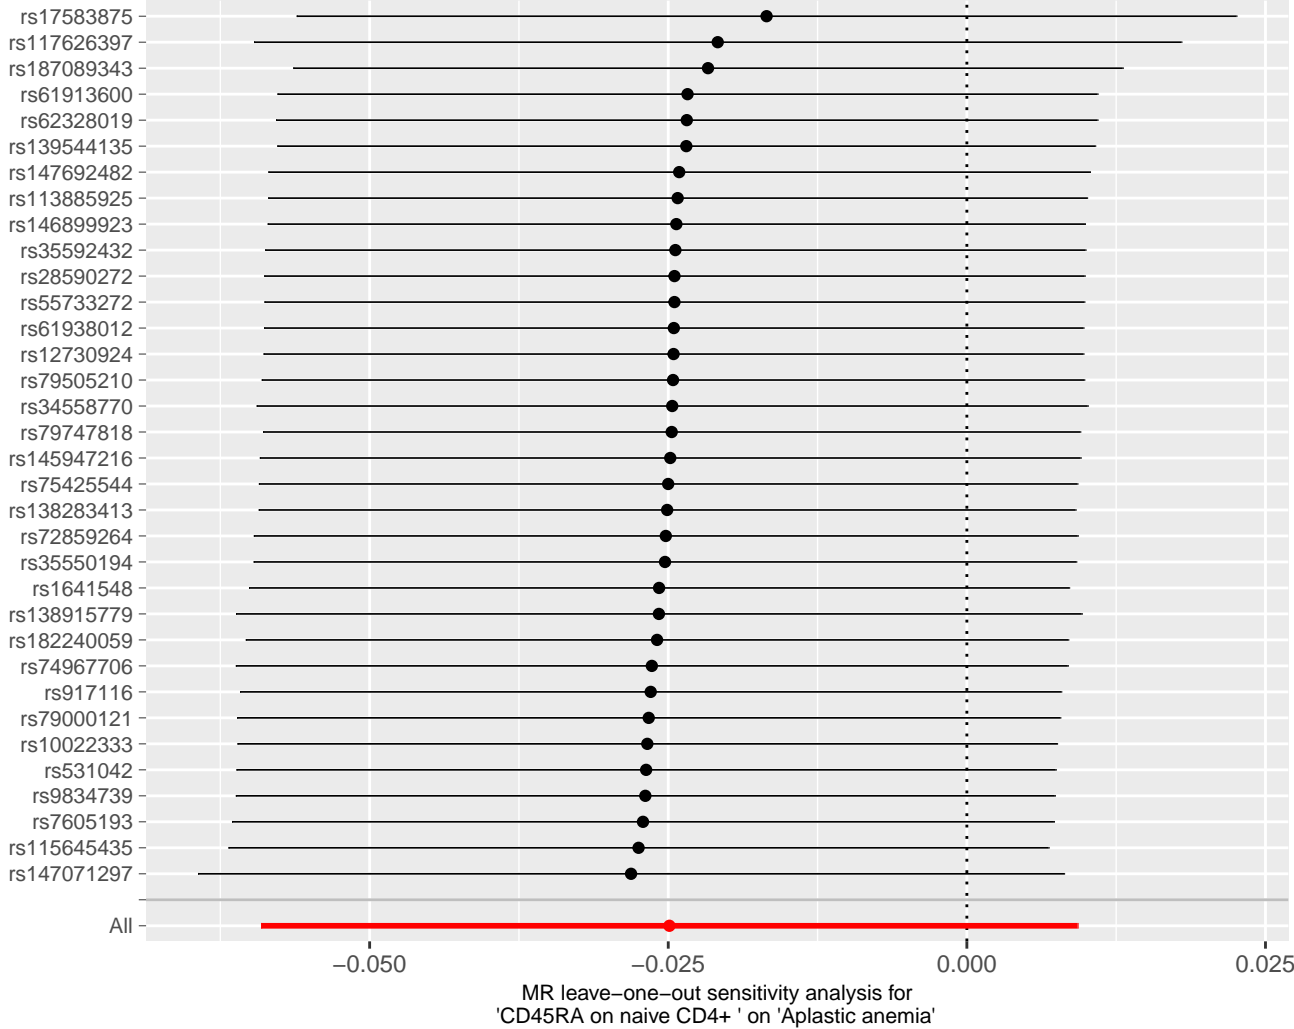



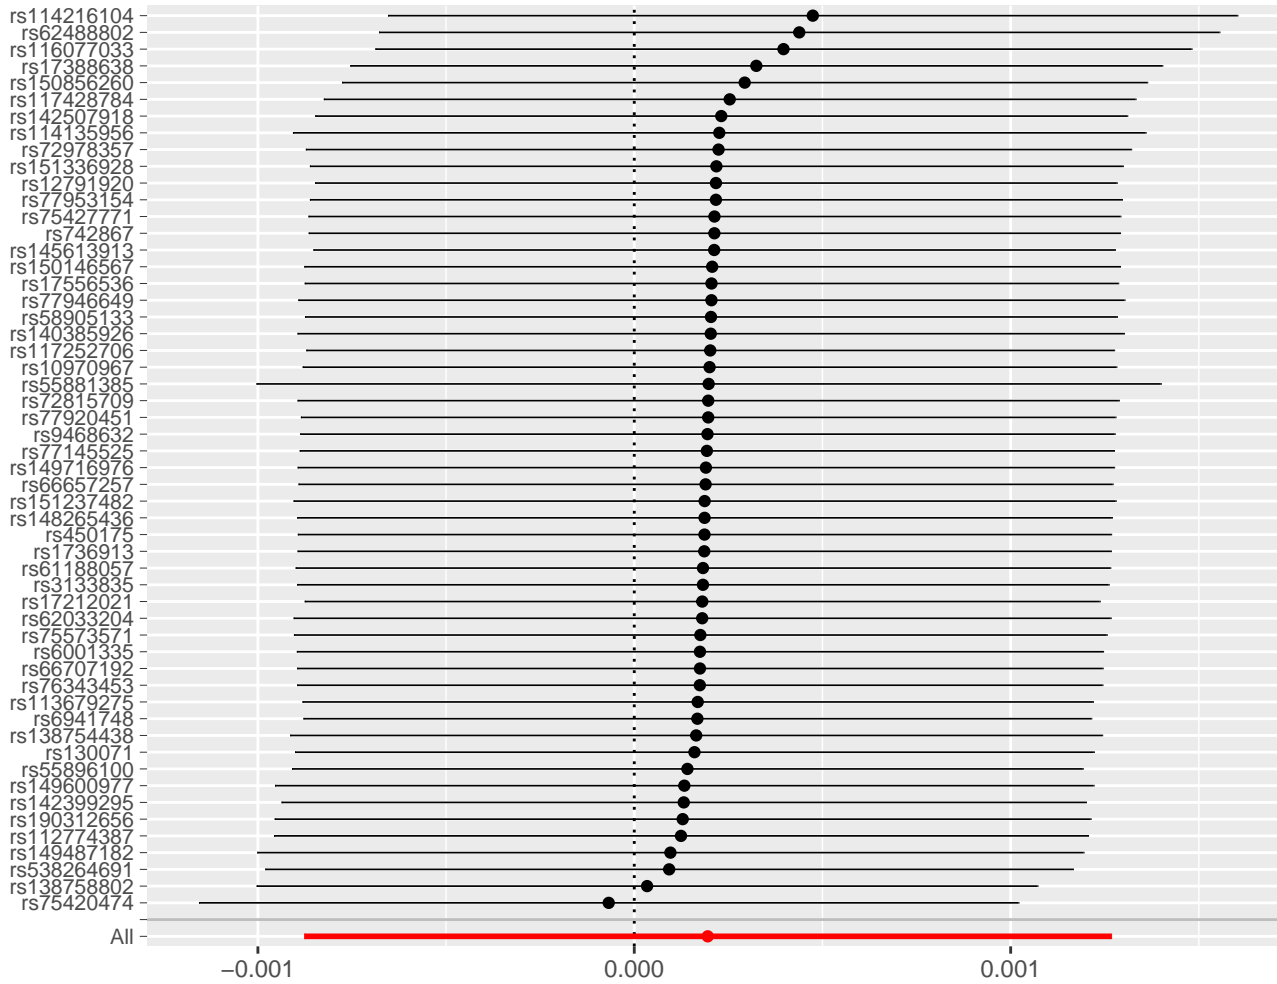

MR leave-one-out sensitivity analysis for 'CD45RA- CD28- CD8br %CD8br' on 'Aplastic anemia'

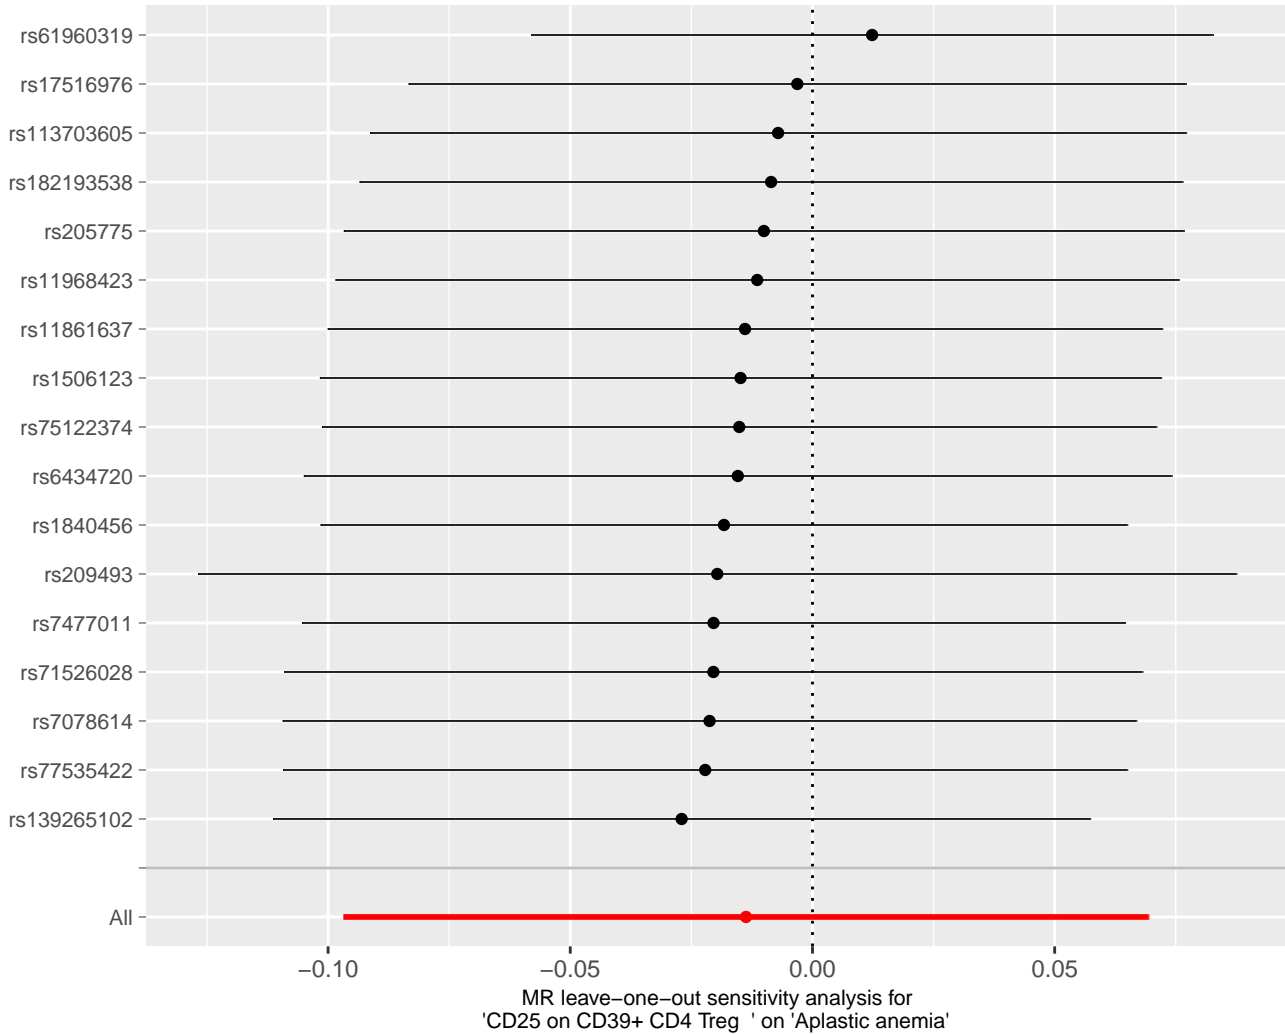

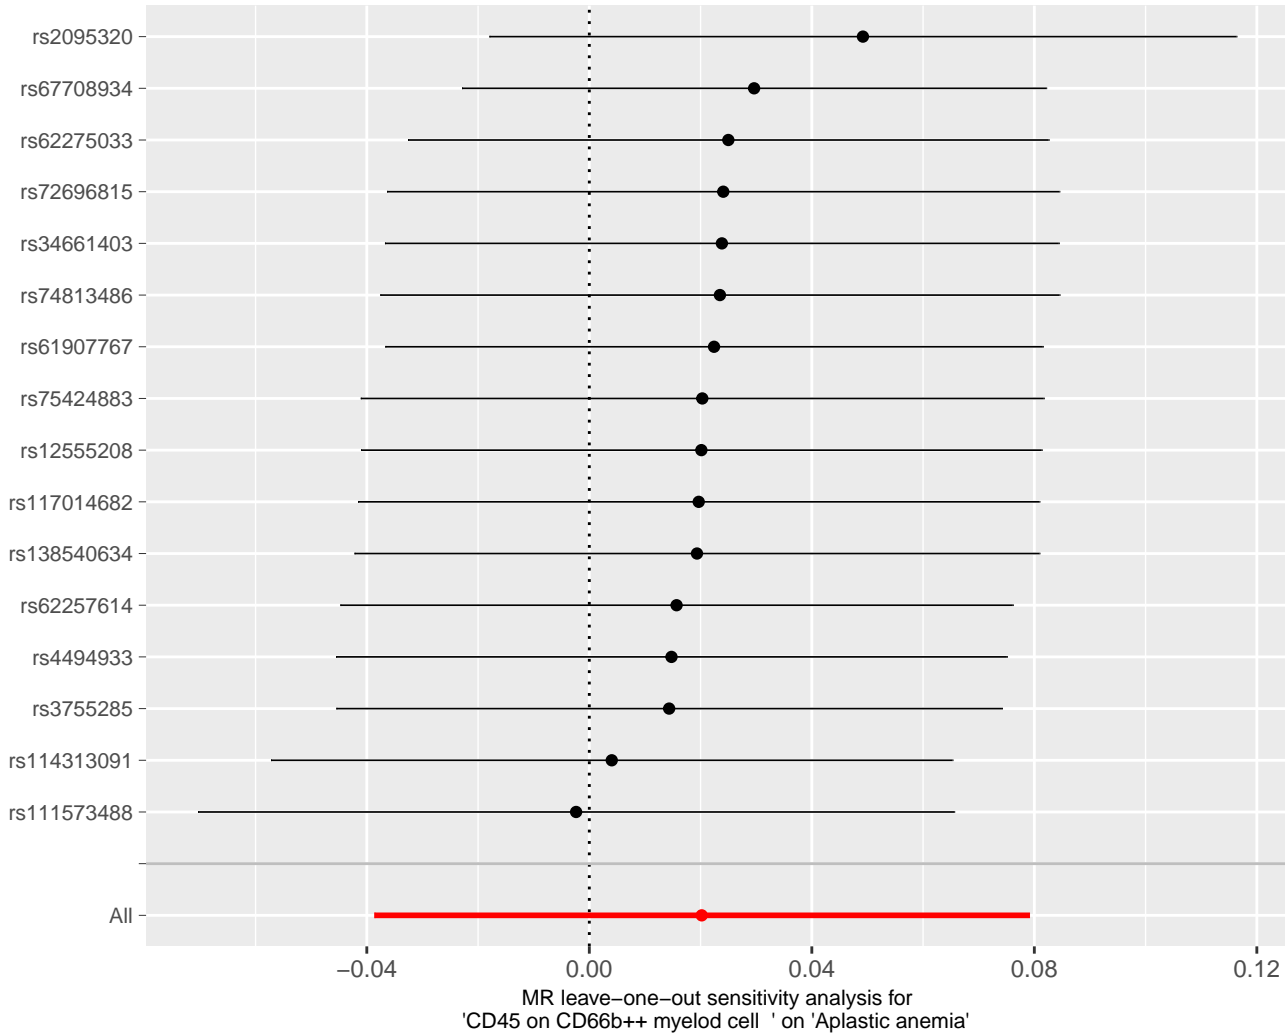

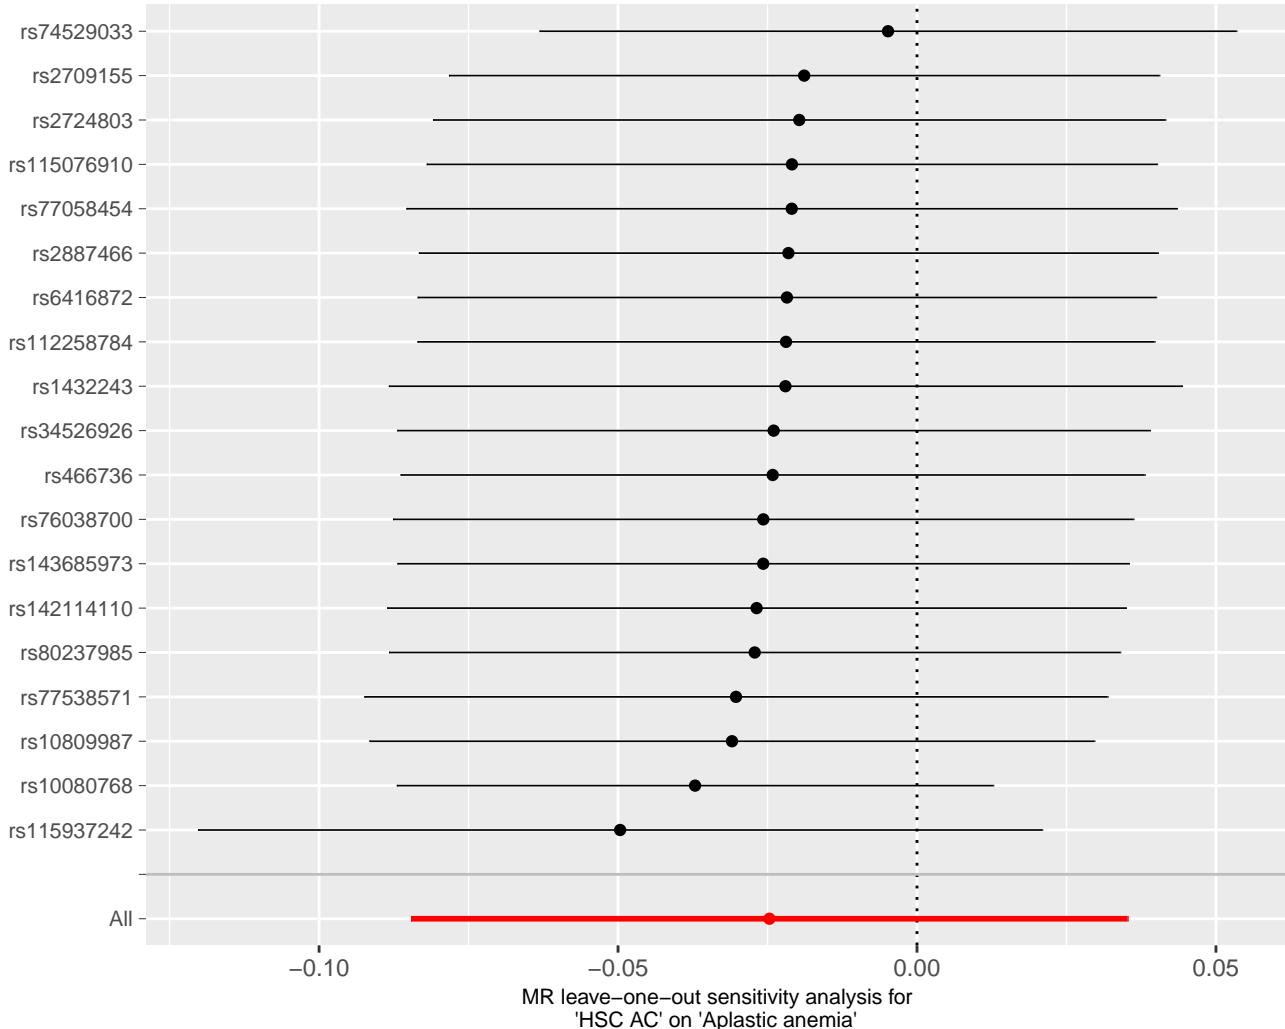

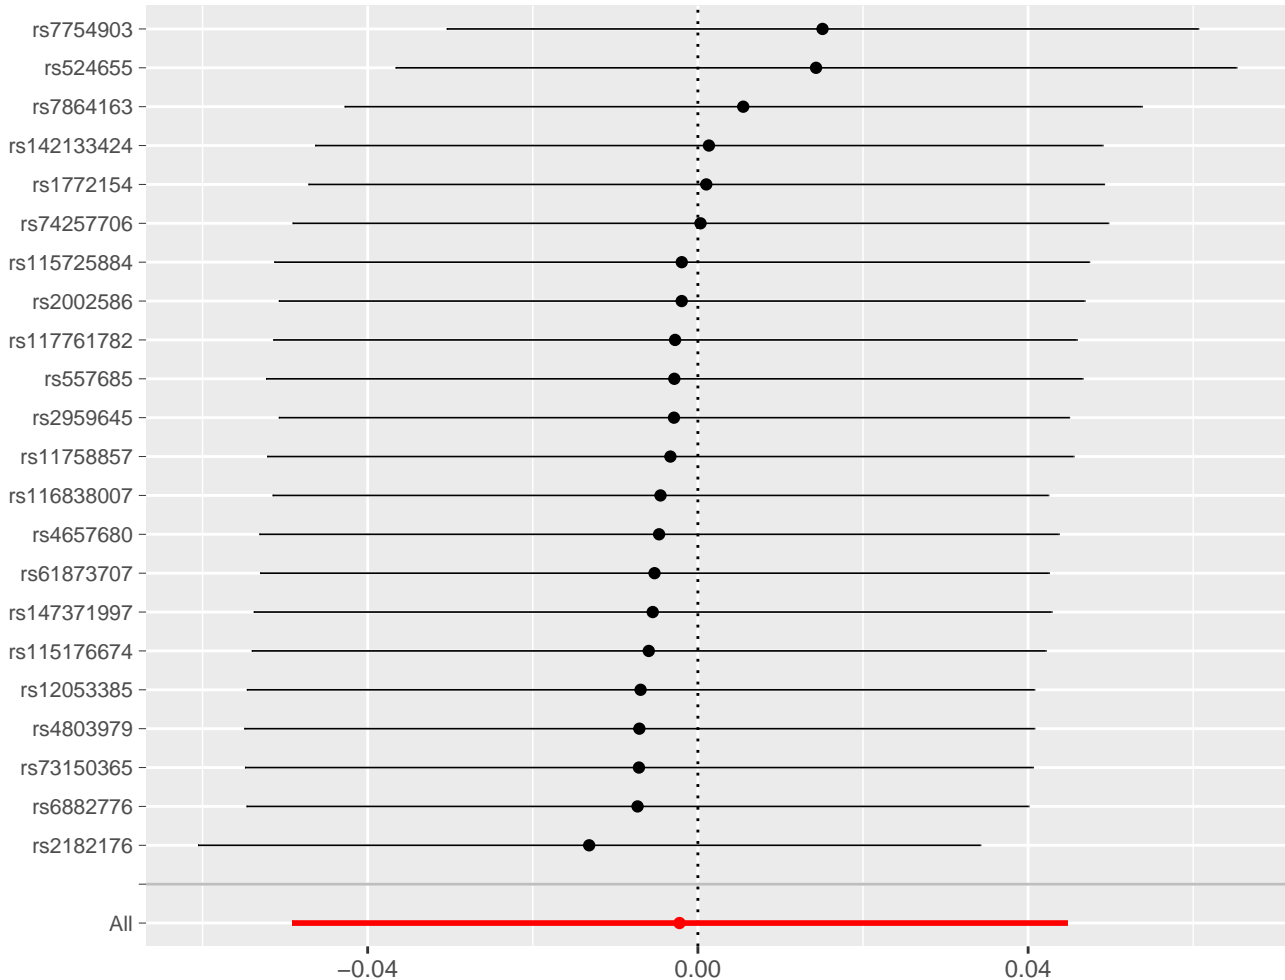

MR leave-one-out sensitivity analysis for 'HVEM on EM CD4+' on 'Aplastic anemia'

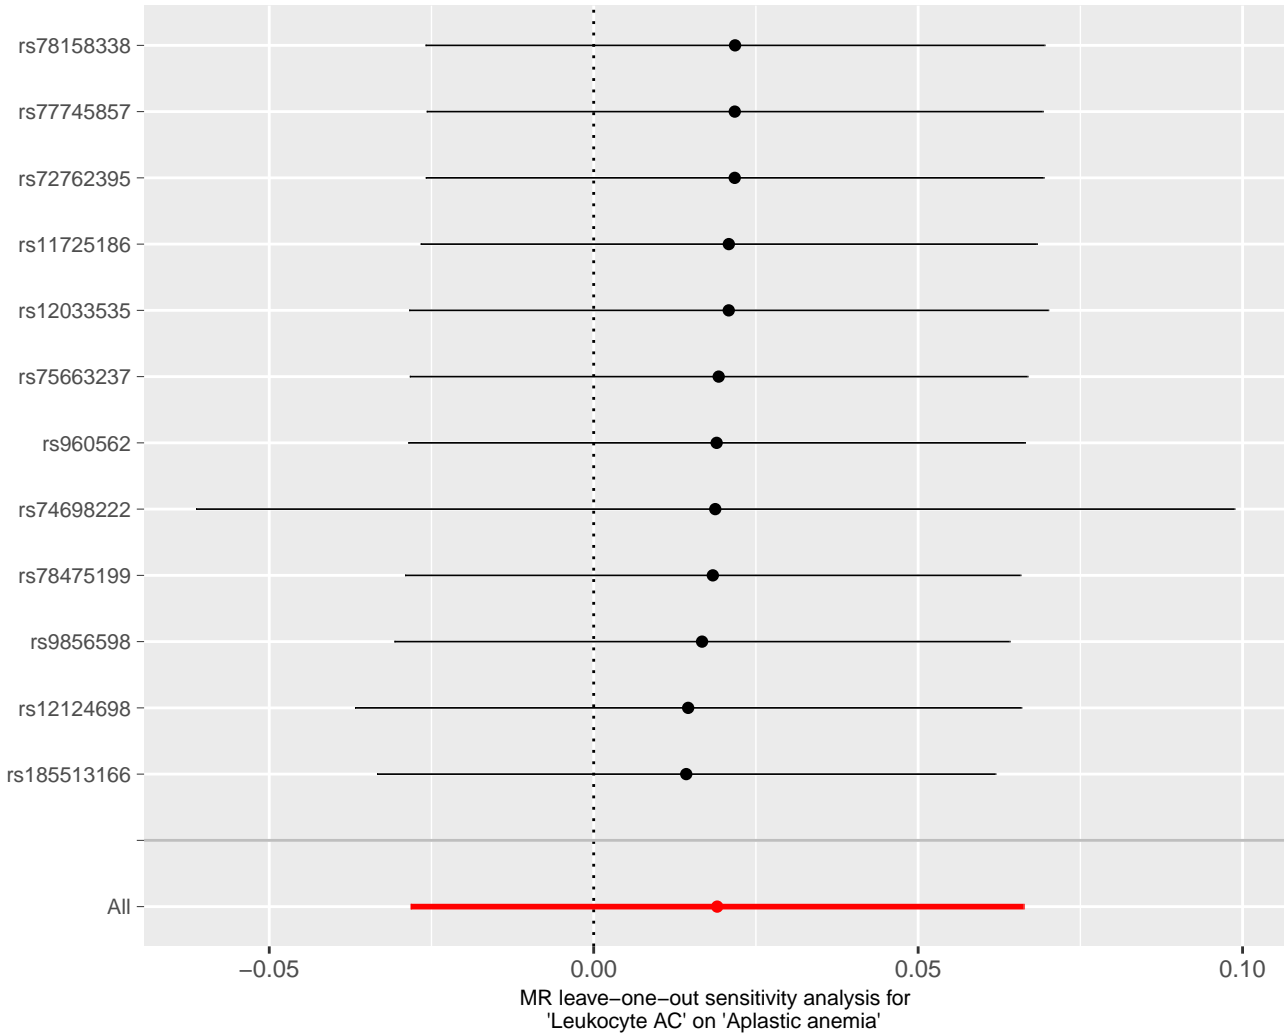

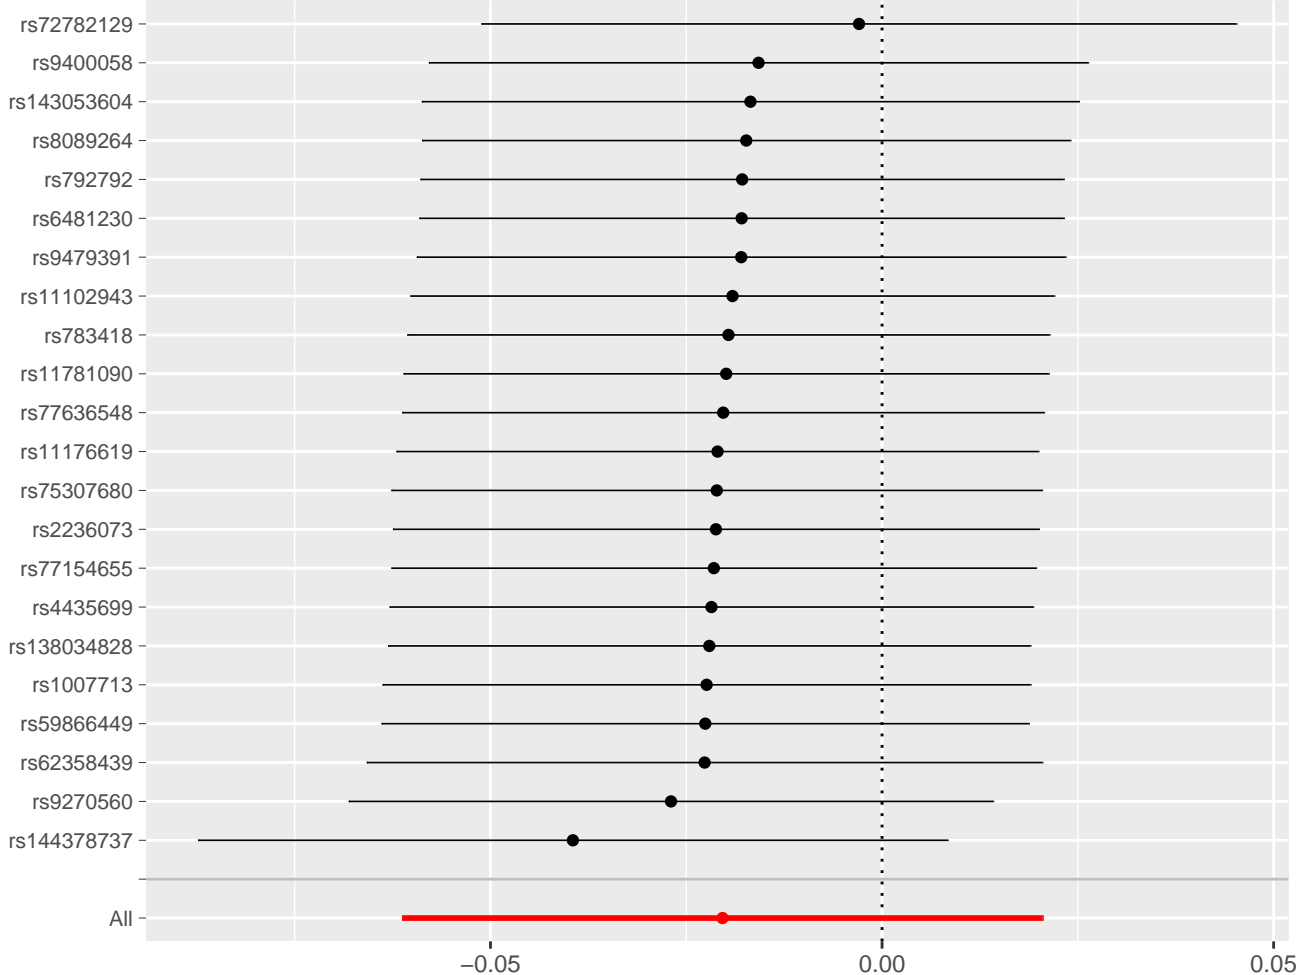

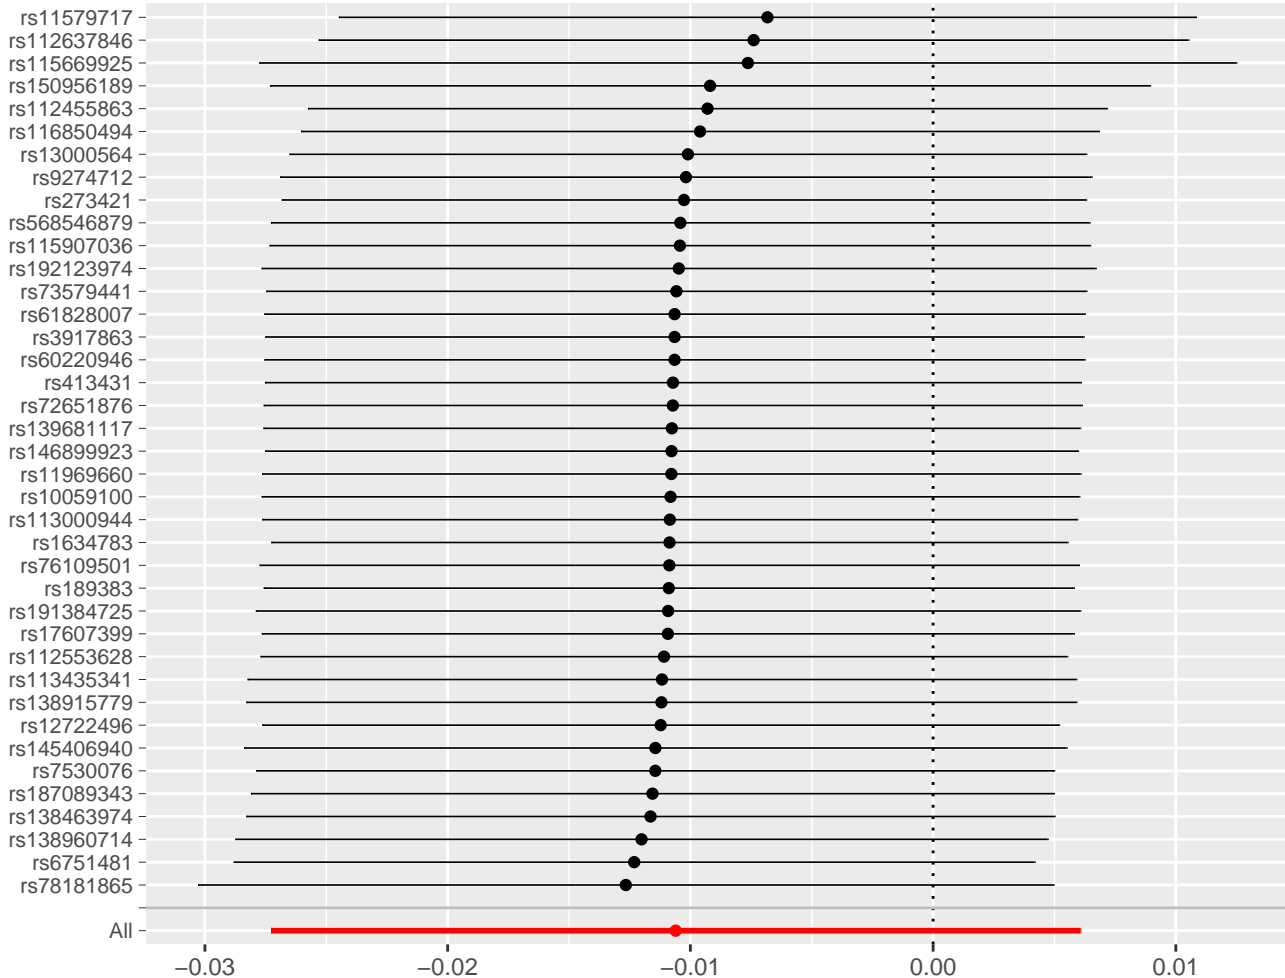

MR leave-one-out sensitivity analysis for 'Activated & secreting Treg %CD4 Treg' on 'Aplastic anemia'



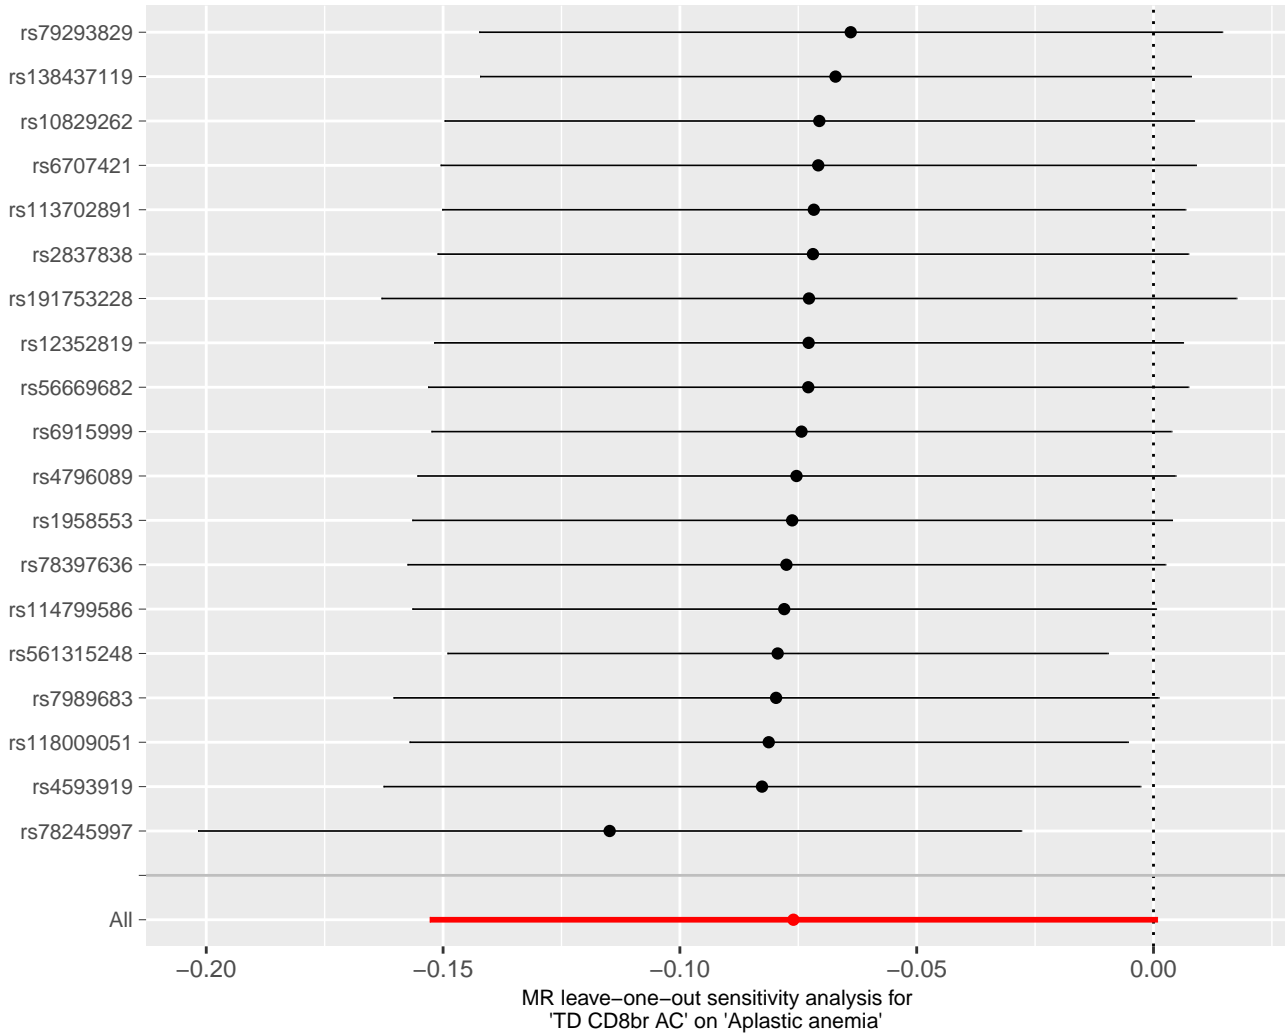

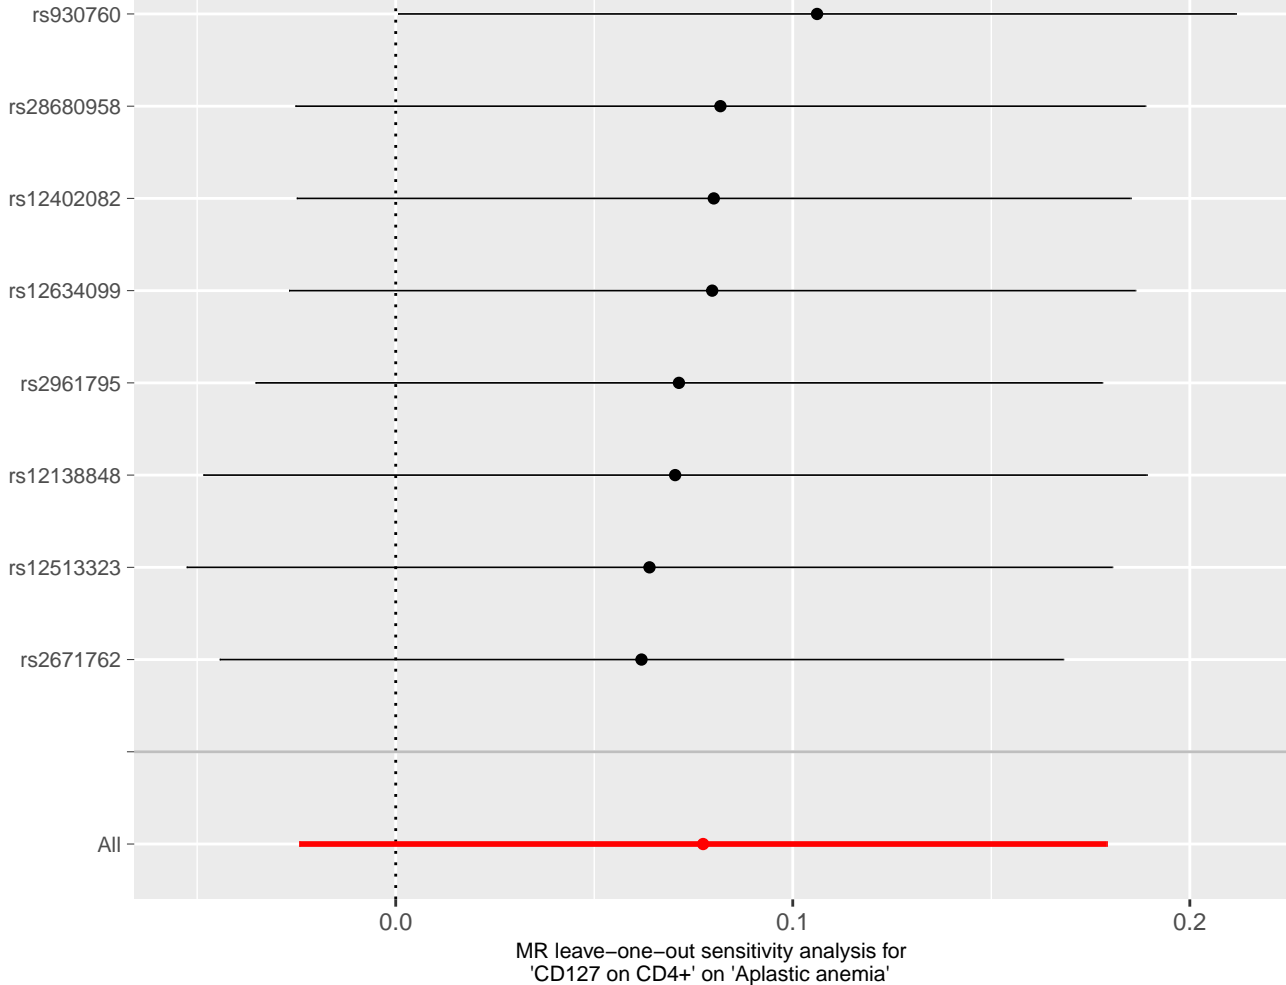

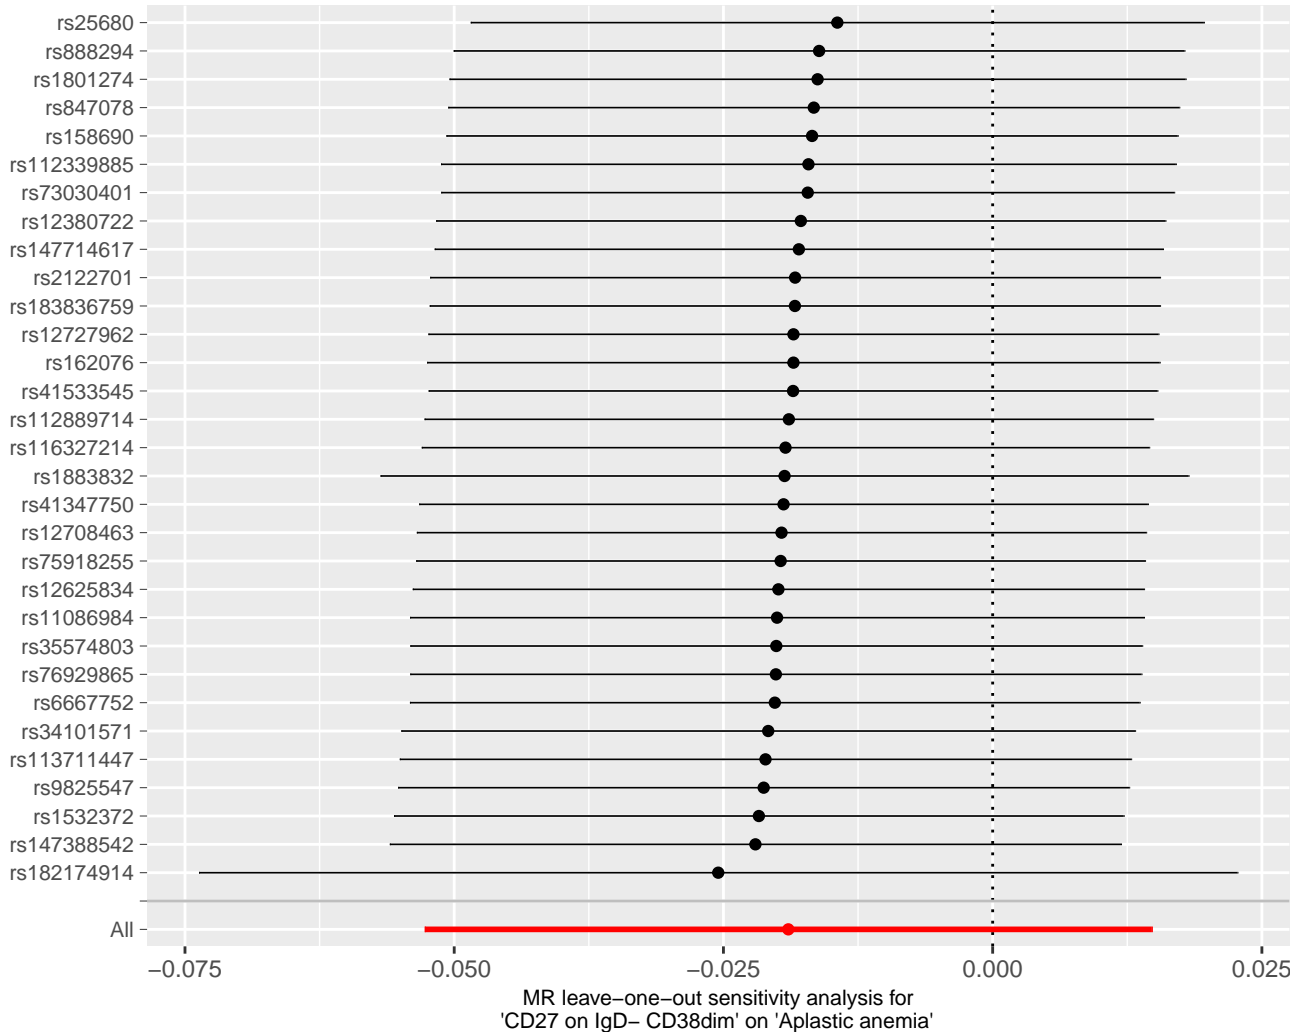

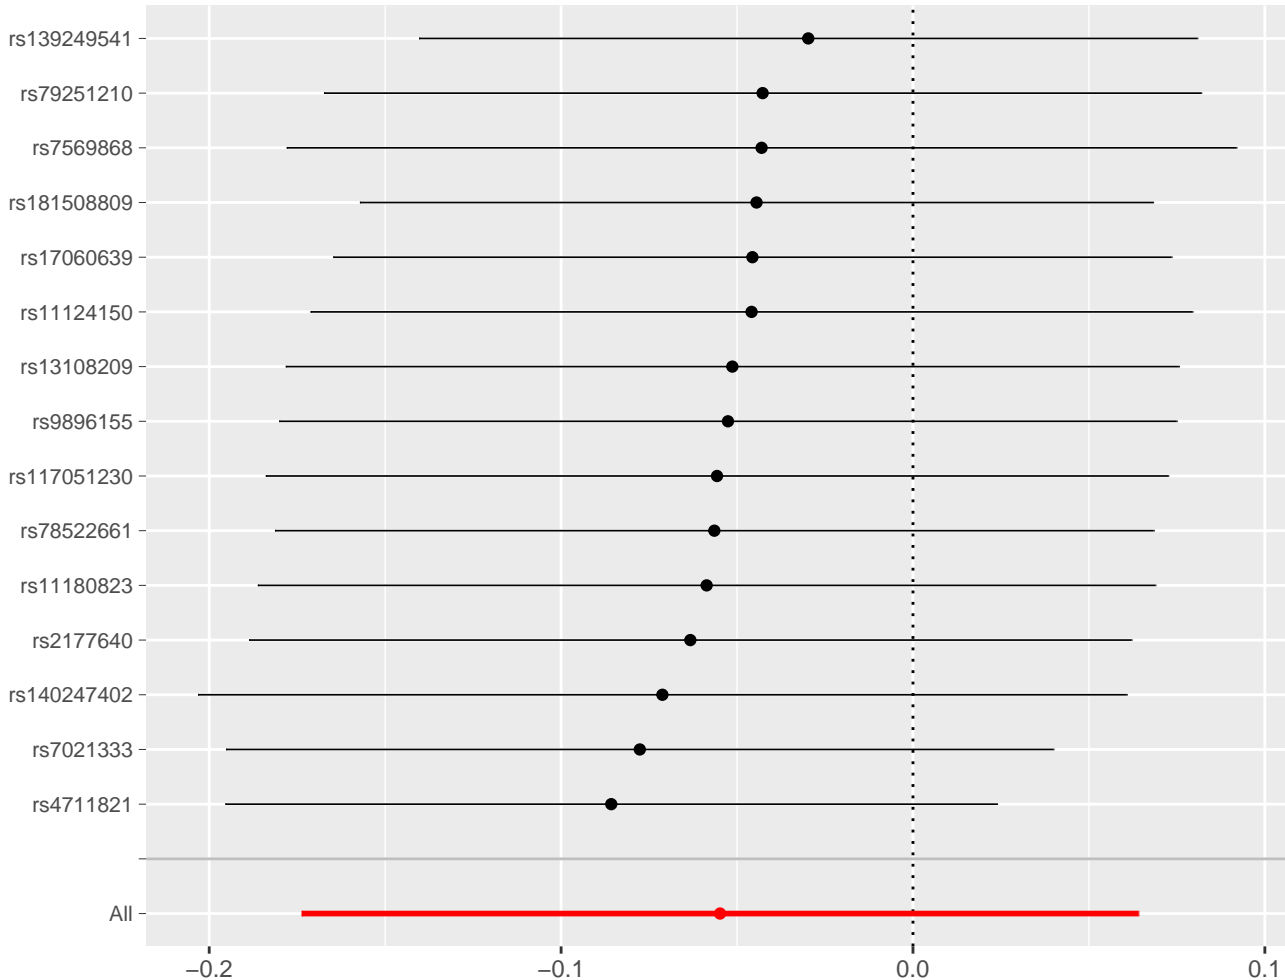

MR leave-one-out sensitivity analysis for 'DN (CD4-CD8-) %T cell' on 'Aplastic anemia'

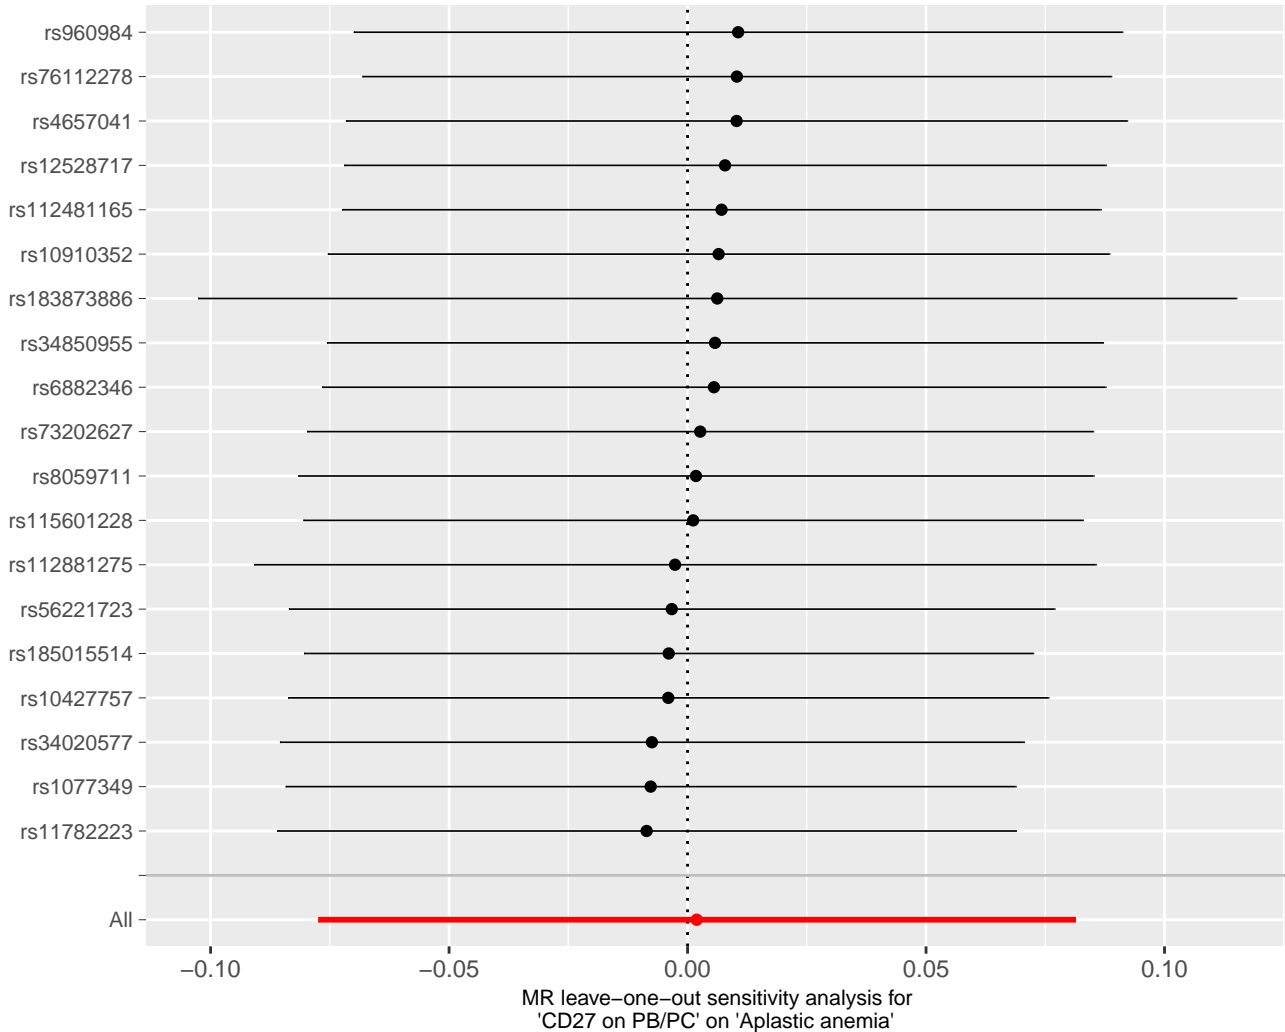

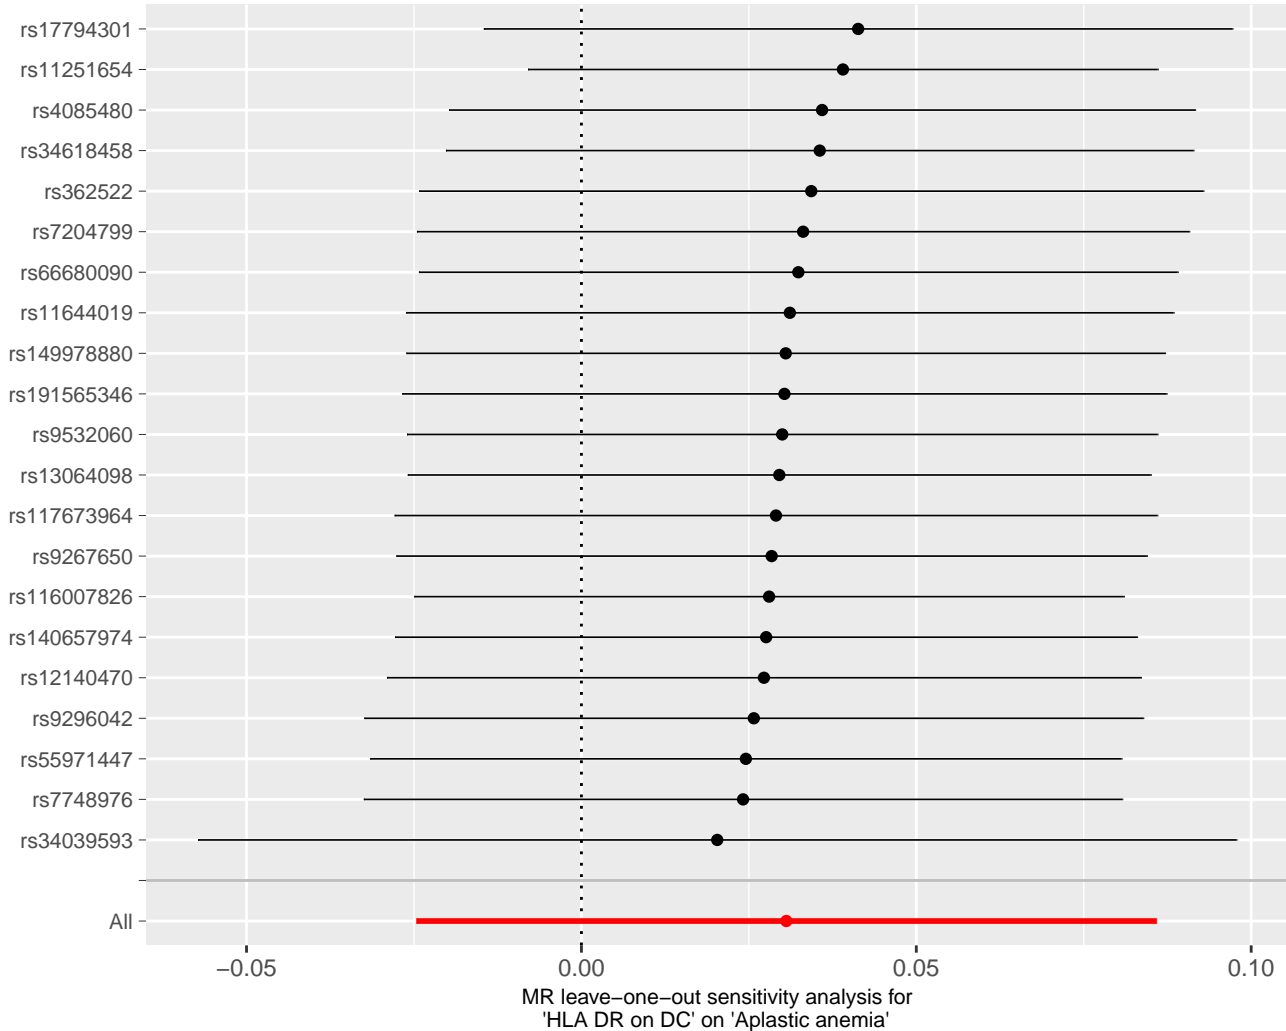

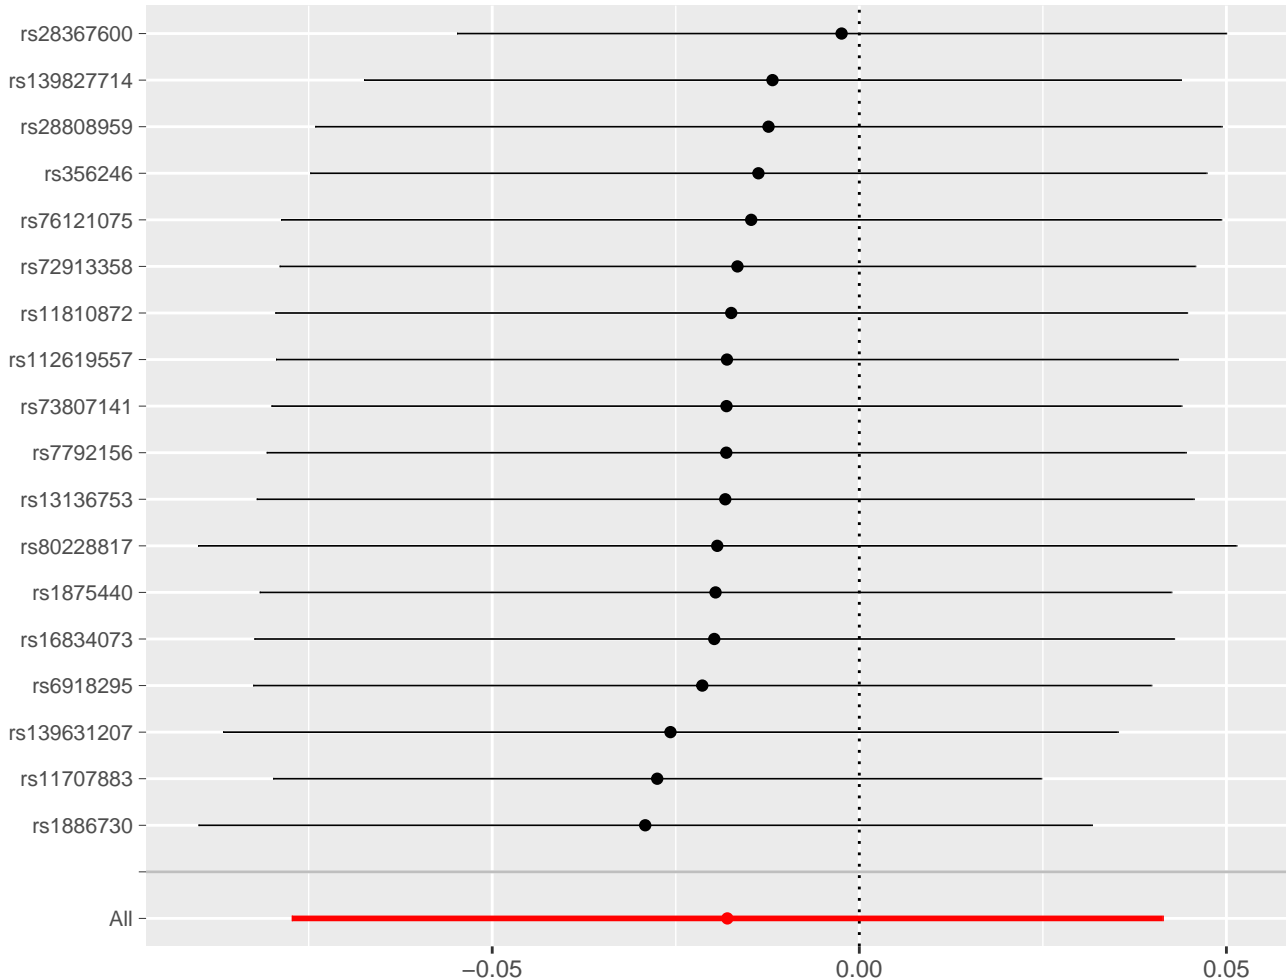

MR leave-one-out sensitivity analysis for 'HVEM on EM CD8br' on 'Aplastic anemia'

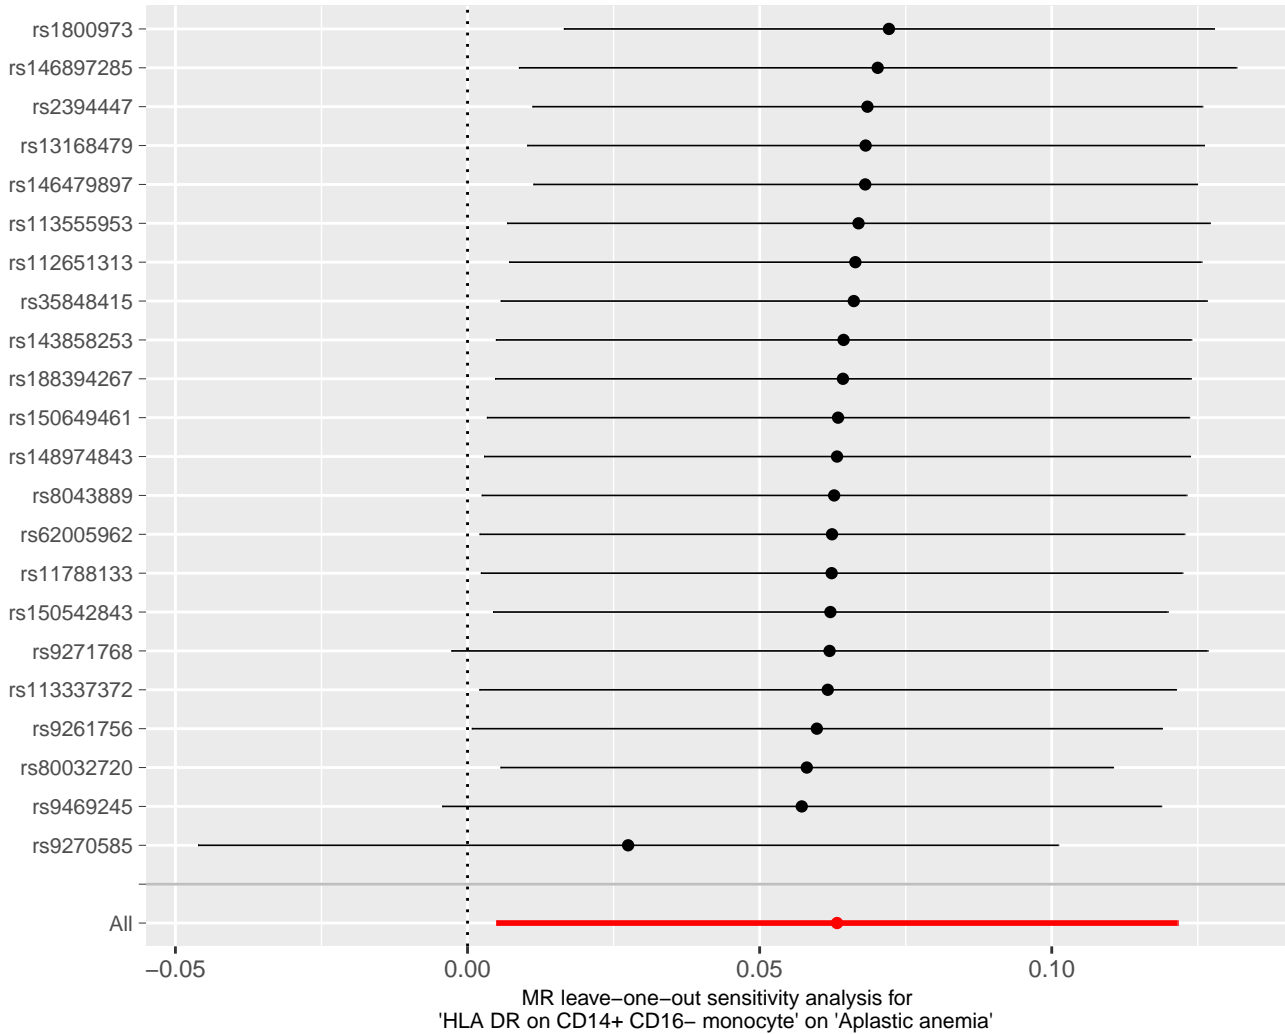



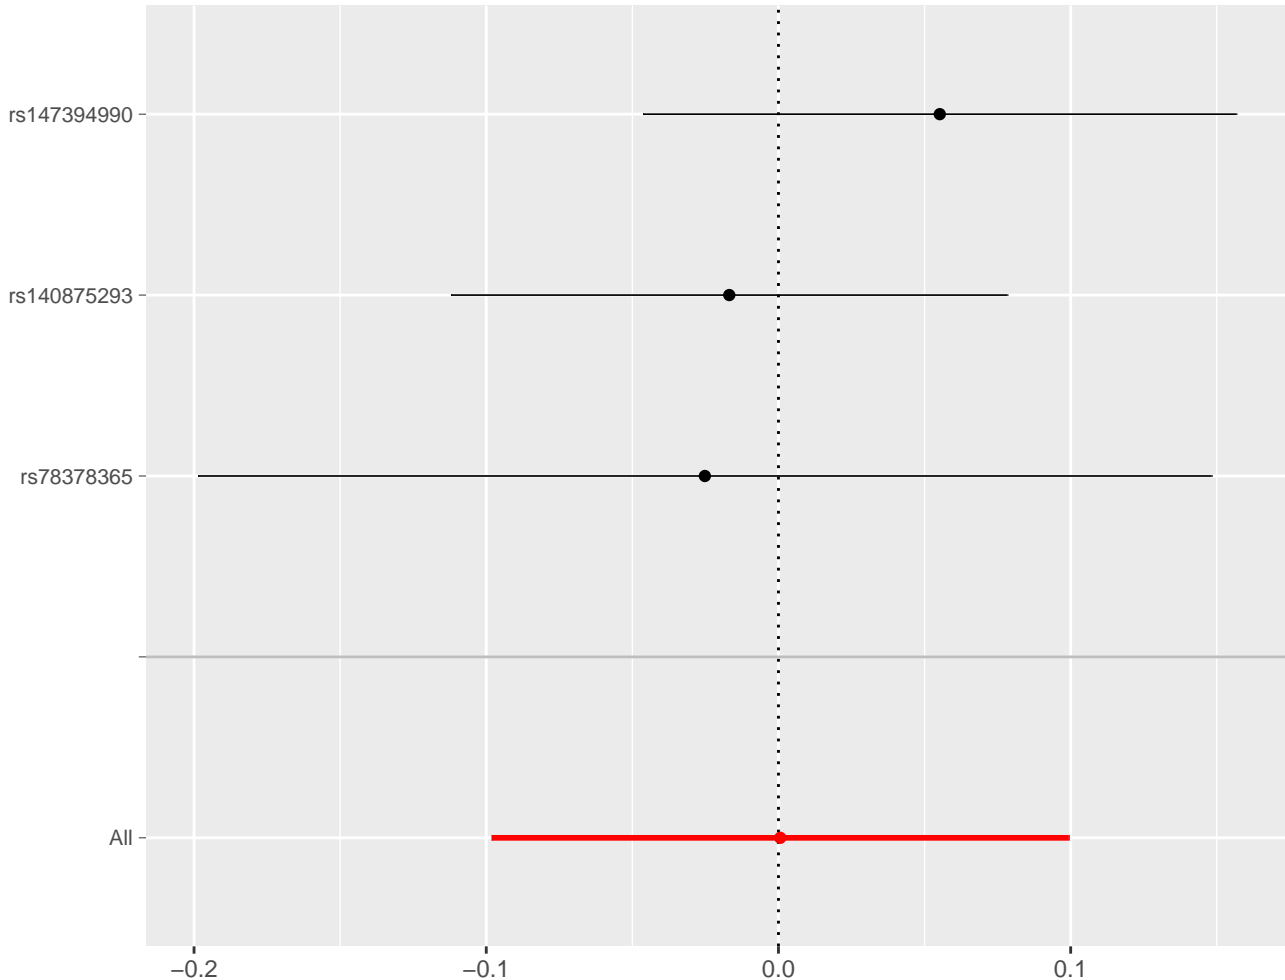

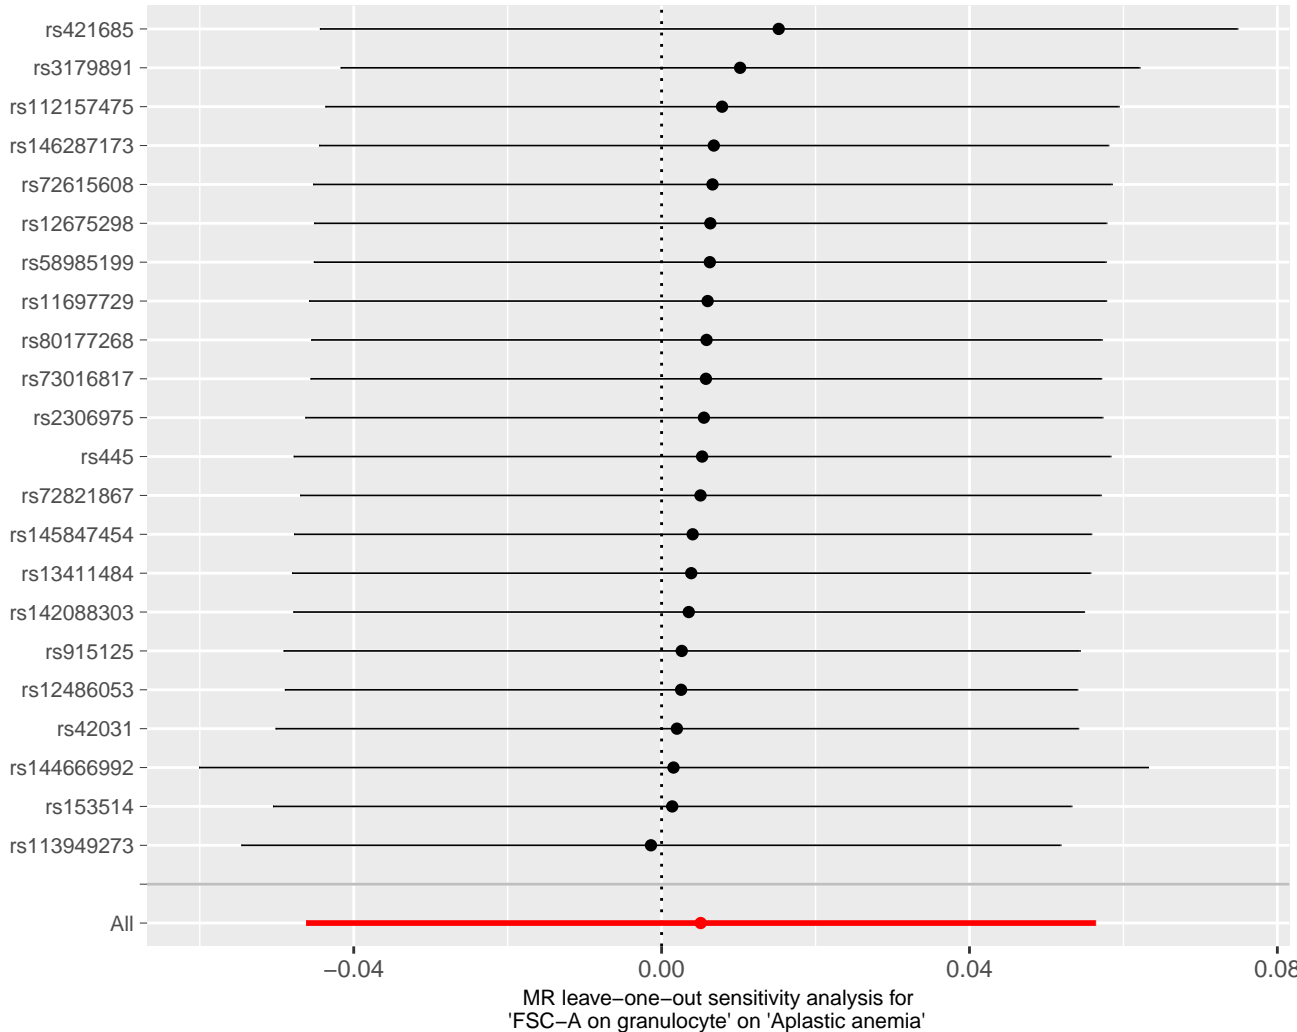

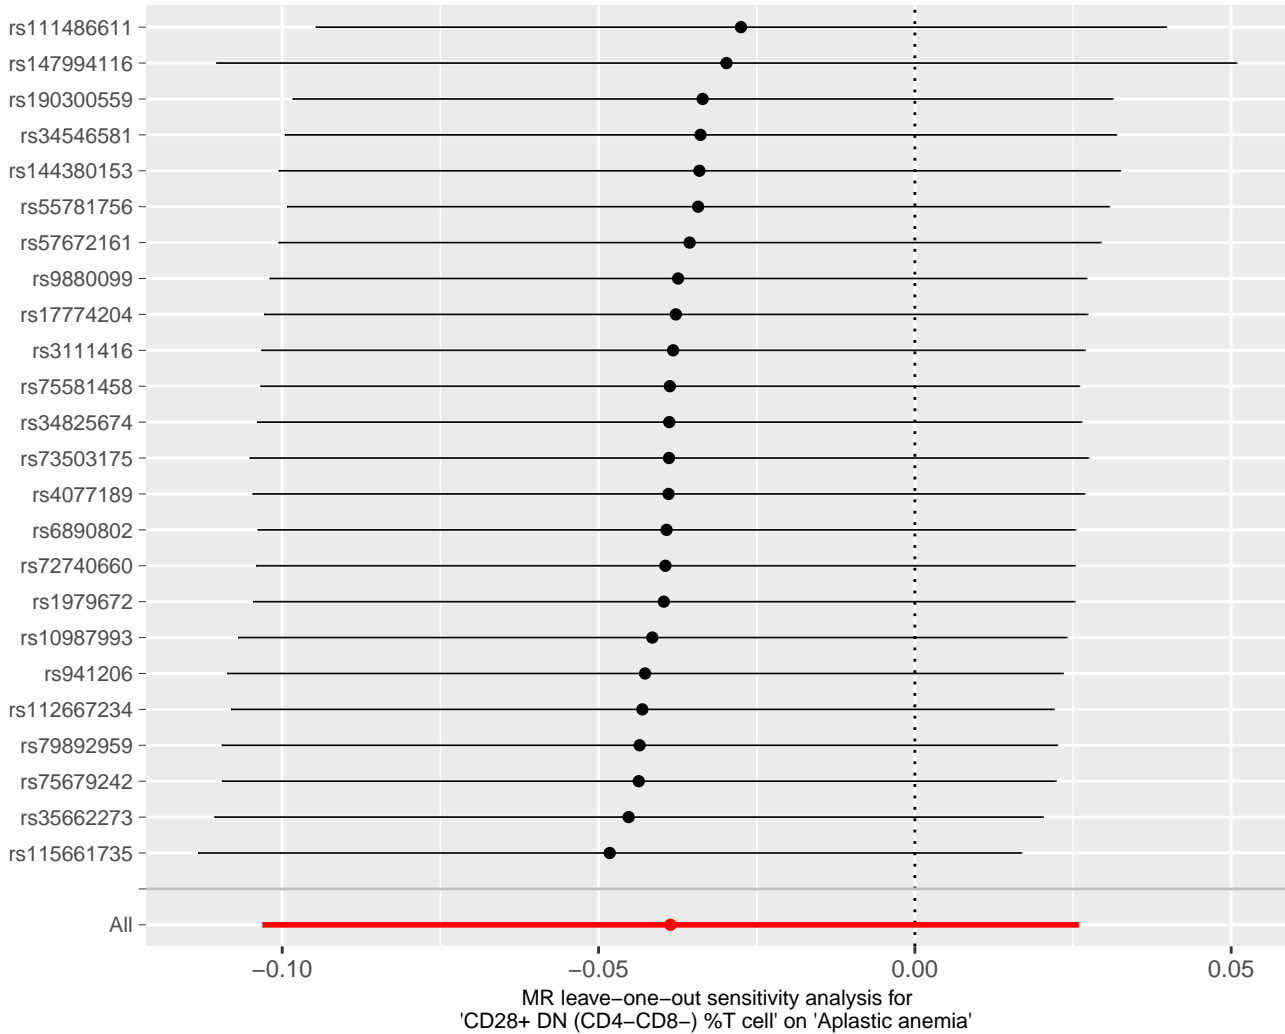

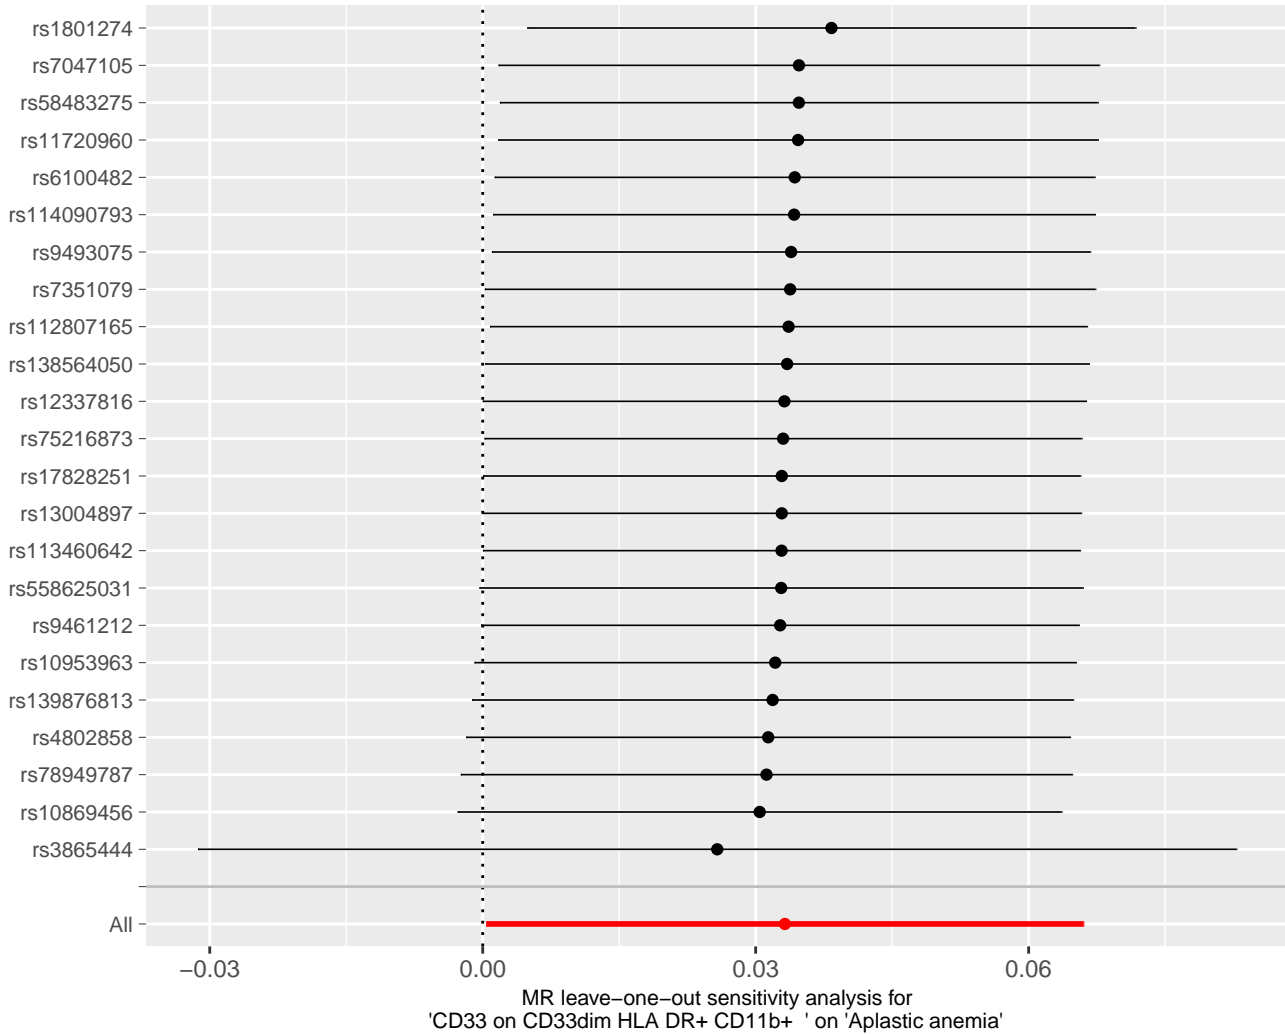

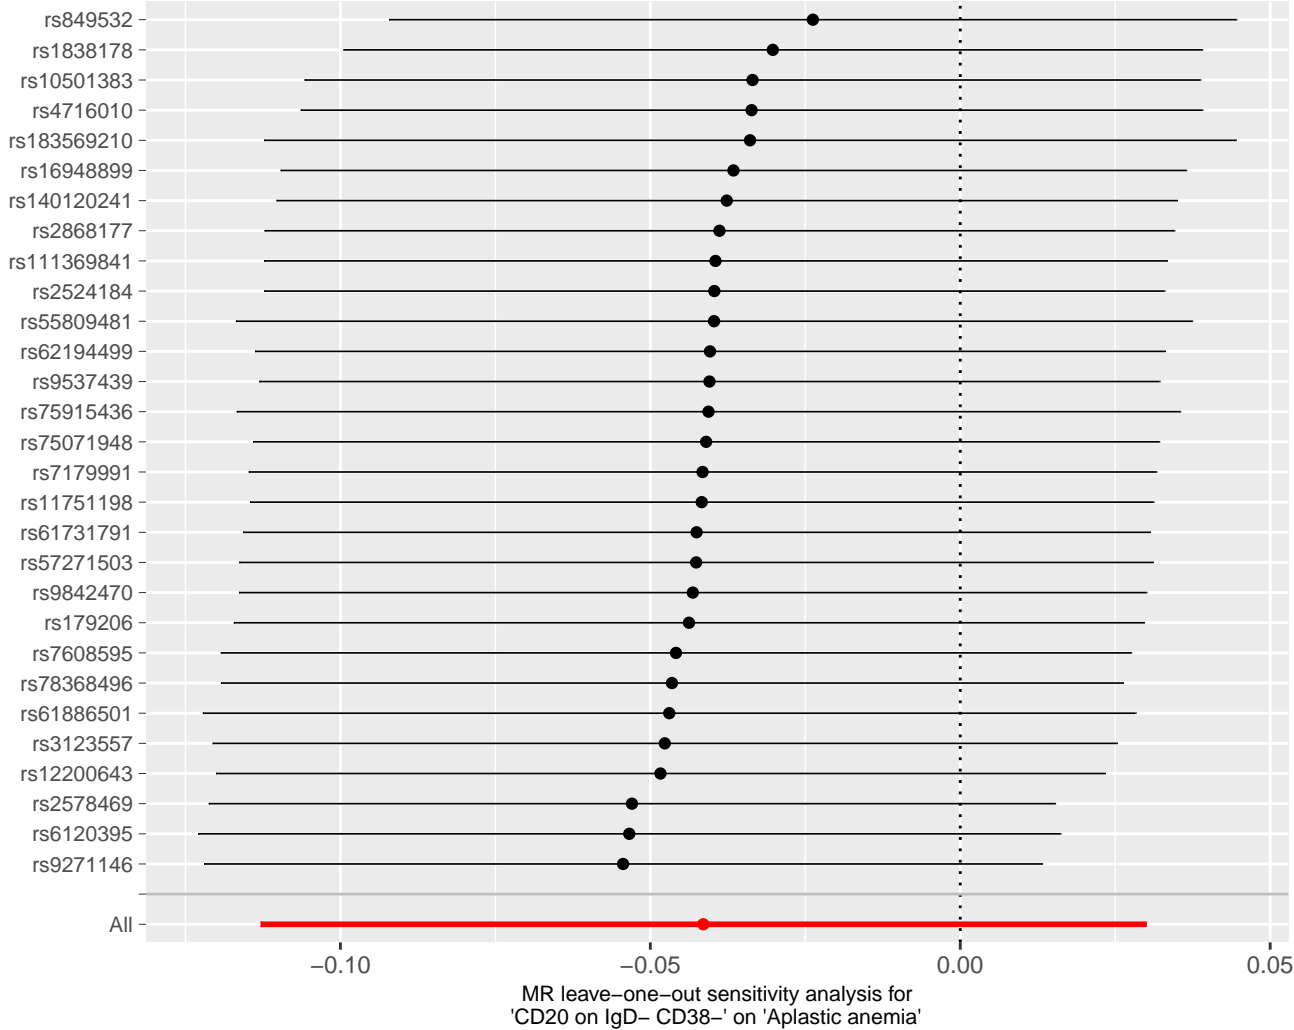

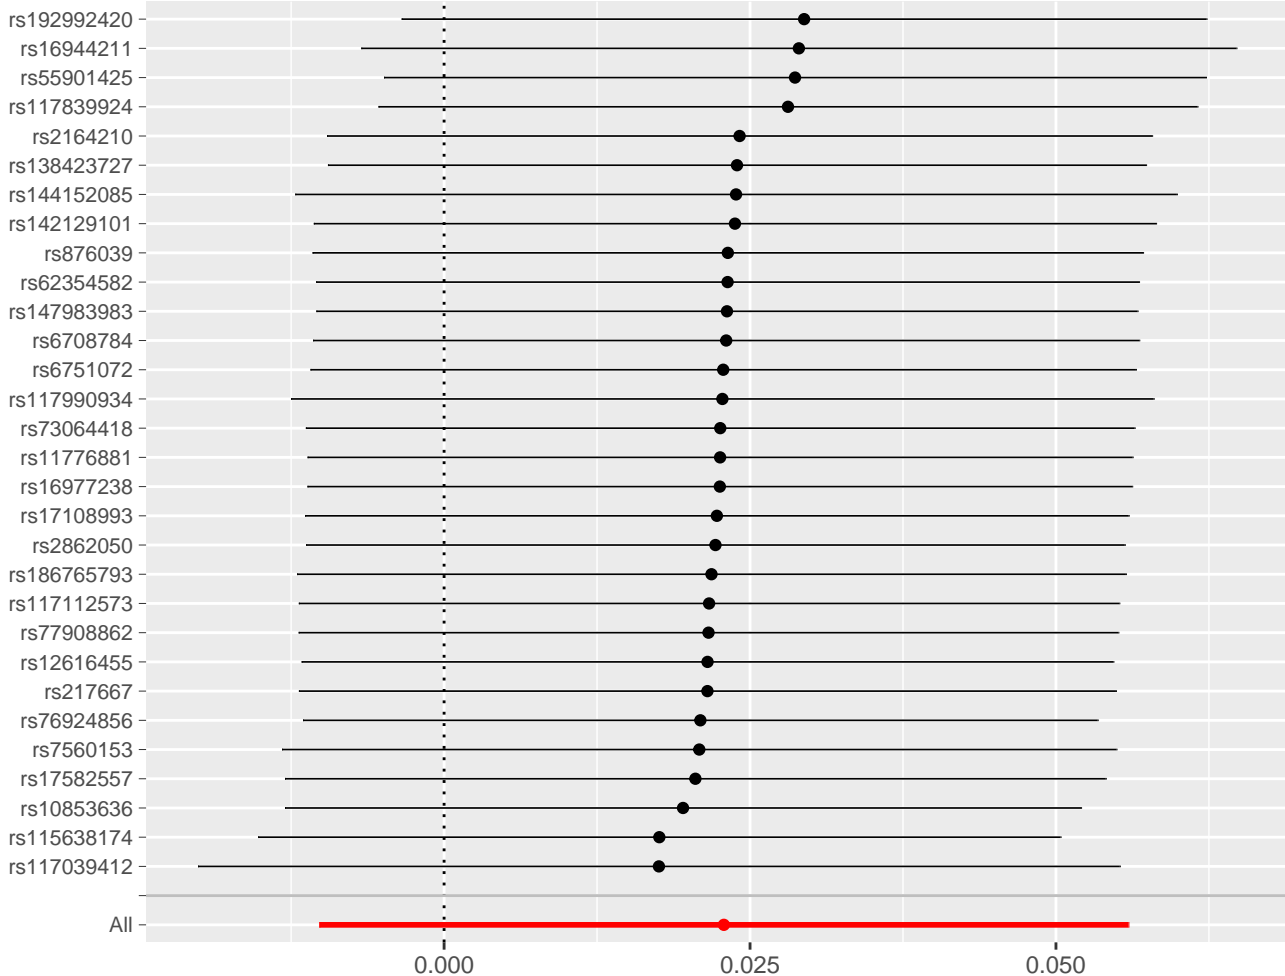

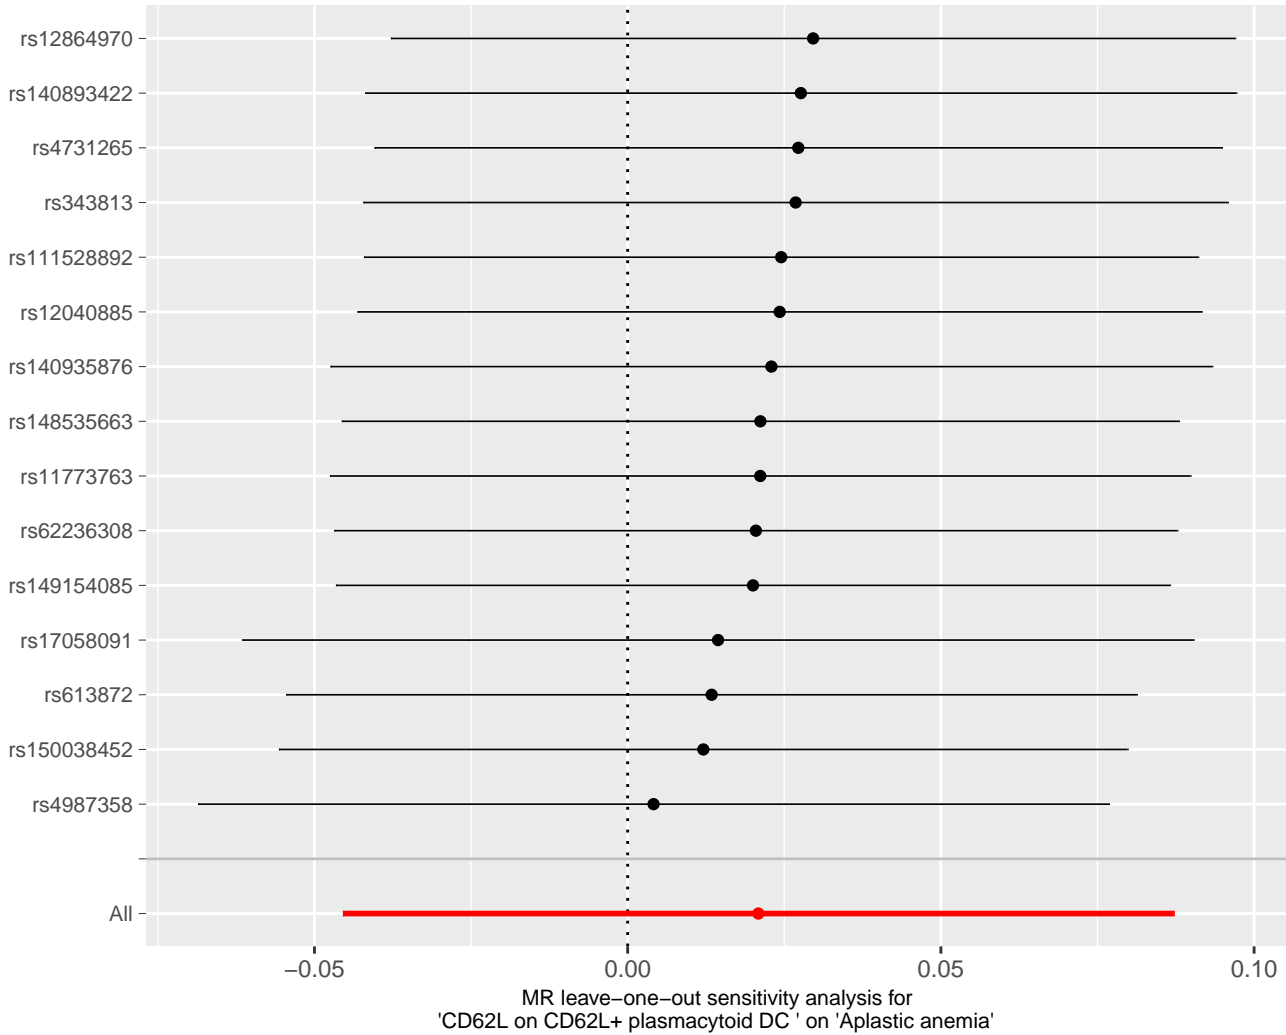

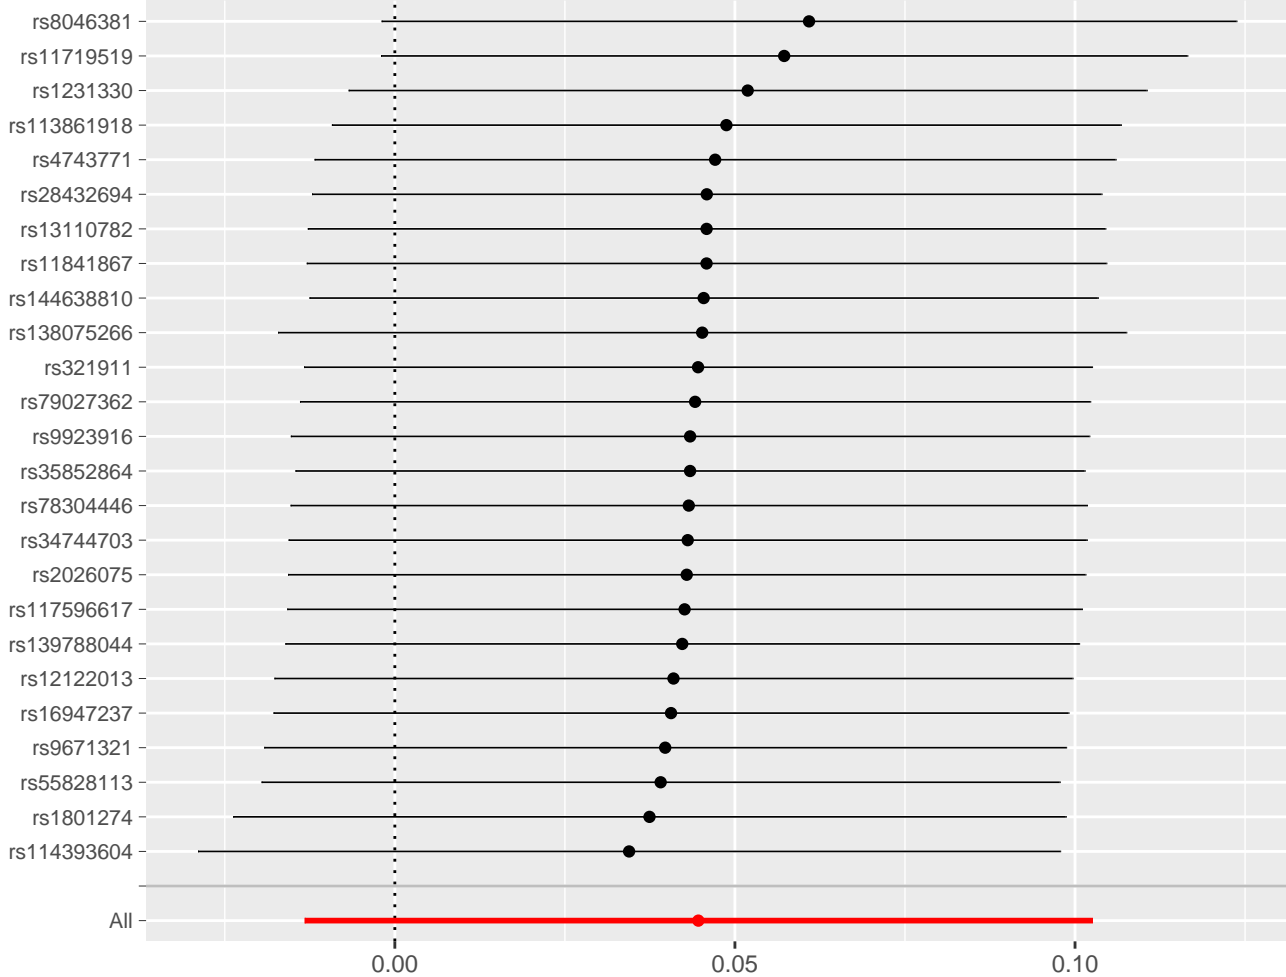

MR leave-one-out sensitivity analysis for 'CD11c on granulocyte' on 'Aplastic anemia'



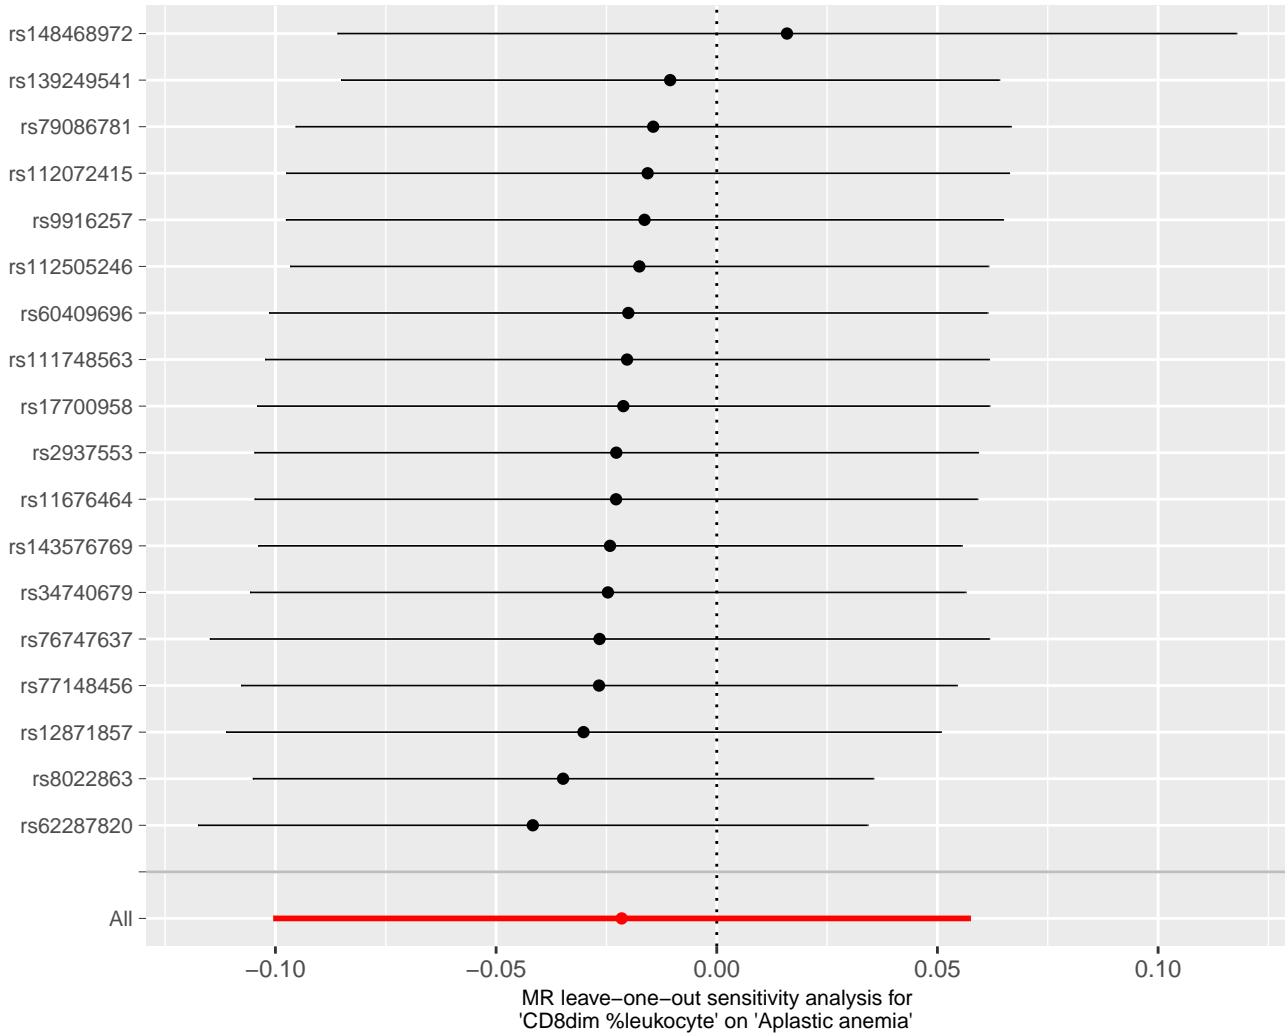

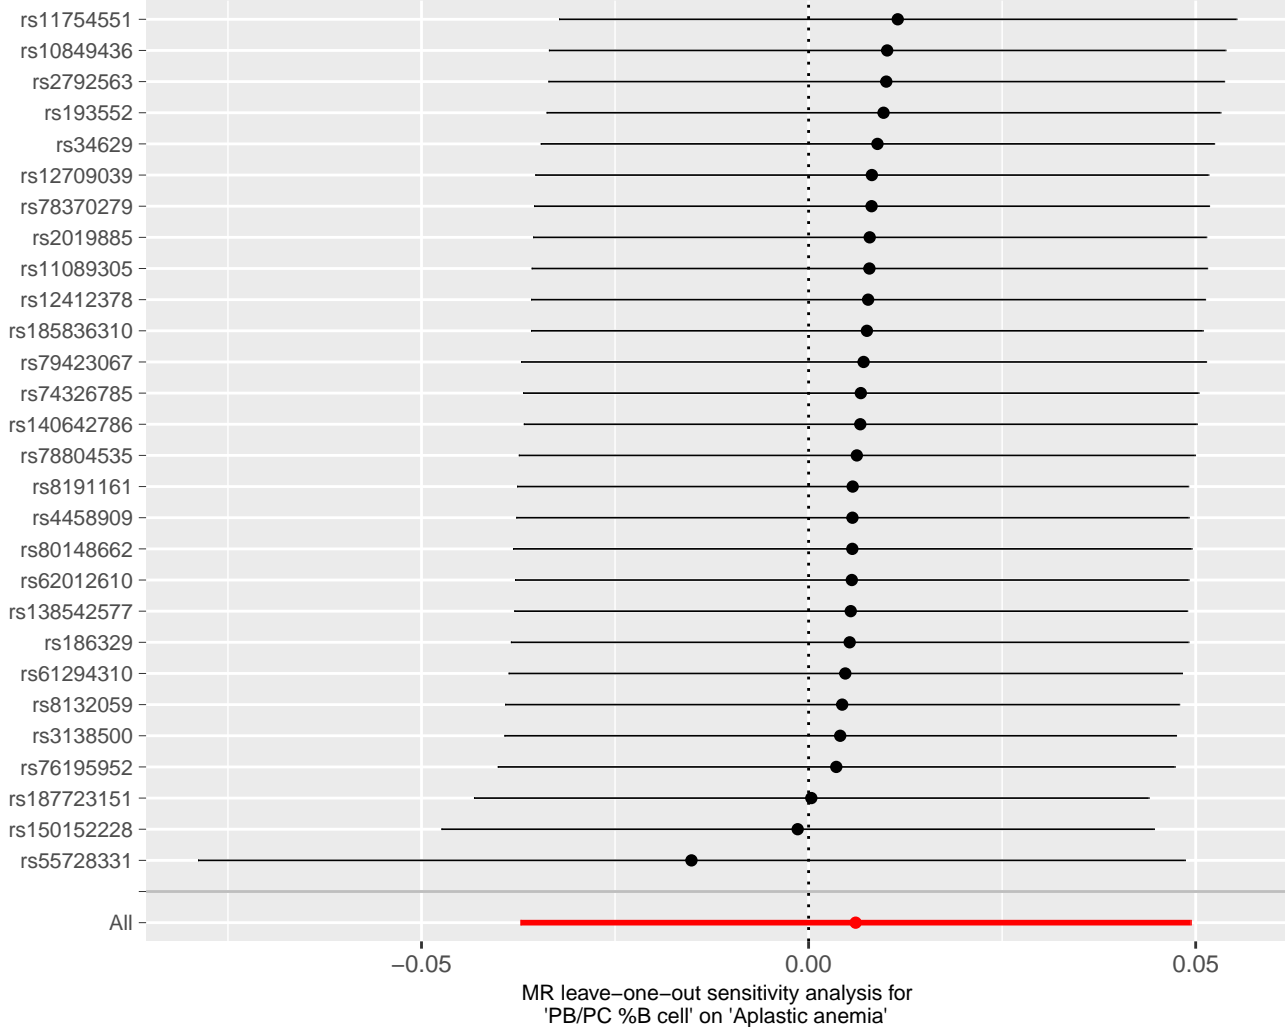

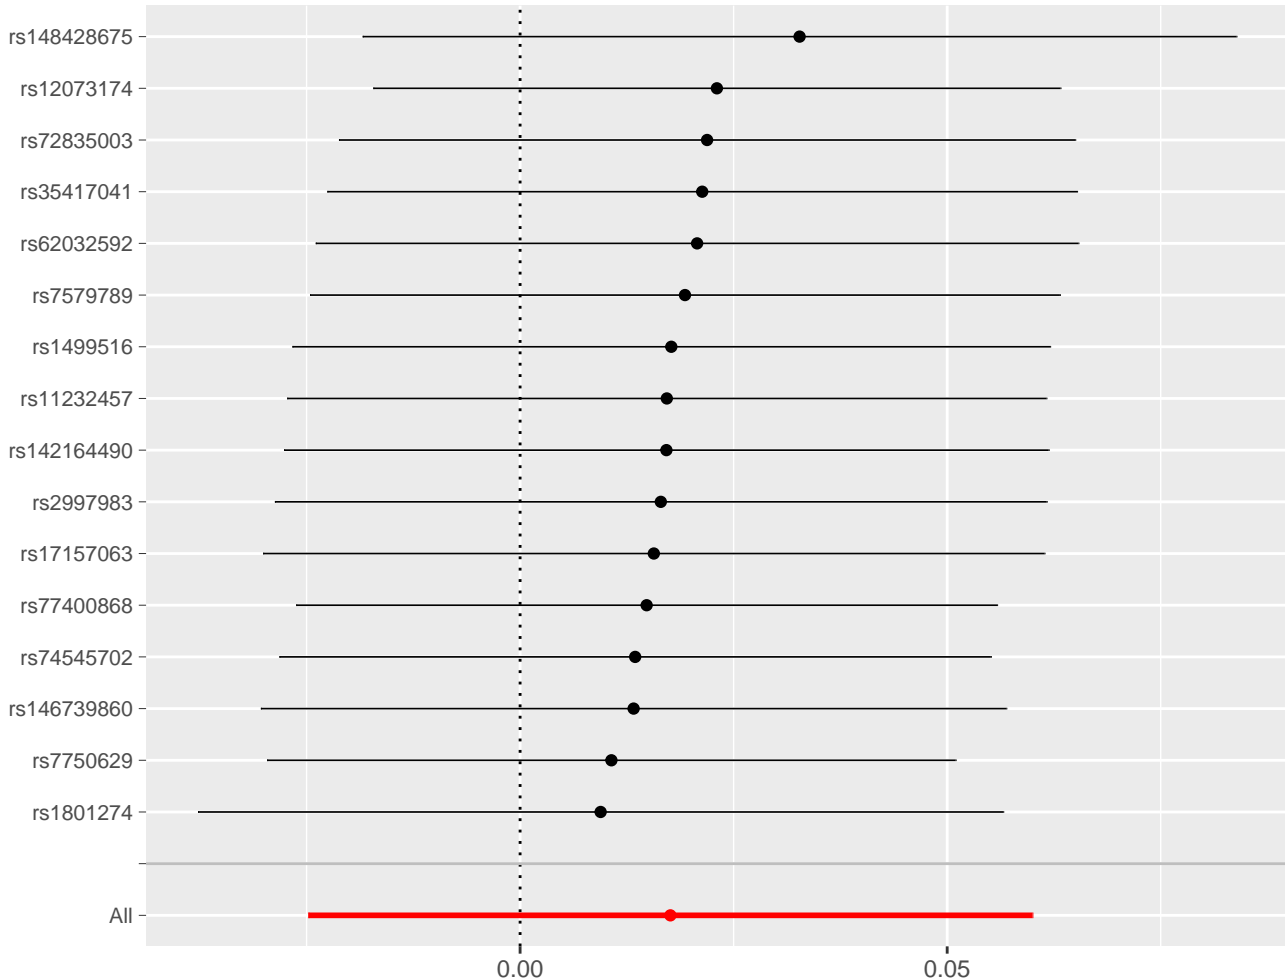

MR leave-one-out sensitivity analysis for 'CD11b on Mo MDSC ' on 'Aplastic anemia'

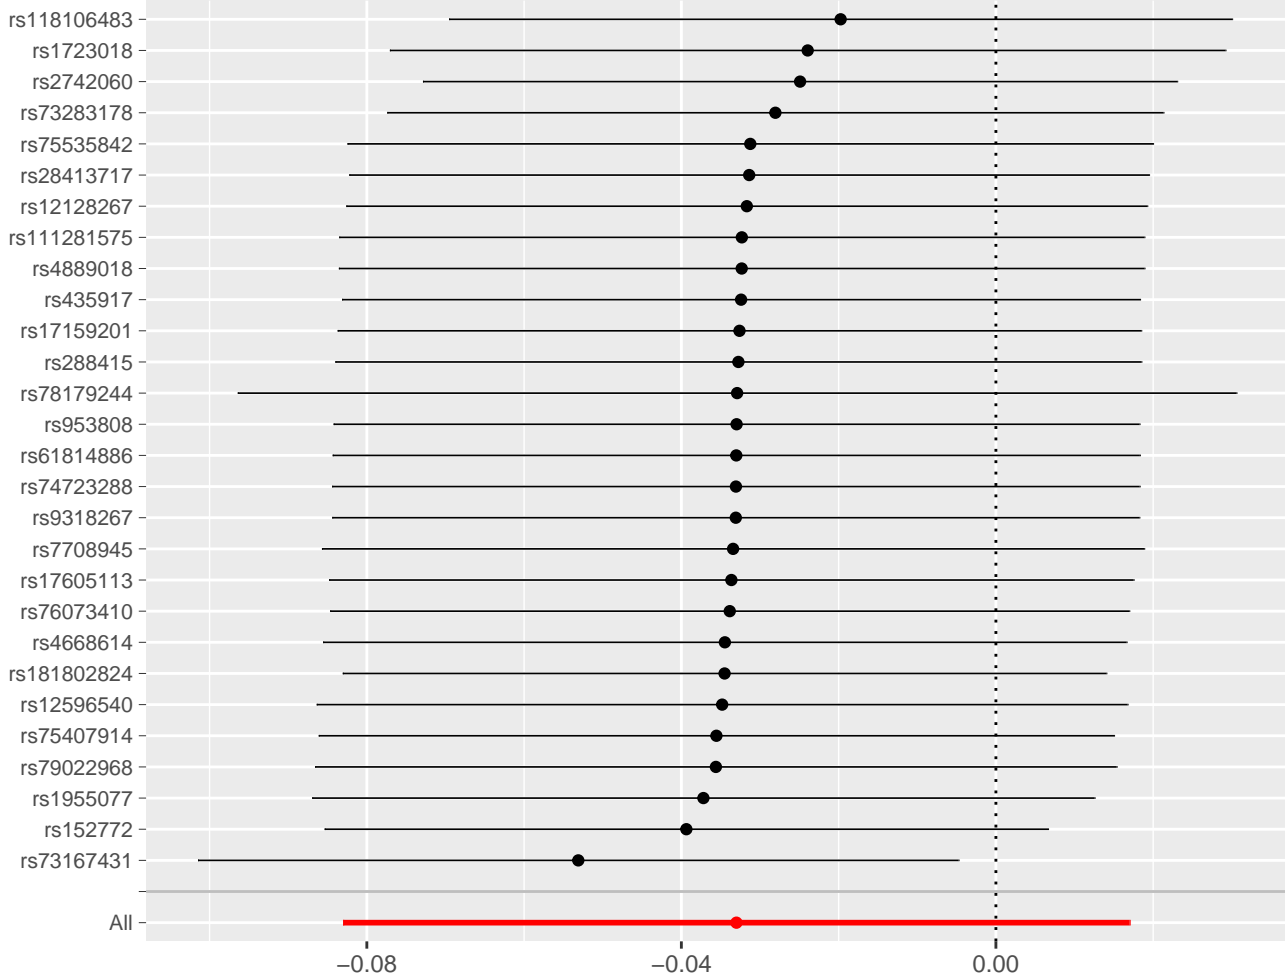

MR leave-one-out sensitivity analysis for 'CD3 on HLA DR+ T cell' on 'Aplastic anemia'

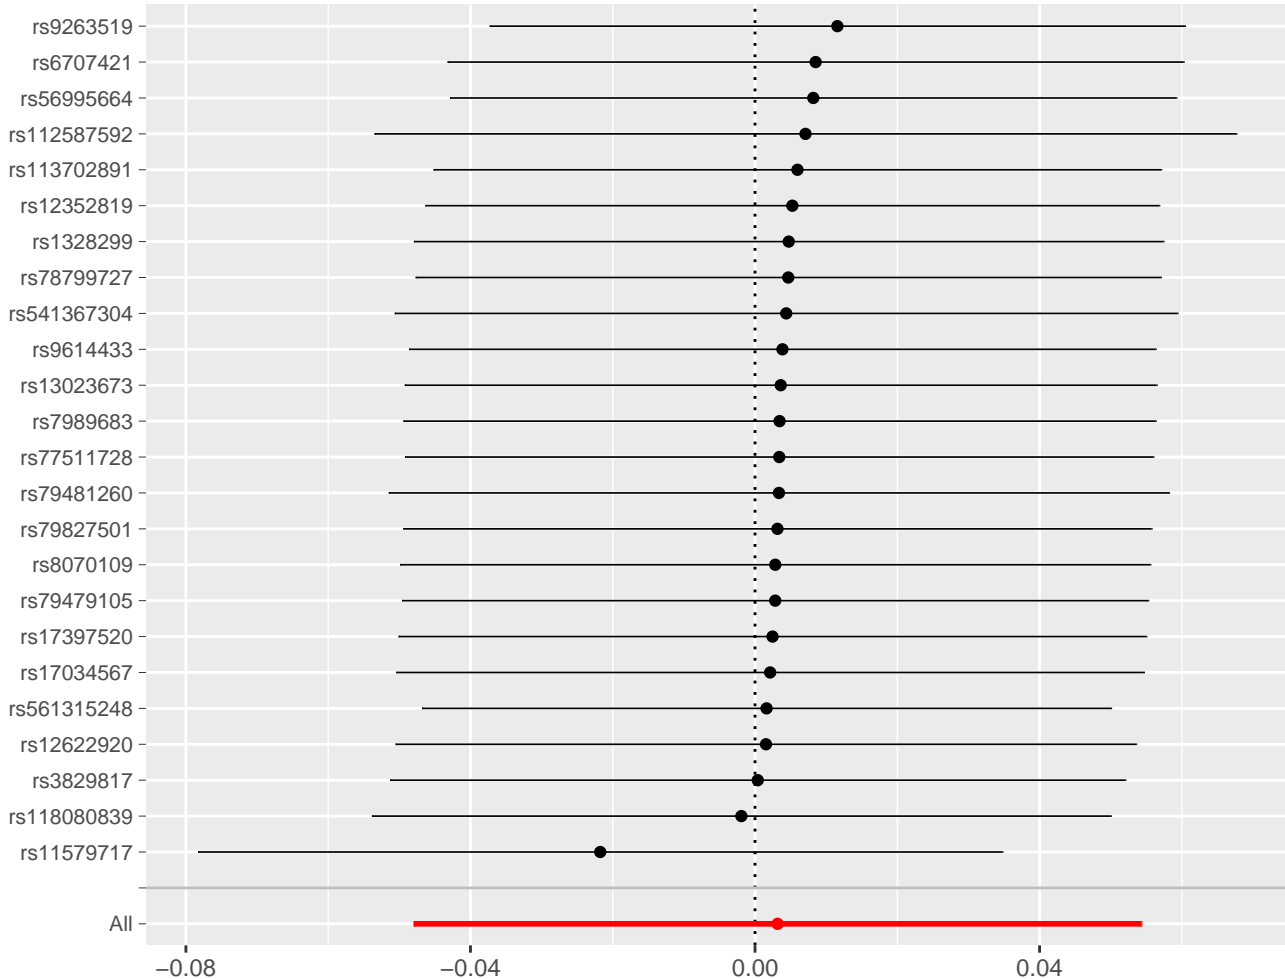

MR leave-one-out sensitivity analysis for 'TD CD8br %CD8br' on 'Aplastic anemia'

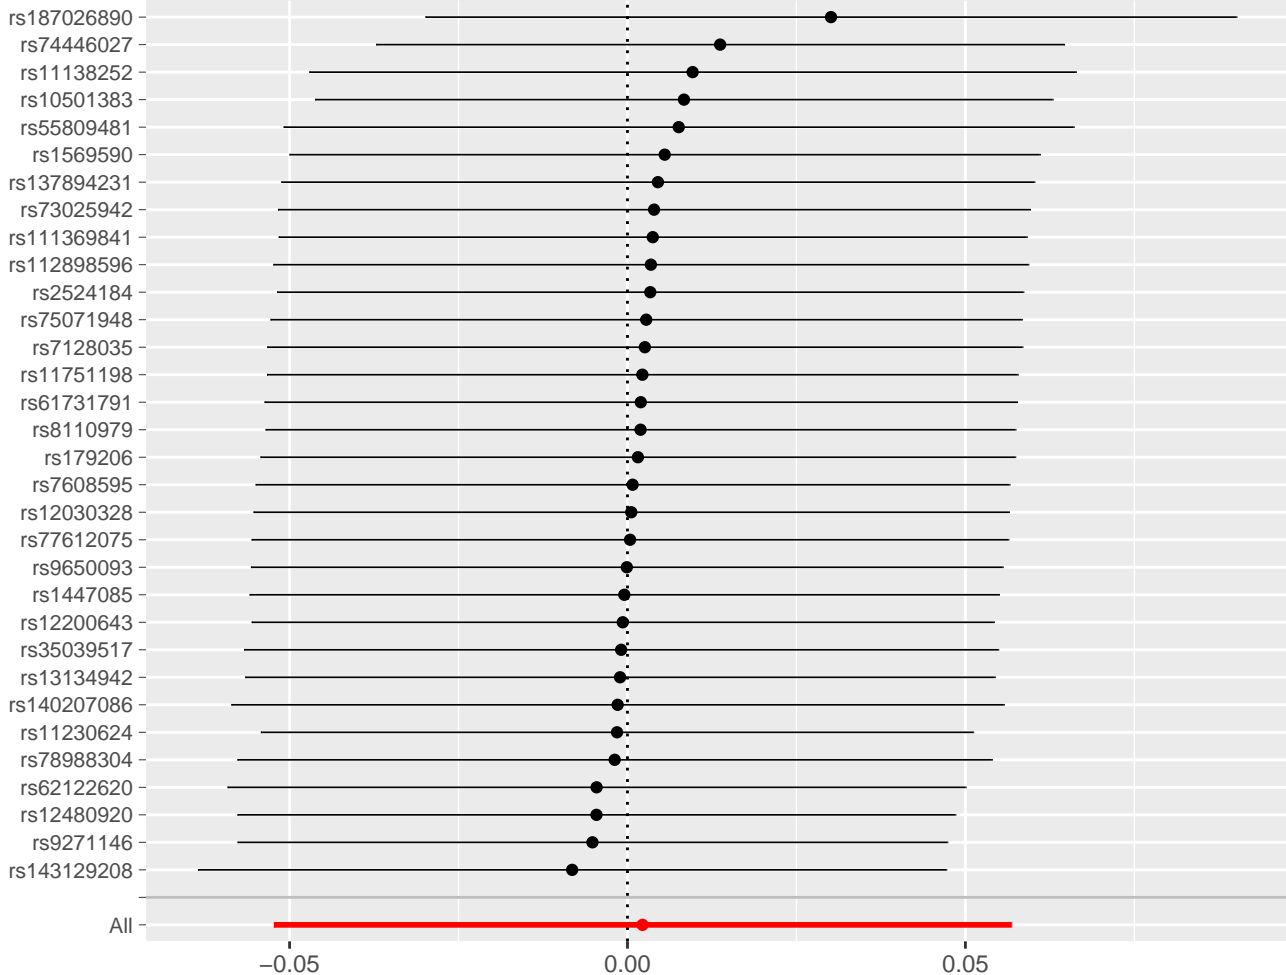

MR leave-one-out sensitivity analysis for 'CD20 on sw mem' on 'Aplastic anemia'

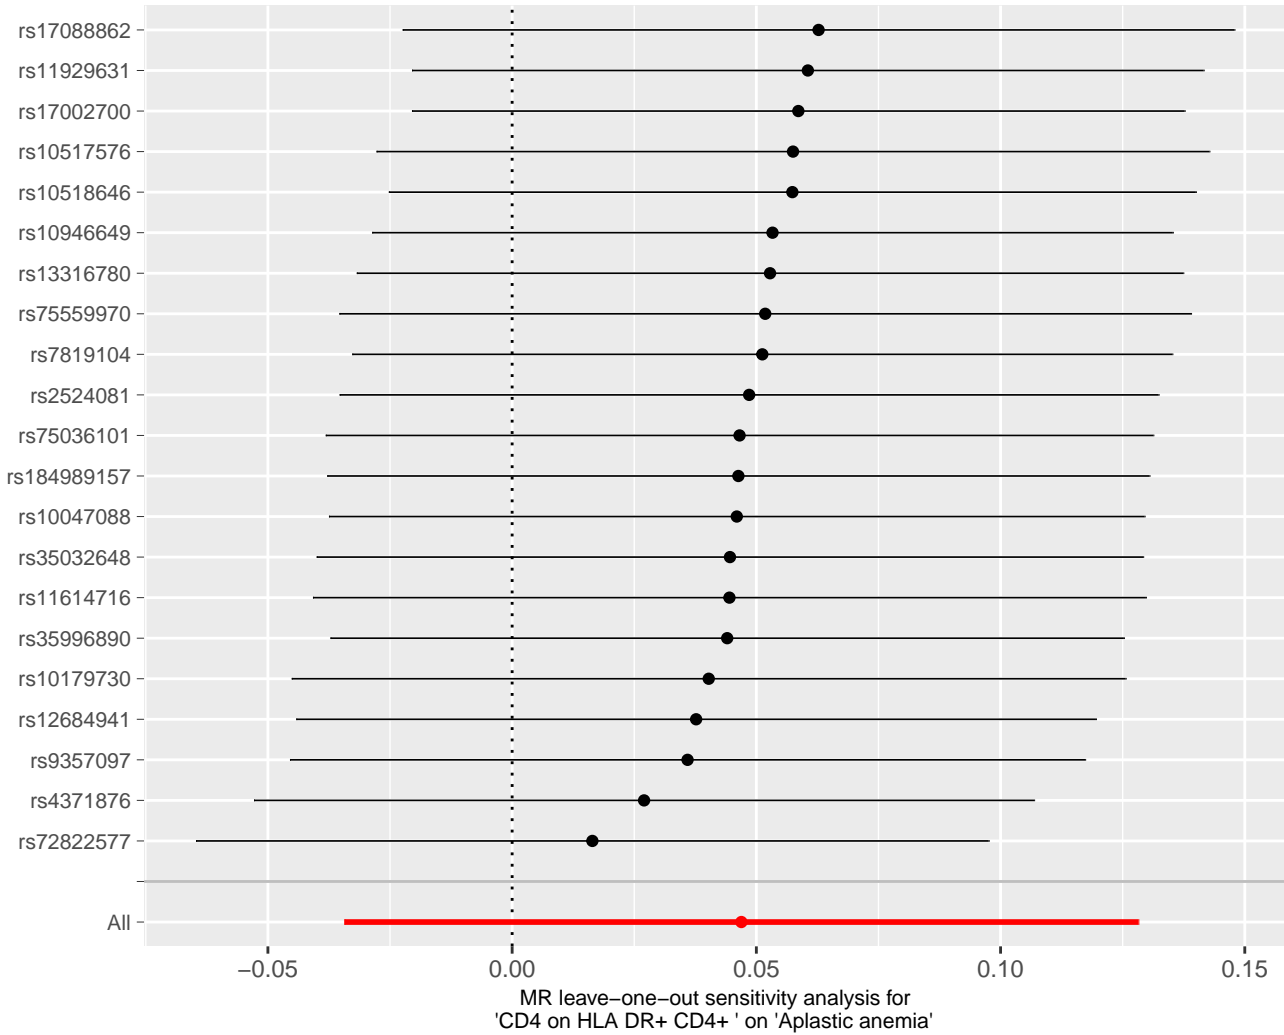

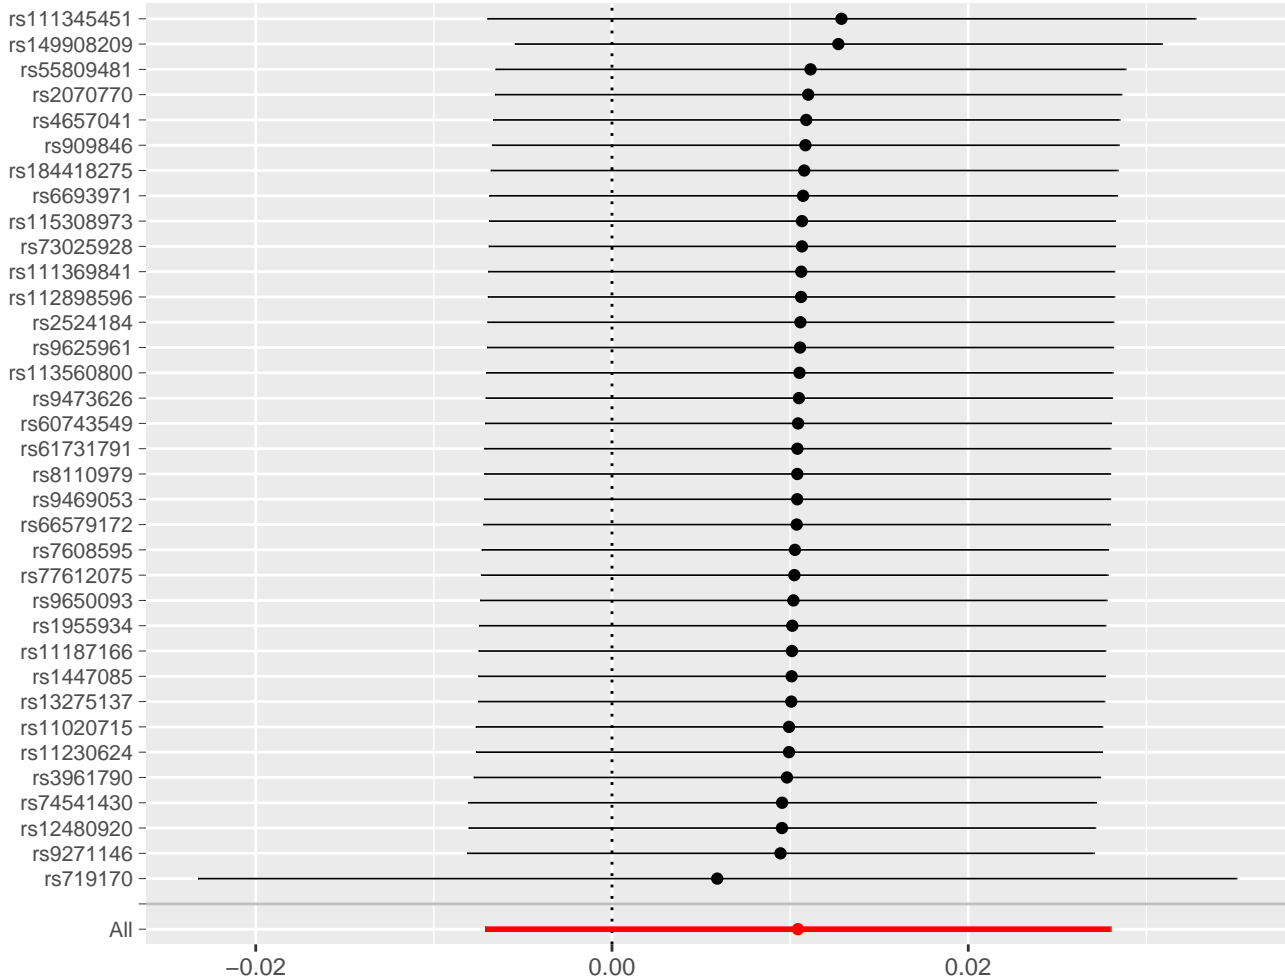

MR leave-one-out sensitivity analysis for 'CD20 on IgD- CD38dim' on 'Aplastic anemia'



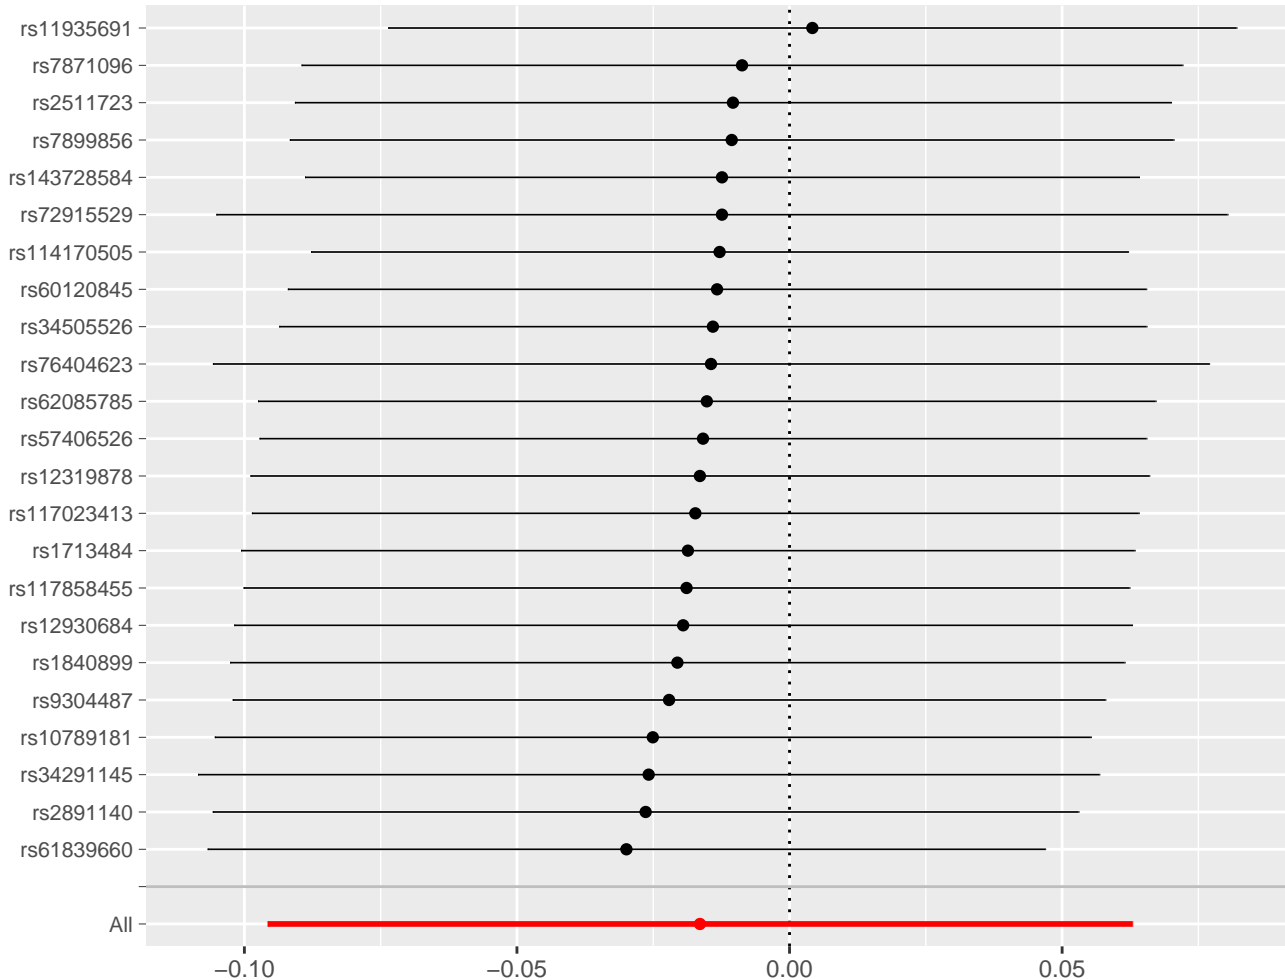

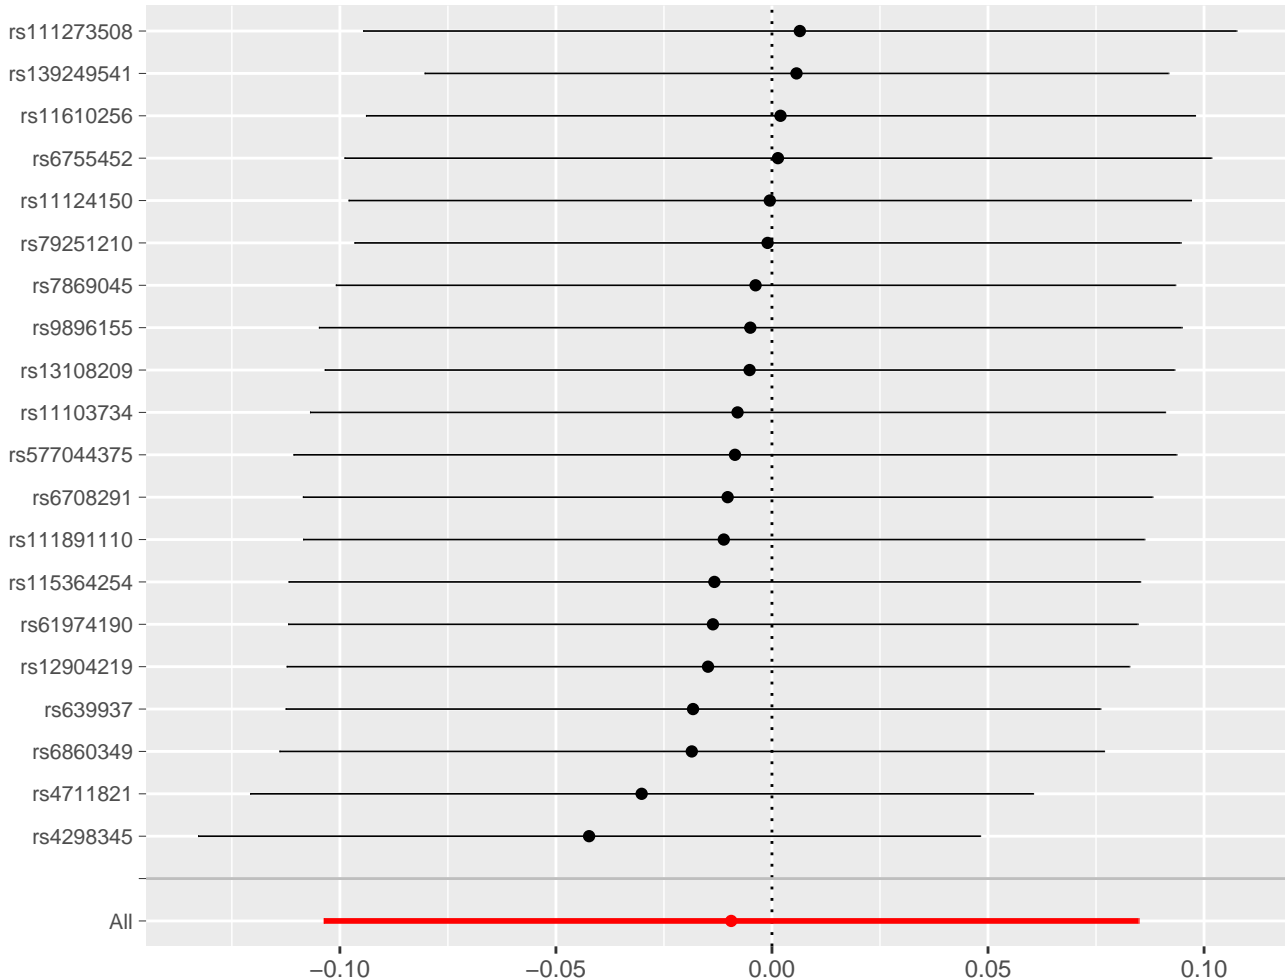

MR leave-one-out sensitivity analysis for 'DN (CD4-CD8-) AC' on 'Aplastic anemia'

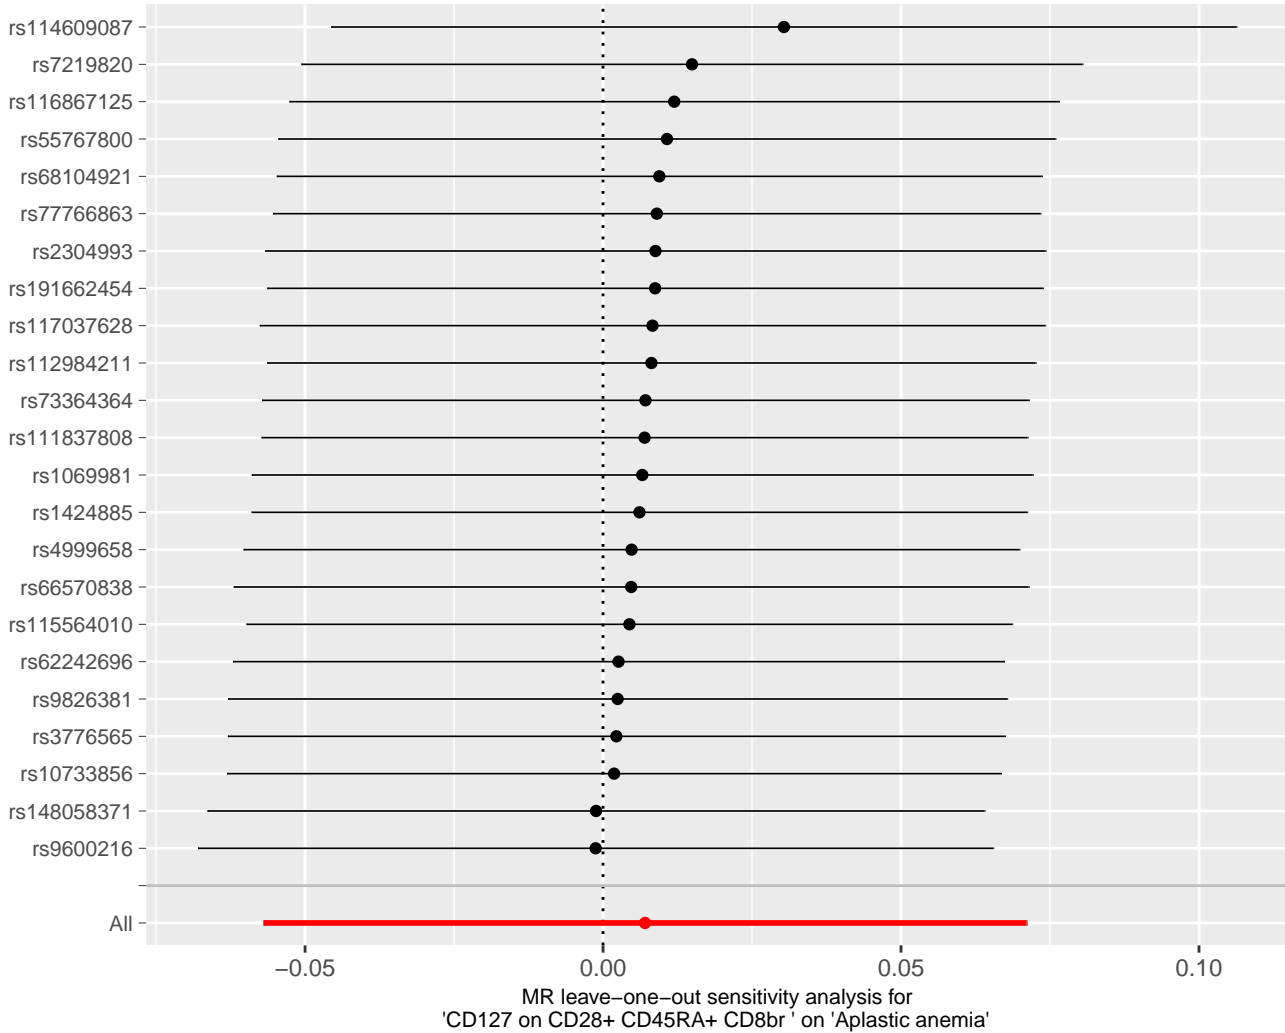

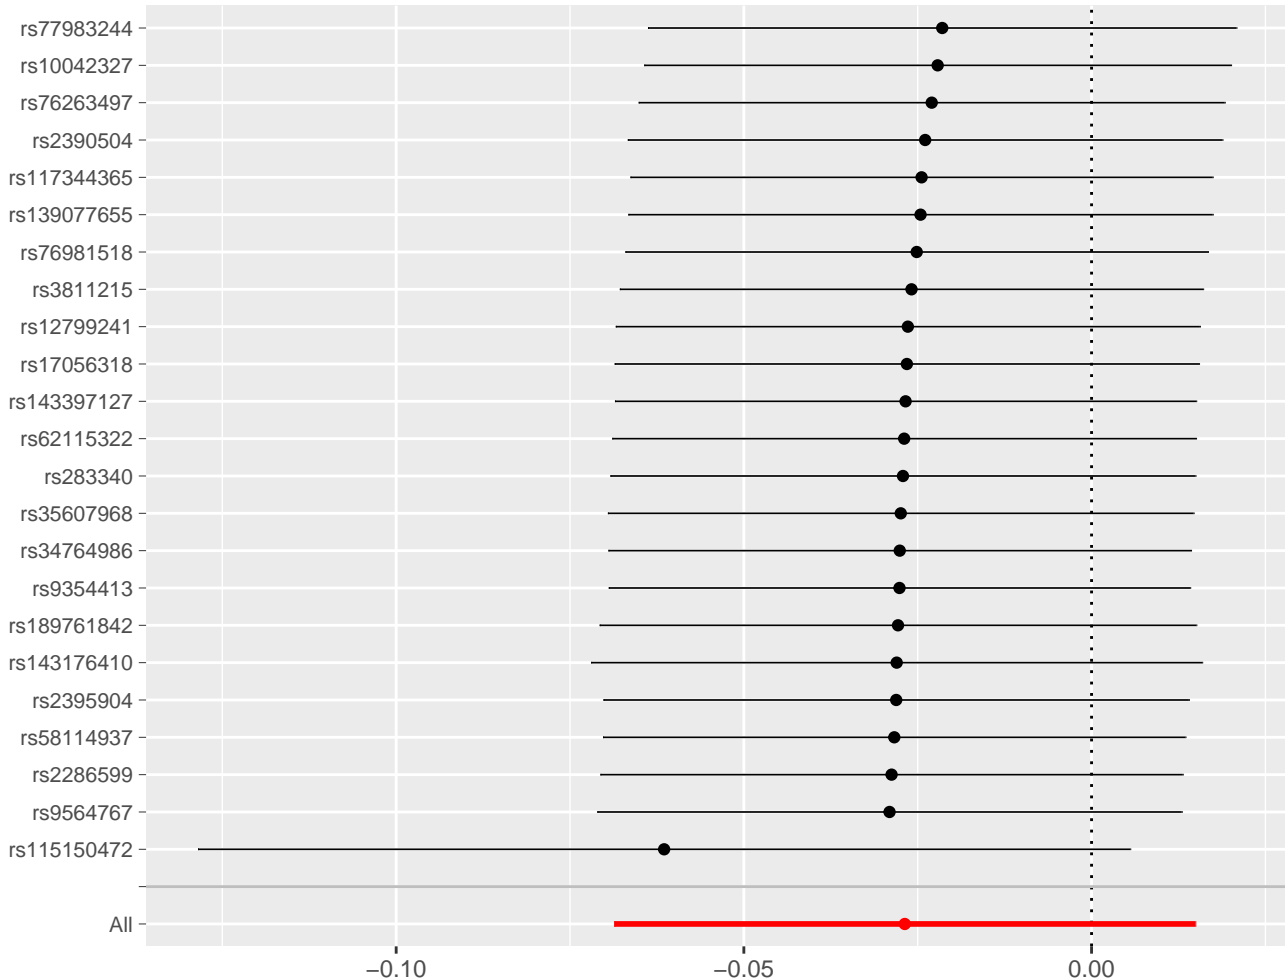

MR leave-one-out sensitivity analysis for 'Naive-mature B cell AC' on 'Aplastic anemia'

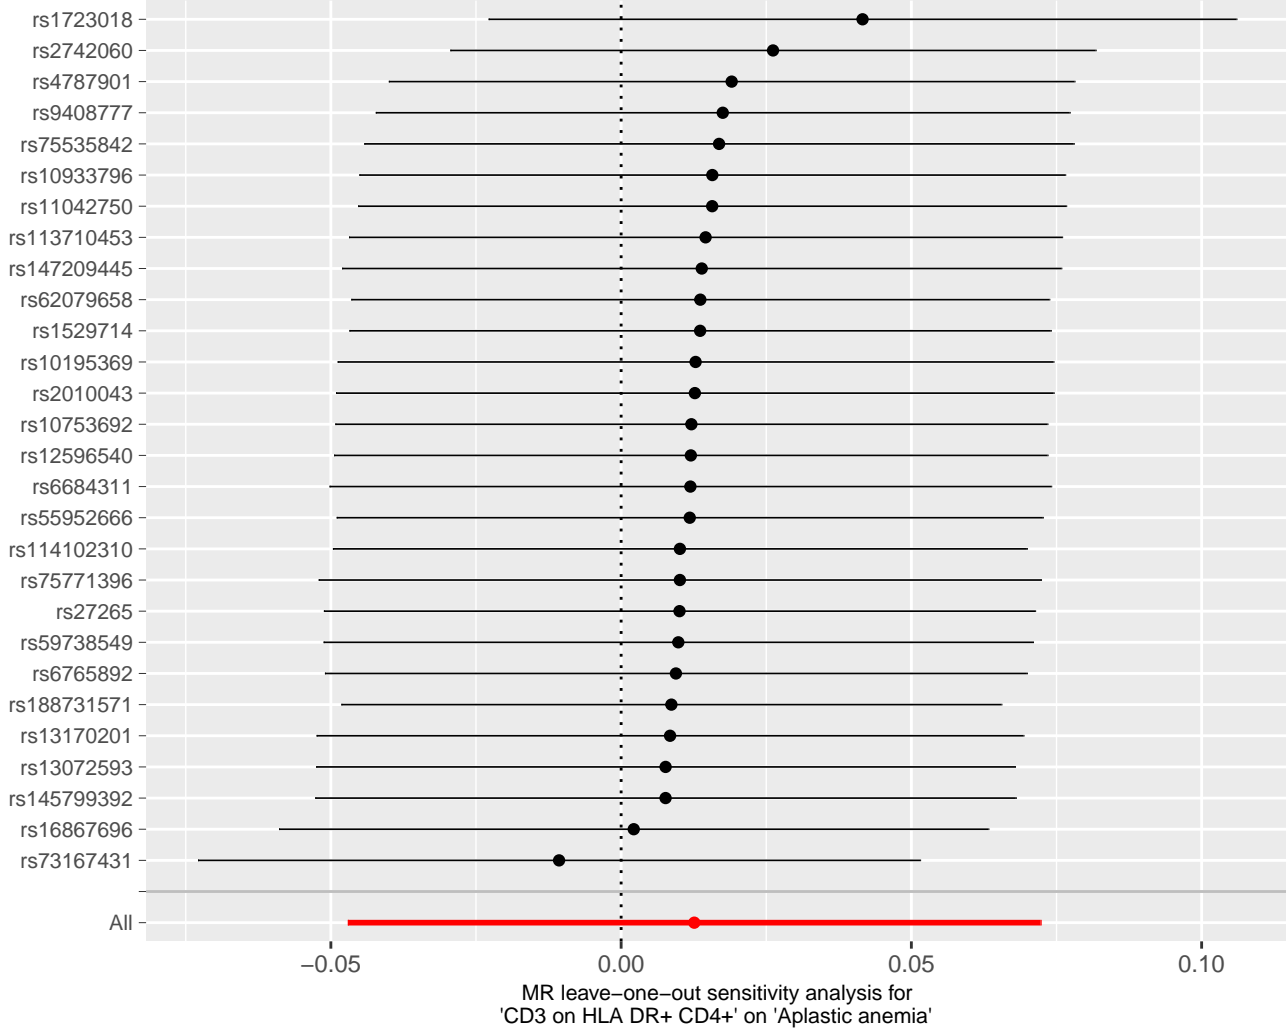

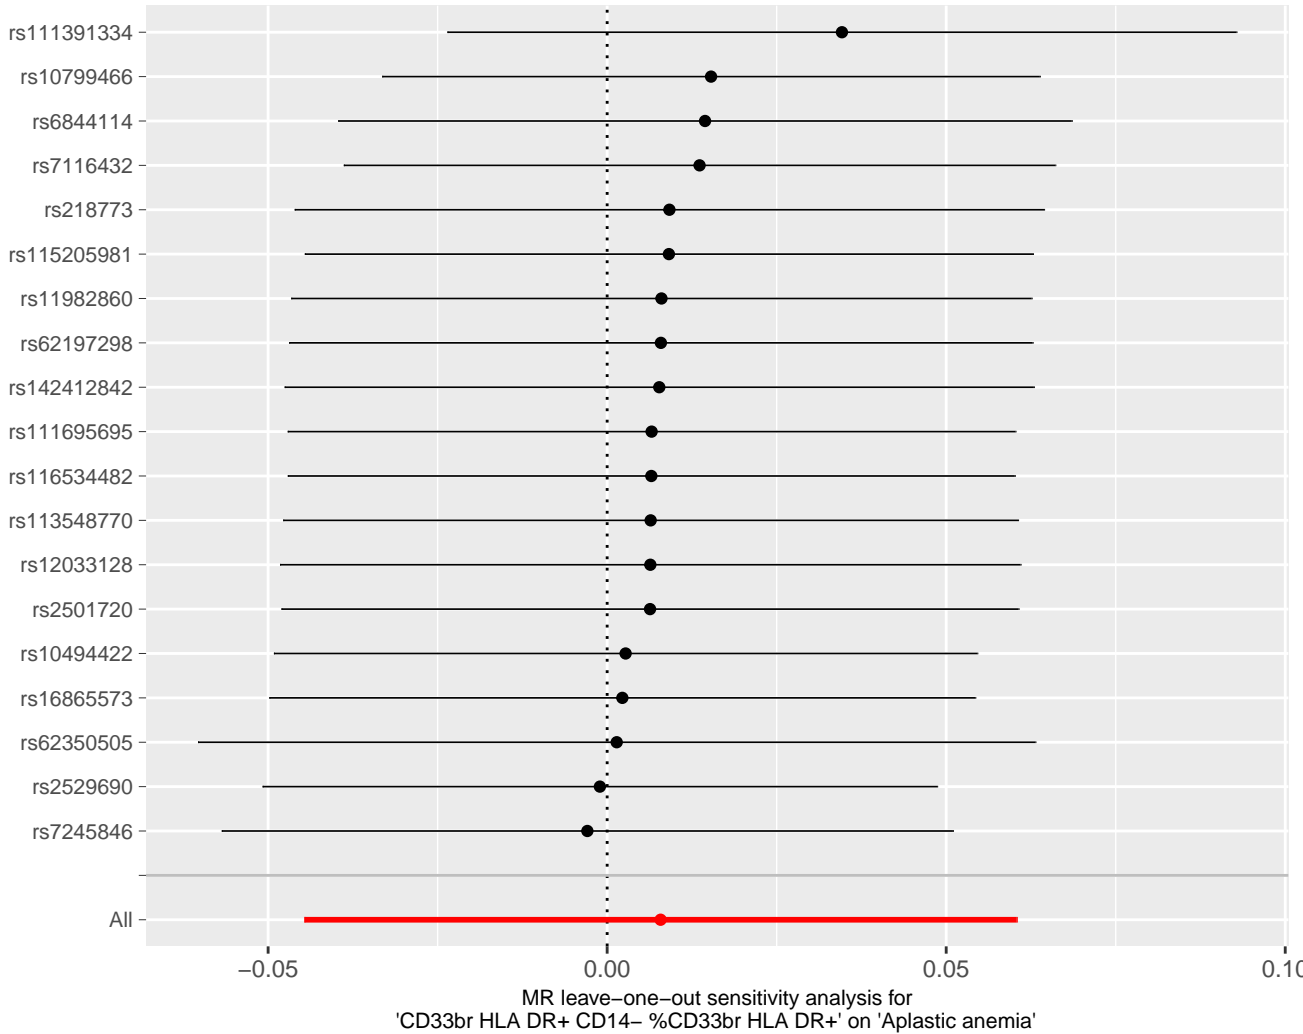

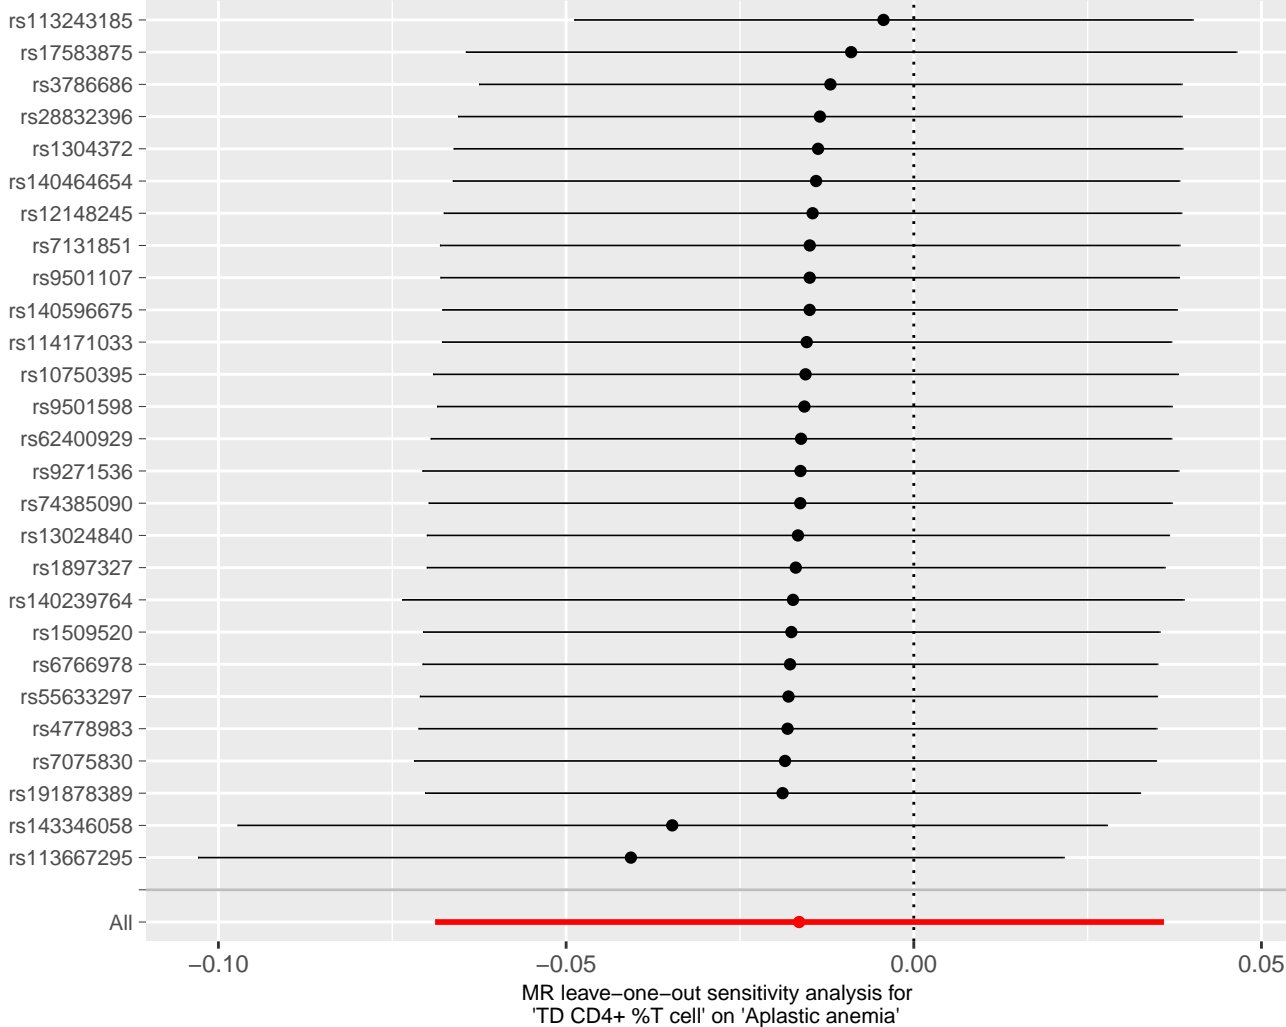

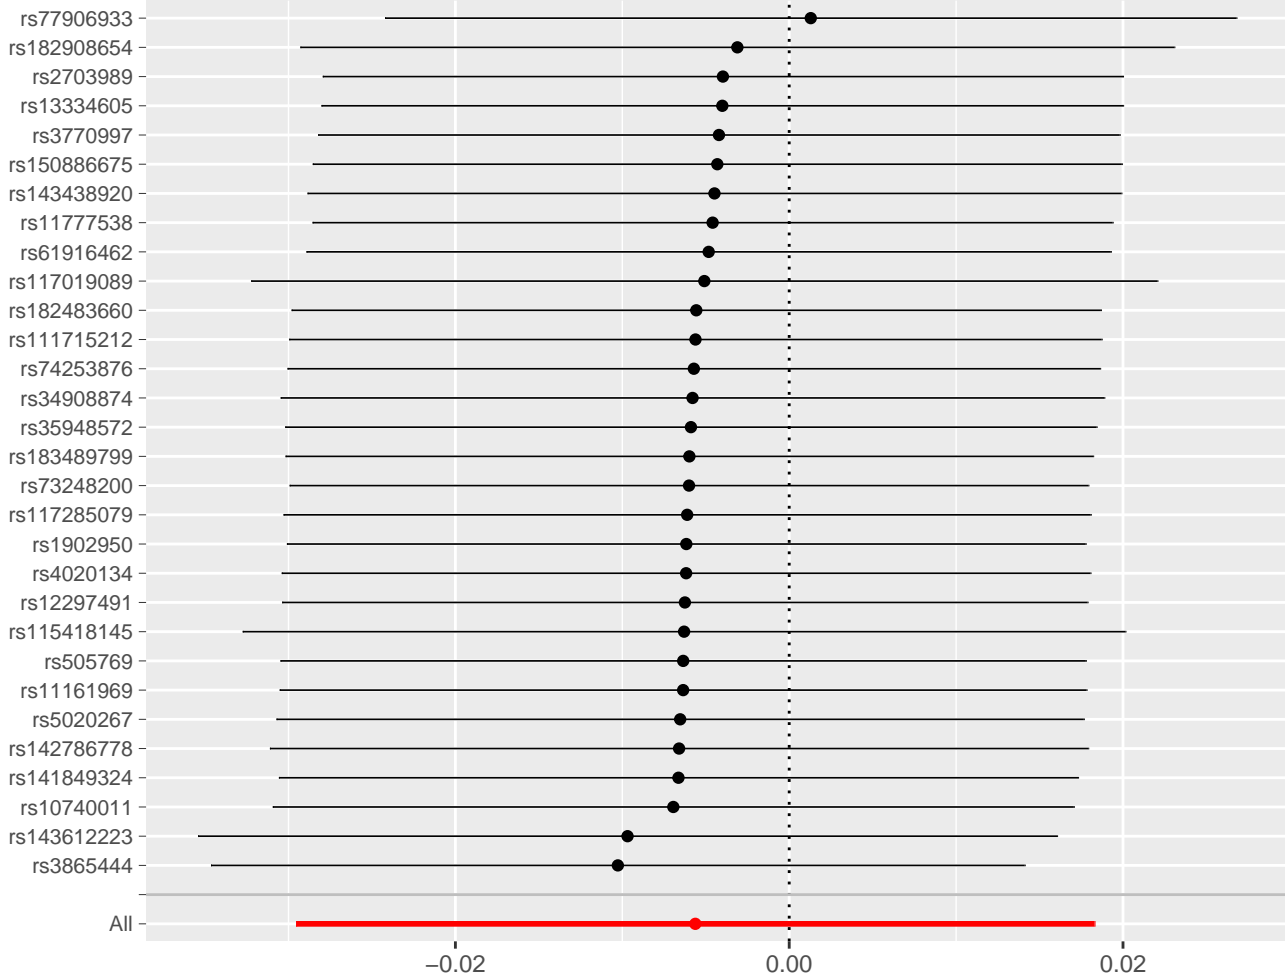

MR leave-one-out sensitivity analysis for 'CD33br HLA DR+ AC' on 'Aplastic anemia'



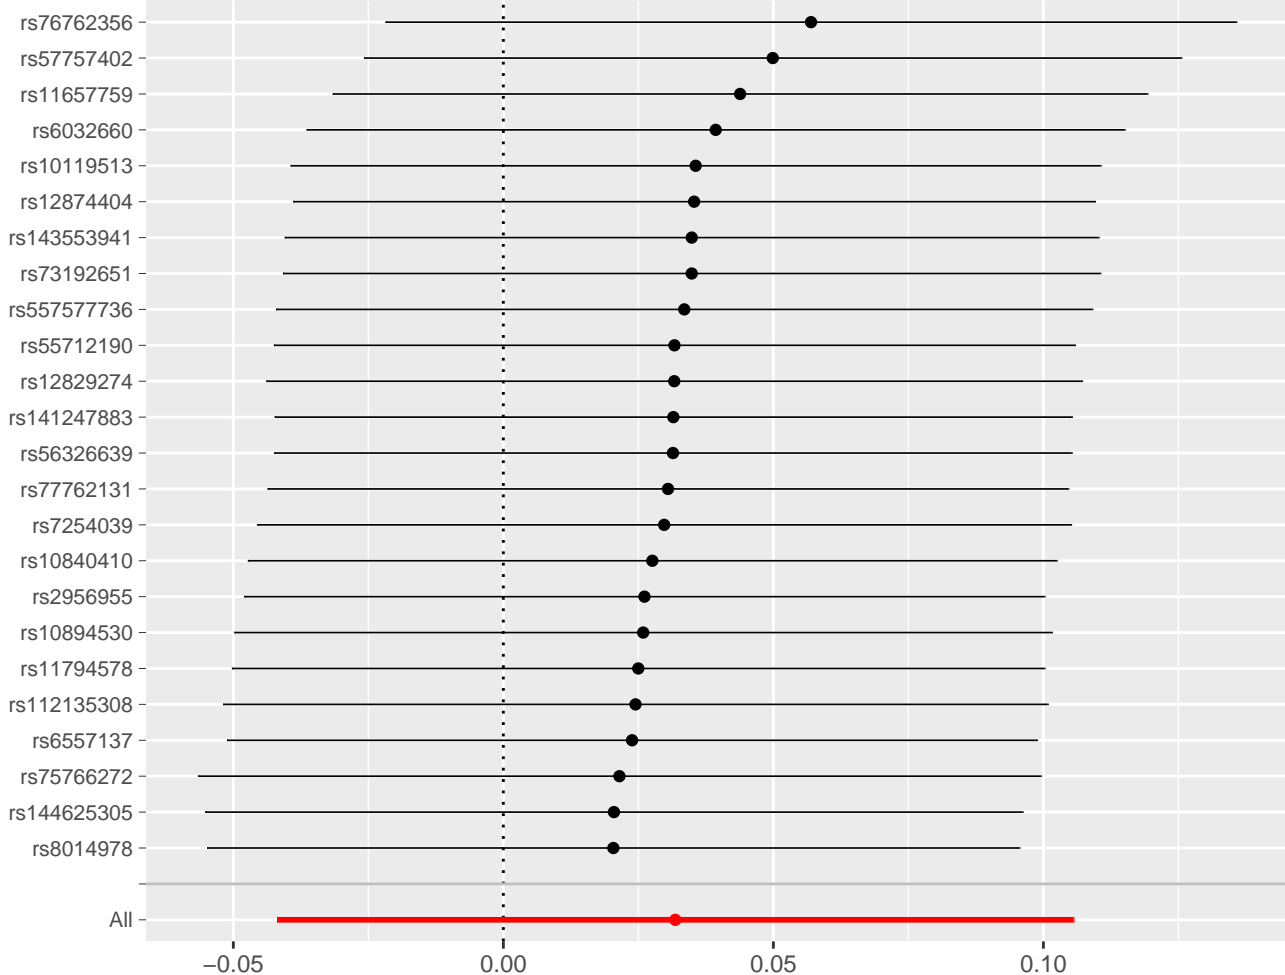

MR leave-one-out sensitivity analysis for 'Unsw Mem %lymphocyte' on 'Aplastic anemia'

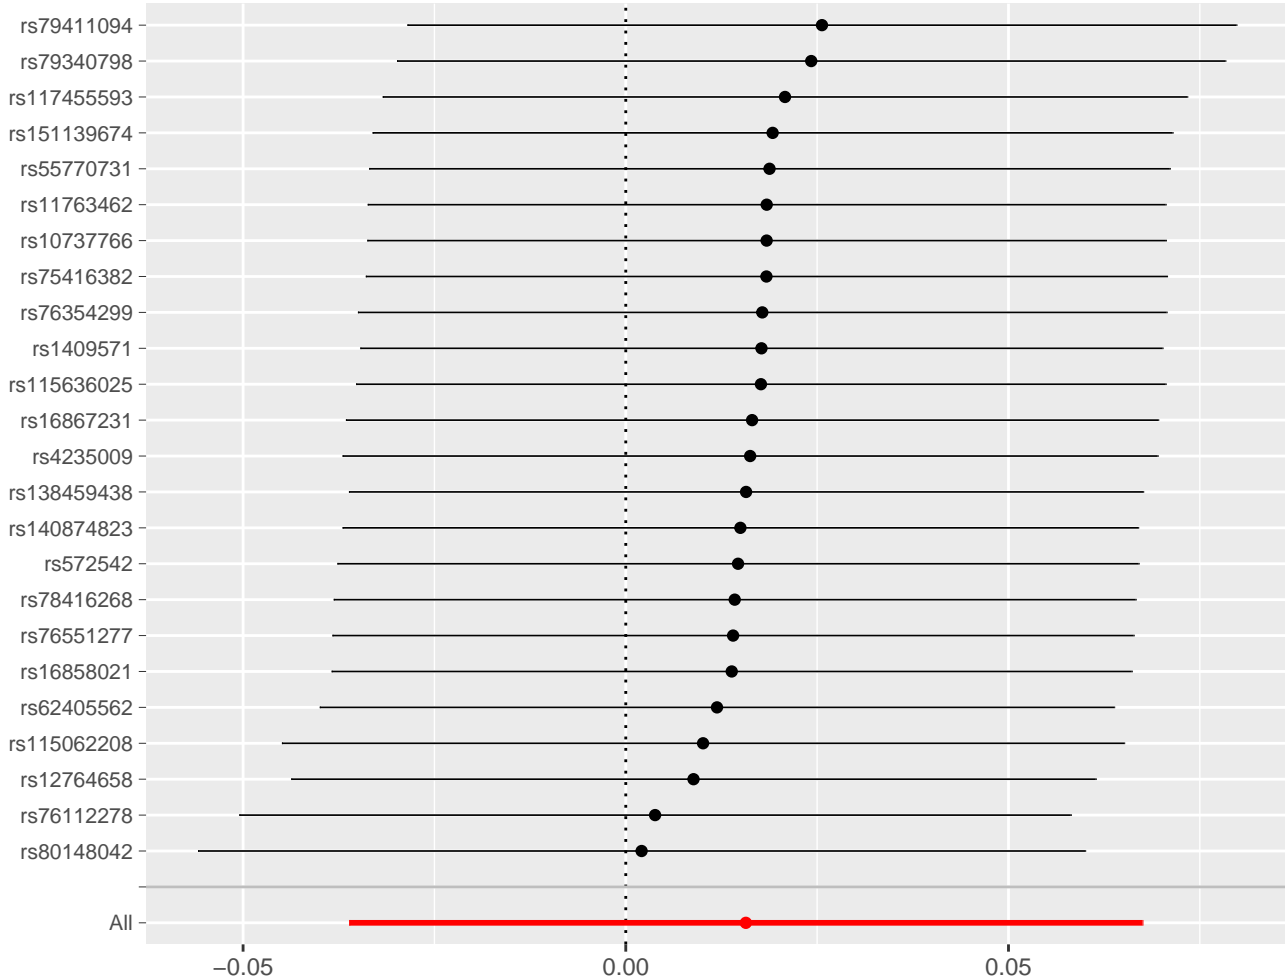

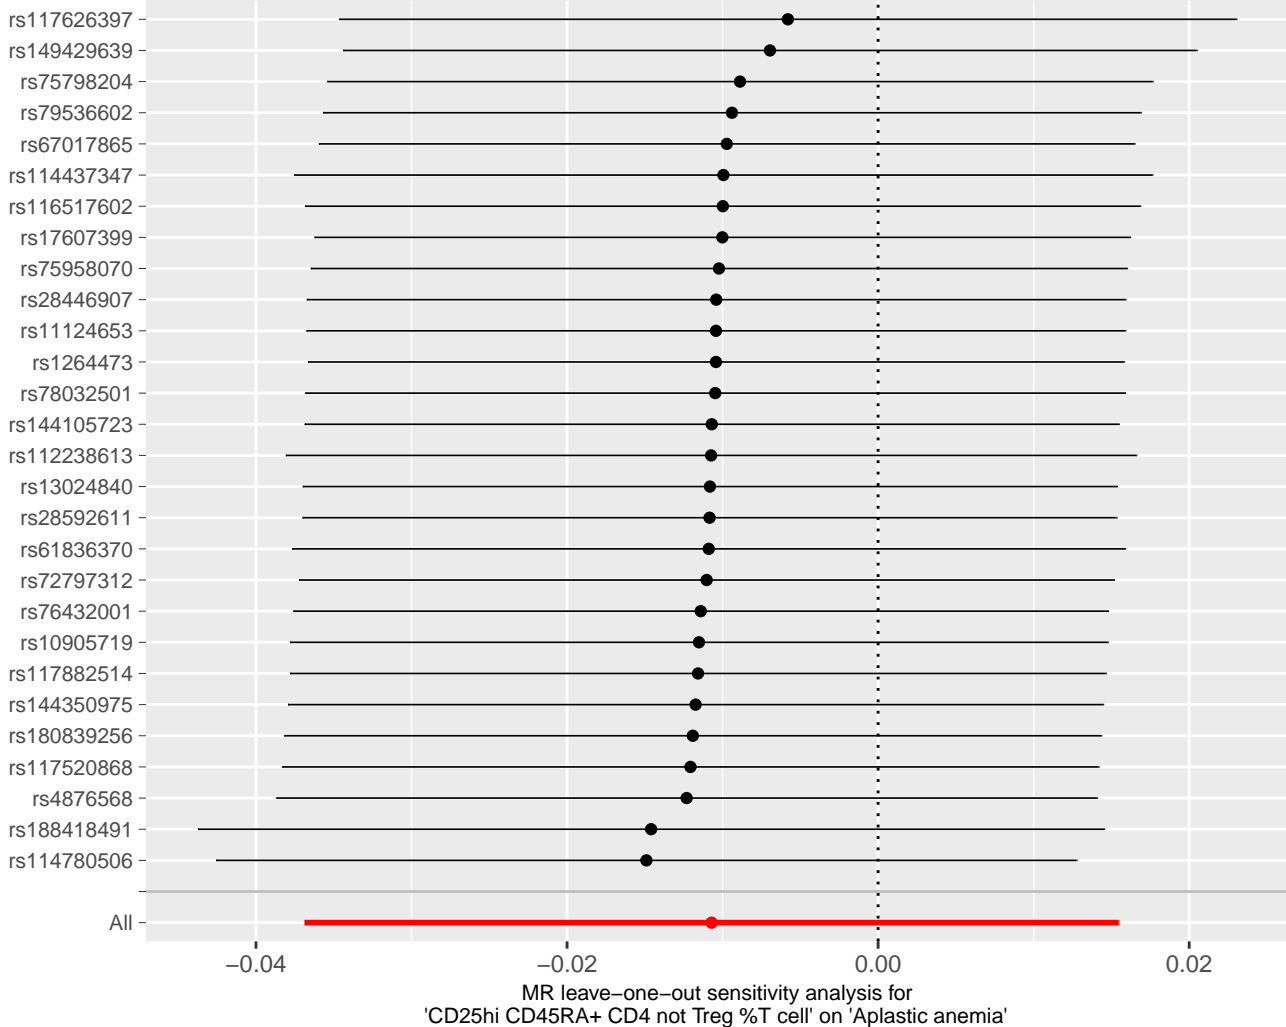

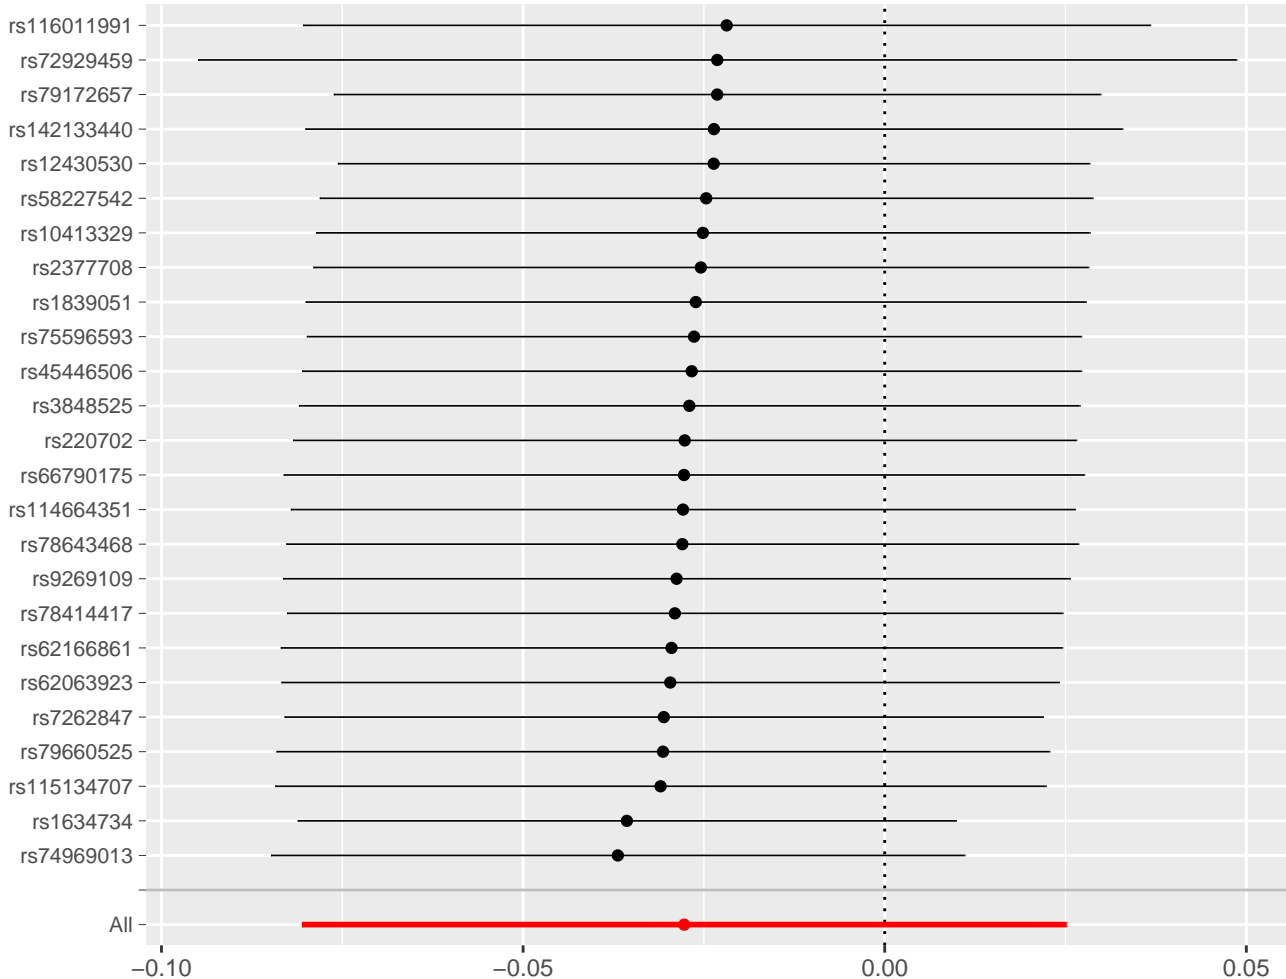

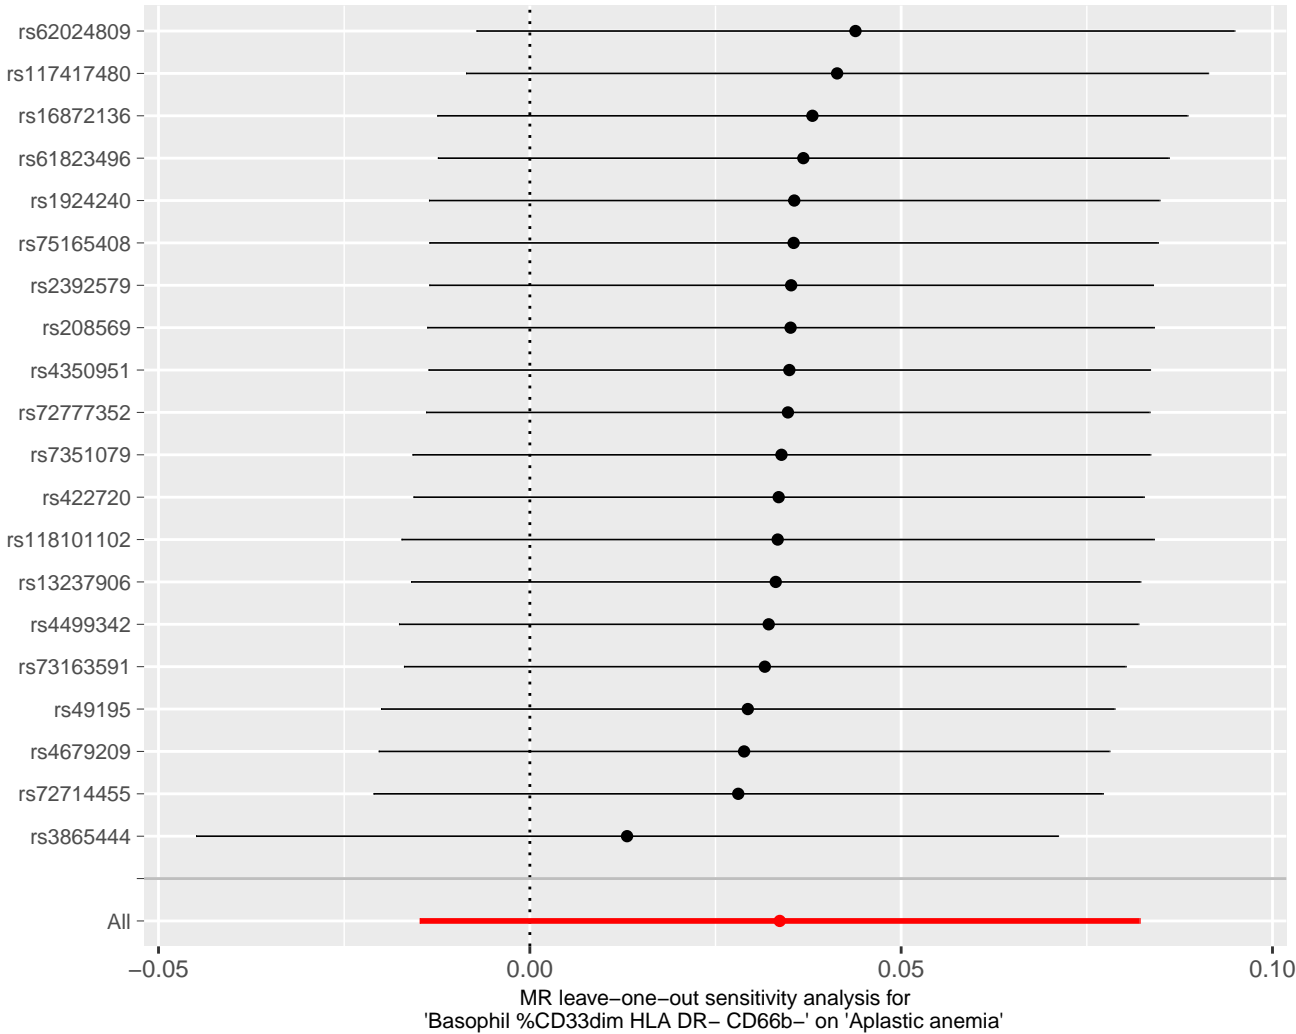

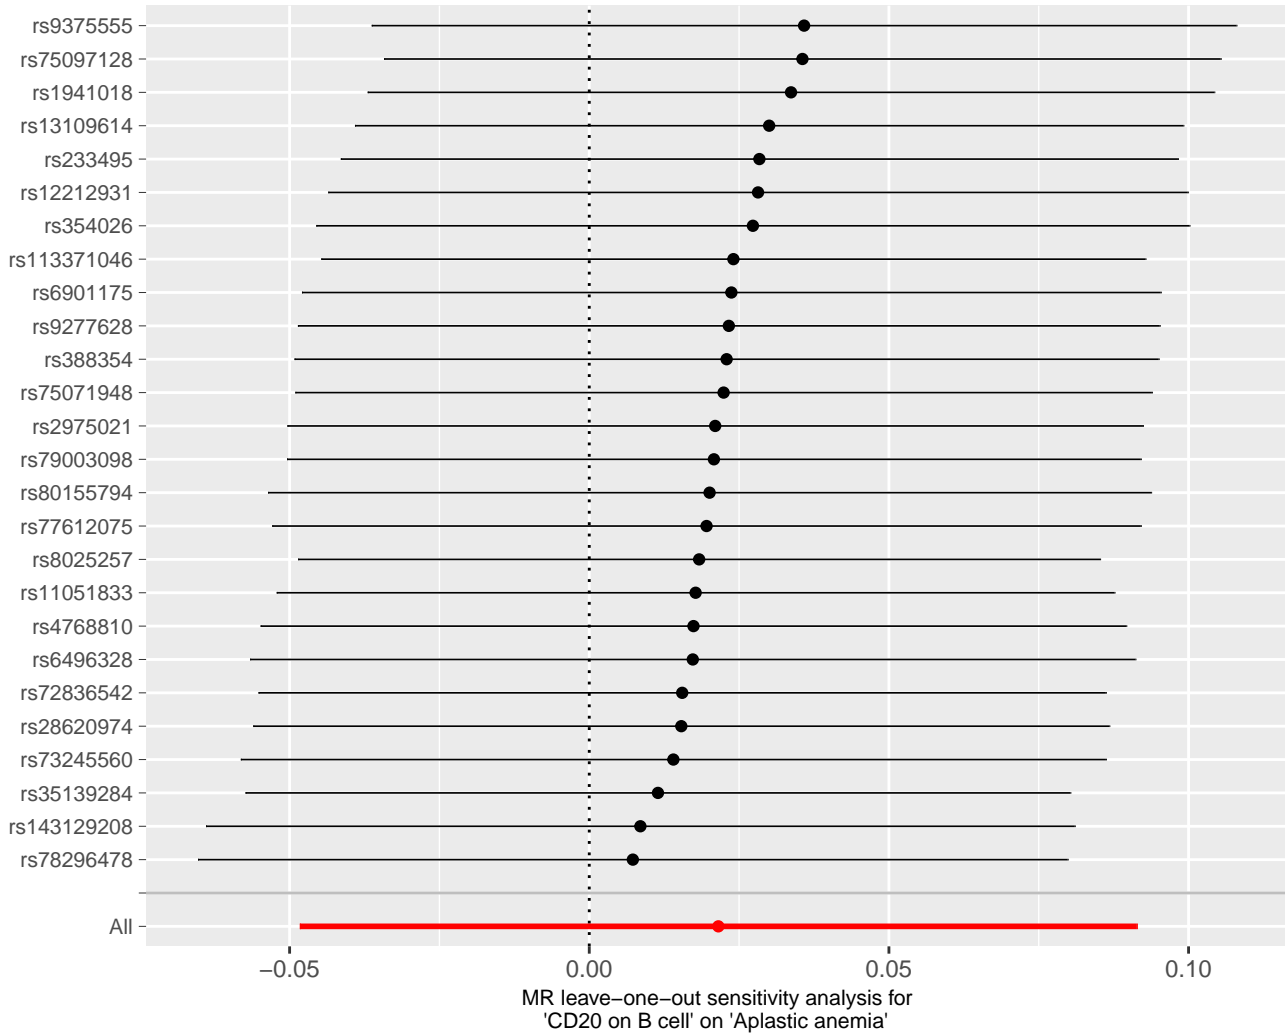

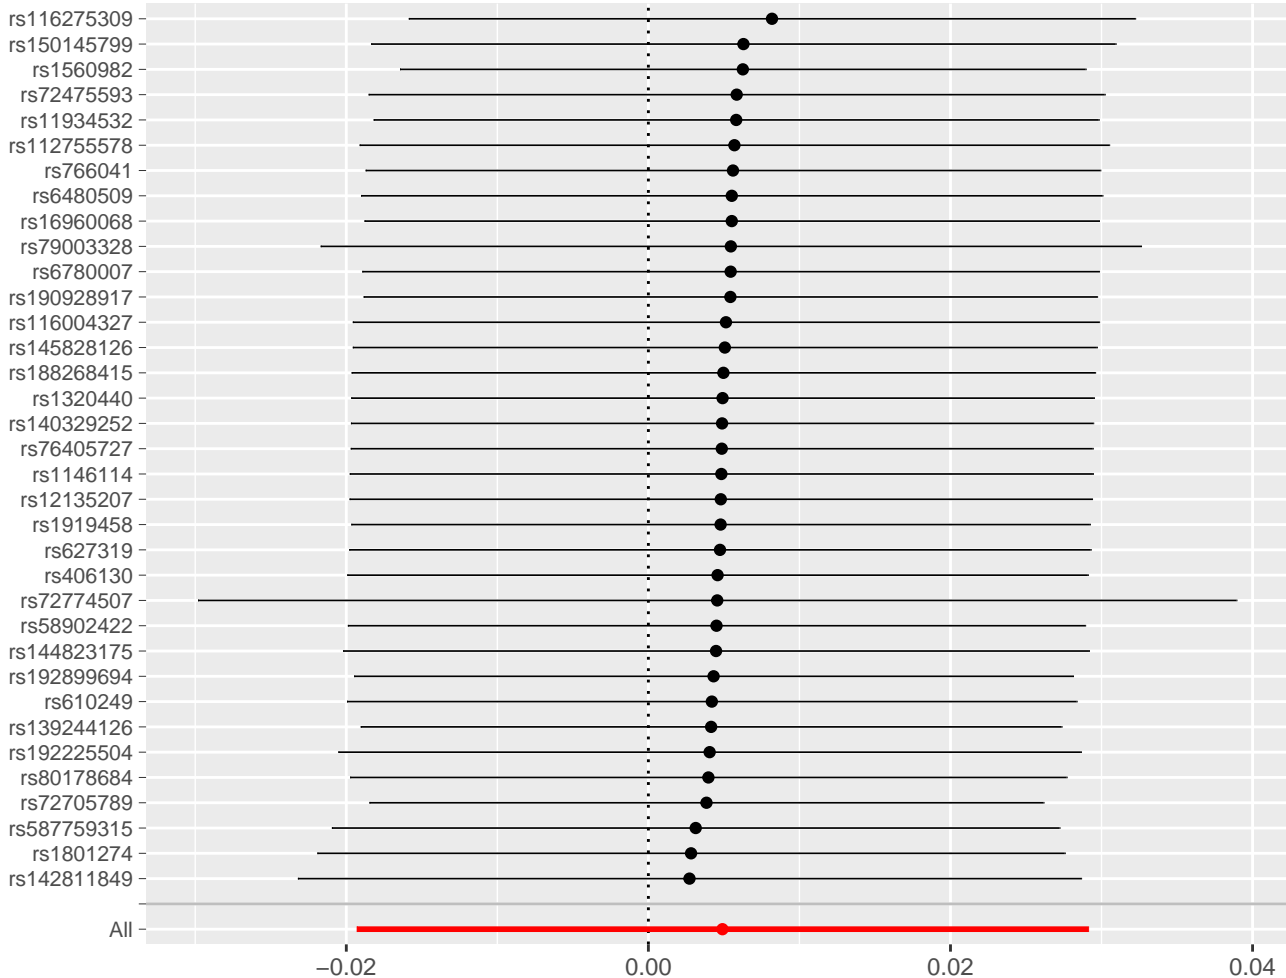

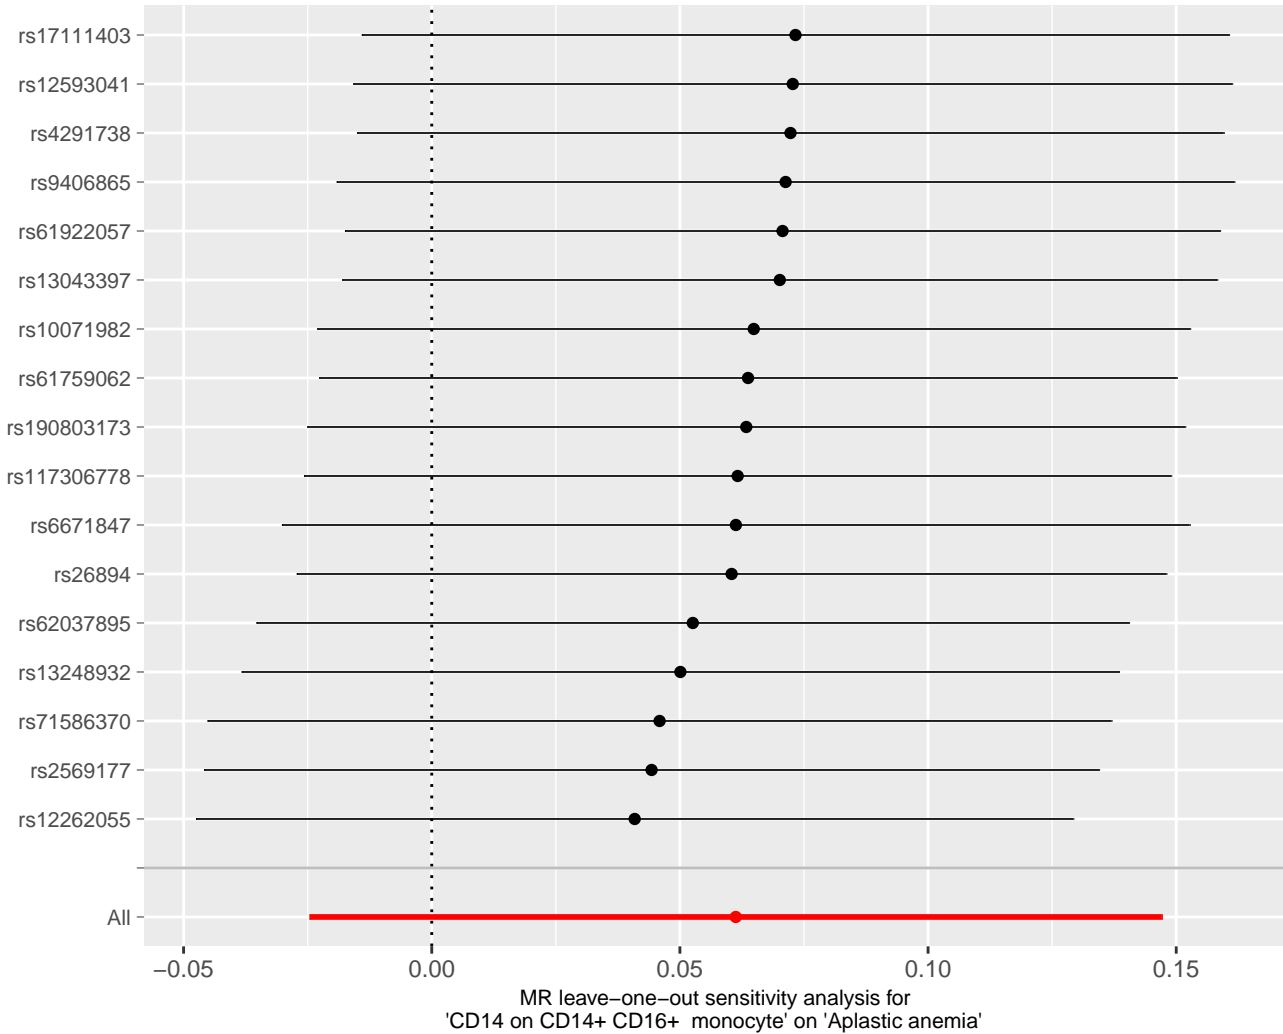



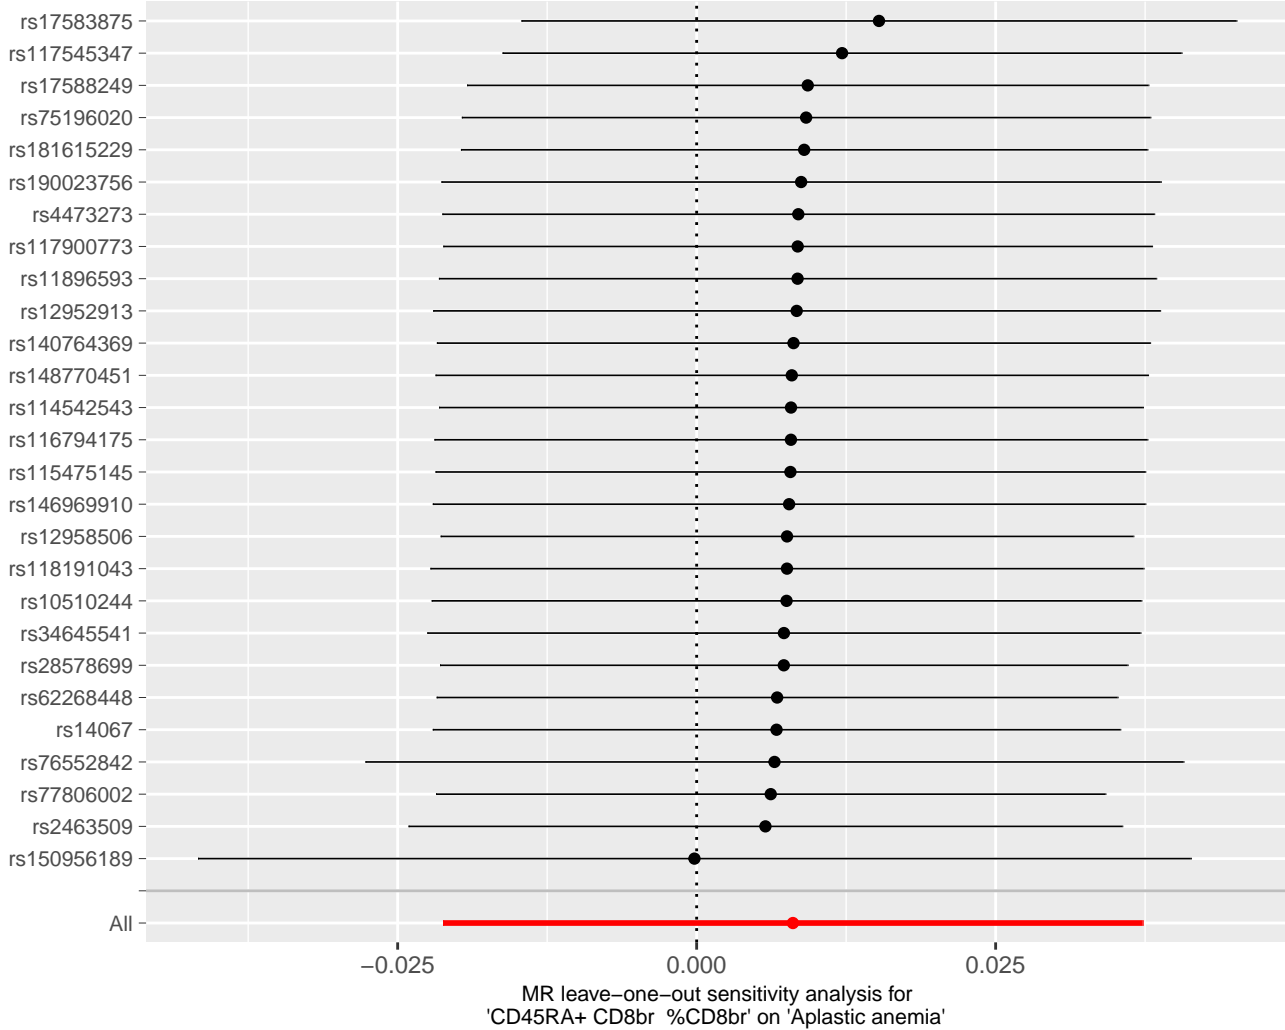

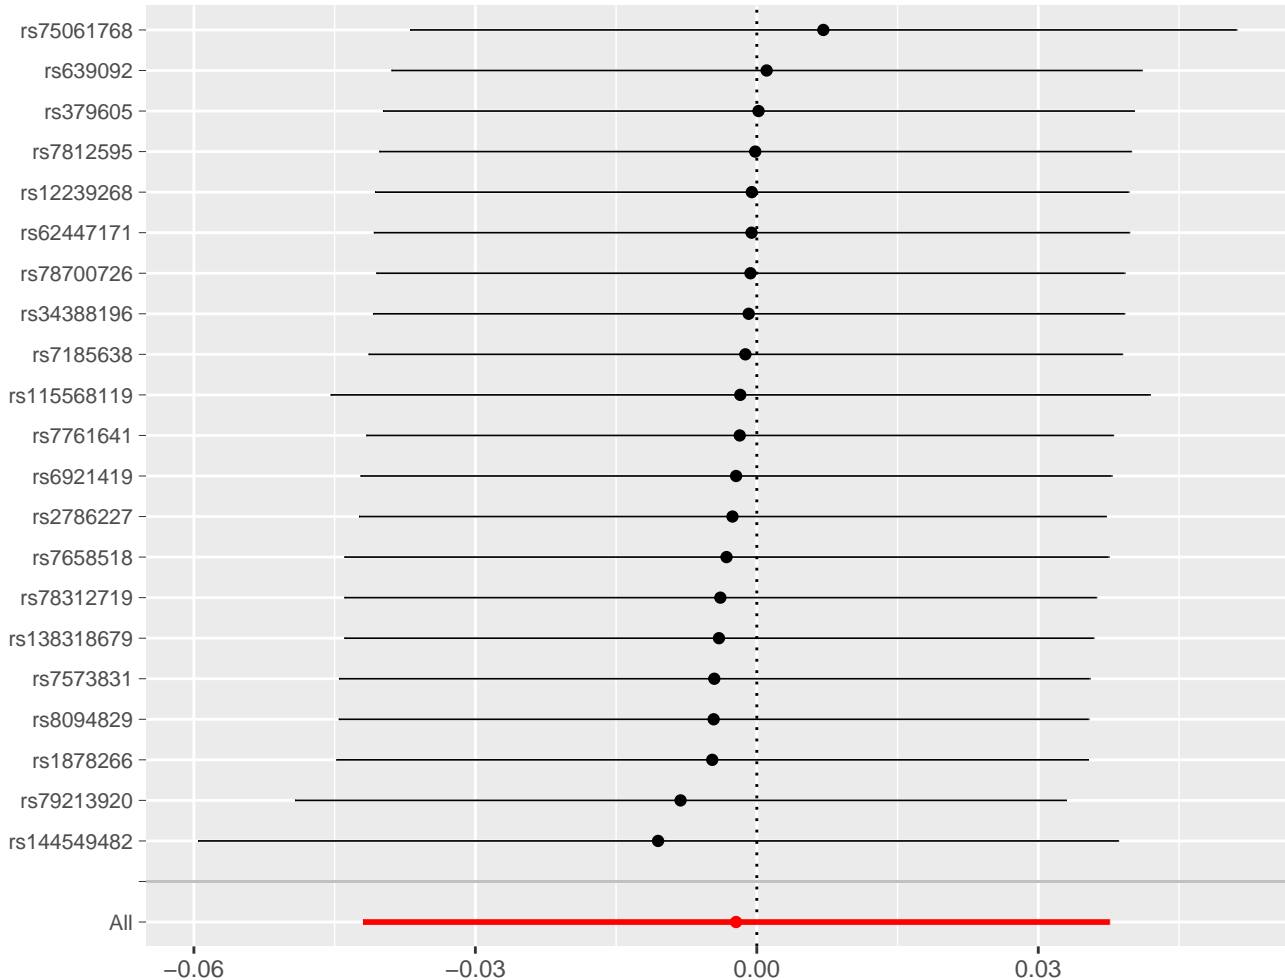

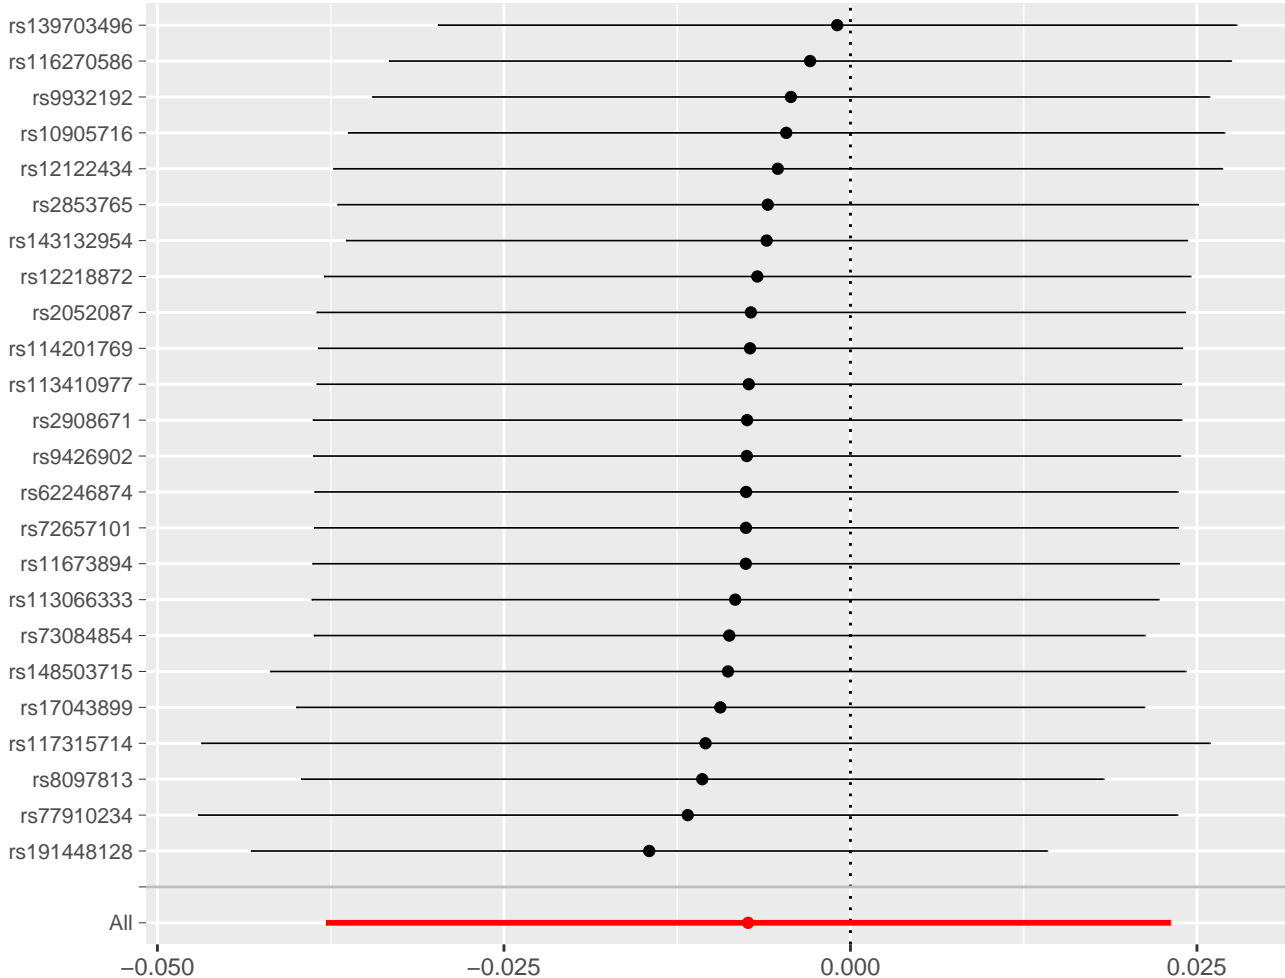

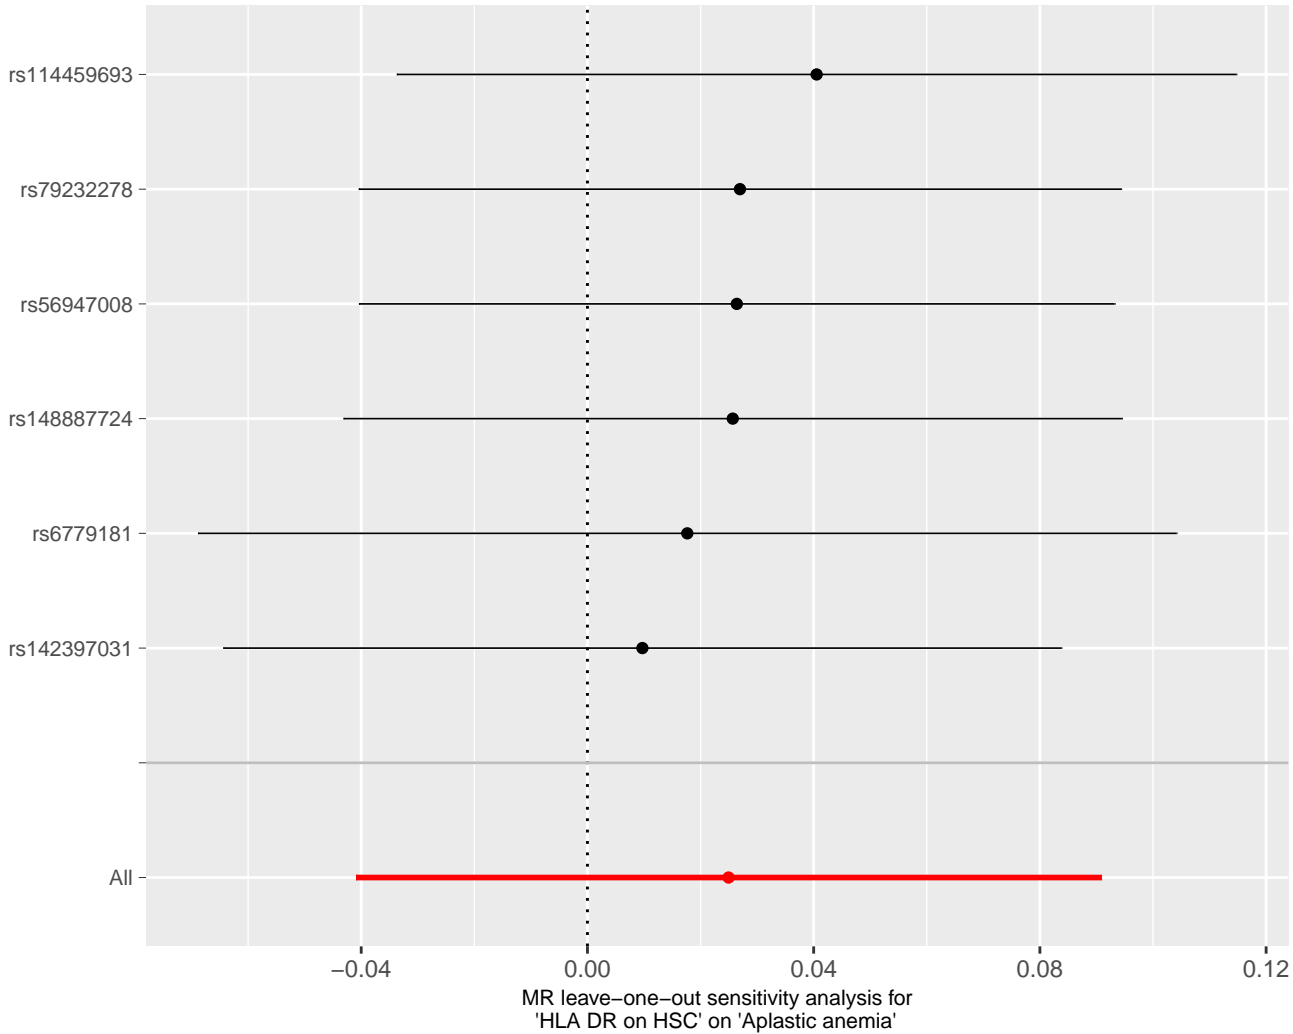

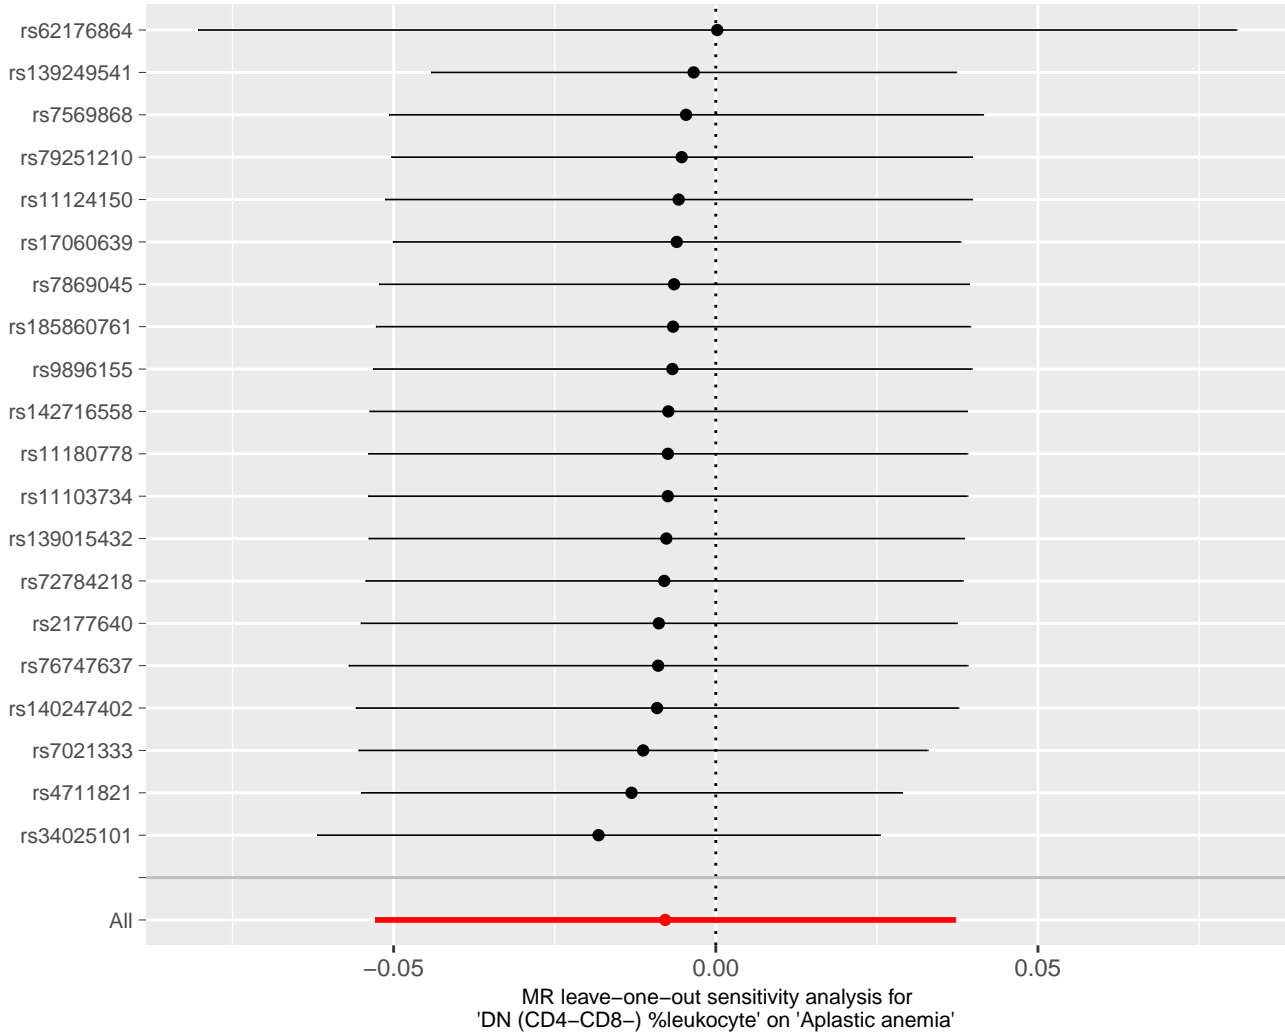

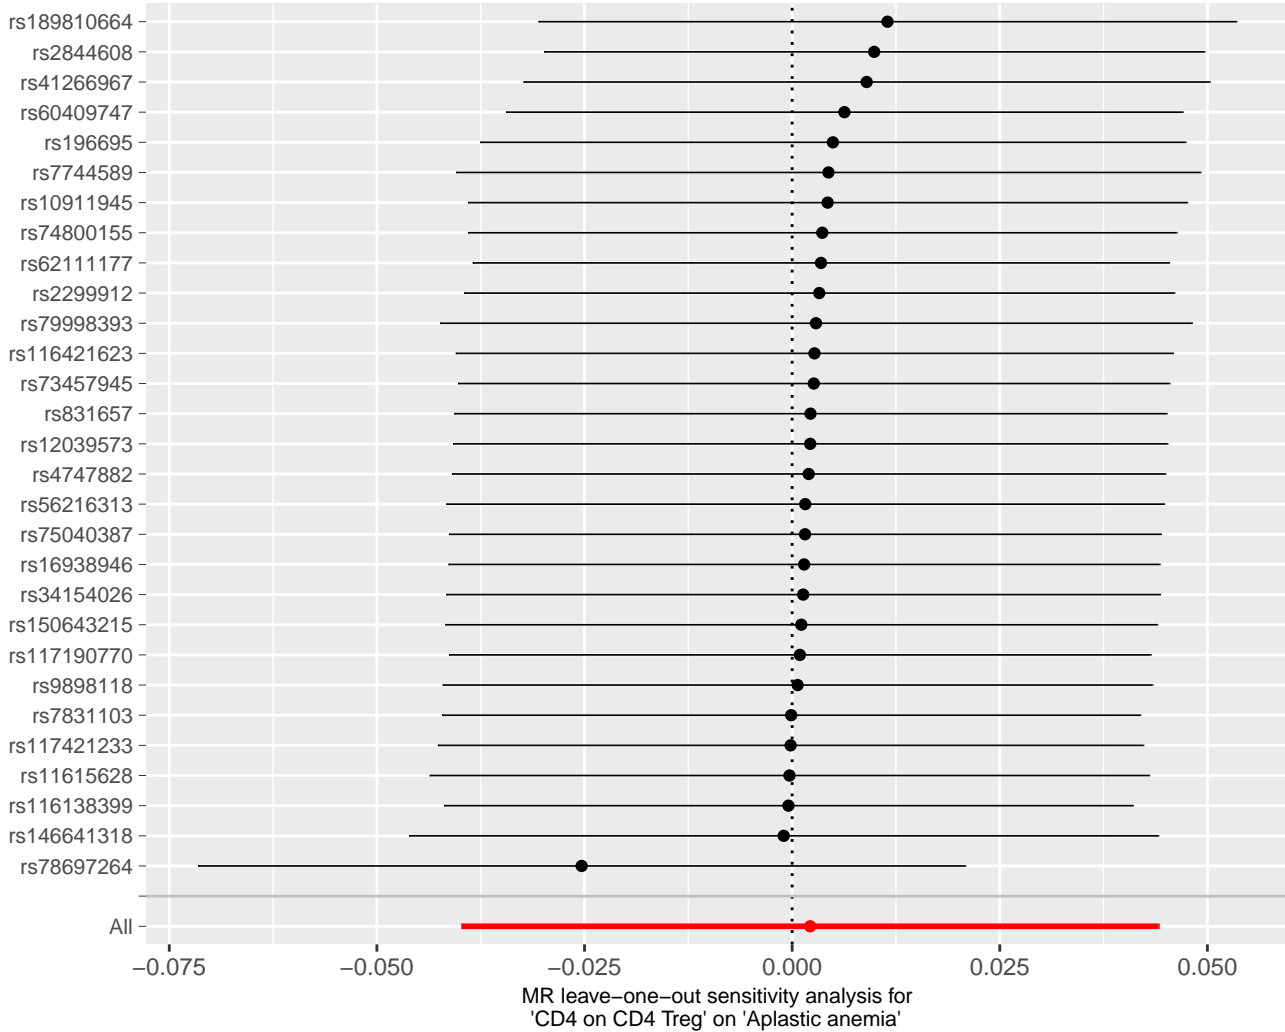

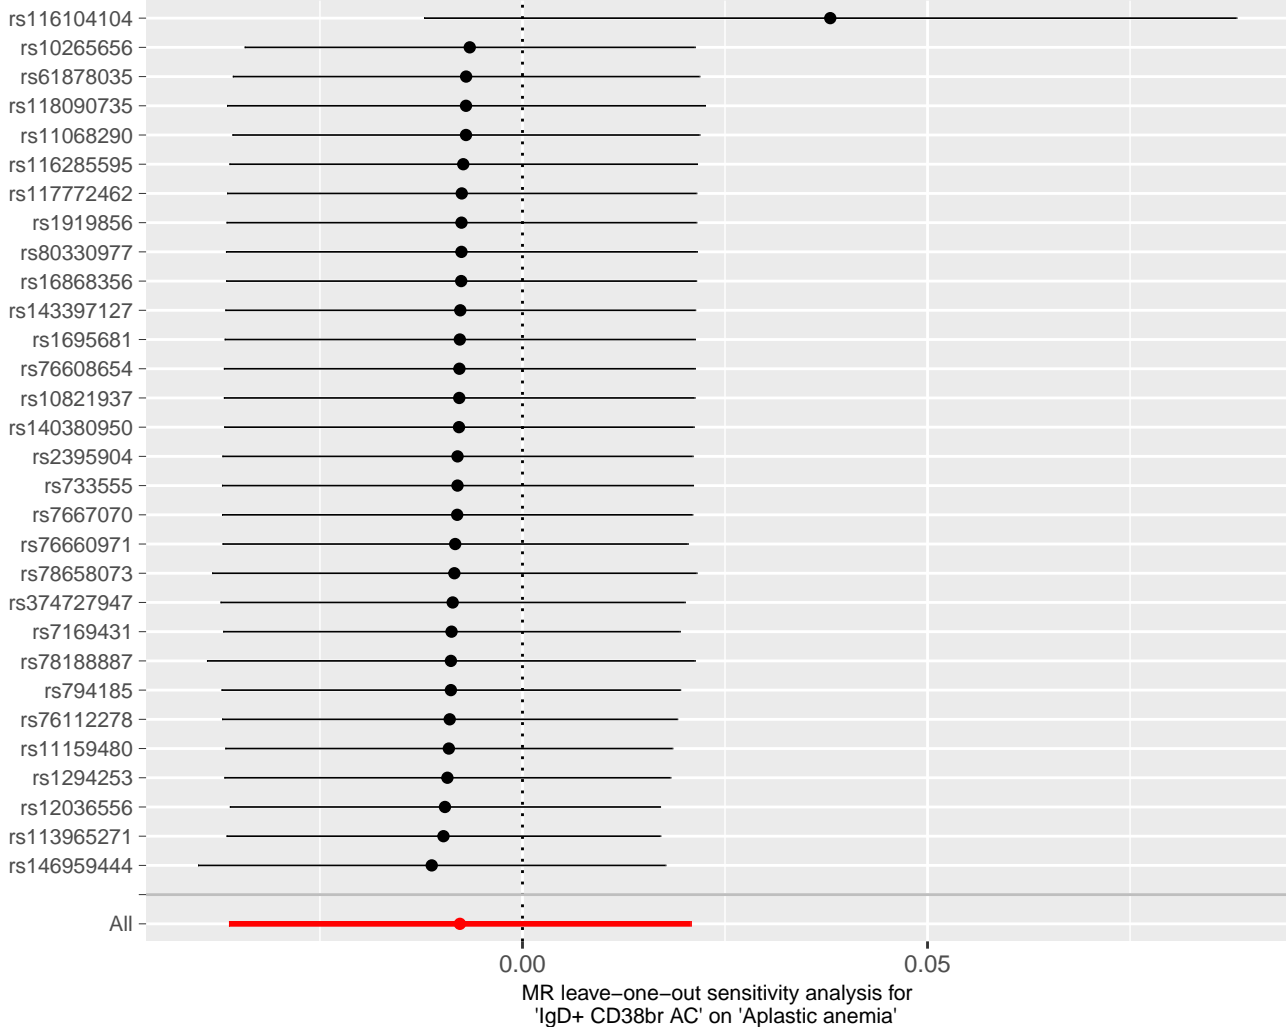

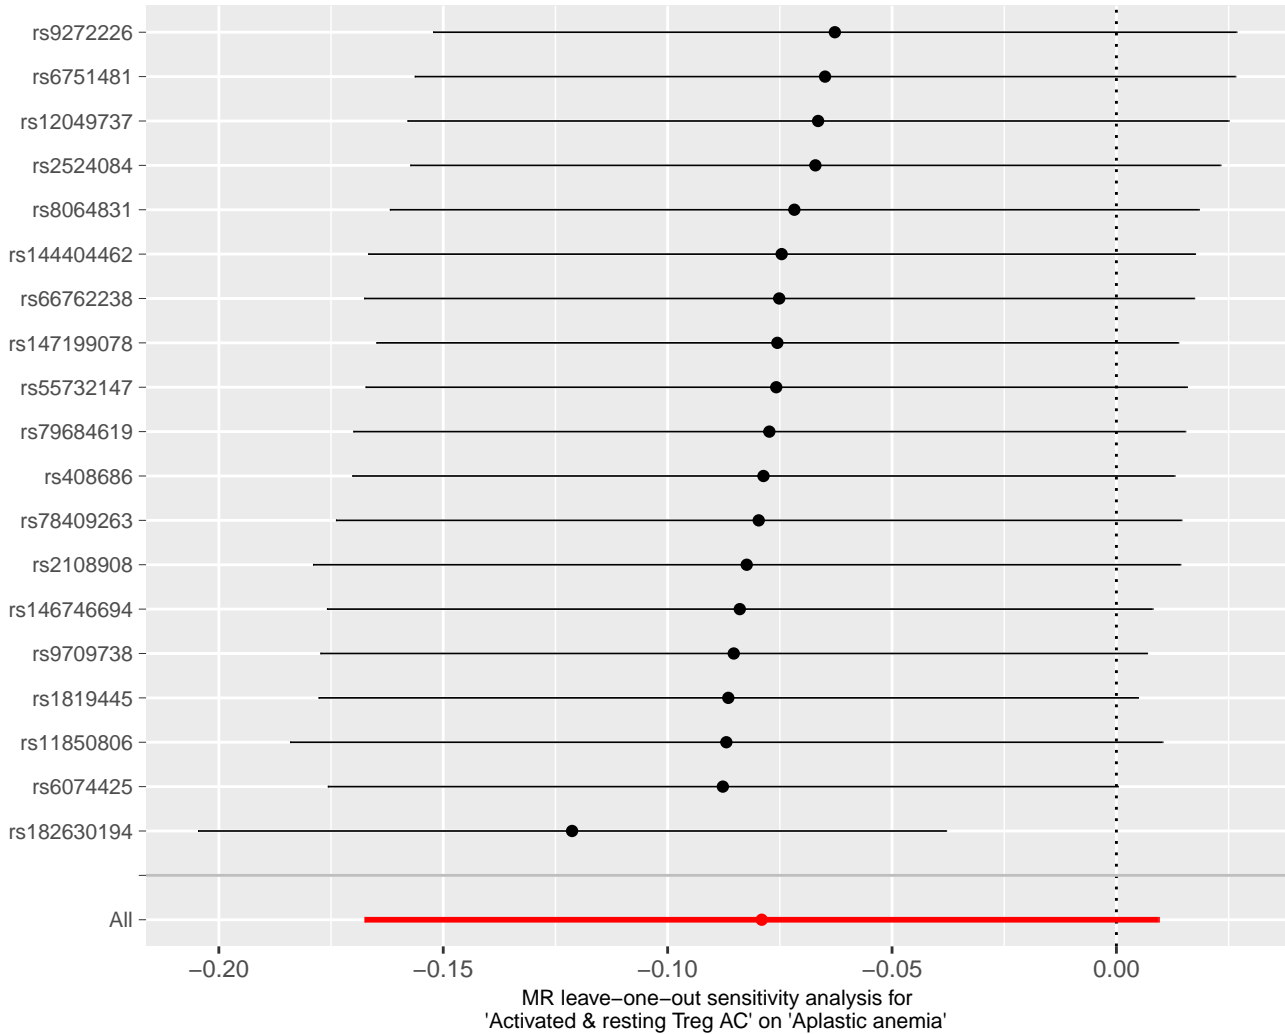



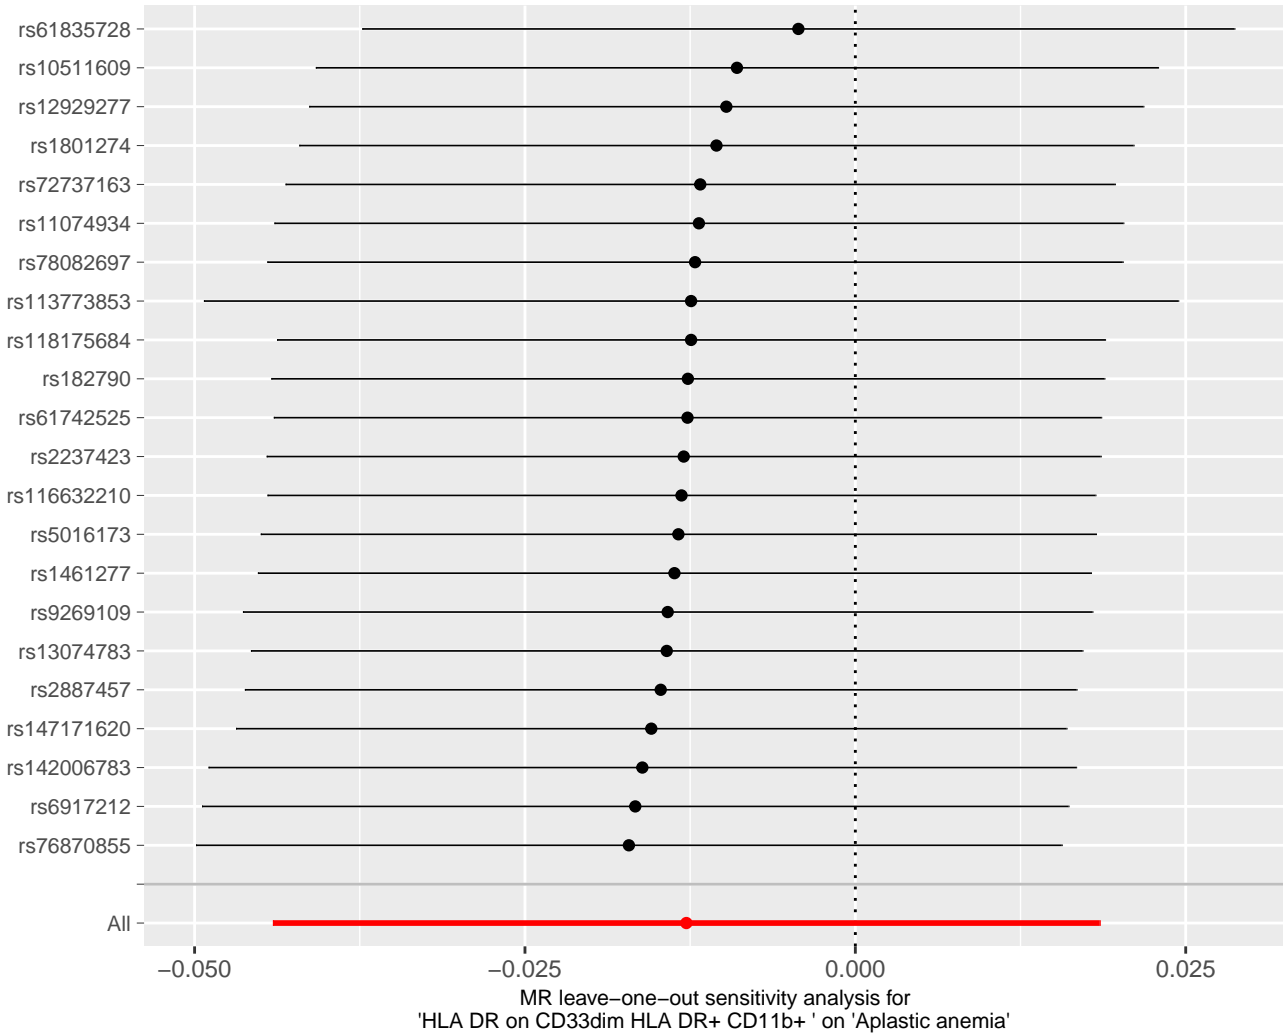

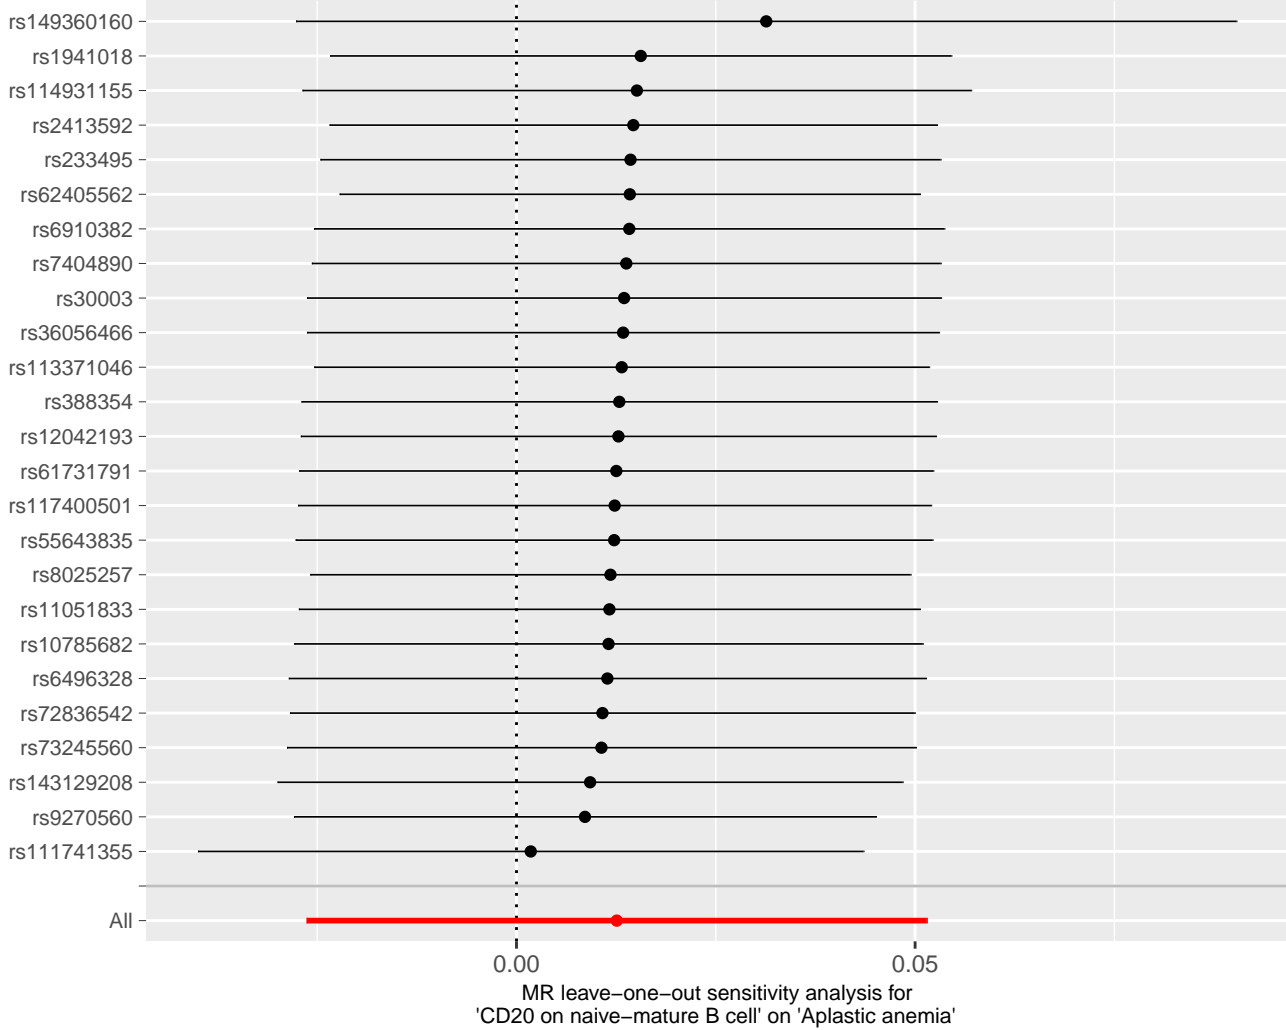

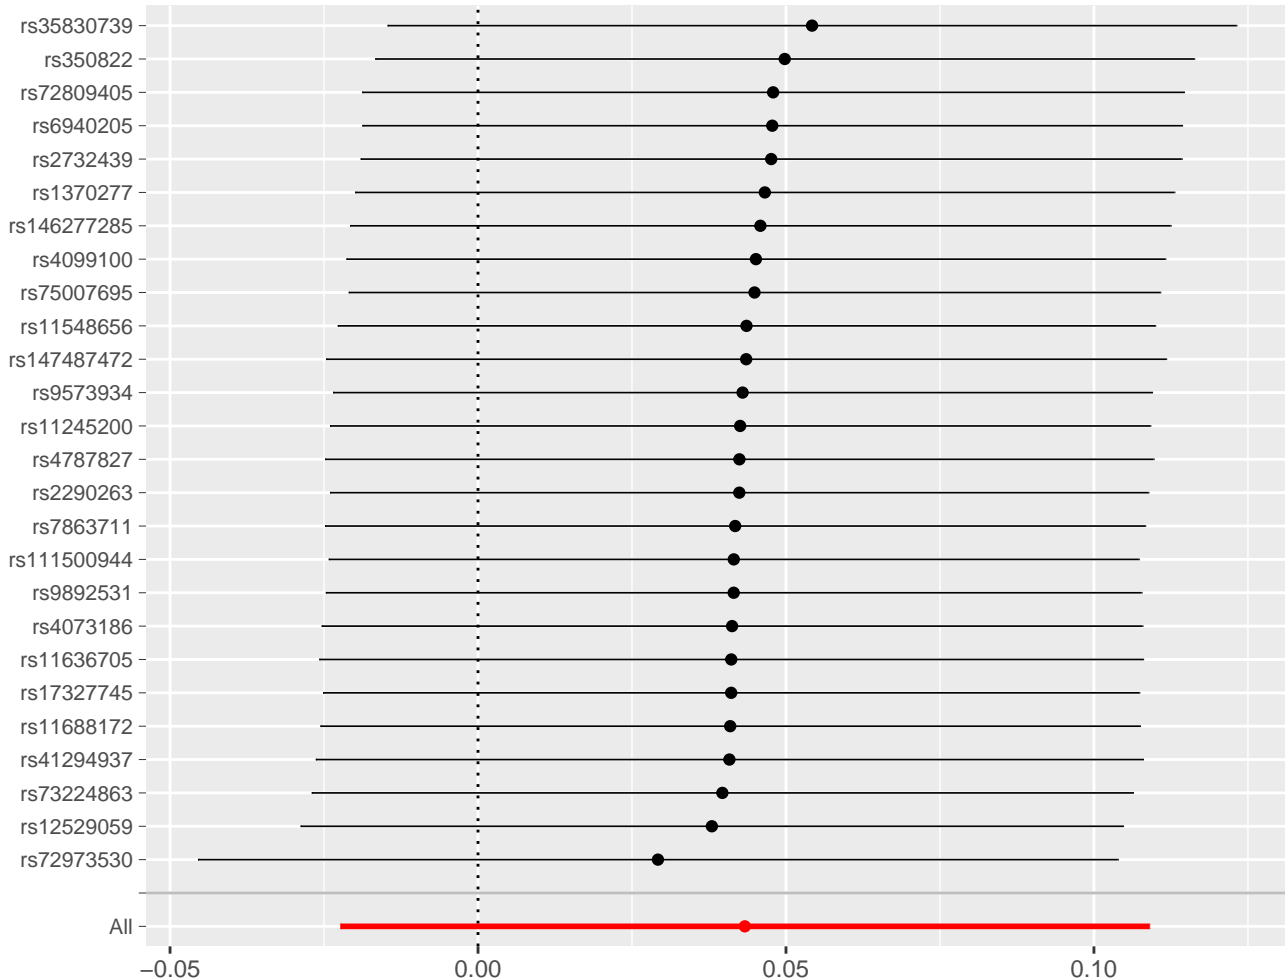

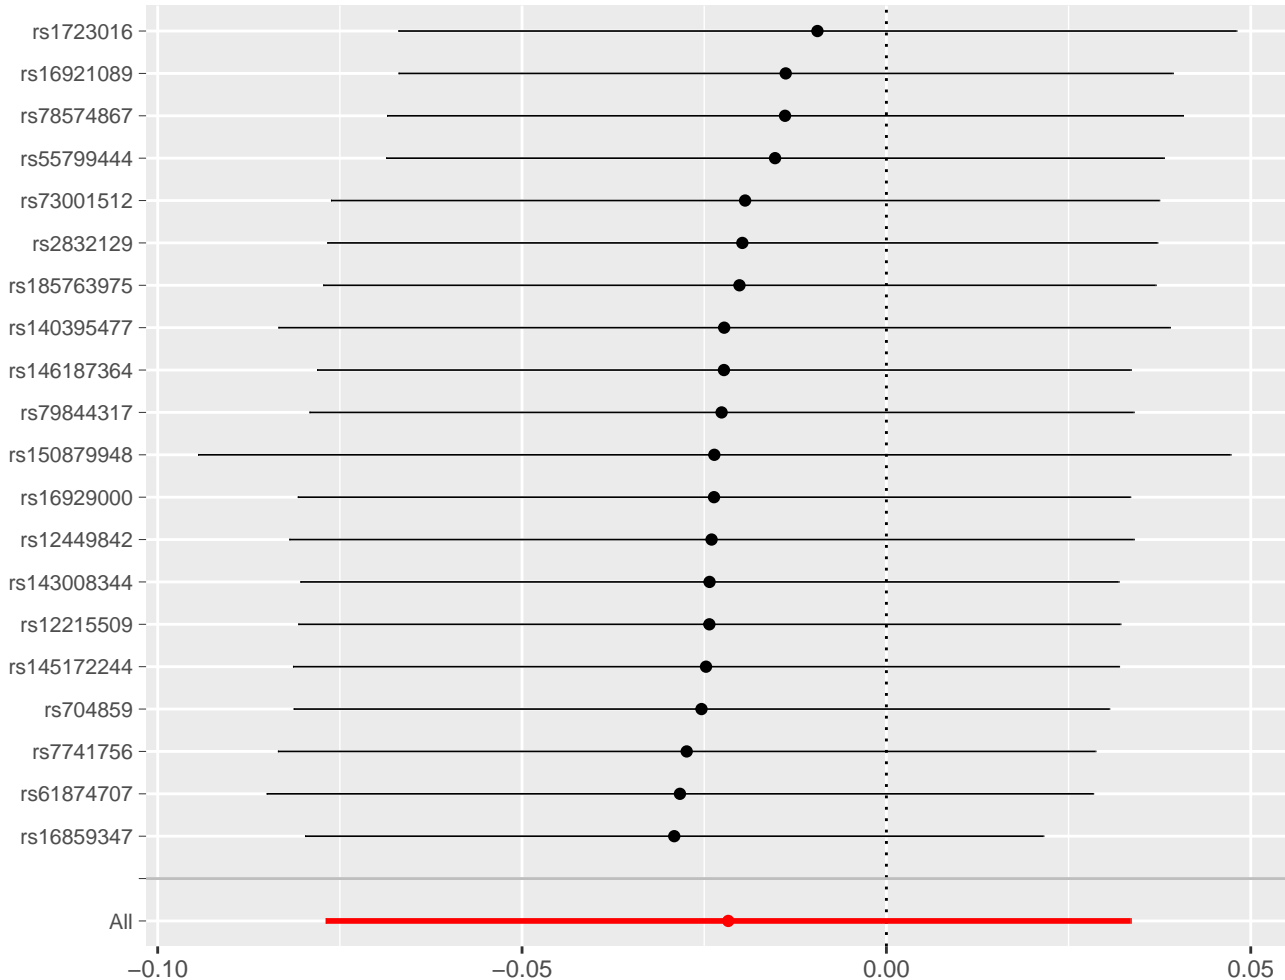

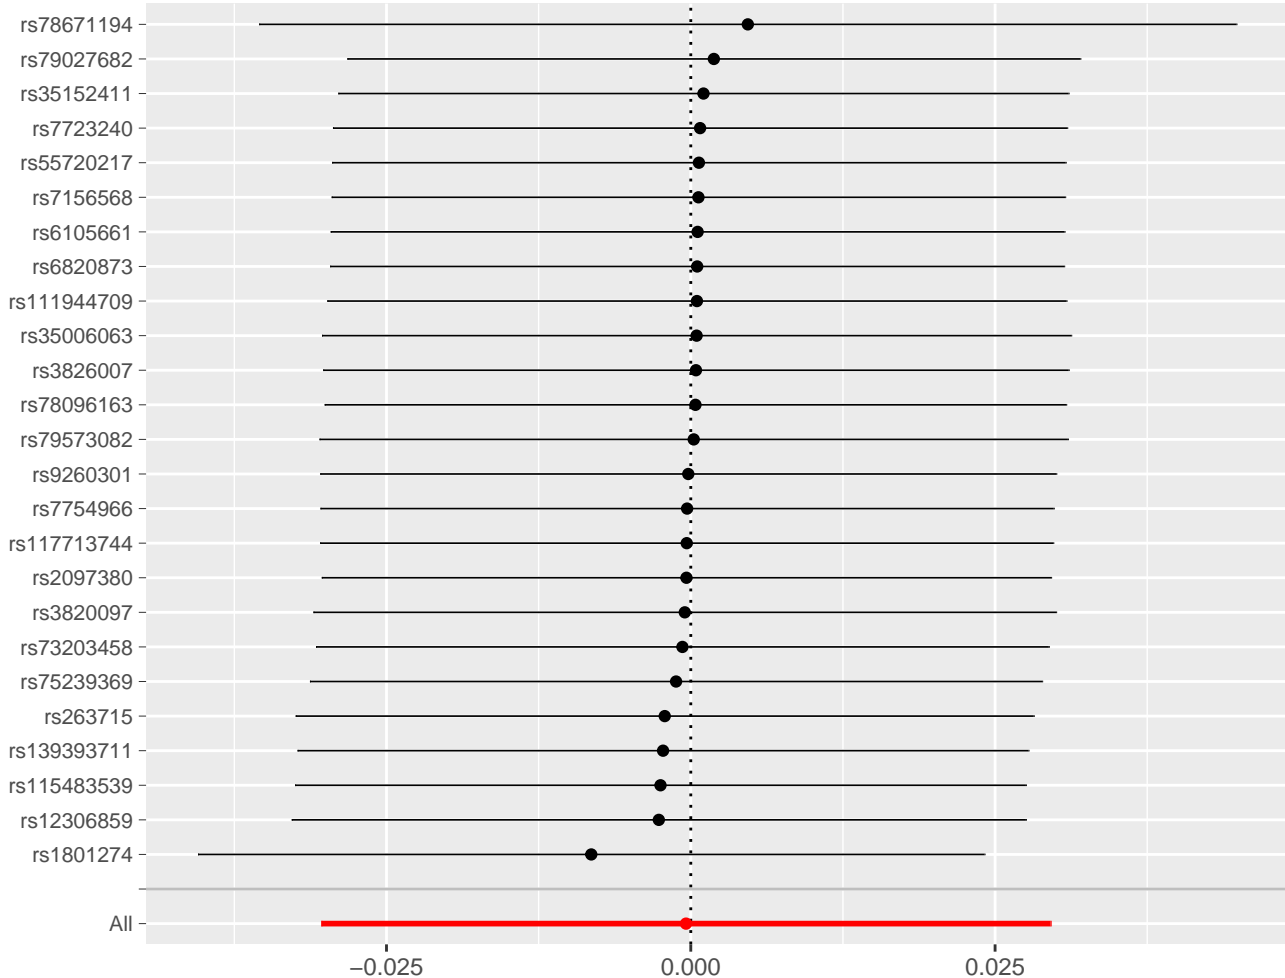

MR leave-one-out sensitivity analysis for 'CD33dim HLA DR+ CD11b+ %CD33dim HLA DR+' on 'Aplastic anemia'

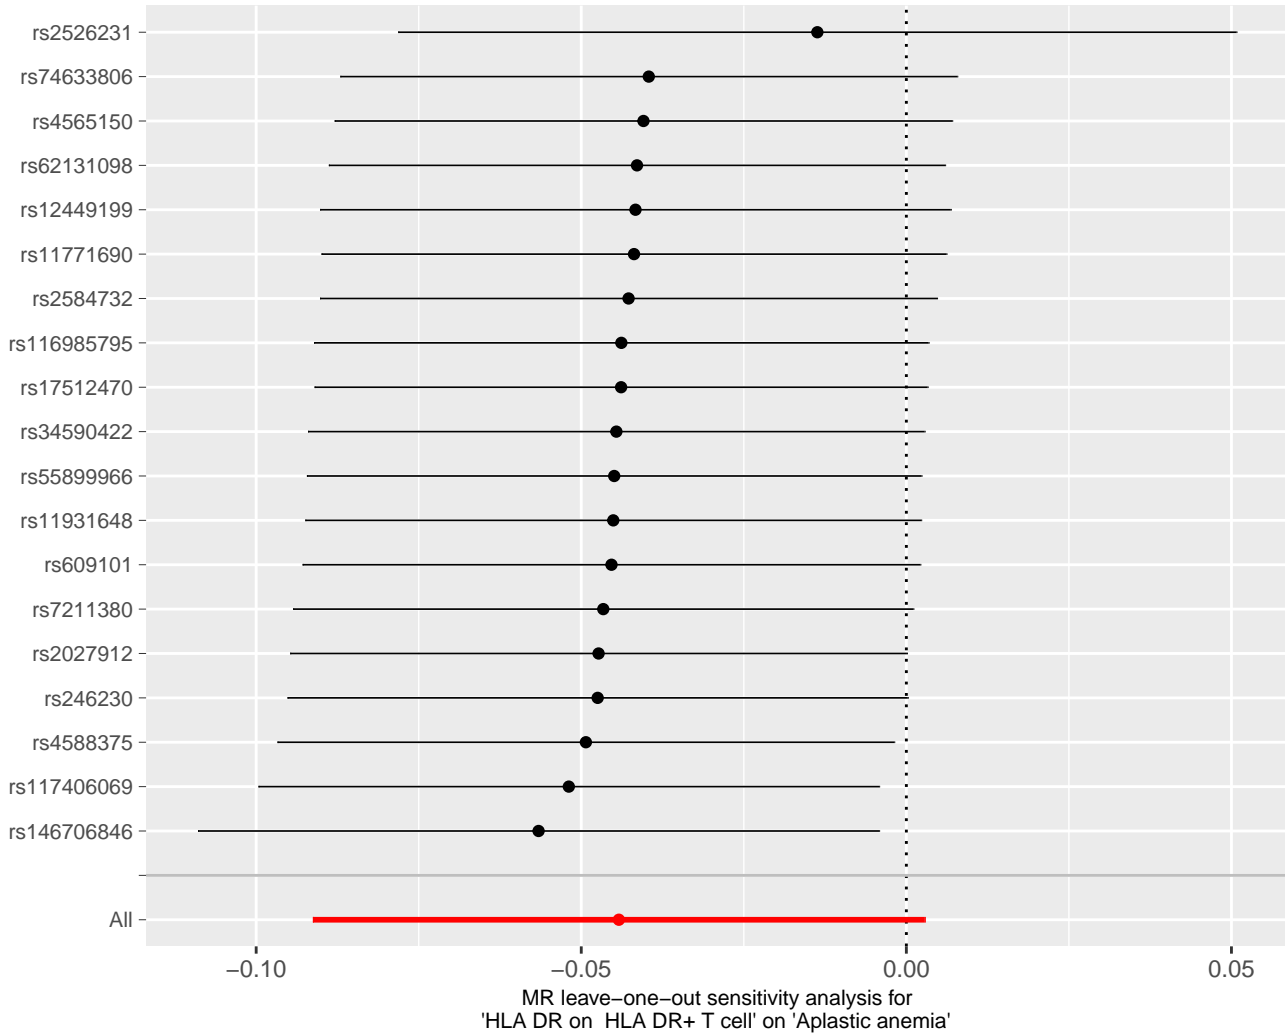

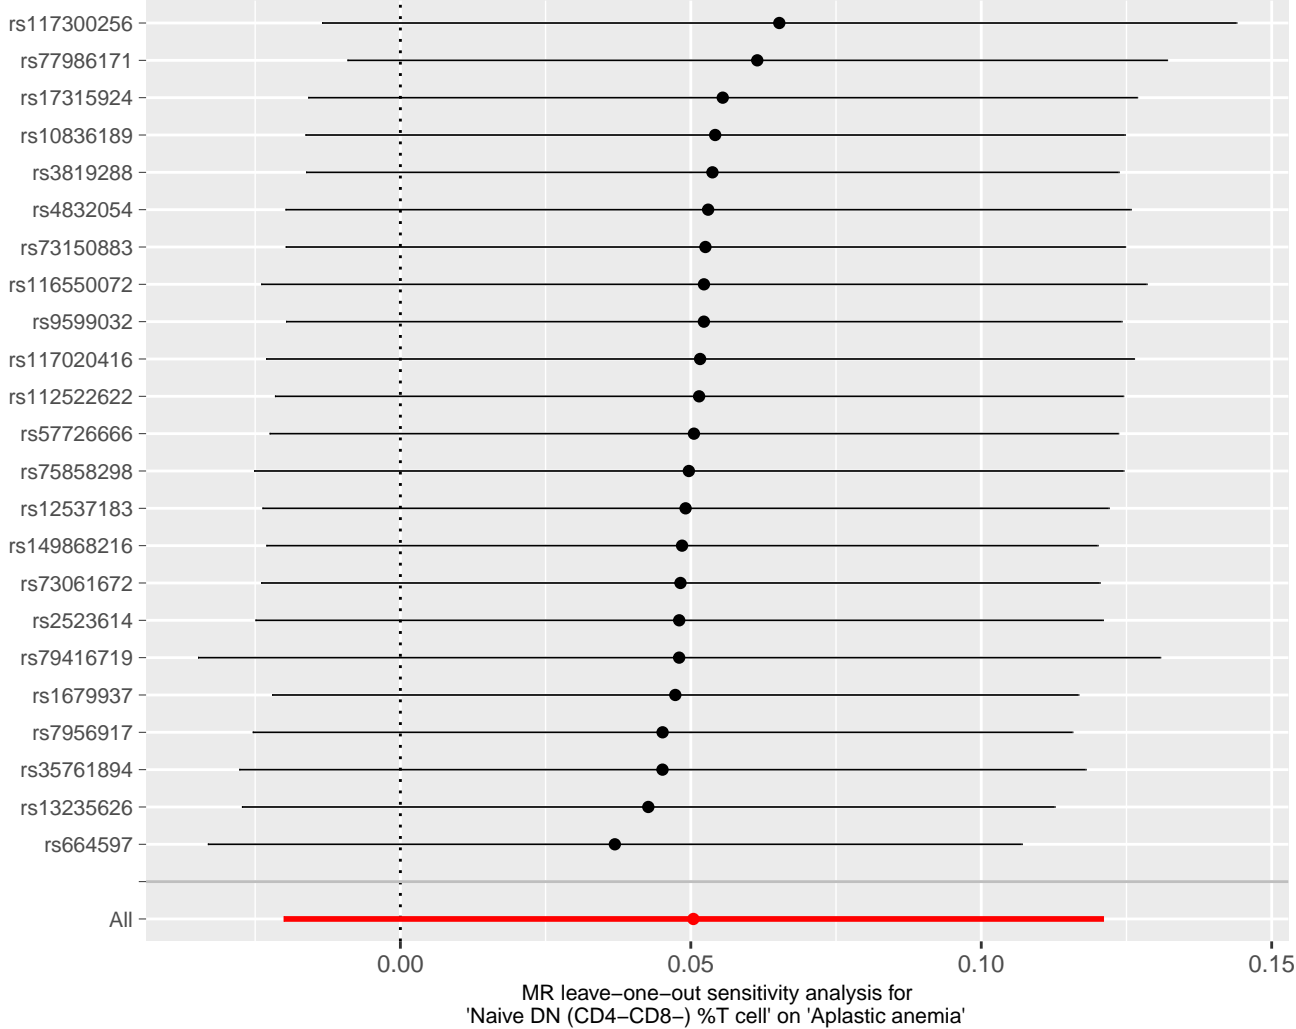

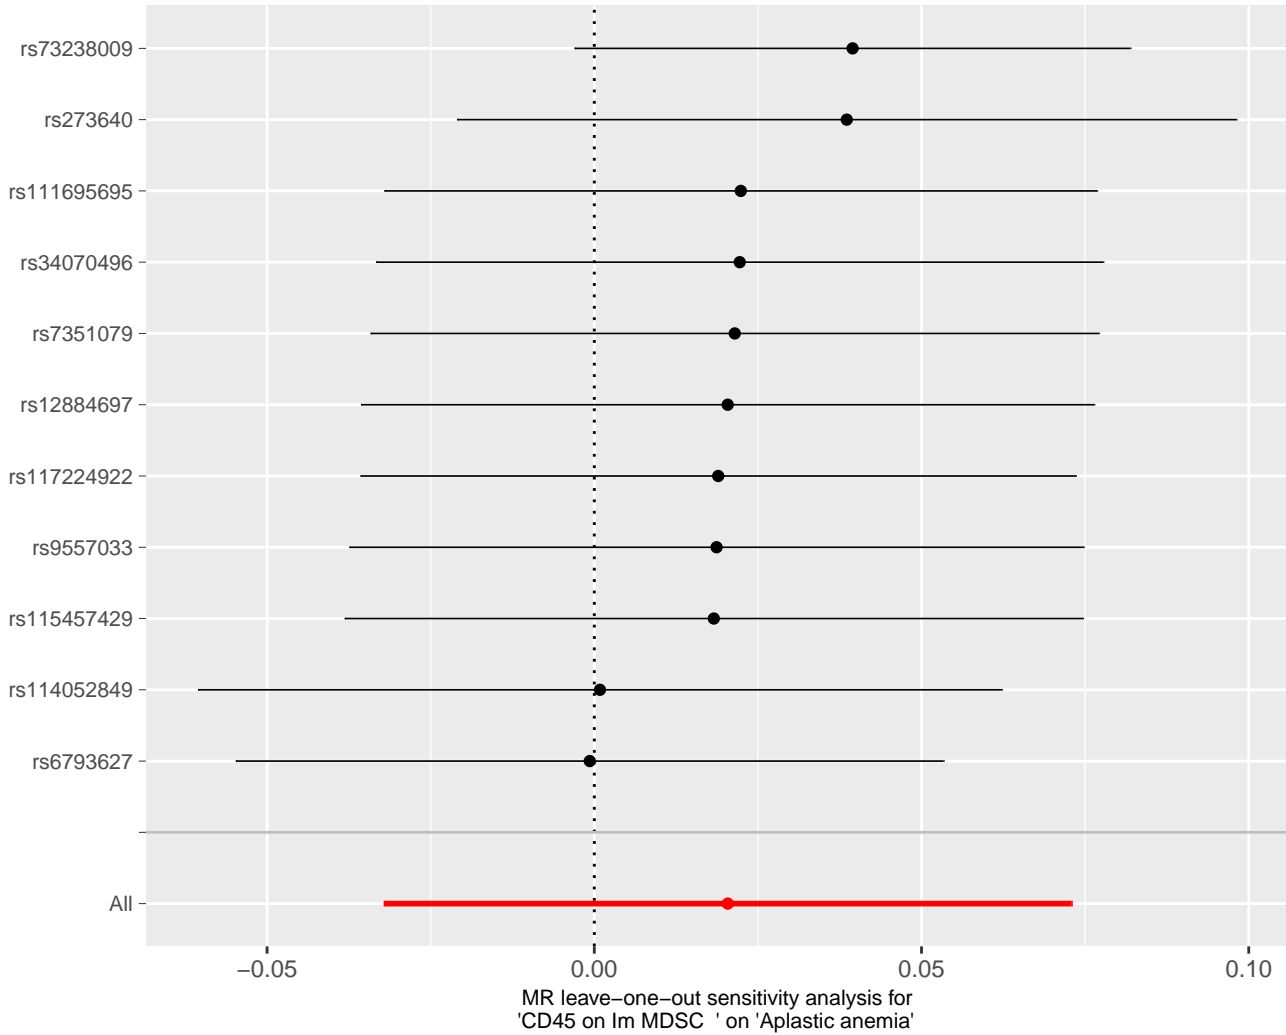



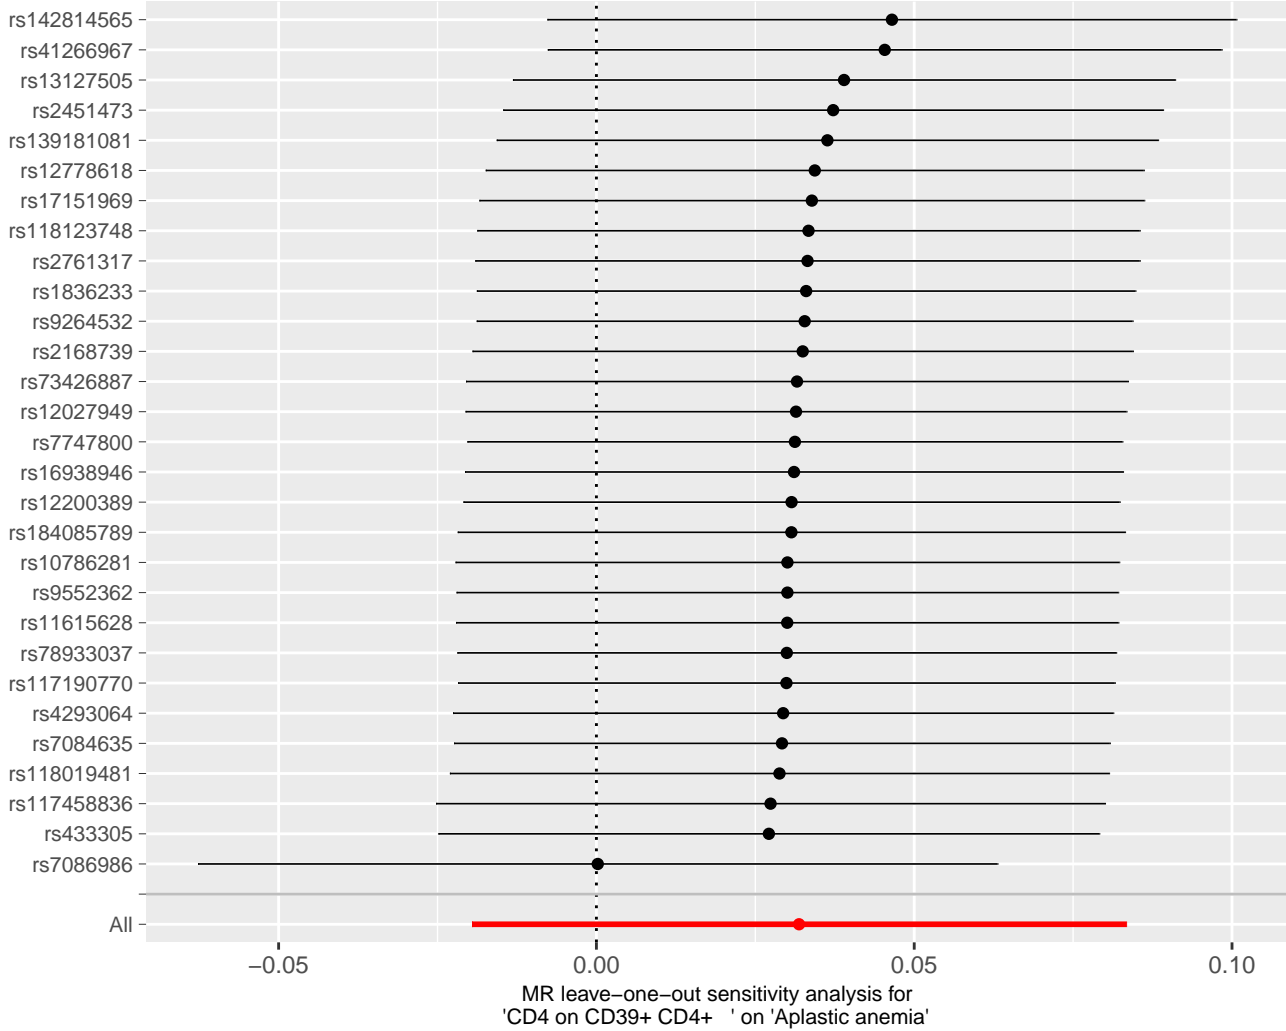

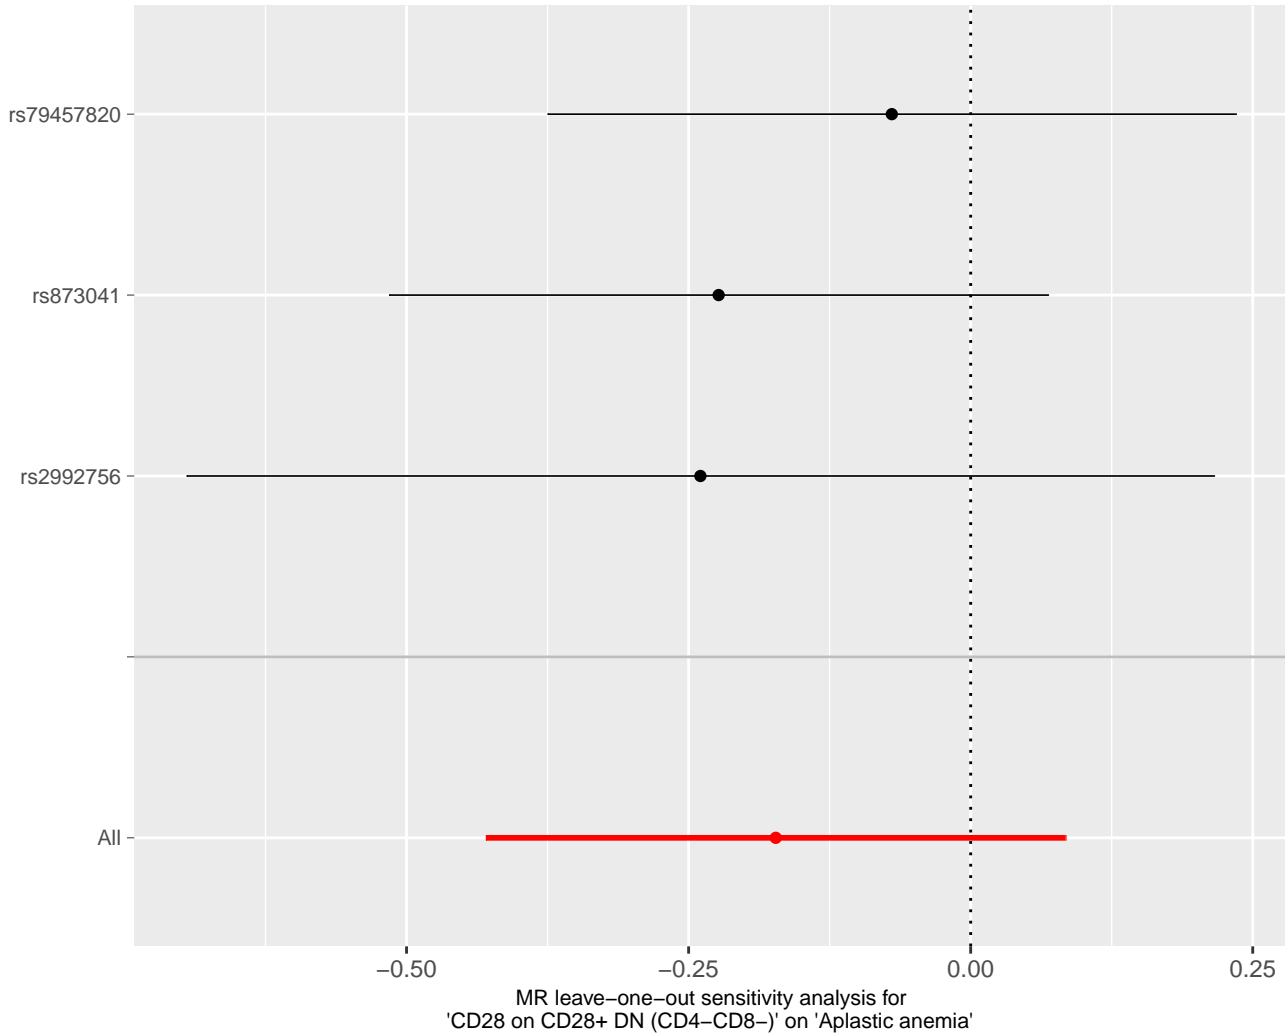

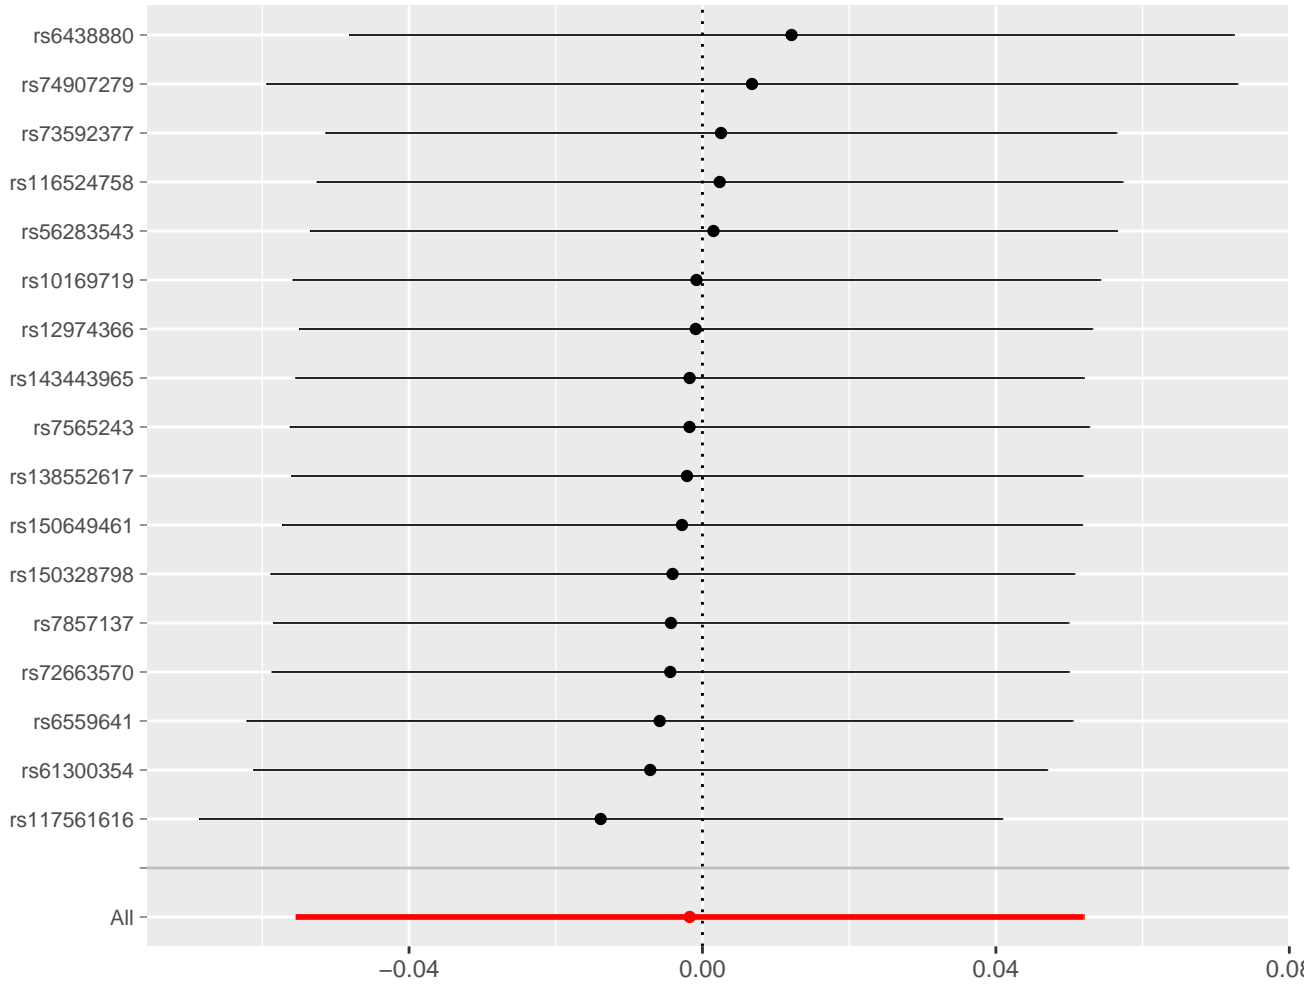

MR leave-one-out sensitivity analysis for 'CD86 on monocyte' on 'Aplastic anemia'

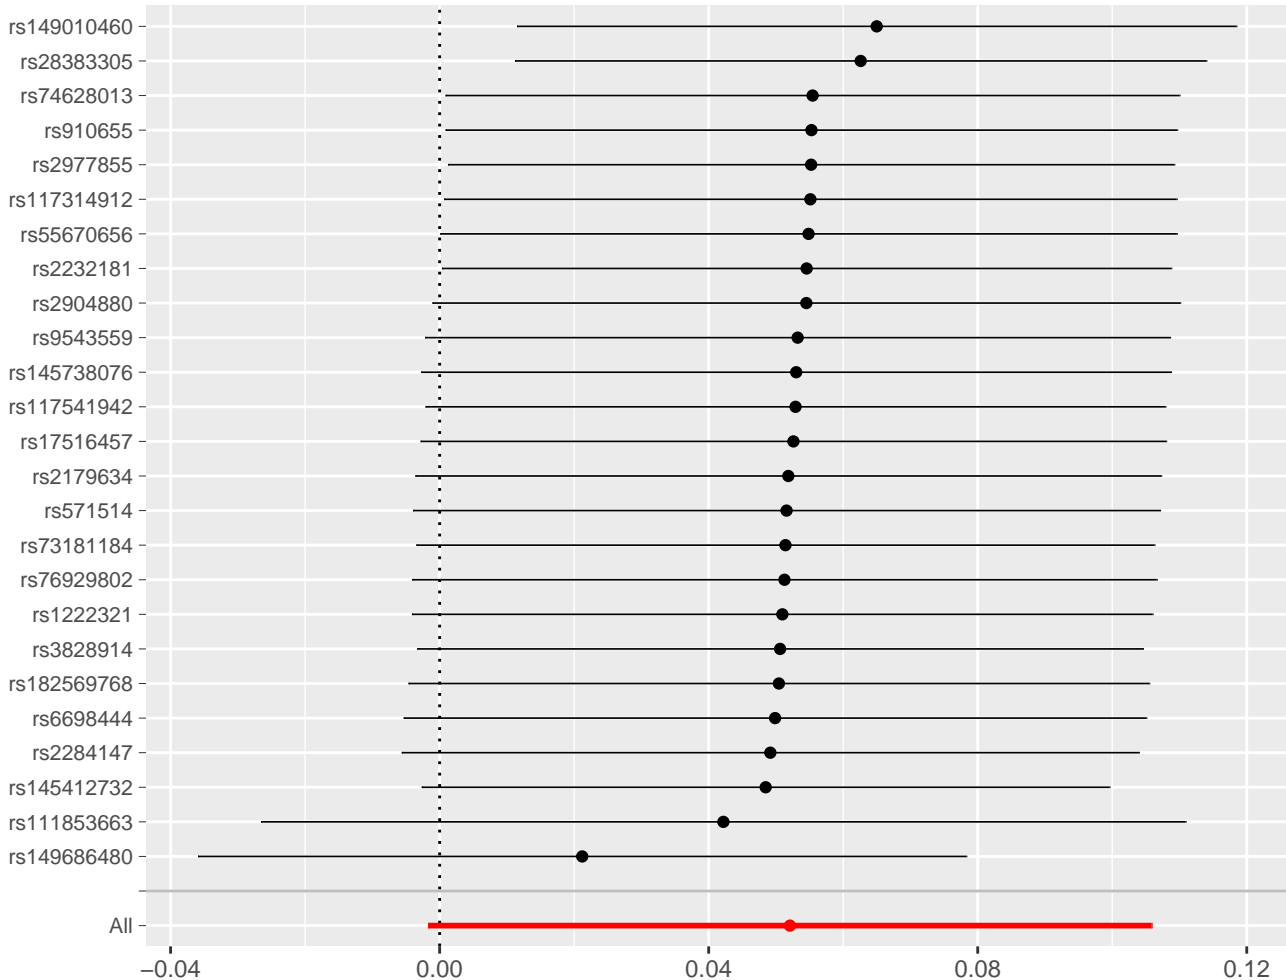

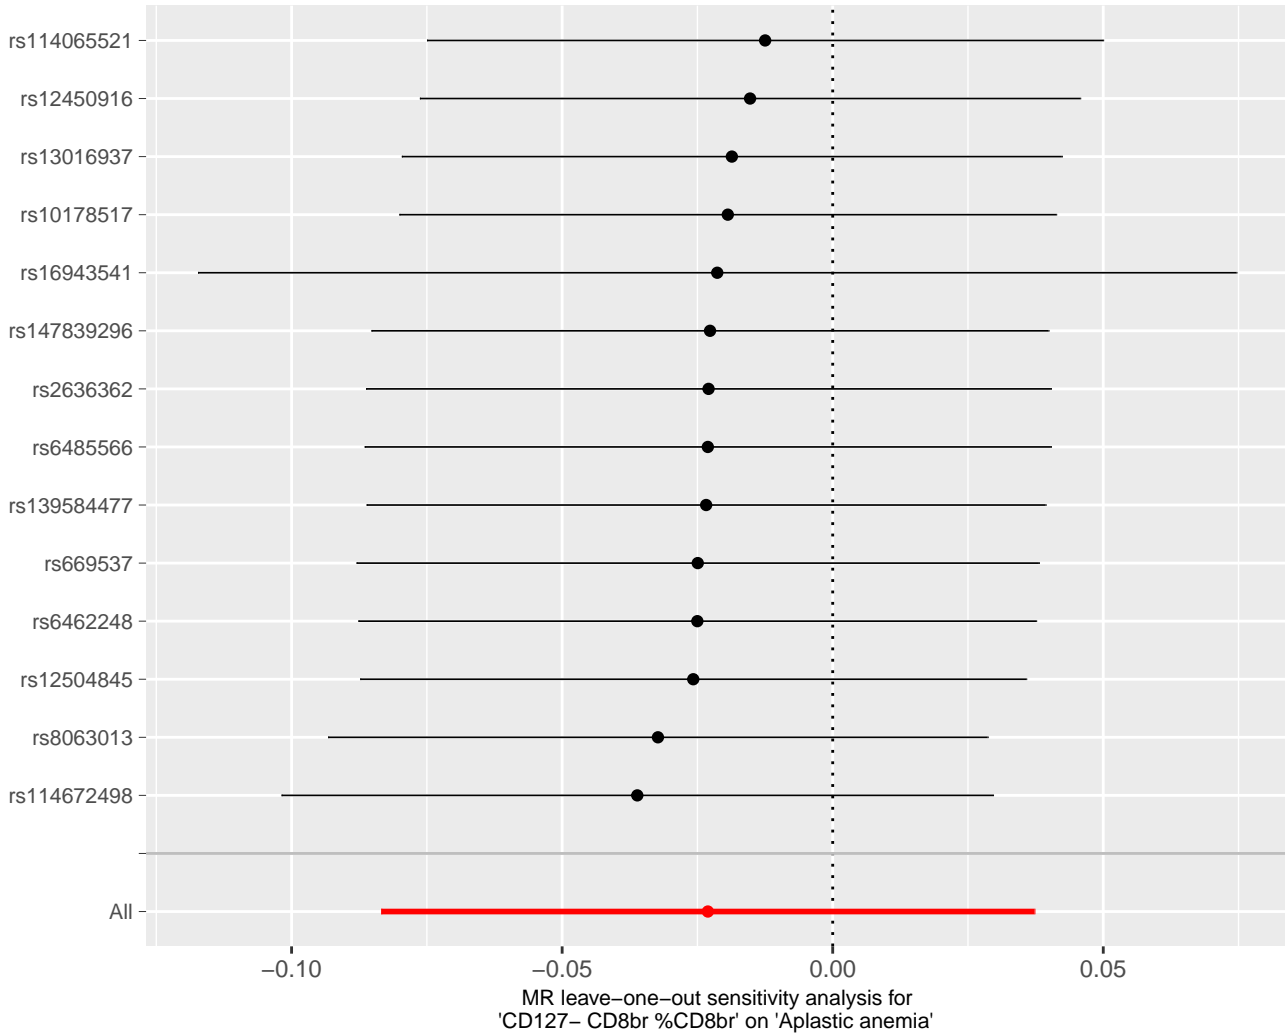

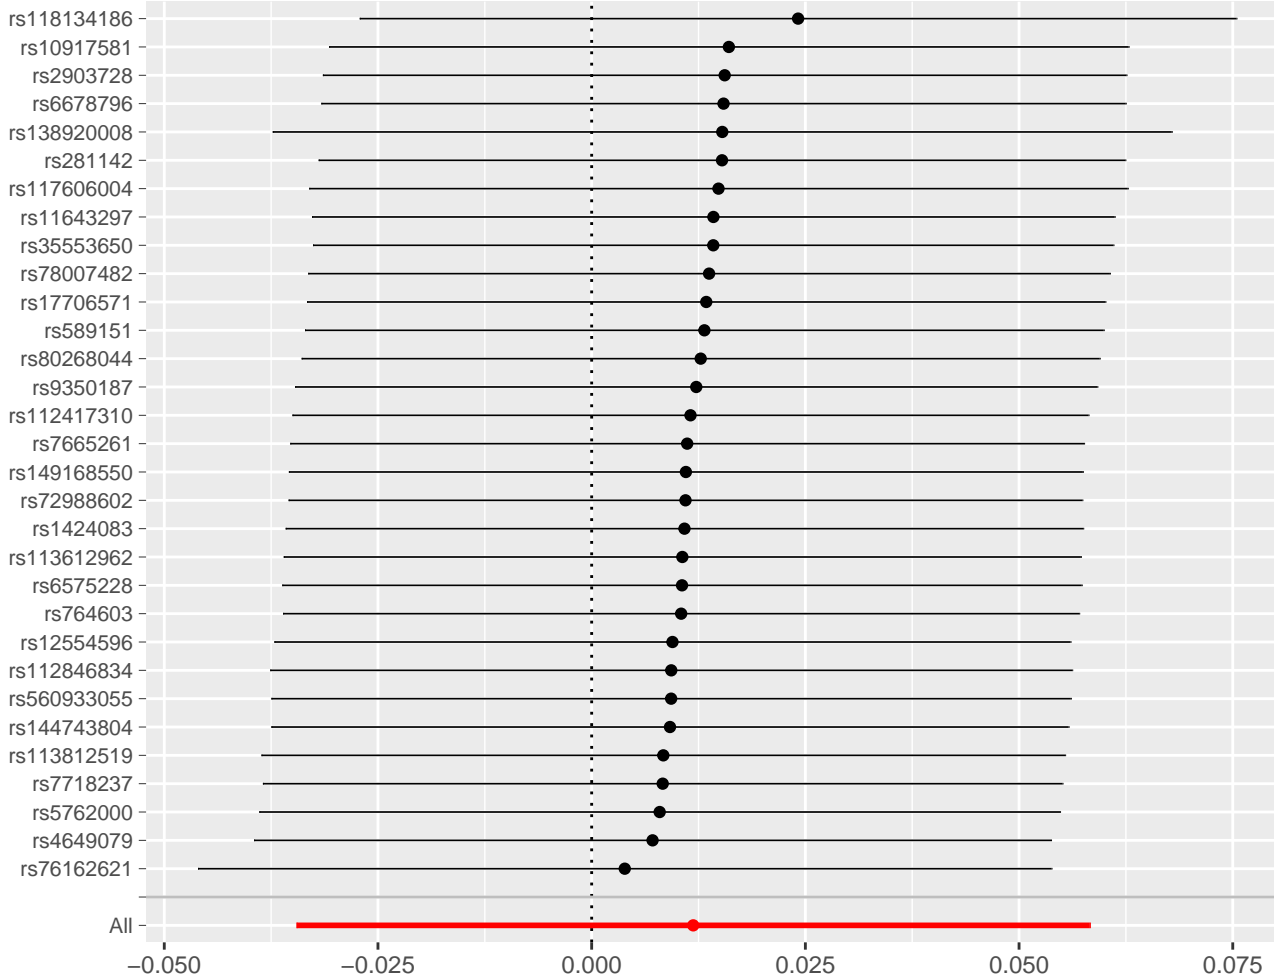

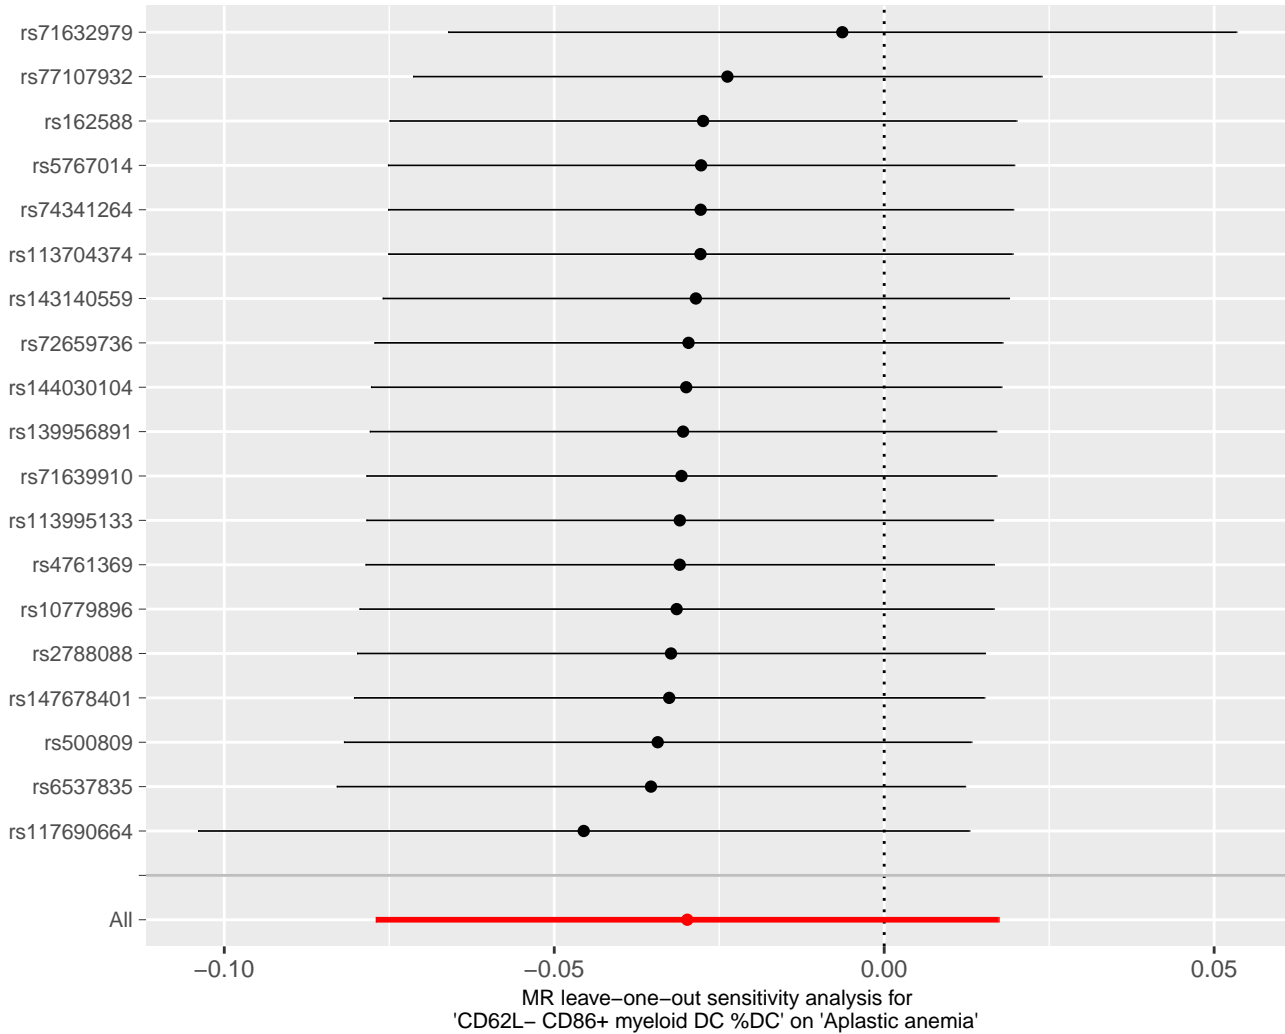

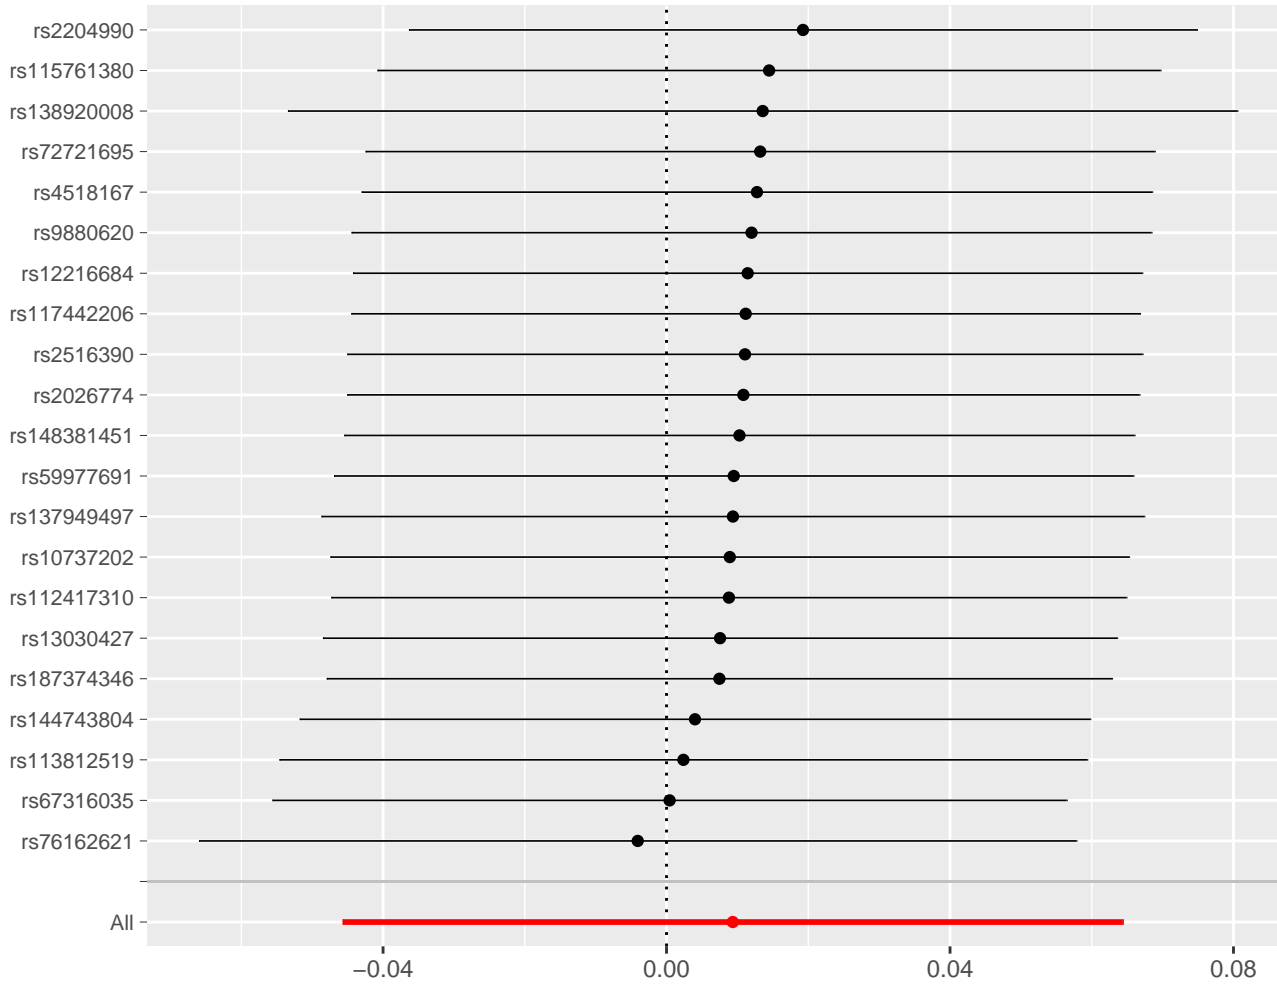

MR leave-one-out sensitivity analysis for 'CD19 on IgD+ CD38br' on 'Aplastic anemia'



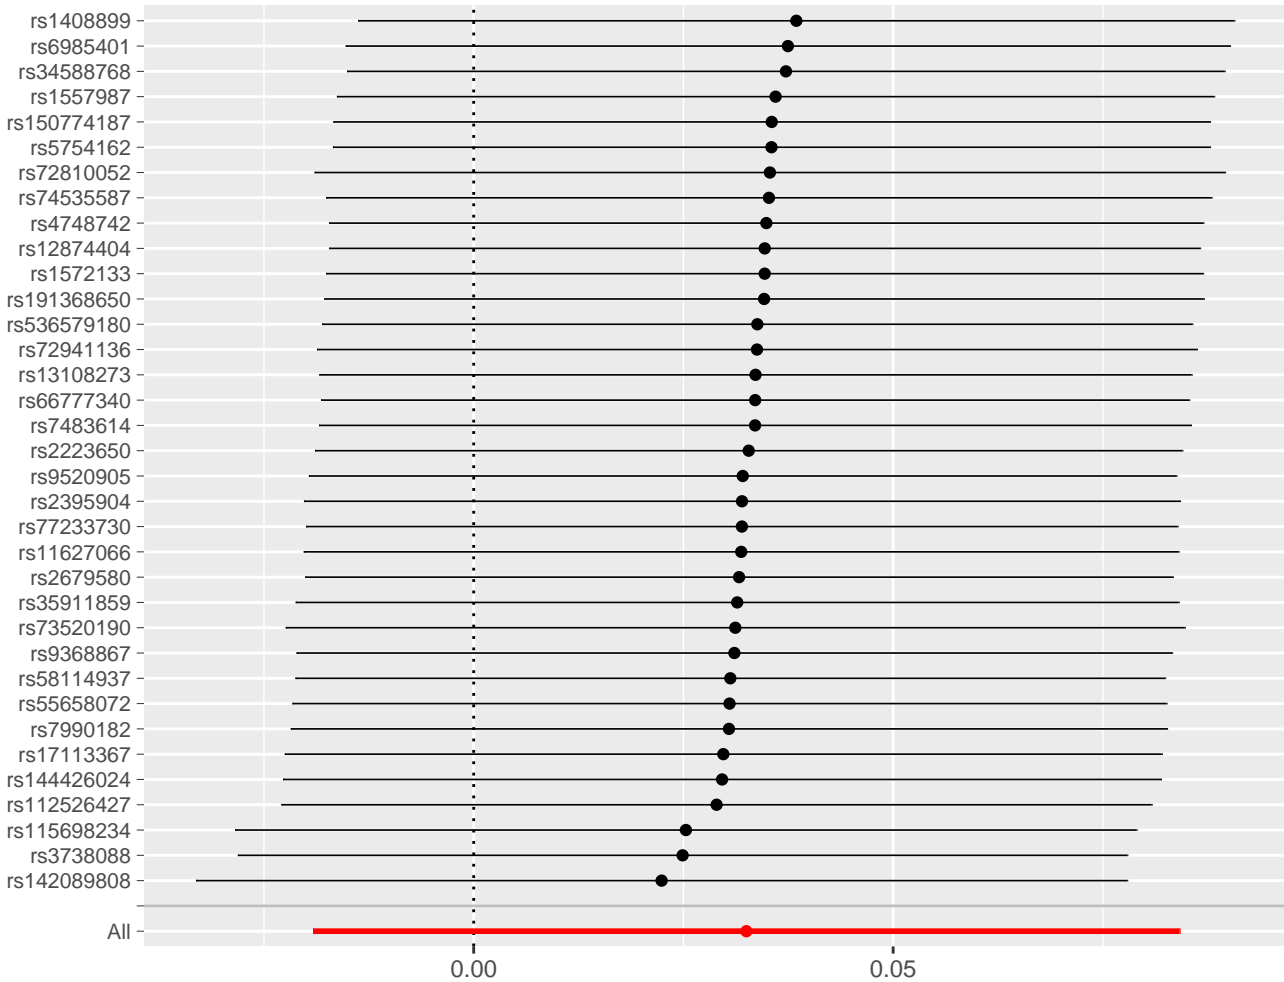

MR leave-one-out sensitivity analysis for 'B cell %lymphocyte' on 'Aplastic anemia'

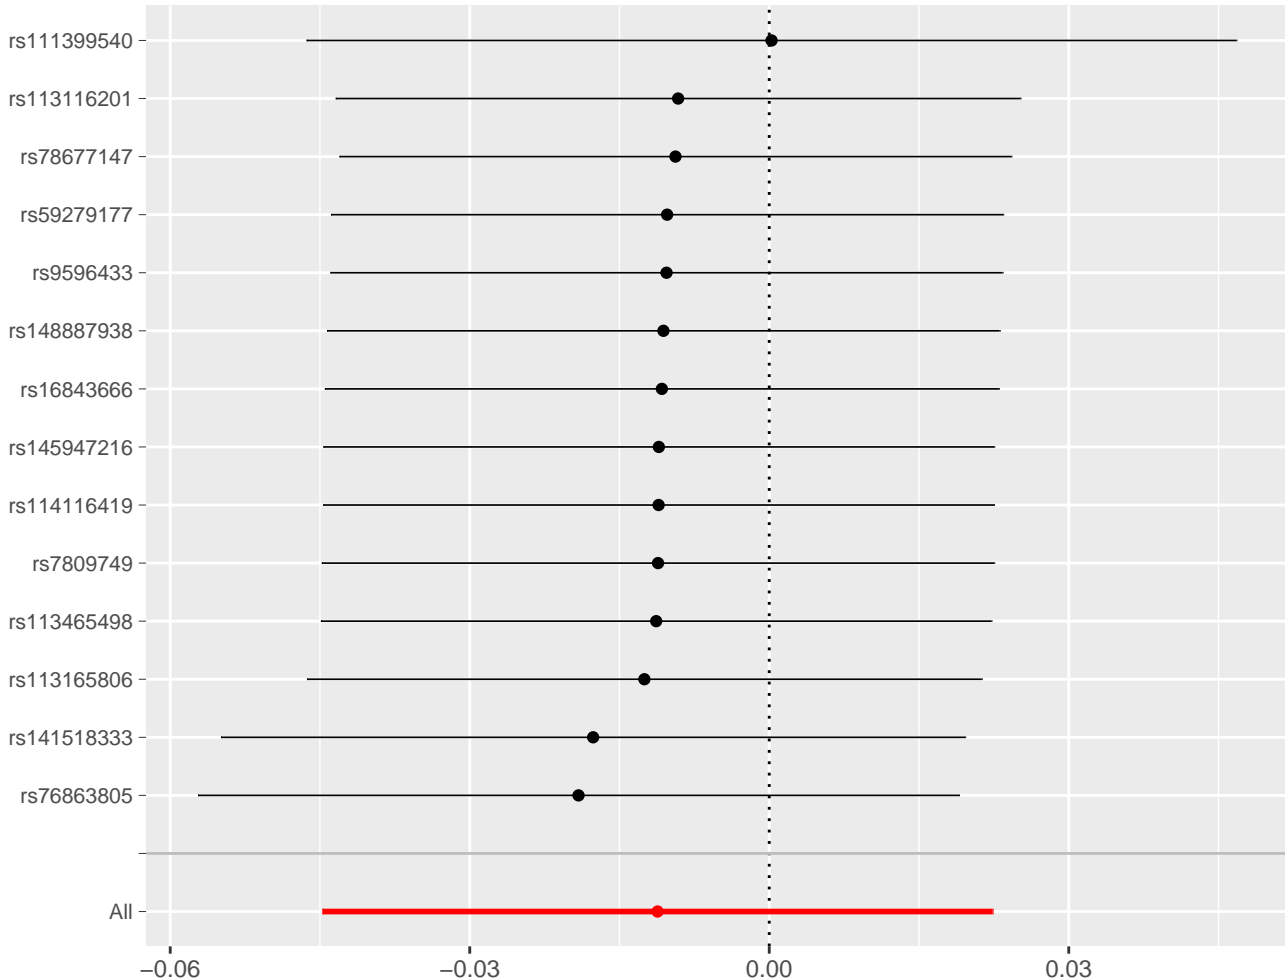

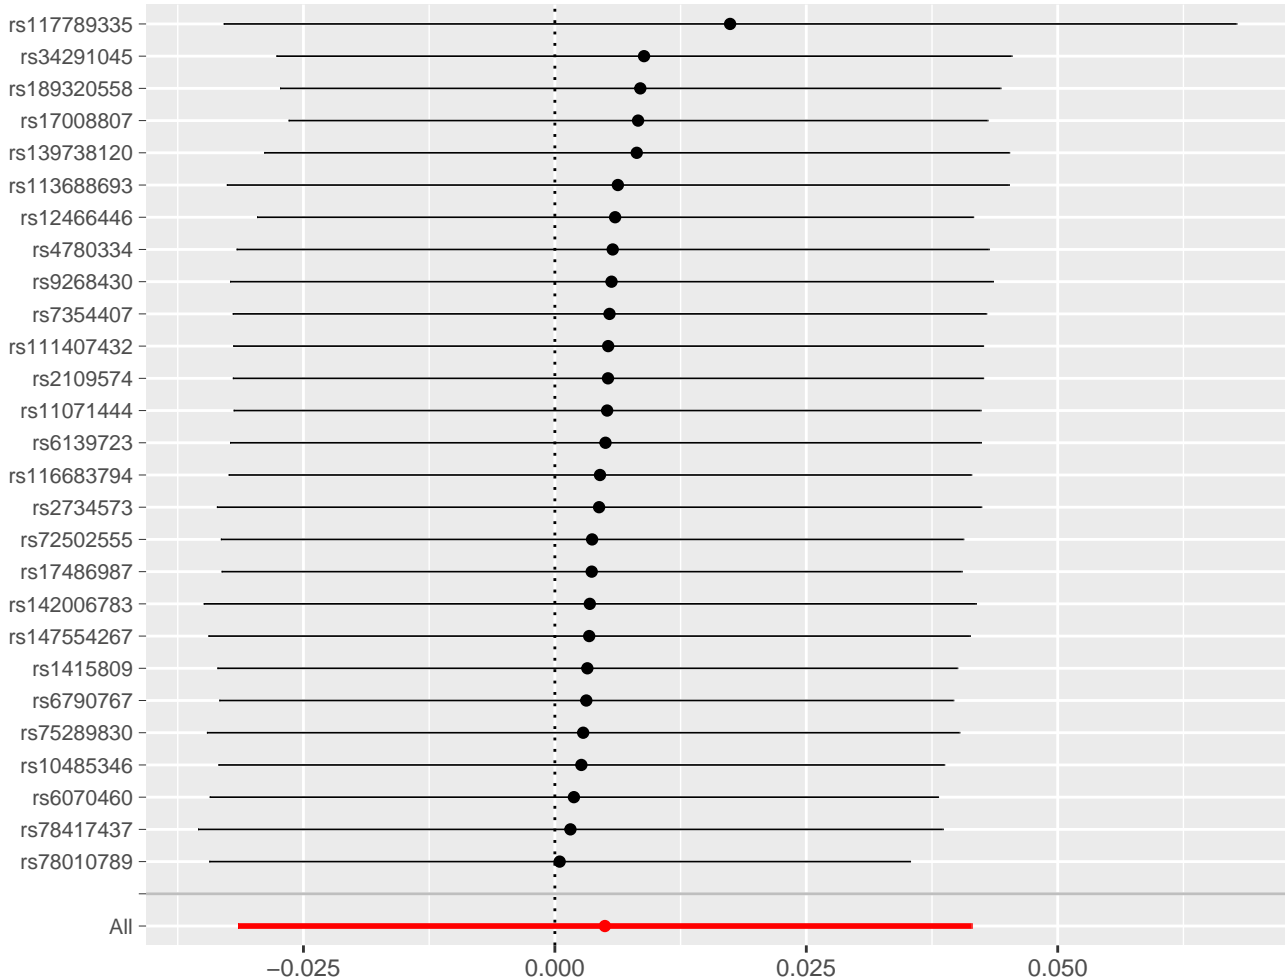

MR leave-one-out sensitivity analysis for 'HLA DR on CD14- CD16-' on 'Aplastic anemia'

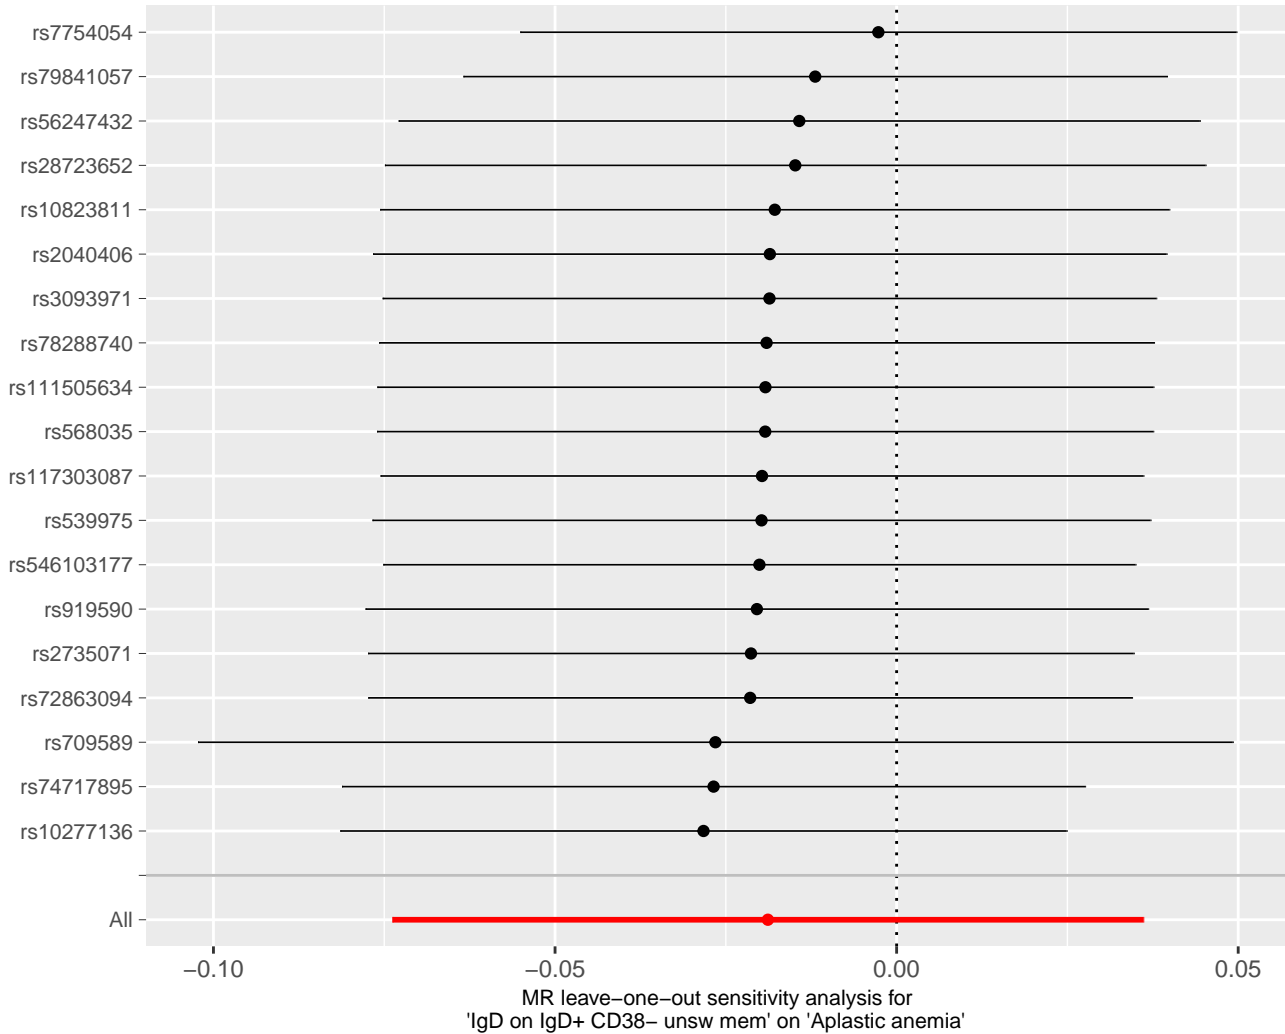

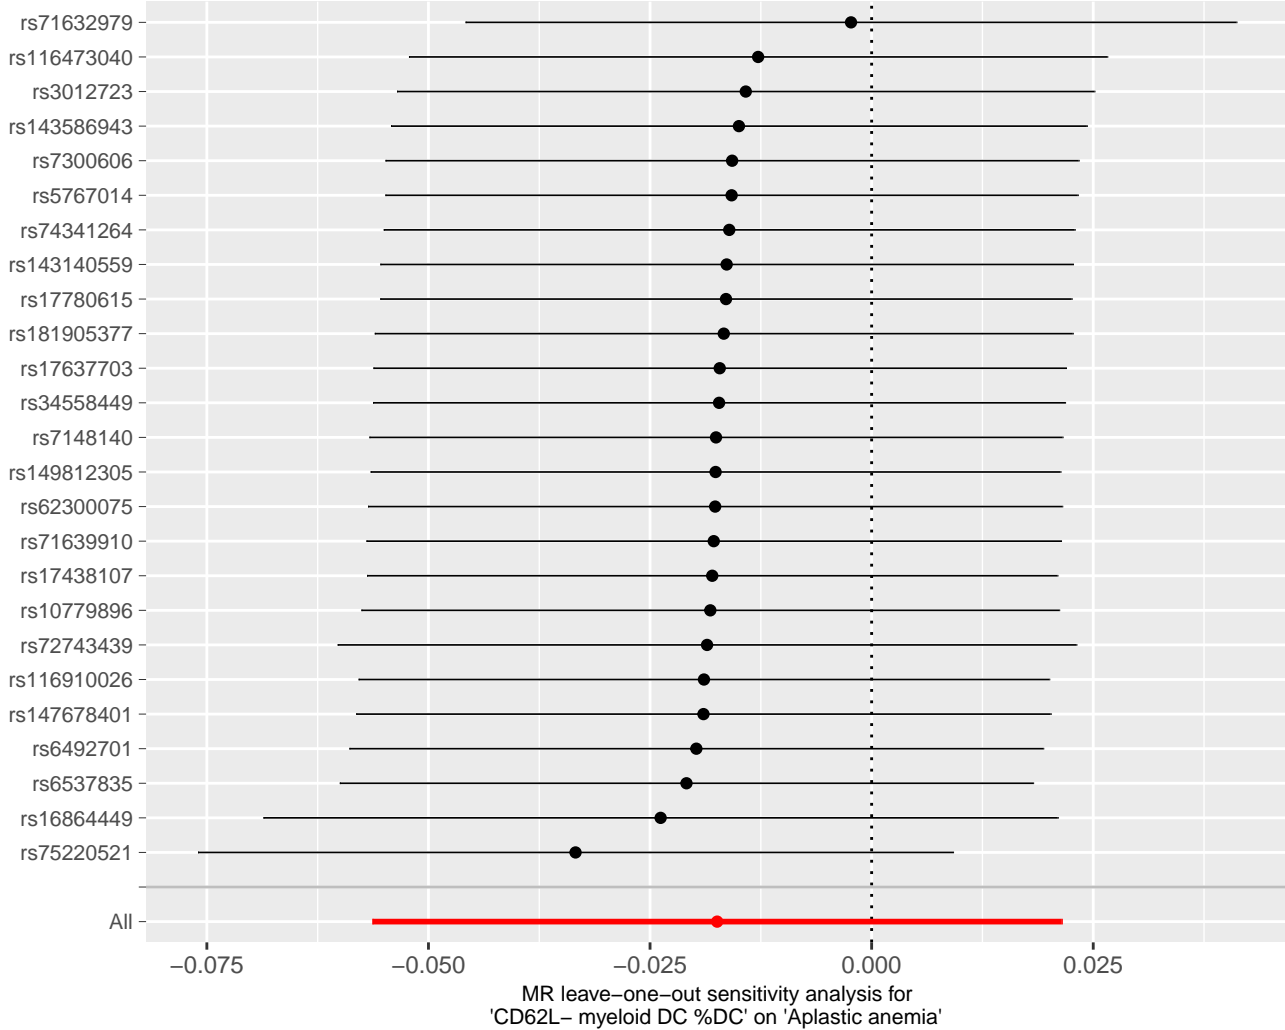

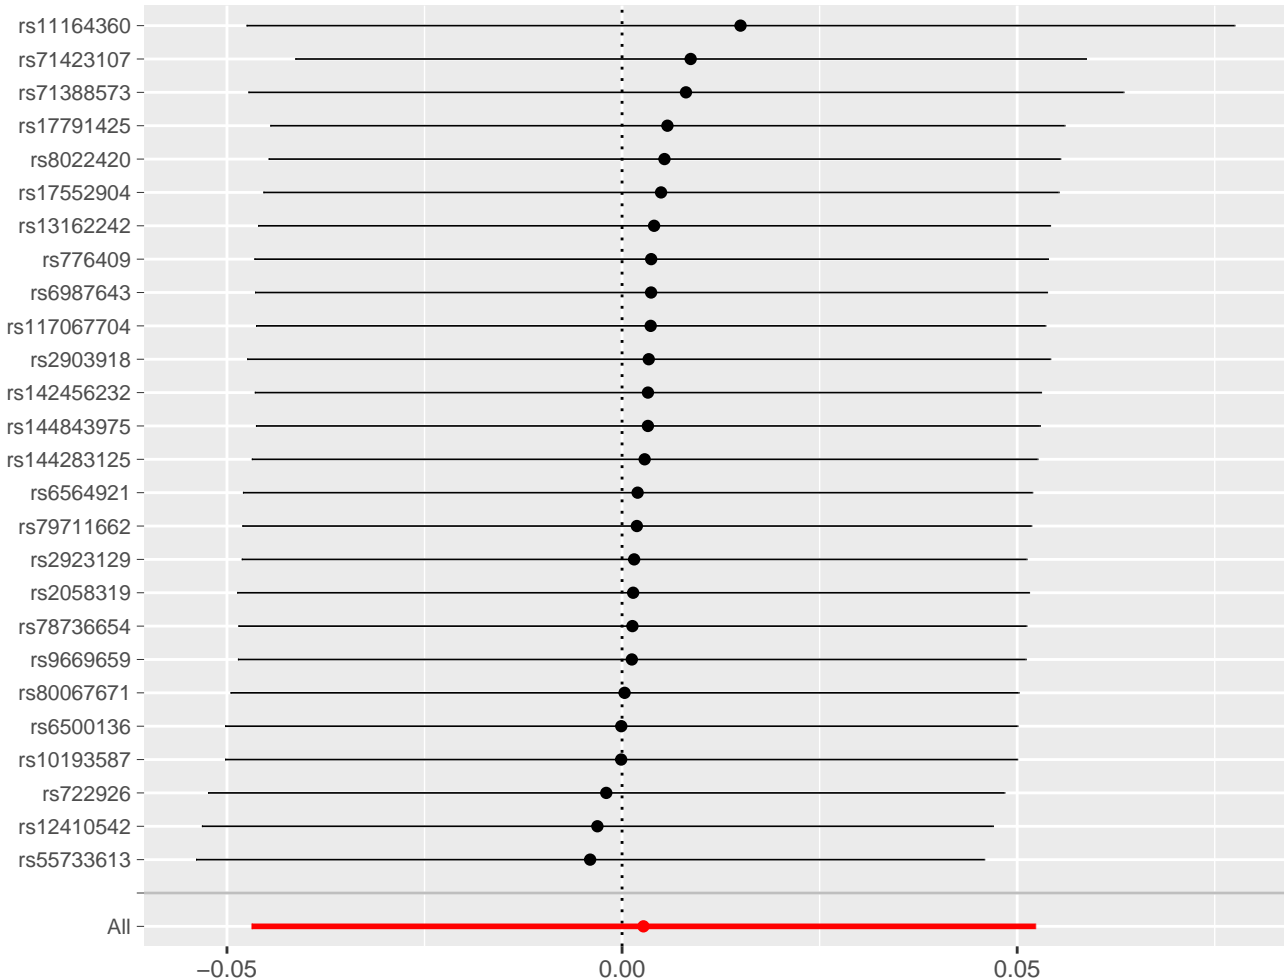

MR leave-one-out sensitivity analysis for 'SSC-A on plasmacytoid DC' on 'Aplastic anemia'

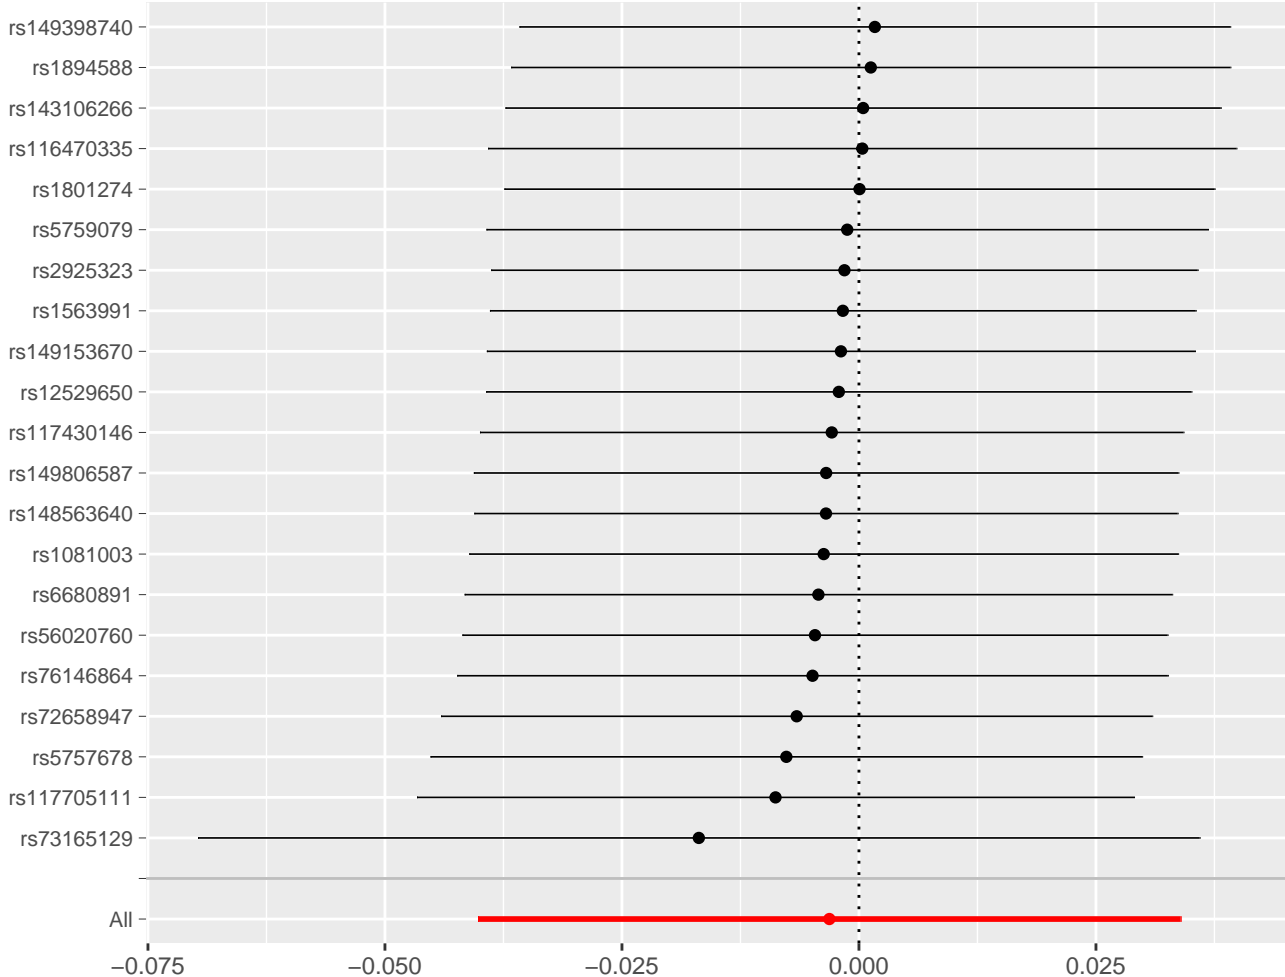

MR leave-one-out sensitivity analysis for 'BAFF-R on B cell' on 'Aplastic anemia'

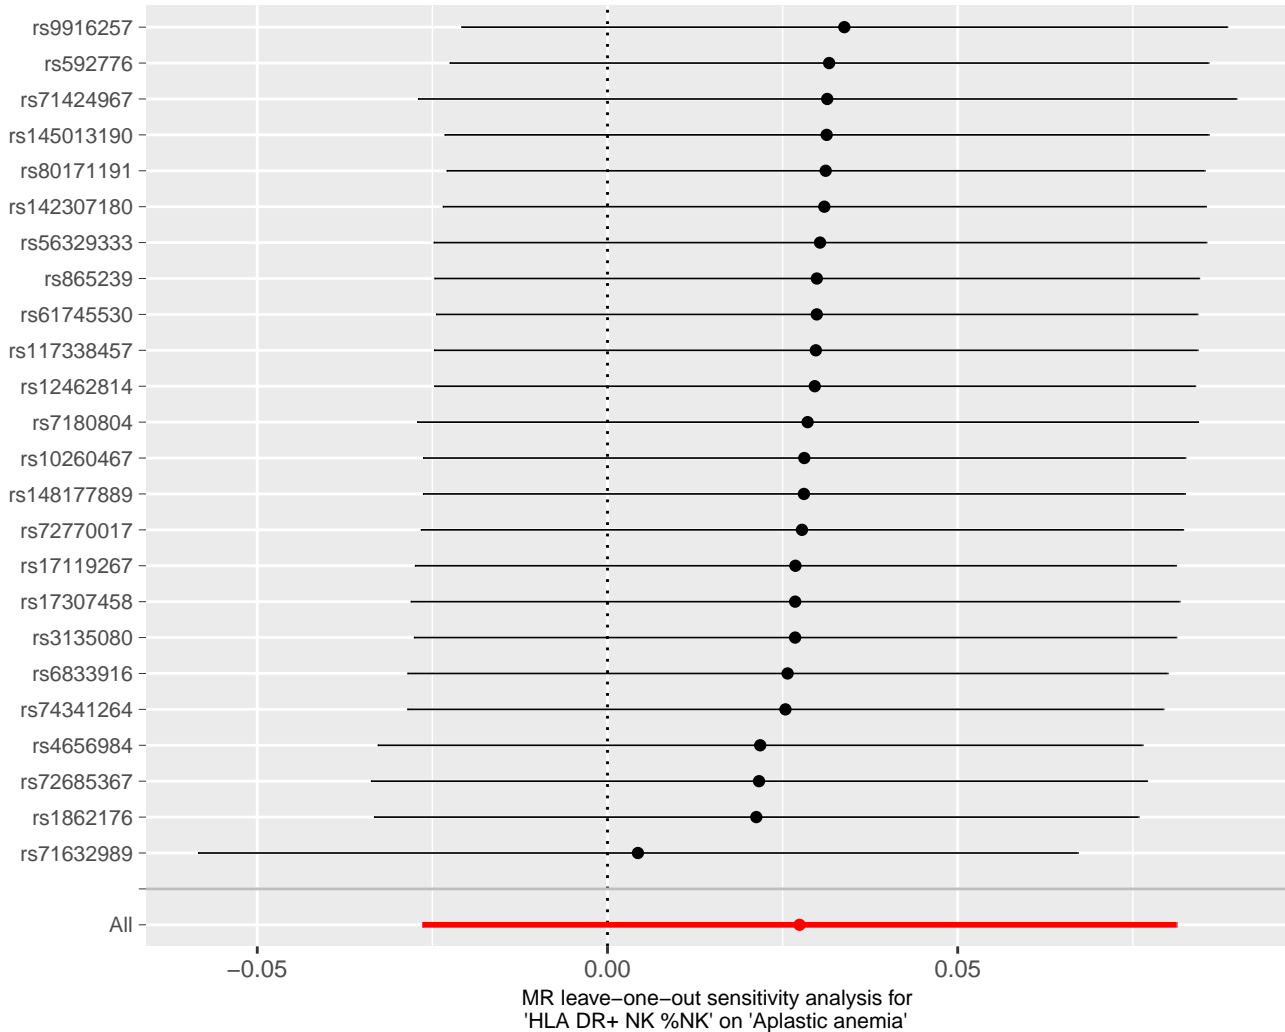



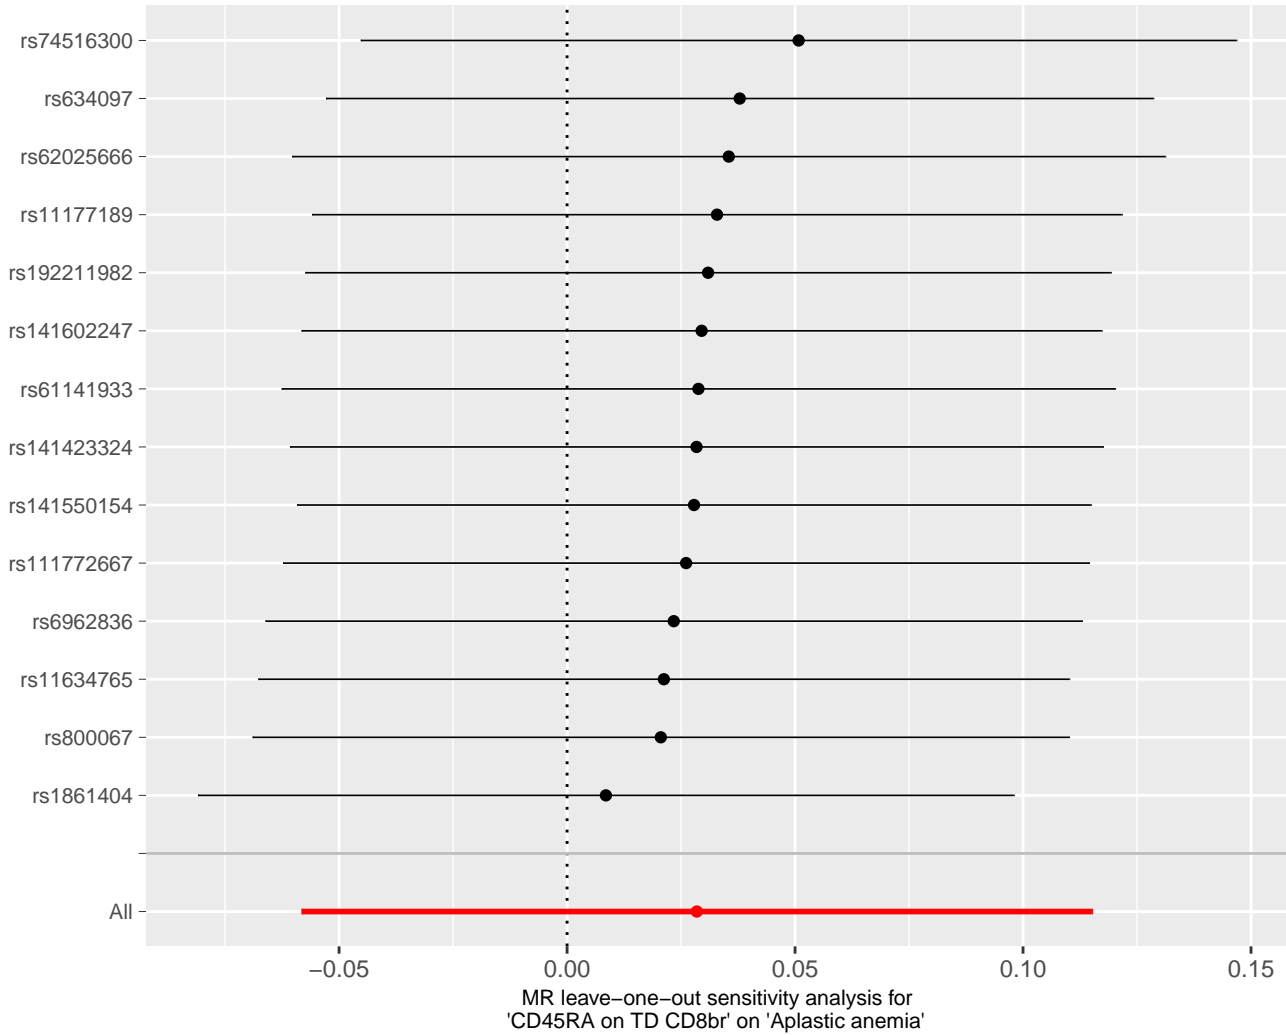

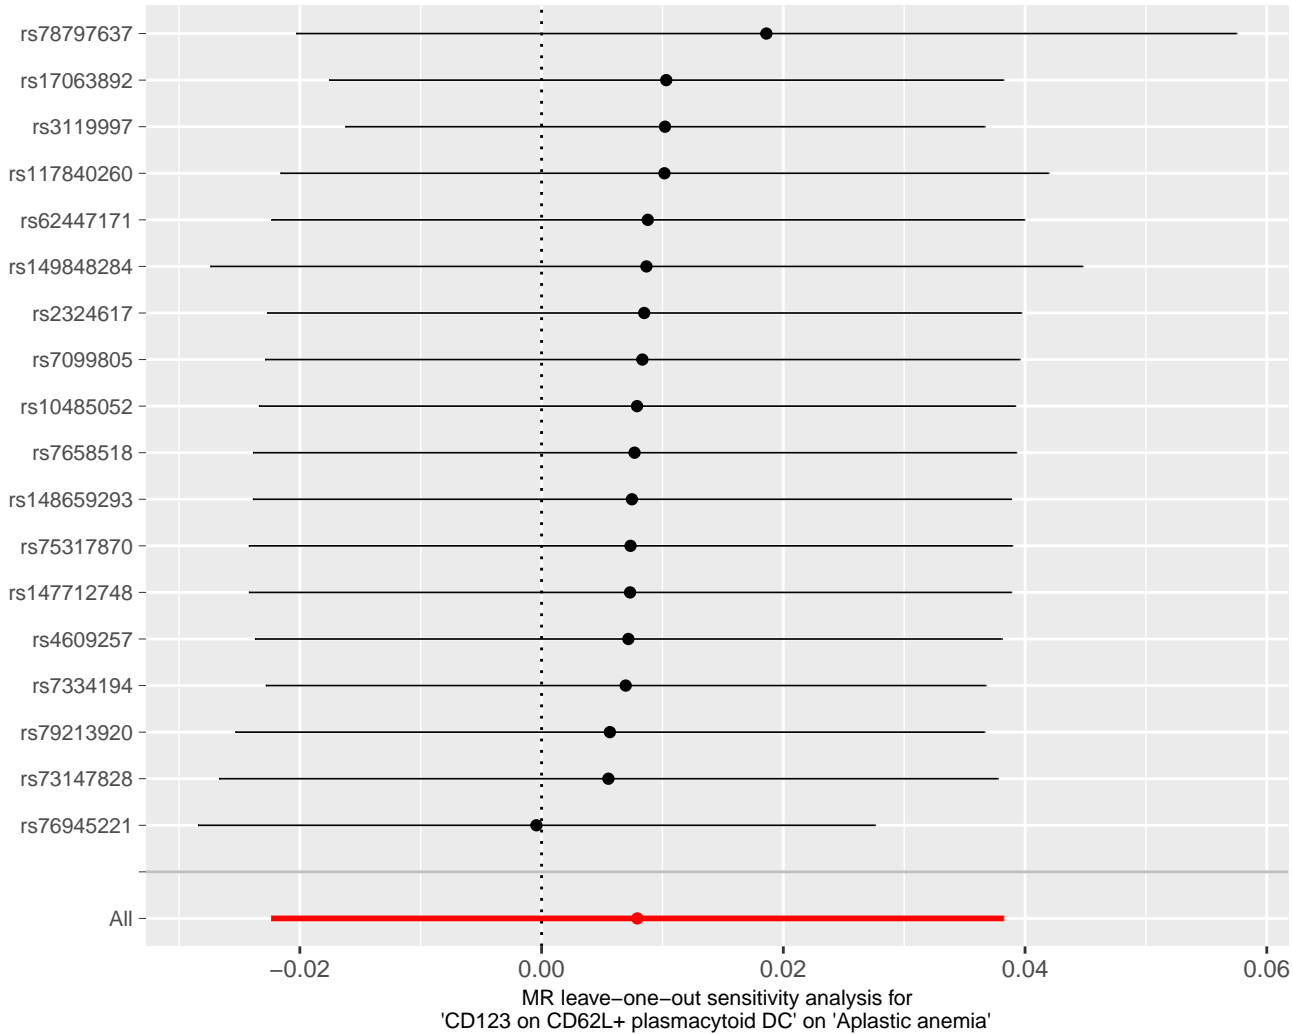

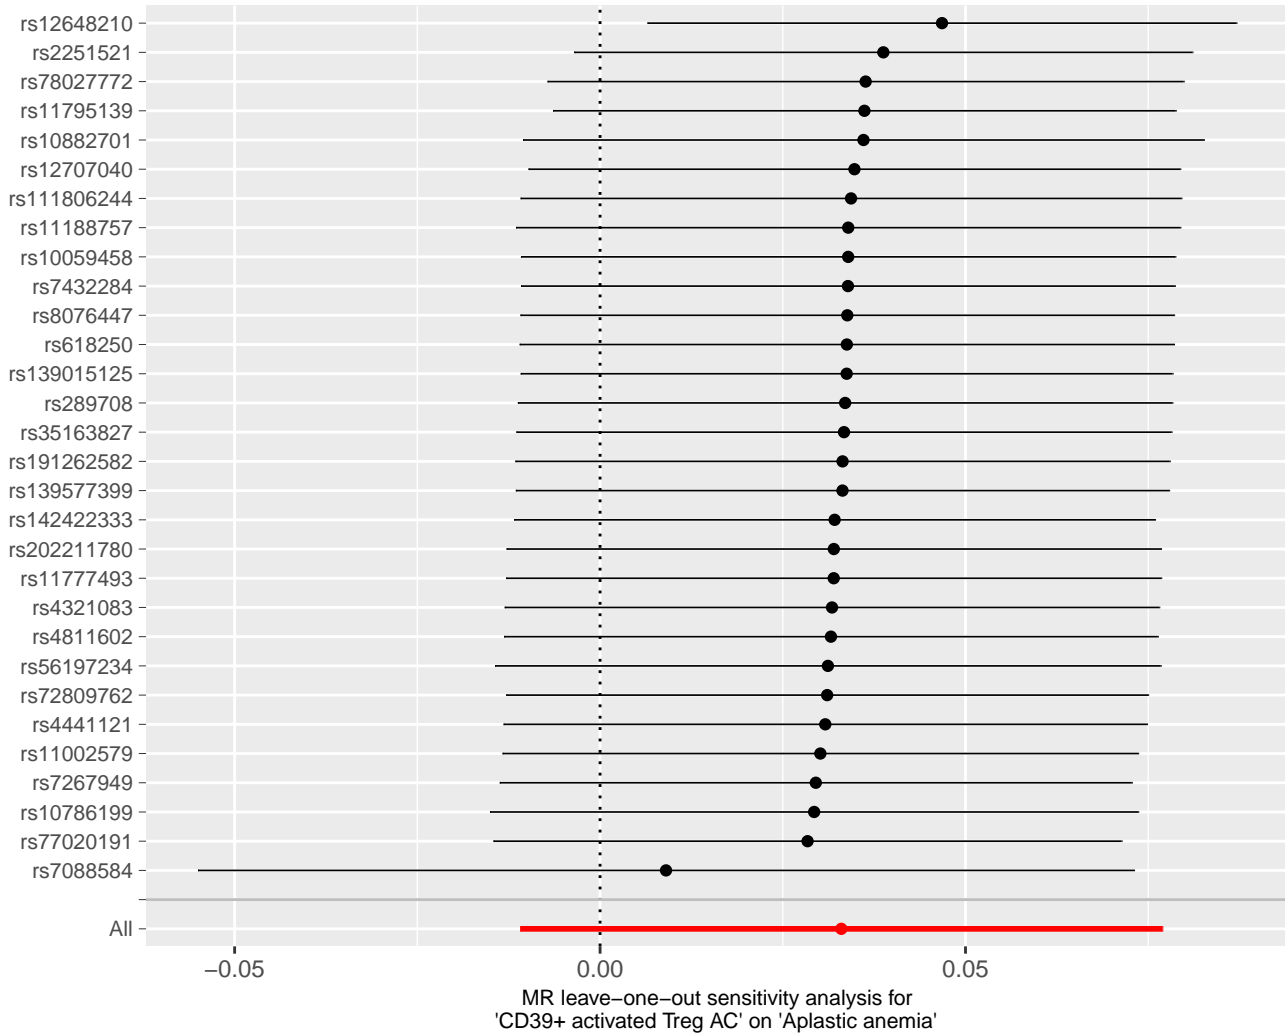

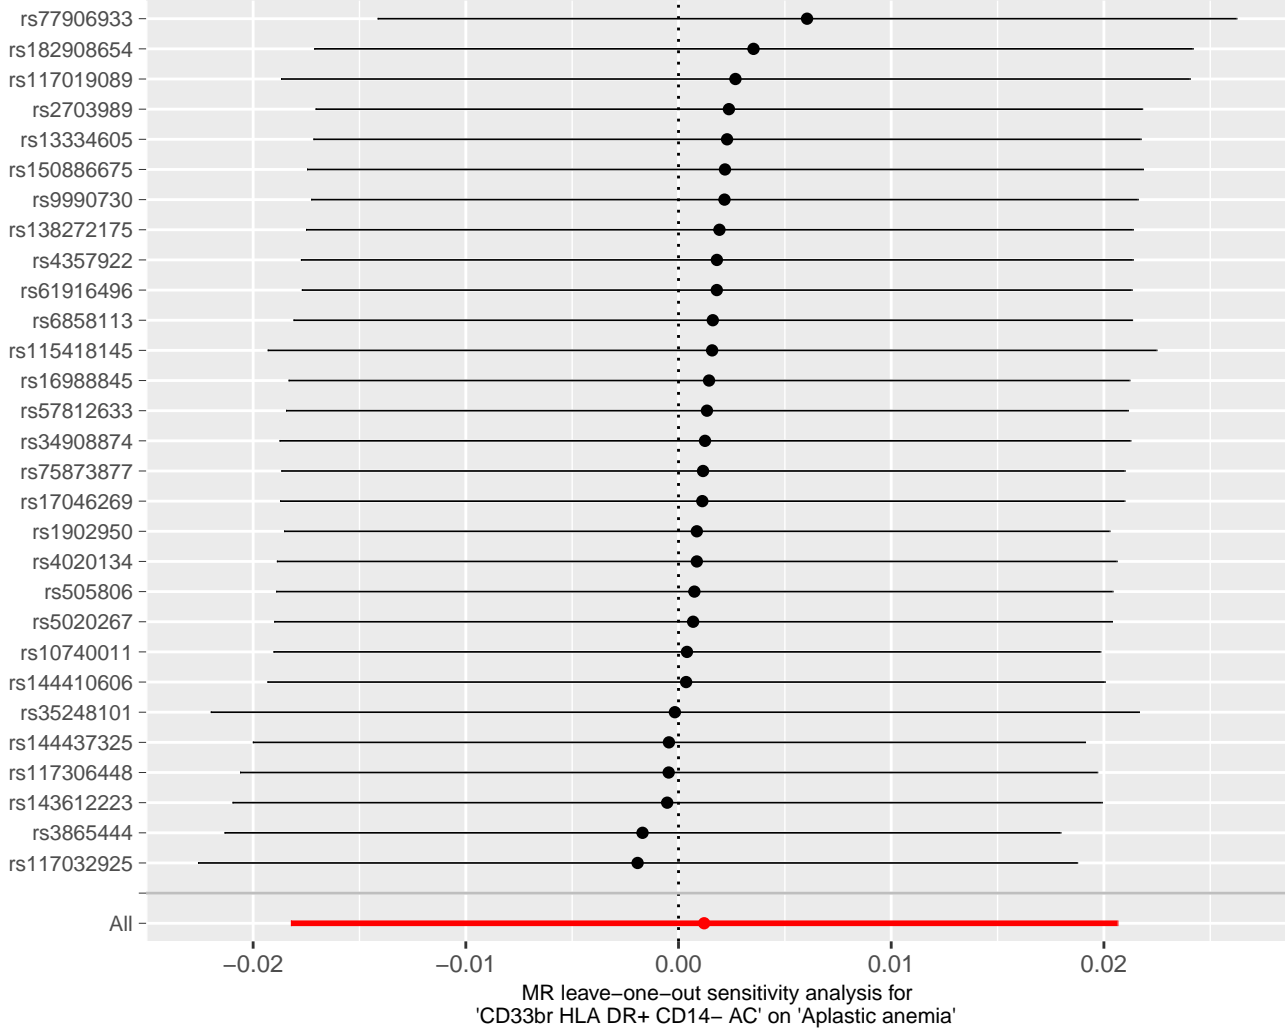

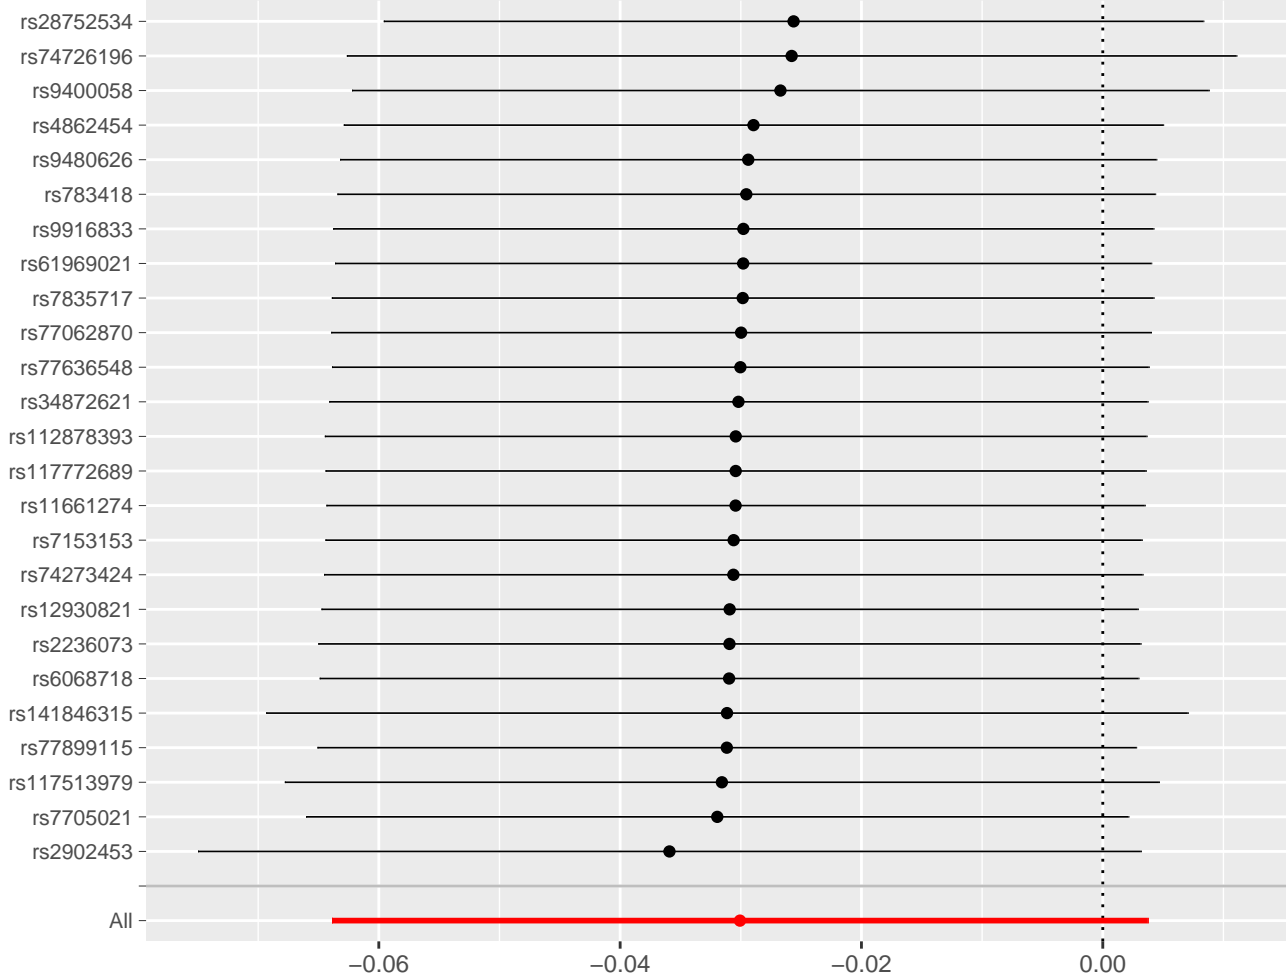

MR leave-one-out sensitivity analysis for 'CD24 on unsw mem' on 'Aplastic anemia'

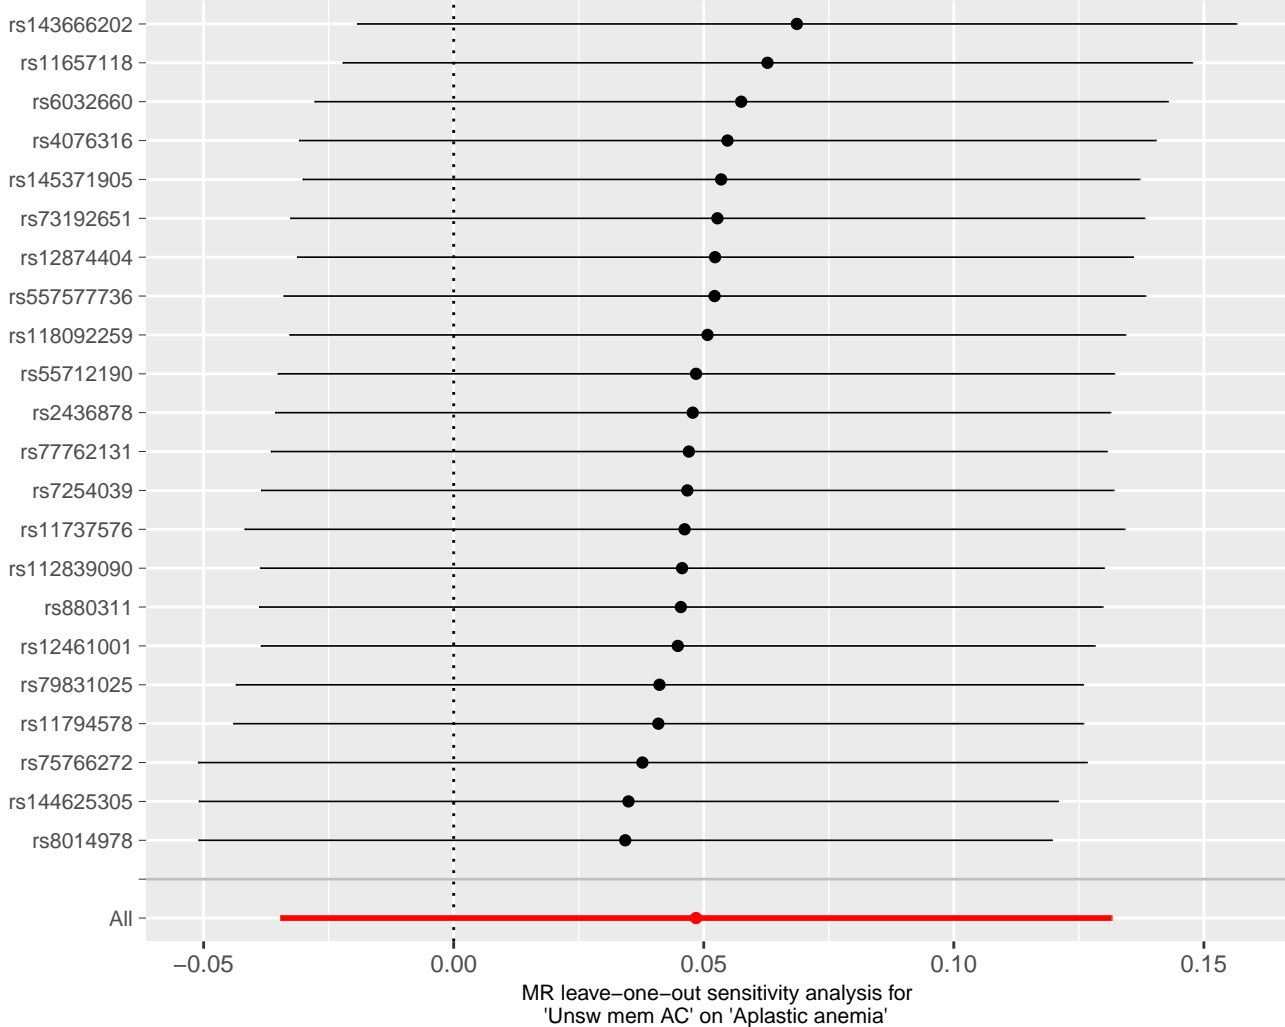

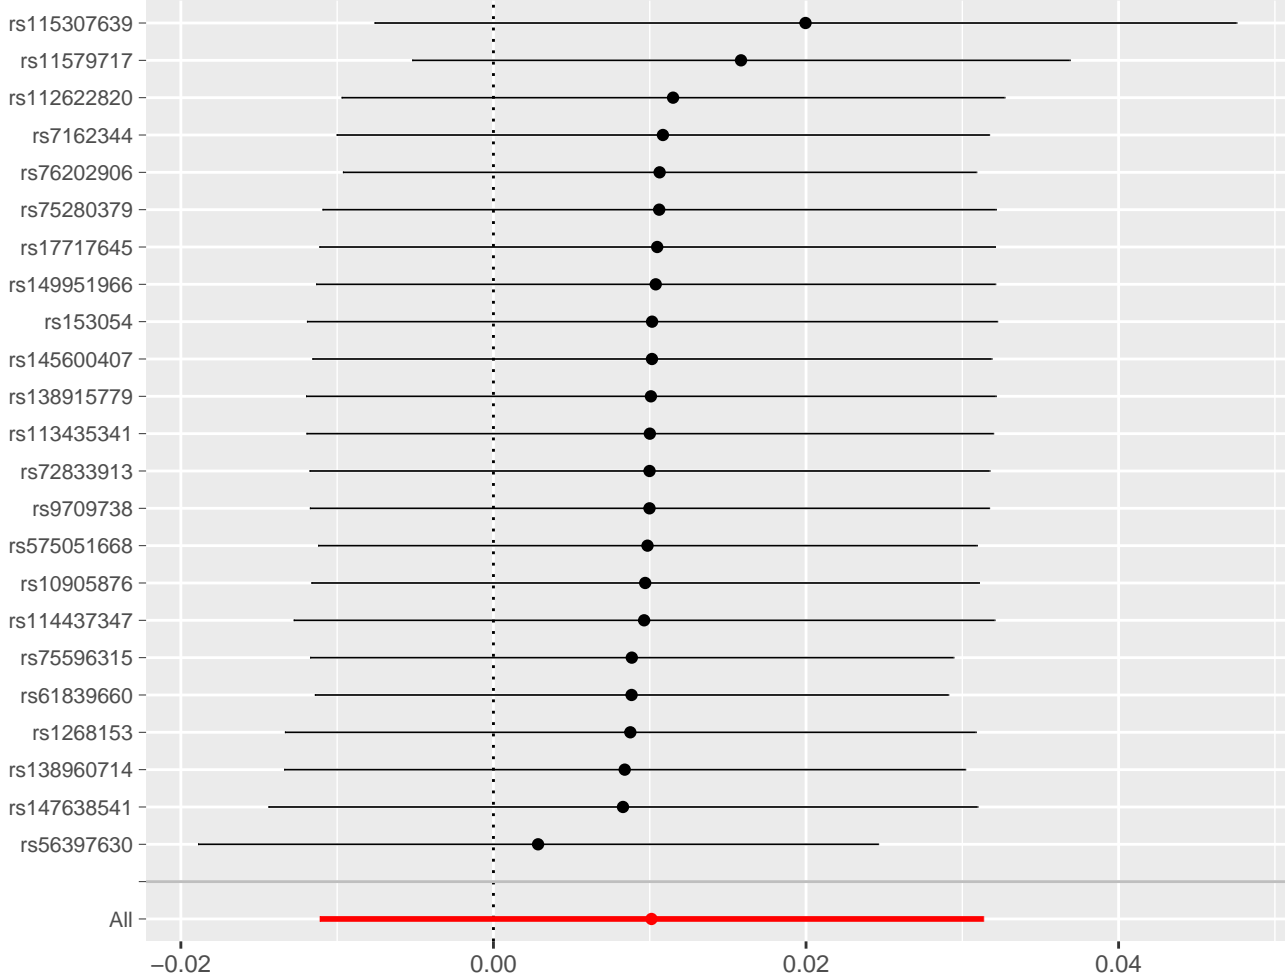

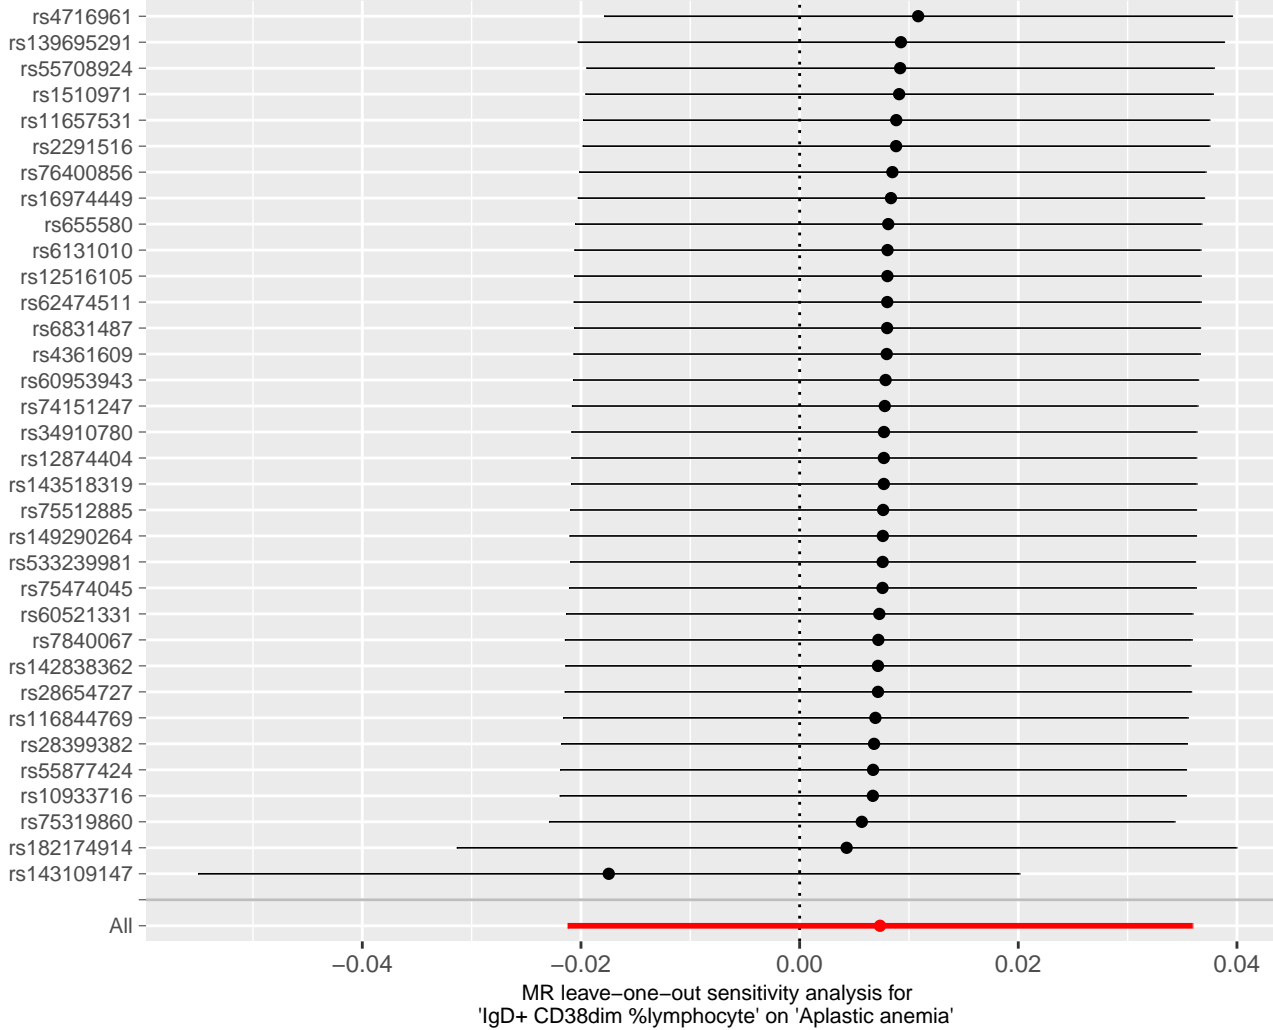



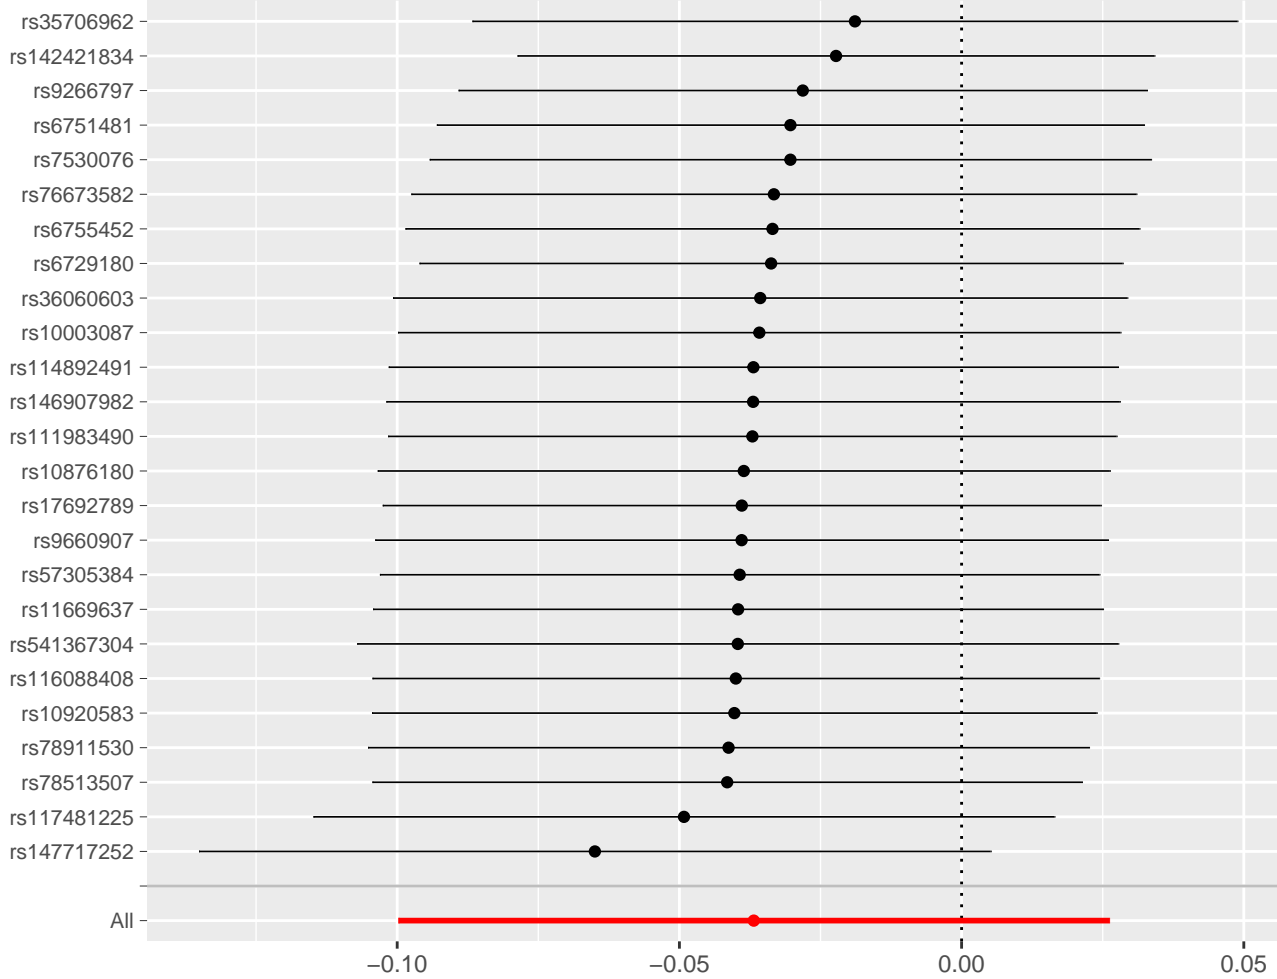

MR leave-one-out sensitivity analysis for 'TD DN (CD4-CD8-) %T cell' on 'Aplastic anemia'

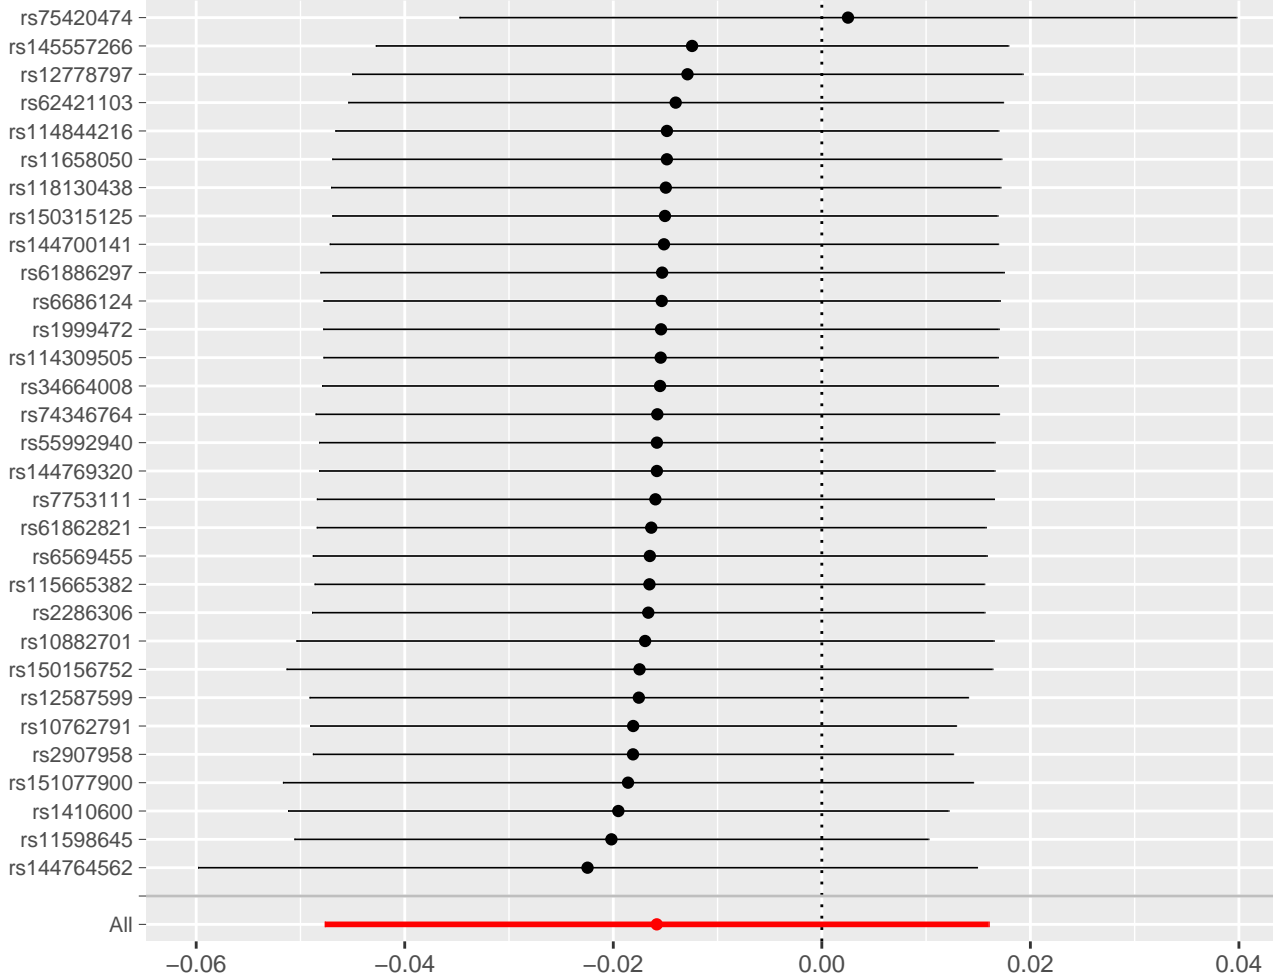

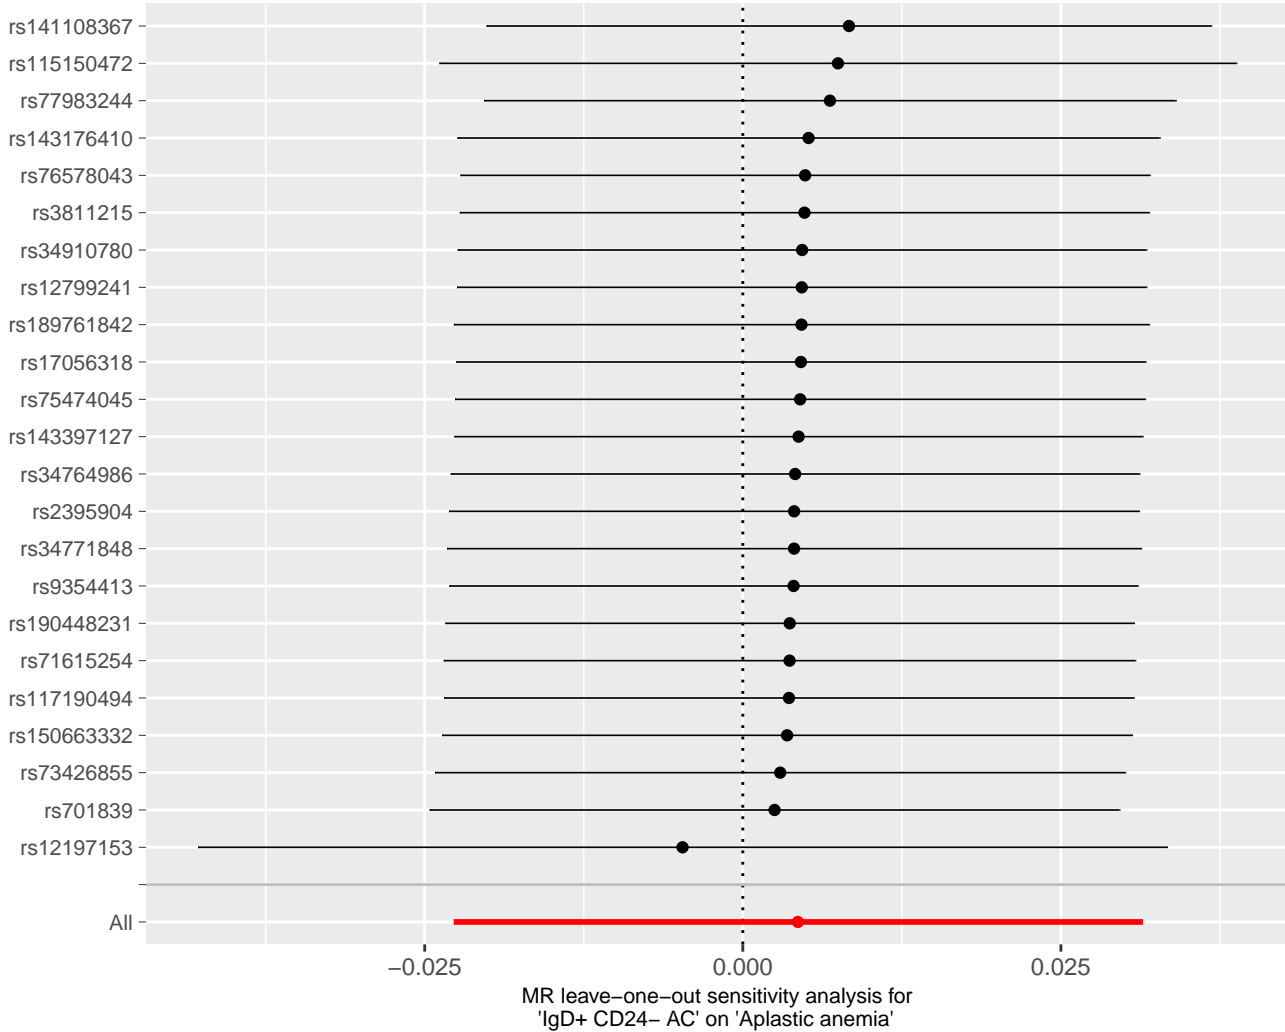

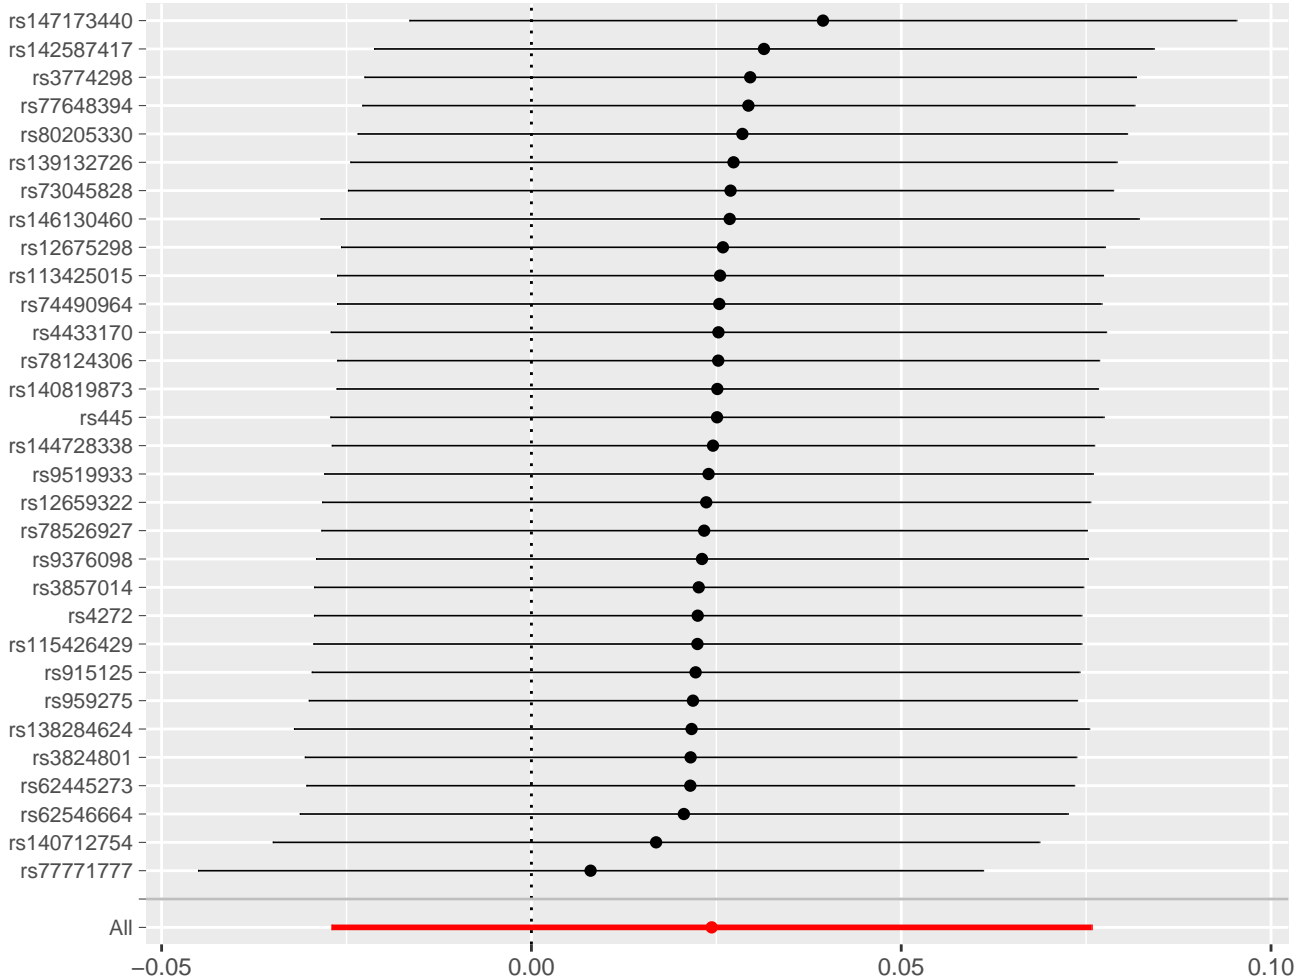

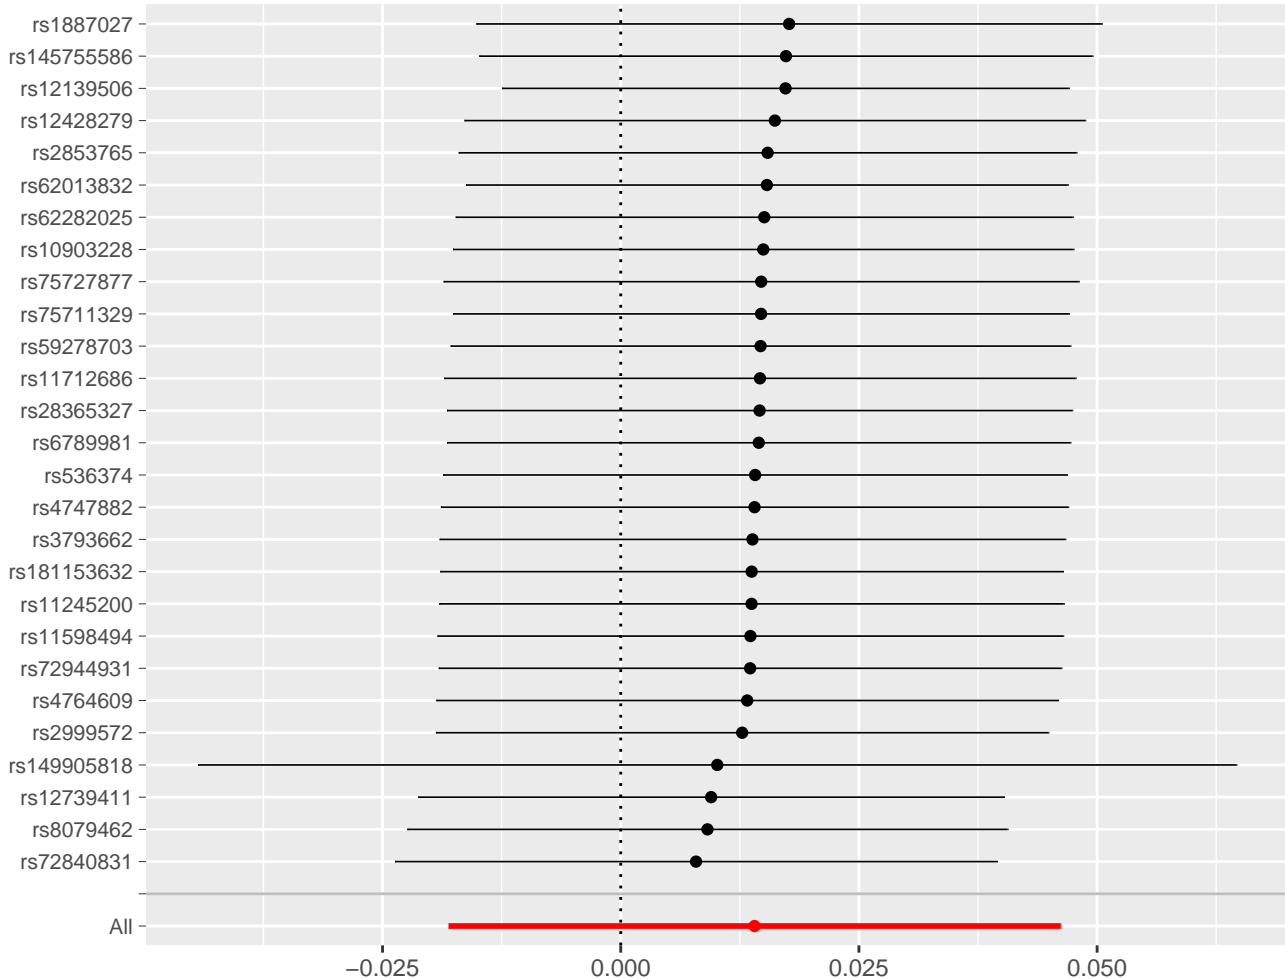

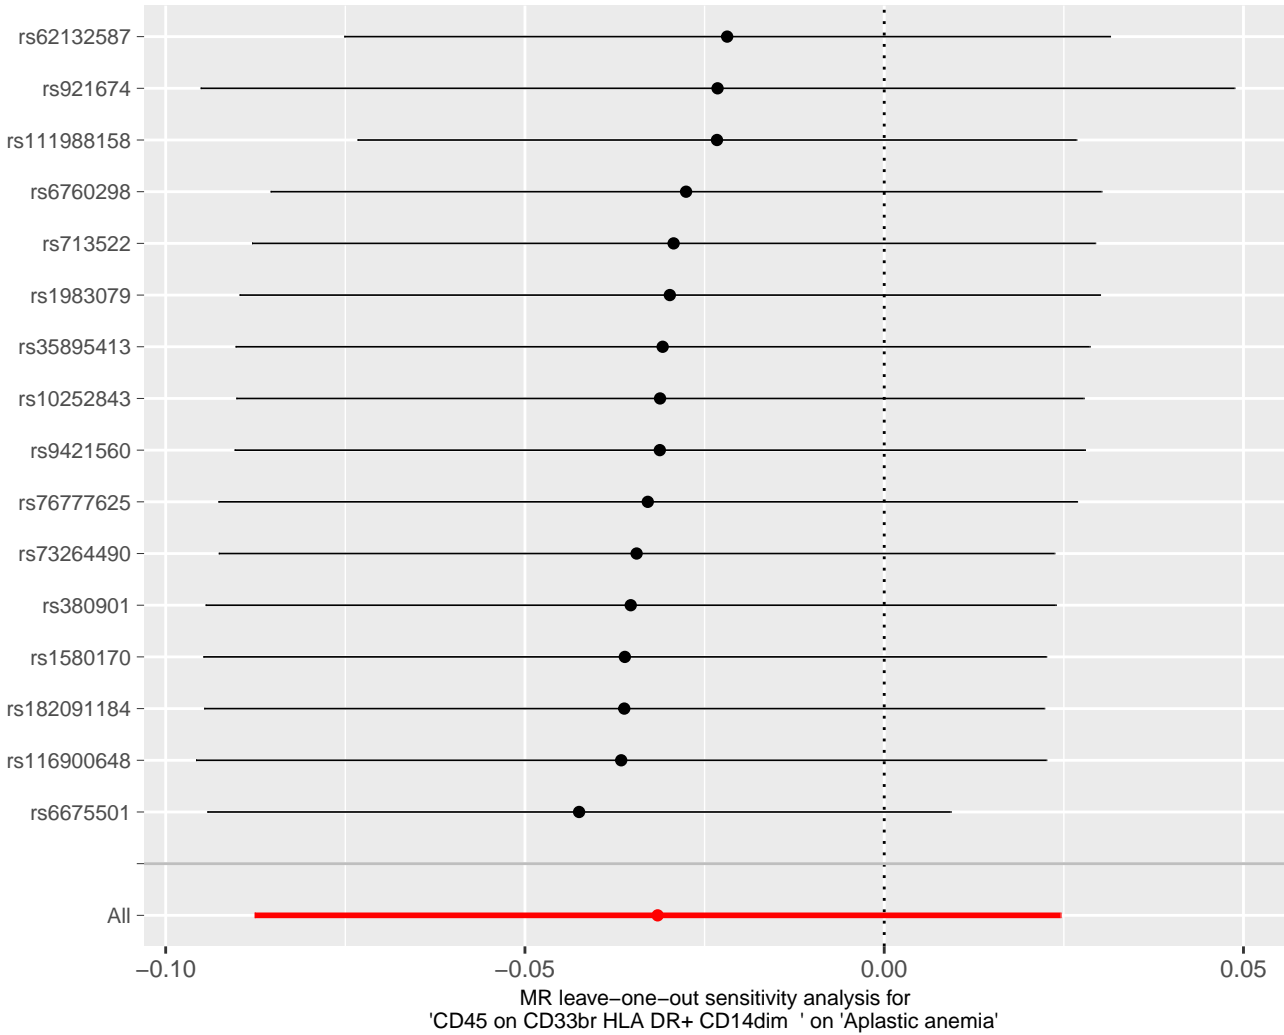

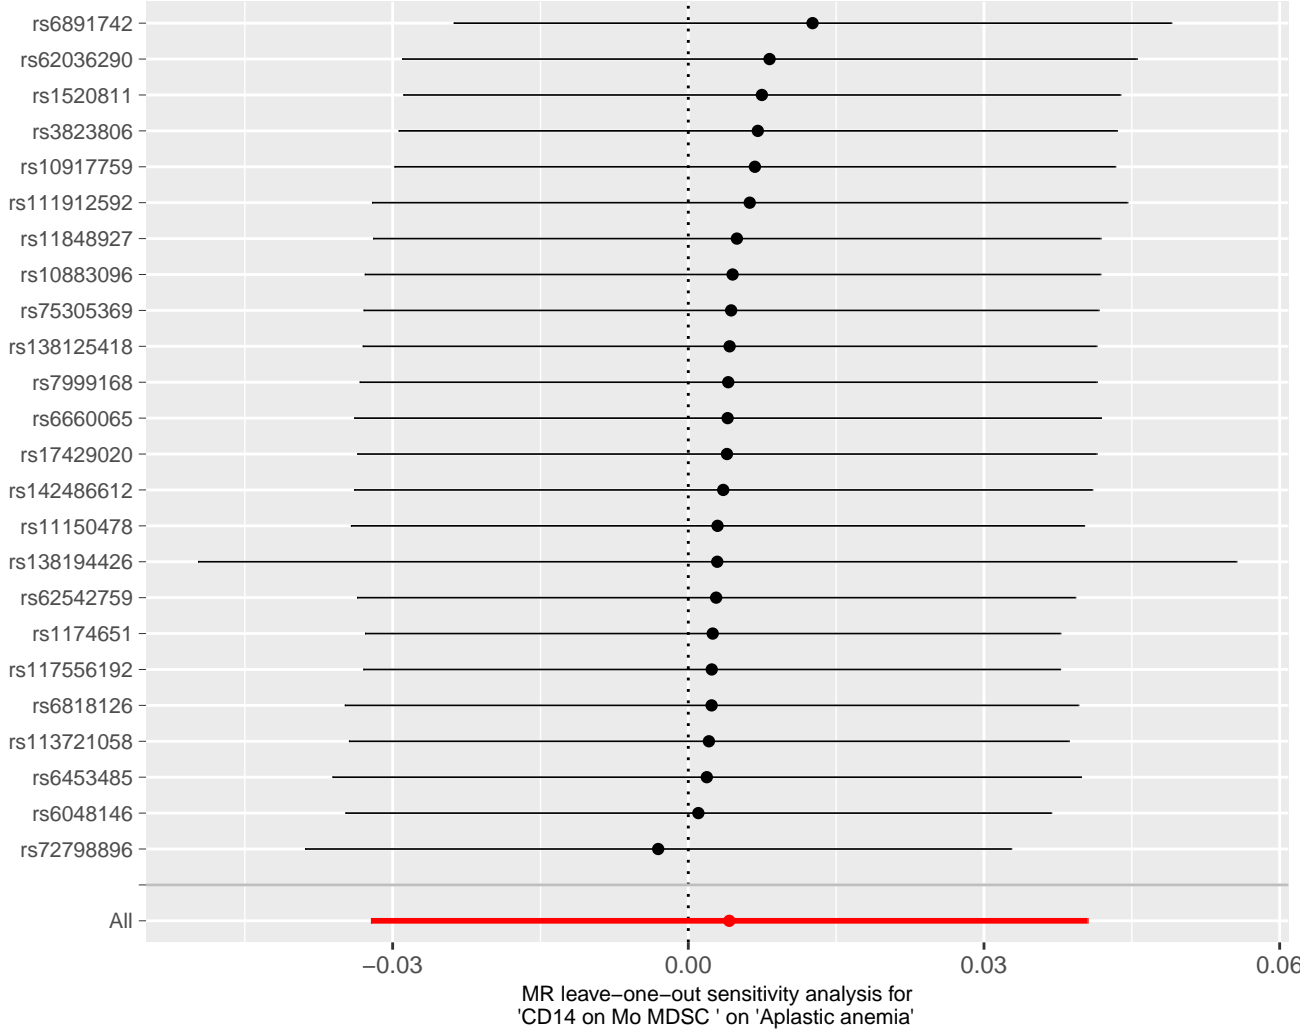

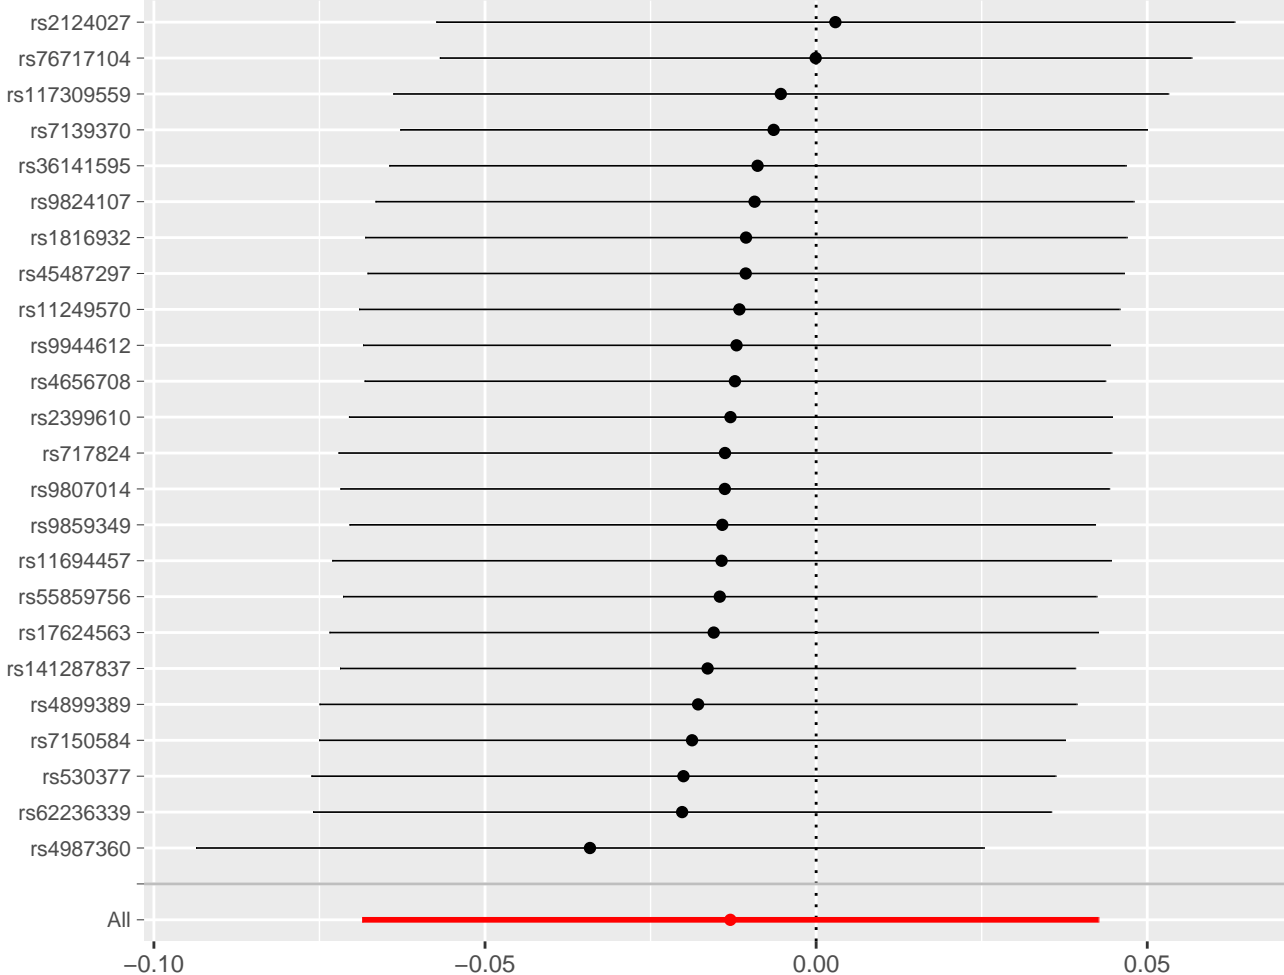



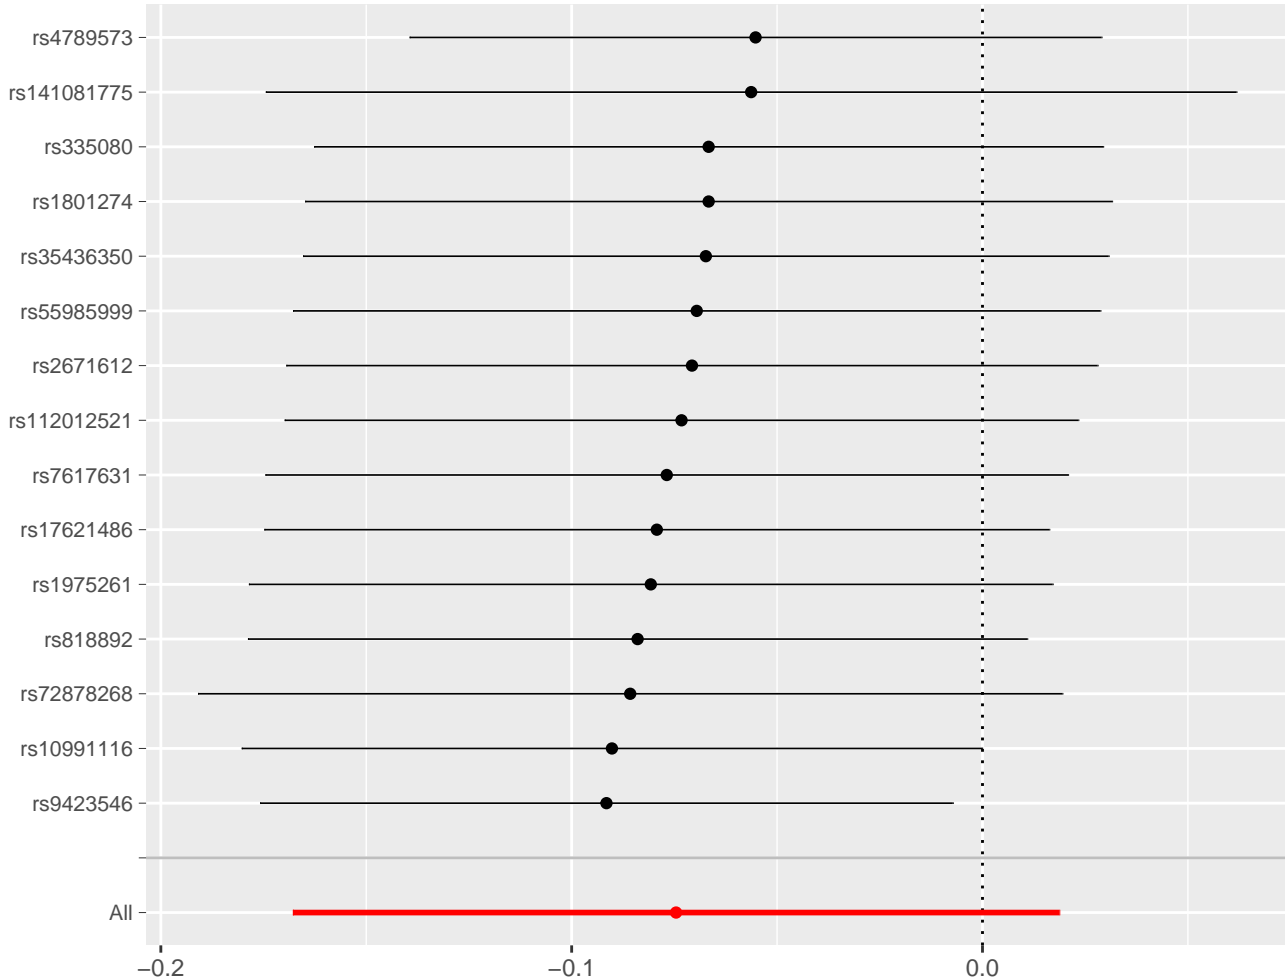

MR leave-one-out sensitivity analysis for 'CD38 on PB/PC' on 'Aplastic anemia'

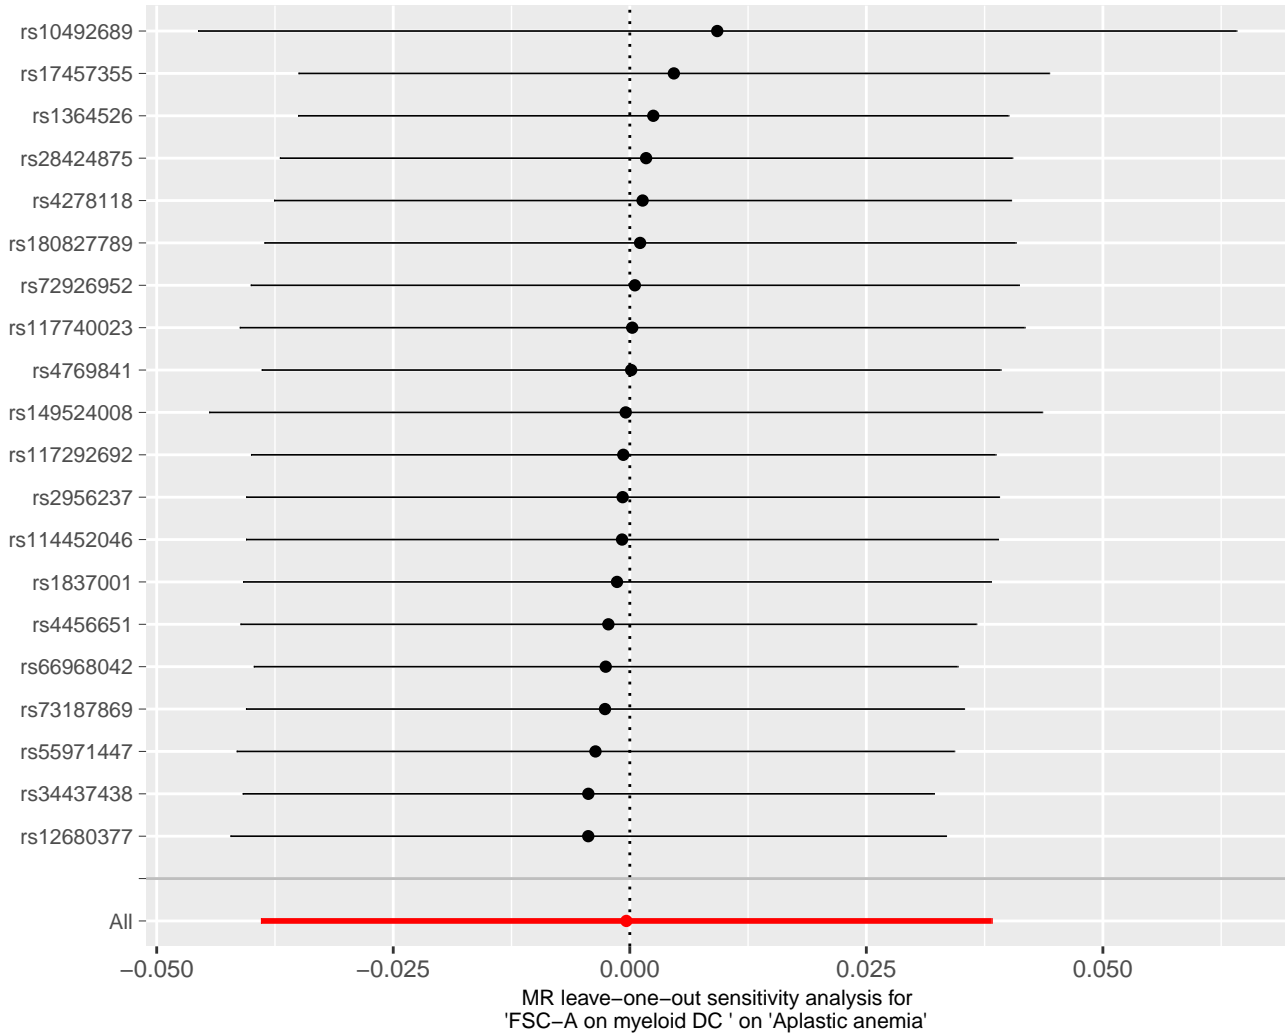

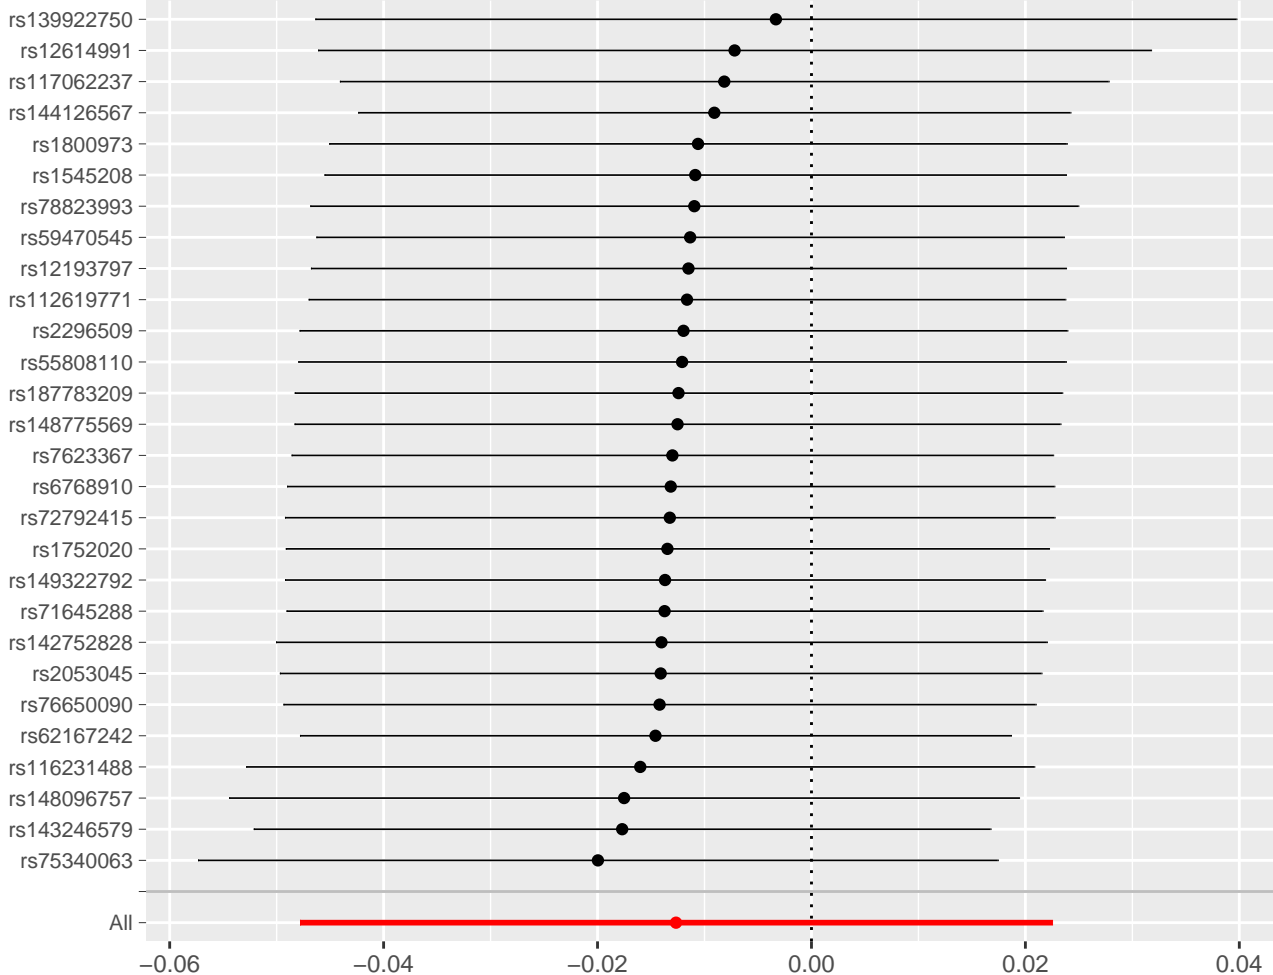

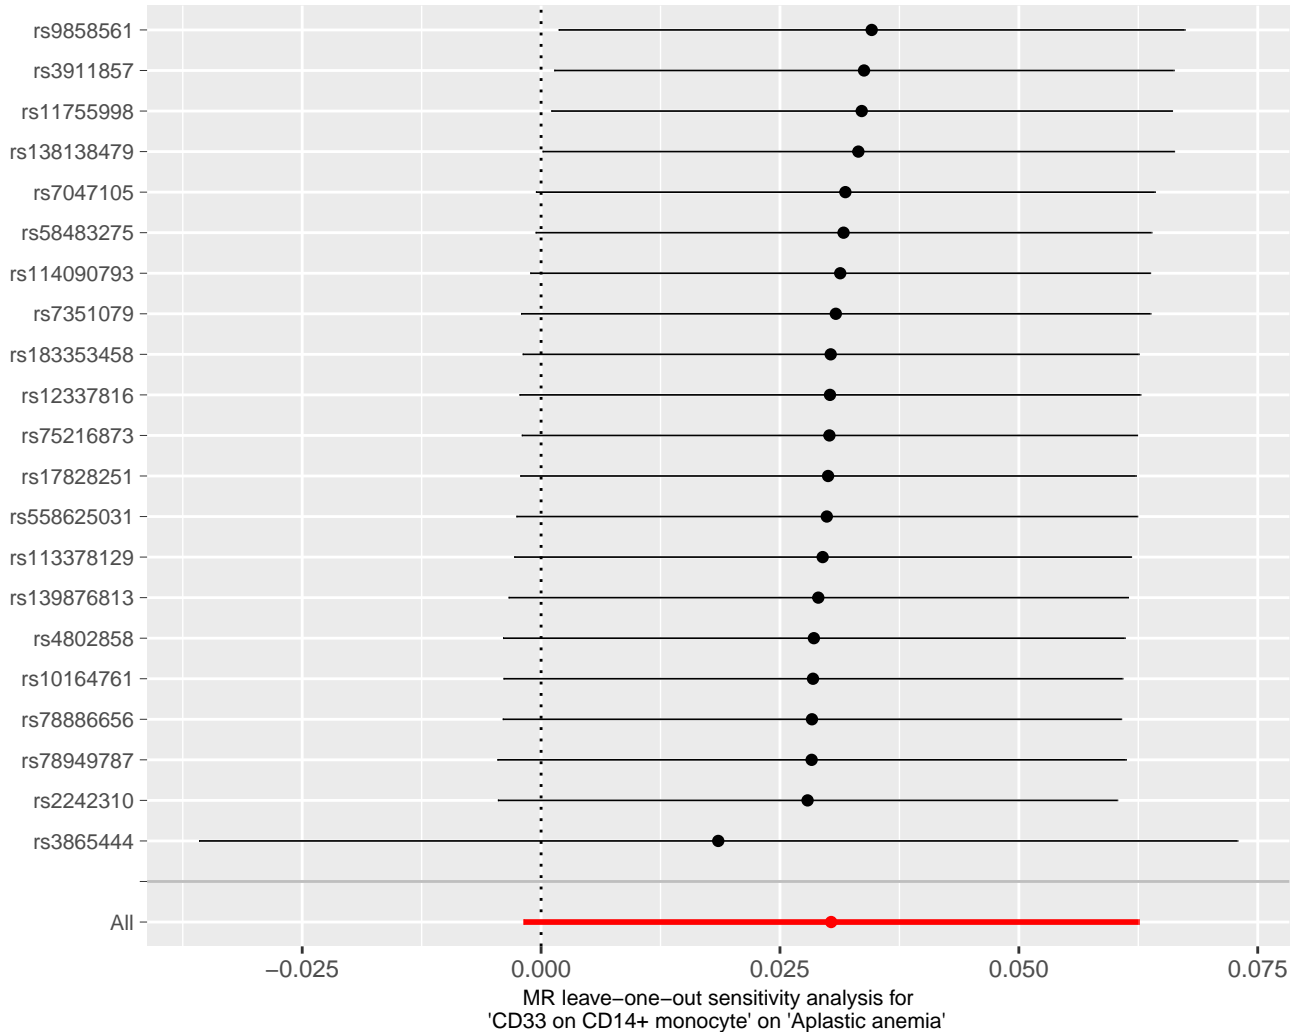

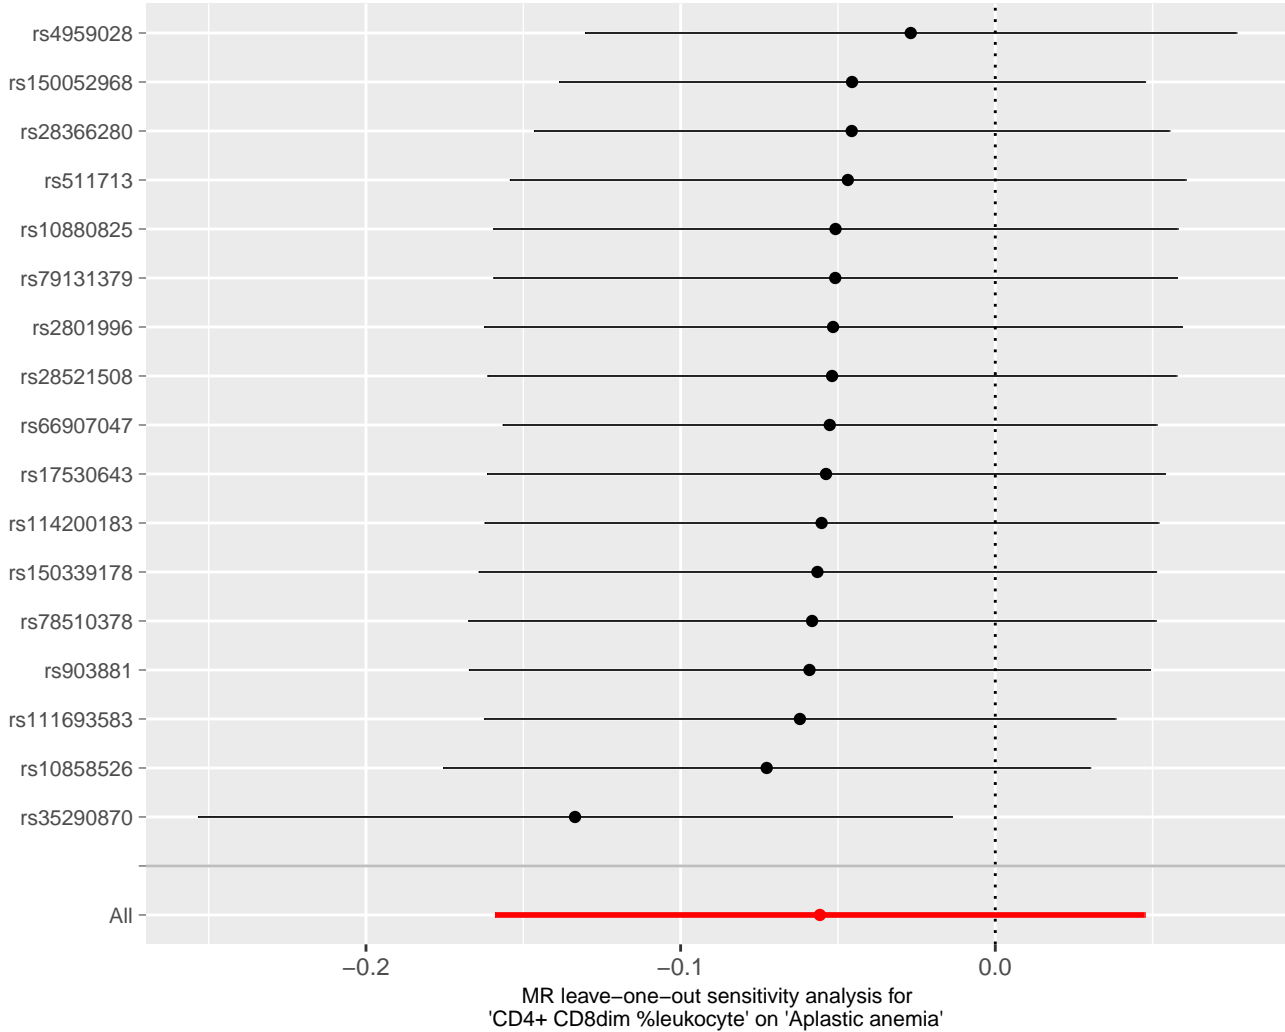

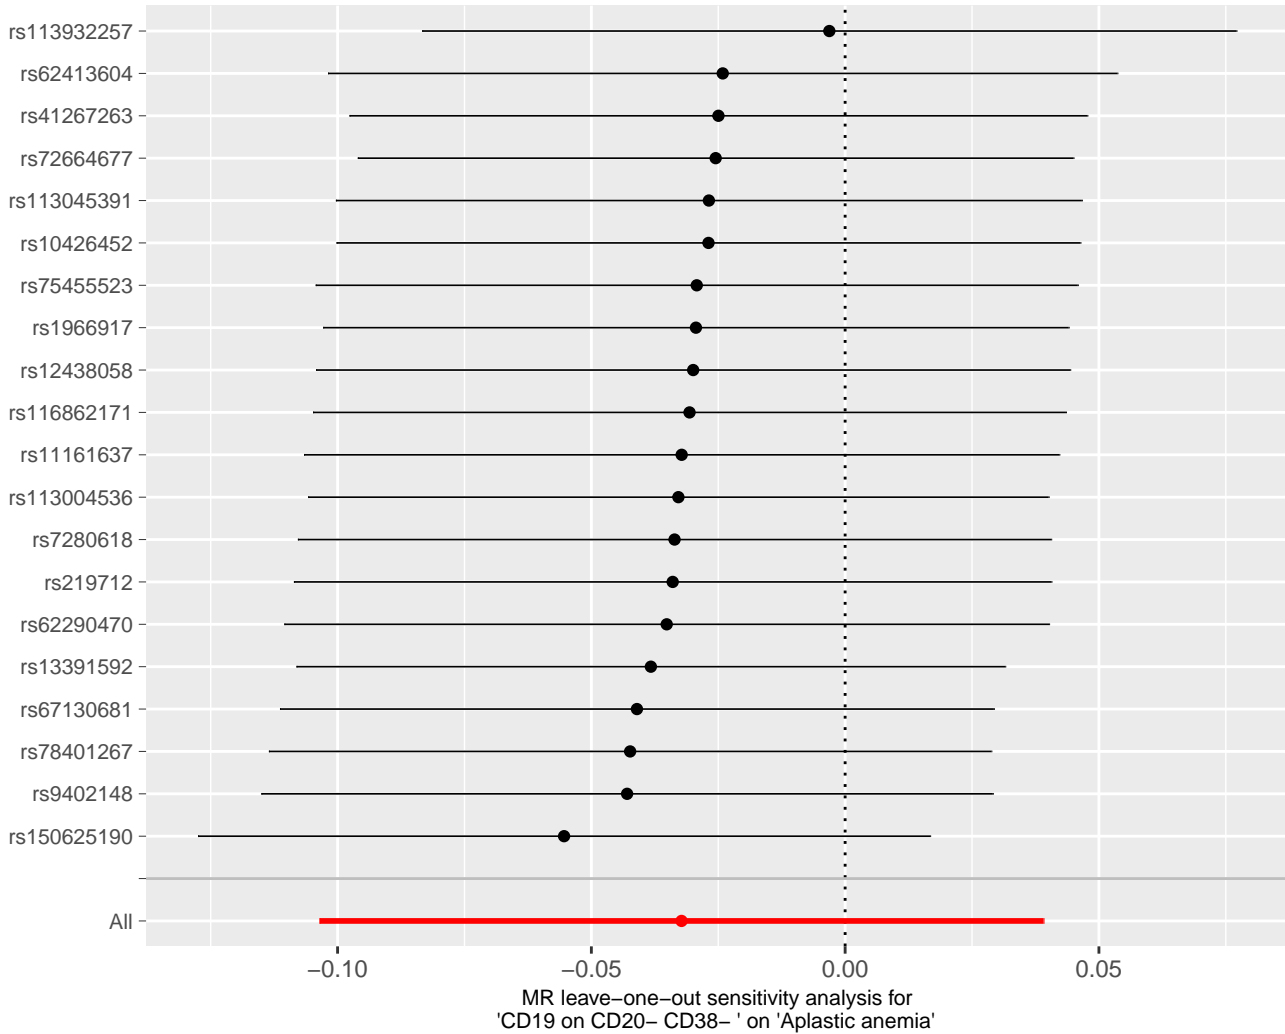

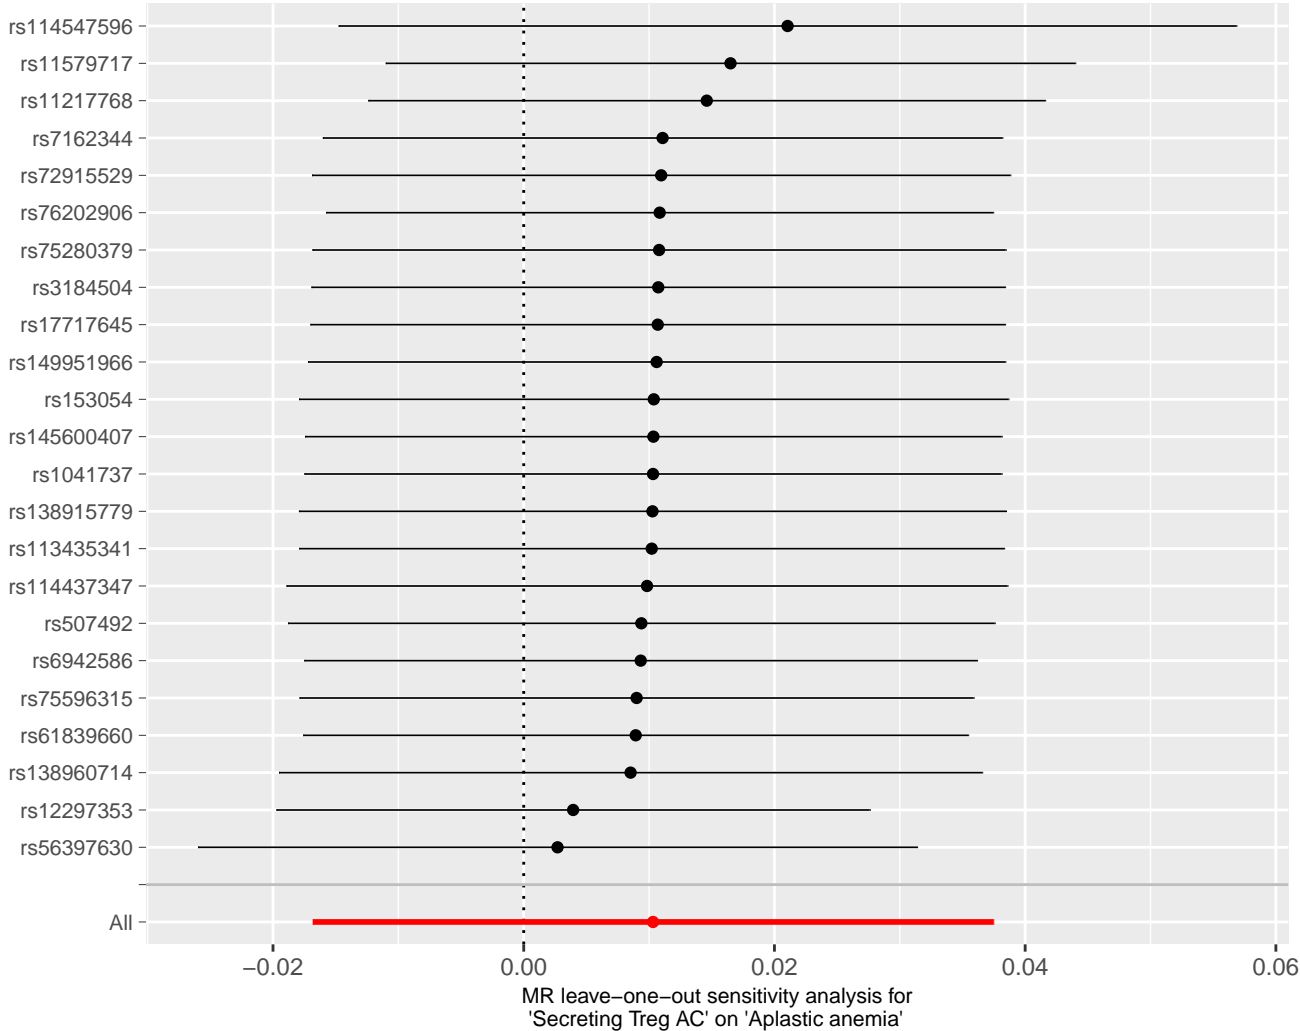

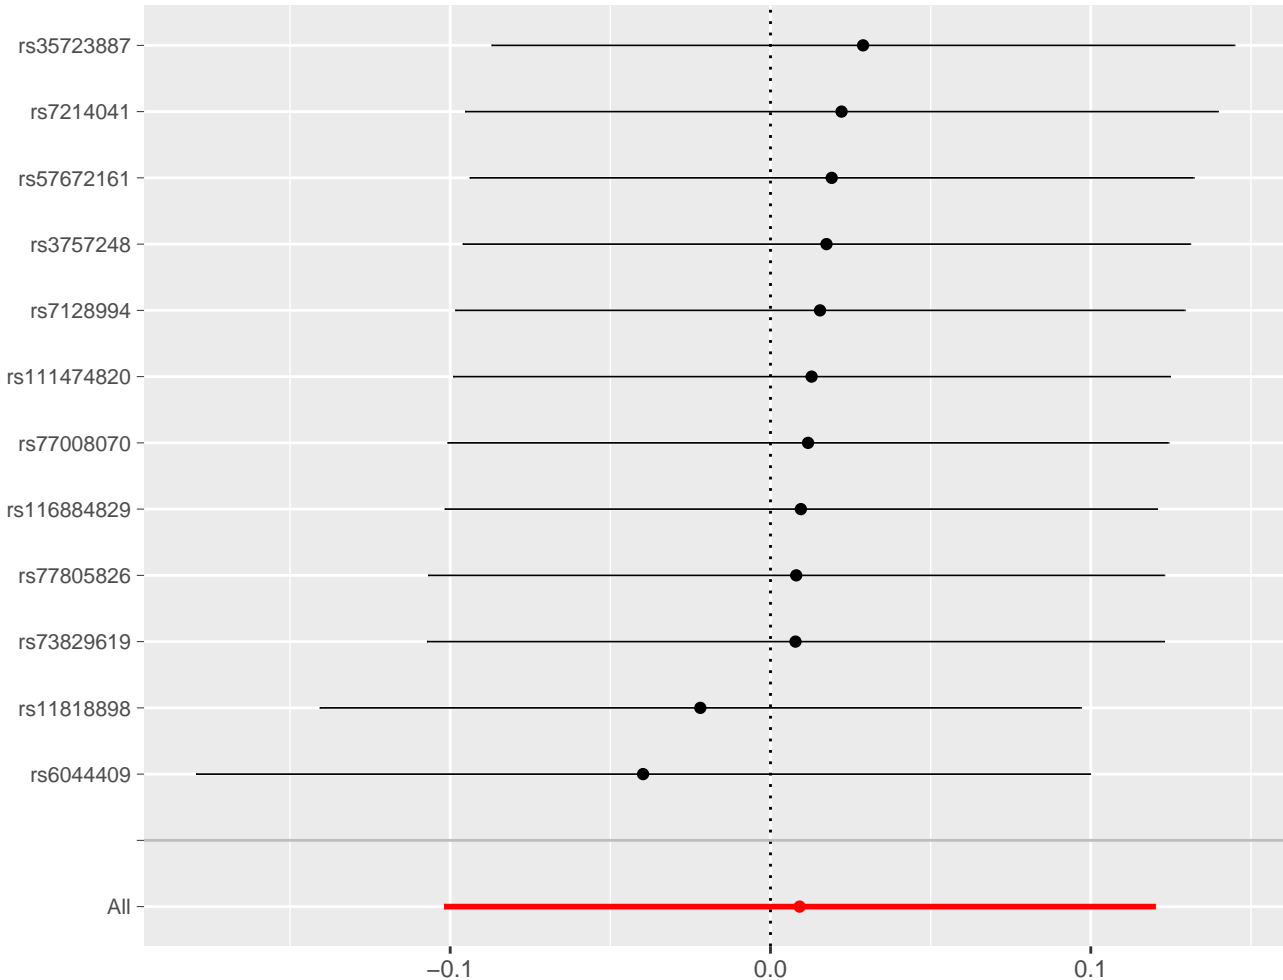

MR leave-one-out sensitivity analysis for 'CD28+ DN (CD4-CD8-) AC' on 'Aplastic anemia'



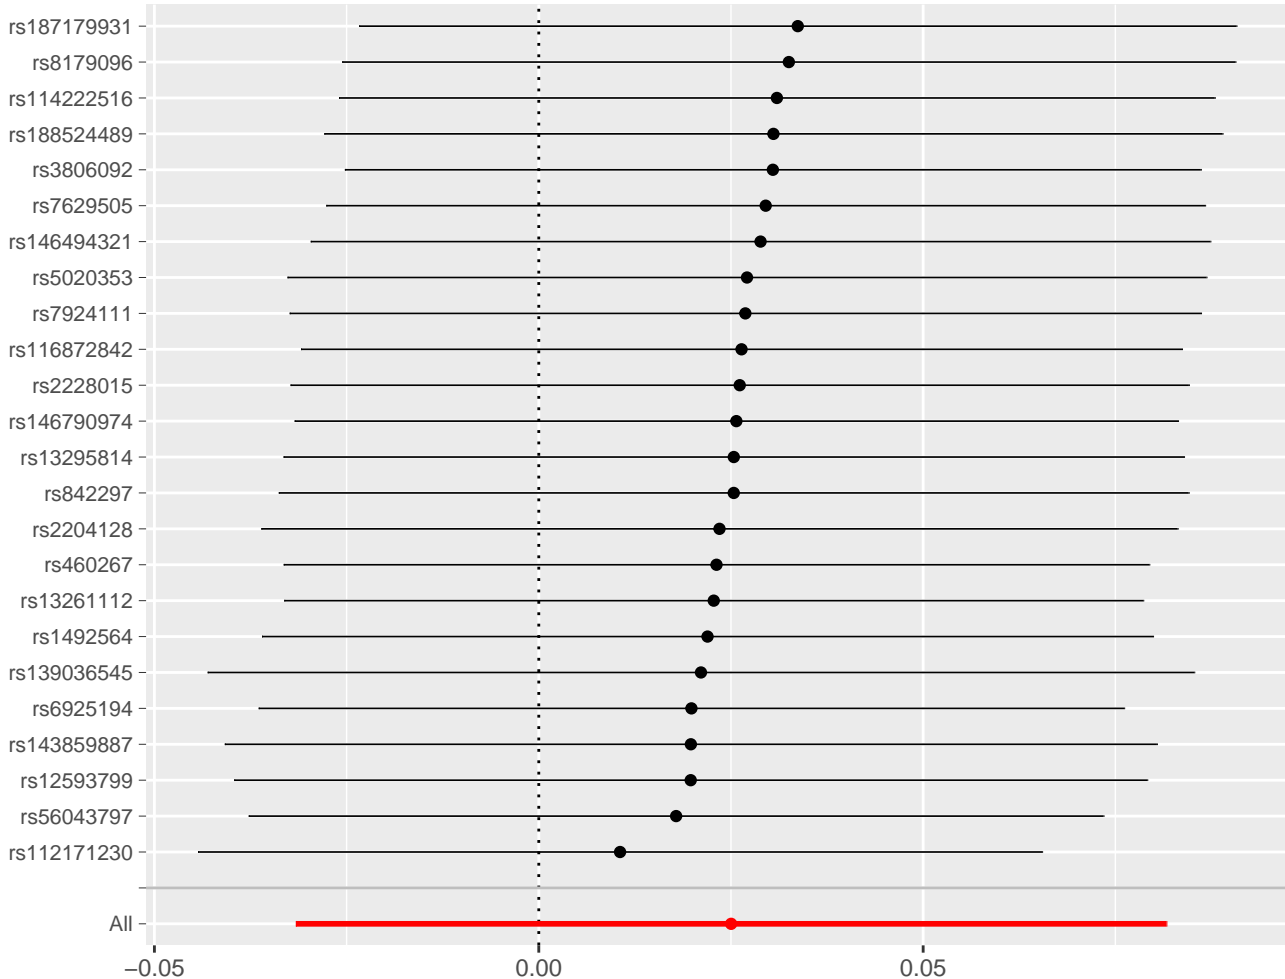

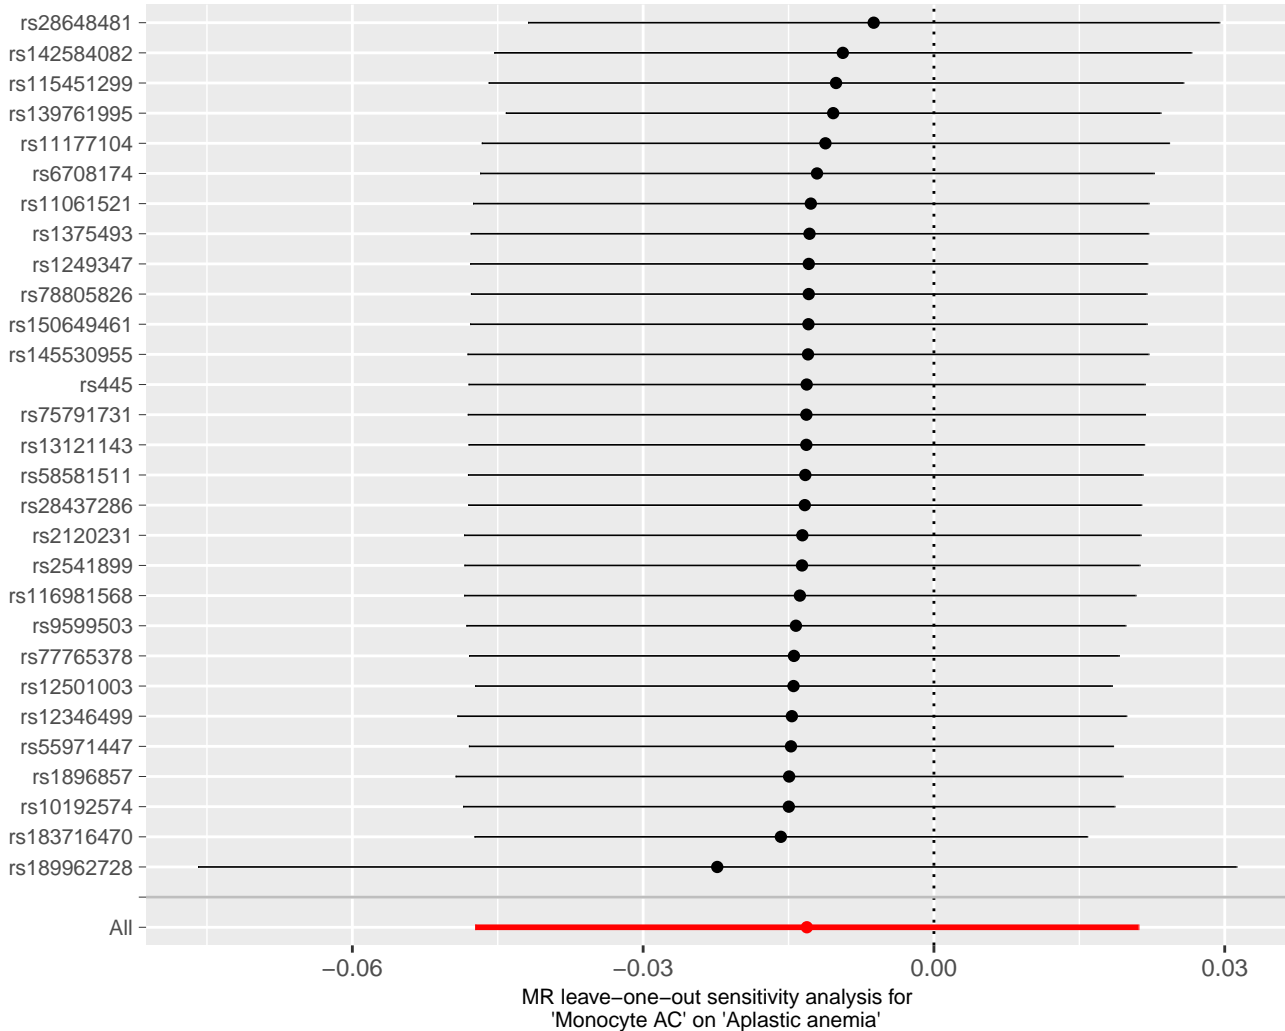

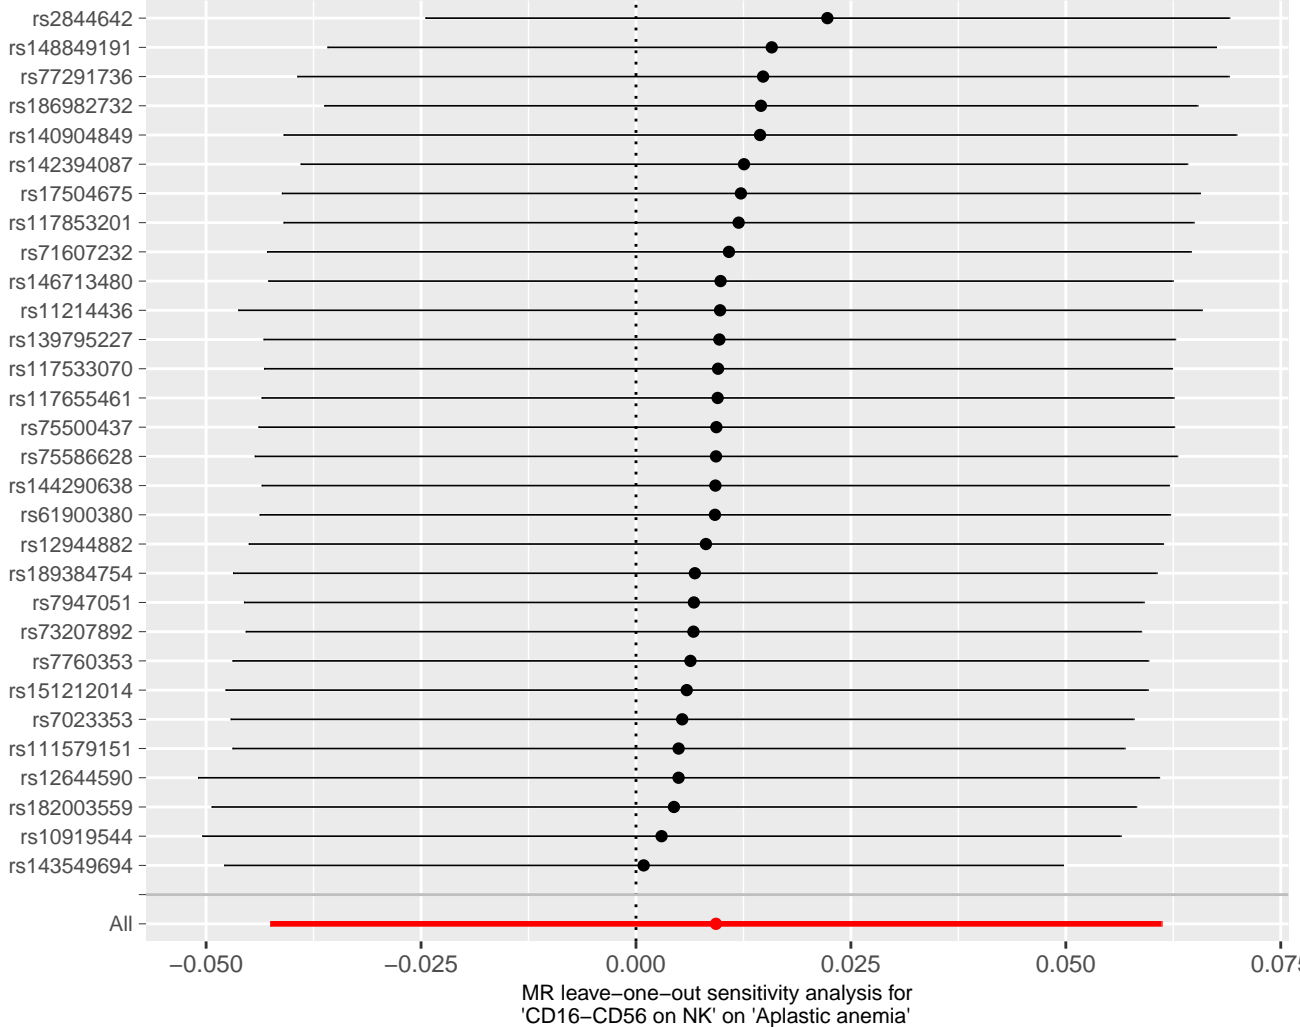

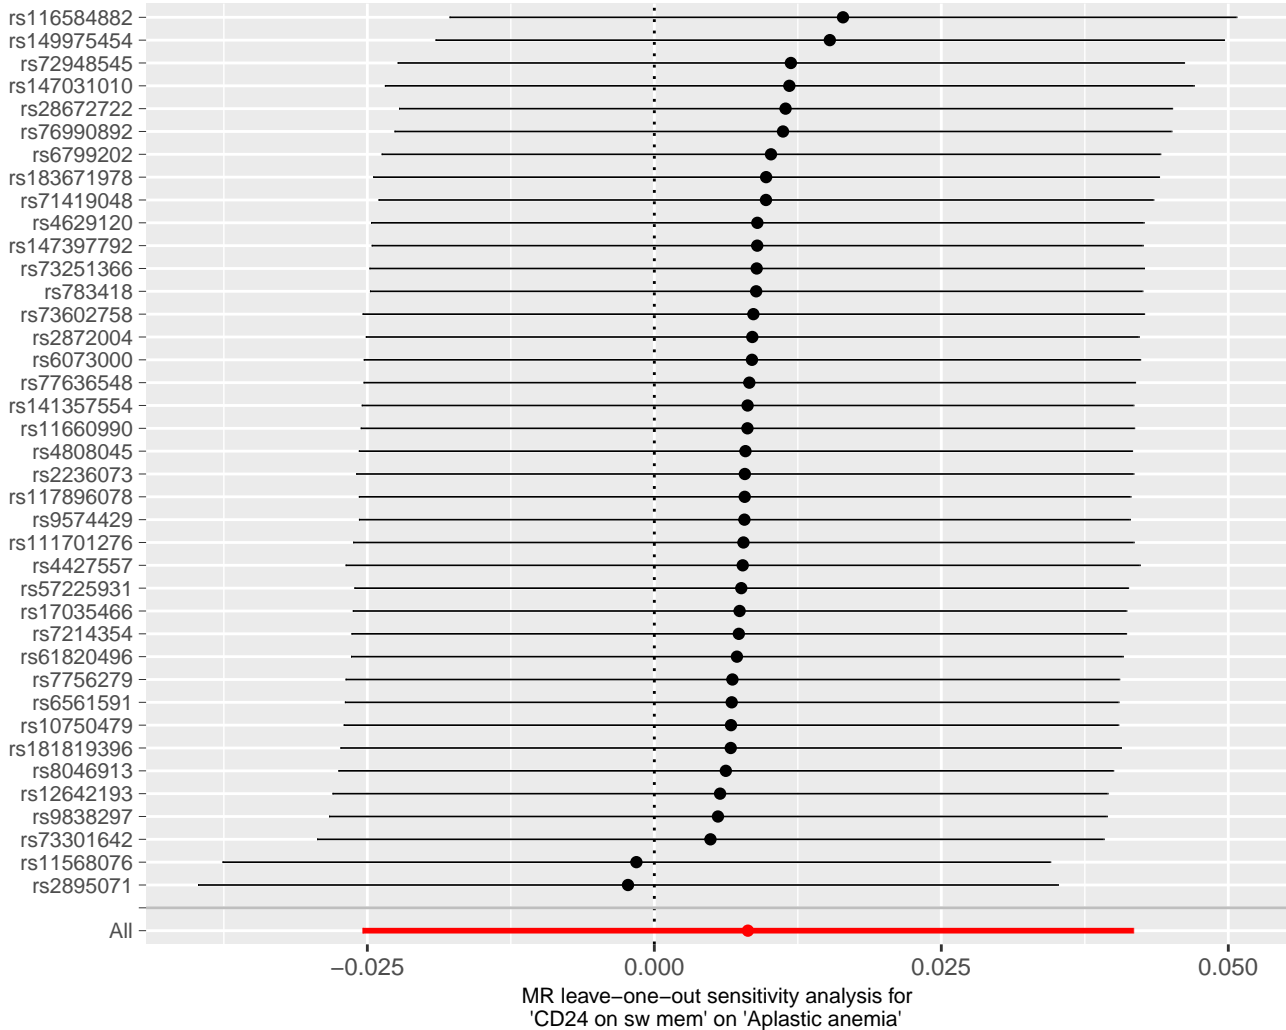

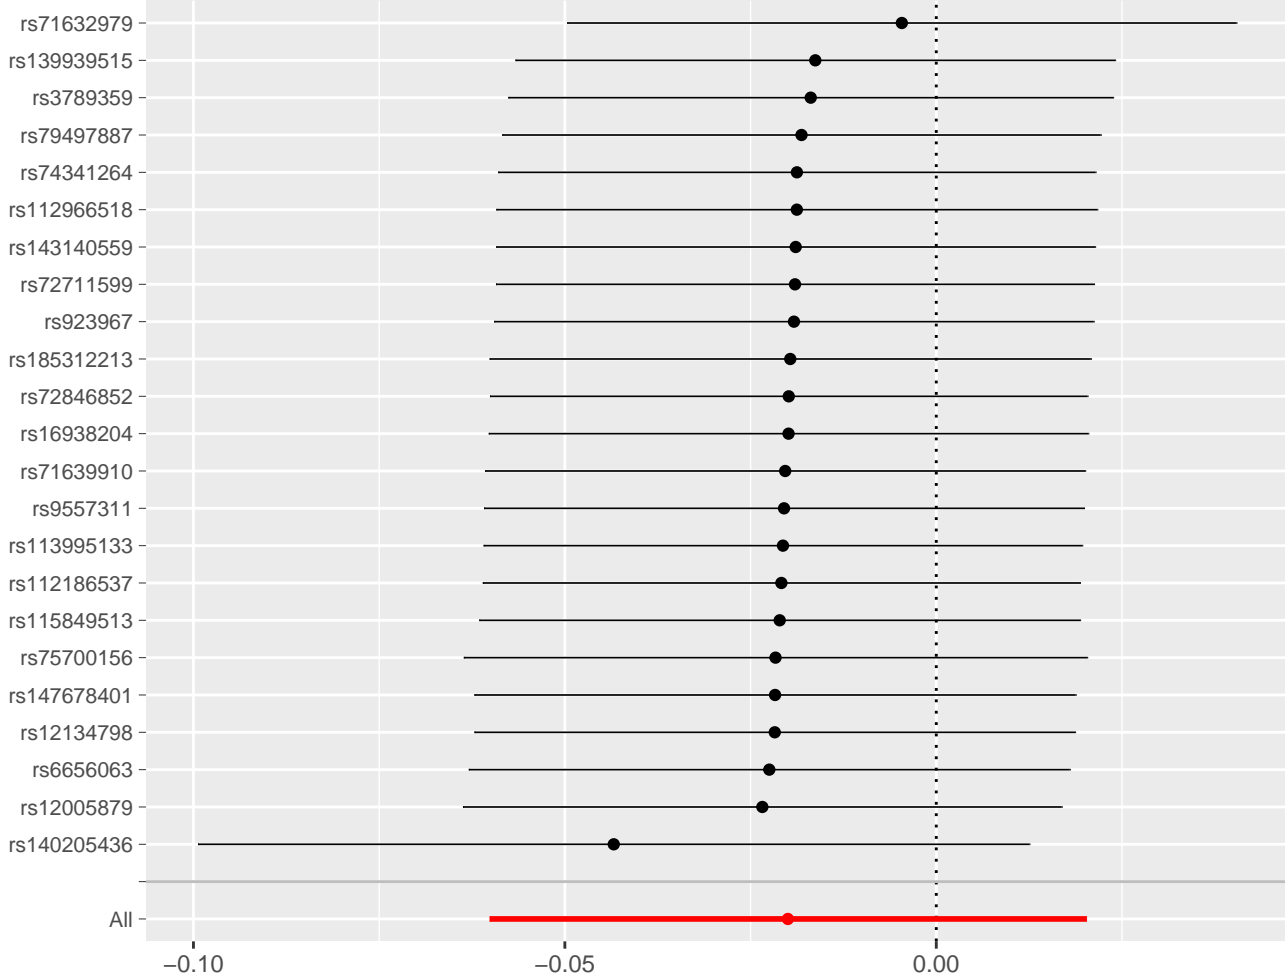

MR leave-one-out sensitivity analysis for 'CD86+ myeloid DC AC' on 'Aplastic anemia'

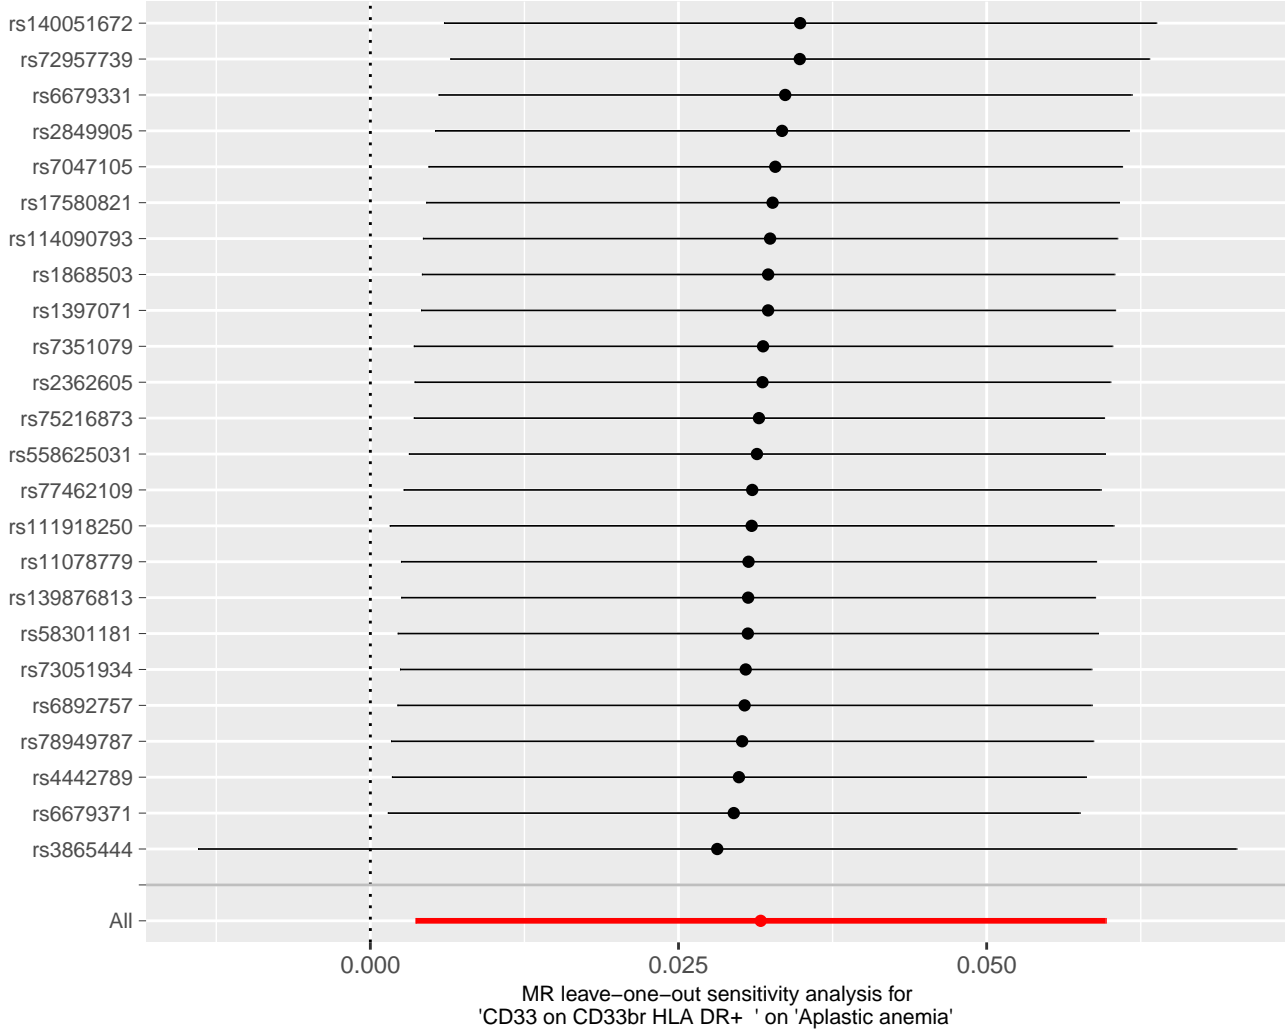

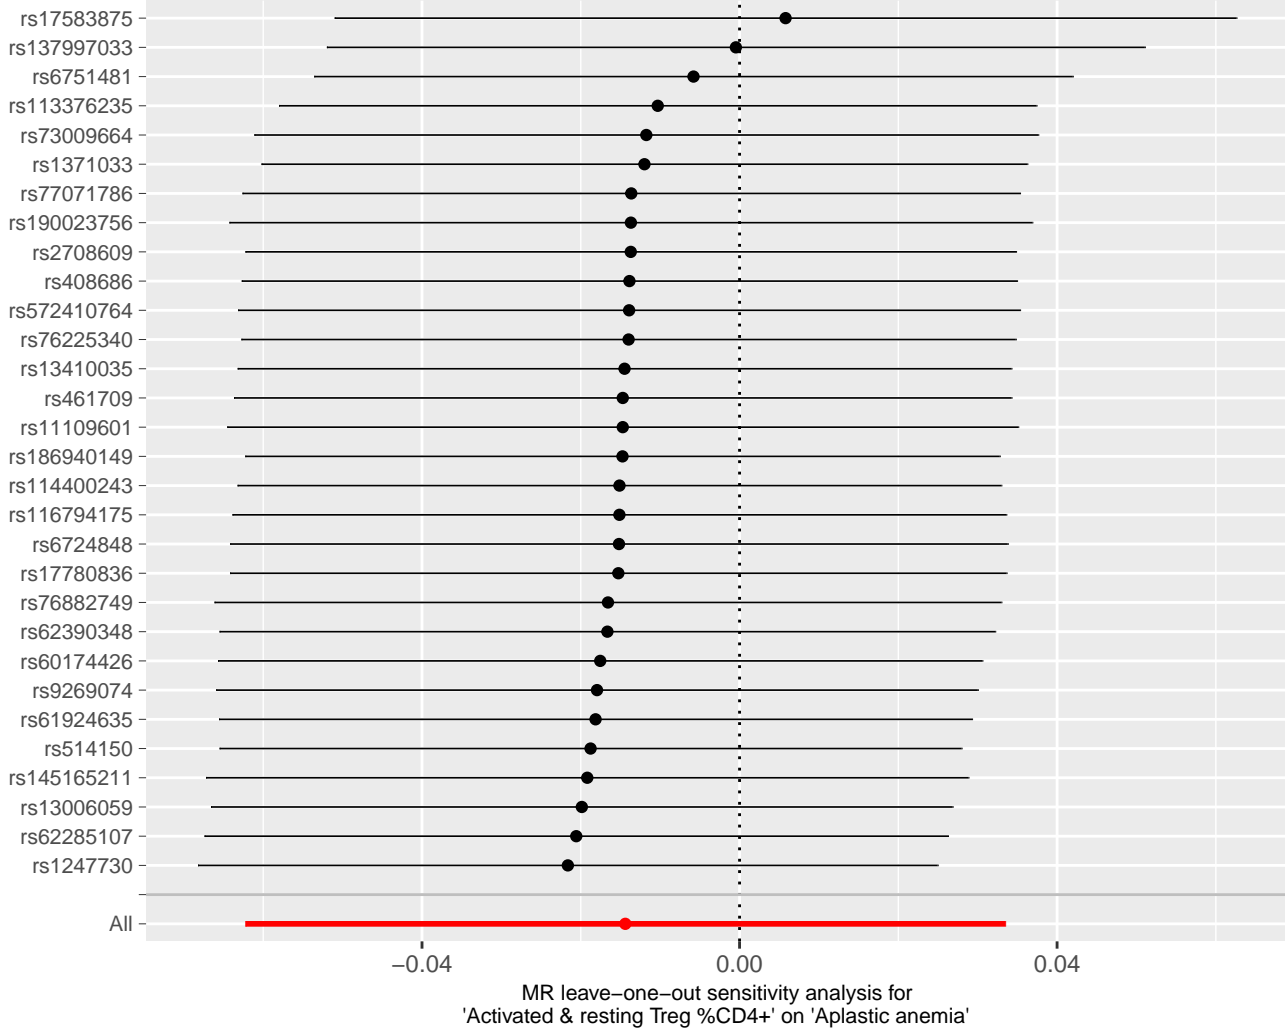

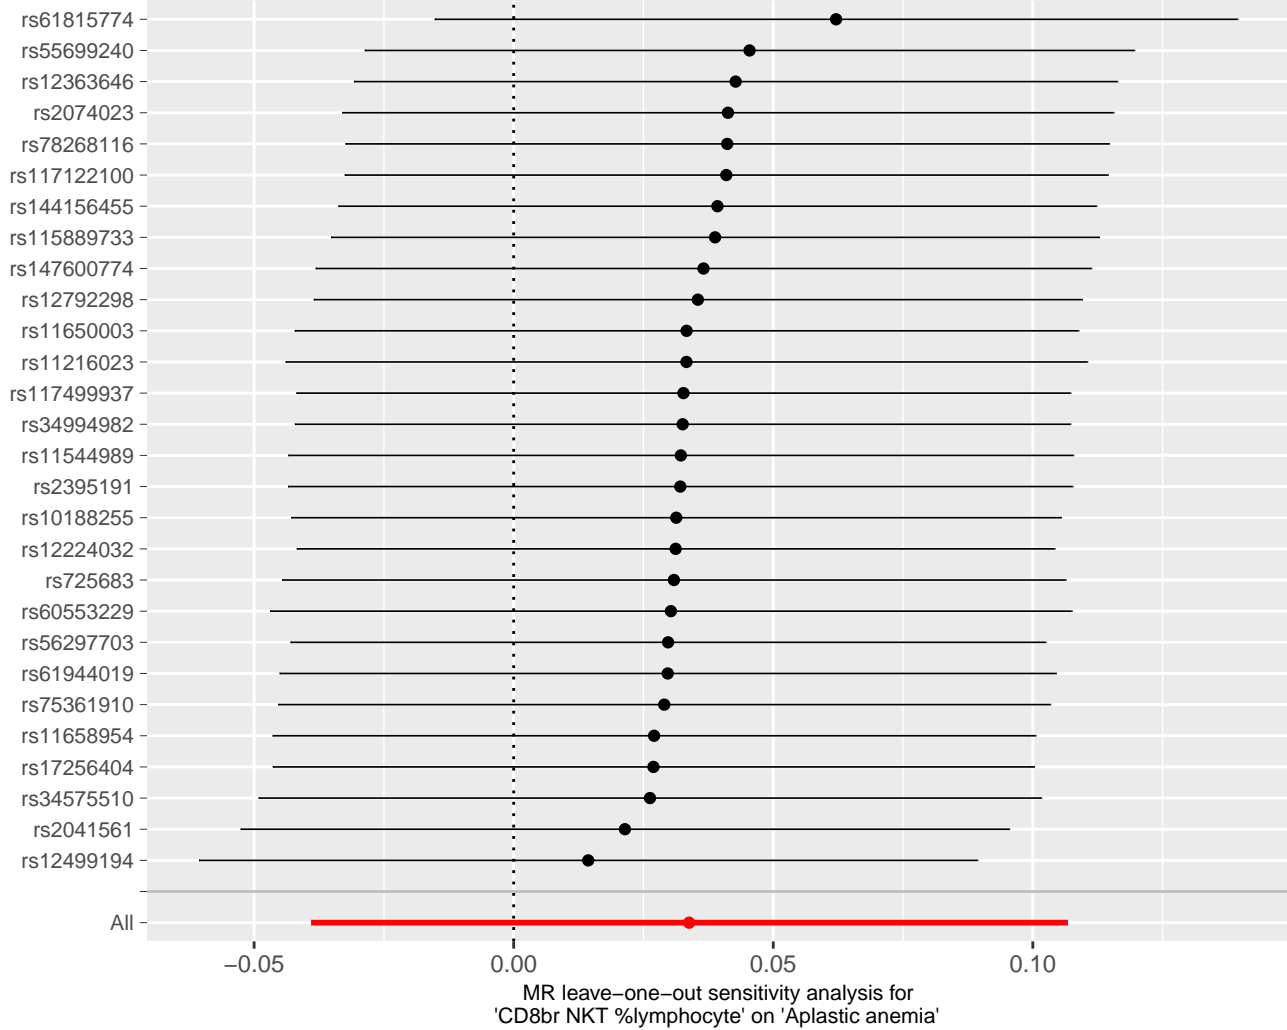



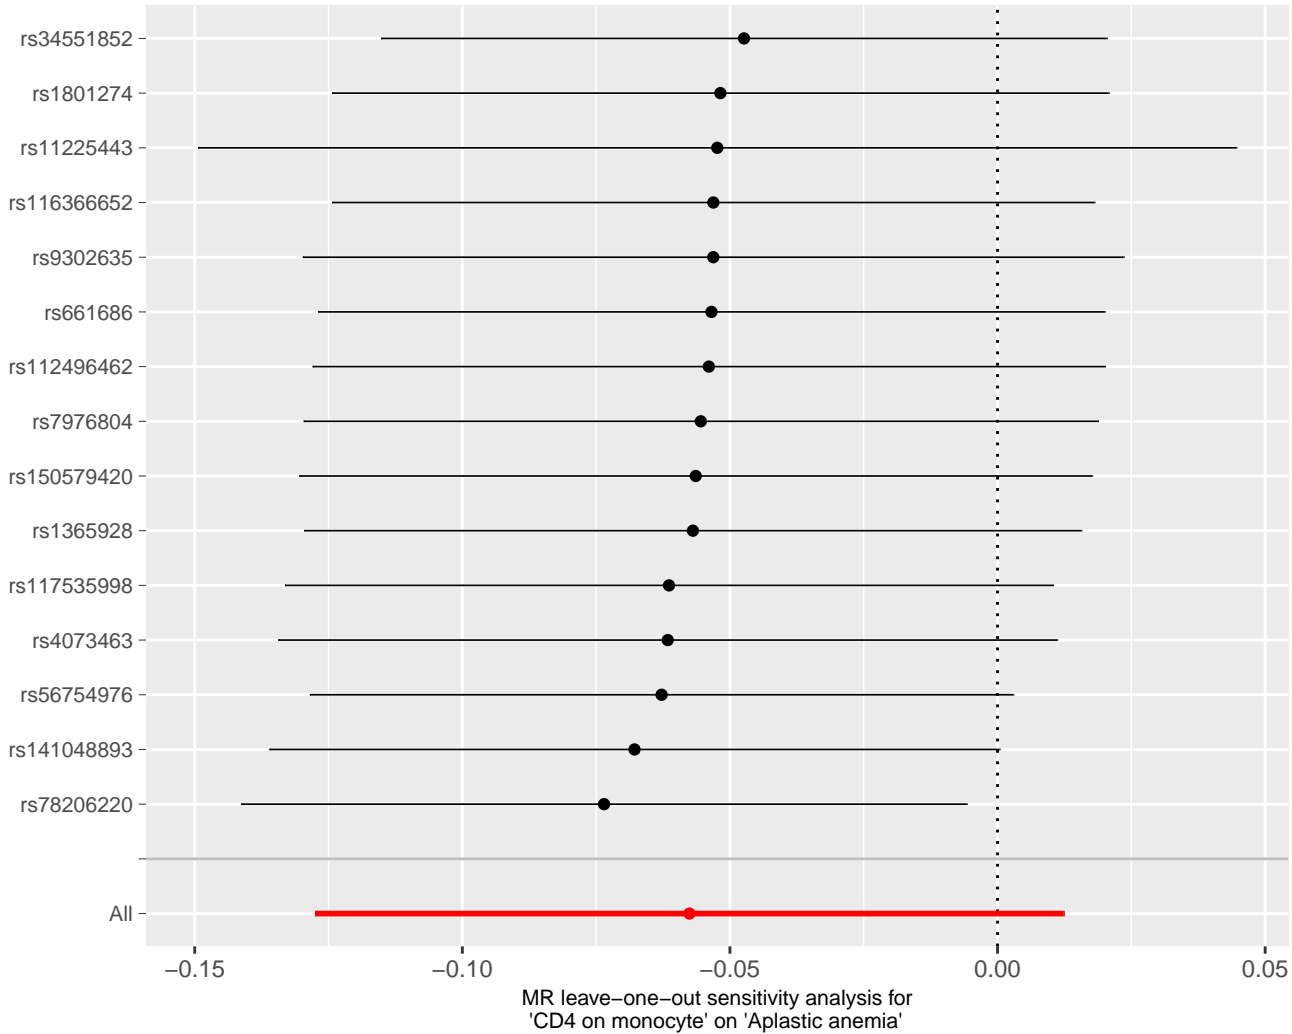

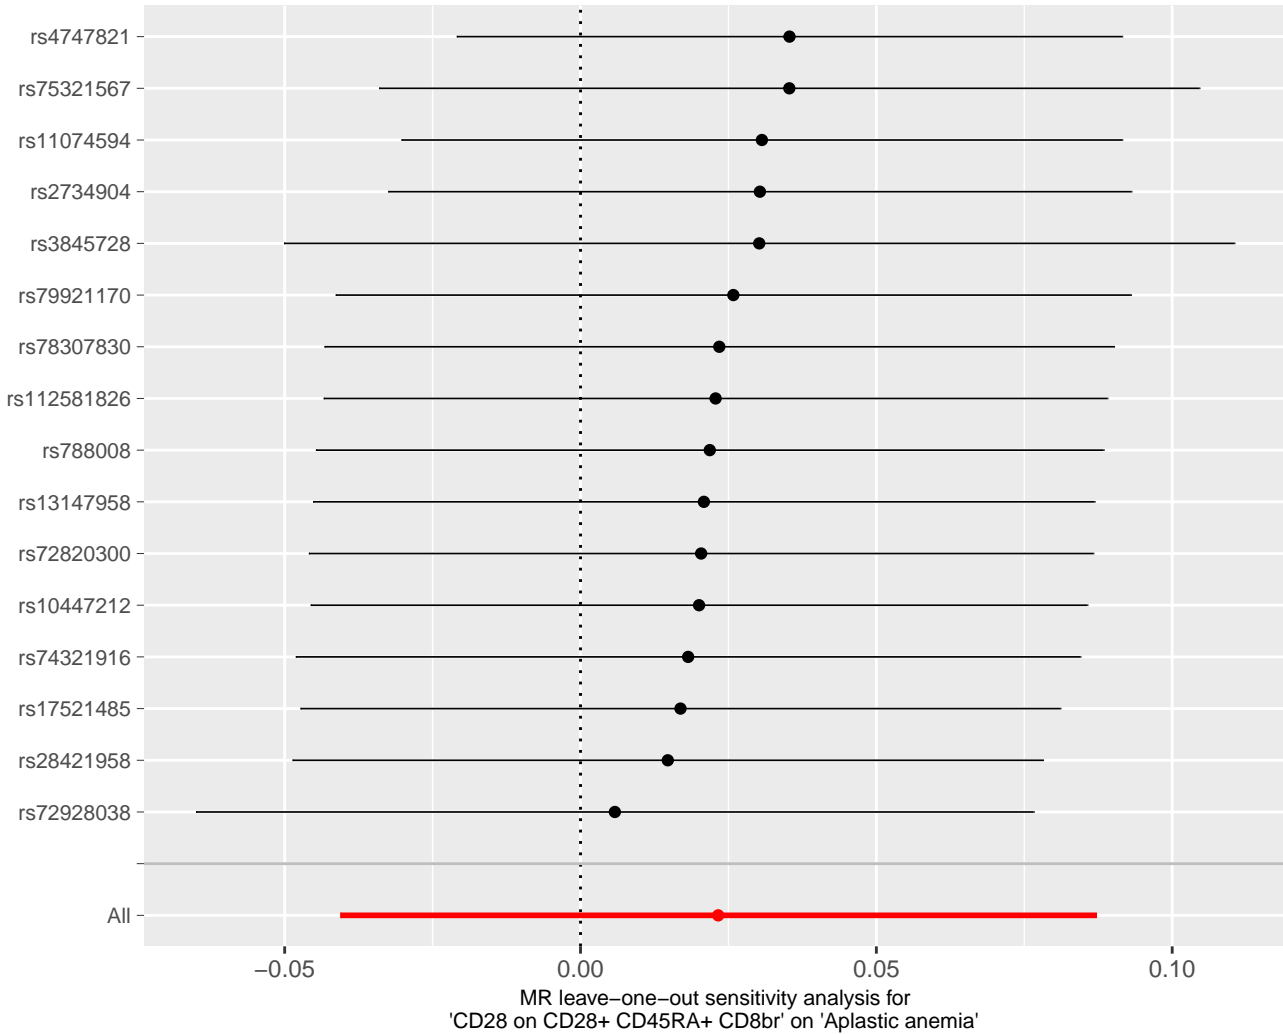

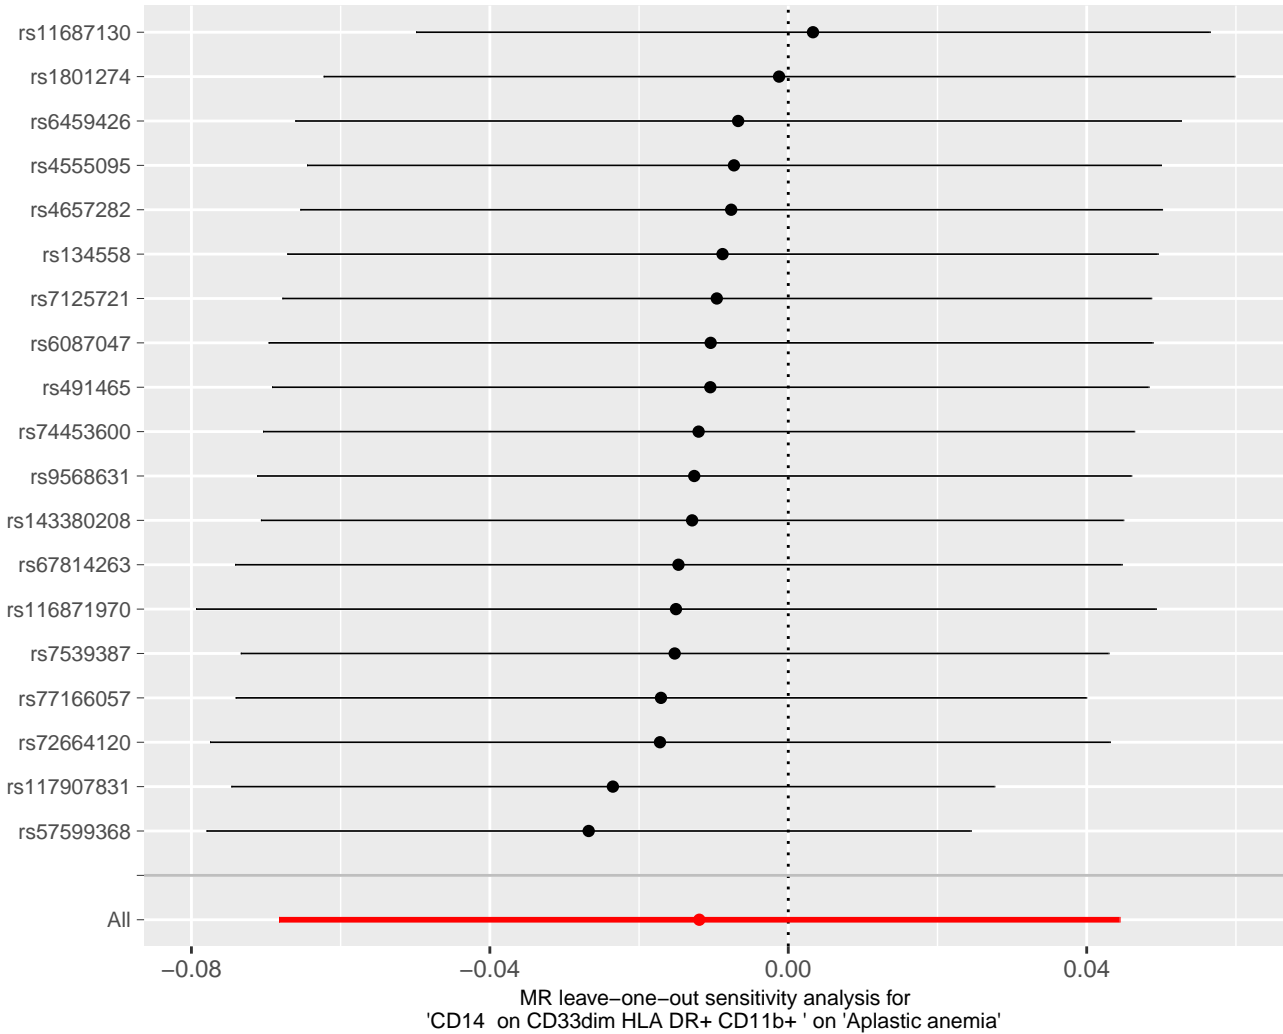

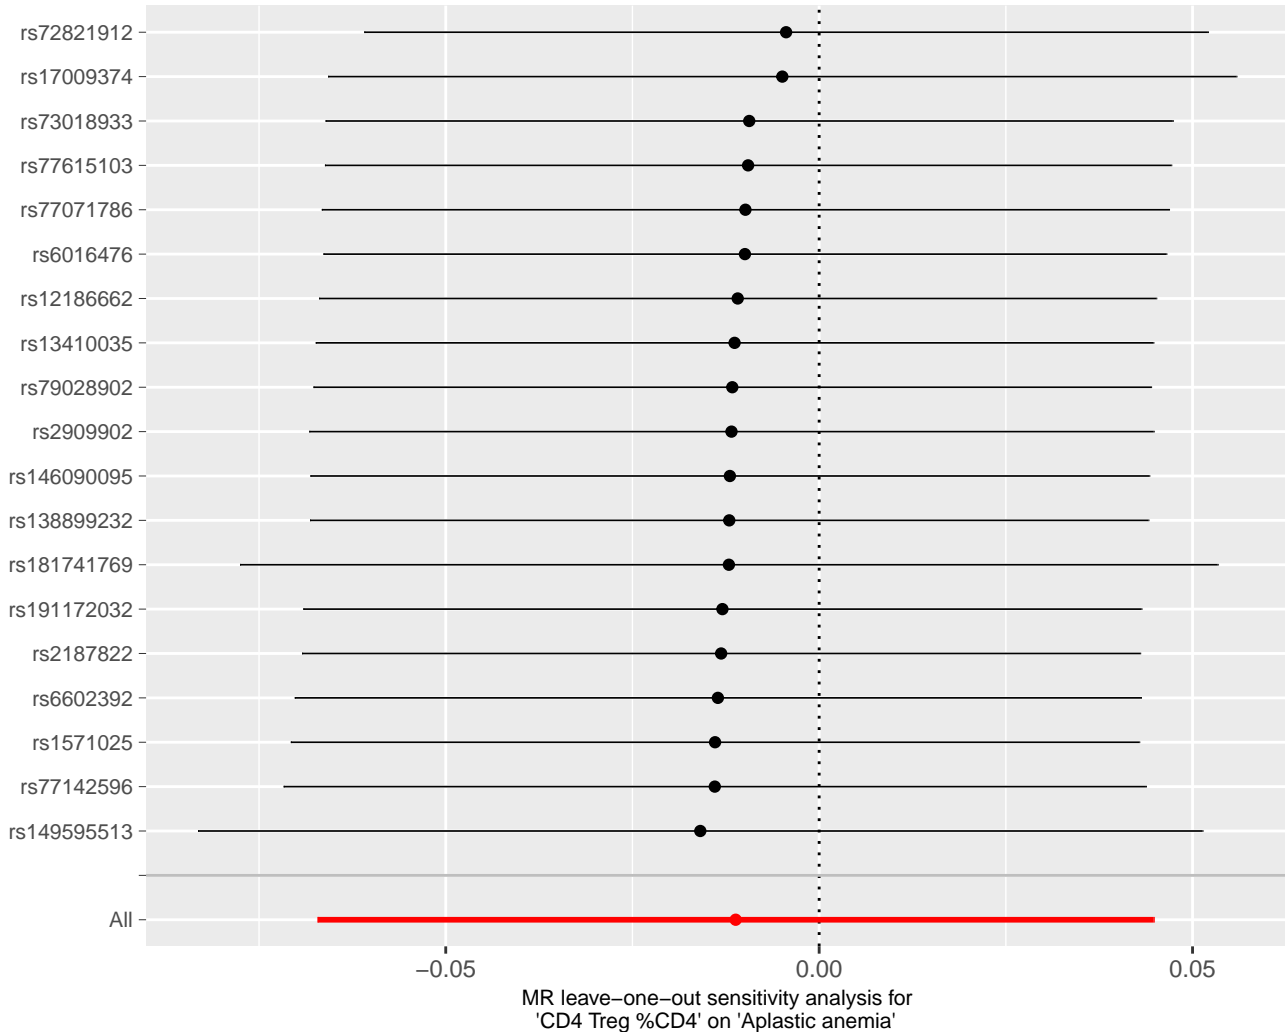

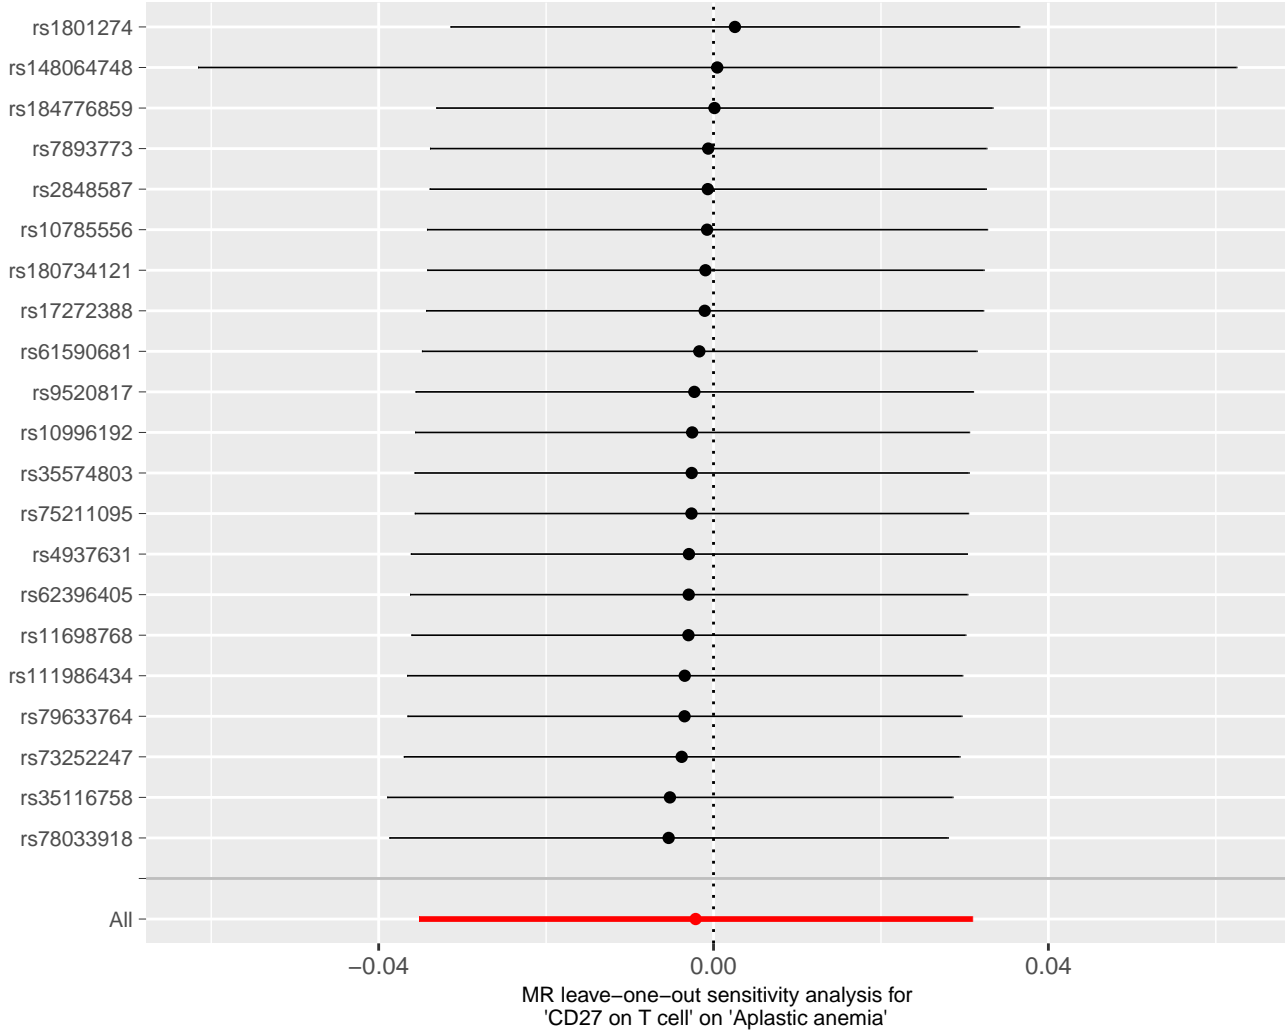

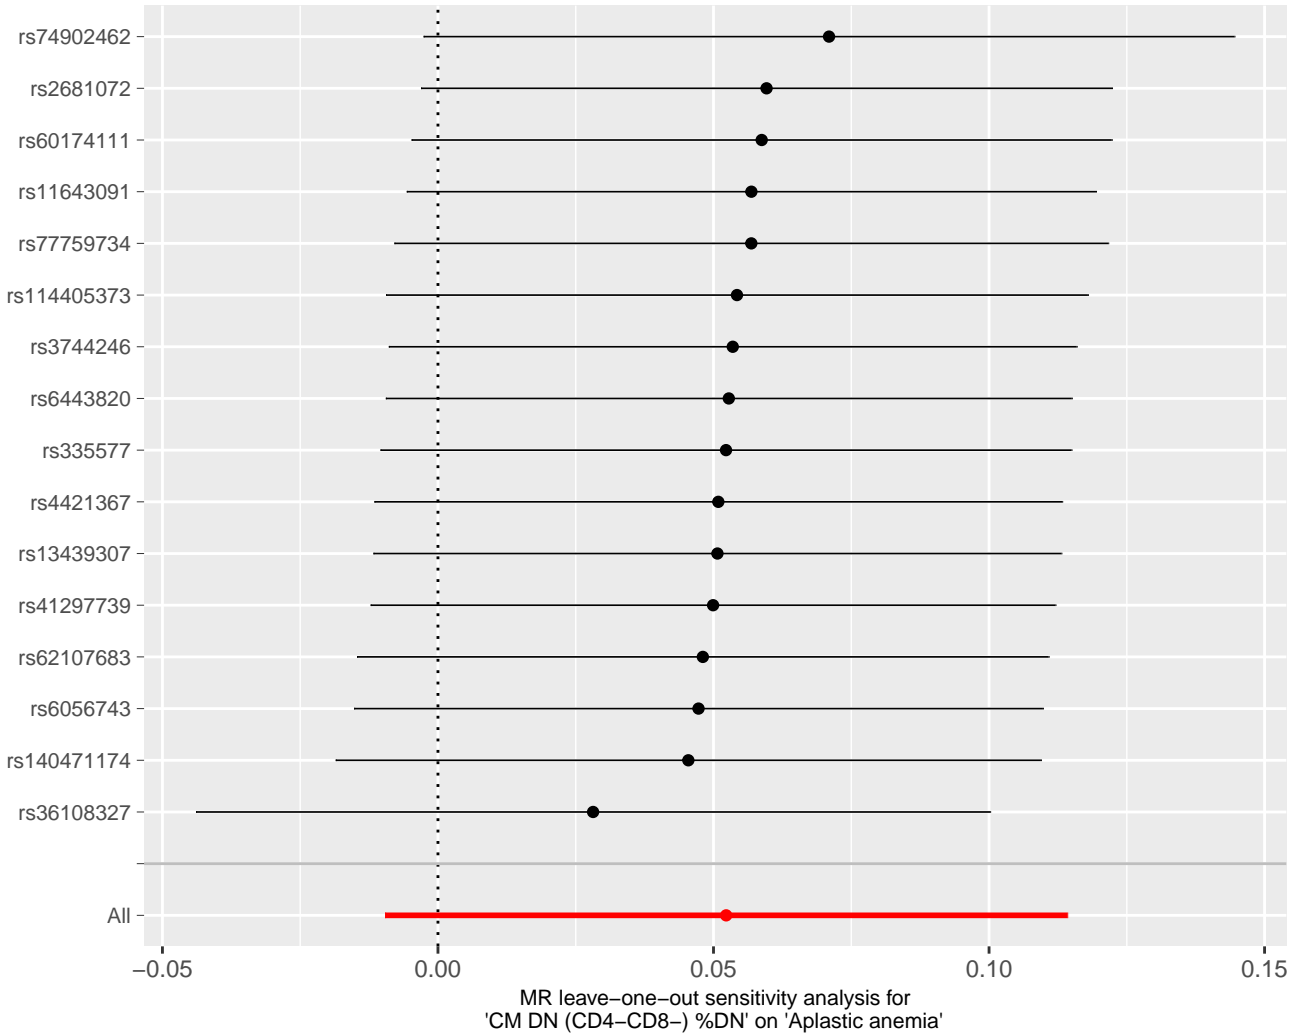

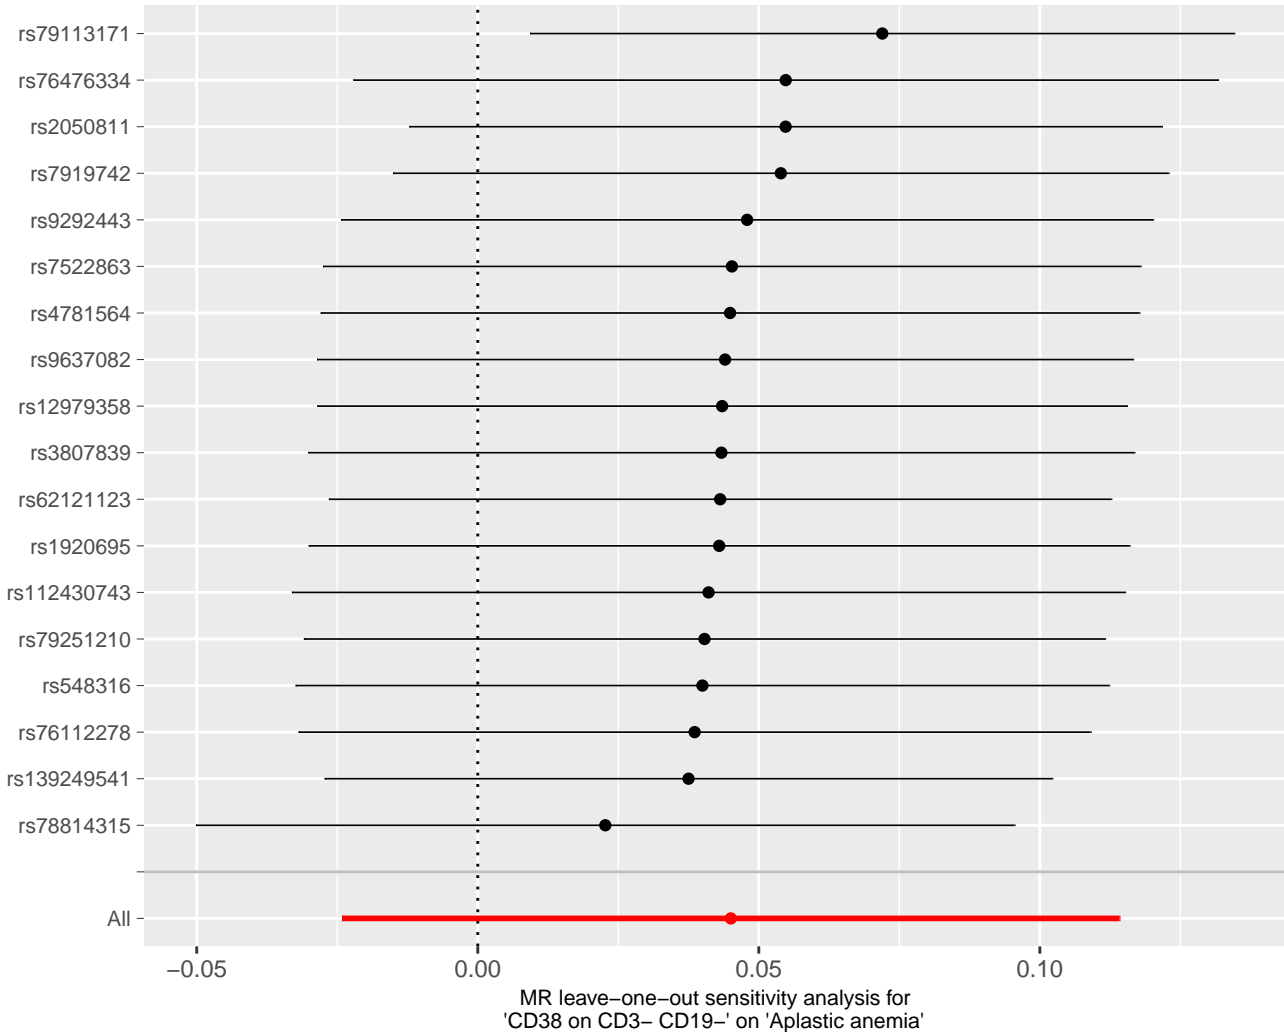

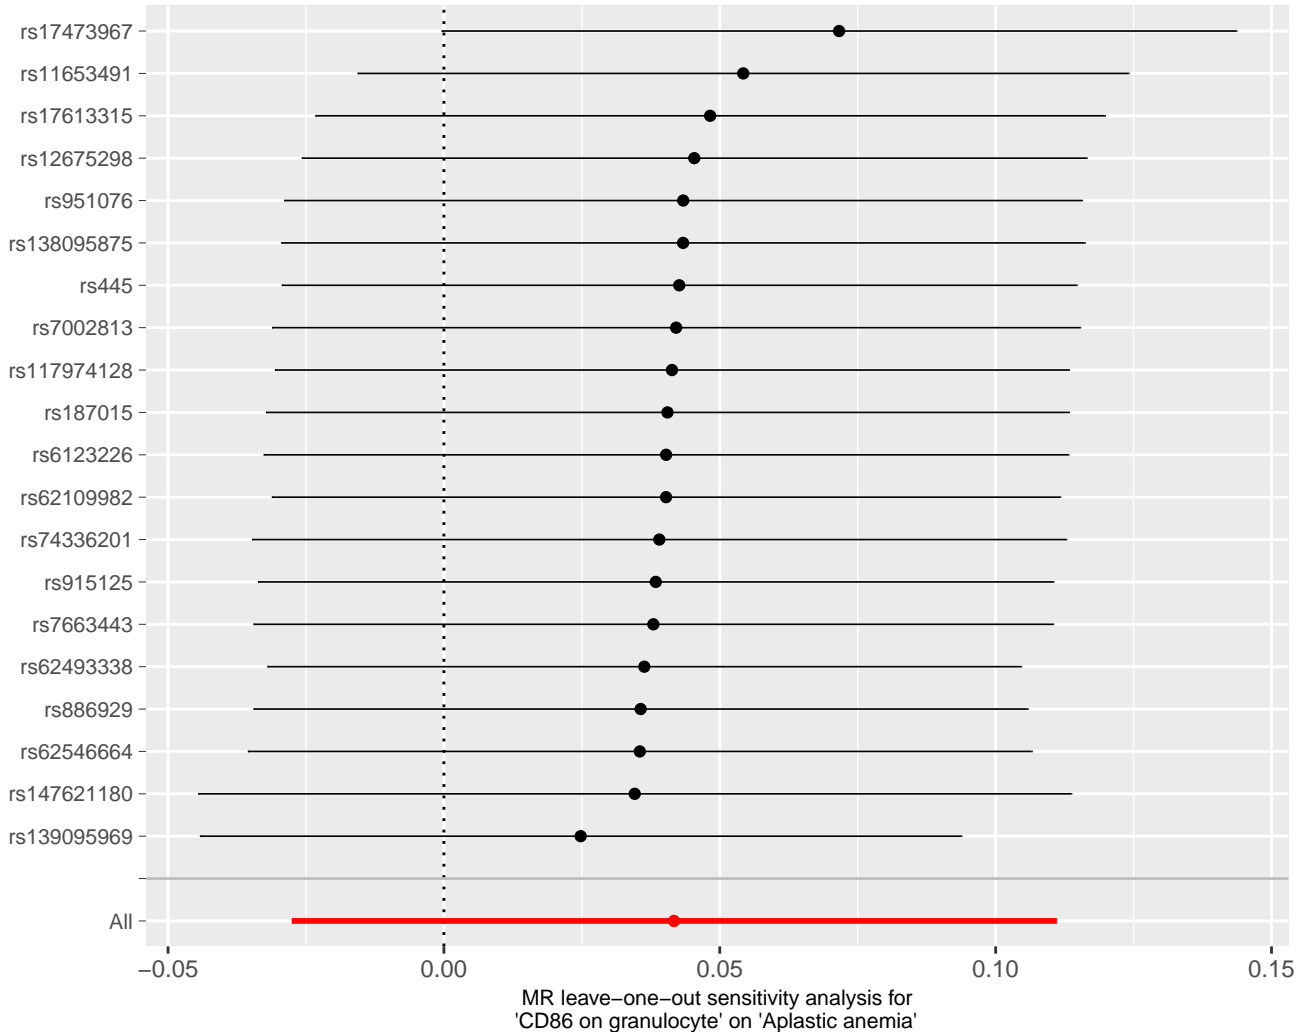



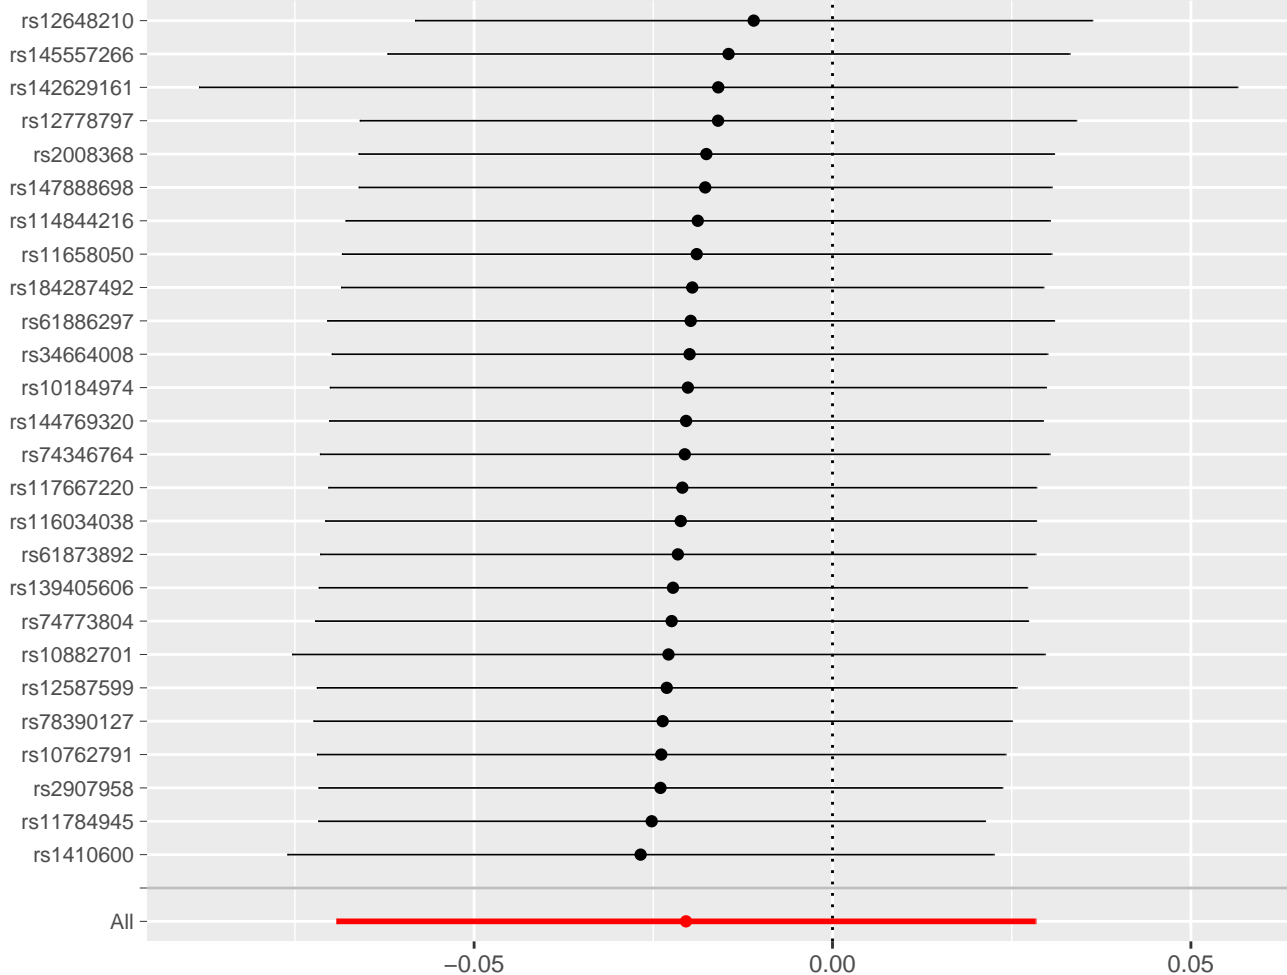

MR leave-one-out sensitivity analysis for 'CD39+ CD4+ %CD4+' on 'Aplastic anemia'

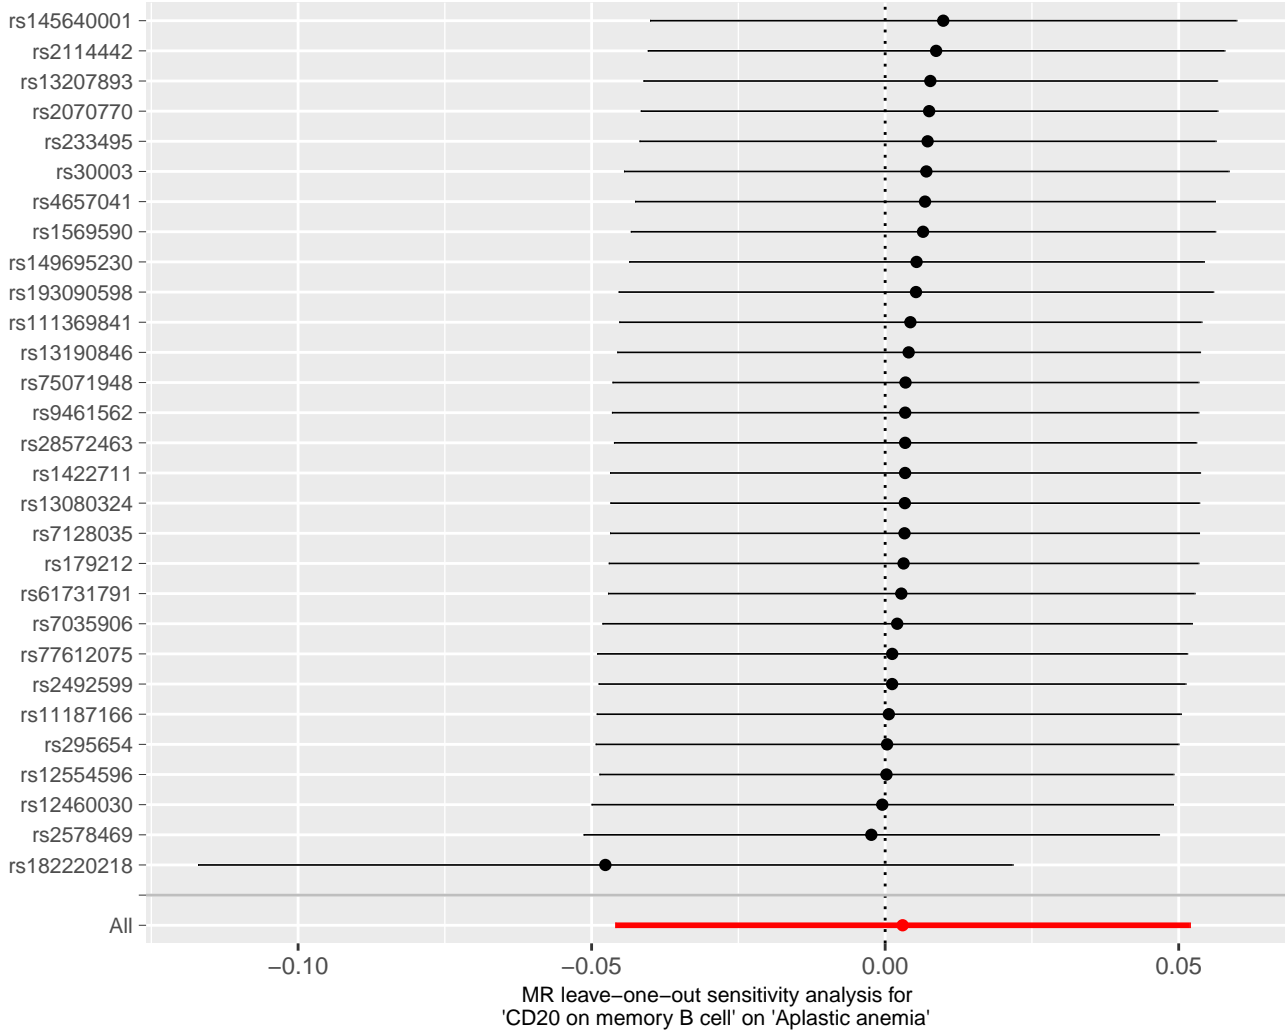

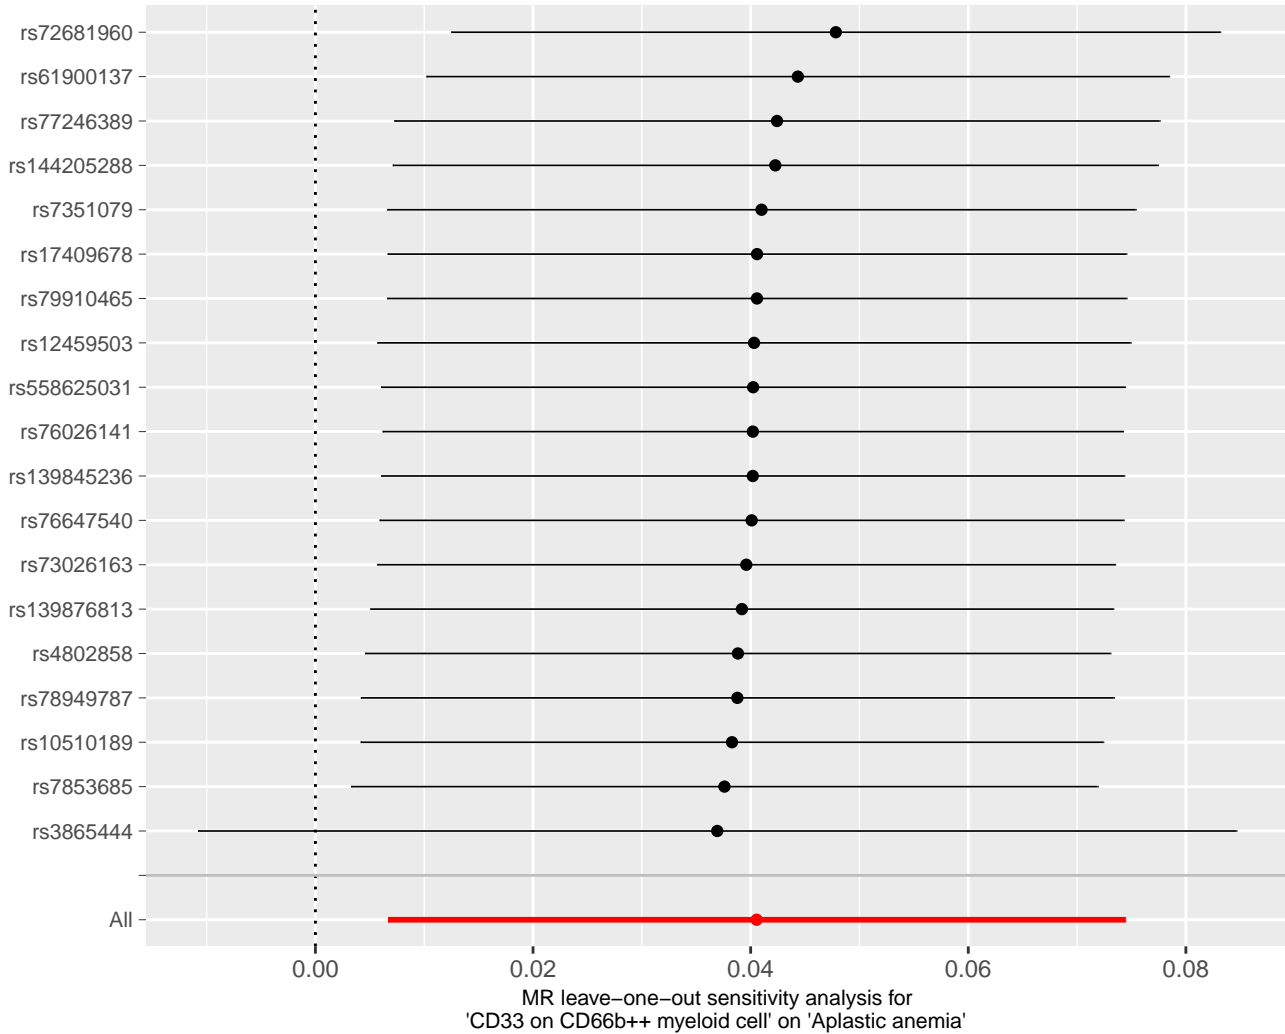

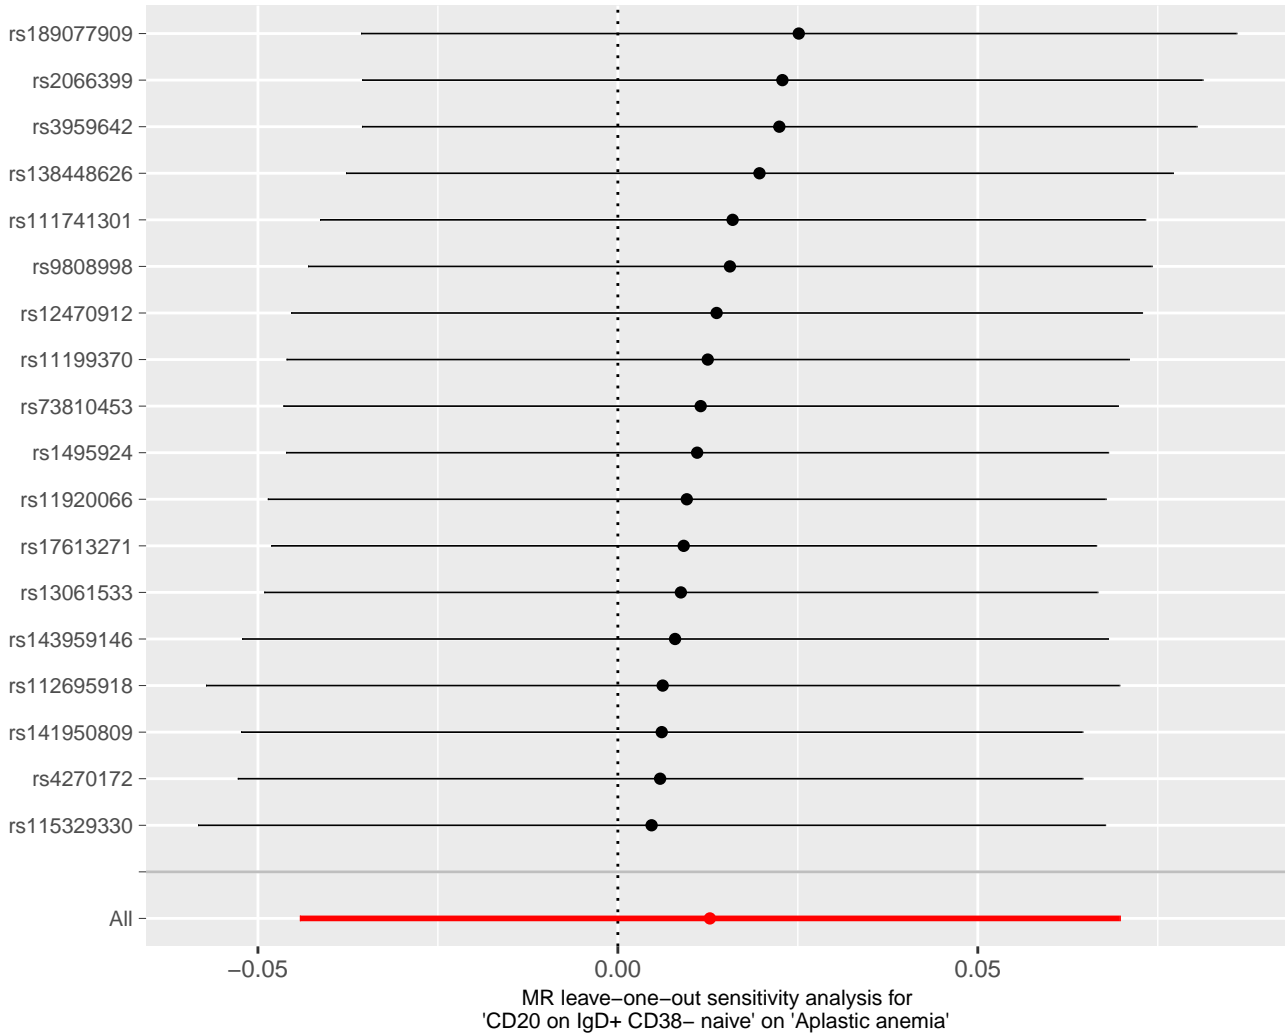

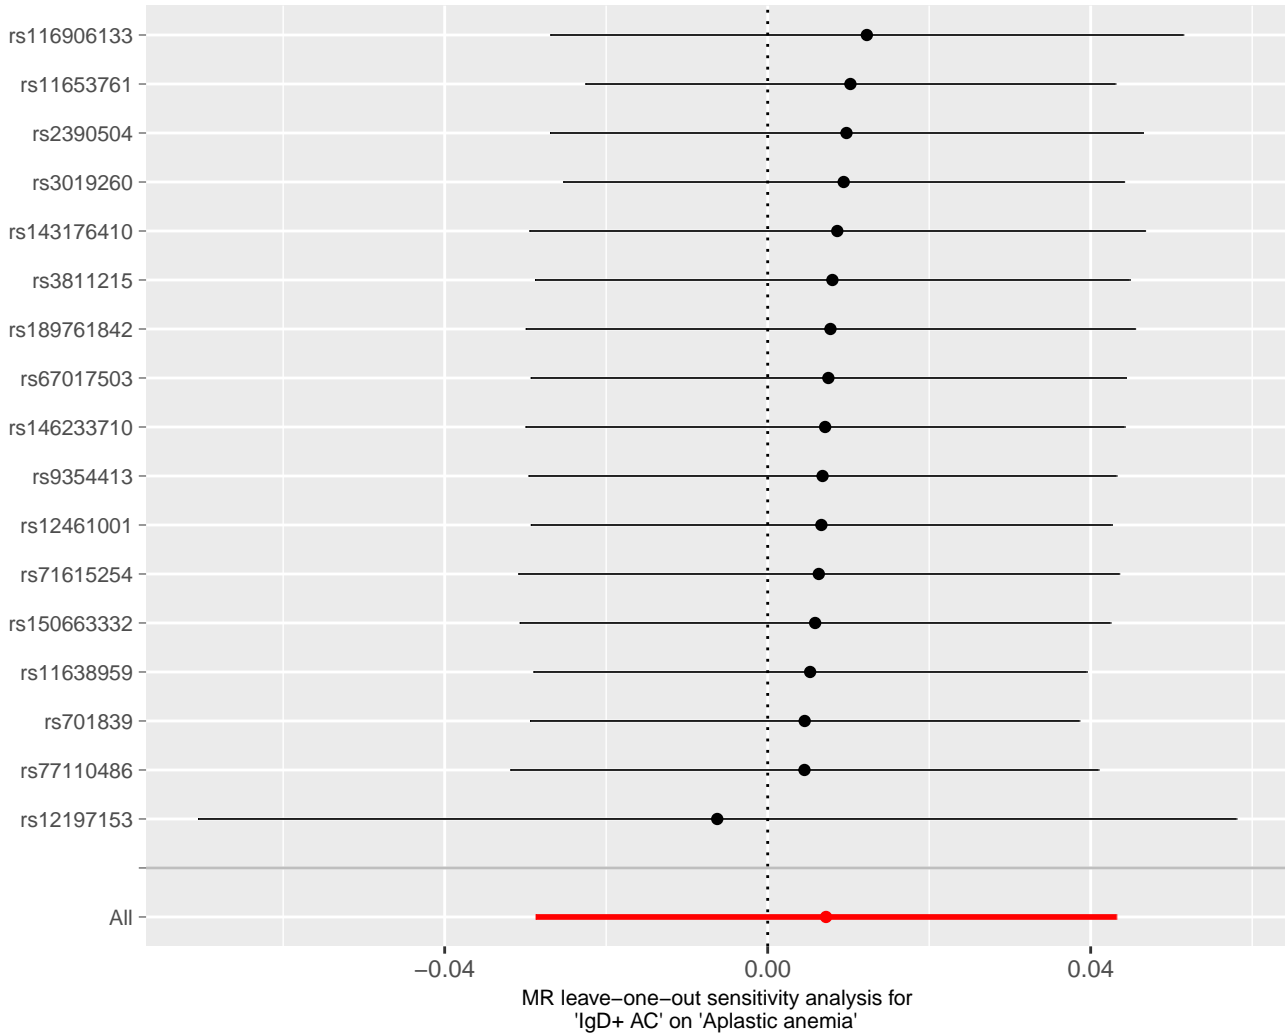

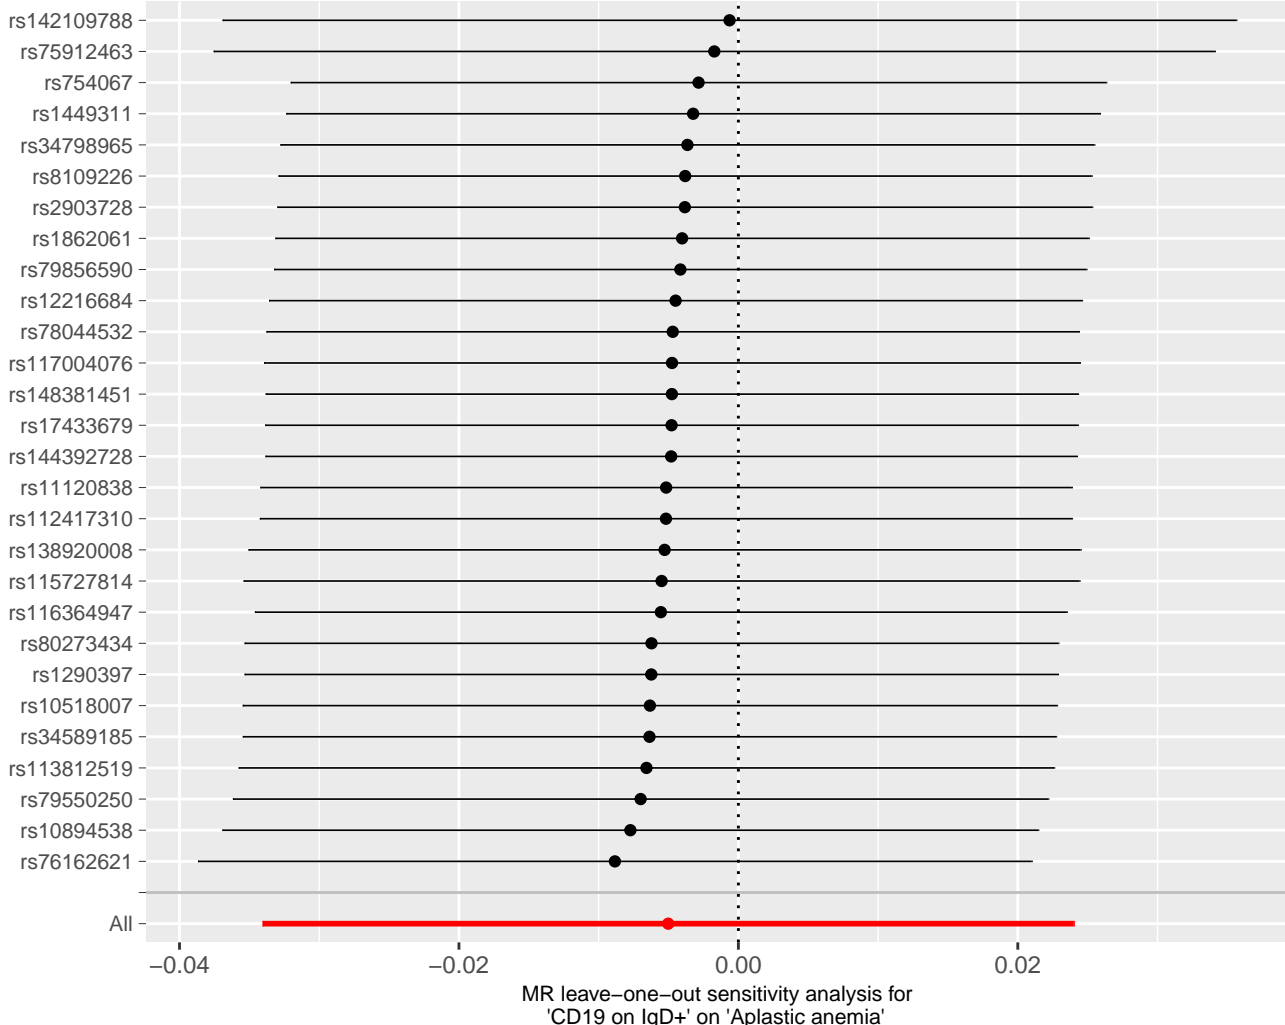

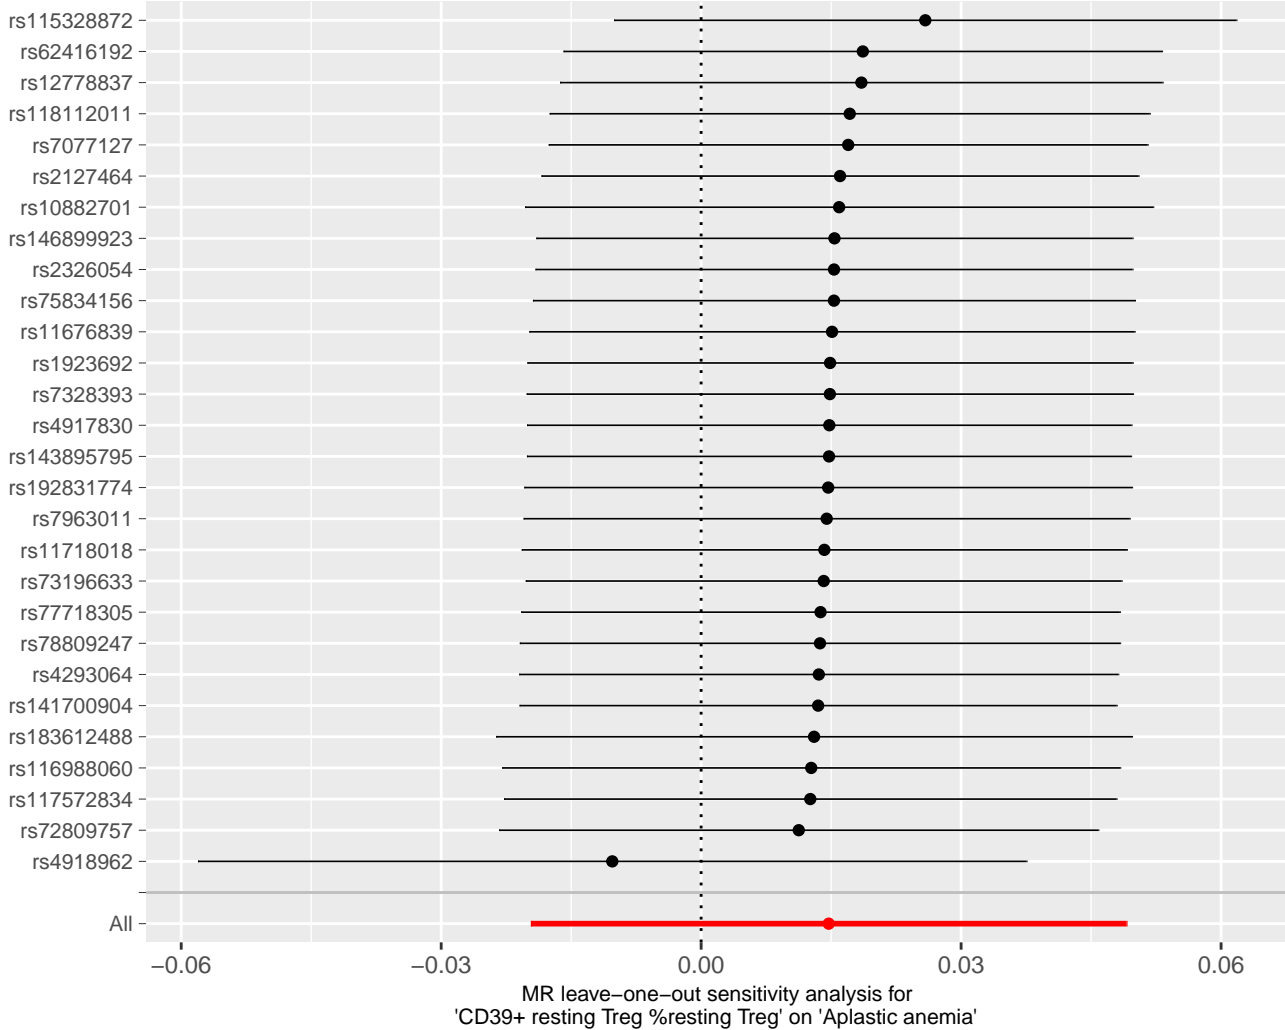

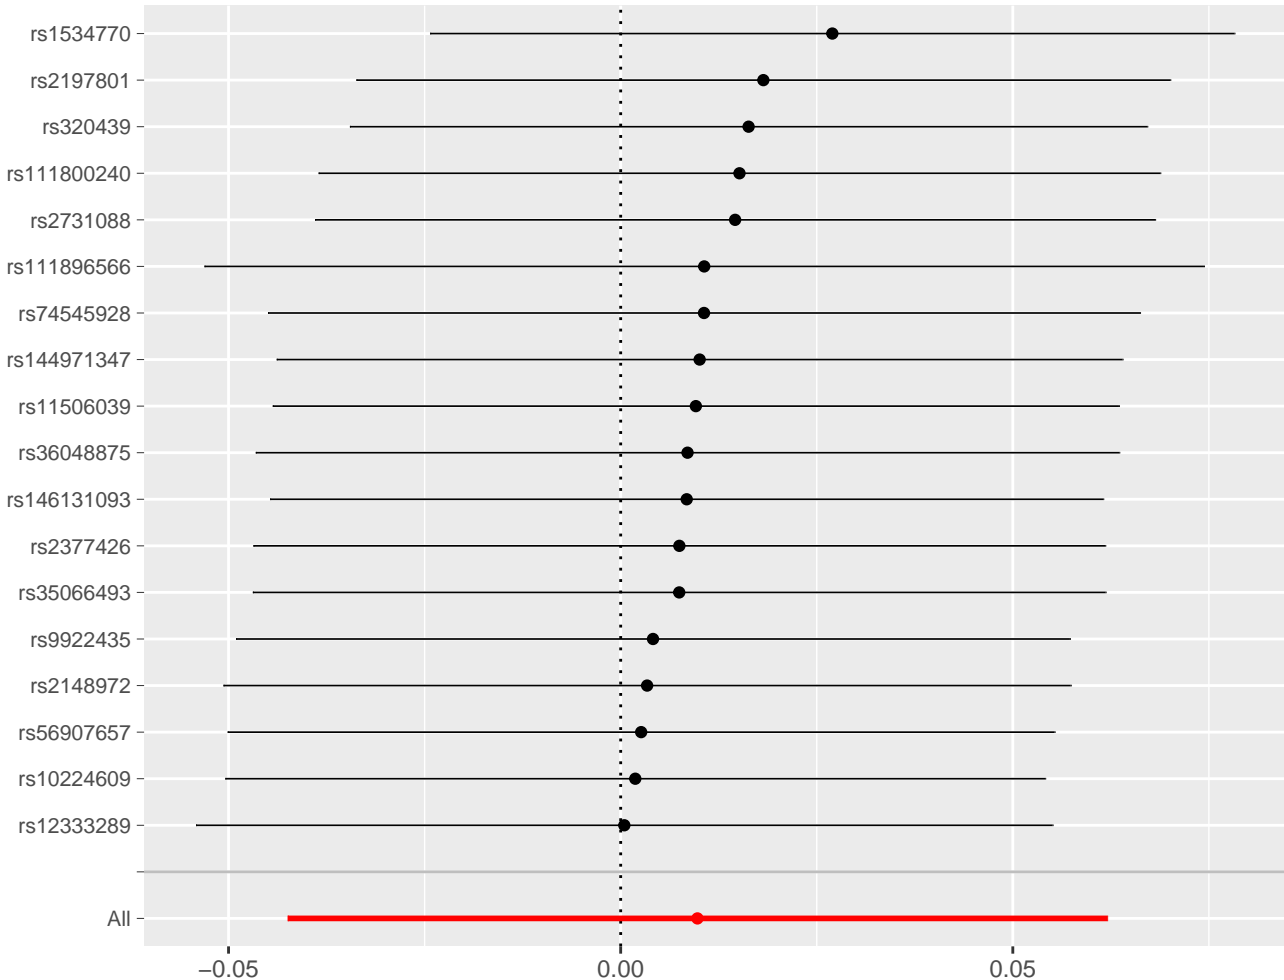



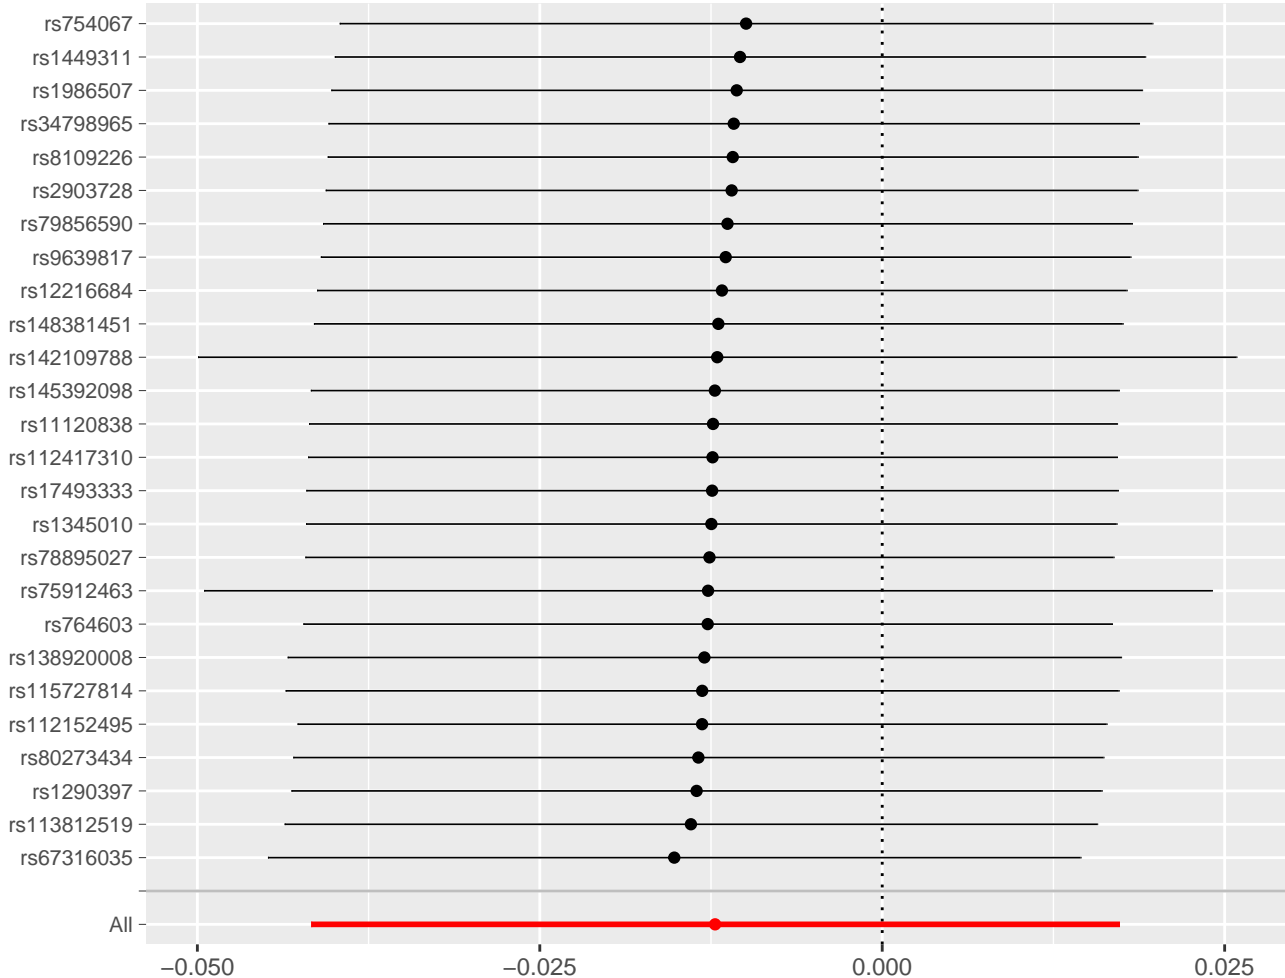

MR leave-one-out sensitivity analysis for 'CD19 on IgD+ CD24-' on 'Aplastic anemia'

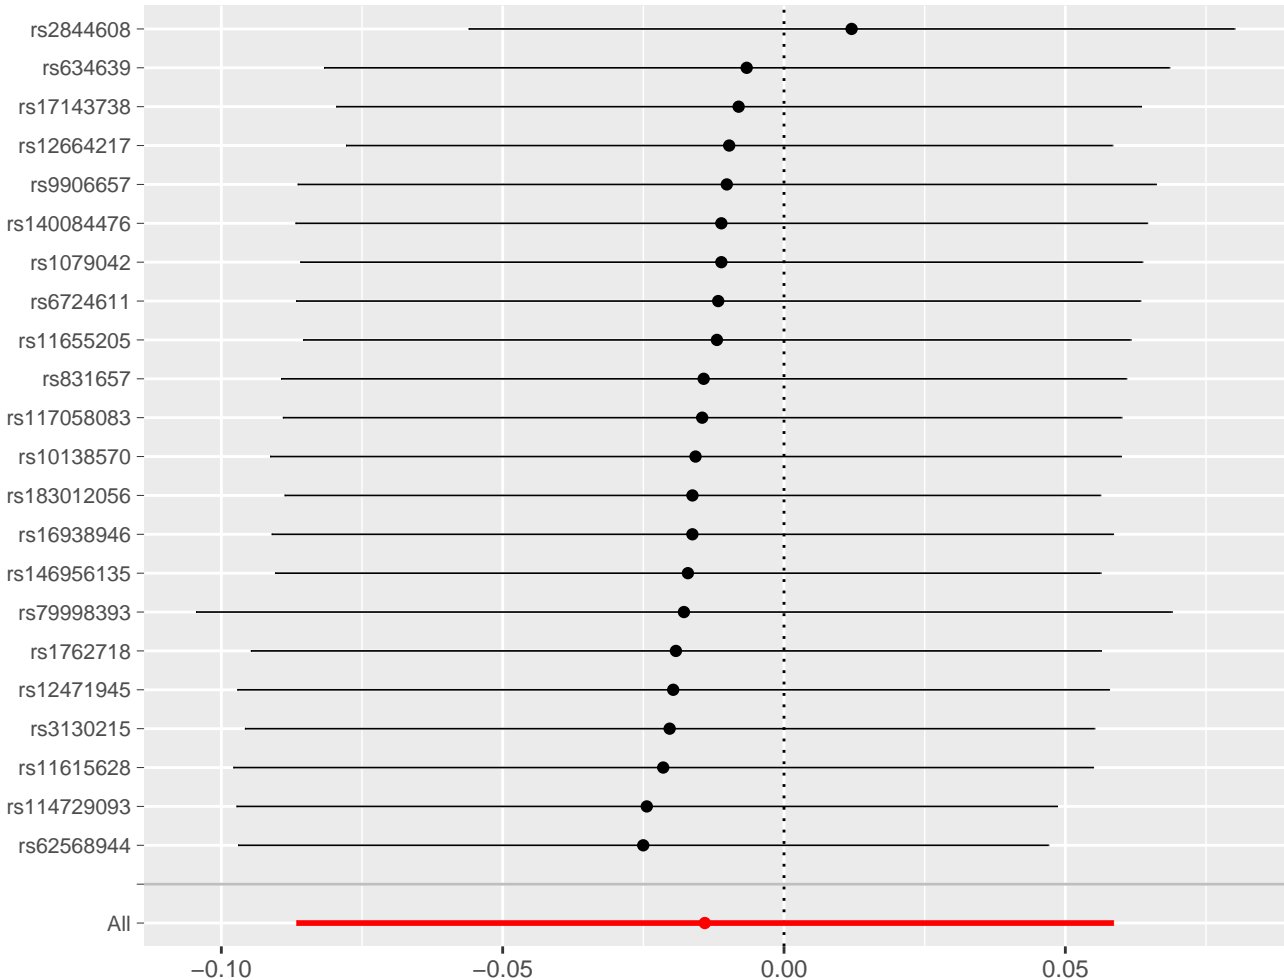

MR leave-one-out sensitivity analysis for 'CD4 on CD28+ CD4+' on 'Aplastic anemia'

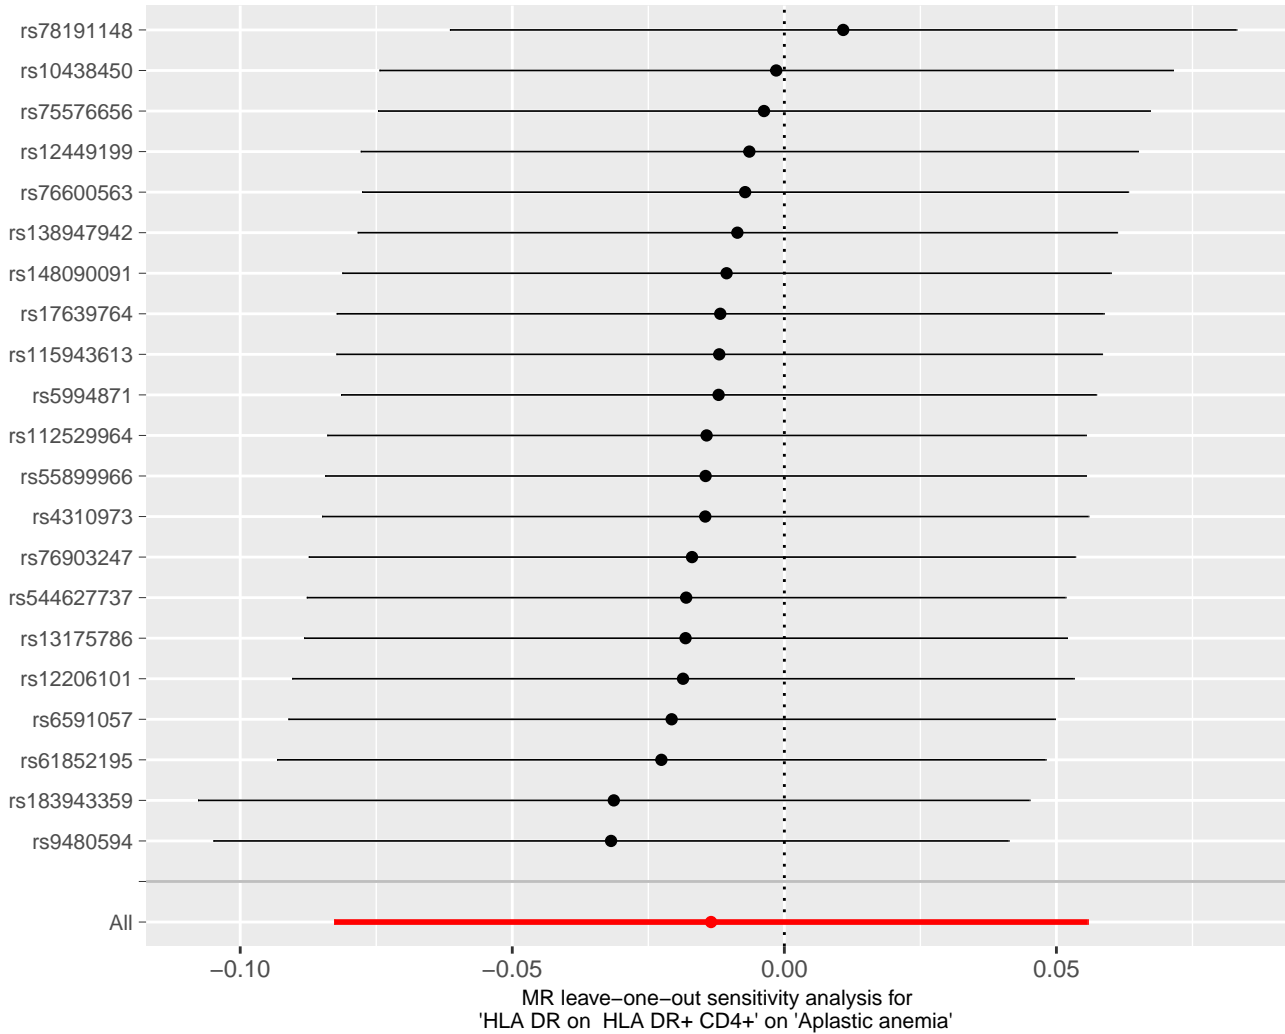

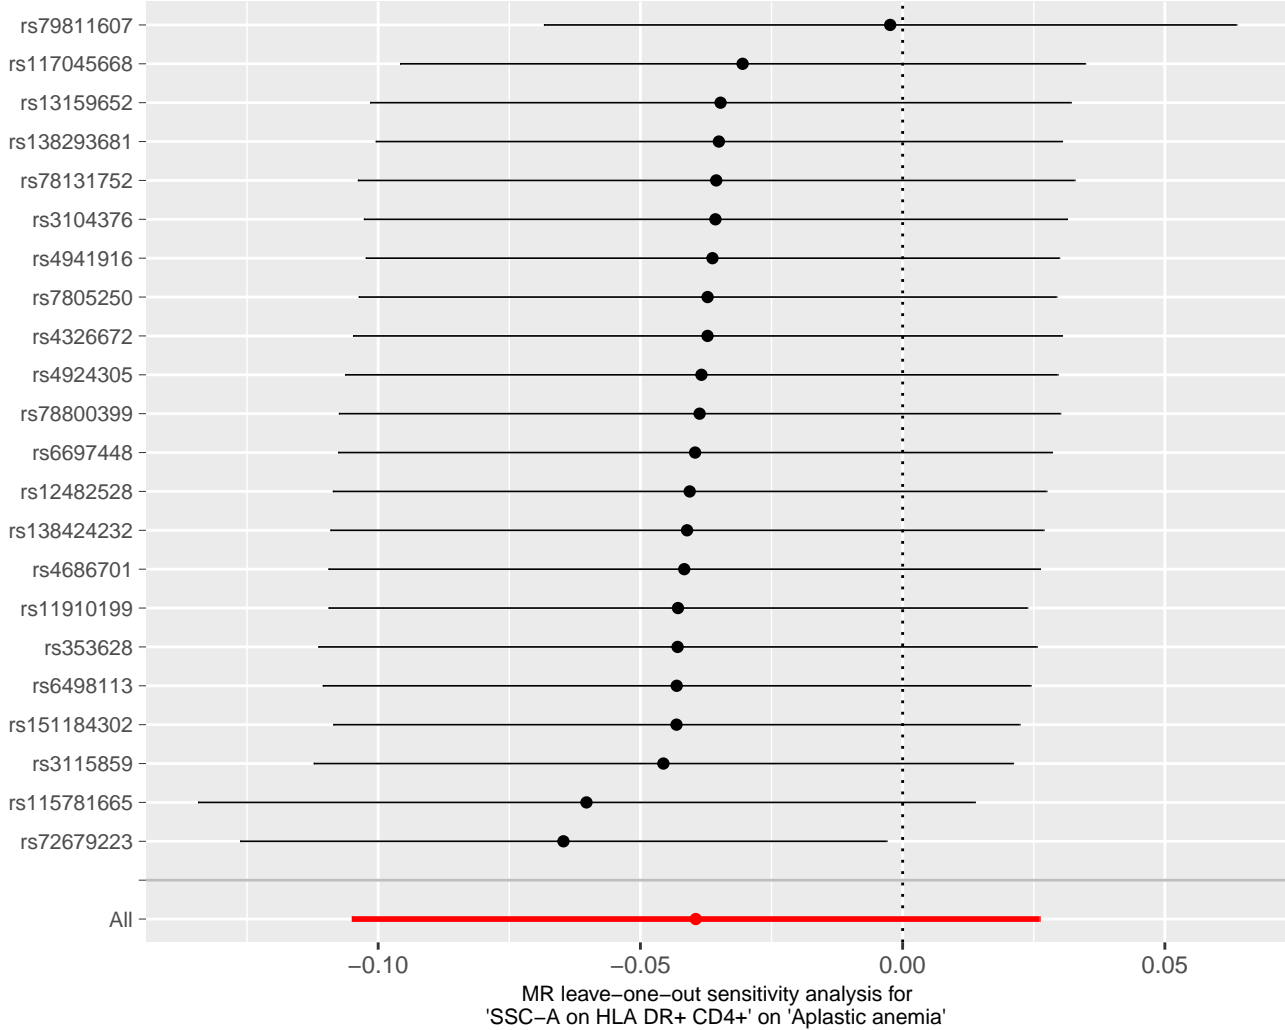

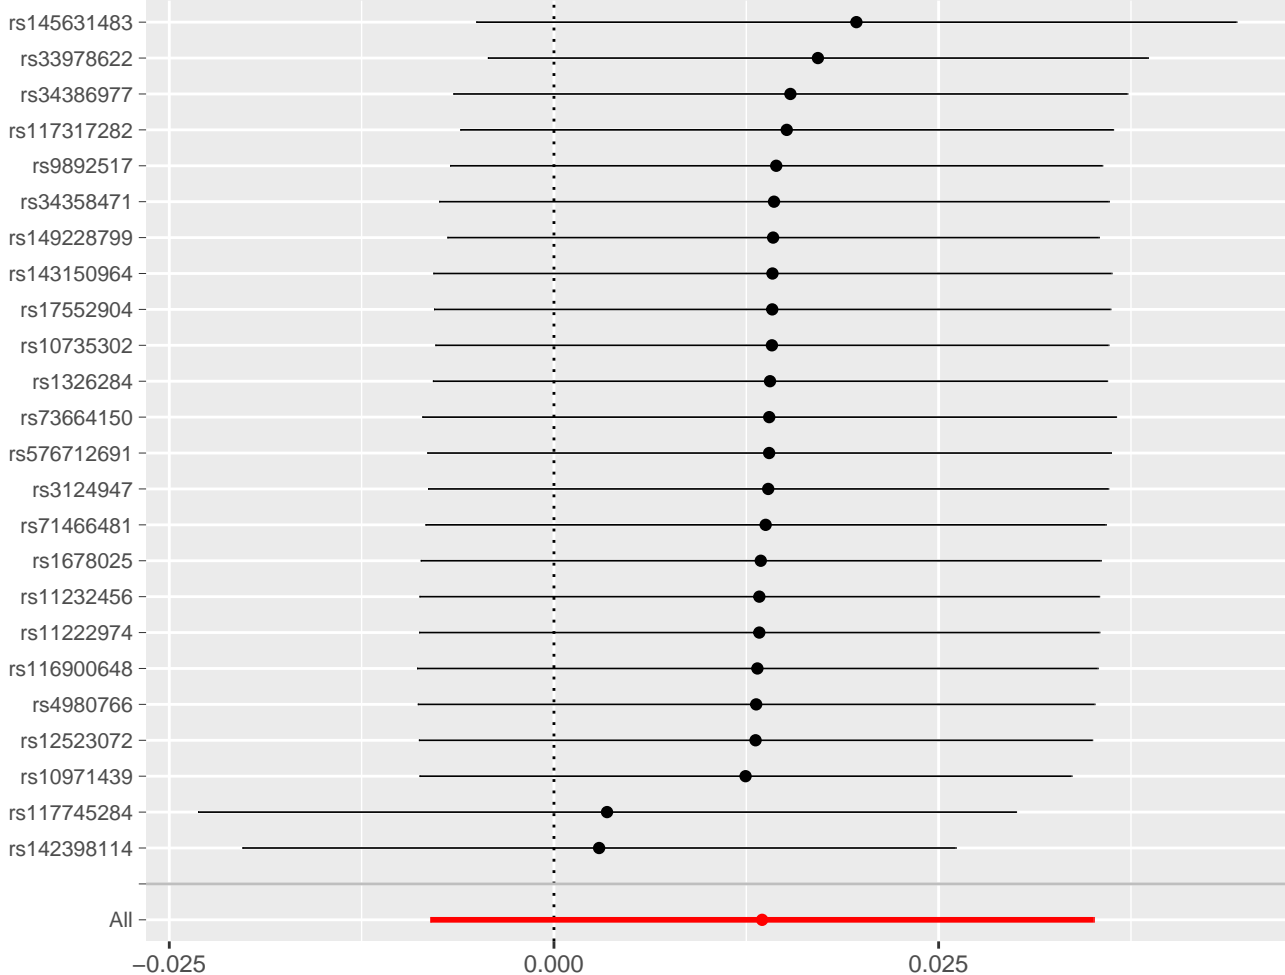

MR leave-one-out sensitivity analysis for 'CD45 on CD33- HLA DR+ ' on 'Aplastic anemia'

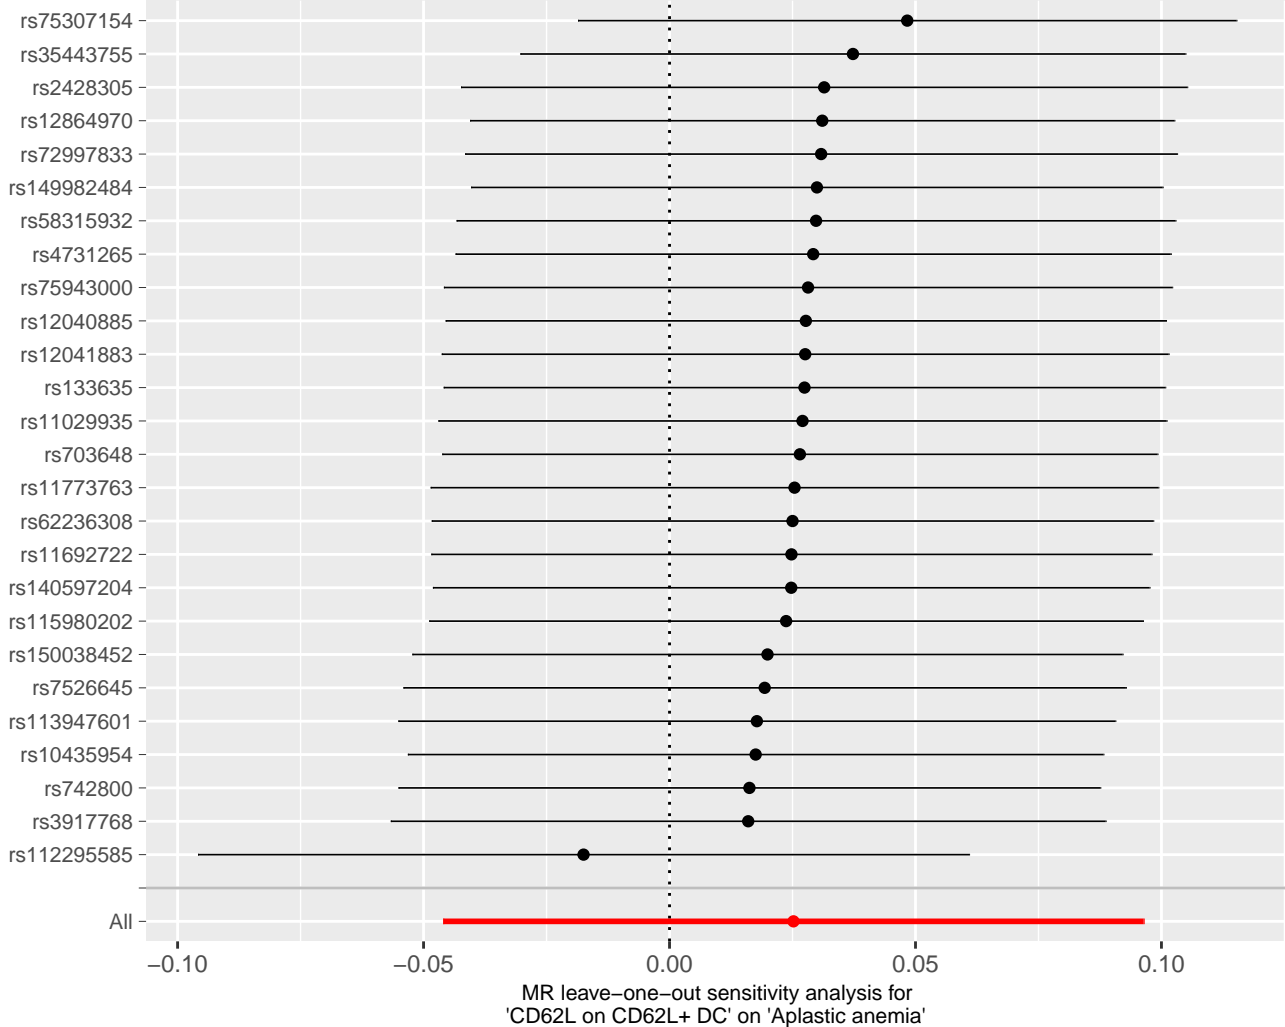

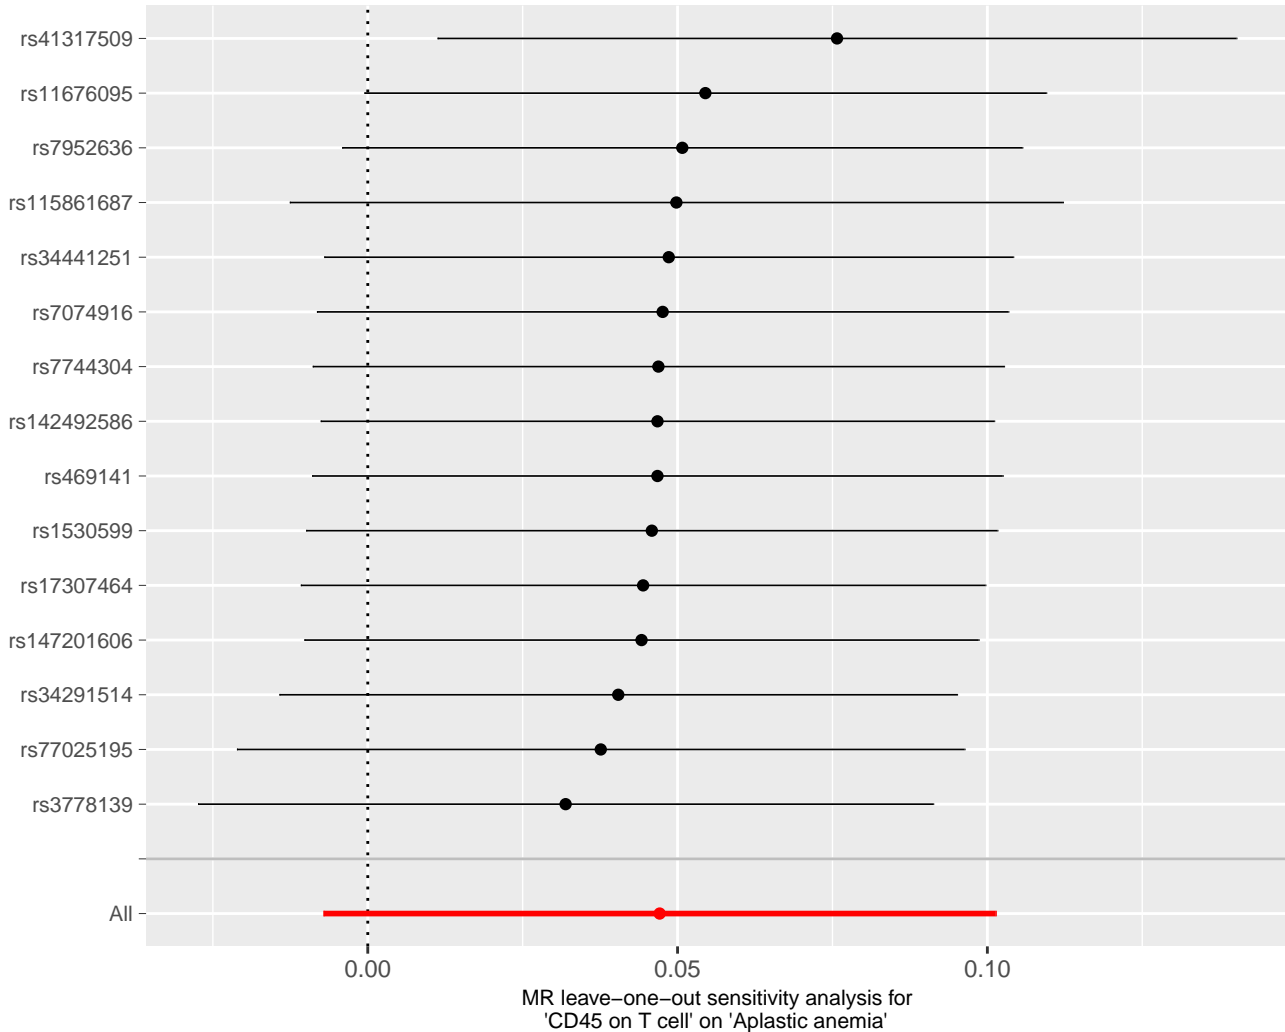

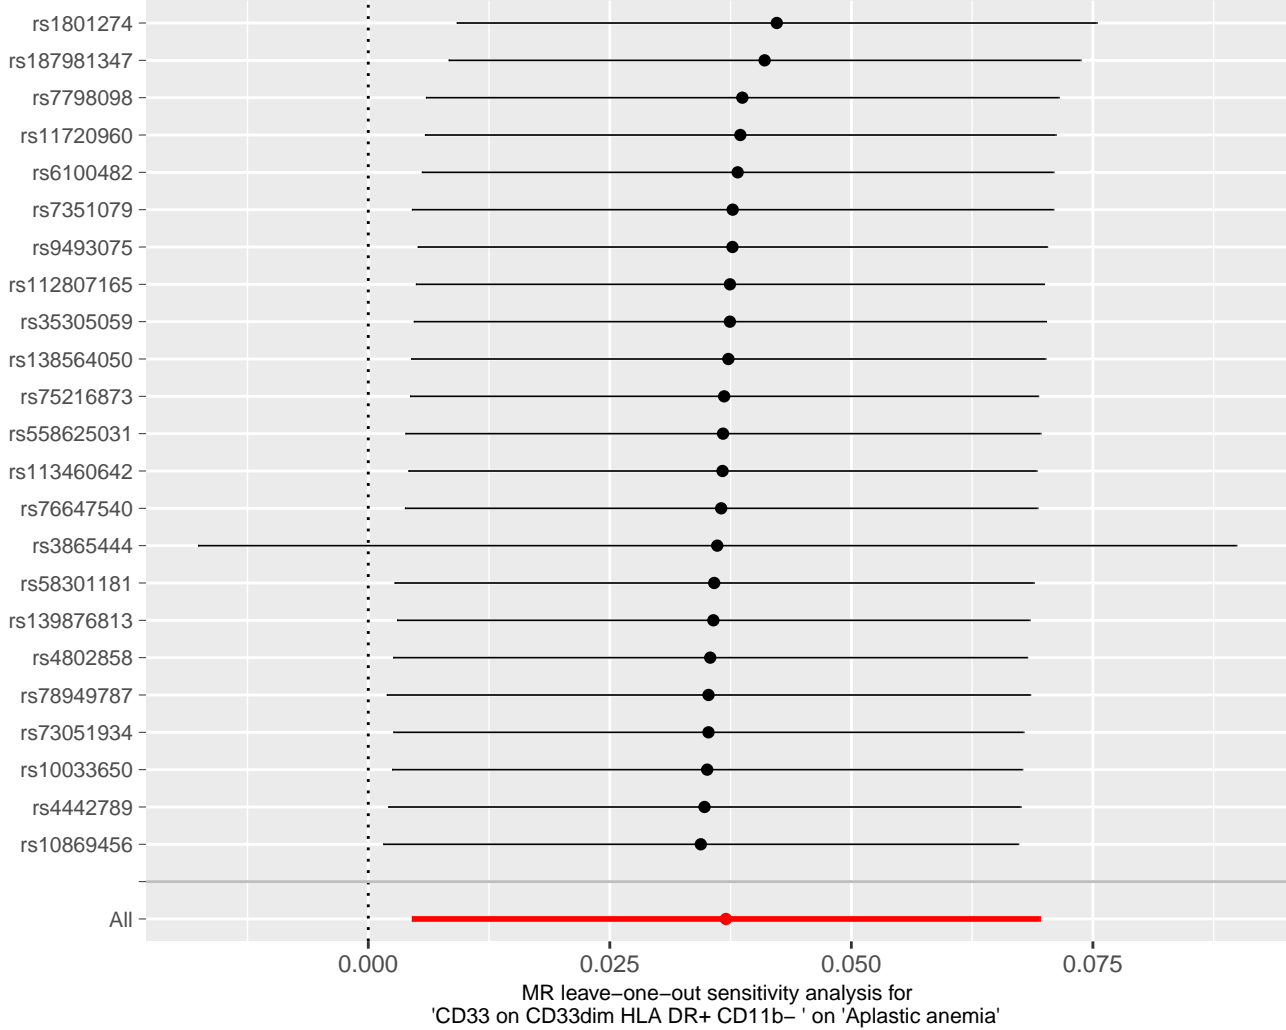



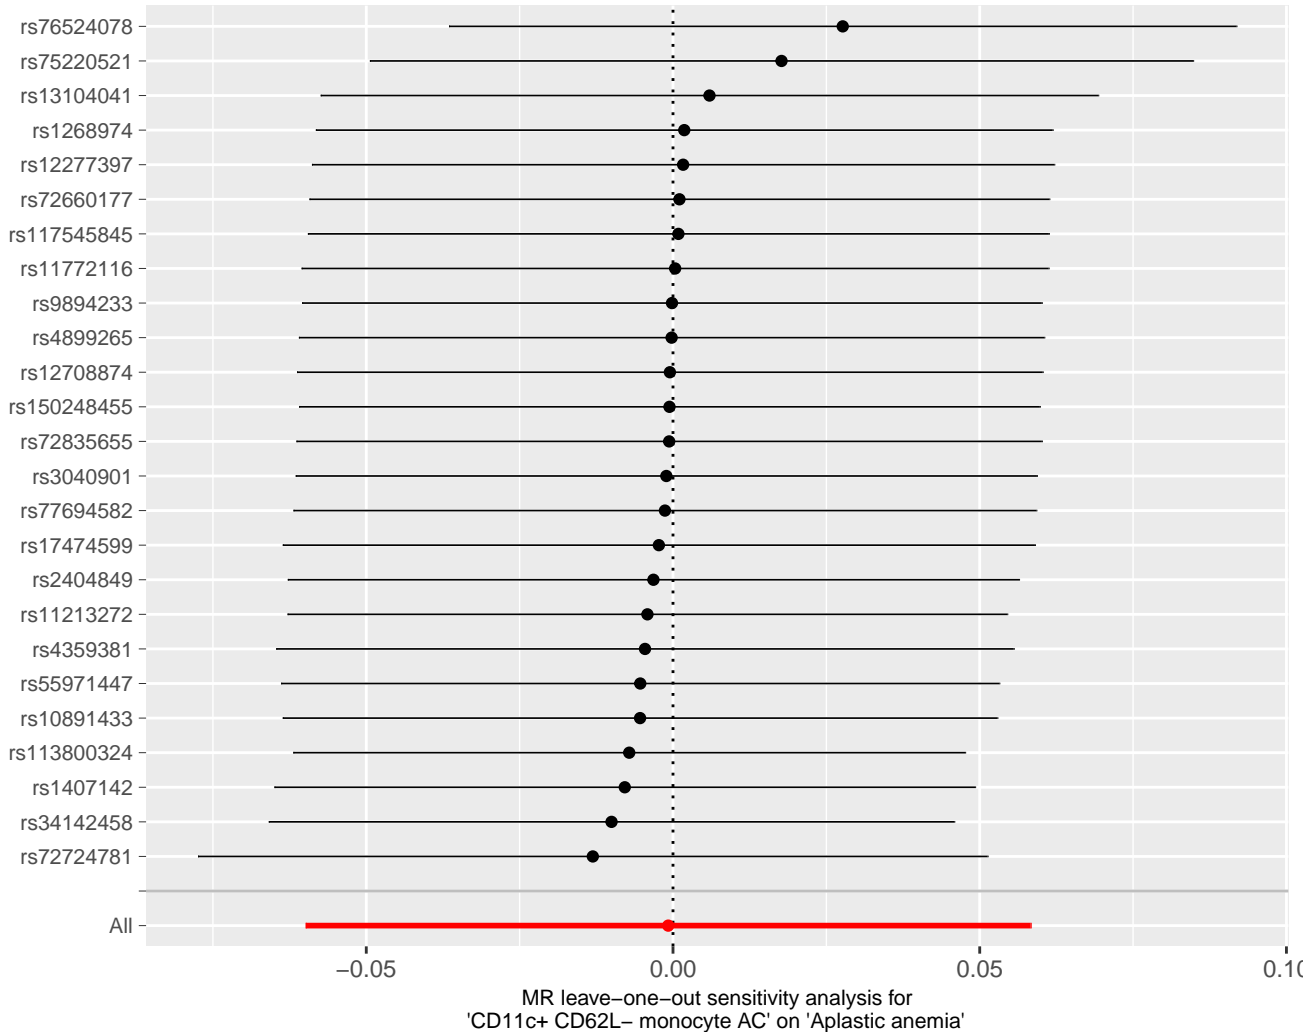

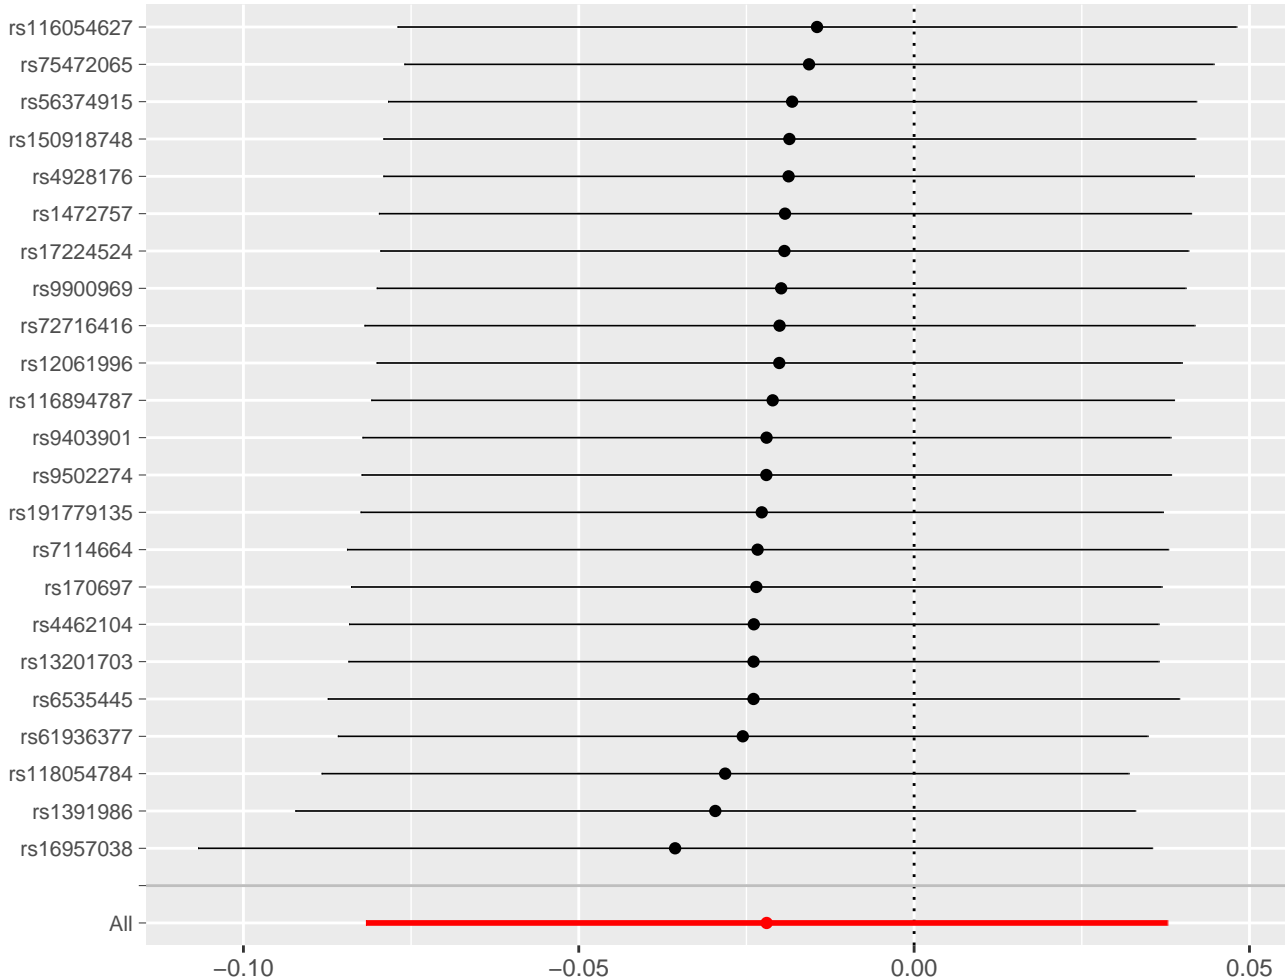

MR leave-one-out sensitivity analysis for 'CD62L- plasmacytoid DC AC' on 'Aplastic anemia'

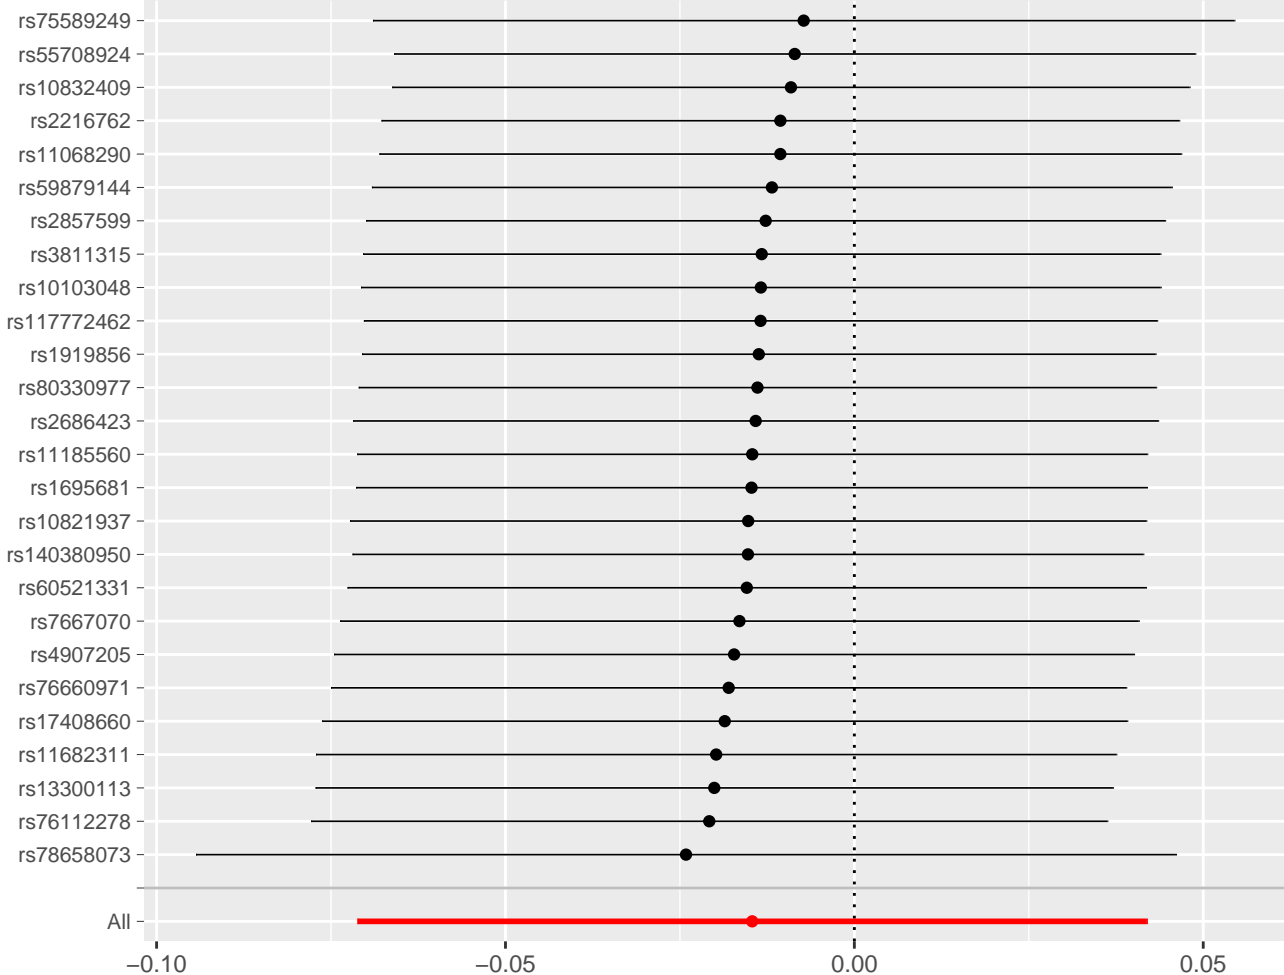

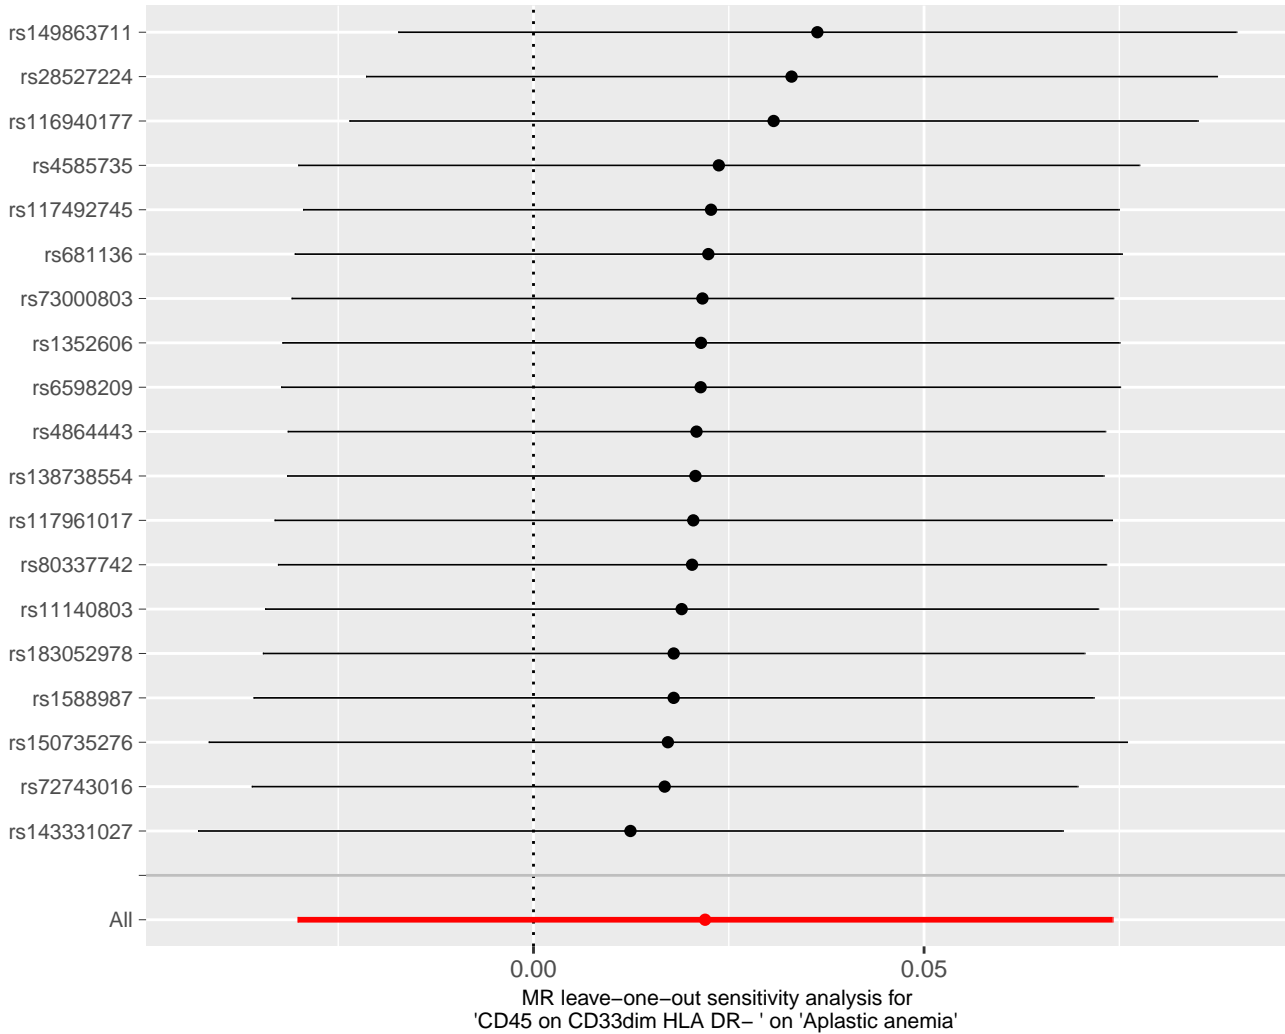

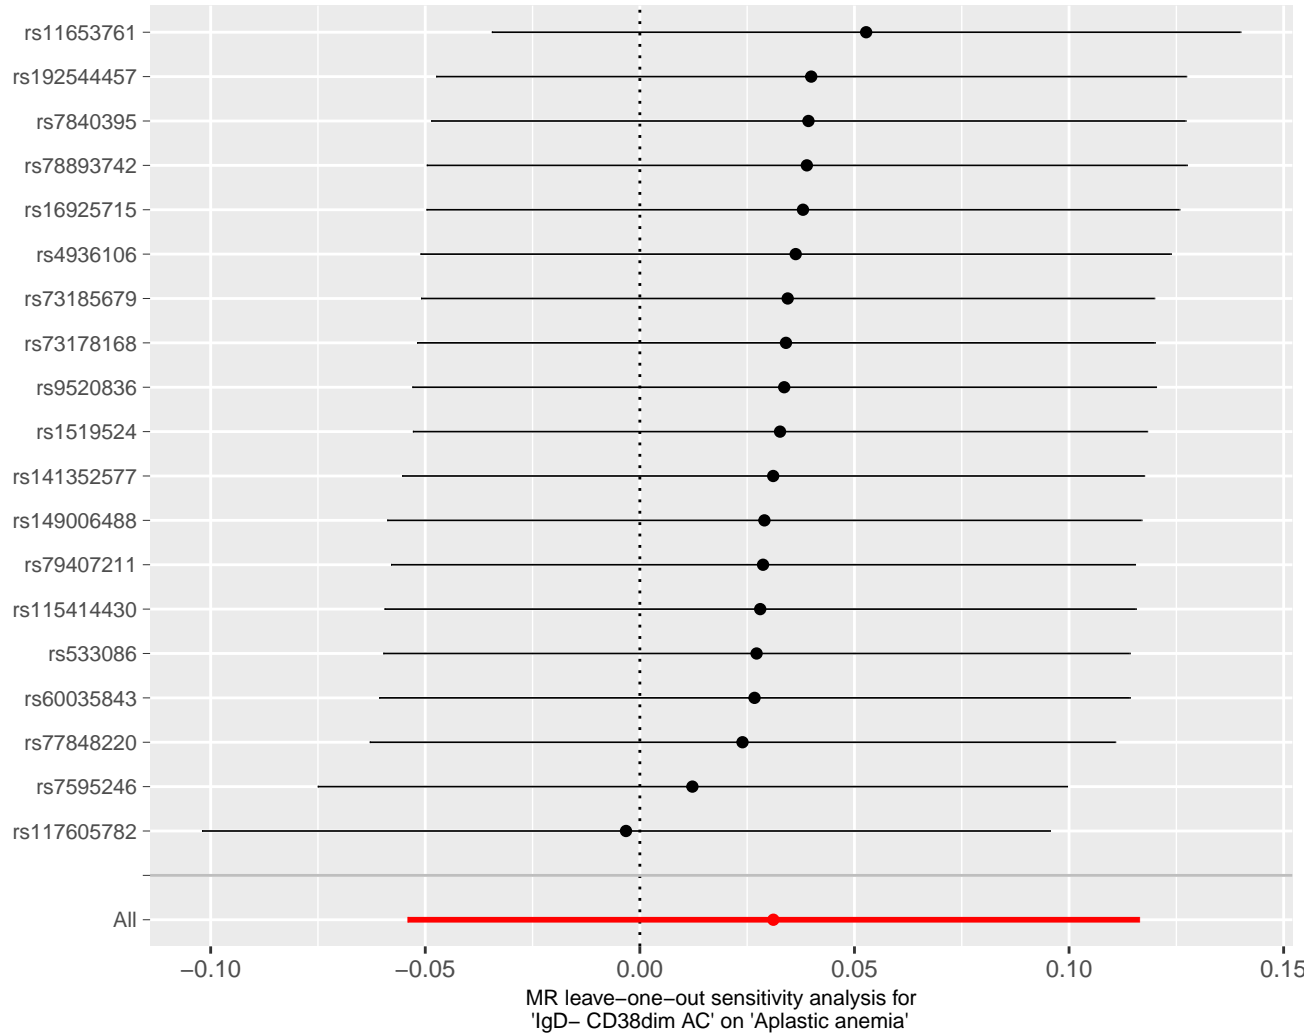

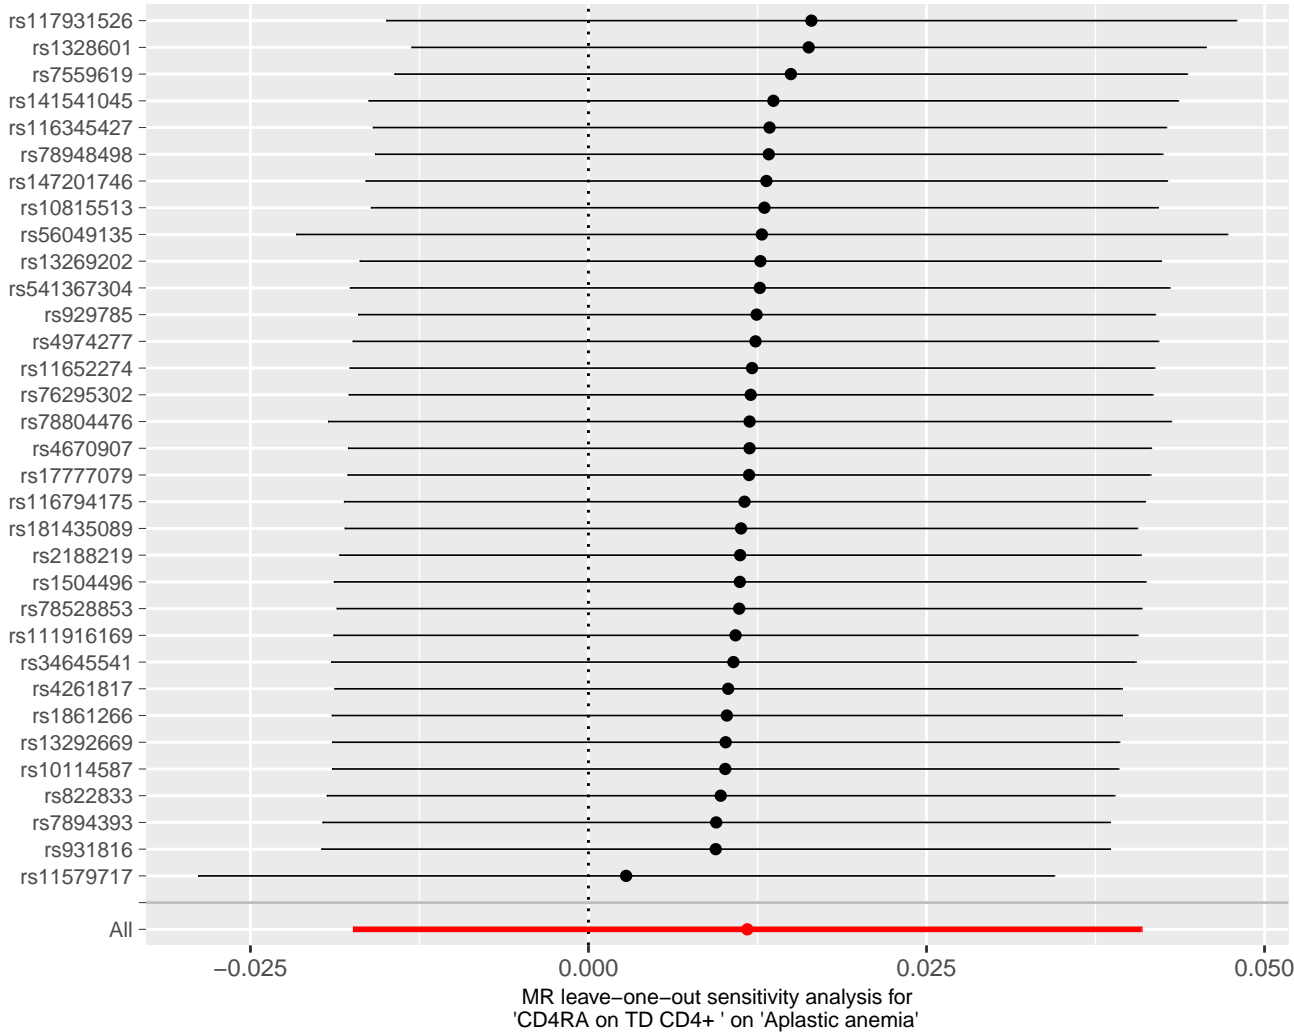

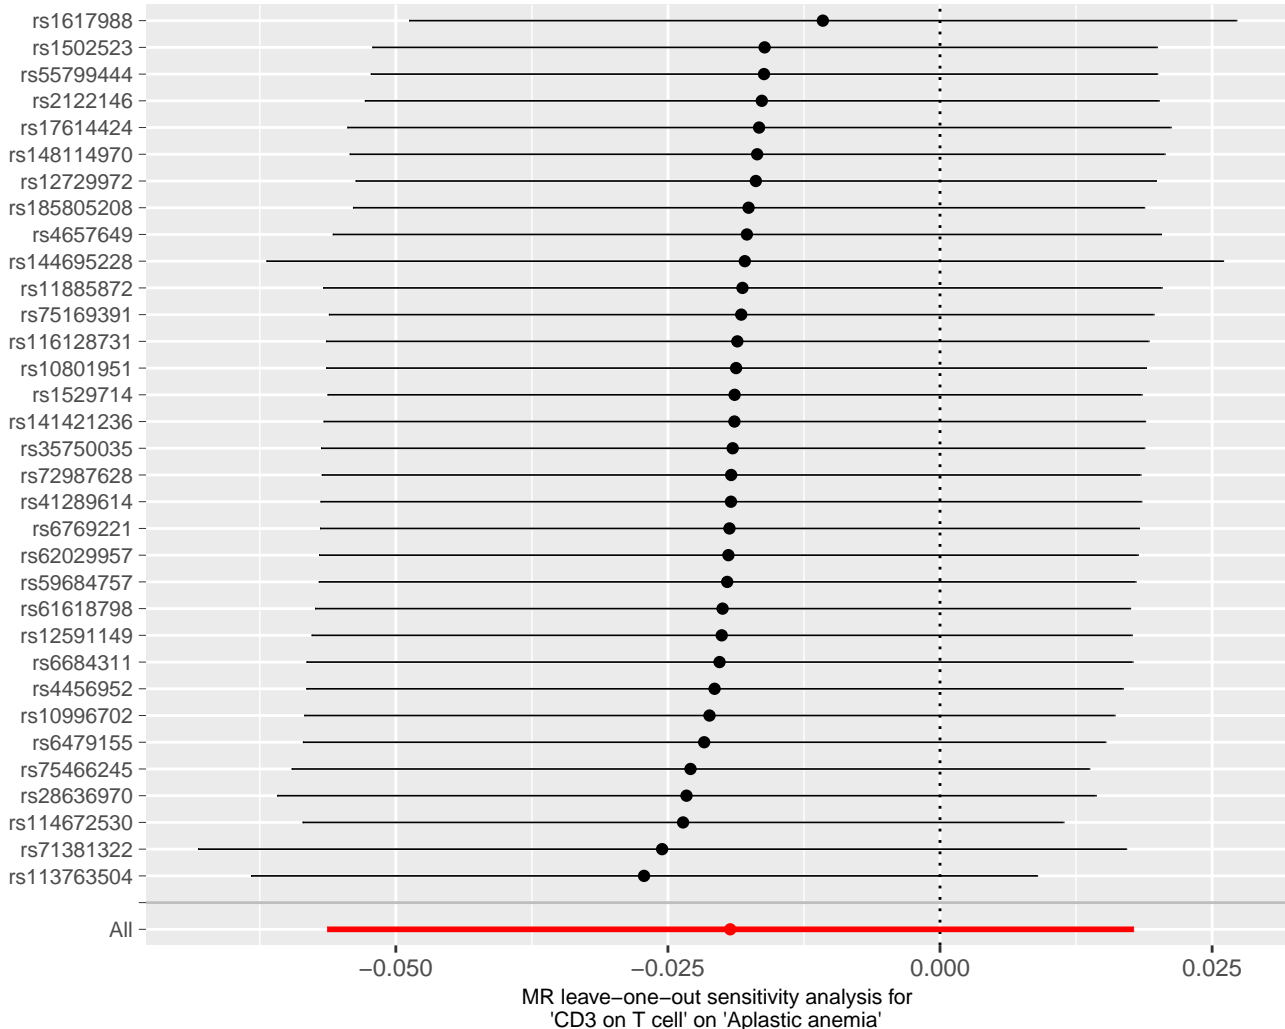

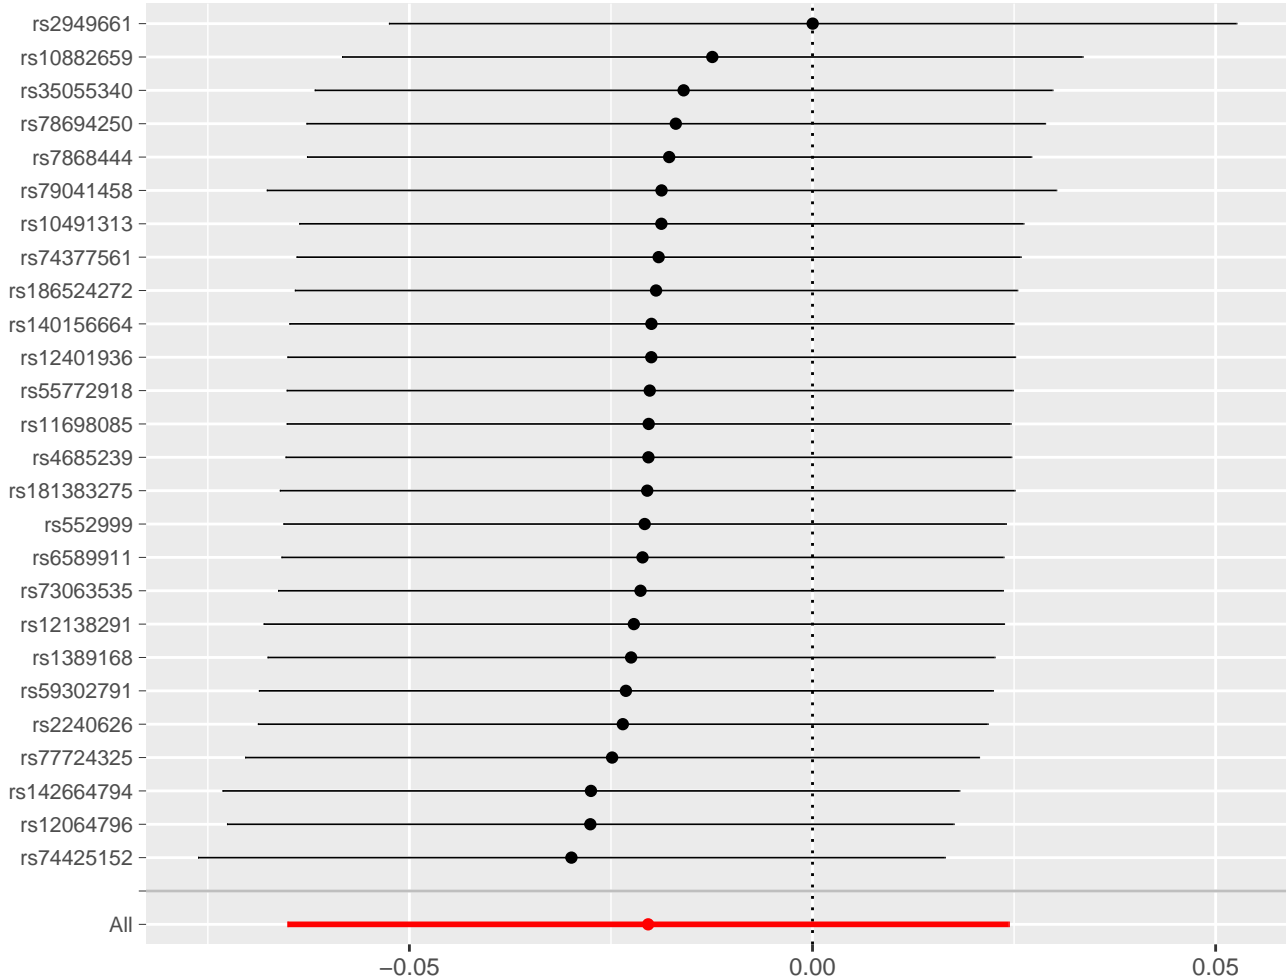



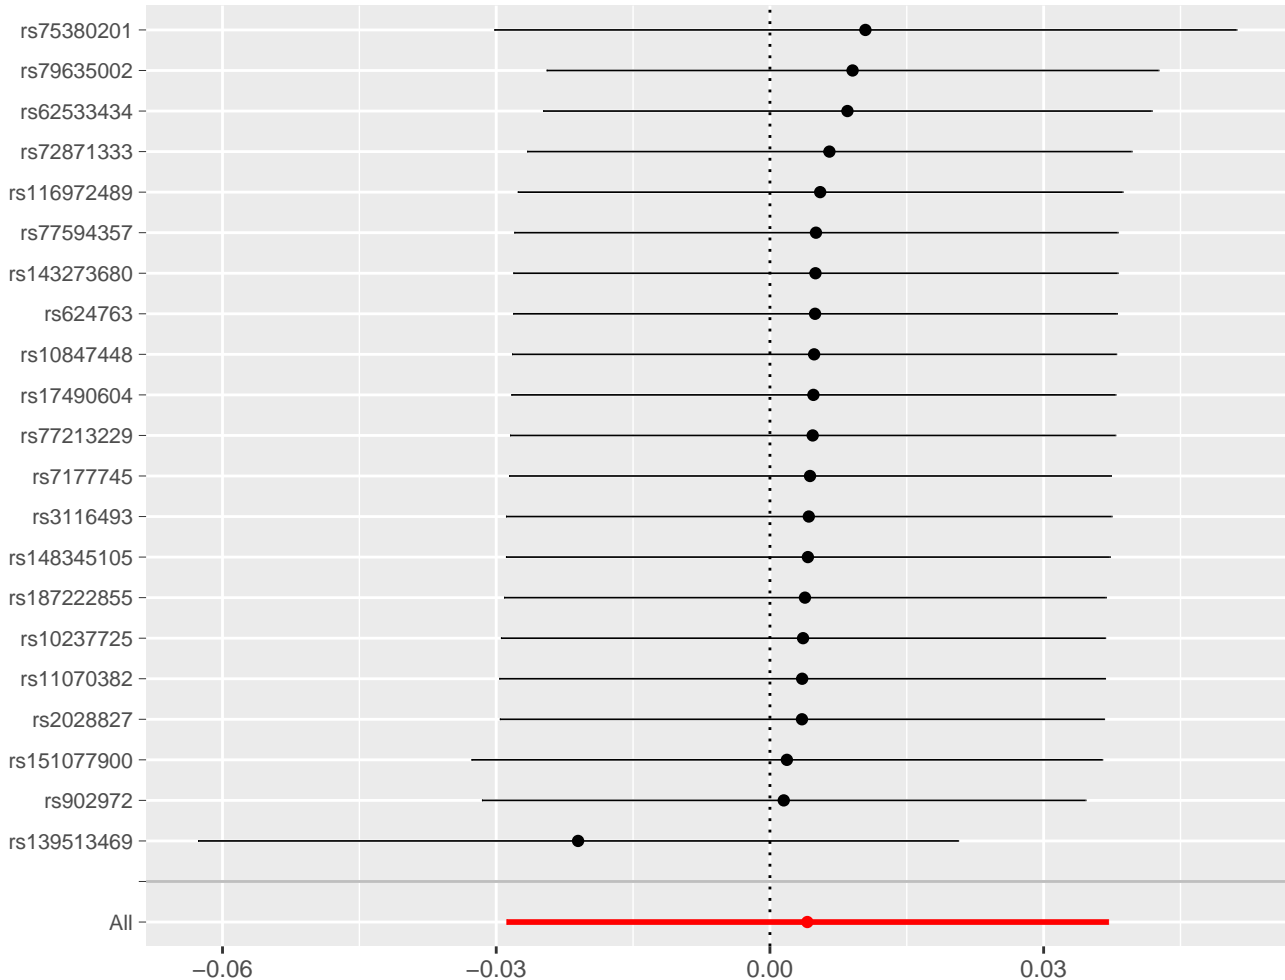

MR leave-one-out sensitivity analysis for 'CD28 on CD39+ CD8br ' on 'Aplastic anemia'

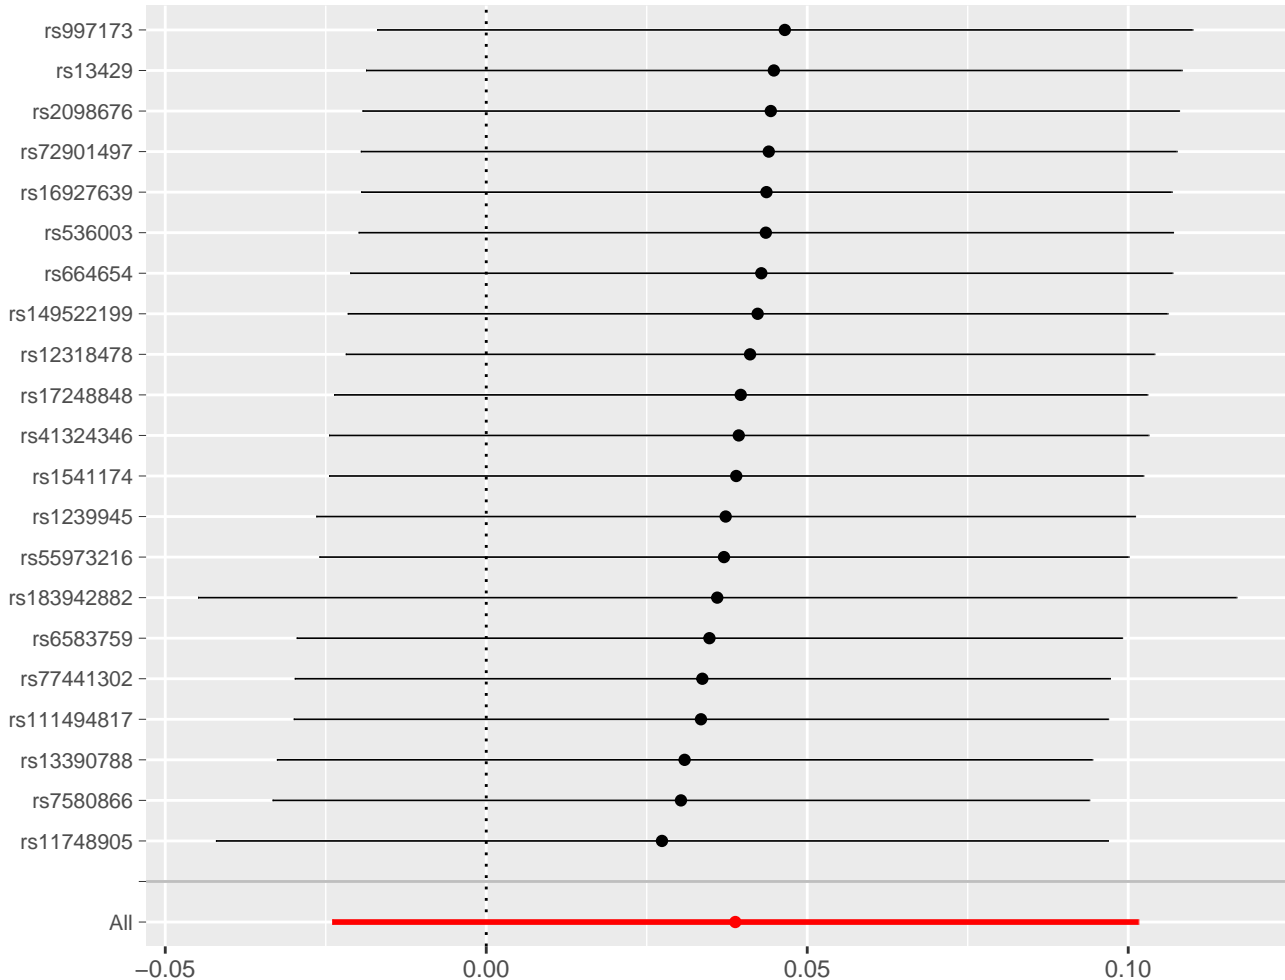

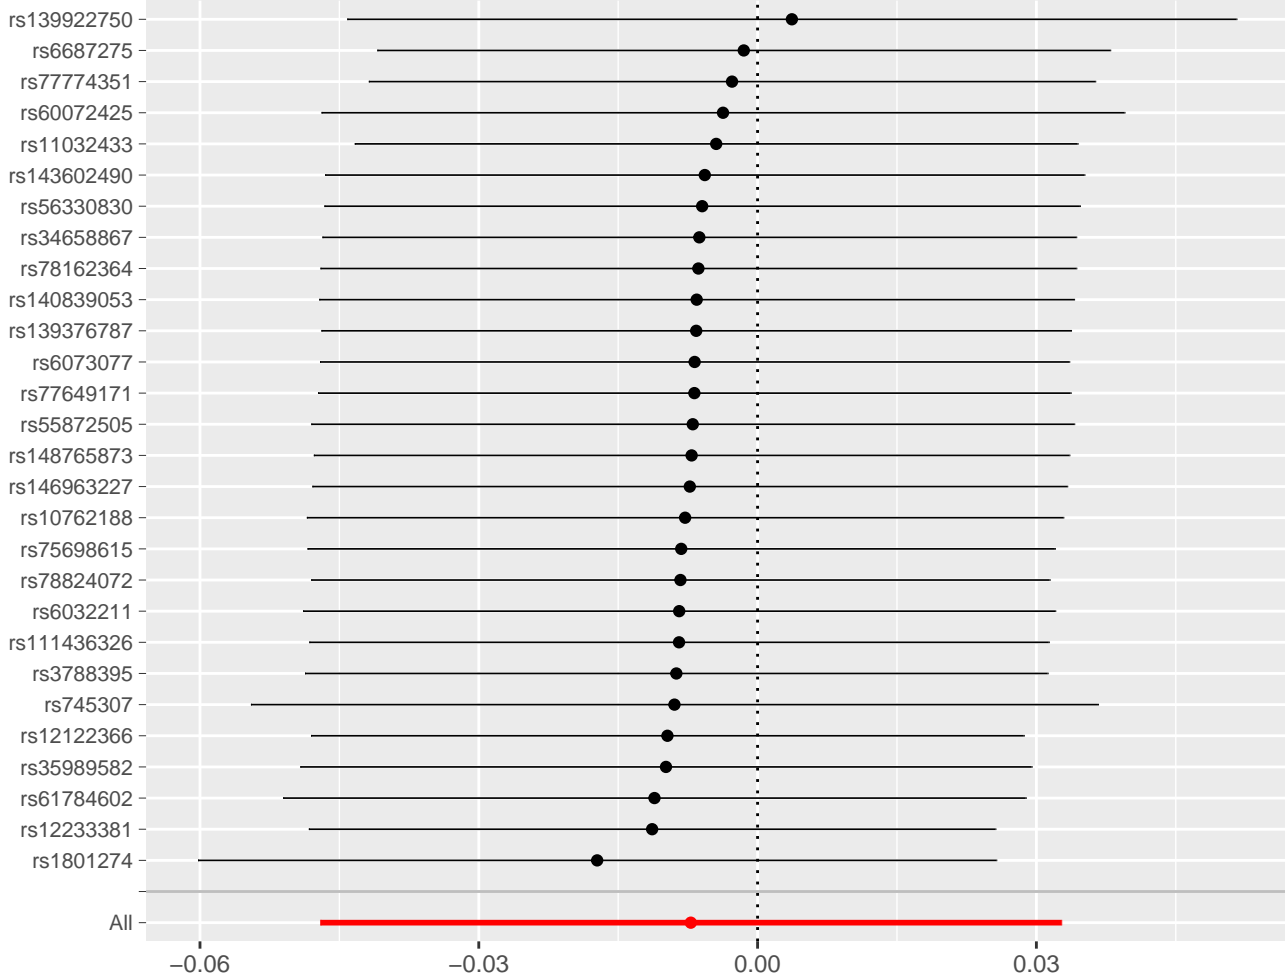

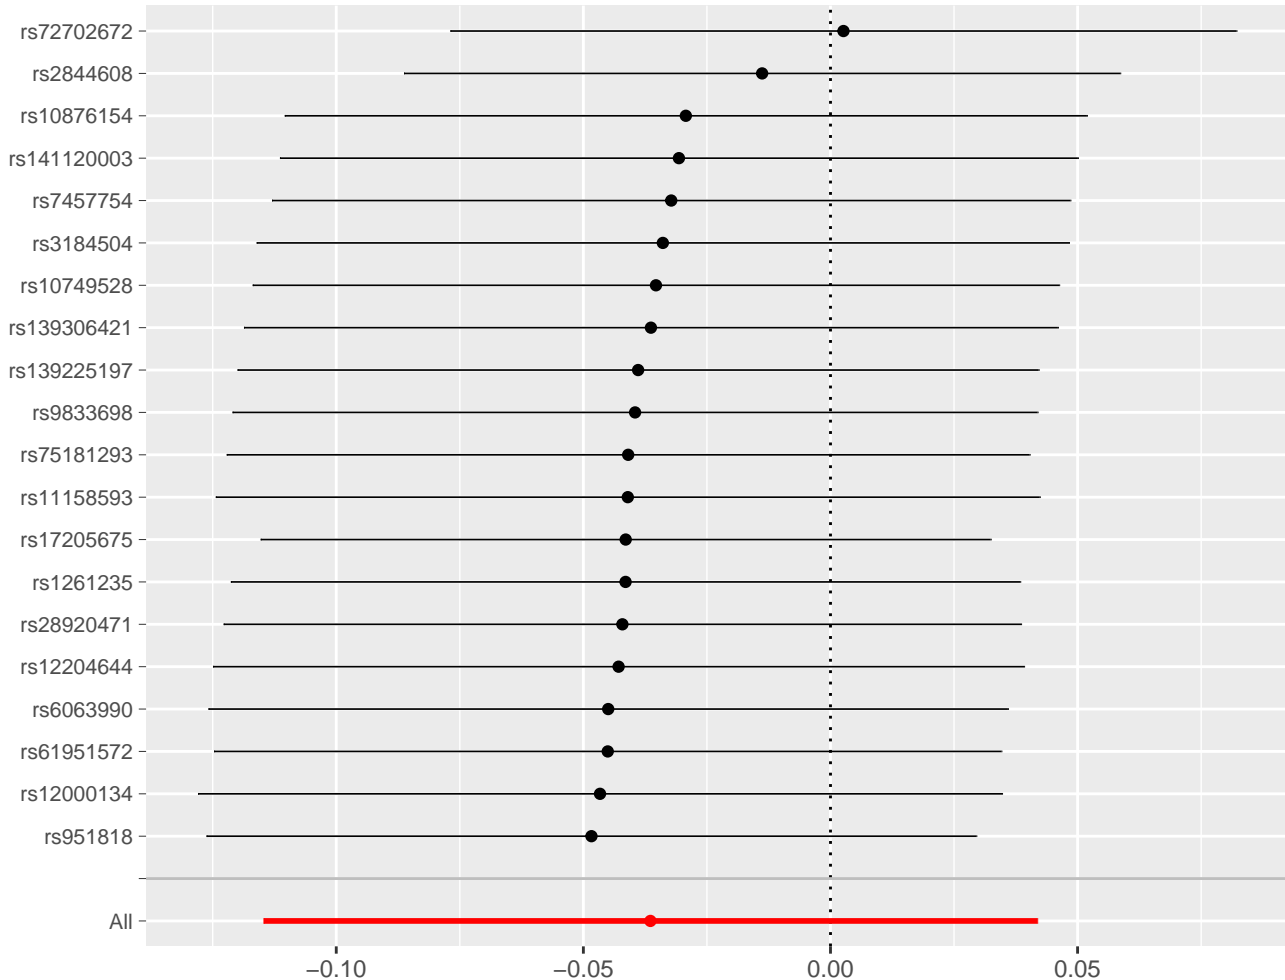

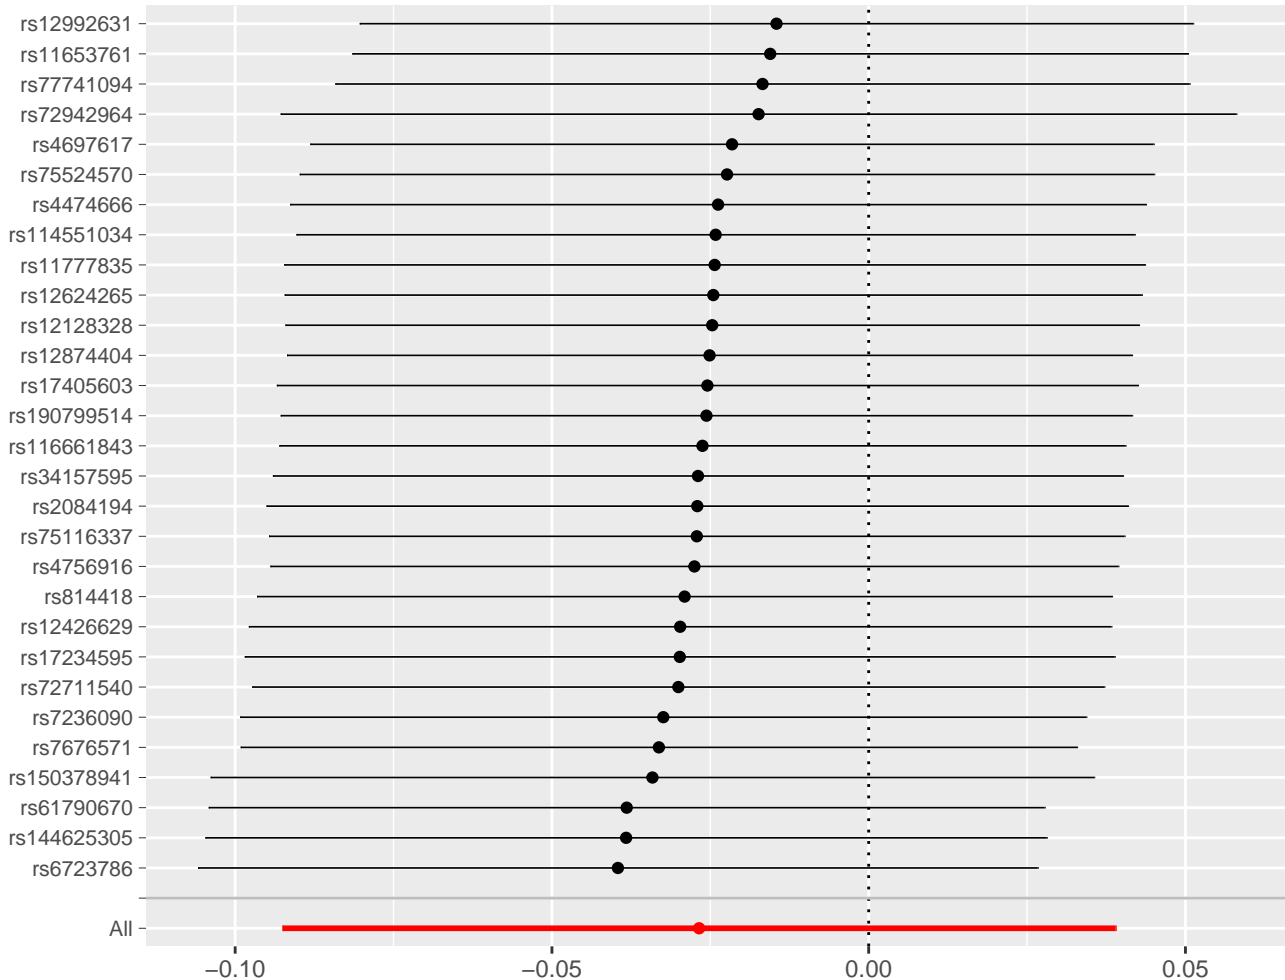

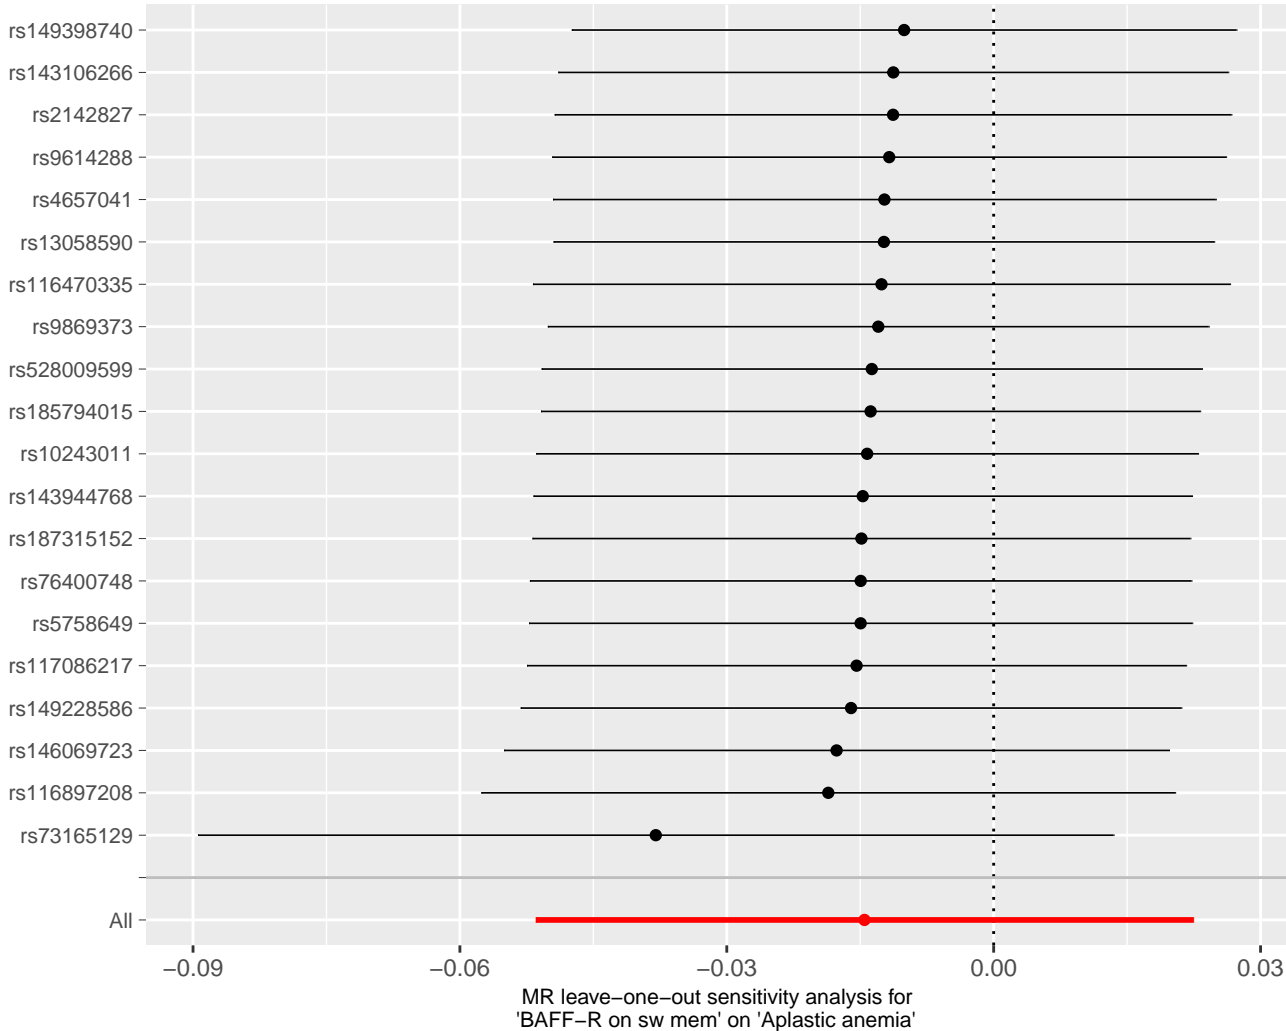

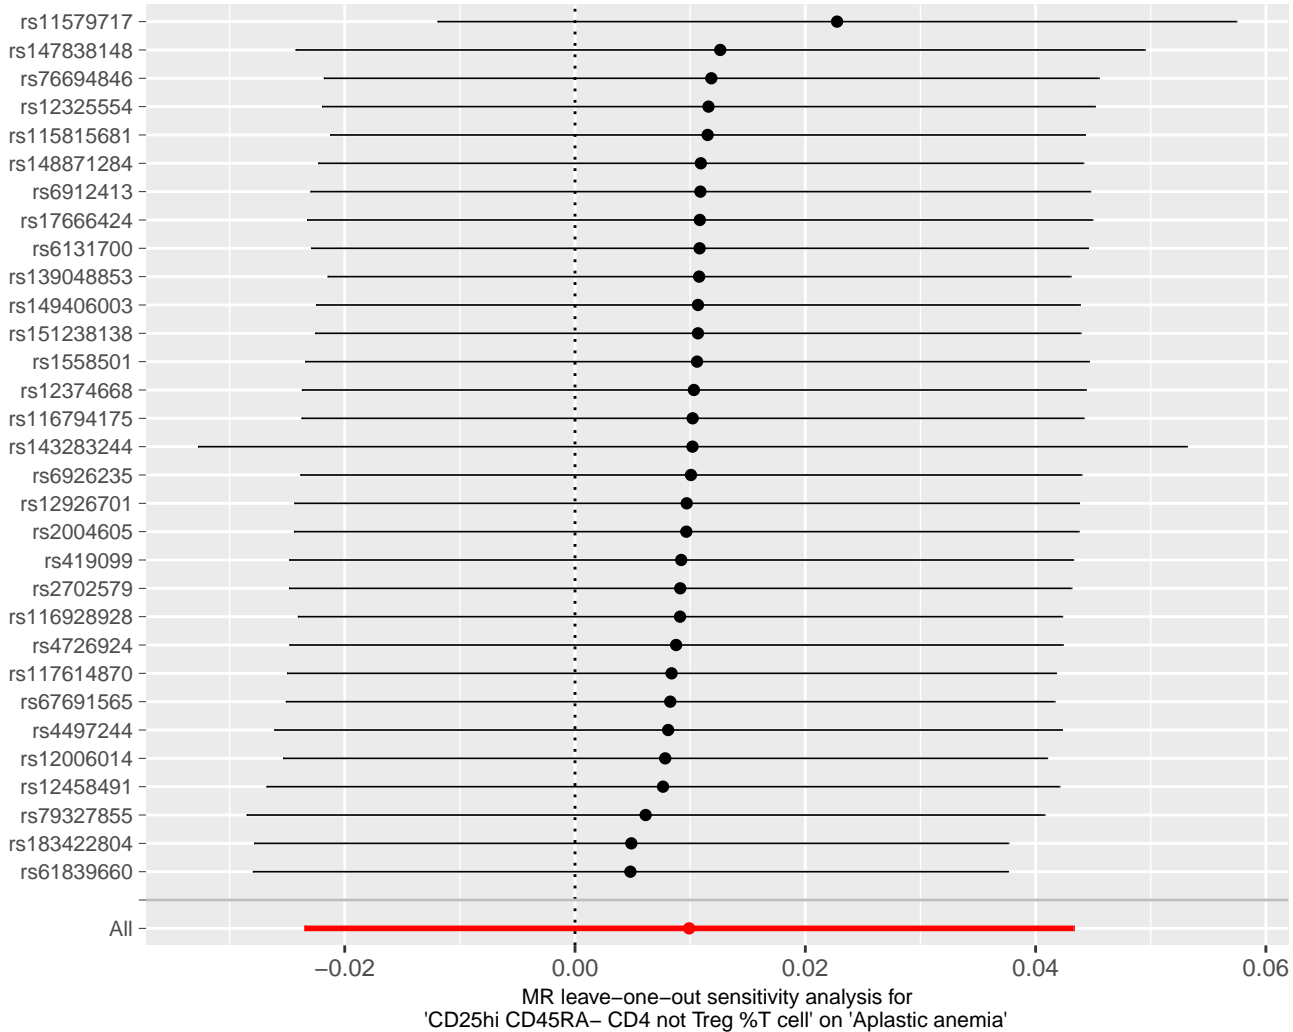

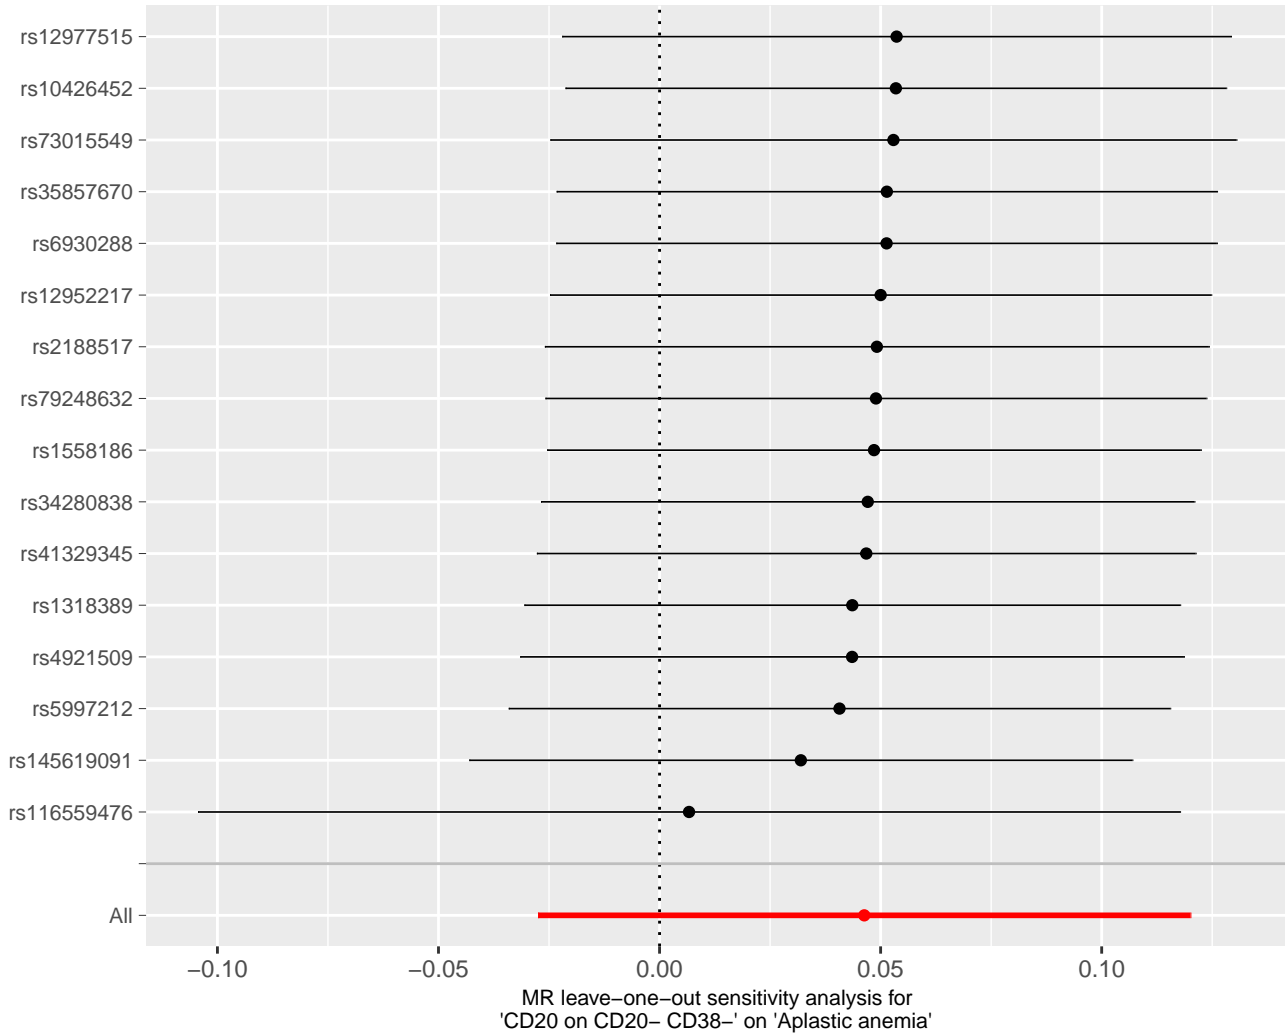



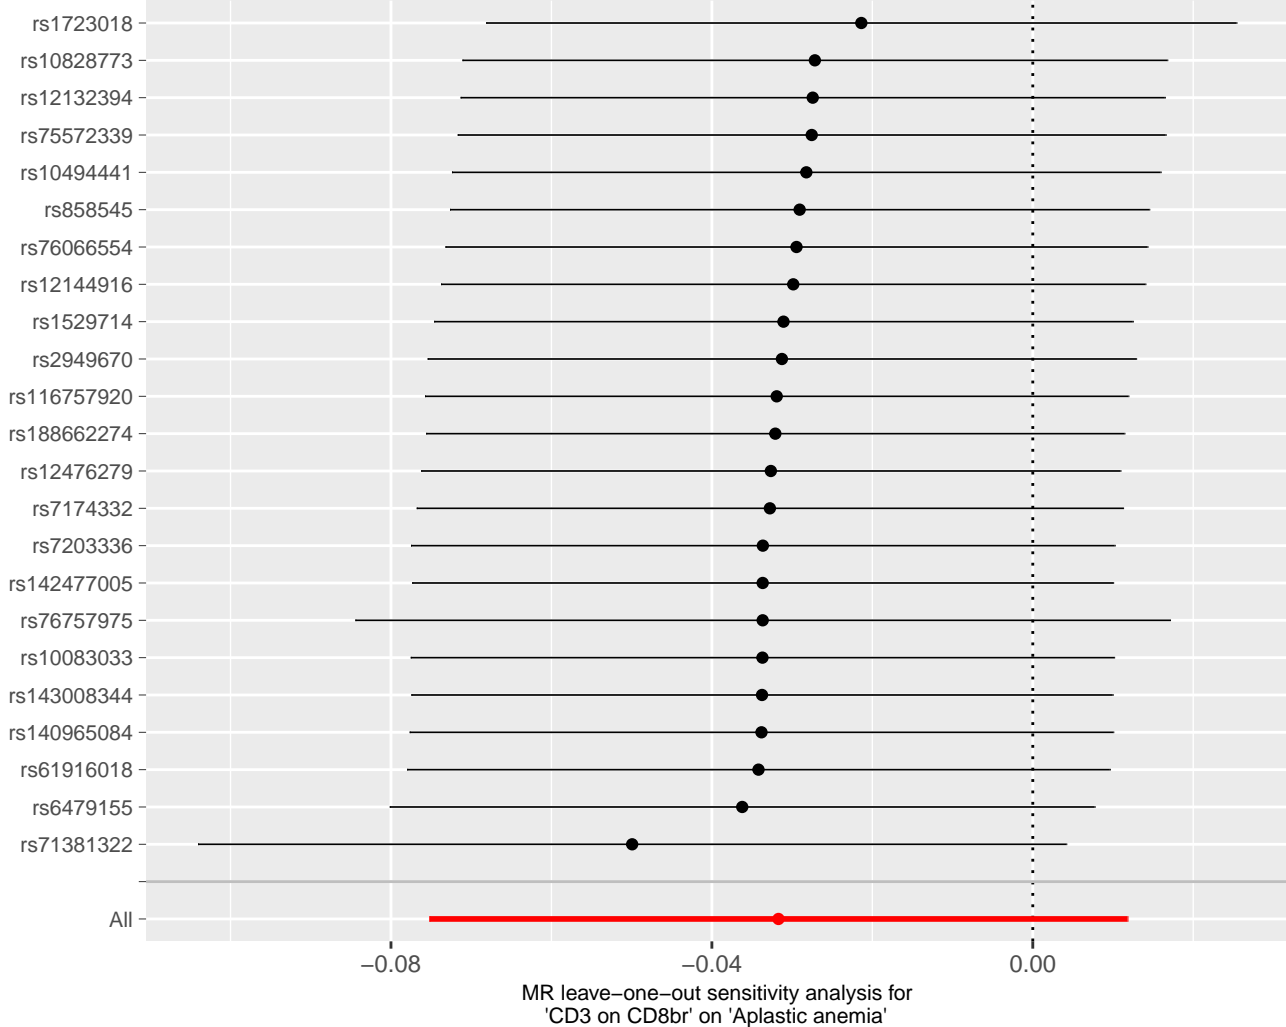

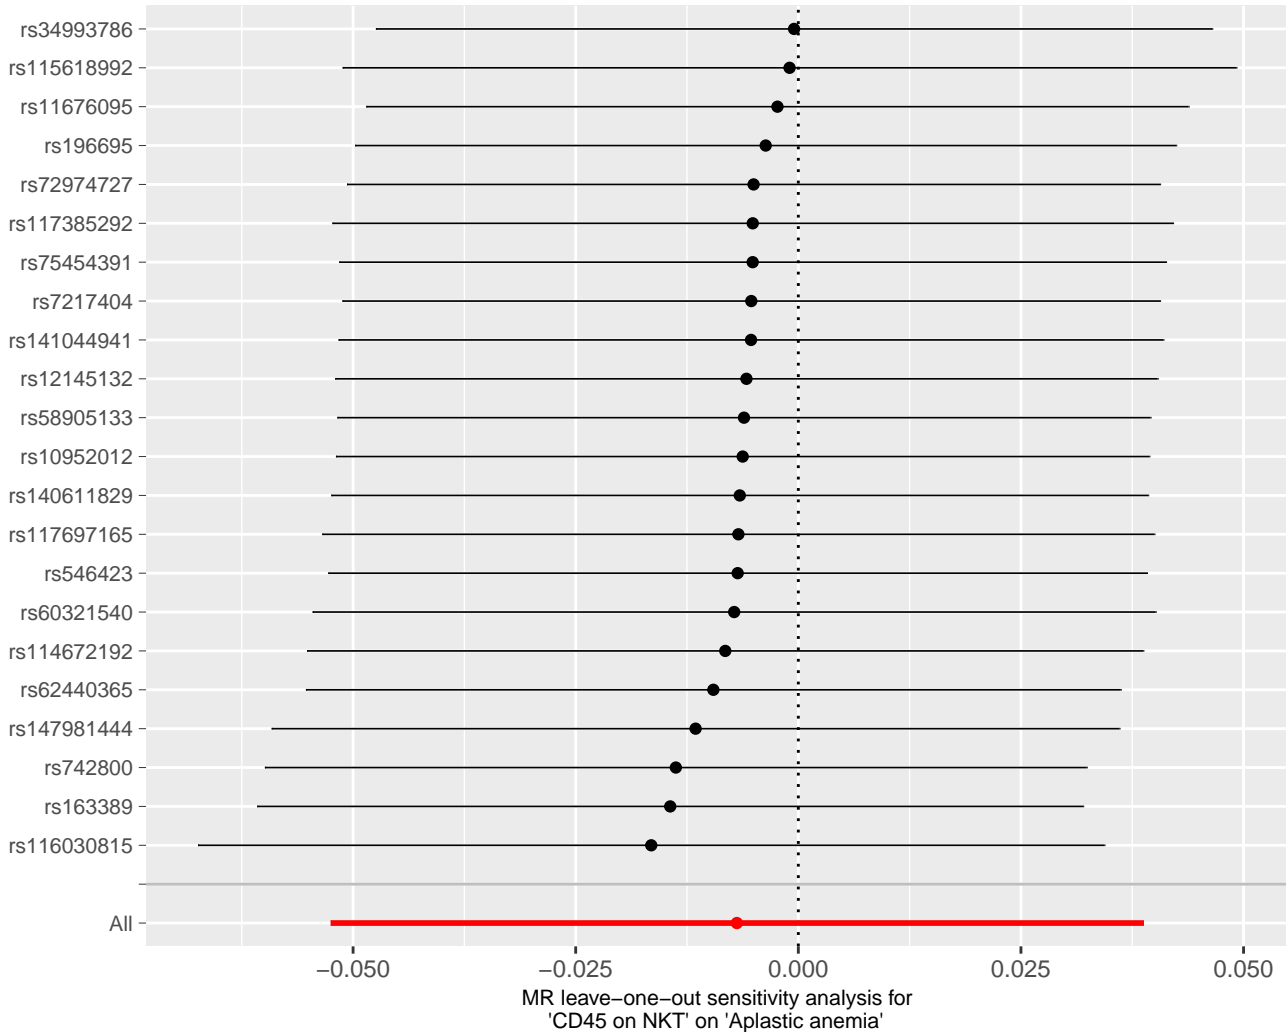

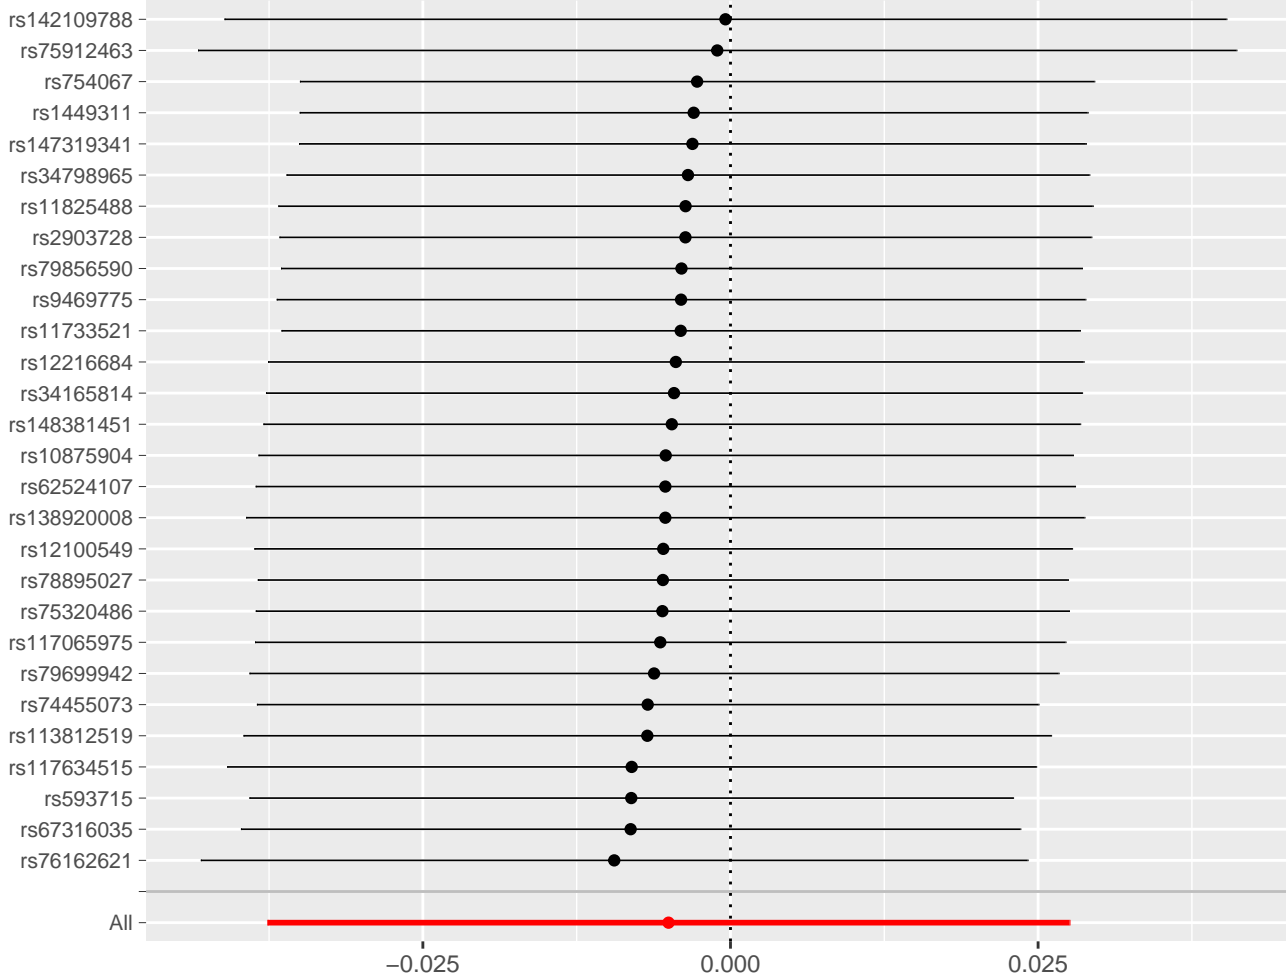

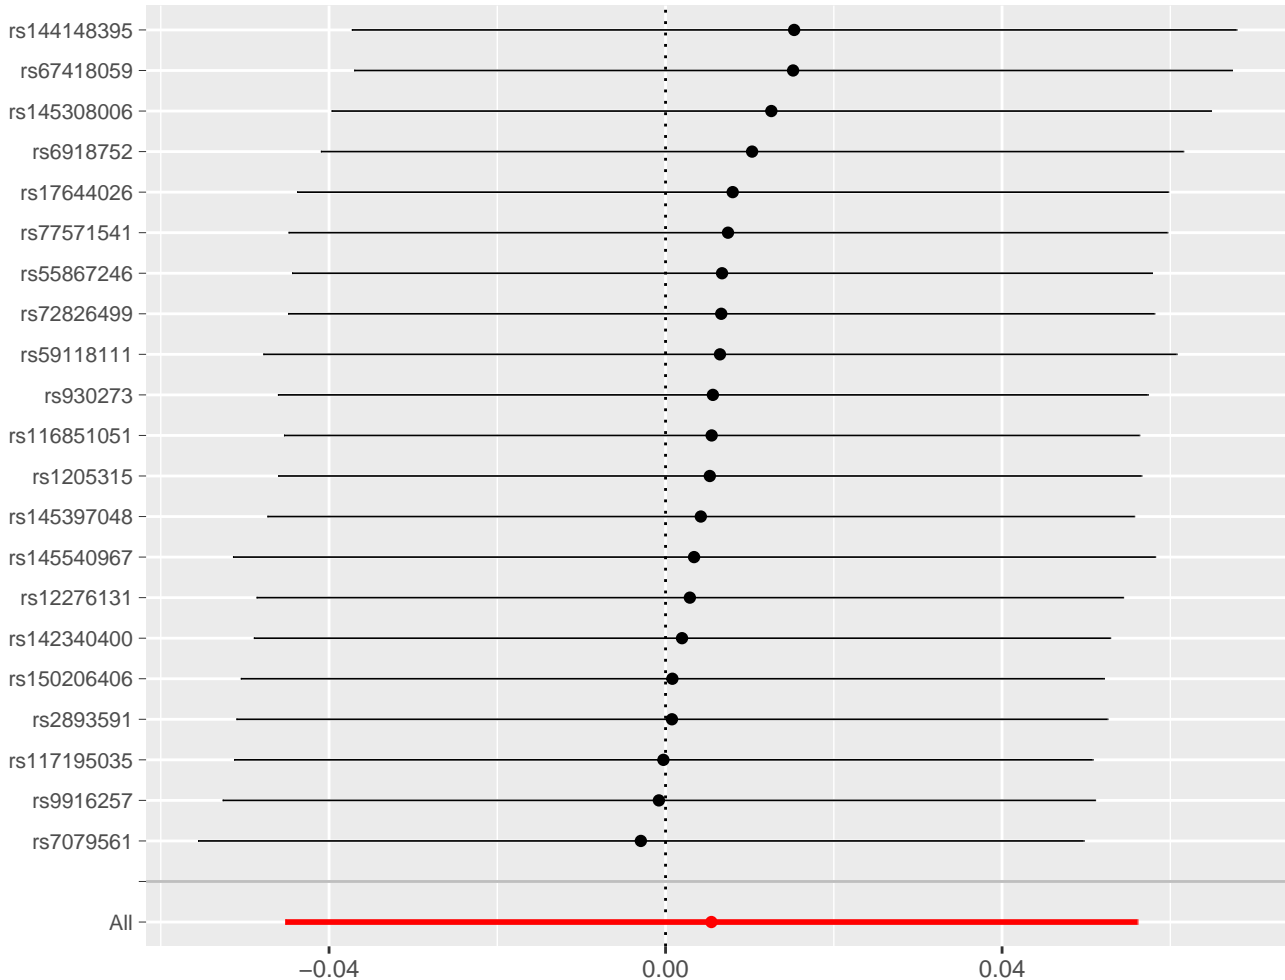

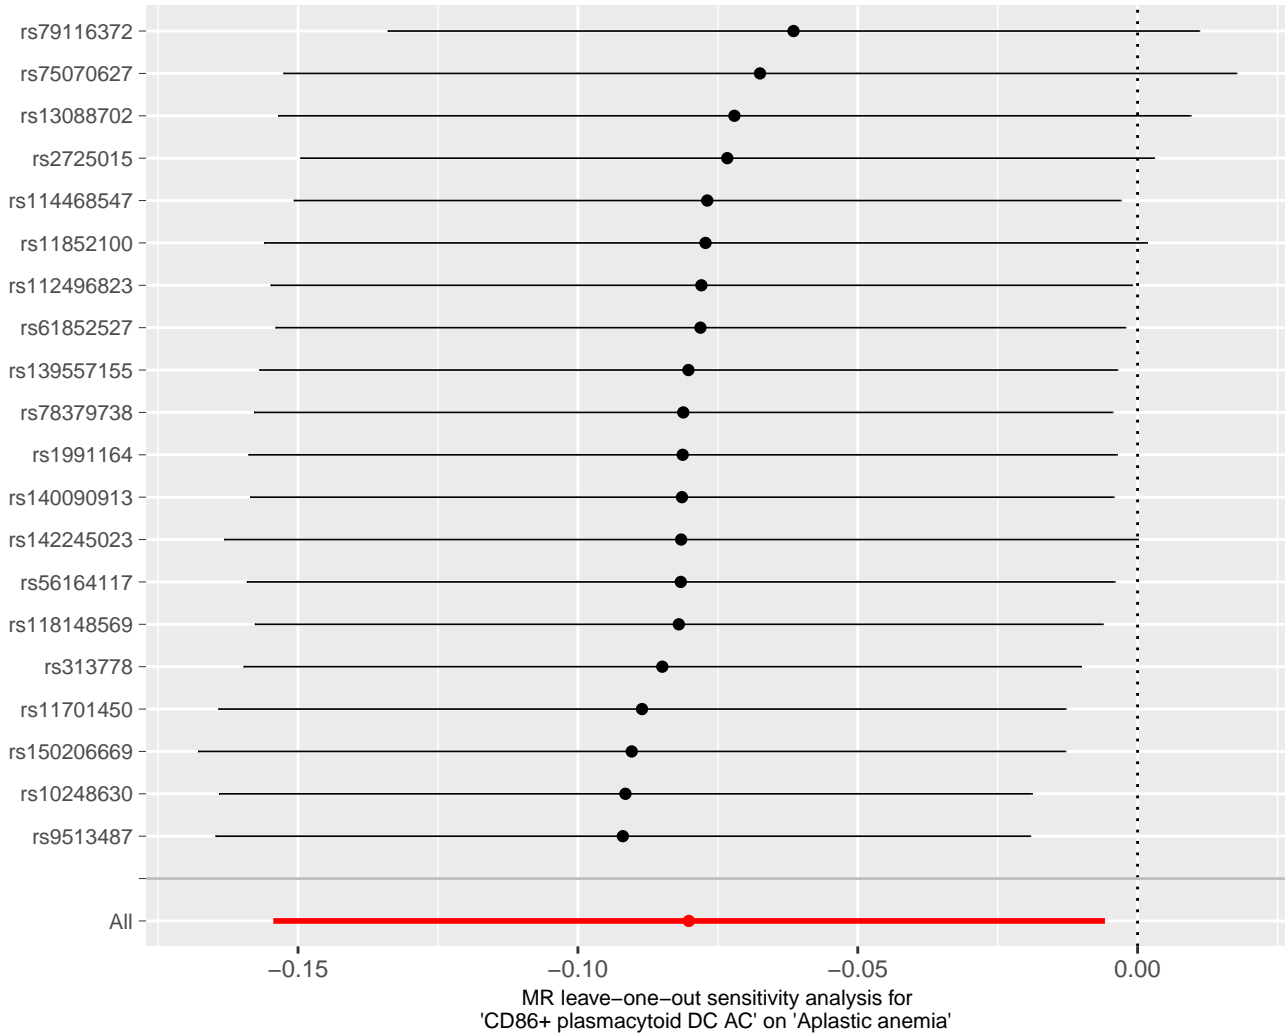

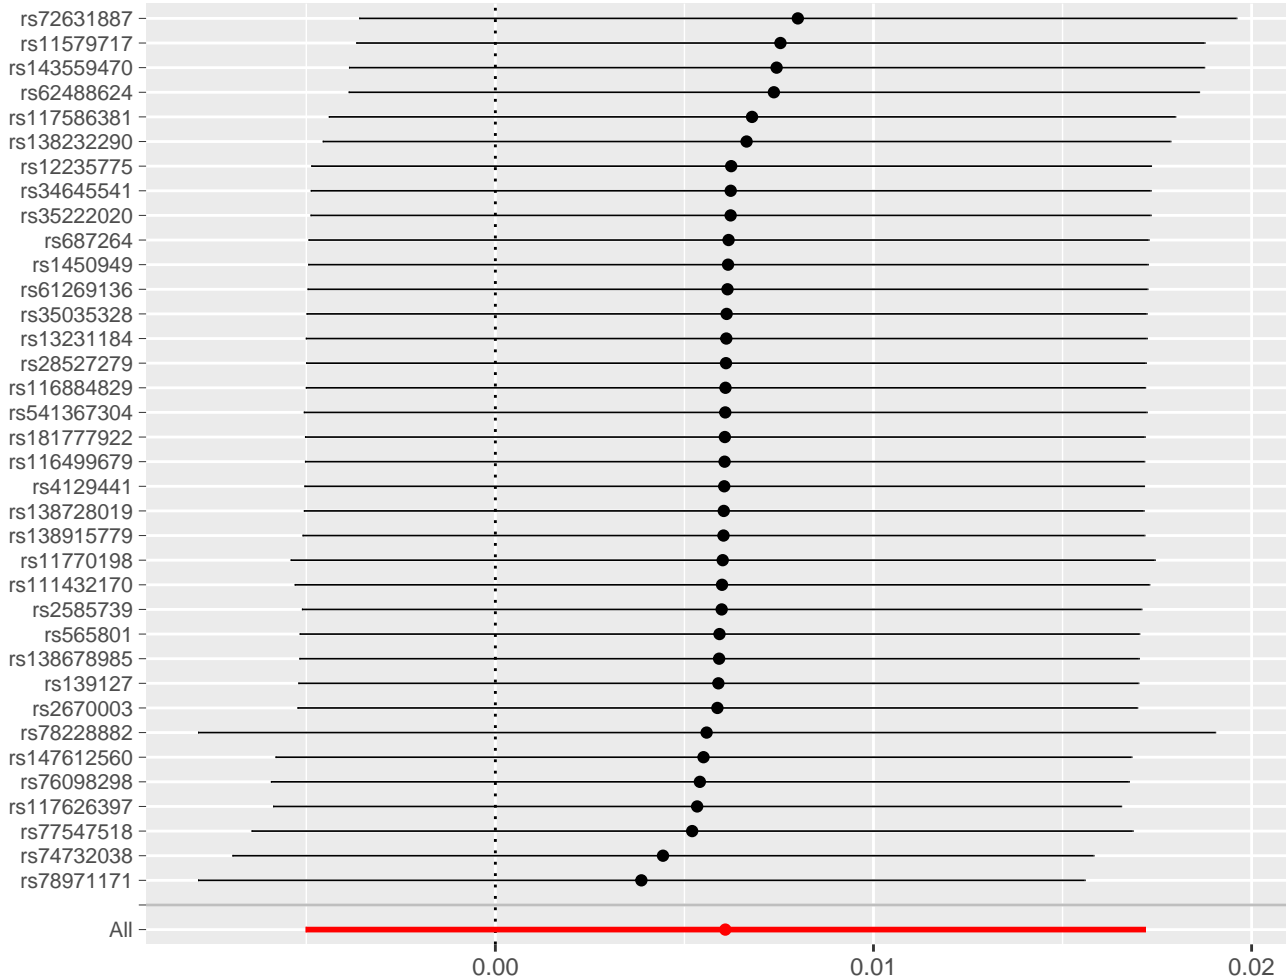

MR leave-one-out sensitivity analysis for 'CD28+ CD45RA- CD8dim AC' on 'Aplastic anemia'

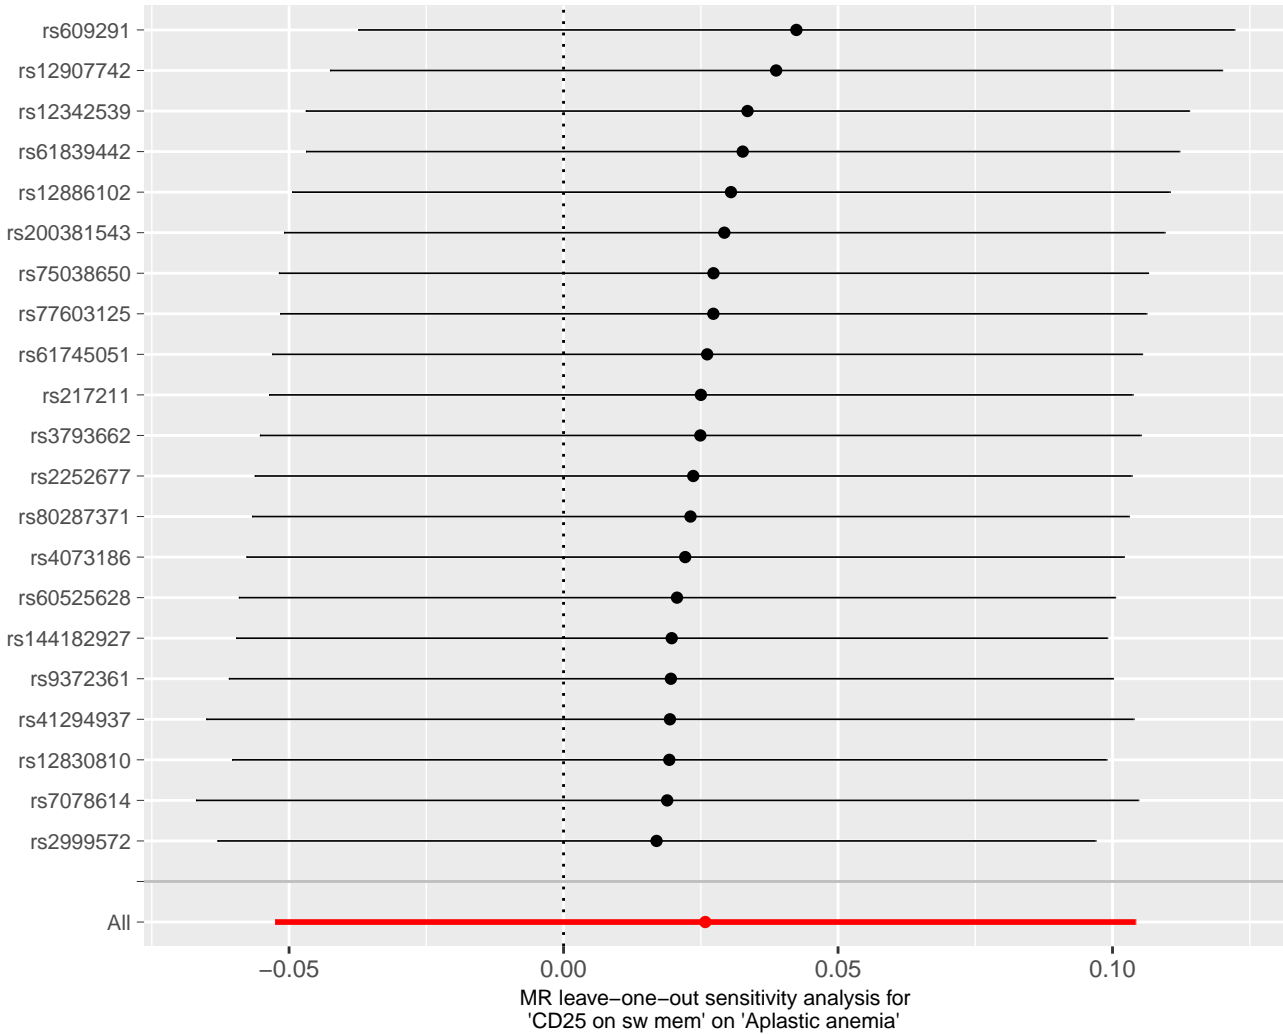

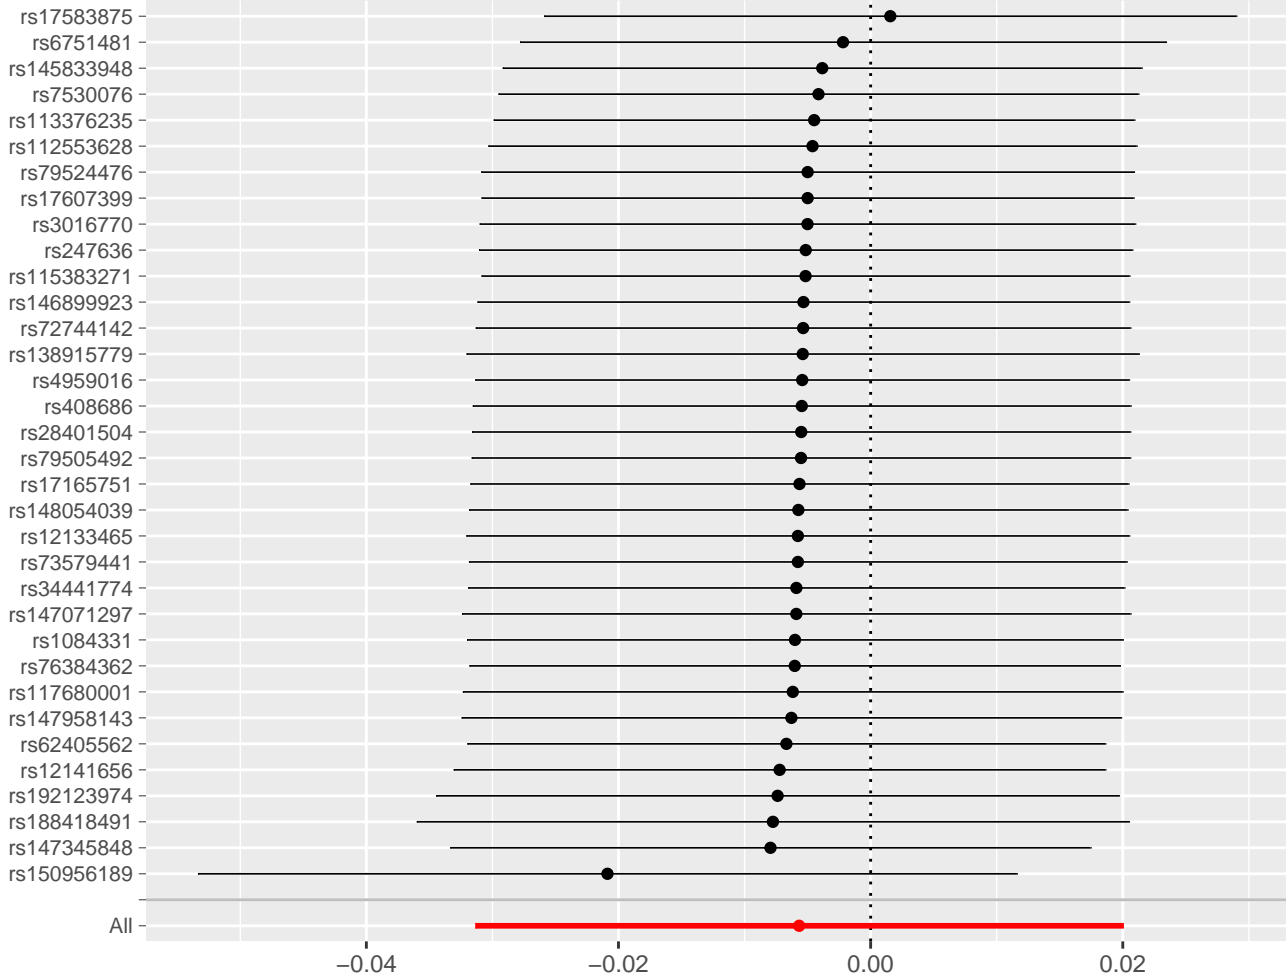

MR leave-one-out sensitivity analysis for 'Resting Treg %CD4' on 'Aplastic anemia'



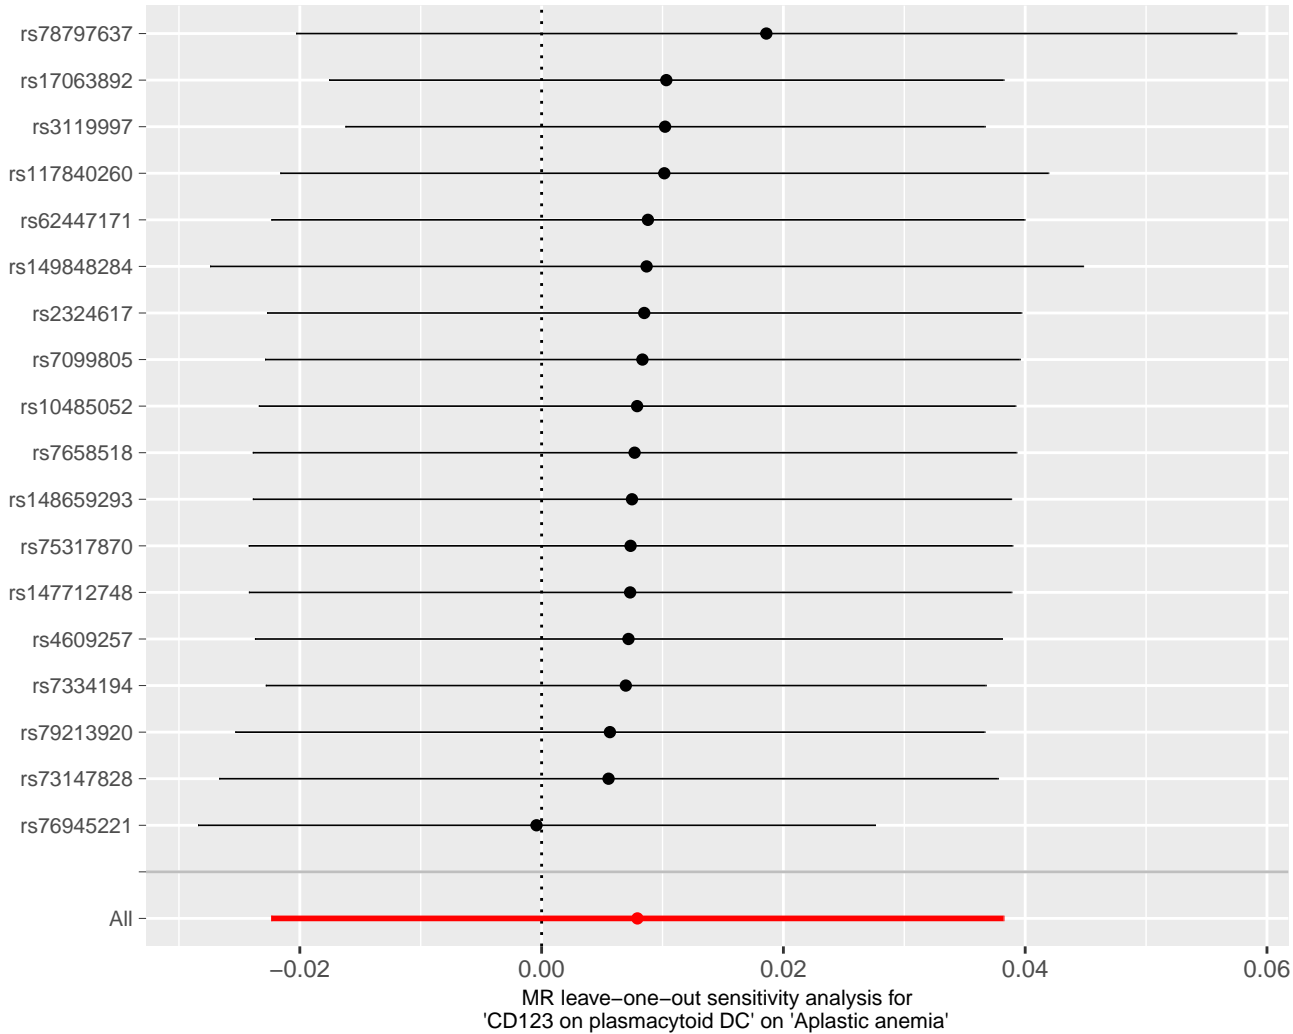

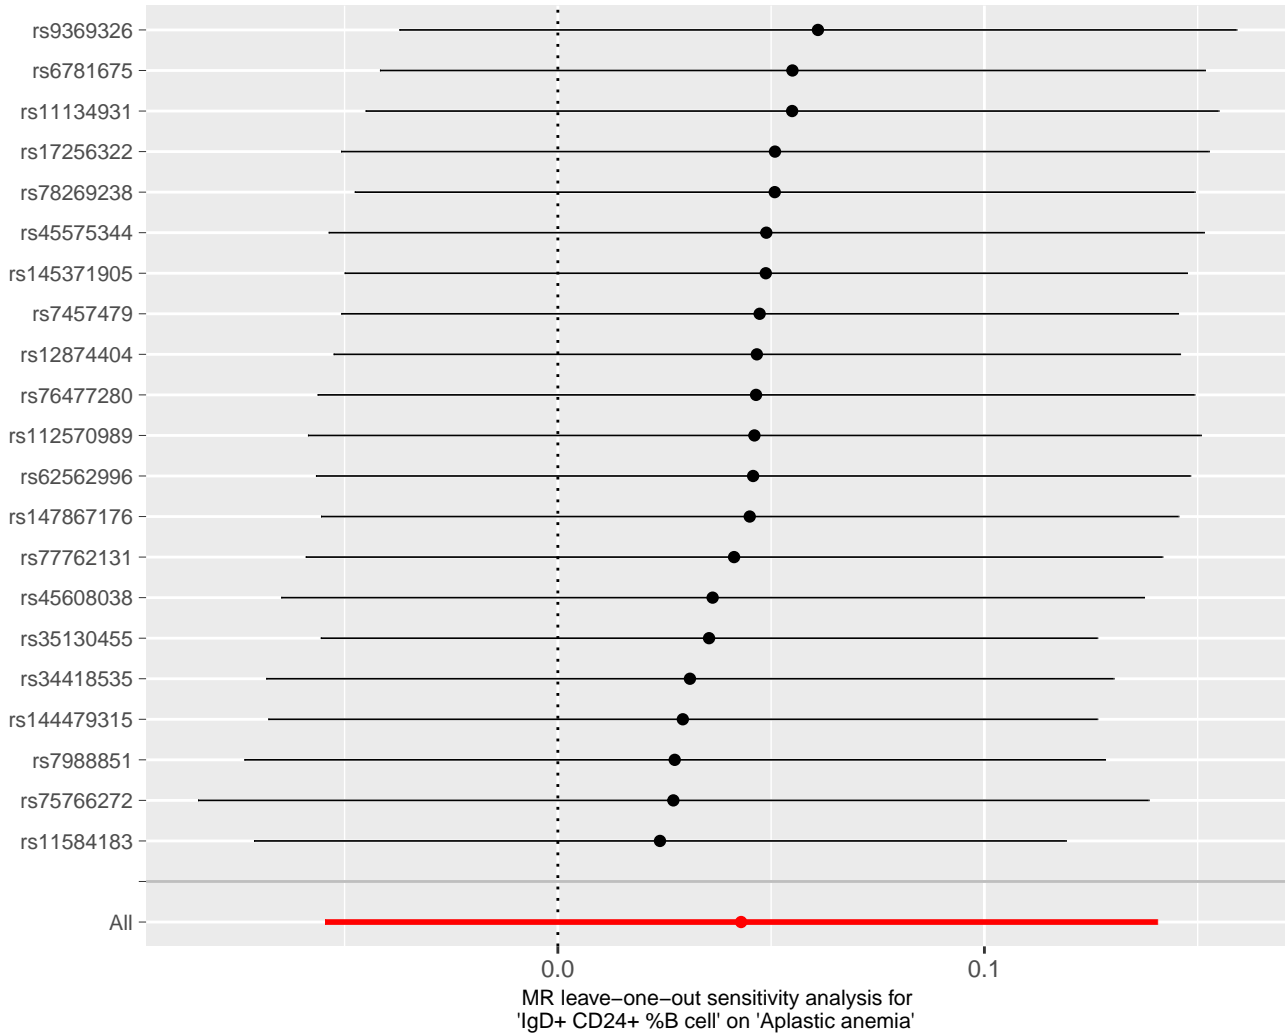

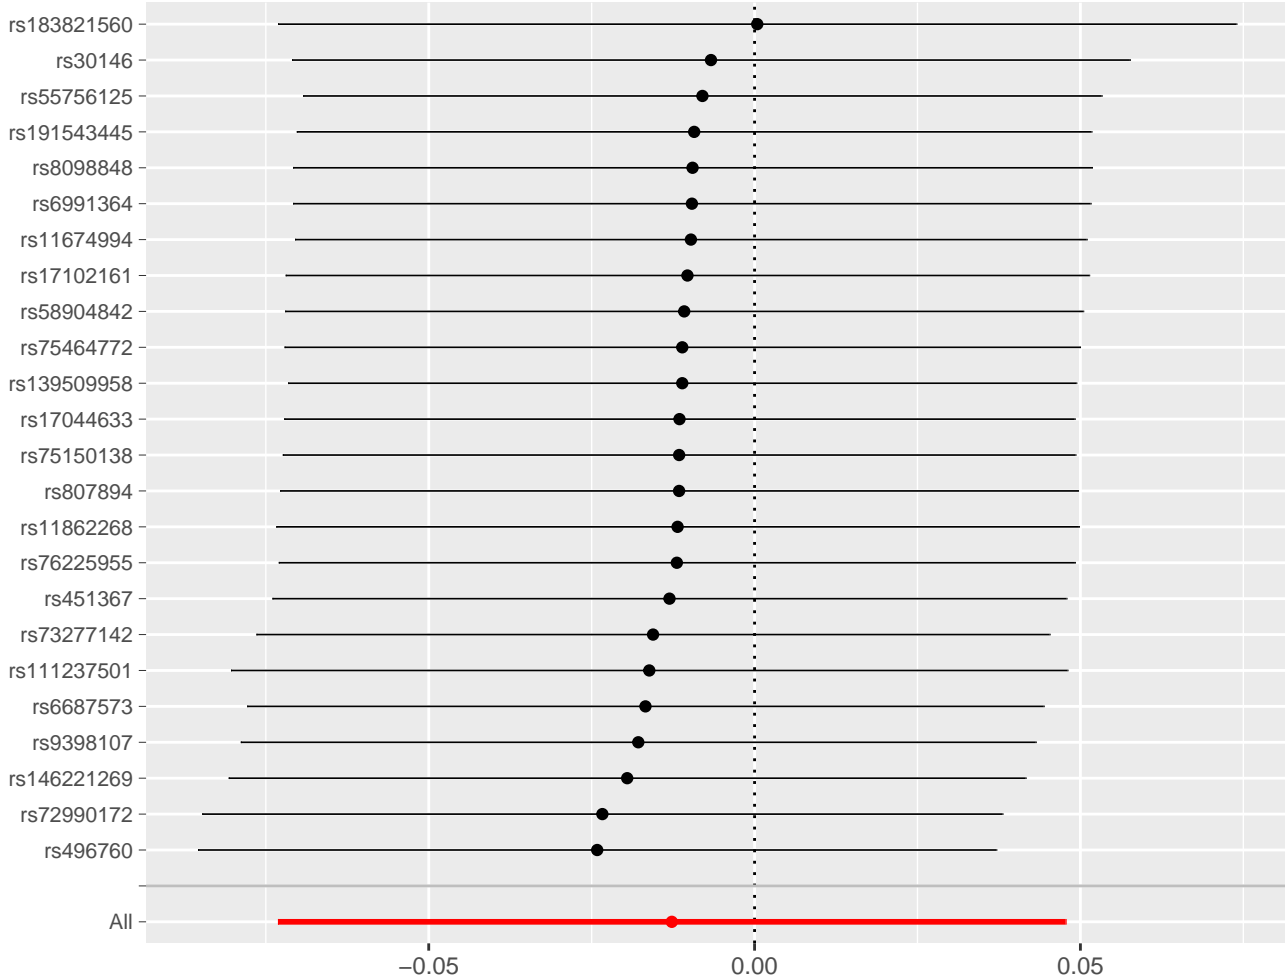

MR leave-one-out sensitivity analysis for 'IgD- CD24- %lymphocyte' on 'Aplastic anemia'

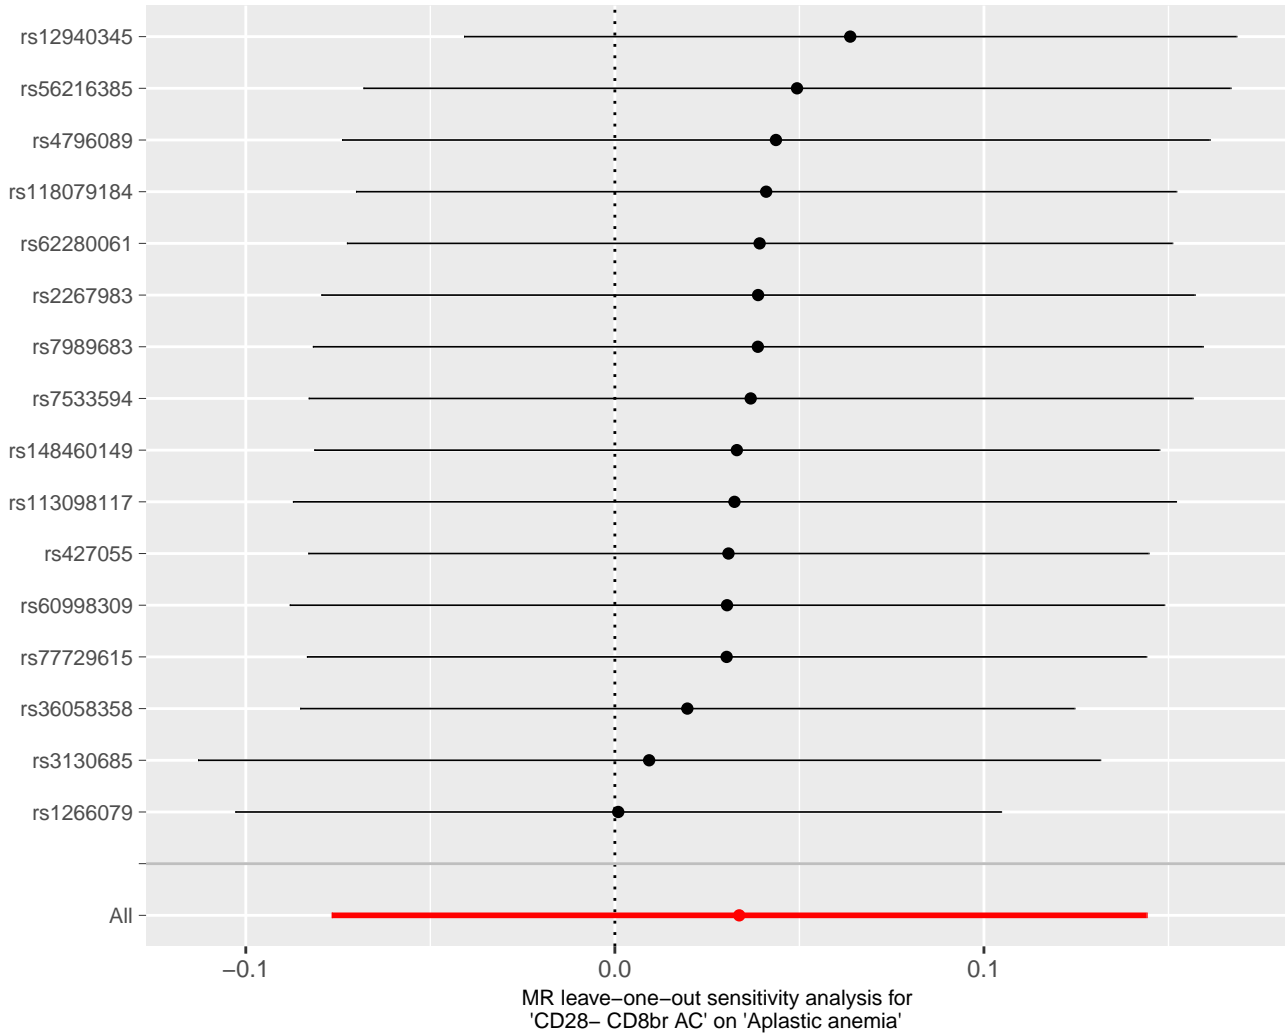

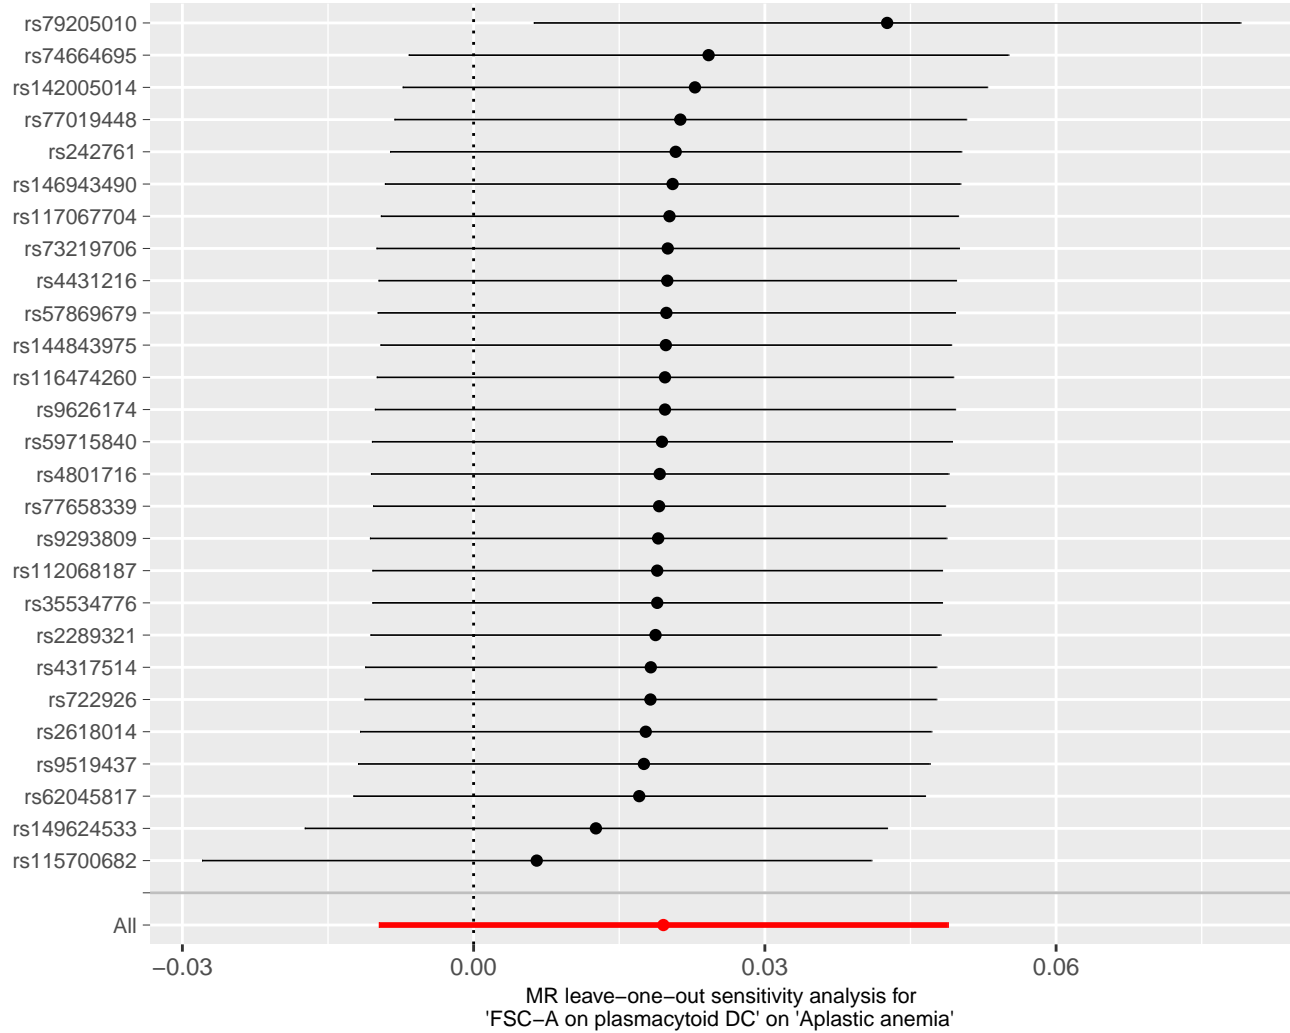

CD45RA+ CD28- CD8br AC

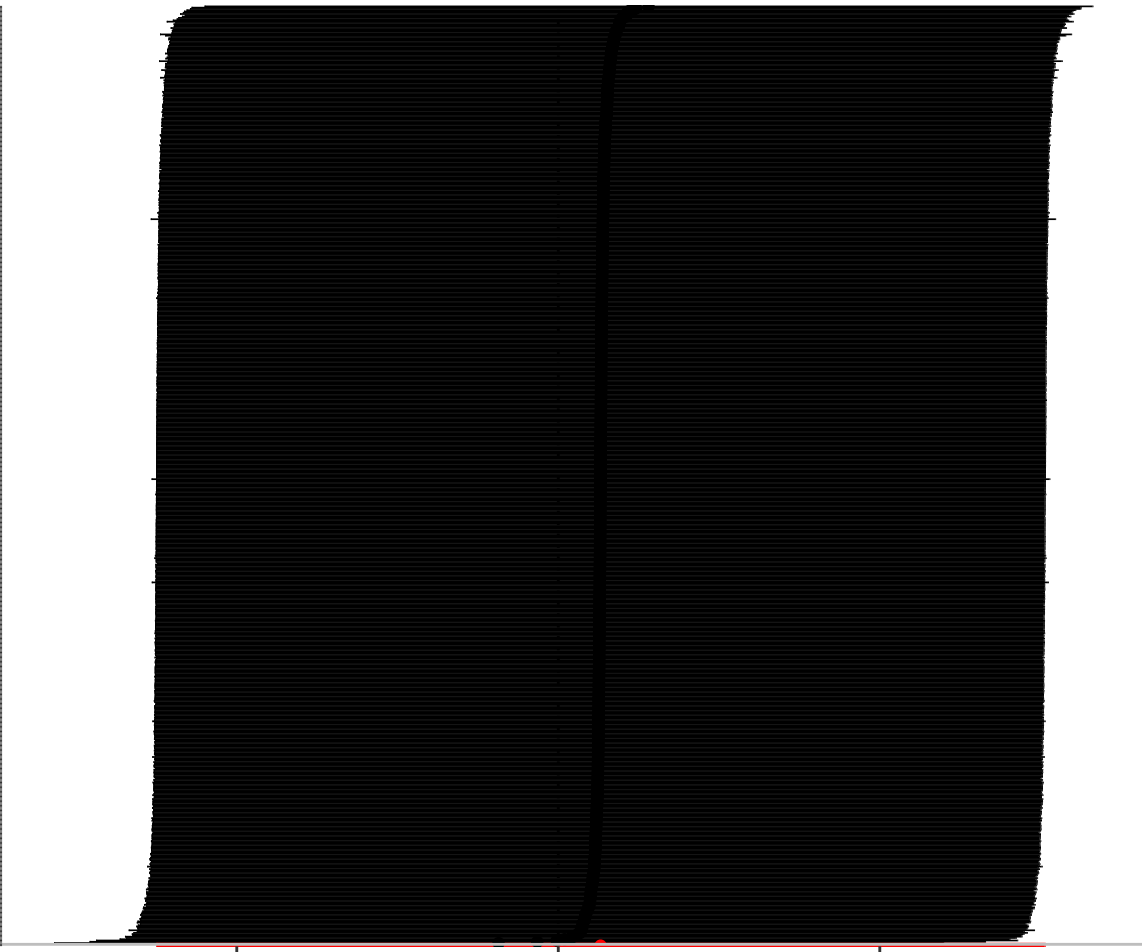

-1e-05 0e+00 1e-05

MR leave-one-out sensitivity analysis for 'CD45RA+ CD28- CD8br AC' on 'Aplastic anemia'

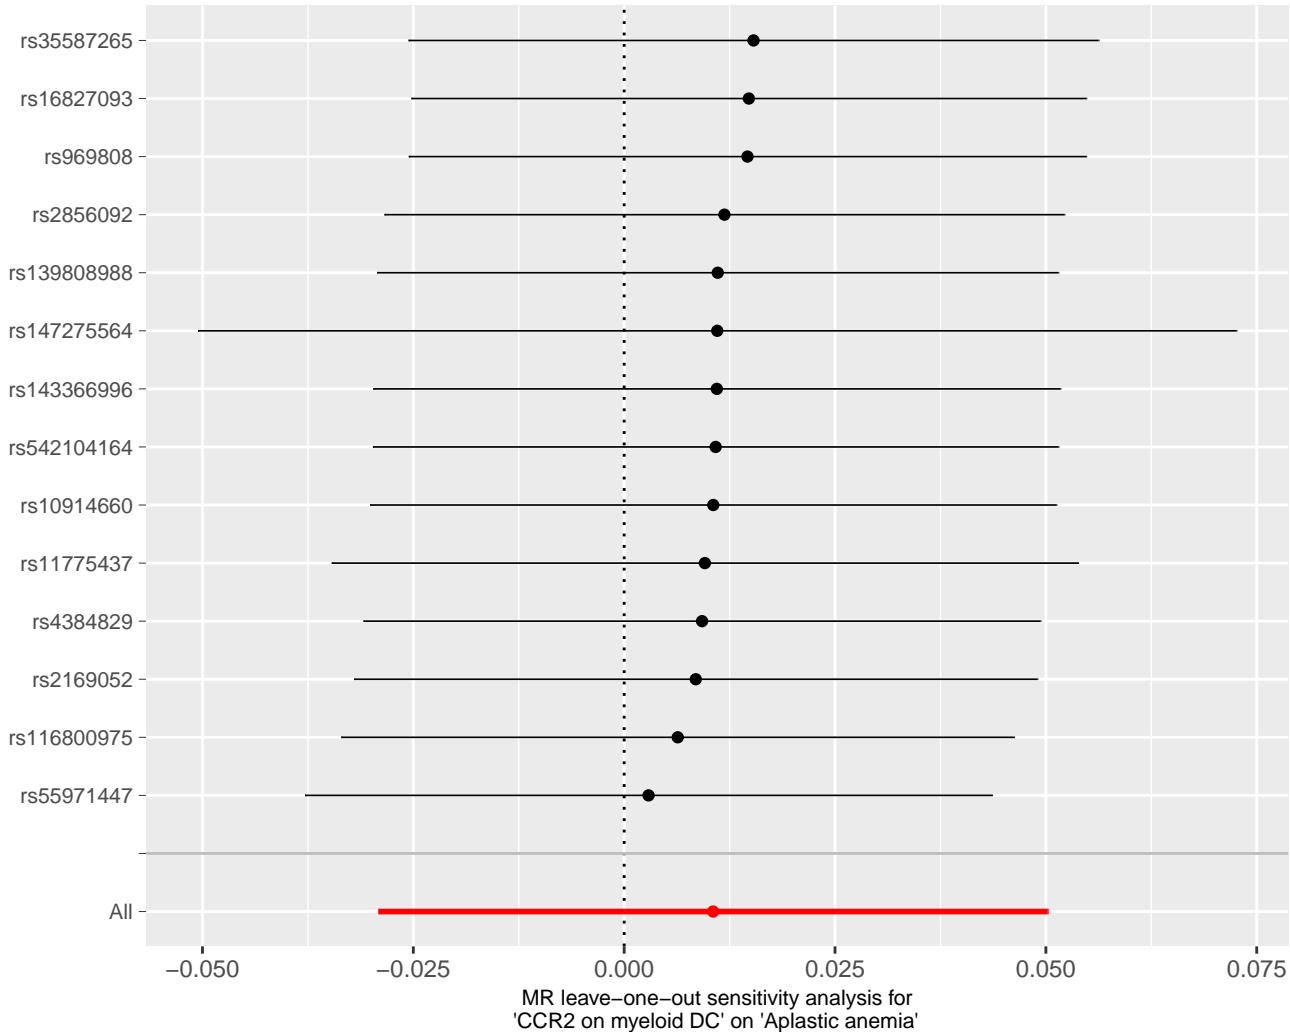

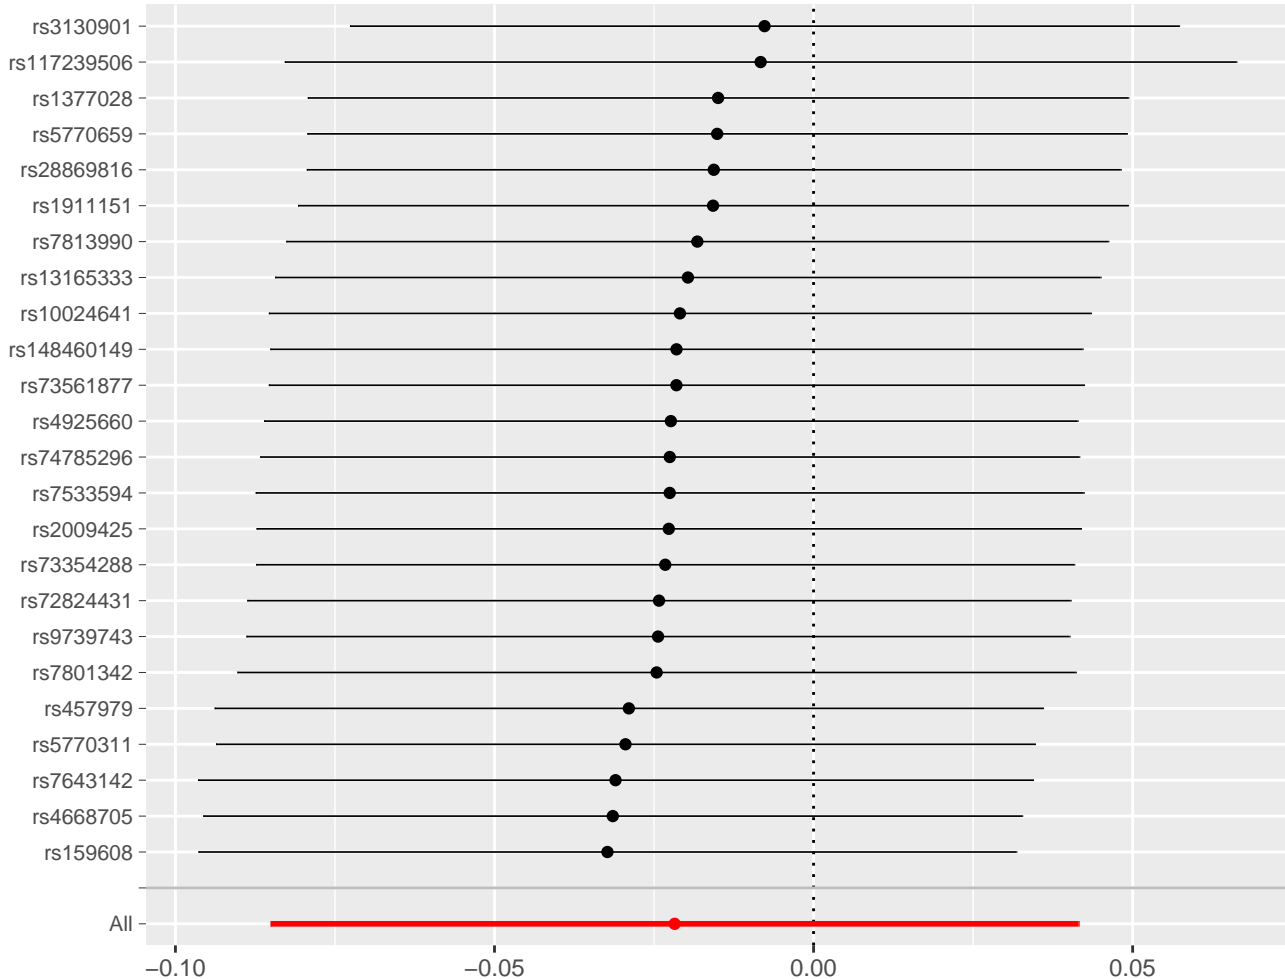

MR leave-one-out sensitivity analysis for 'CD127 on CD8br' on 'Aplastic anemia'



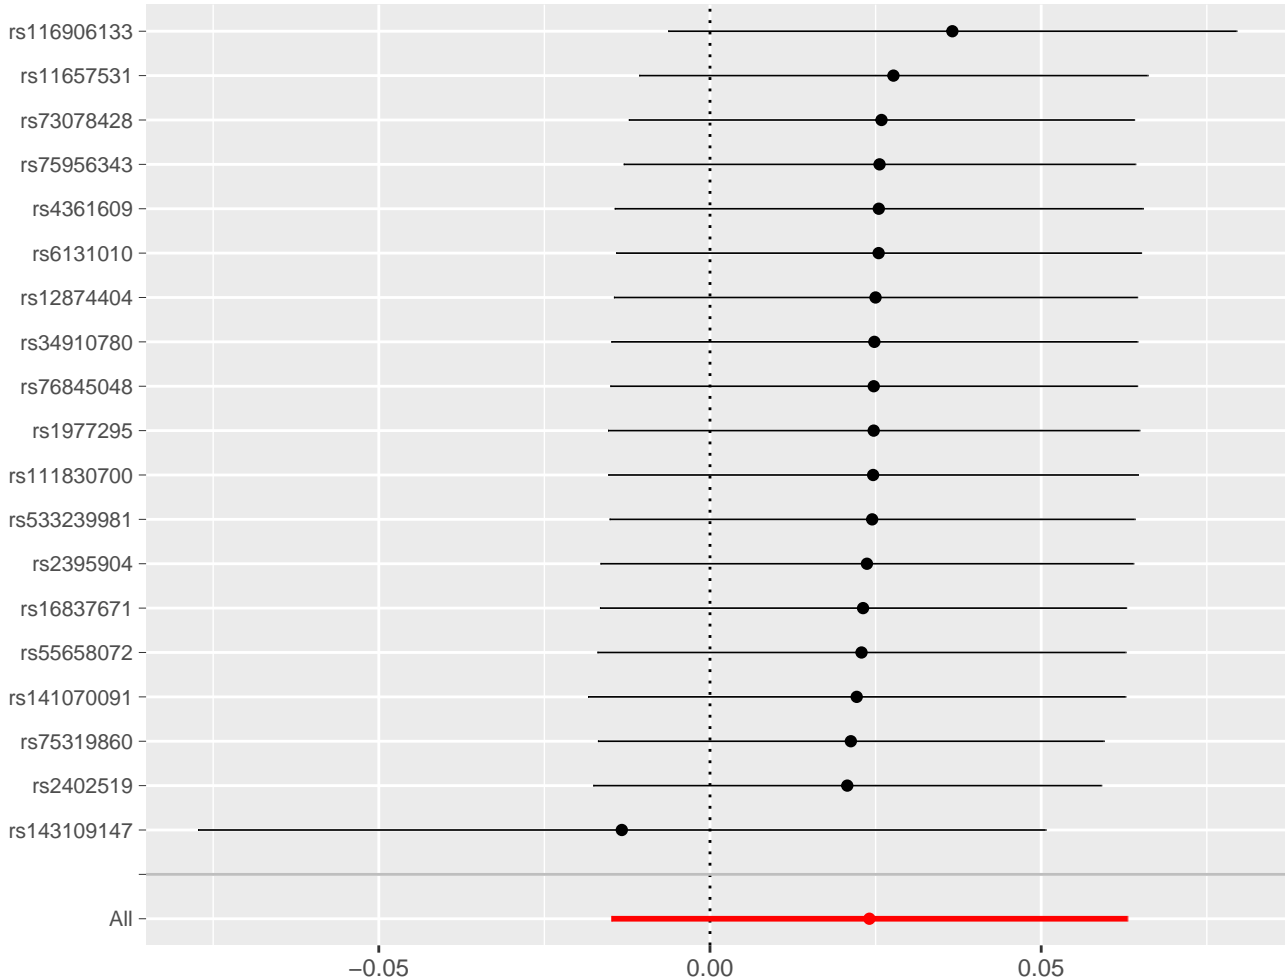

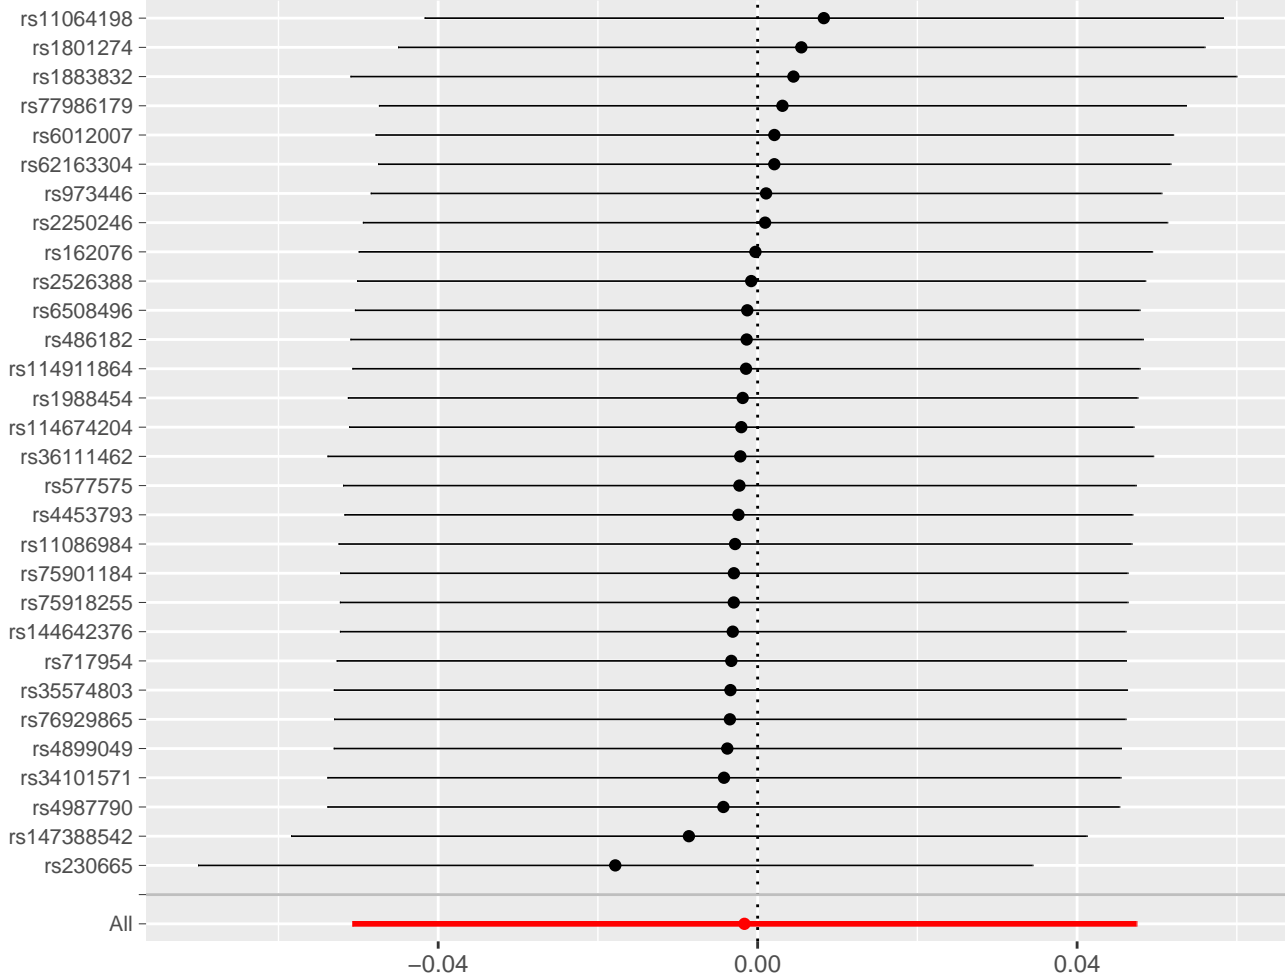

MR leave-one-out sensitivity analysis for 'CD27 on IgD- CD38-' on 'Aplastic anemia'

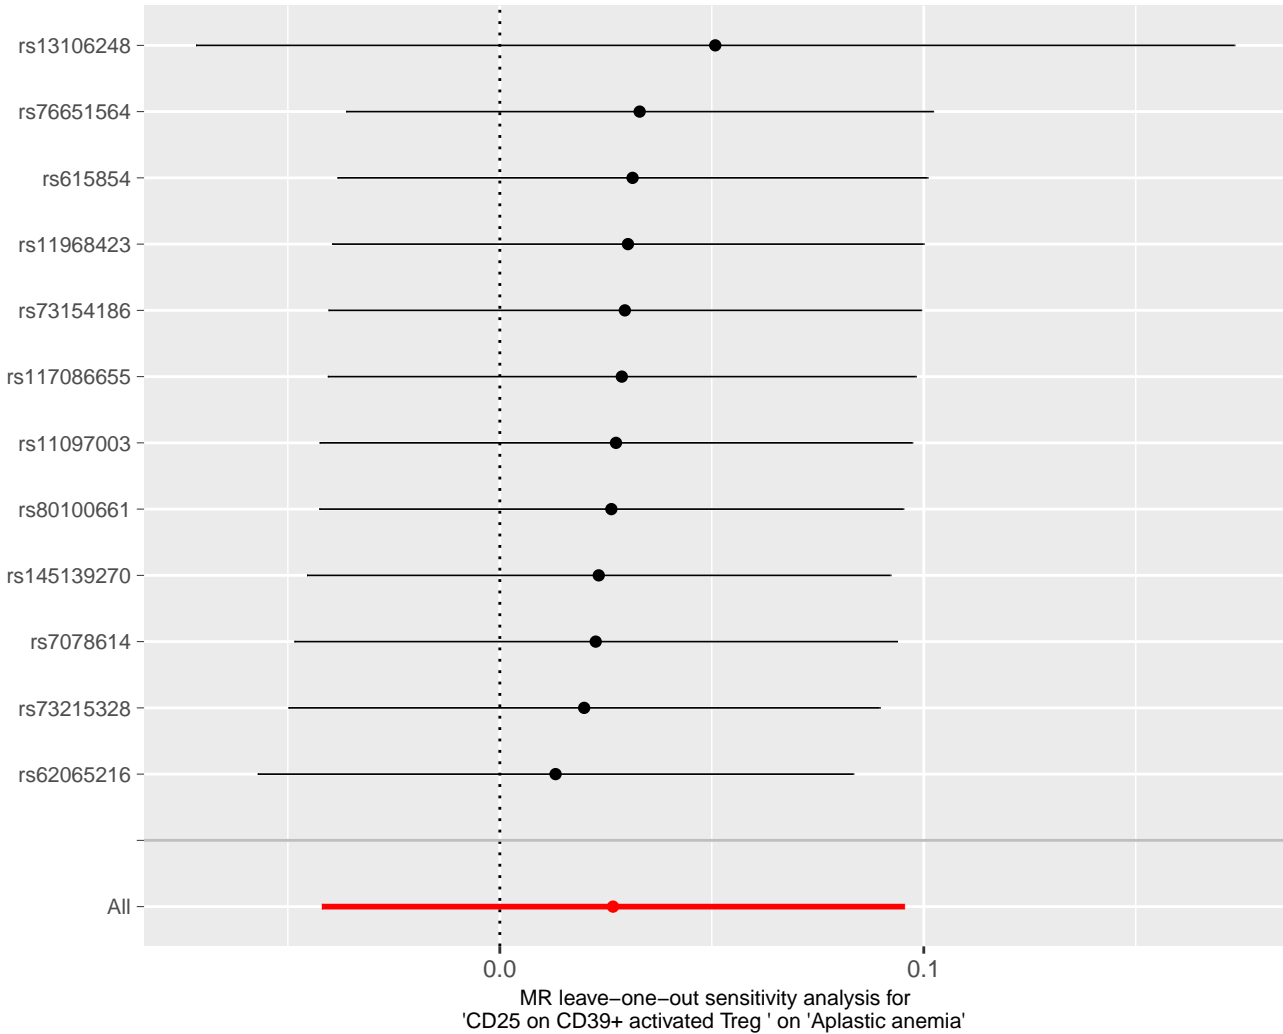

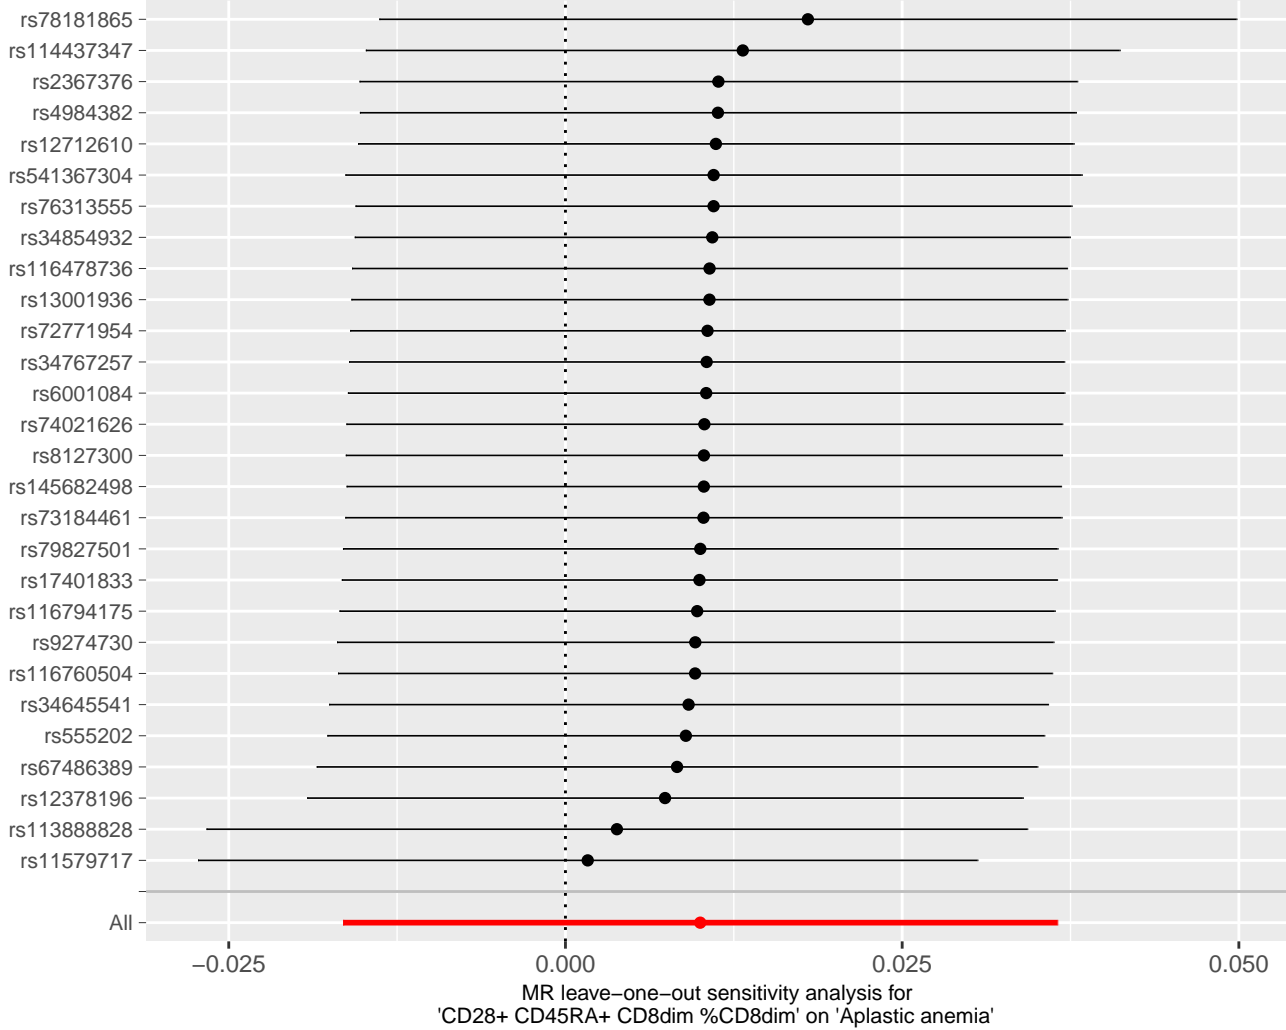

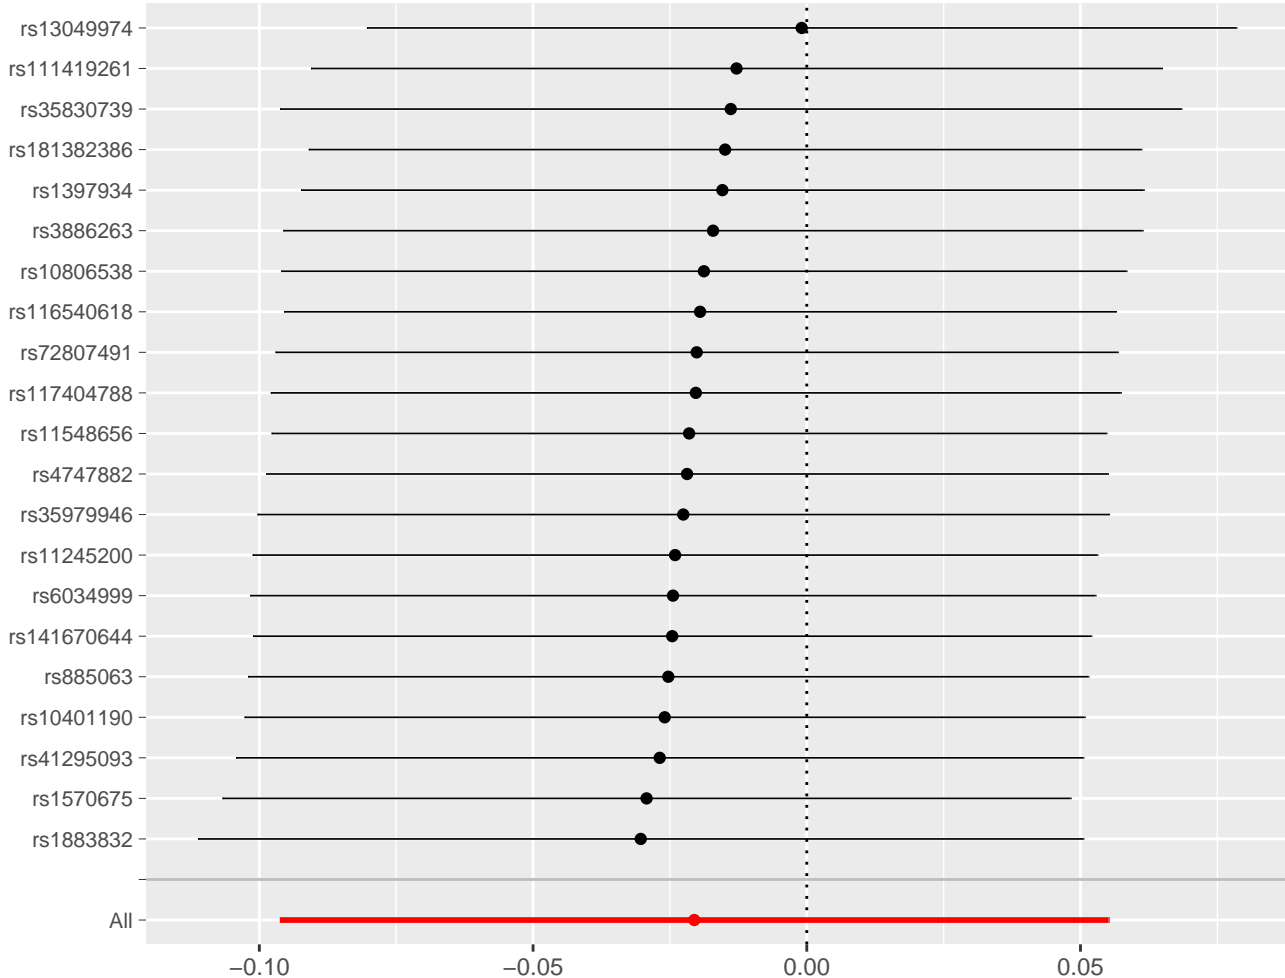

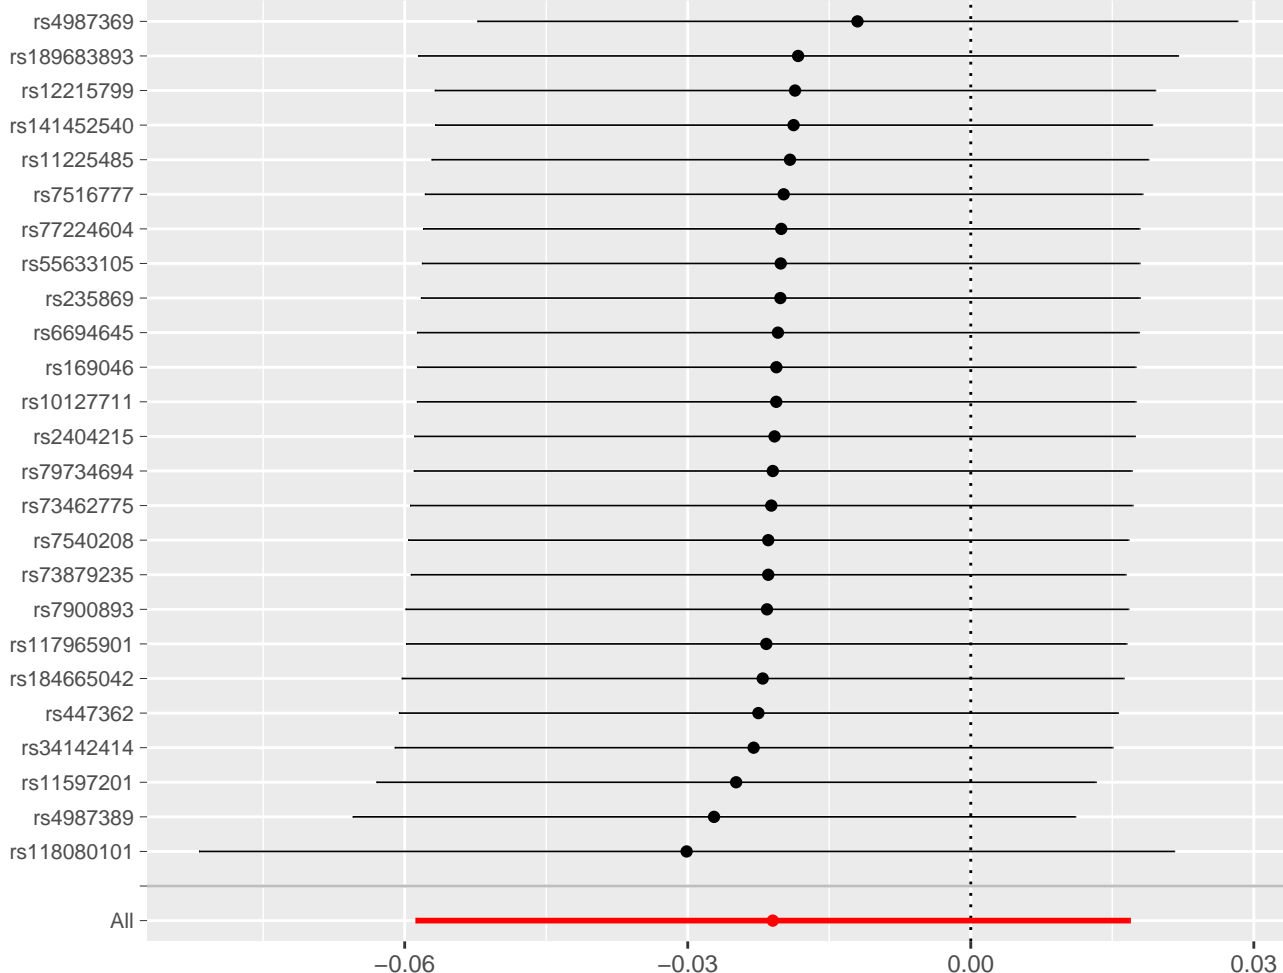

MR leave-one-out sensitivity analysis for 'CD62L on monocyte' on 'Aplastic anemia'

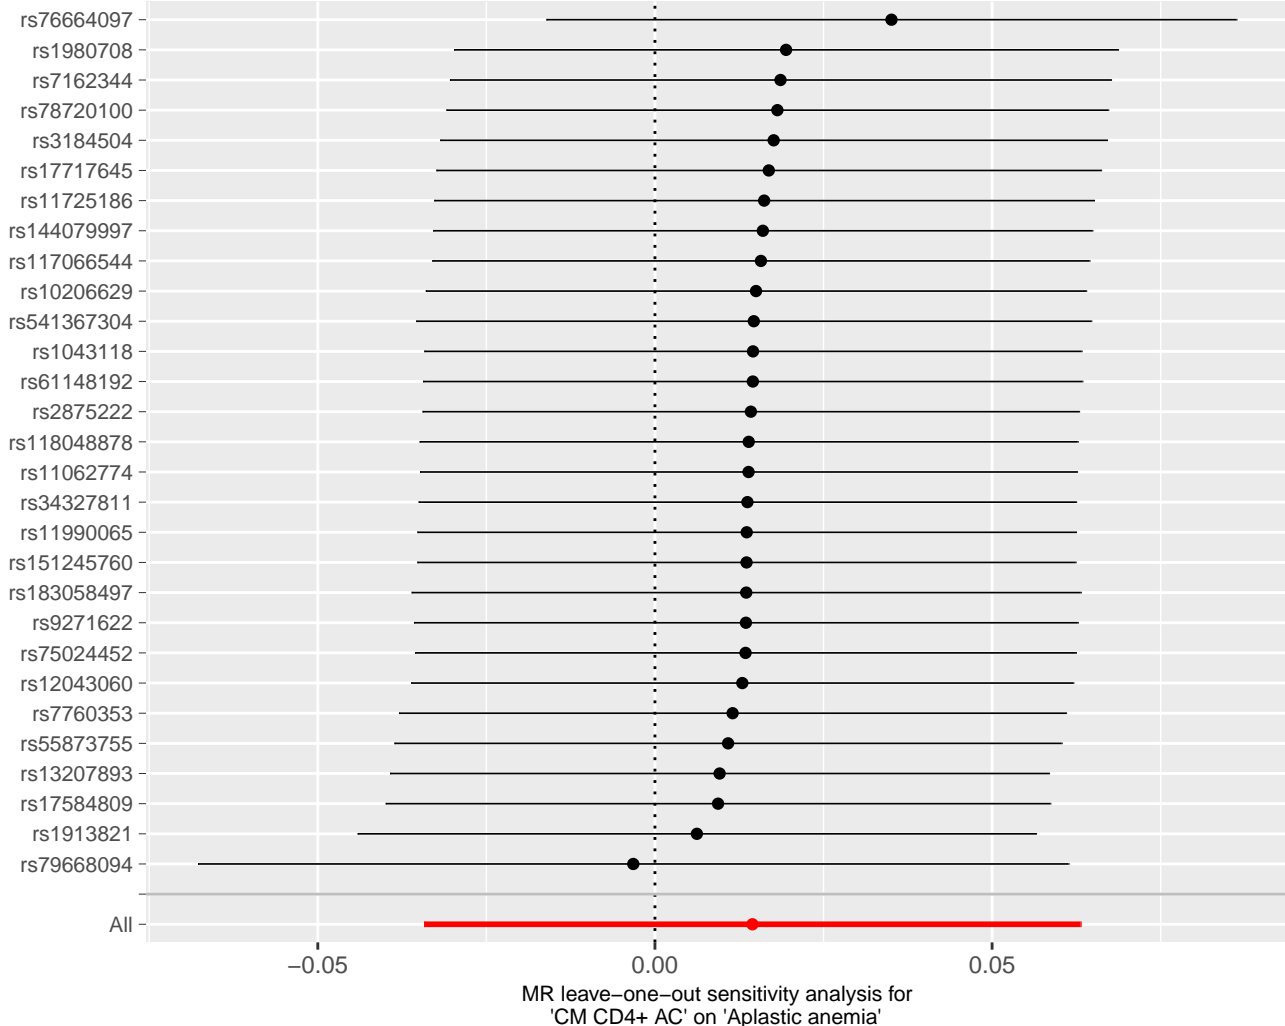

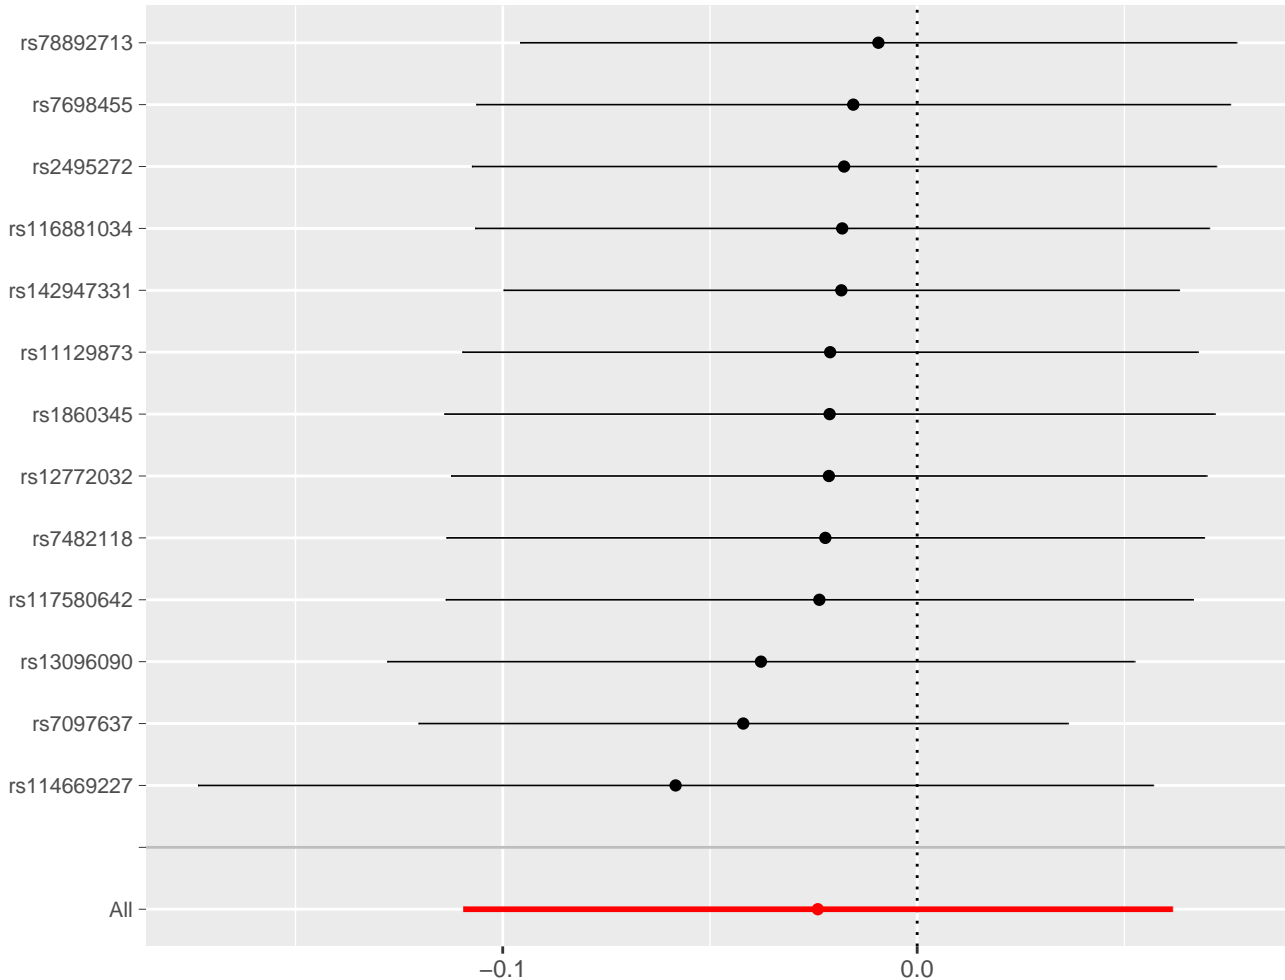

MR leave-one-out sensitivity analysis for 'CD45 on HLA DR+ NK' on 'Aplastic anemia'



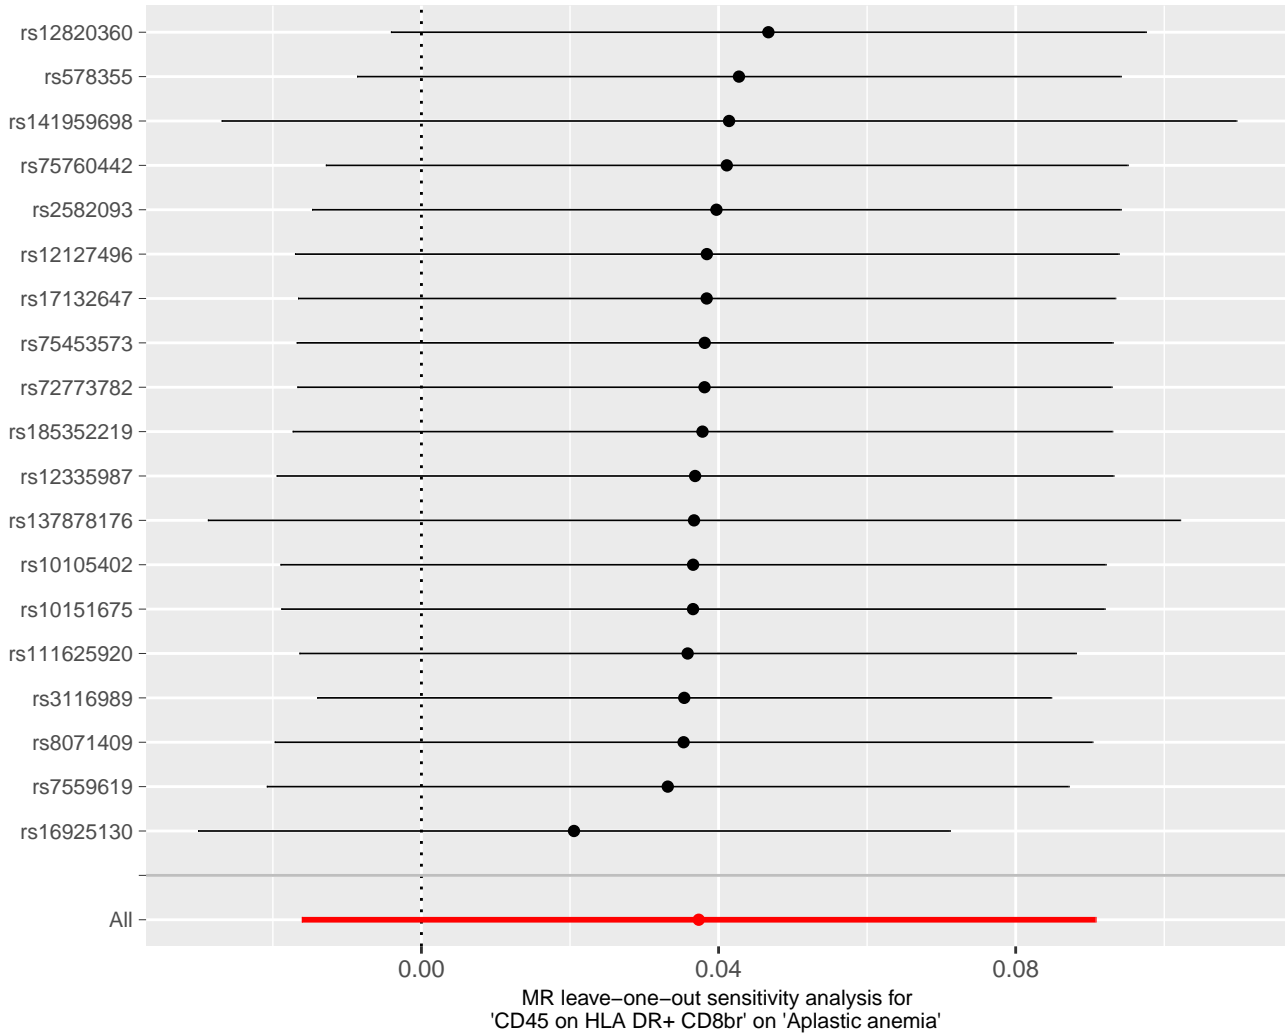

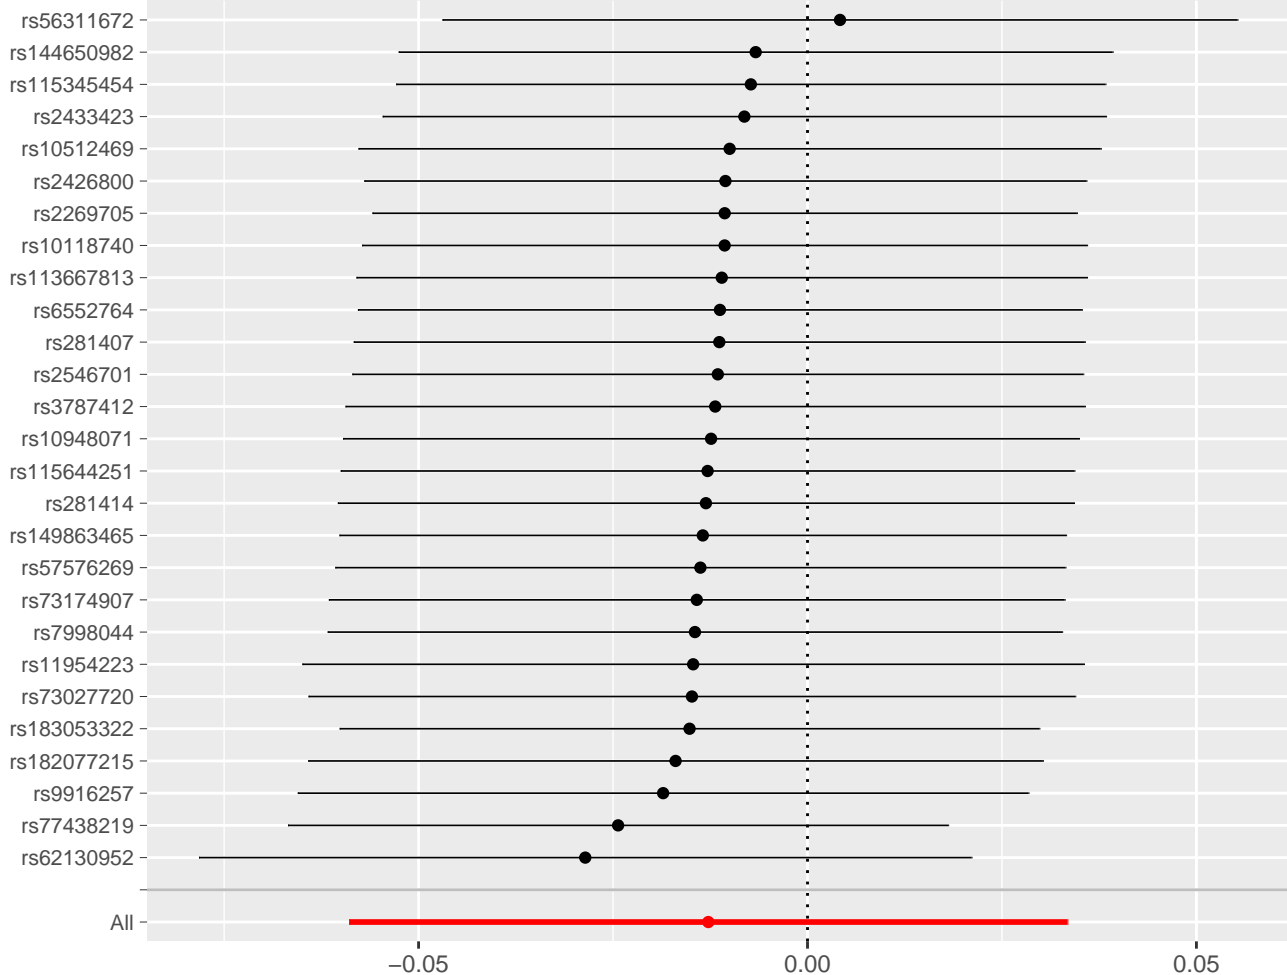

MR leave-one-out sensitivity analysis for 'NK %lymphocyte' on 'Aplastic anemia'

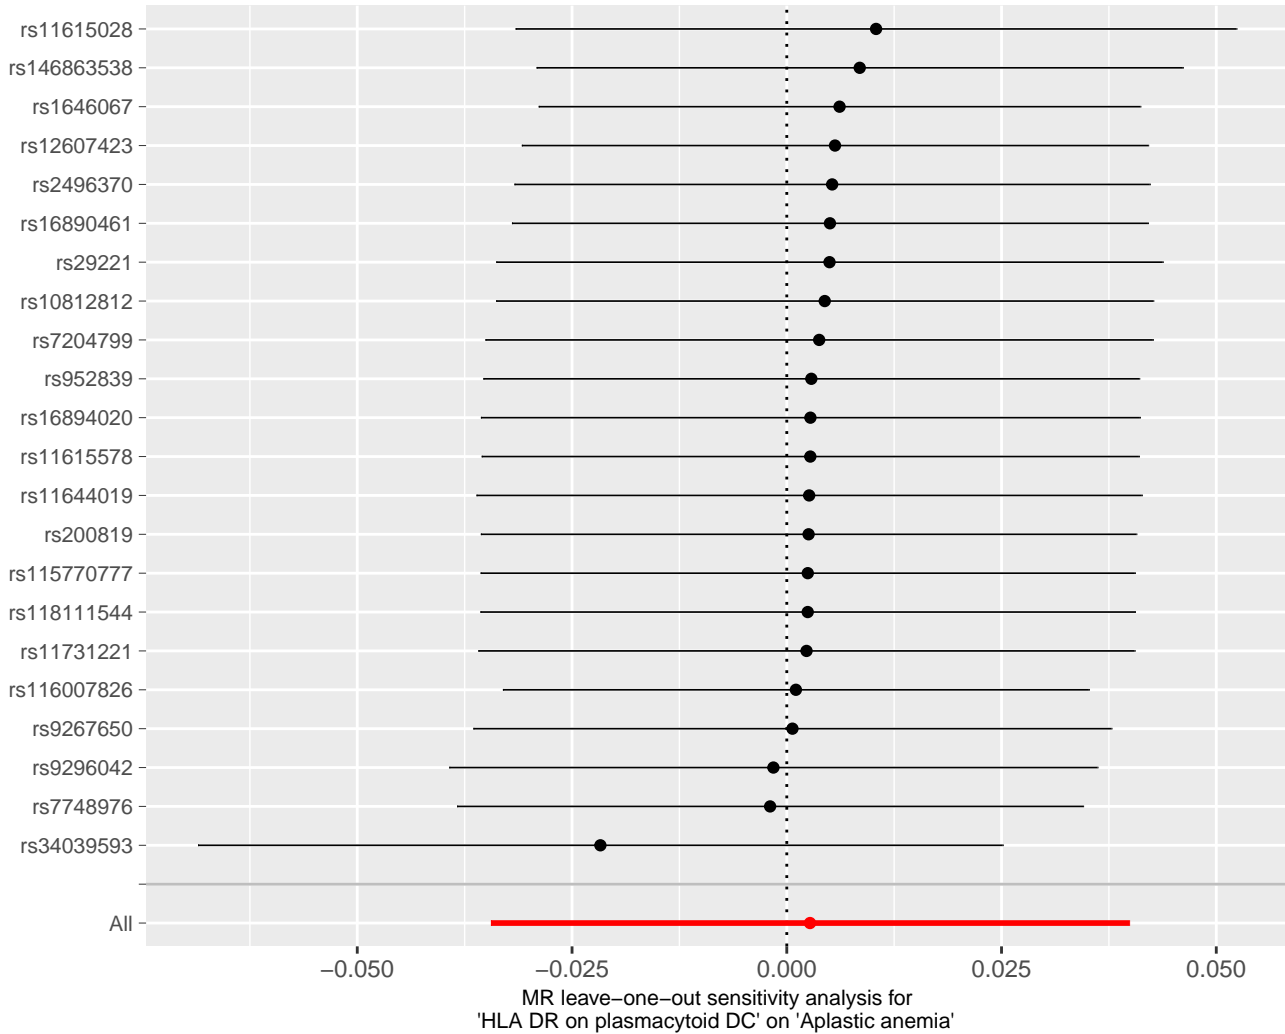

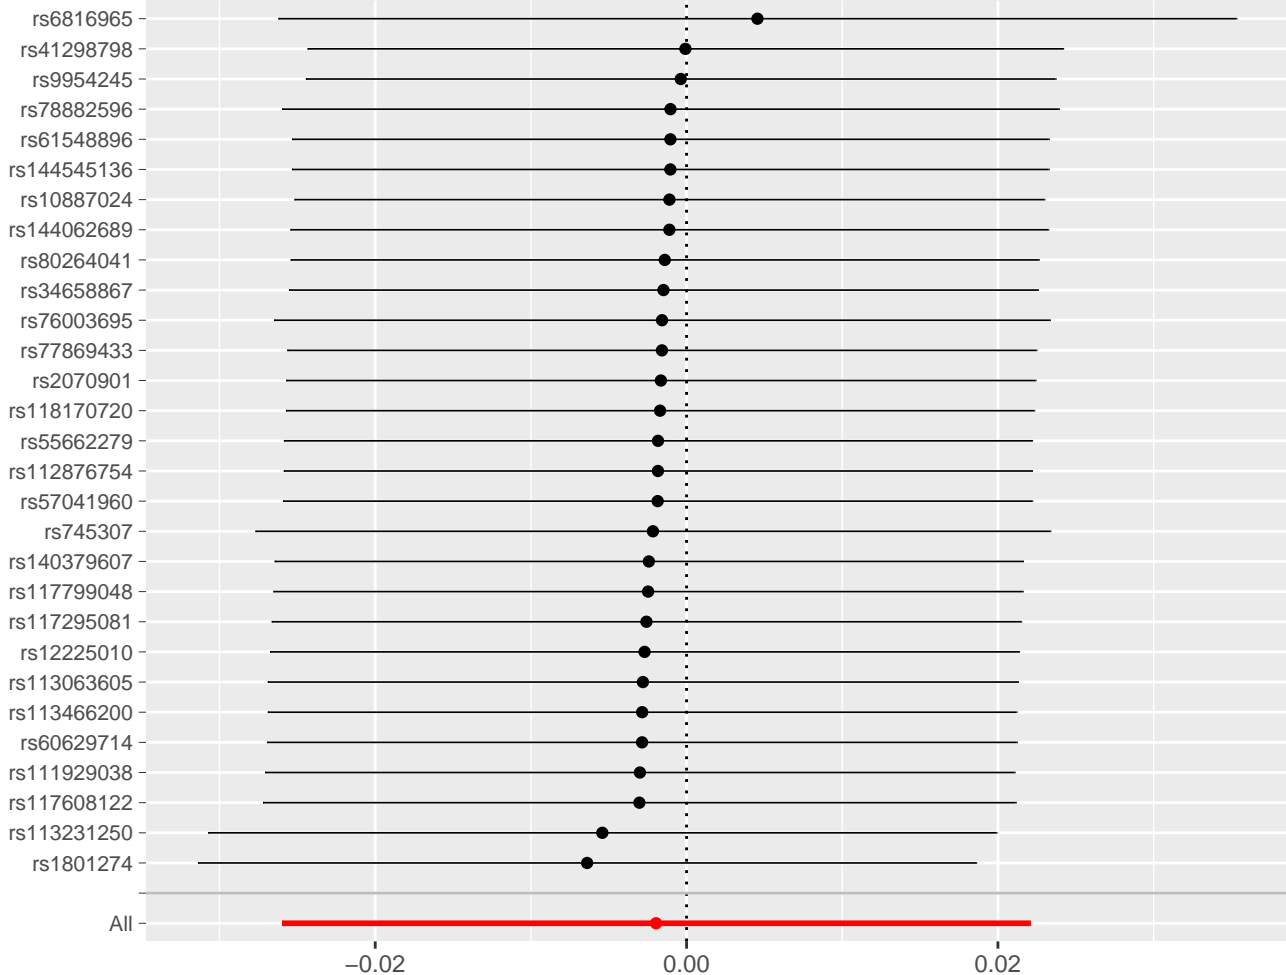

MR leave-one-out sensitivity analysis for 'CD40 on monocytes' on 'Aplastic anemia'

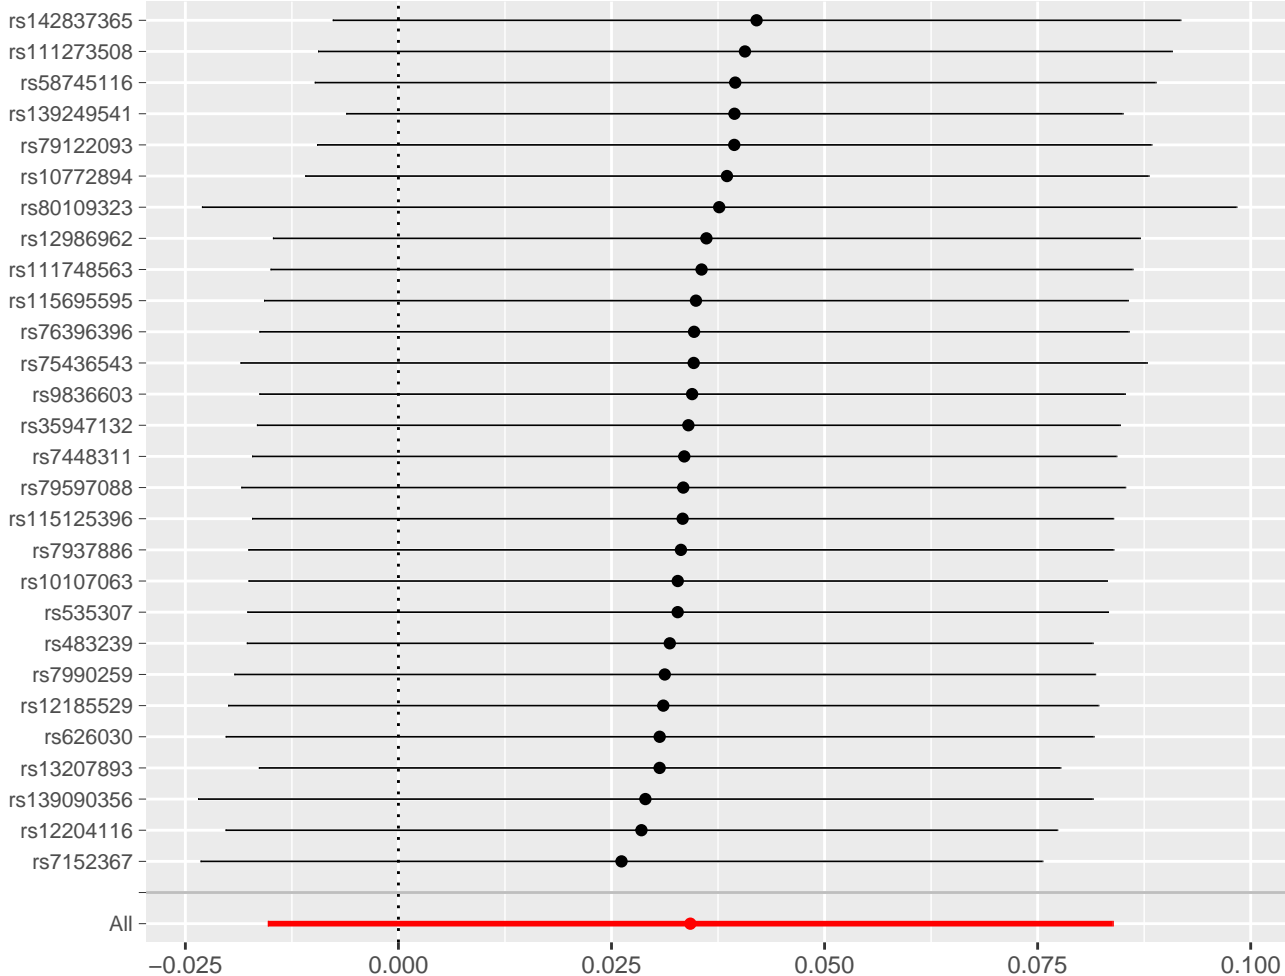

MR leave-one-out sensitivity analysis for 'CD28- CD8dim AC' on 'Aplastic anemia'

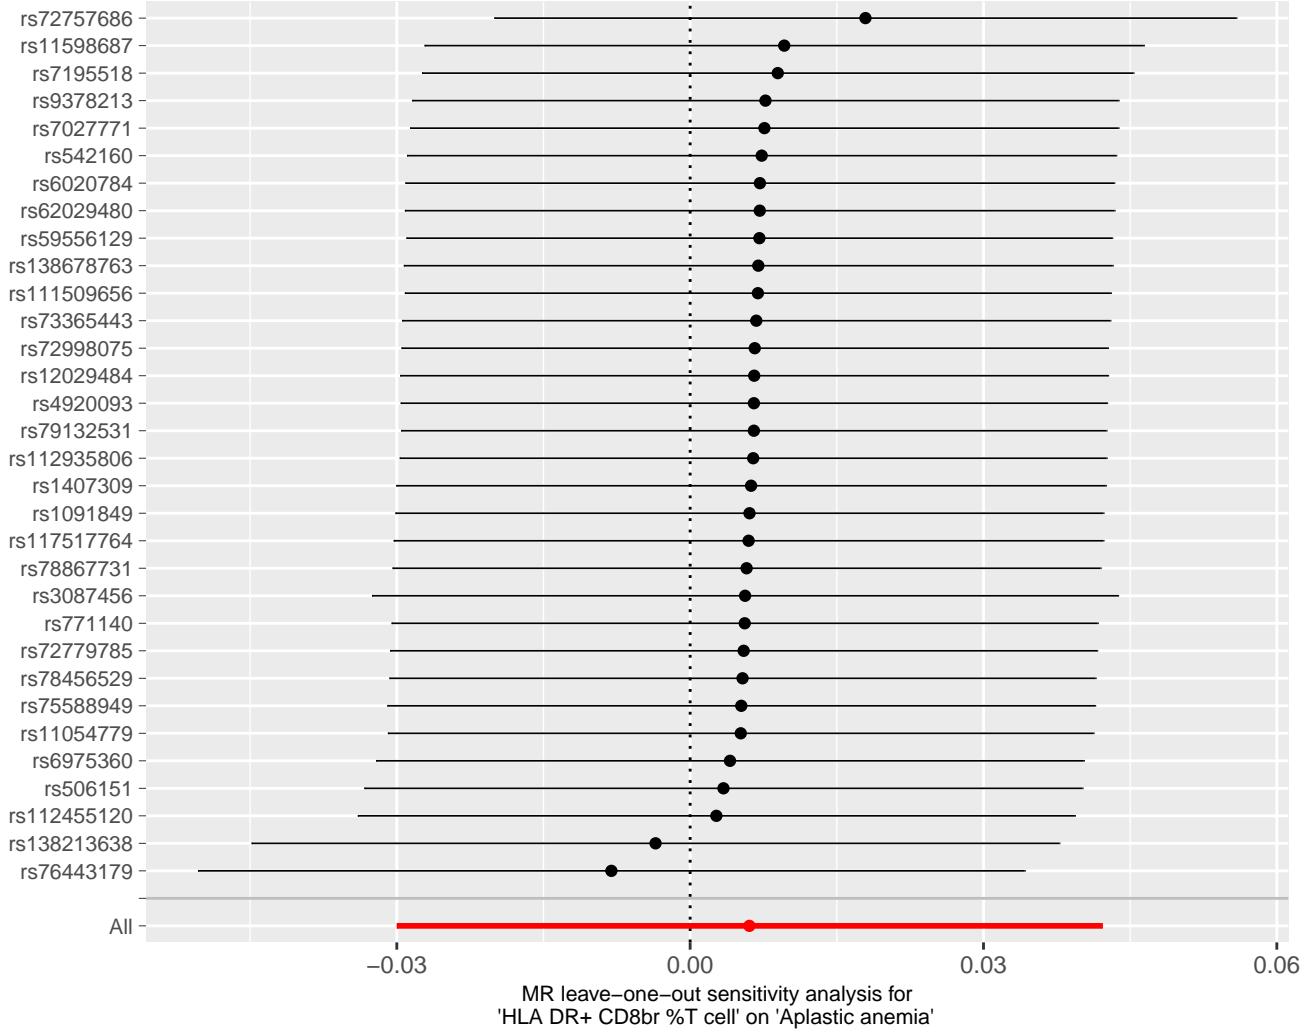

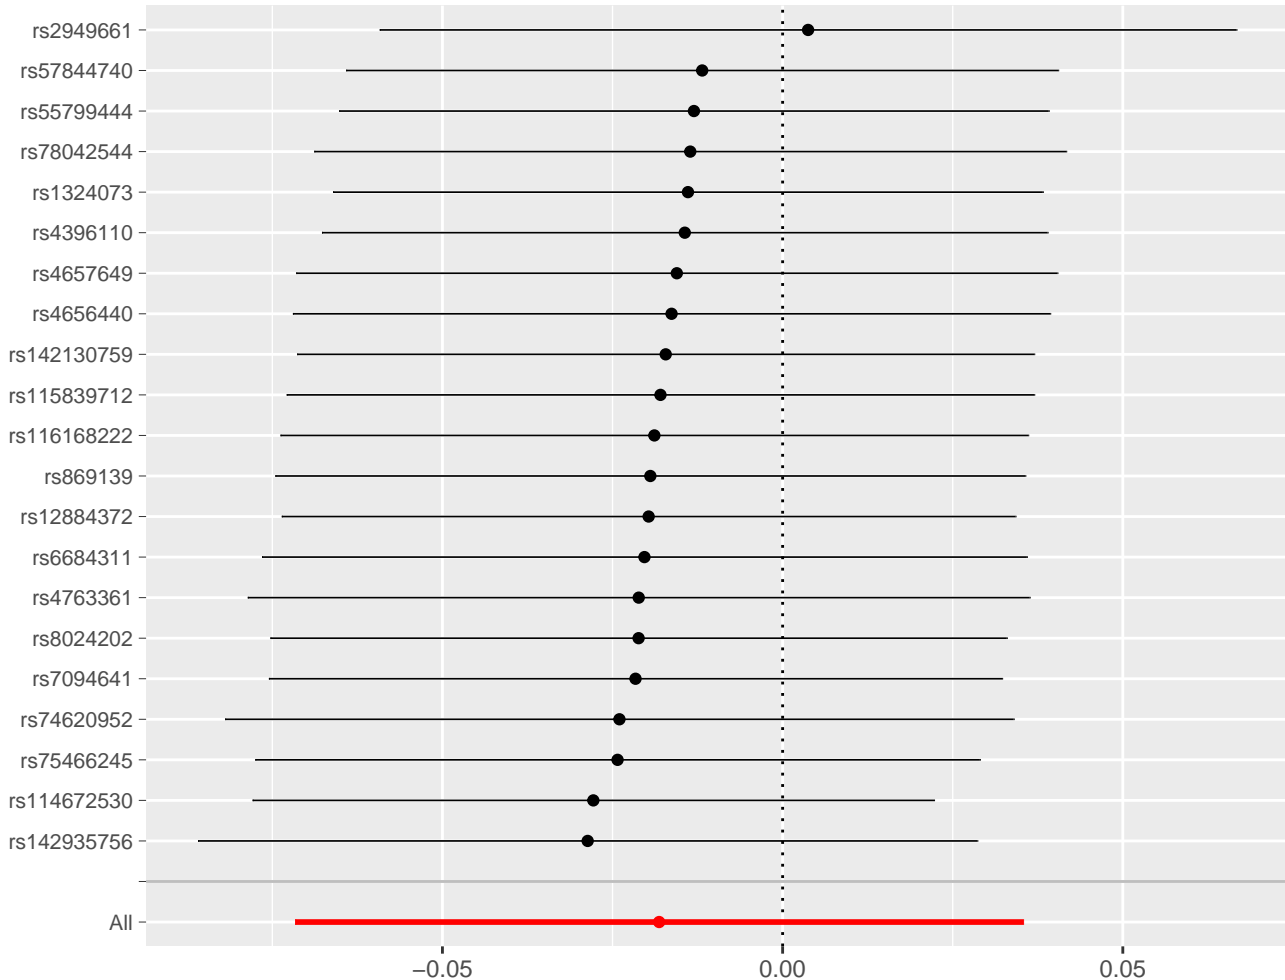

-0.05

0.00

0.05

MR leave-one-out sensitivity analysis for 'CD3 on secreting Treg ' on 'Aplastic anemia'

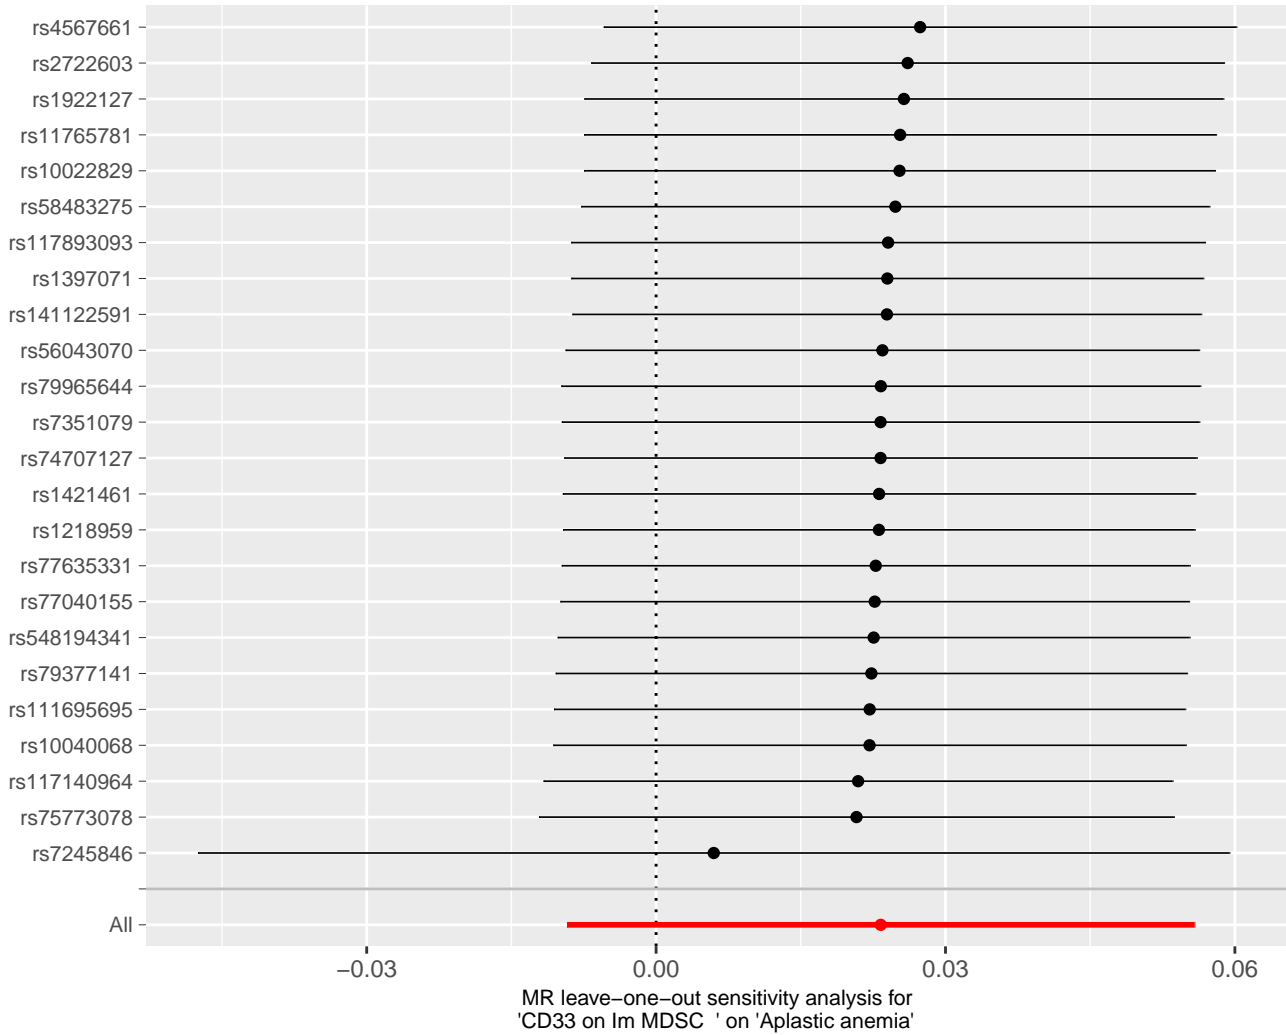



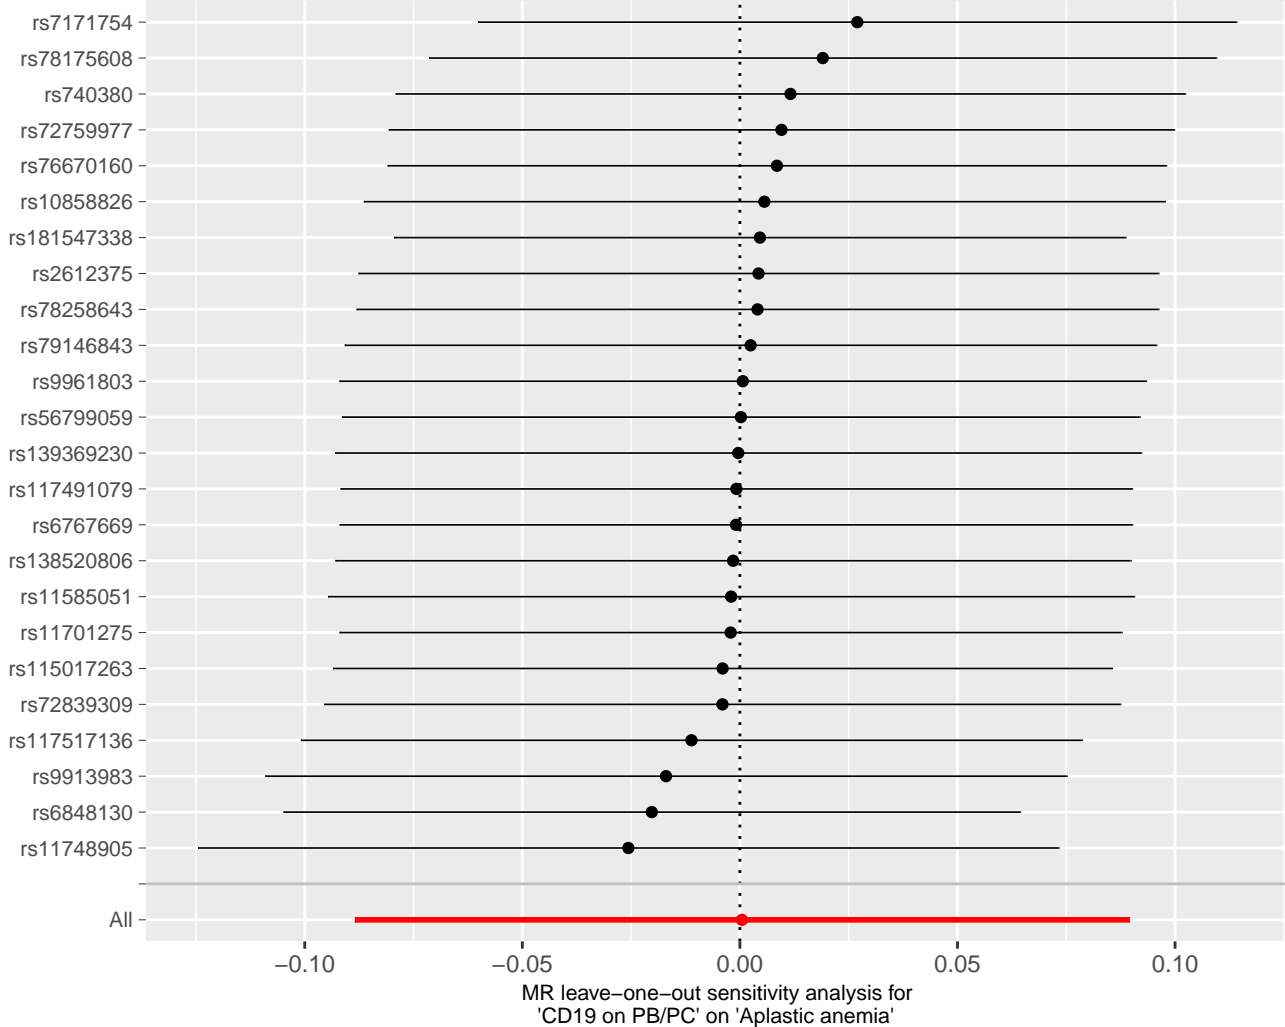

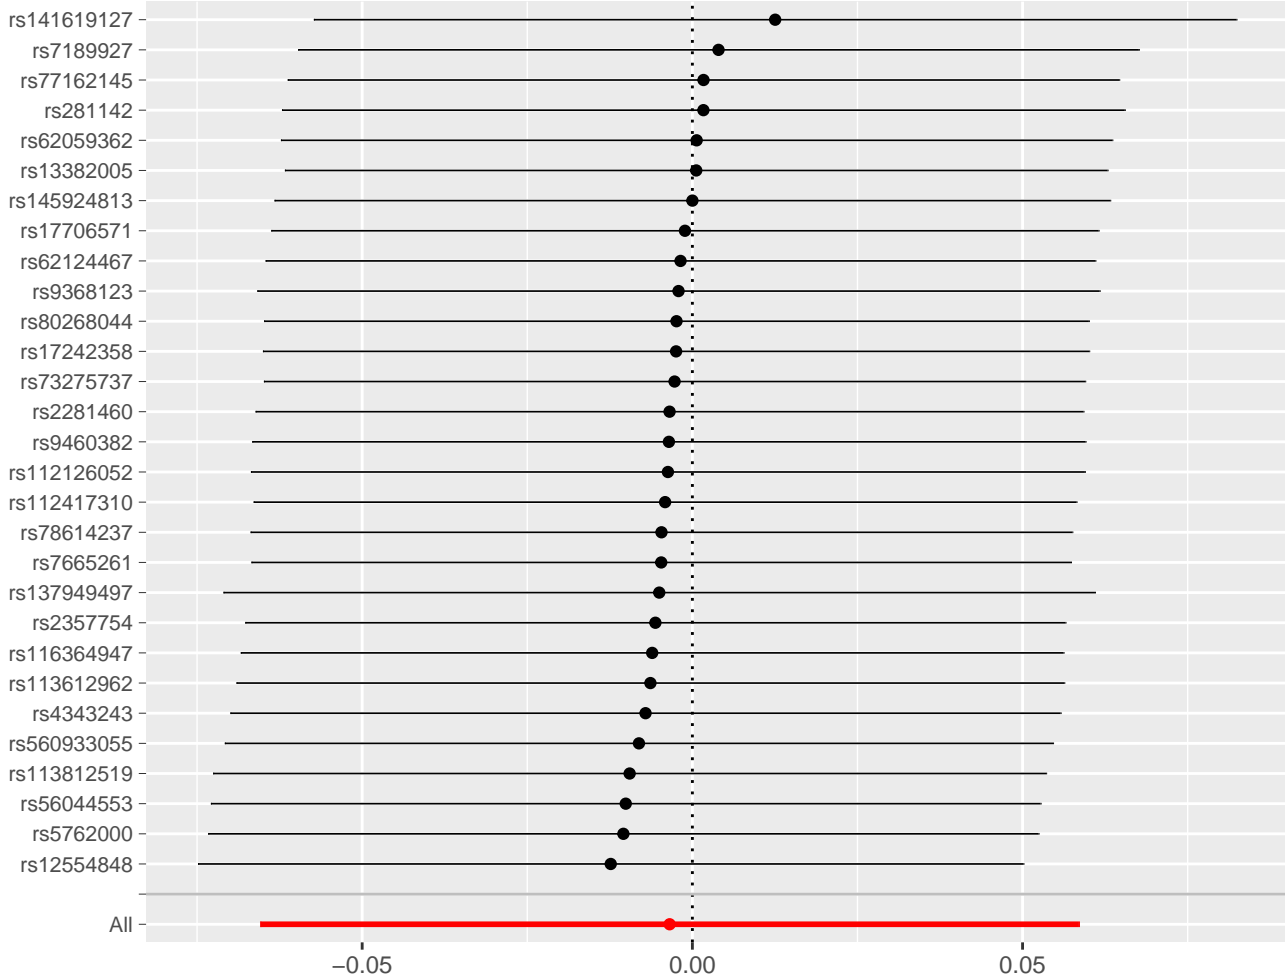

MR leave-one-out sensitivity analysis for 'CD19 on sw mem' on 'Aplastic anemia'

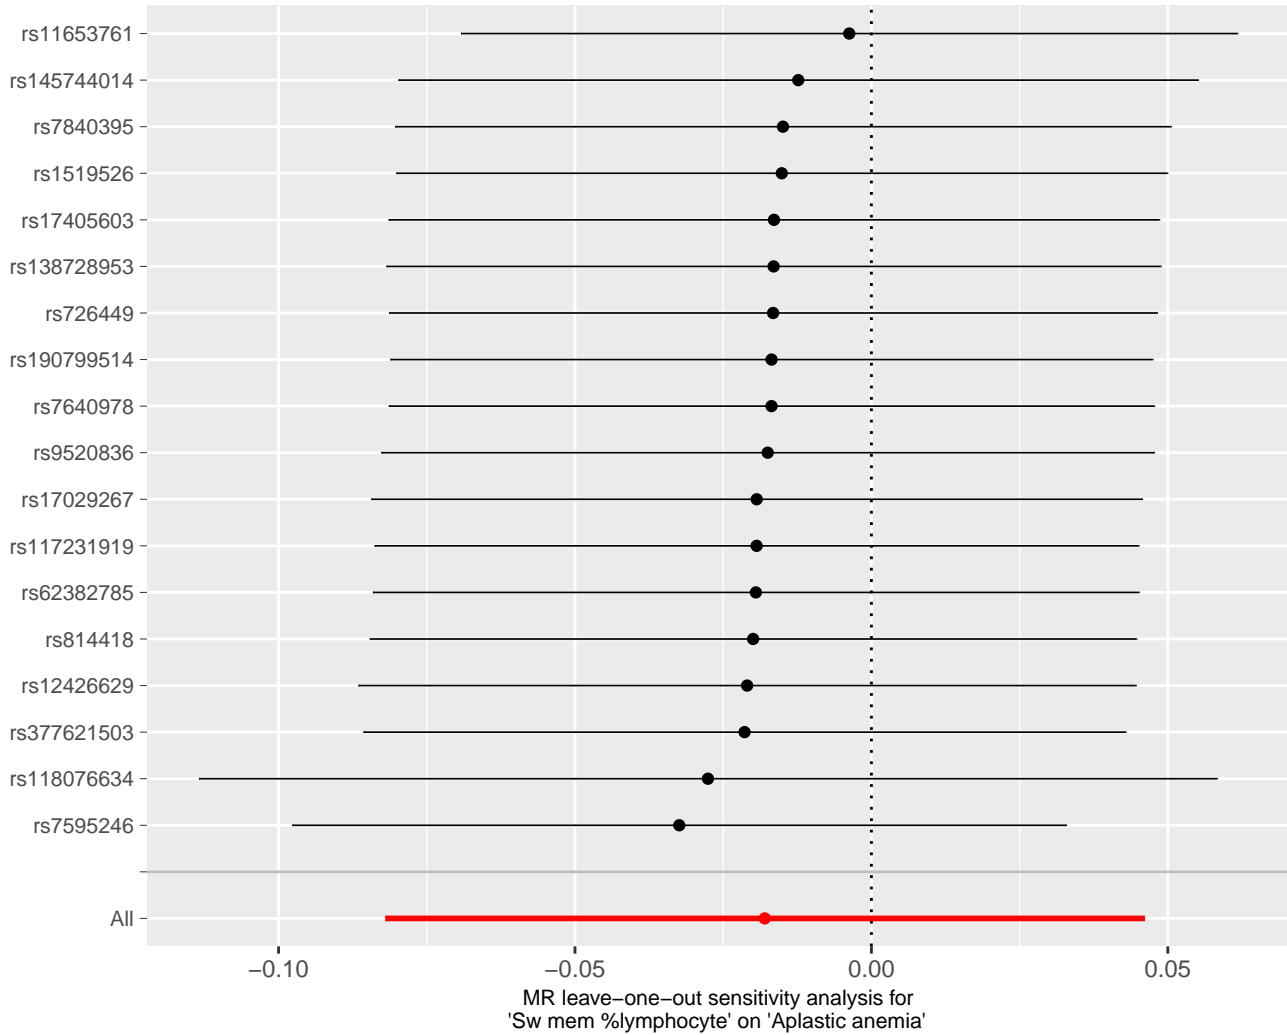

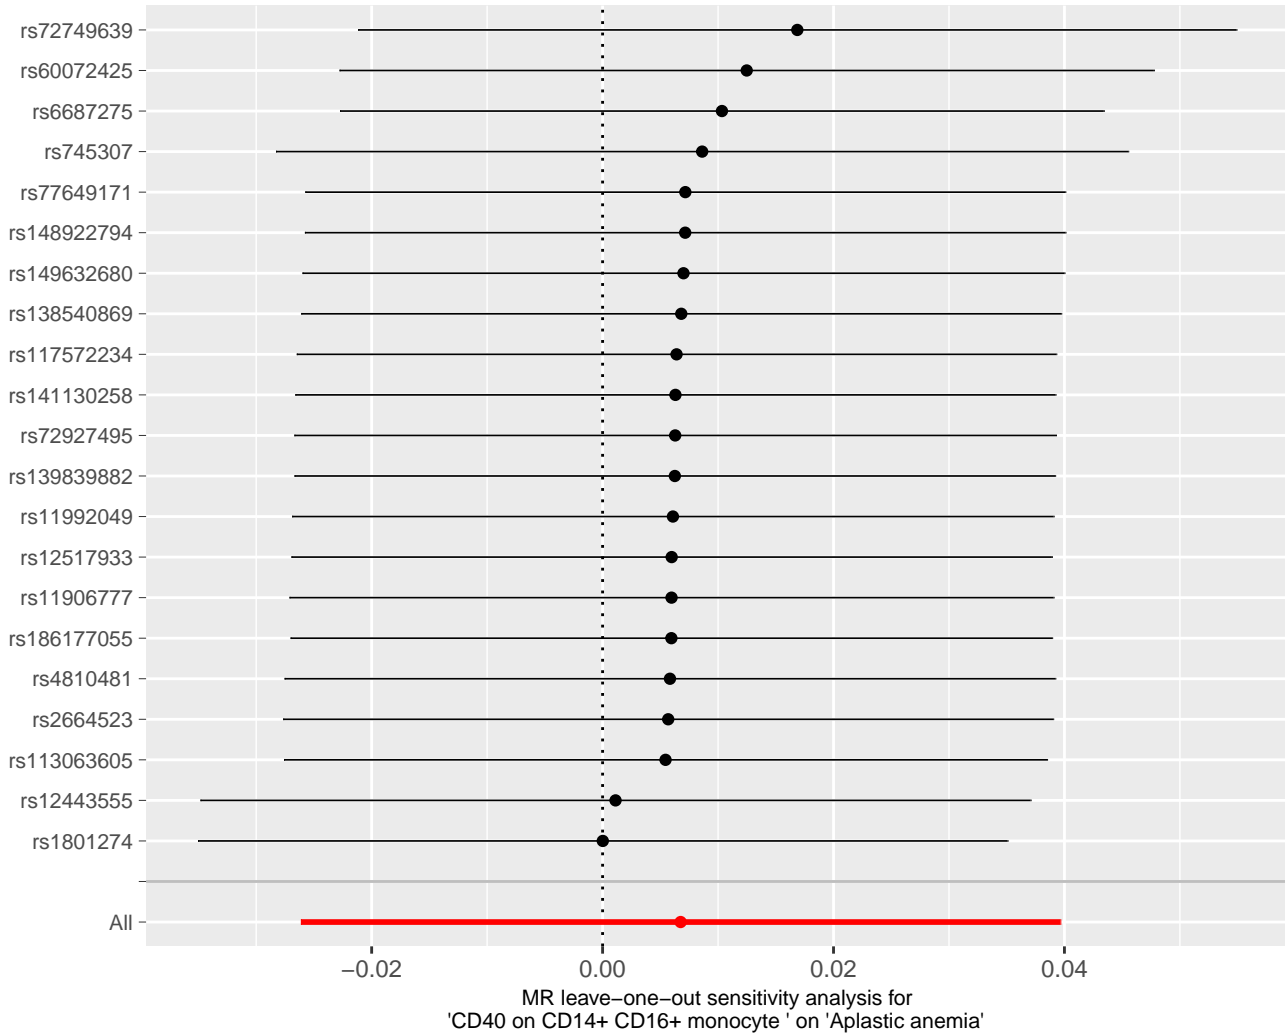

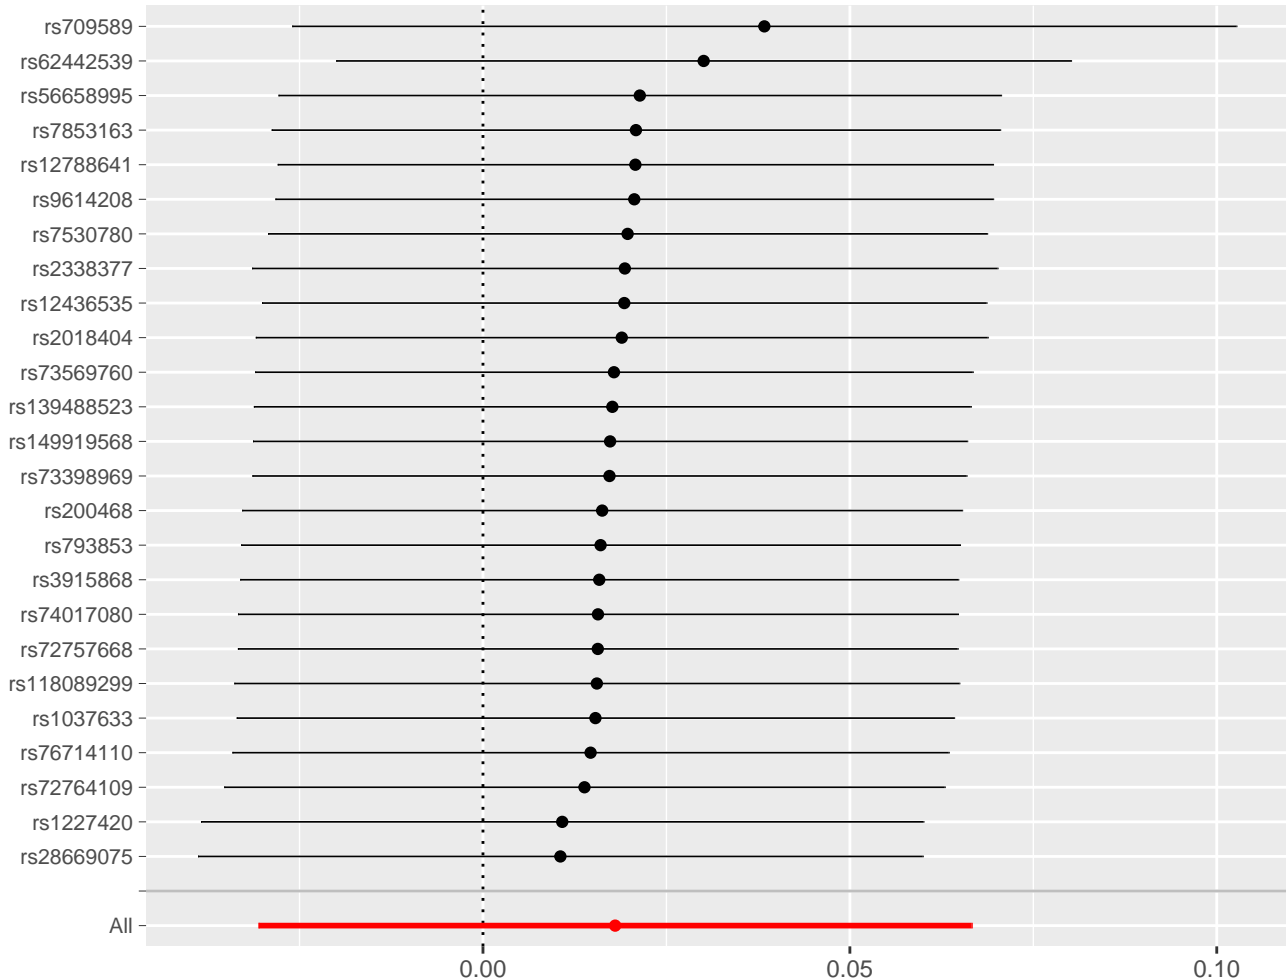

MR leave-one-out sensitivity analysis for 'IgD on IgD+ CD38br' on 'Aplastic anemia'

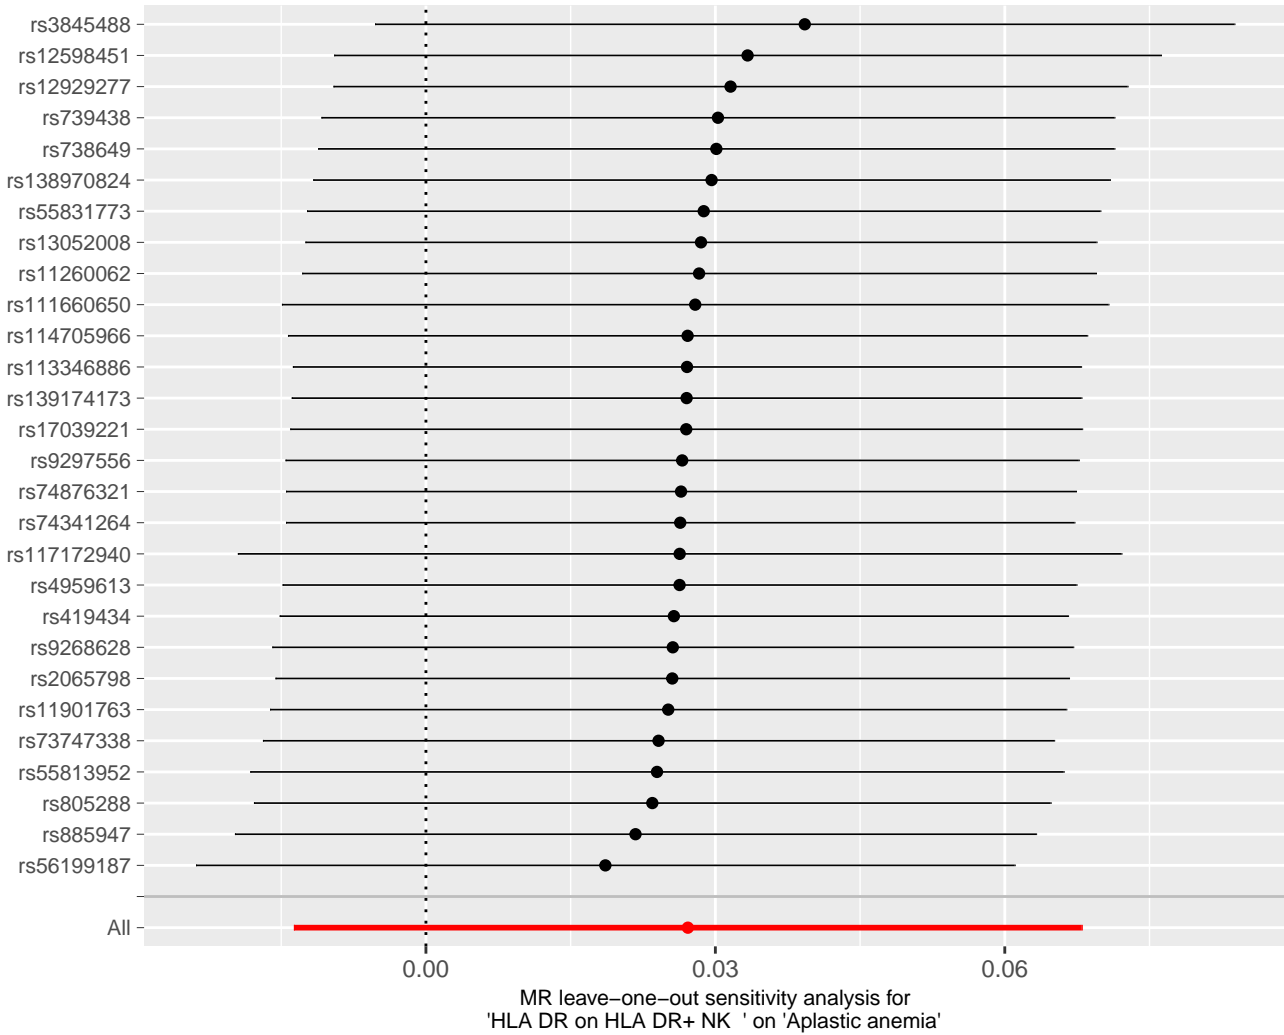

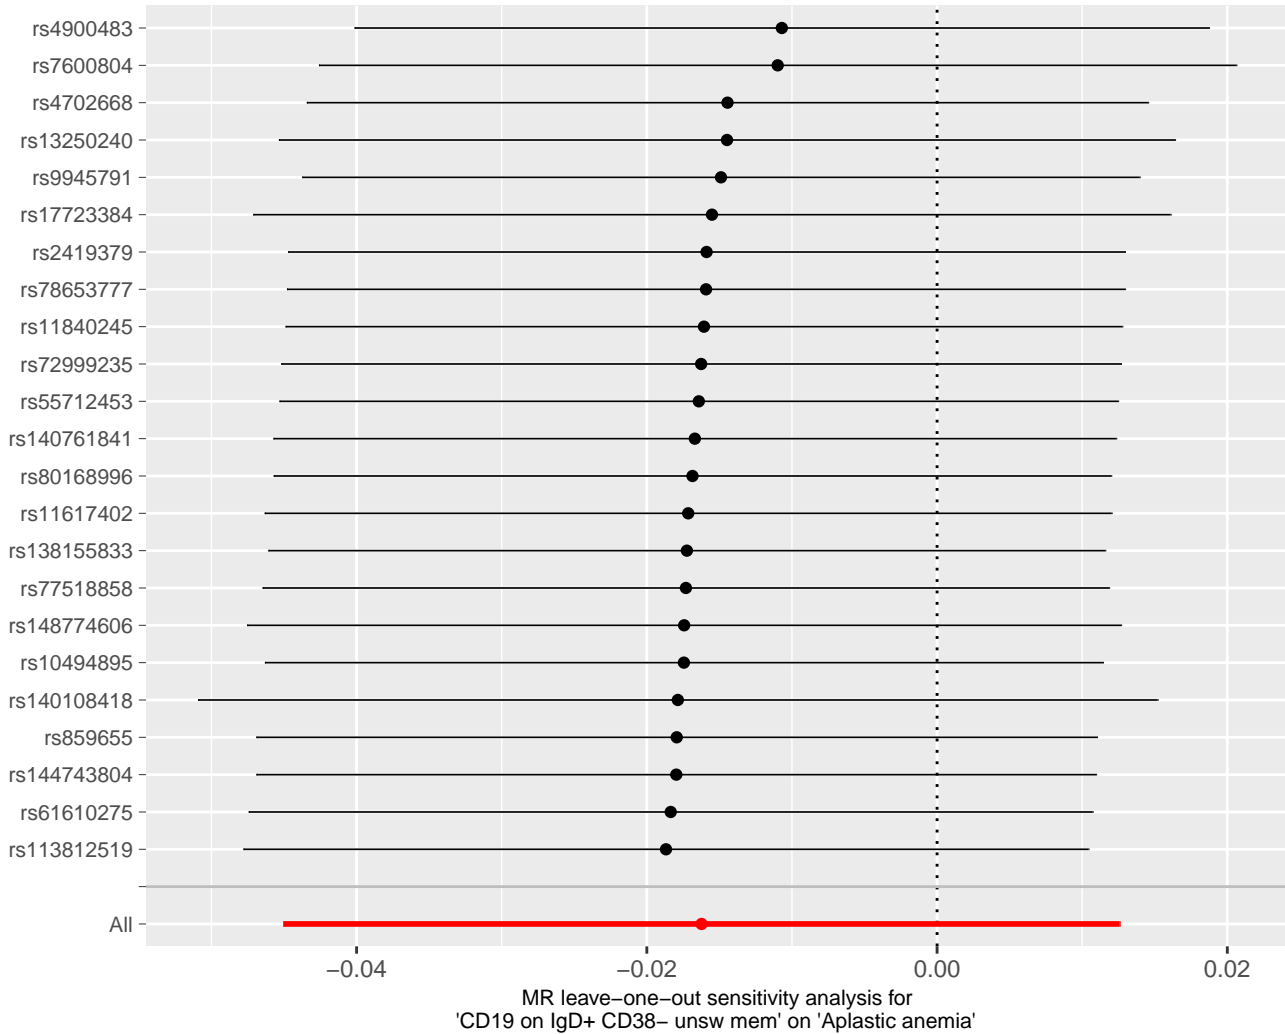

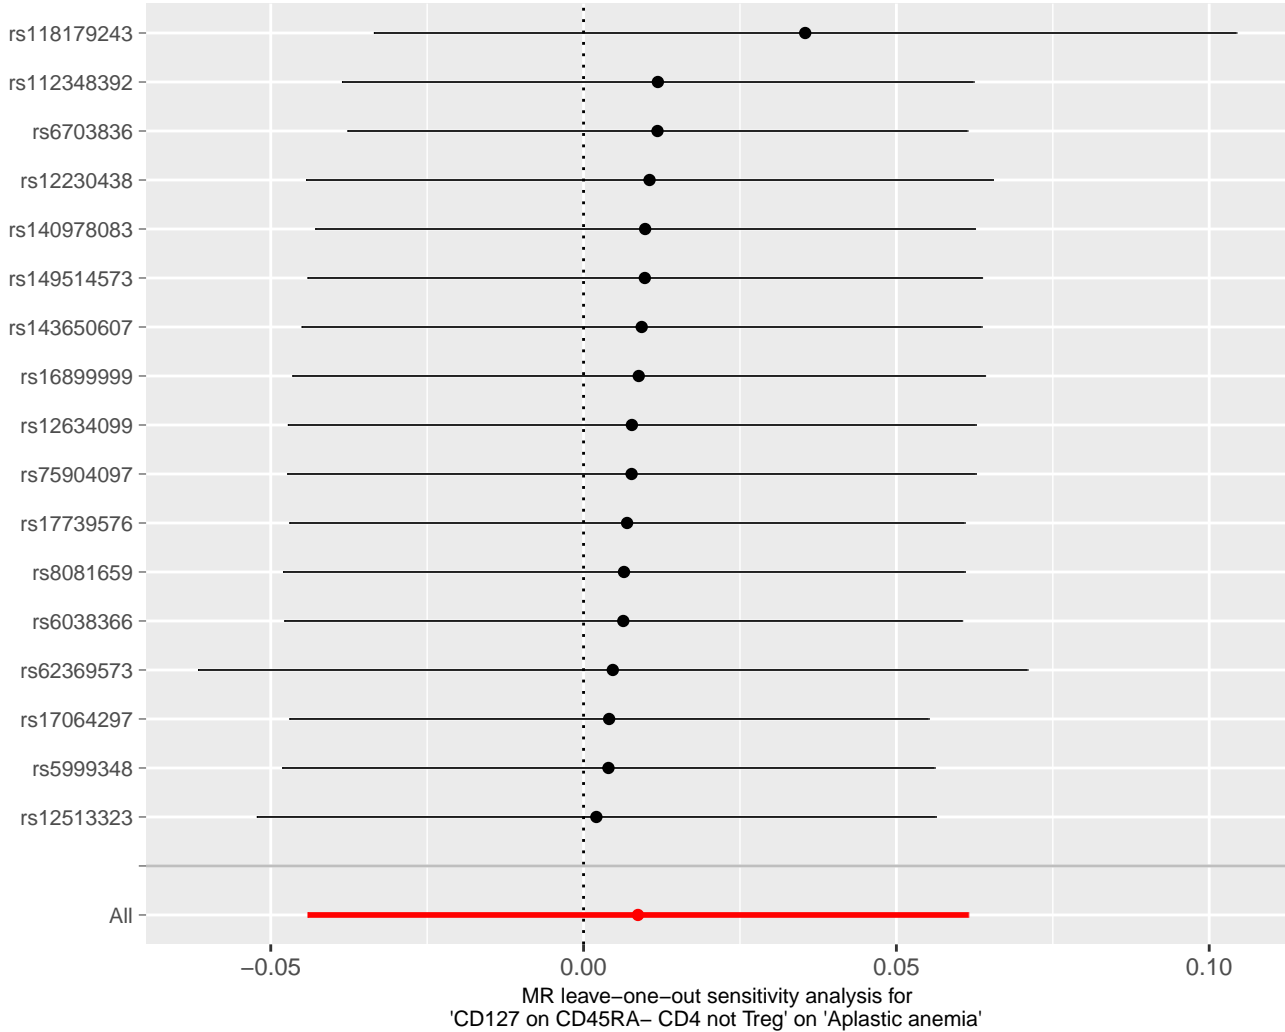



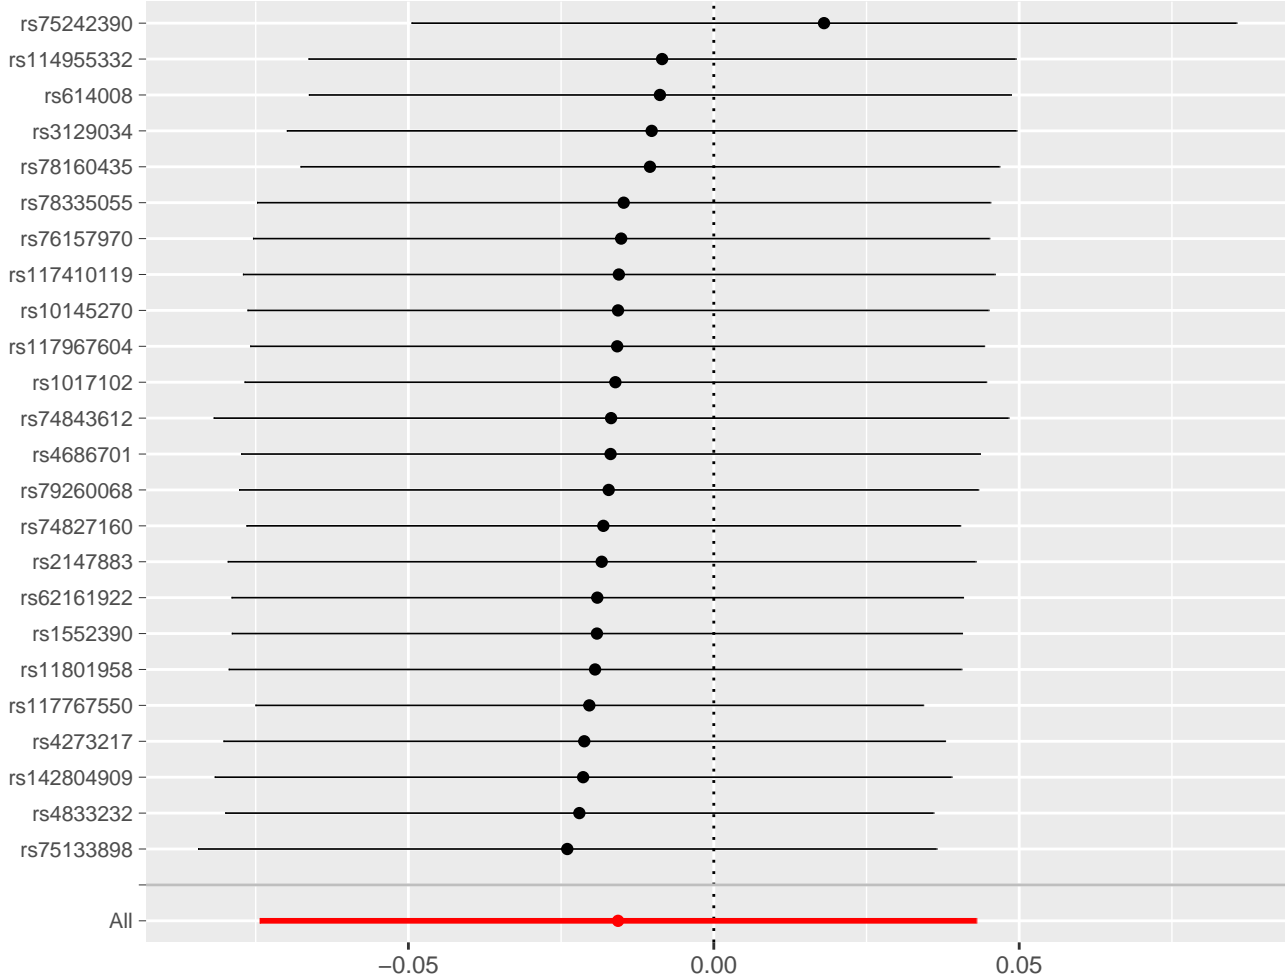

MR leave-one-out sensitivity analysis for 'SSC-A on HLA DR+ CD8br' on 'Aplastic anemia'

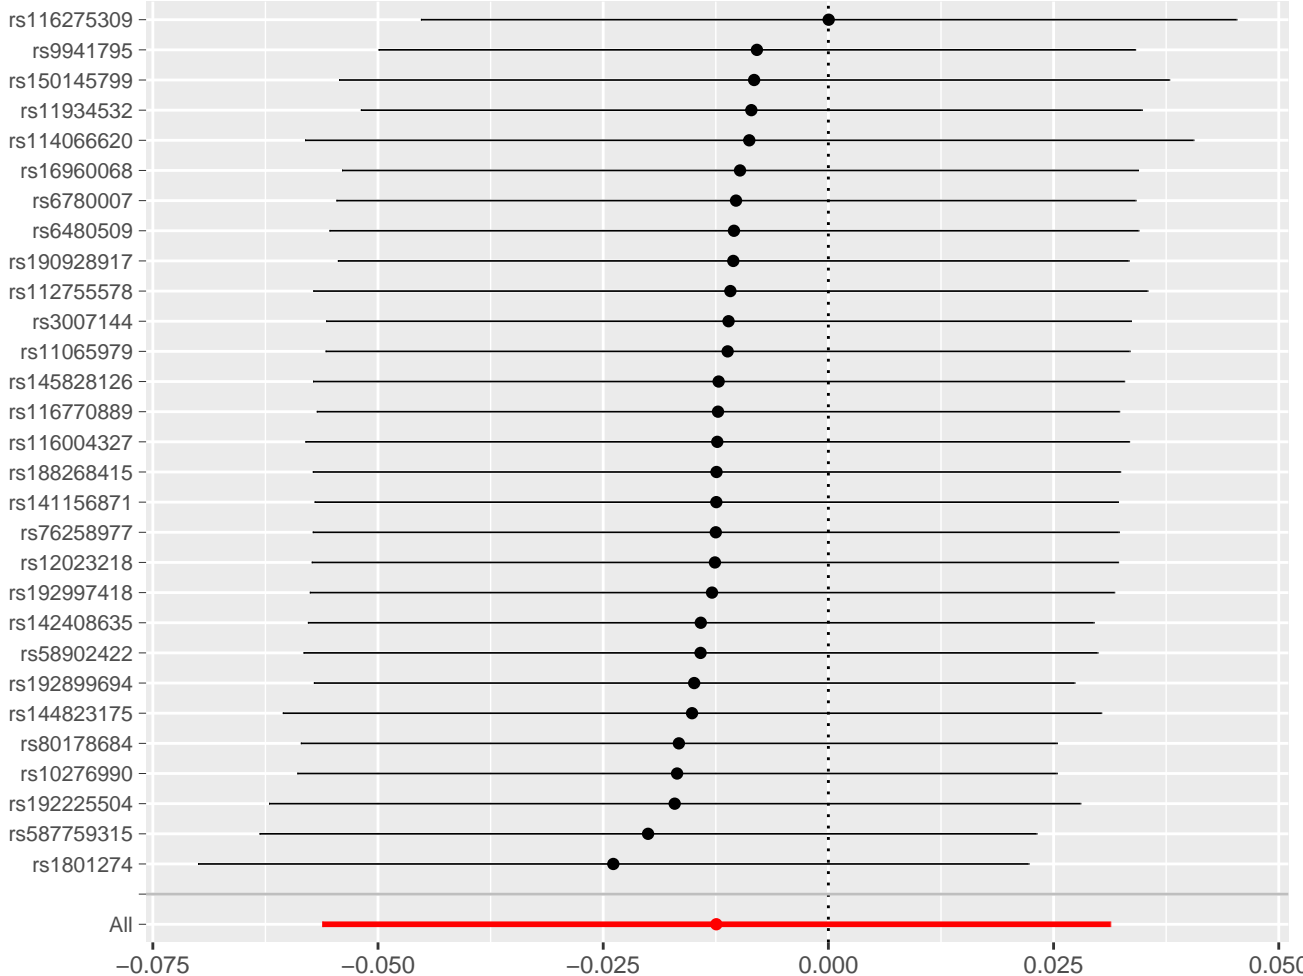

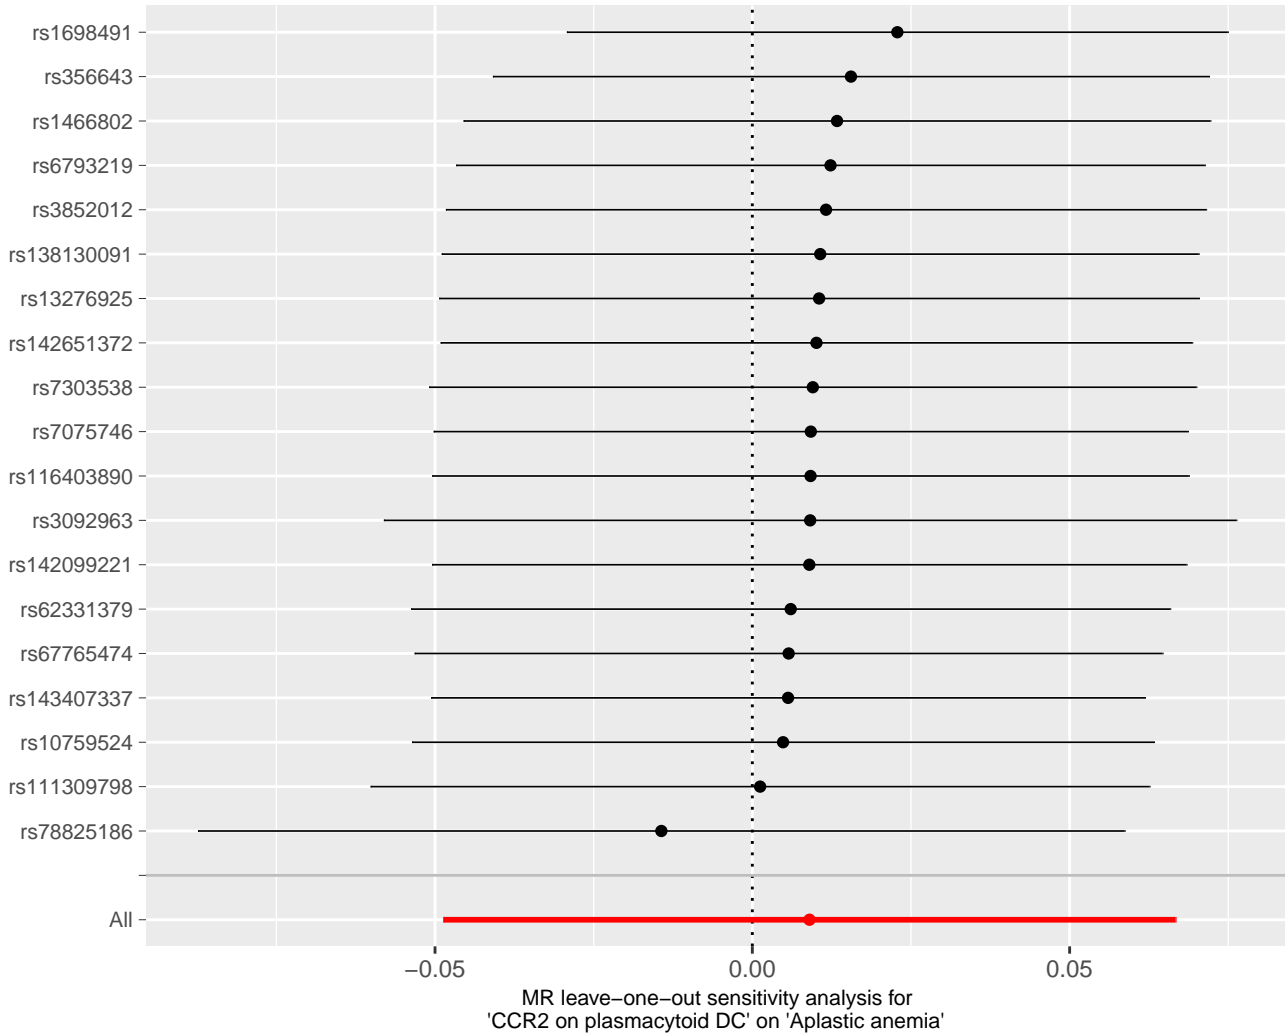

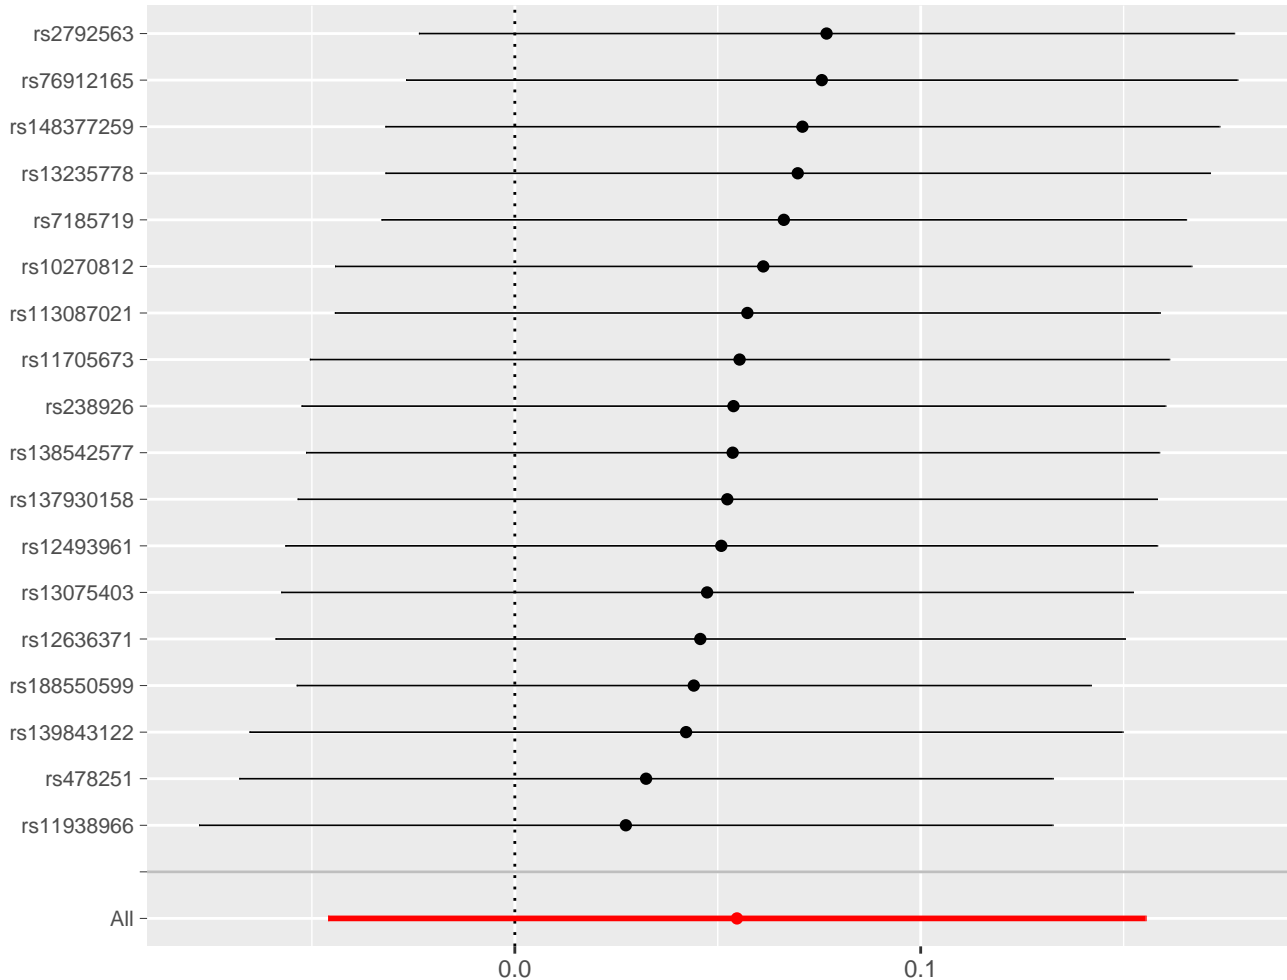

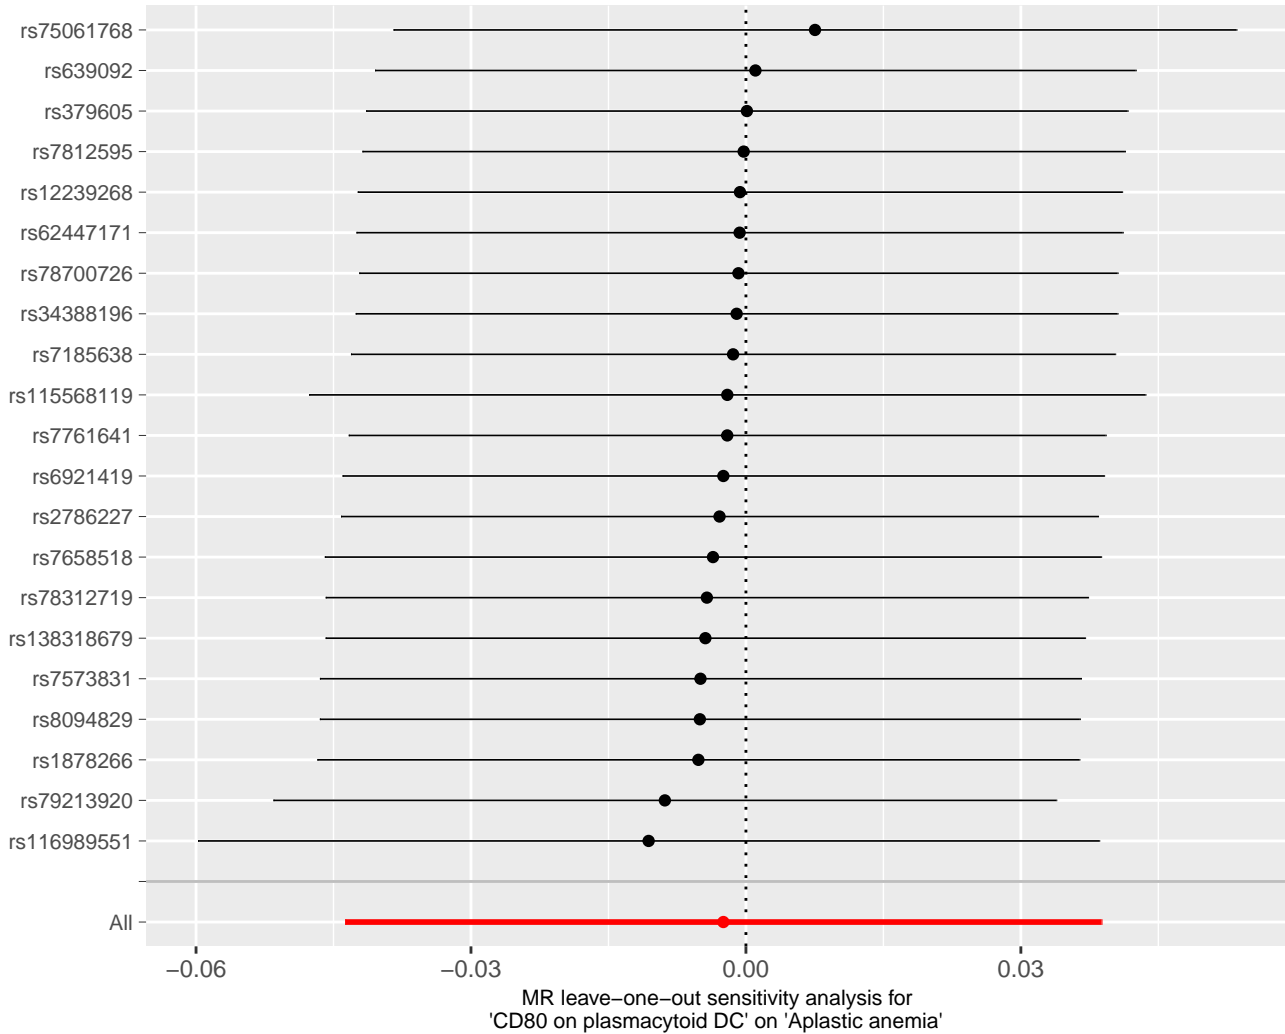

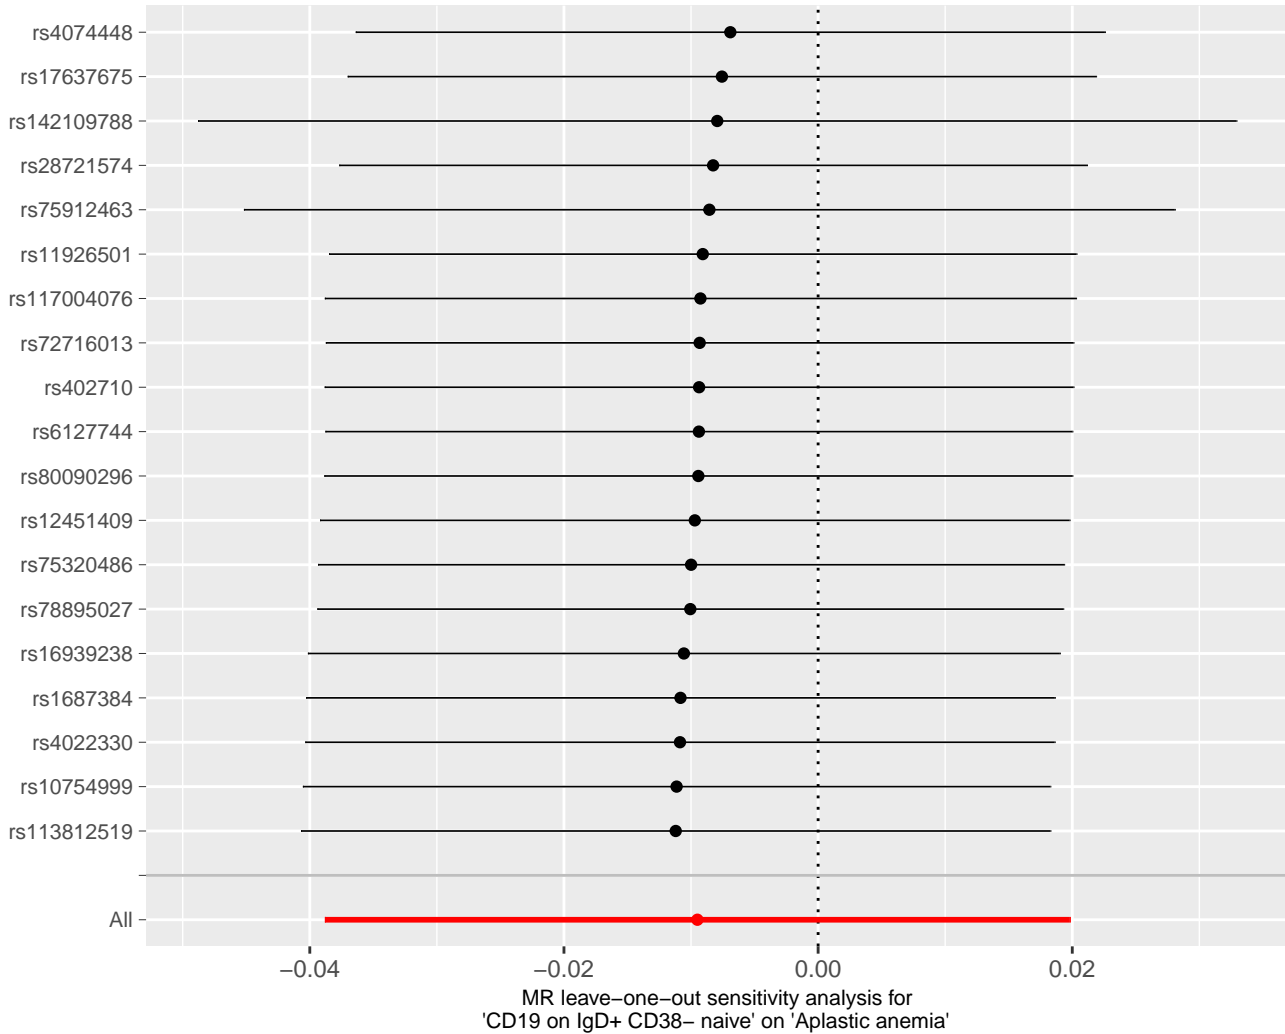

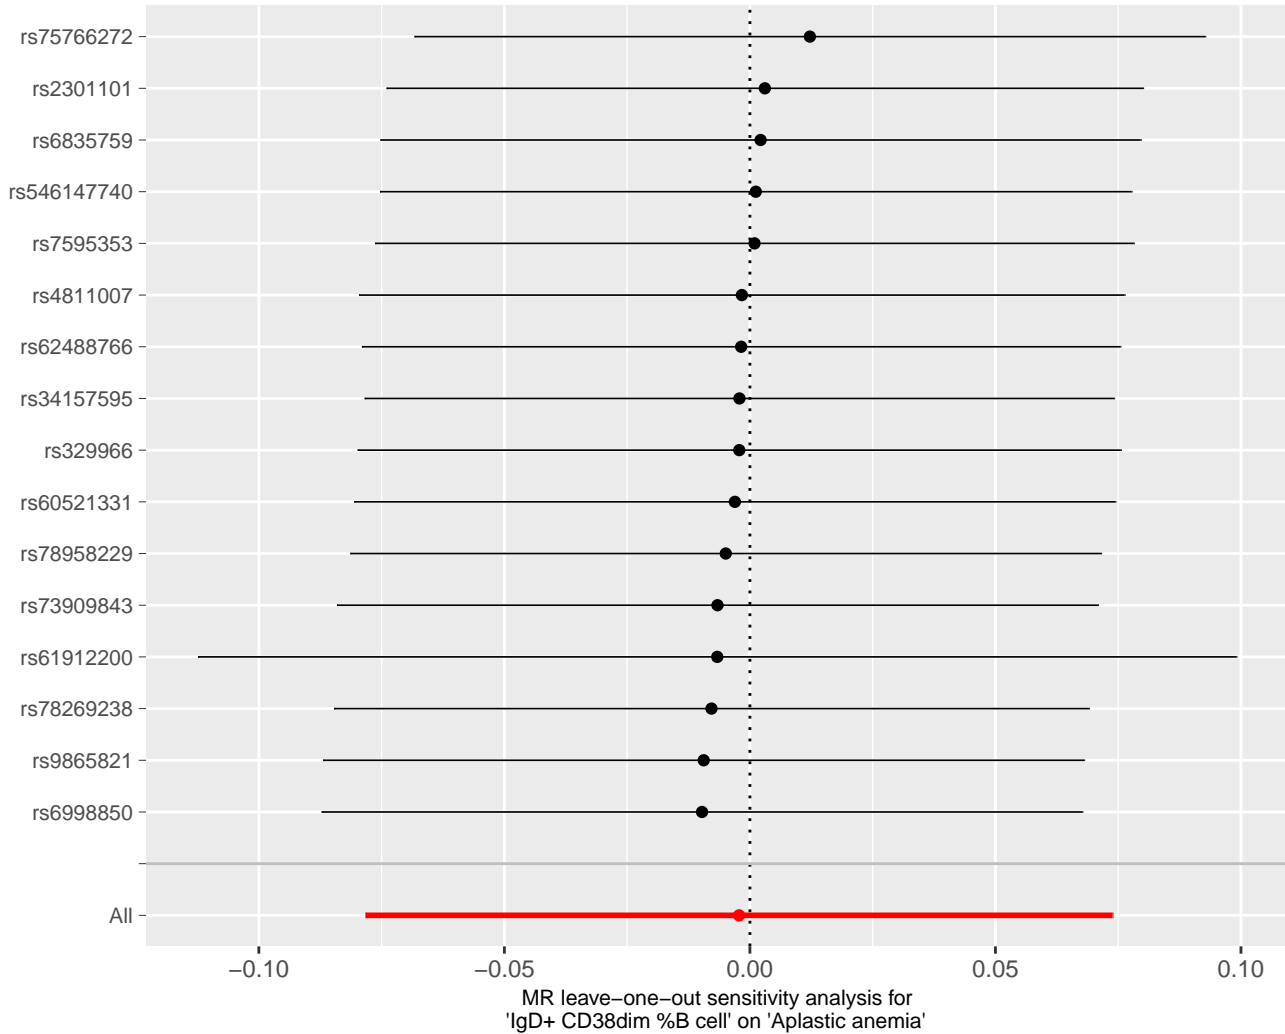

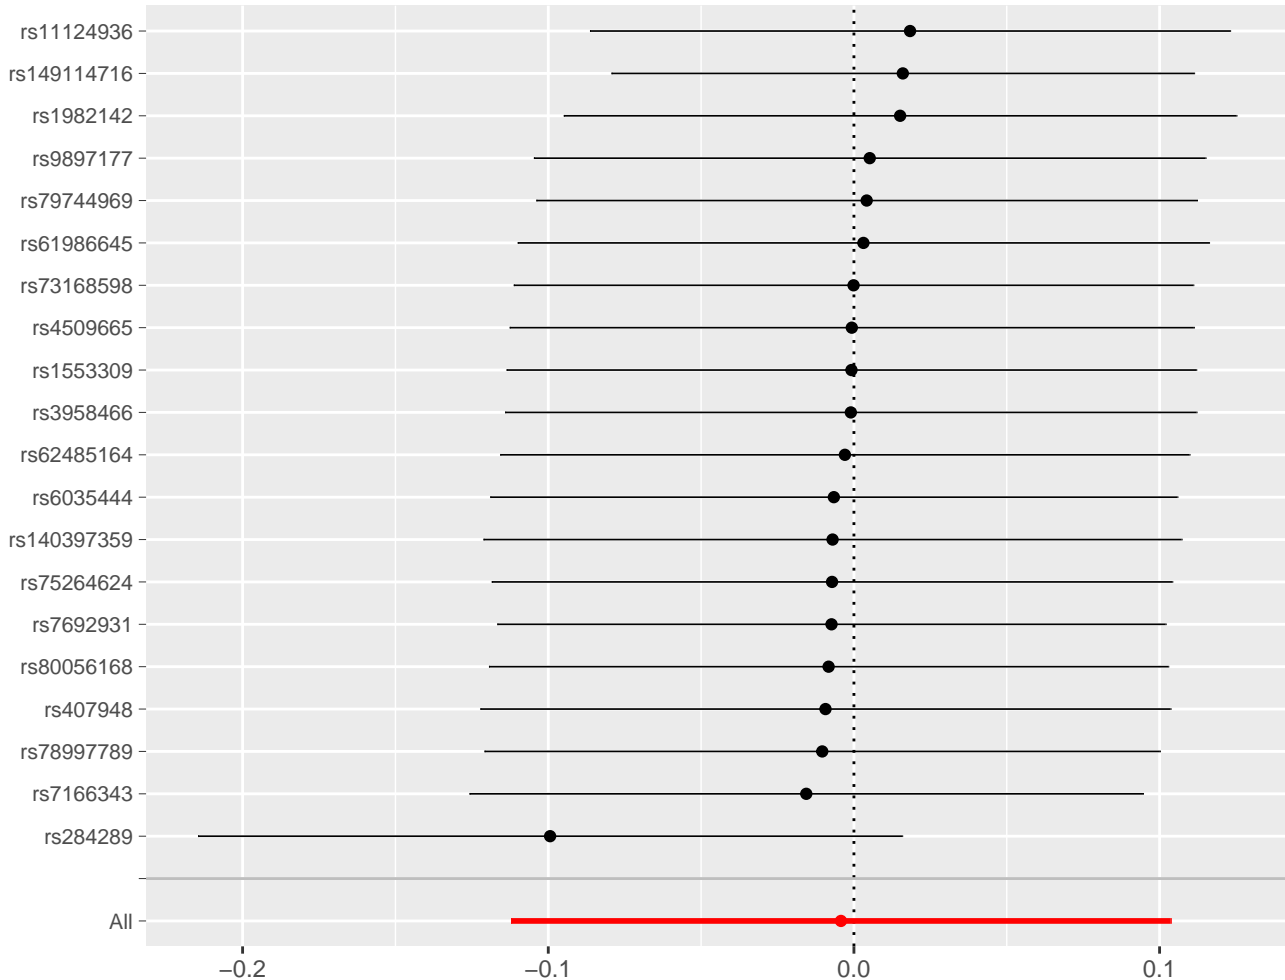



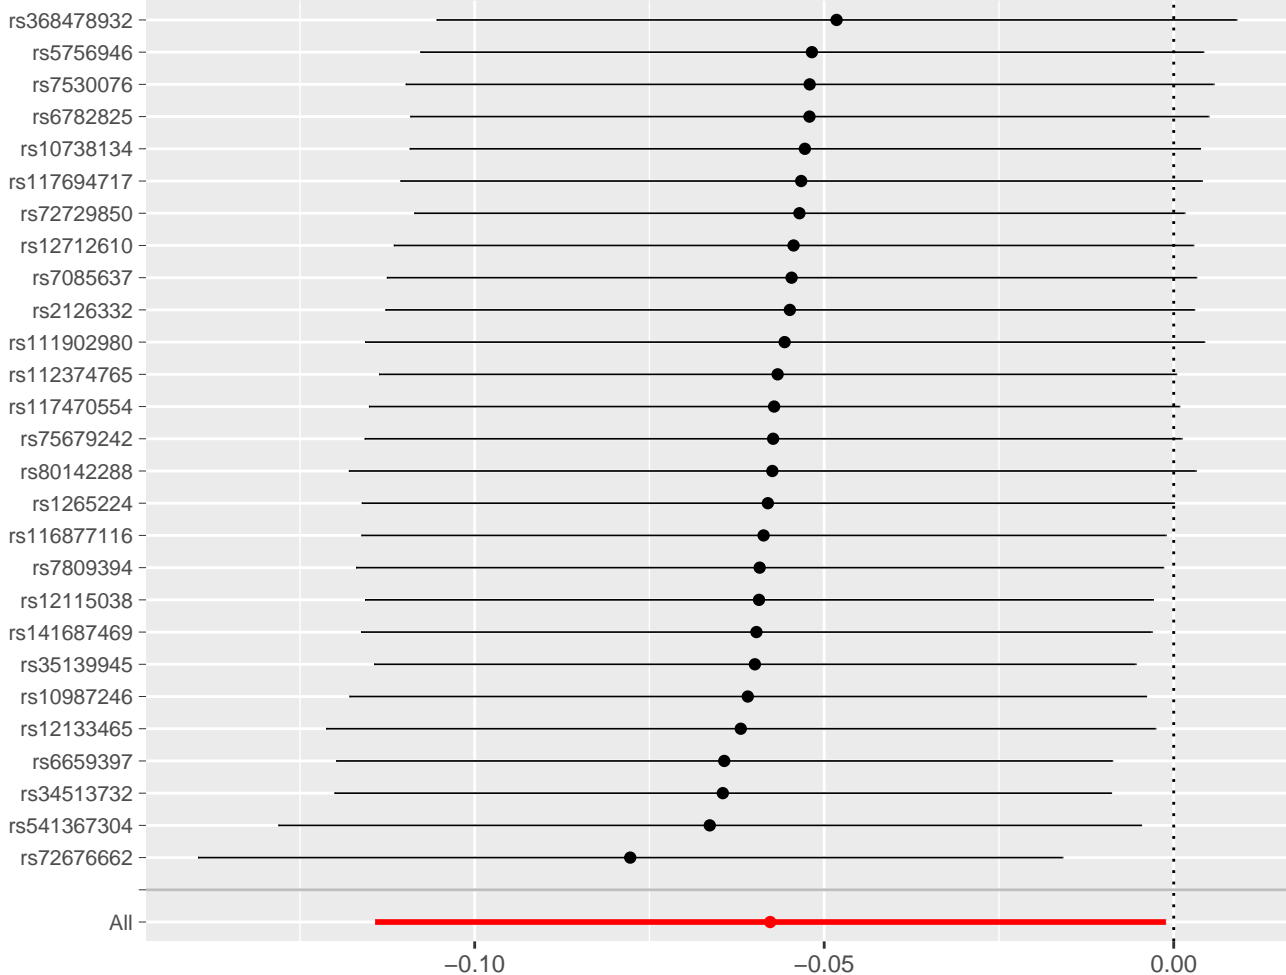

MR leave-one-out sensitivity analysis for 'TD DN (CD4-CD8-) %DN' on 'Aplastic anemia'

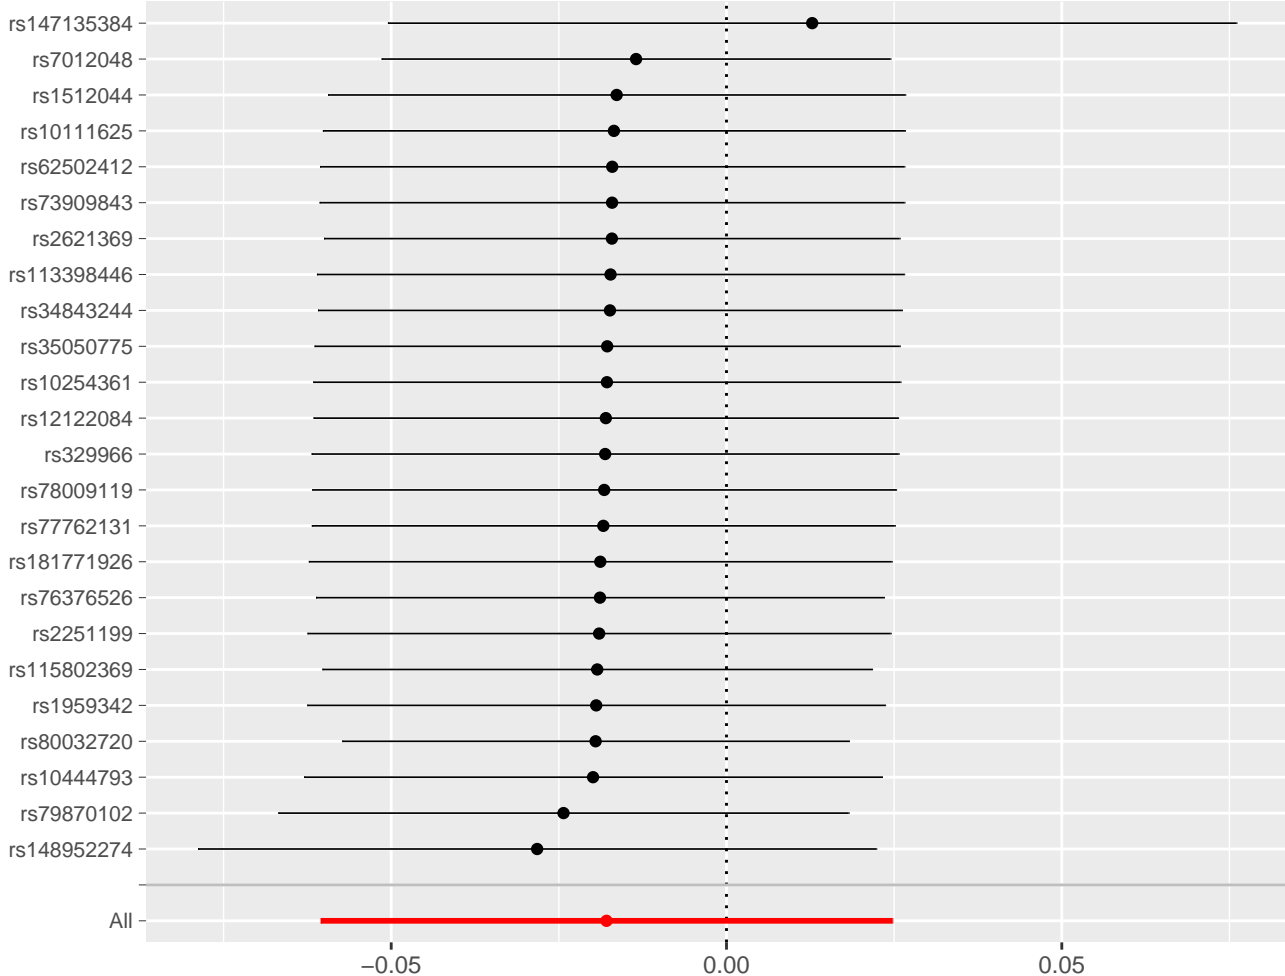

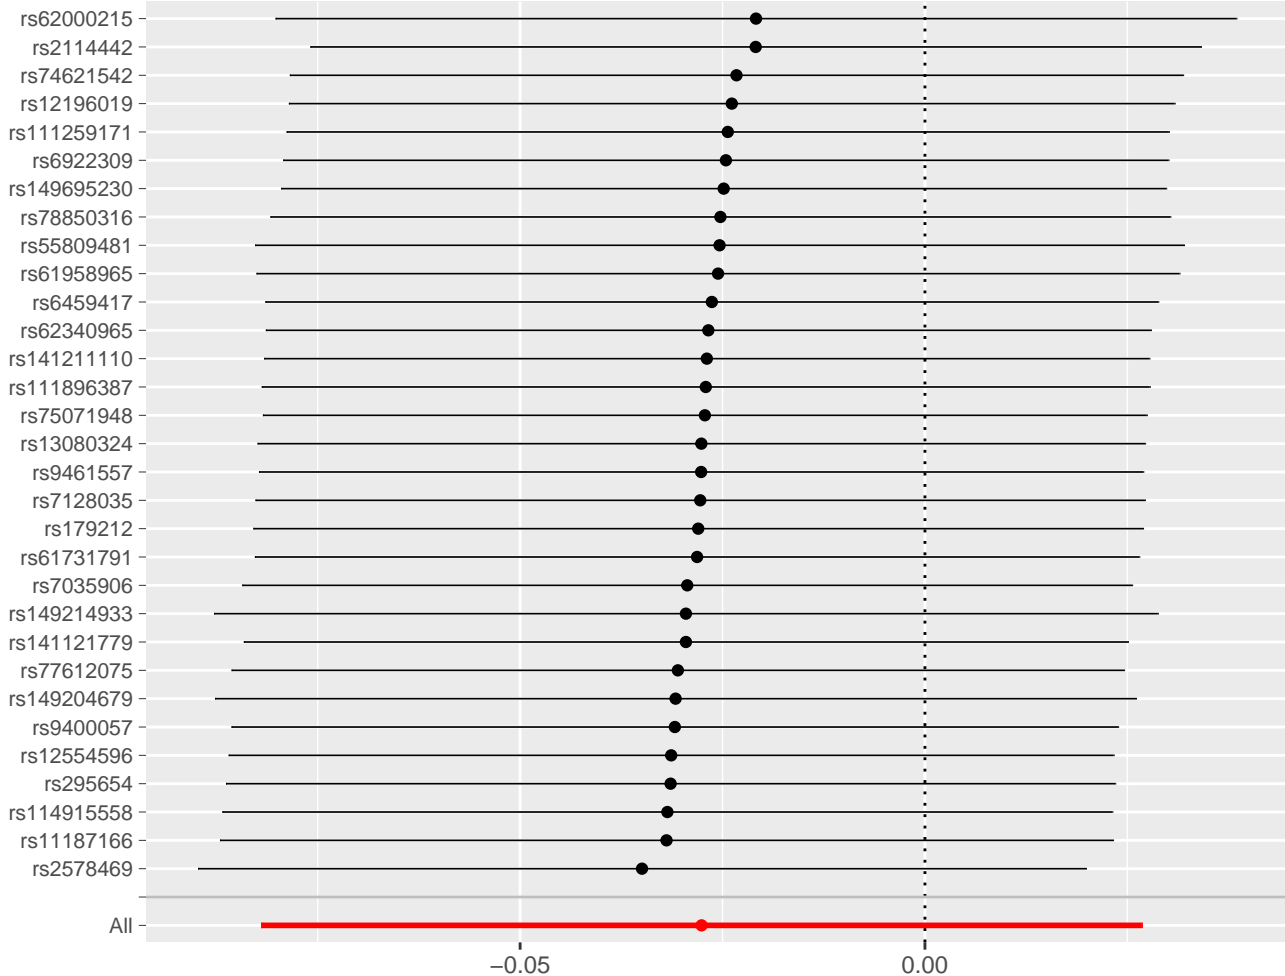

MR leave-one-out sensitivity analysis for 'CD20 on CD24+ CD27+' on 'Aplastic anemia'

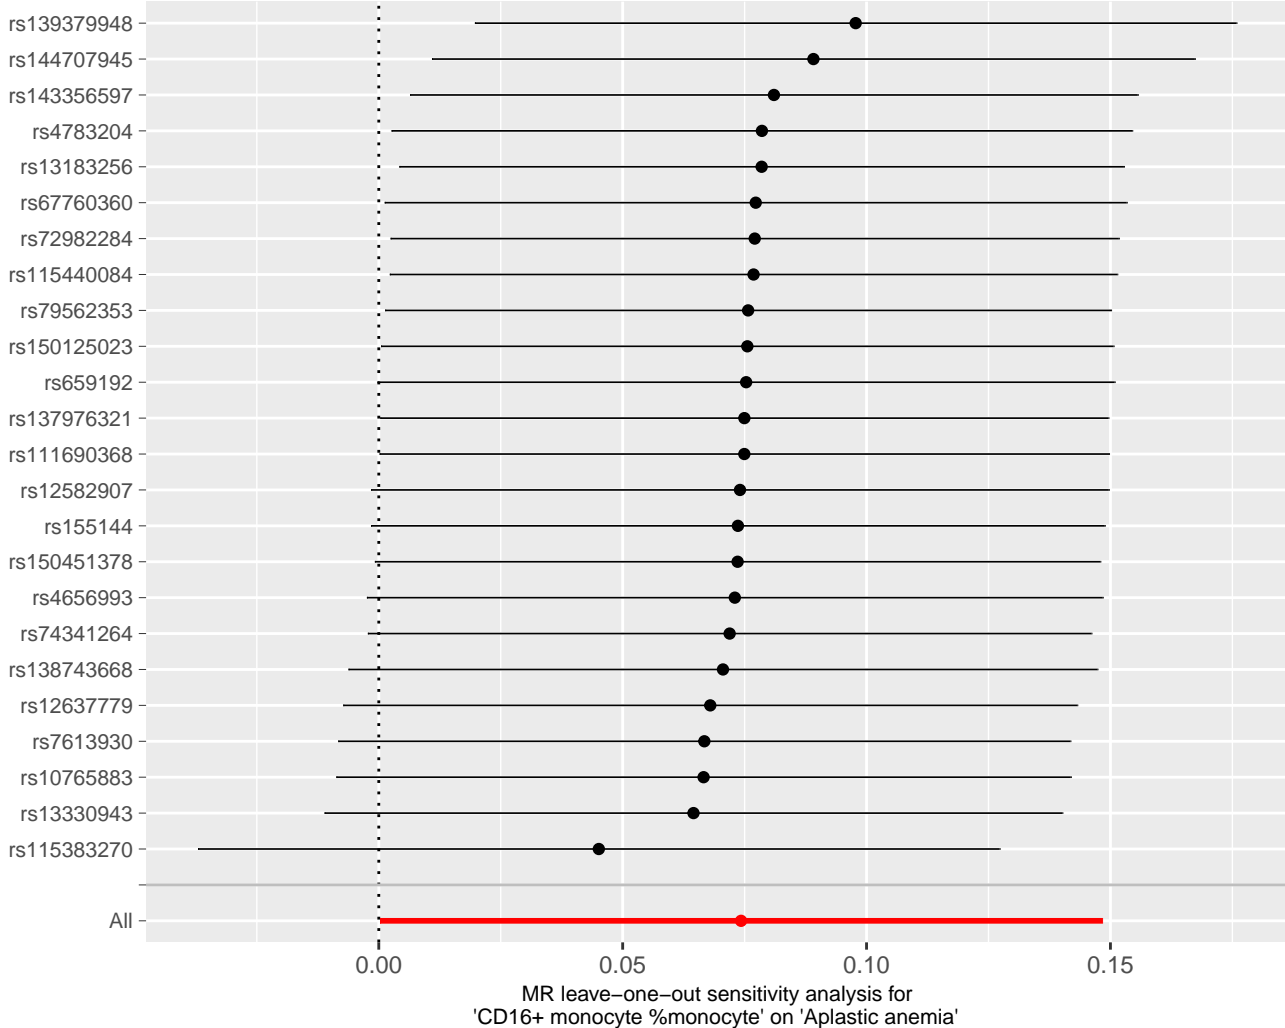

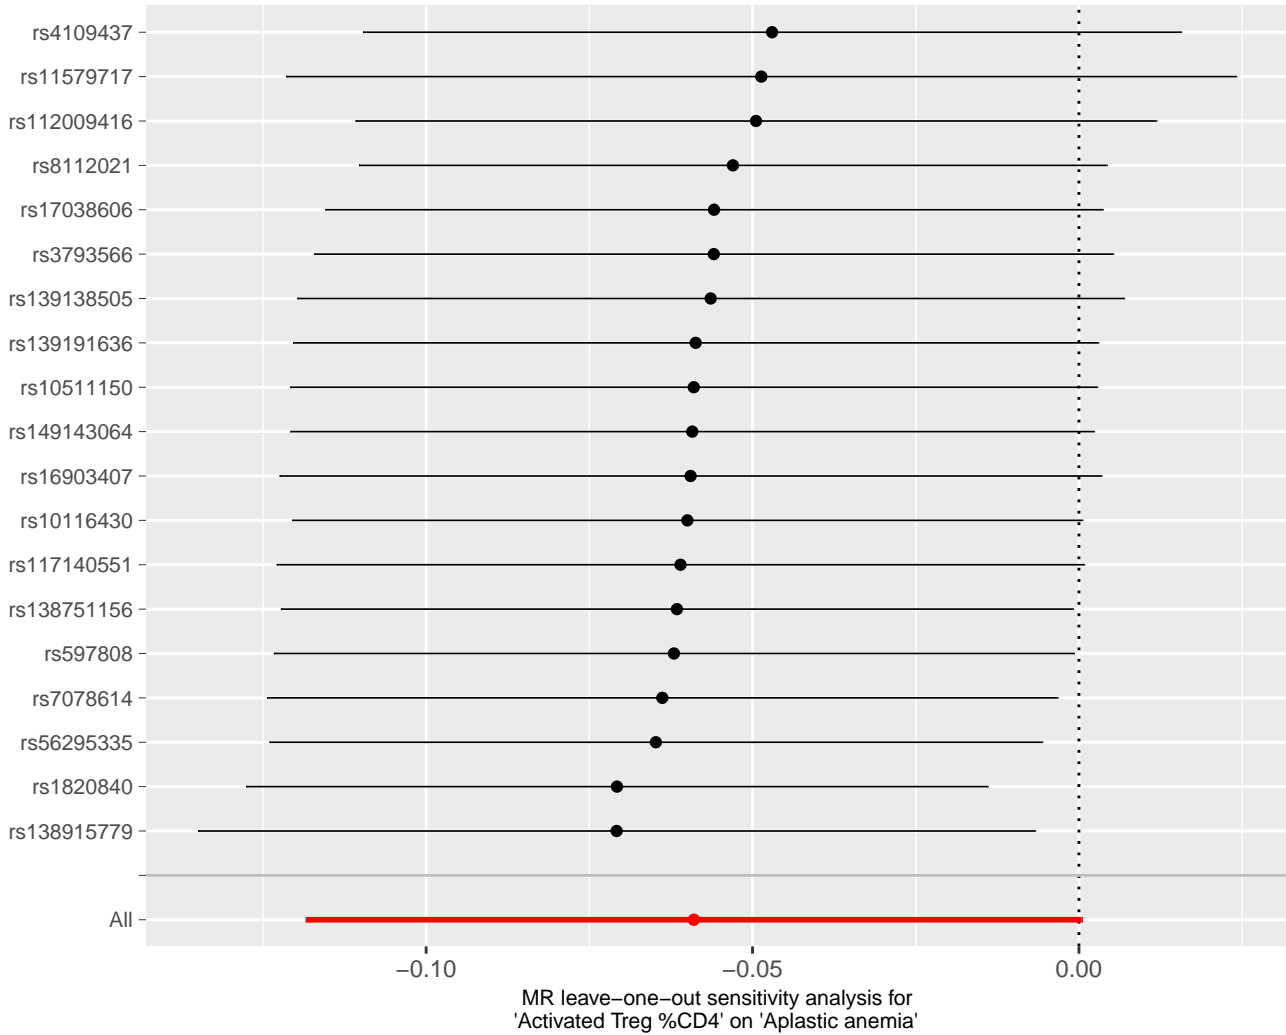

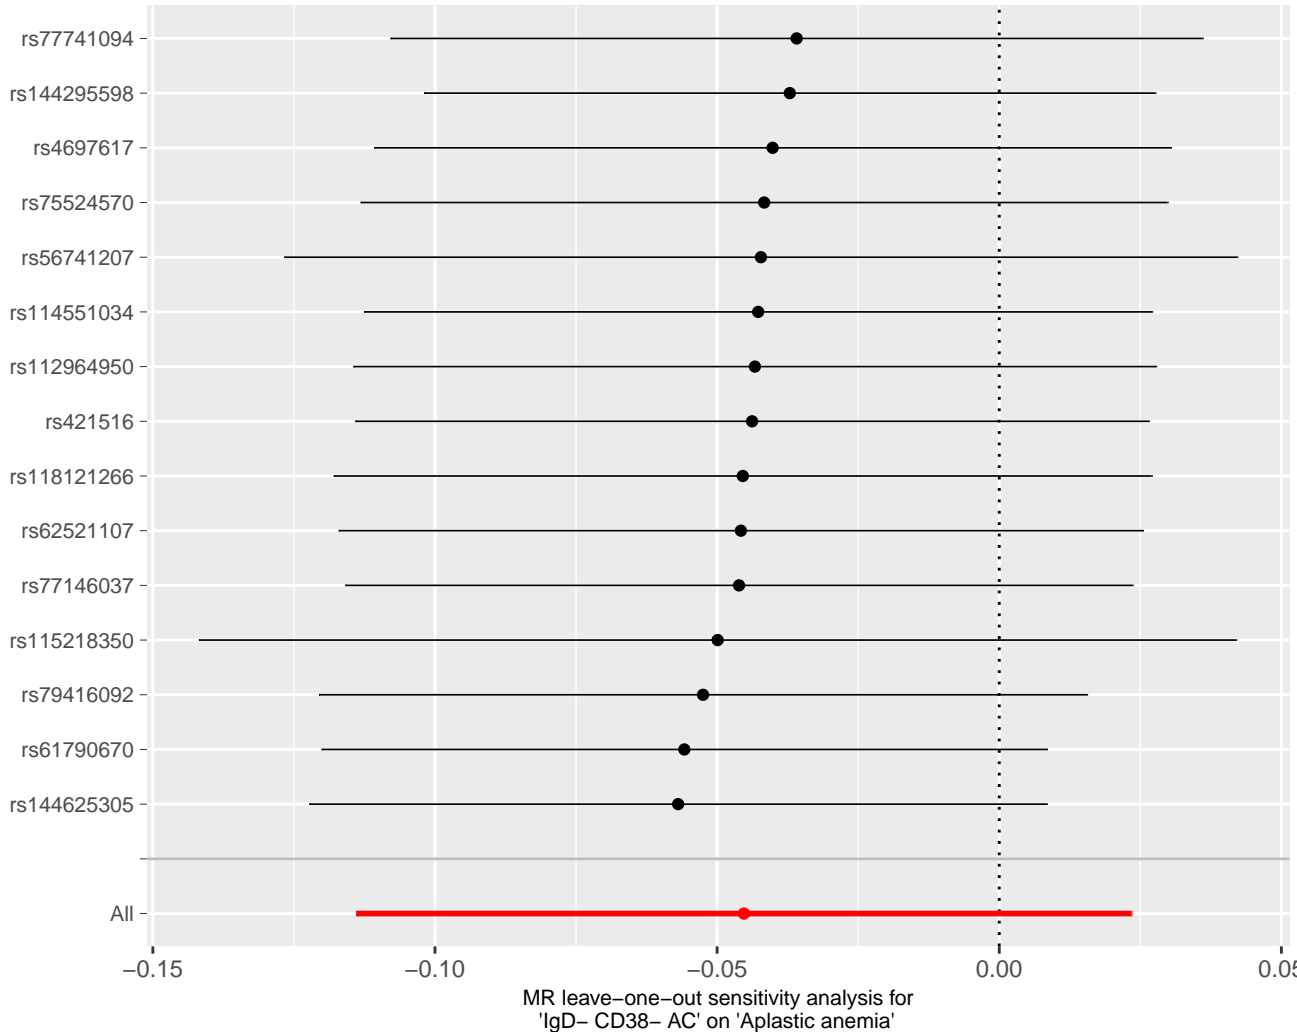

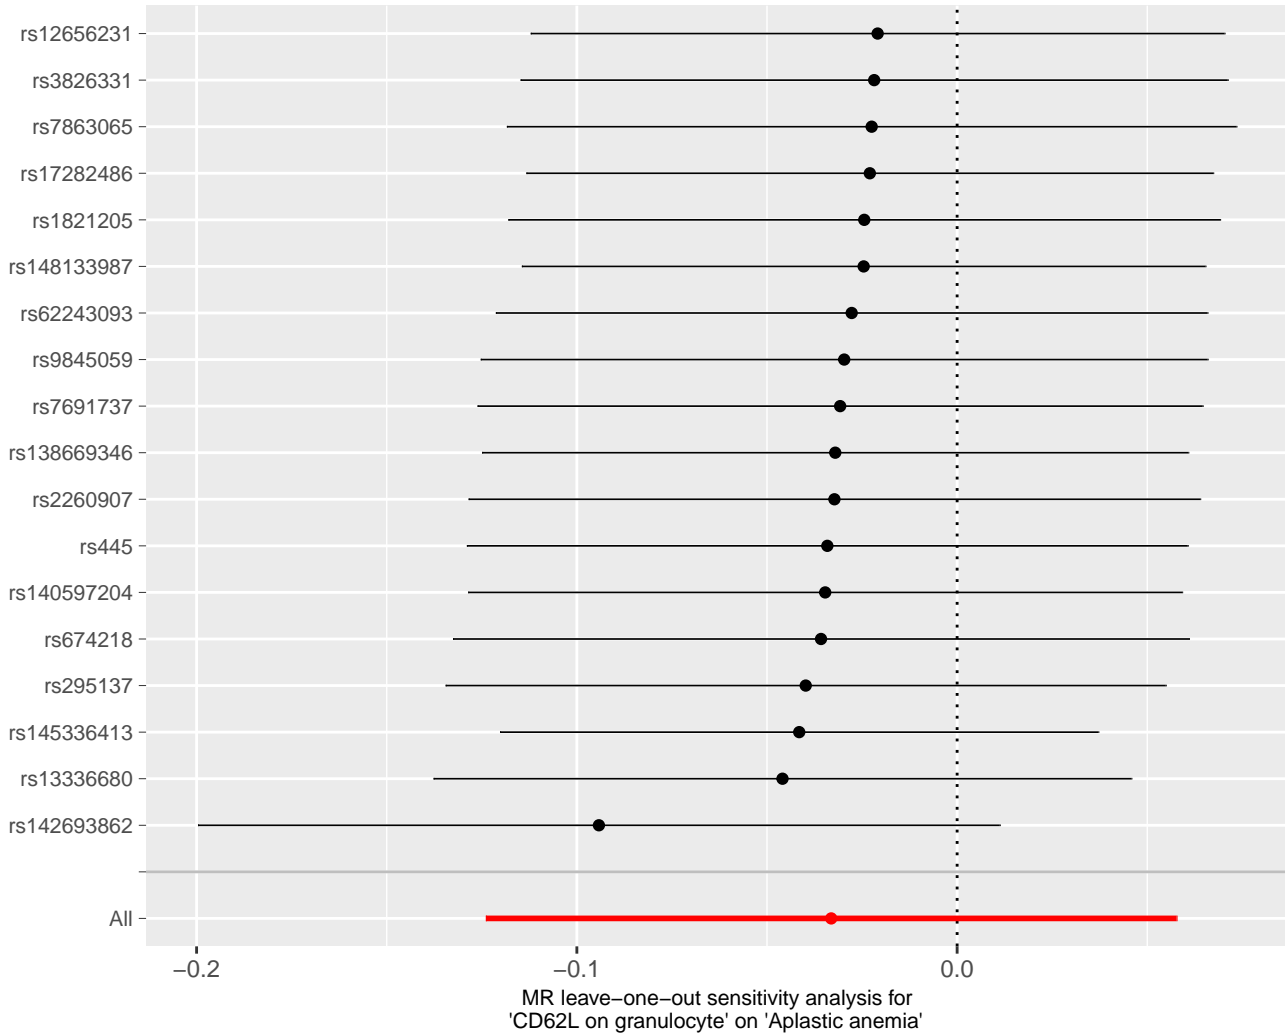

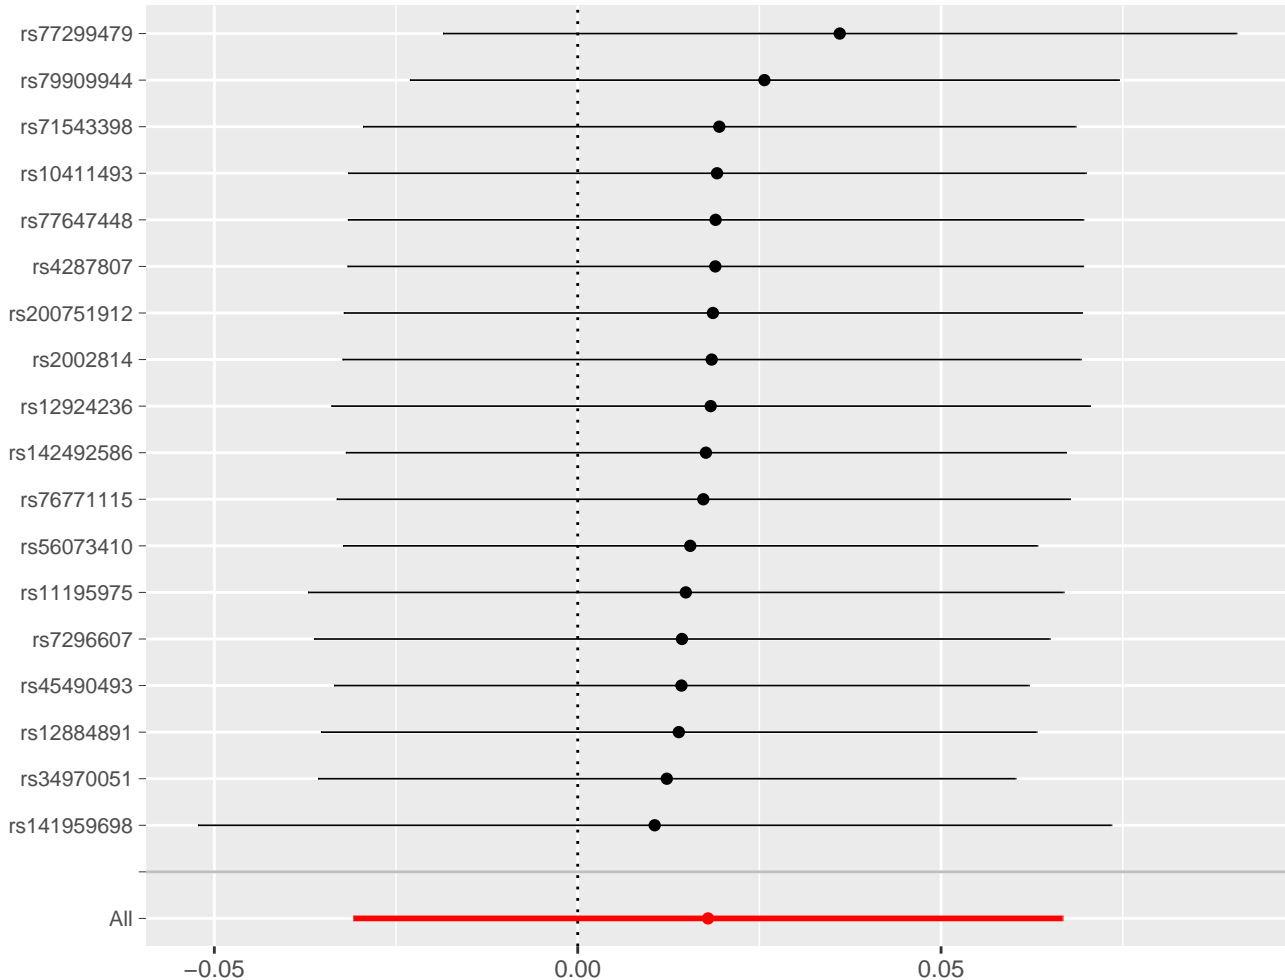



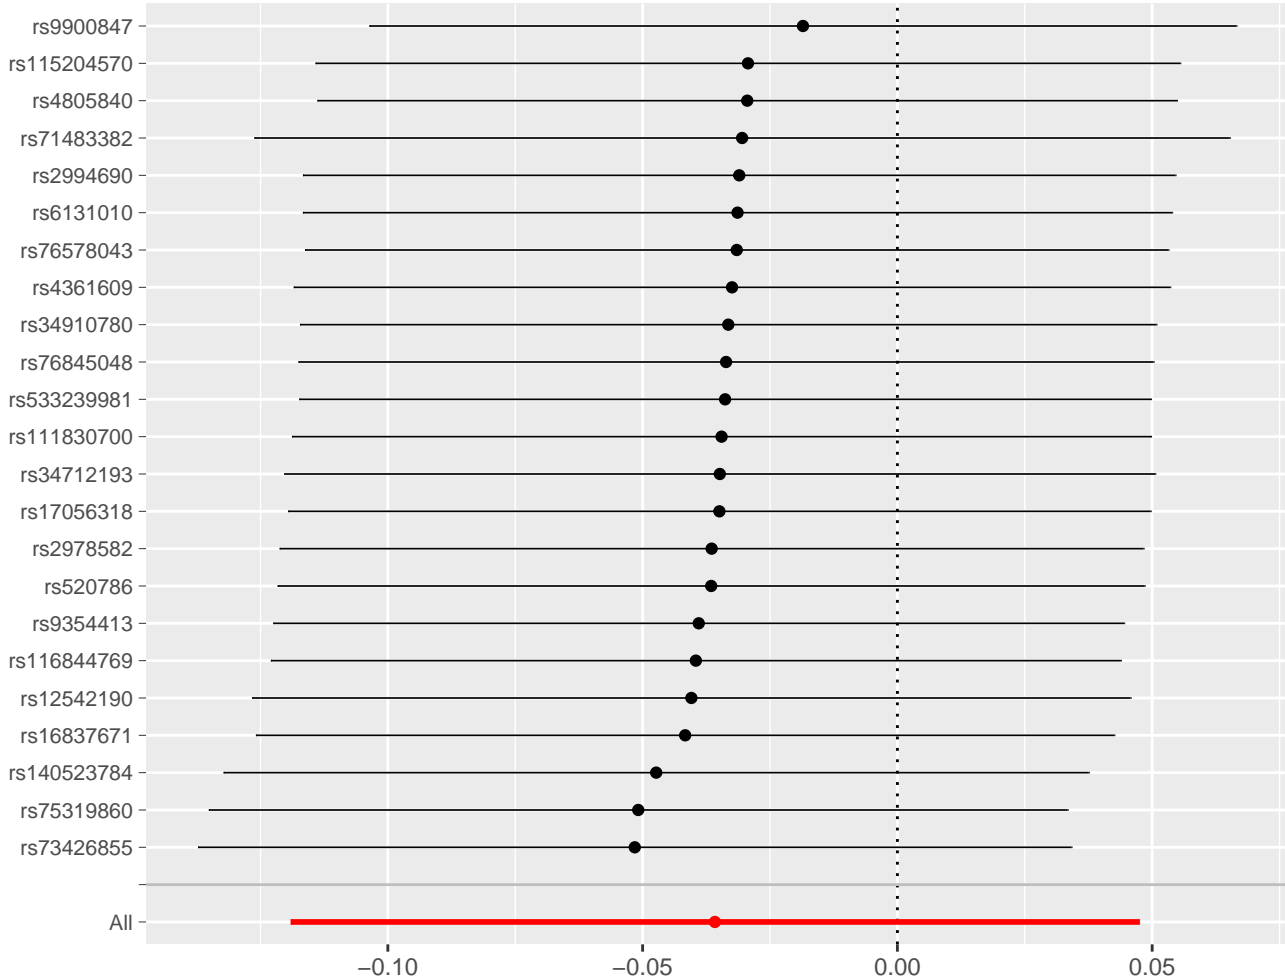

MR leave-one-out sensitivity analysis for 'IgD+ CD24- %lymphocyte' on 'Aplastic anemia'

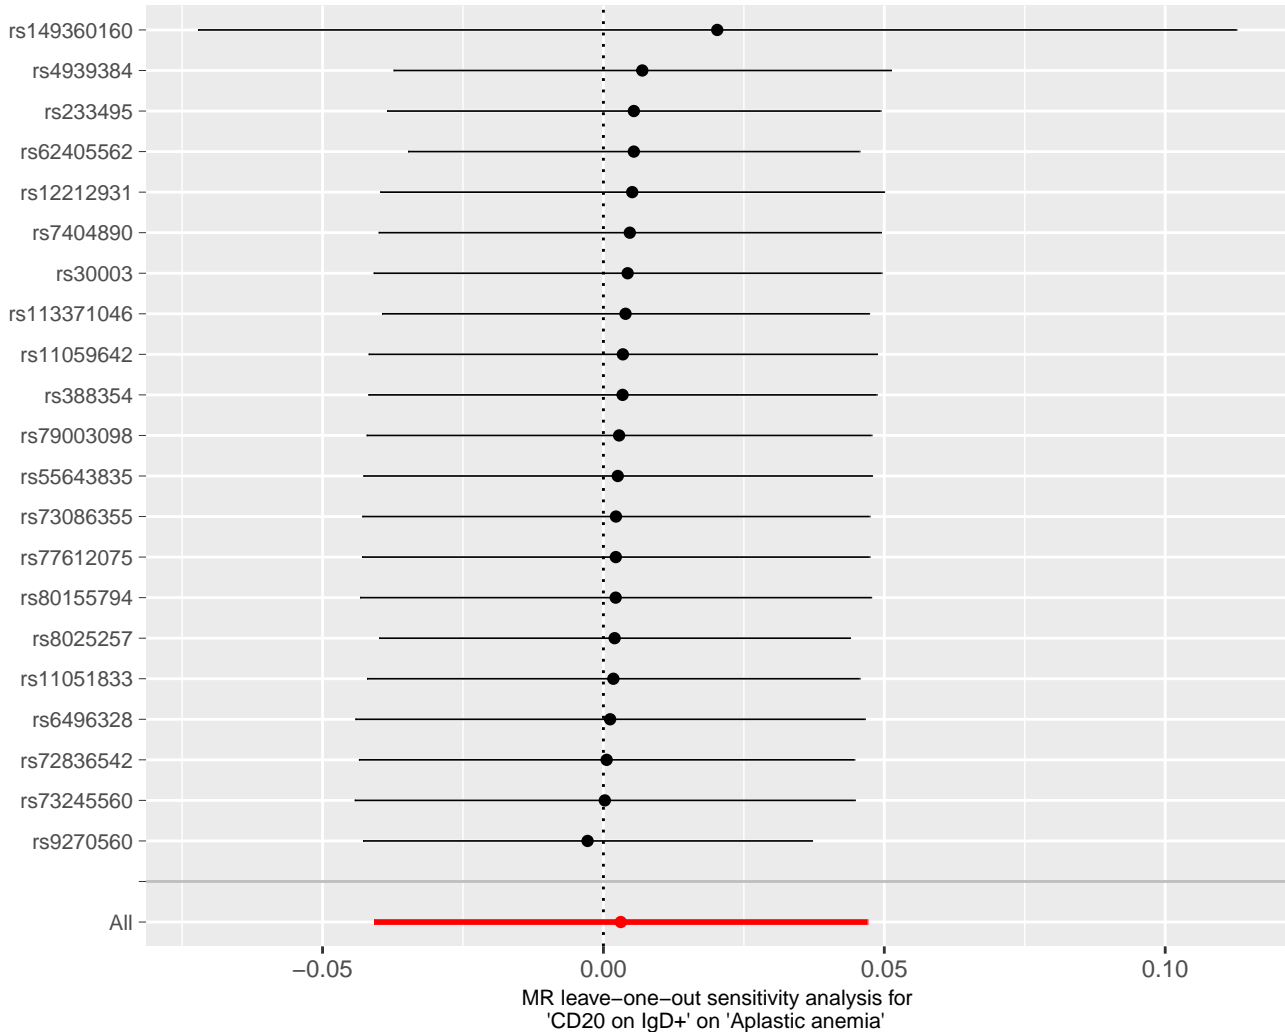

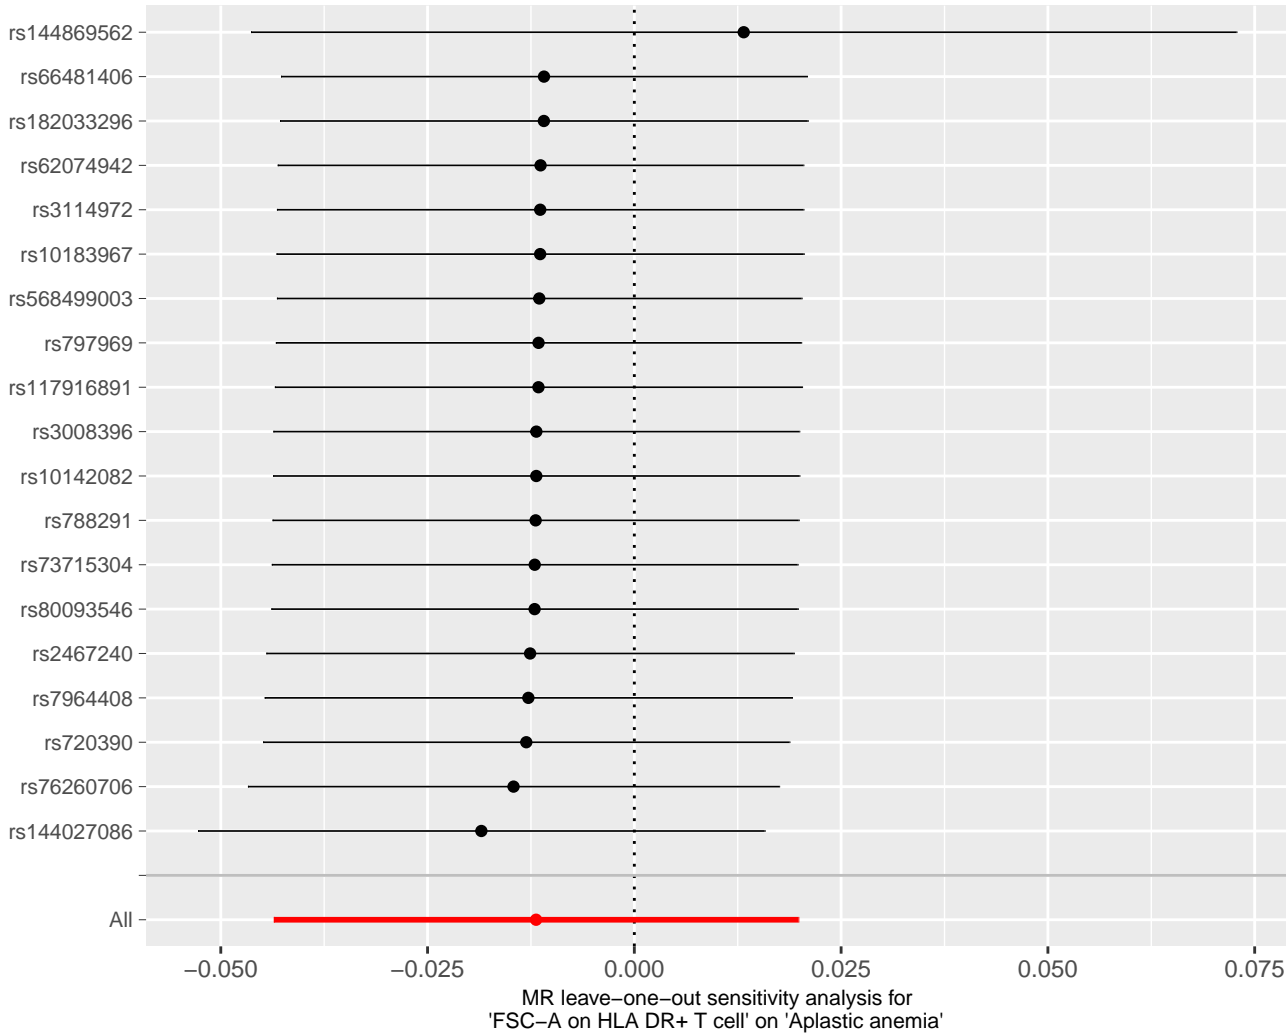

Supplement: 41598_2024_69104_MOESM1_ESM.pdf [file 41598_2024_69104_MOESM1_ESM.pdf]
