# Supplementary material for: Causal role of immune cells in aplastic anemia: Mendelian randomization (MR) study
Source: PubMed Central journal article supplement — Sci Rep. 2024 Aug 3;14:18010. doi: 10.1038/s41598-024-69104-0 (PMC11297992; doi:10.1038/s41598-024-69104-0), 2024-08-03

Supplementary figure3: Forest plots of all MR analyses of 731 immunophenotypes on aplastic anemia.

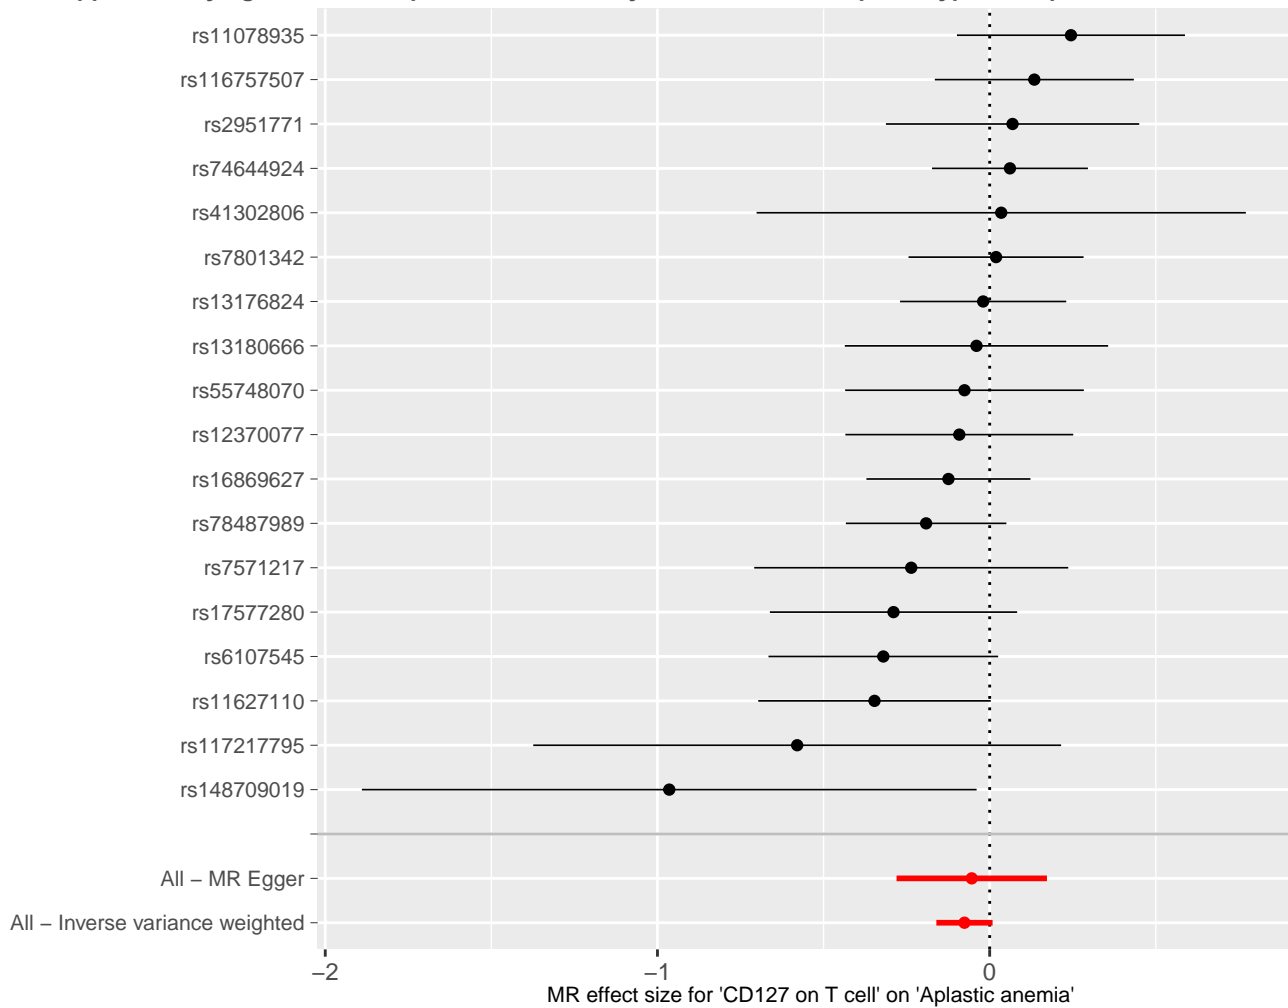

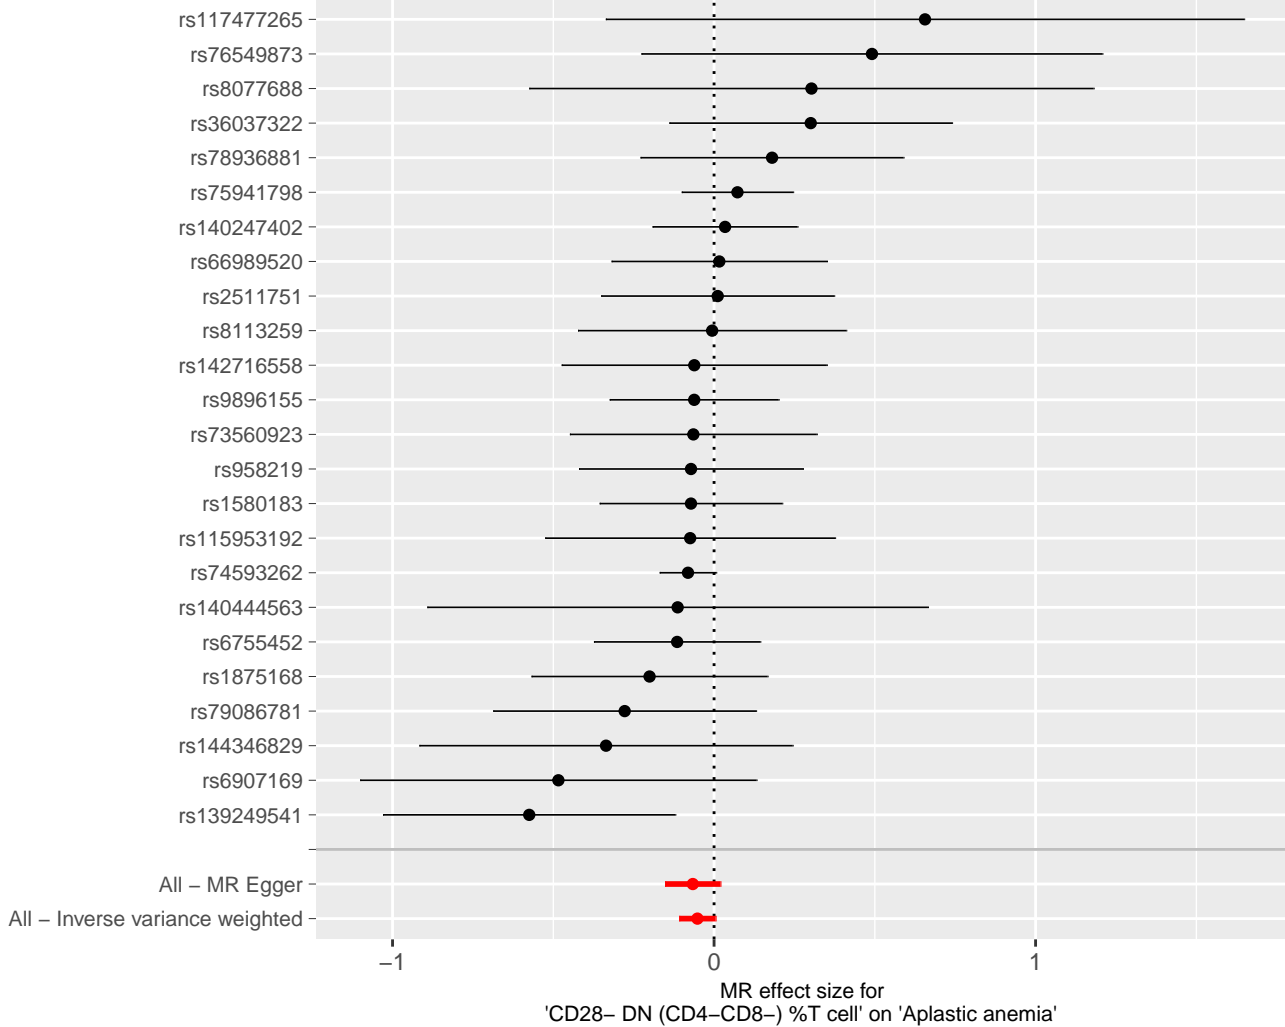

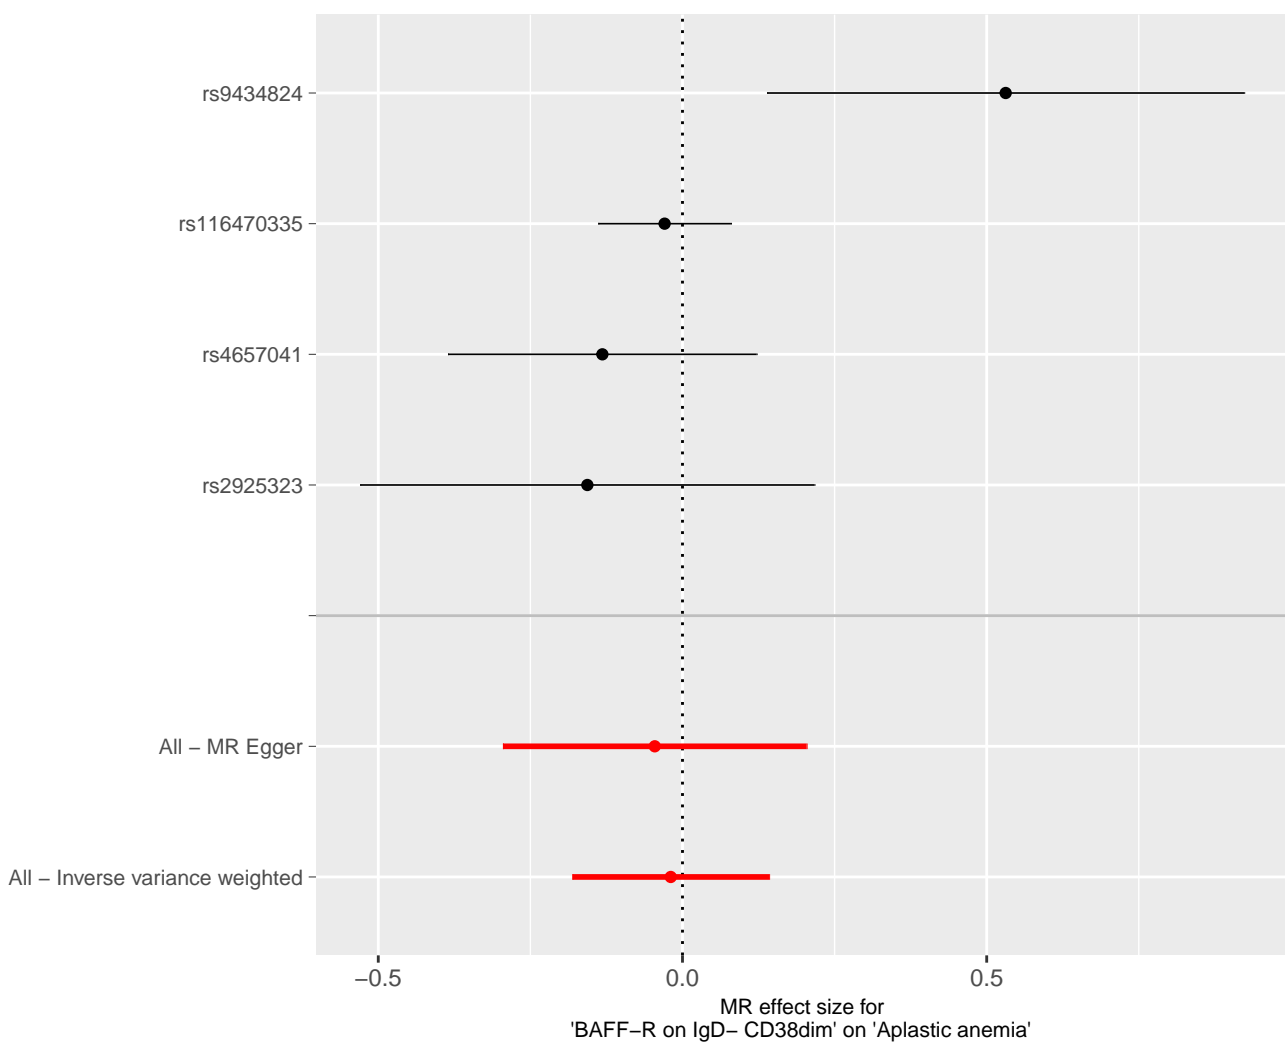

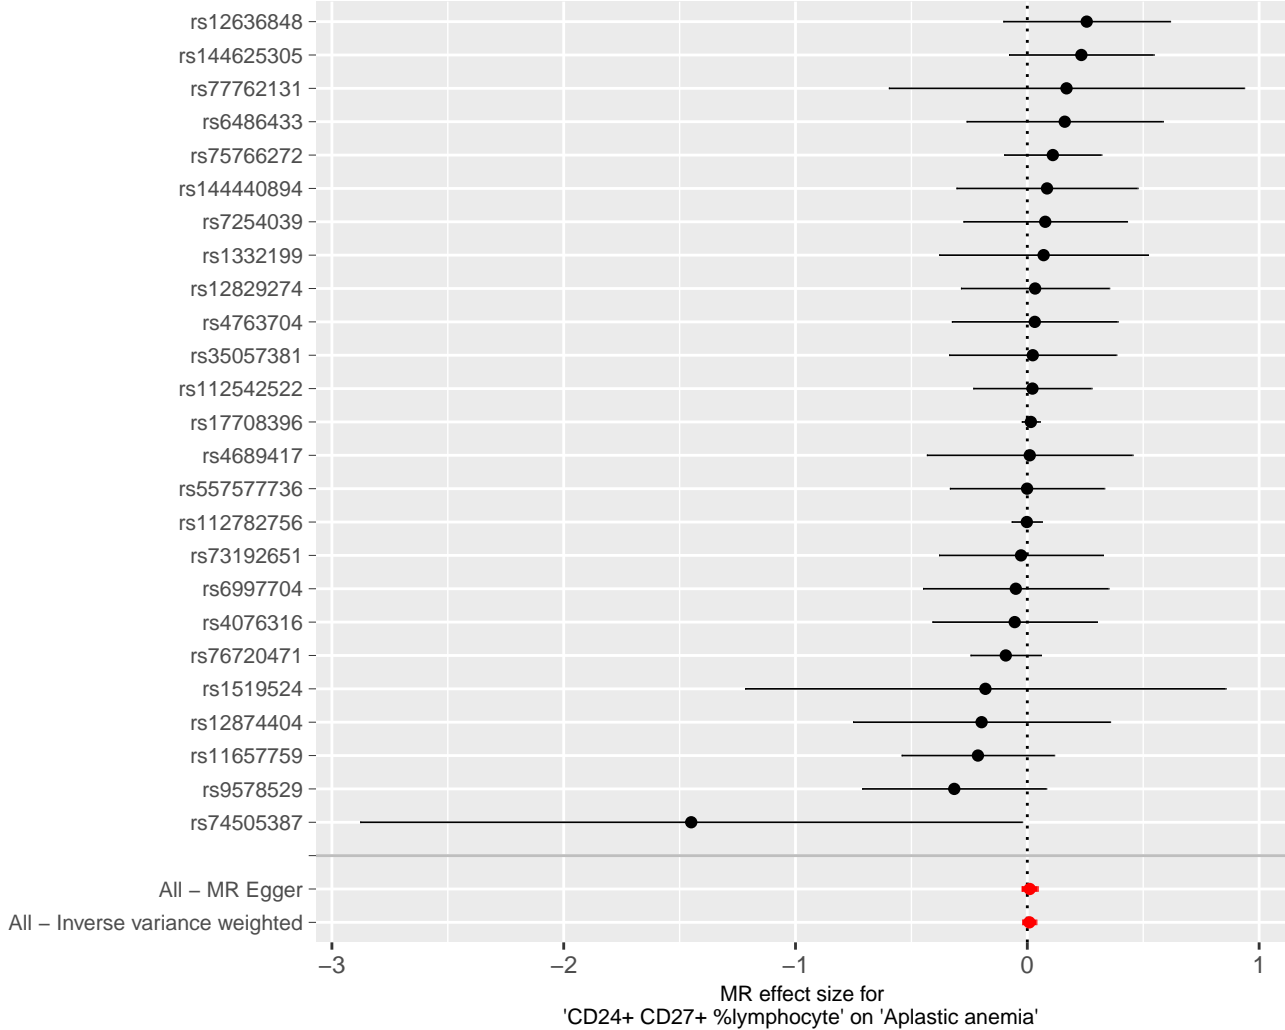

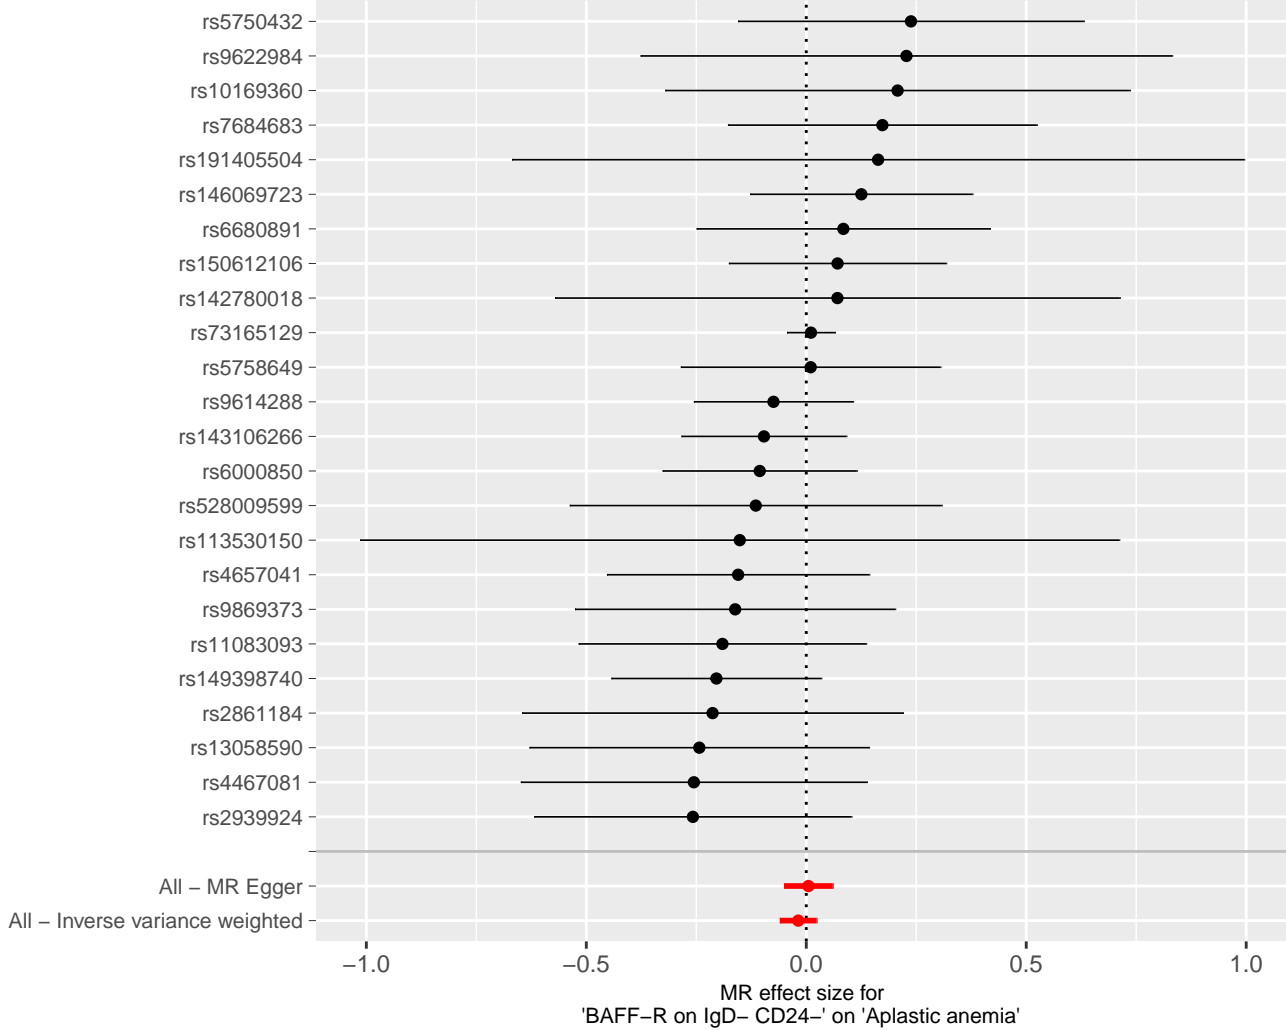

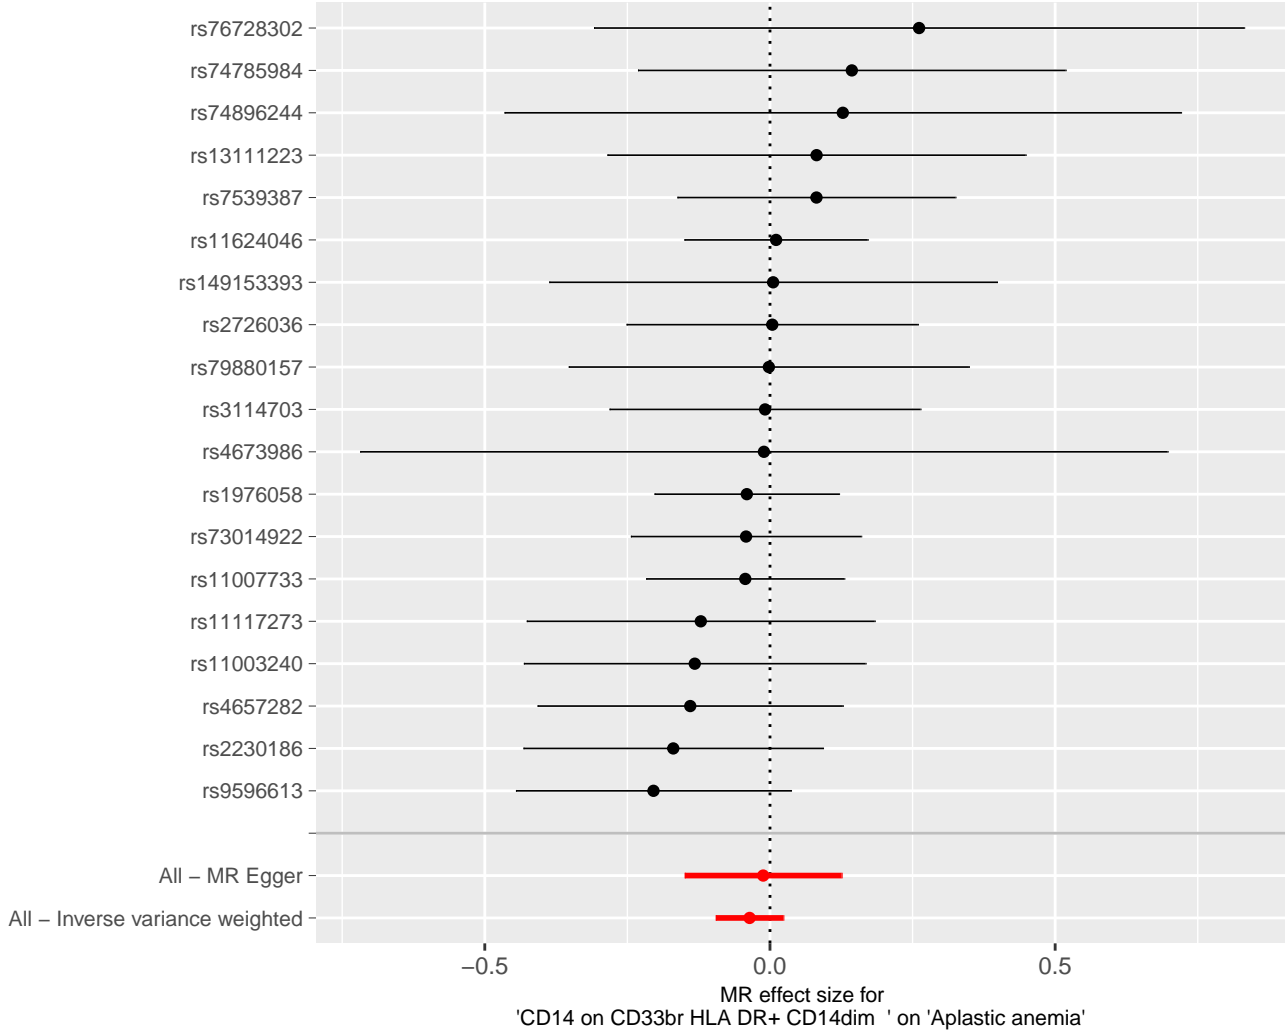

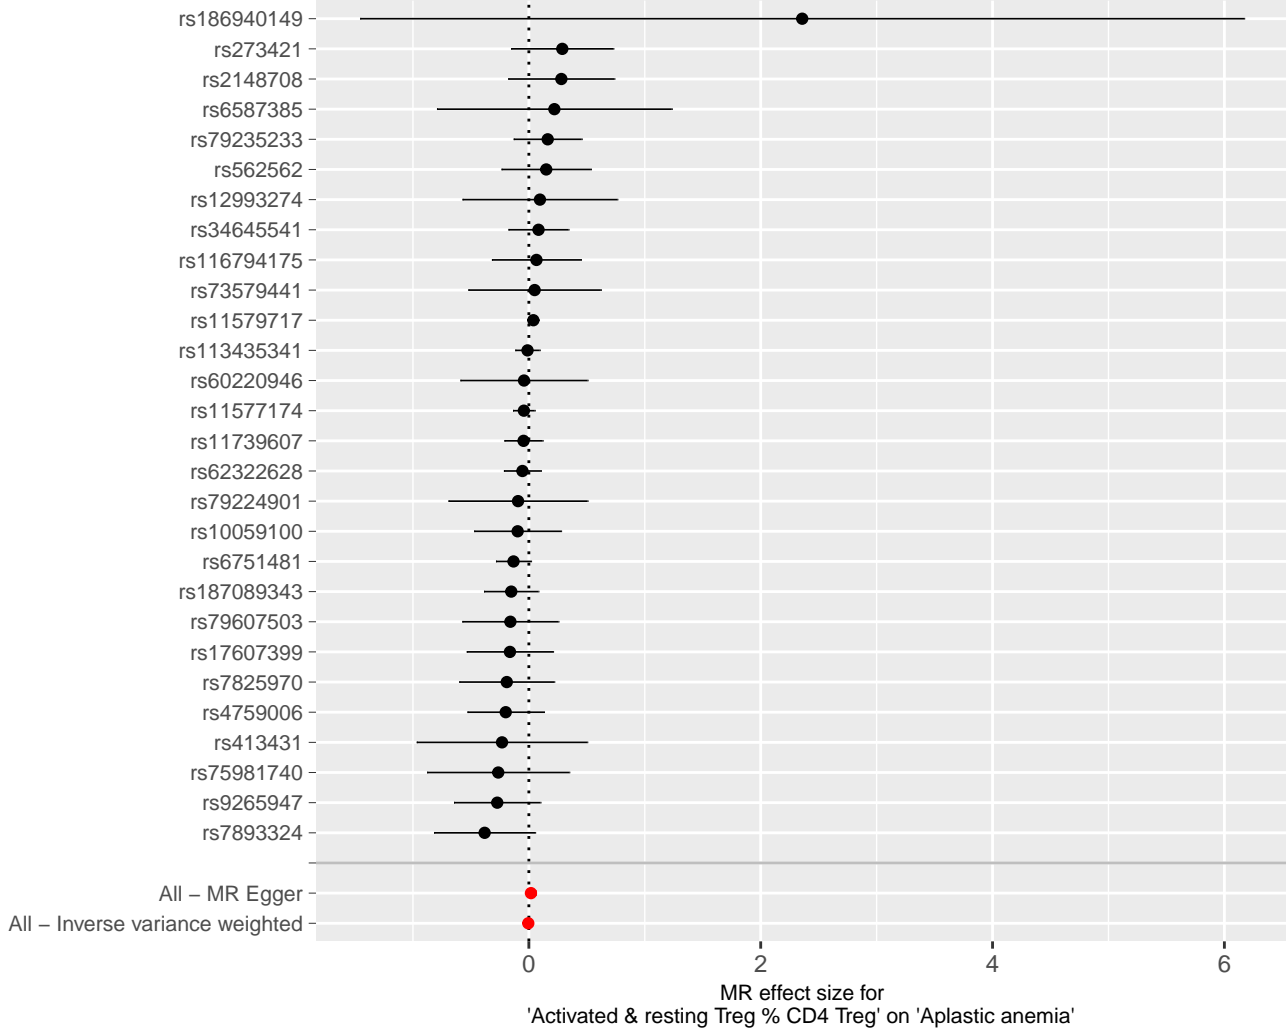

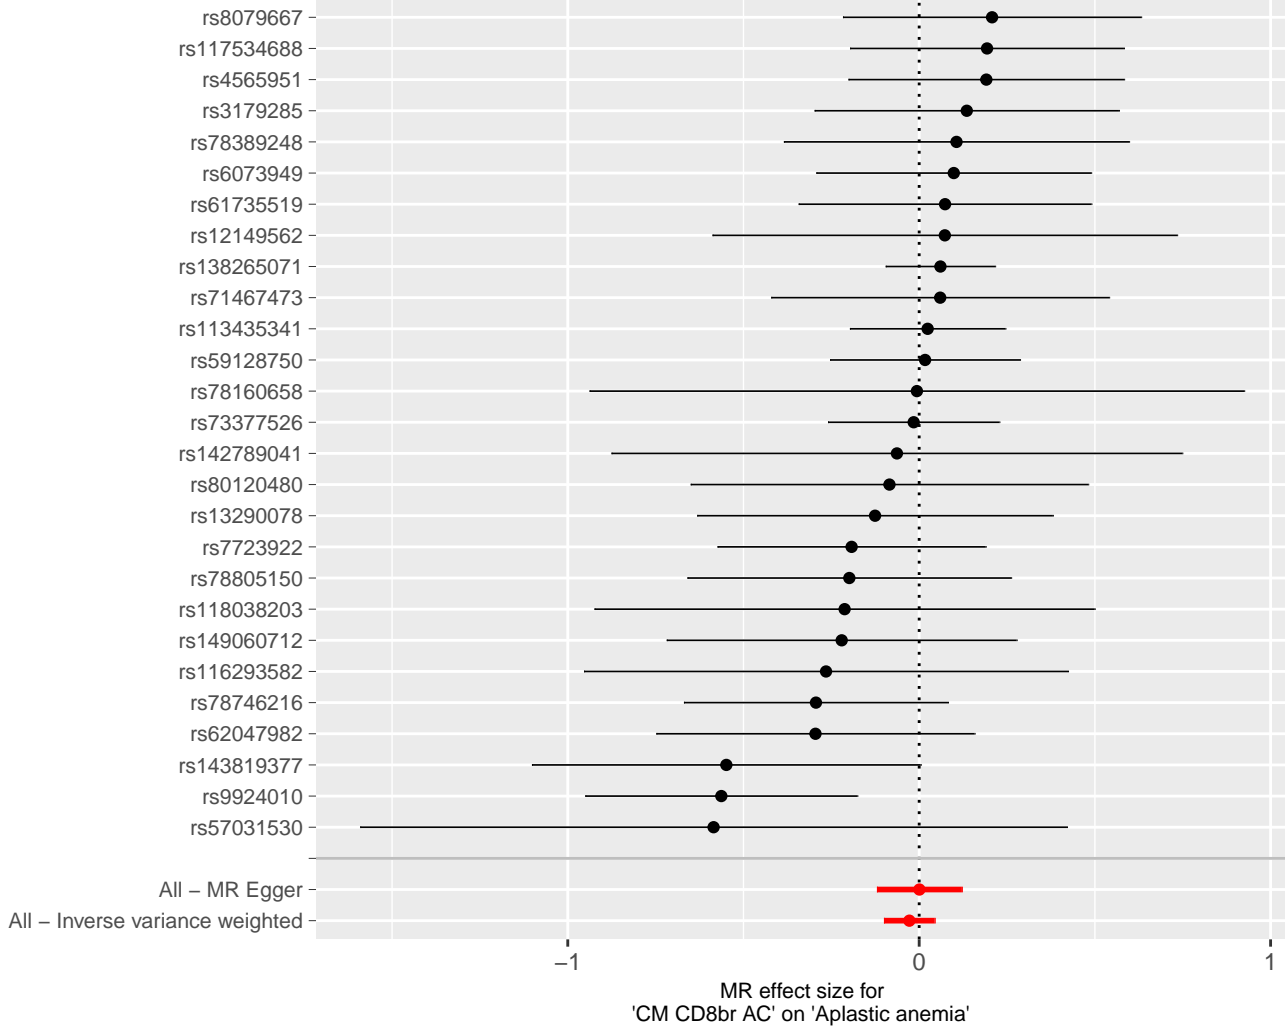



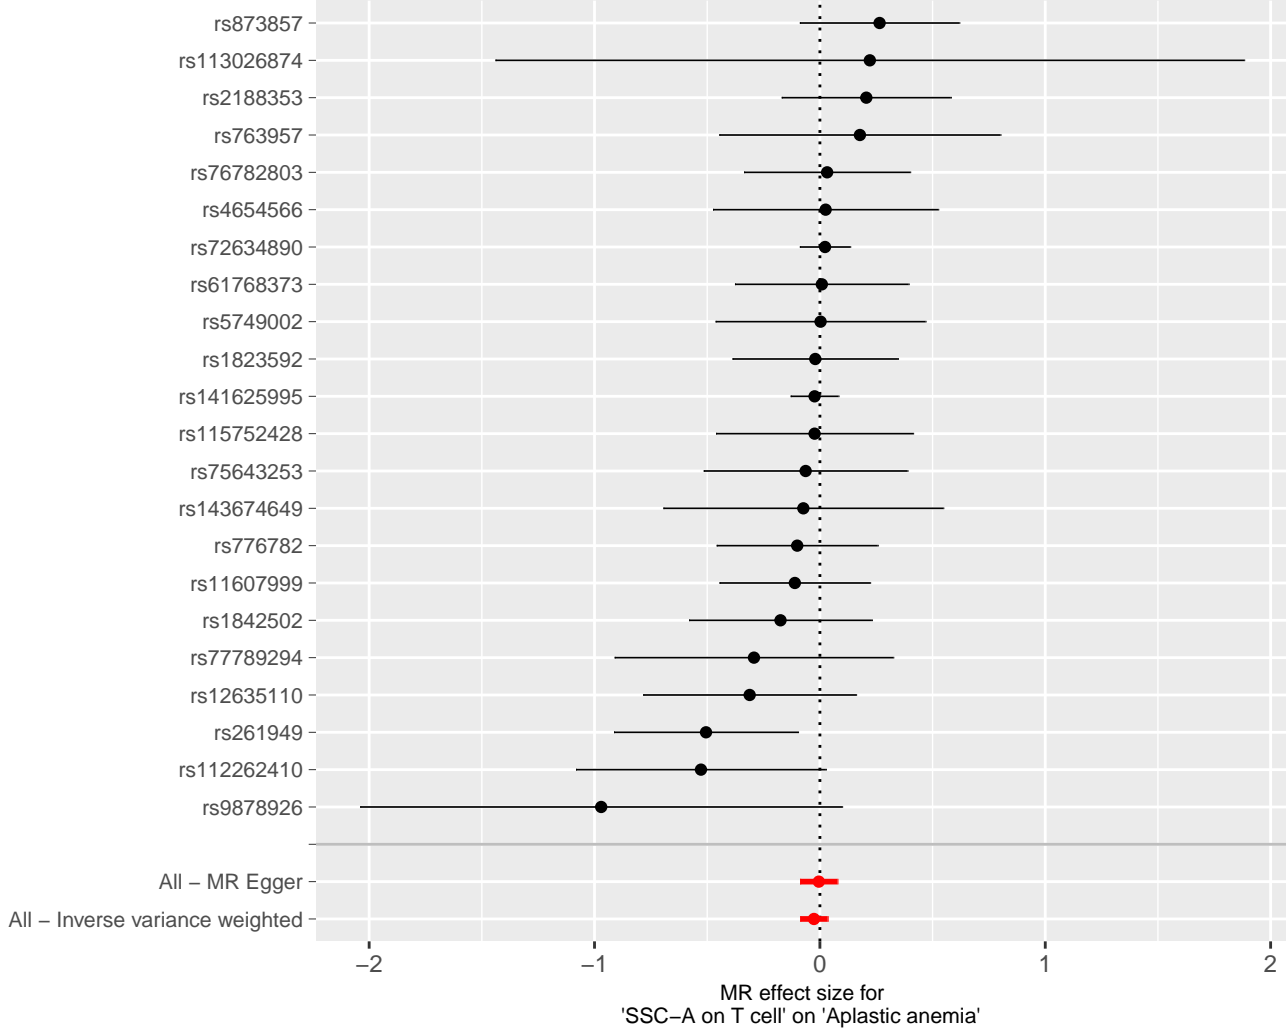

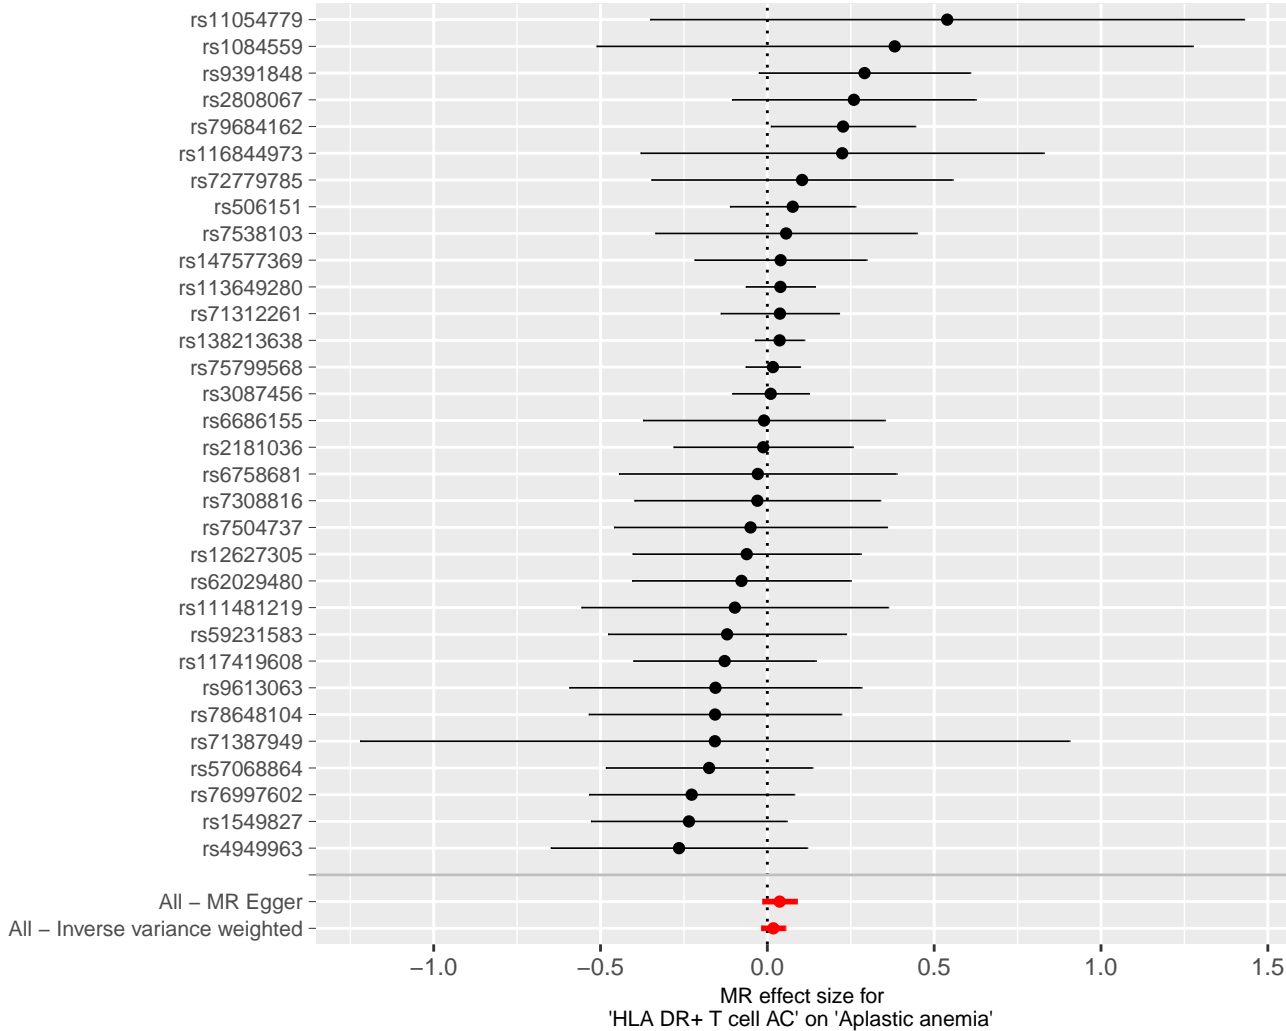

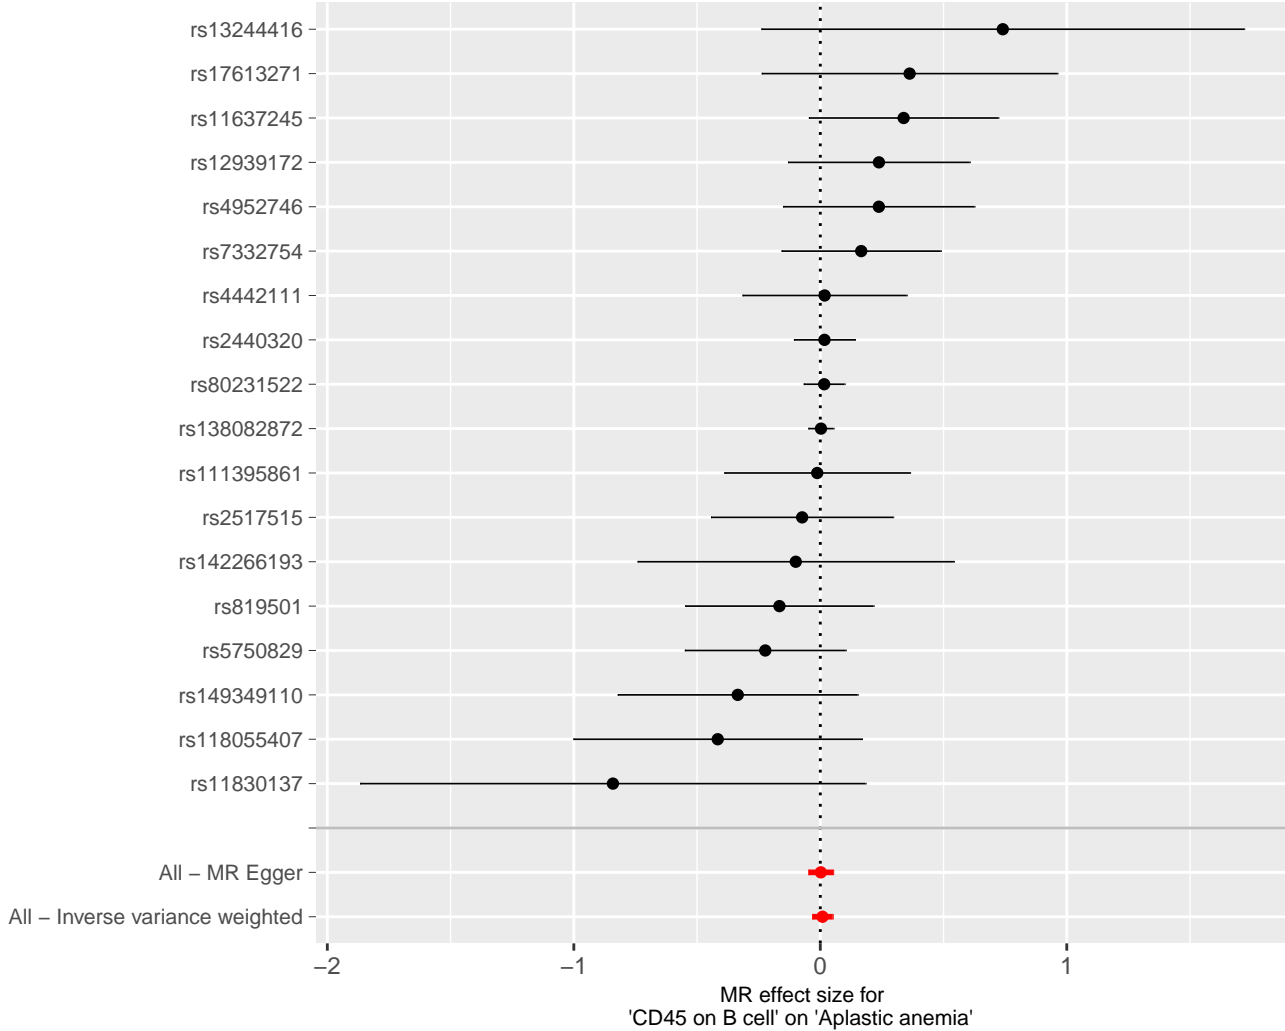

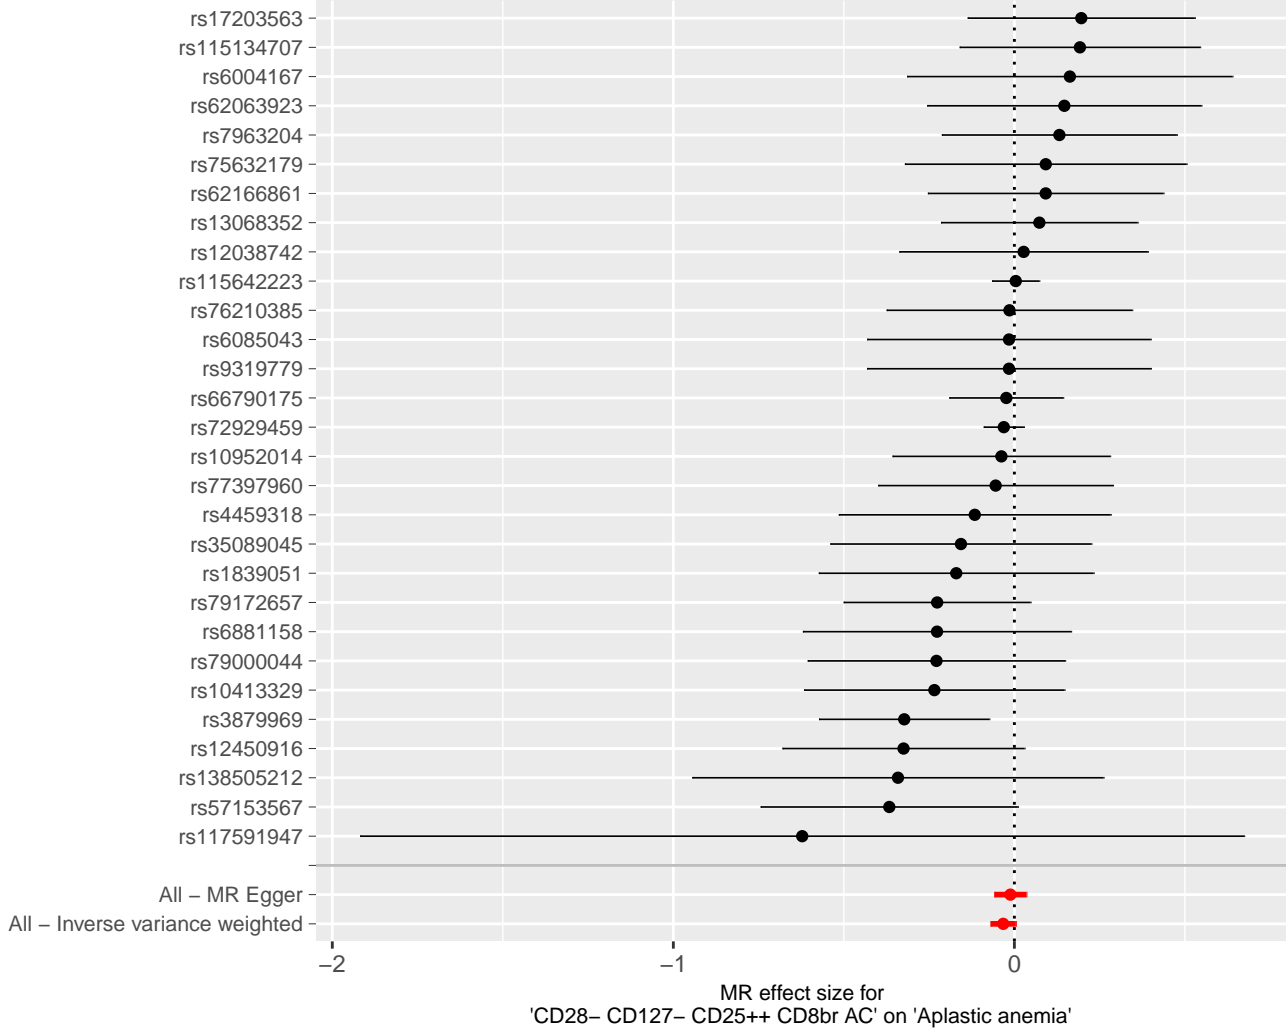

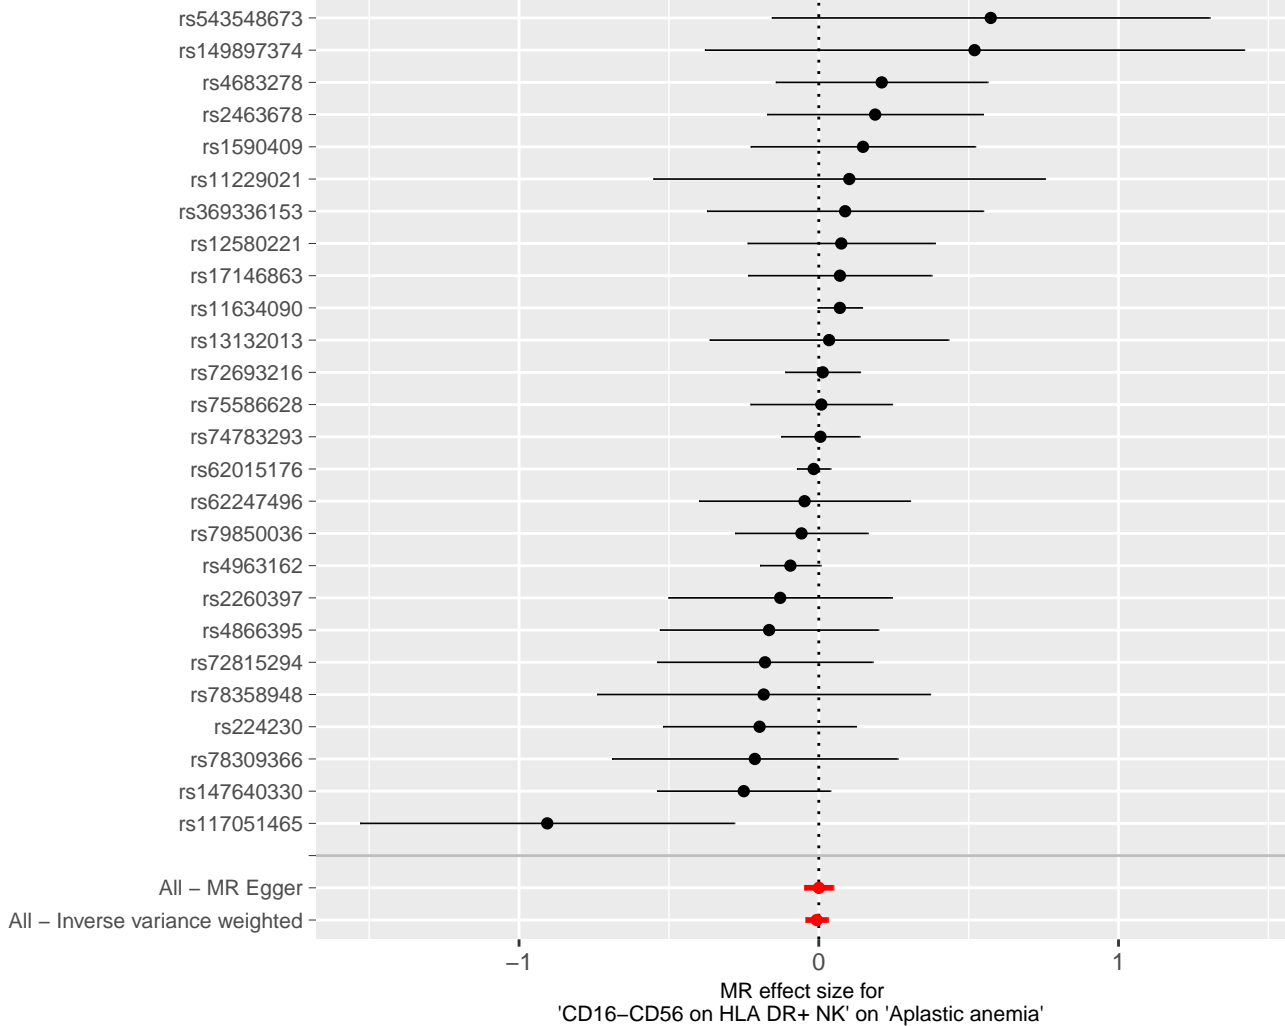

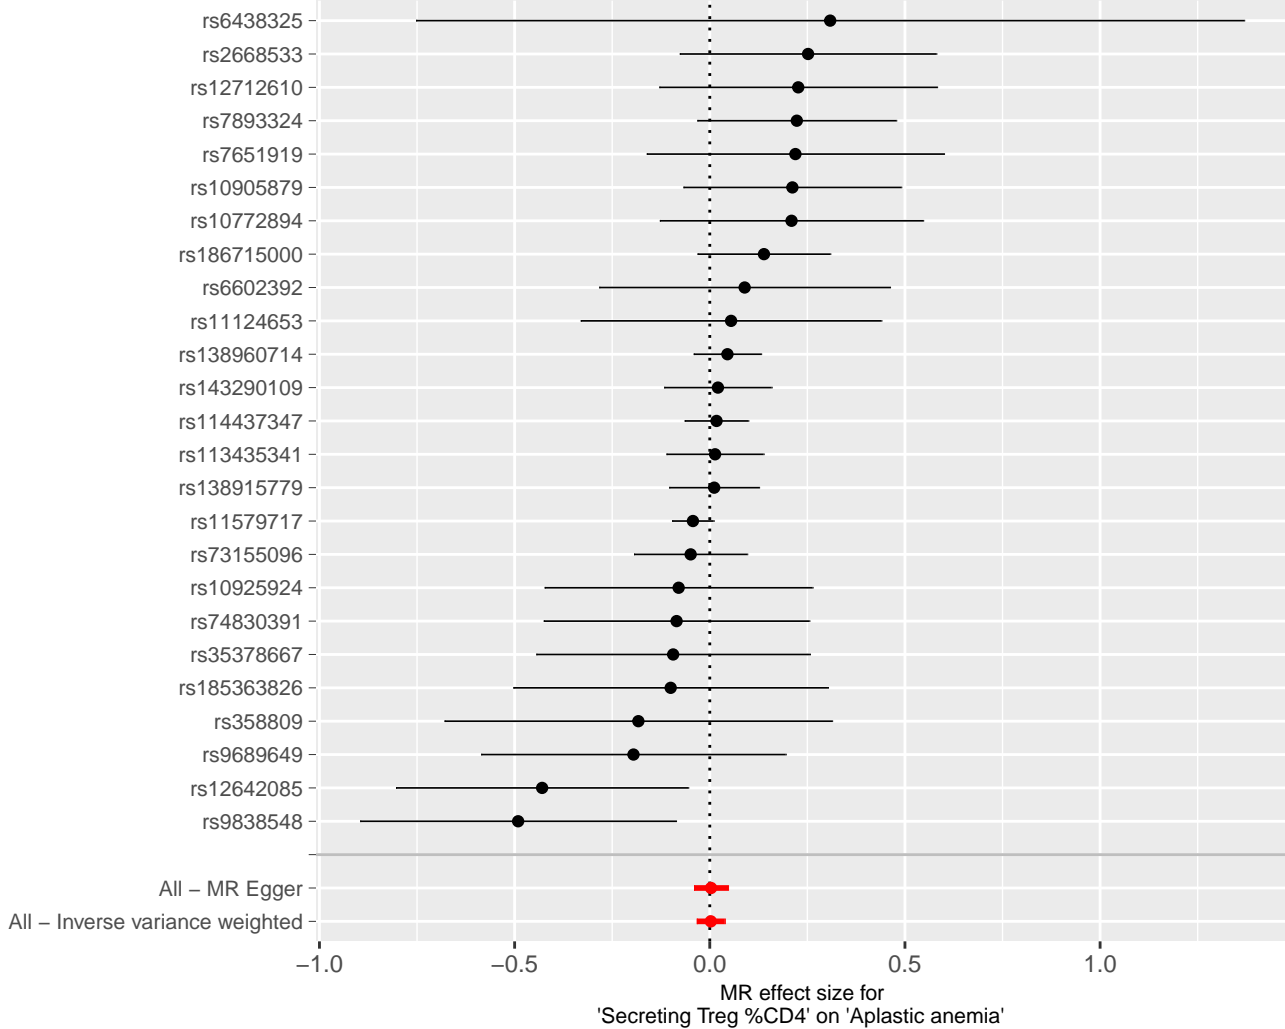

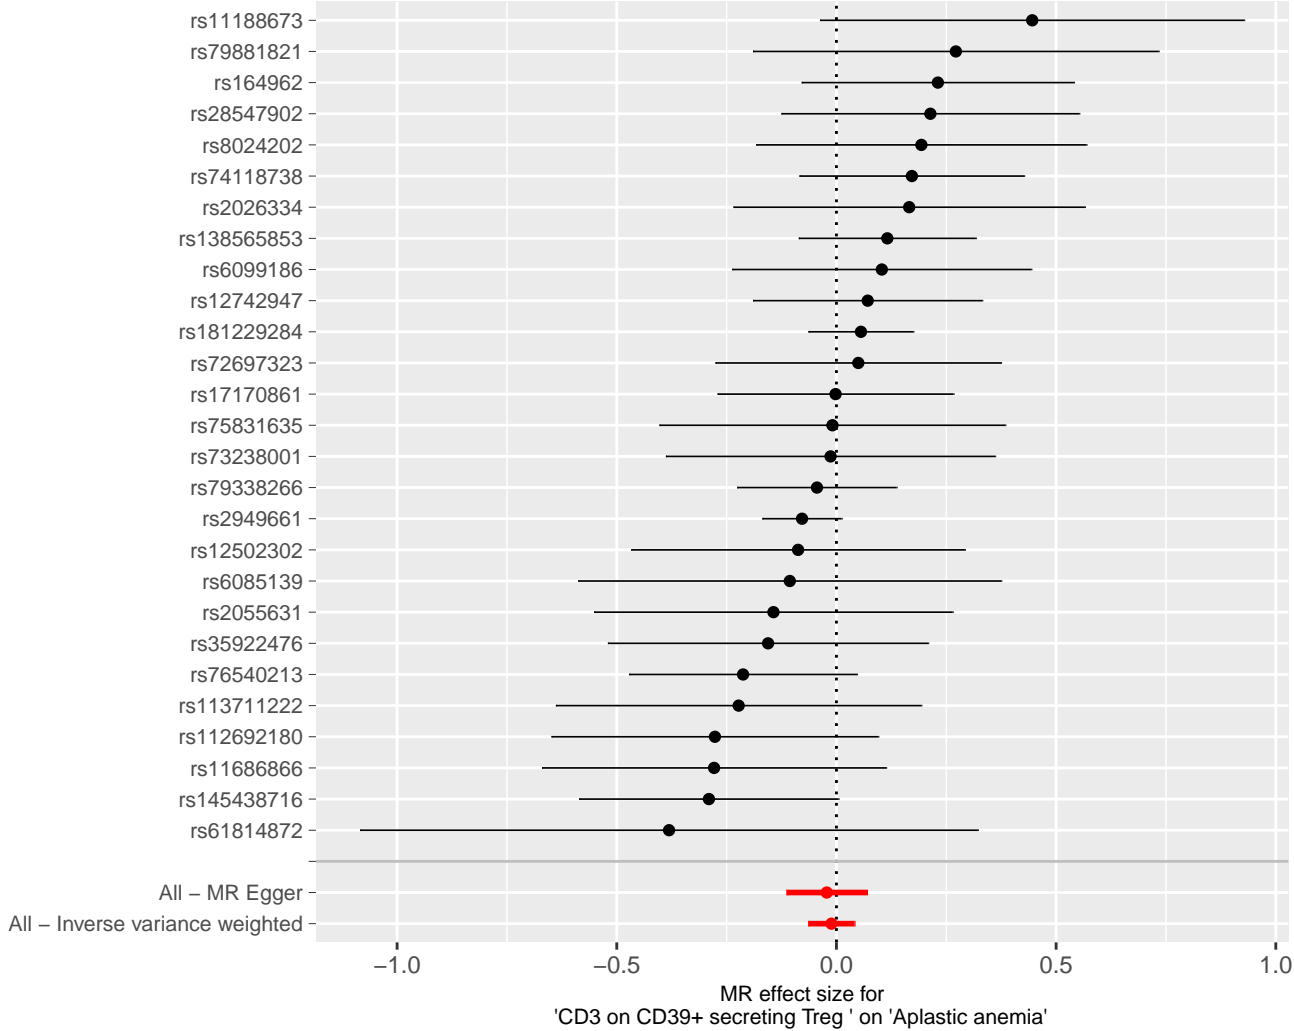

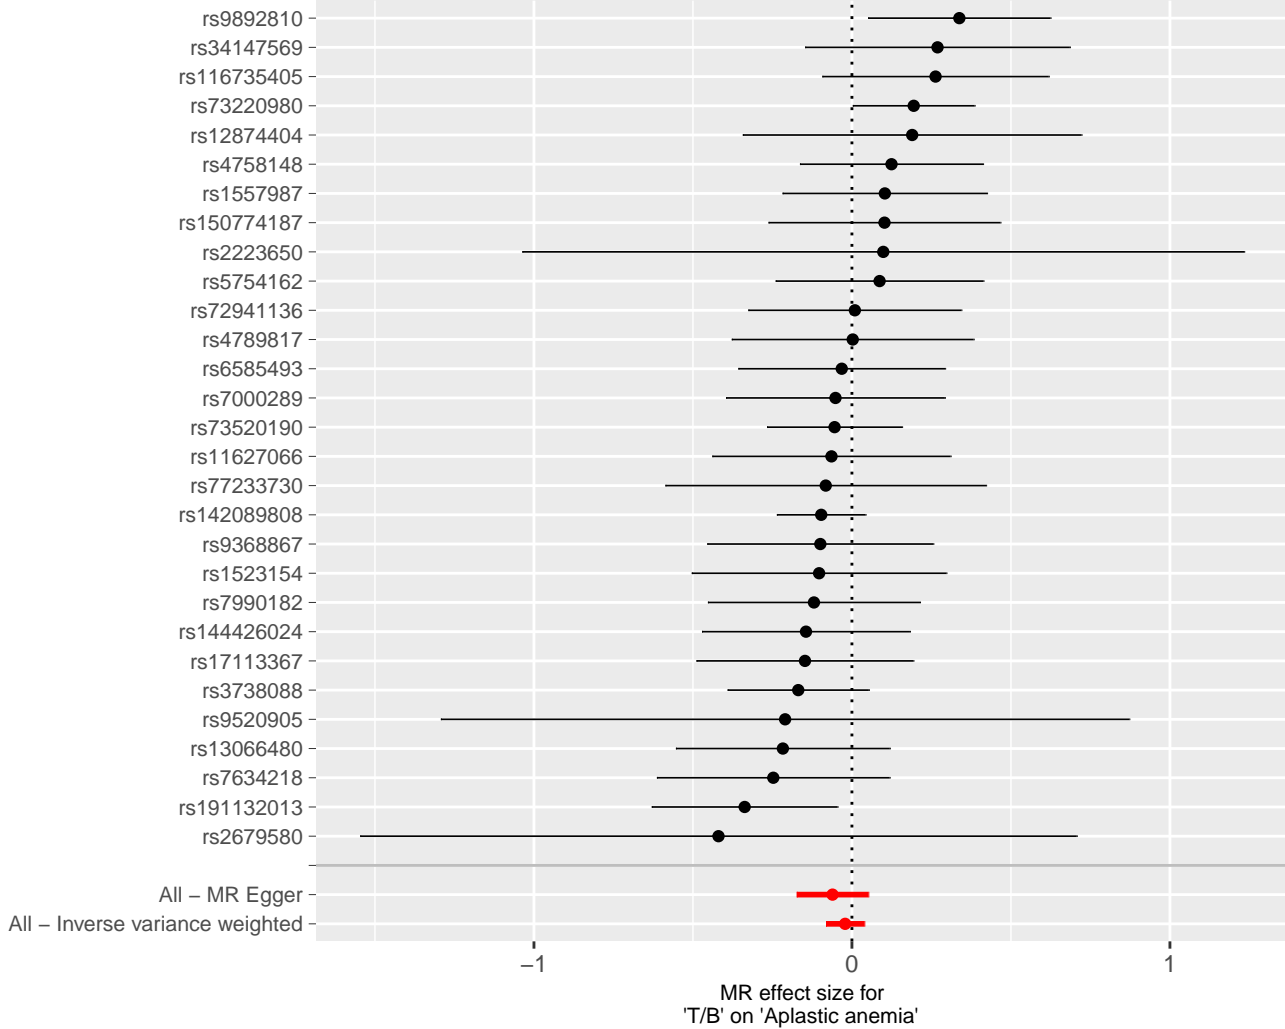



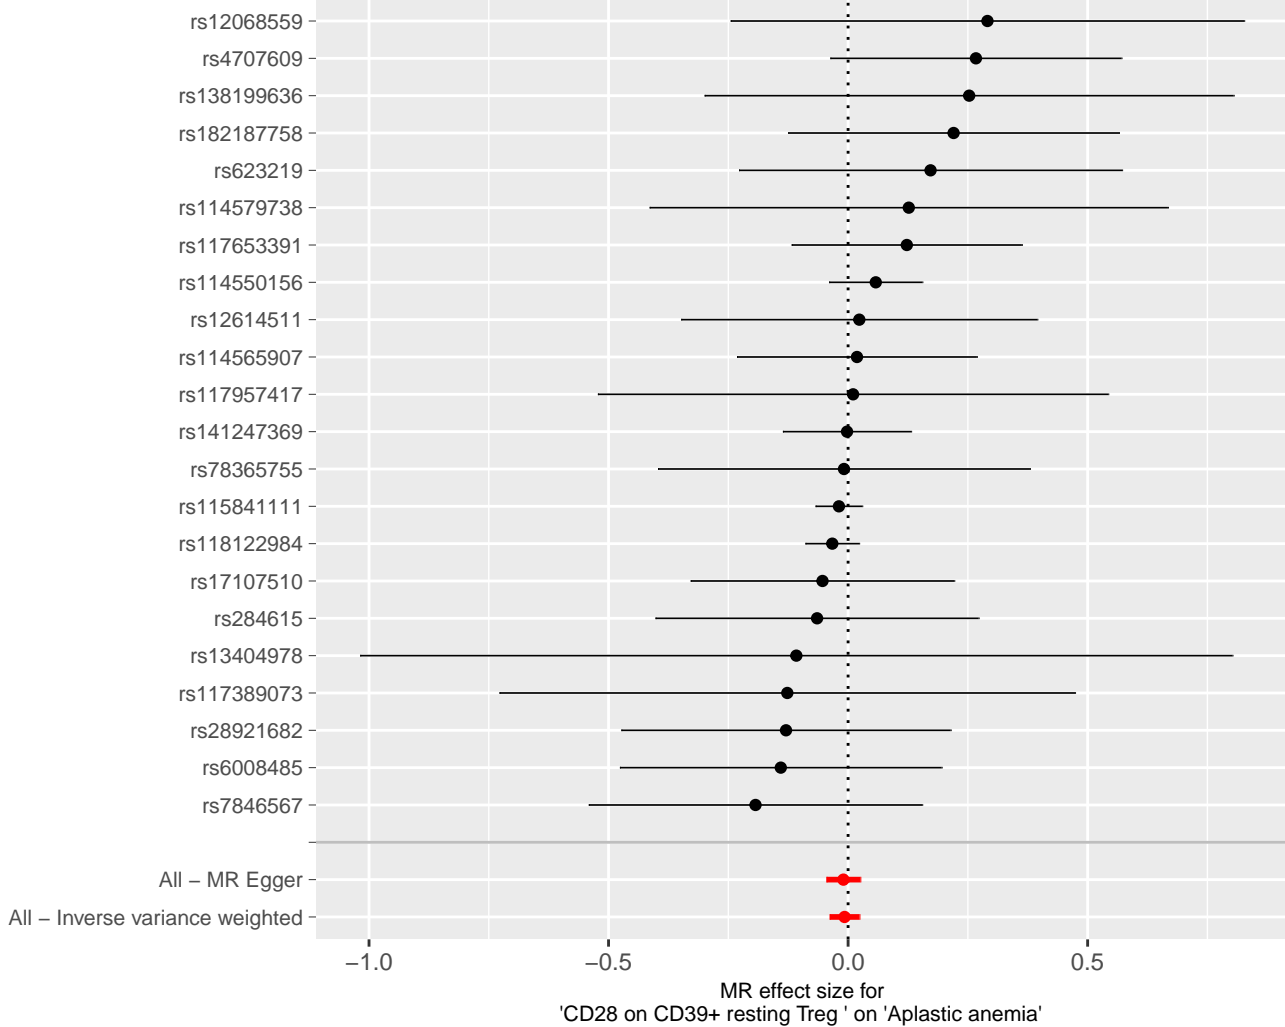

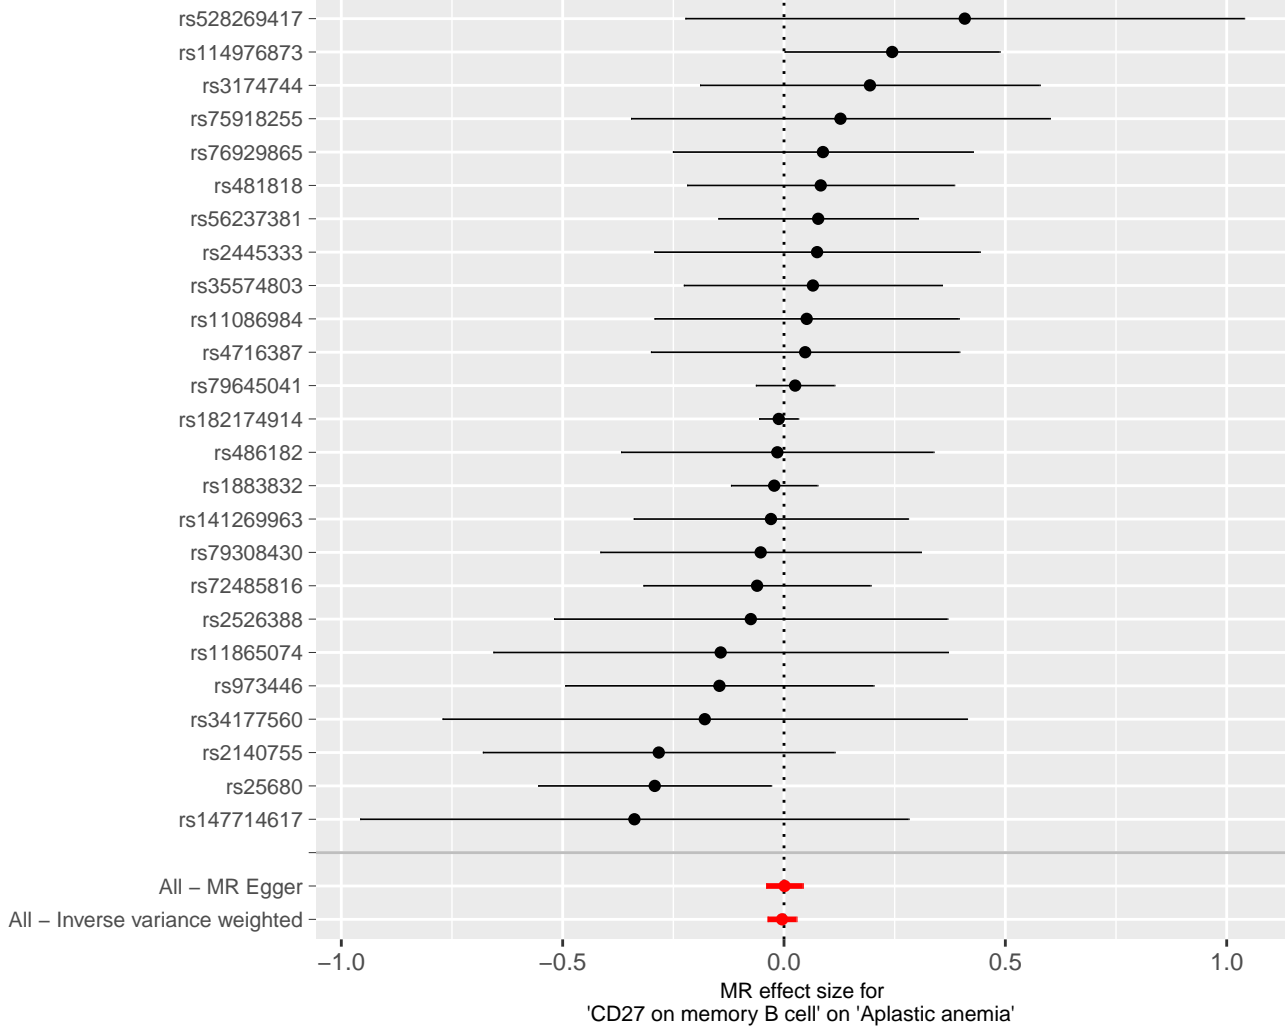

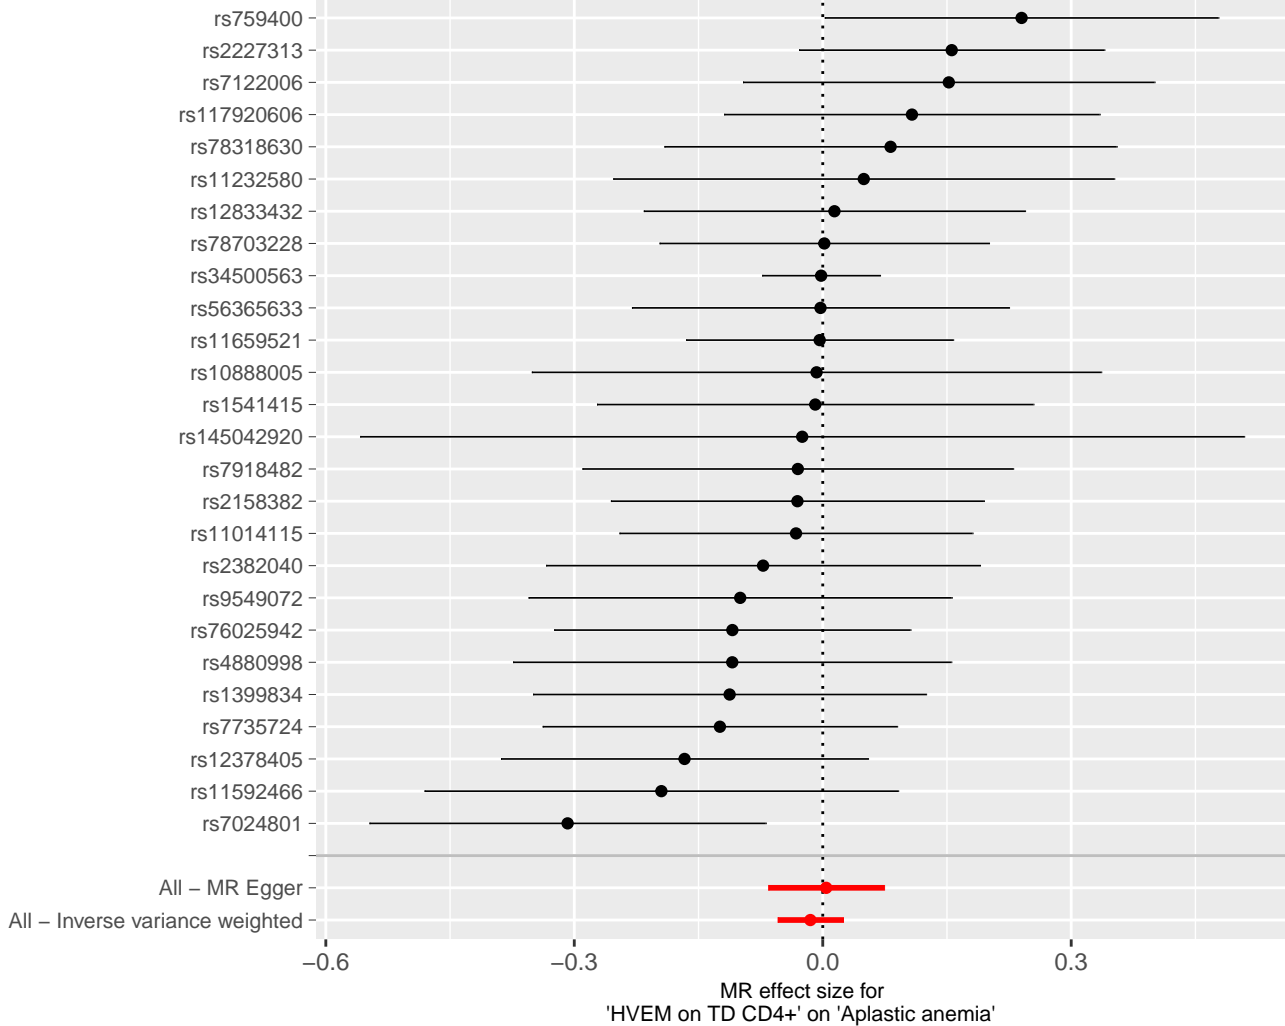

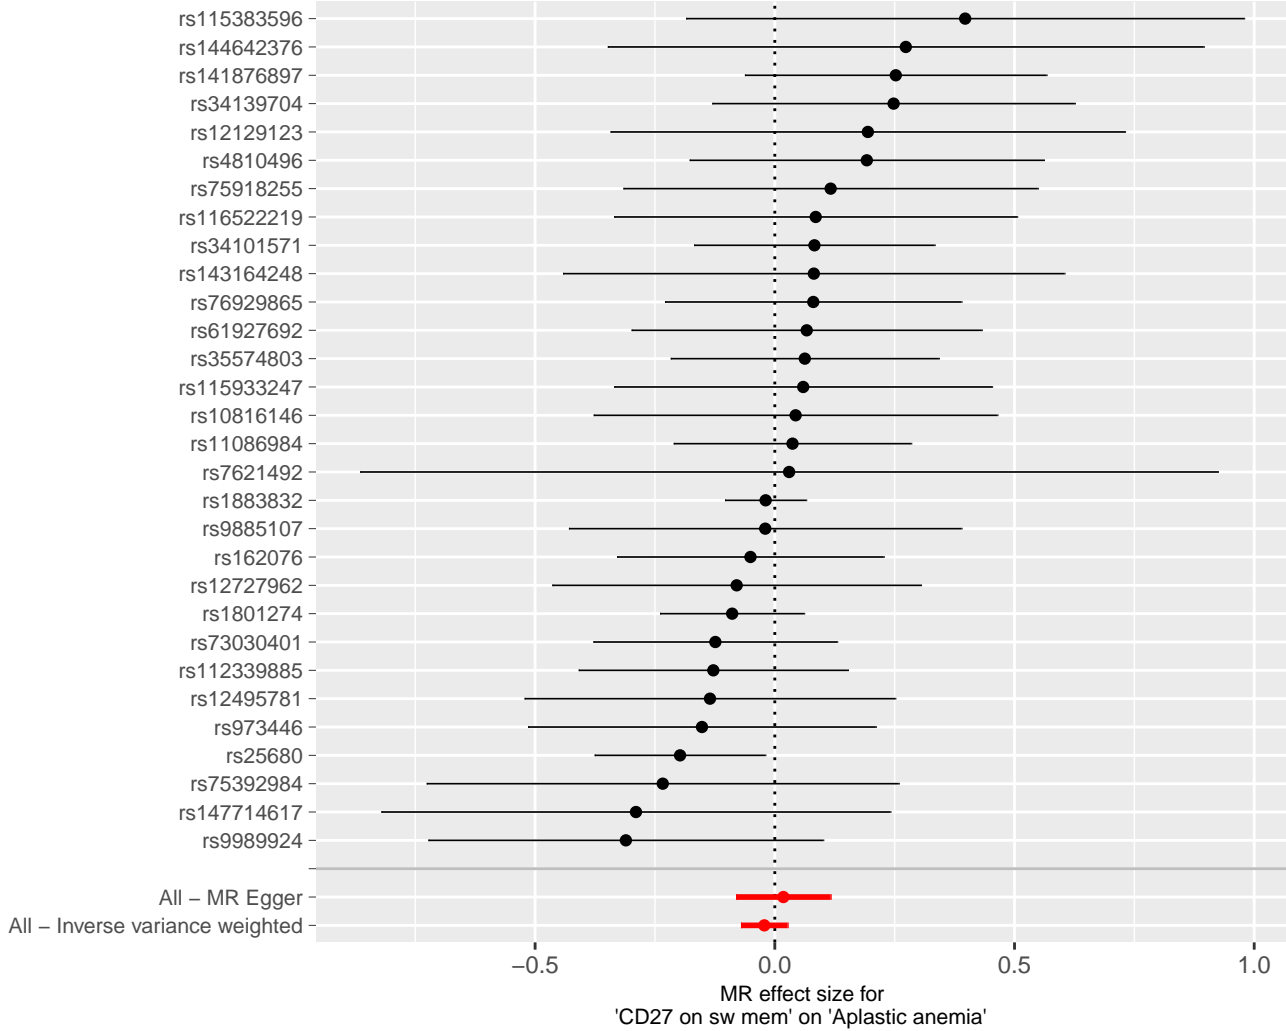

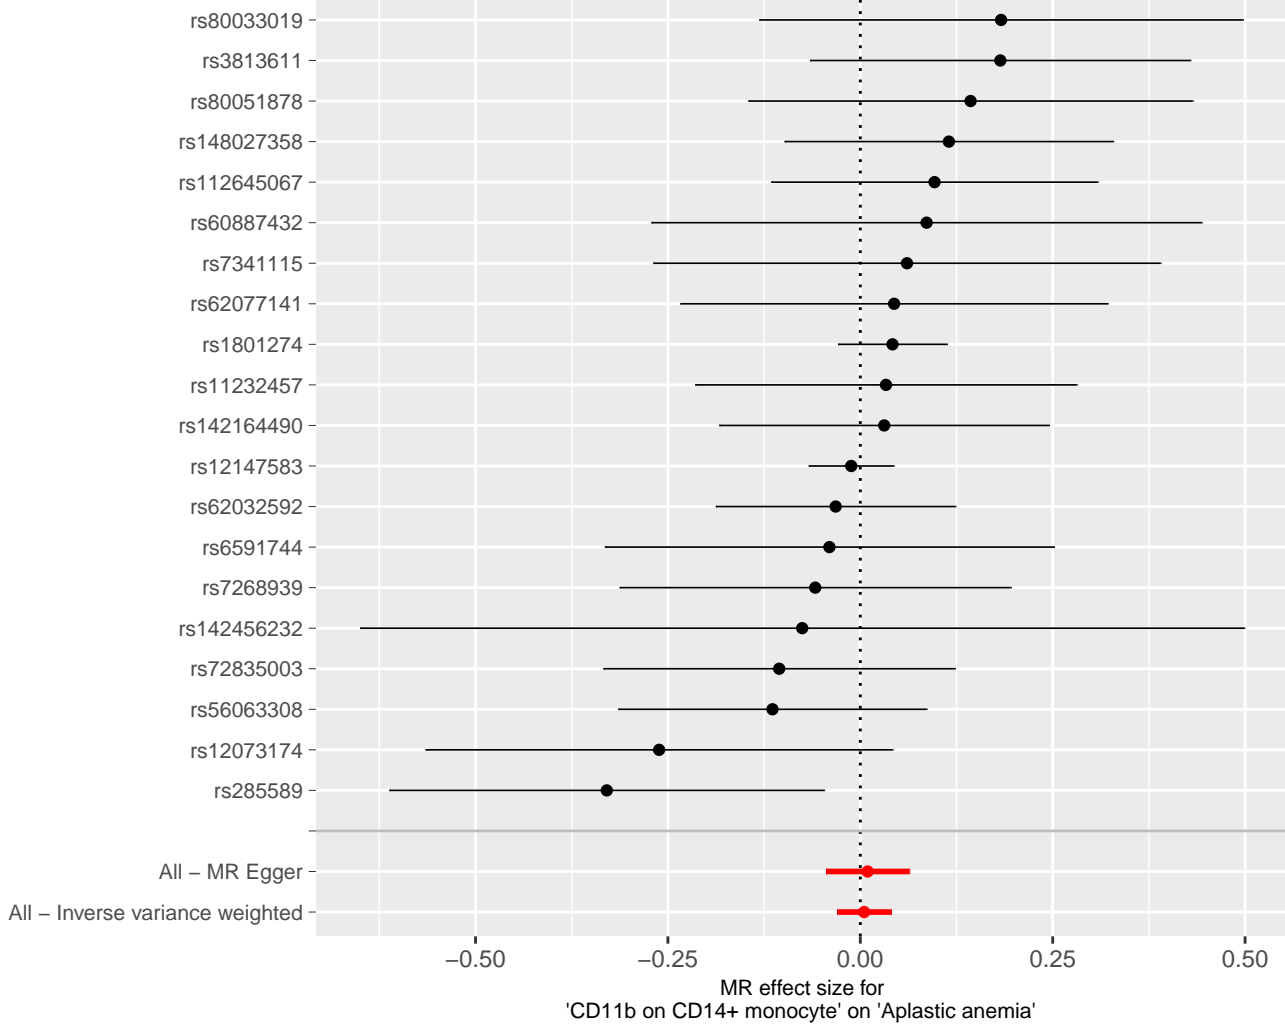

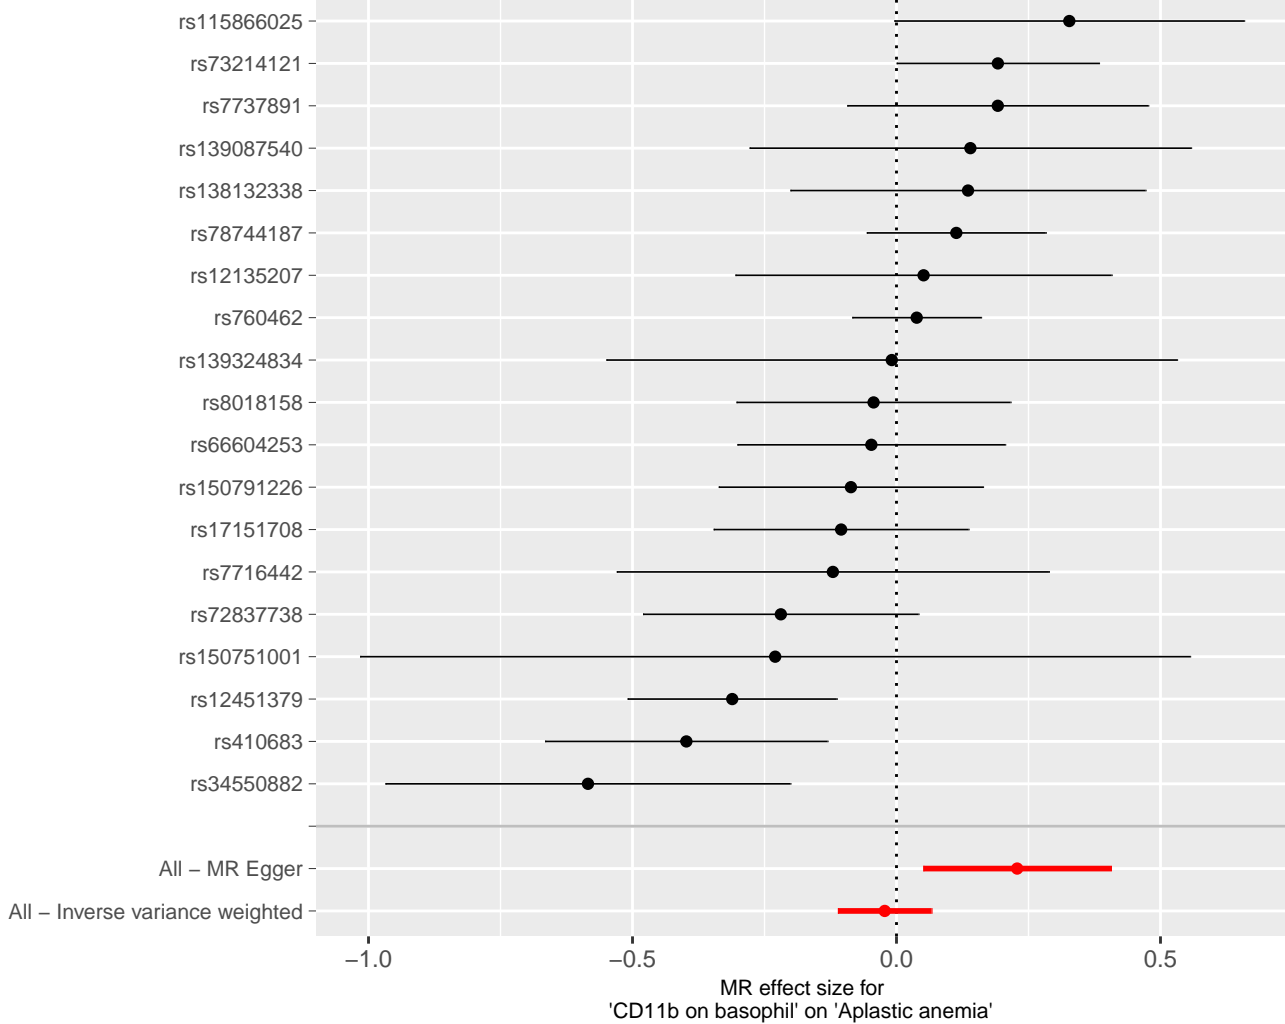

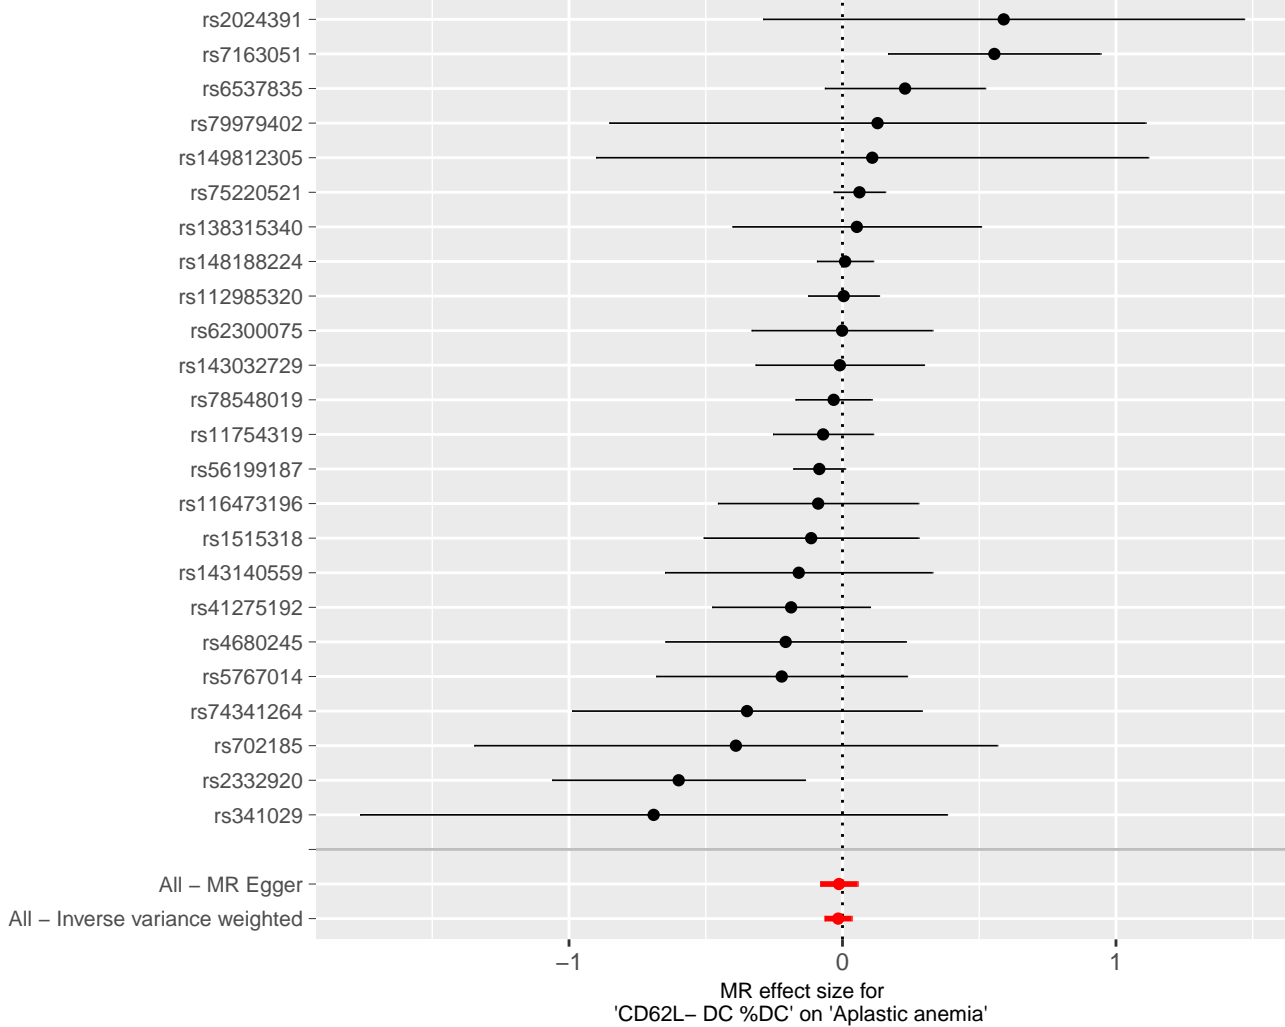

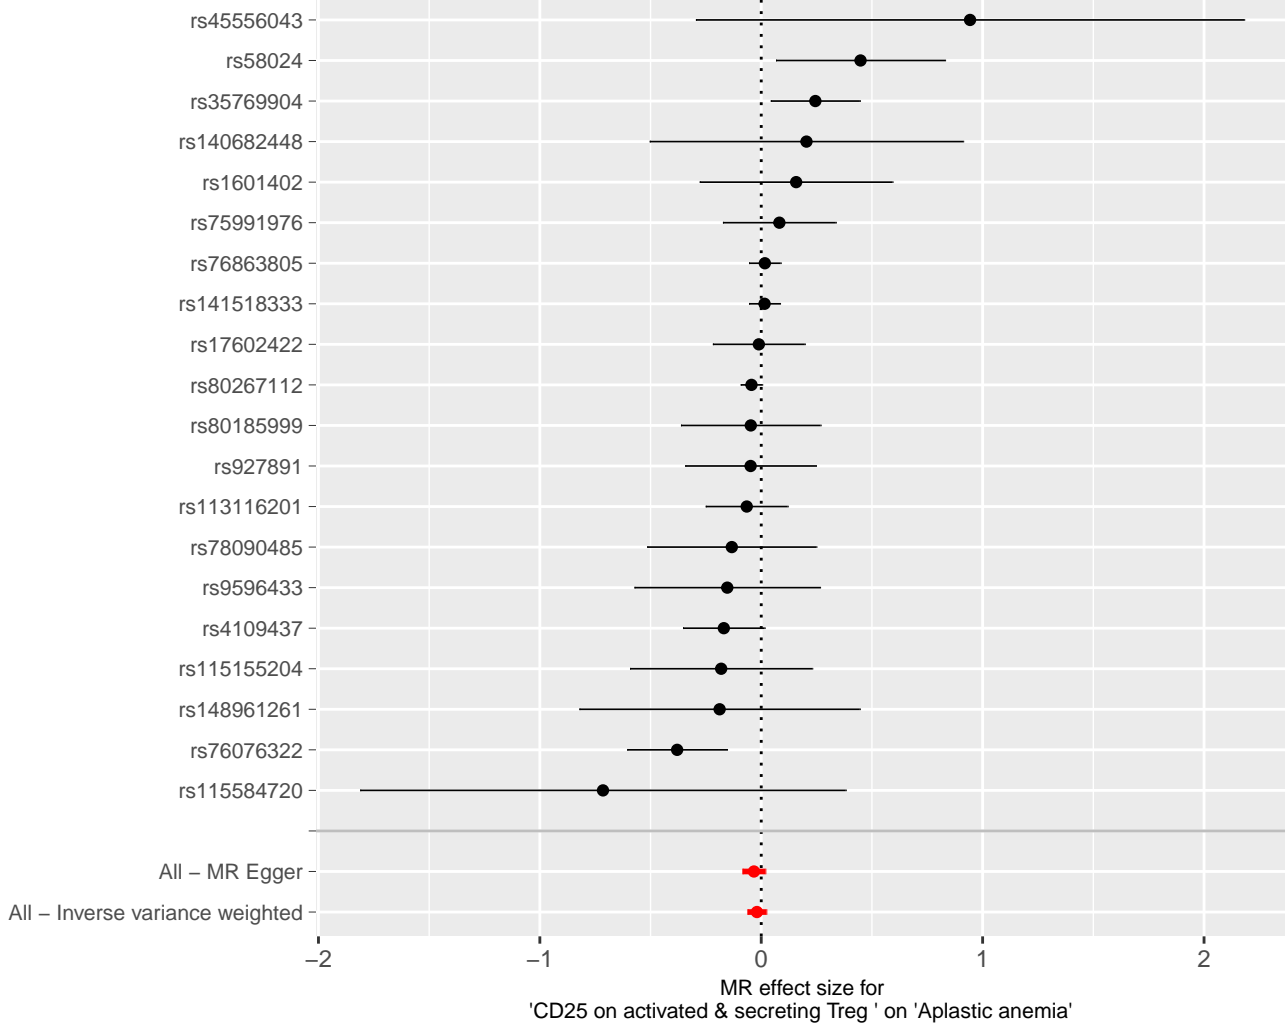



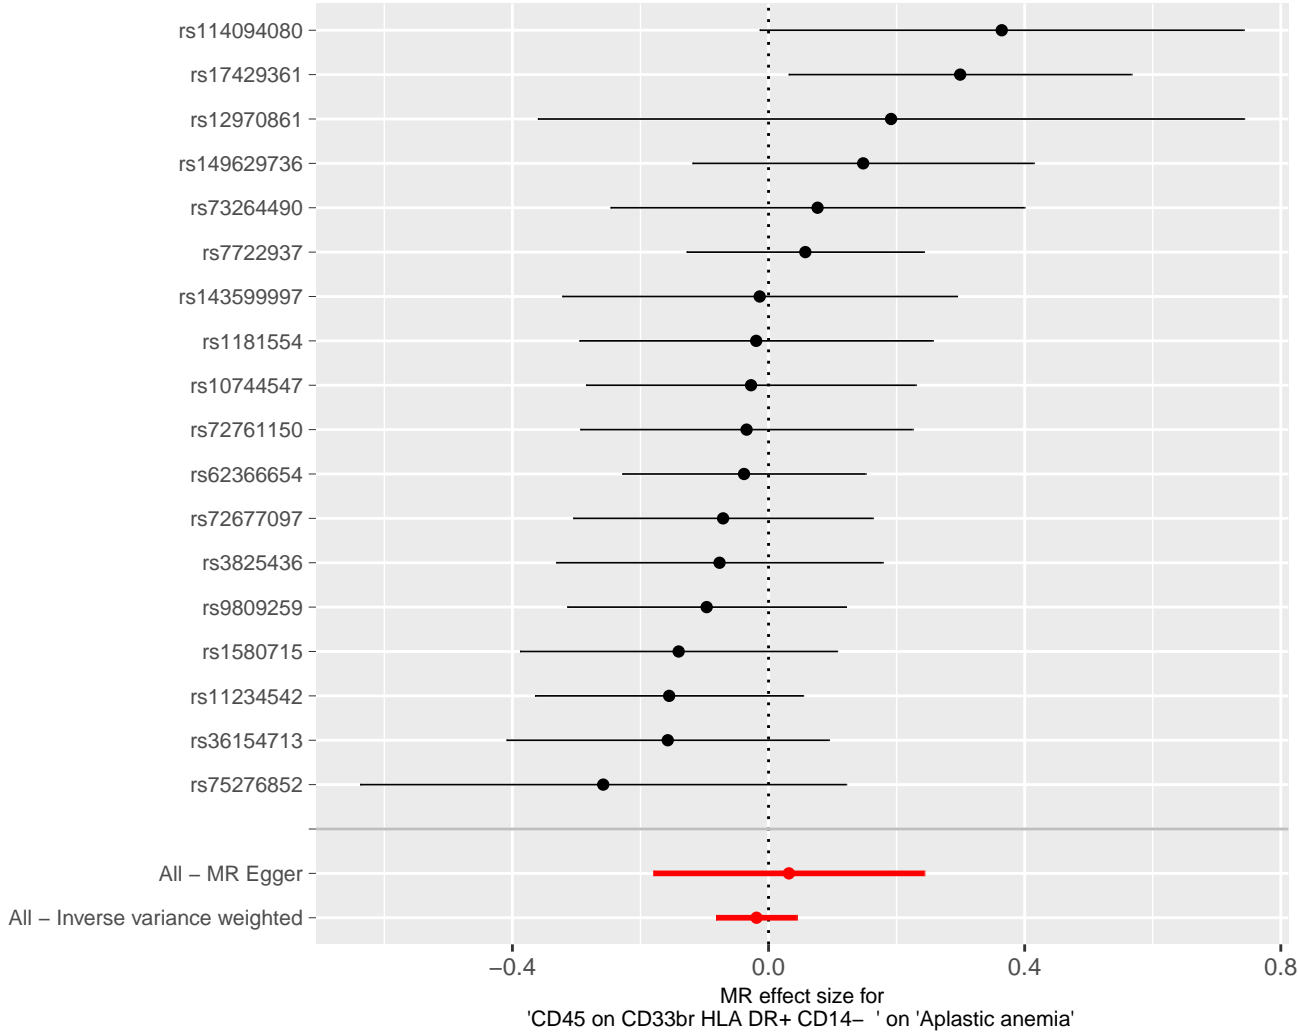

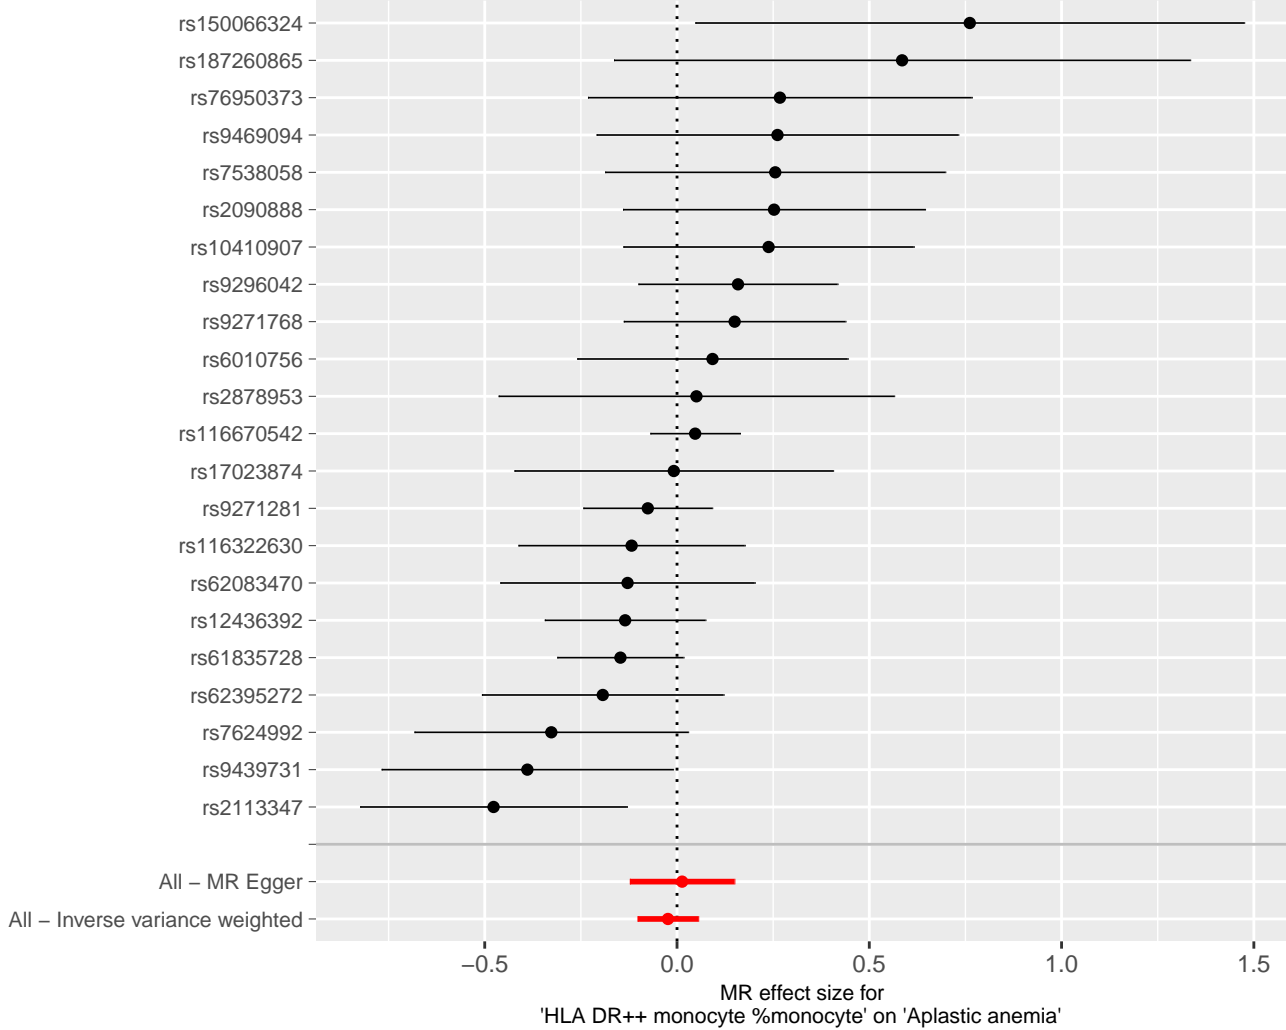

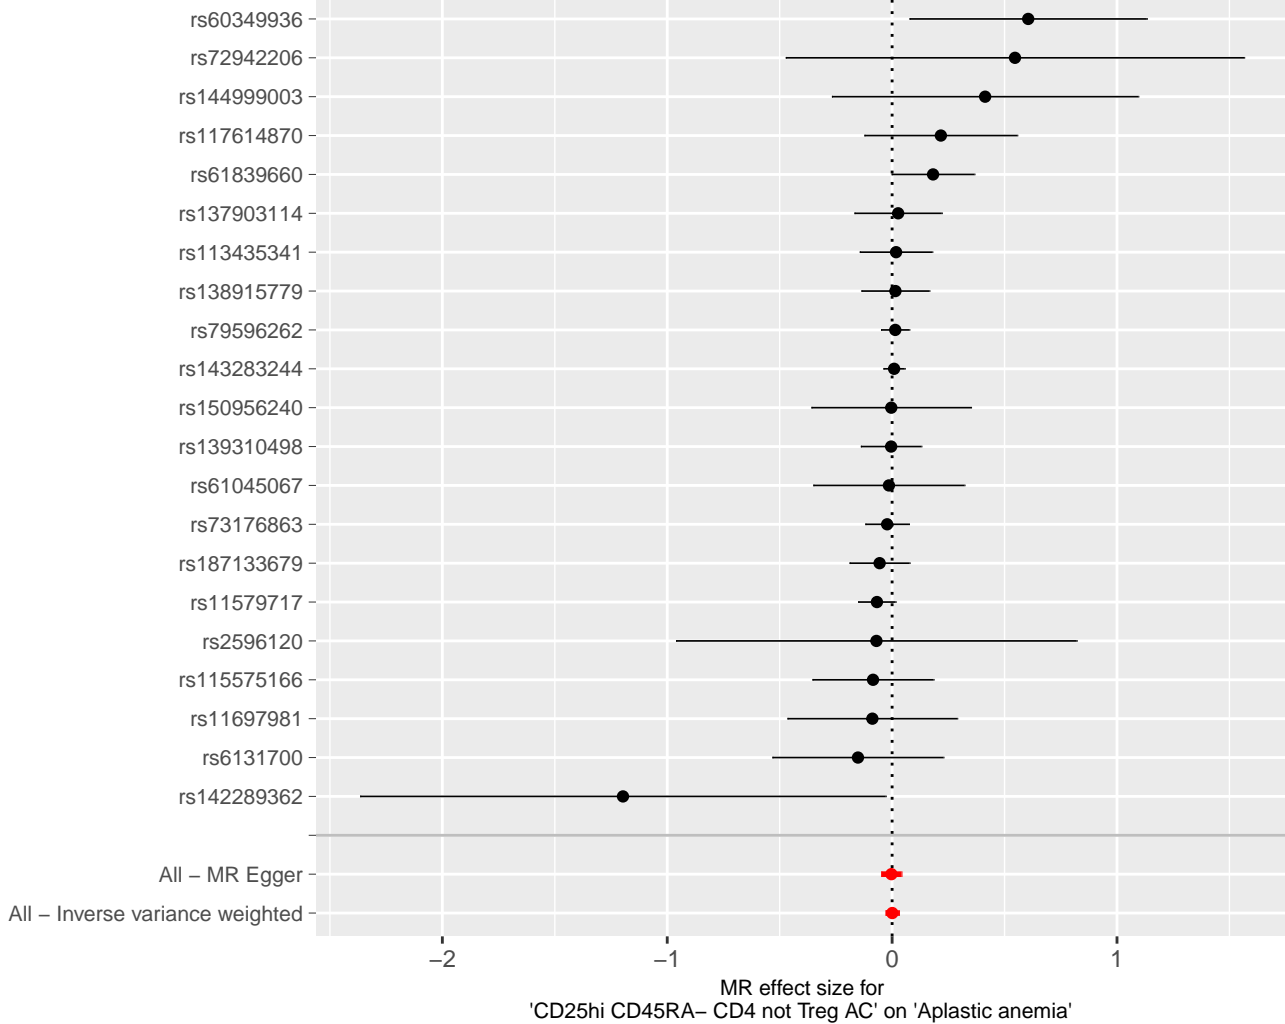

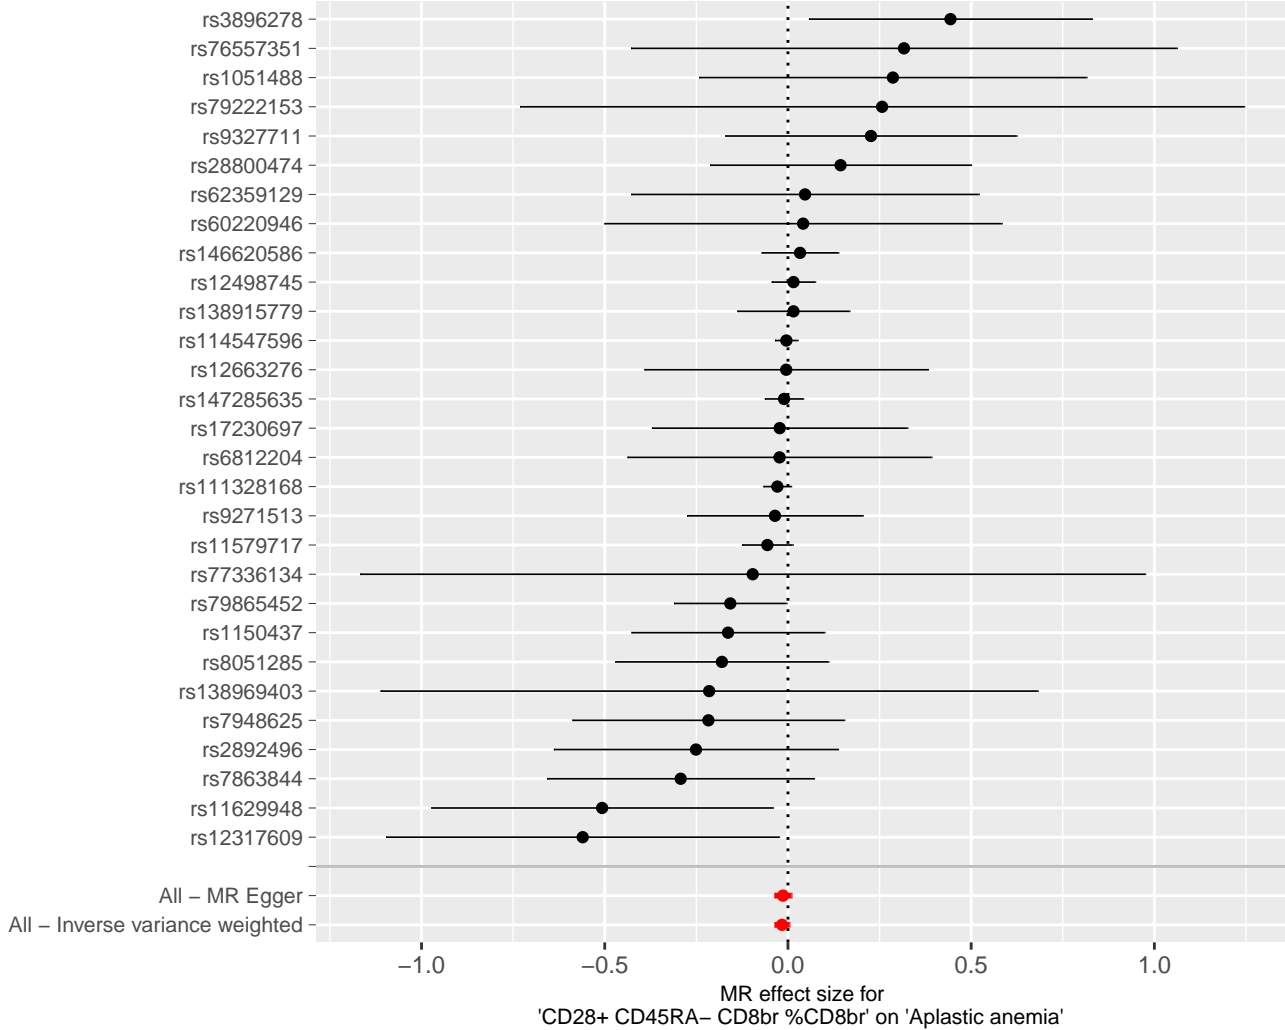

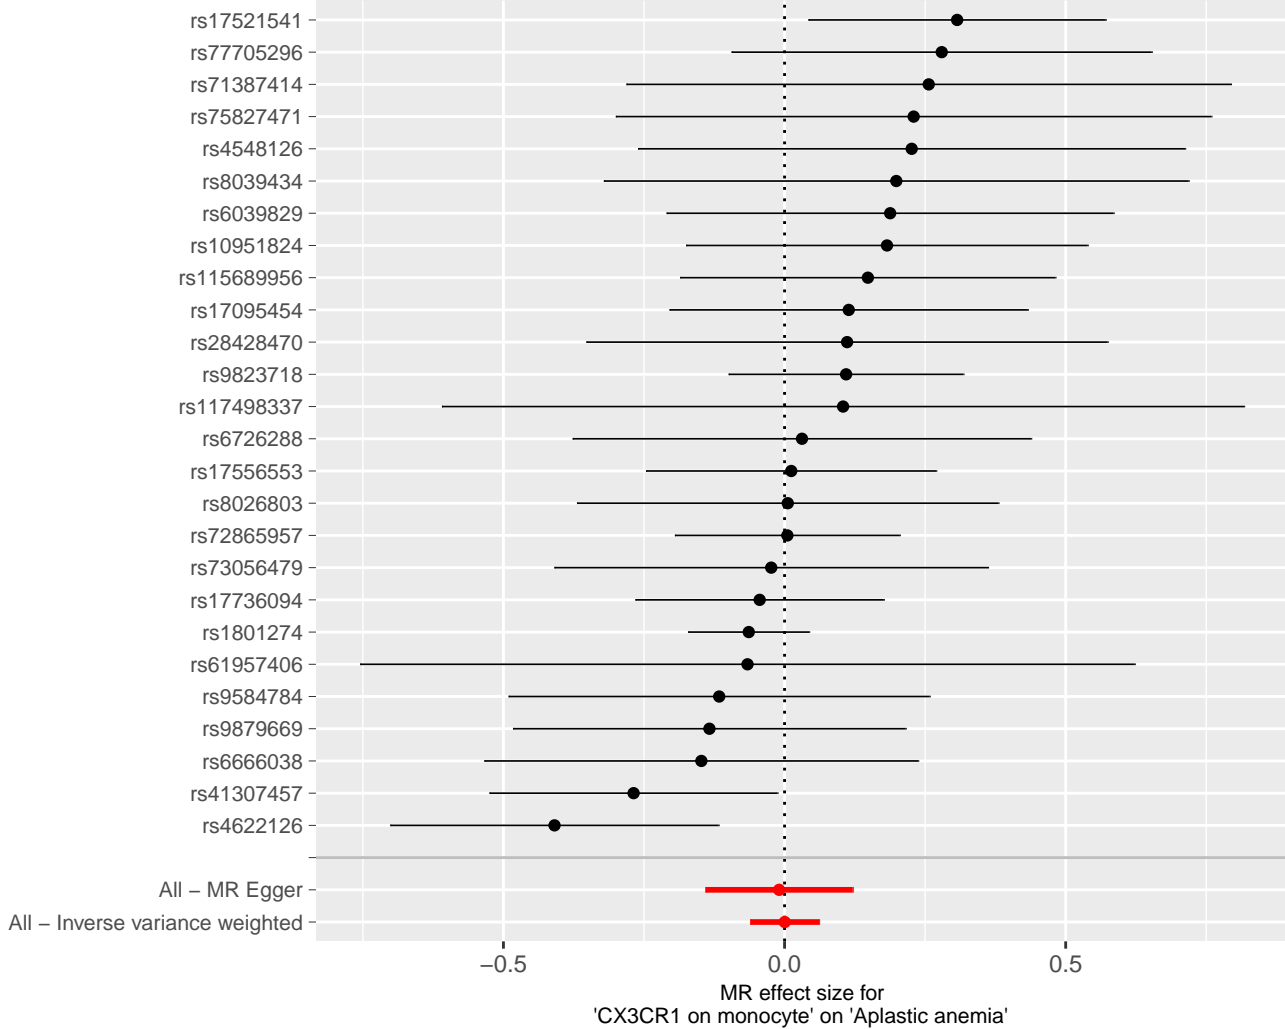

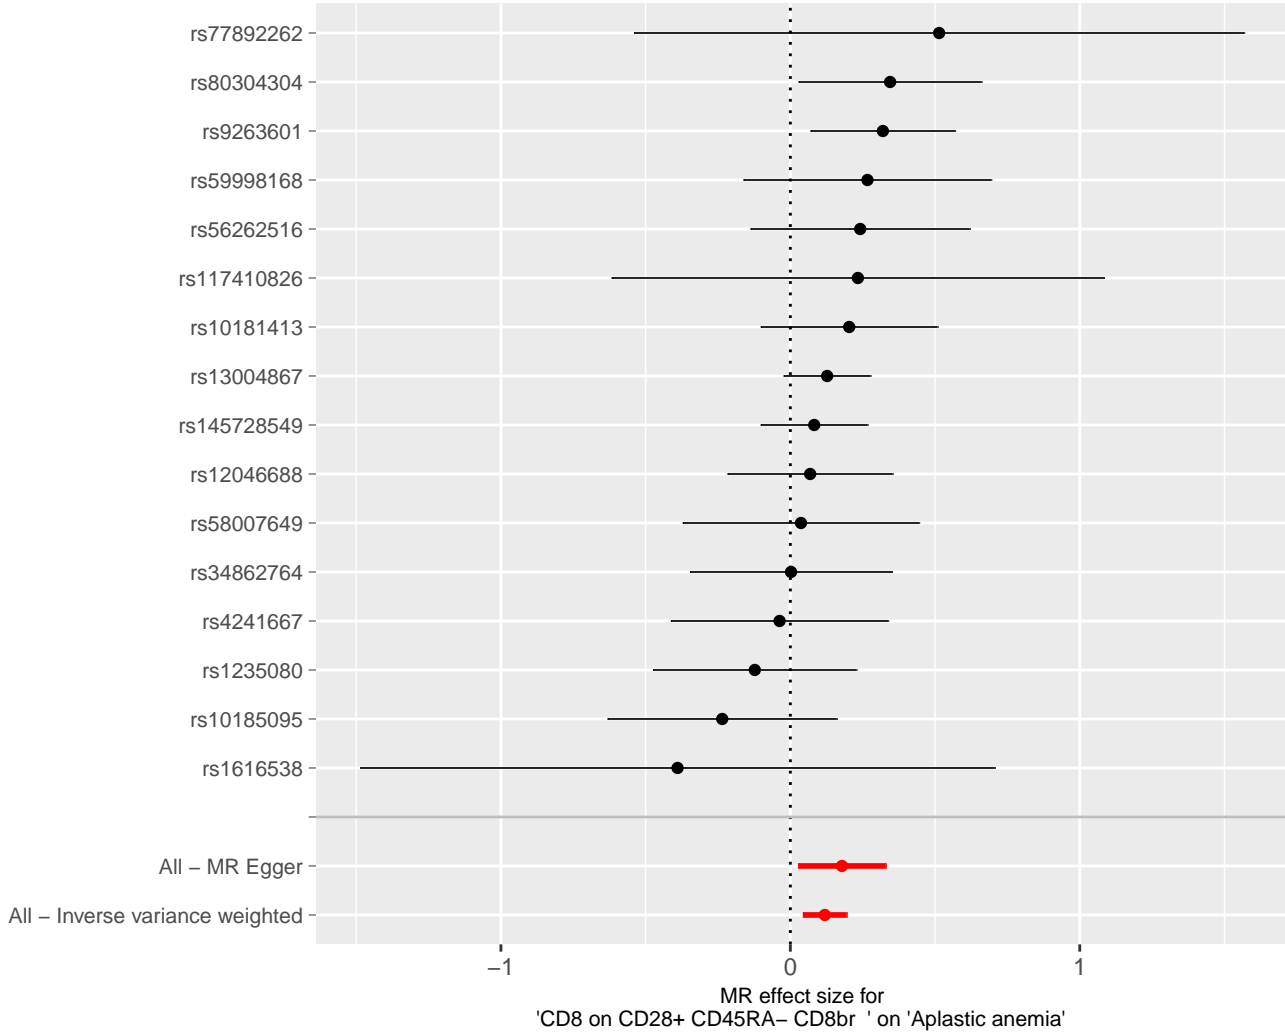

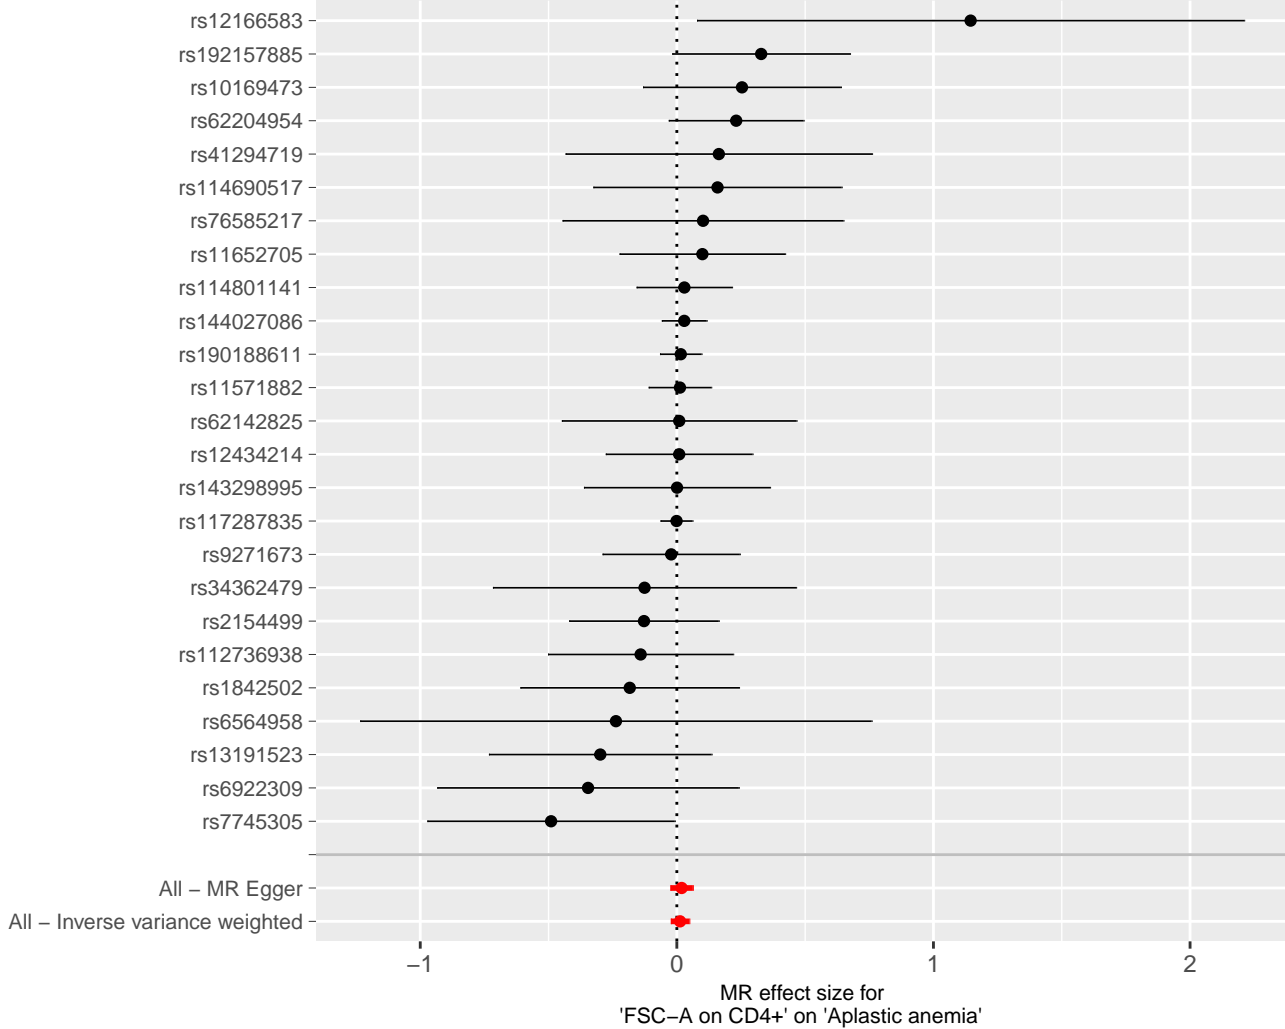

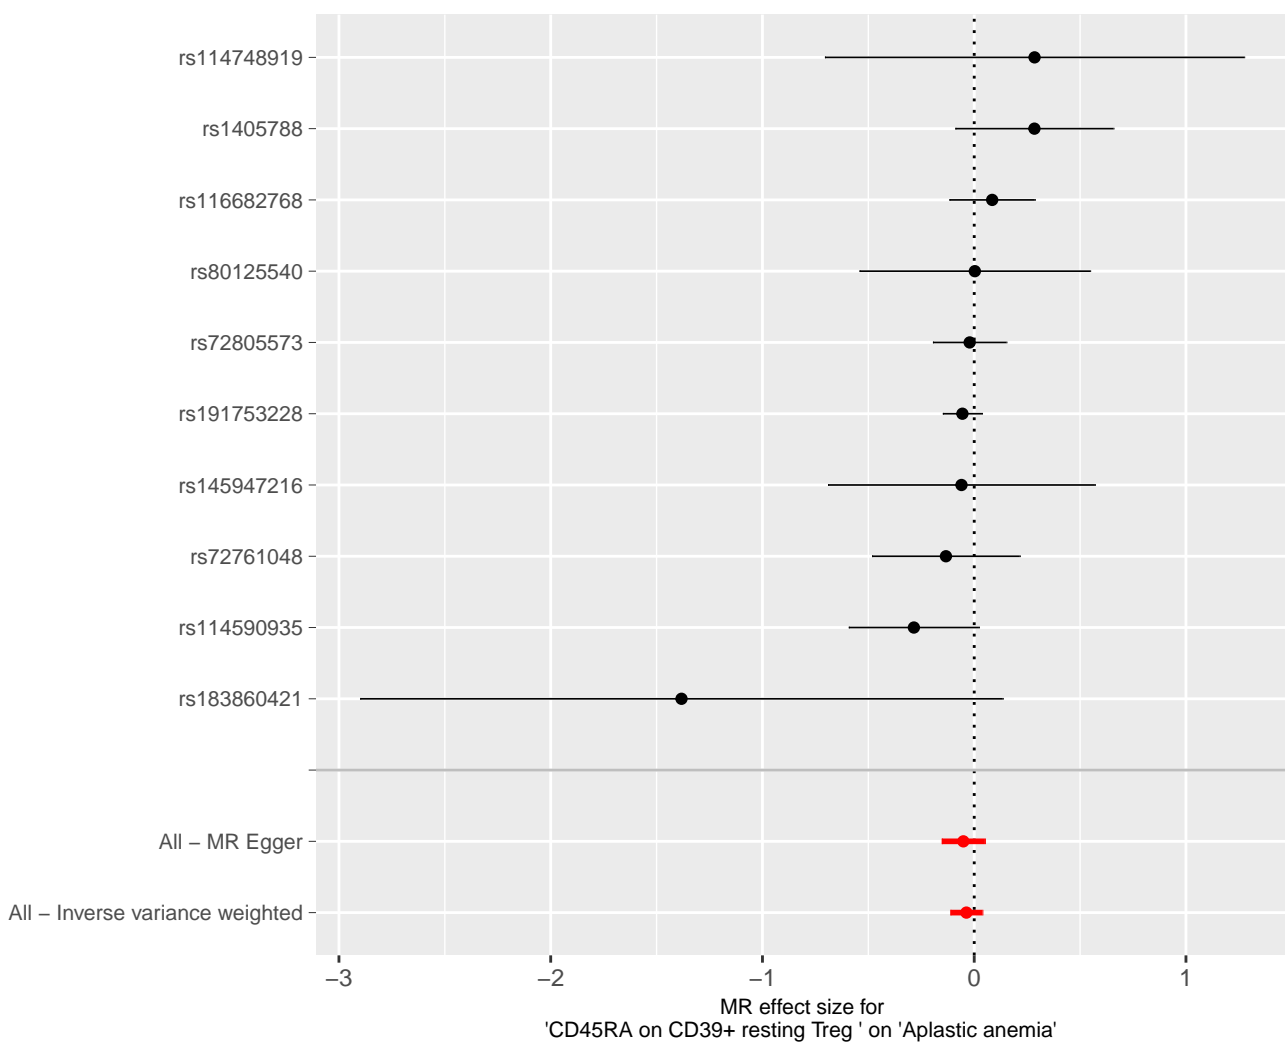



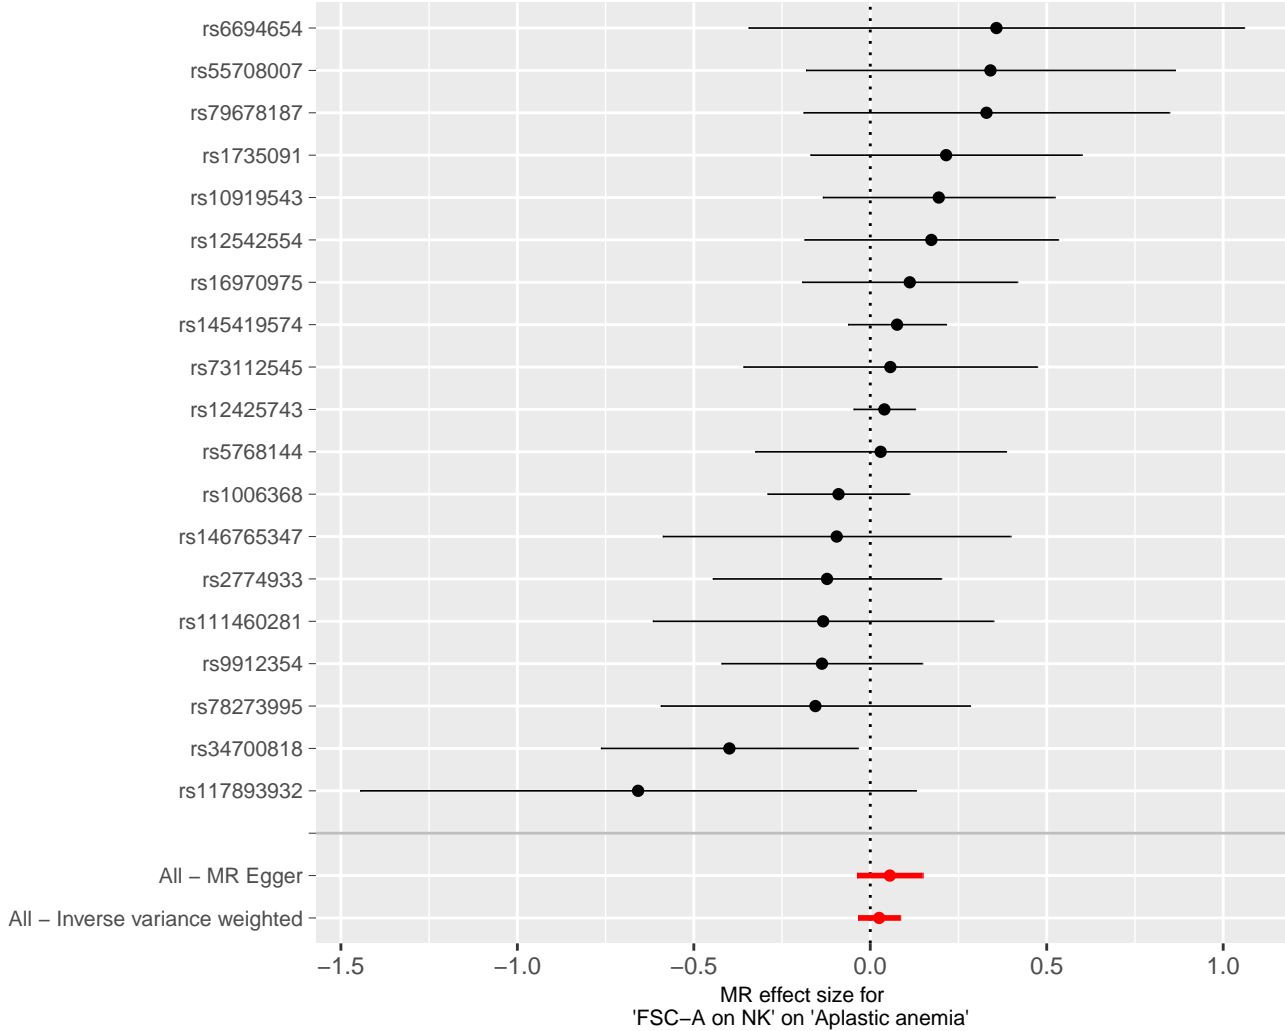

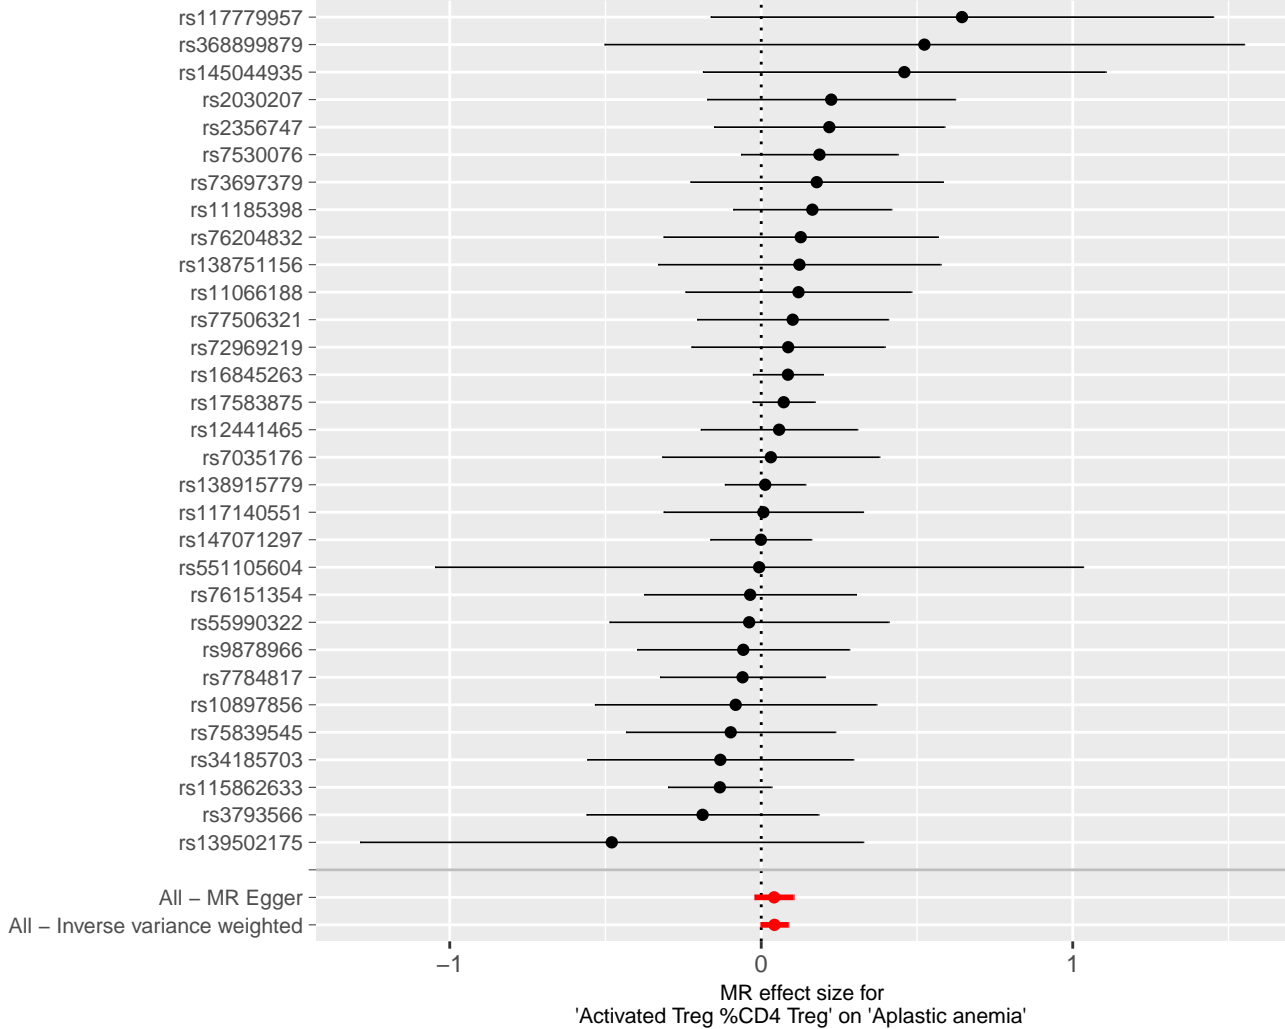

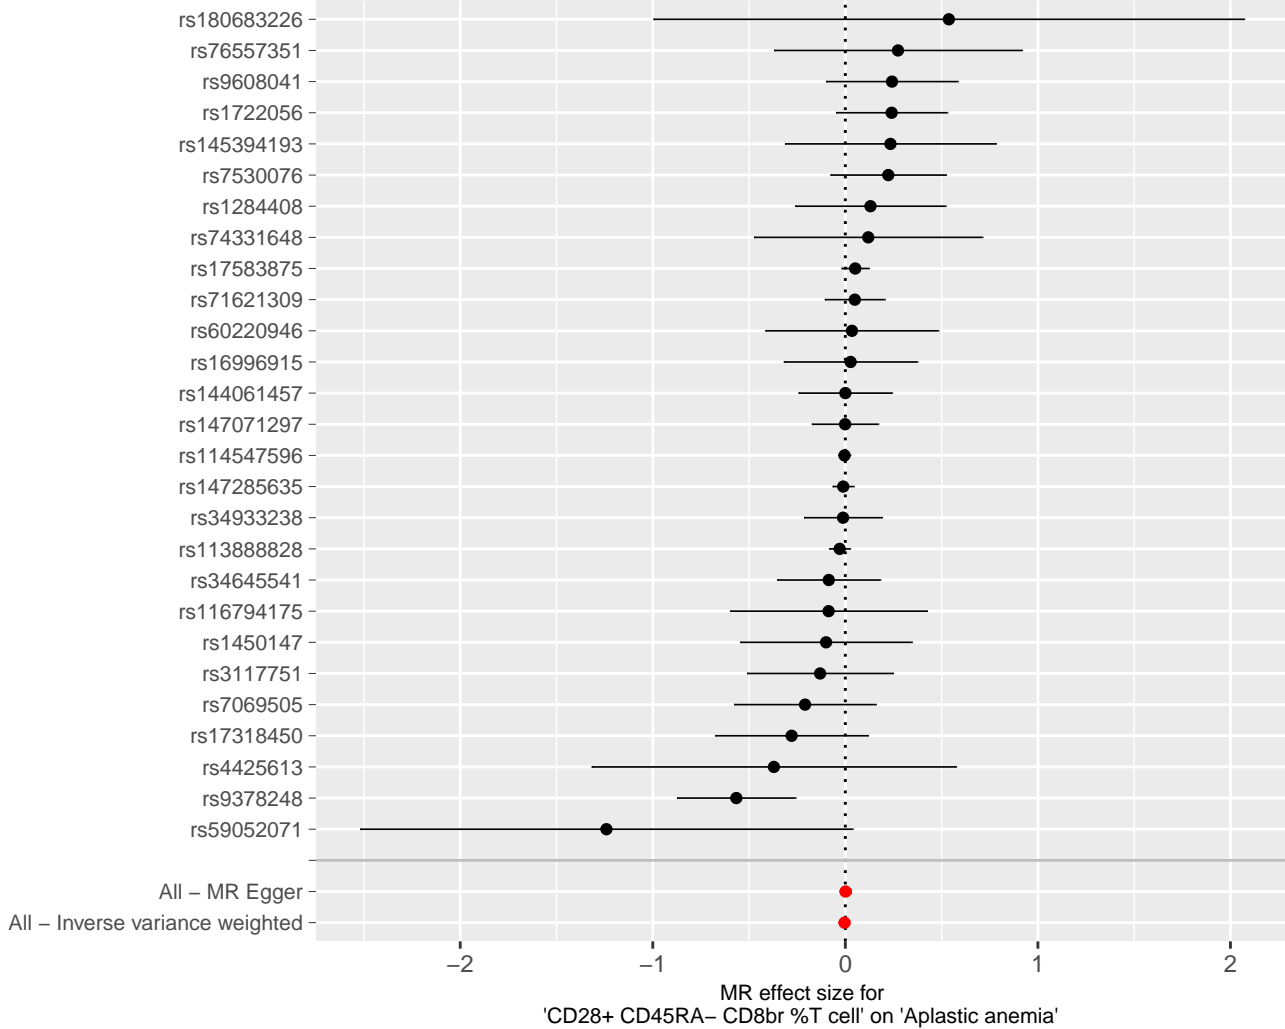

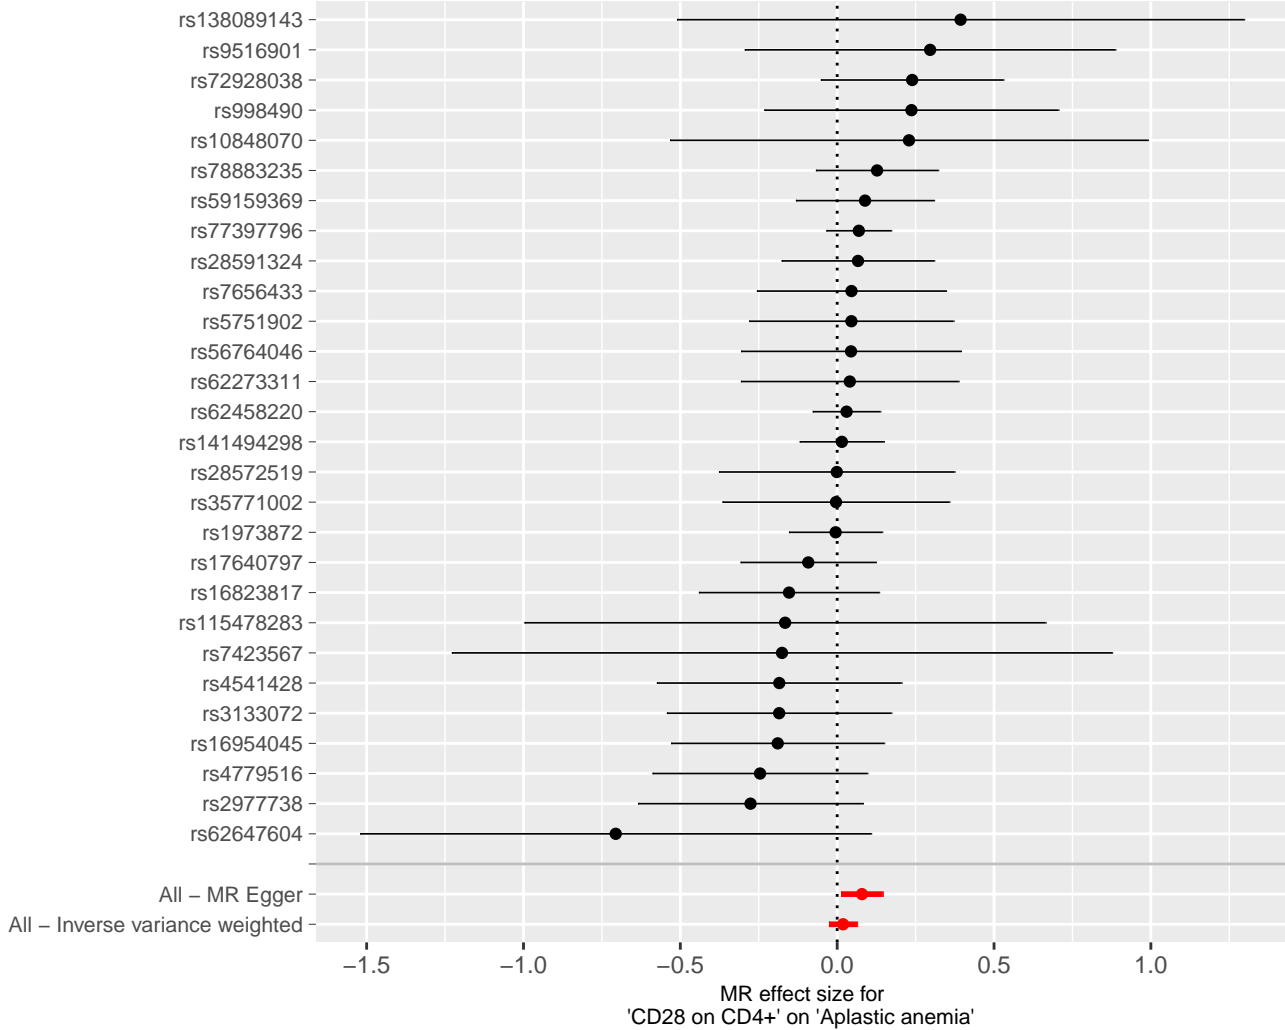

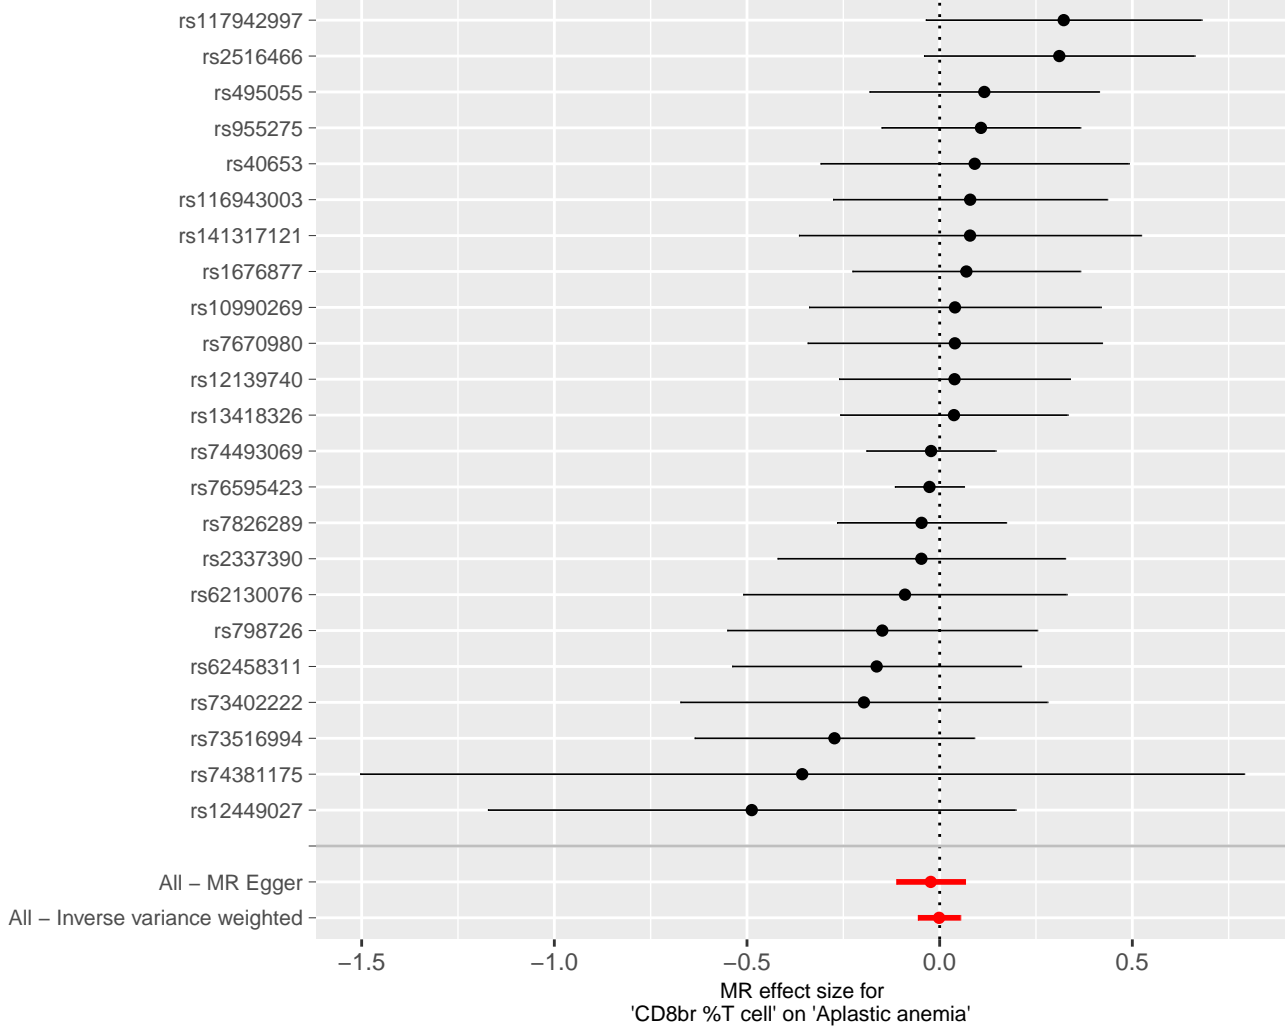

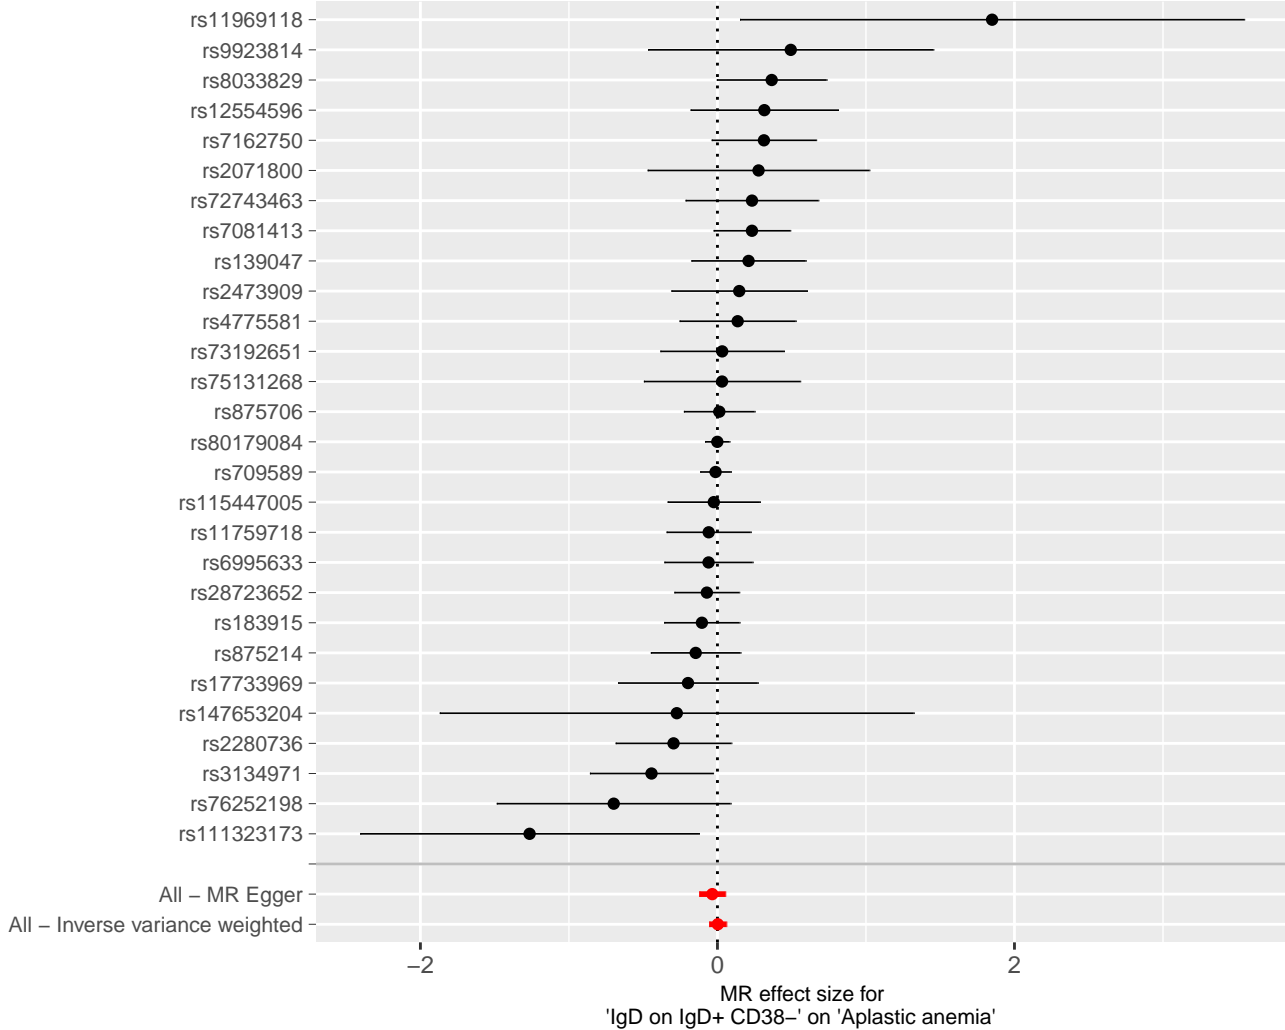

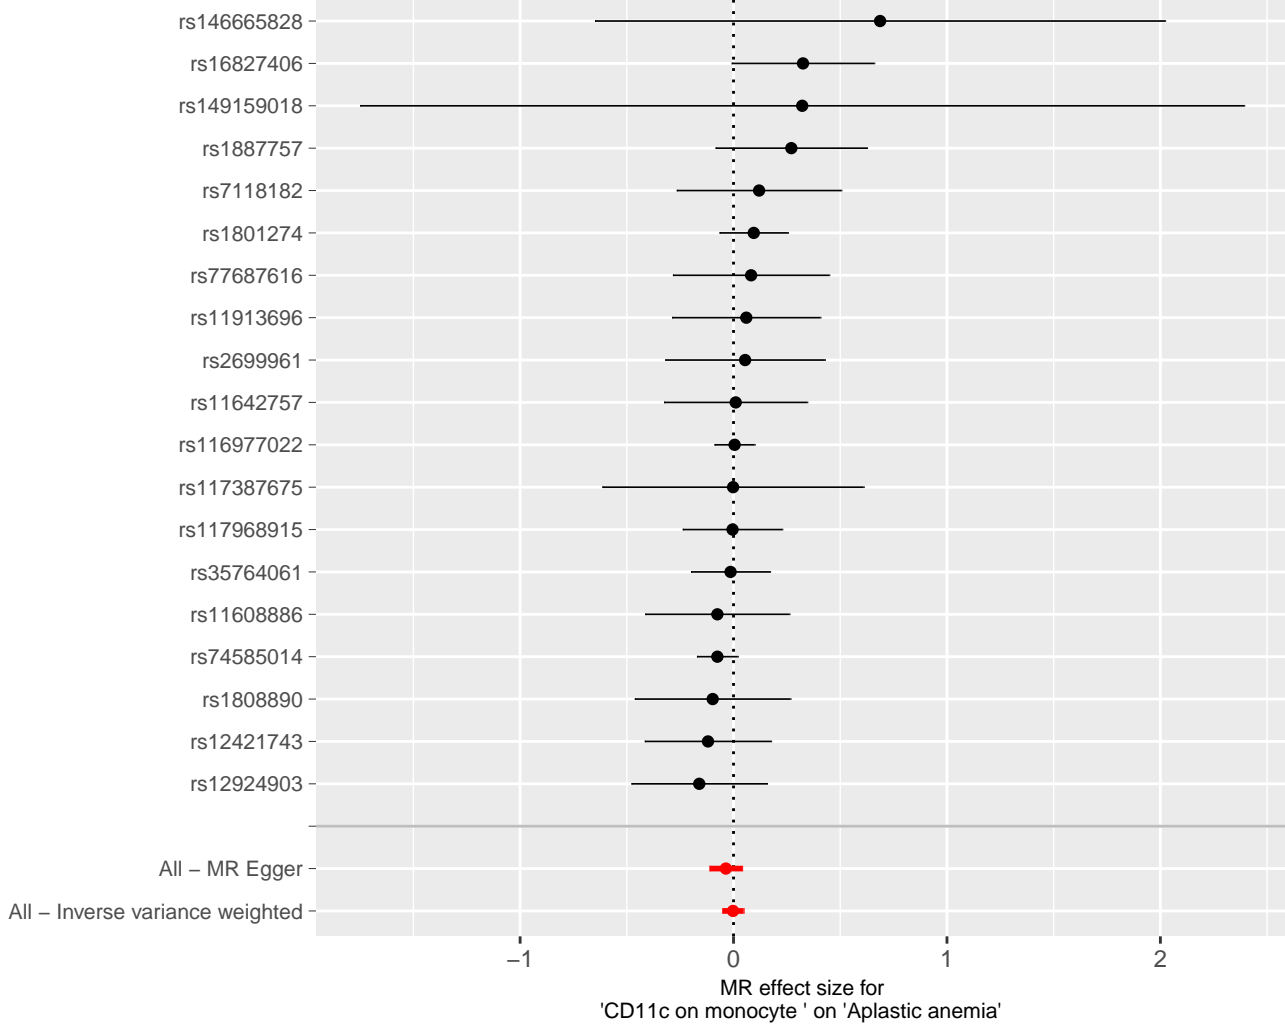

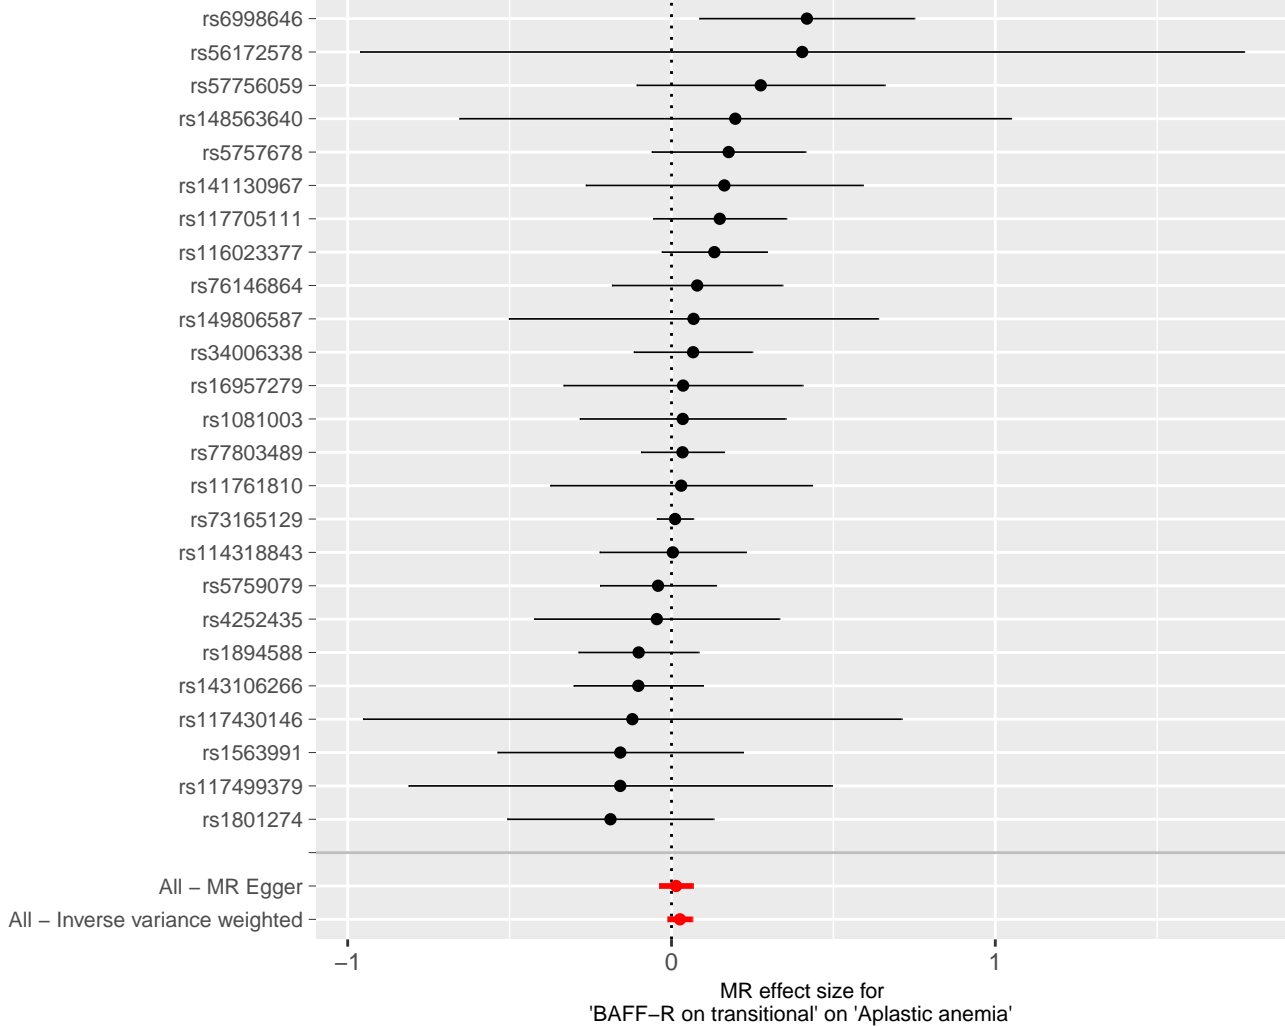



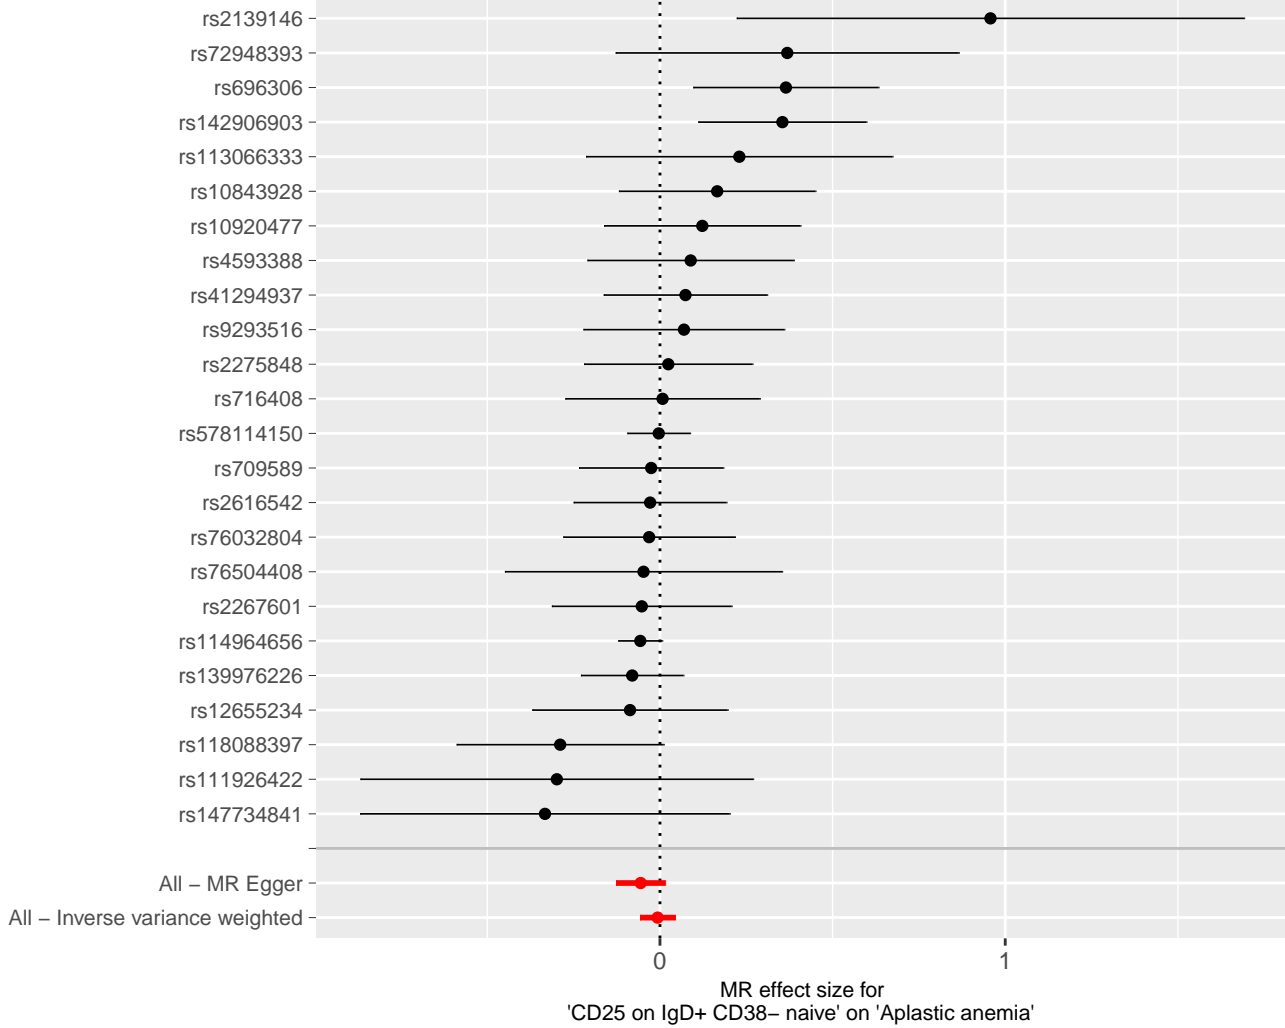

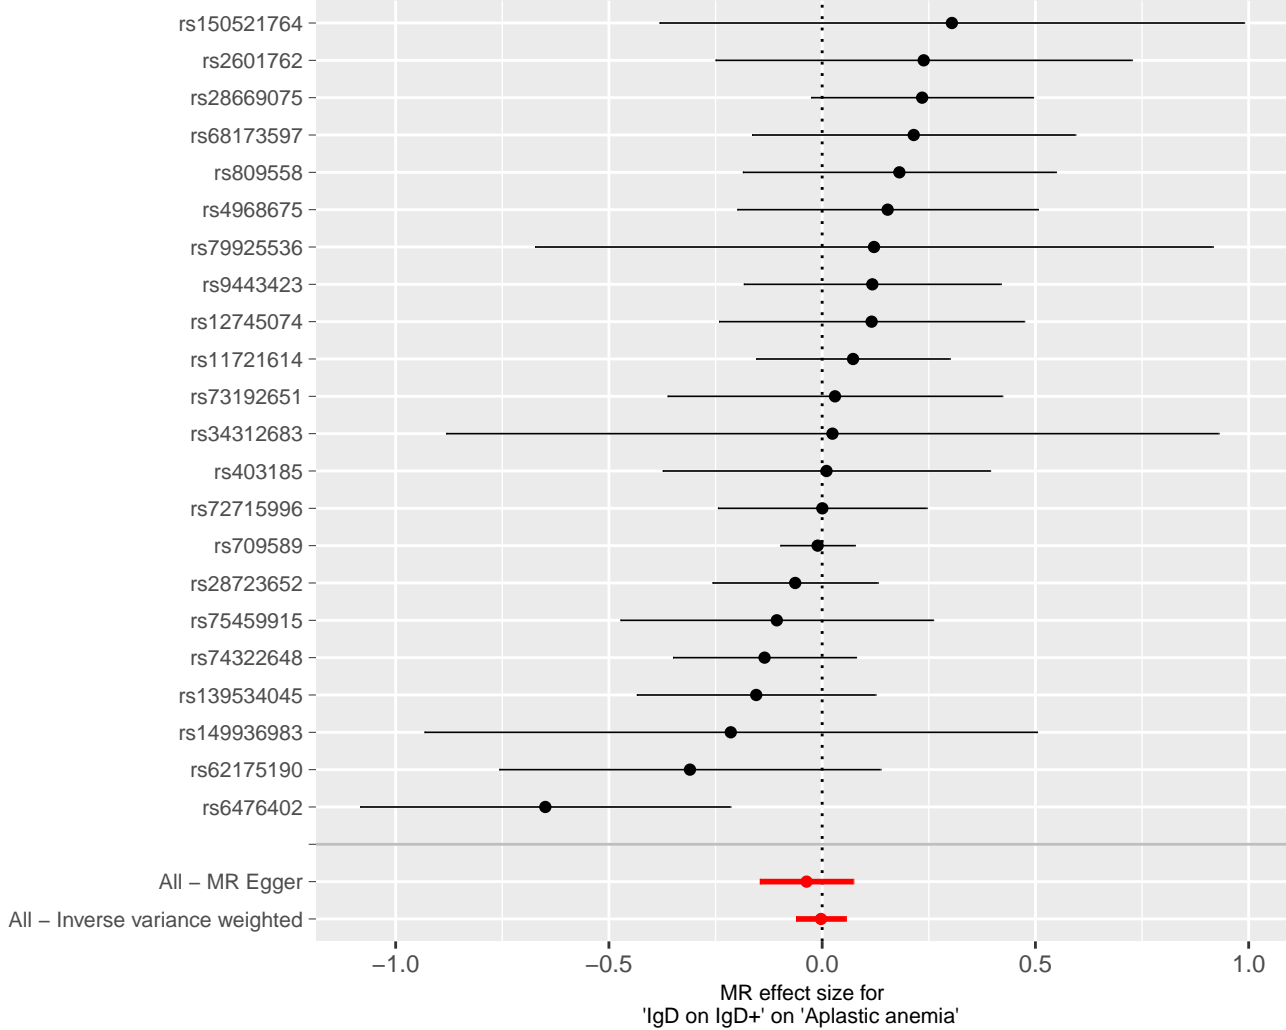

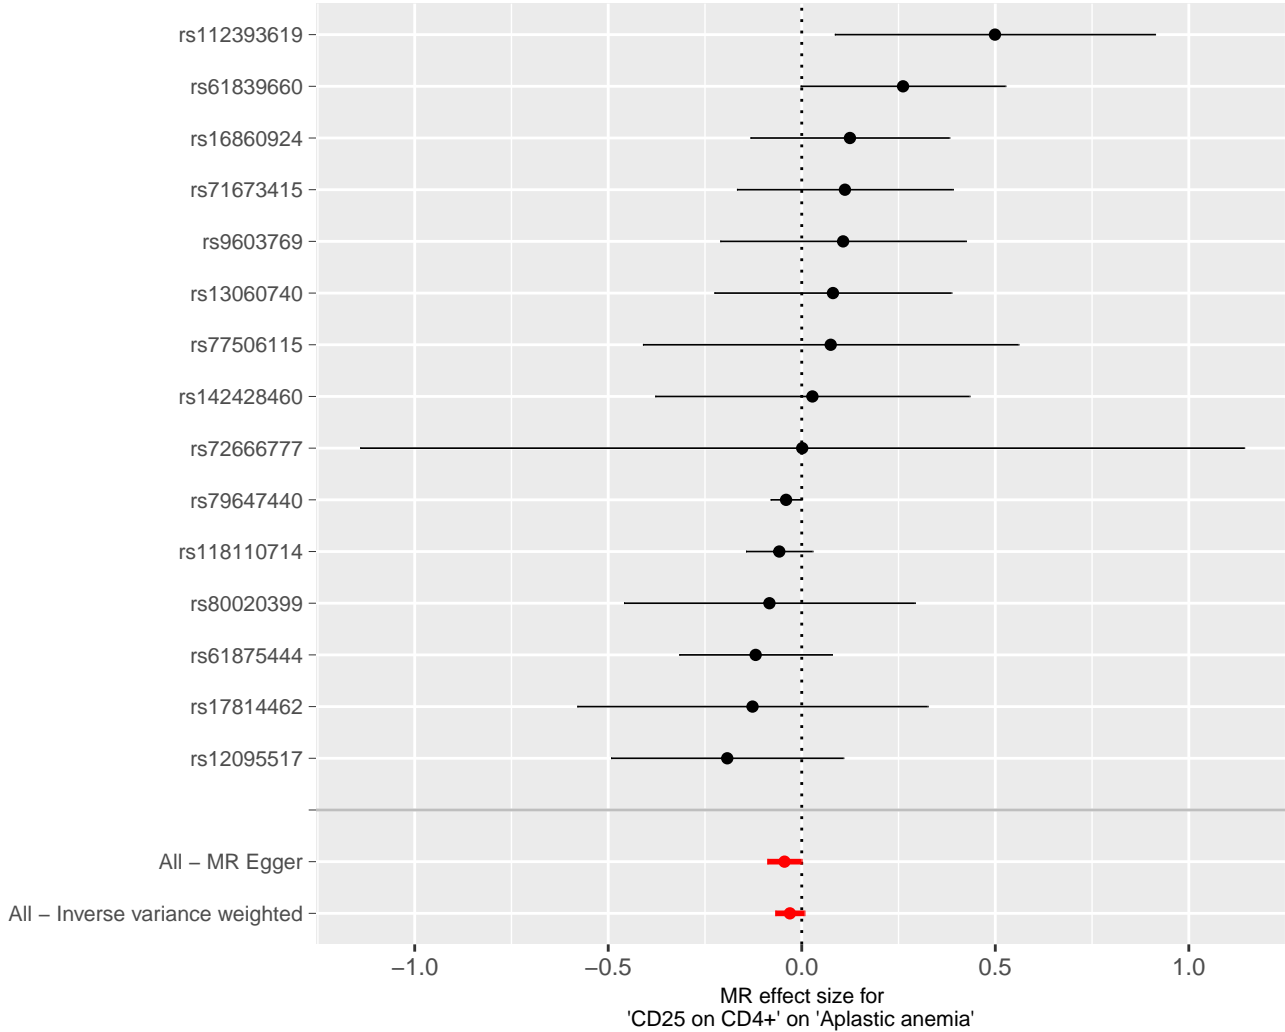

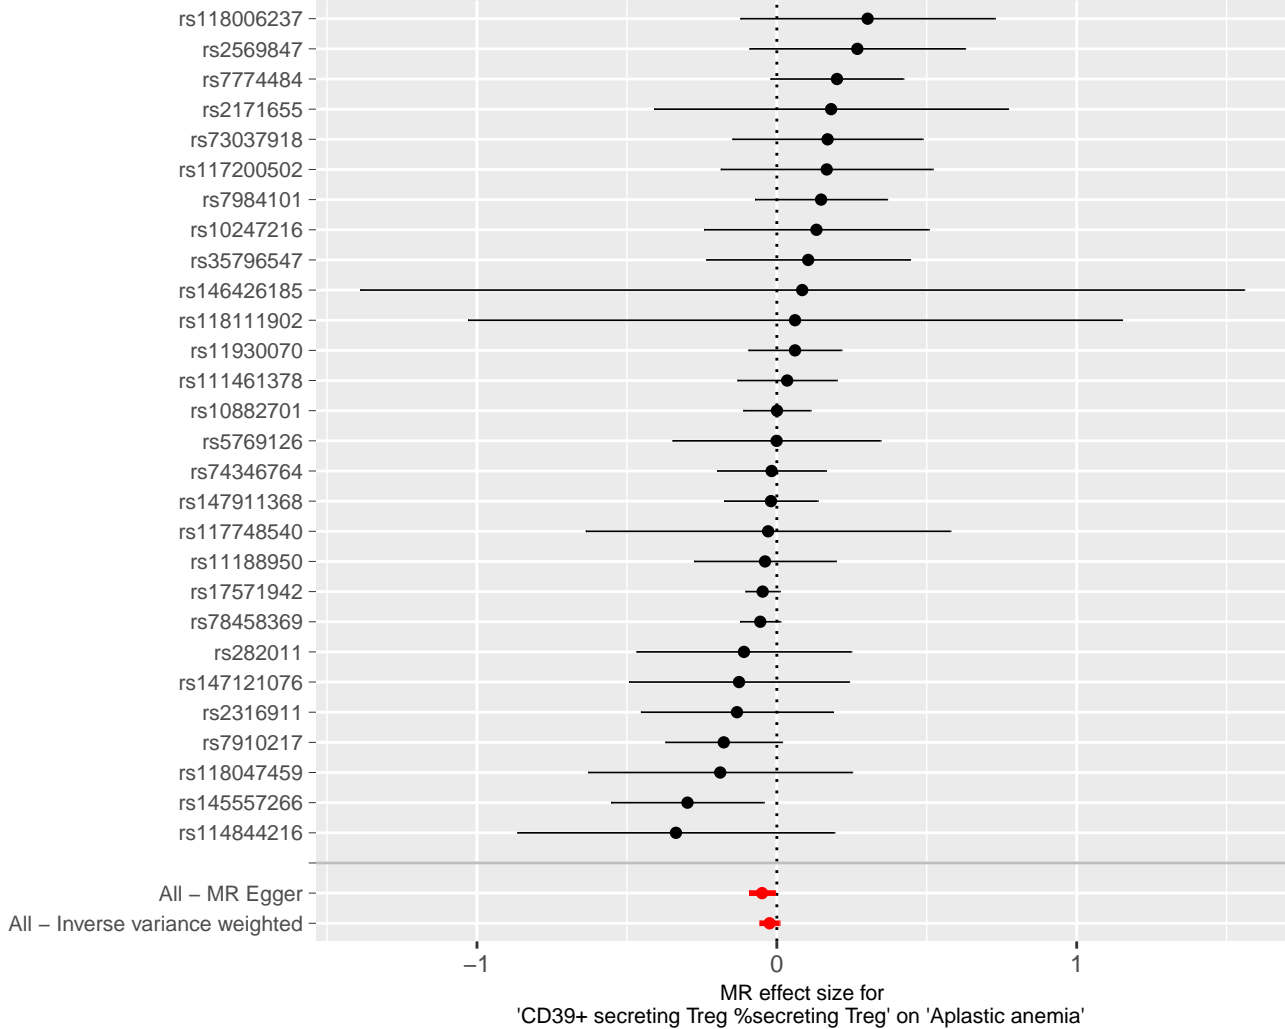

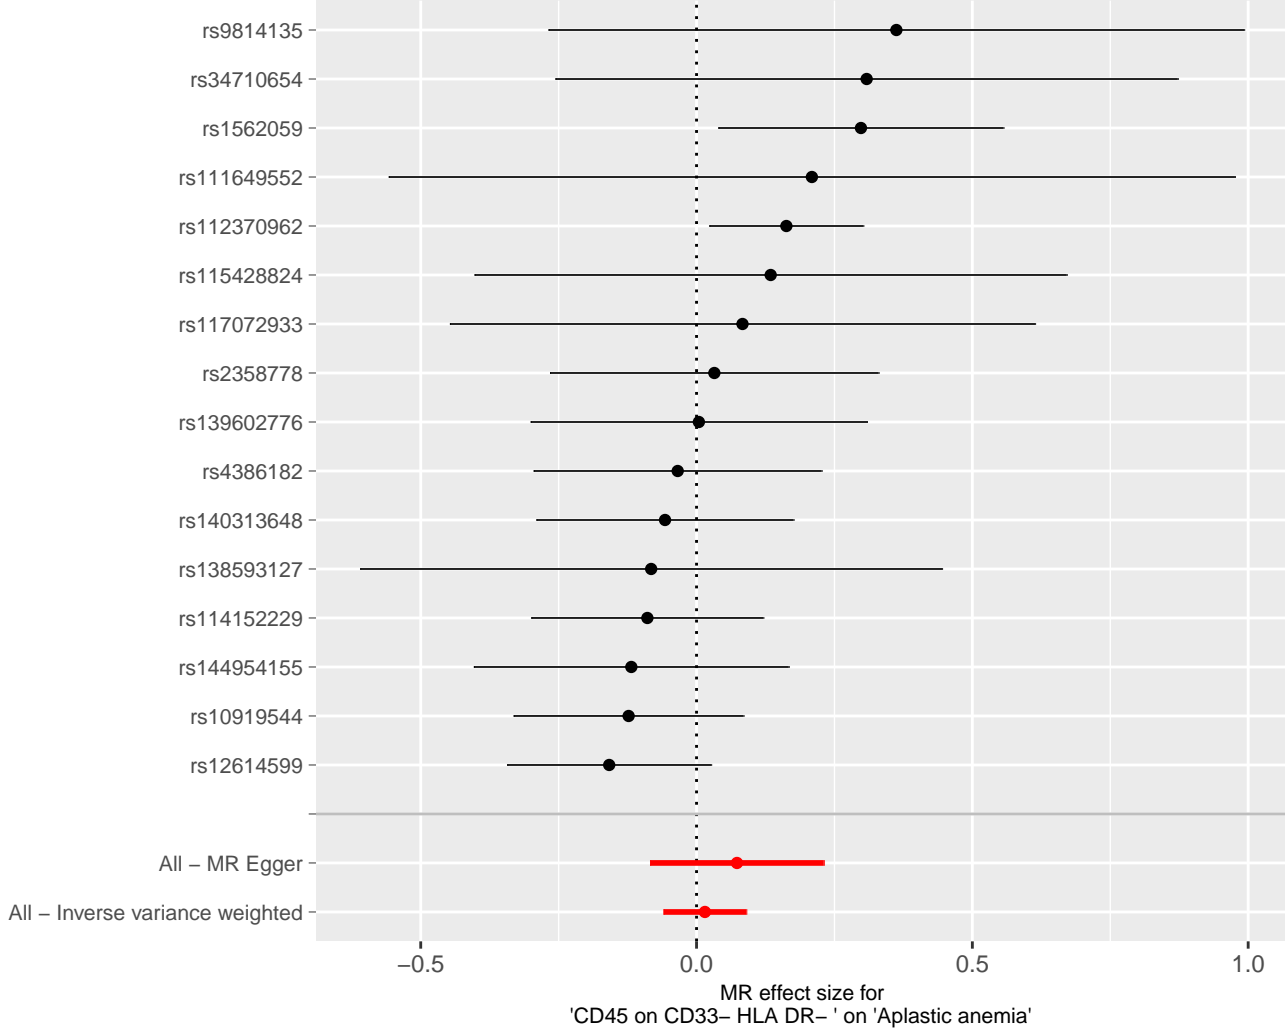

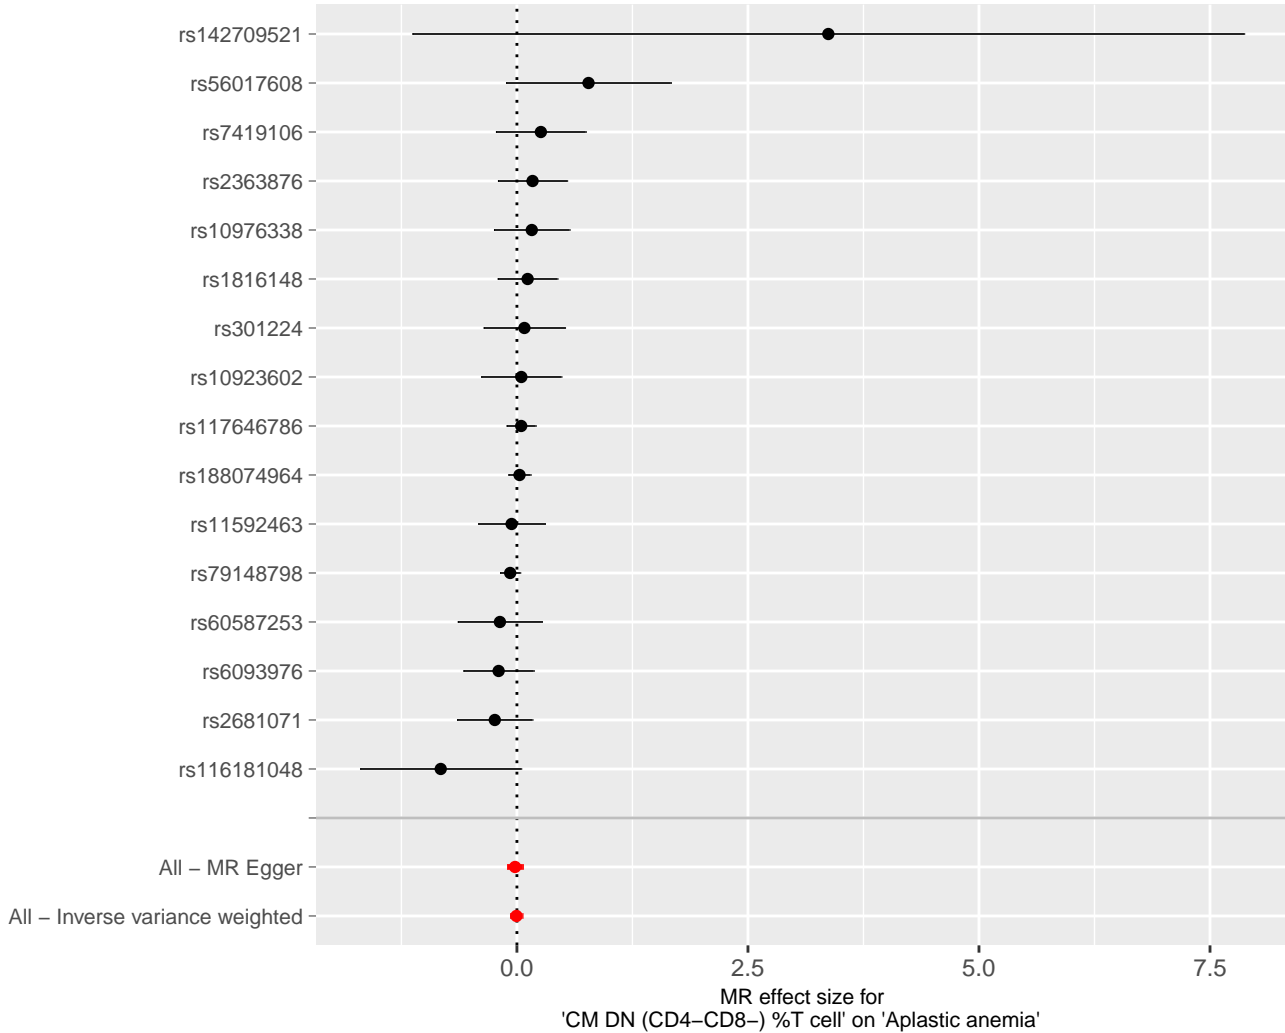

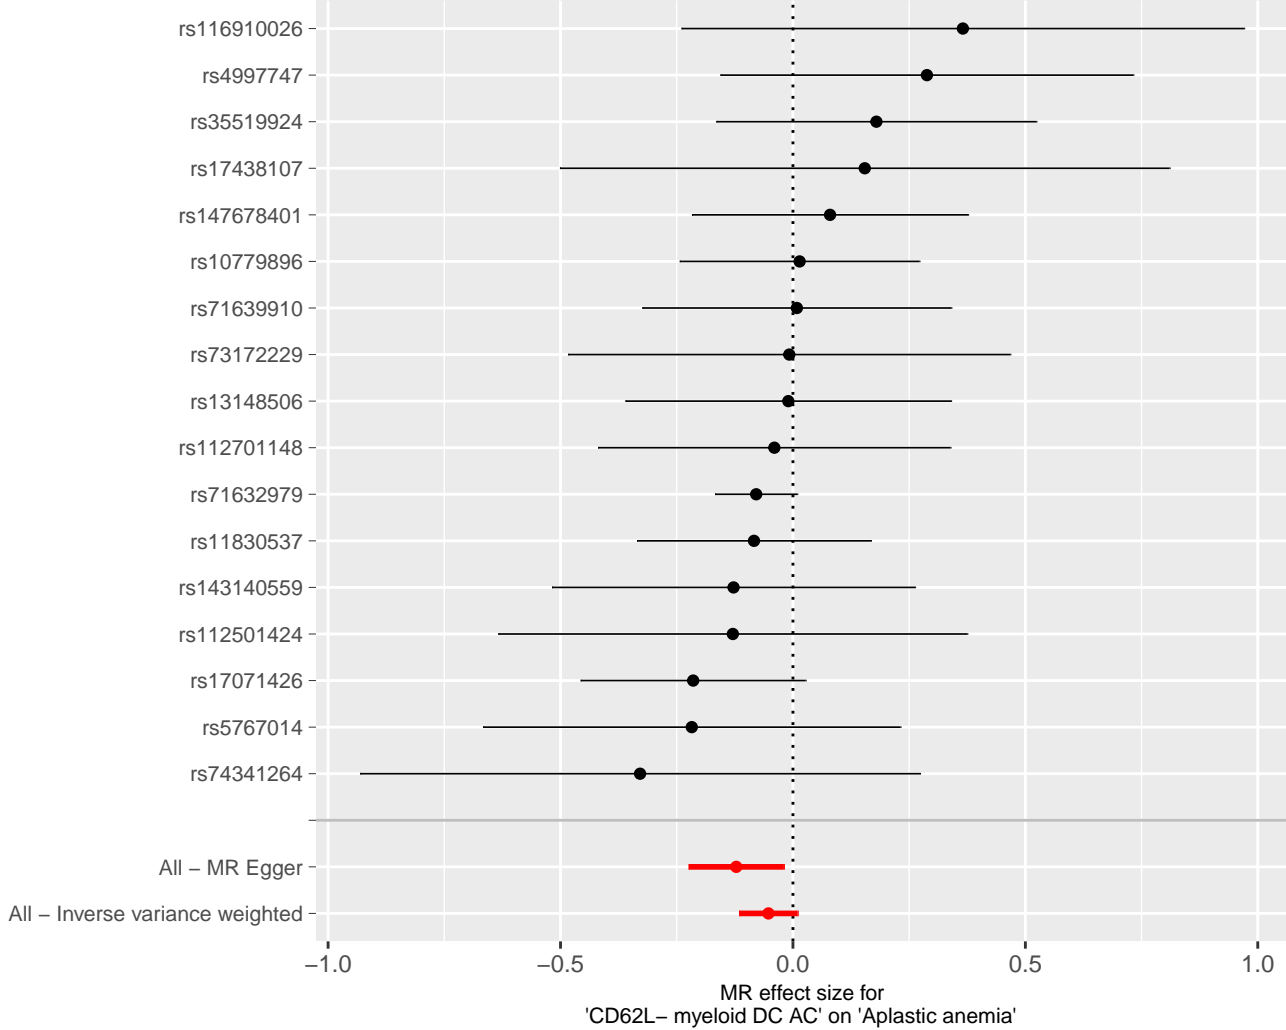

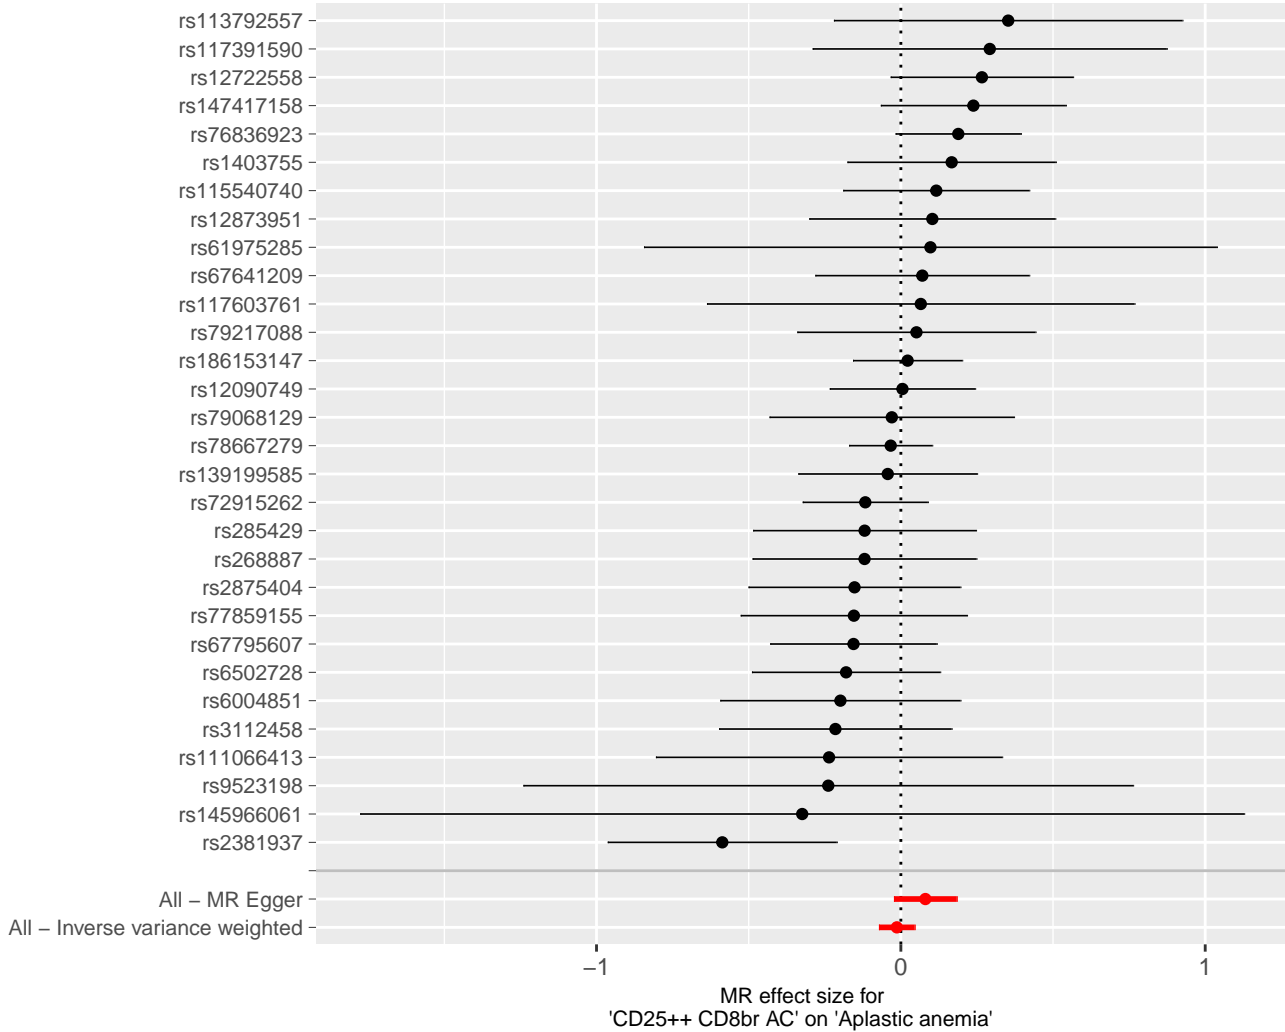



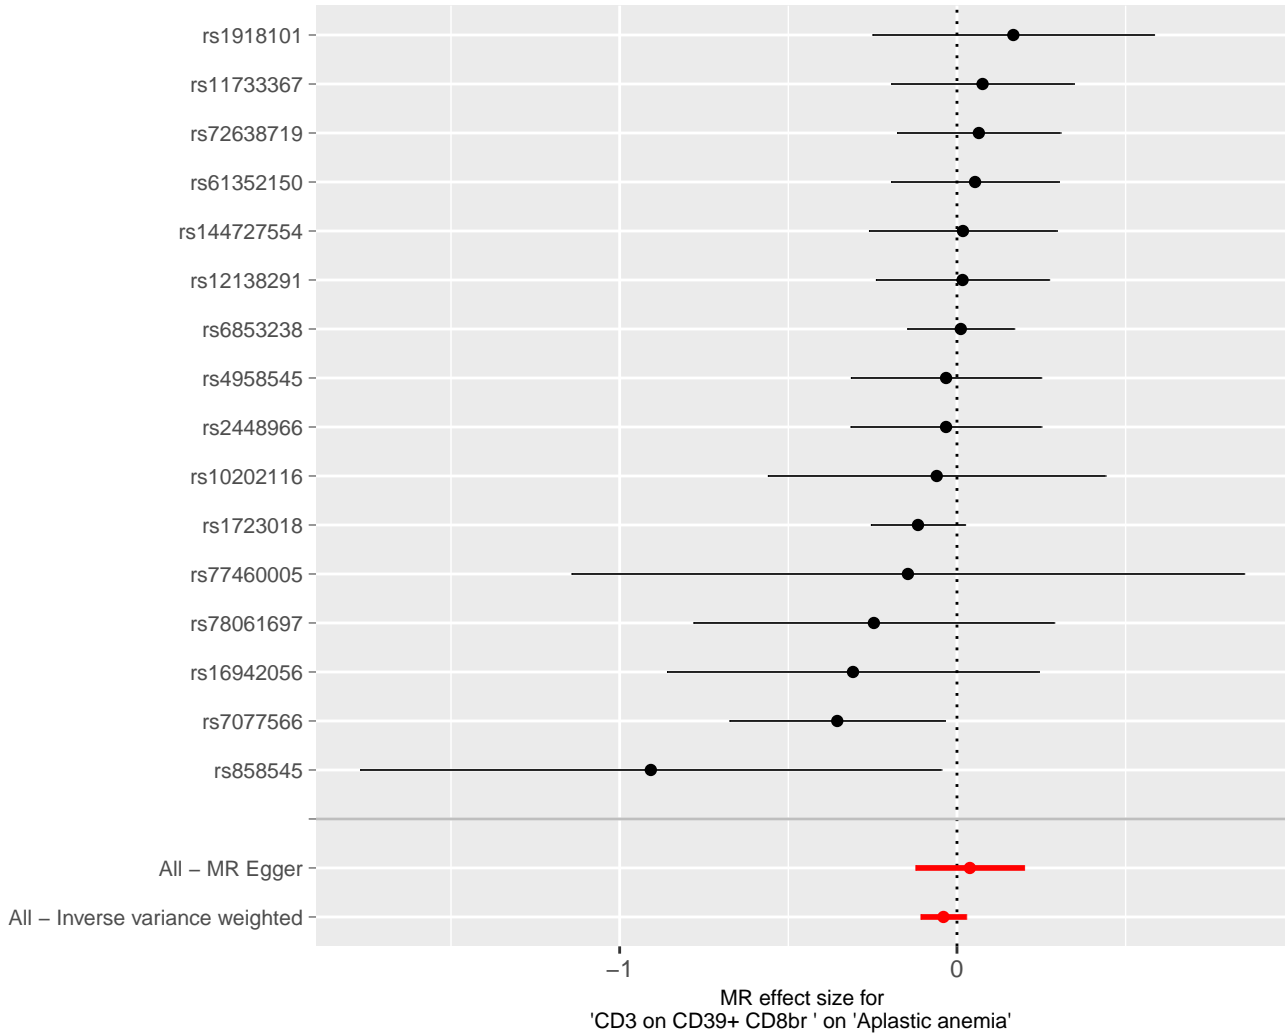

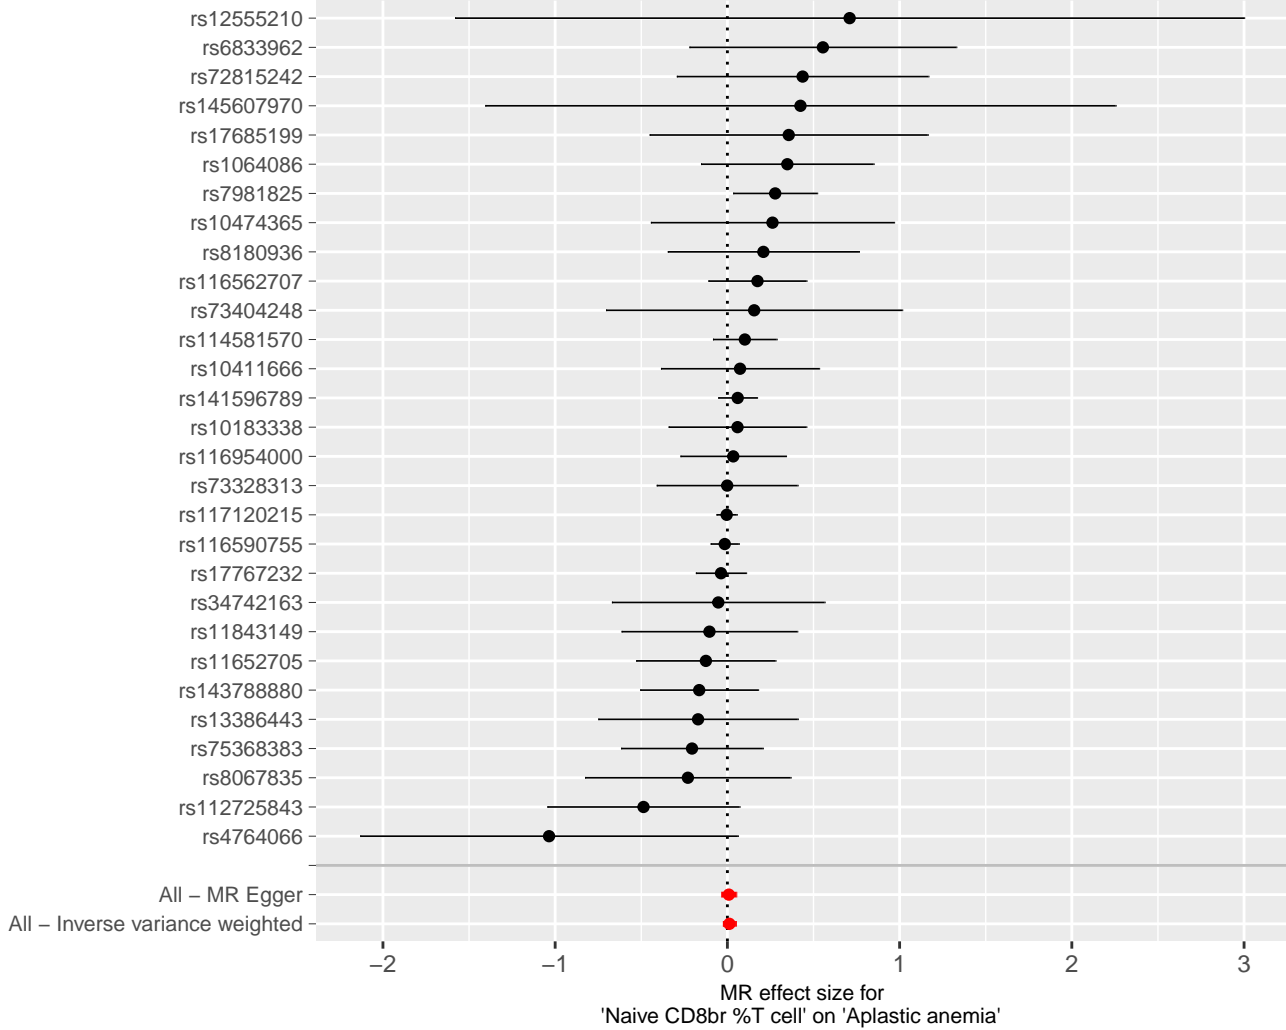

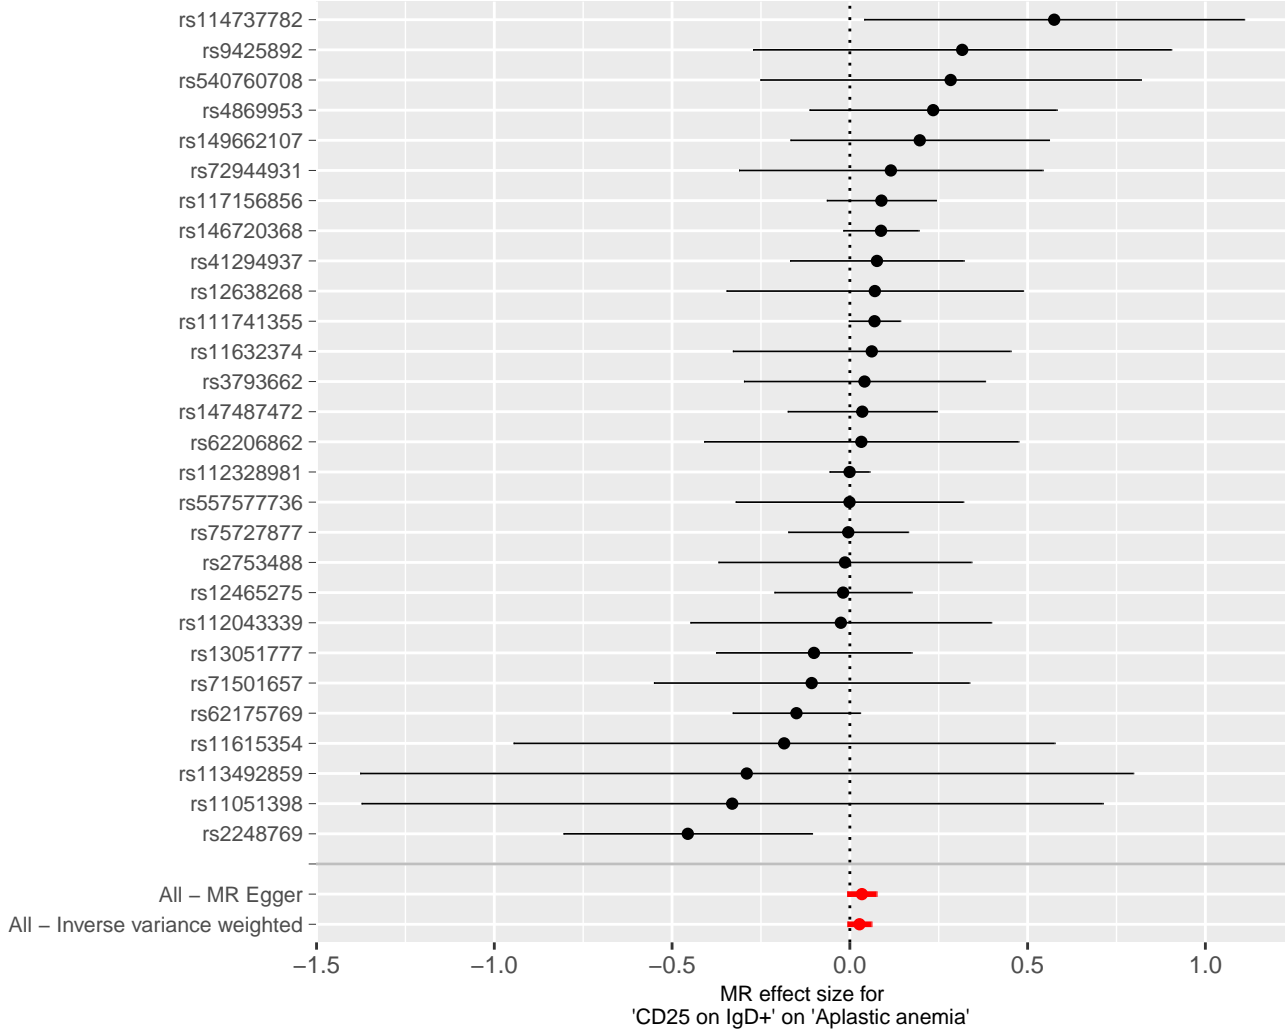

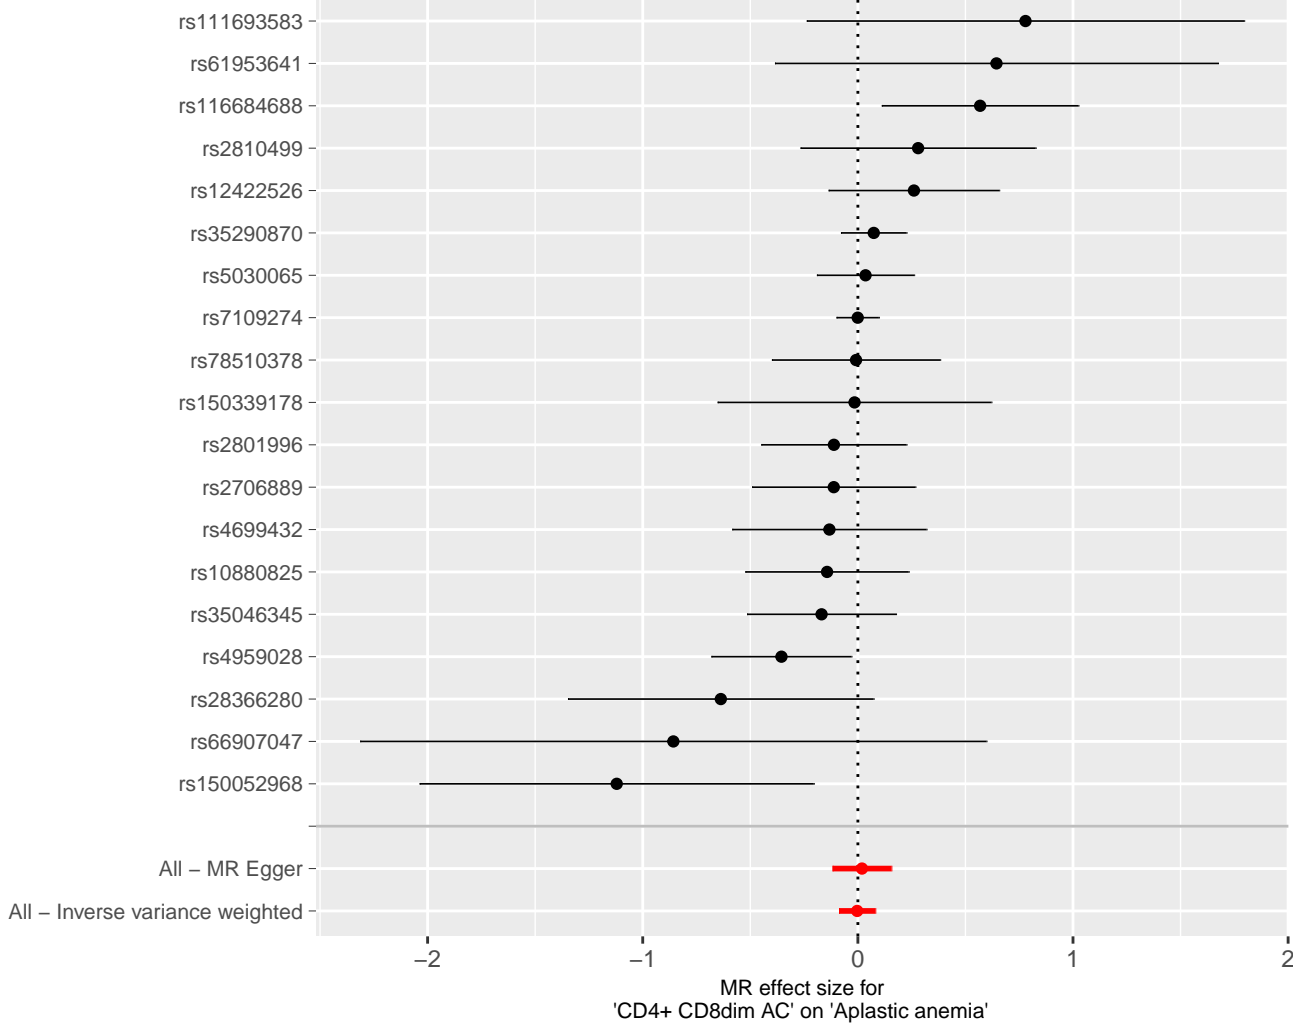

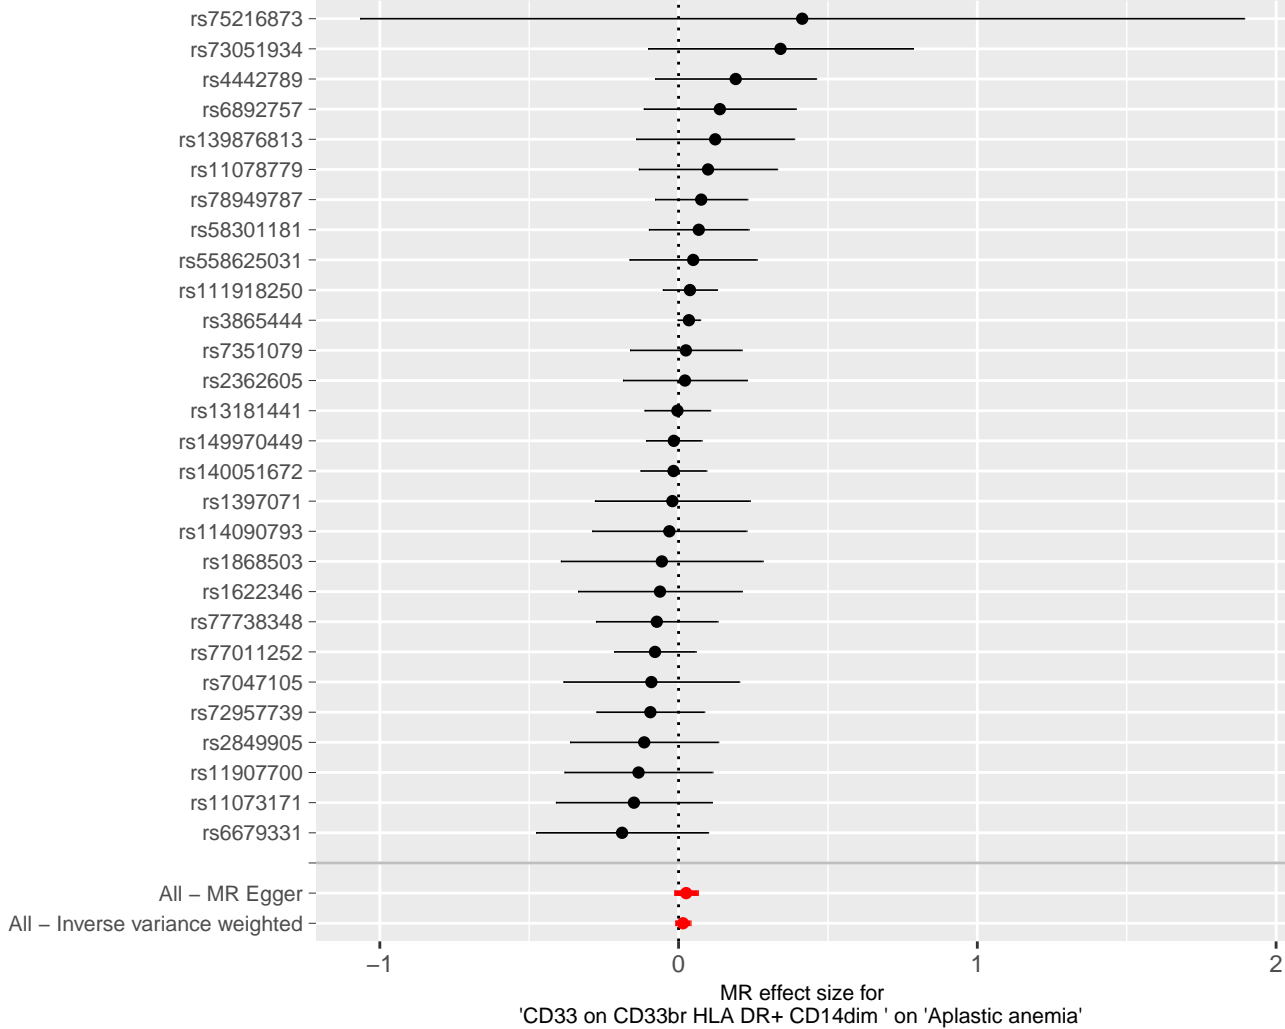

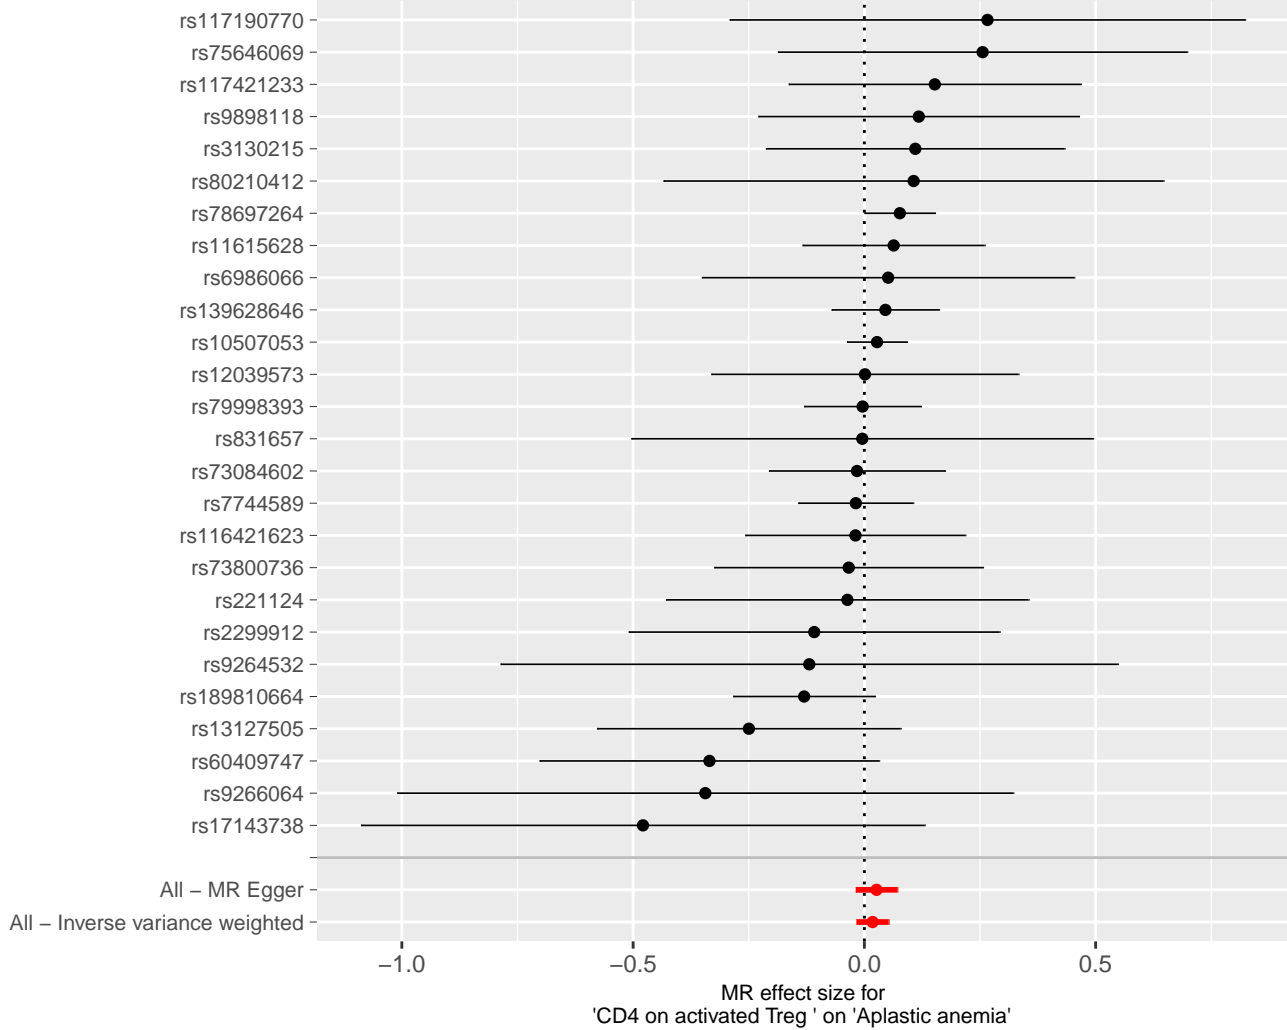

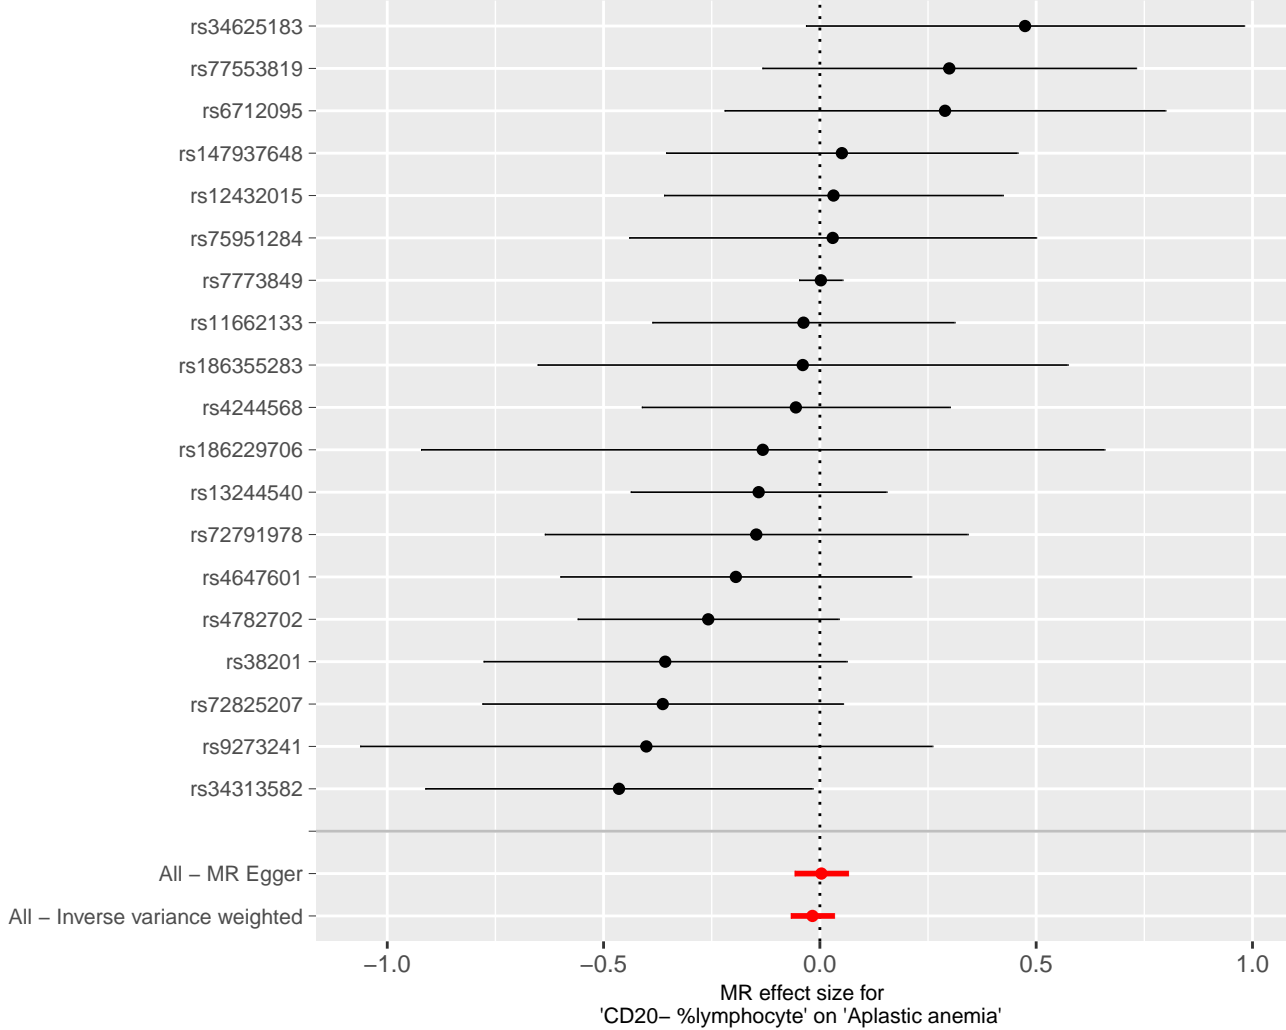

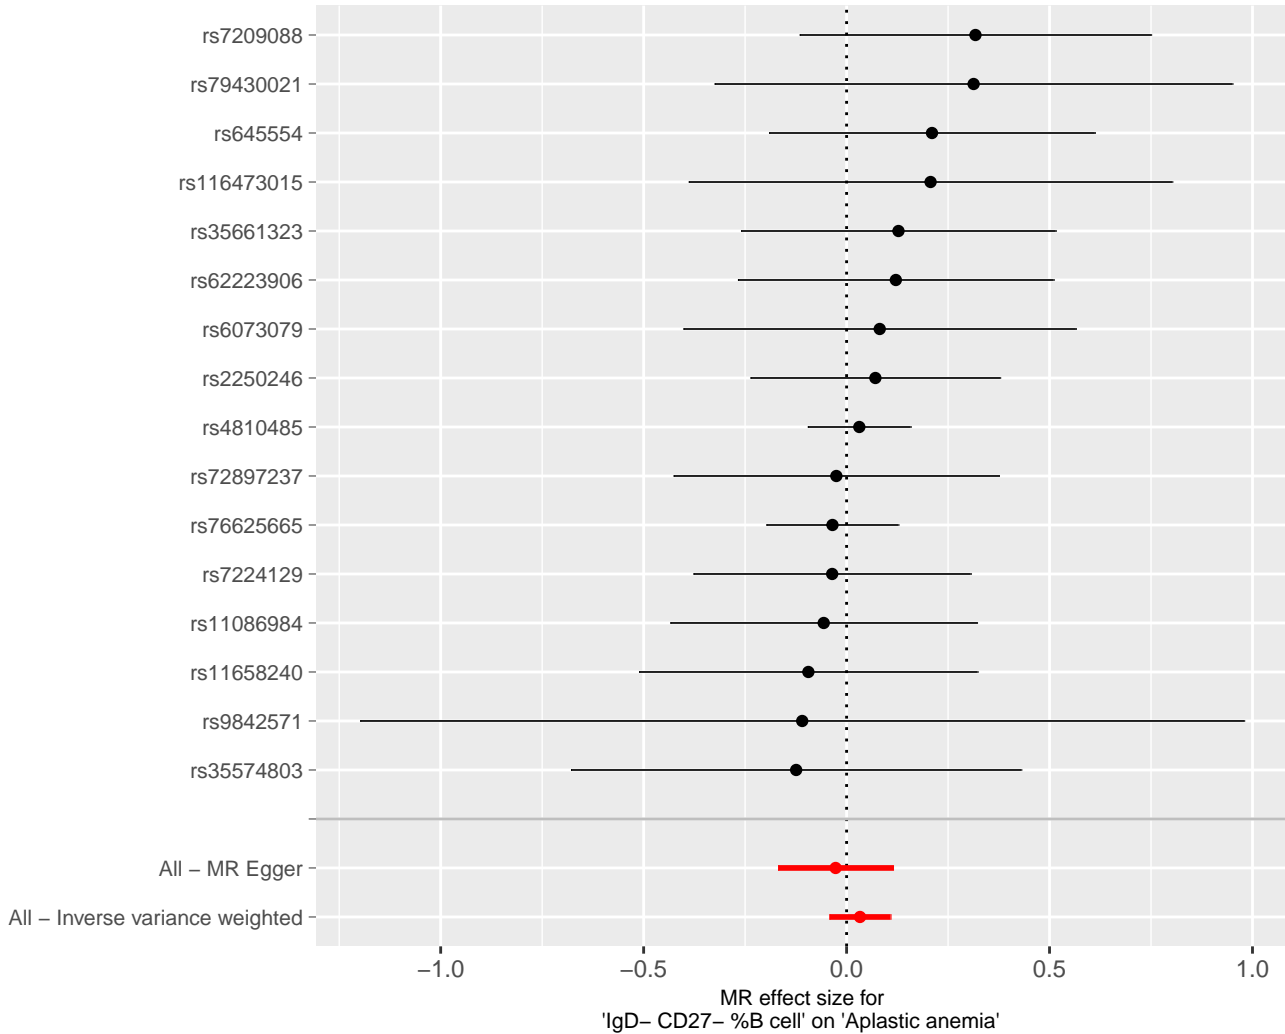



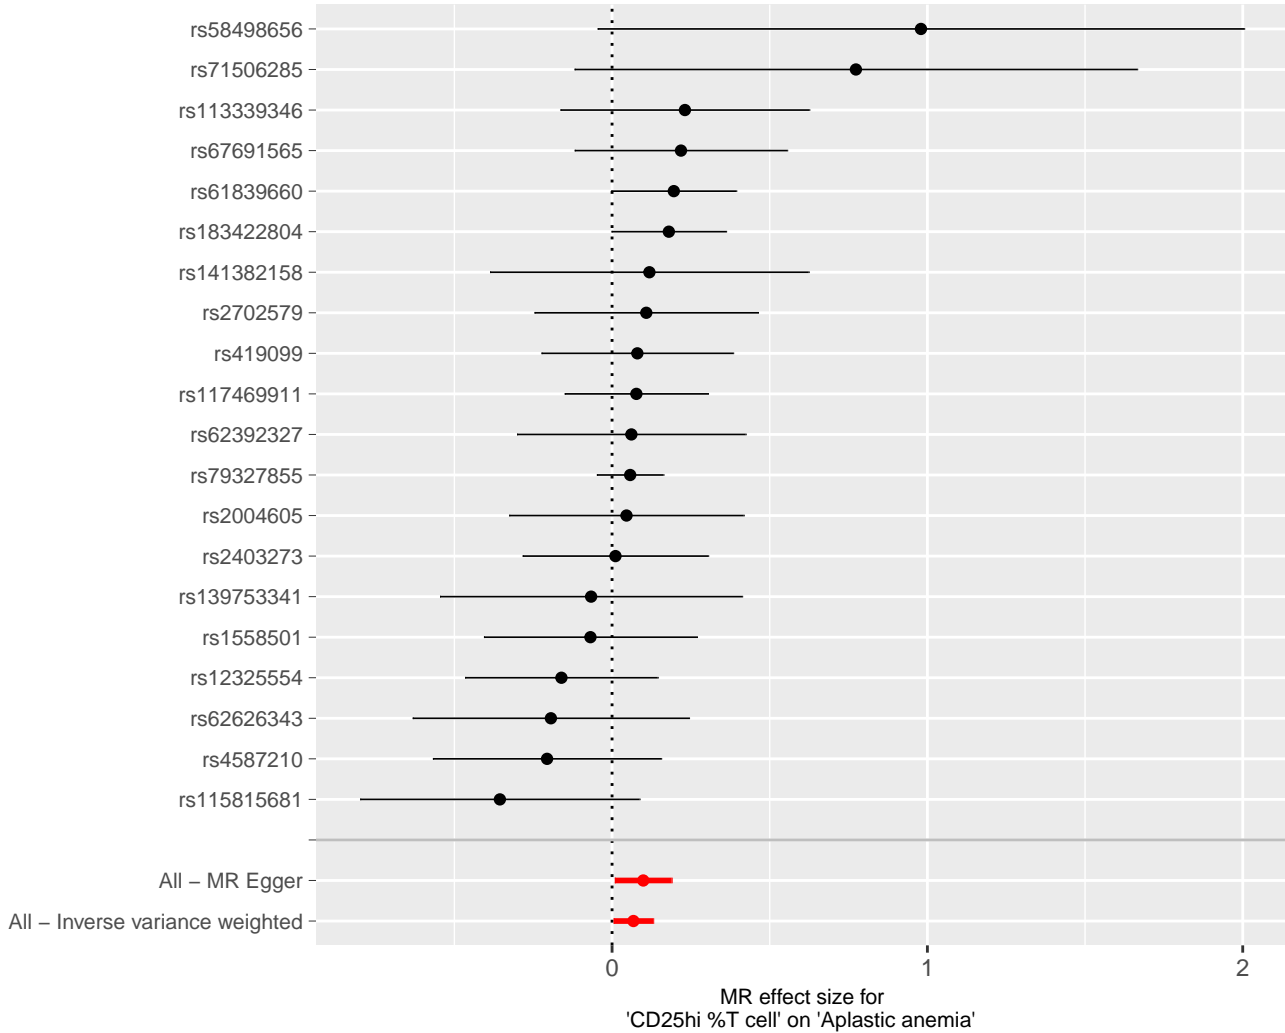

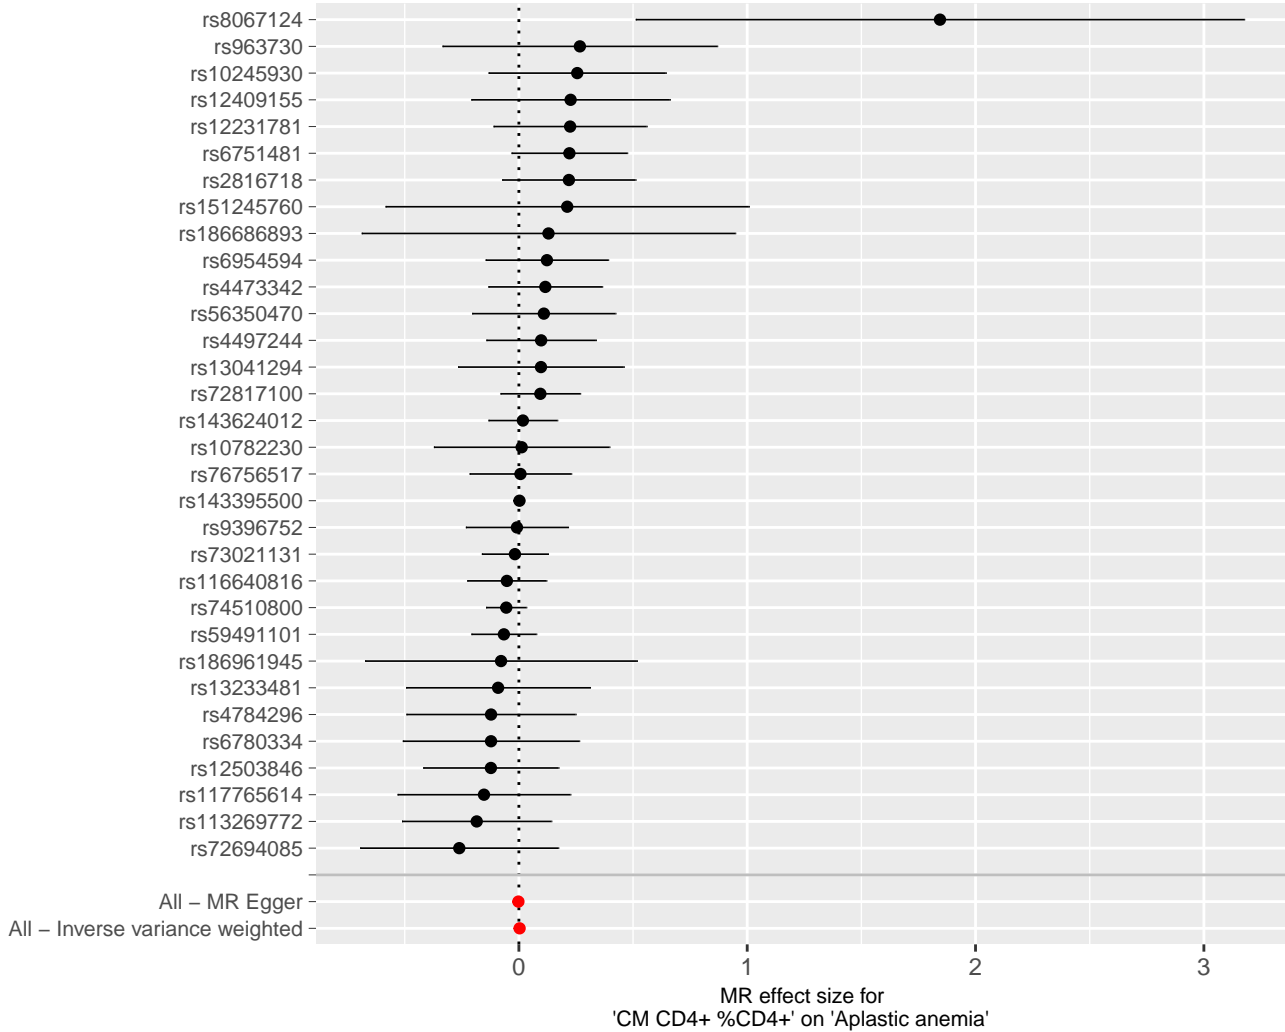

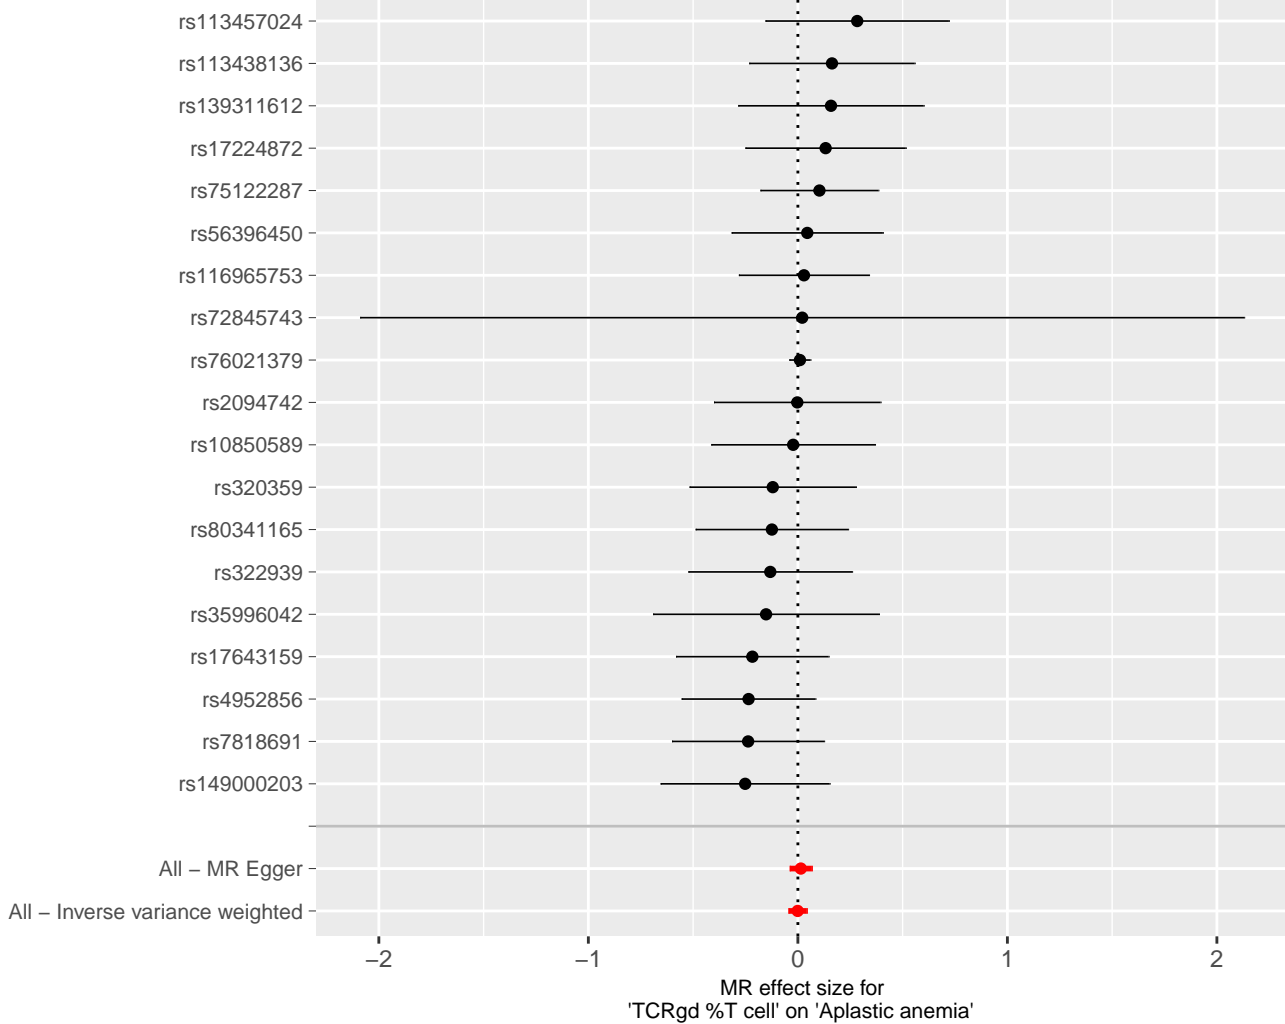

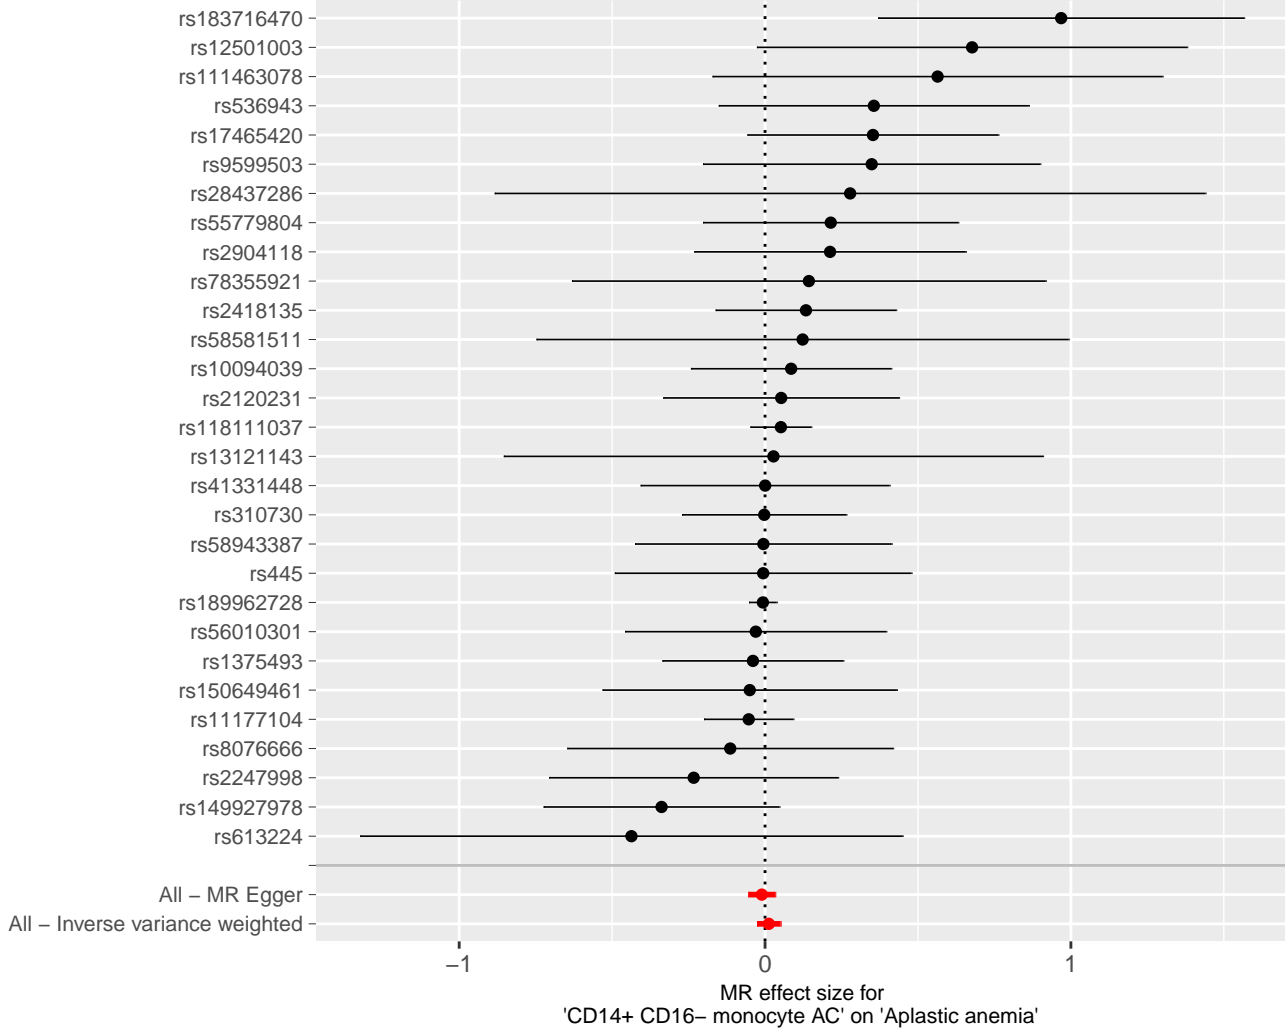

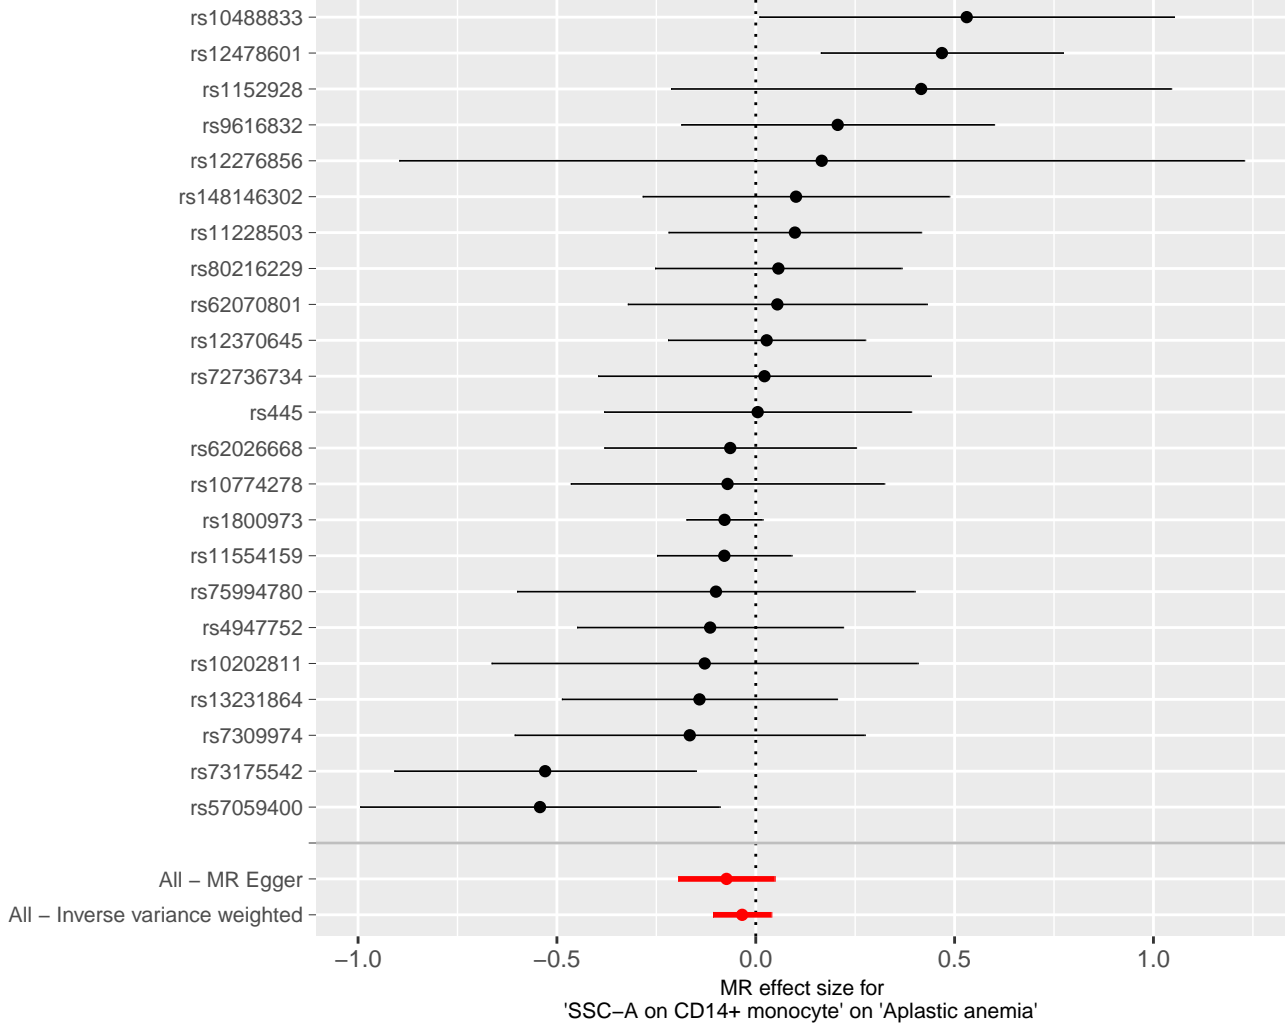

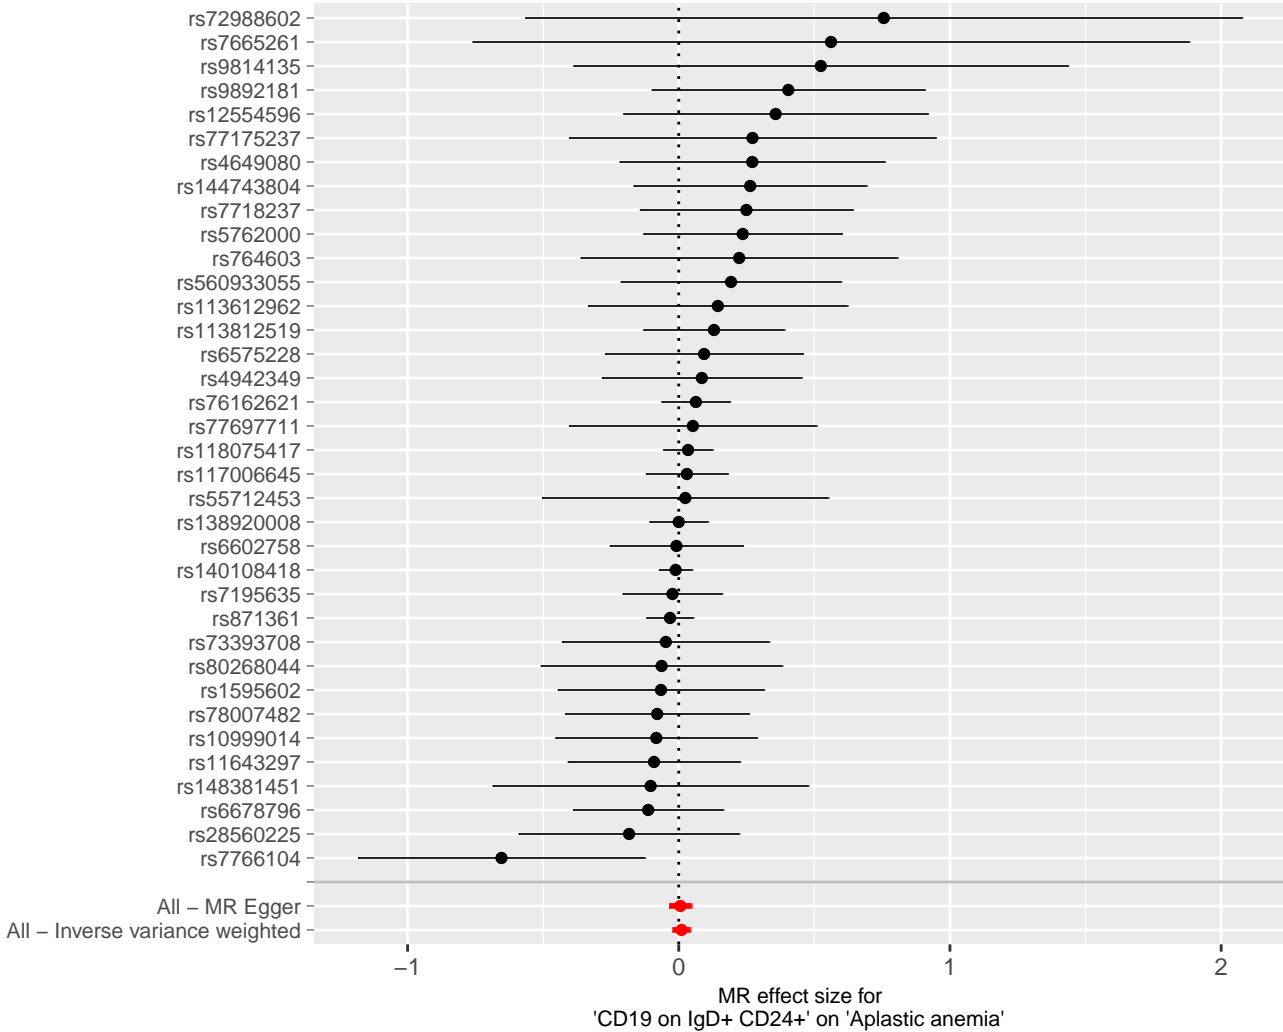

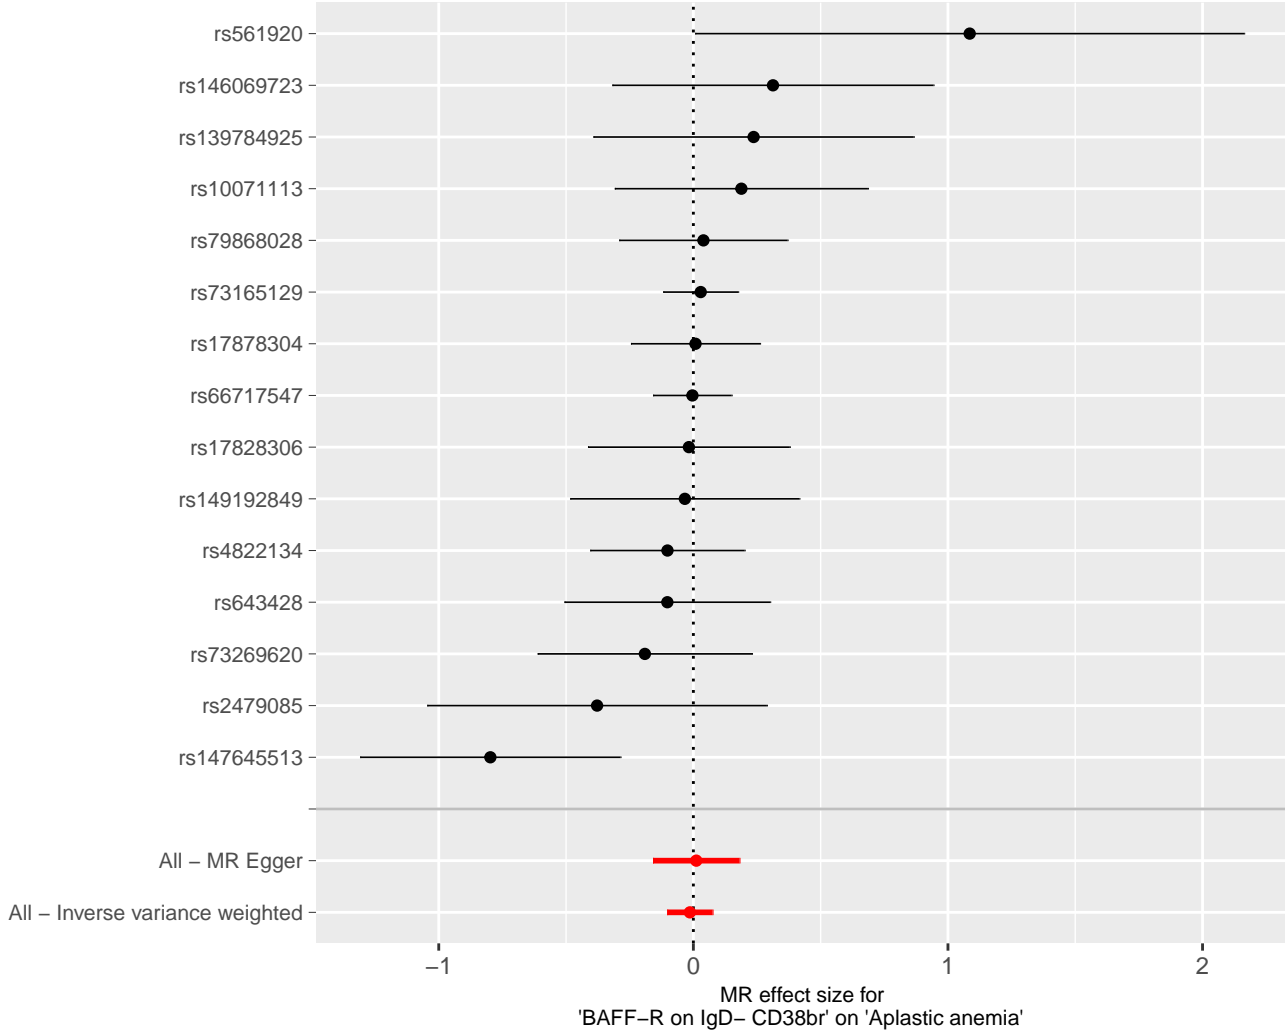

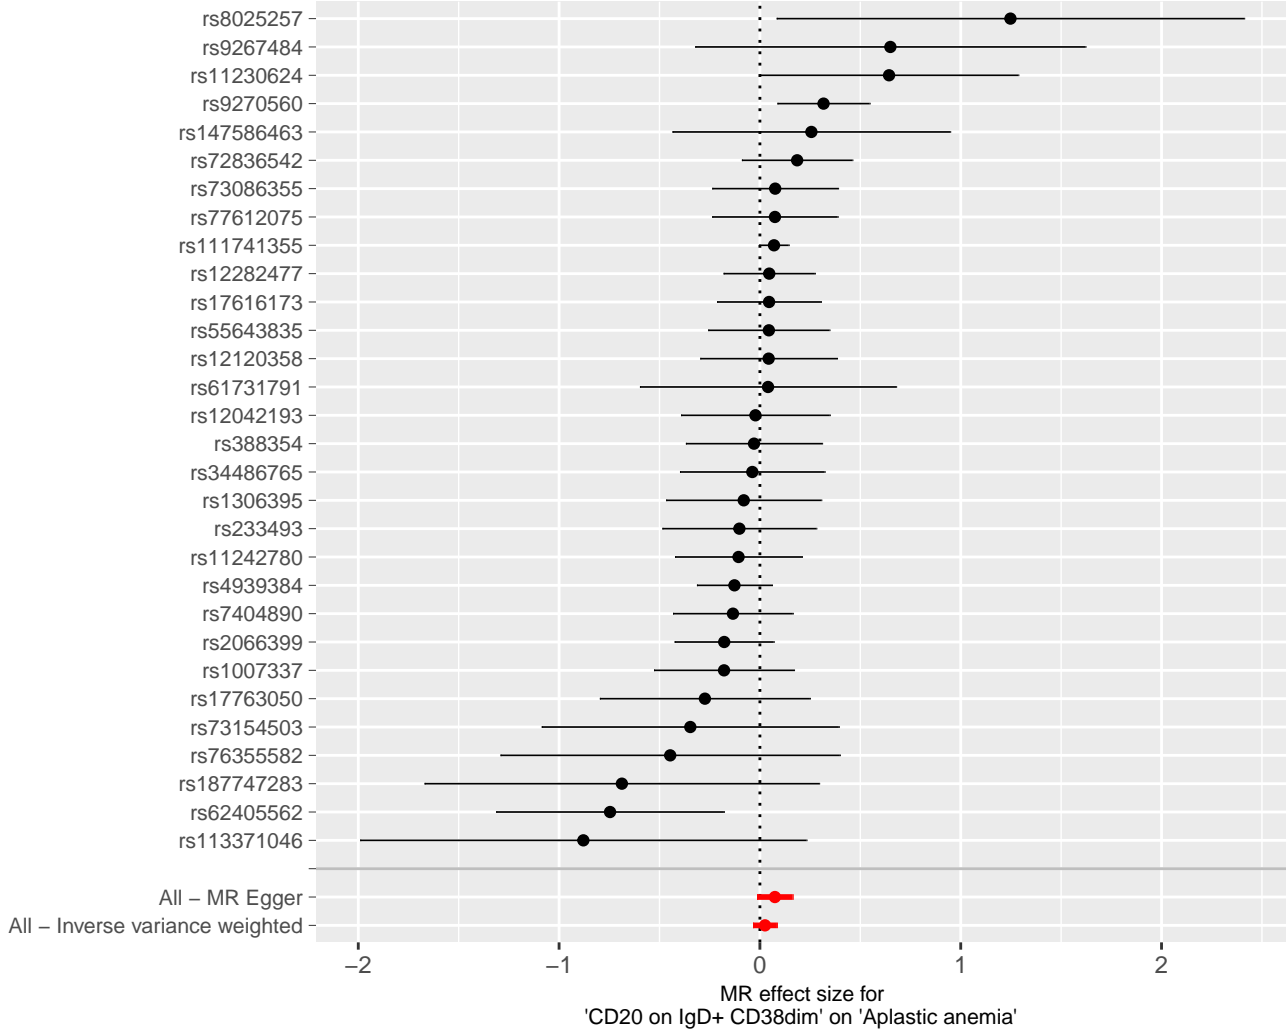



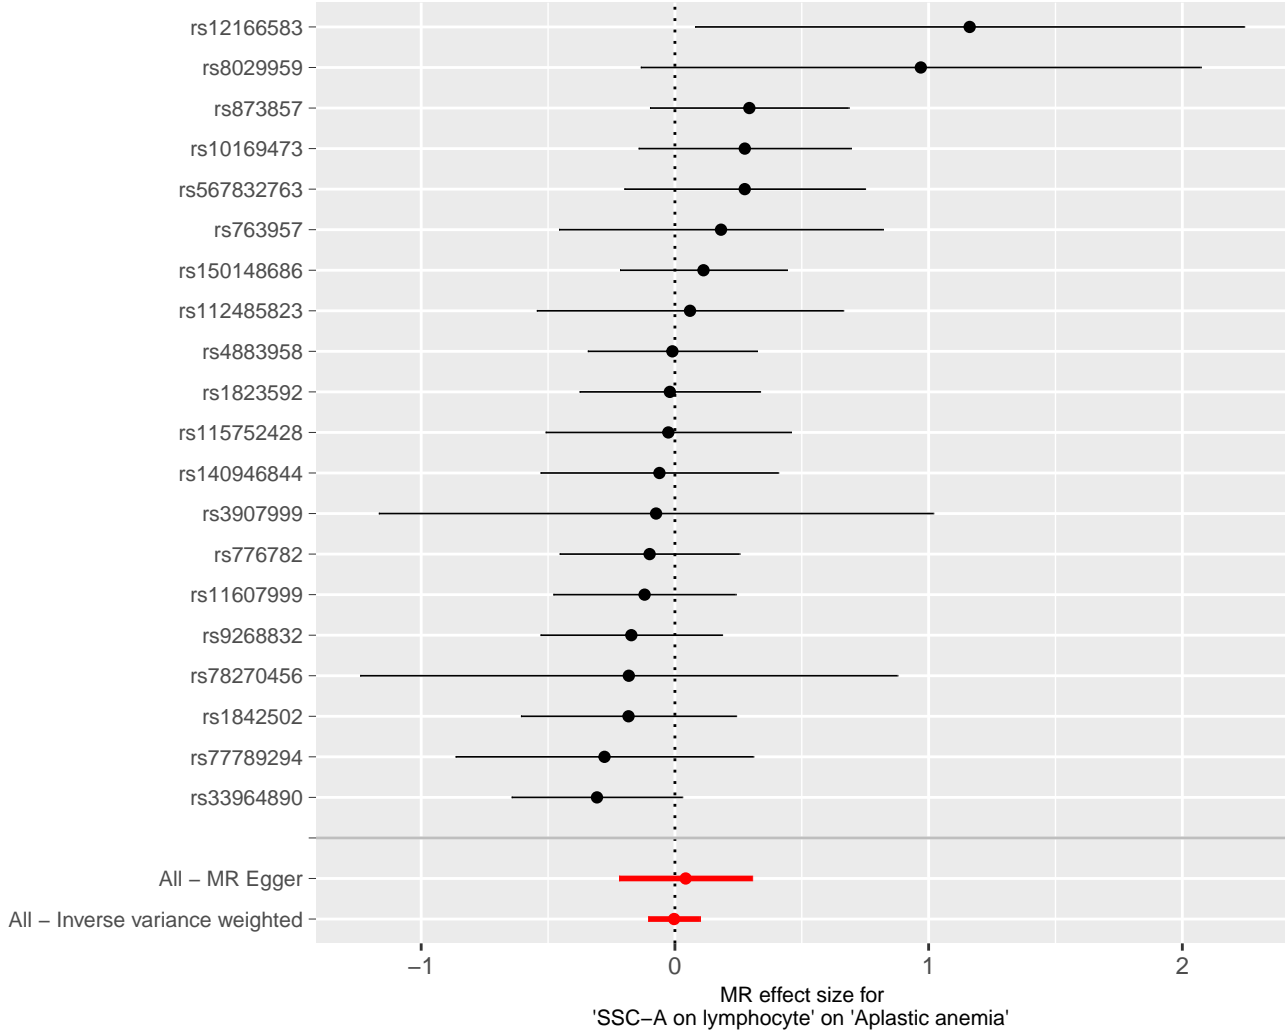

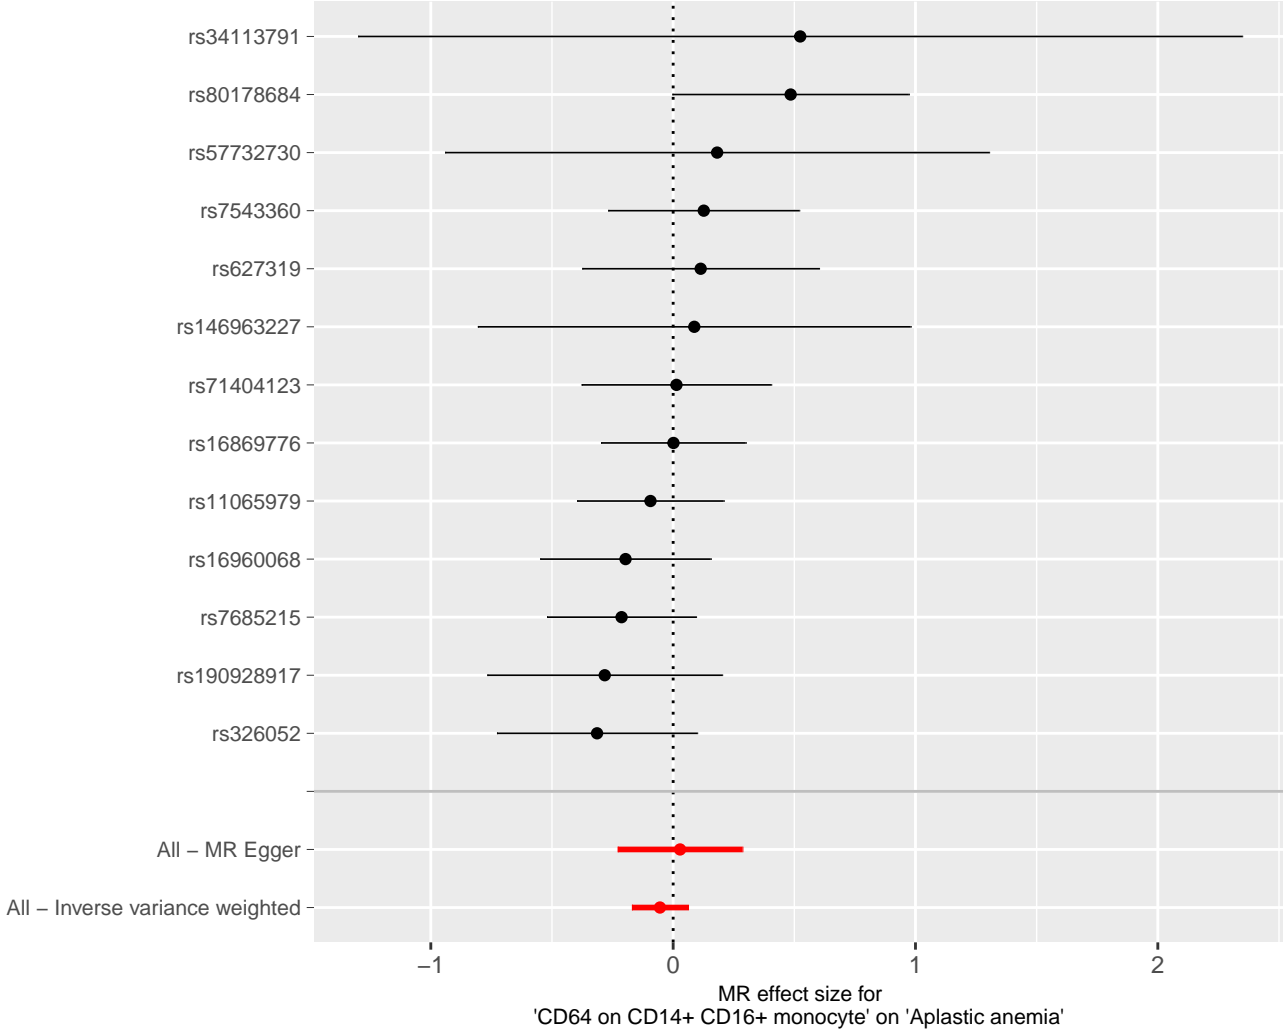

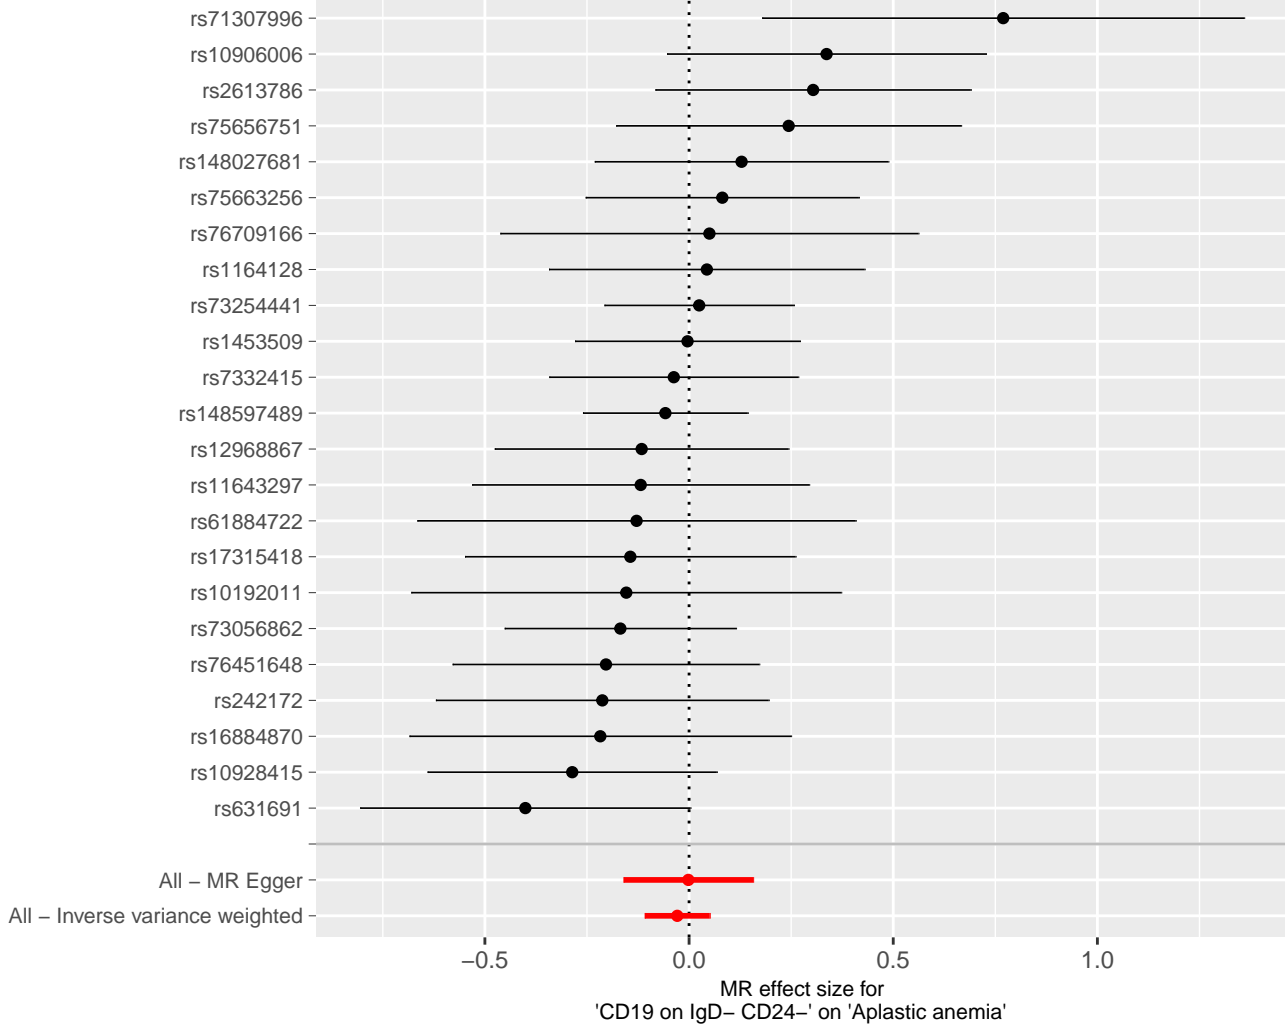

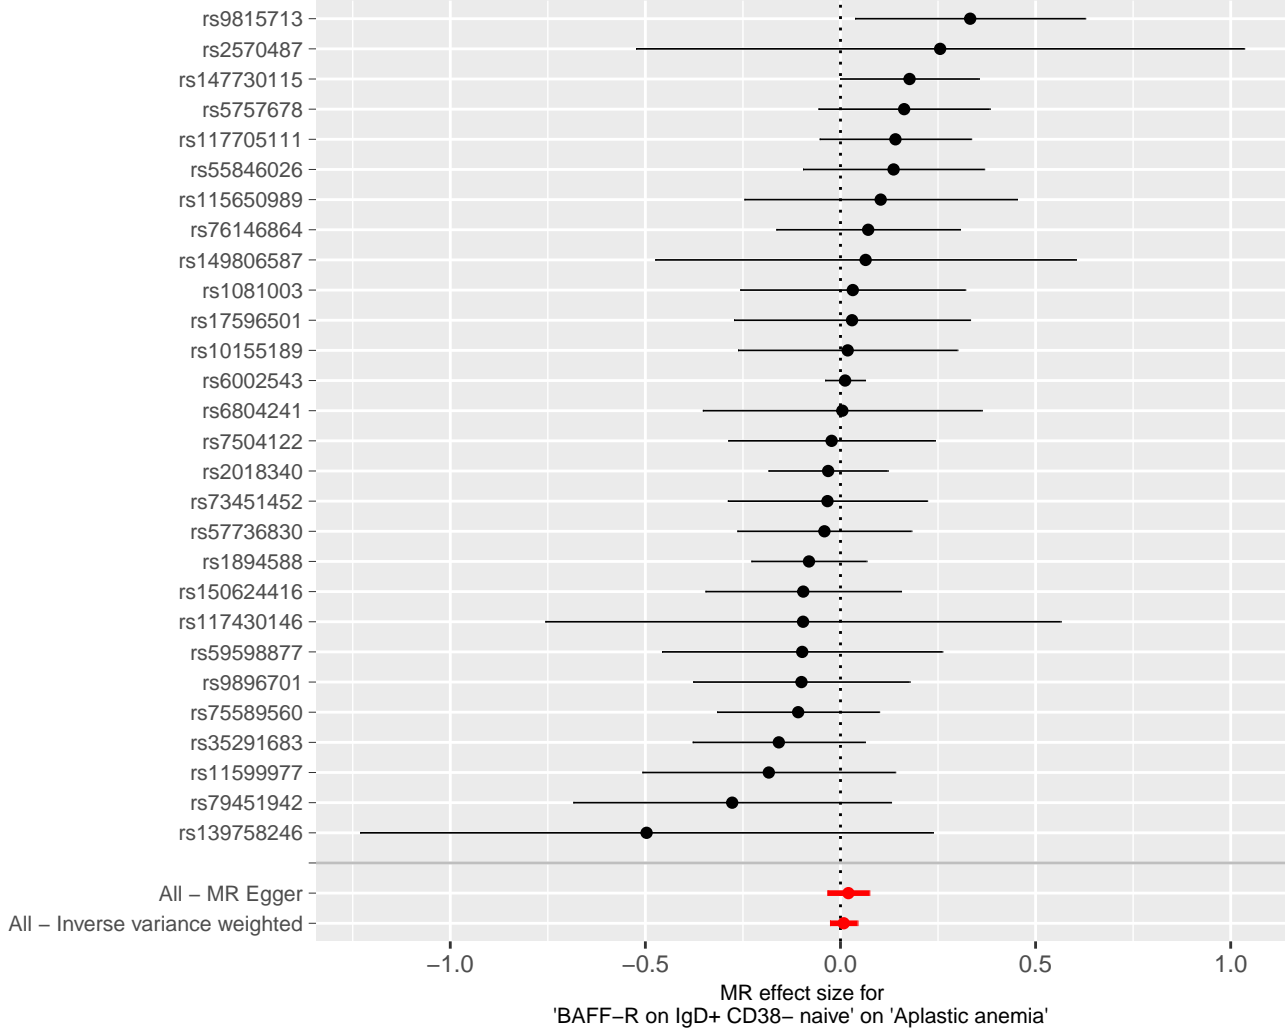

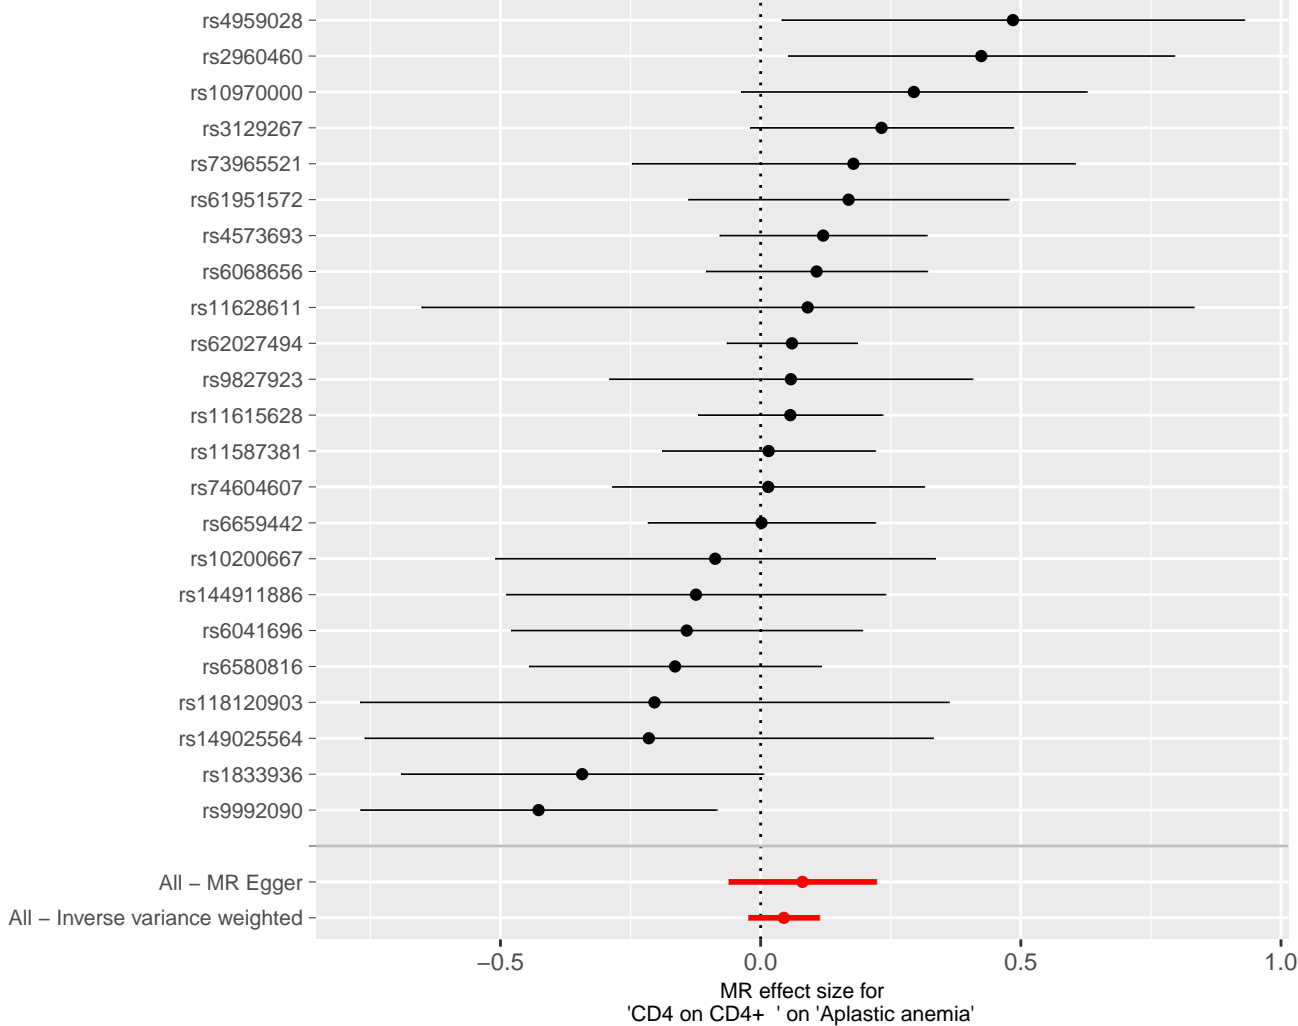

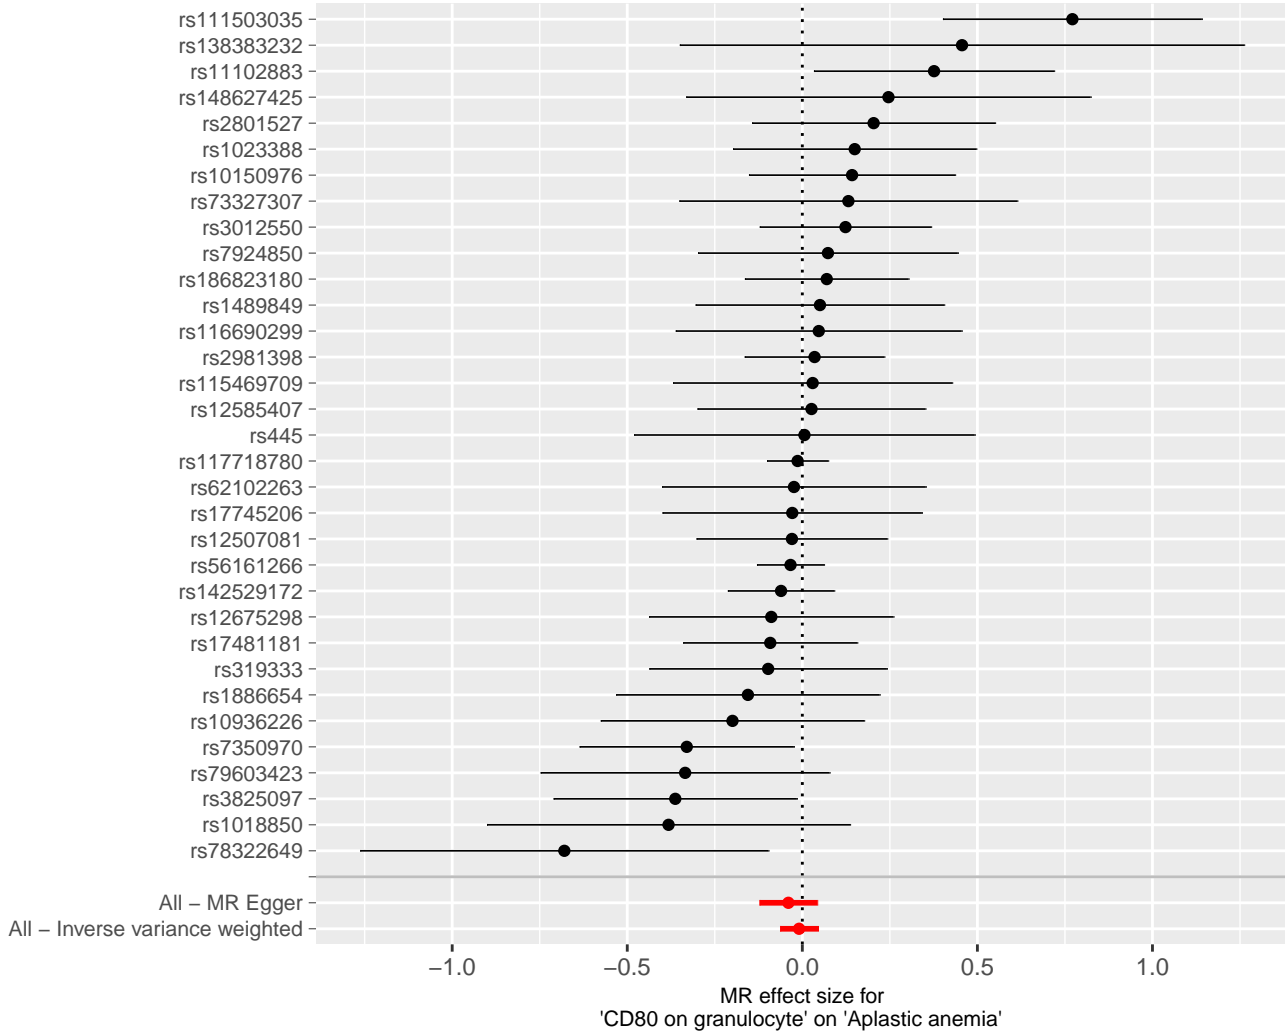

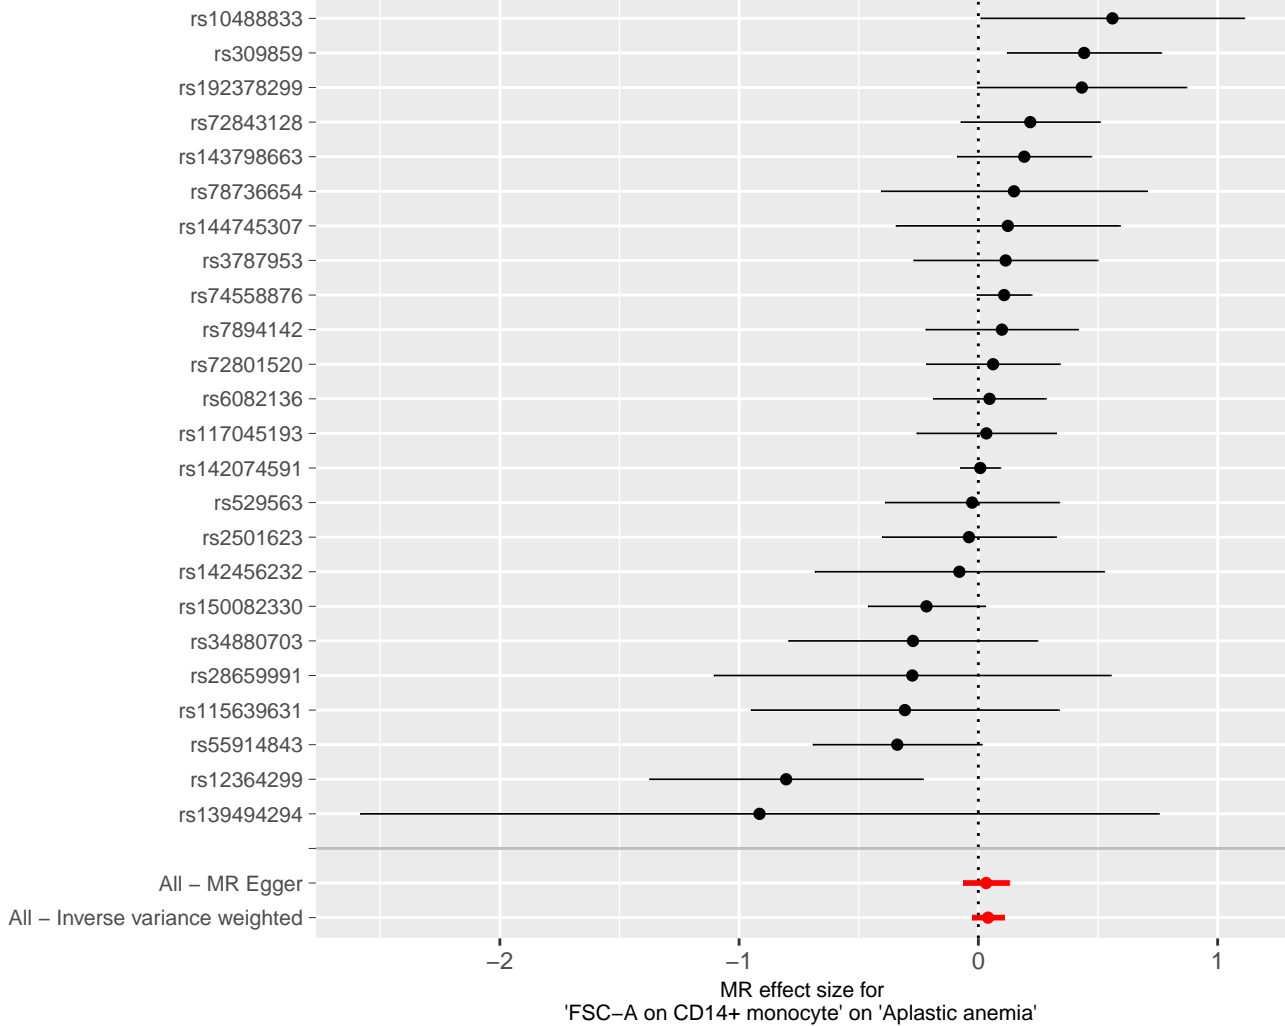

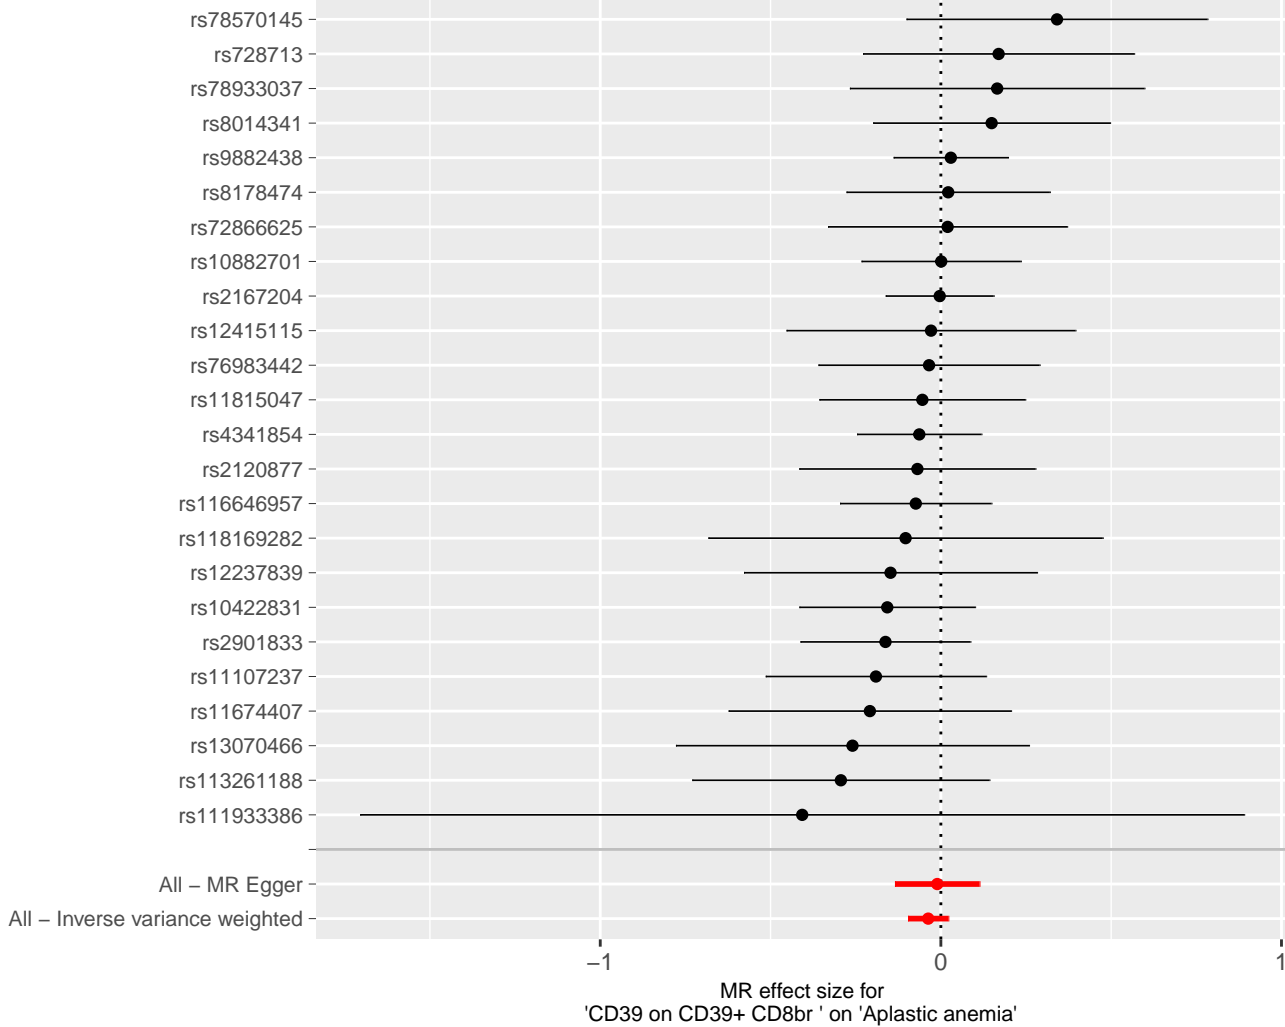



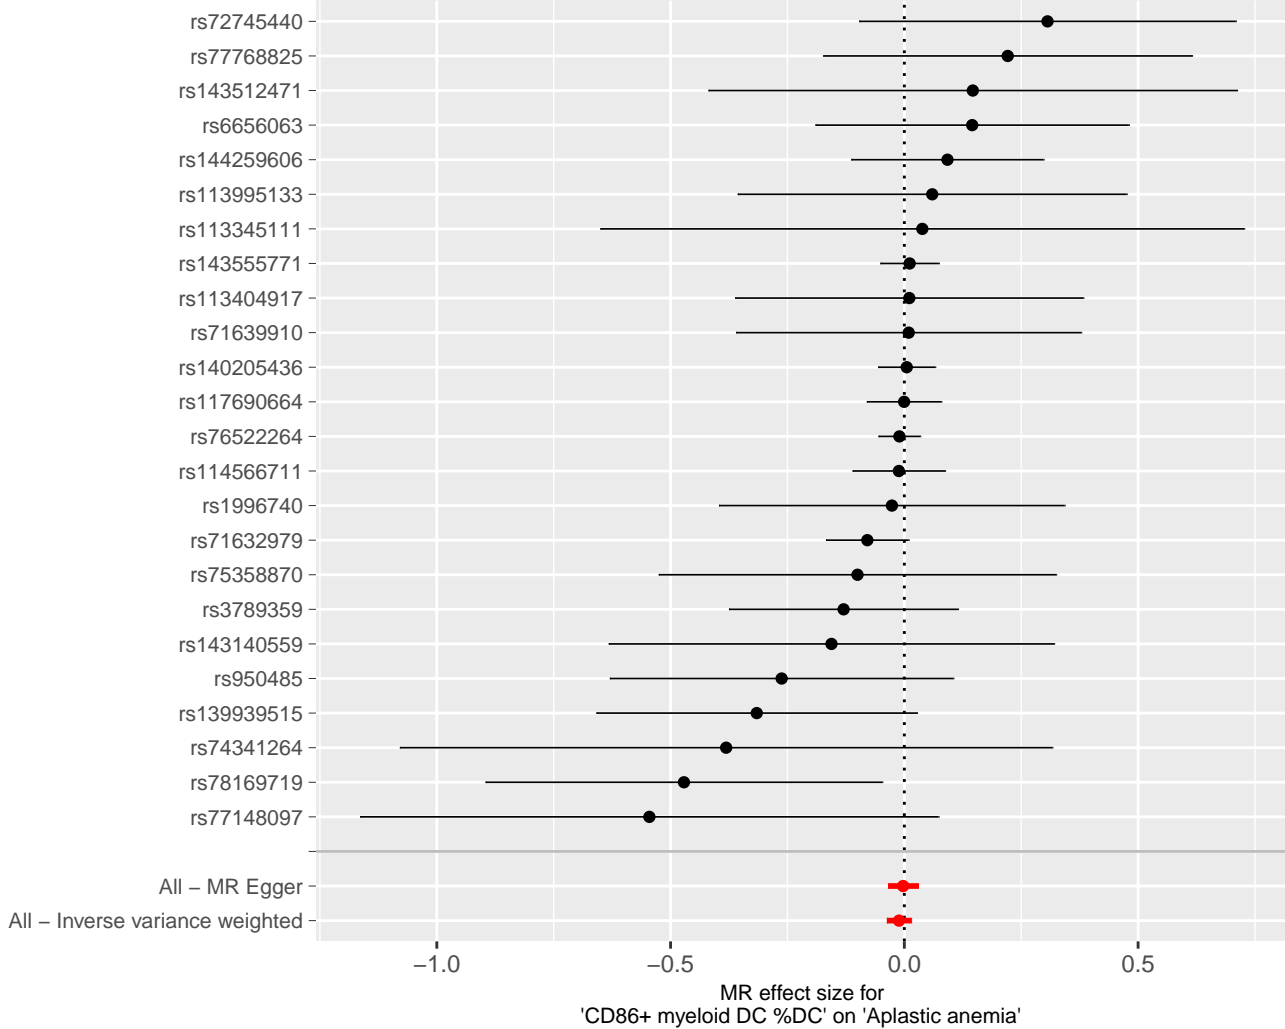

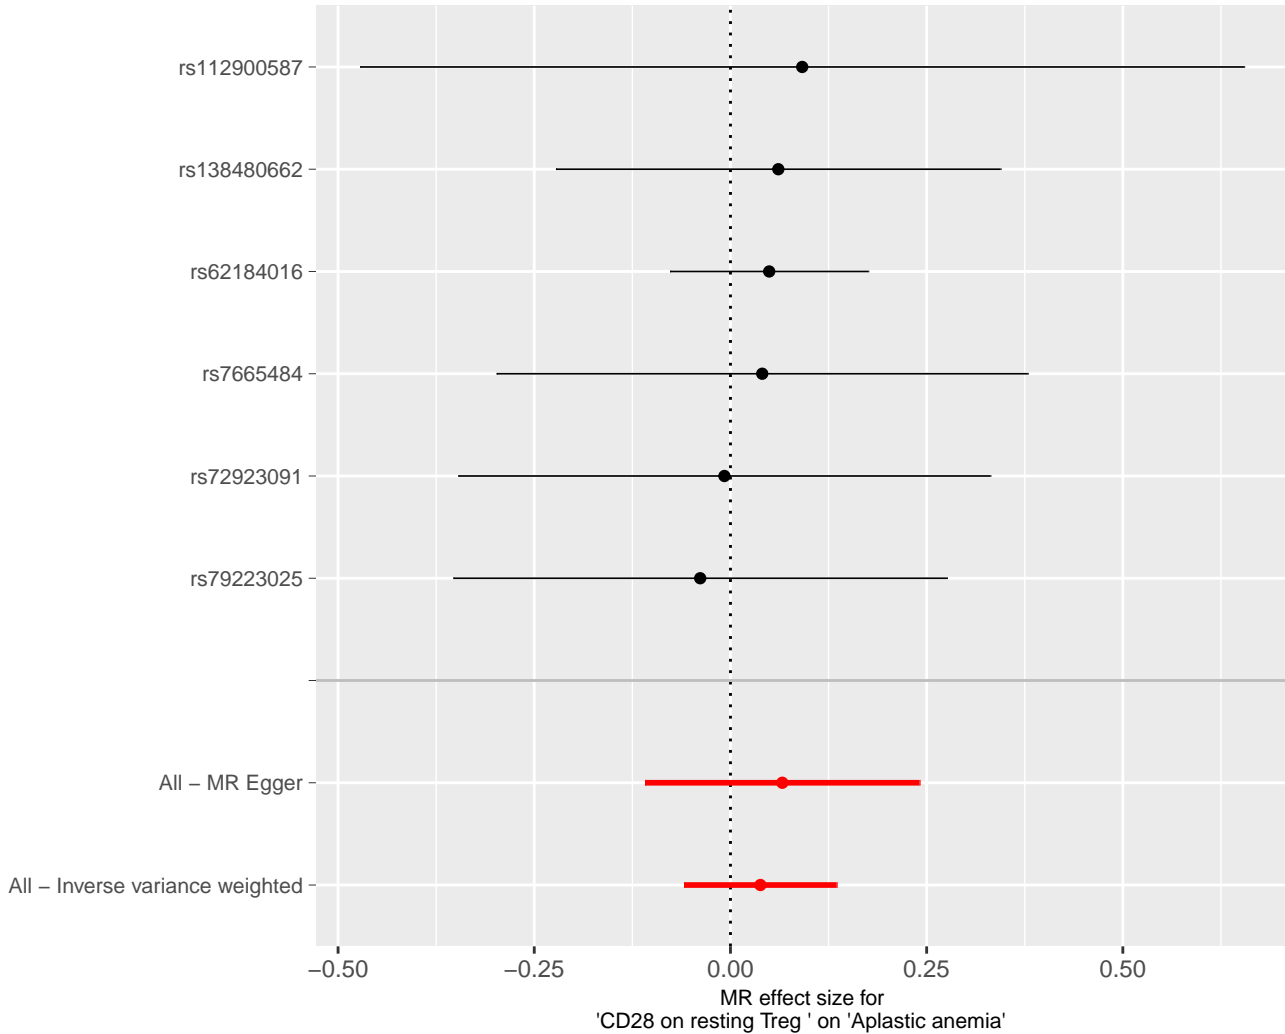

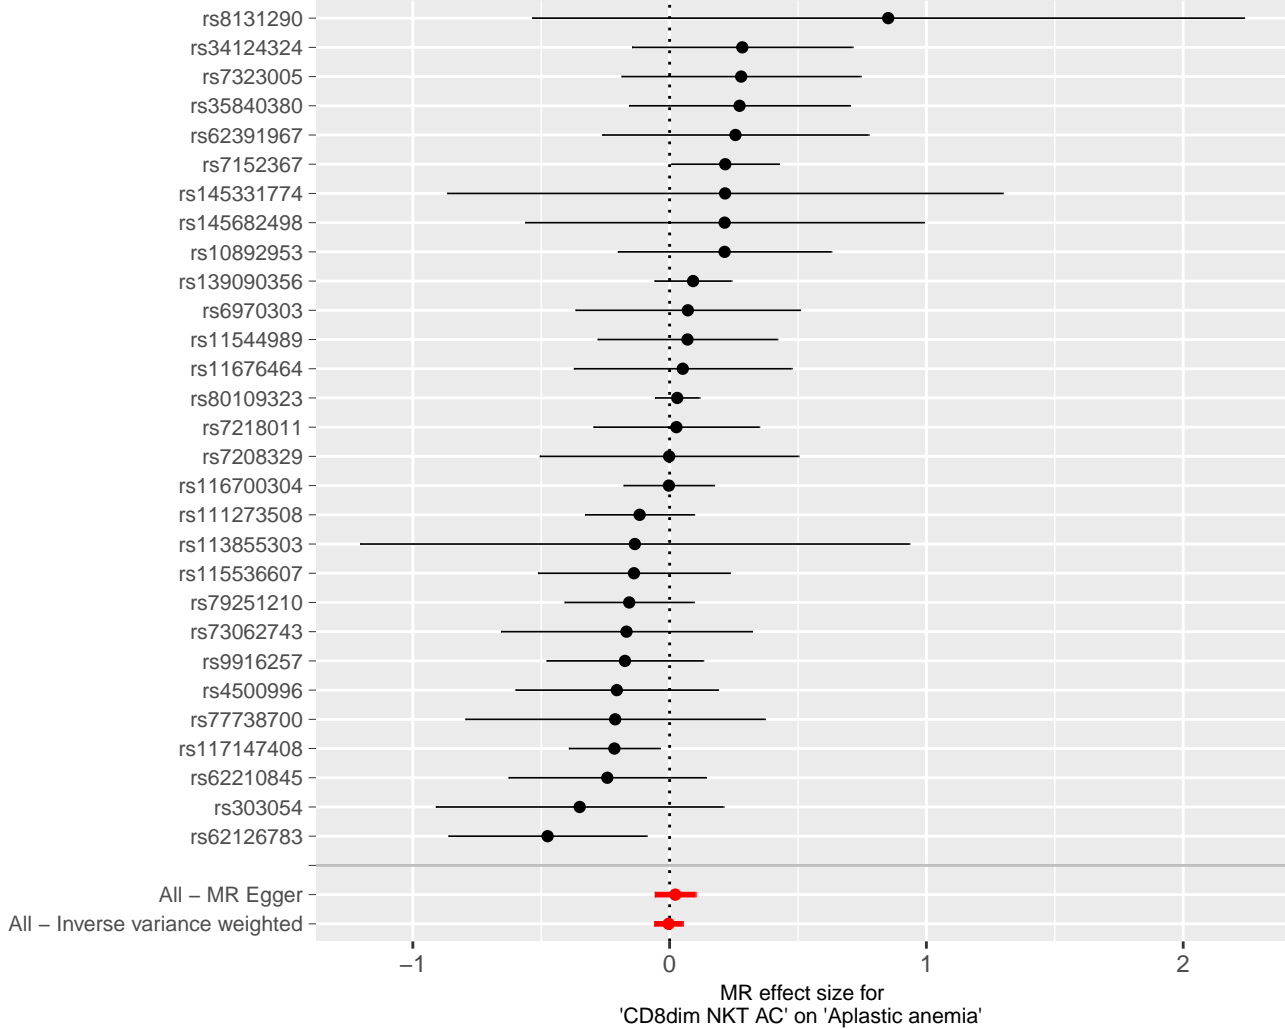

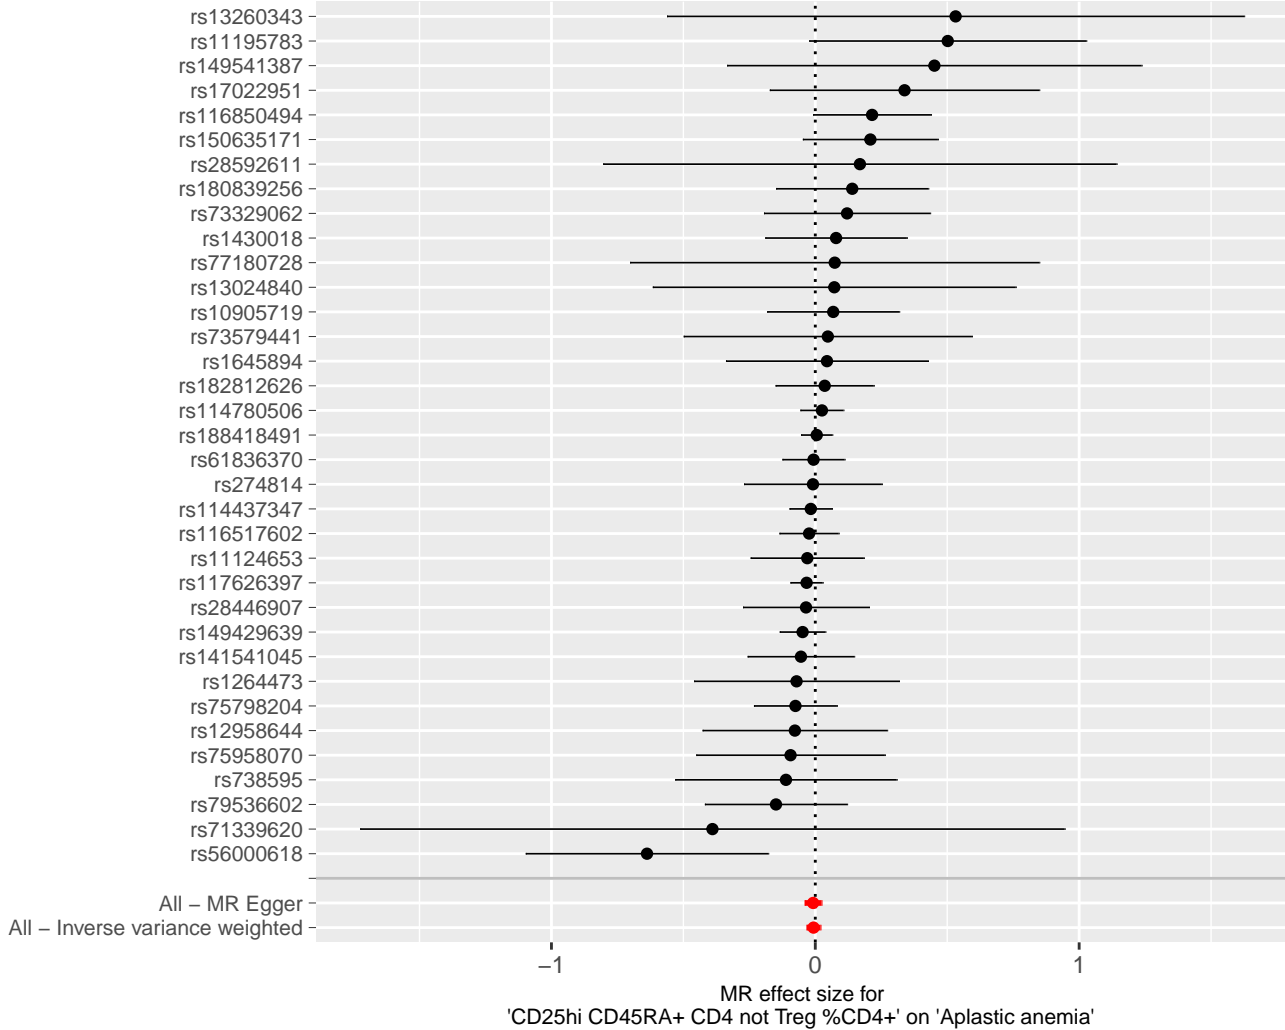

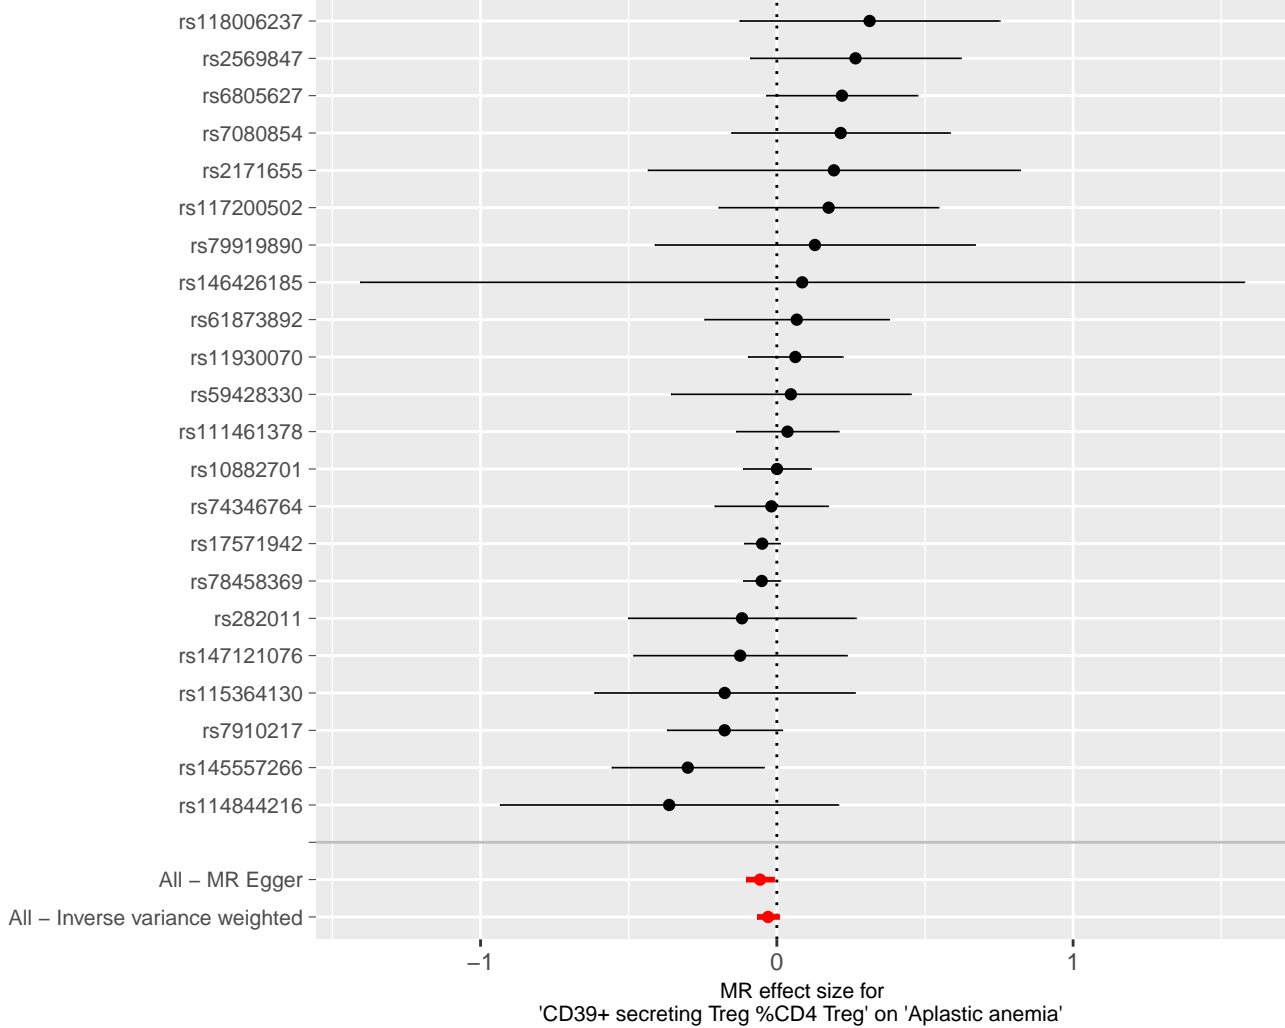

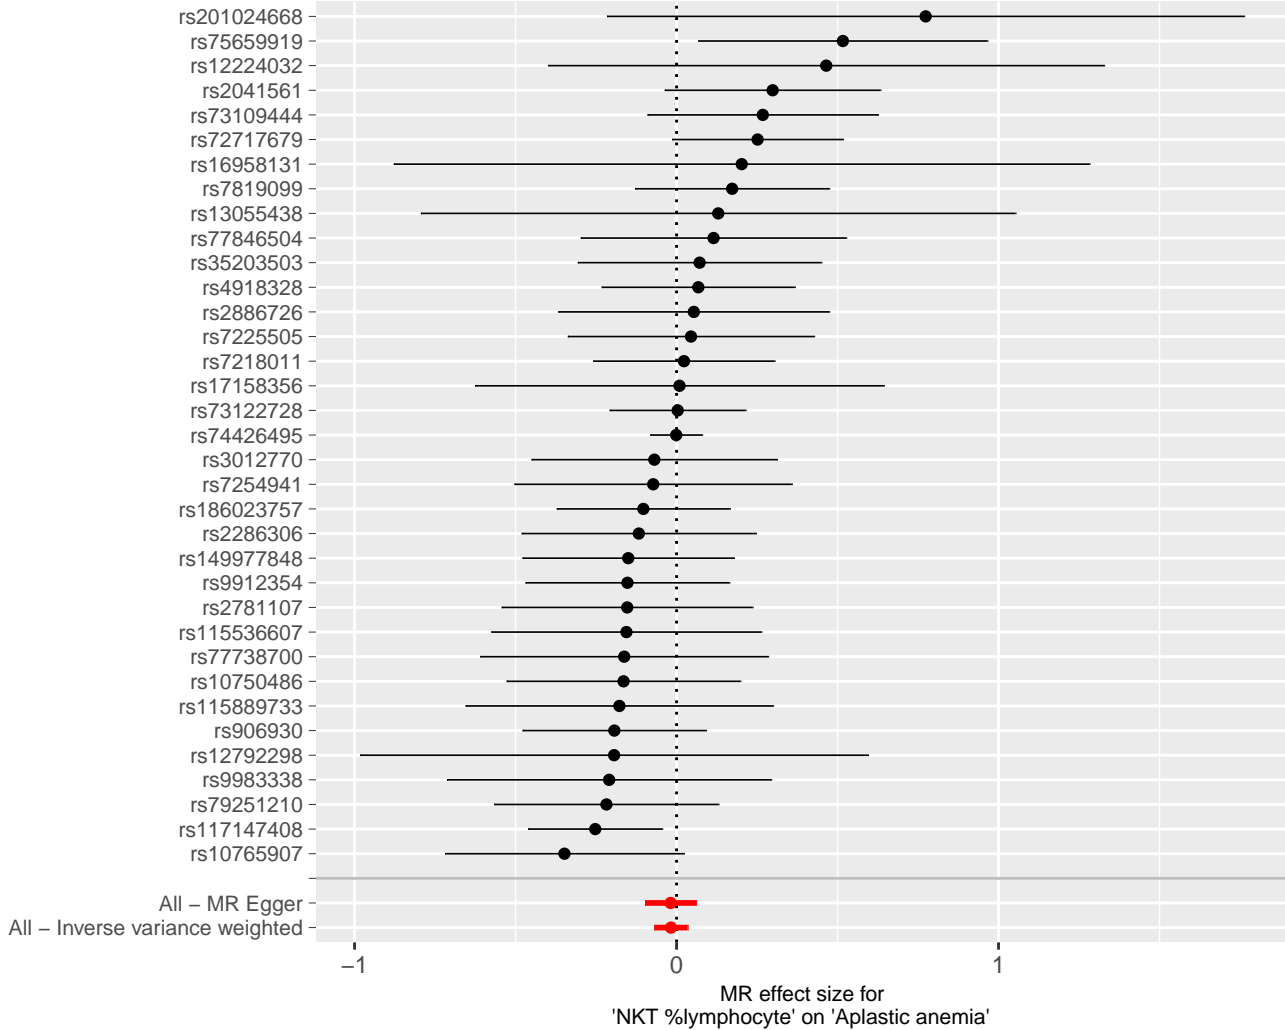

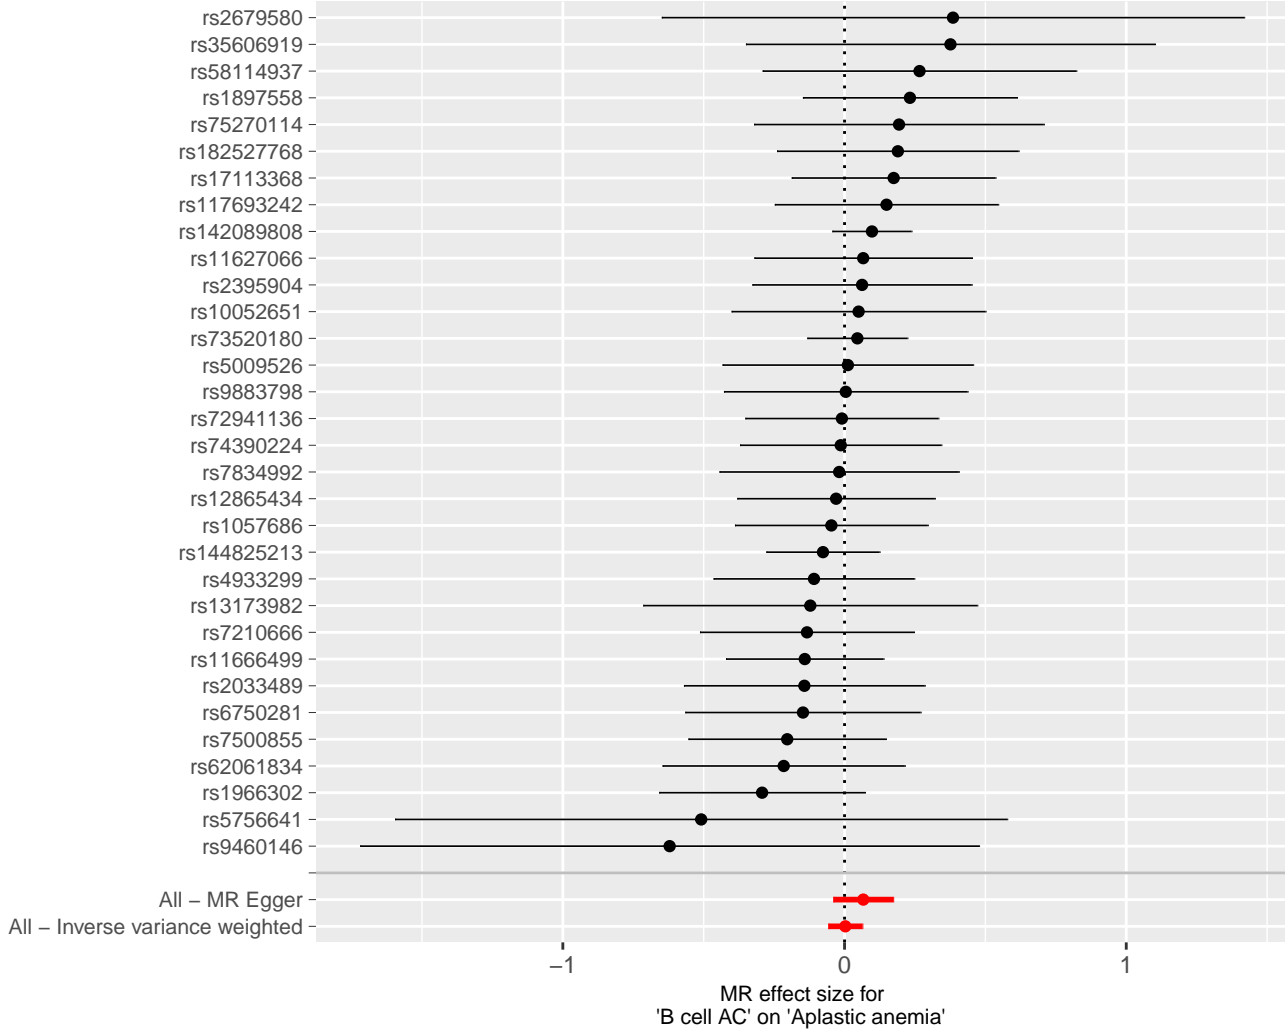

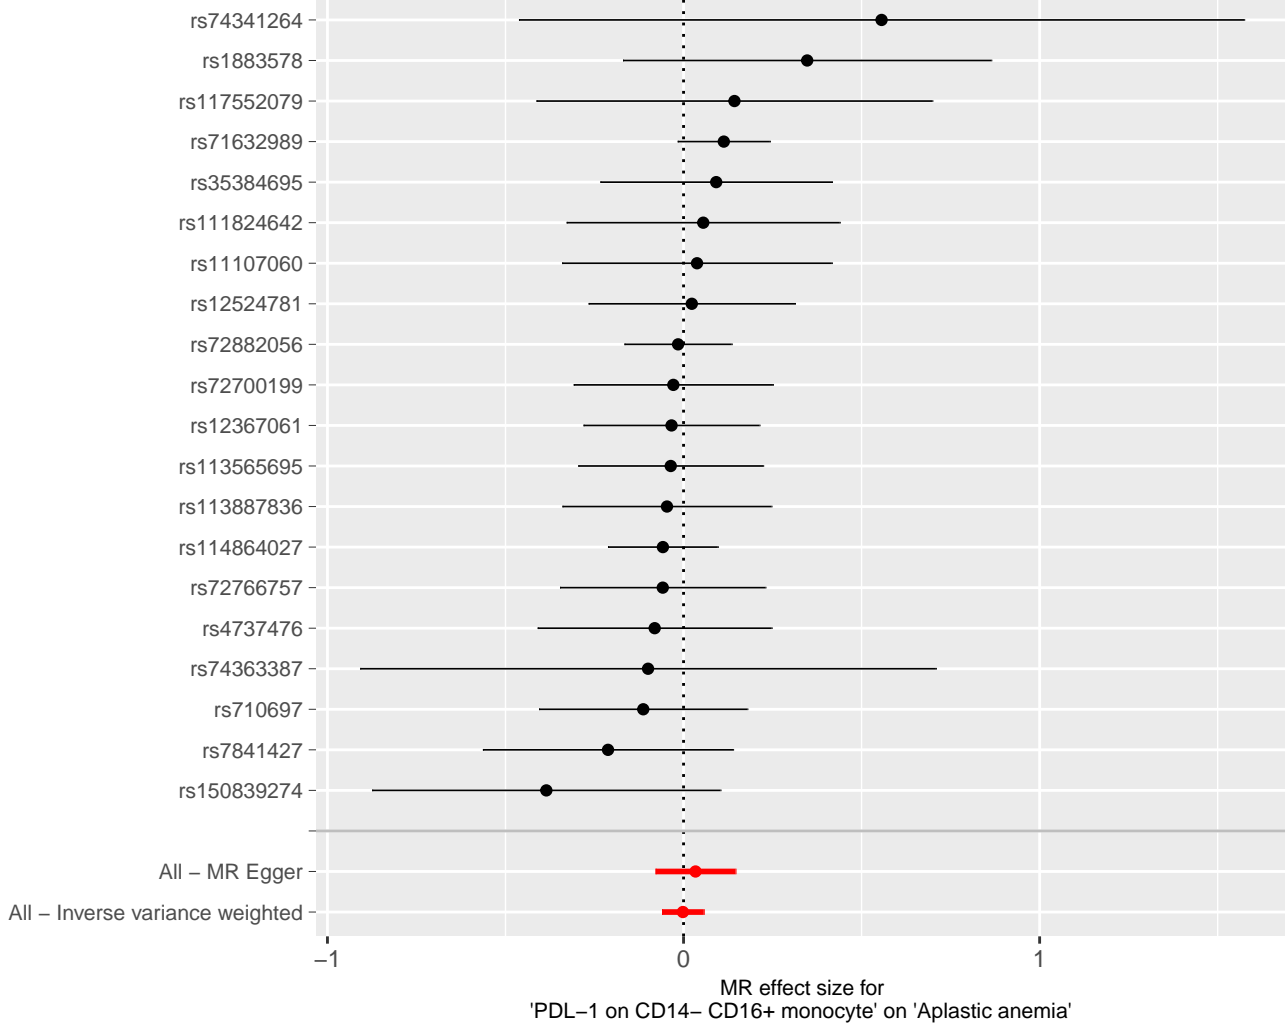



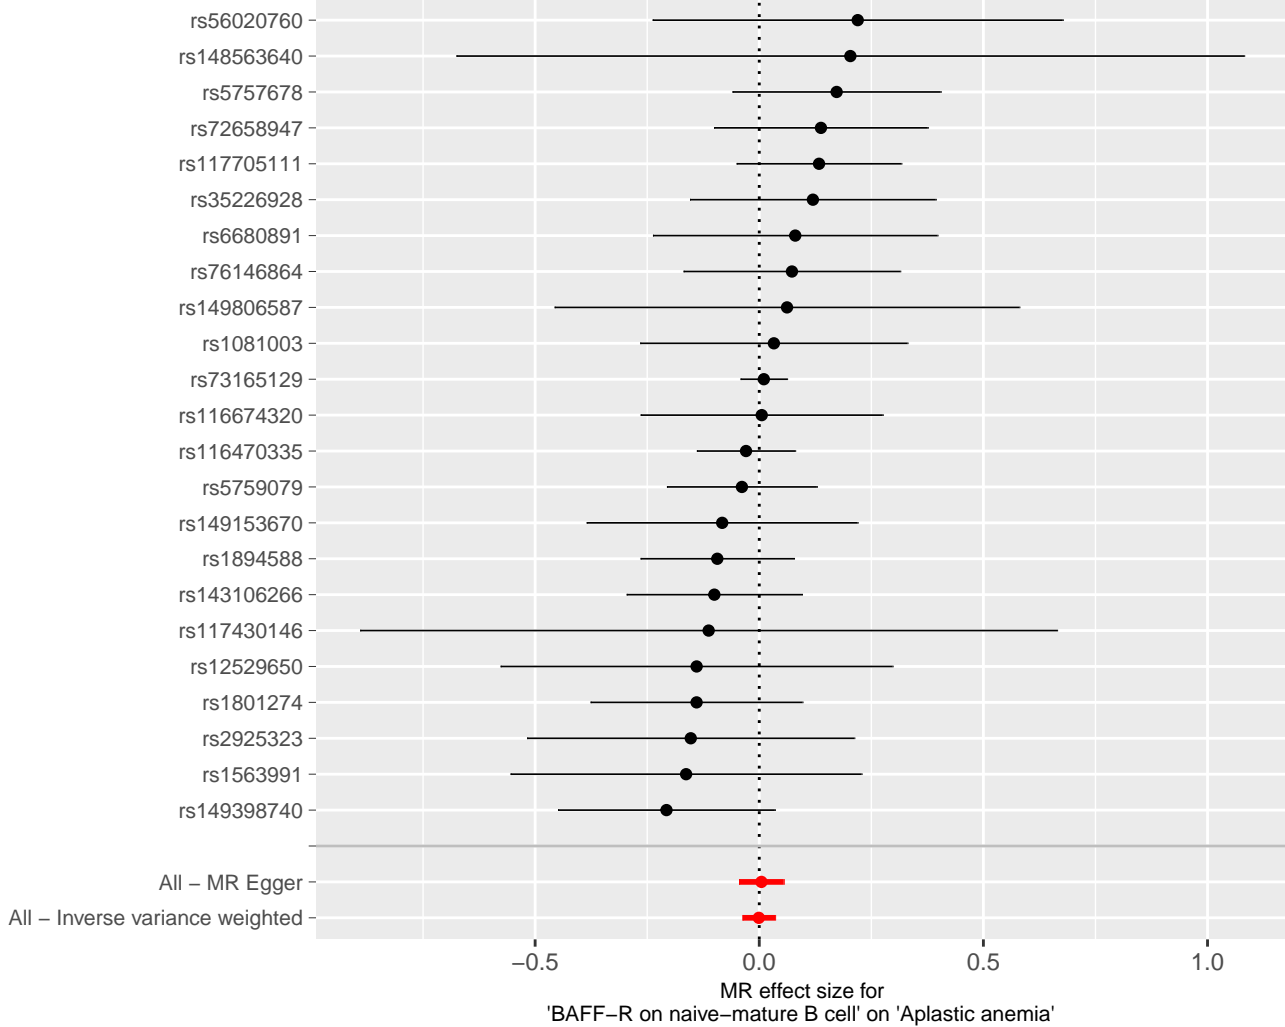

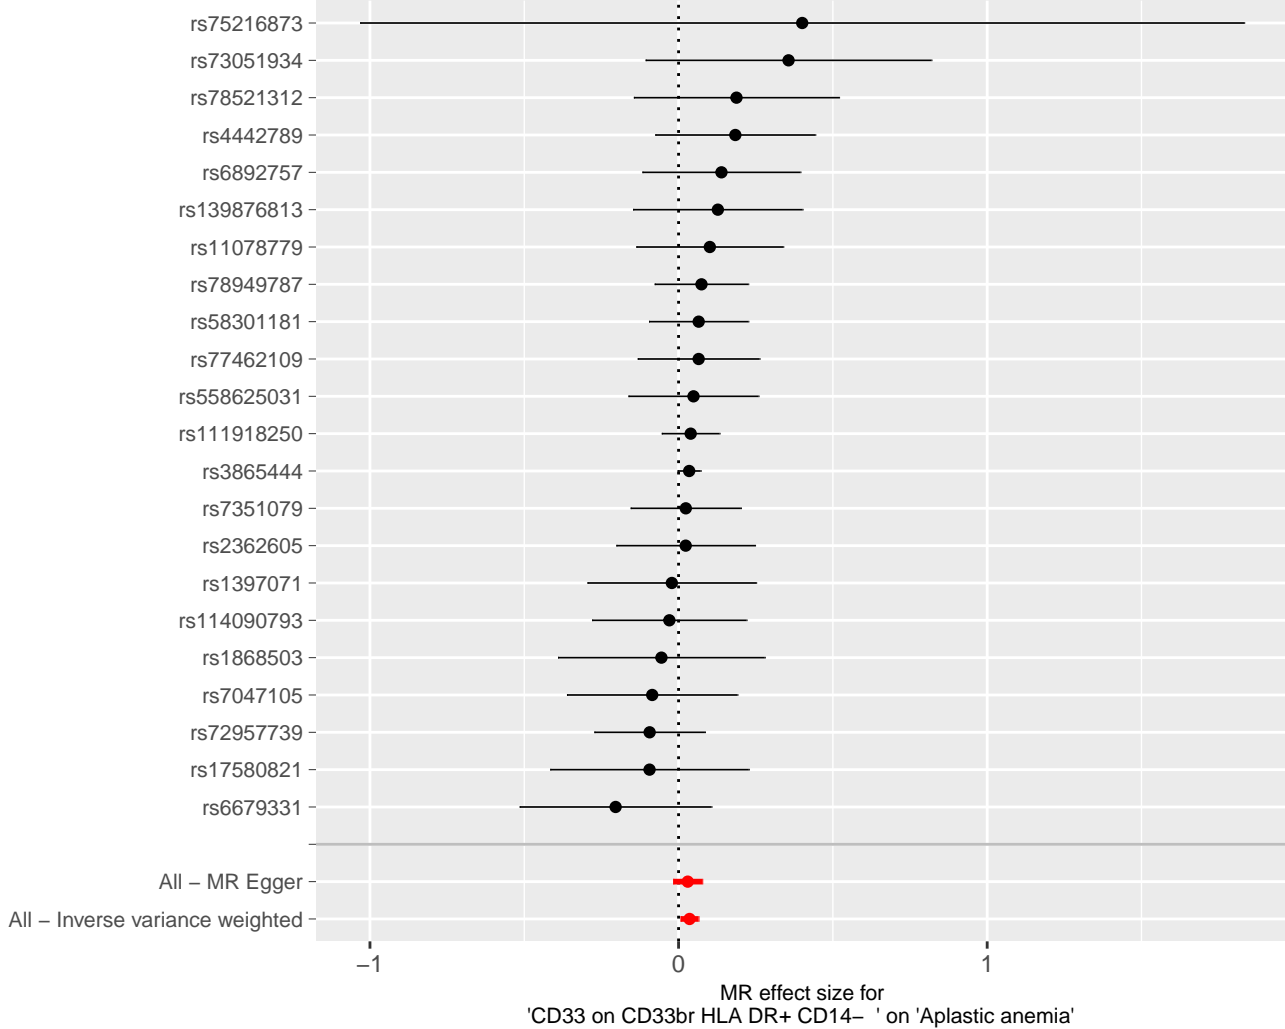

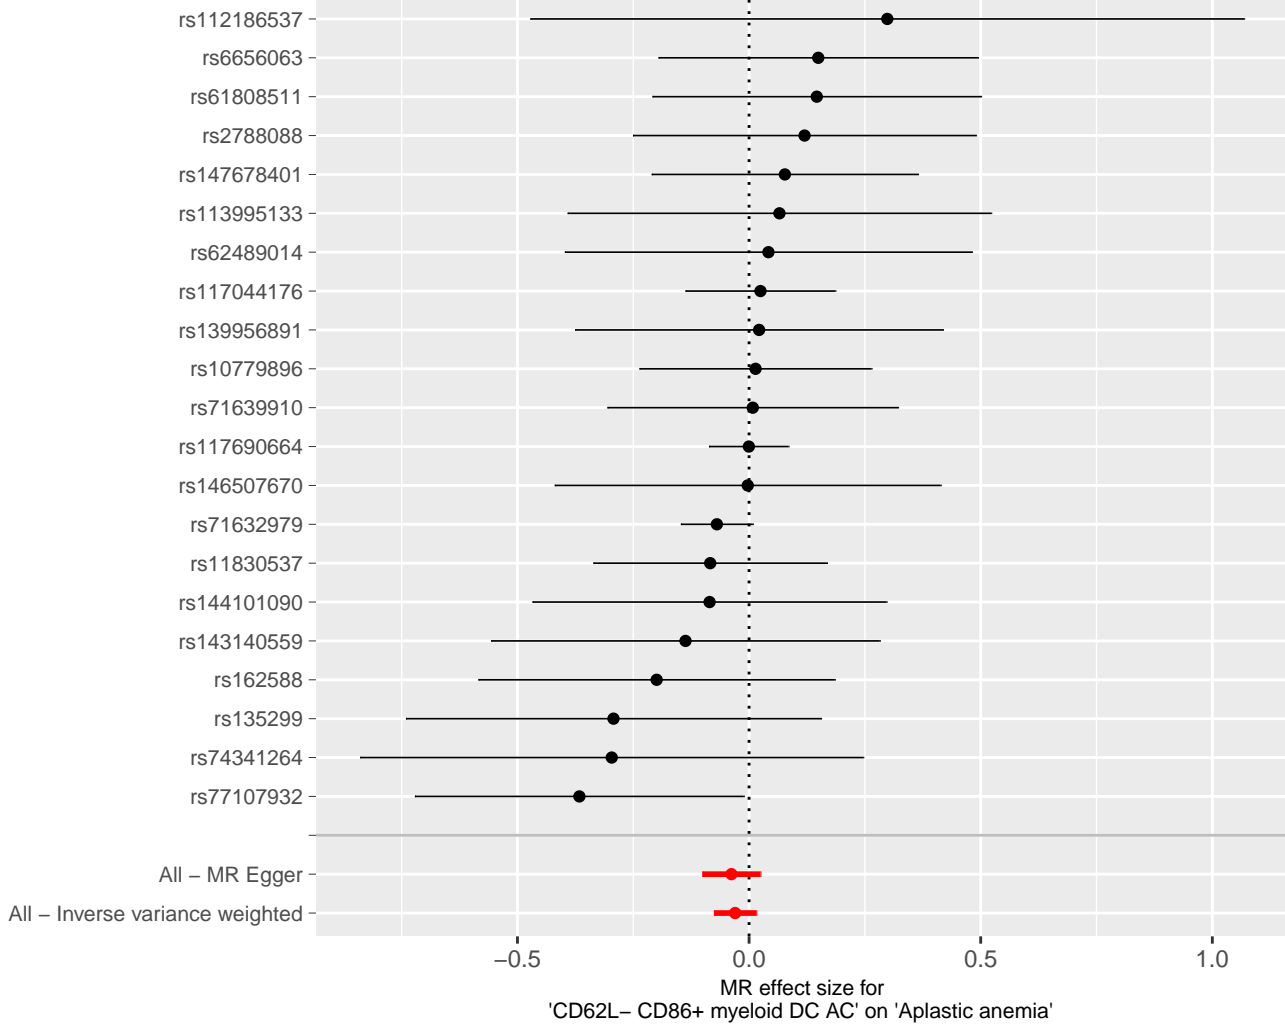

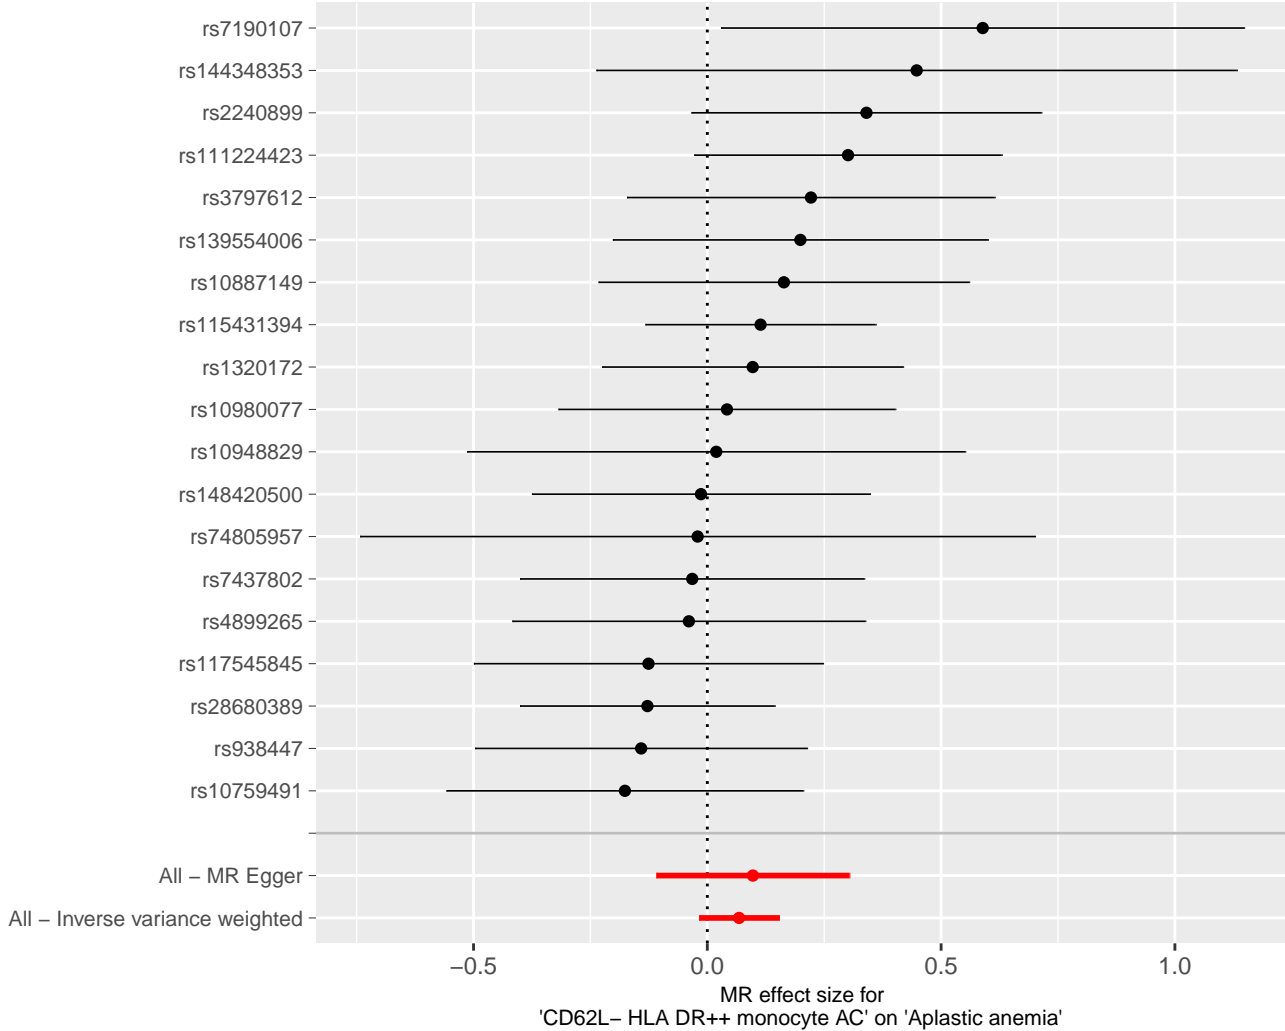

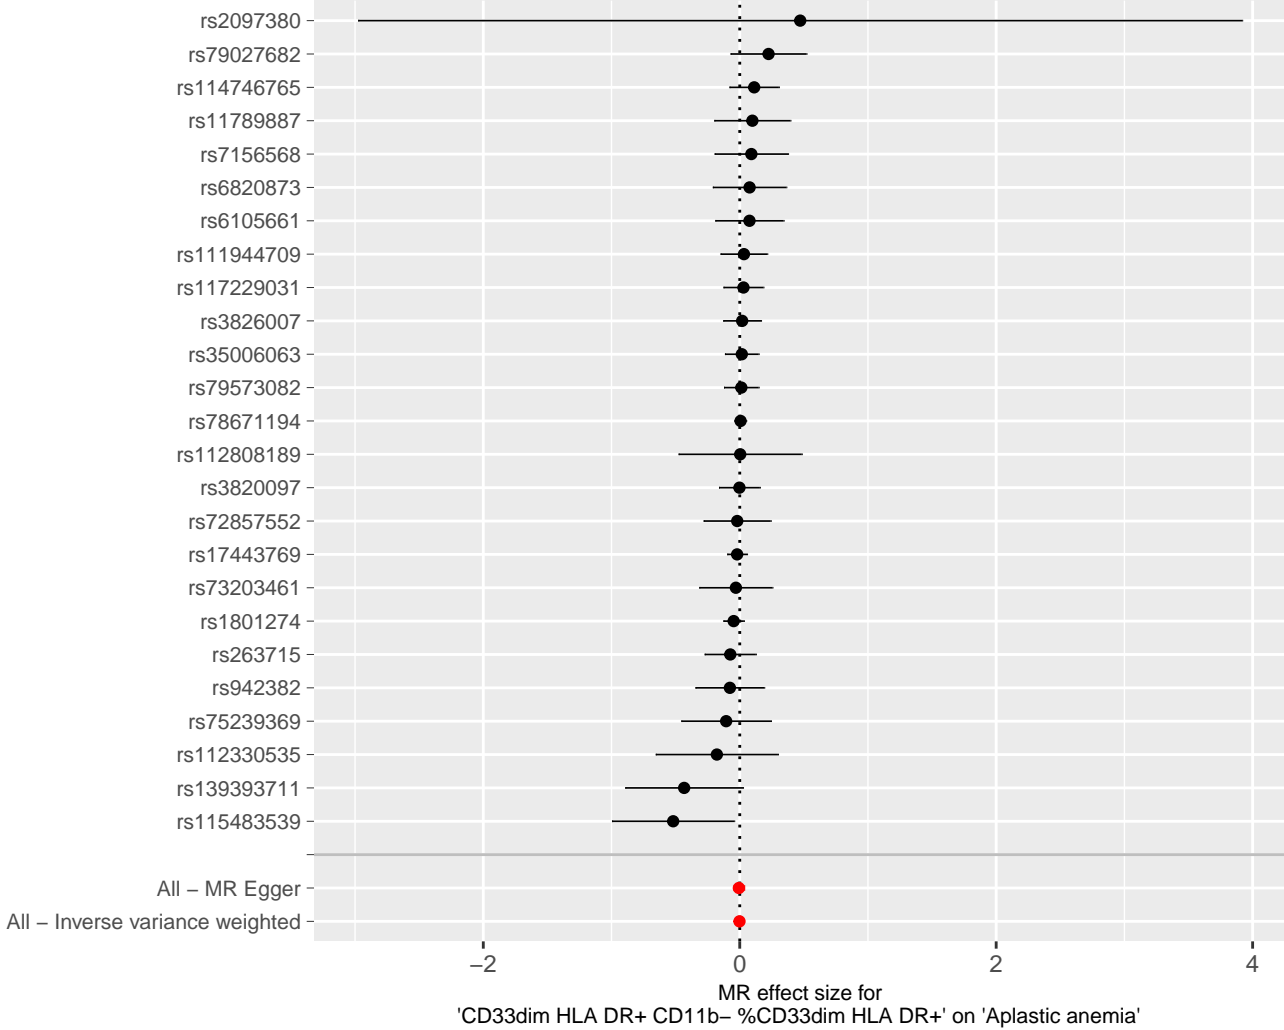

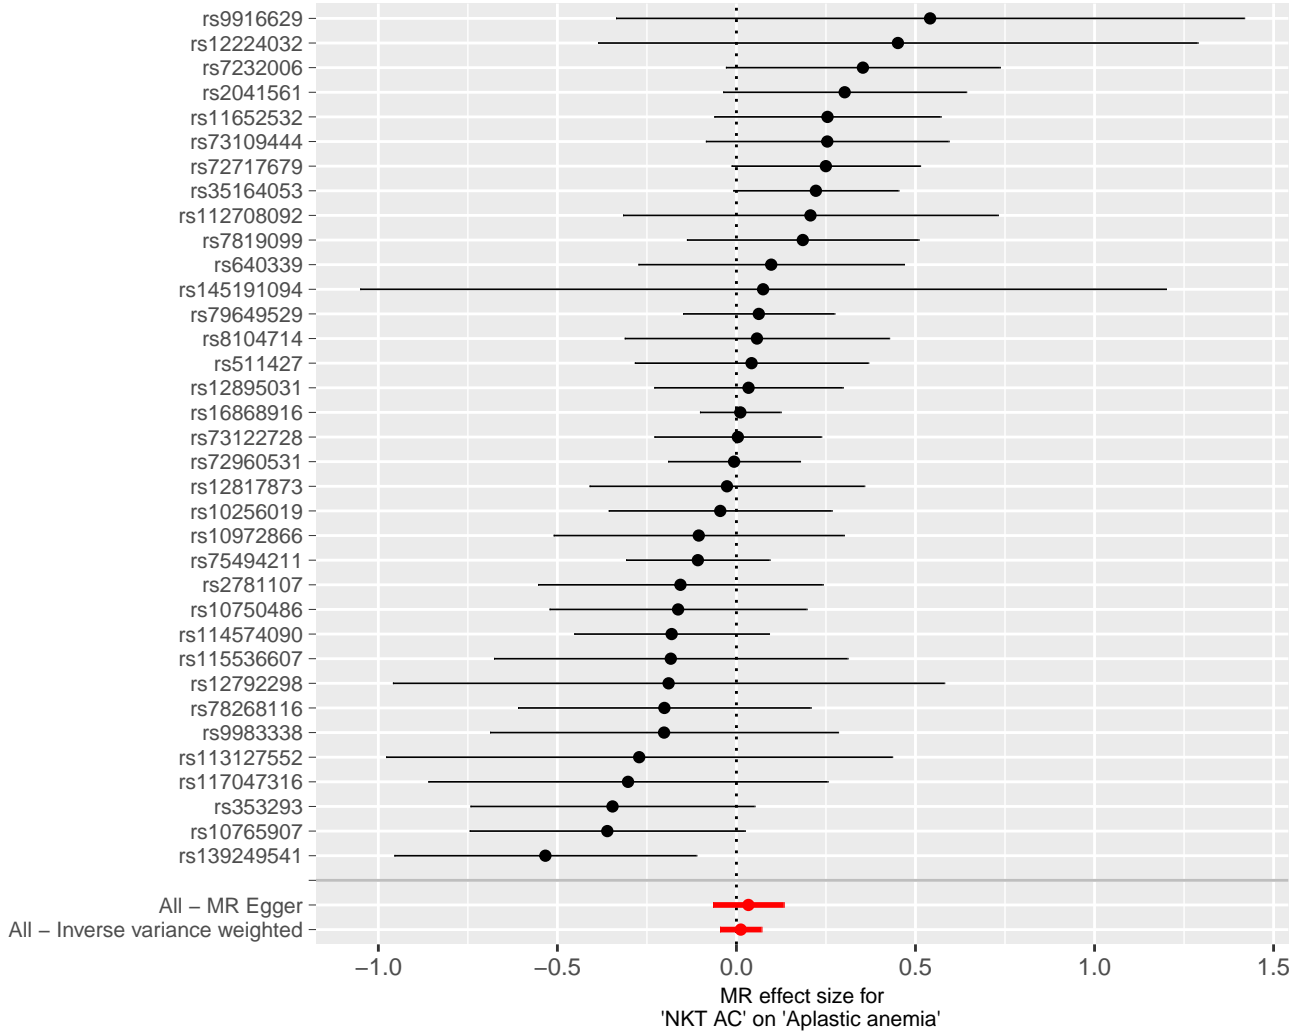

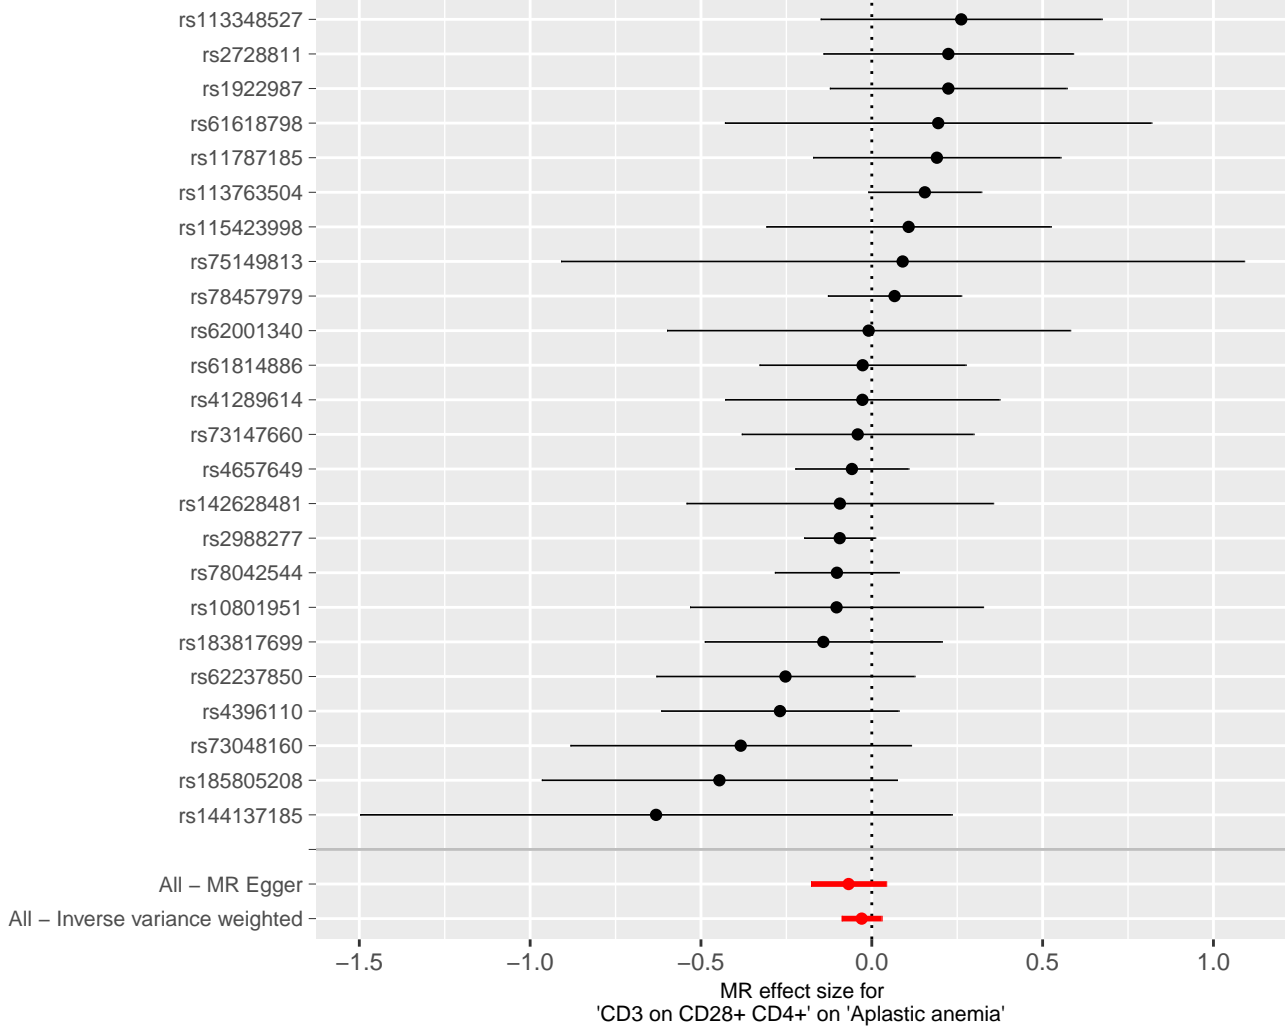

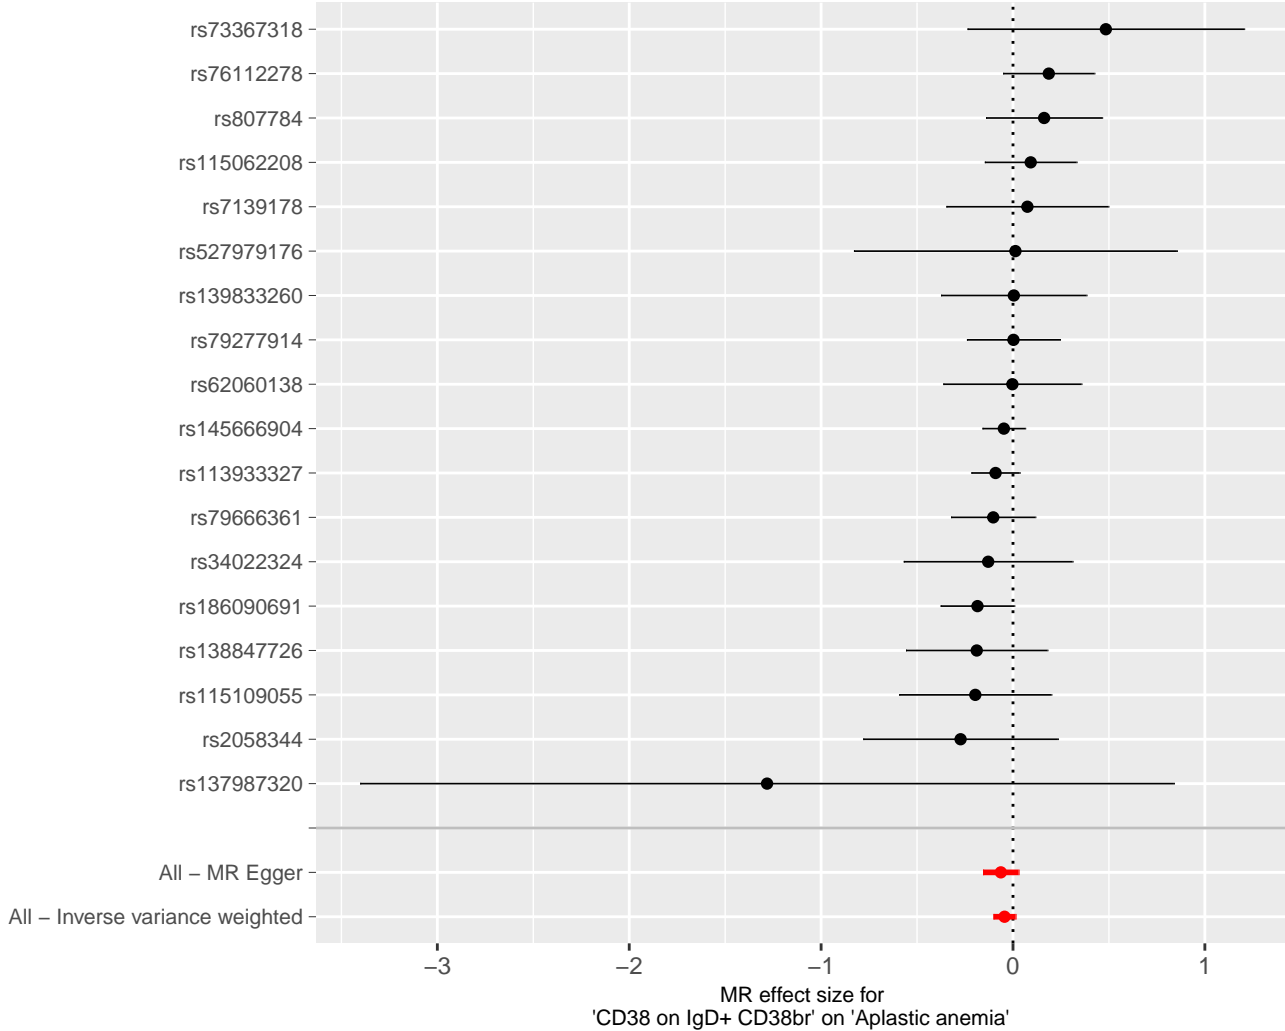



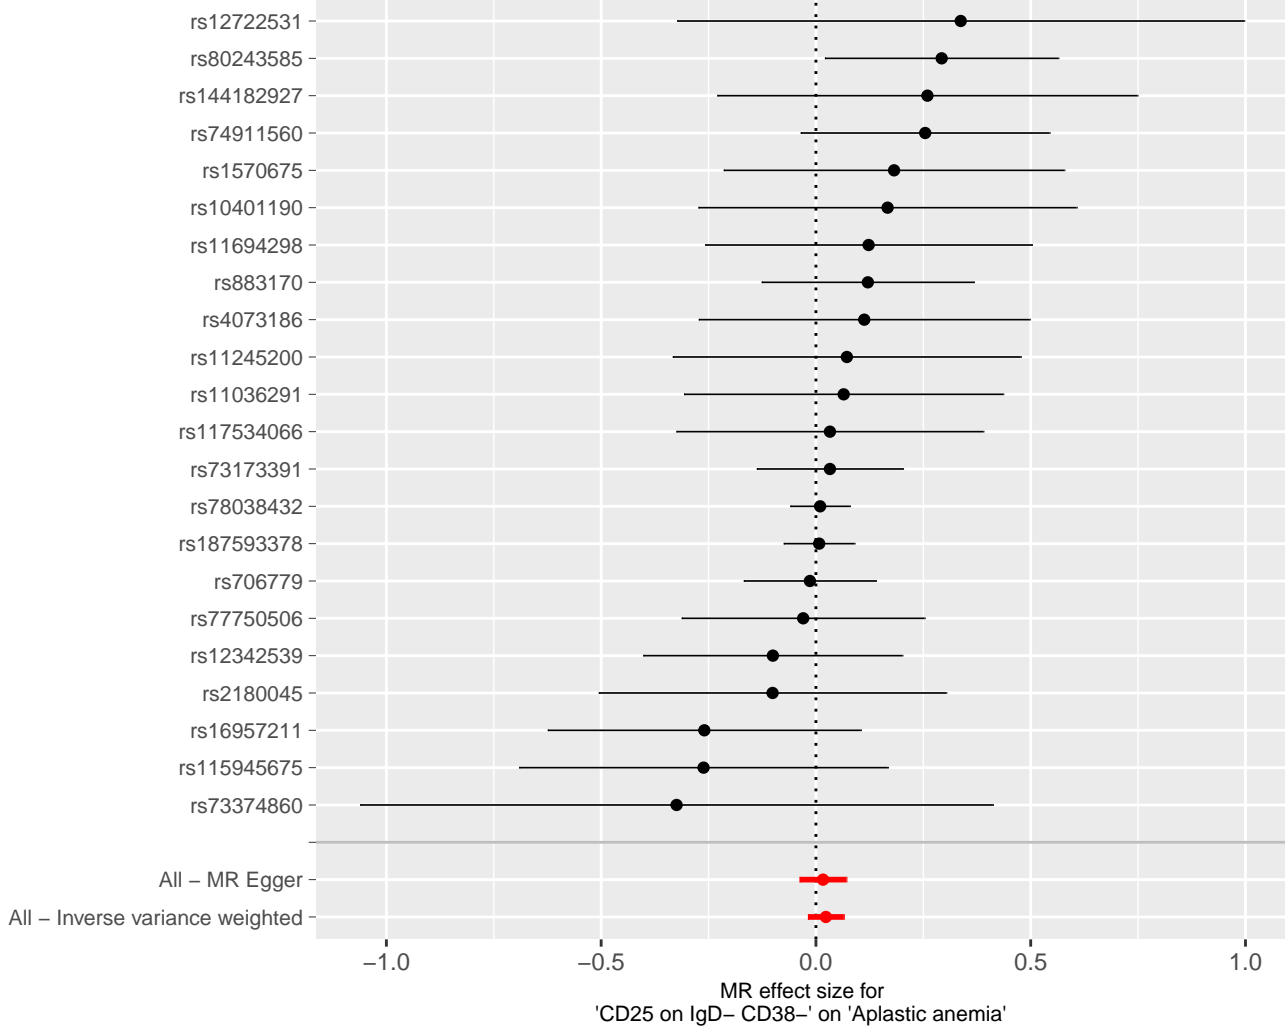

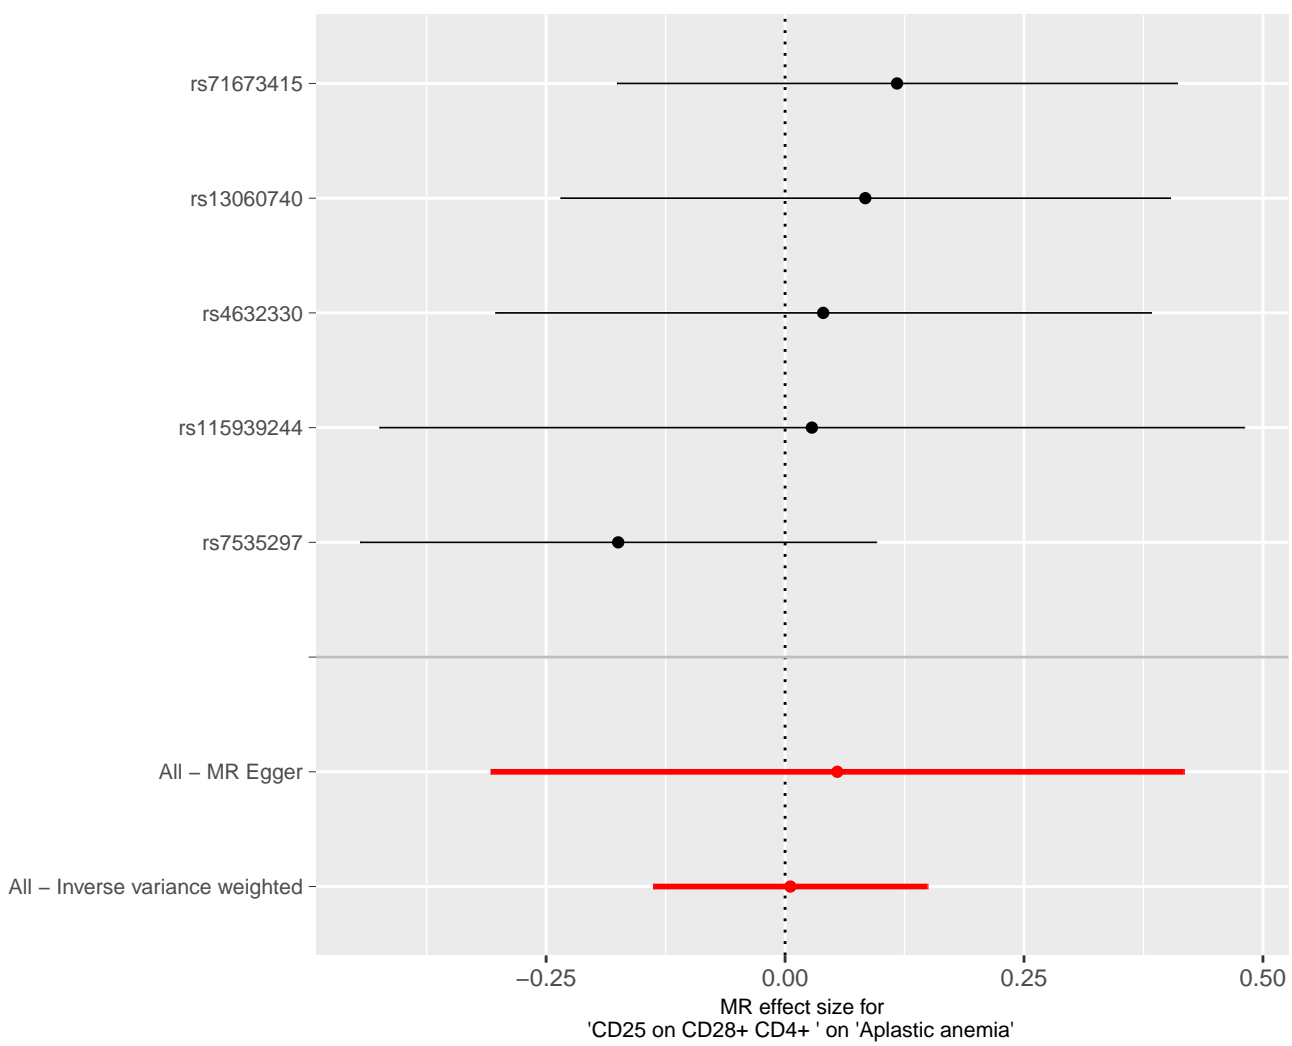

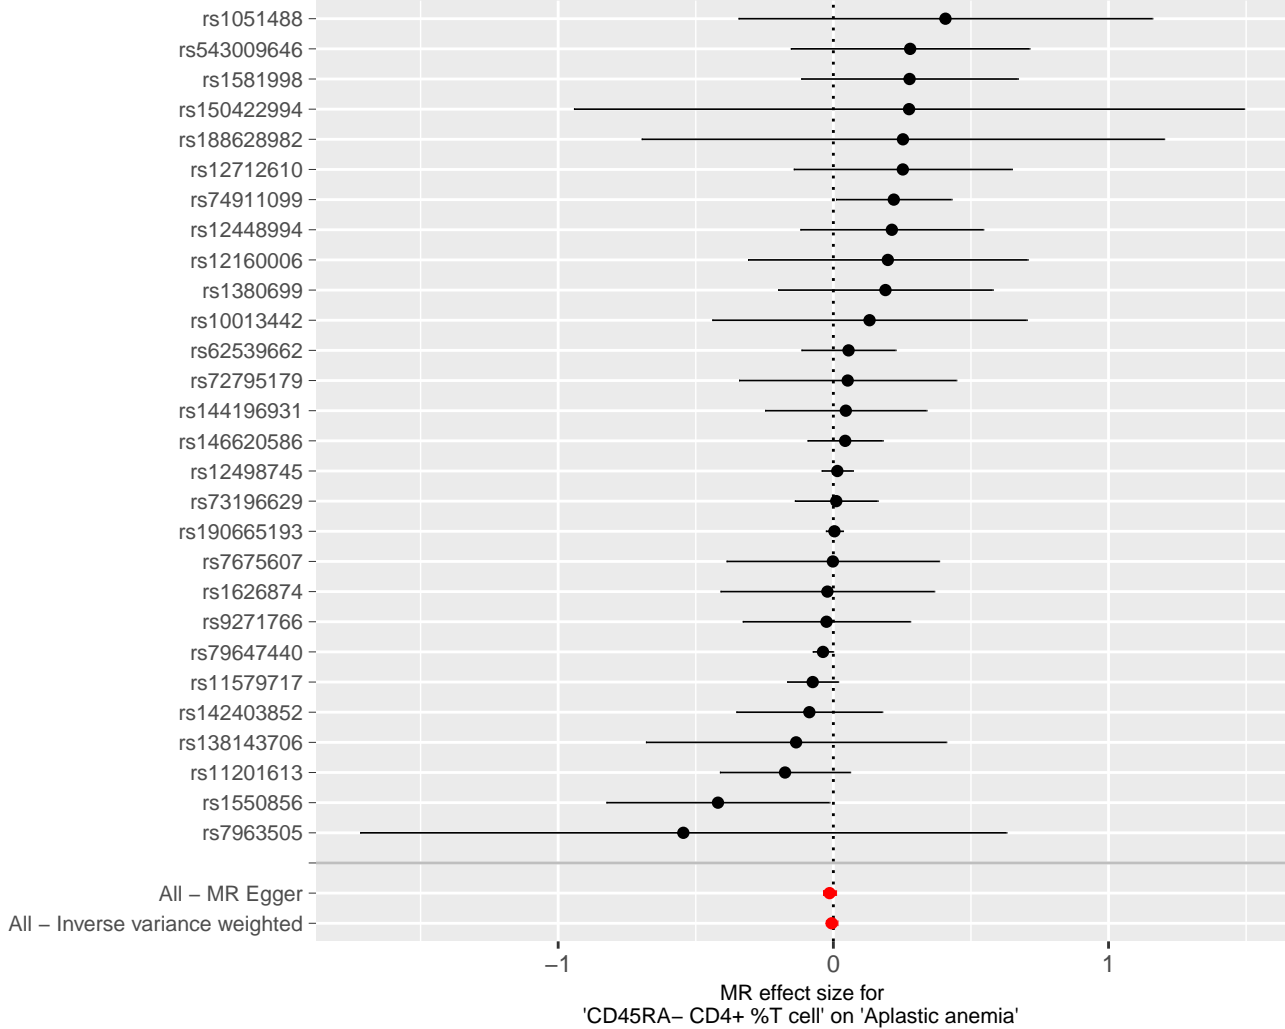

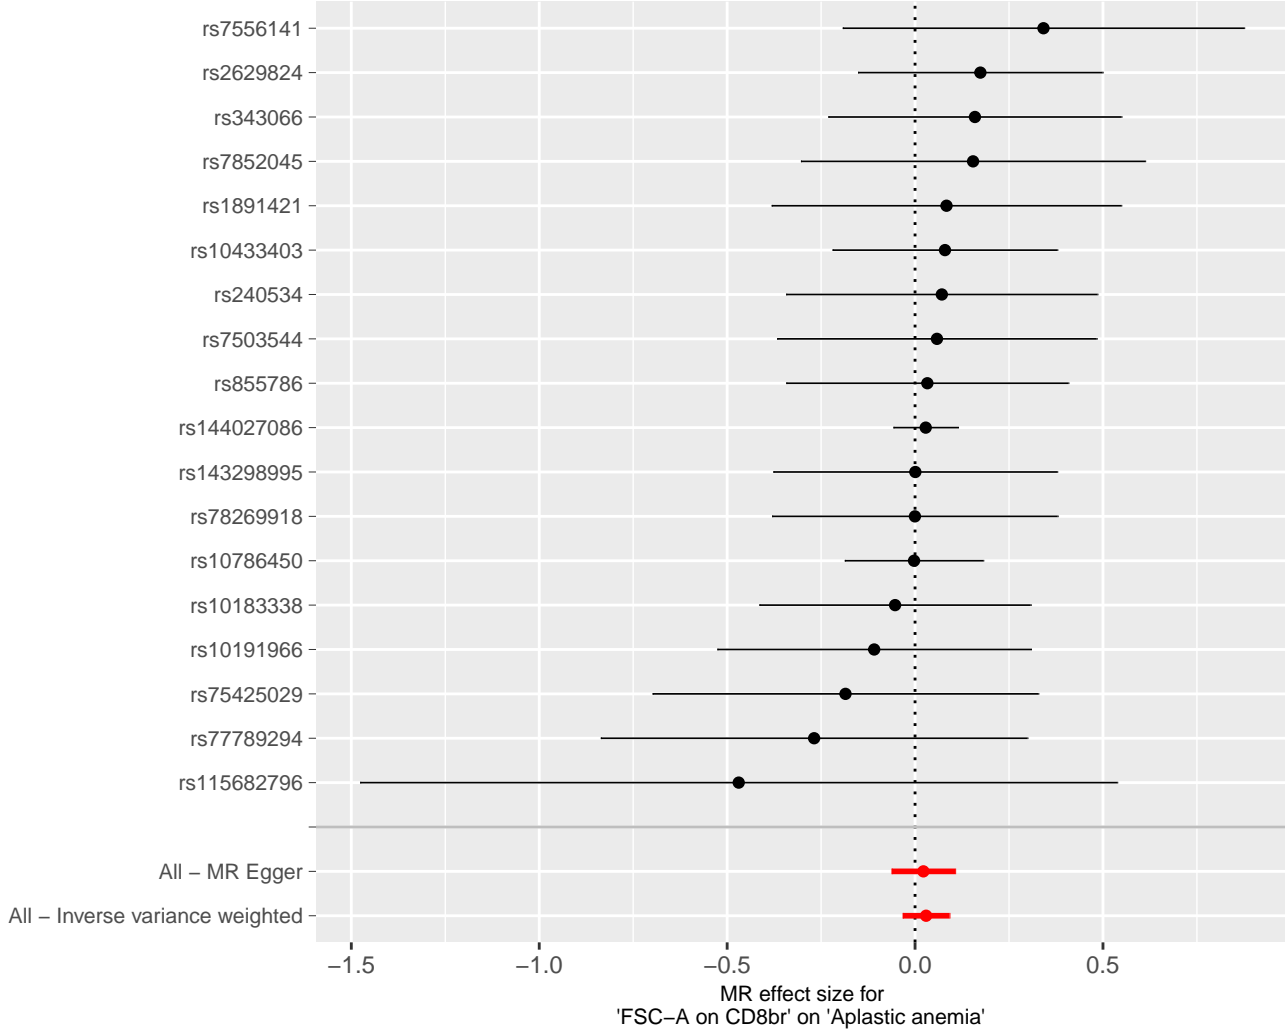

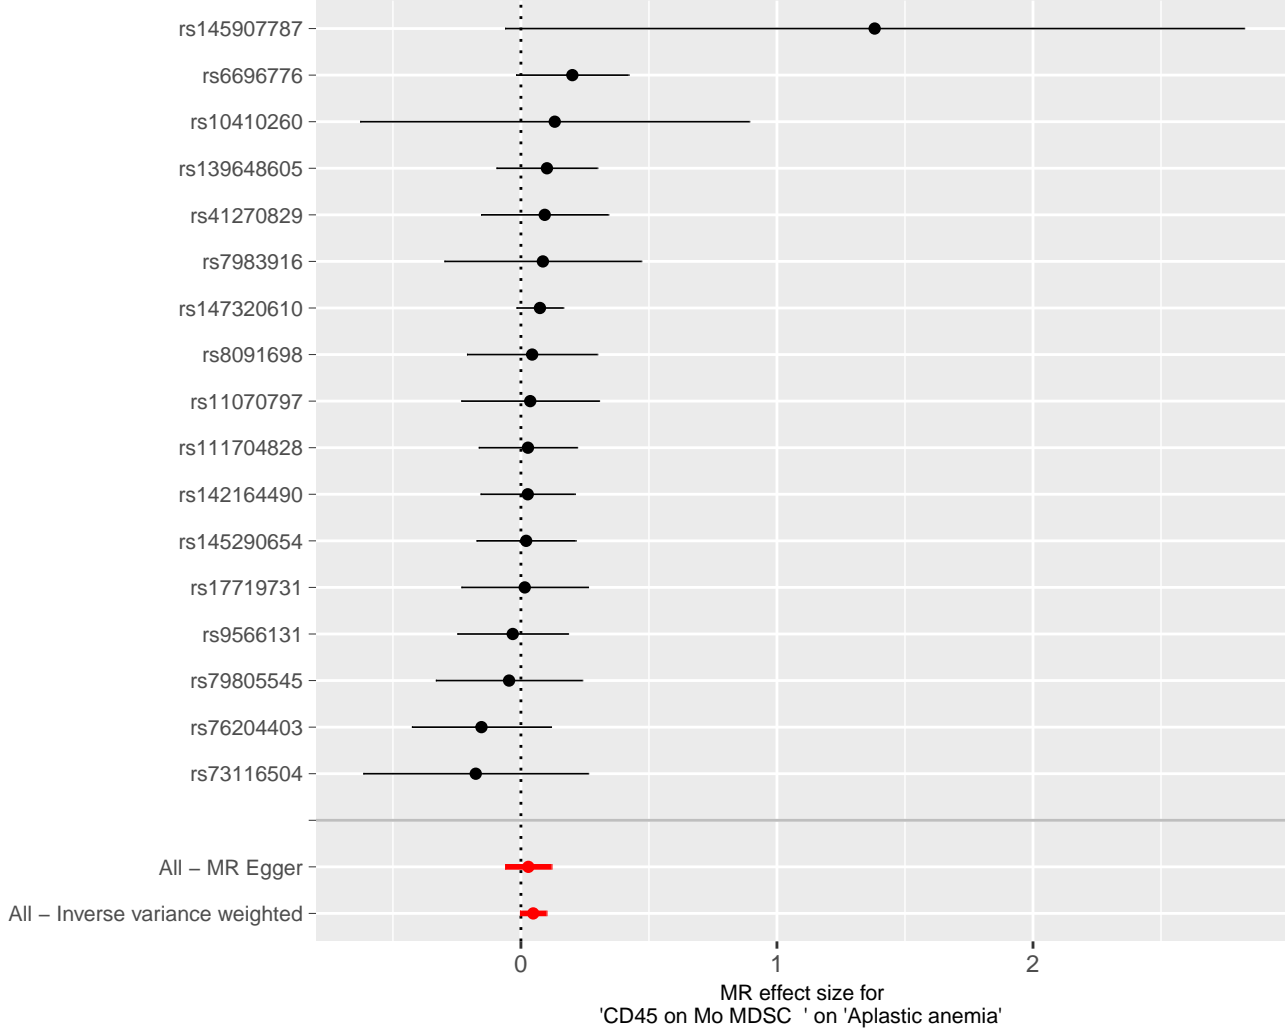

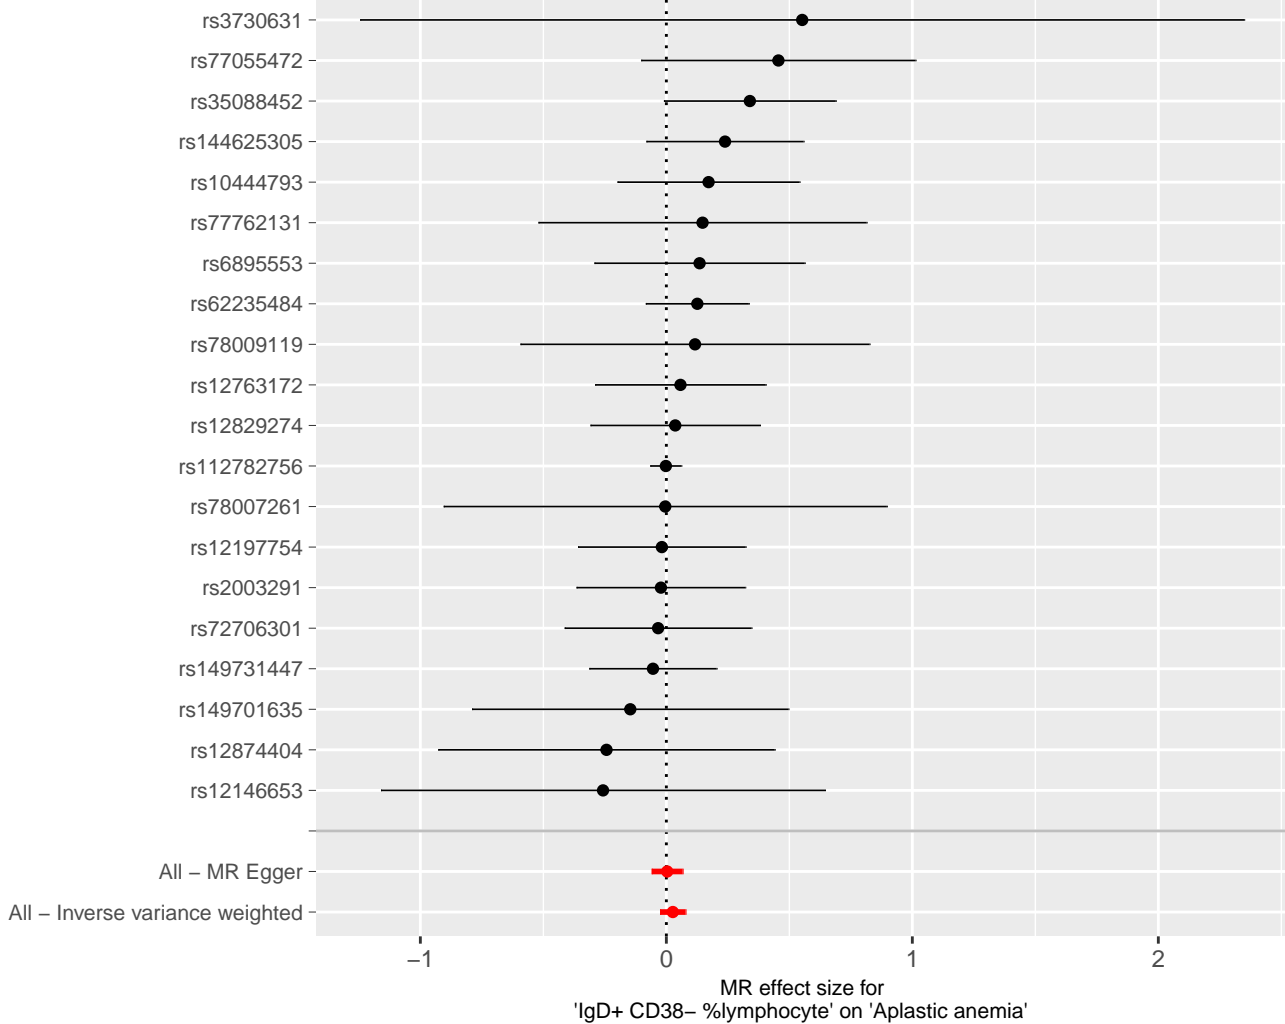

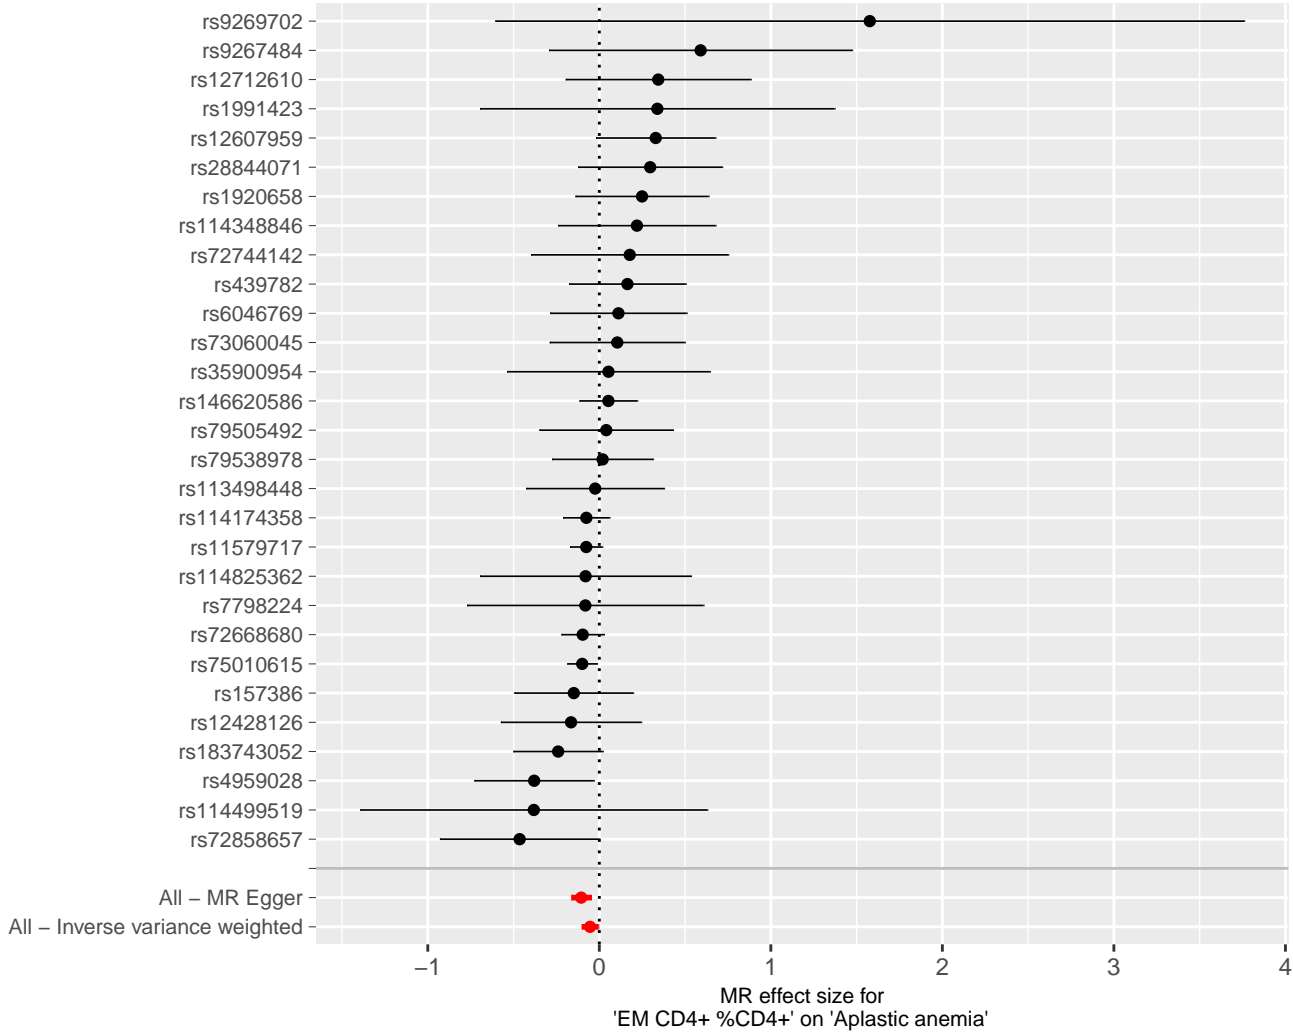

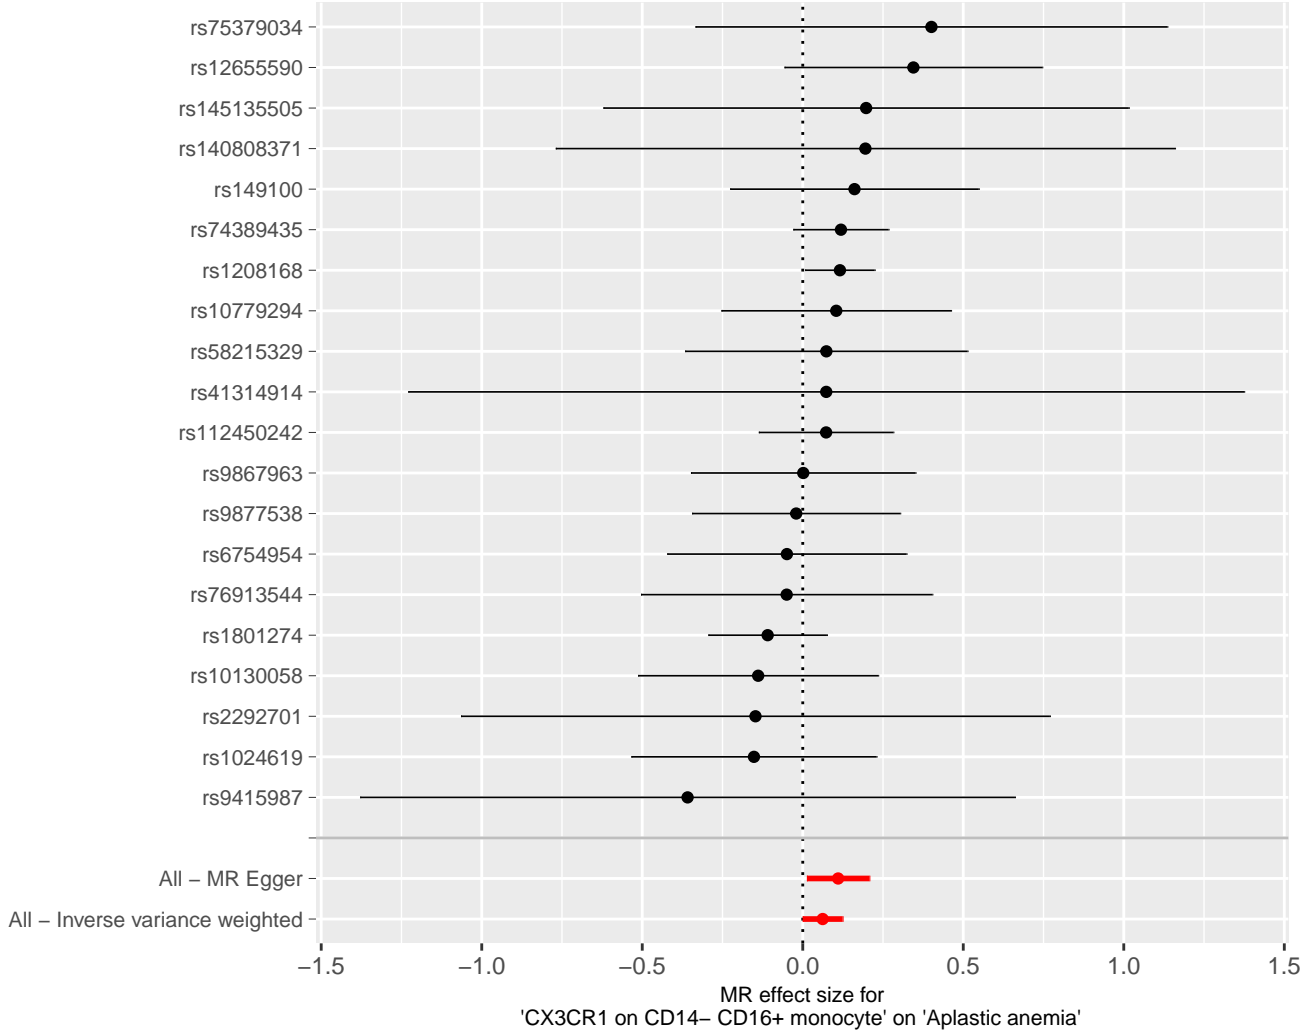



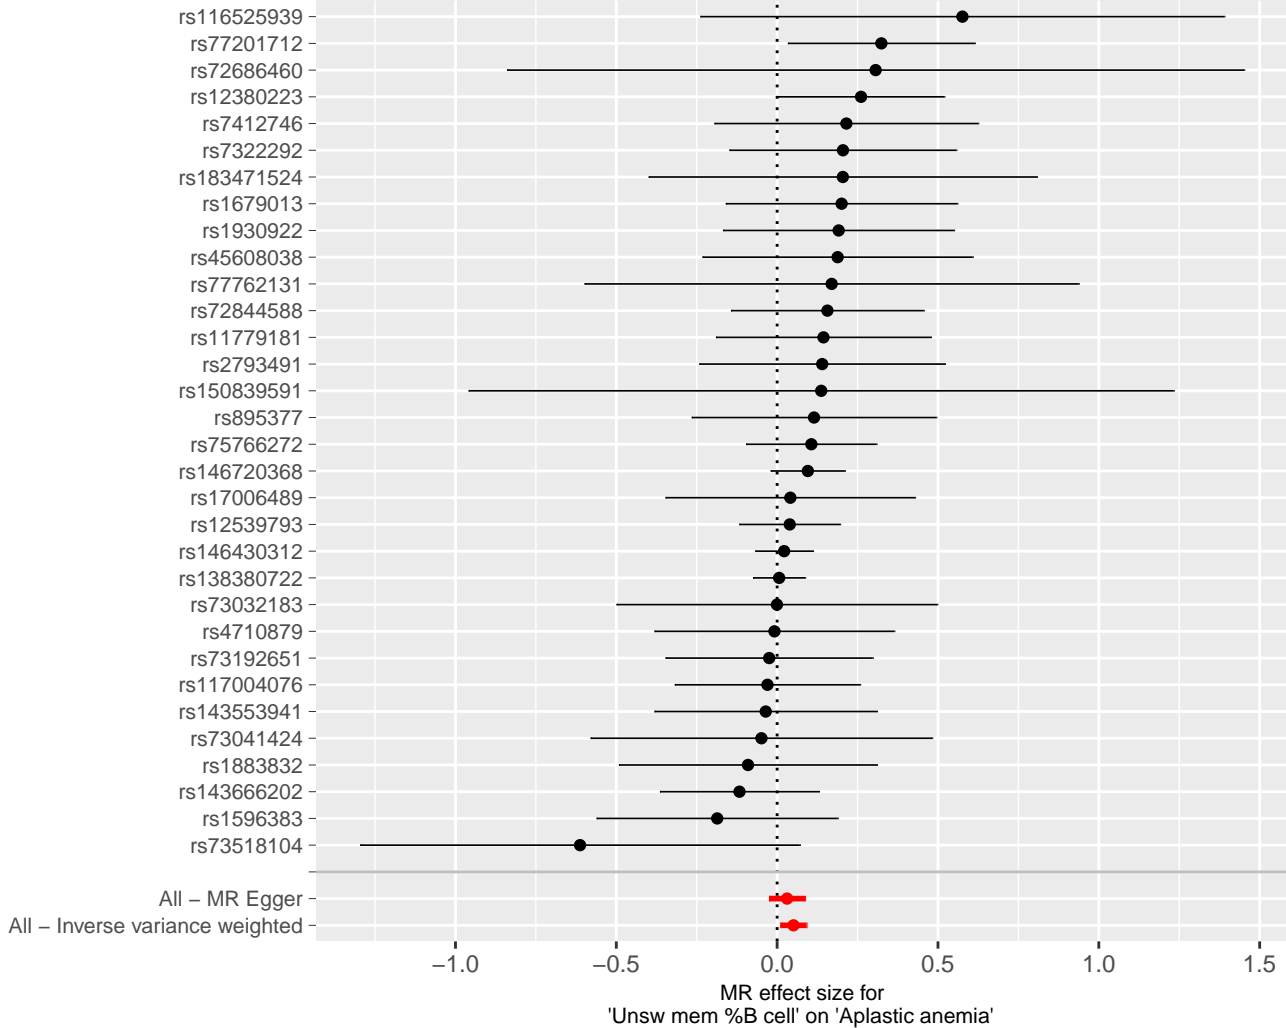

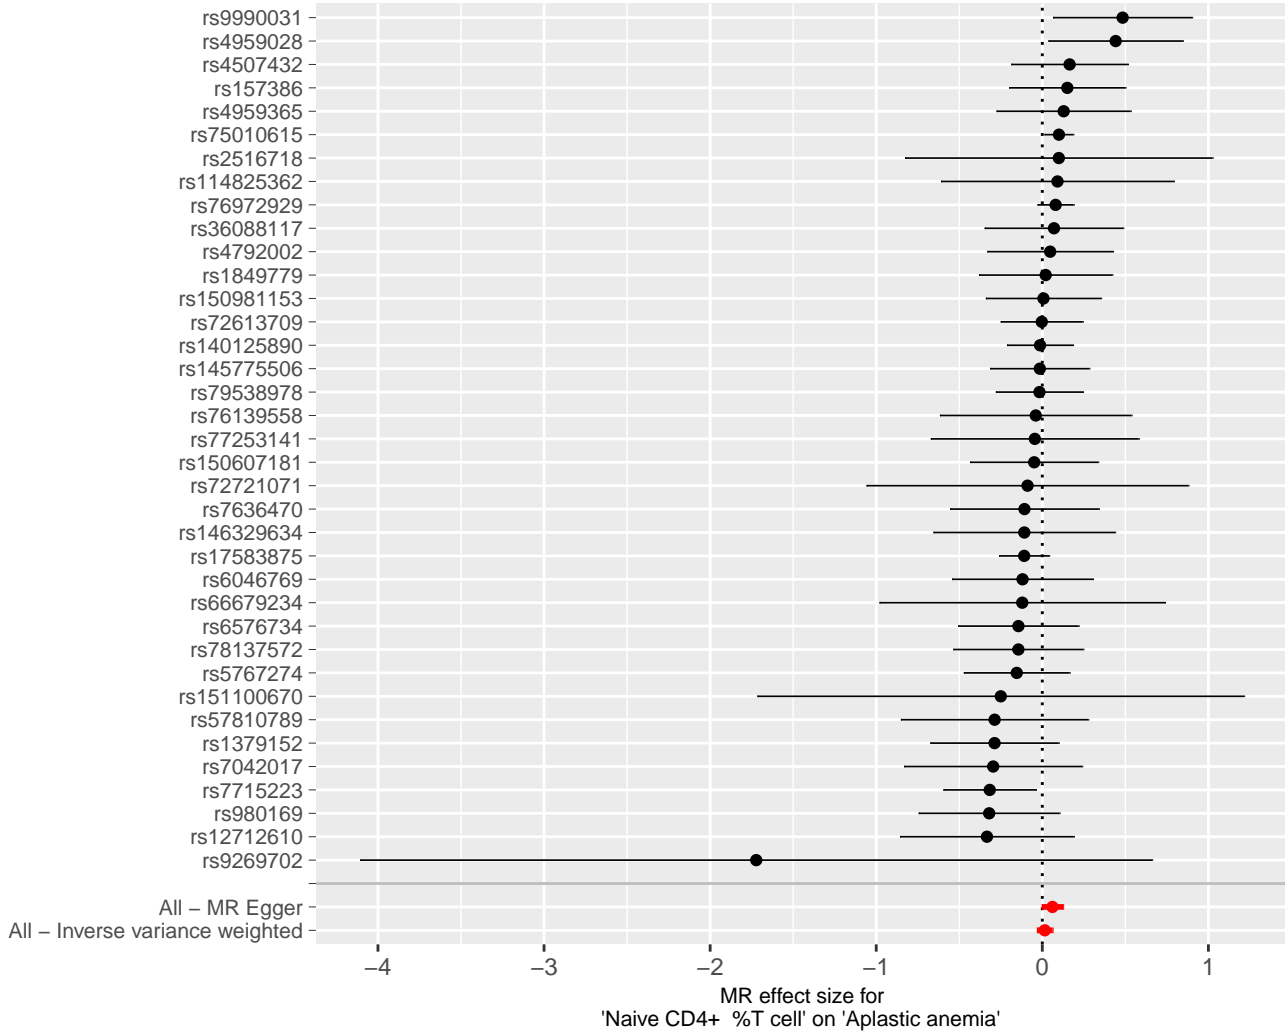

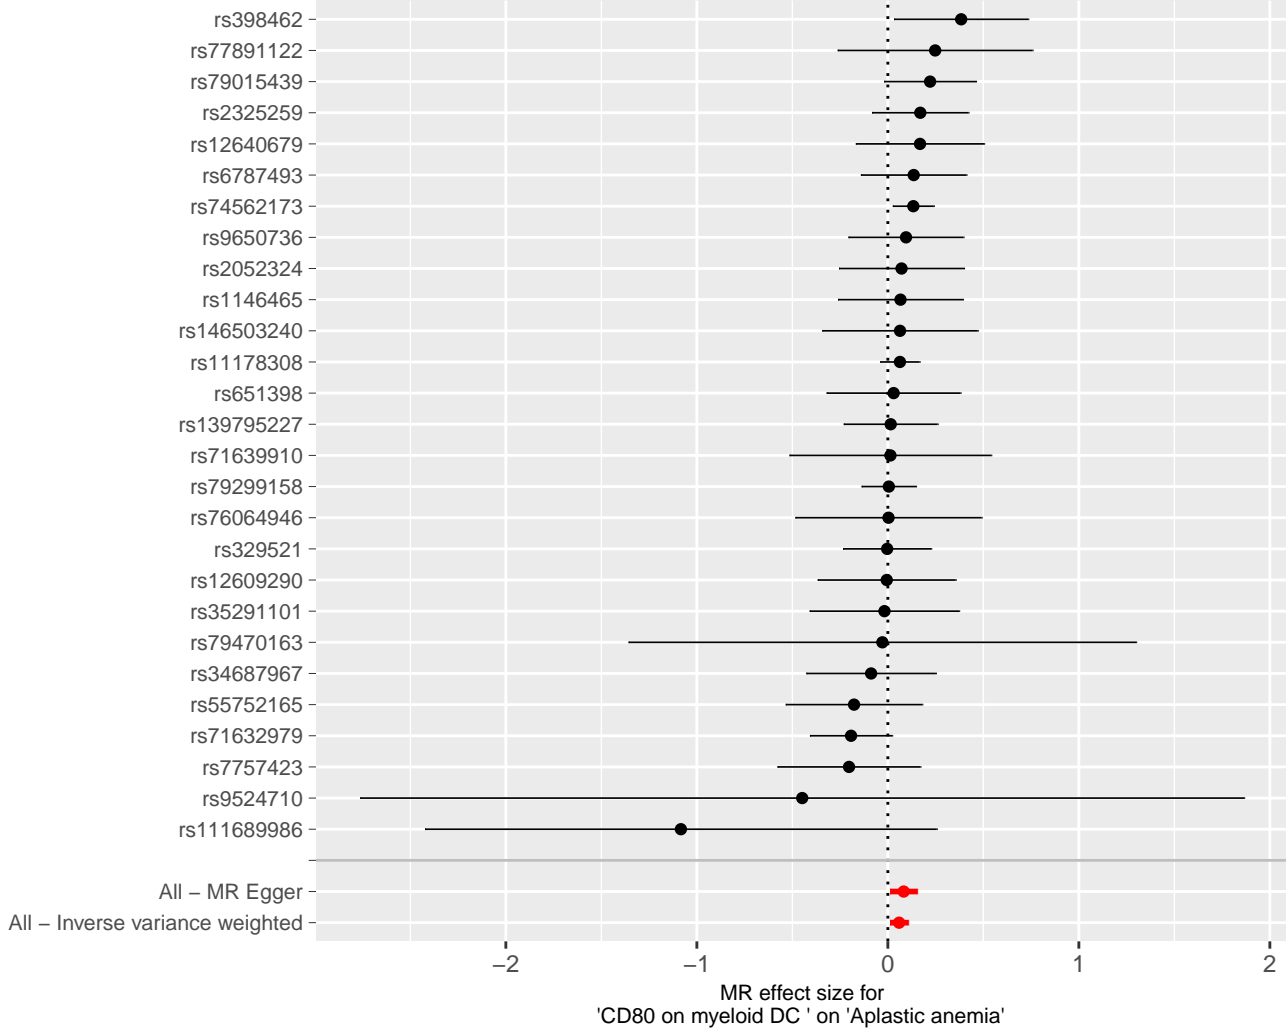

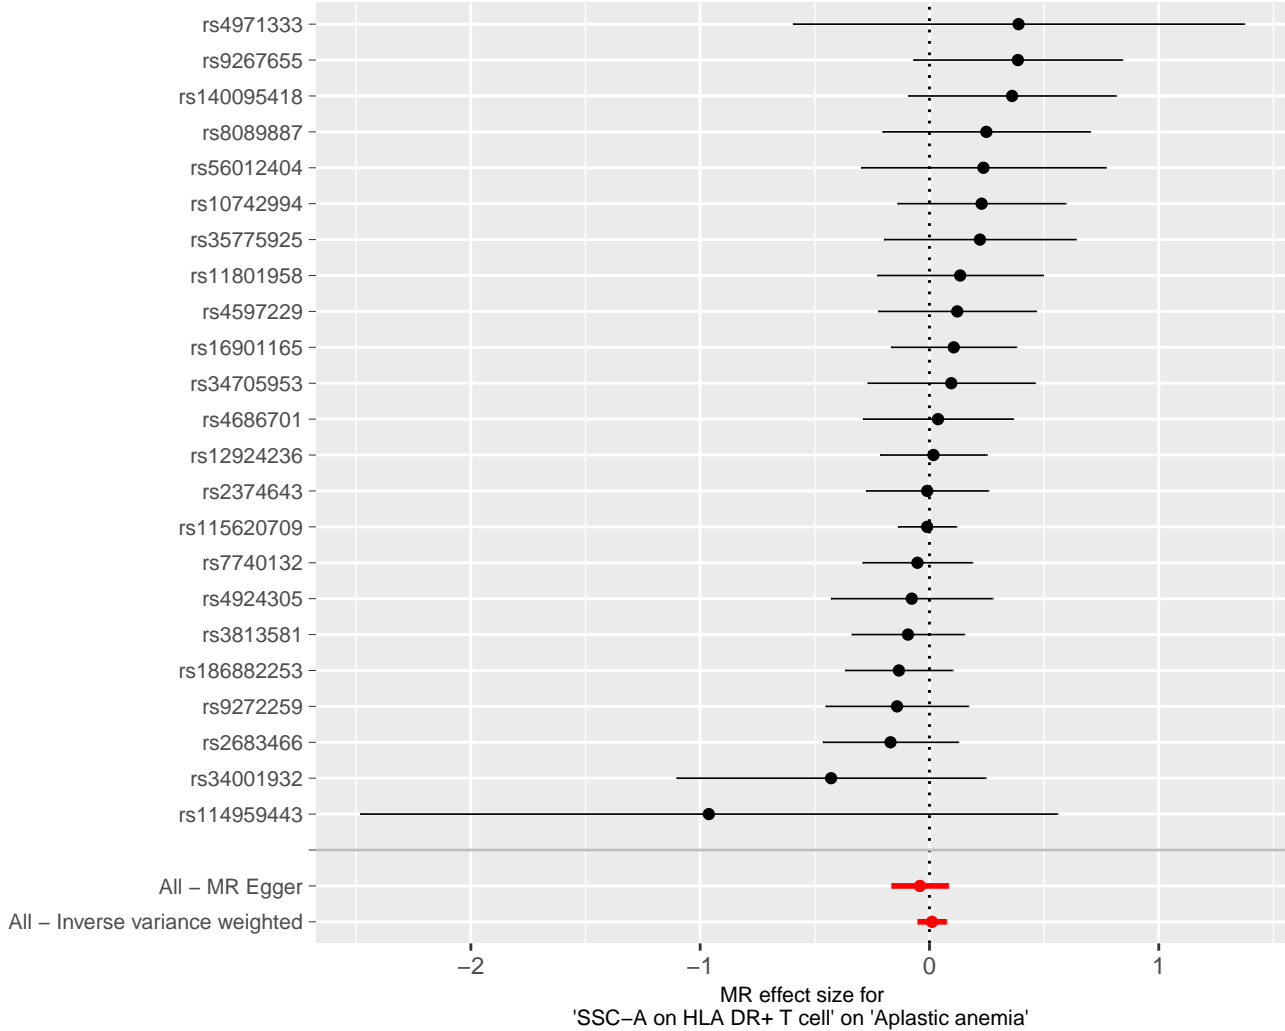

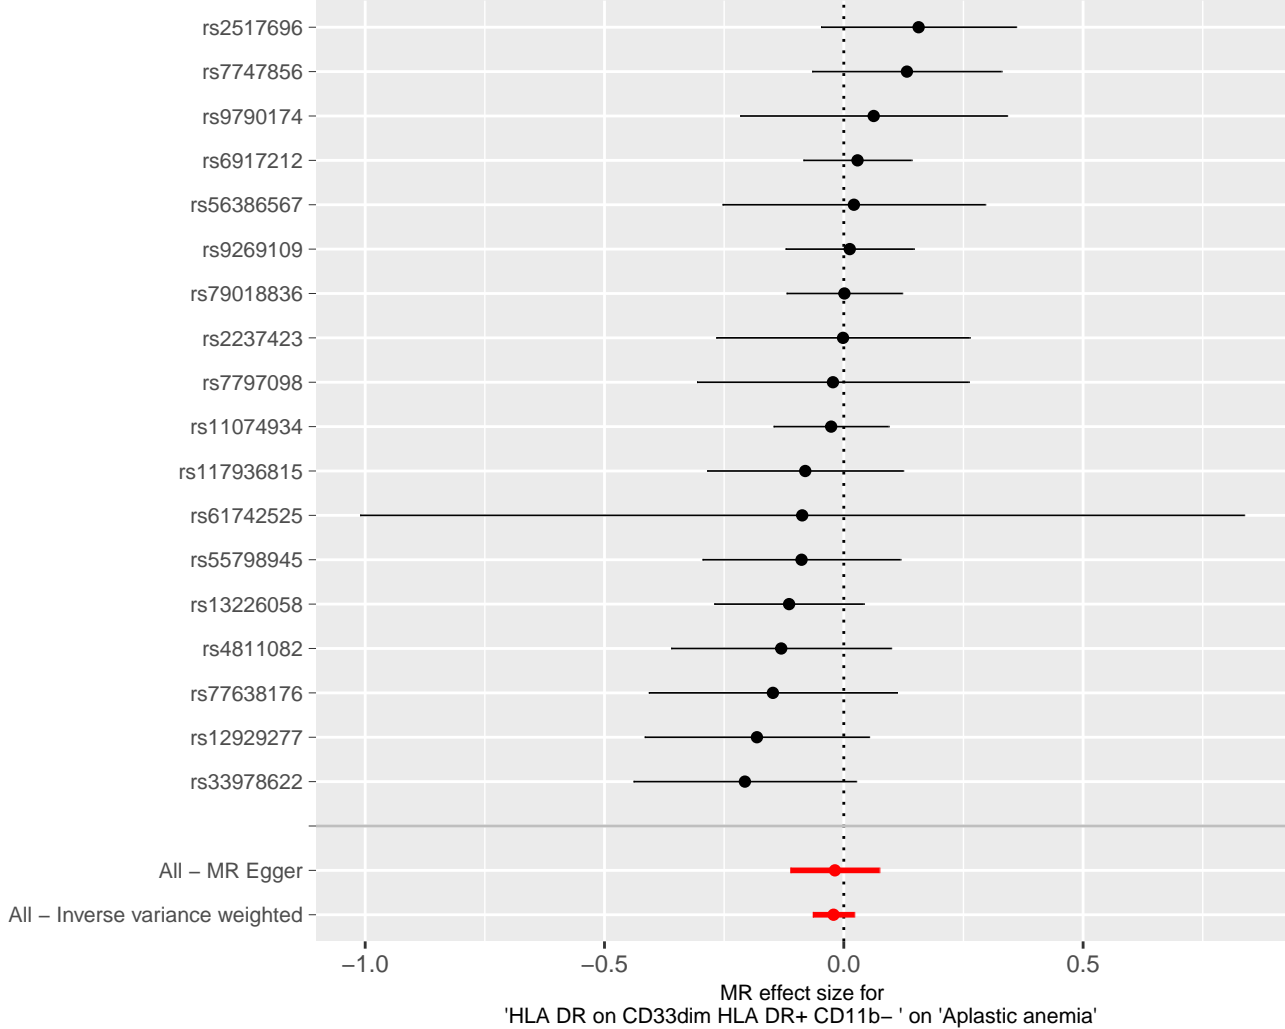

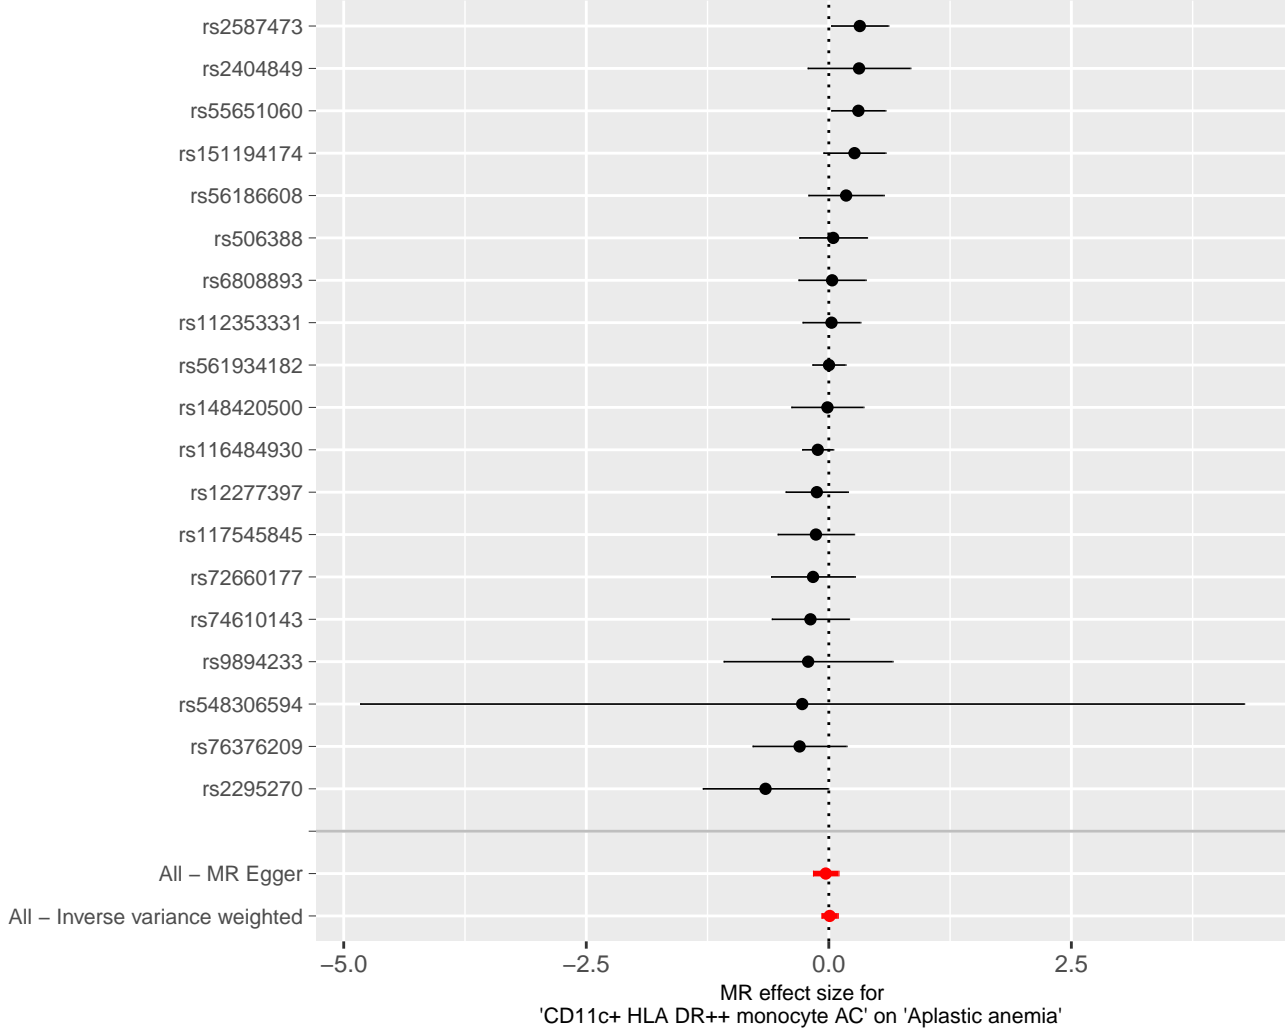

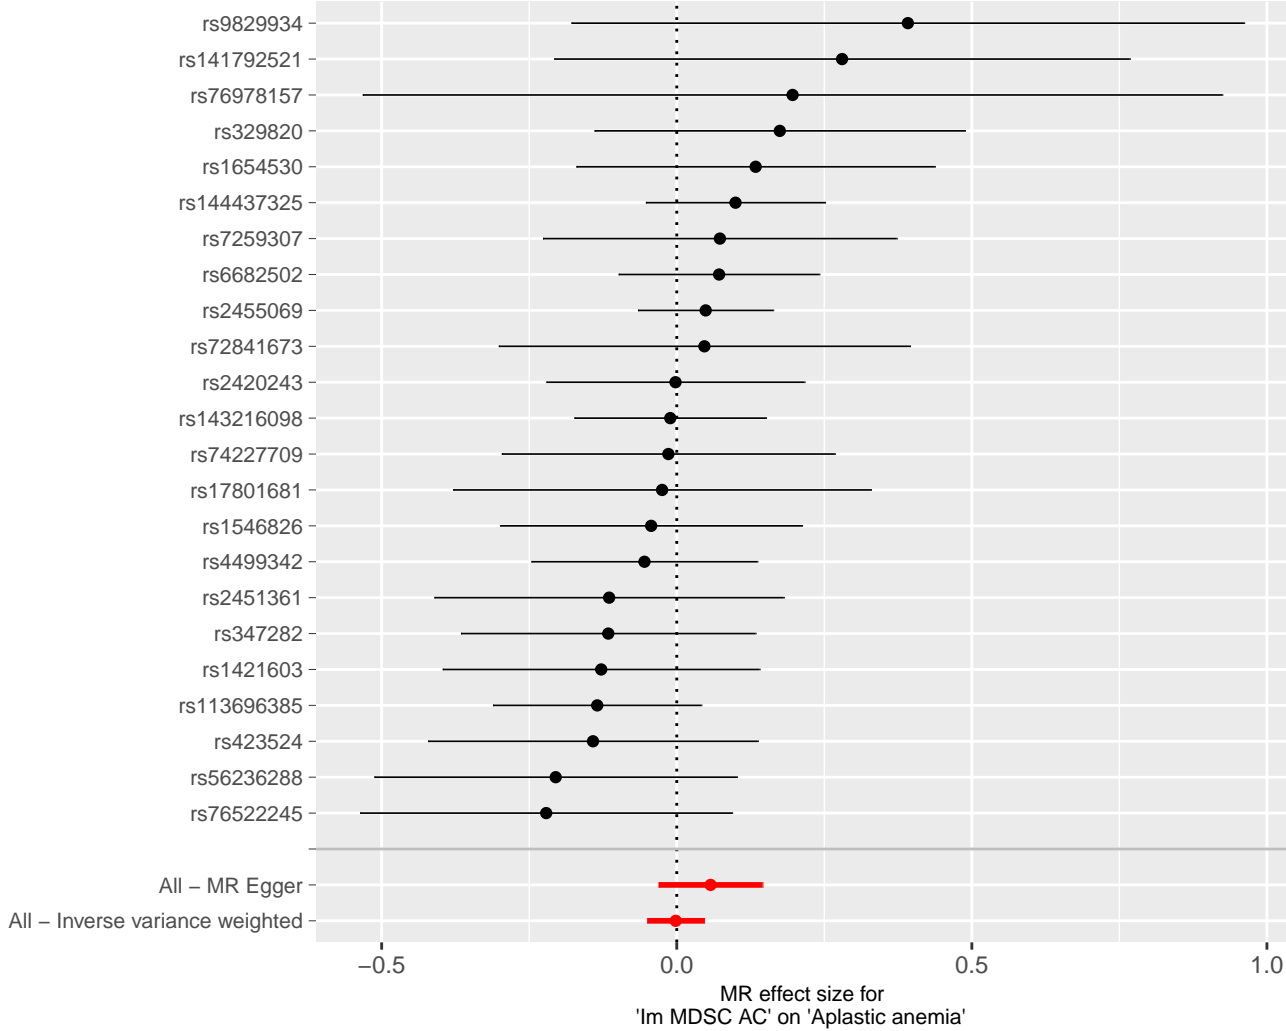

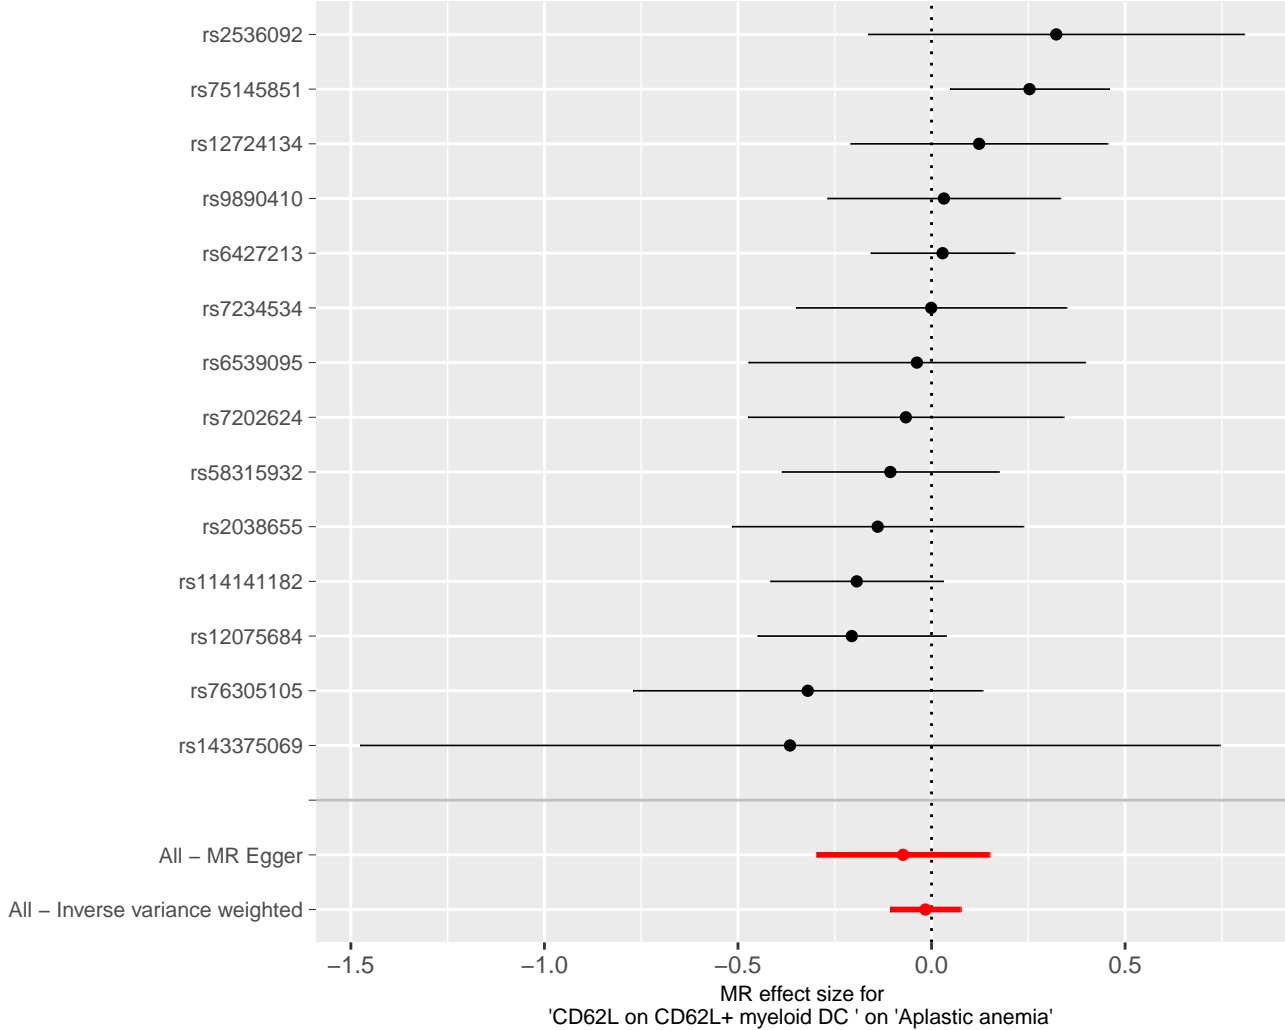



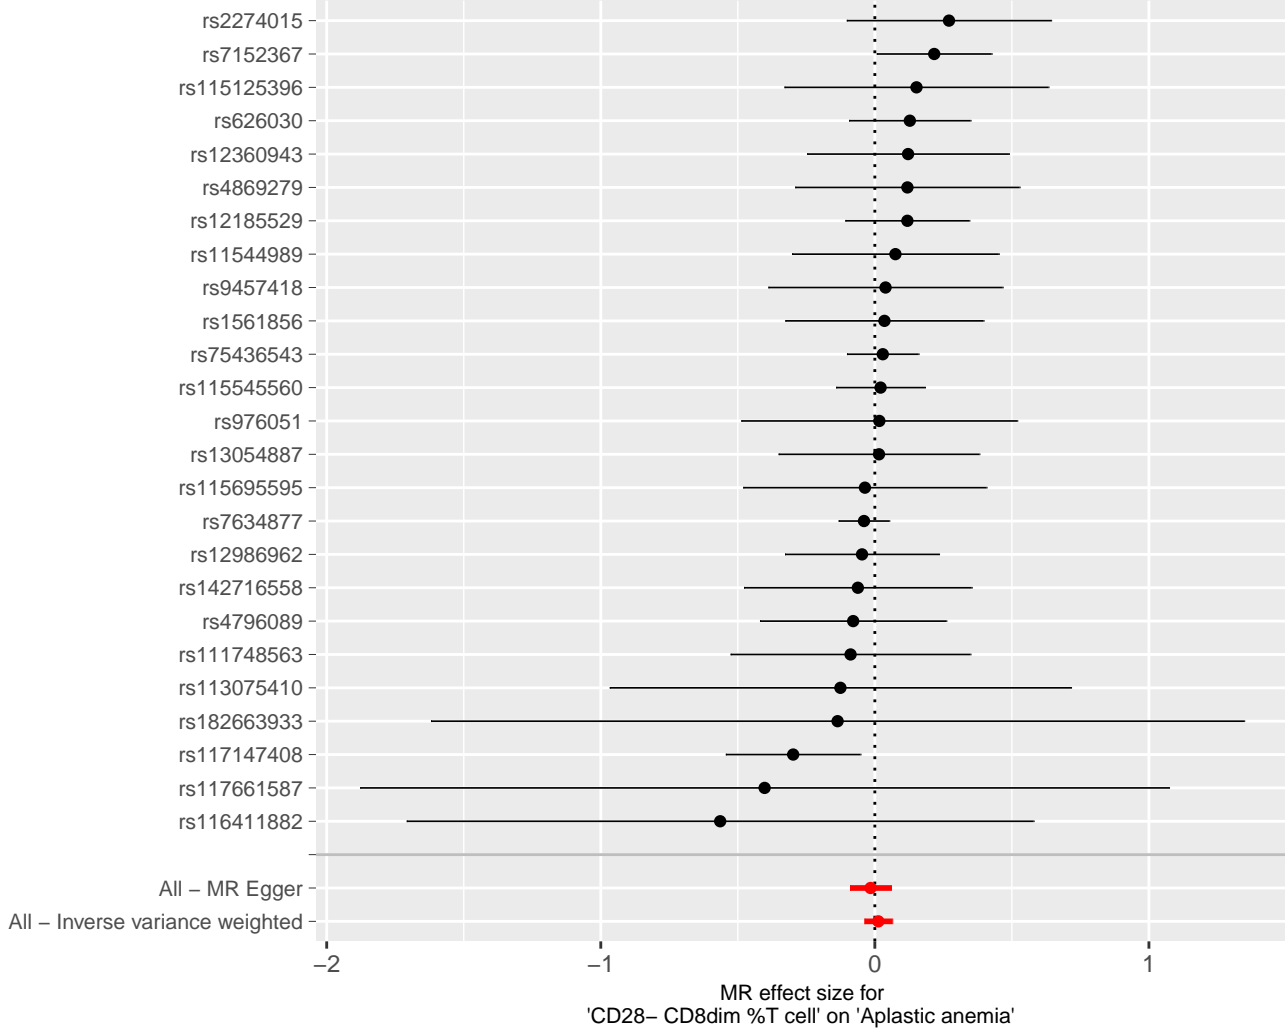

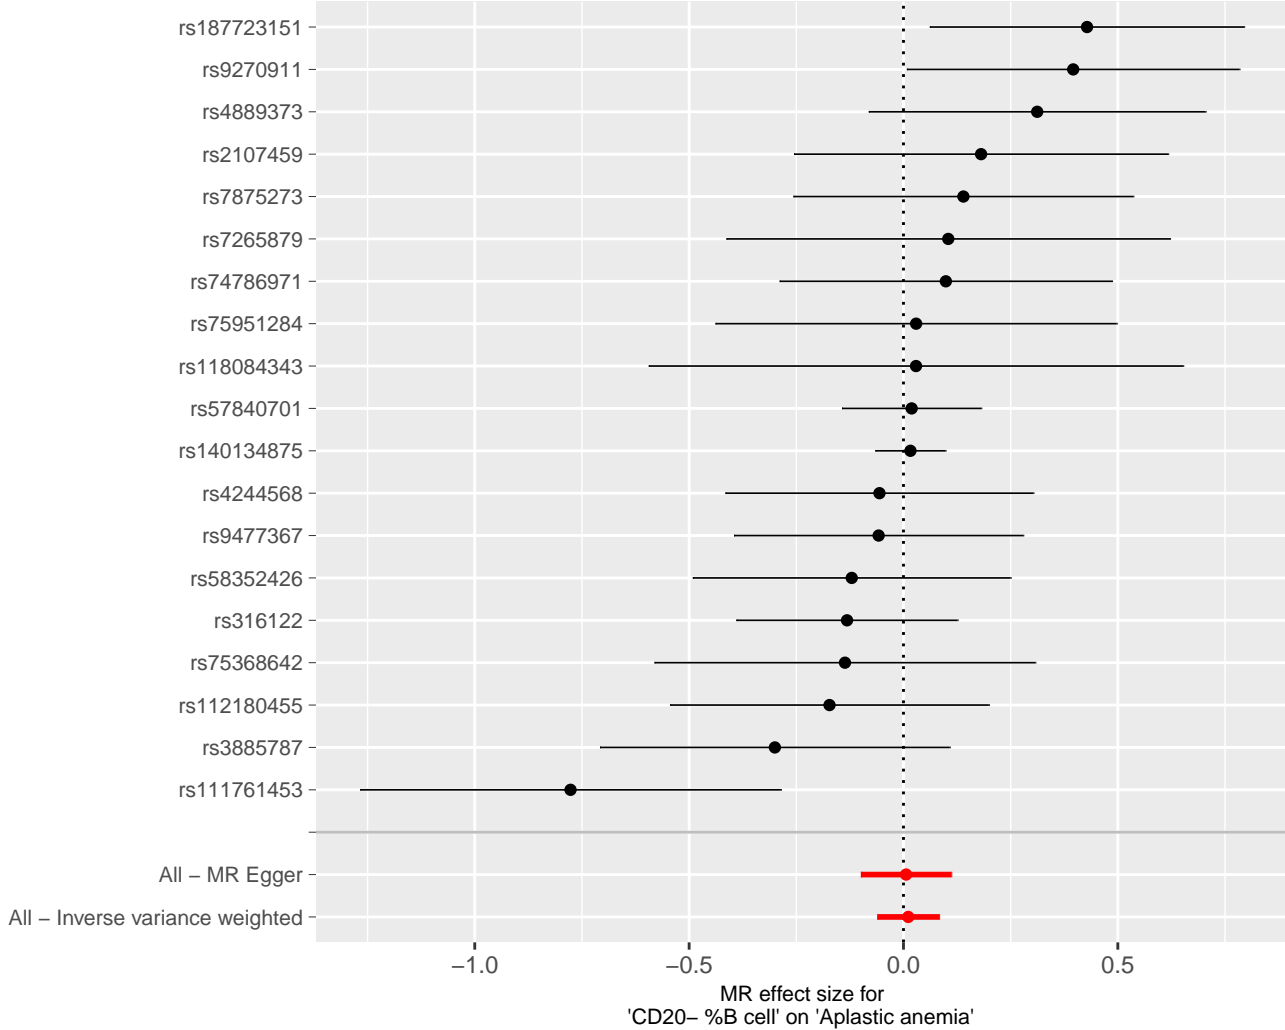

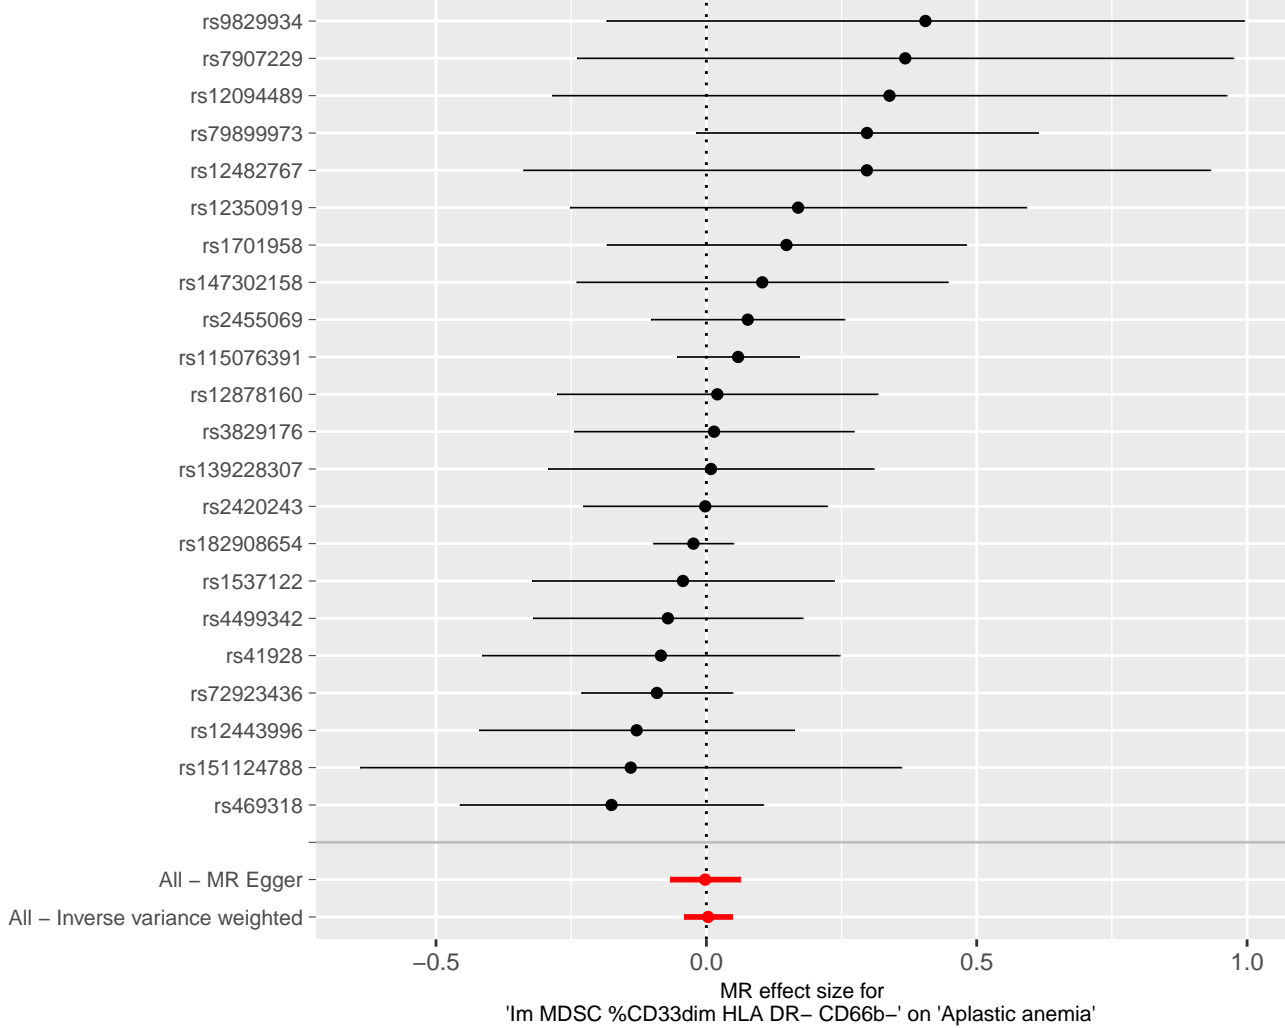

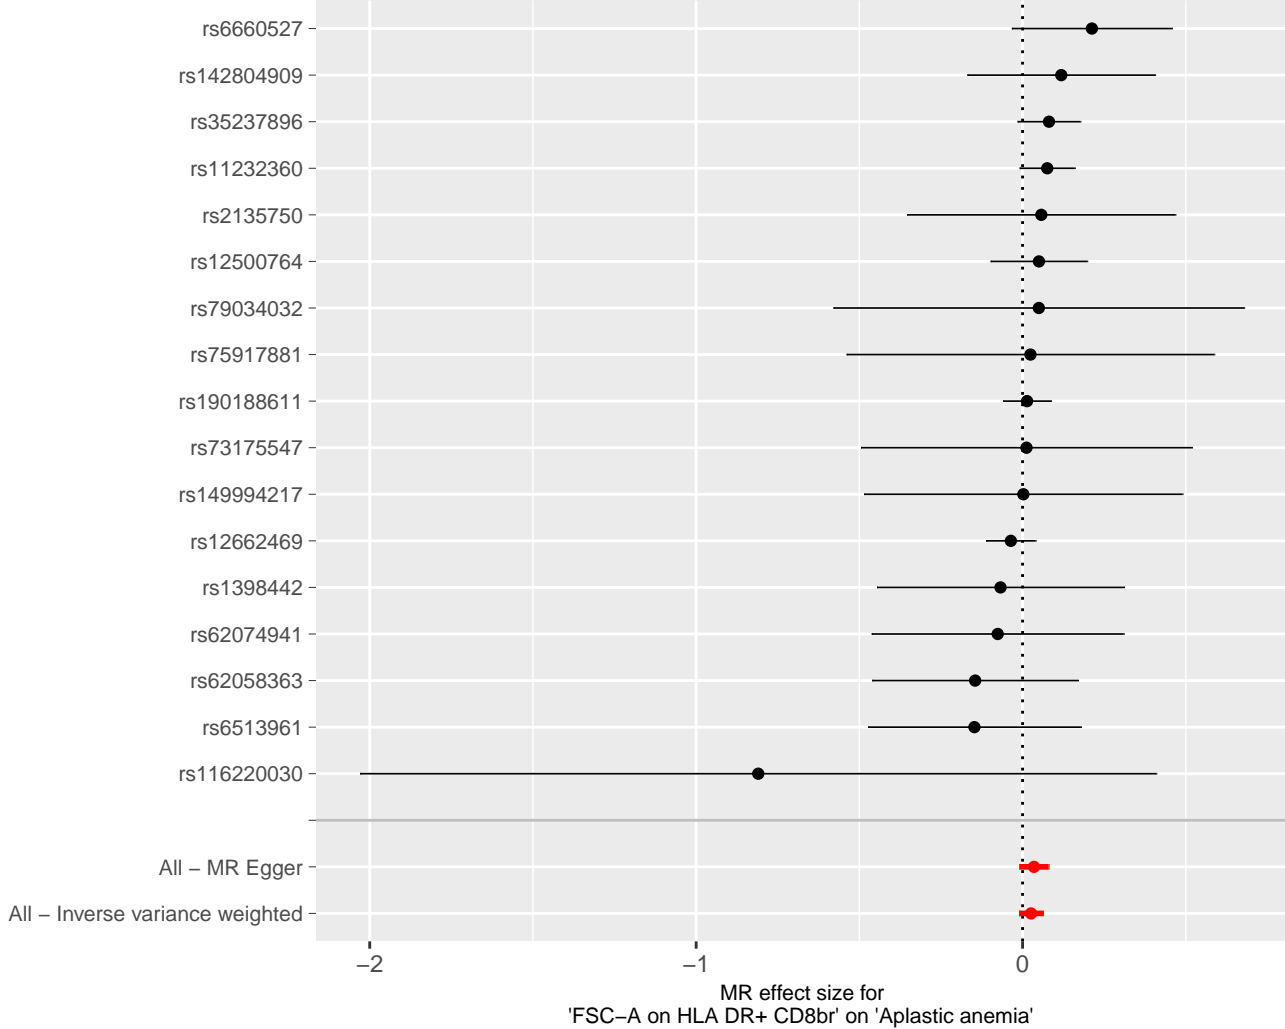

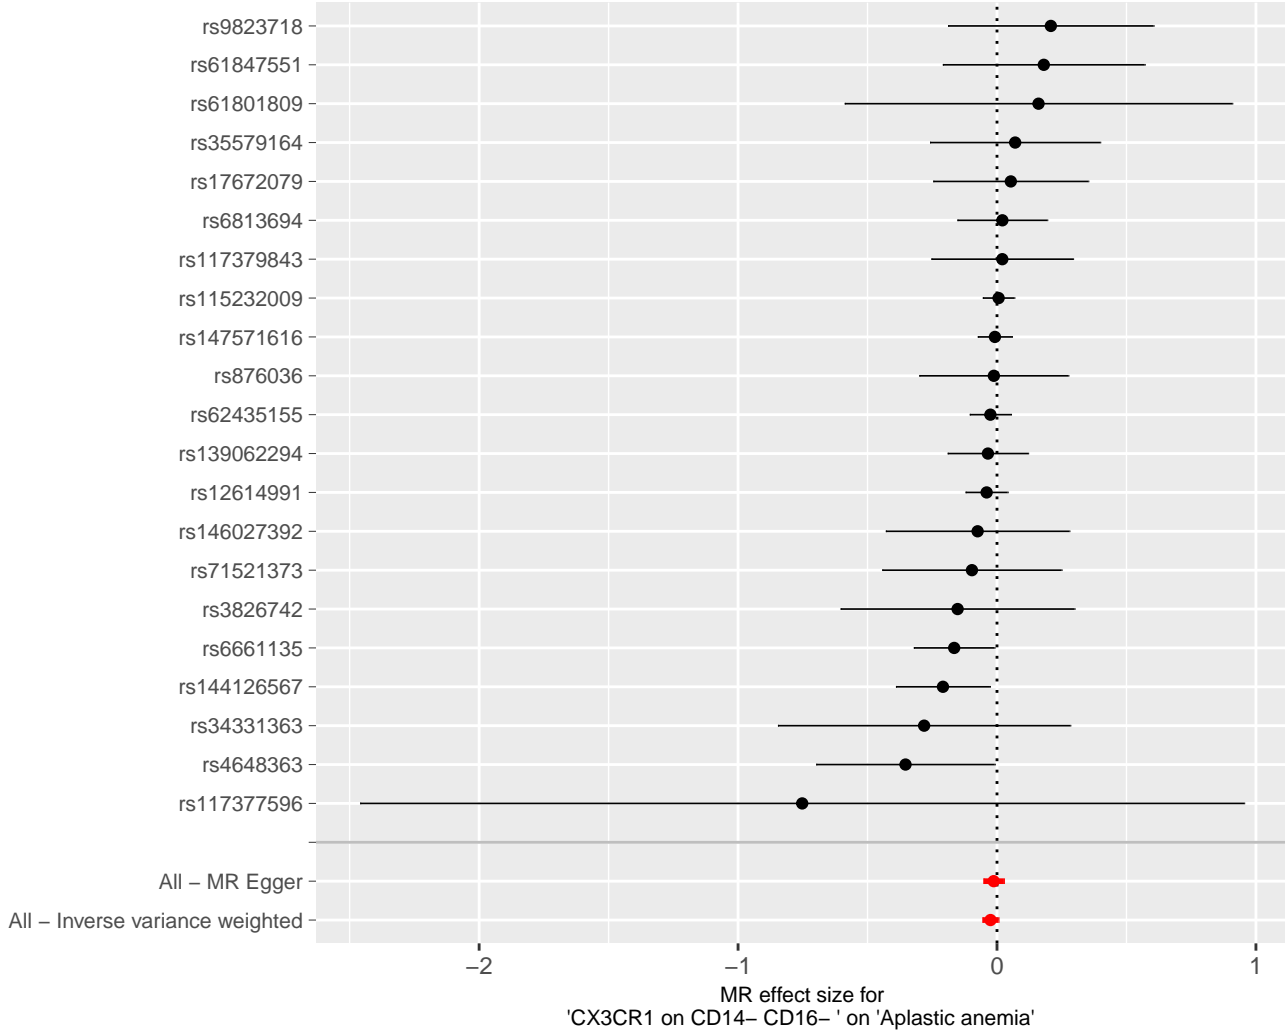

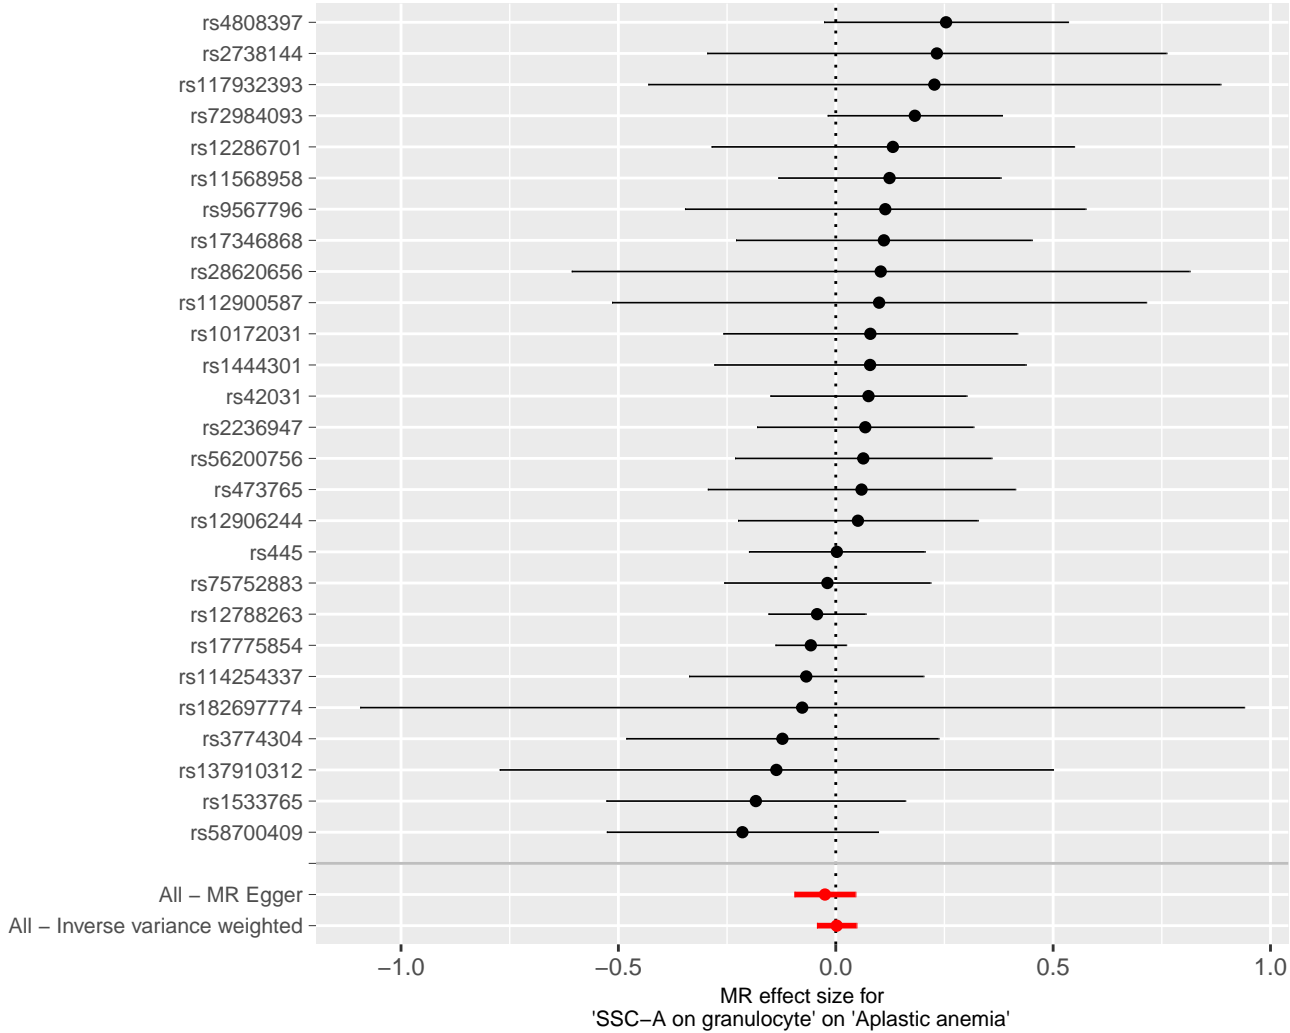

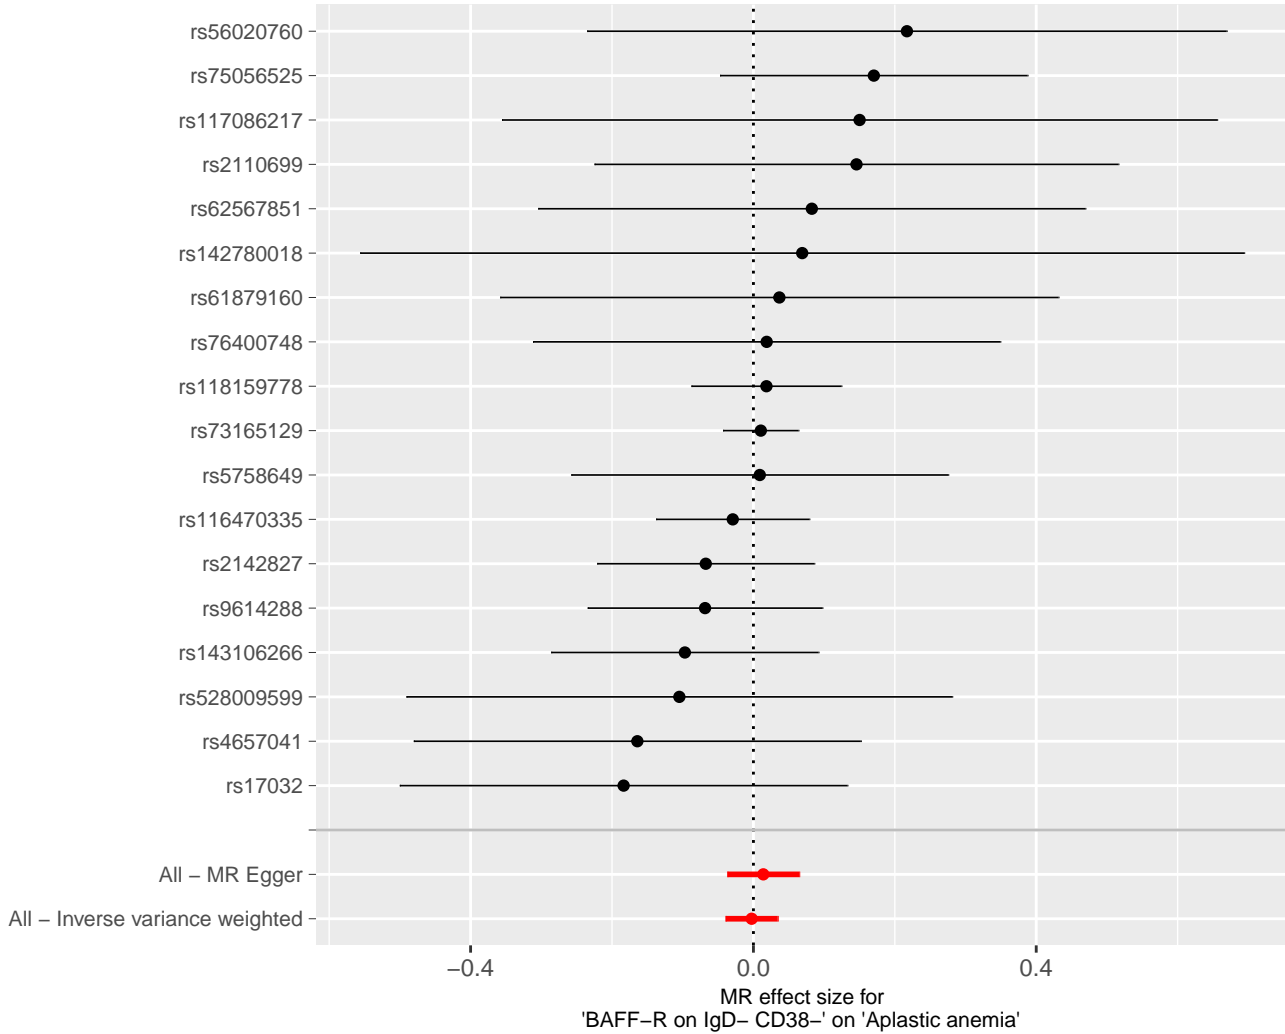

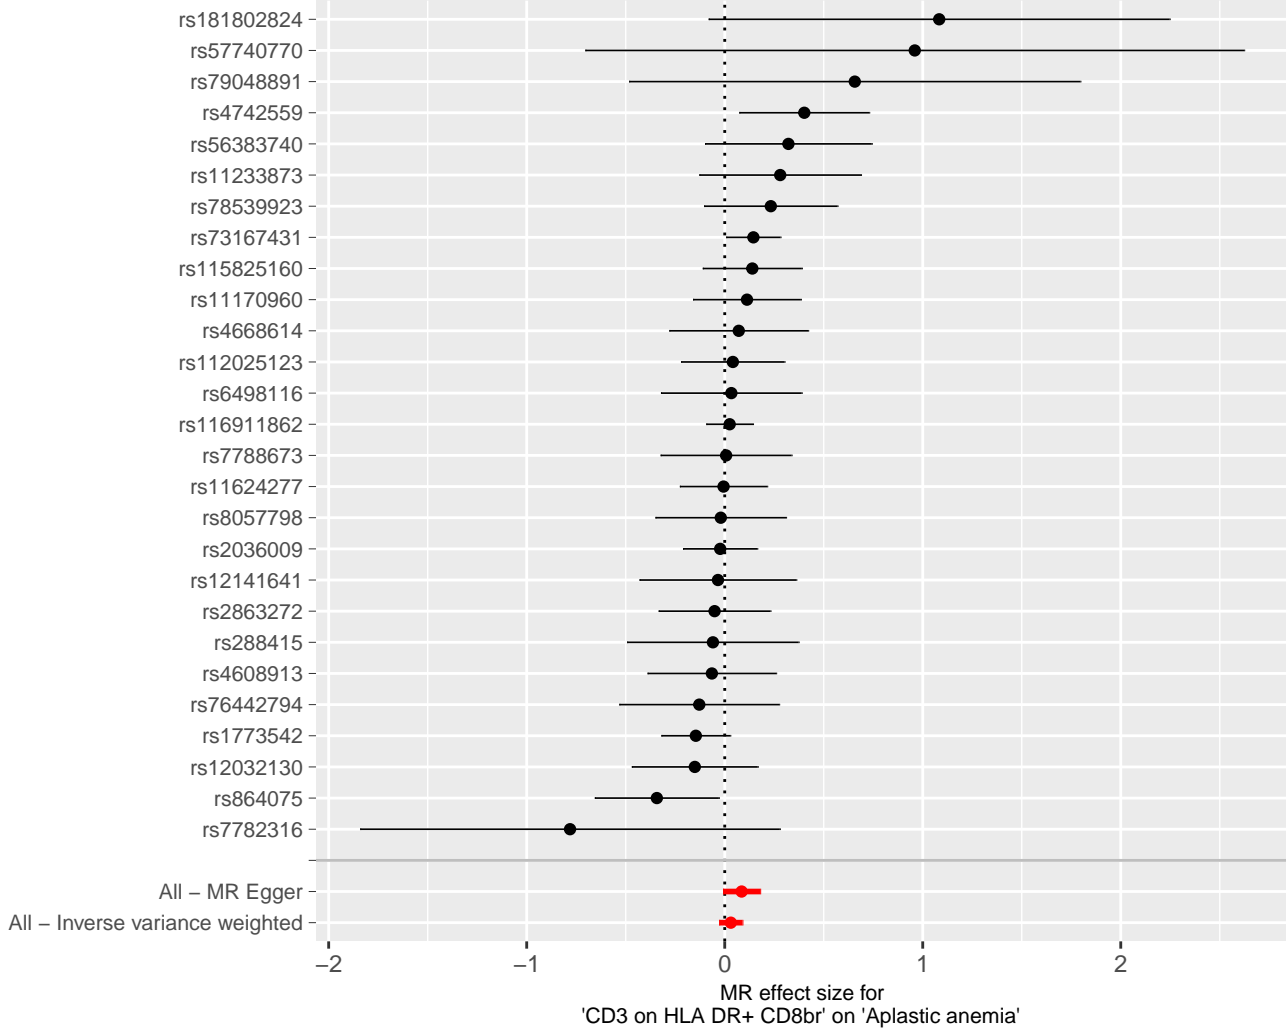



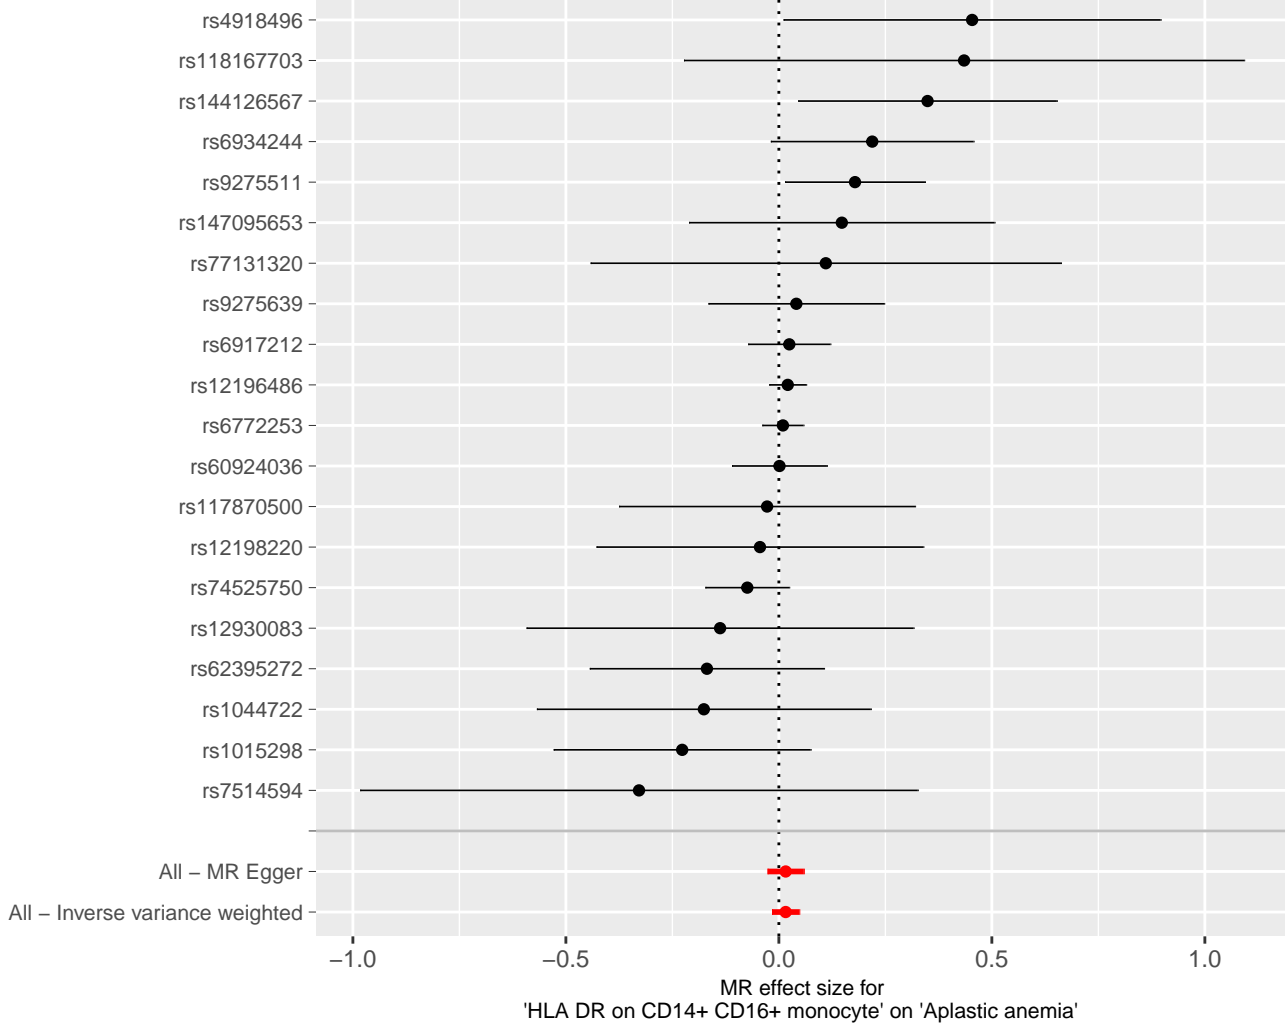

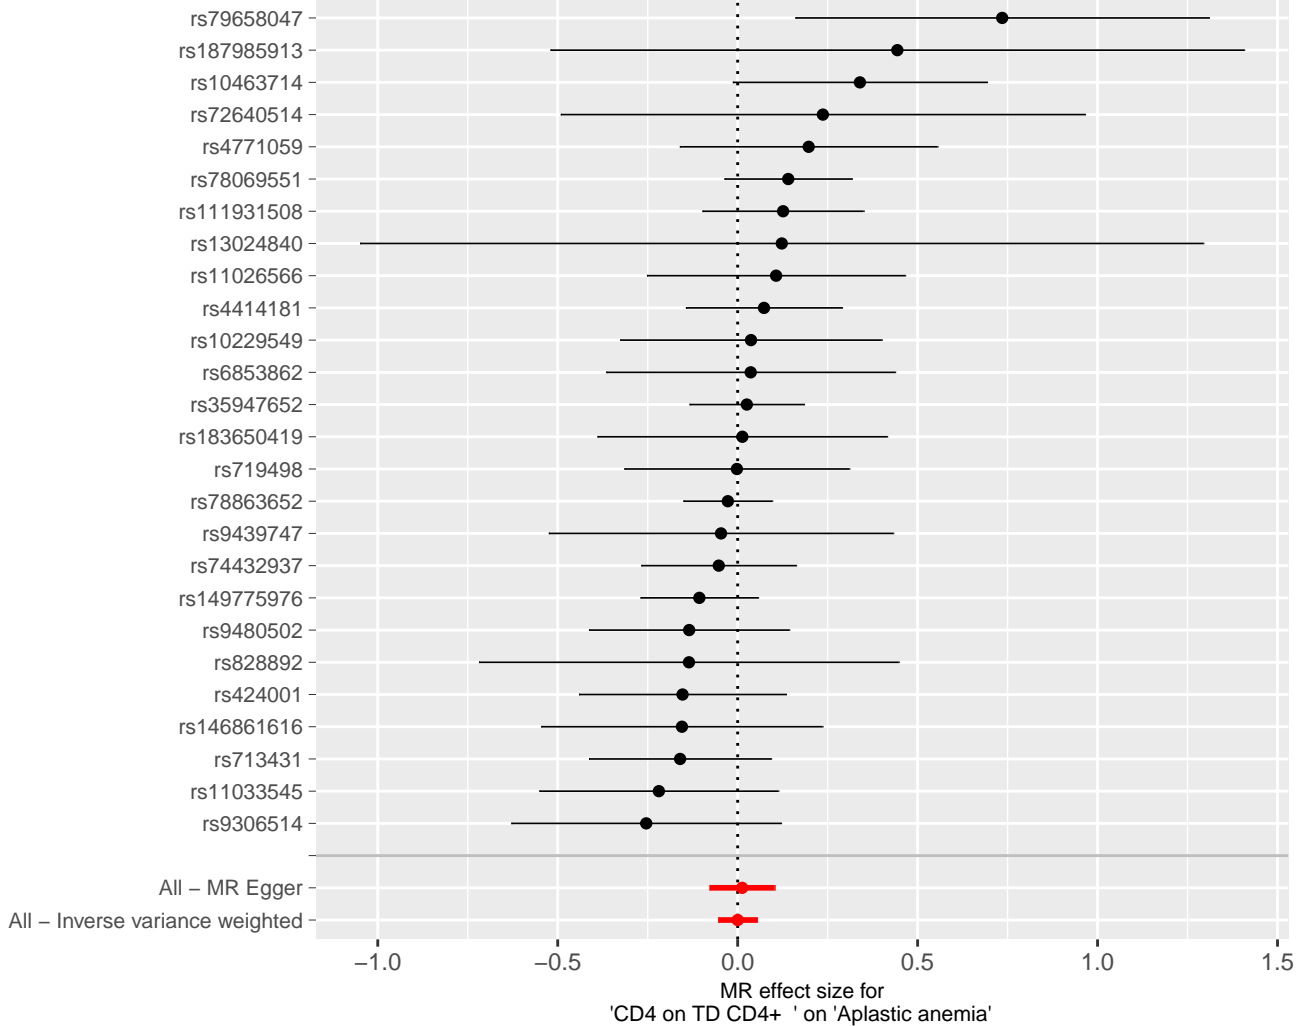

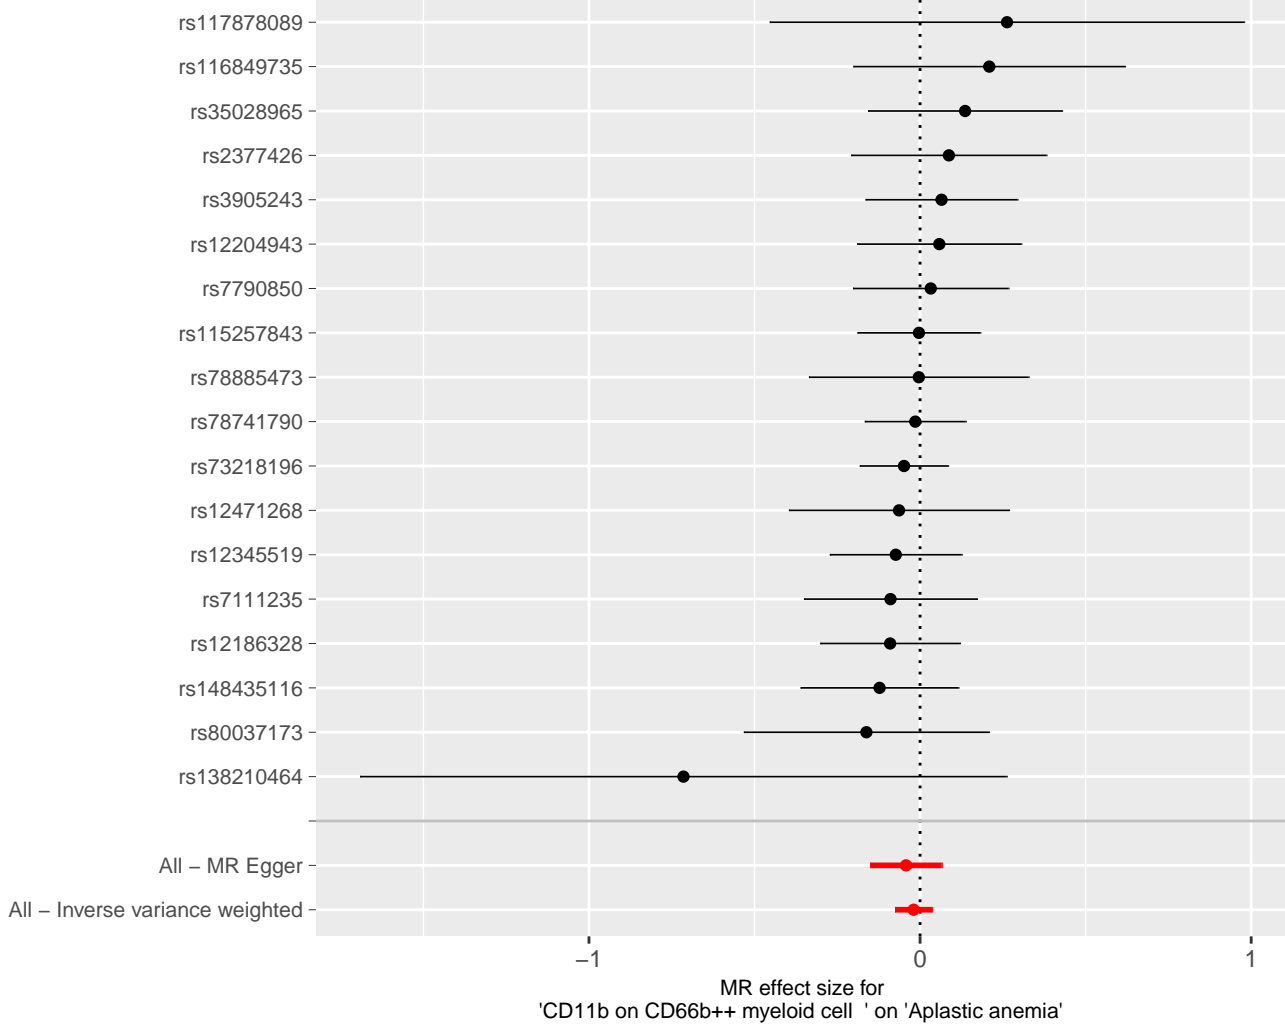

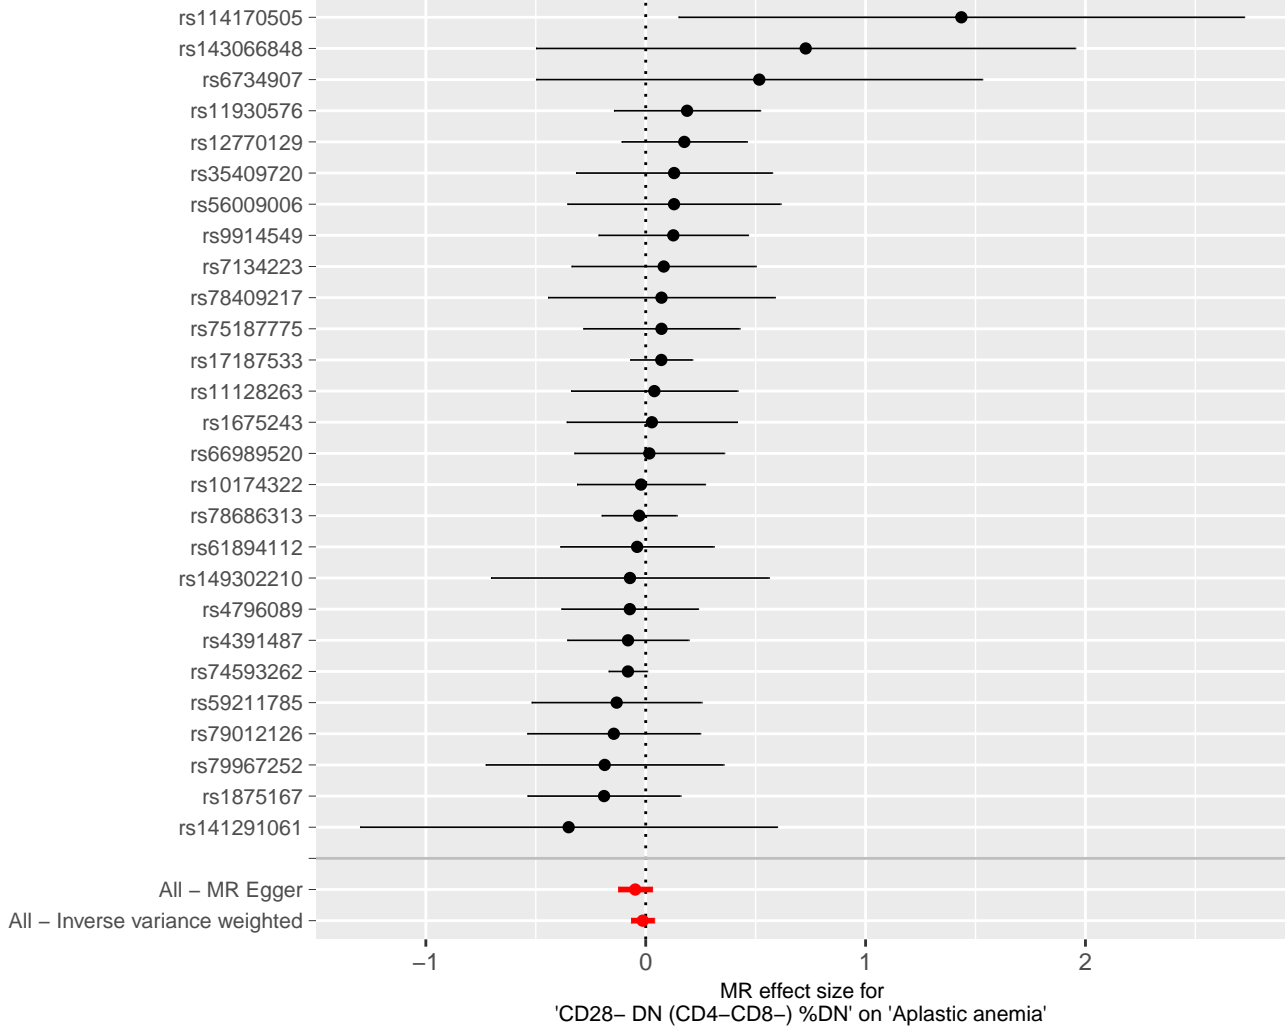

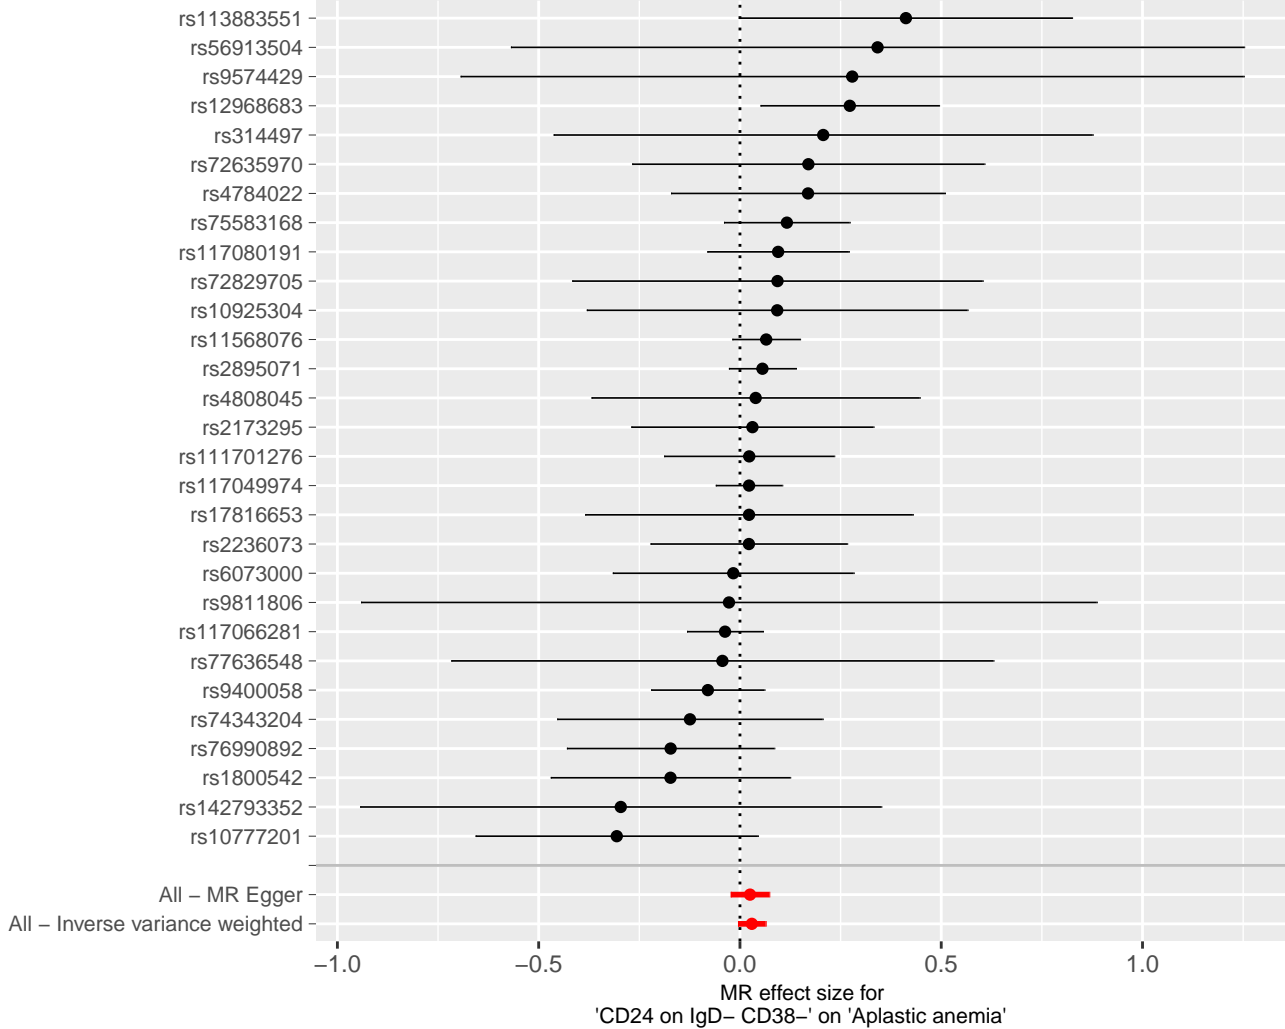

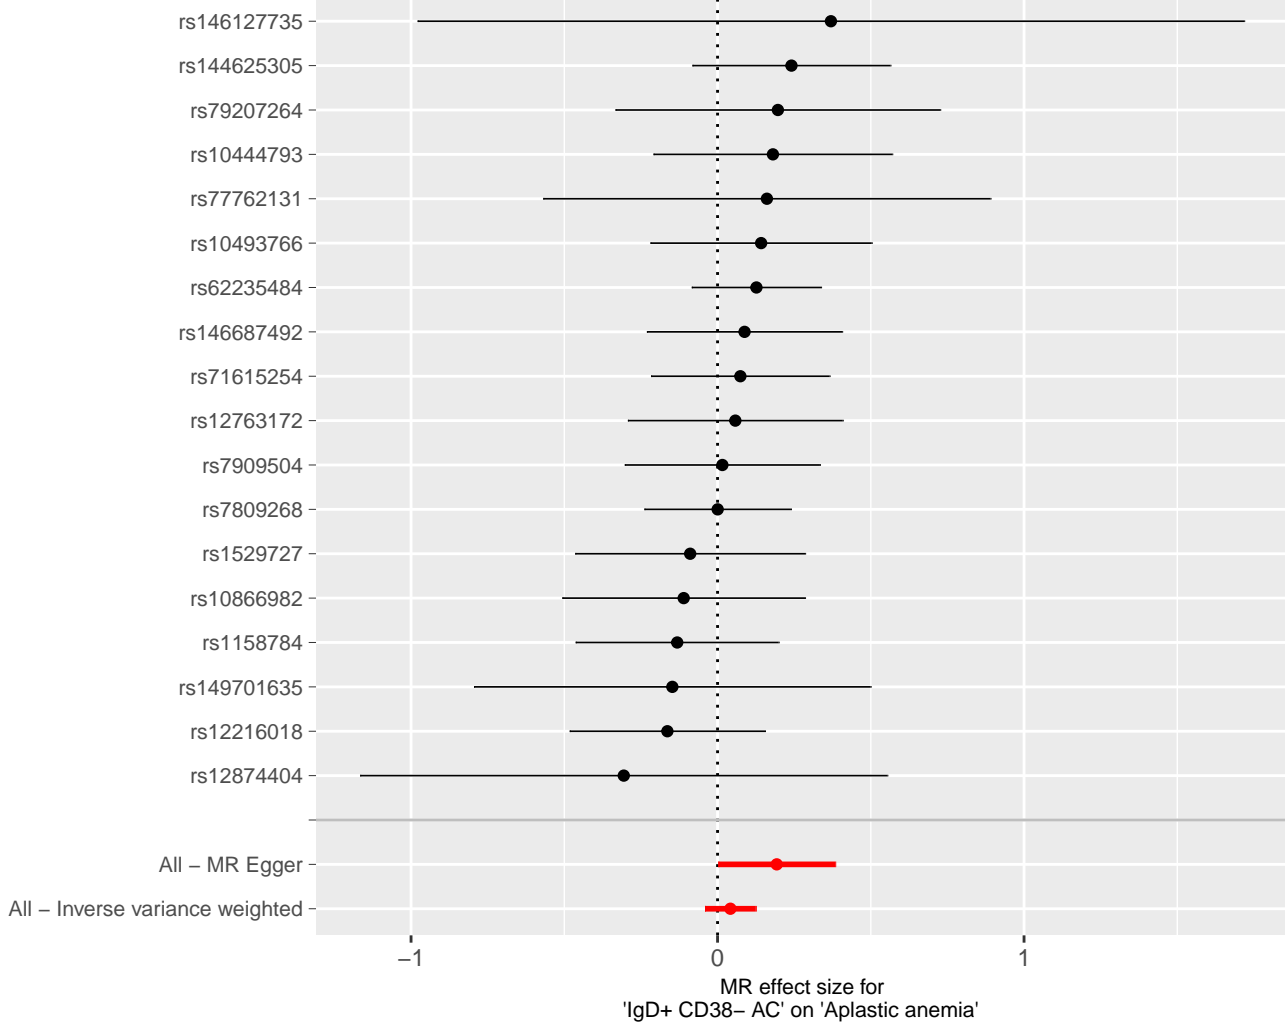

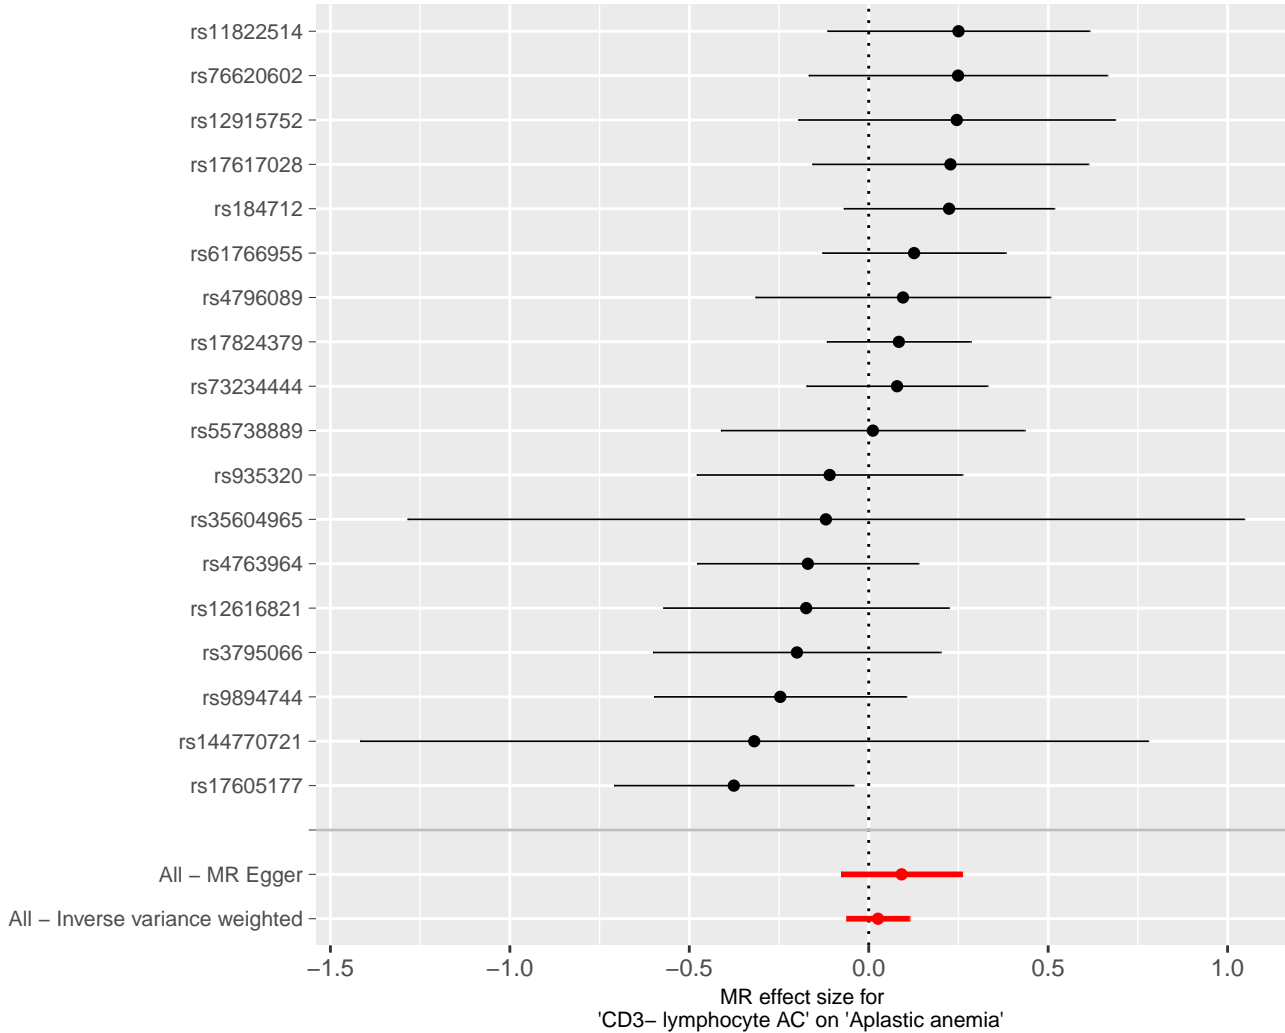

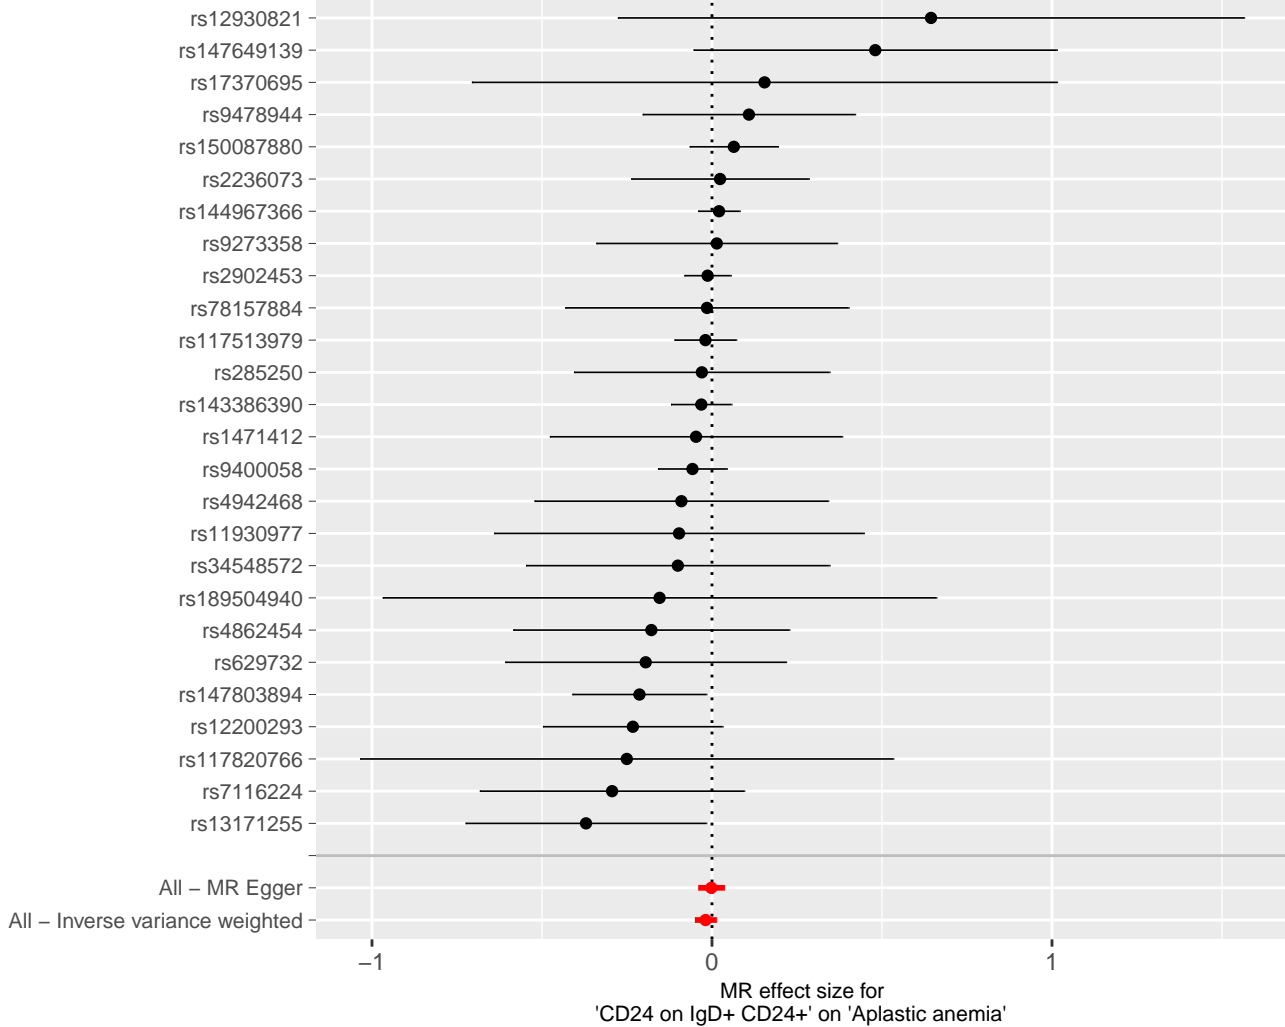



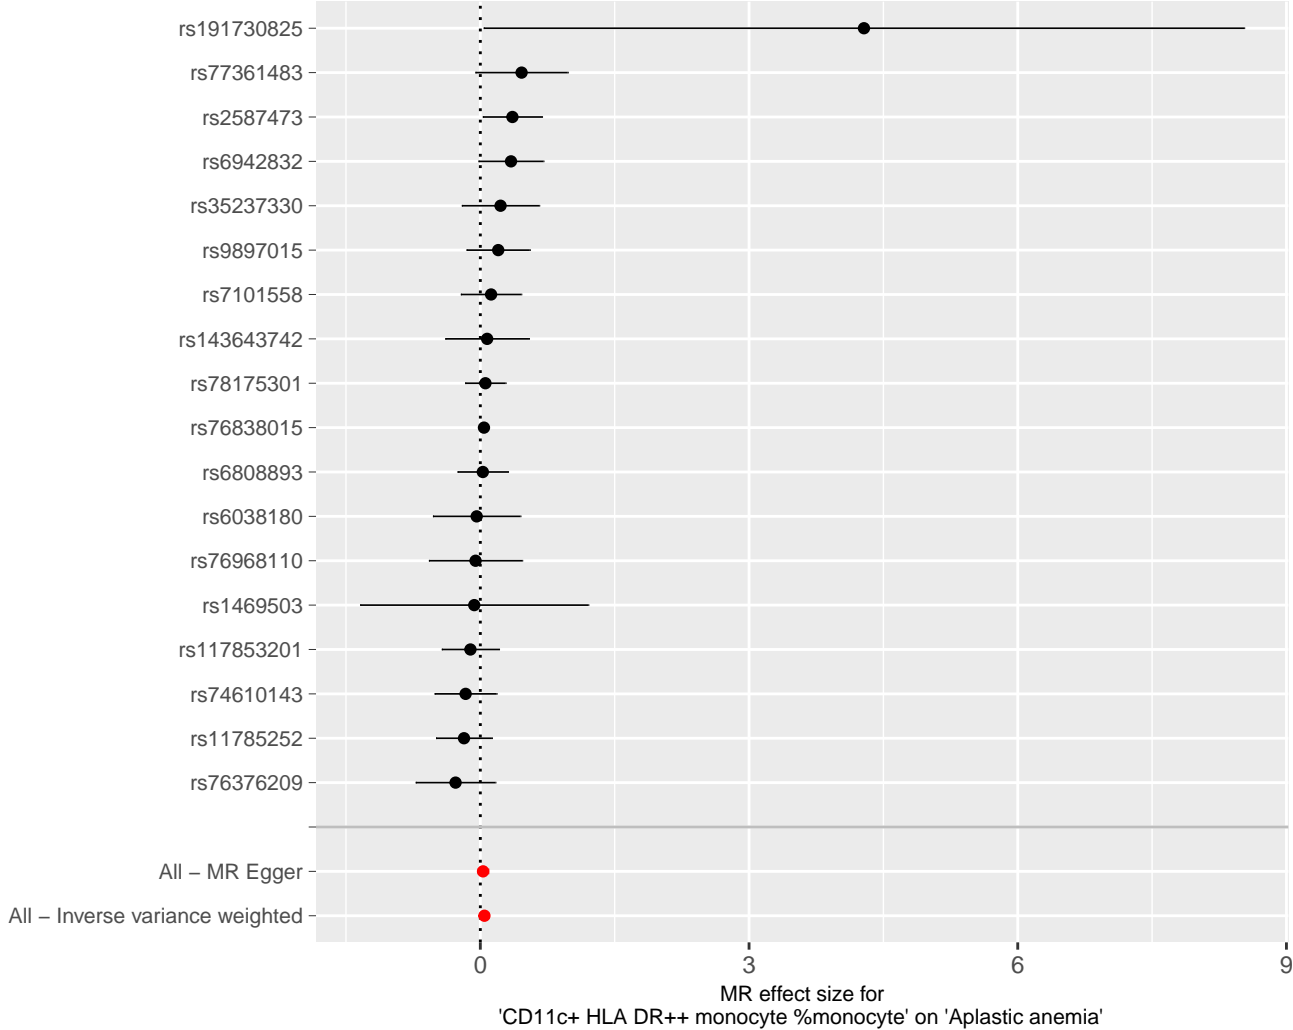

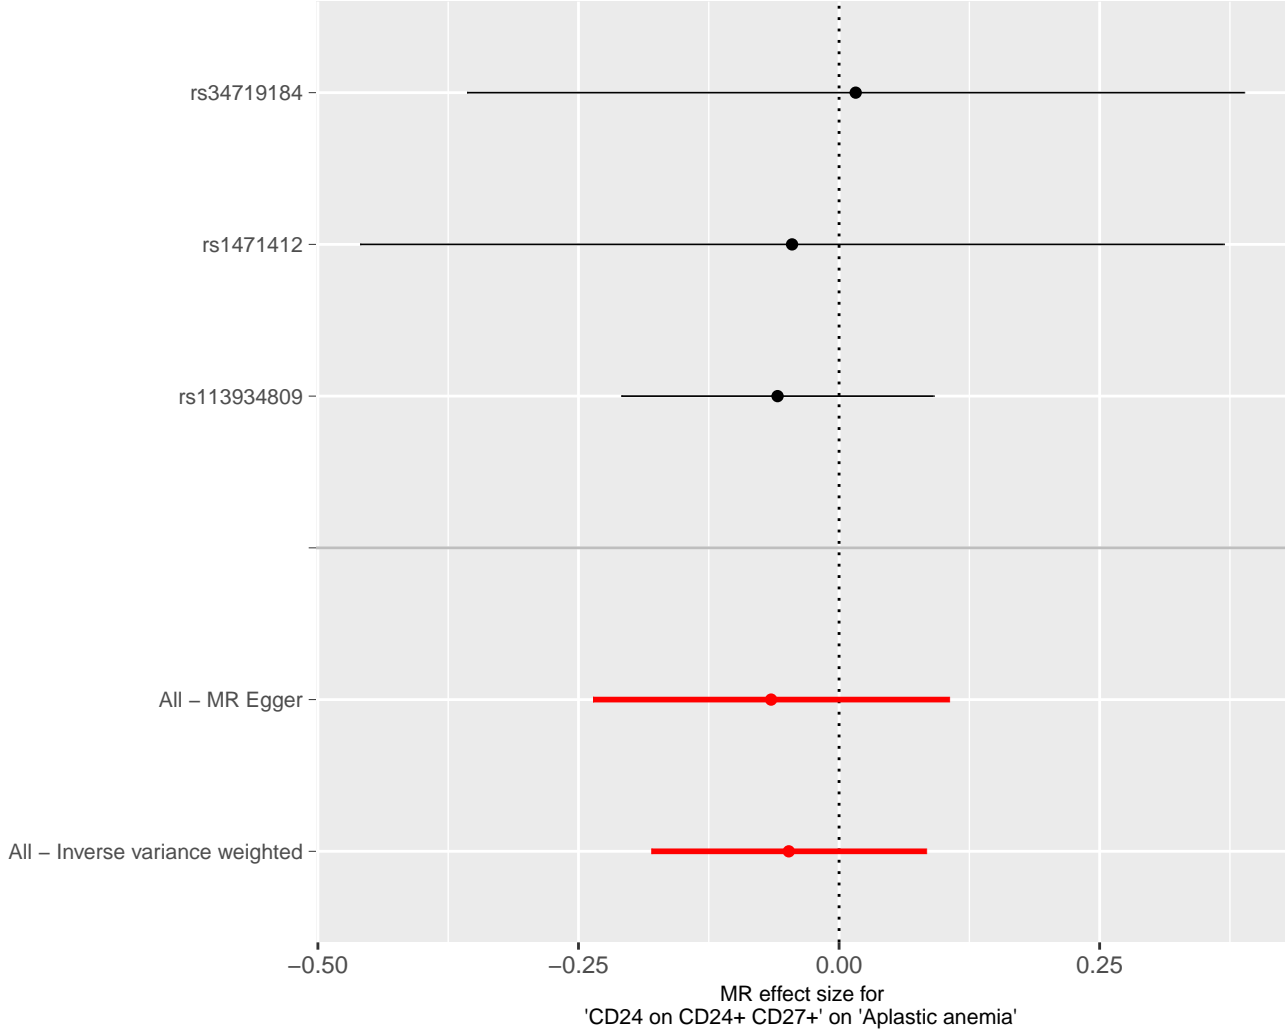

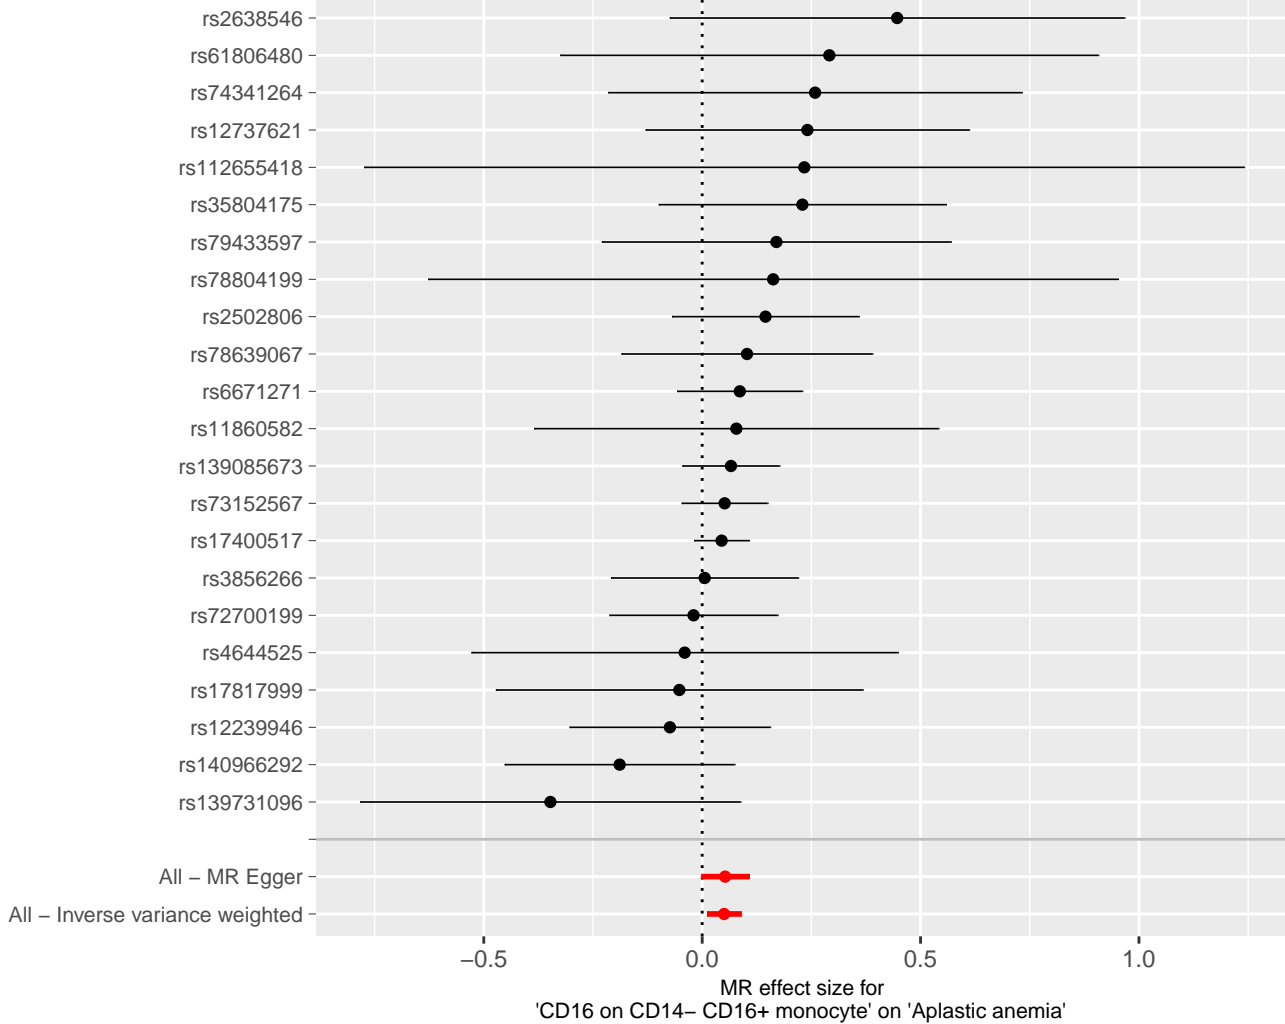

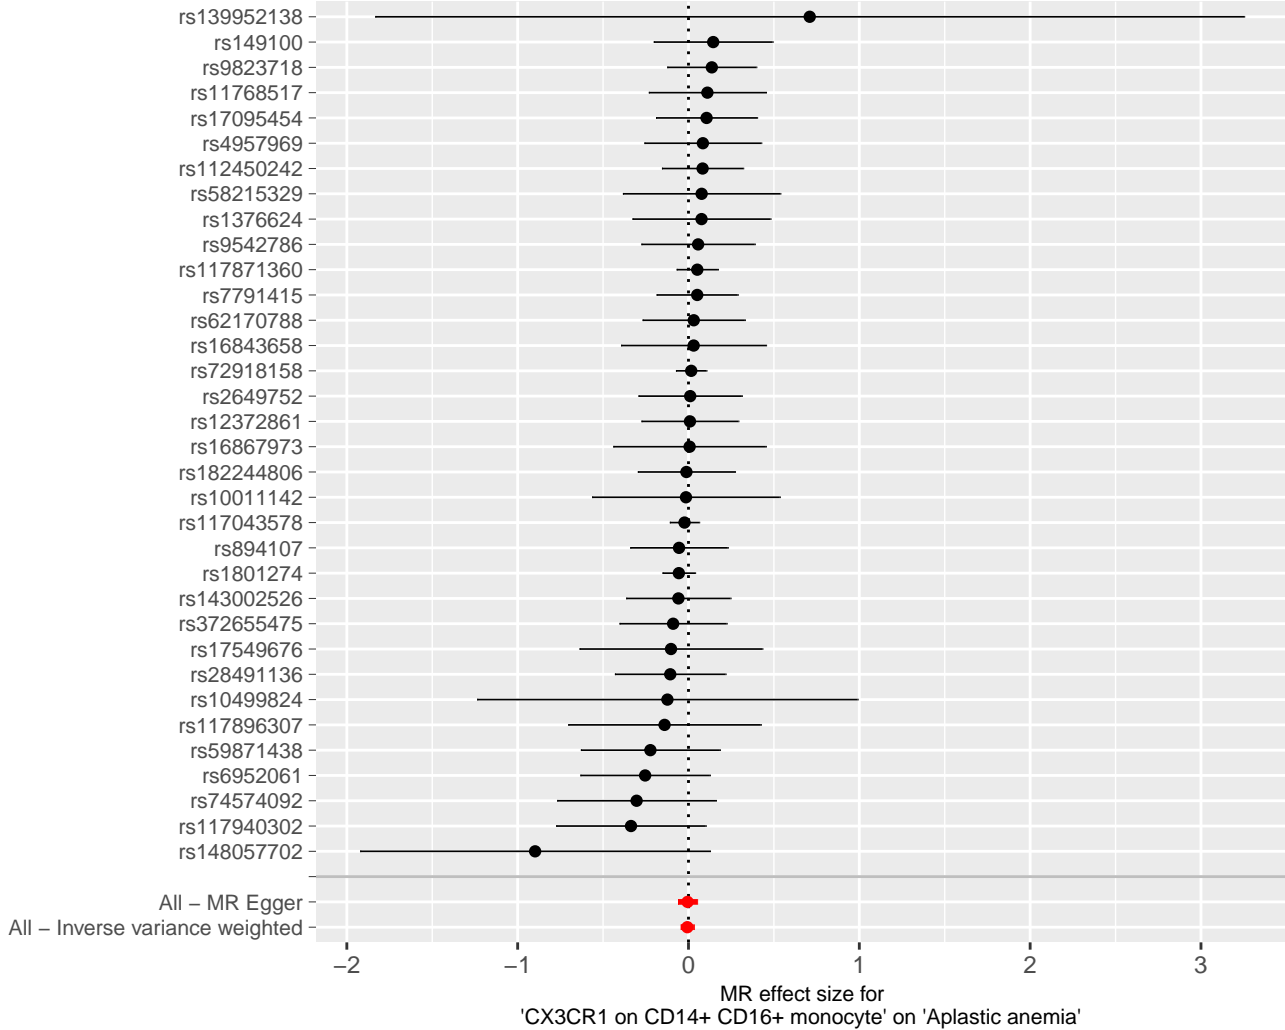

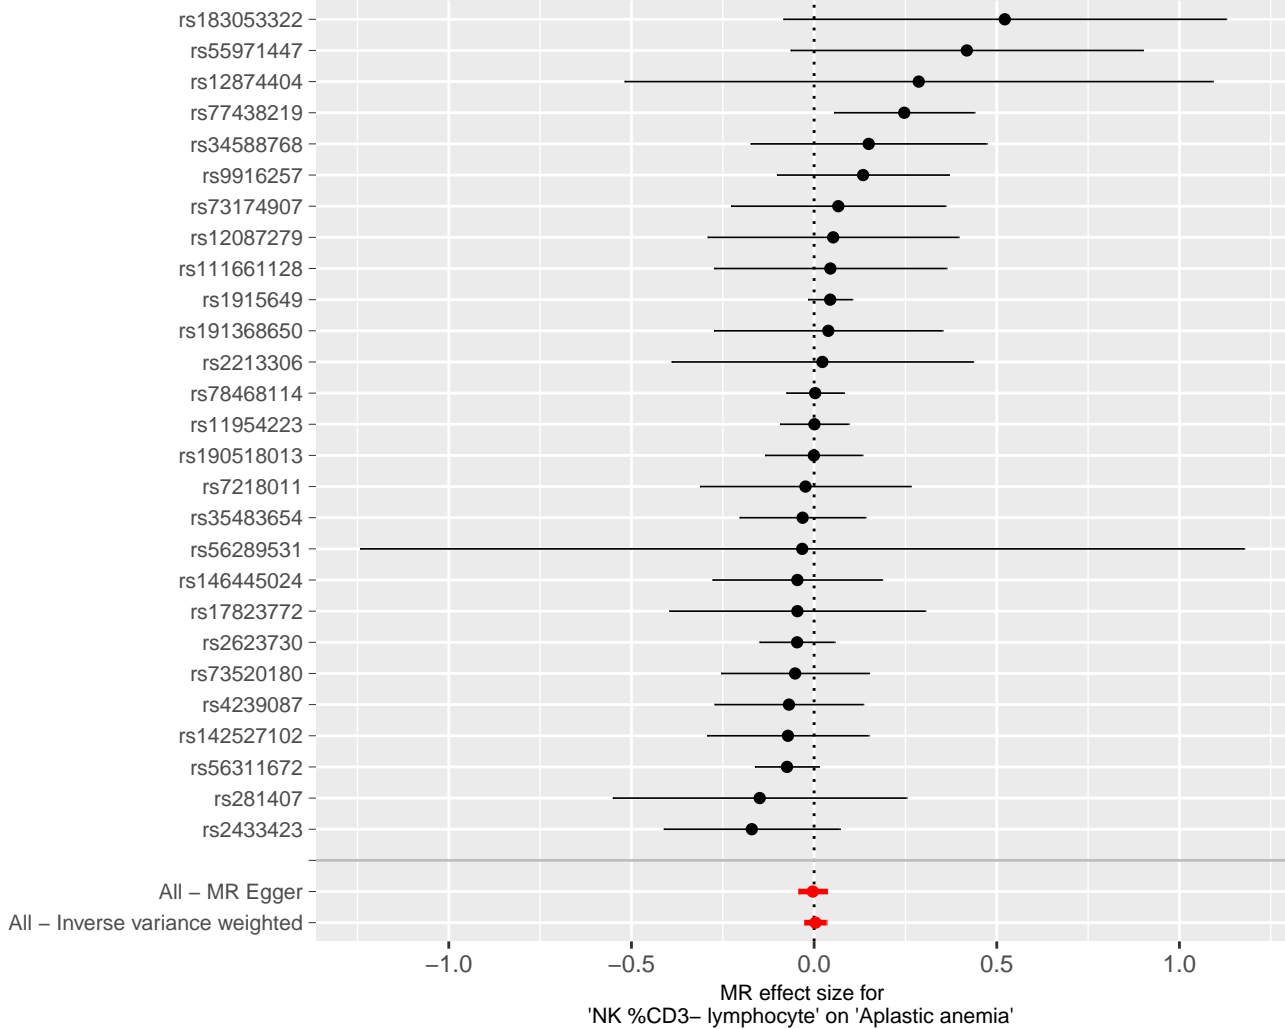

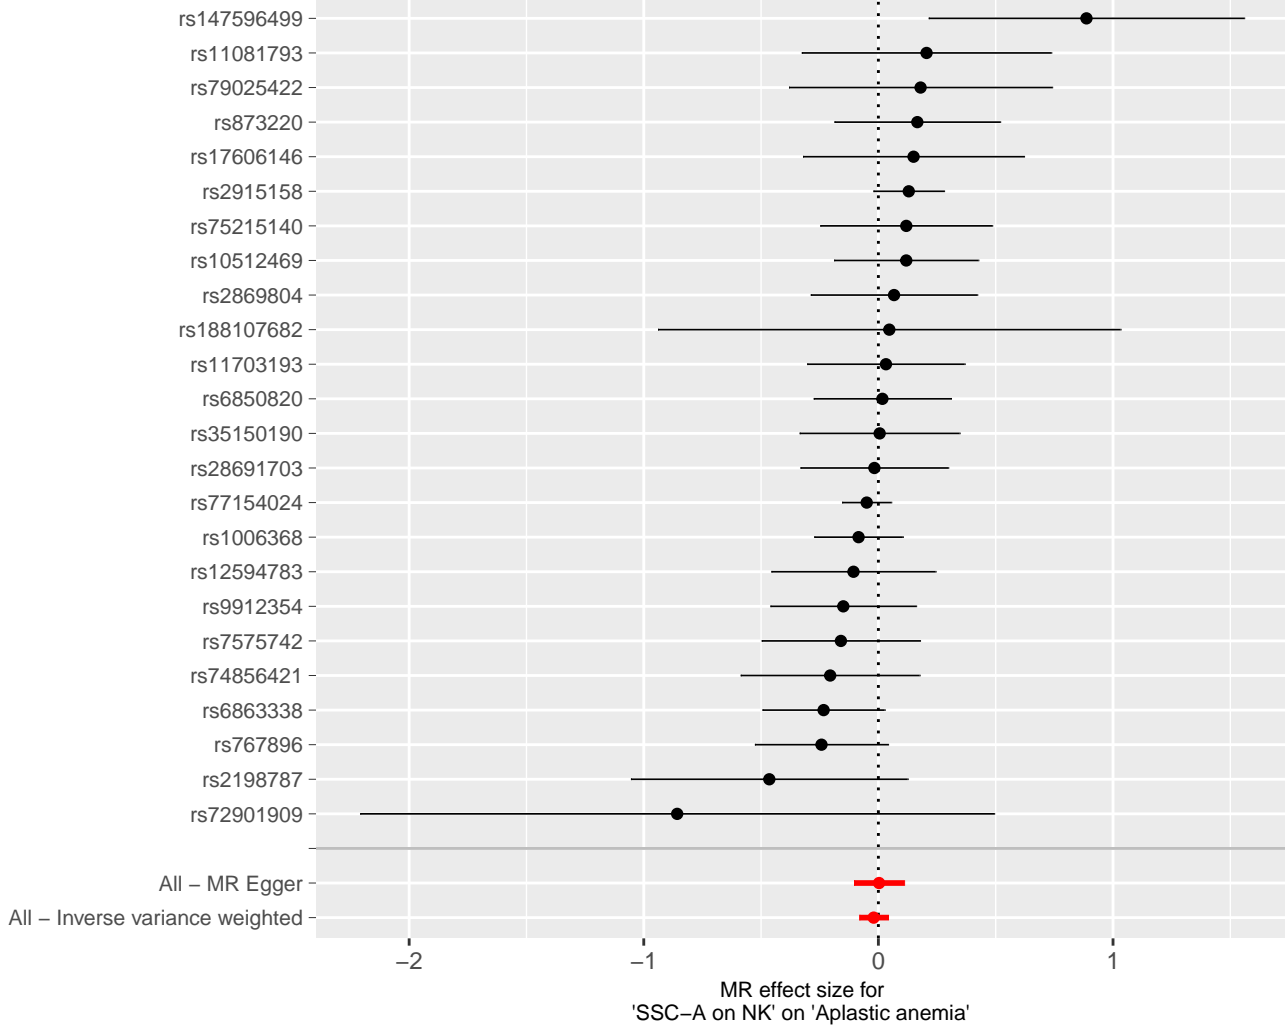

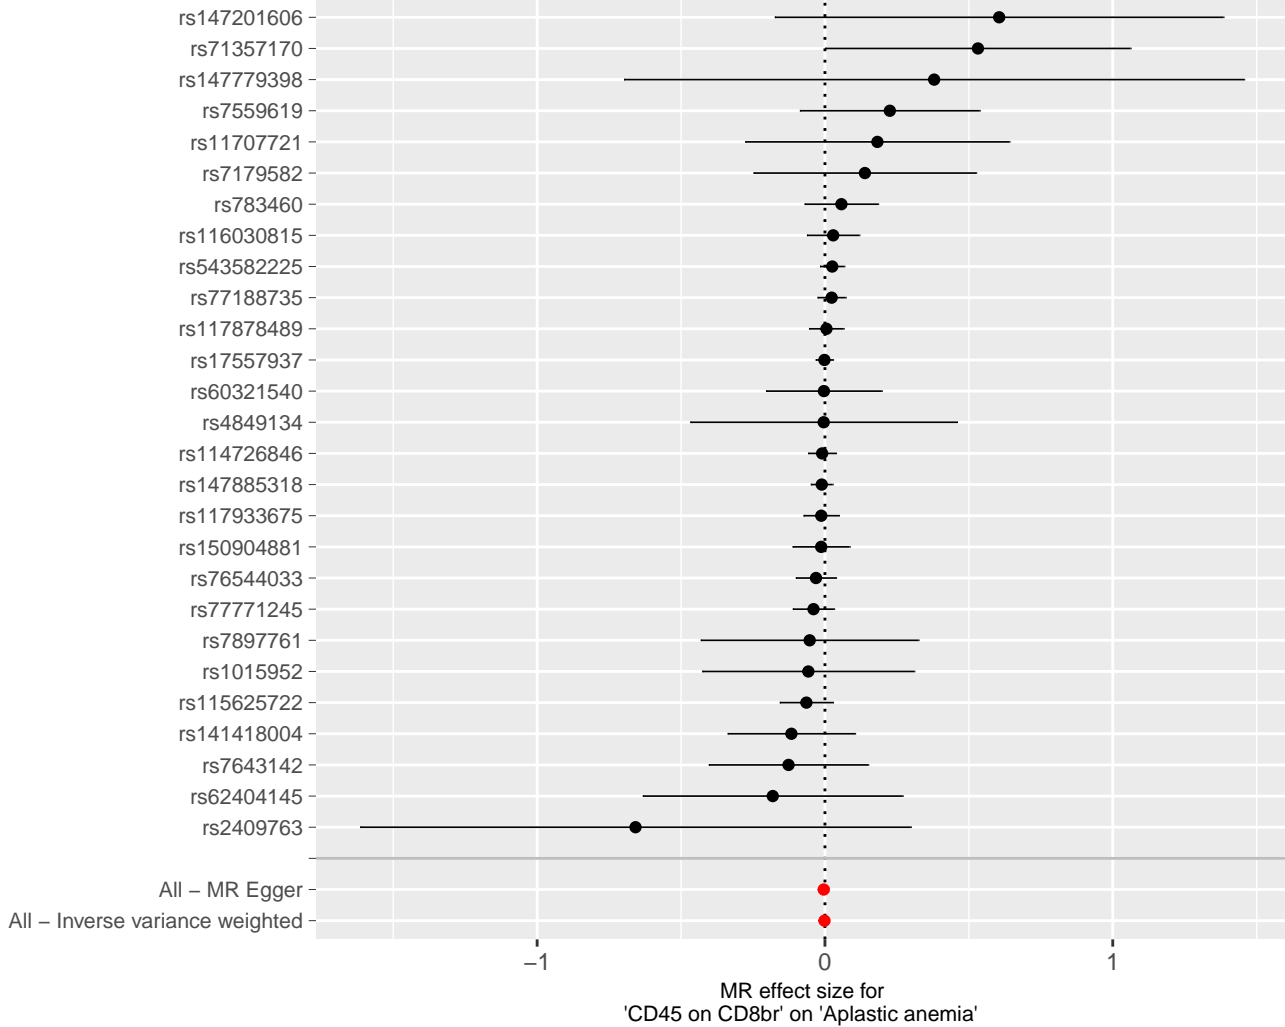

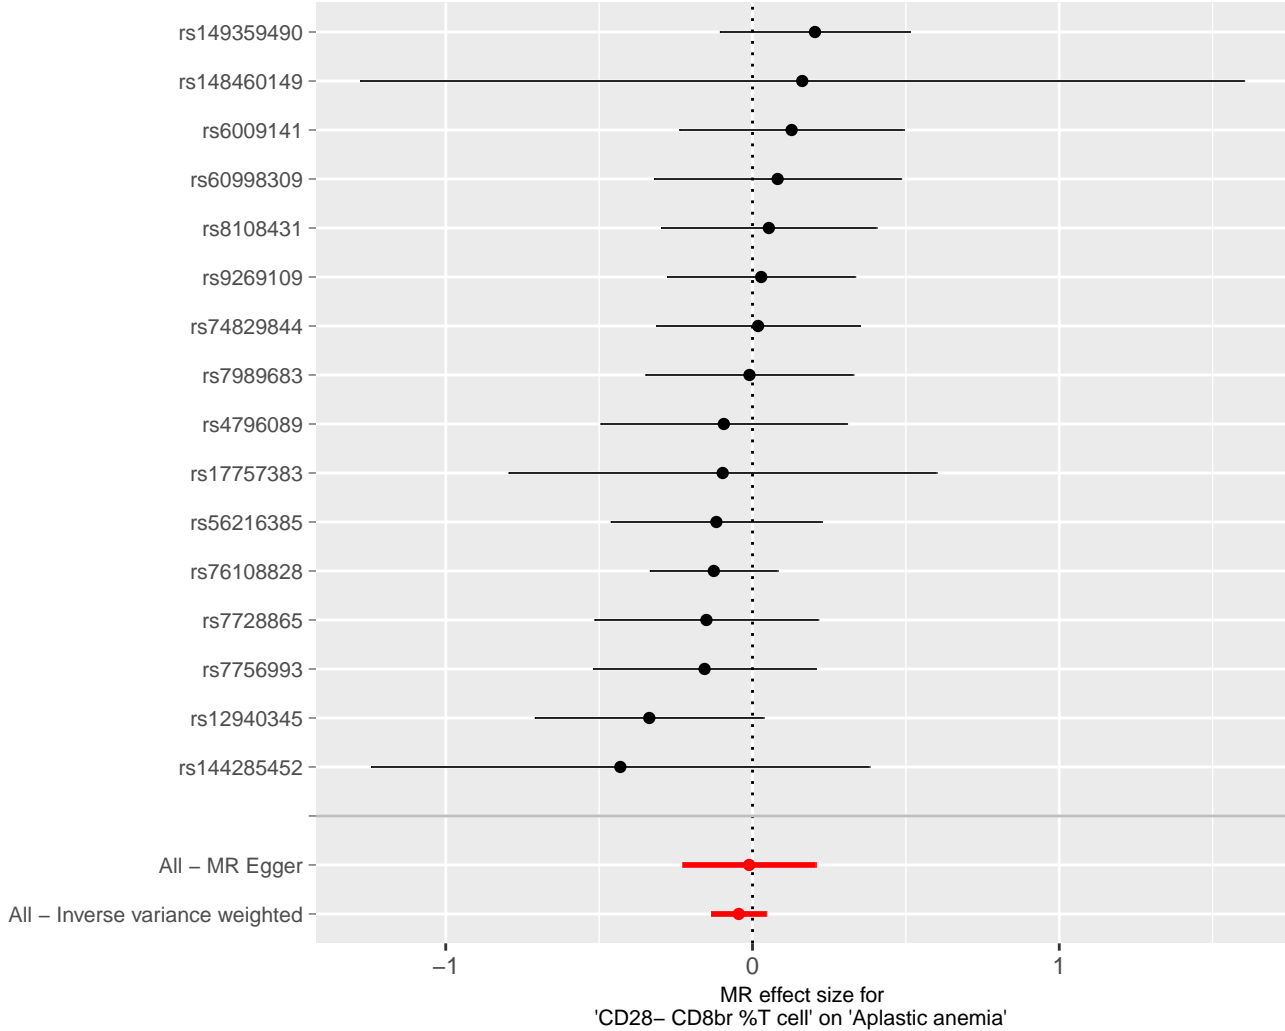



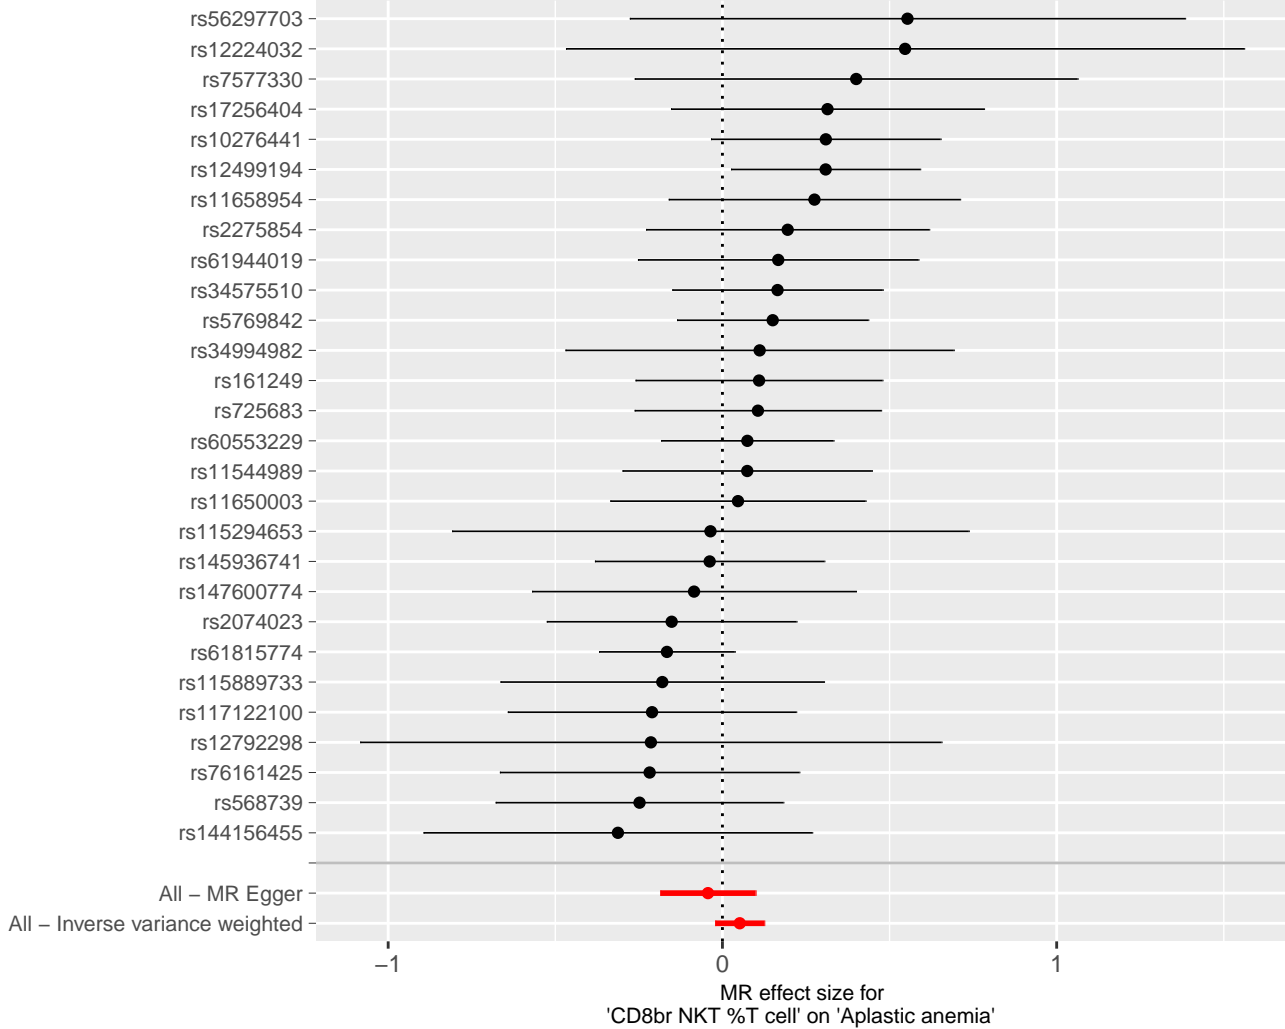

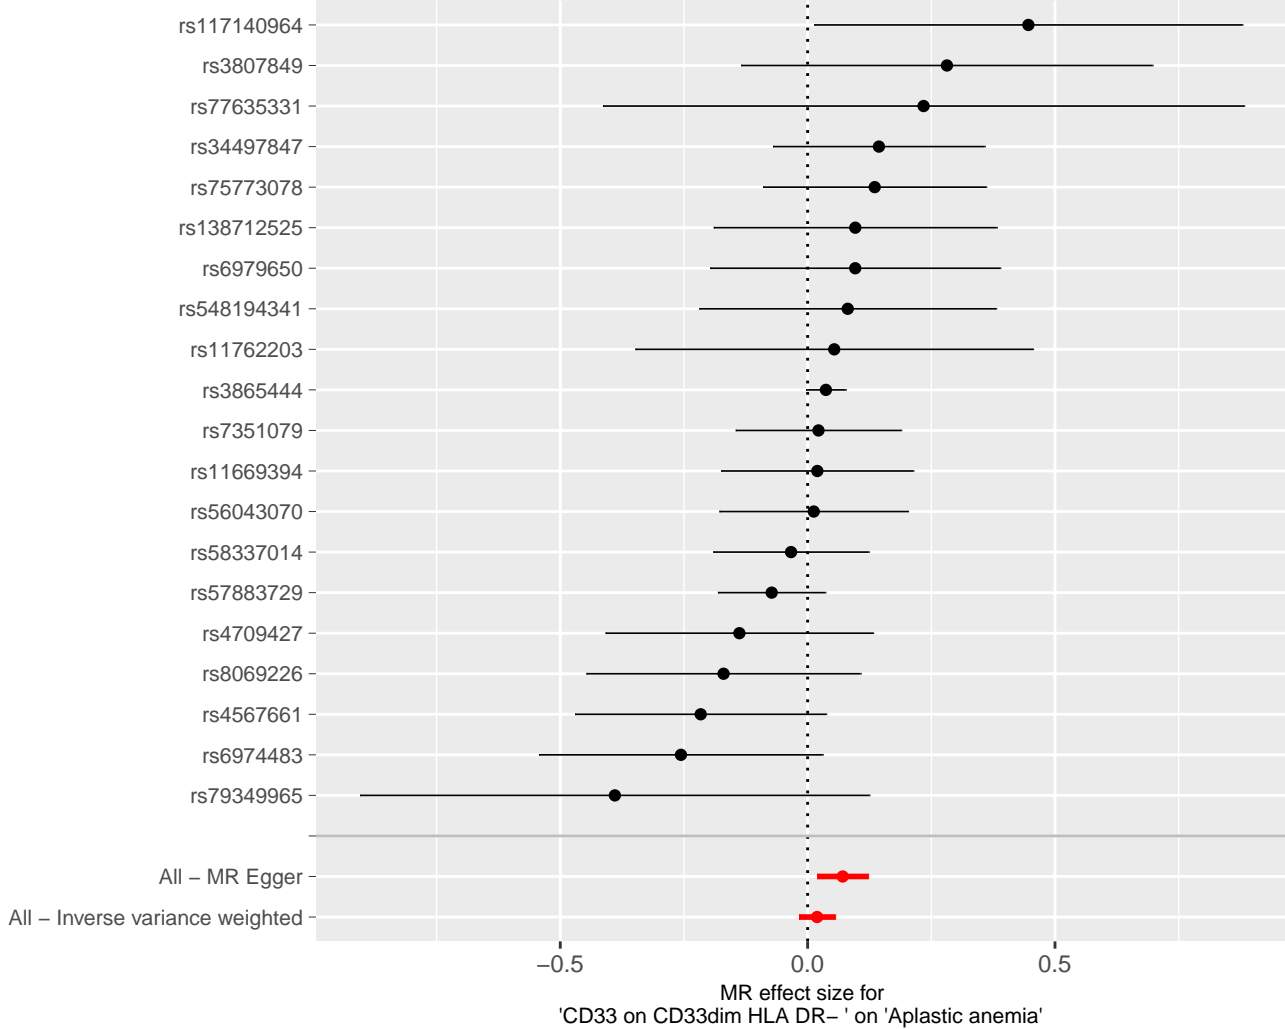

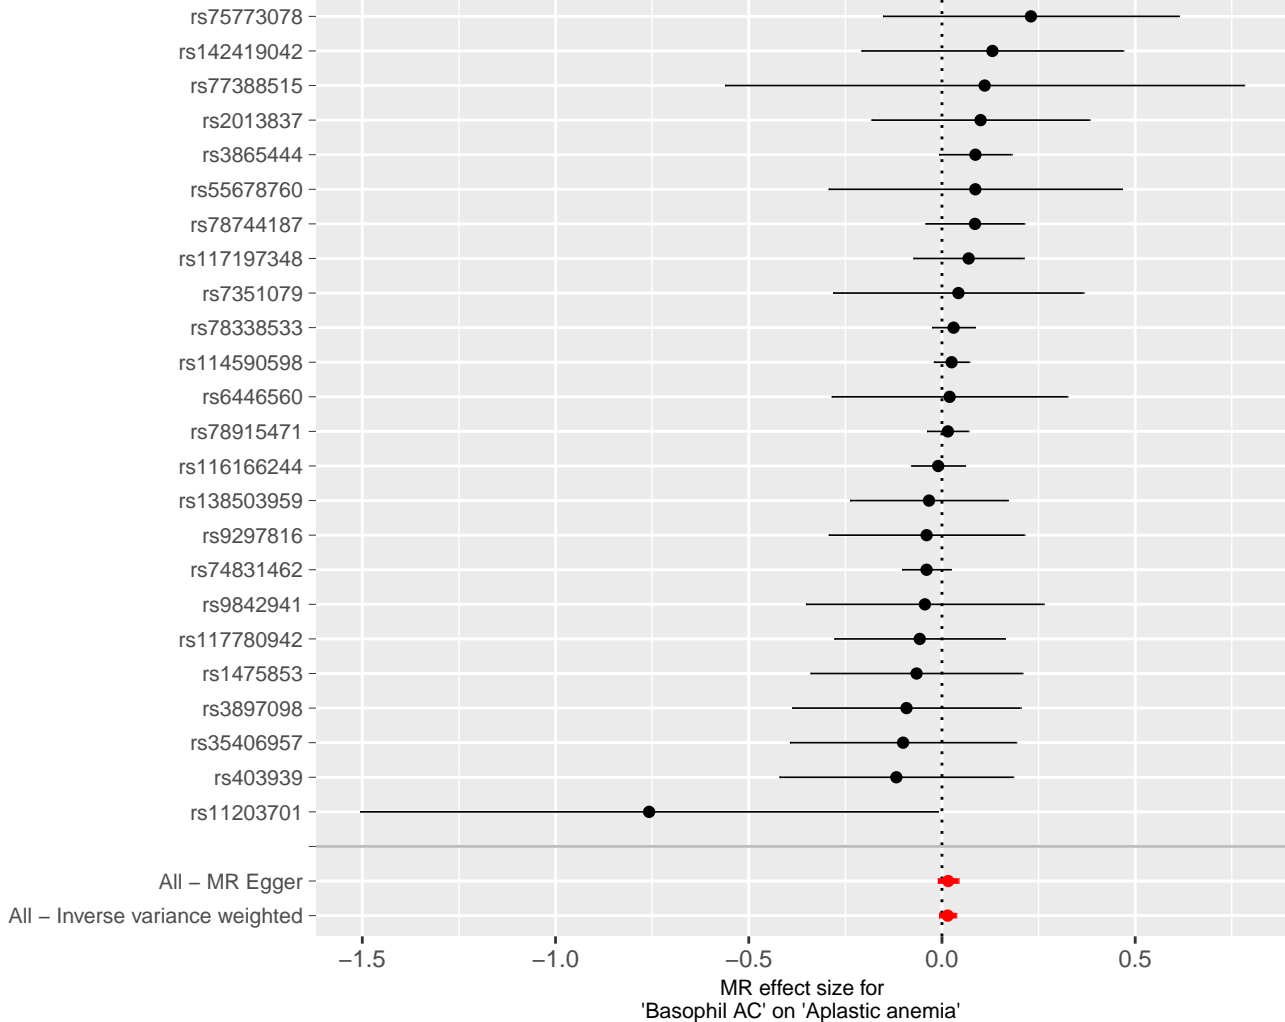

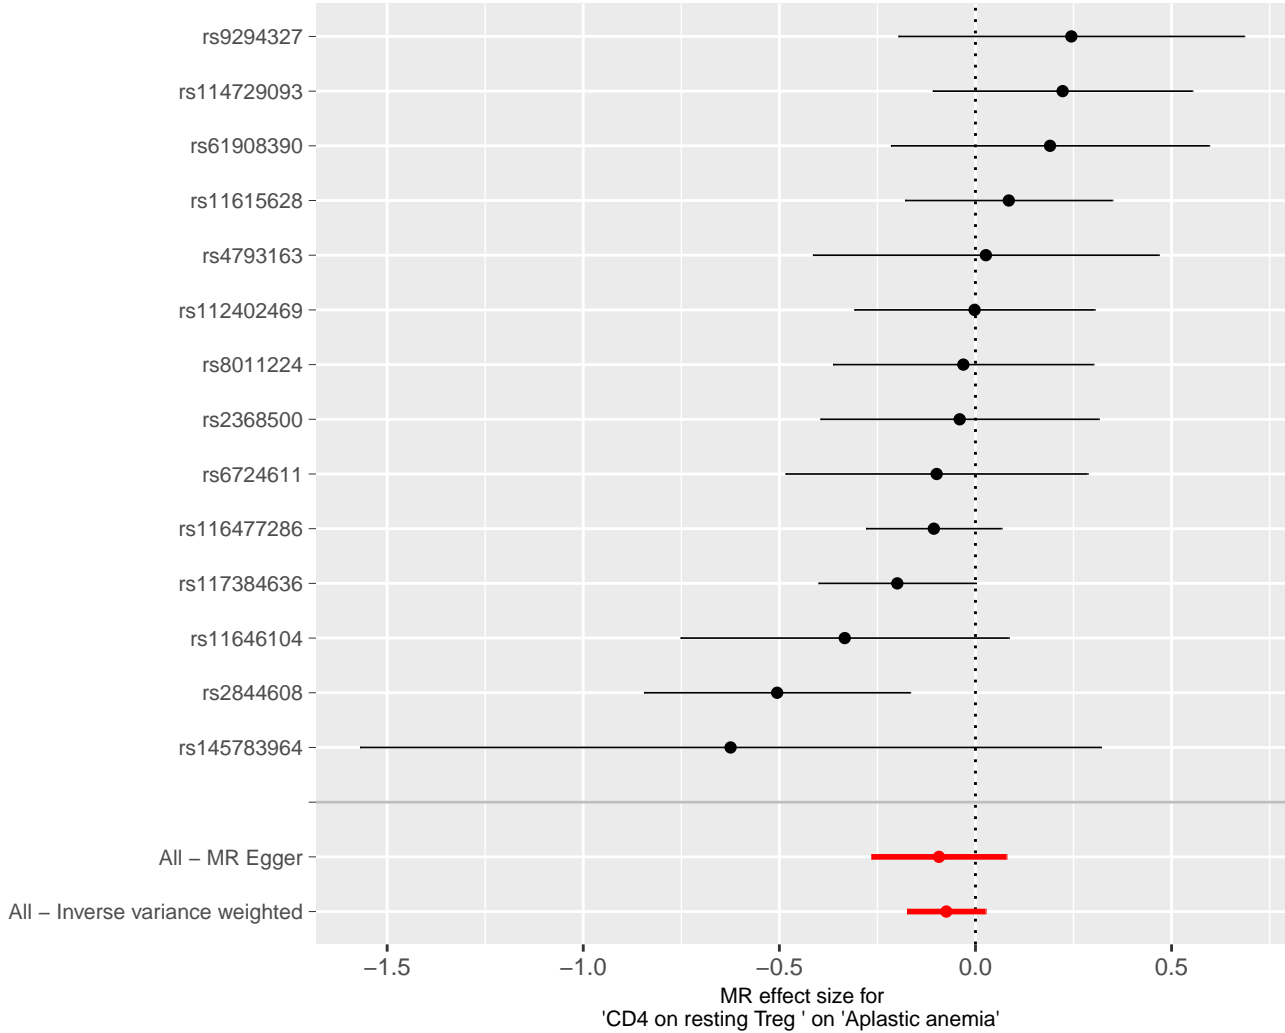

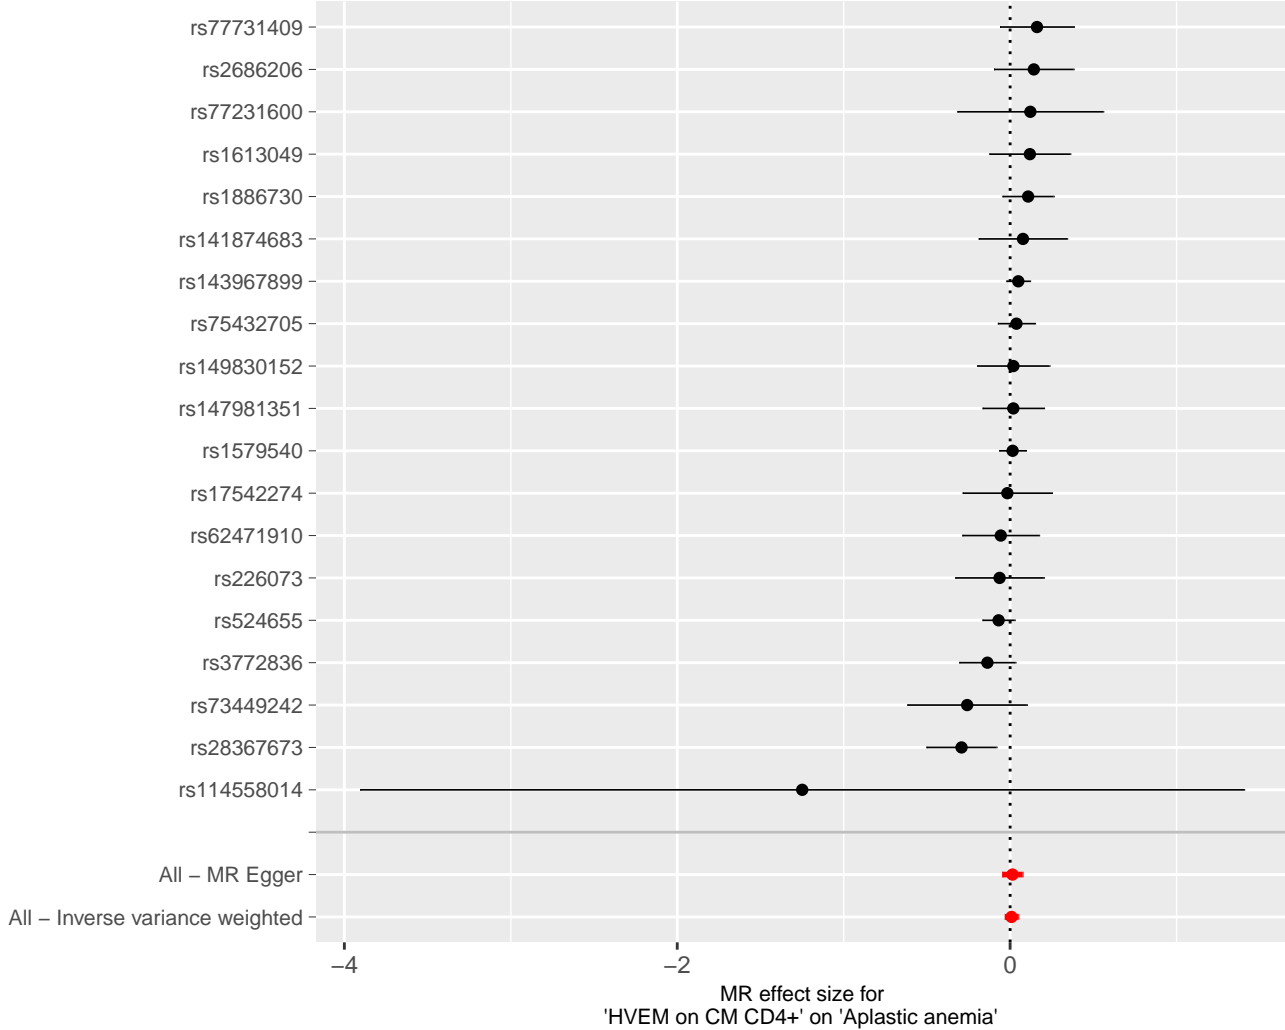

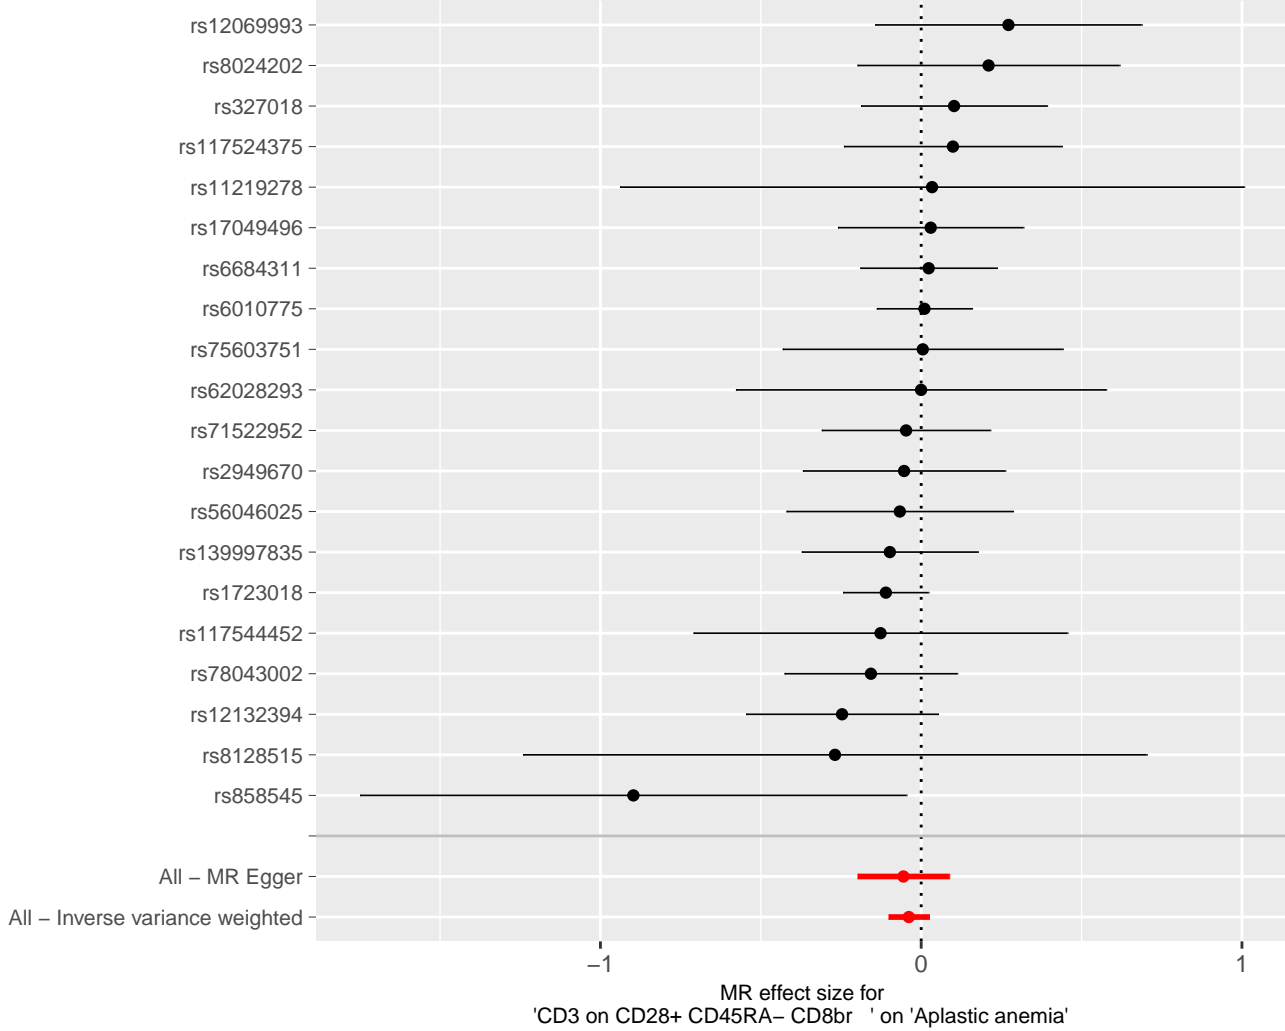

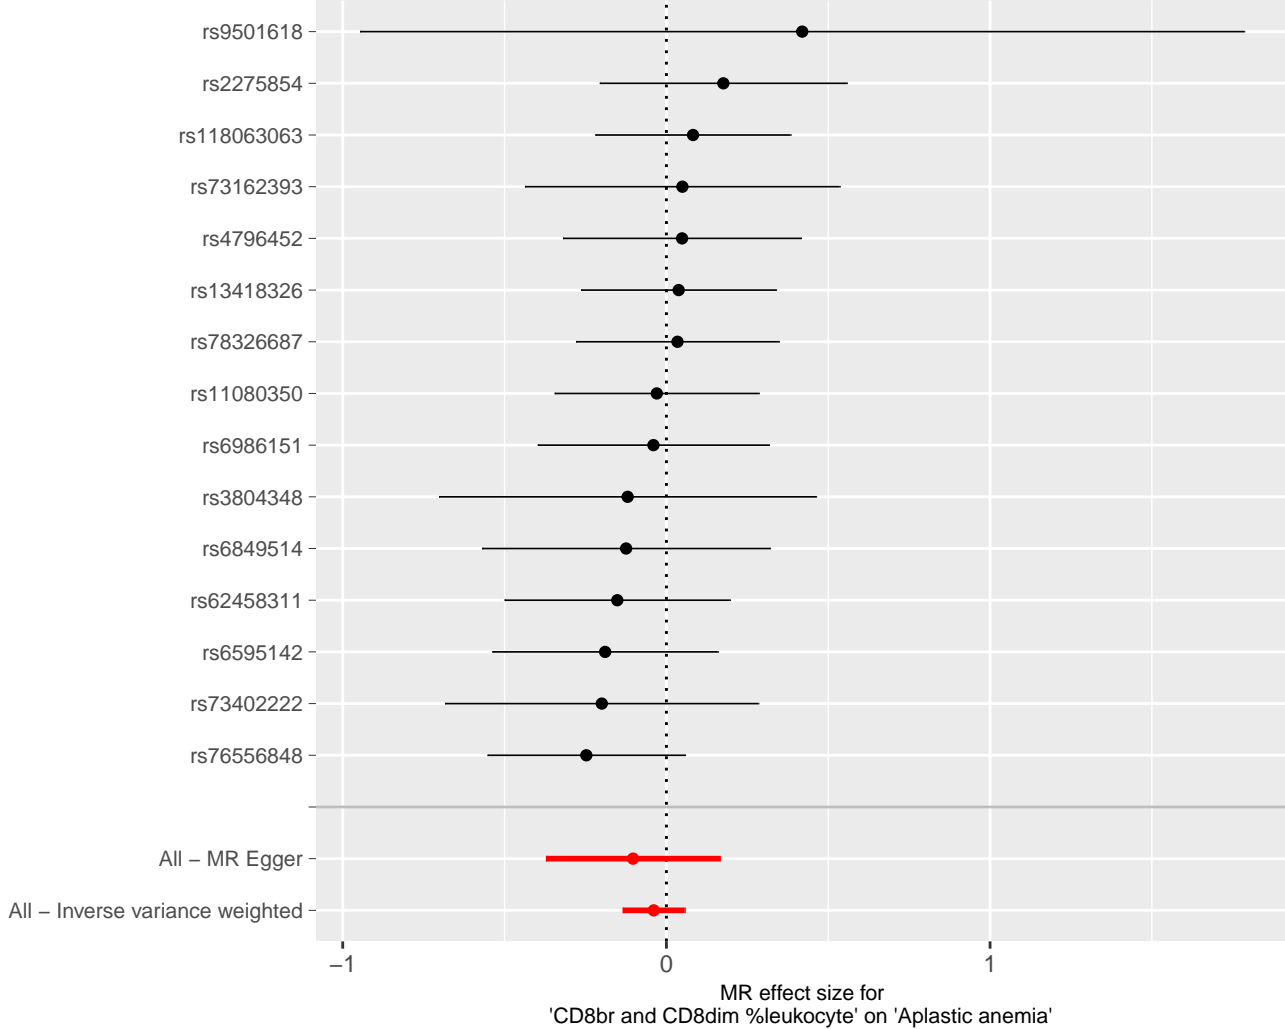

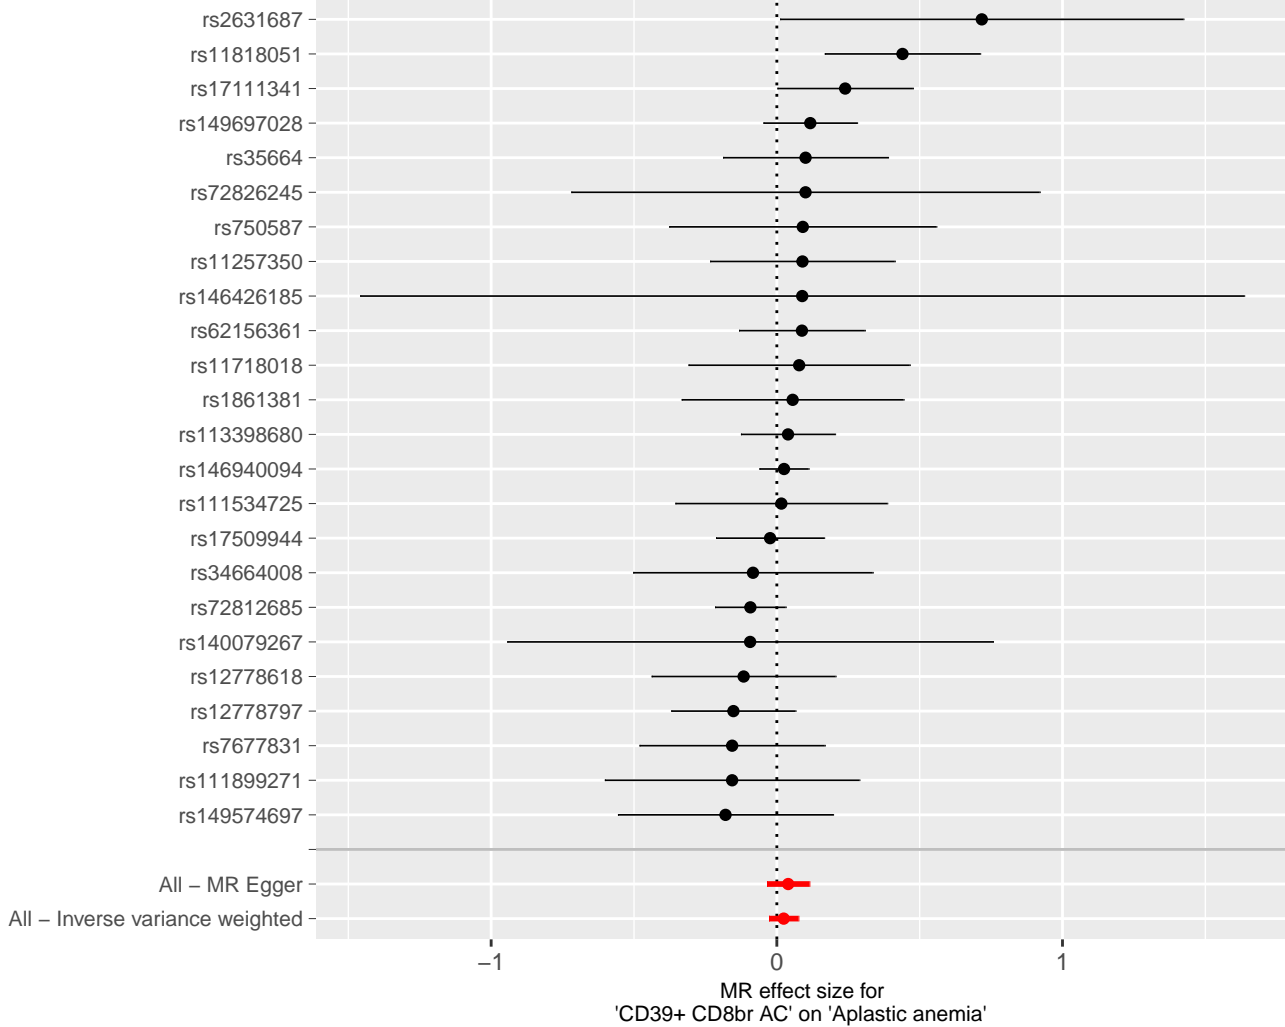



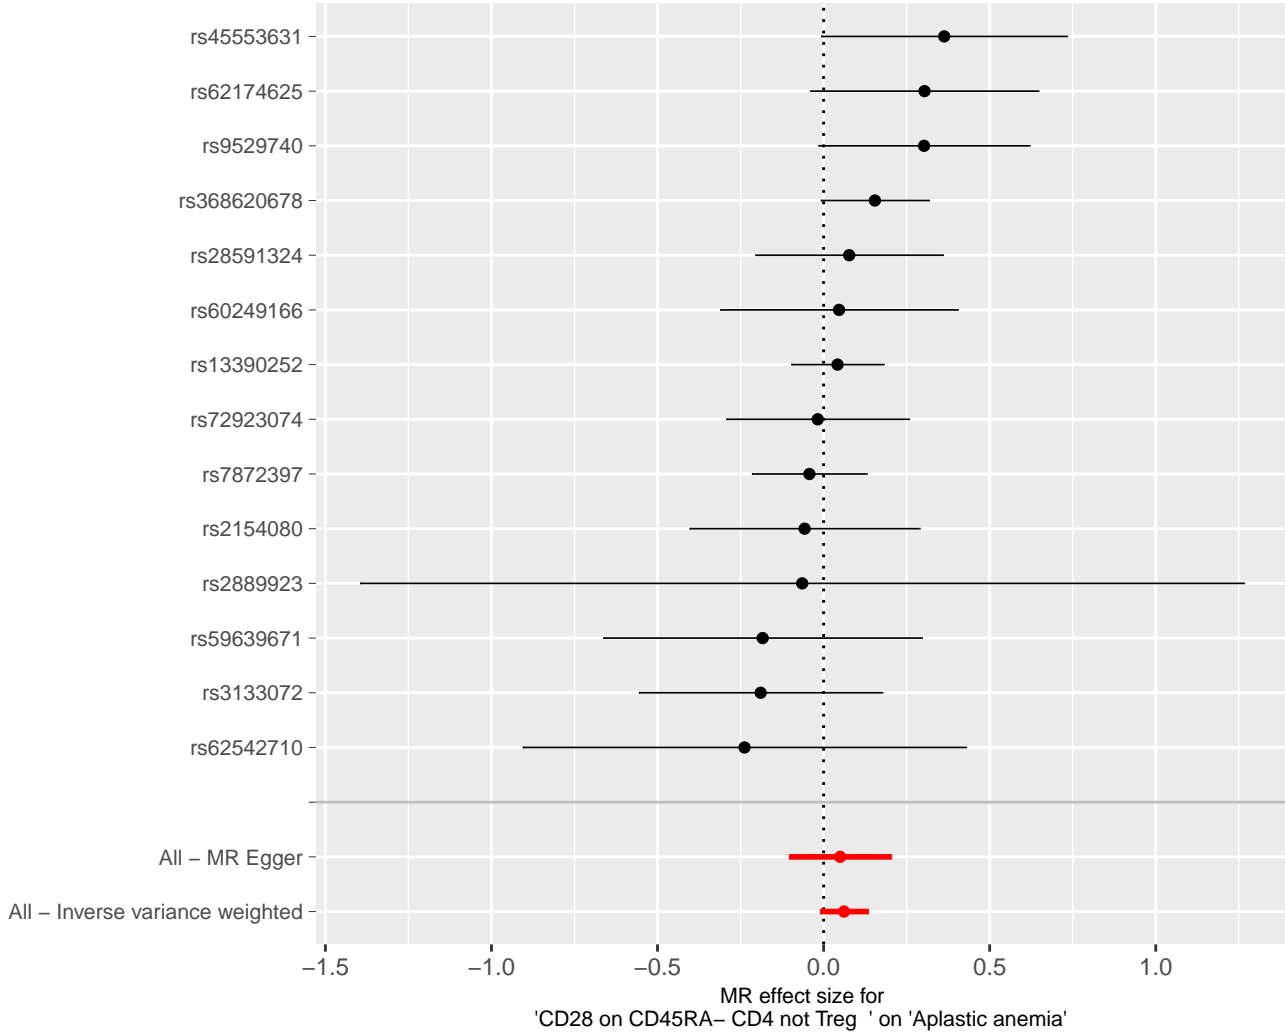

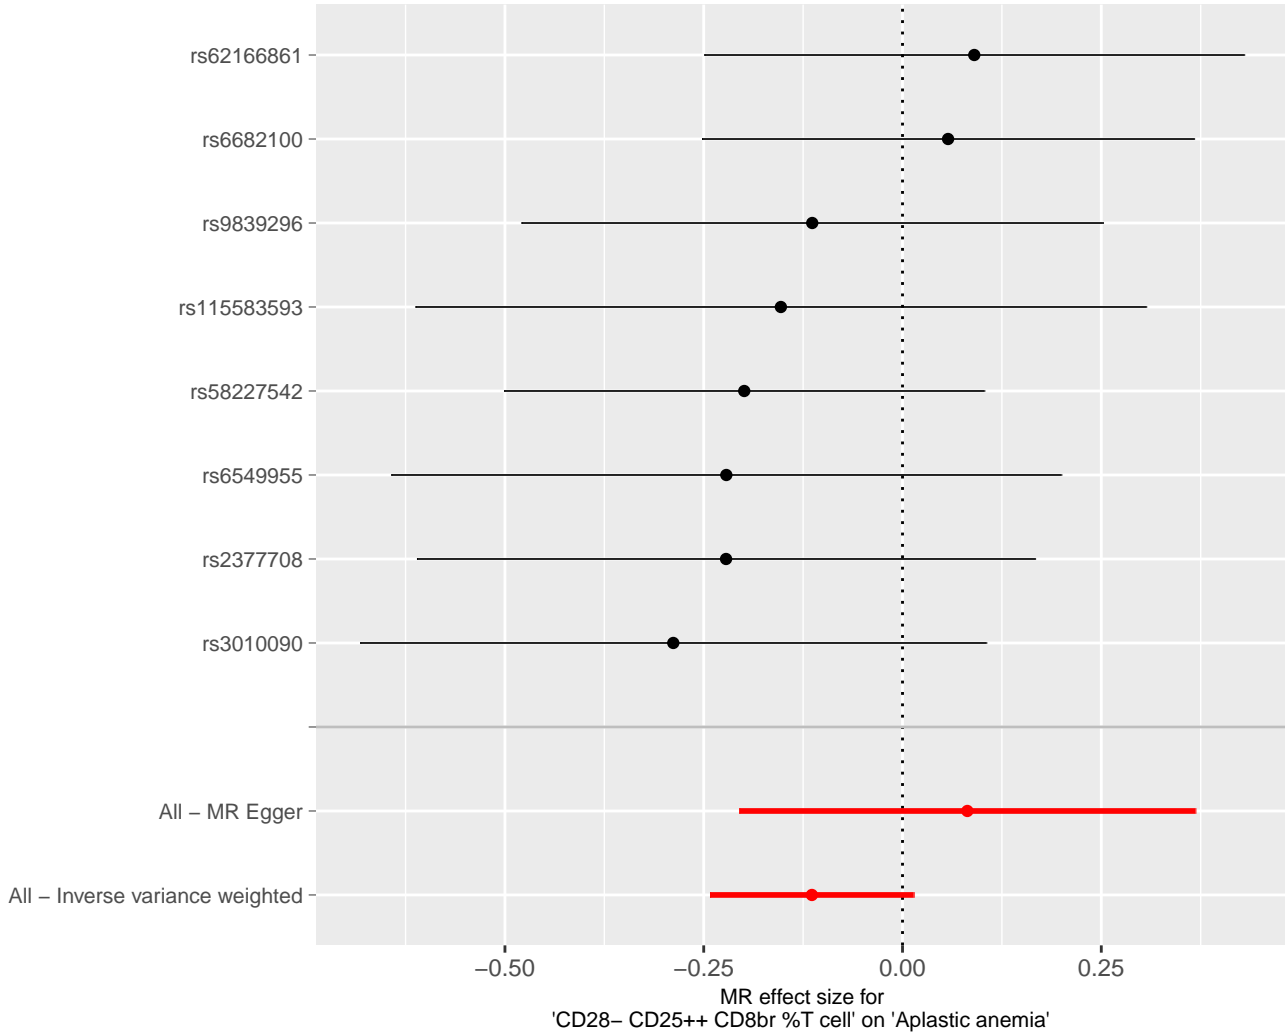

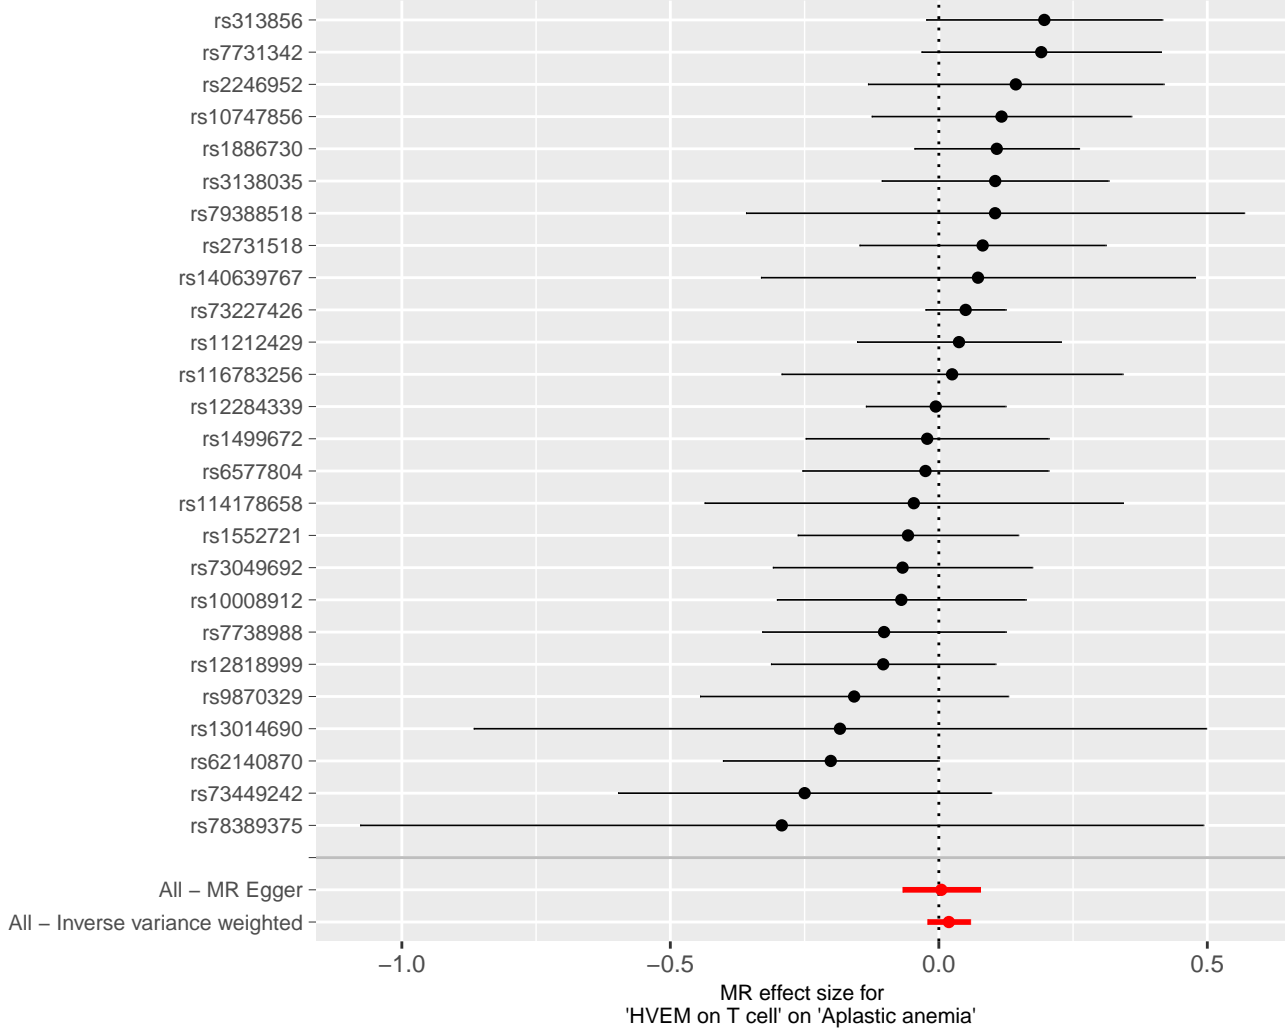

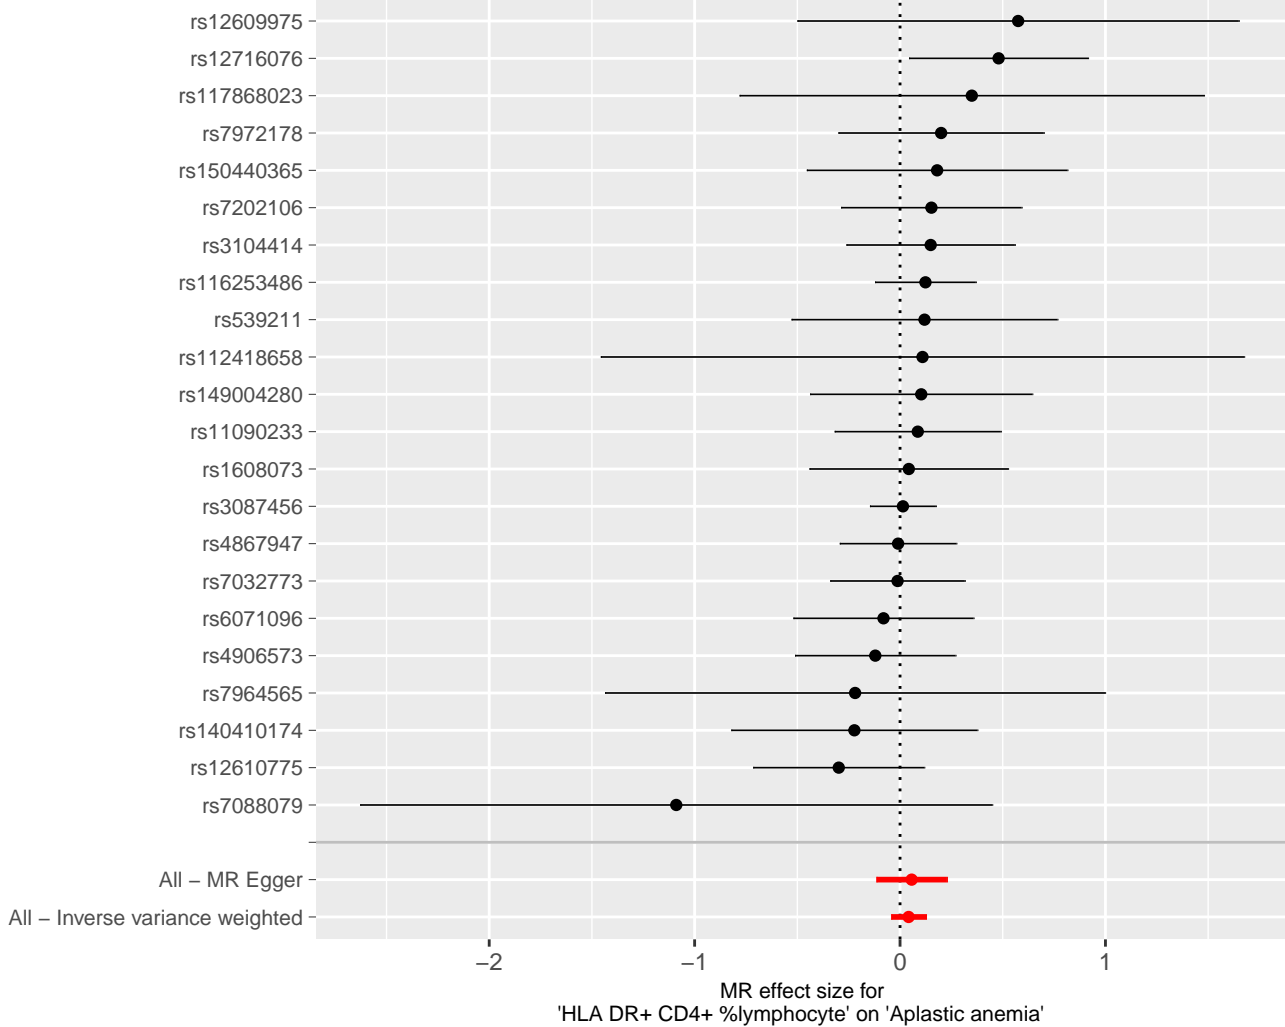

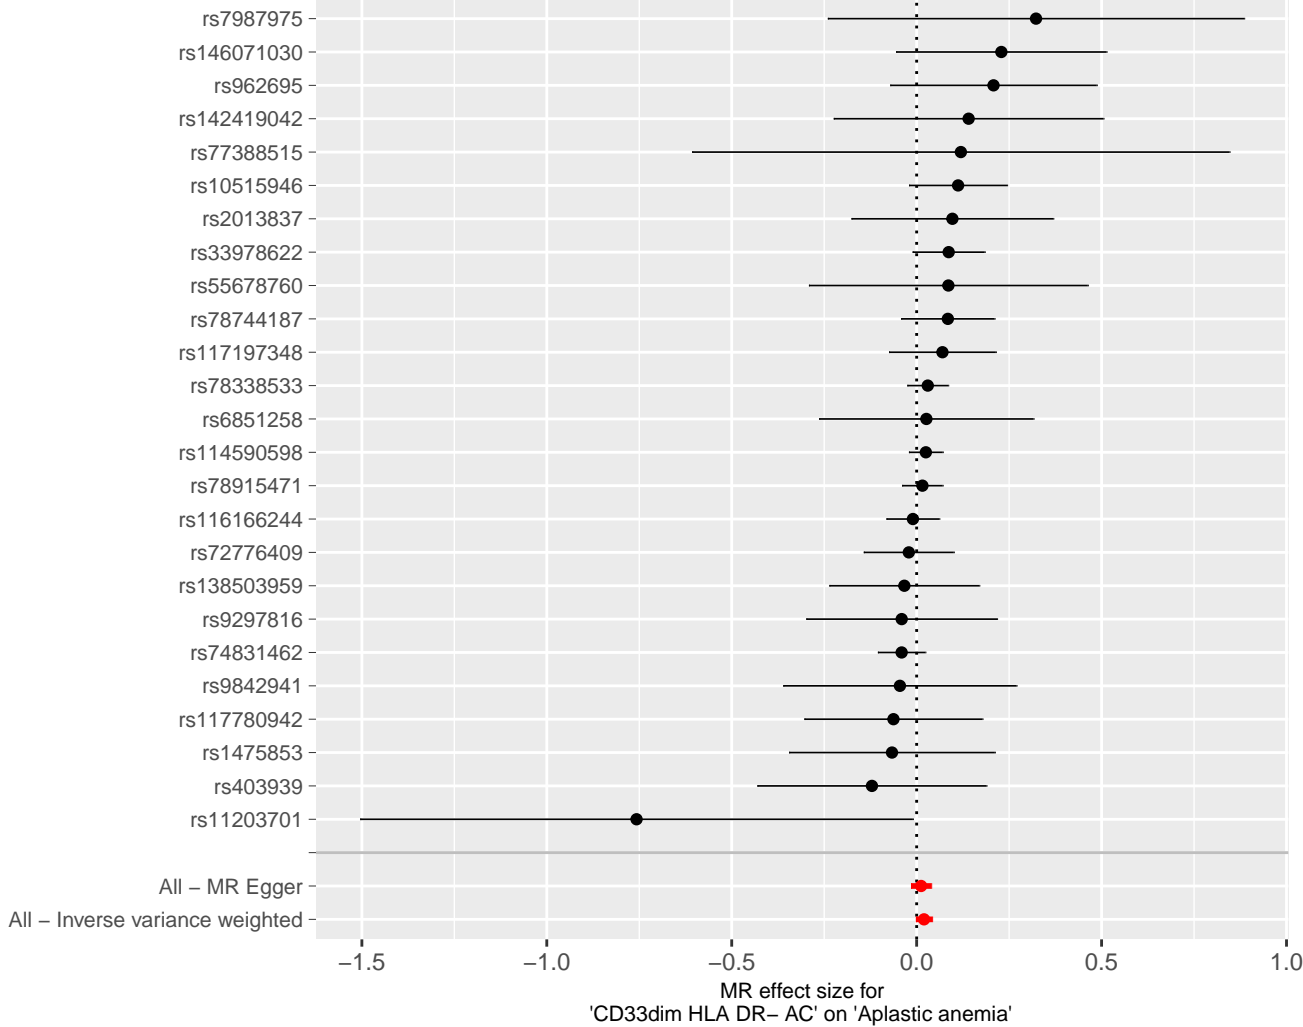

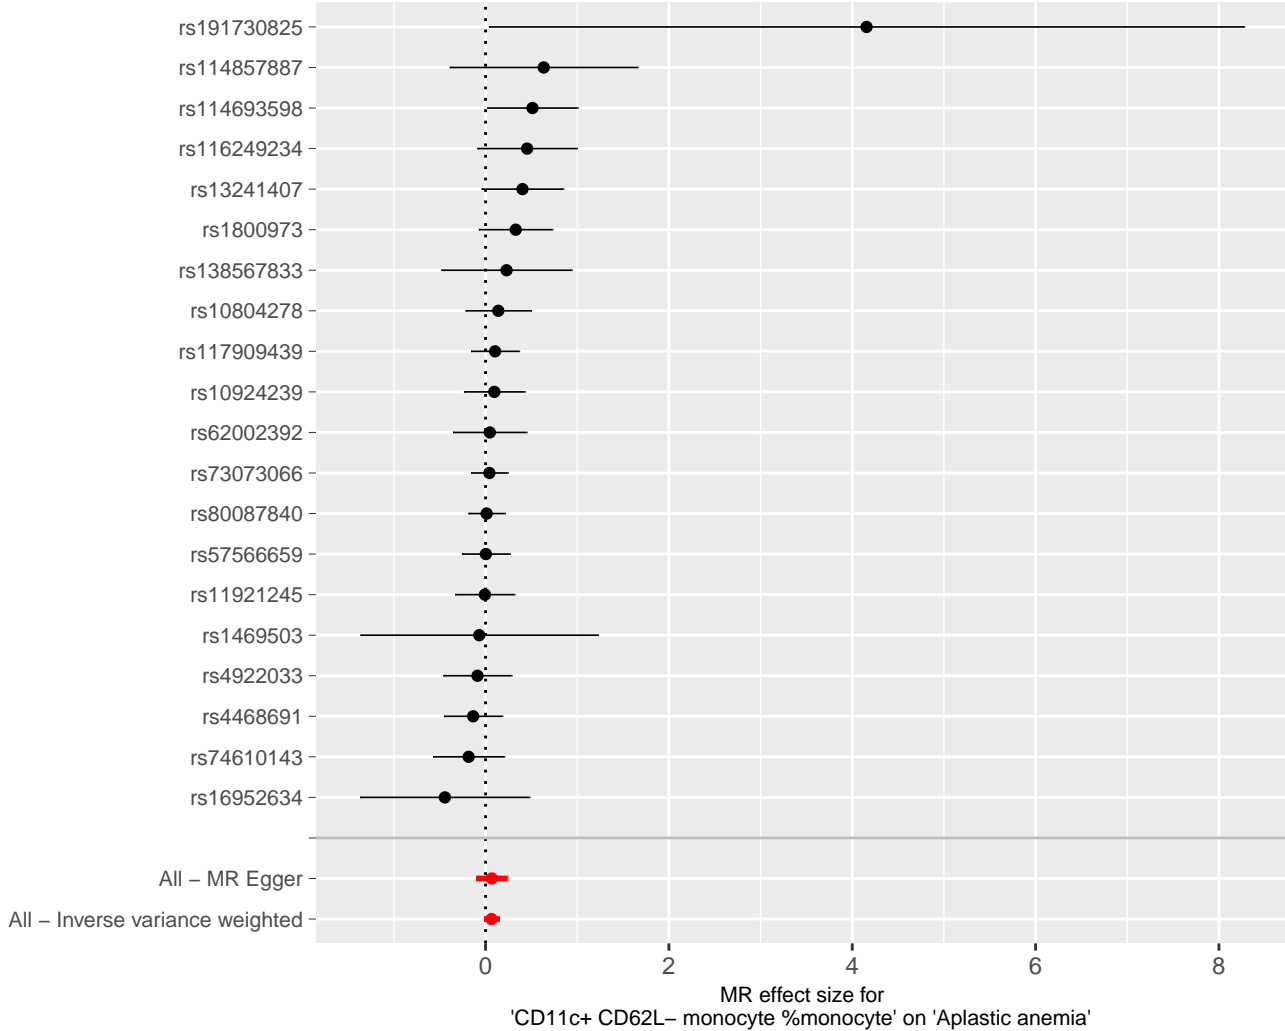

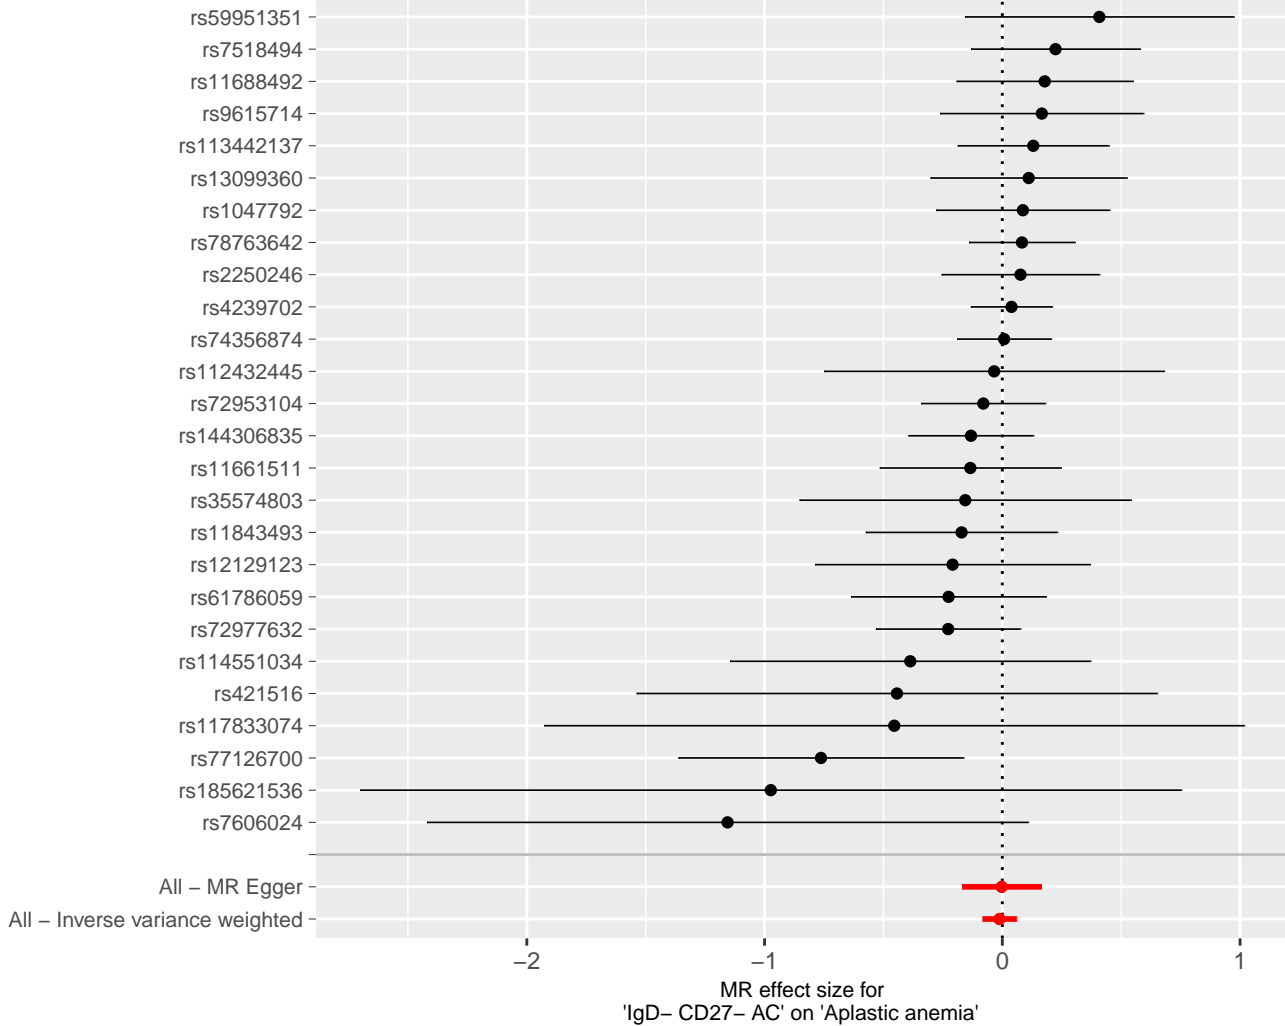

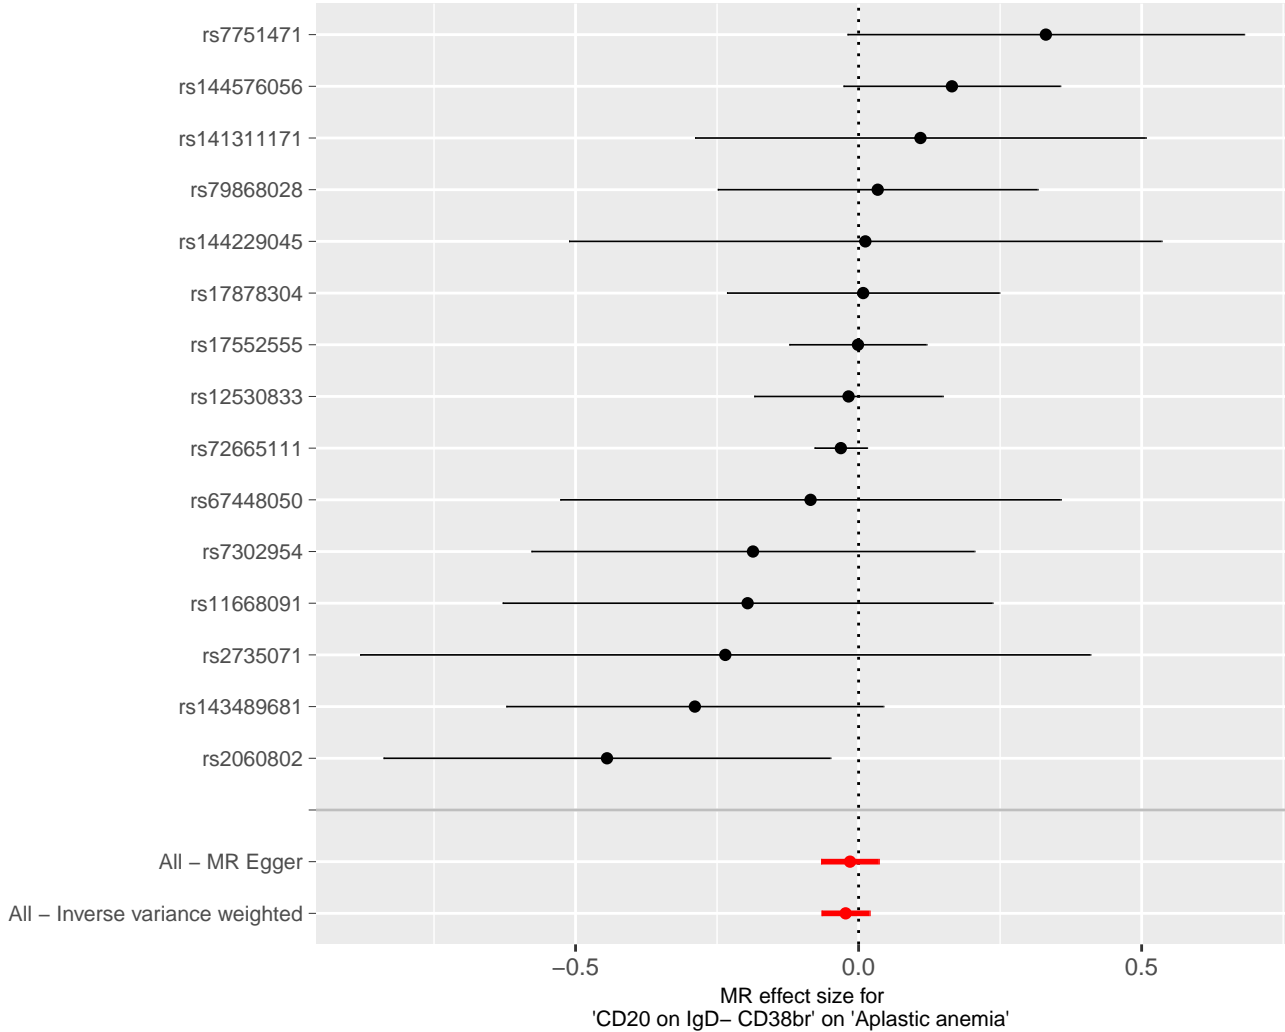



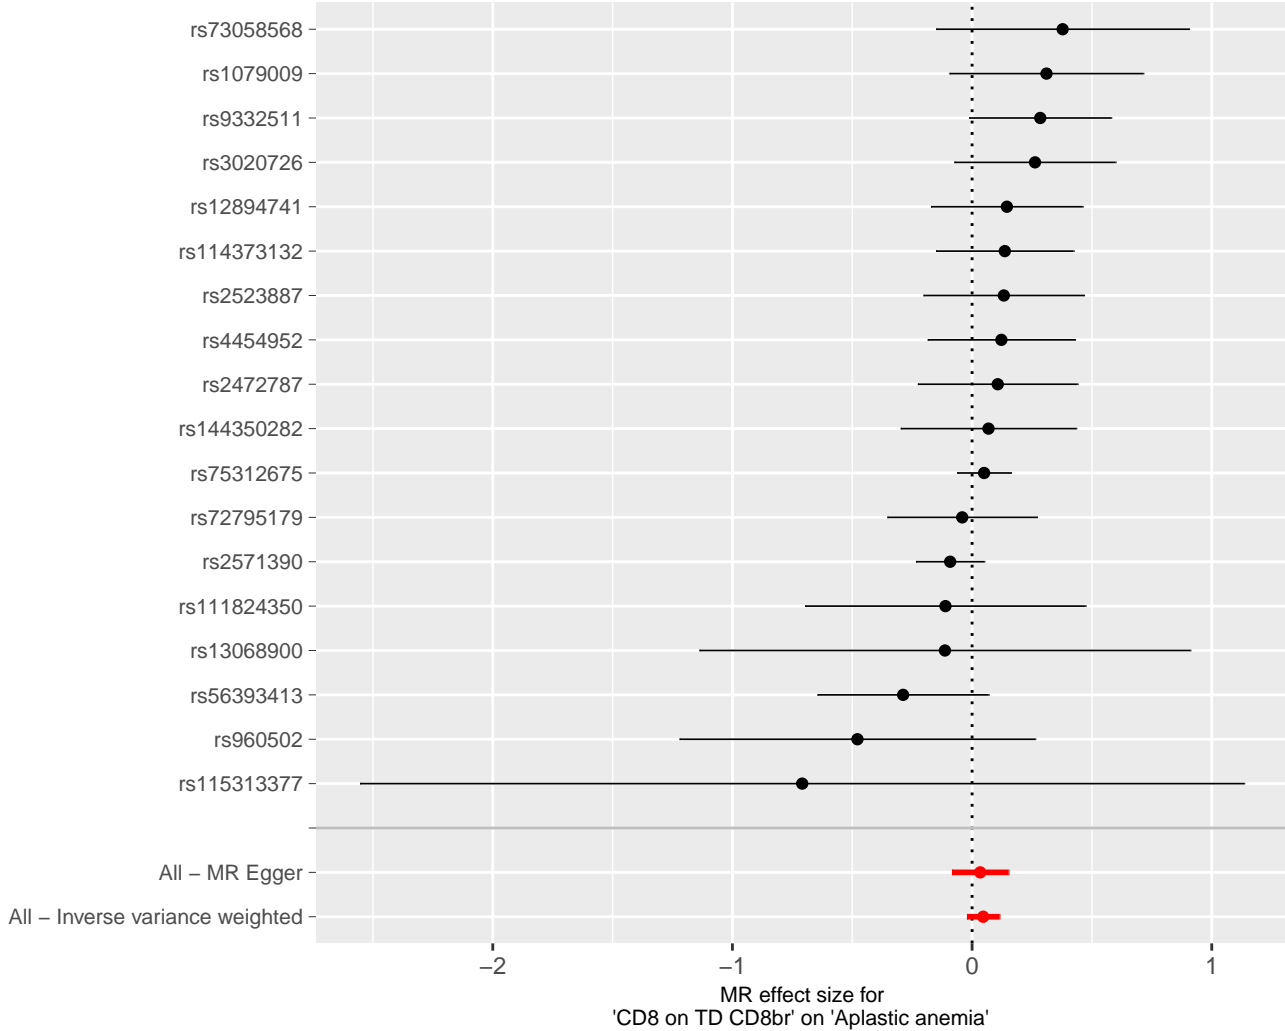

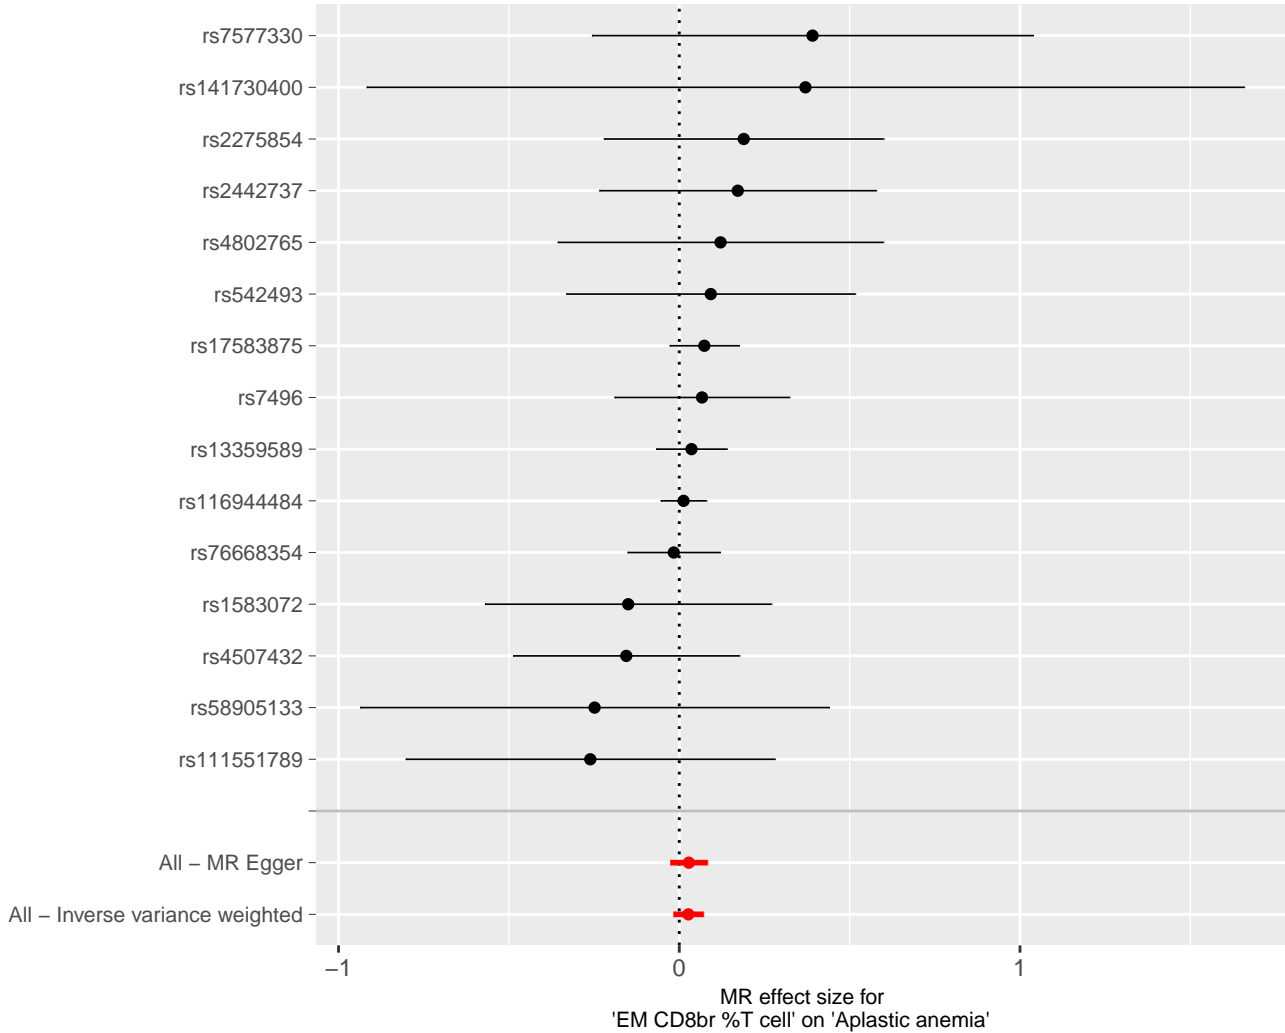

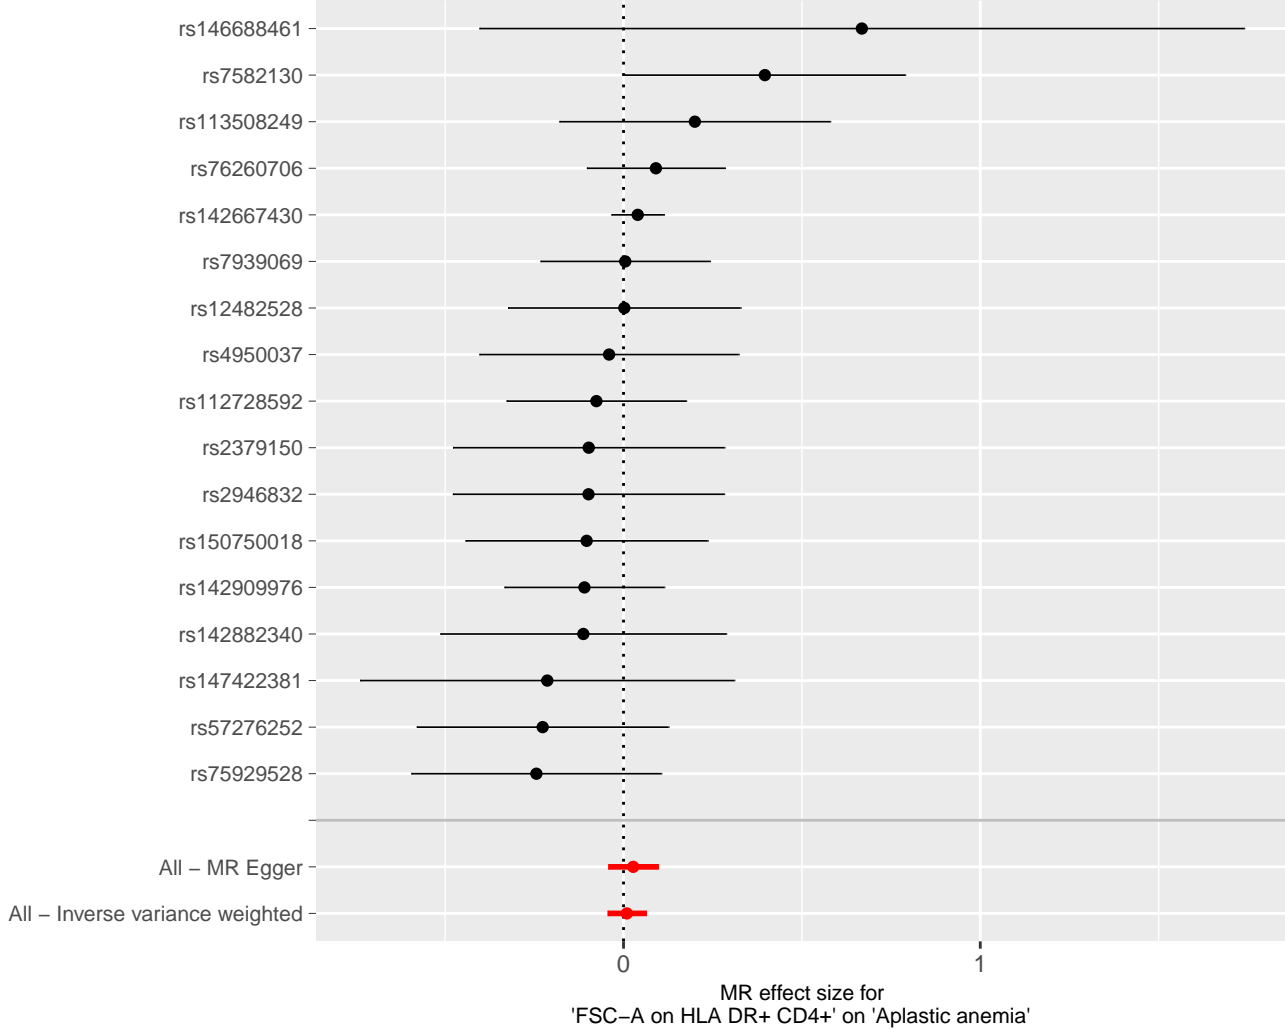

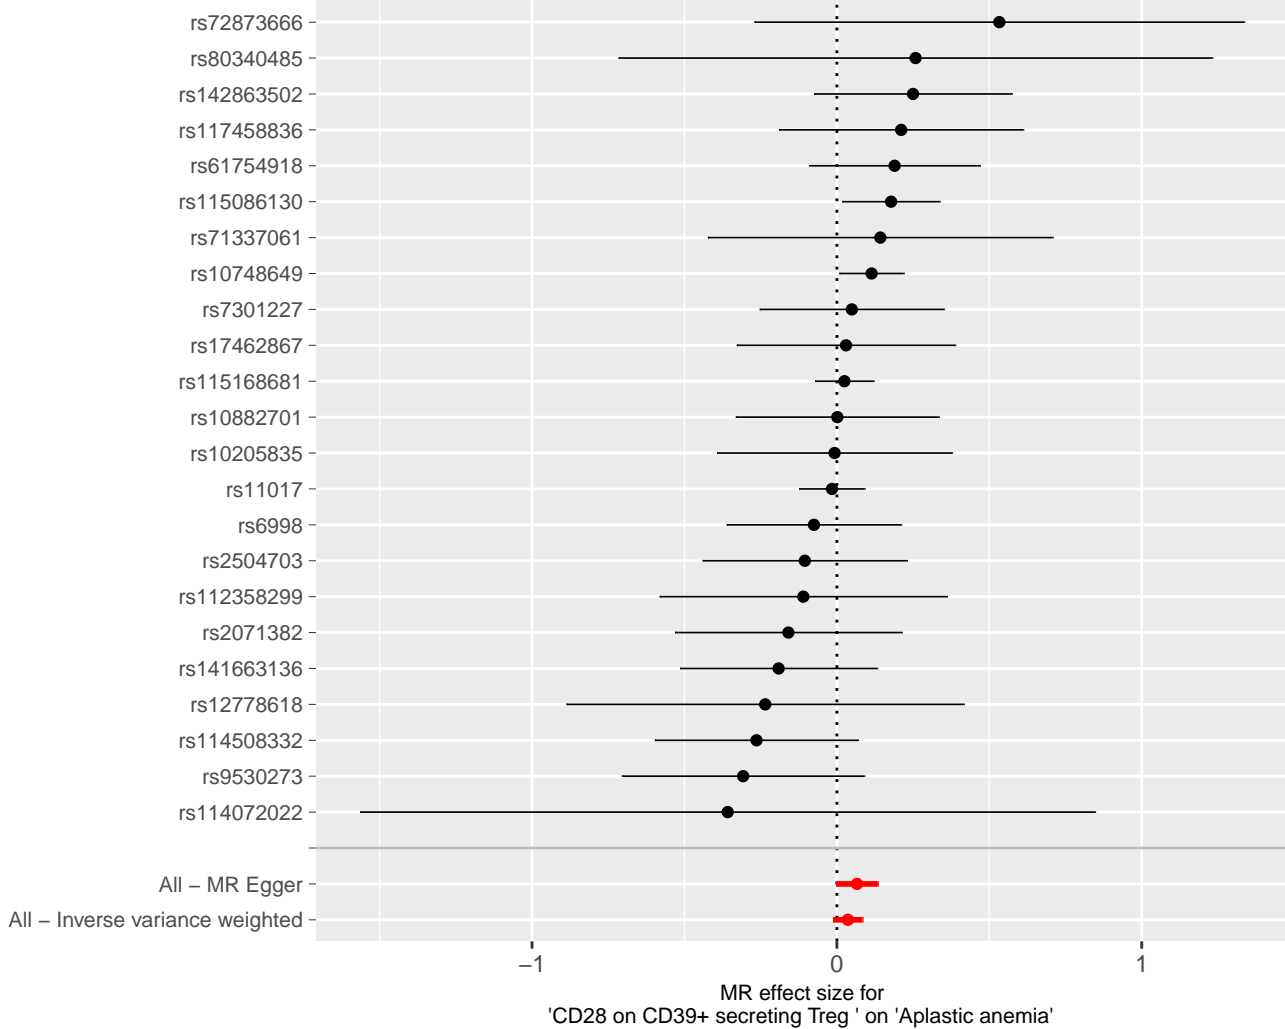

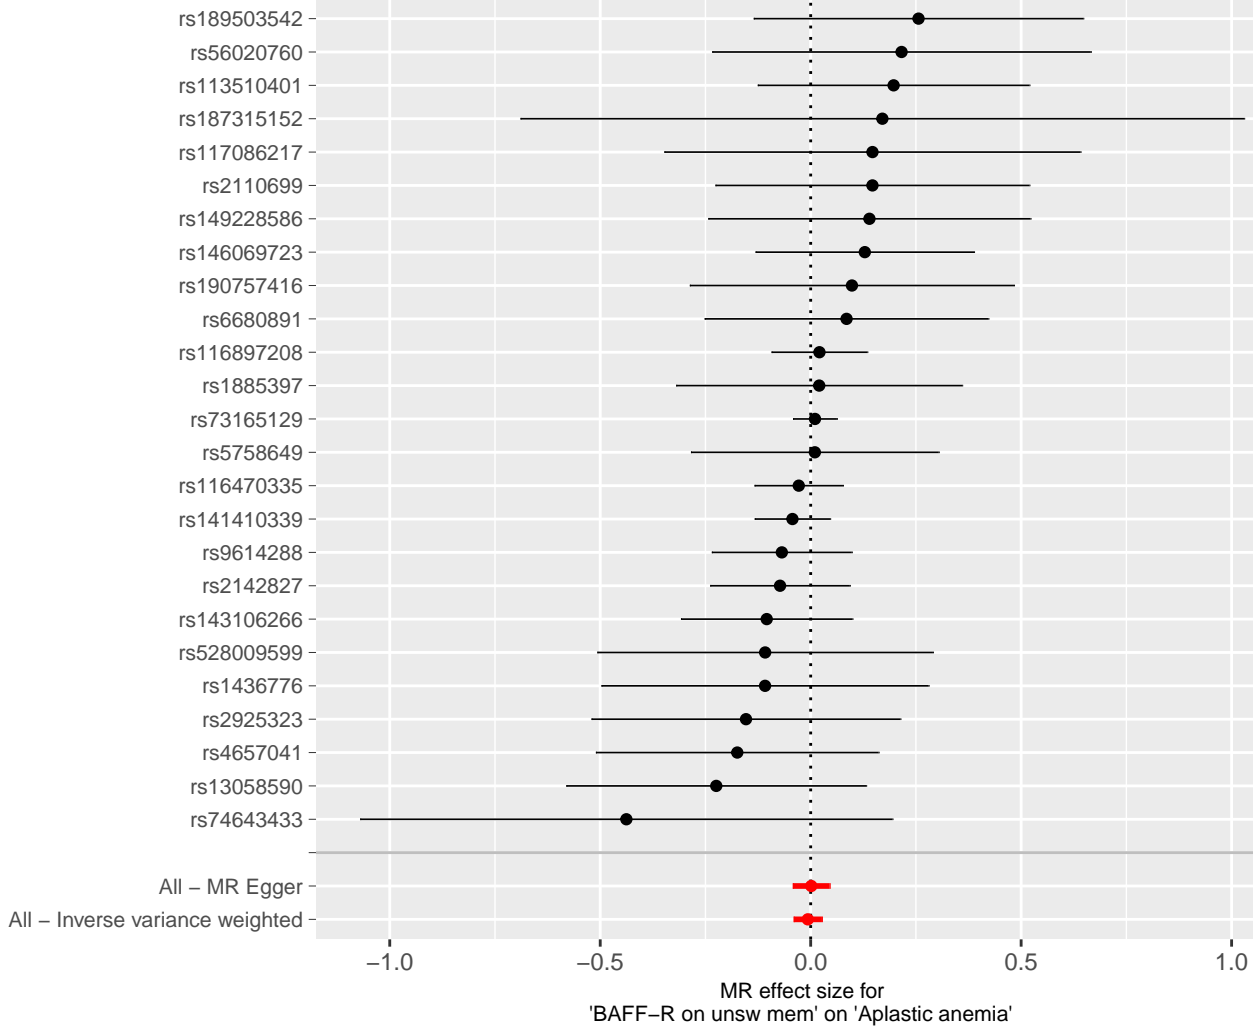

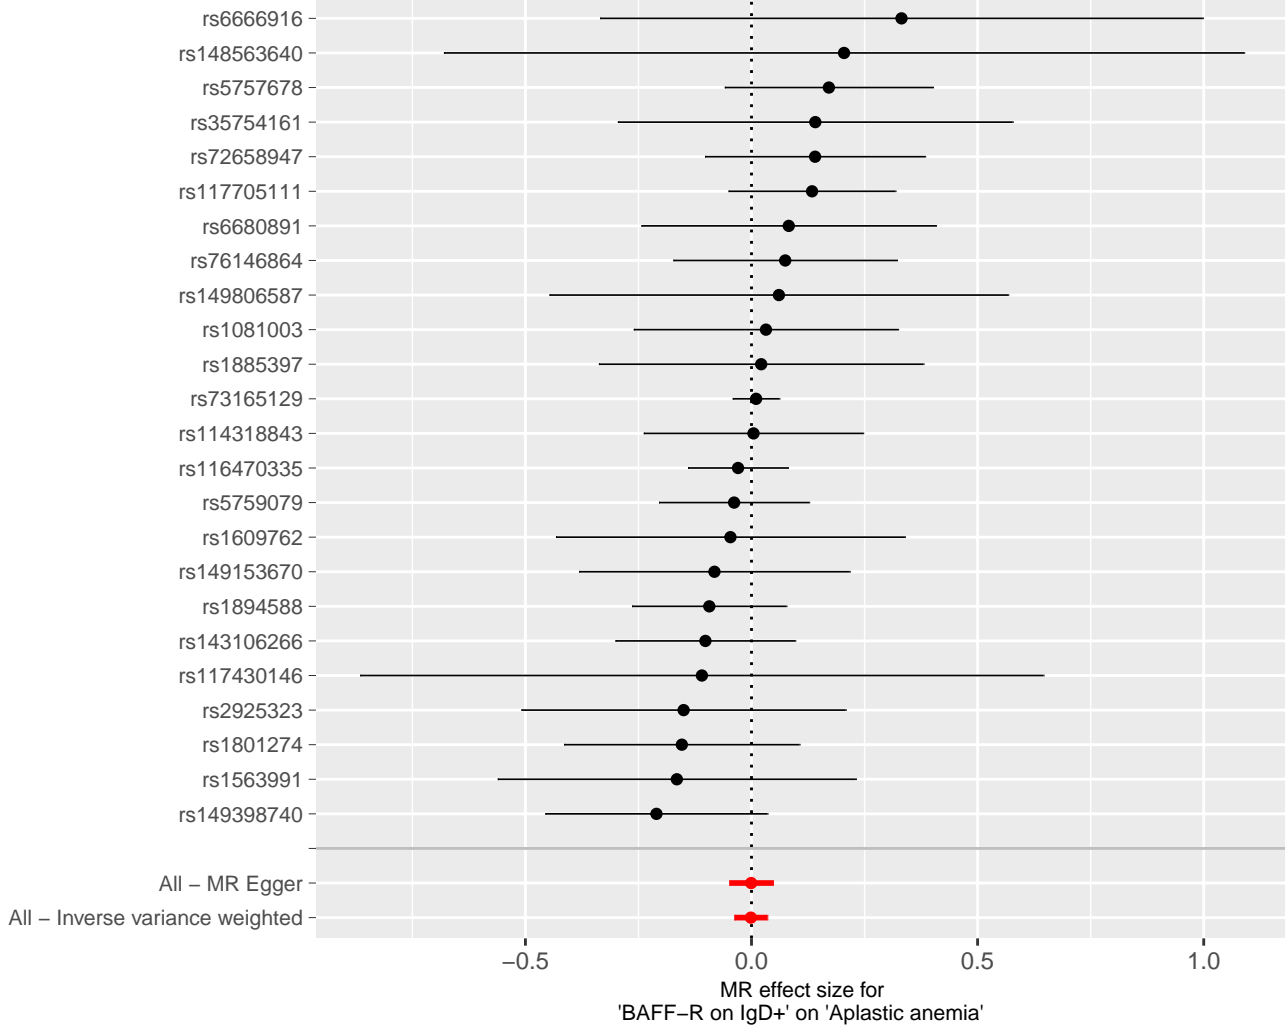

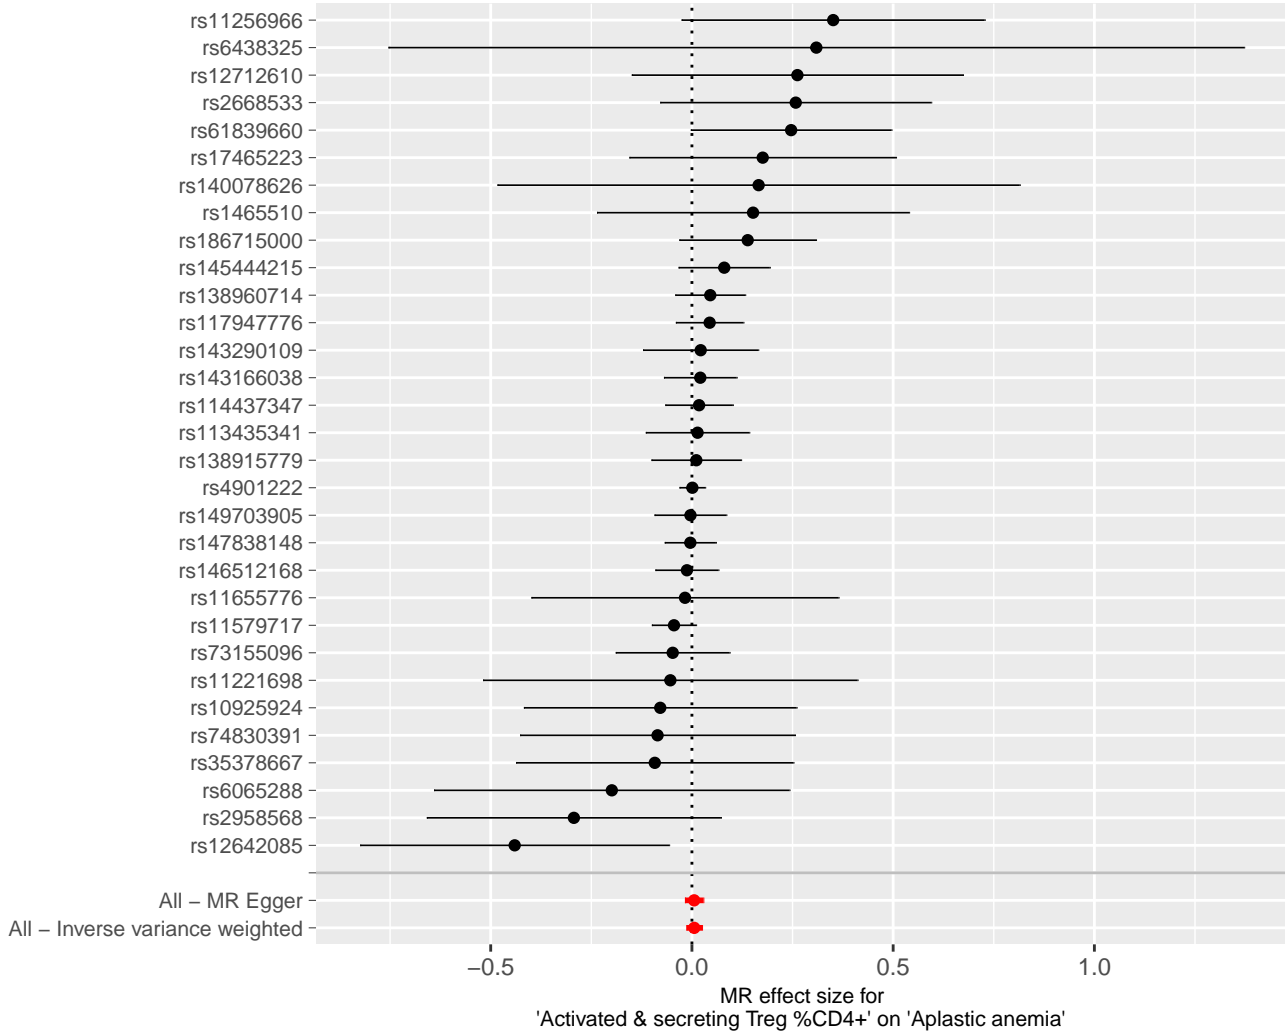

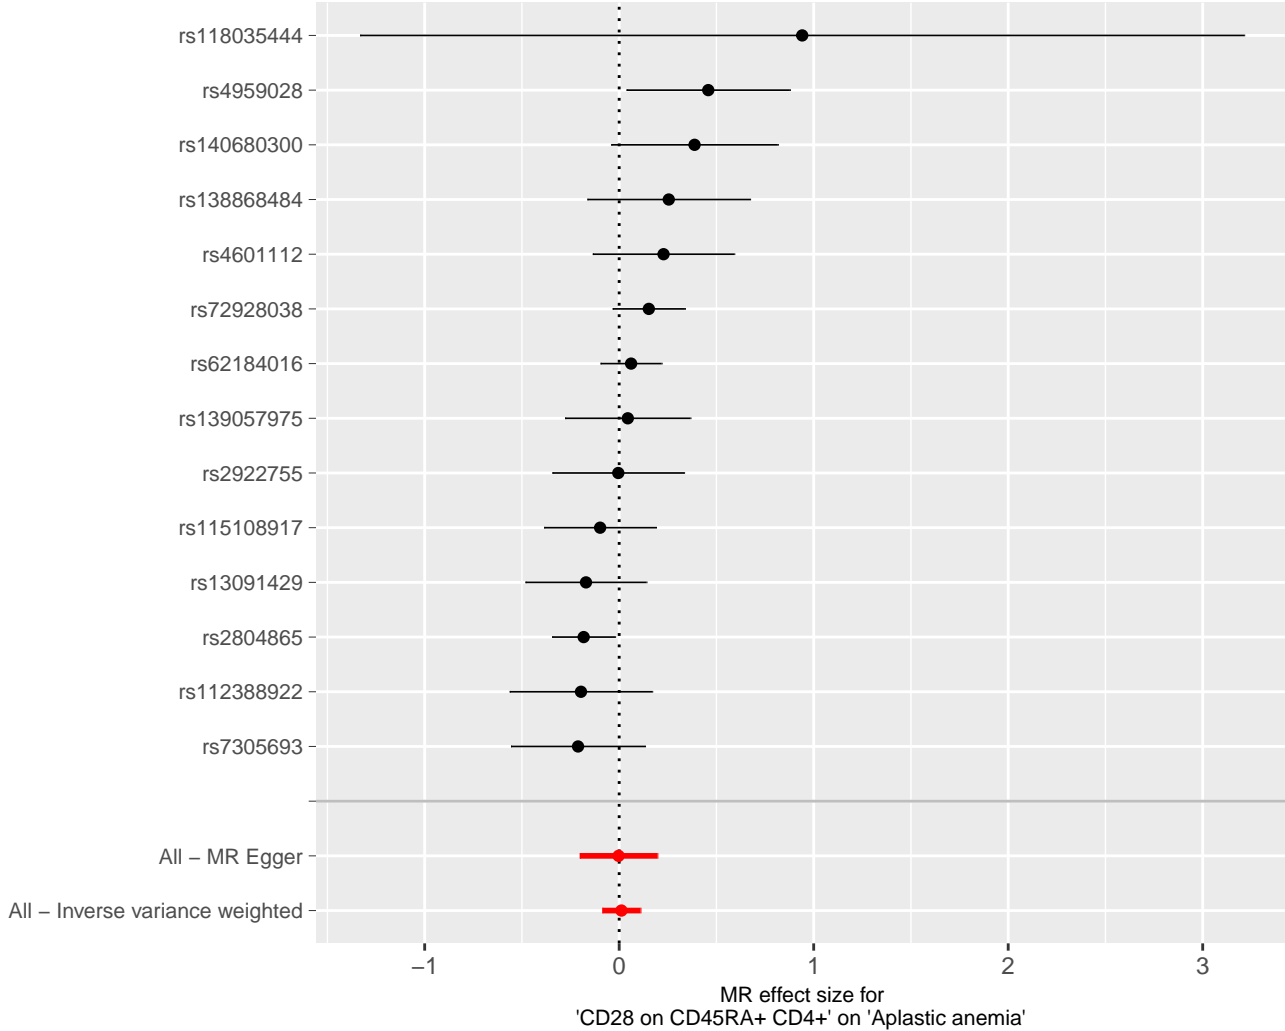



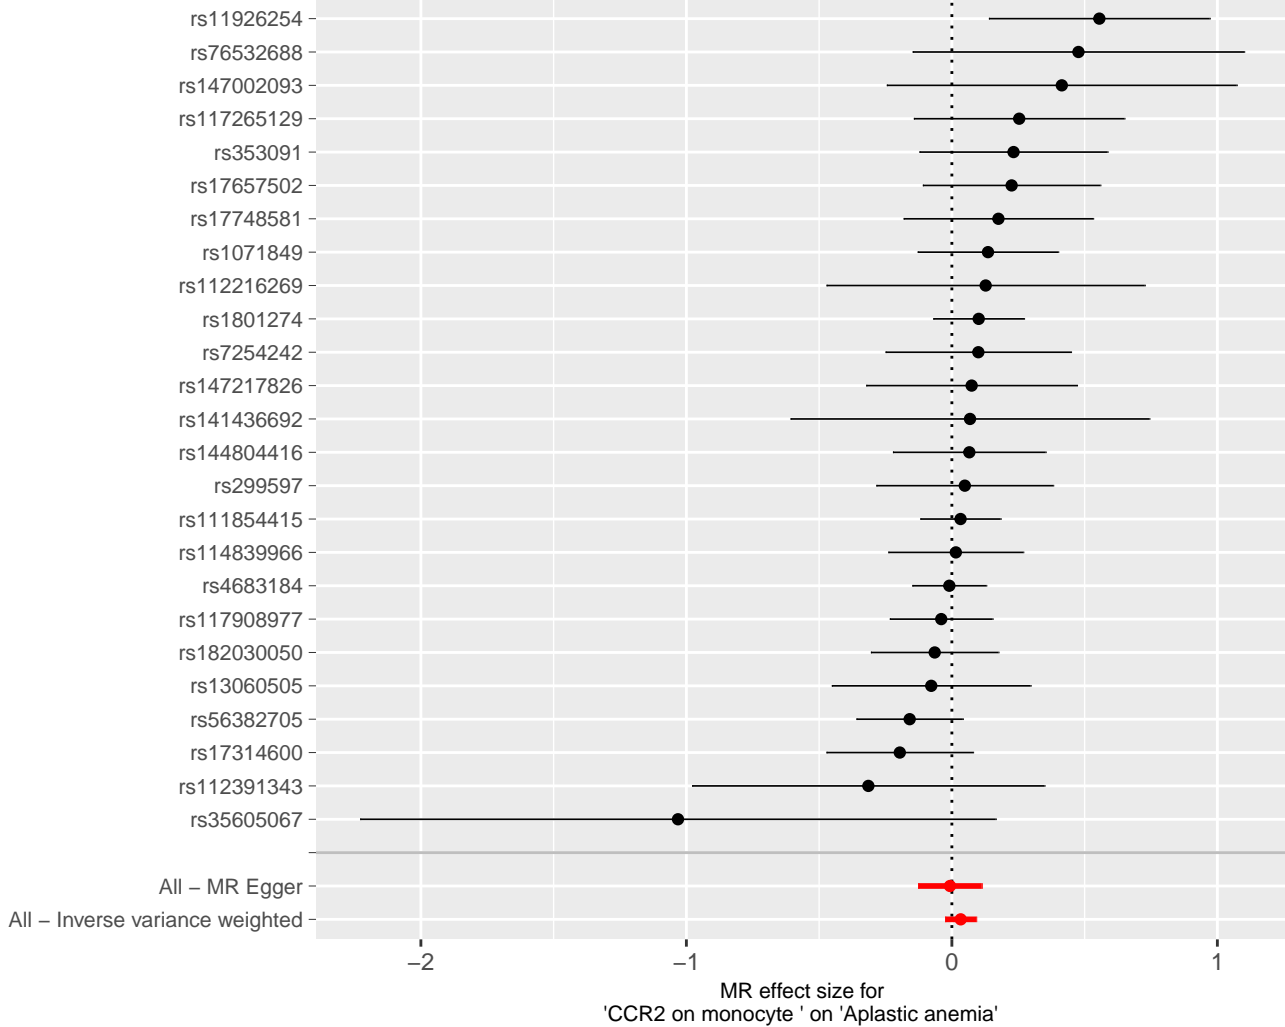

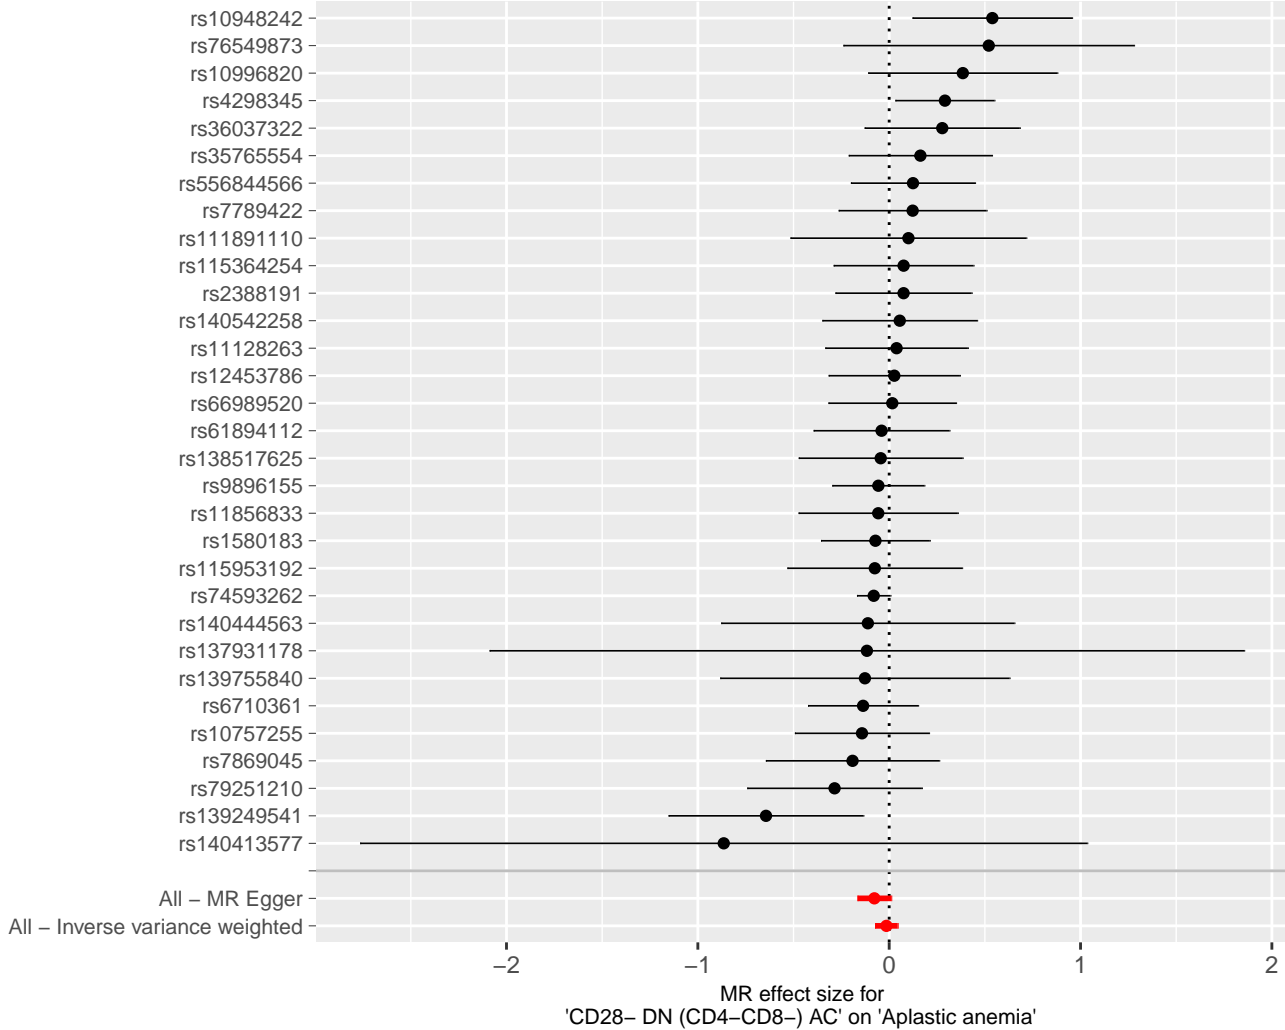

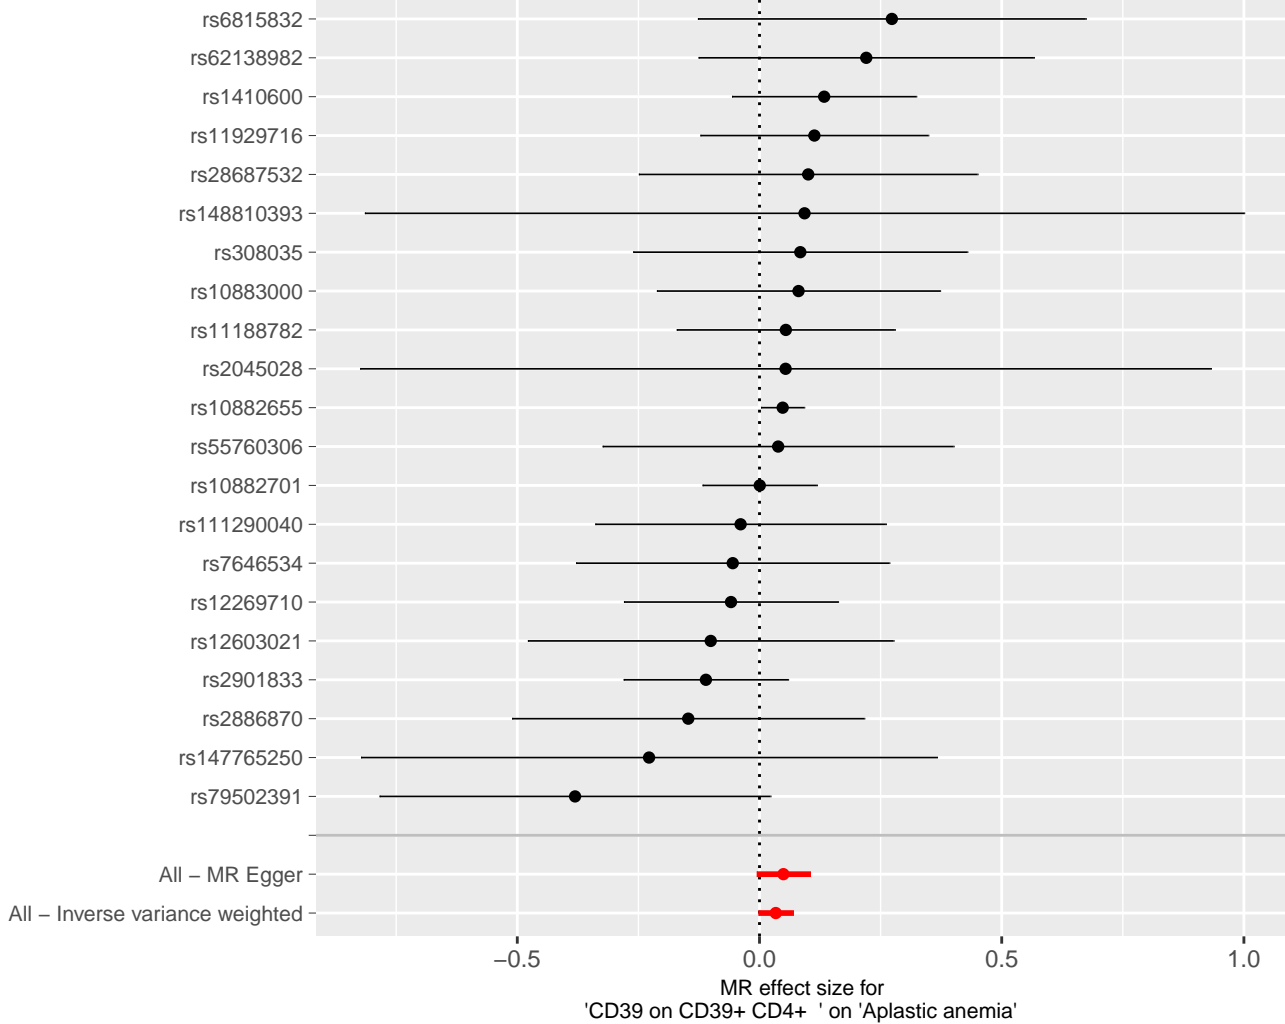

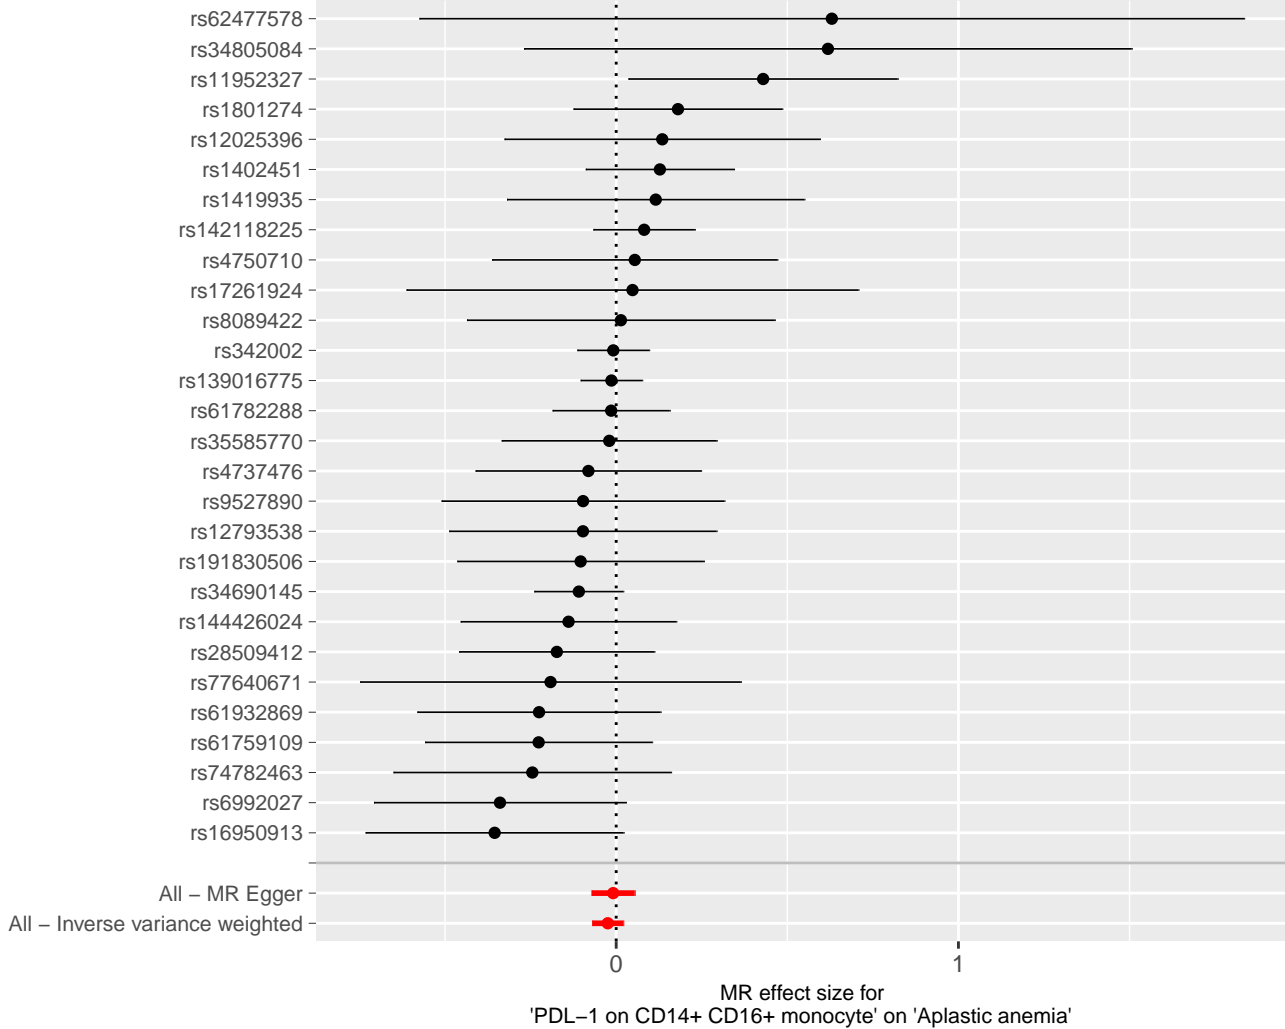

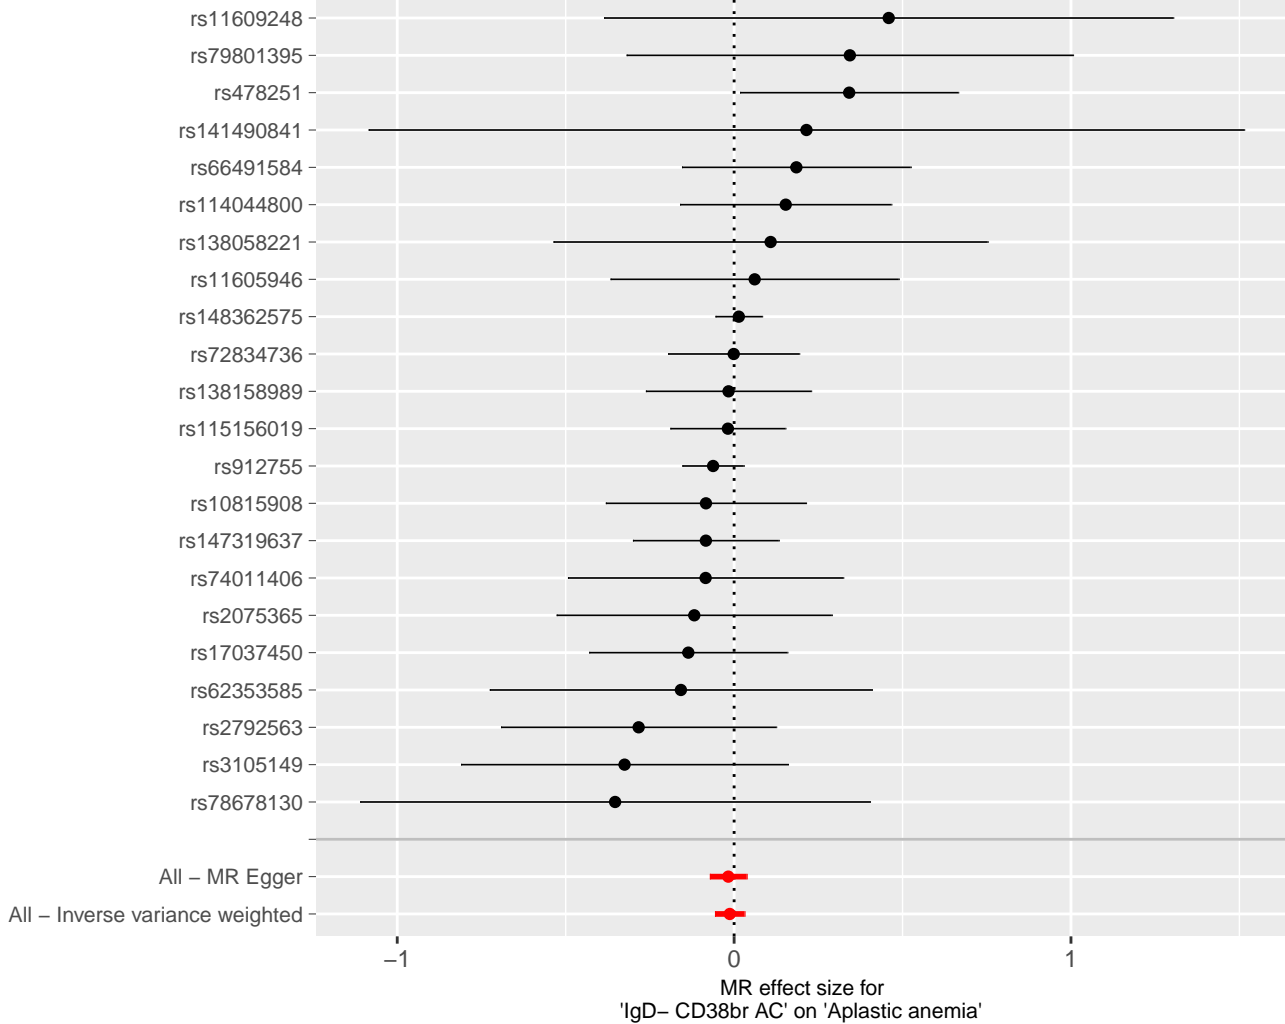

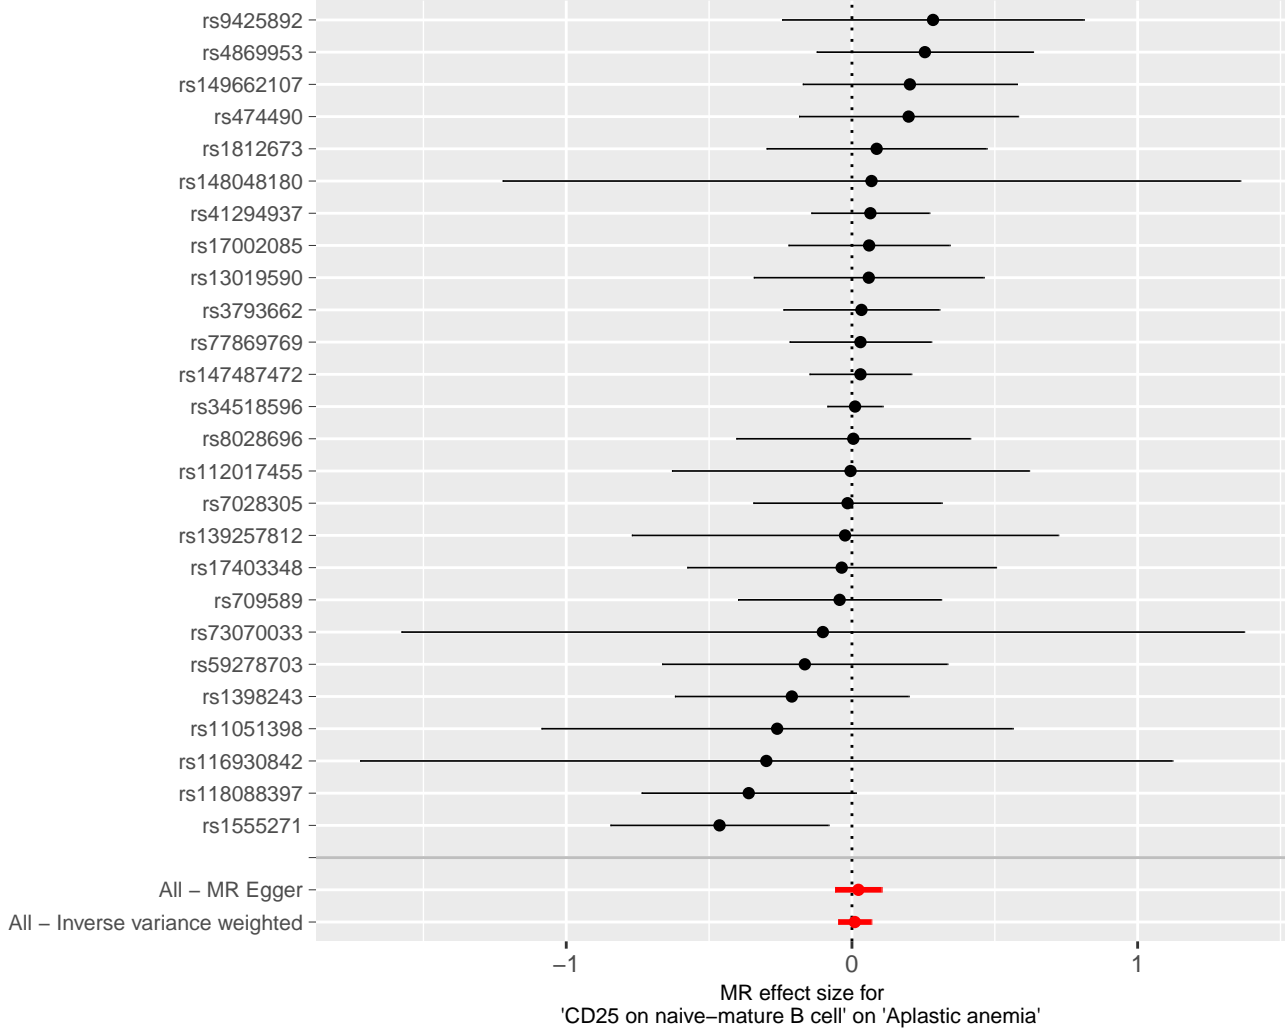

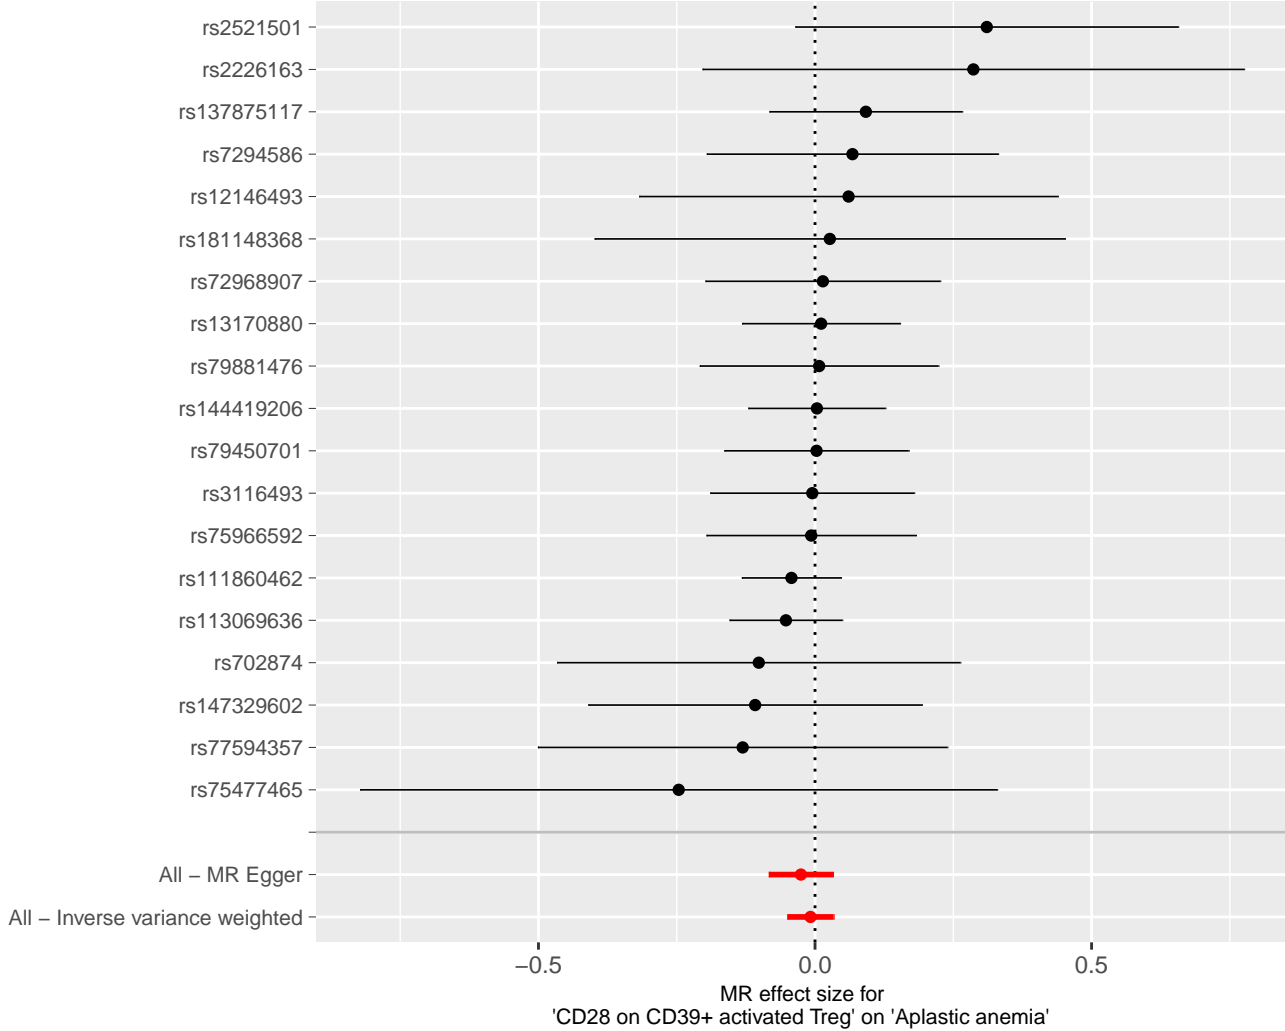

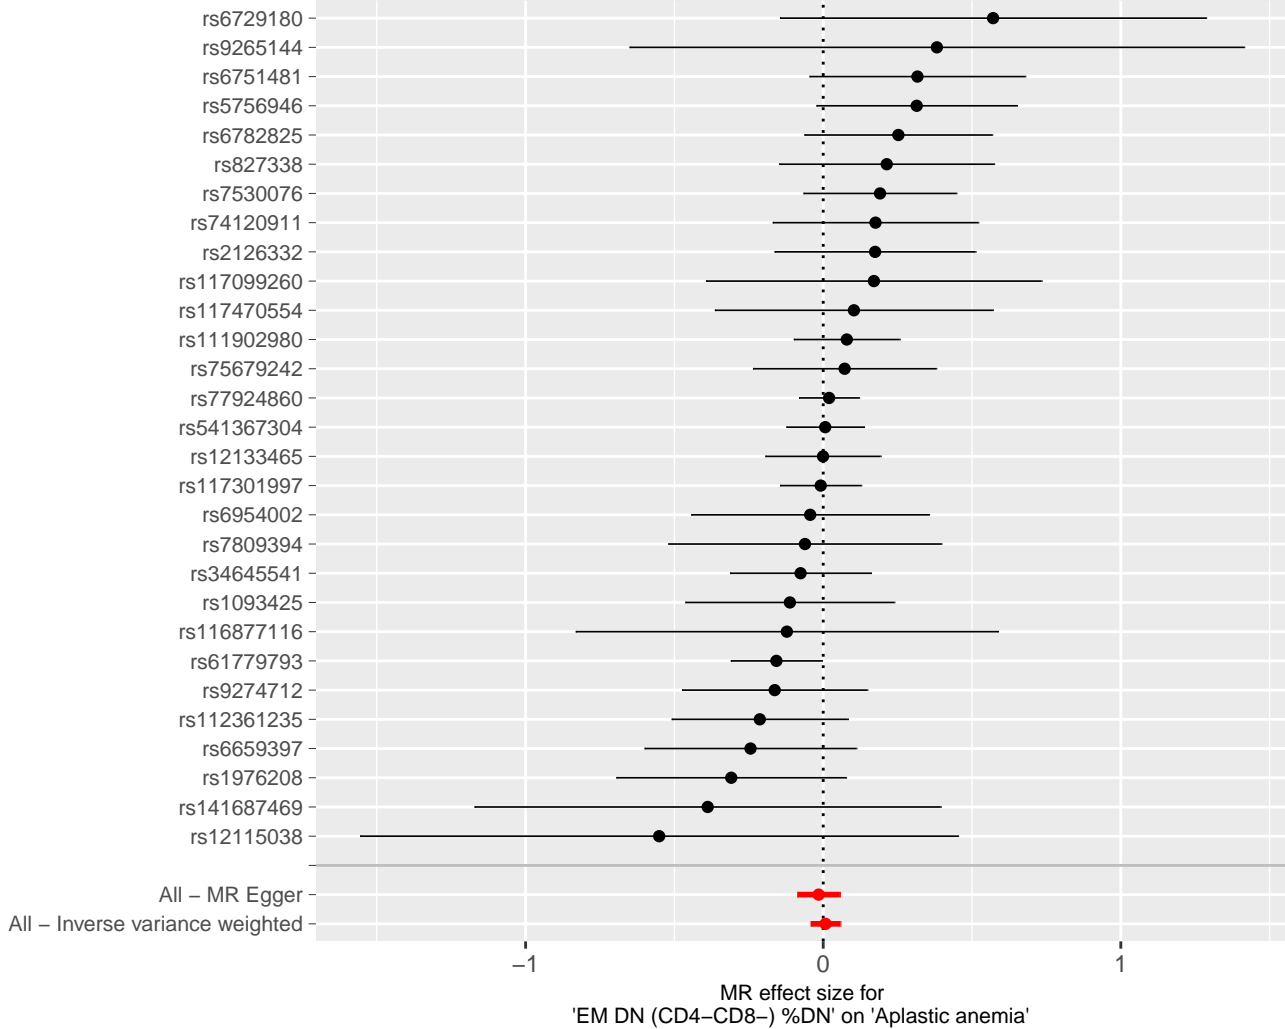



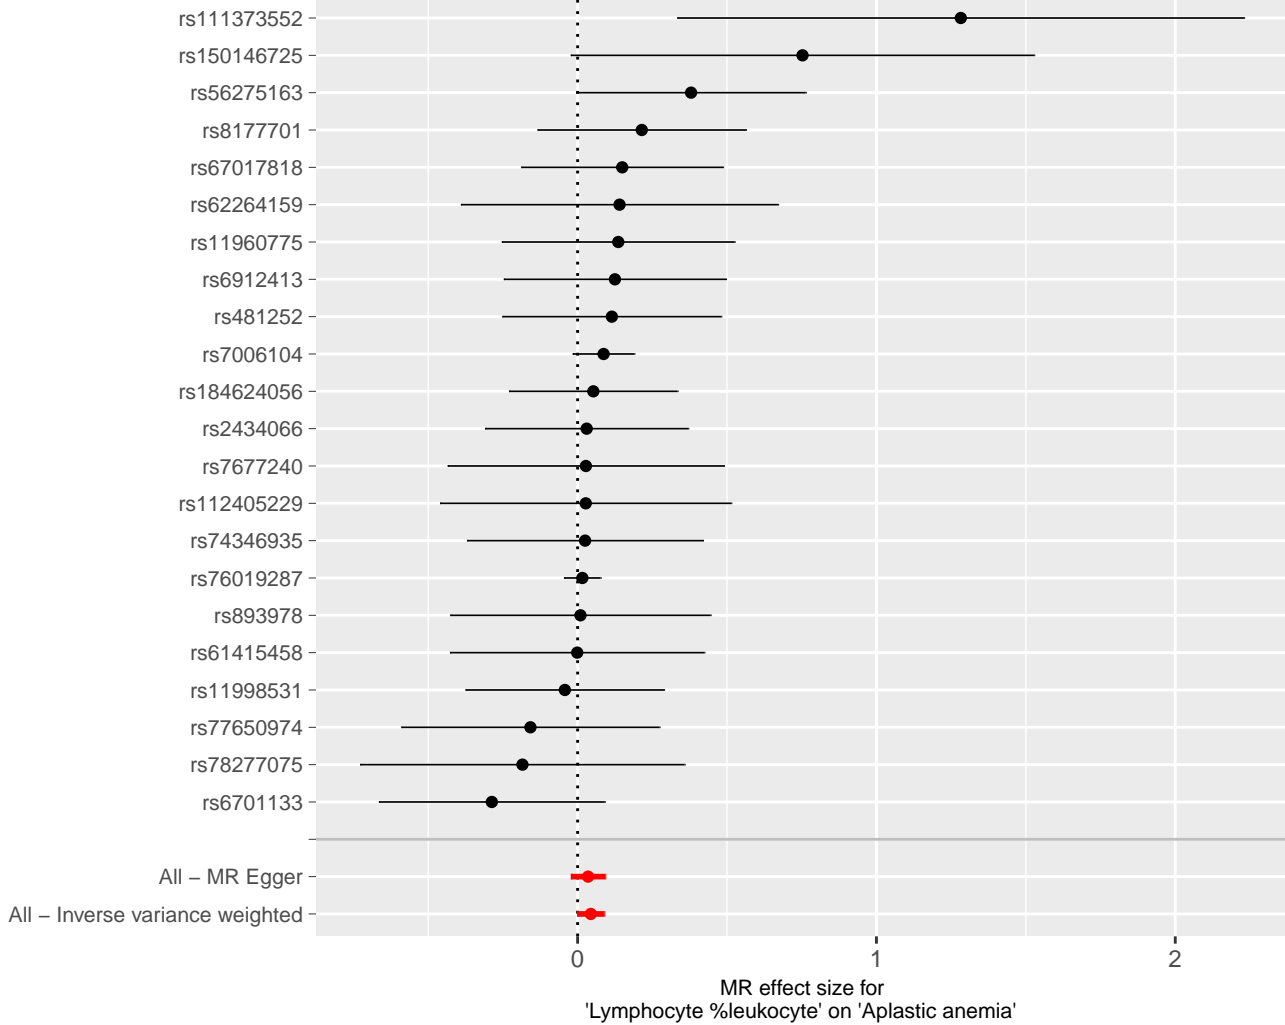

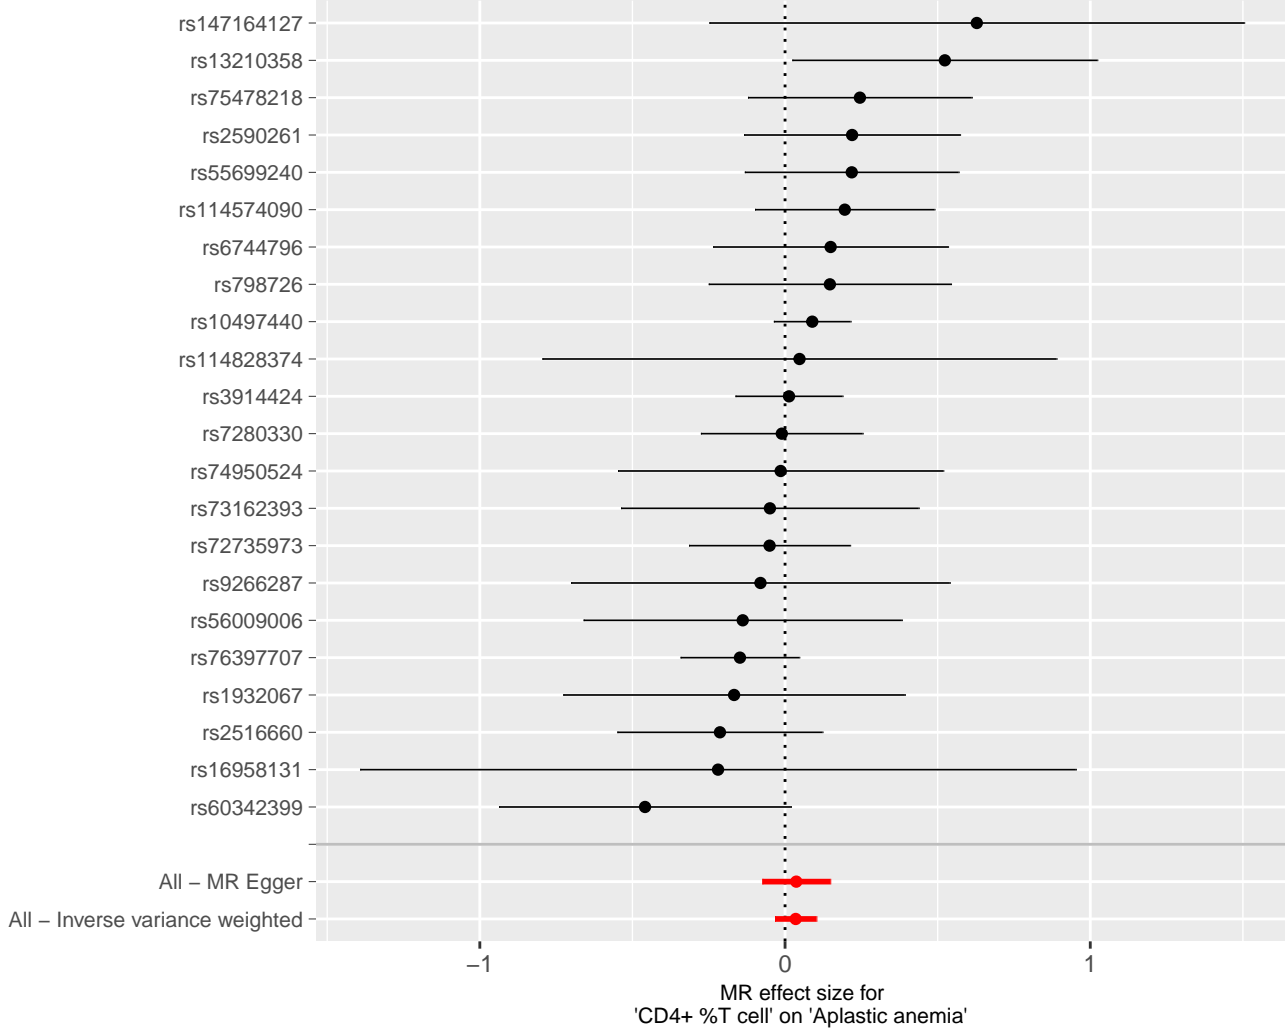

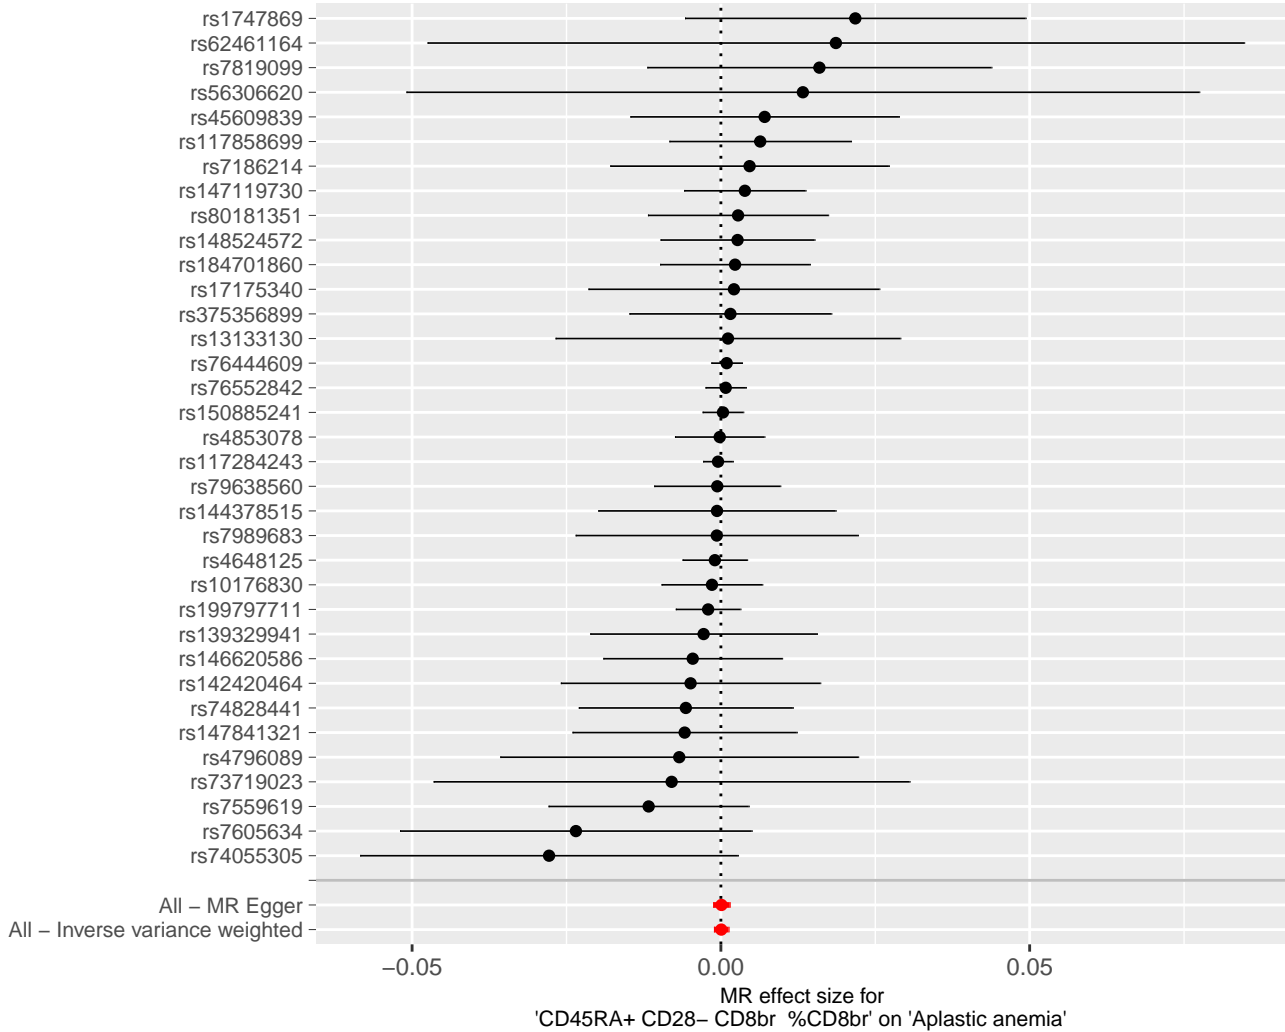

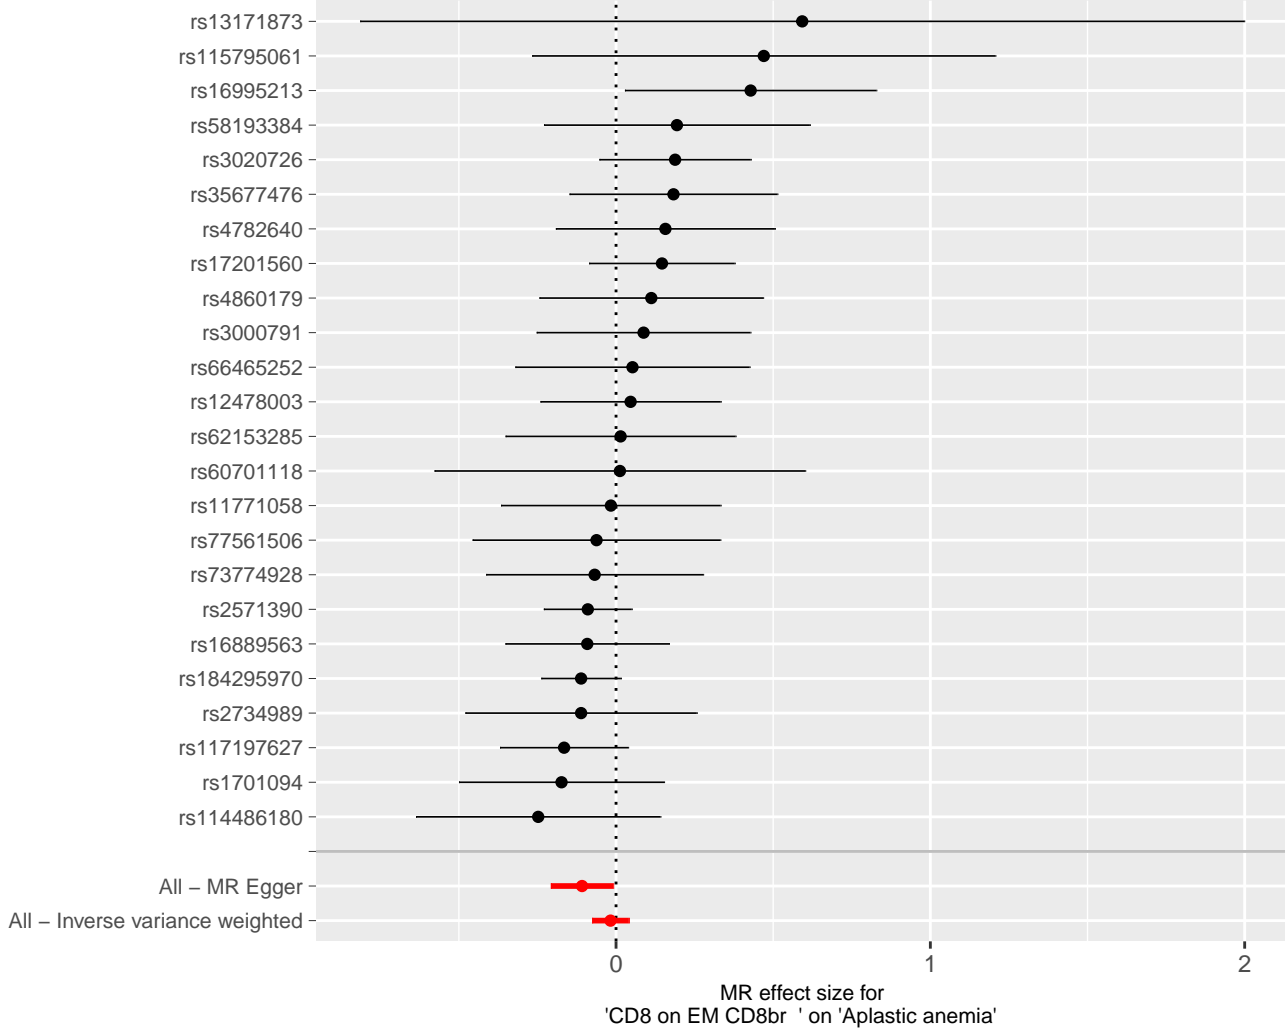

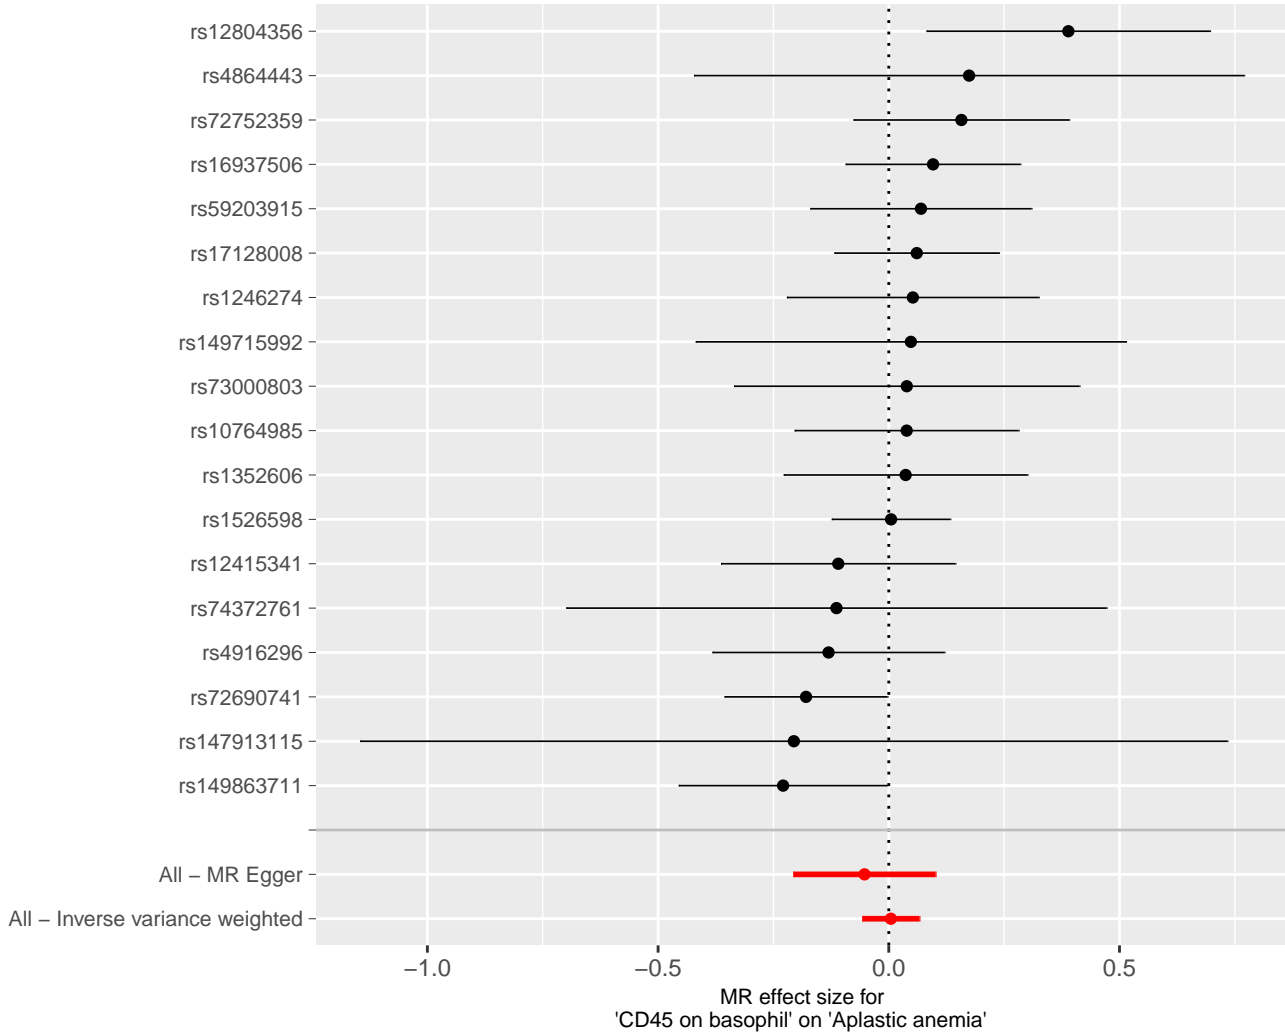

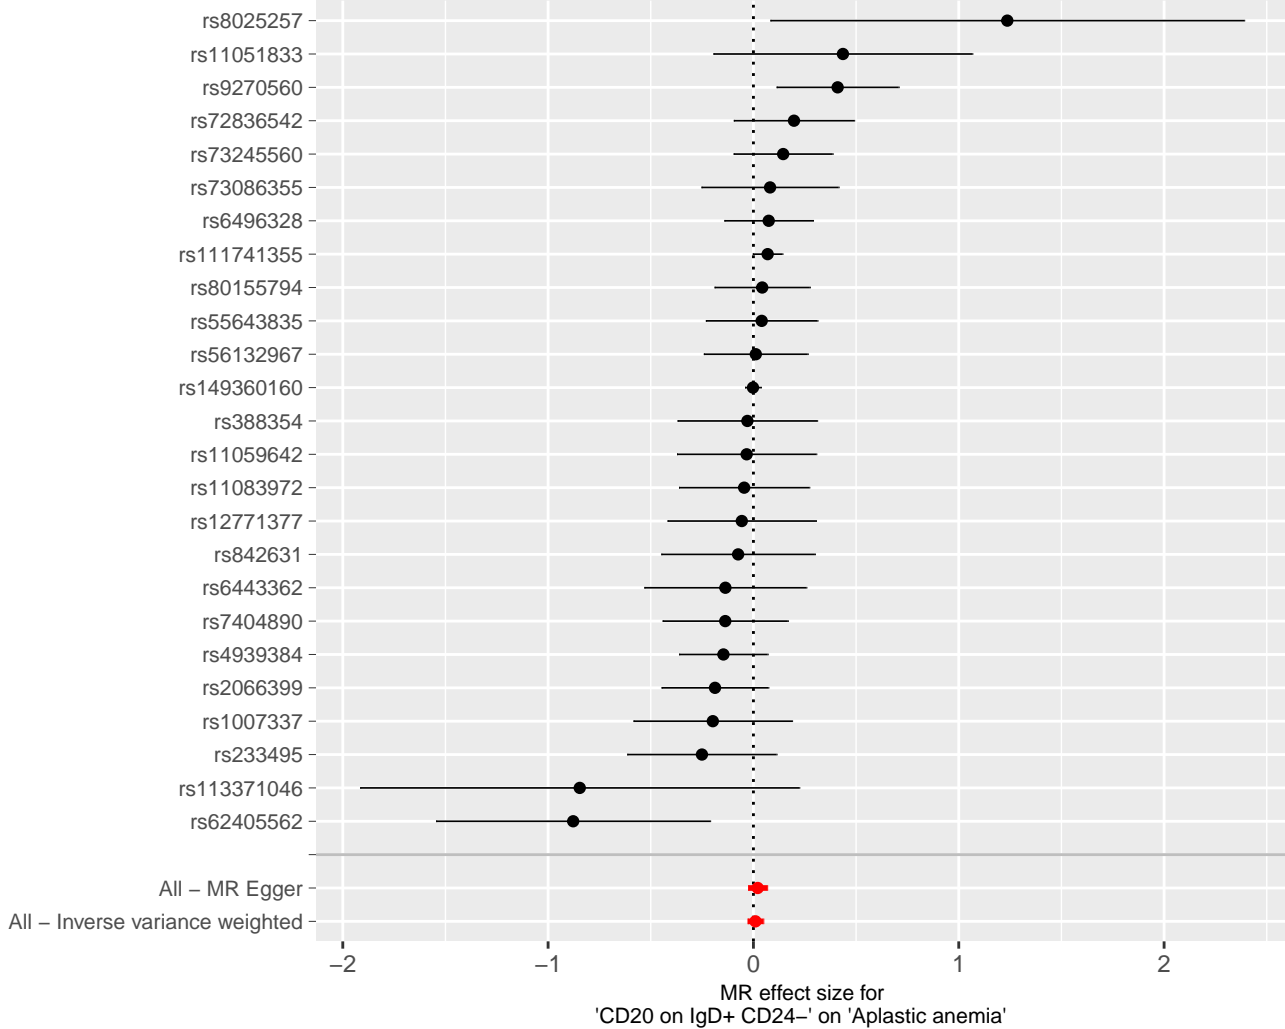

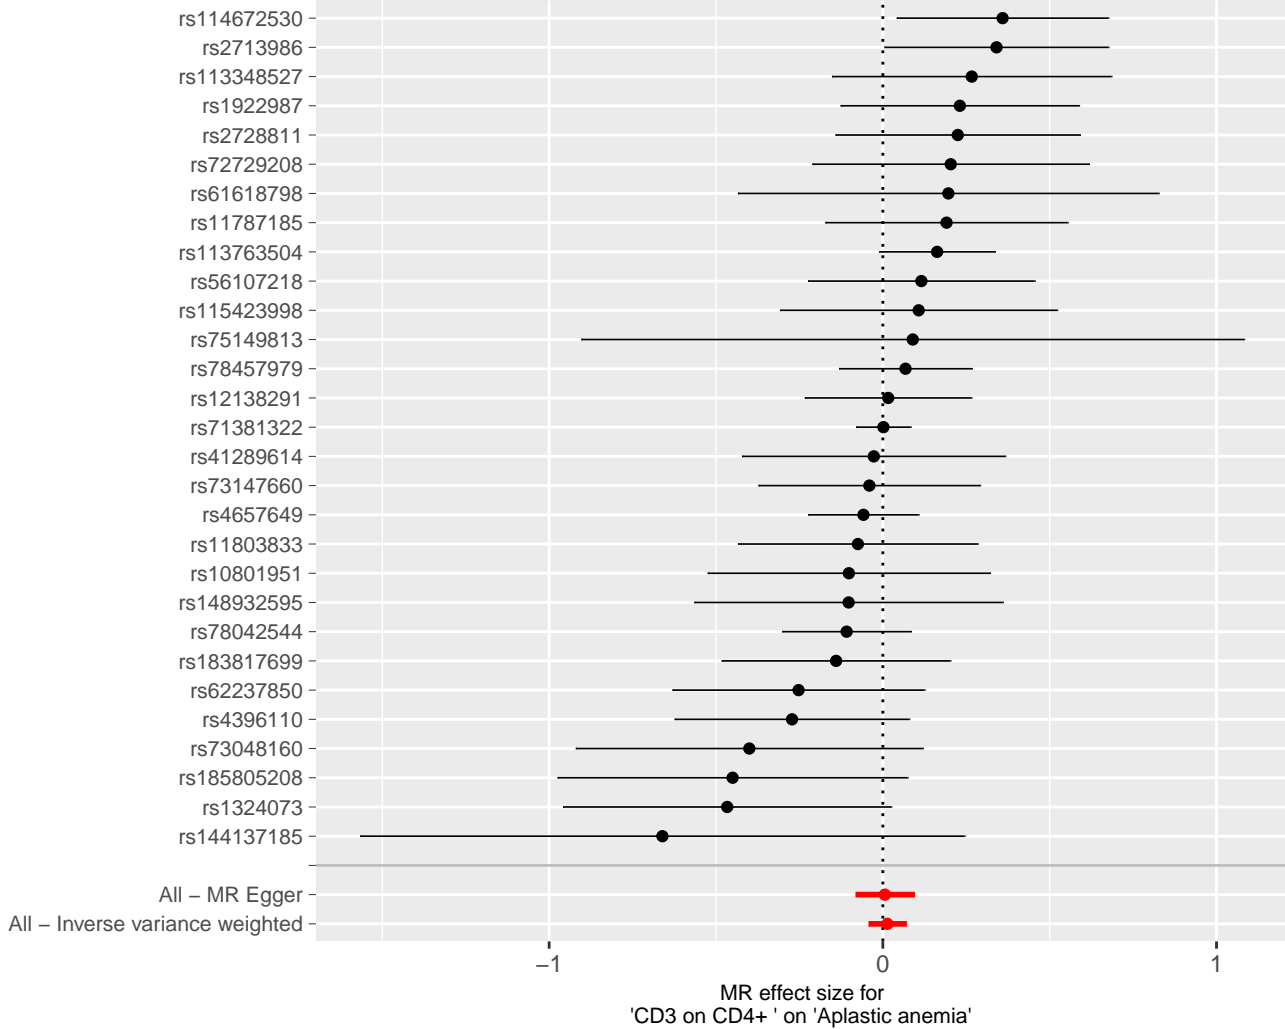

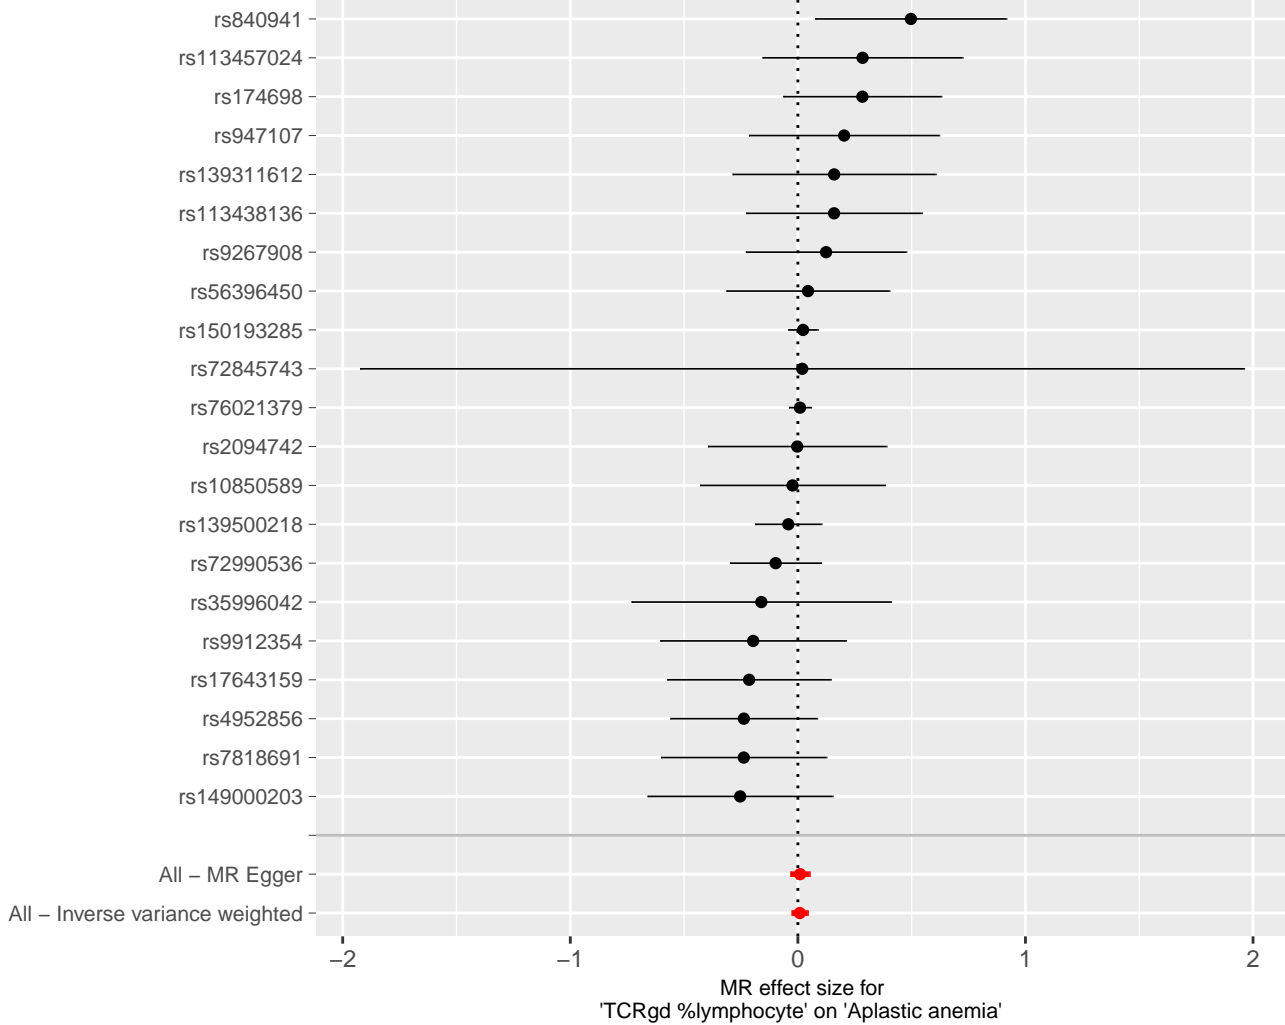



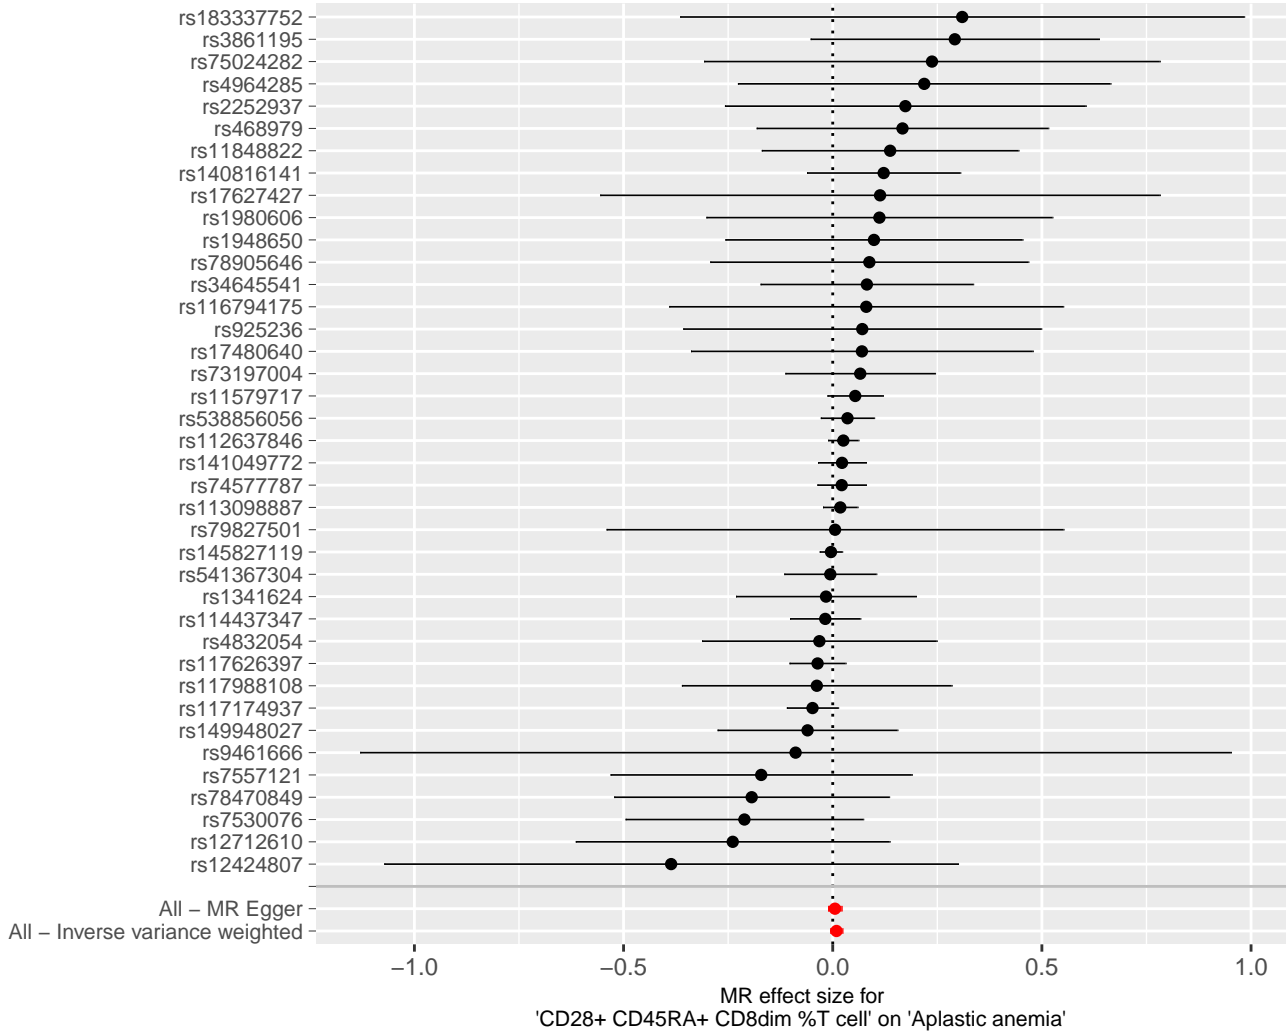

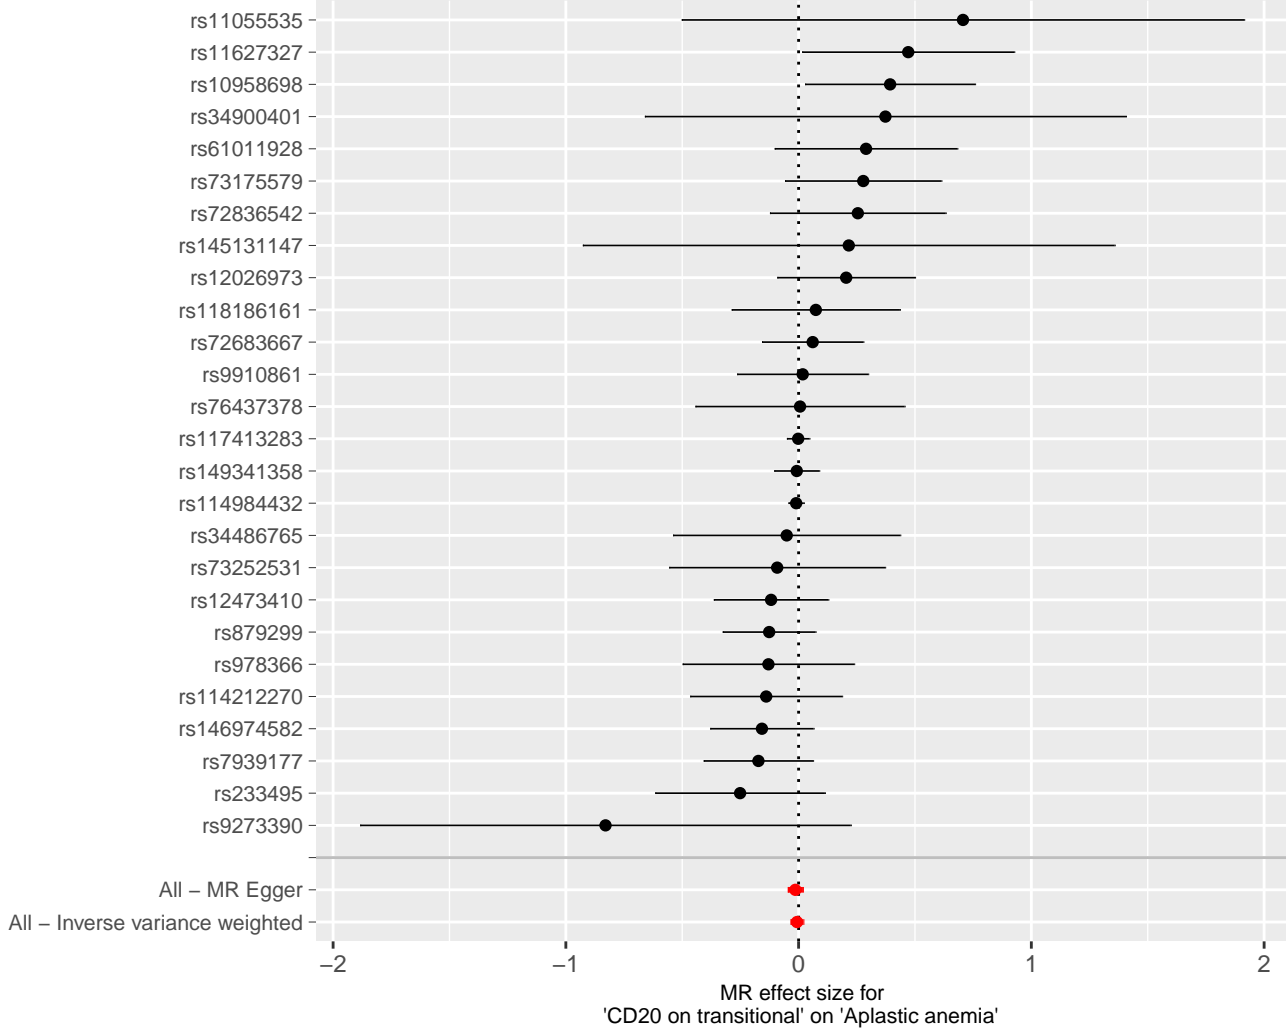

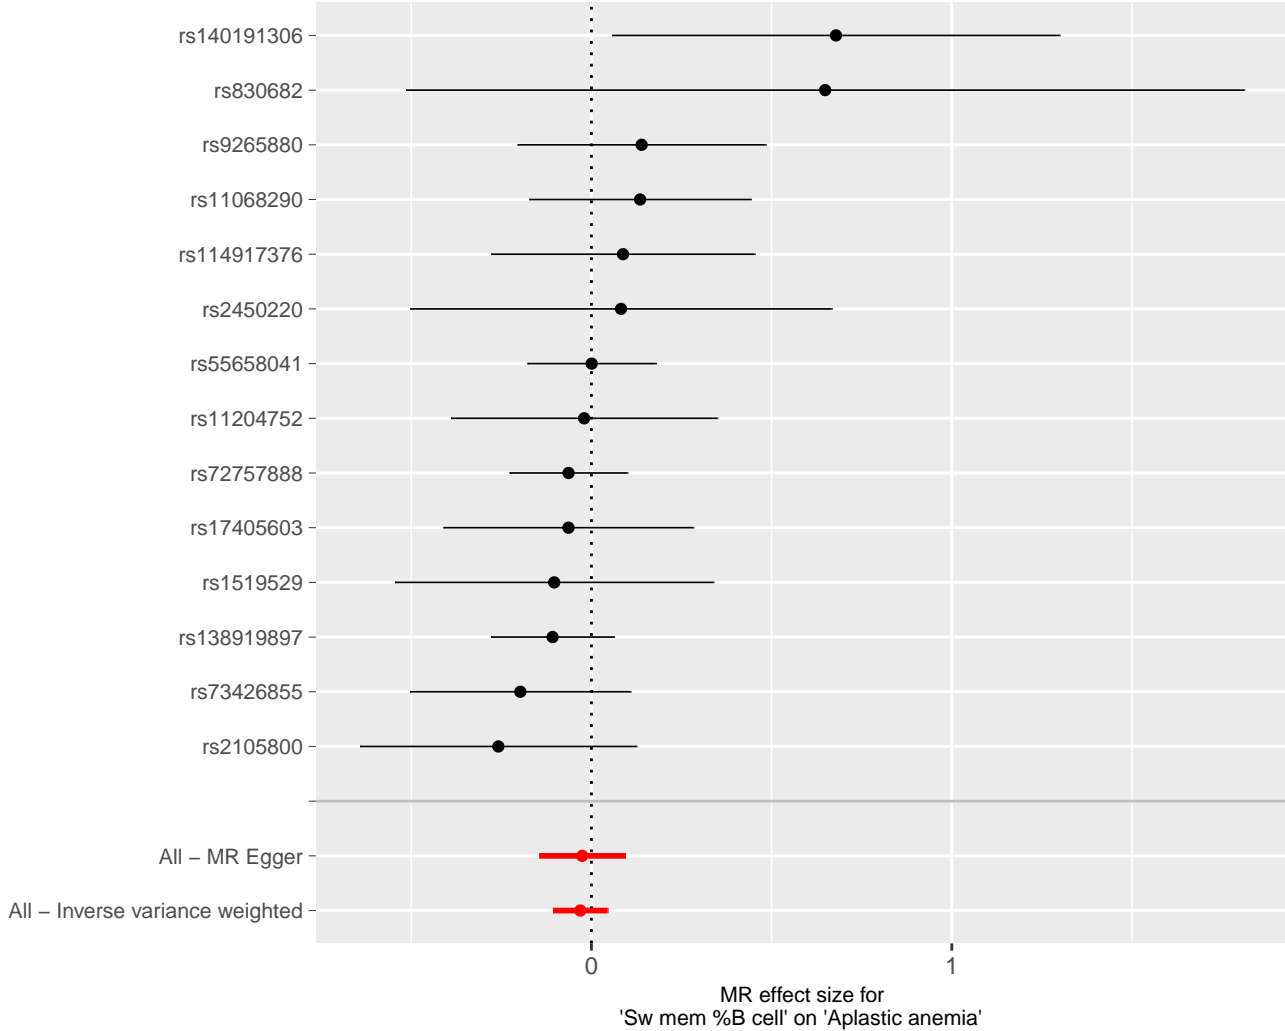

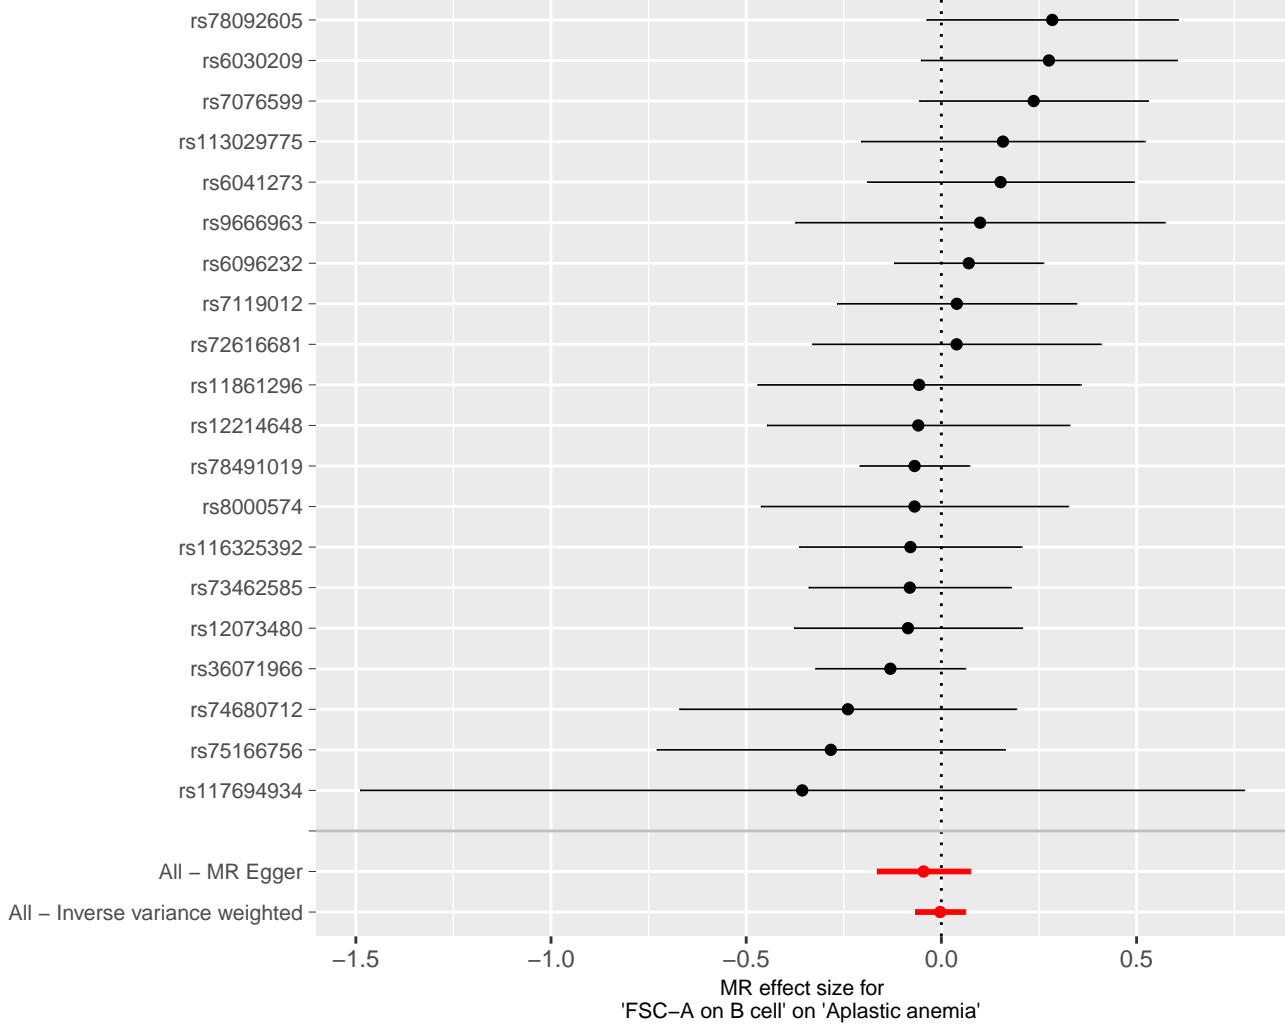

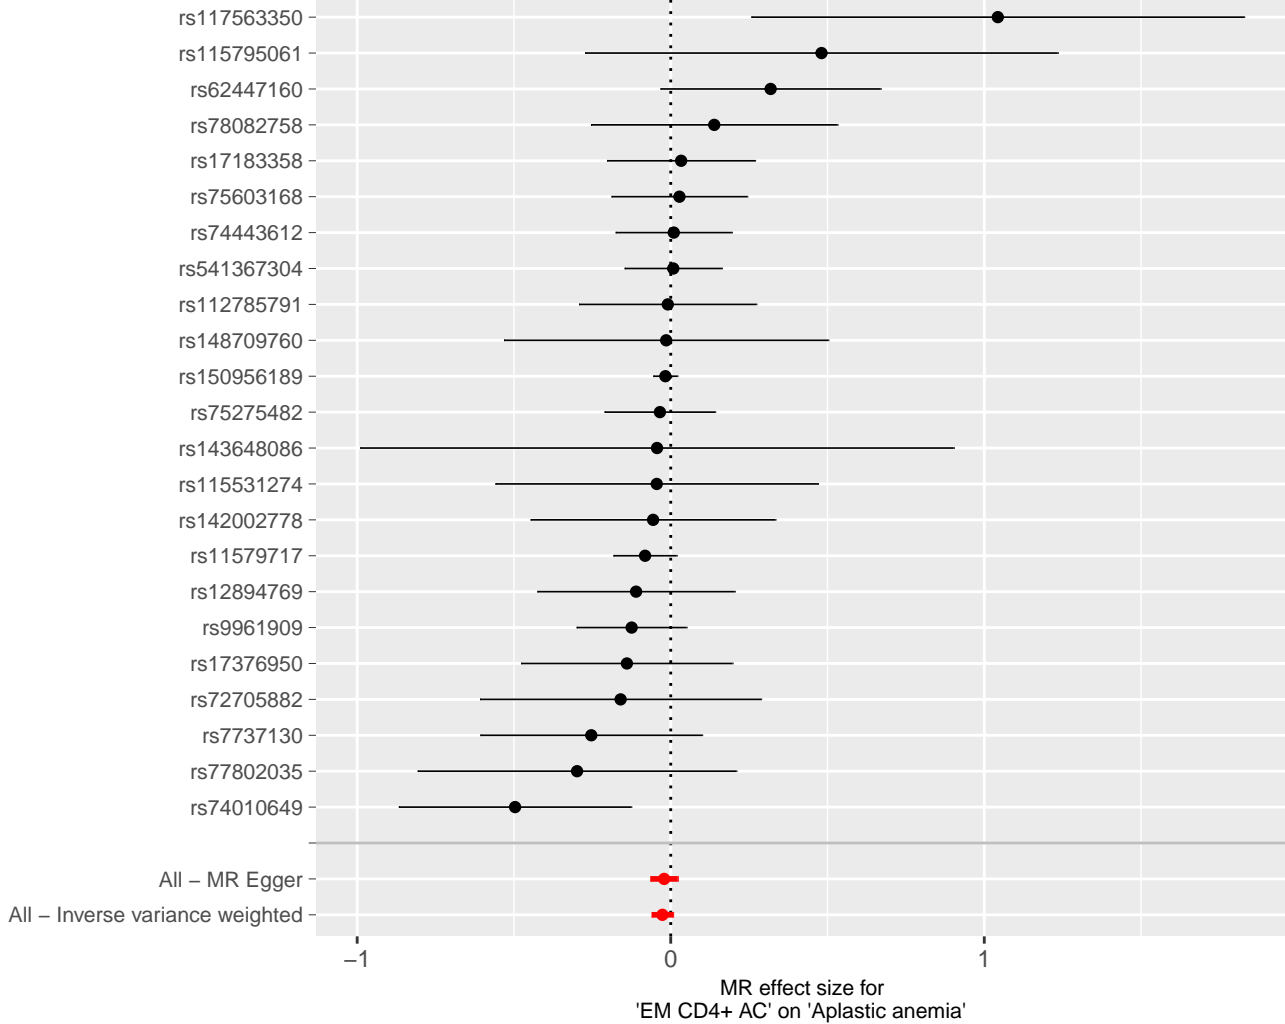

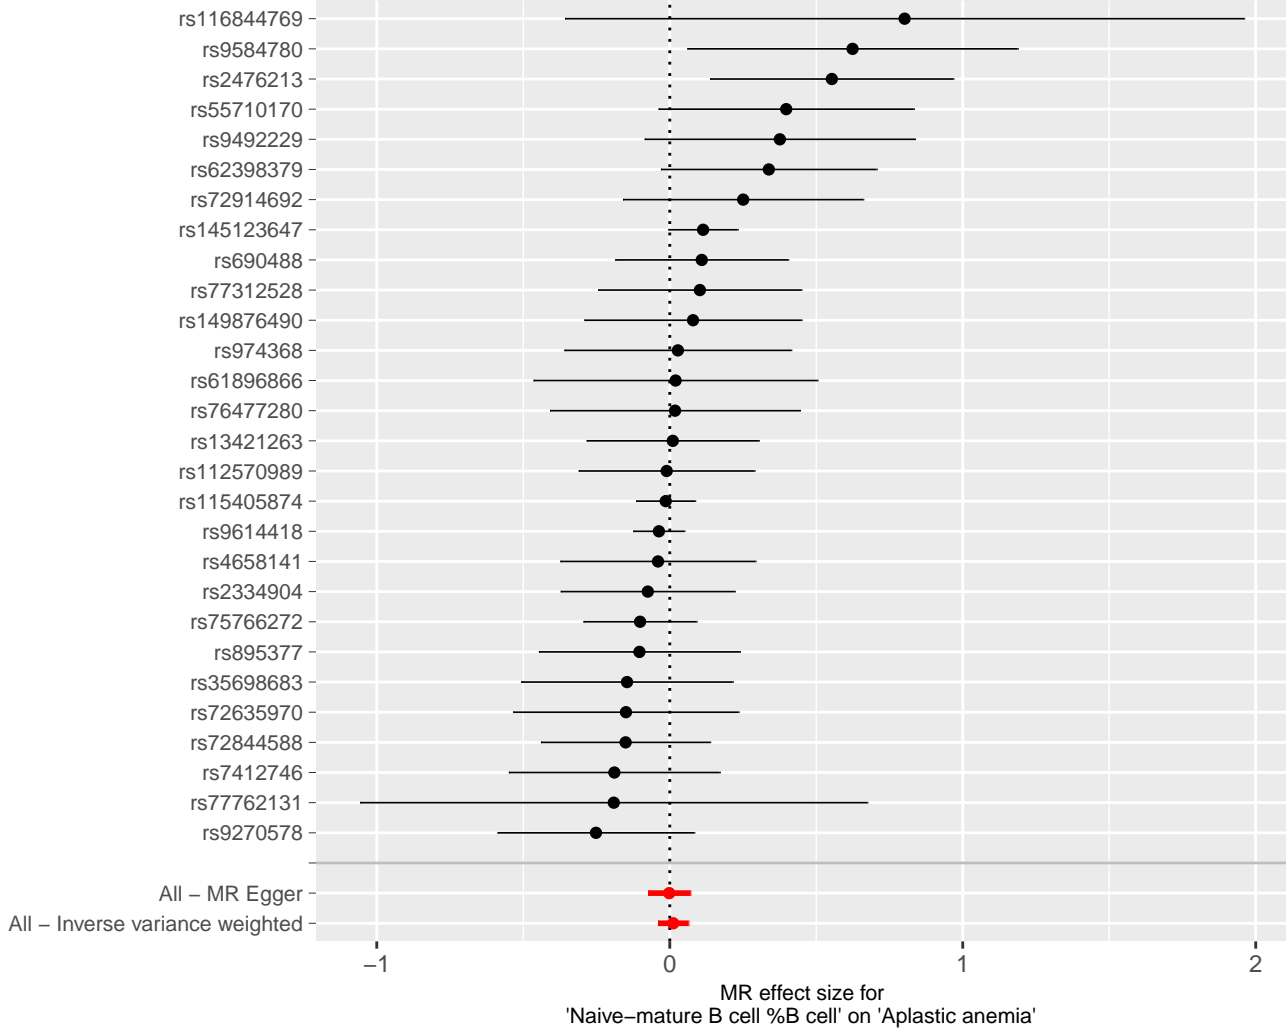

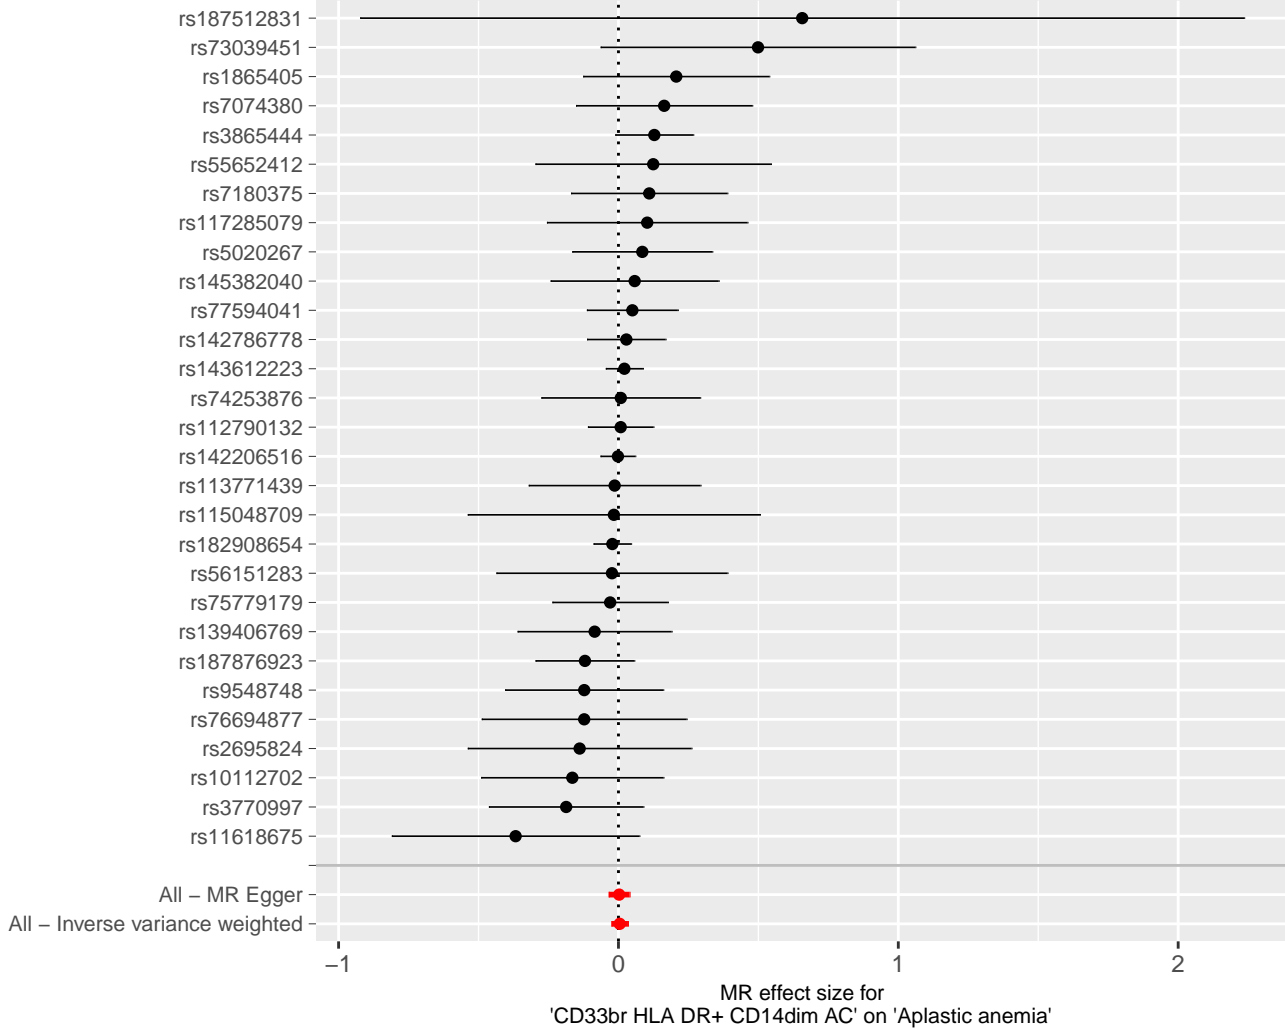

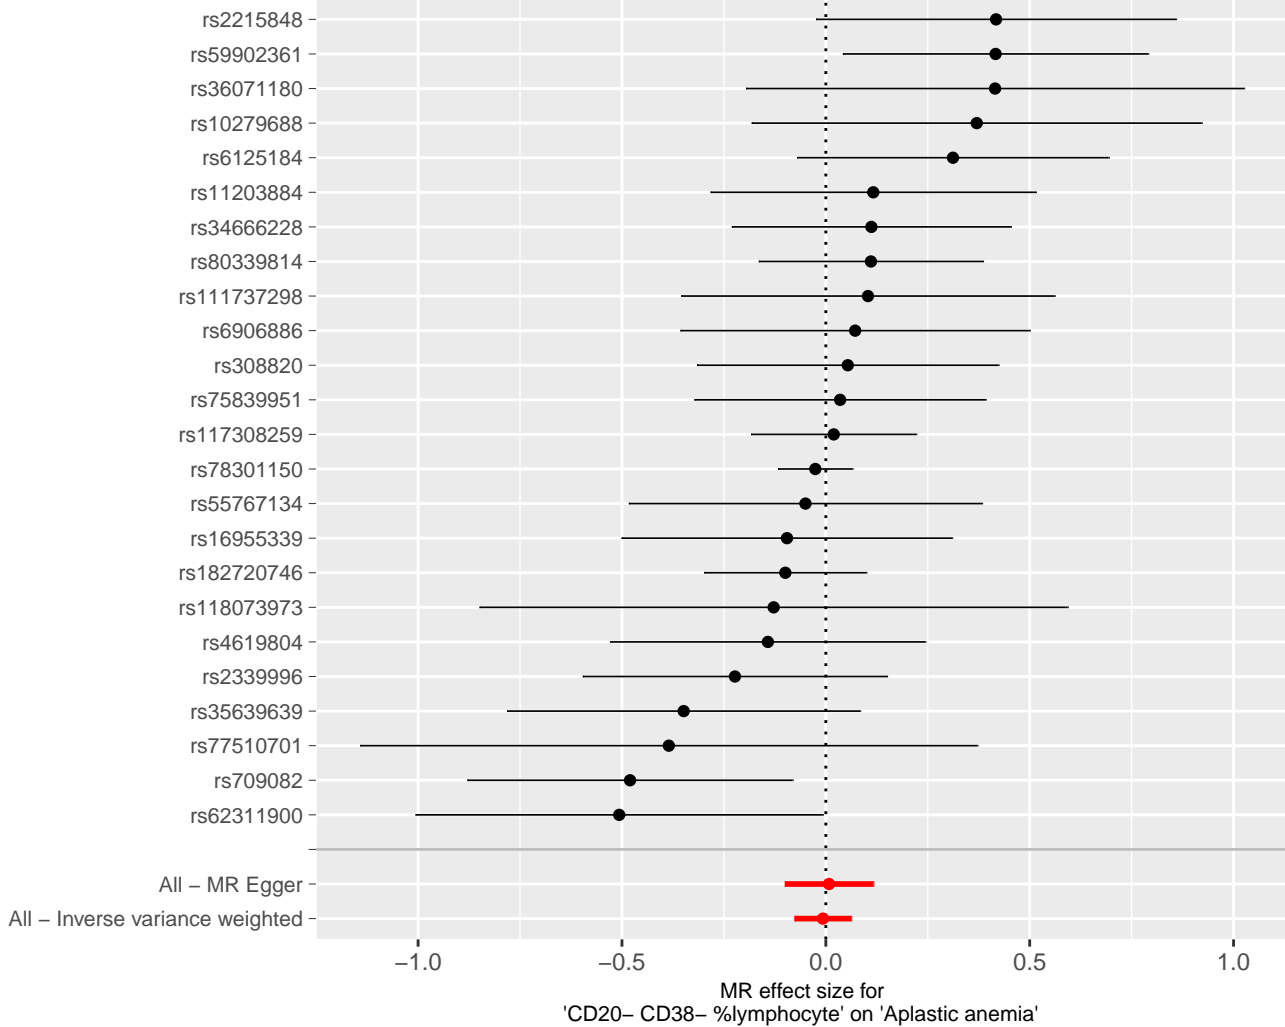



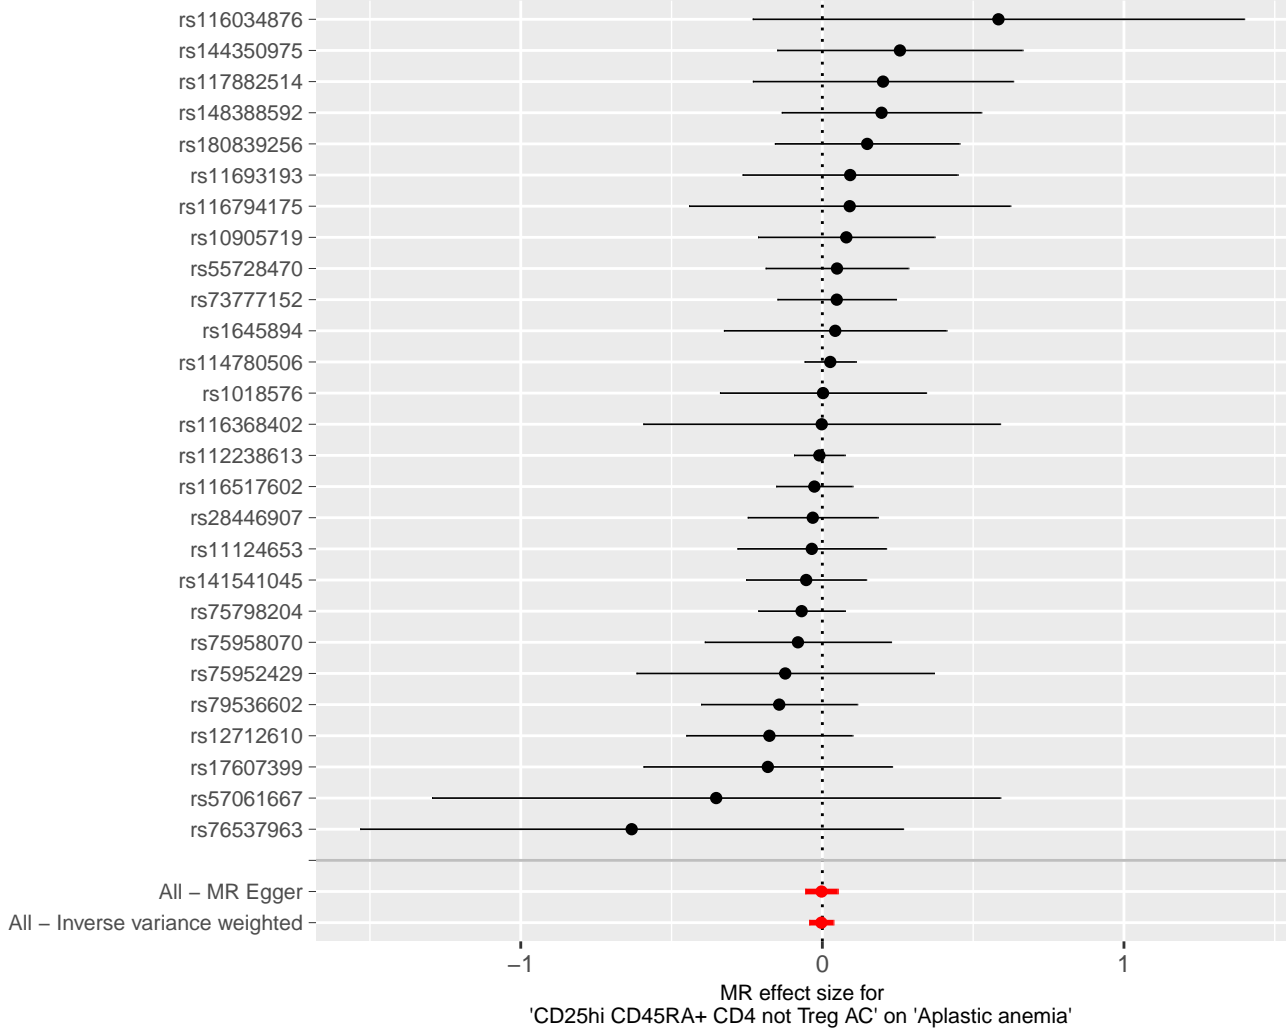

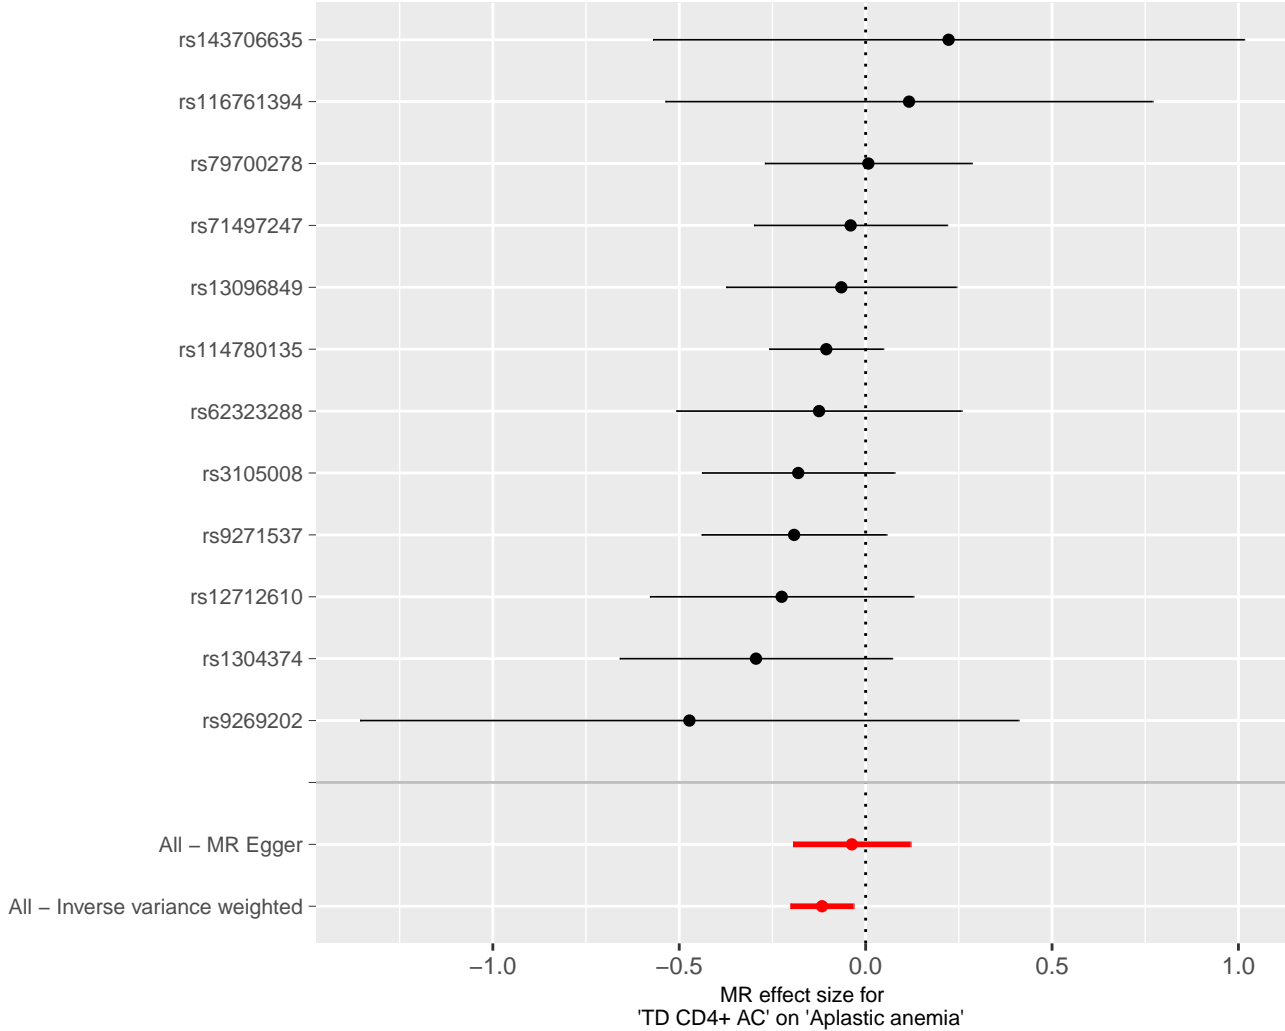

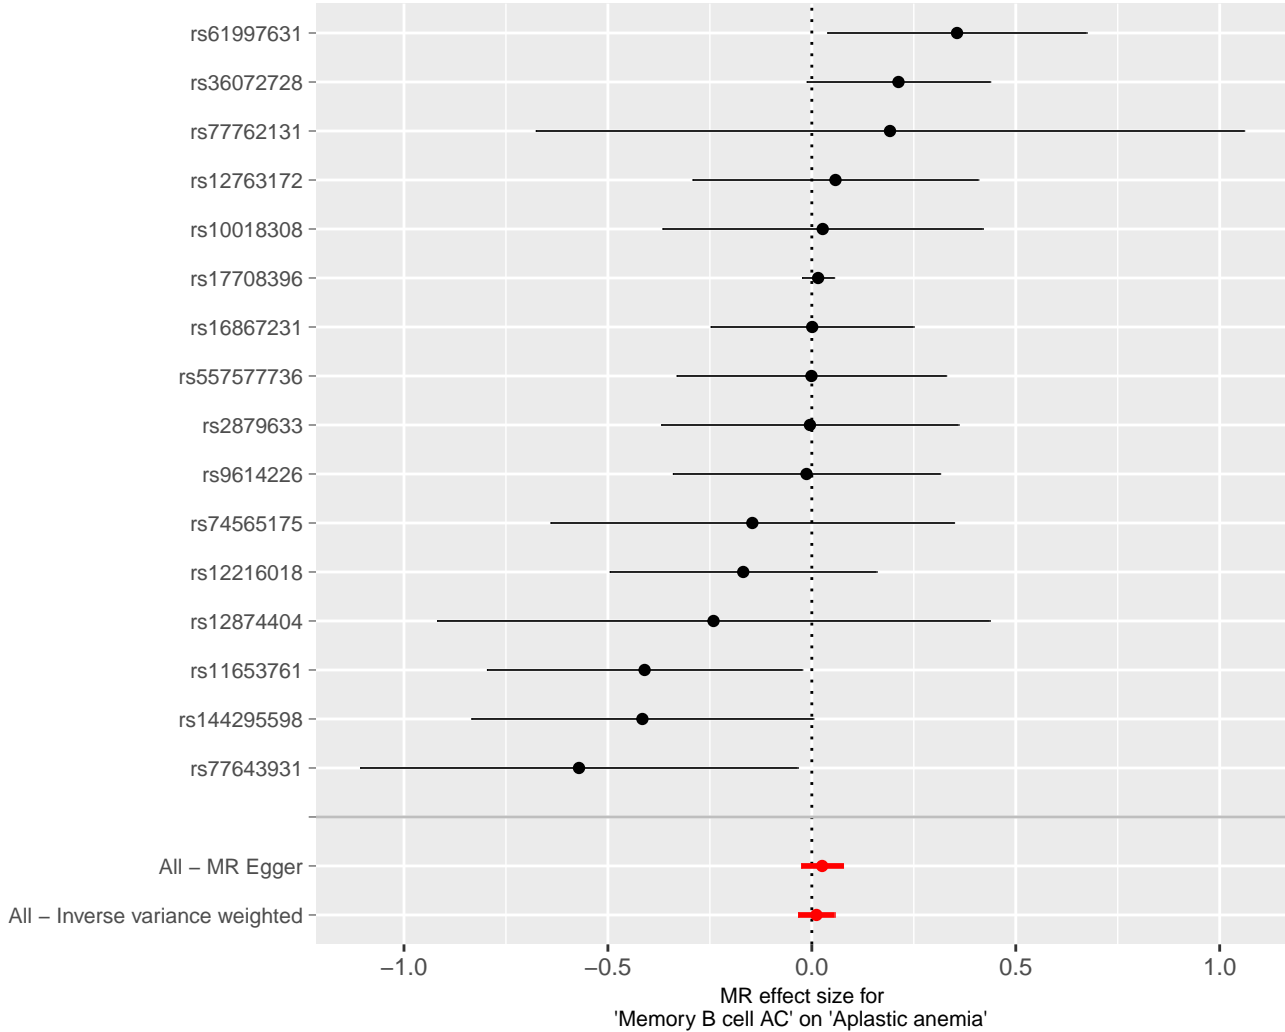

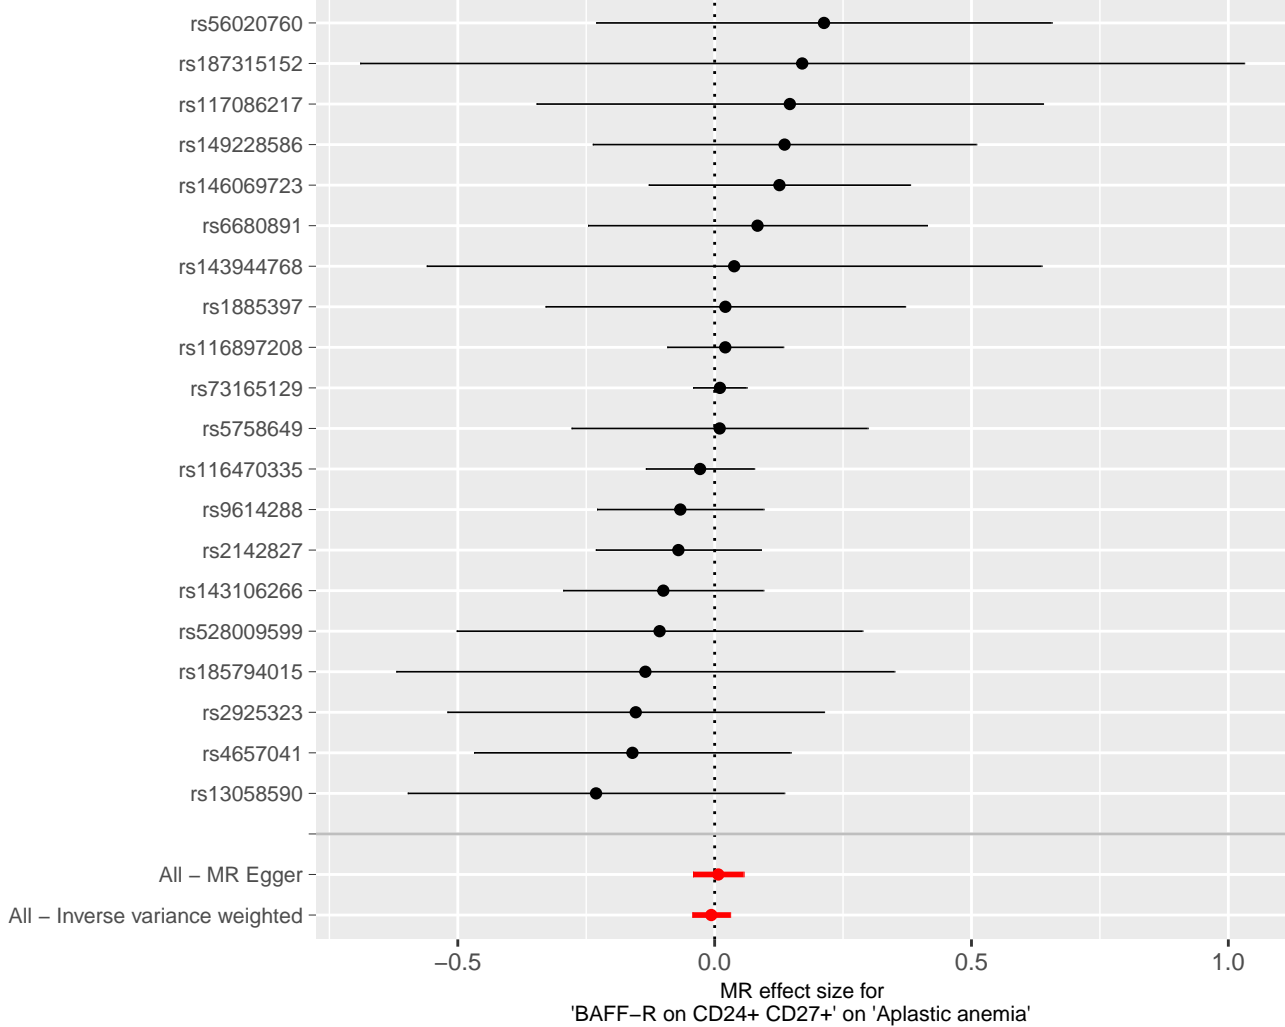

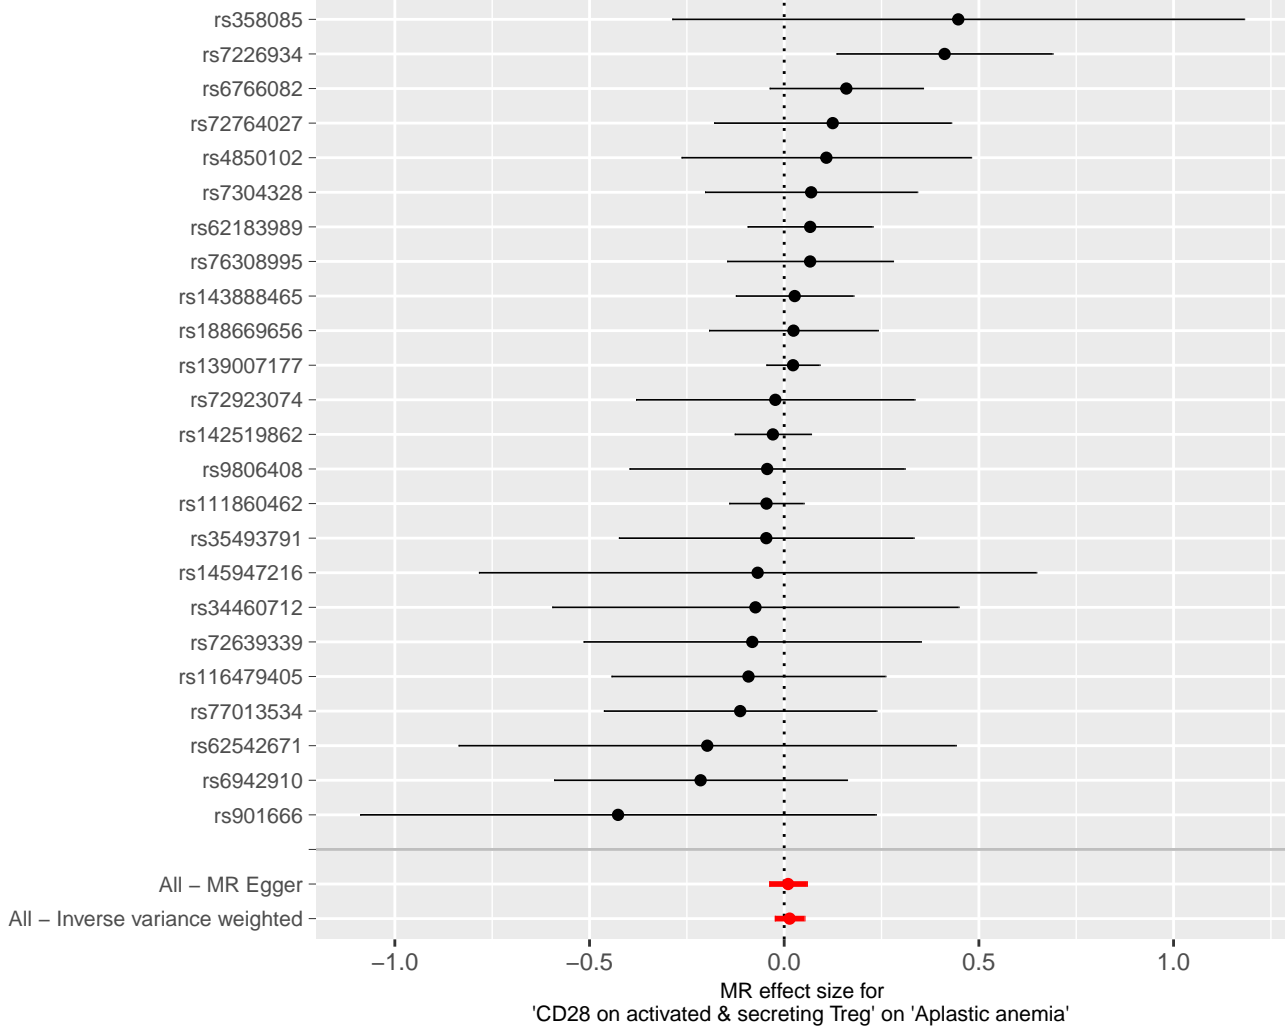

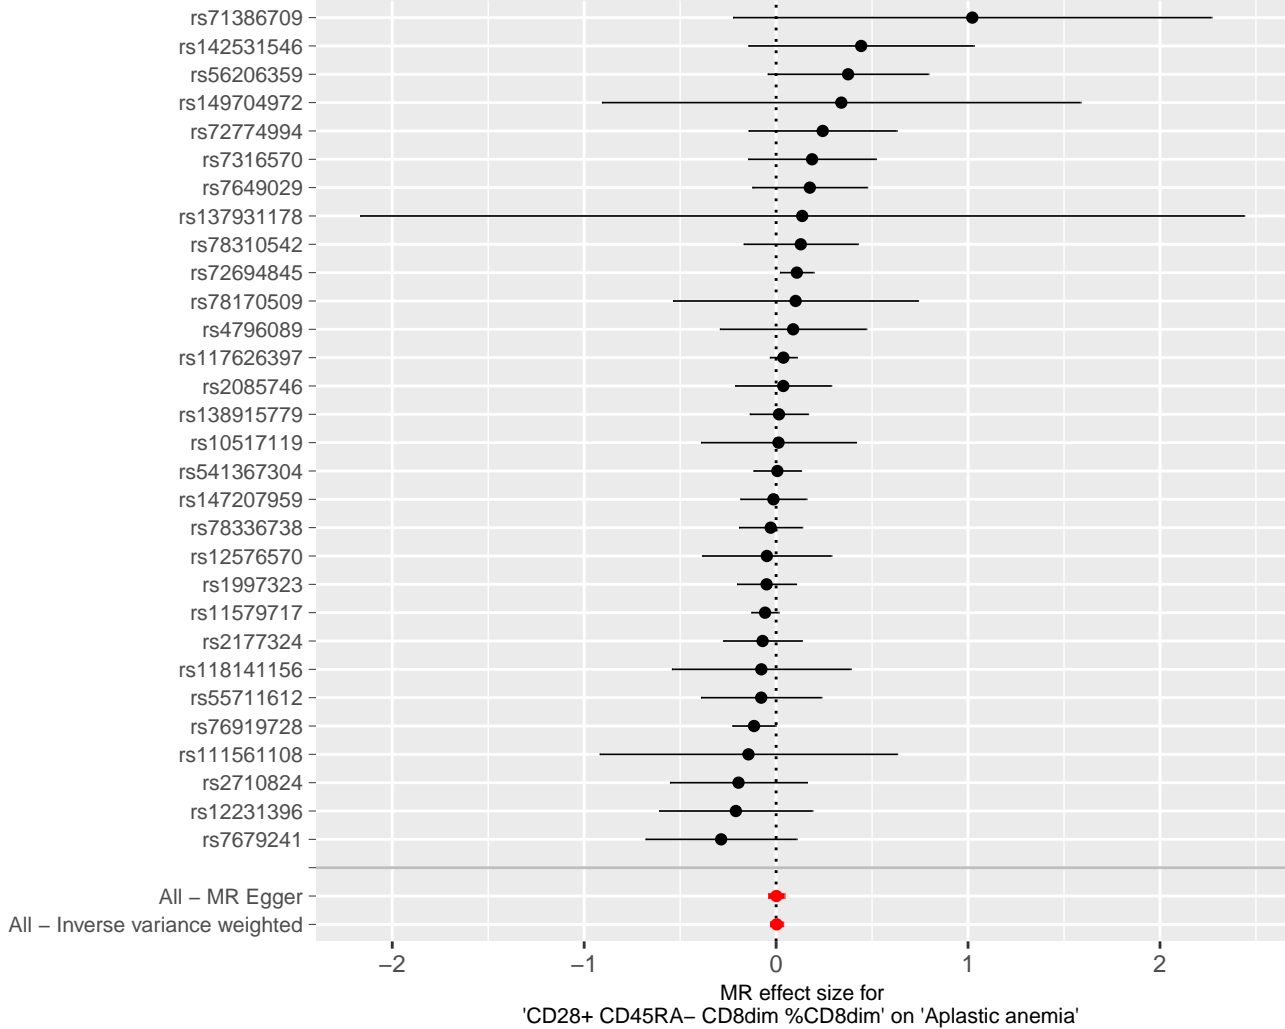

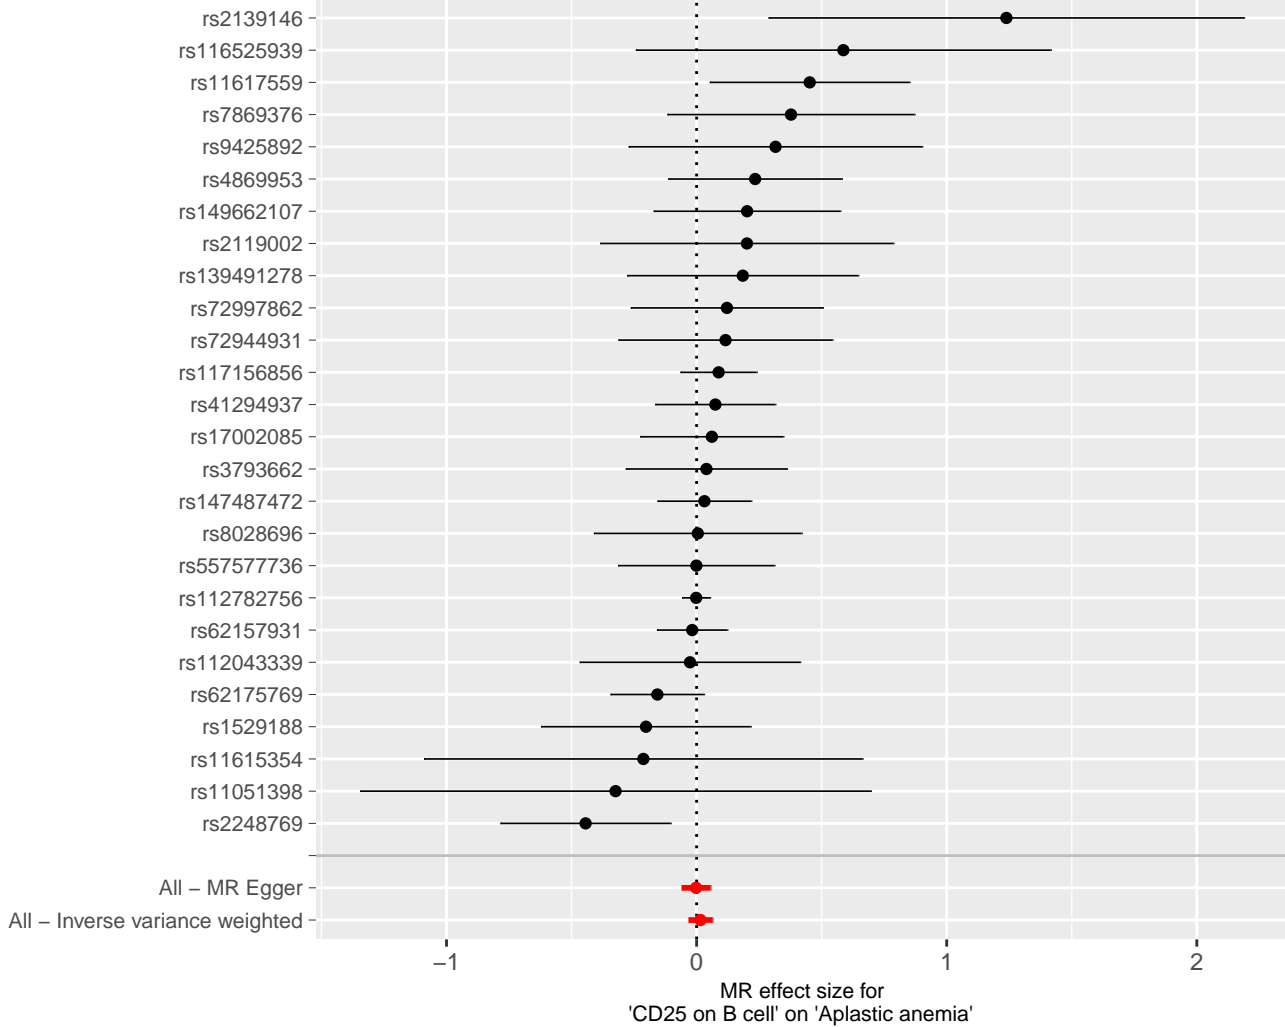

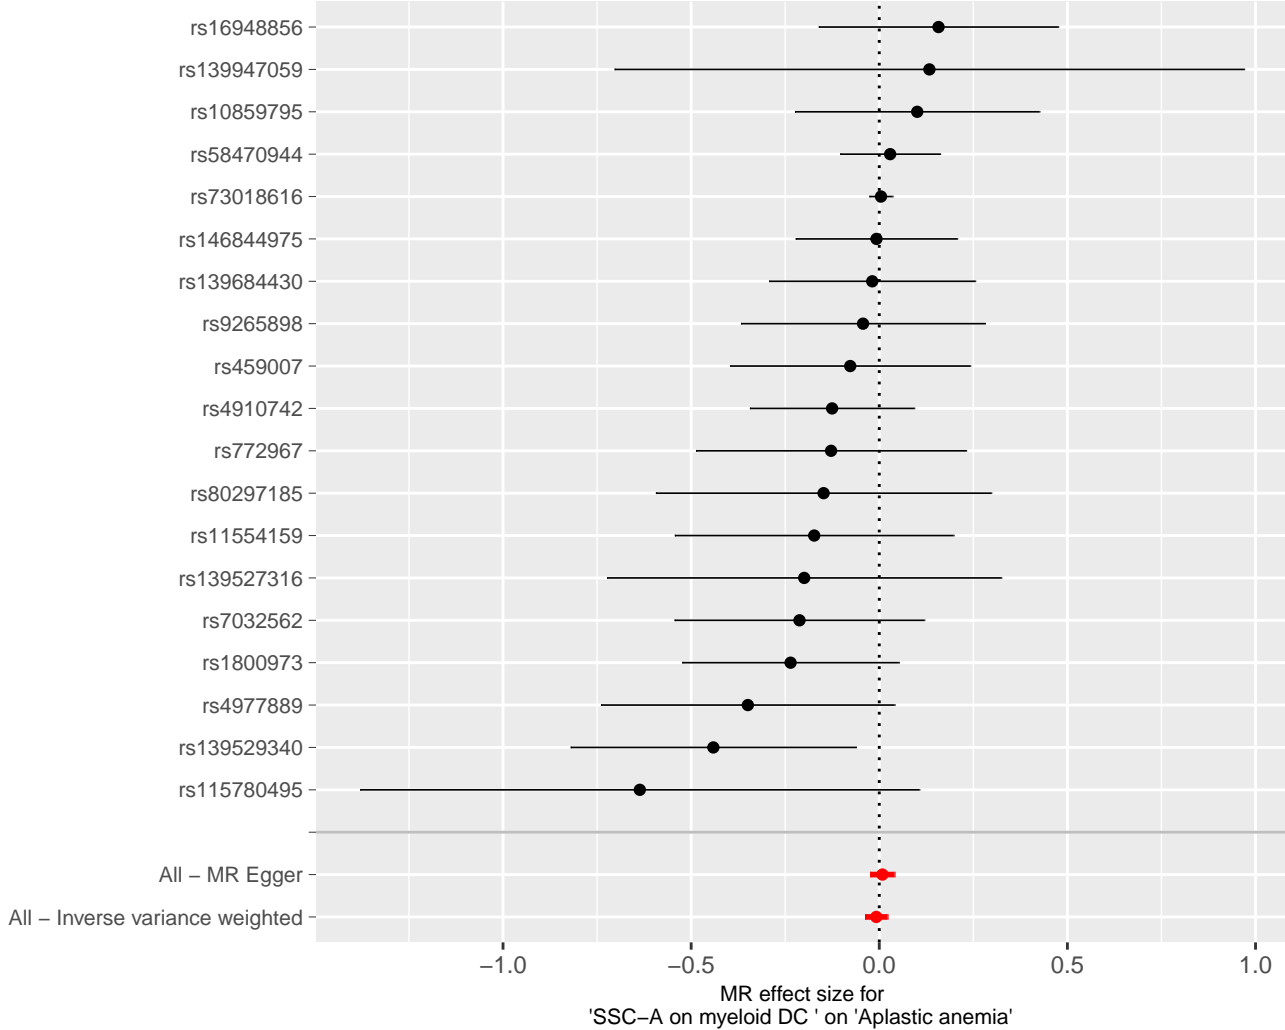



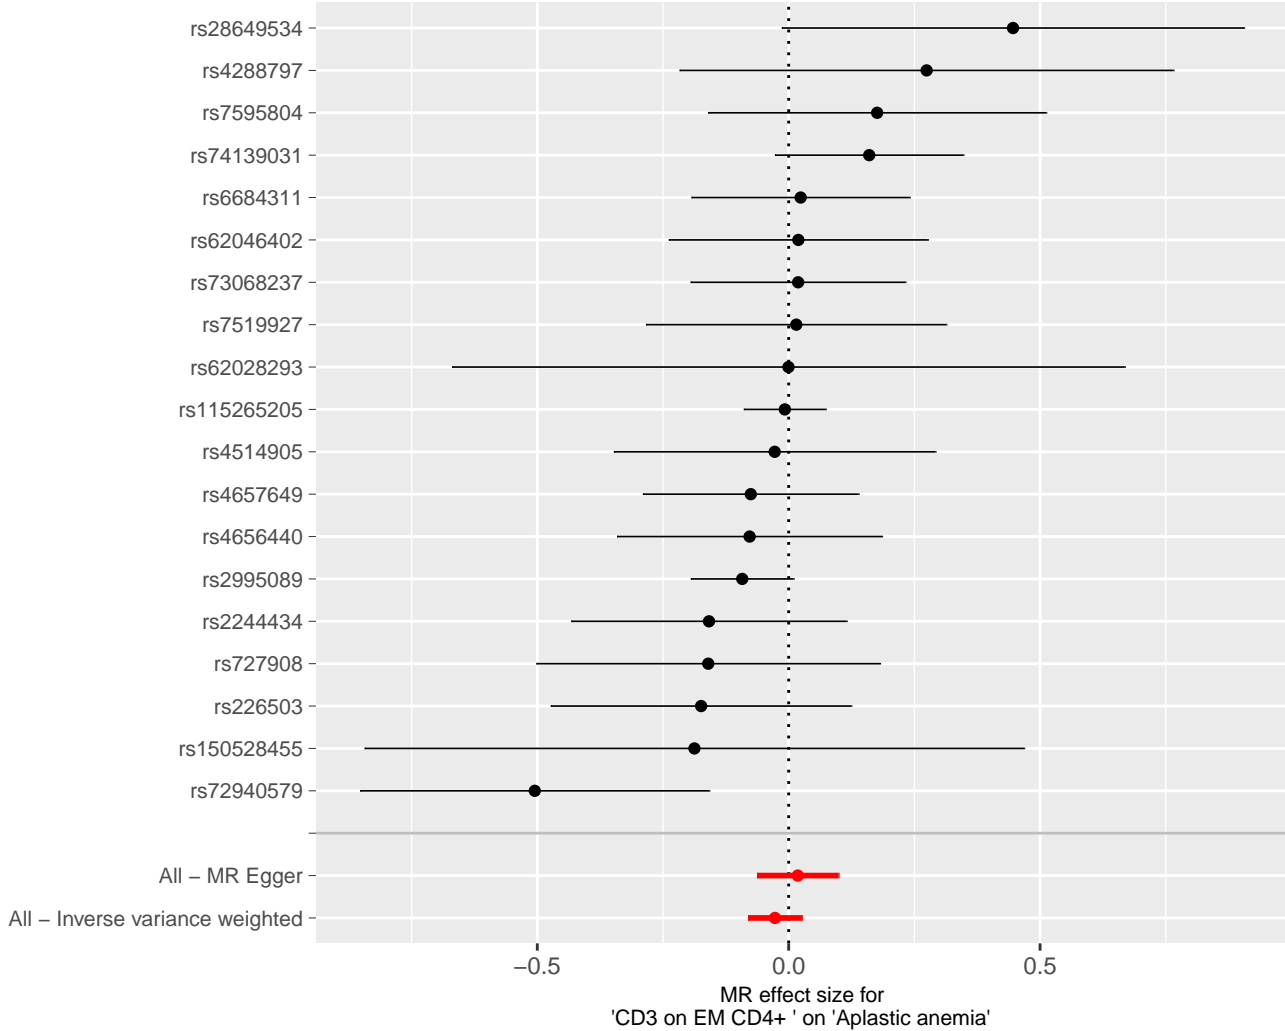

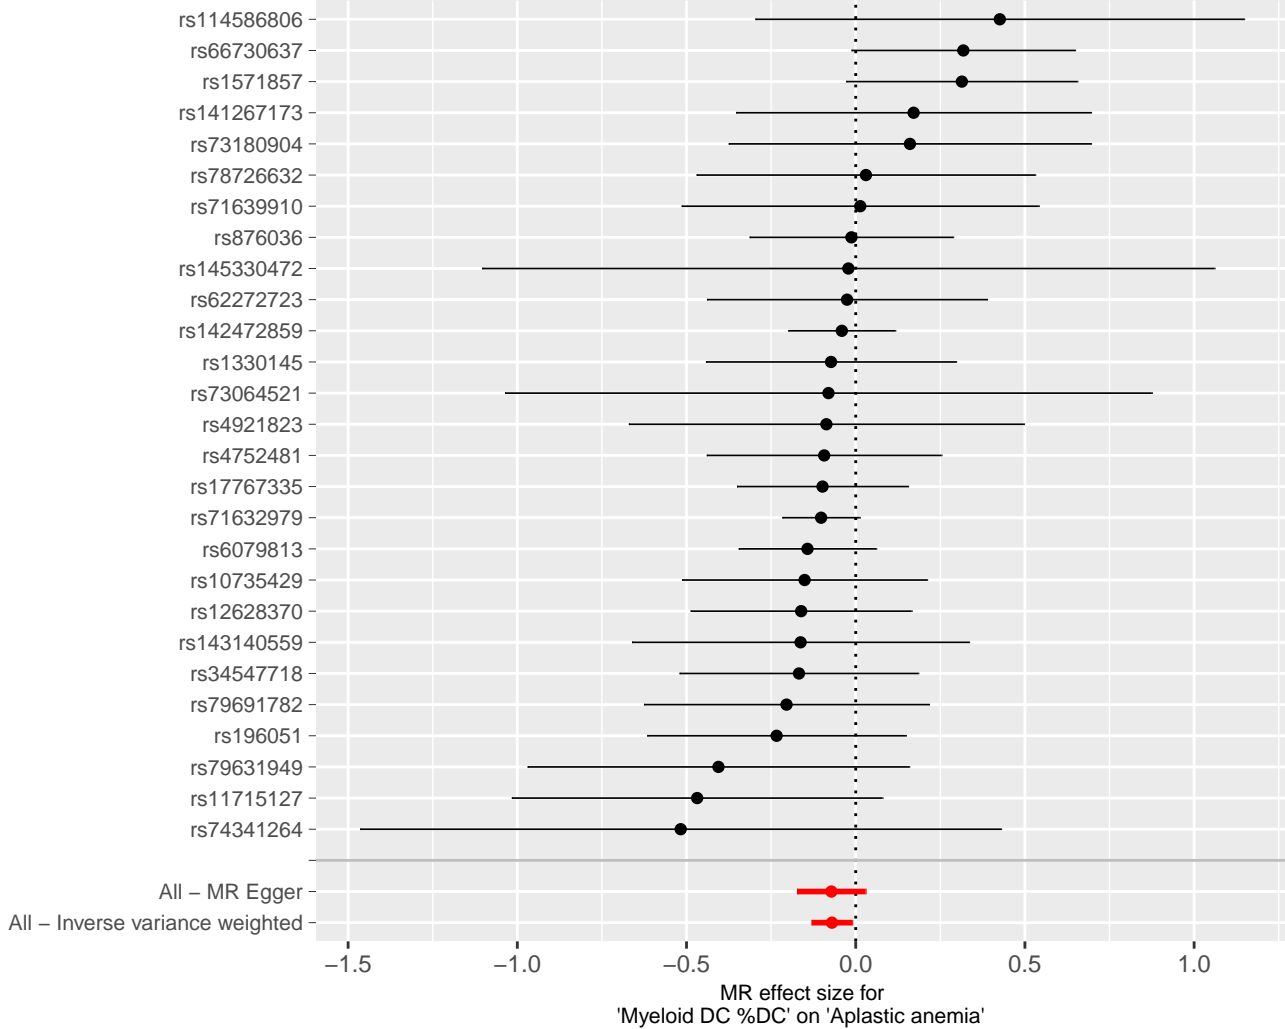

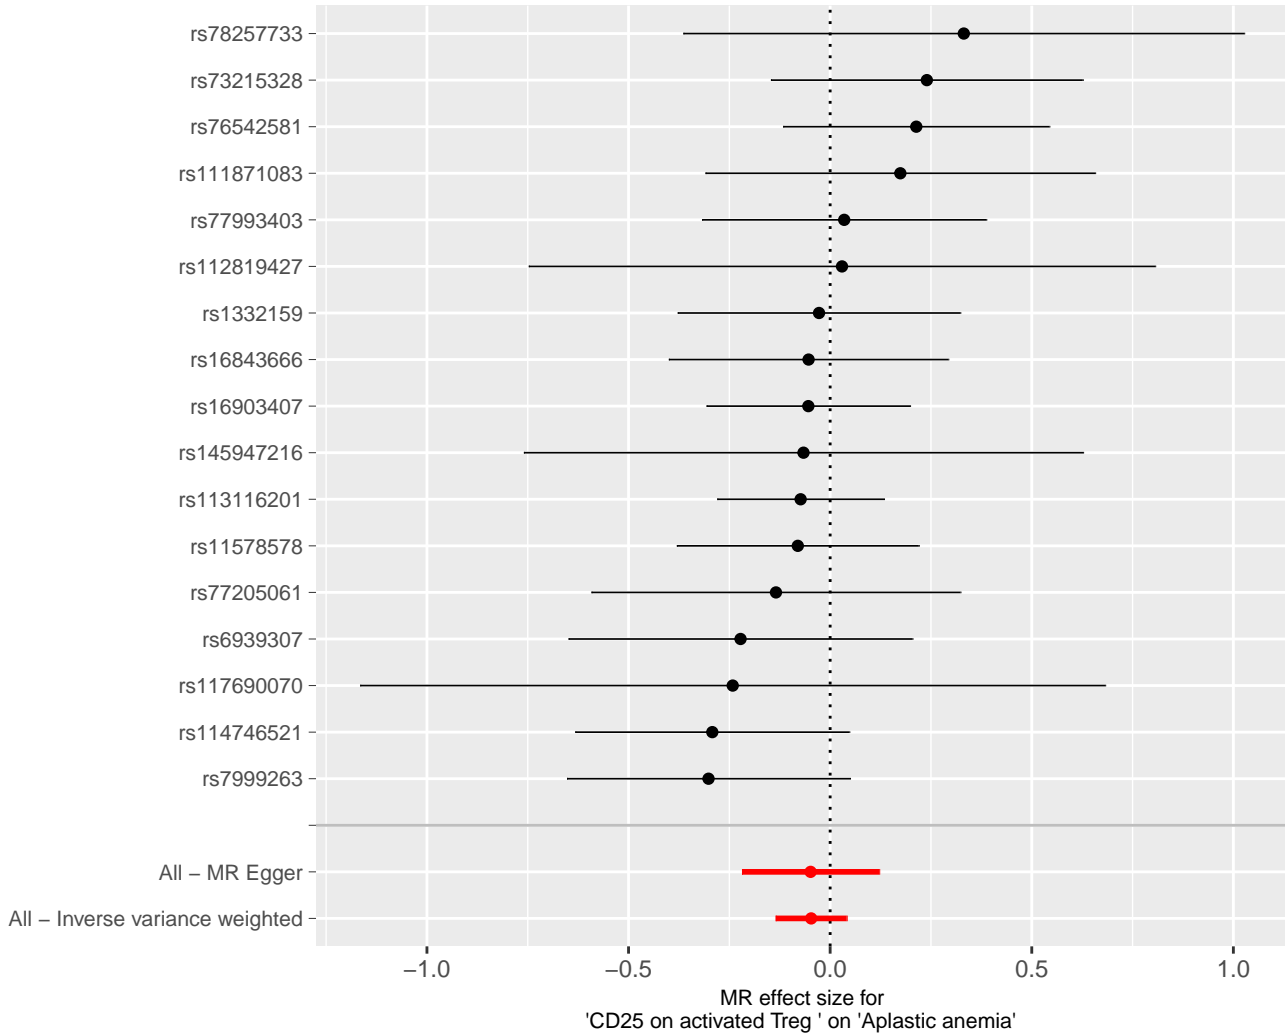

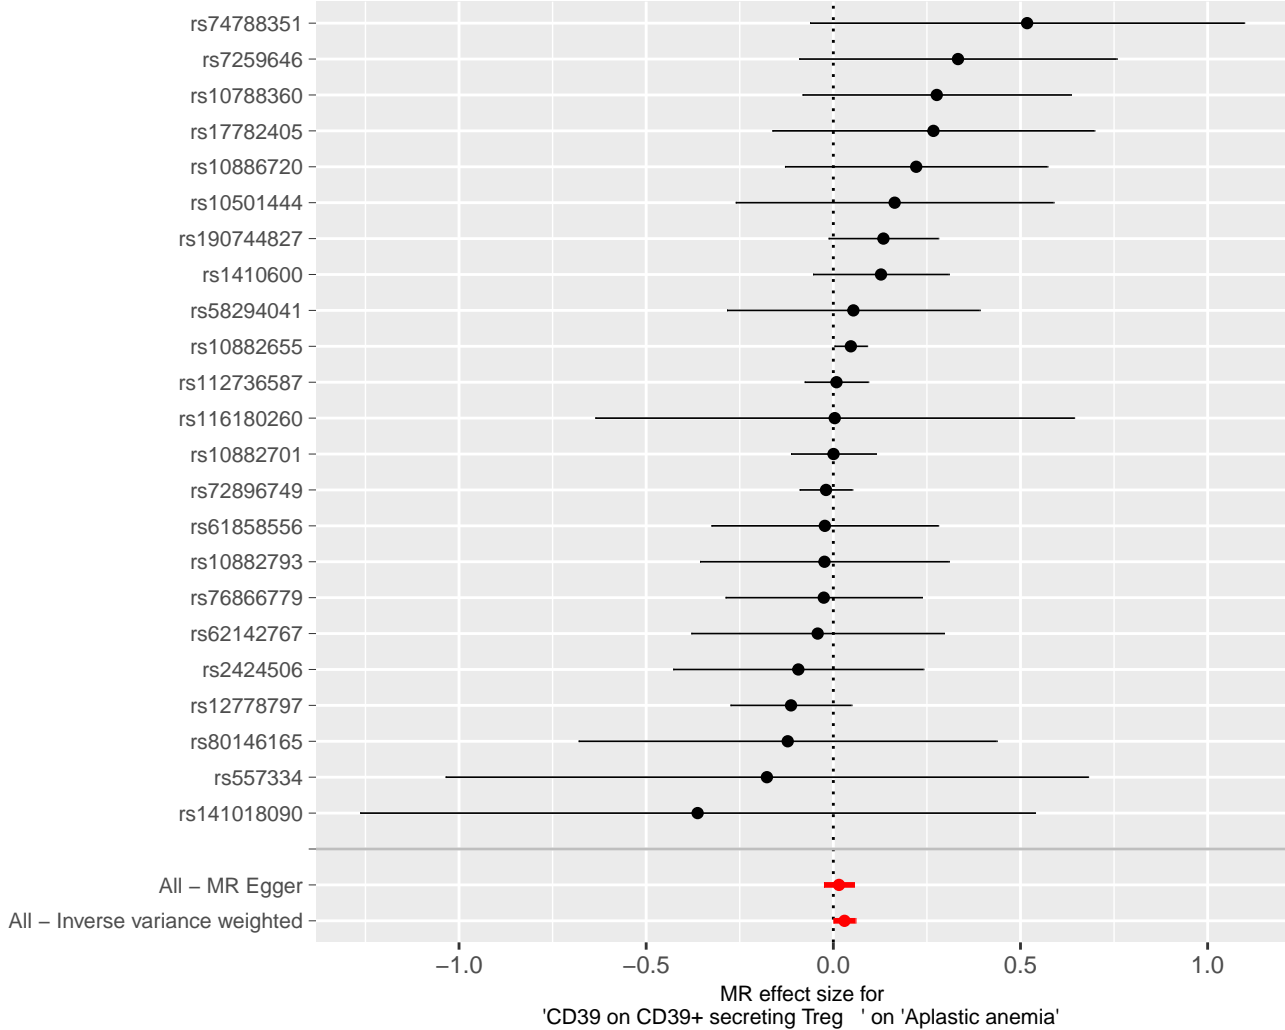

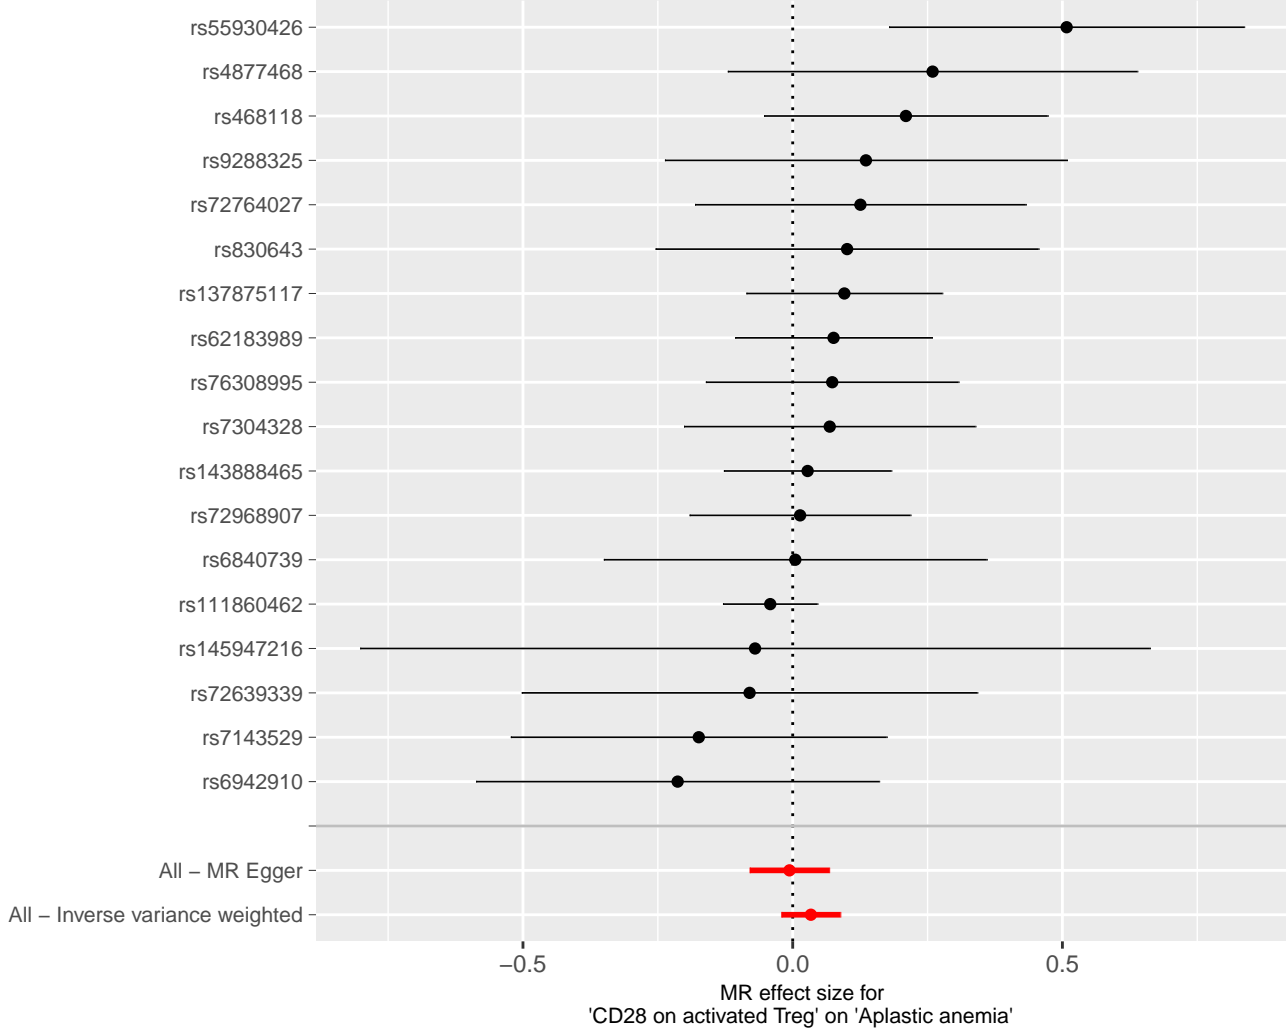

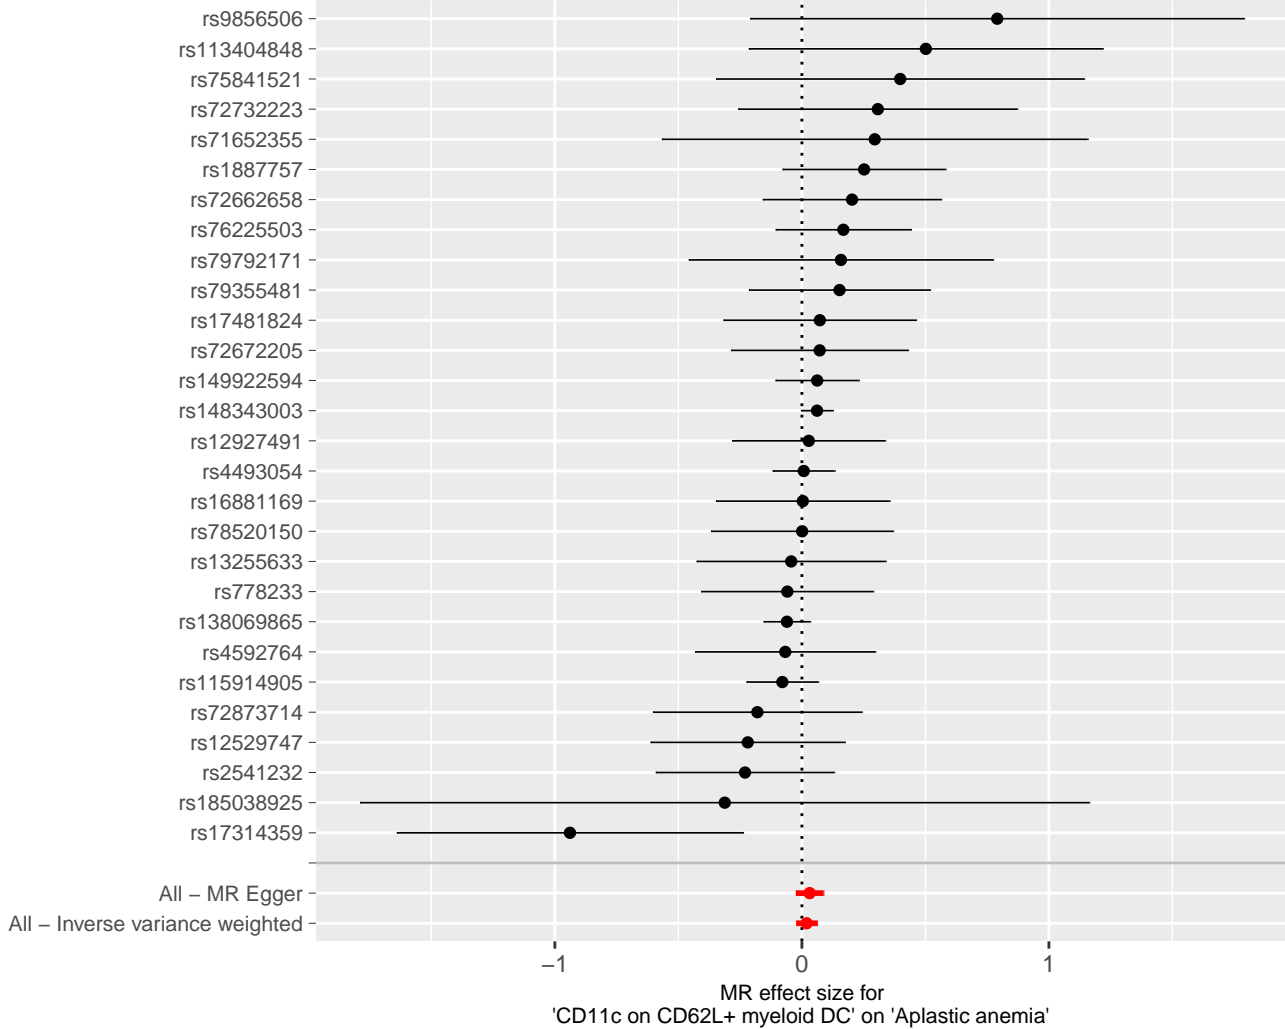

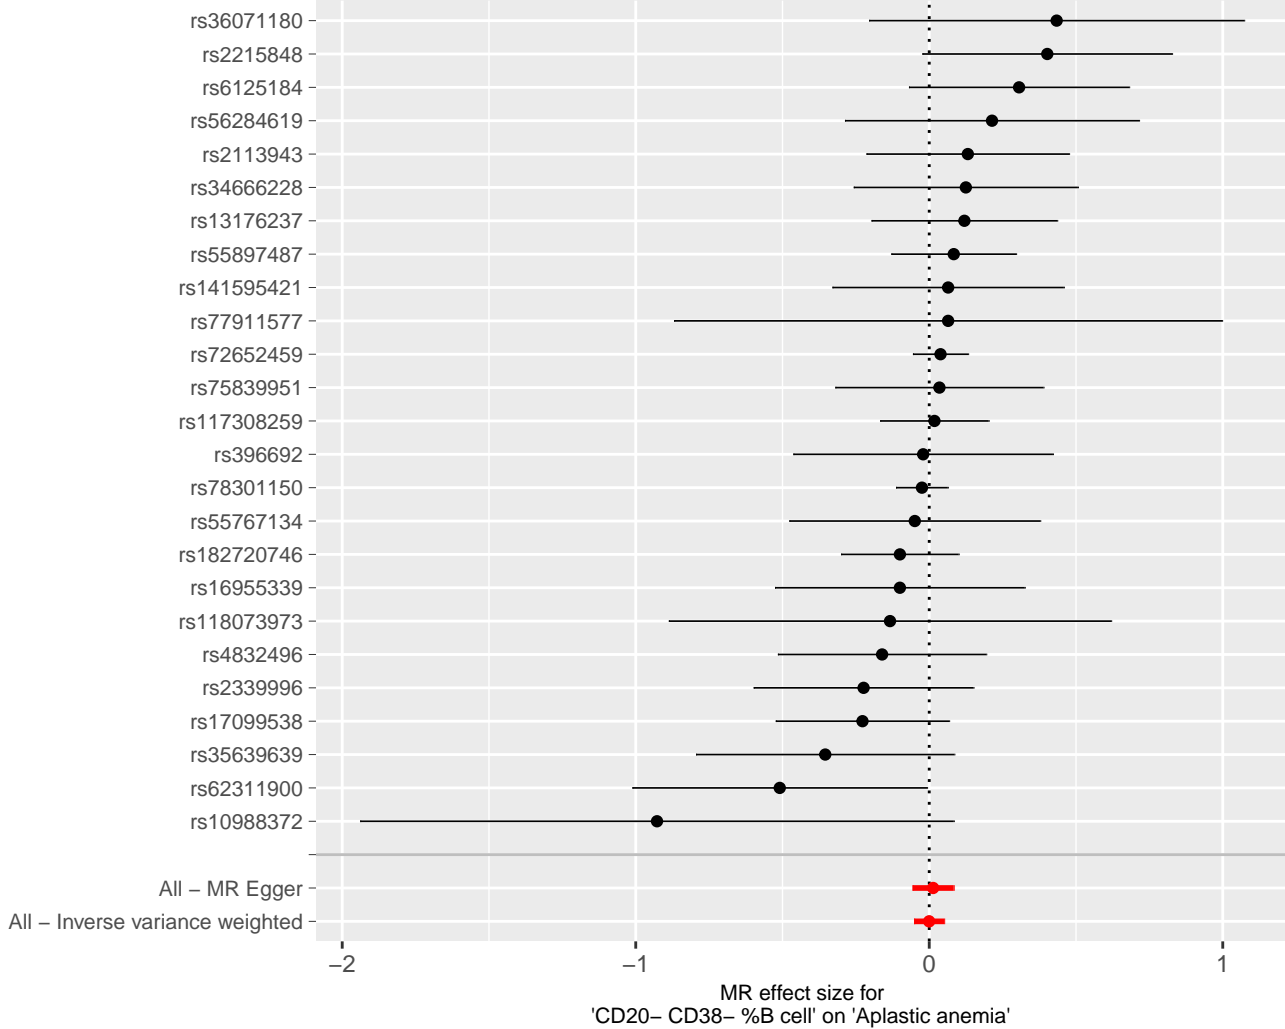

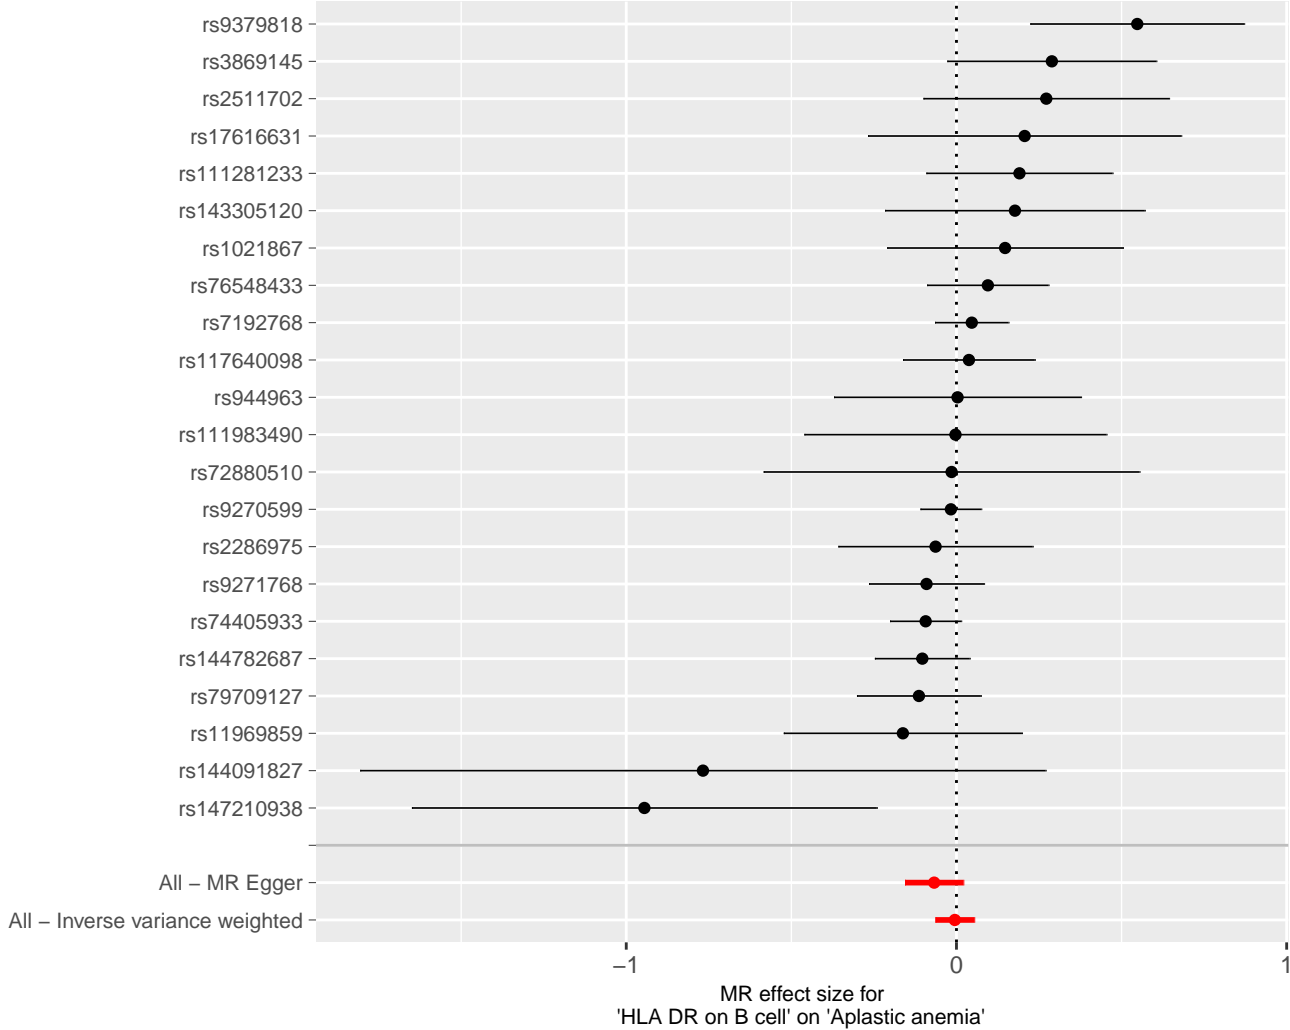



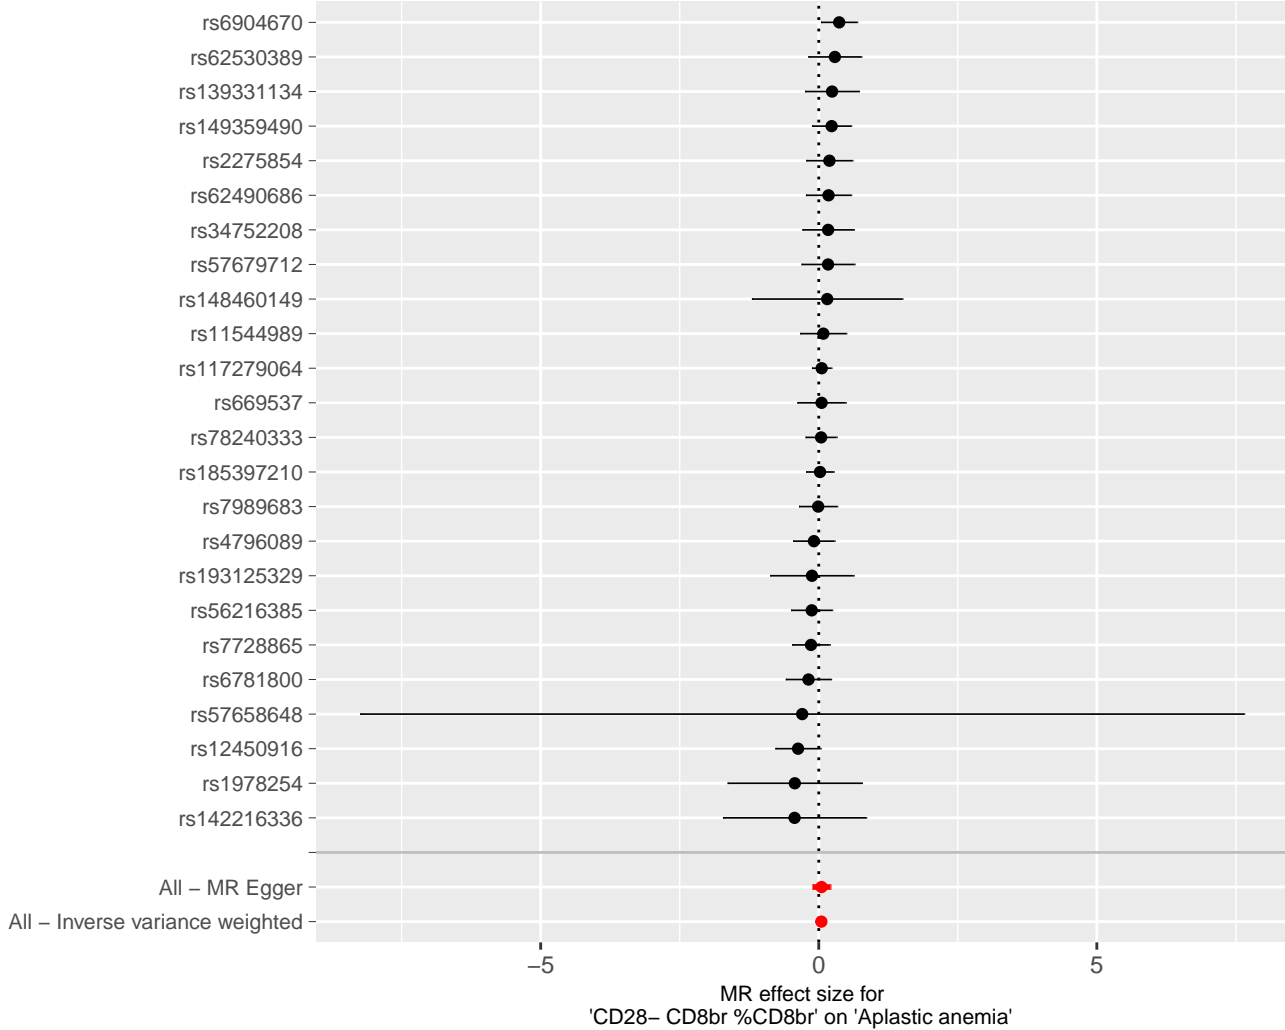

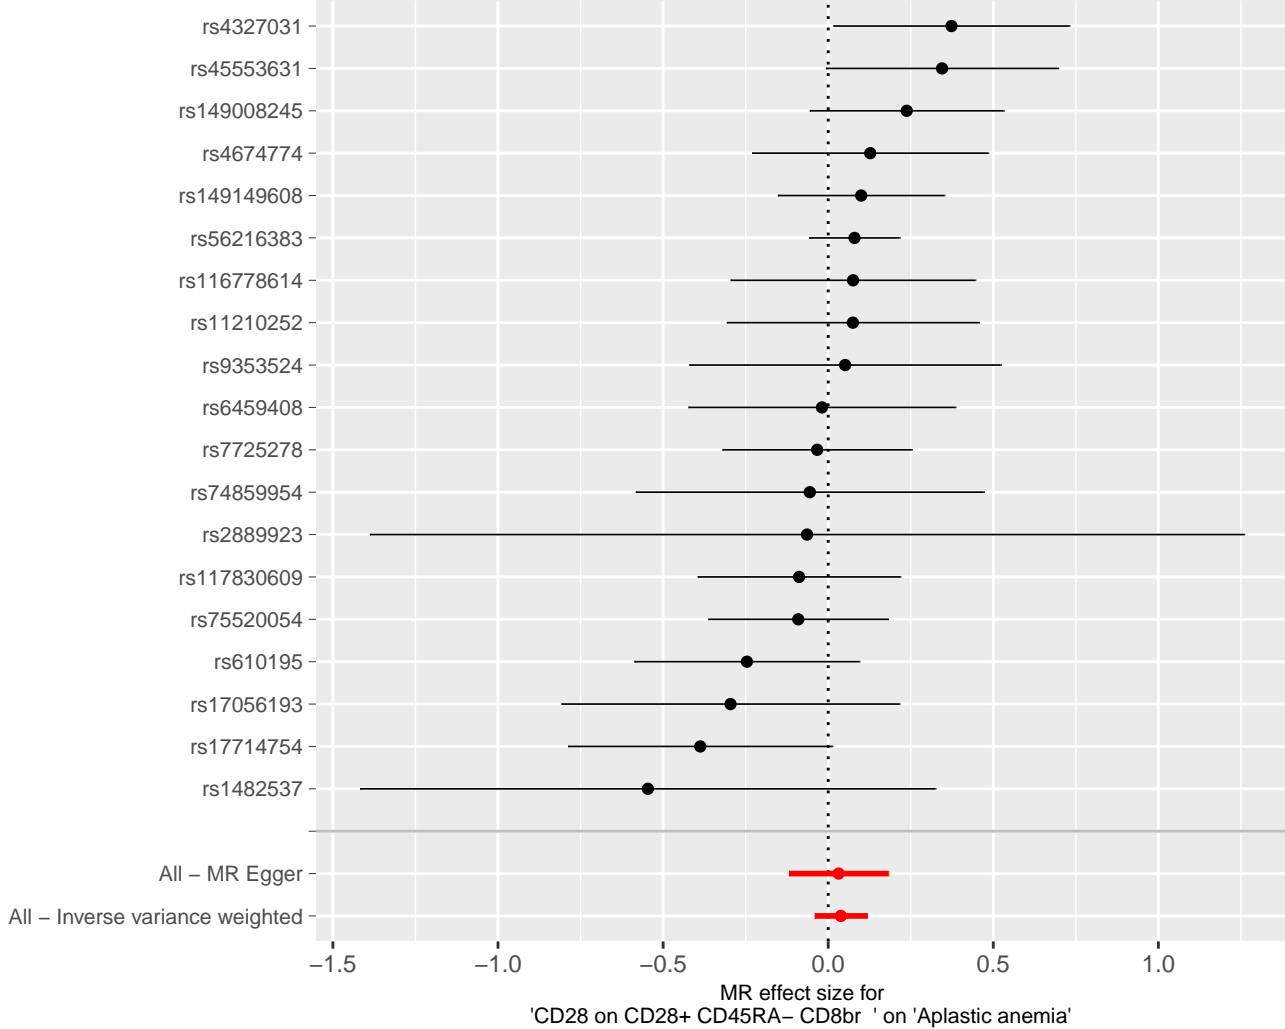

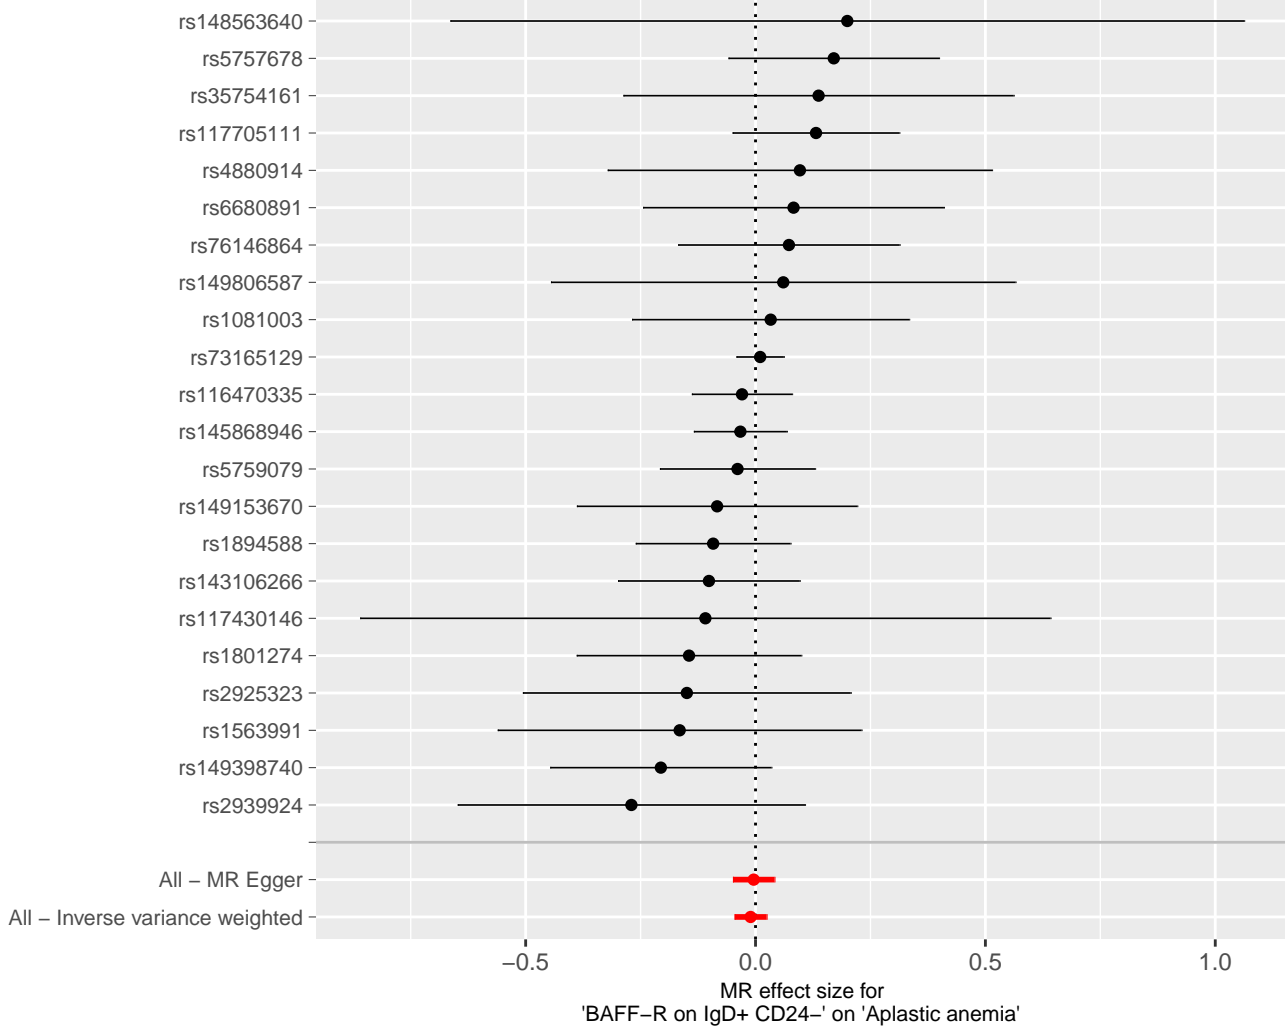

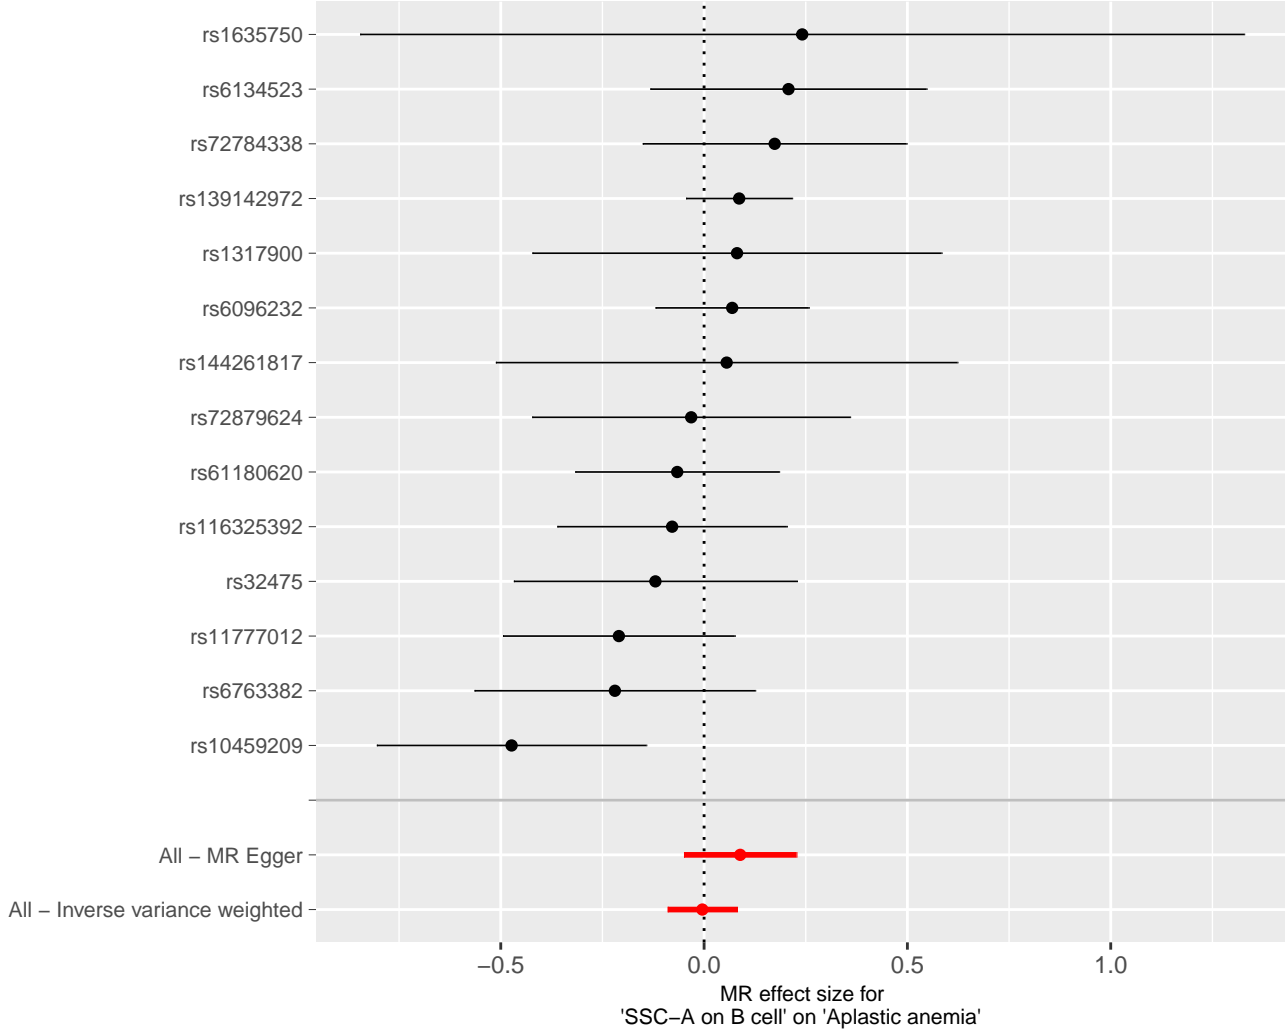

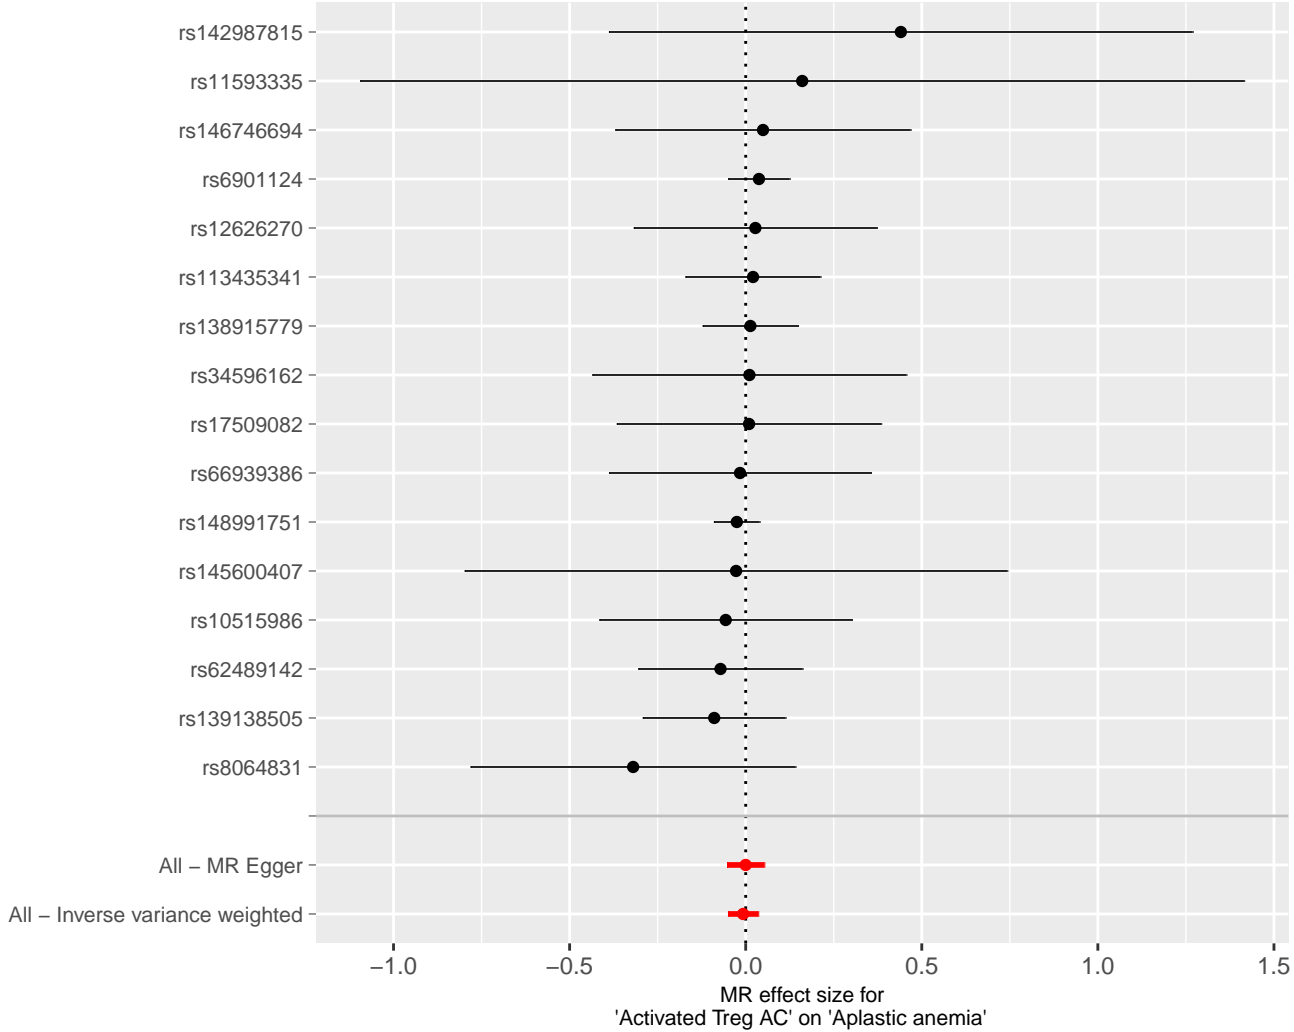

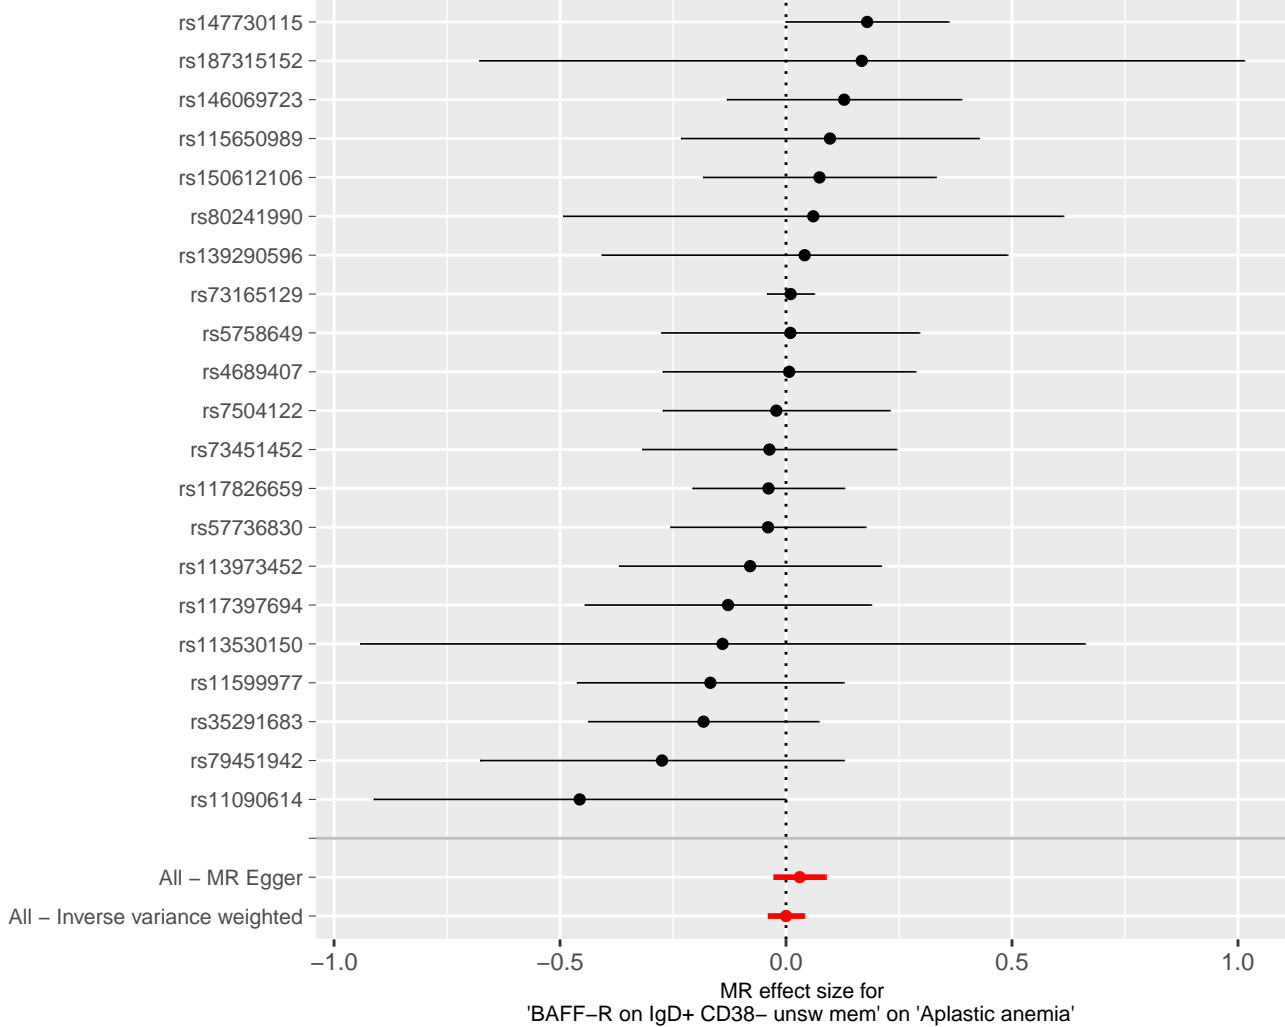

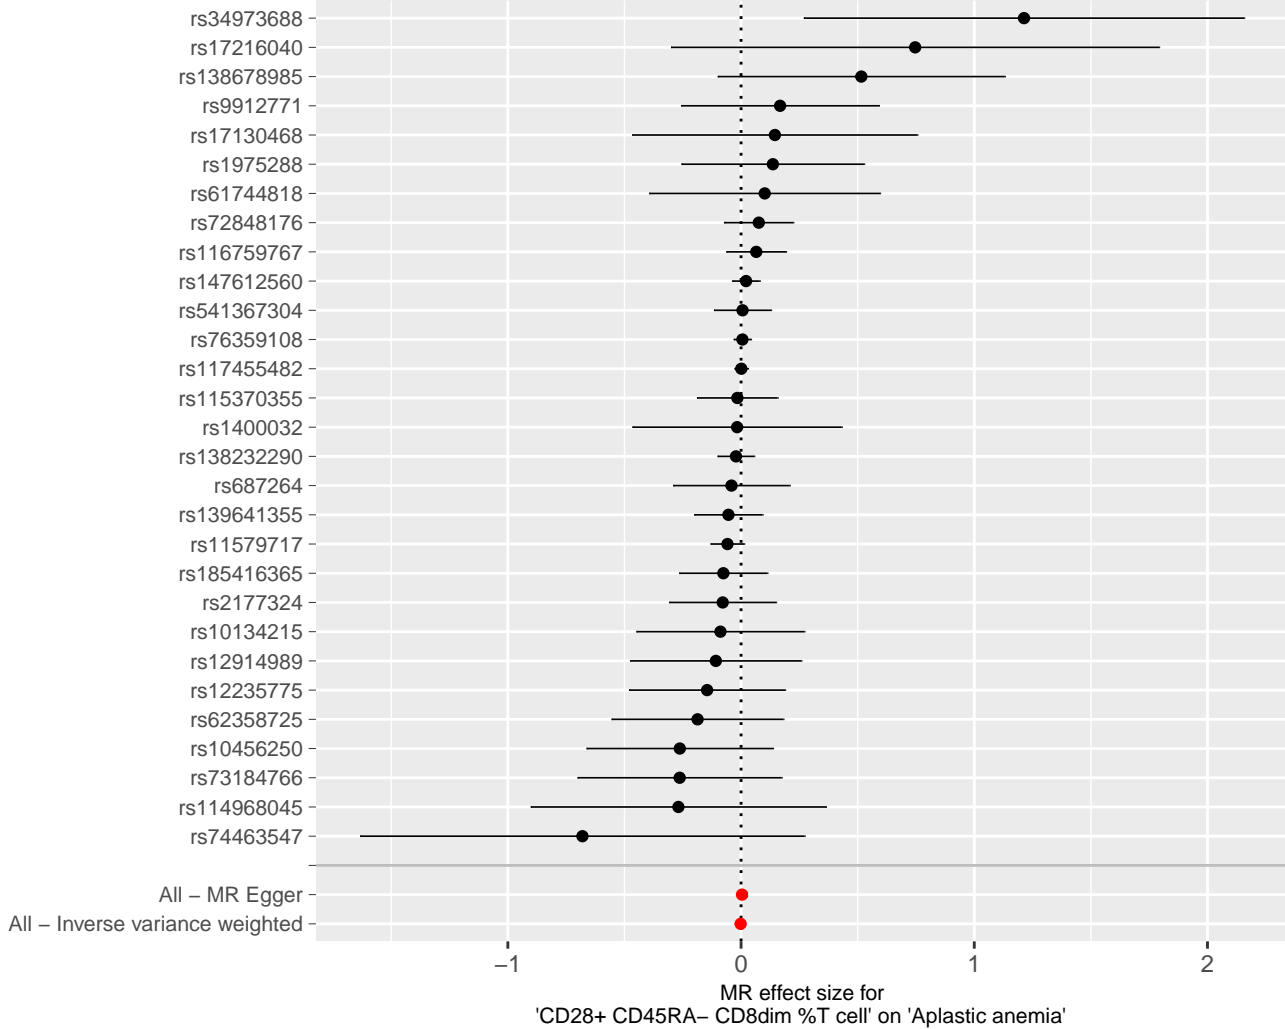

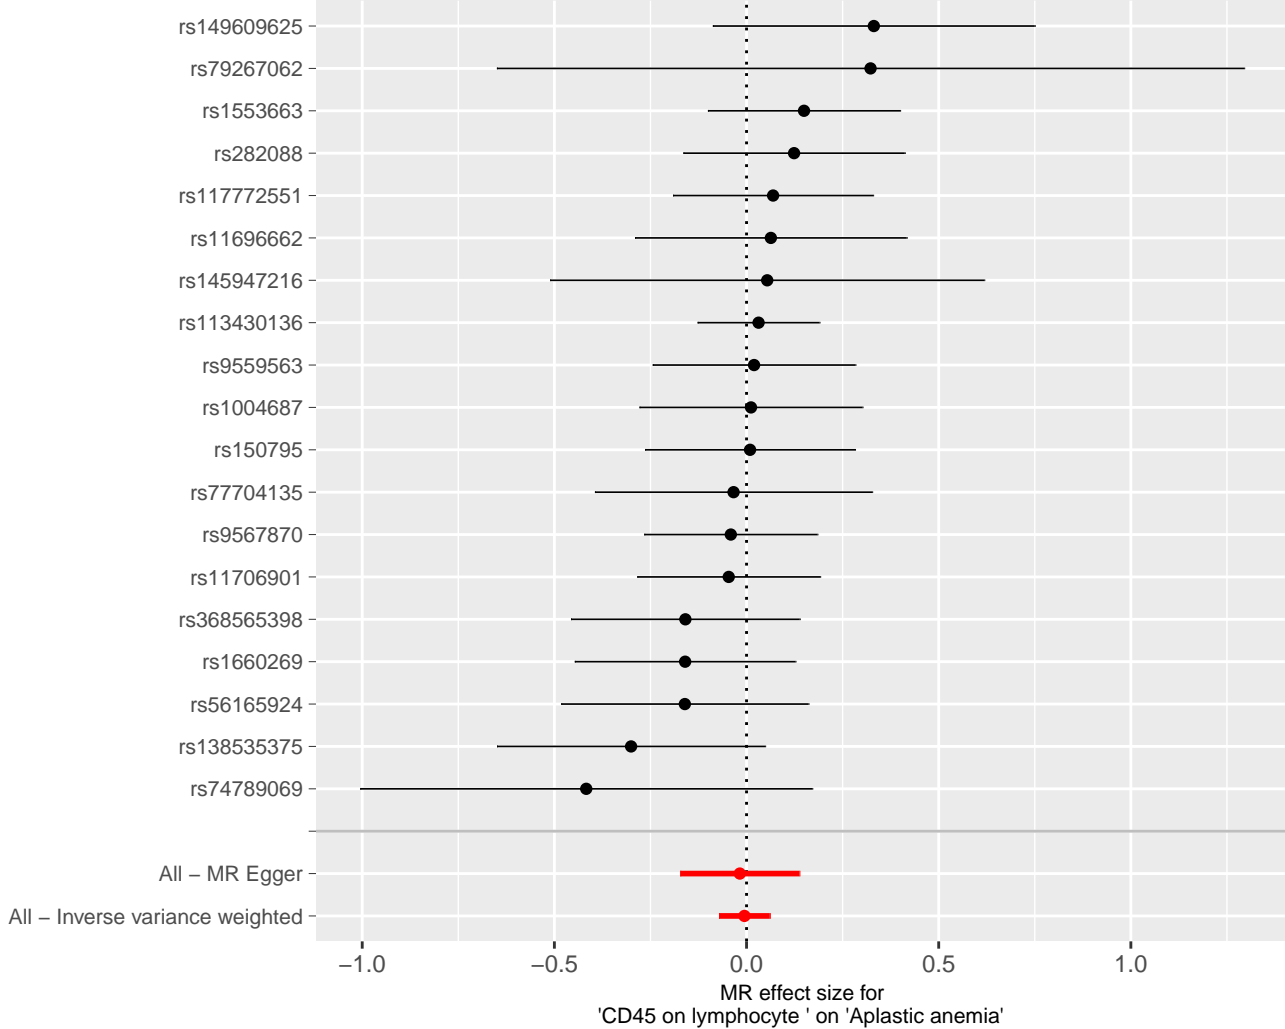



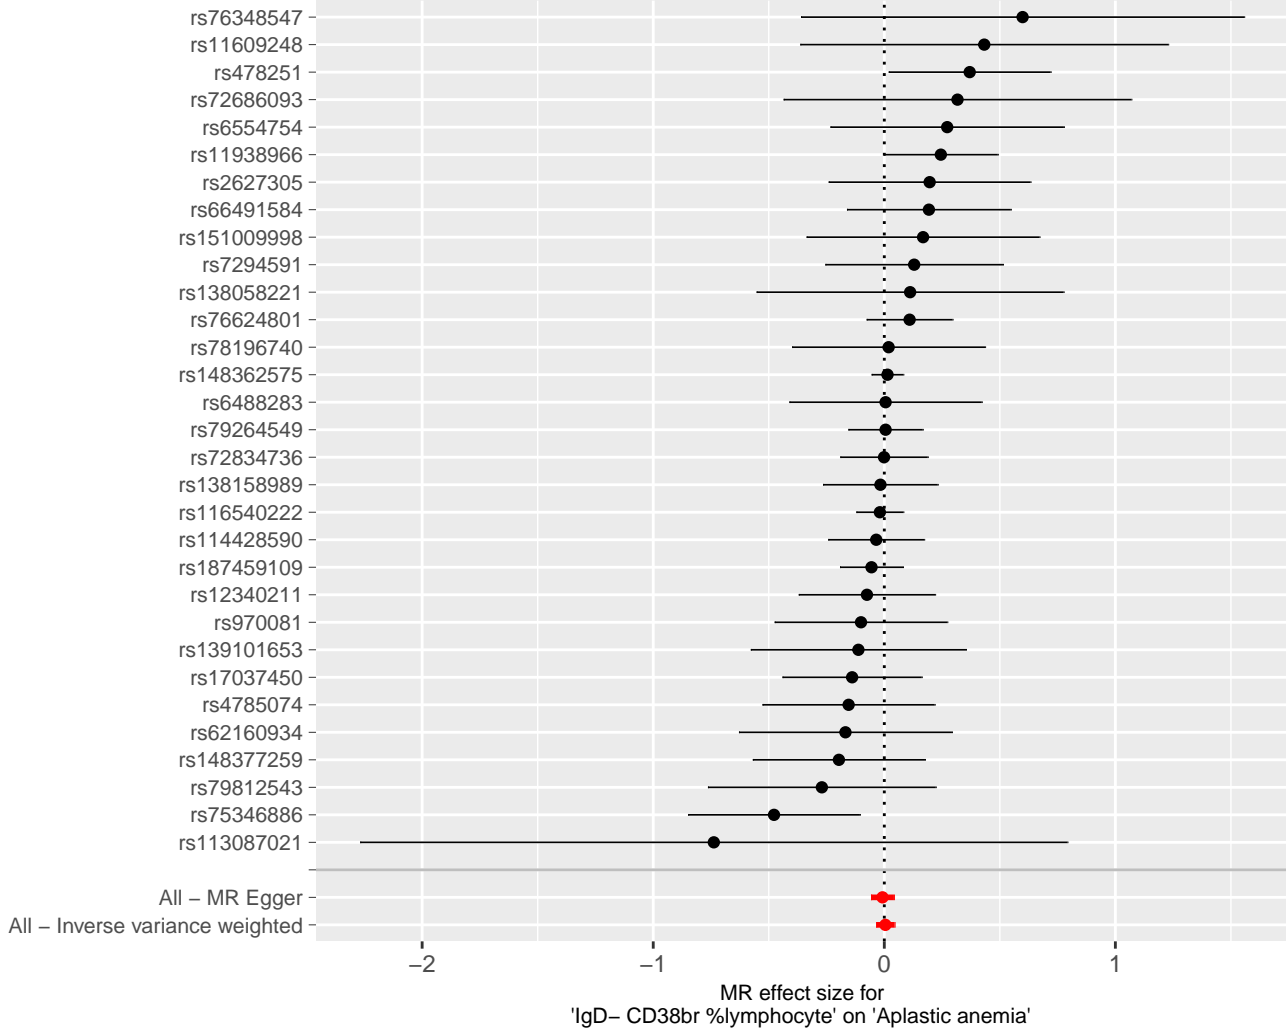

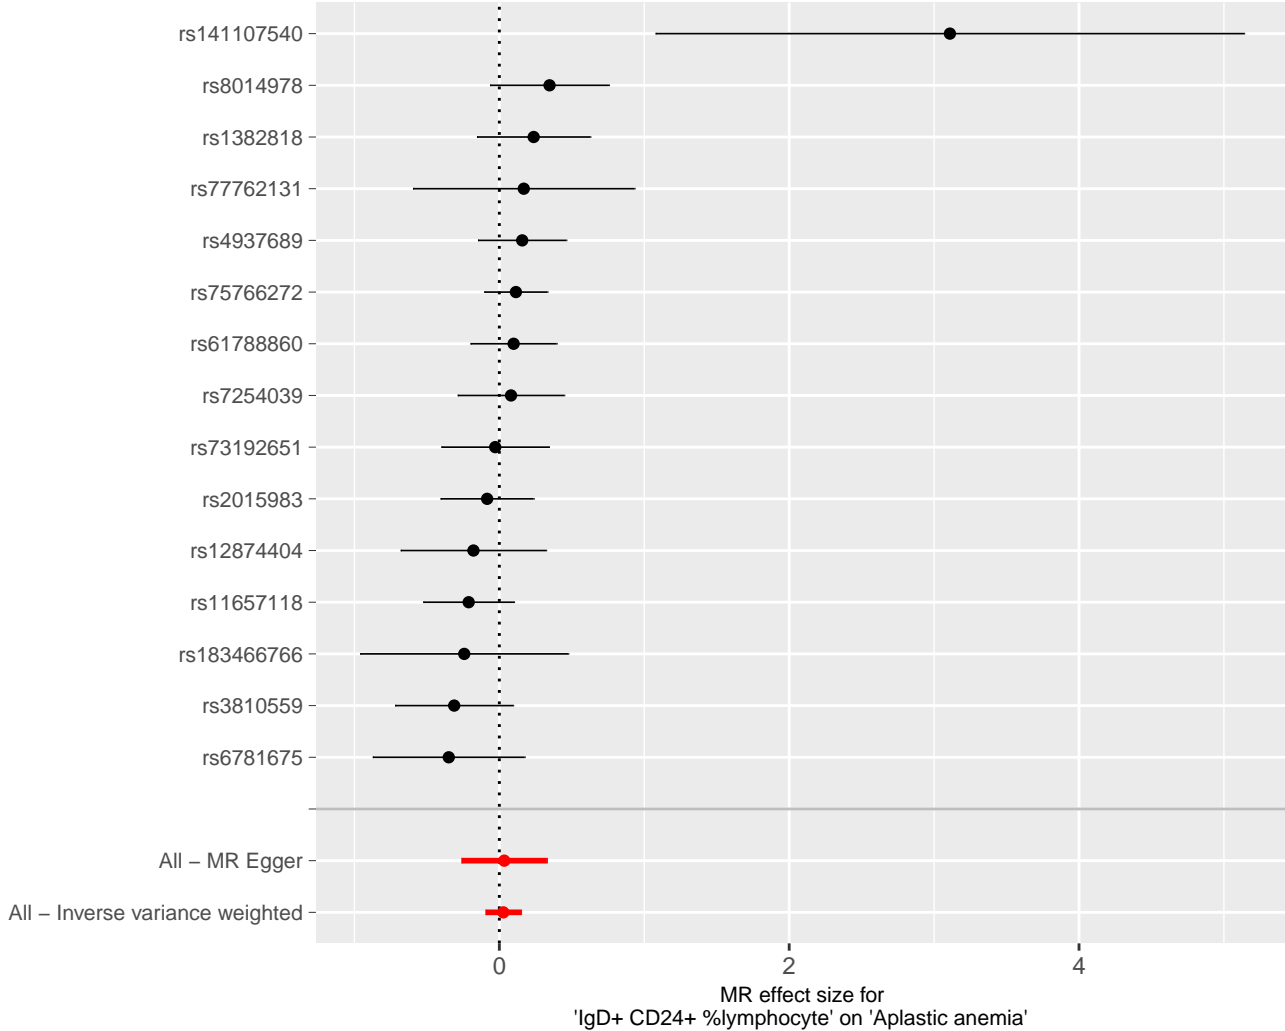

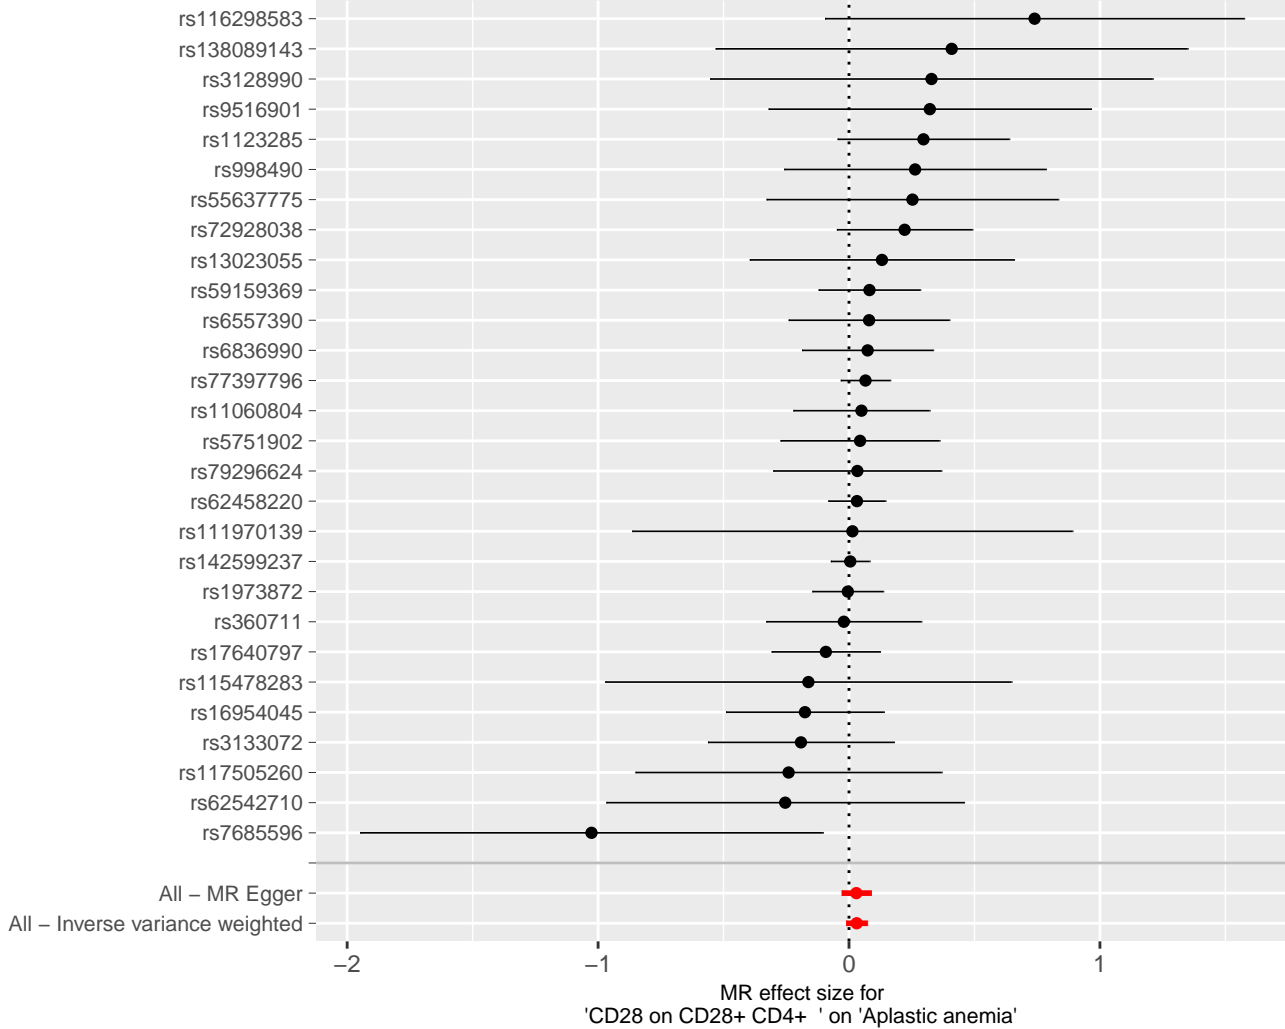

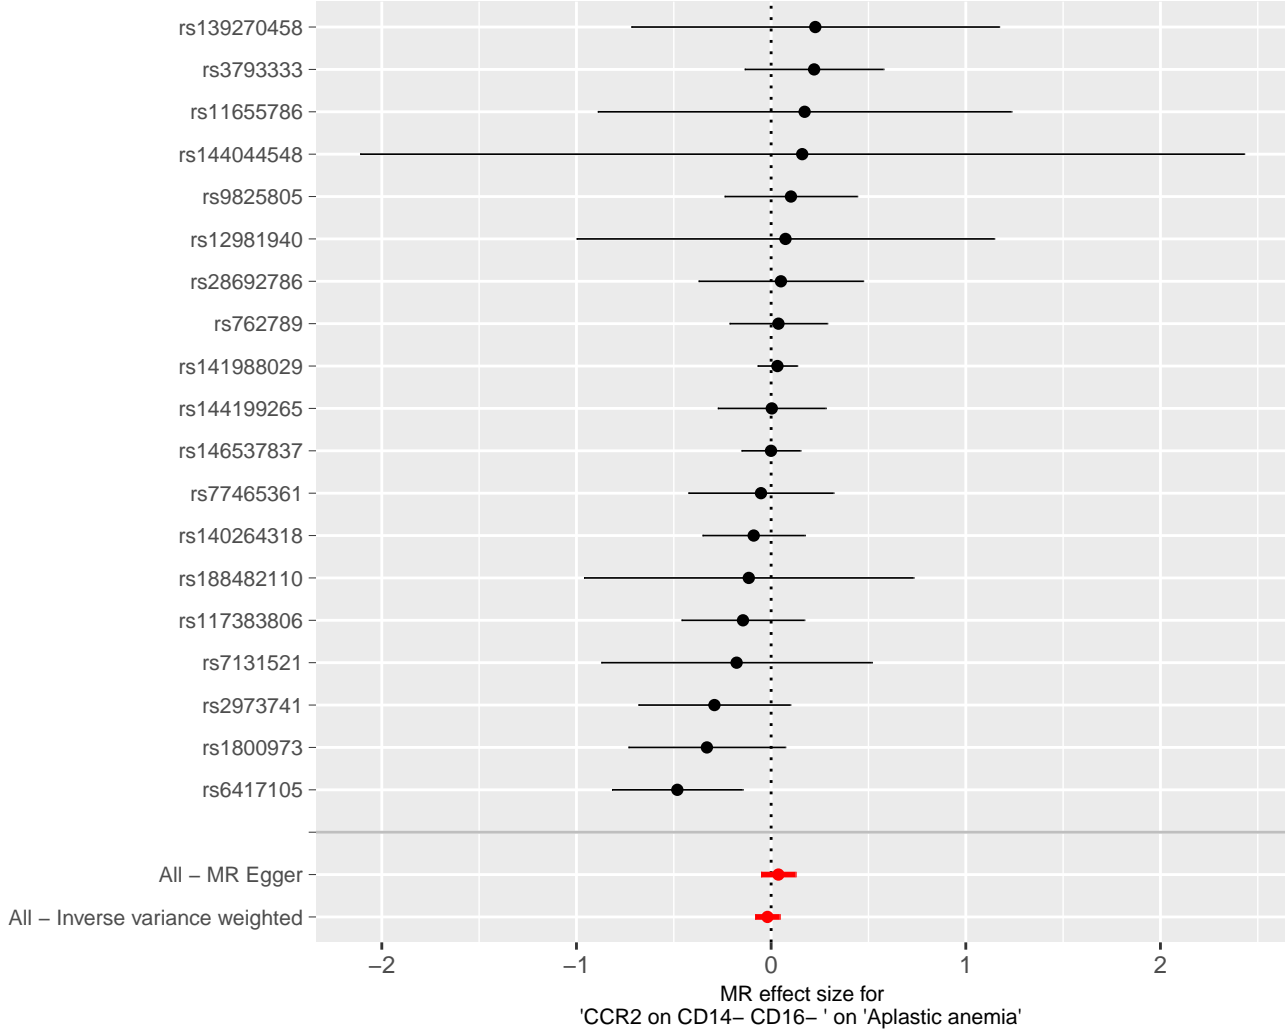

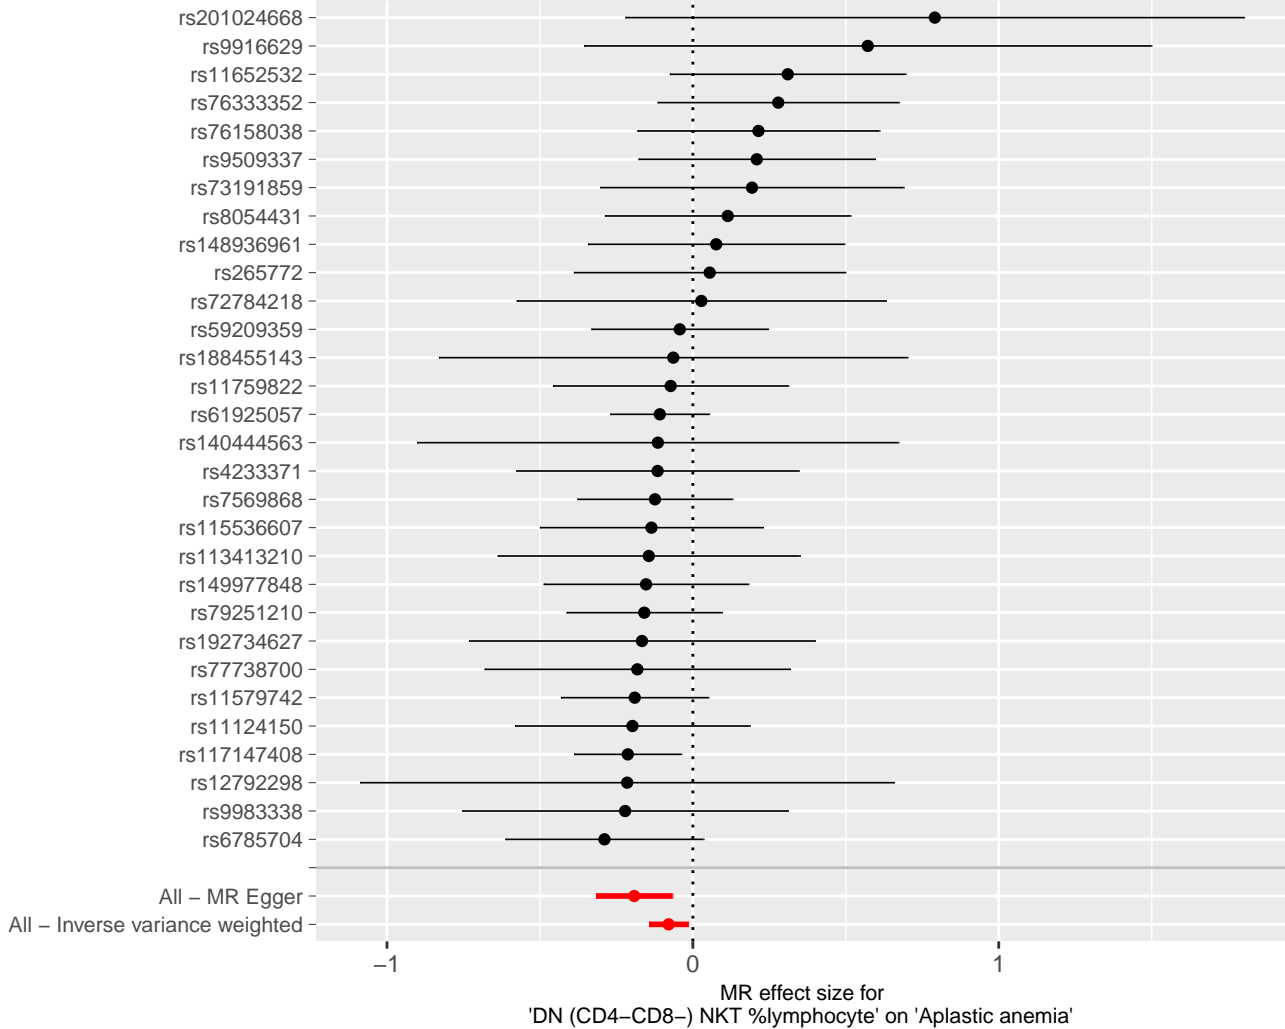

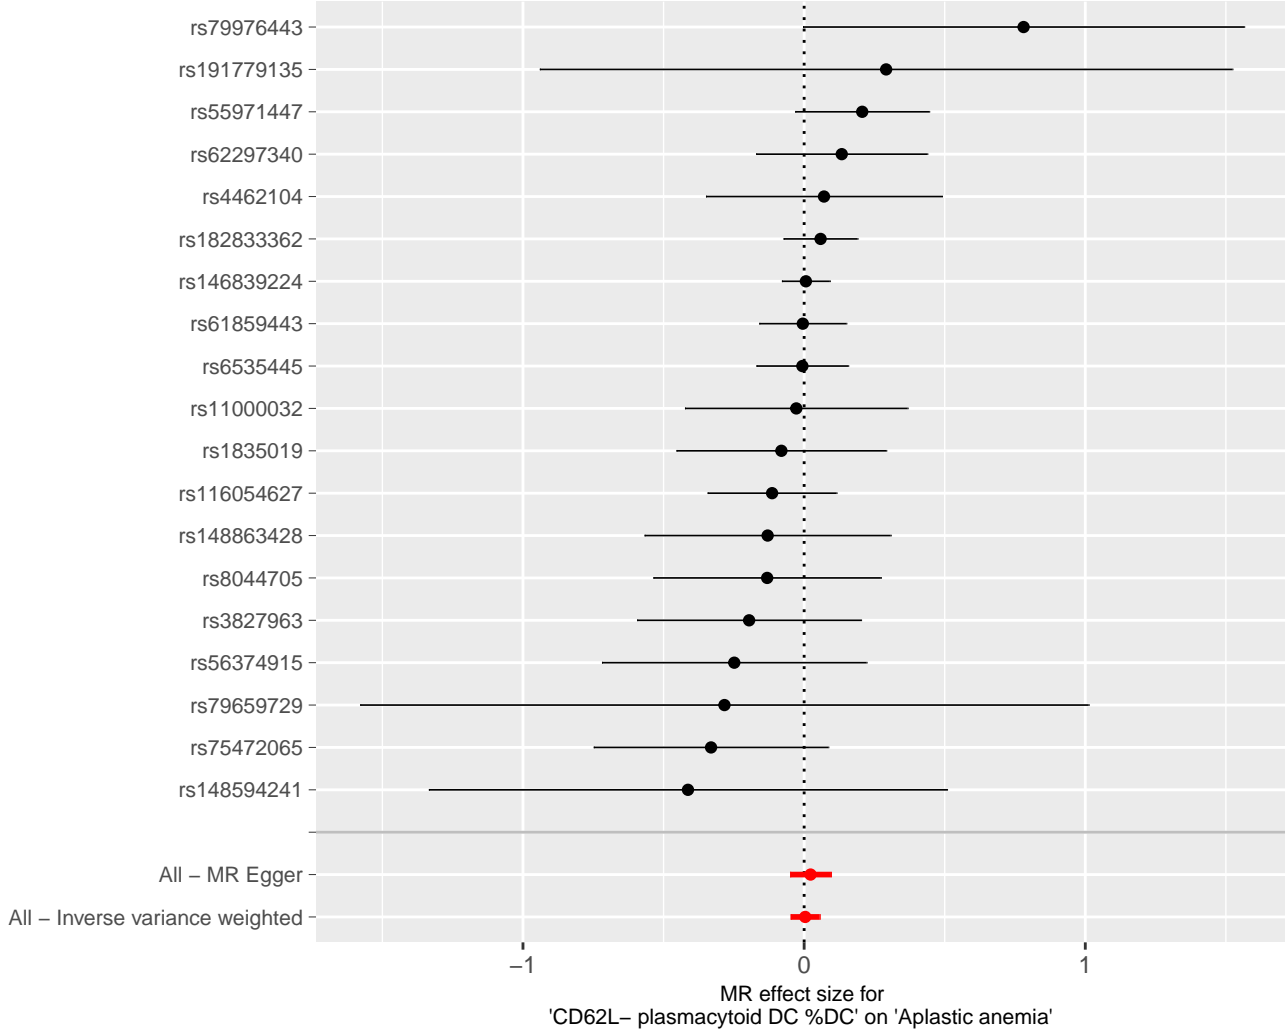

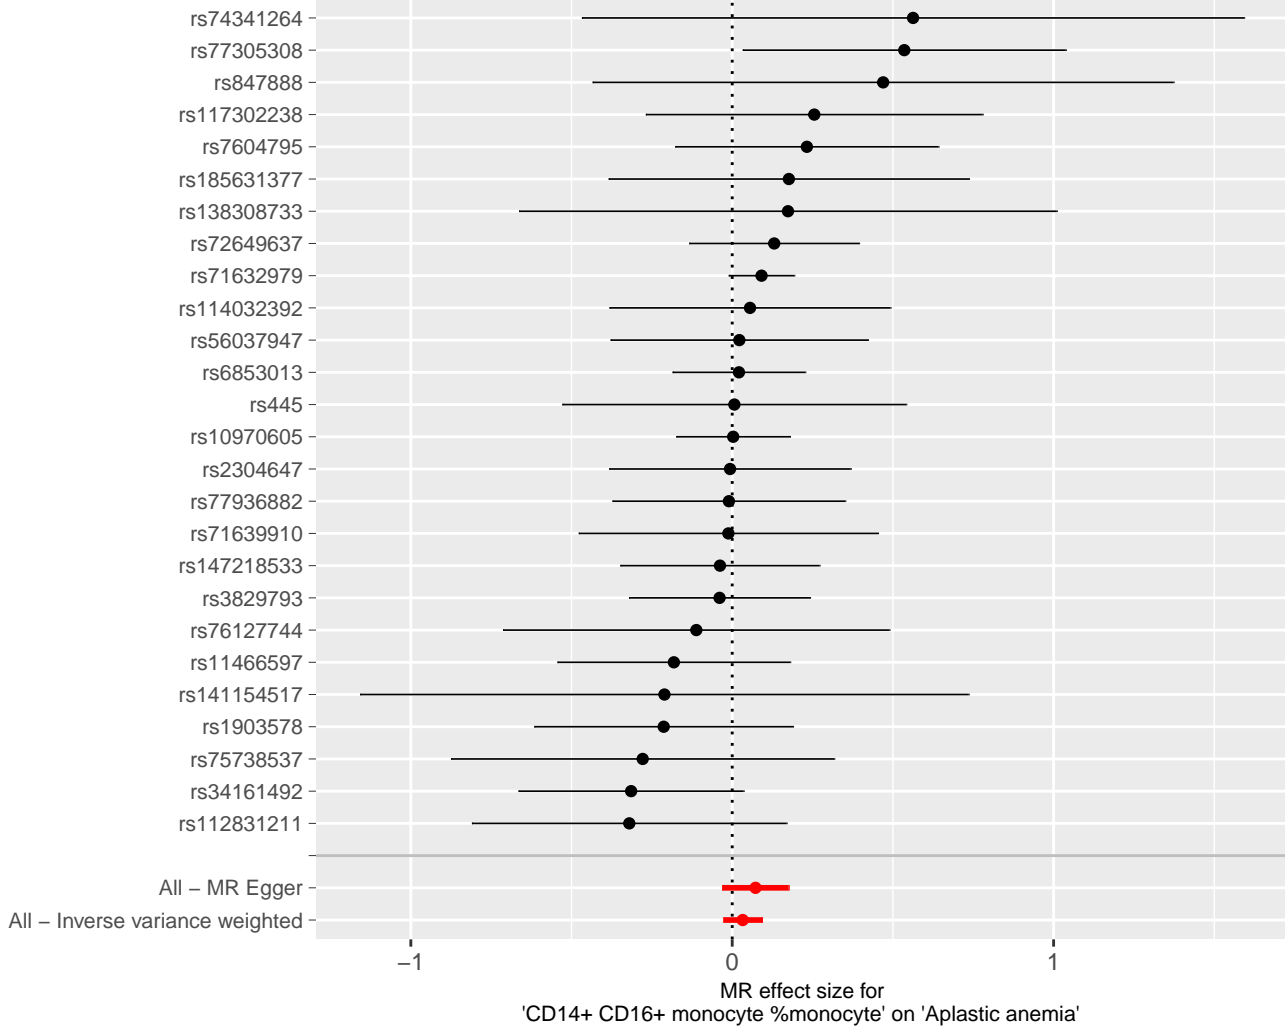

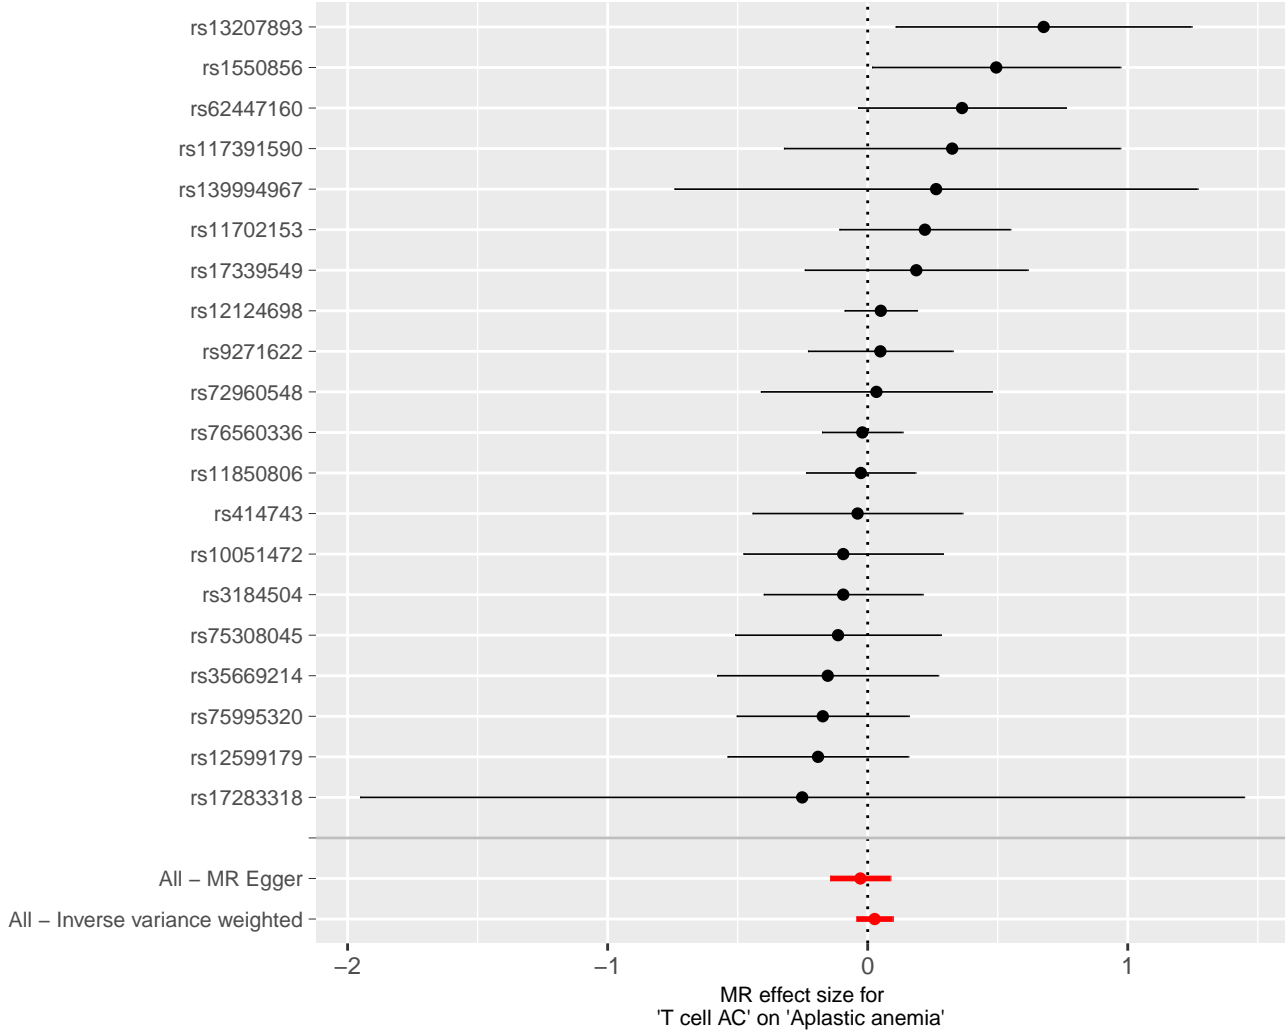



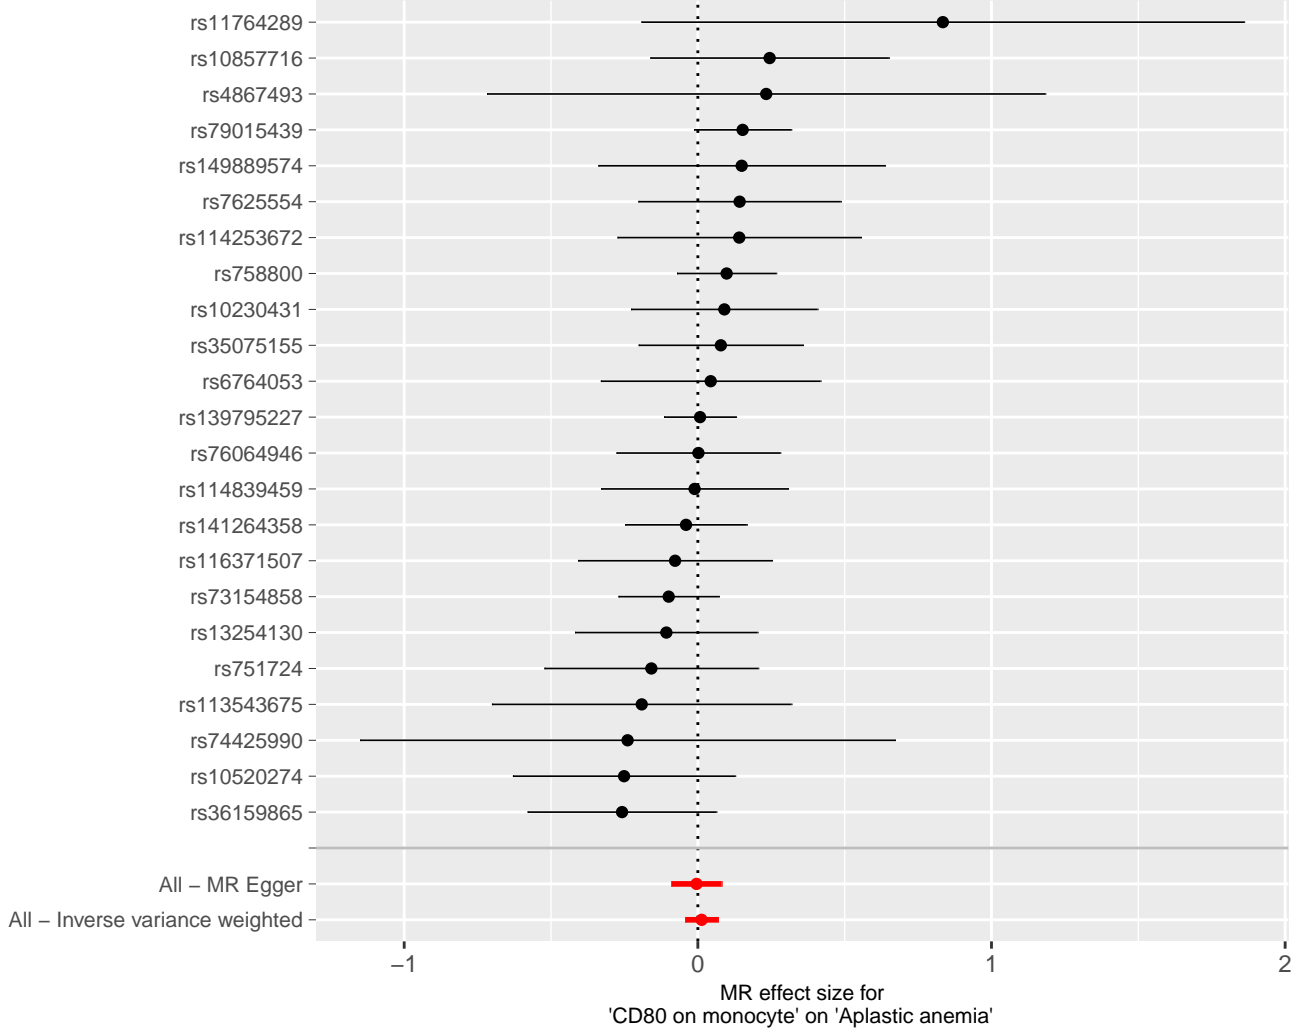

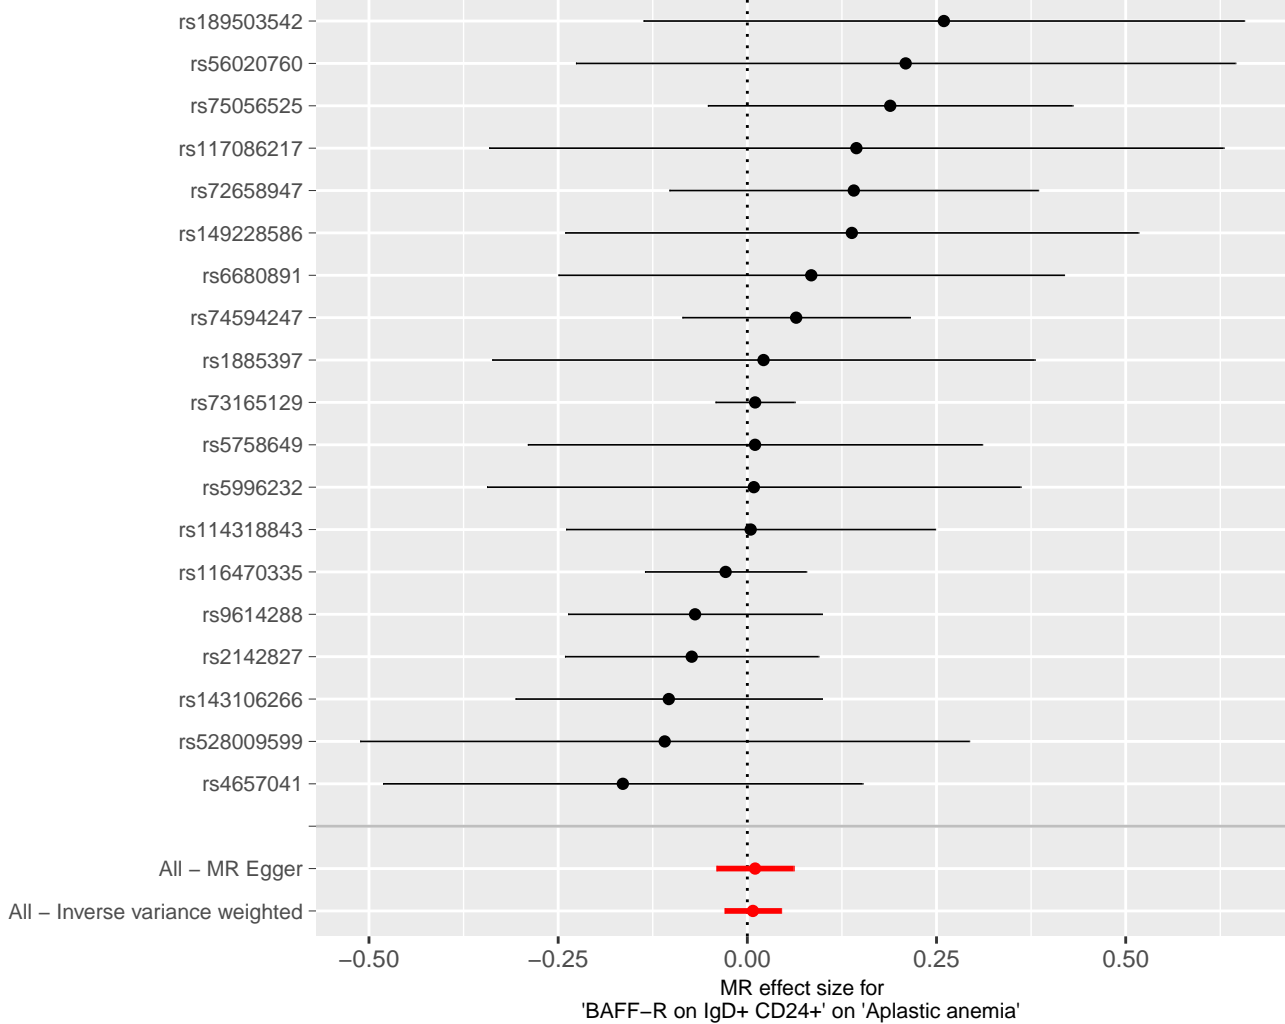

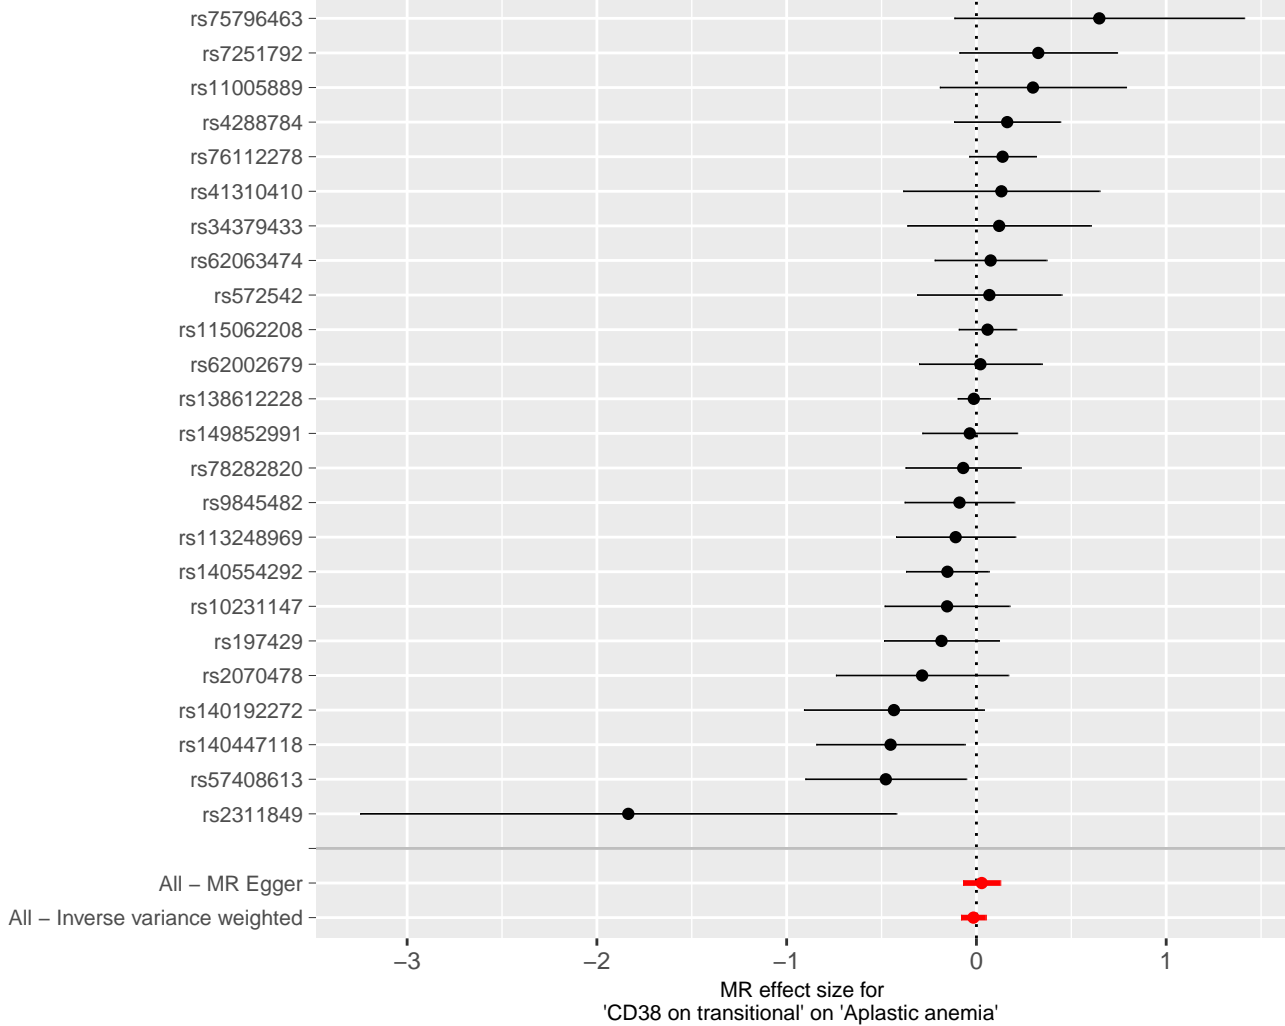

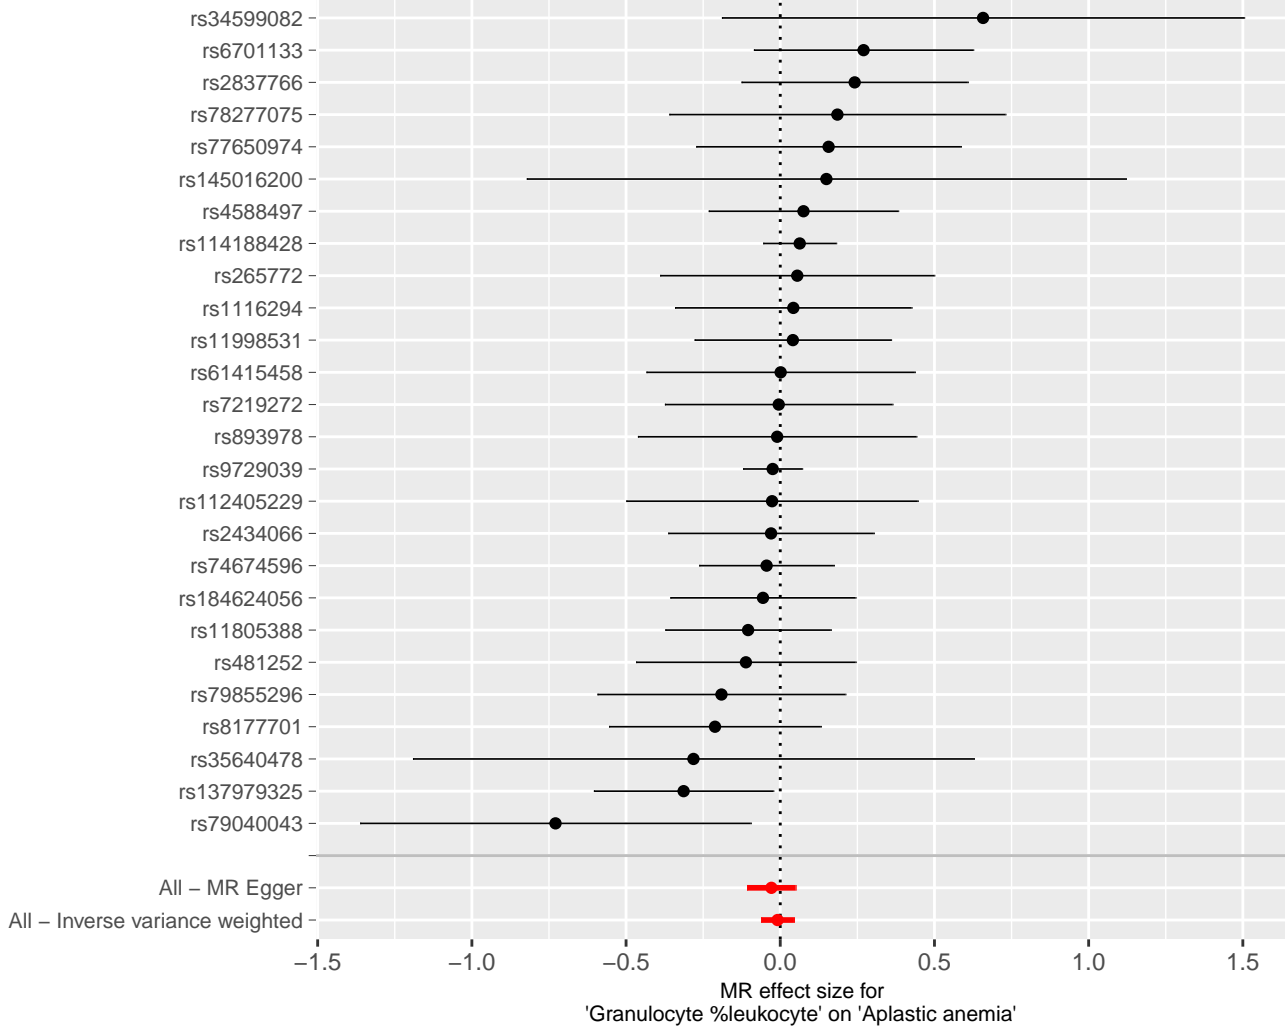

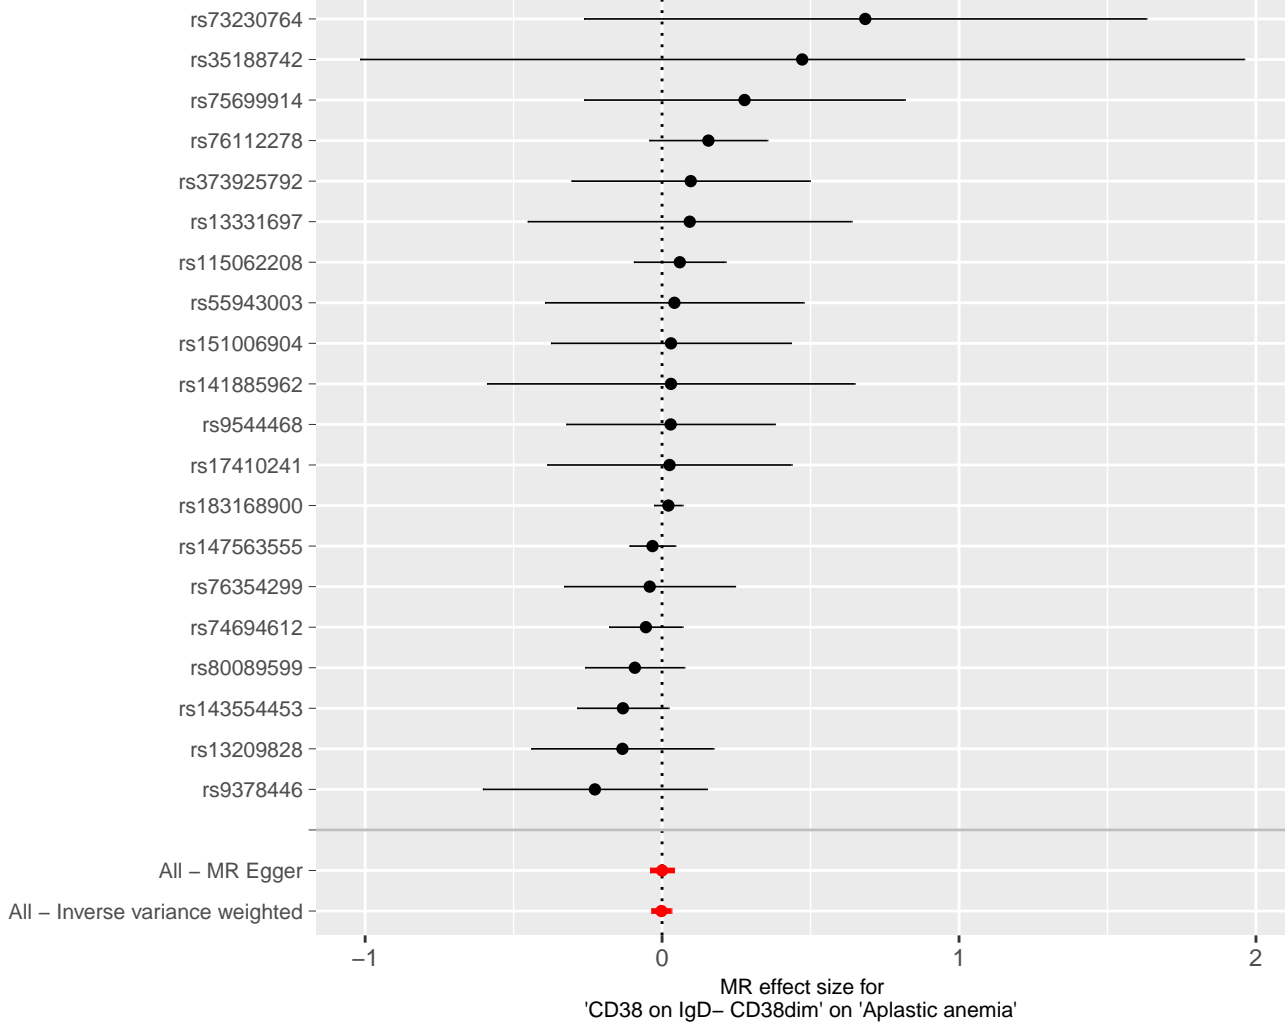

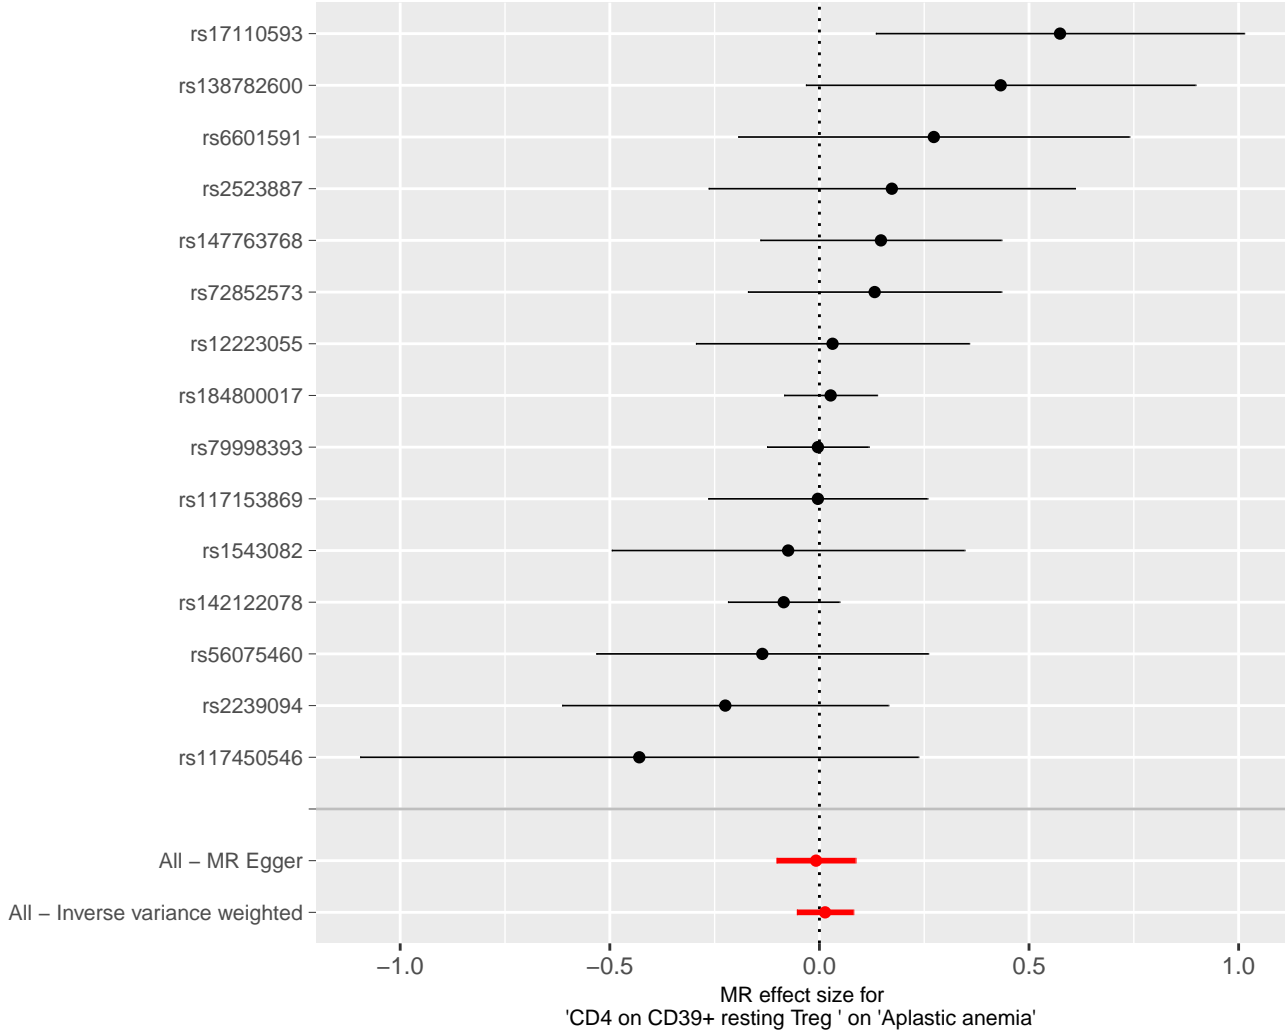

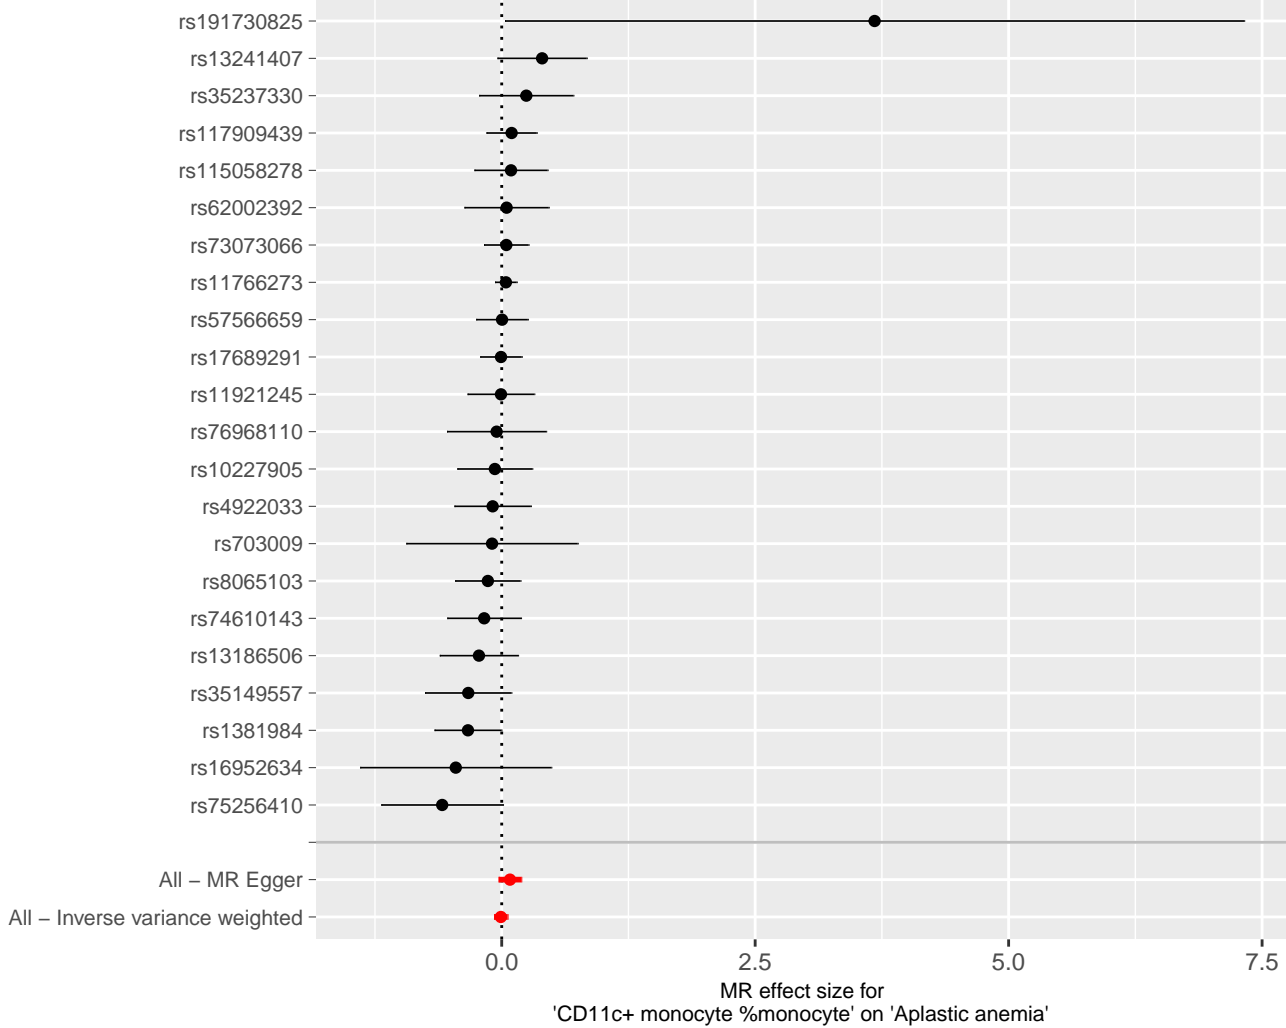

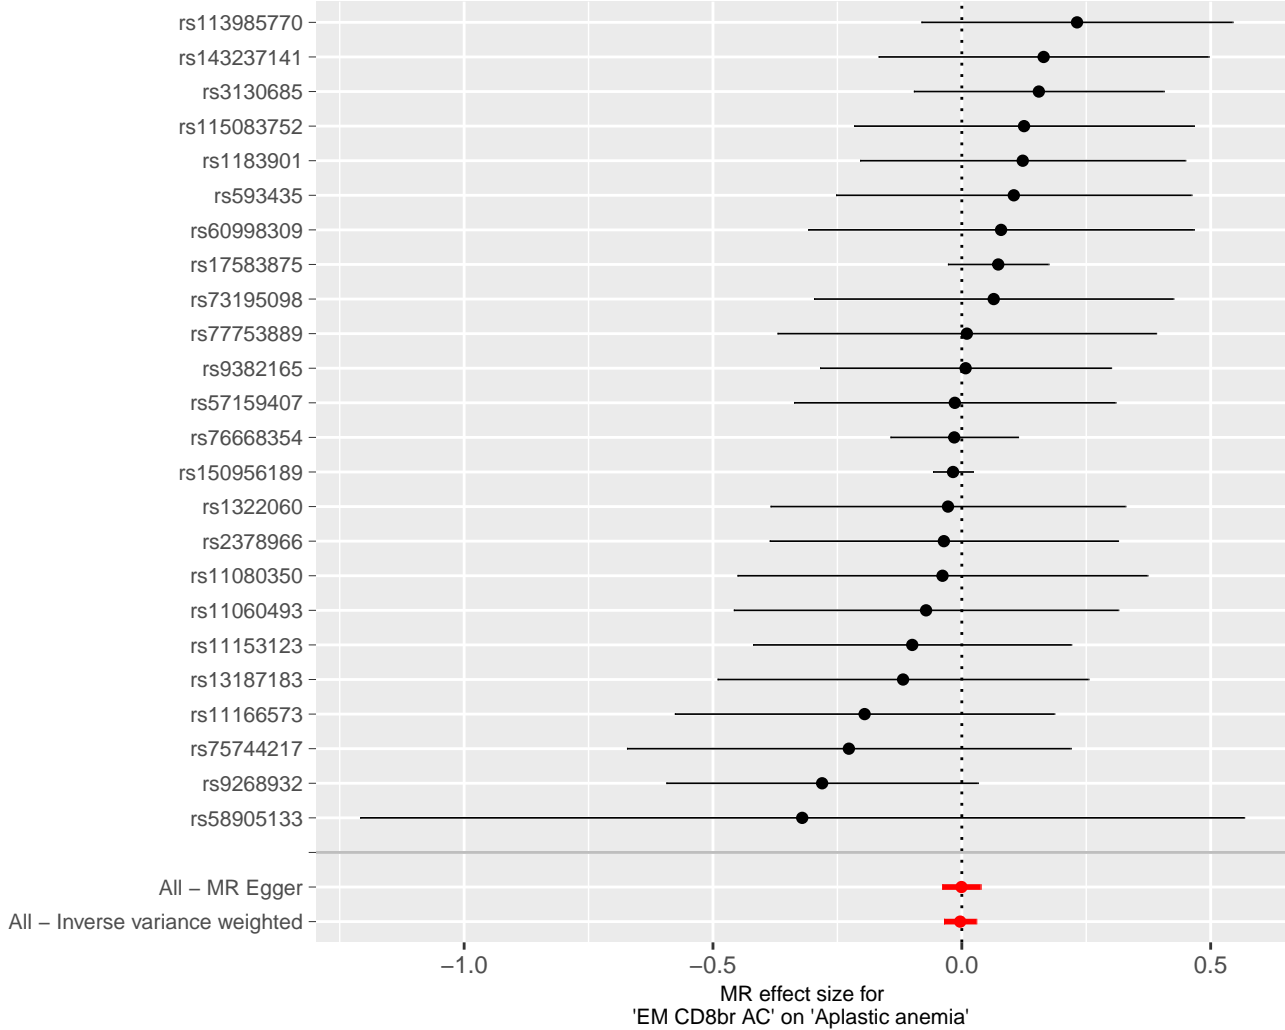



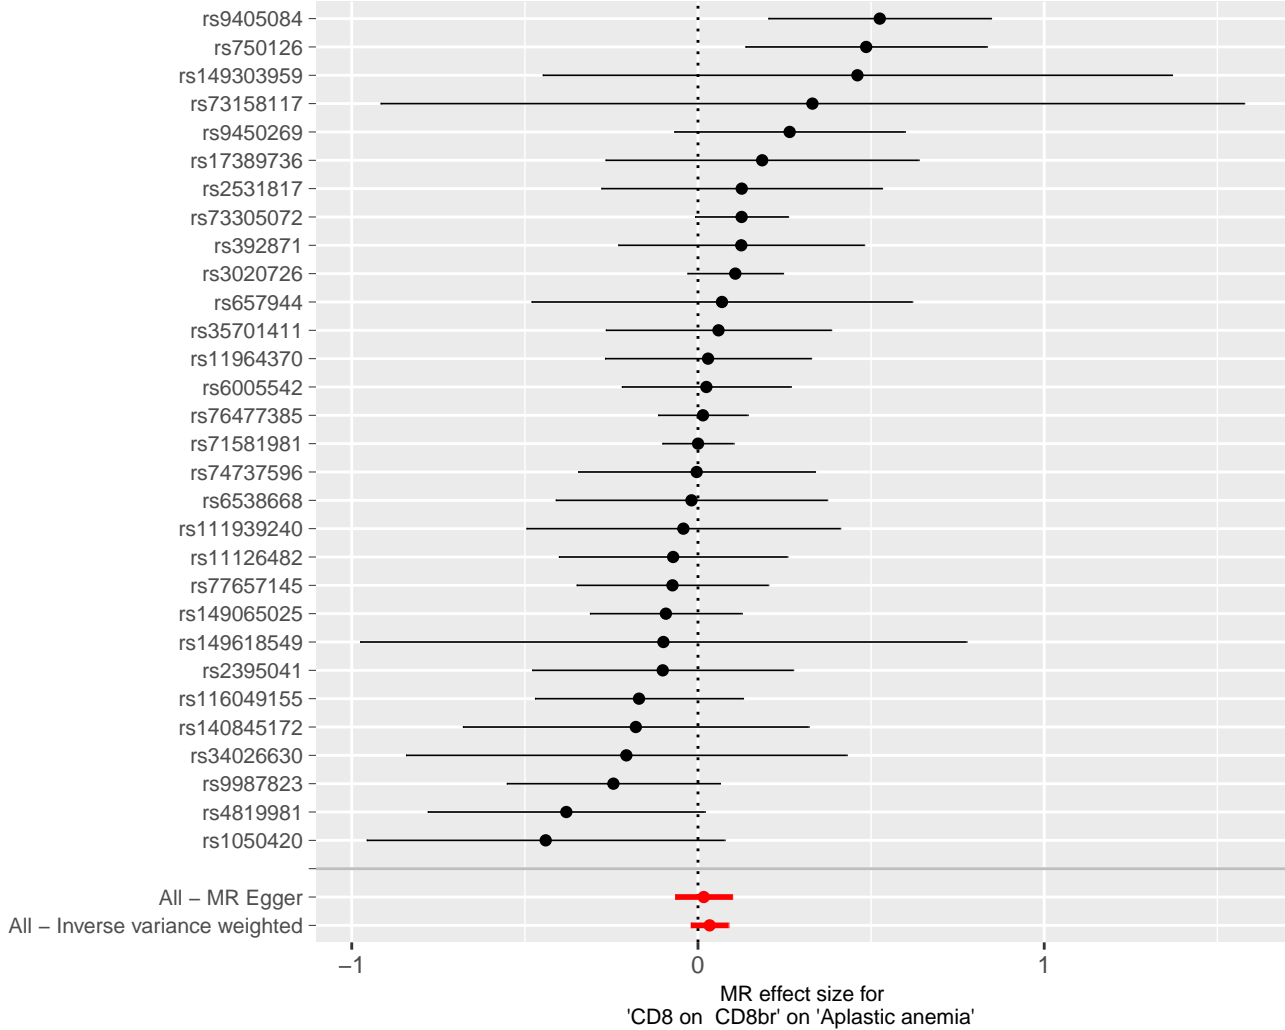

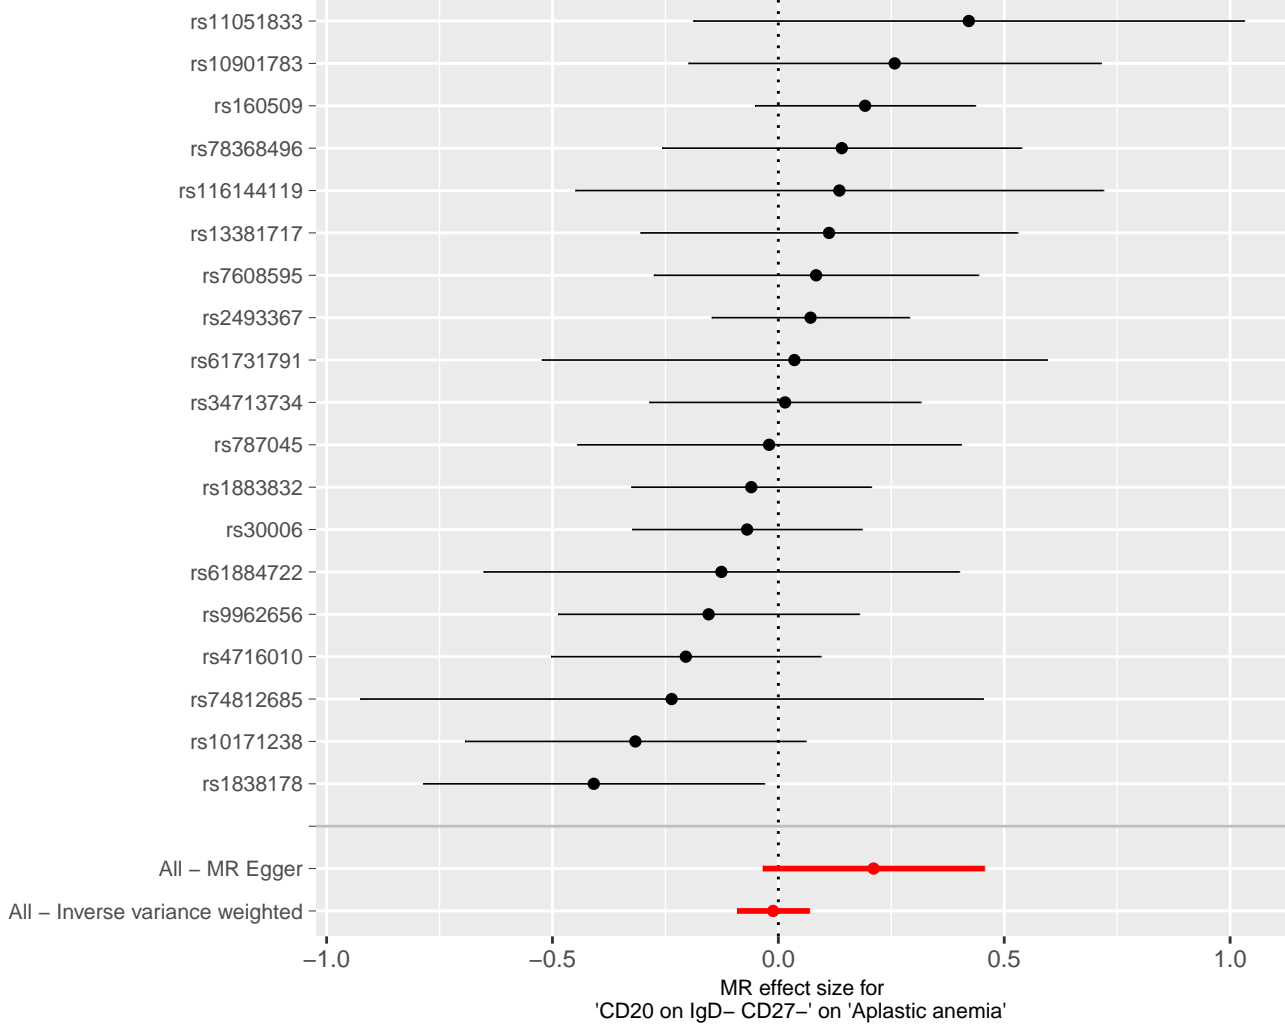

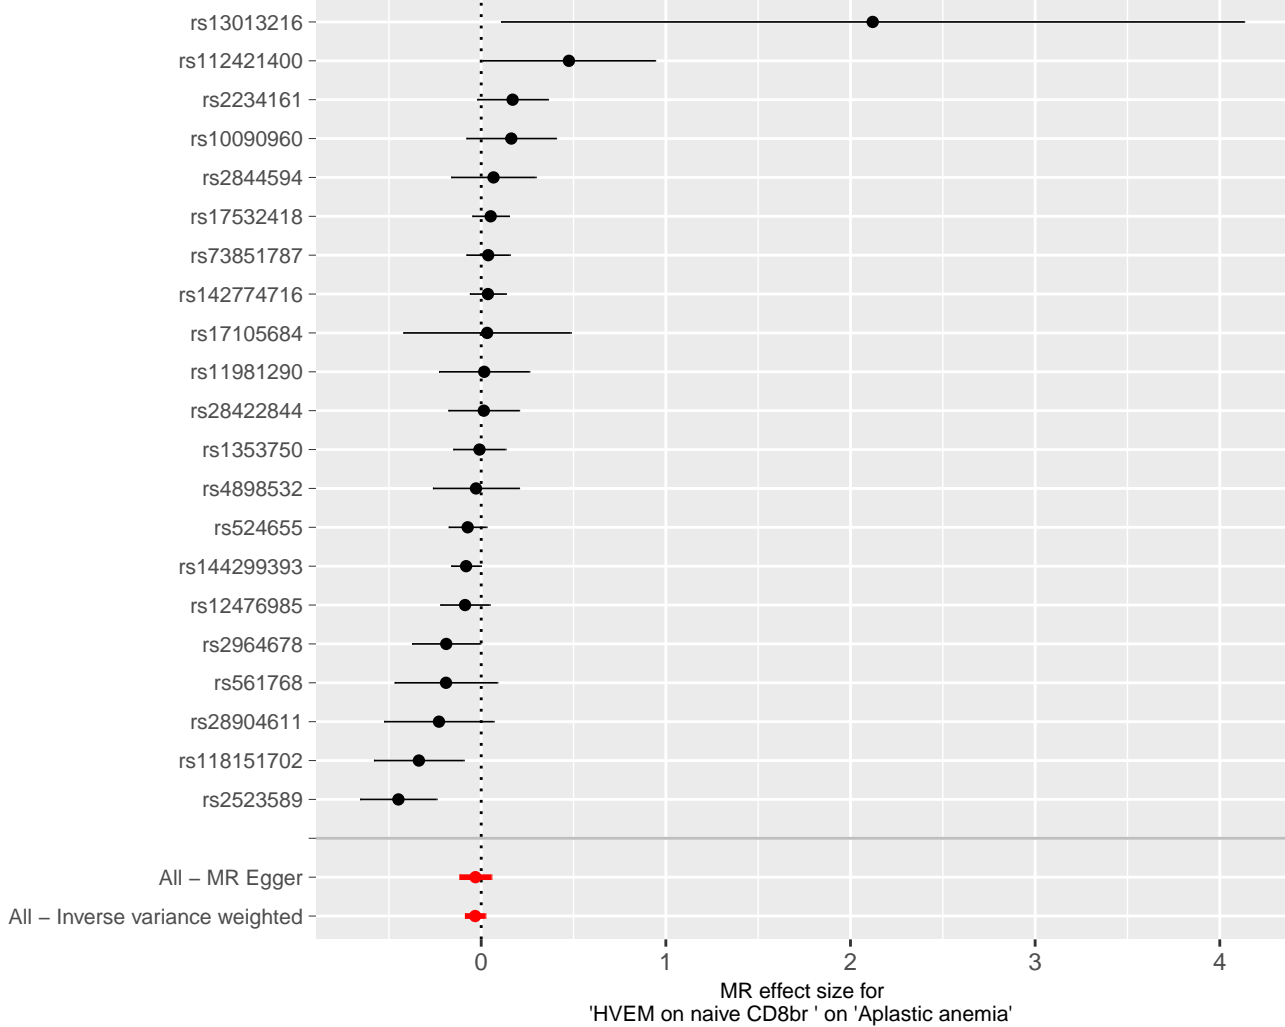

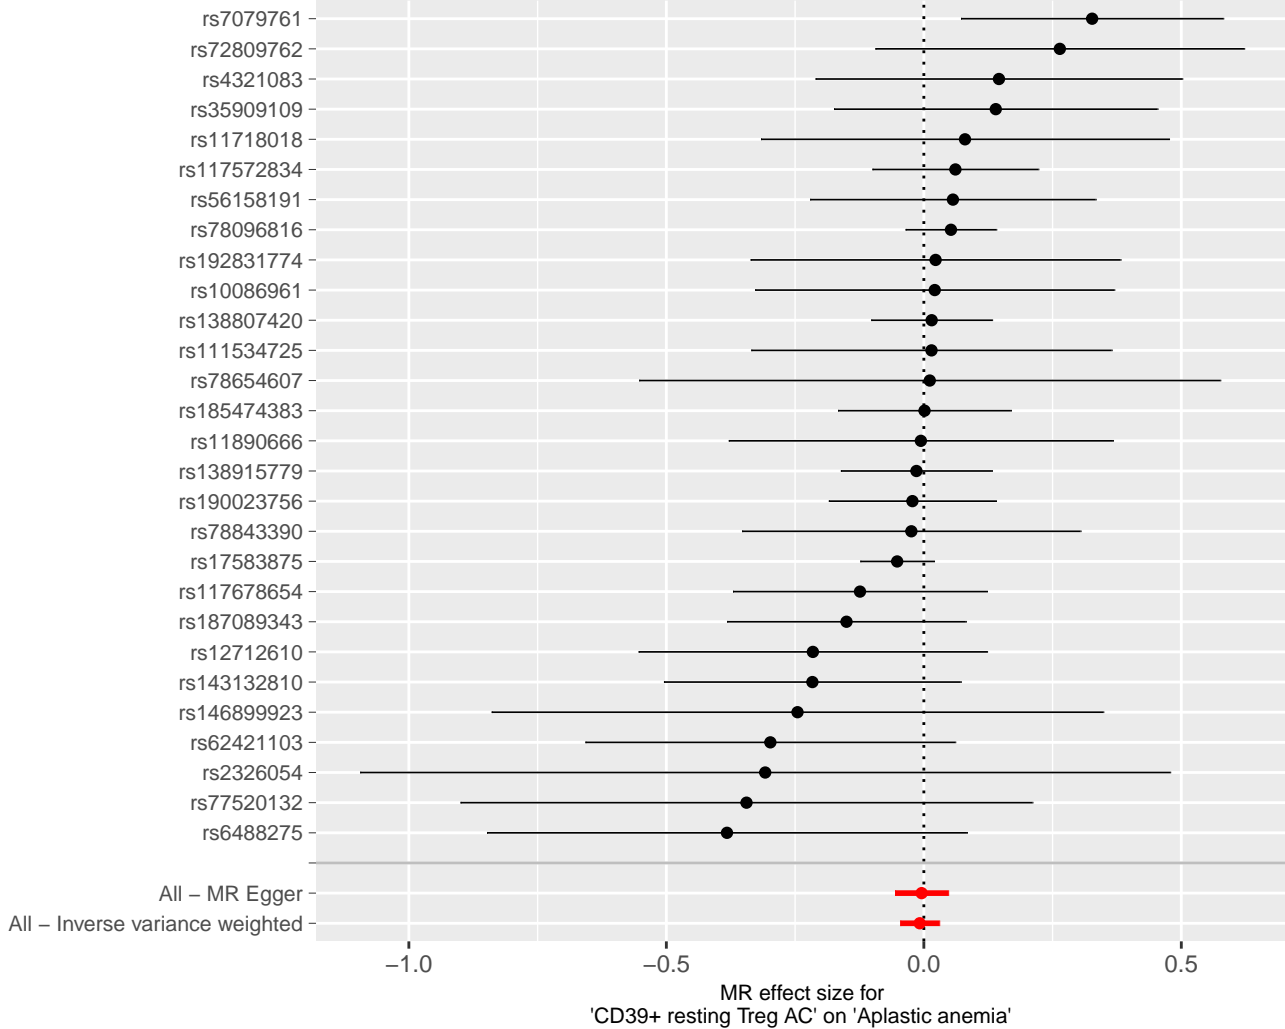

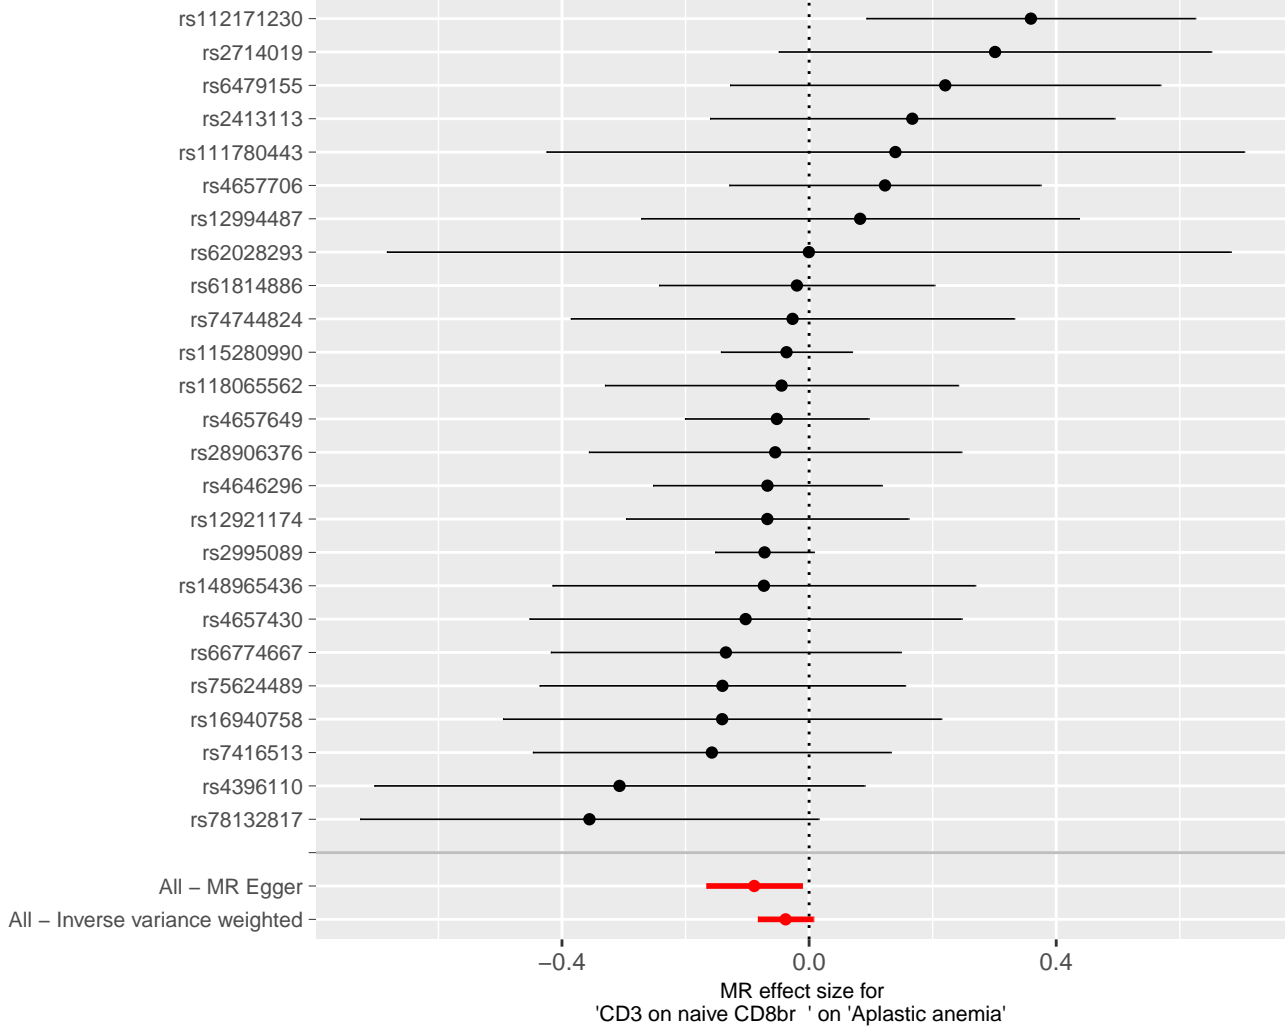

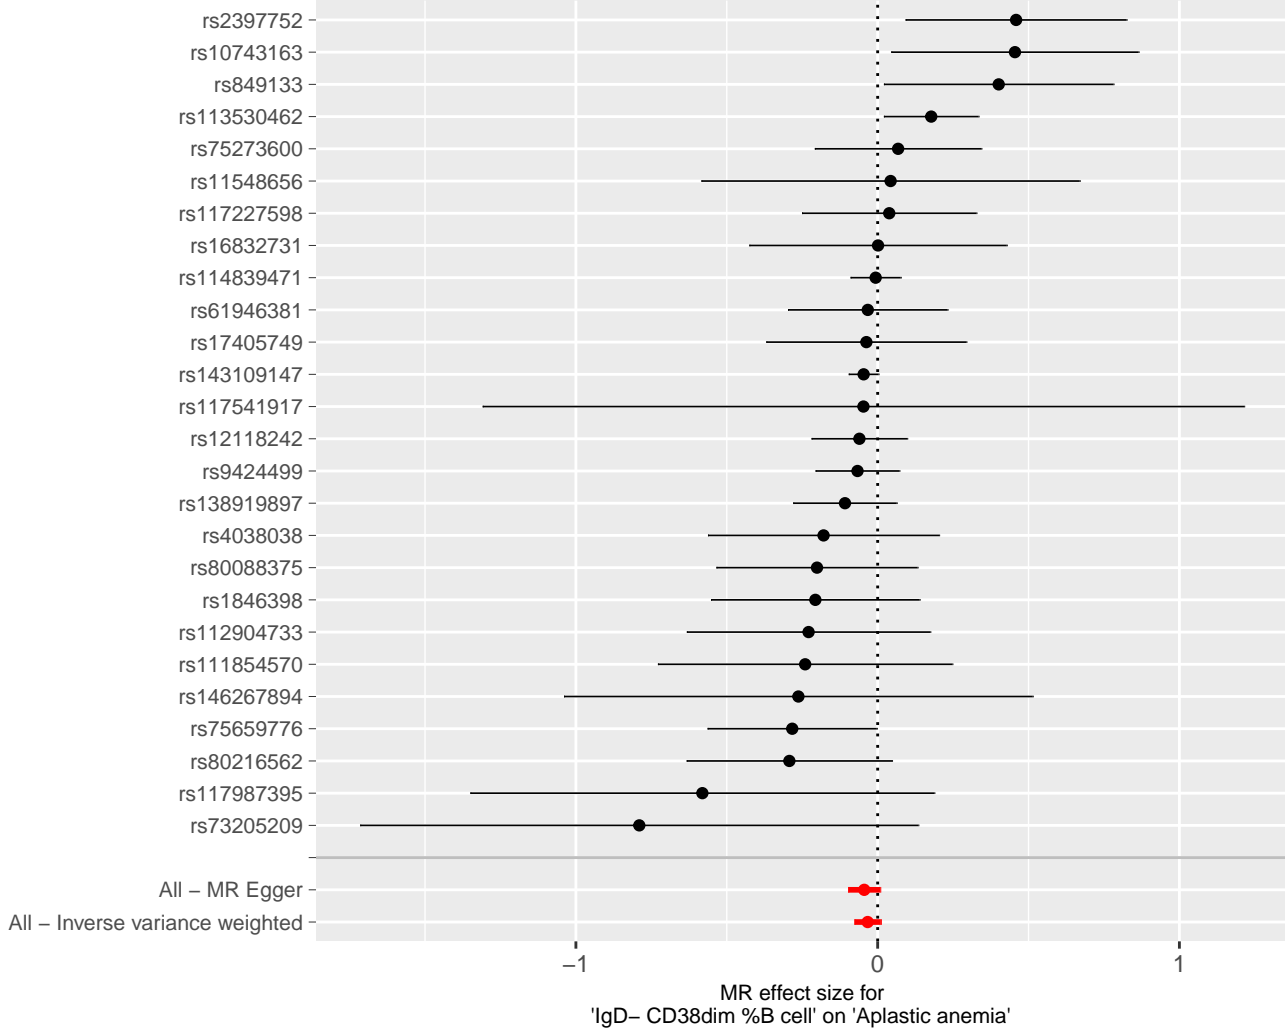

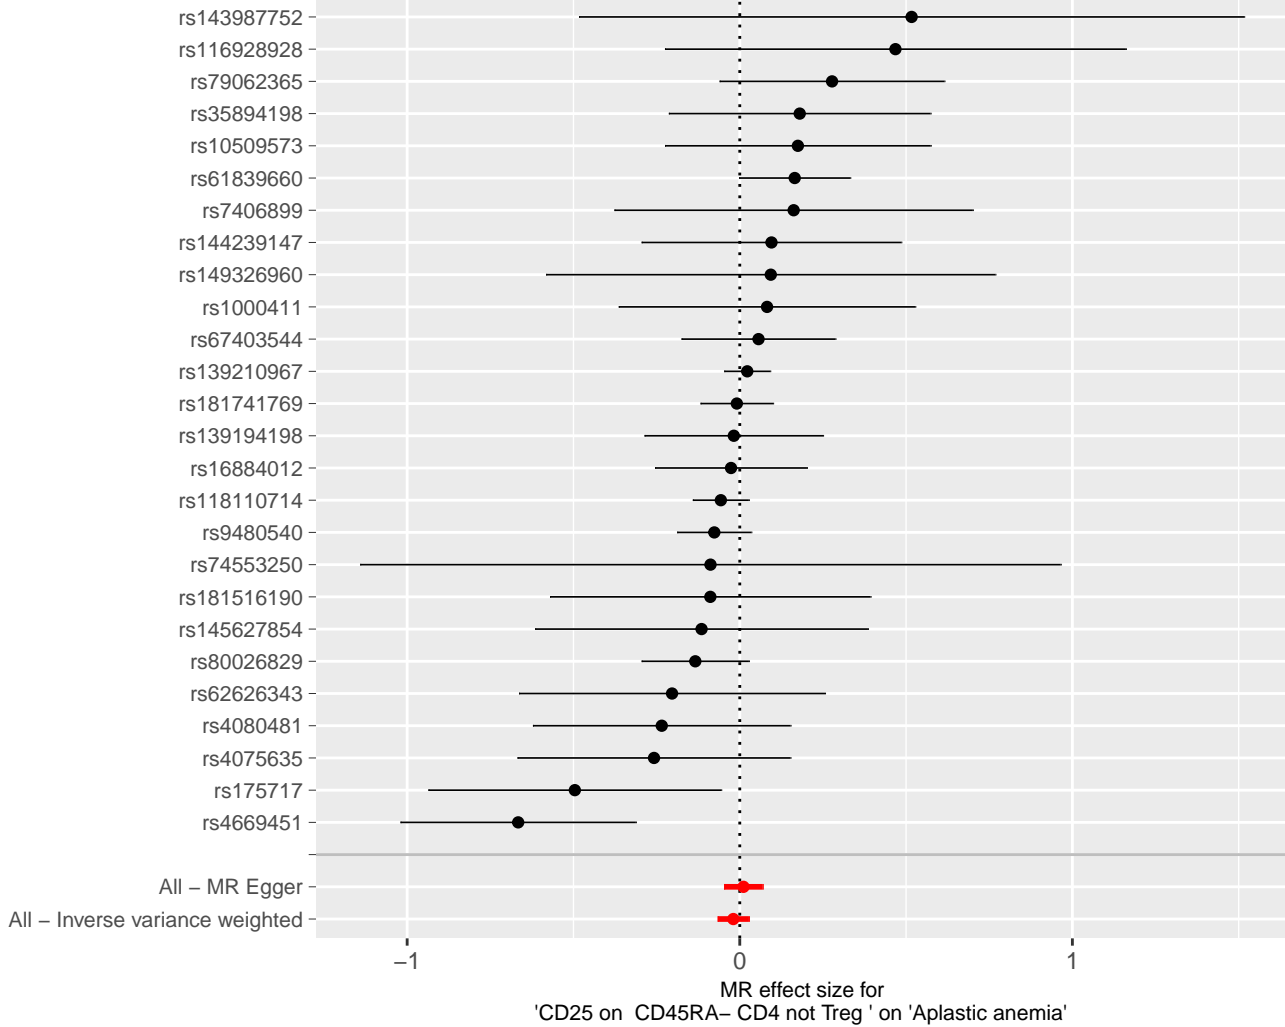

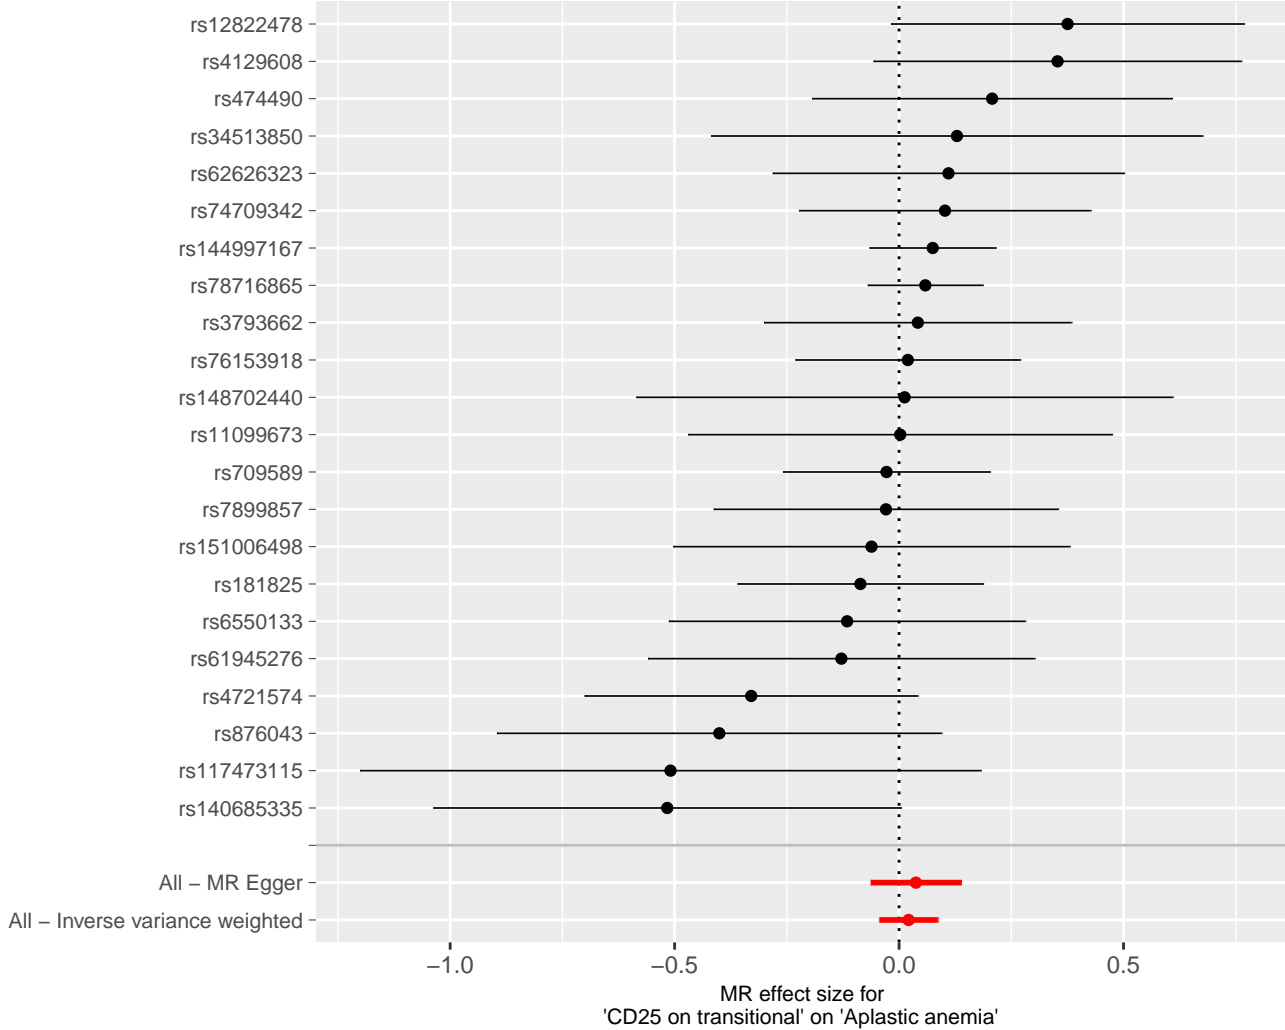



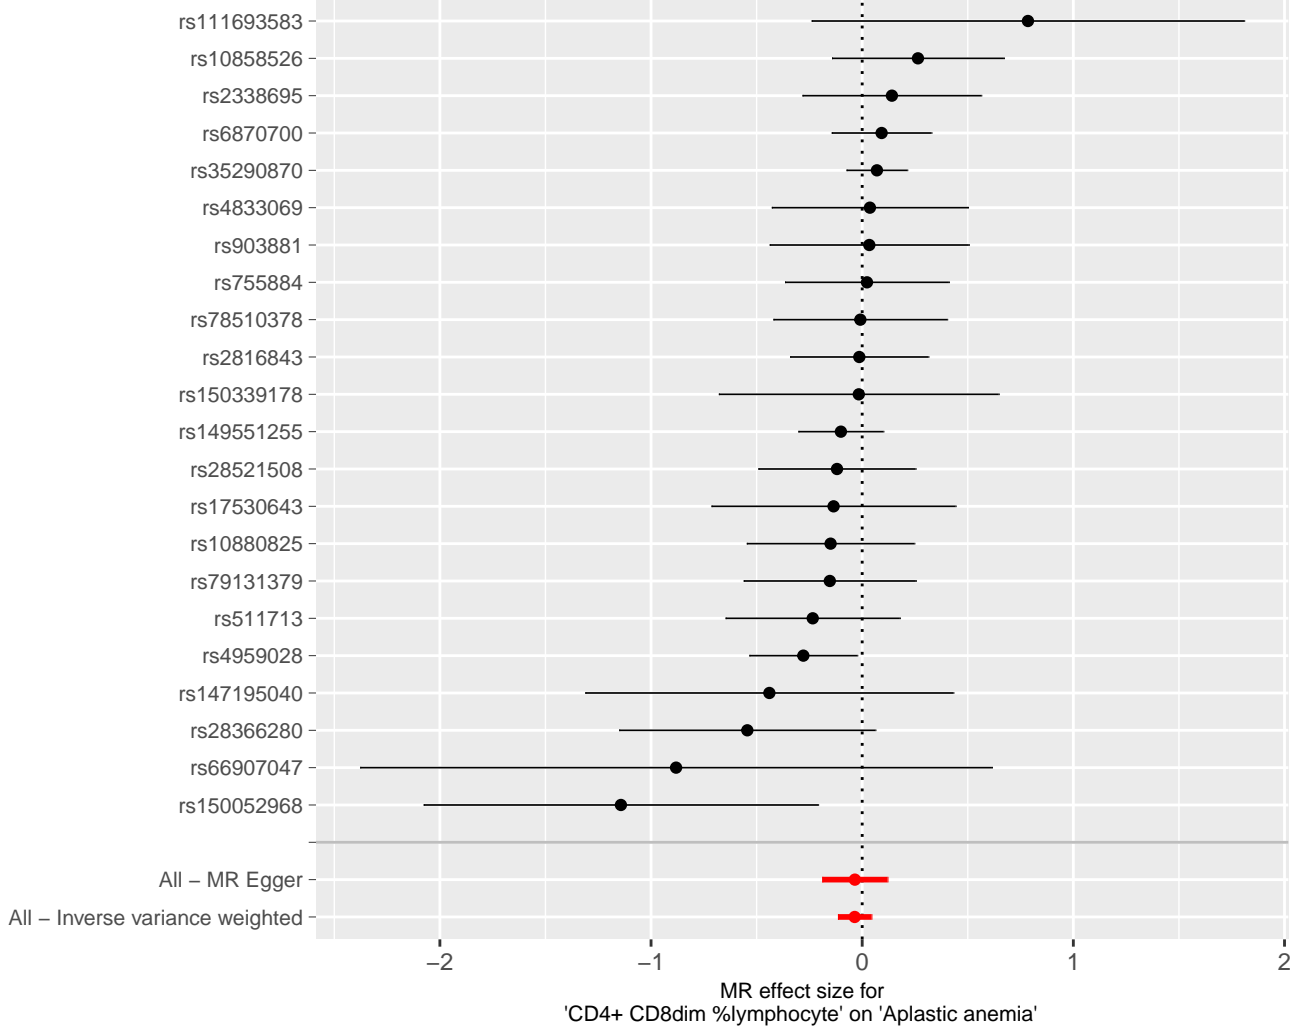

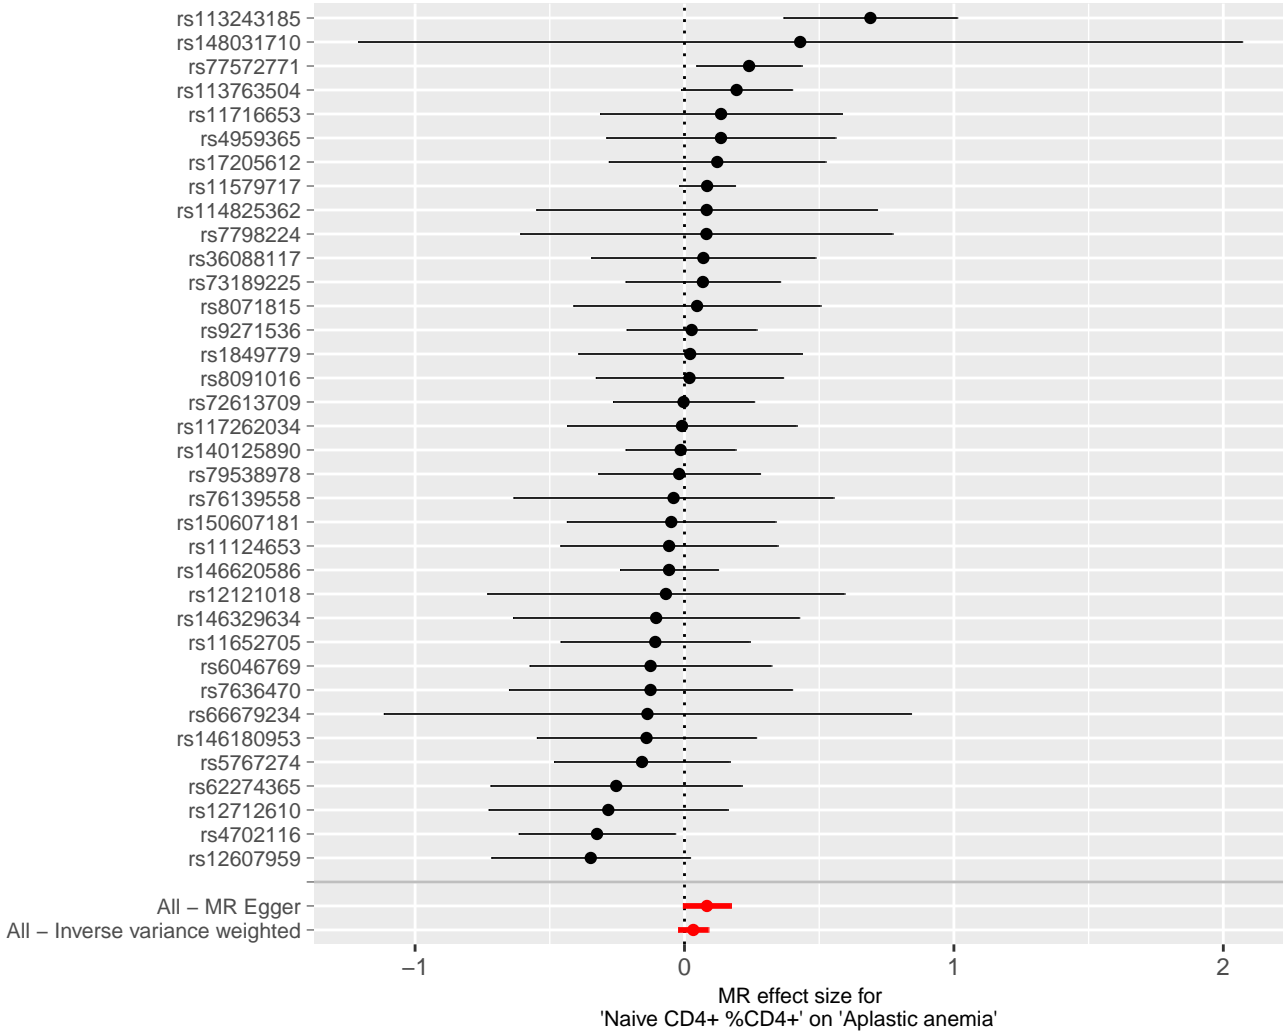

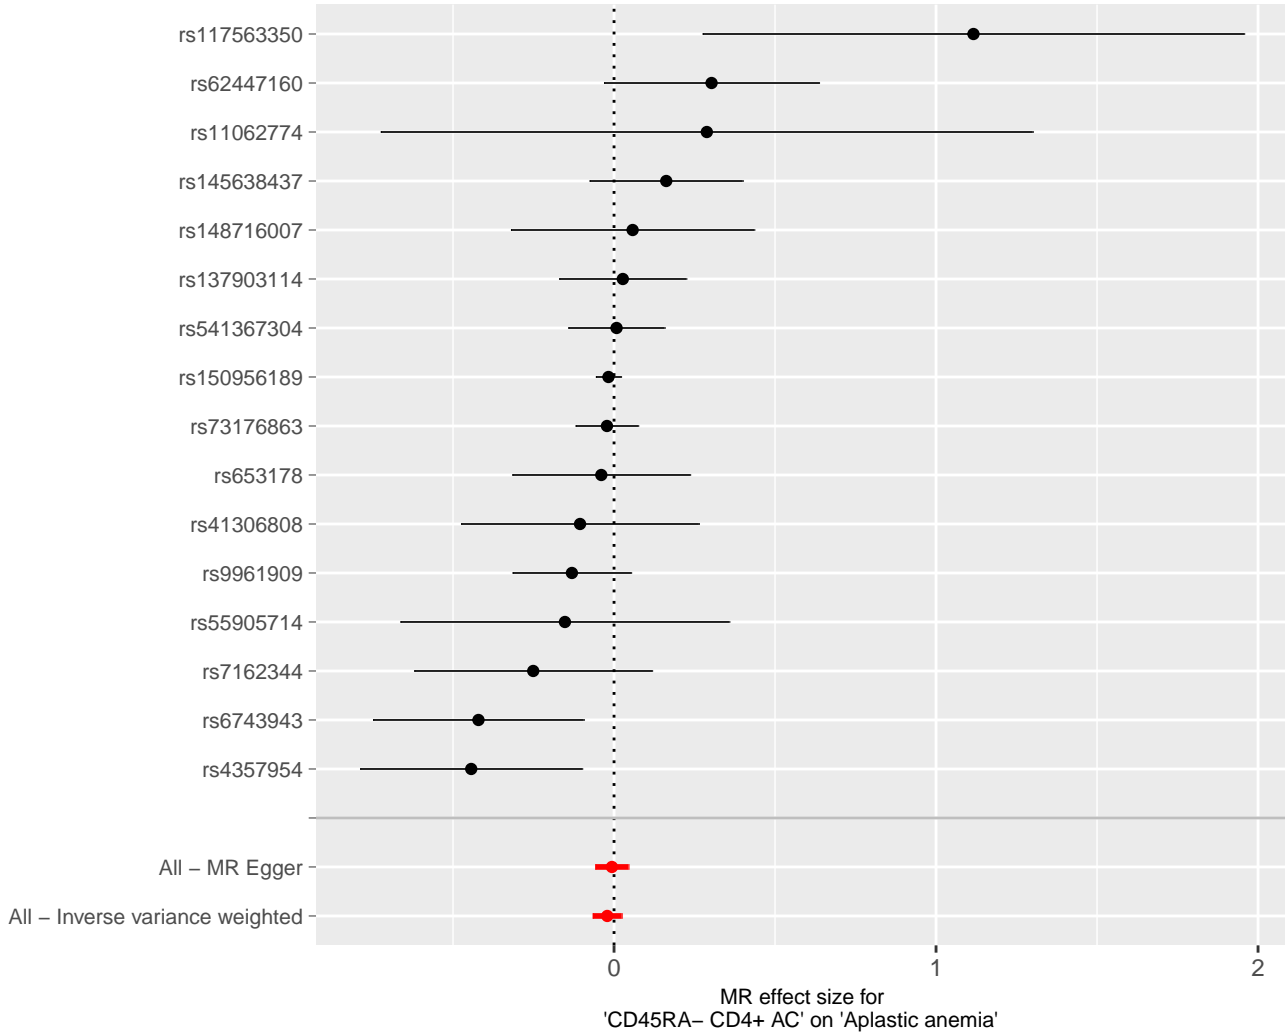

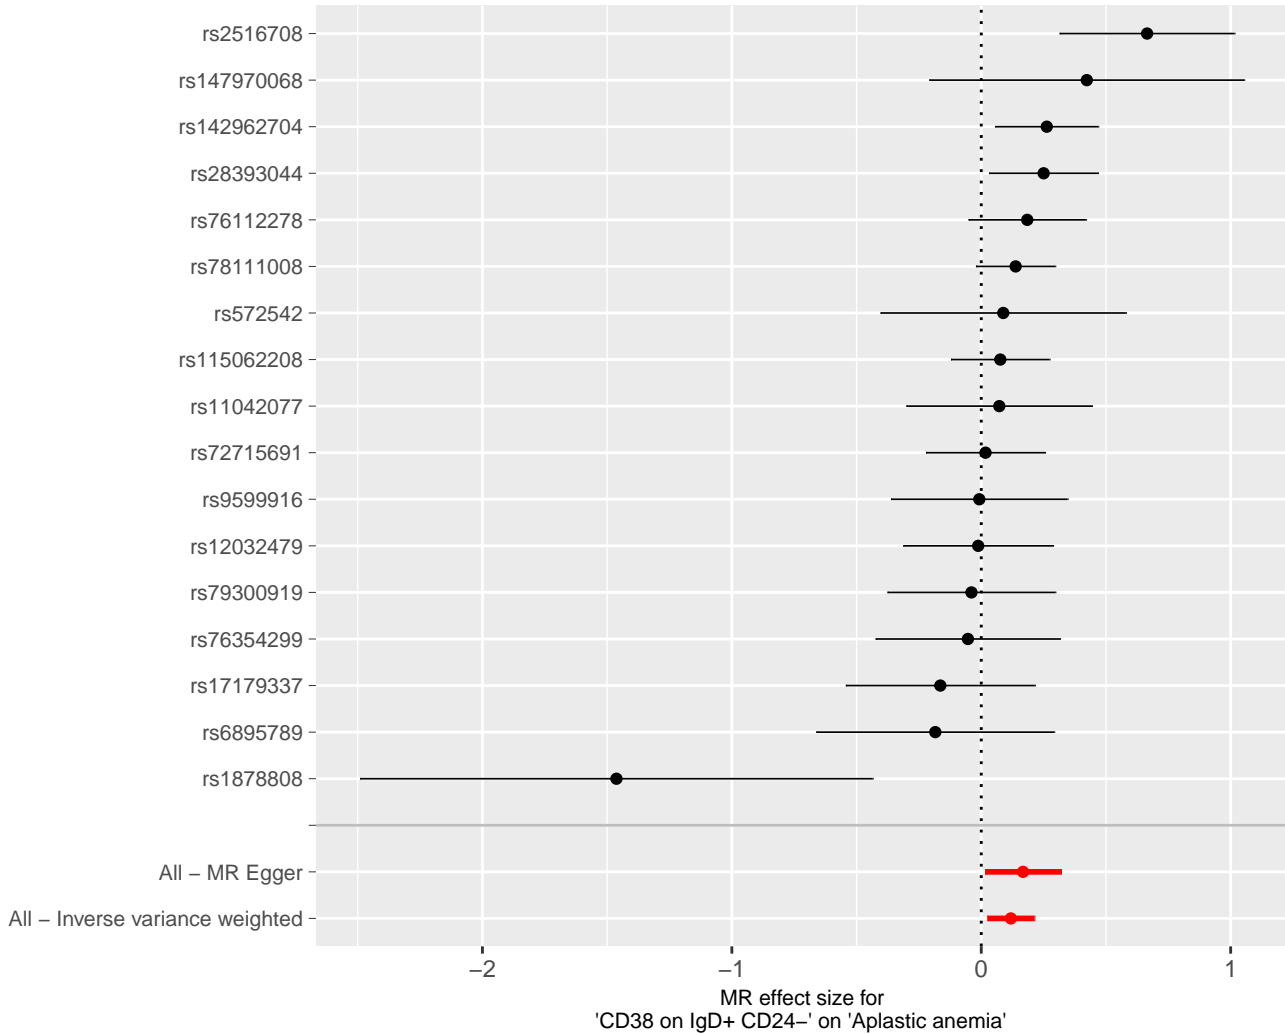

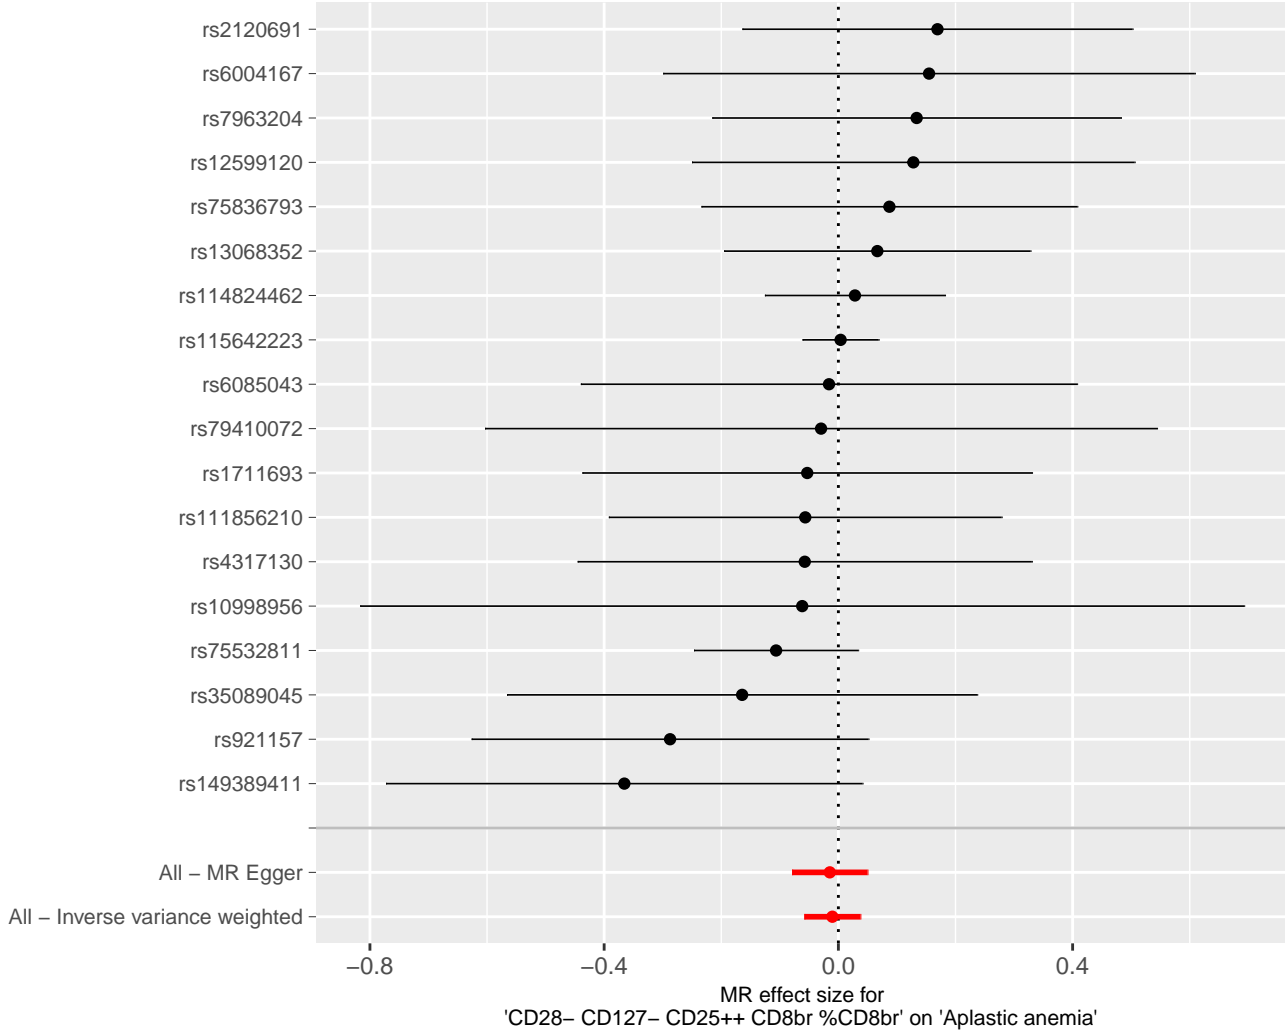

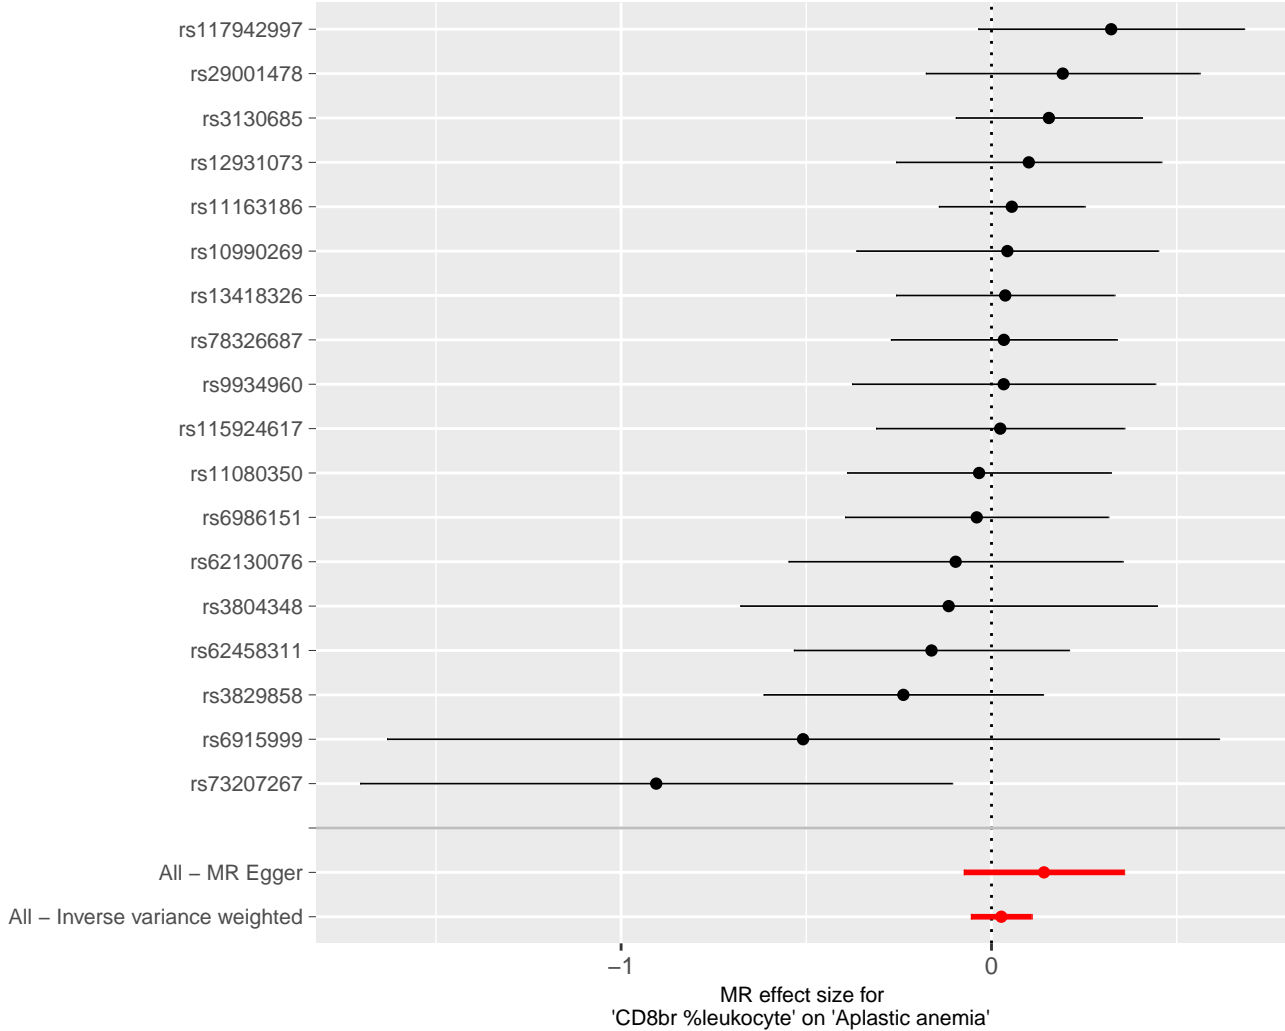

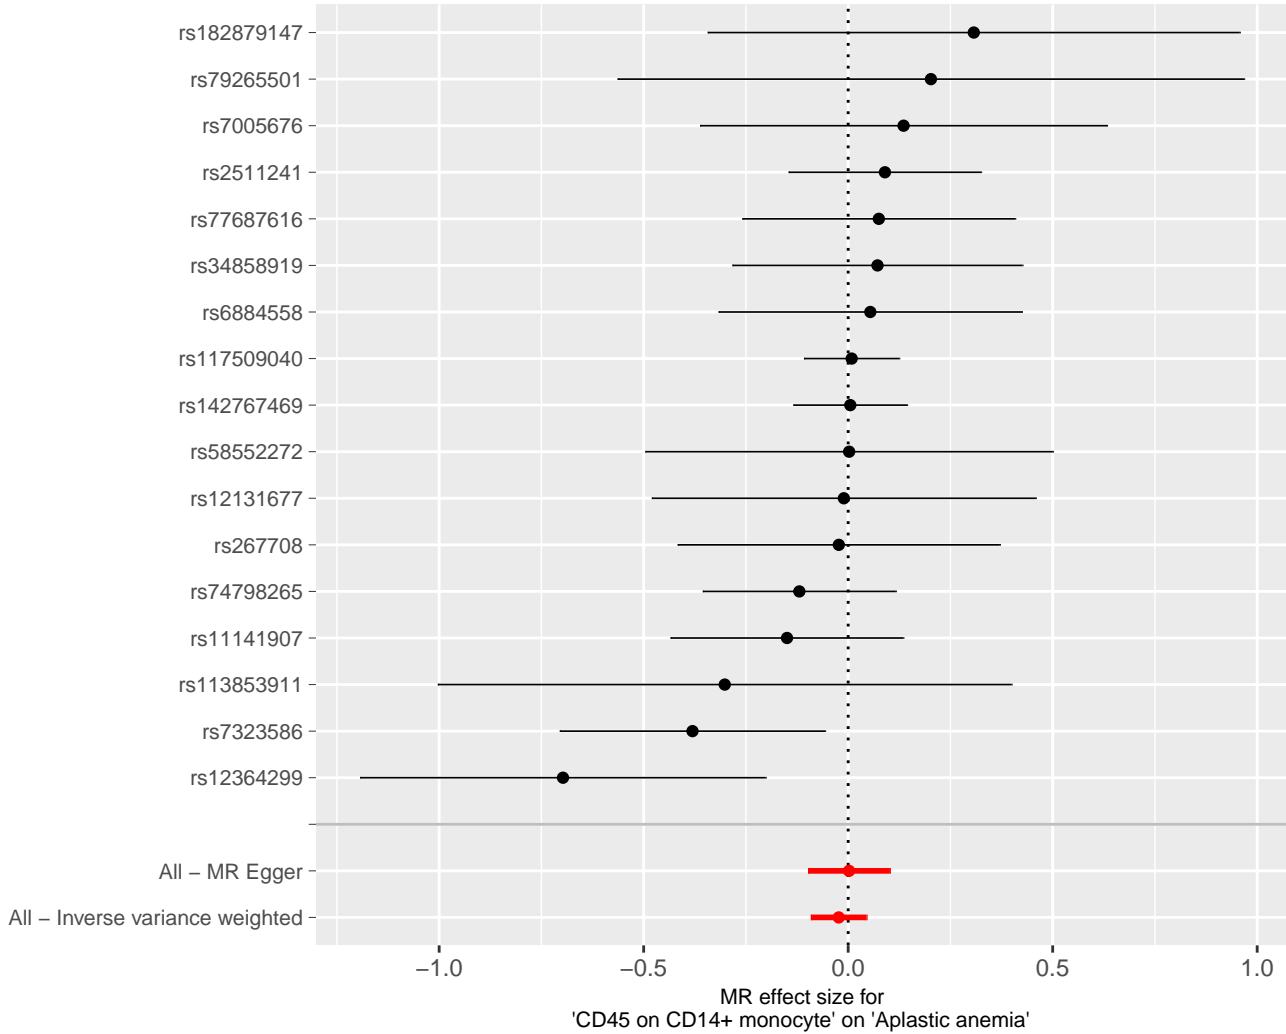

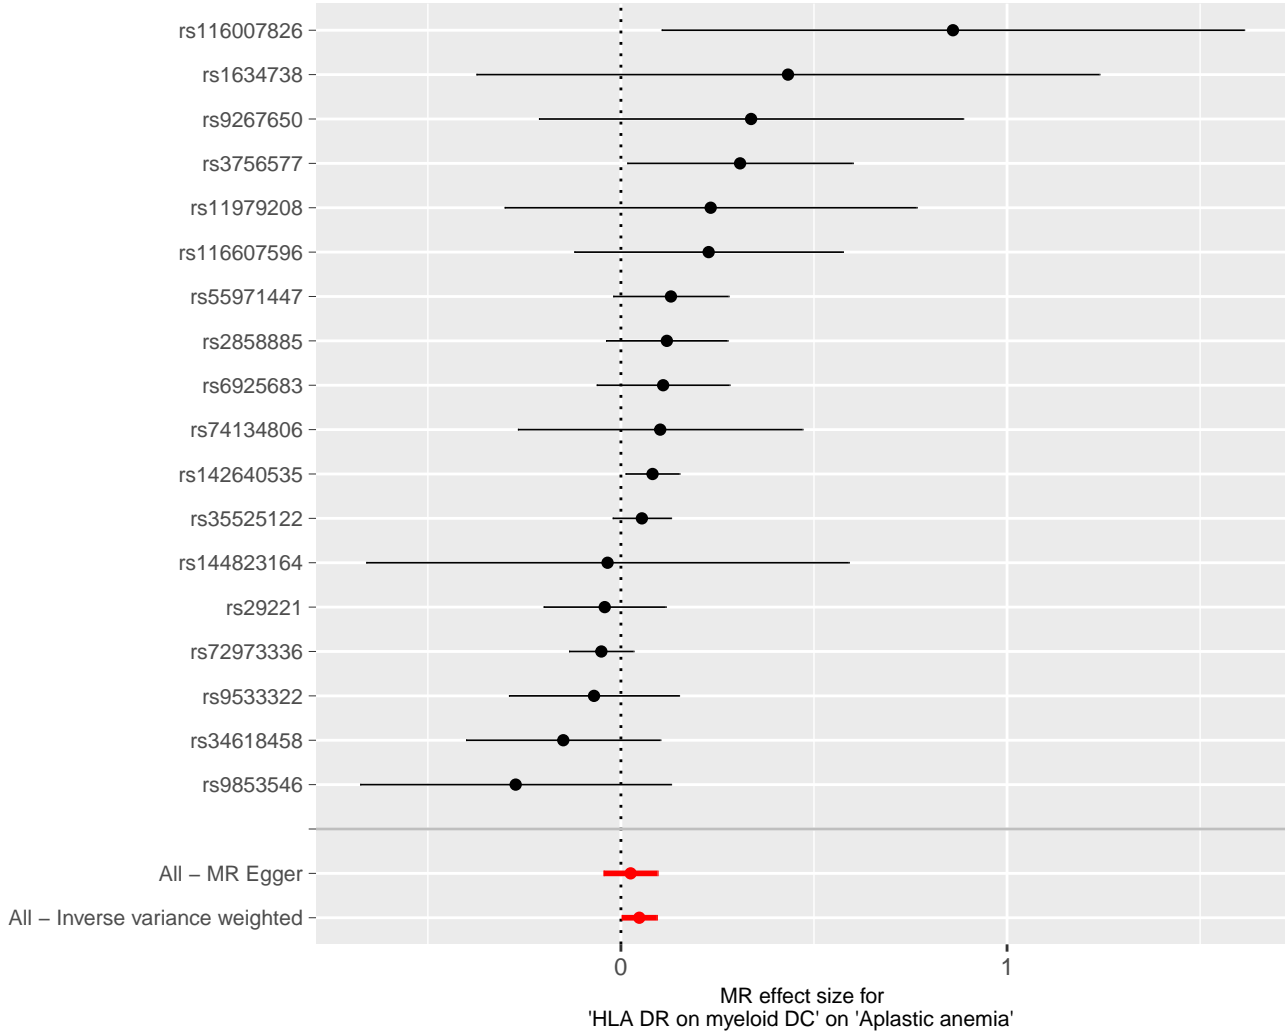



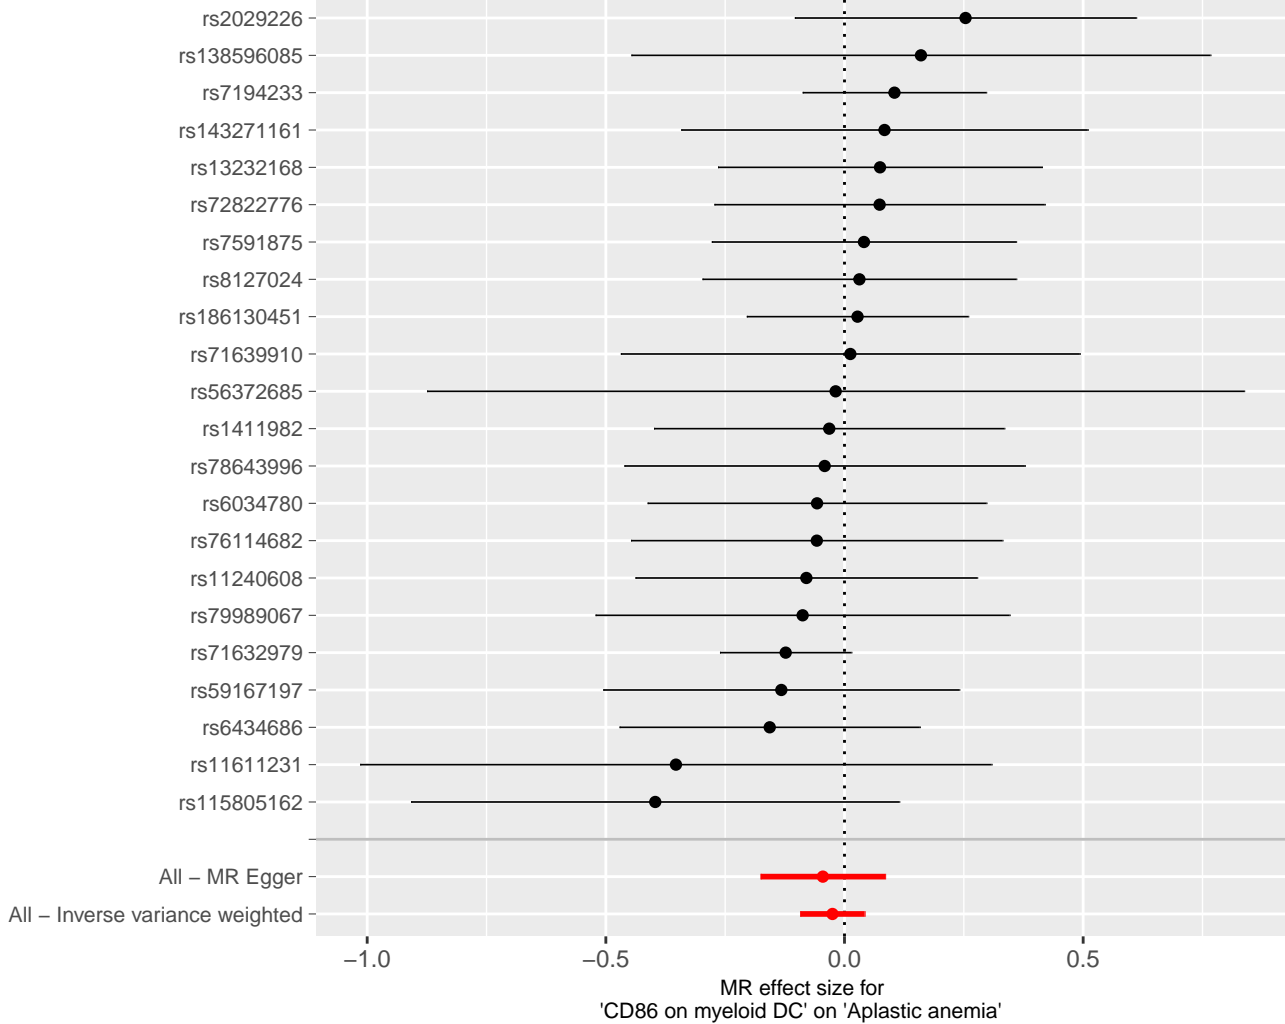

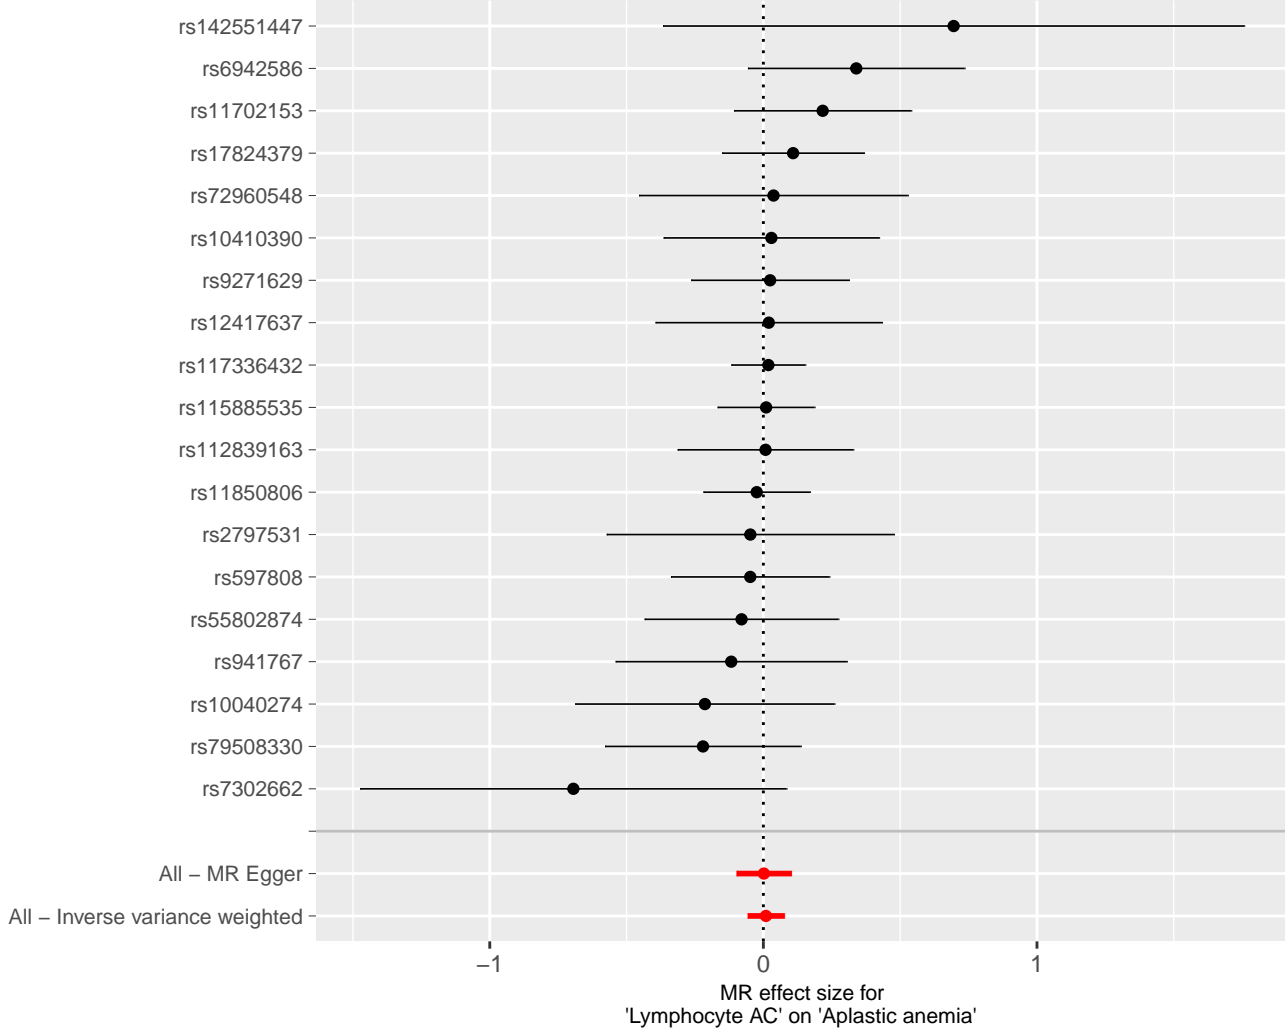

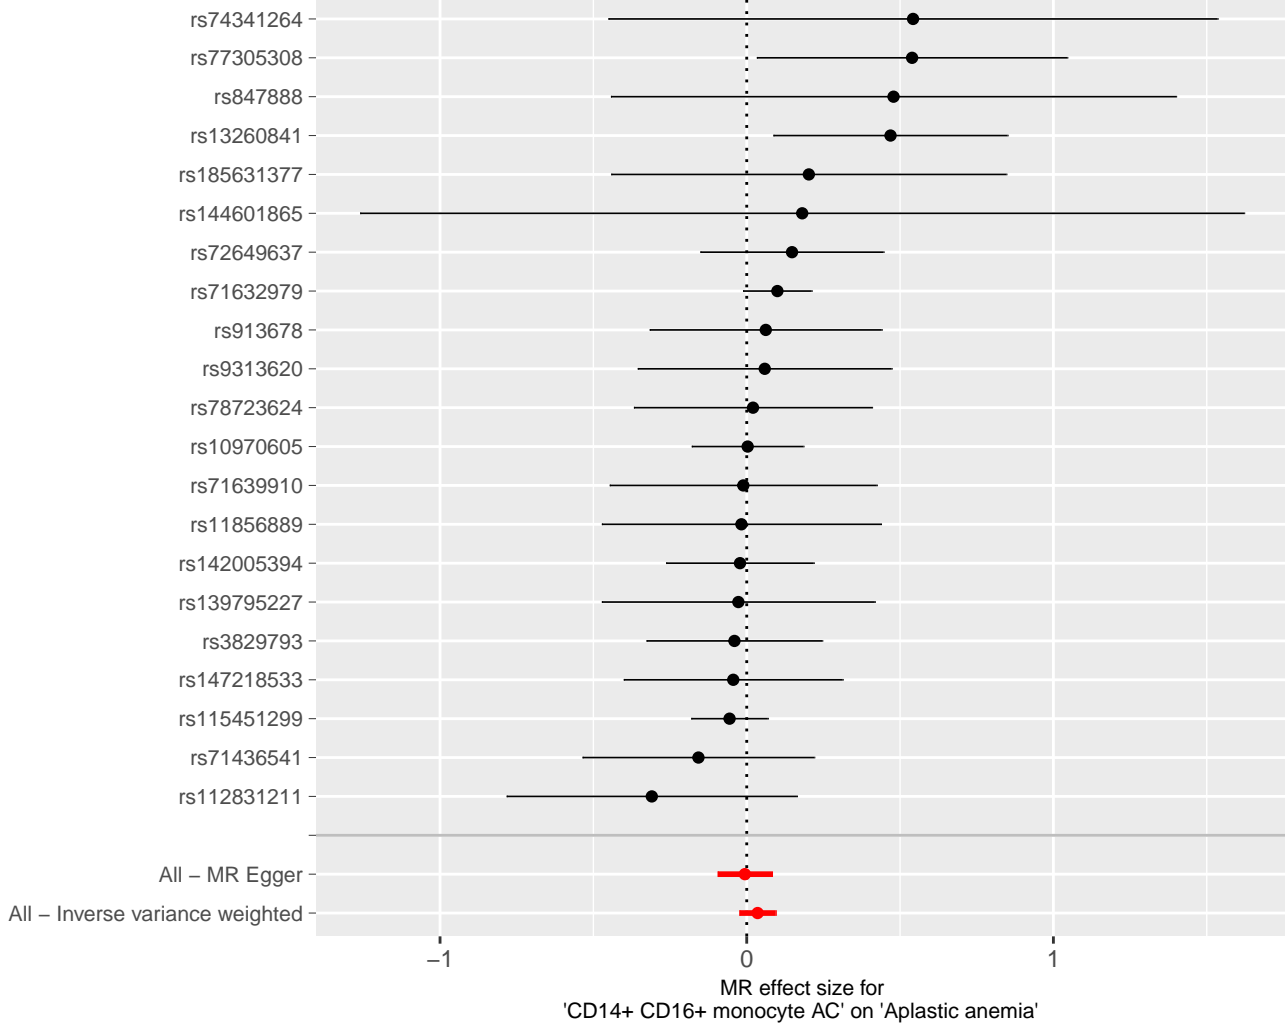

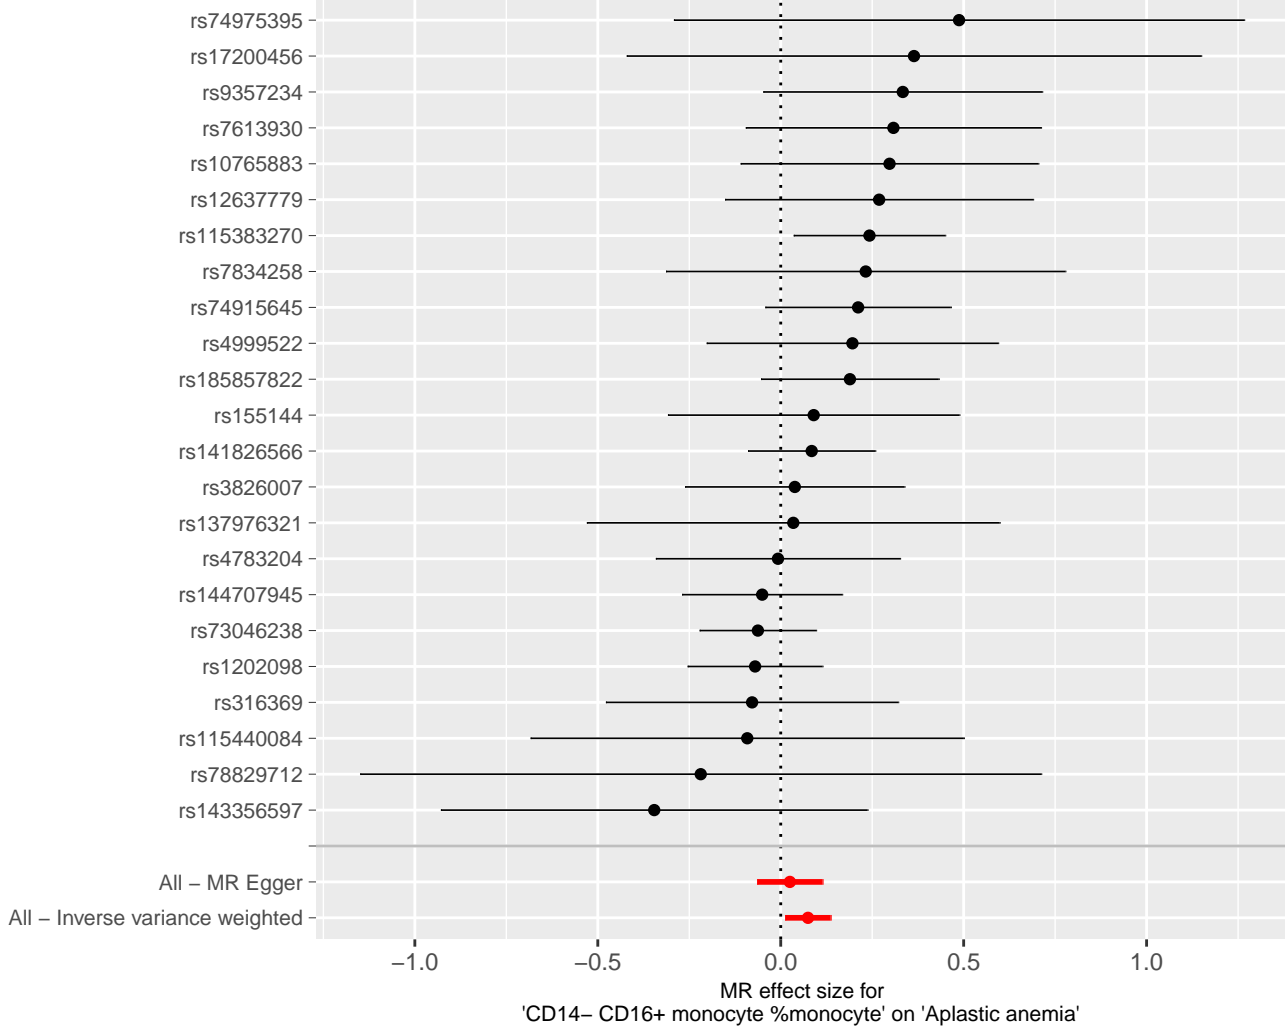

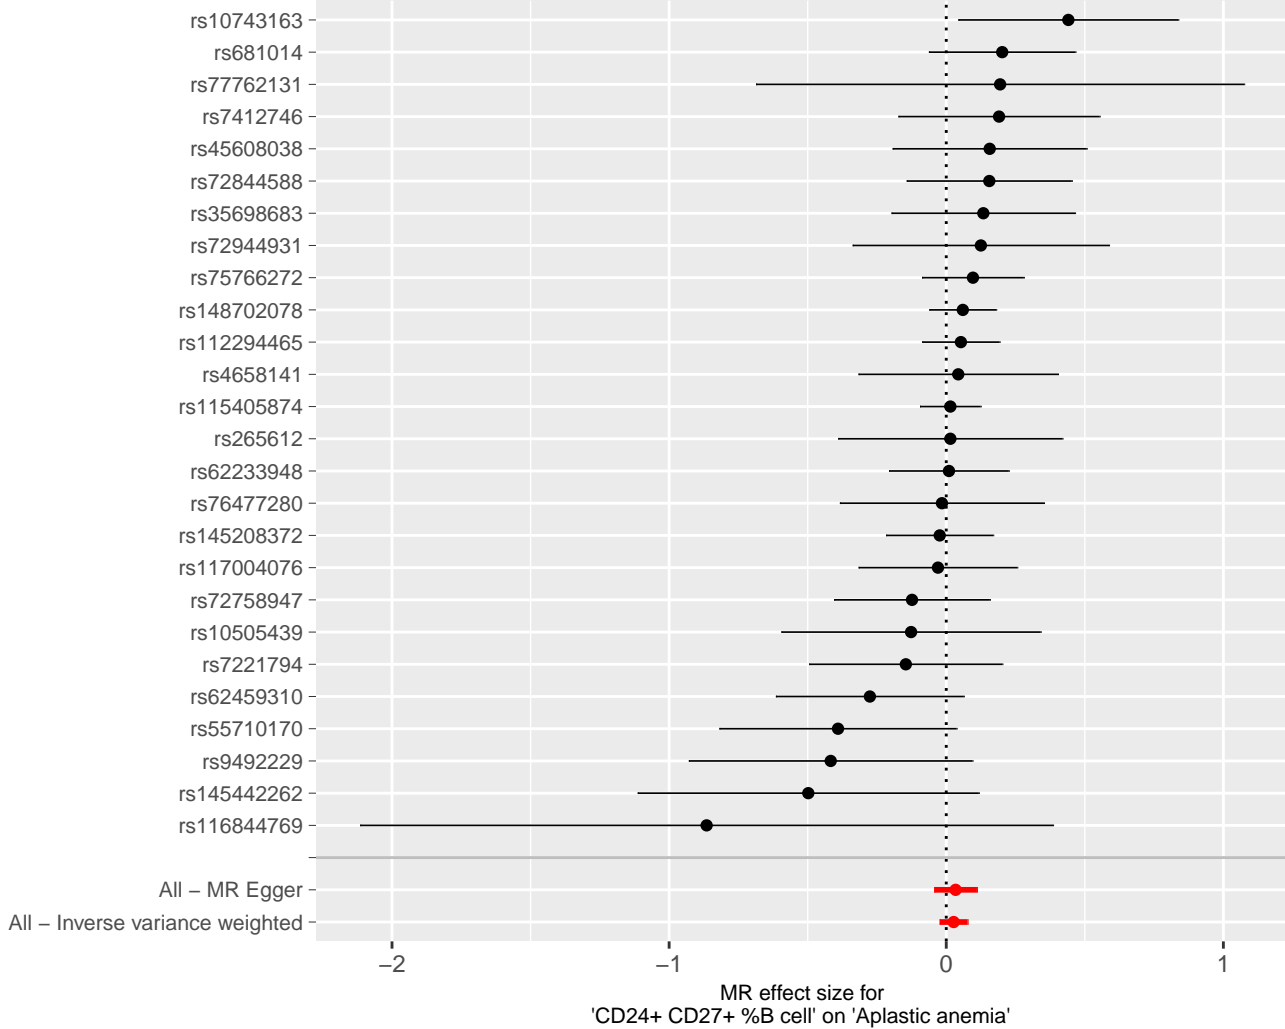

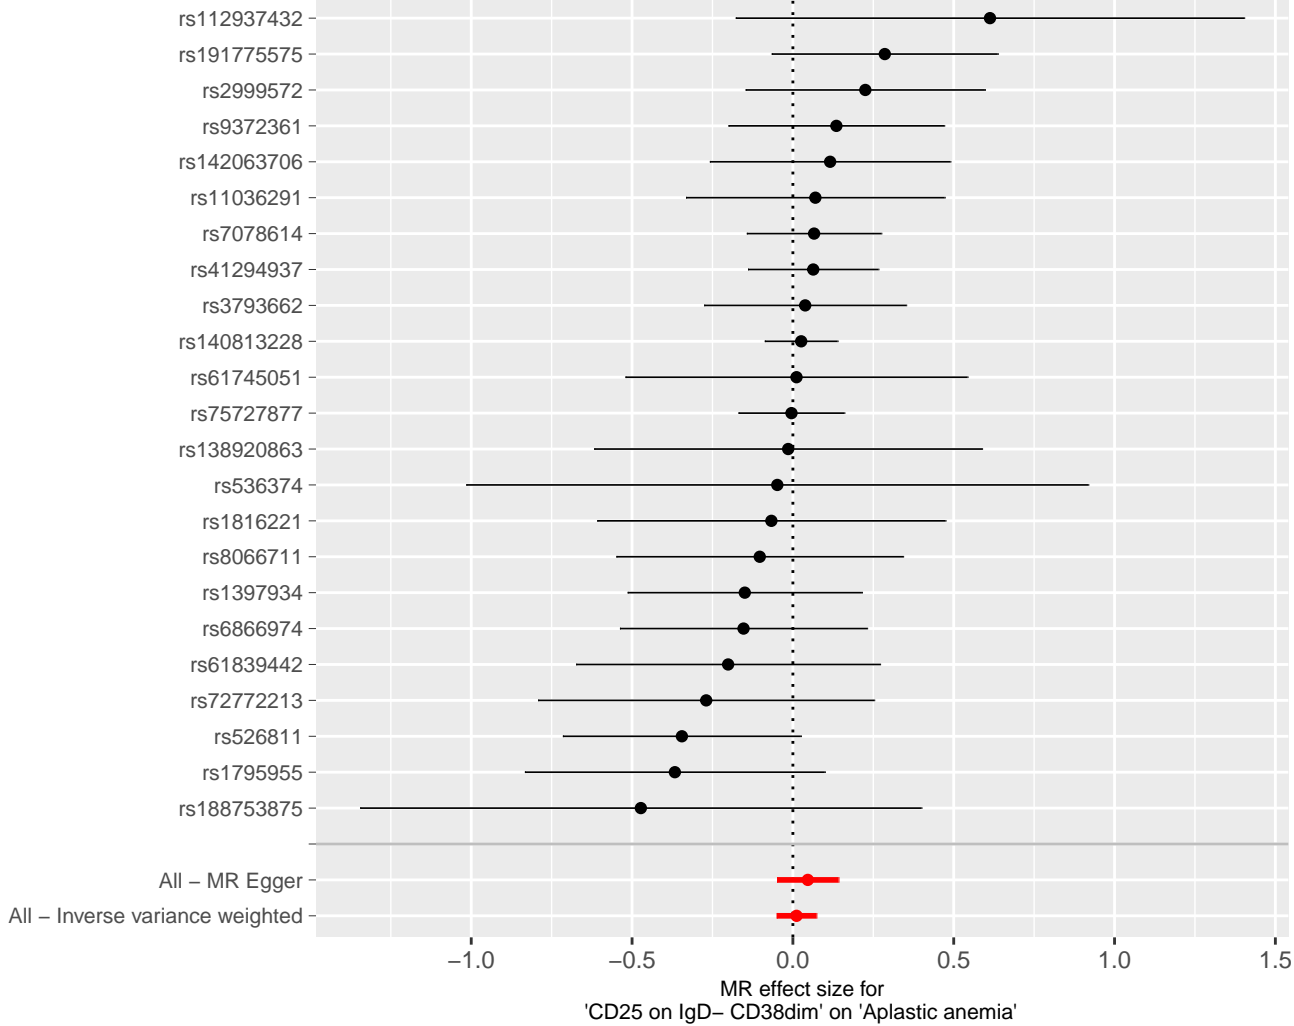

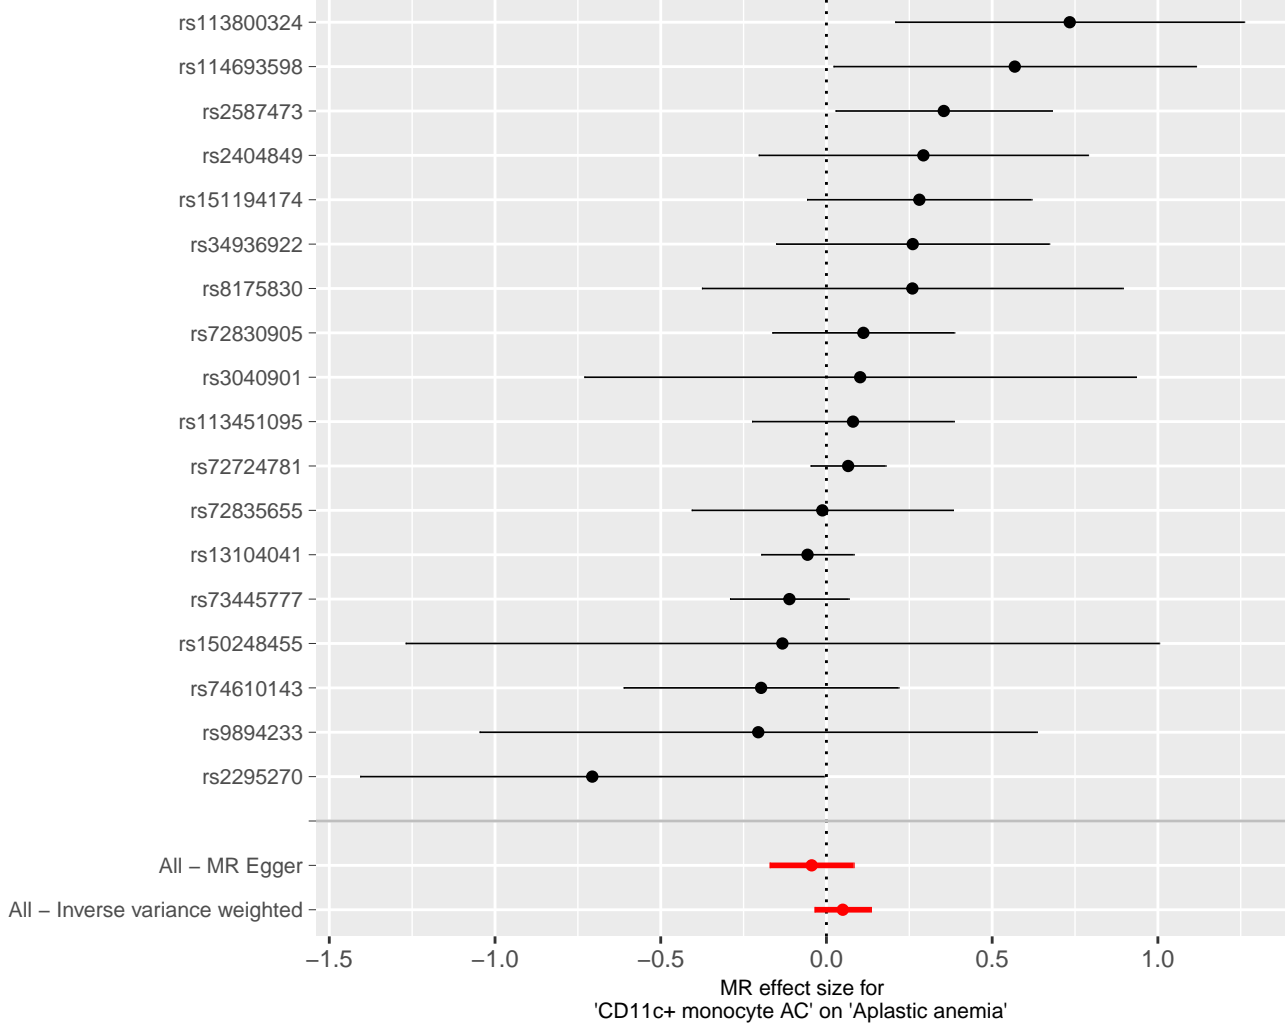

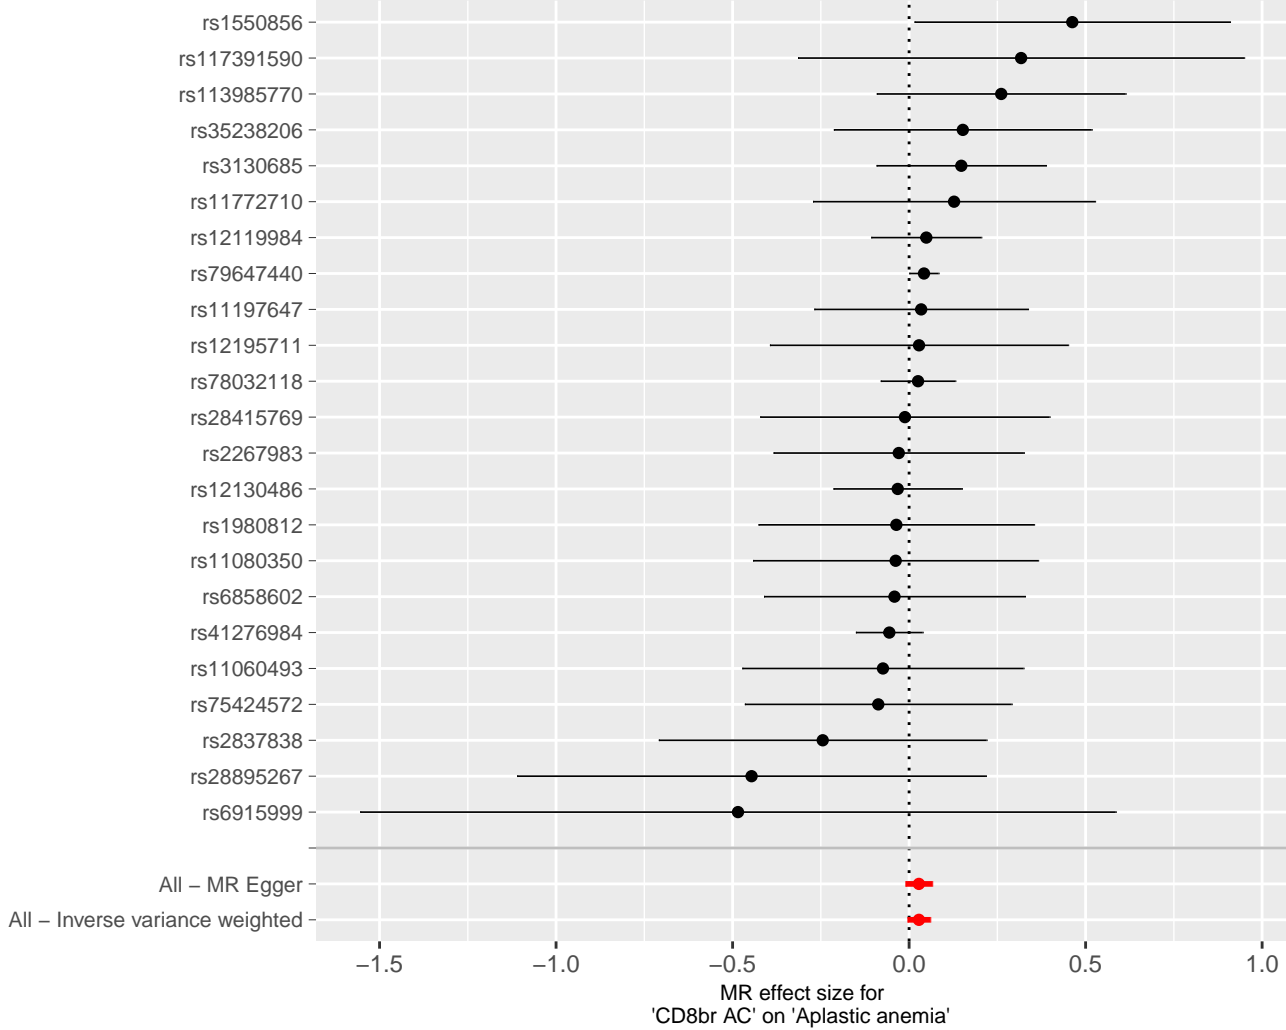



All - Inverse variance weighted

-0.6

-0.3

0.0

0.3

MR effect size for  
'CD45RA- CD28- CD8br %T cell' on 'Aplastic anemia'

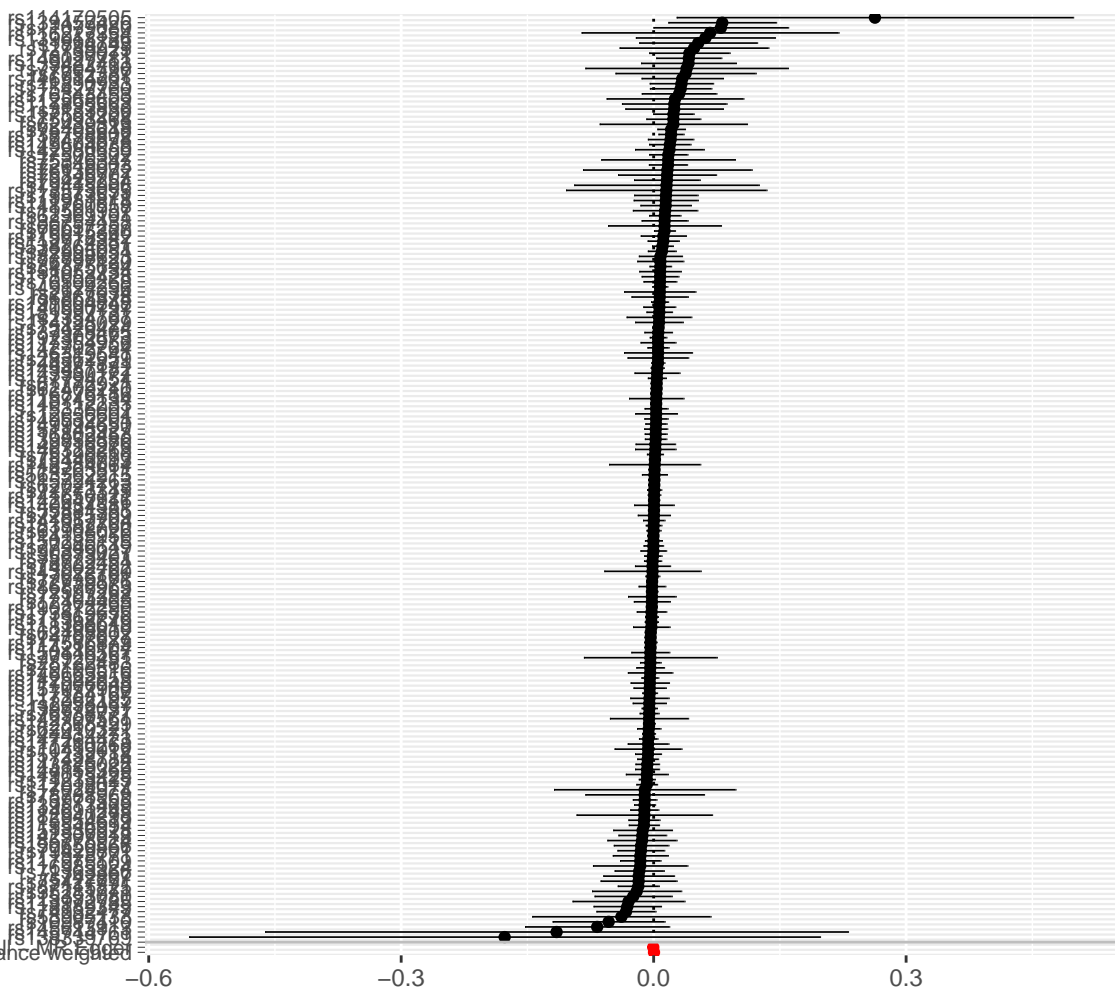

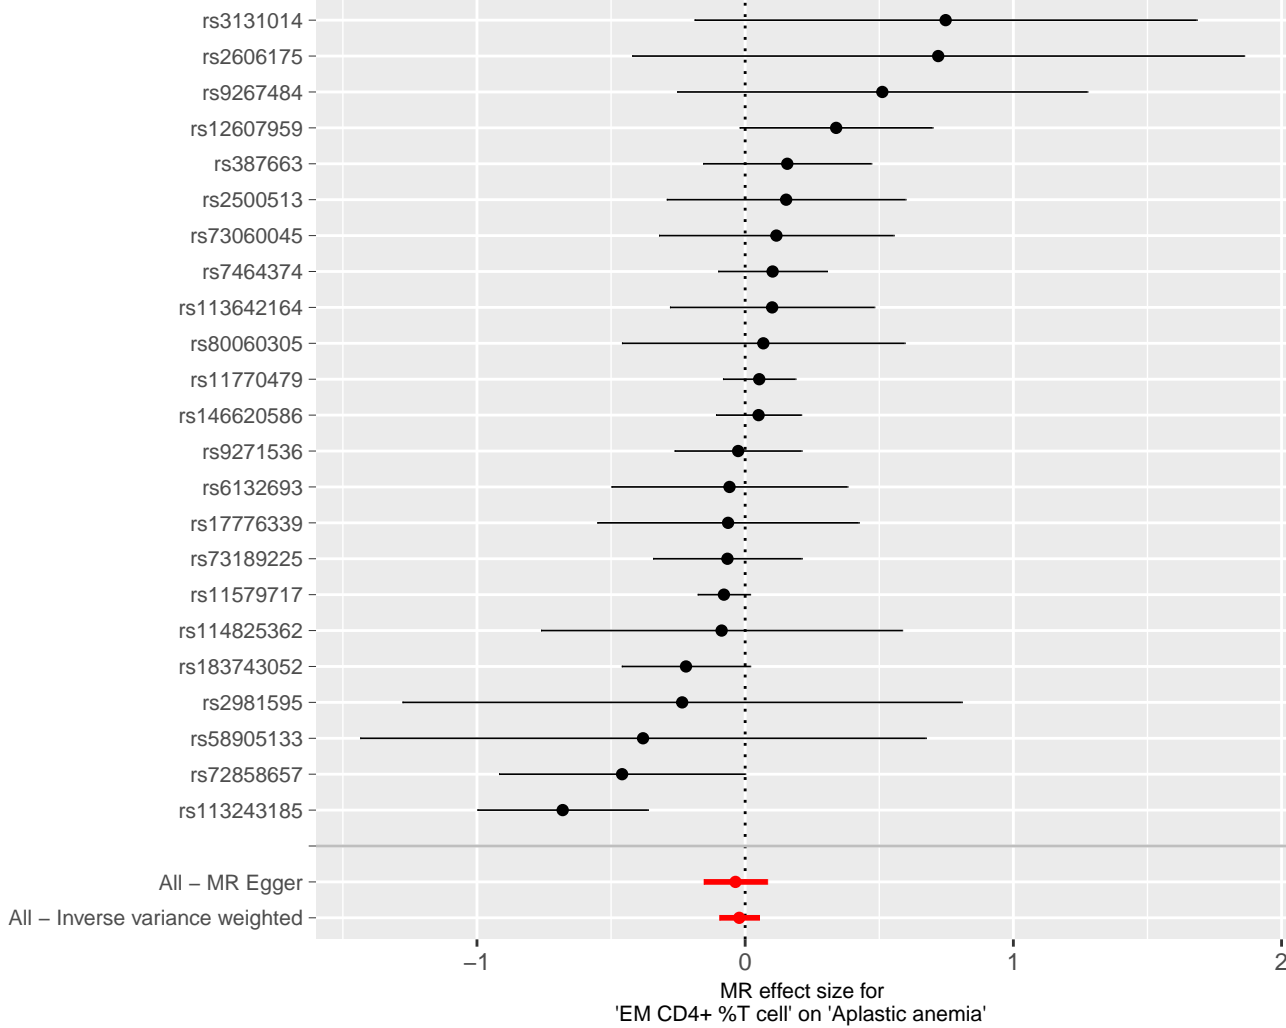

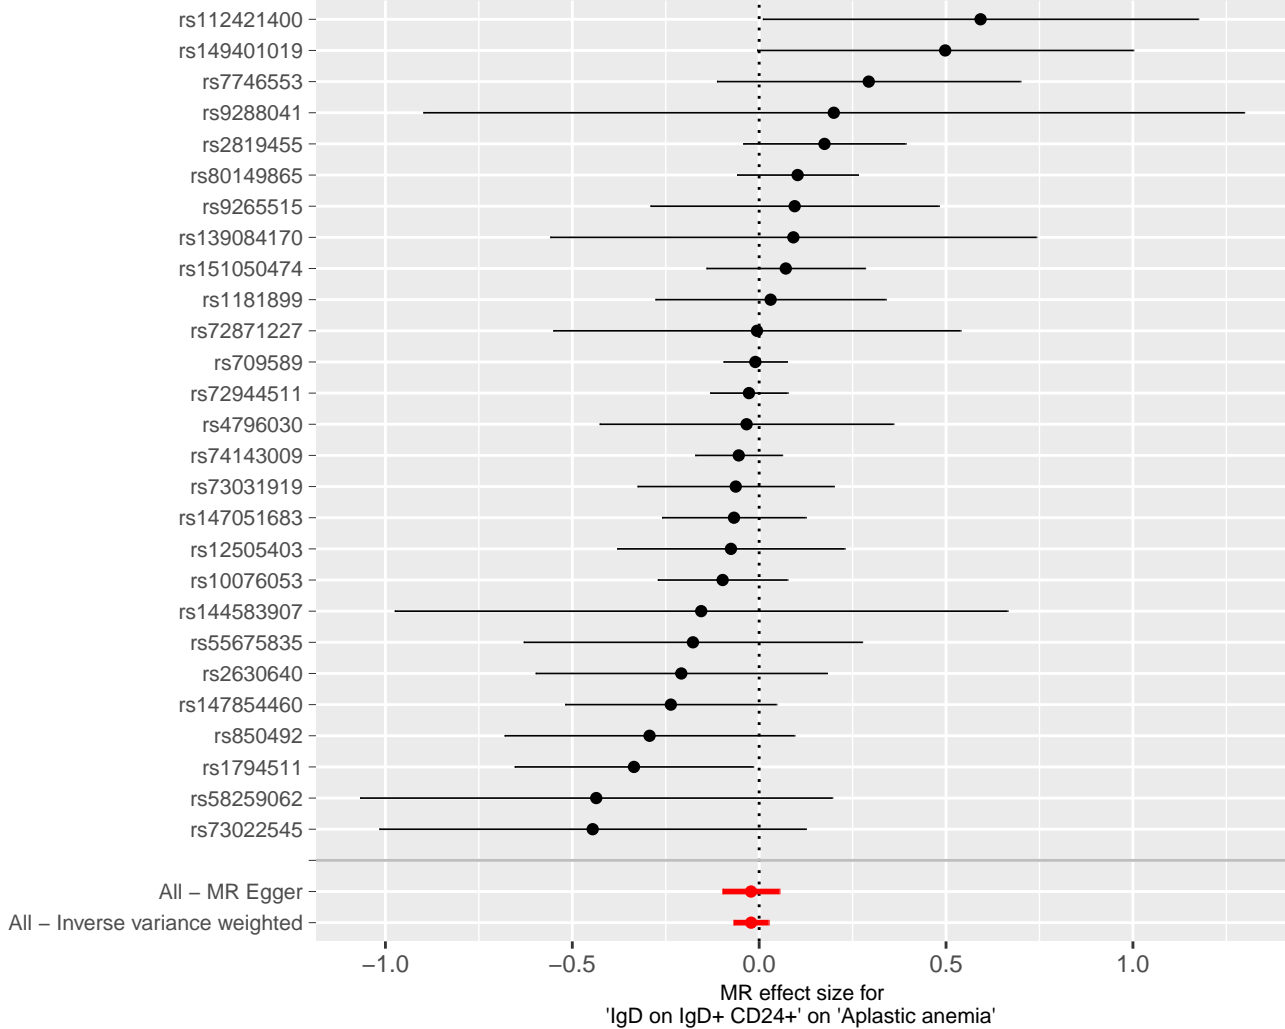

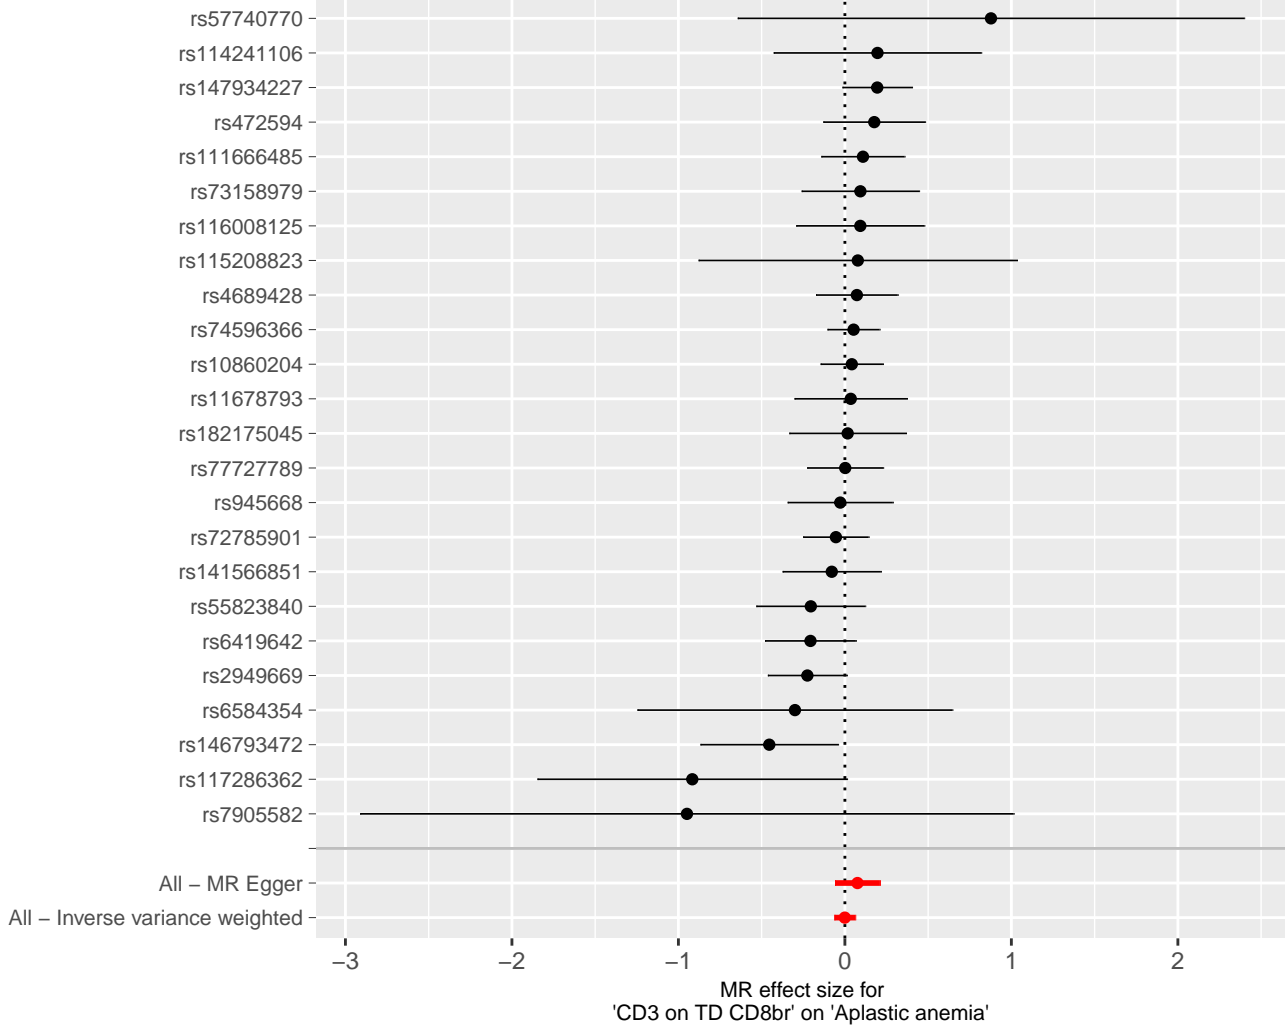

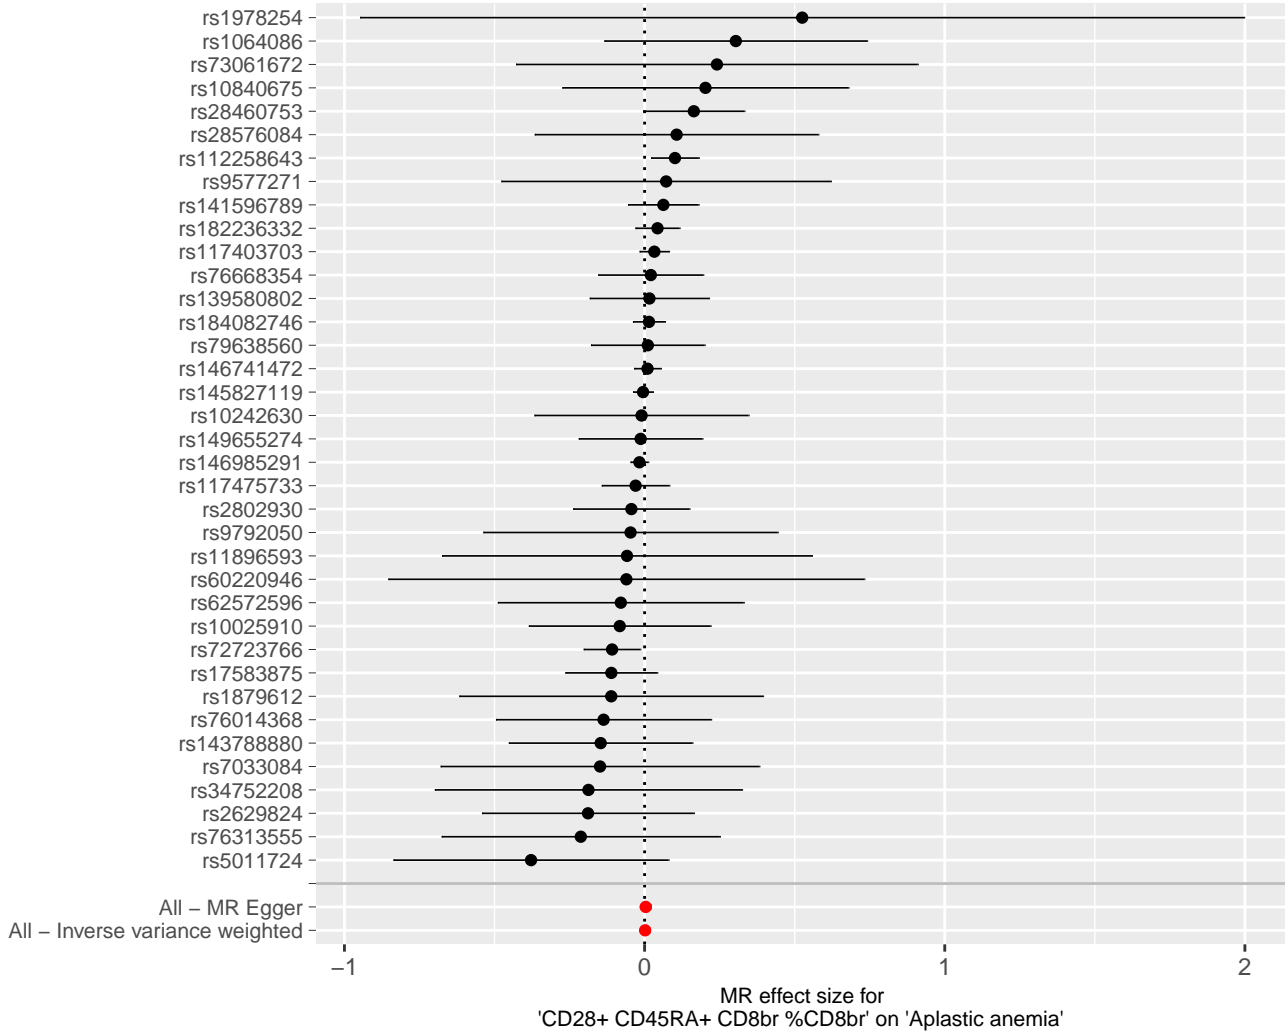

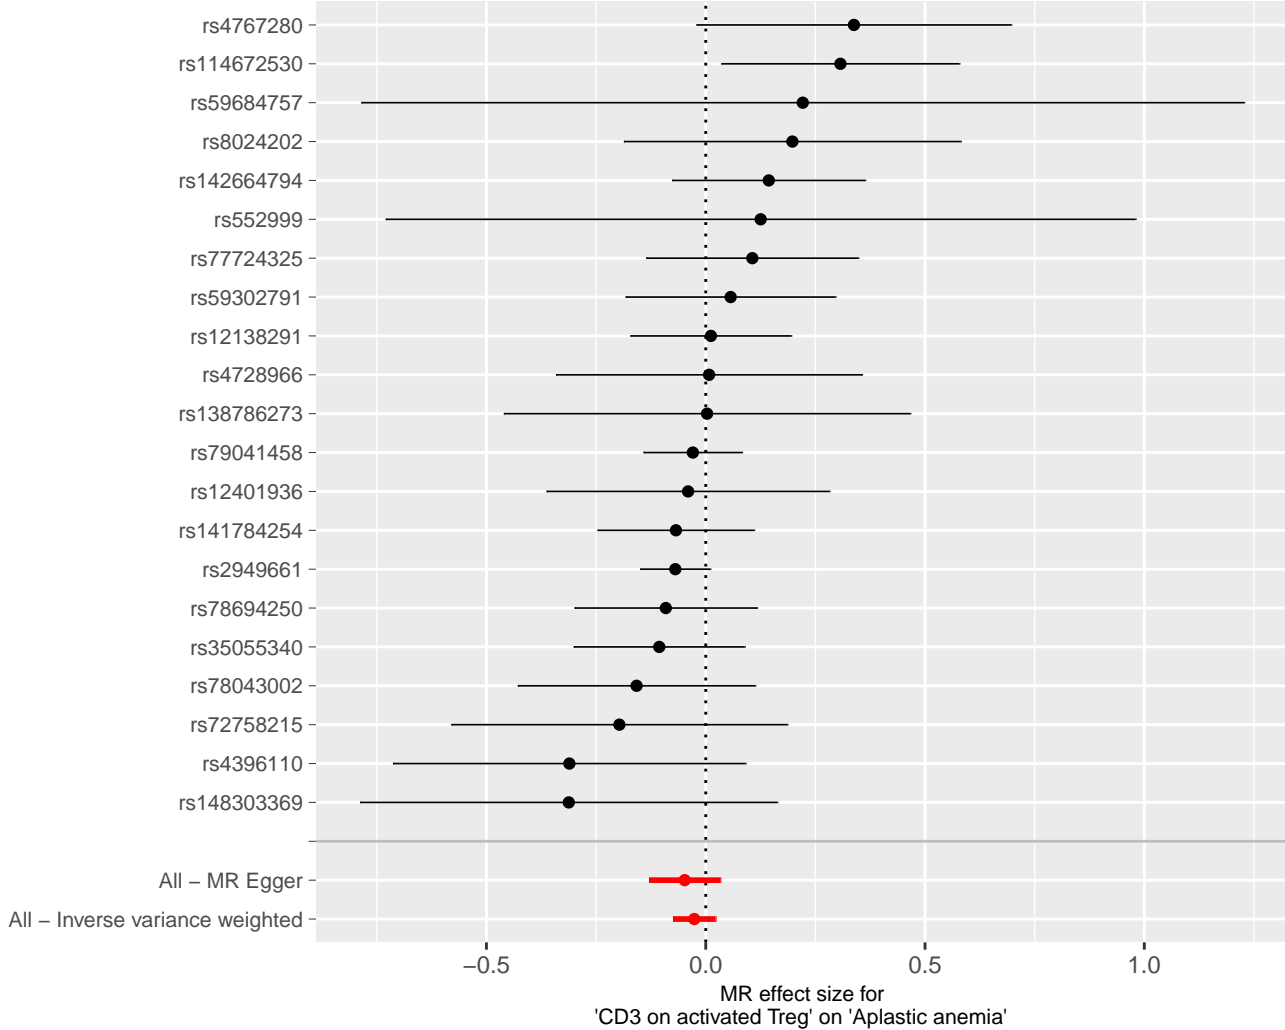

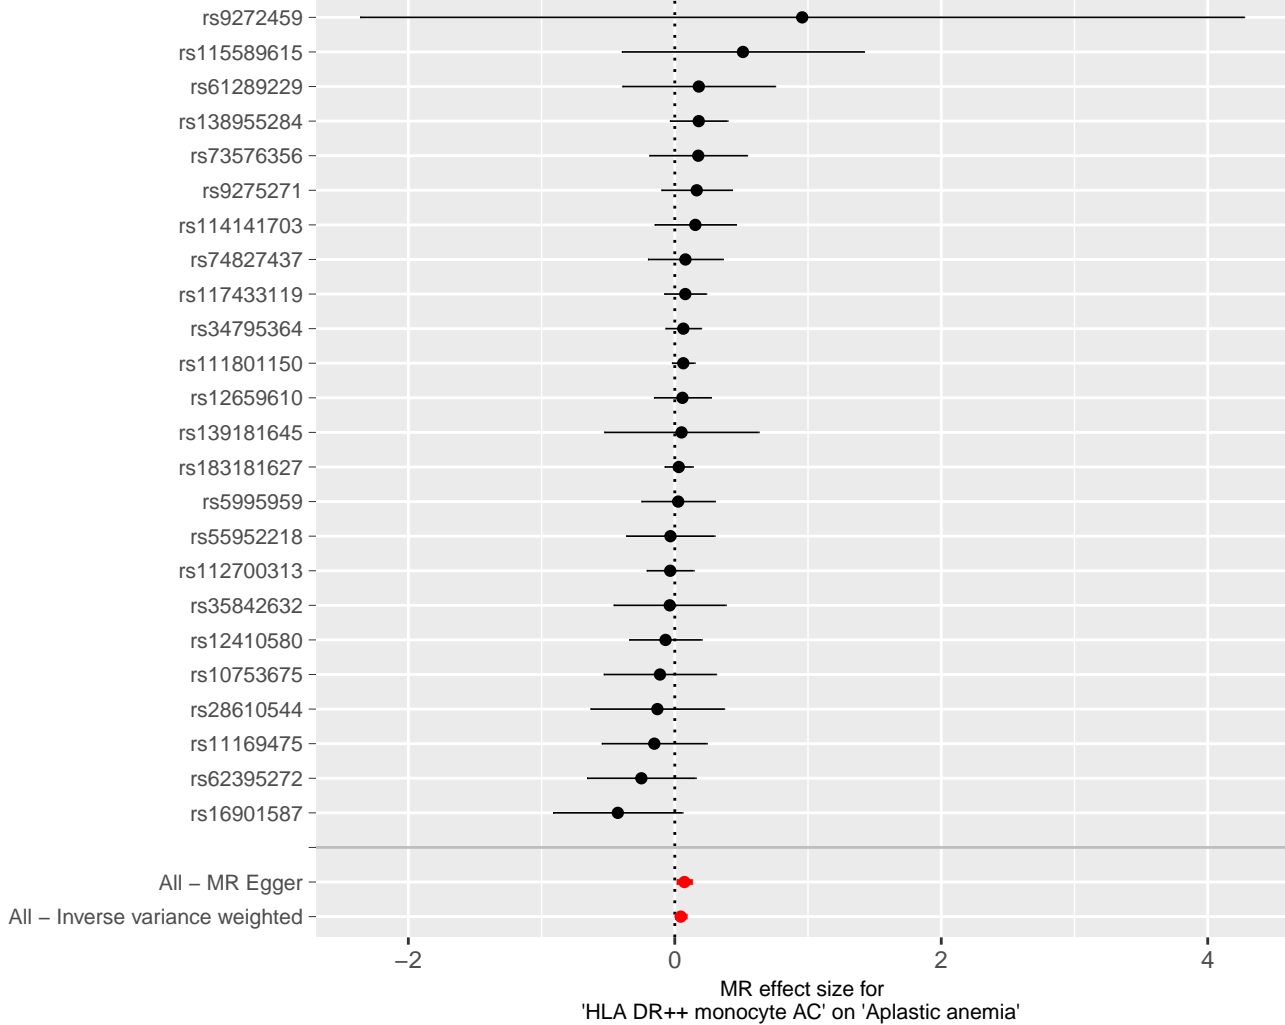

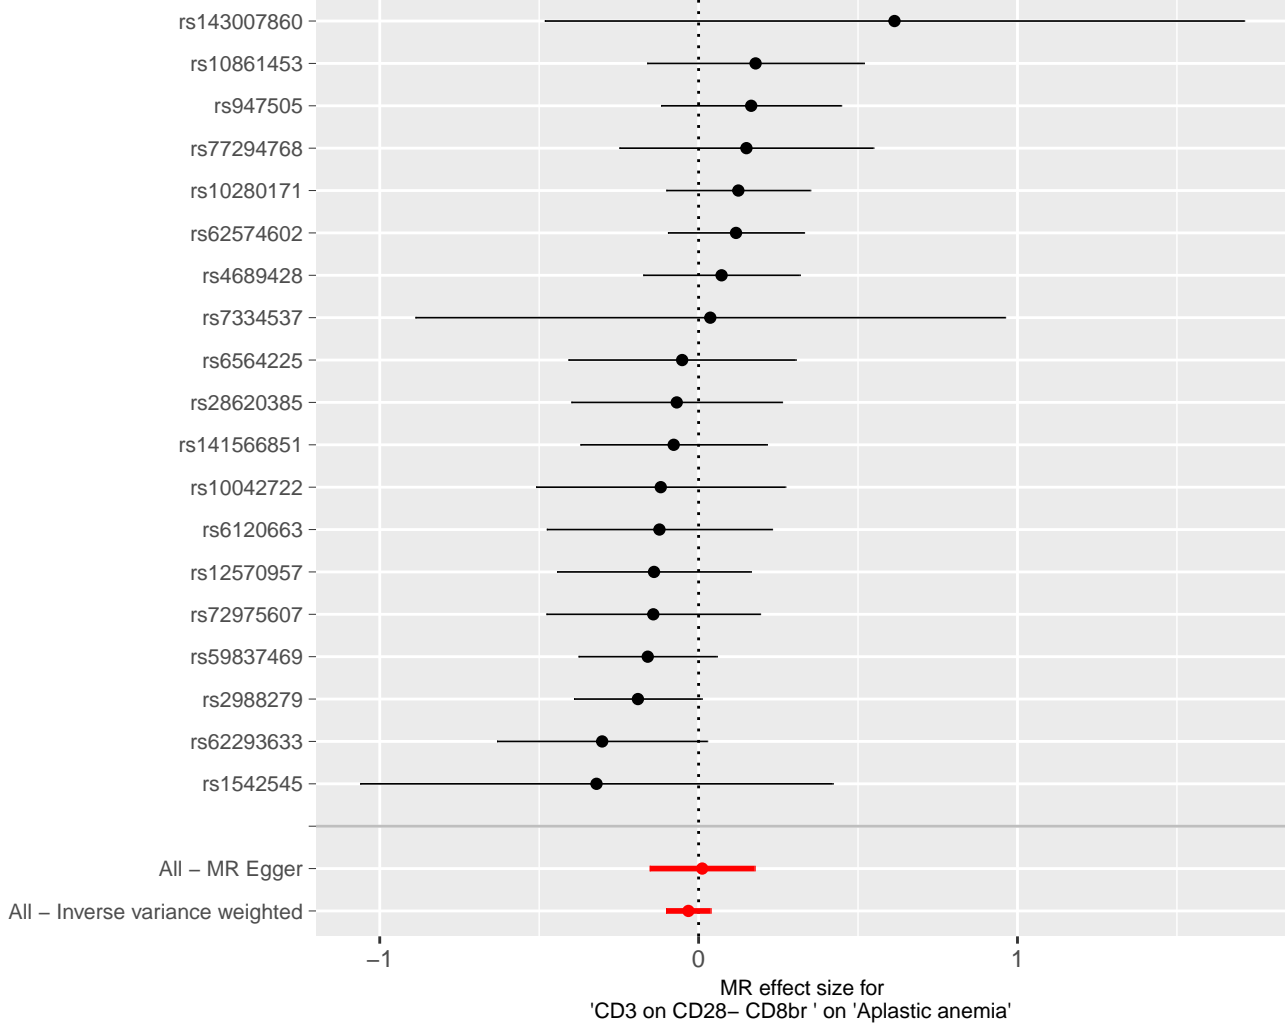



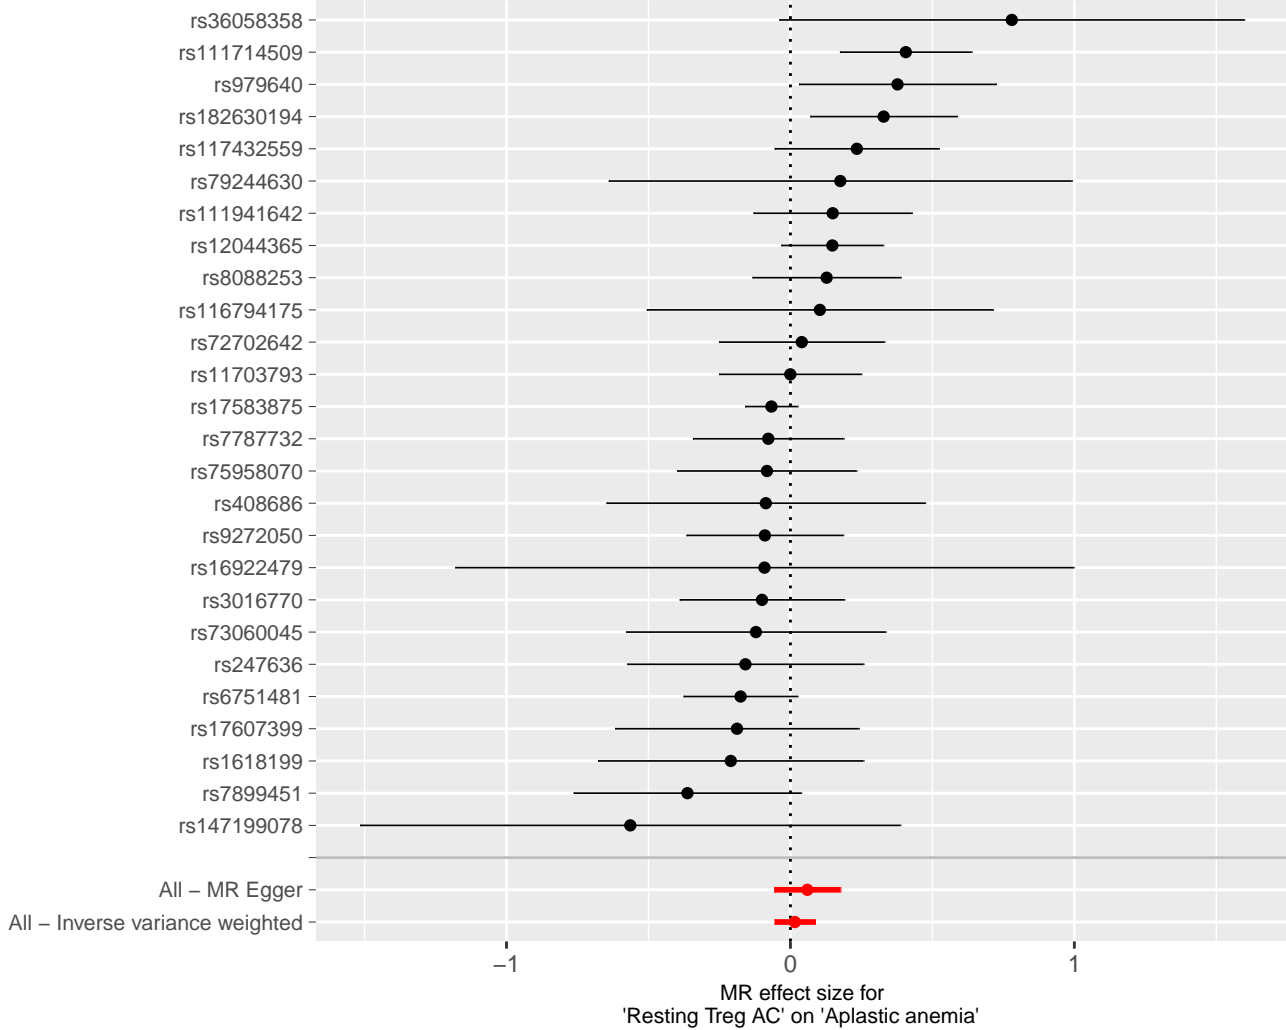

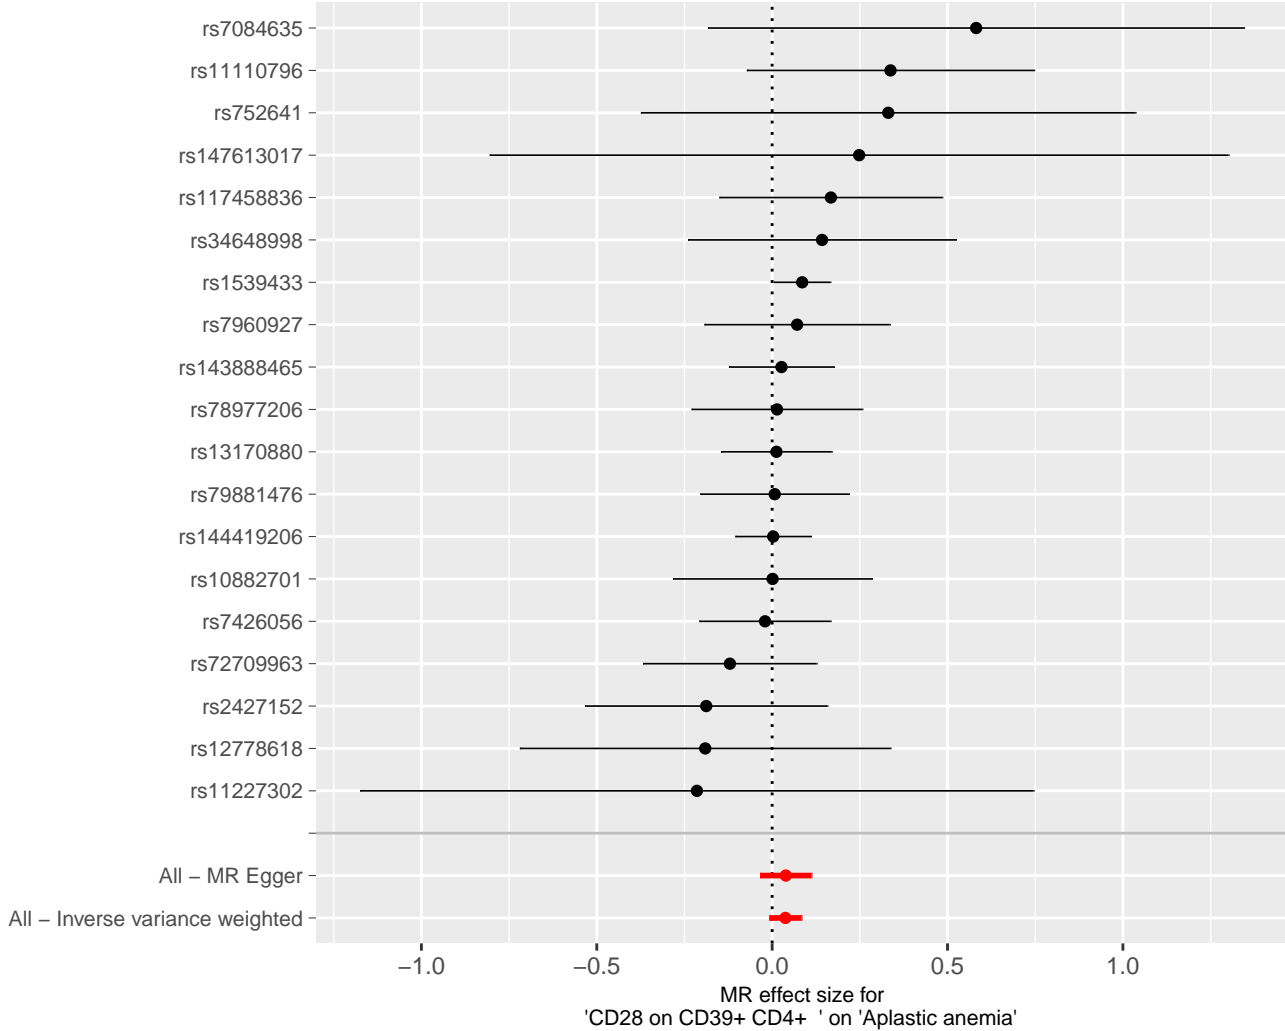

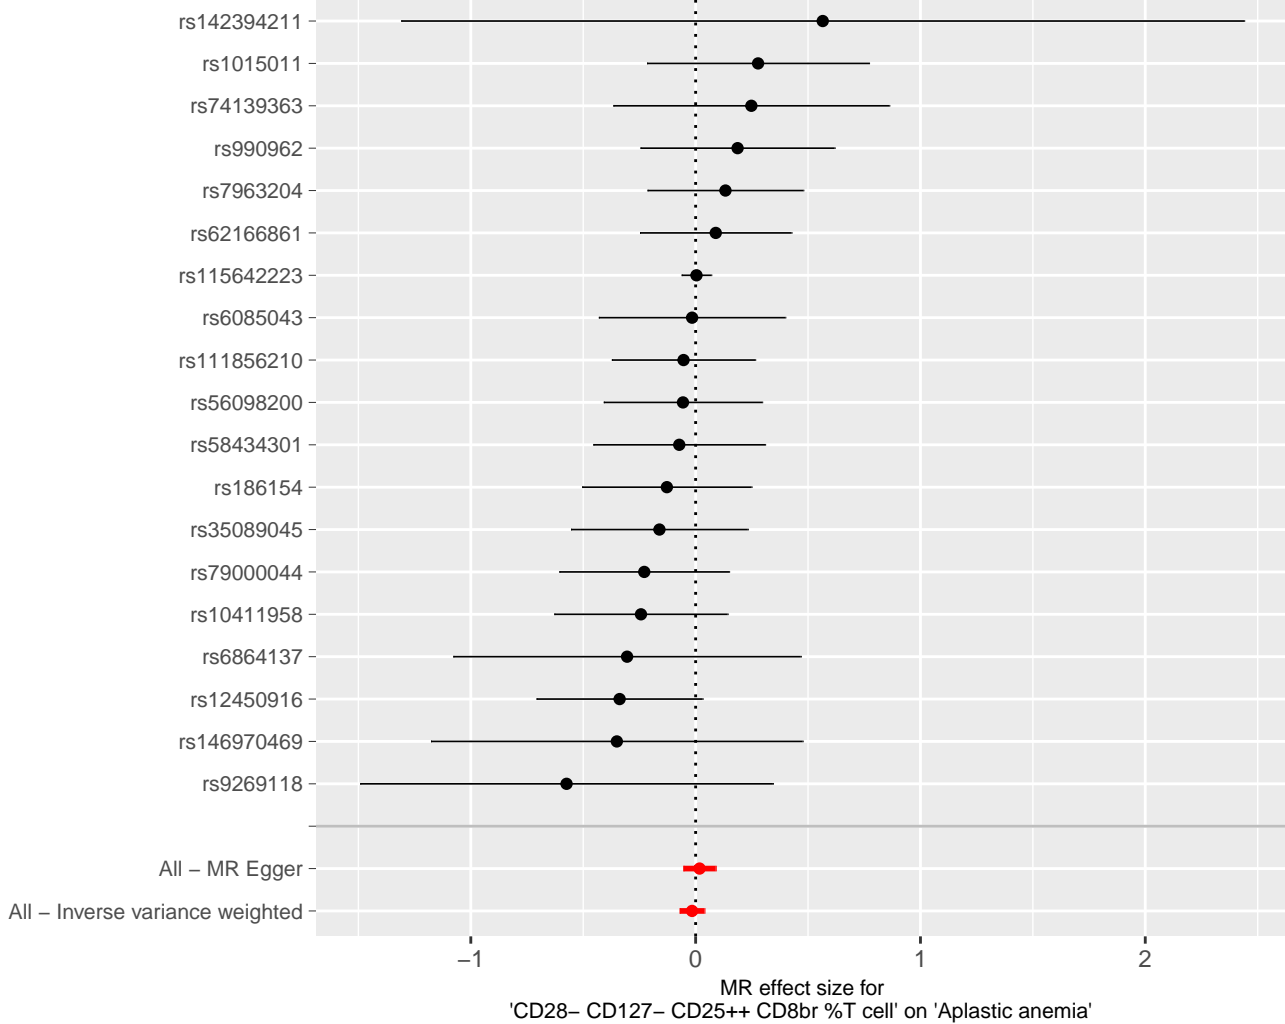

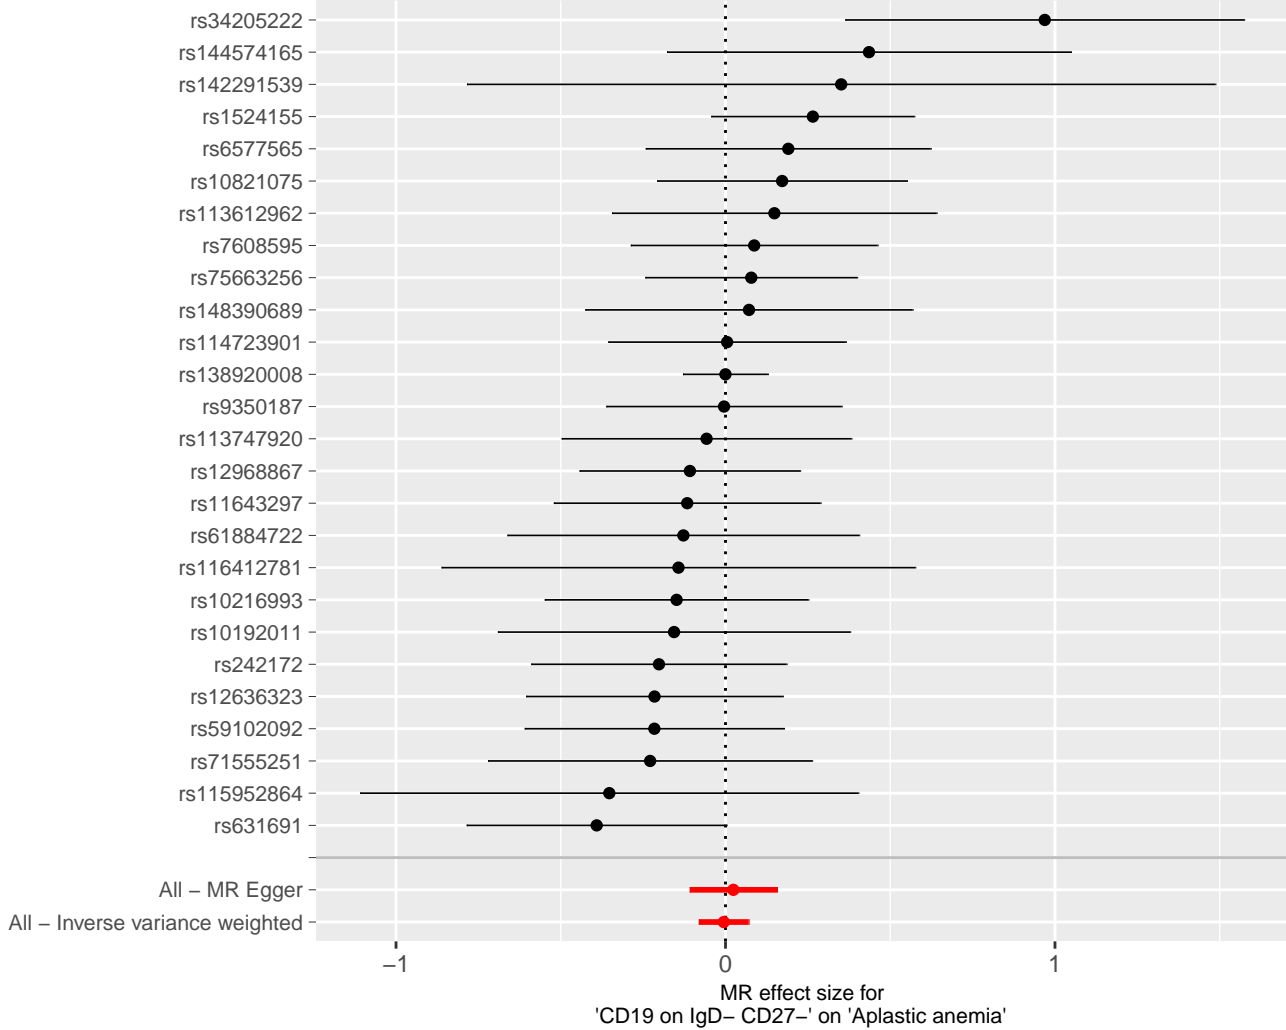

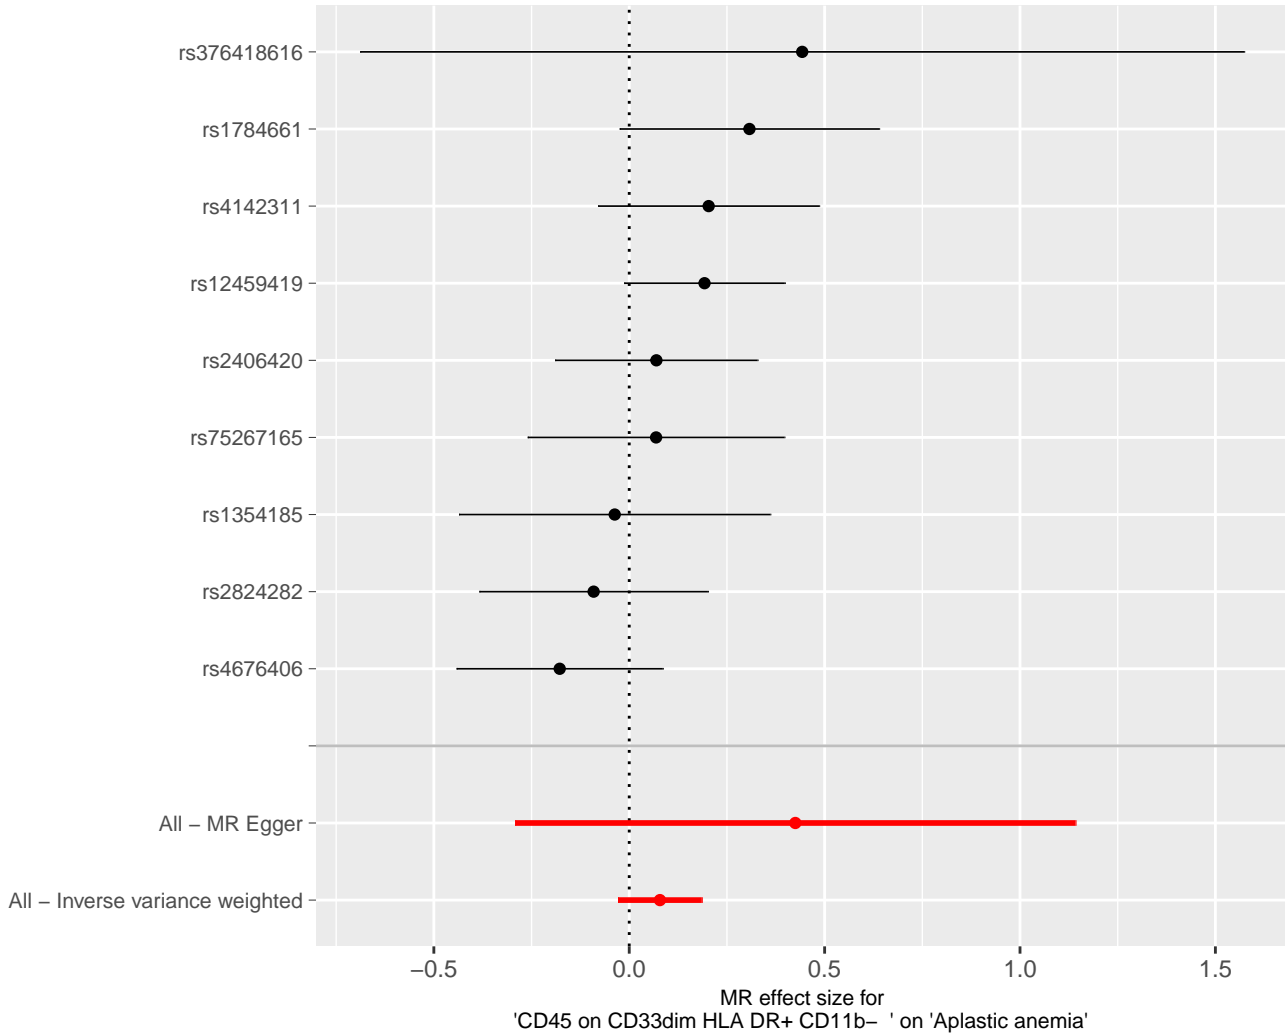

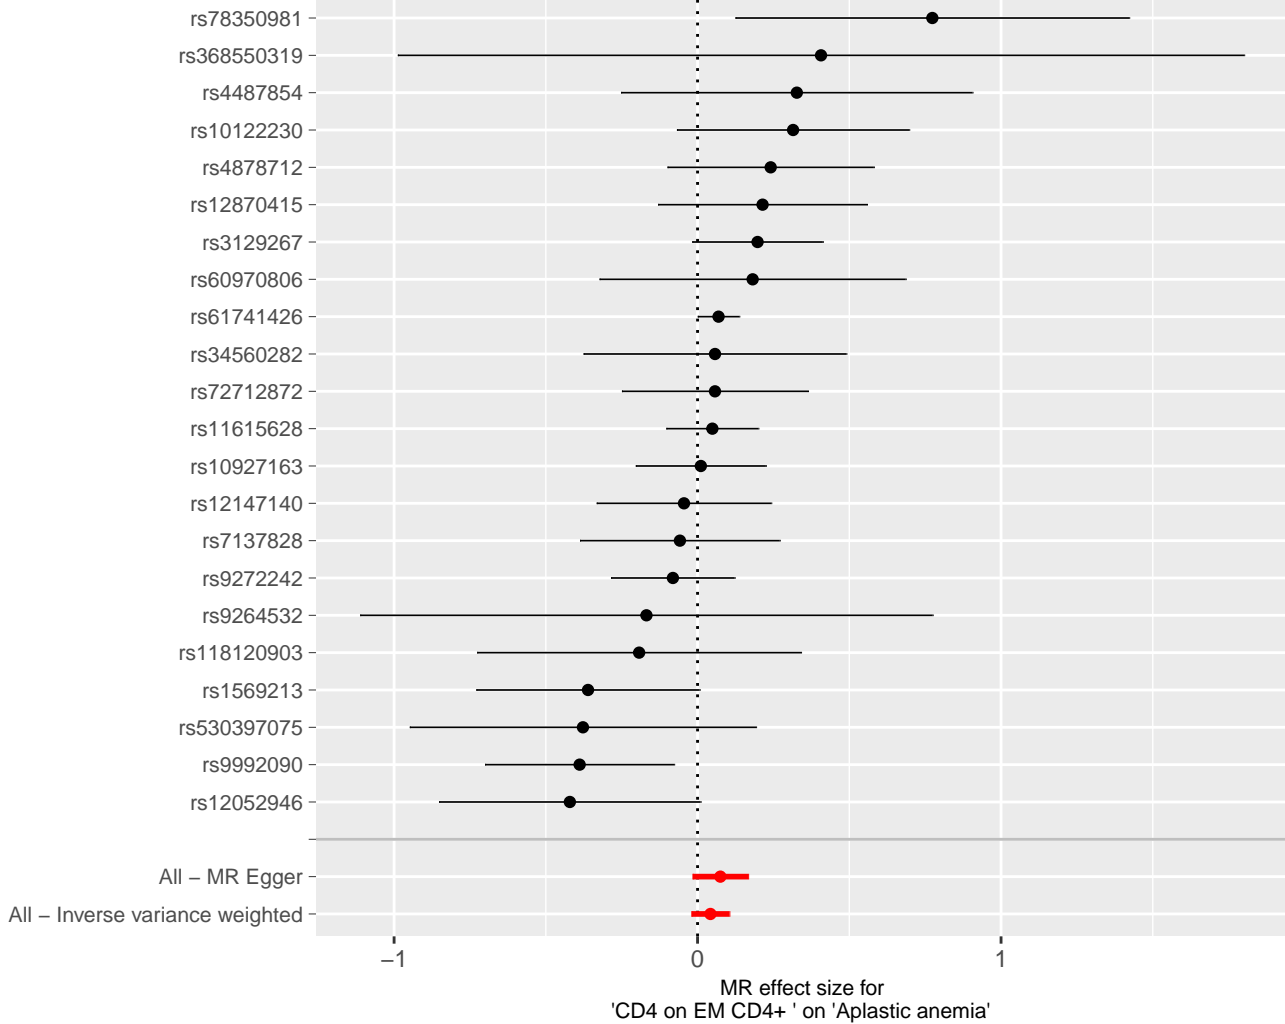

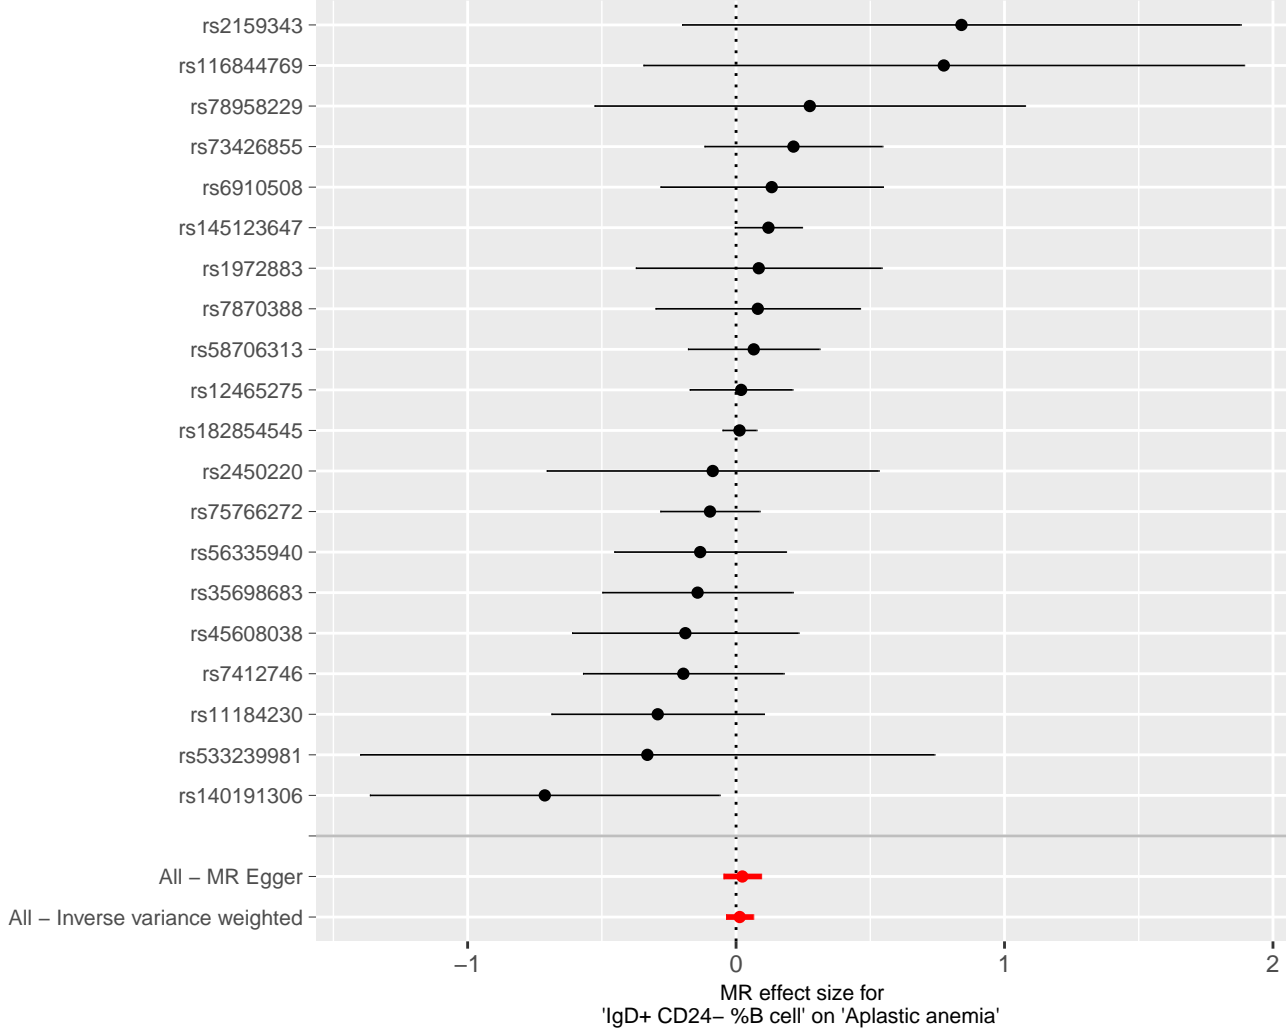

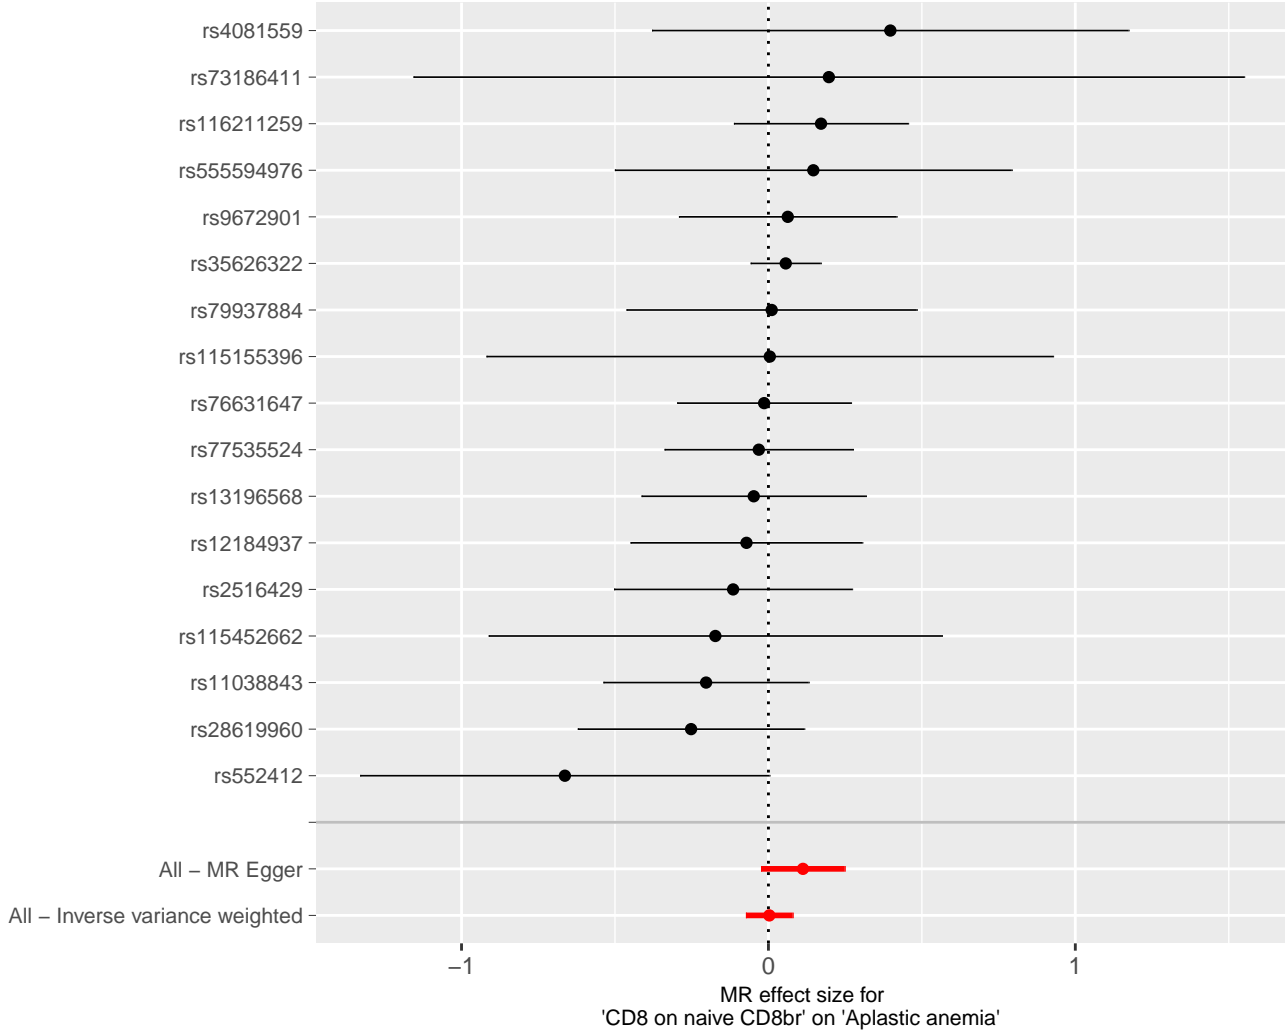



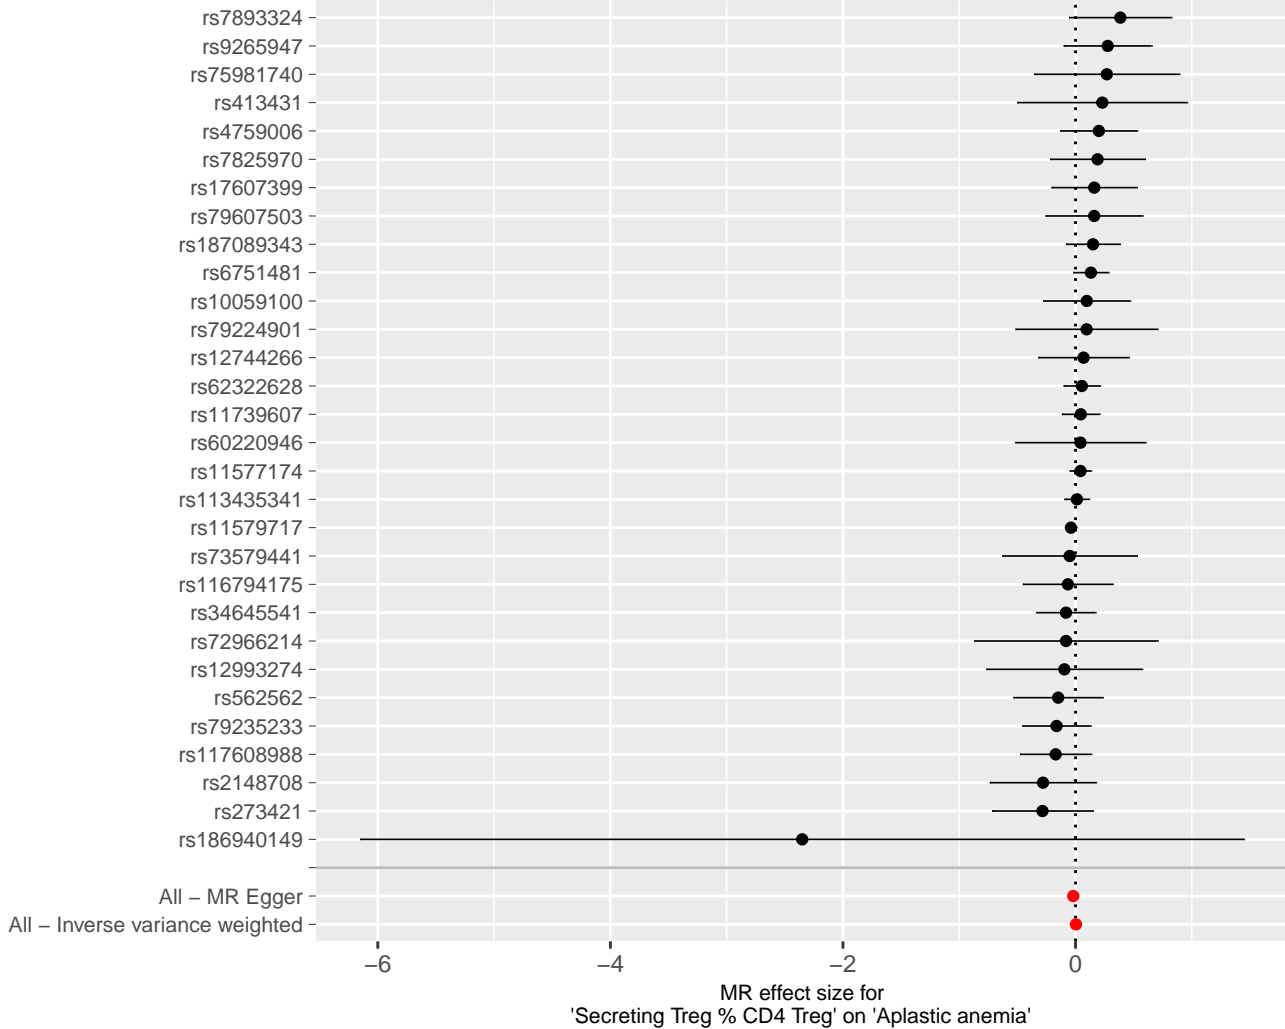

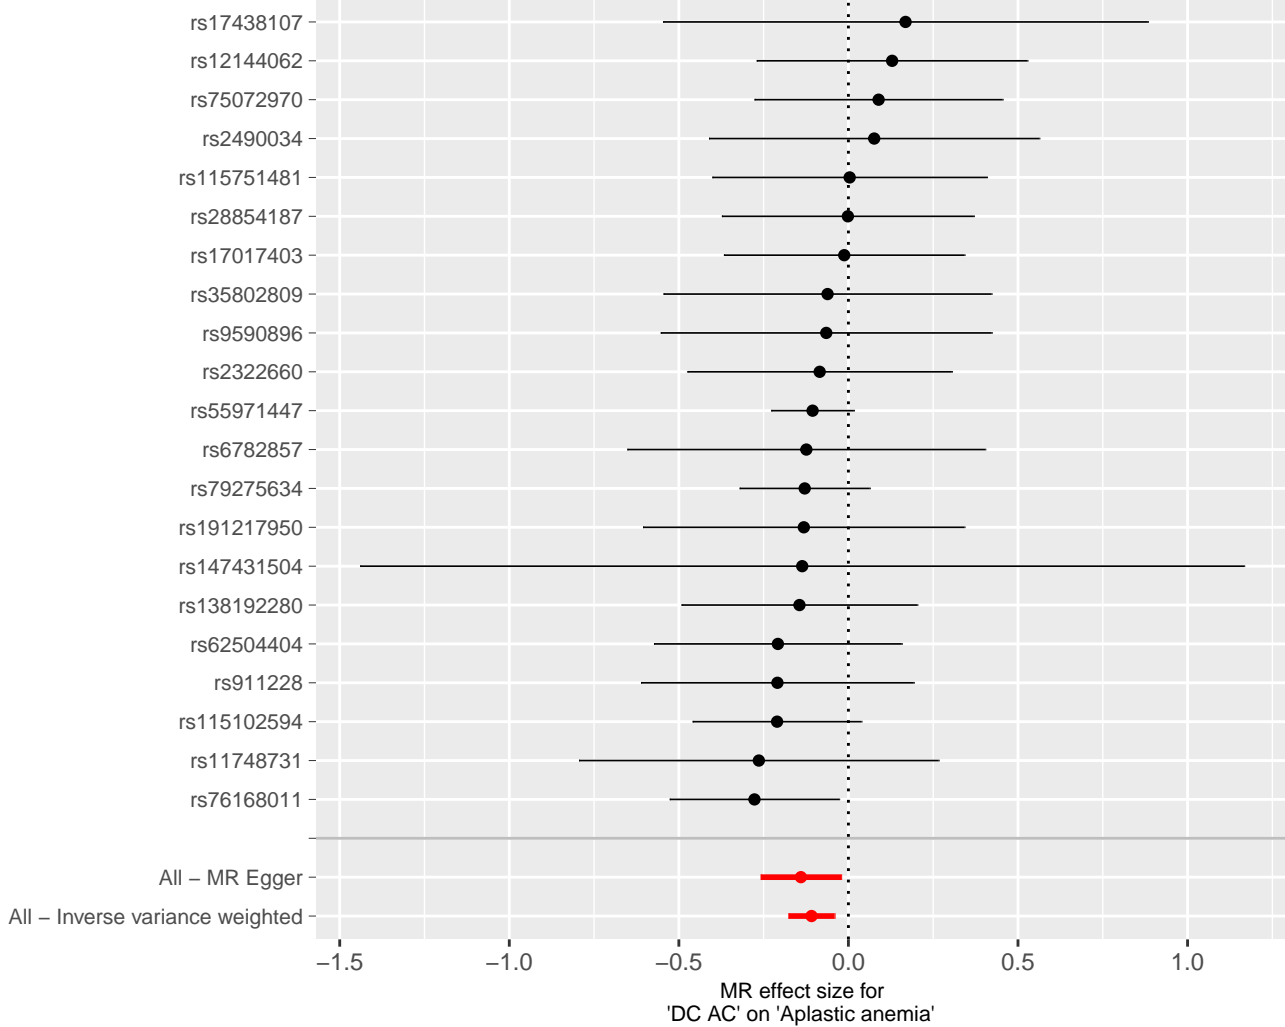

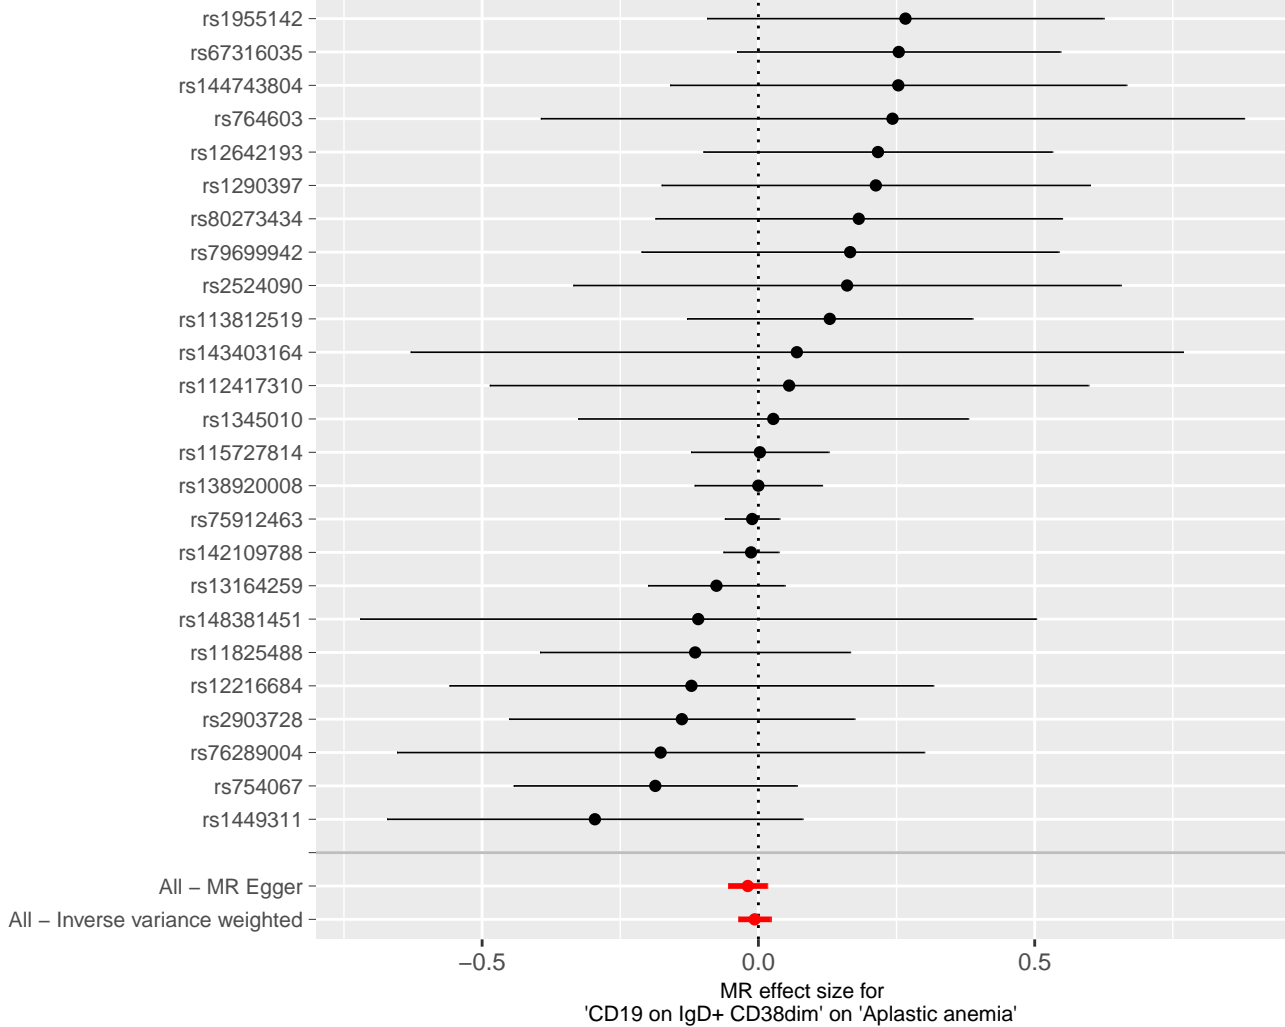

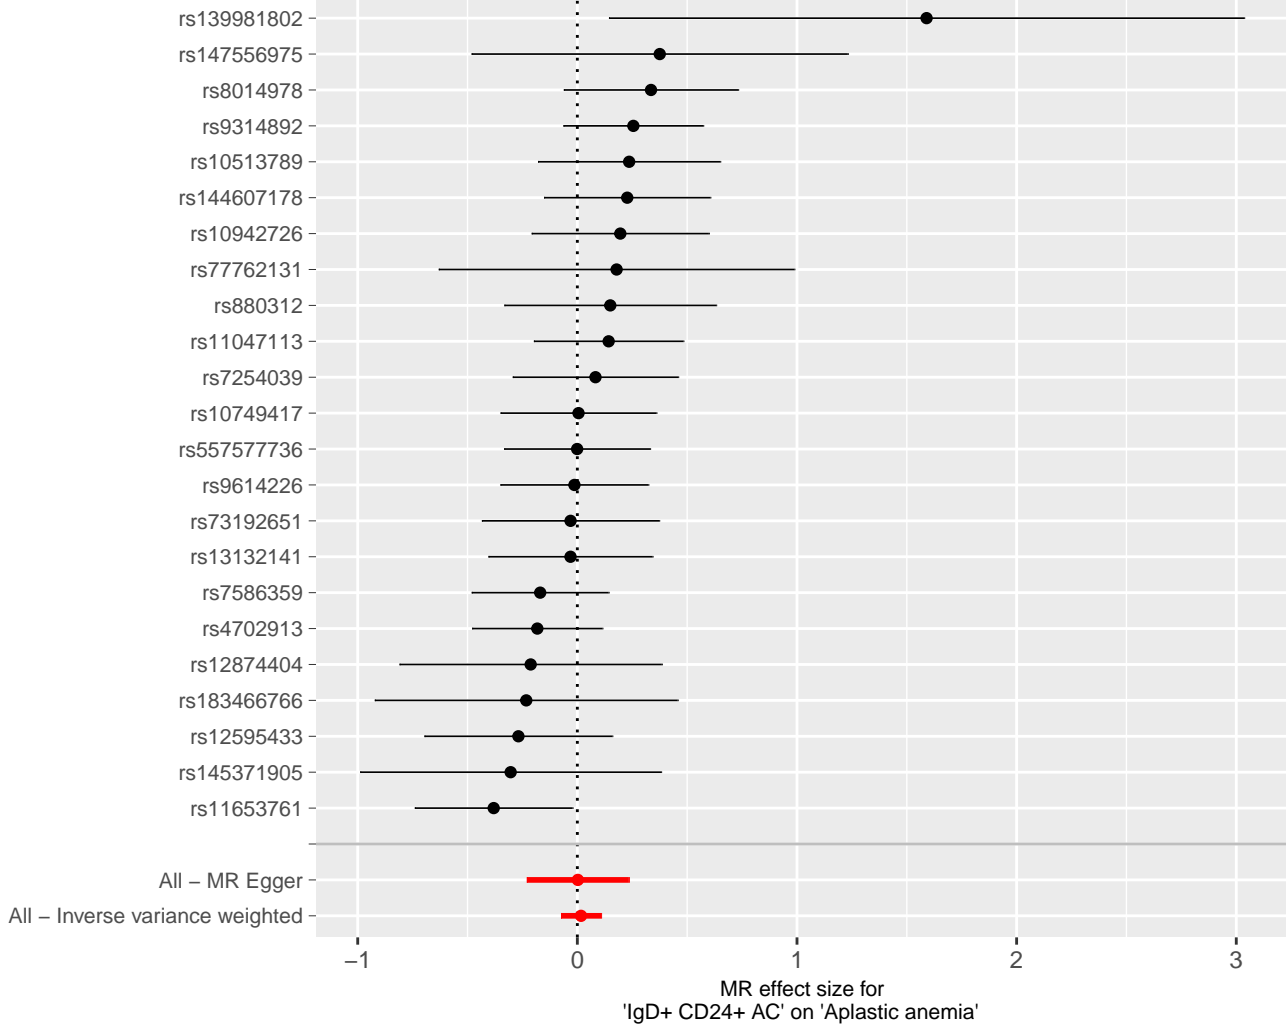

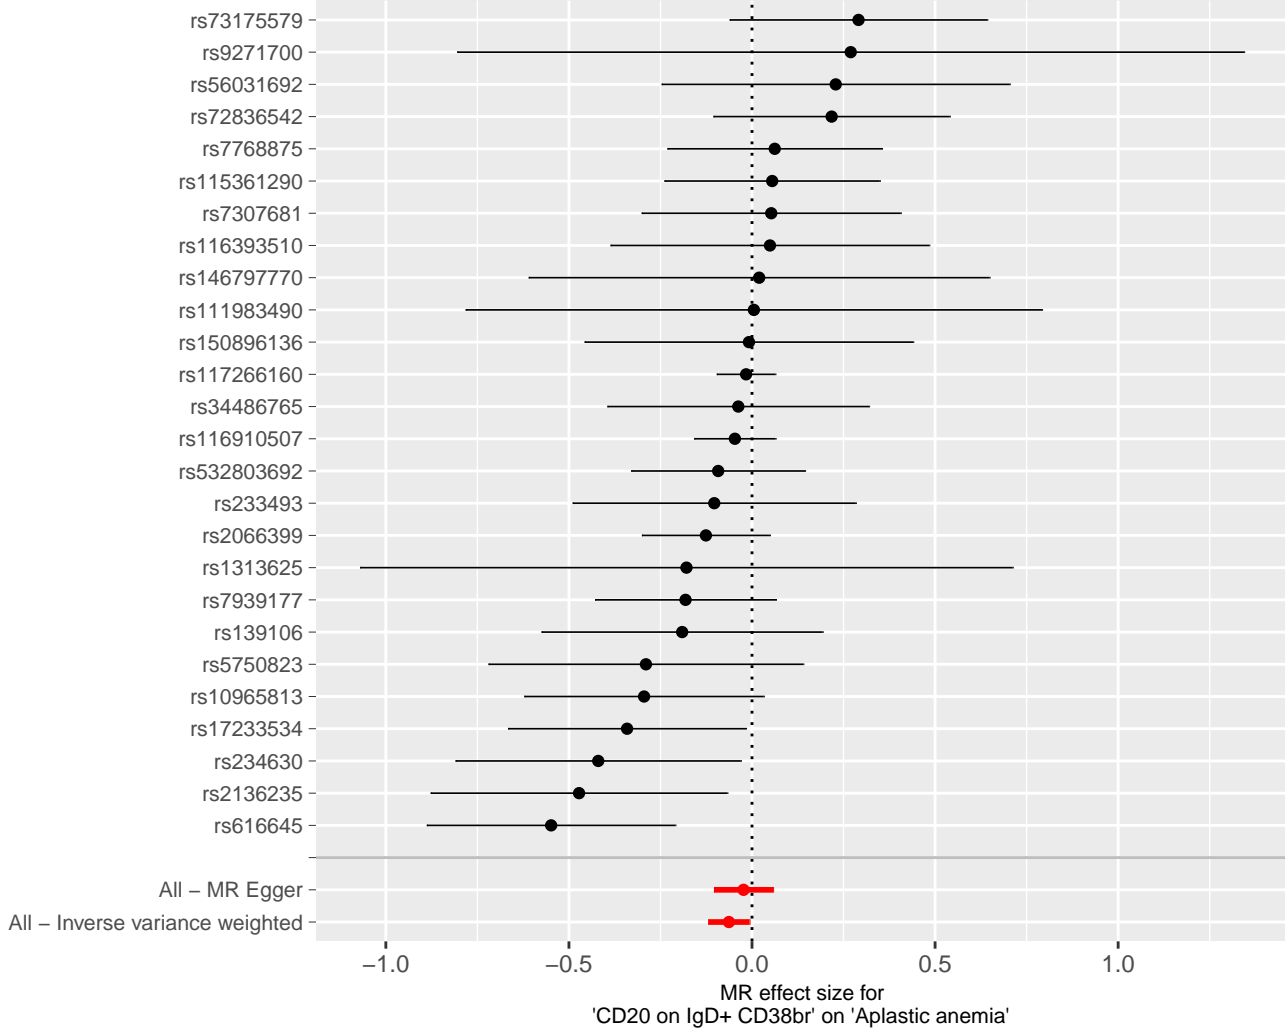

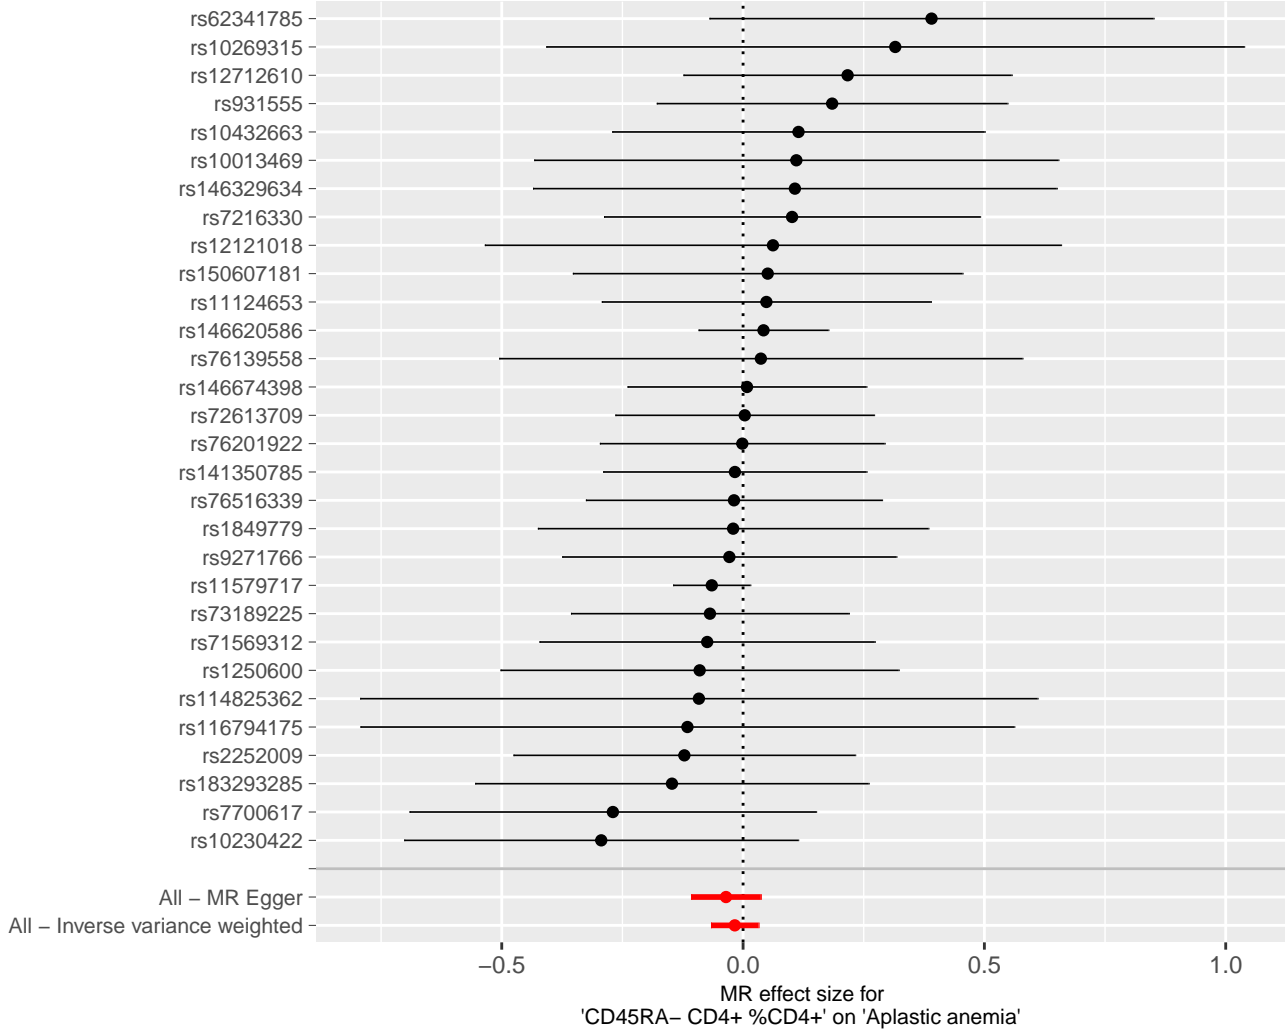

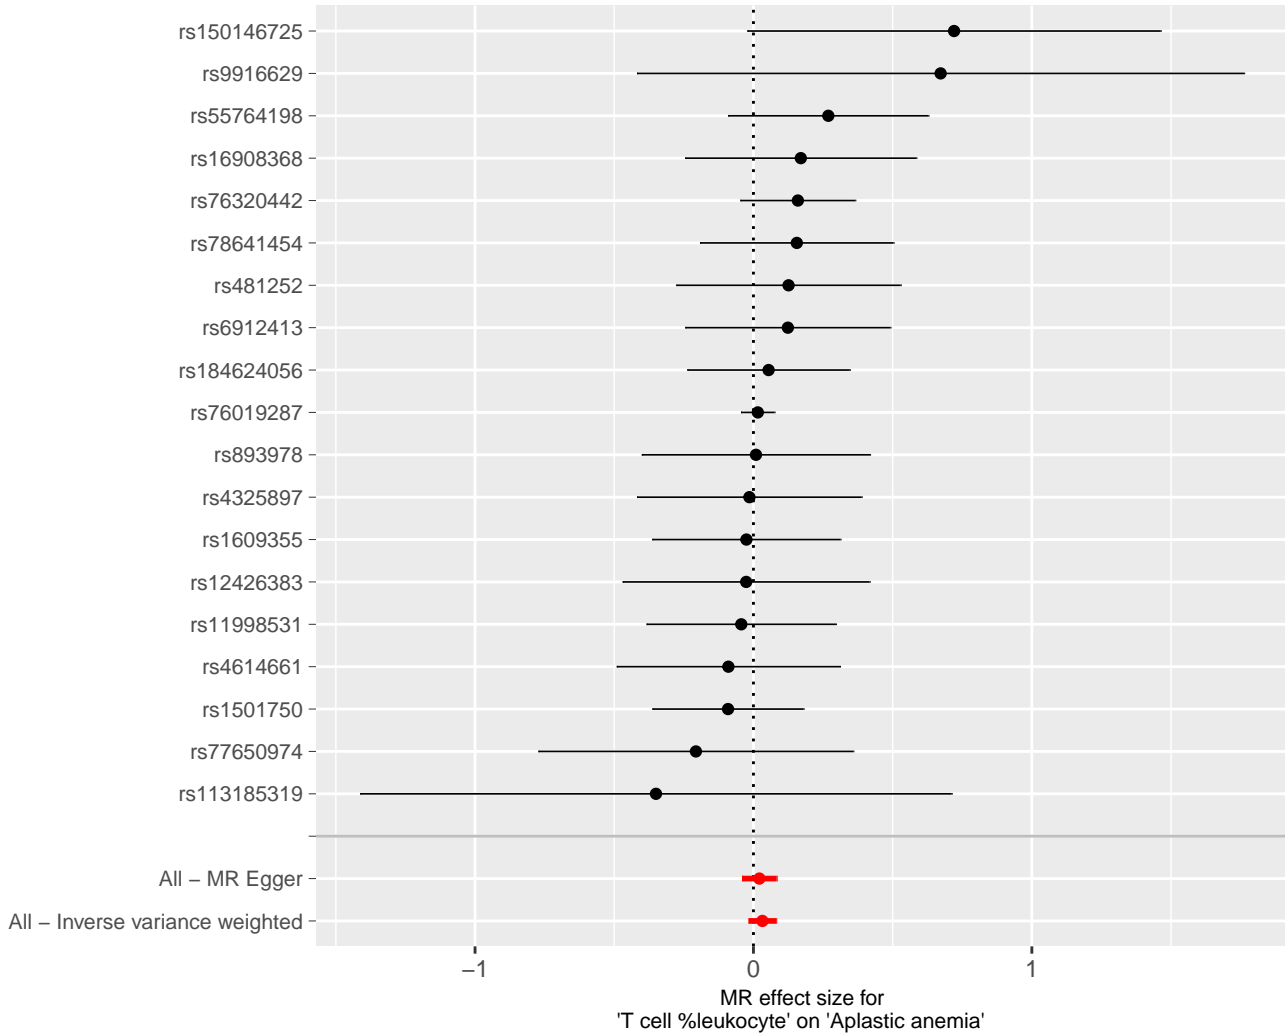

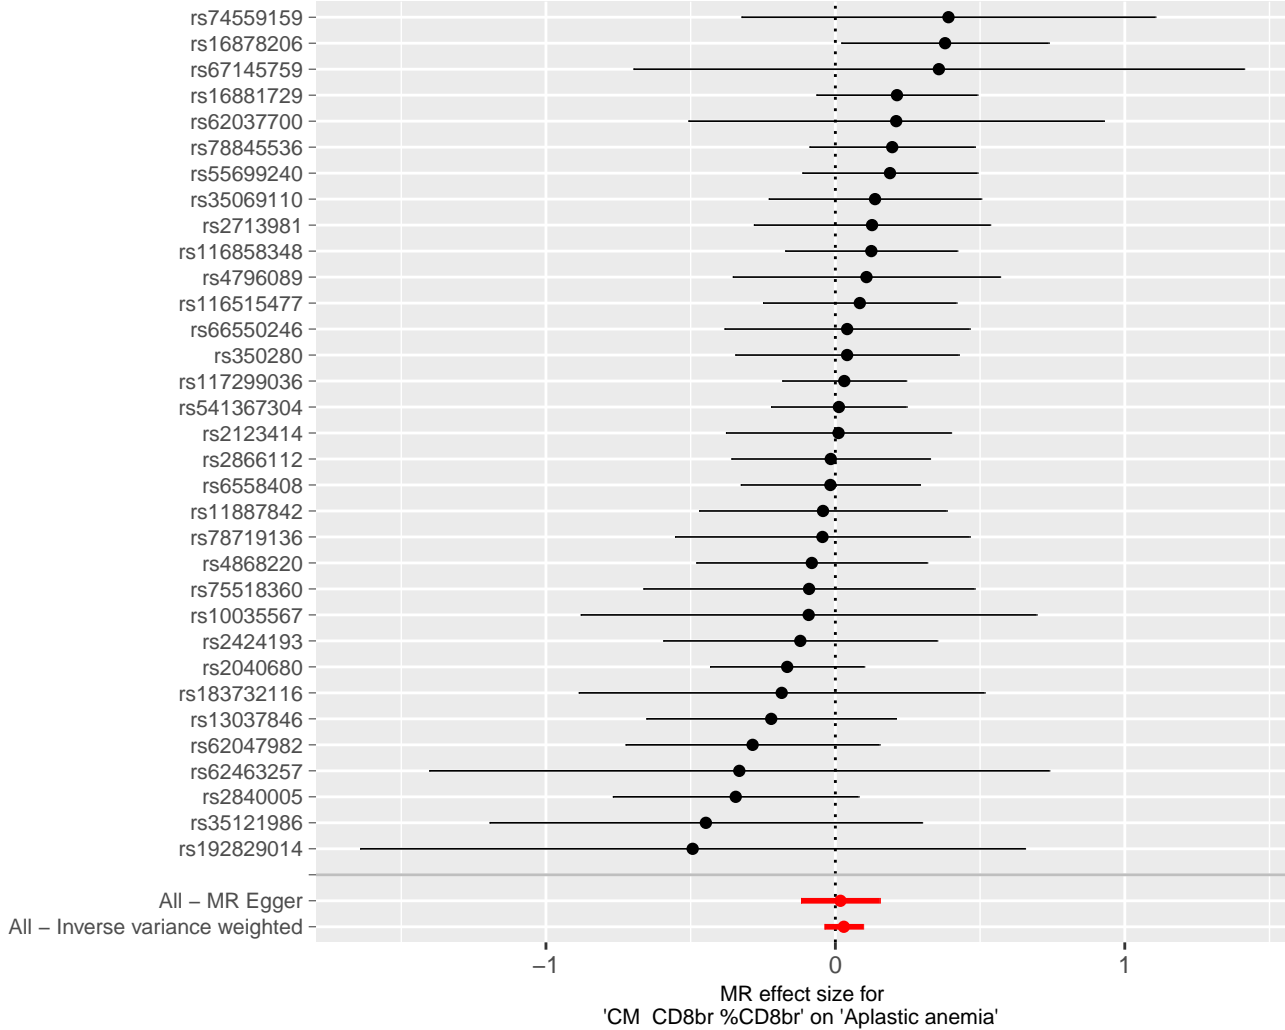



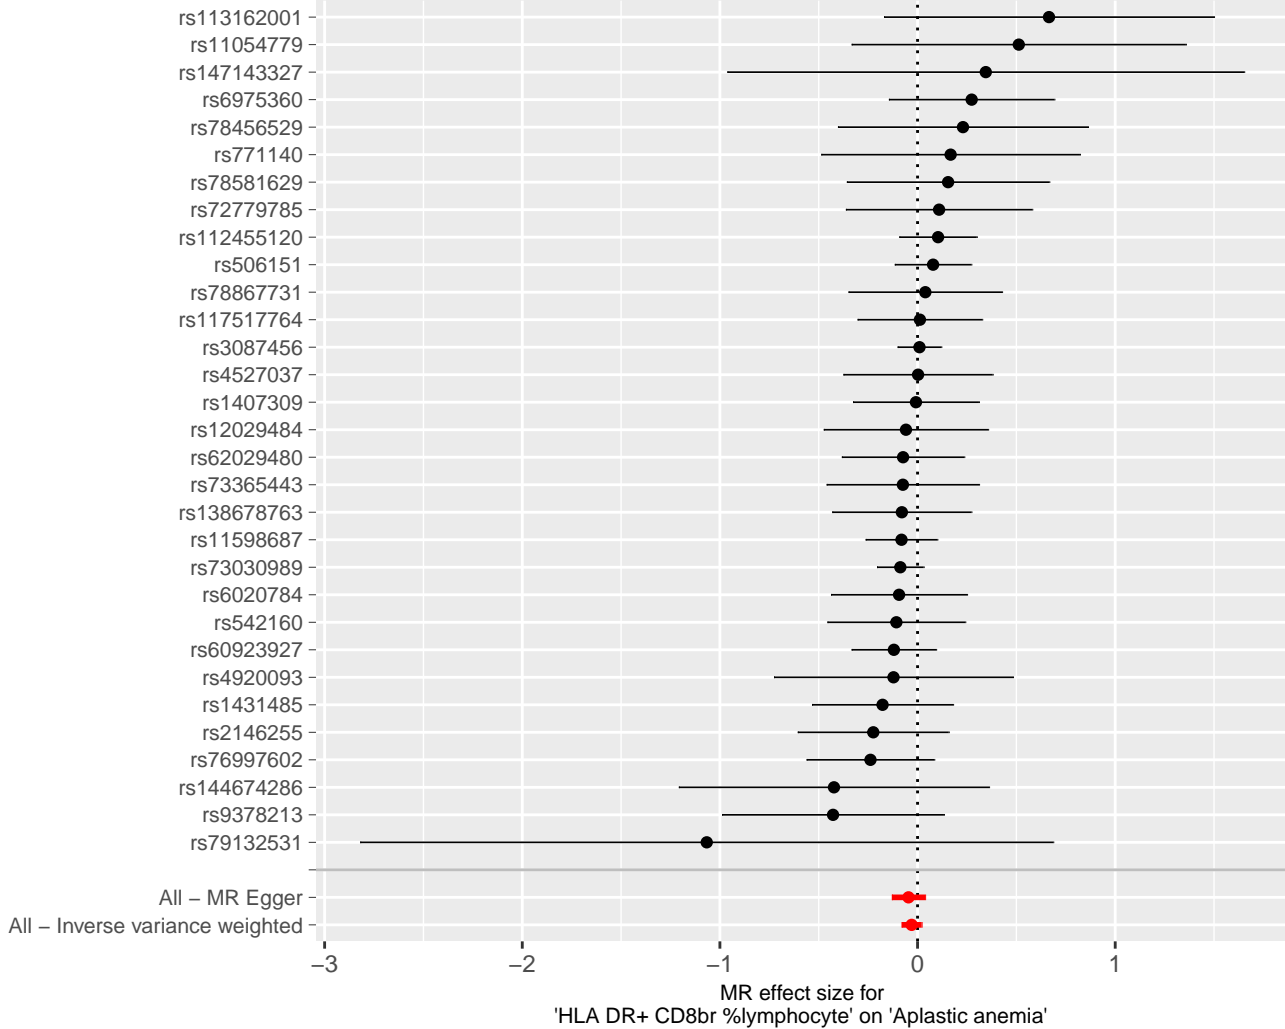

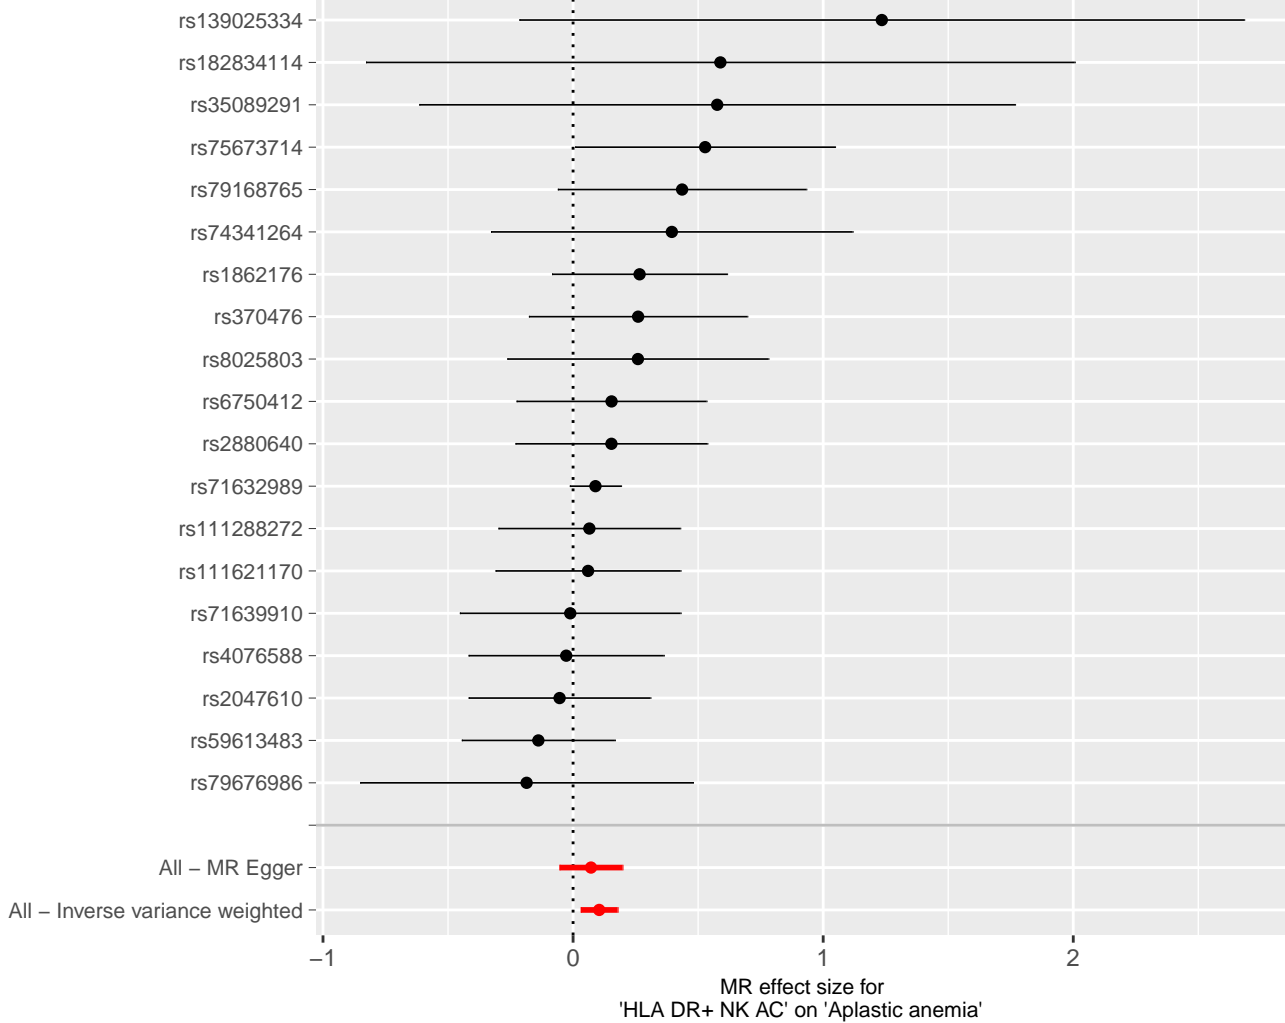

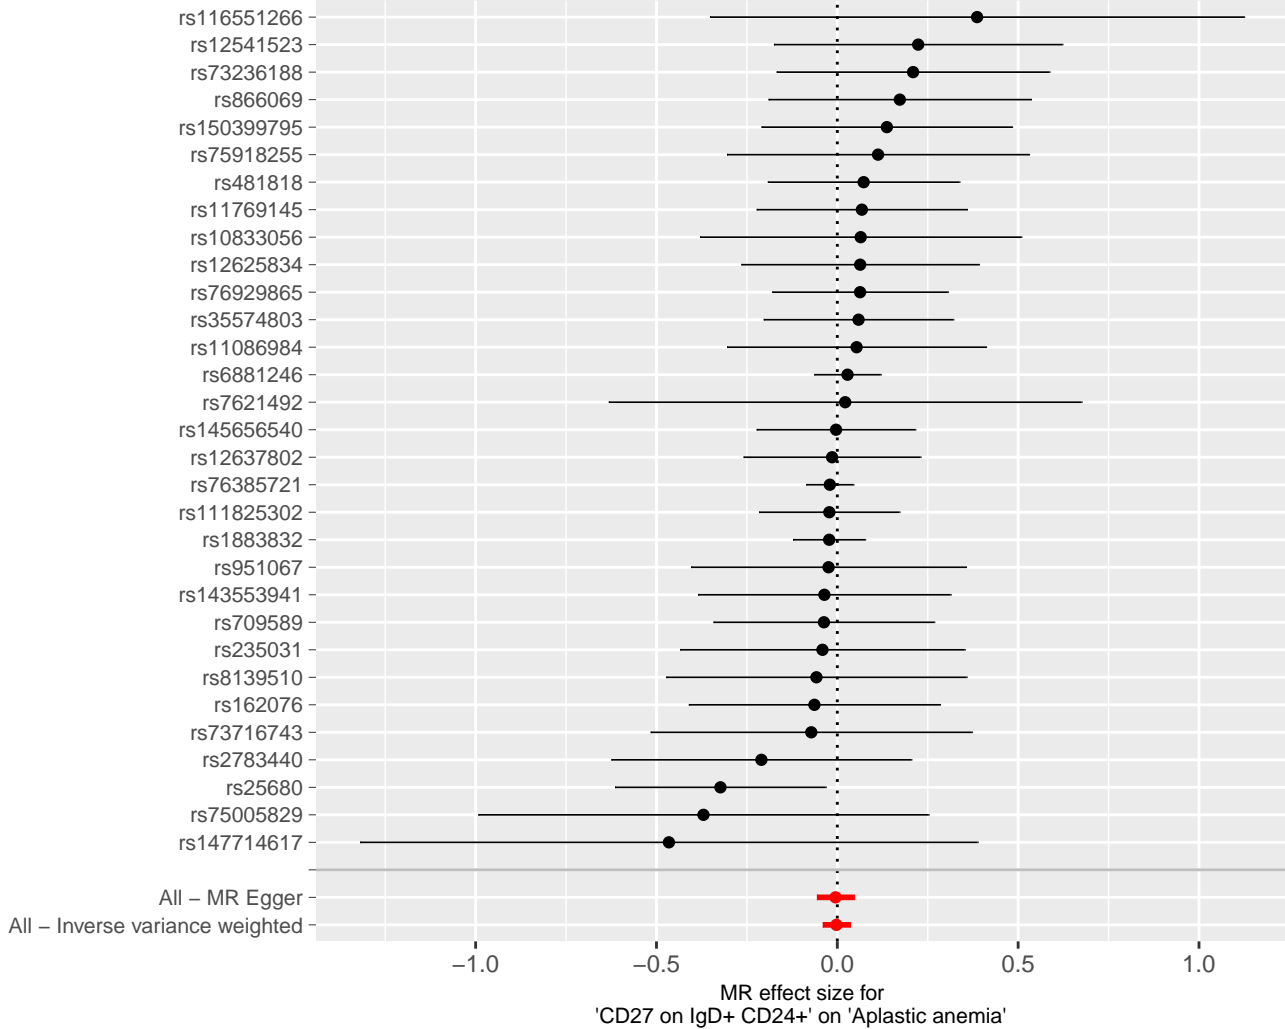

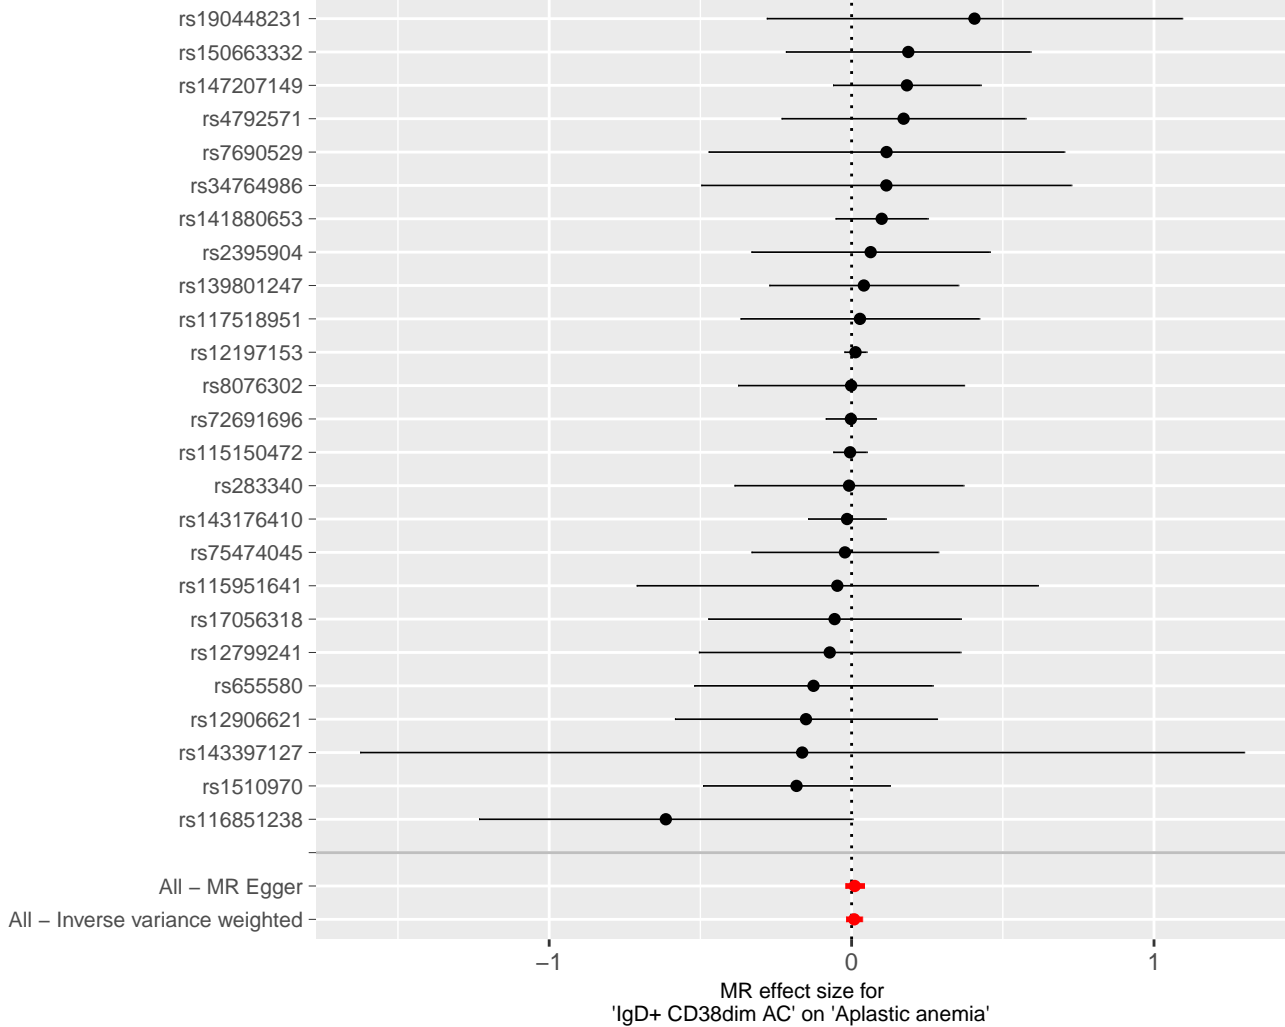

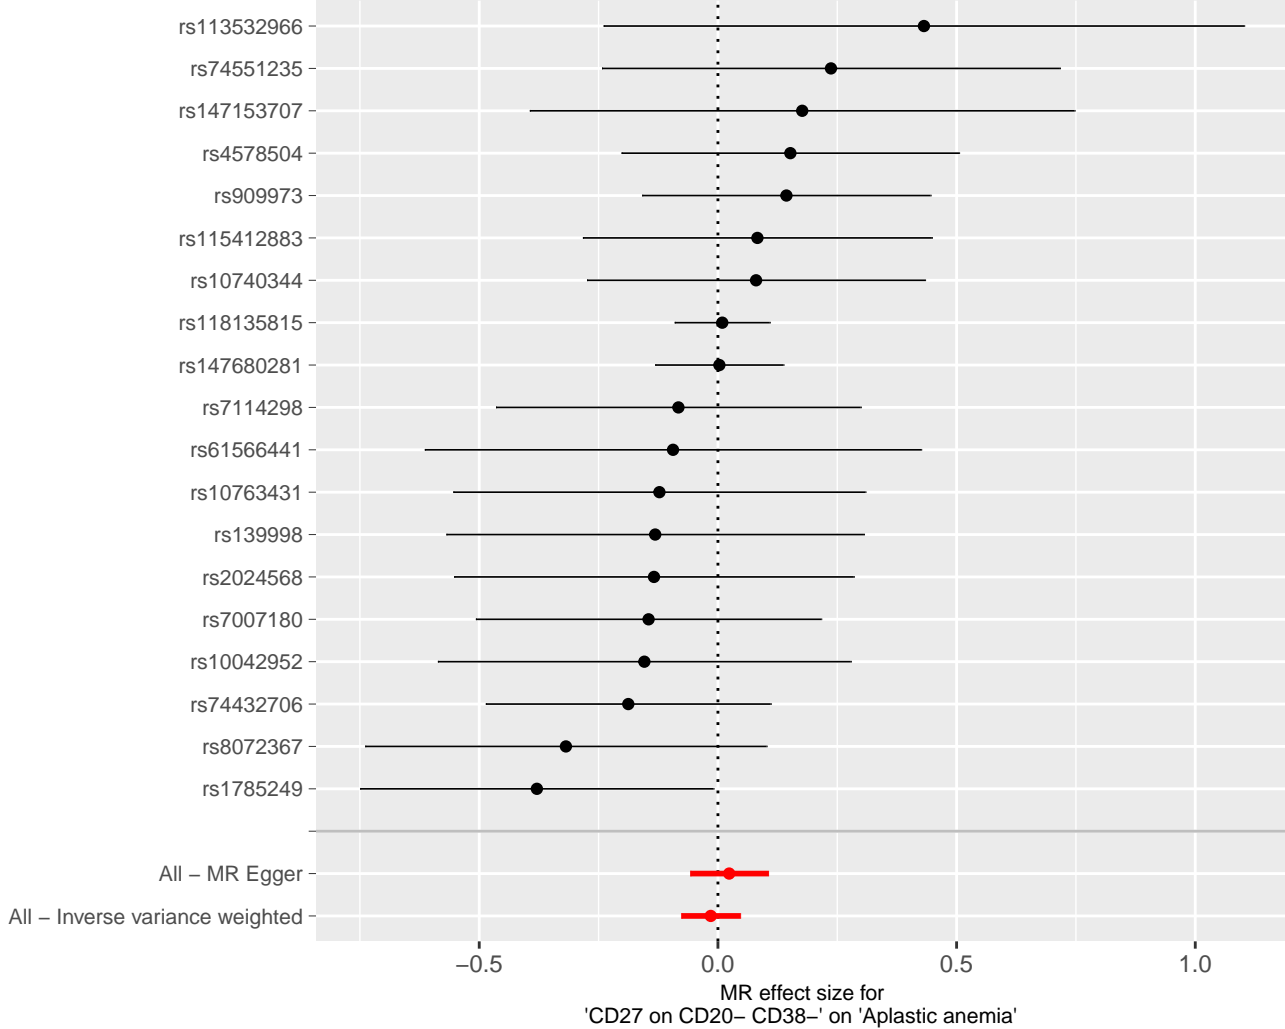

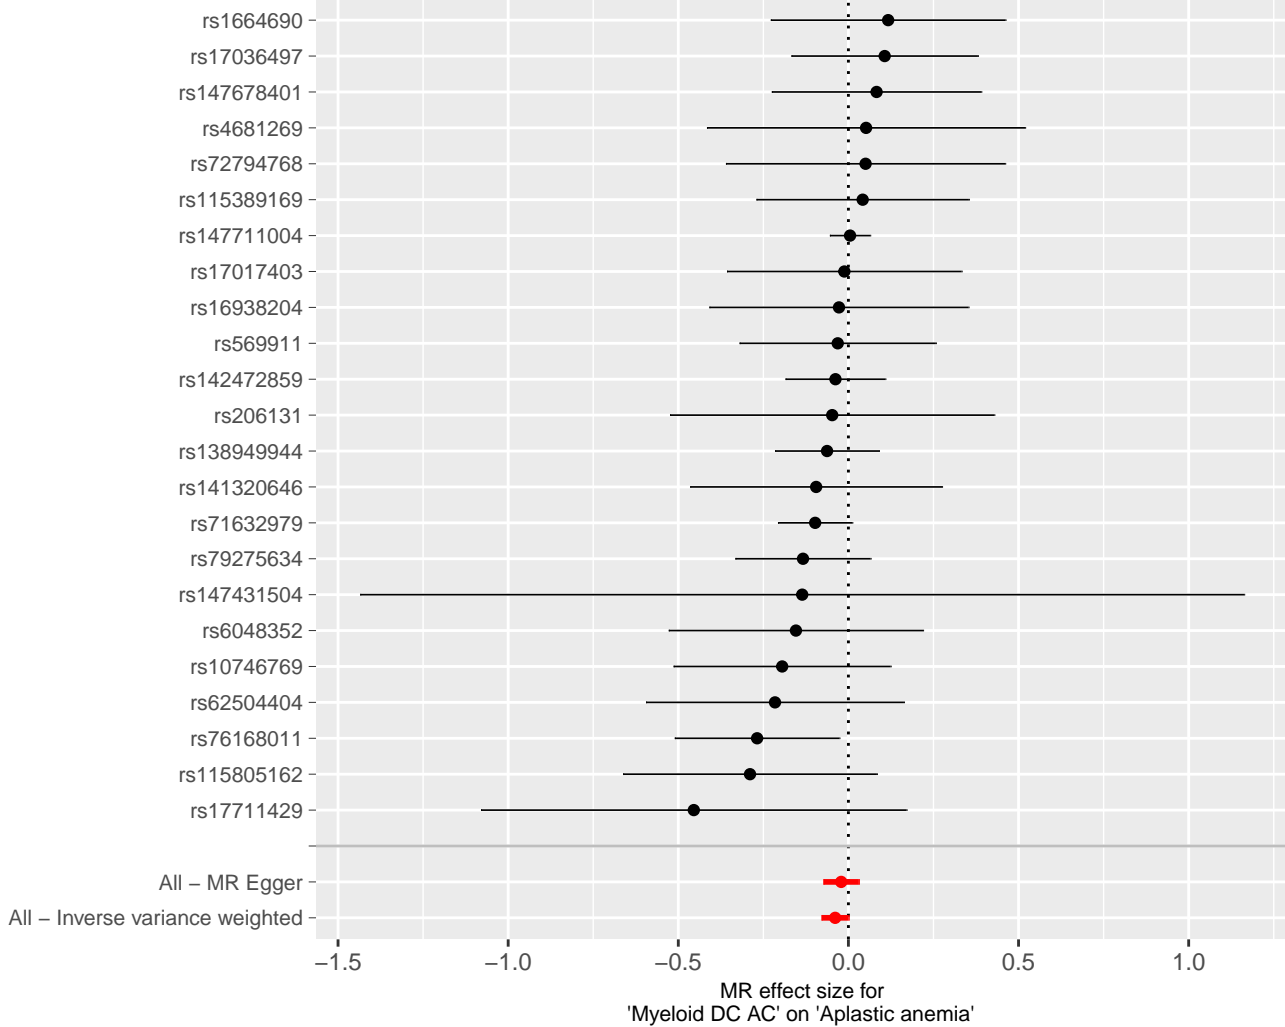

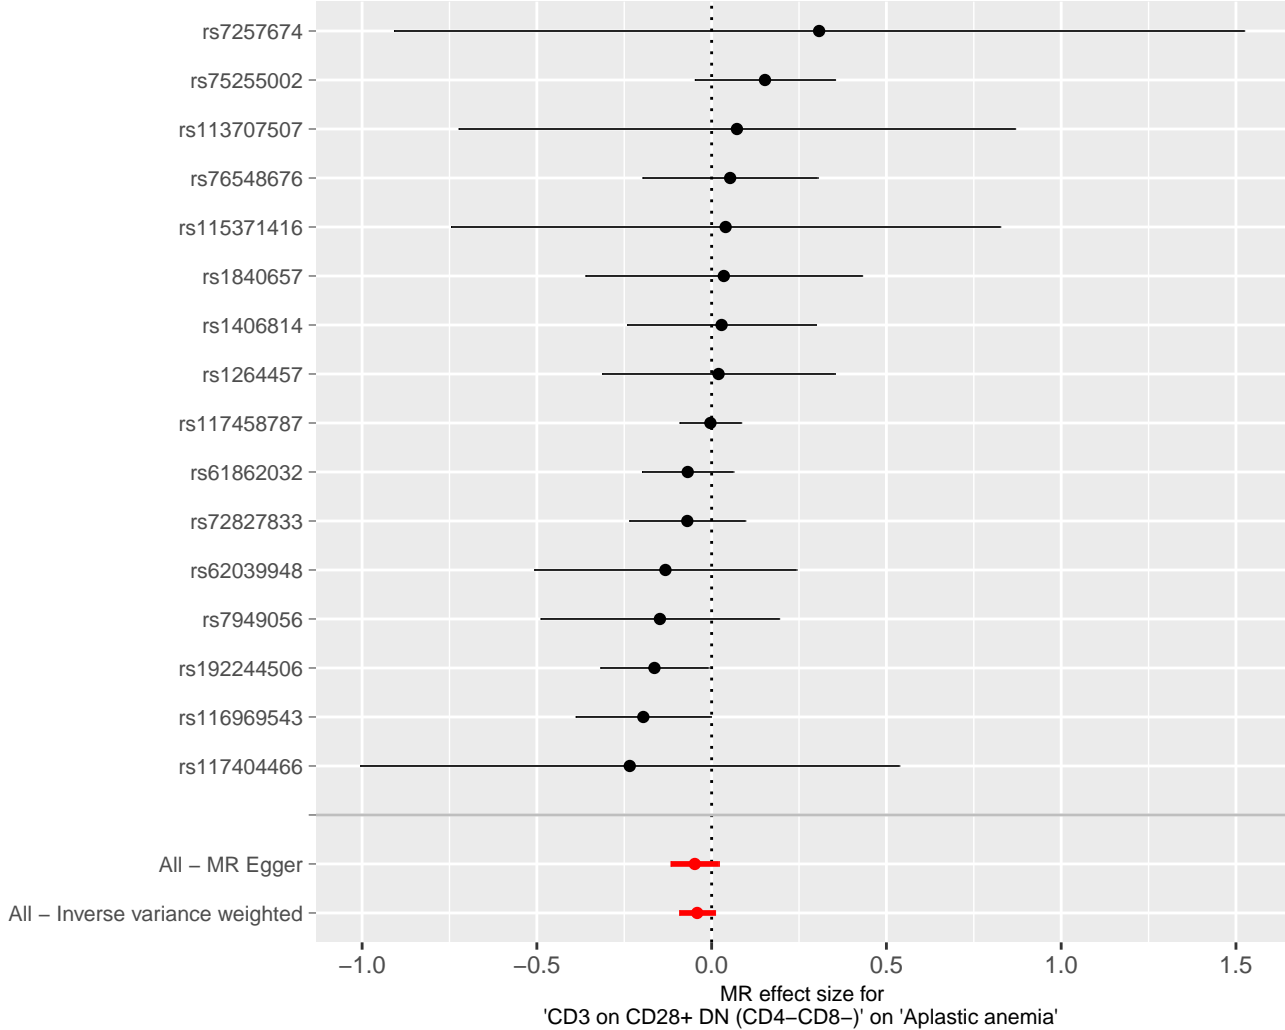

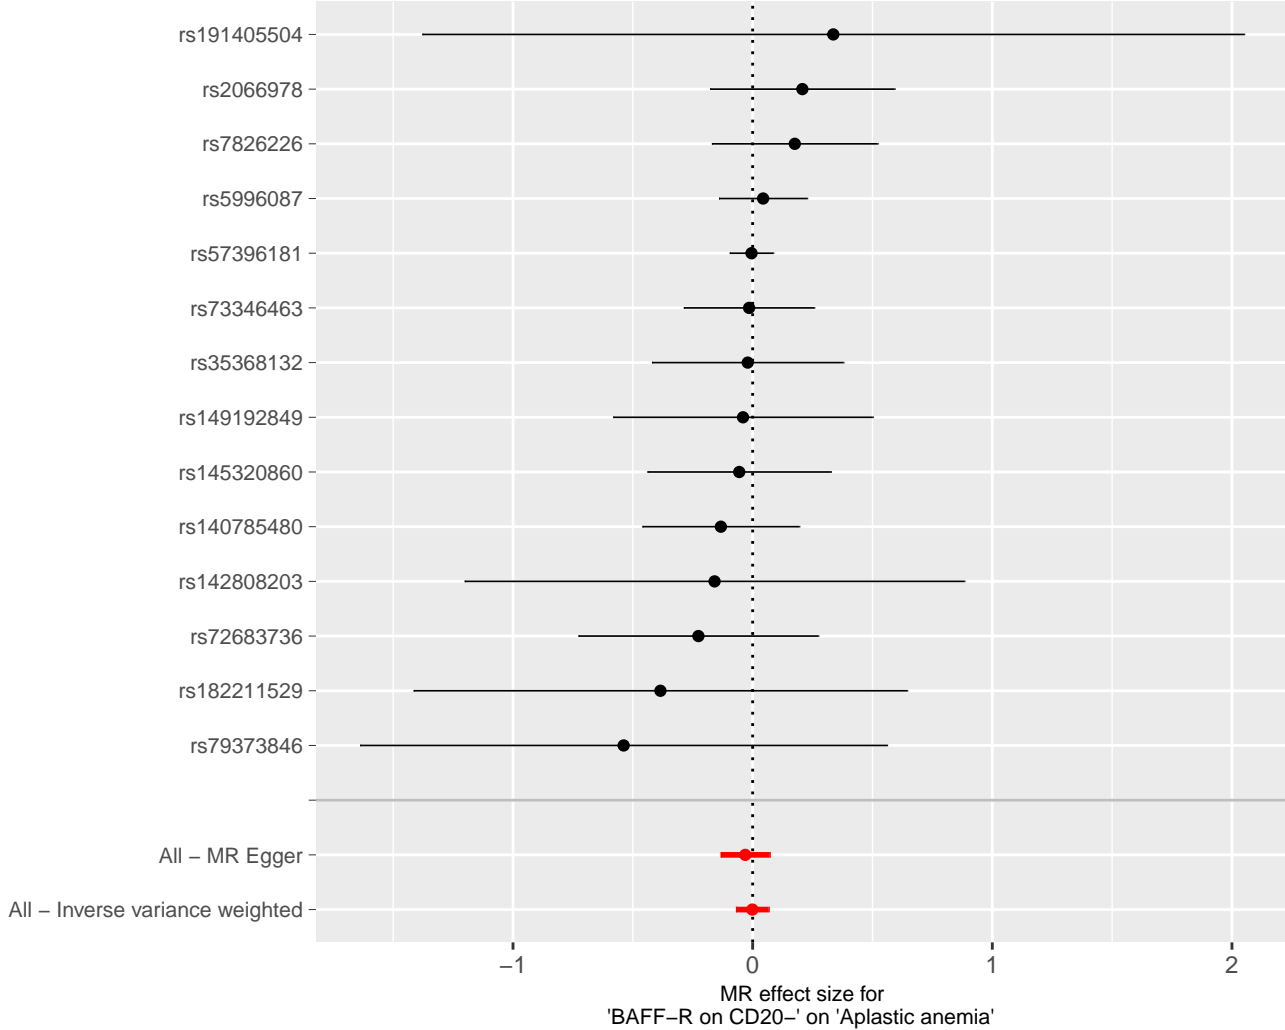



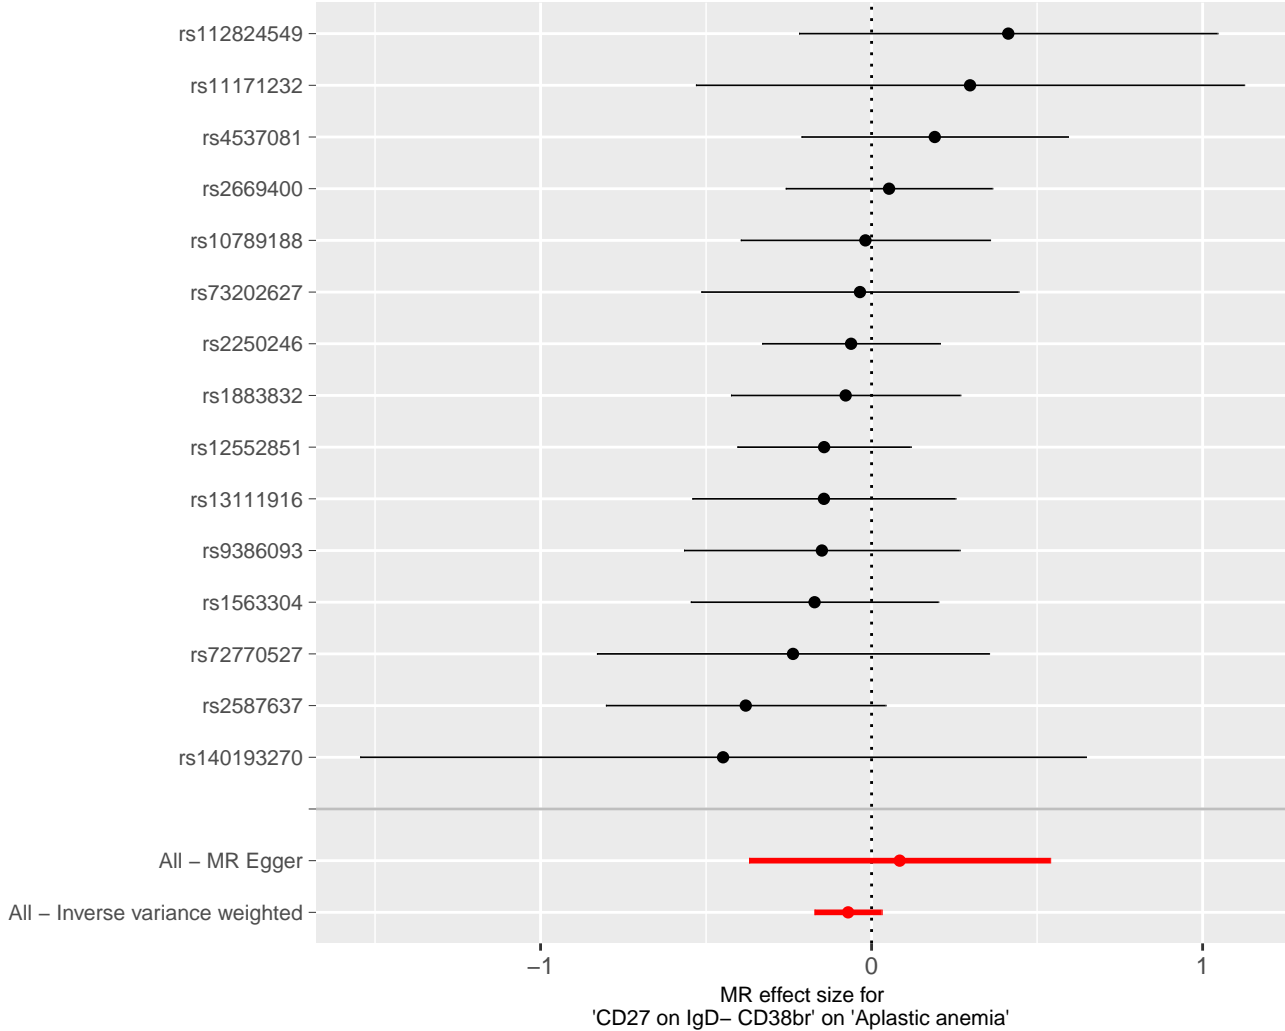

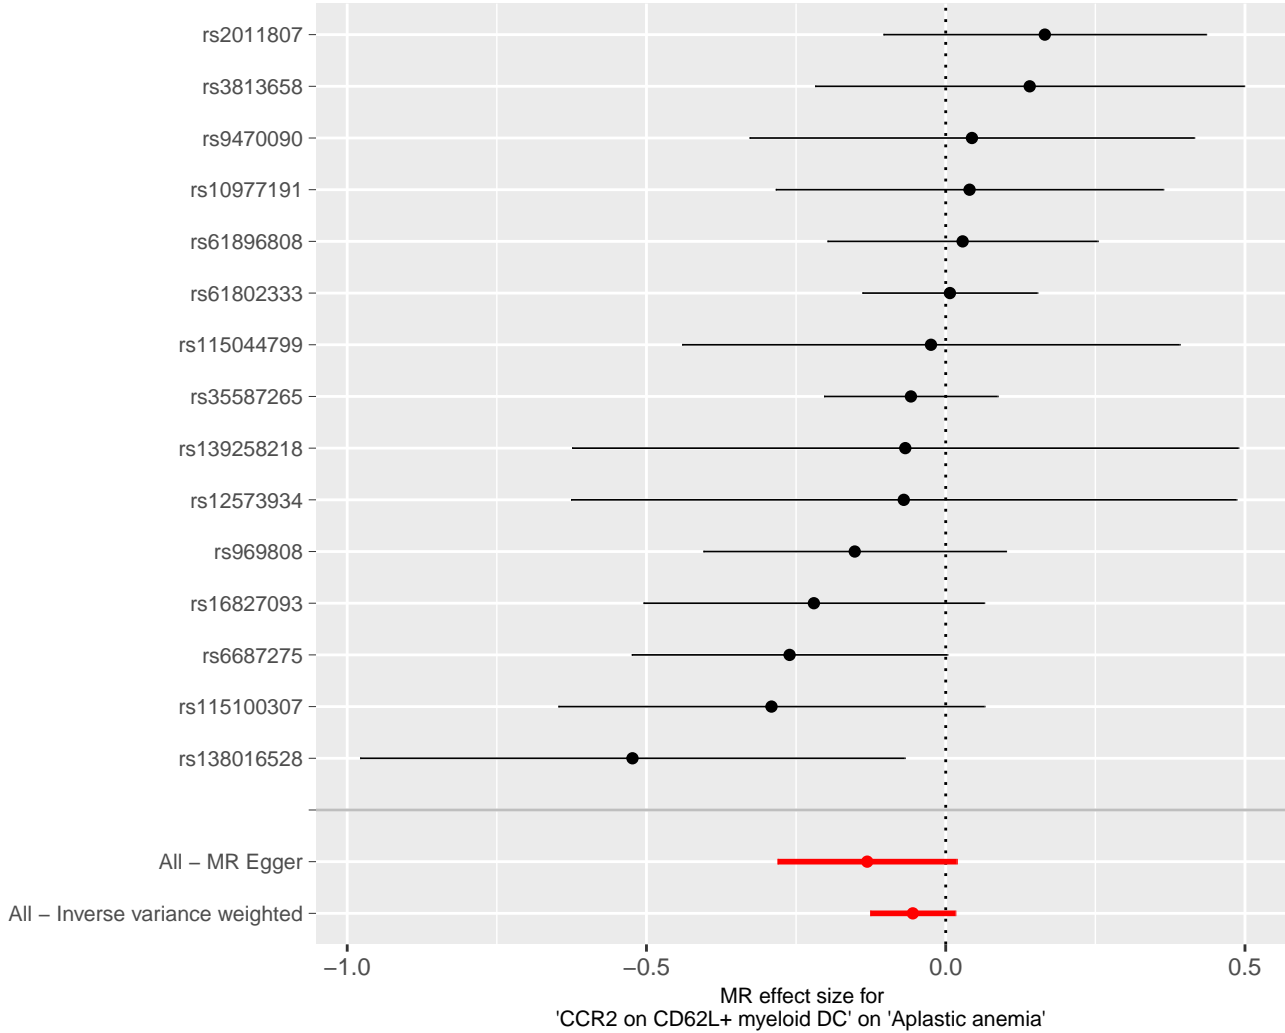

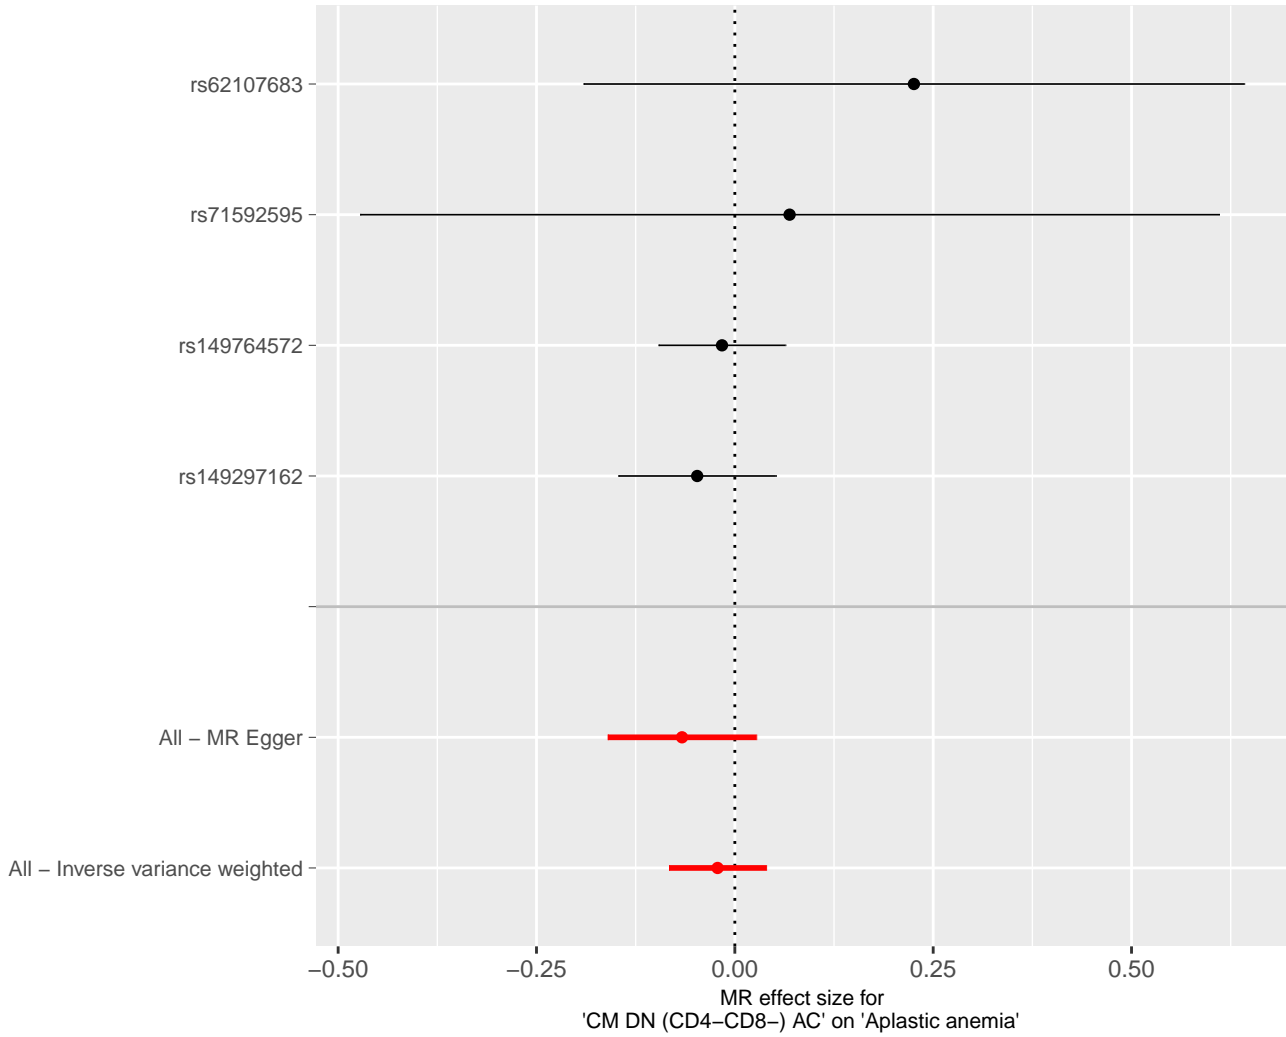

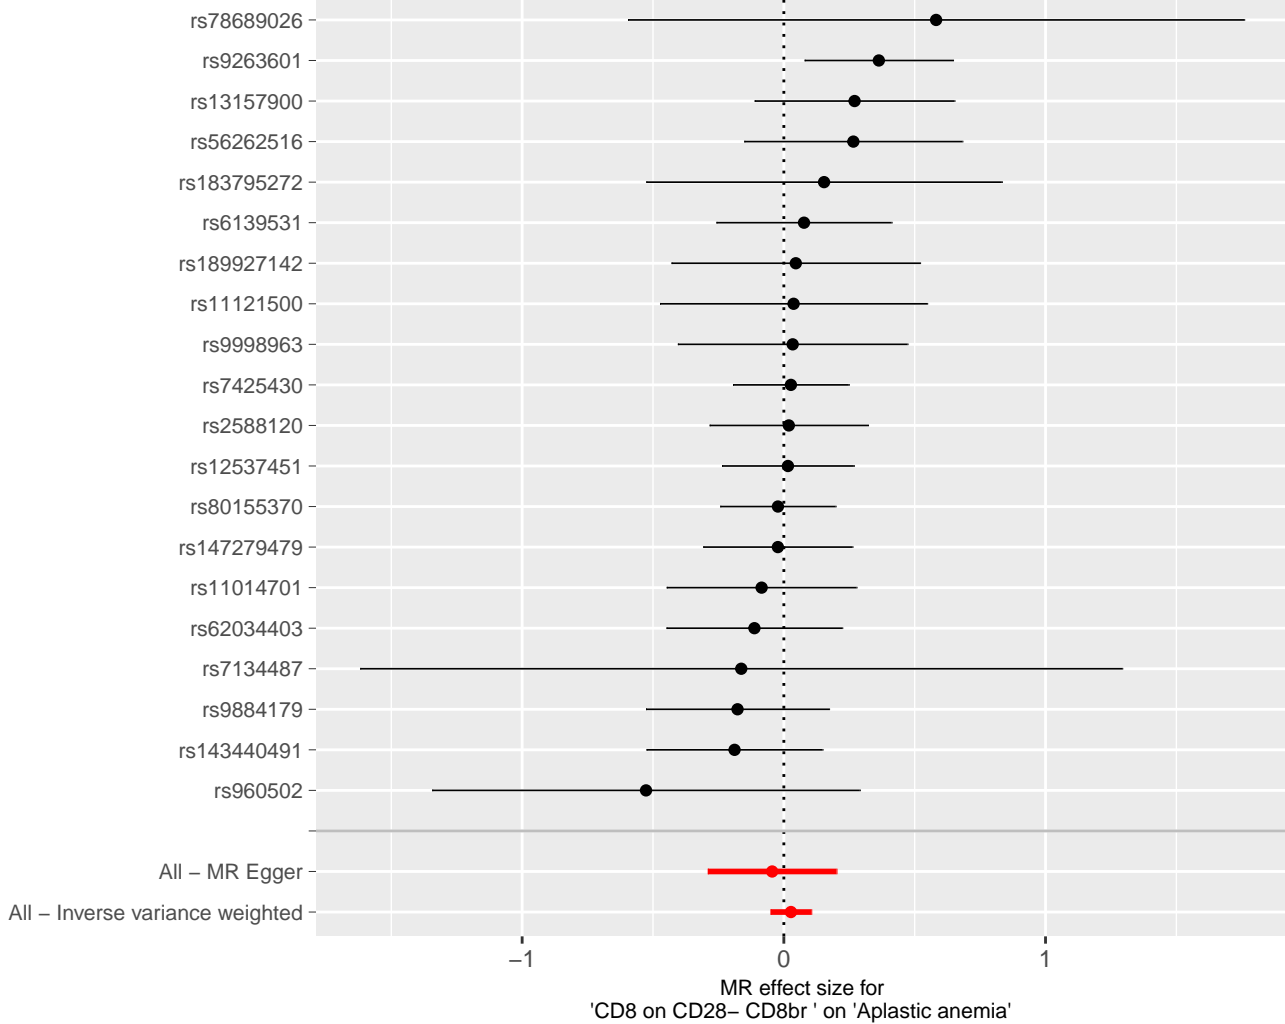

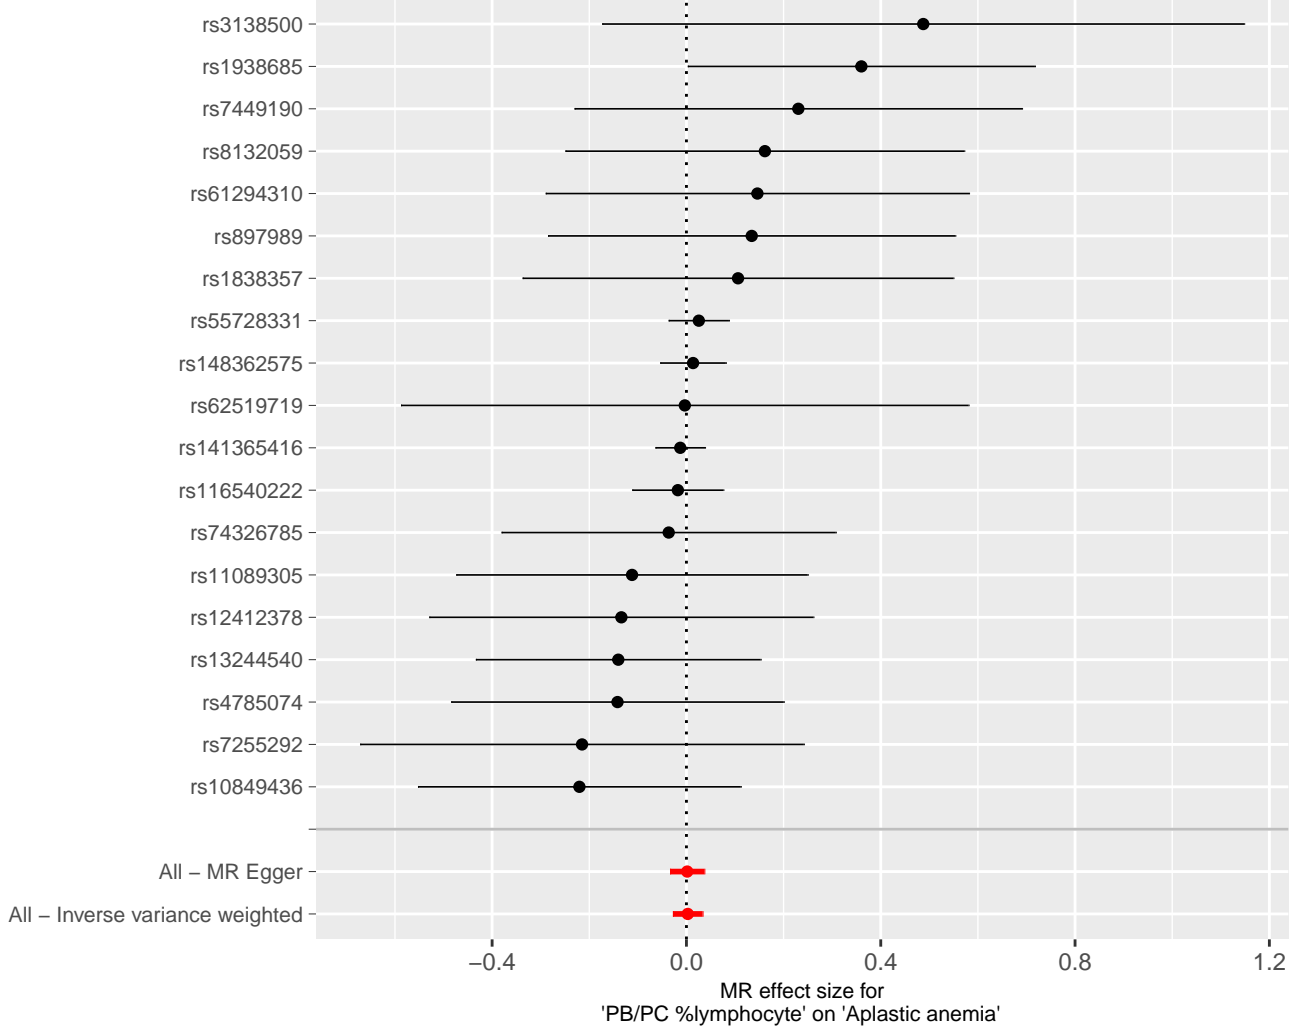

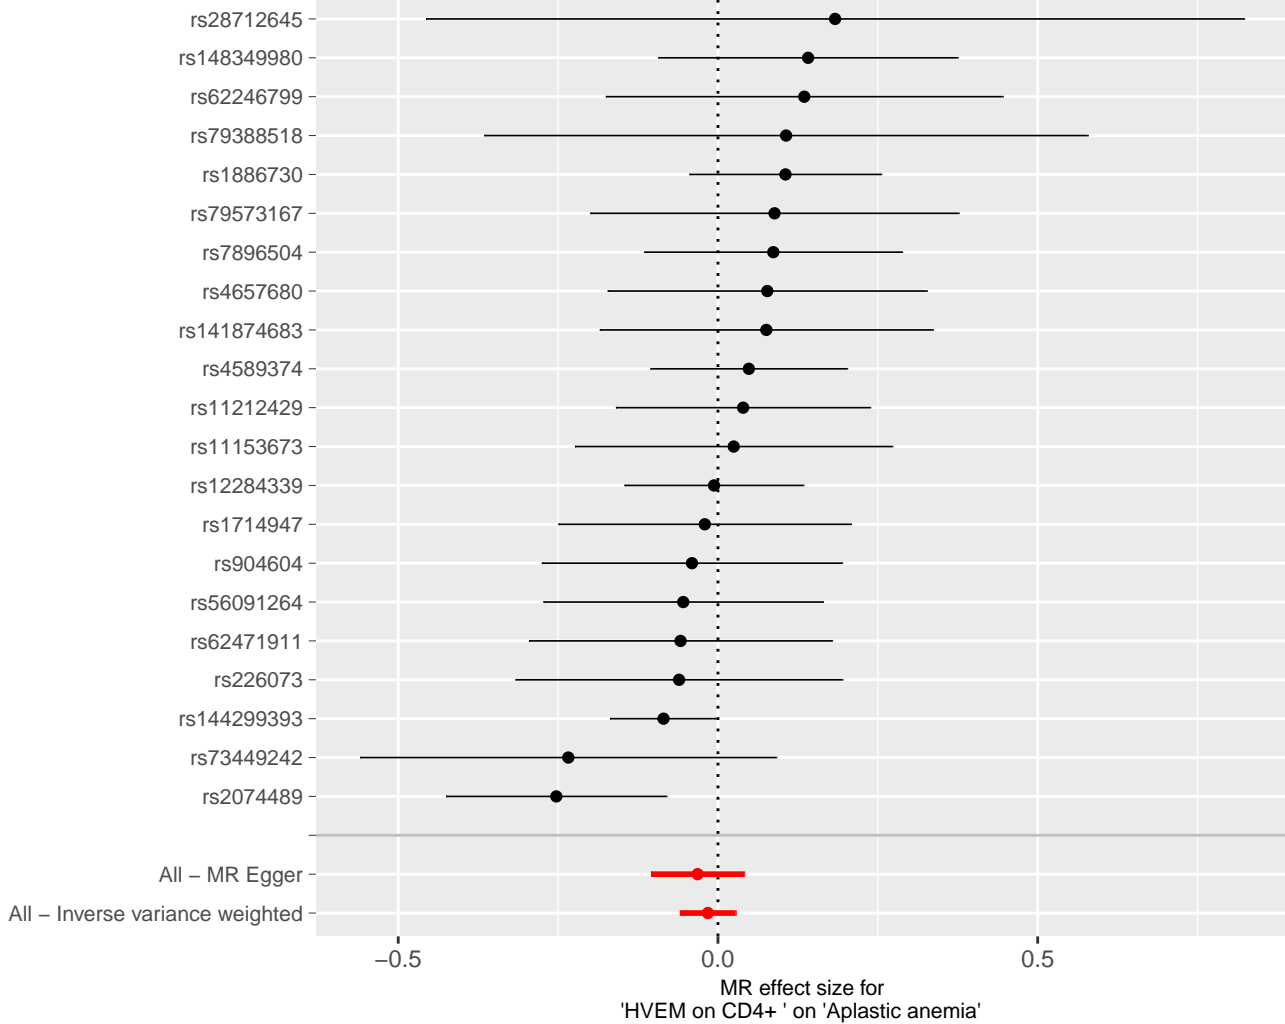

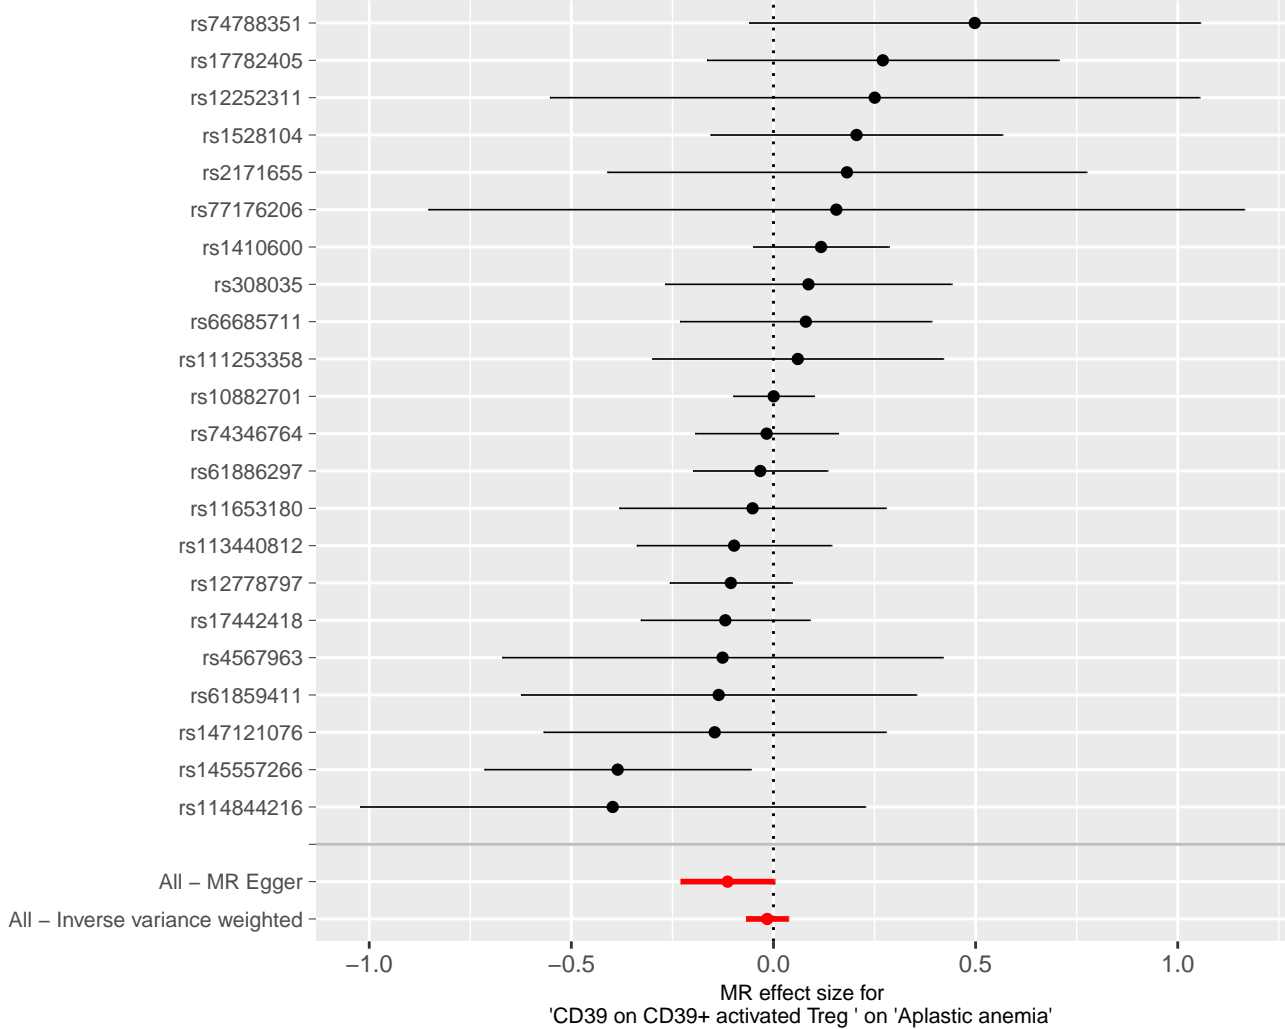

All - Inverse variance weighted

All - MR Egger

-1 0 1 2 3

MR effect size for  
'CD28+ CD45RA+ CD8br %T cell' on 'Aplastic anemia'

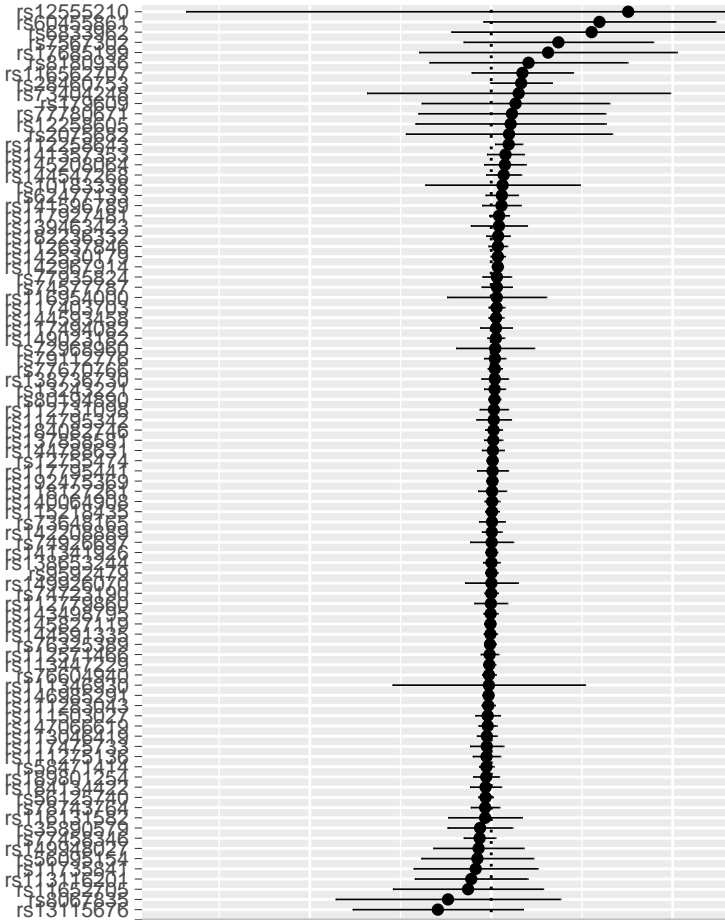



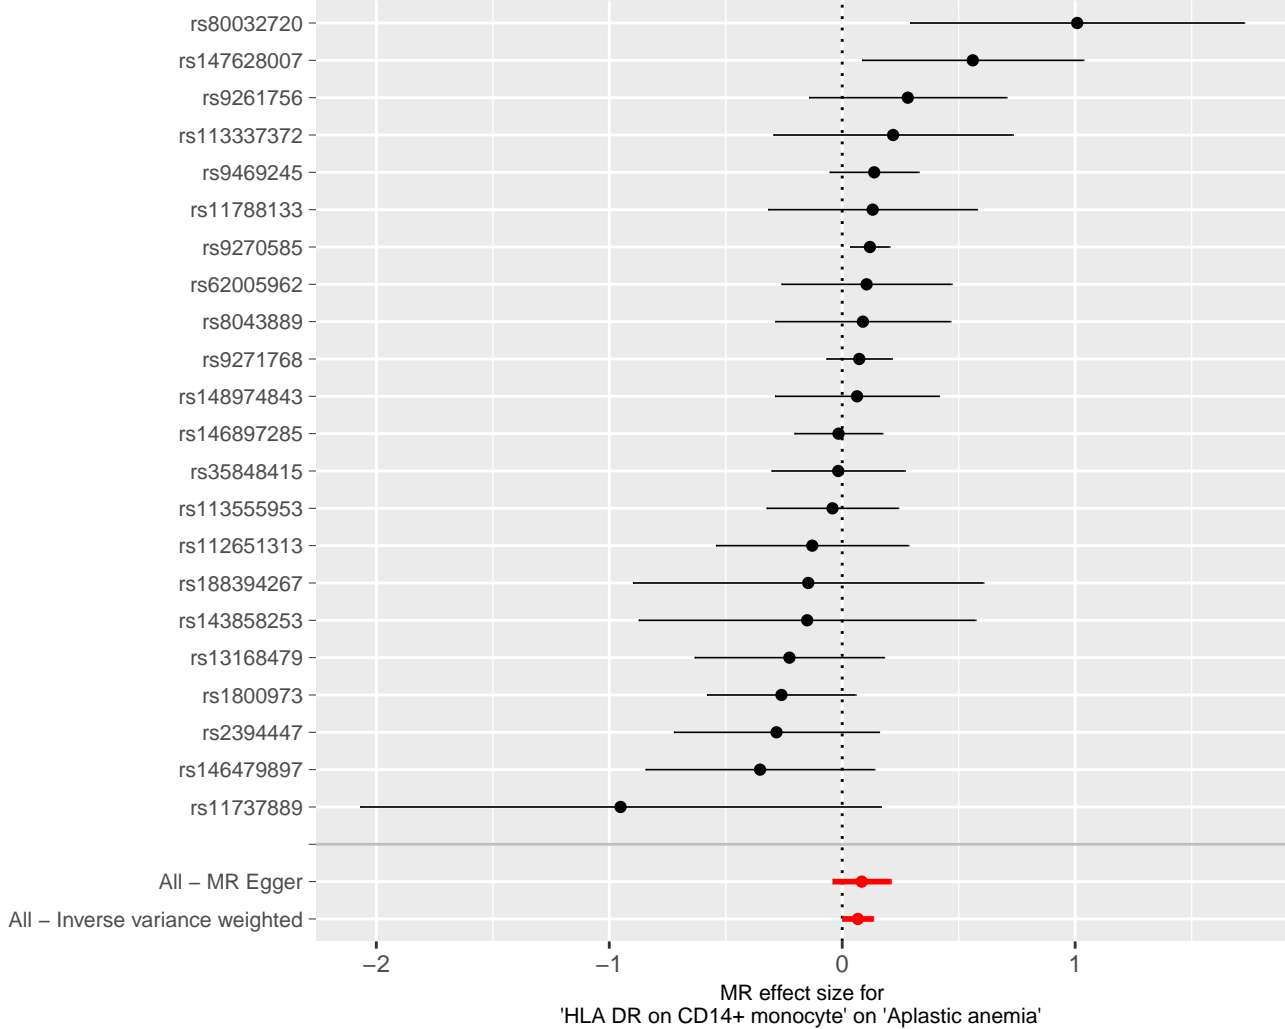

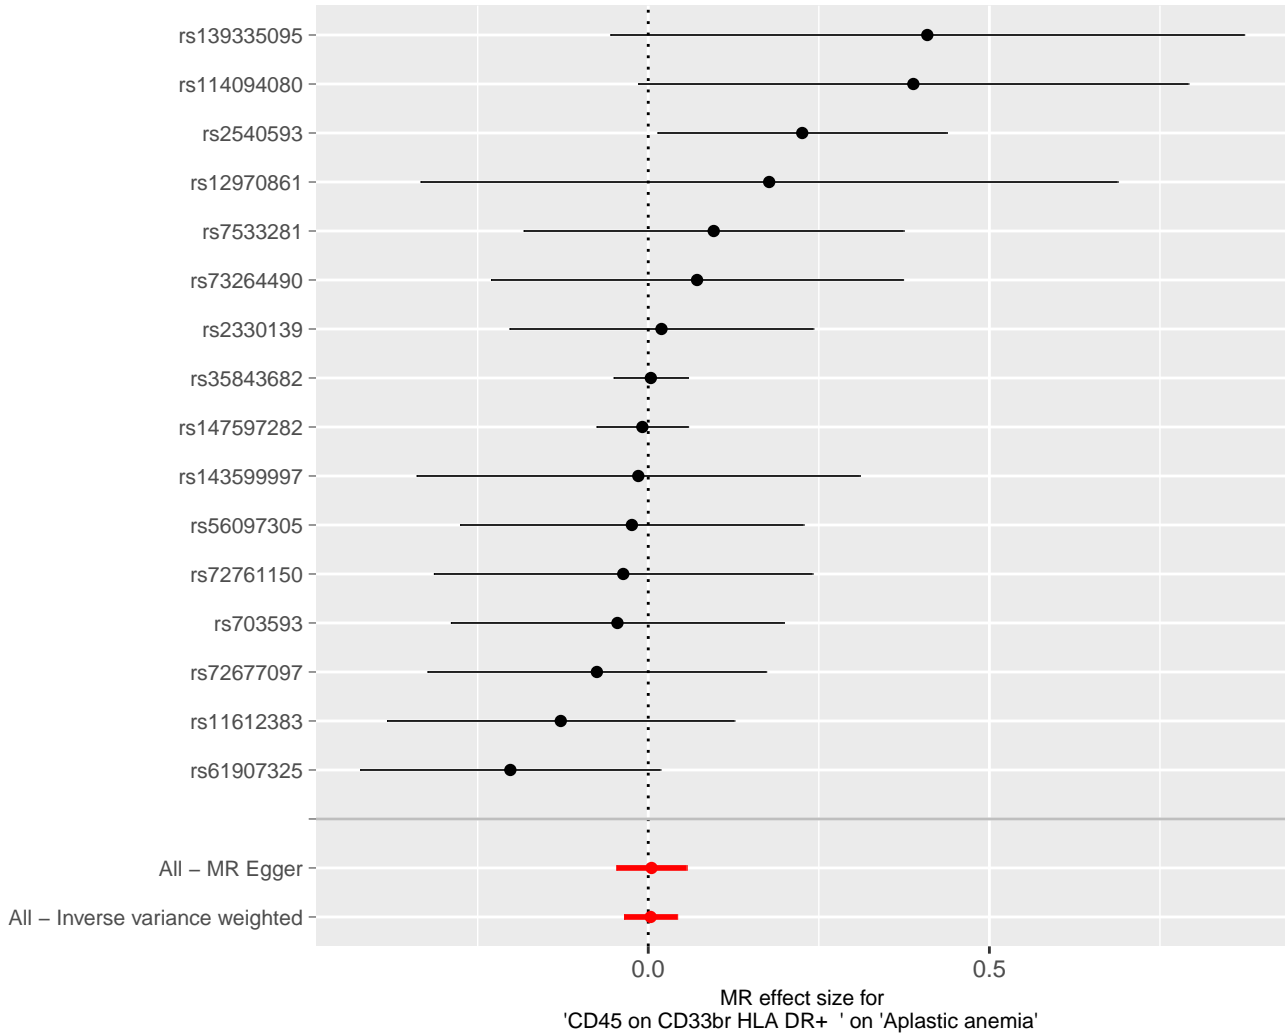

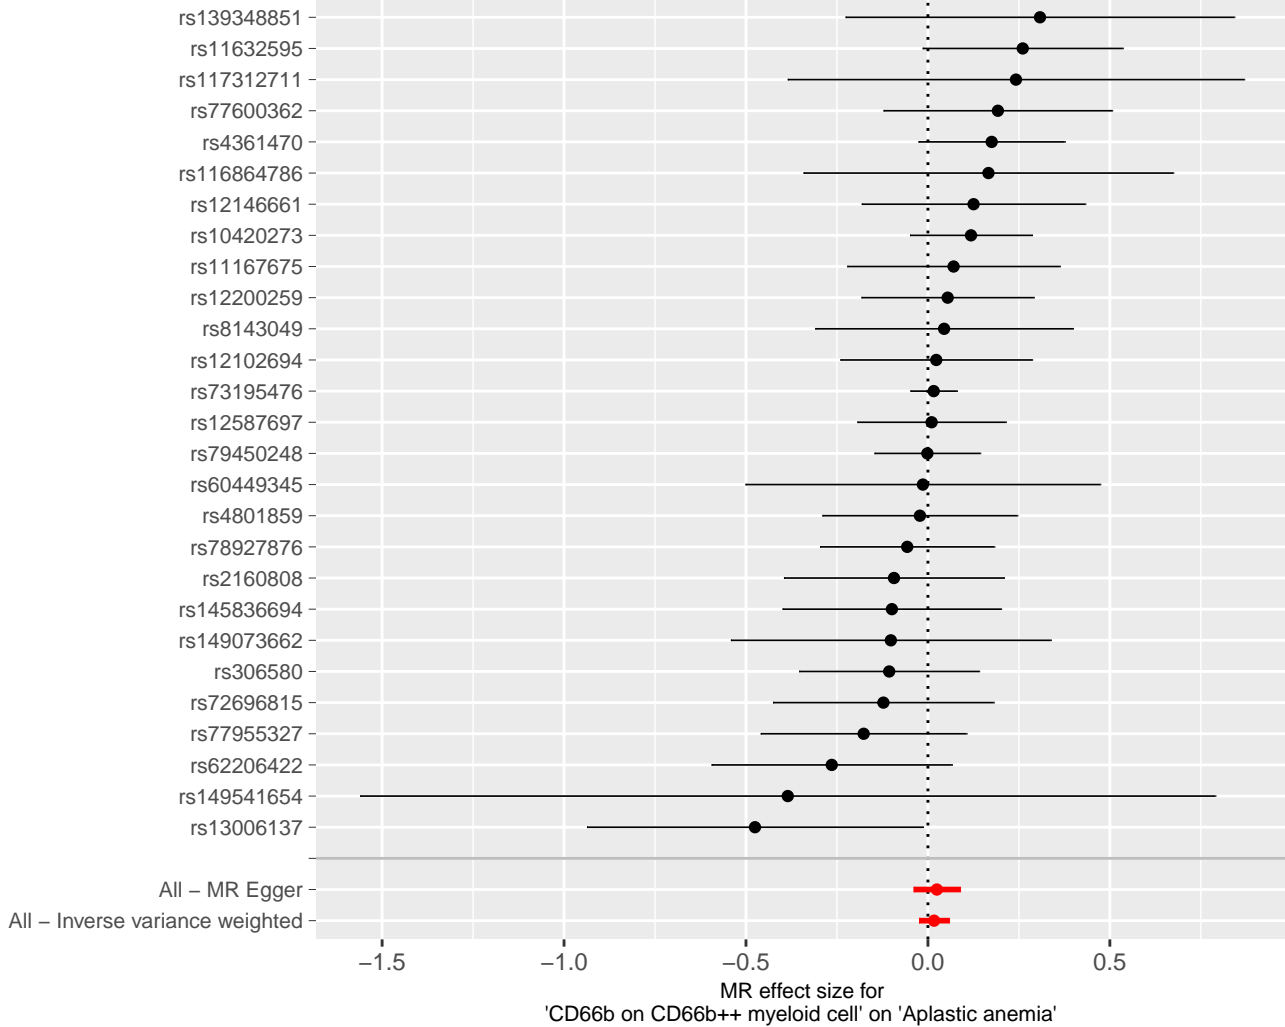

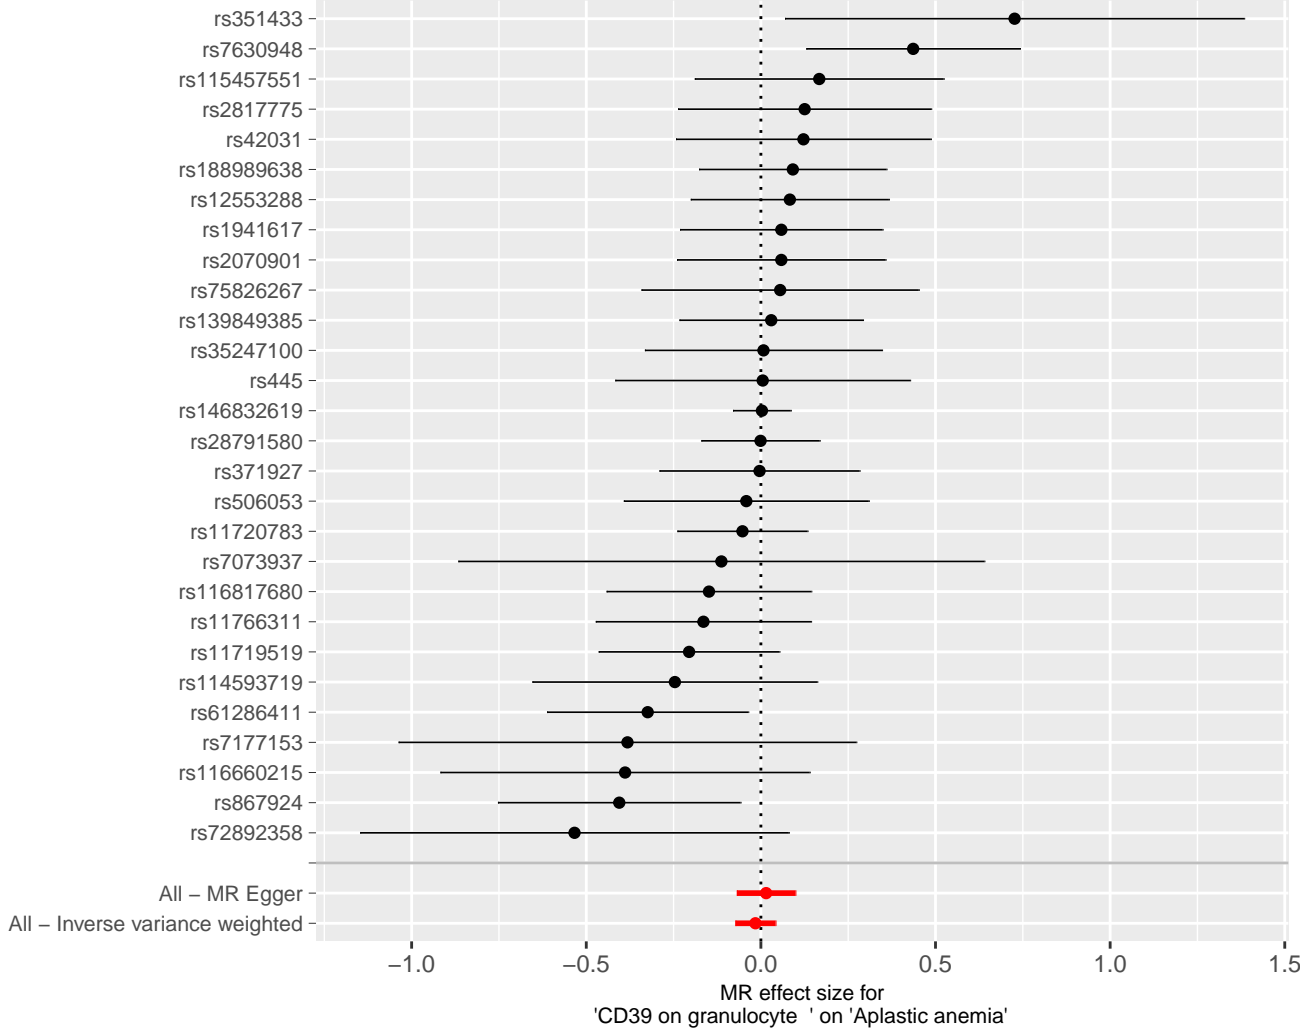

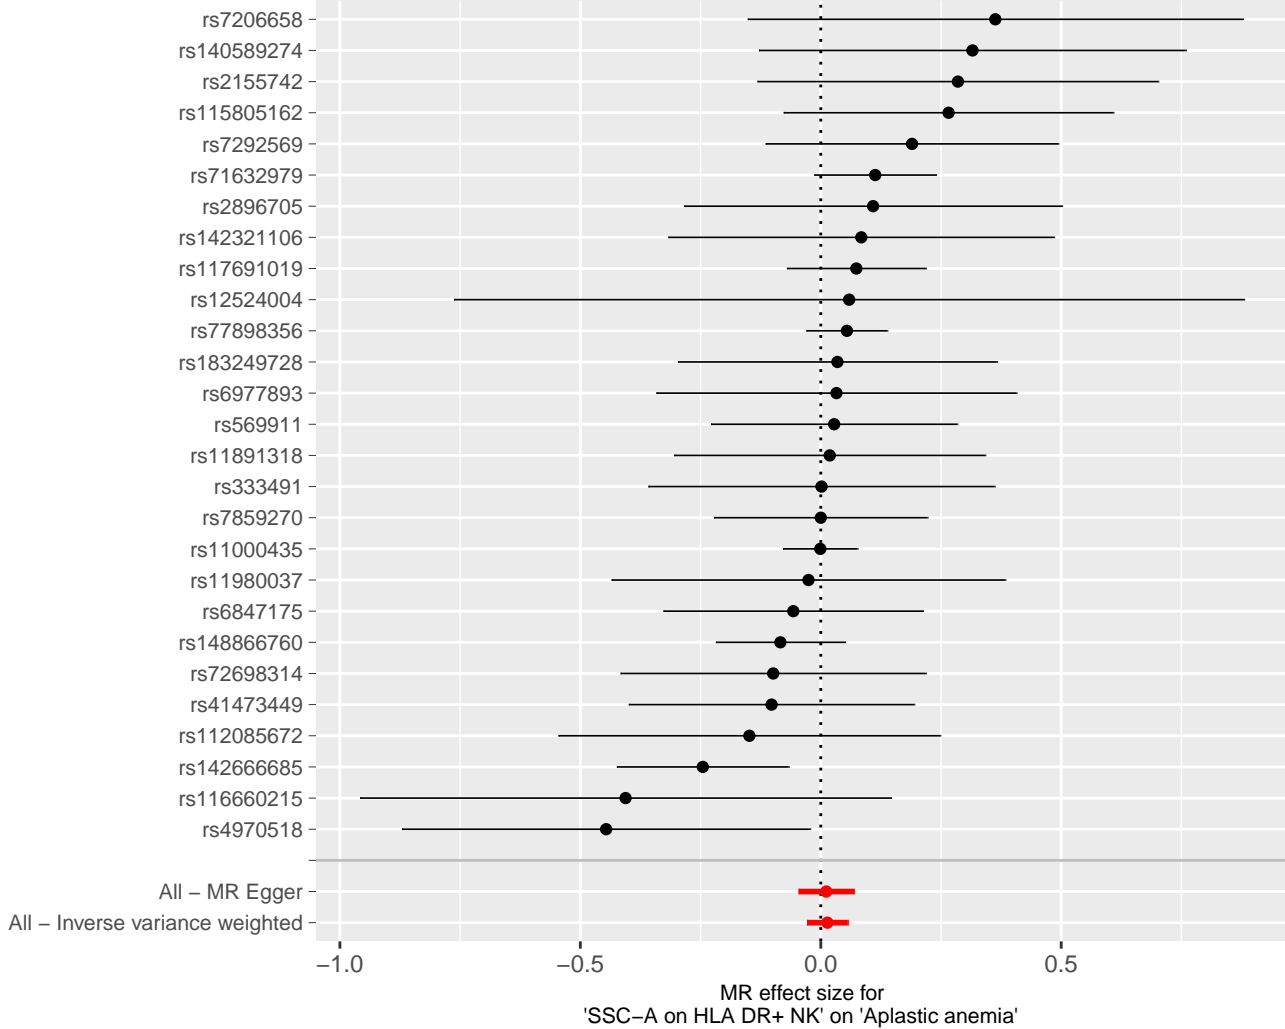

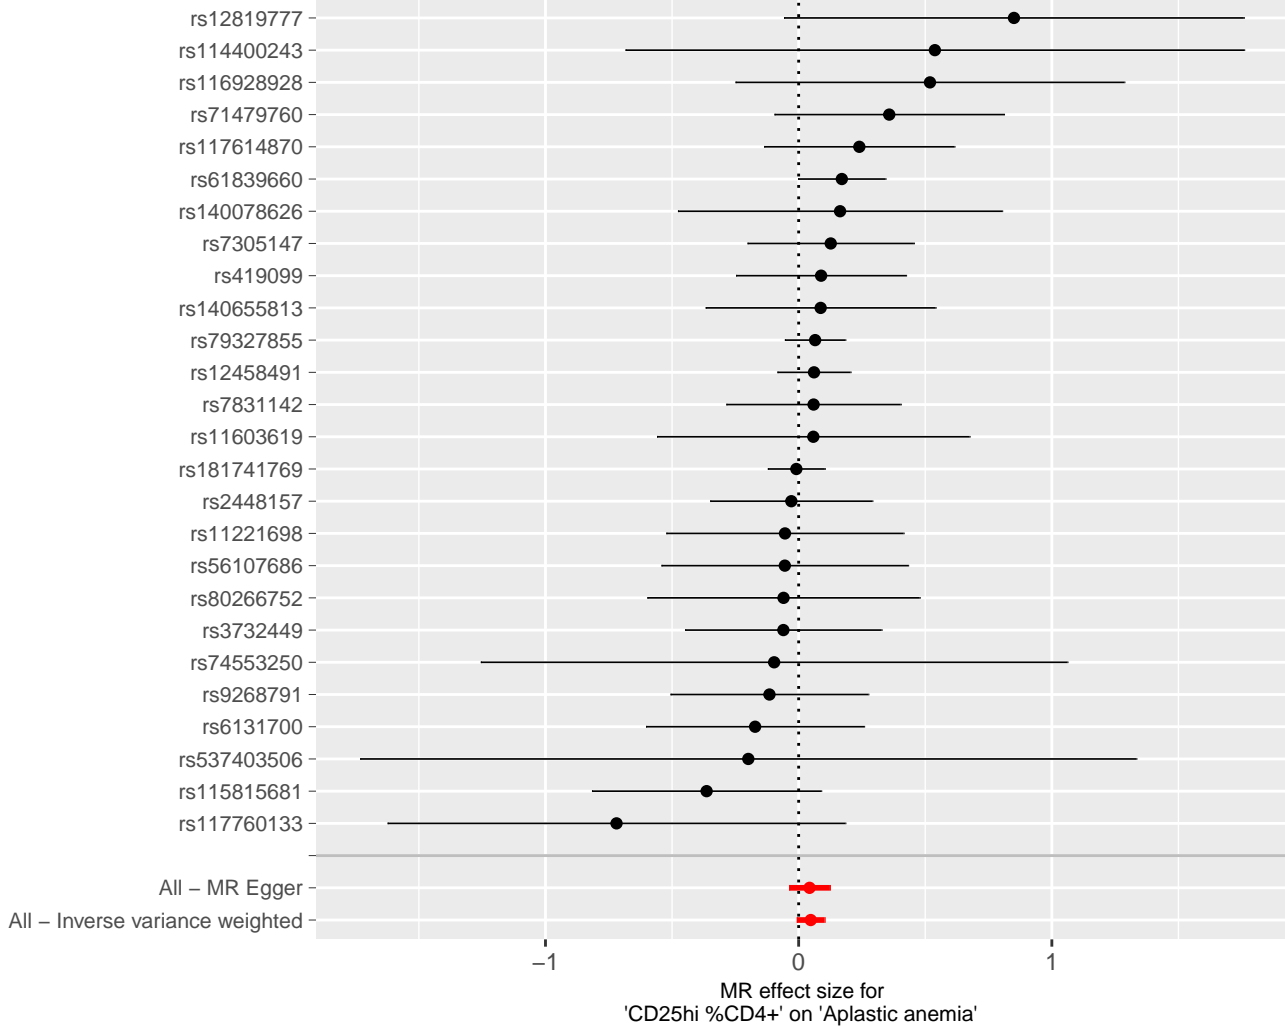

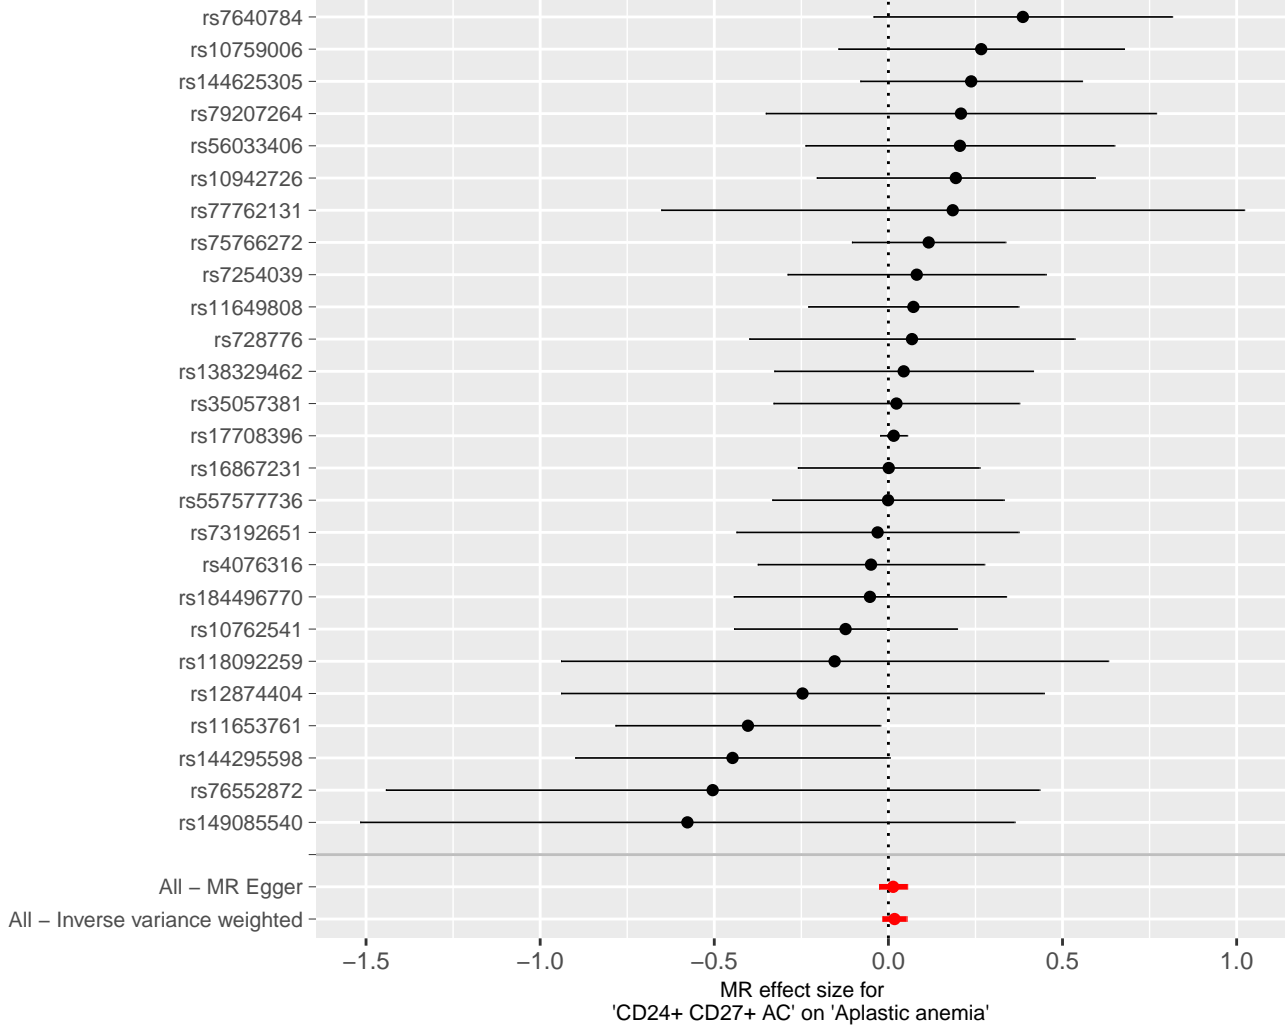

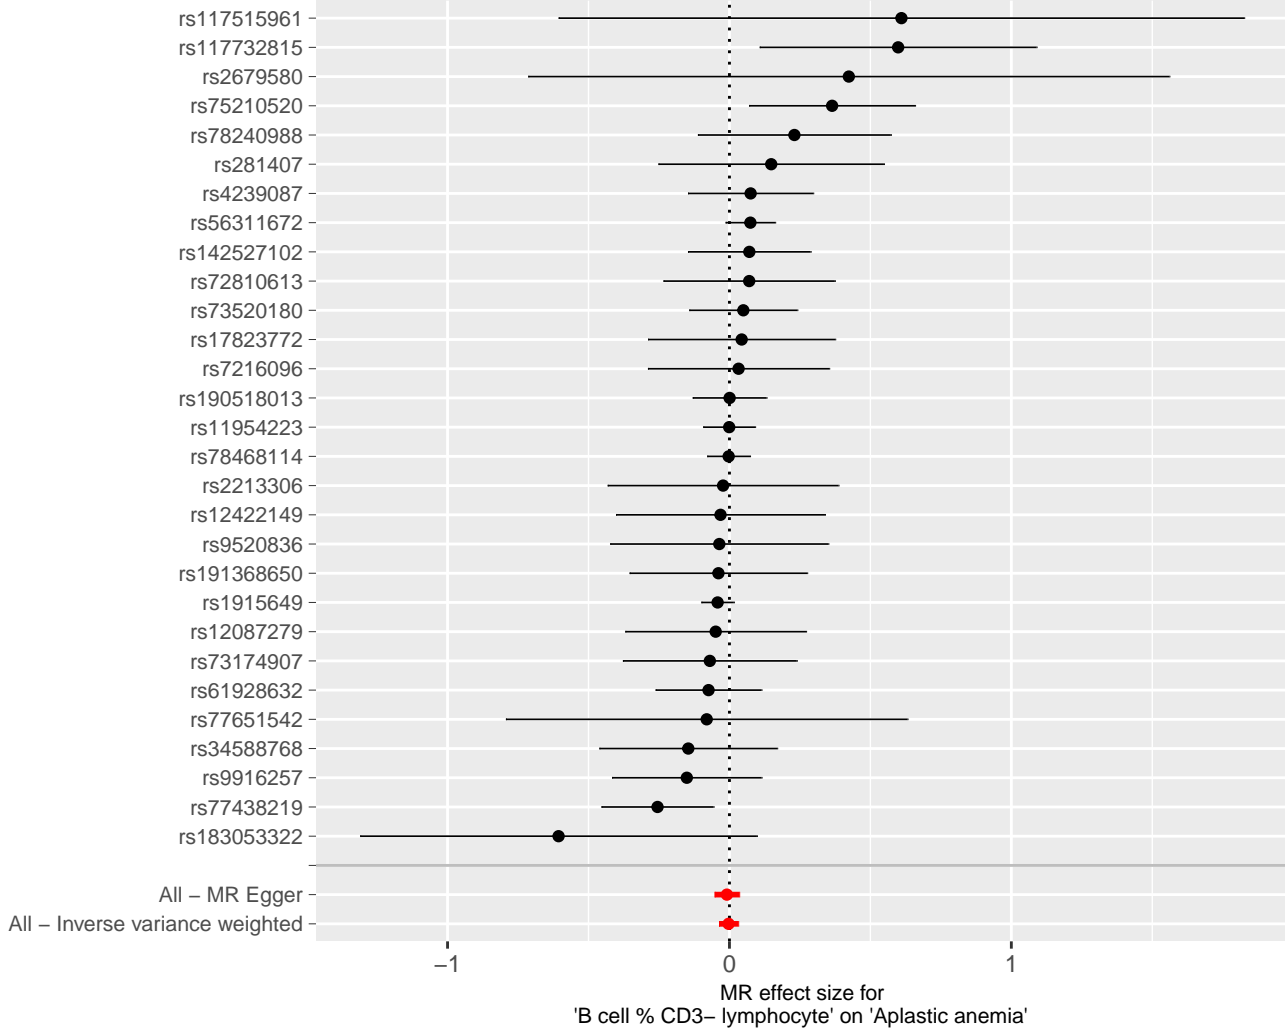



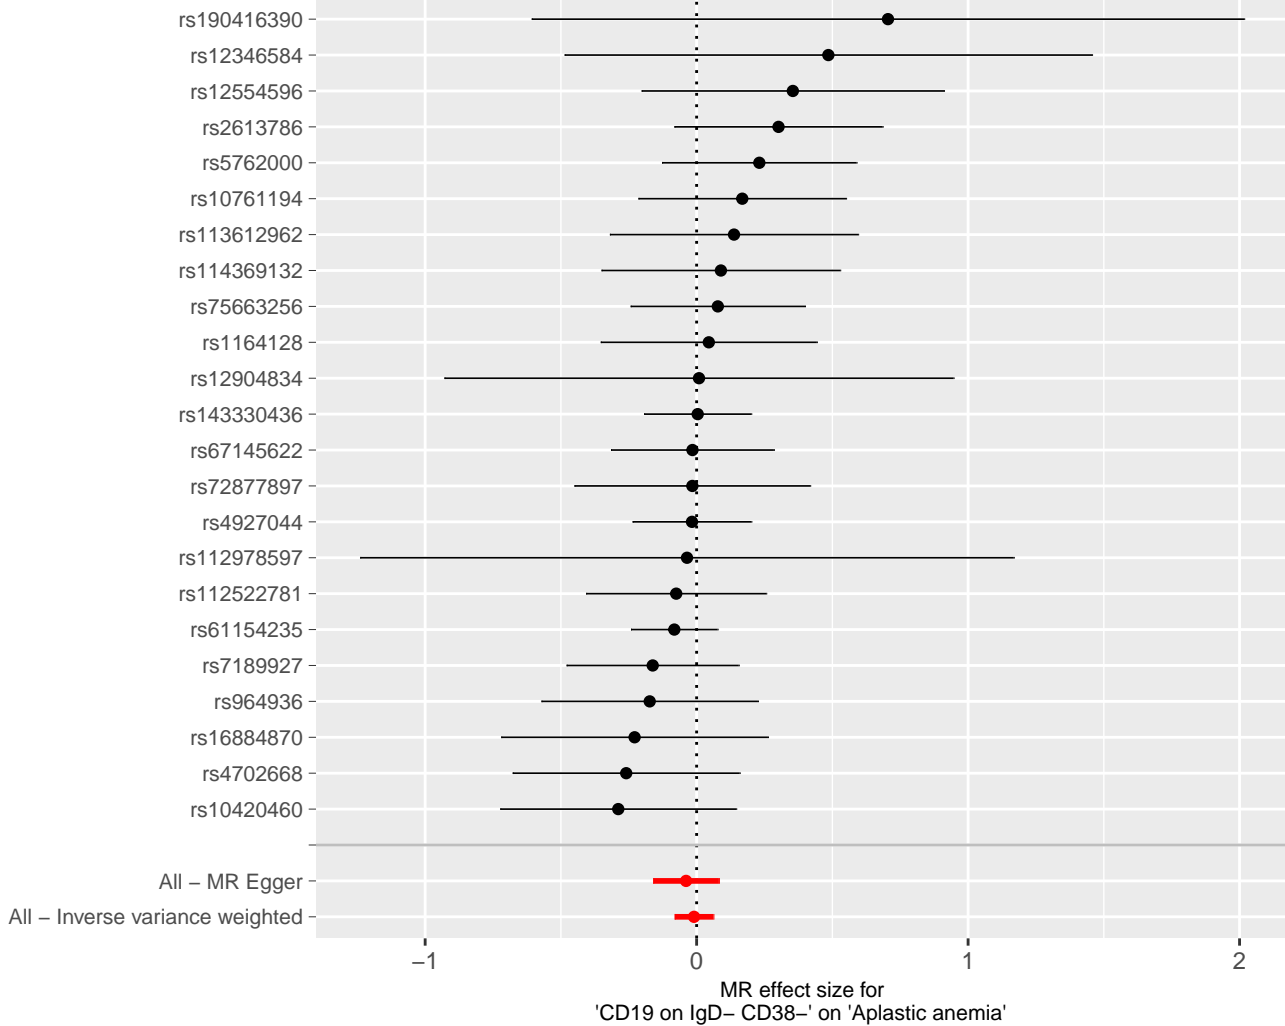

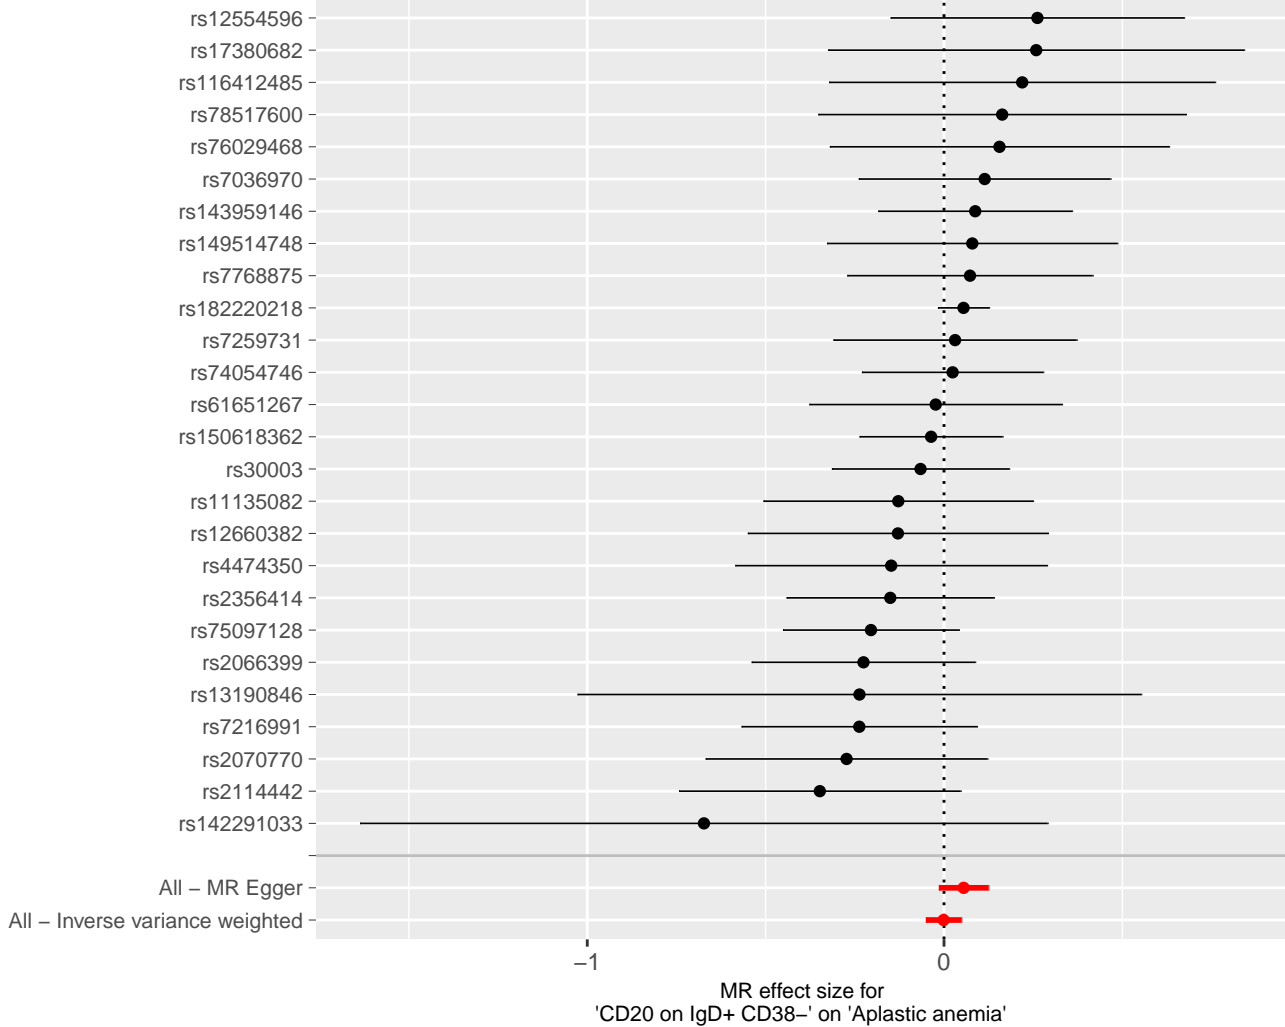

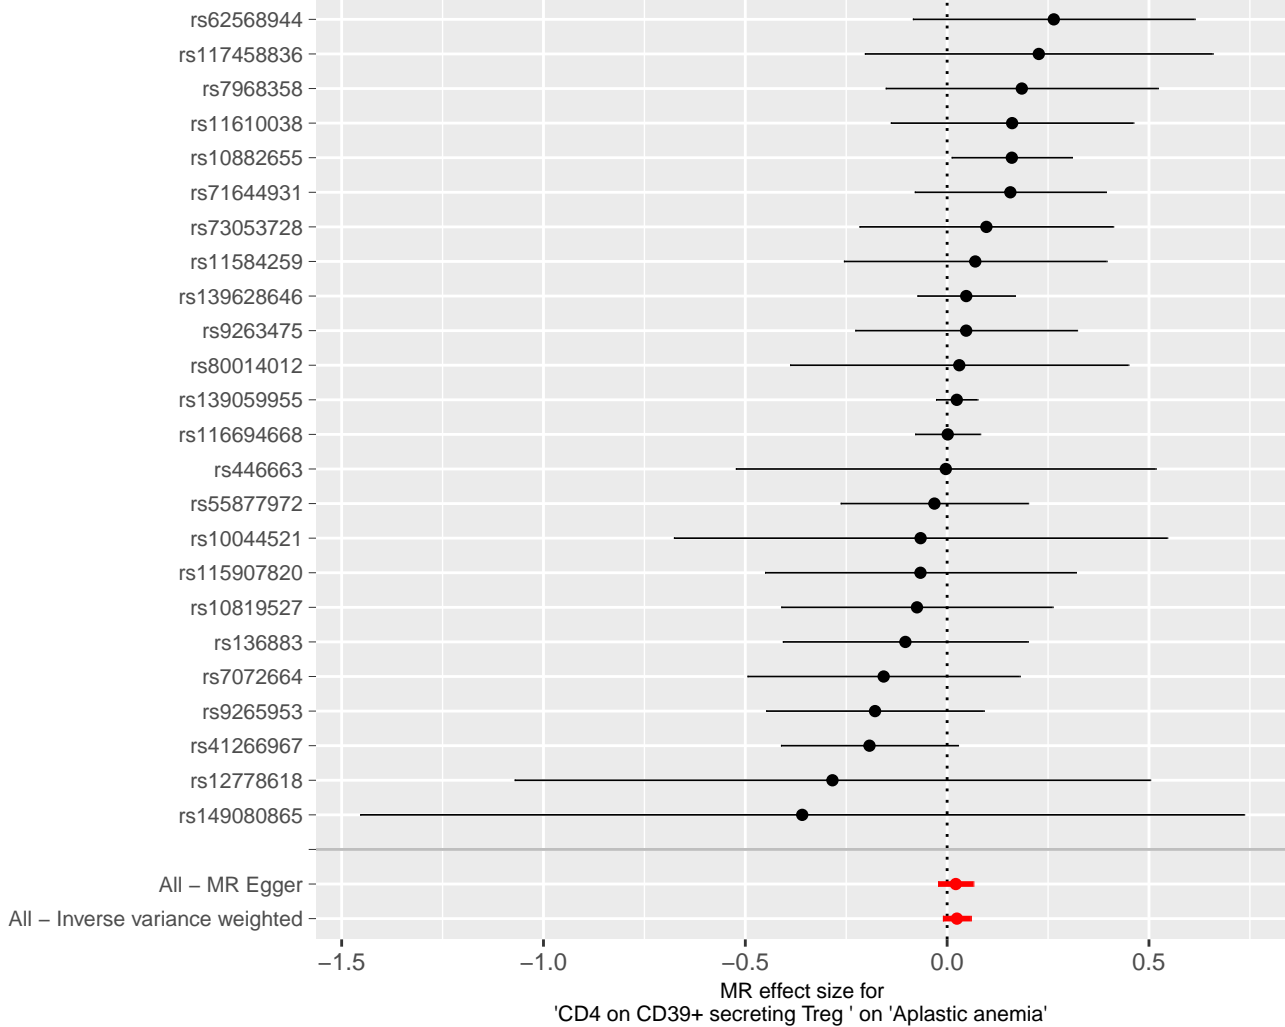

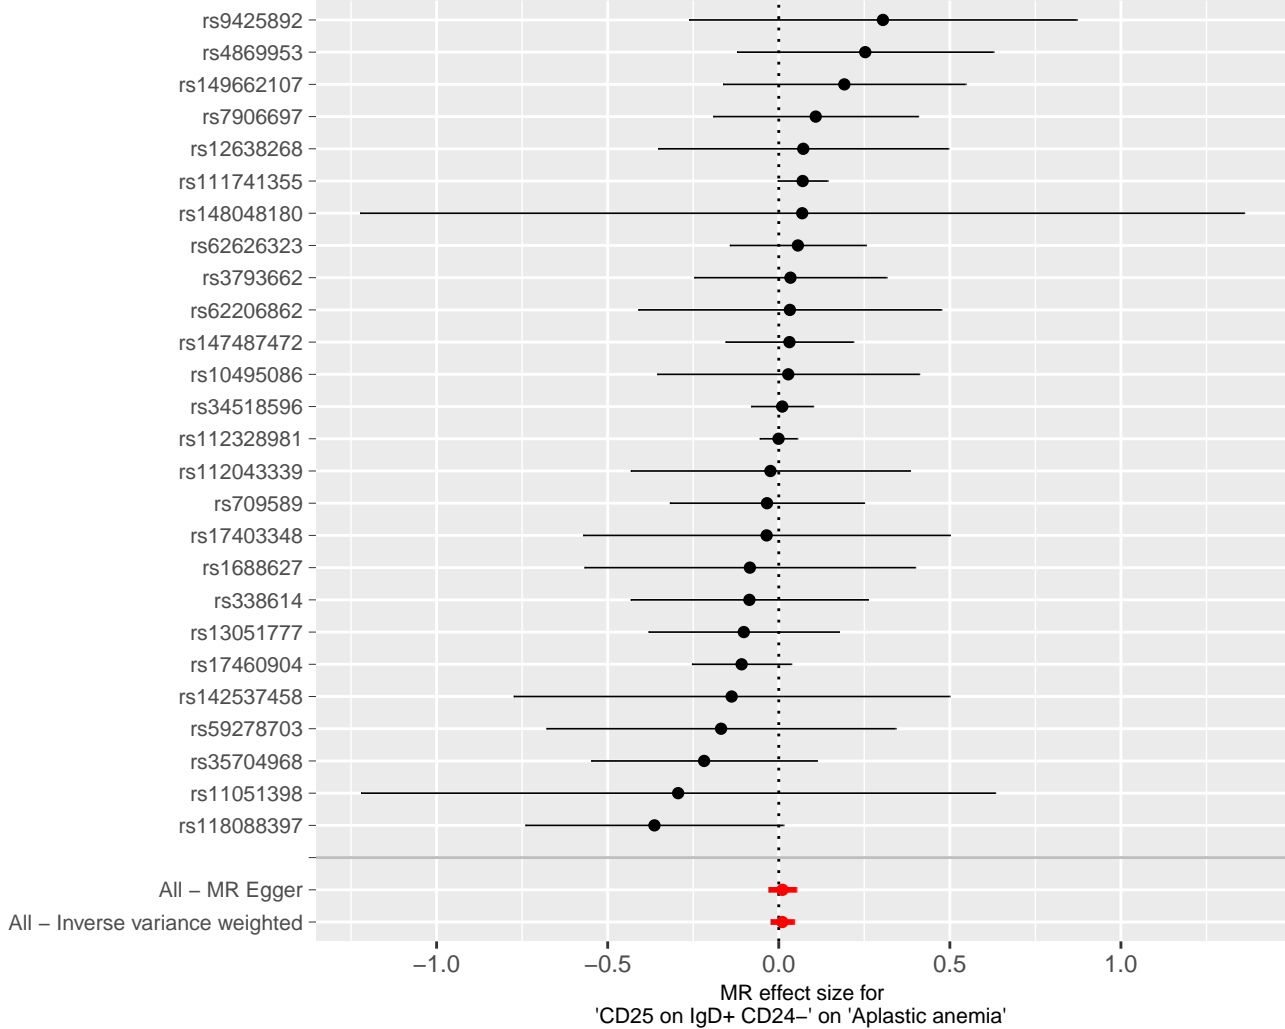

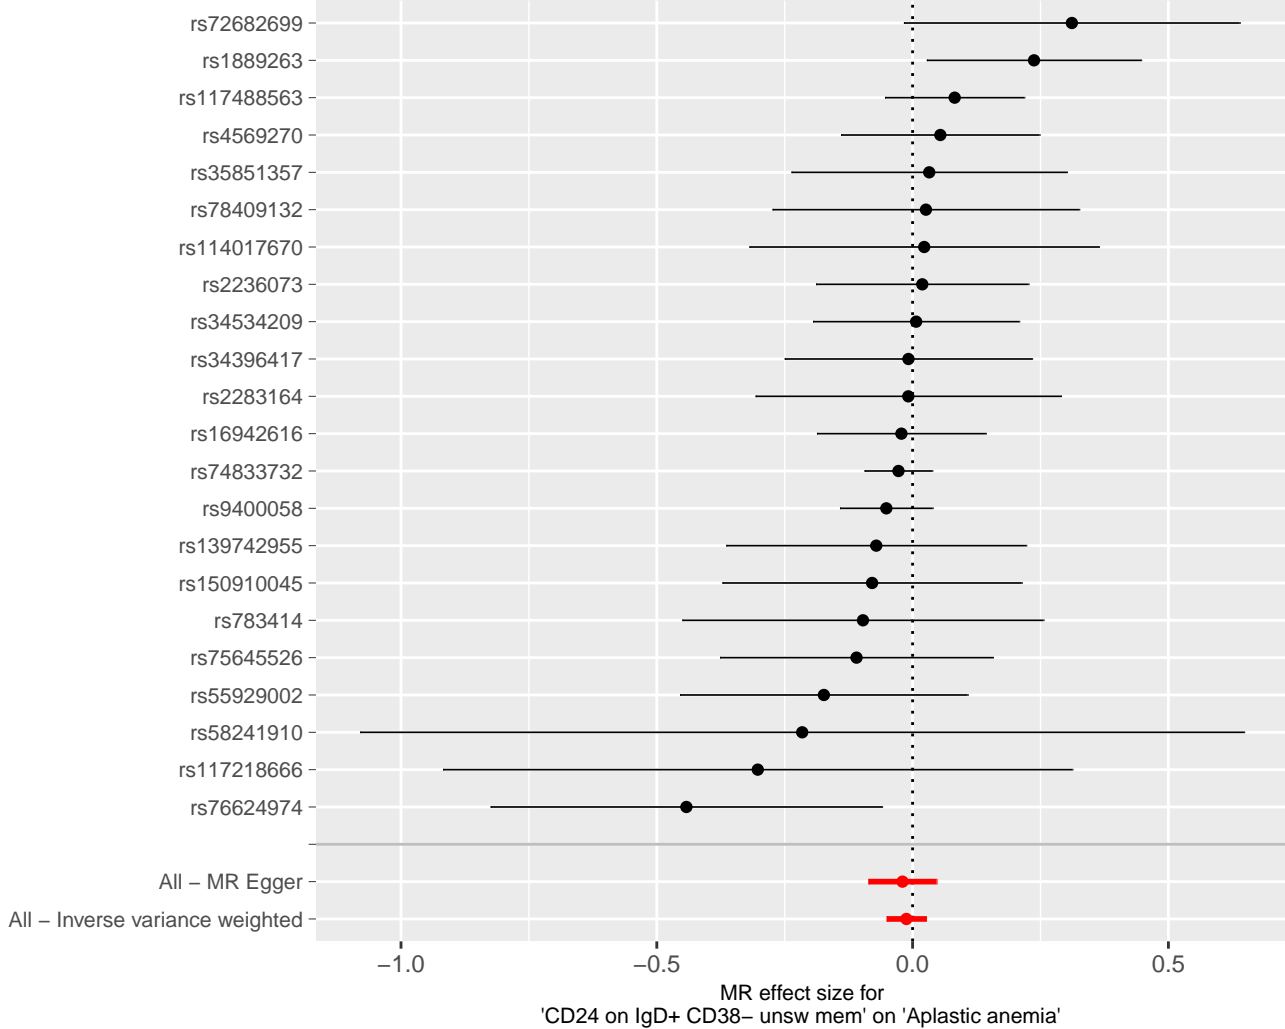

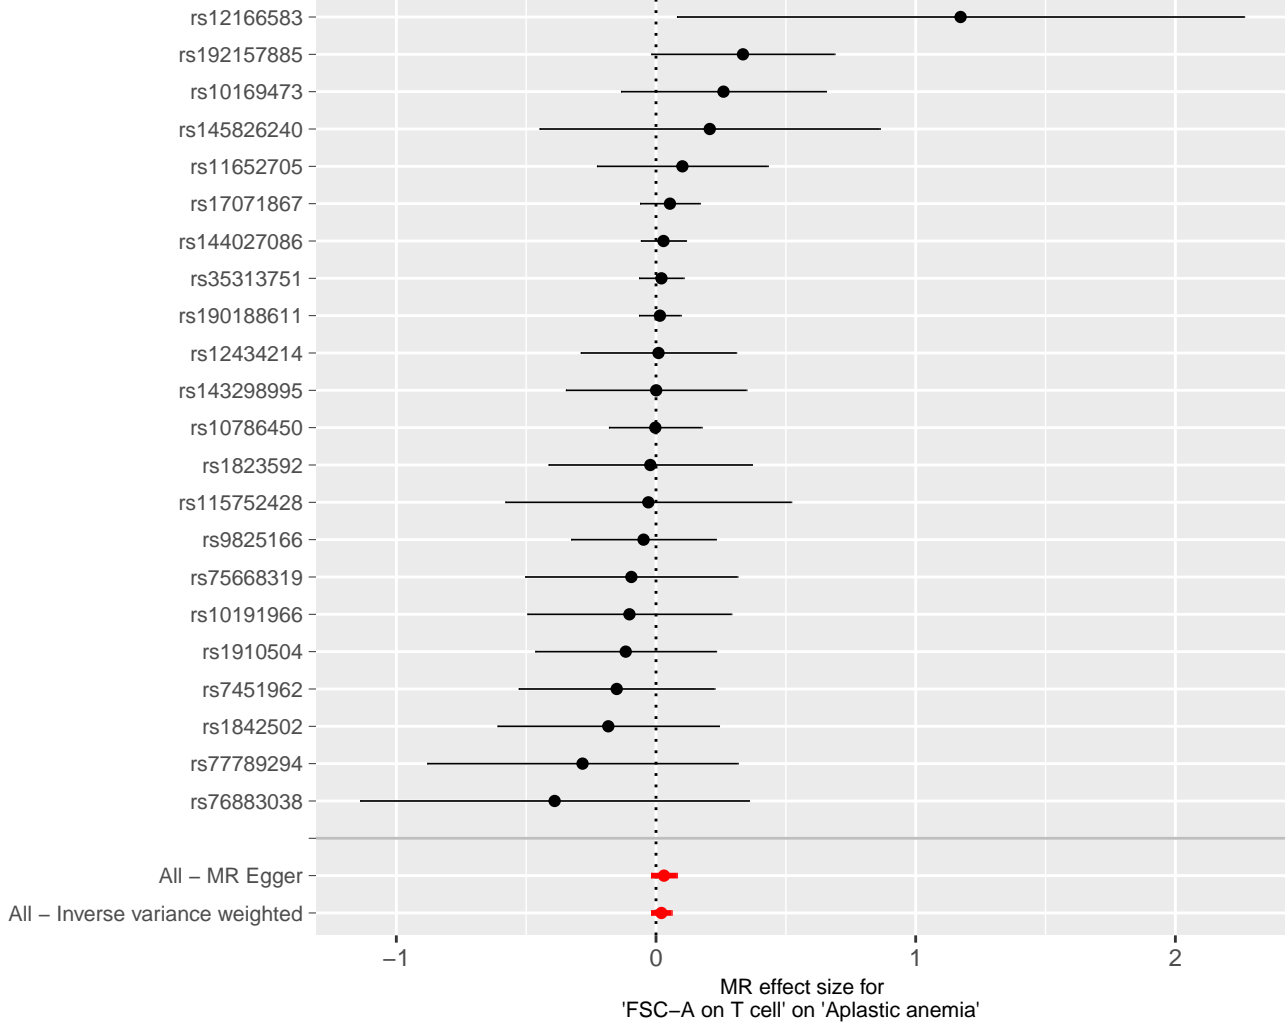

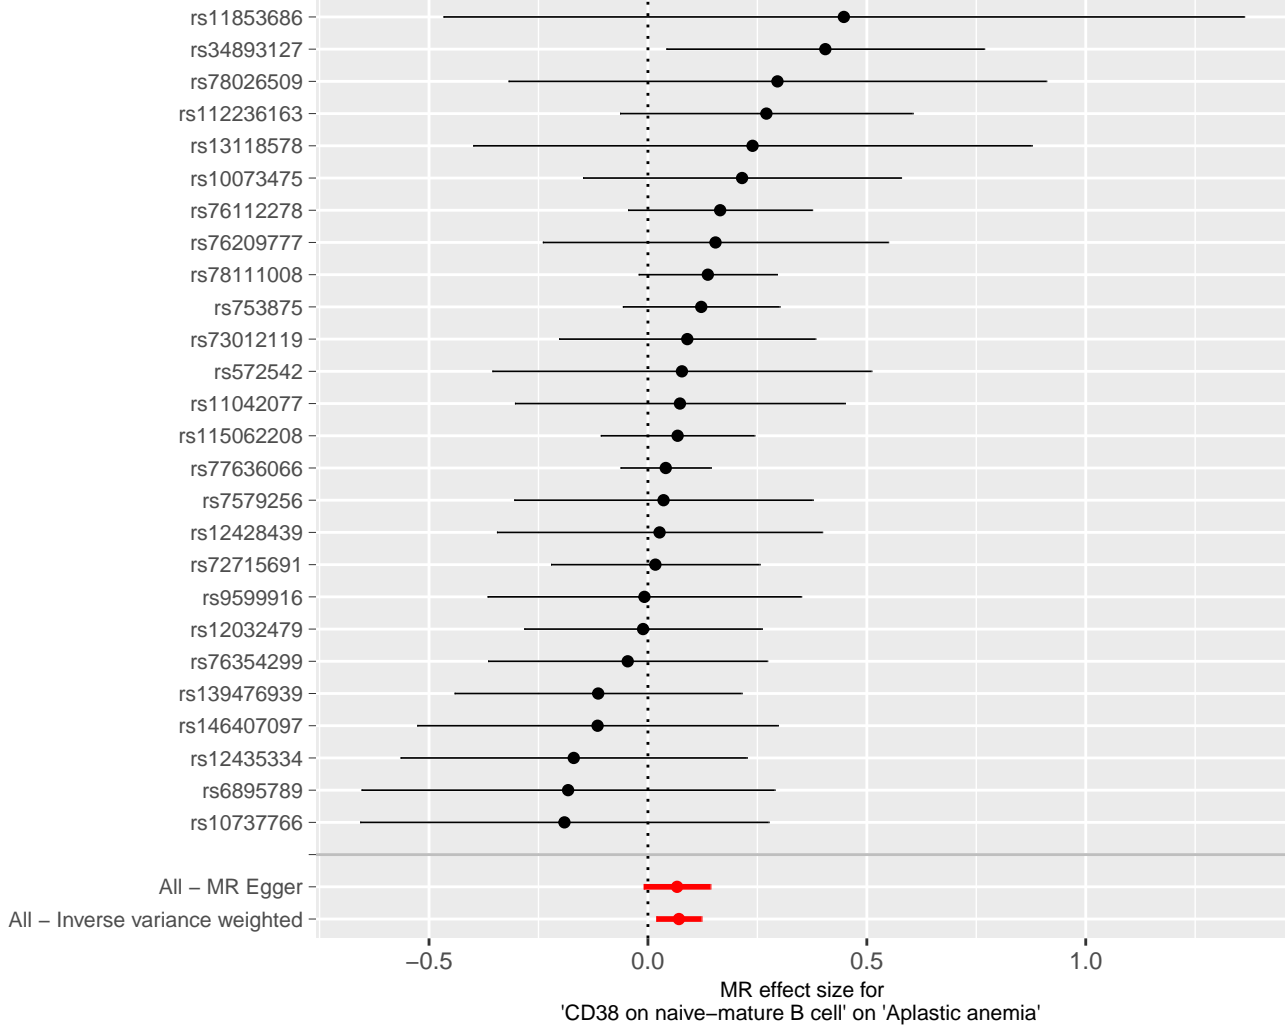

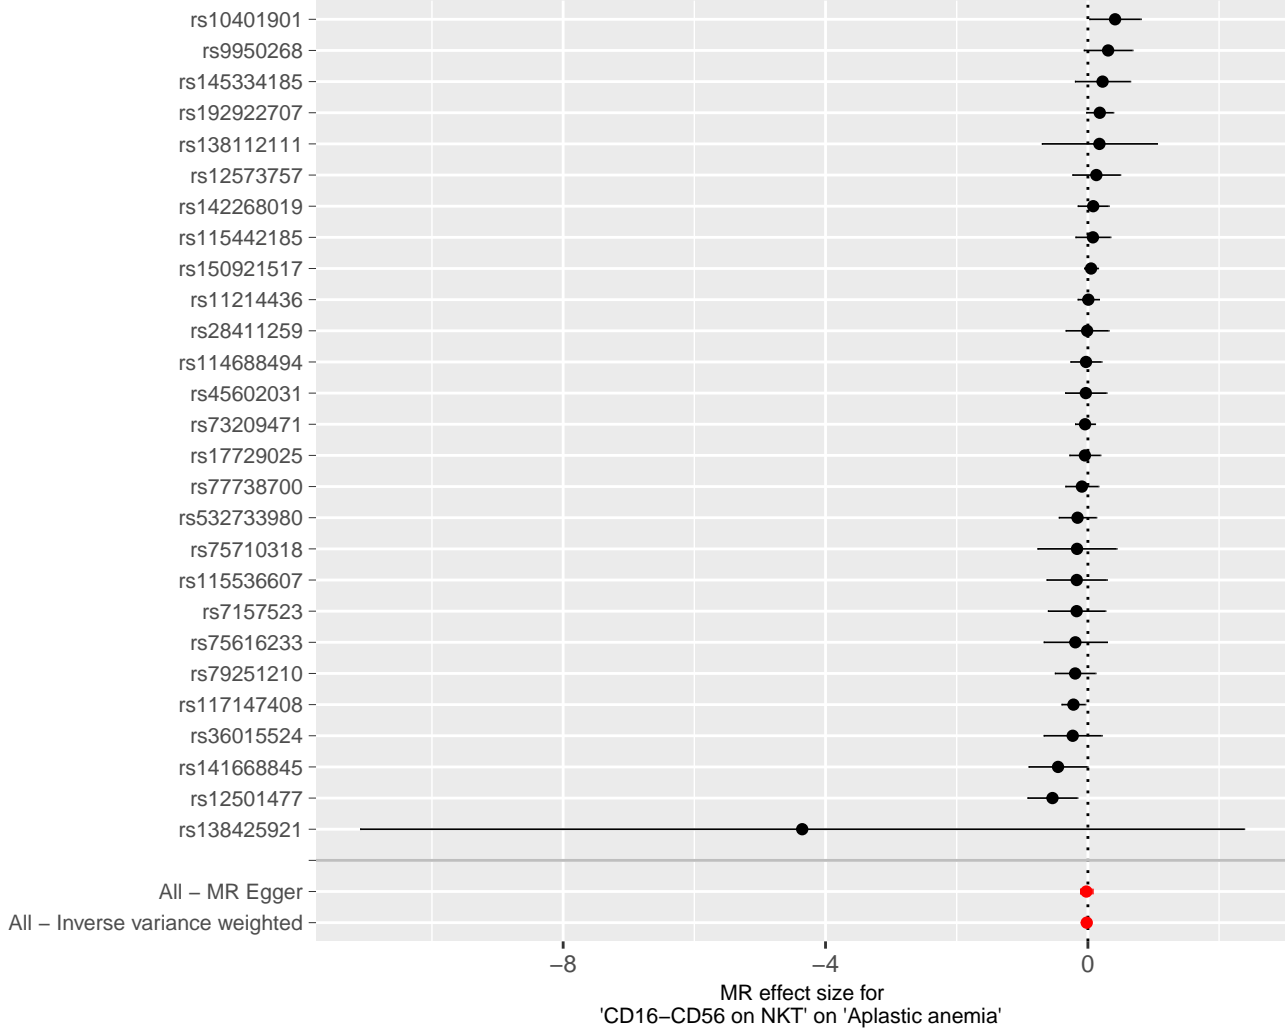



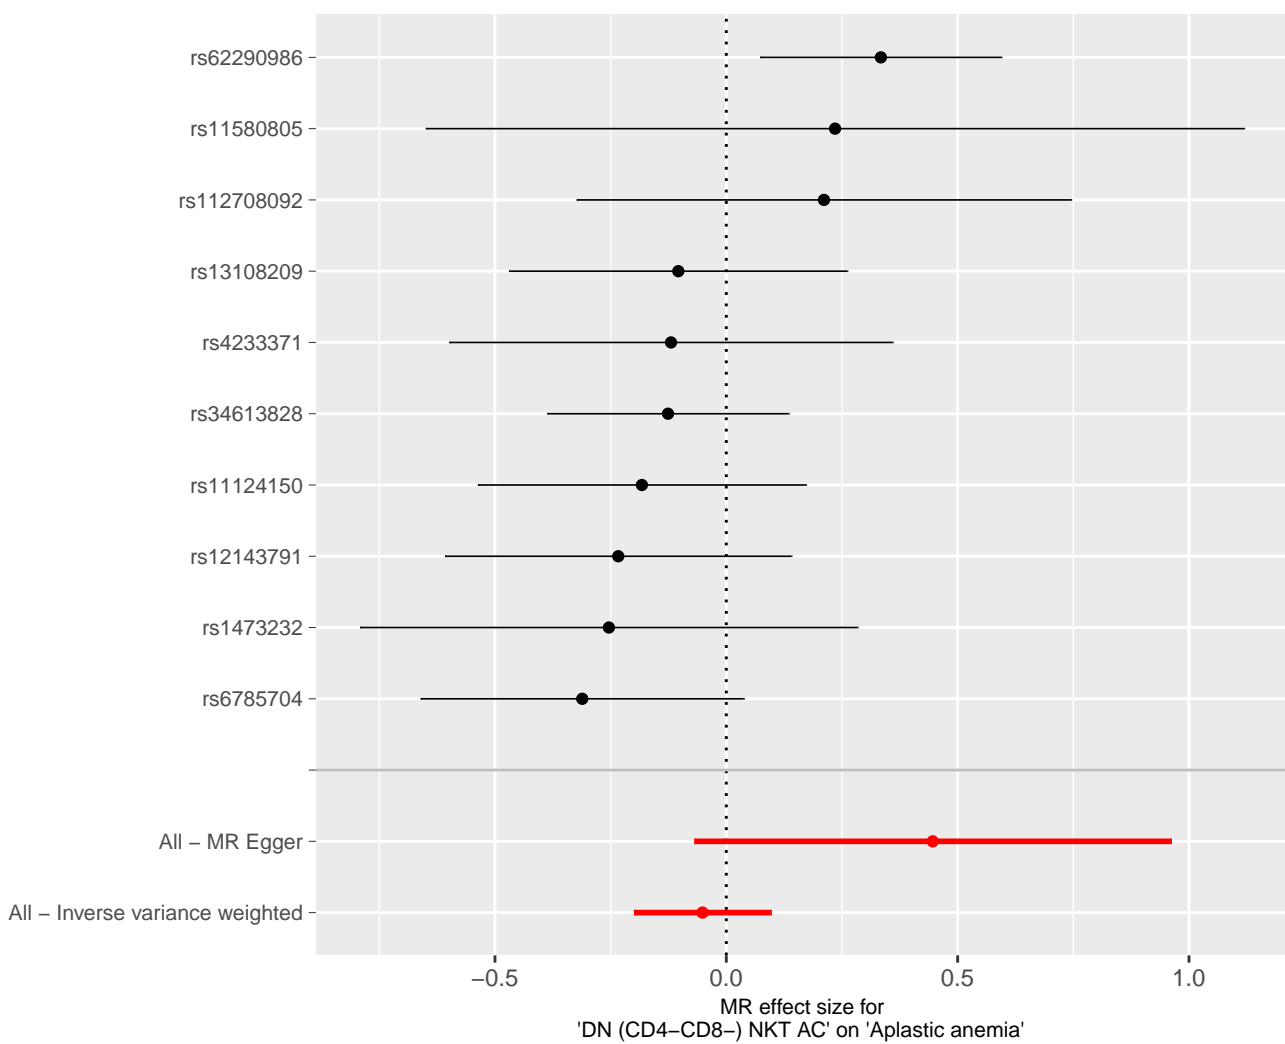

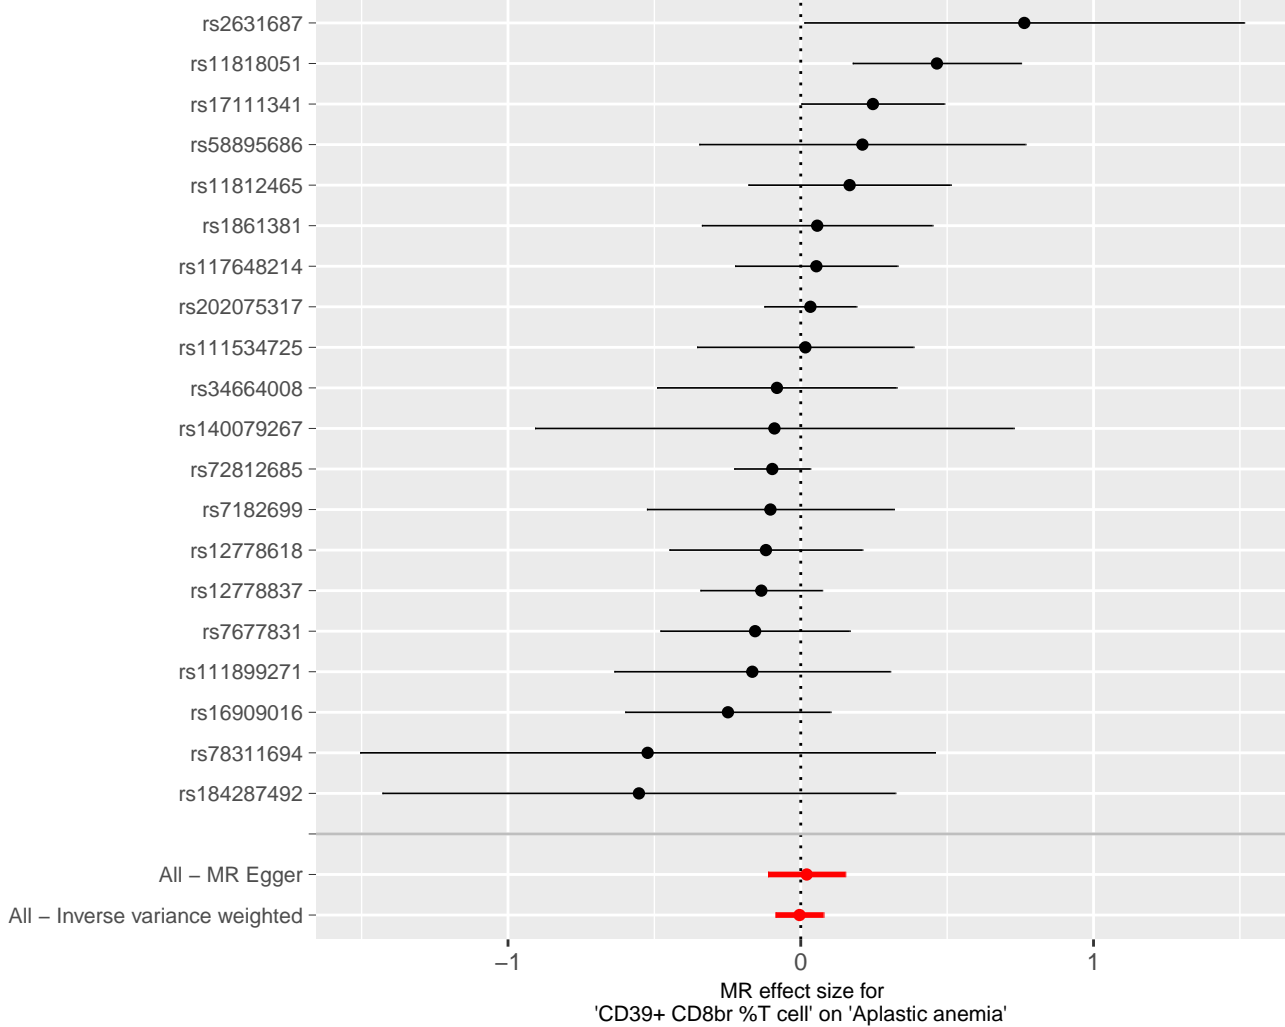

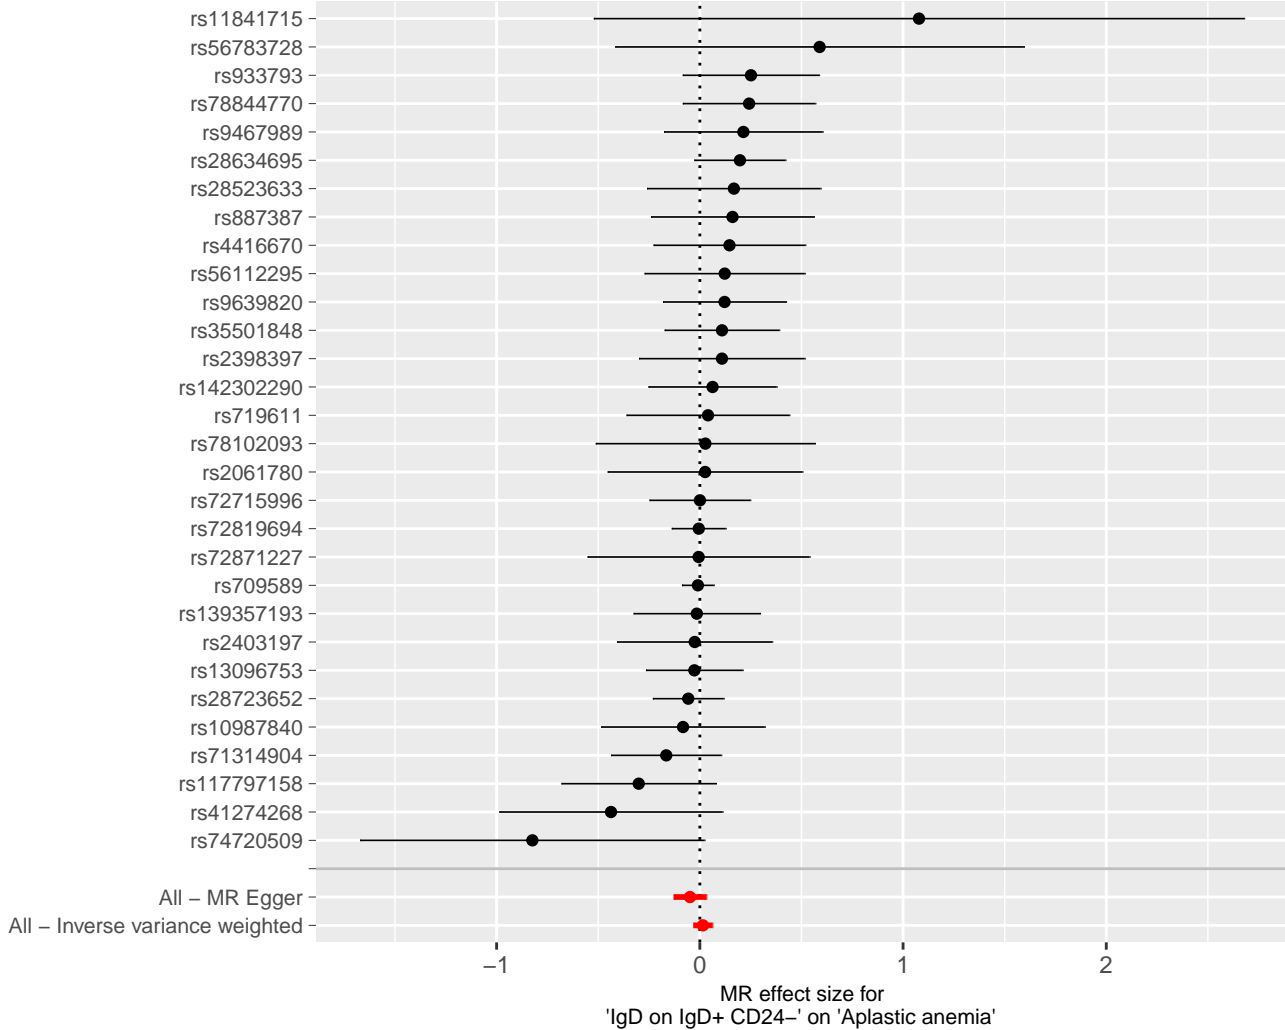

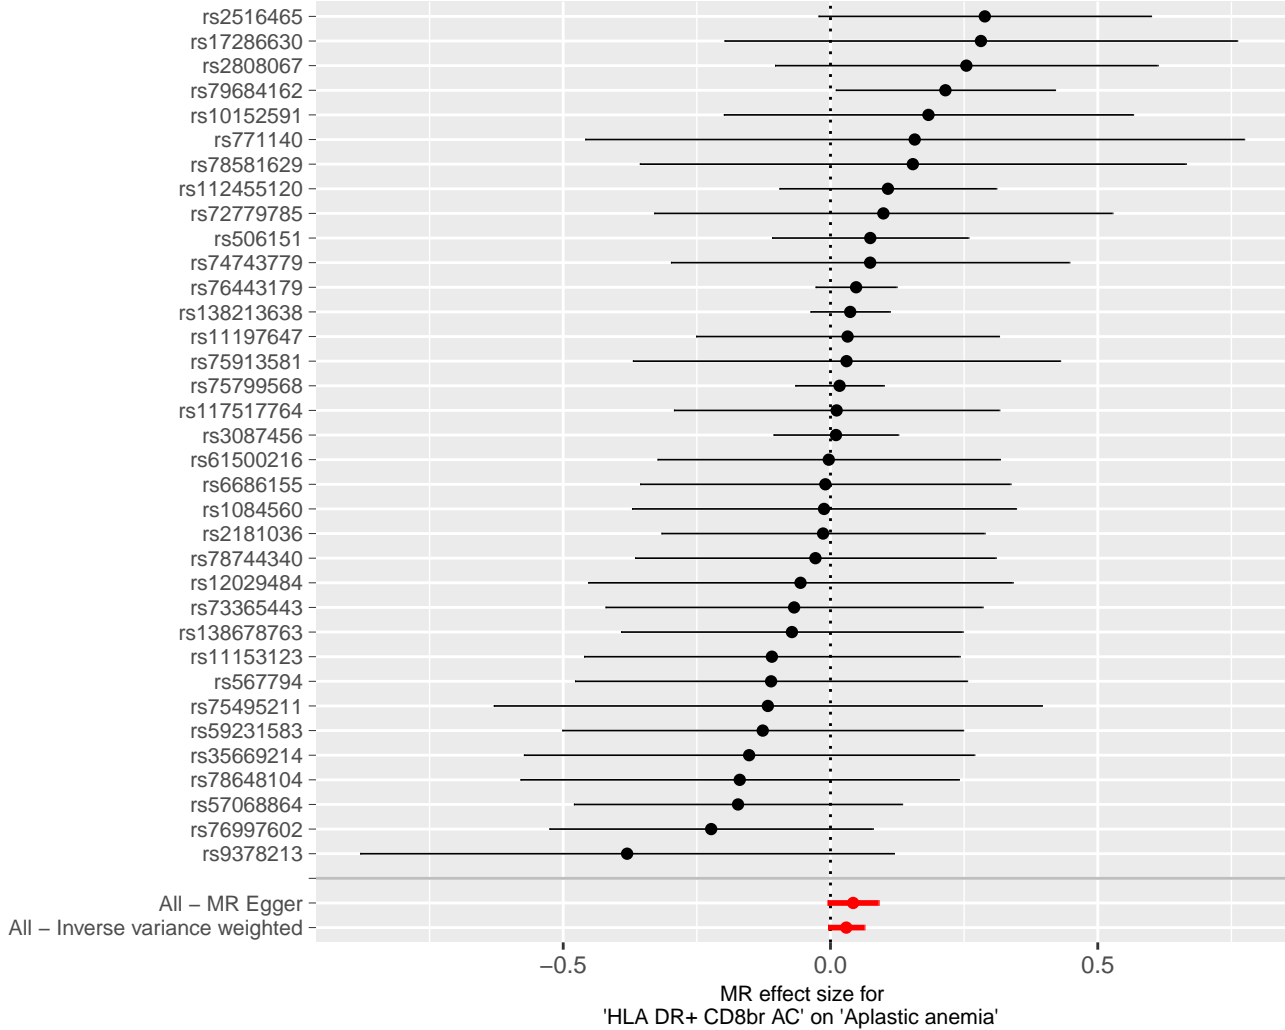

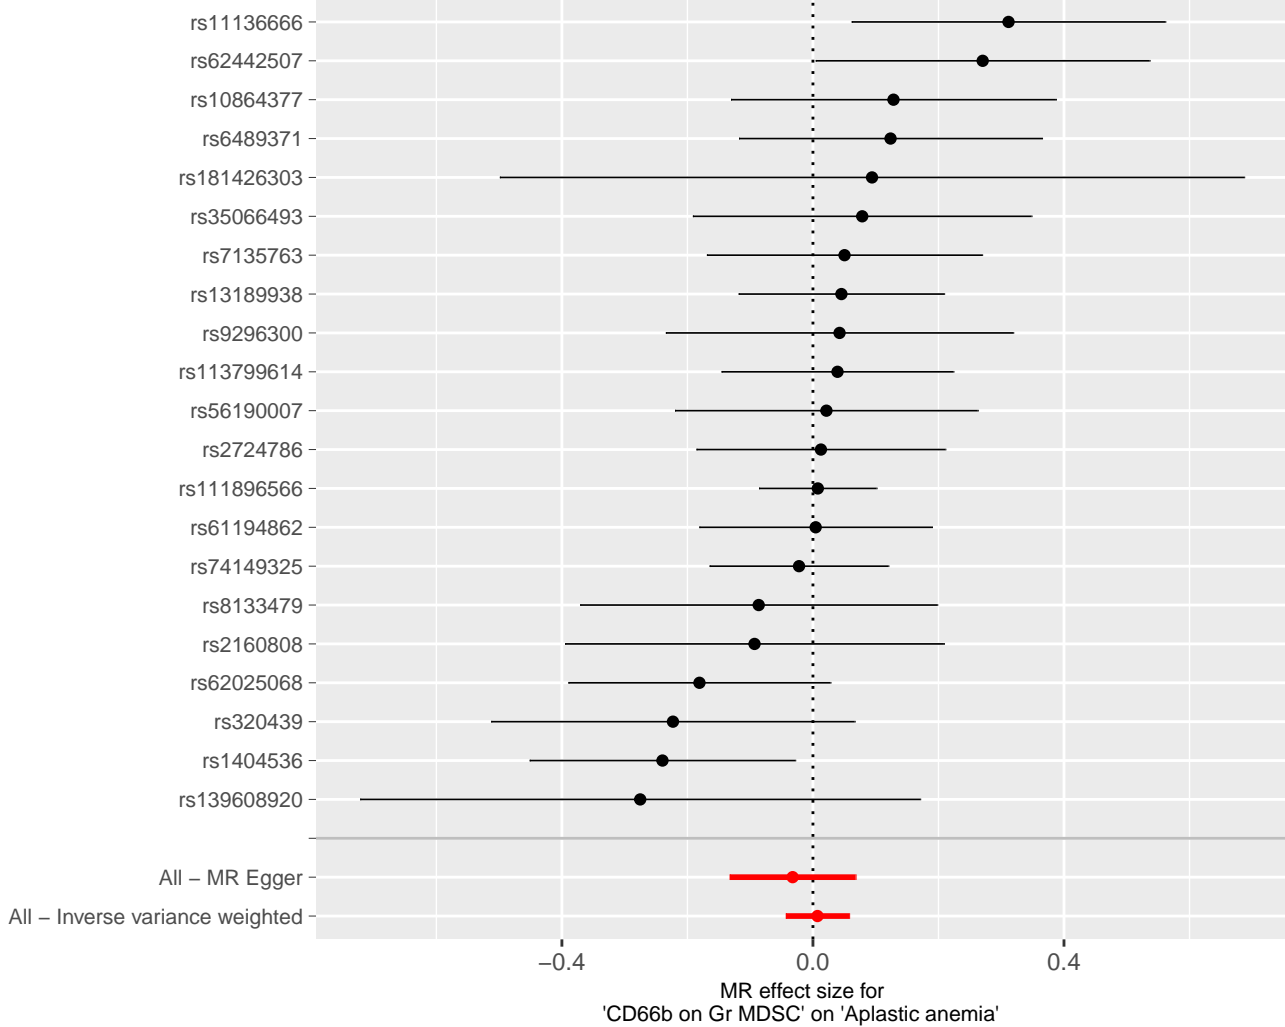

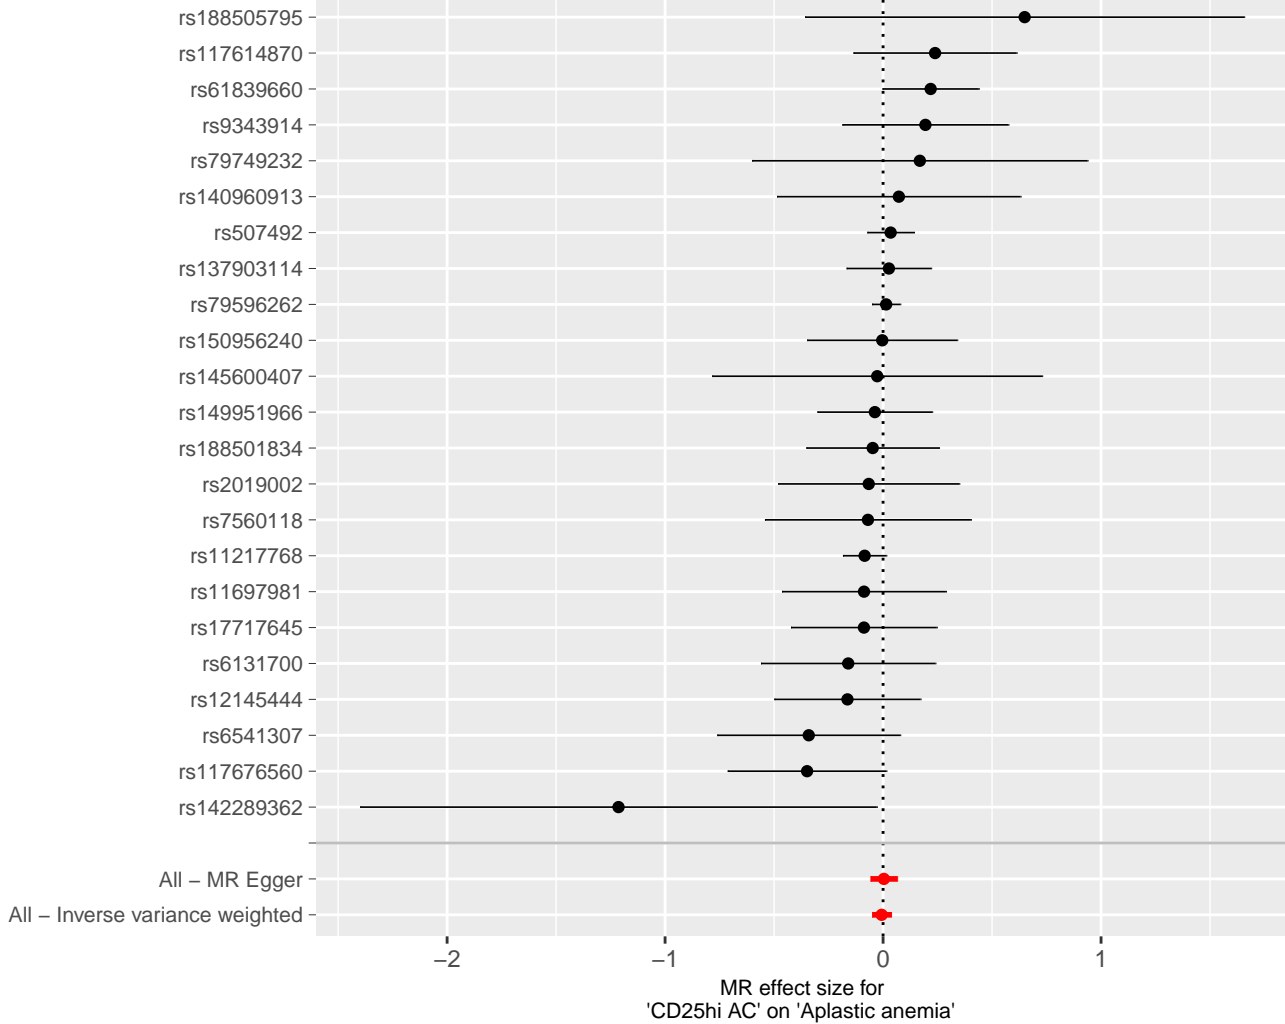

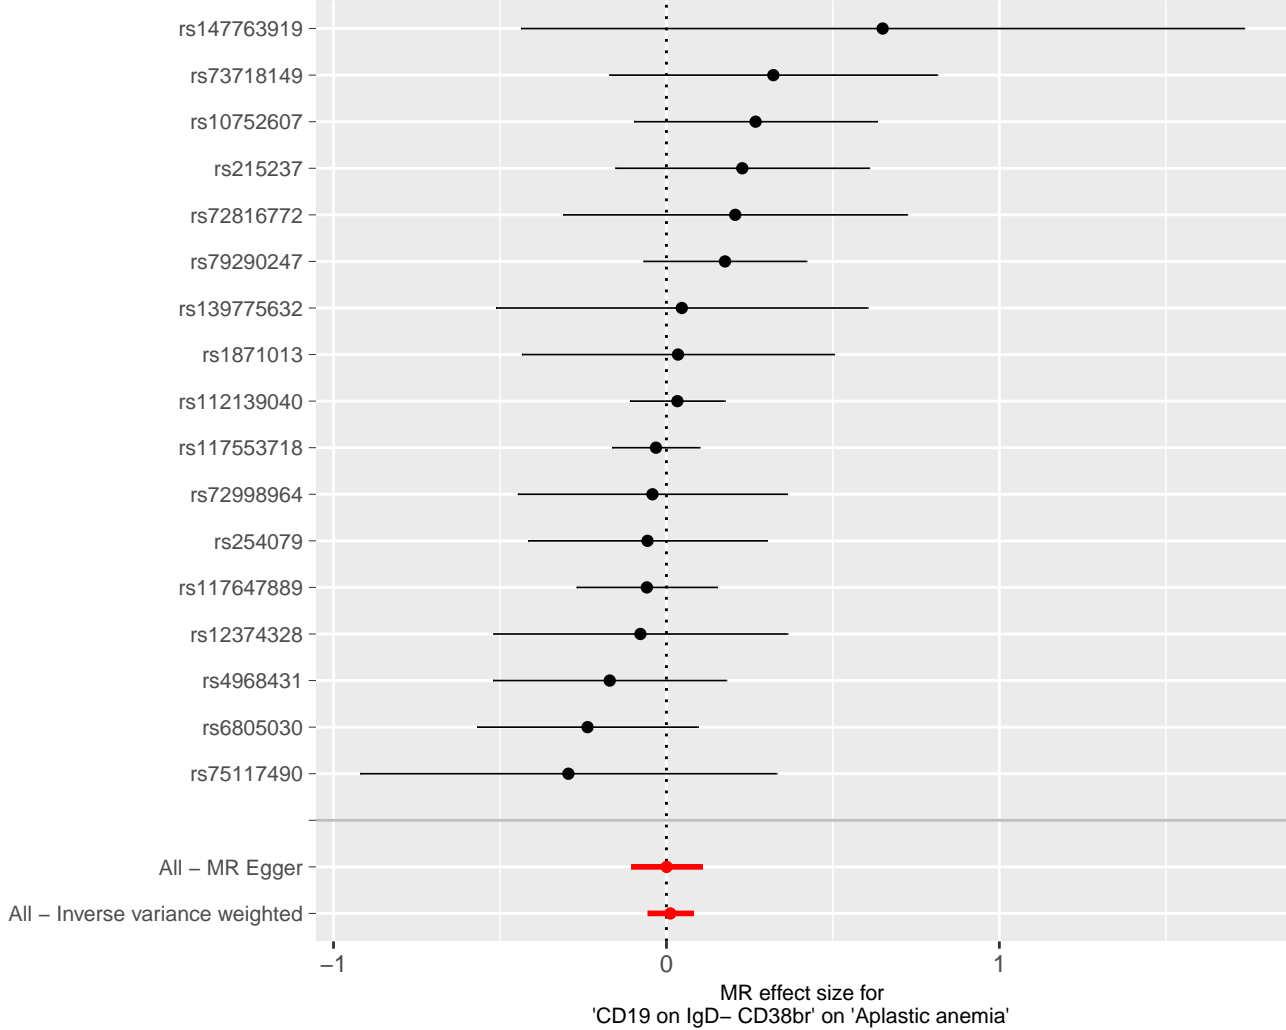

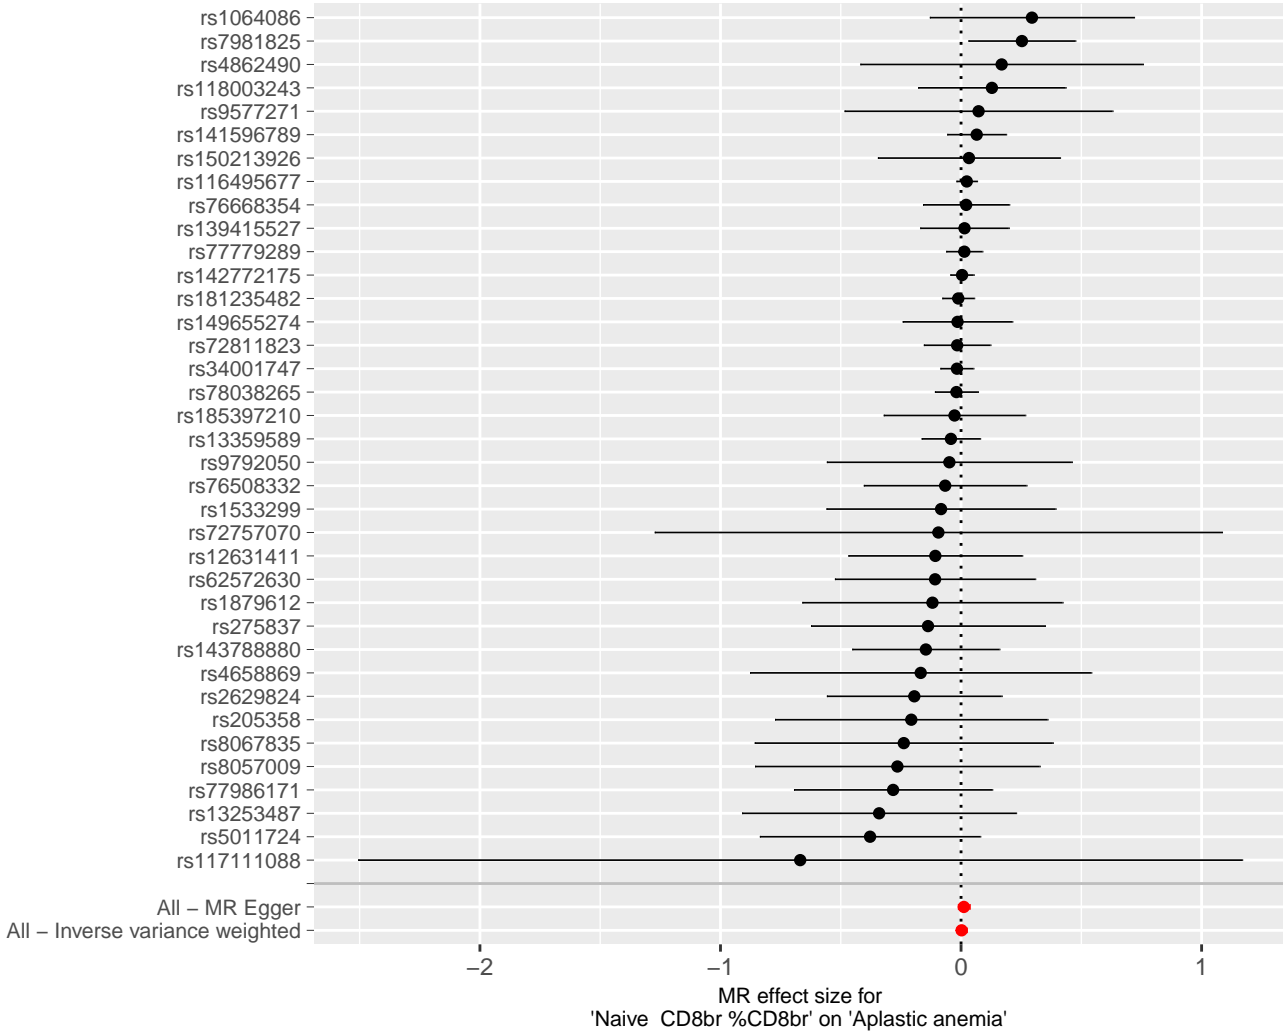



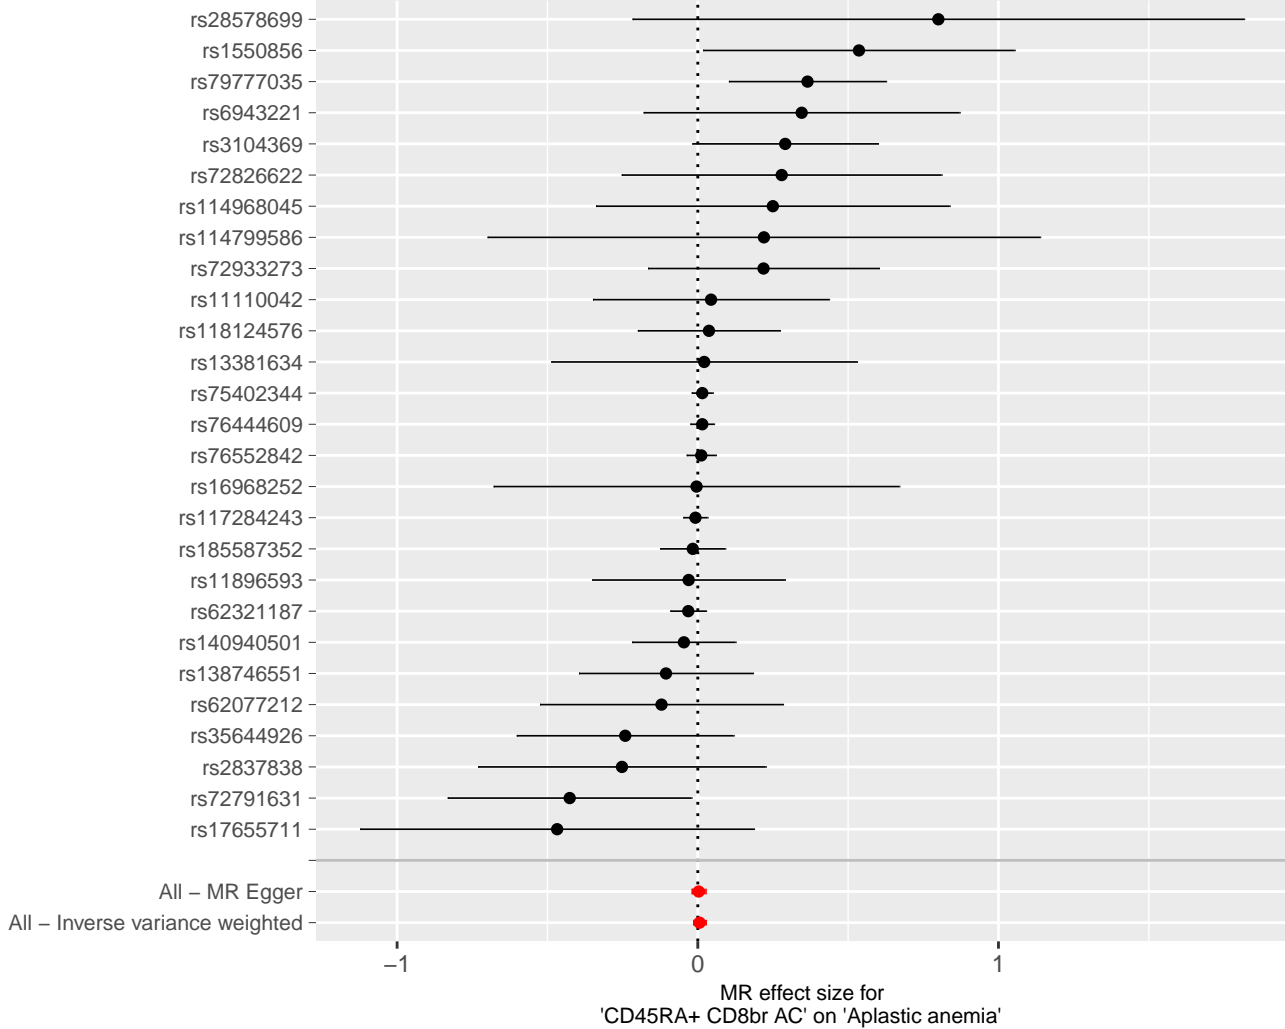

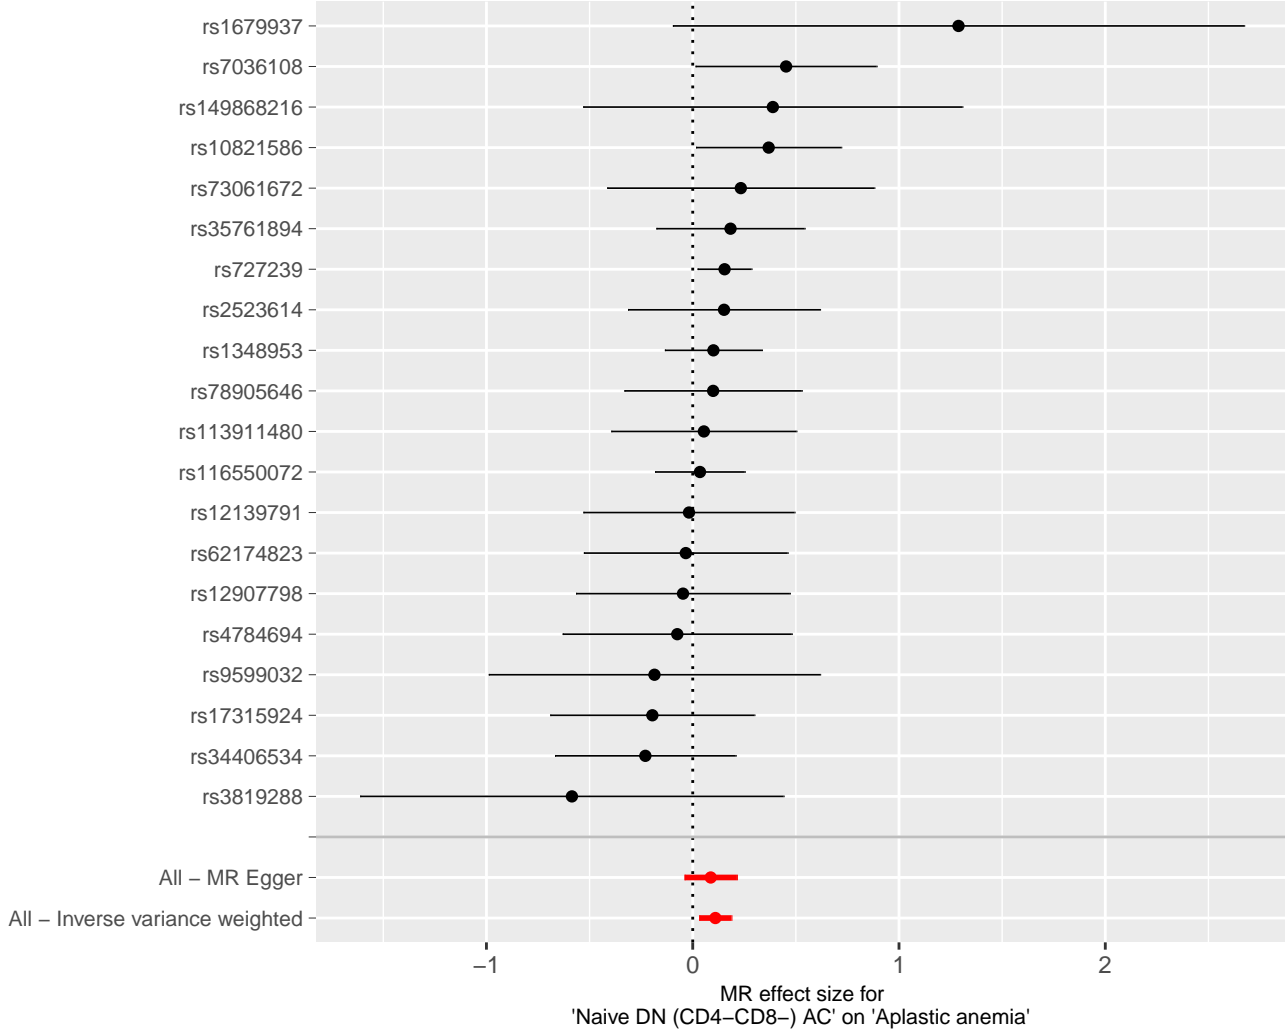

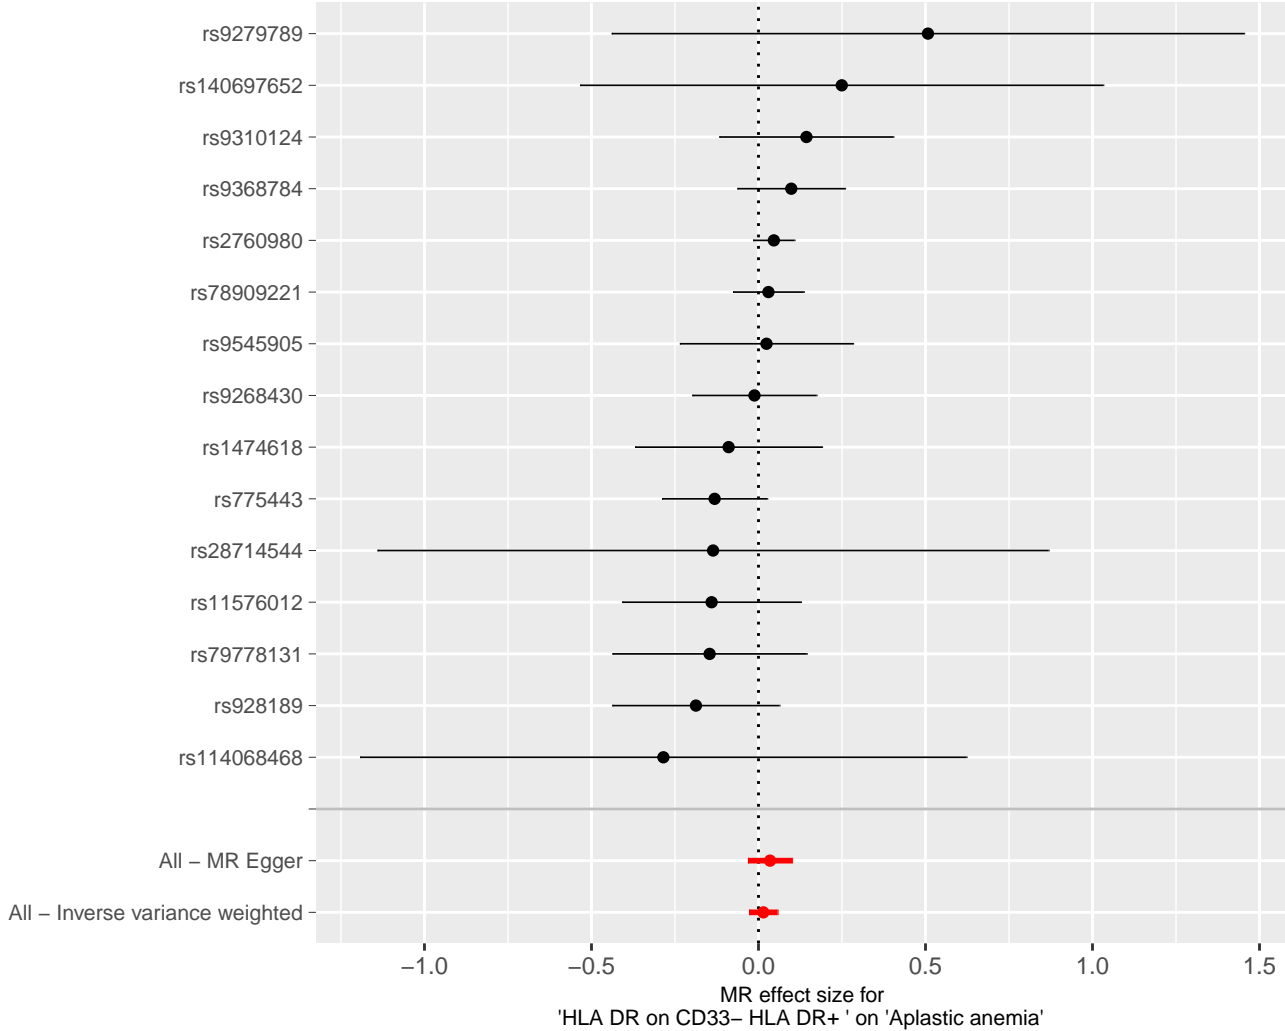

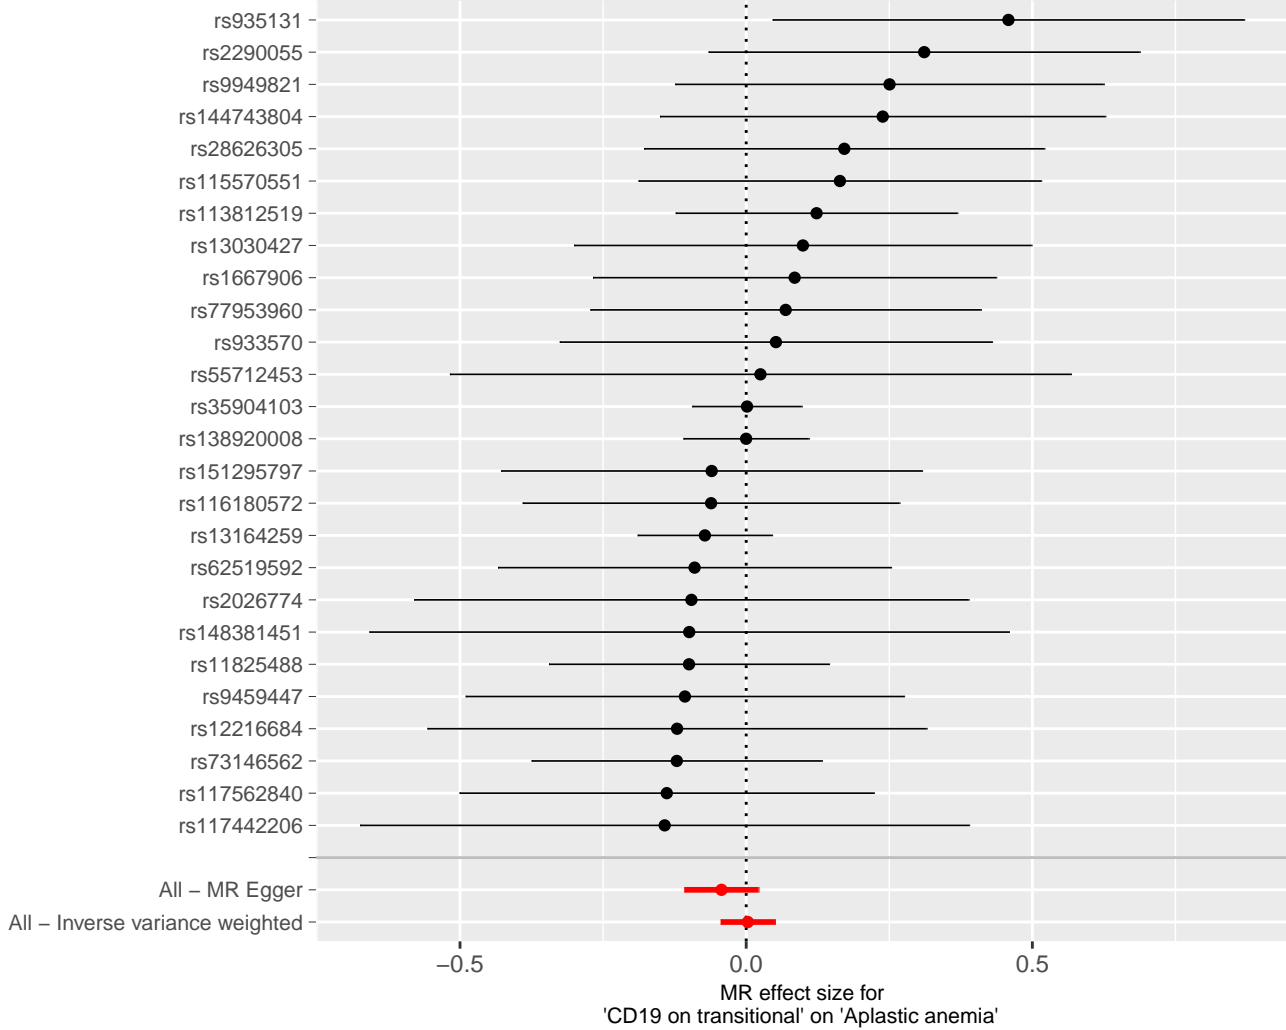

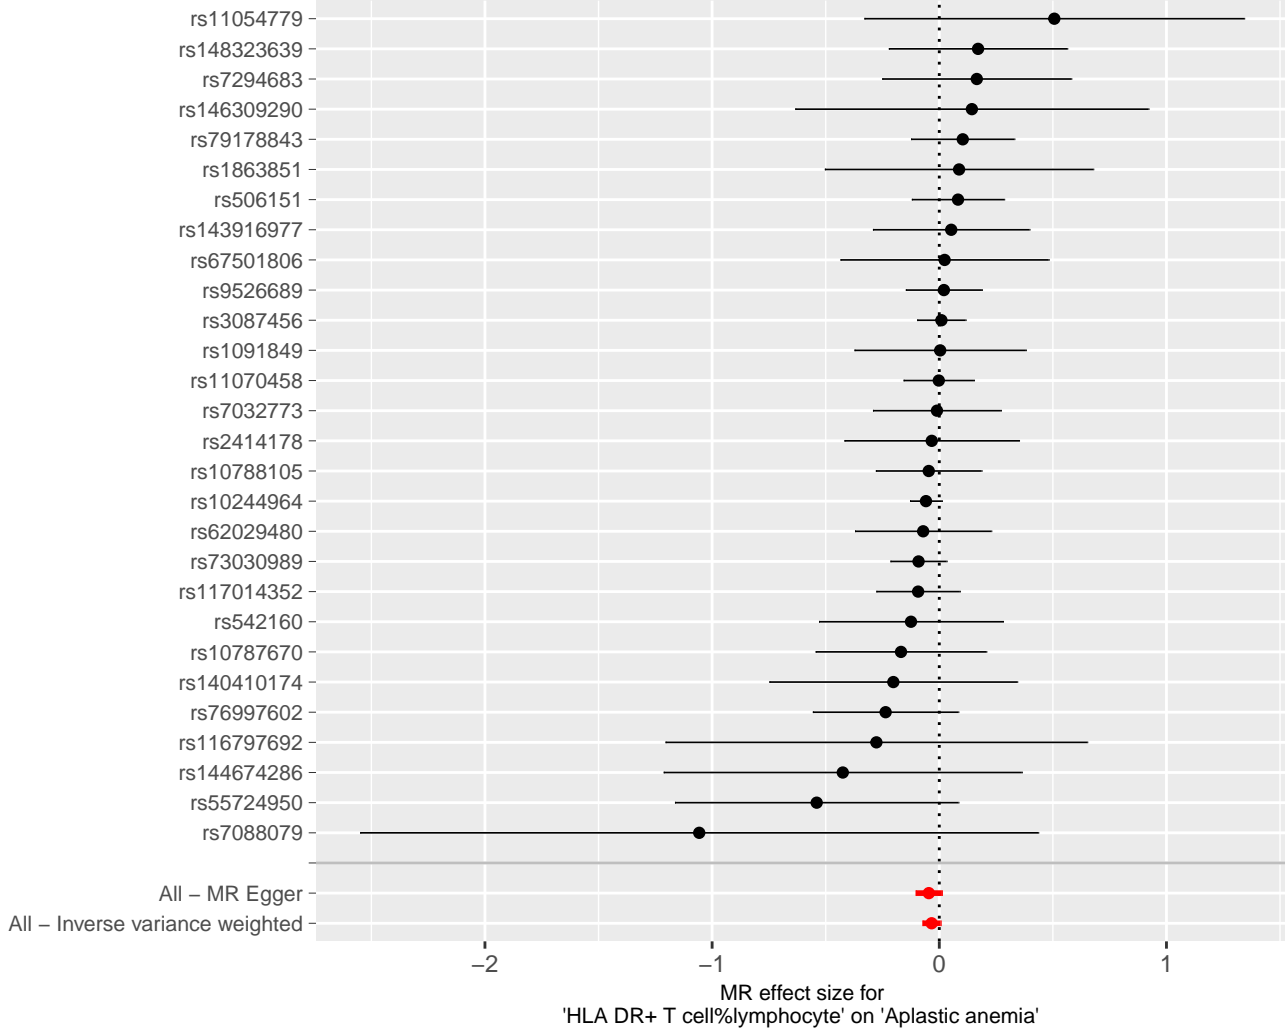

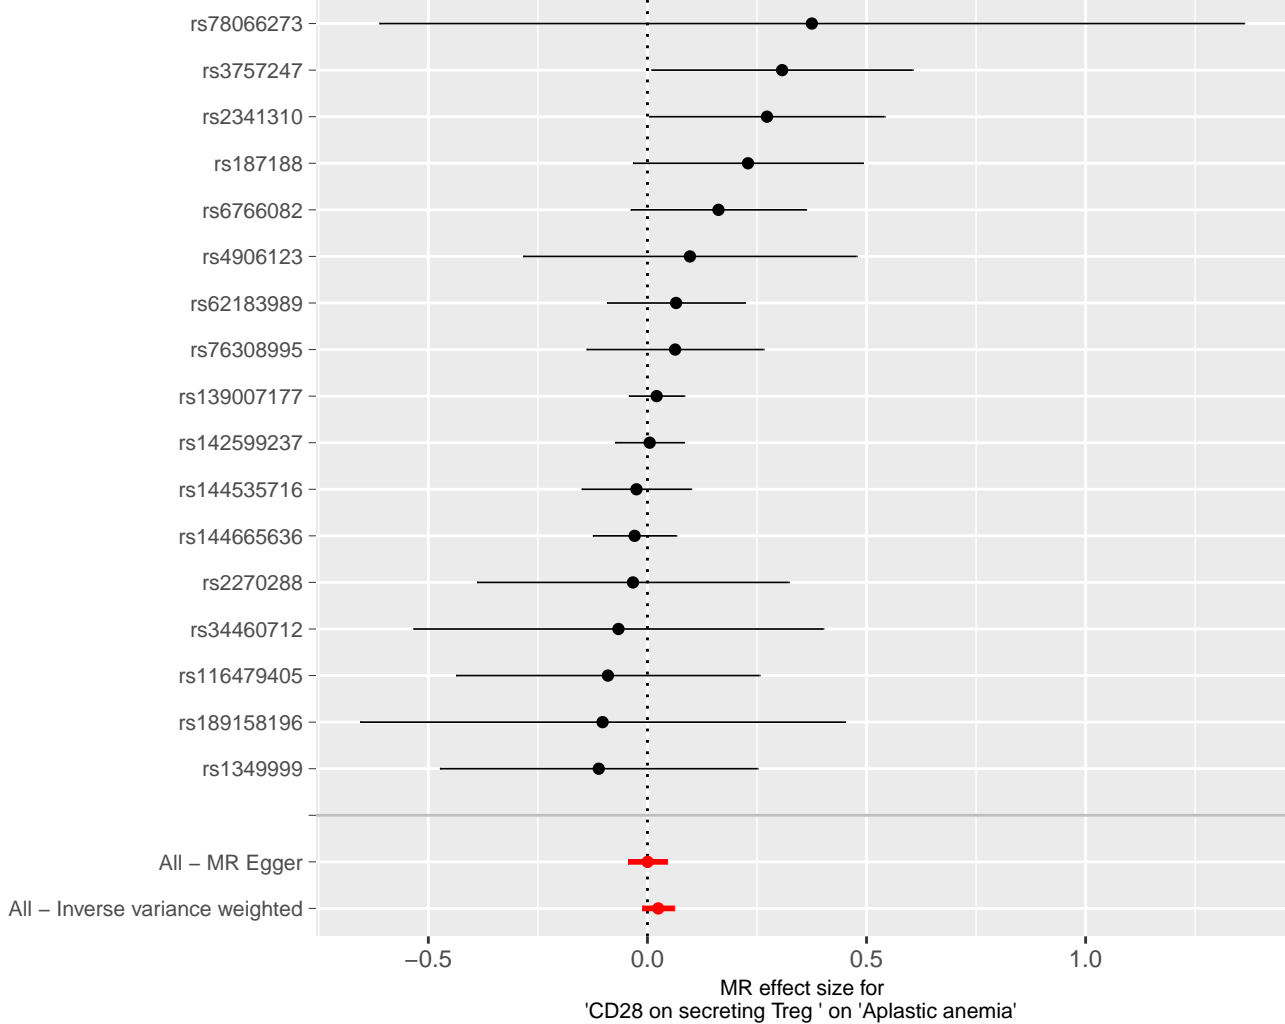

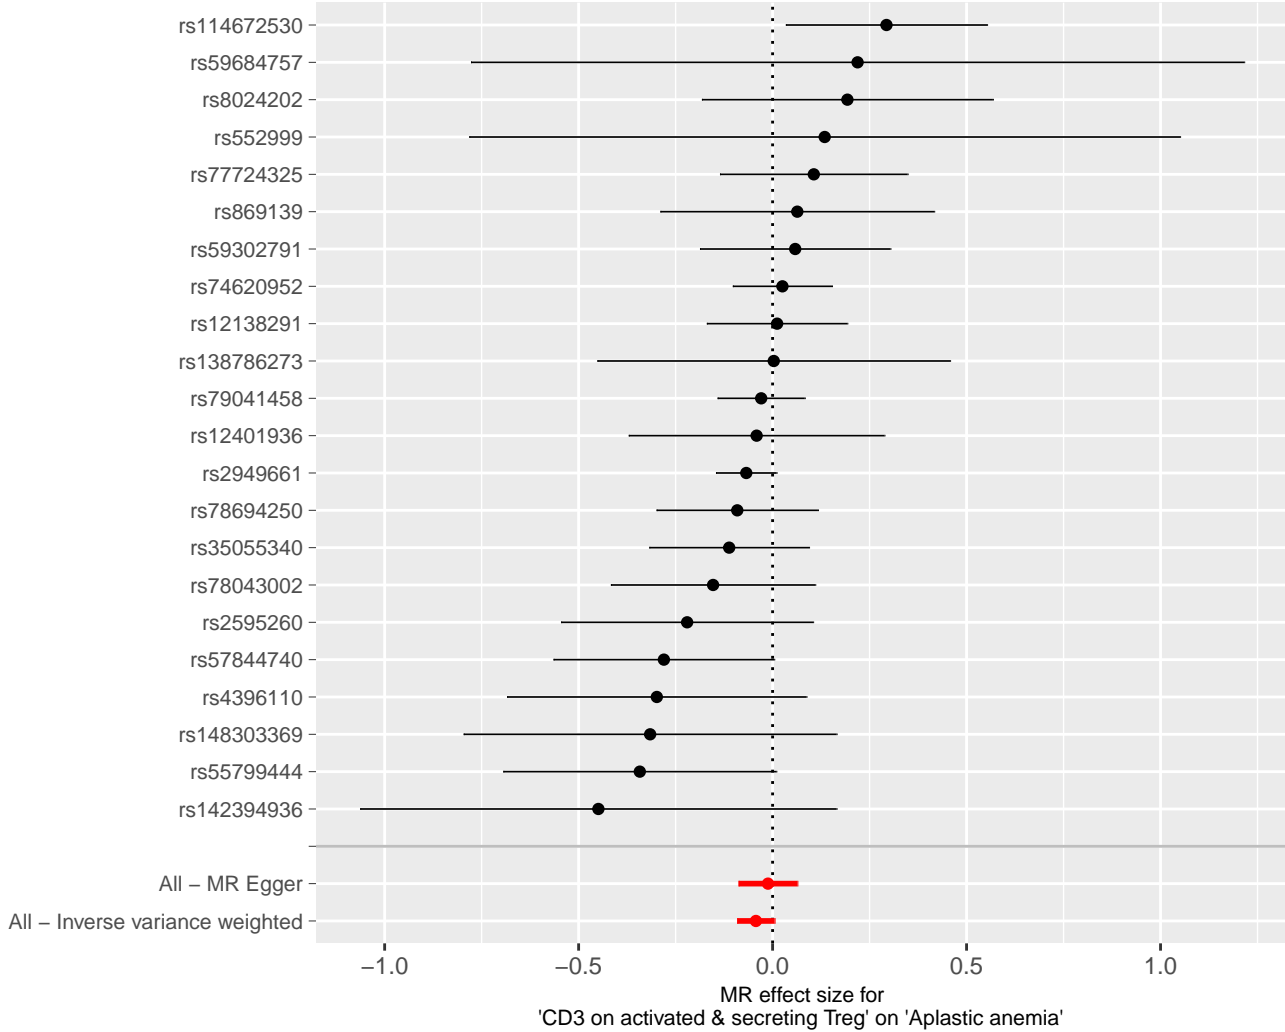

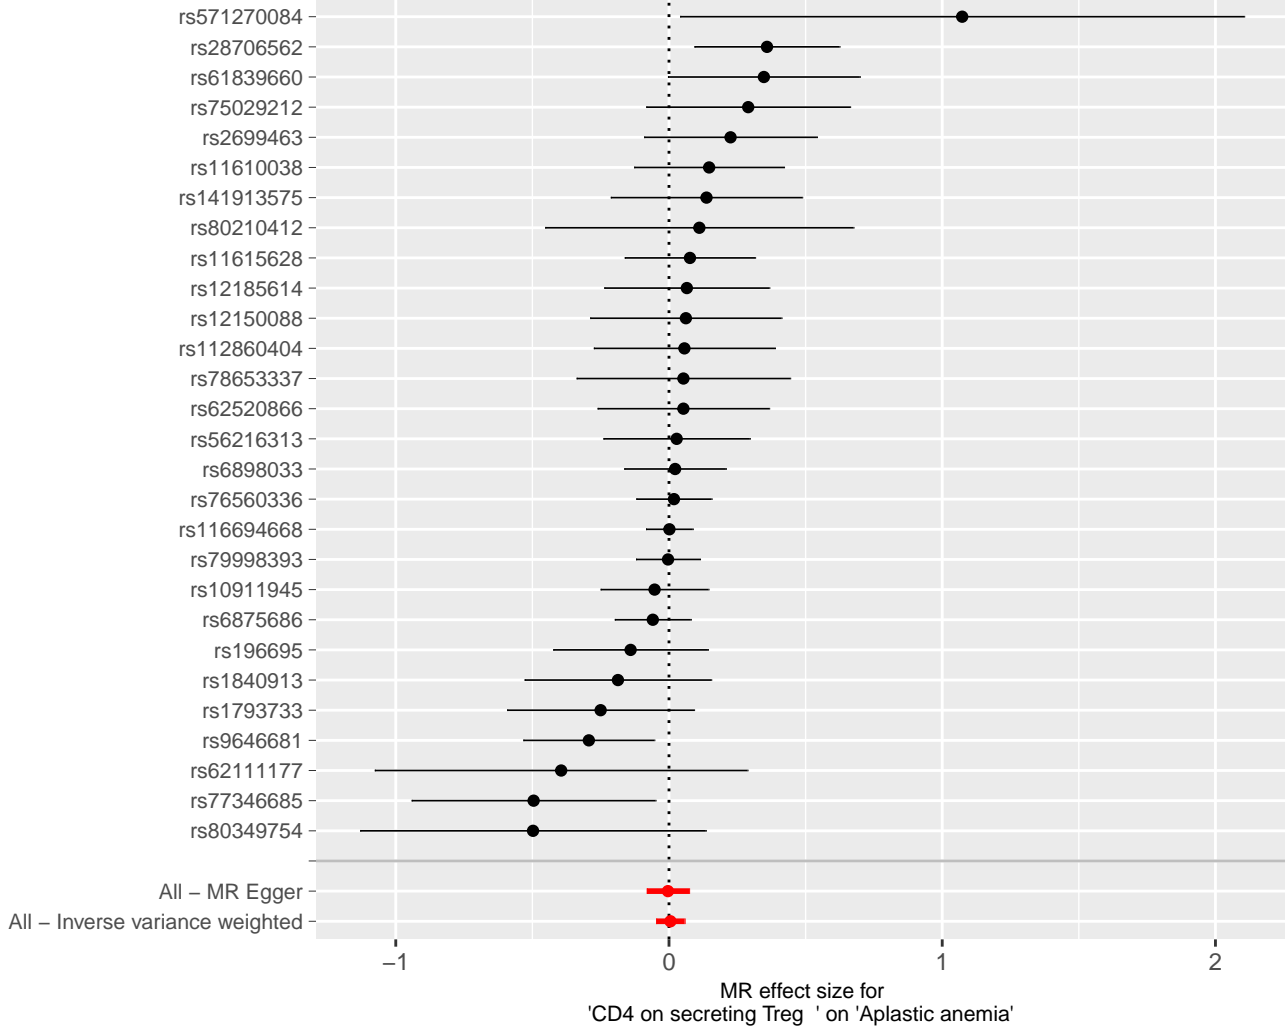



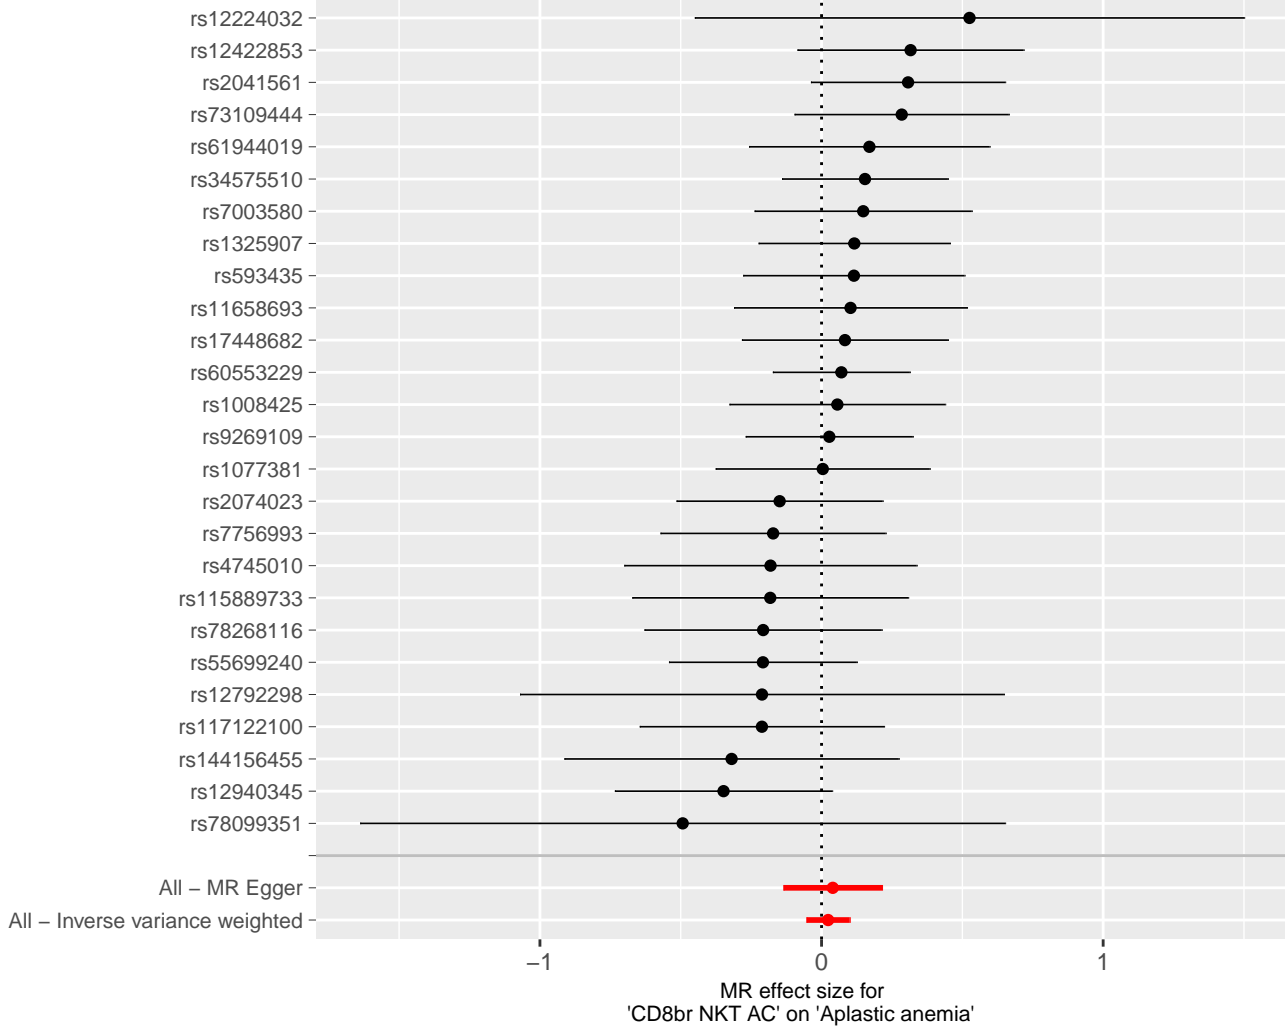

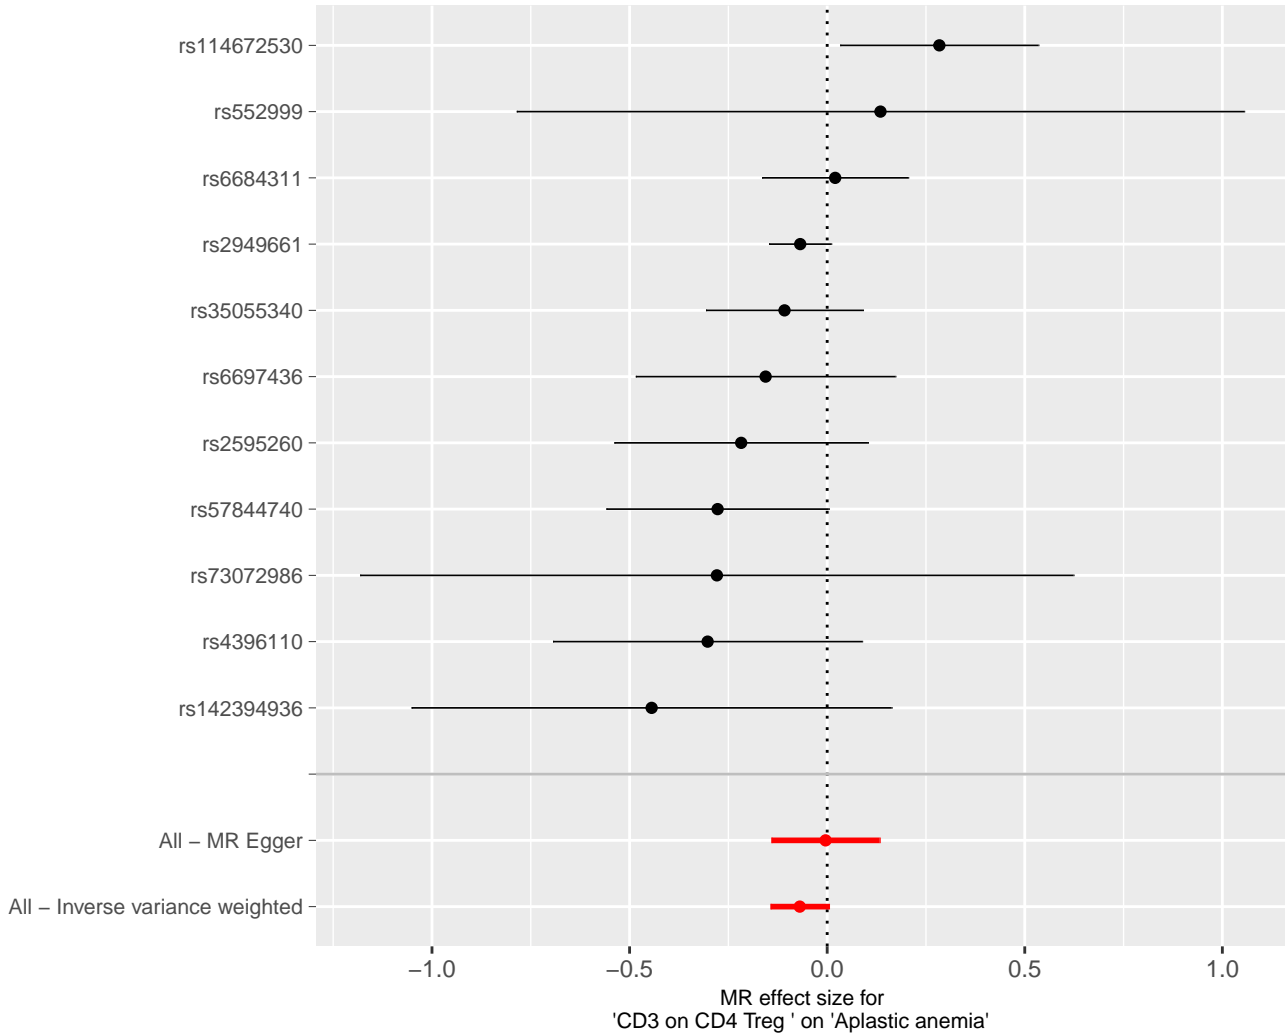

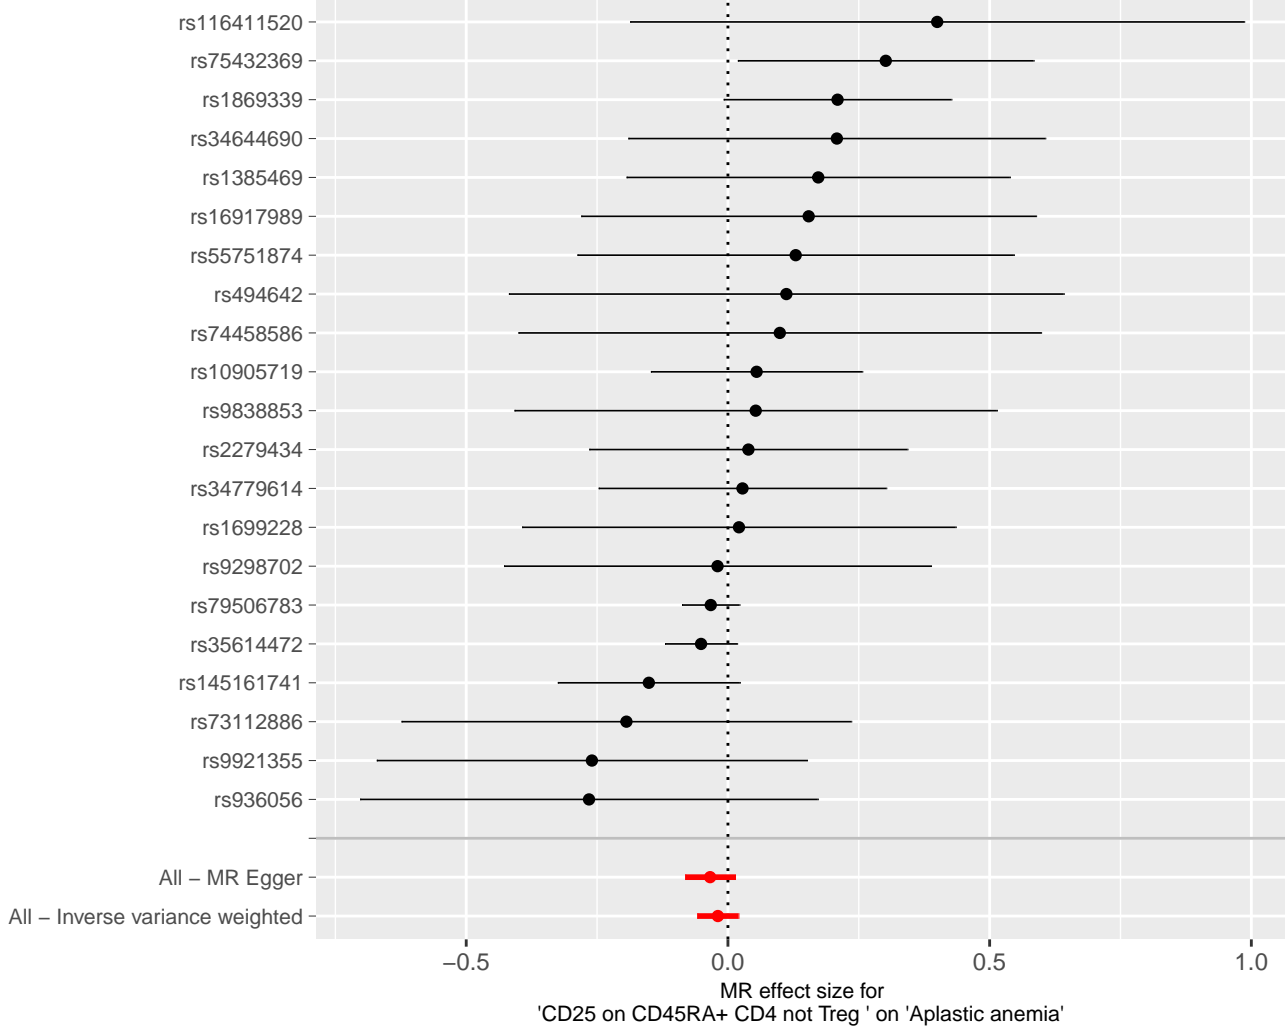

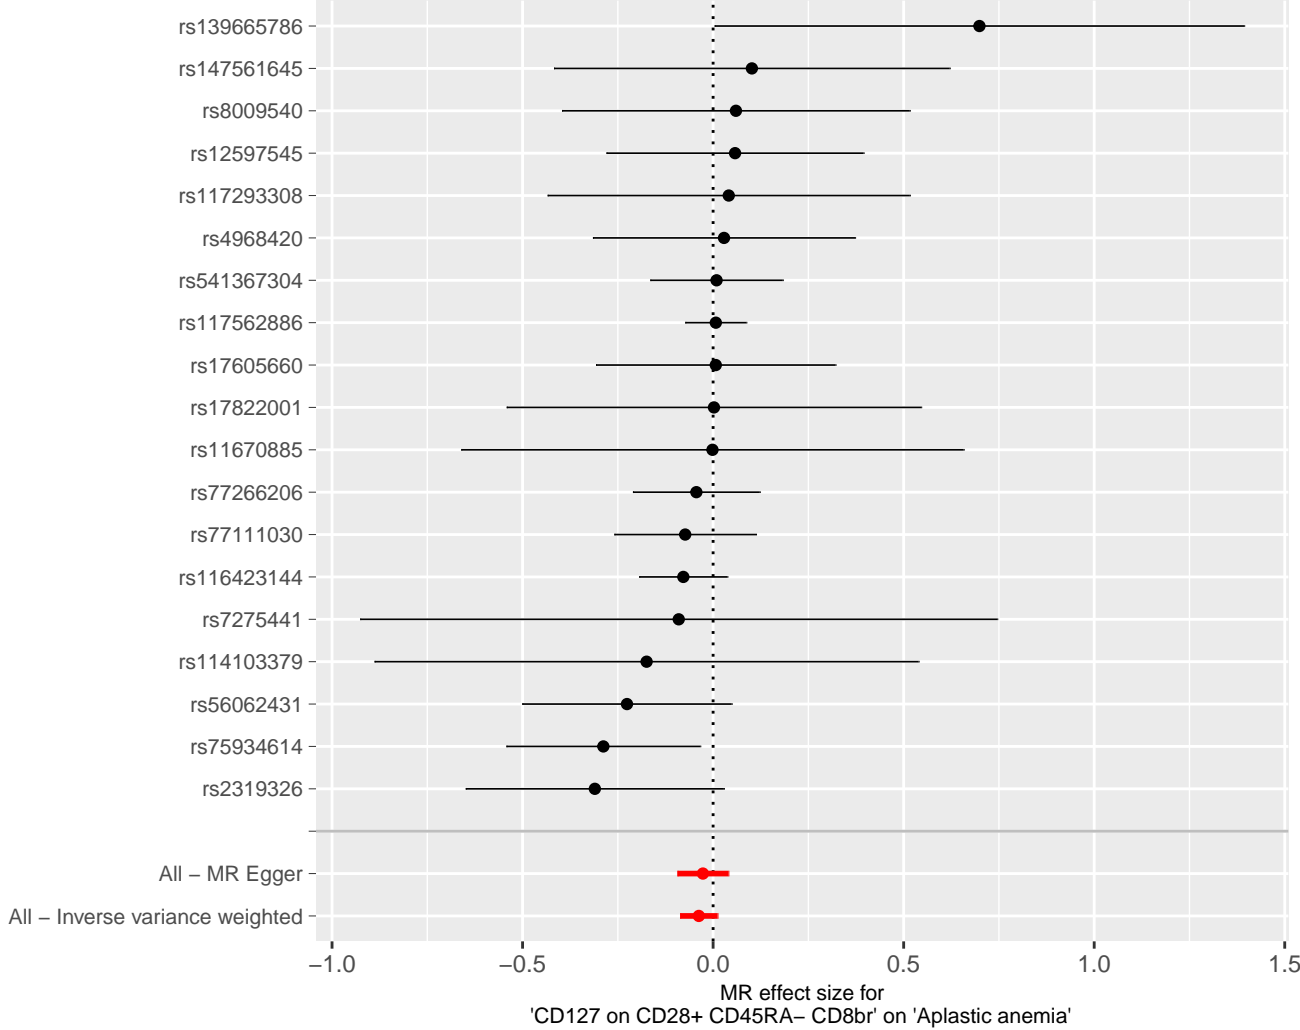

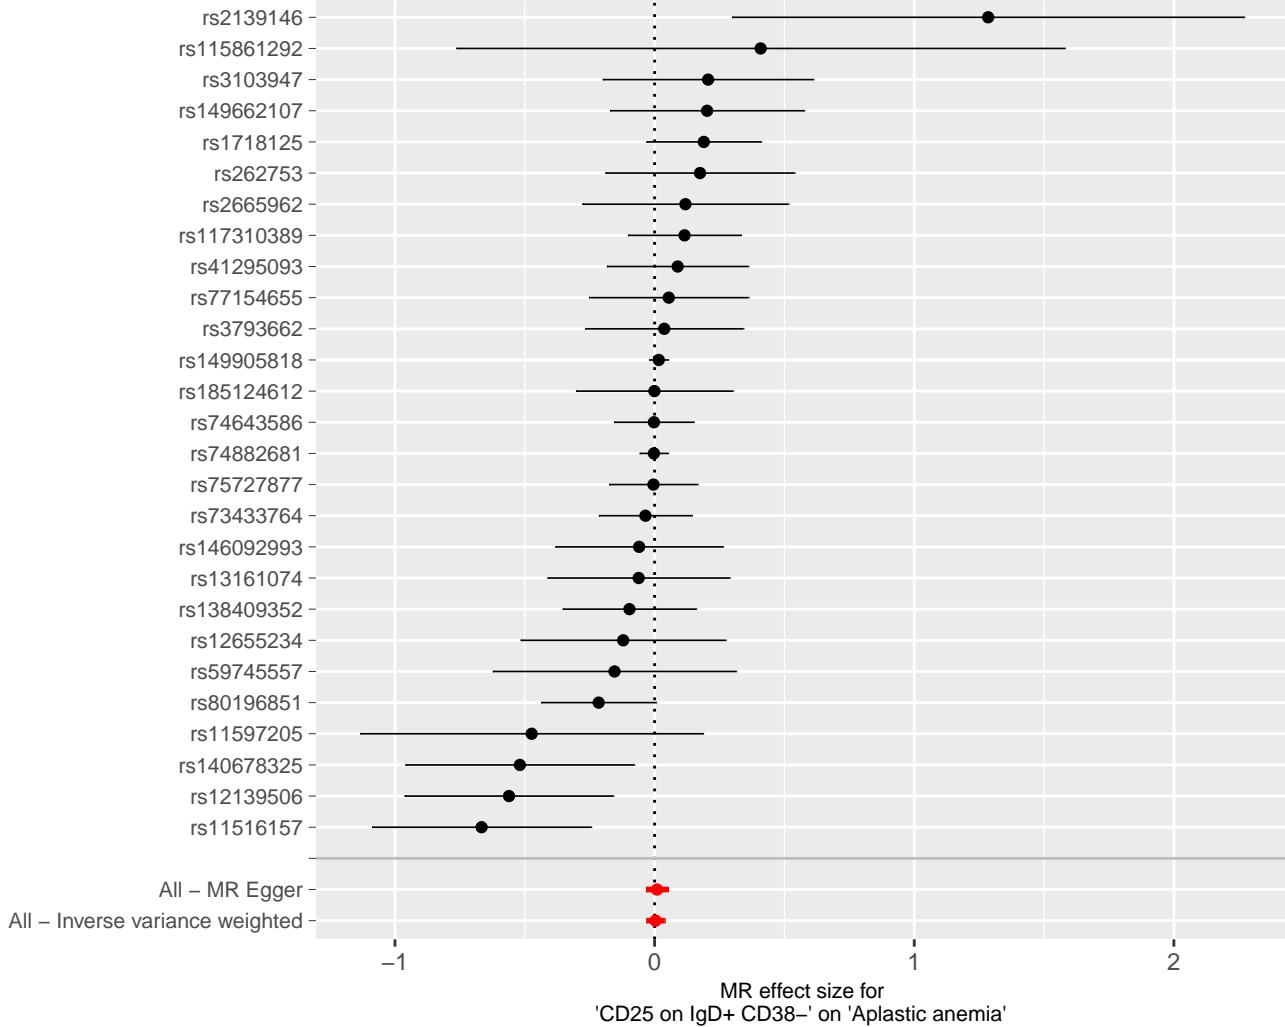

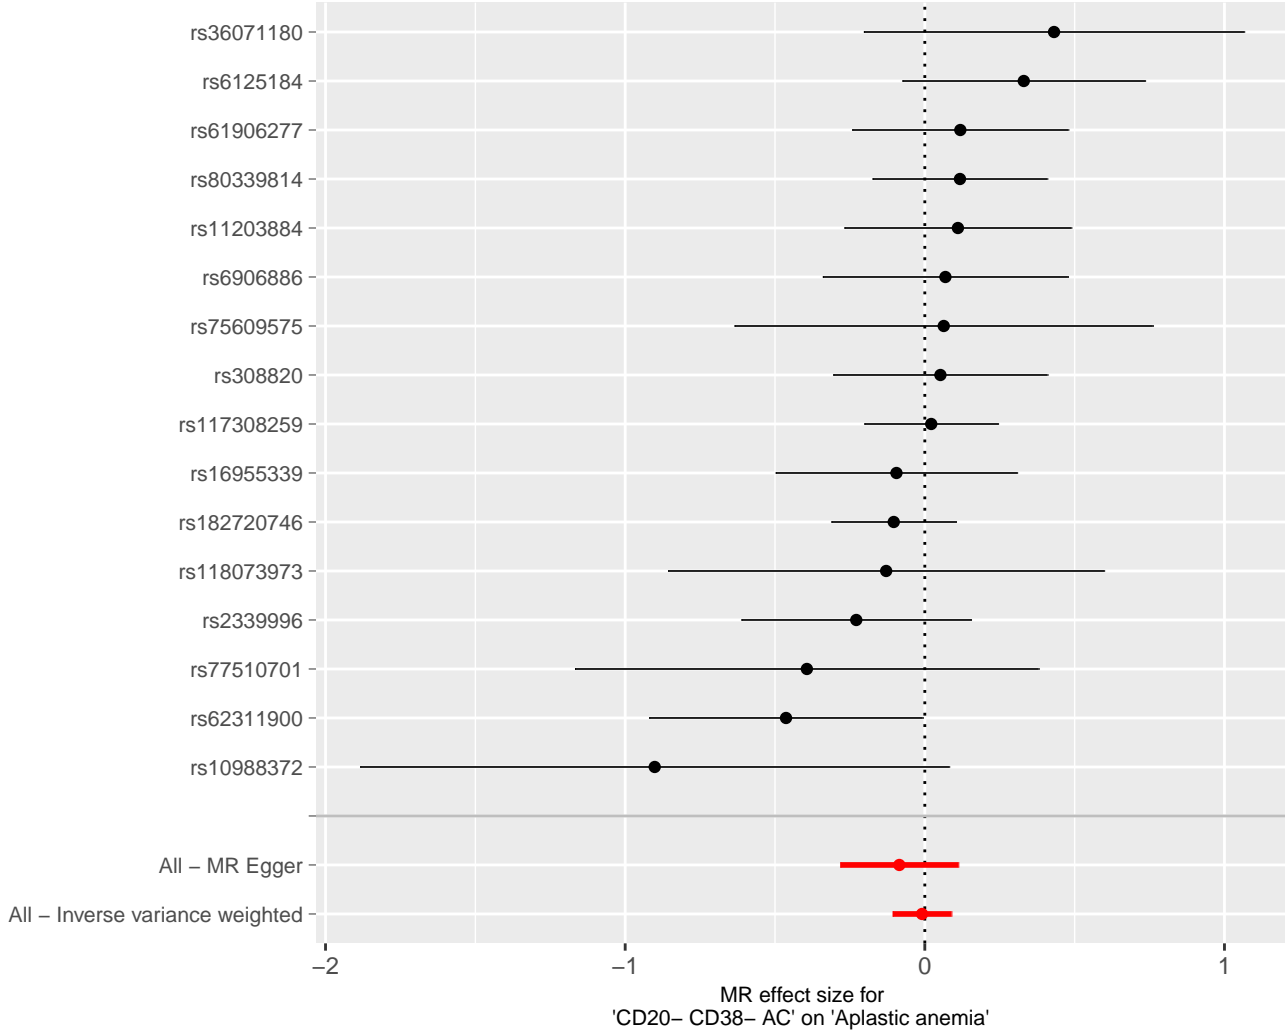

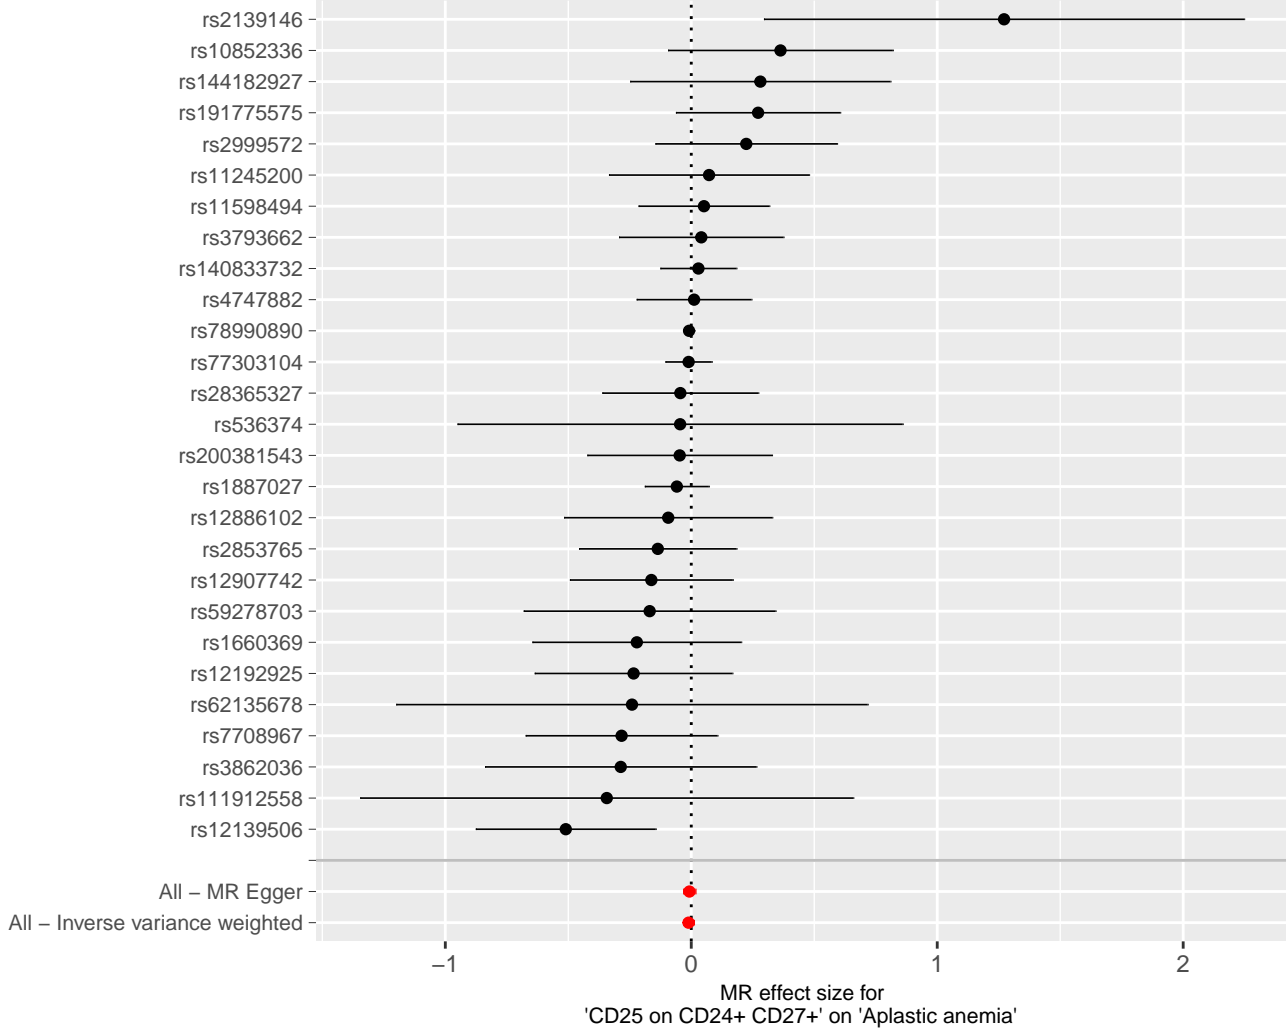

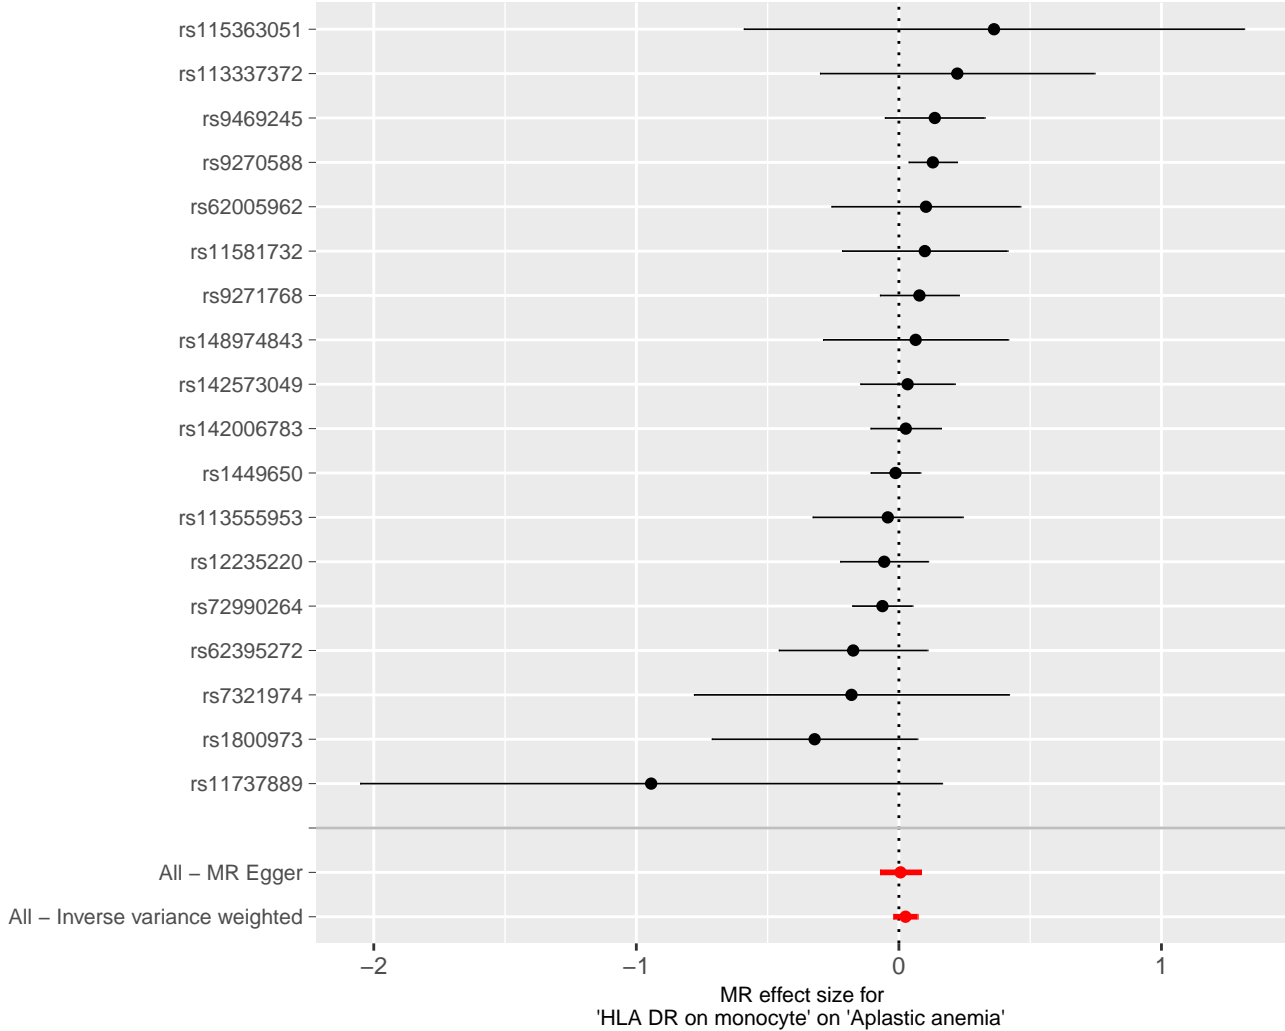



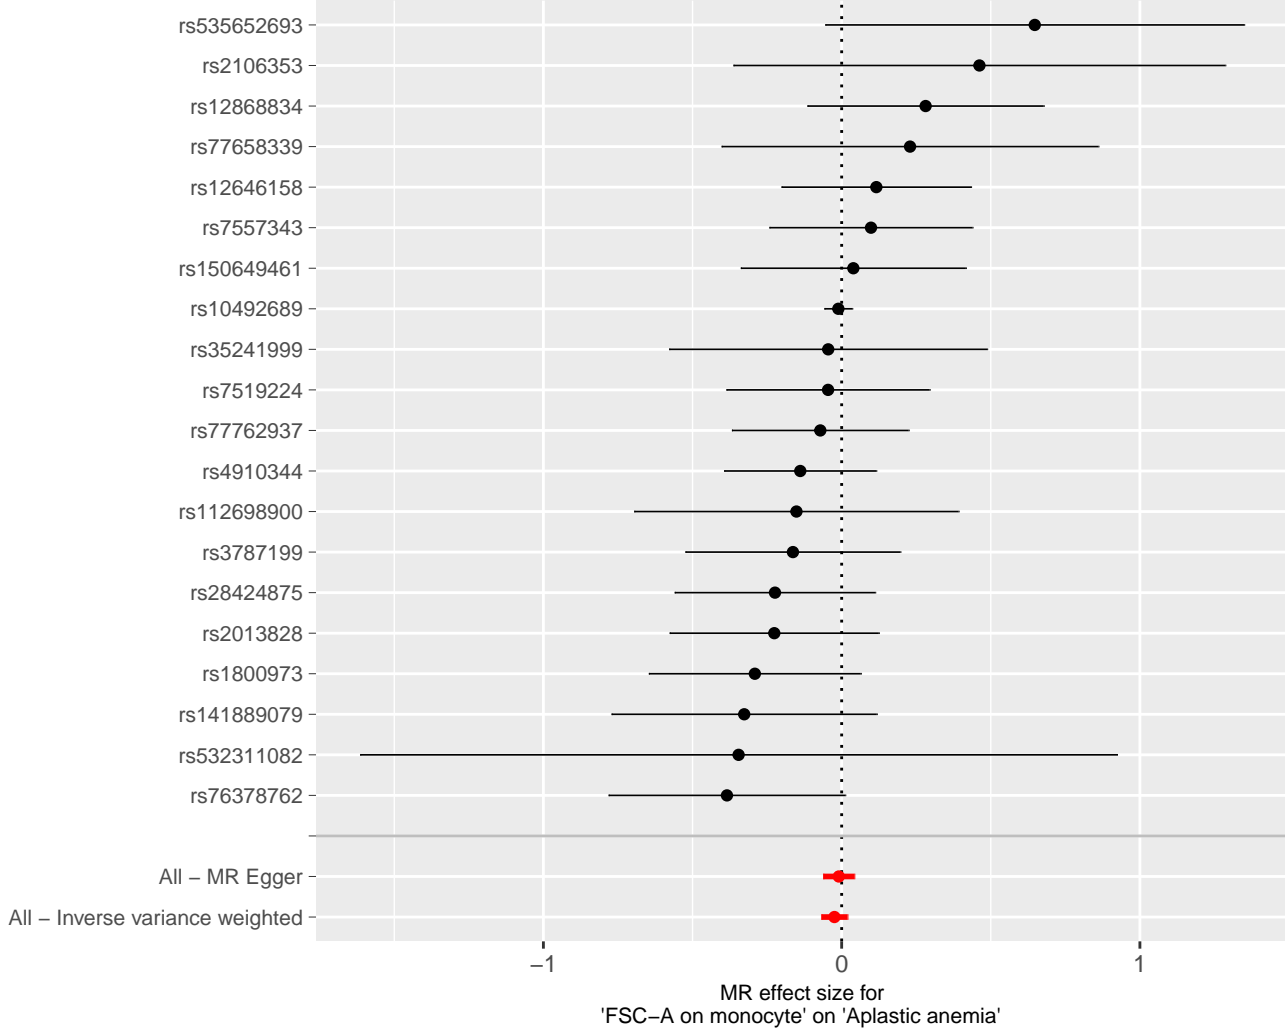

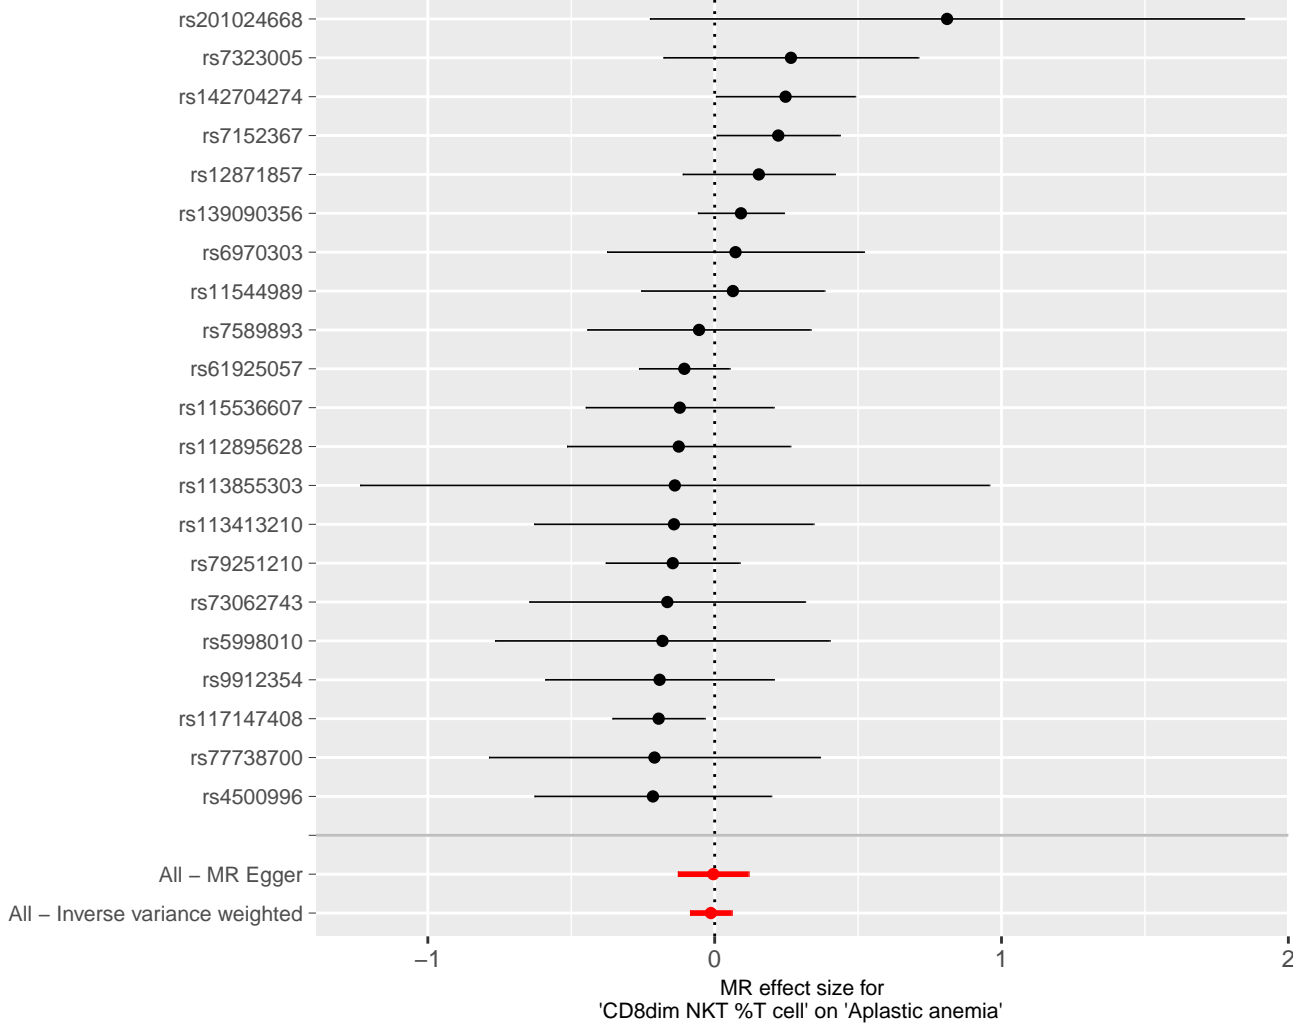

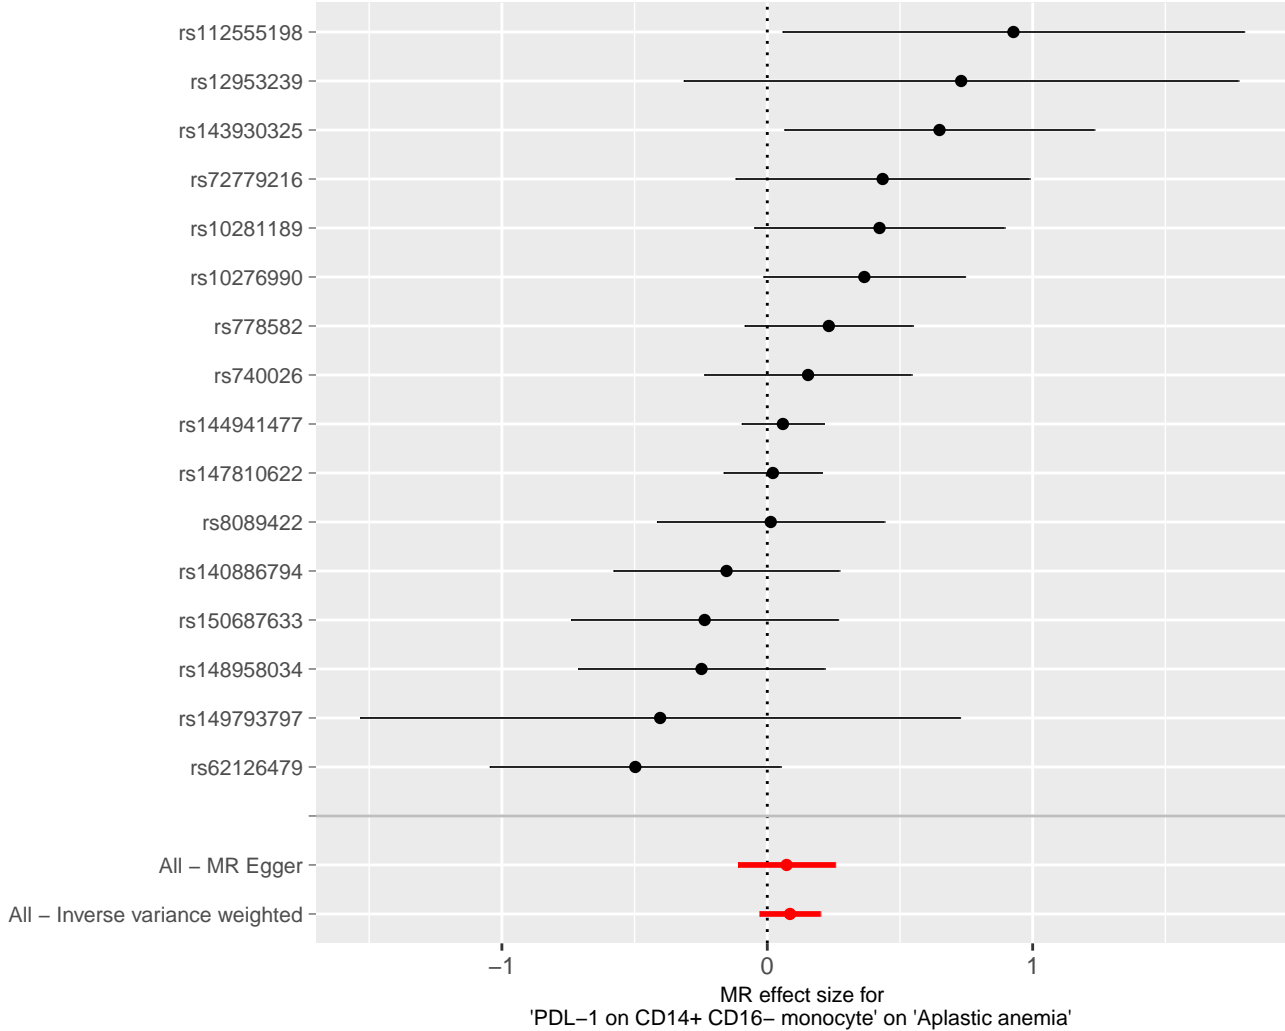

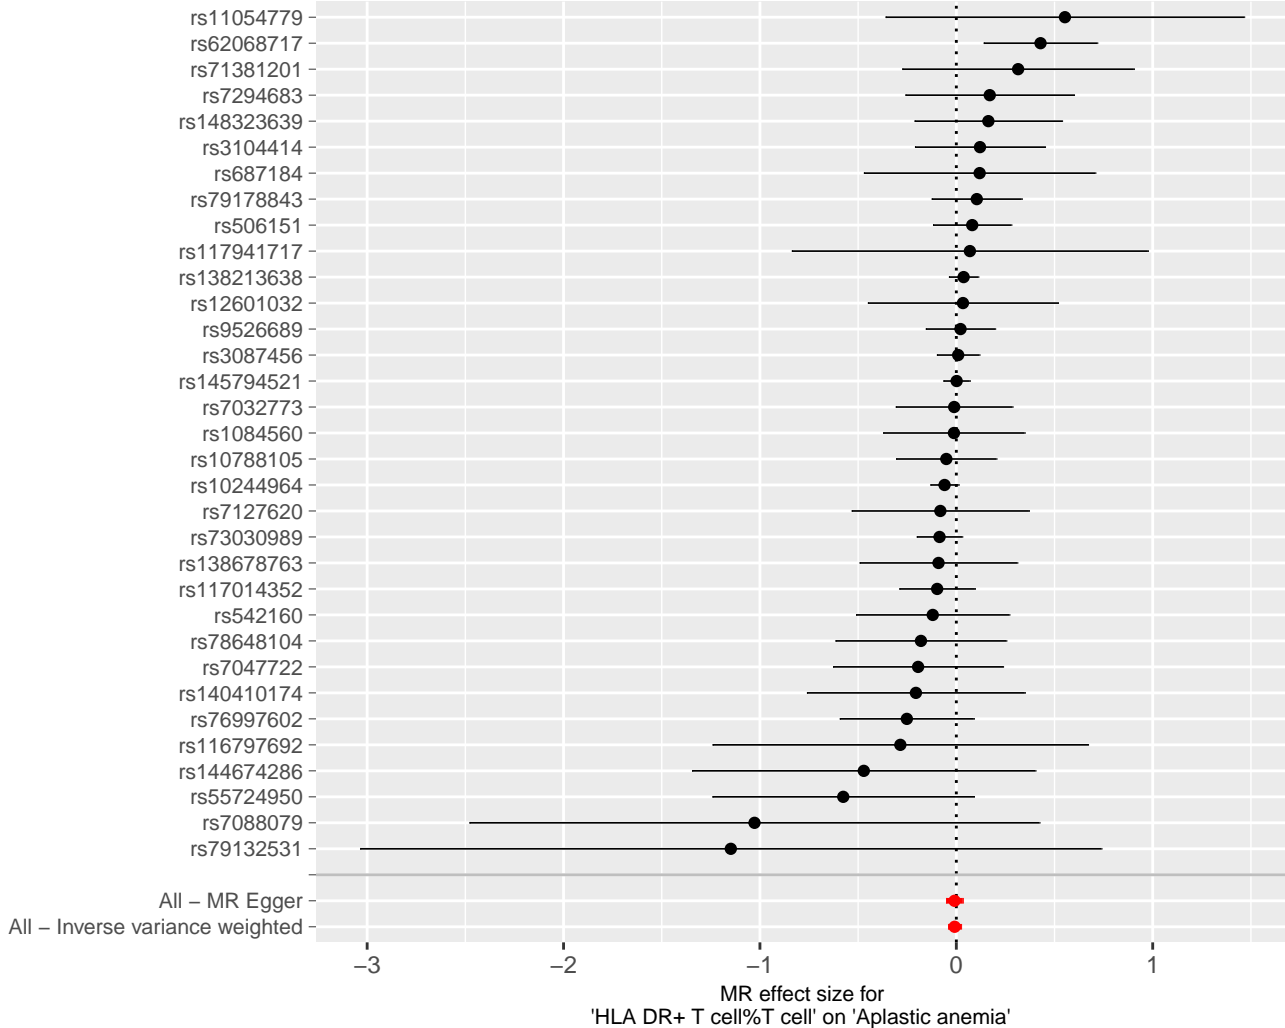

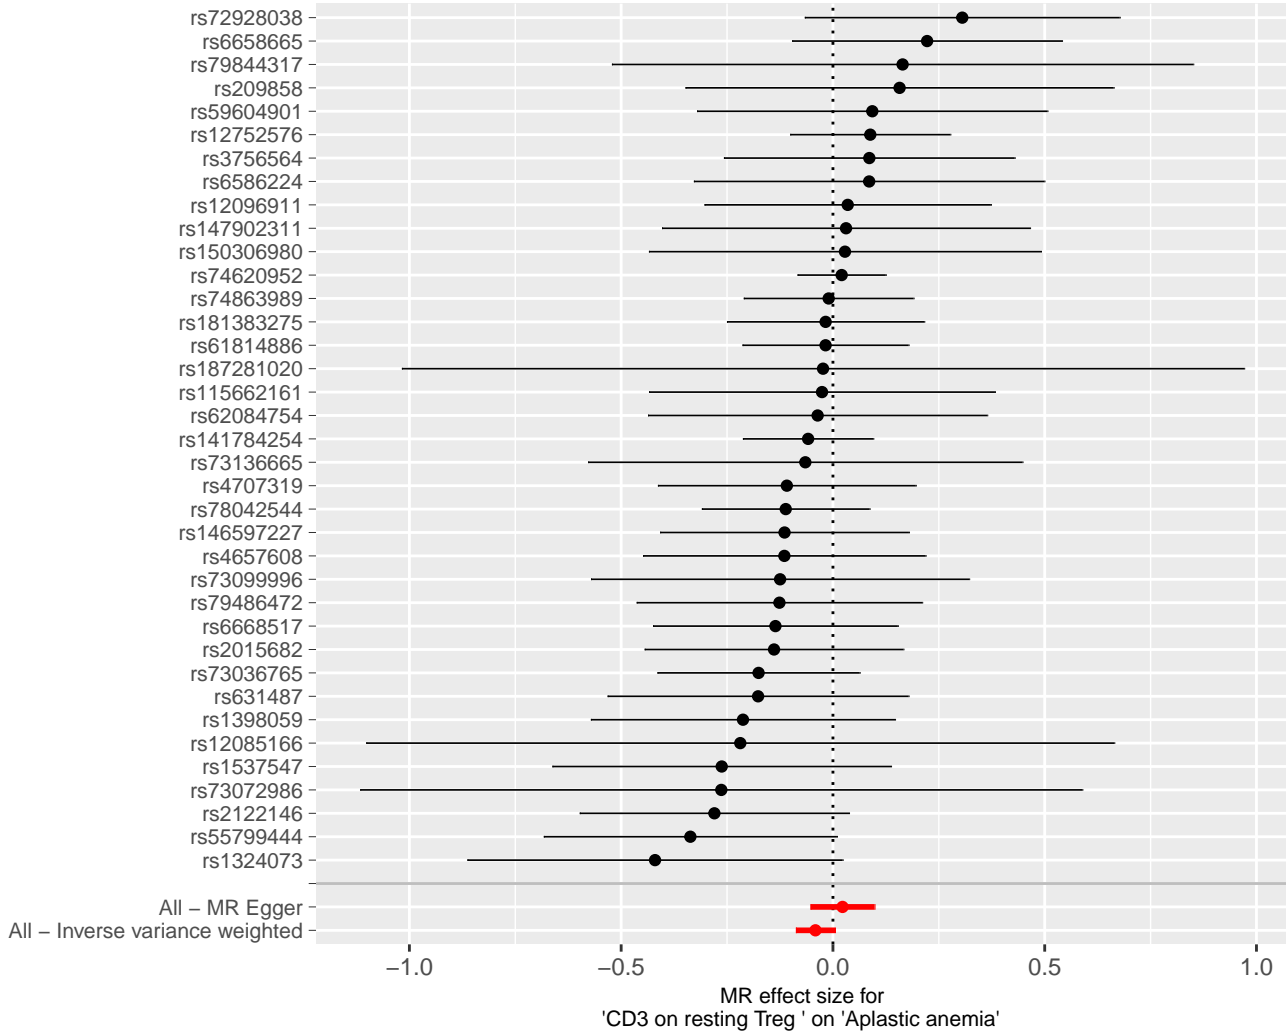

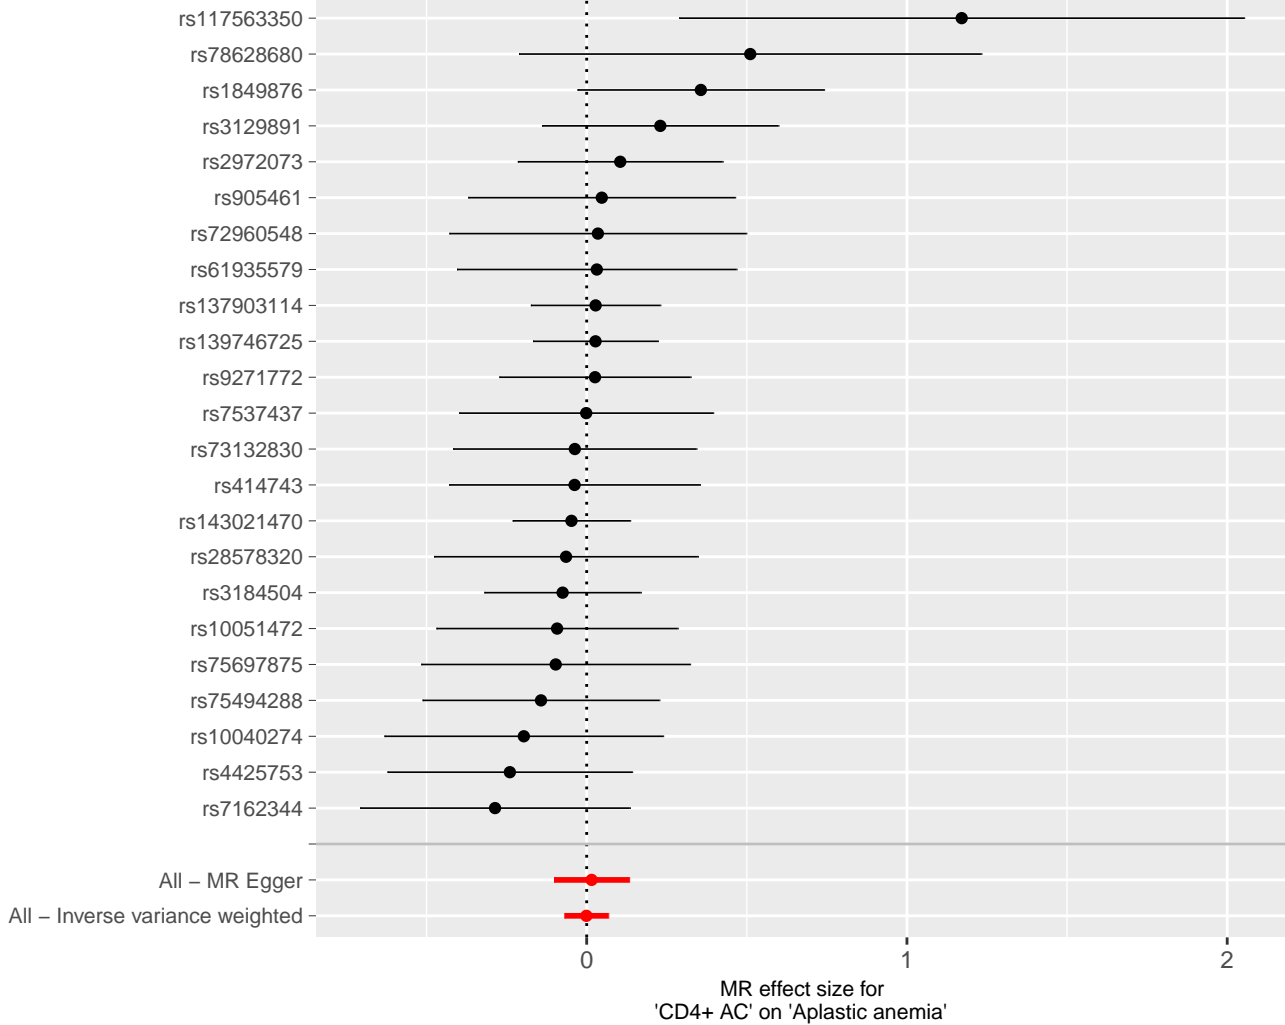

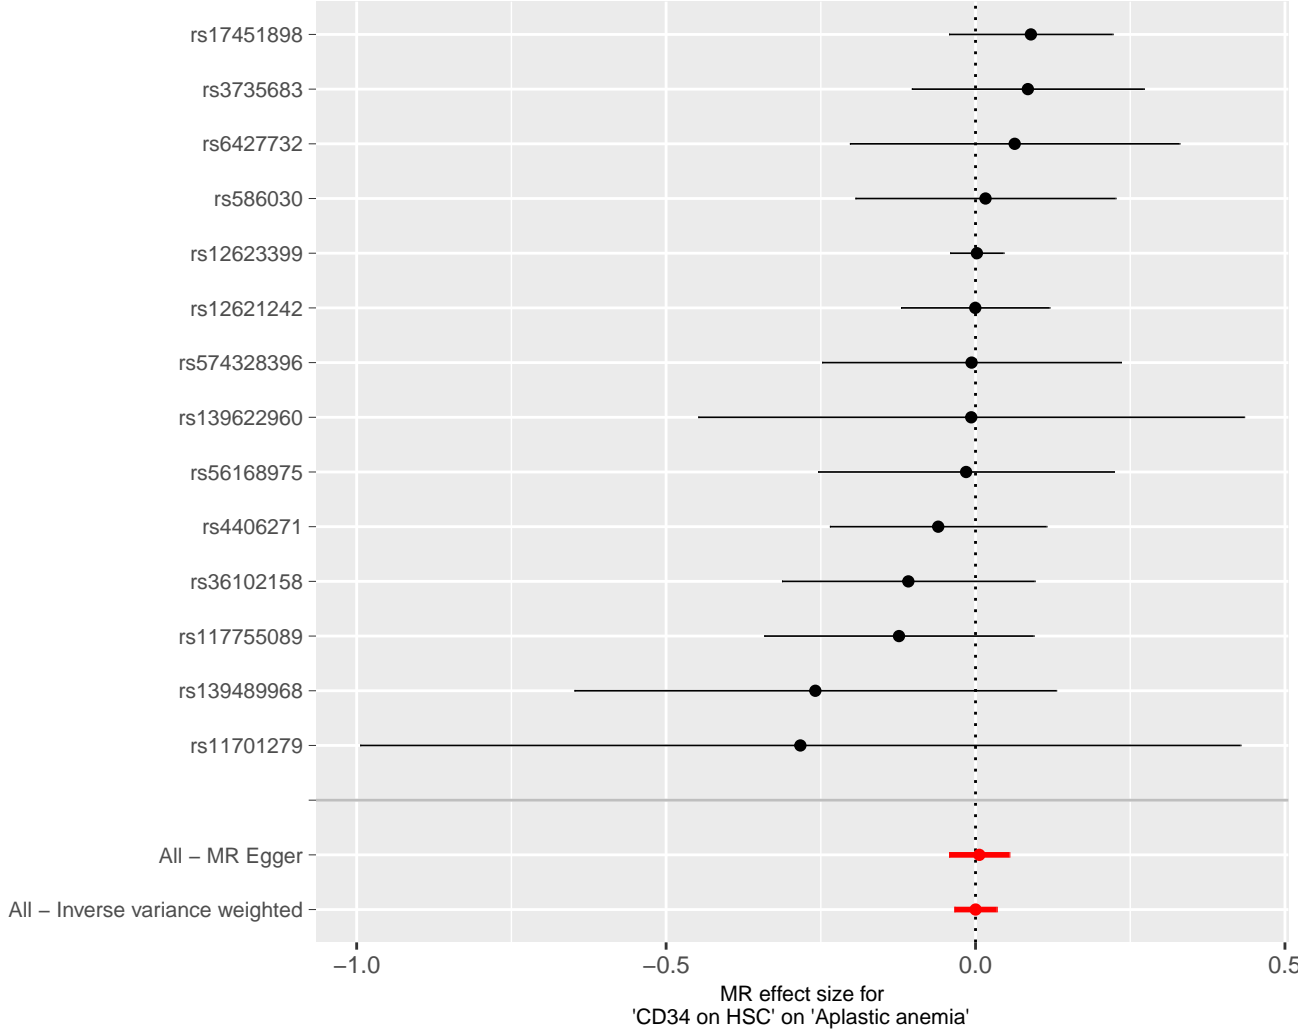

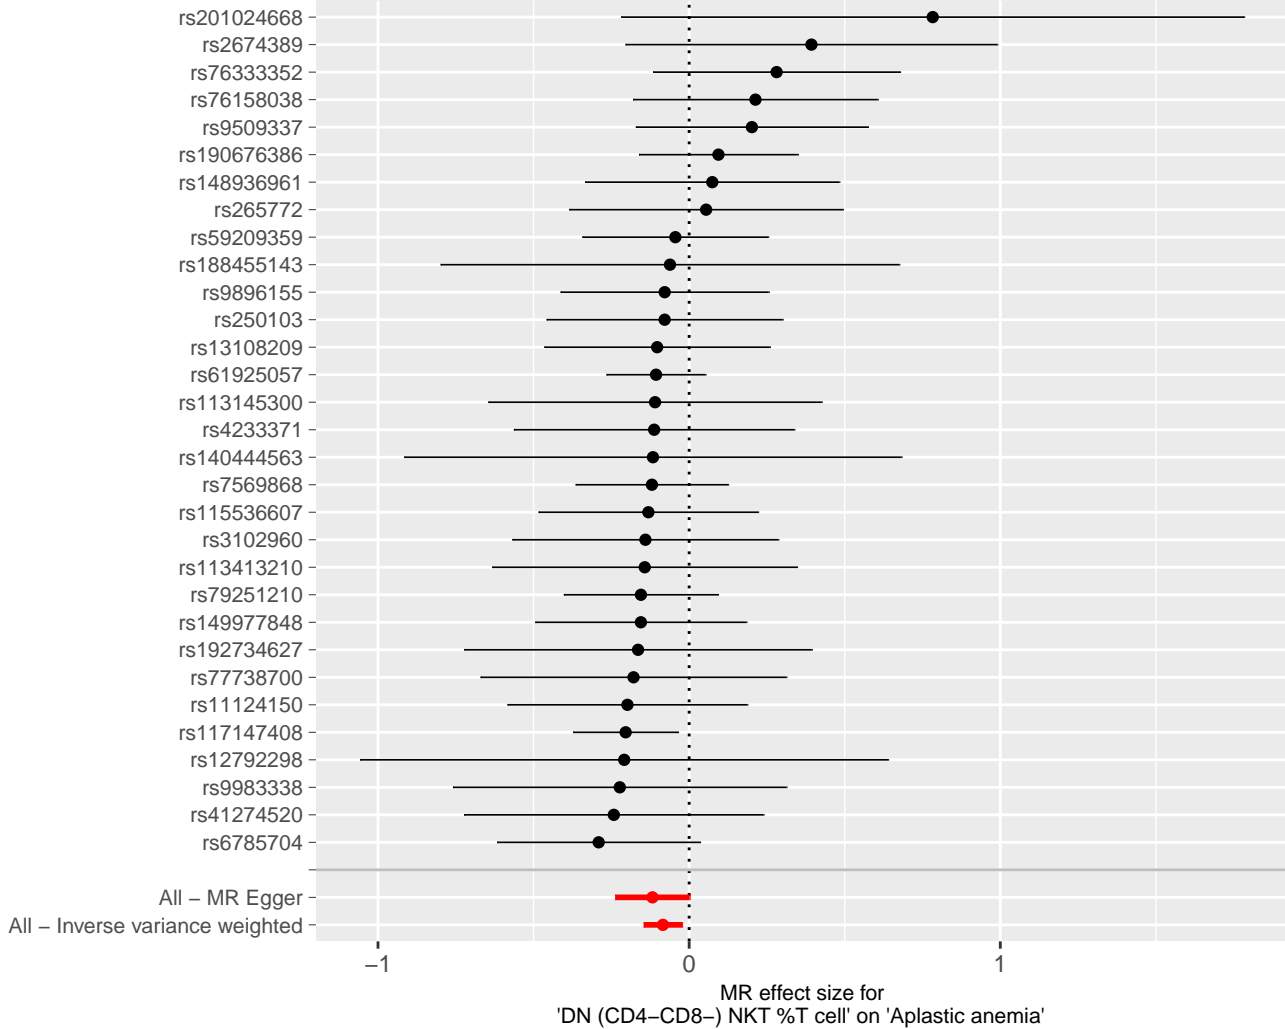



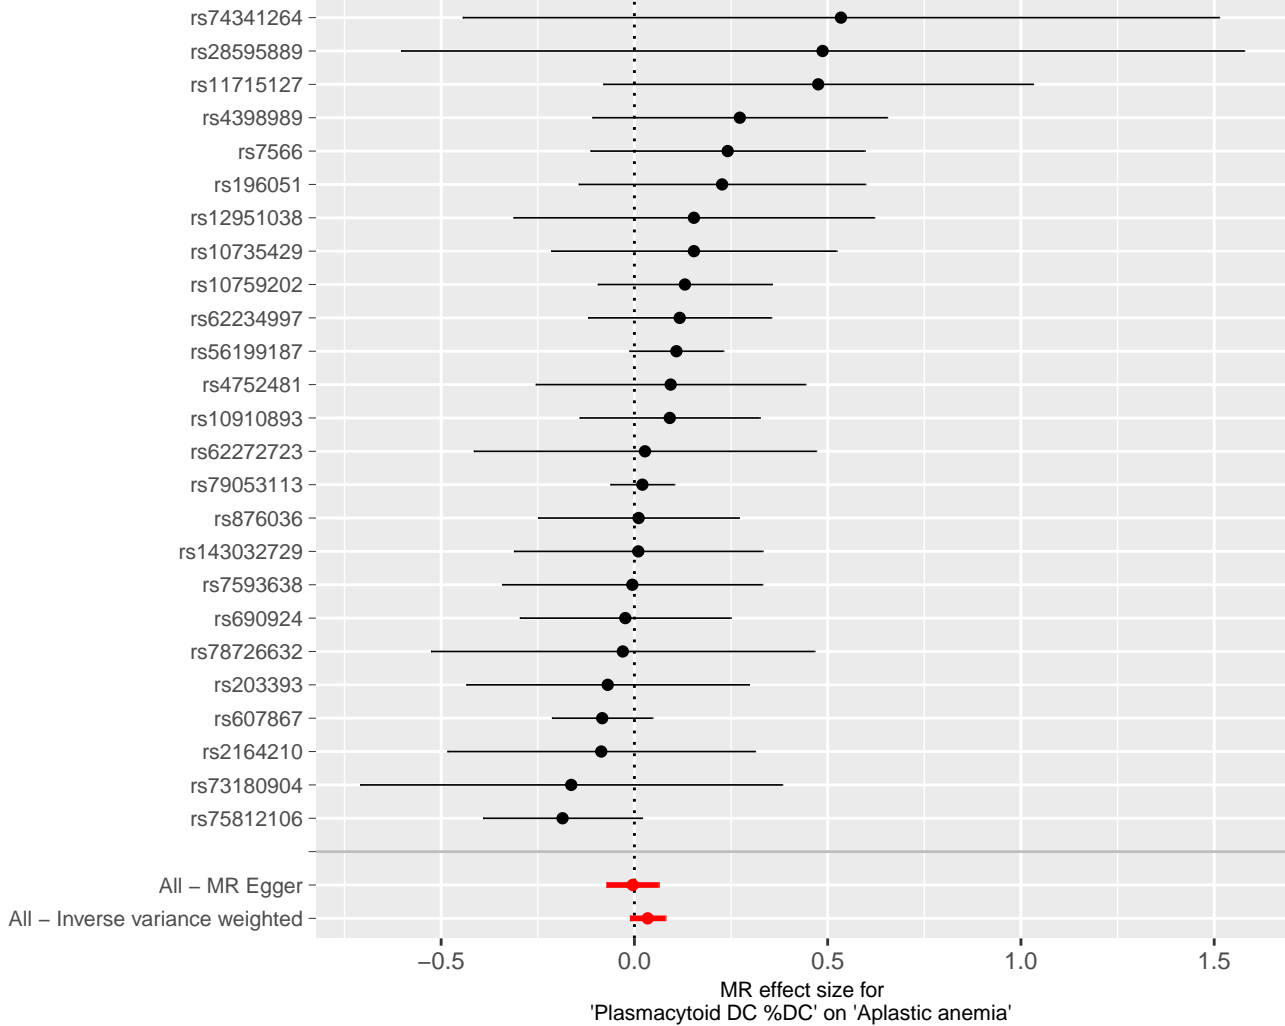

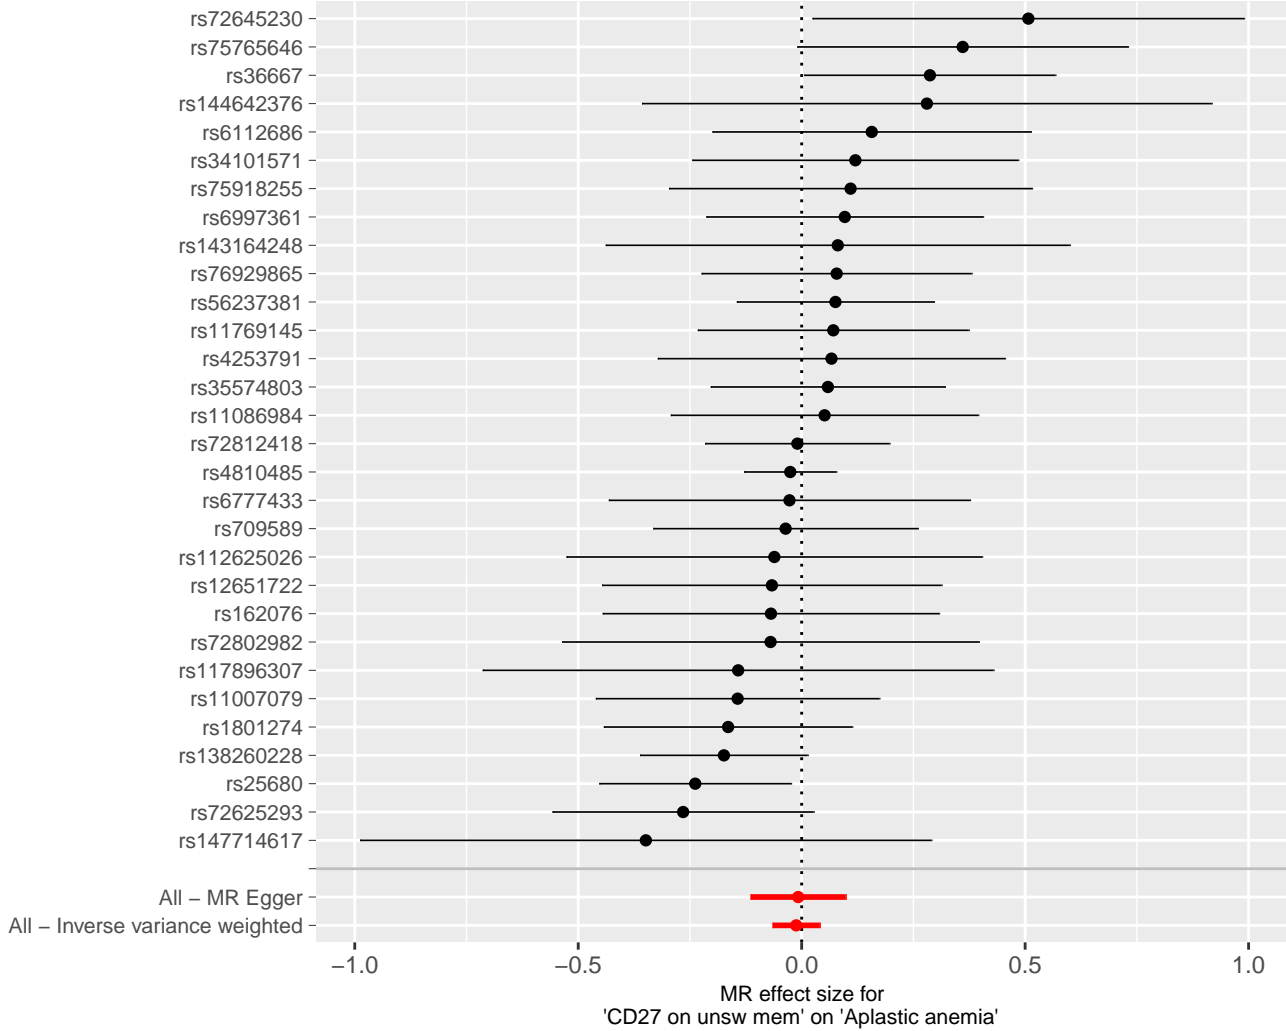

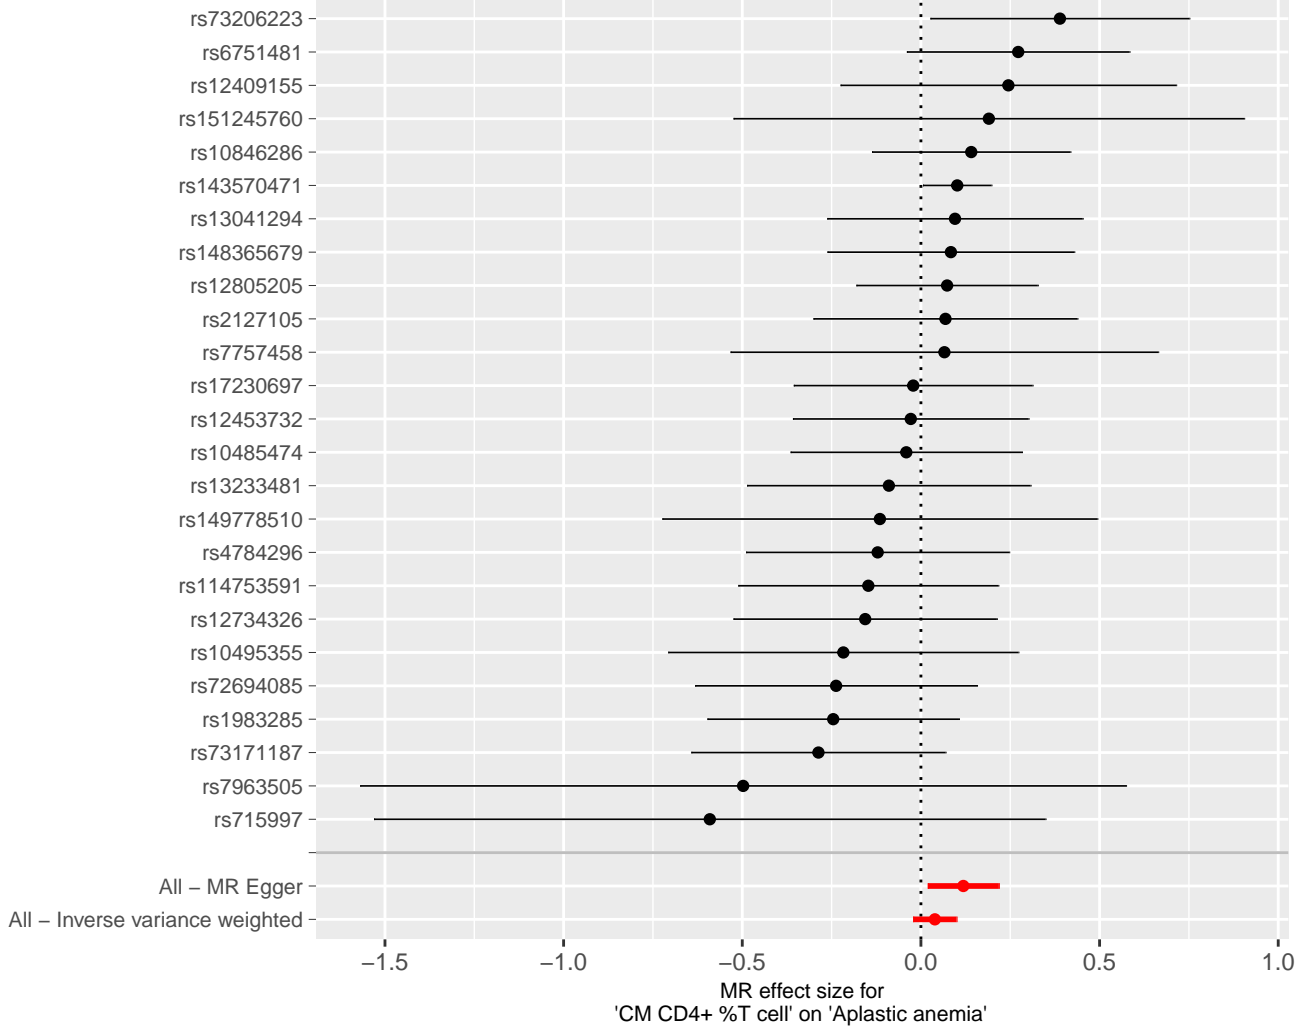

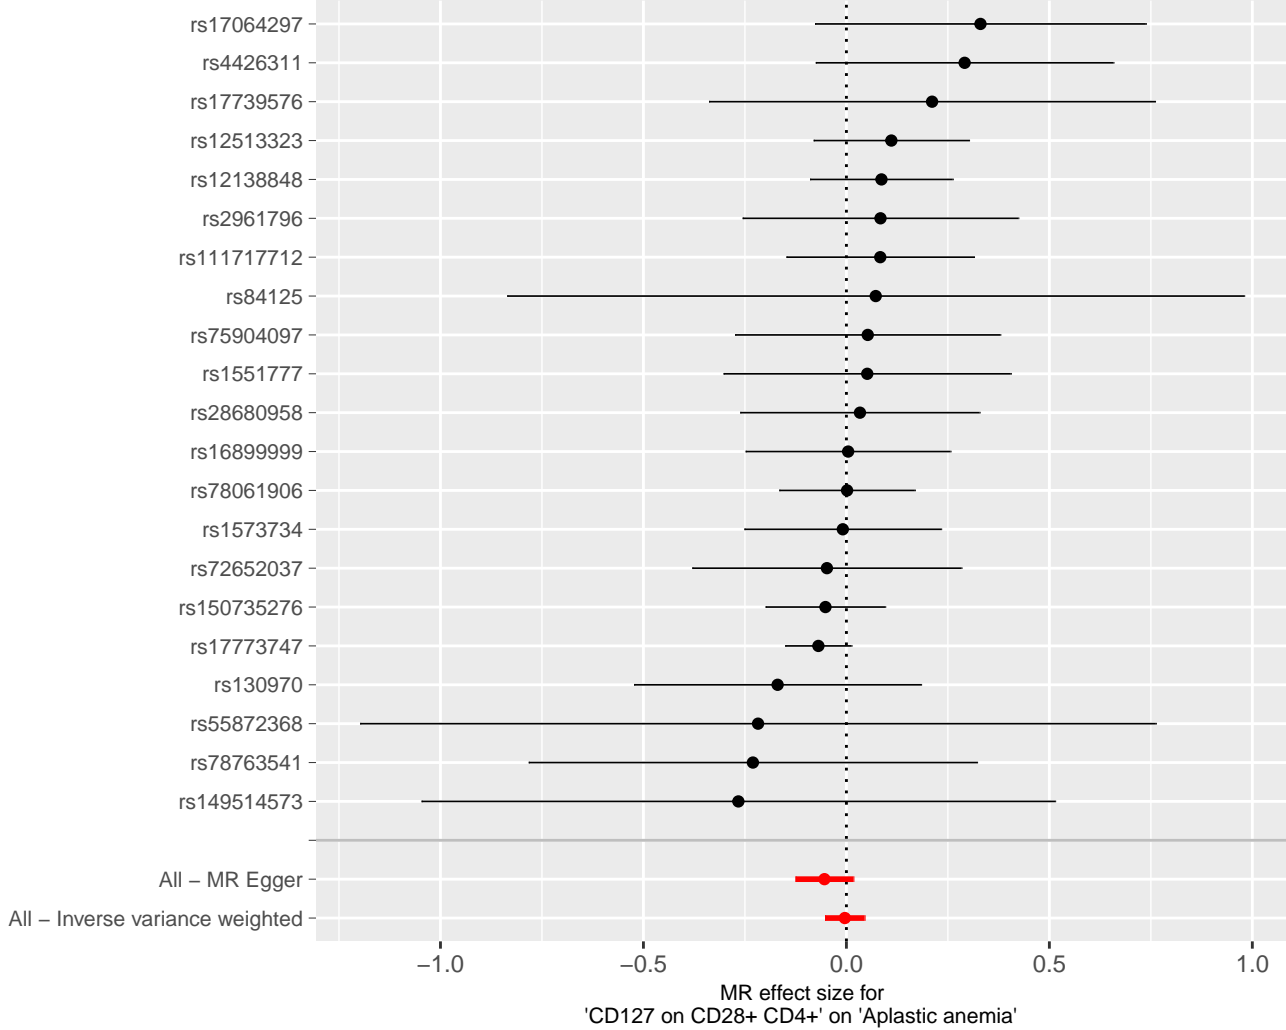

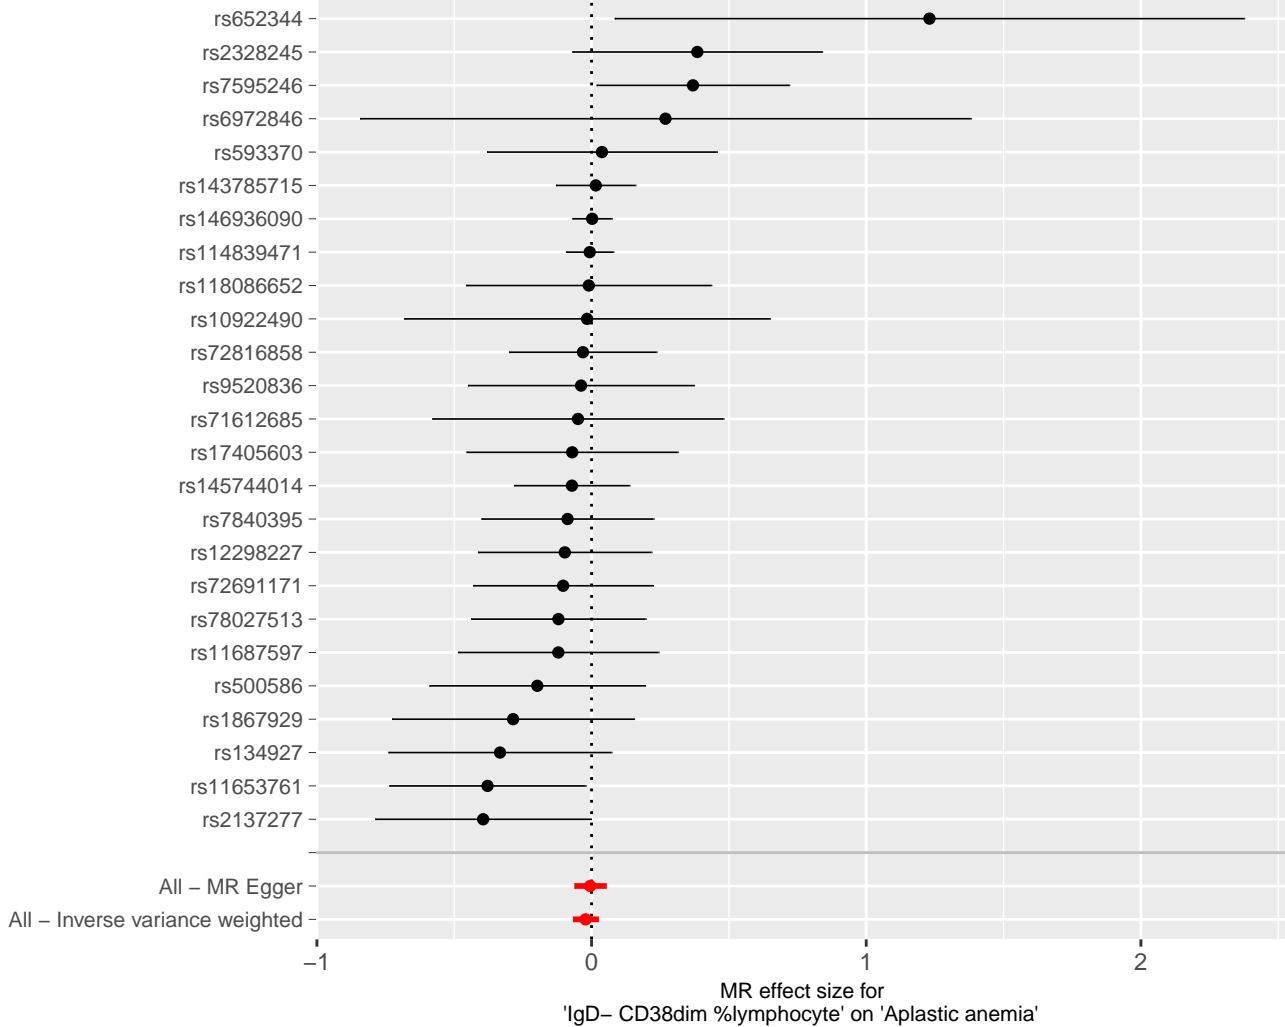

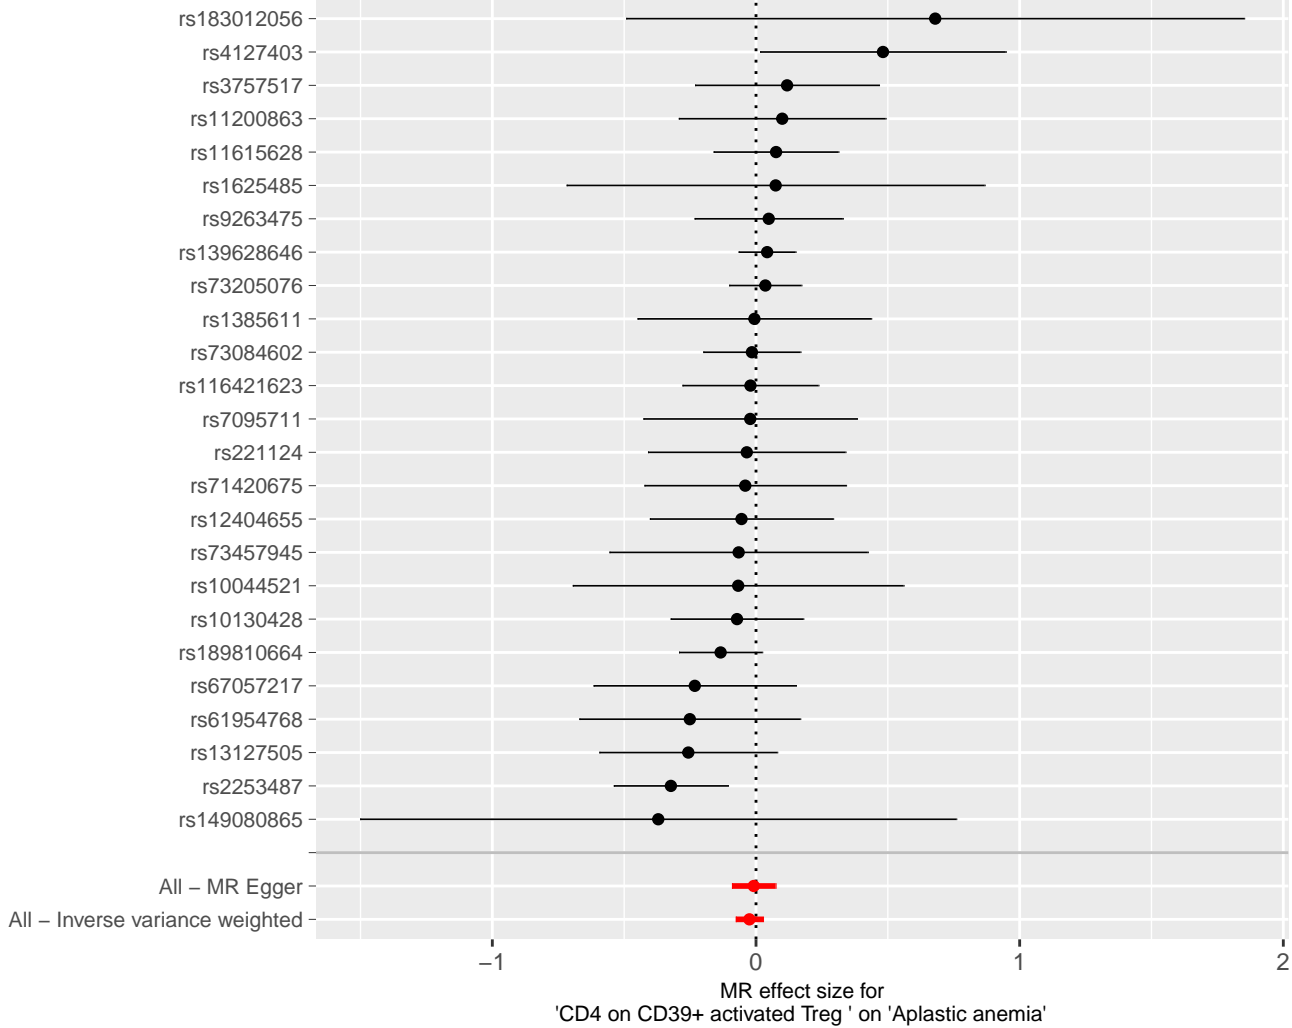

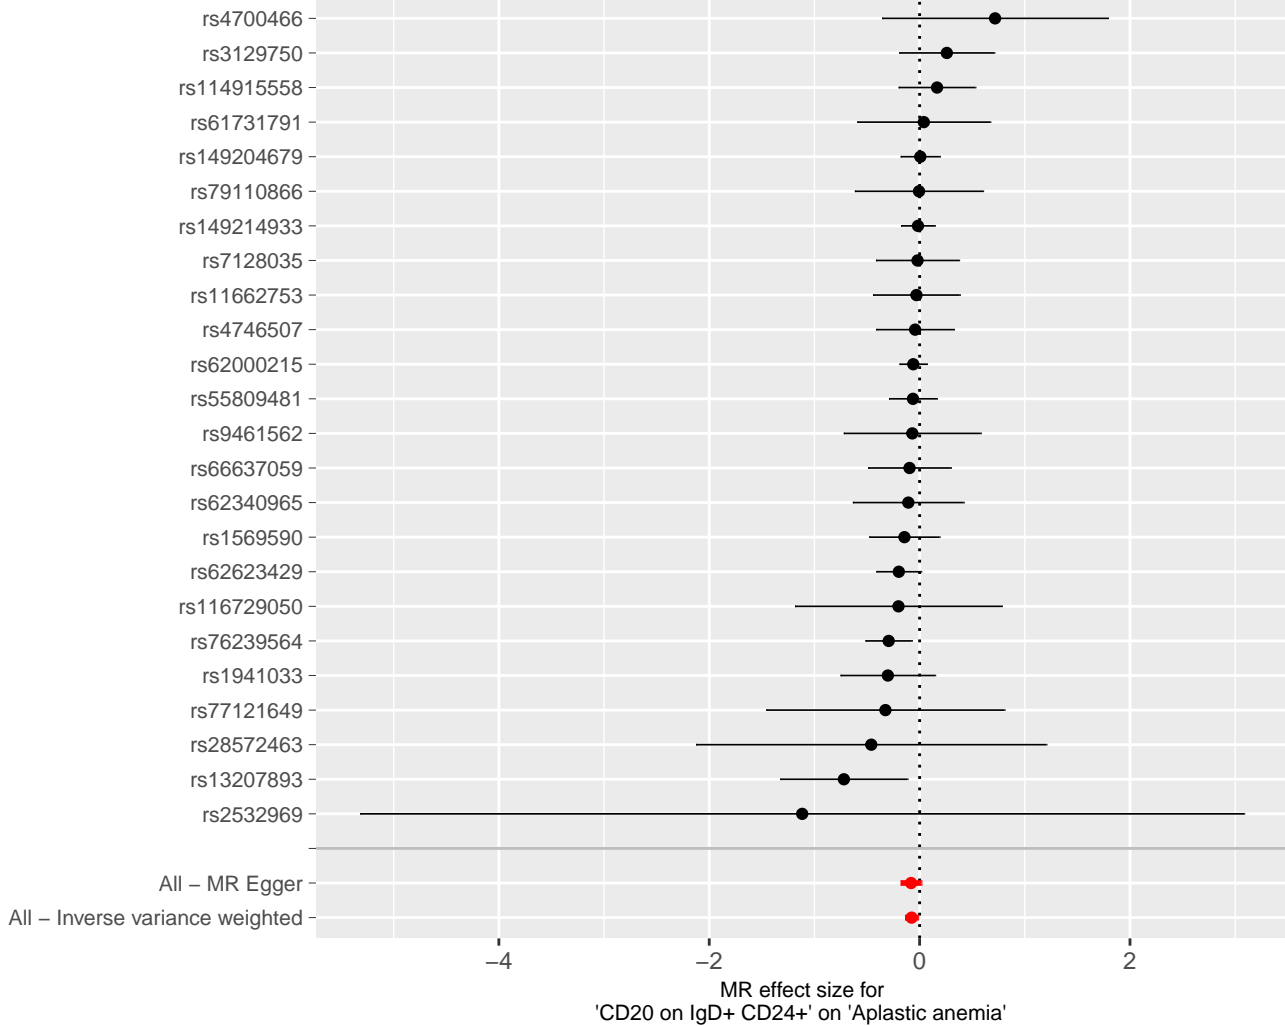

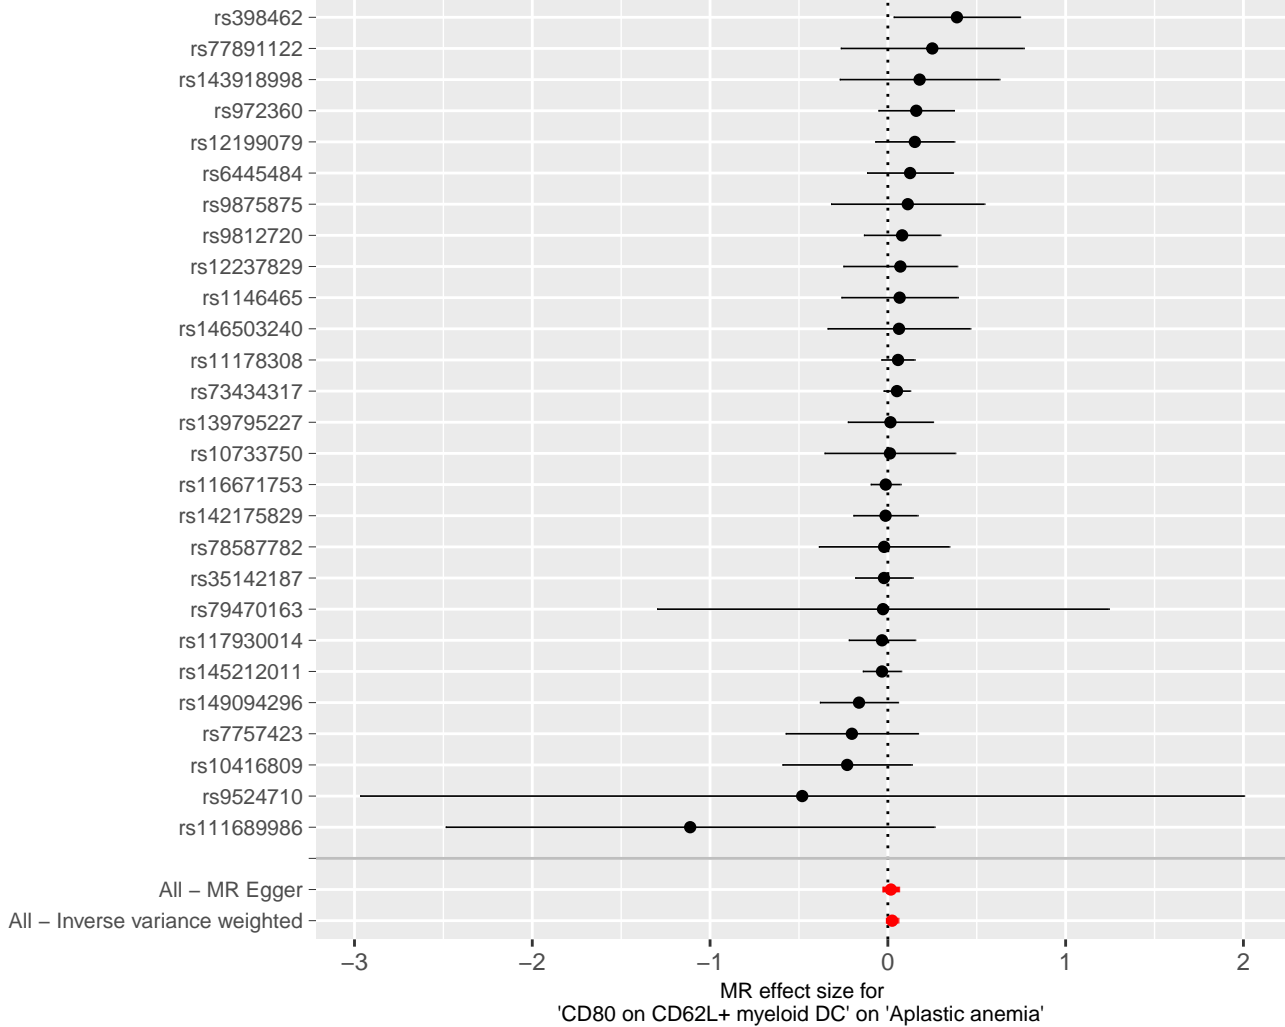



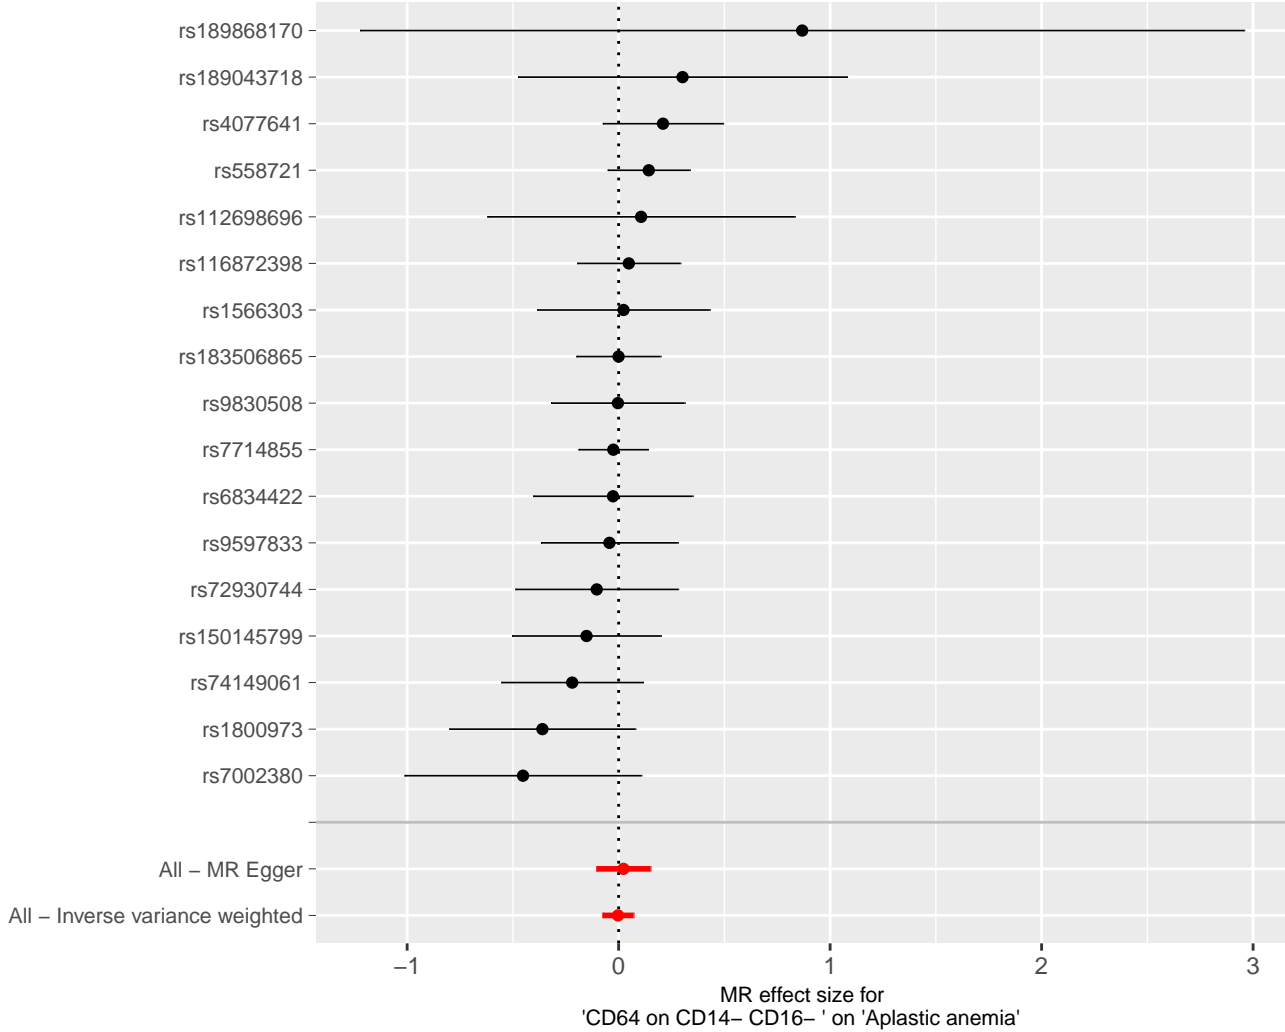

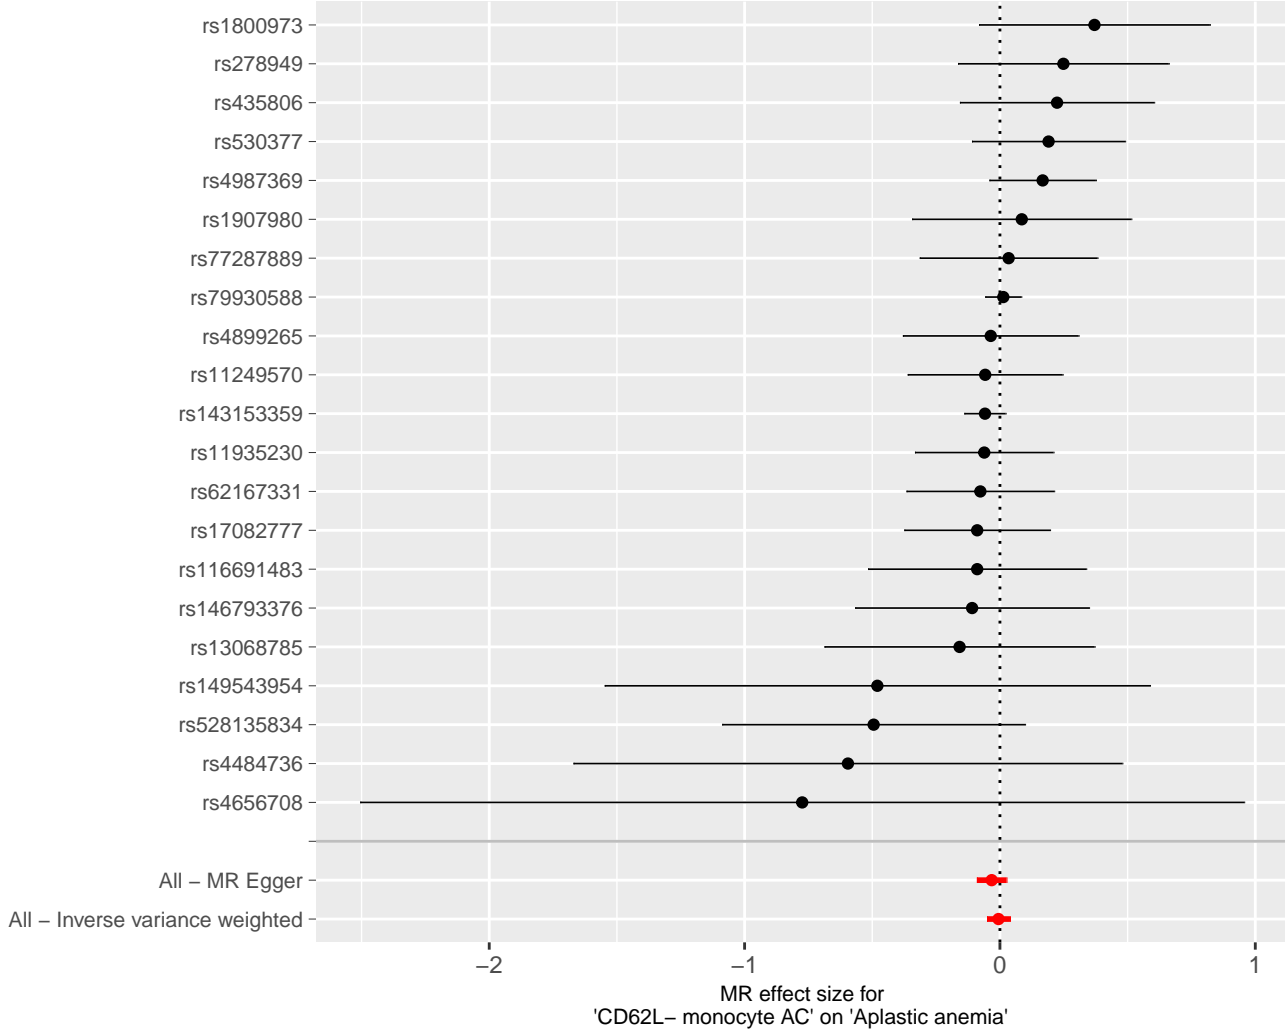

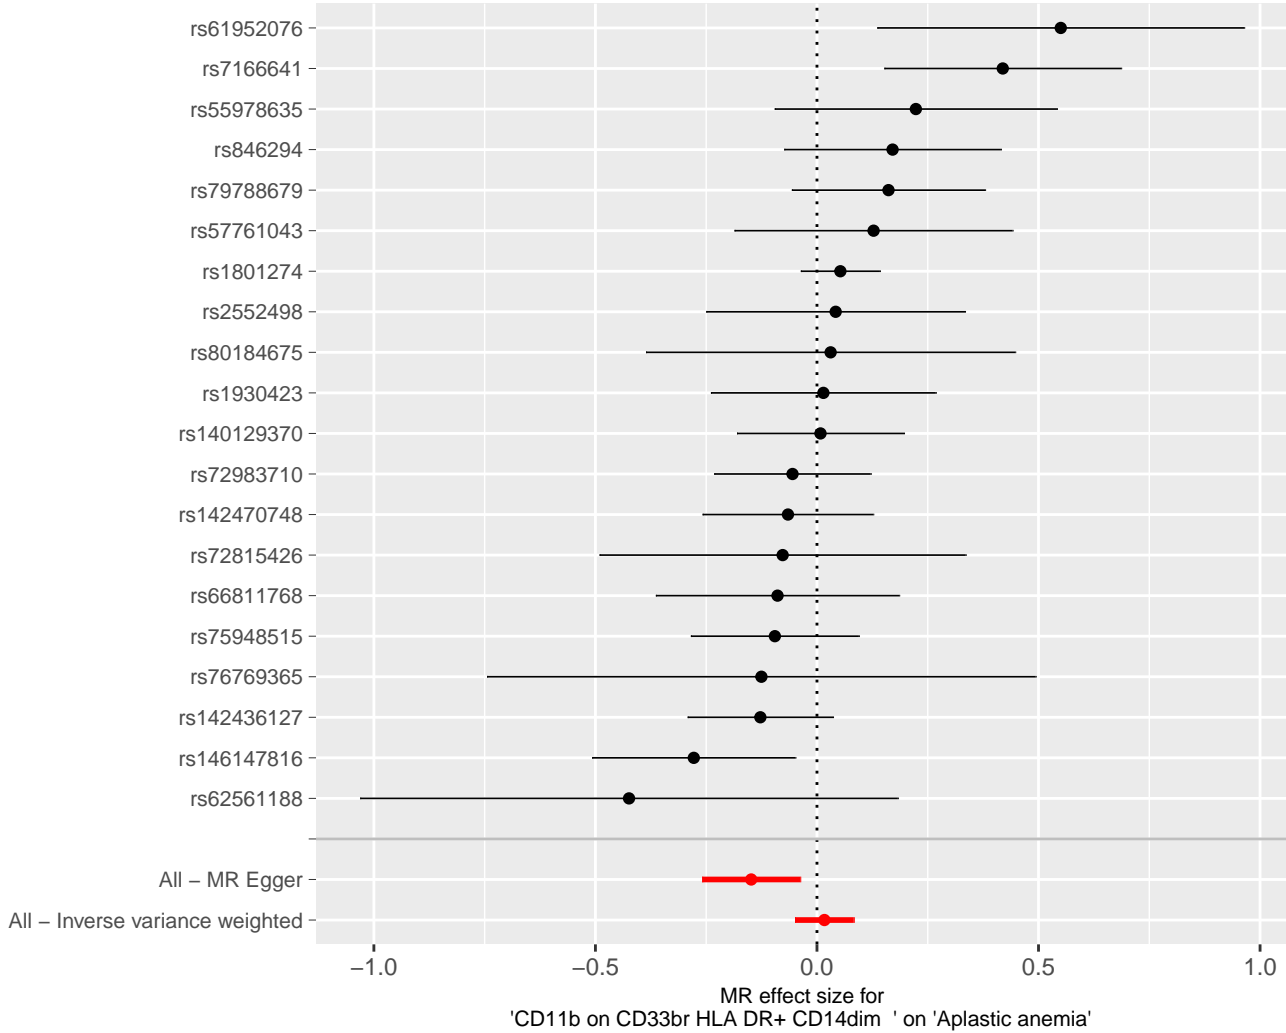

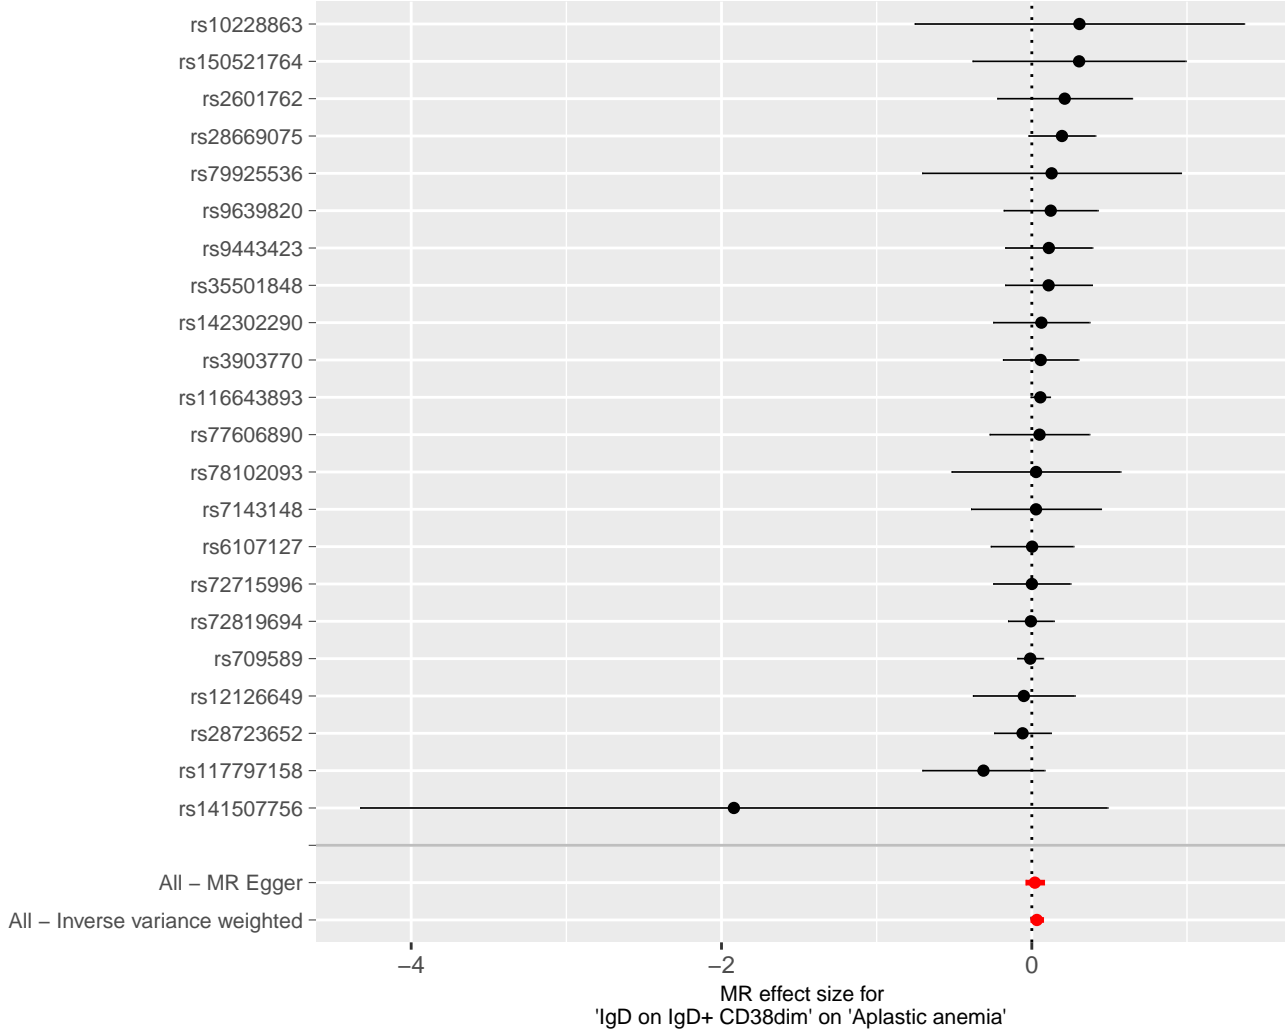

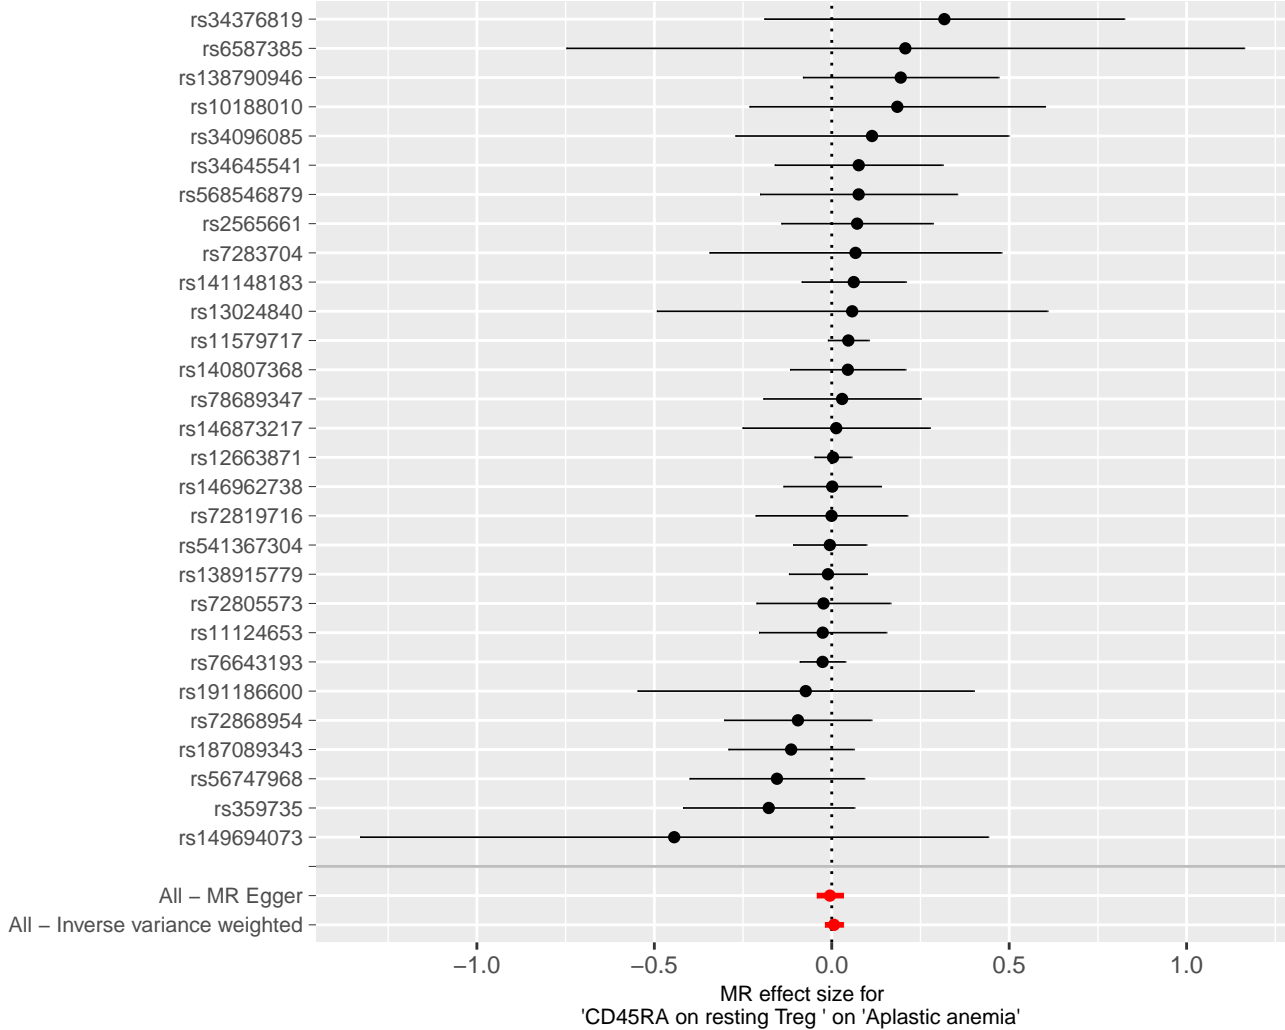

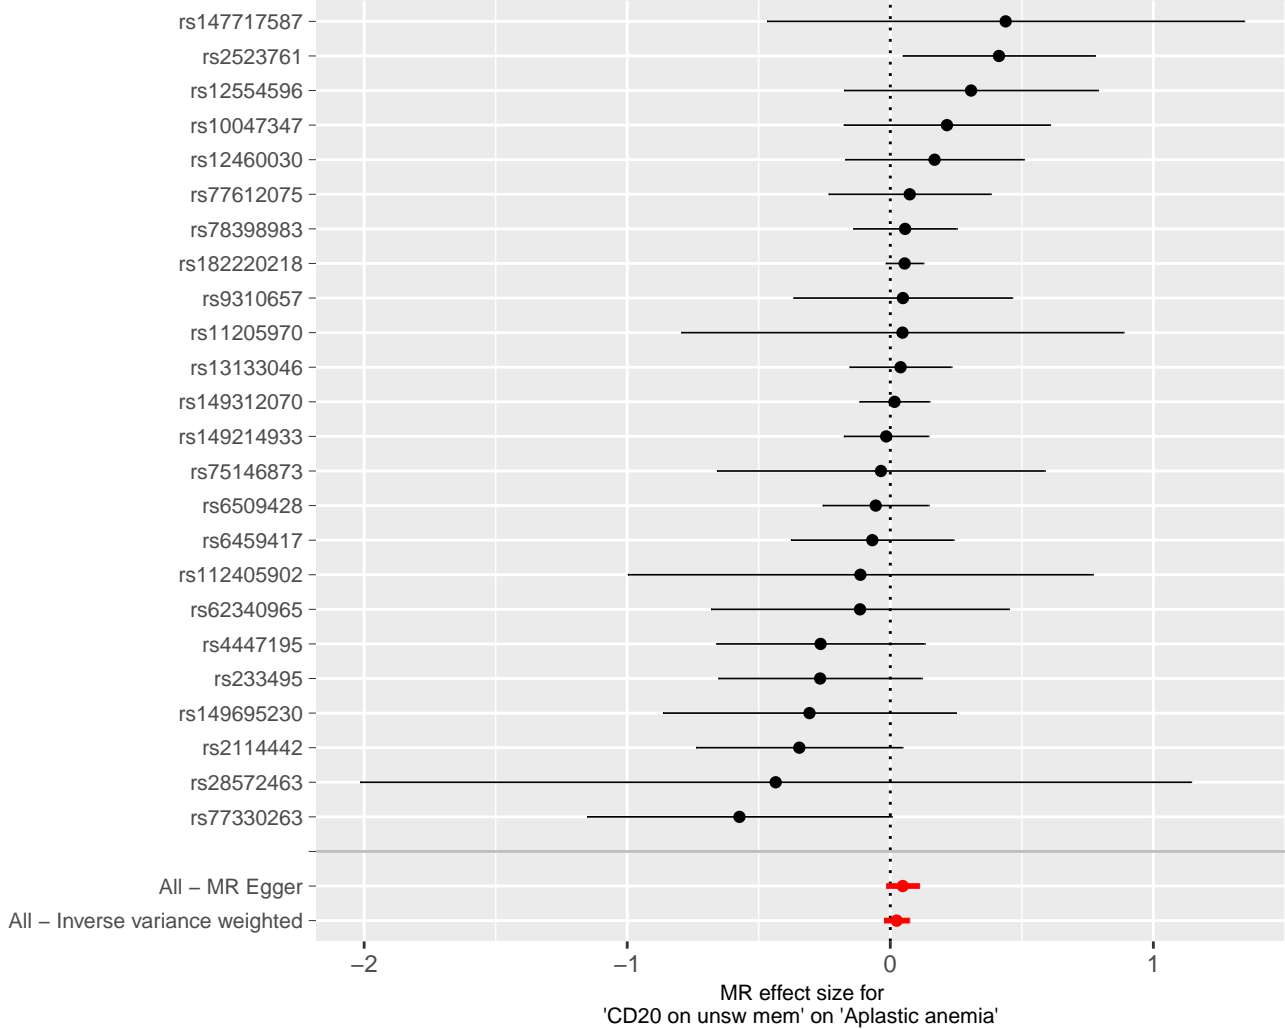

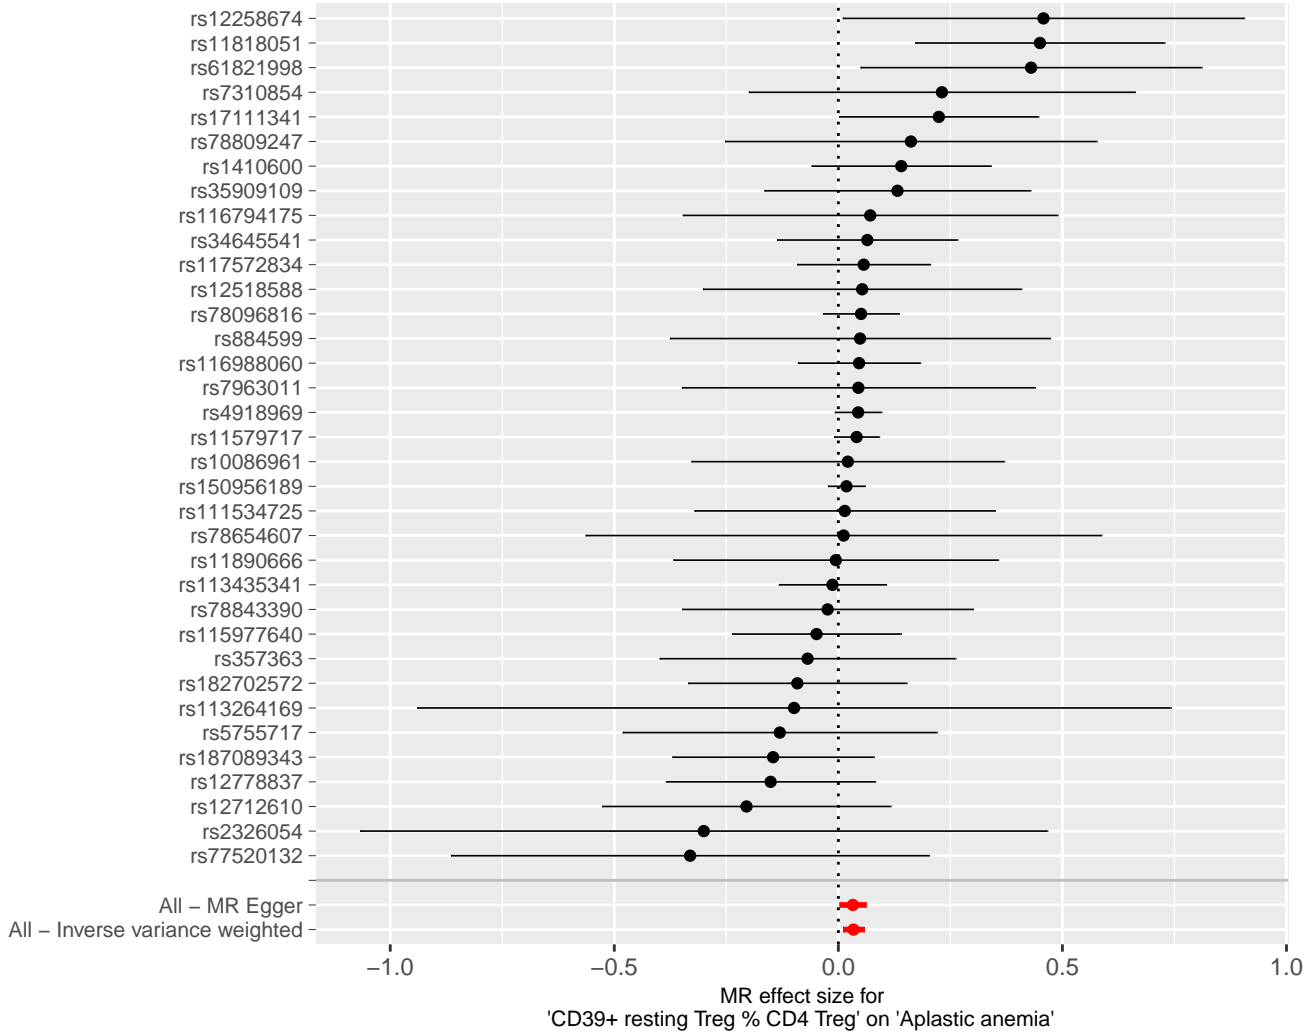

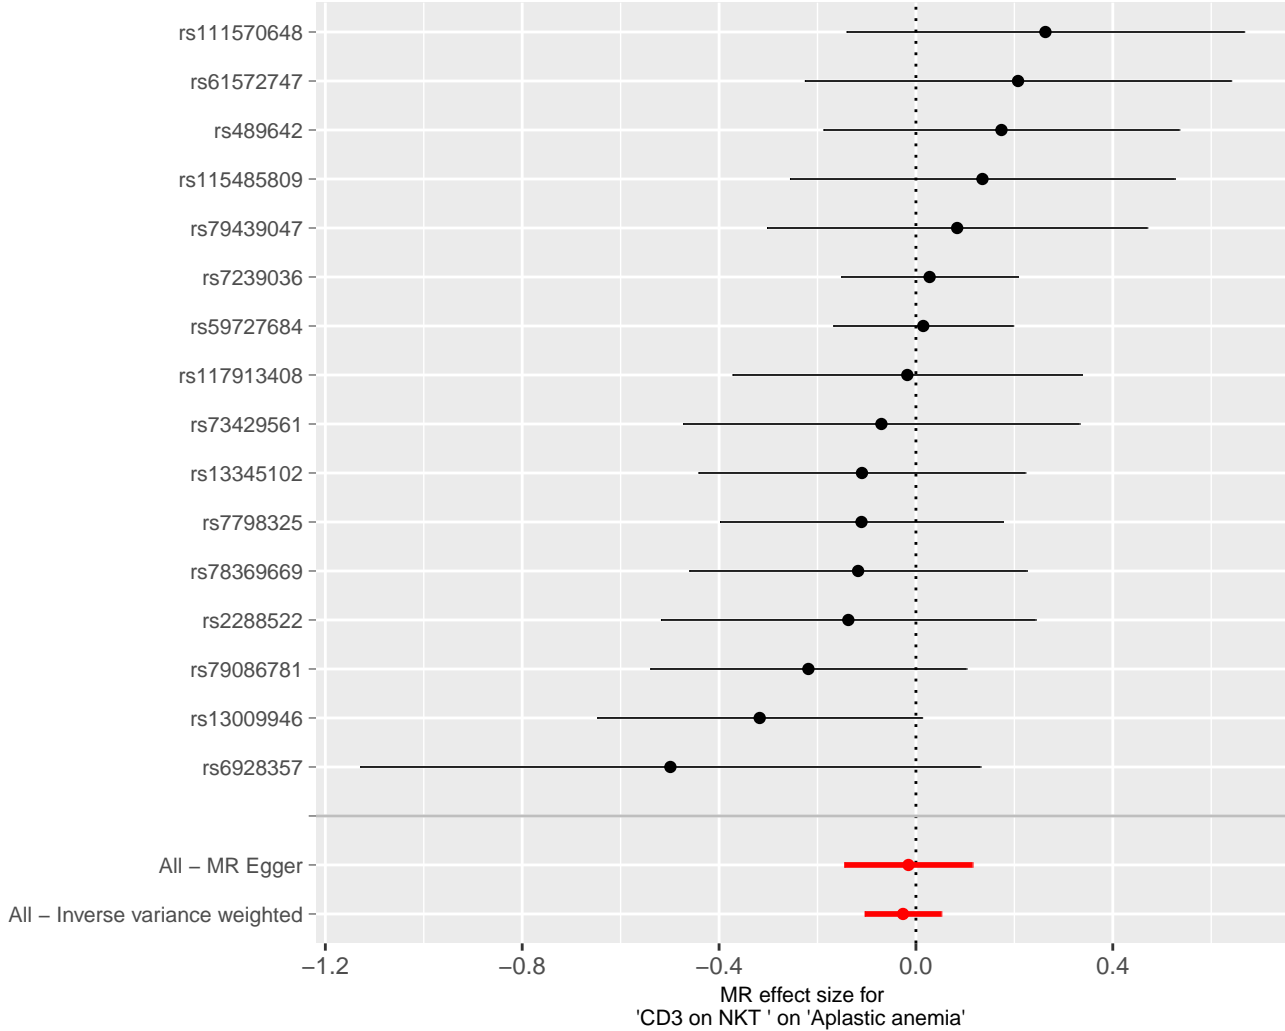



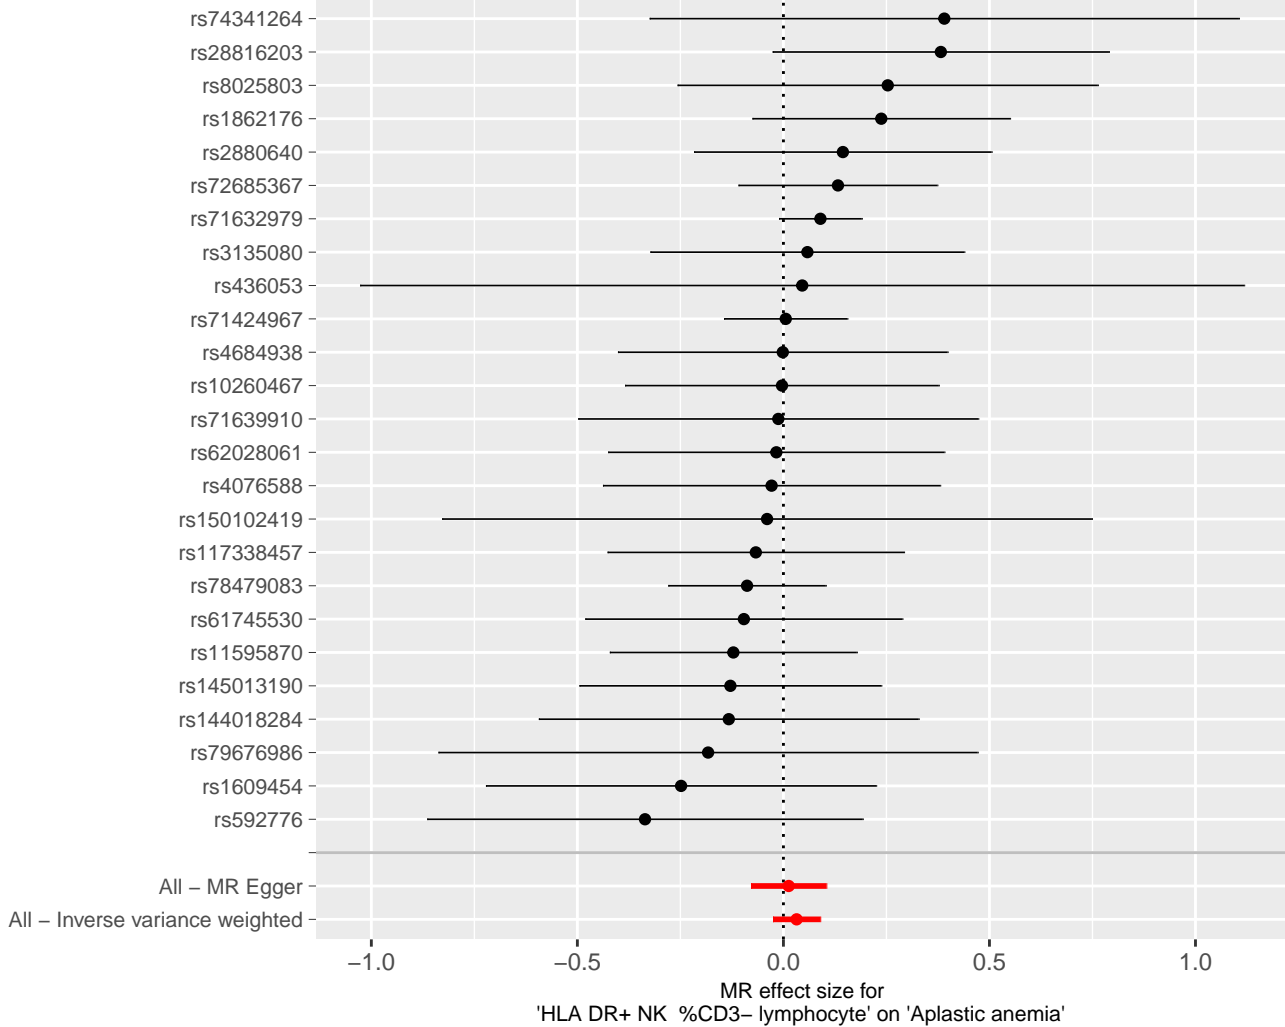

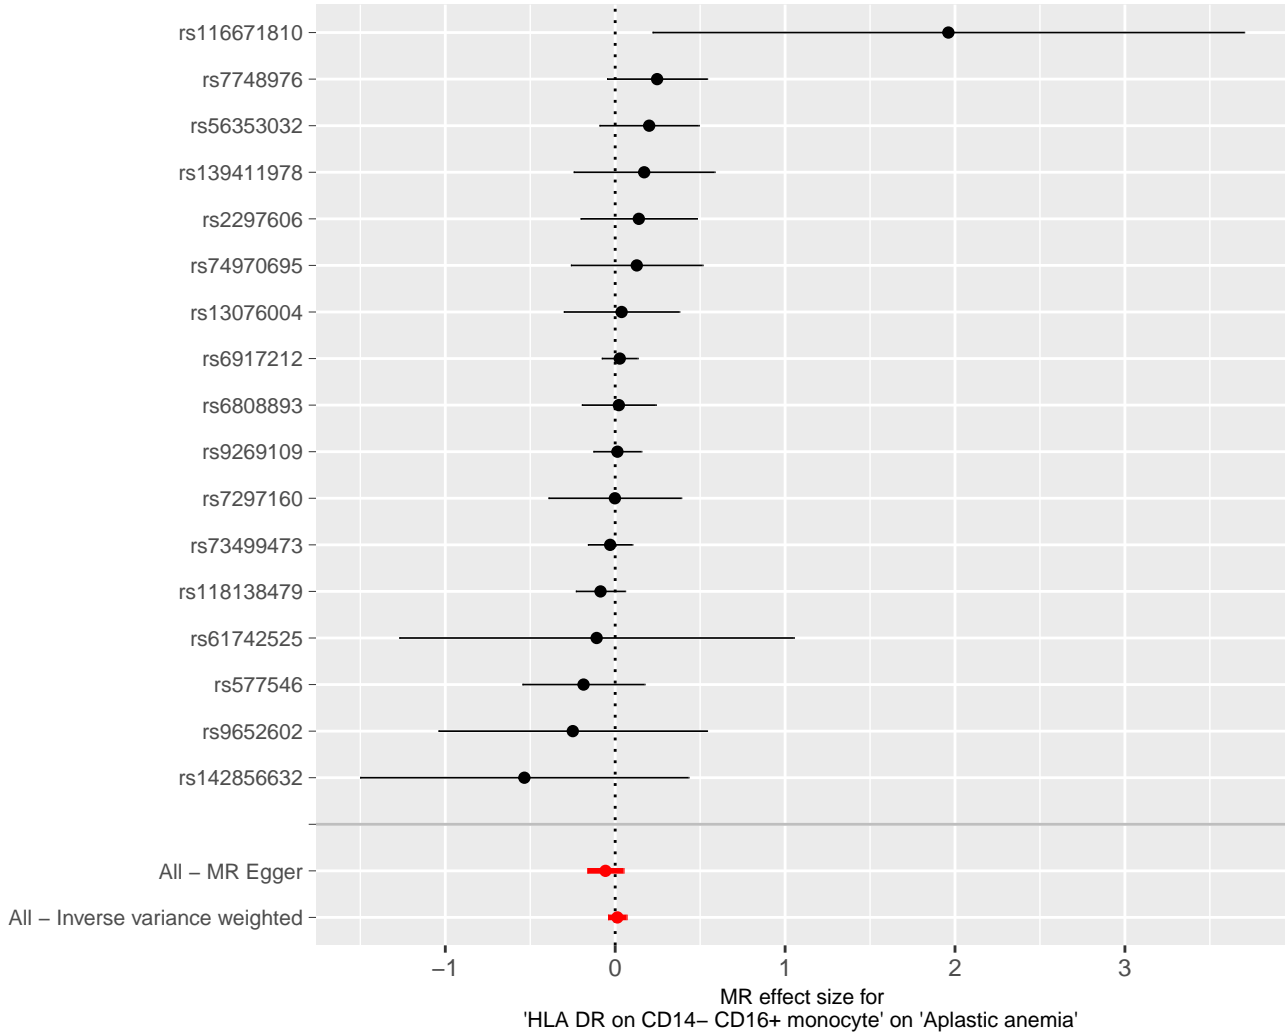

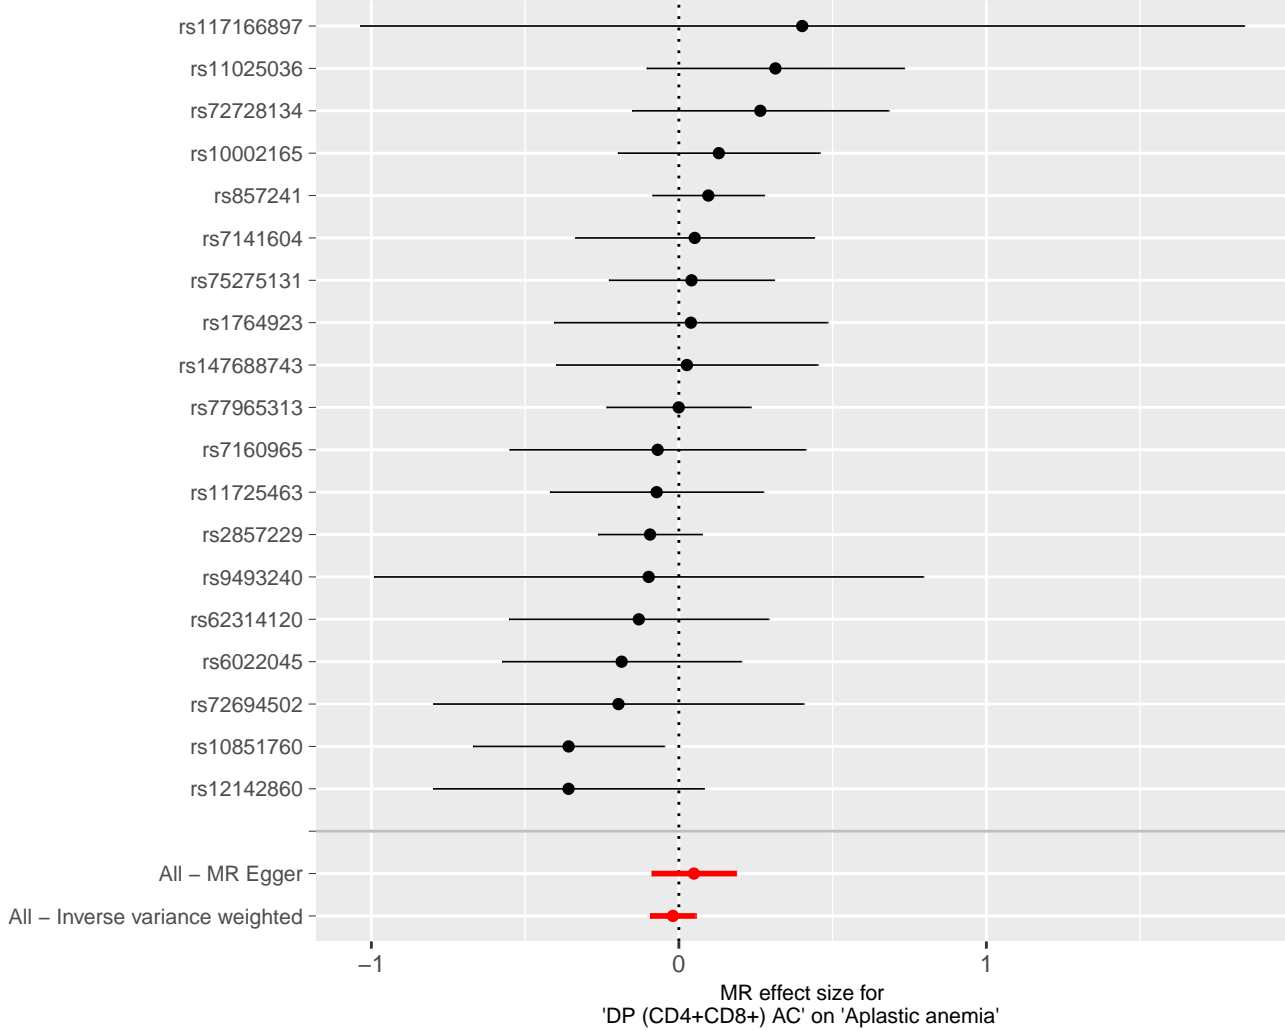

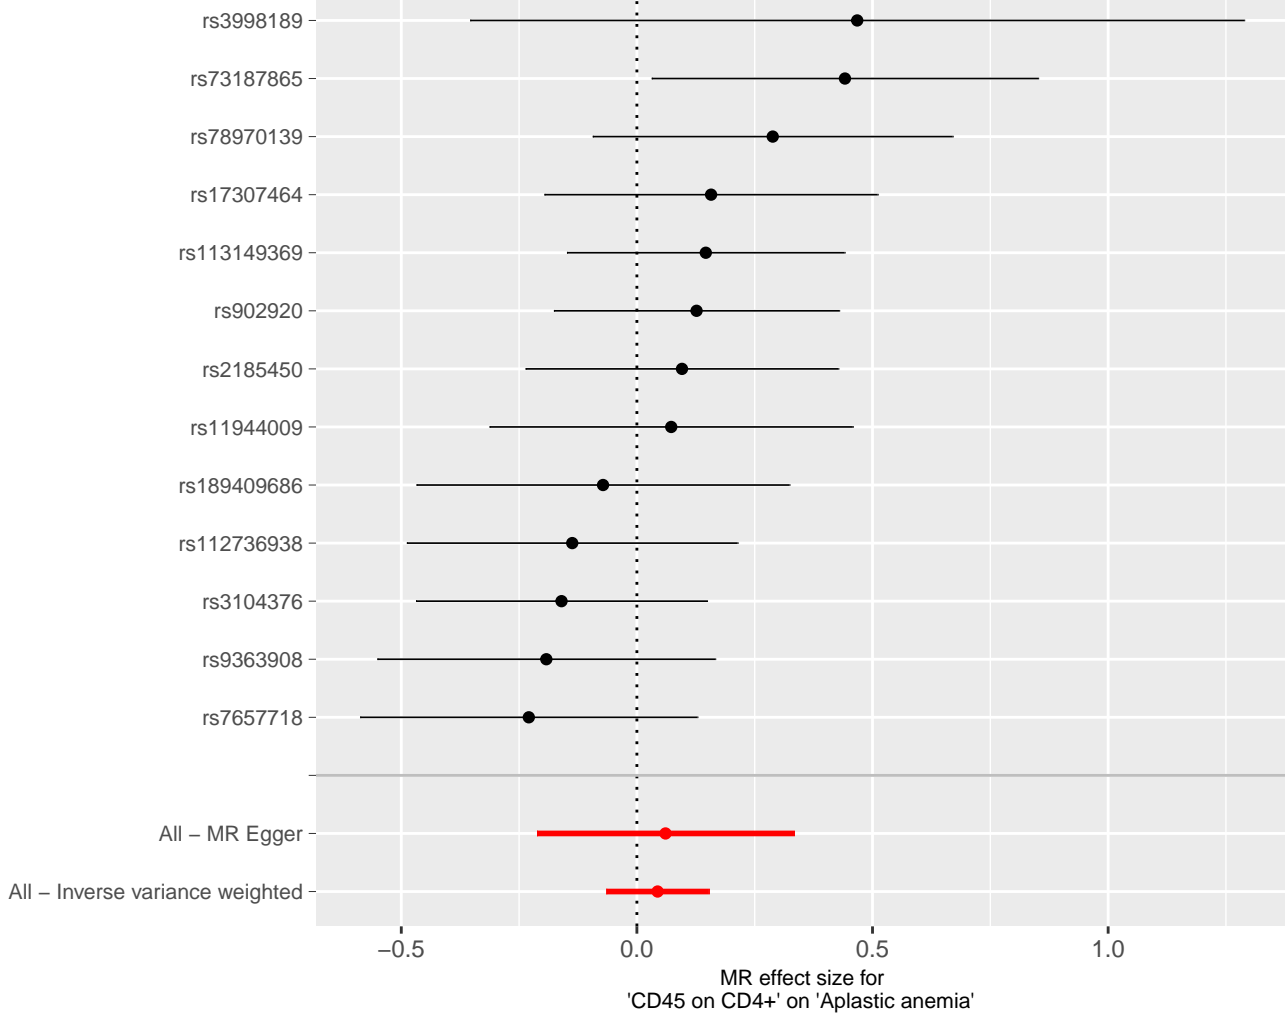

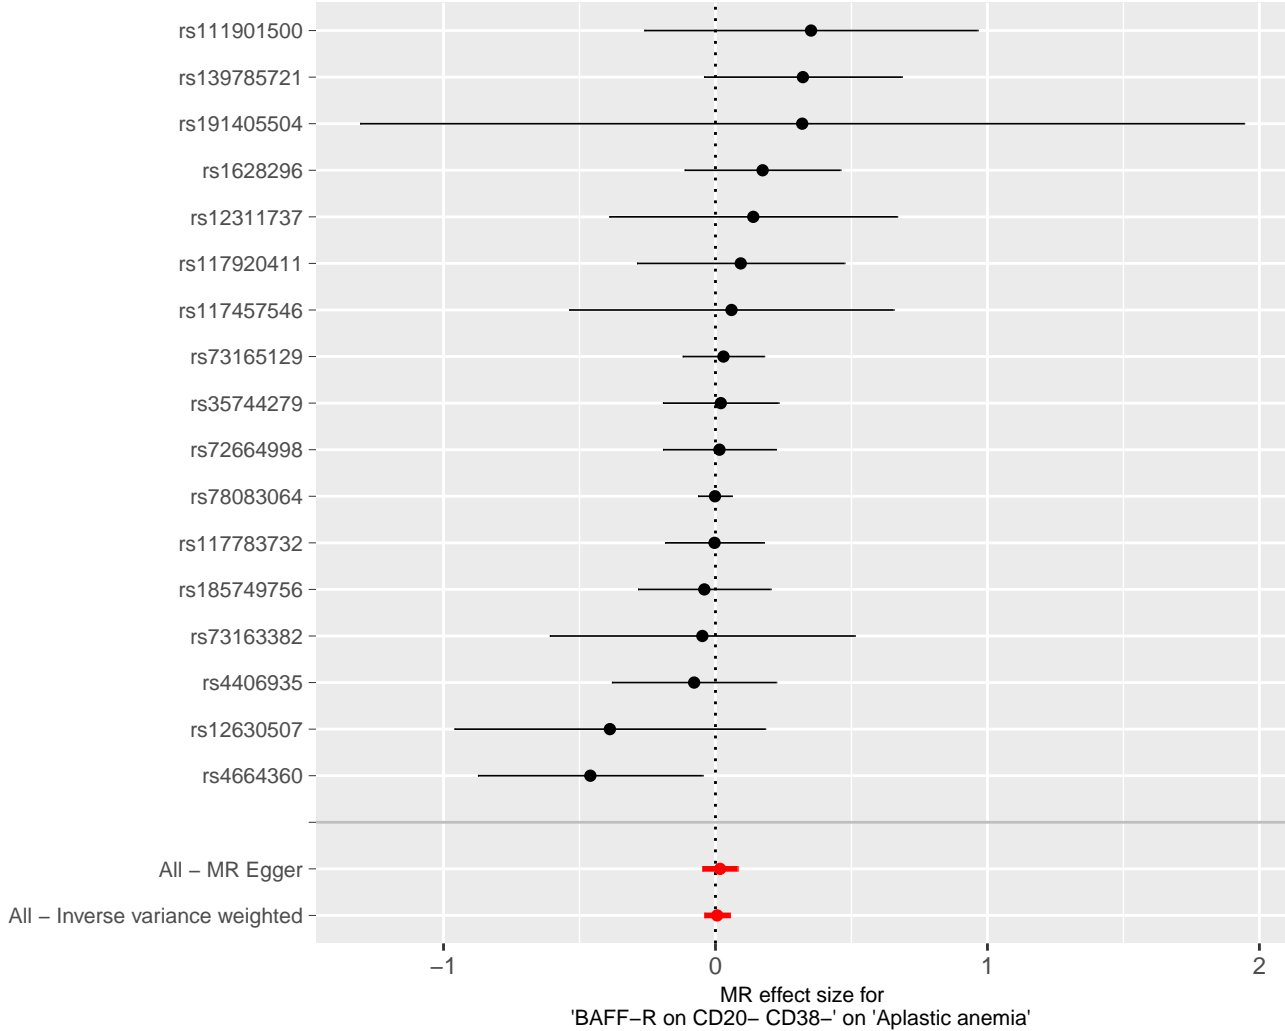

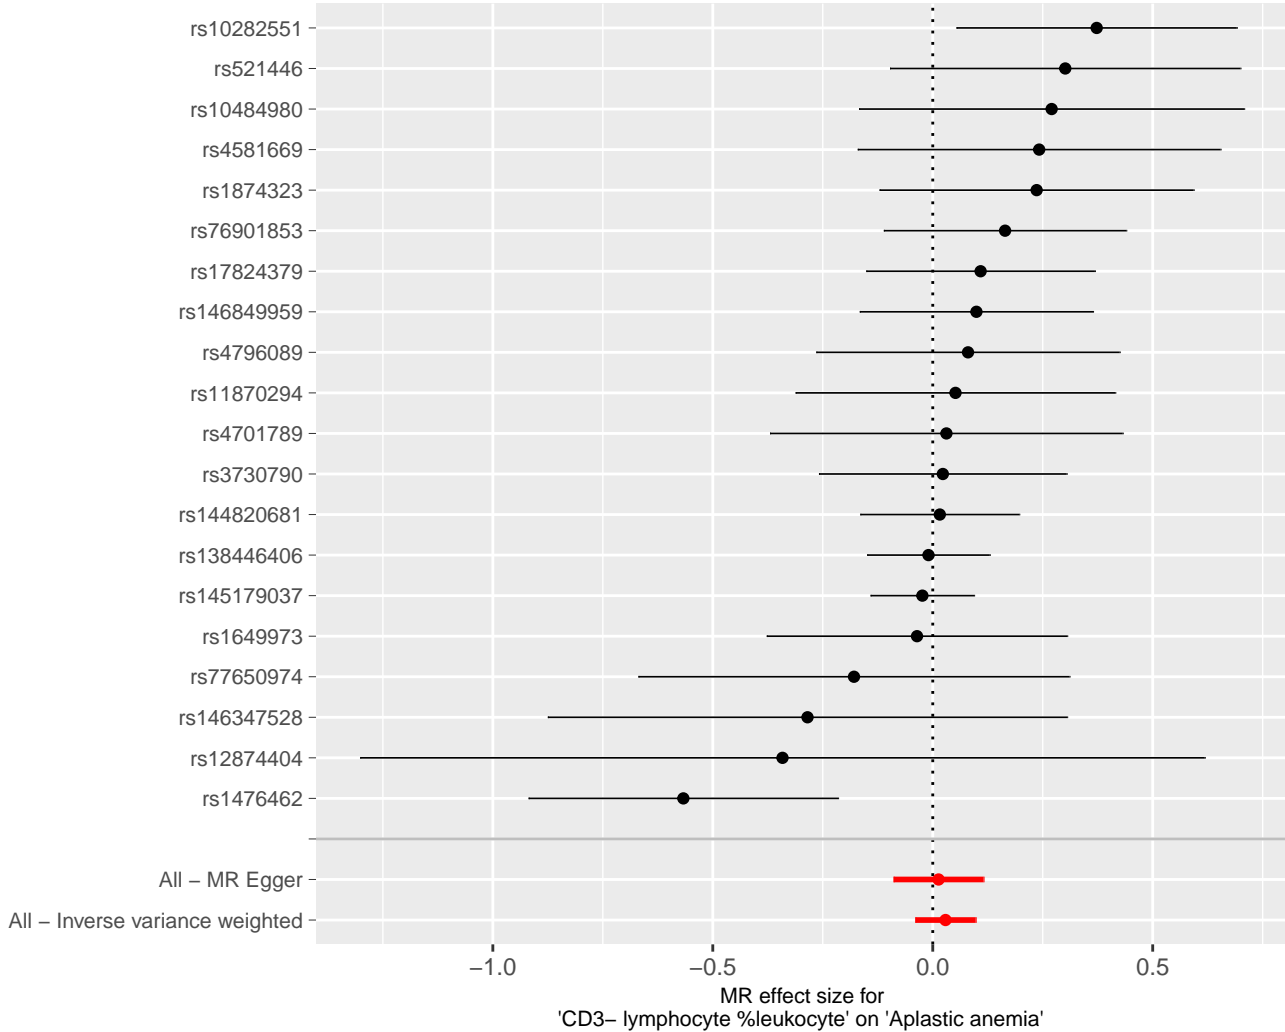

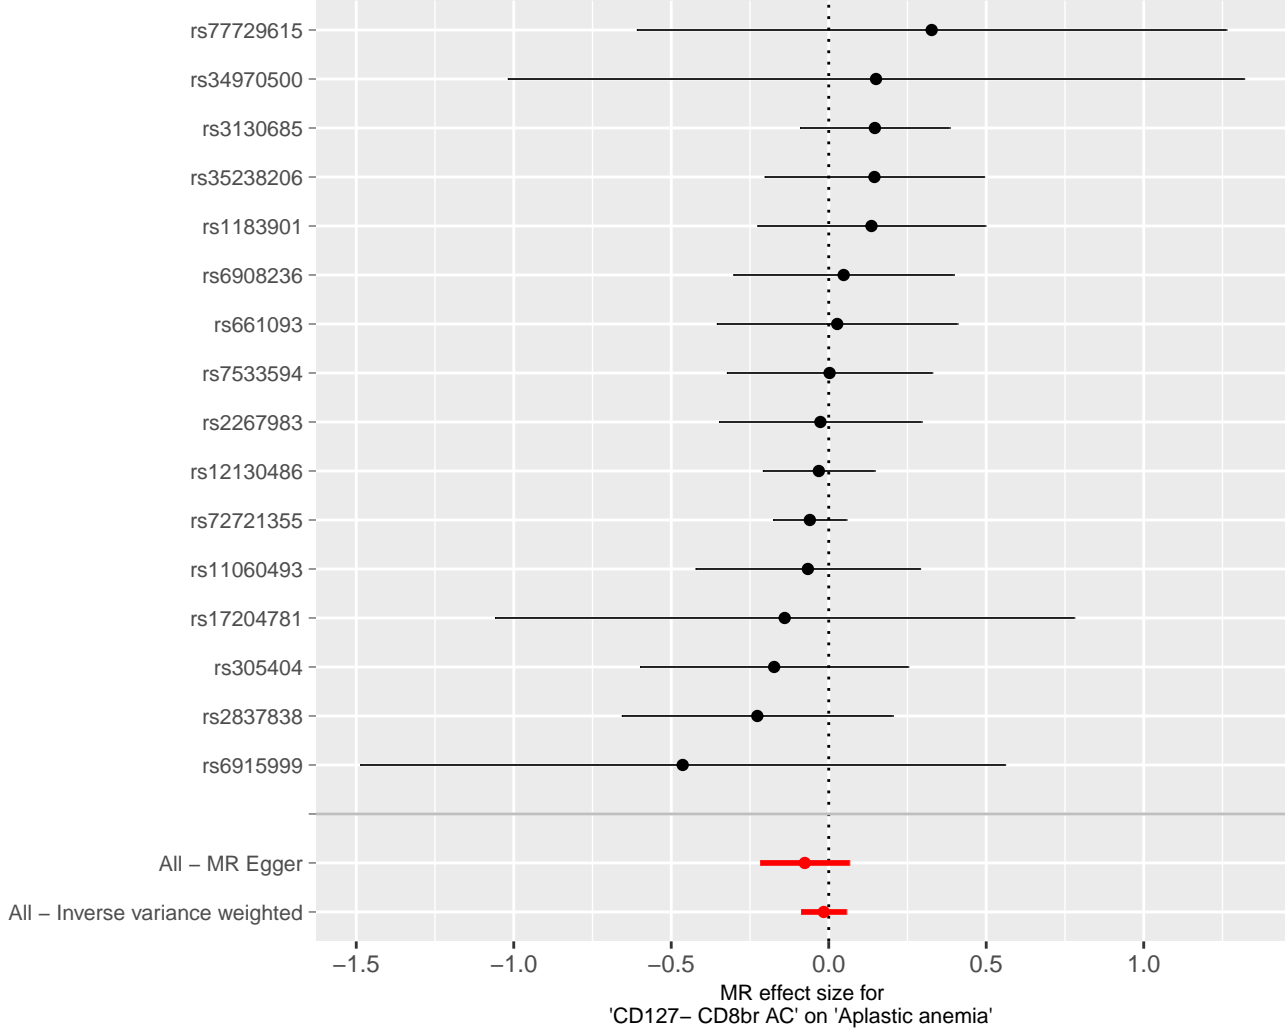

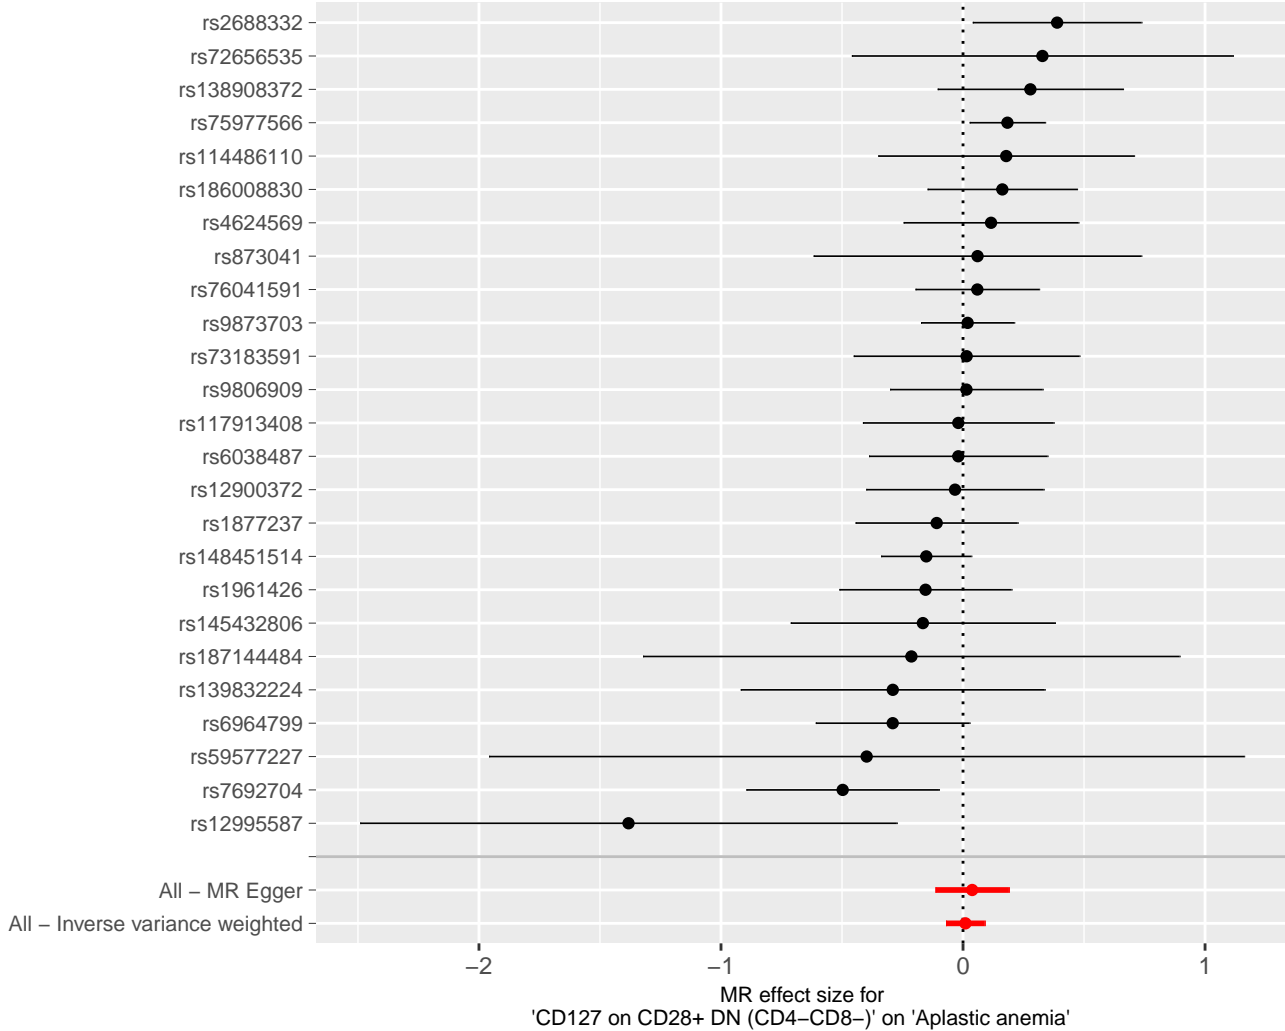



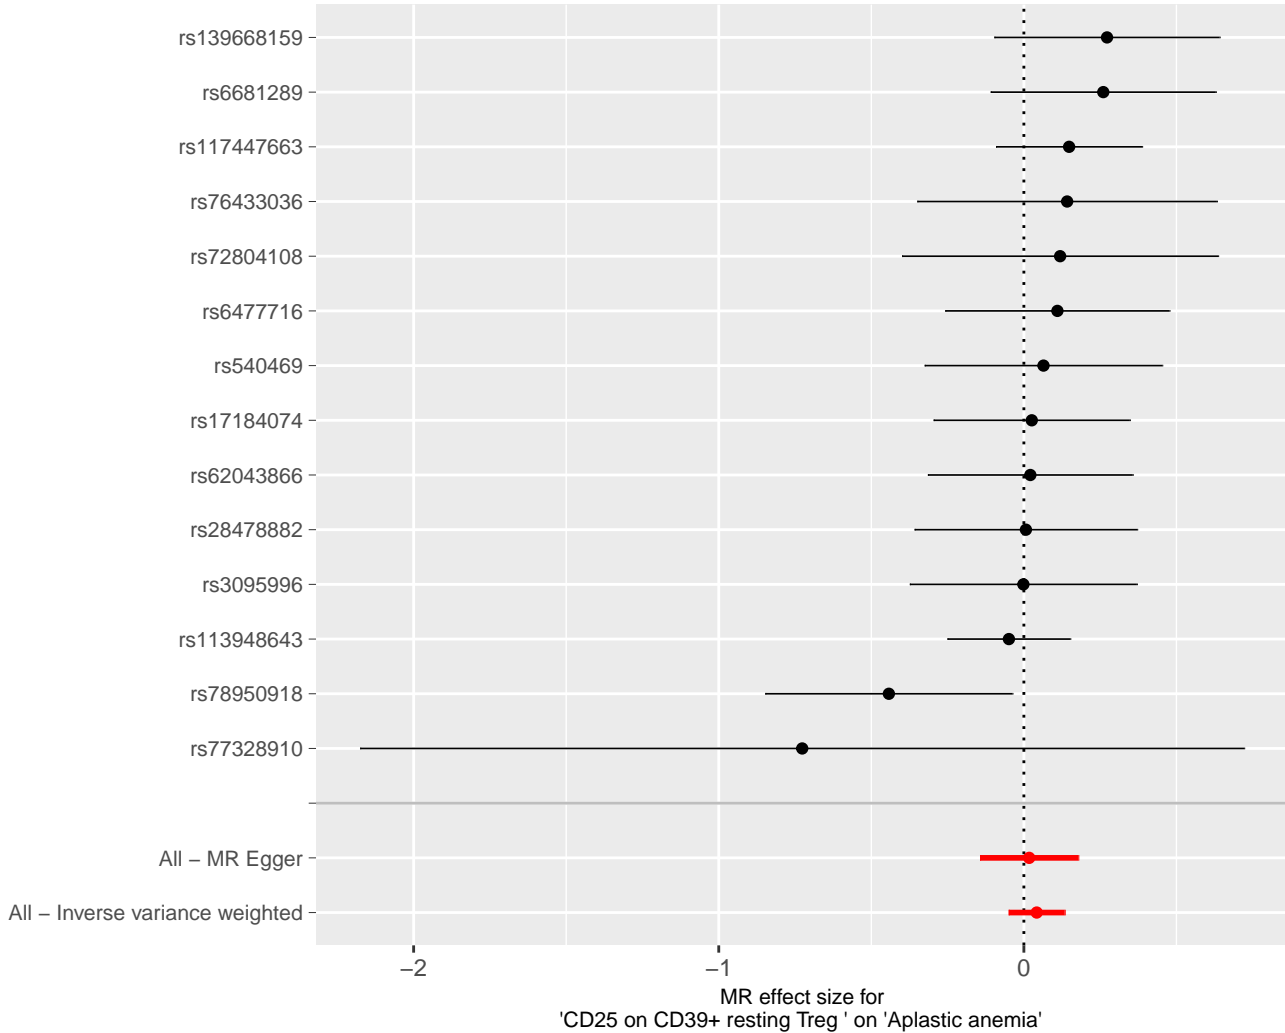

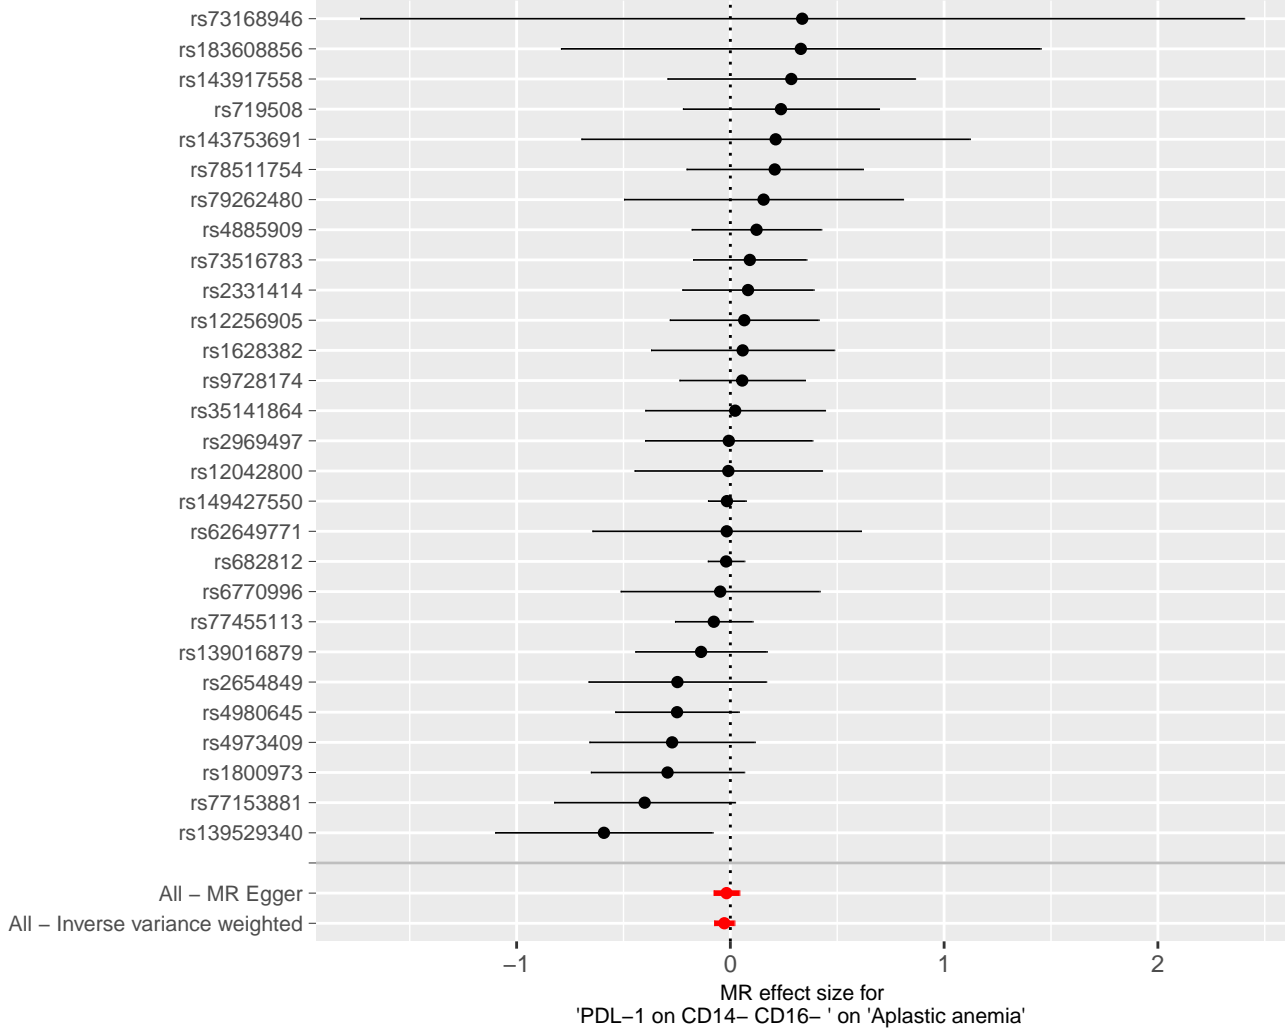

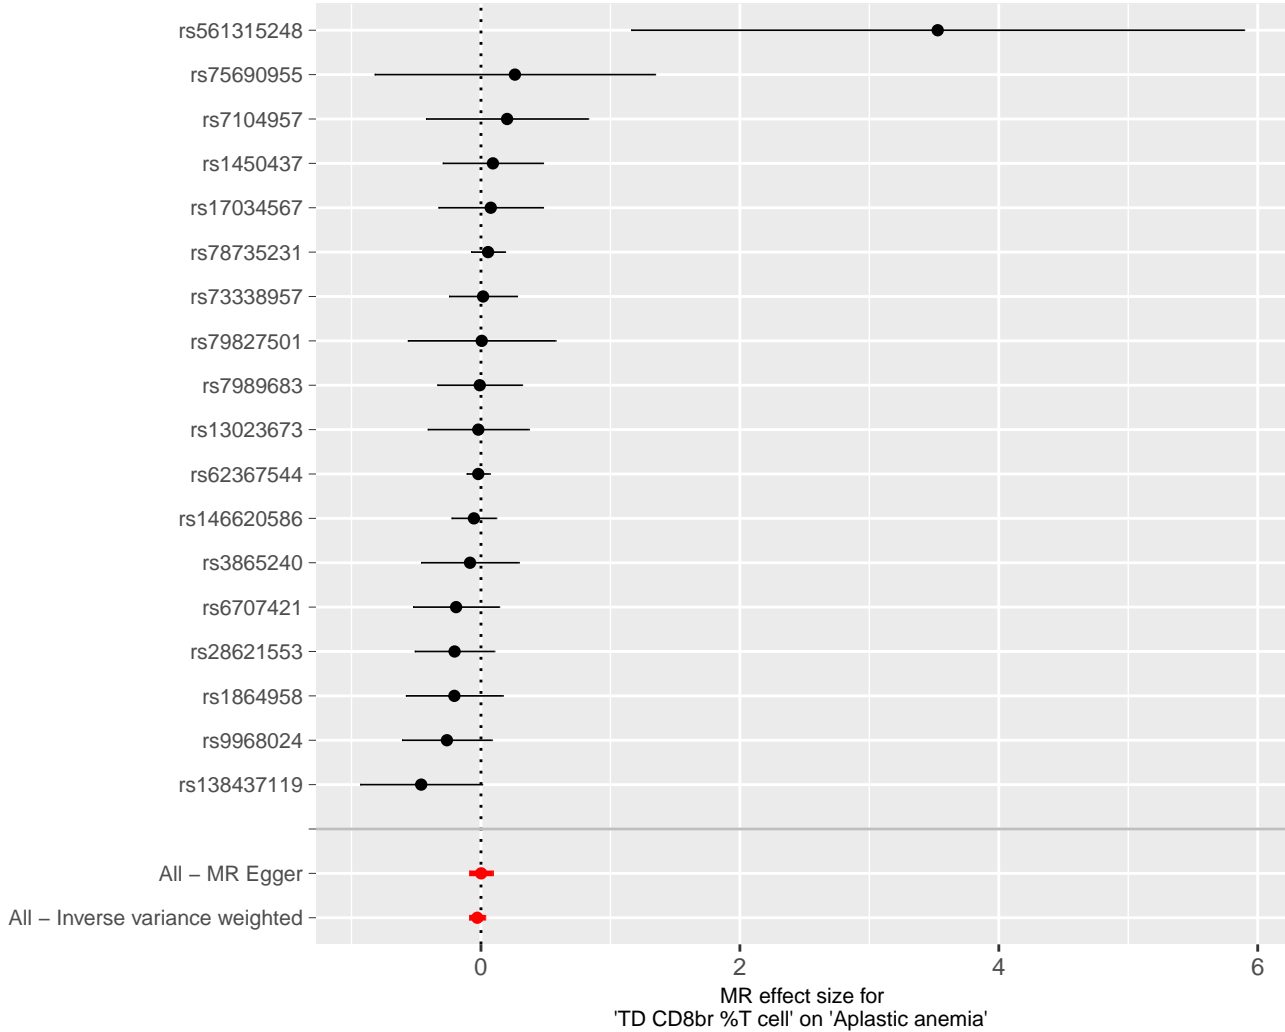

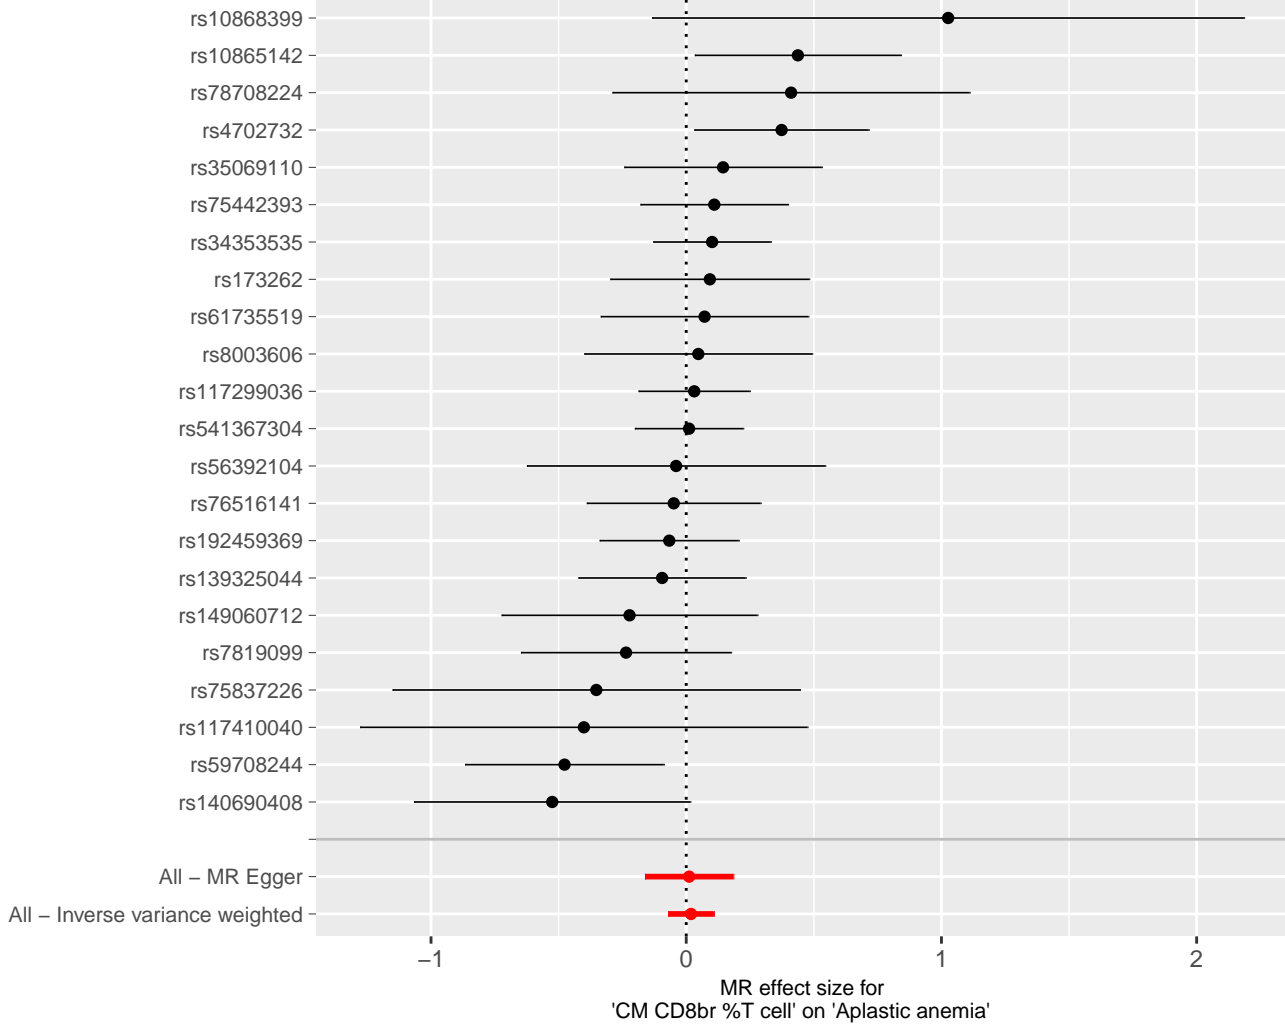

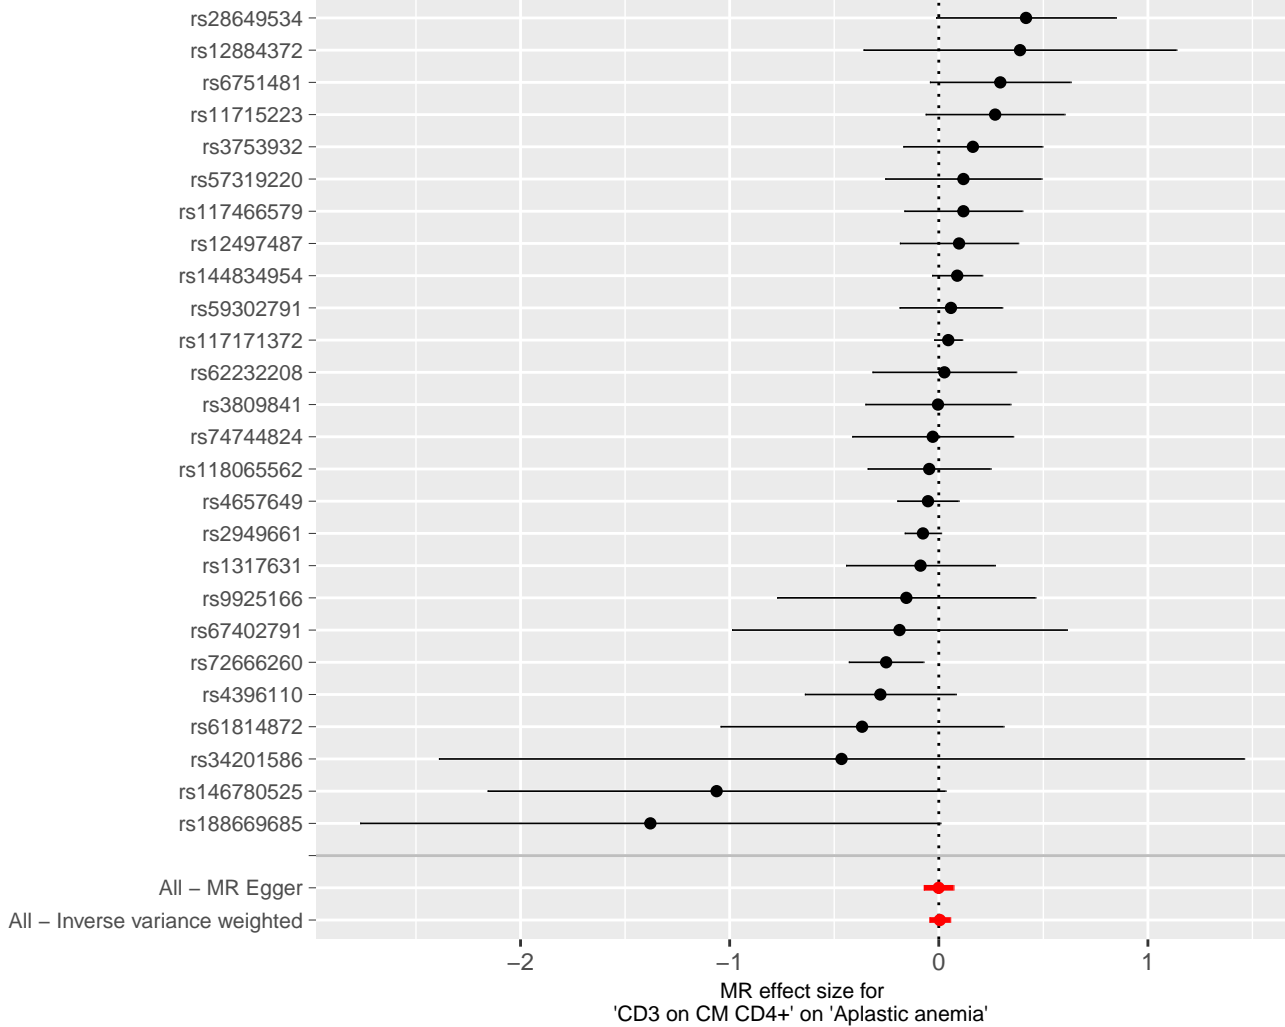

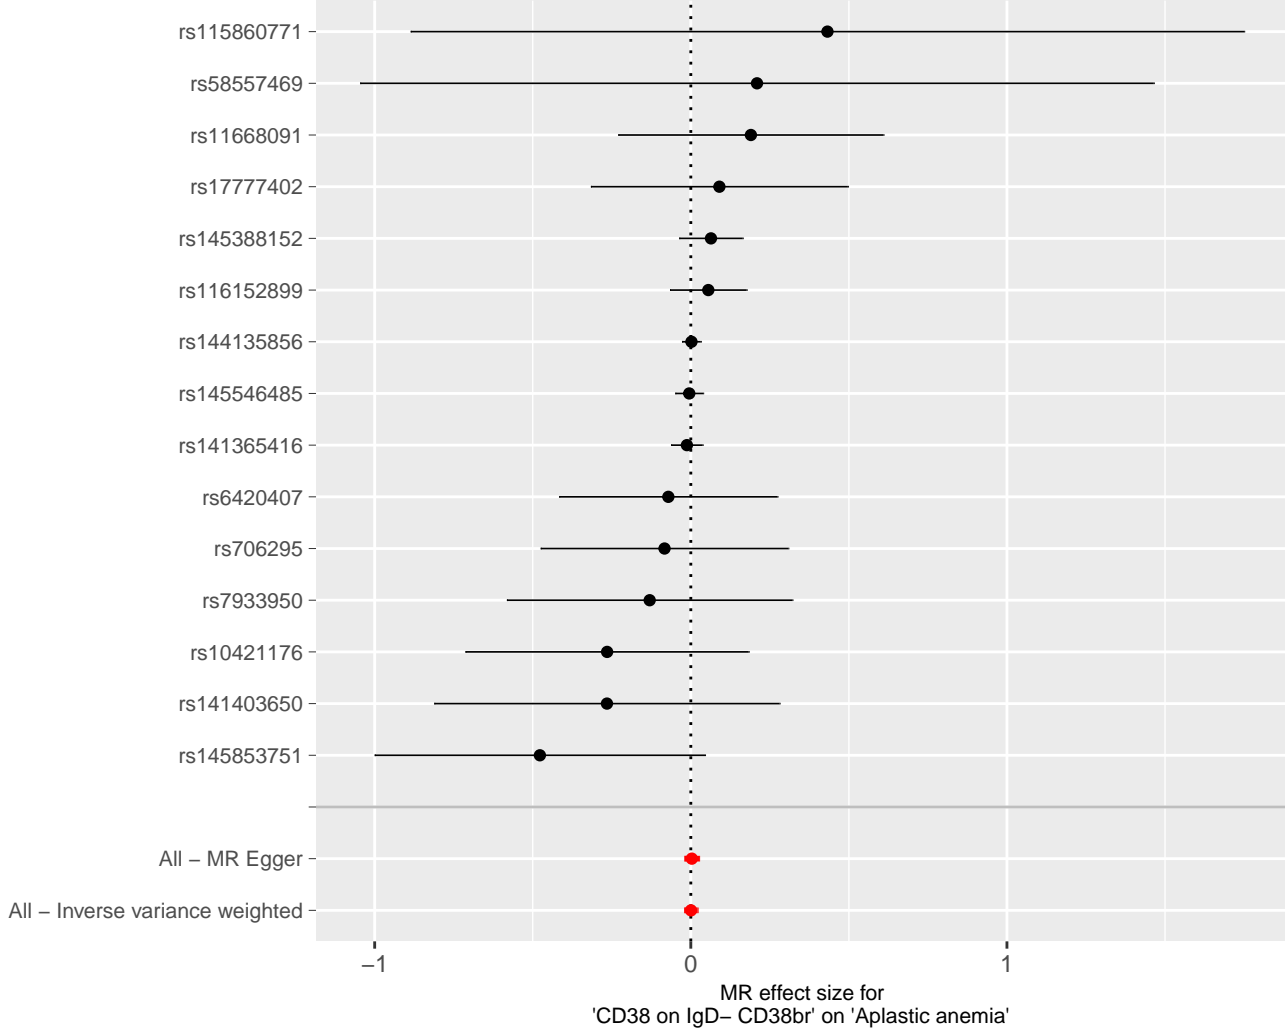

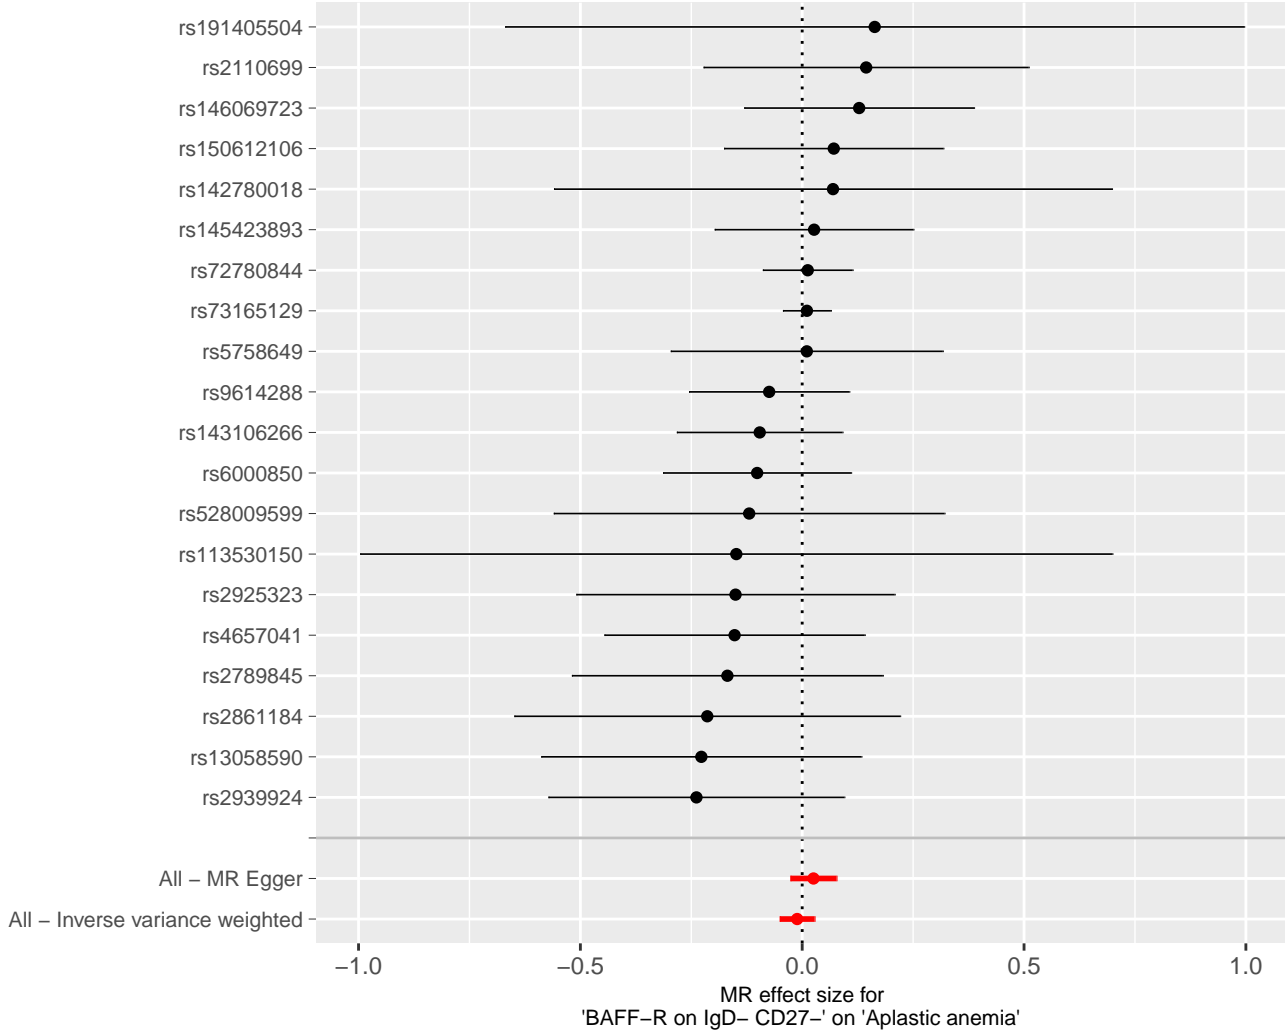

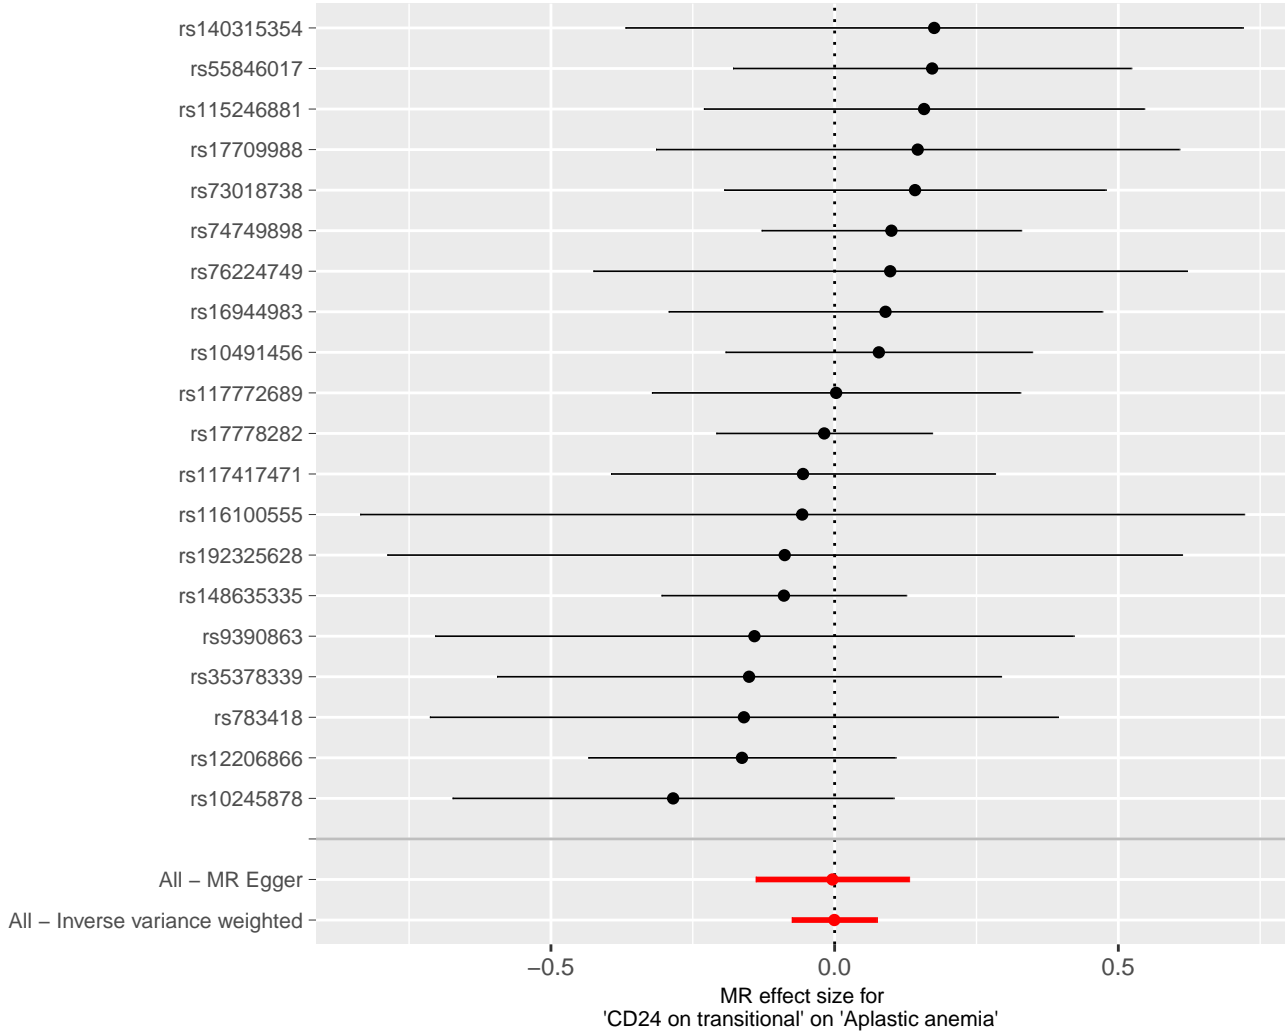



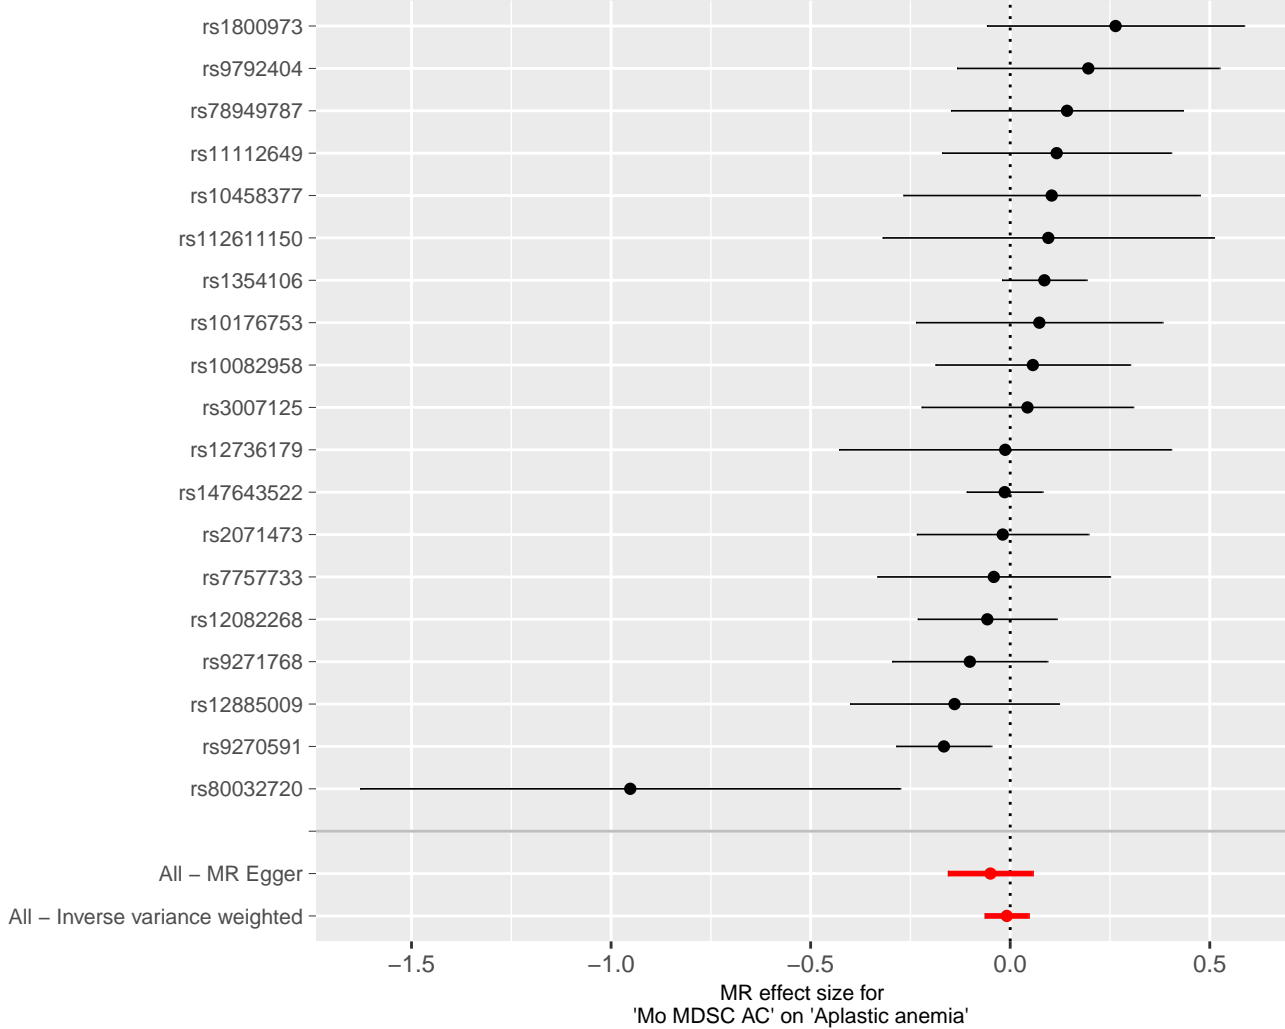

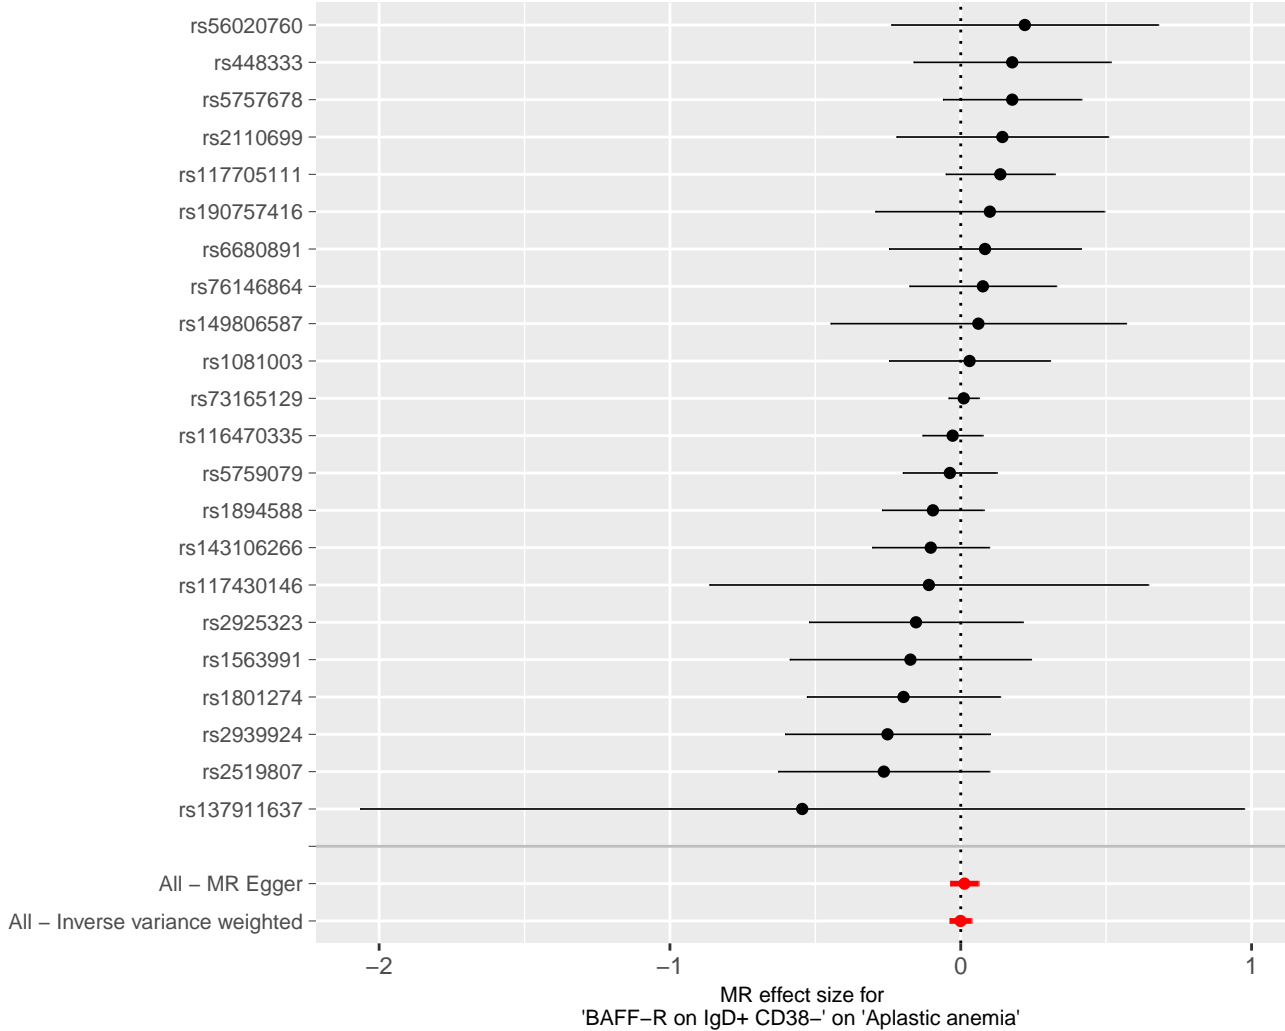

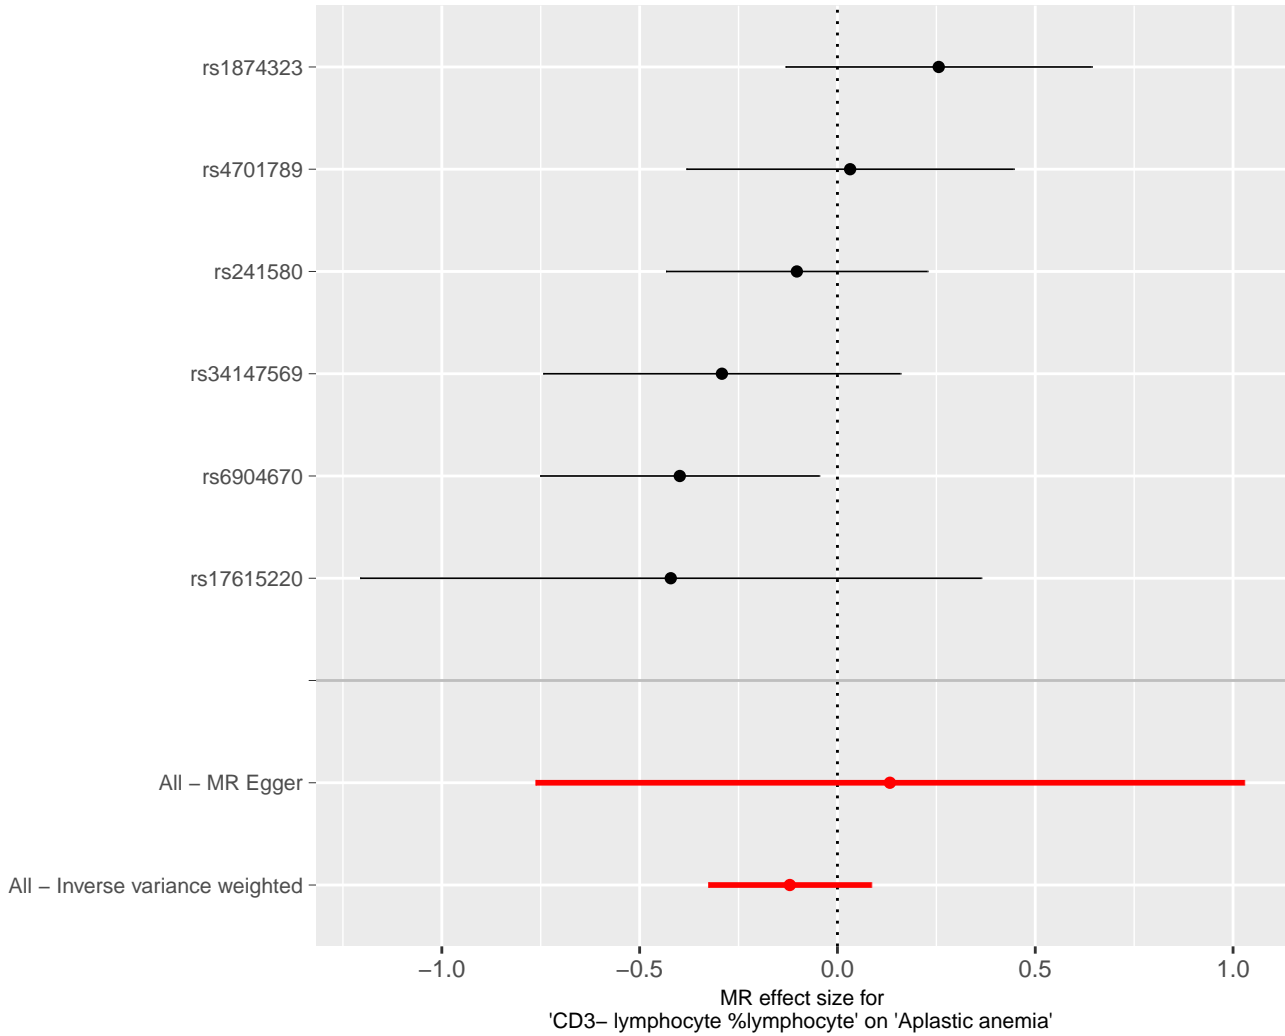

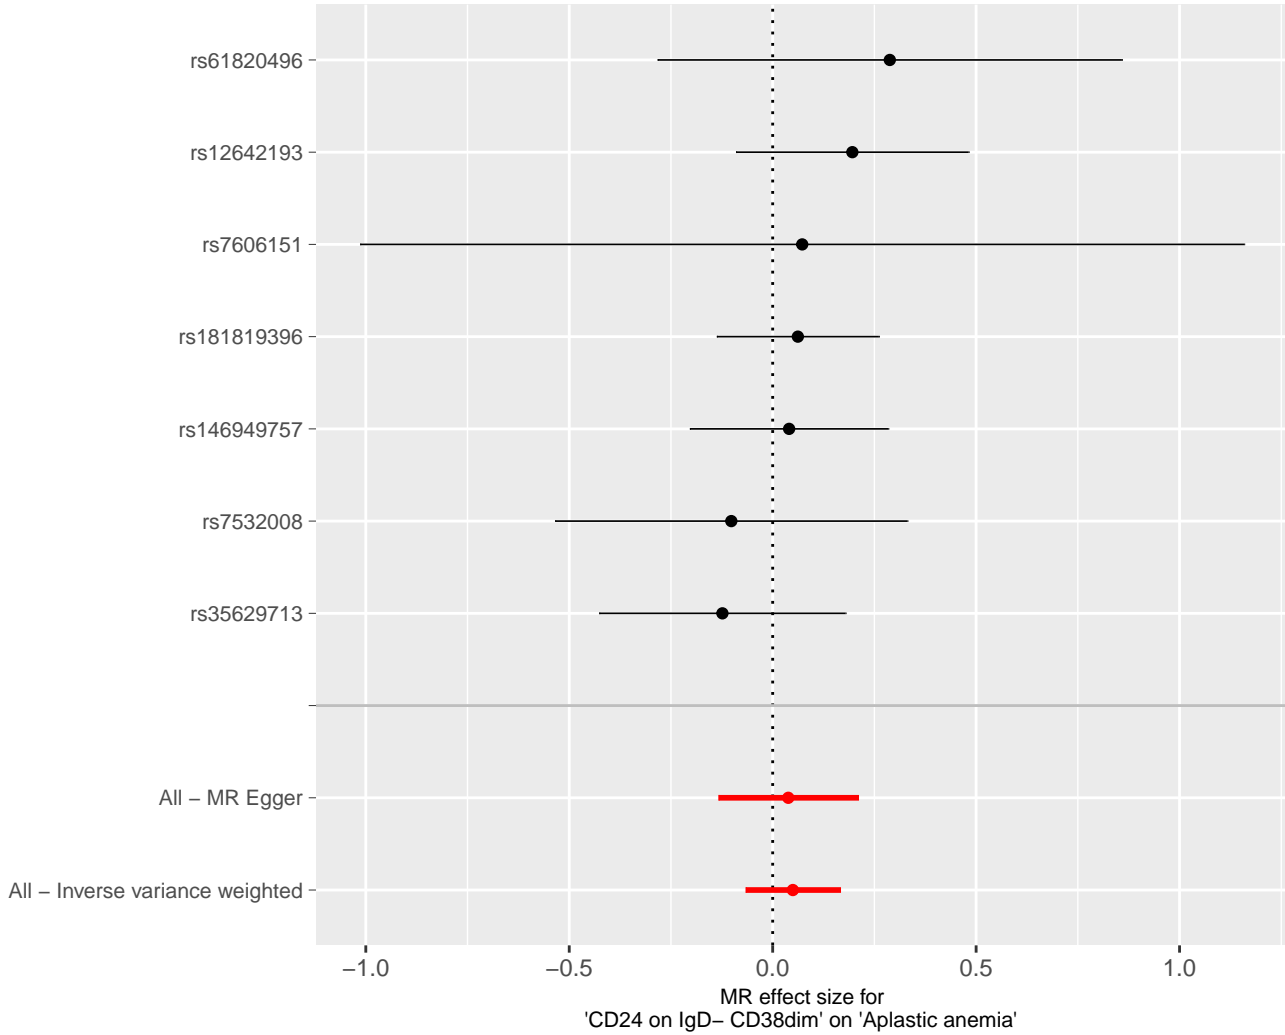

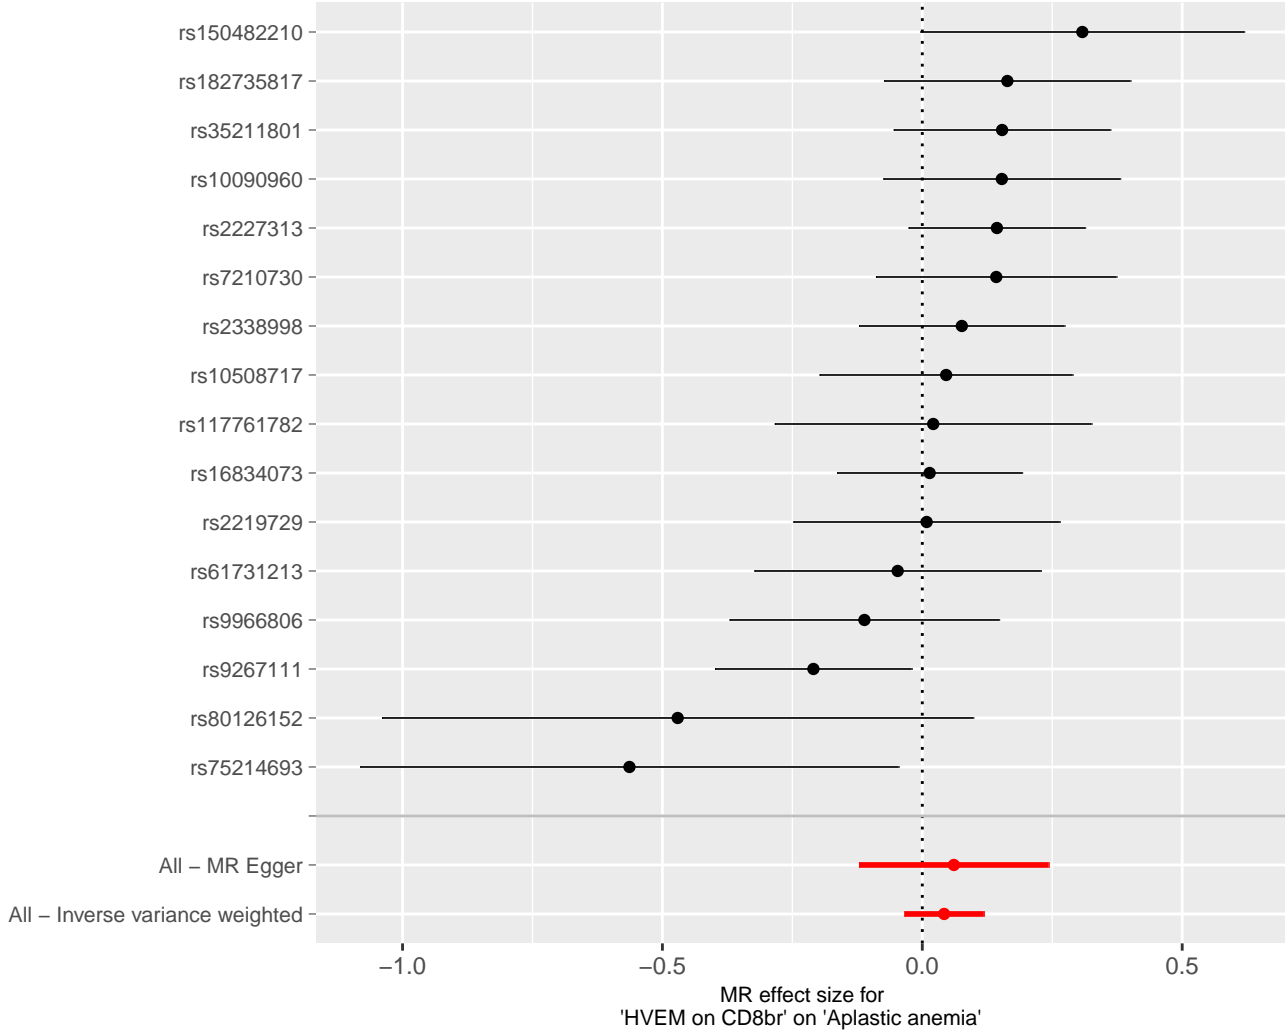

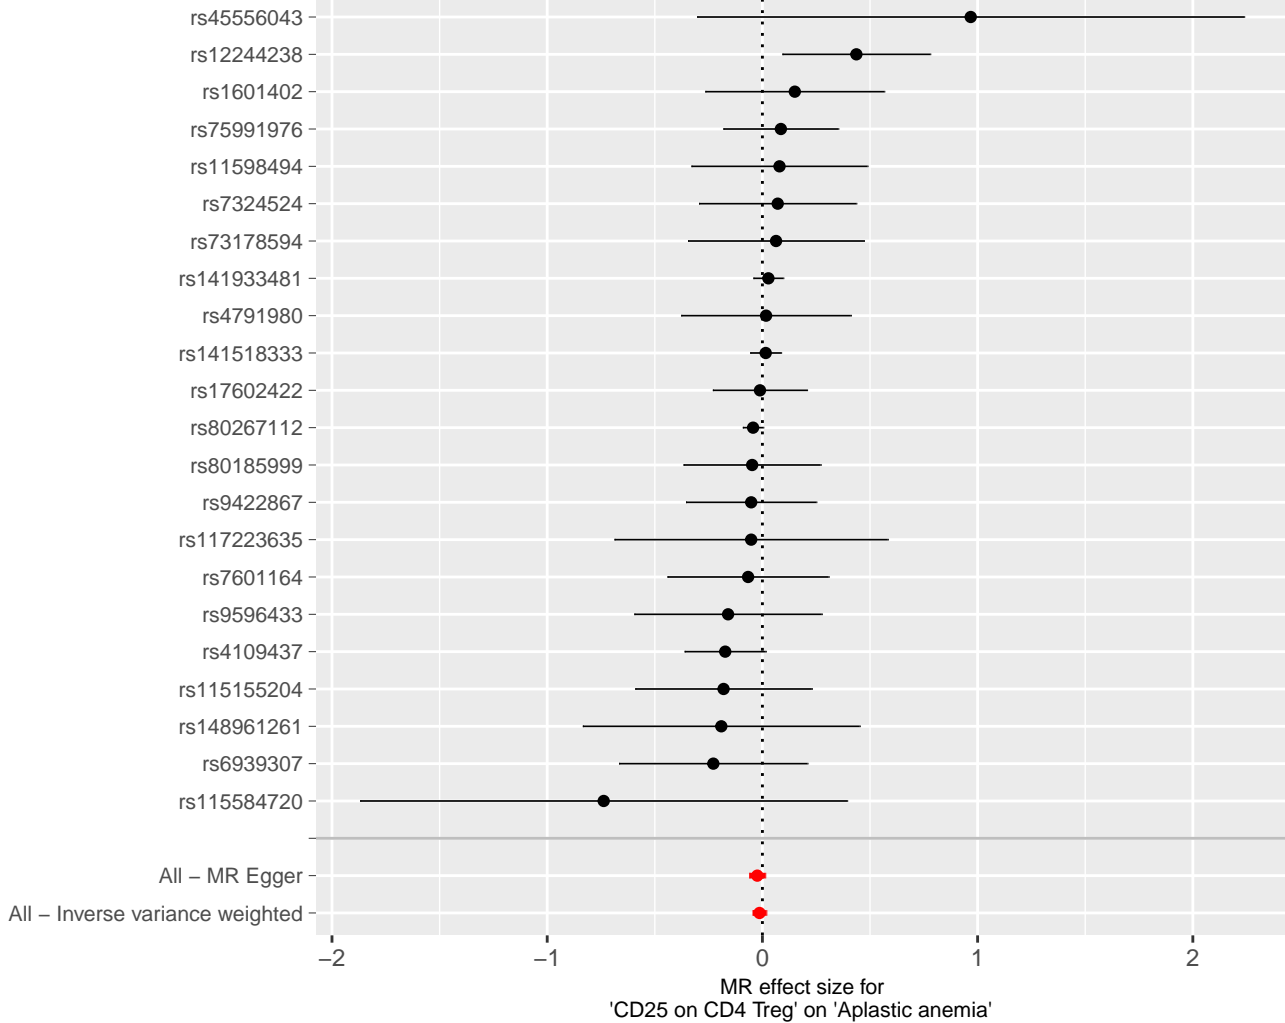

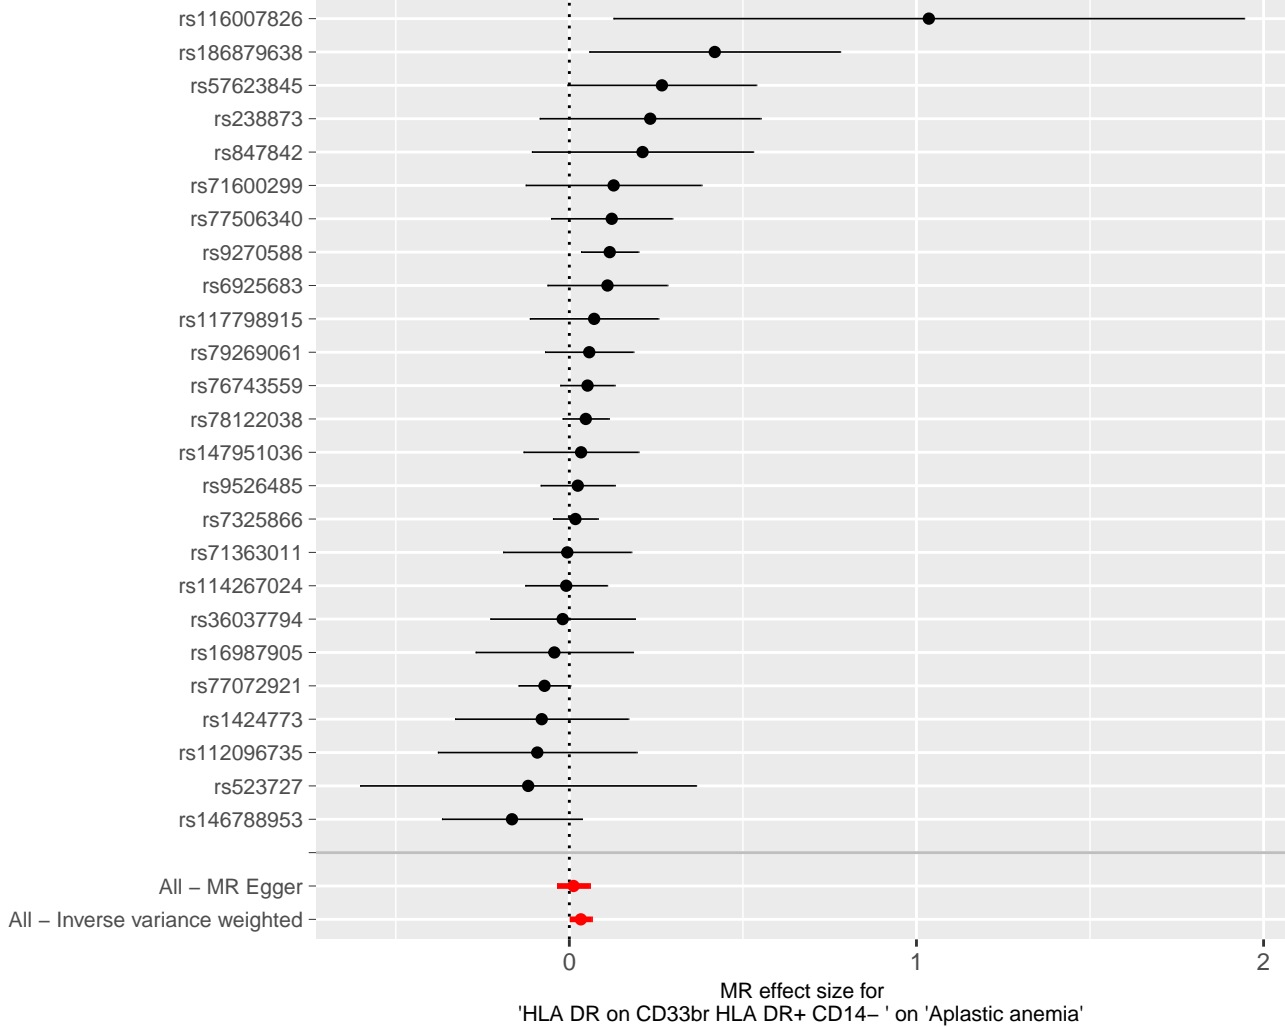

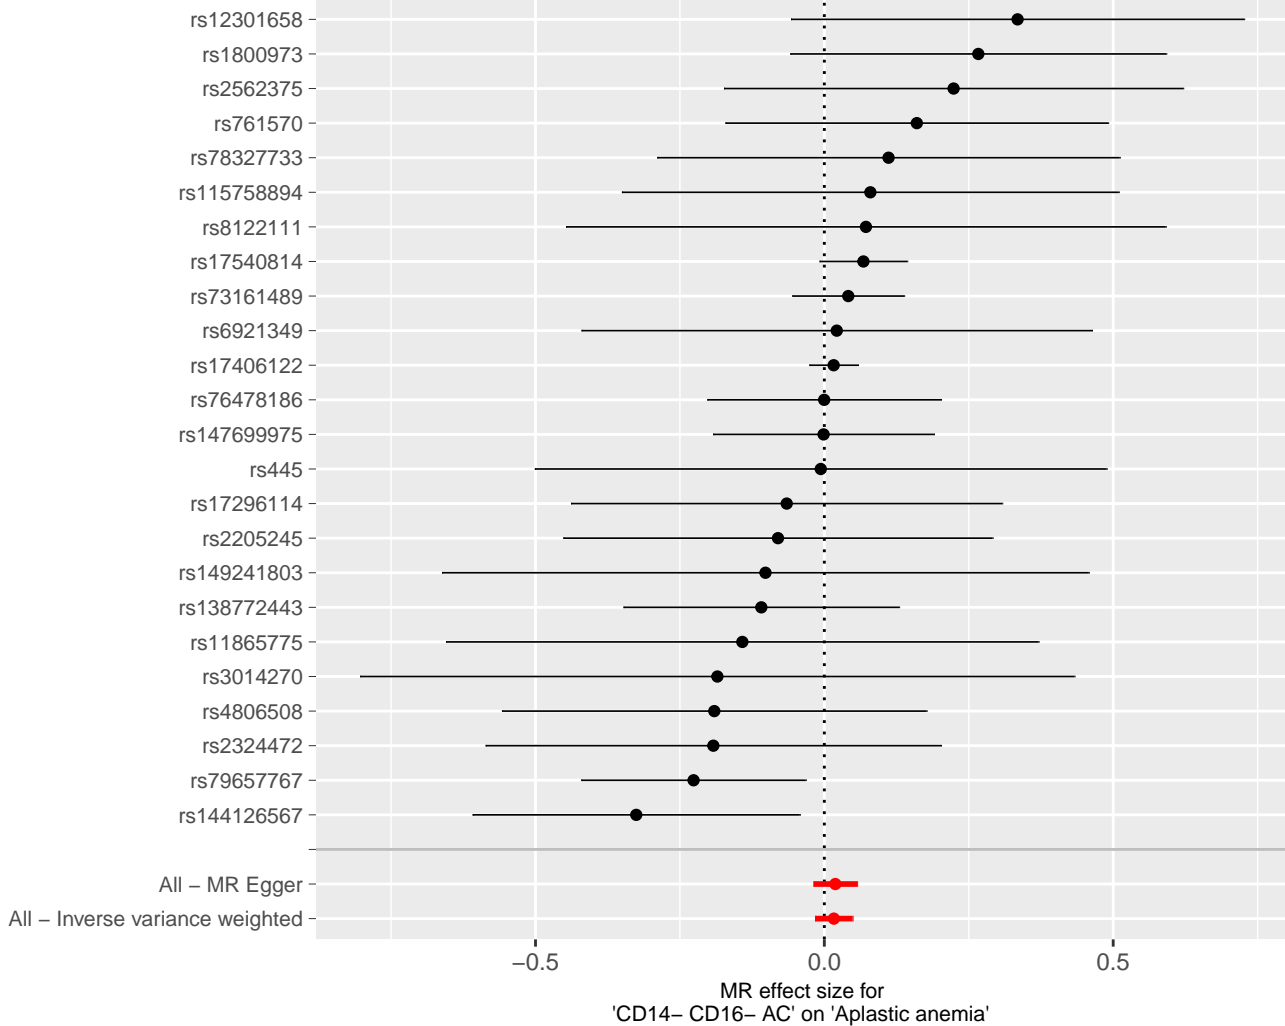



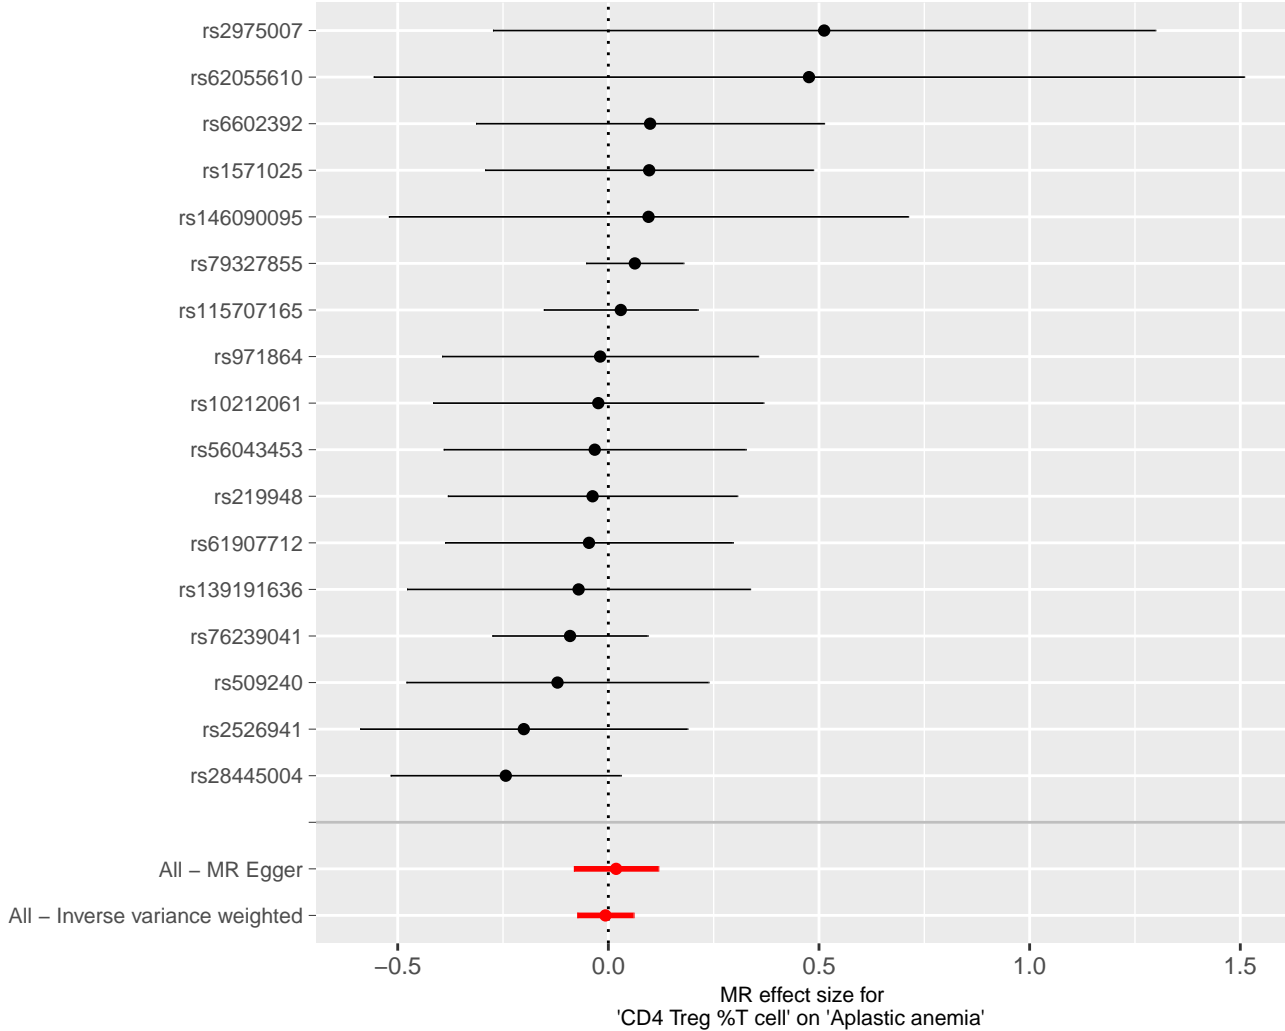

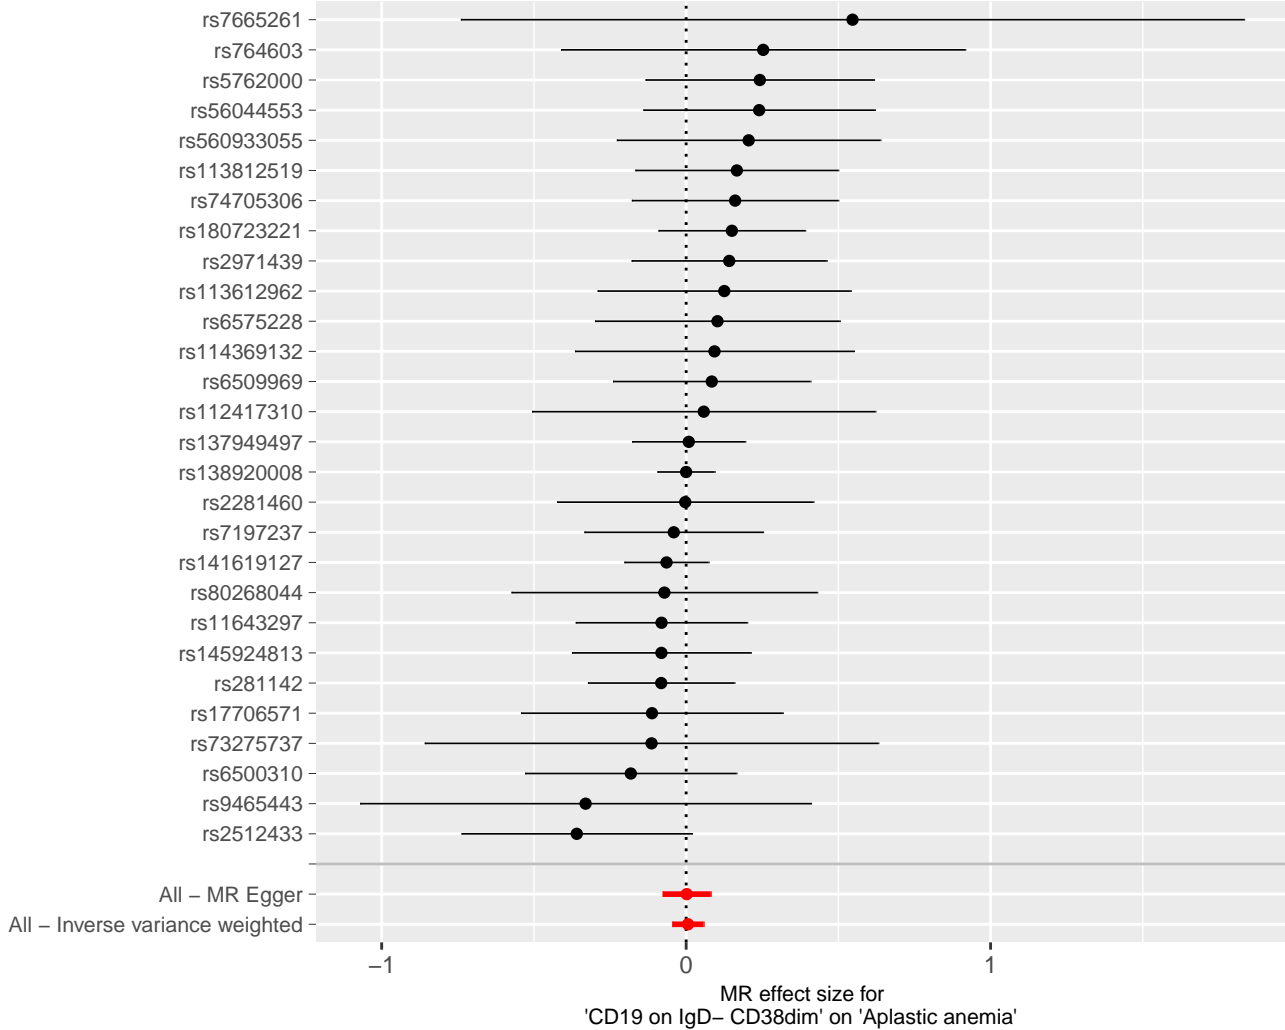

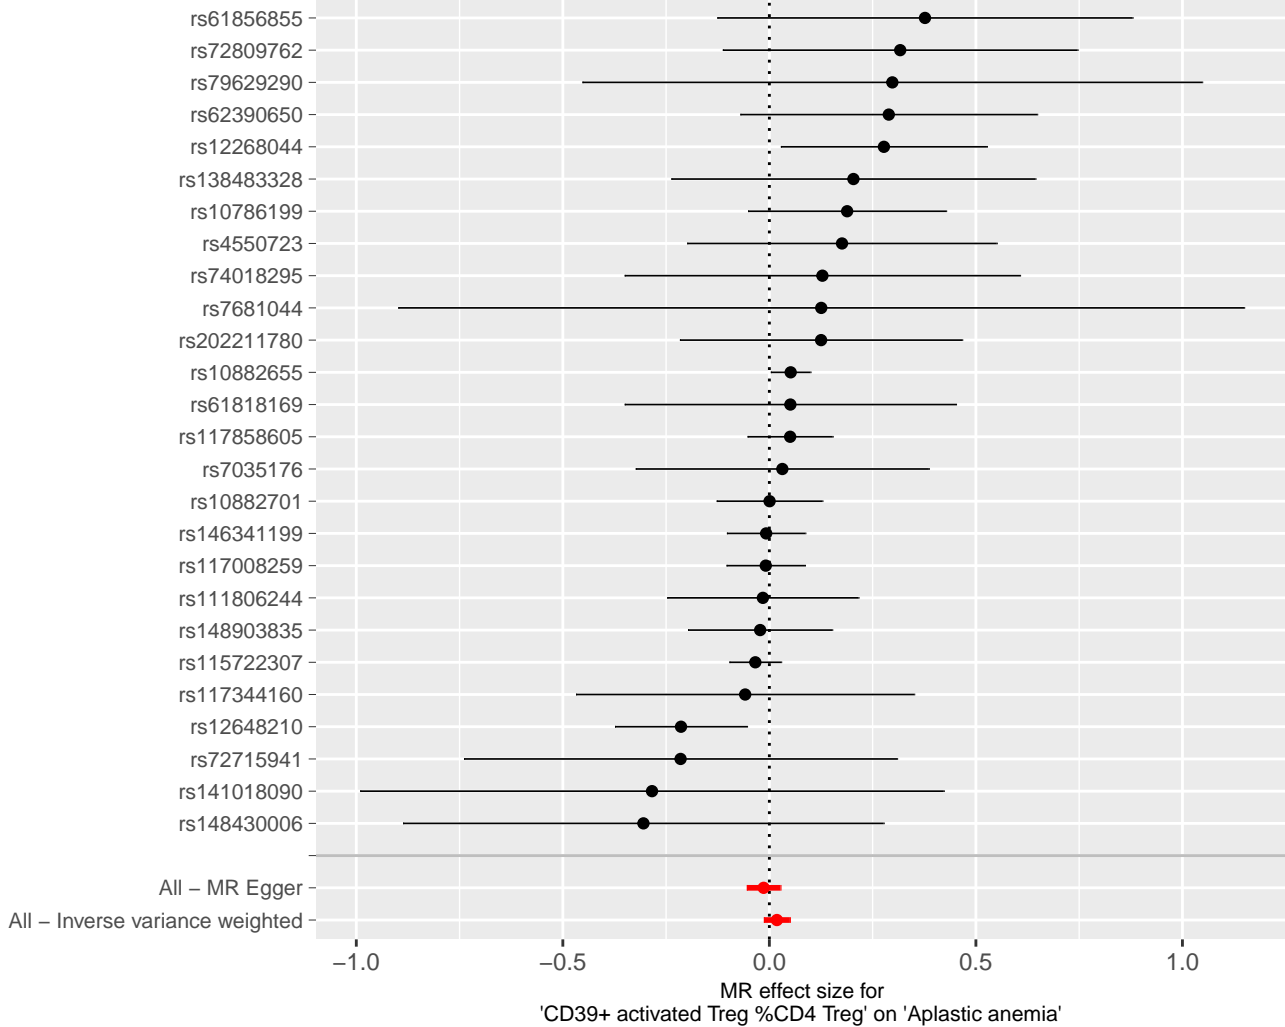

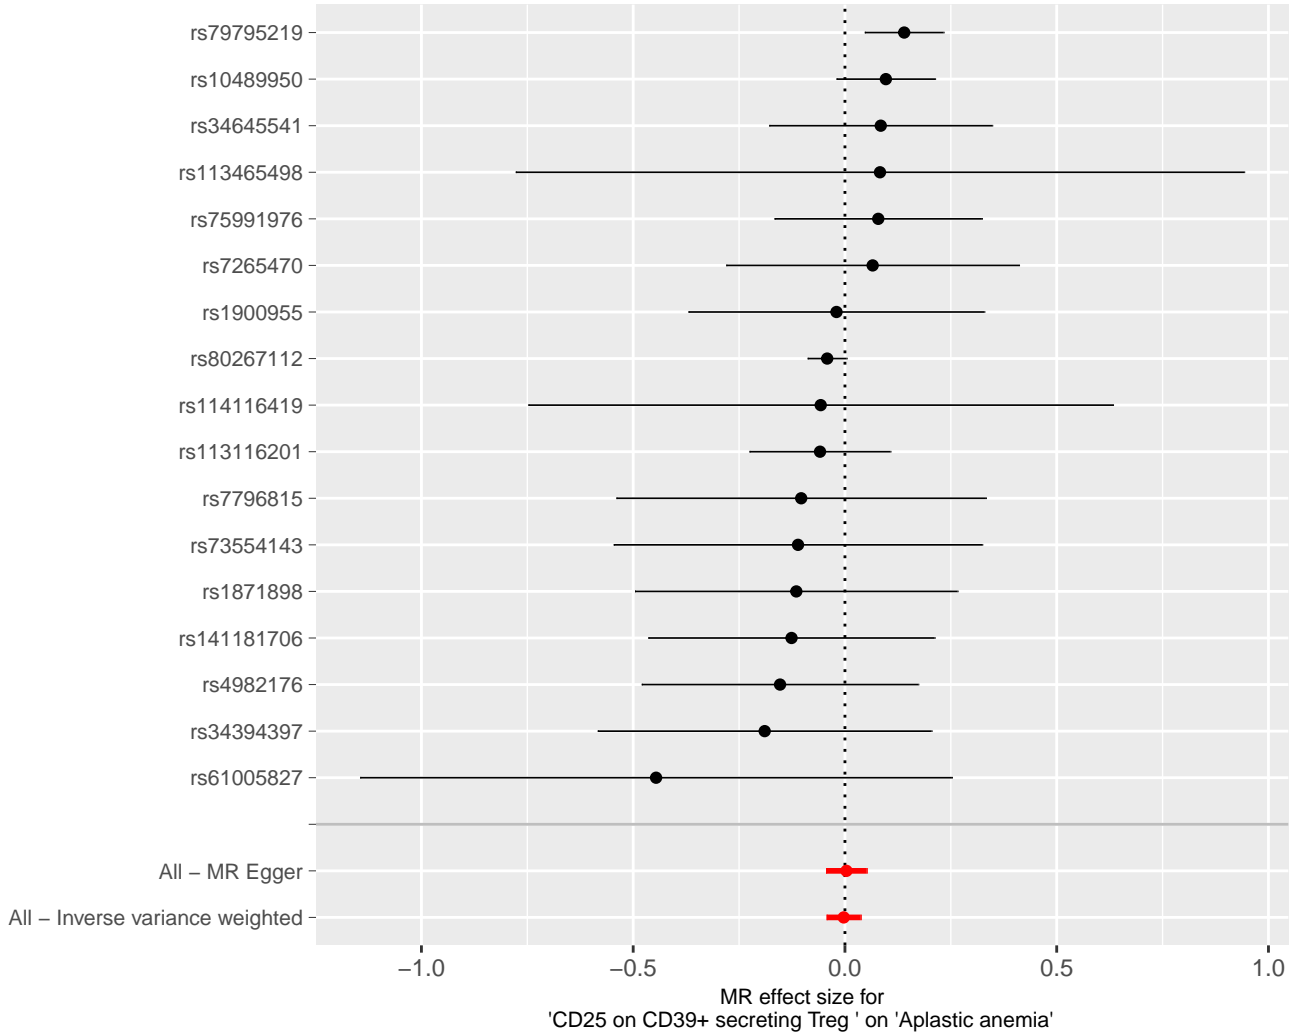

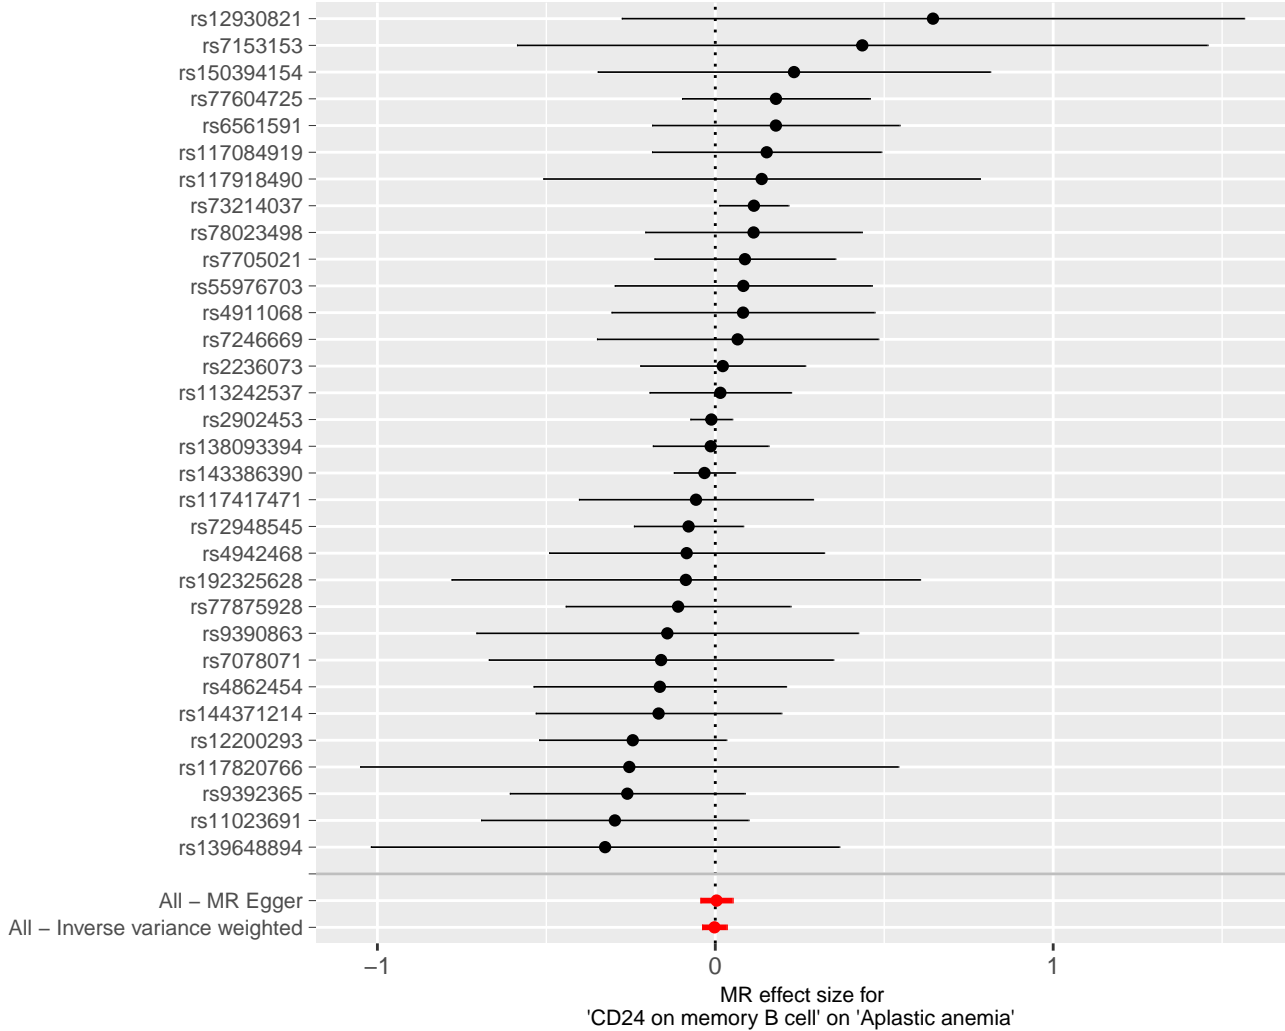

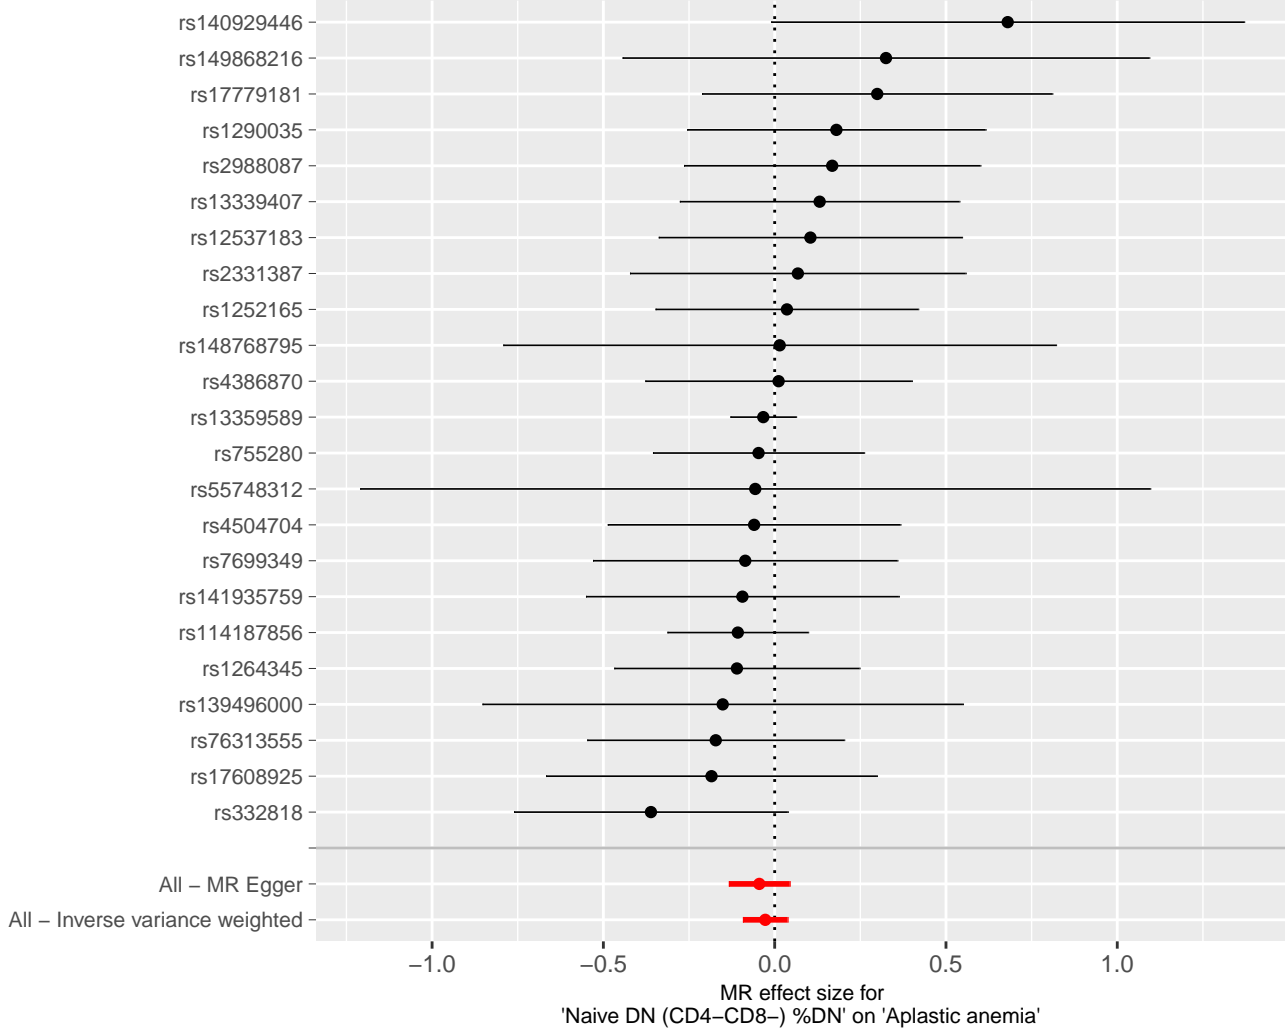

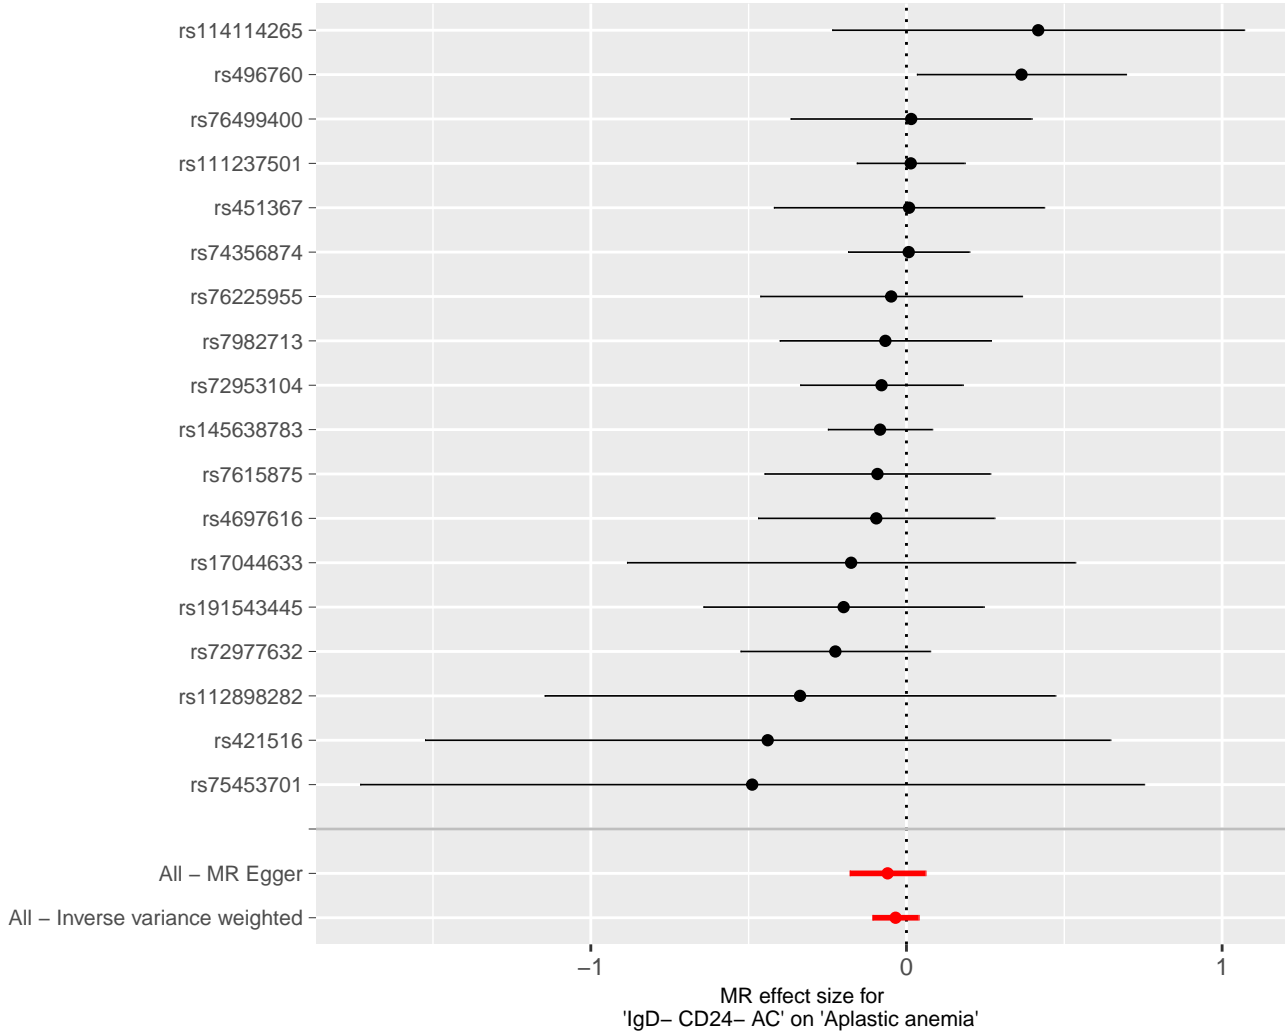

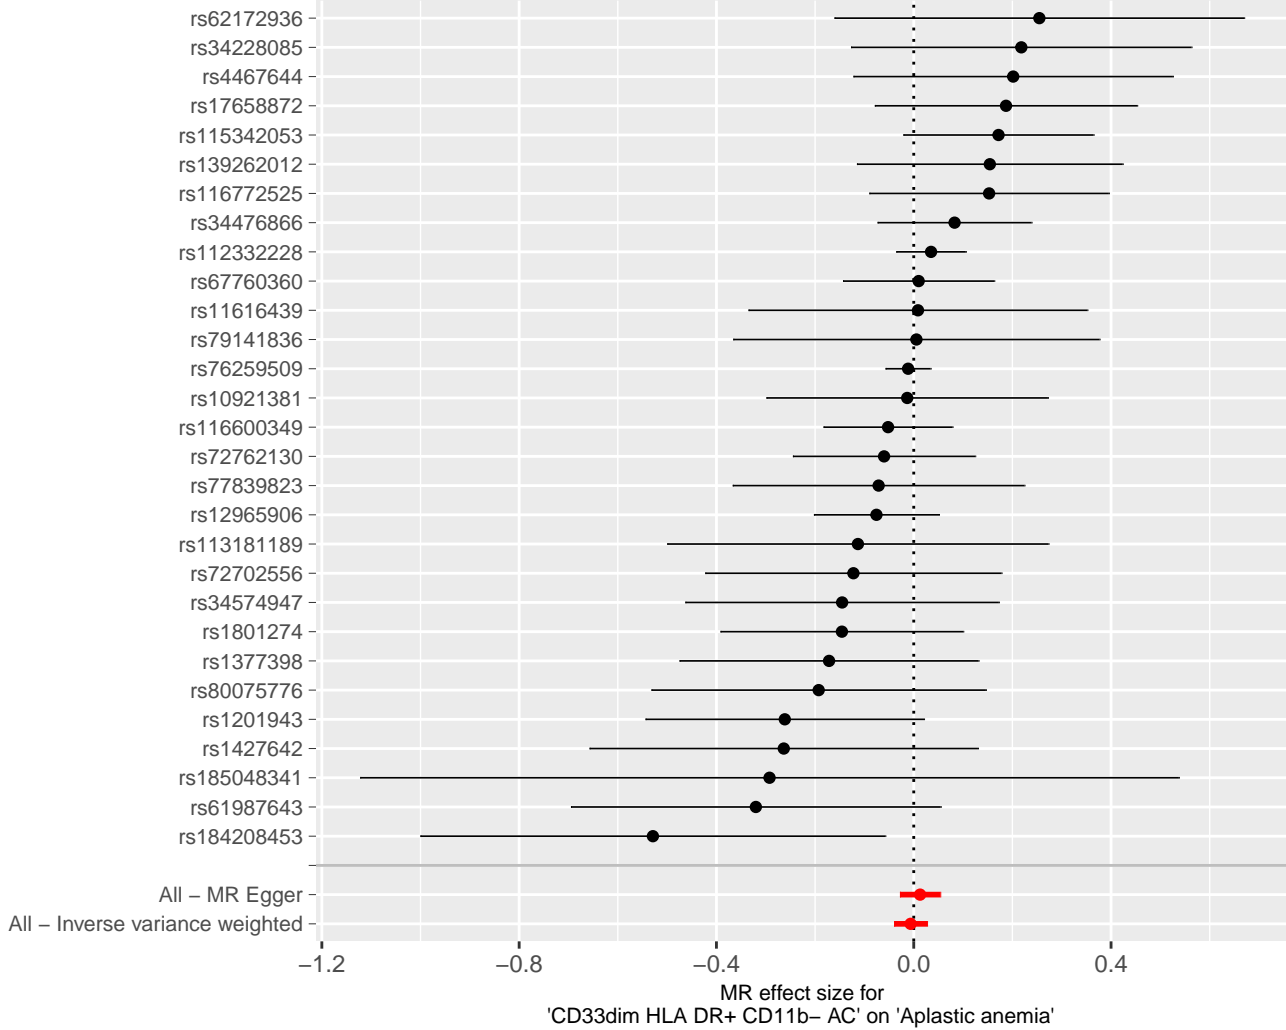



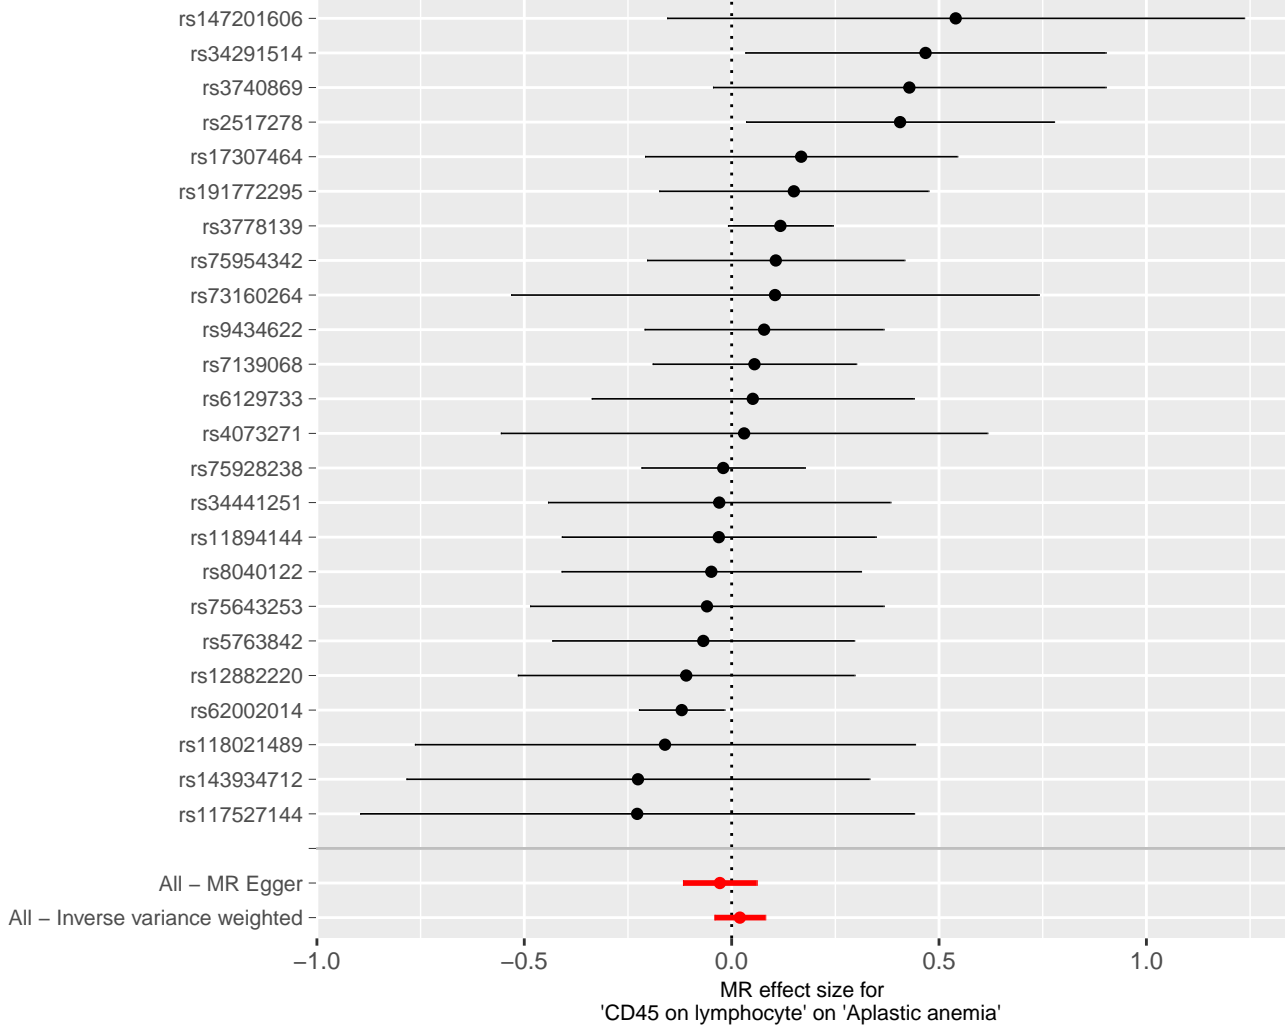

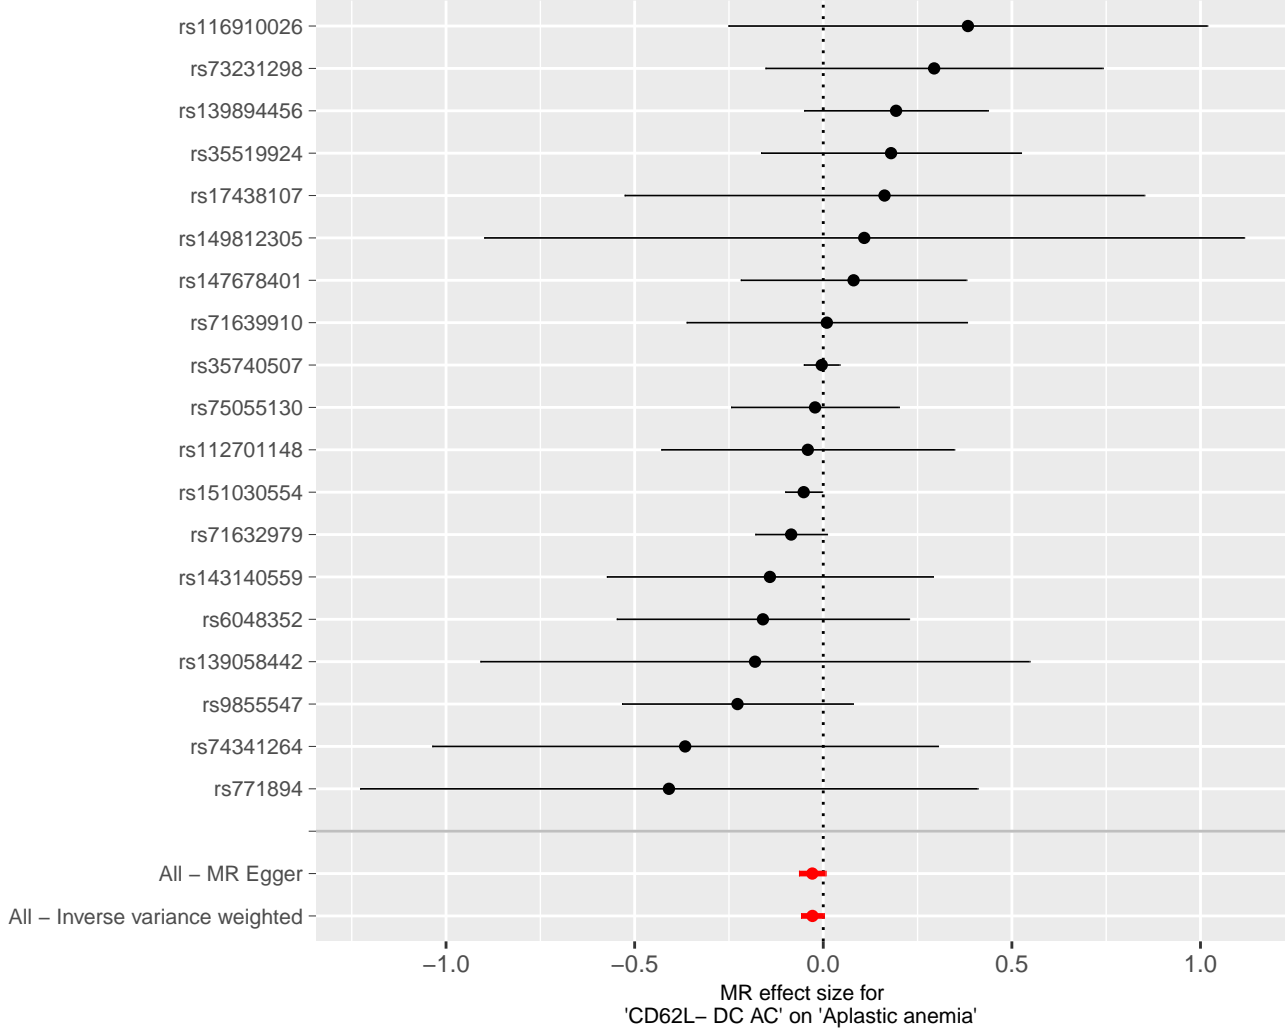

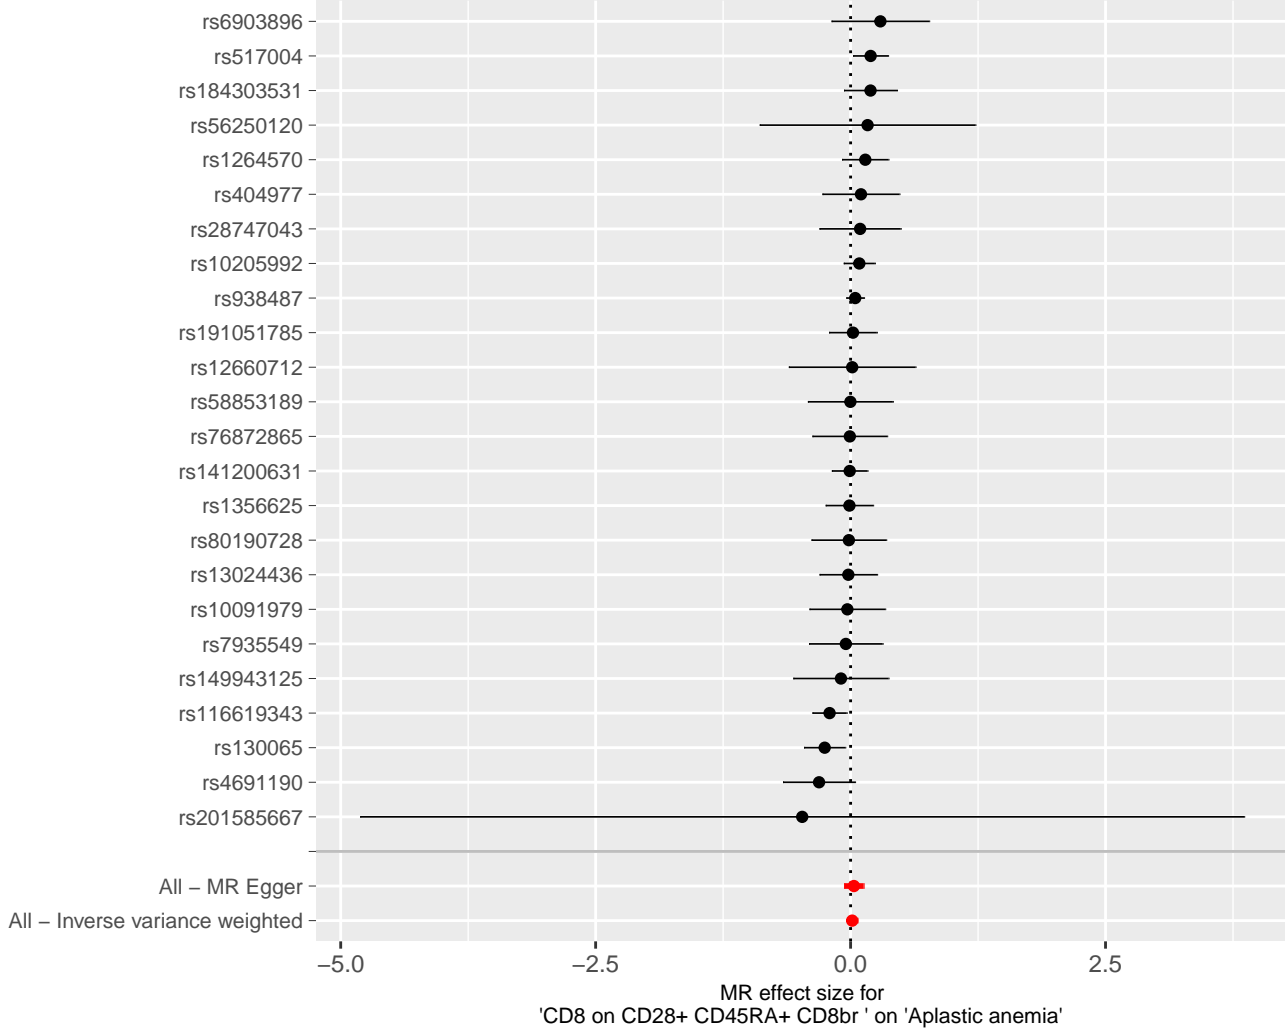

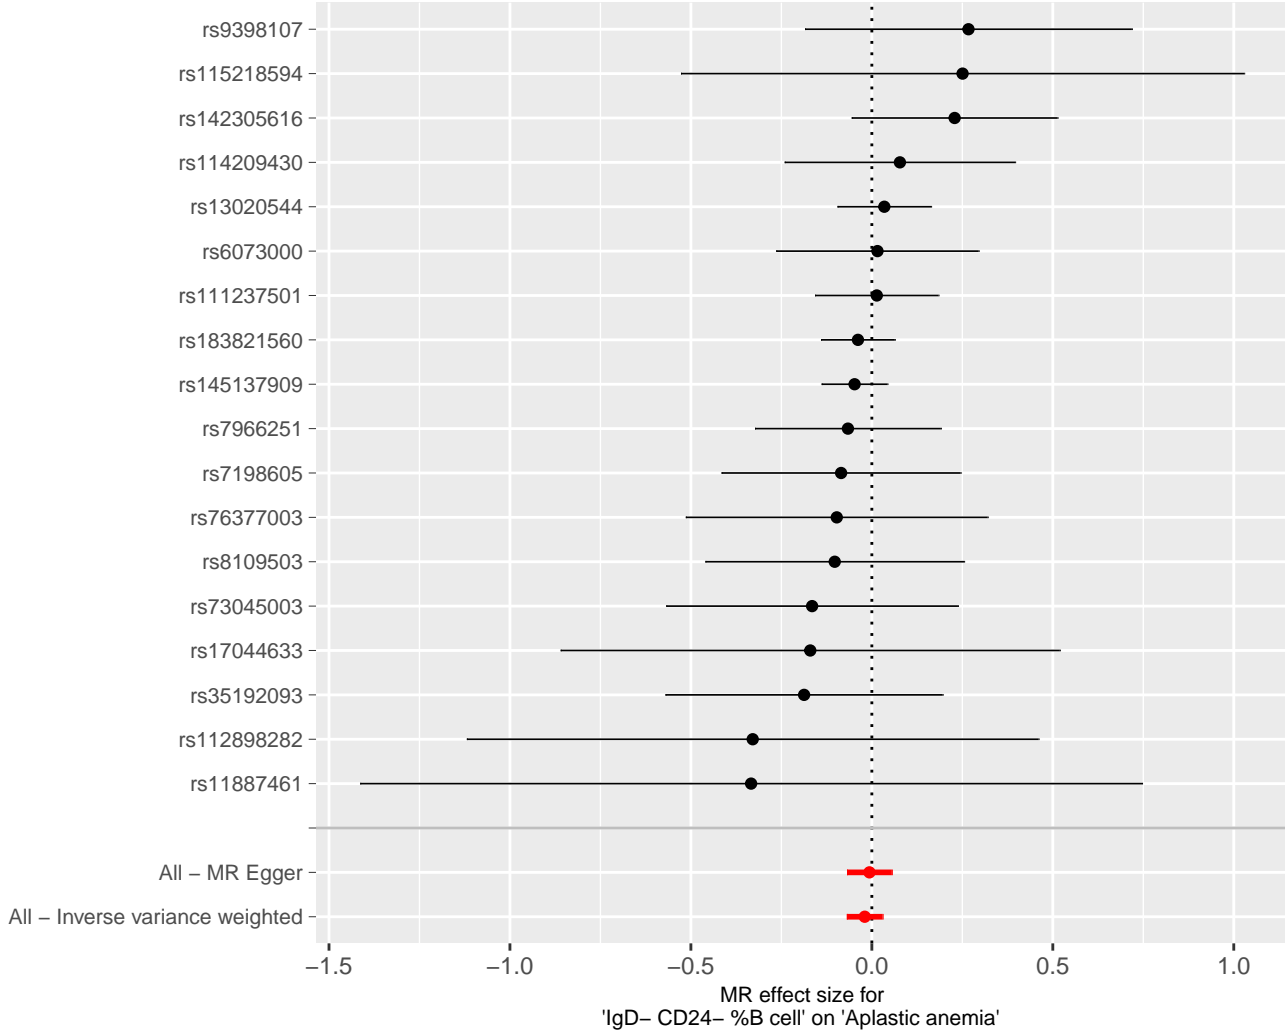

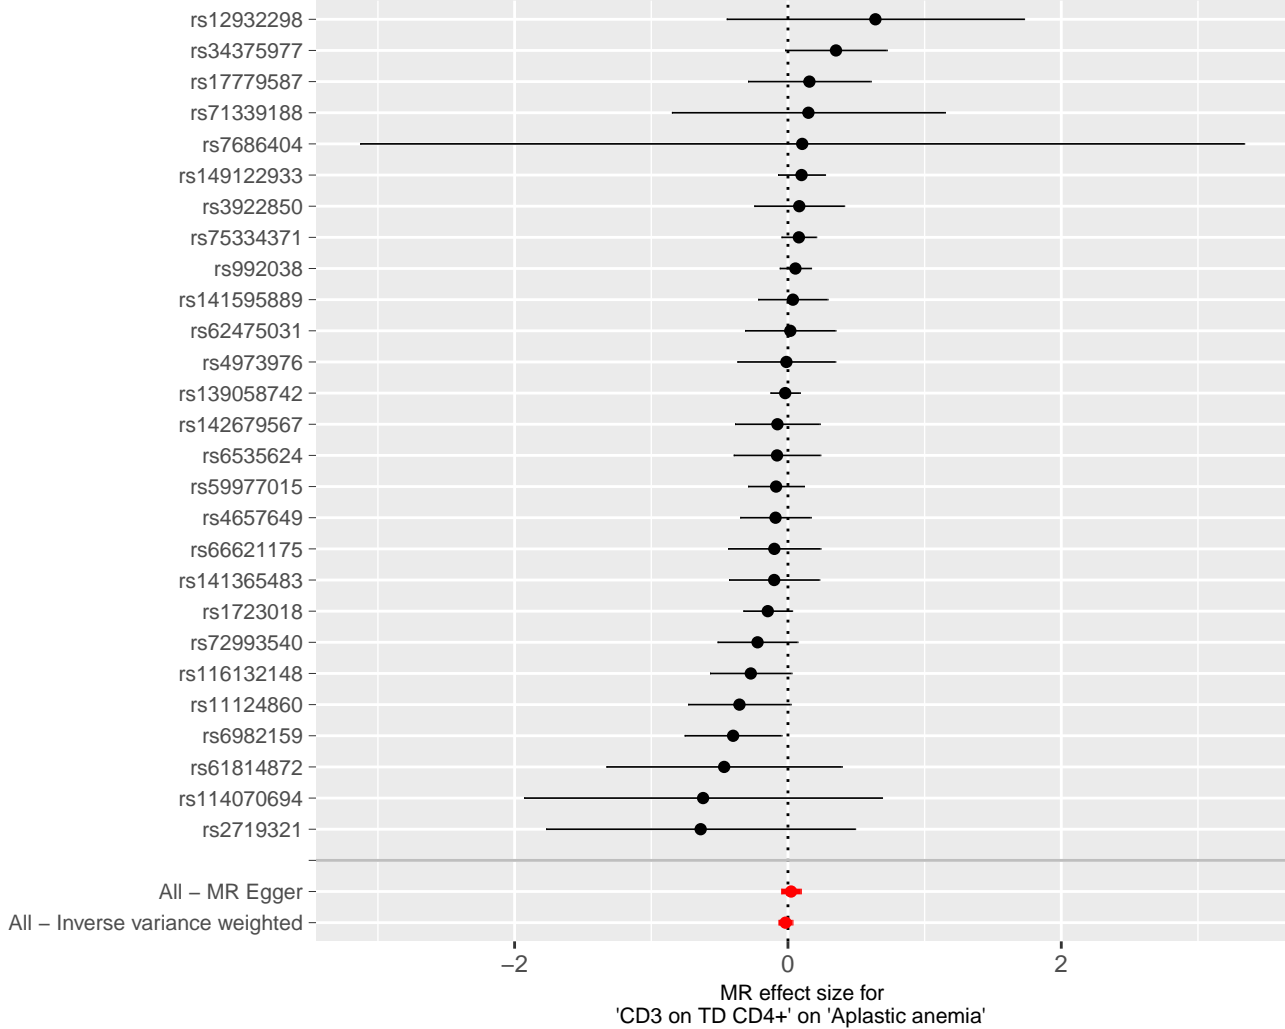

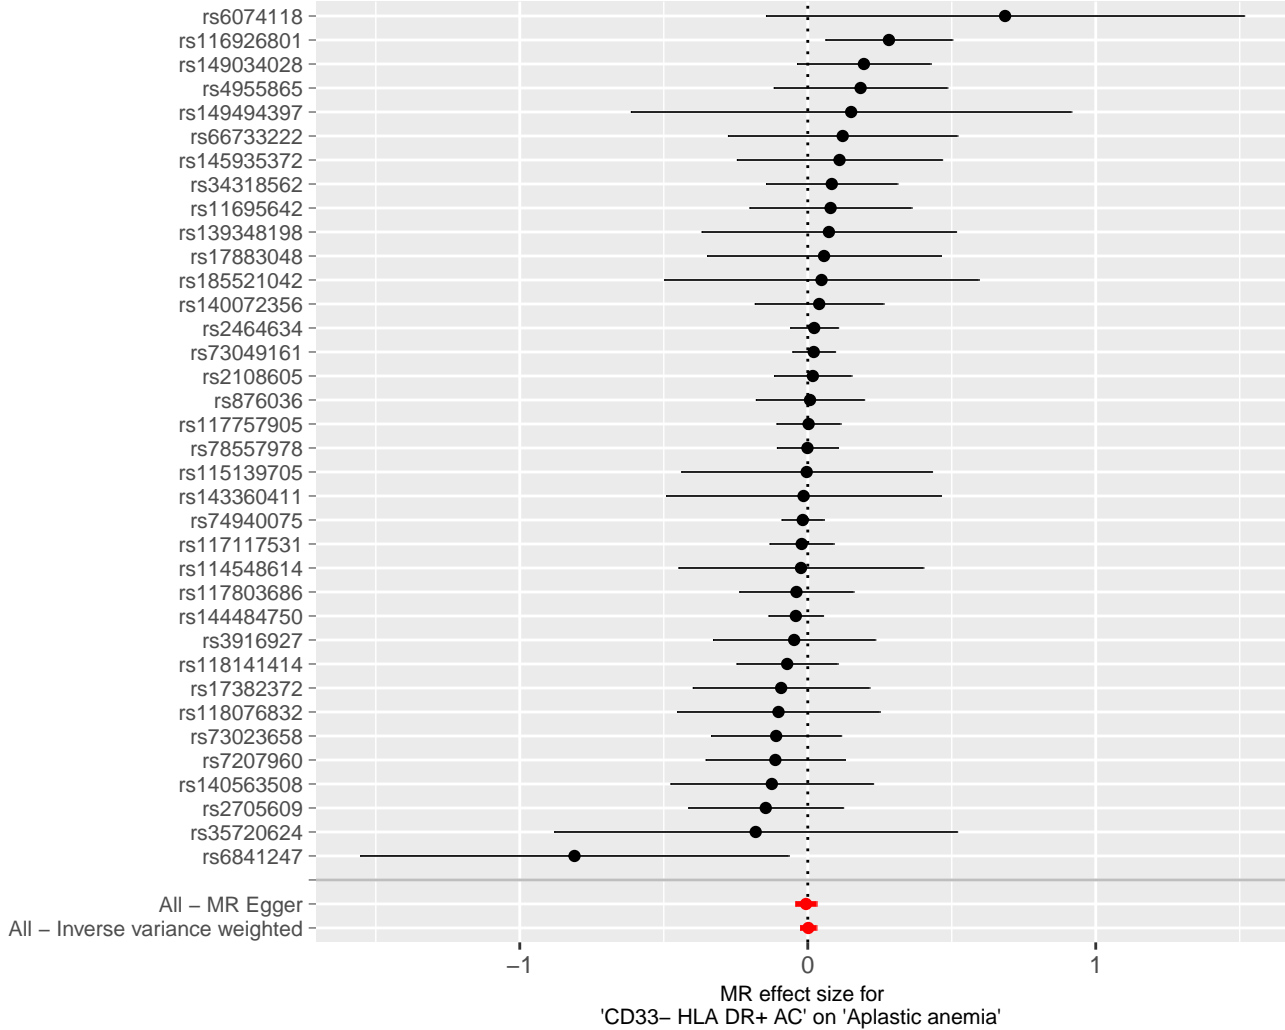

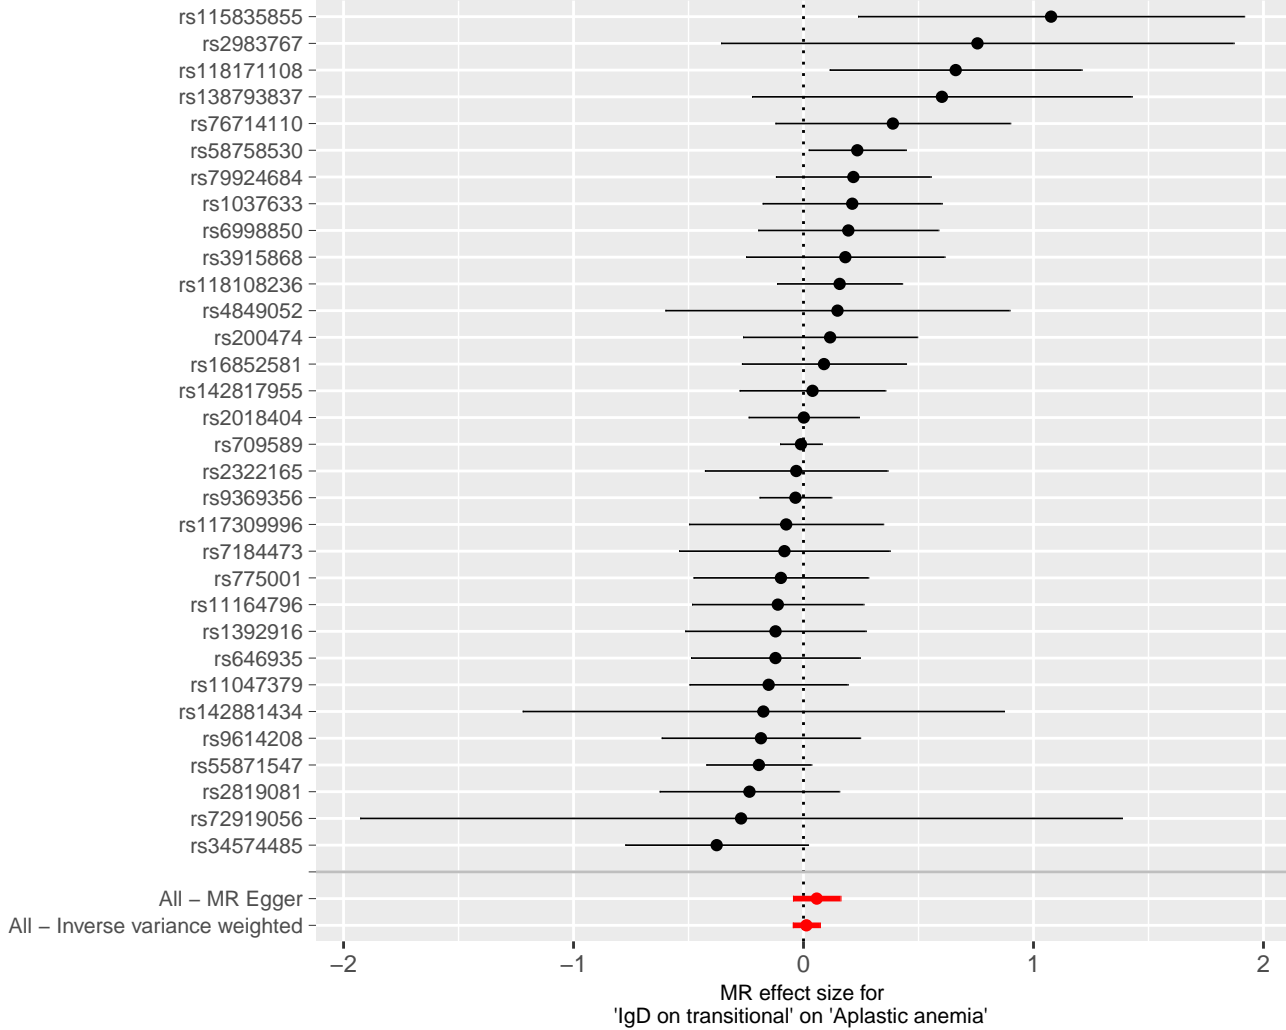

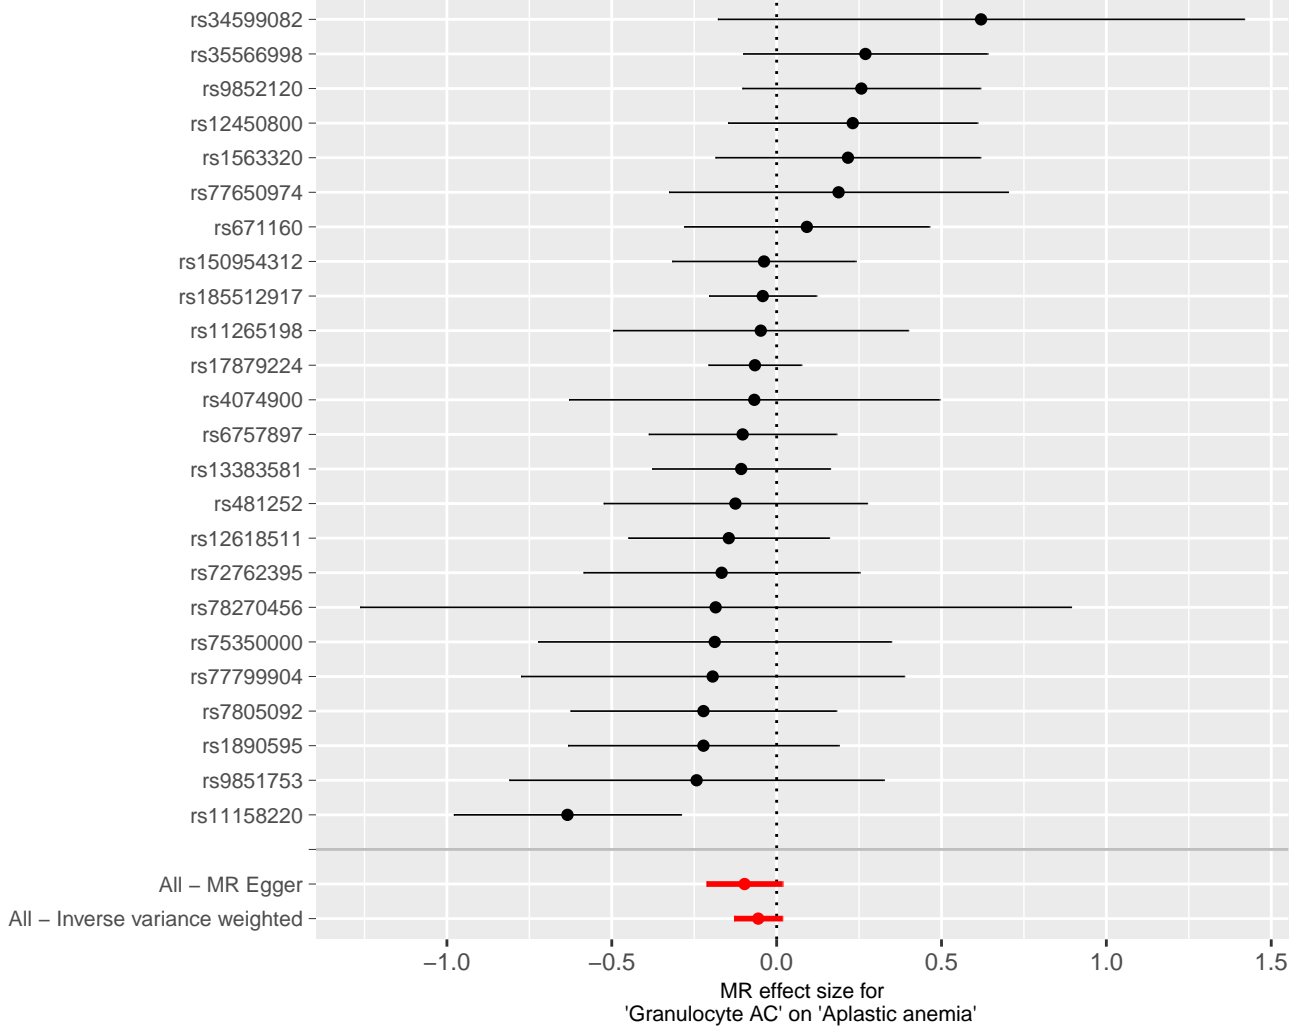



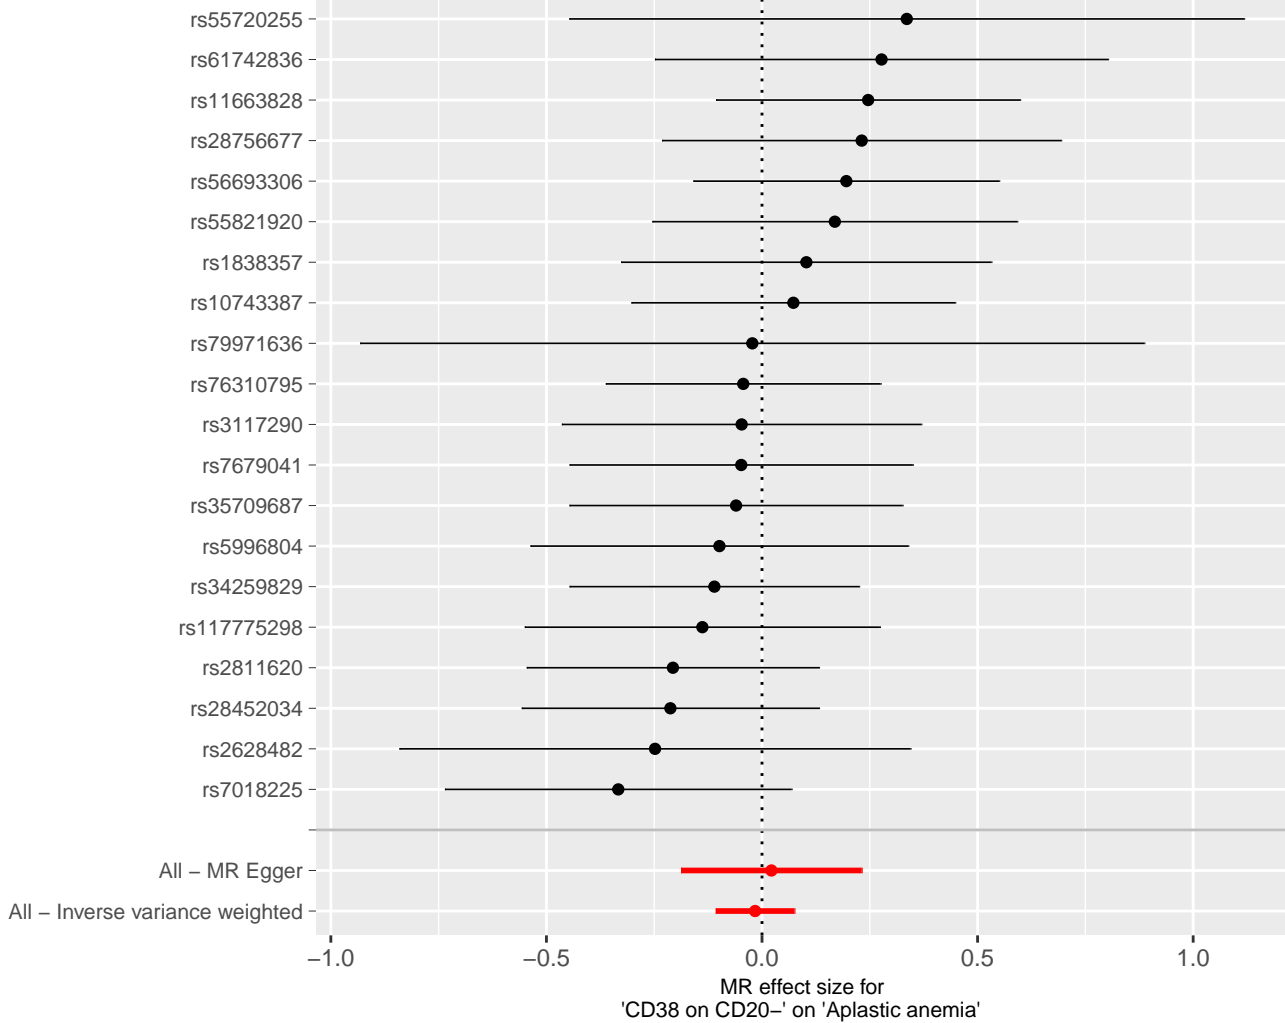

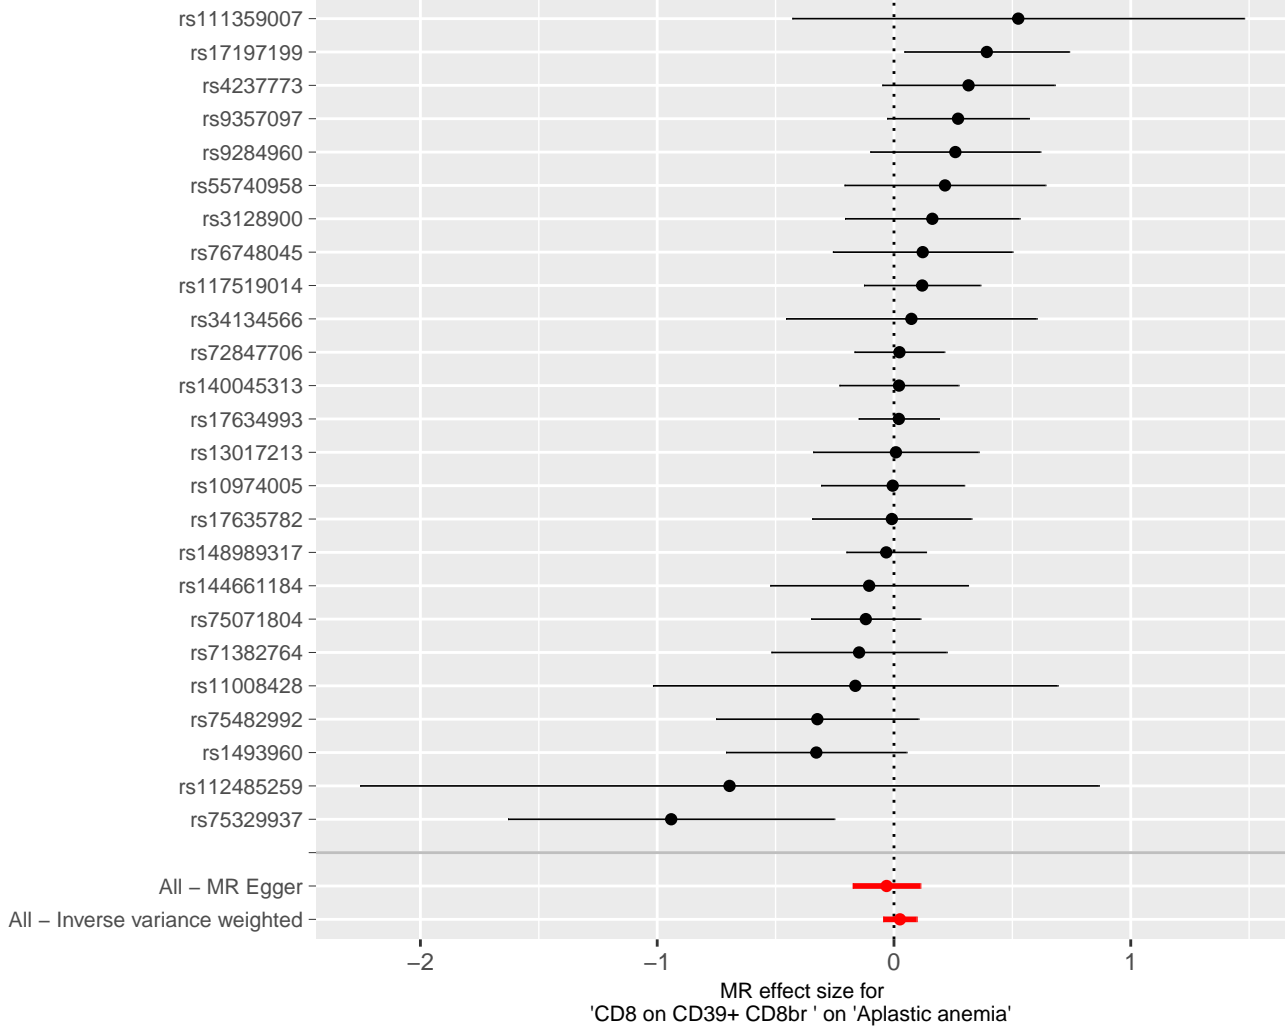

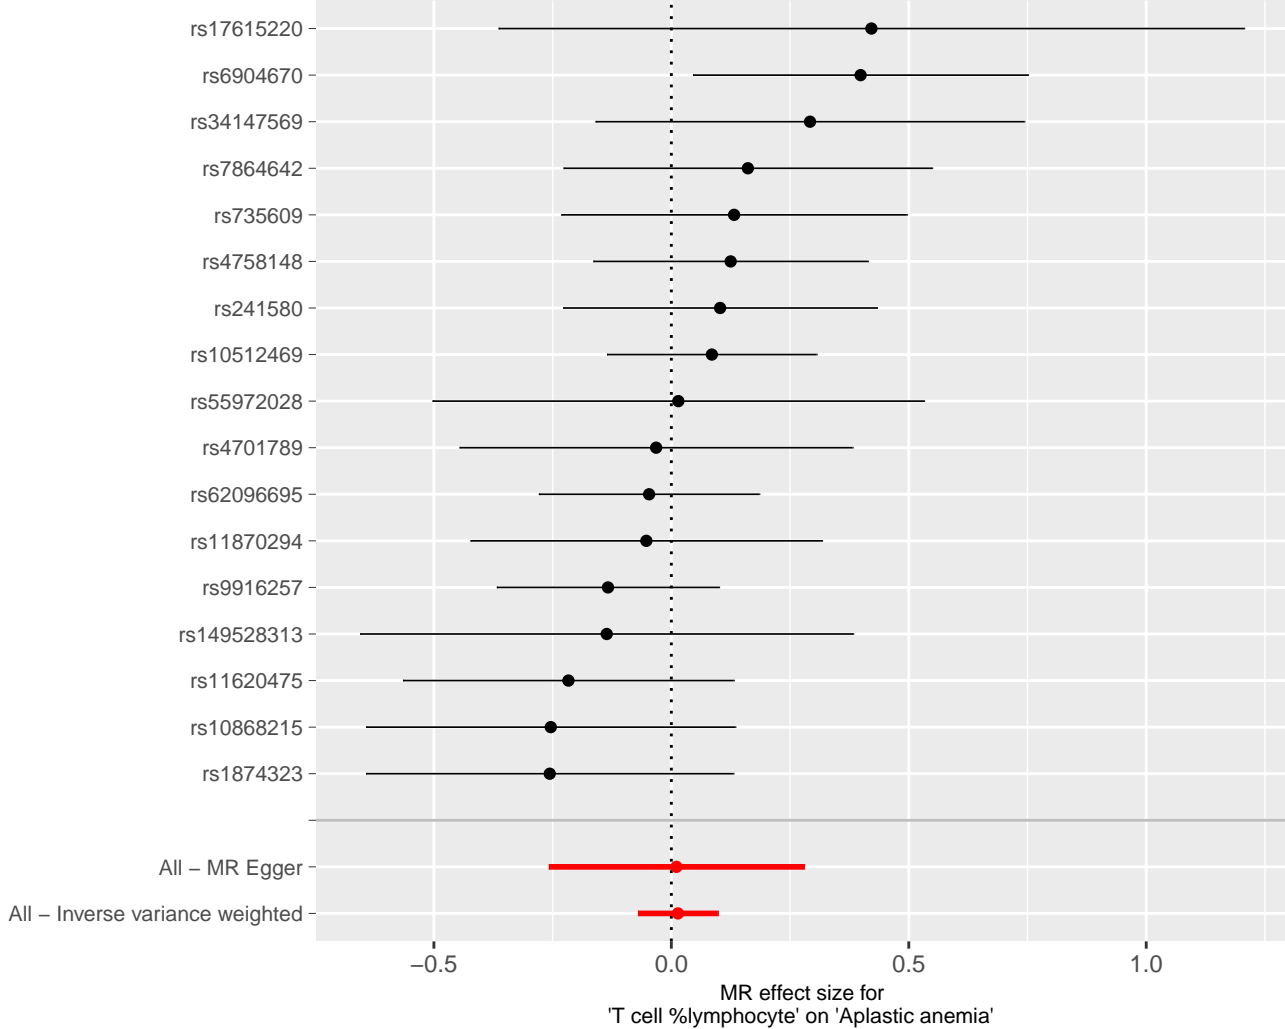

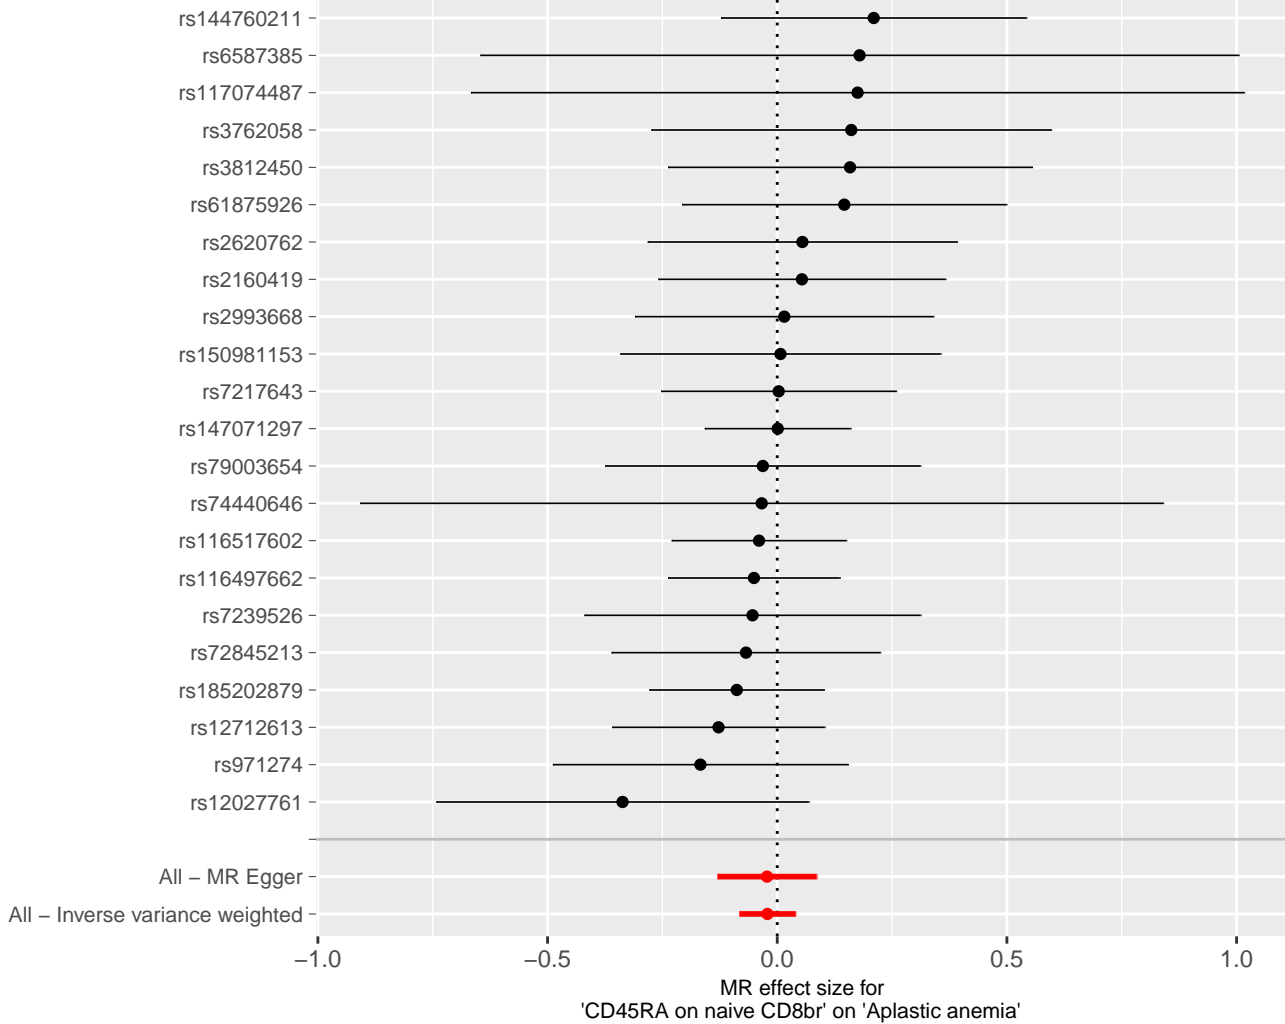

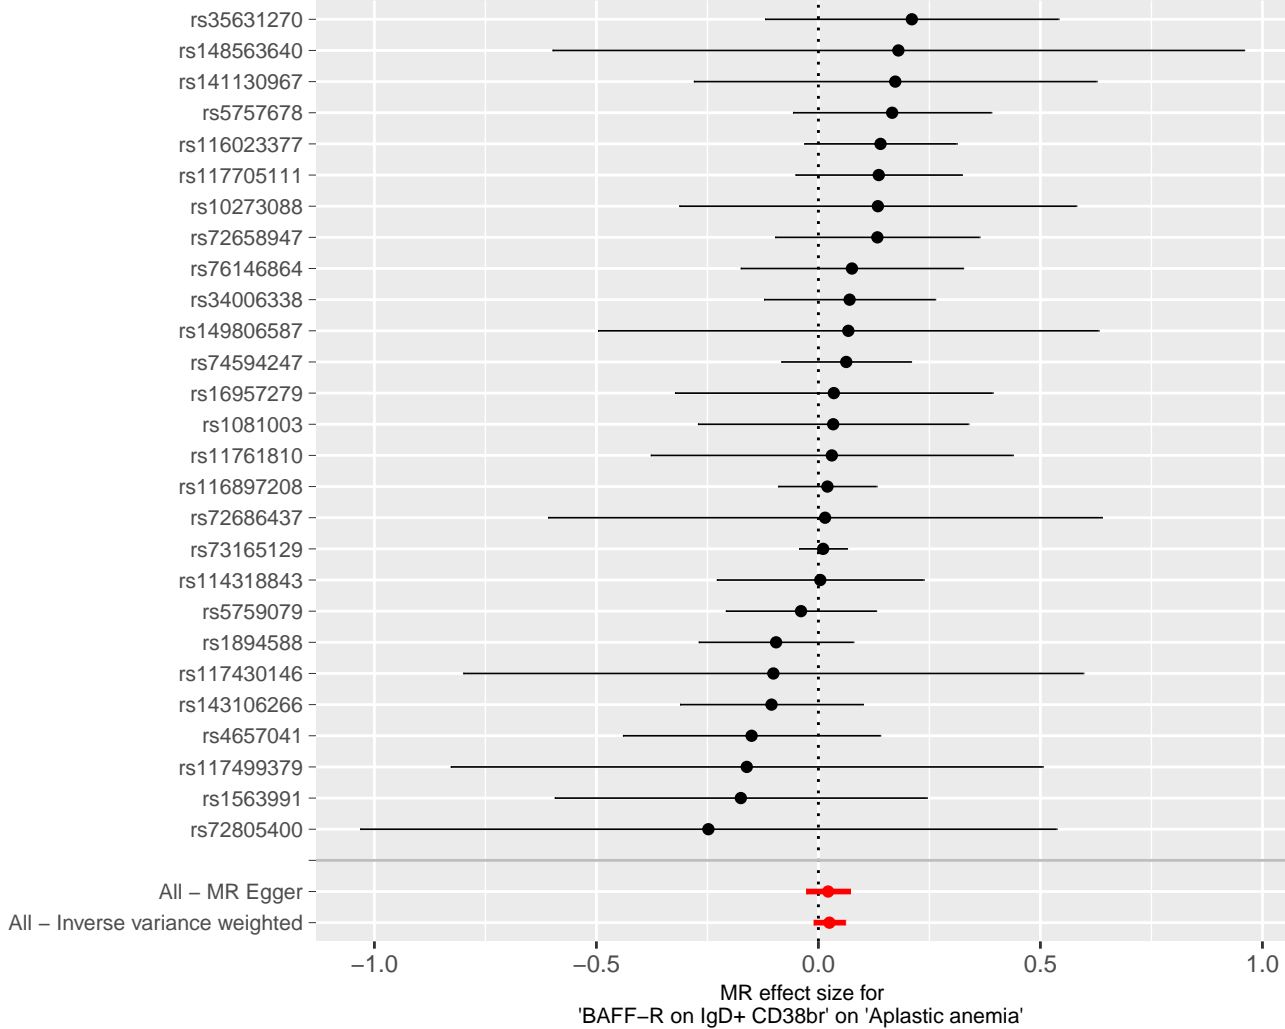

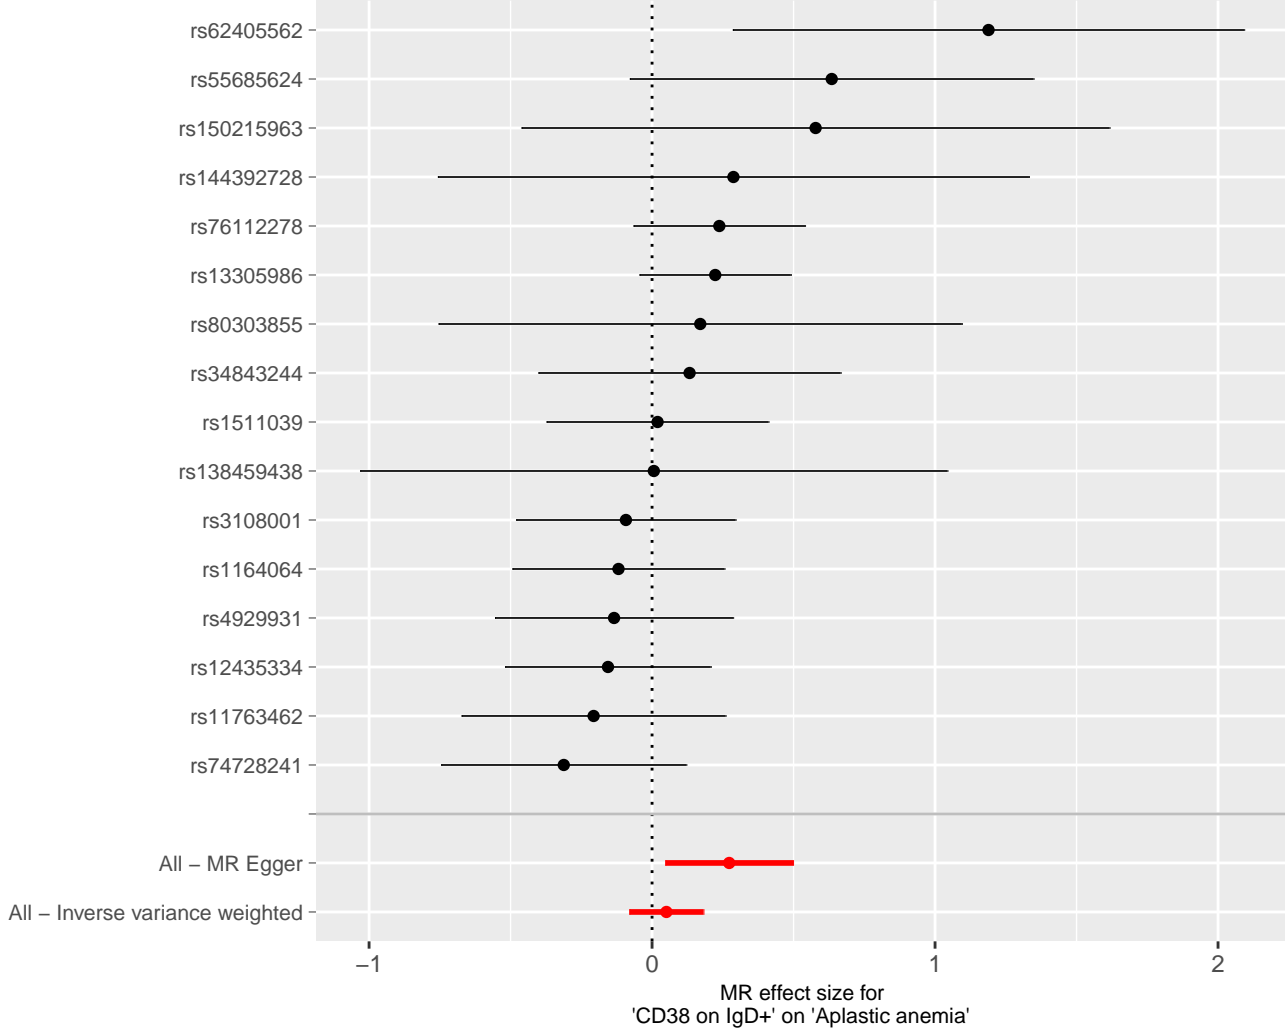

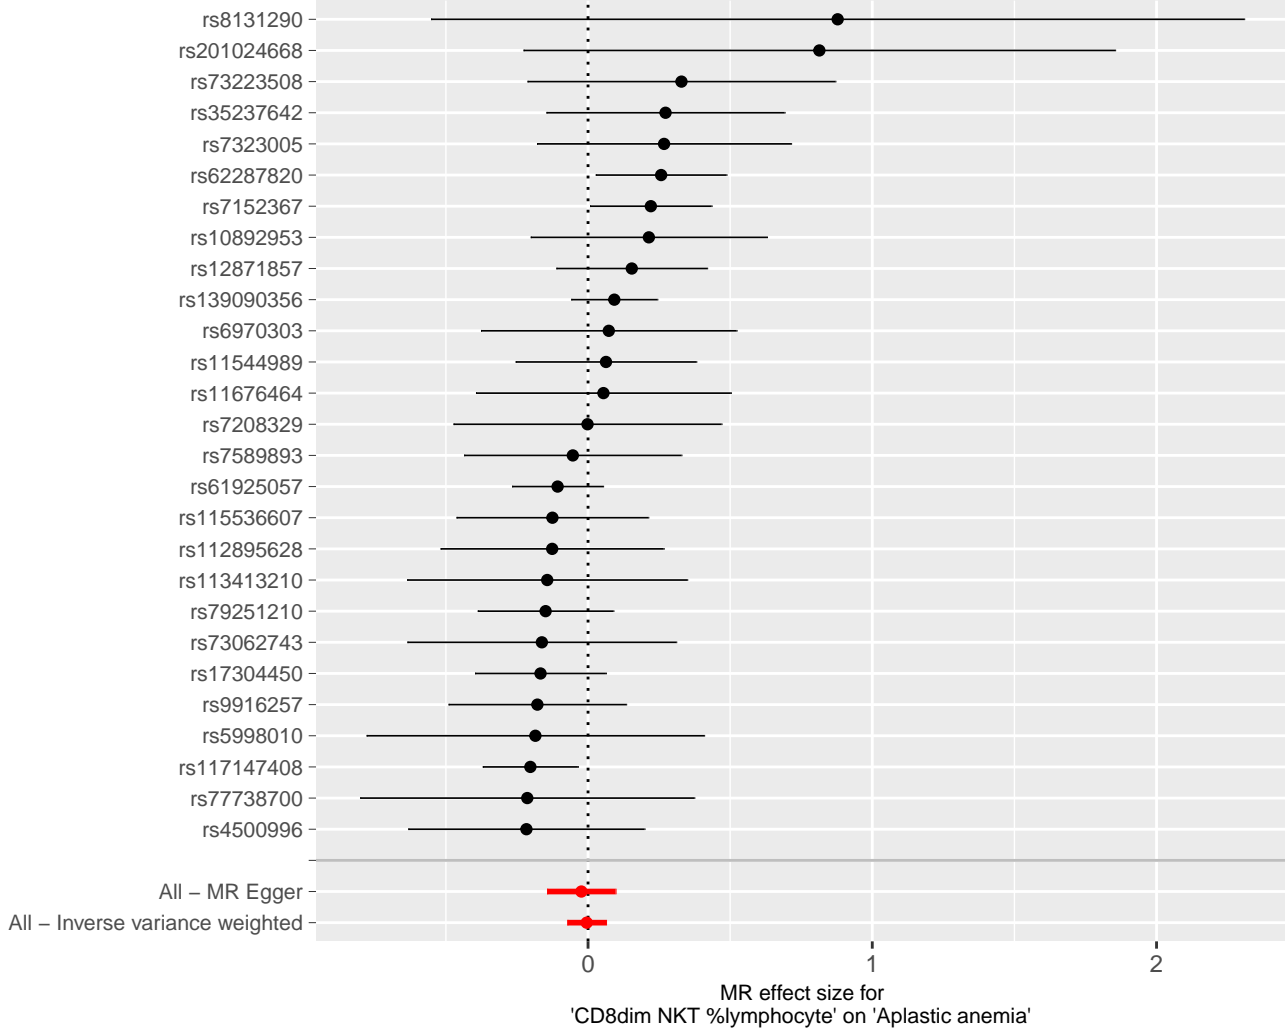

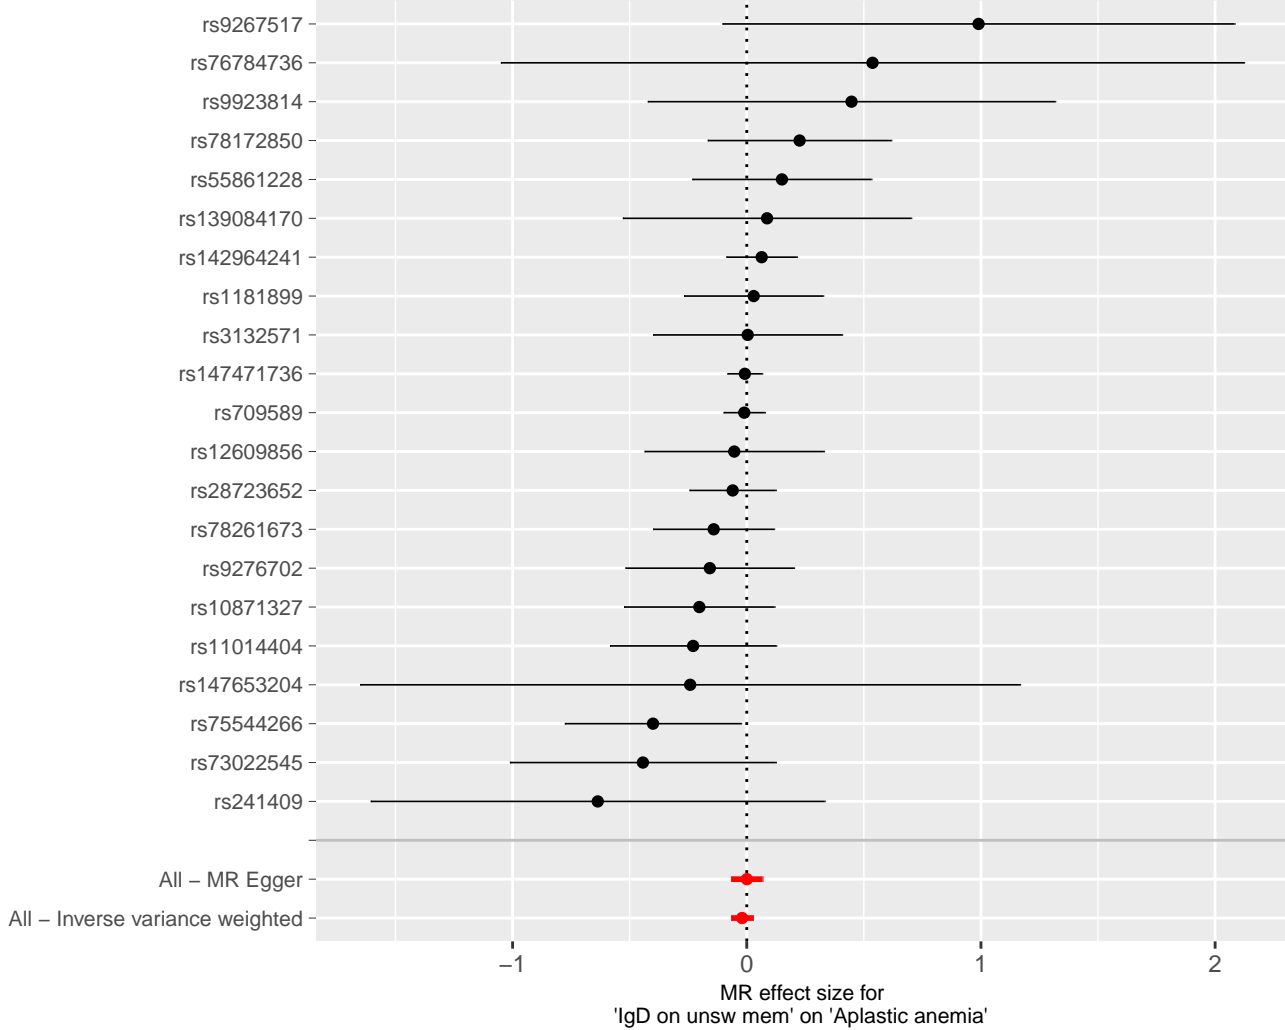



All - Inverse variance weighted

-0.02 -0.01 0.00 0.01 0.02

MR effect size for  
'CD45RA- CD28- CD8br AC' on 'Aplastic anemia'

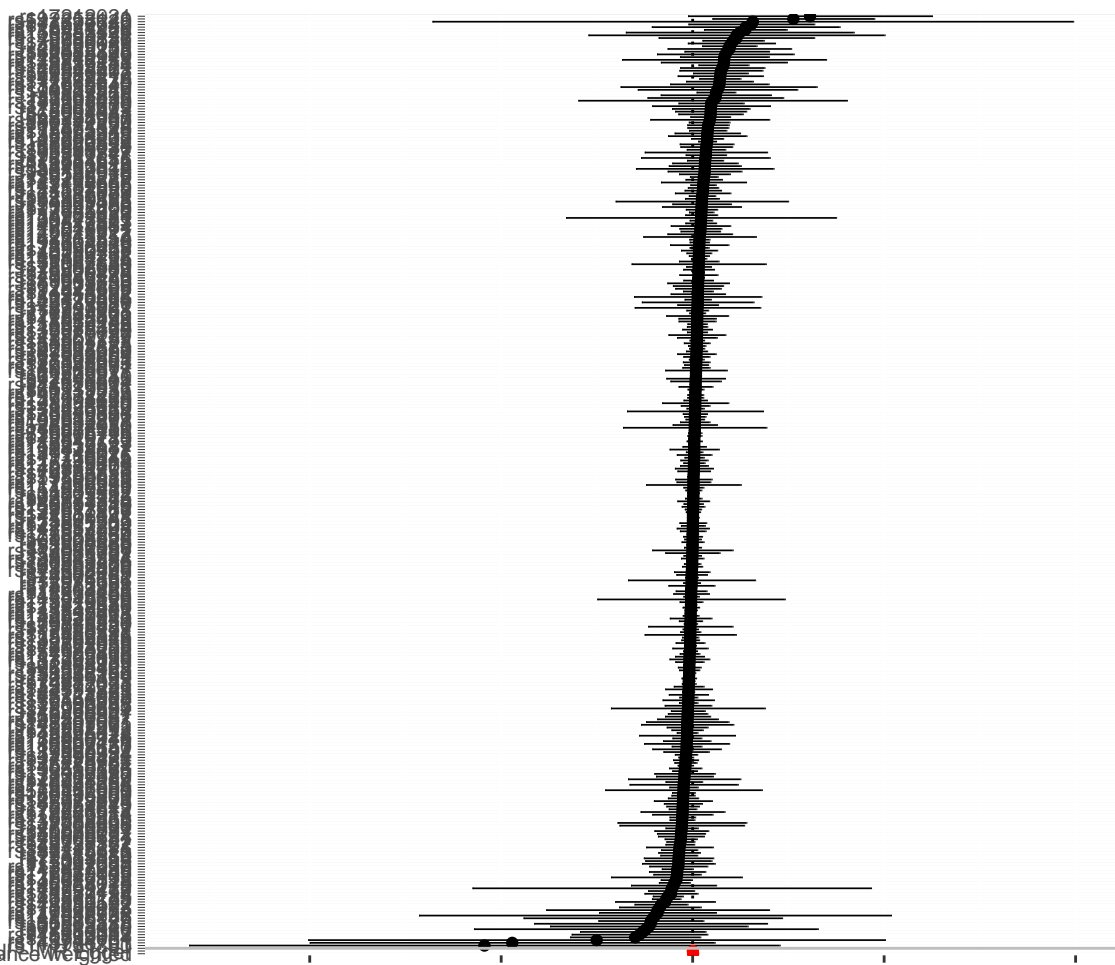

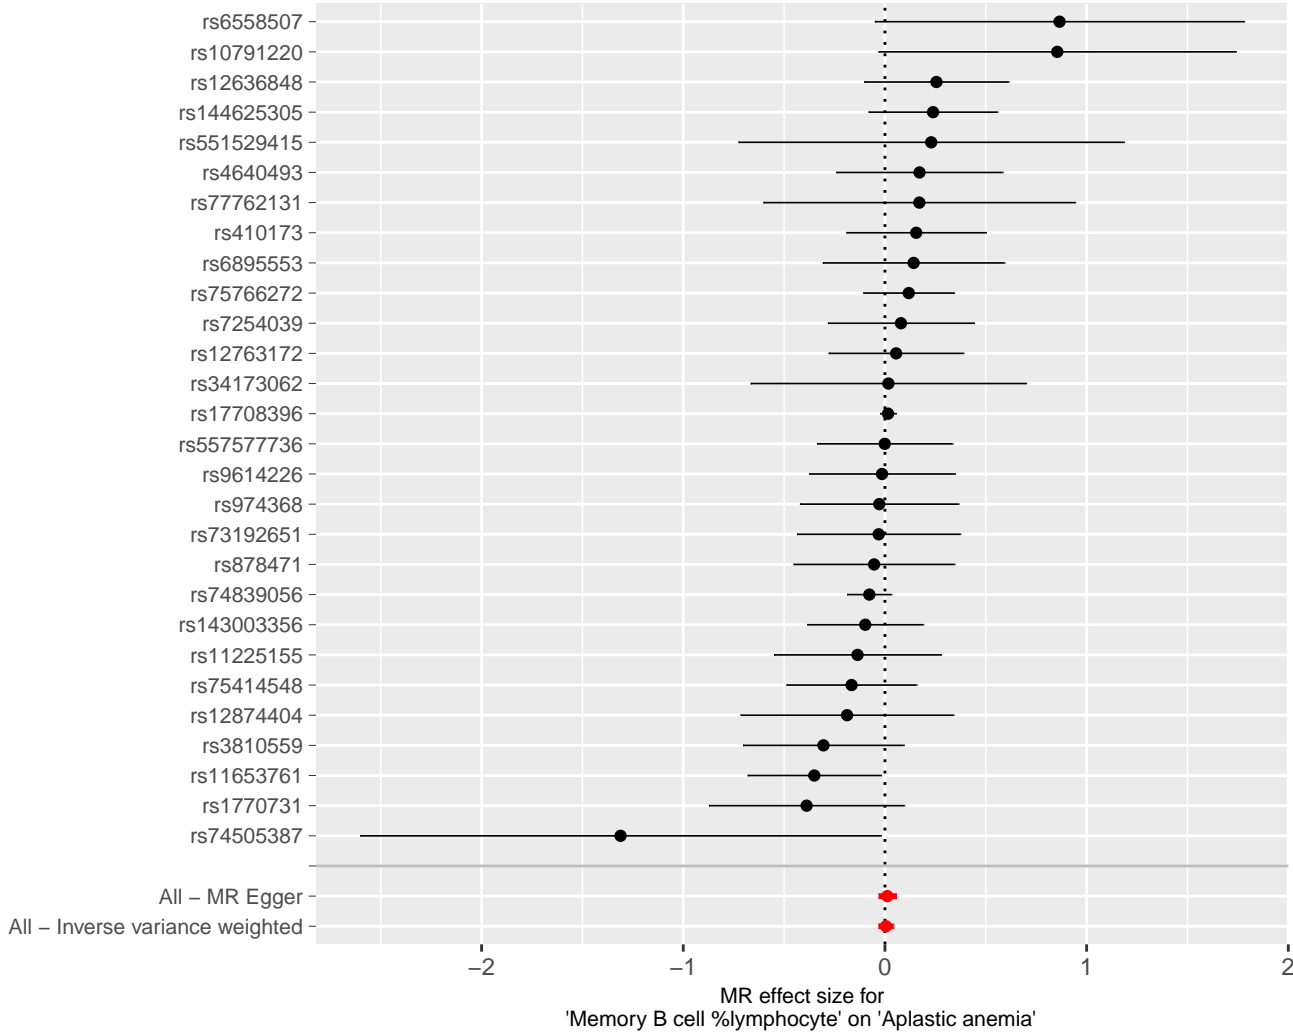

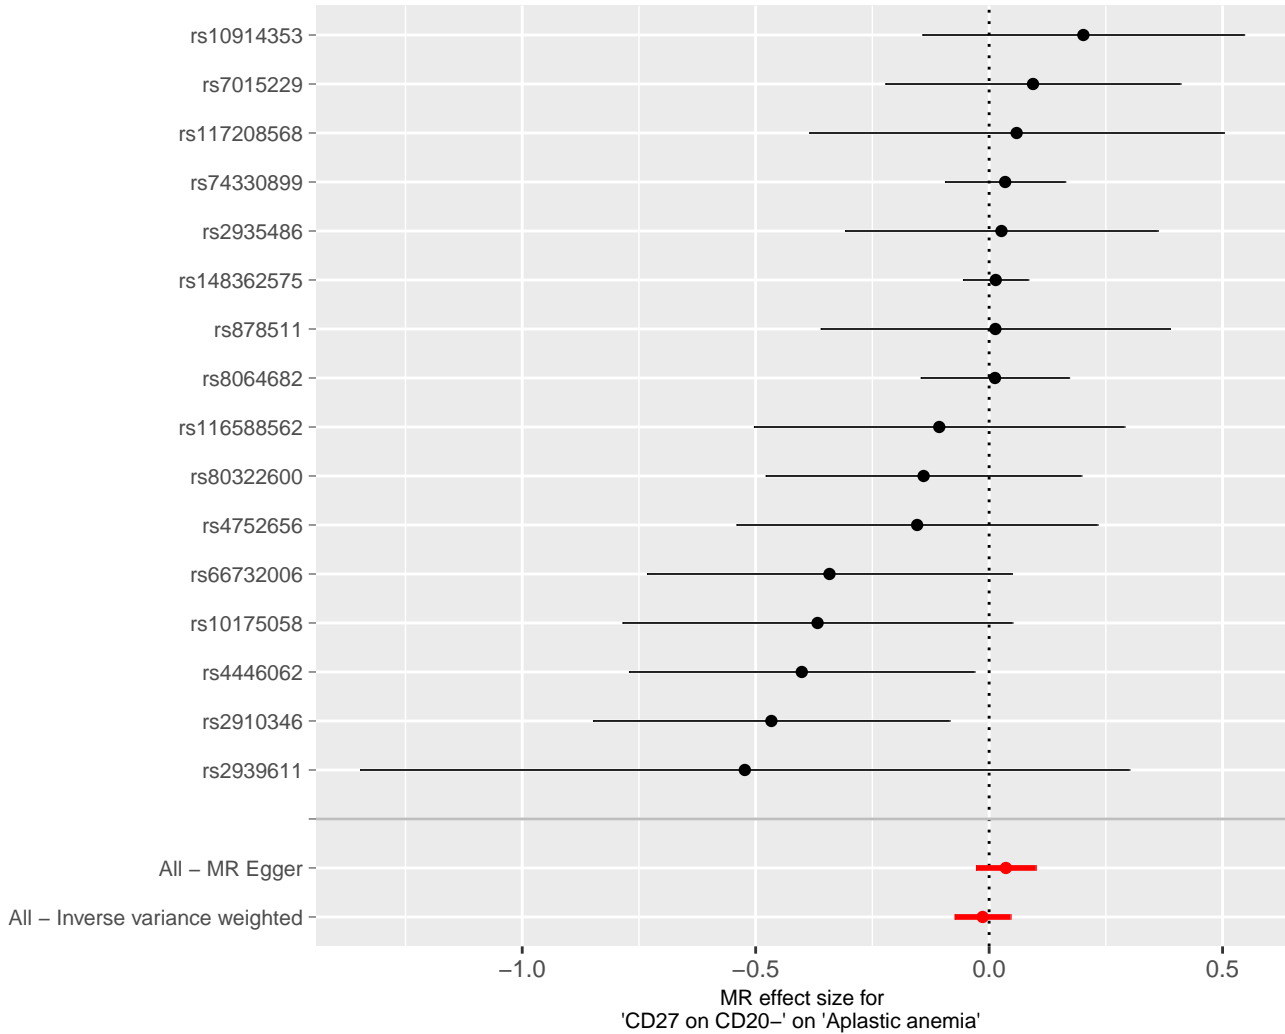

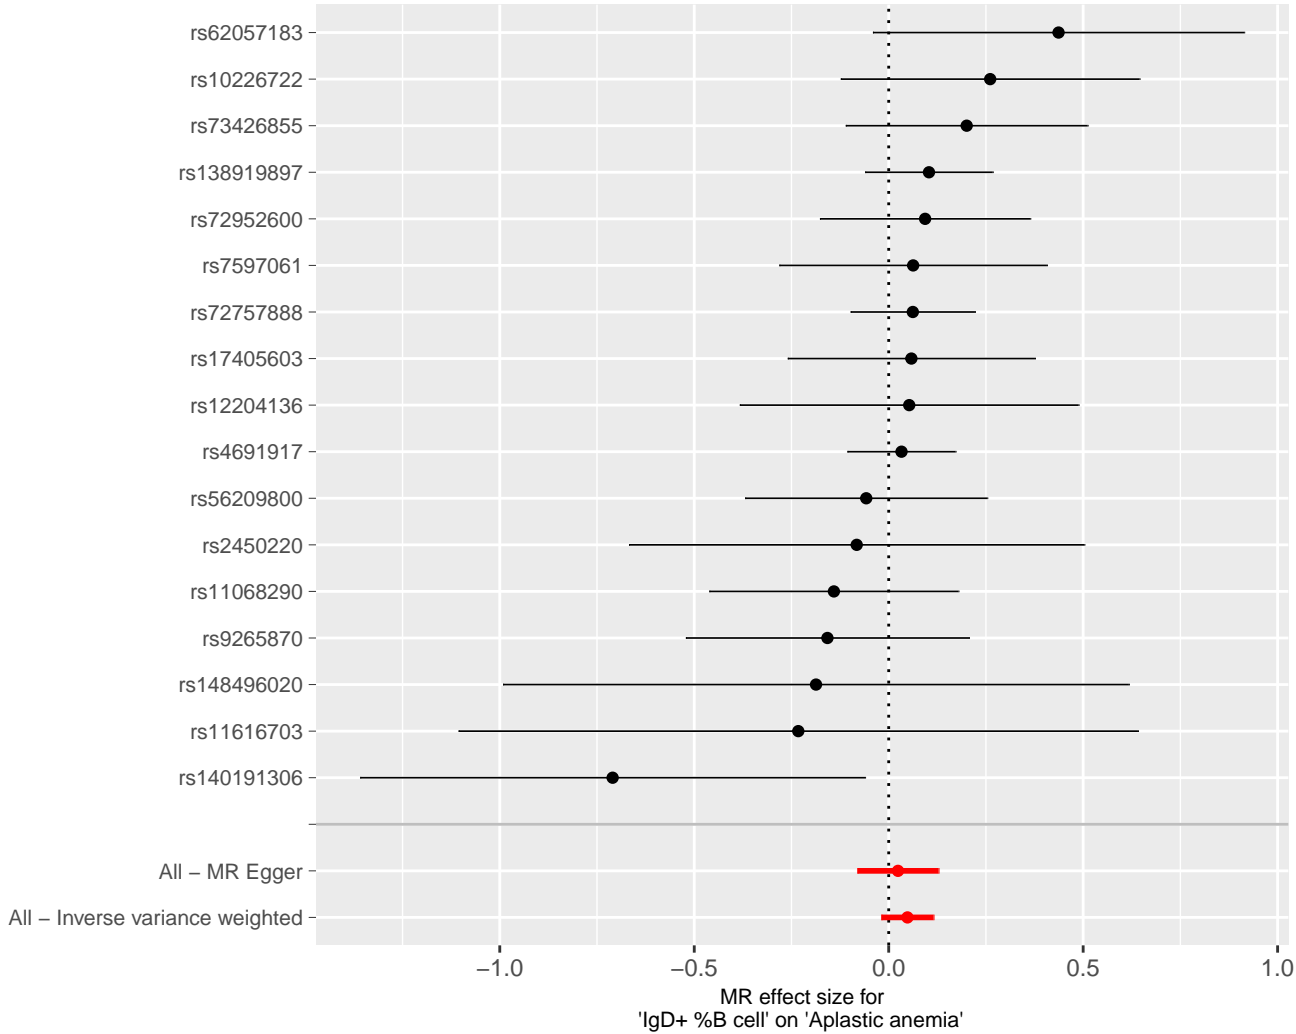

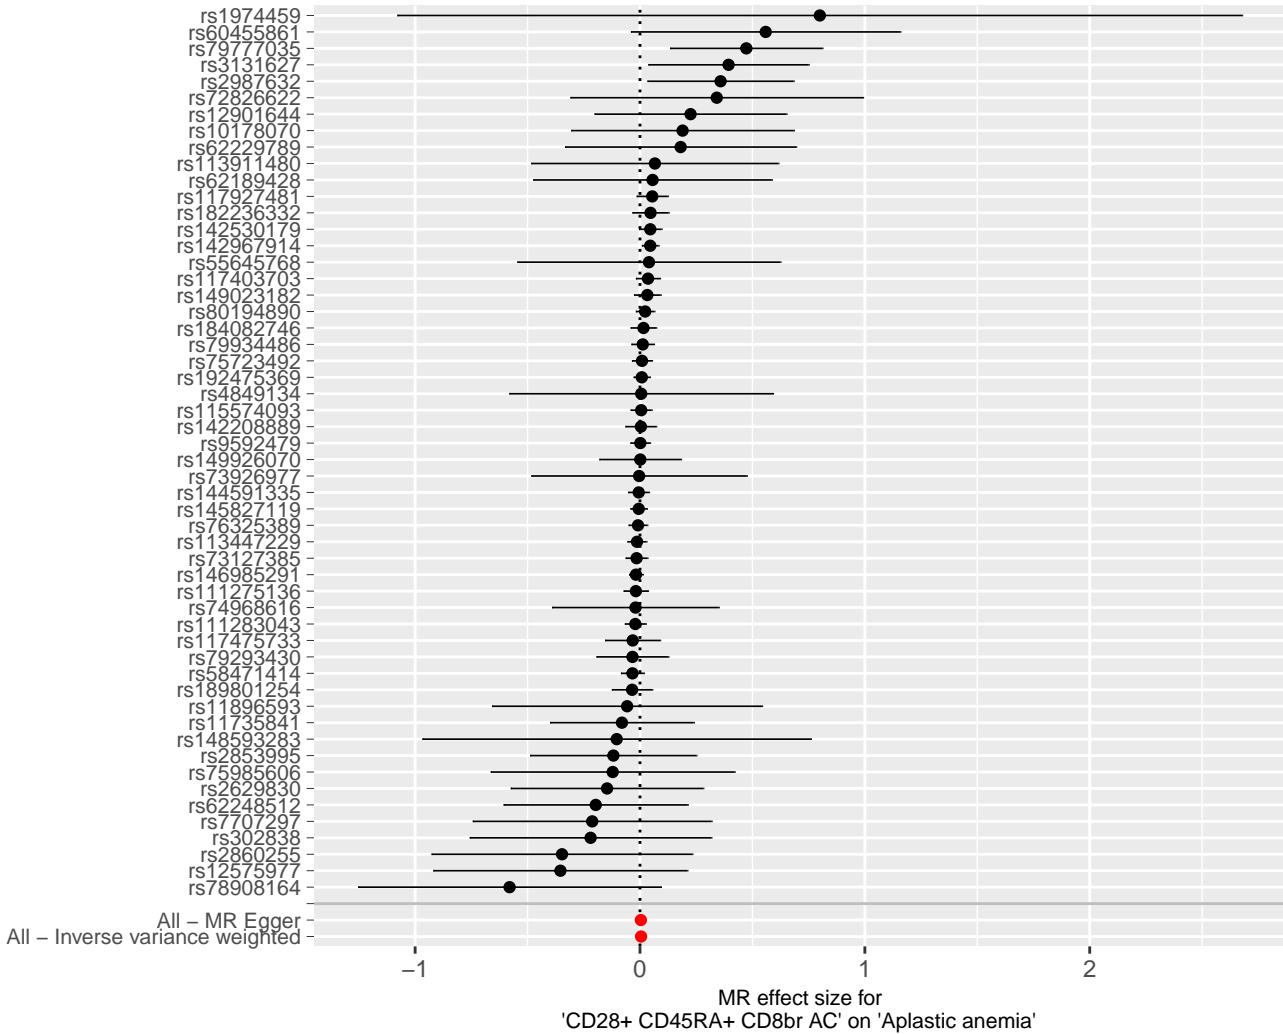

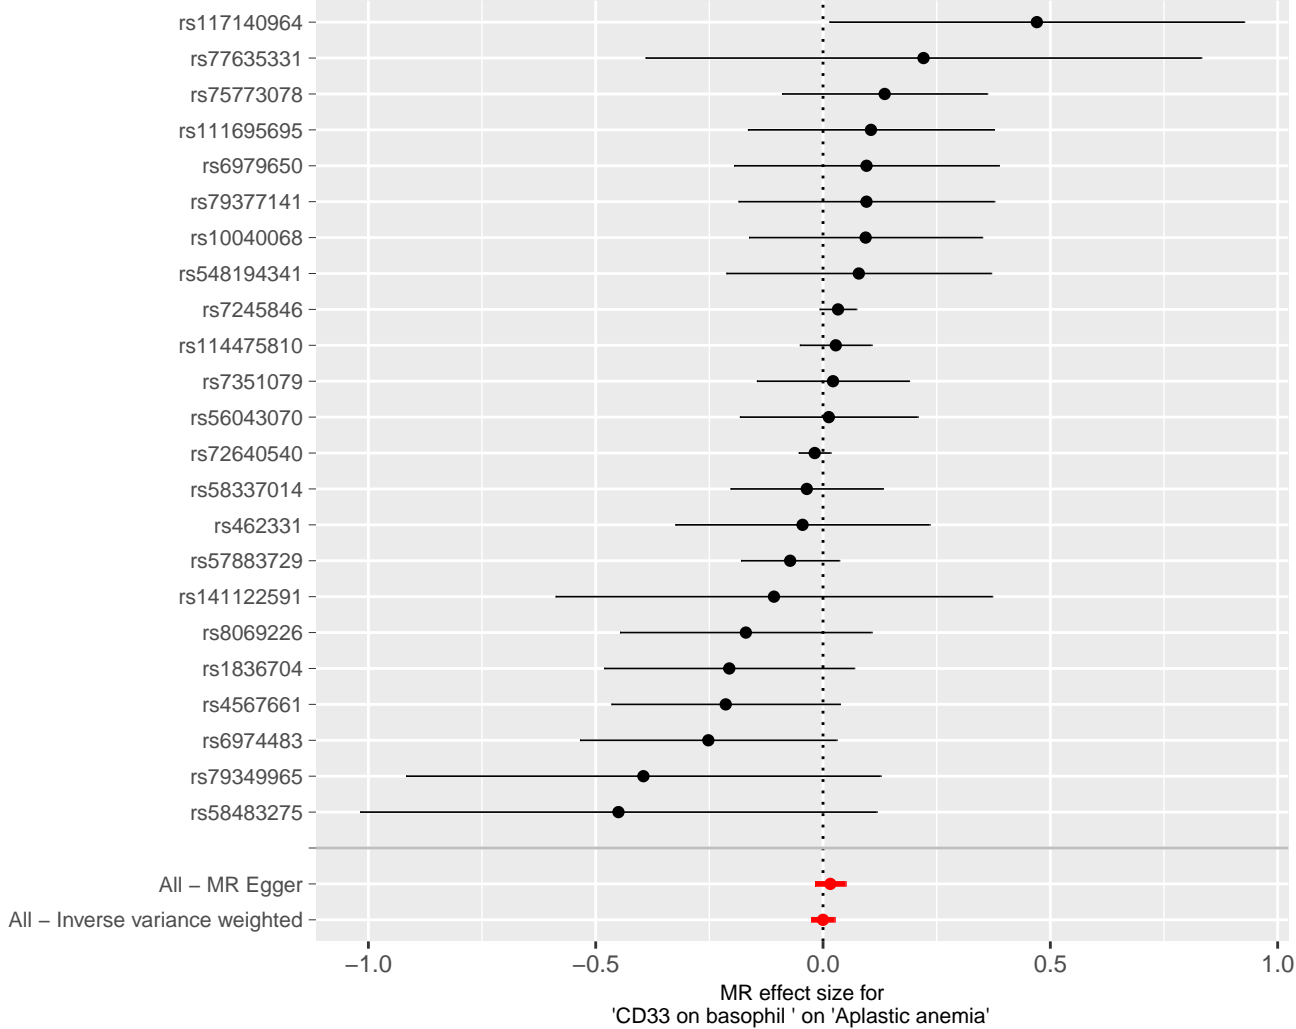

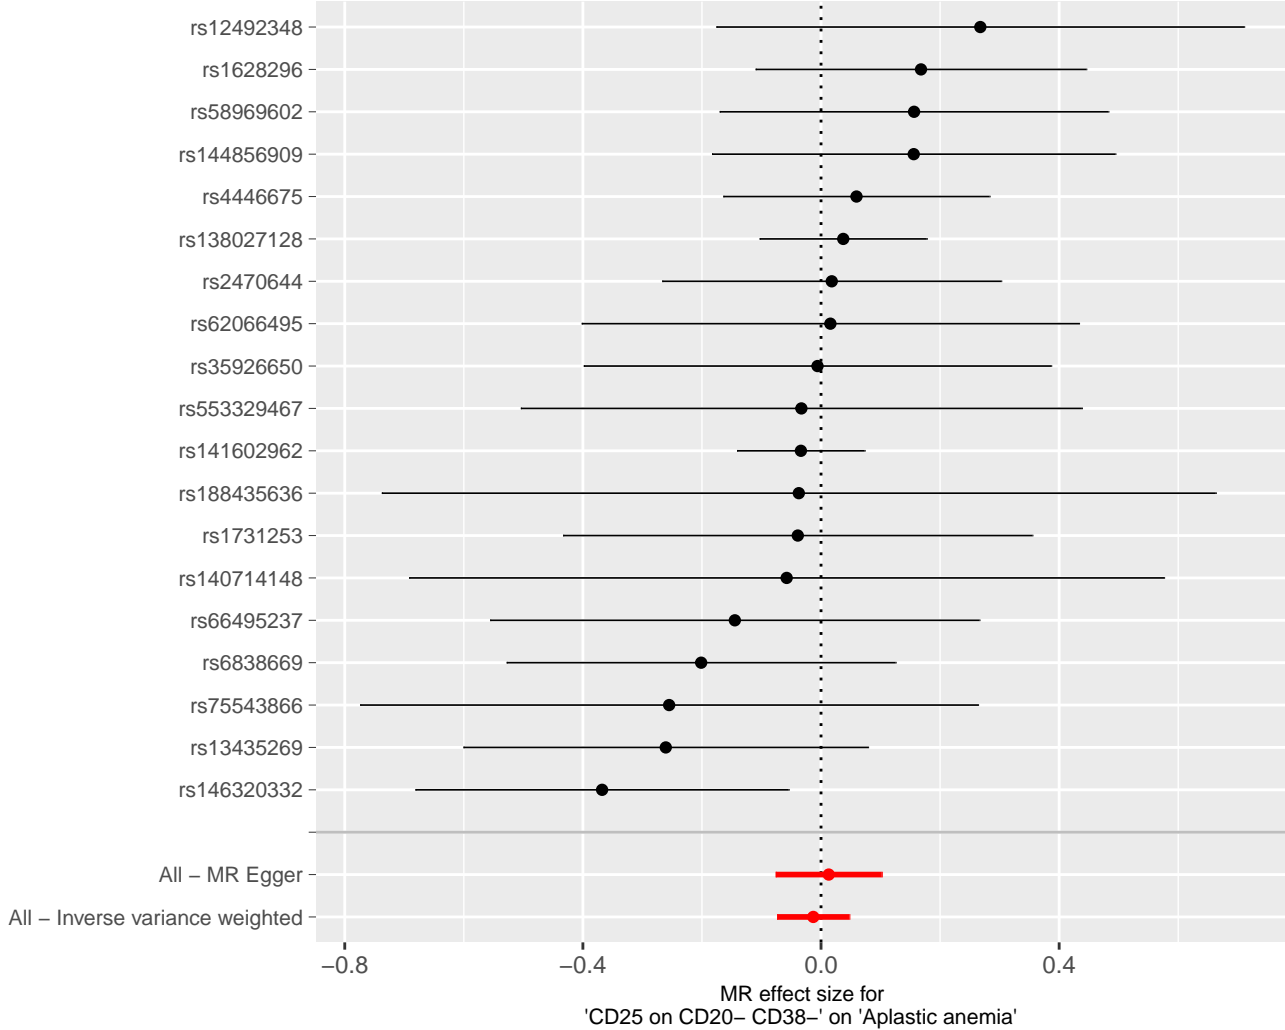

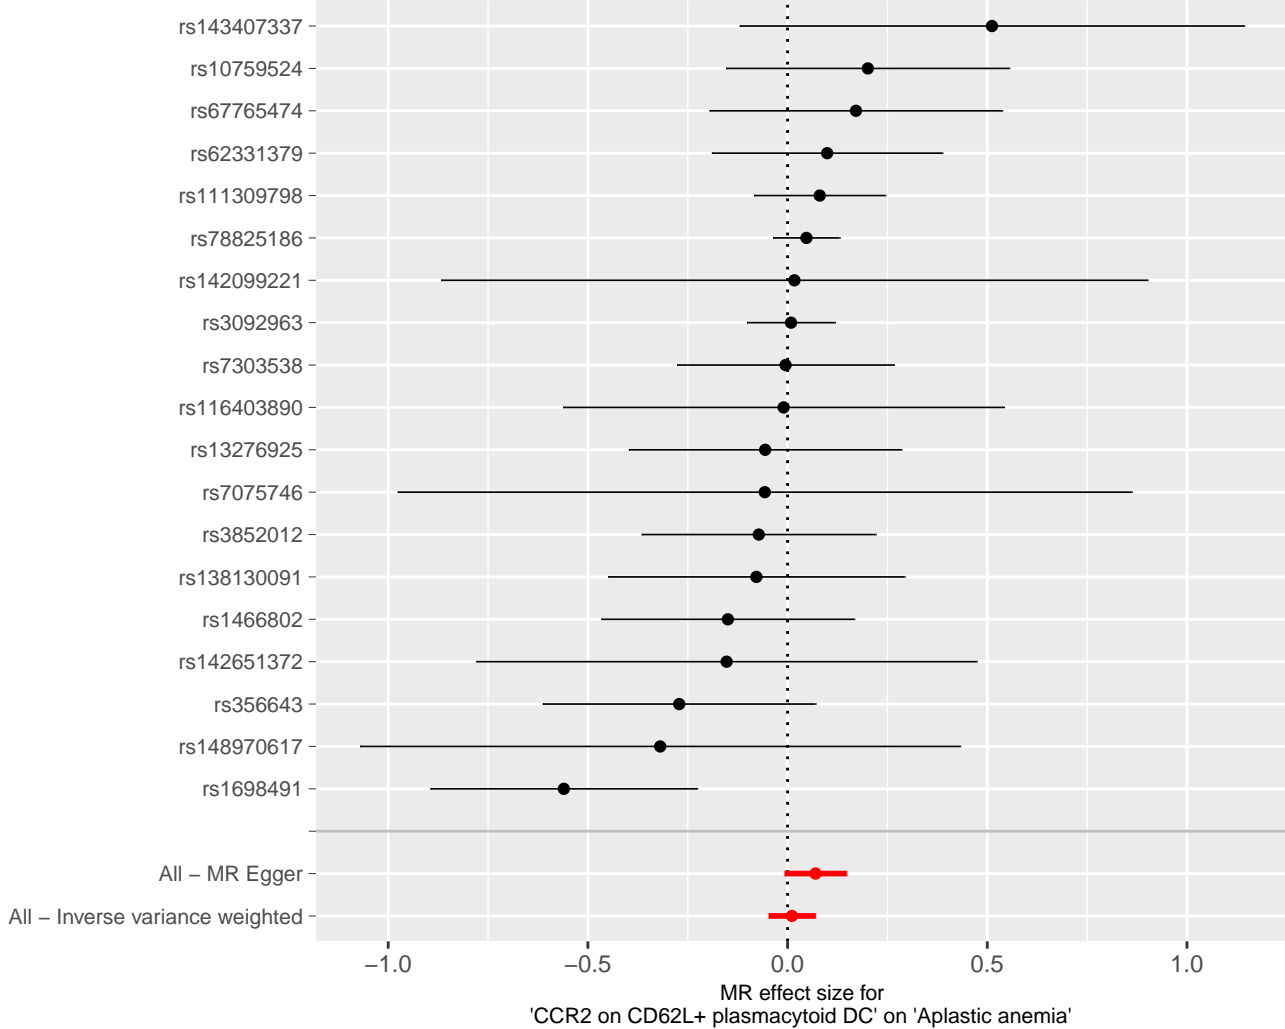



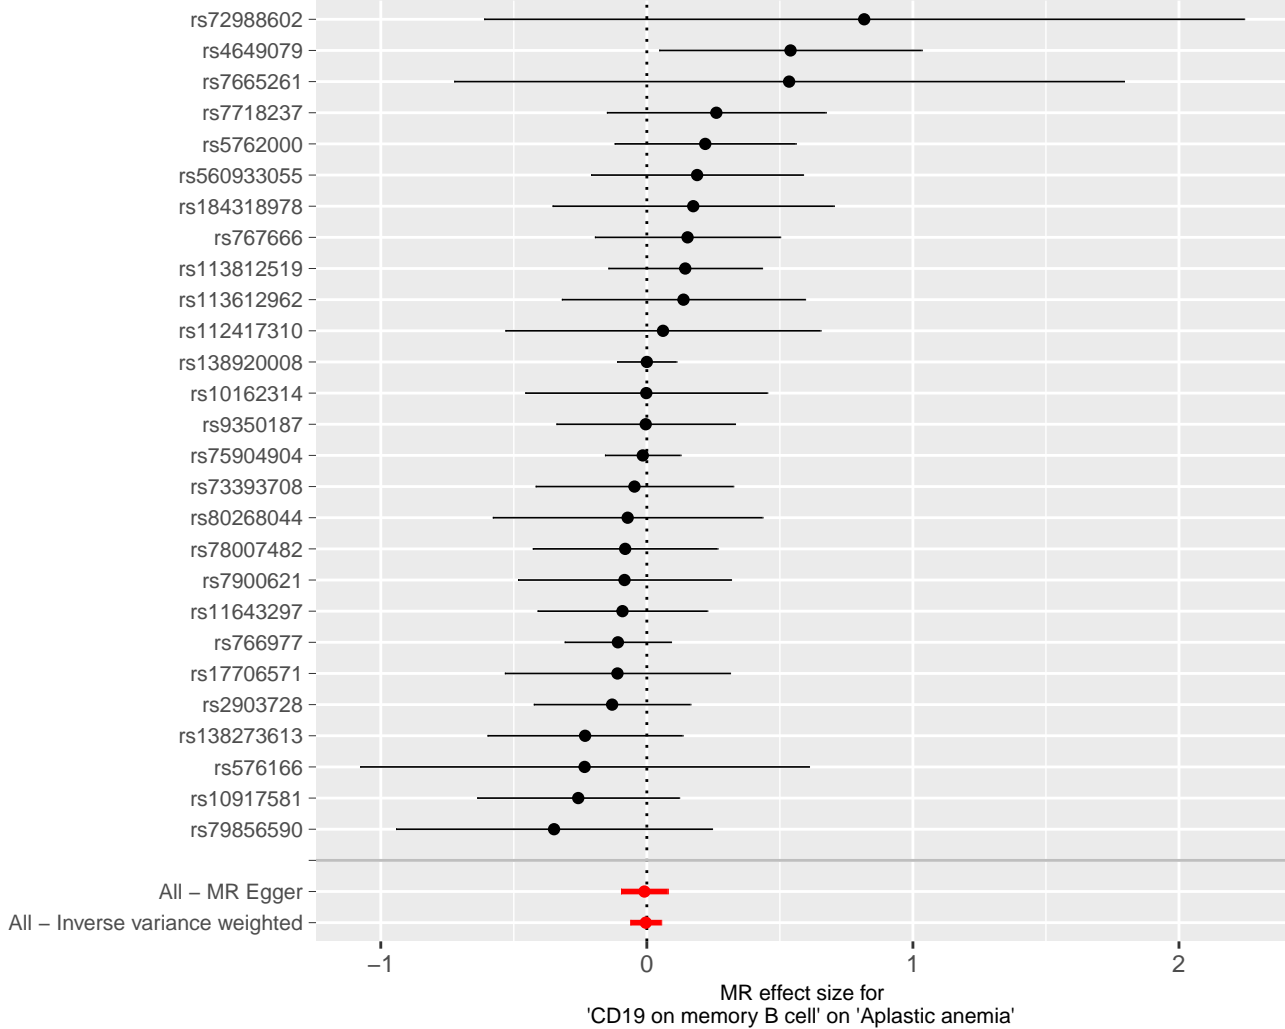

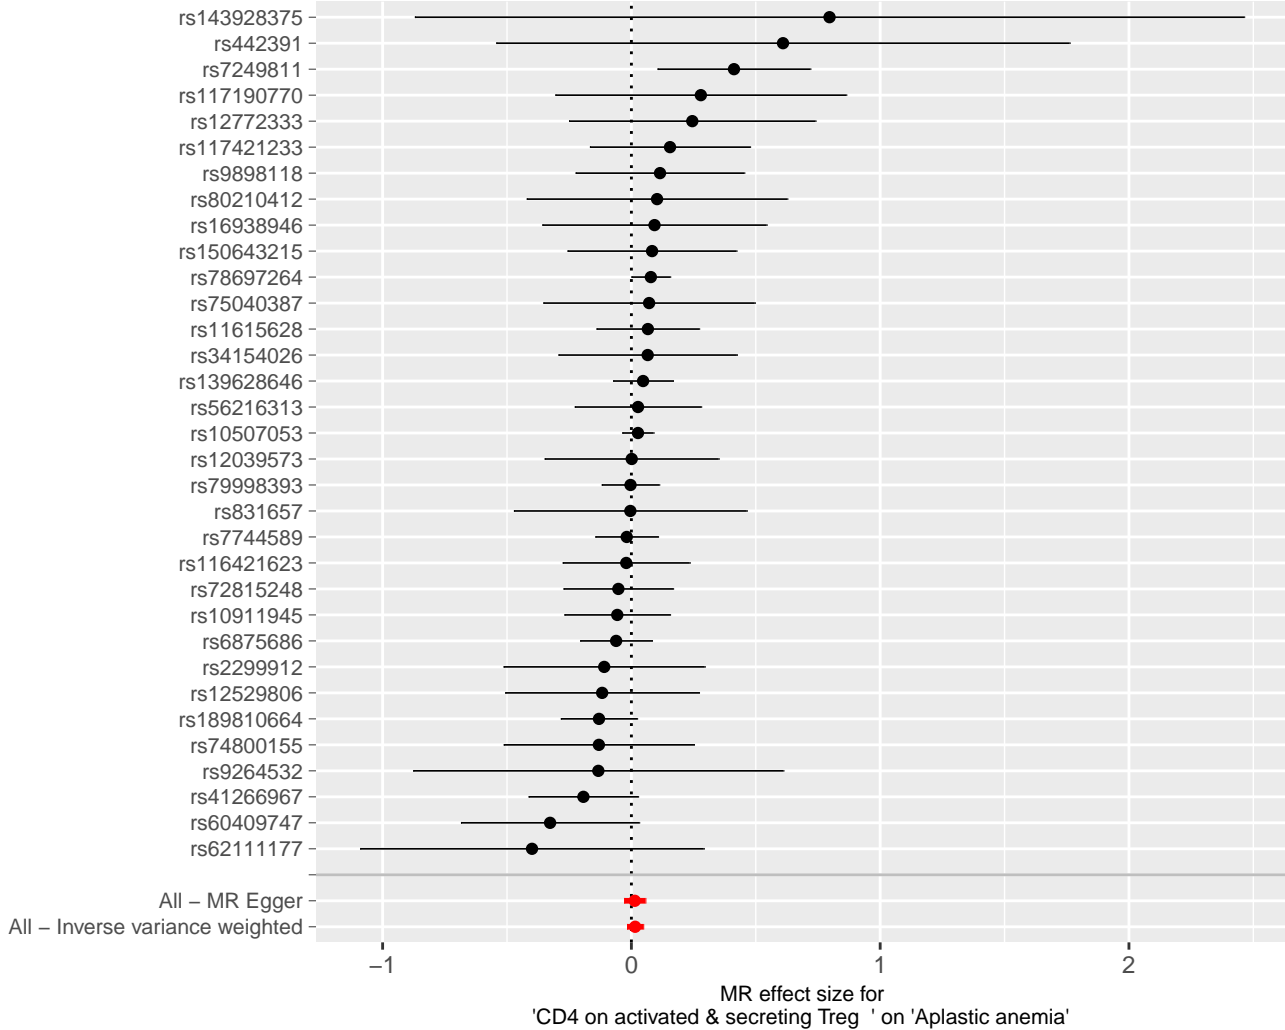

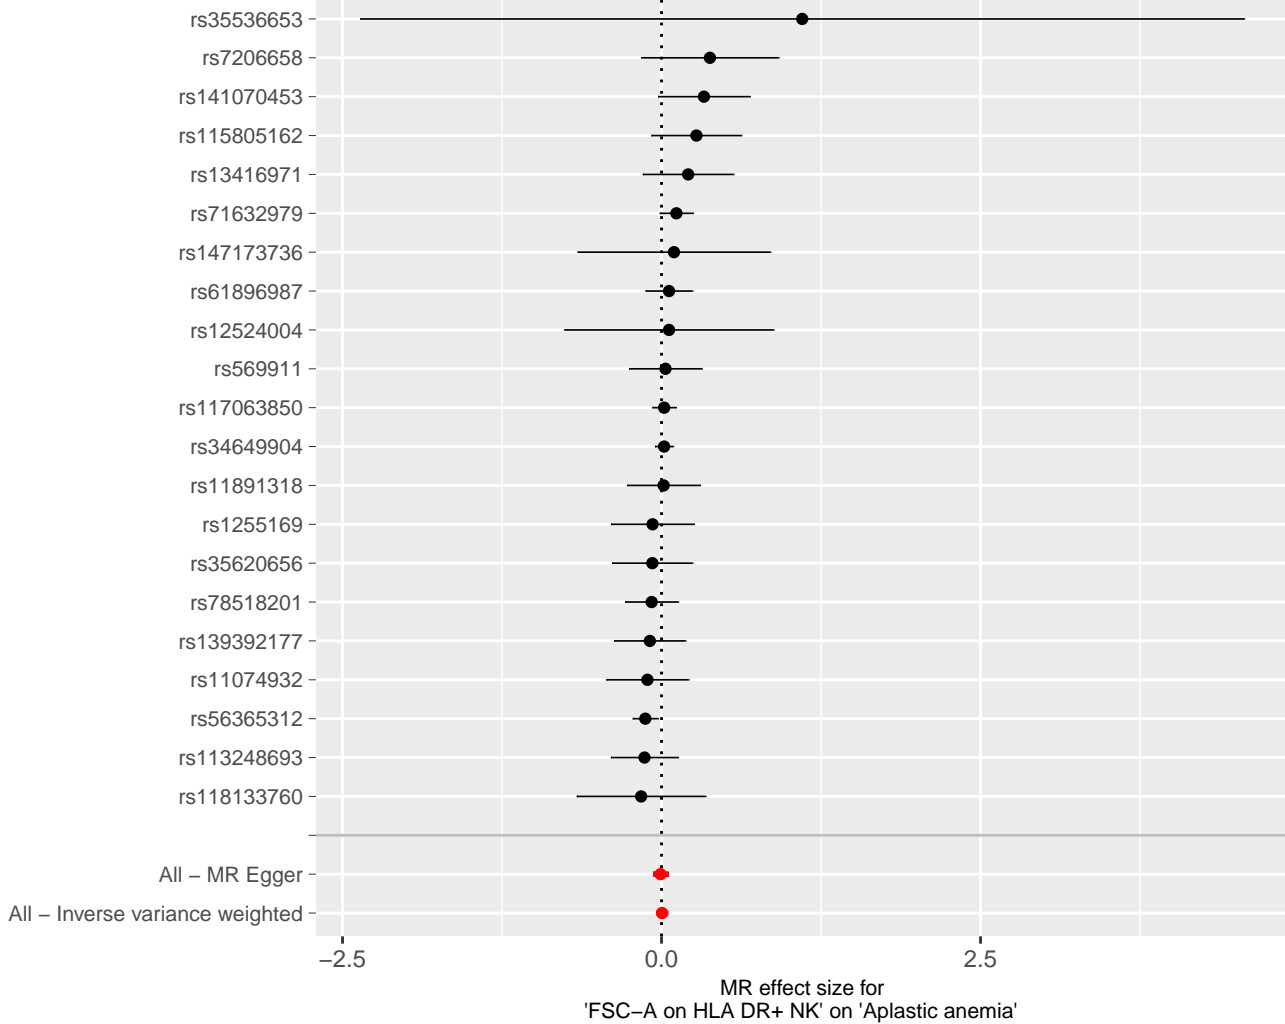

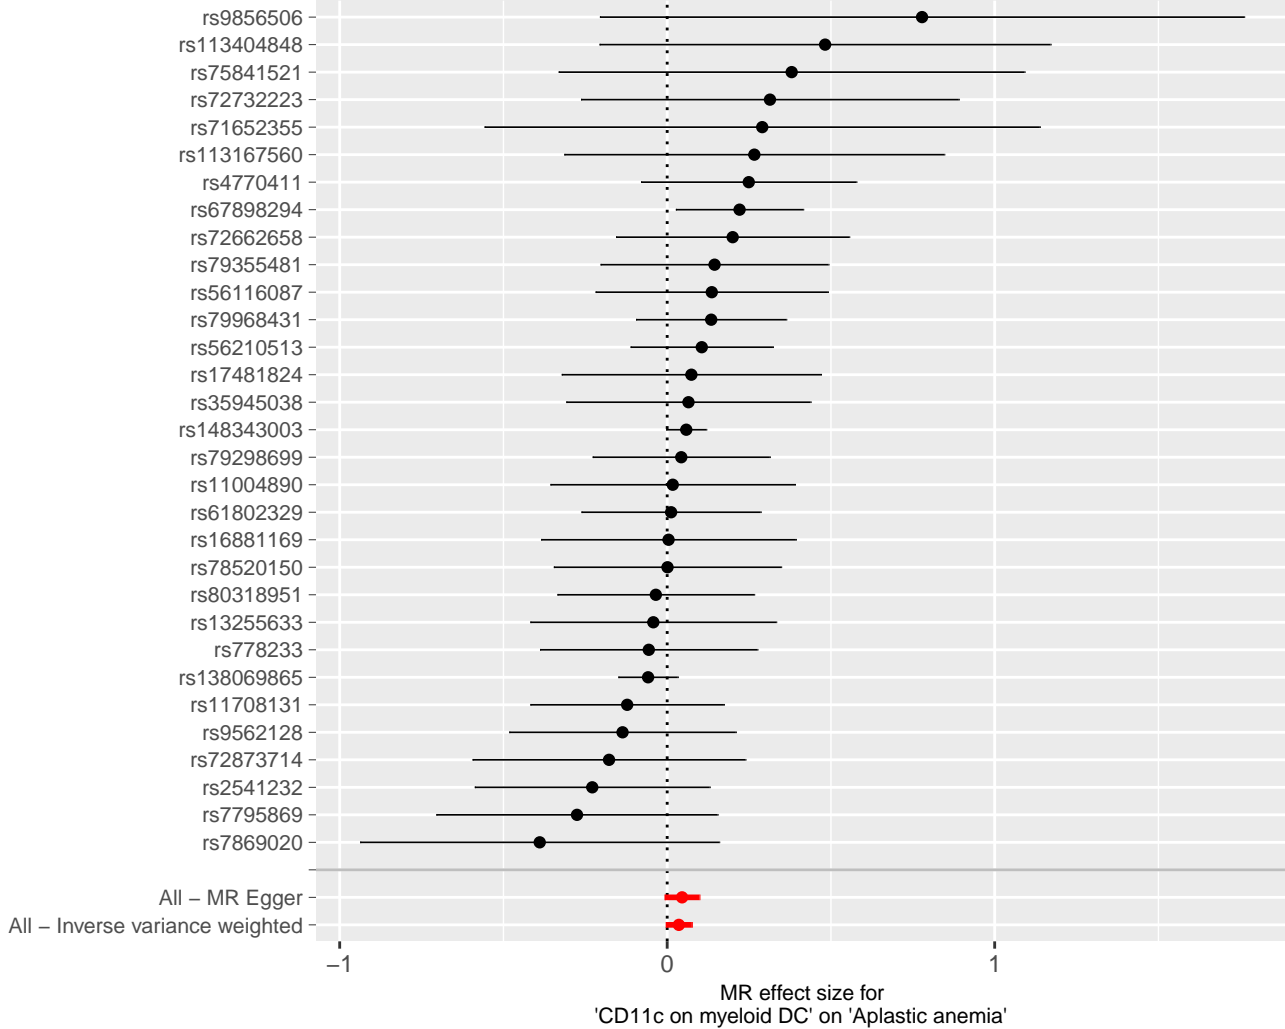

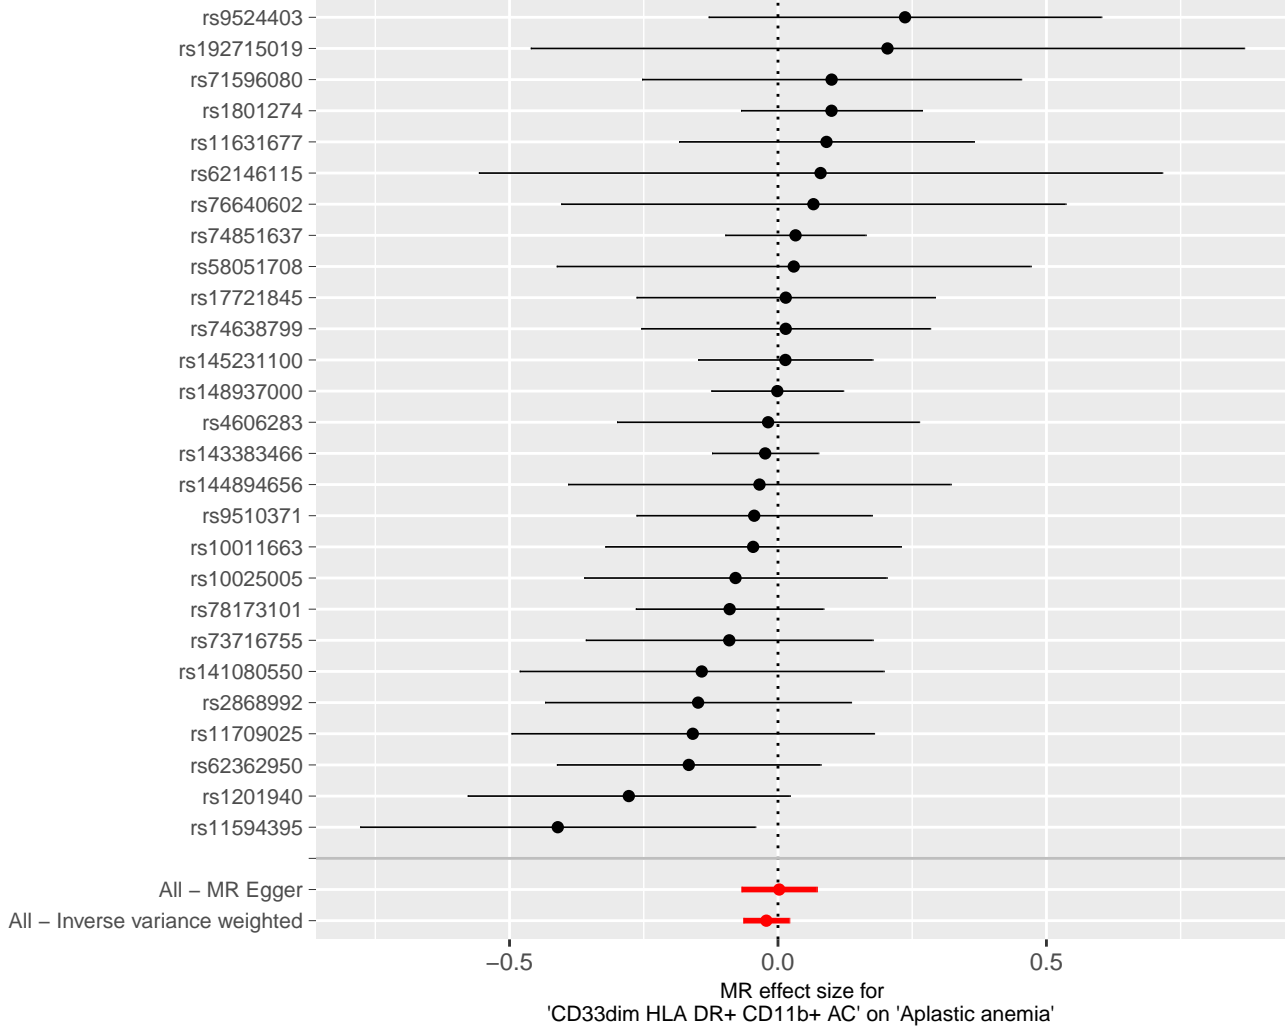

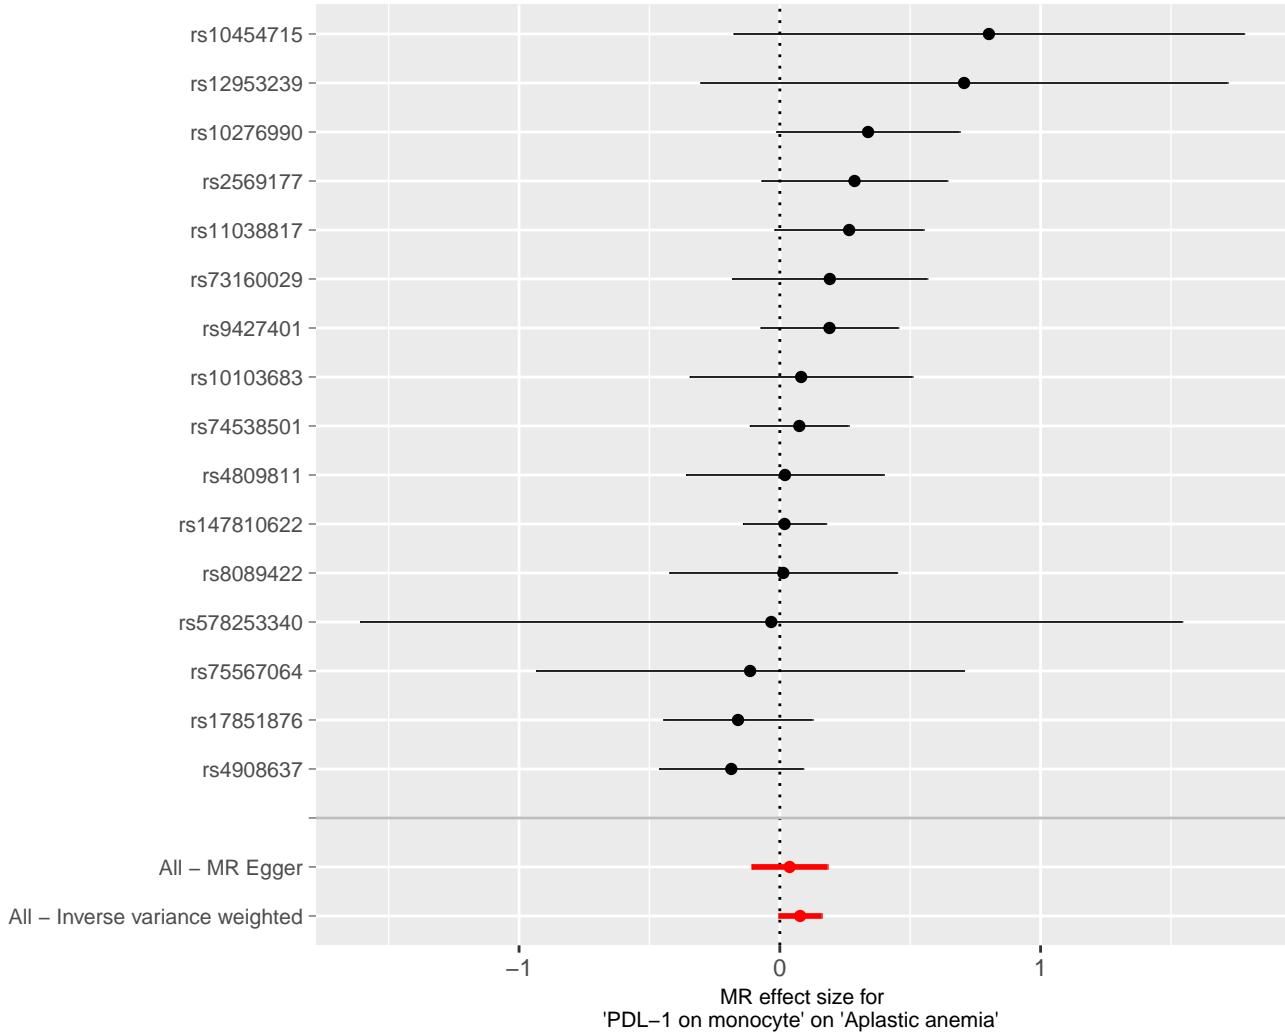

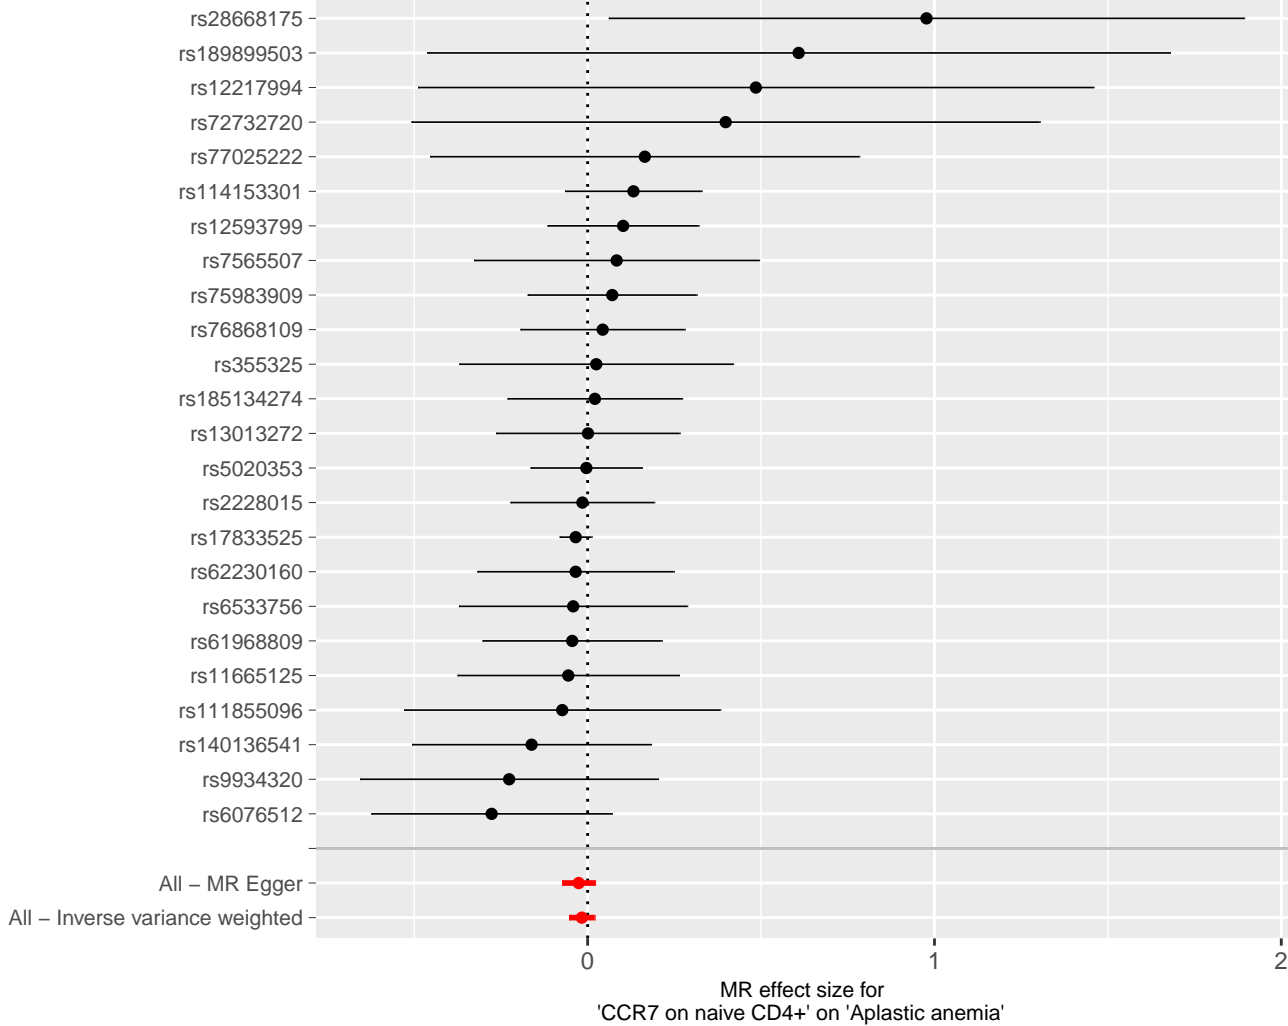

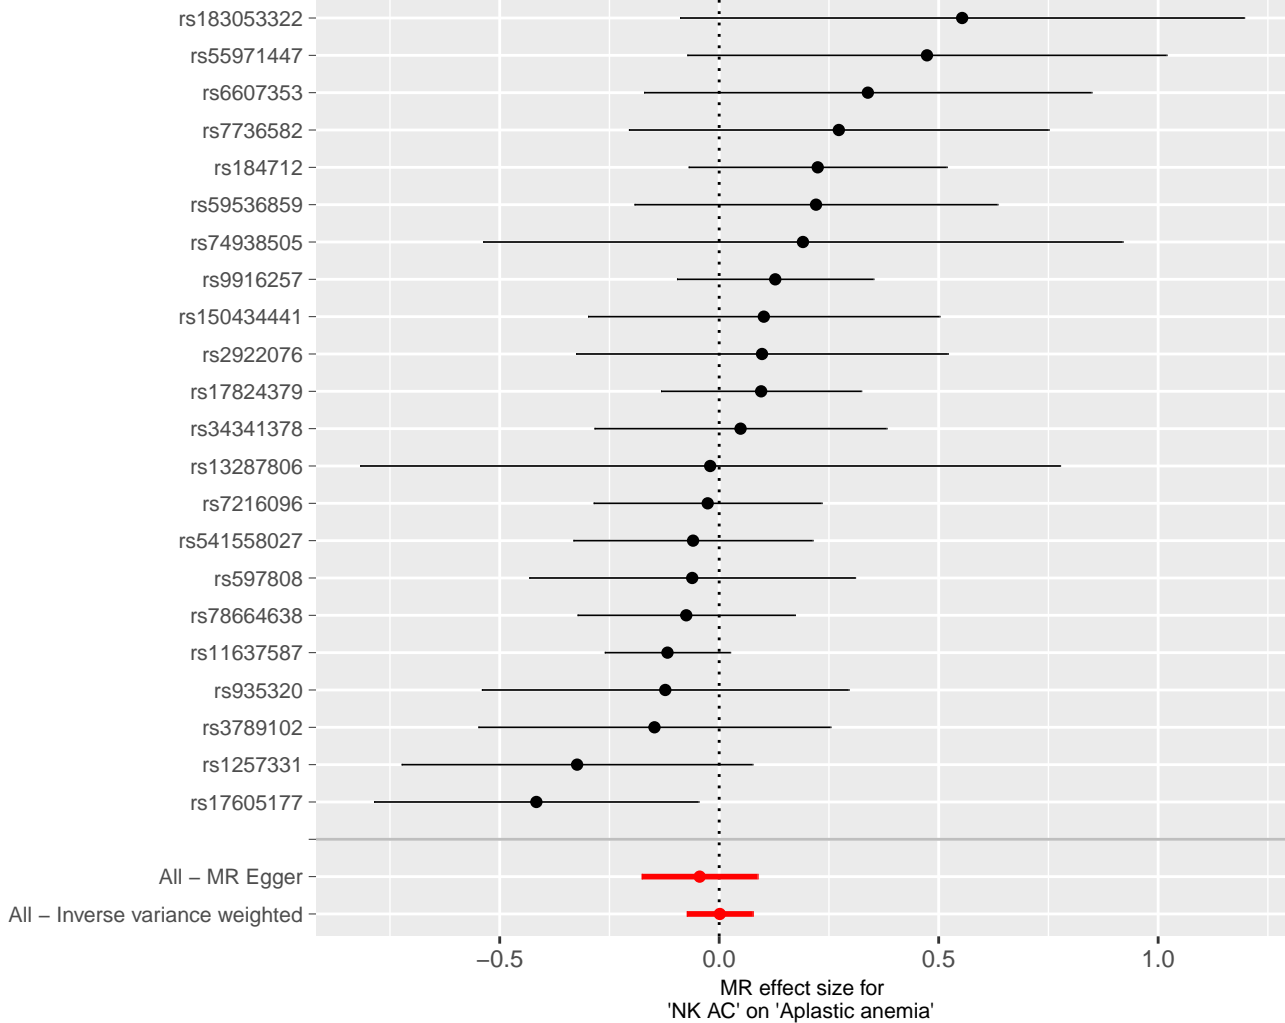



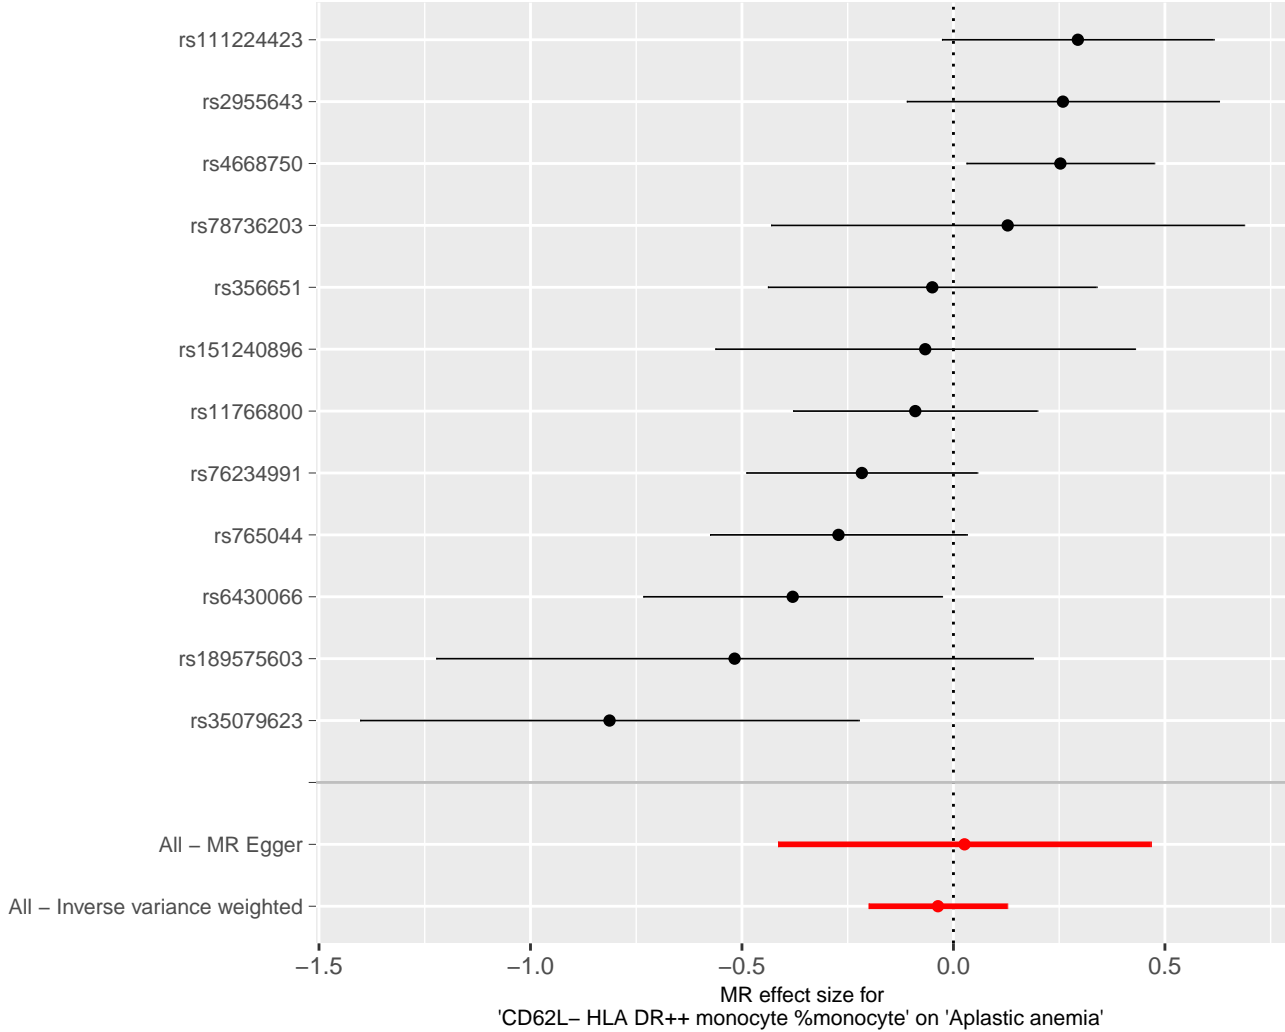

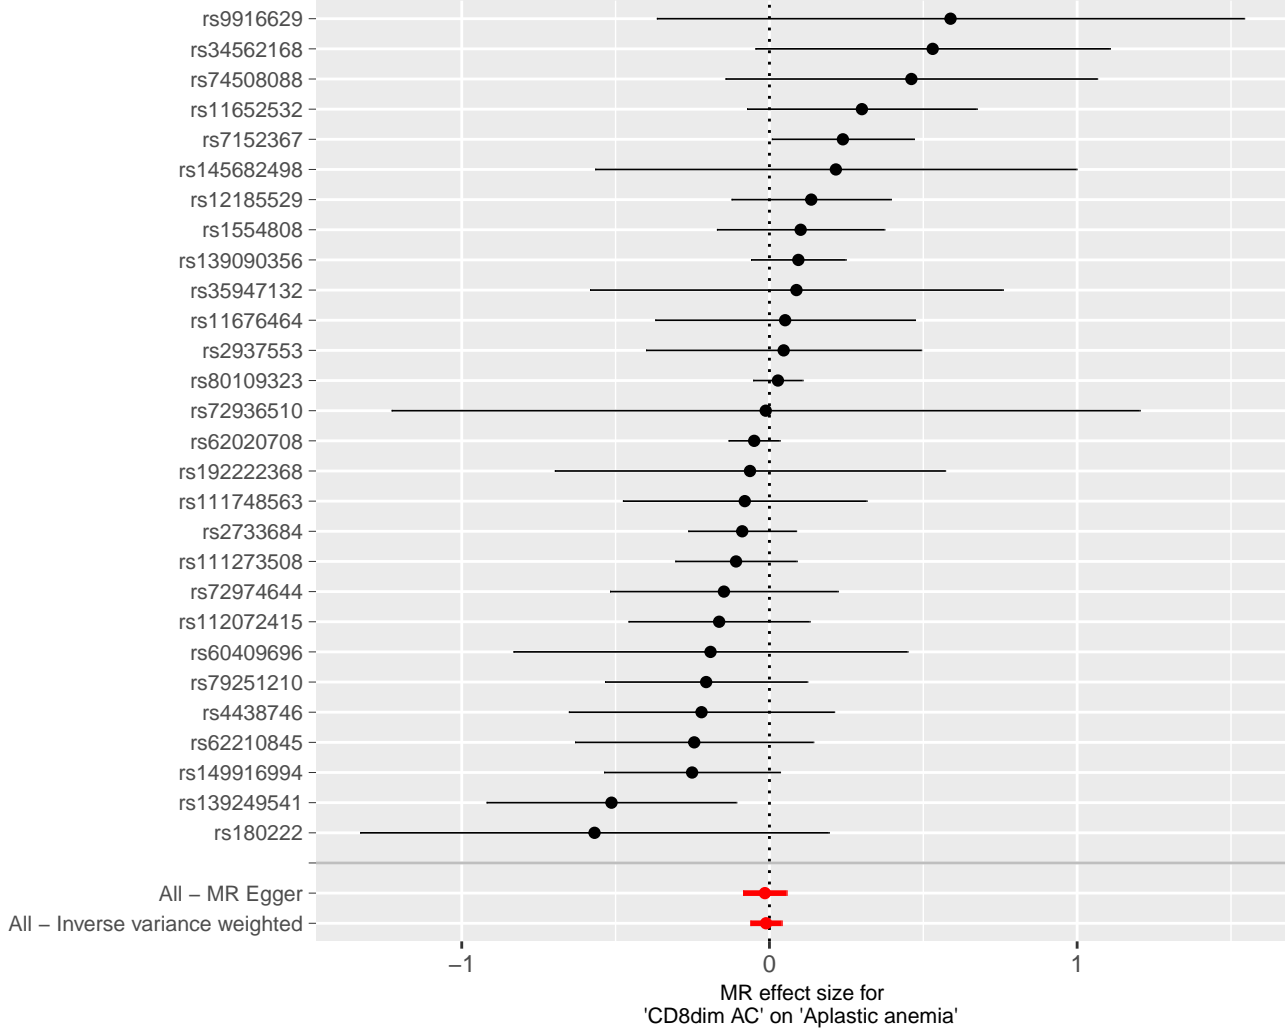

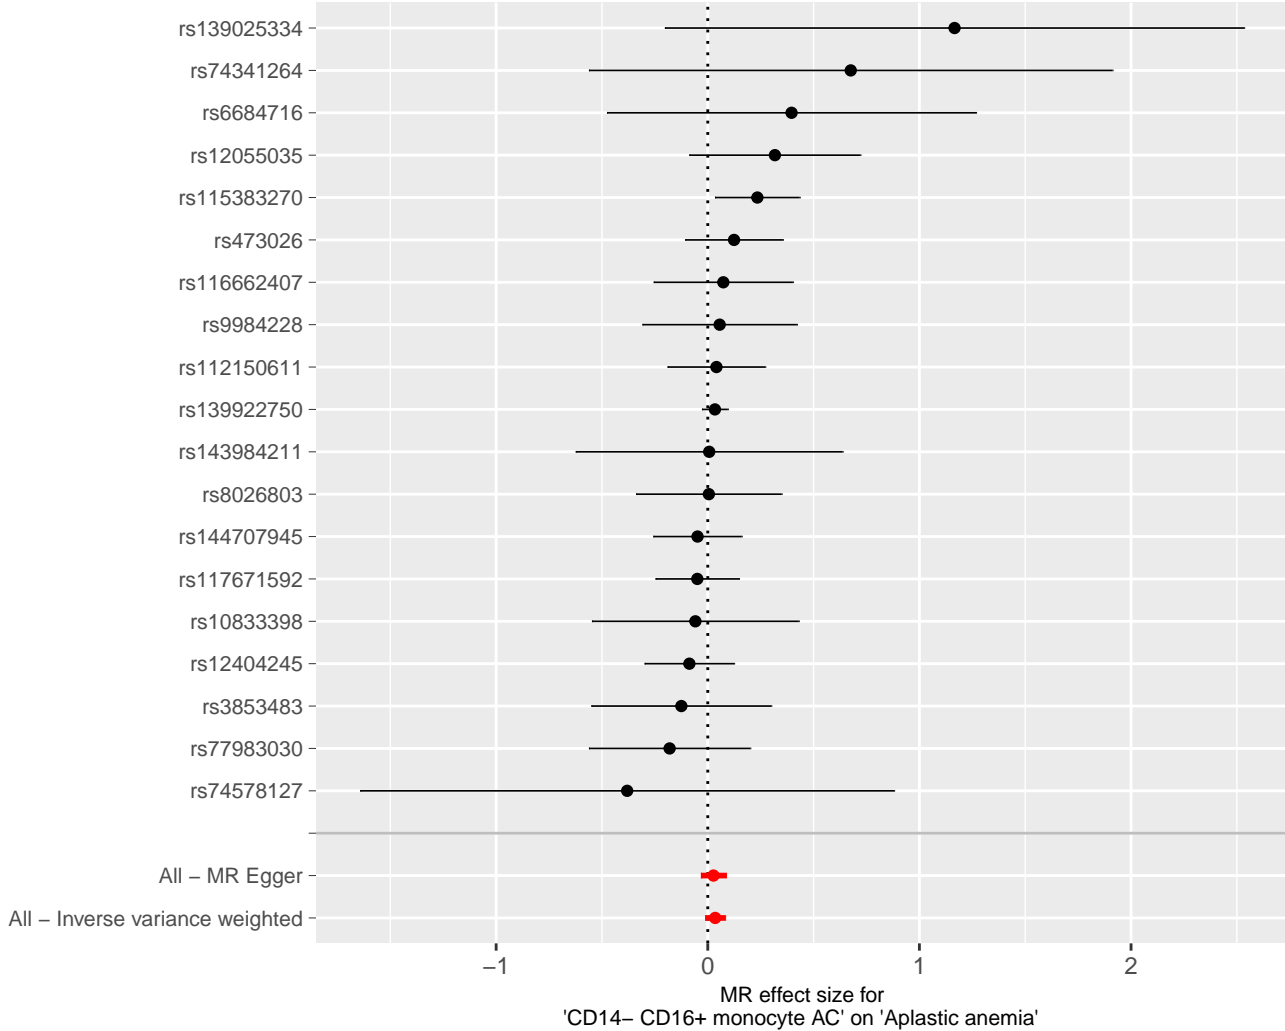

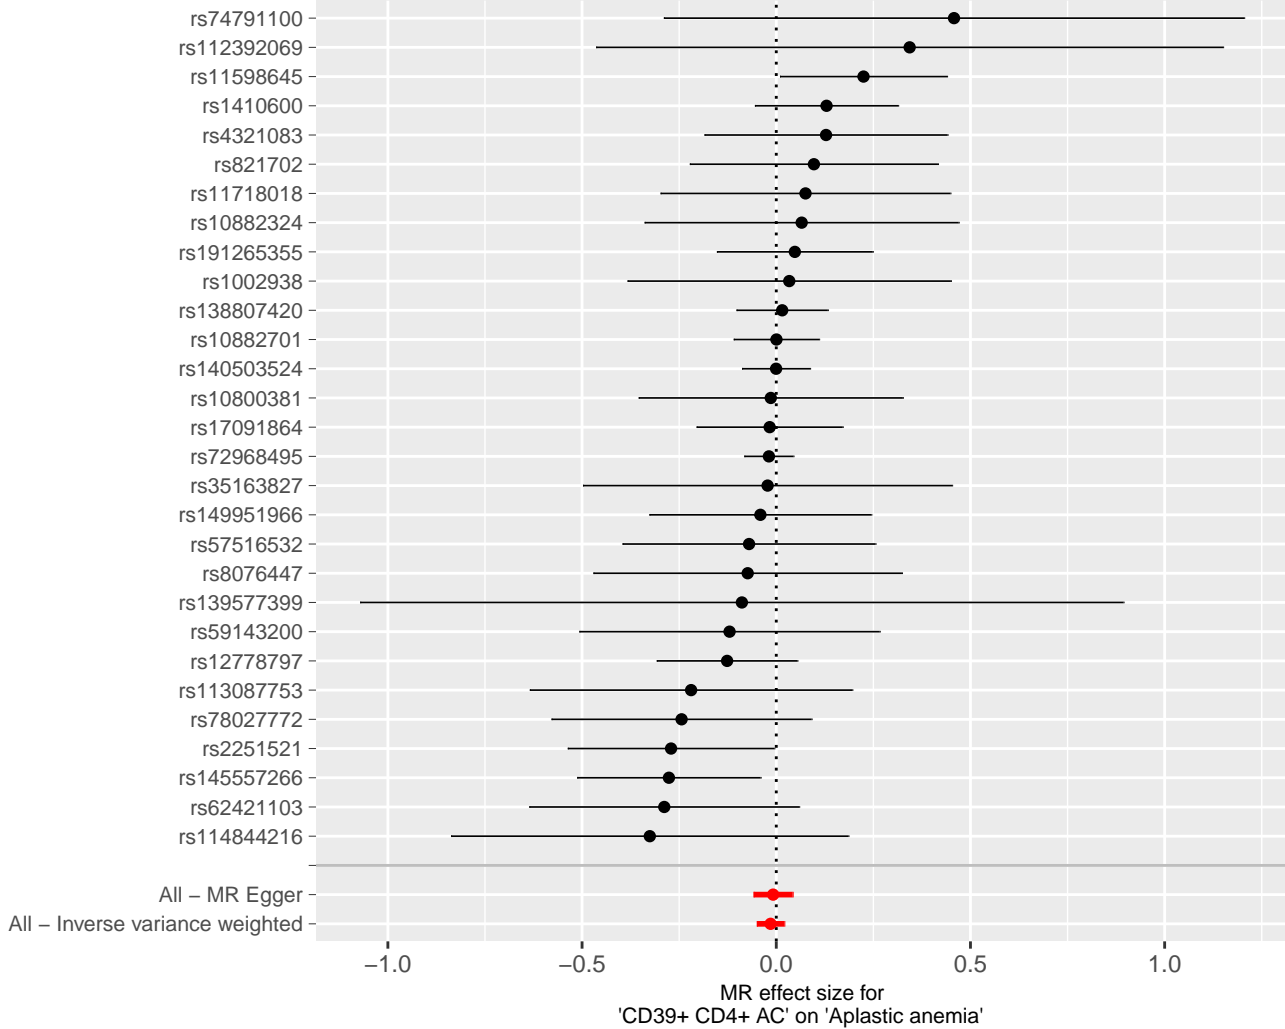

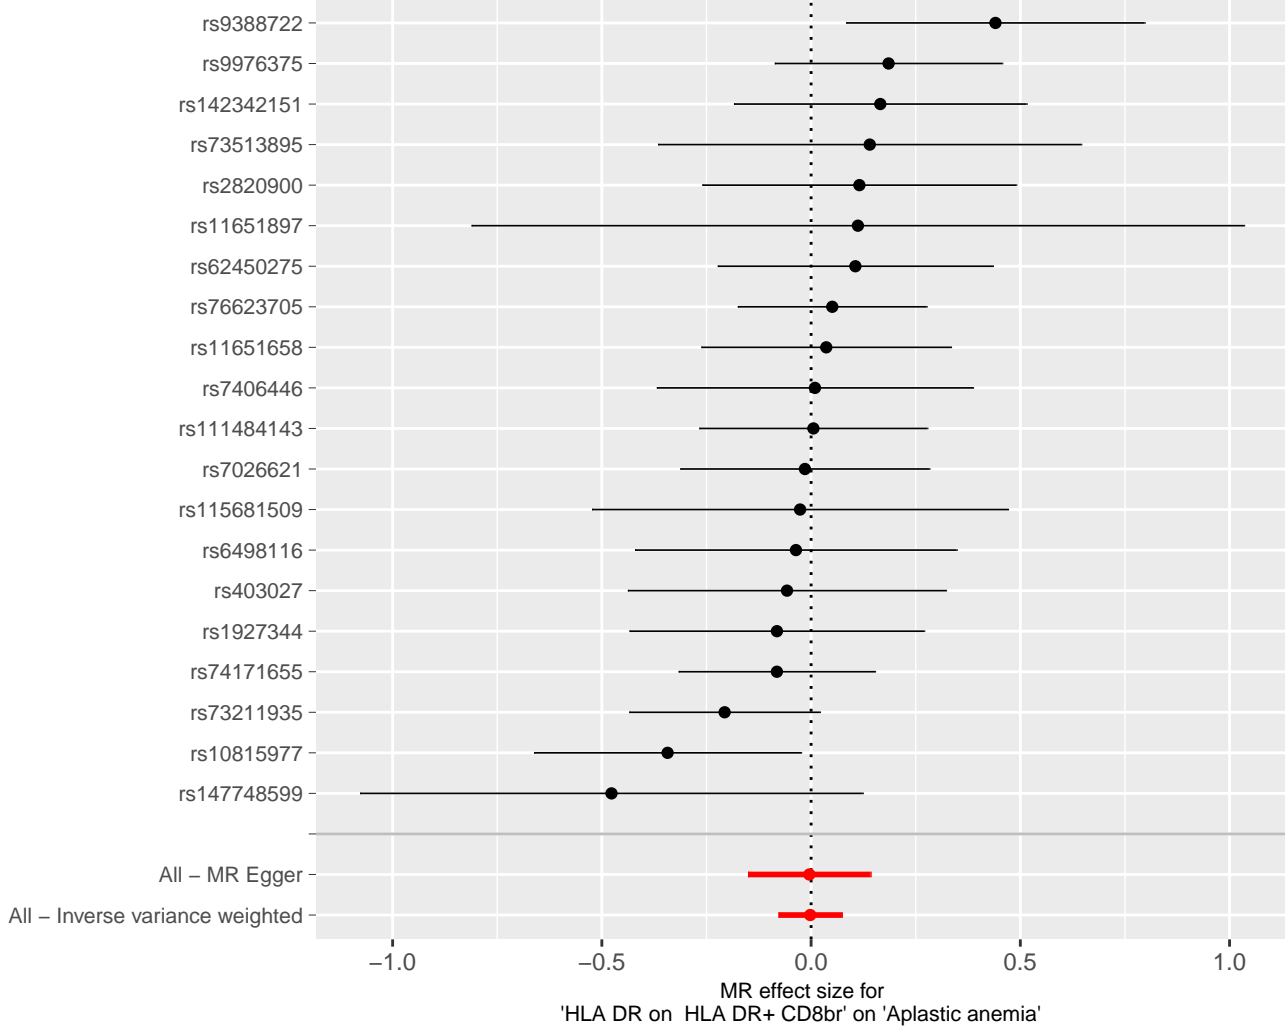

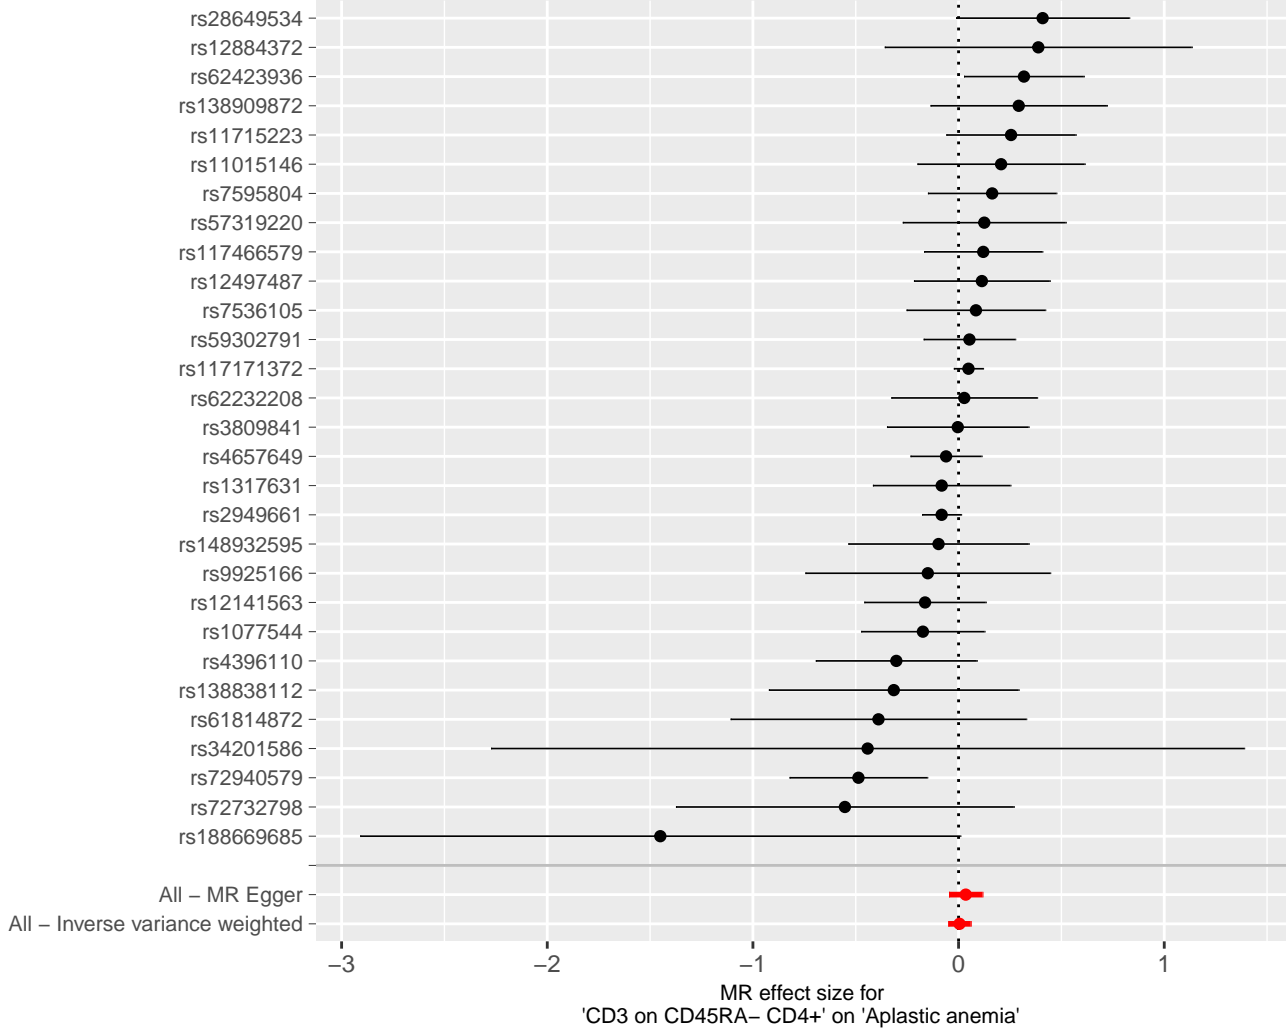

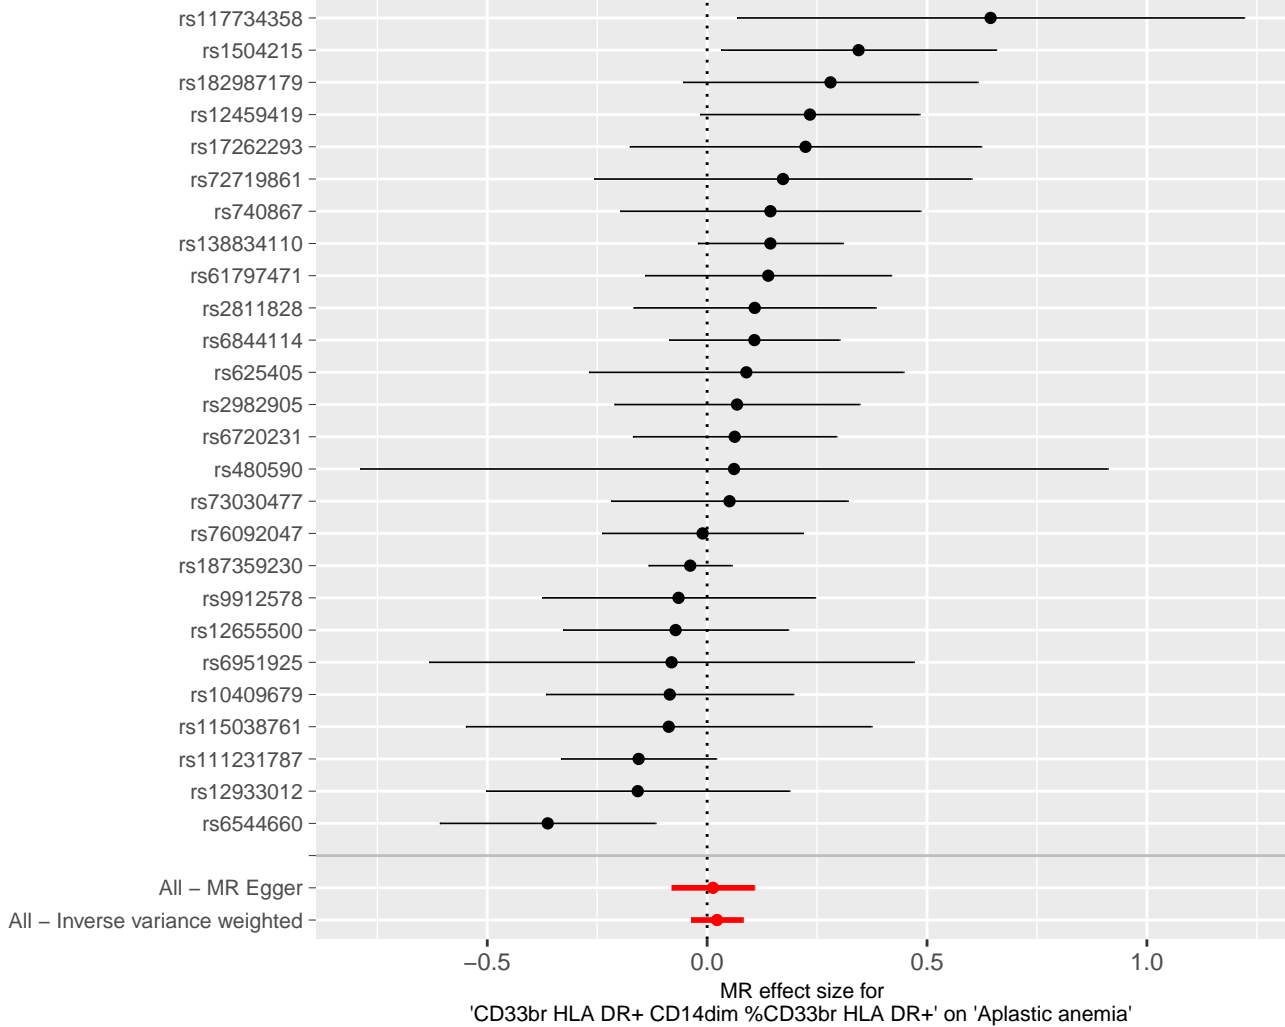

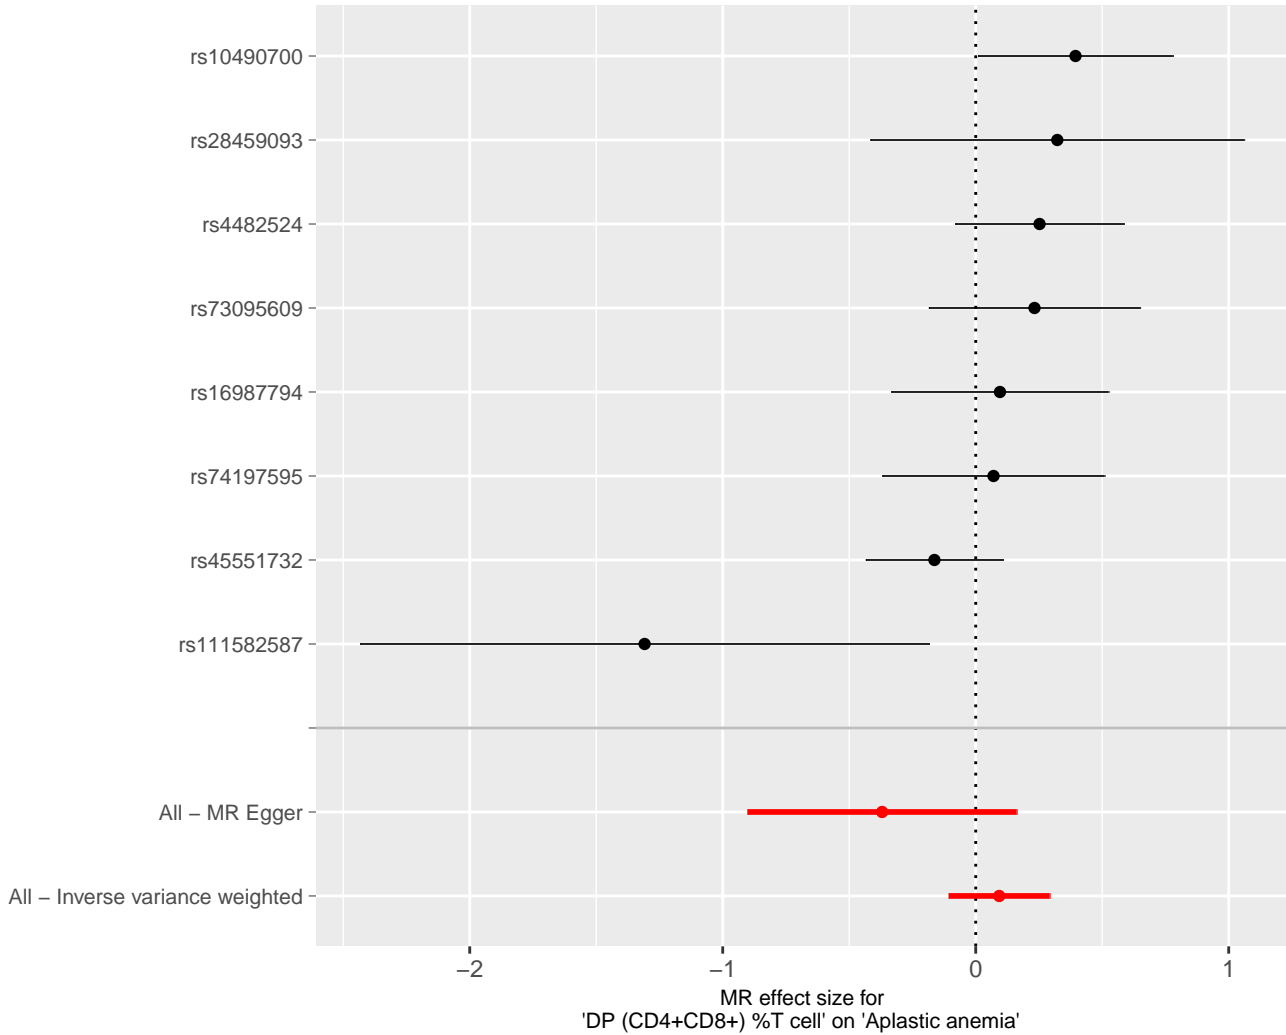



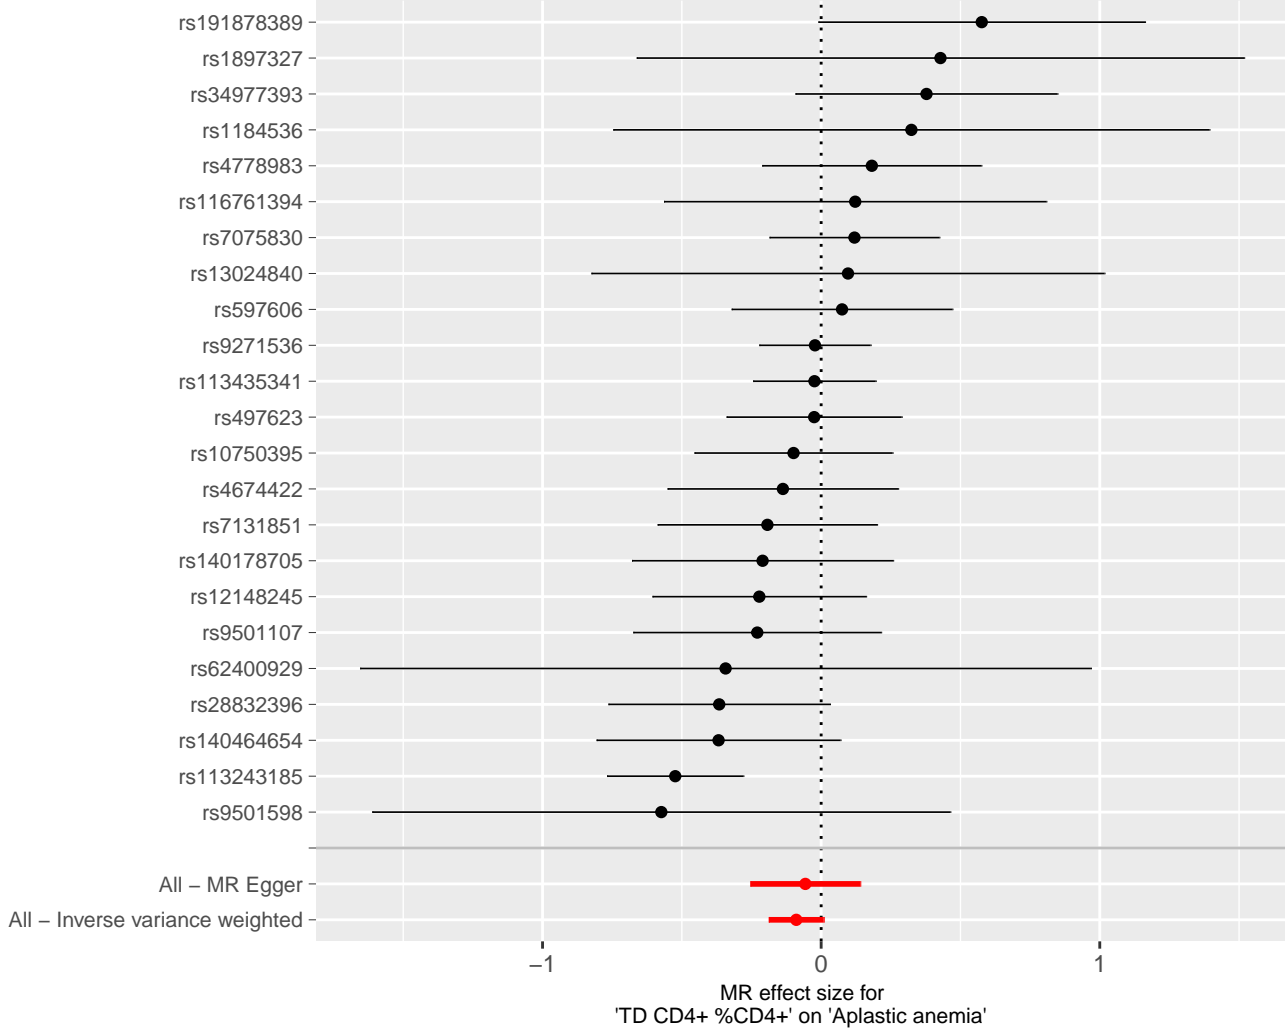

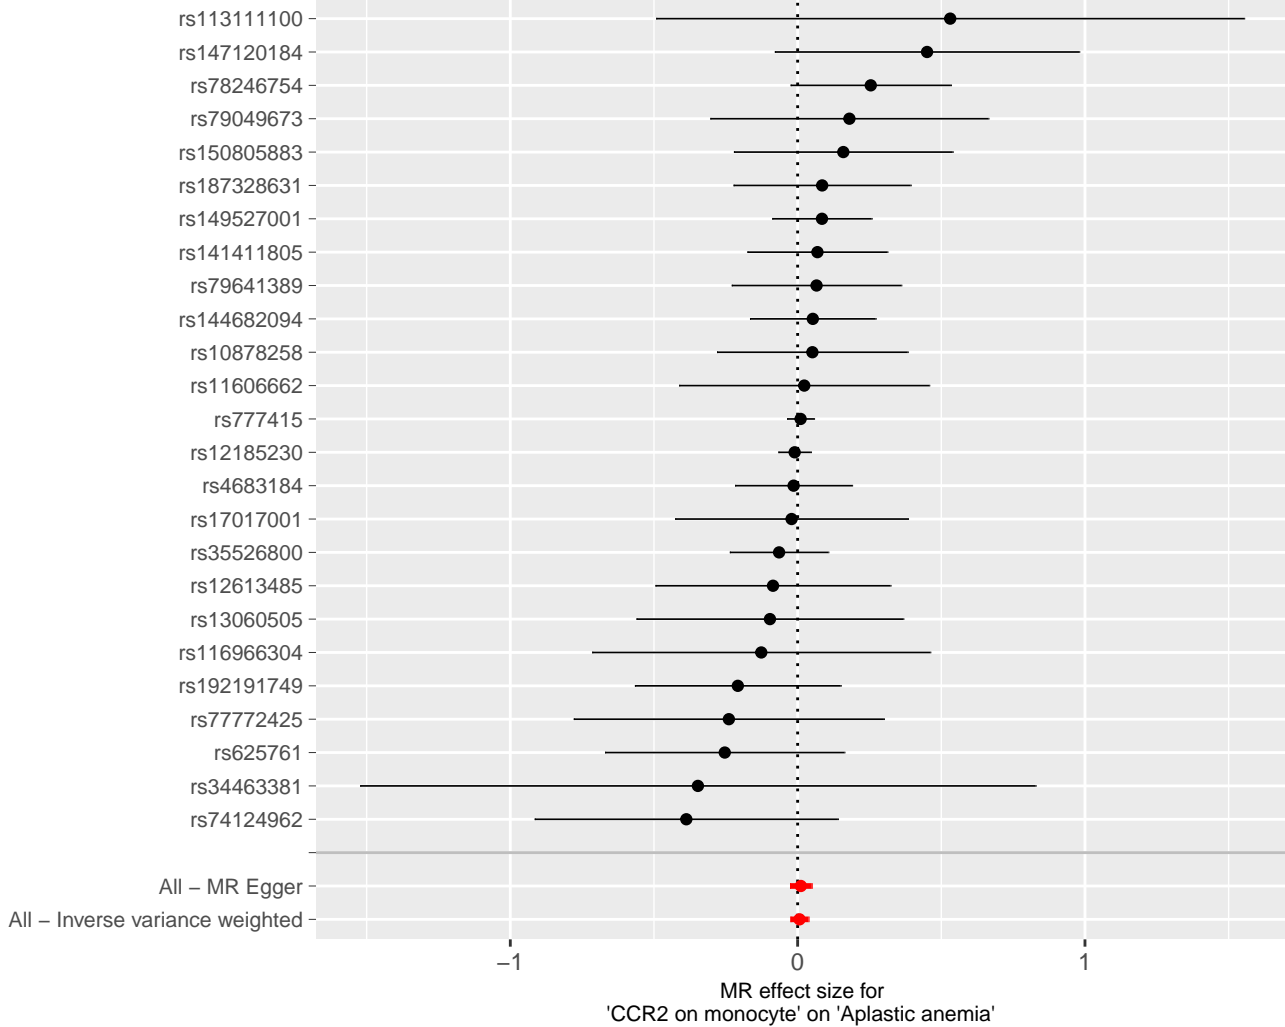

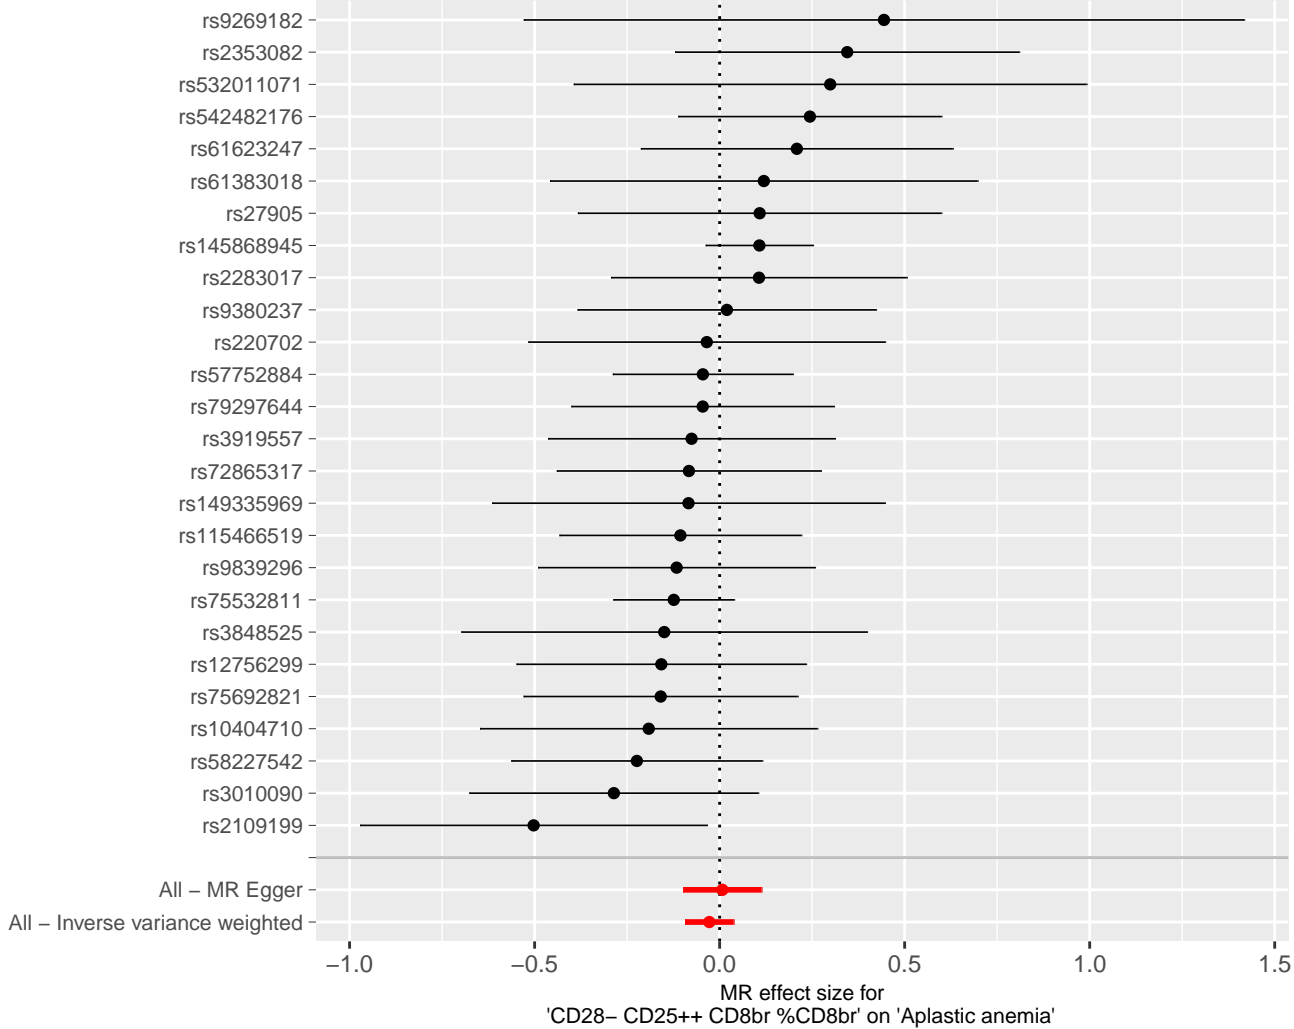

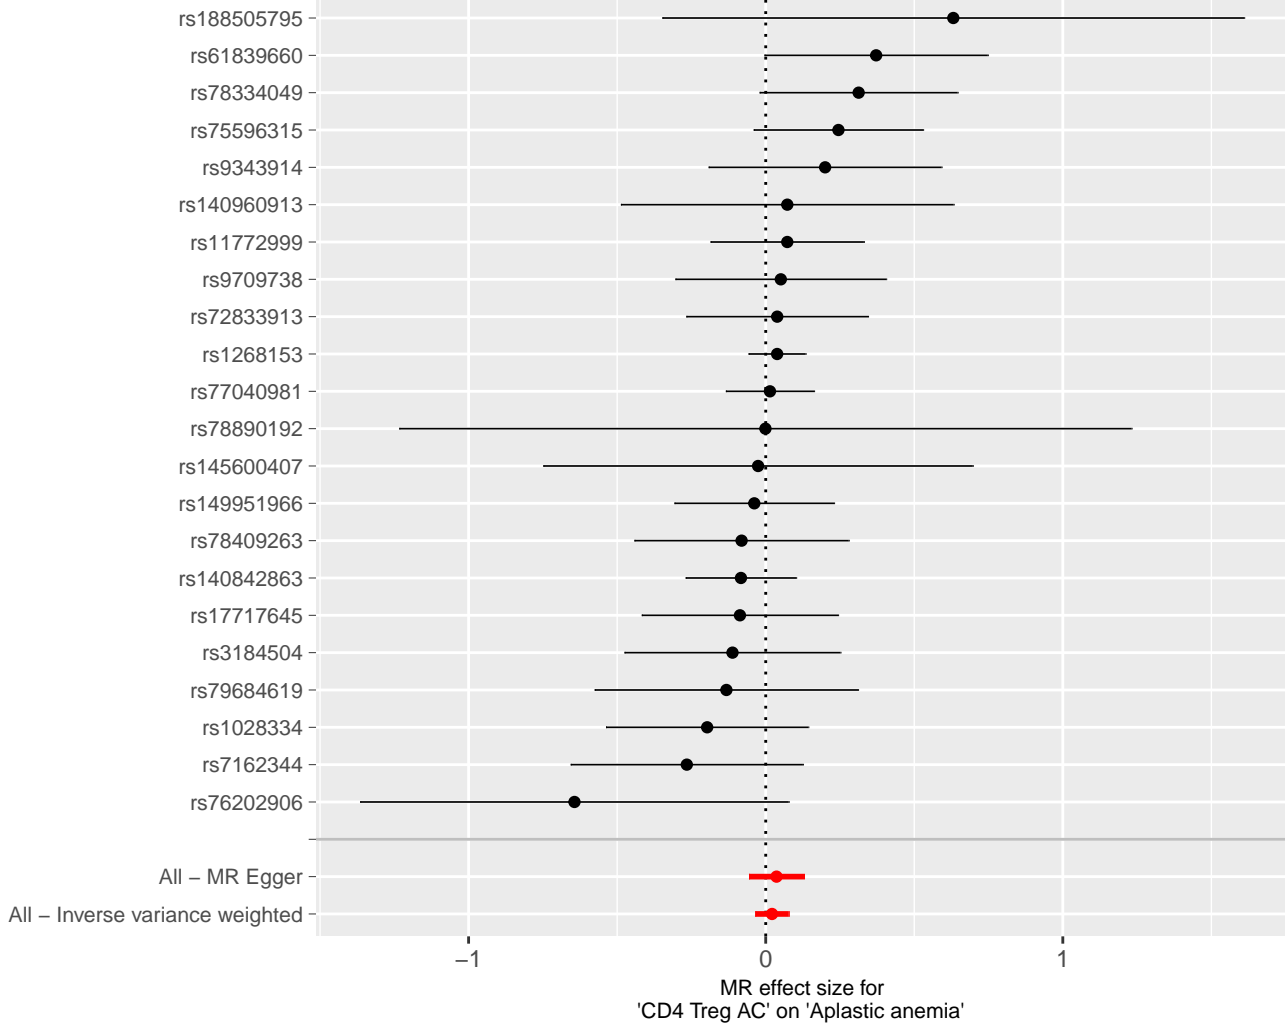

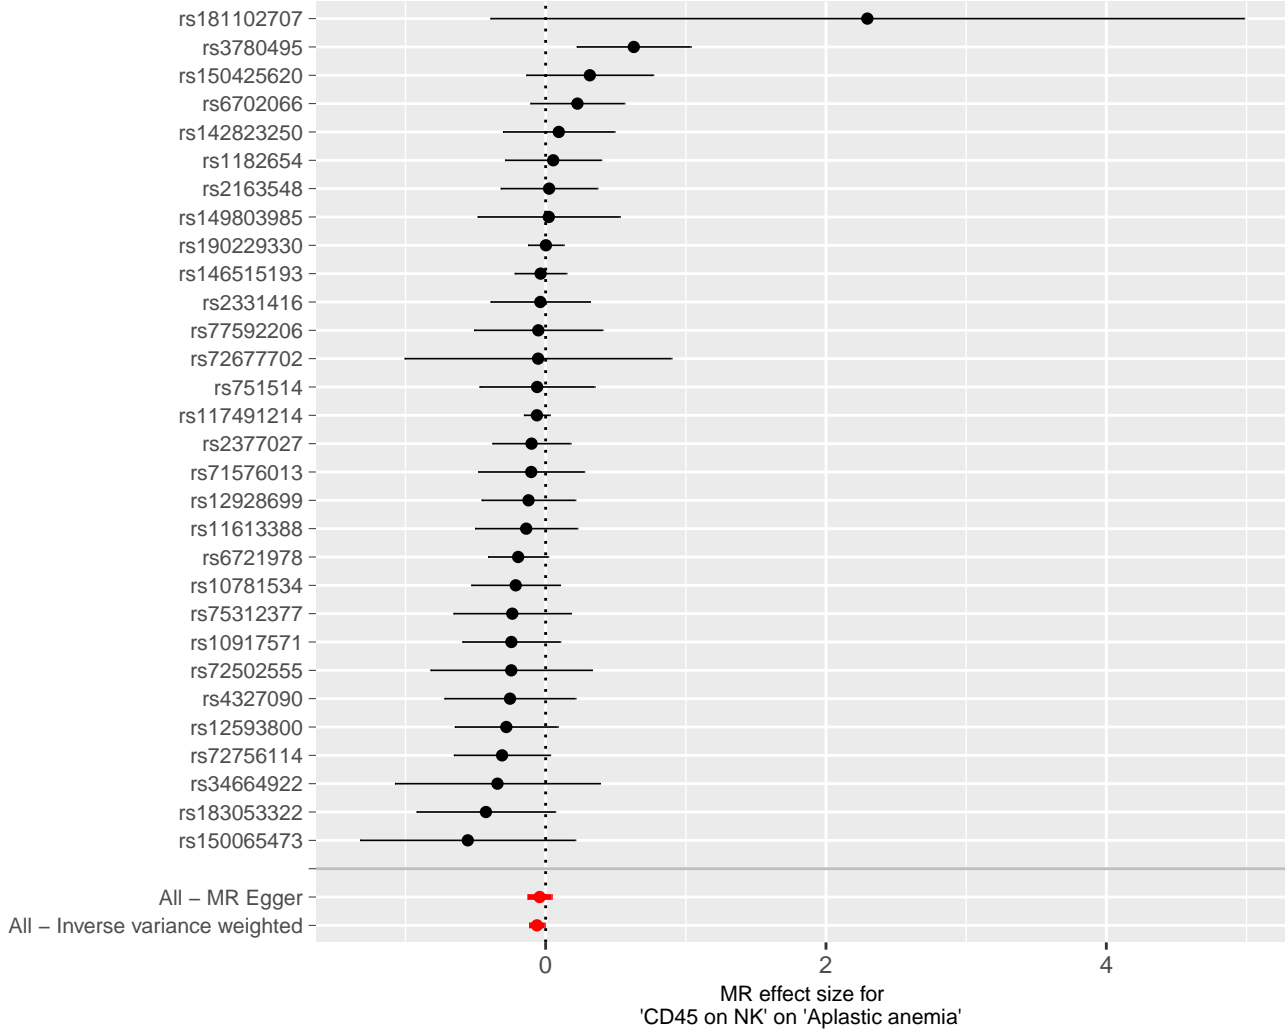

All - Inverse variance weights

-0.2 -0.1 0.0 0.1

MR effect size for  
'CD45RA+ CD28- CD8br %T cell' on 'Aplastic anemia'

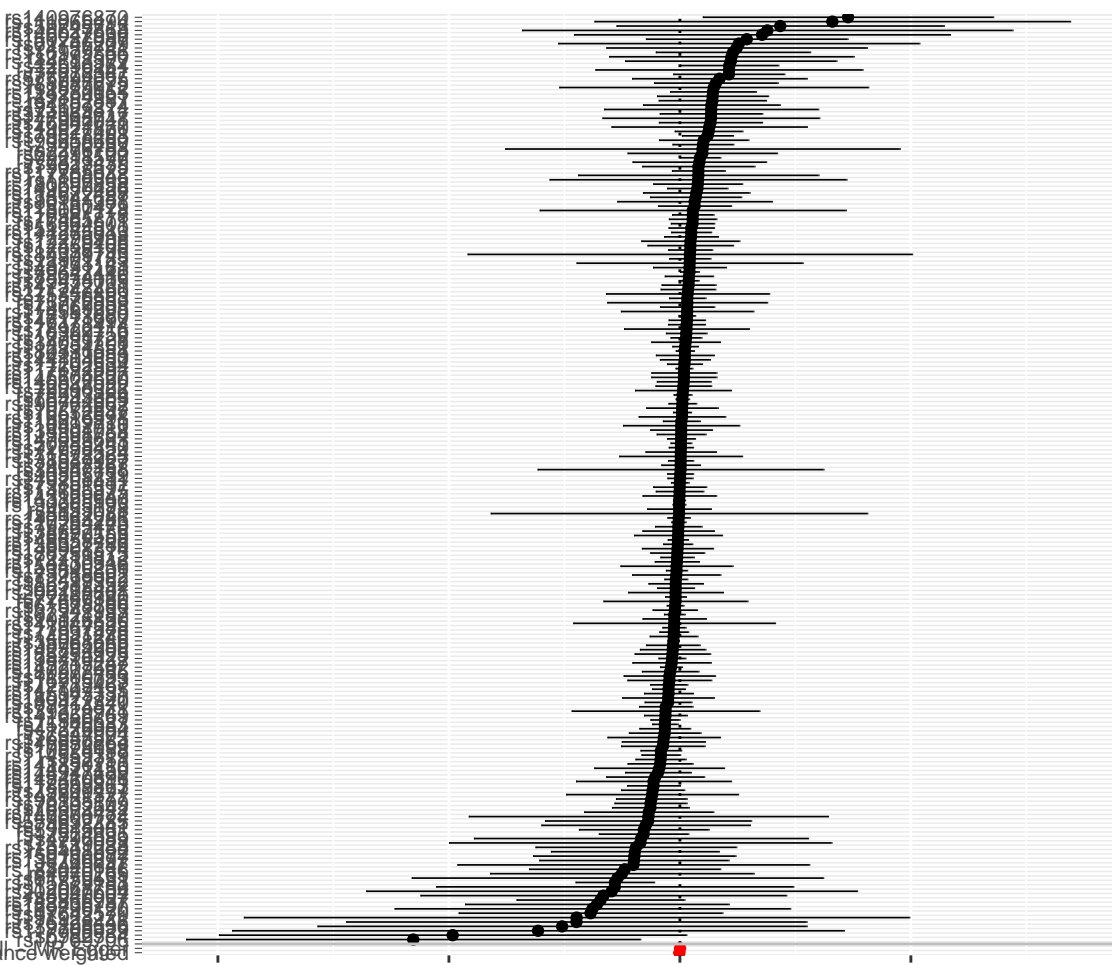

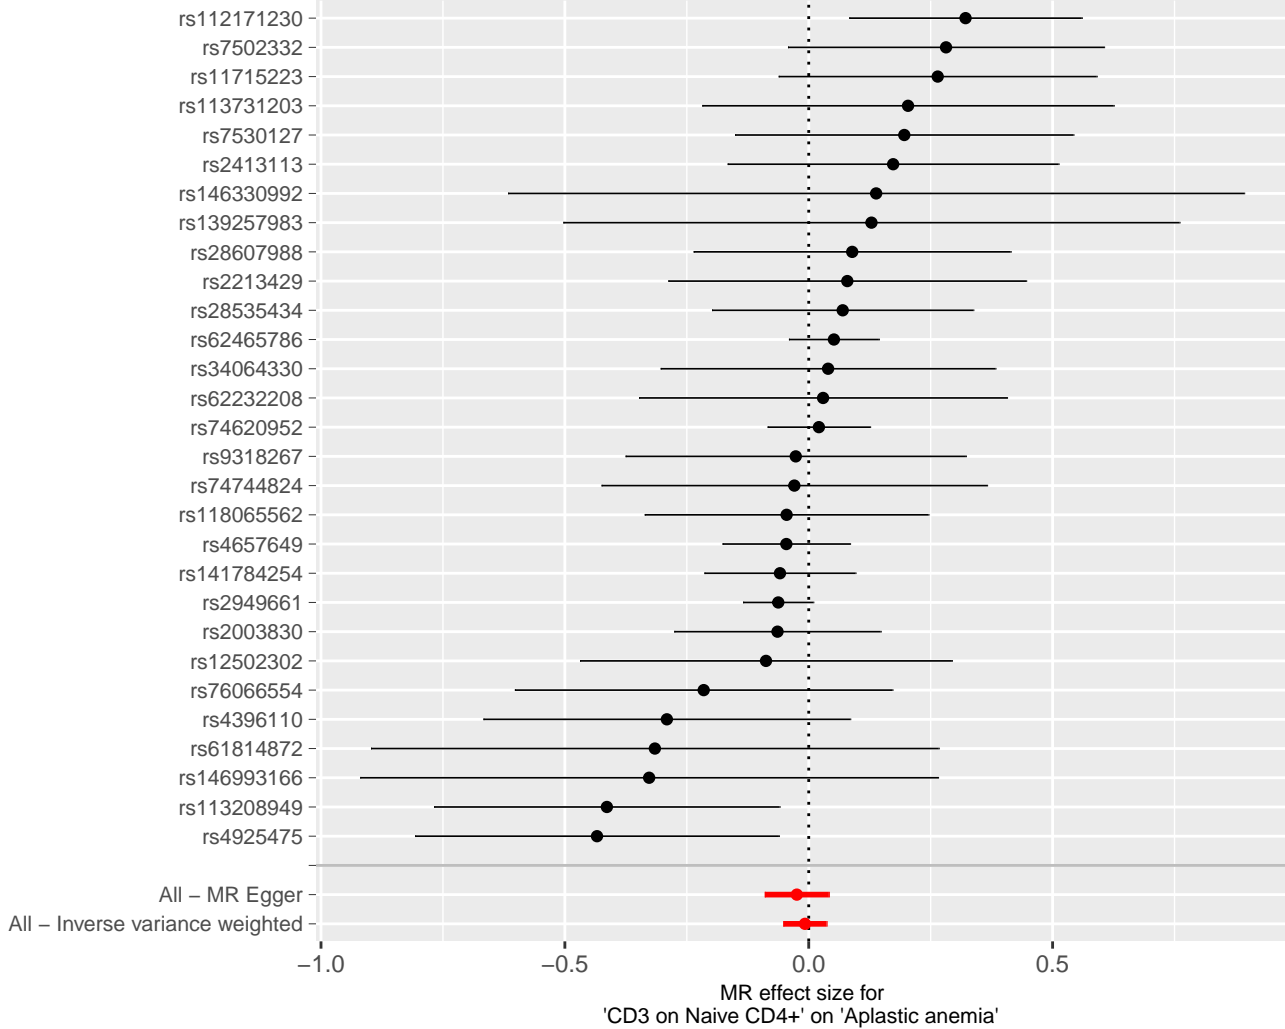

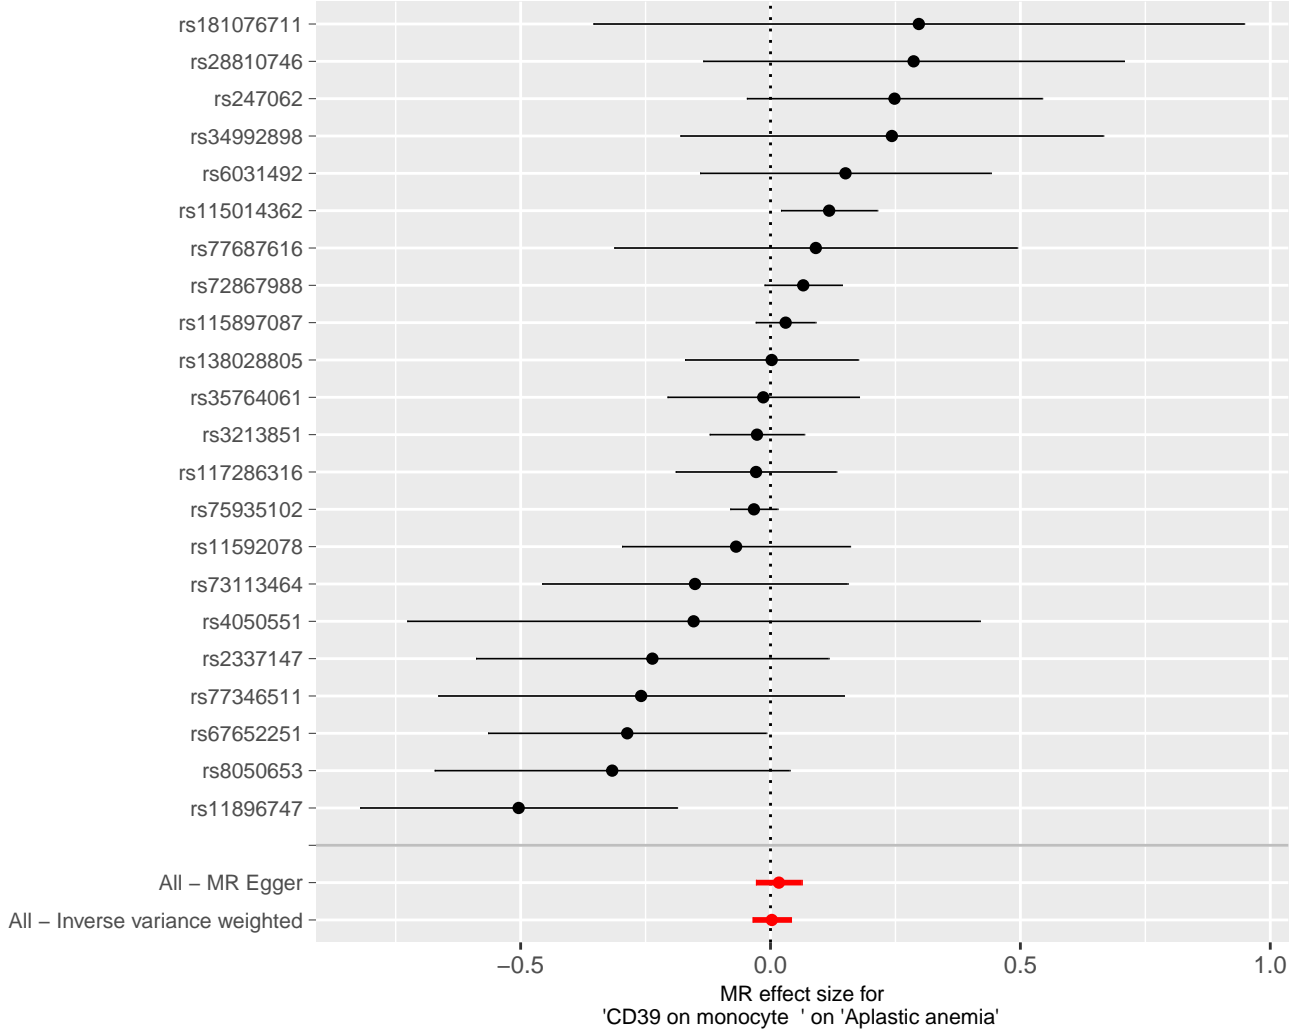



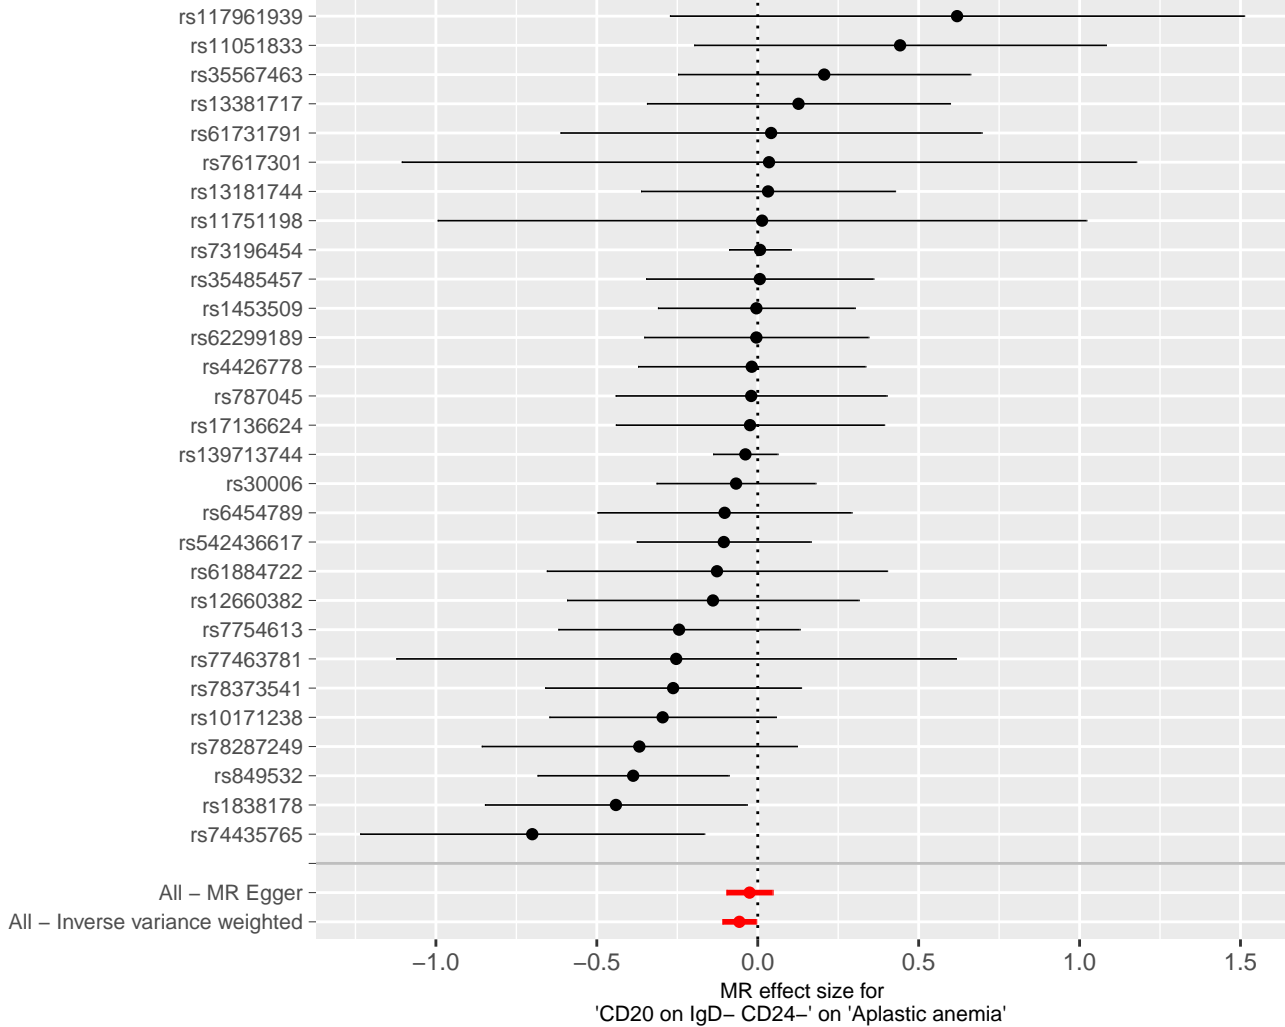

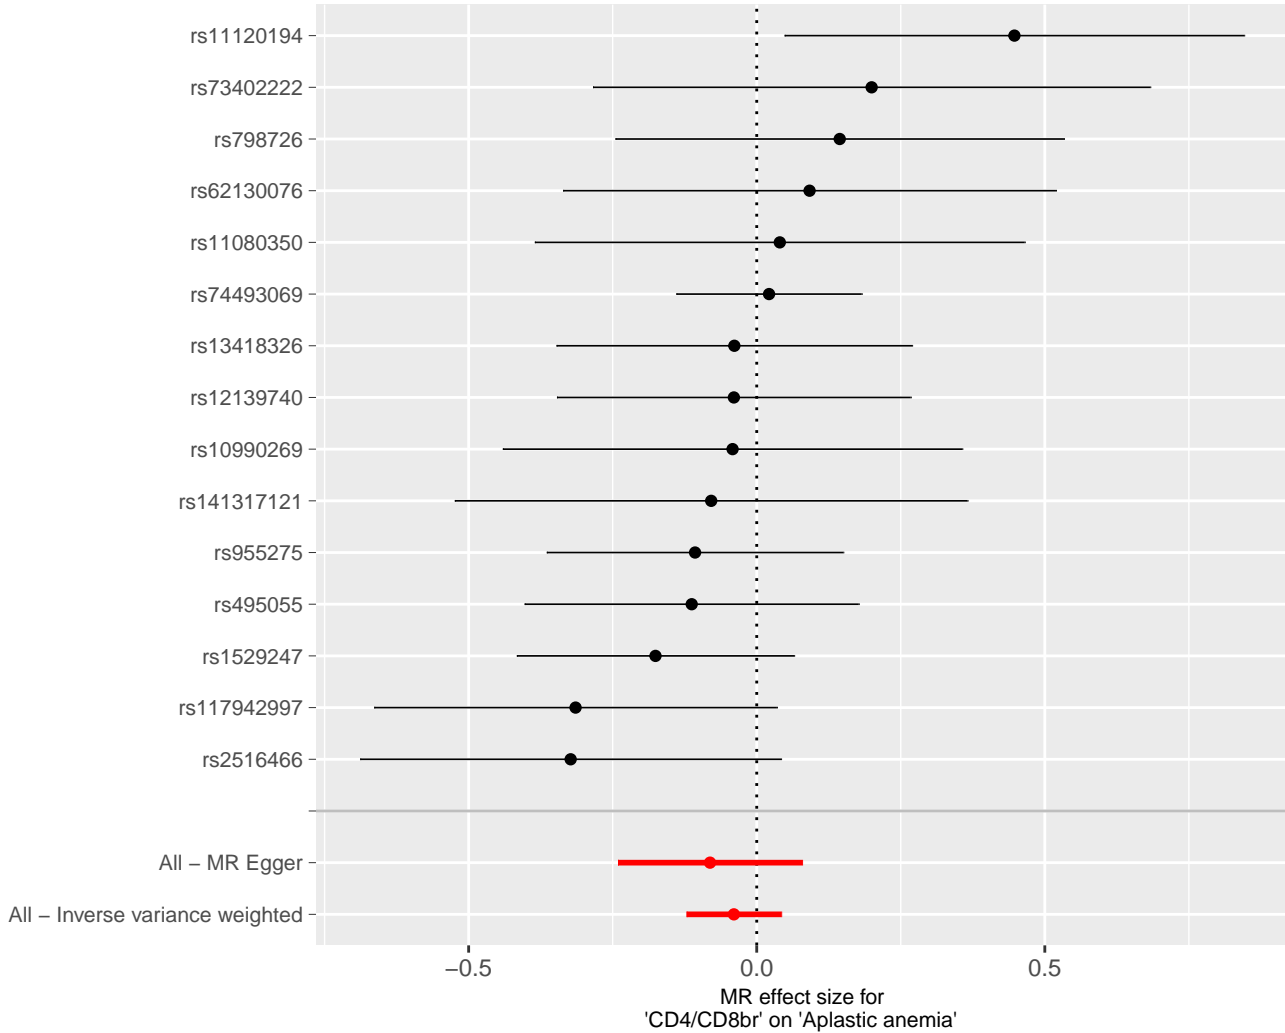

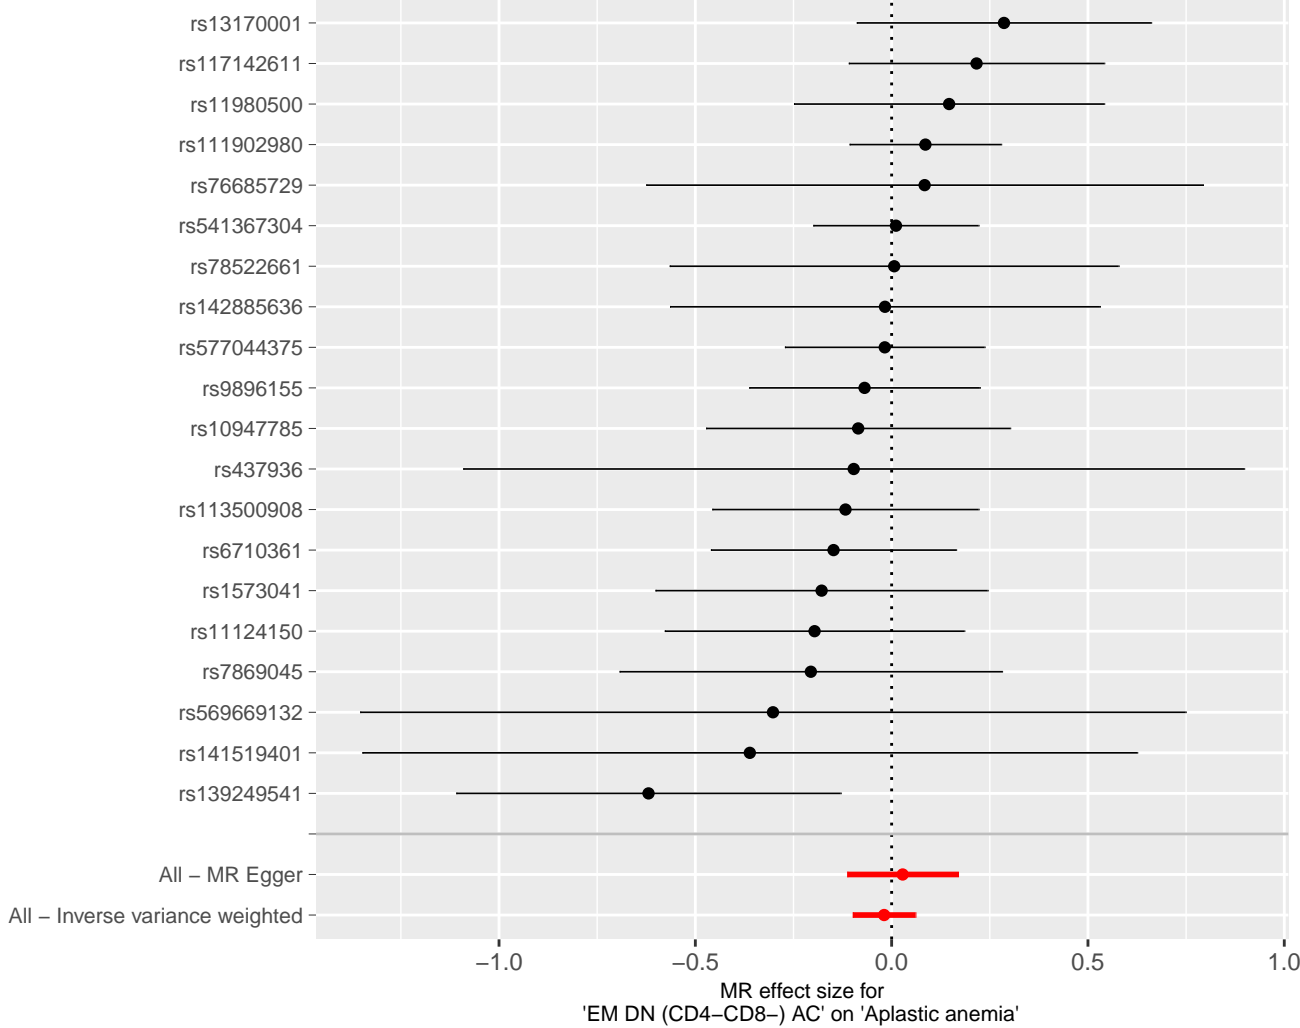

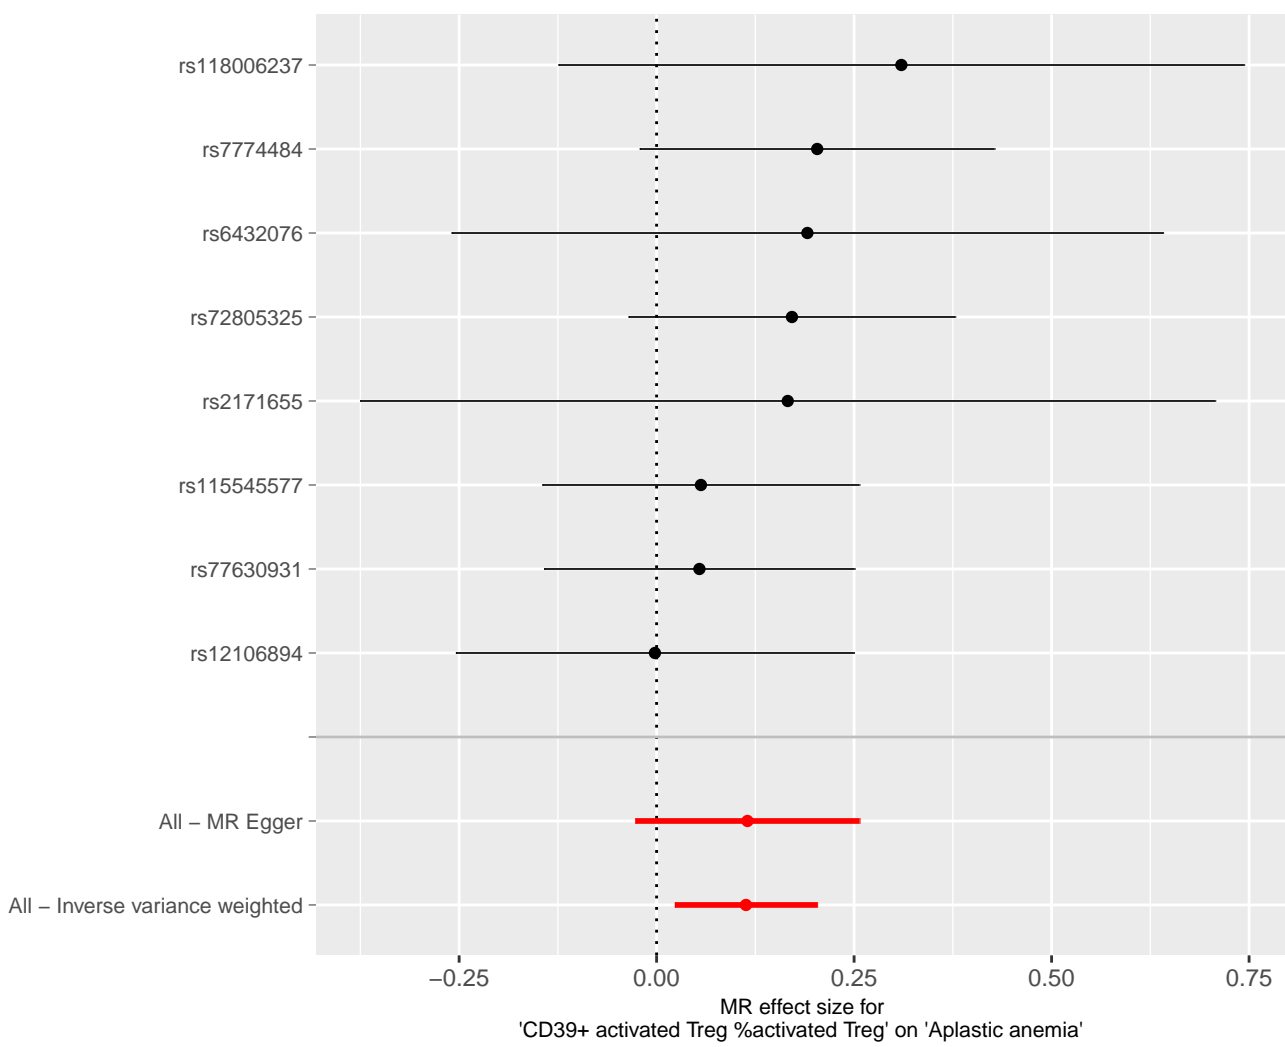

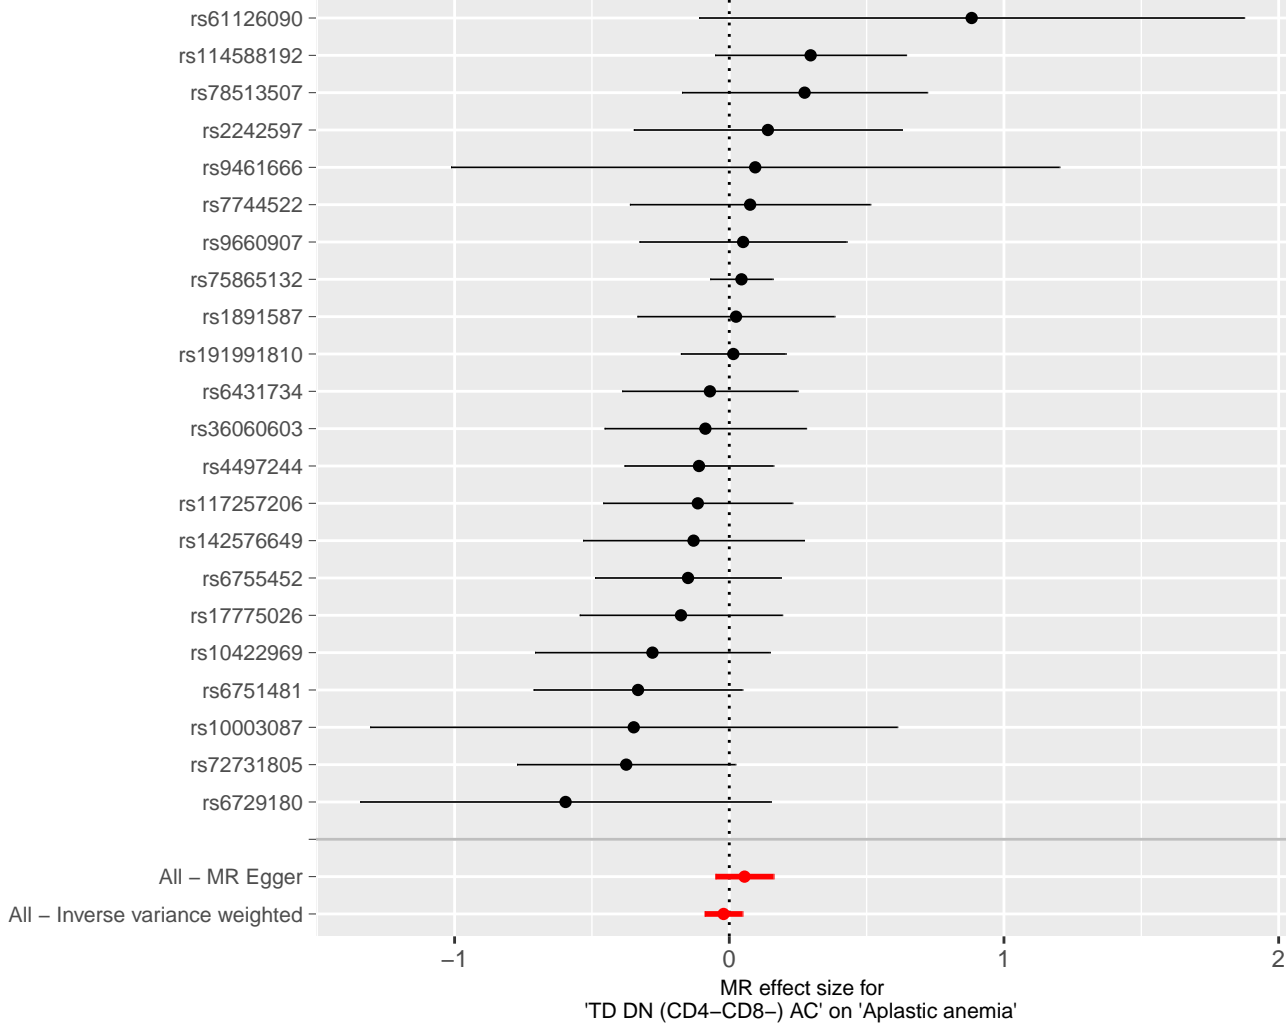

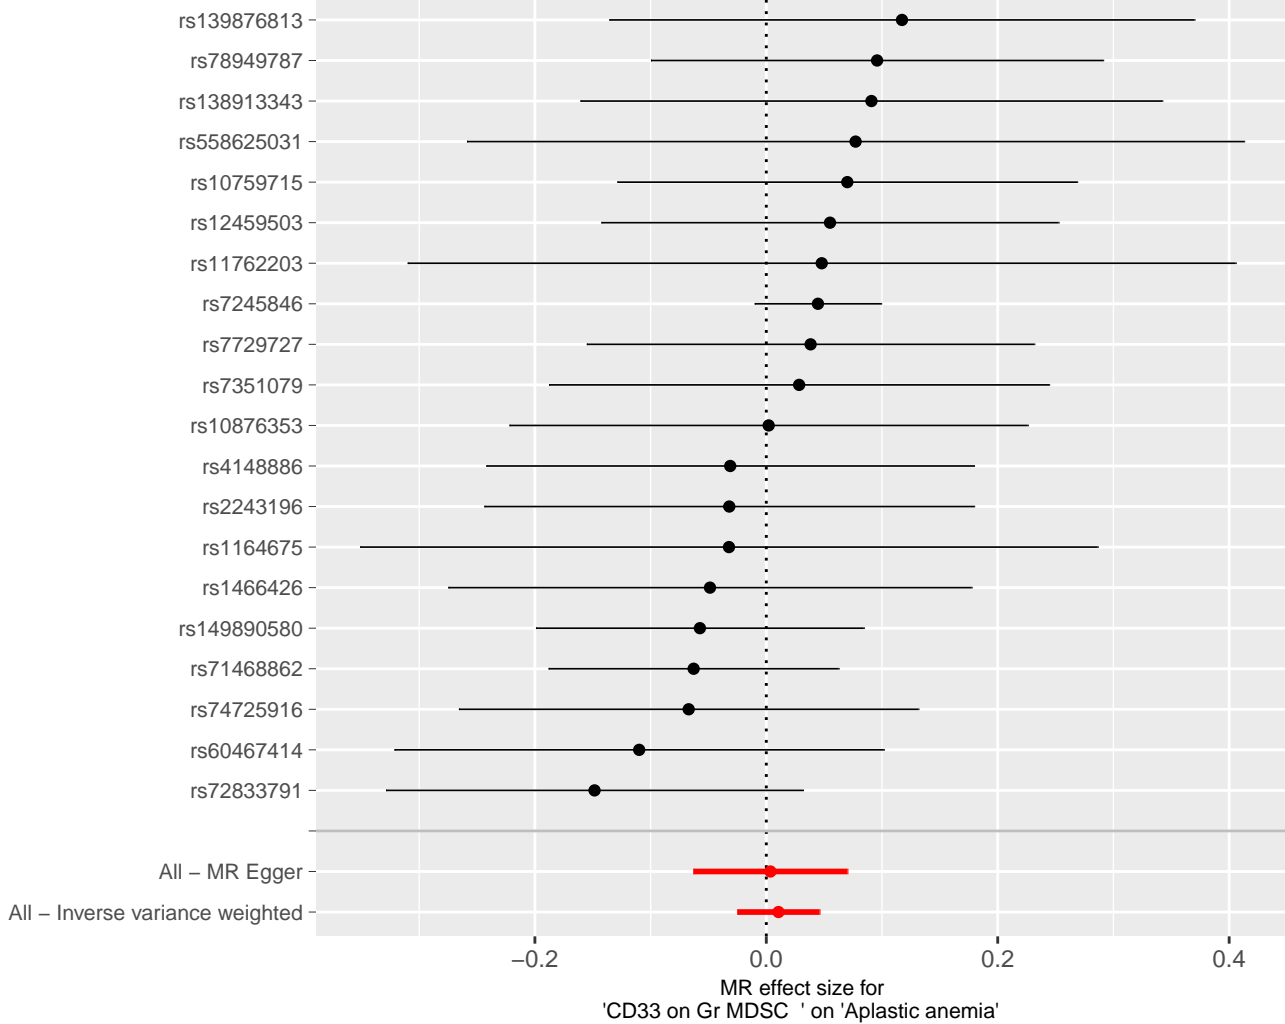

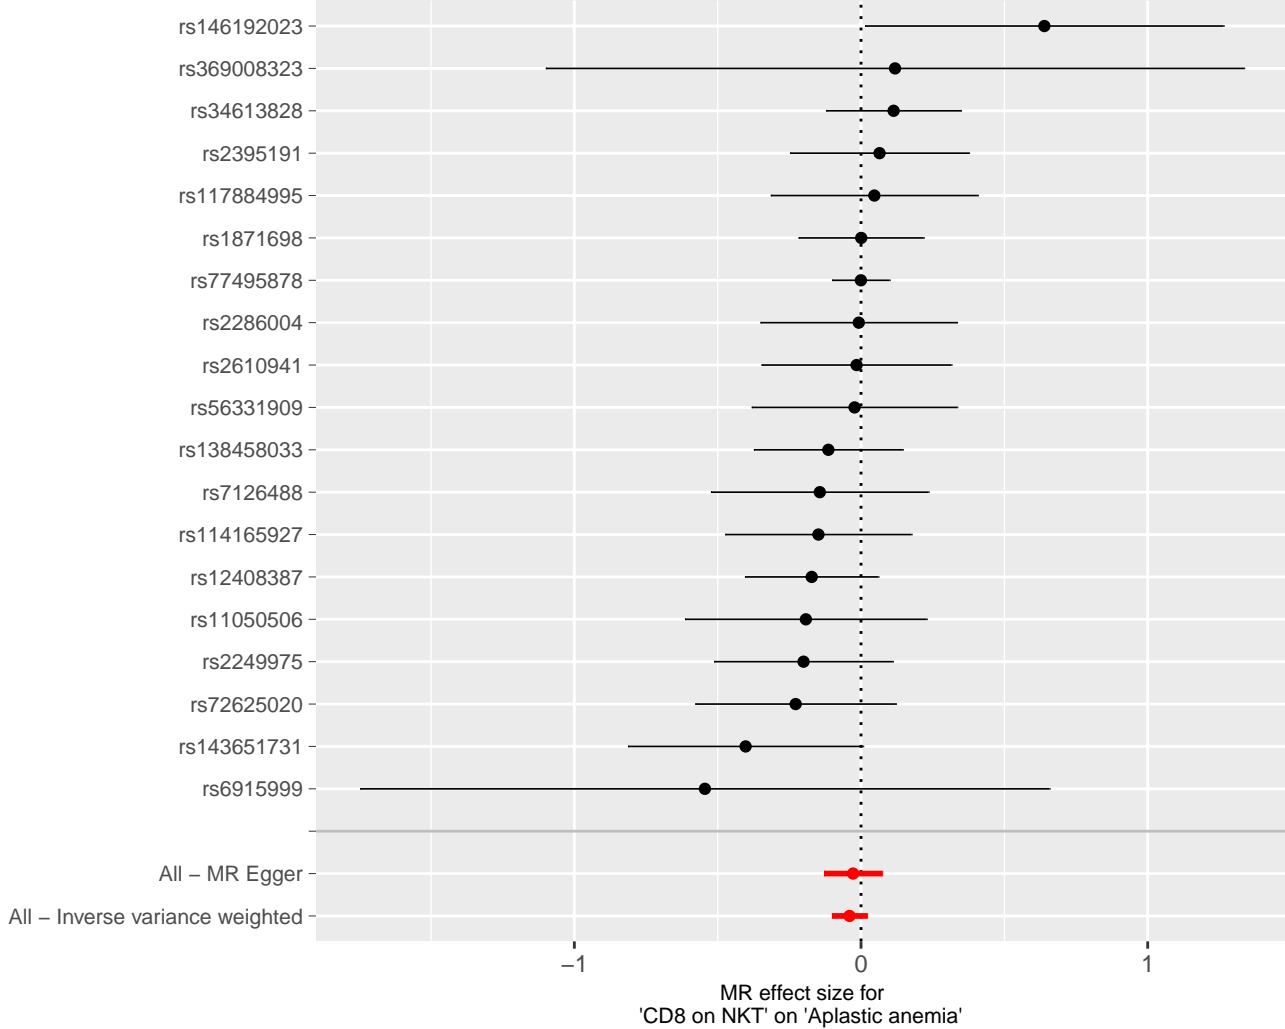

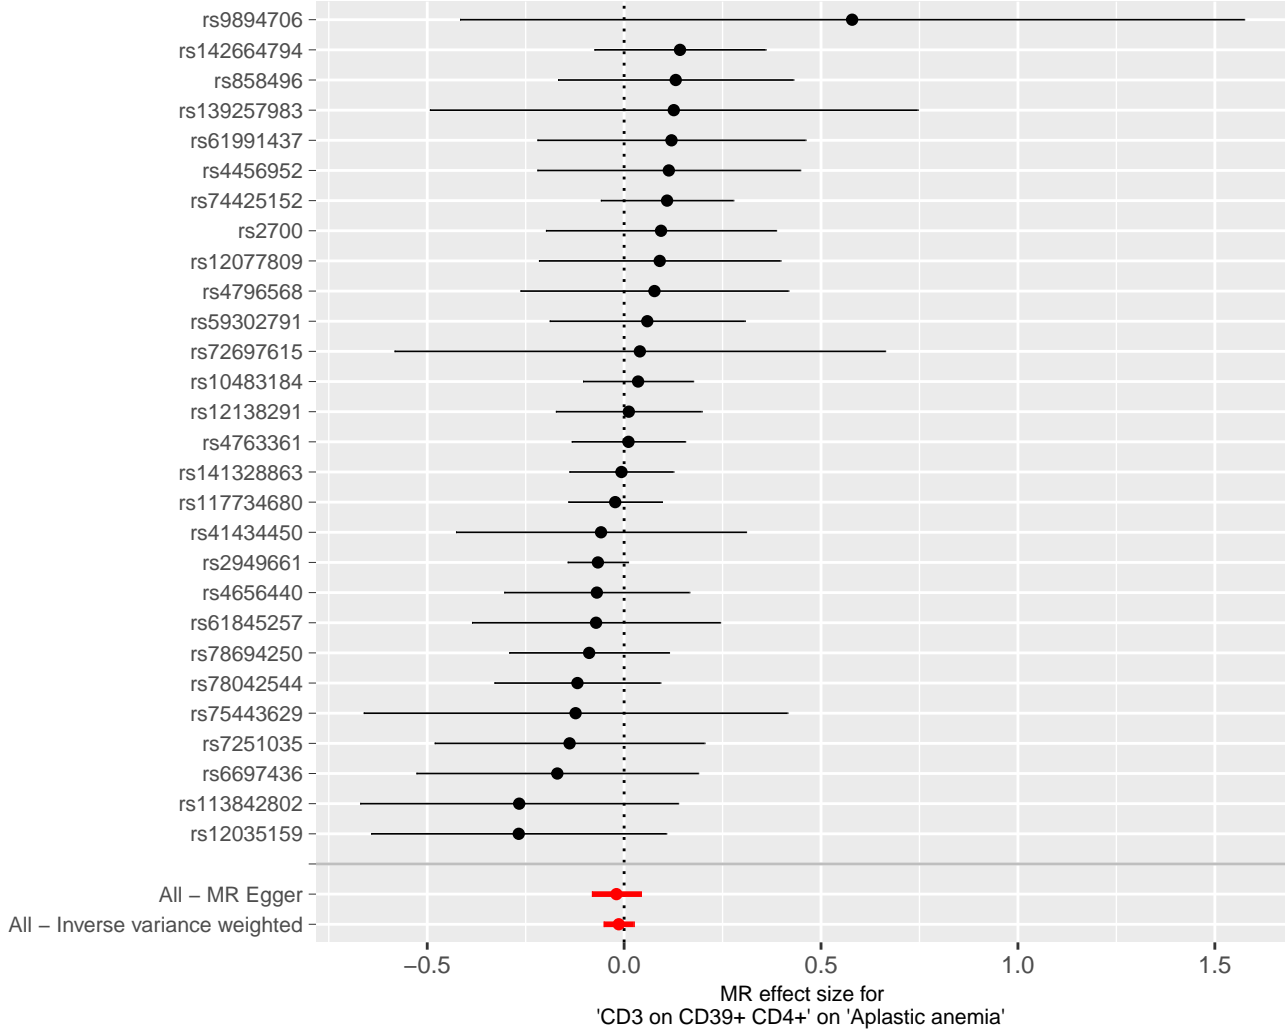



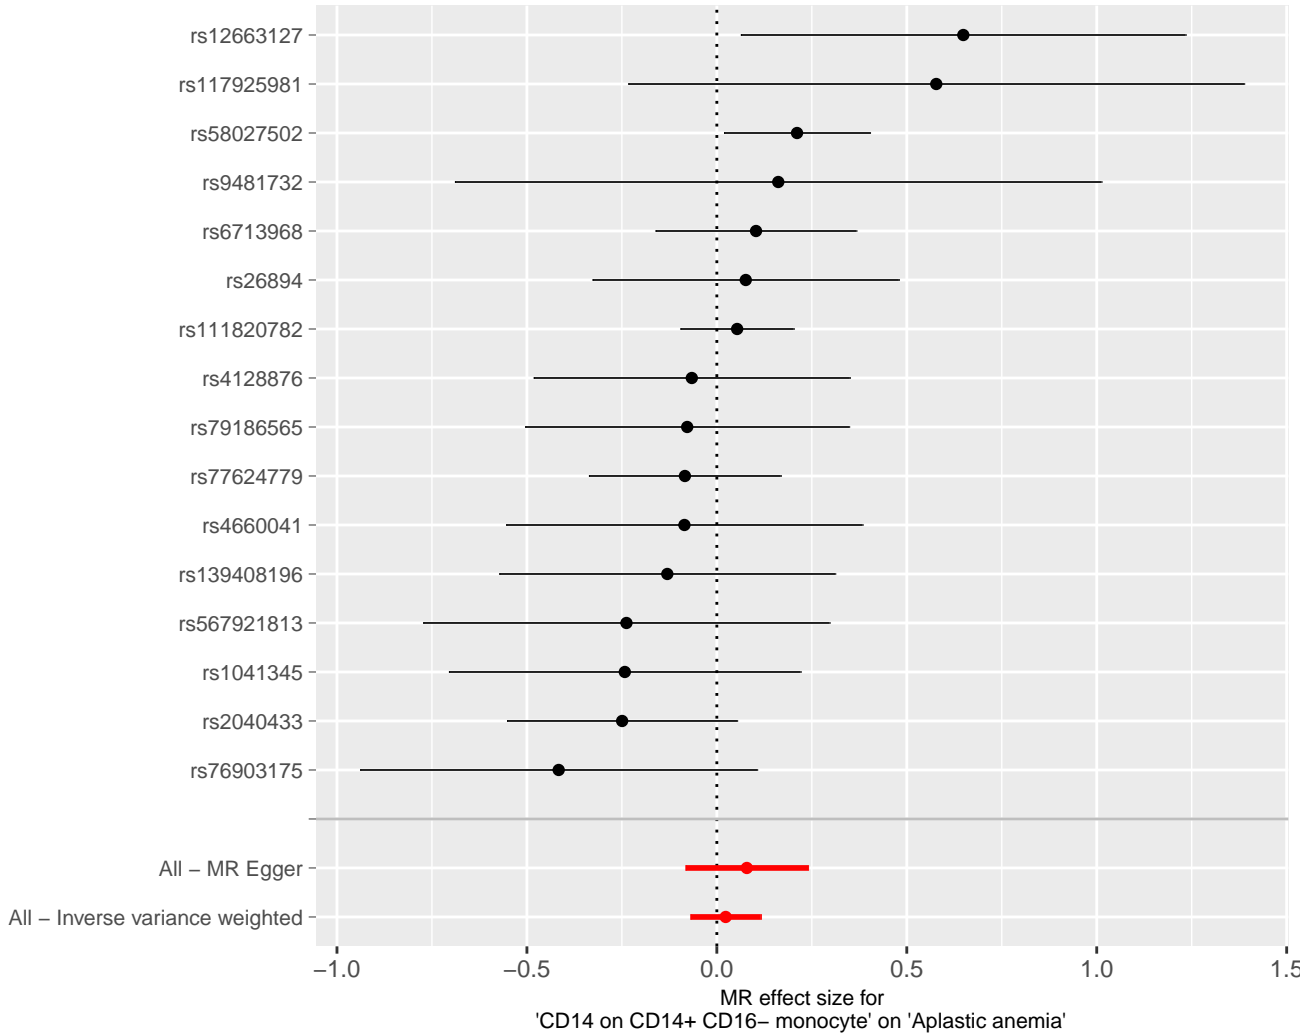

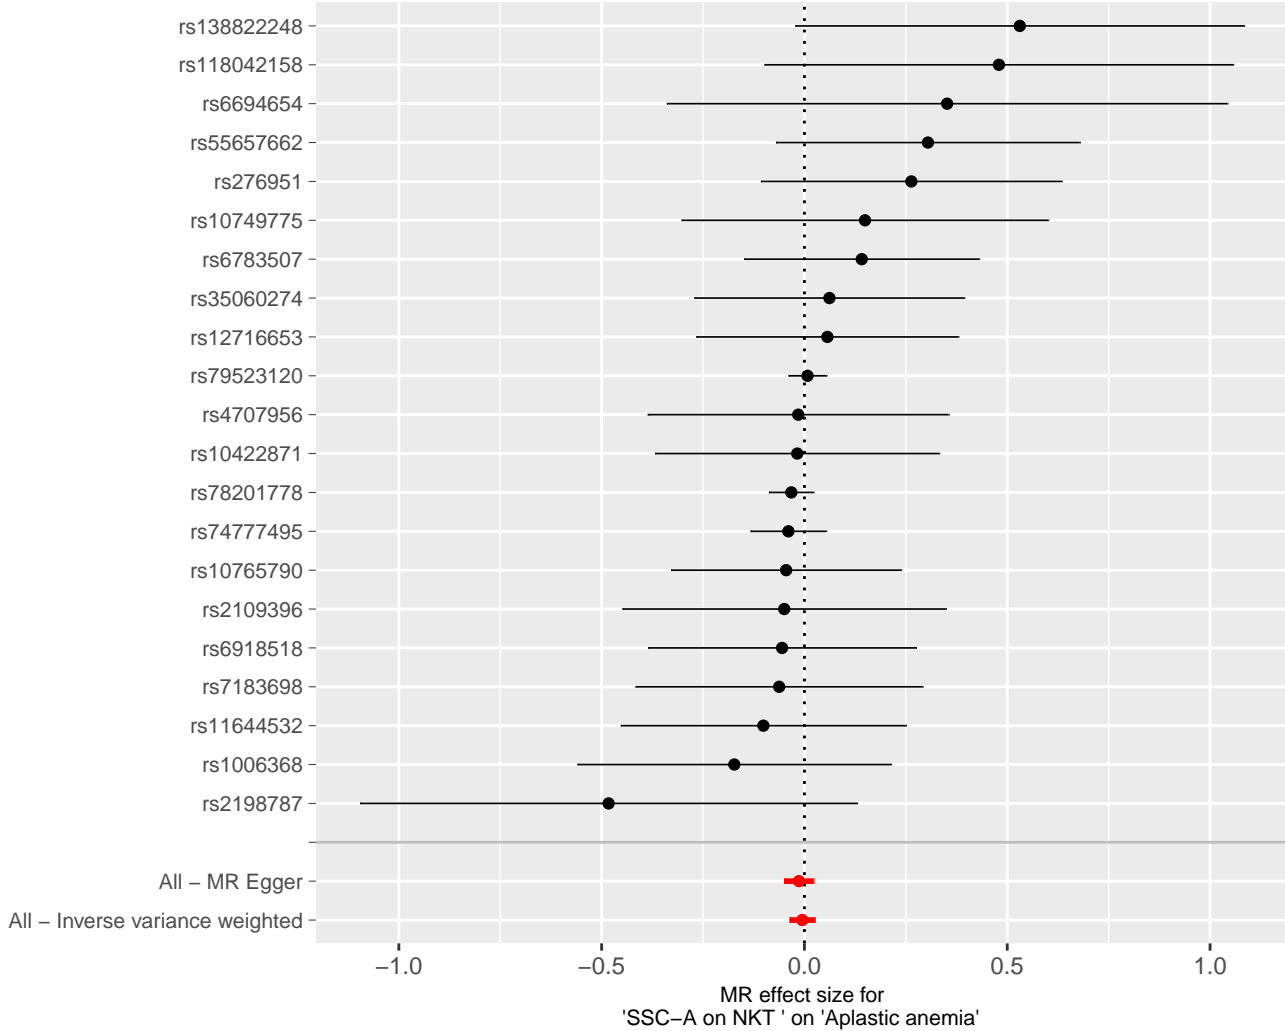

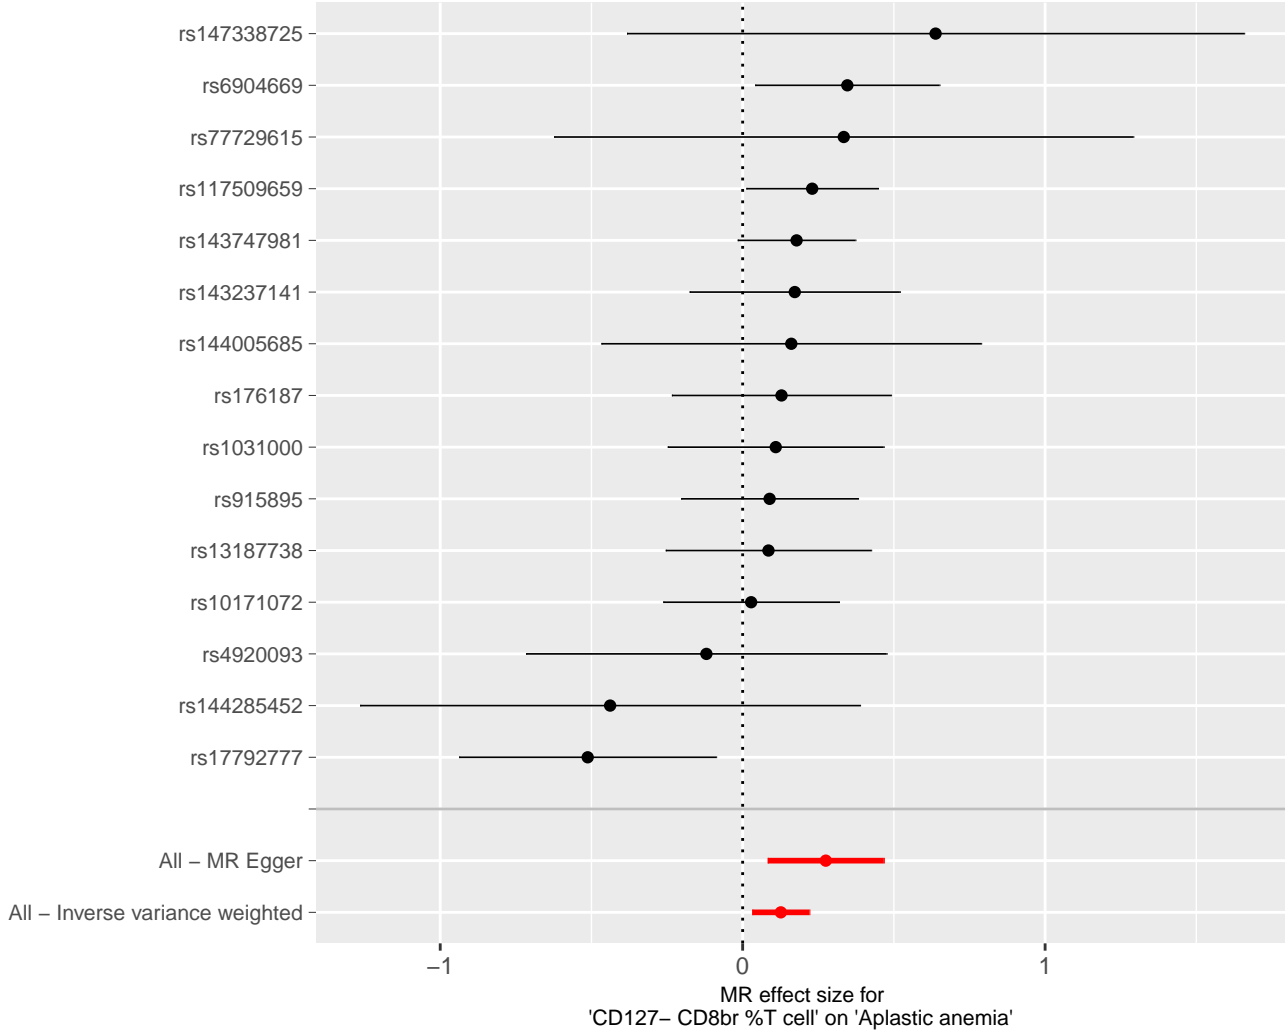

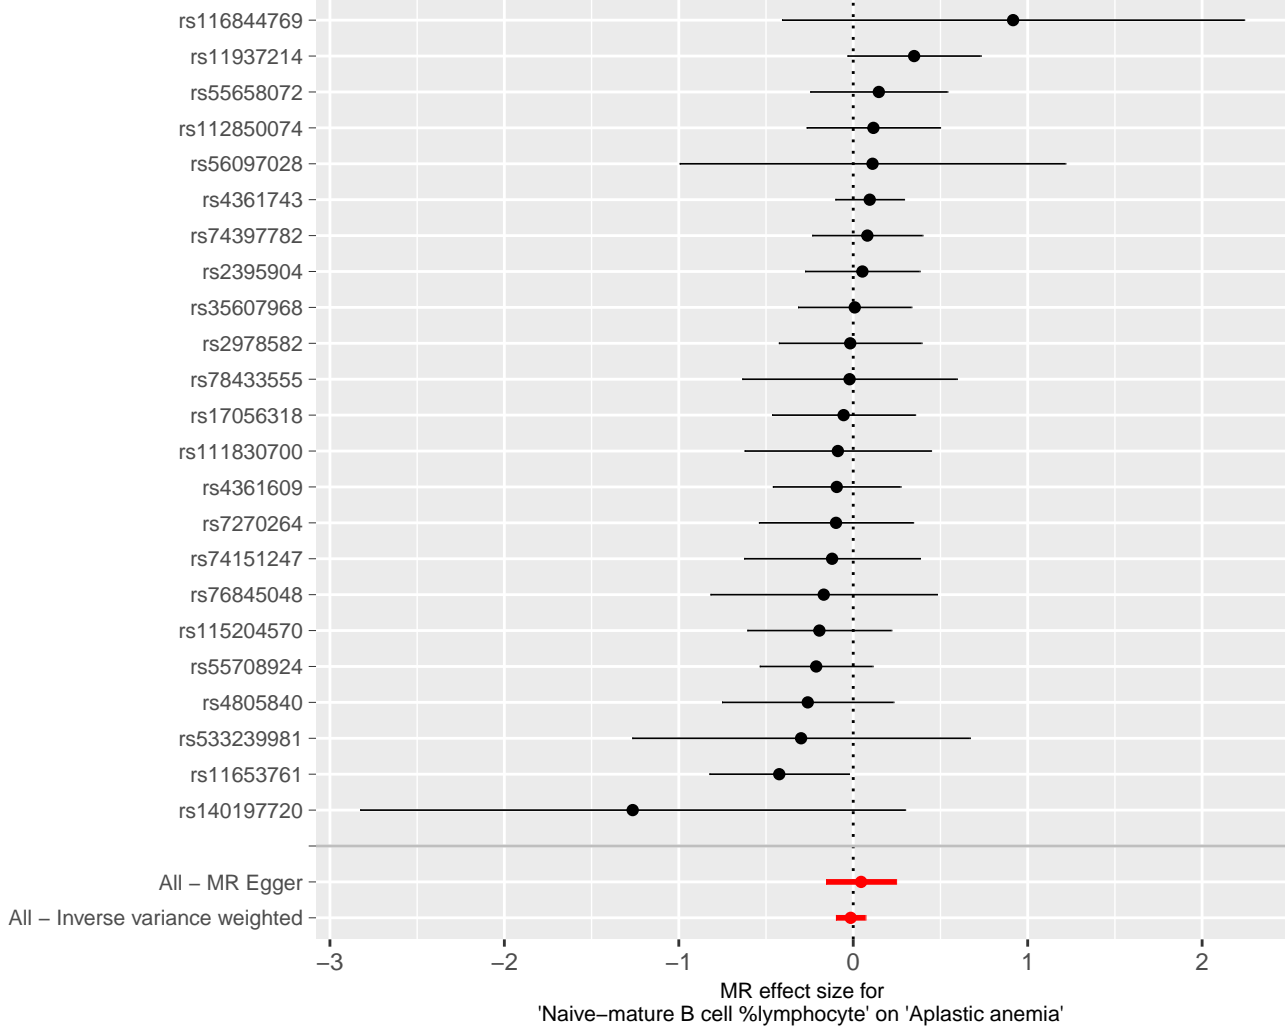

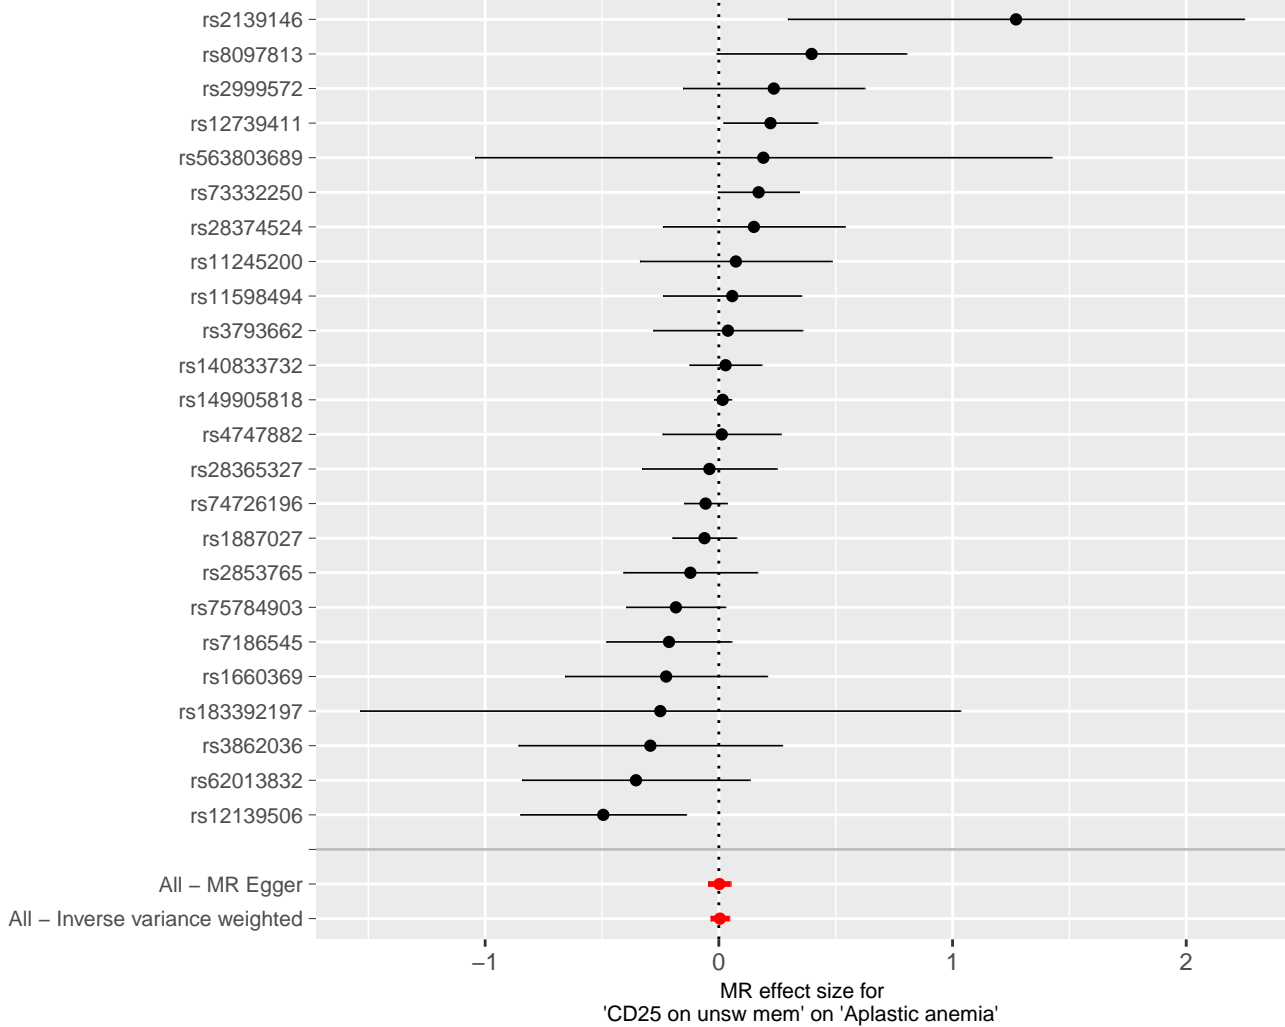

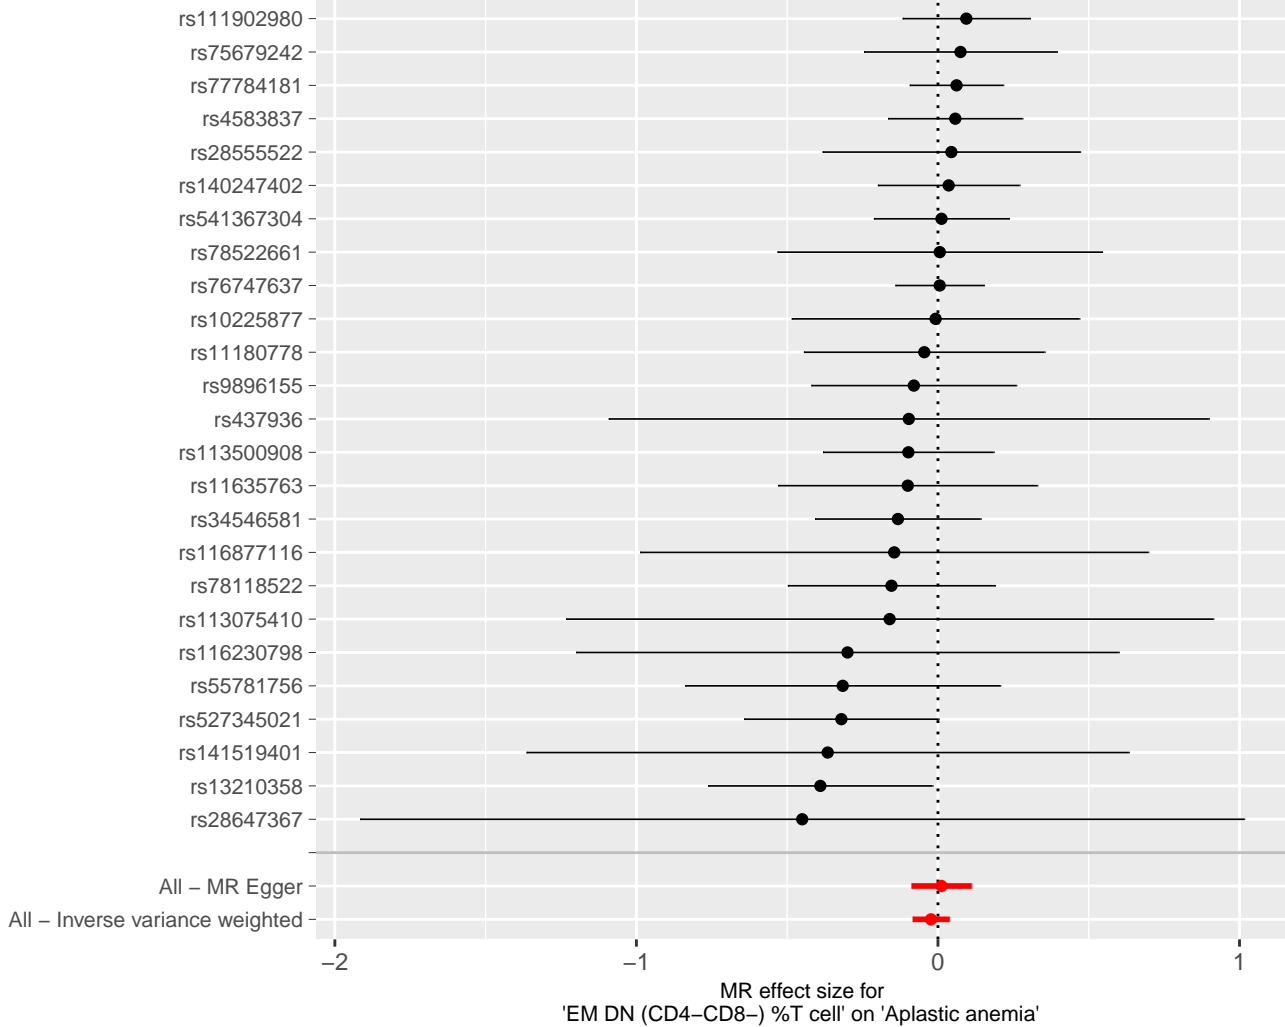

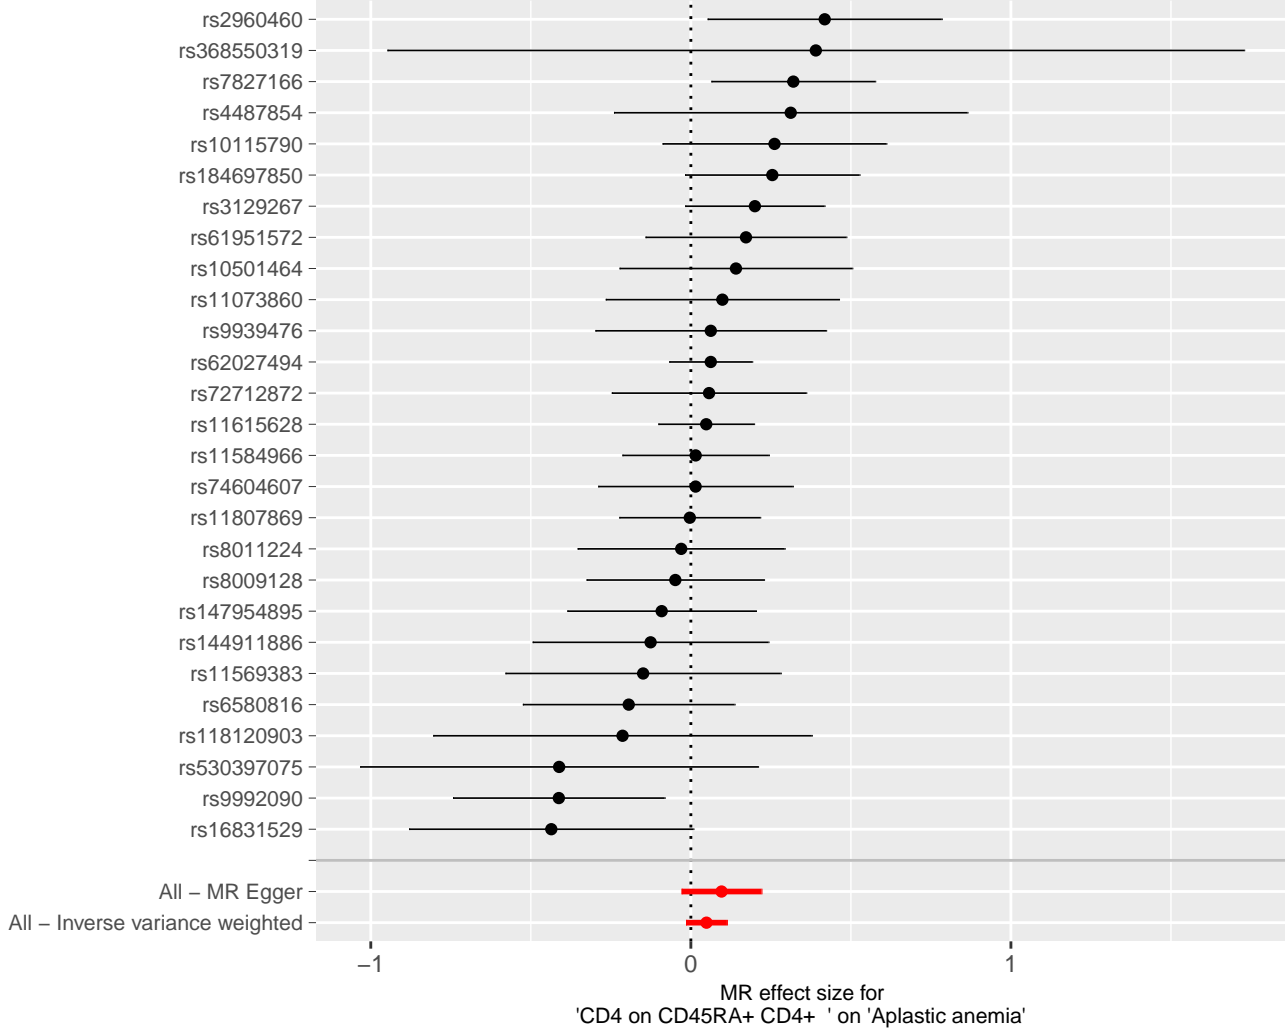

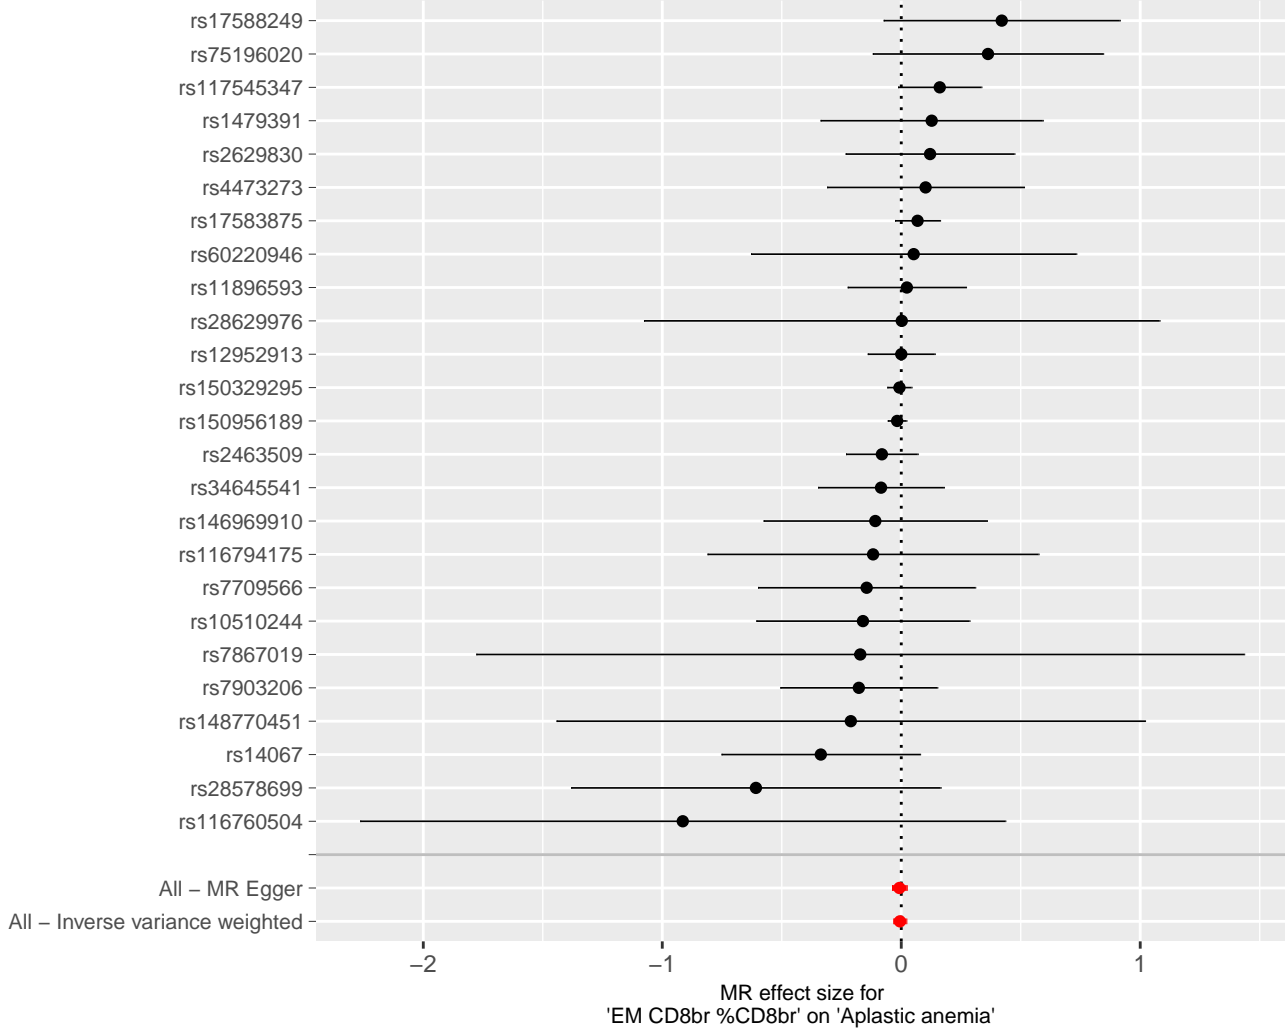



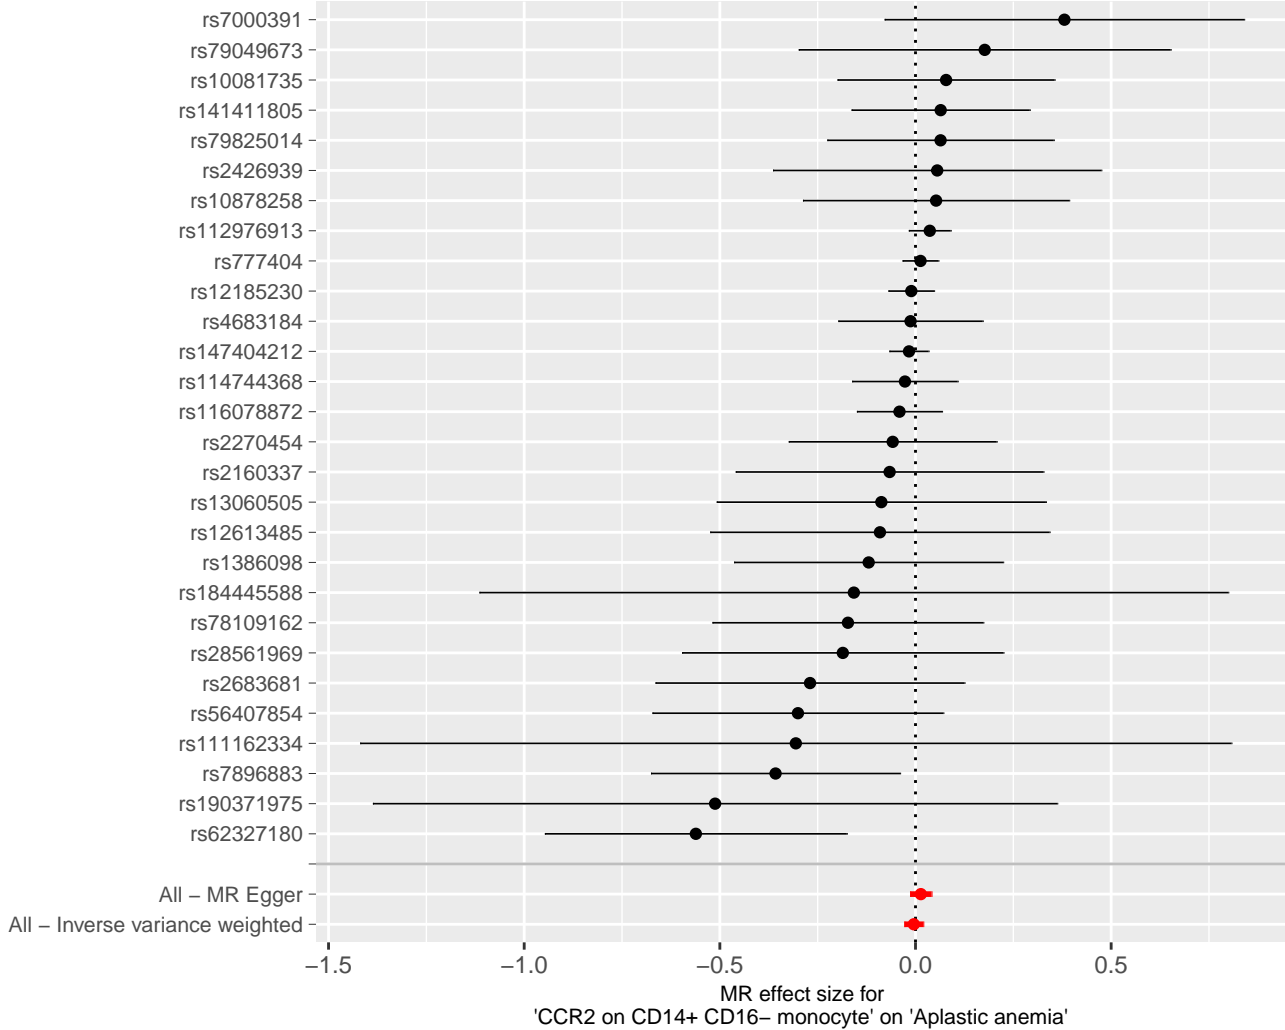

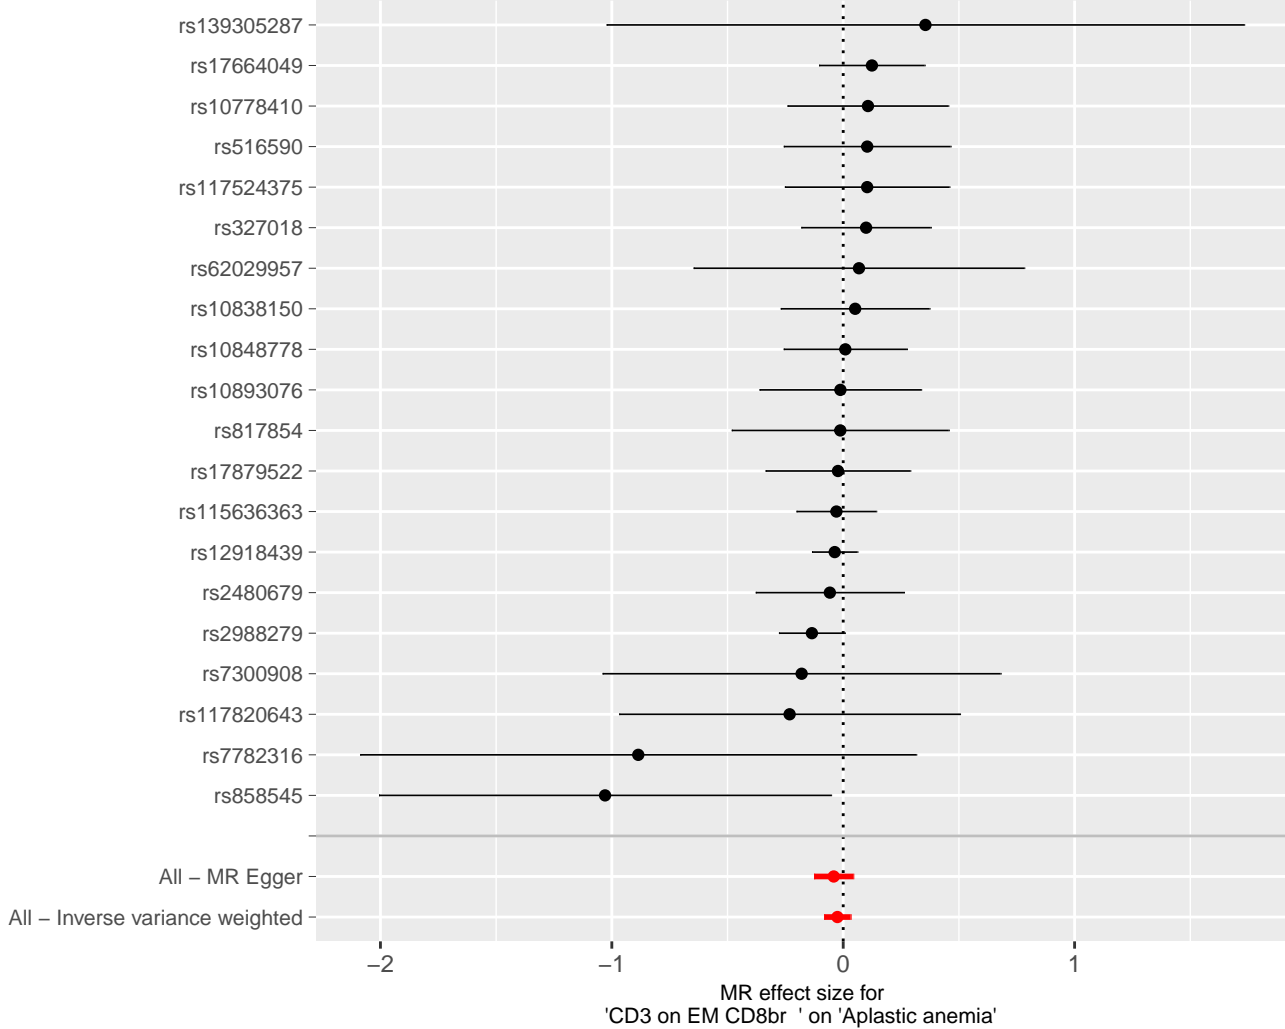

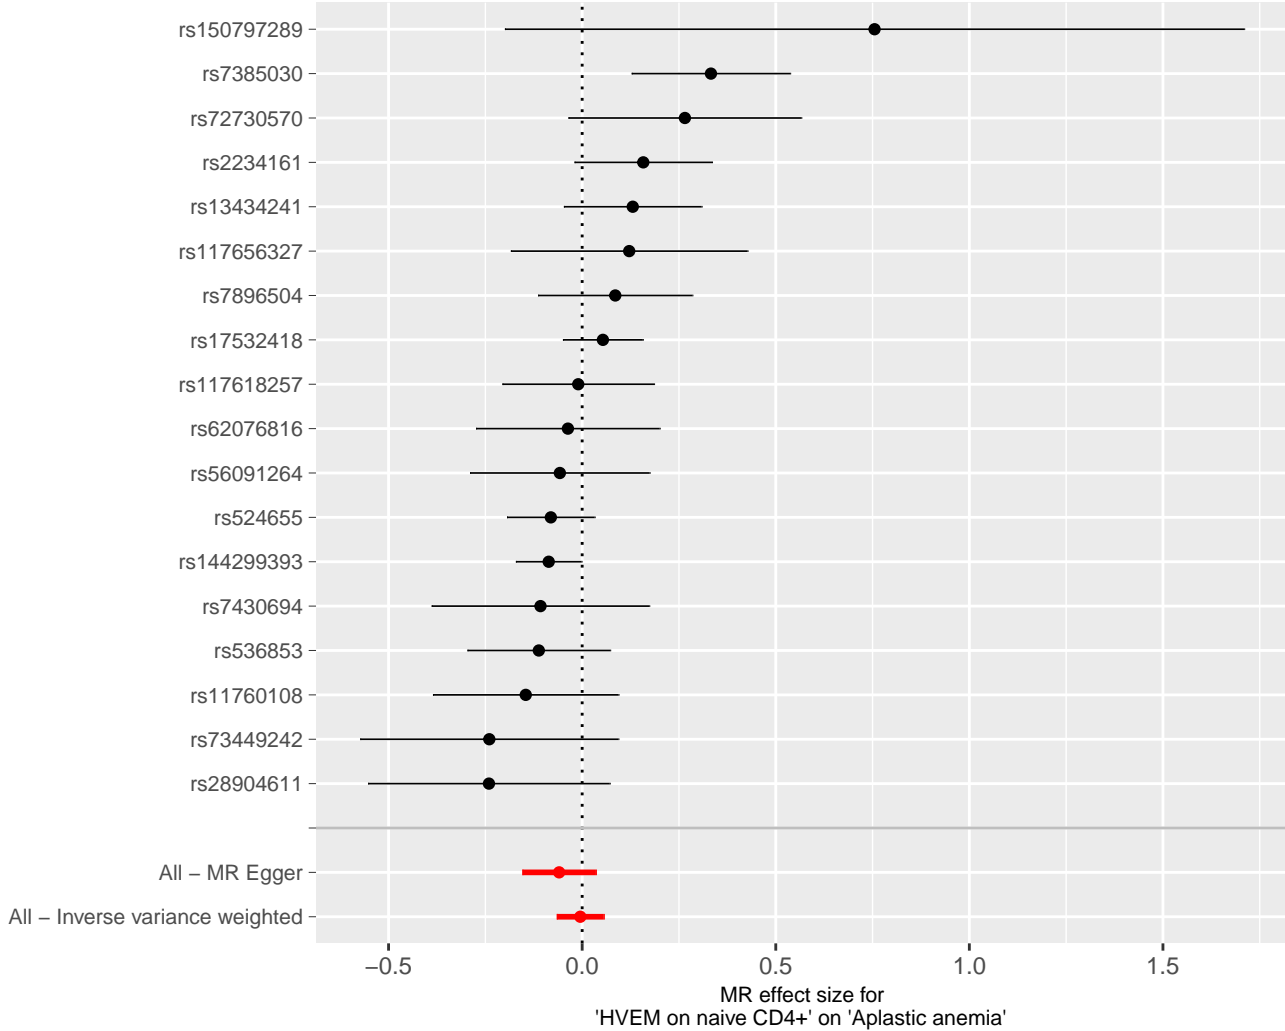

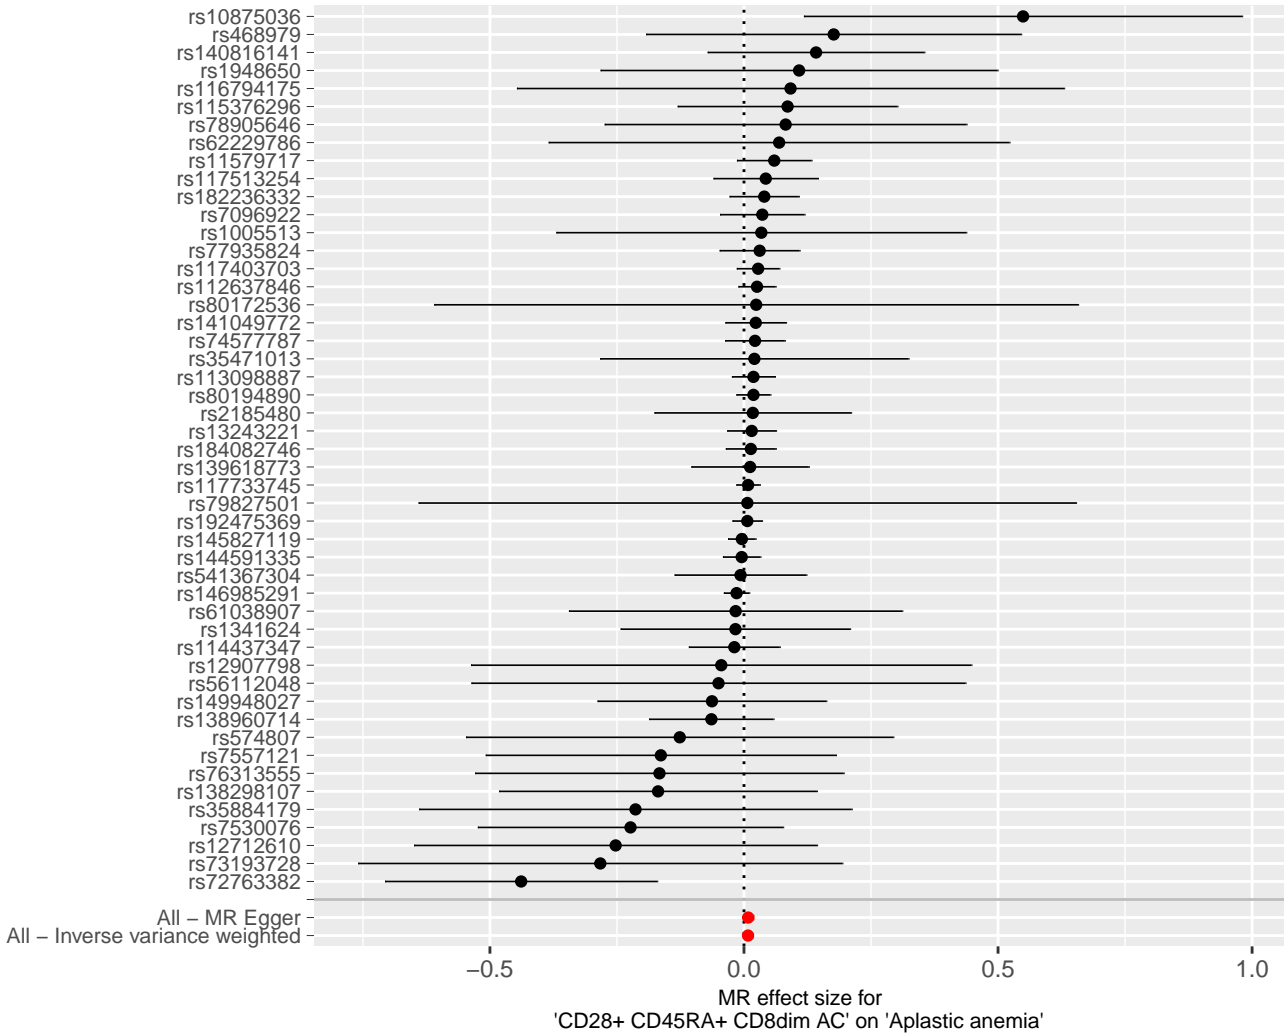

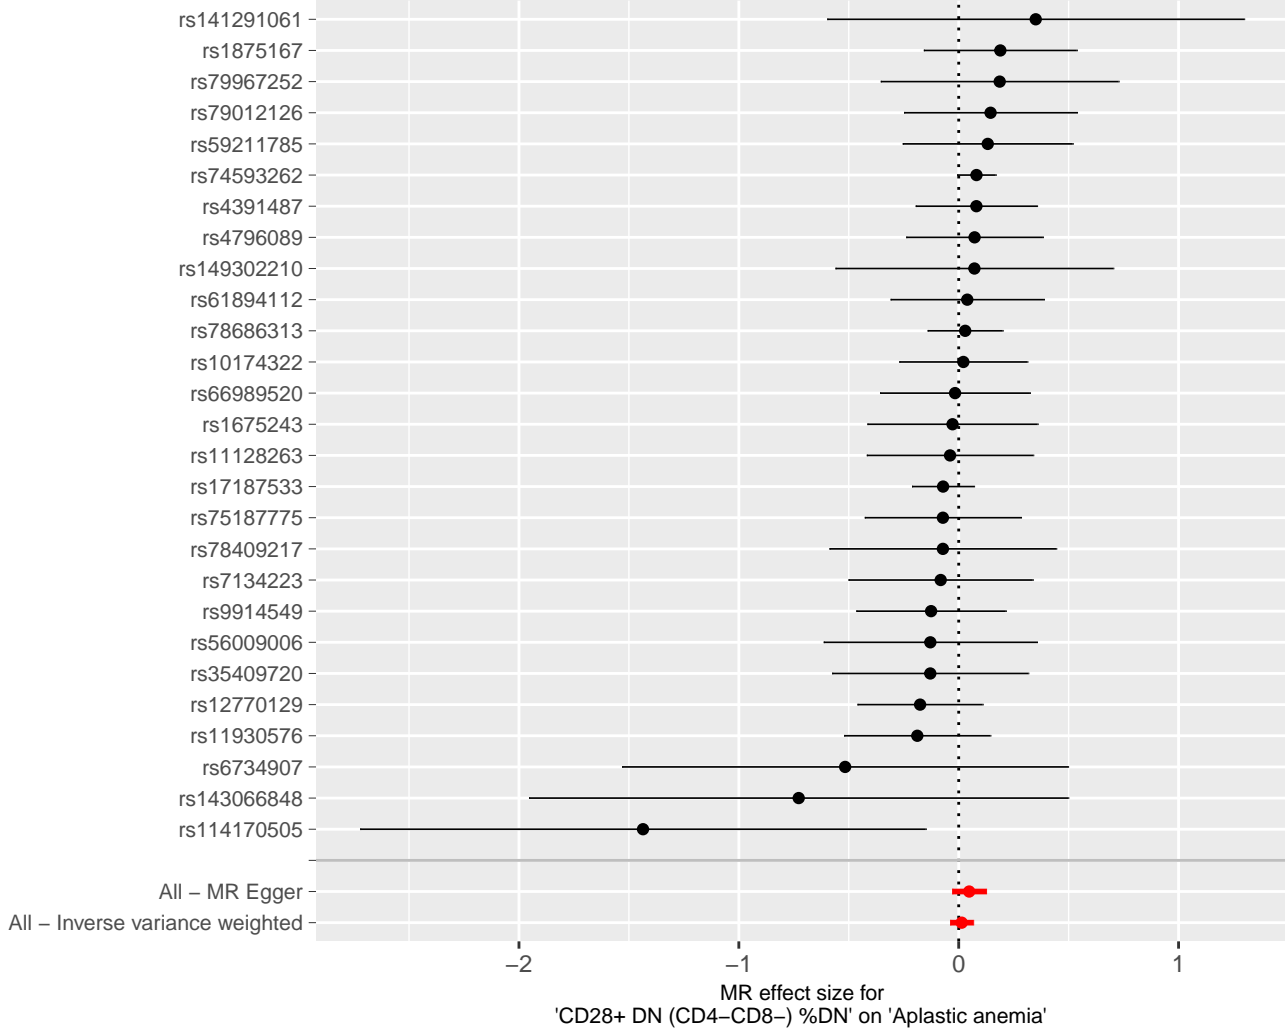

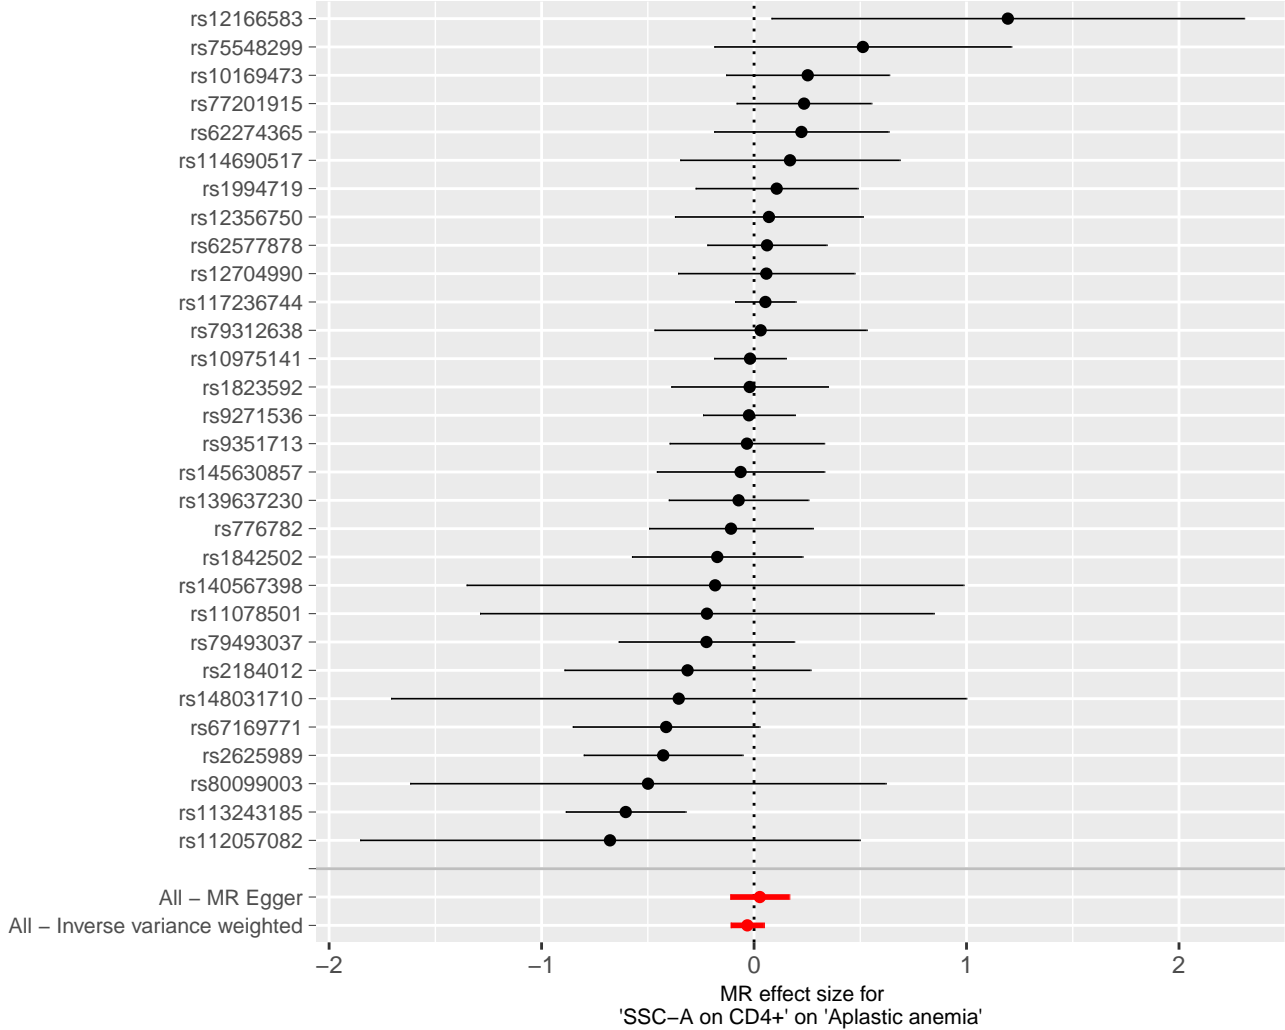

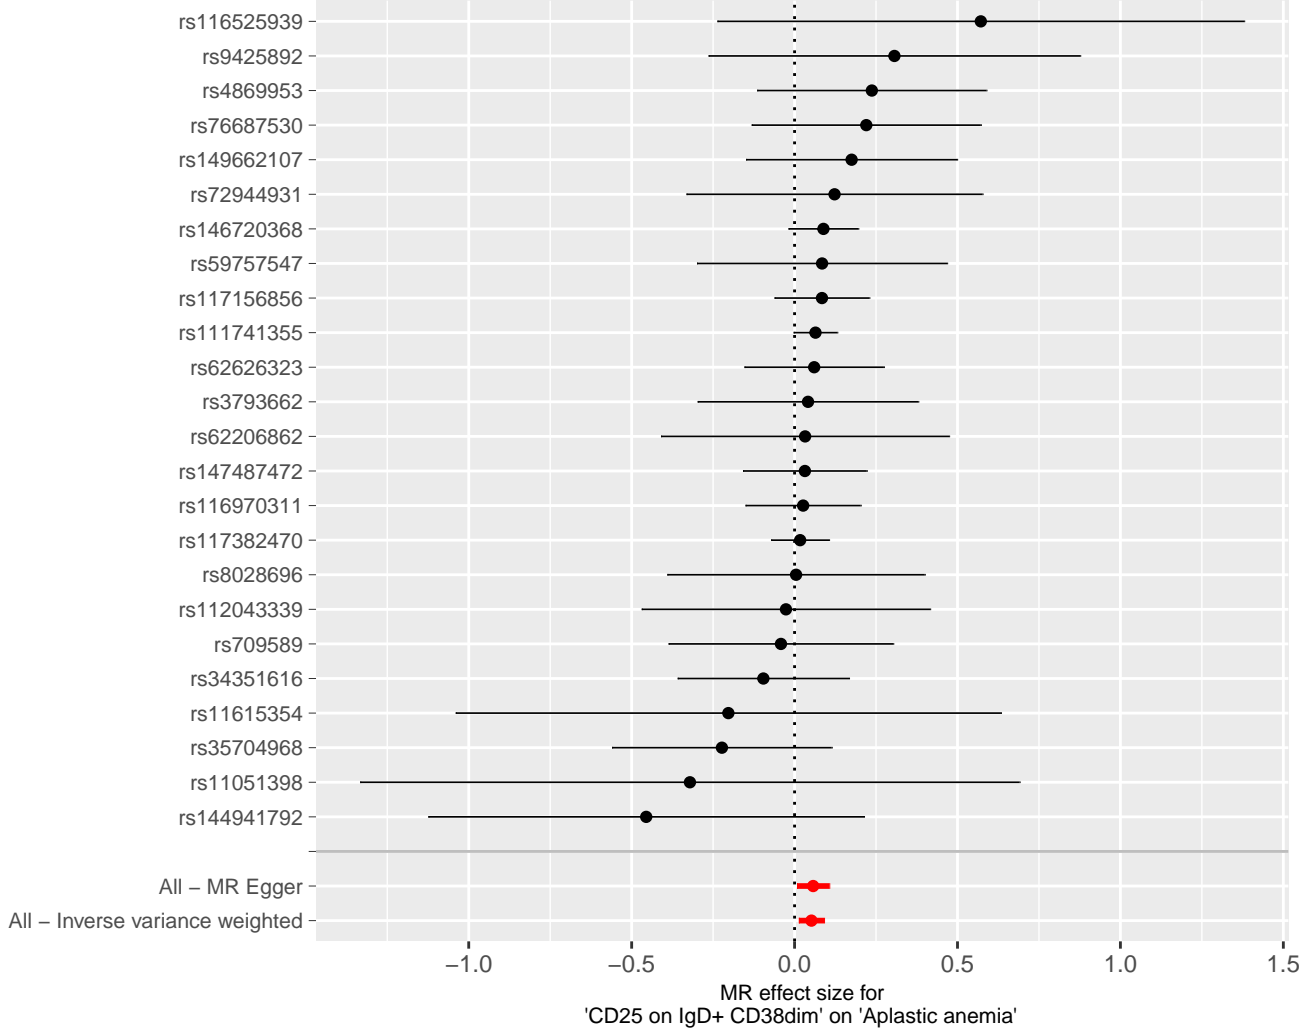

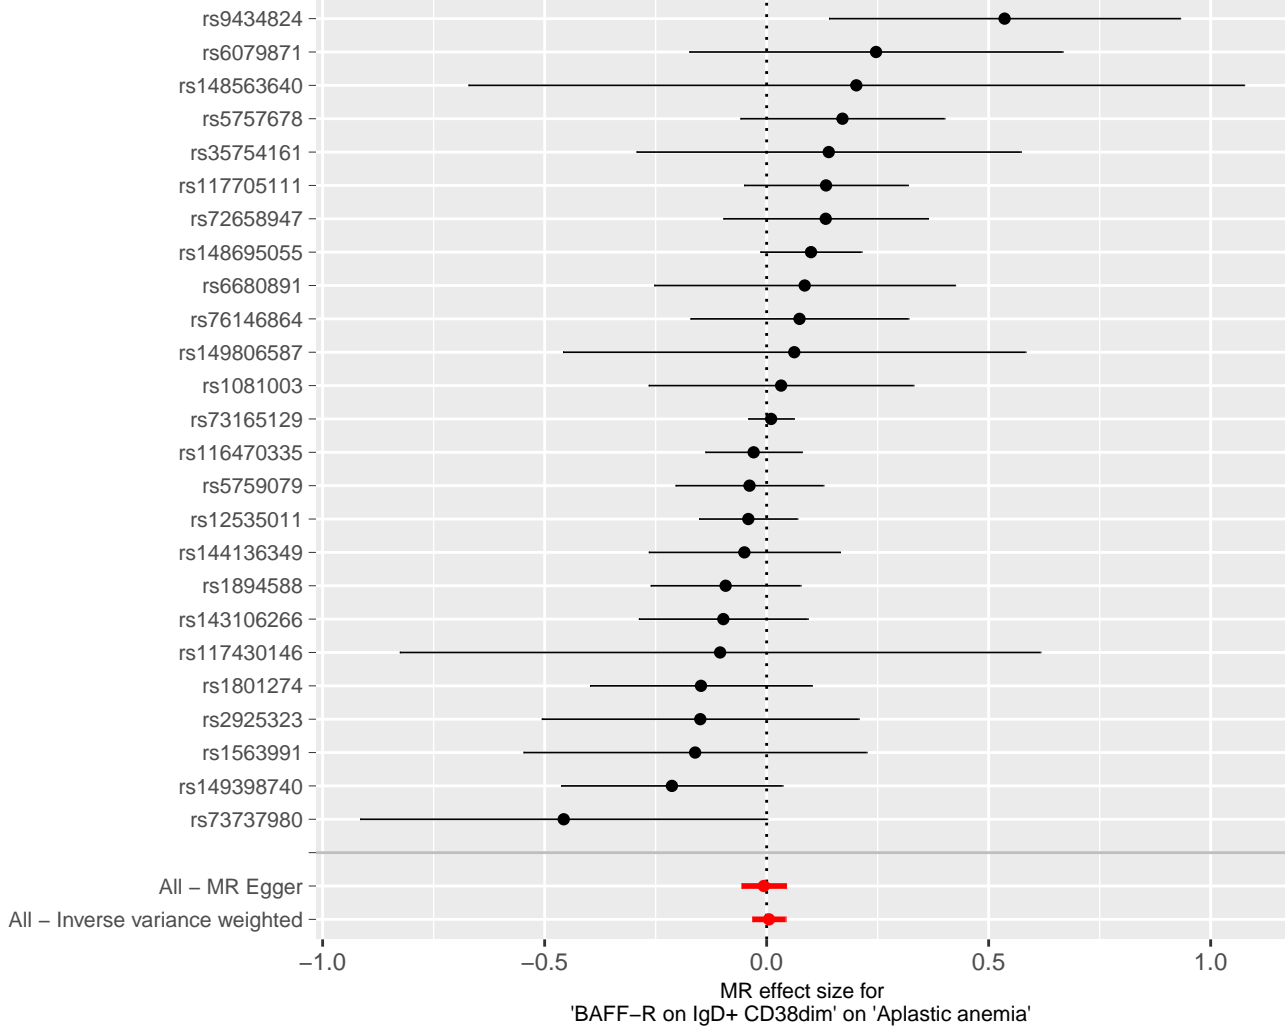



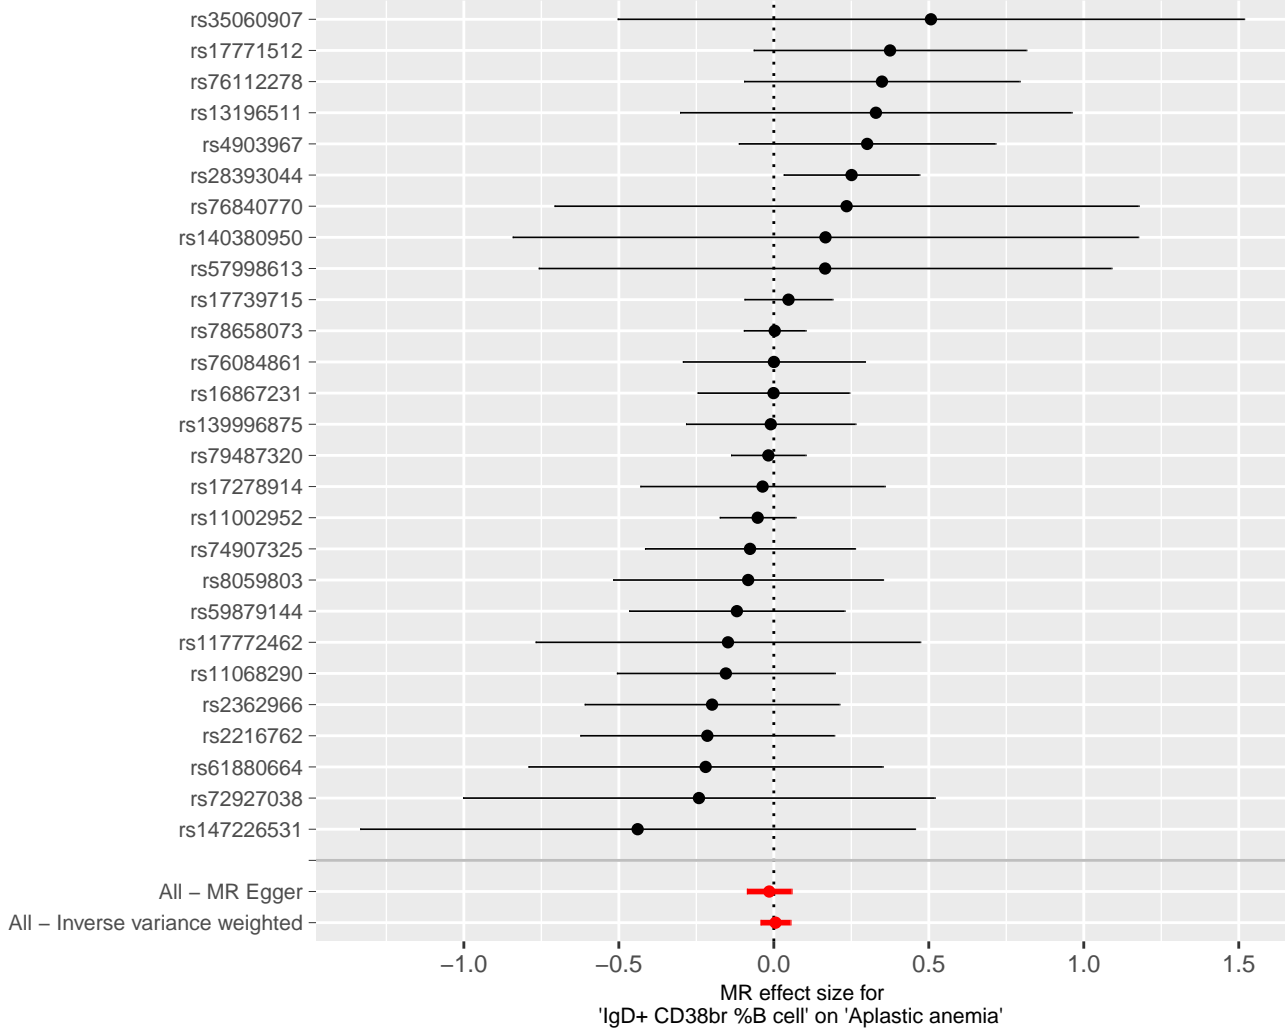

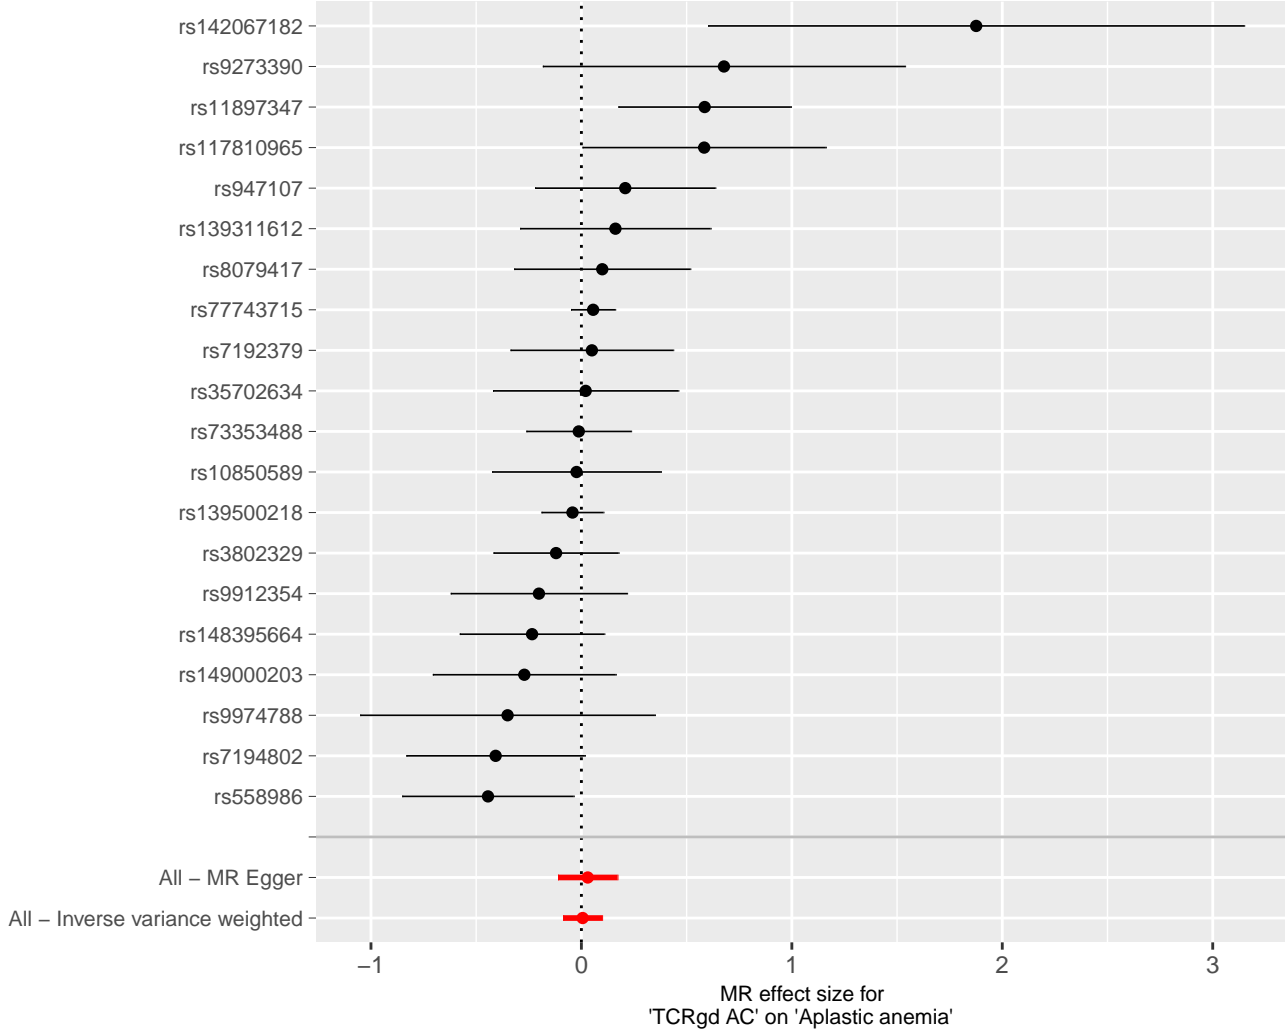

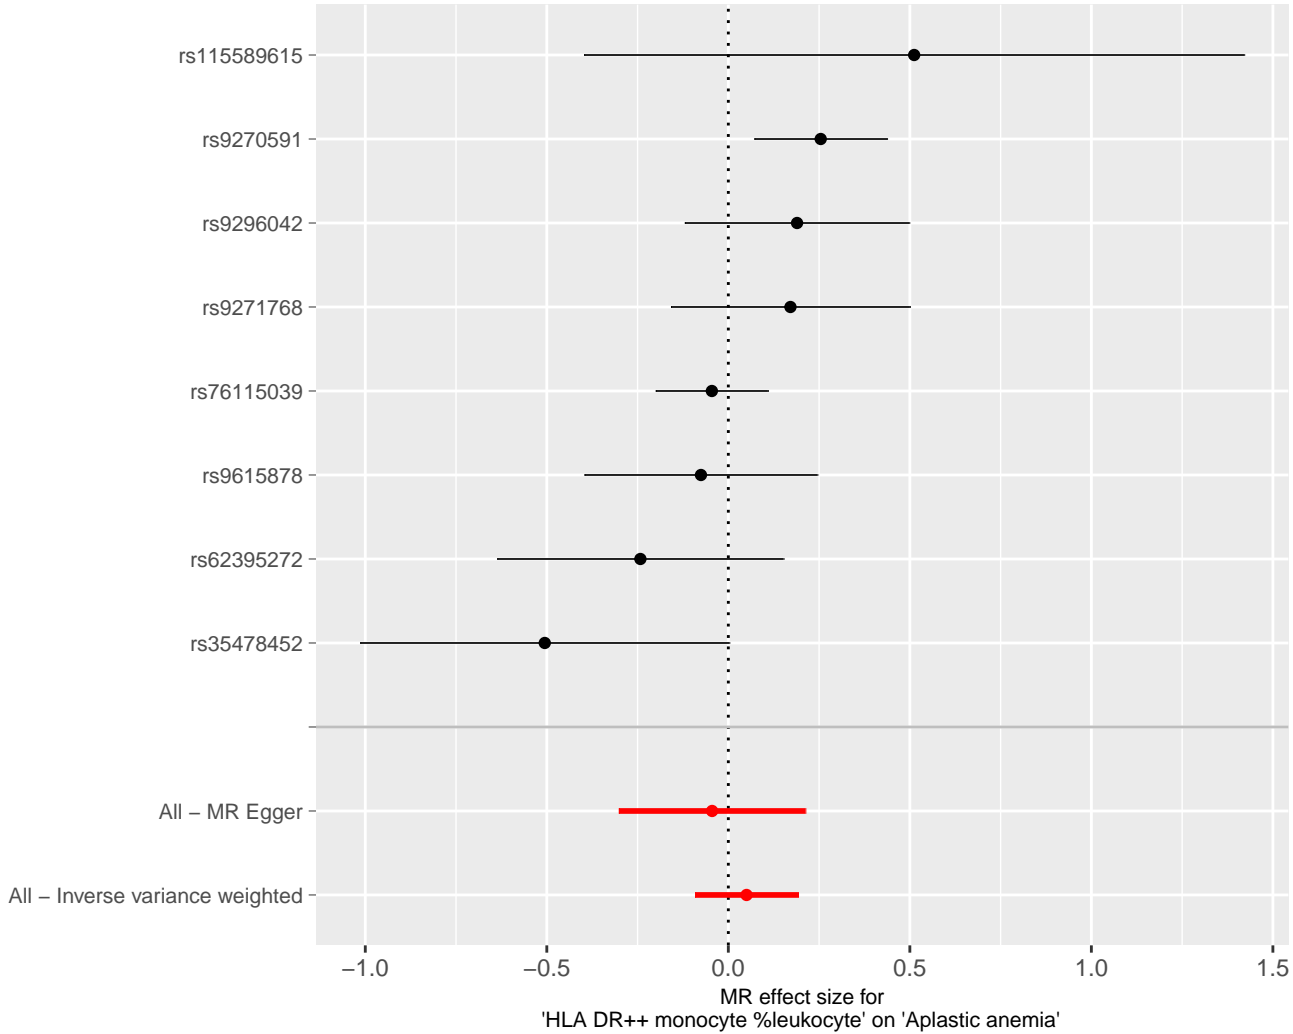

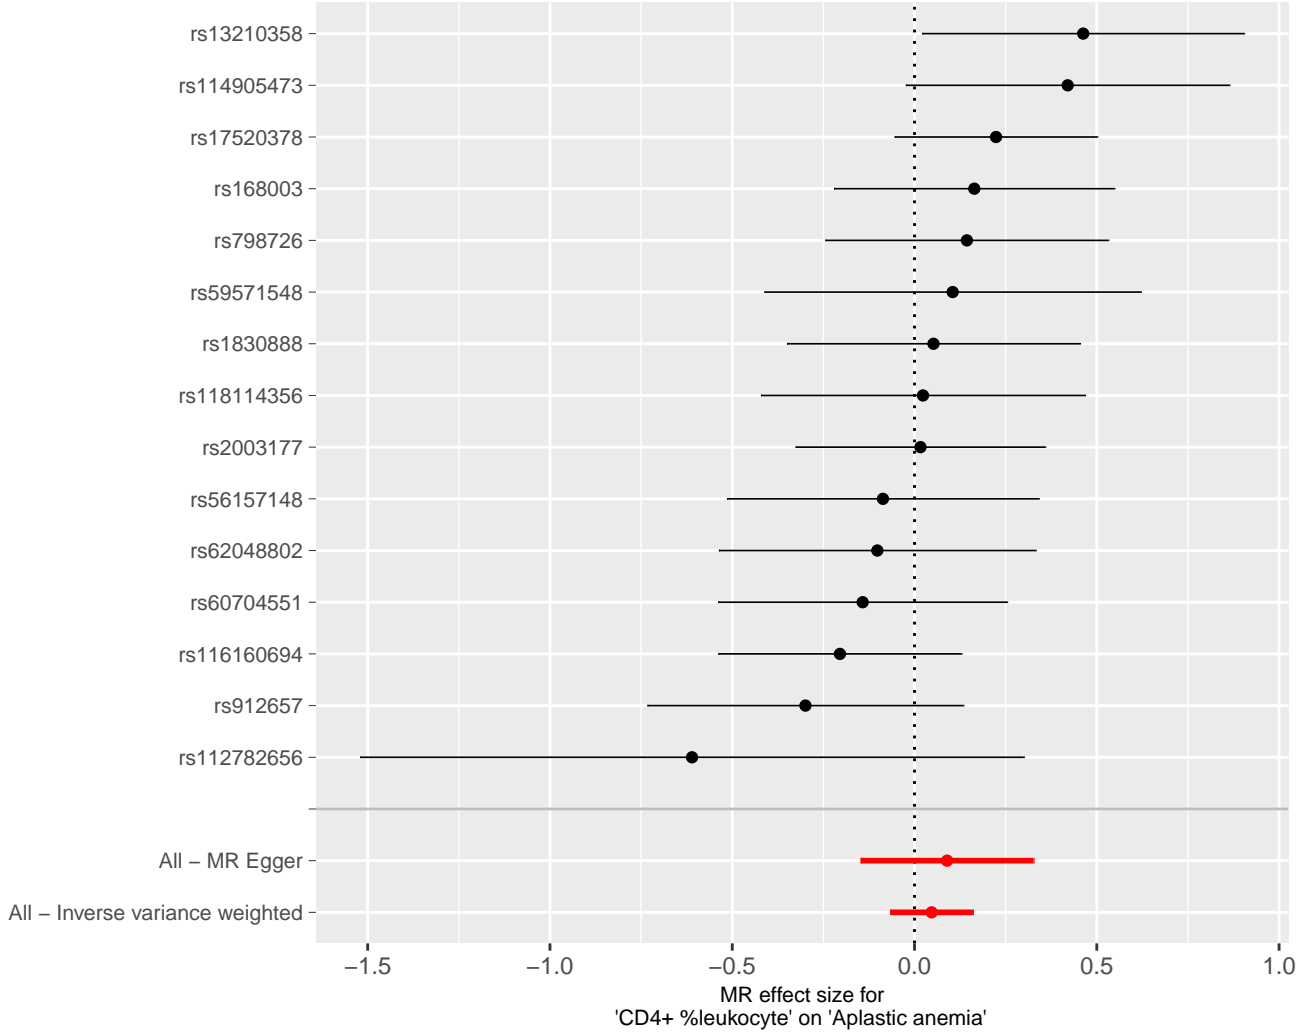

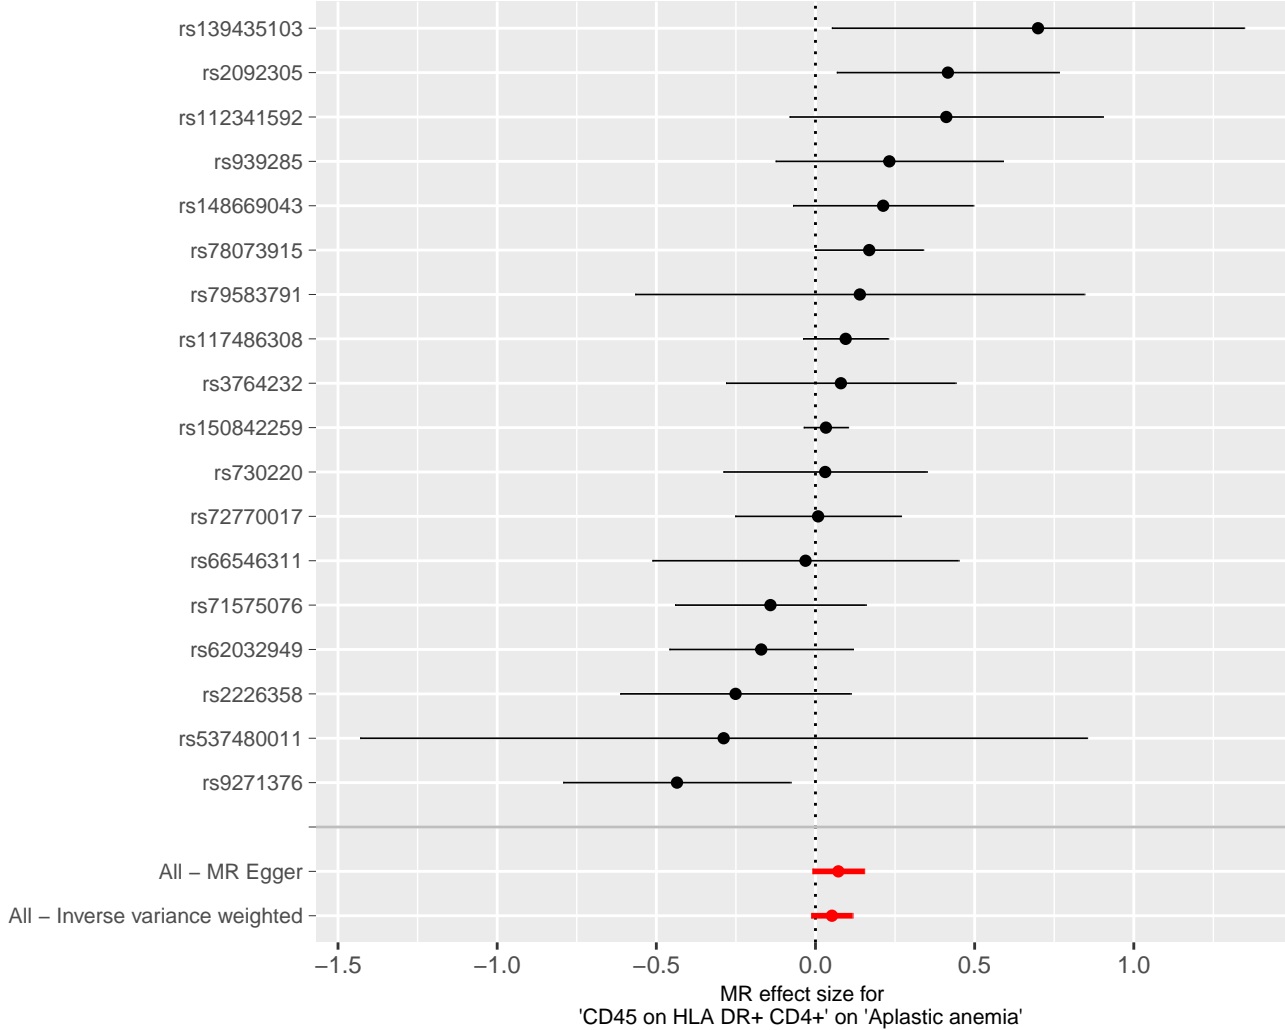

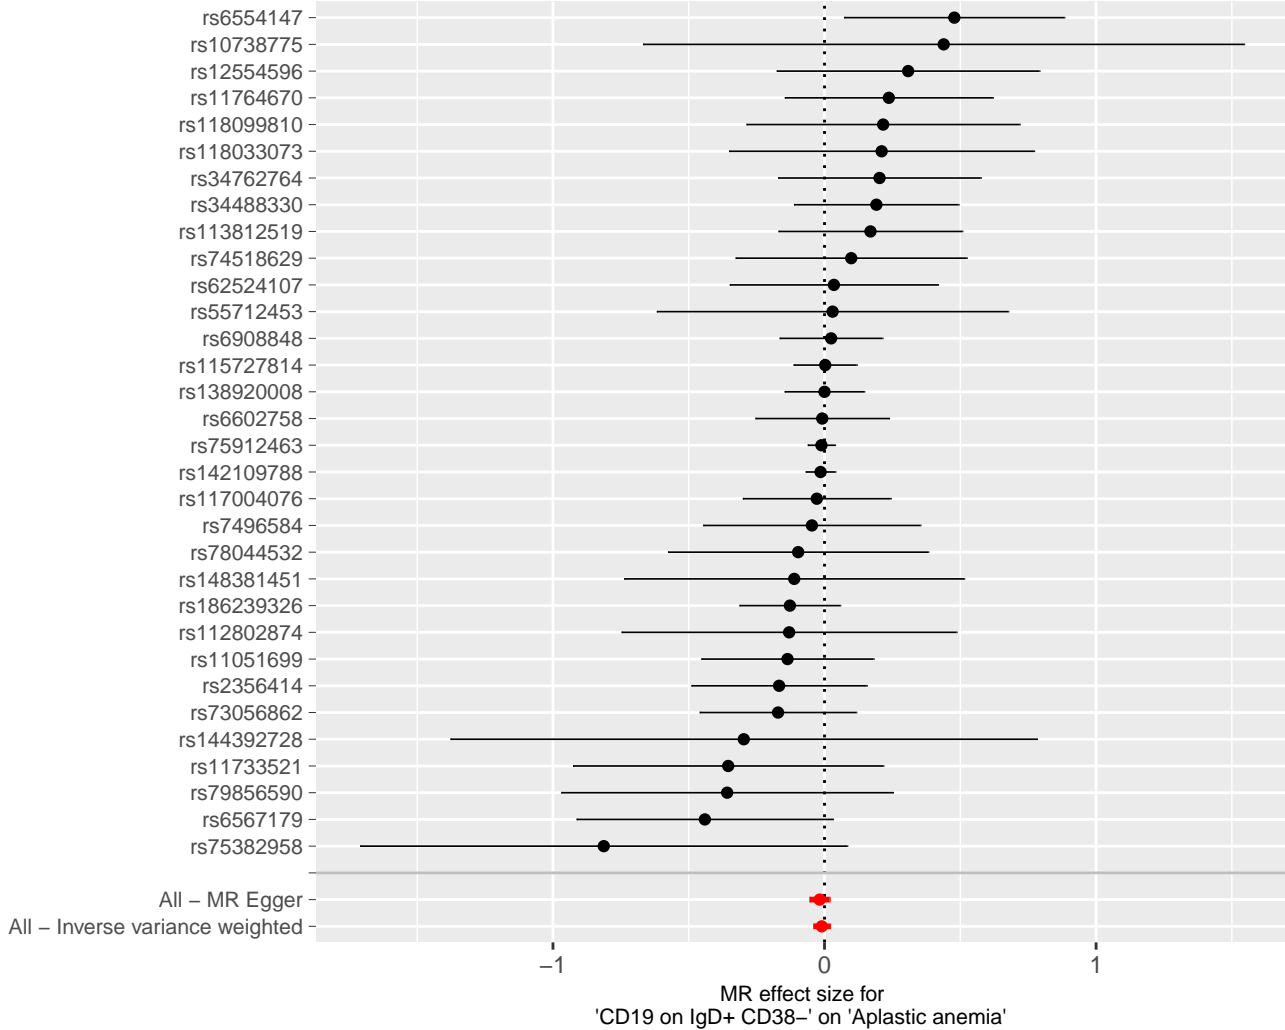

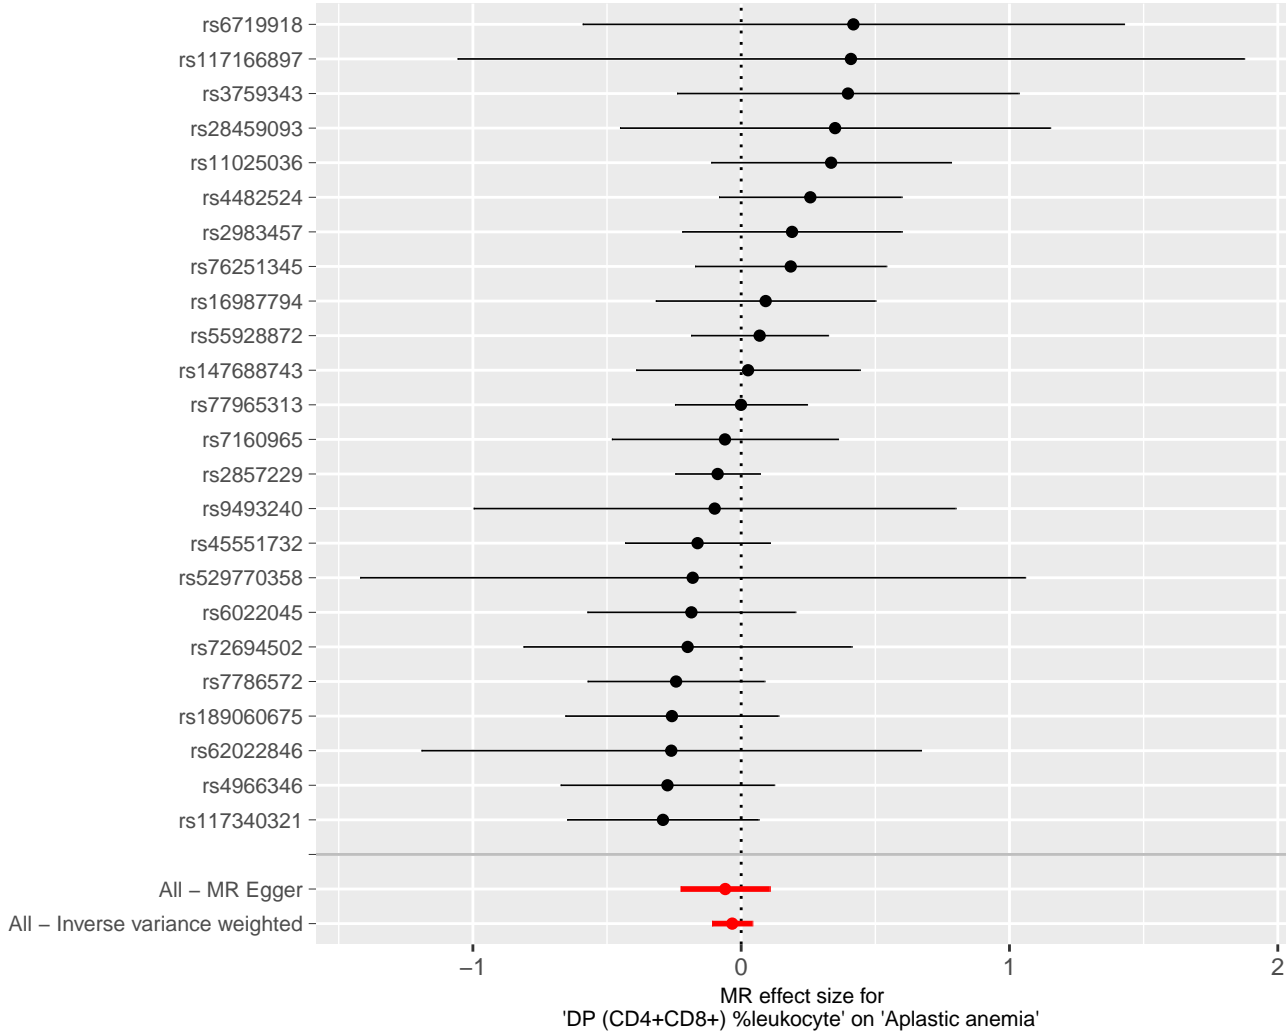

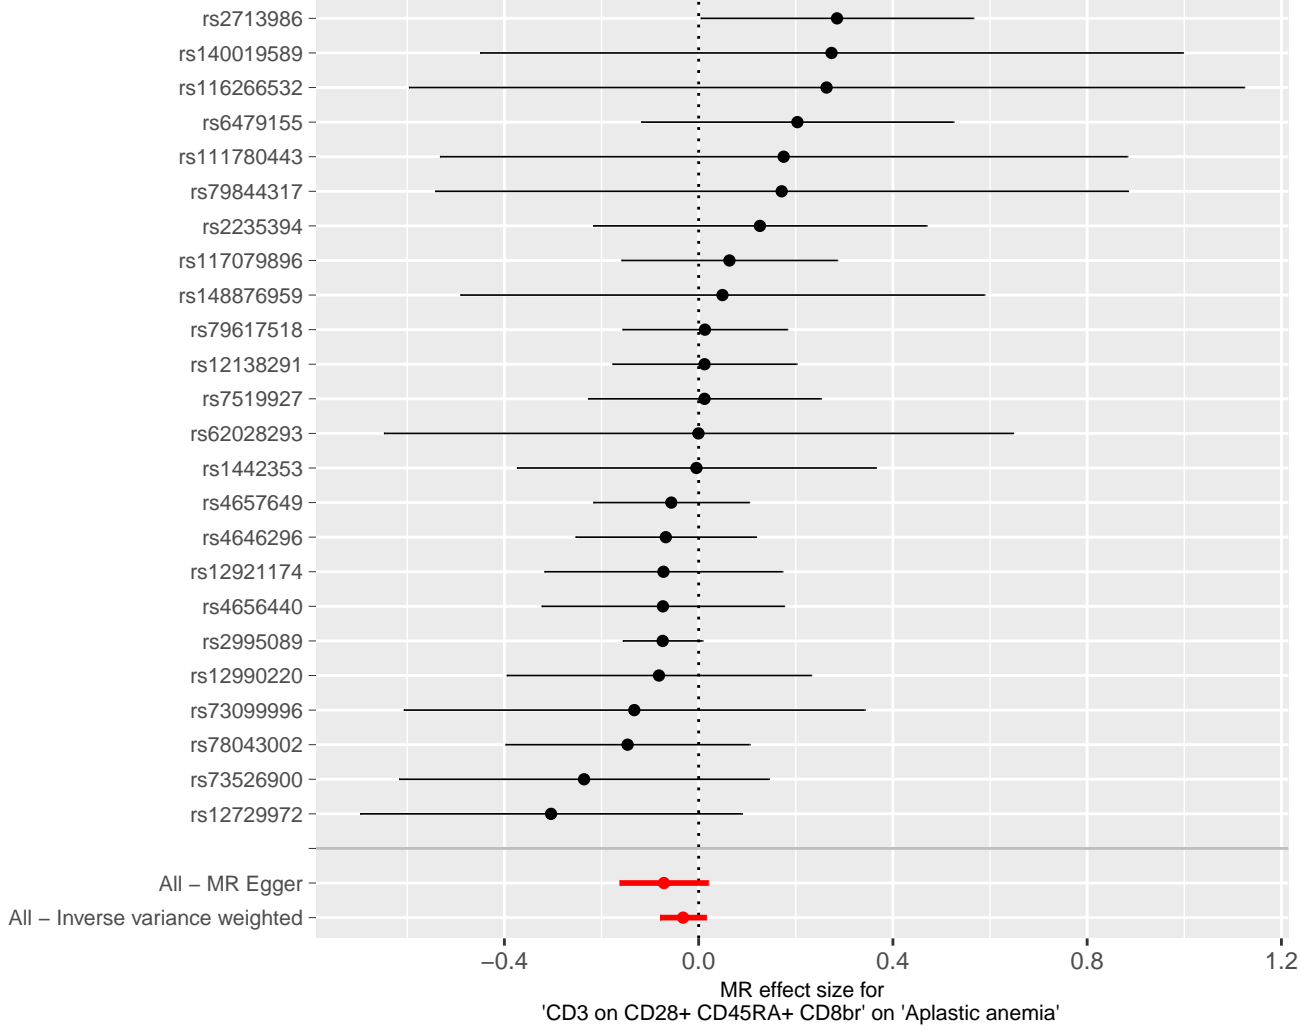



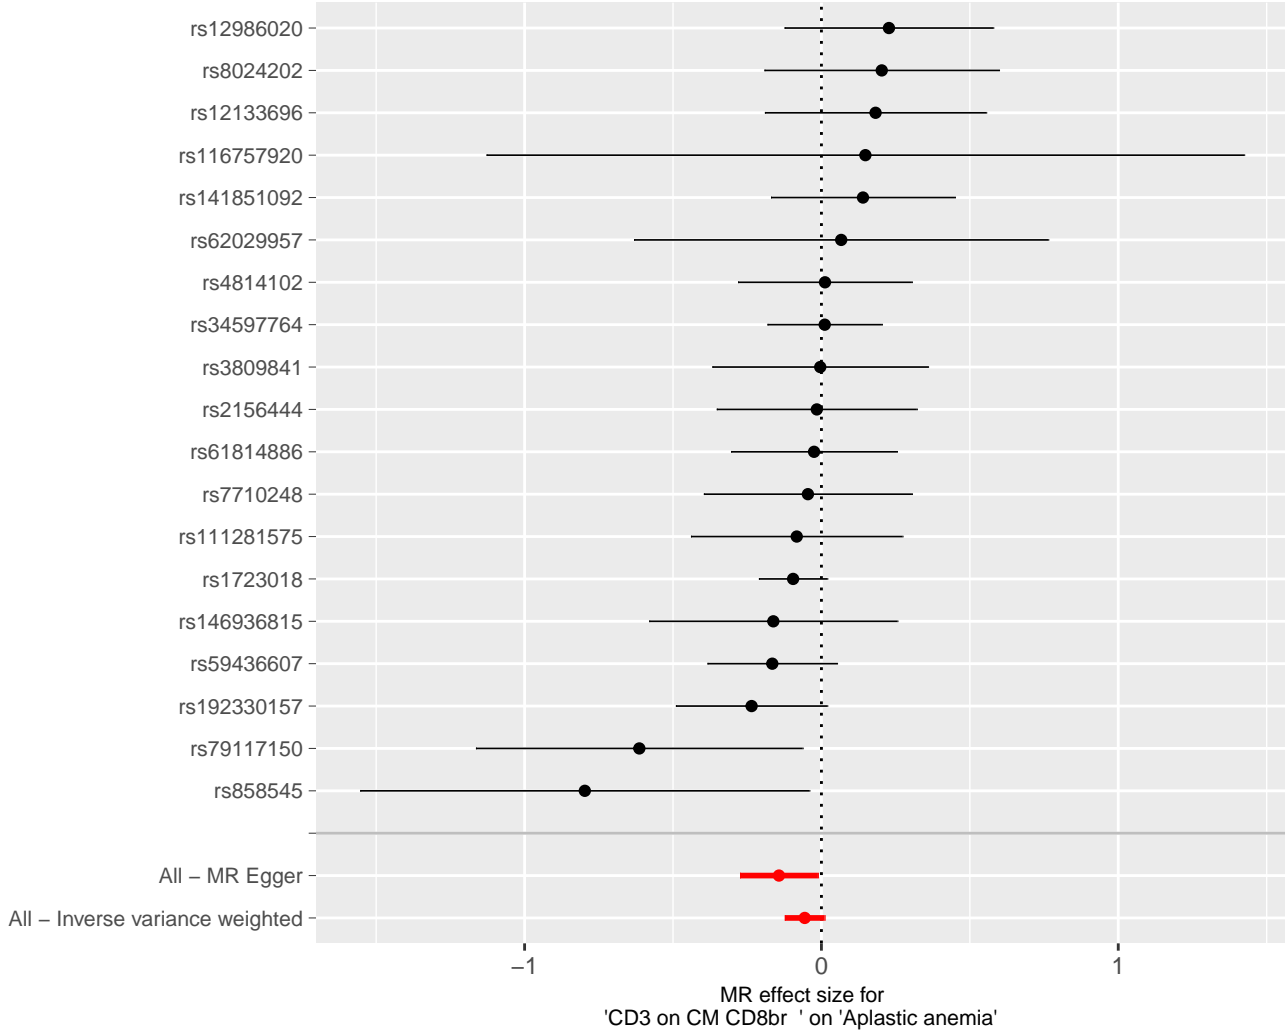

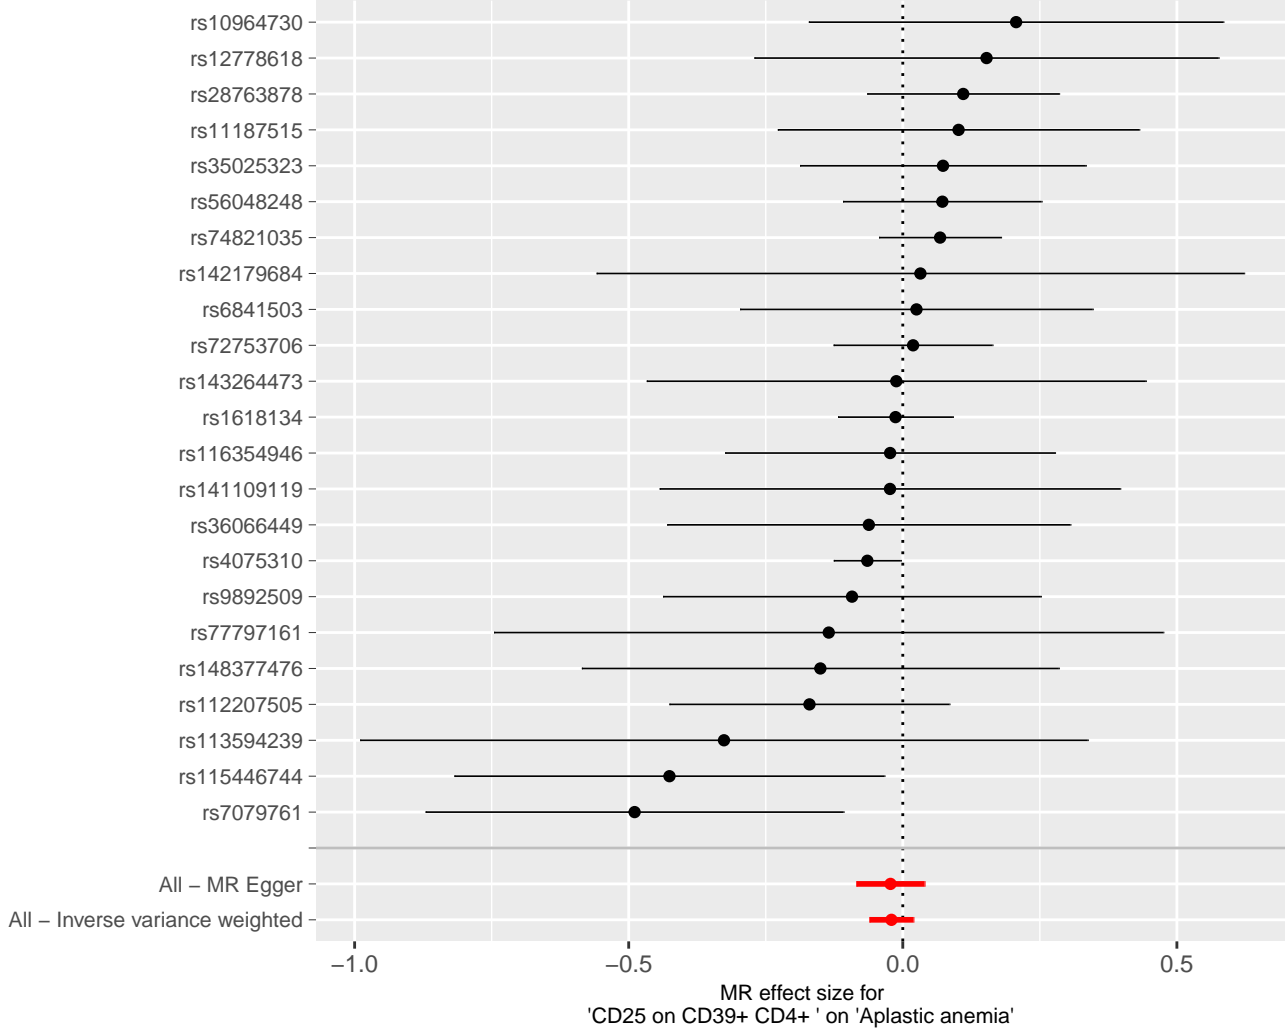

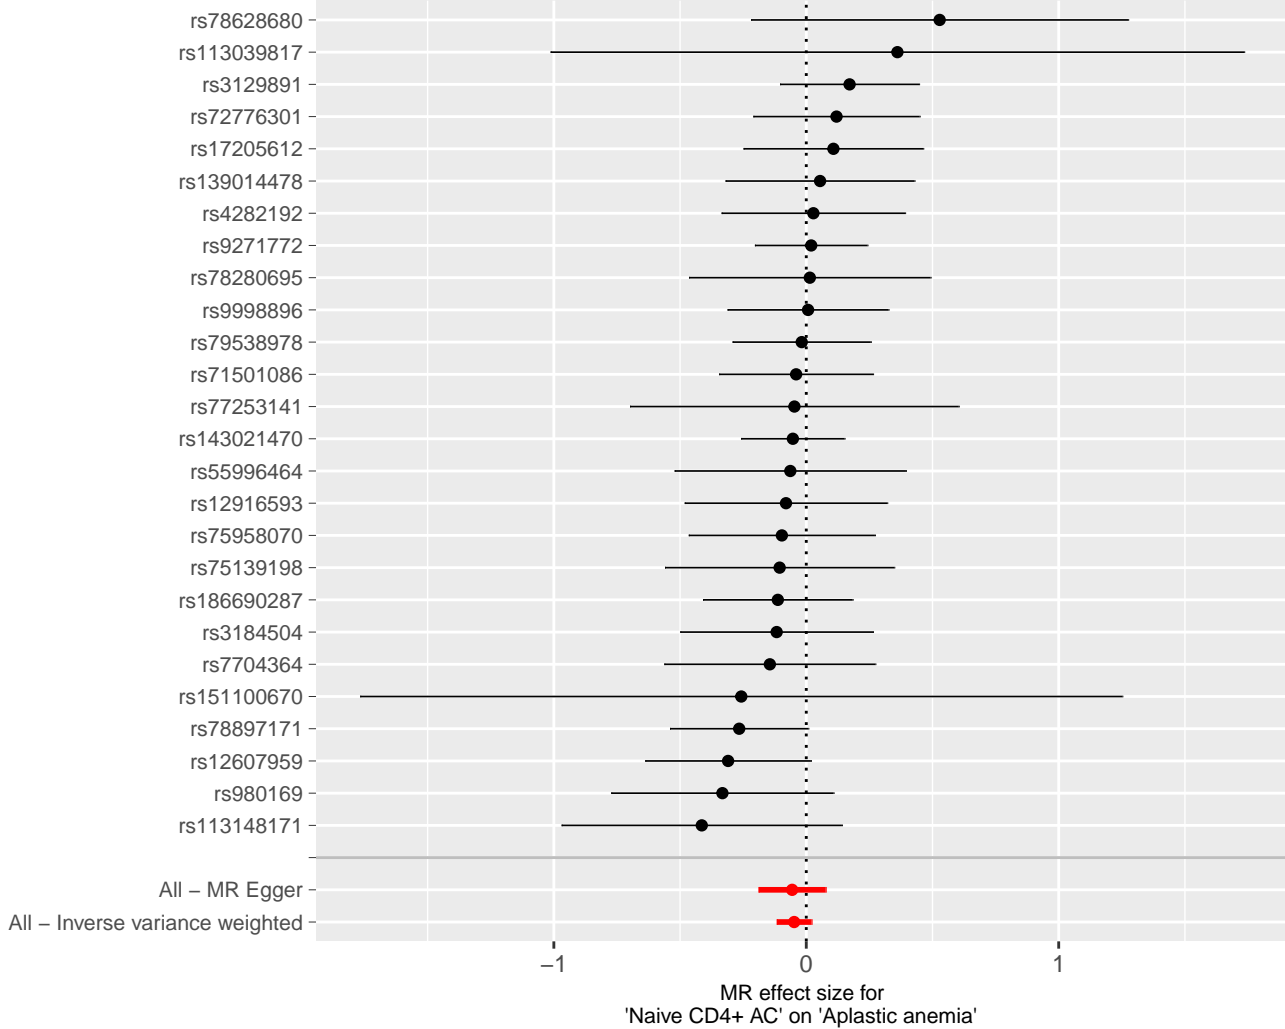

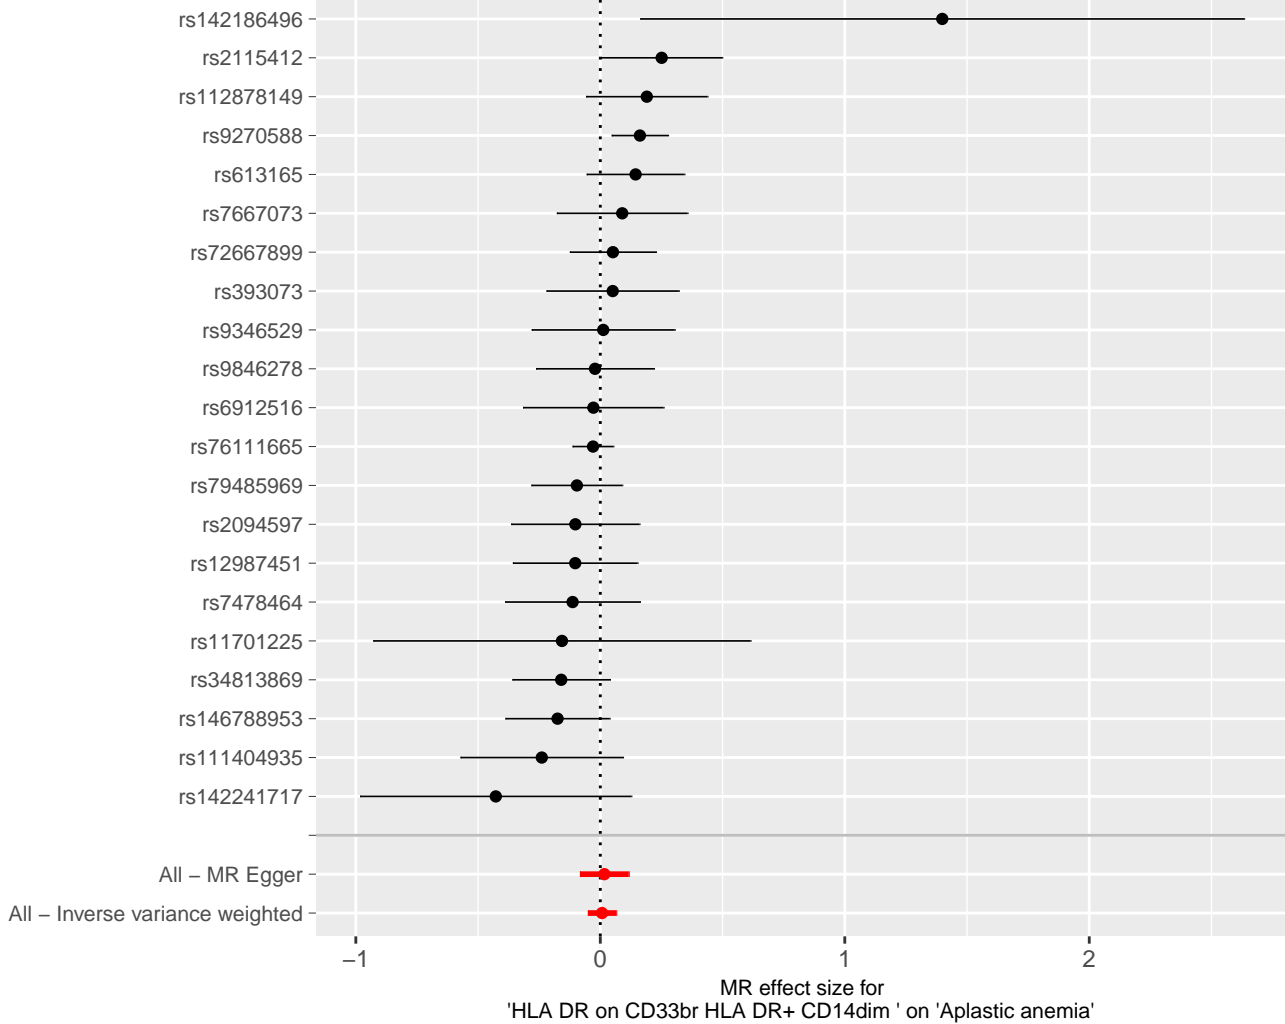

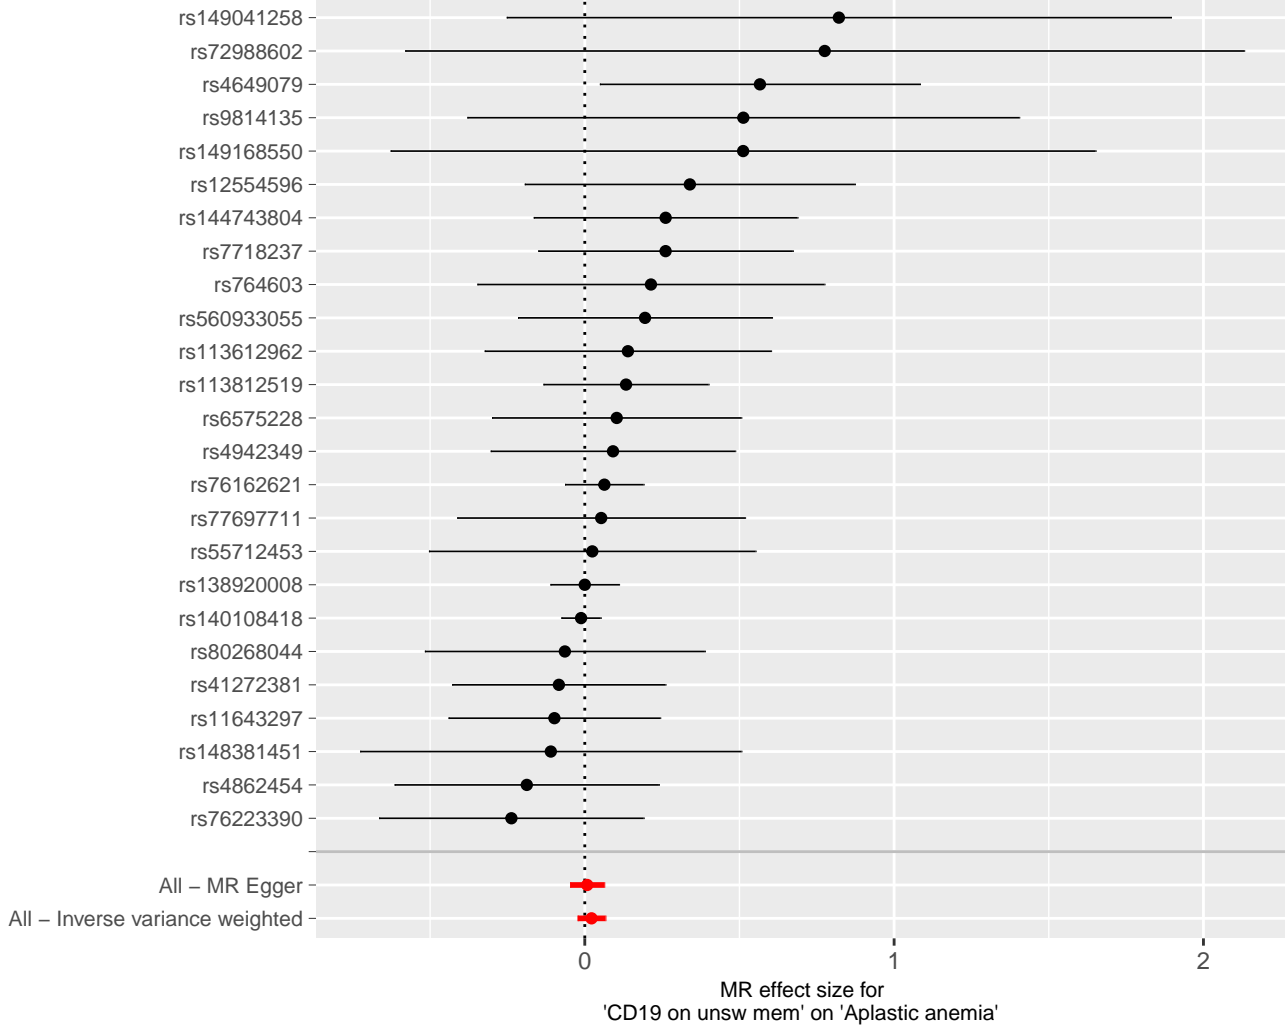

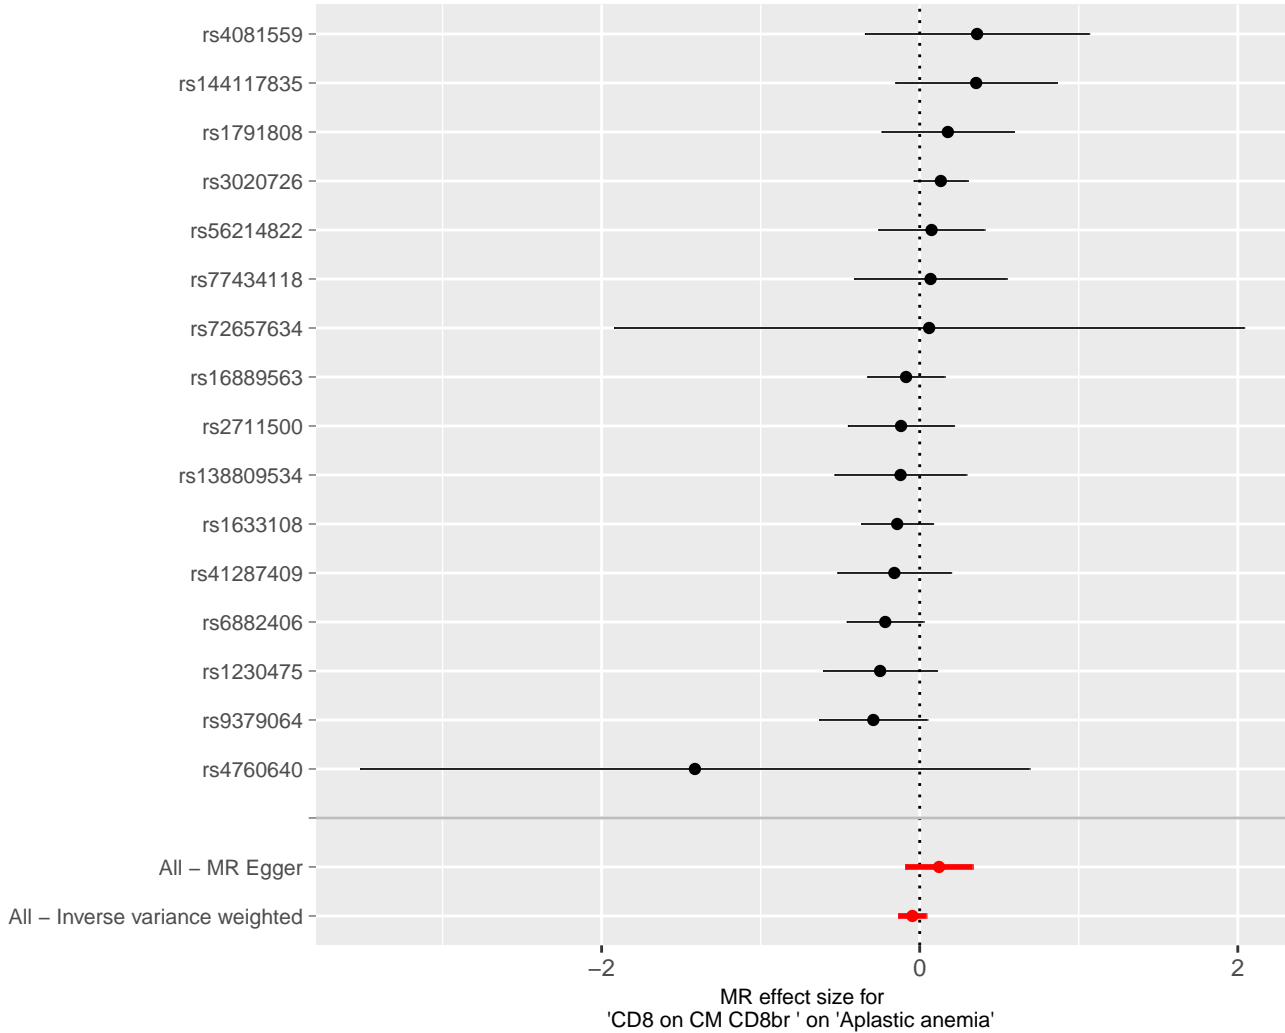

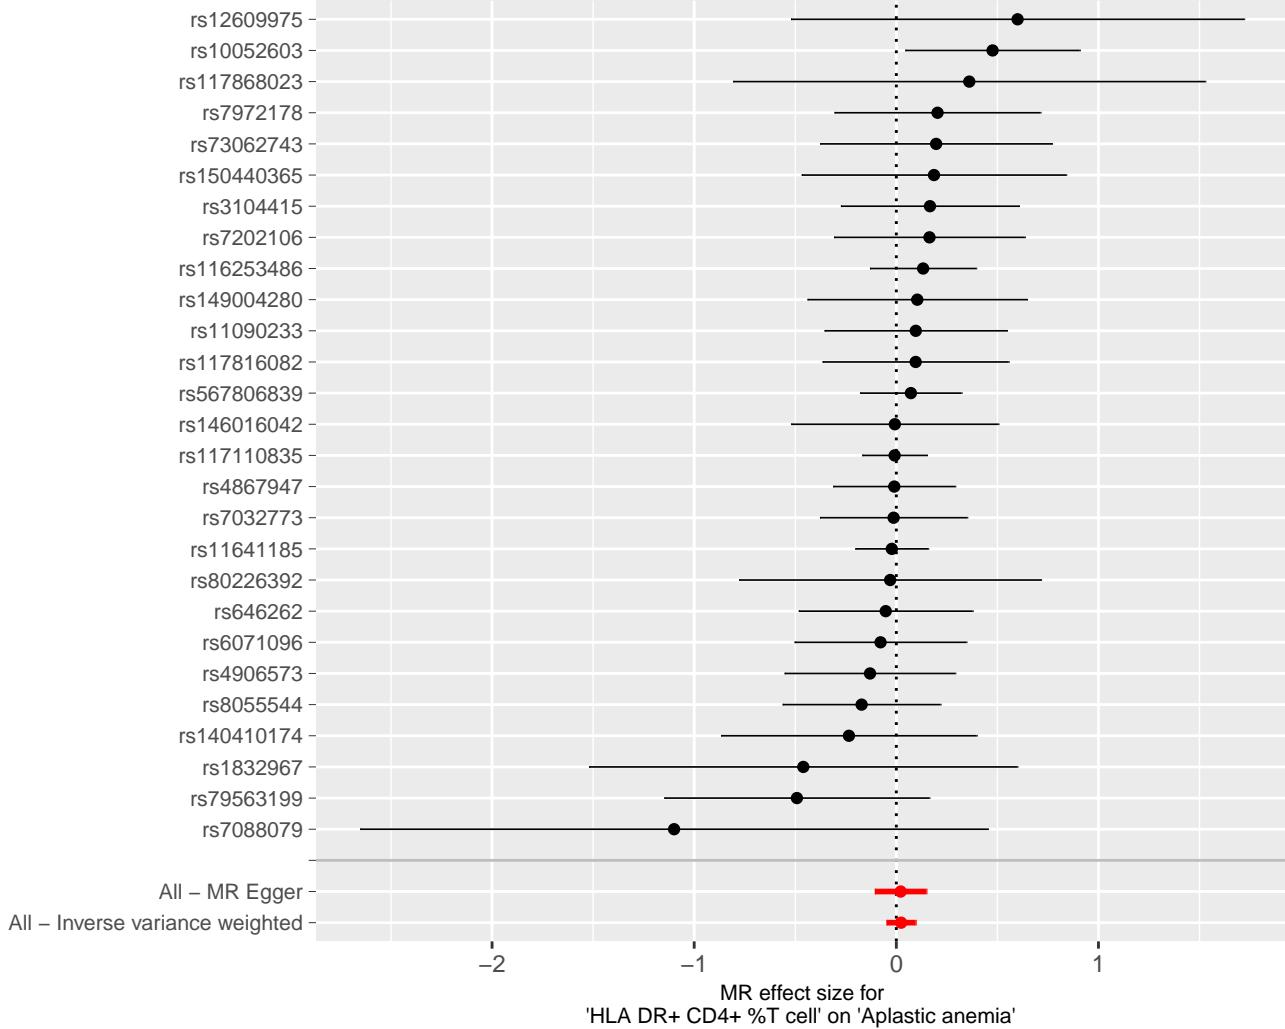

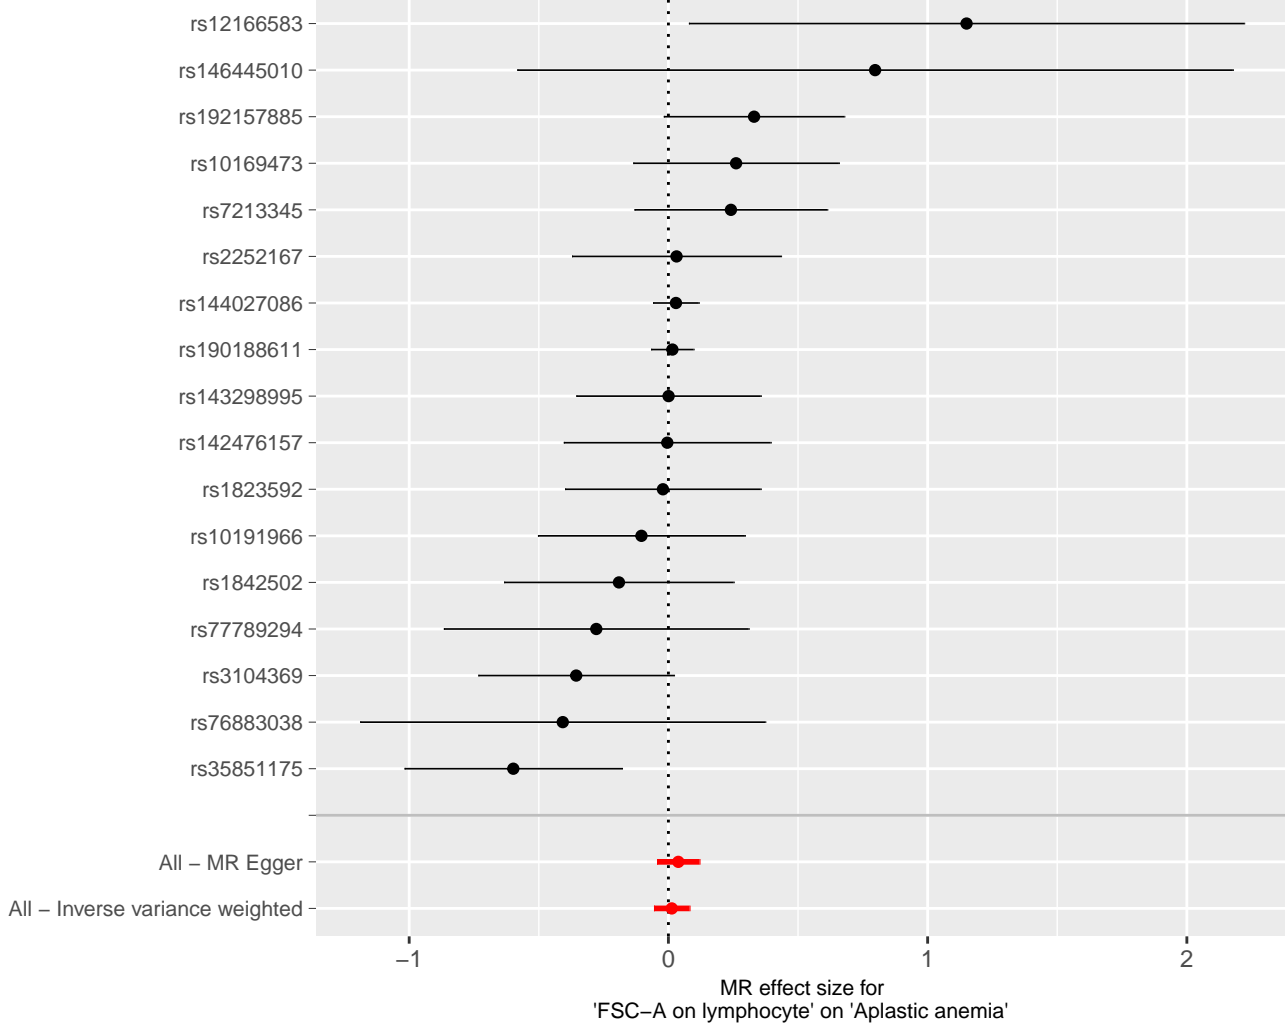



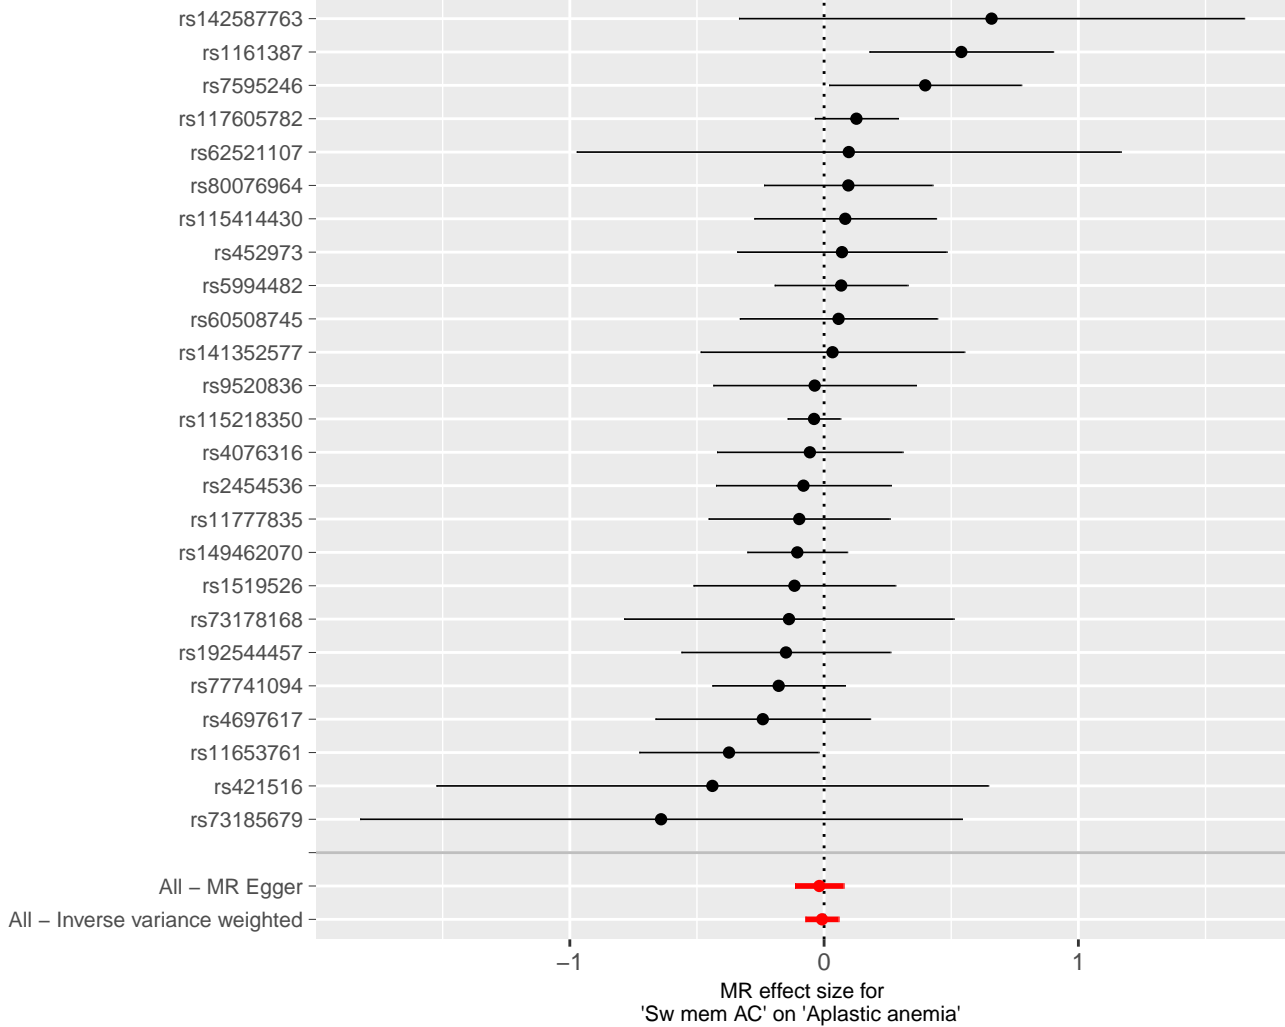

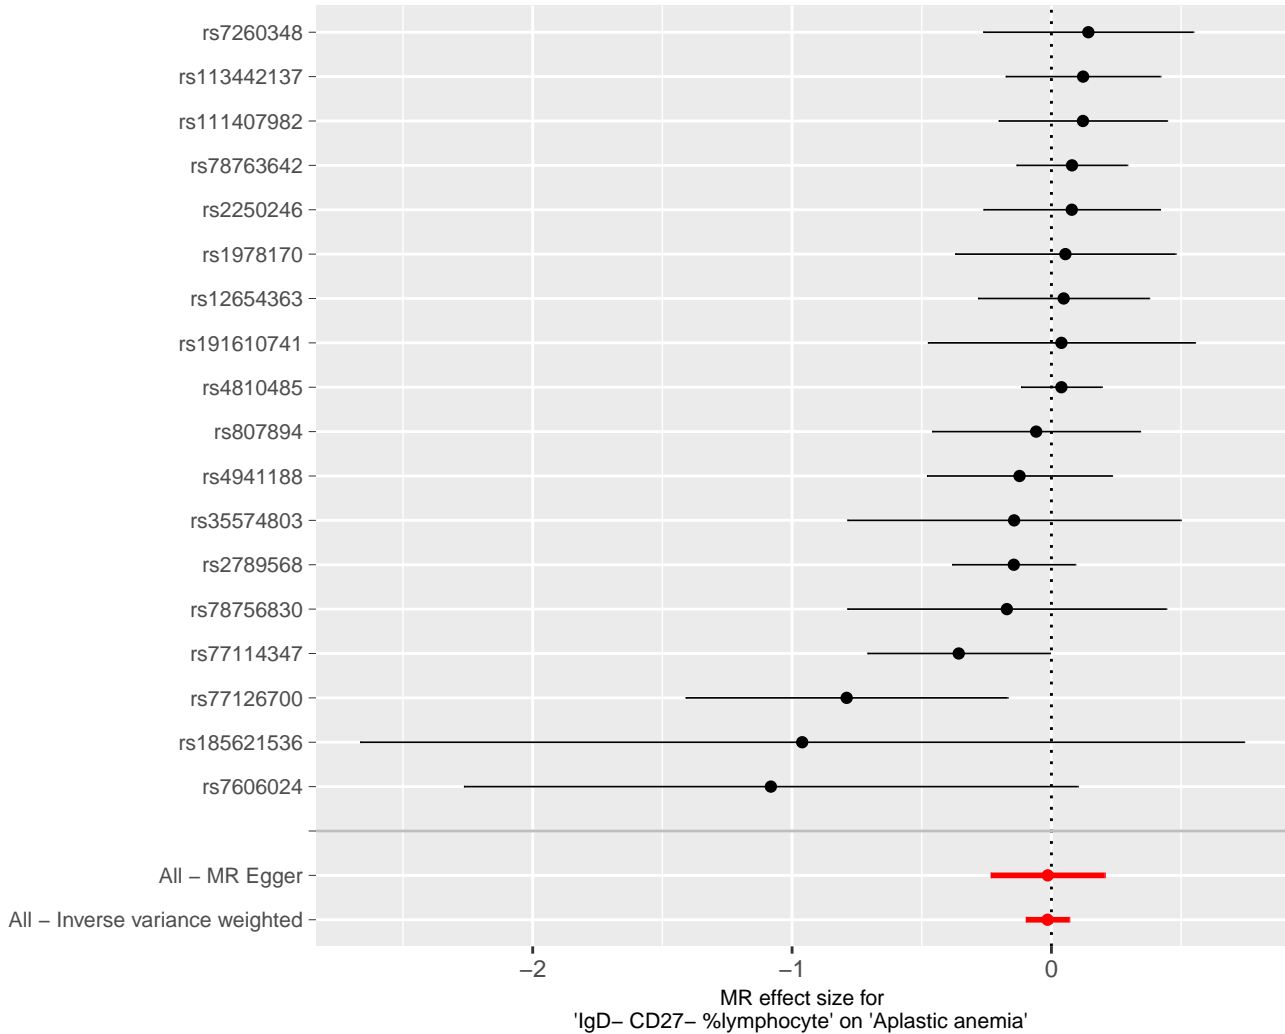

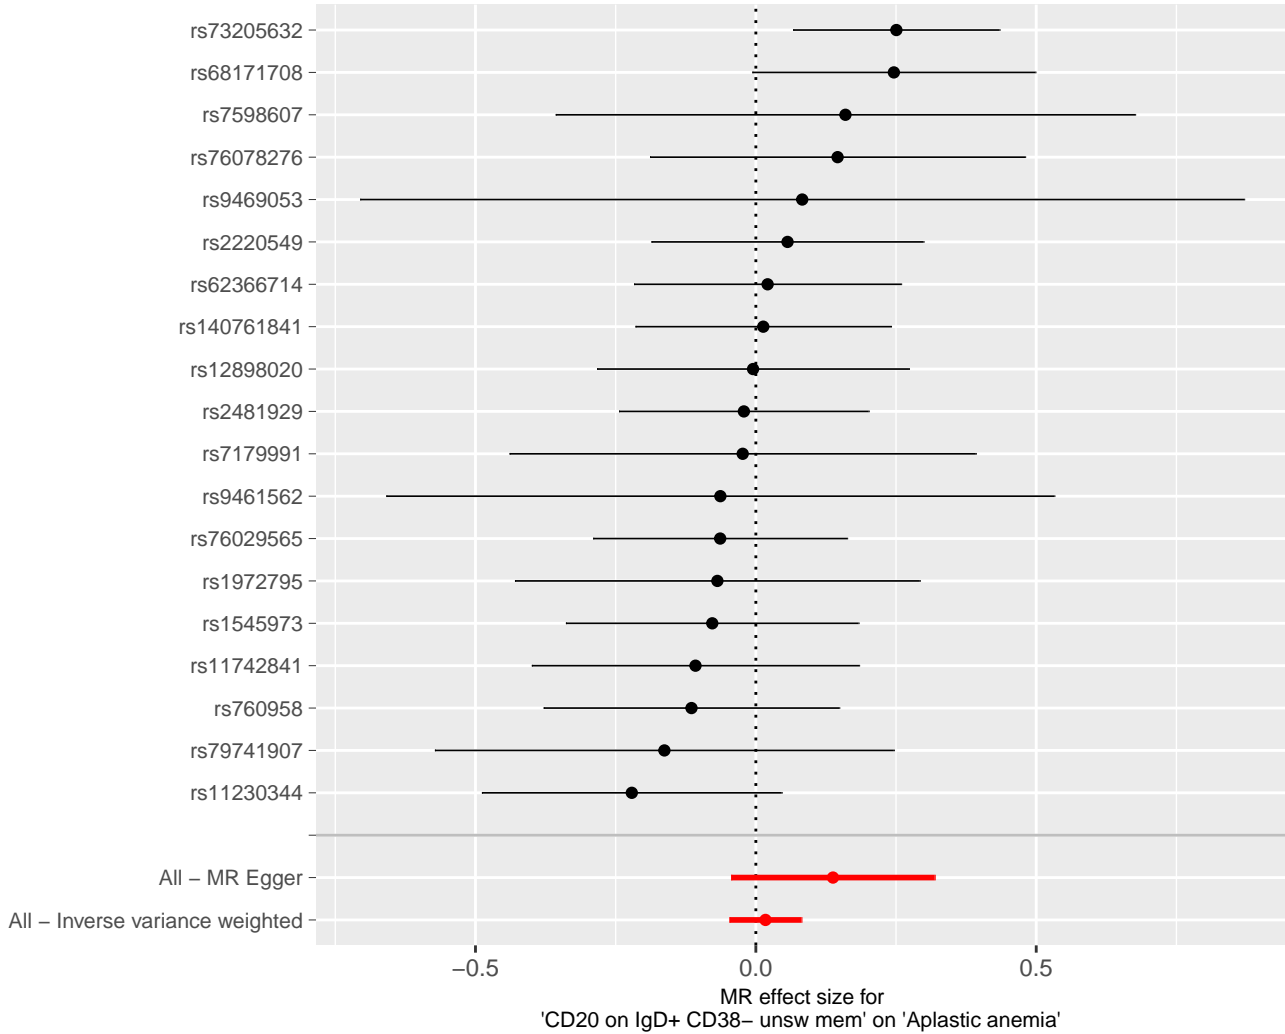

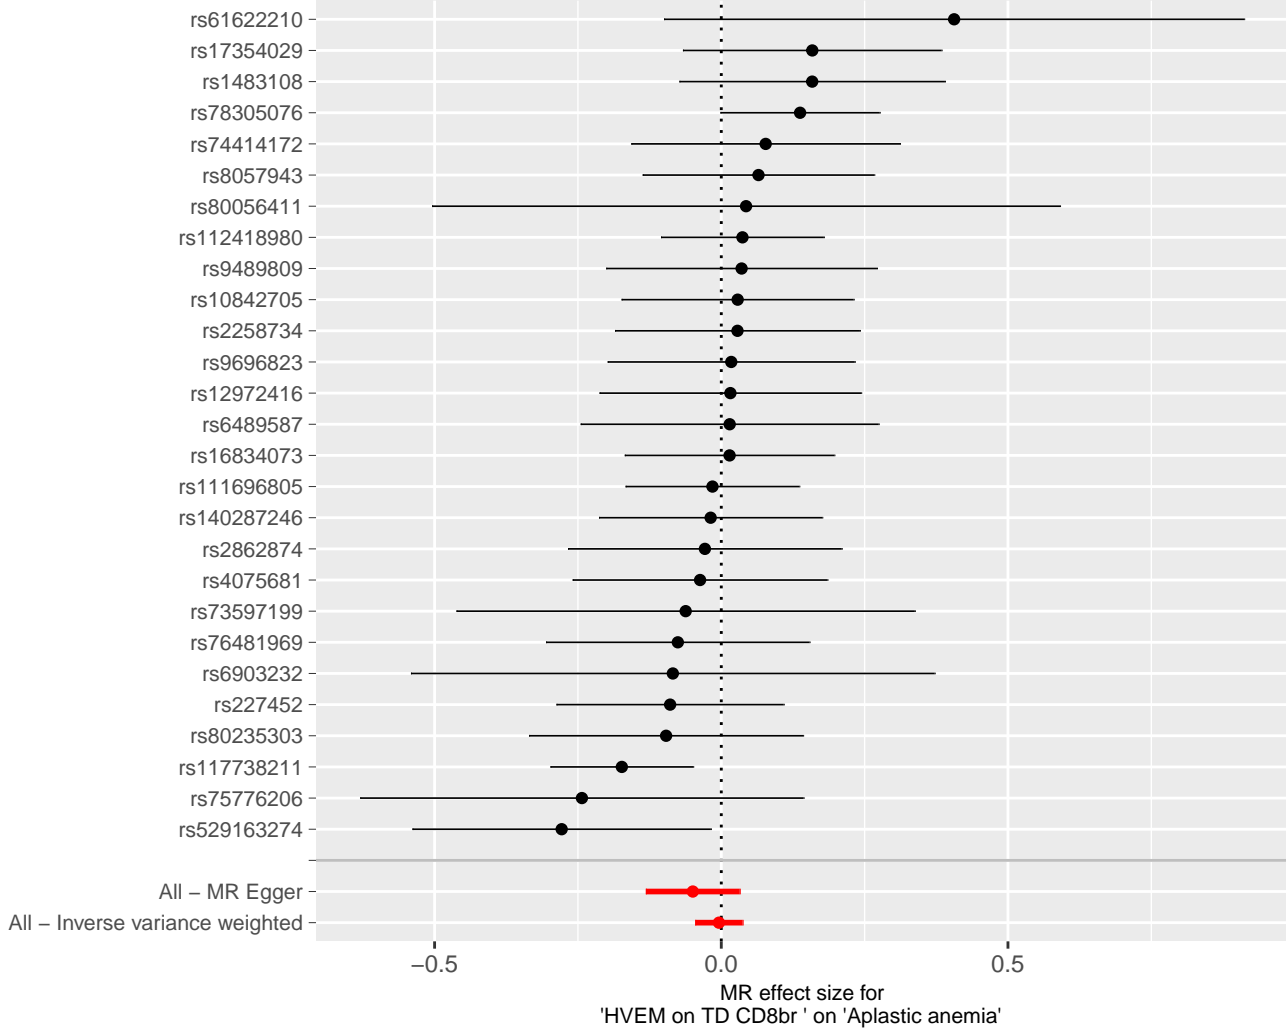

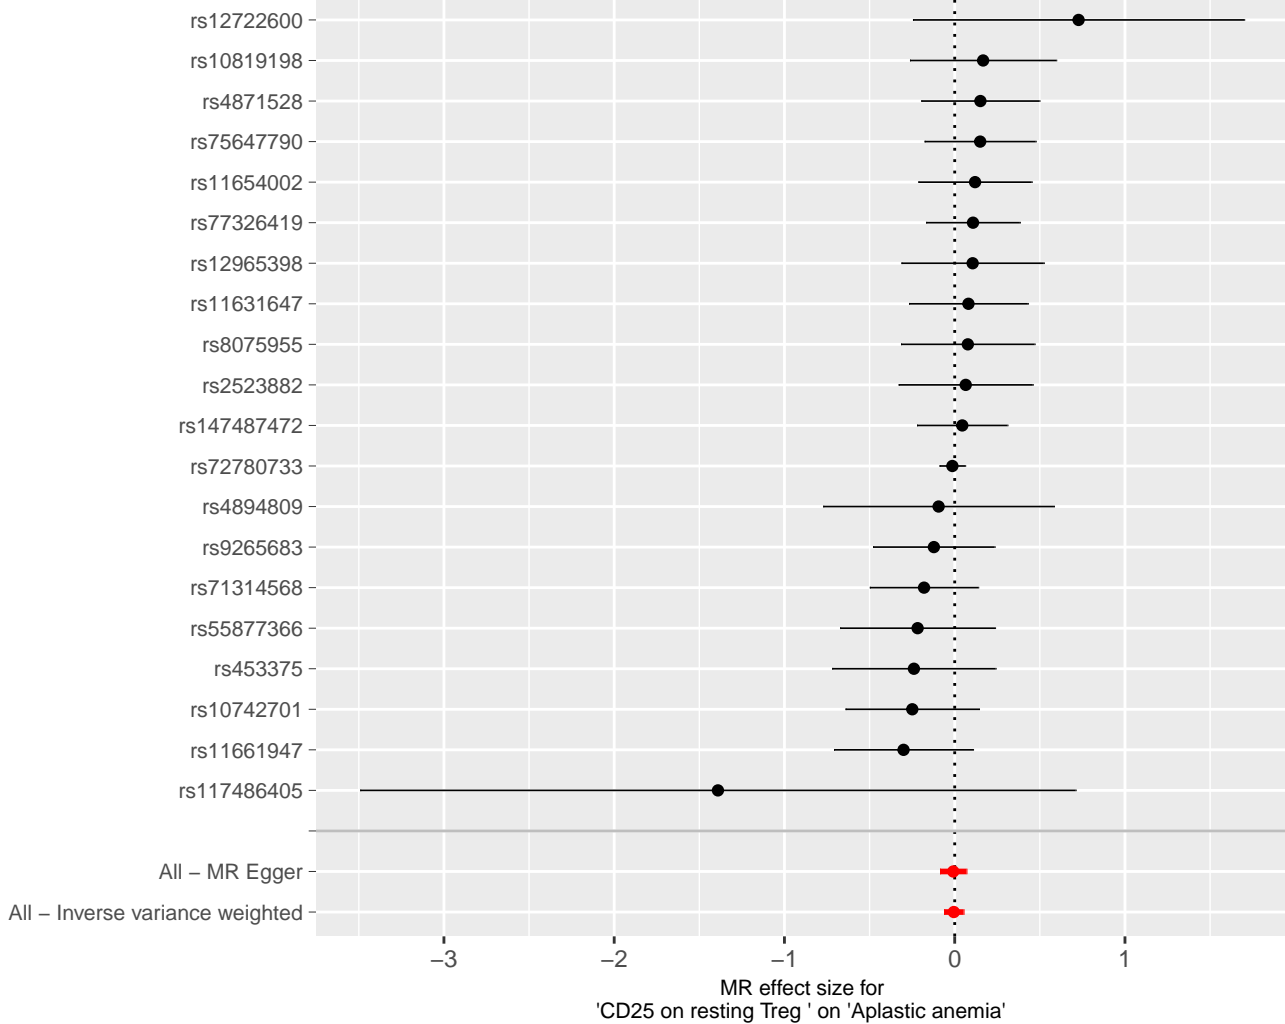

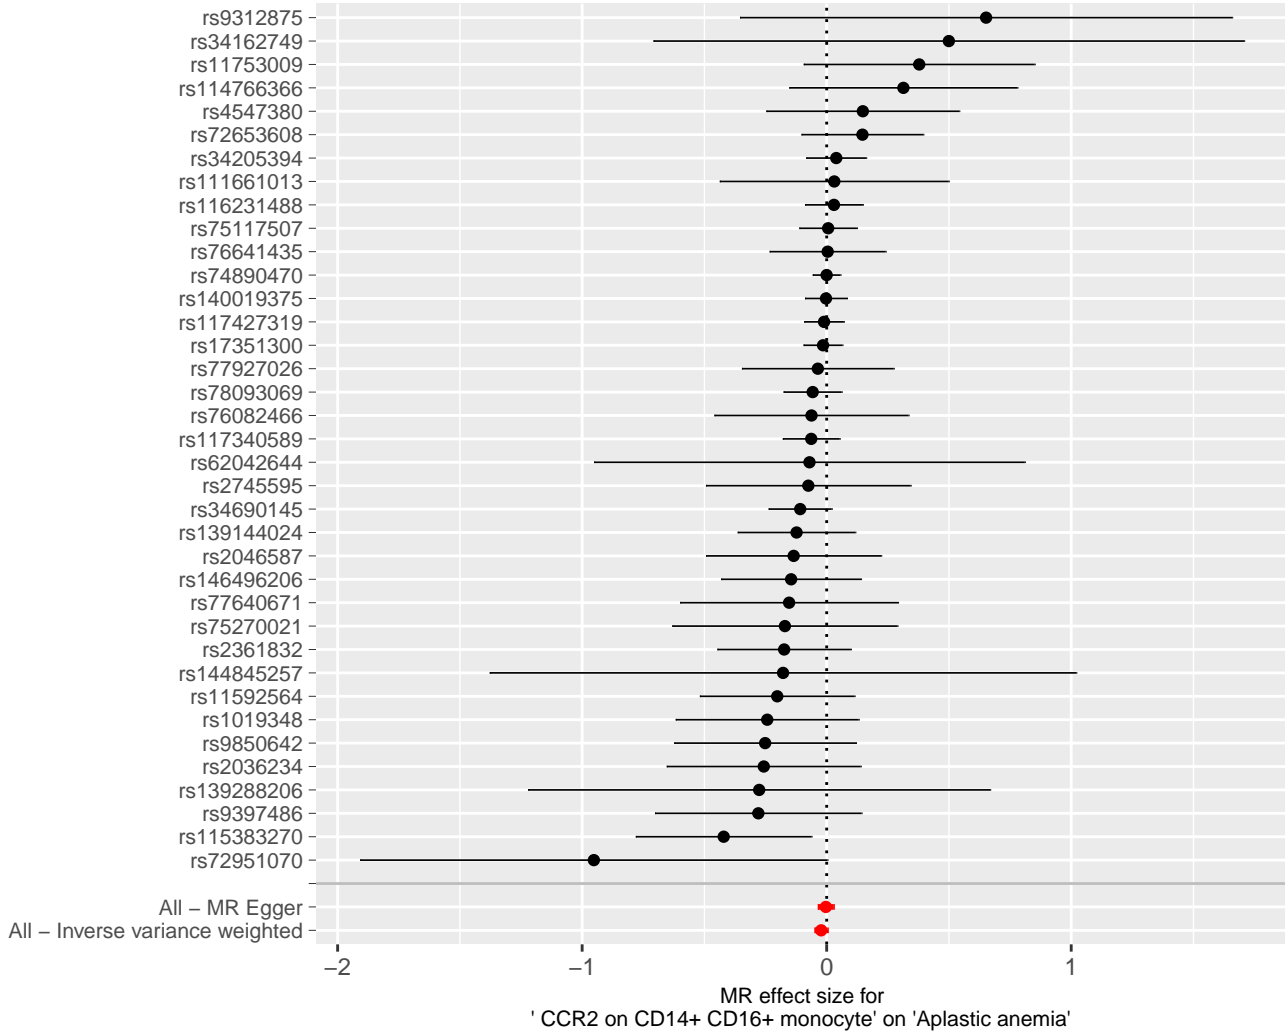

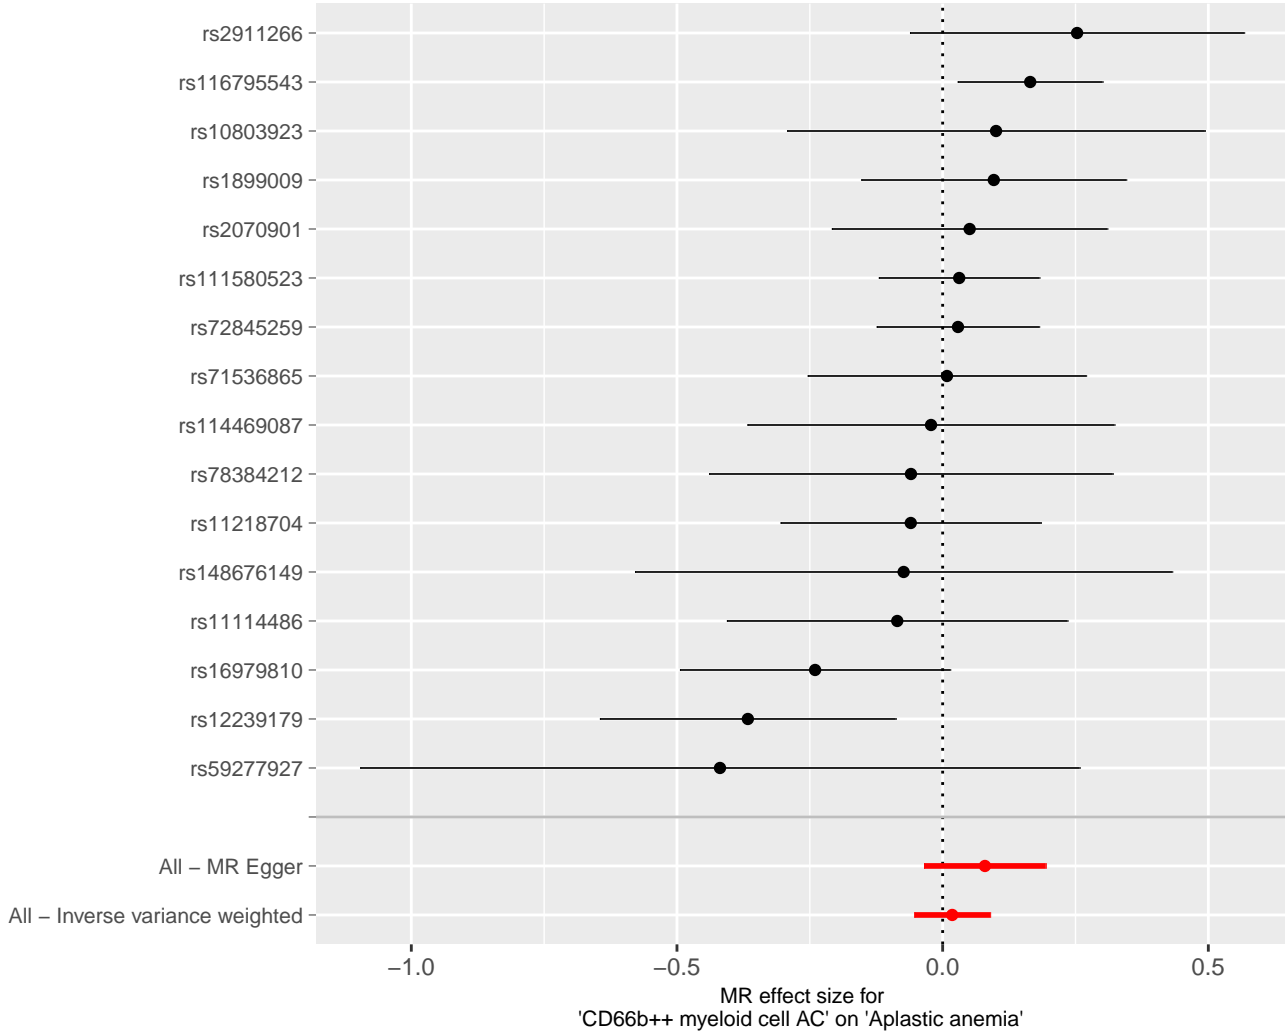

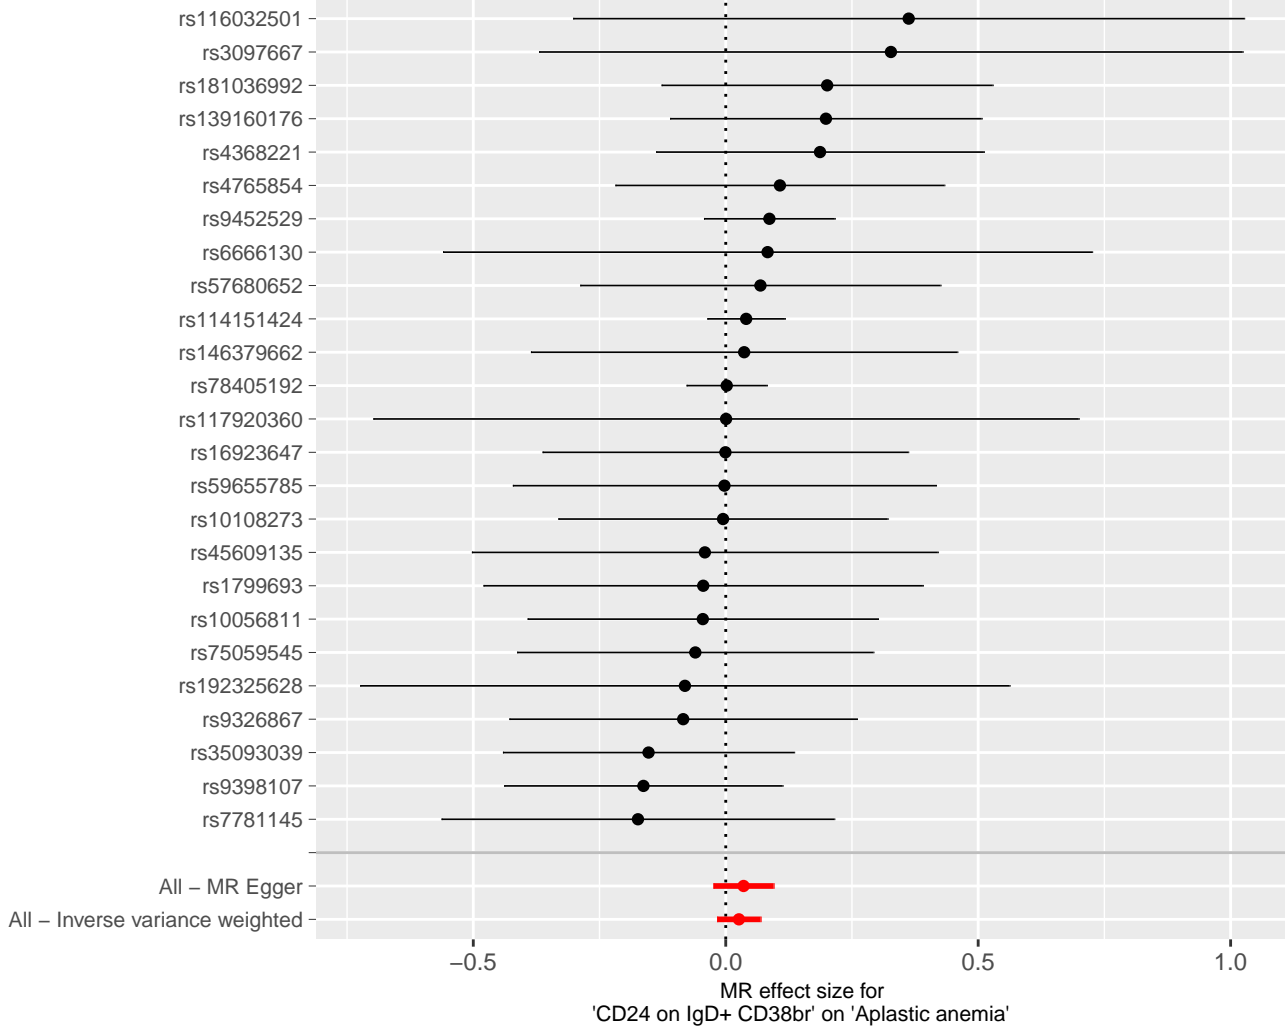



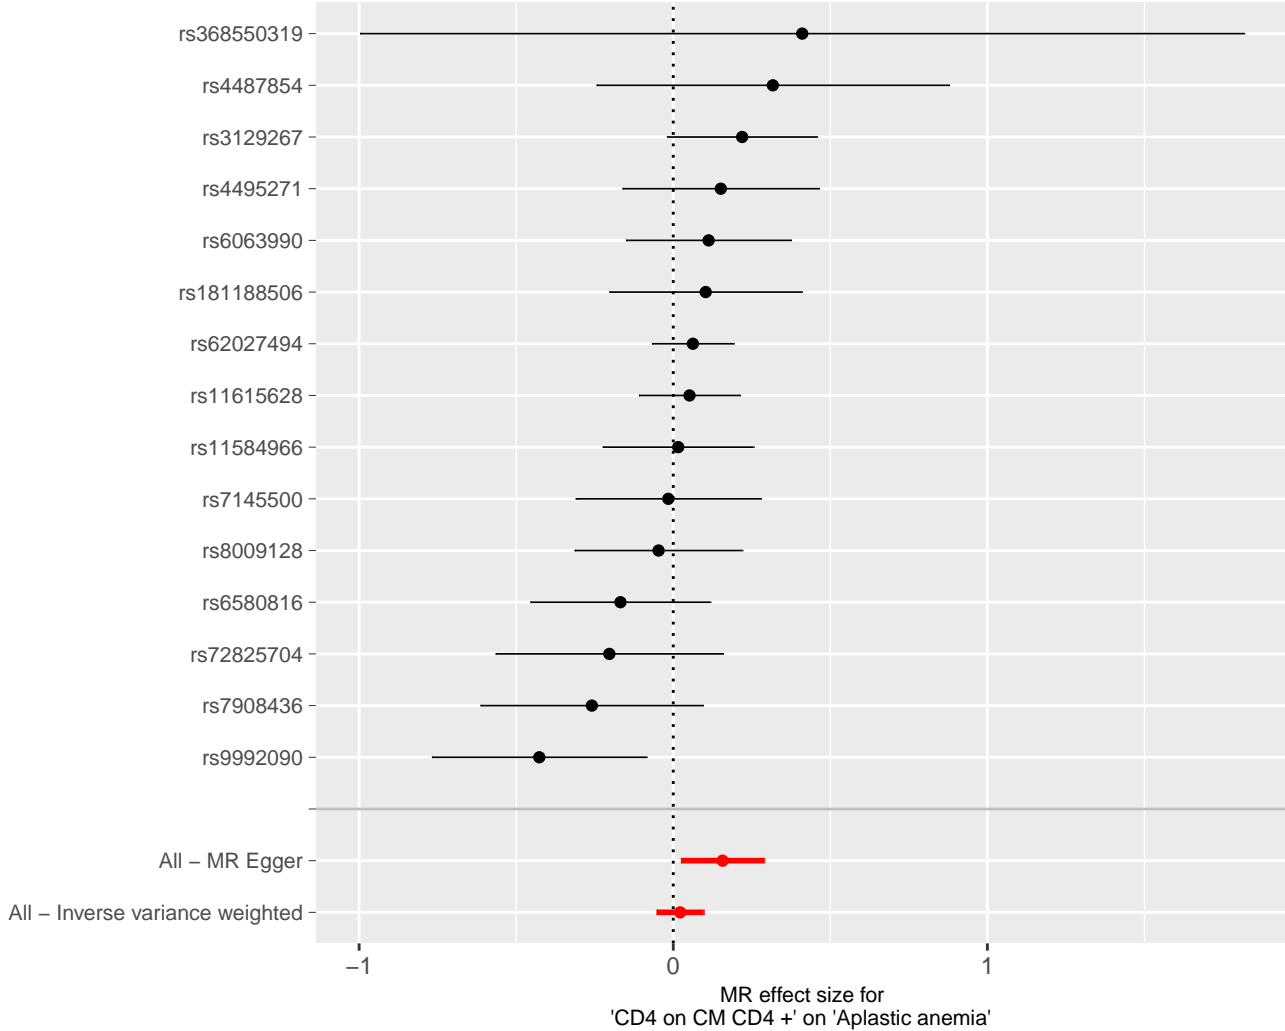

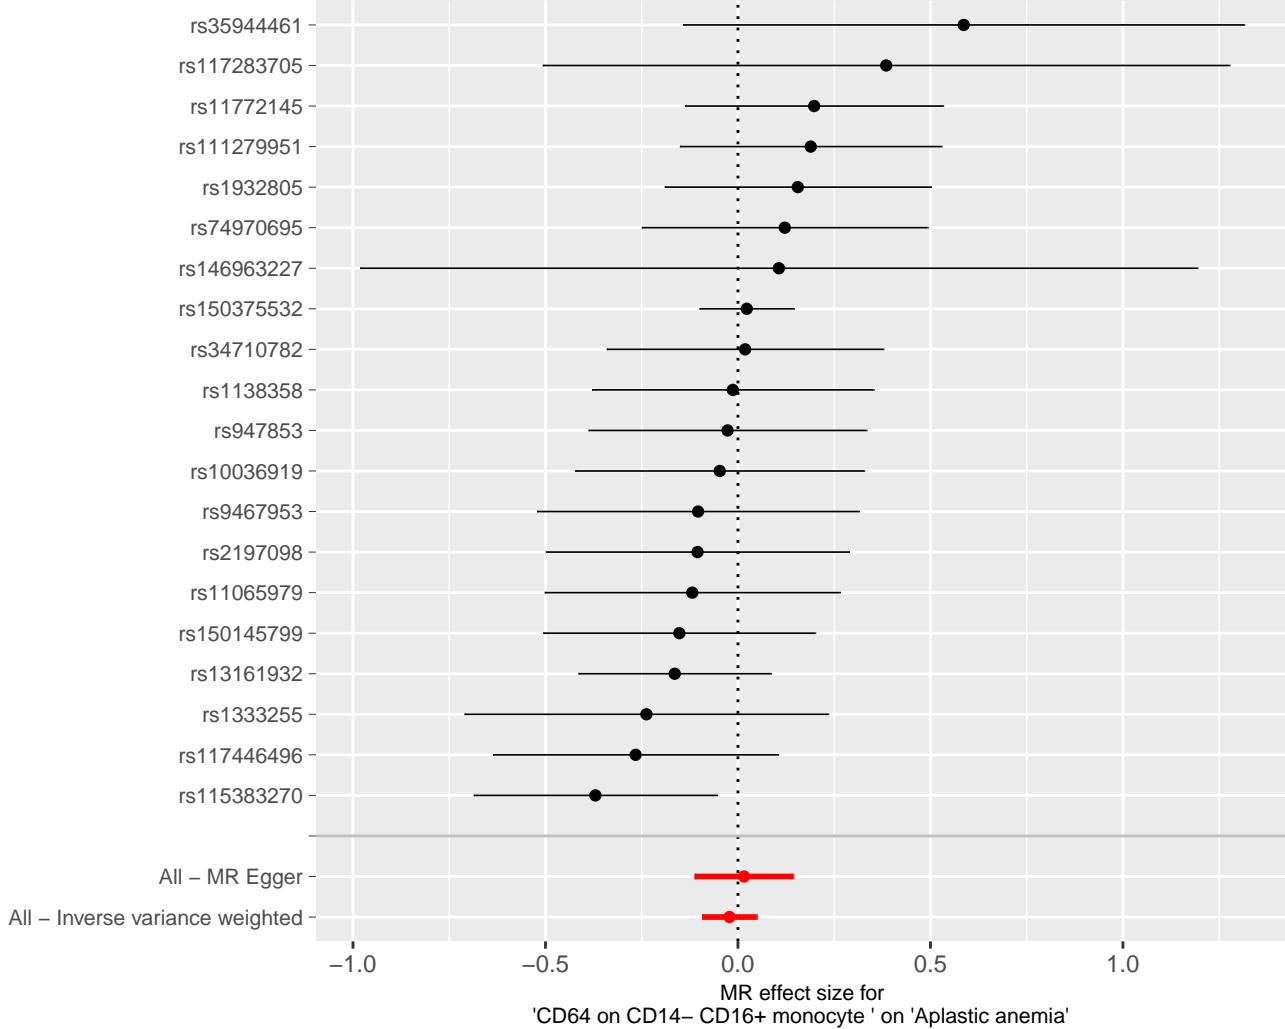

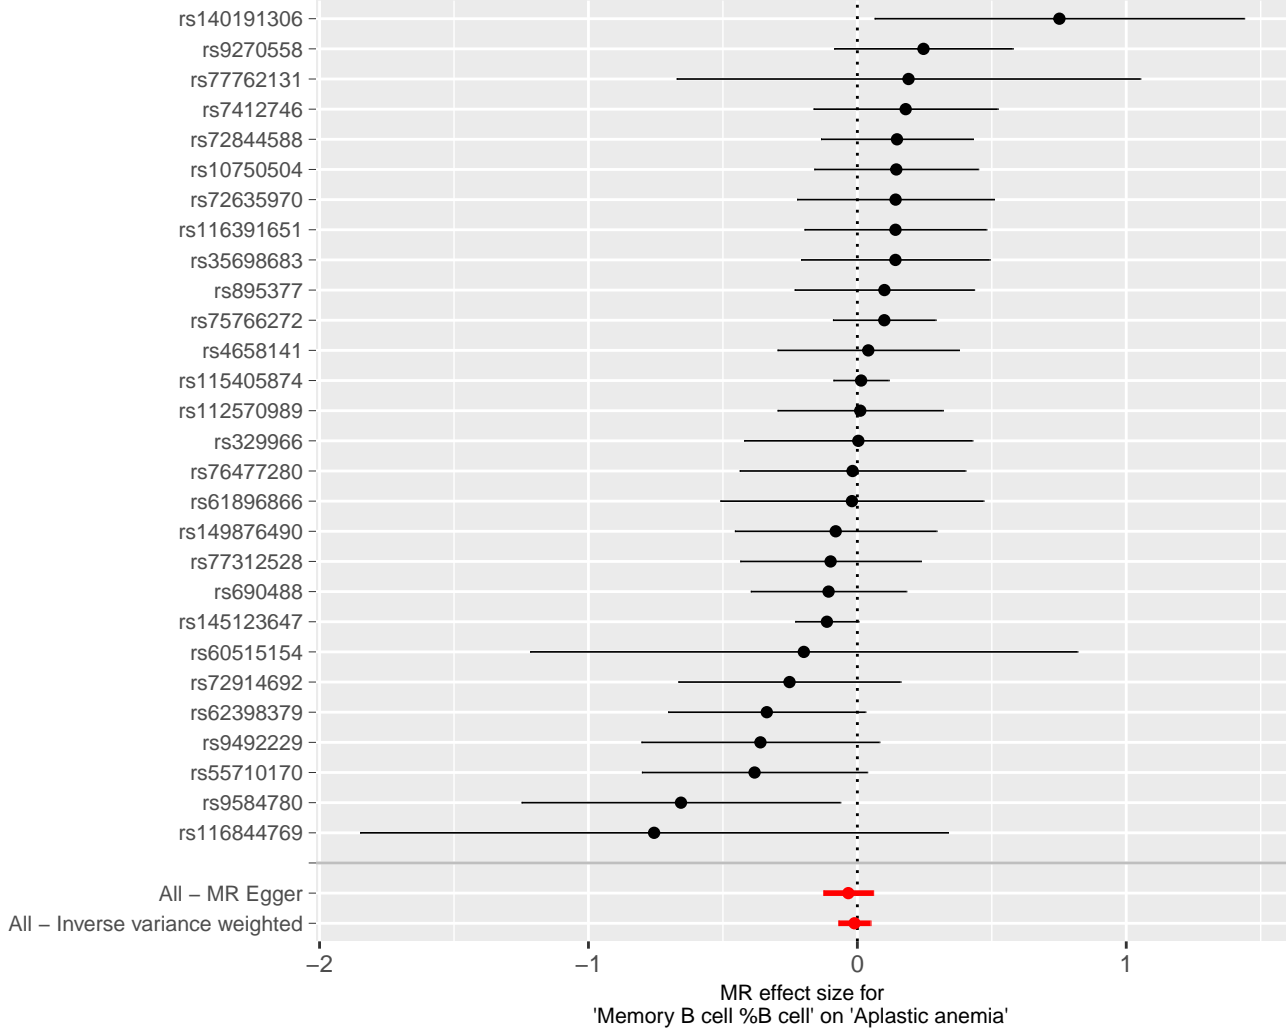

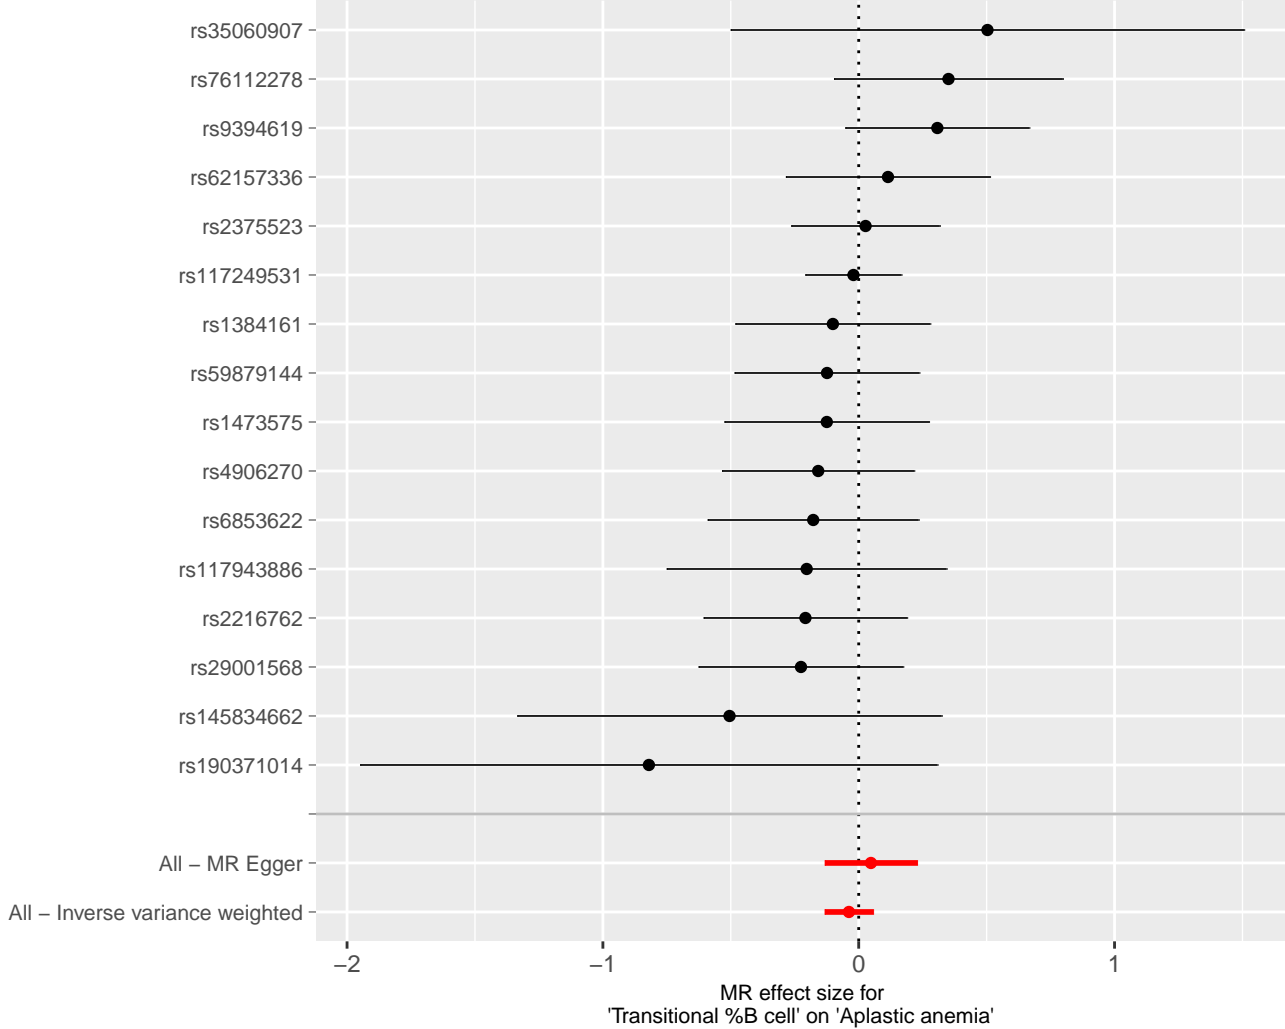

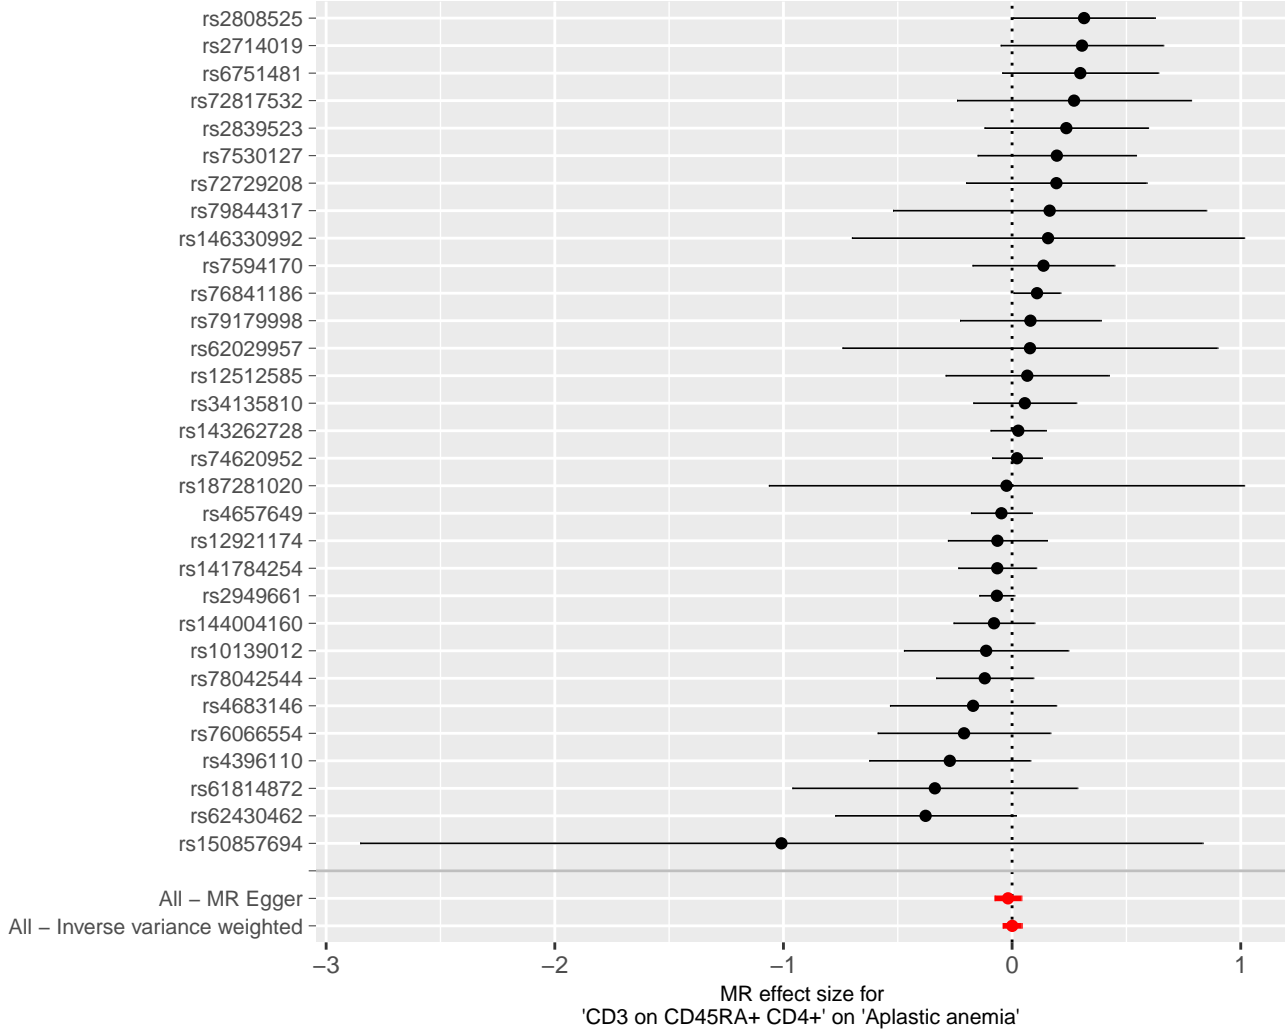

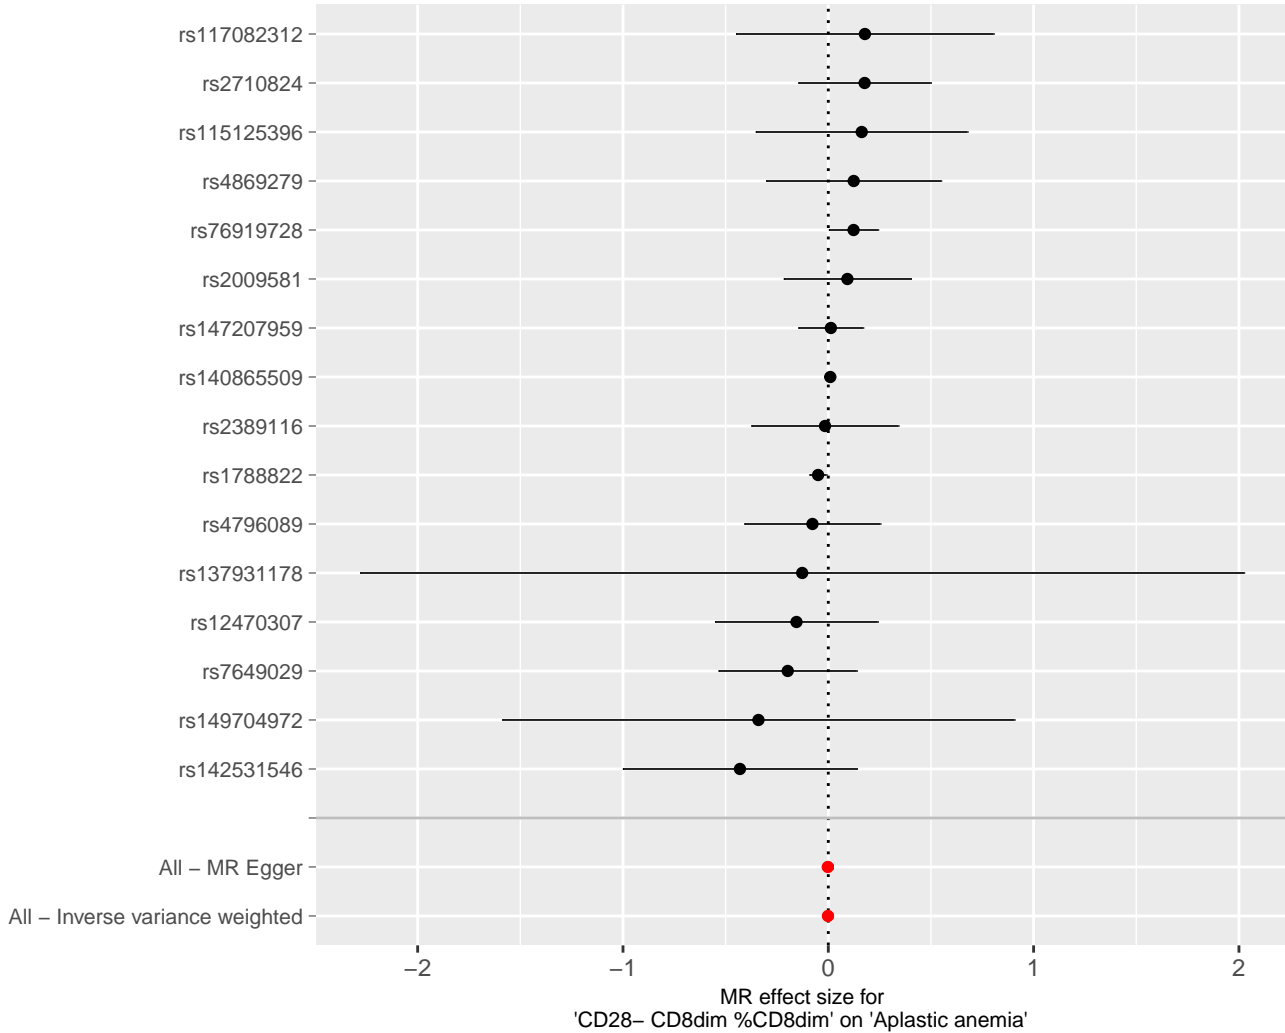

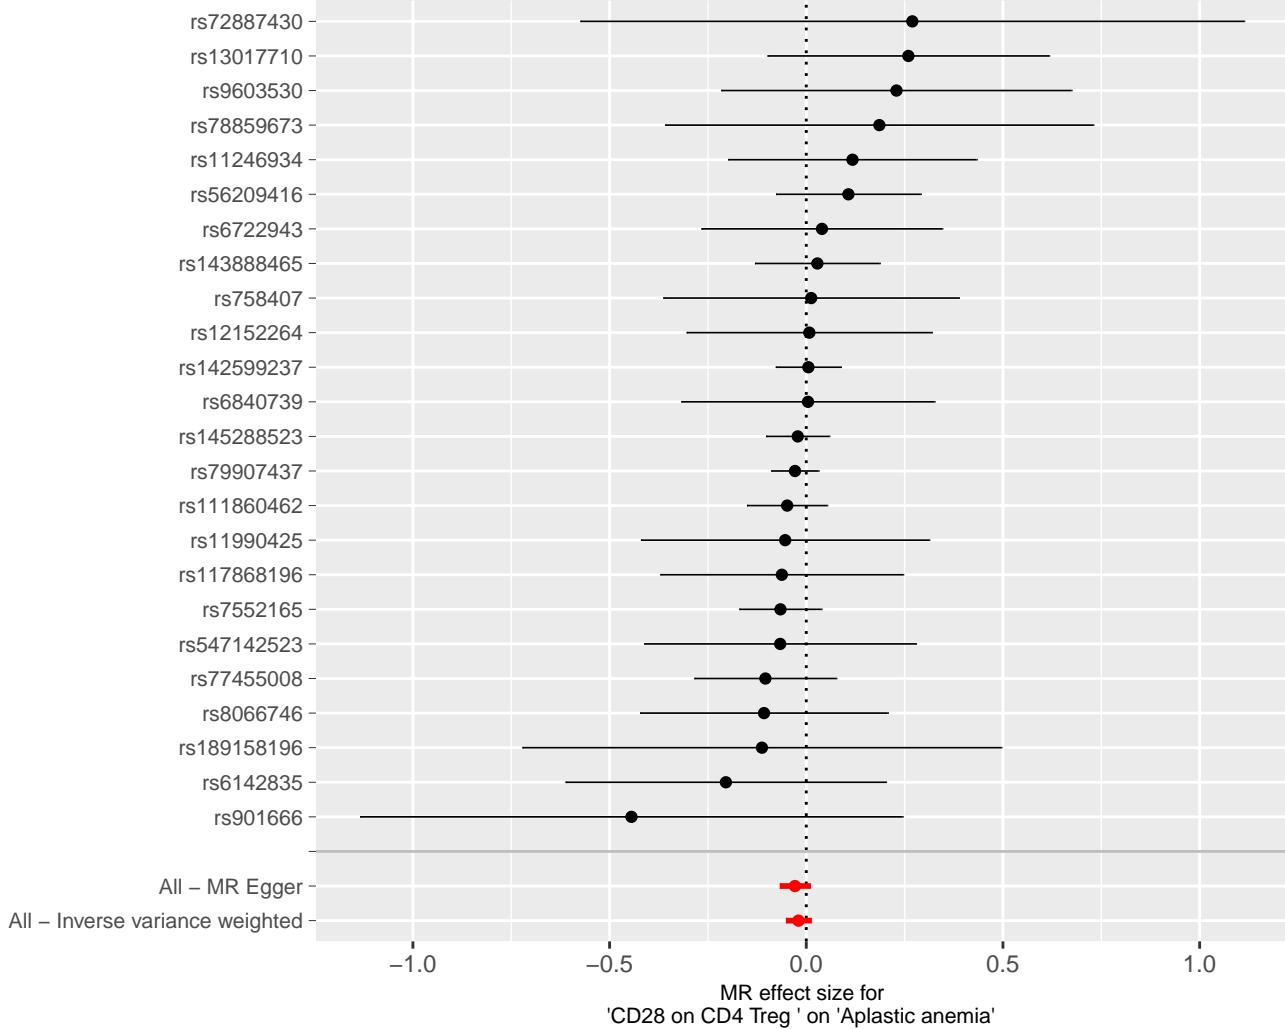

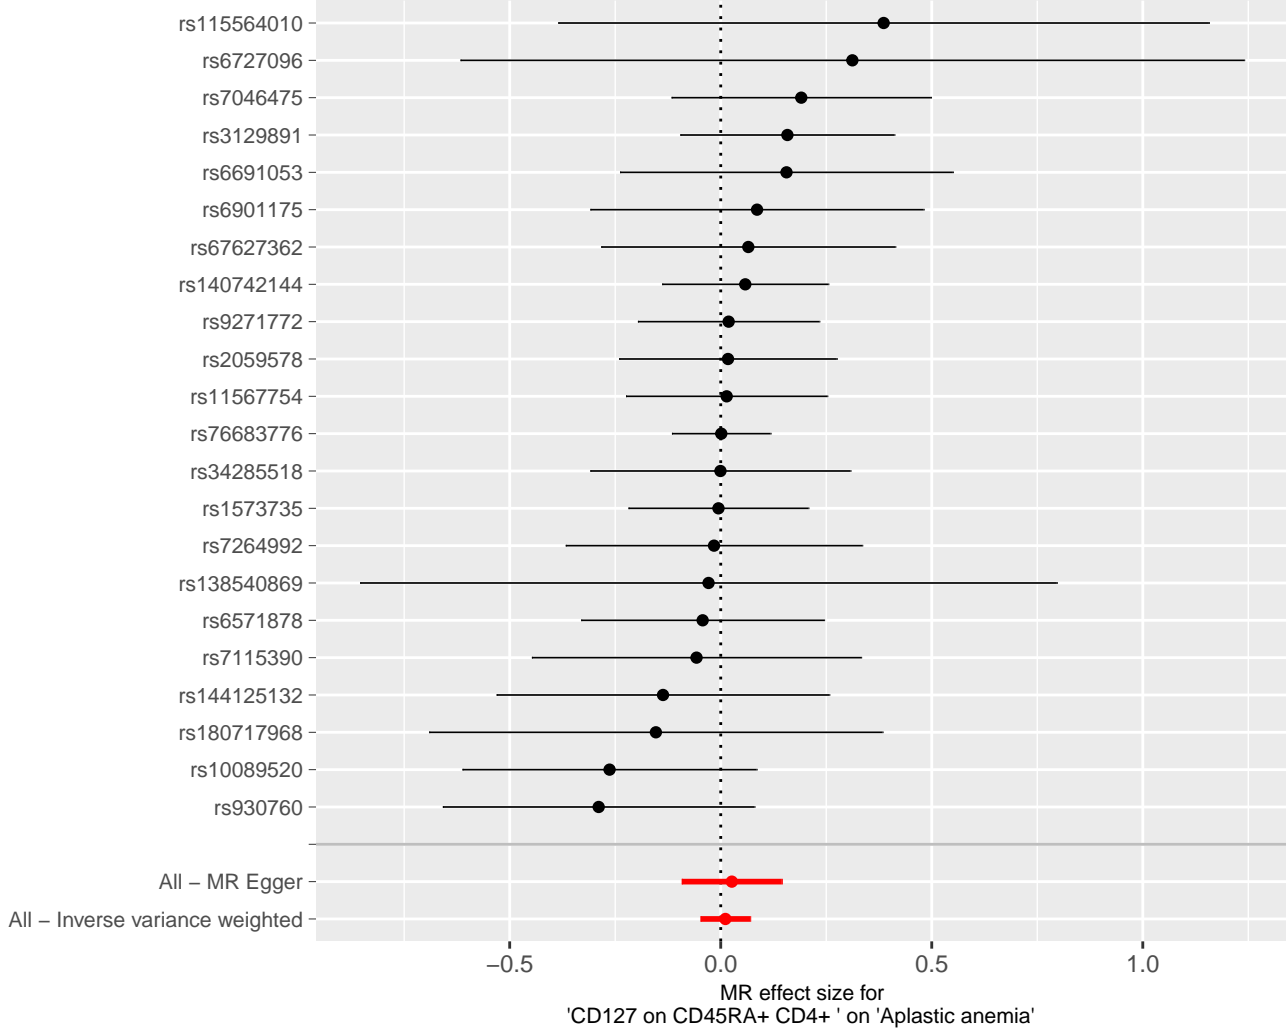



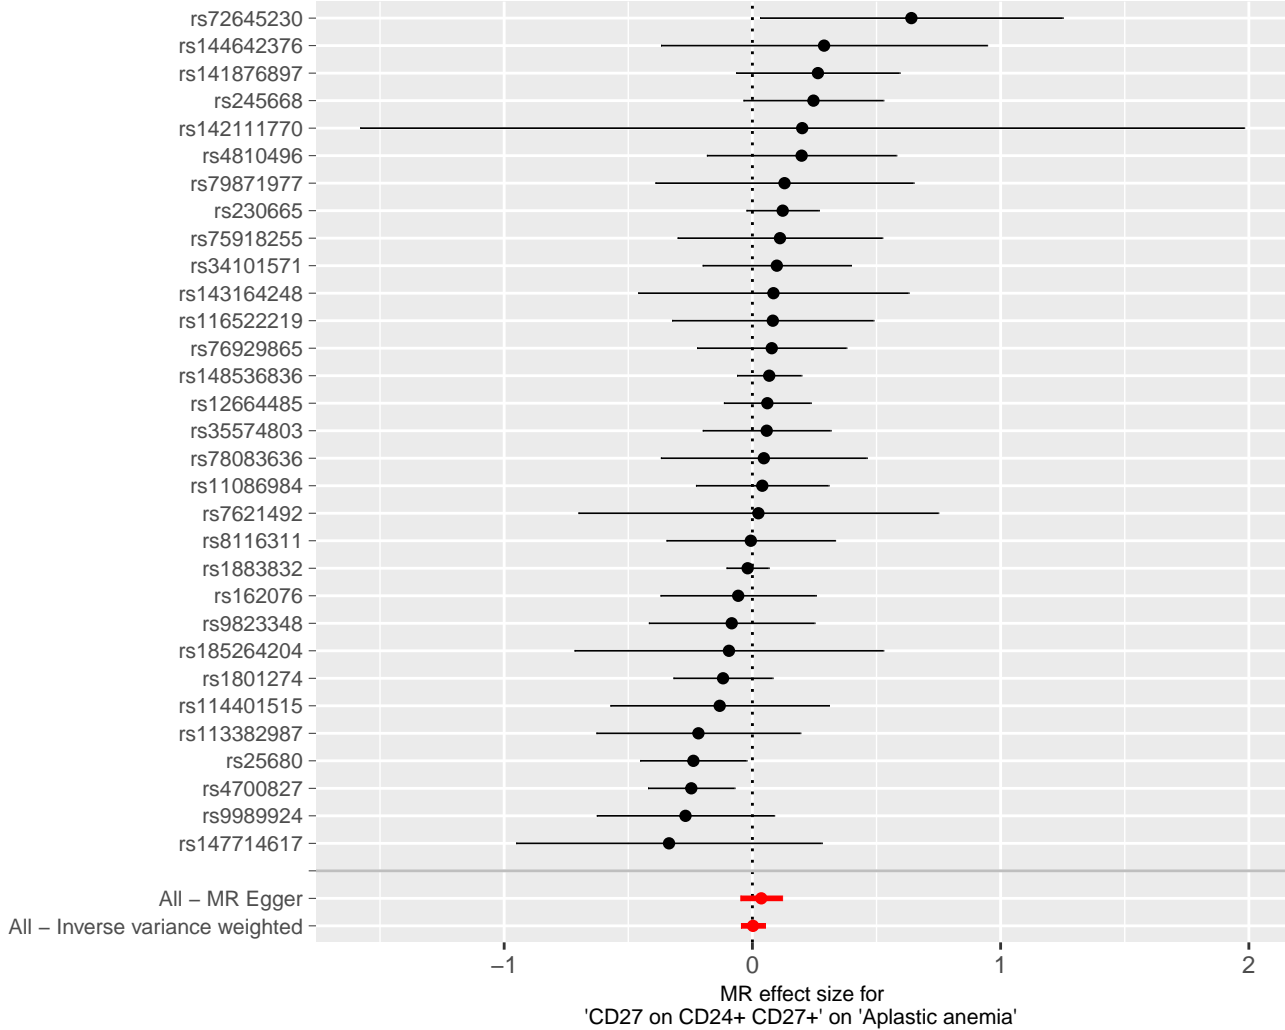

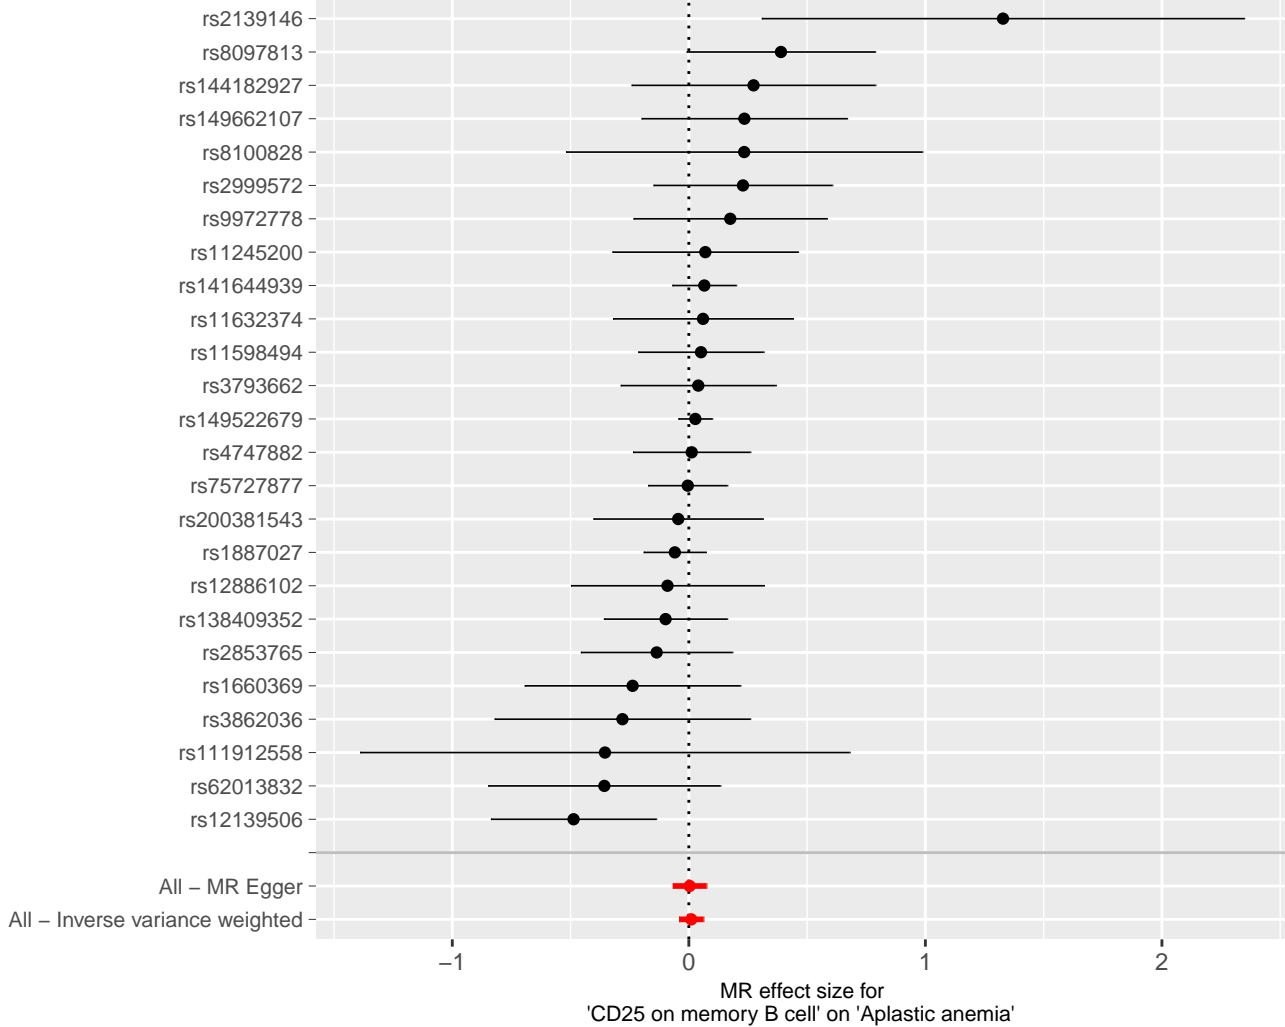

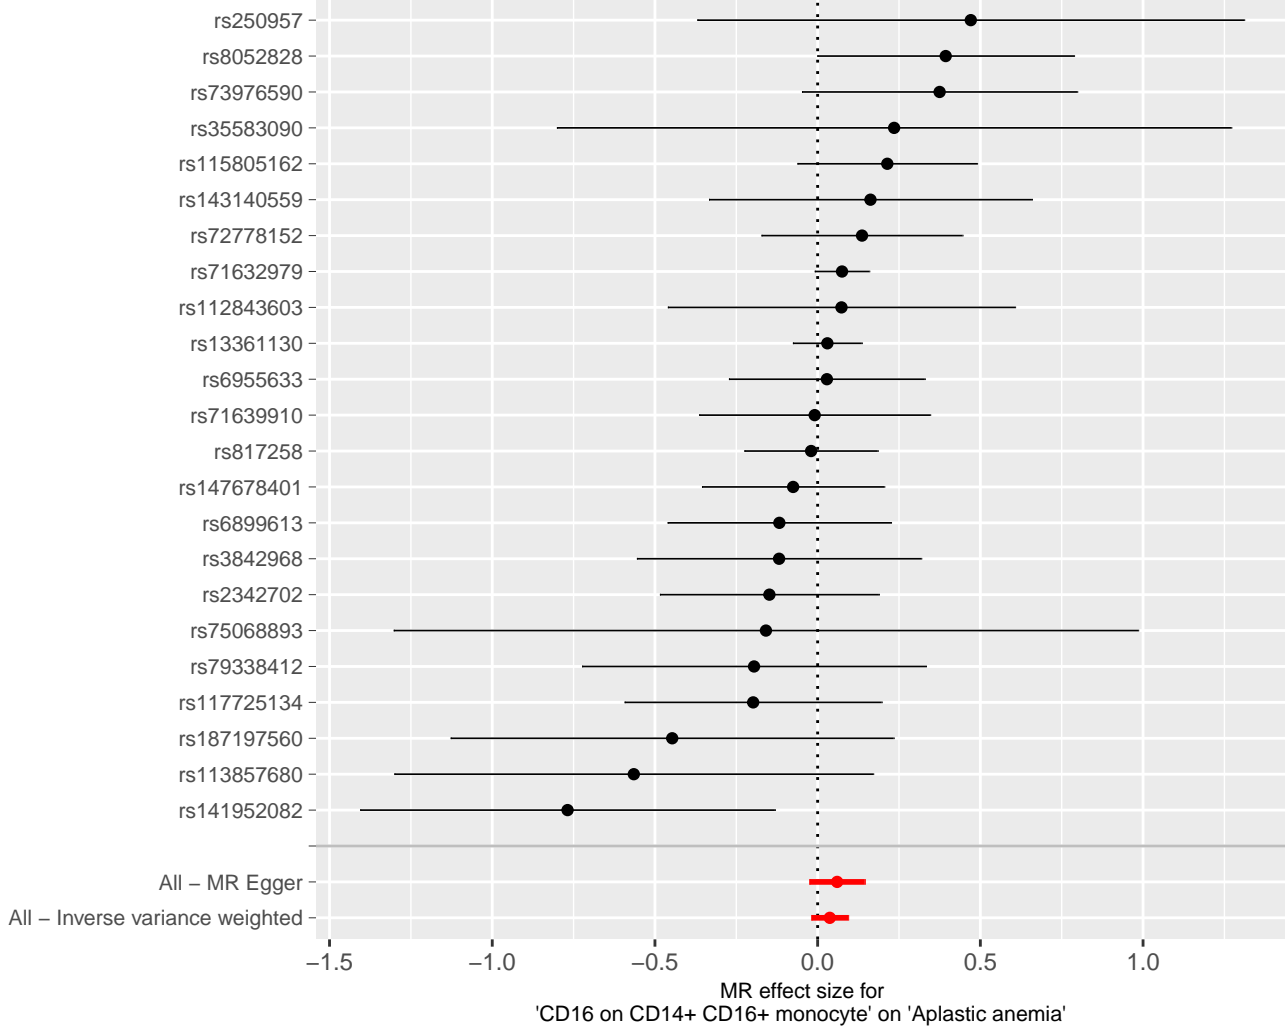

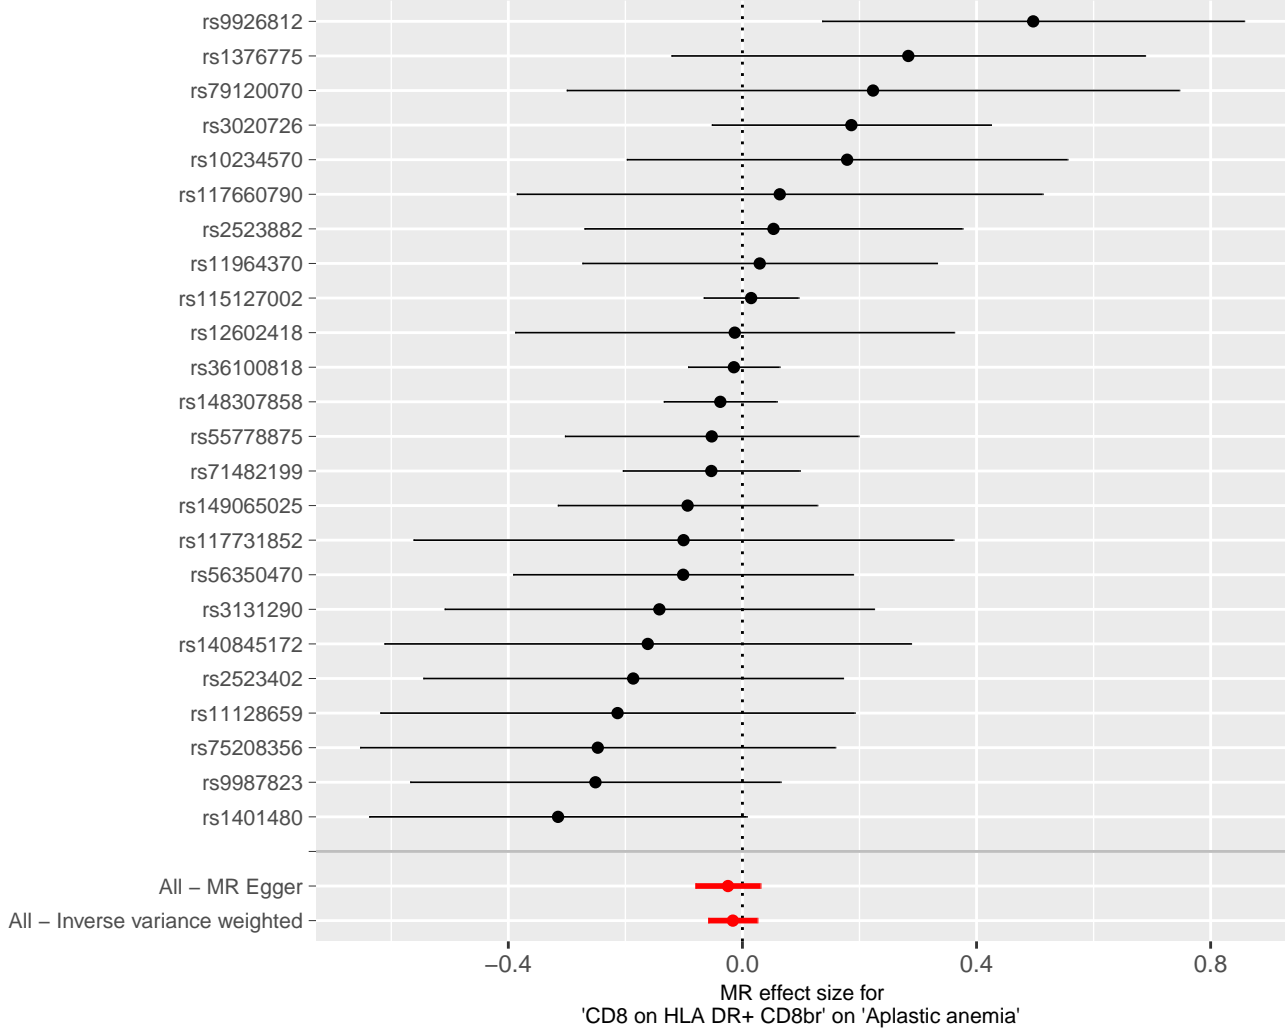

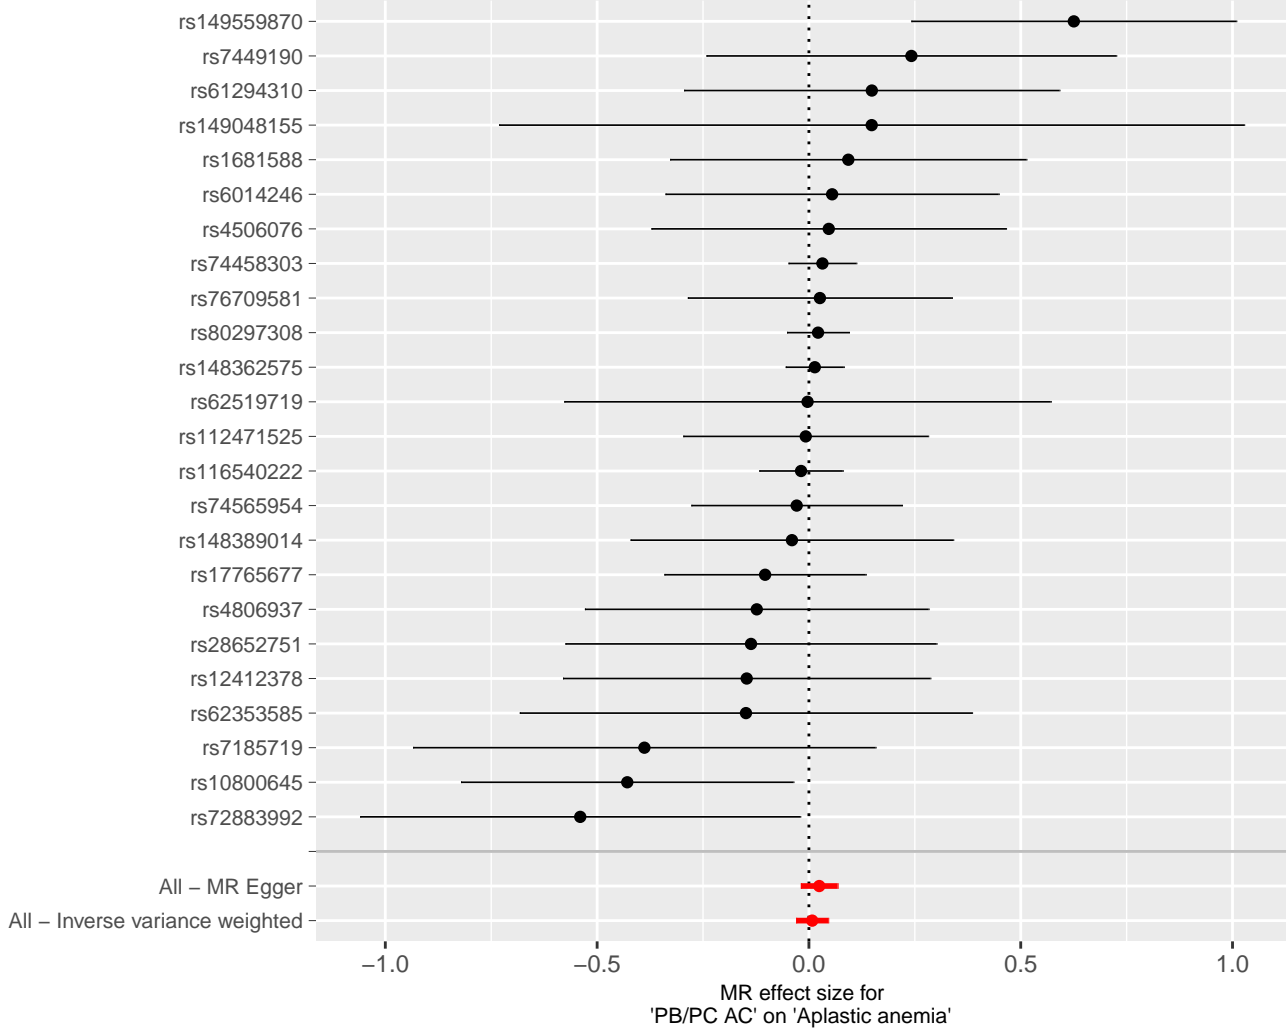

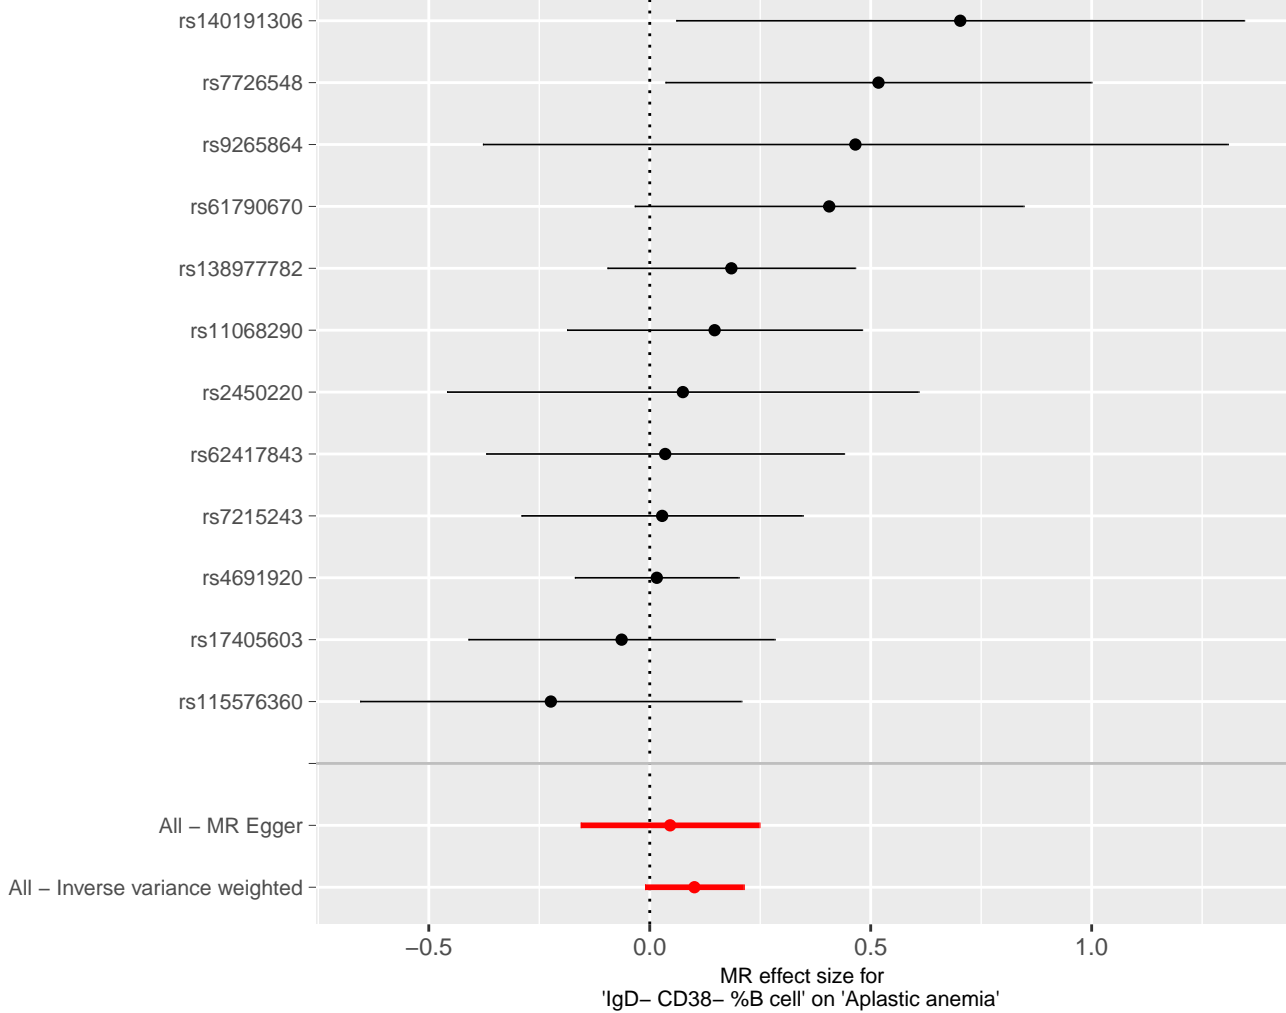

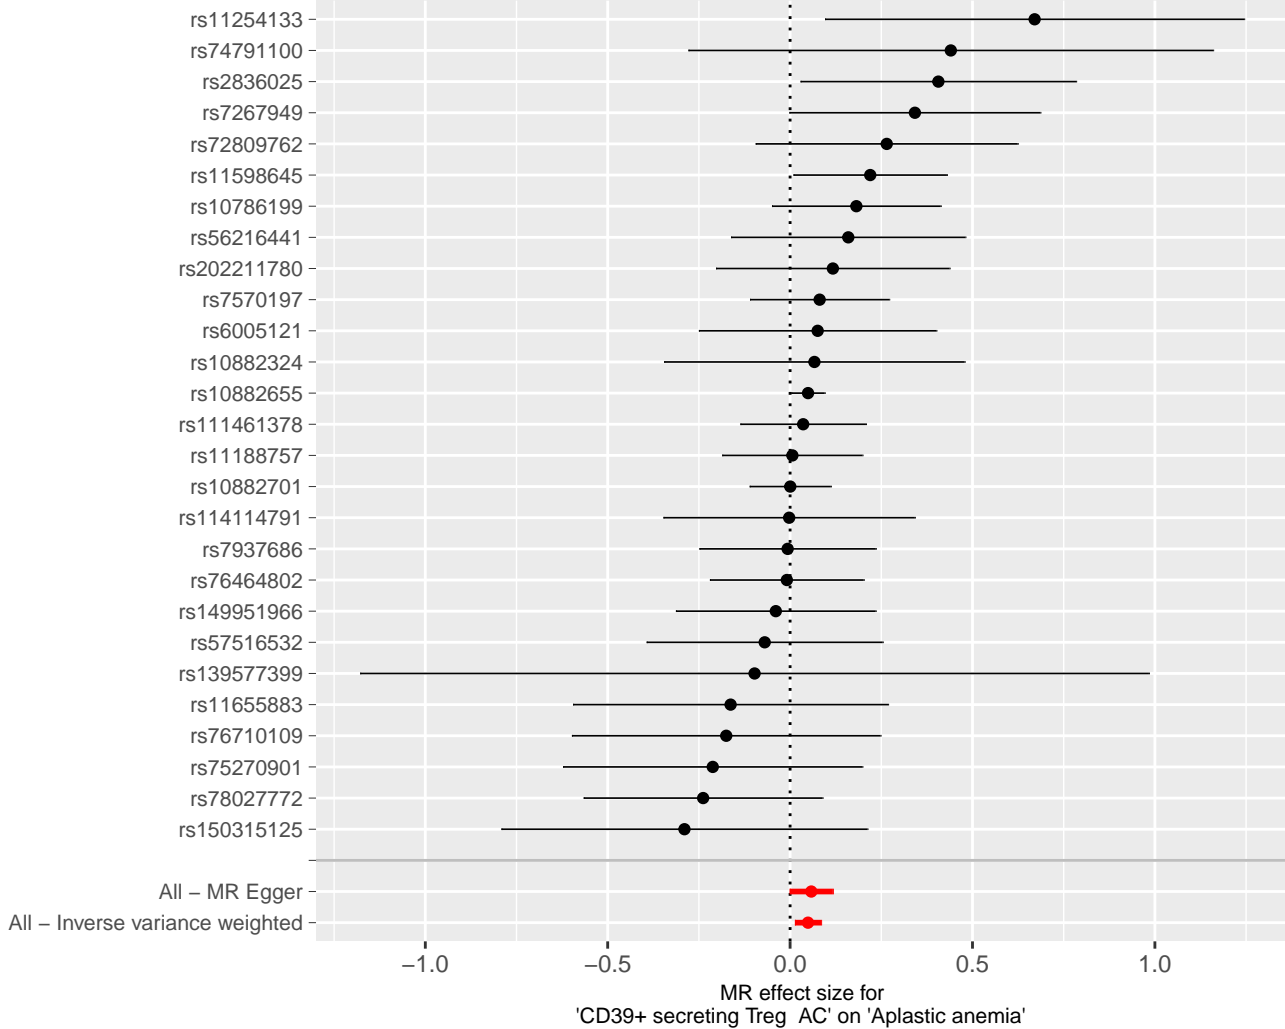

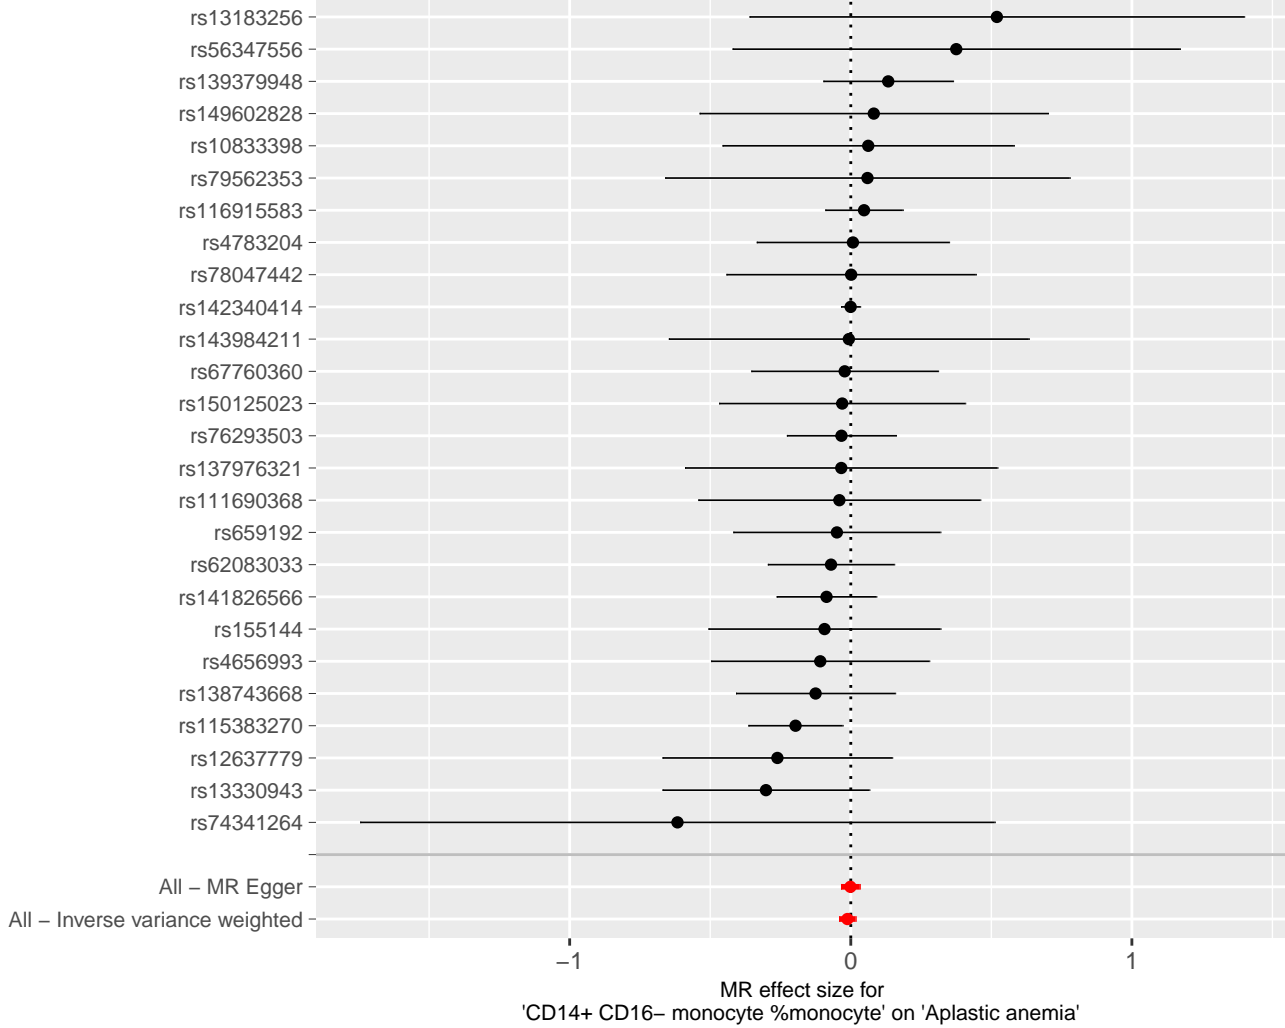



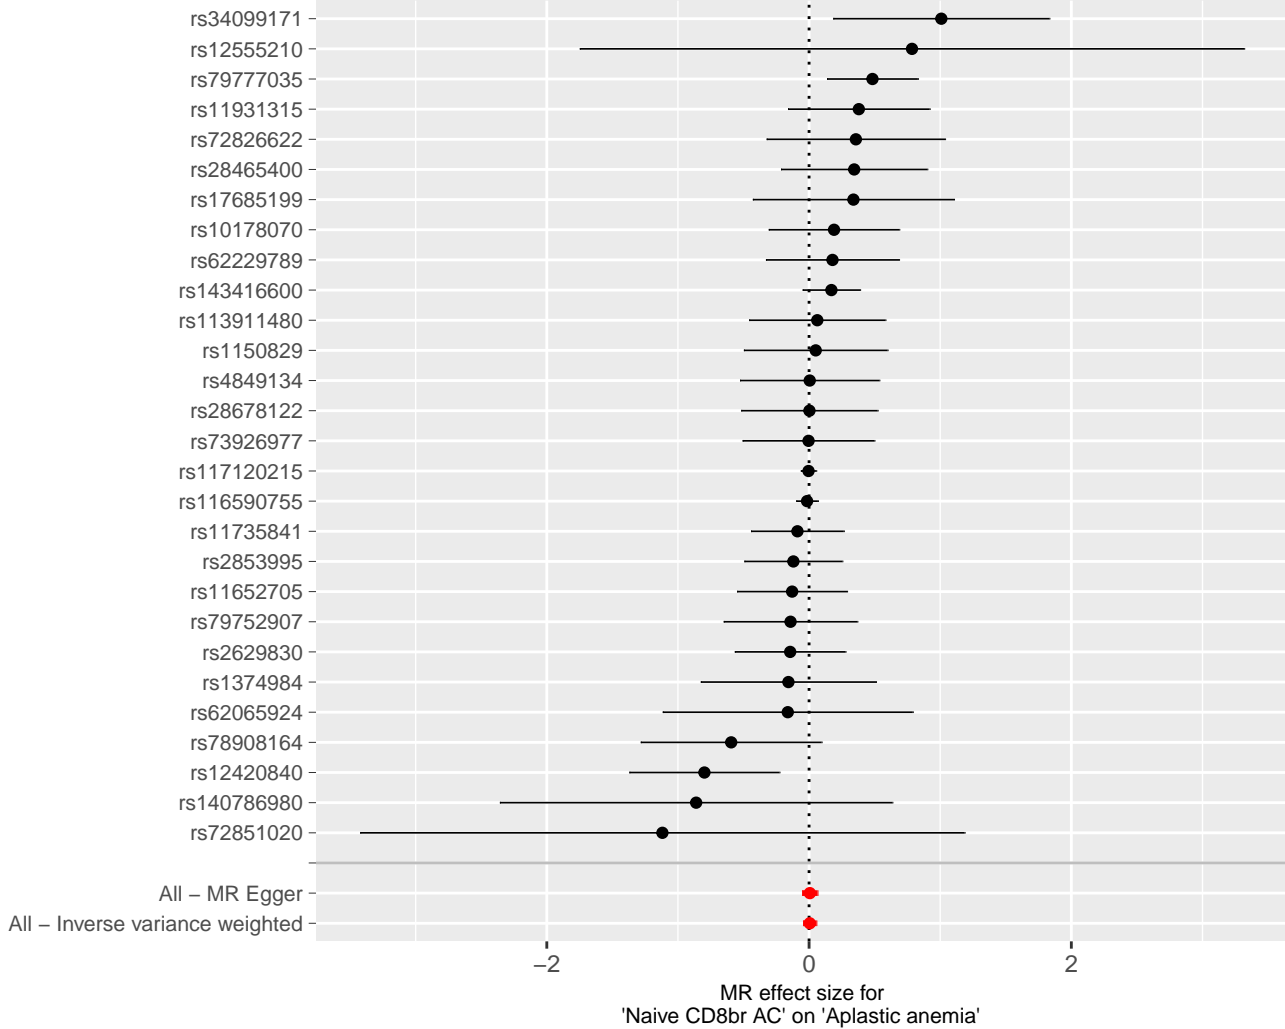

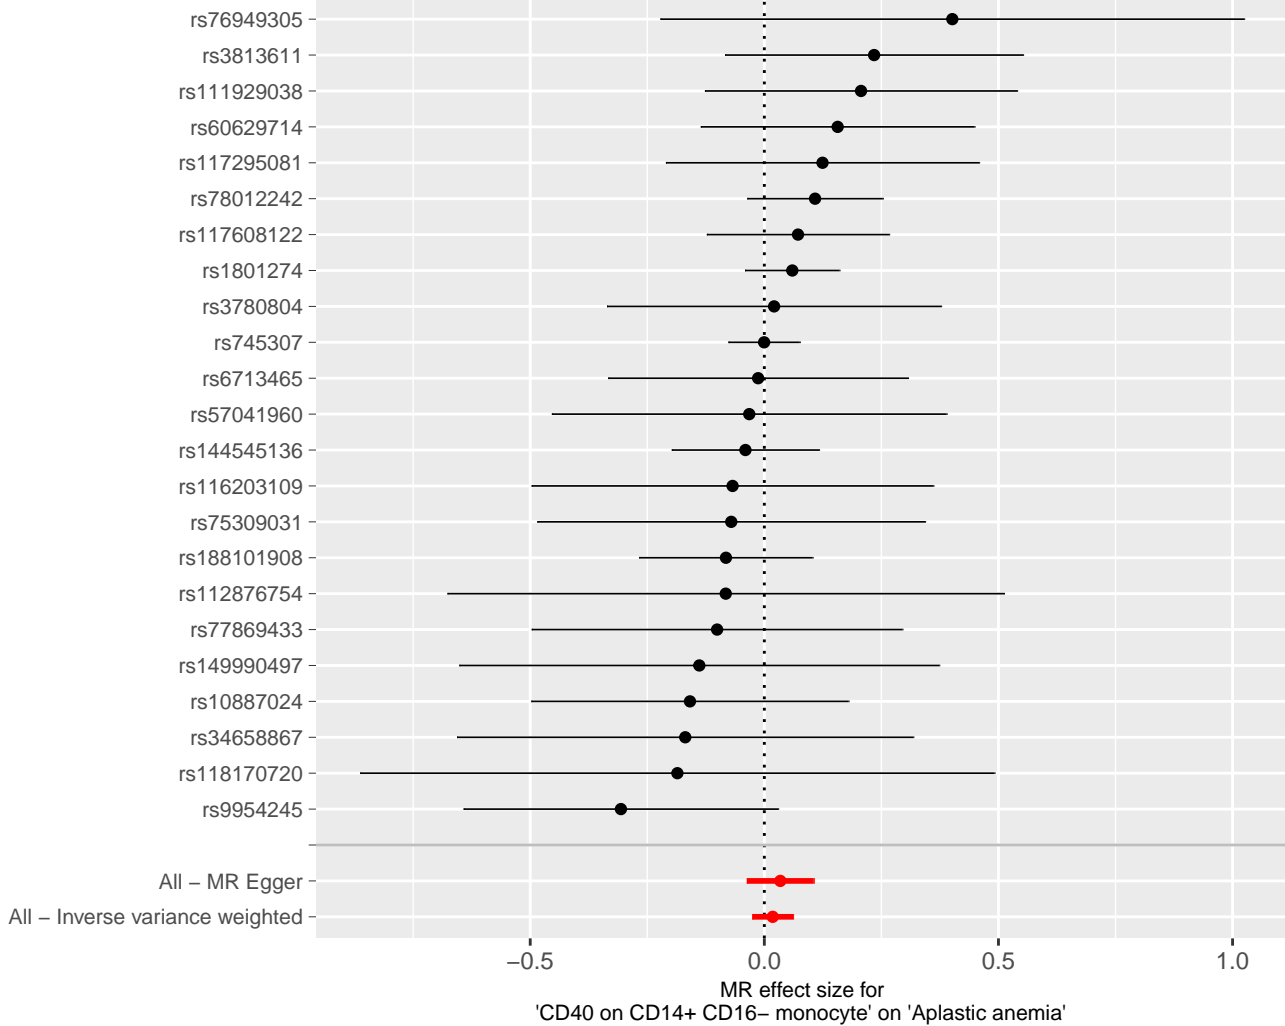

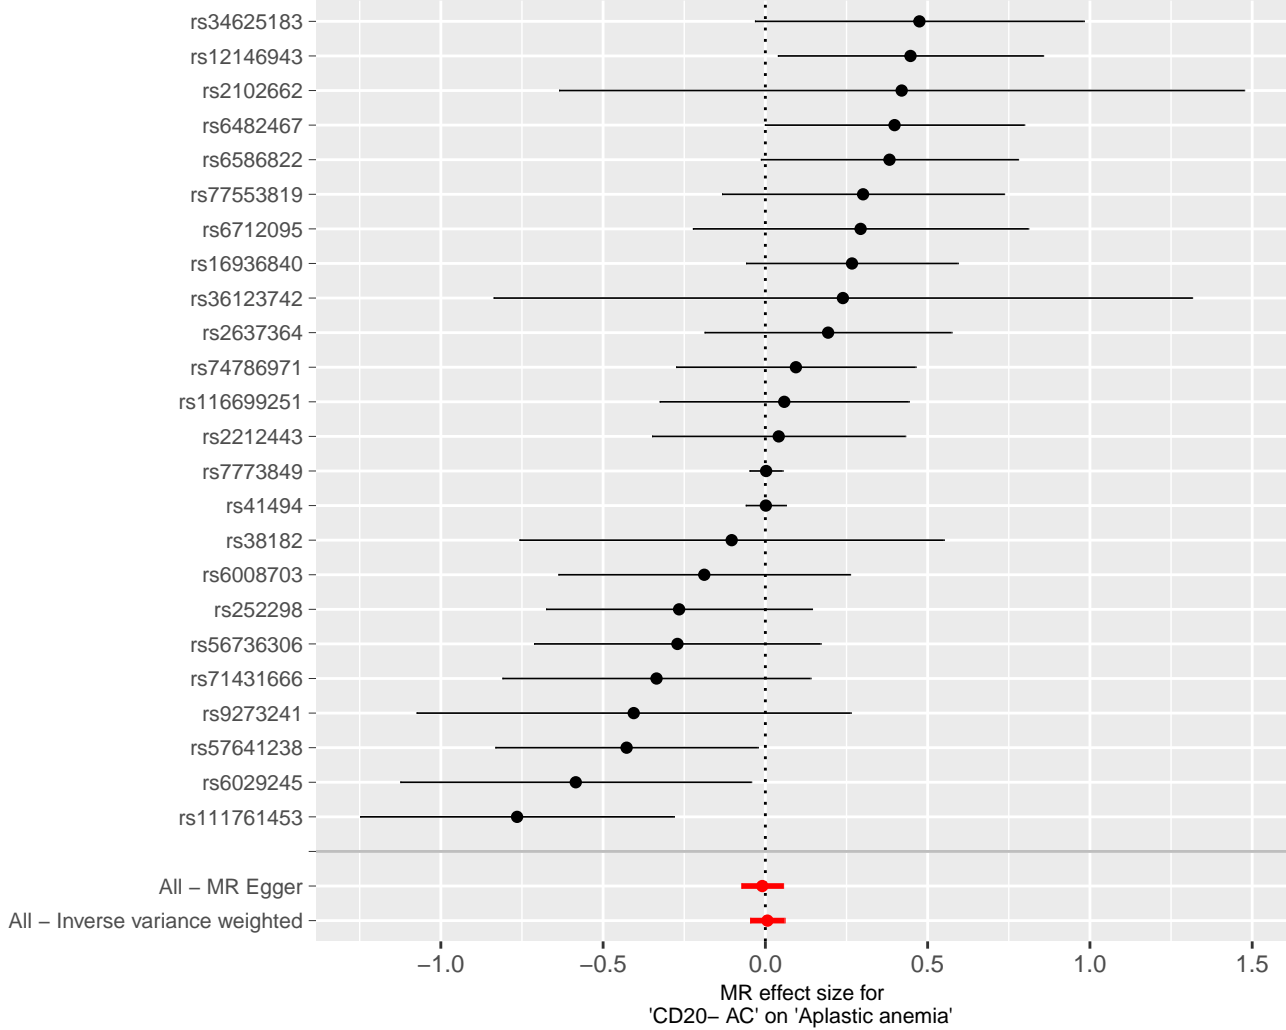

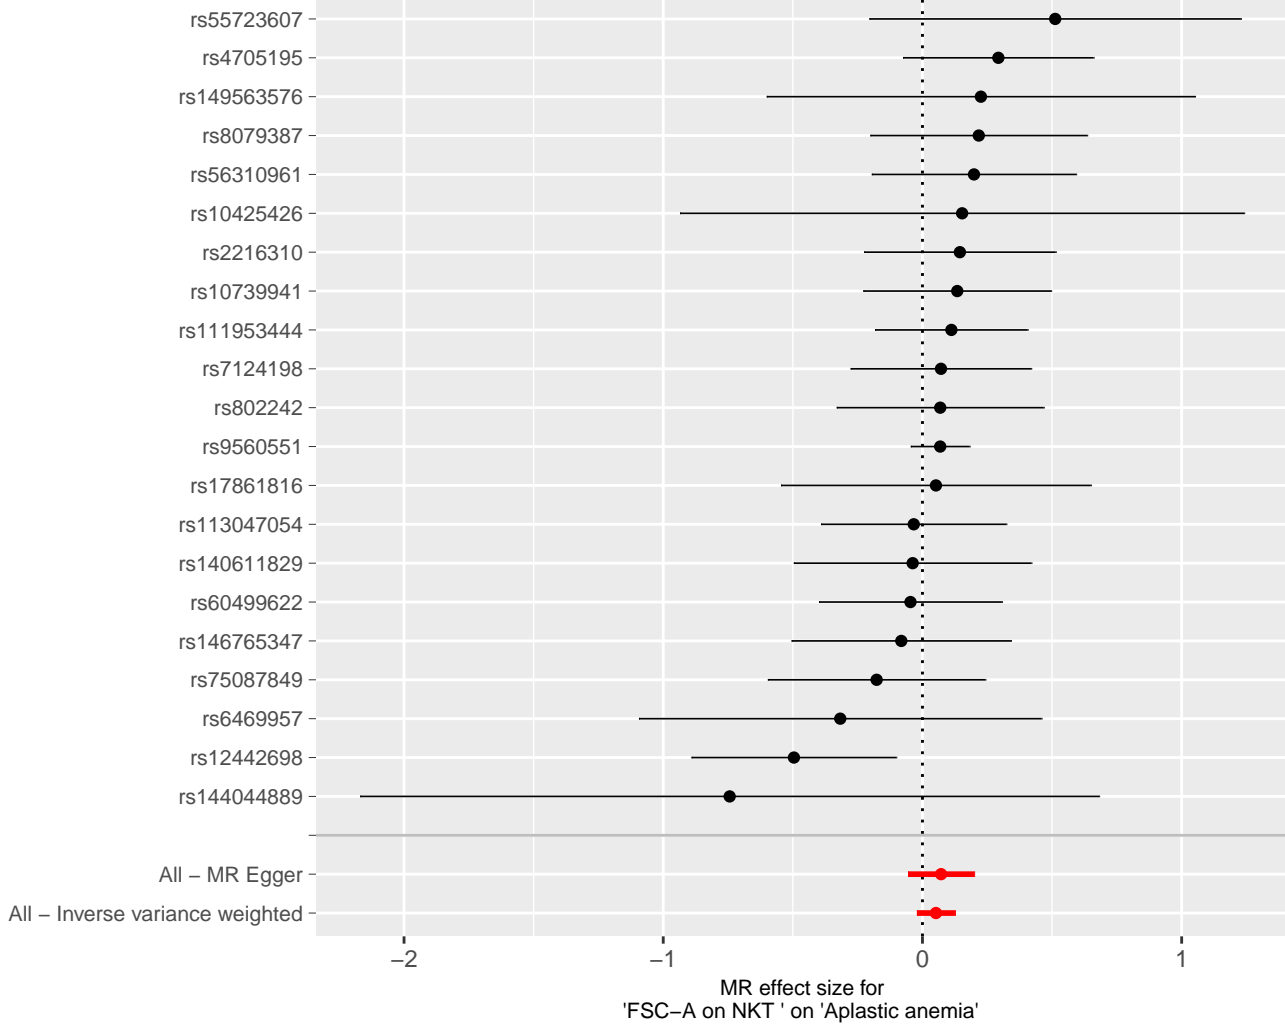

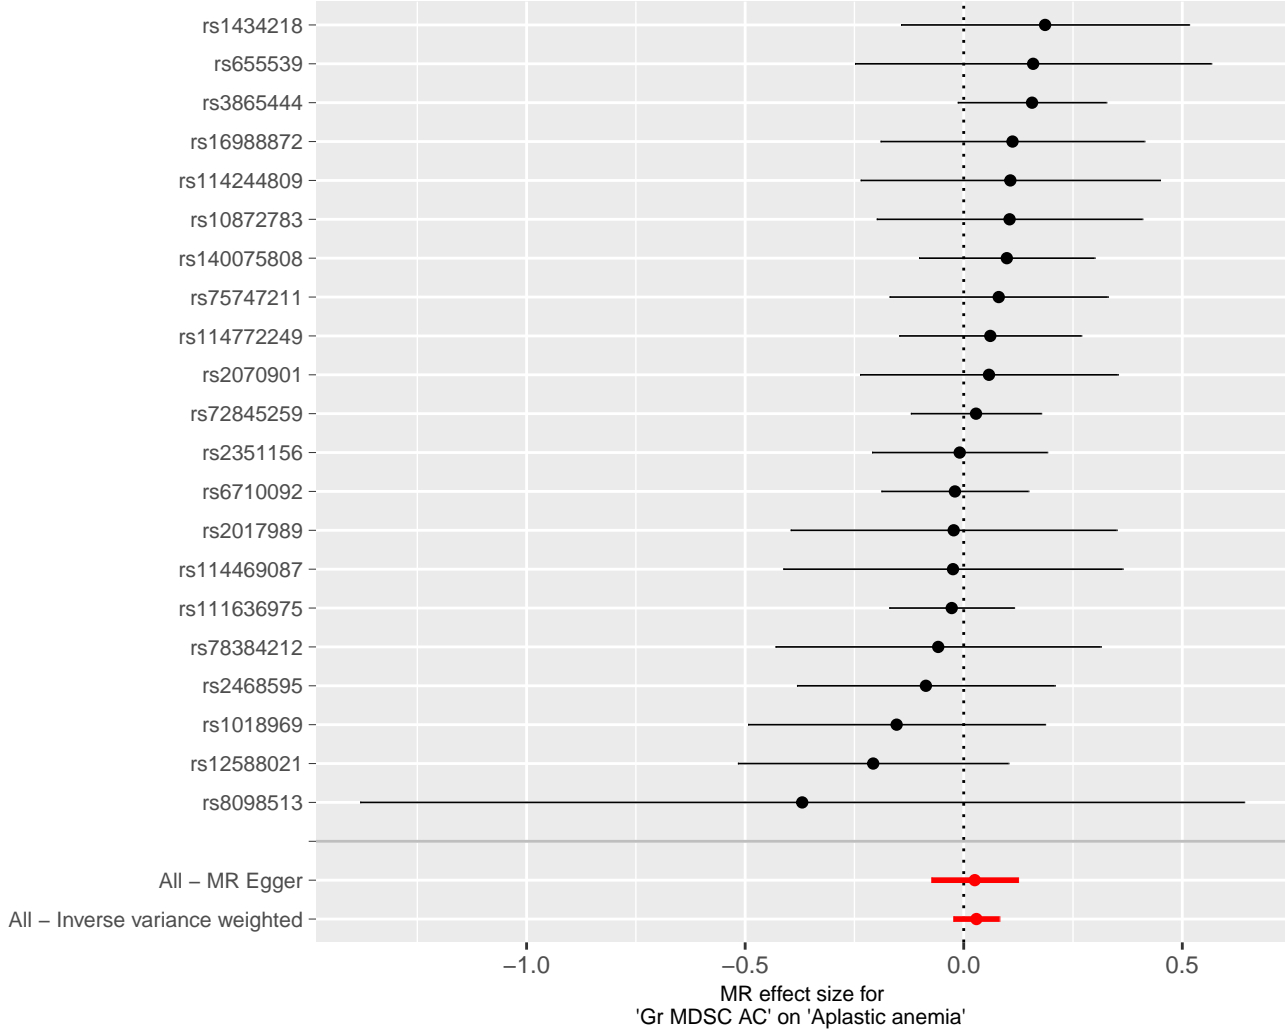

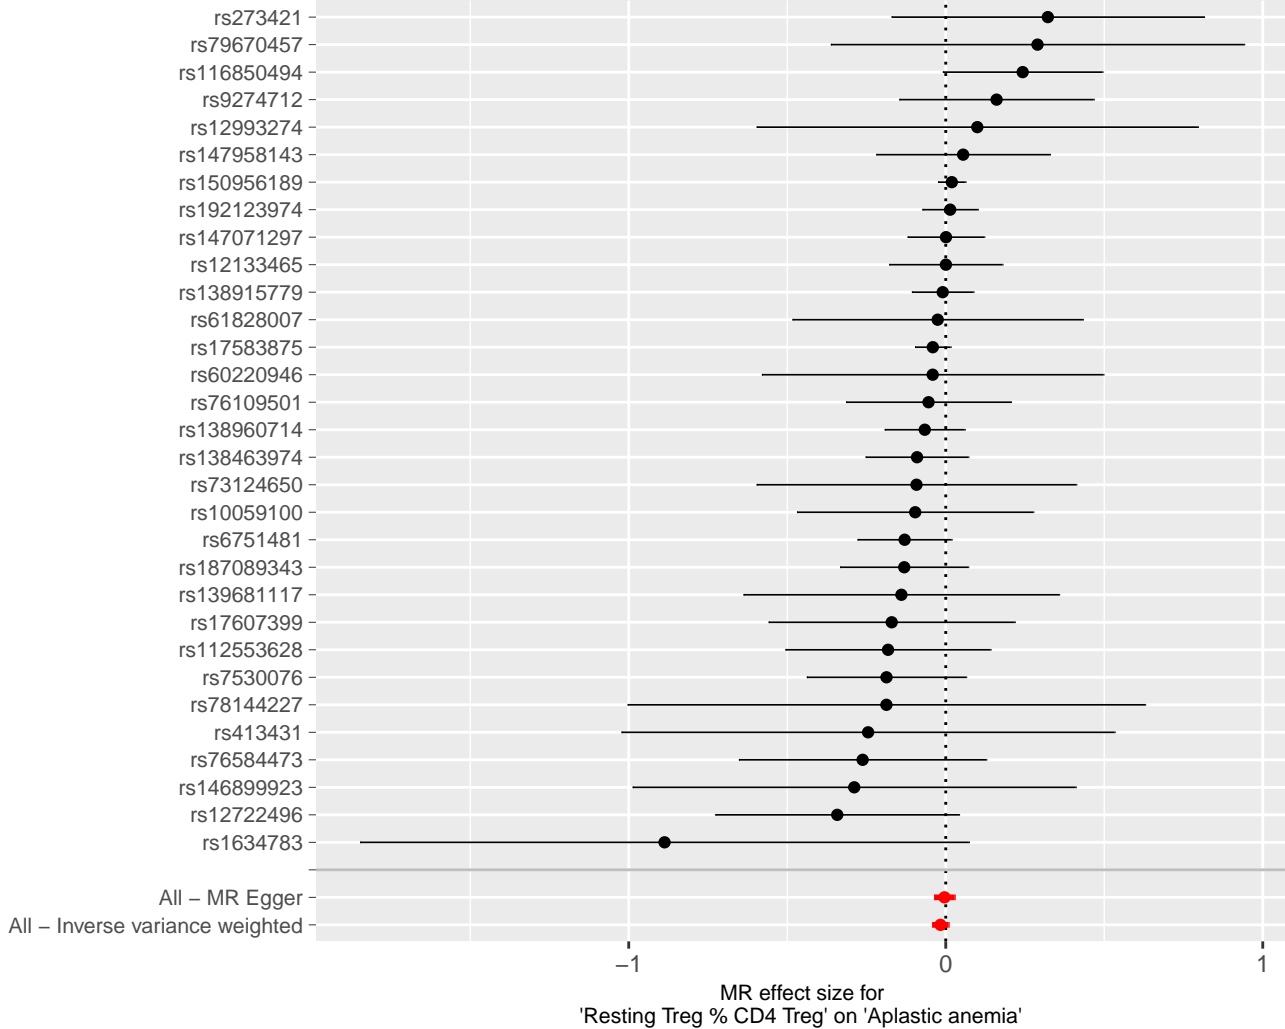

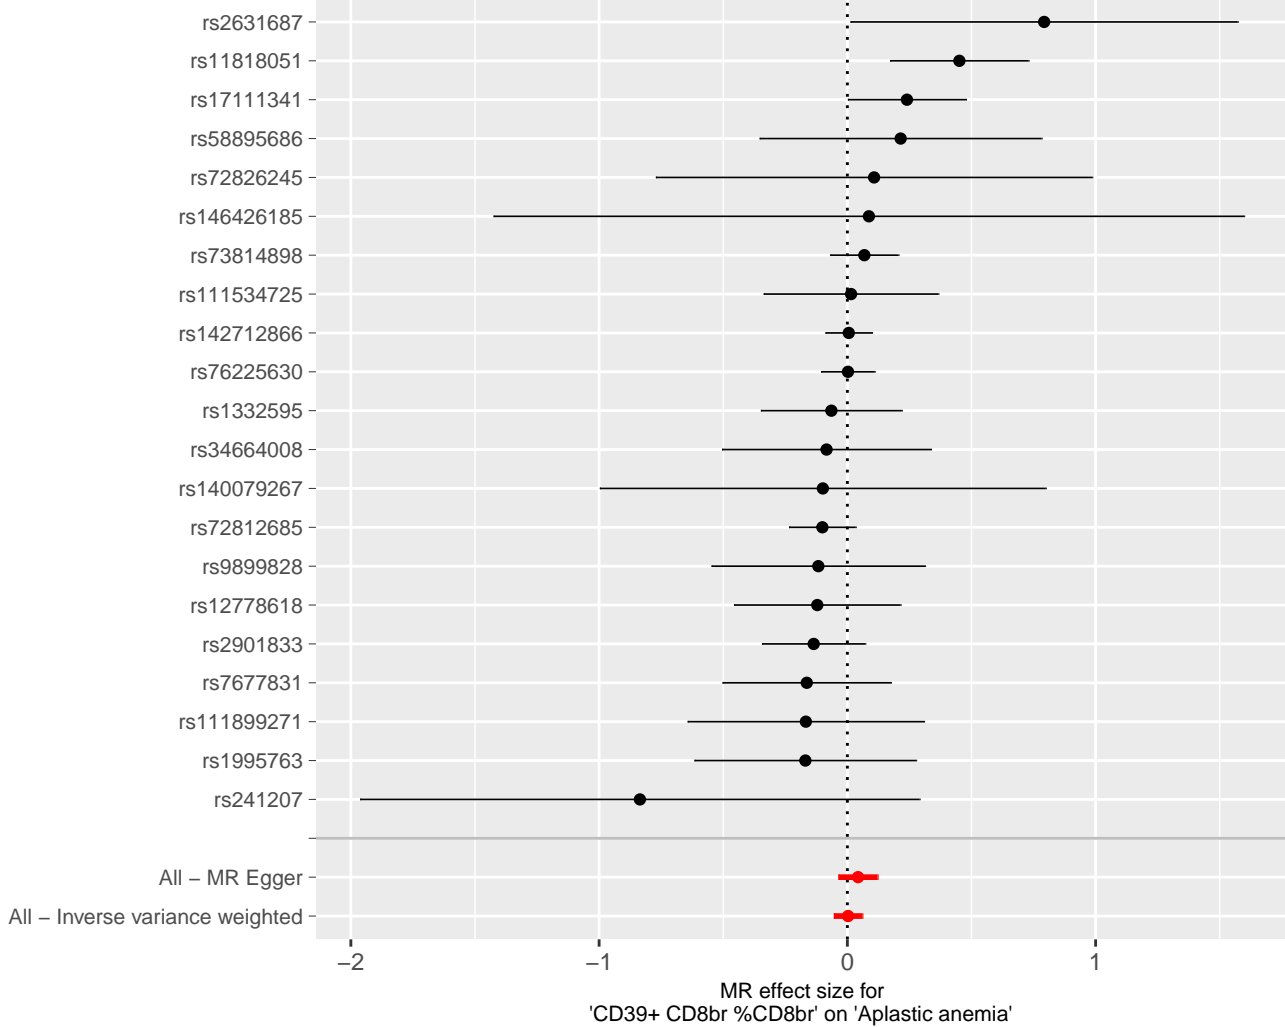

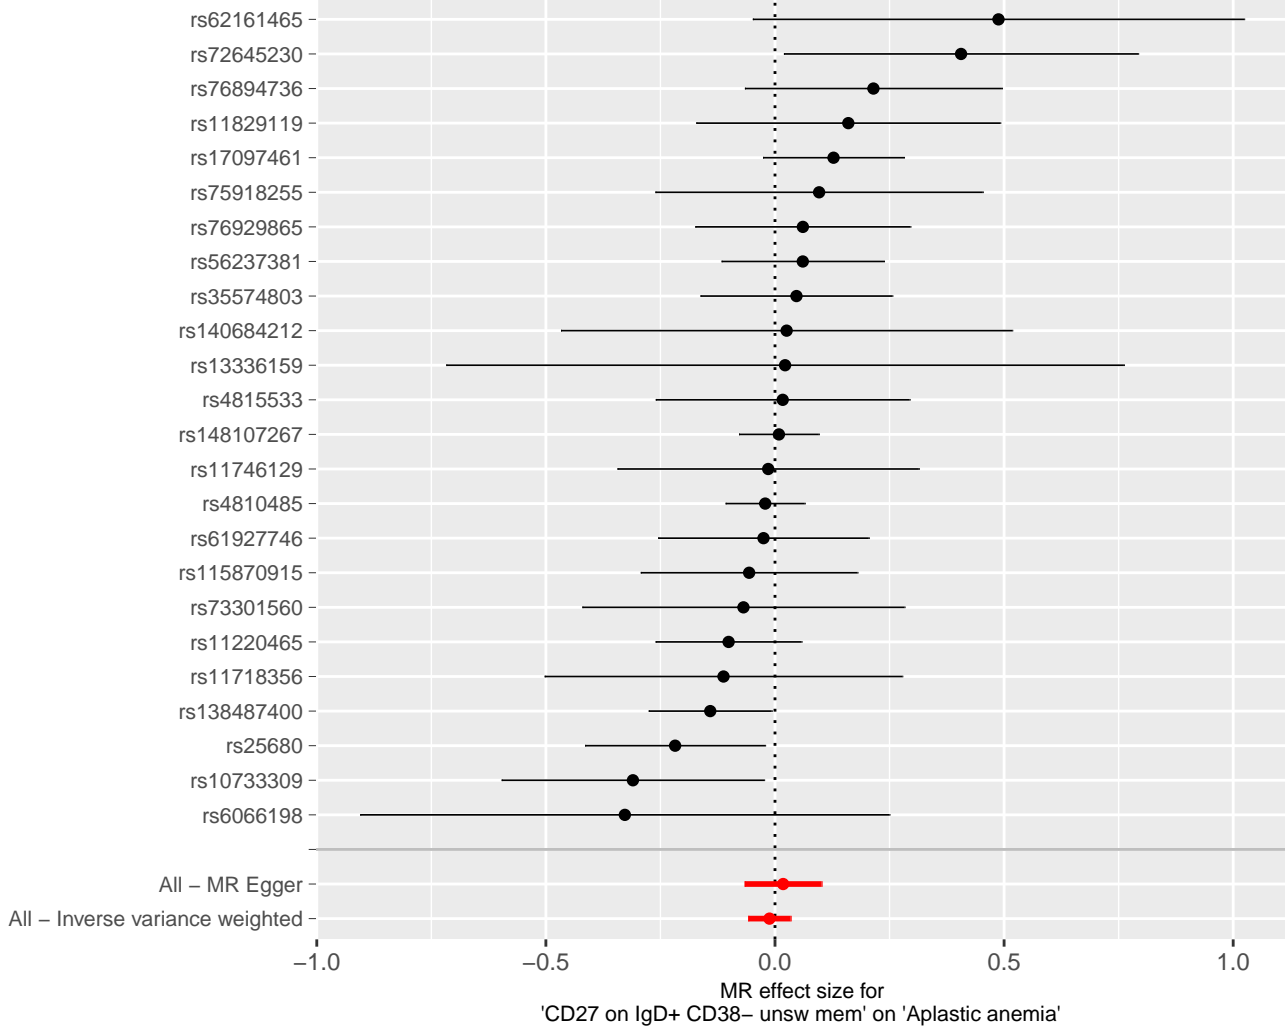



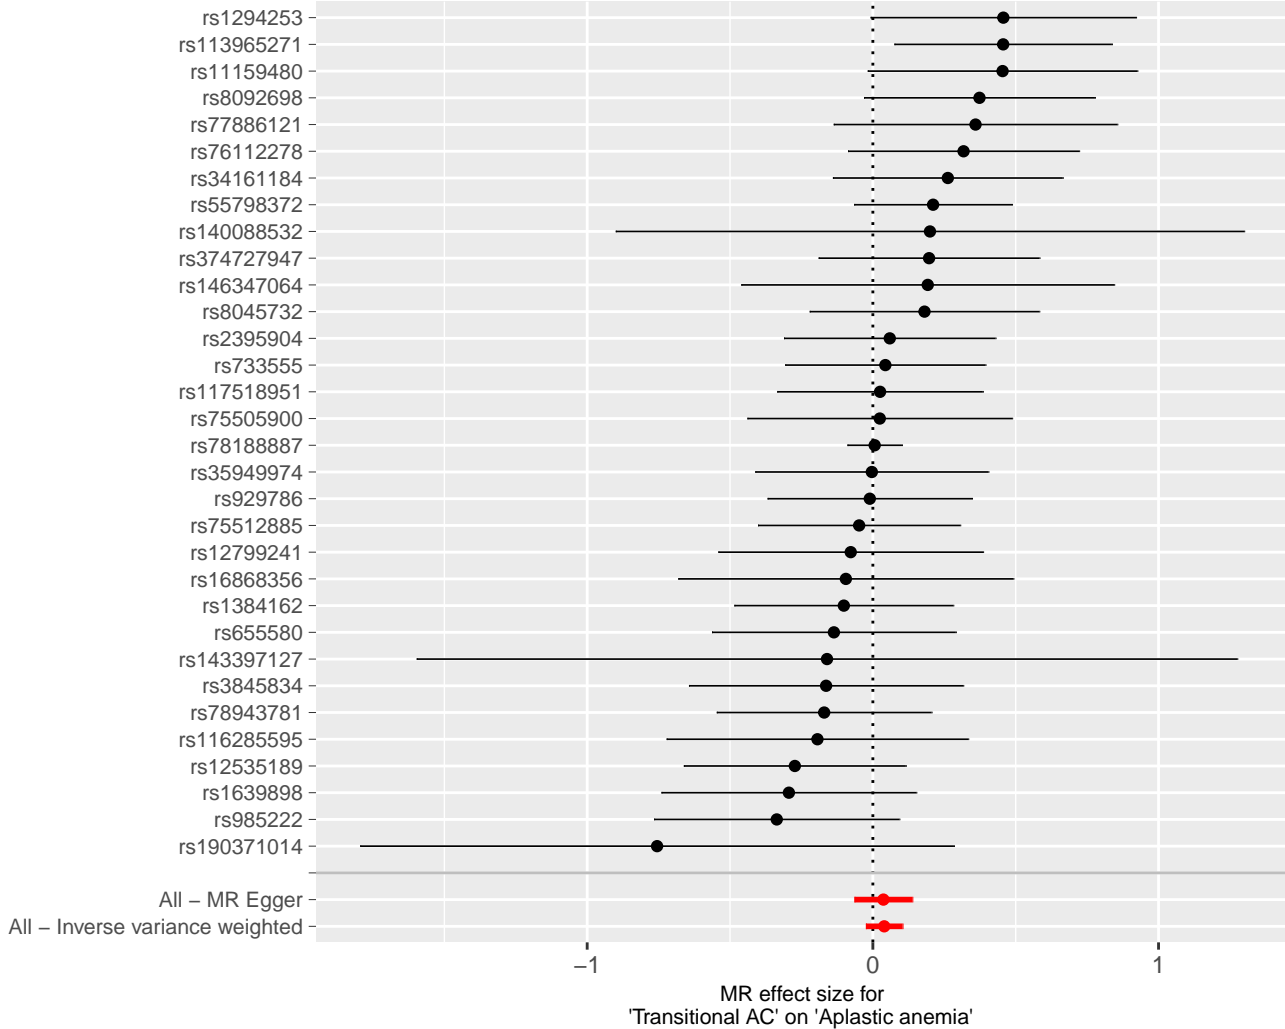

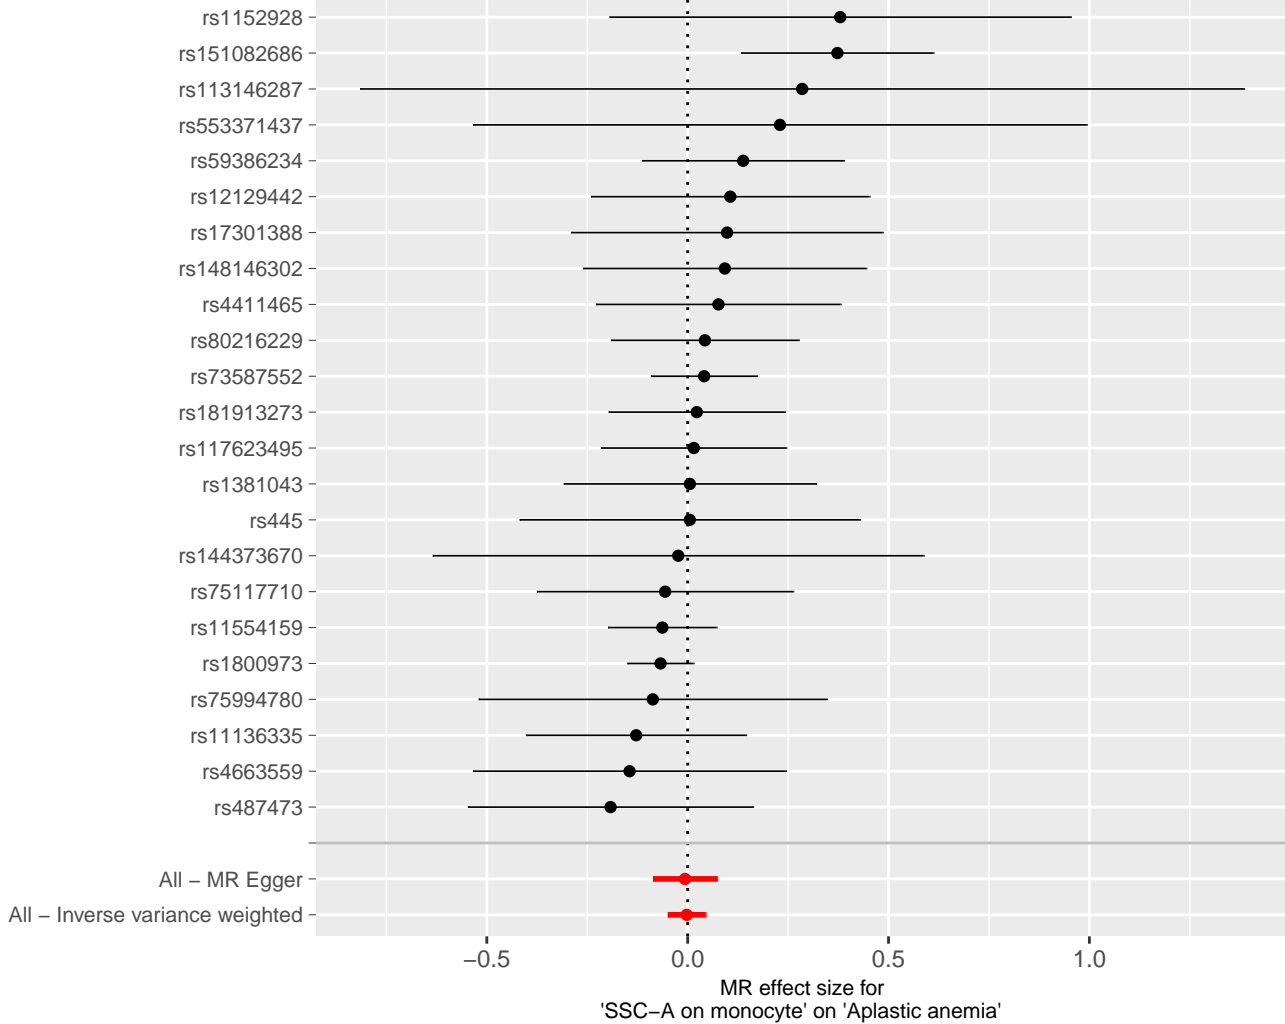

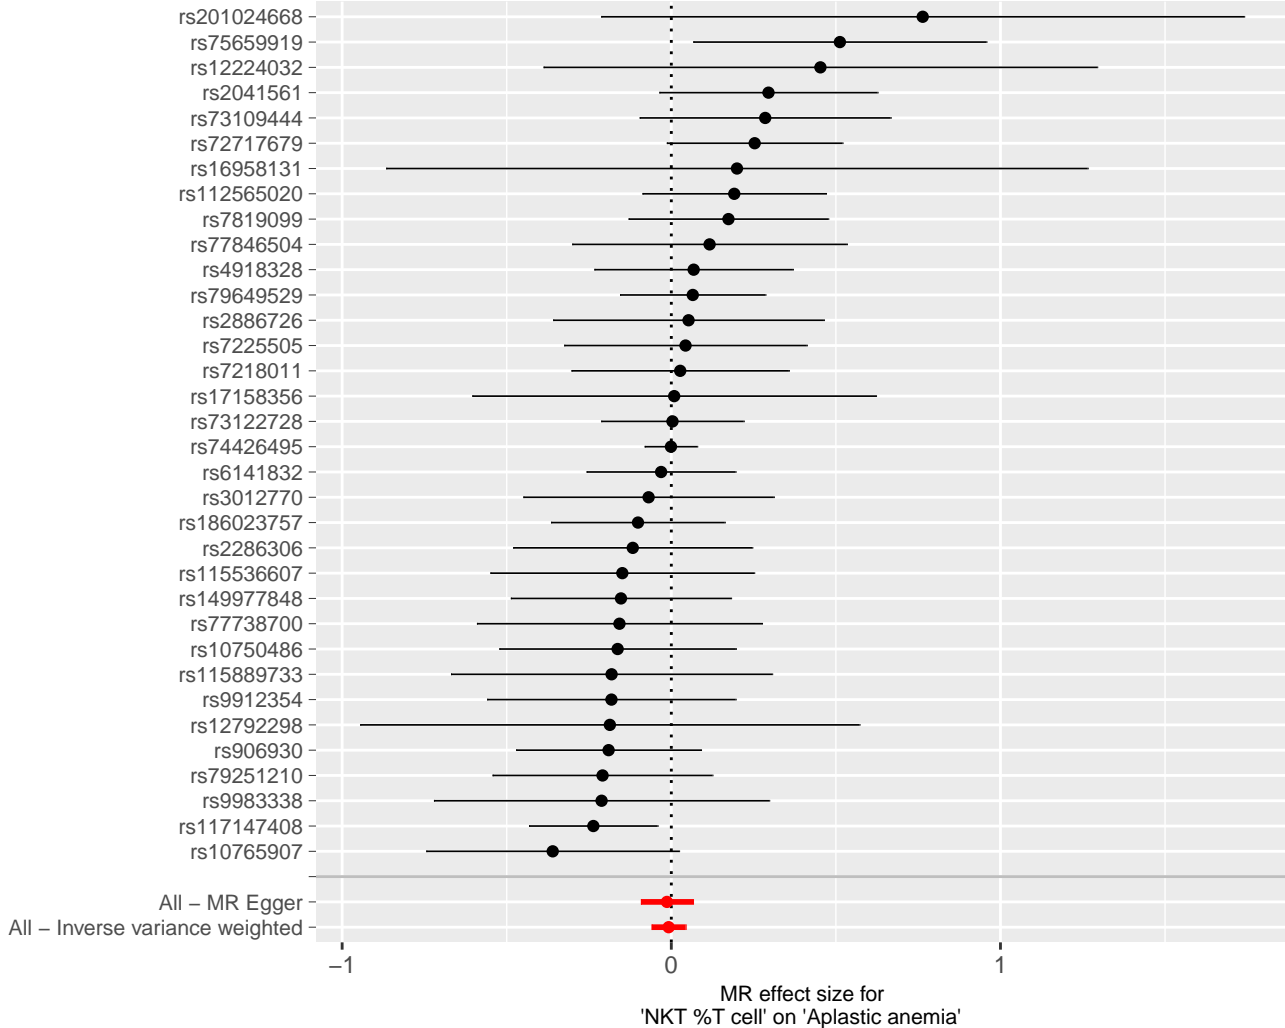

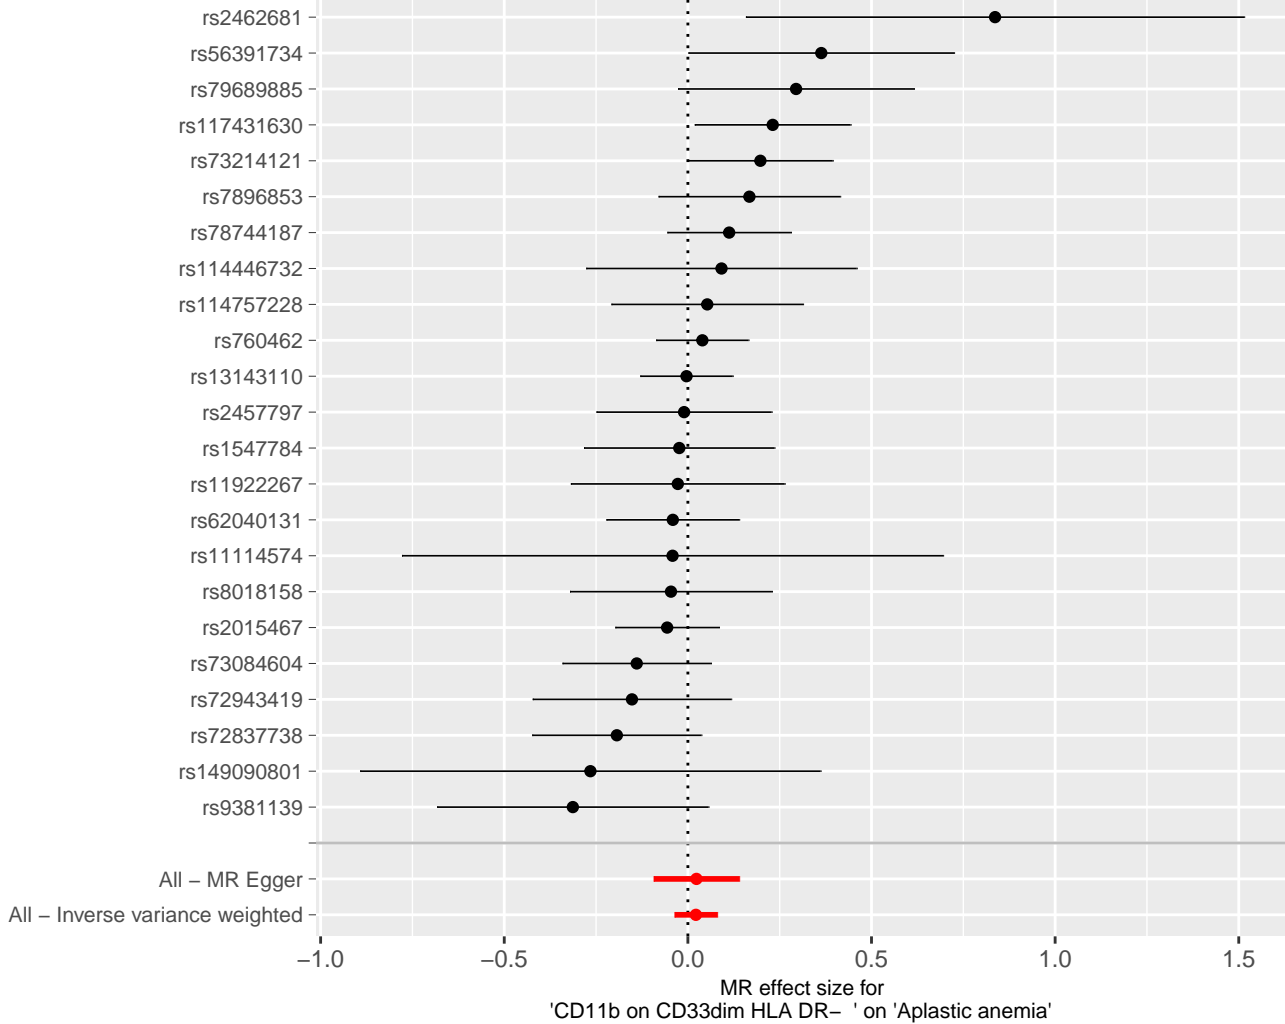

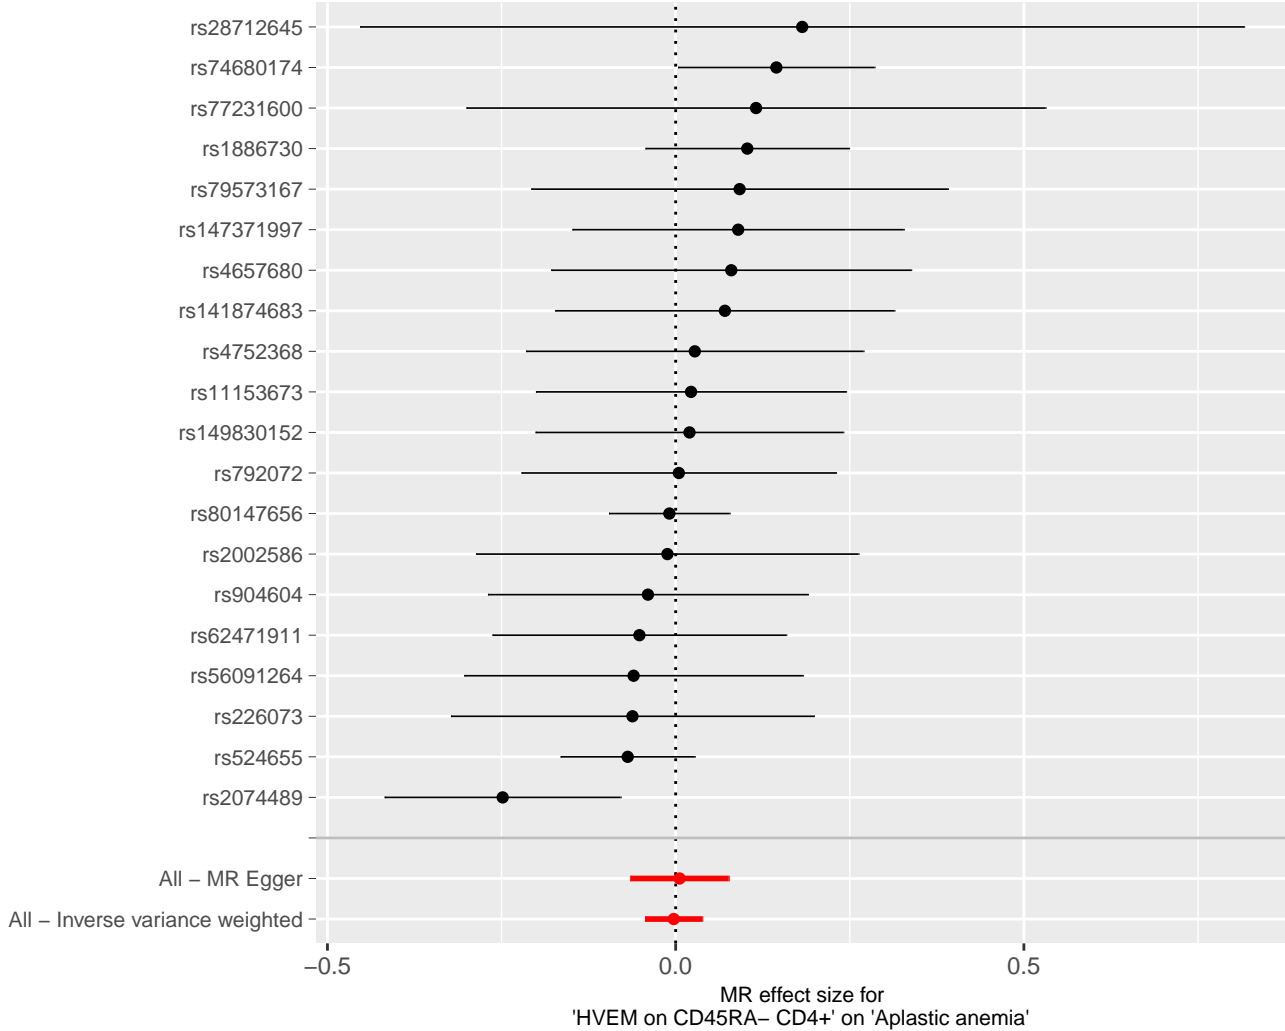

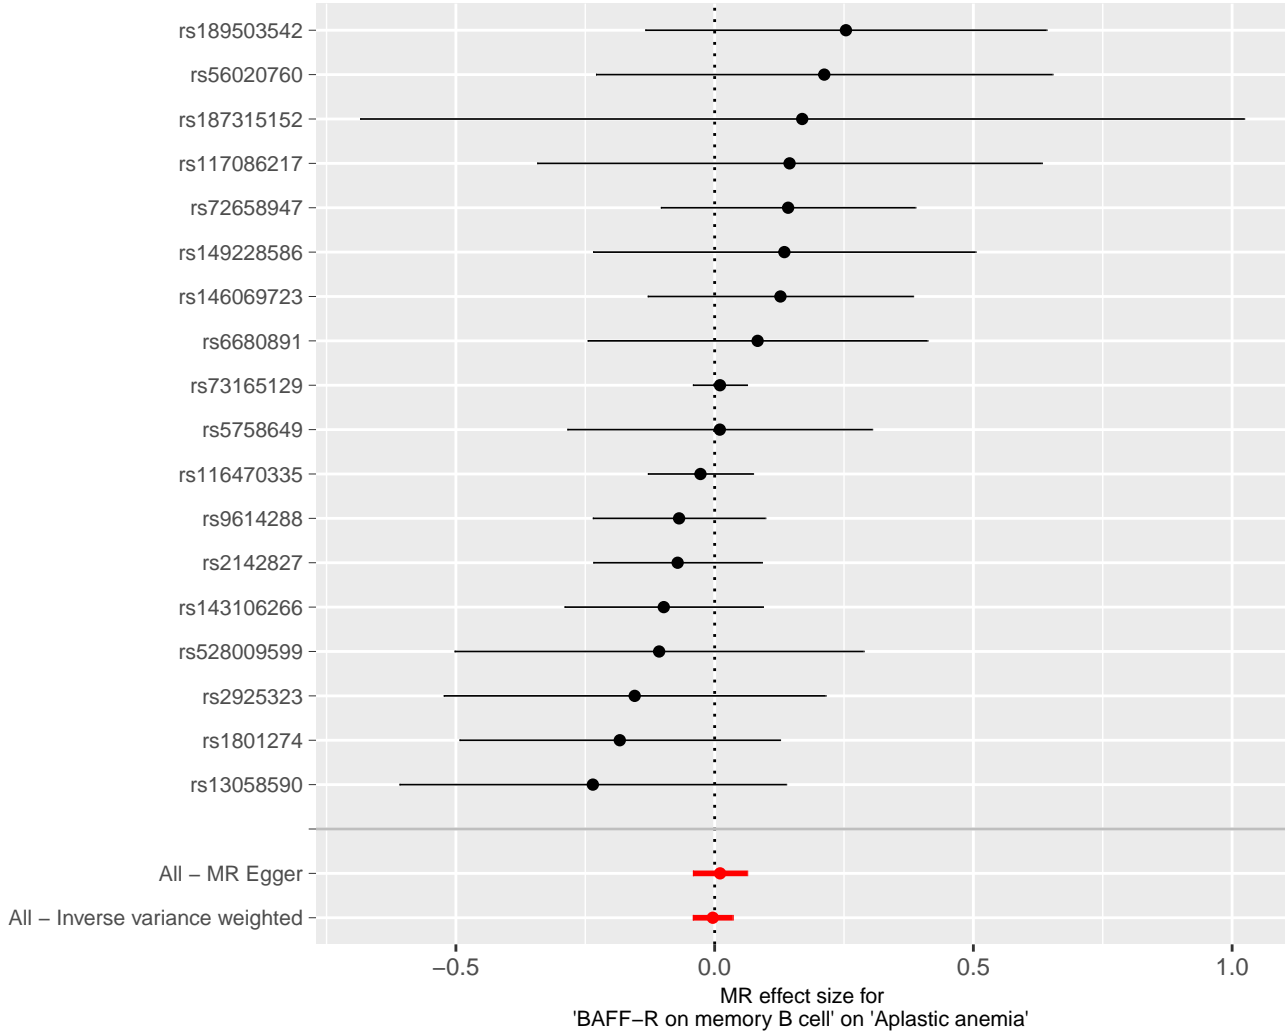

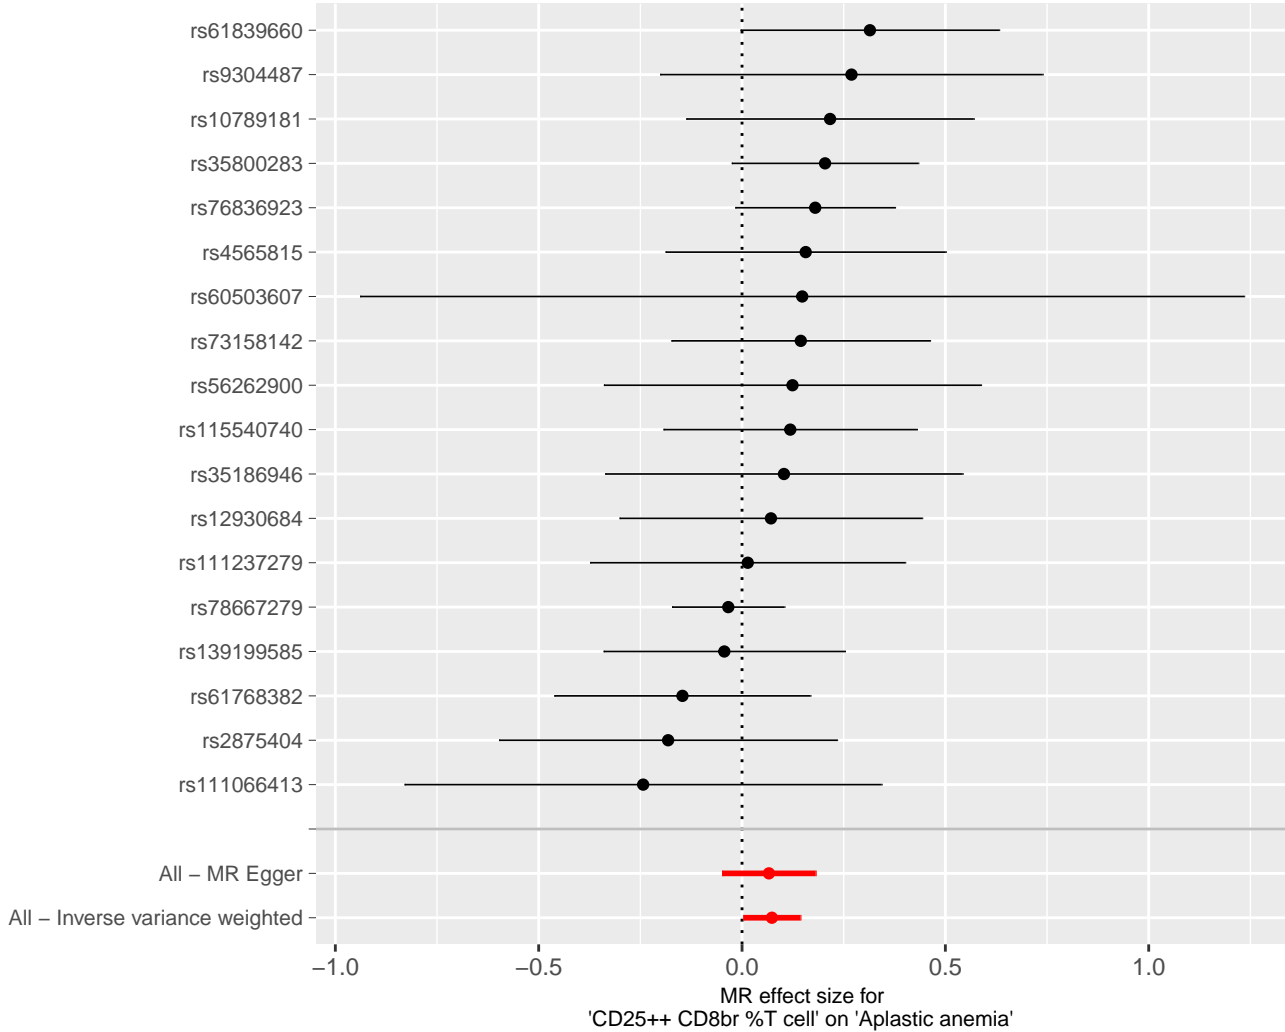

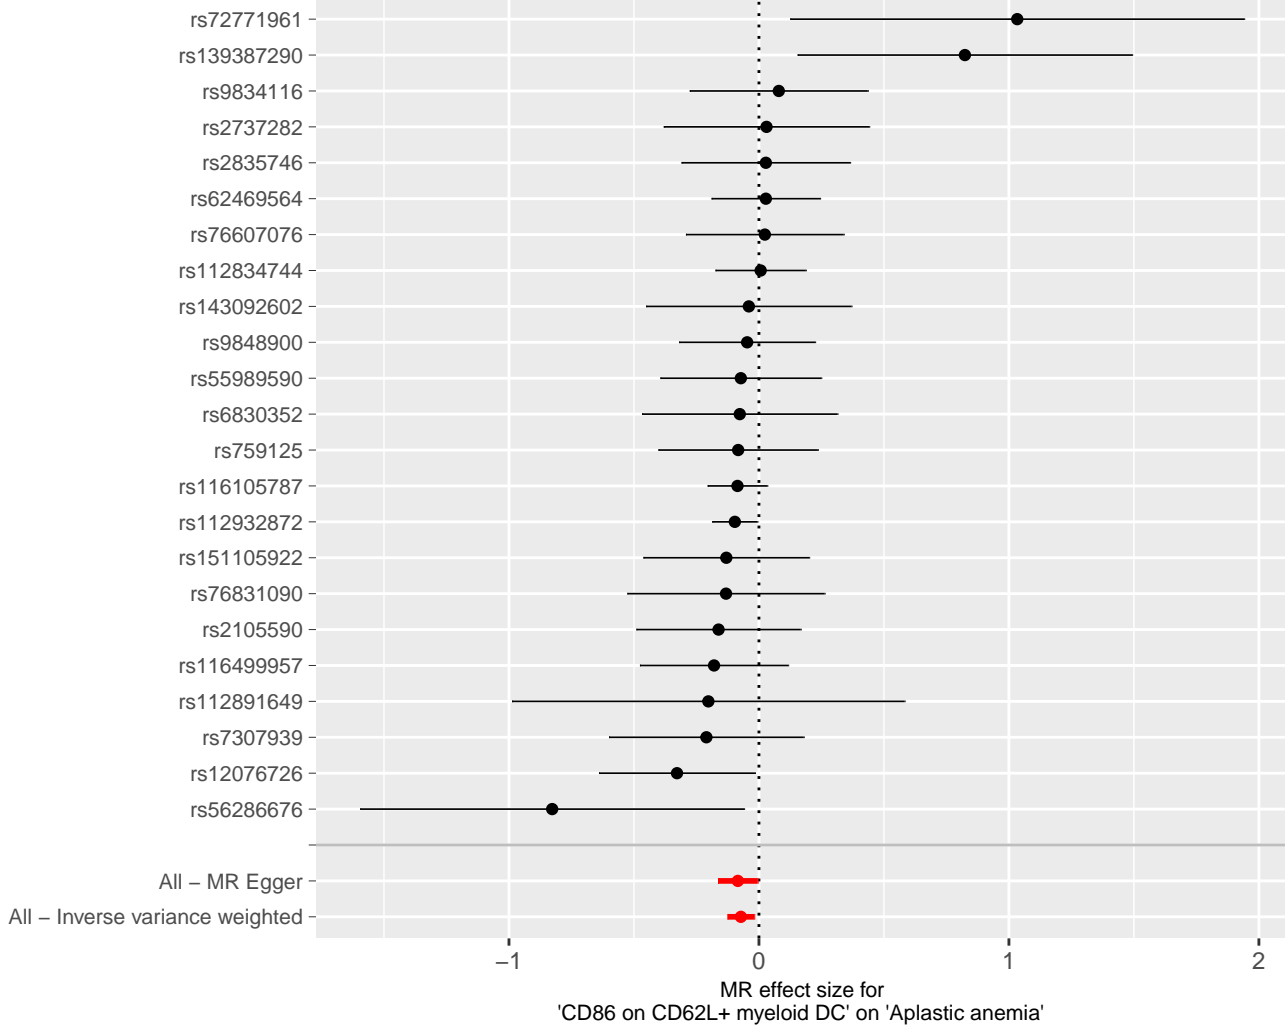



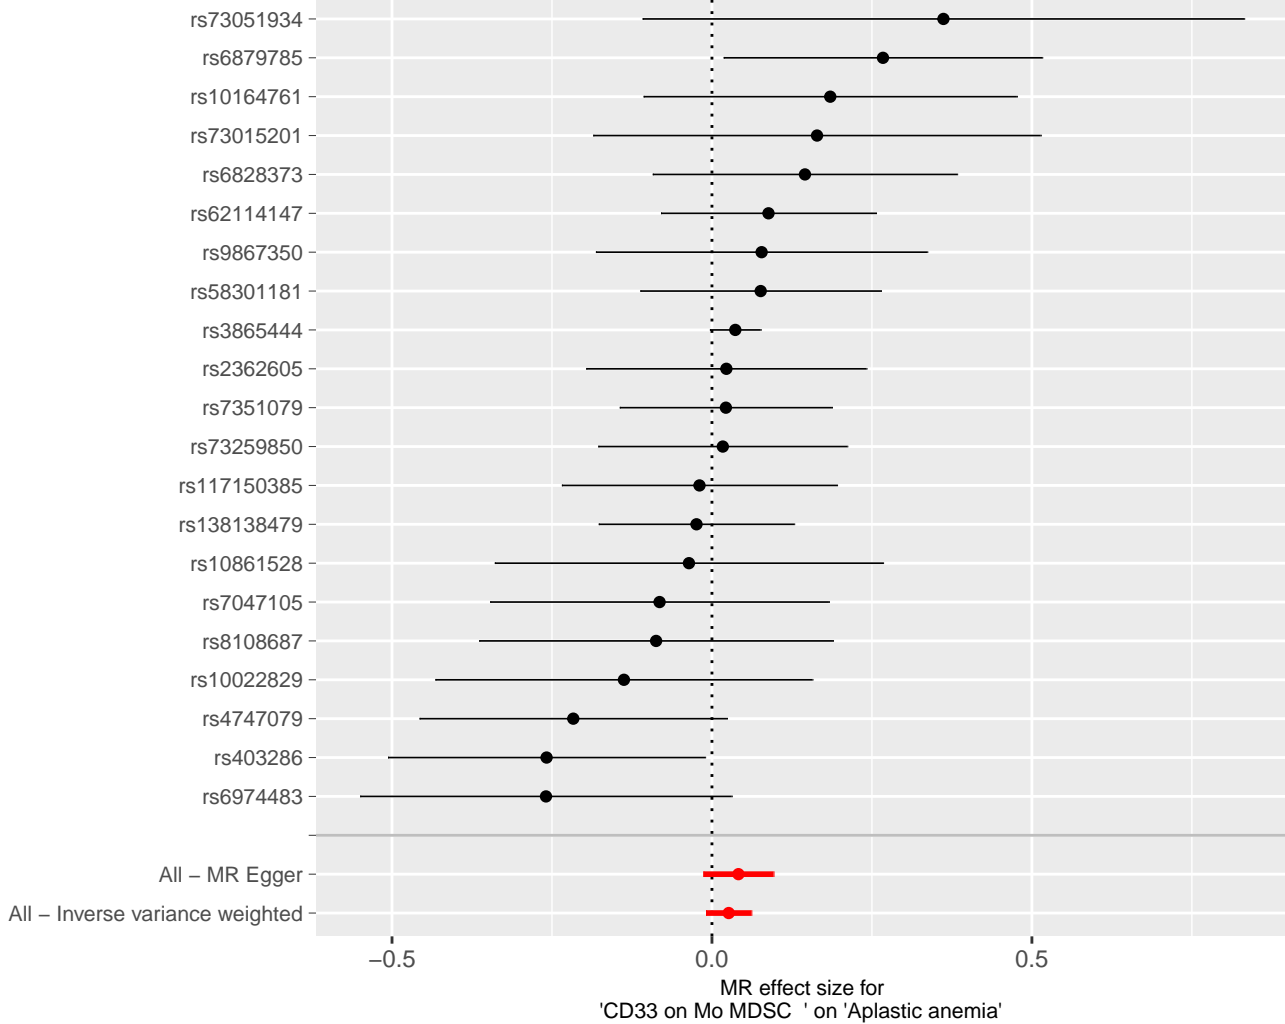

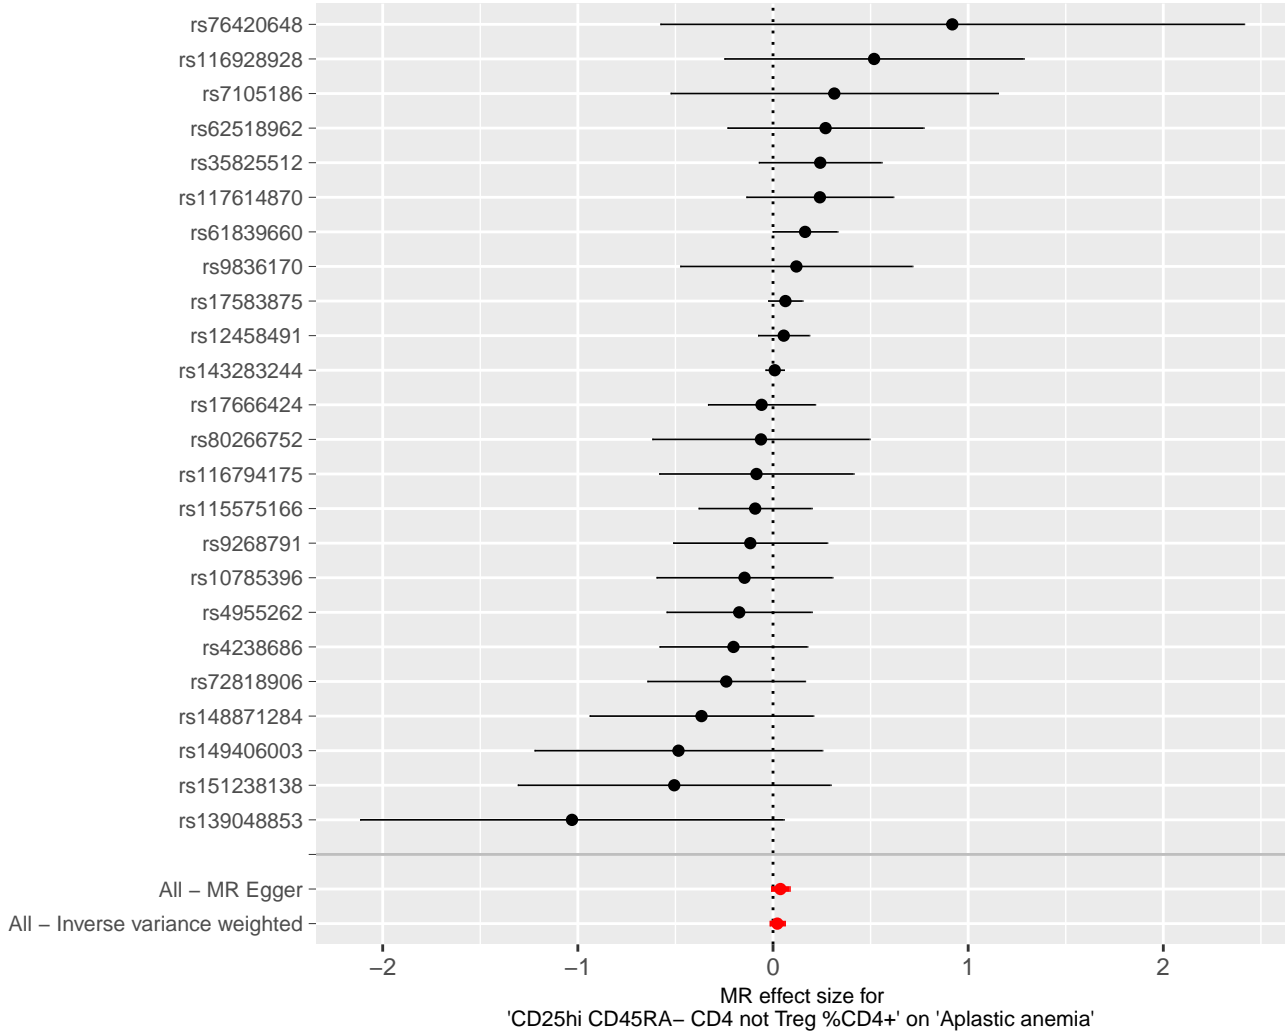

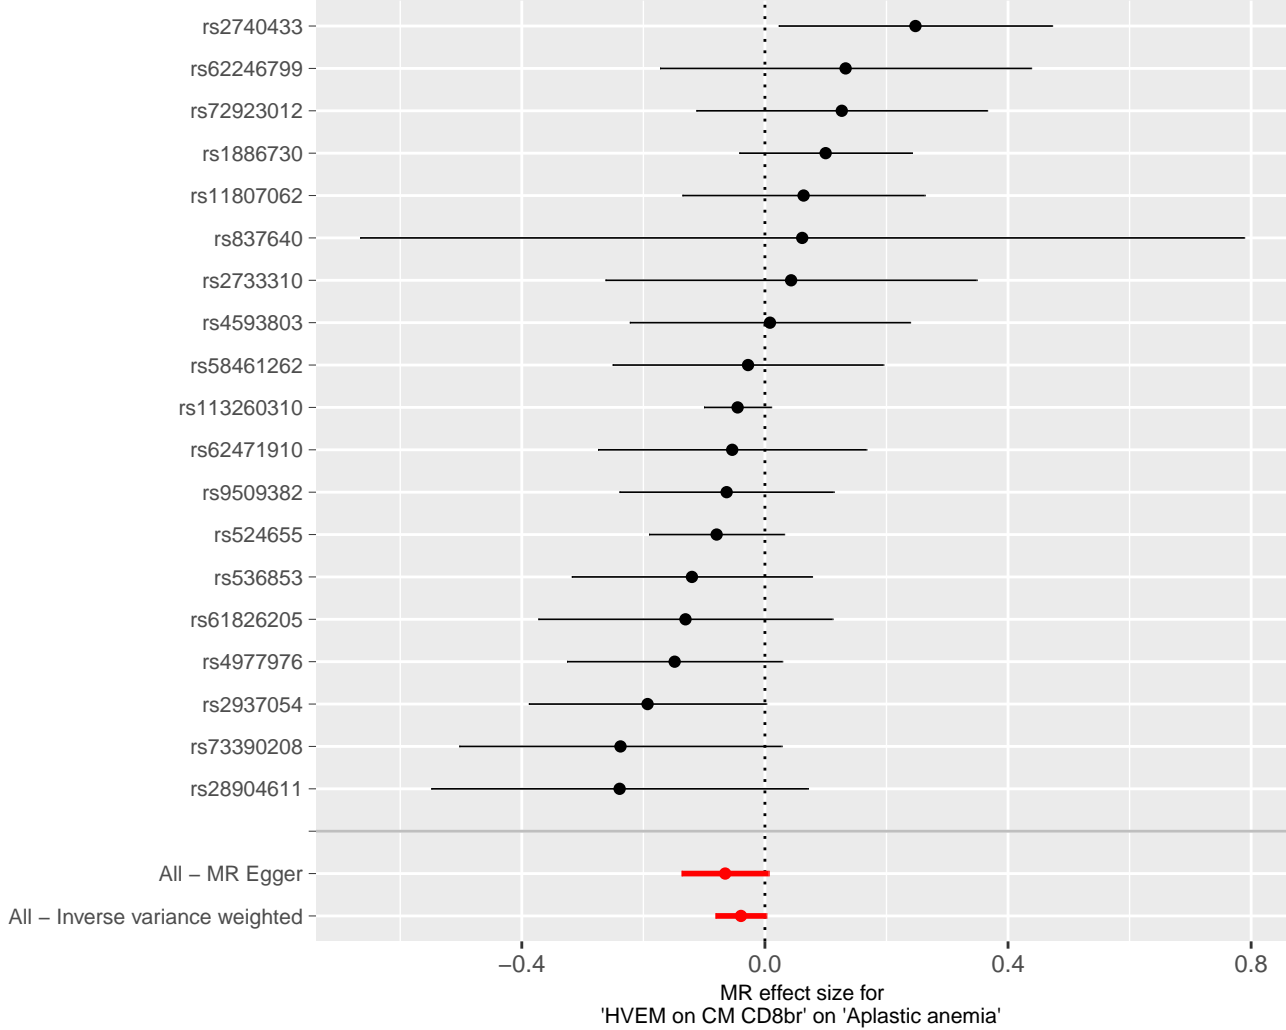

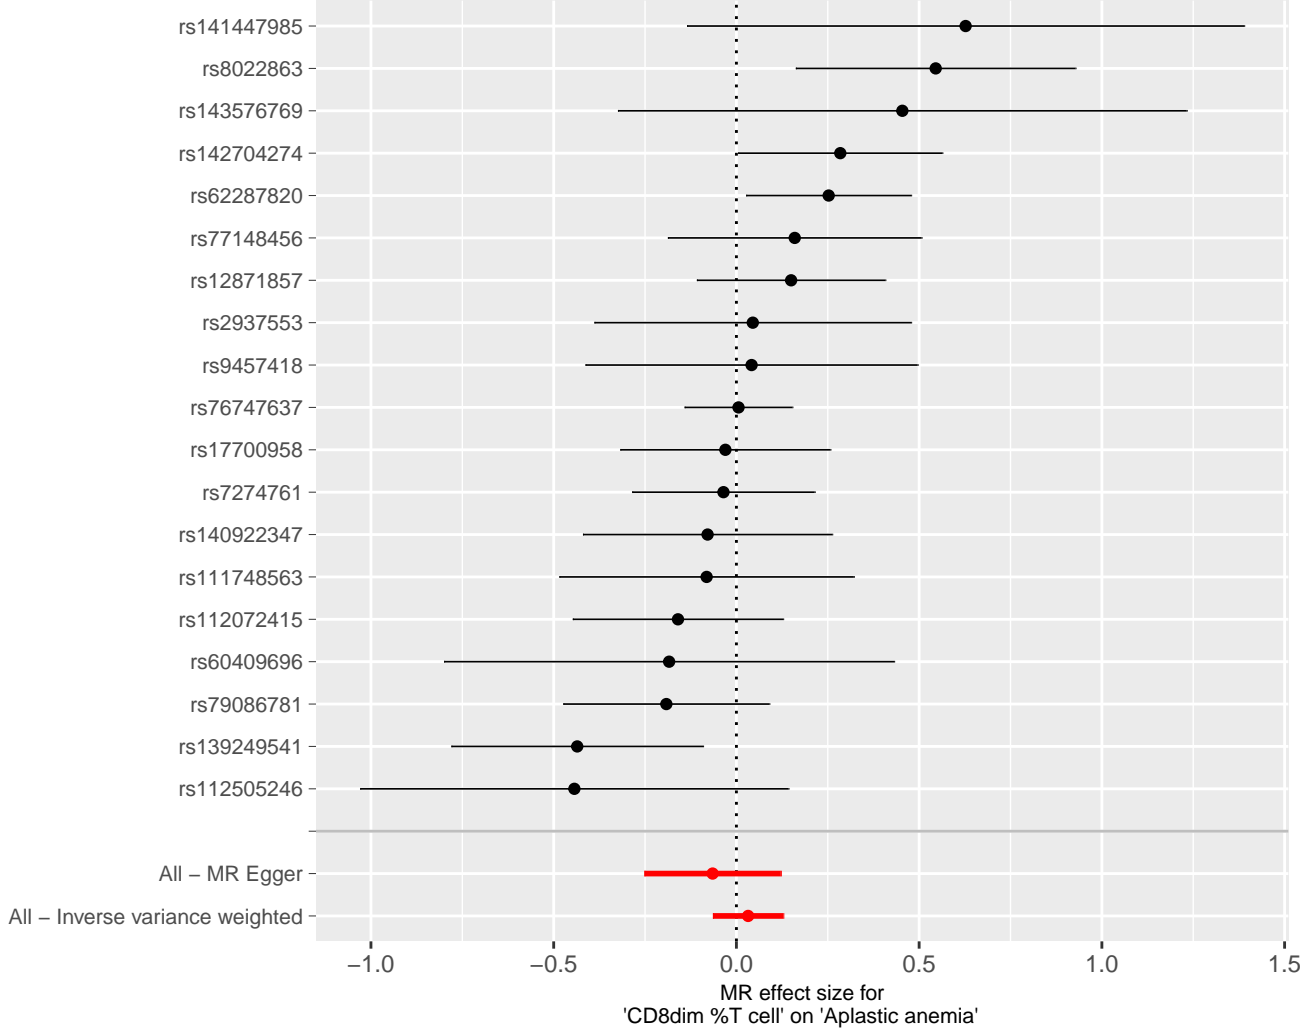

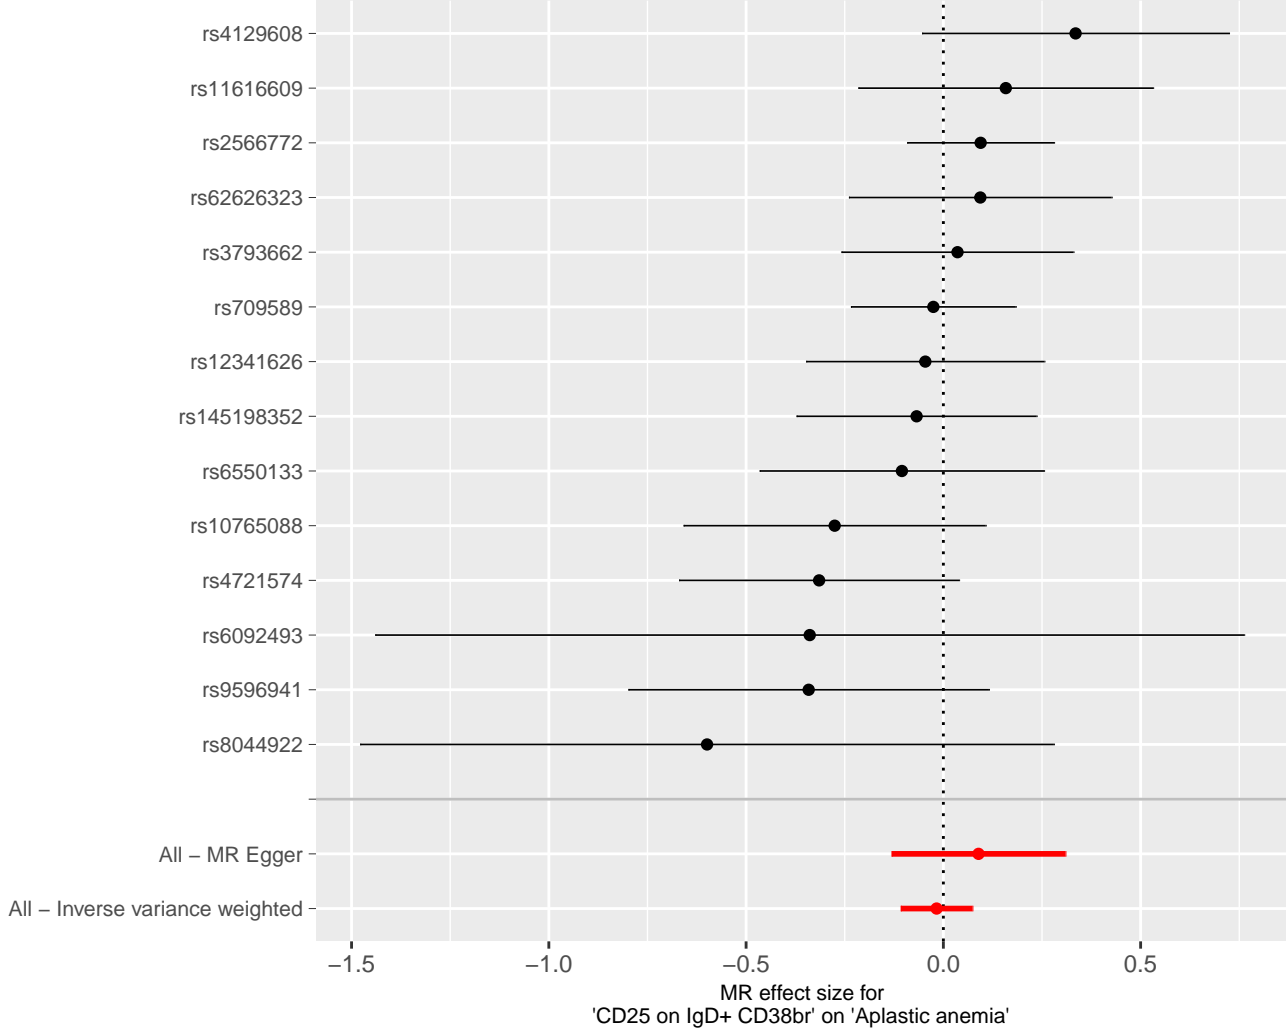

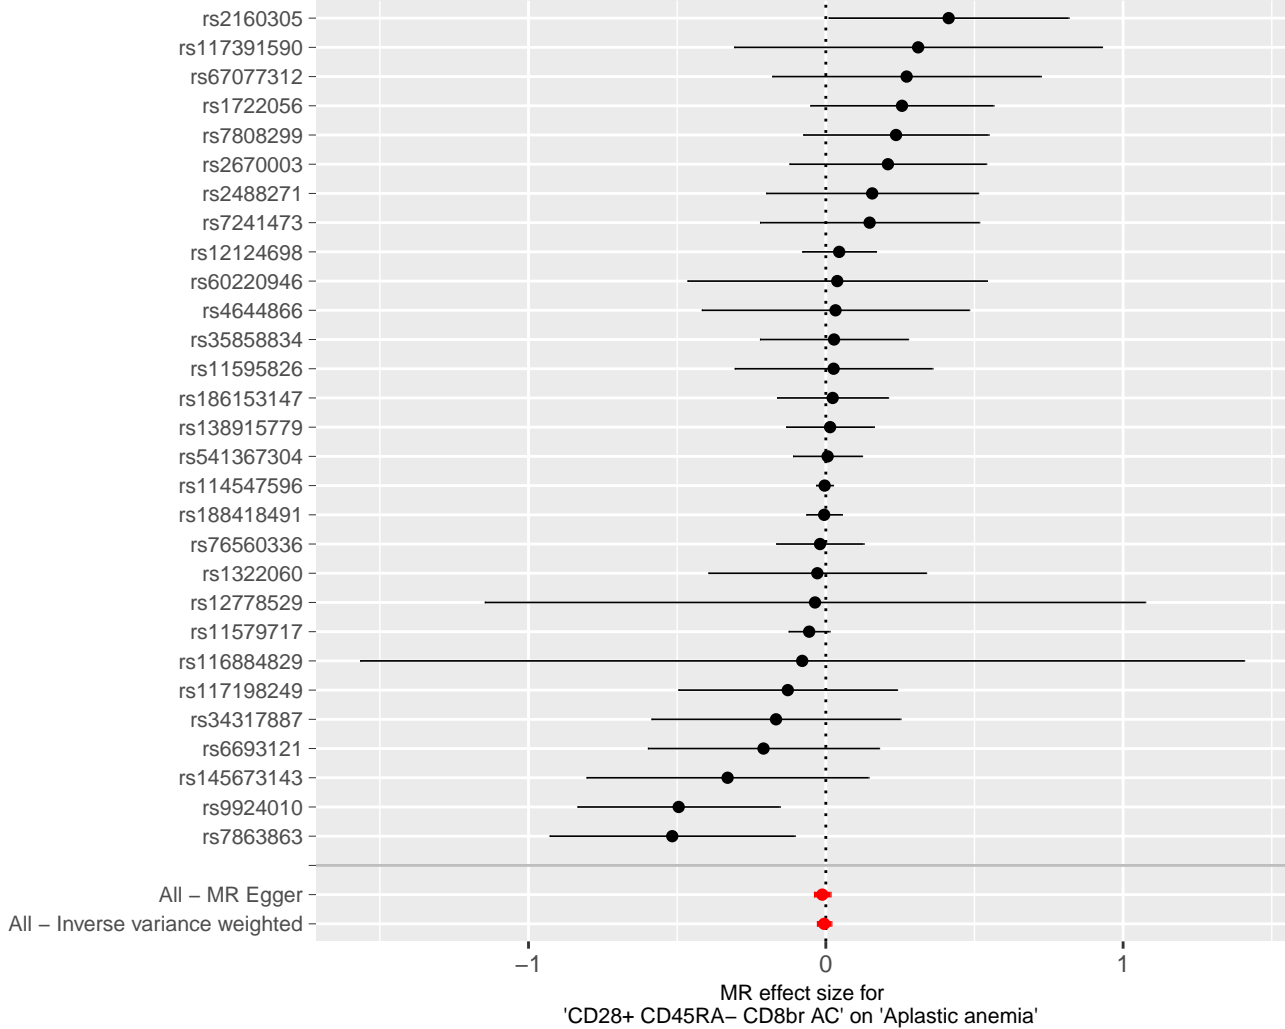

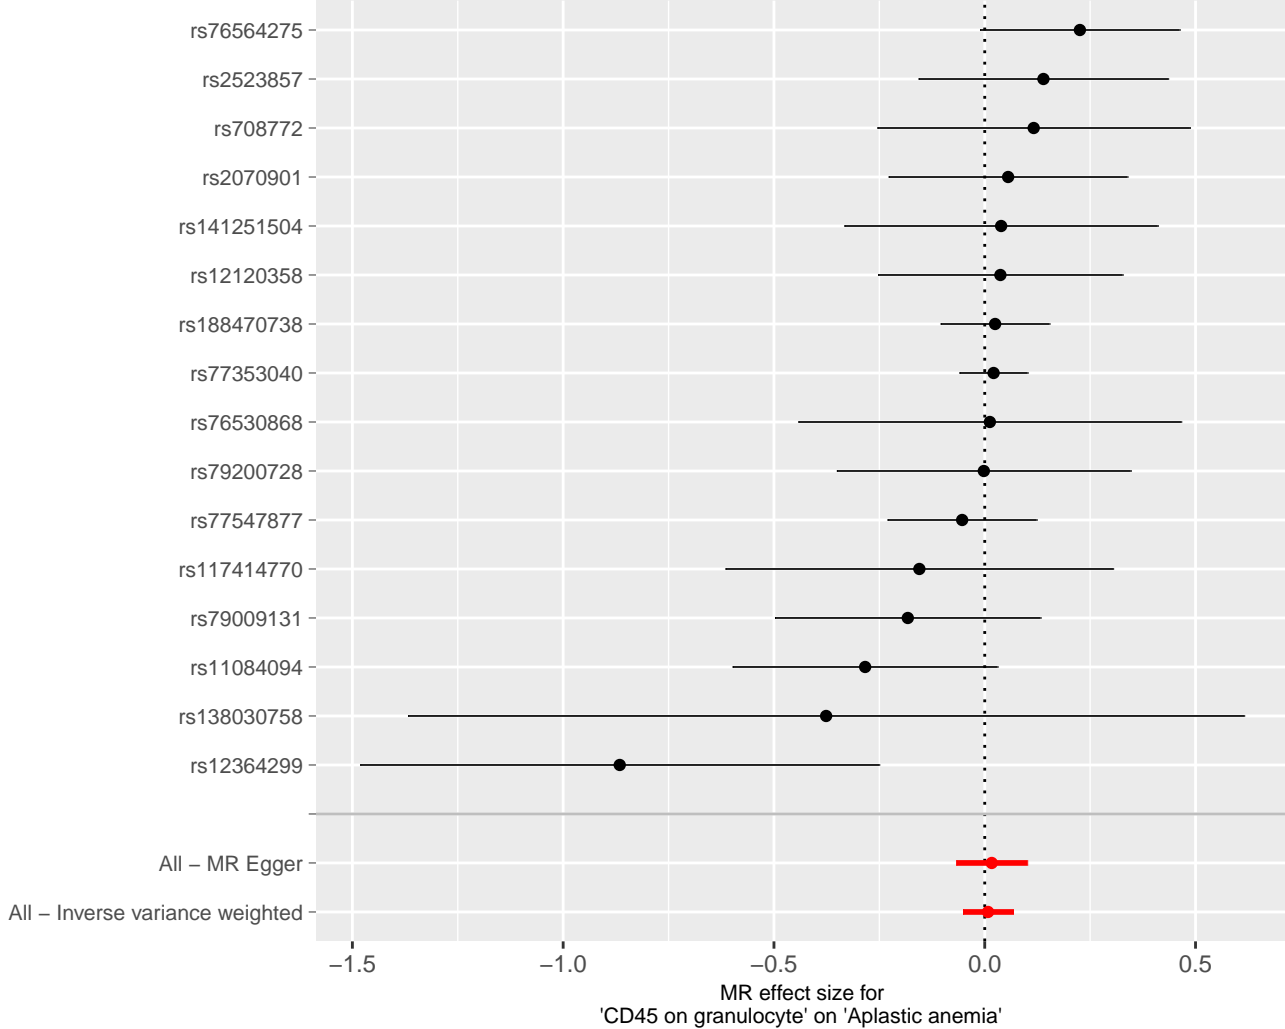

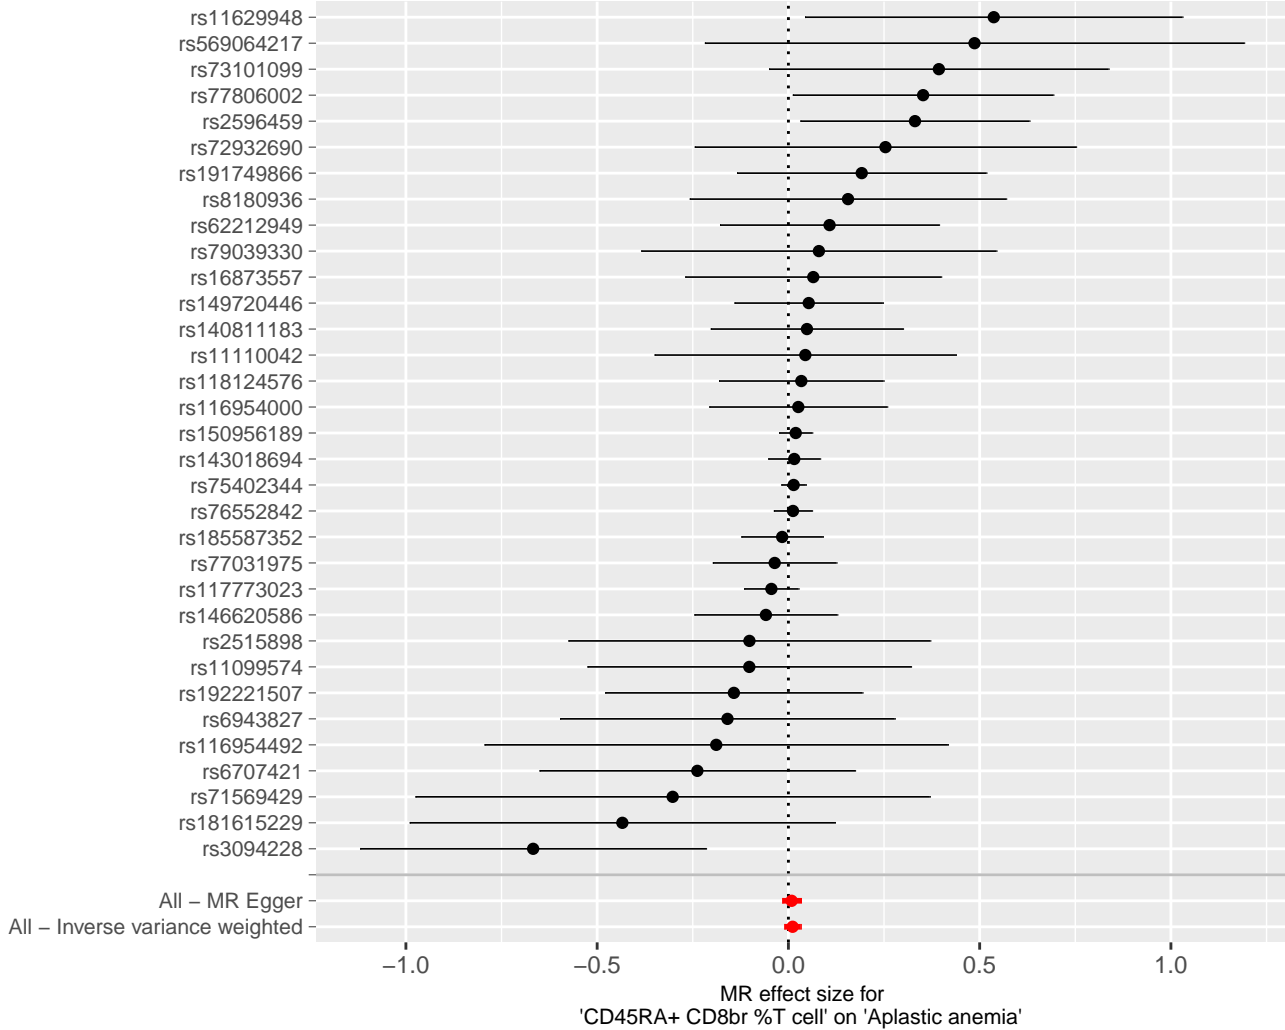



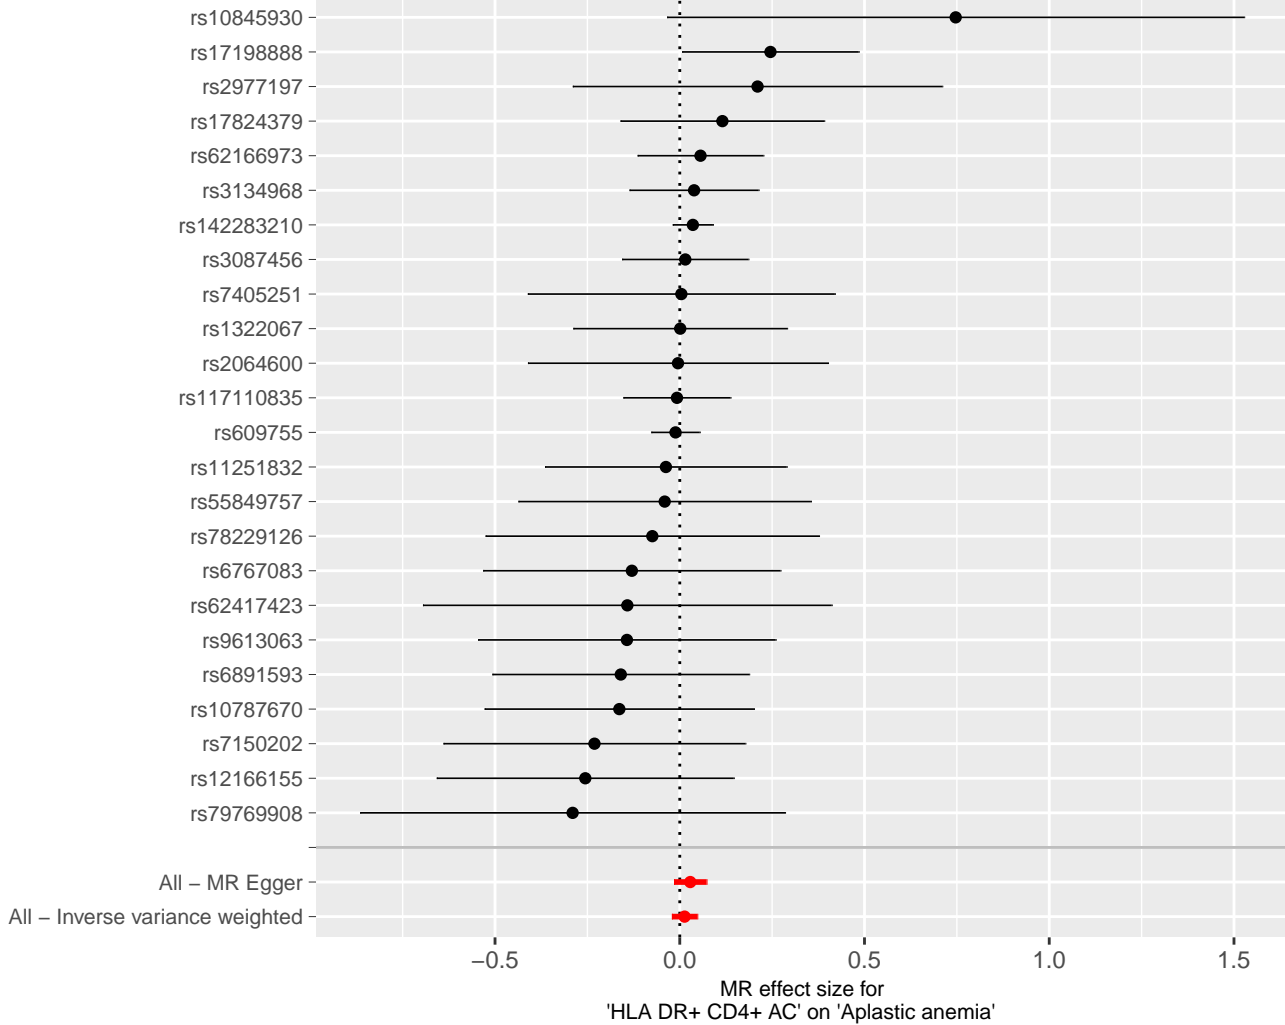

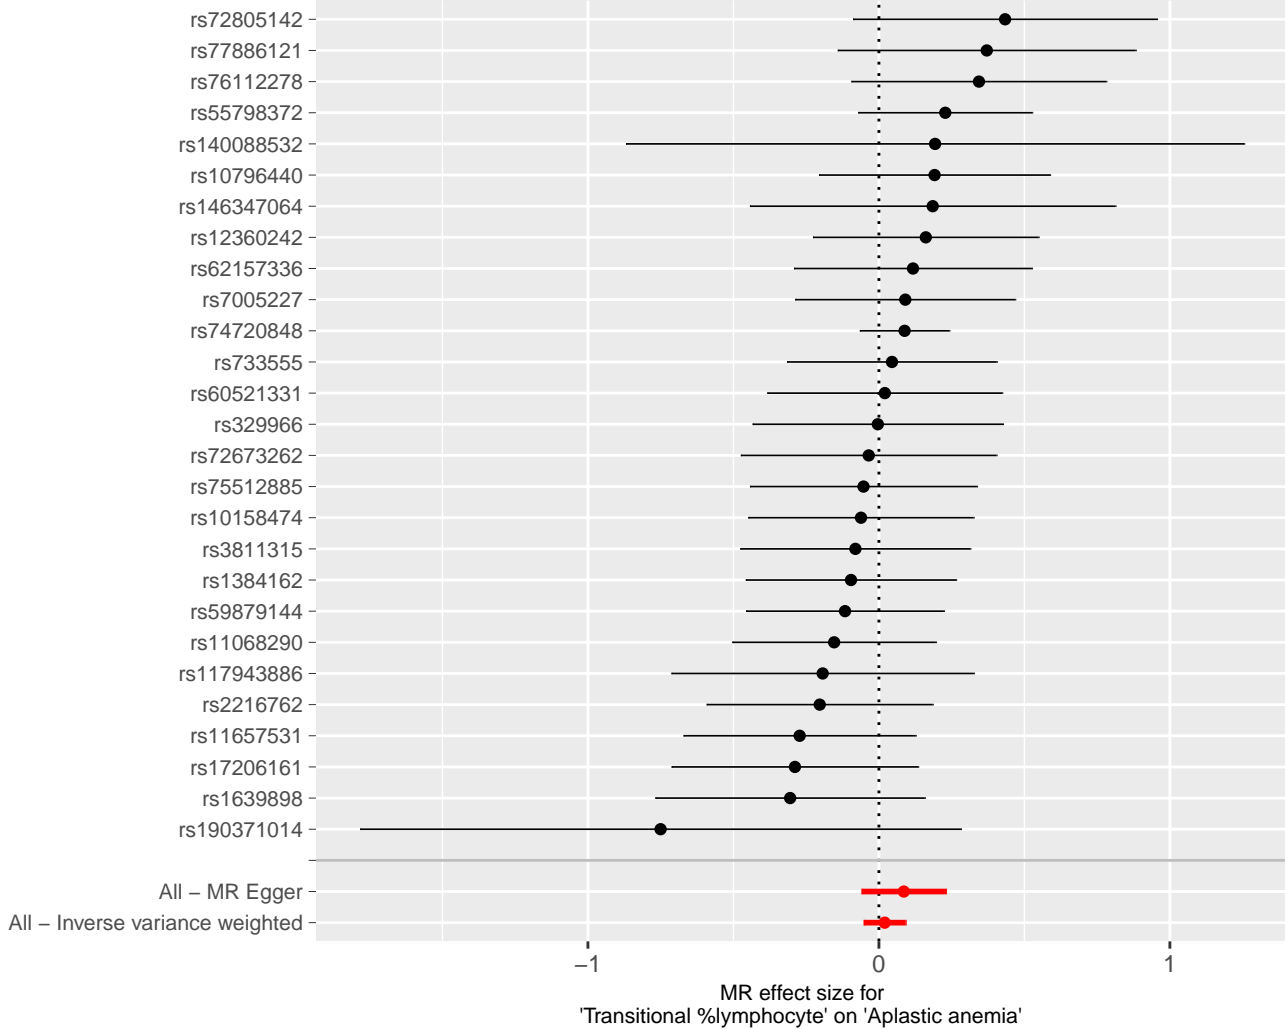

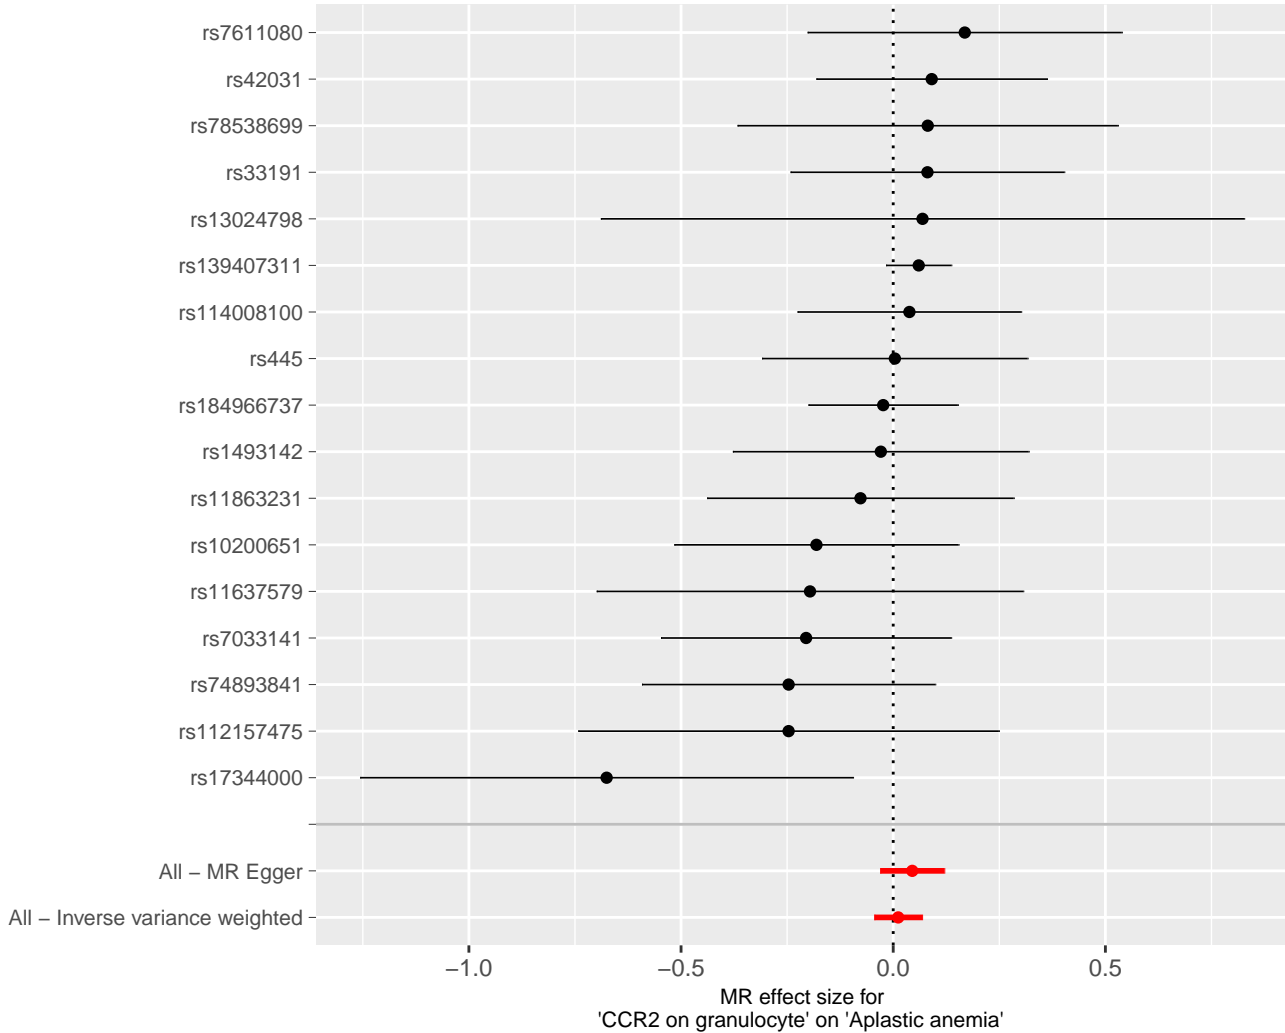

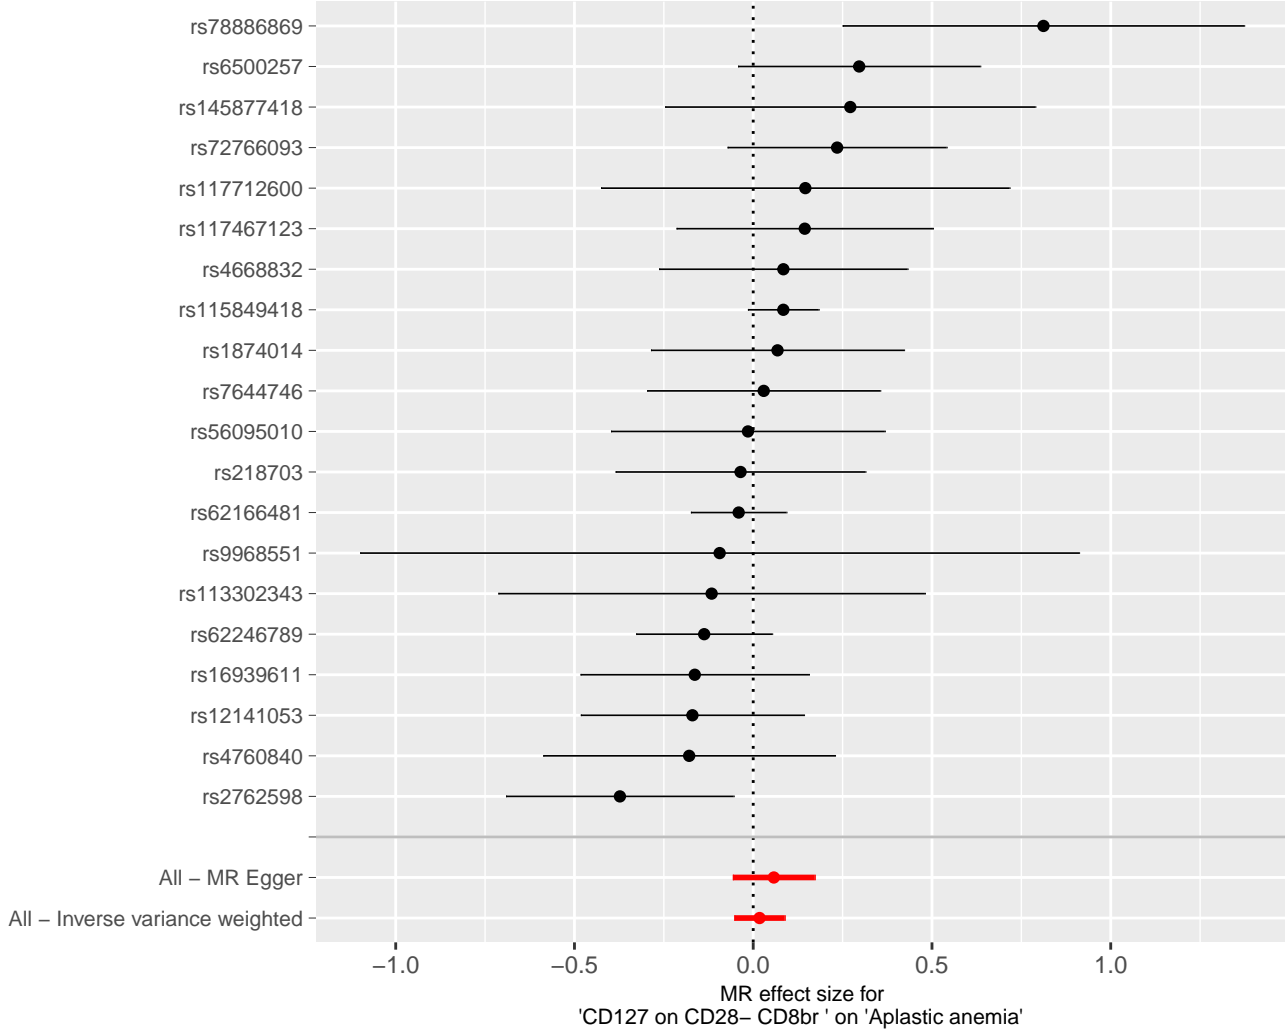

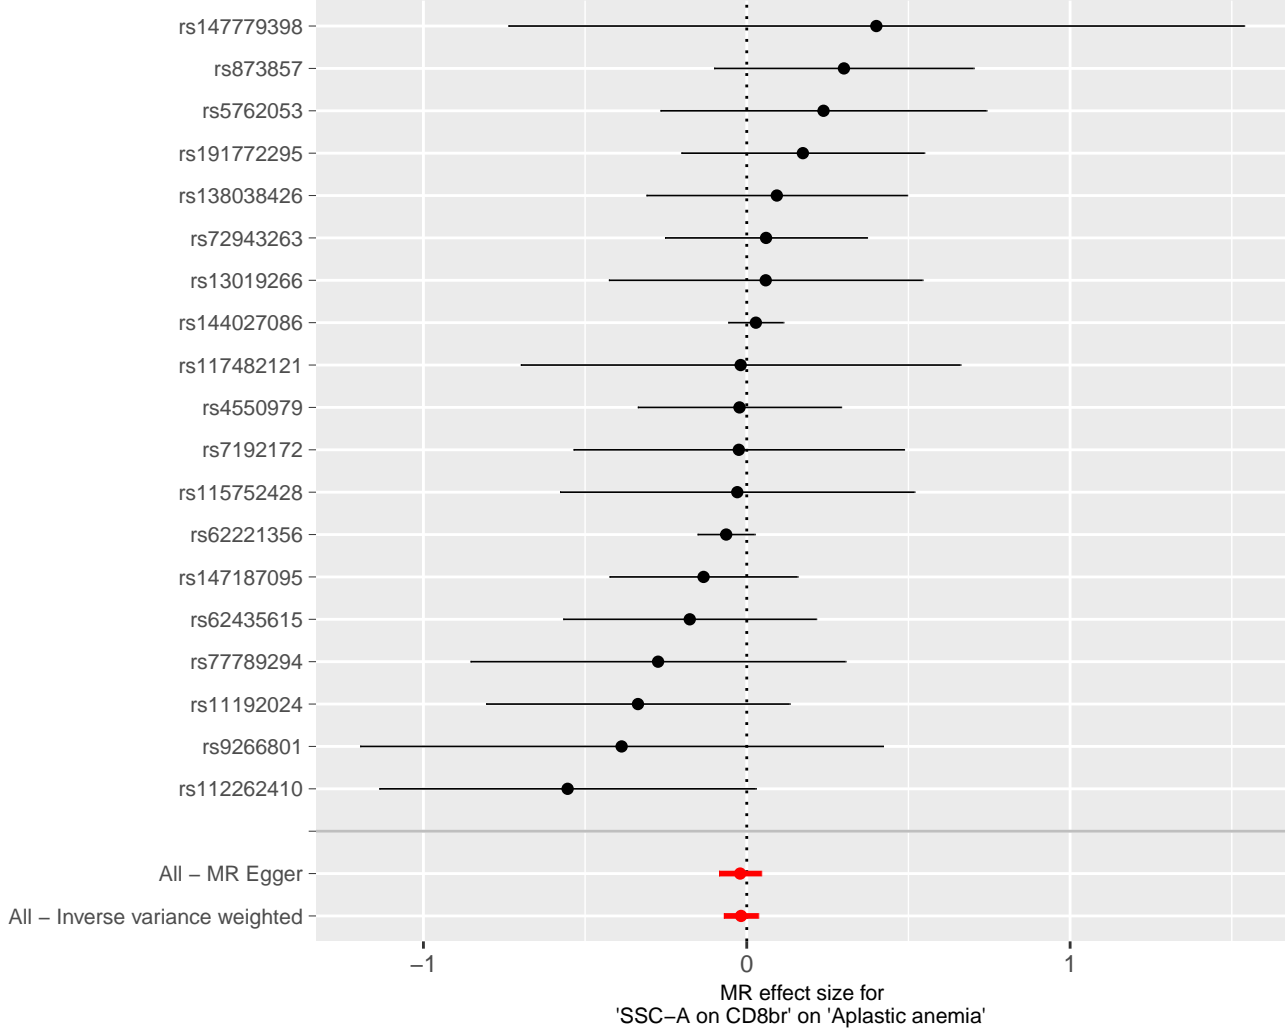

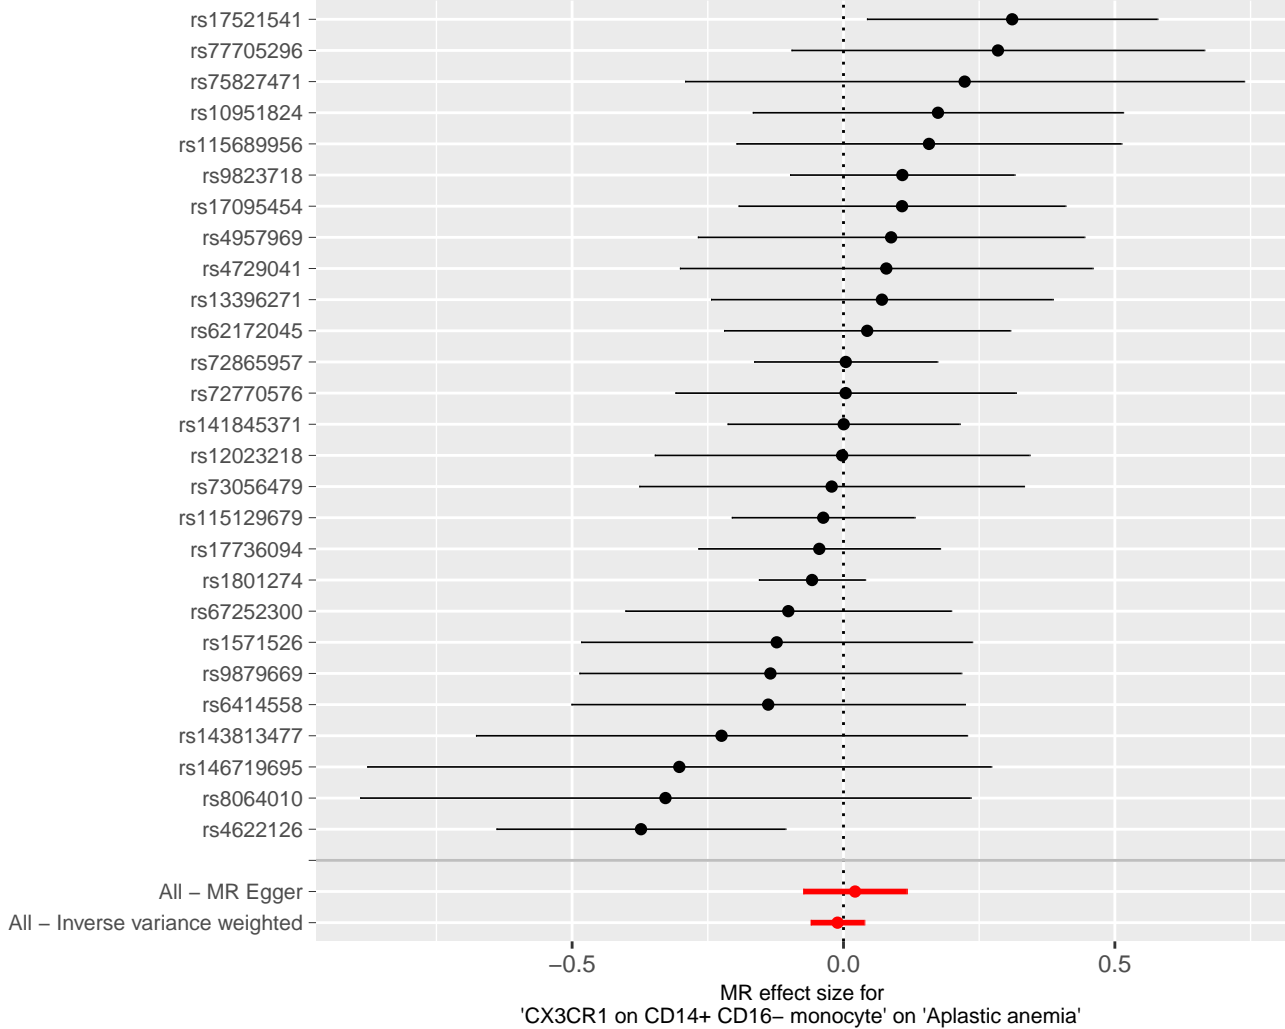

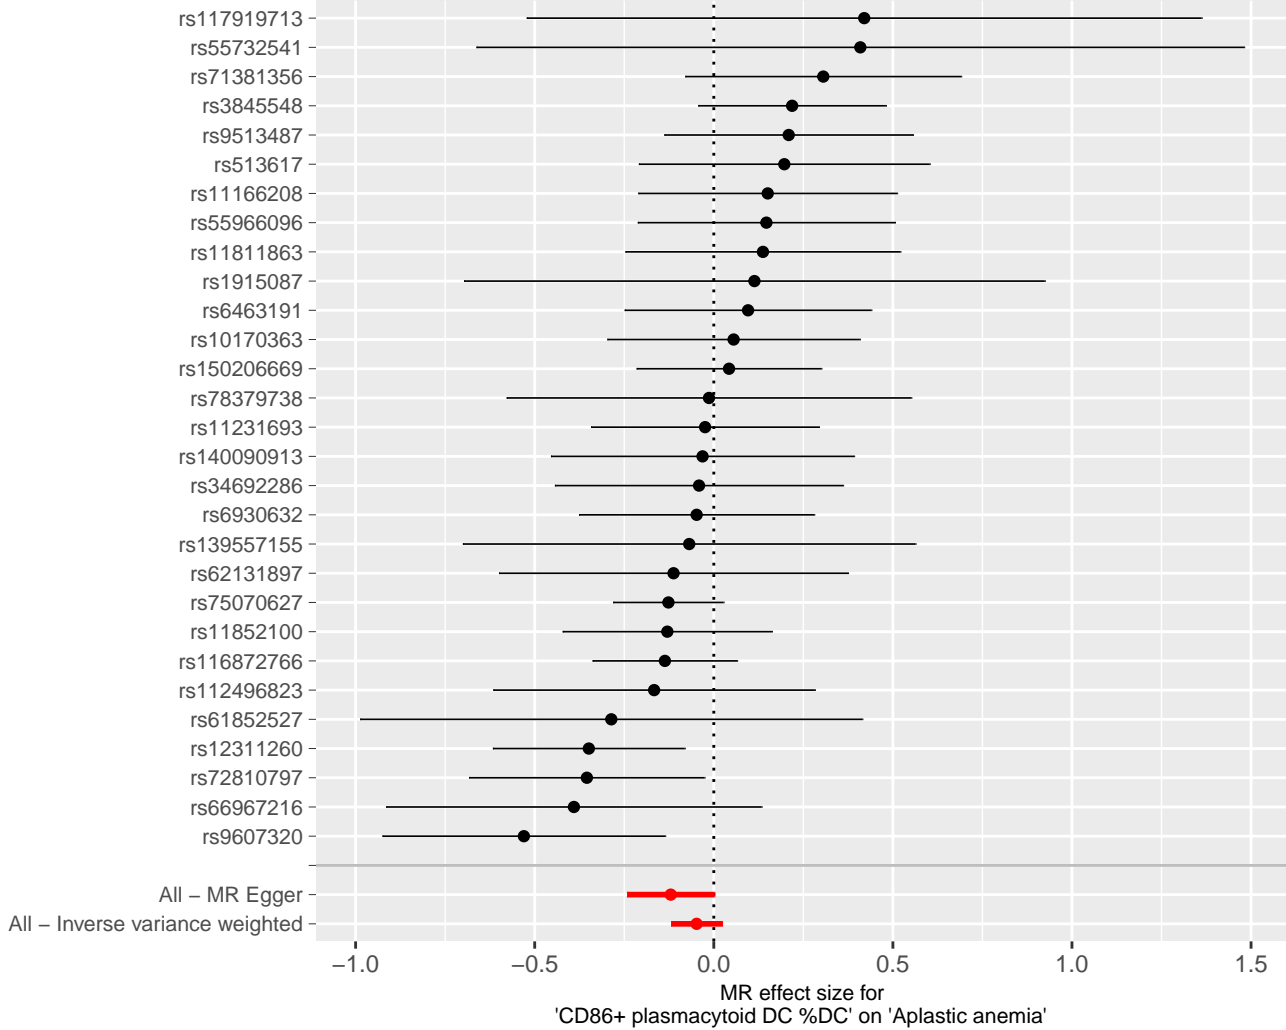

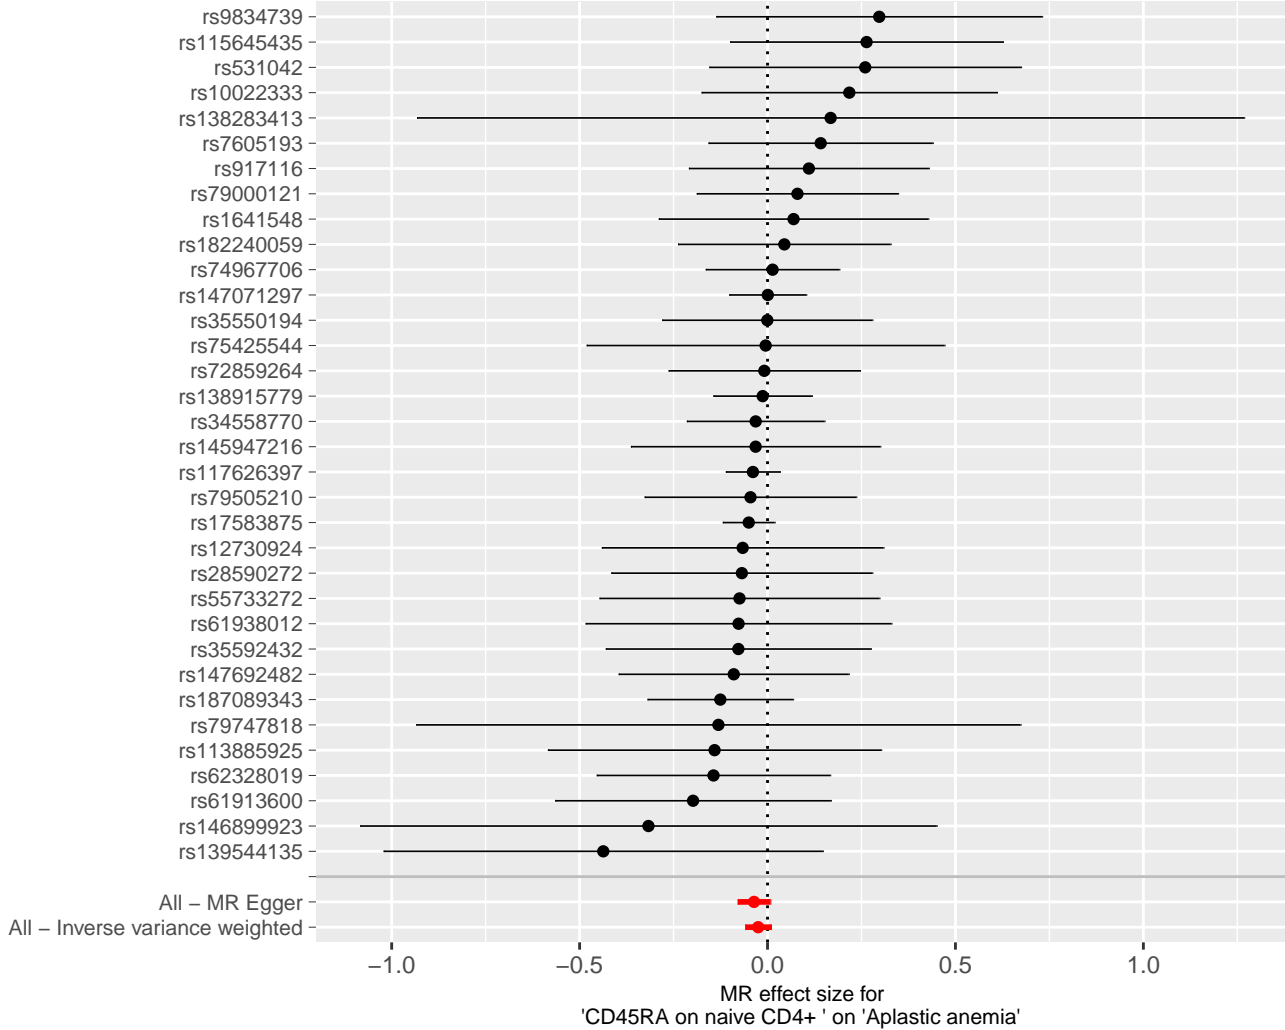



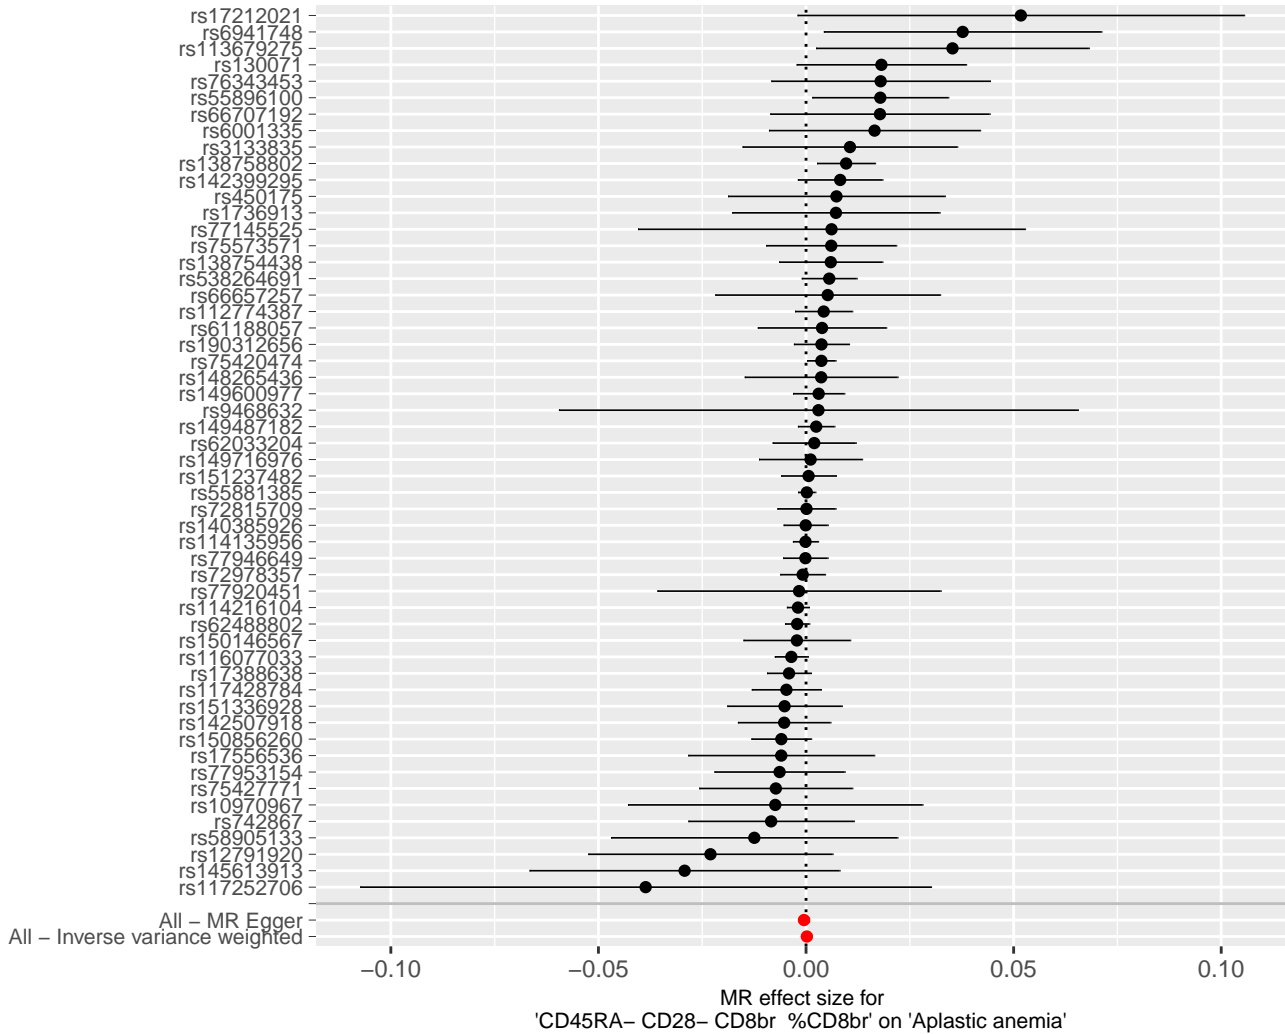

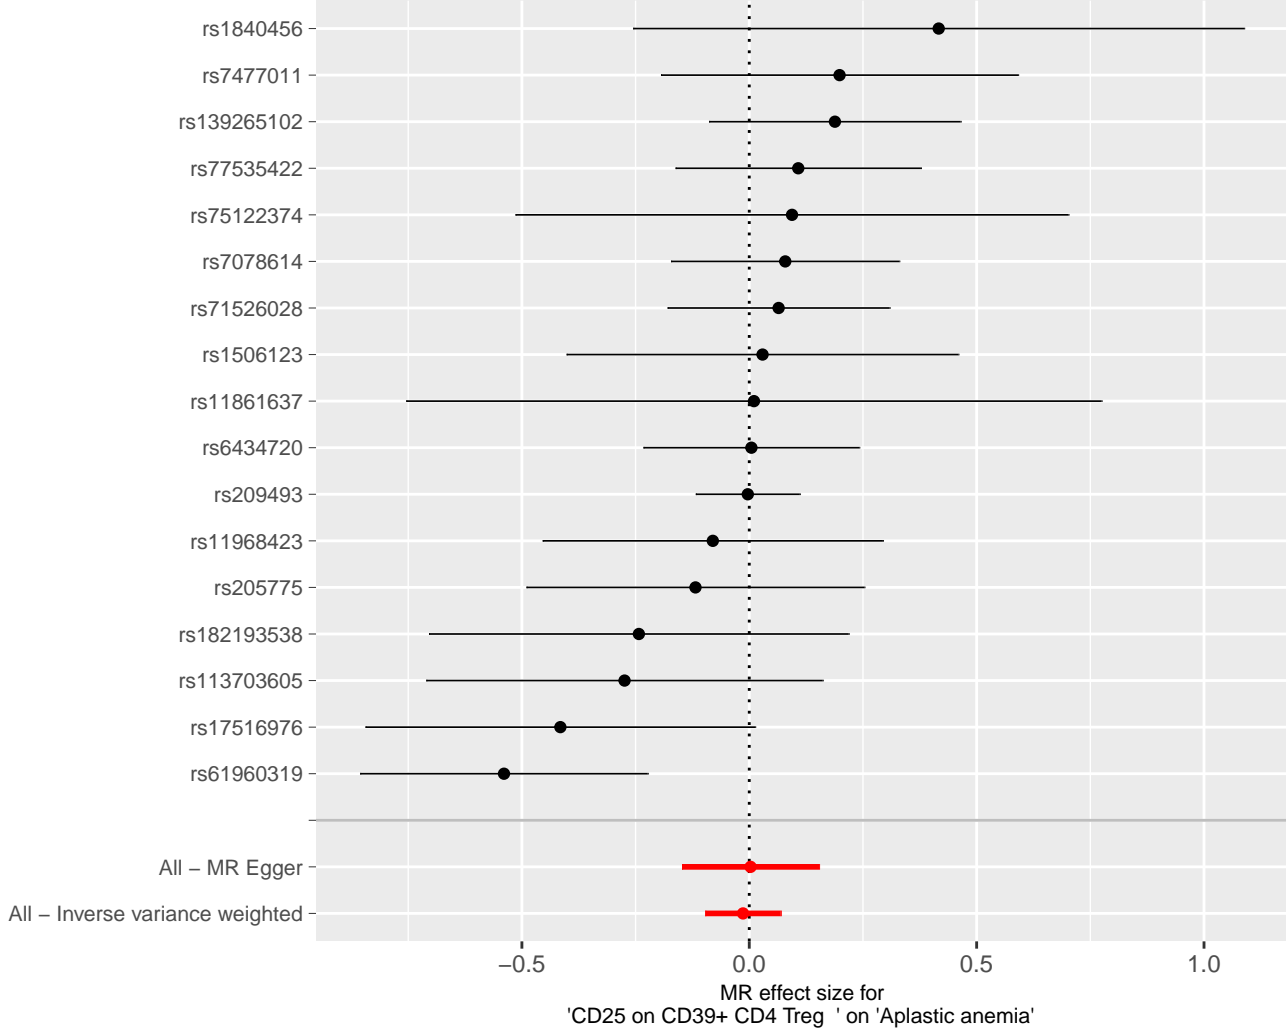

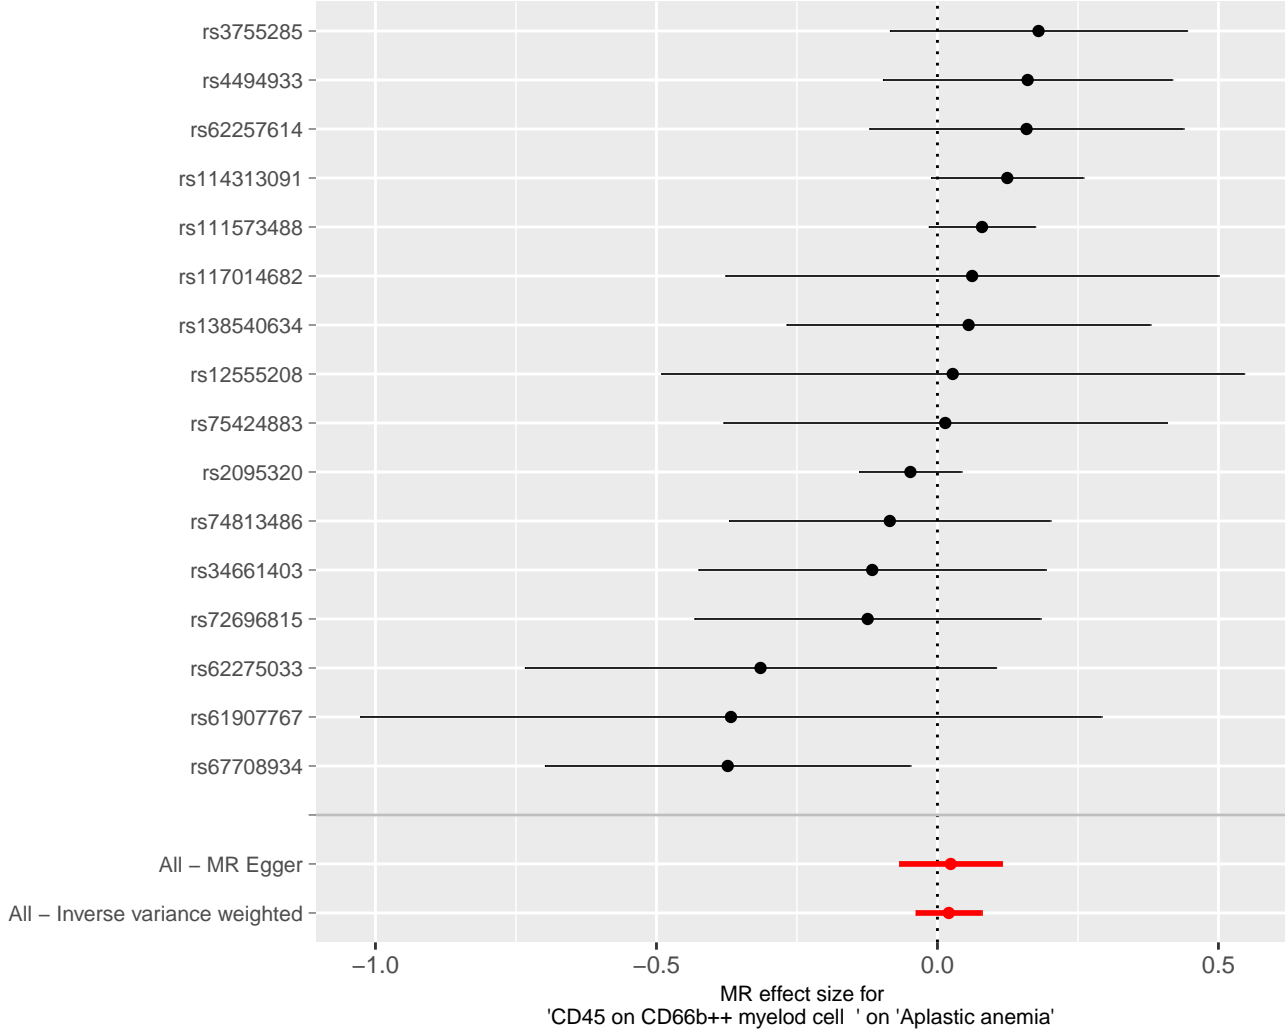

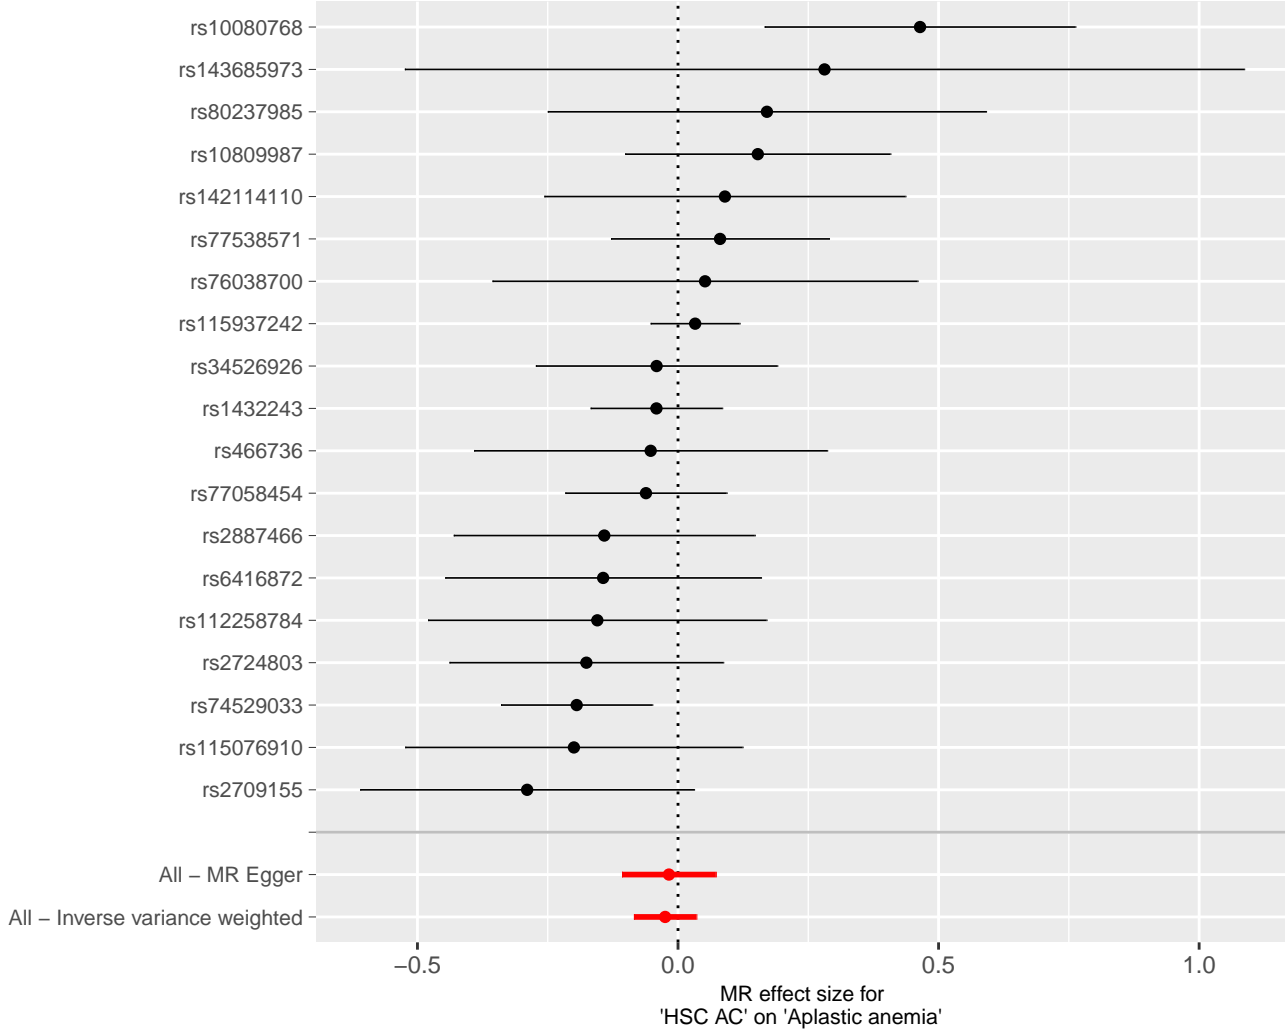

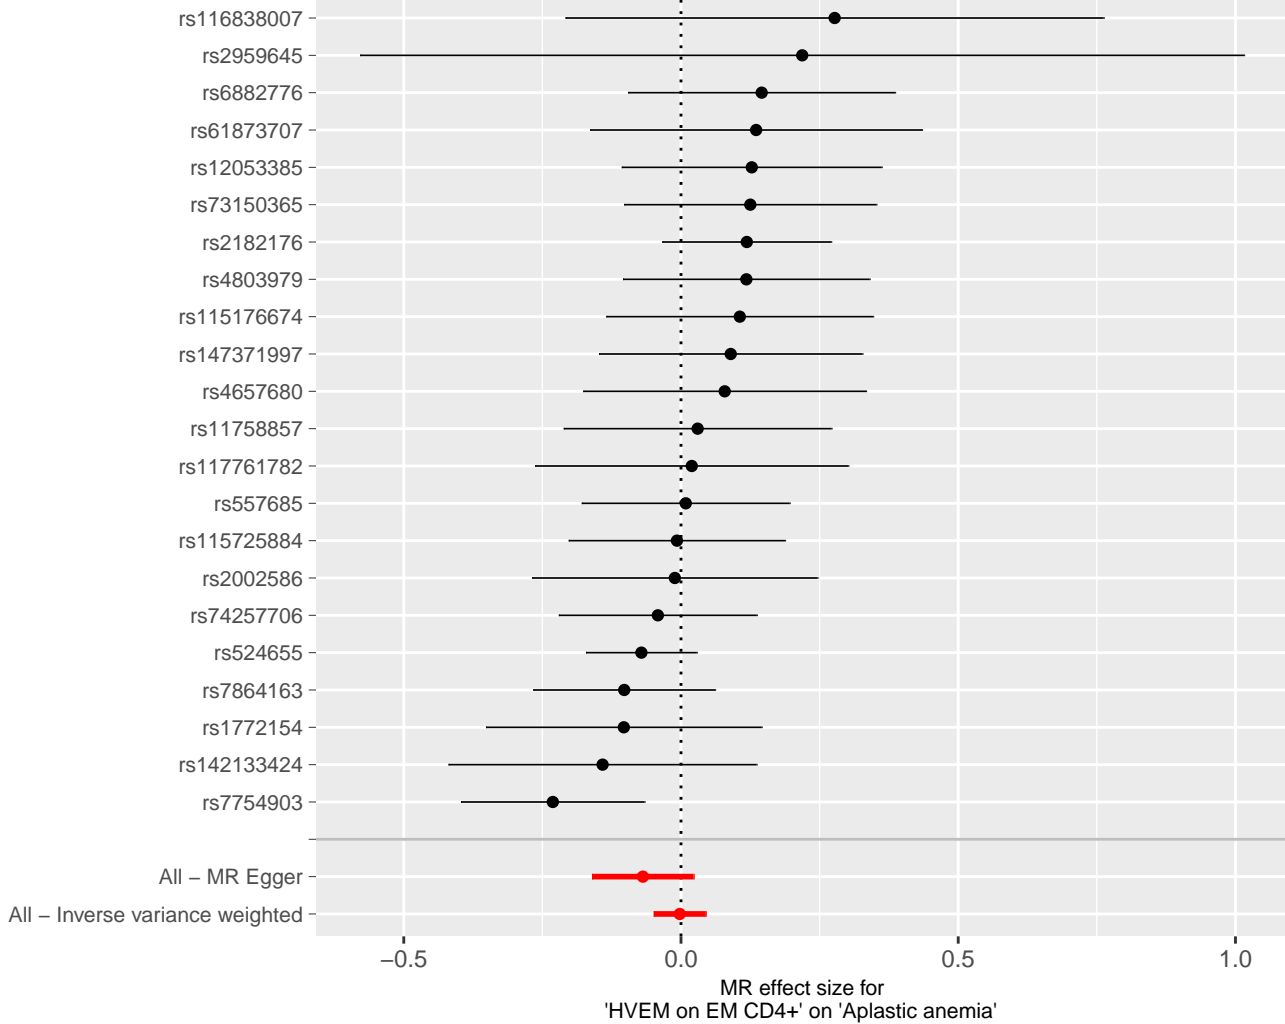

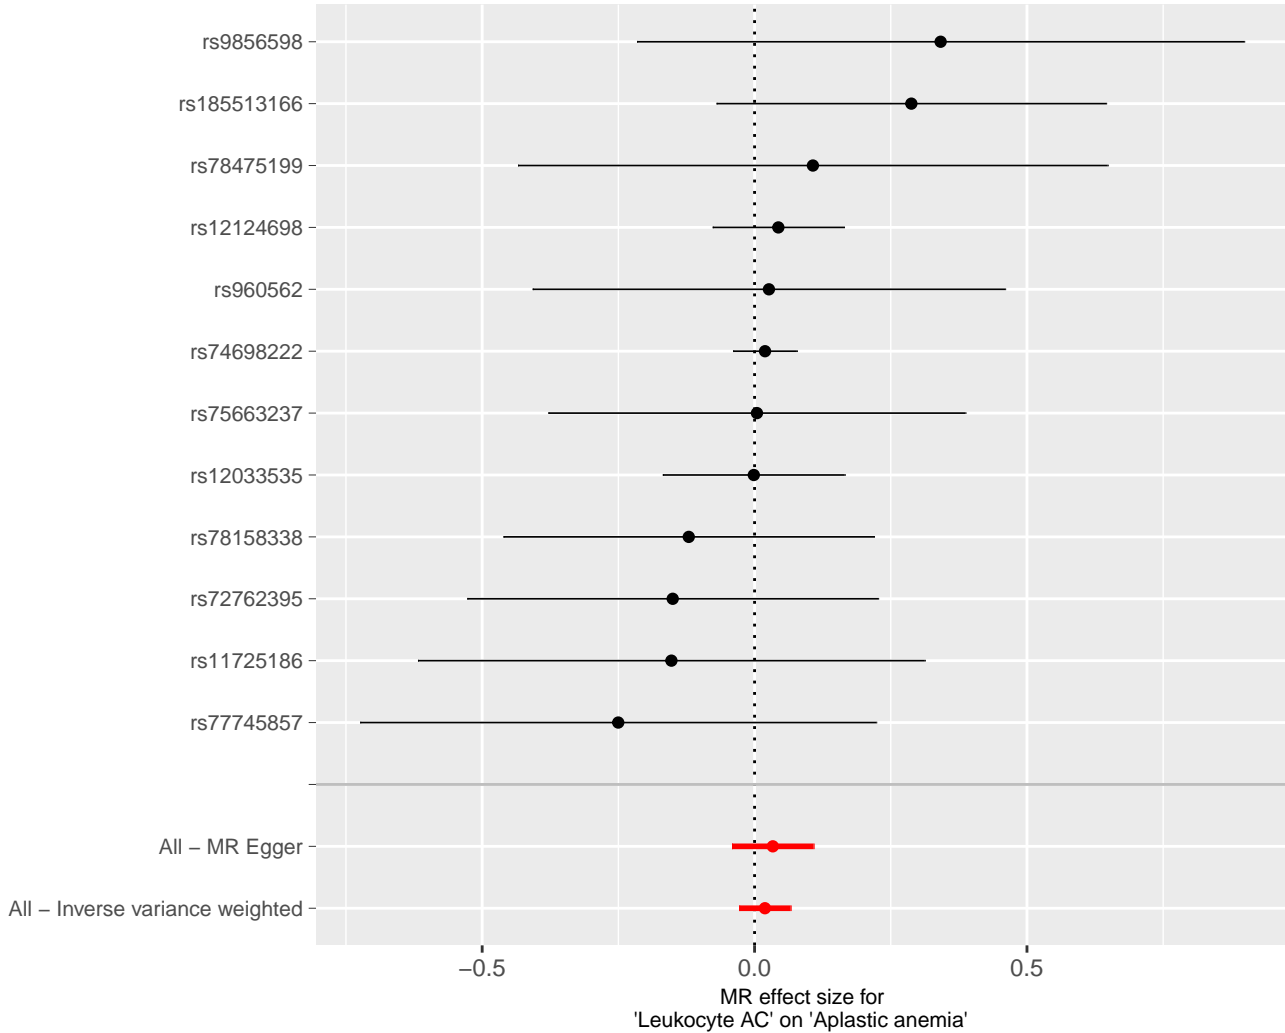

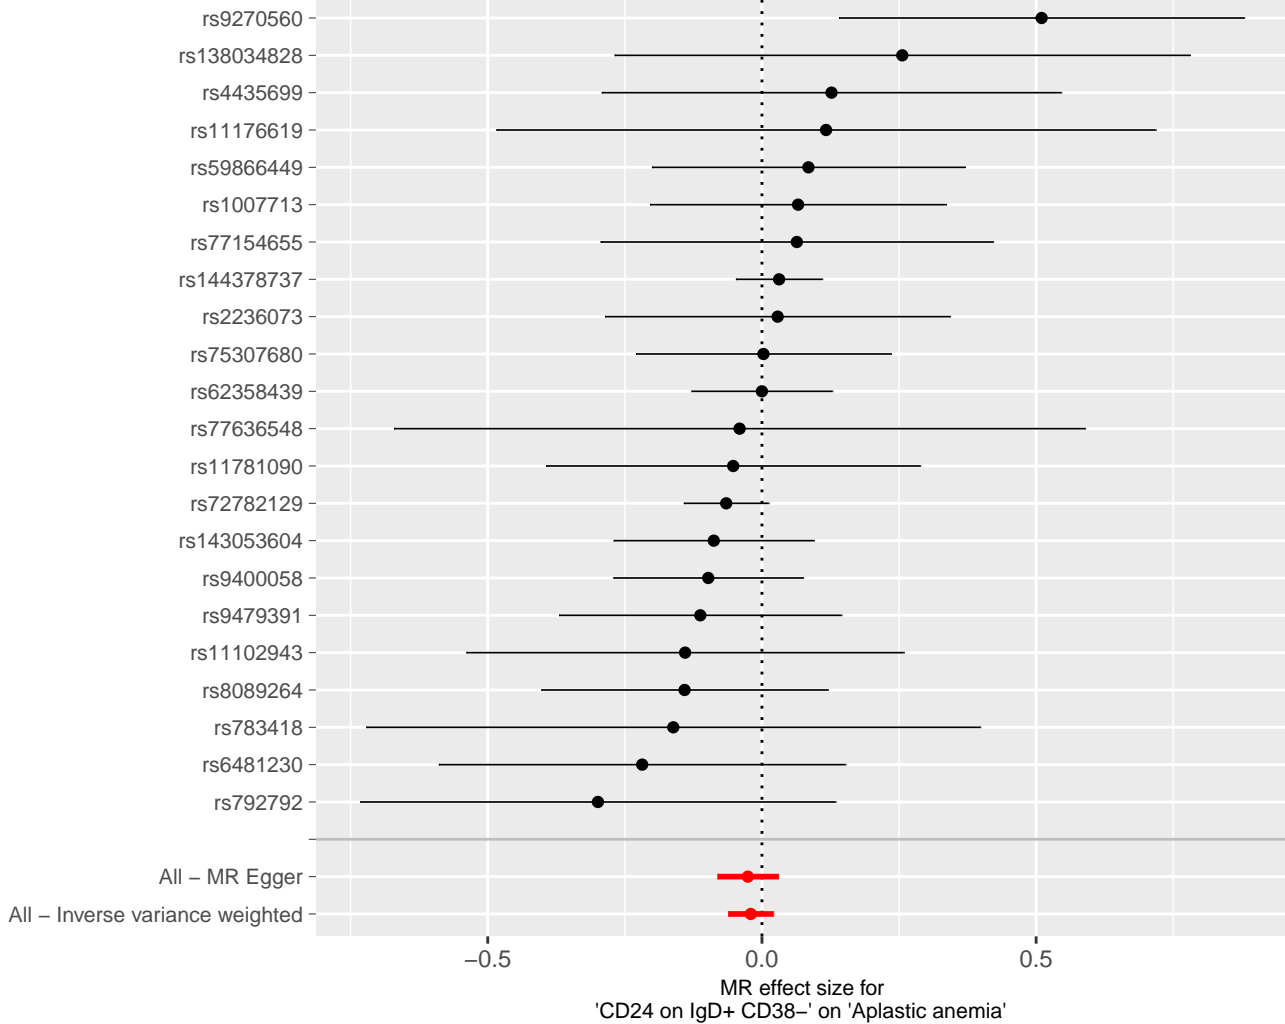

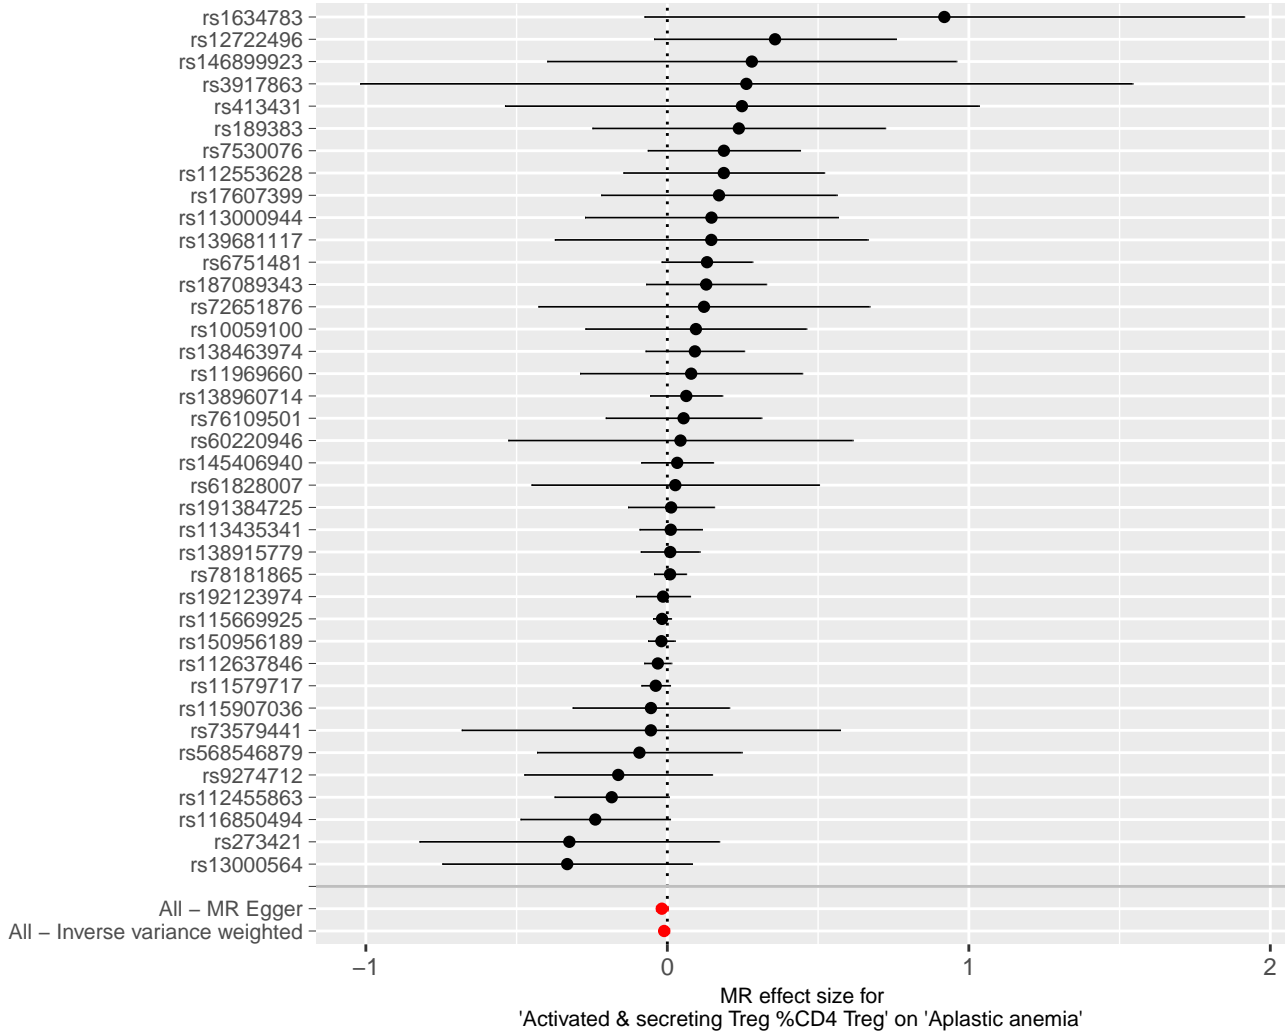



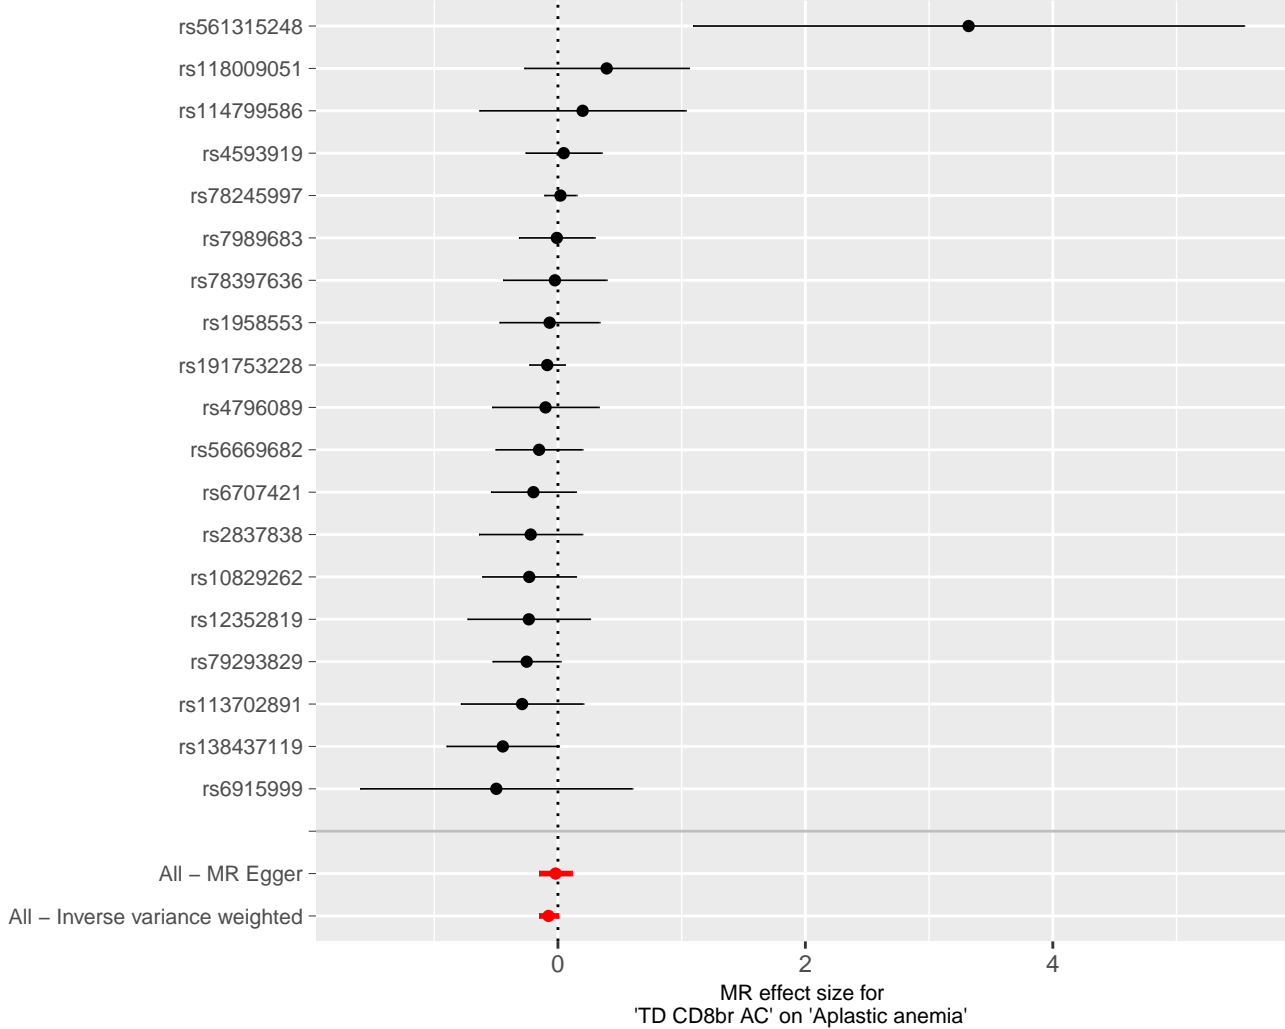

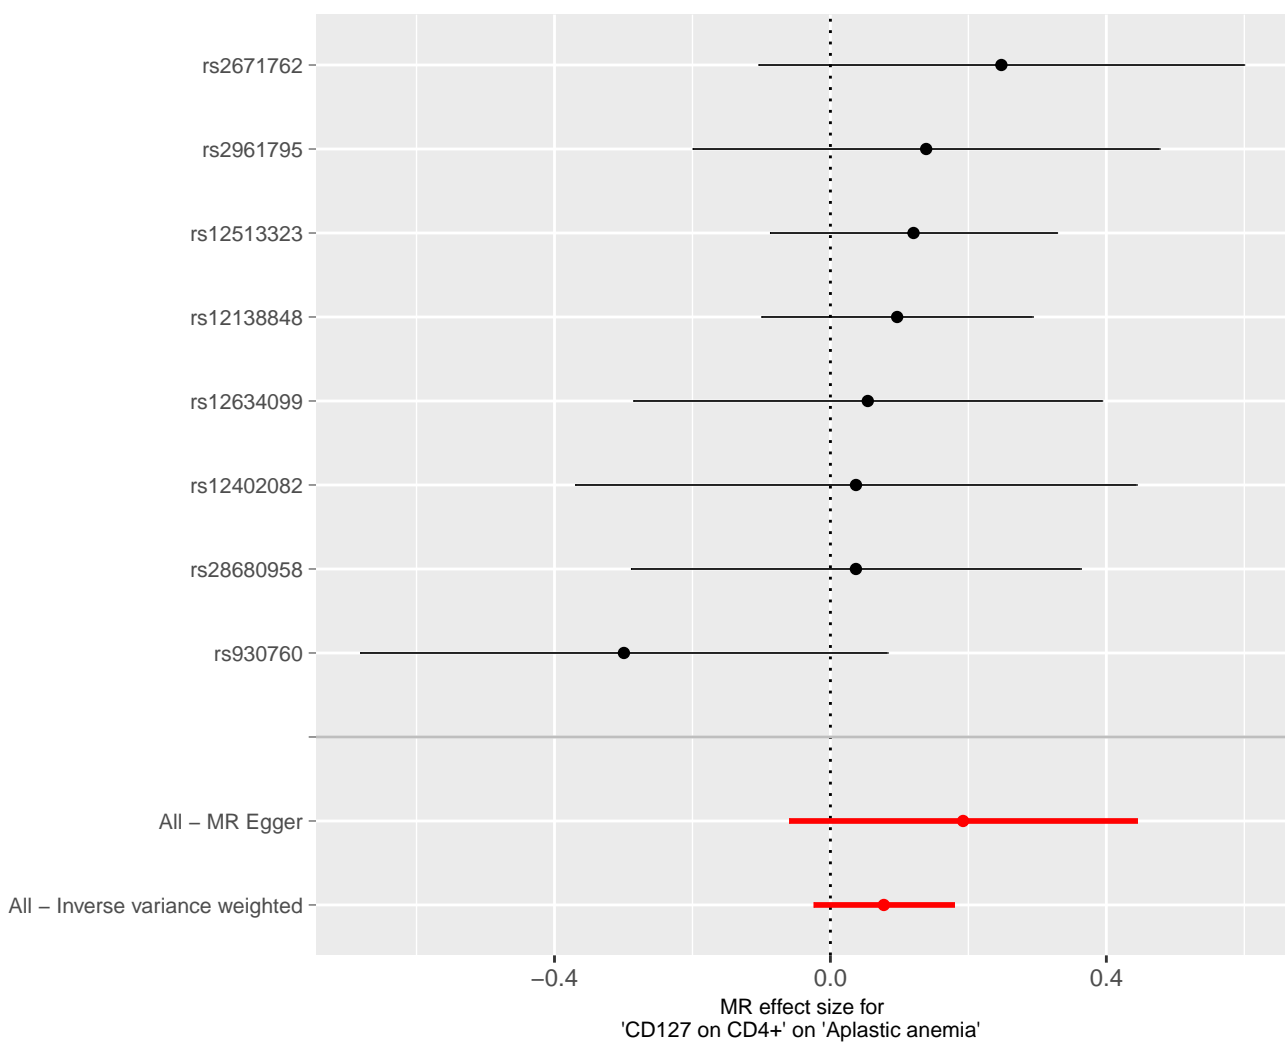

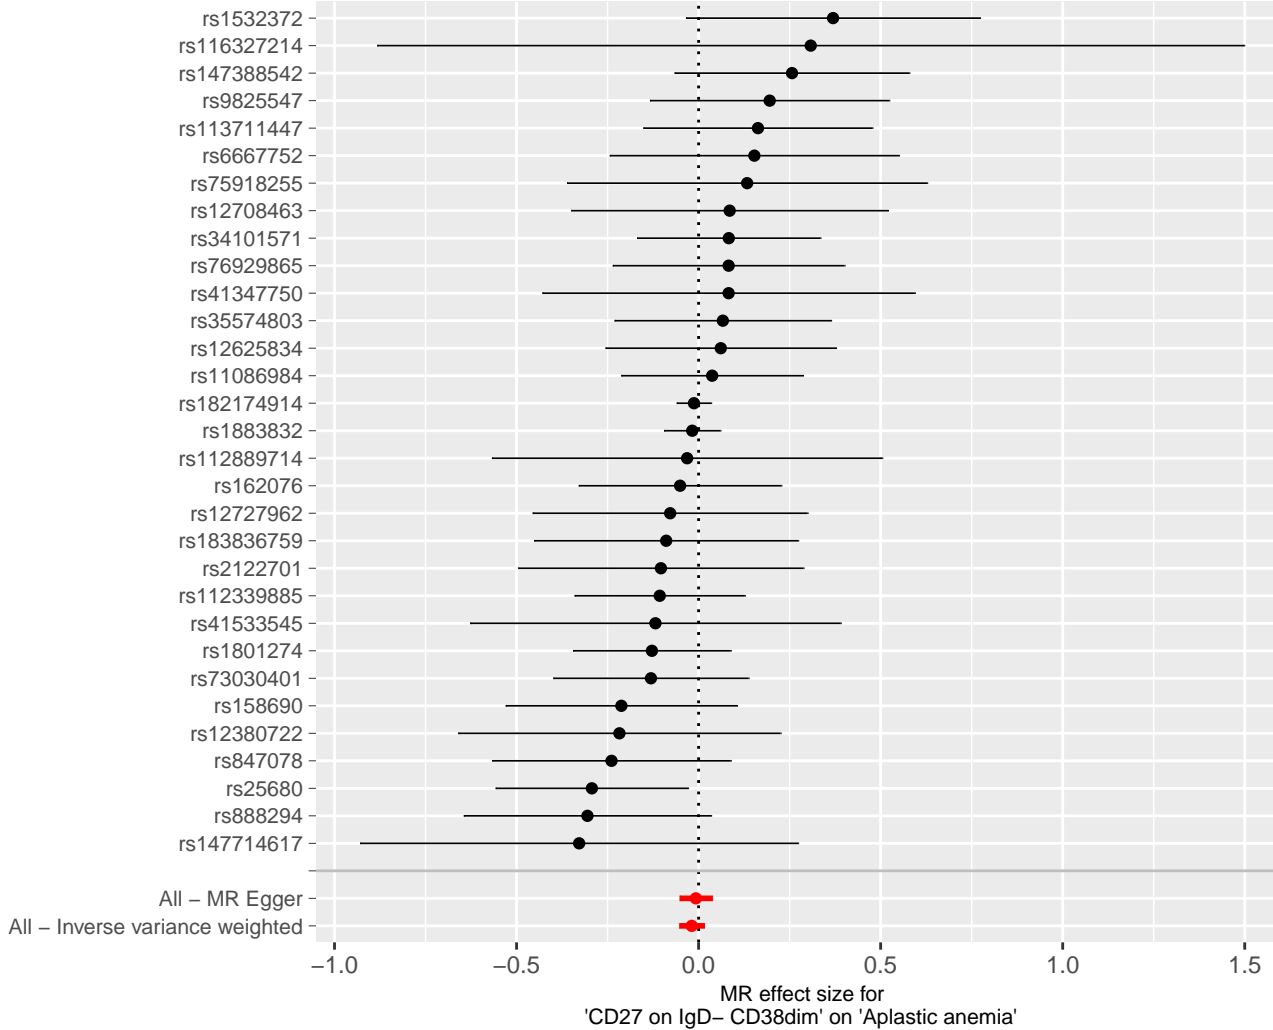

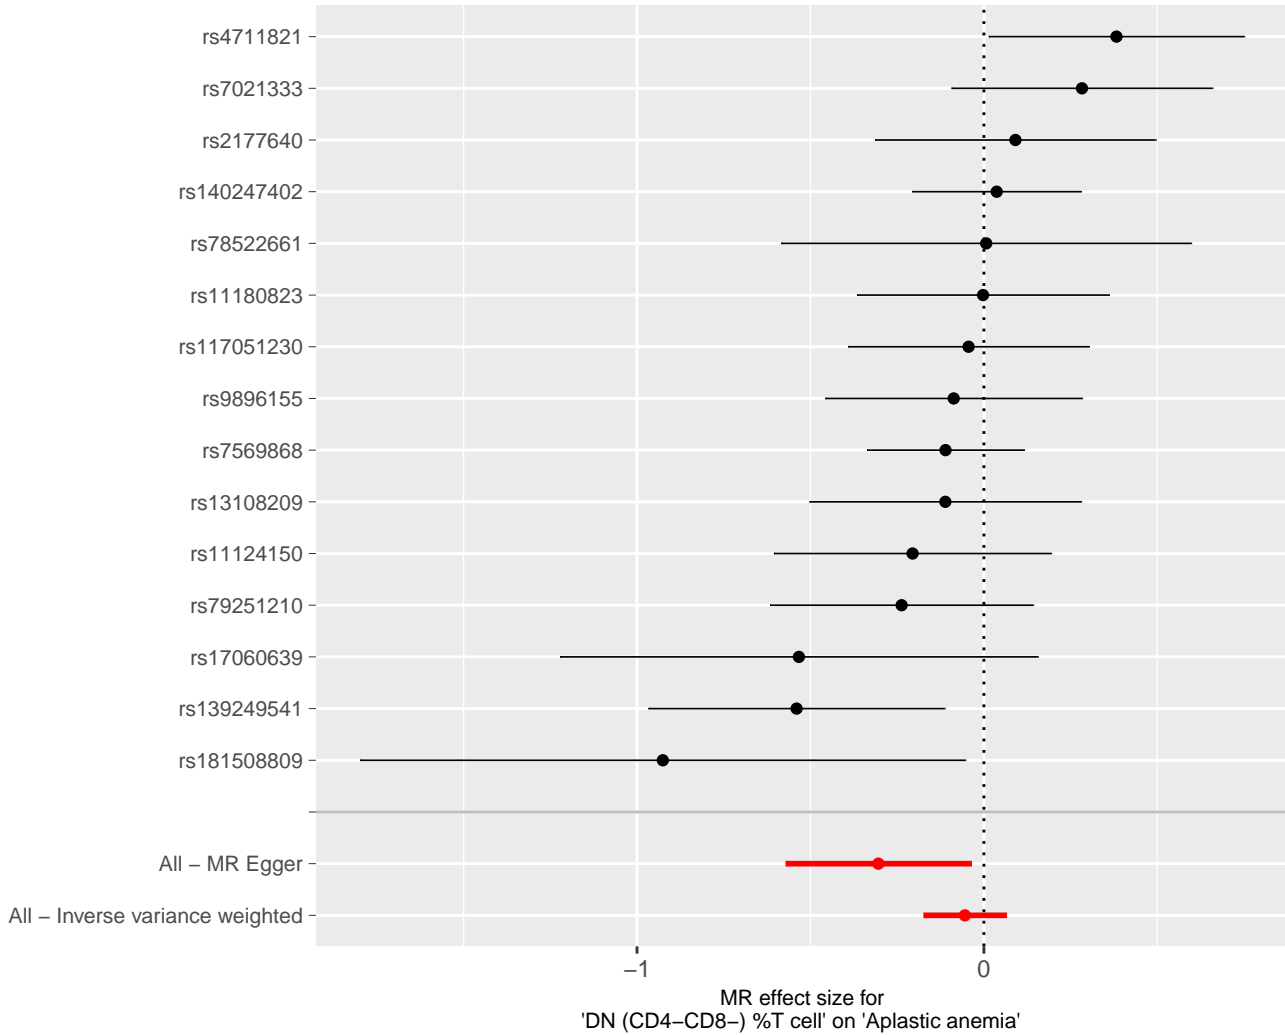

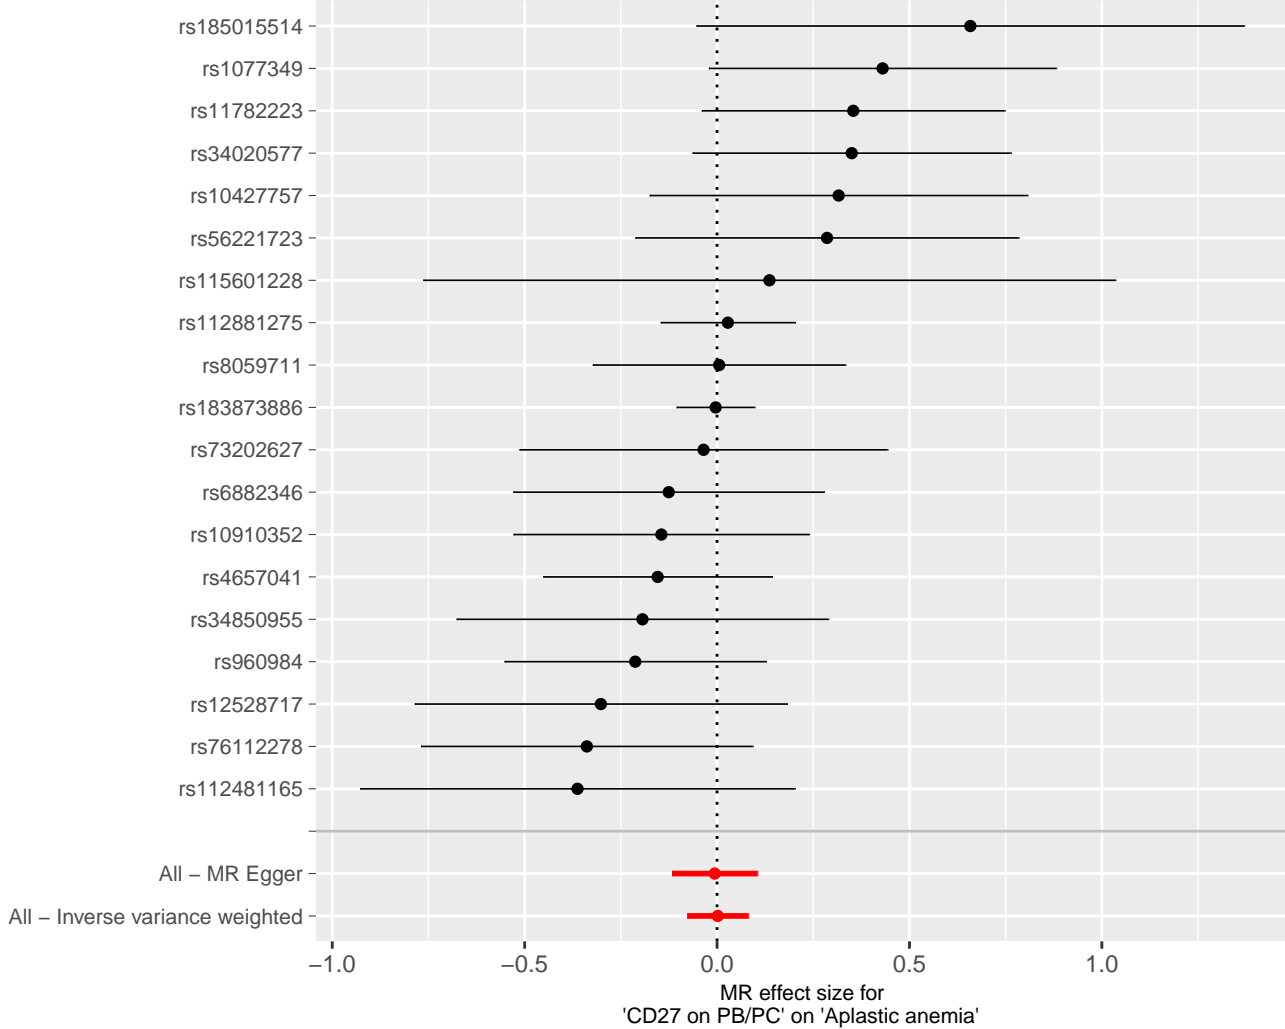

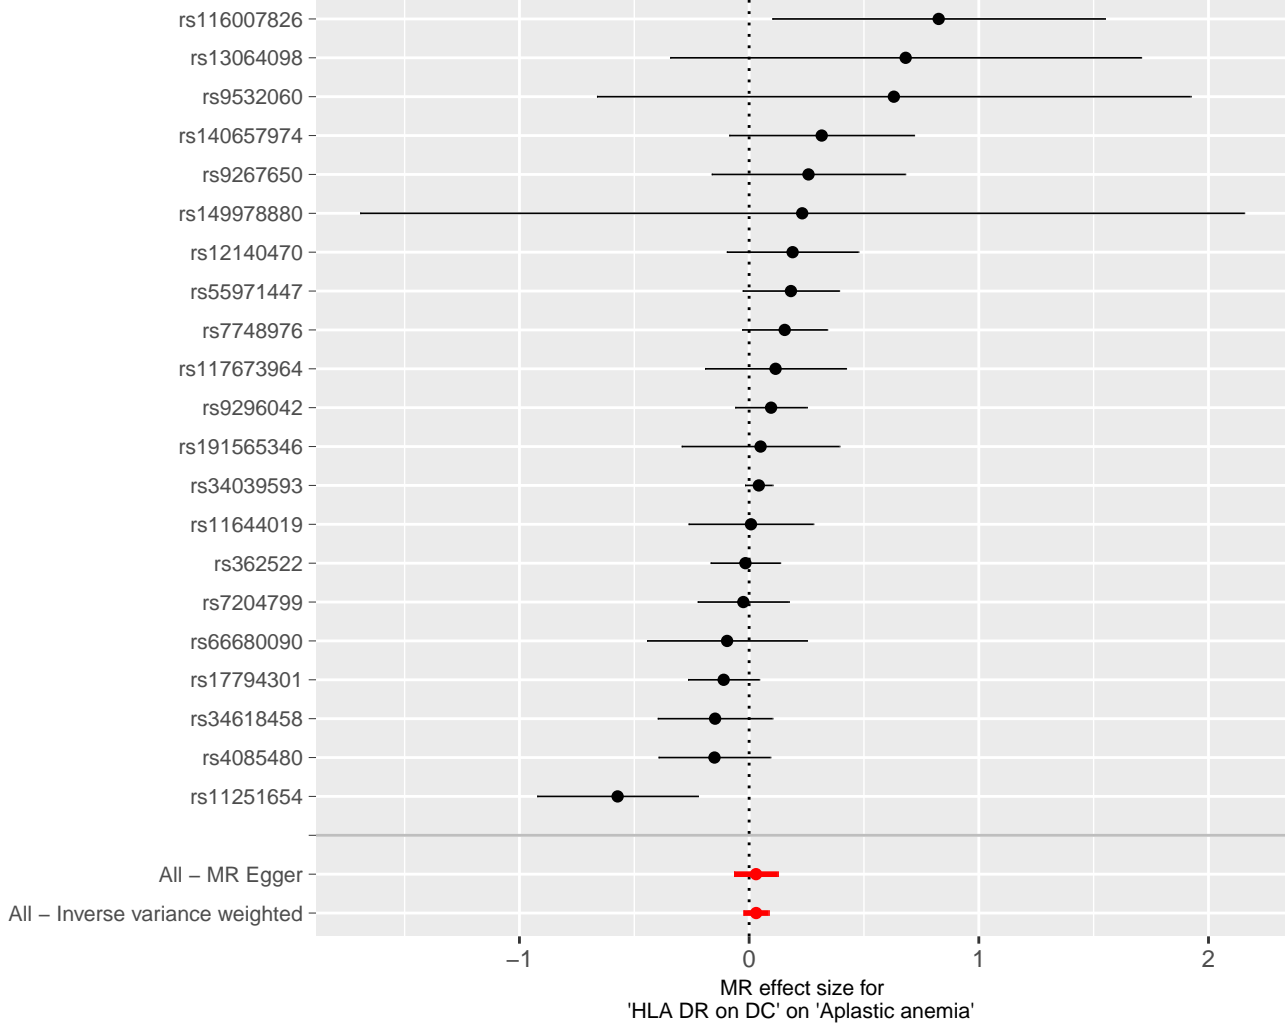

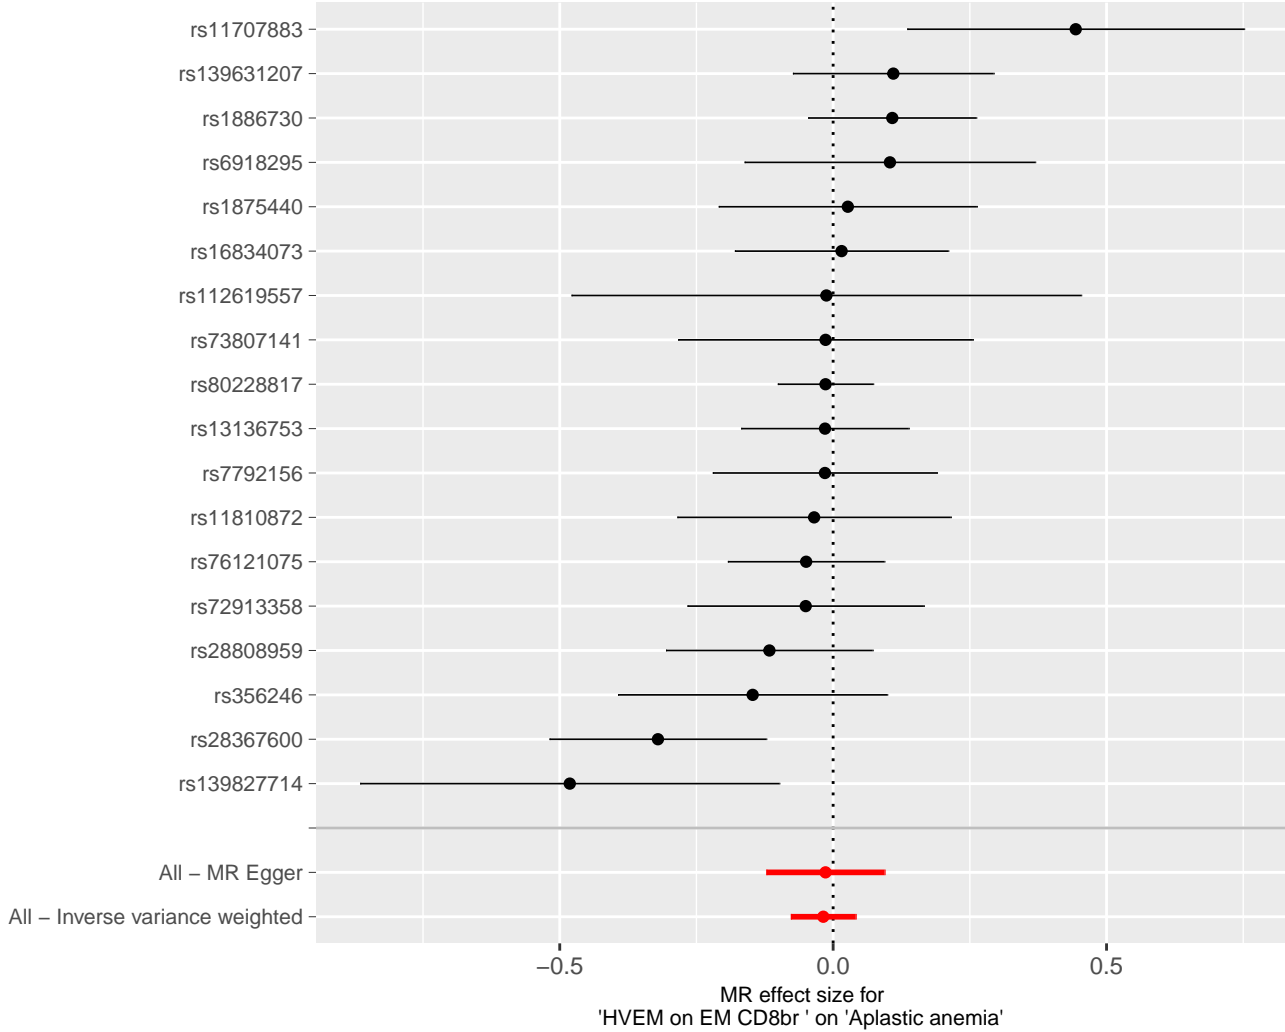

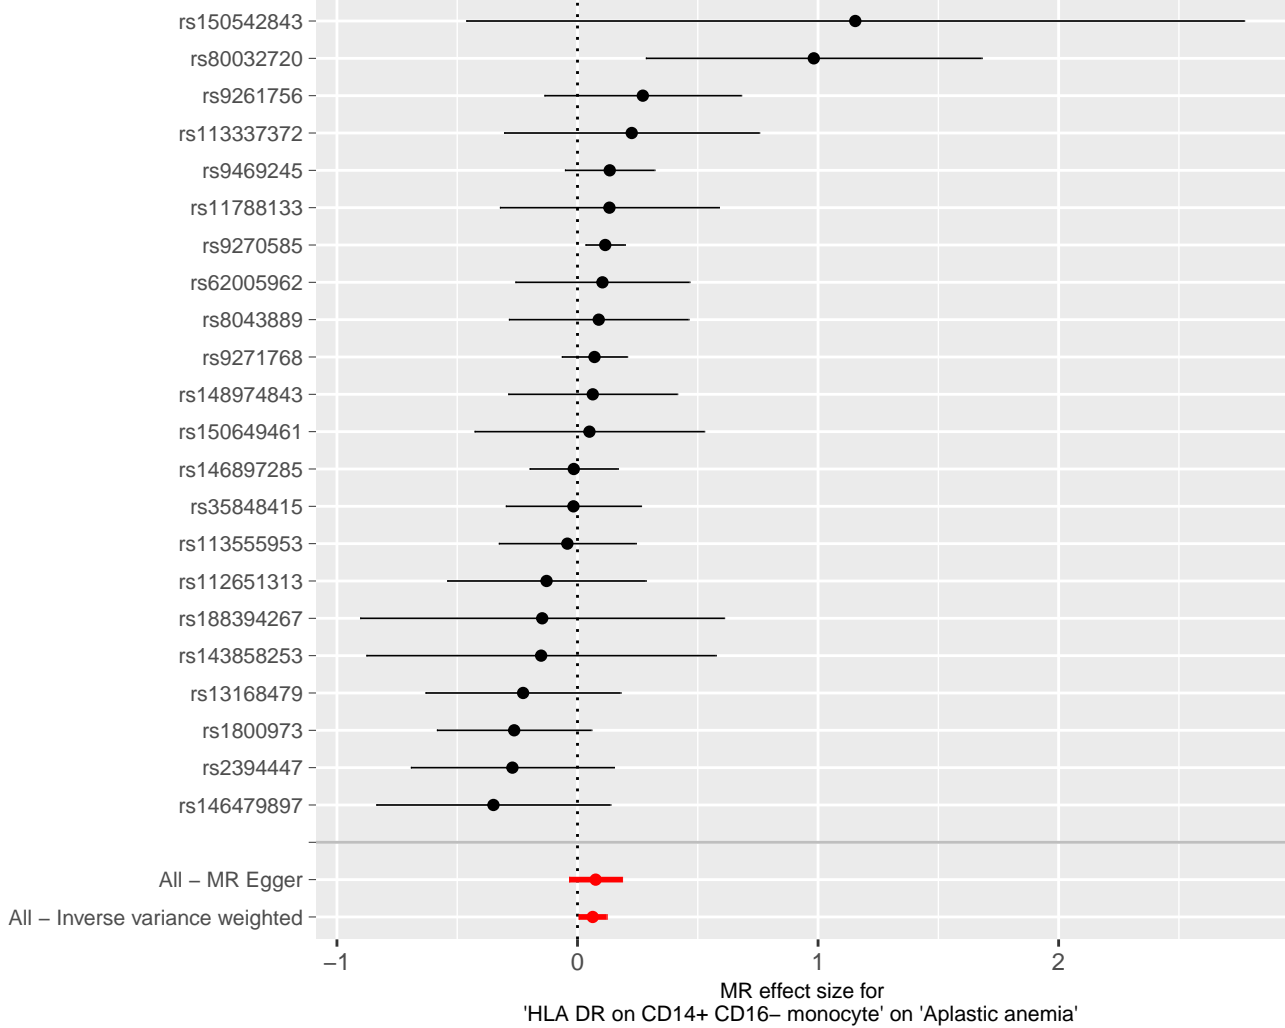



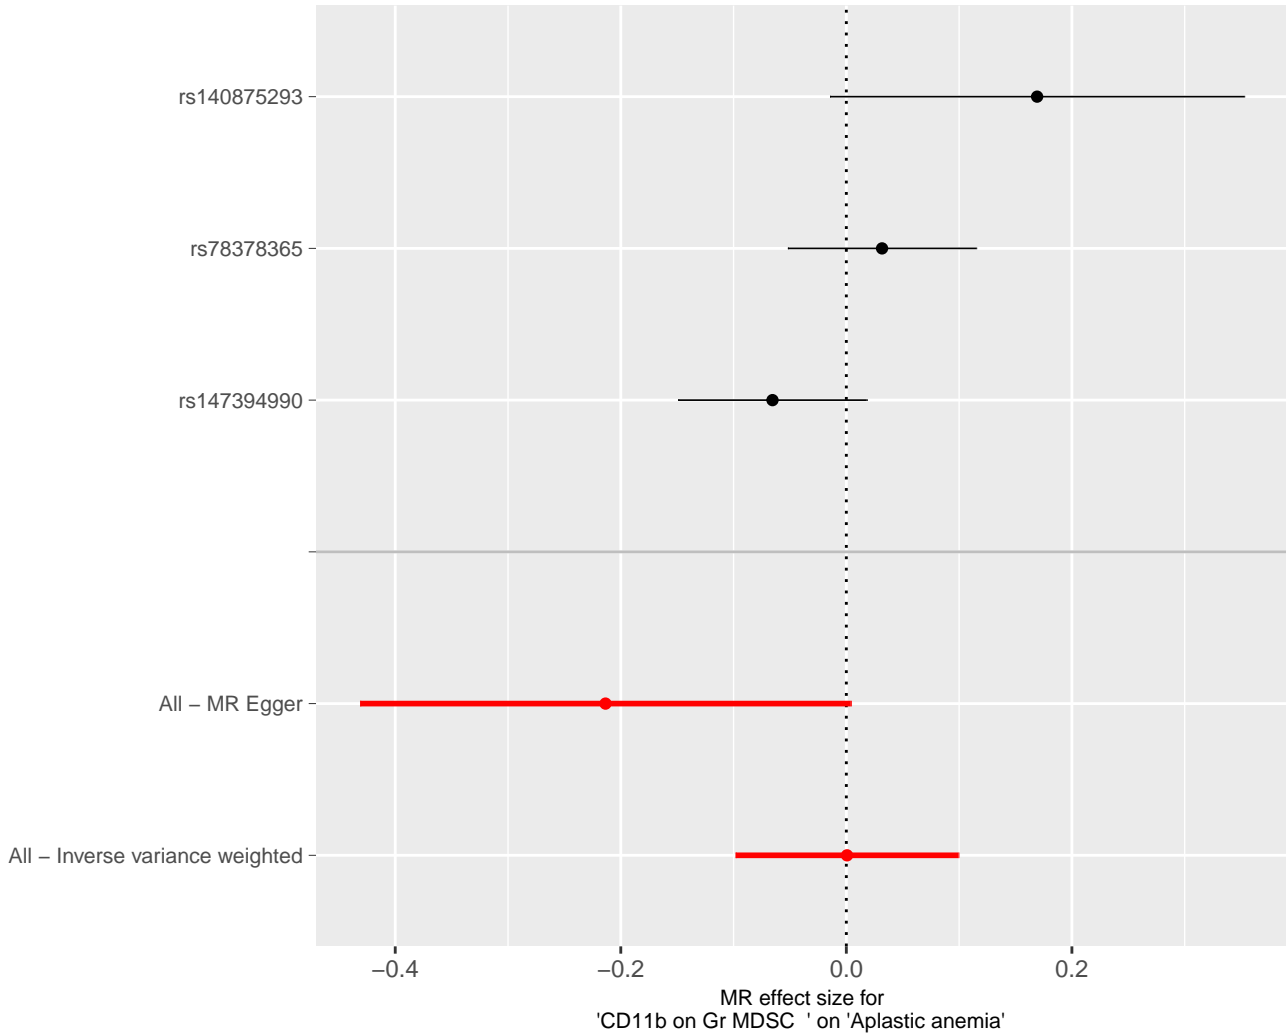

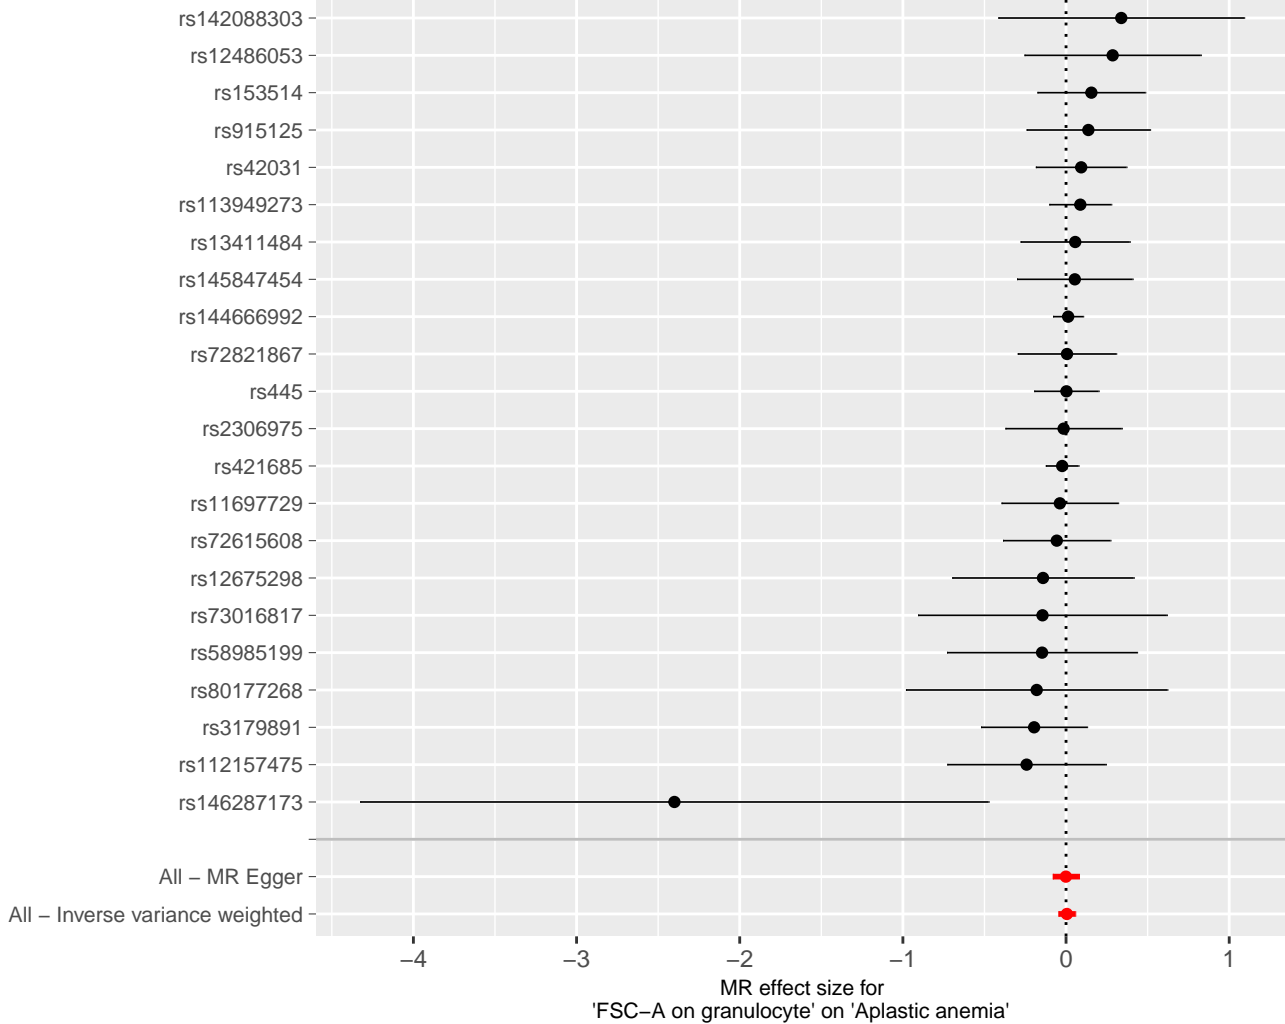

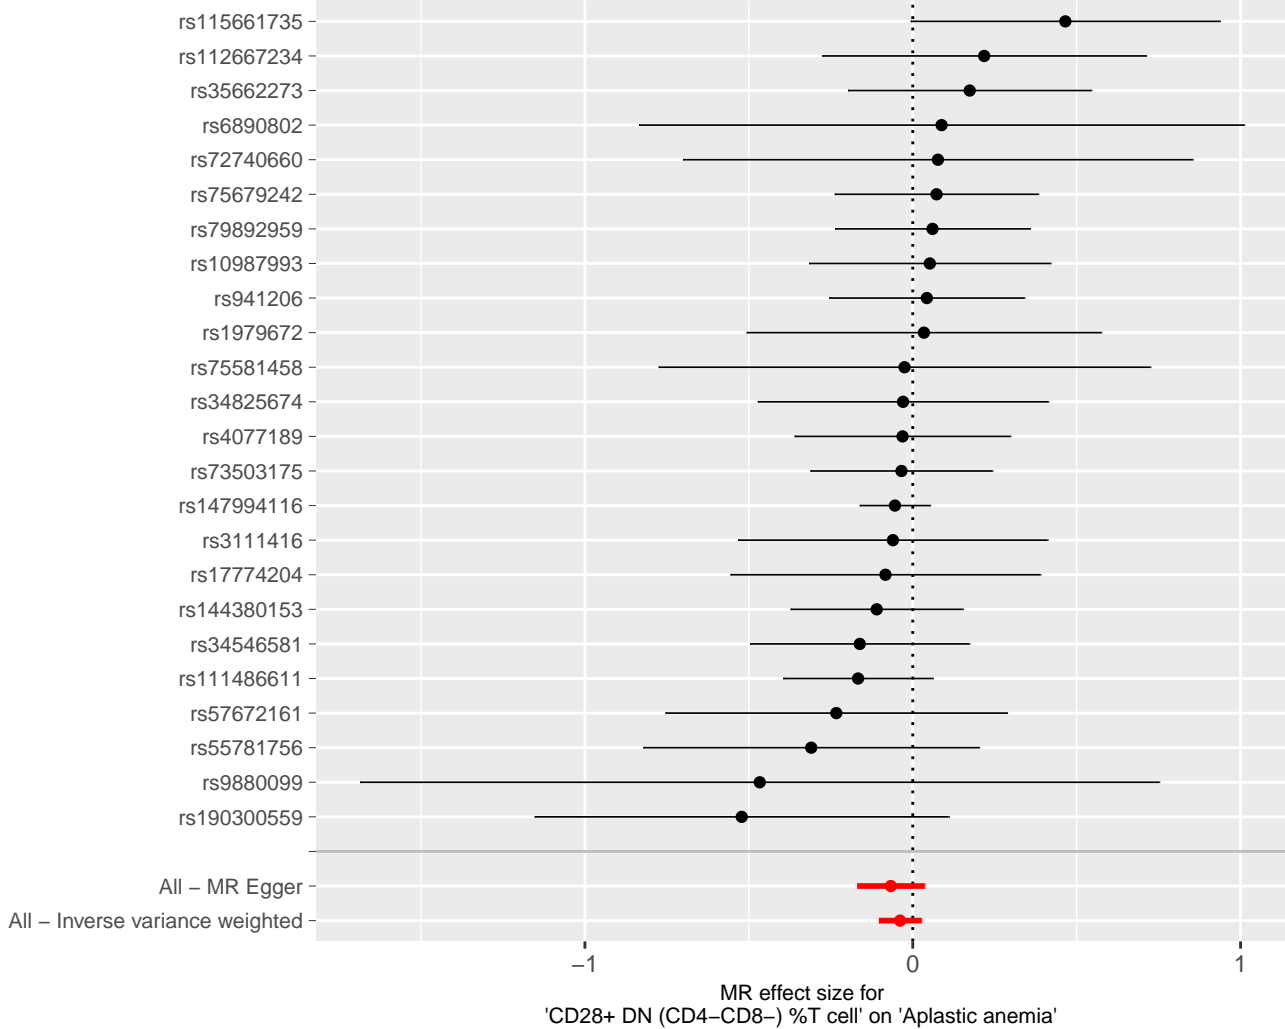

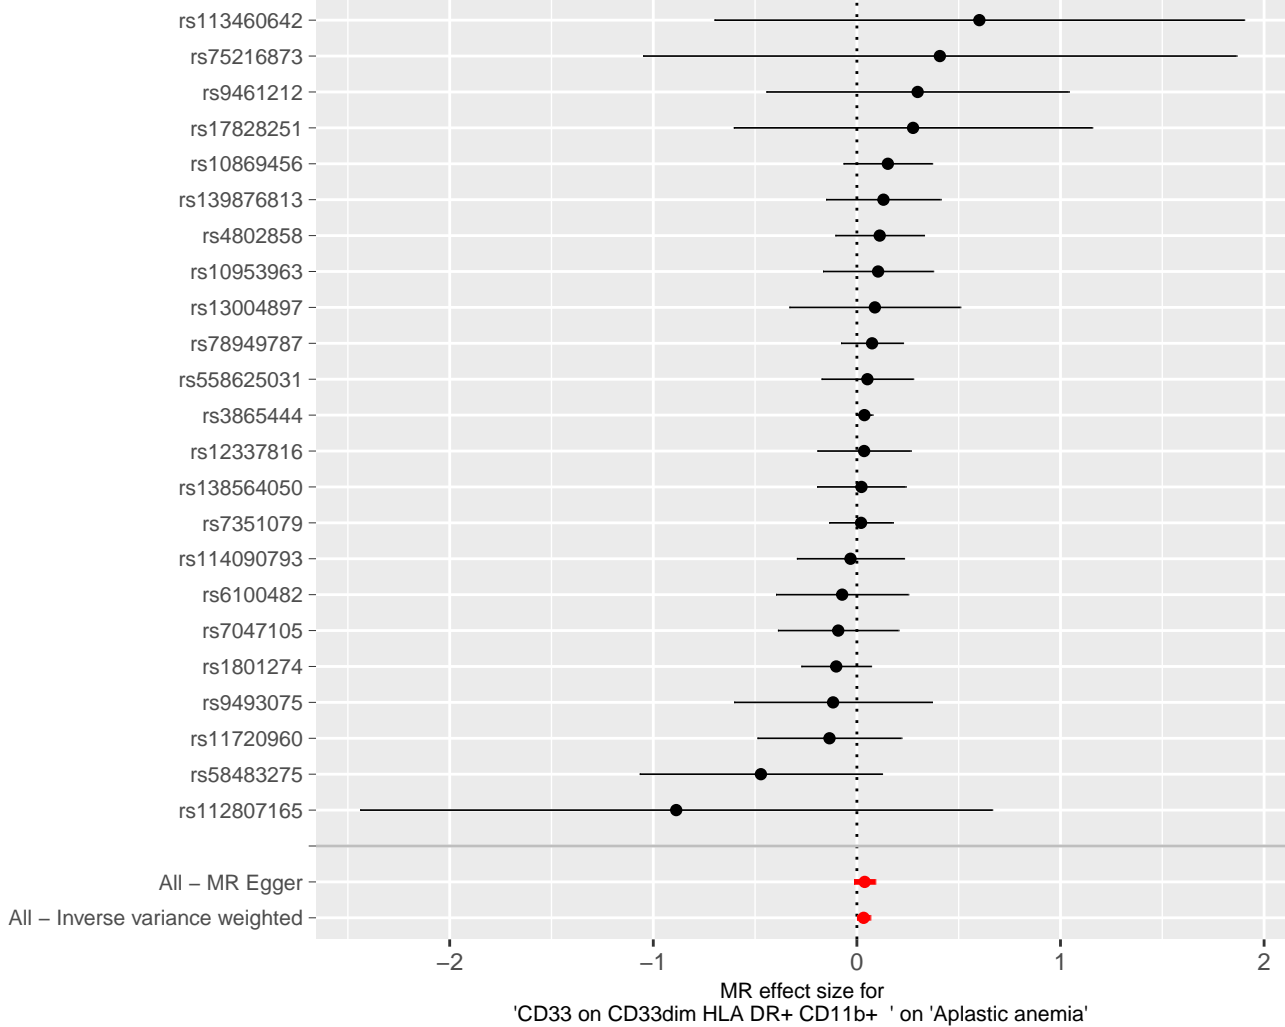

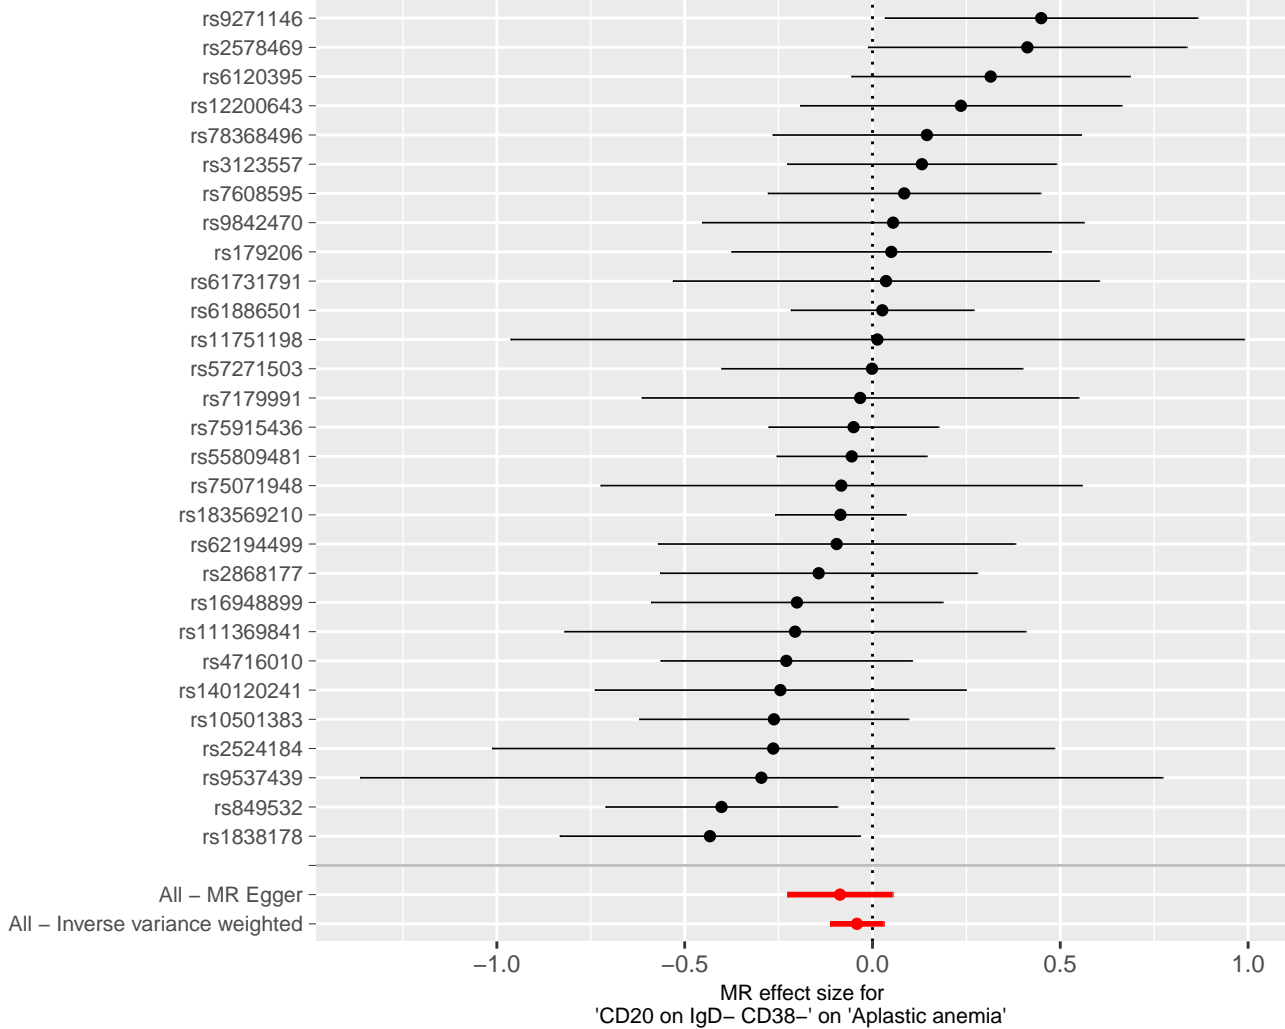

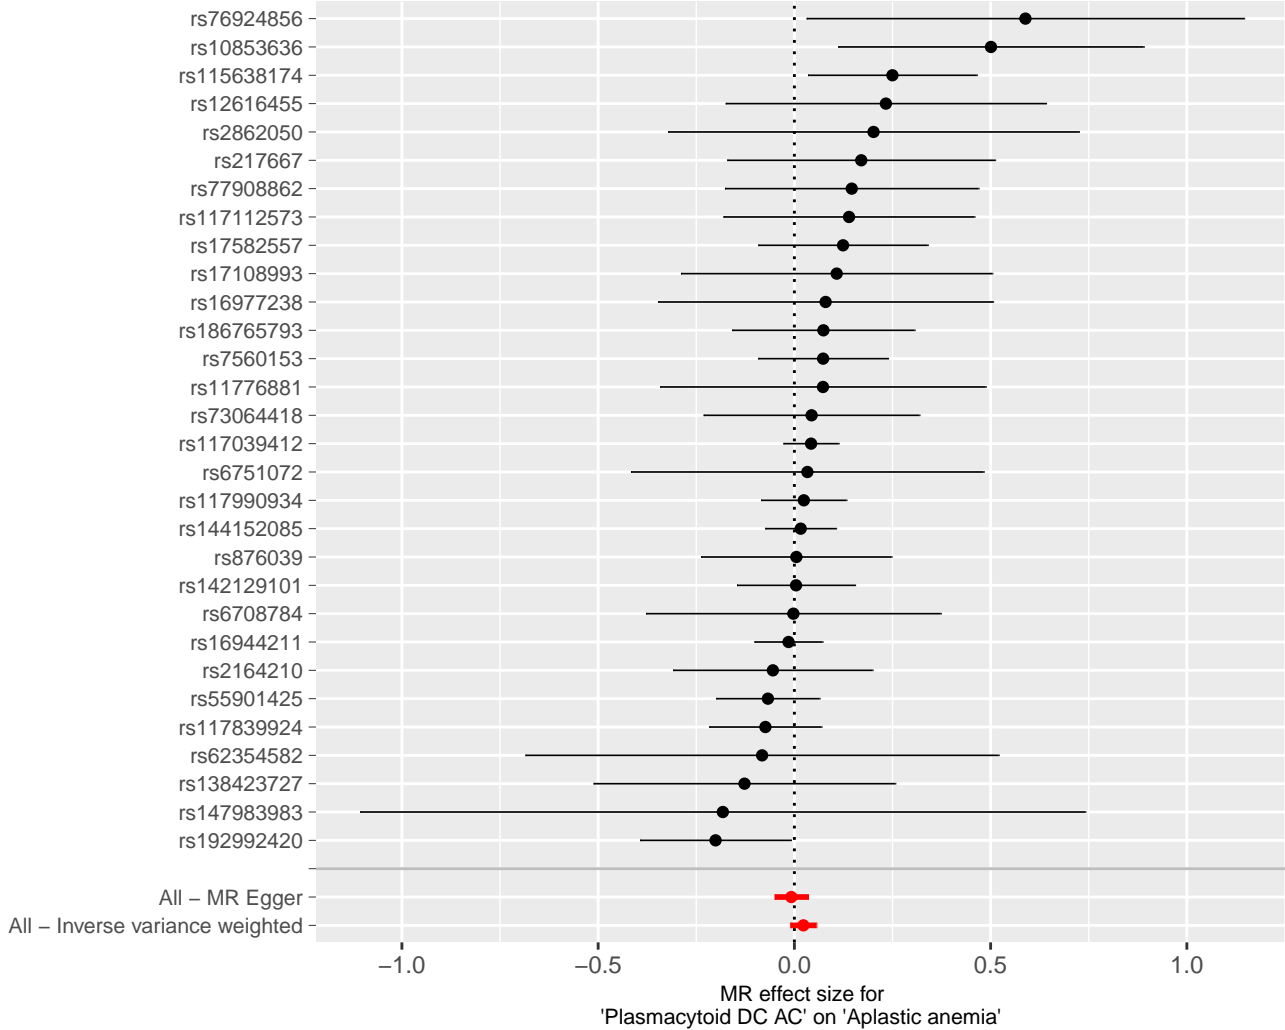

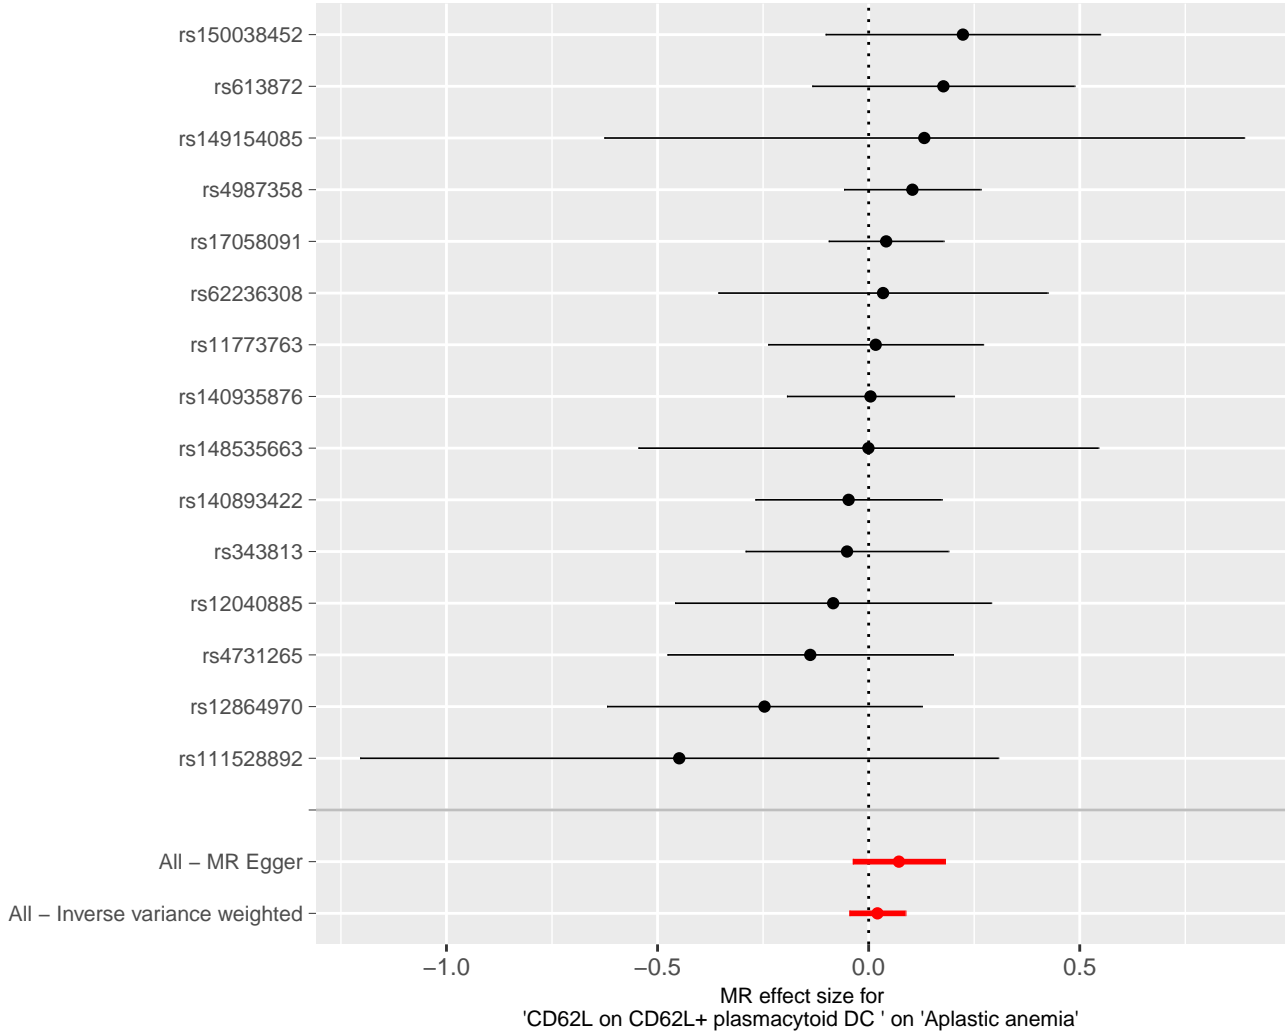

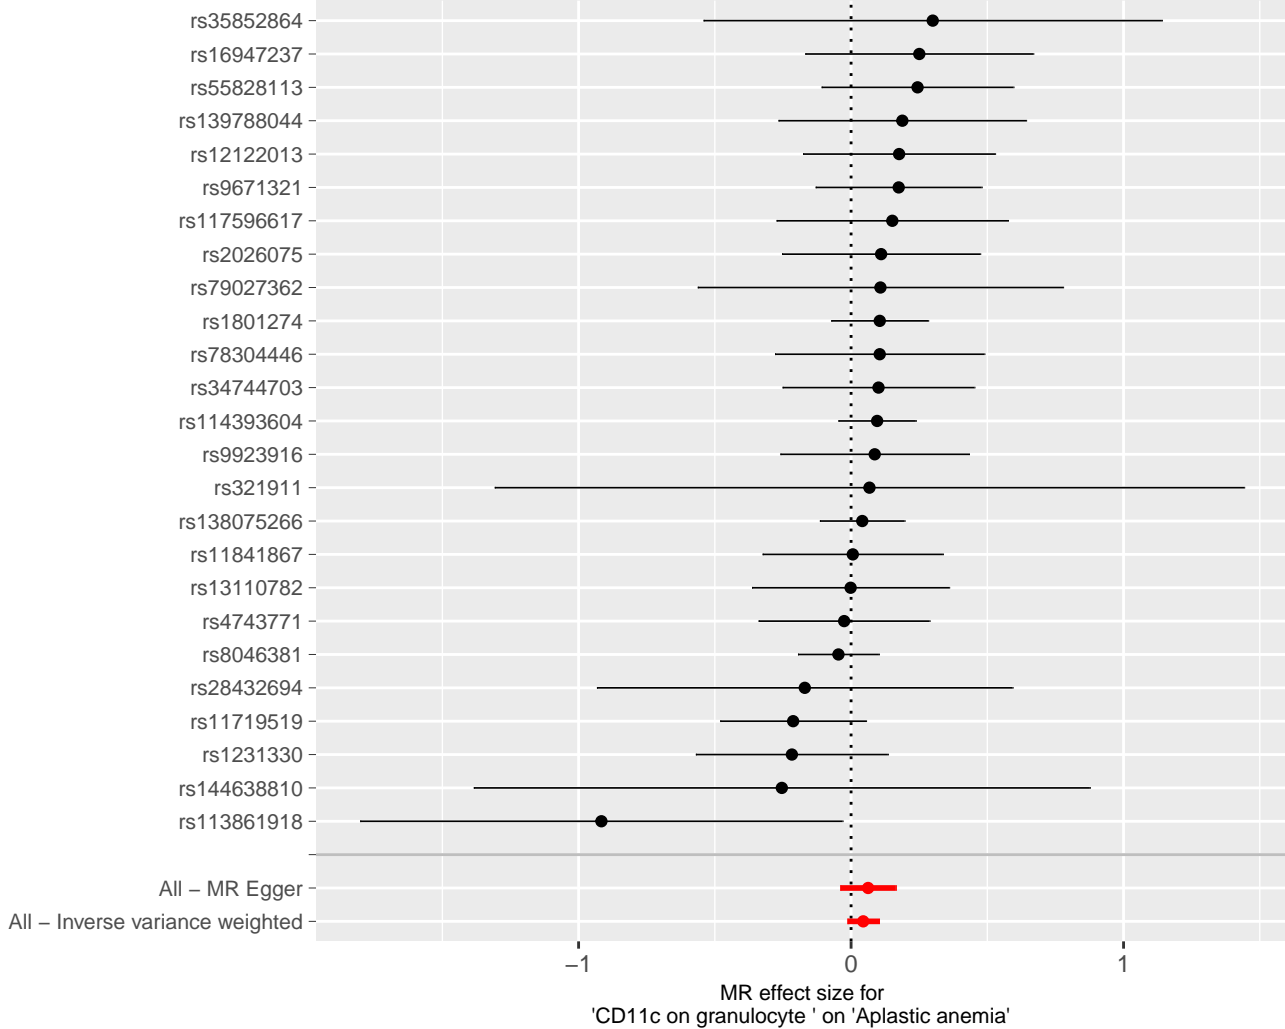



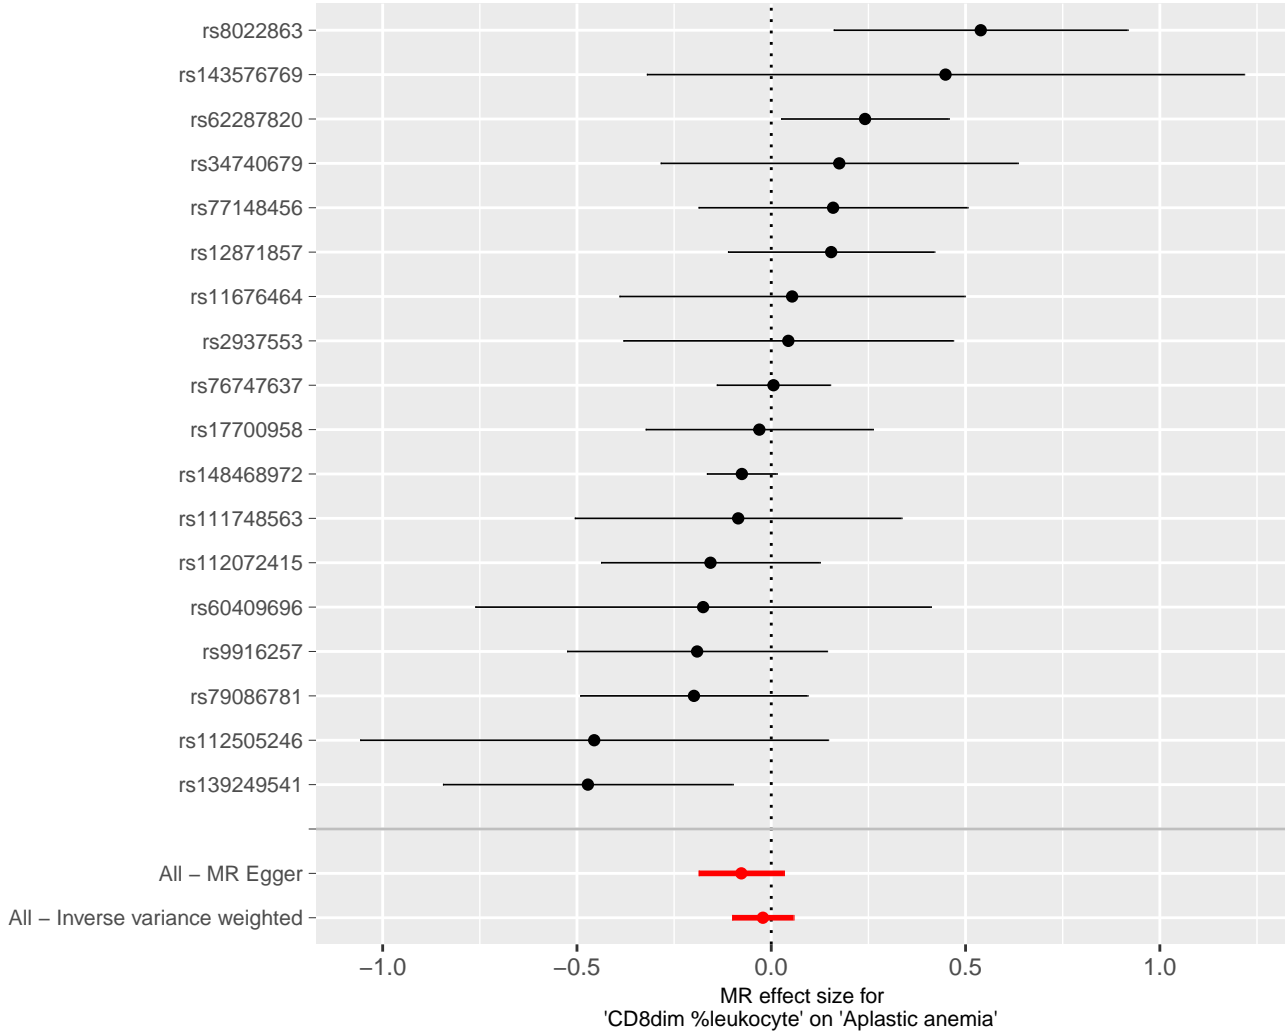

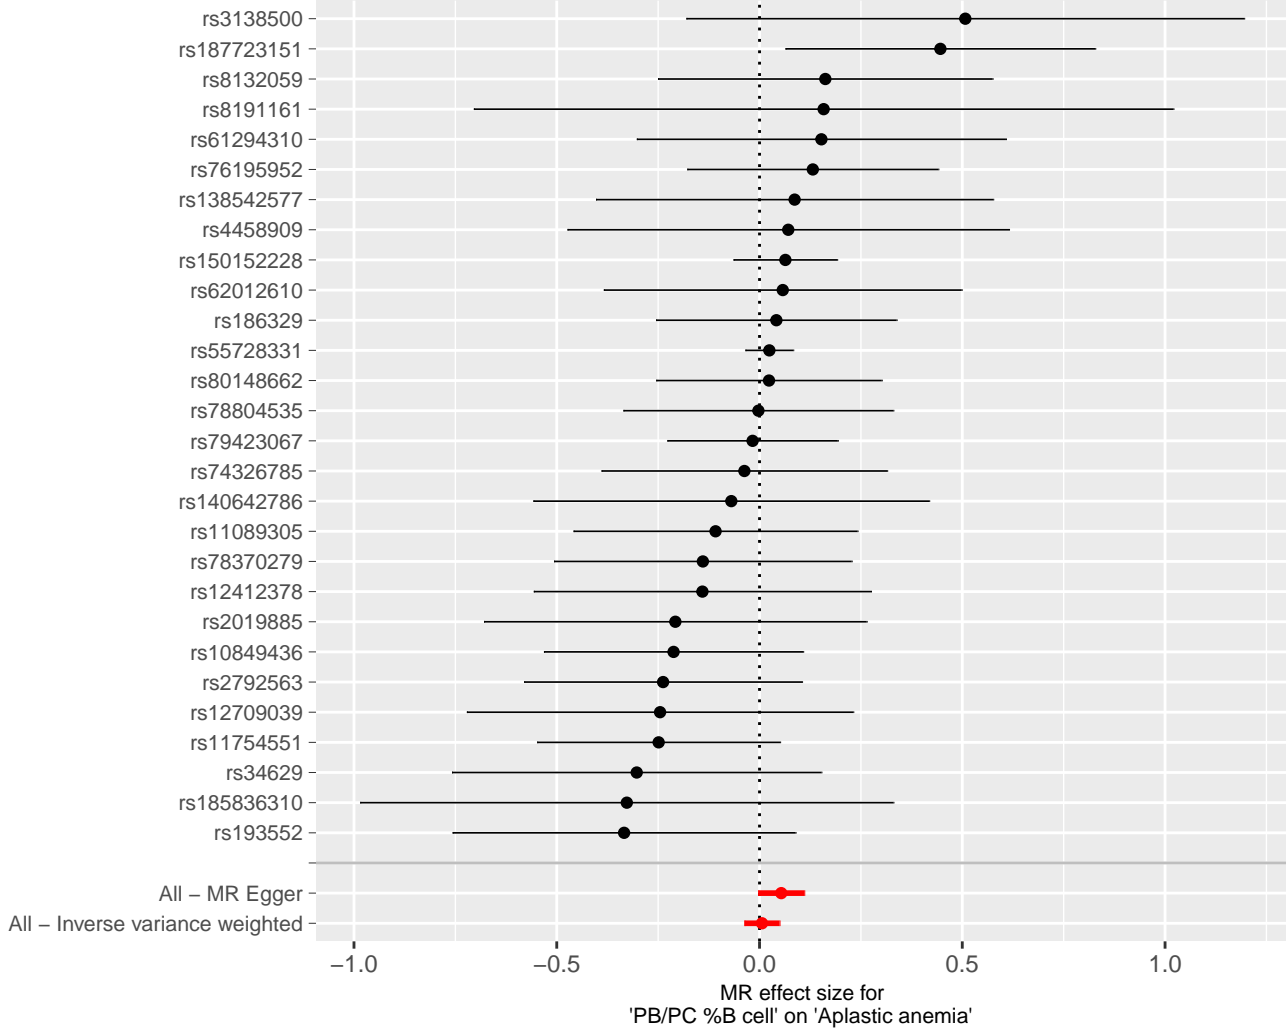

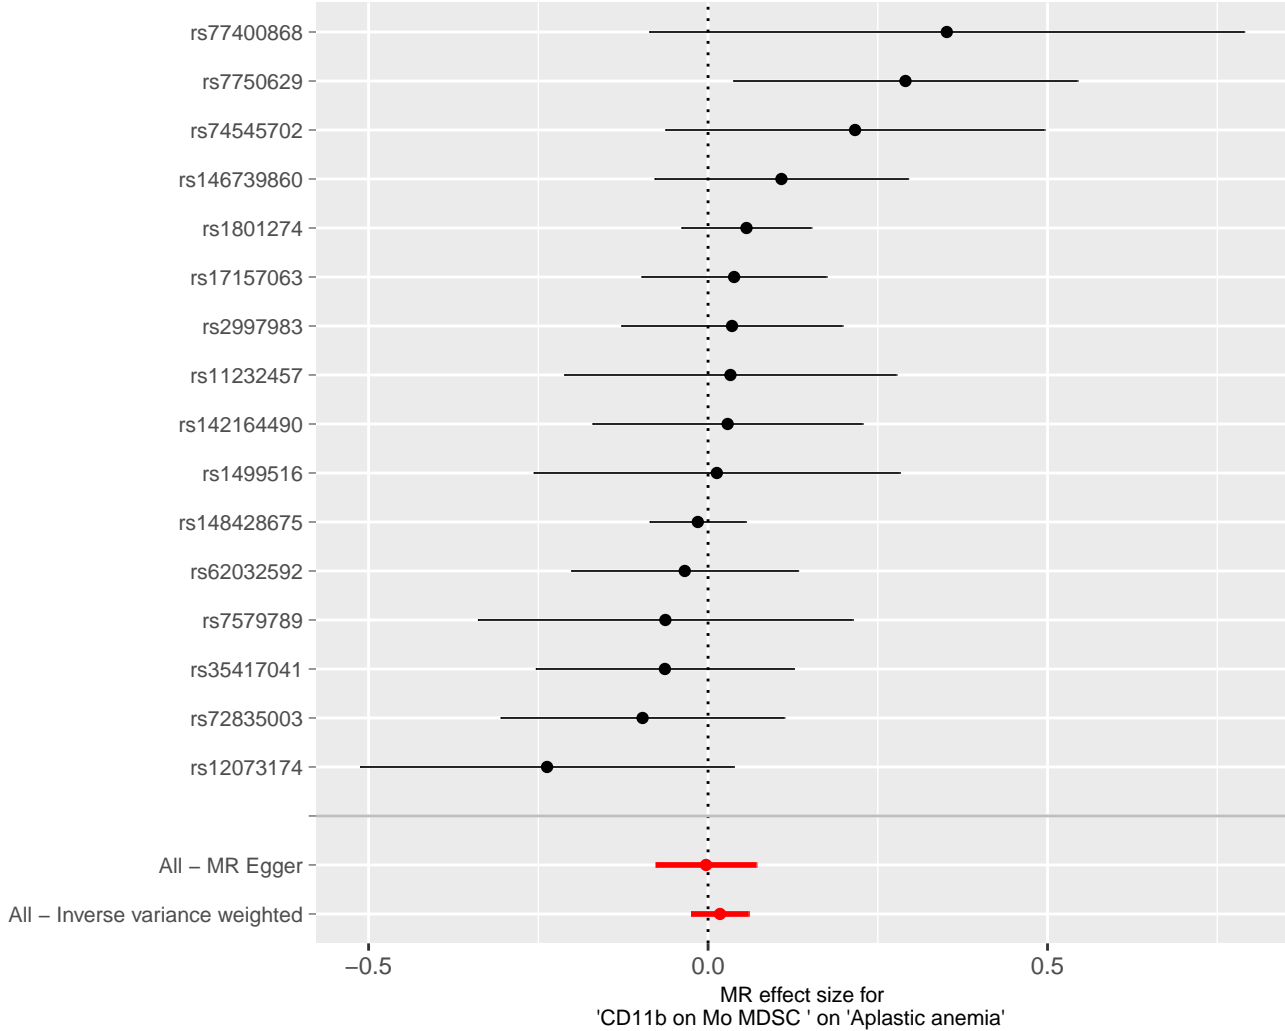

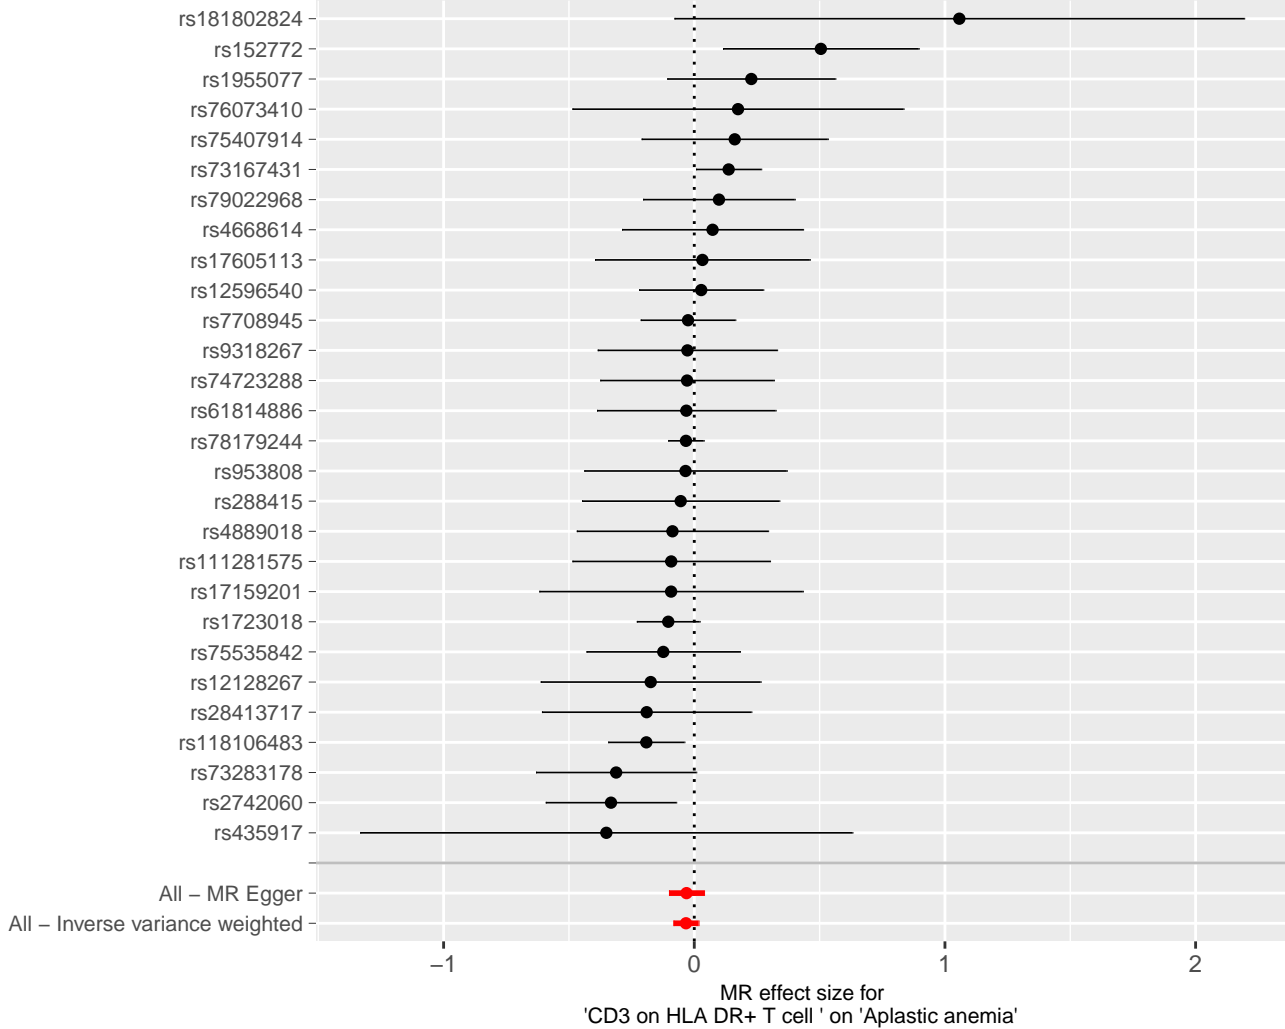

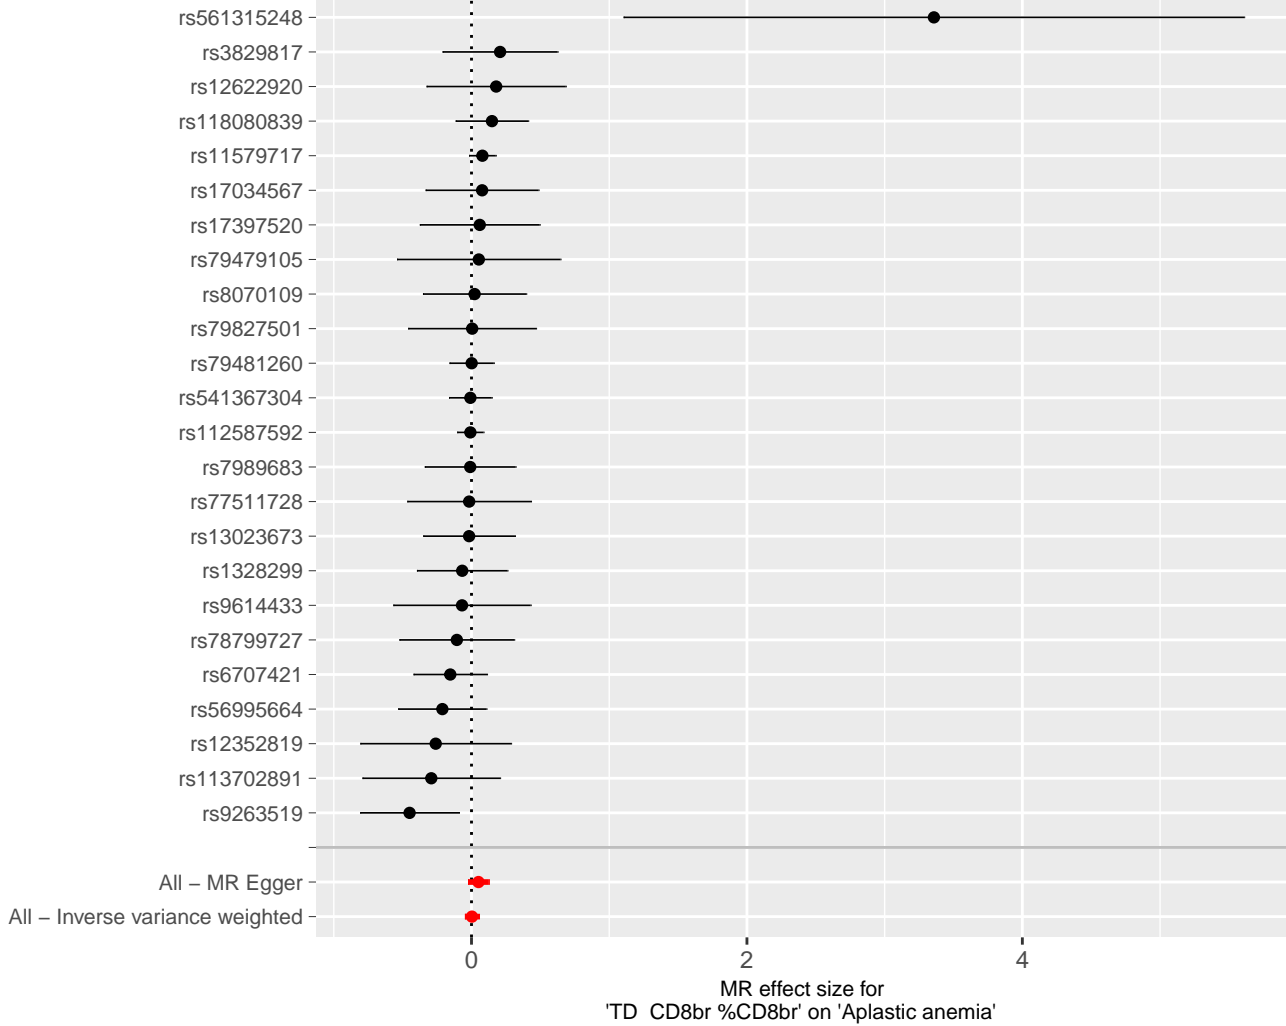

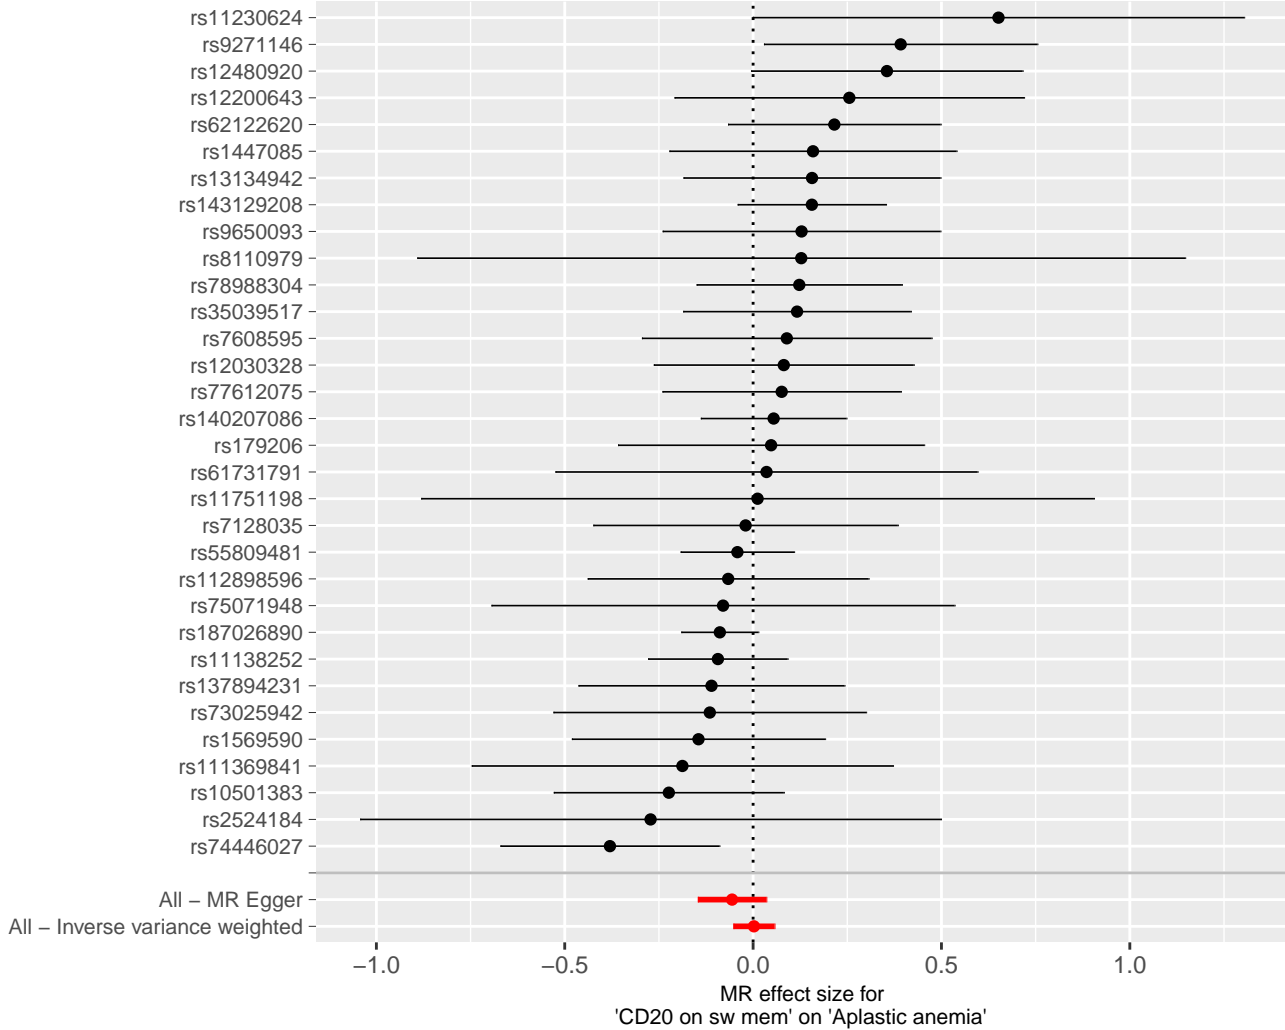

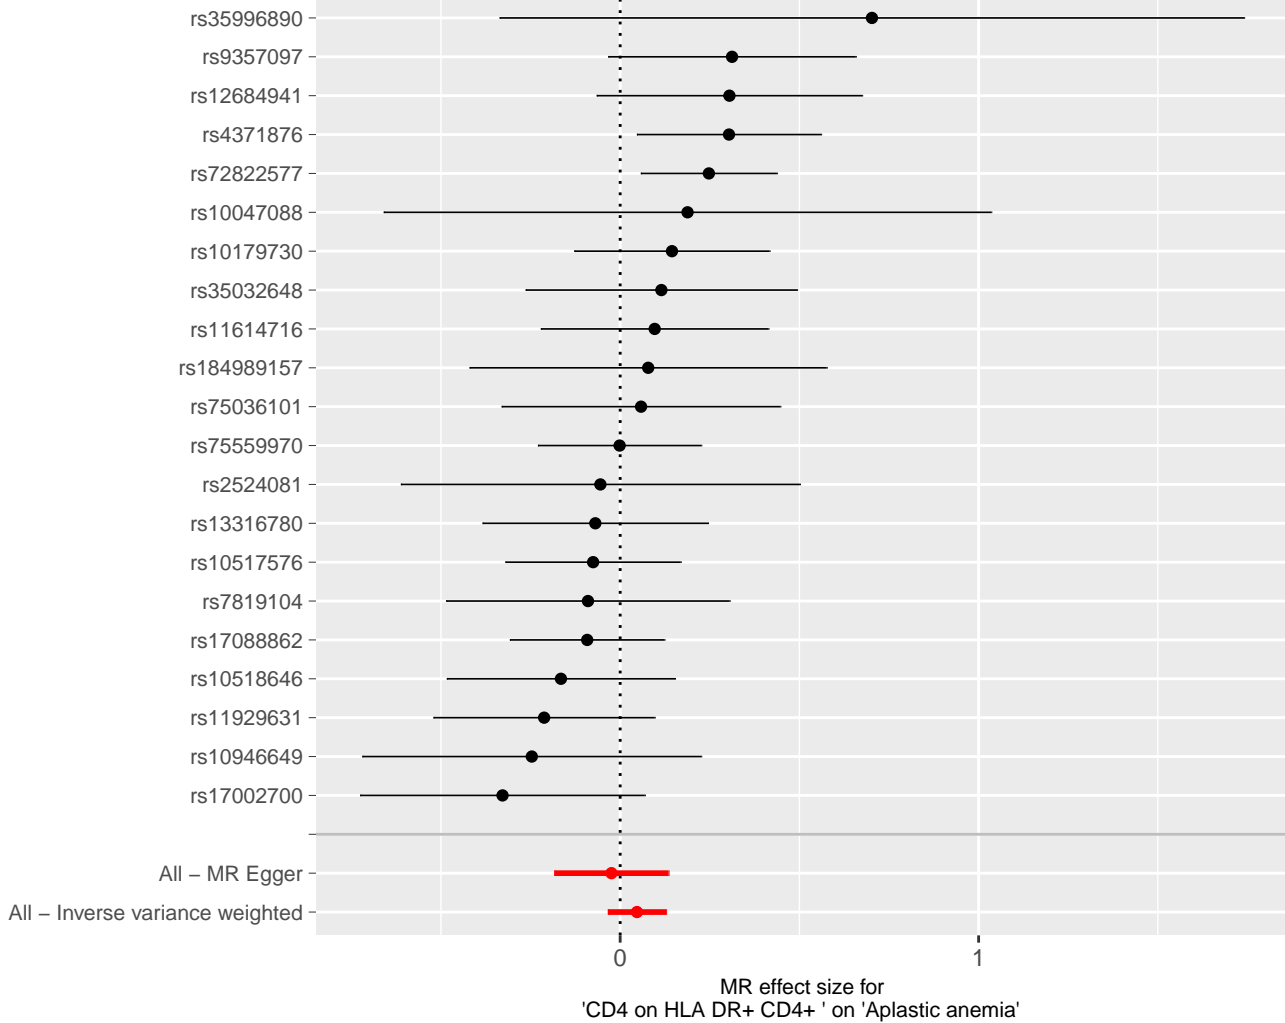

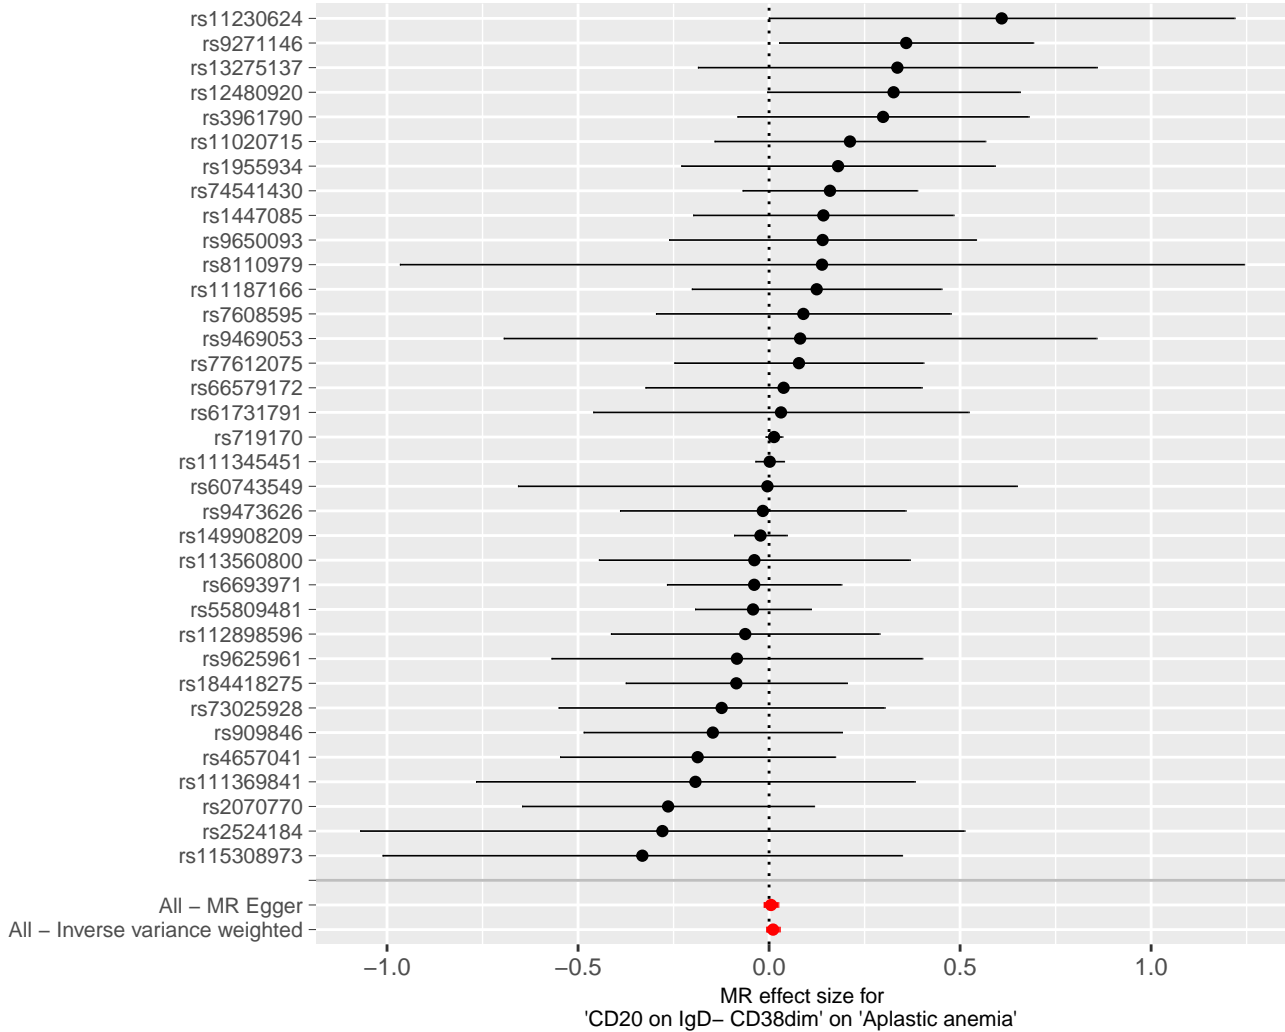



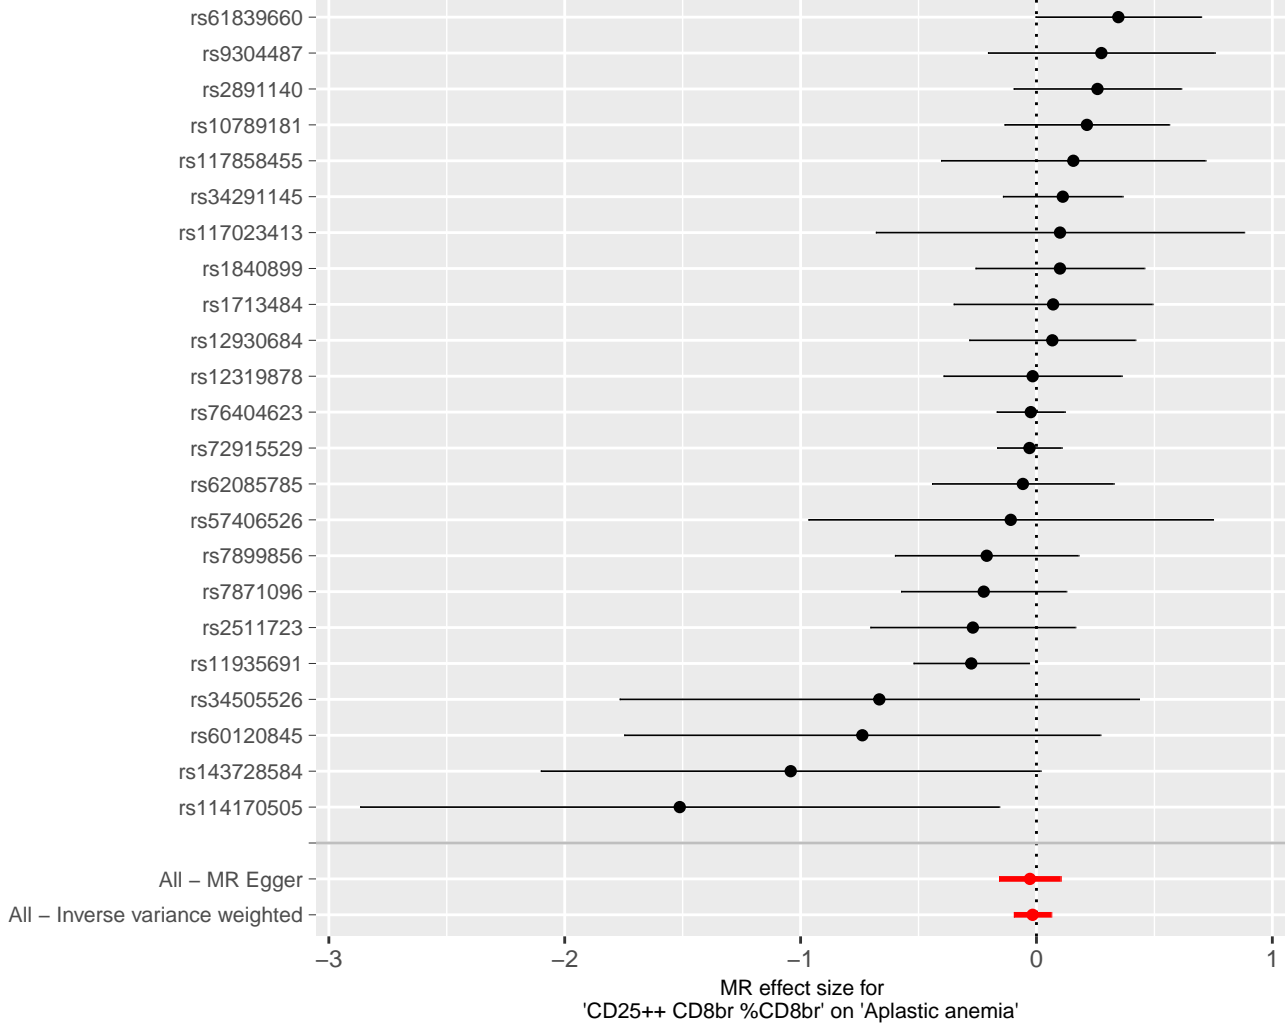

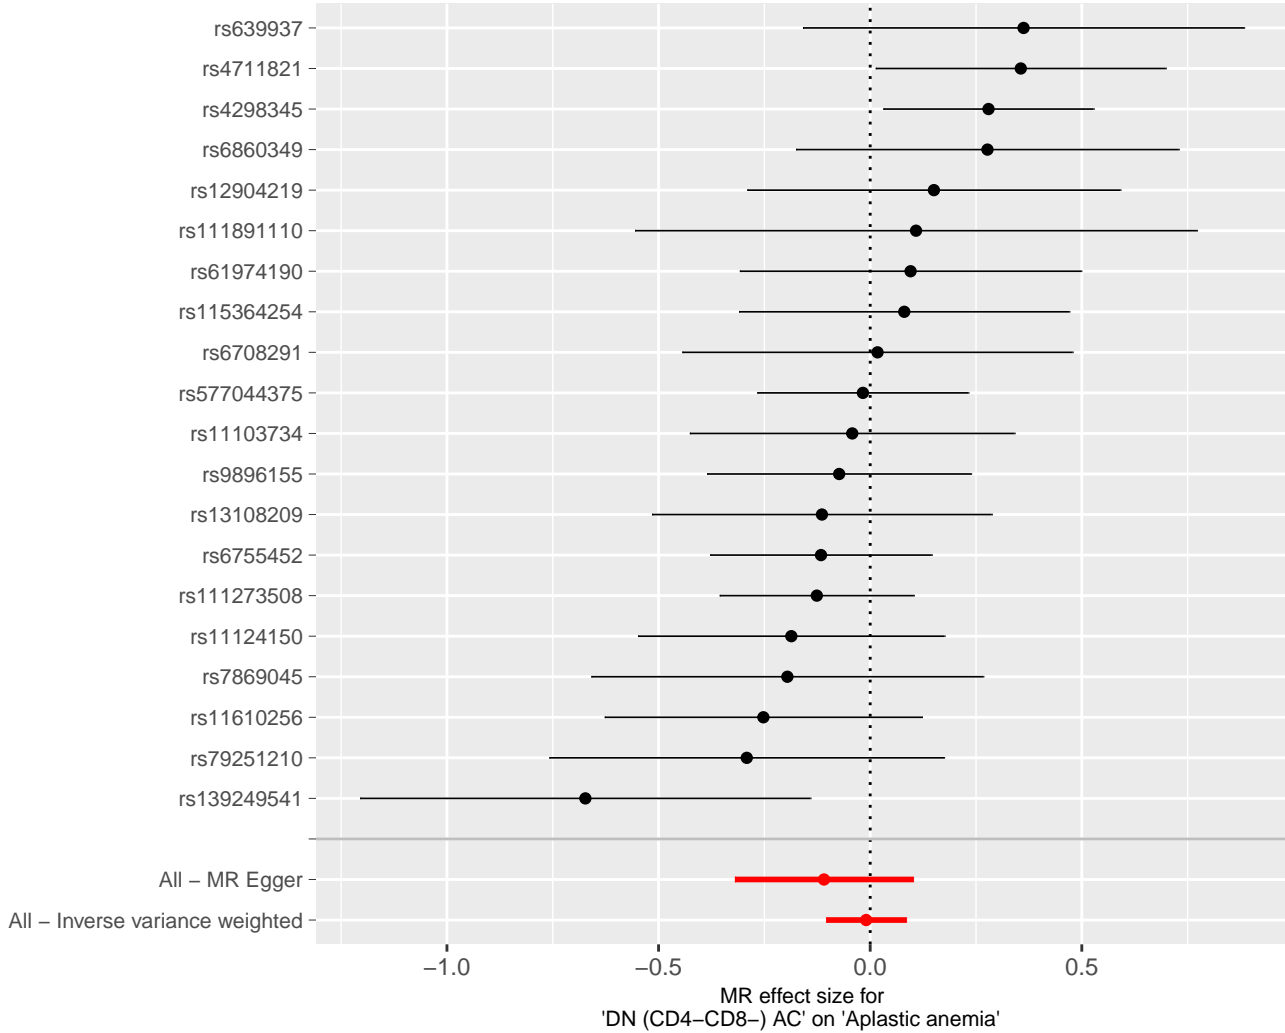

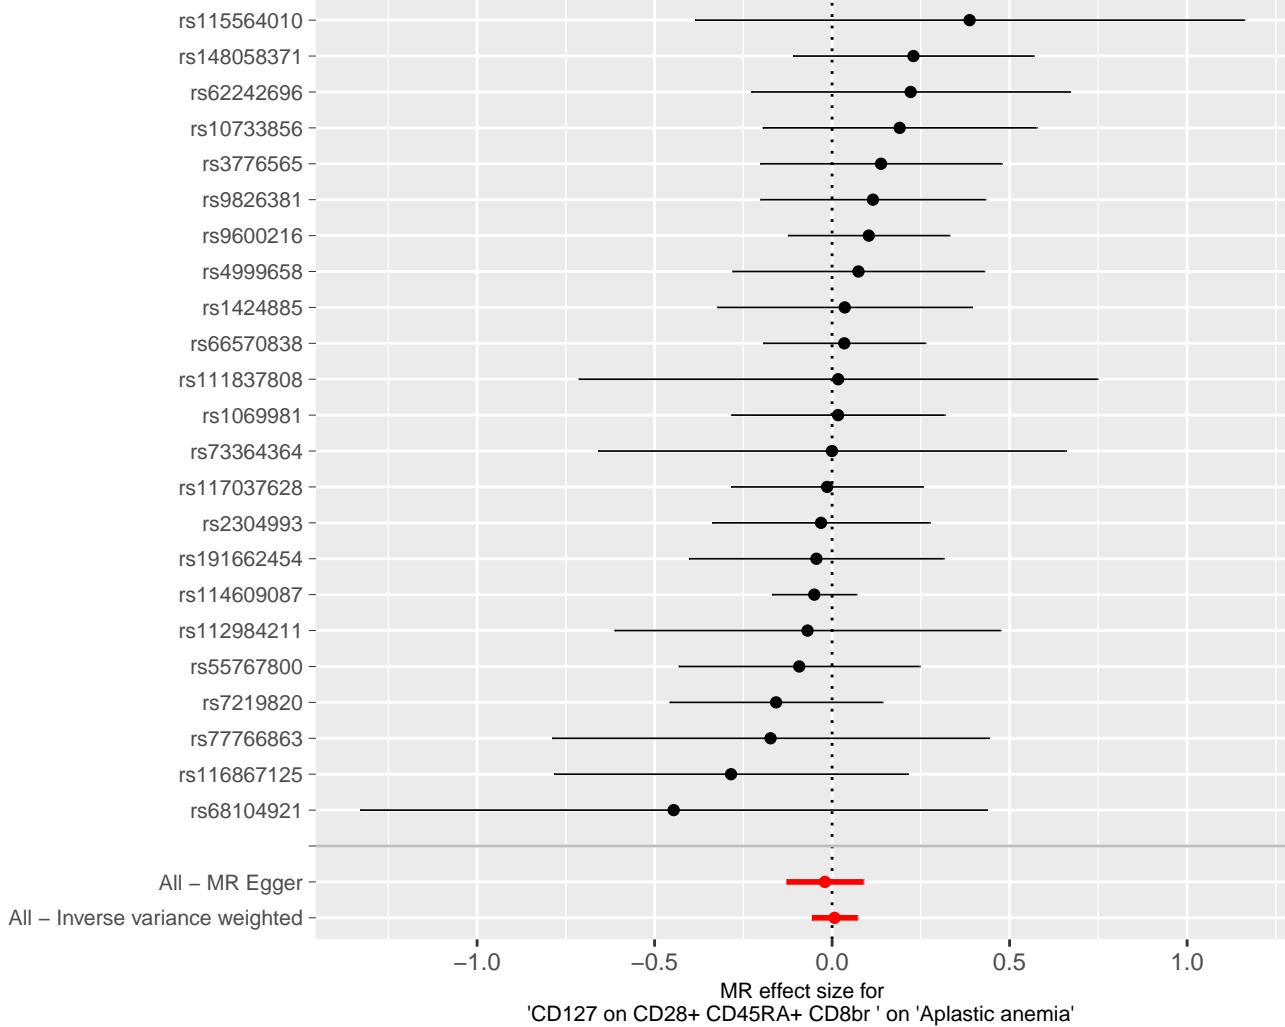

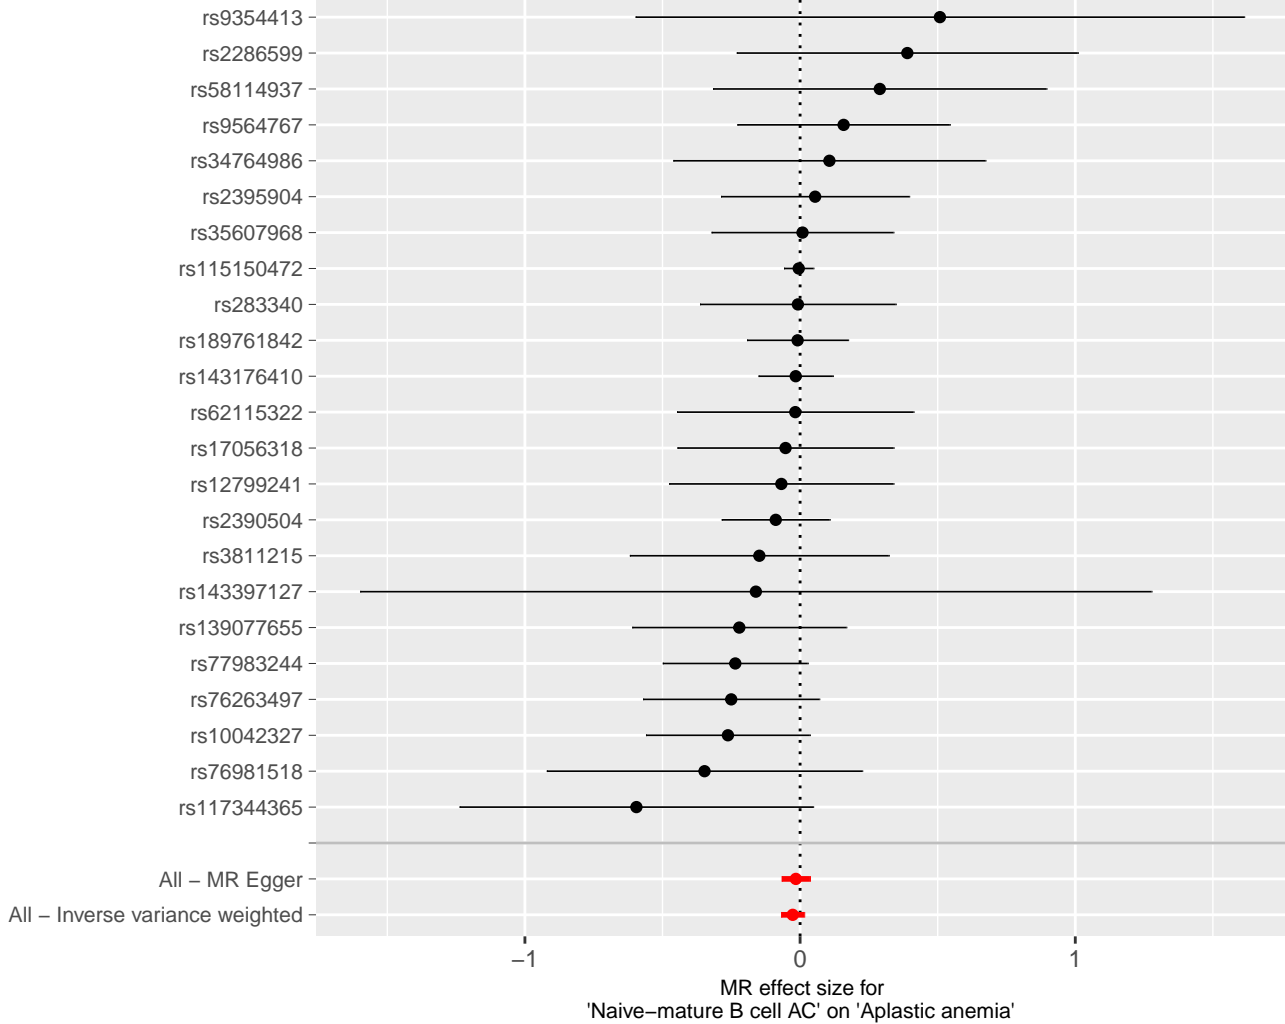

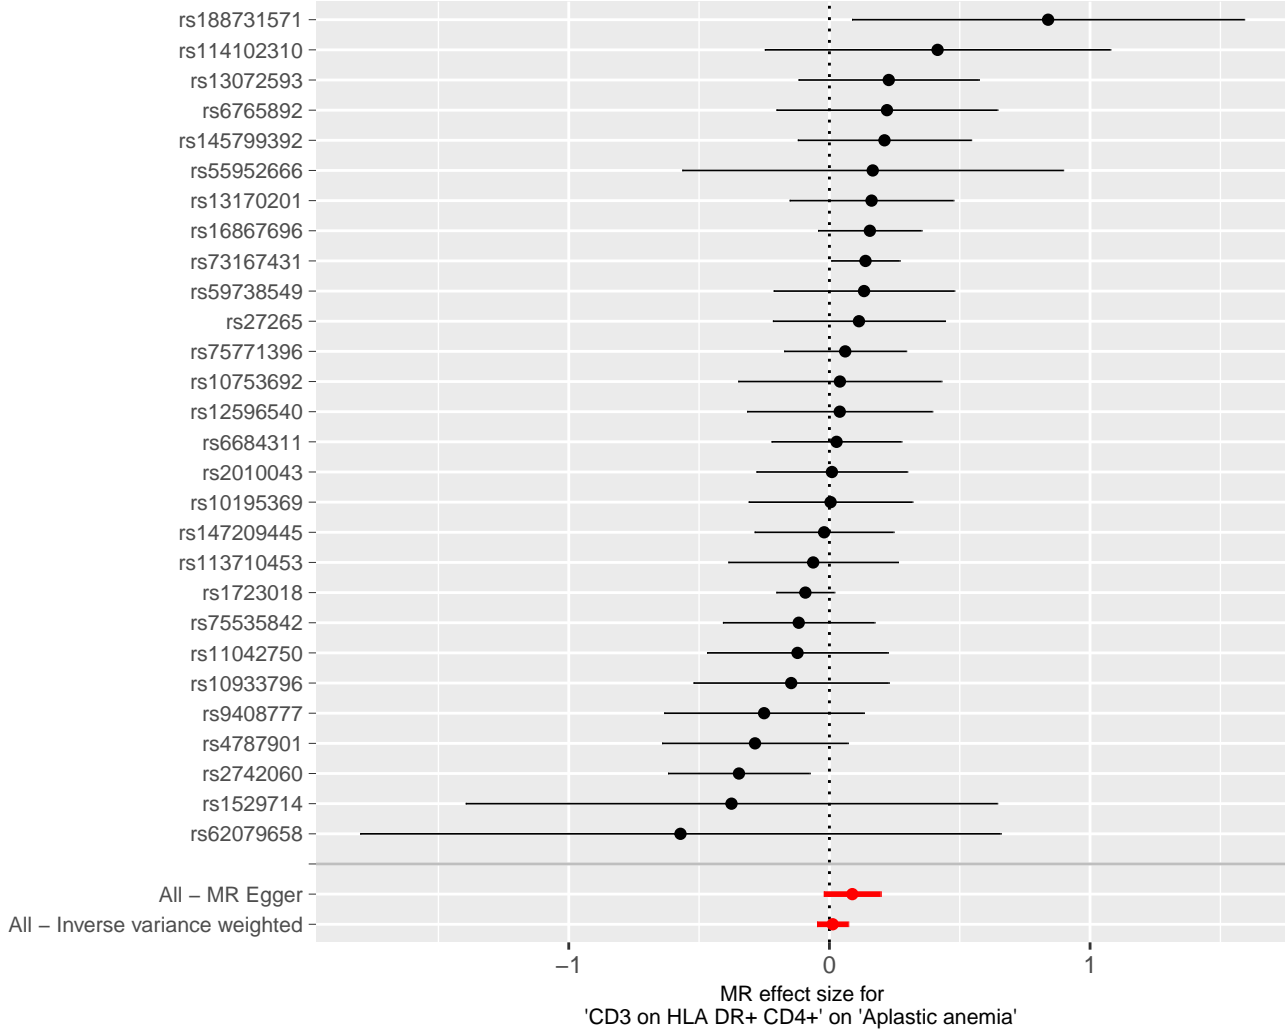

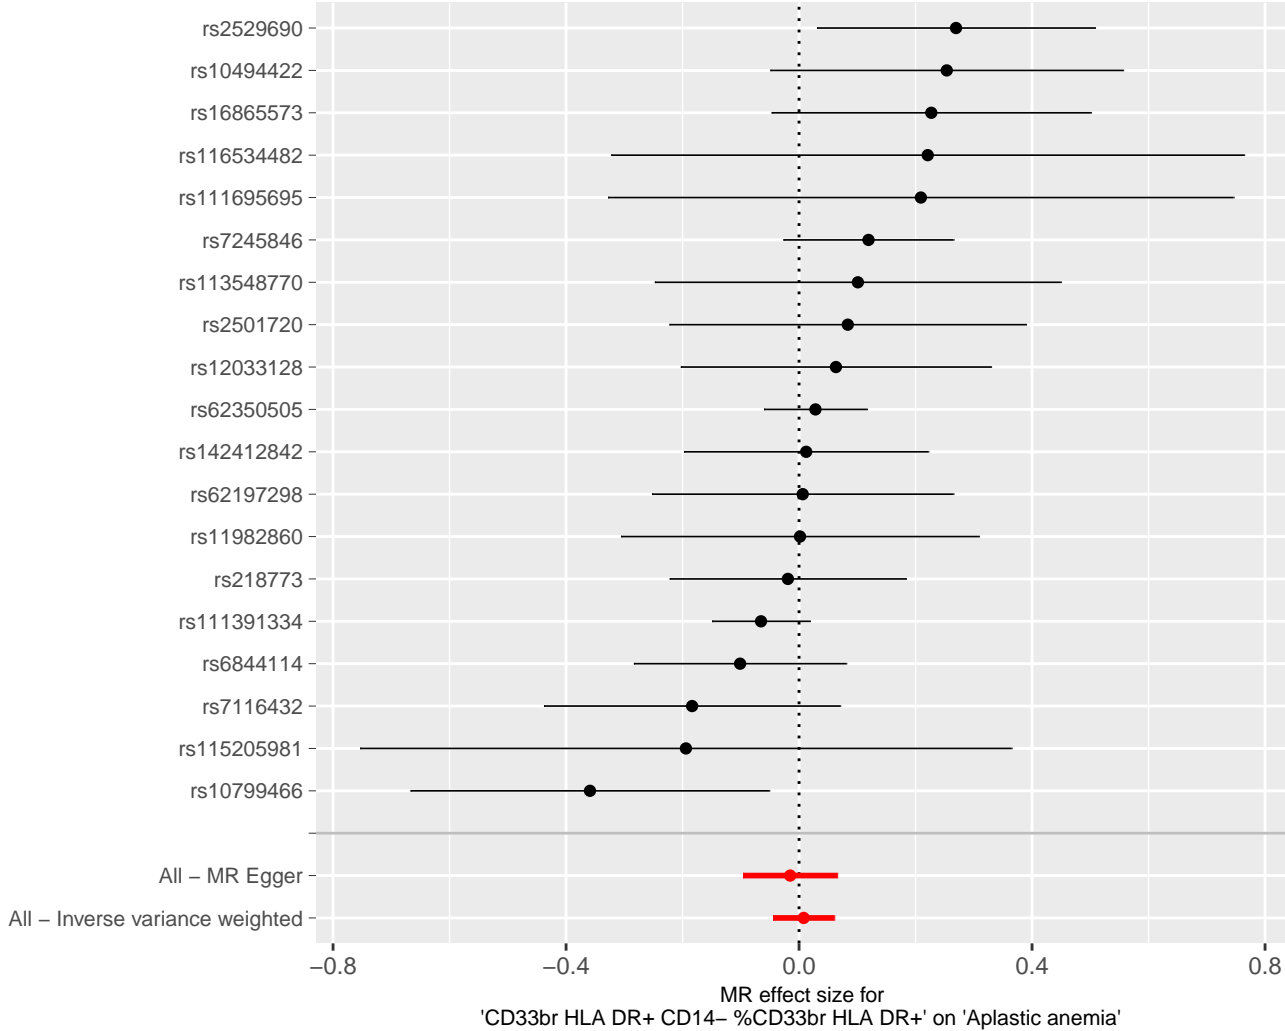

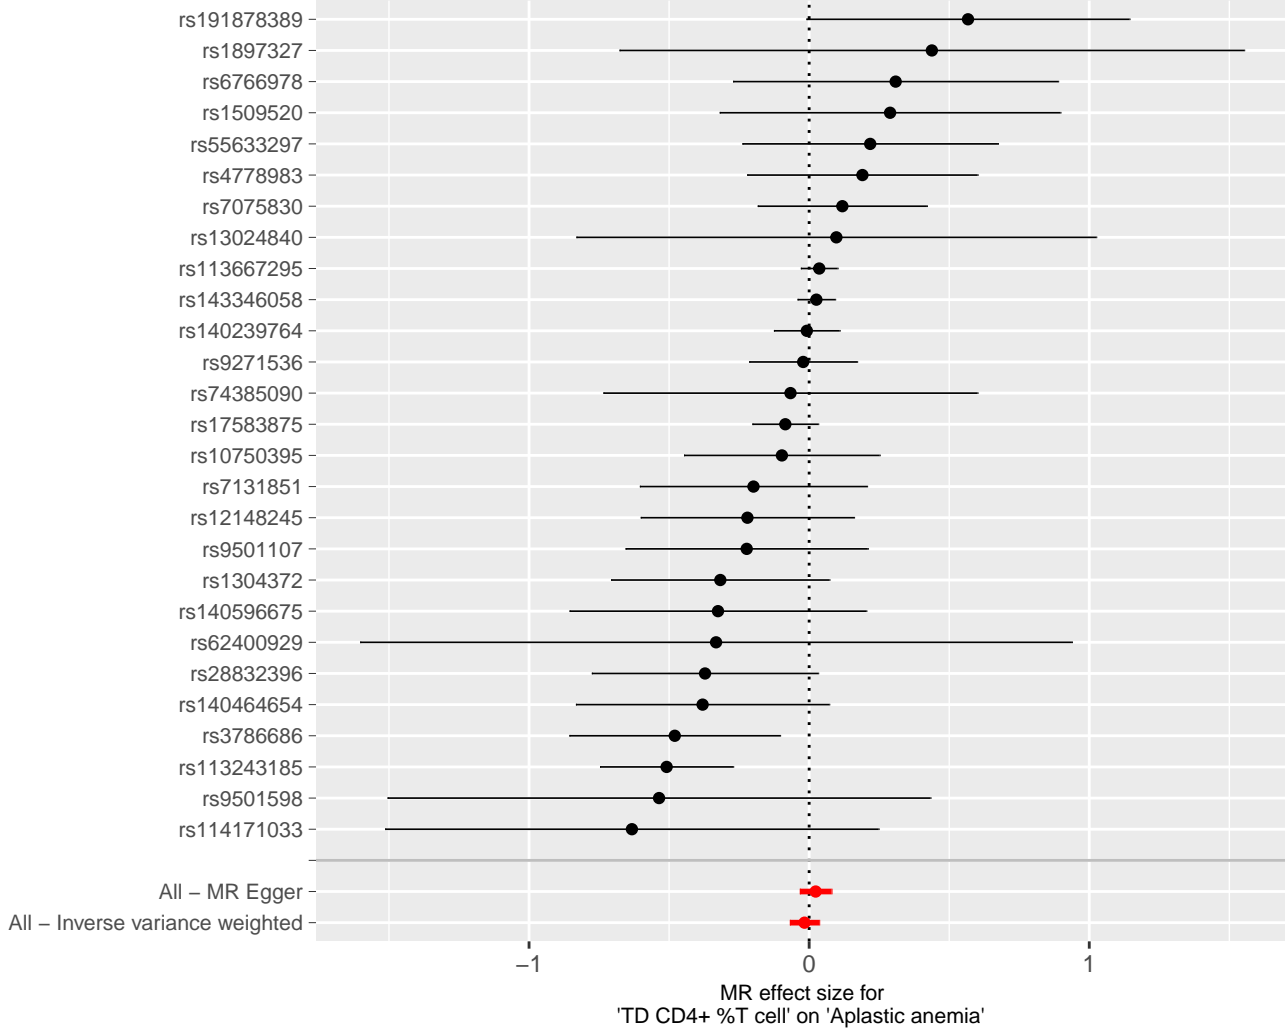

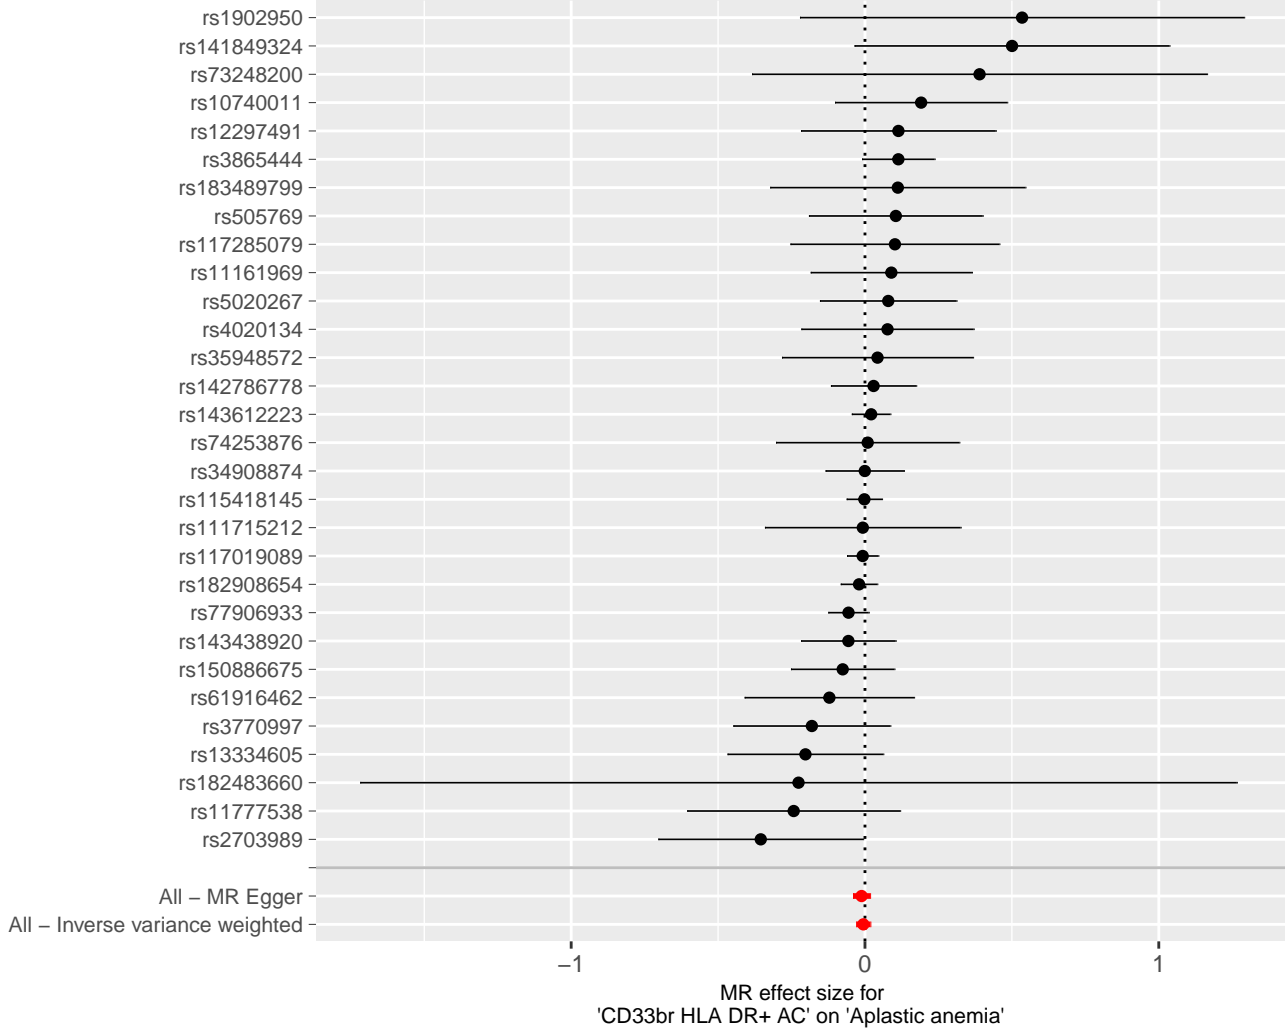



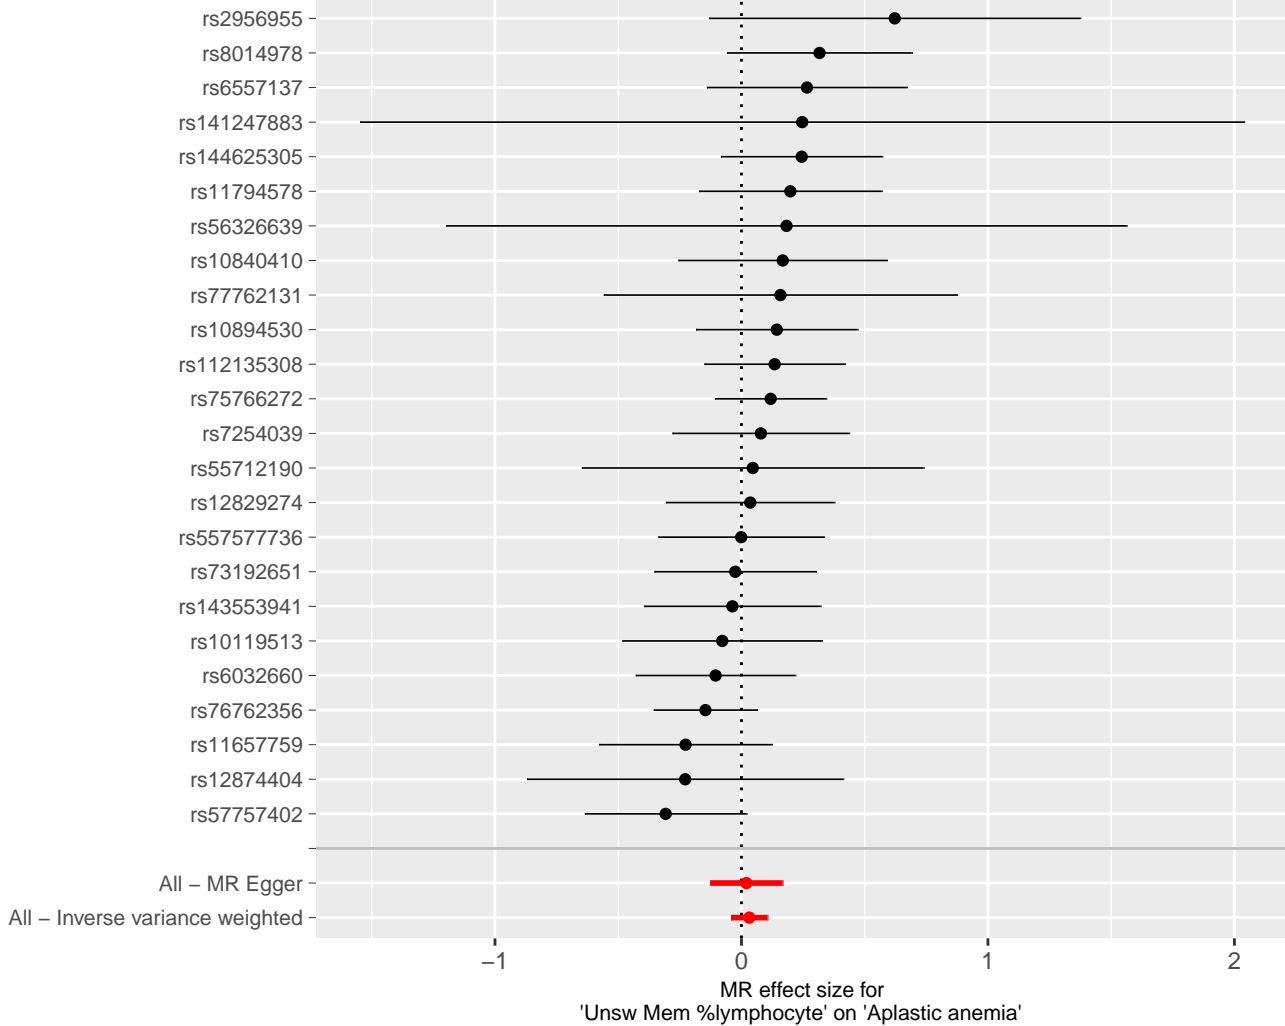

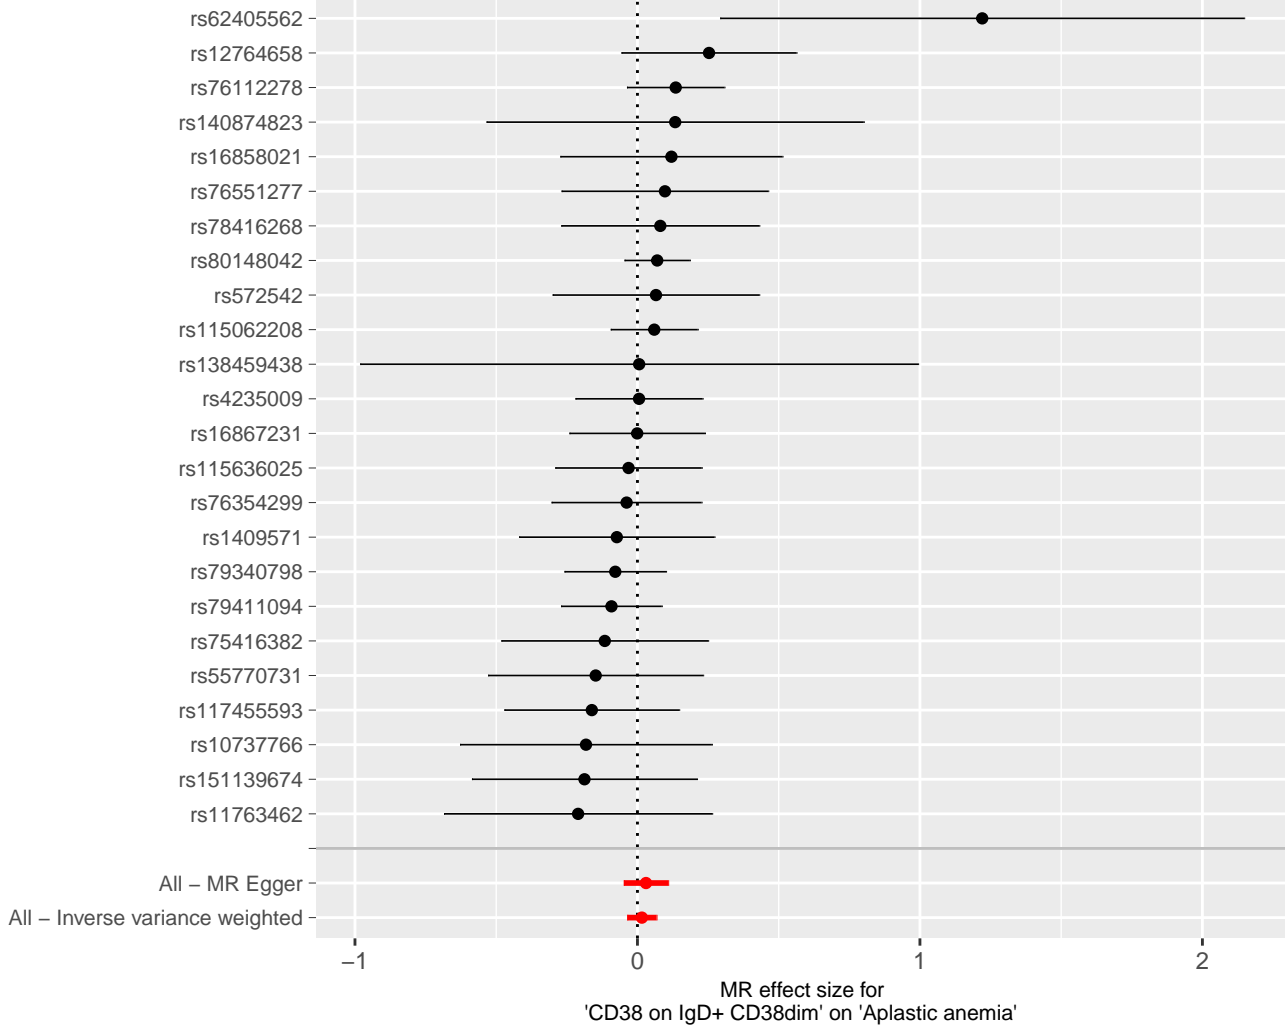

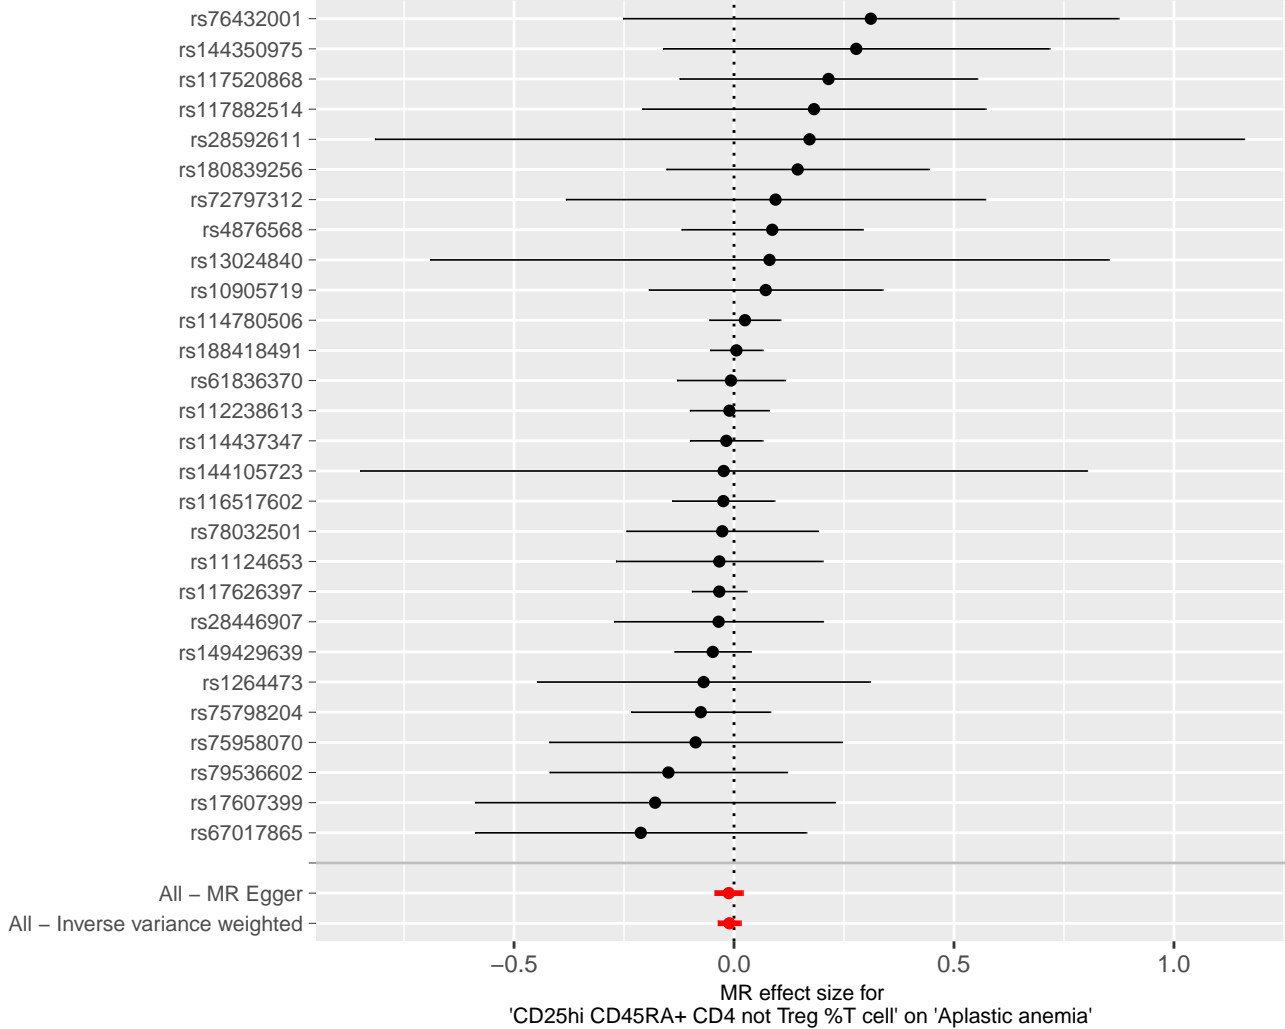

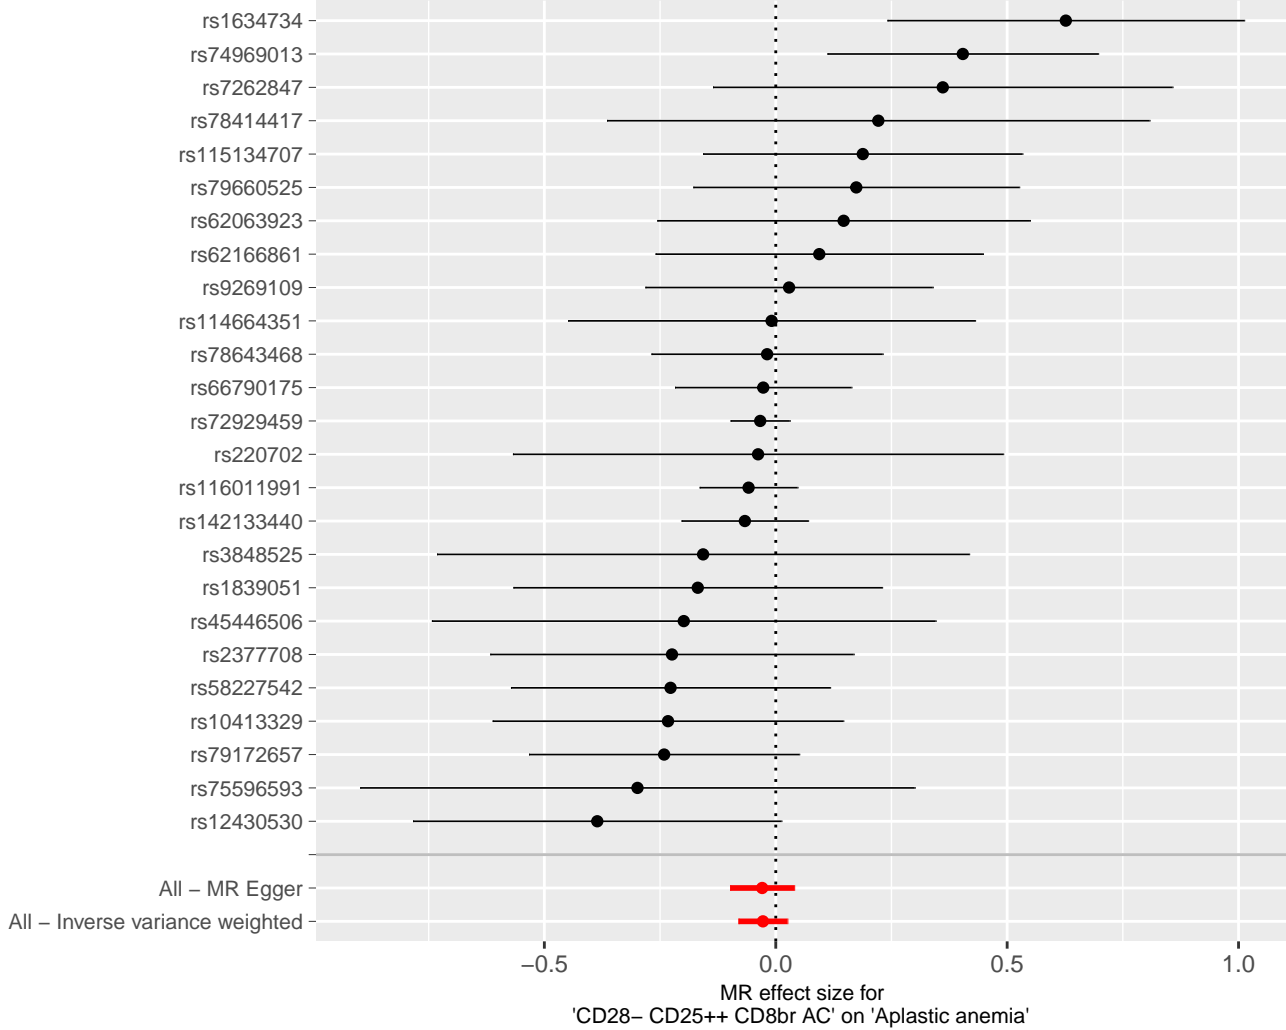

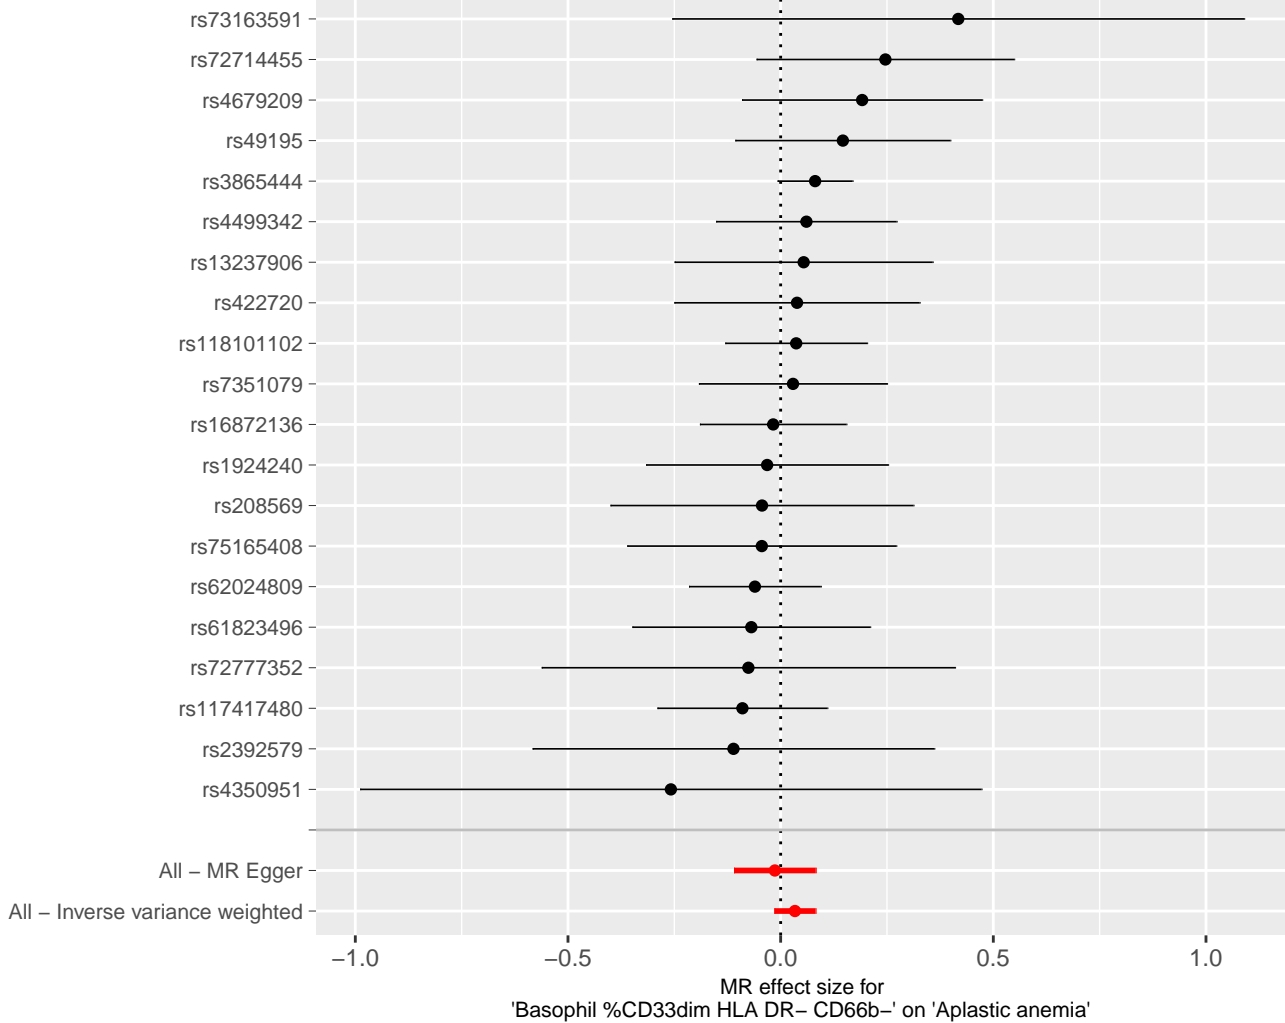

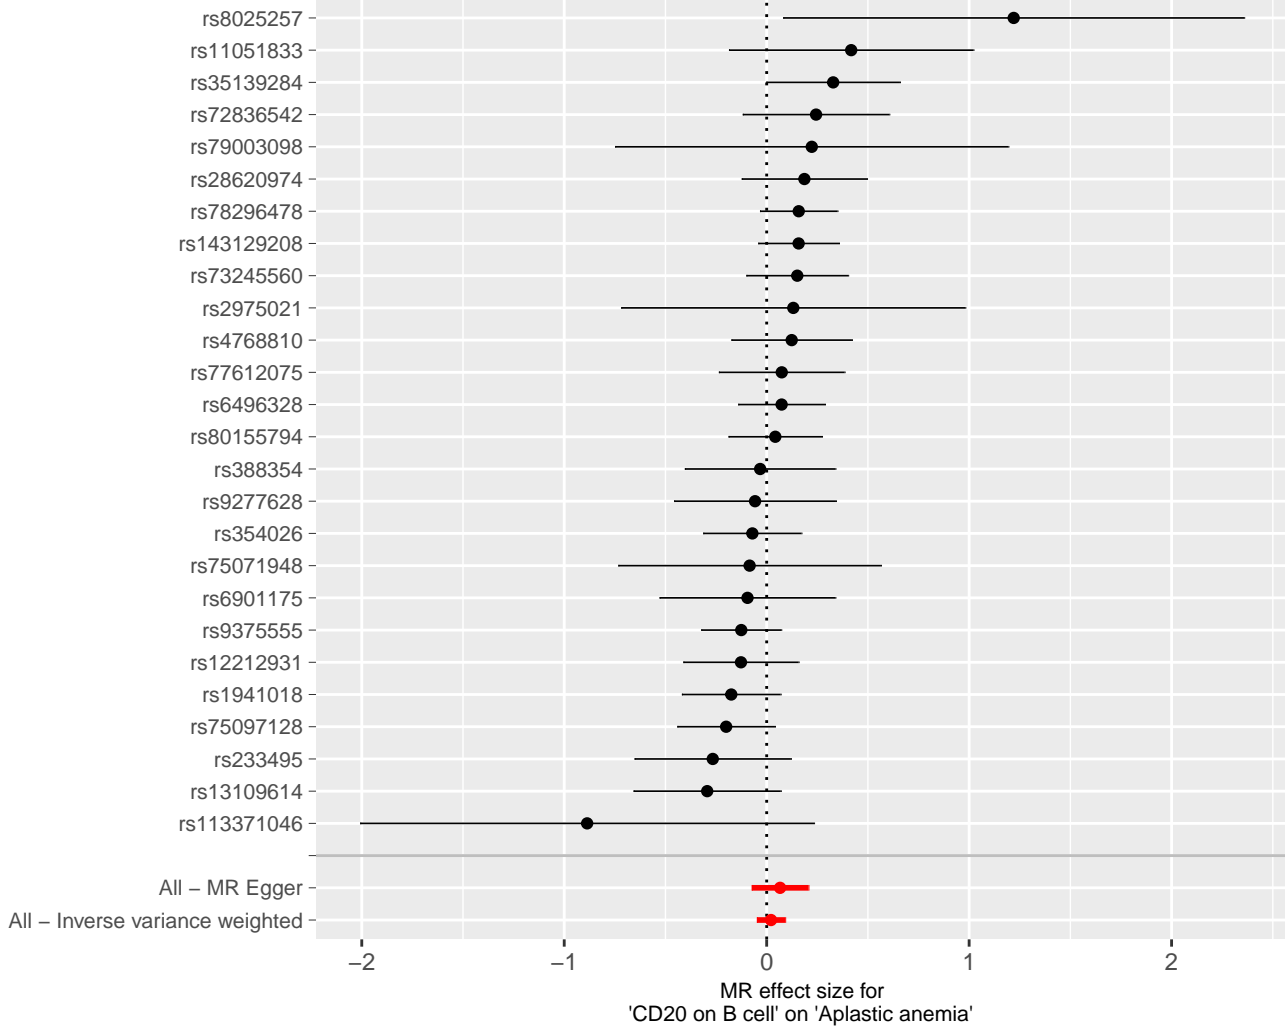

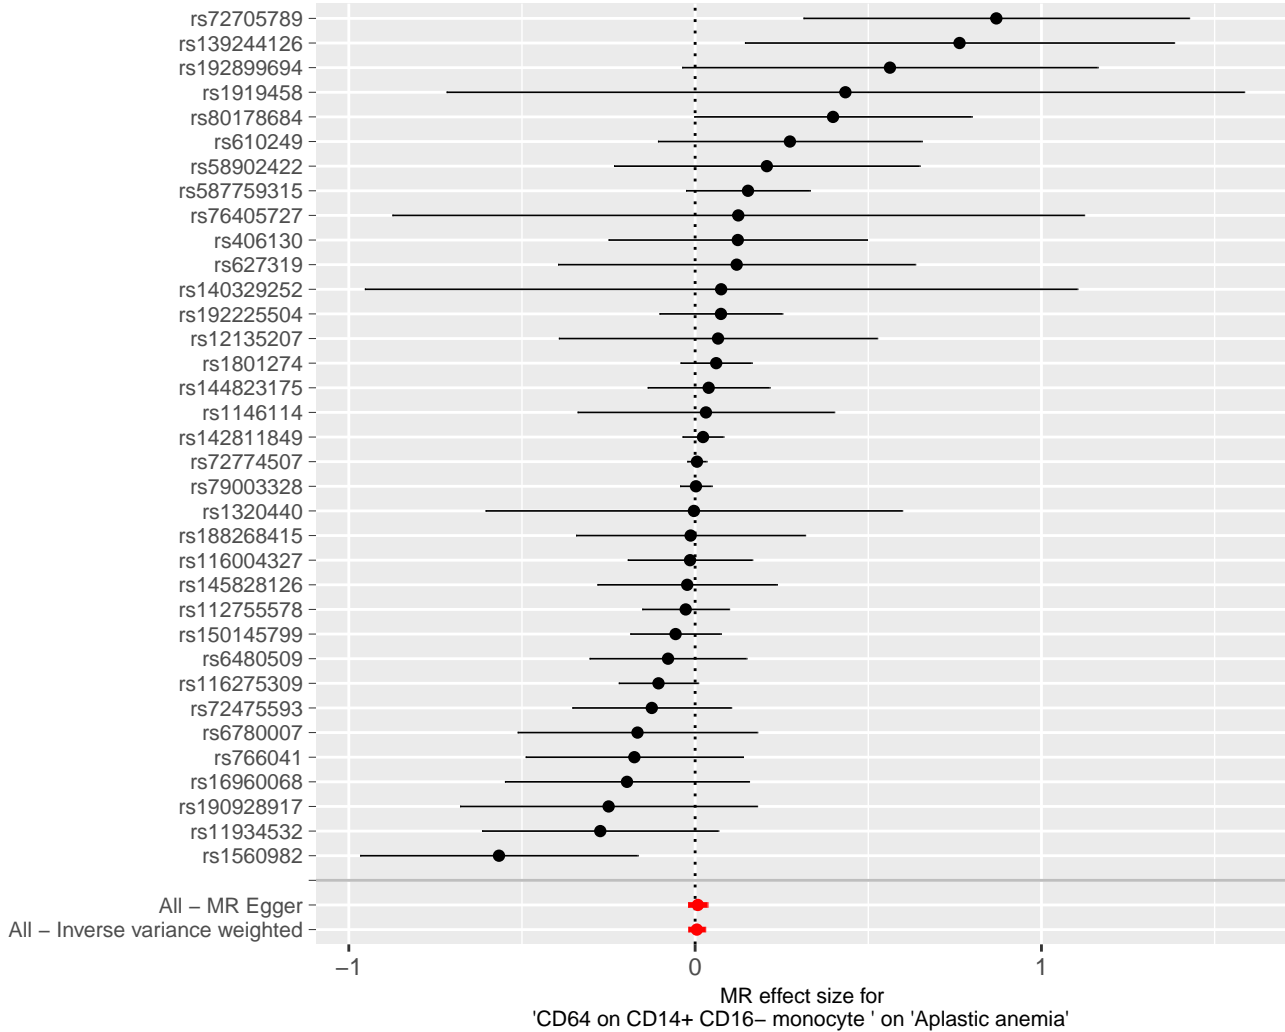

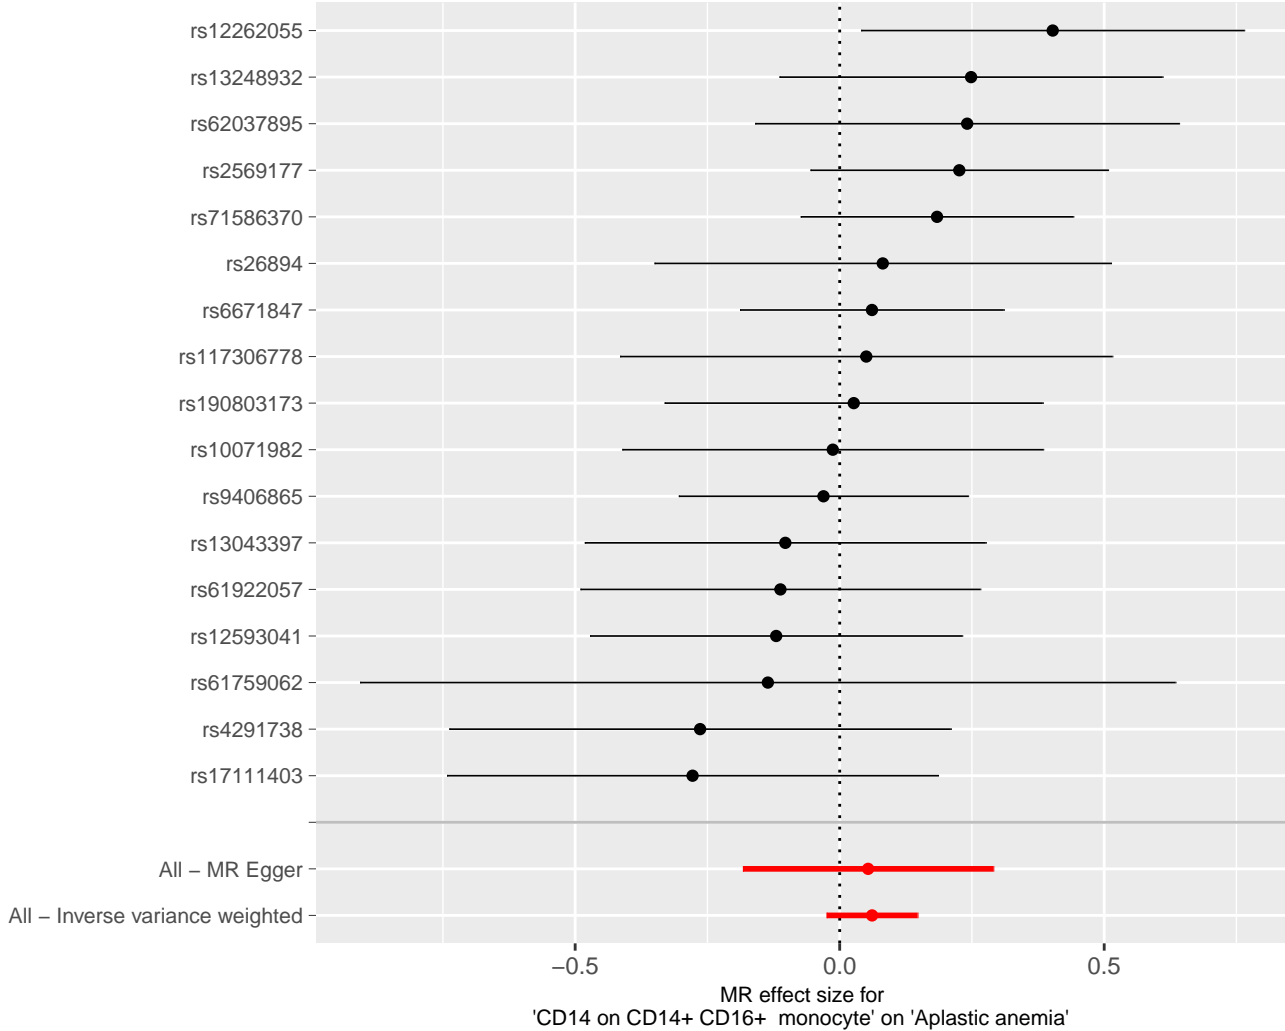



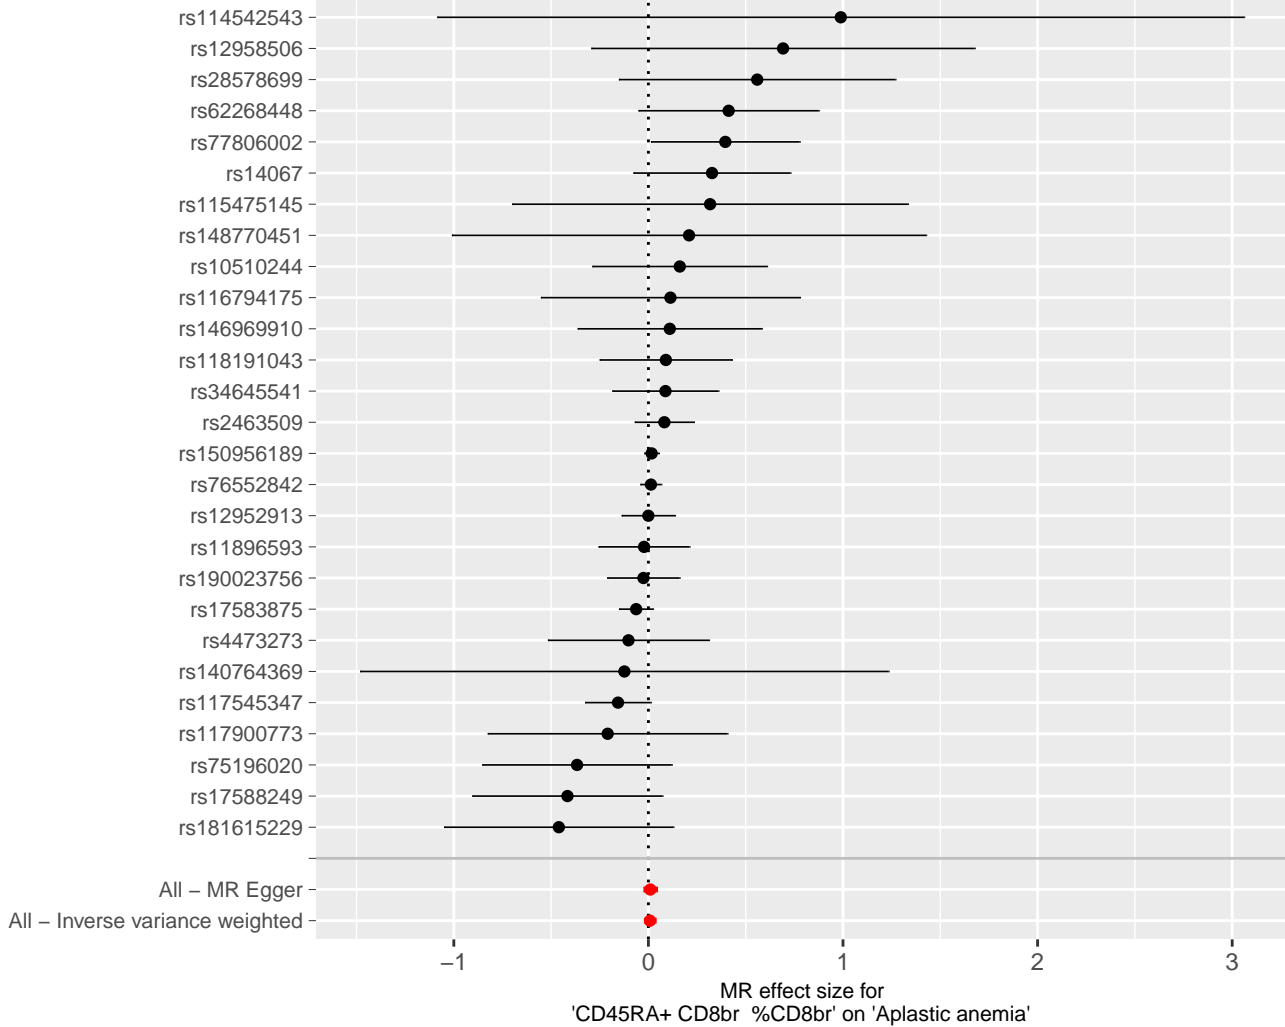

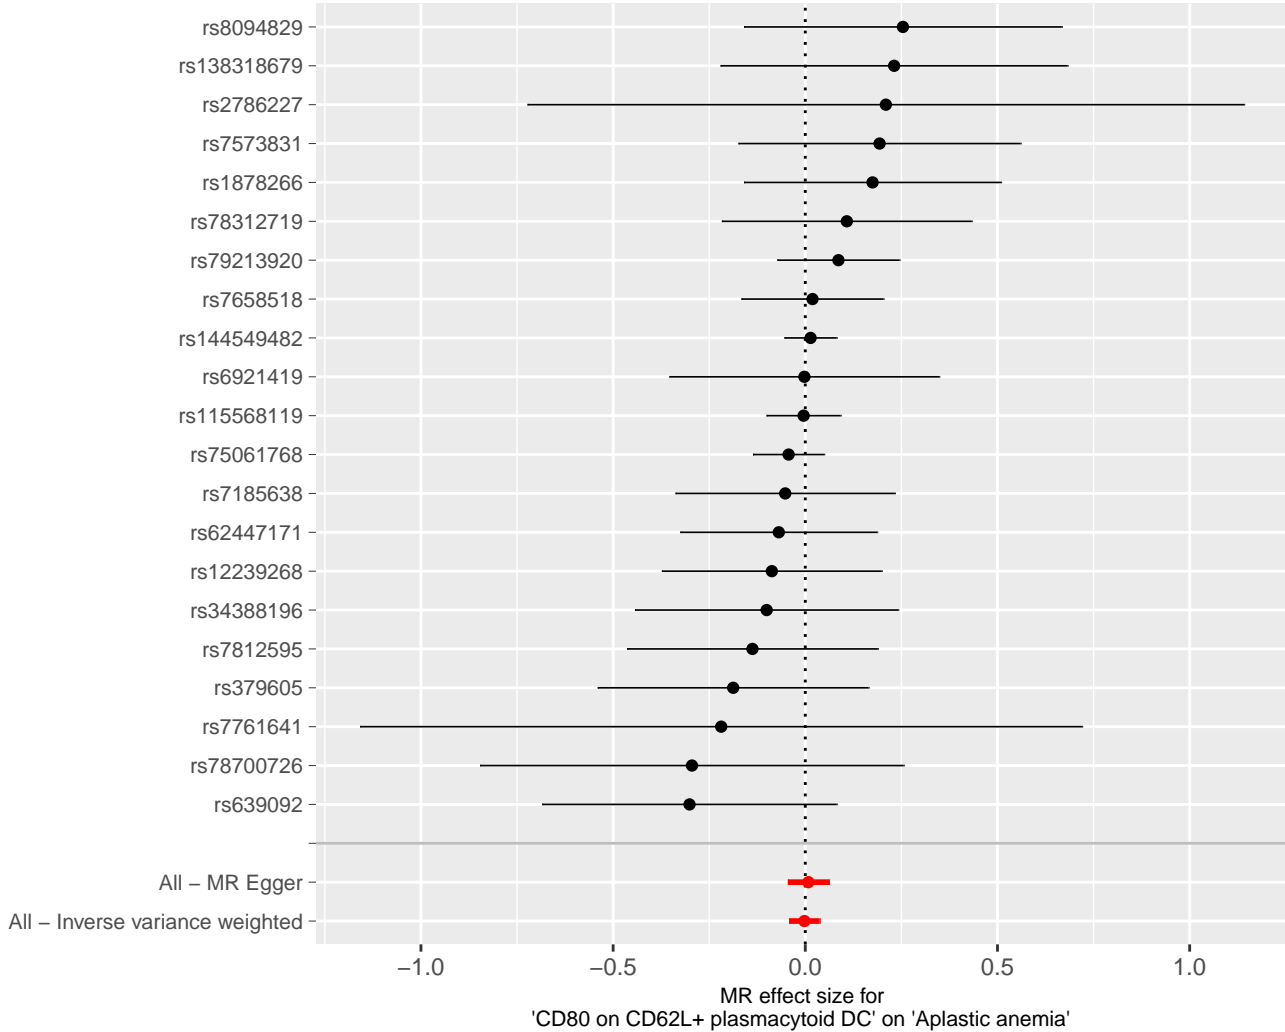

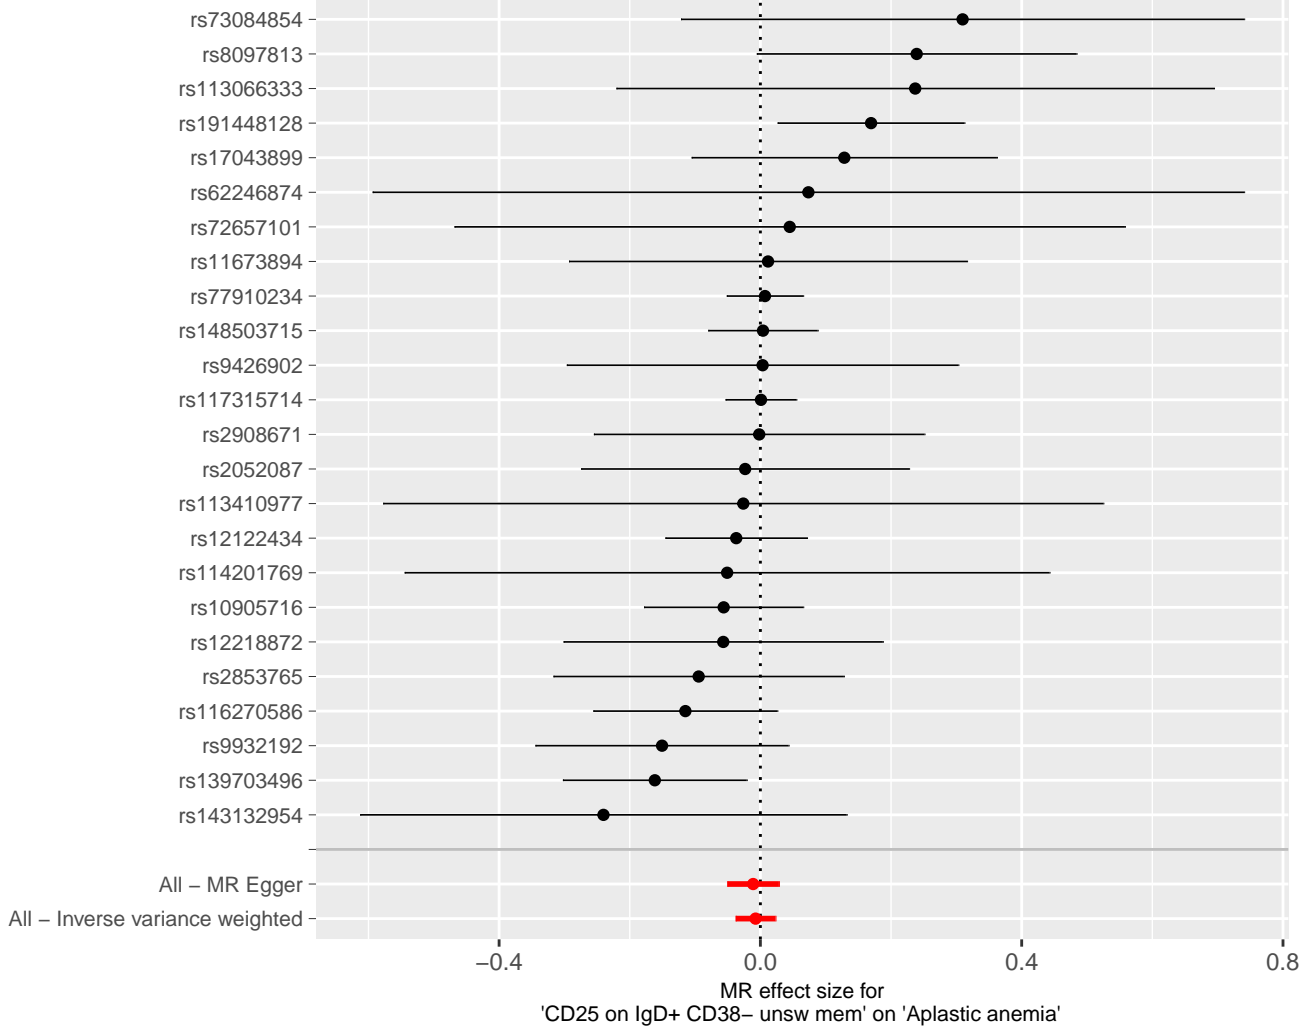

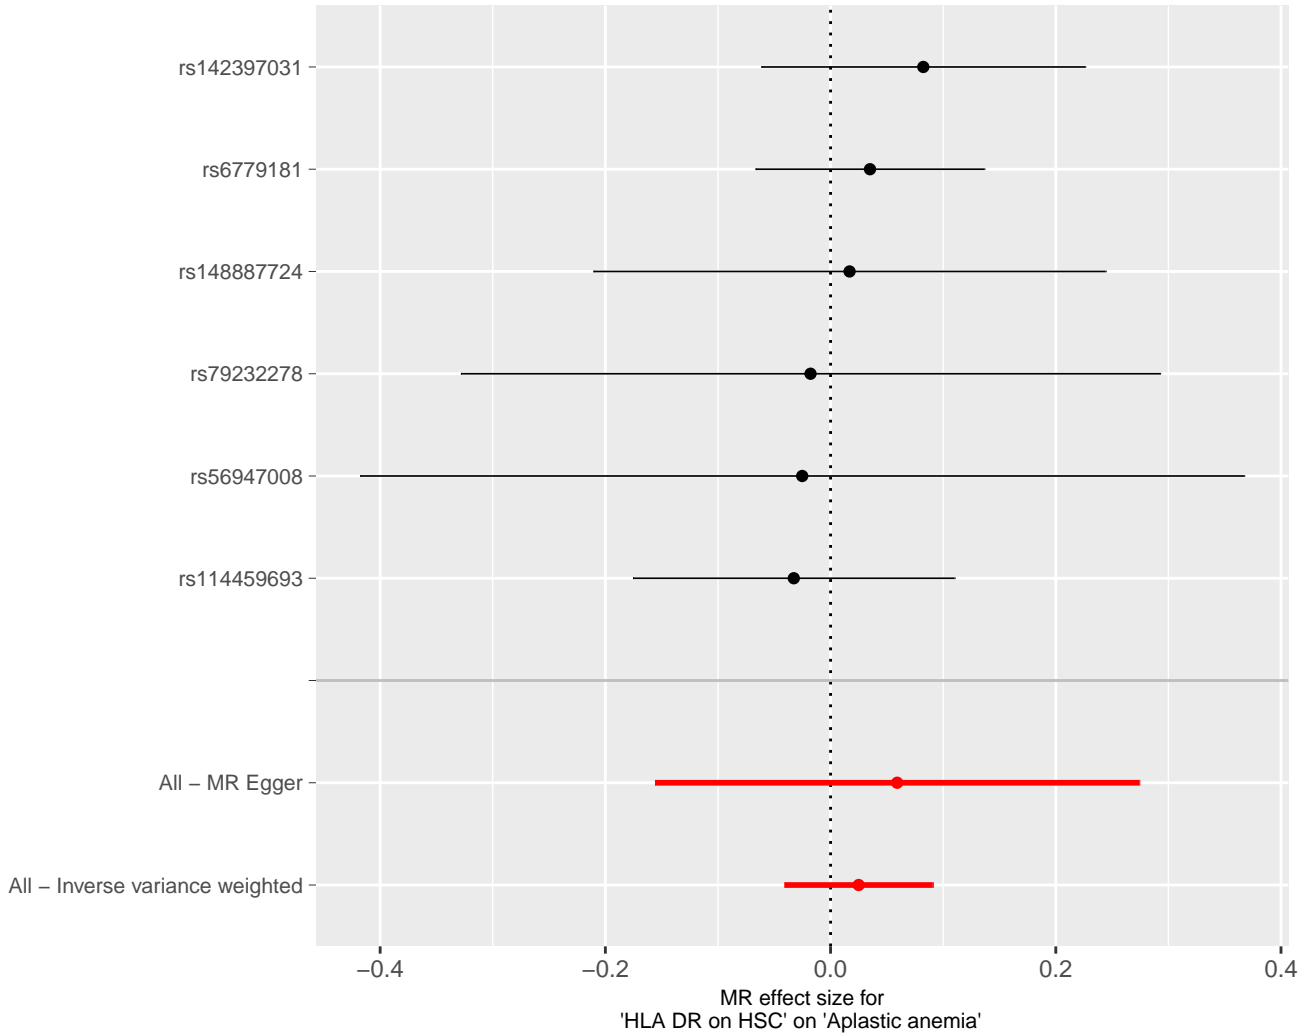

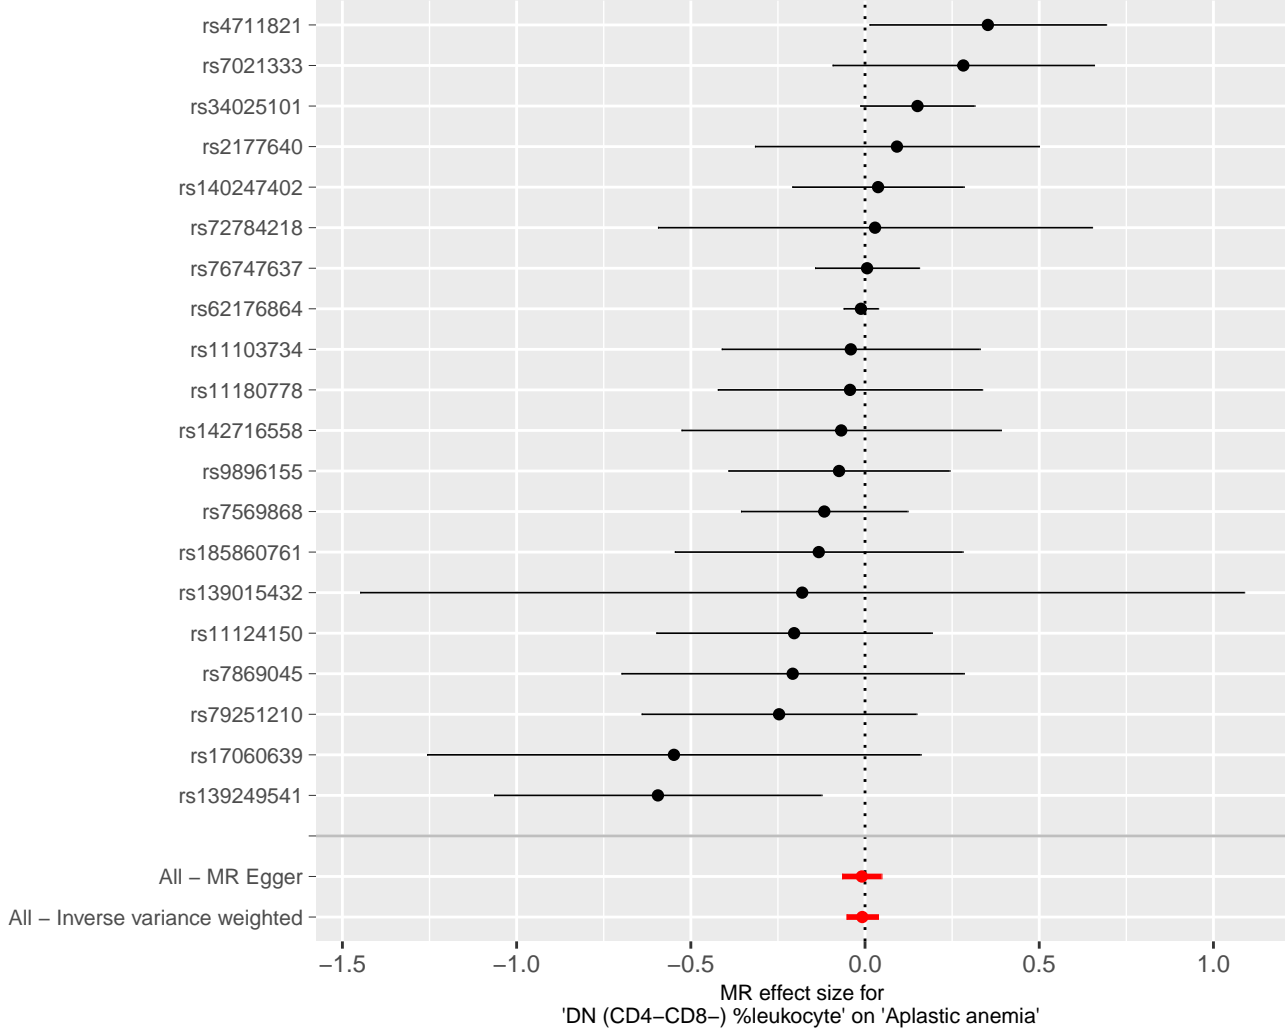

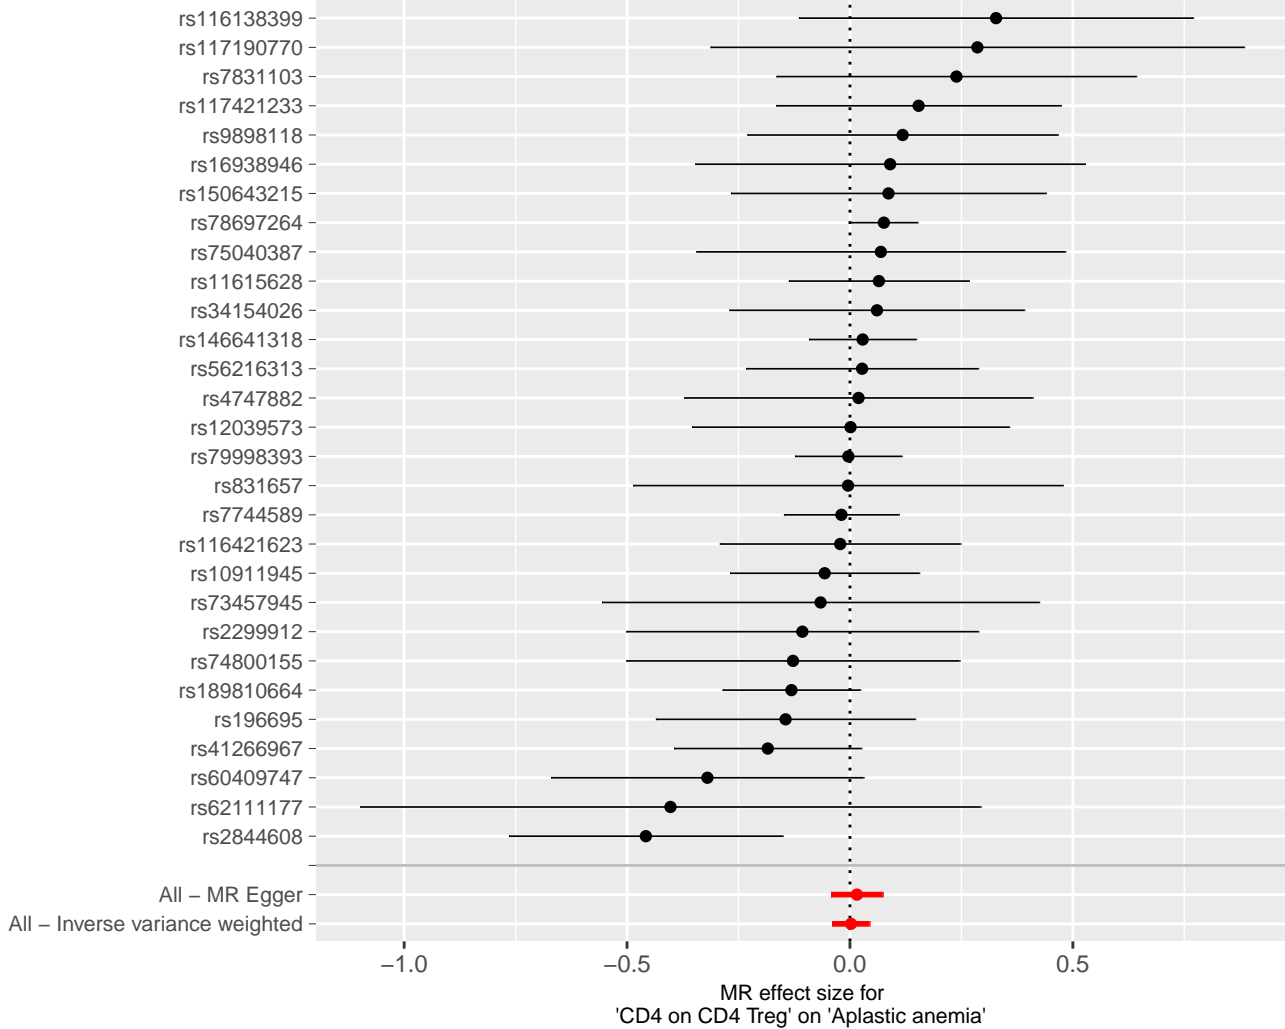

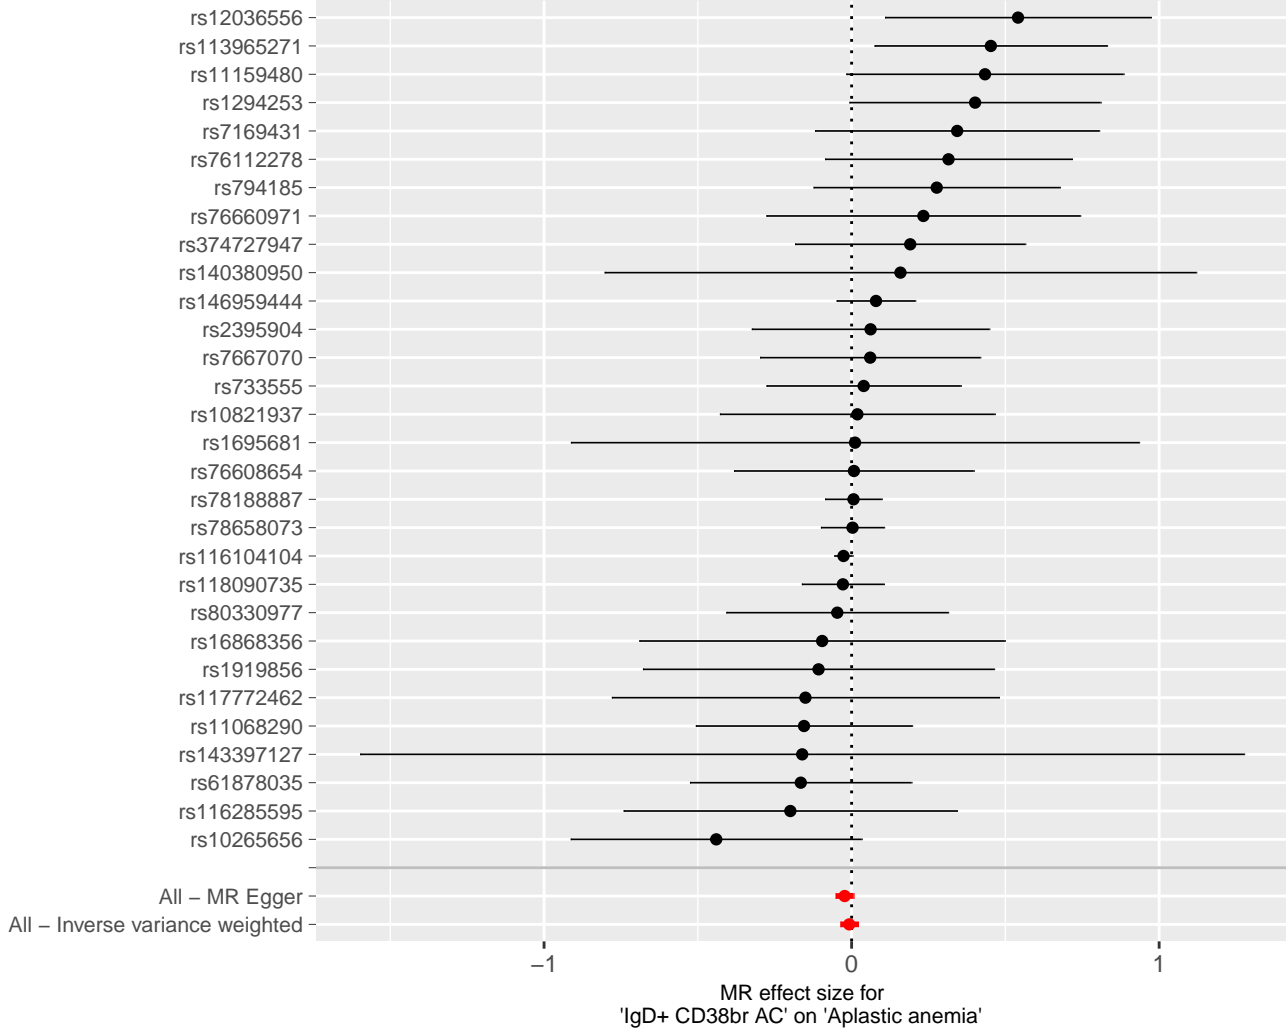

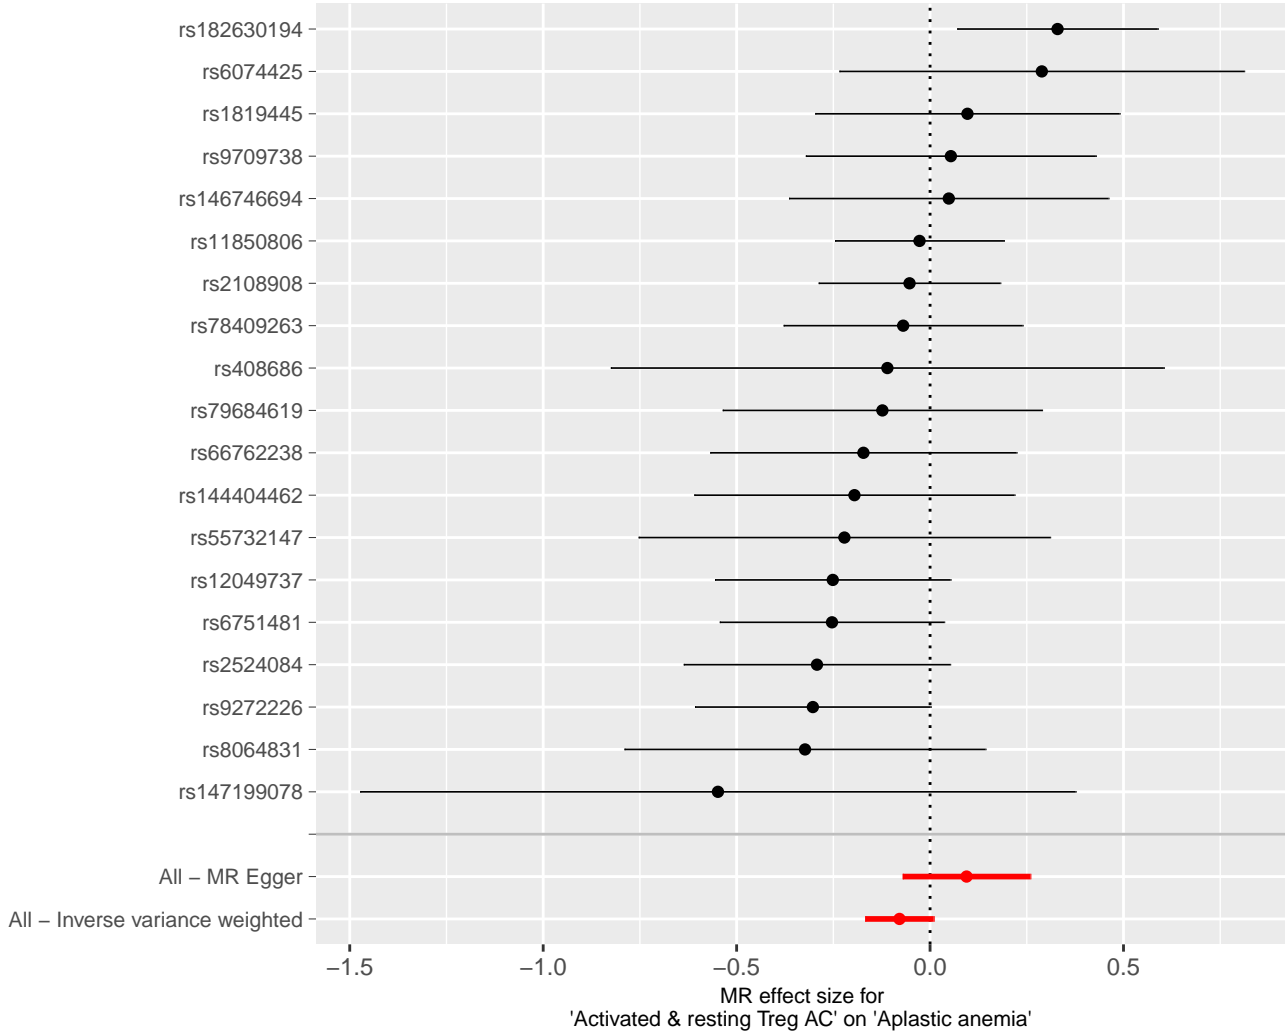



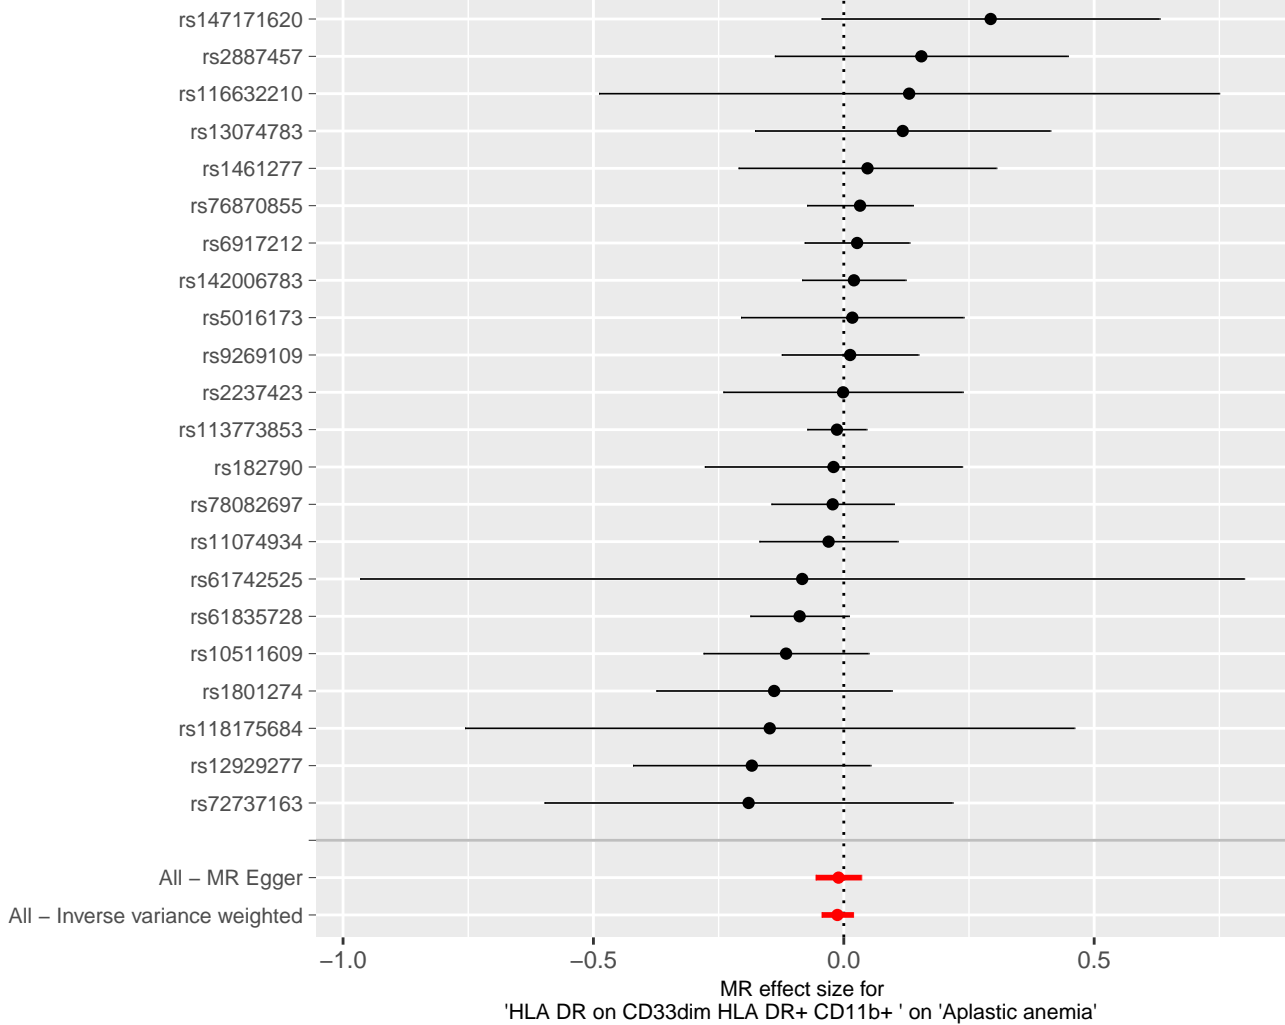

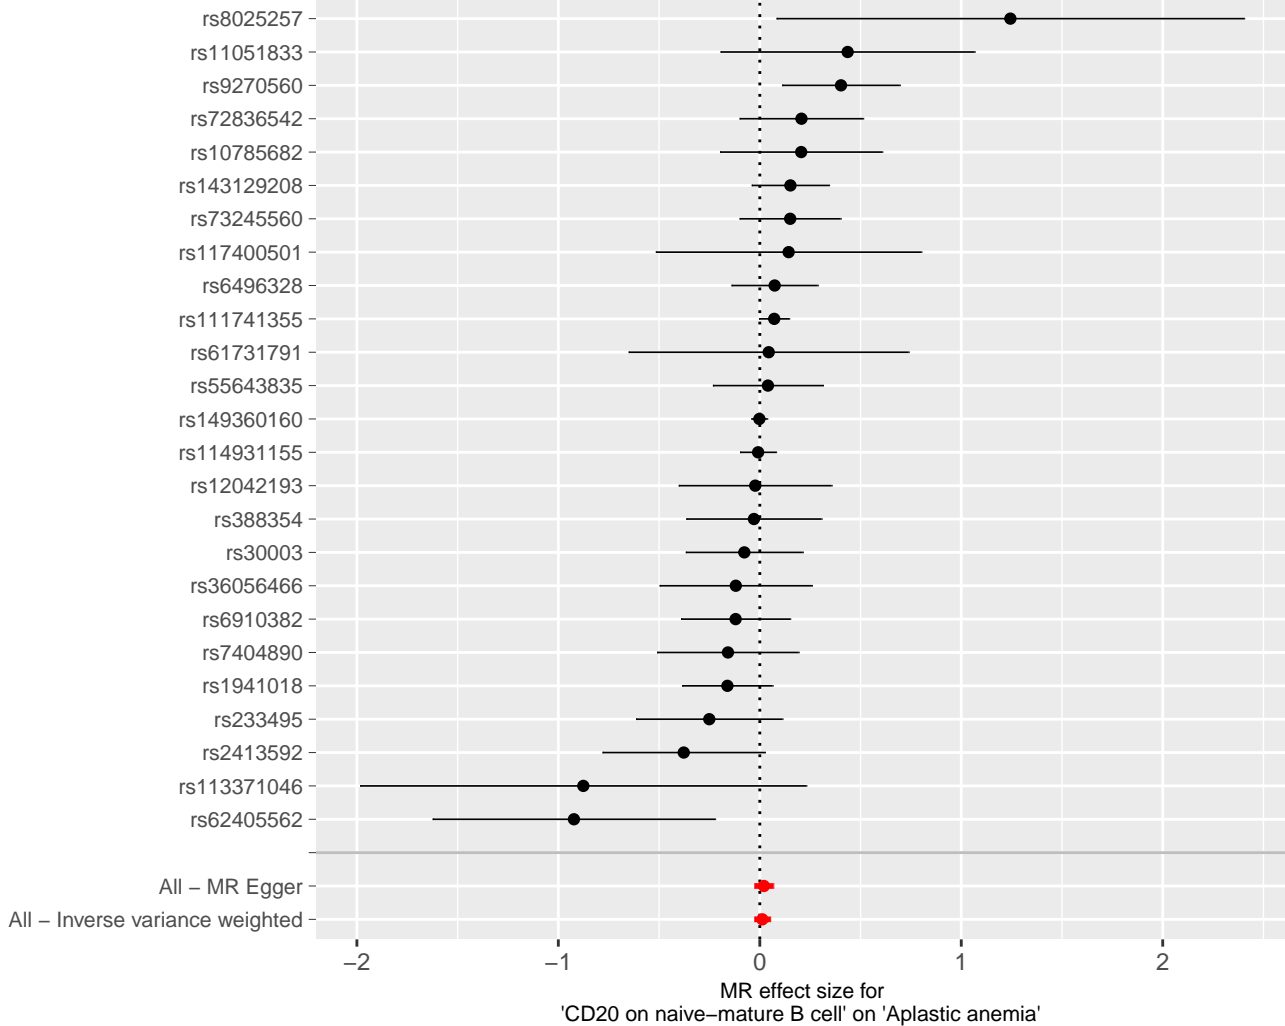

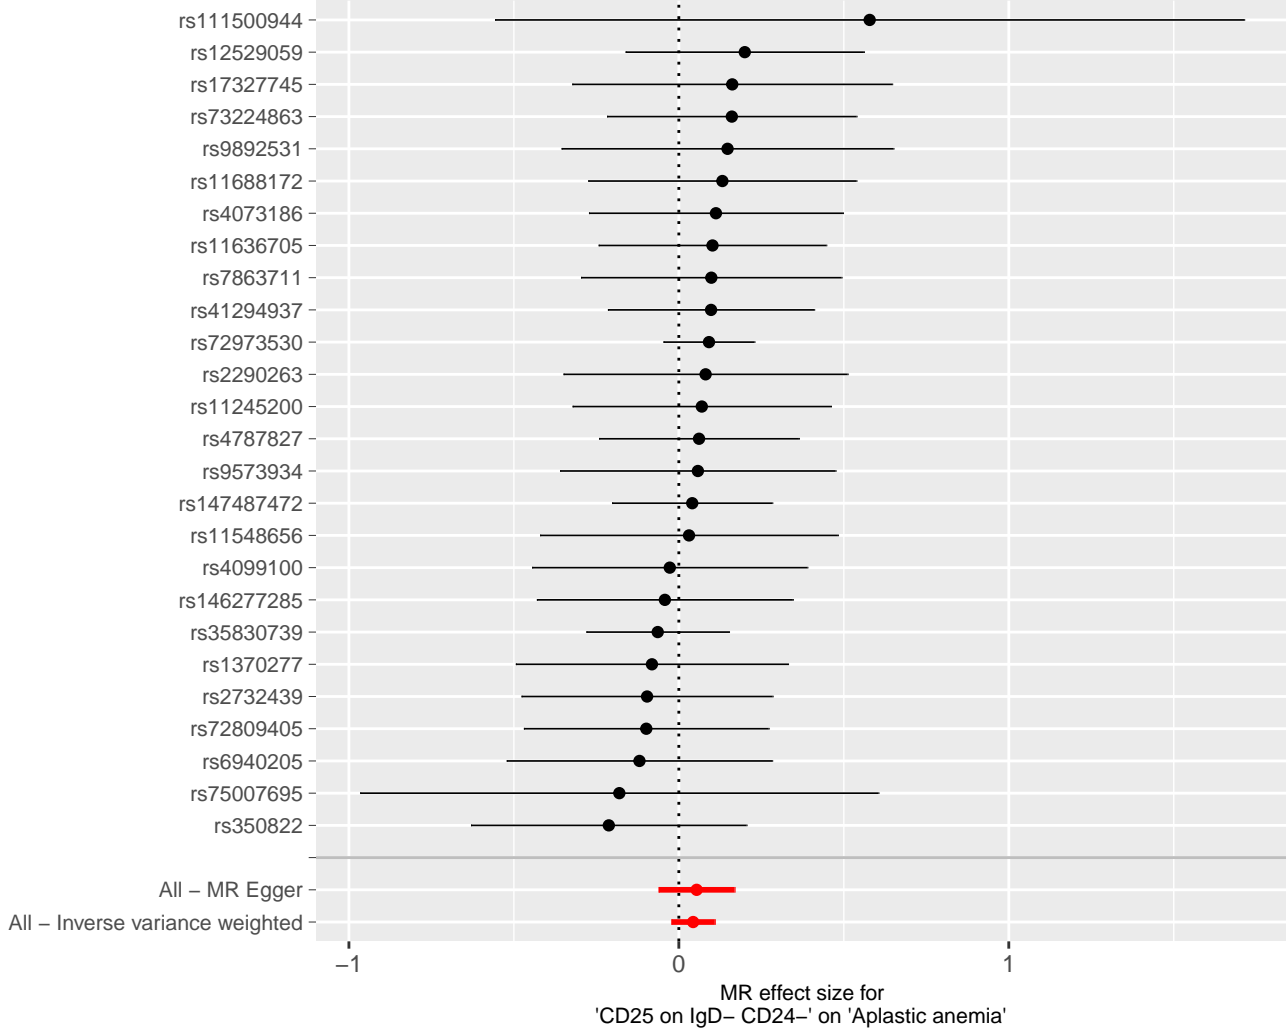

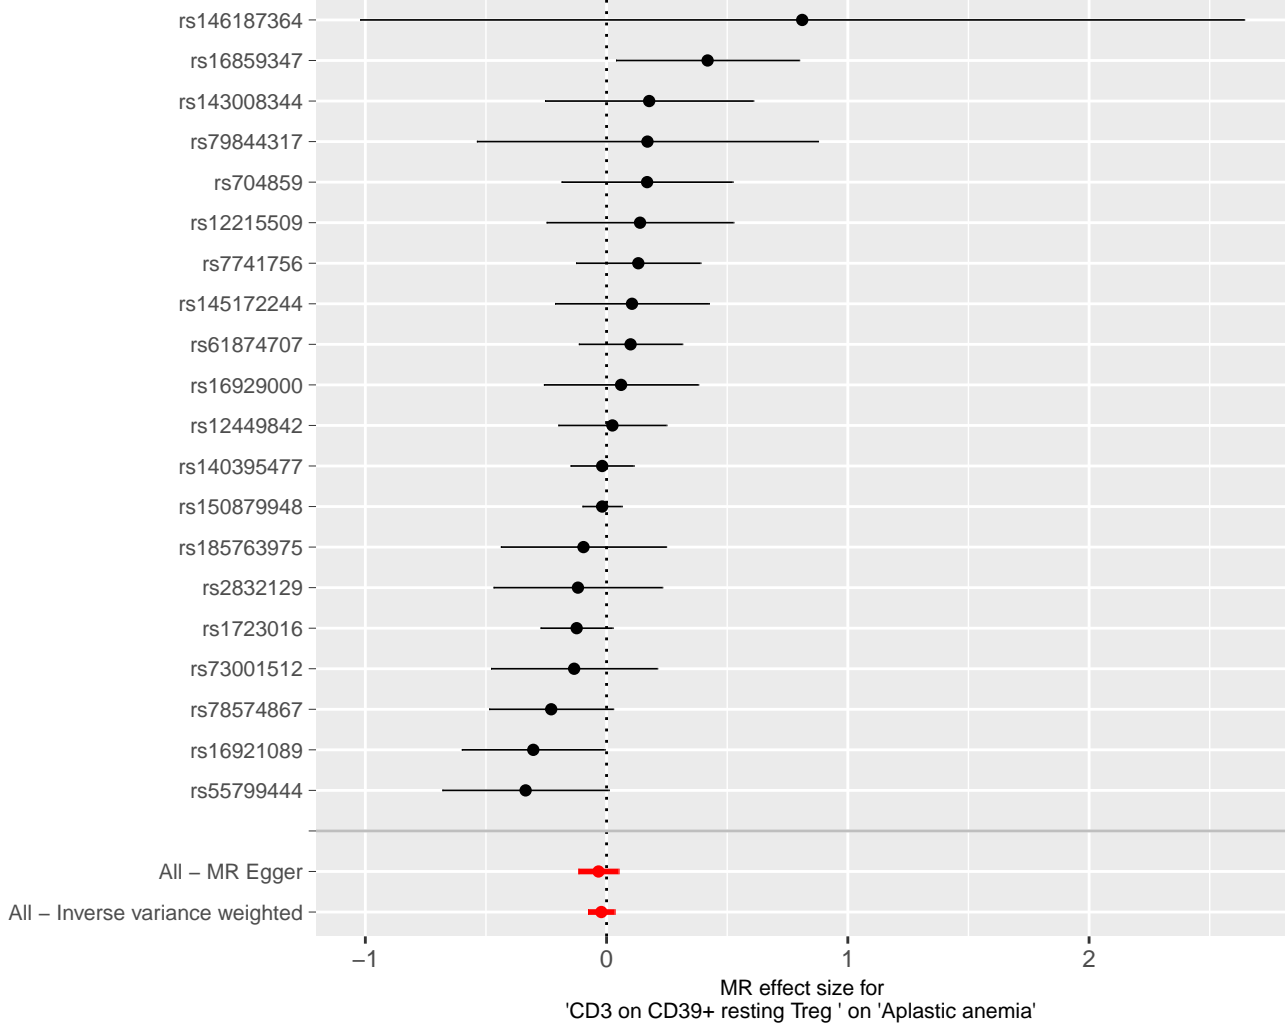

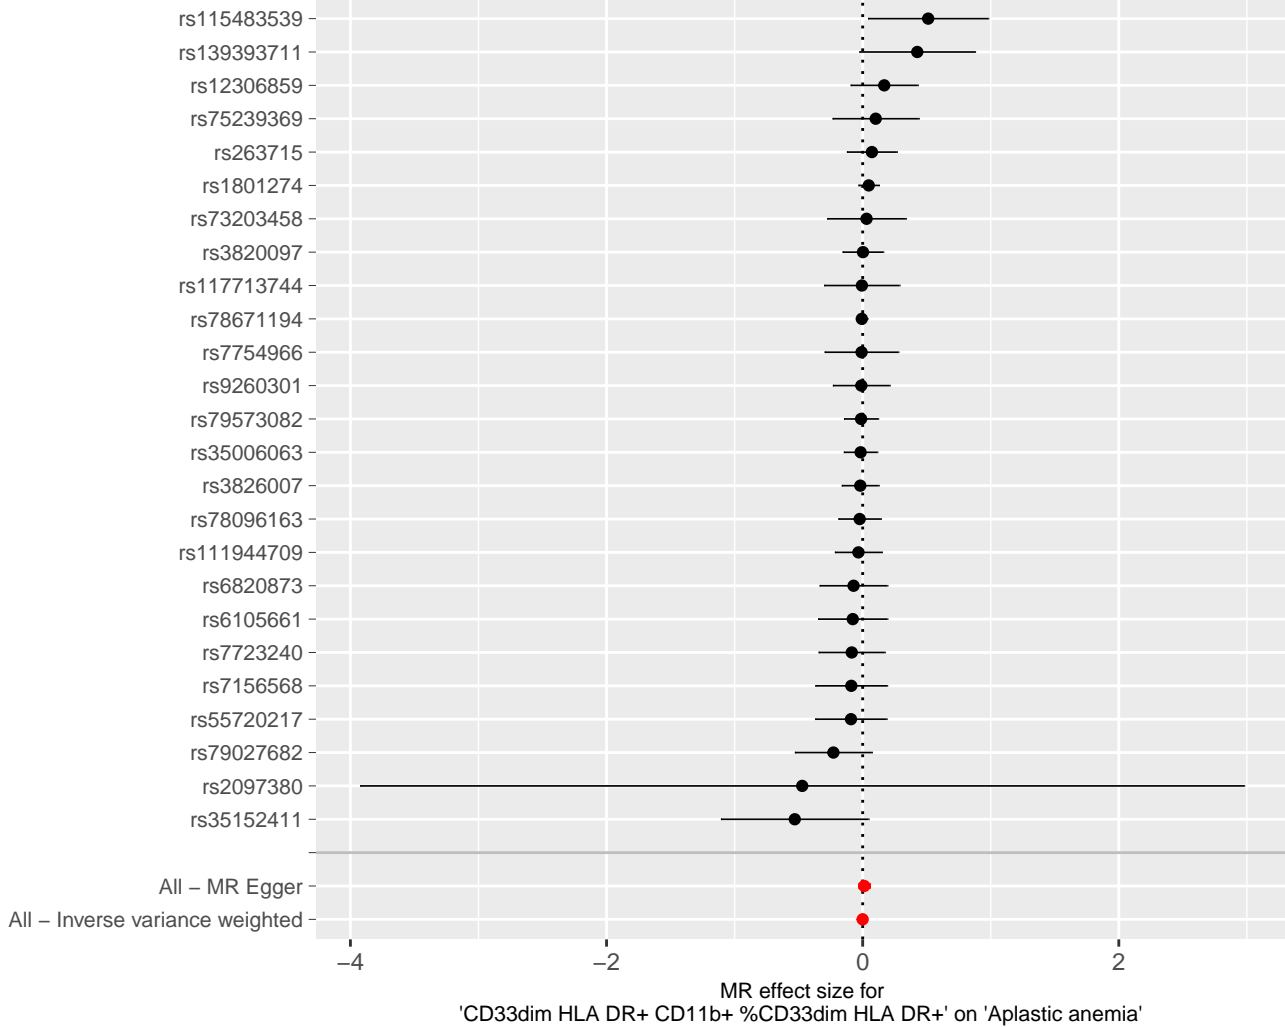

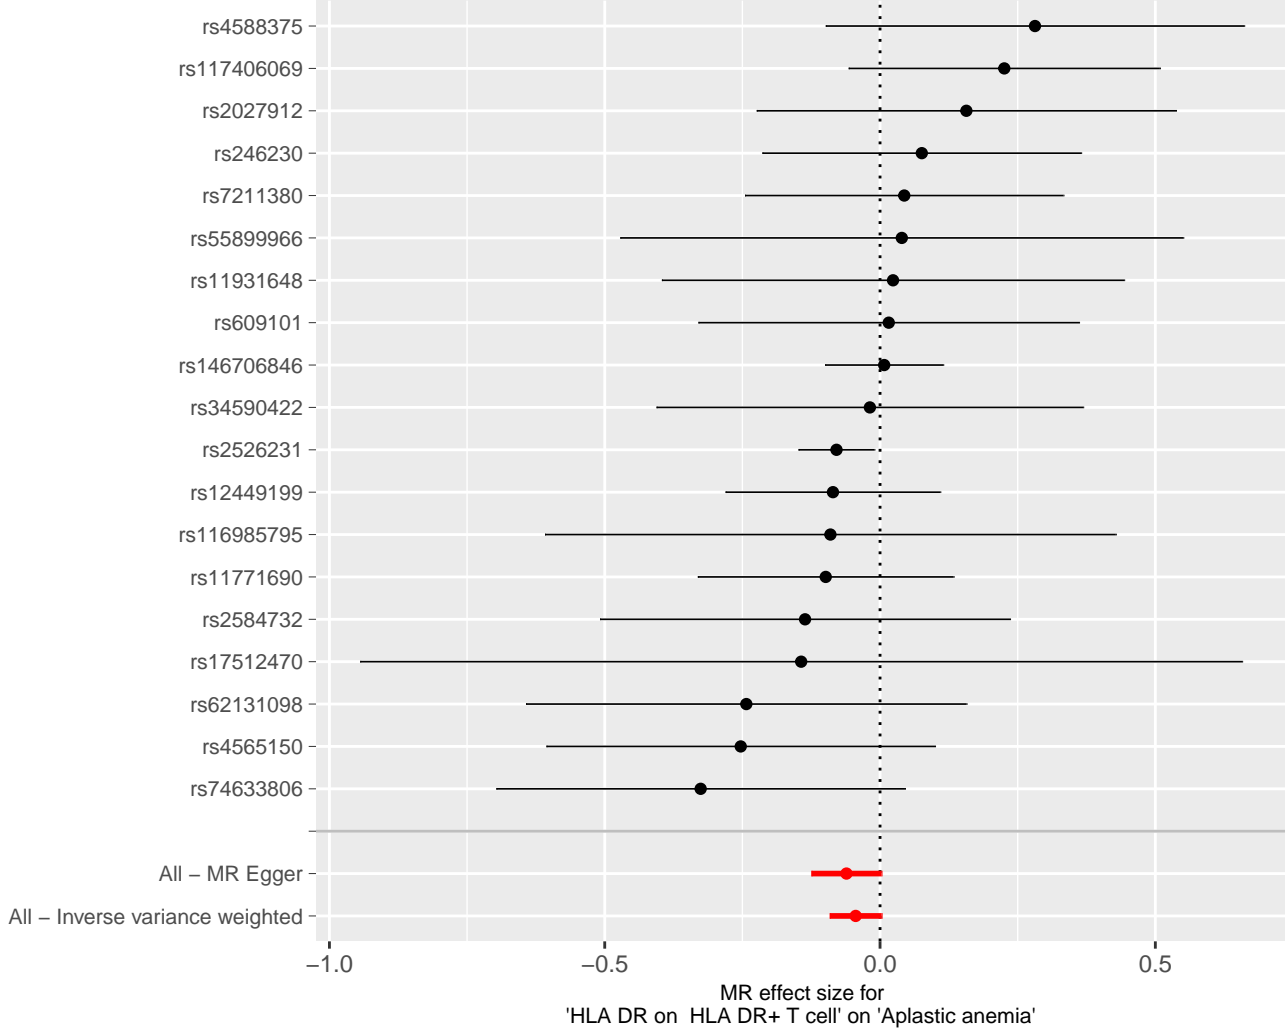

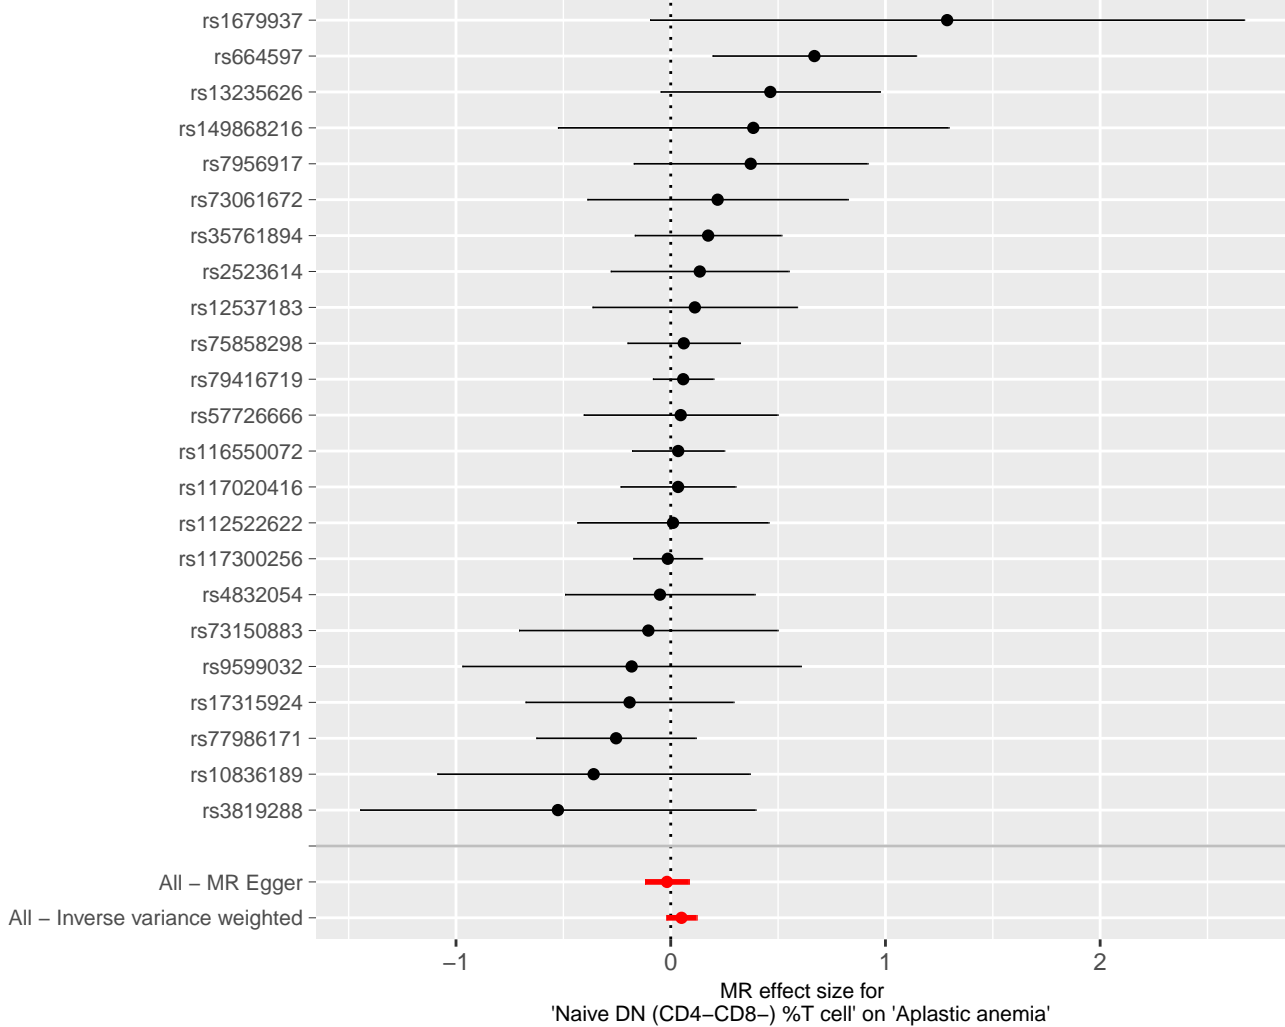

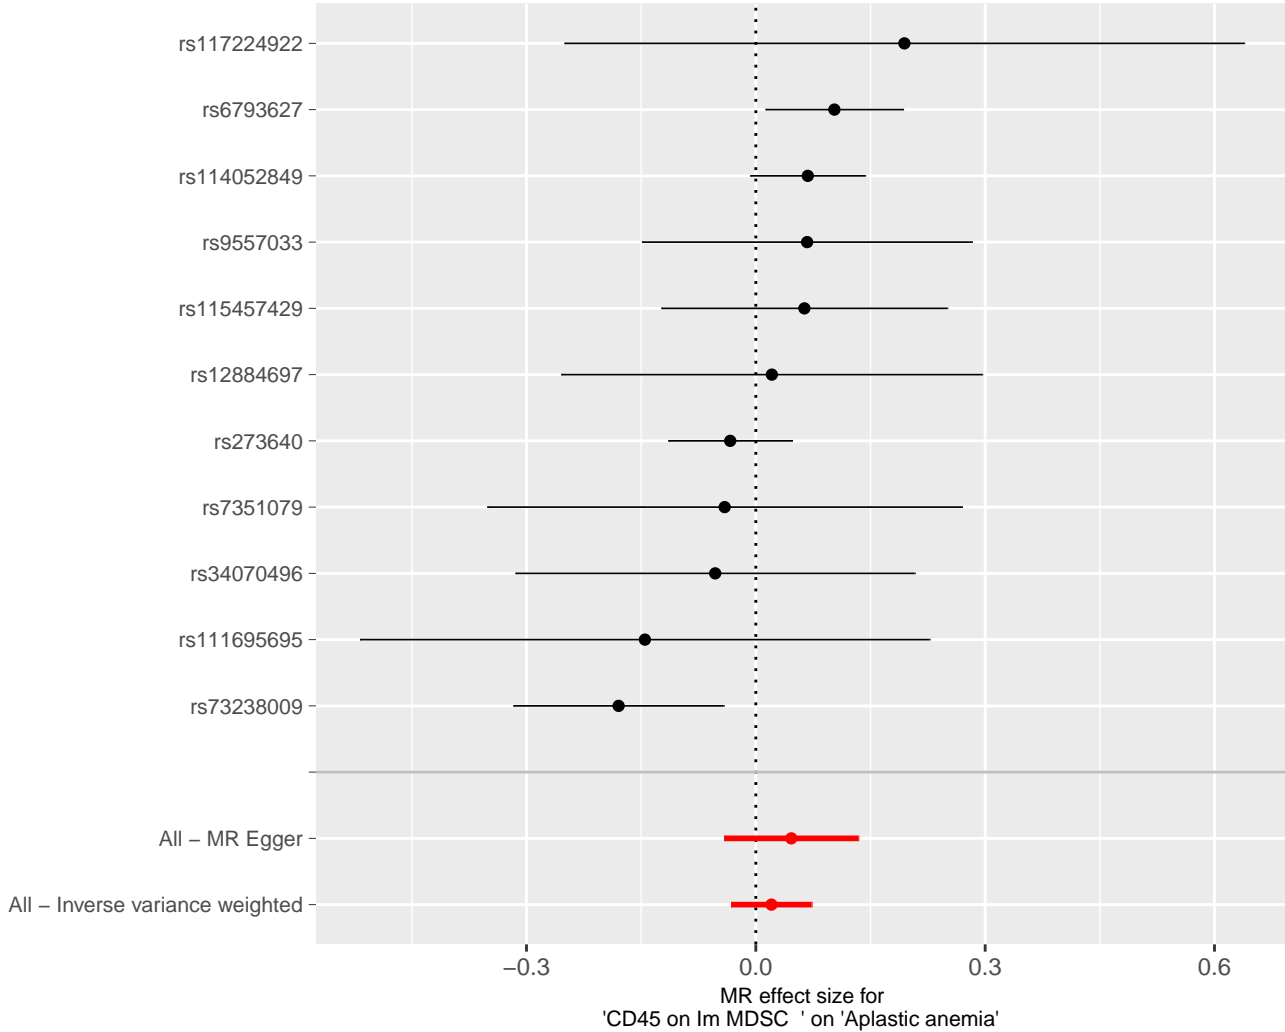



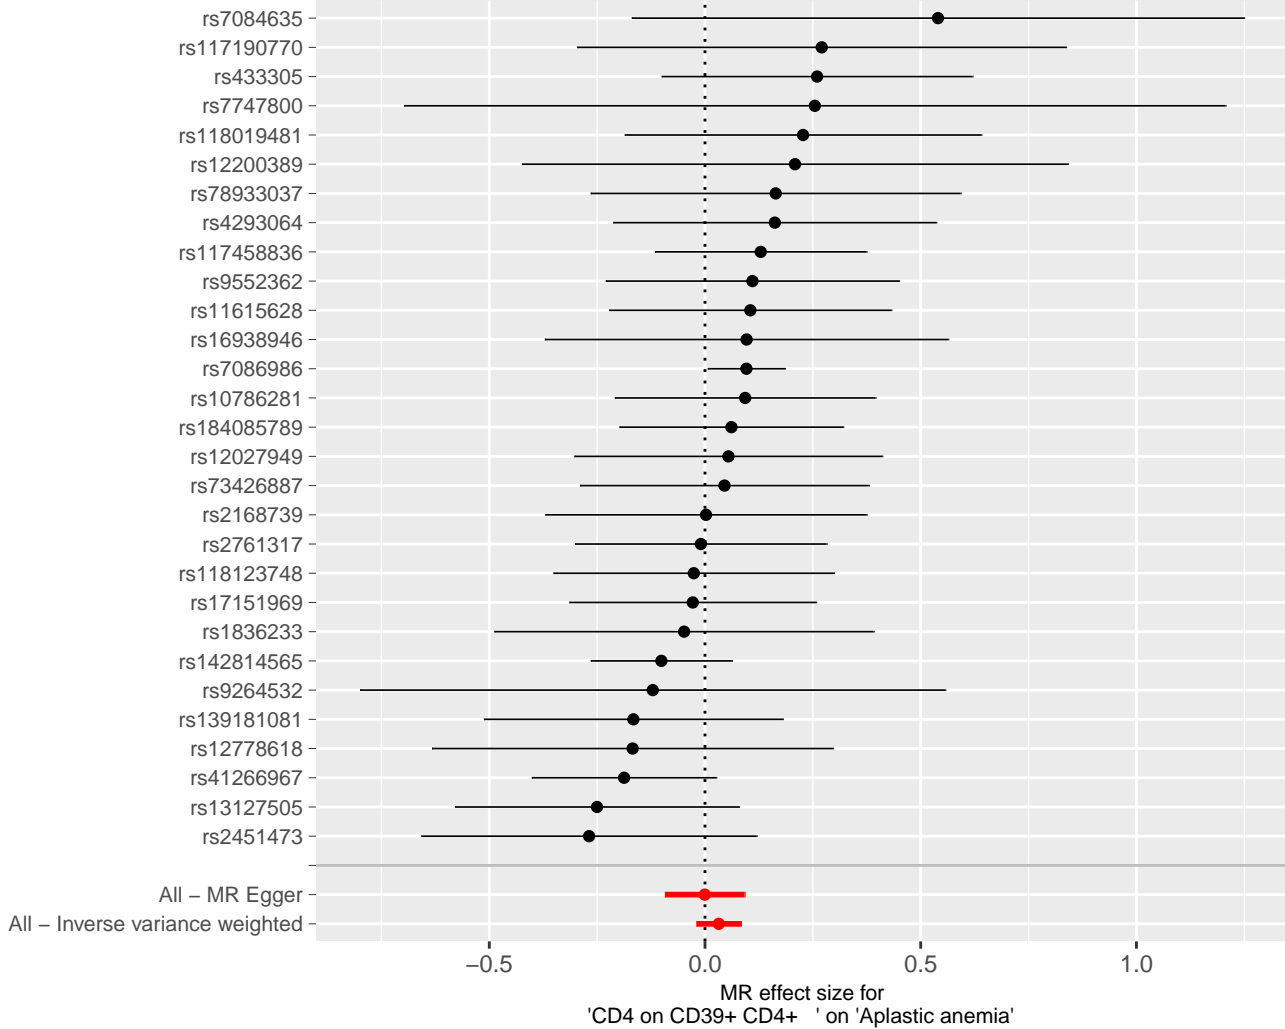

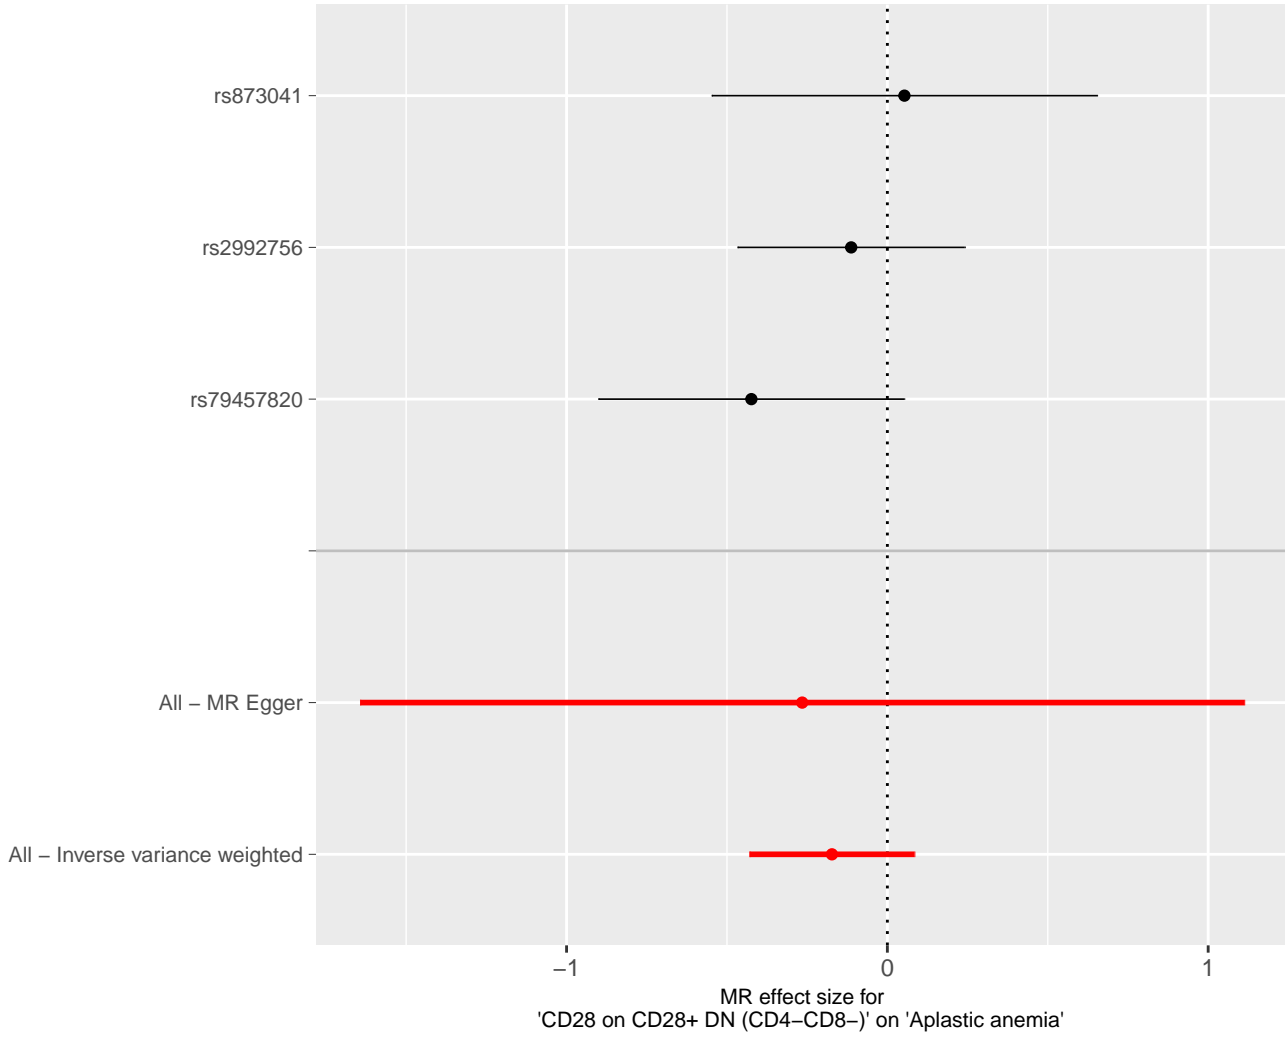

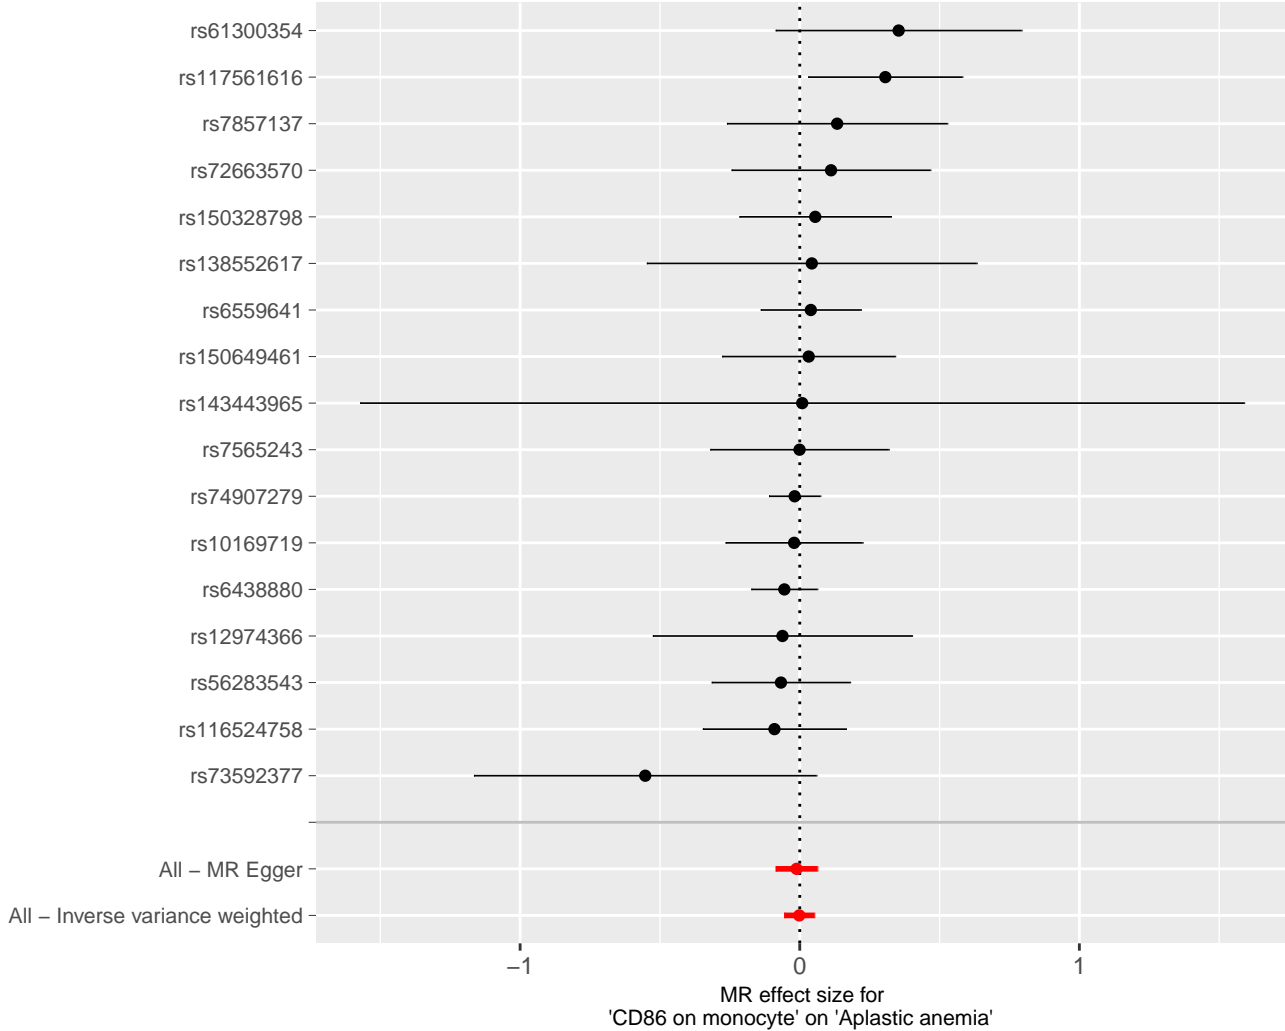

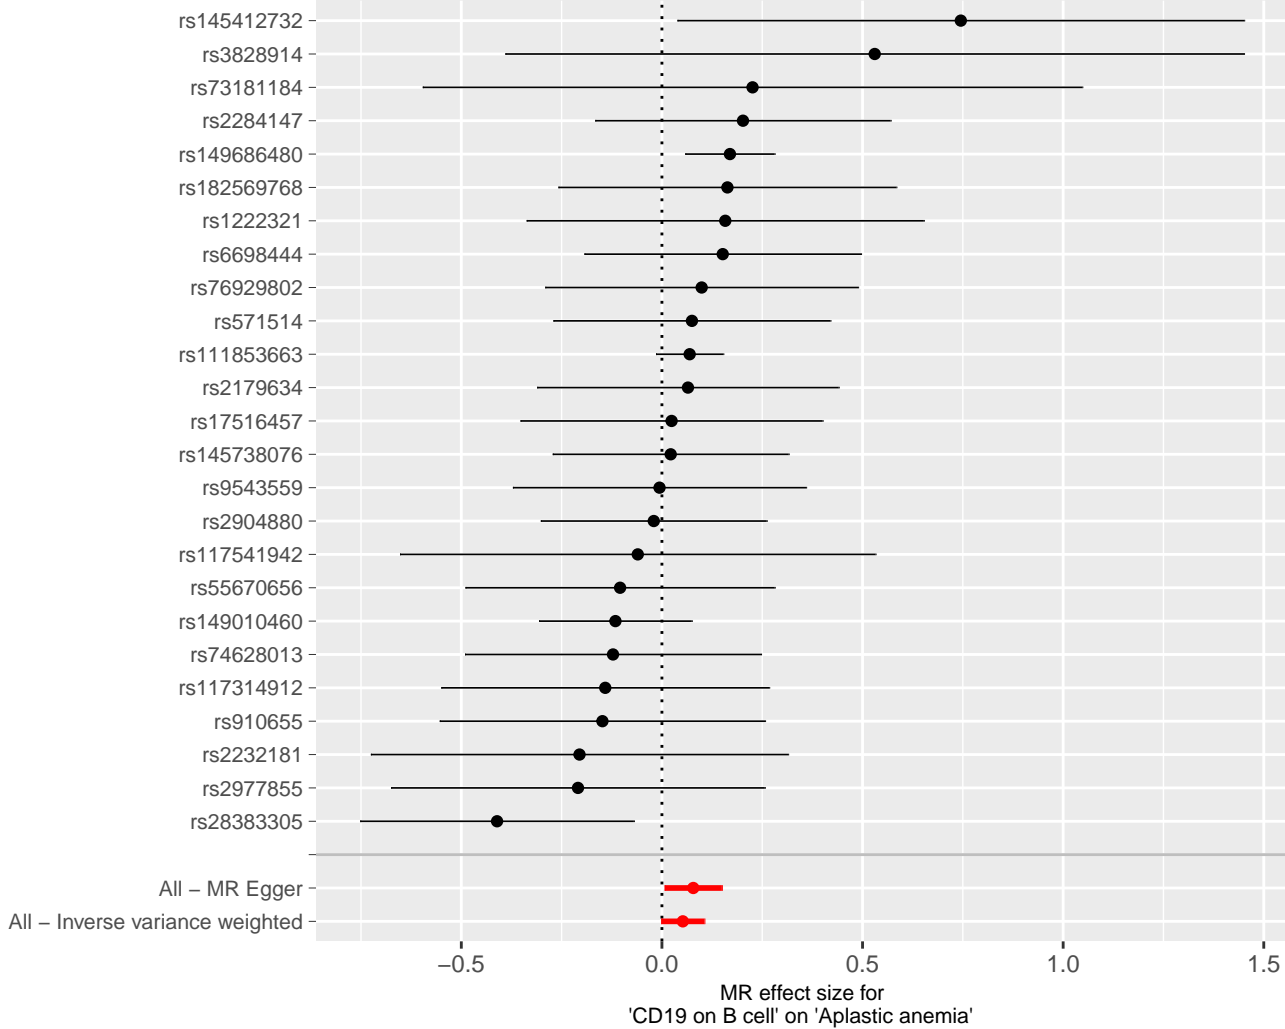

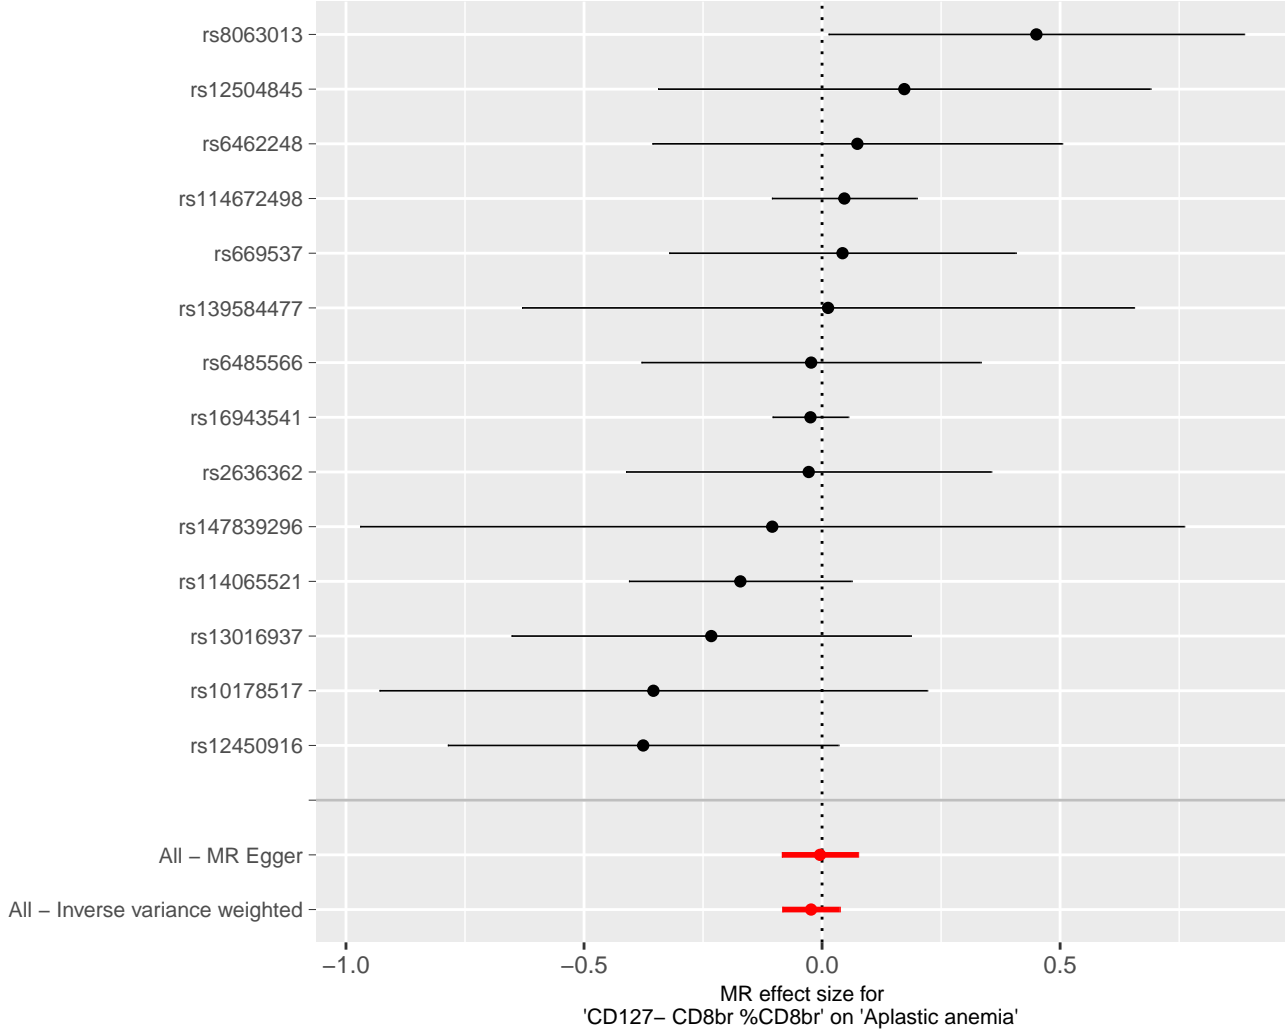

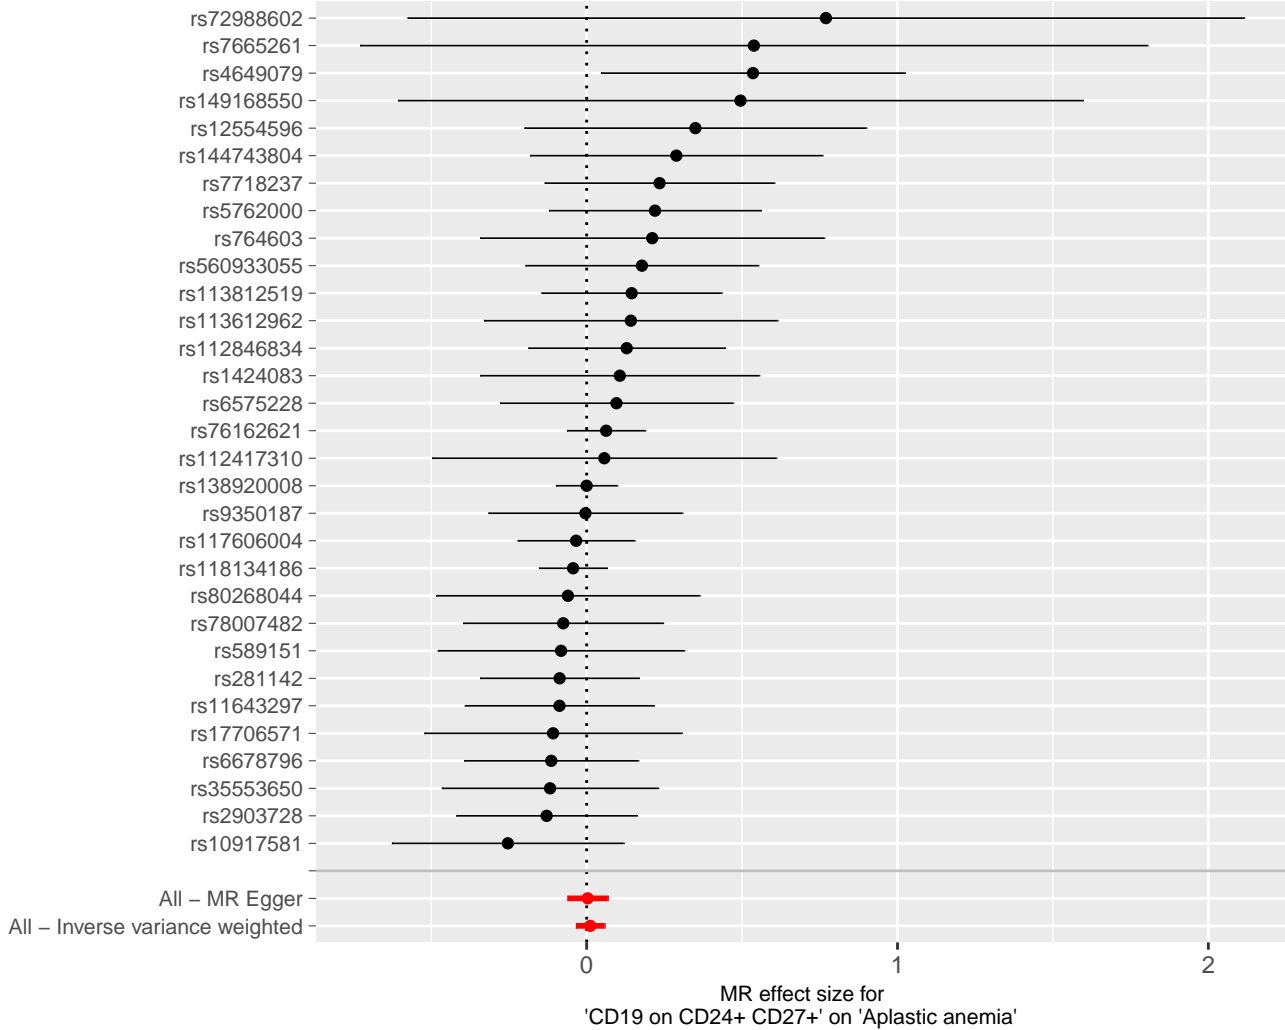

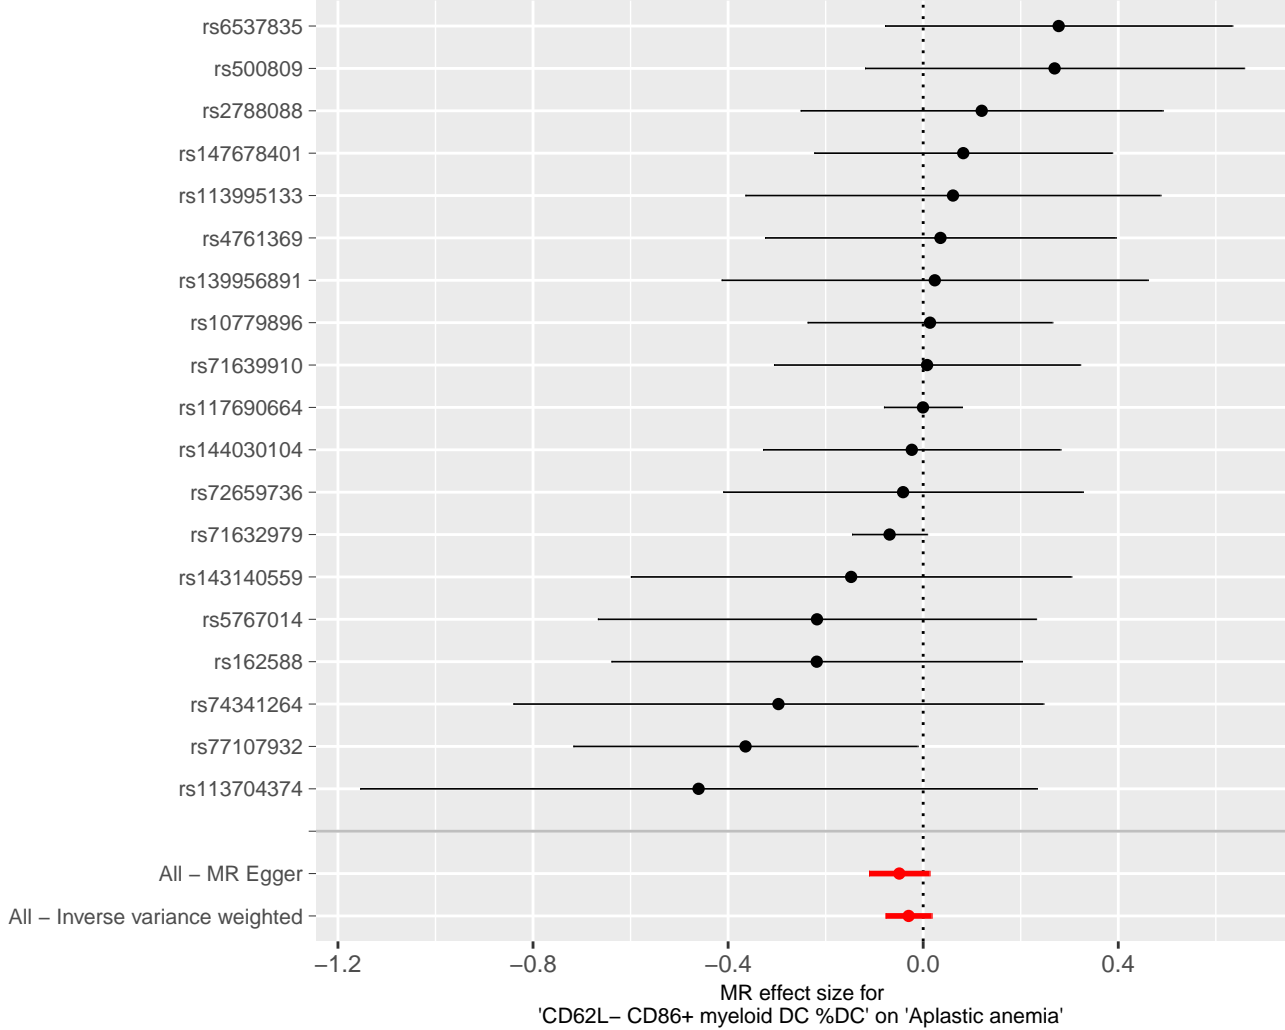

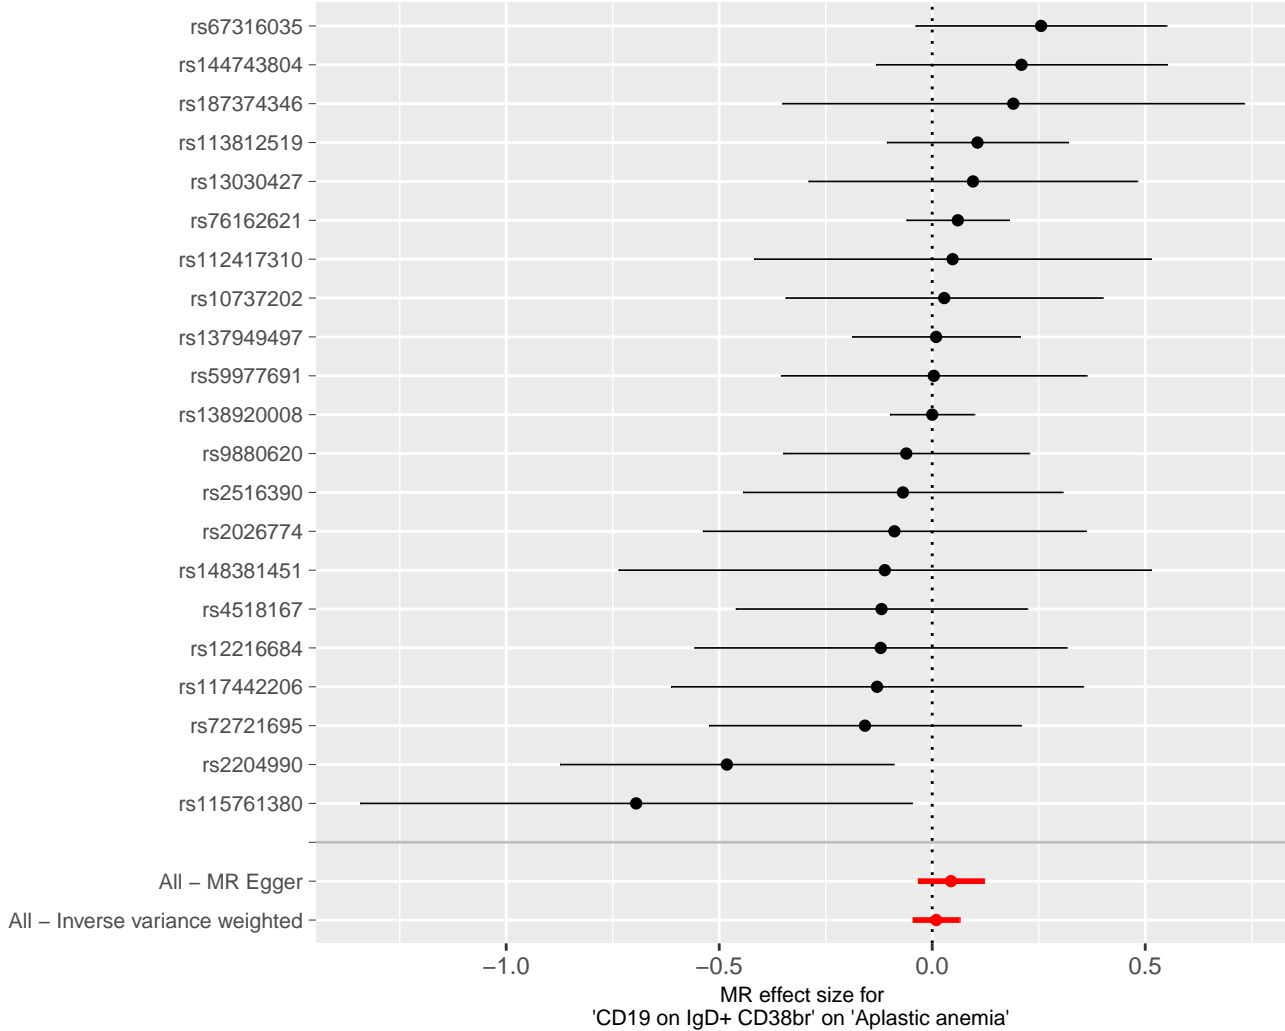



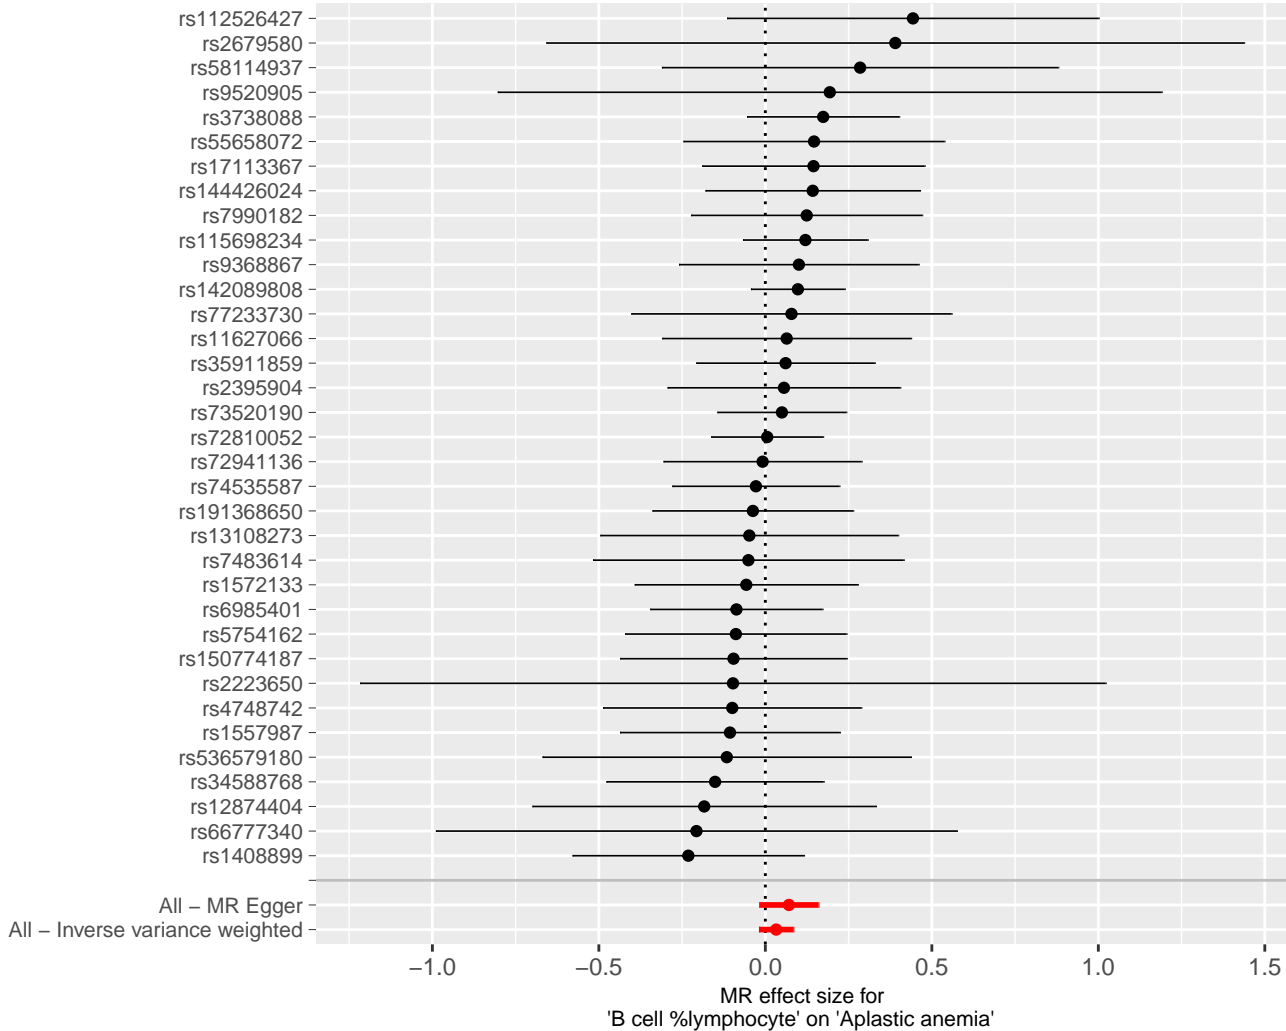

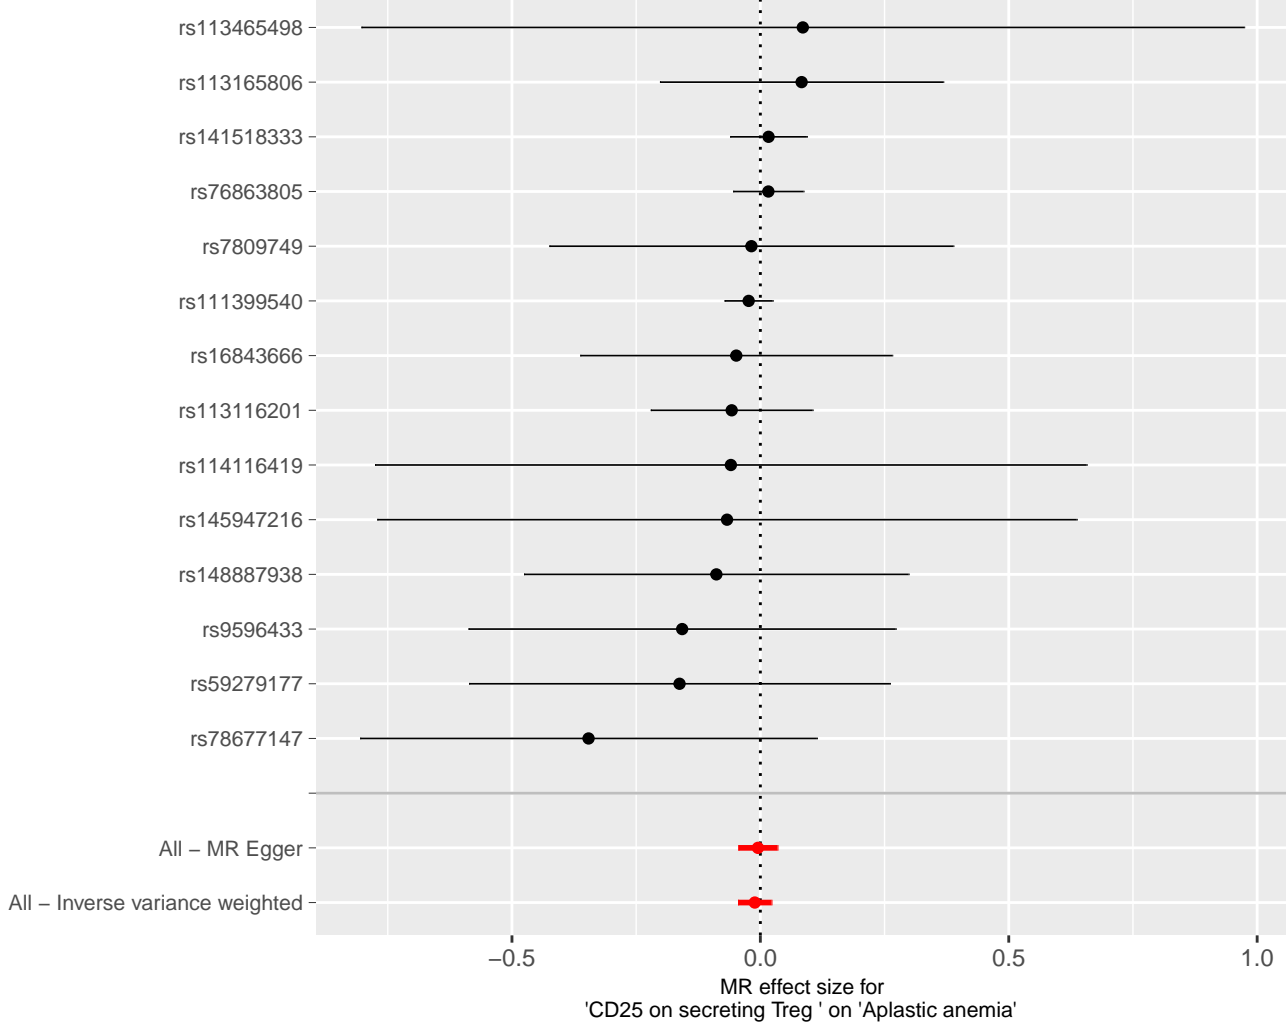

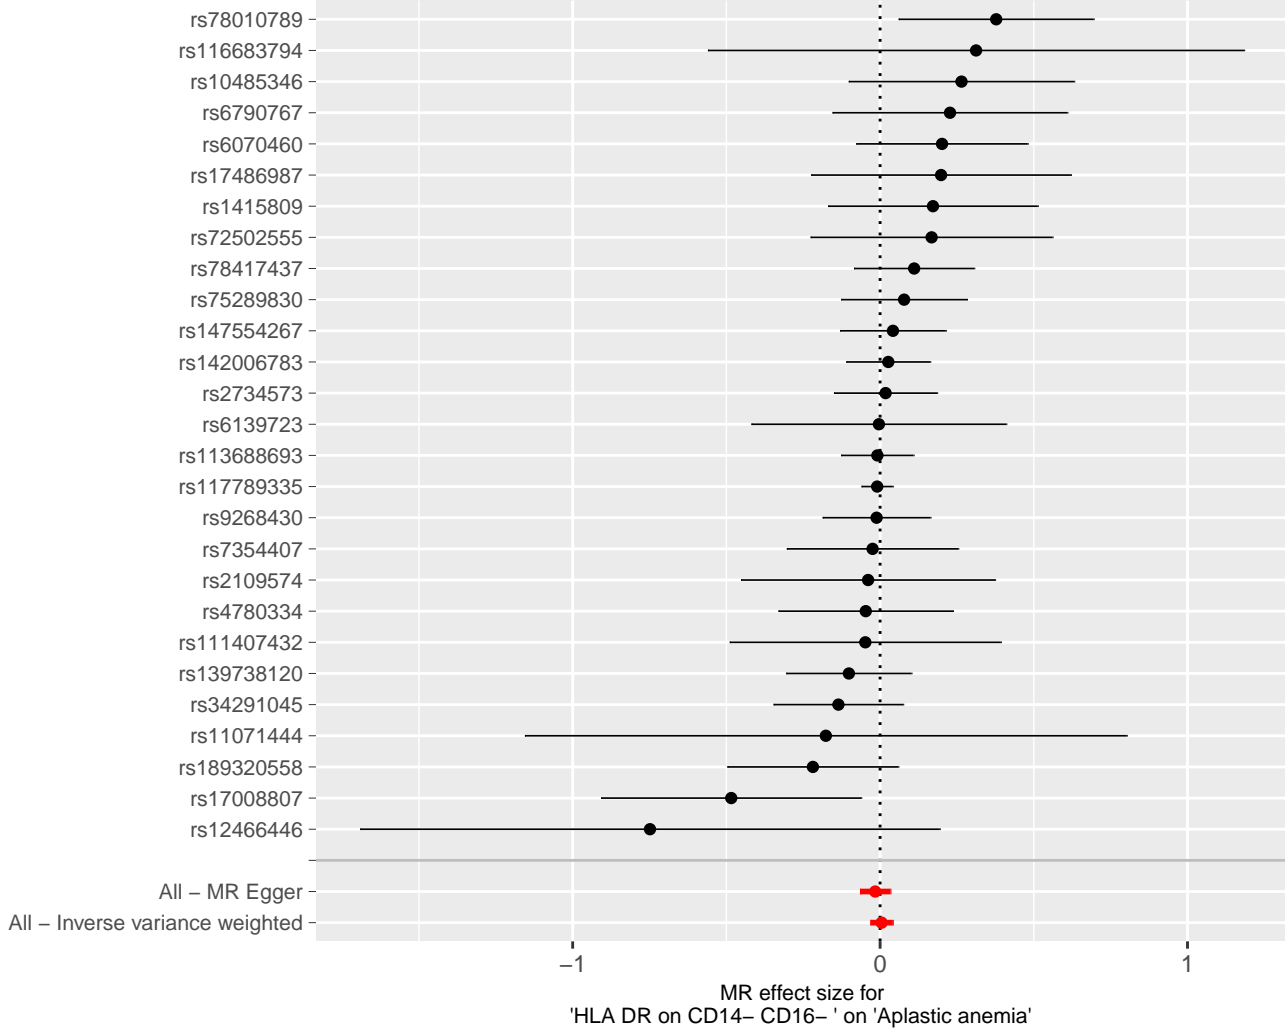

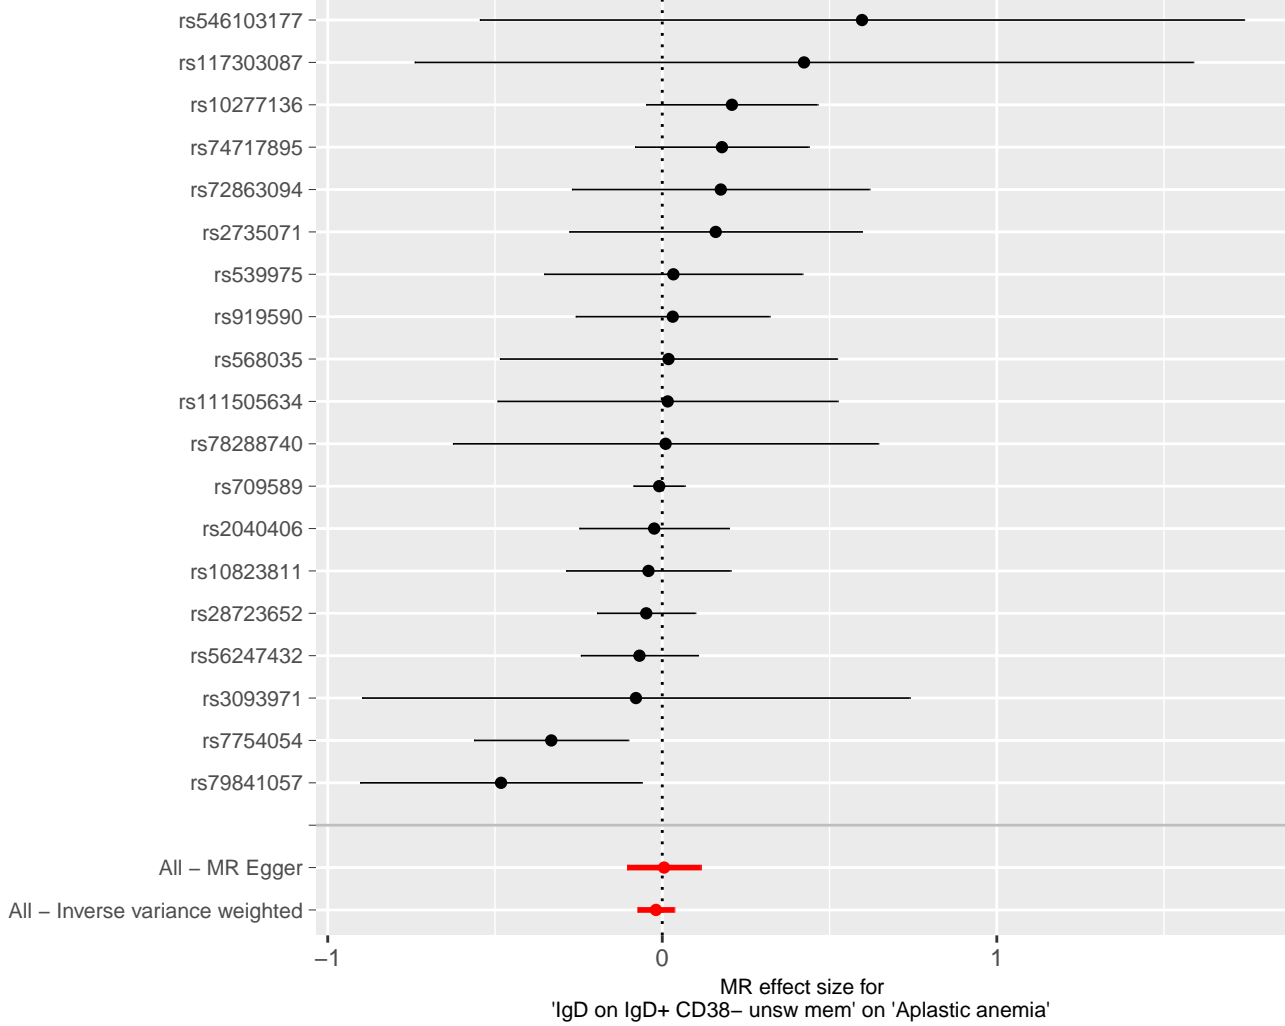

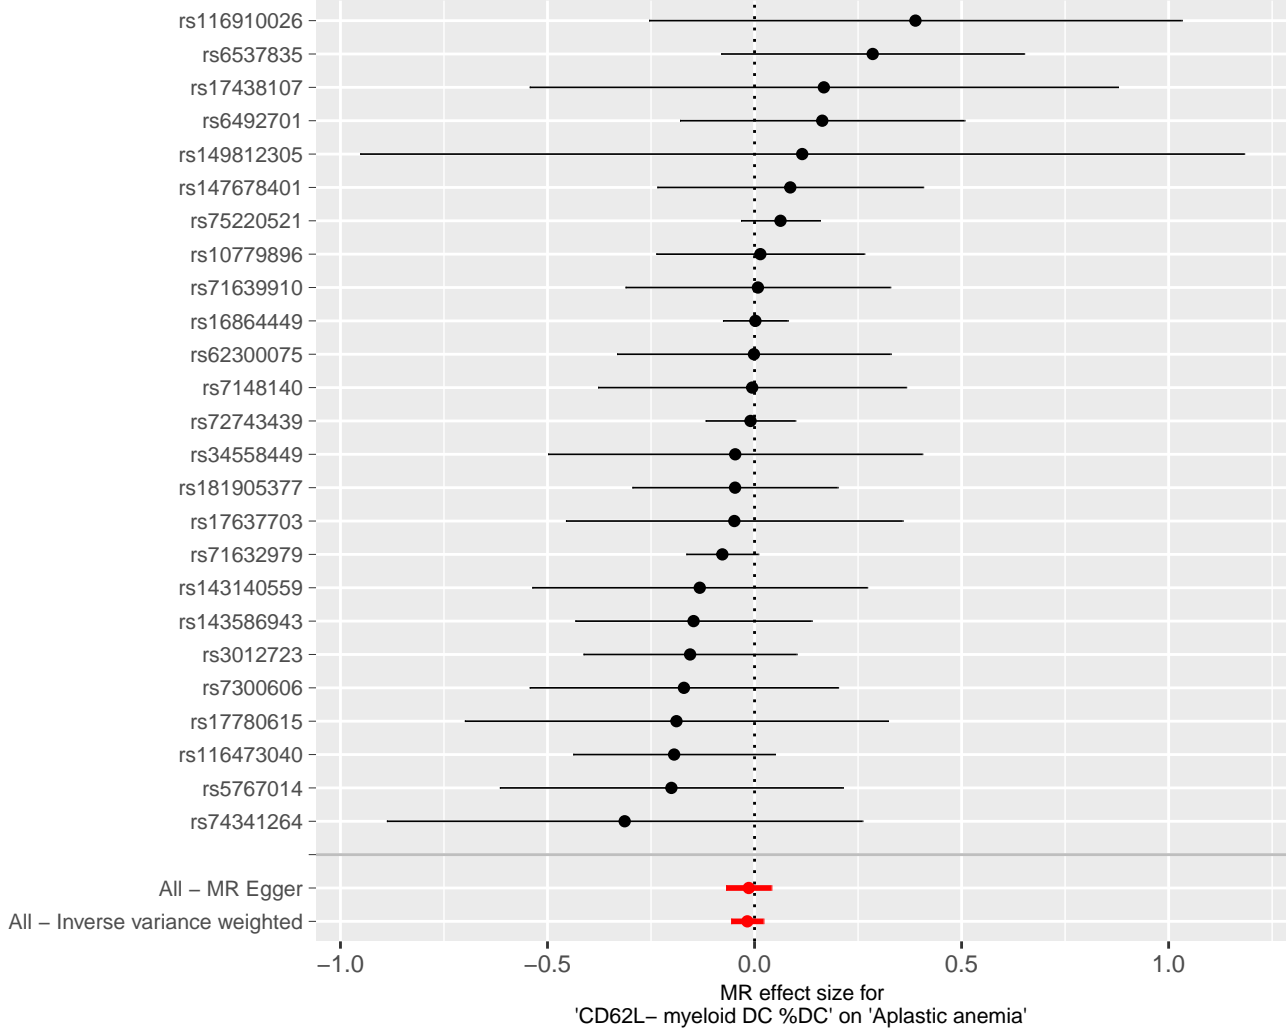

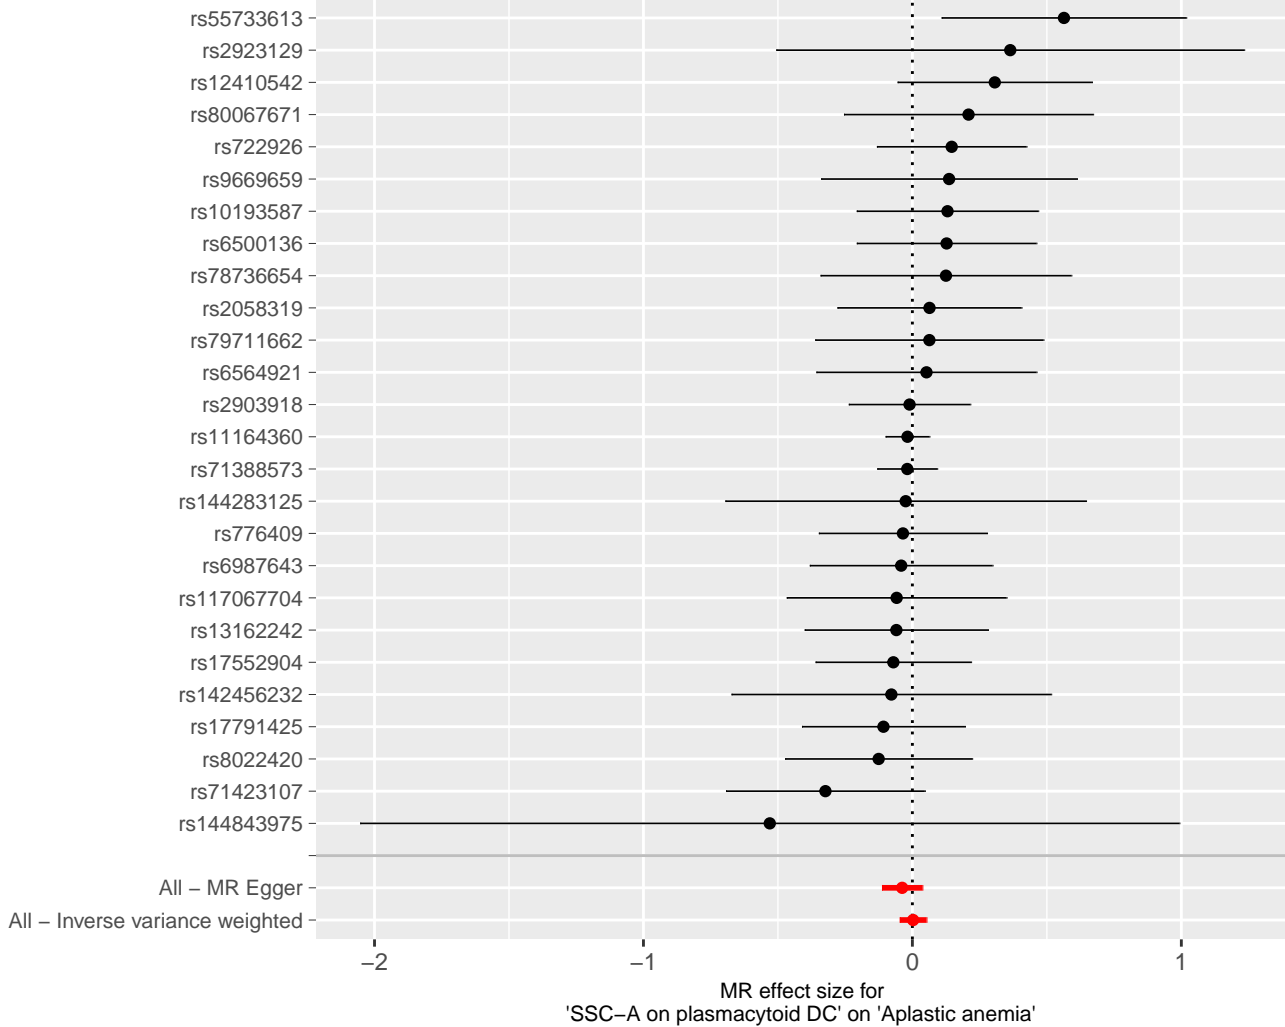

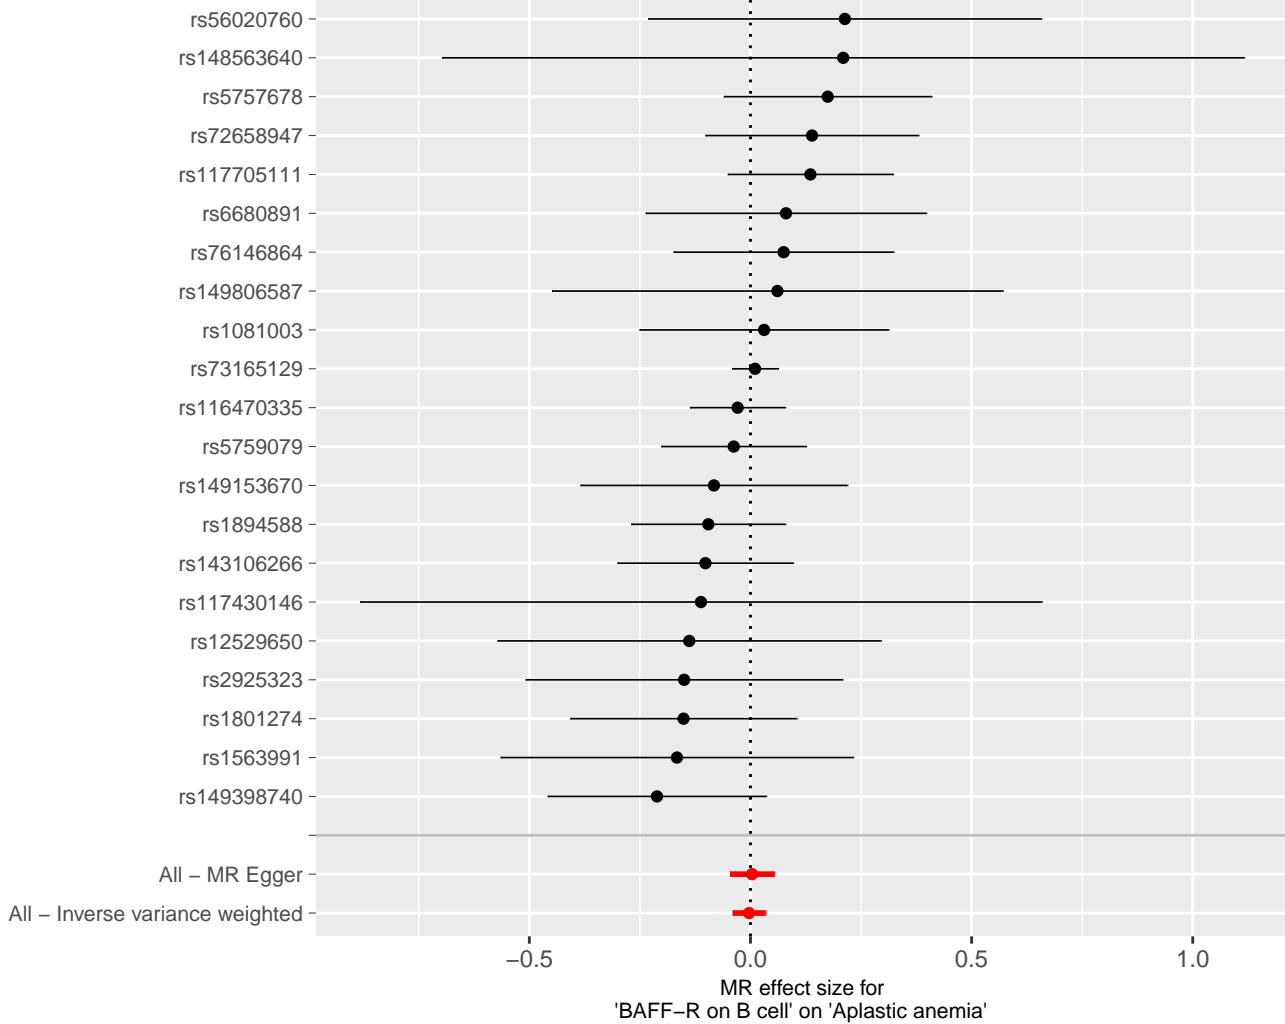

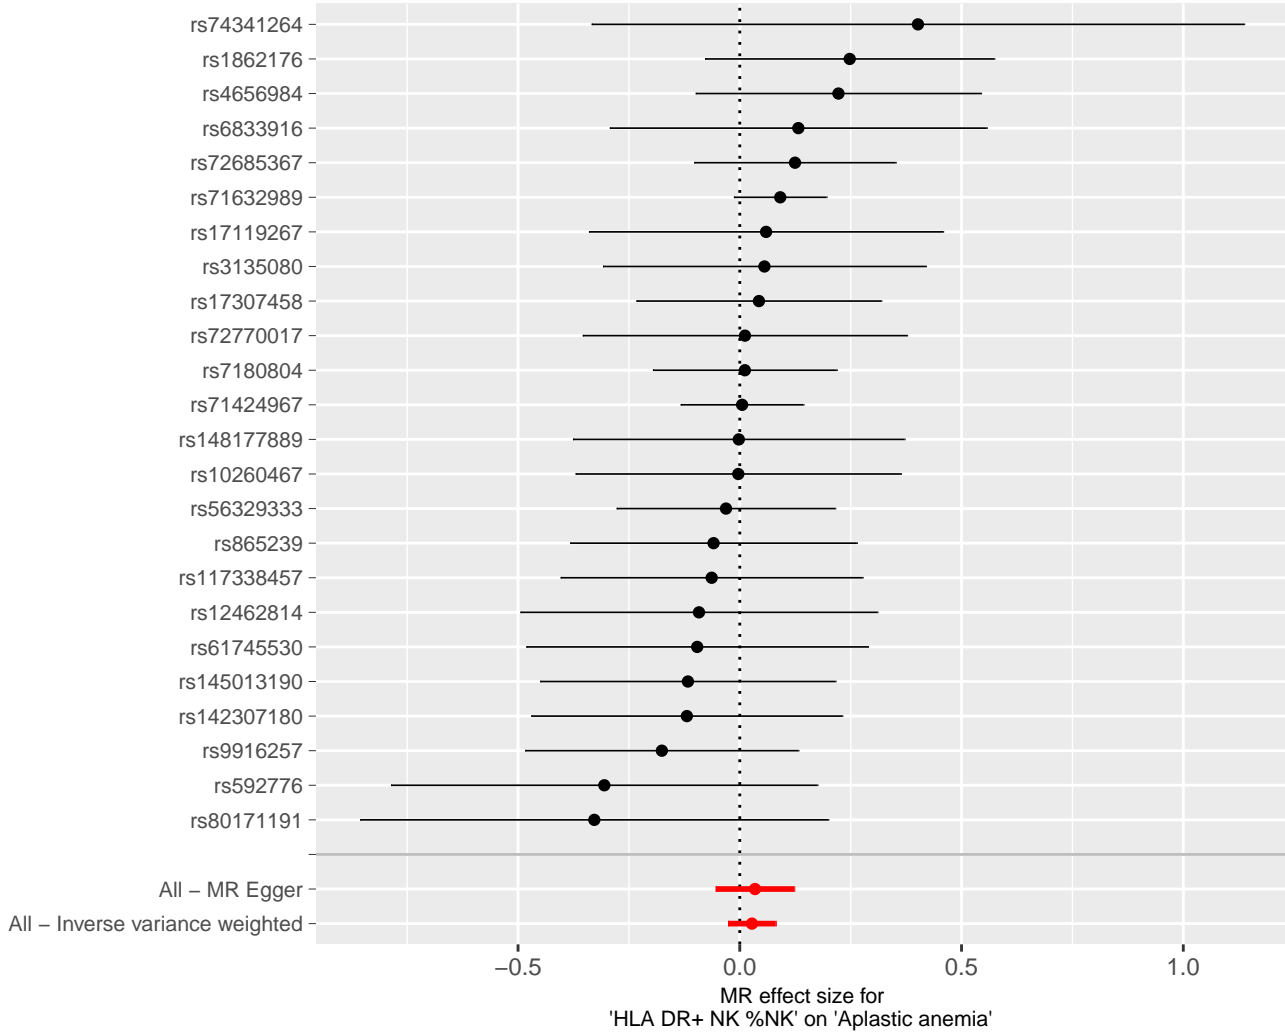



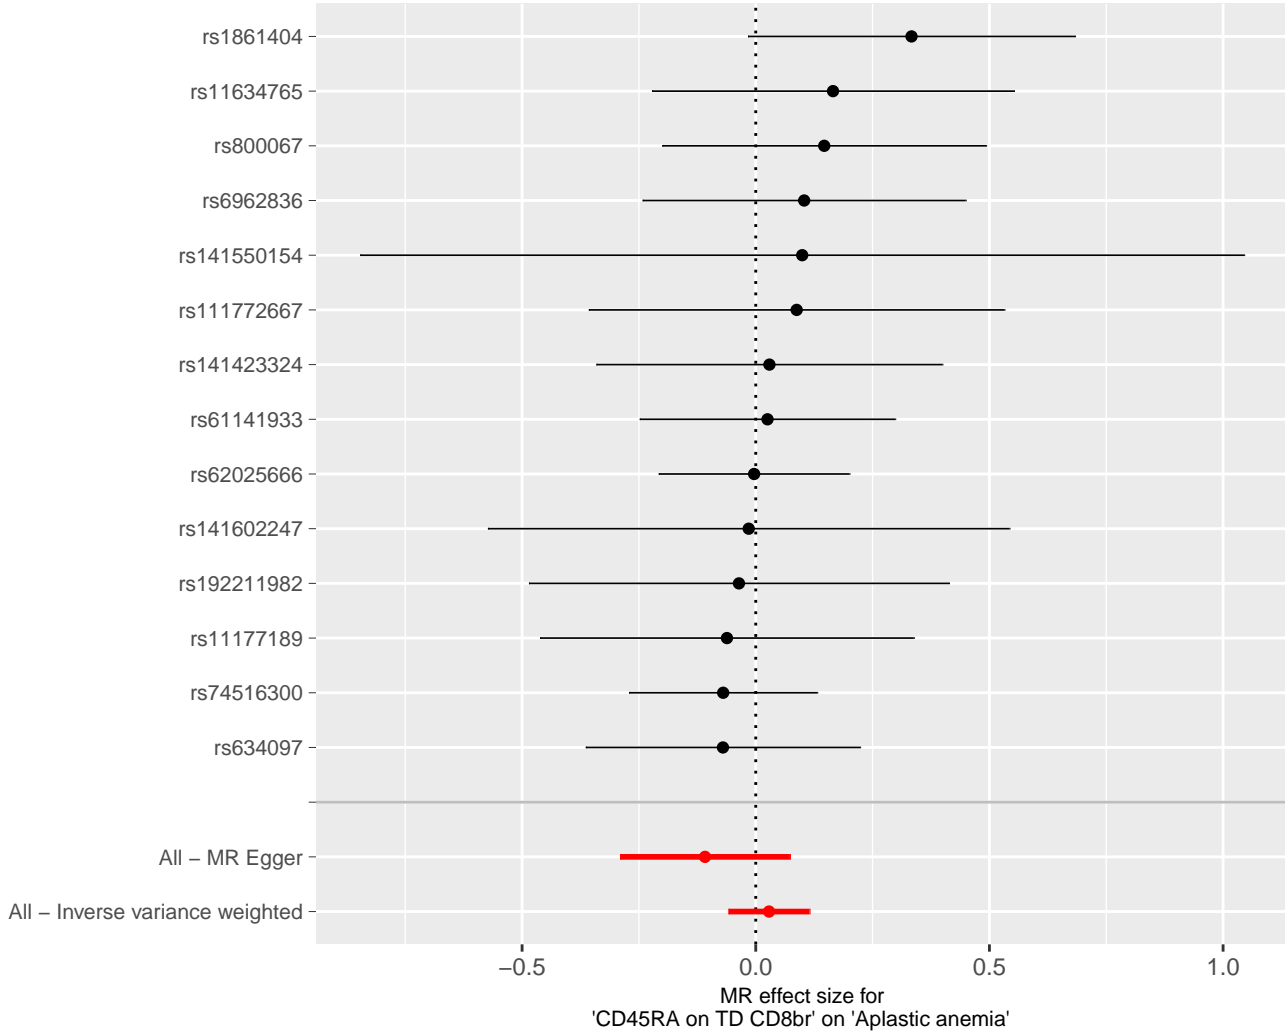

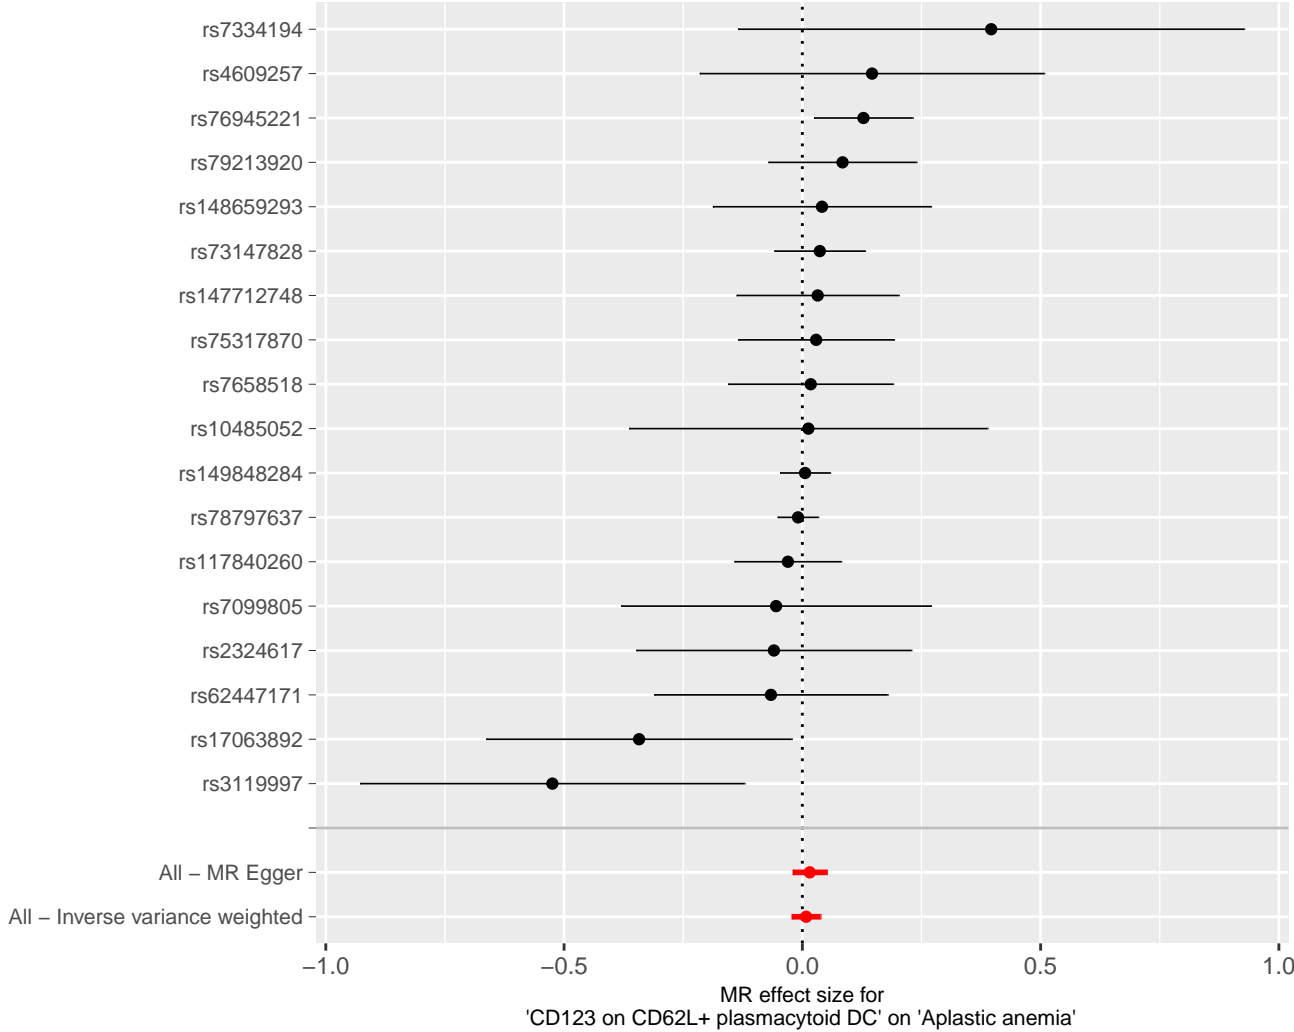

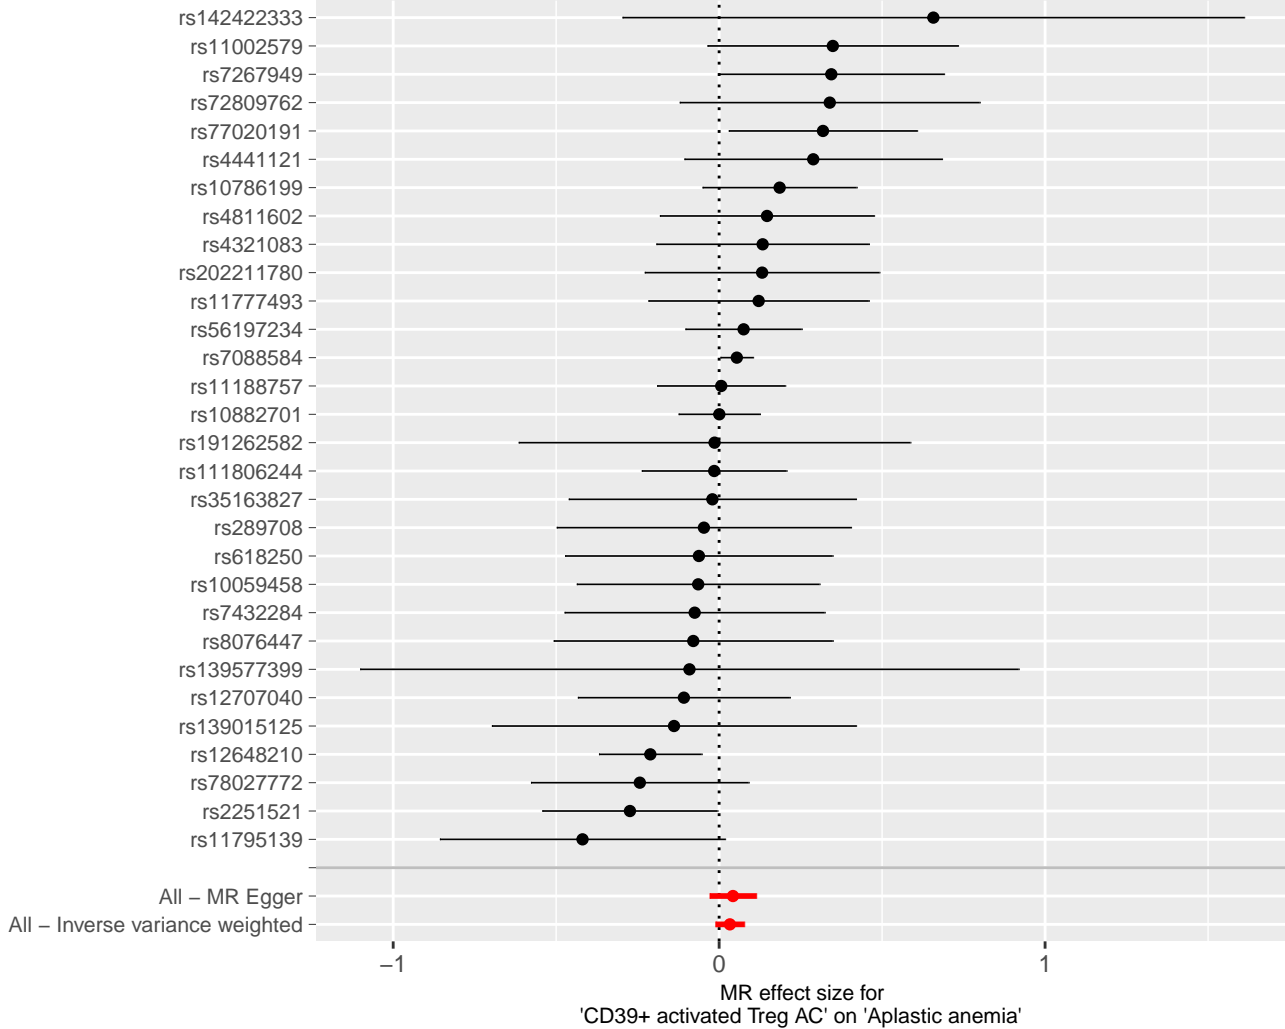

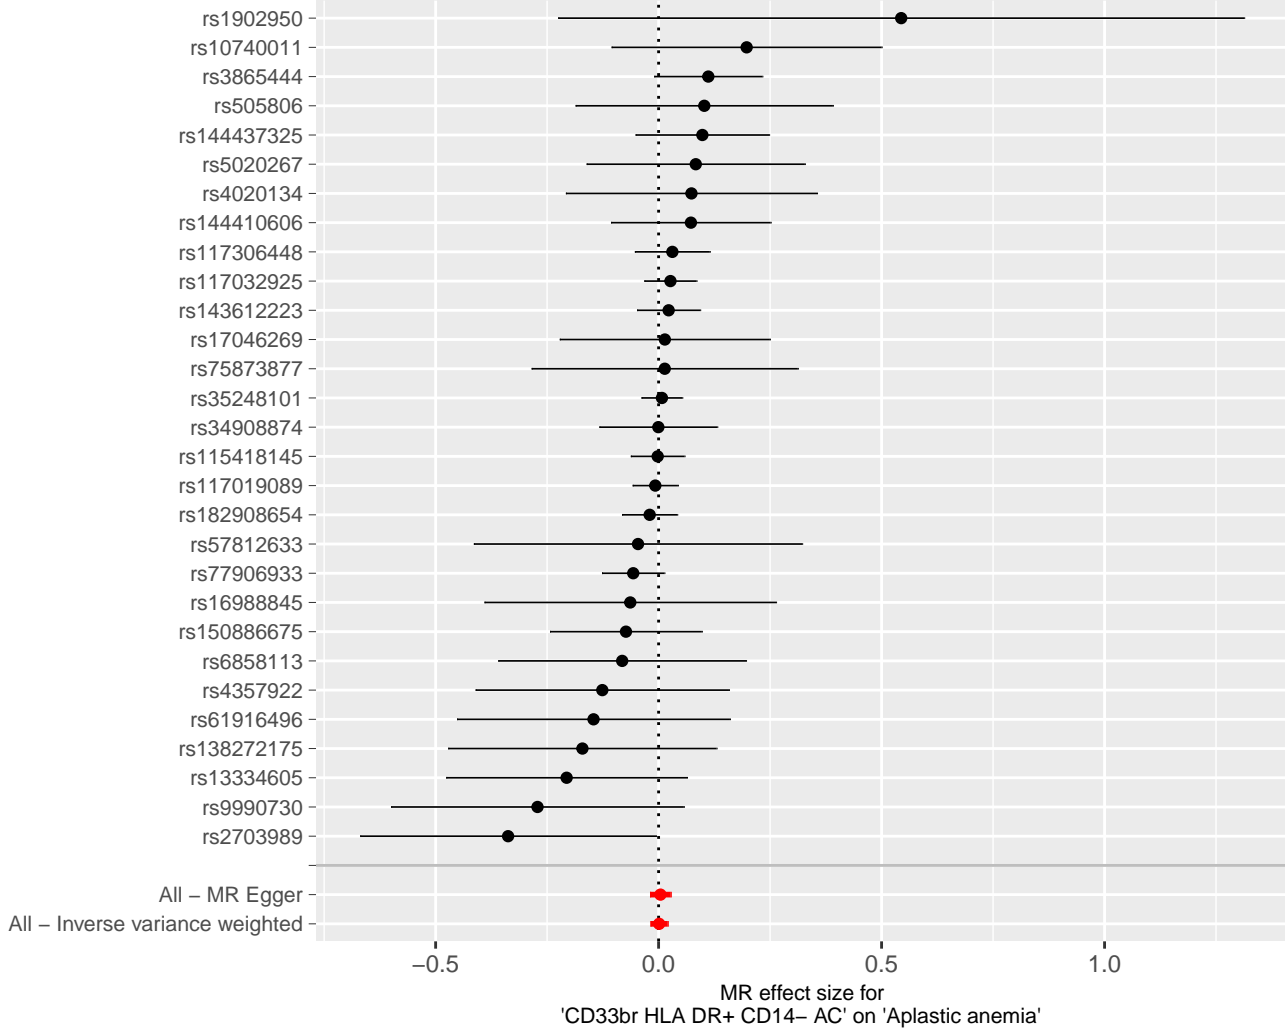

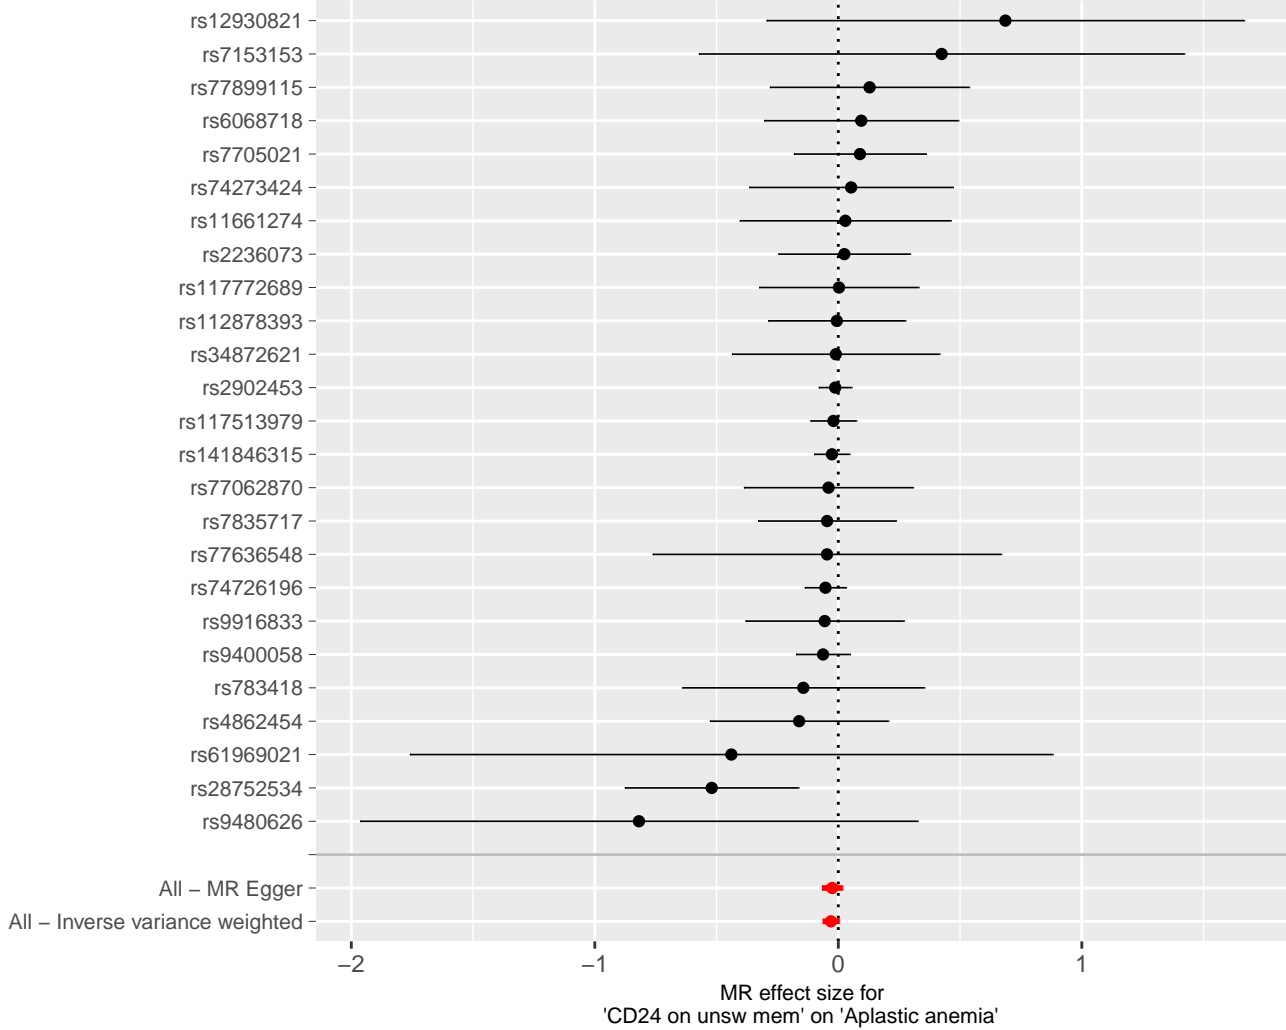

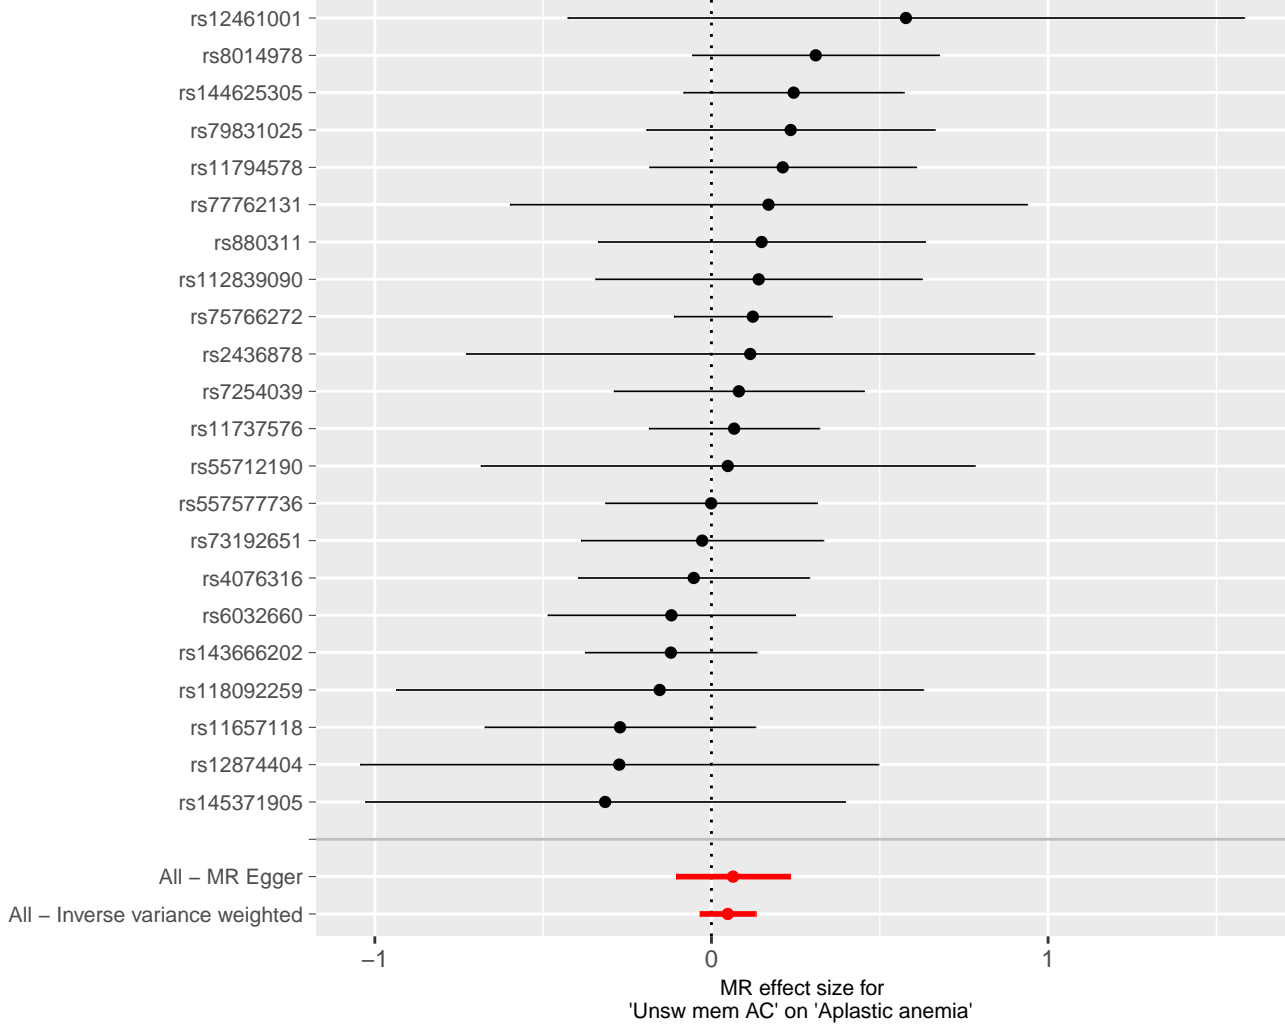

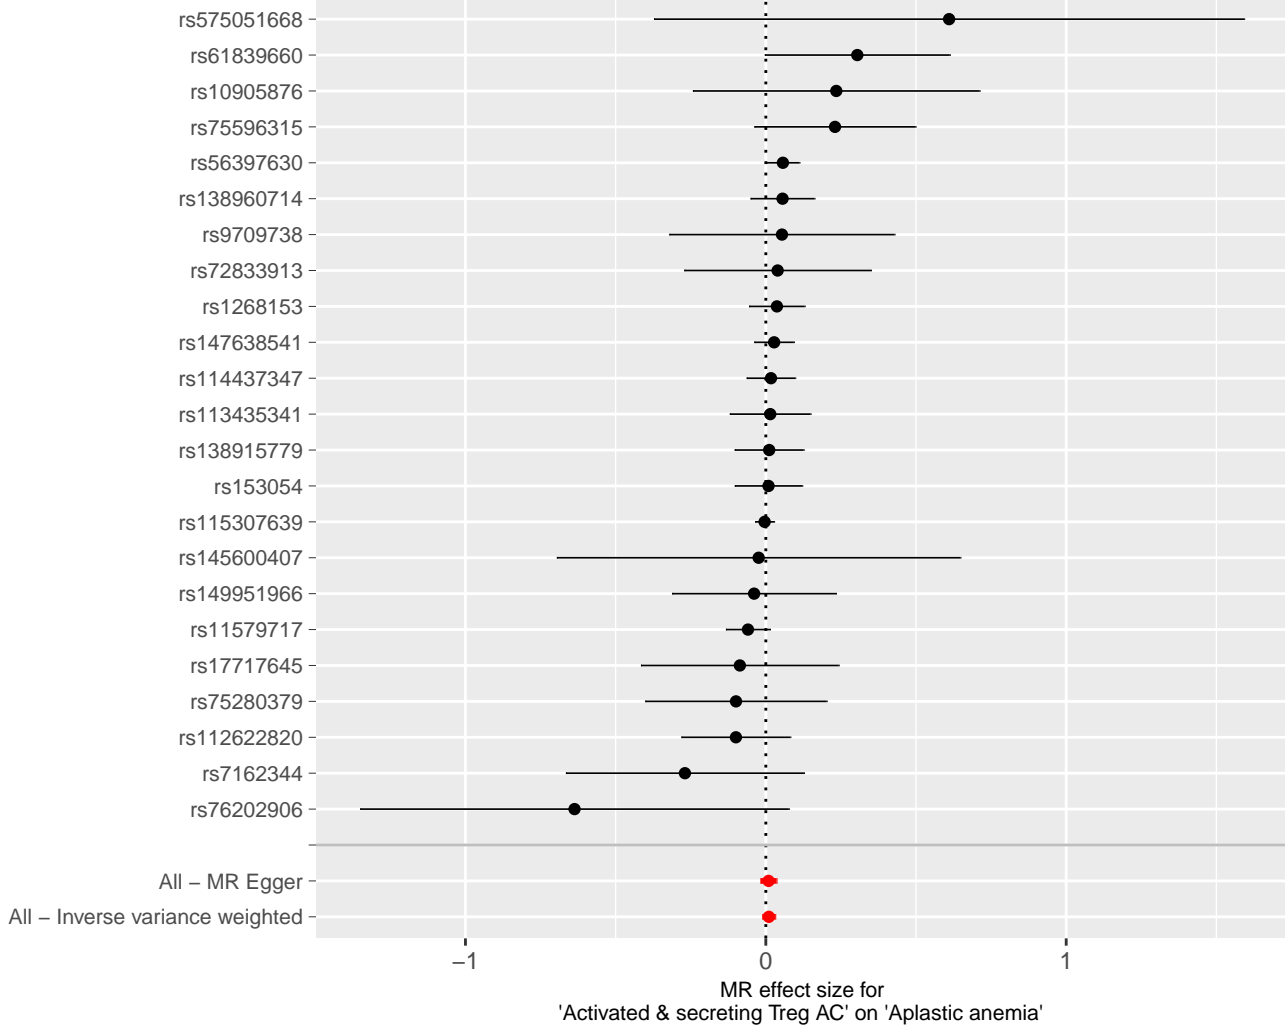

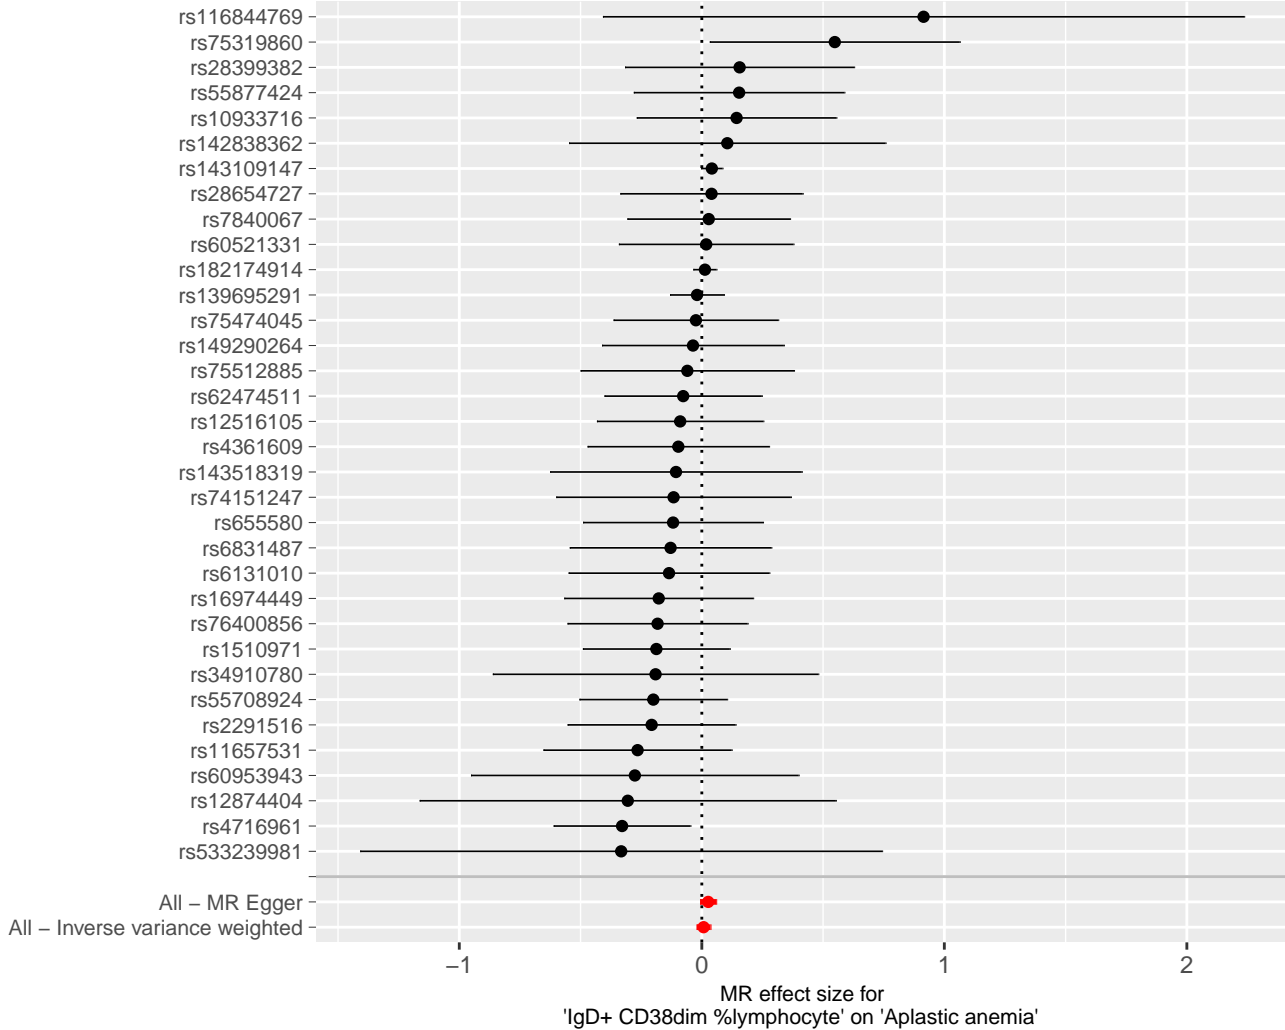



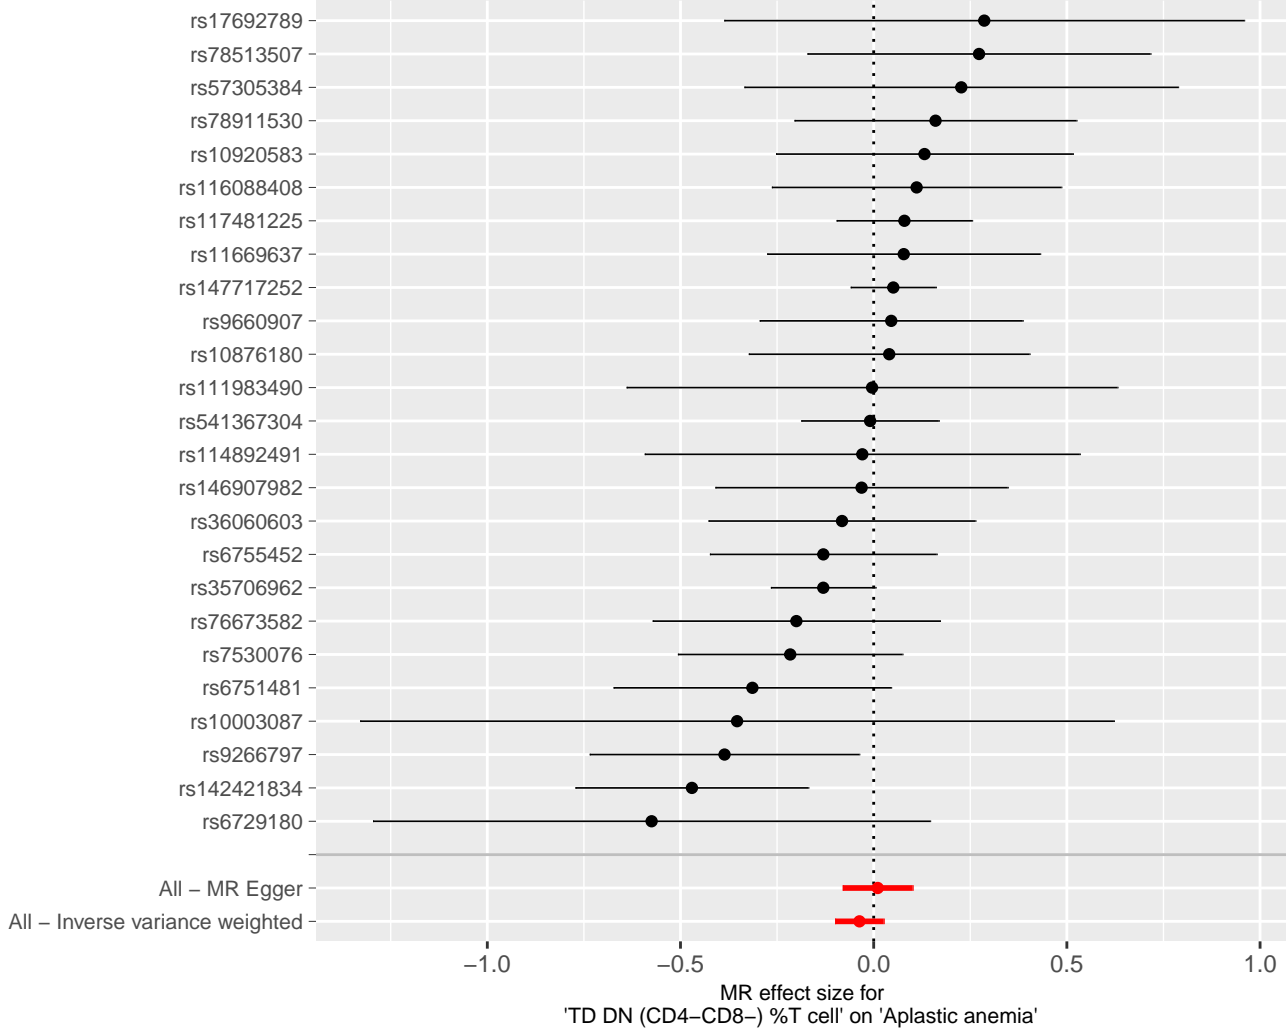

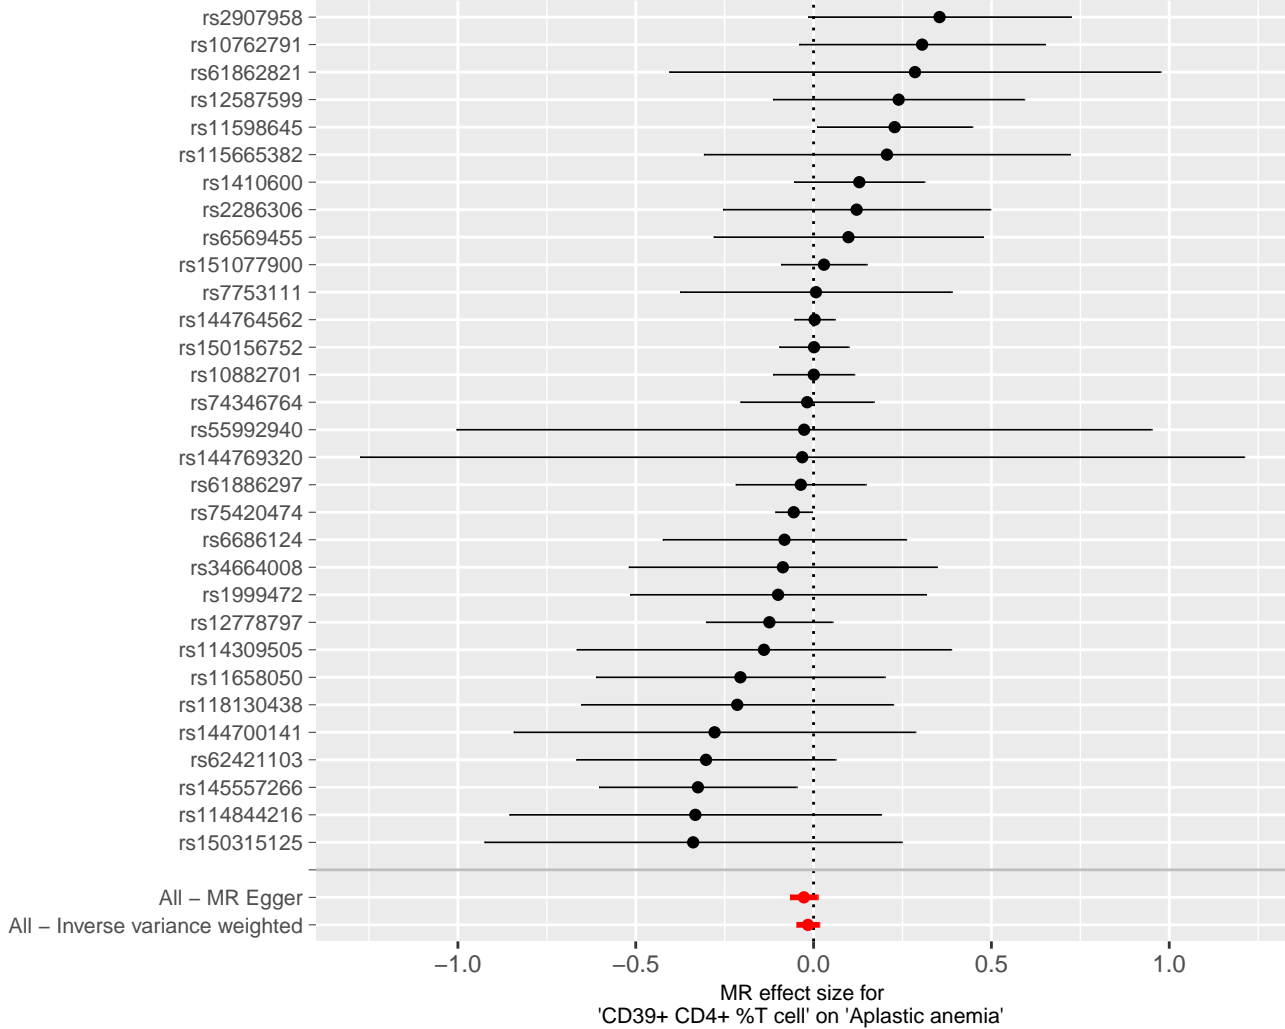

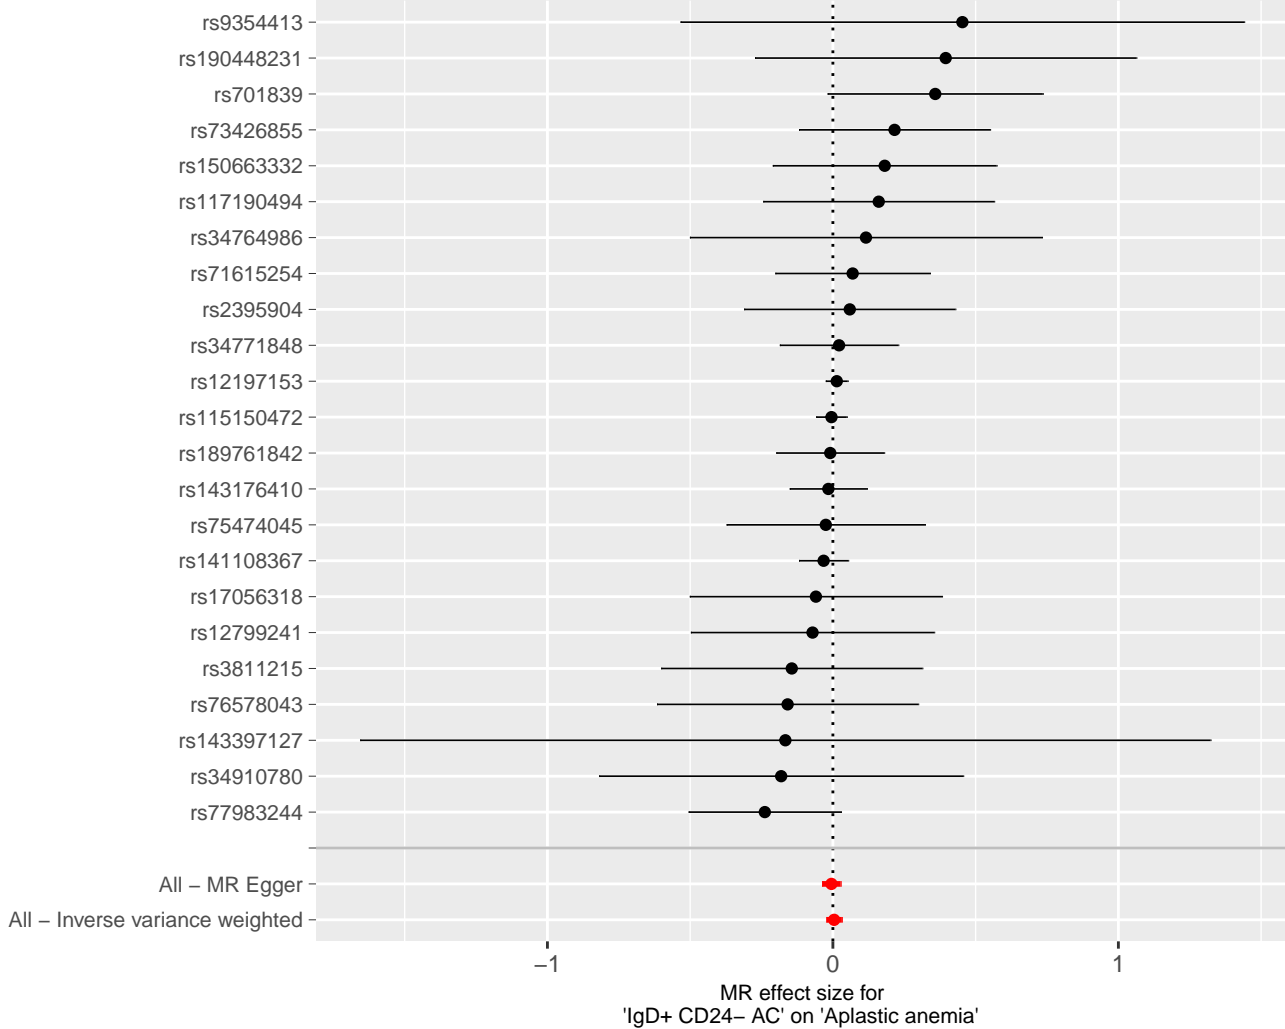

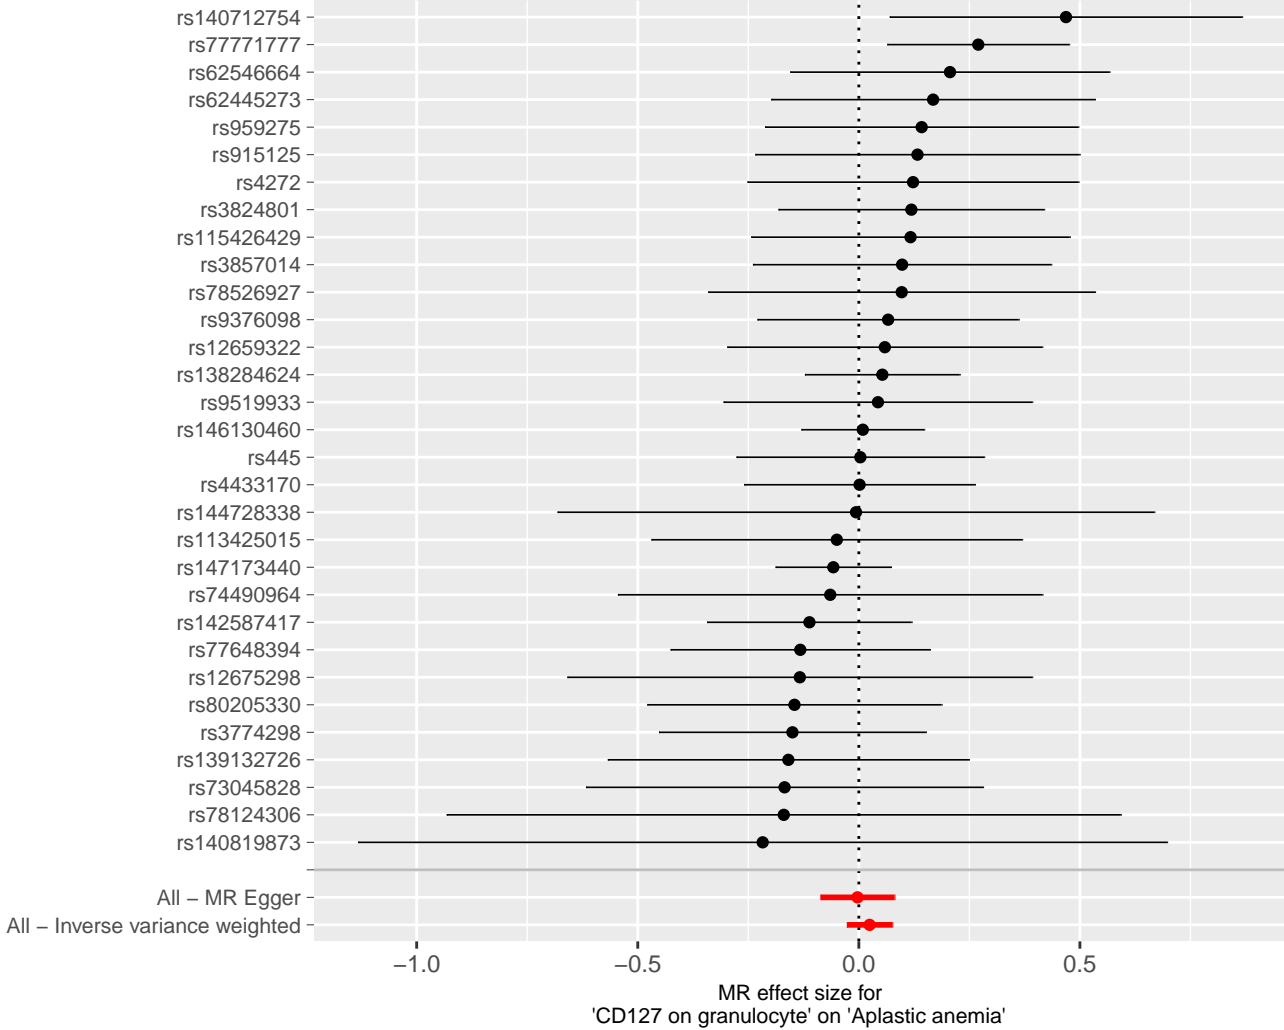

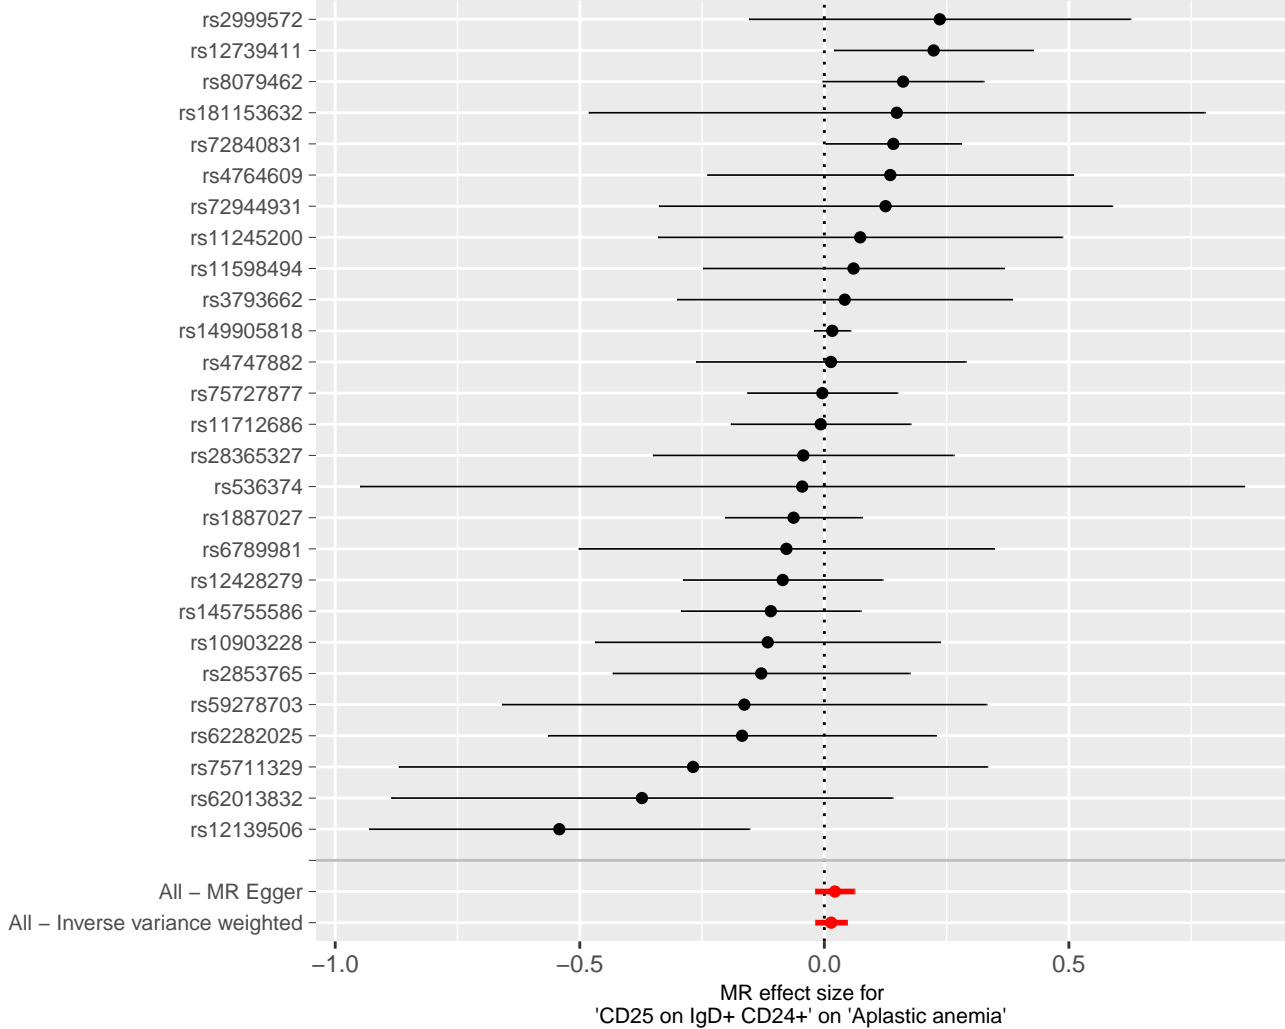

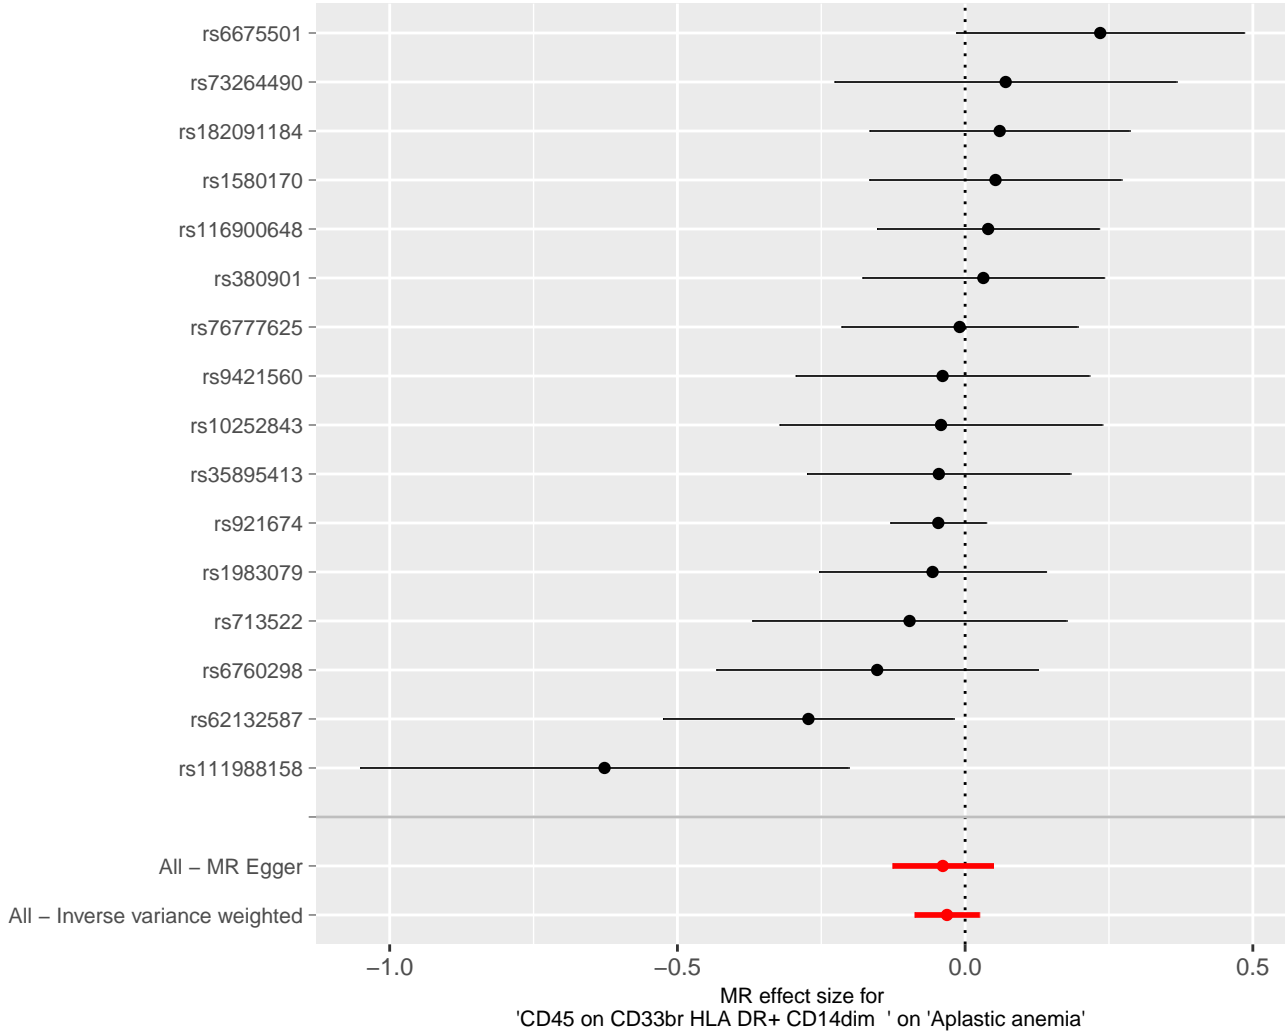

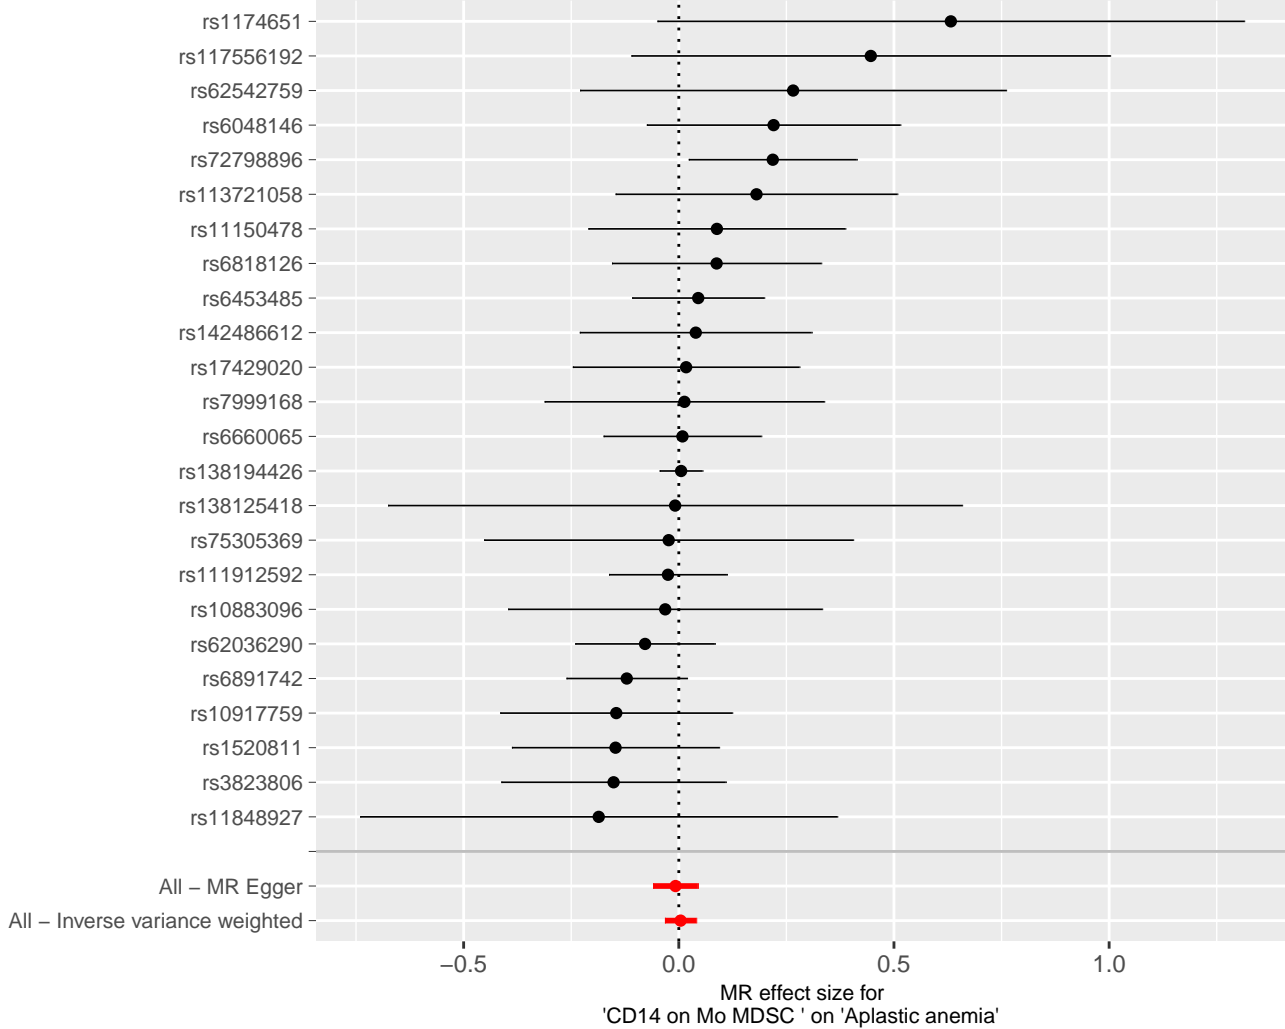

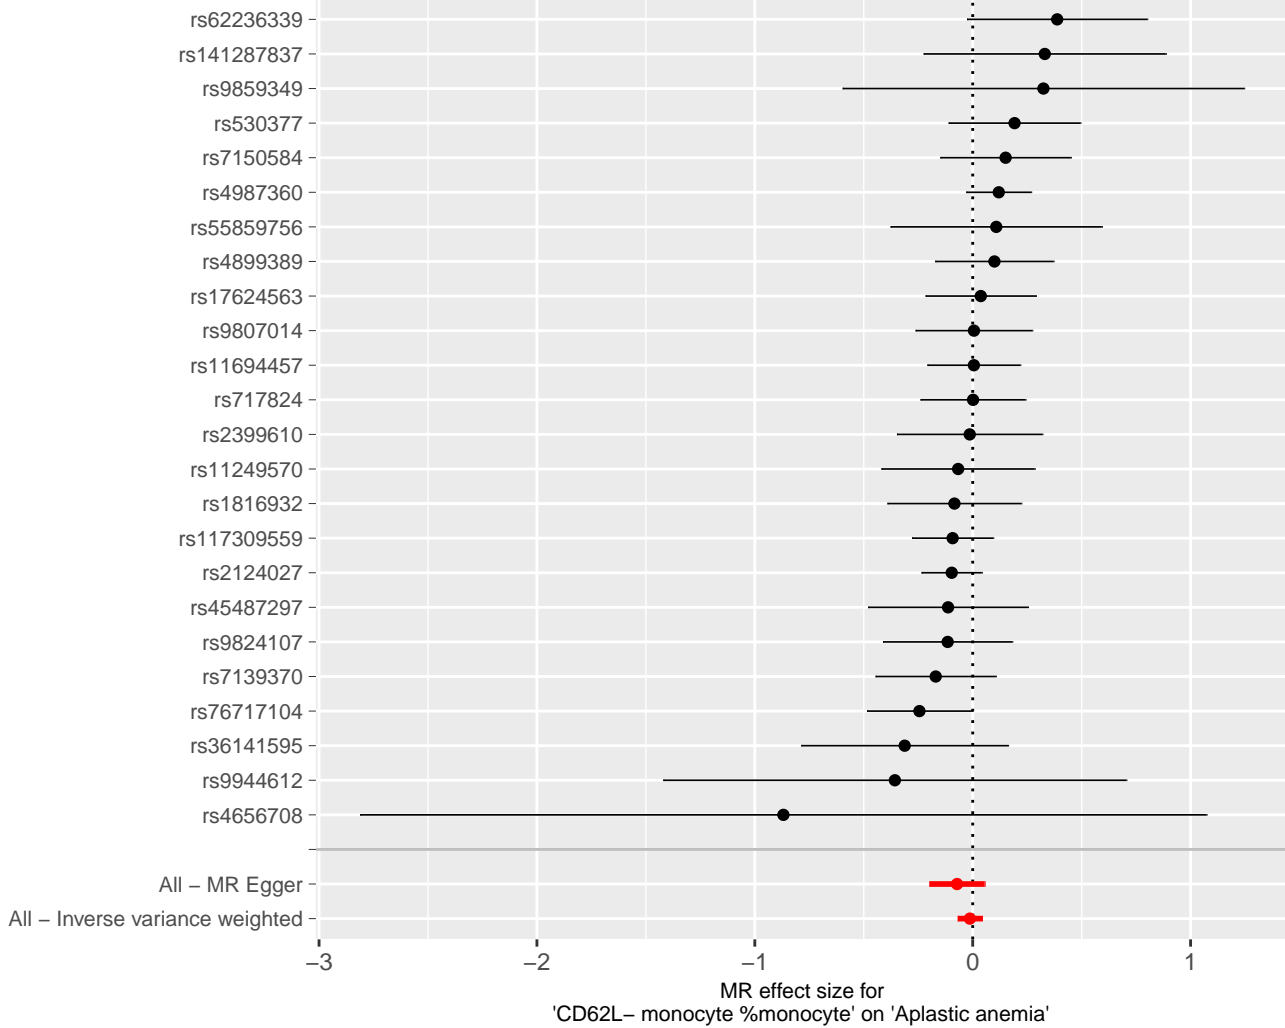



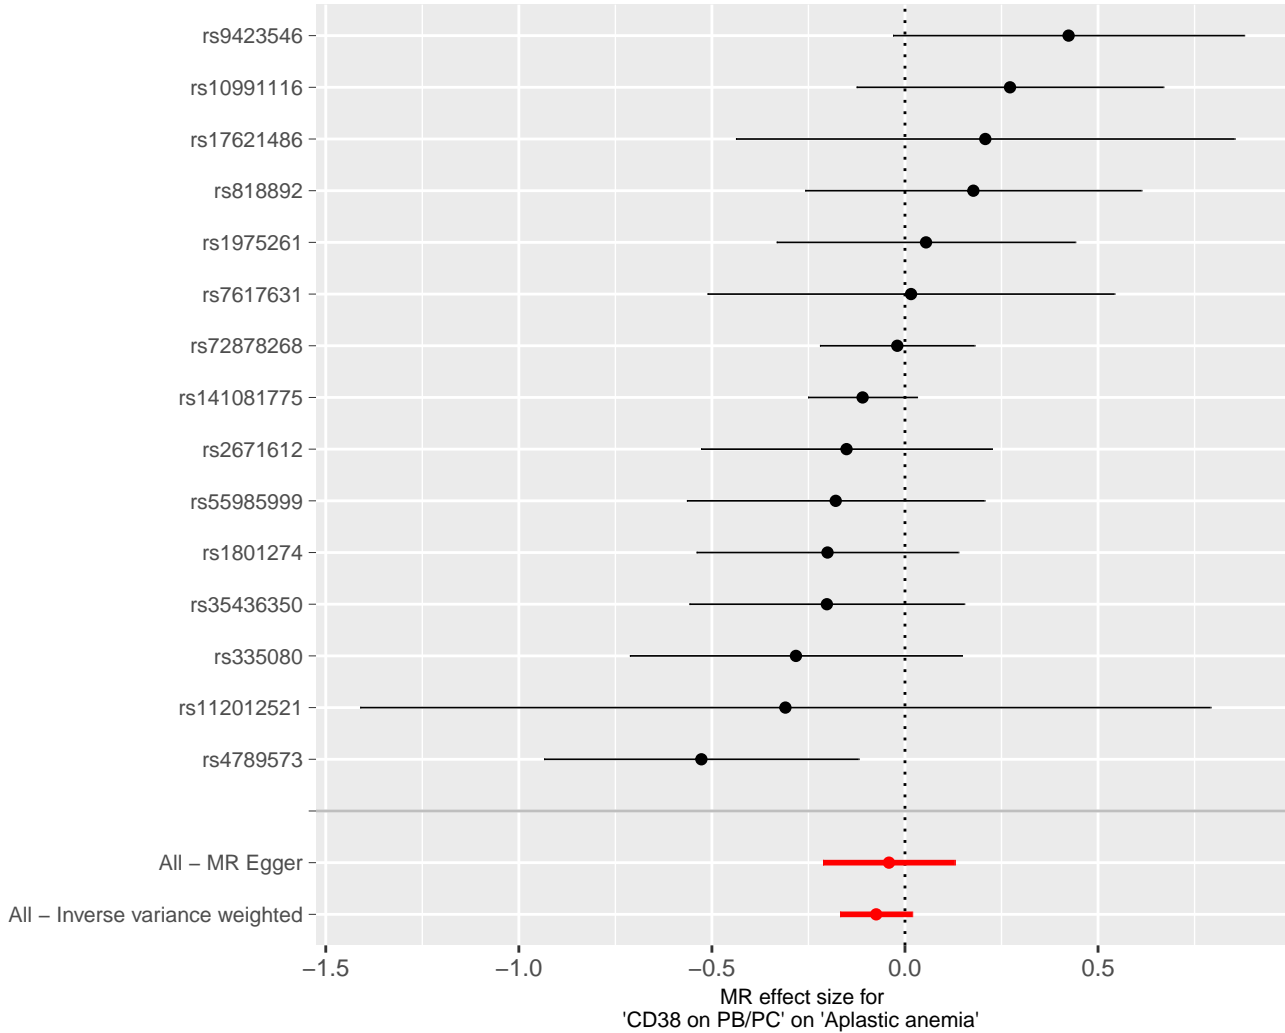

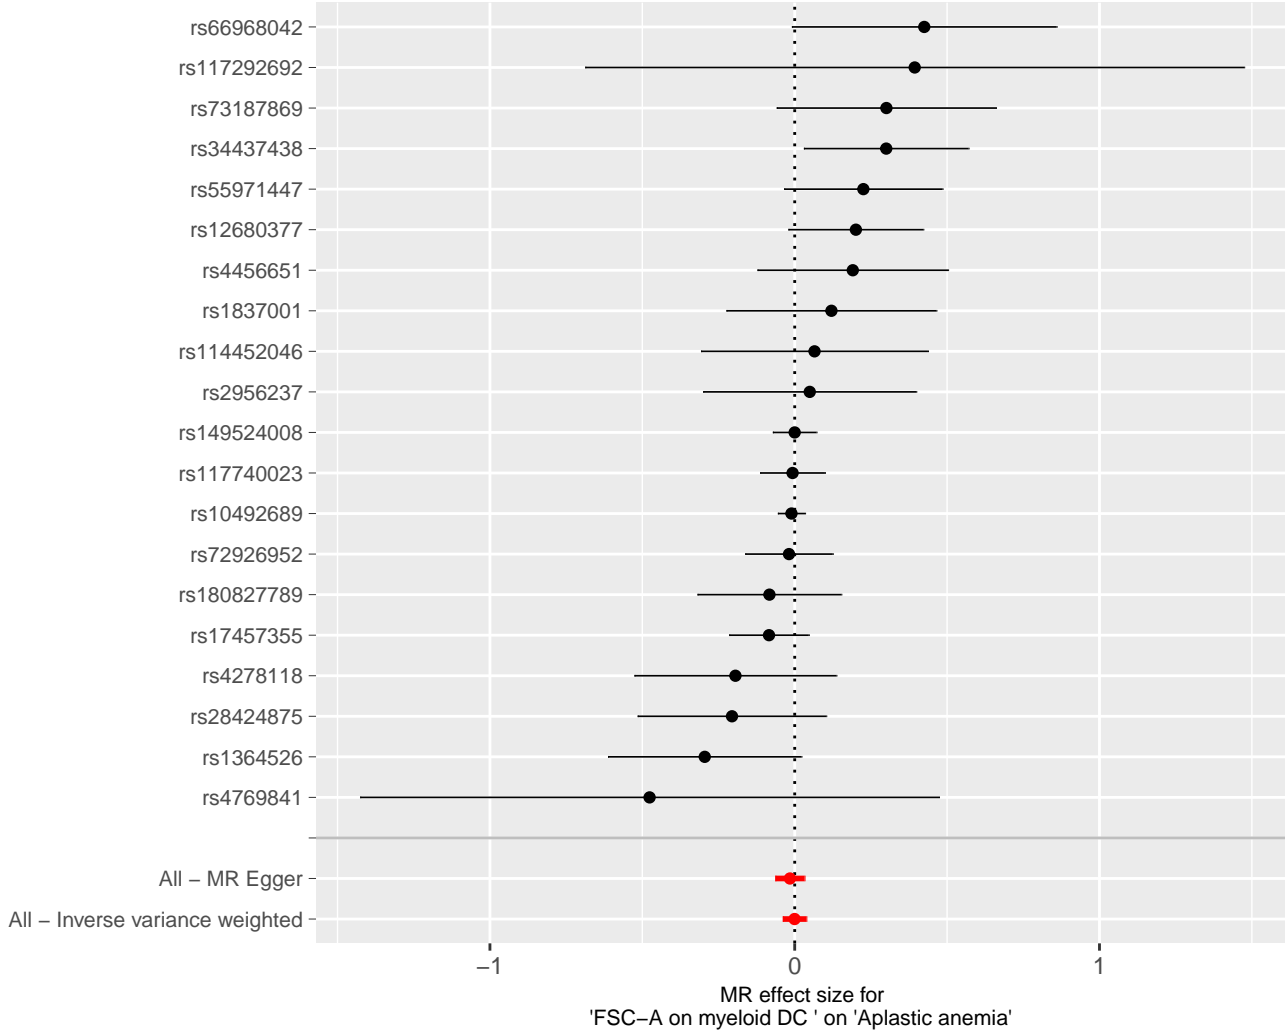

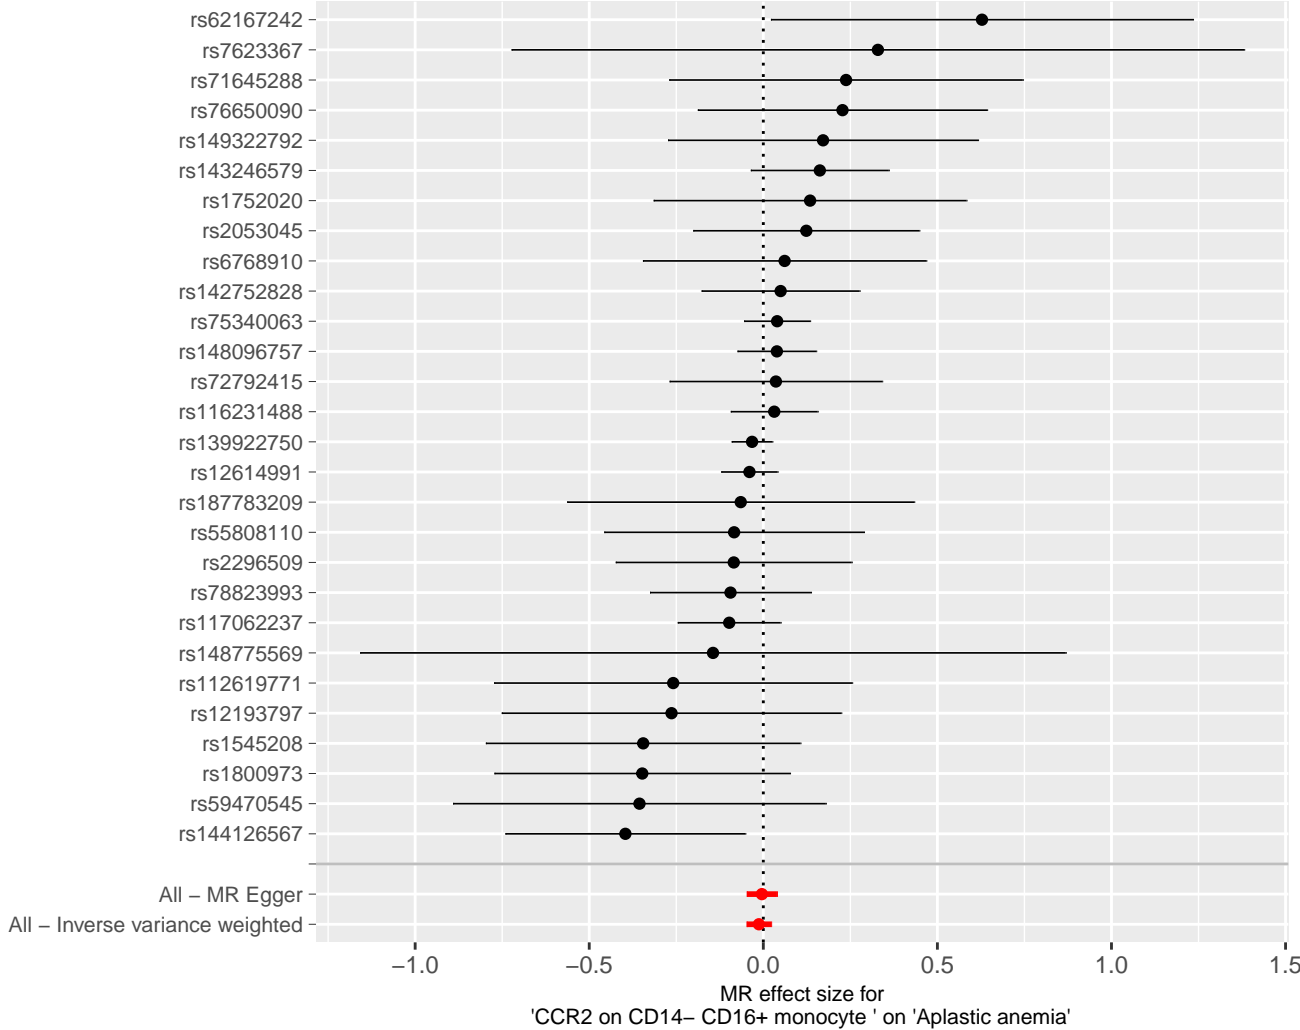

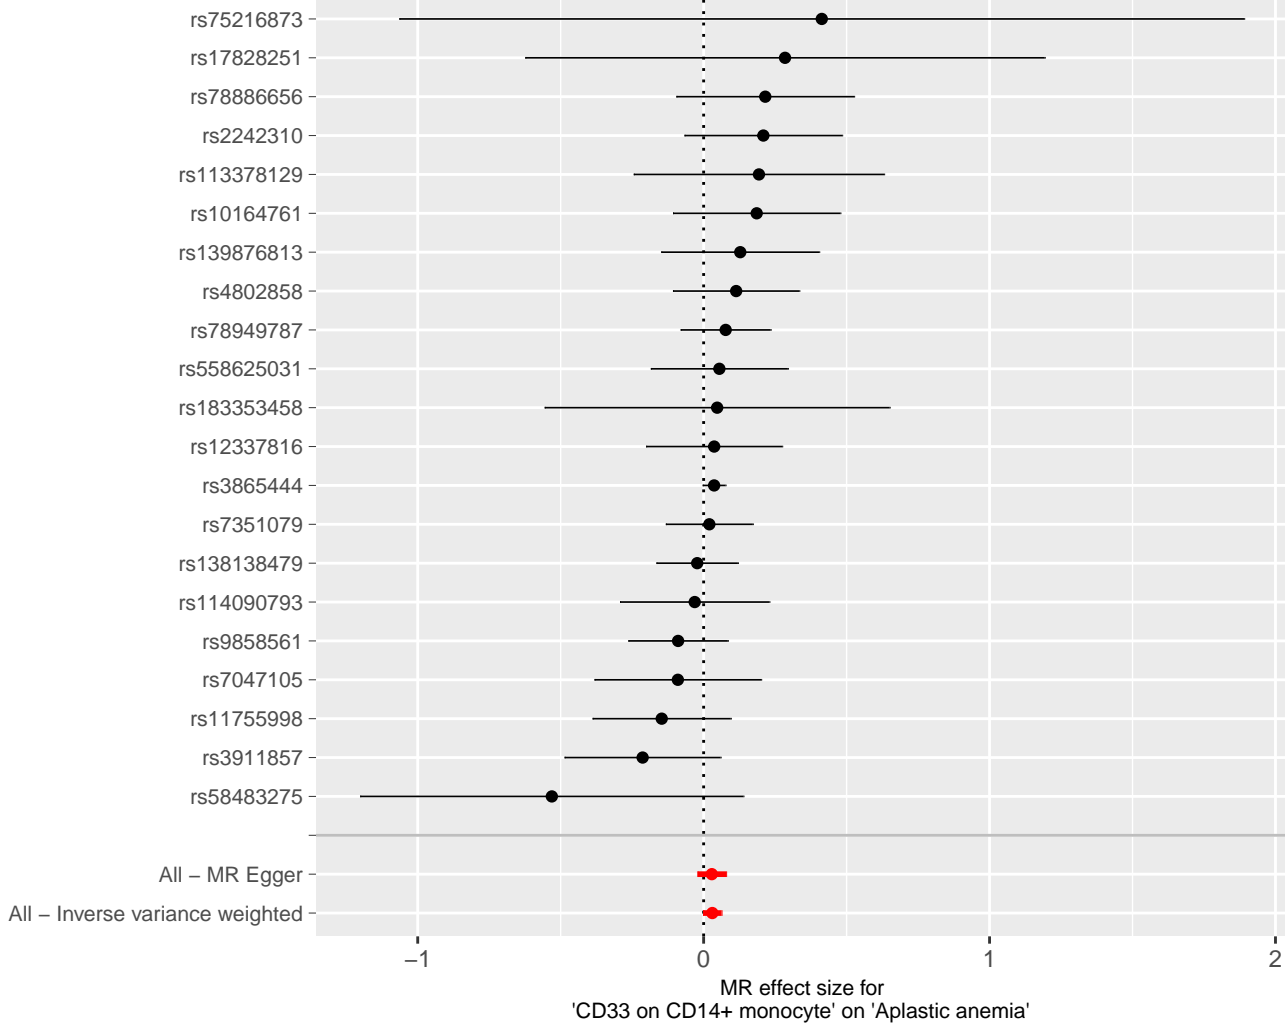

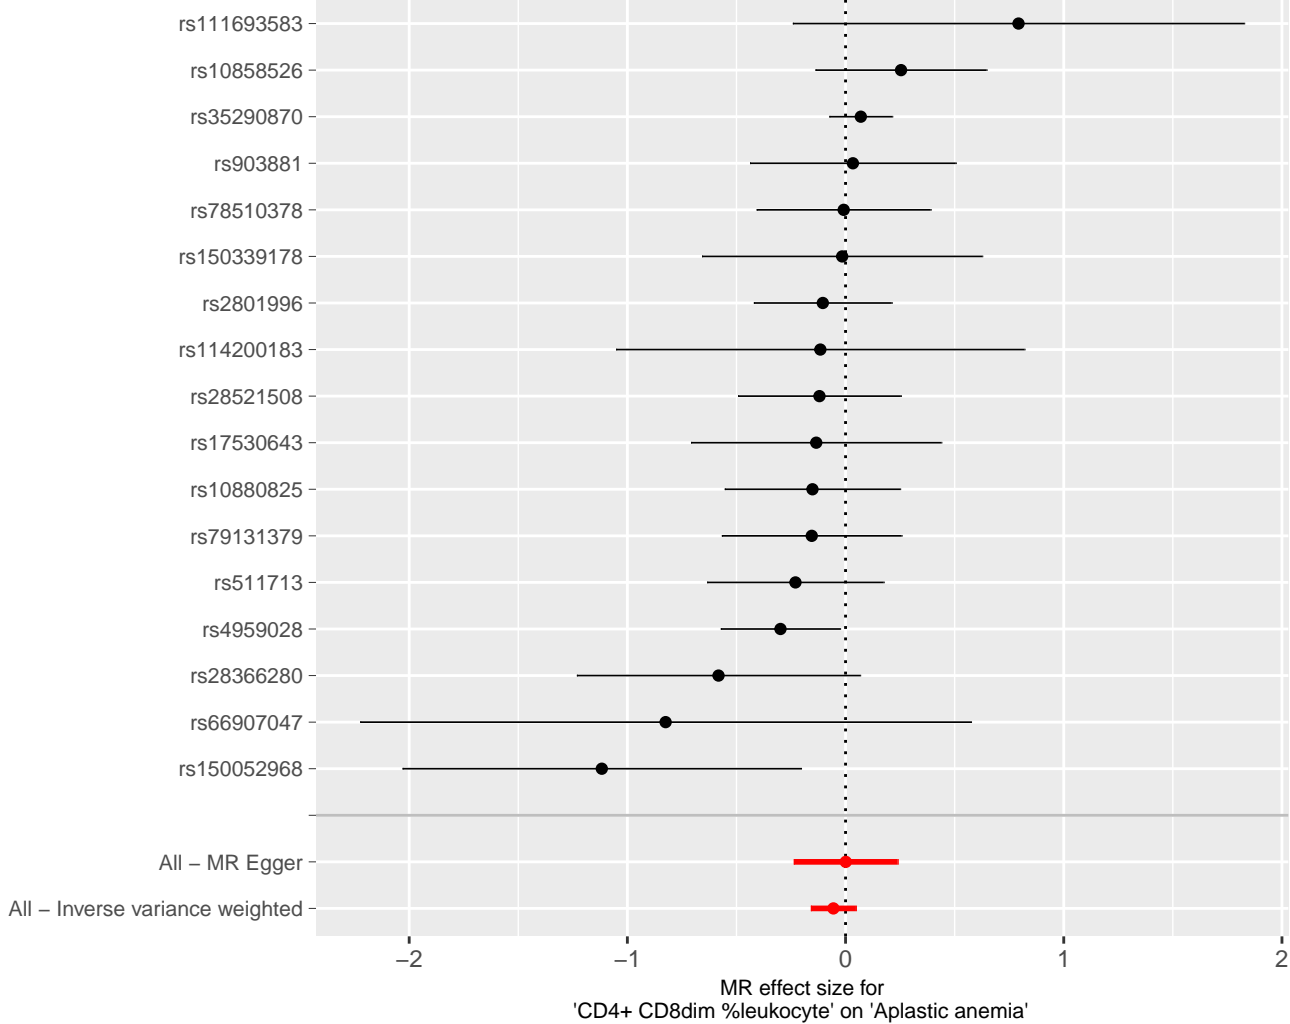

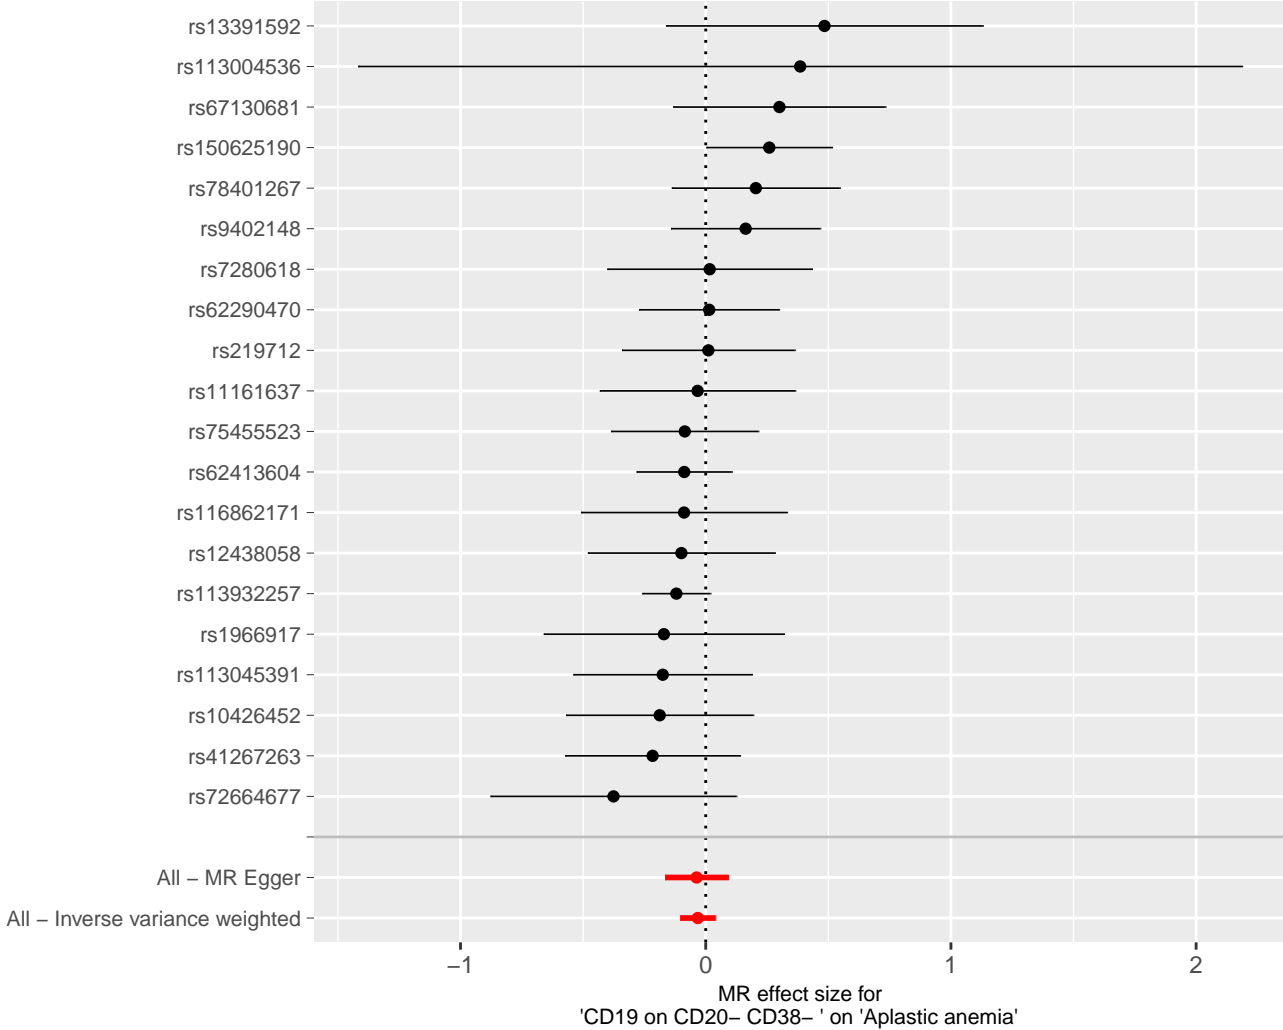

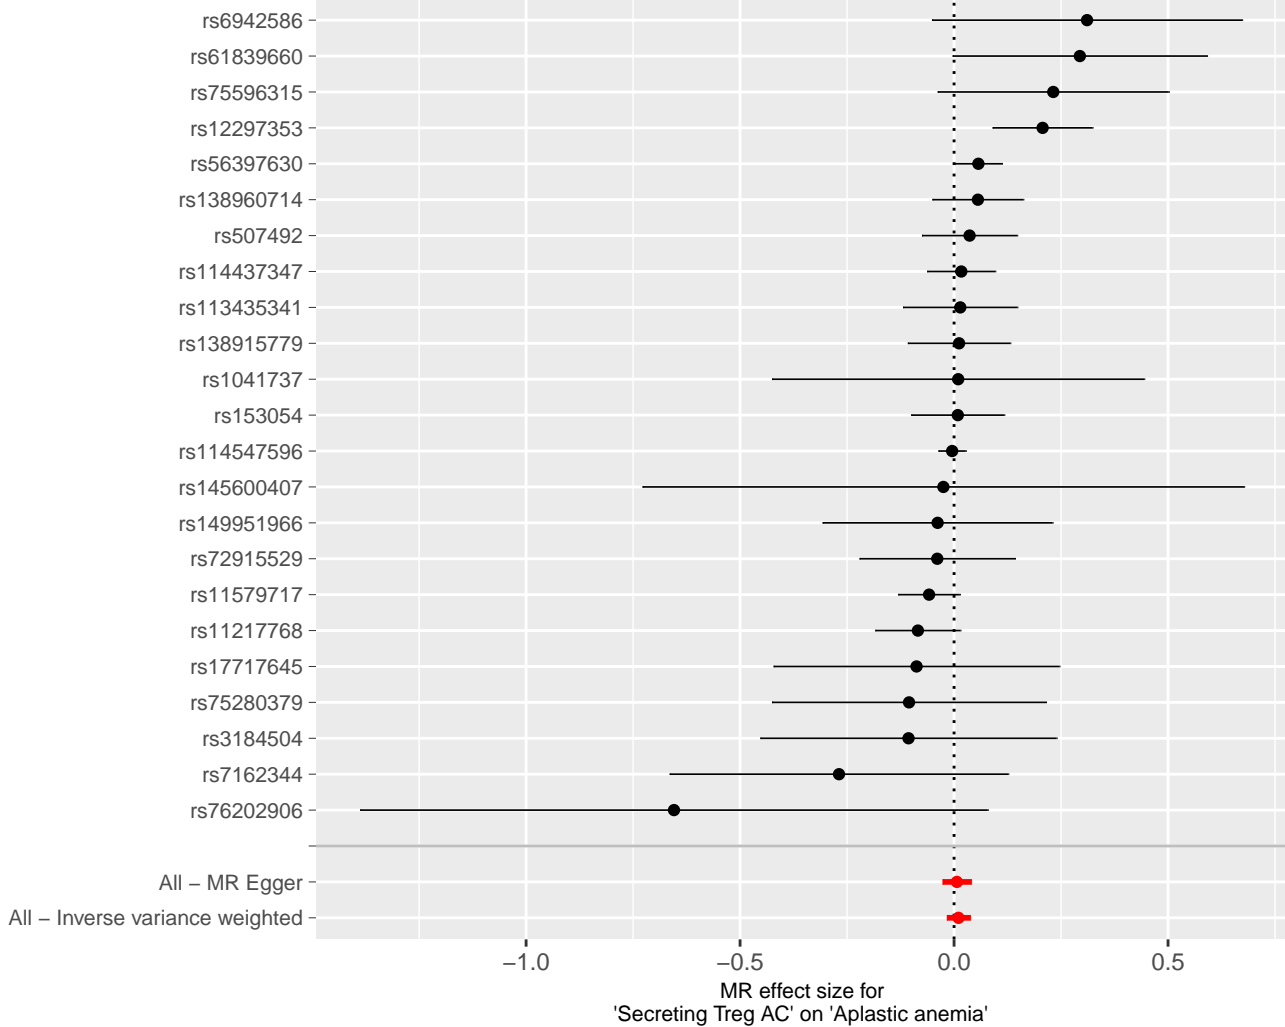

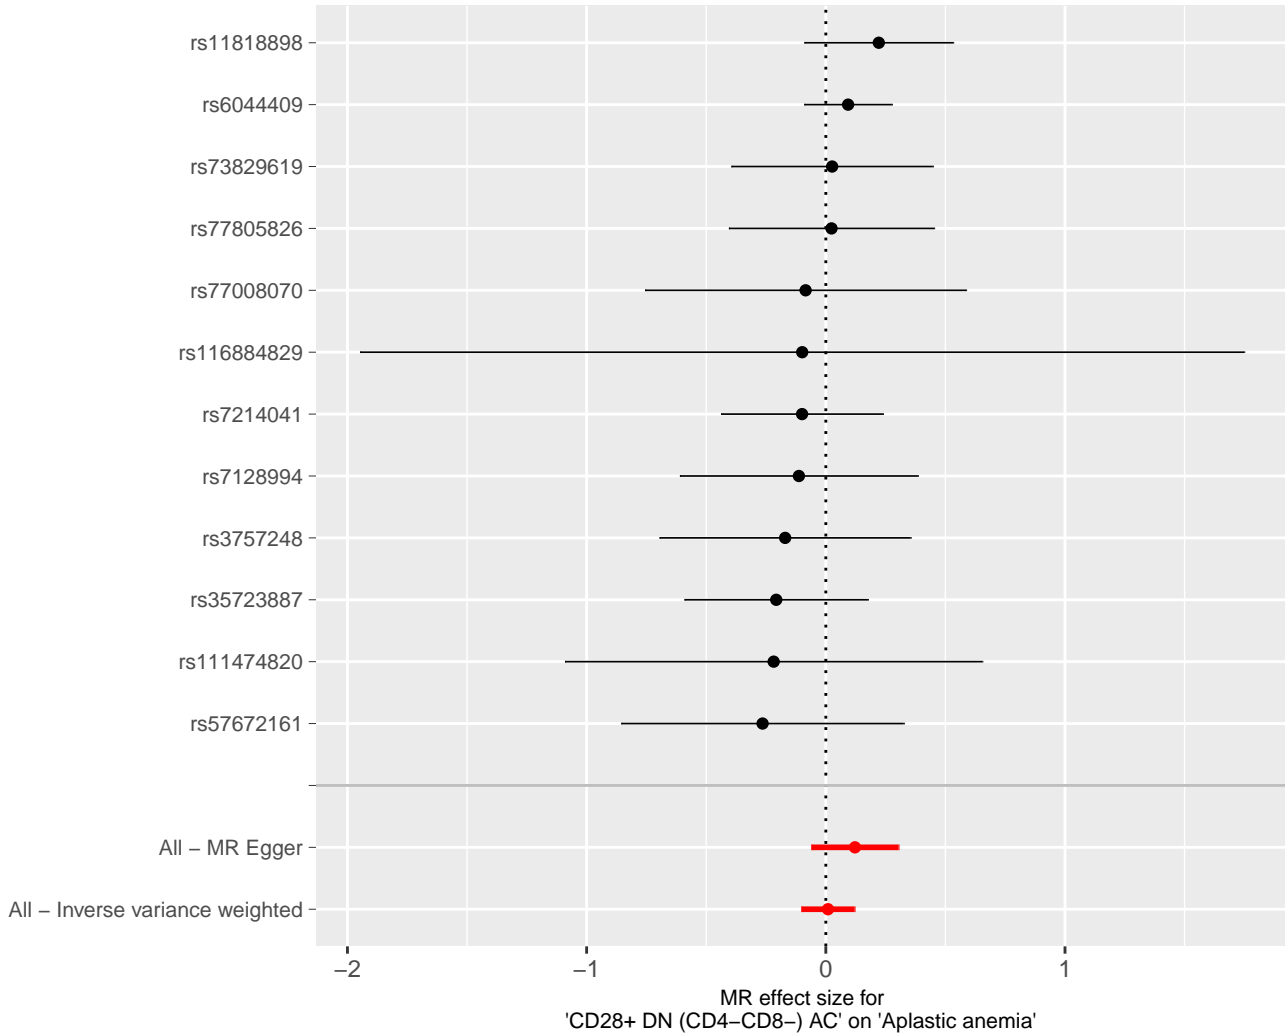



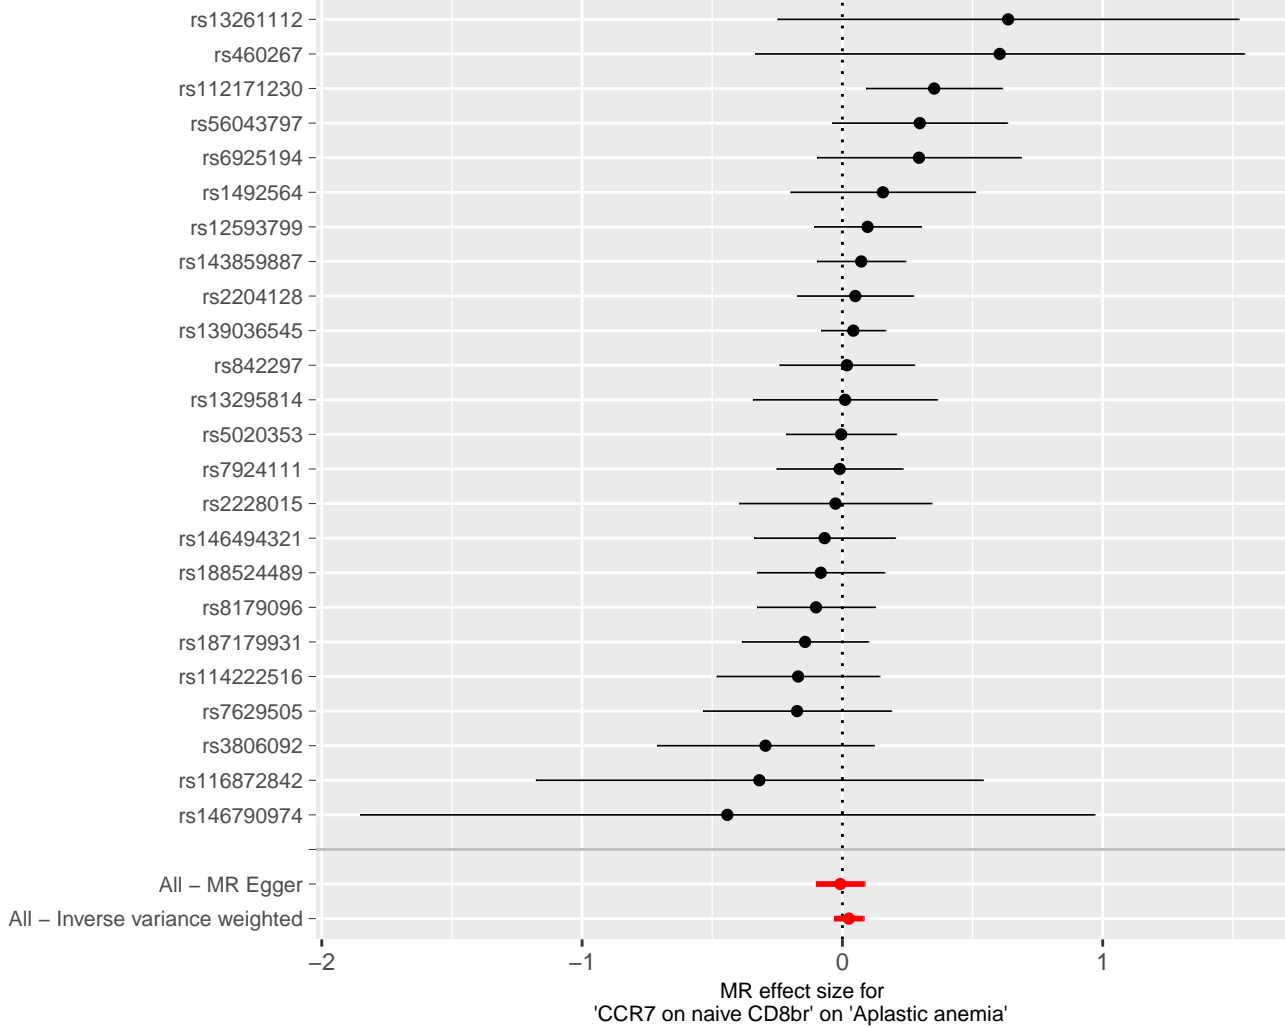

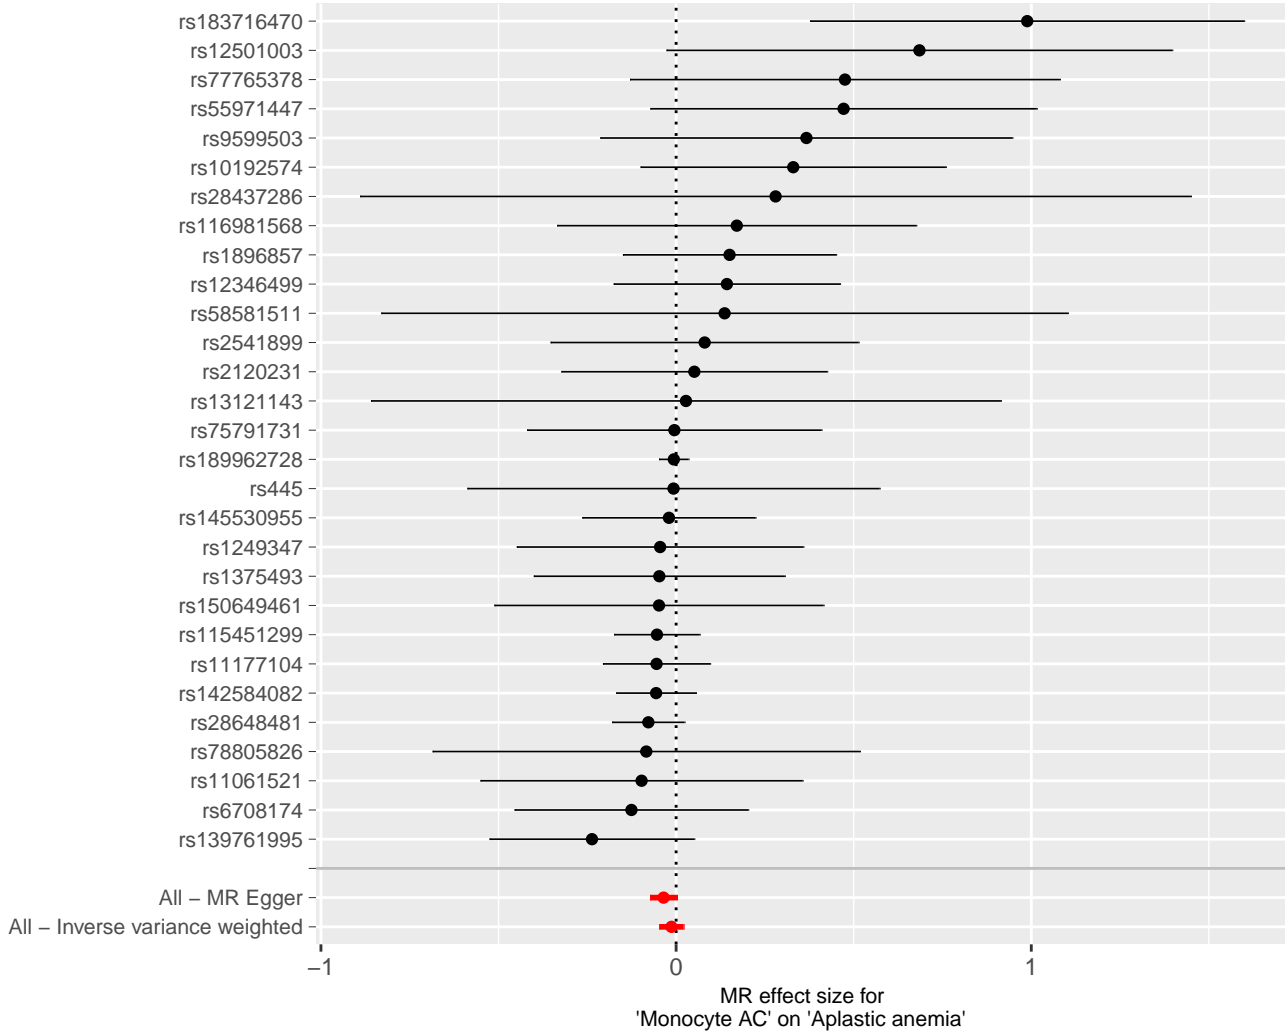

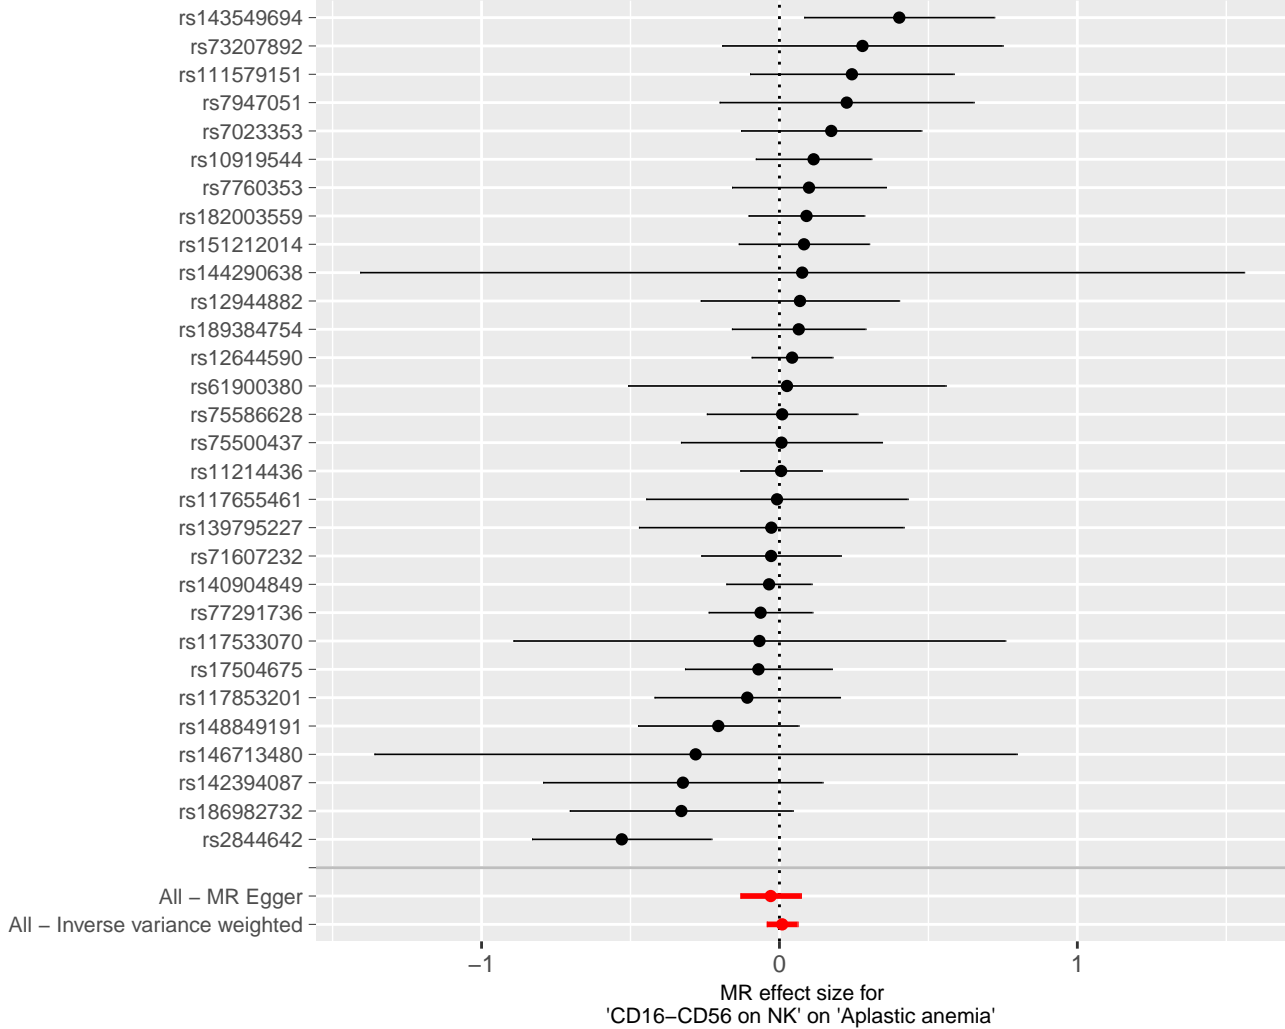

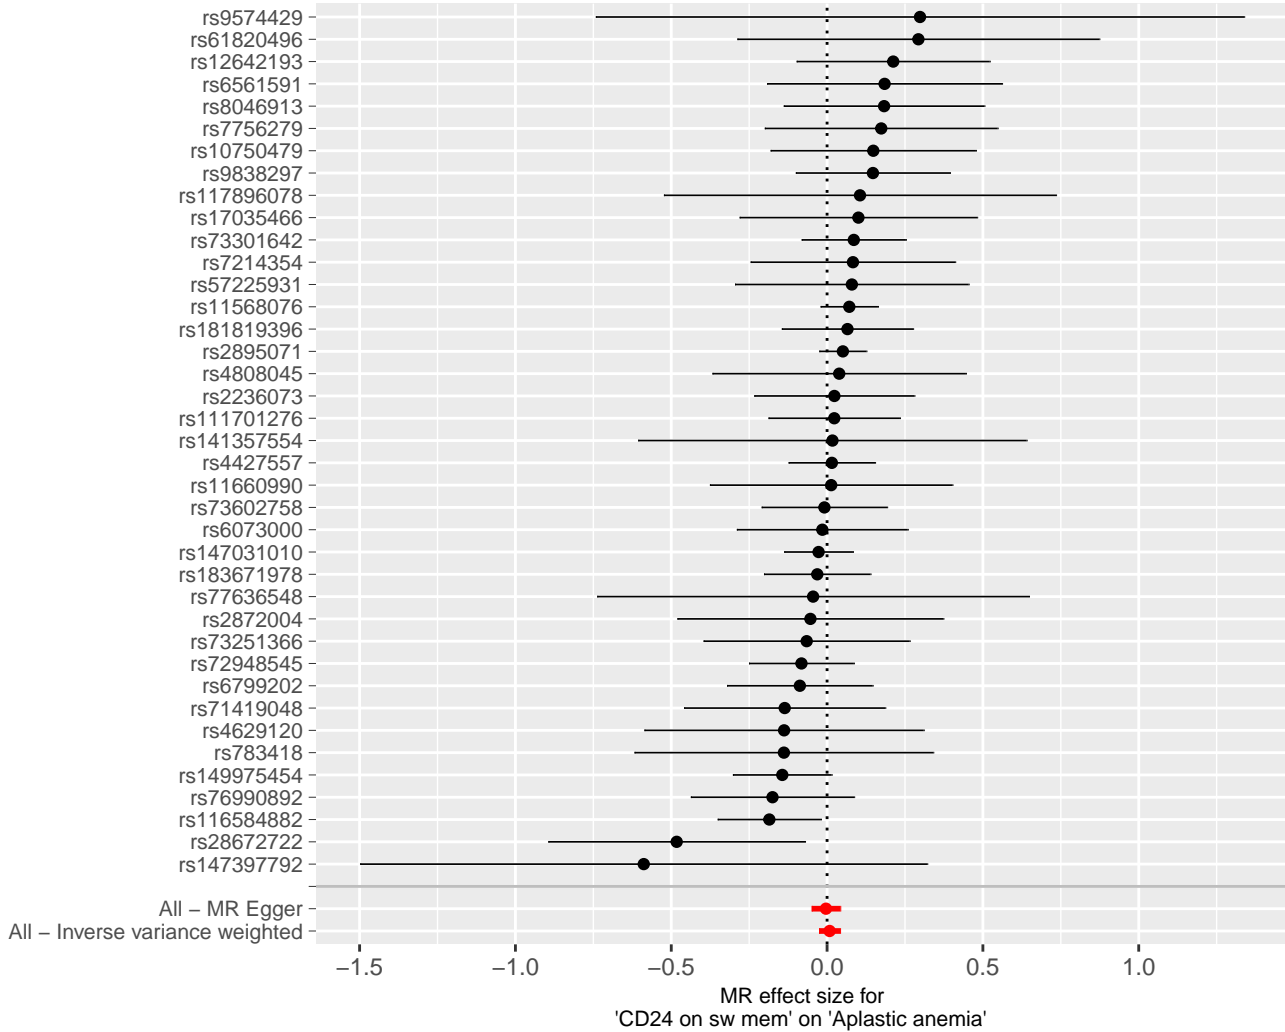

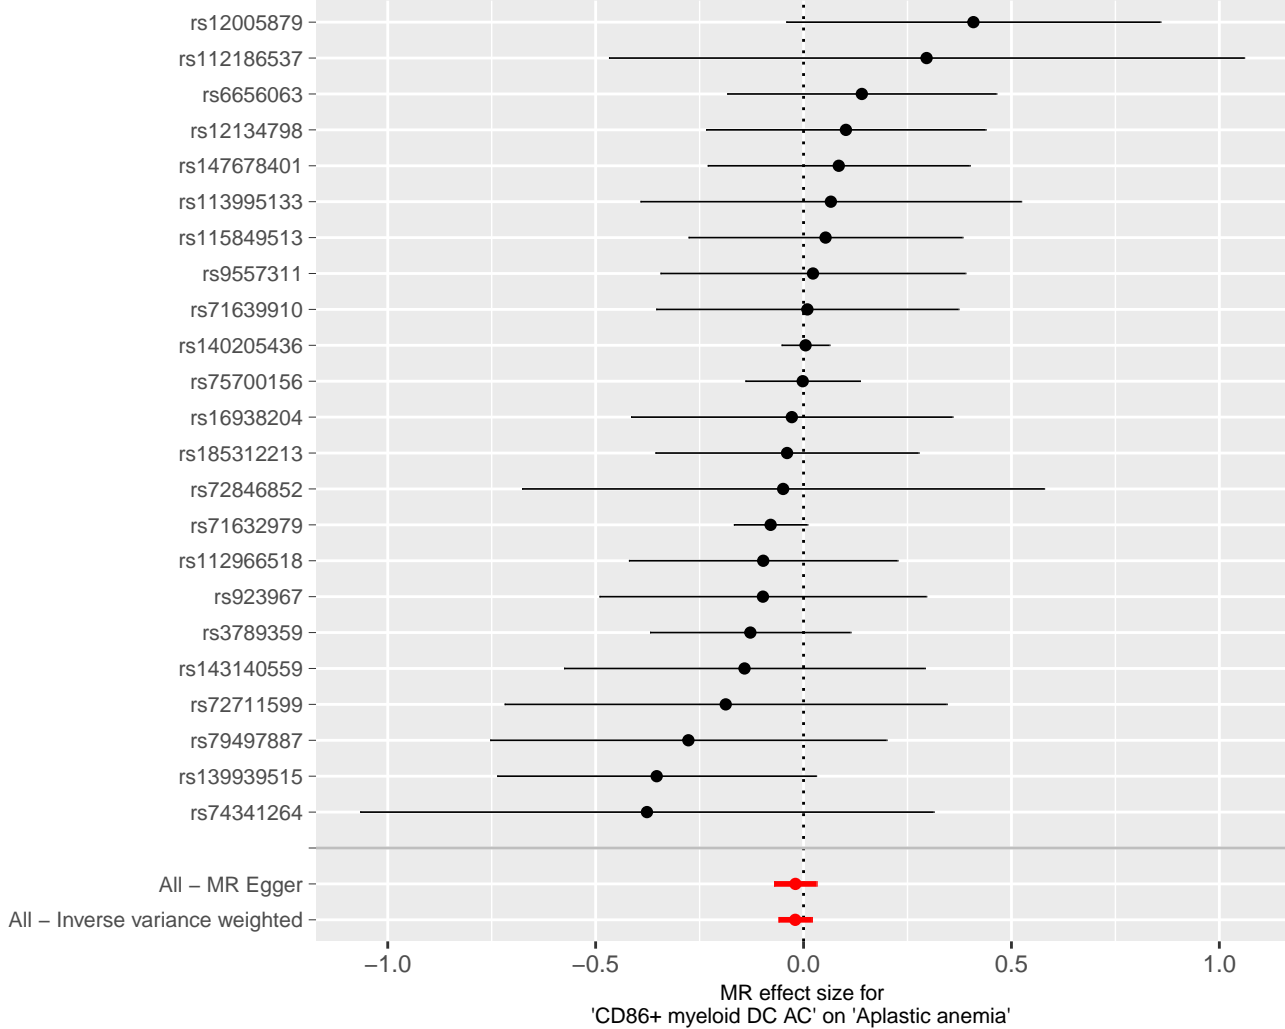

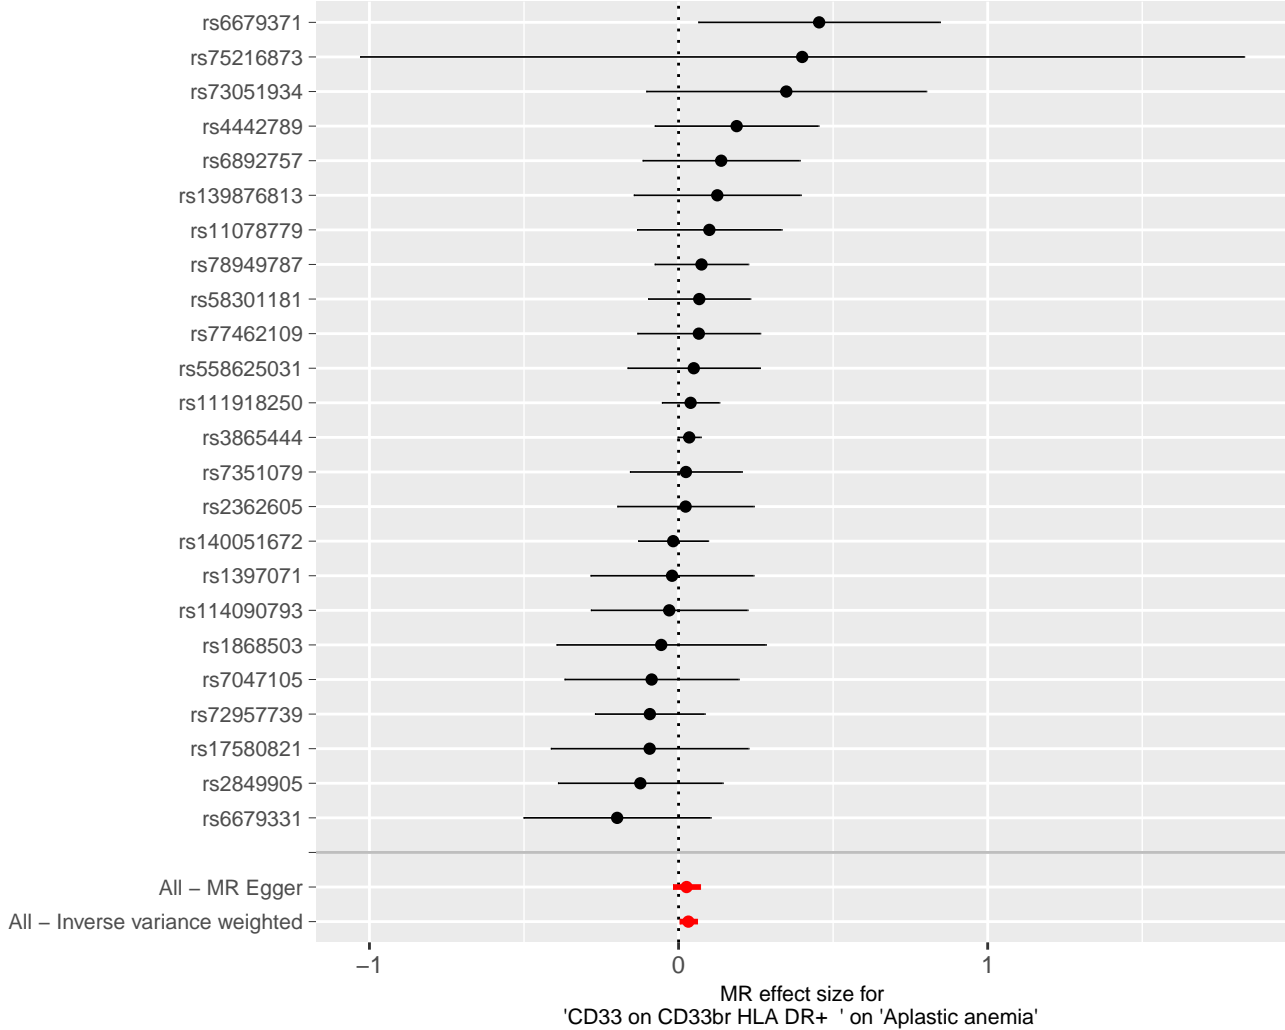

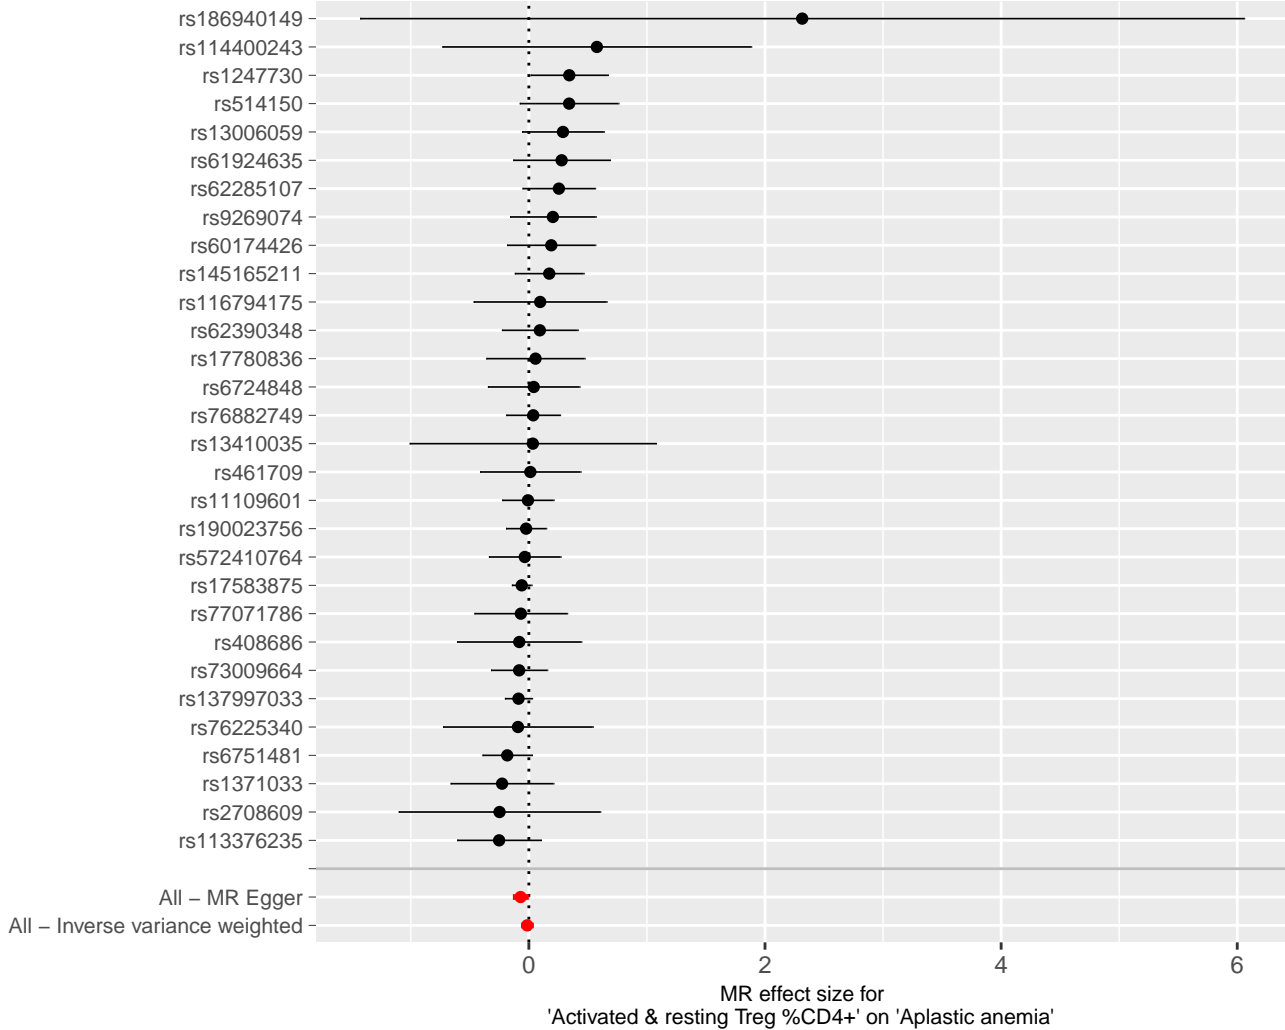

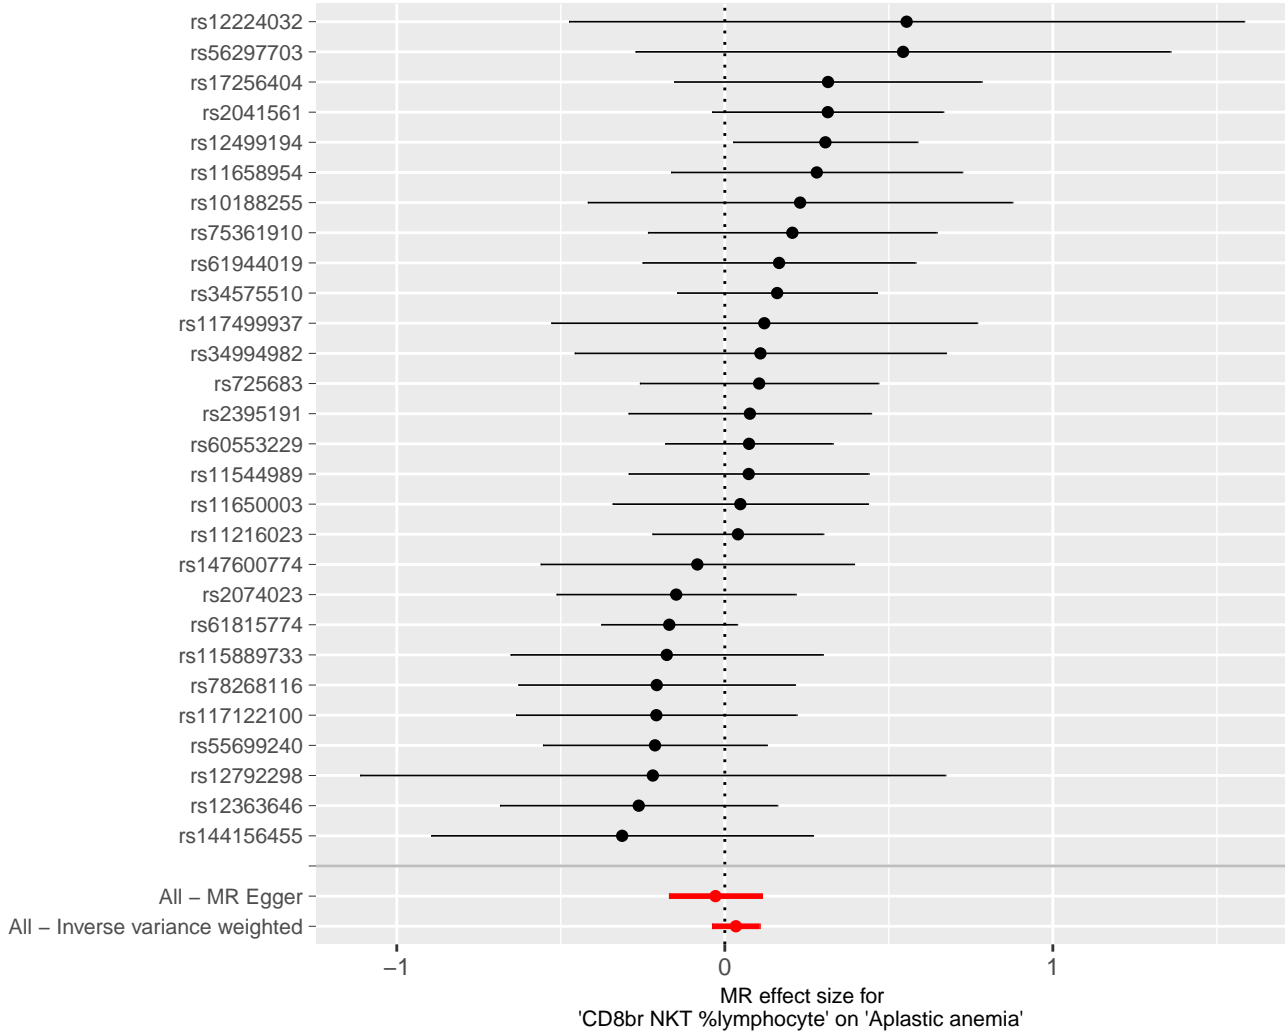



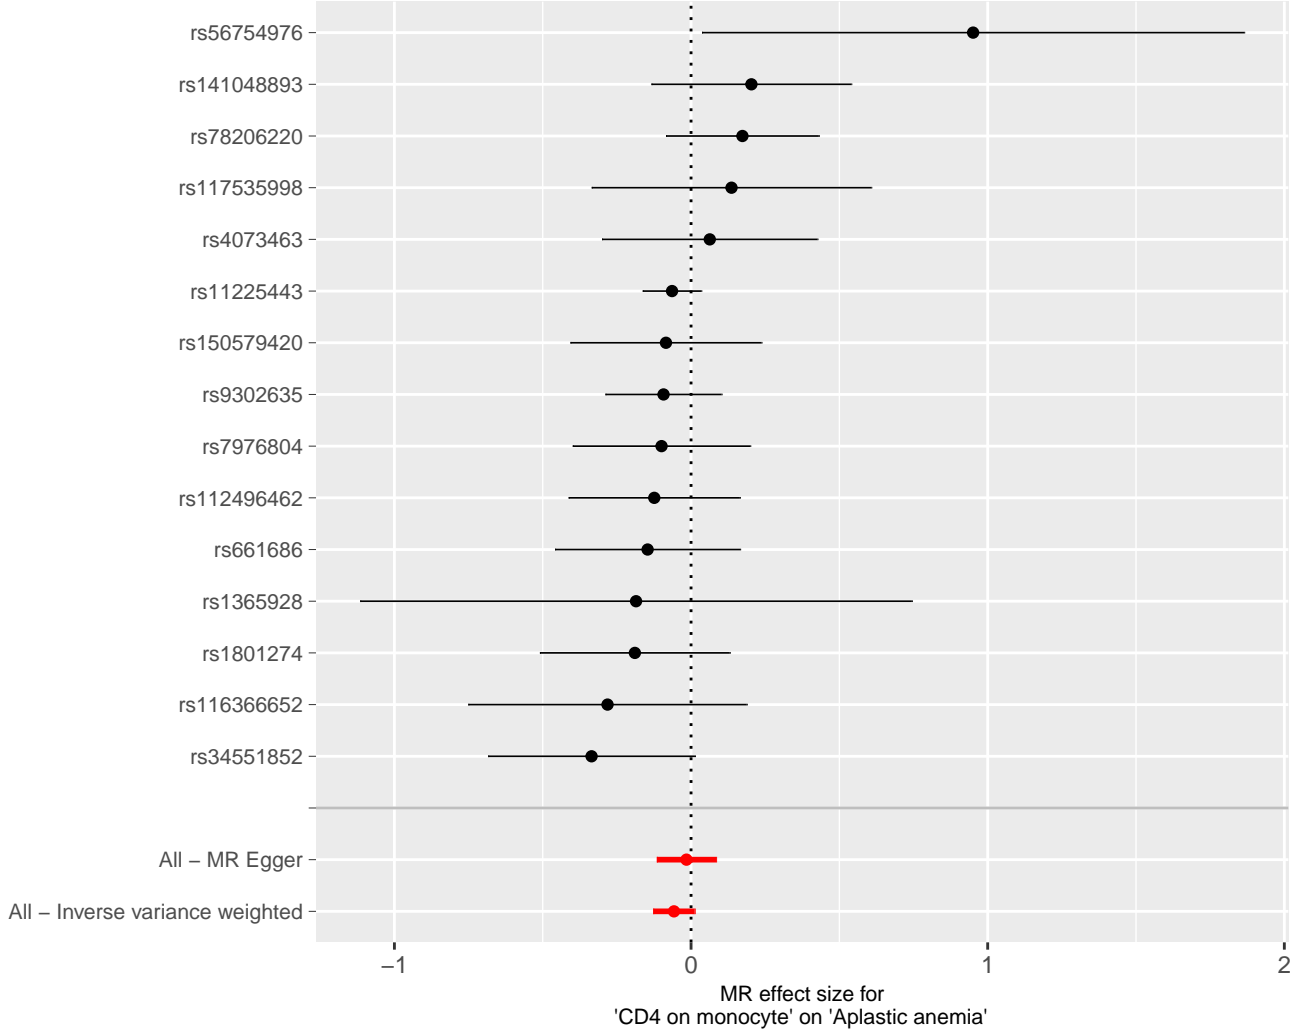

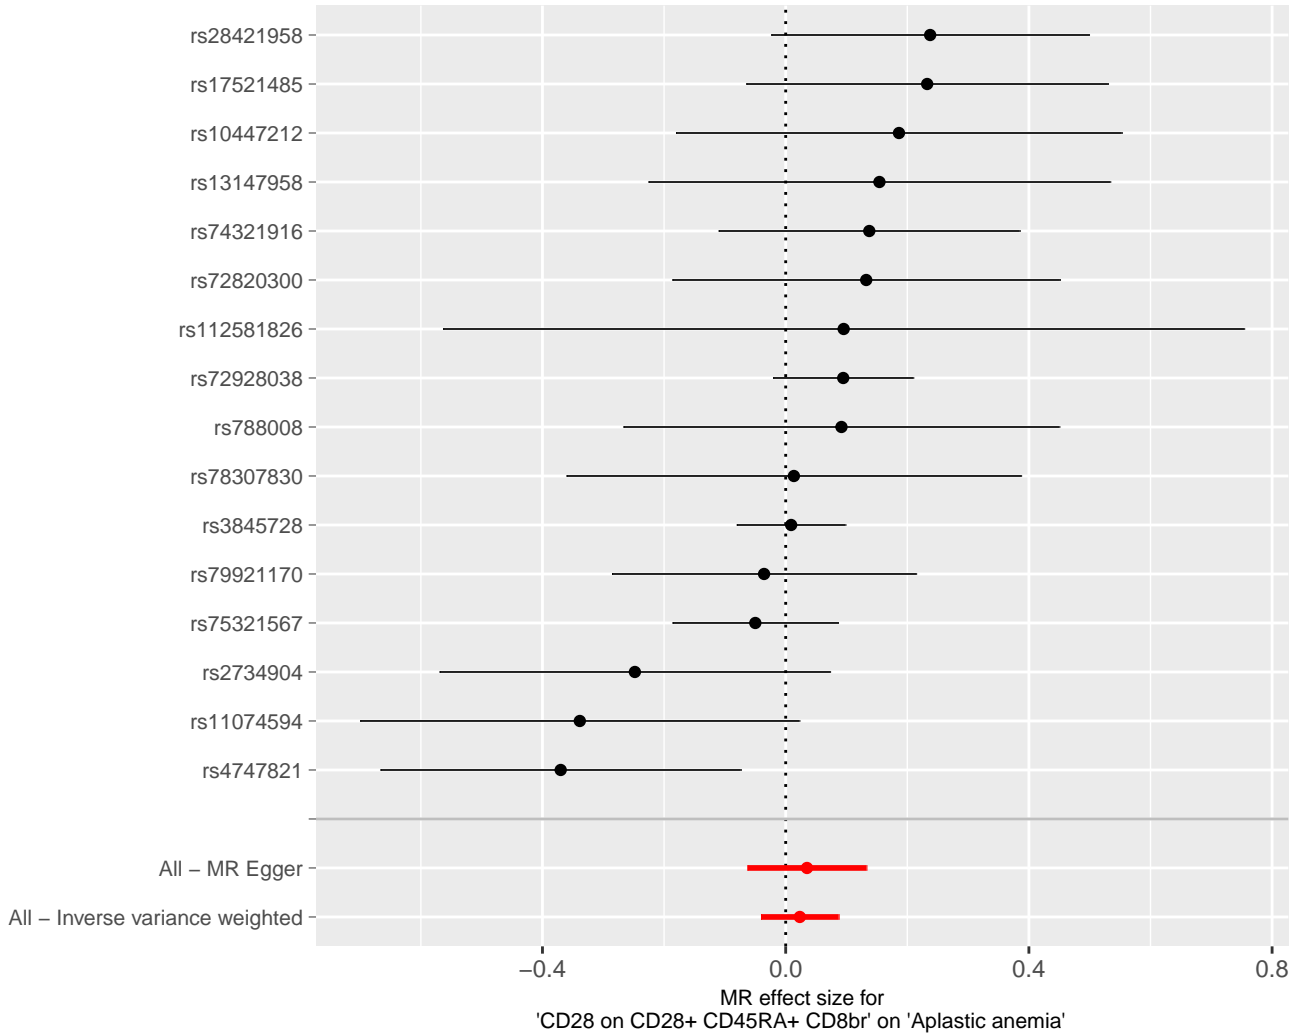

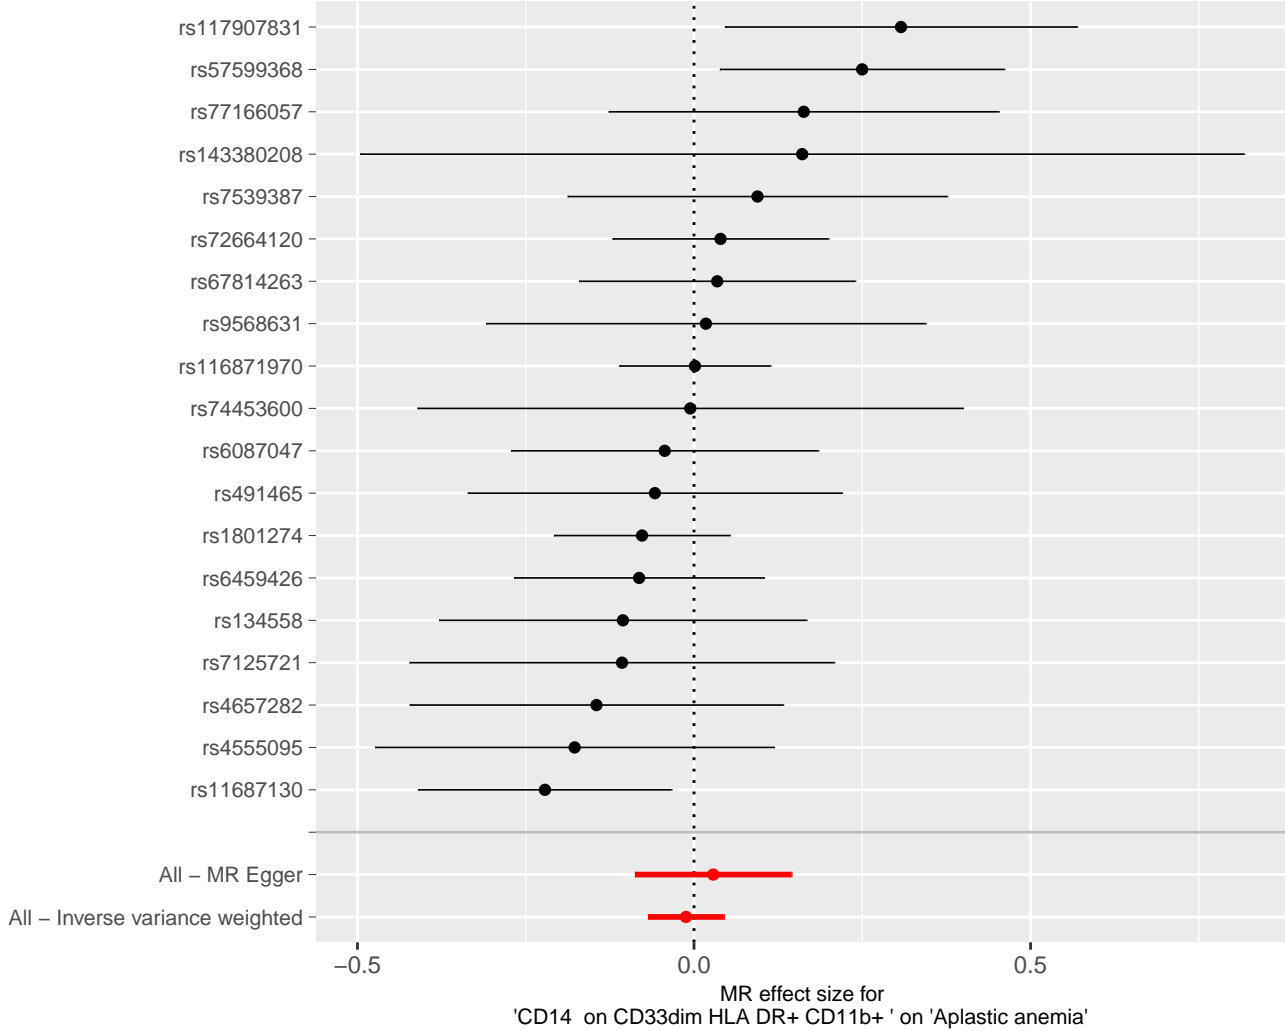

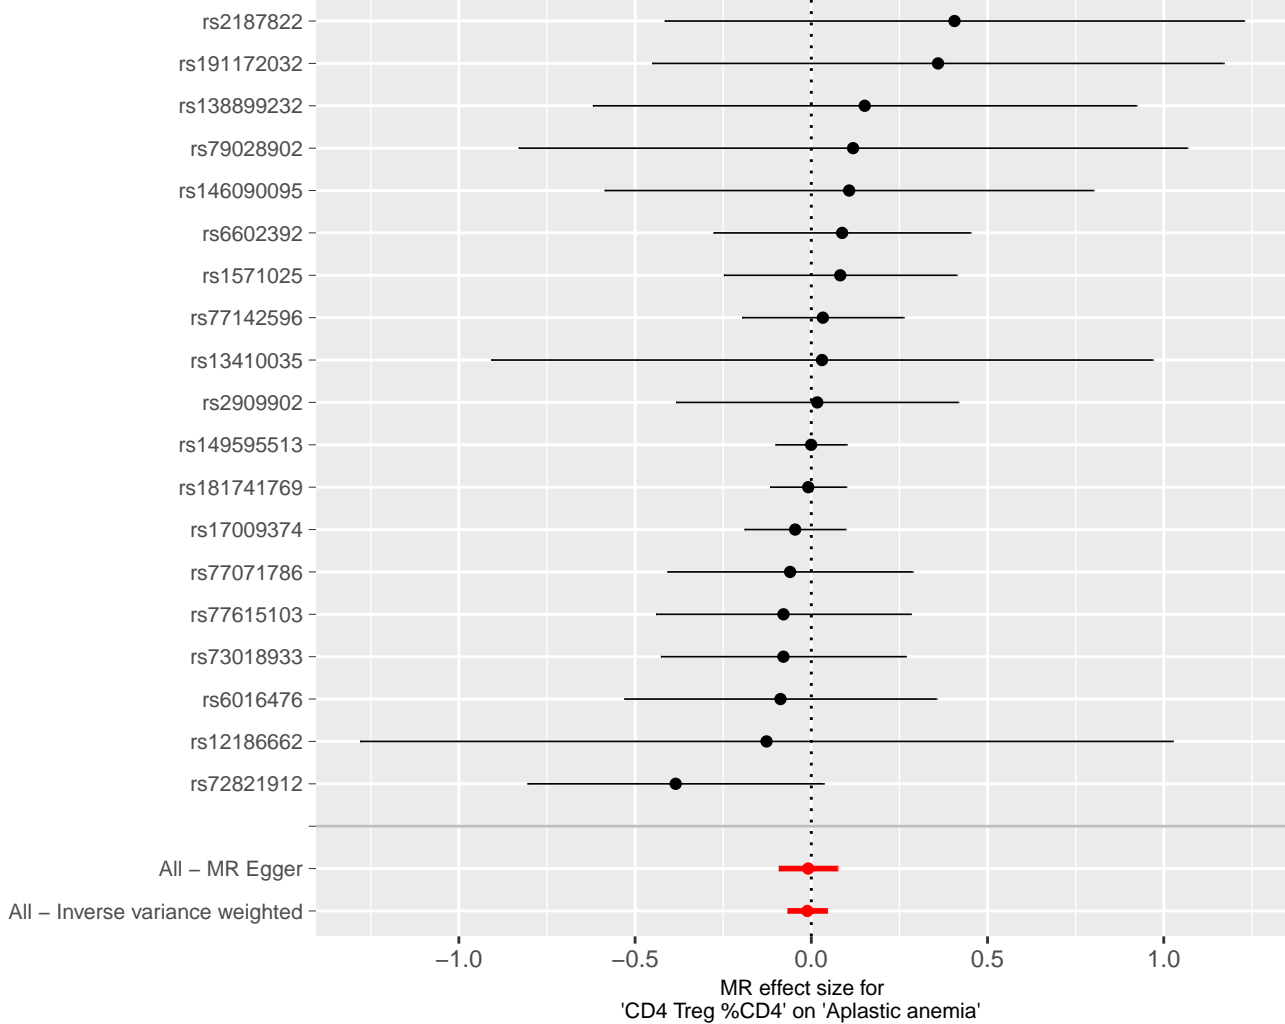

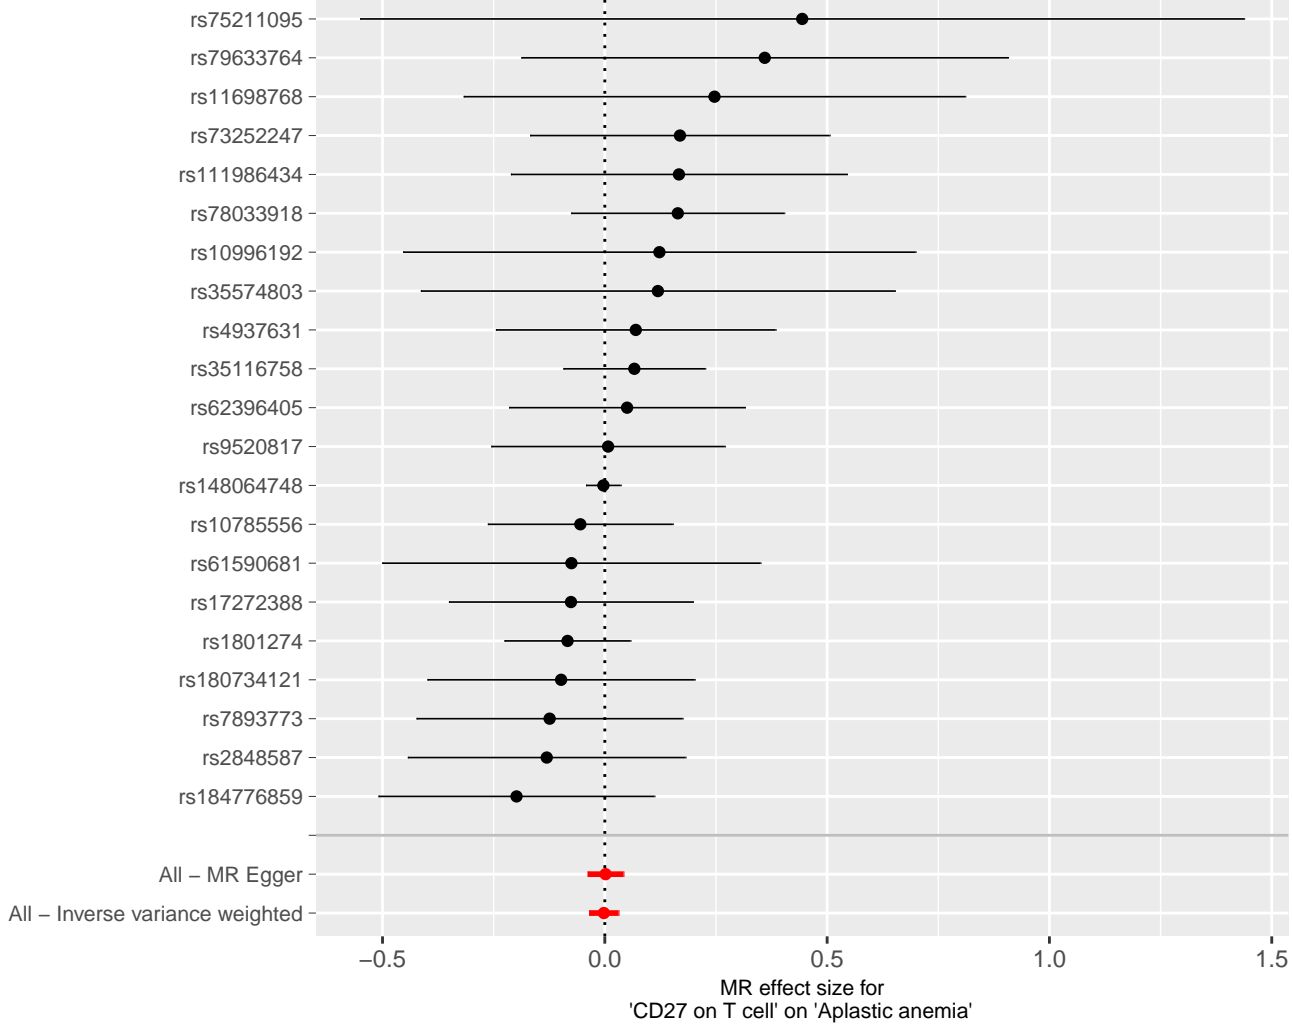

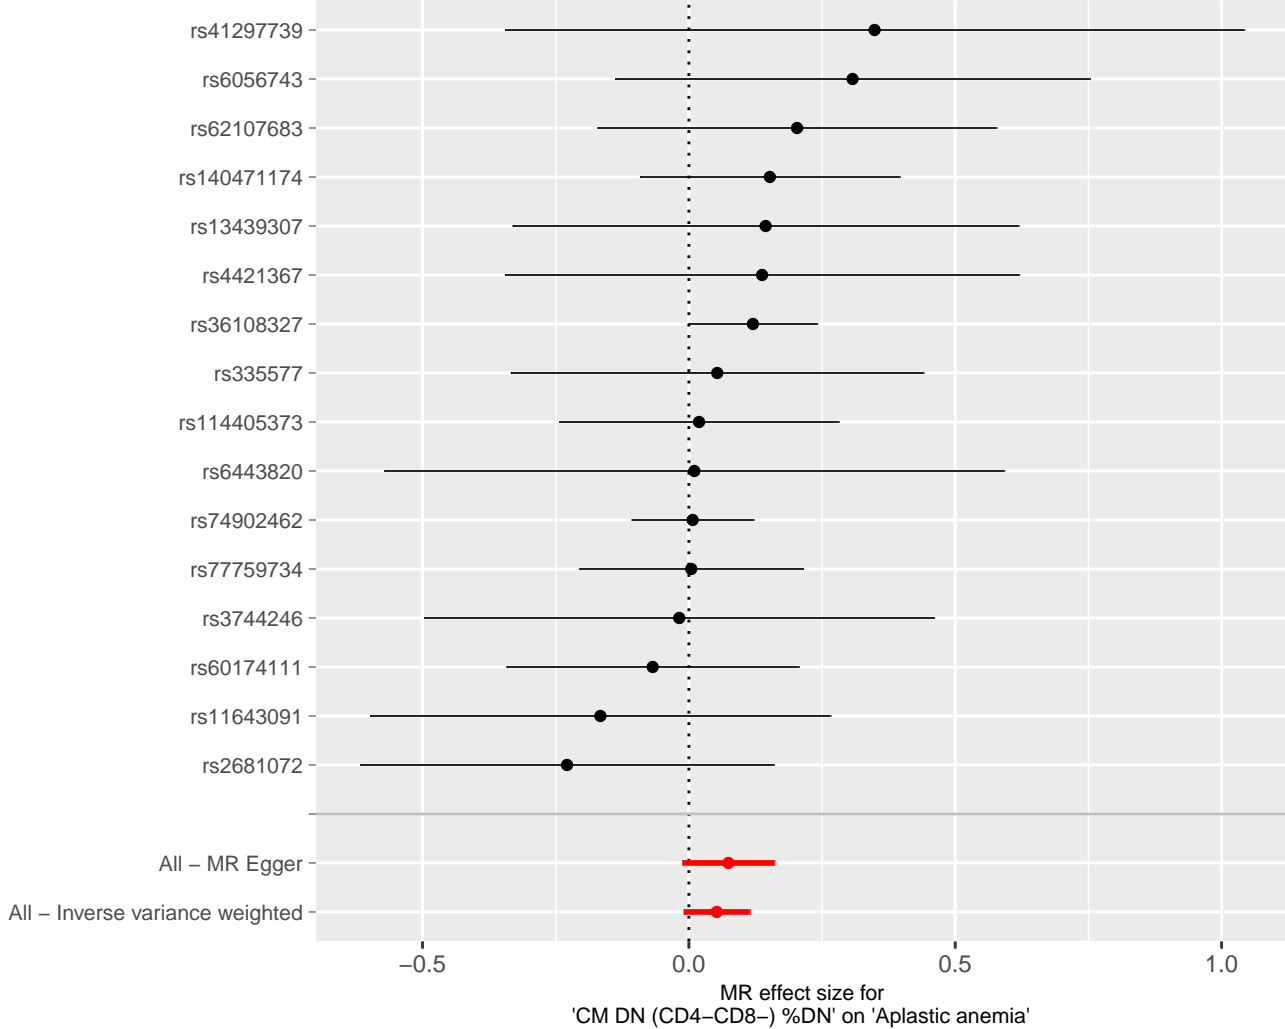

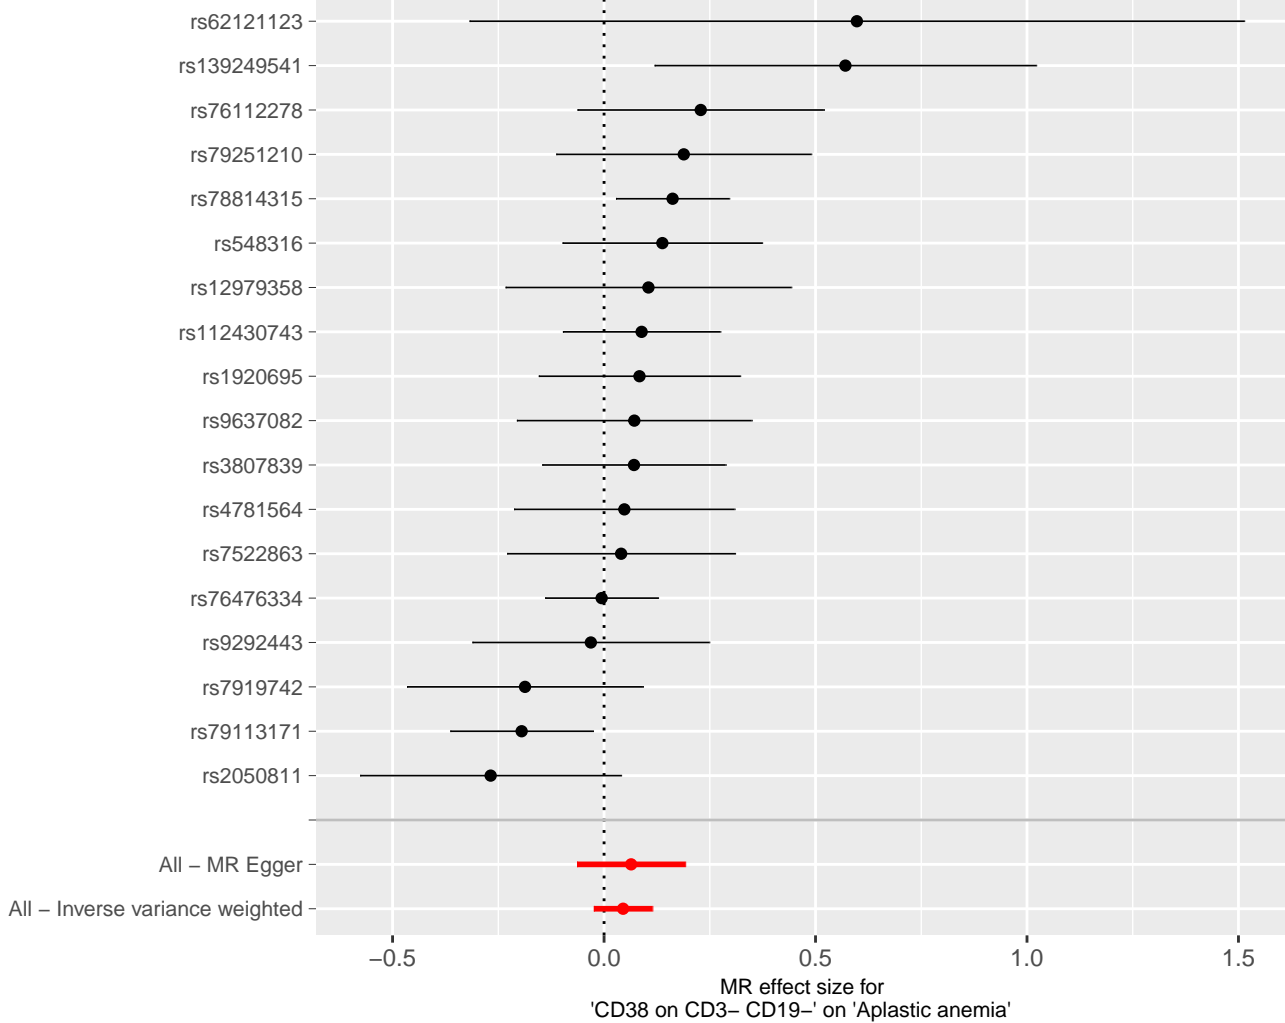

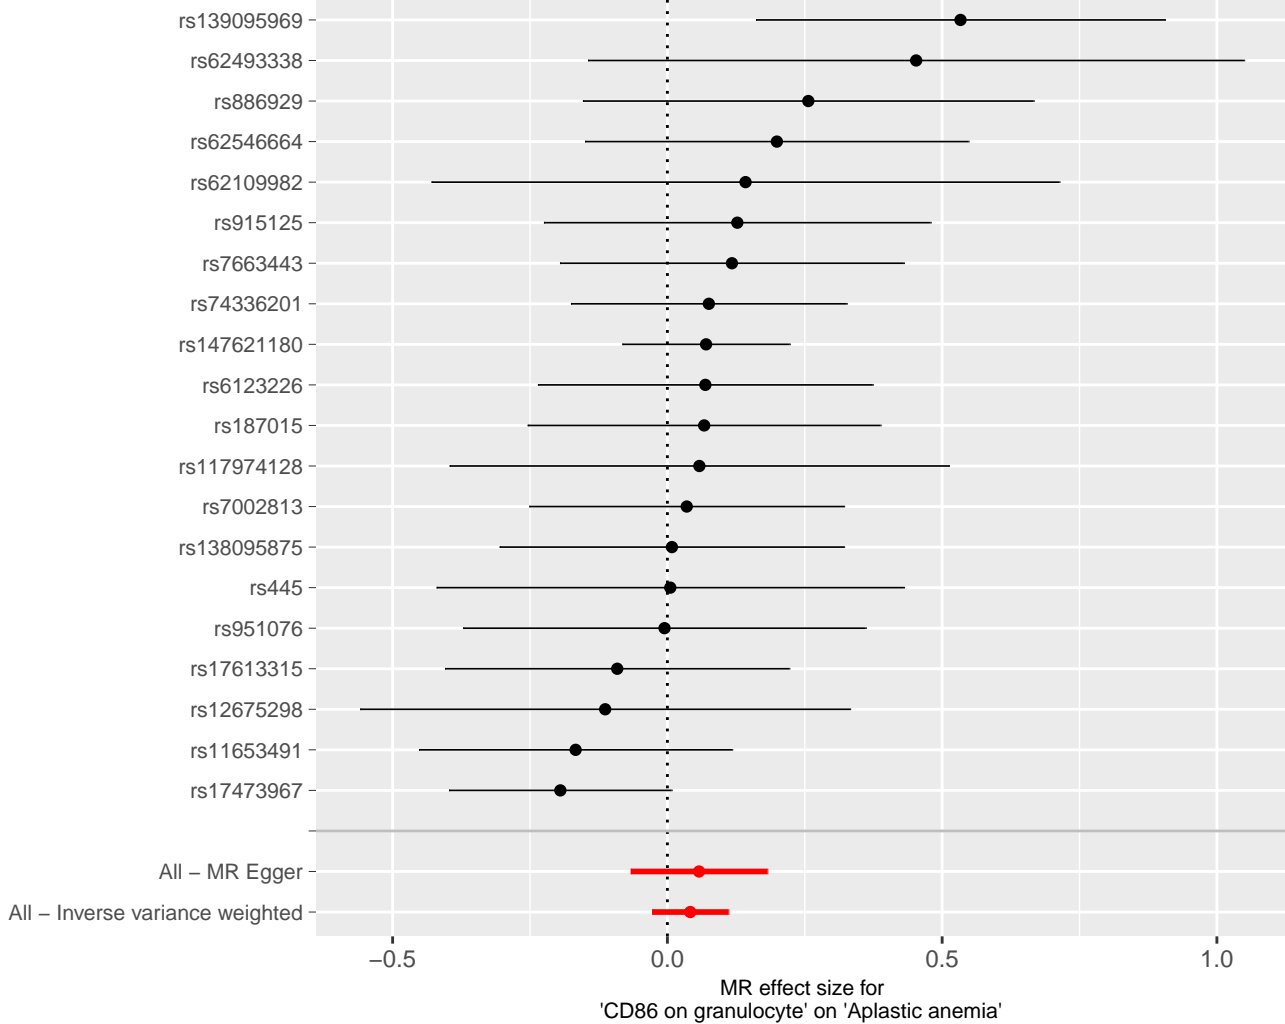



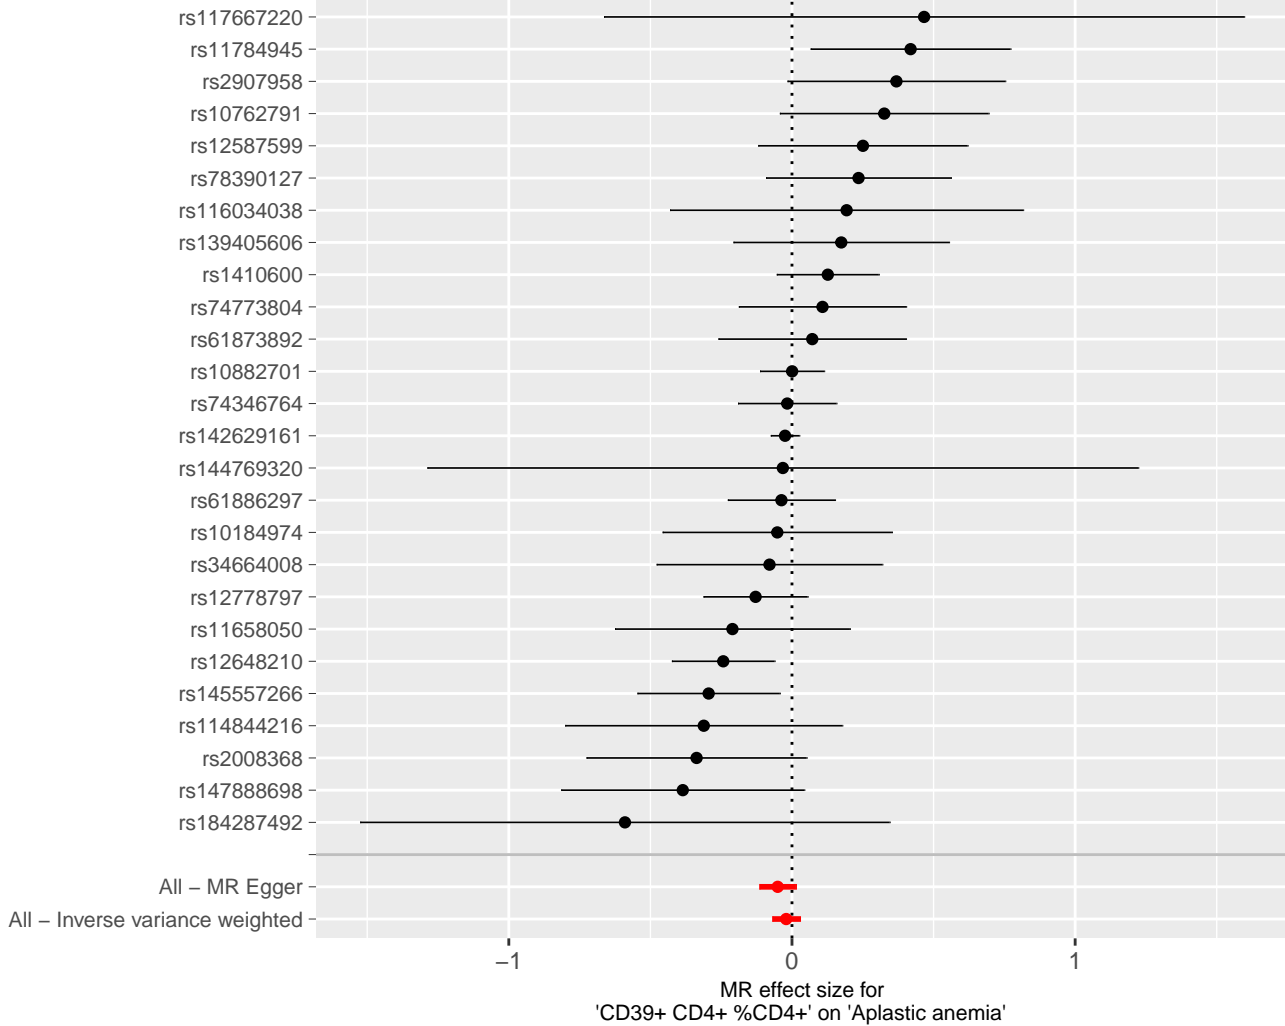

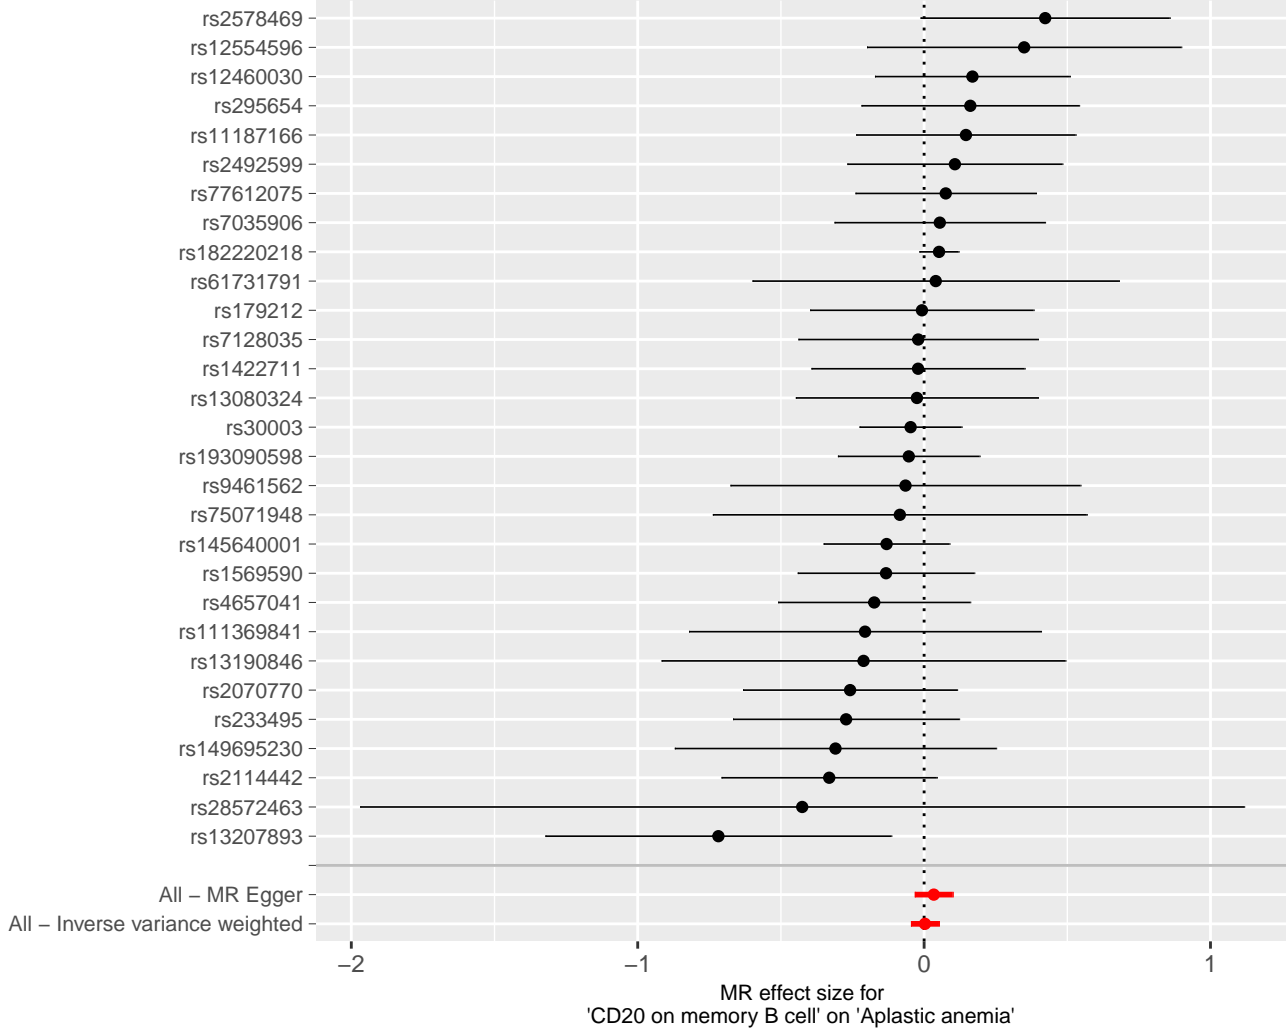

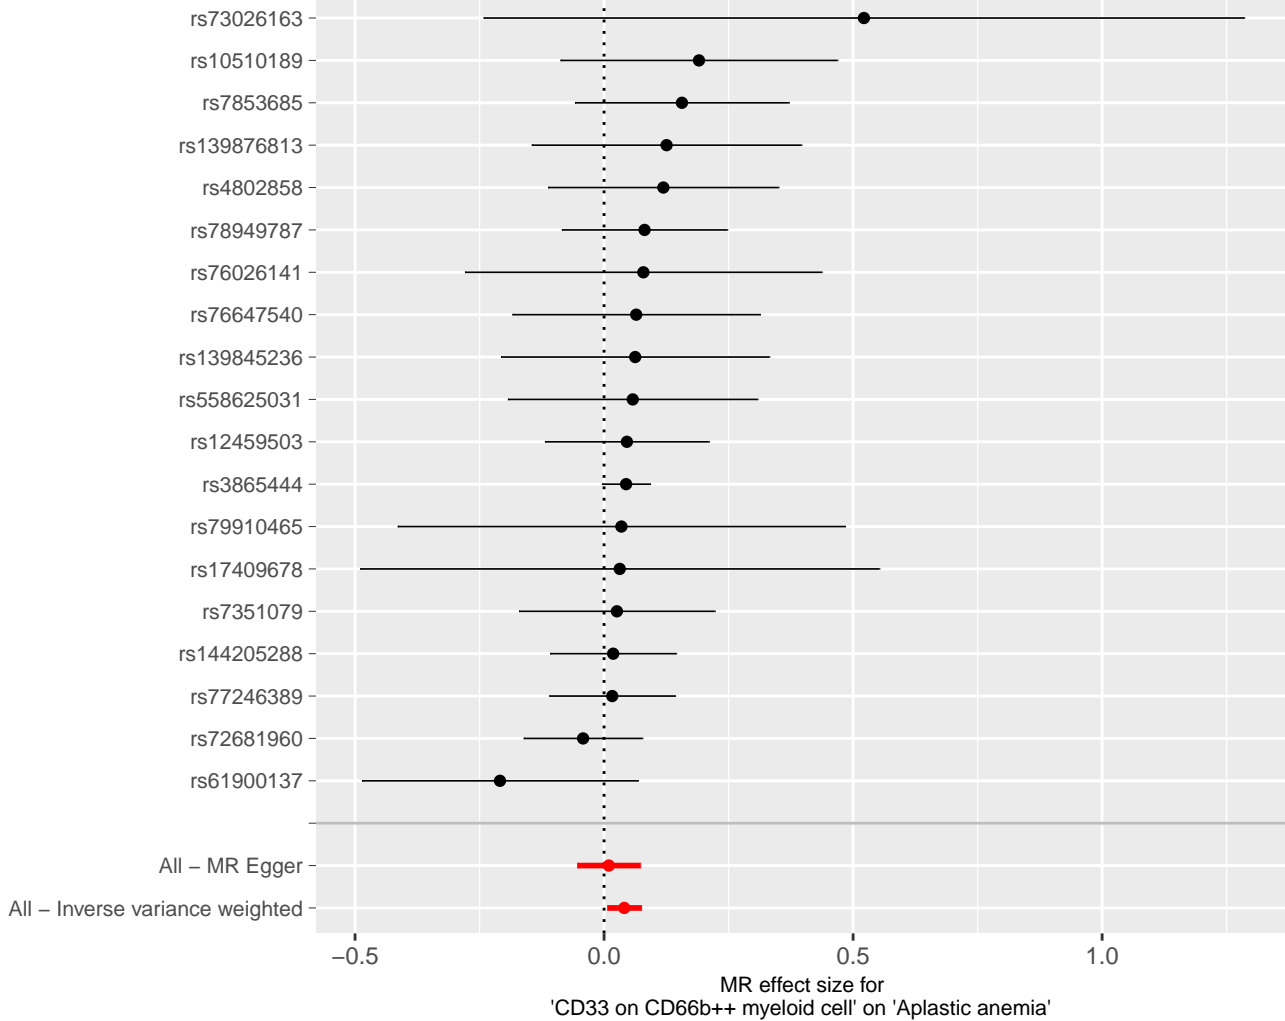

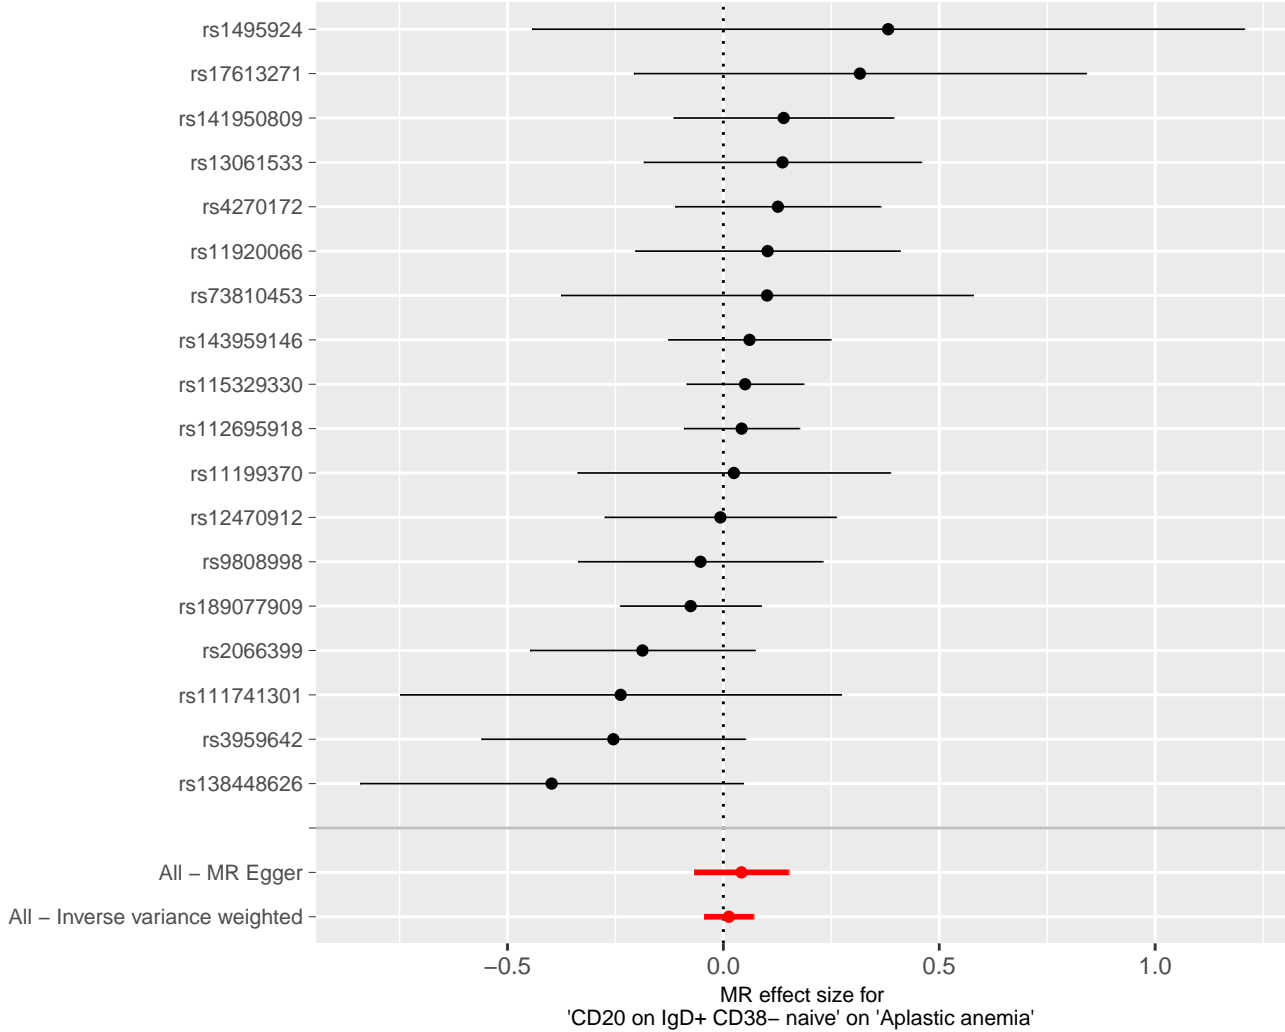

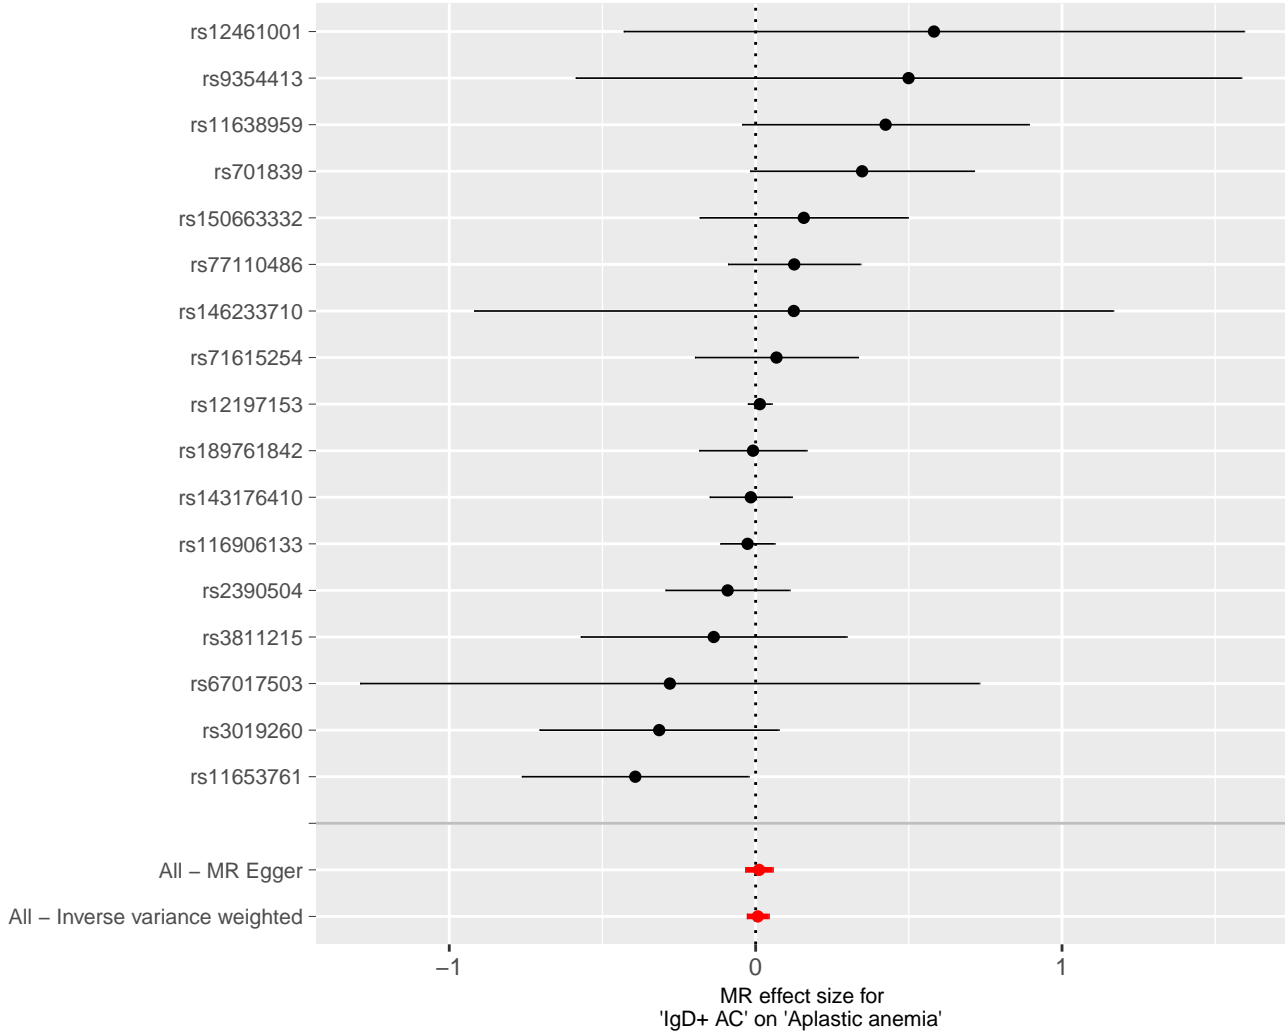

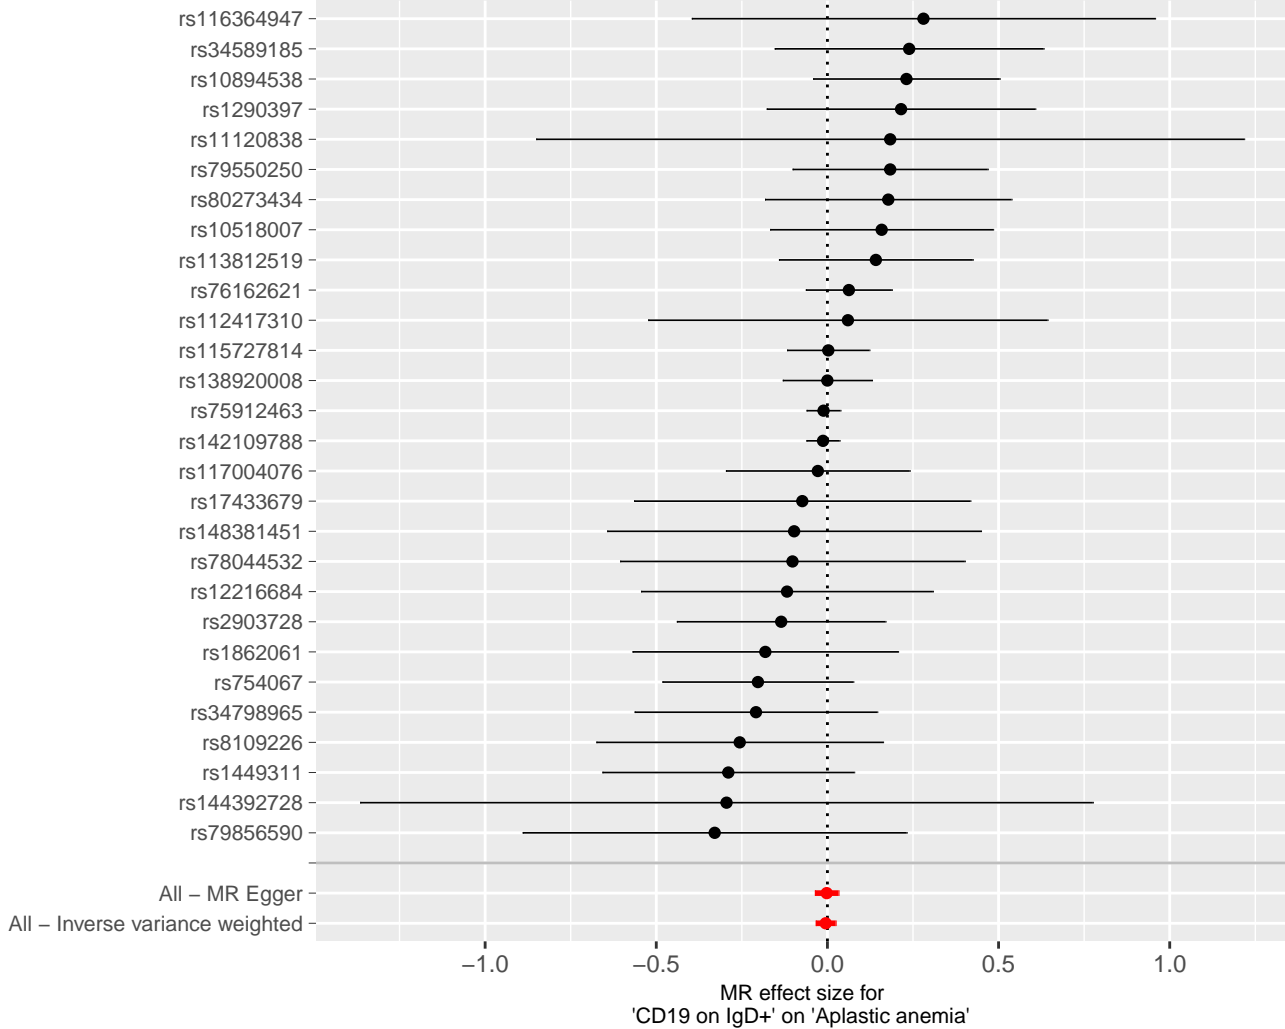

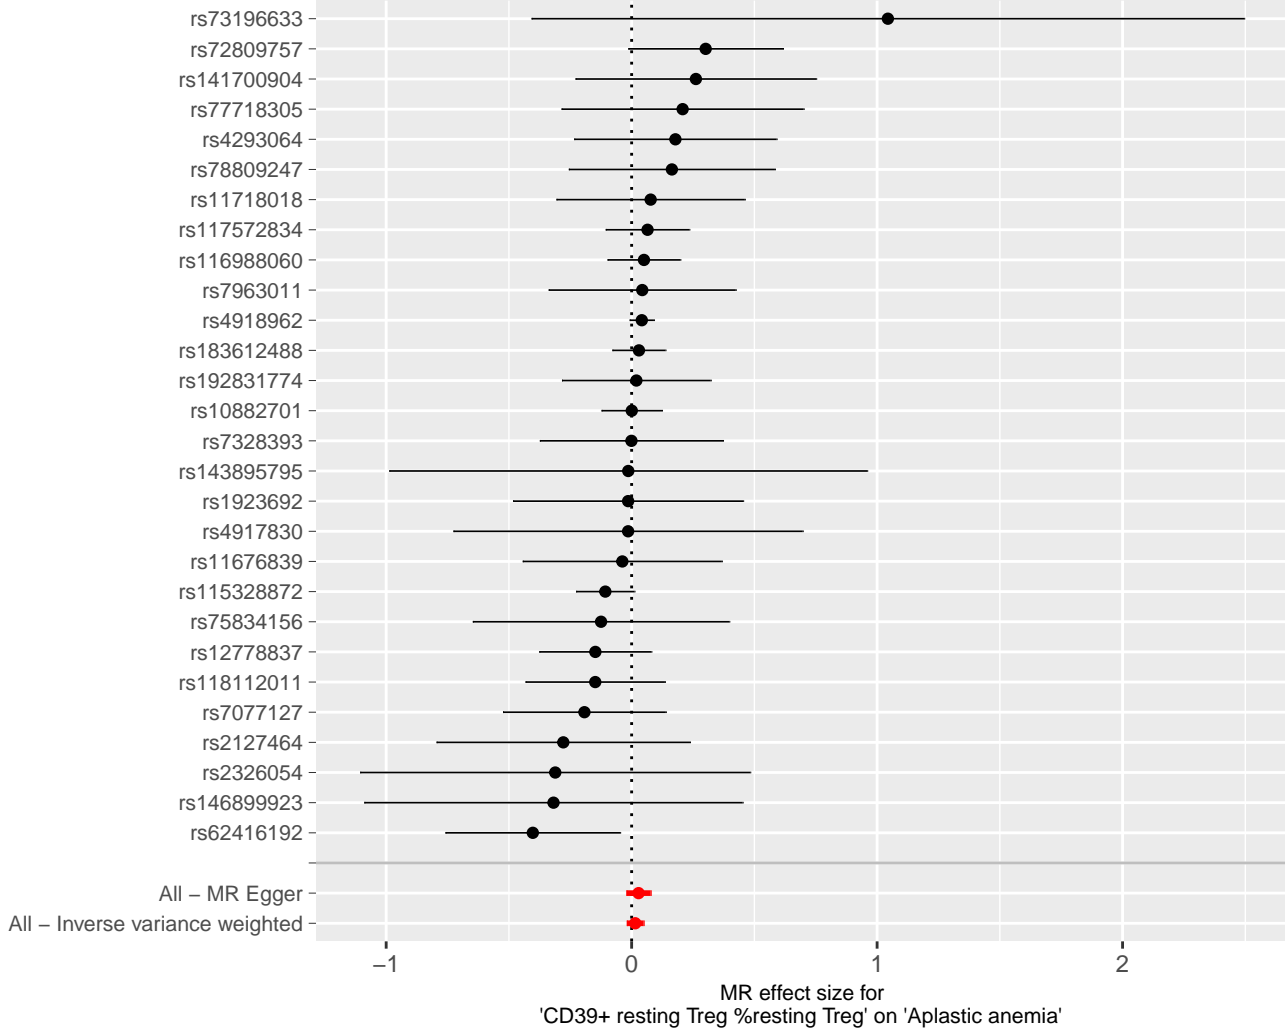

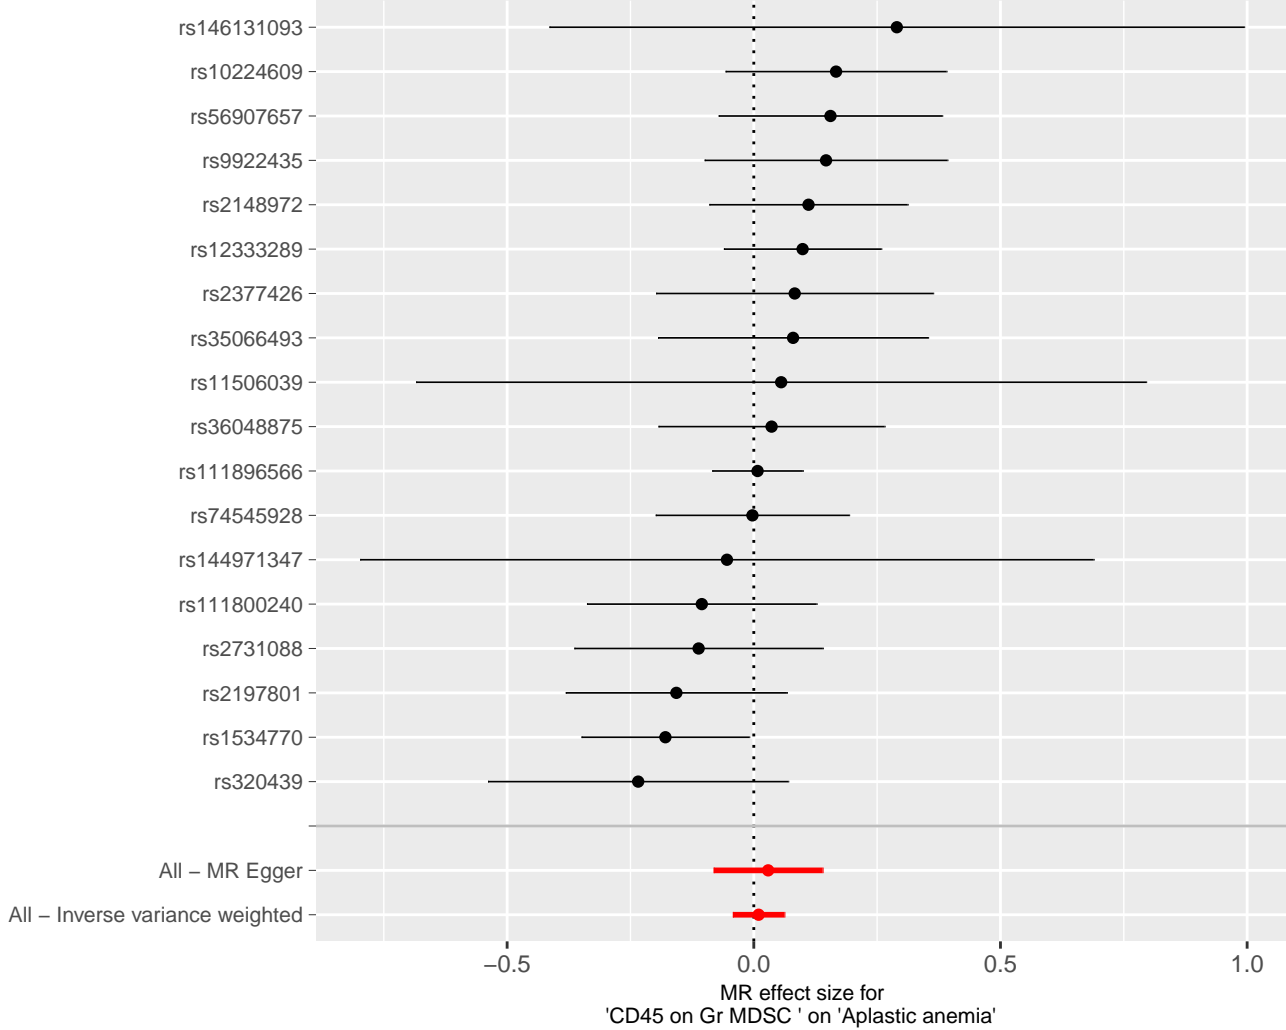



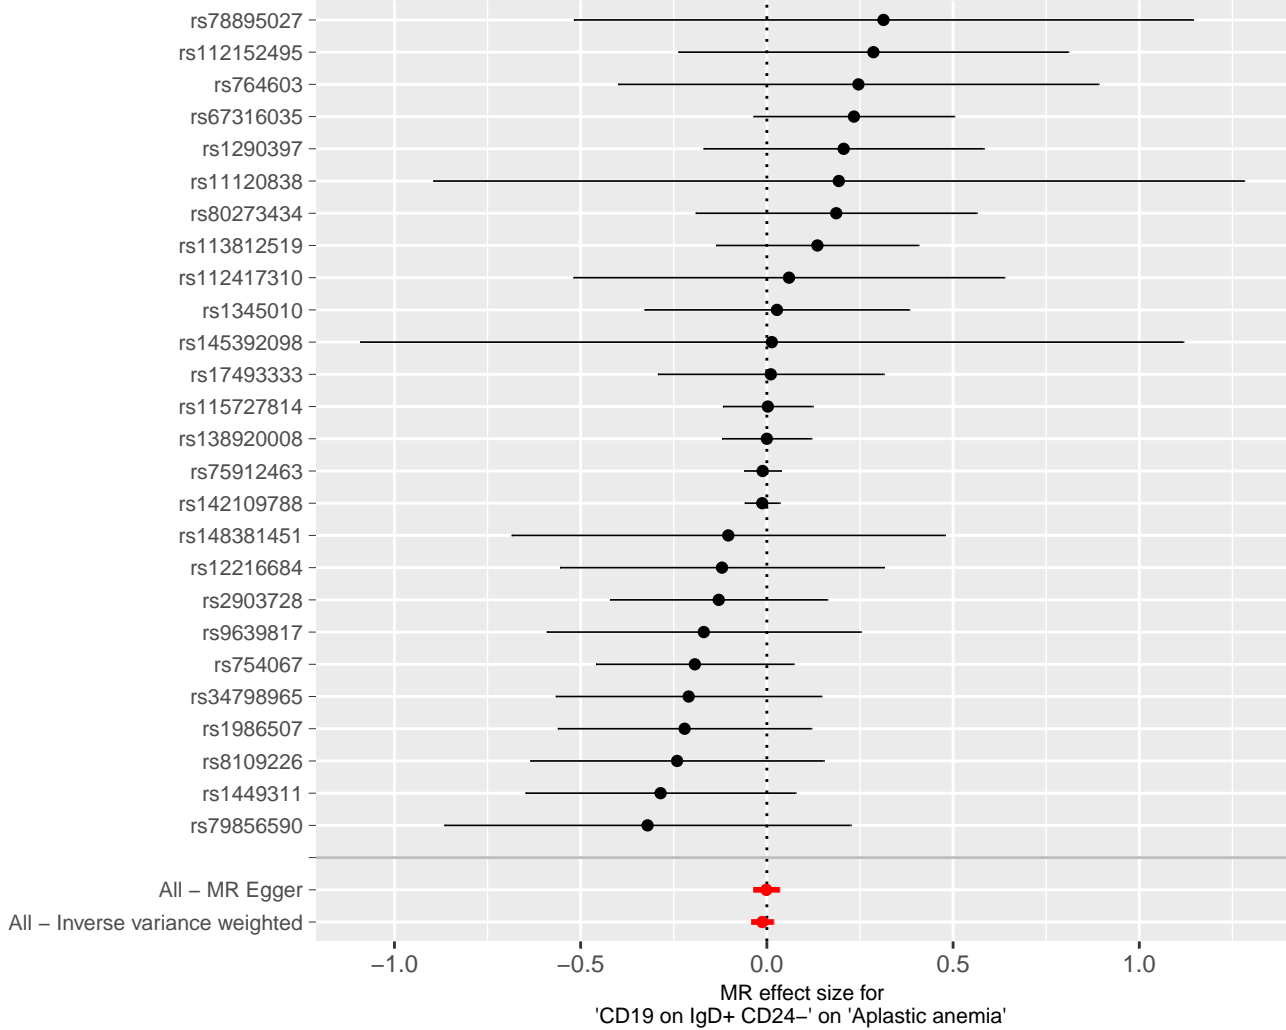

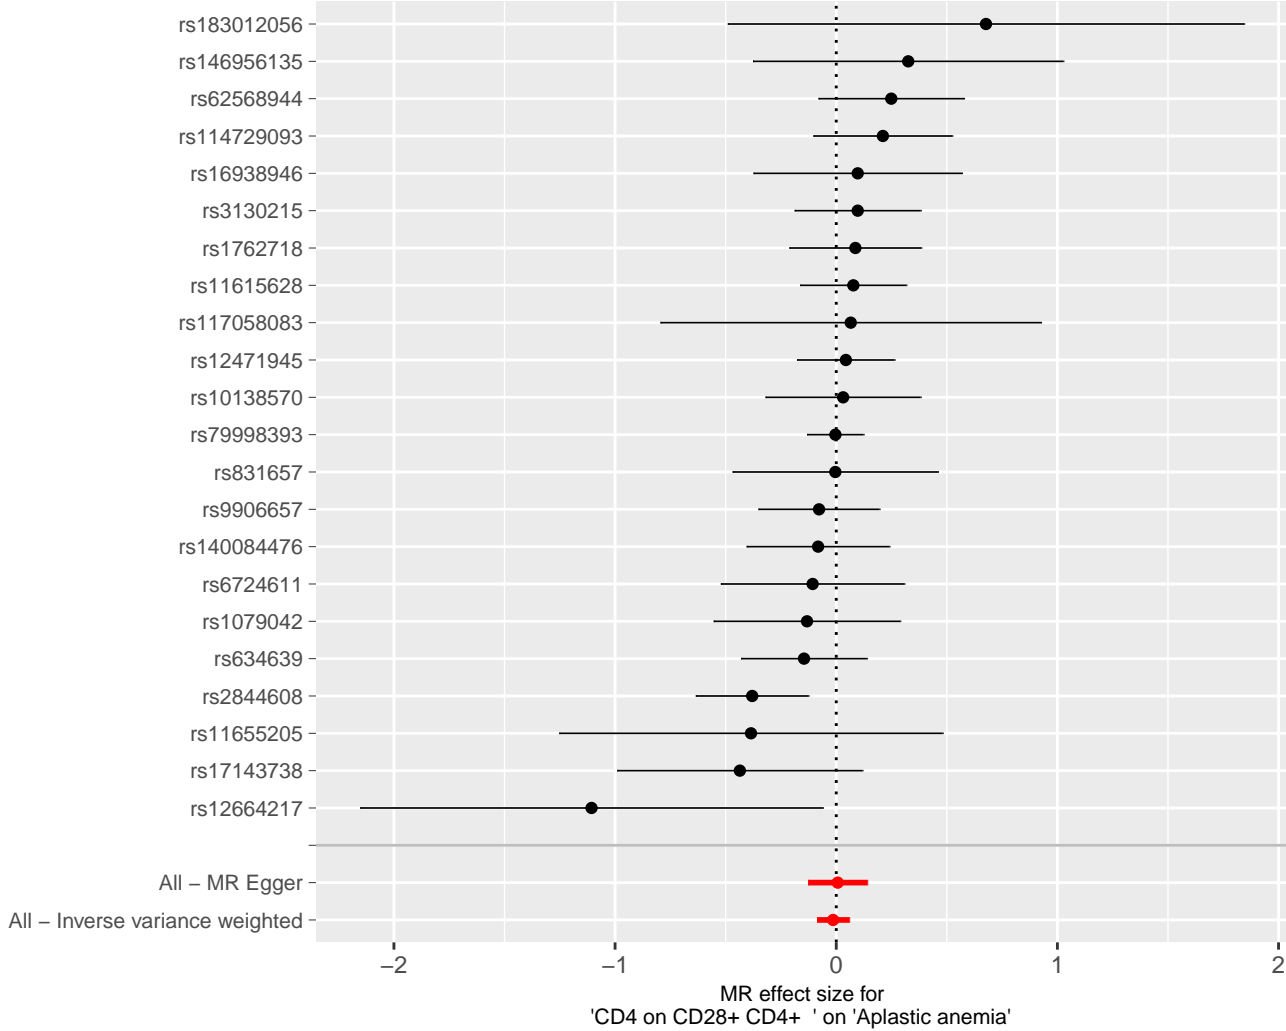

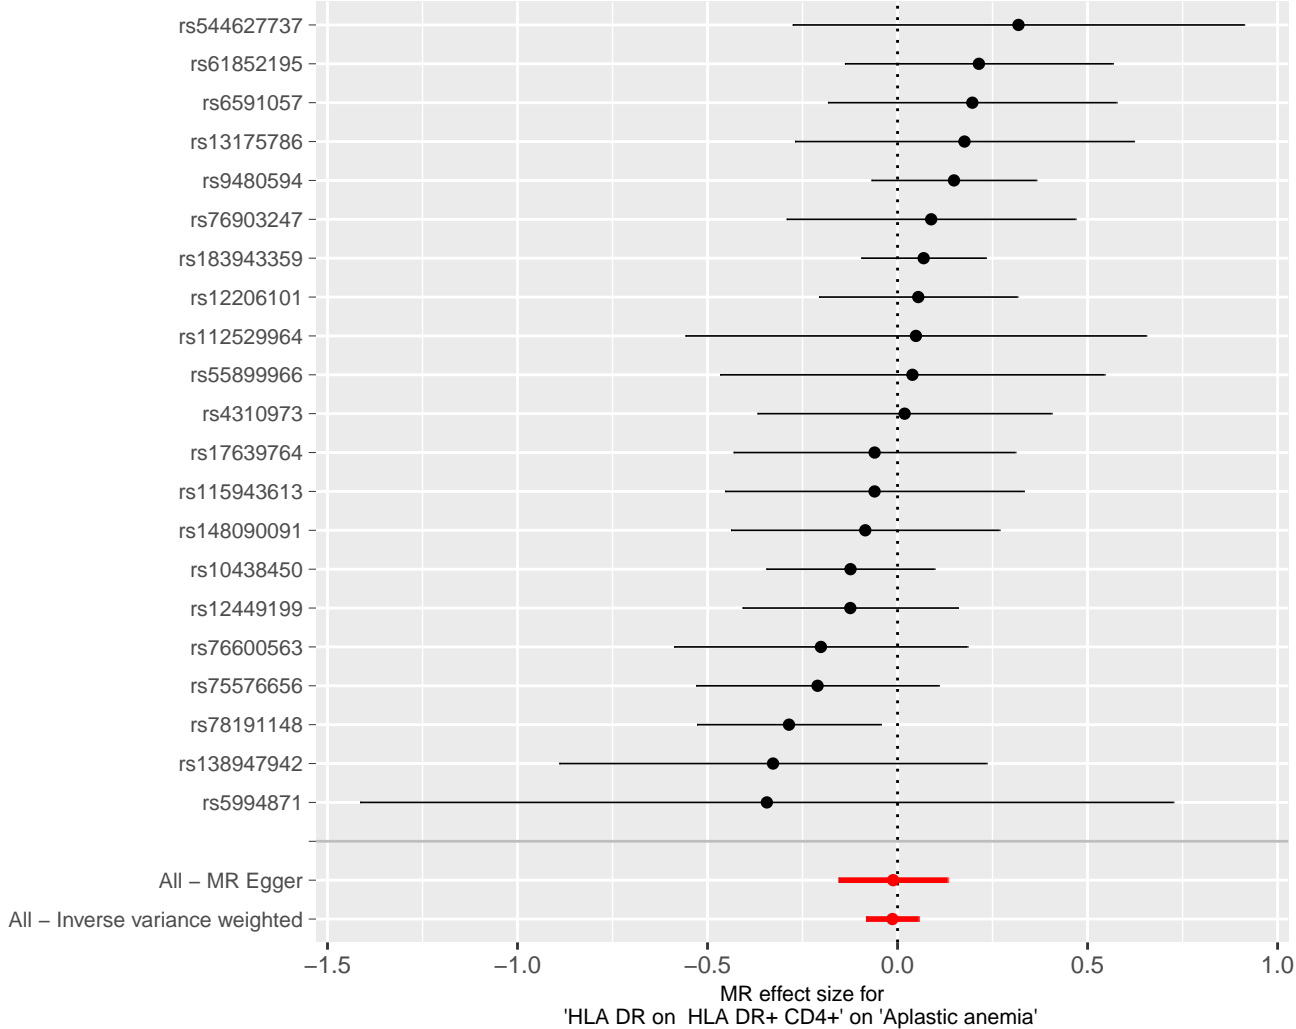

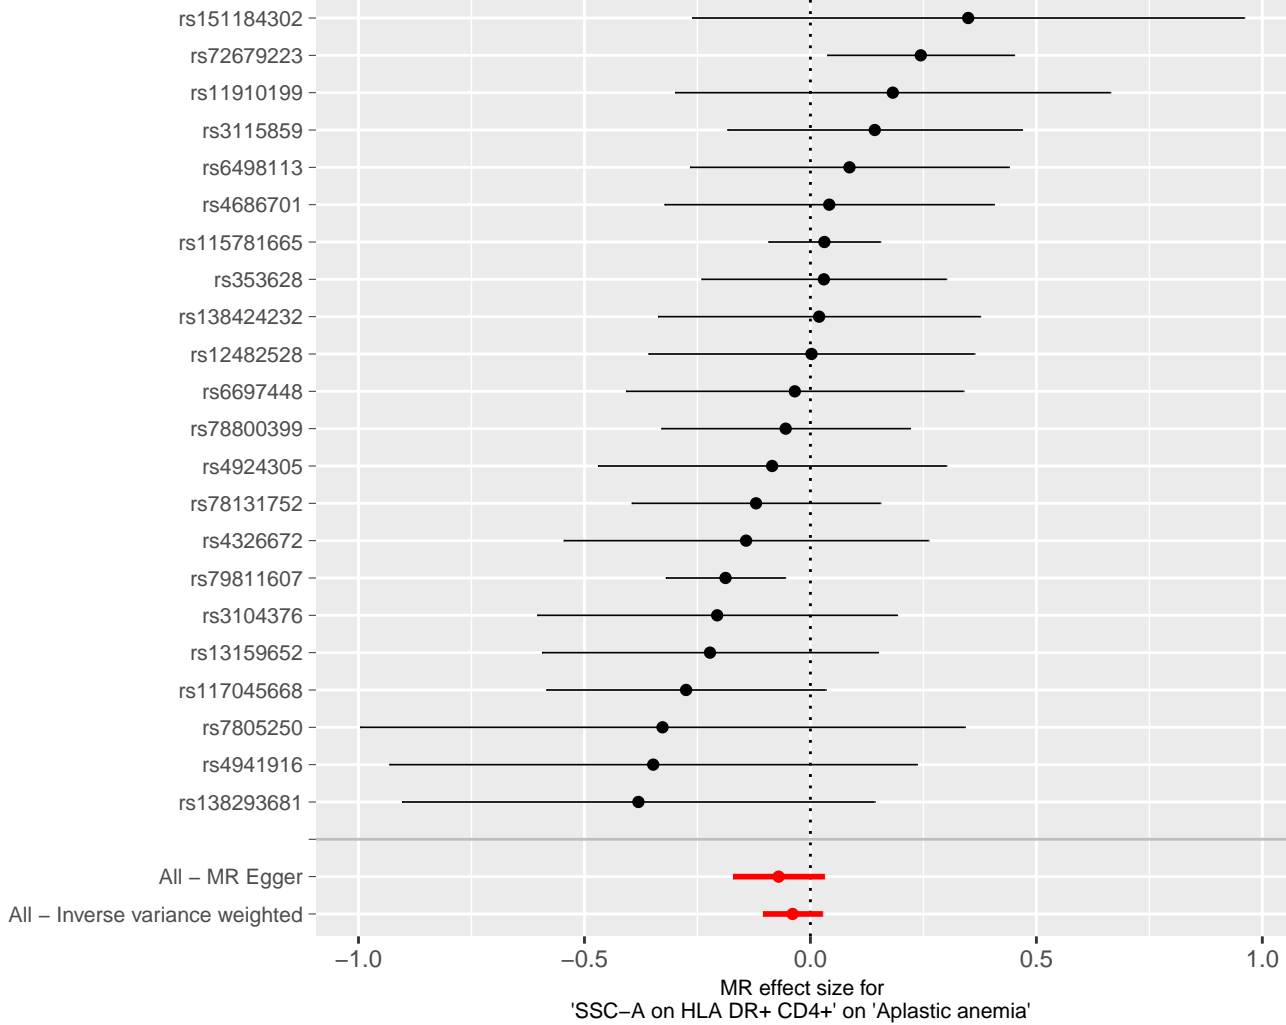

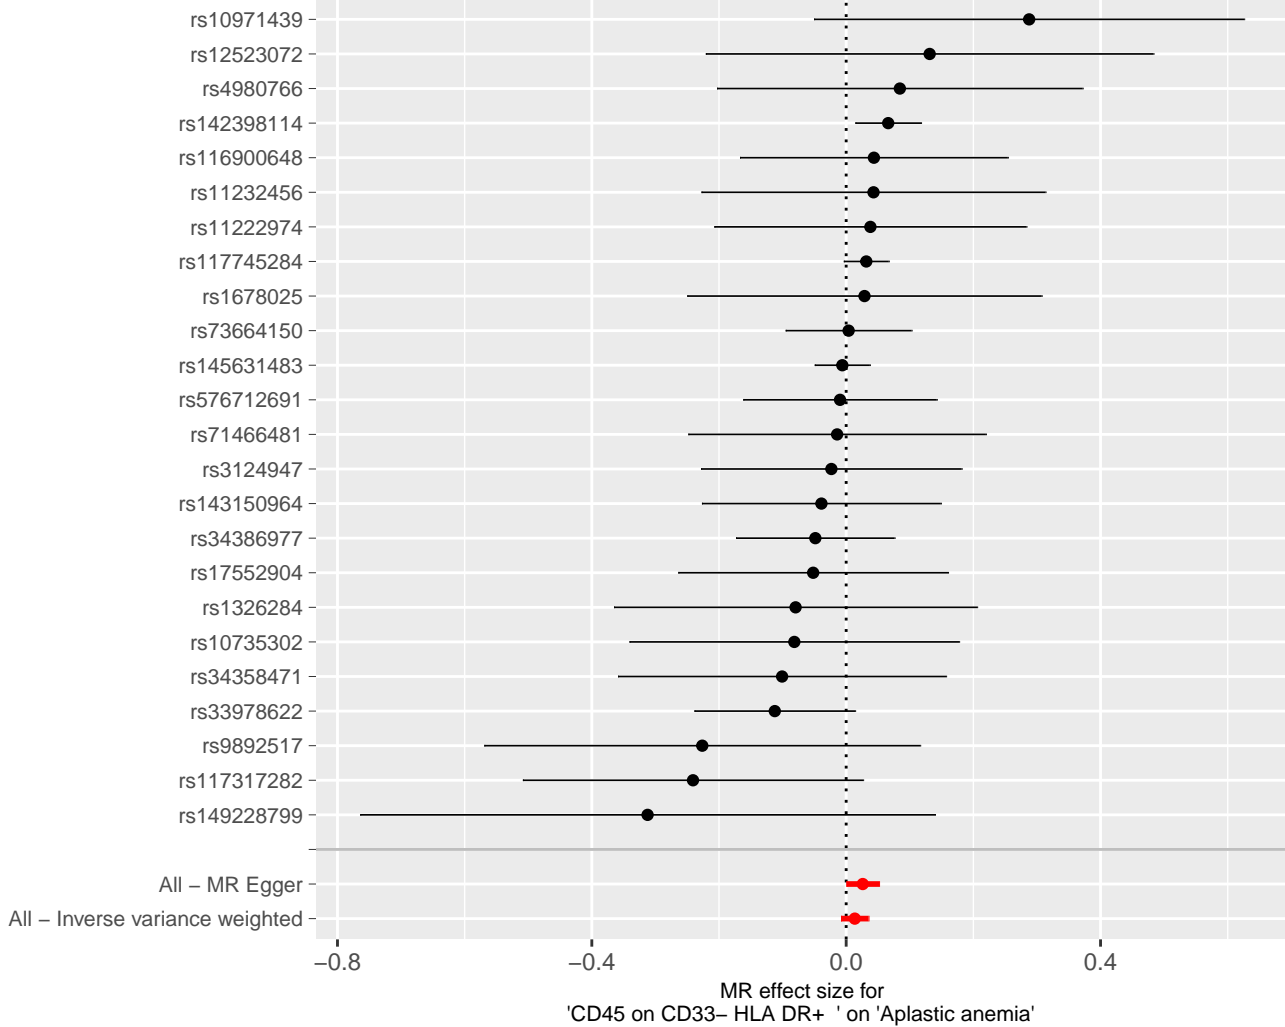

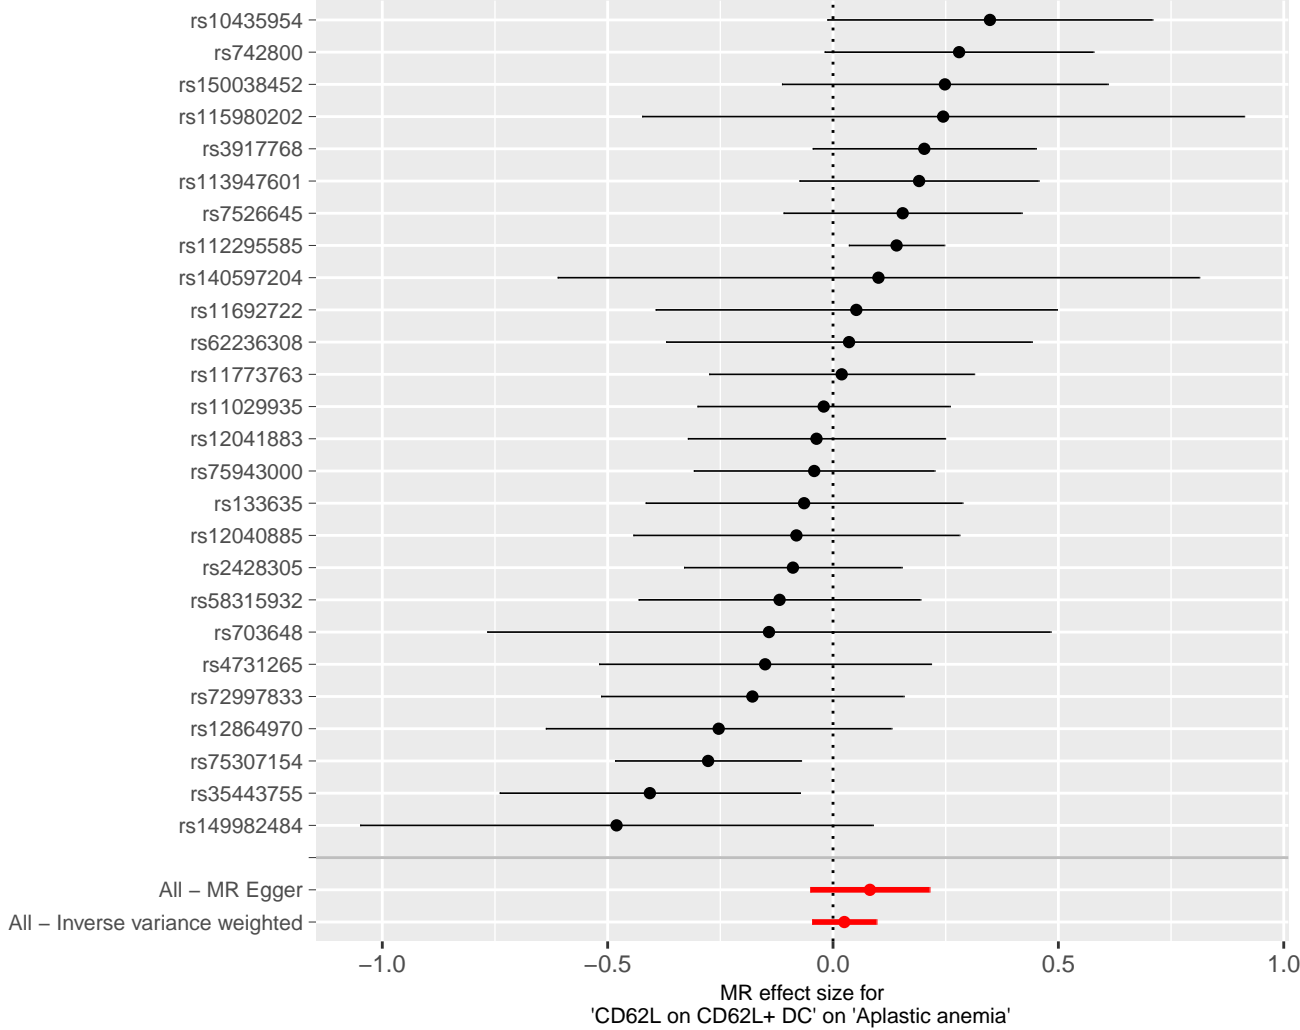

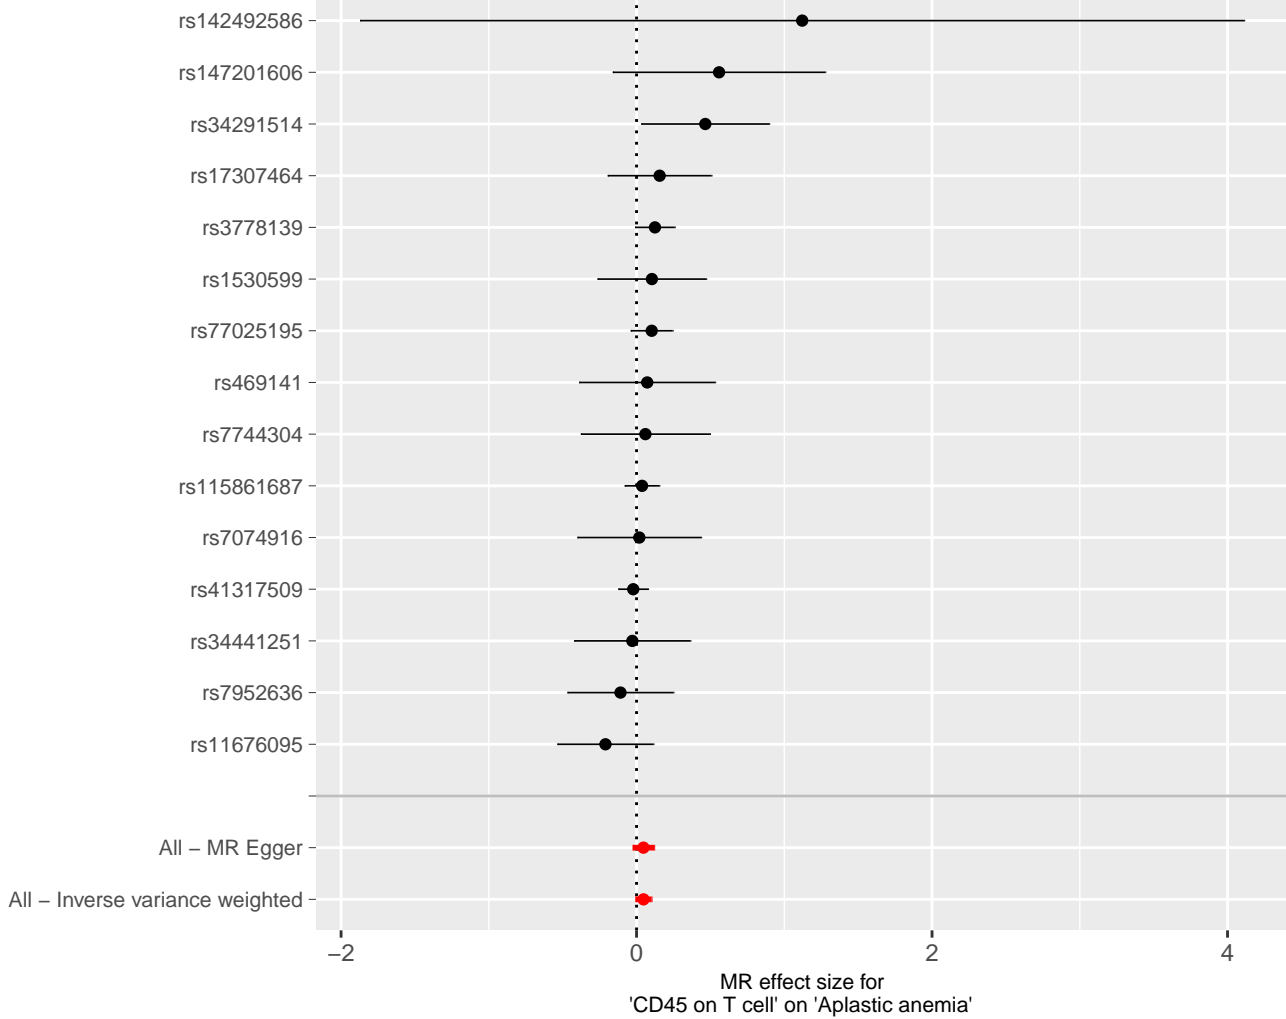

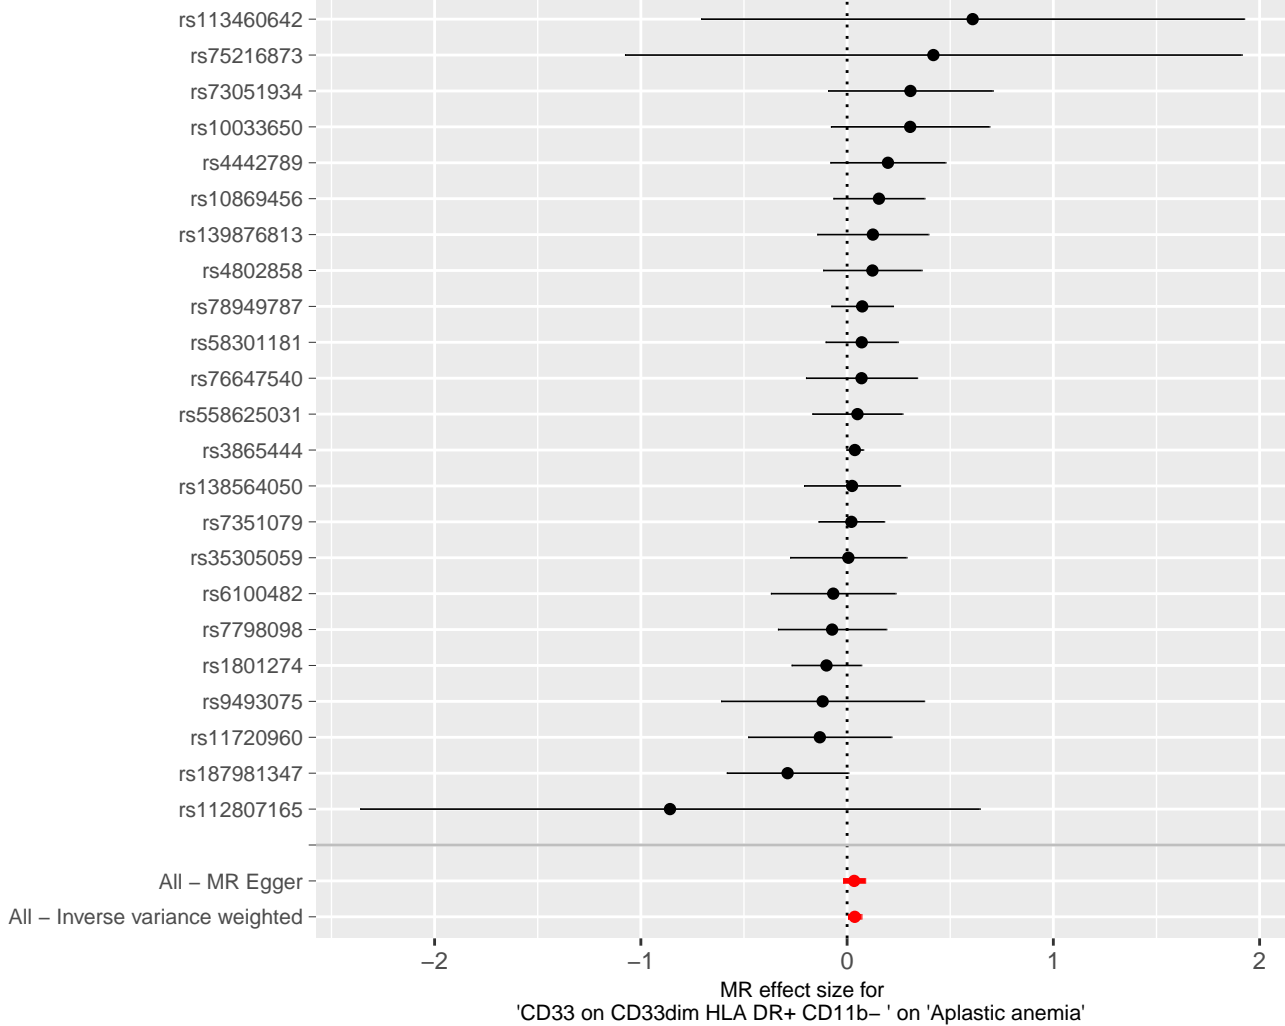



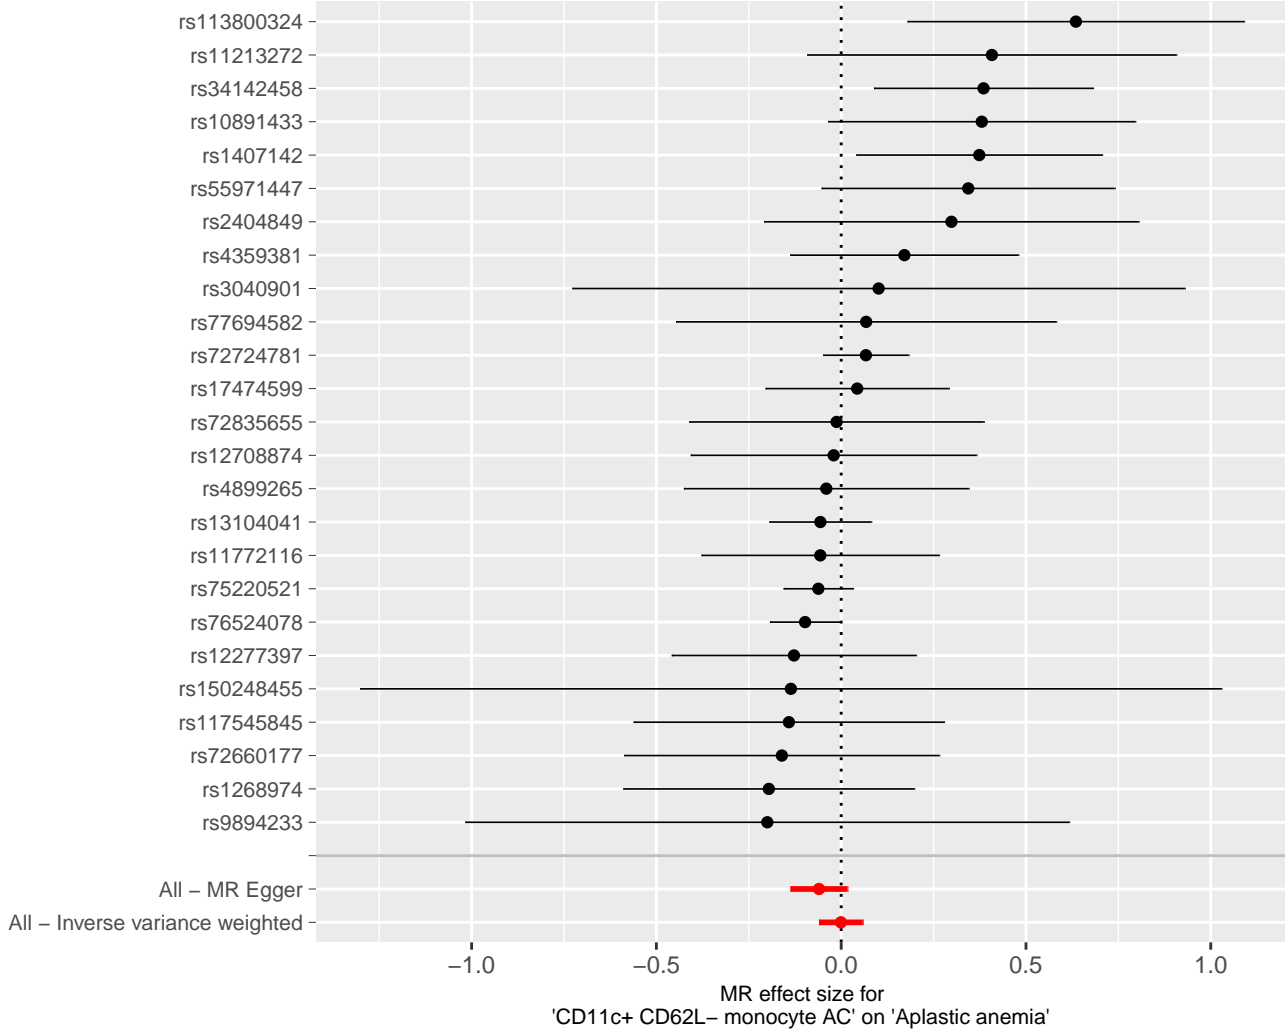

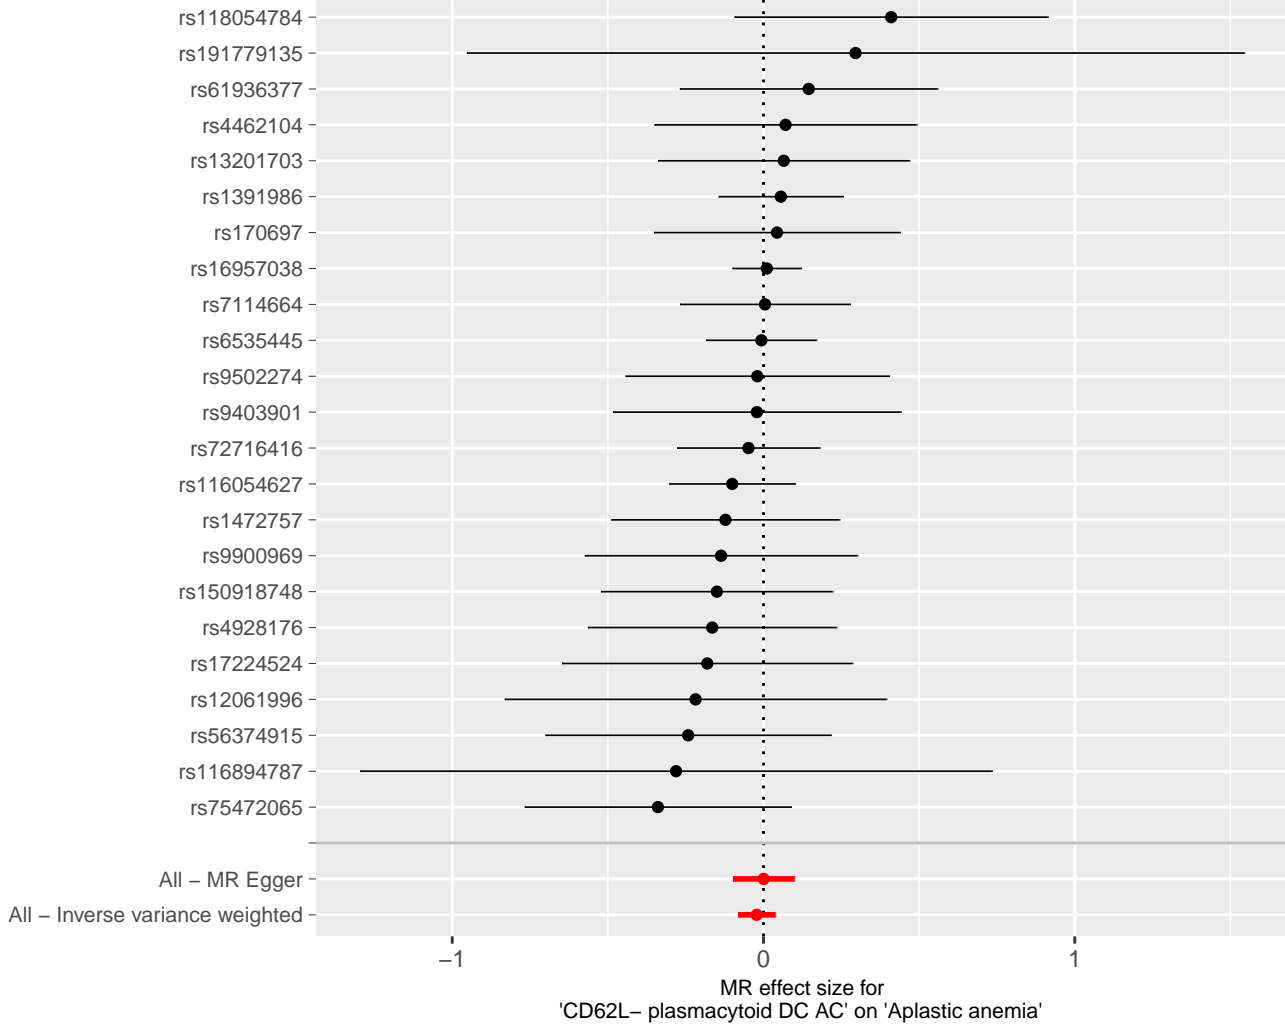

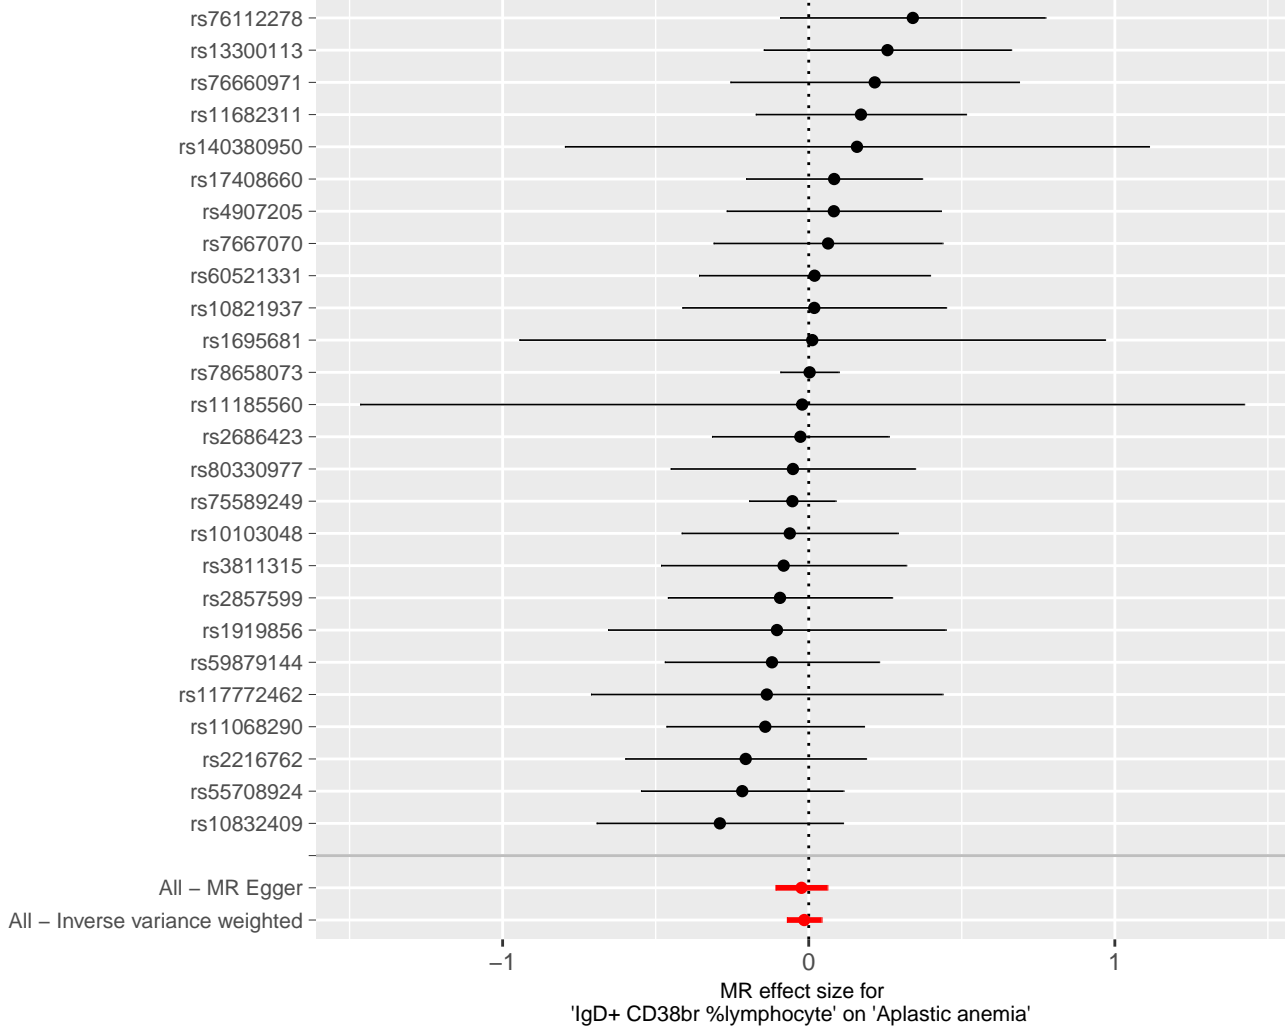

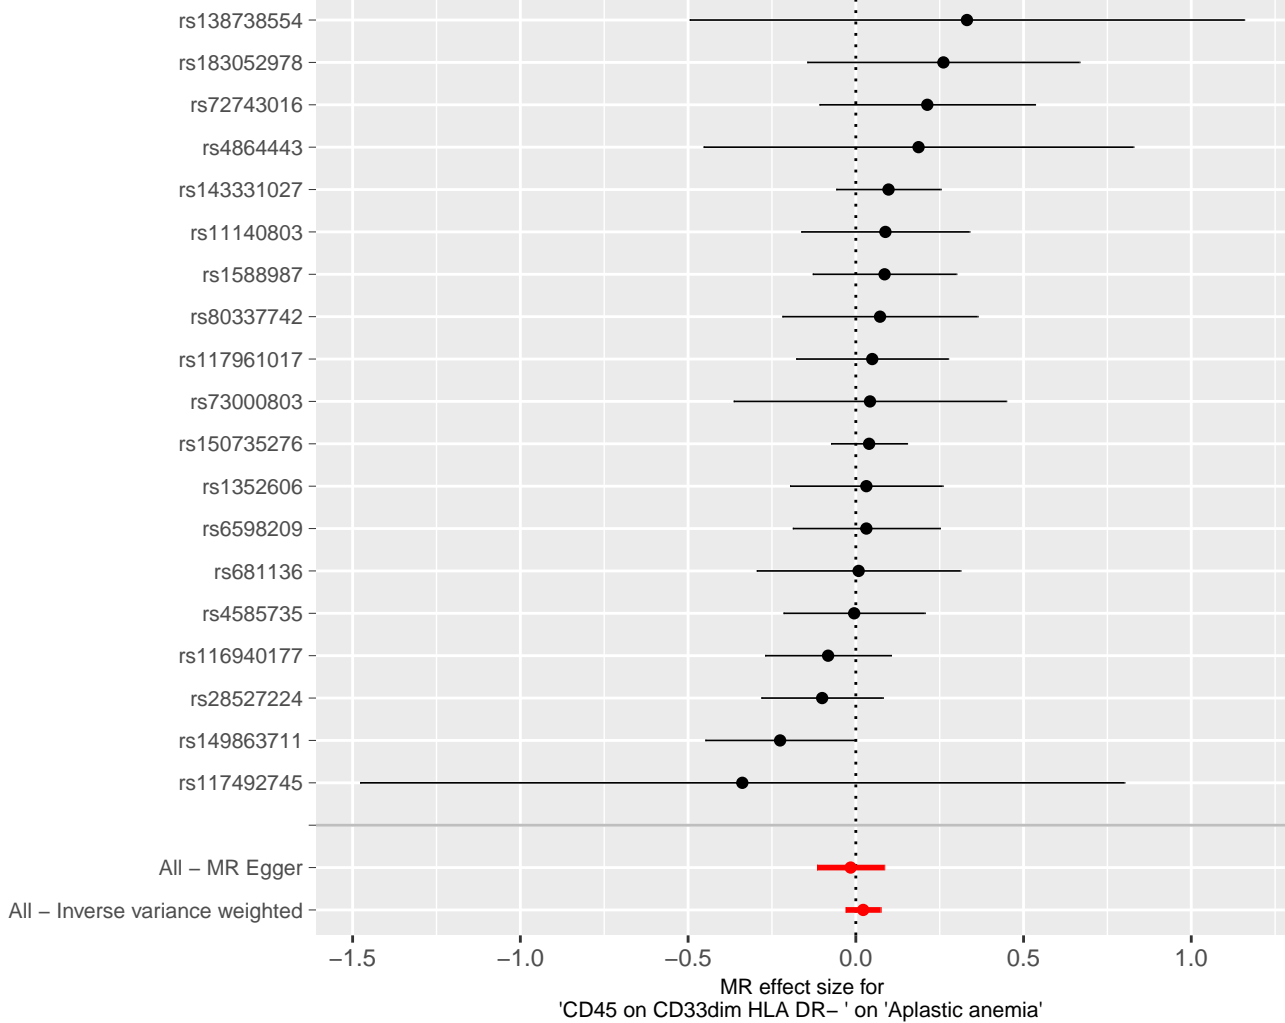

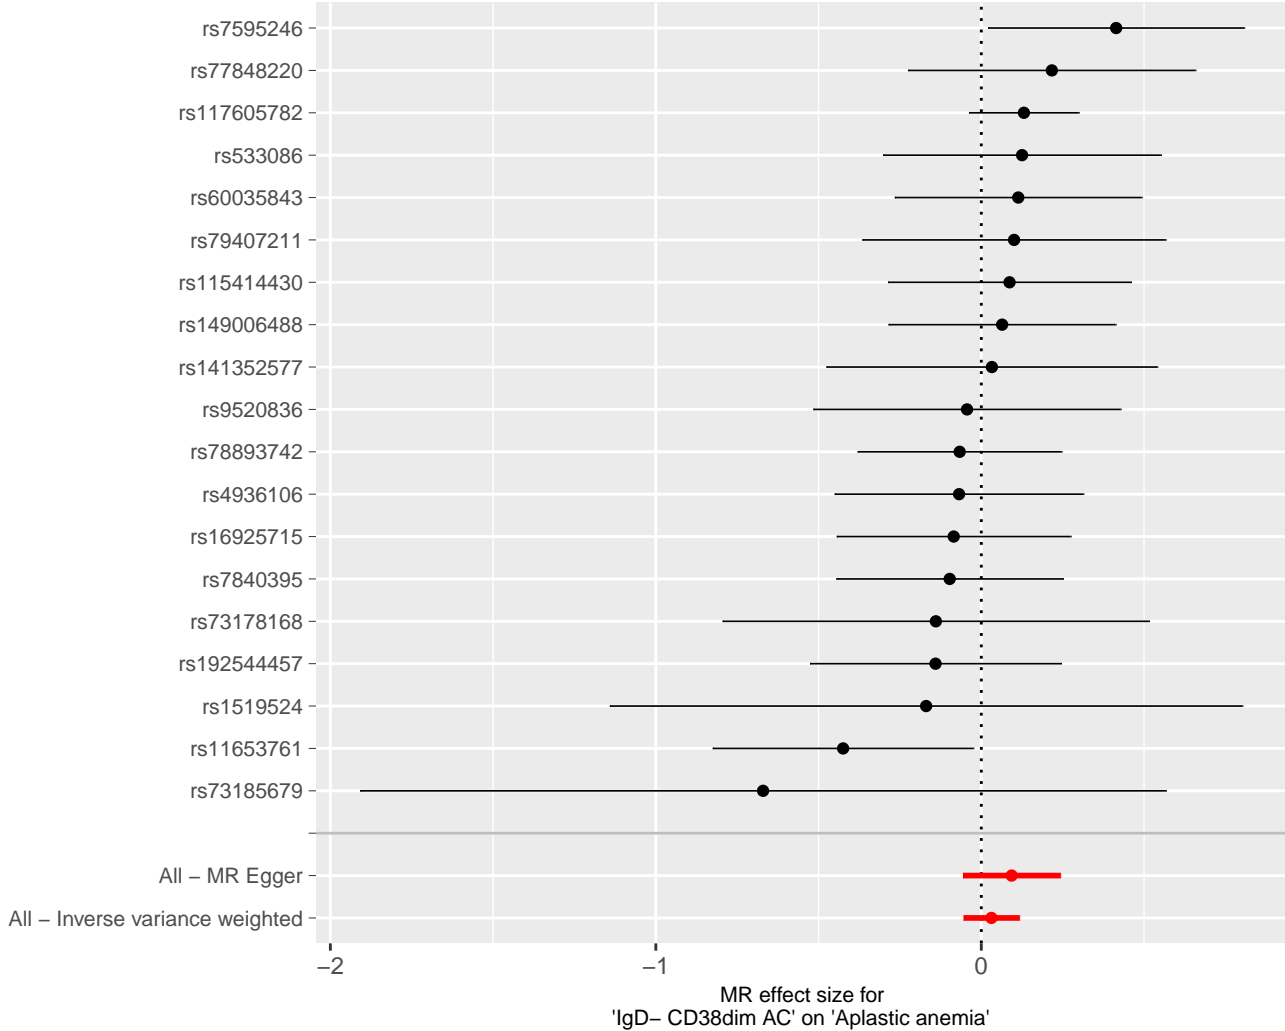

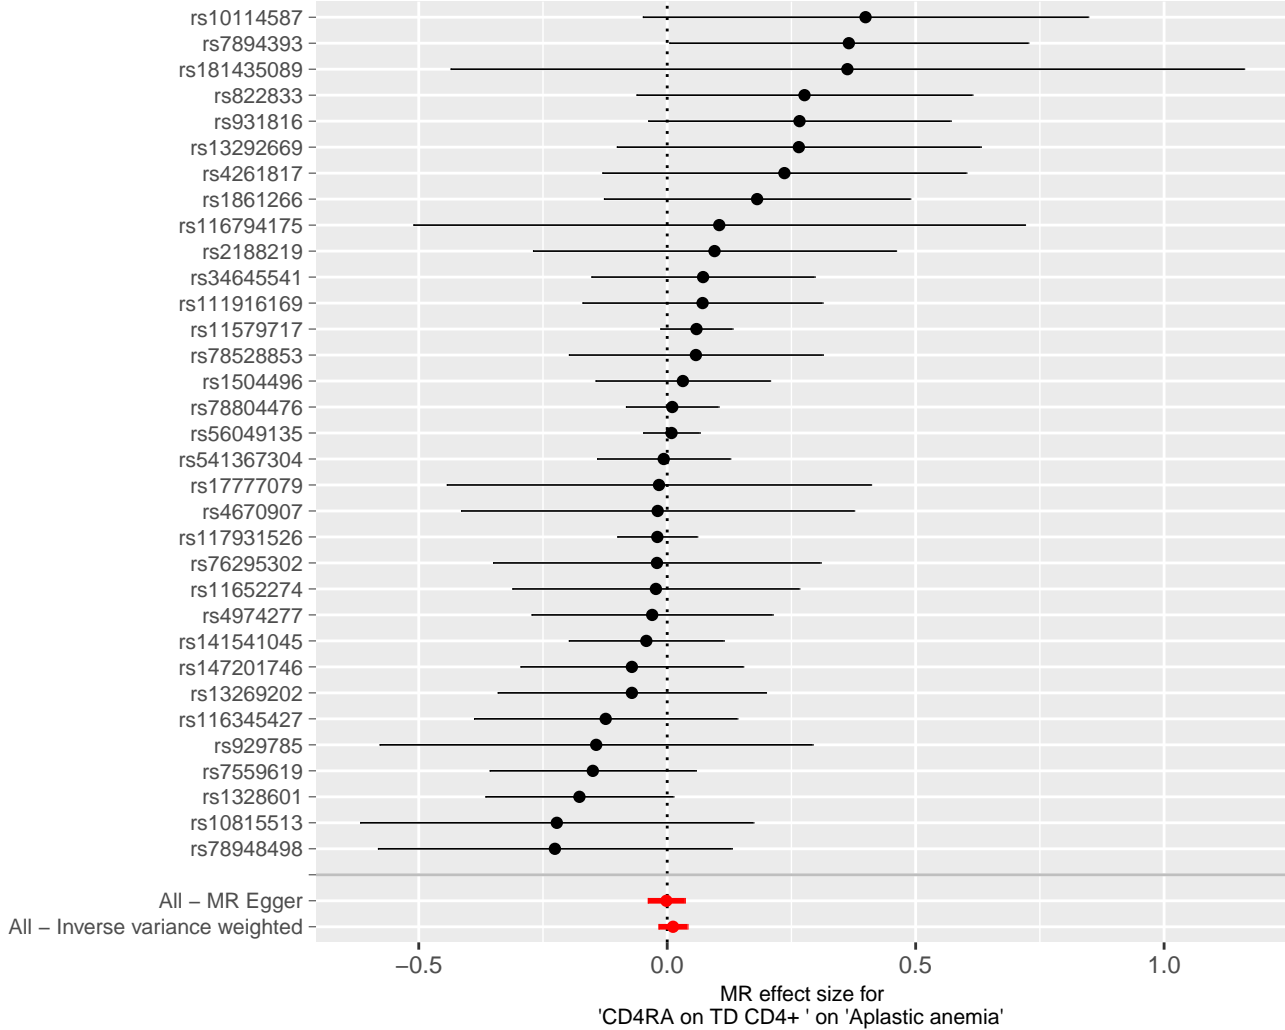

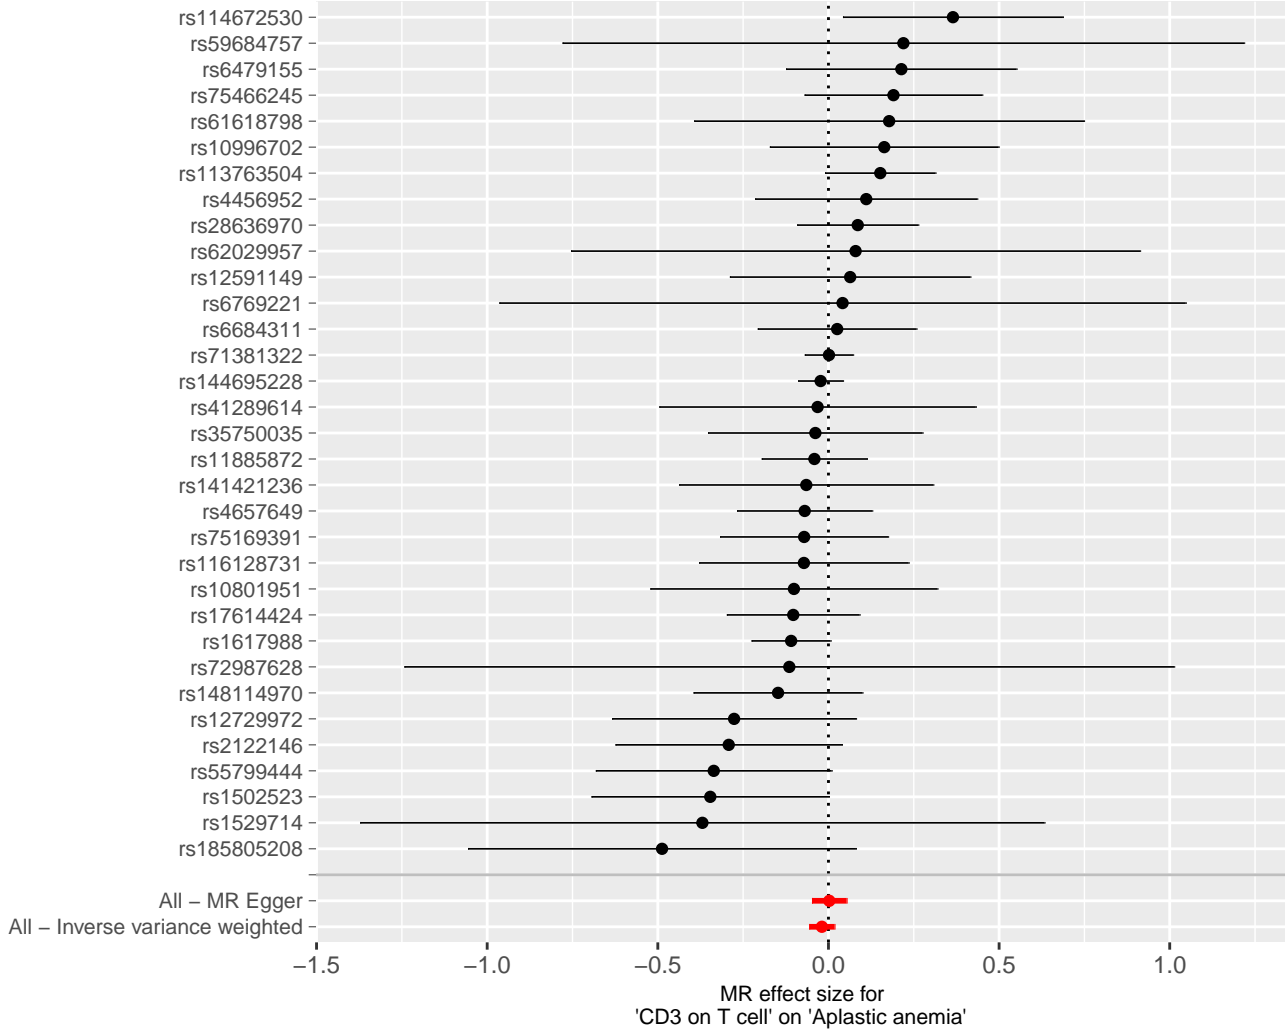

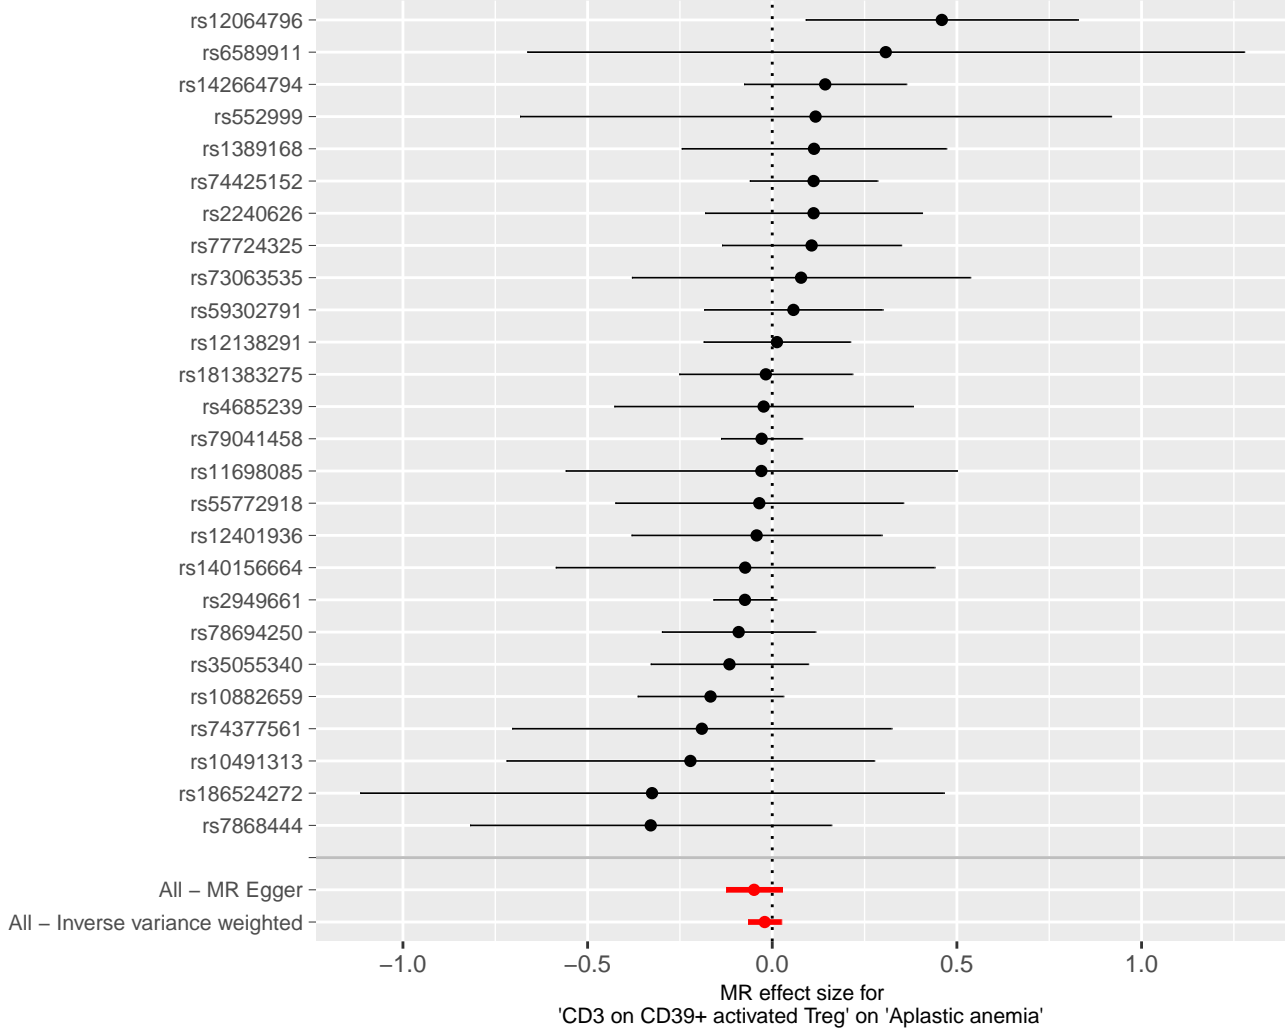



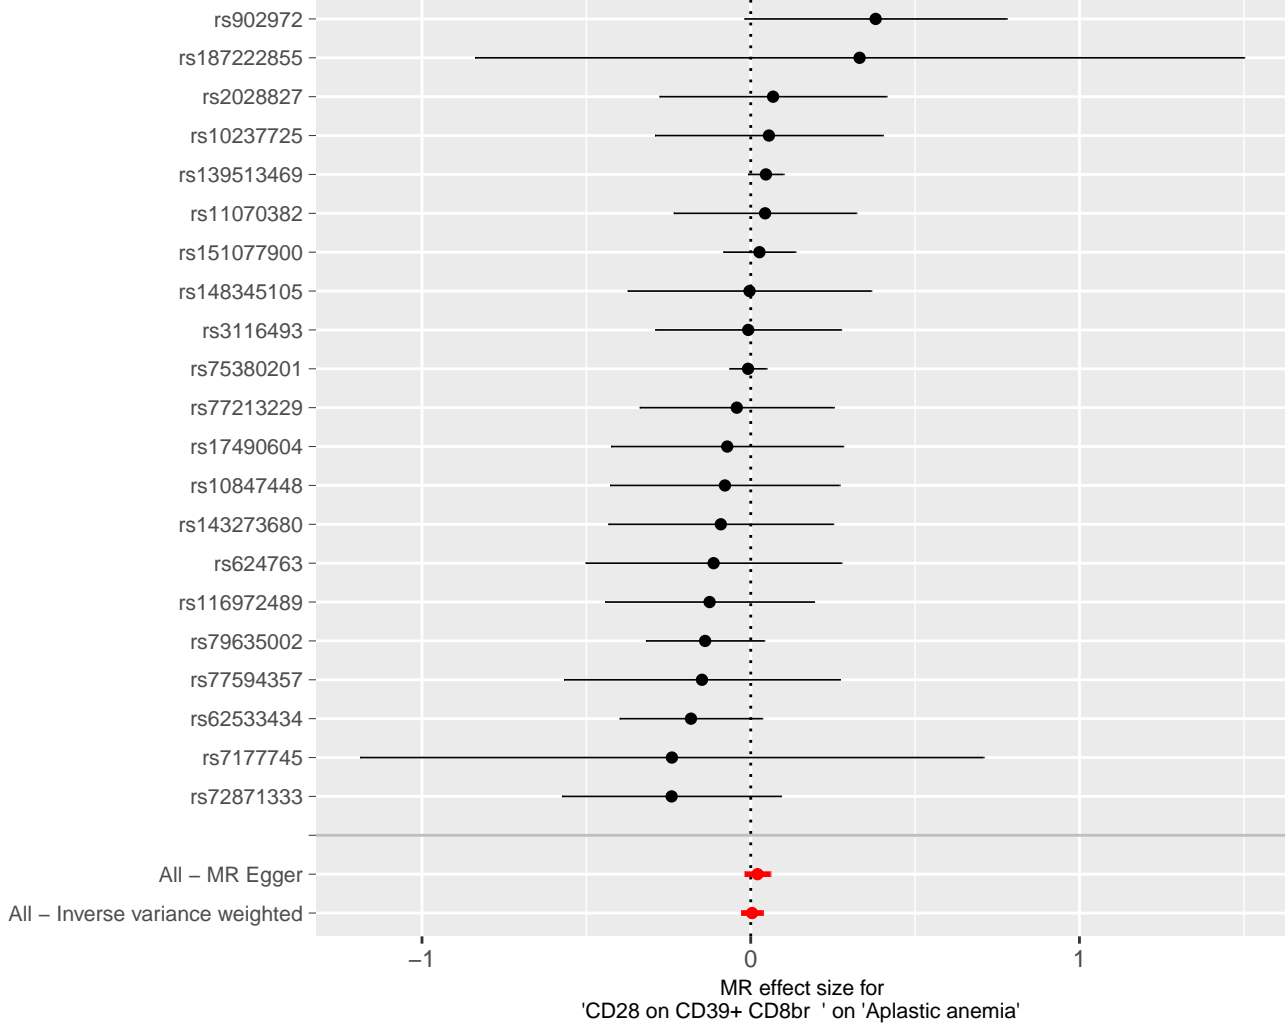

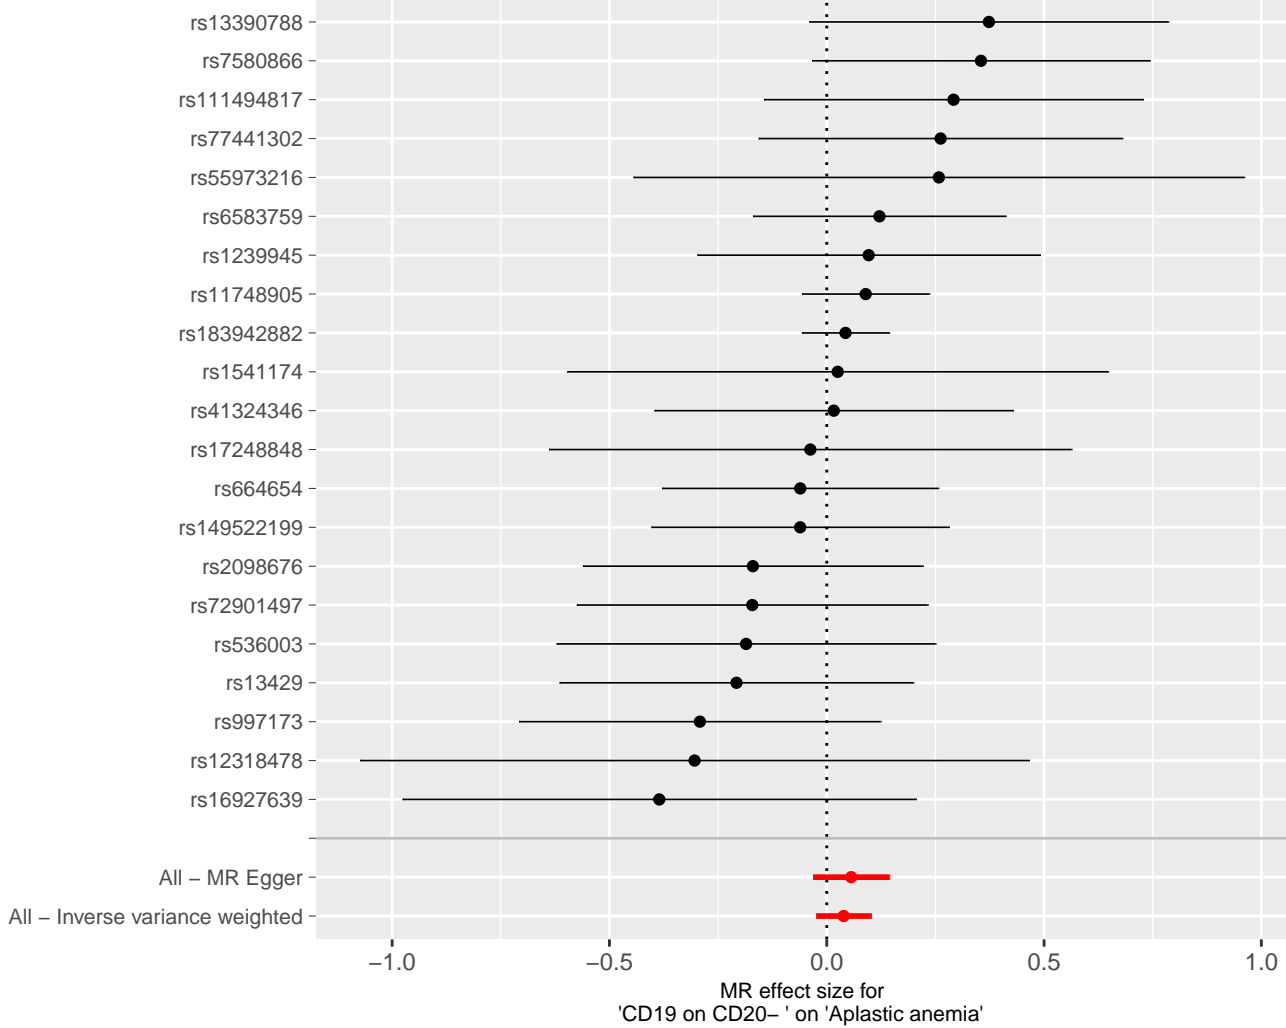

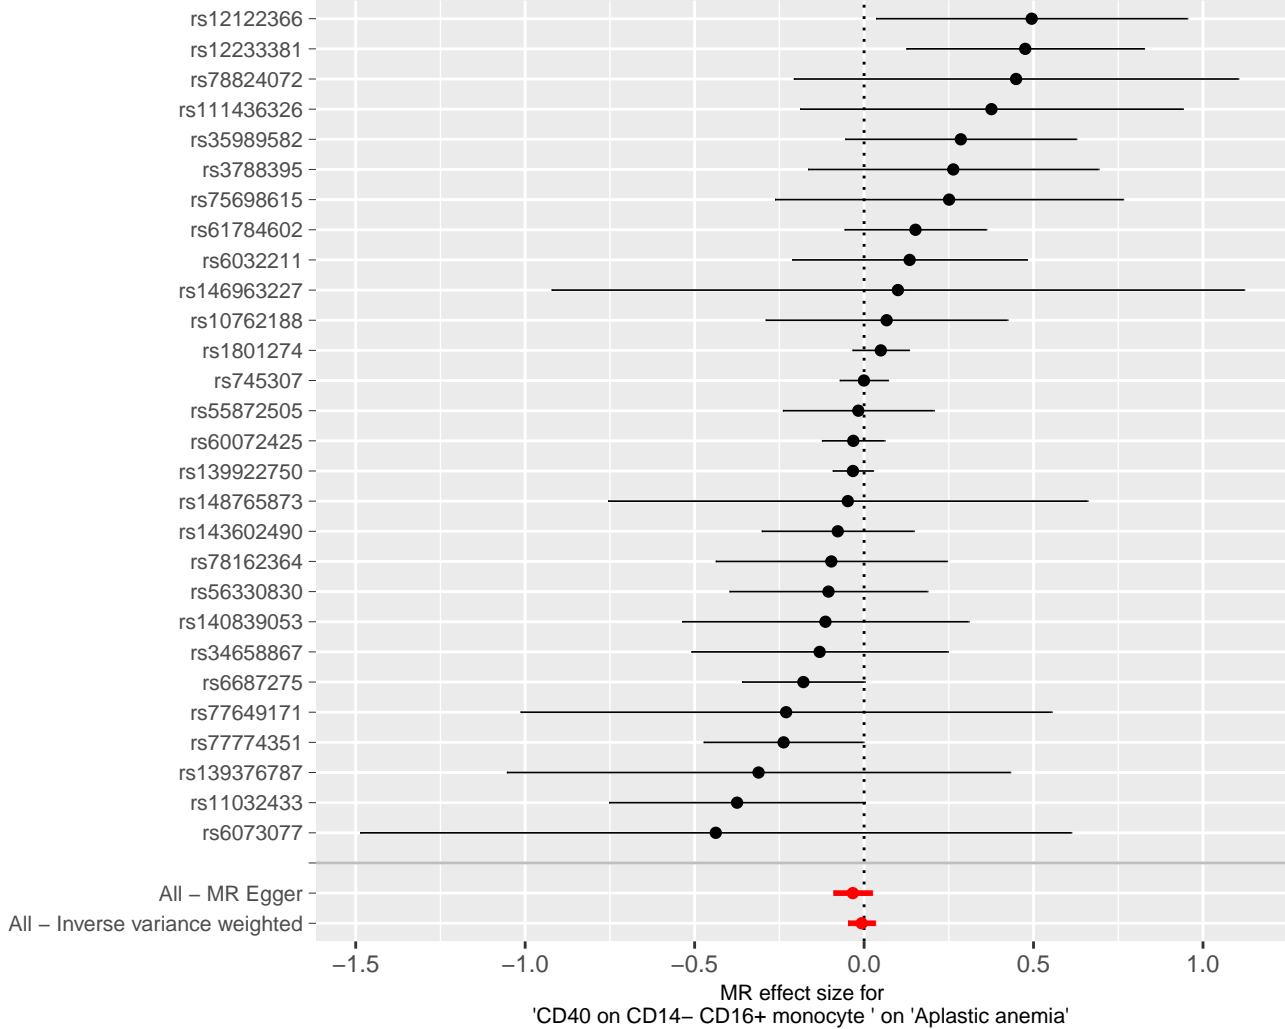

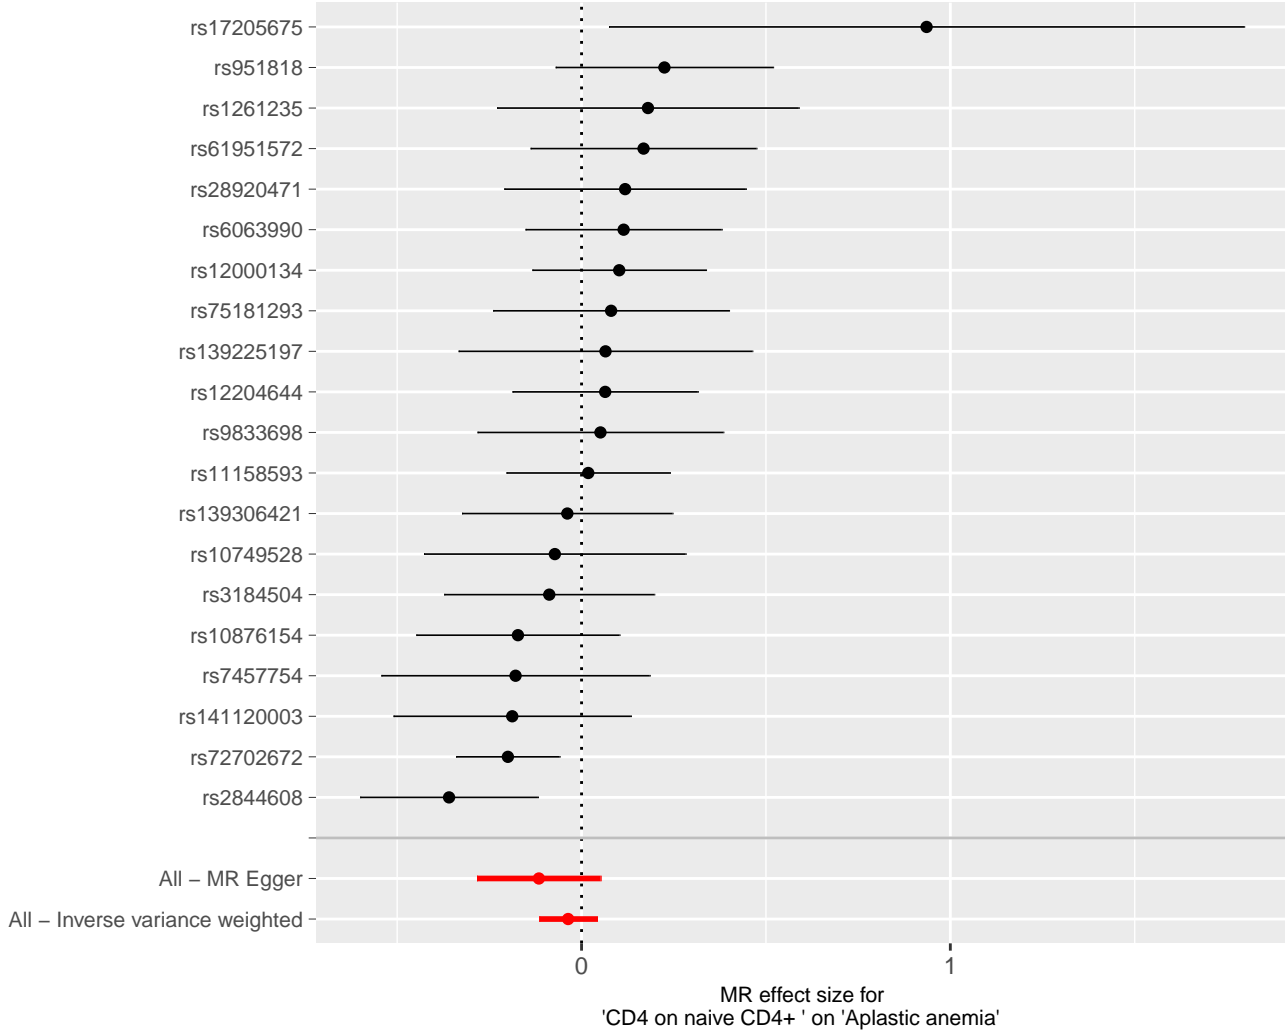

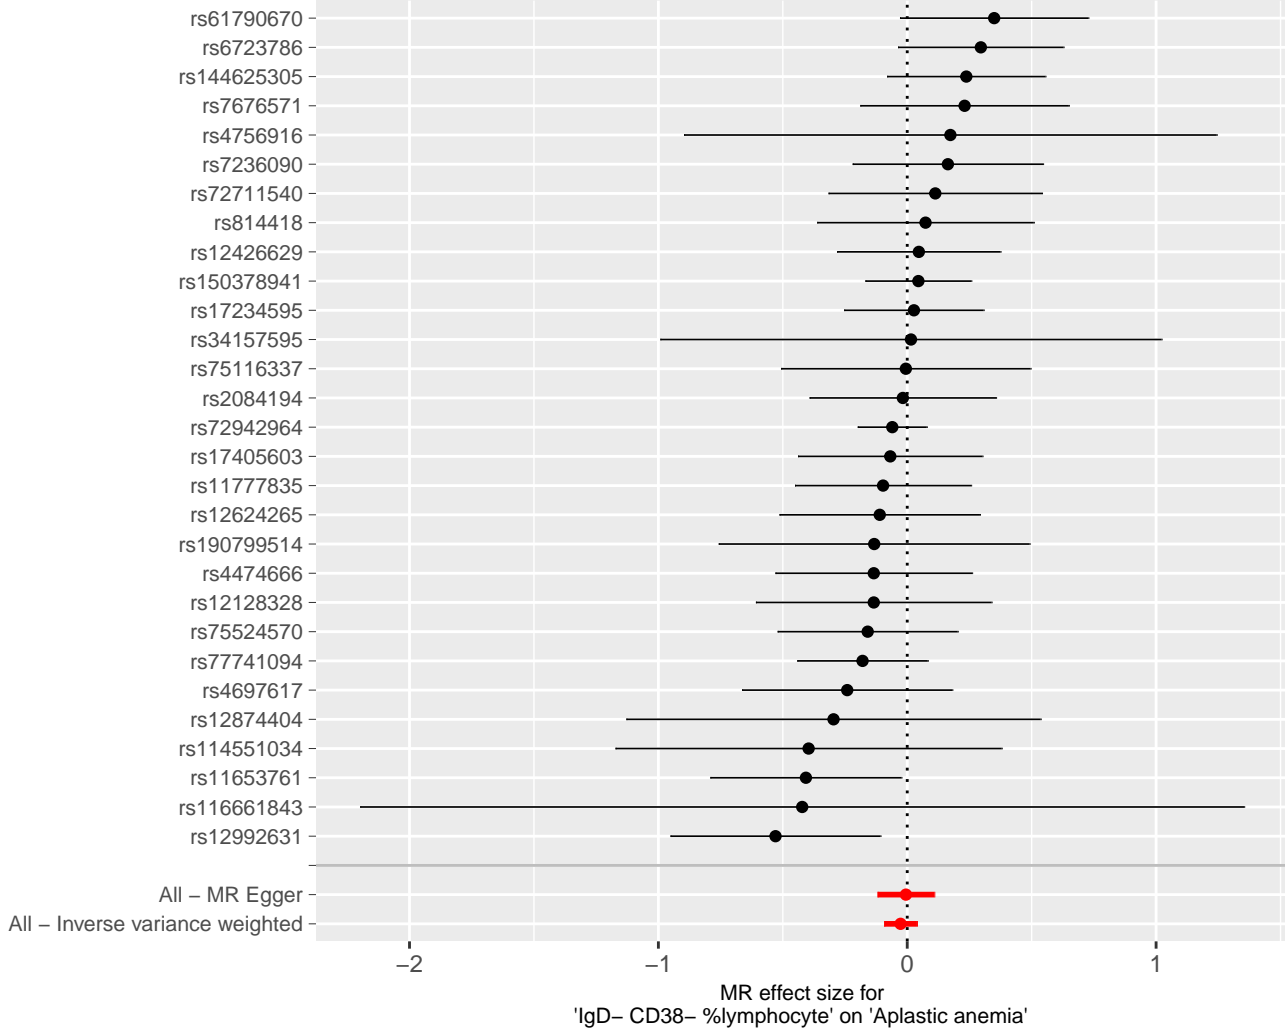

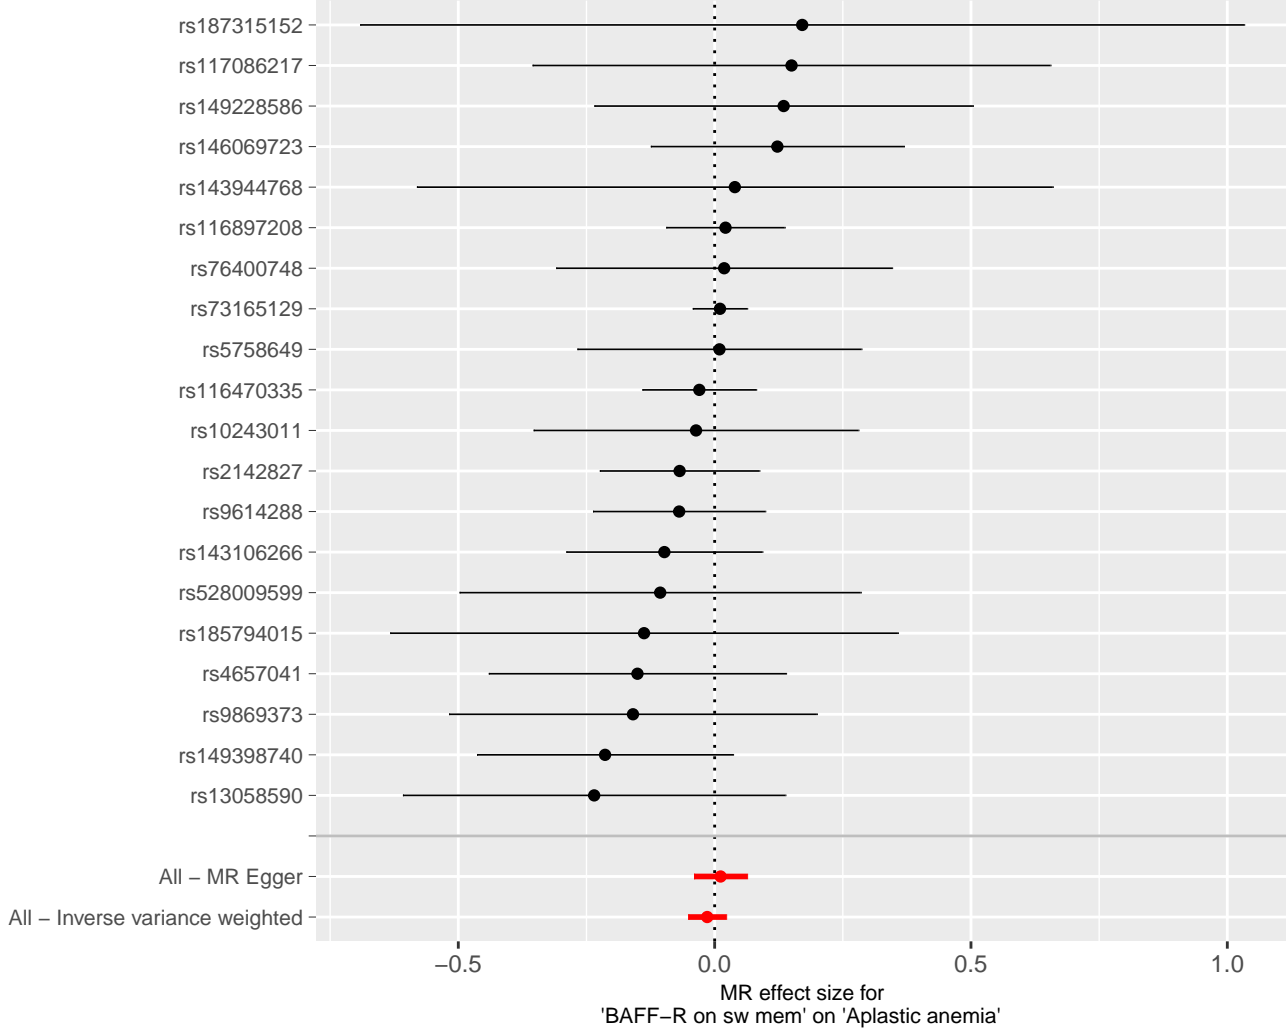

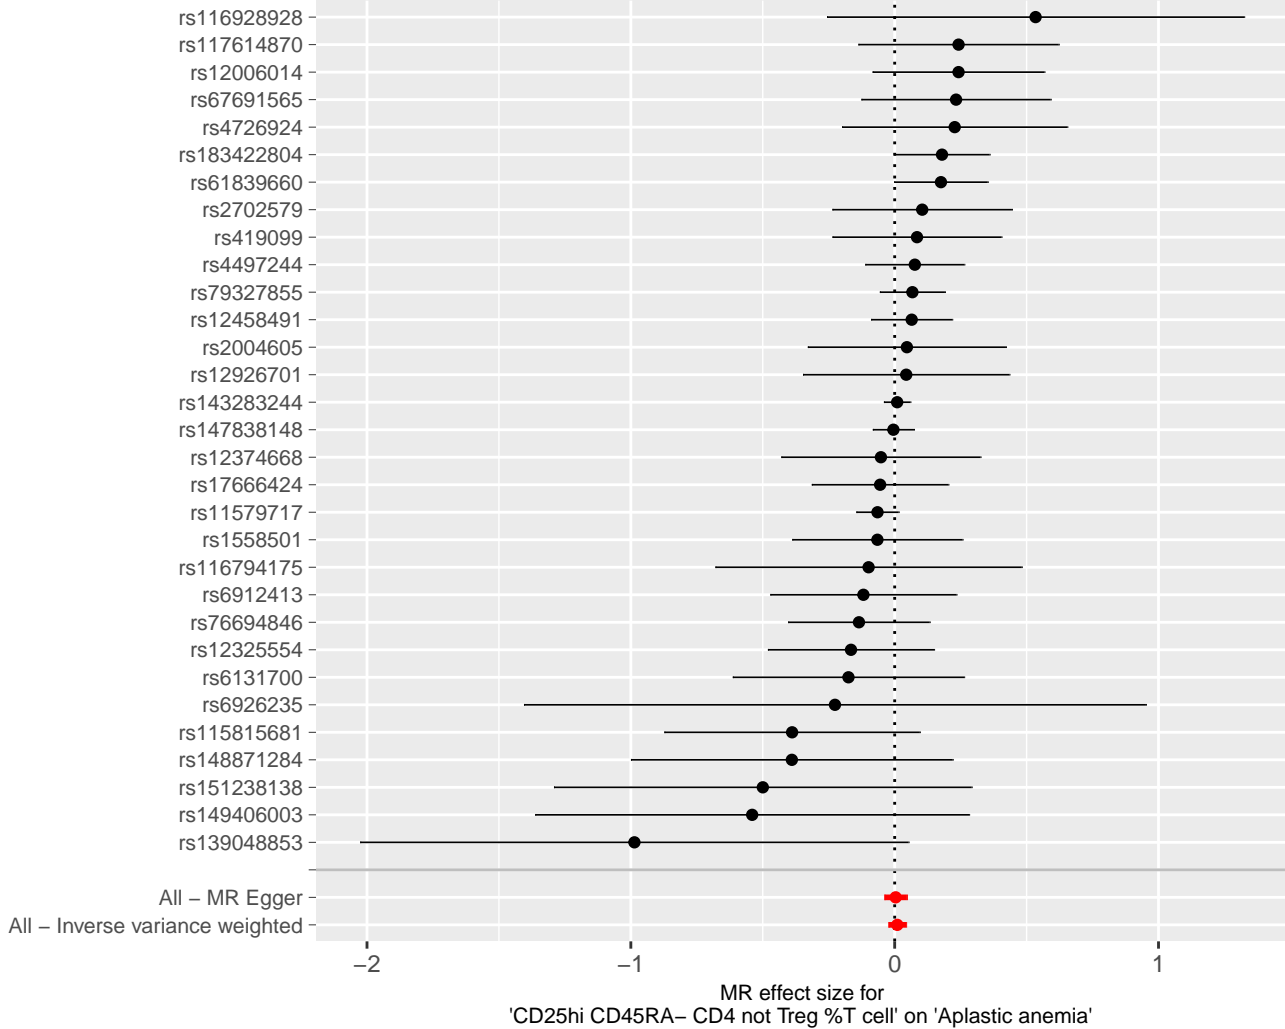

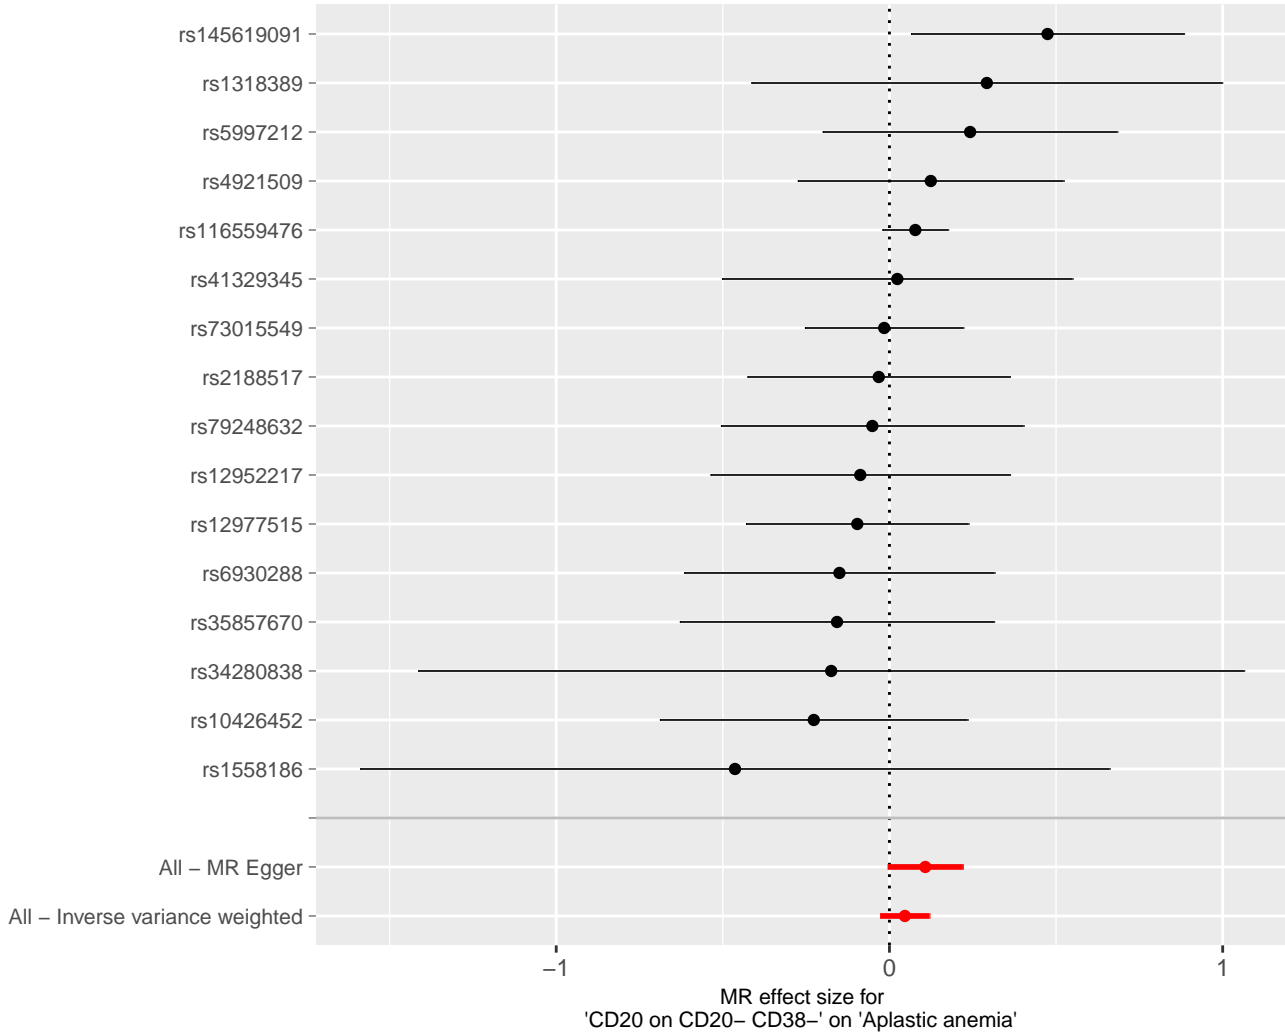



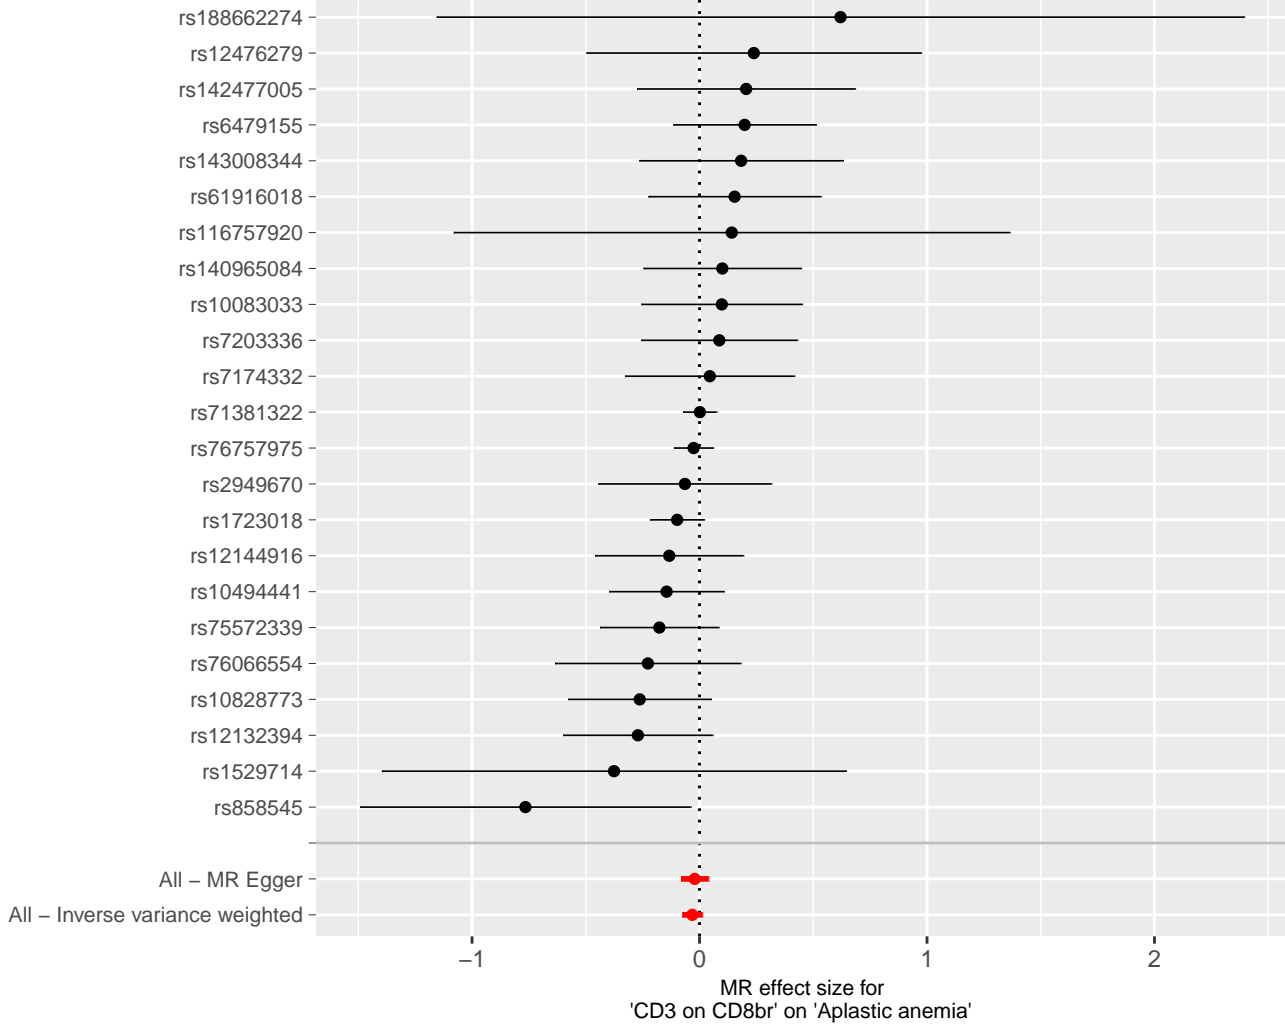

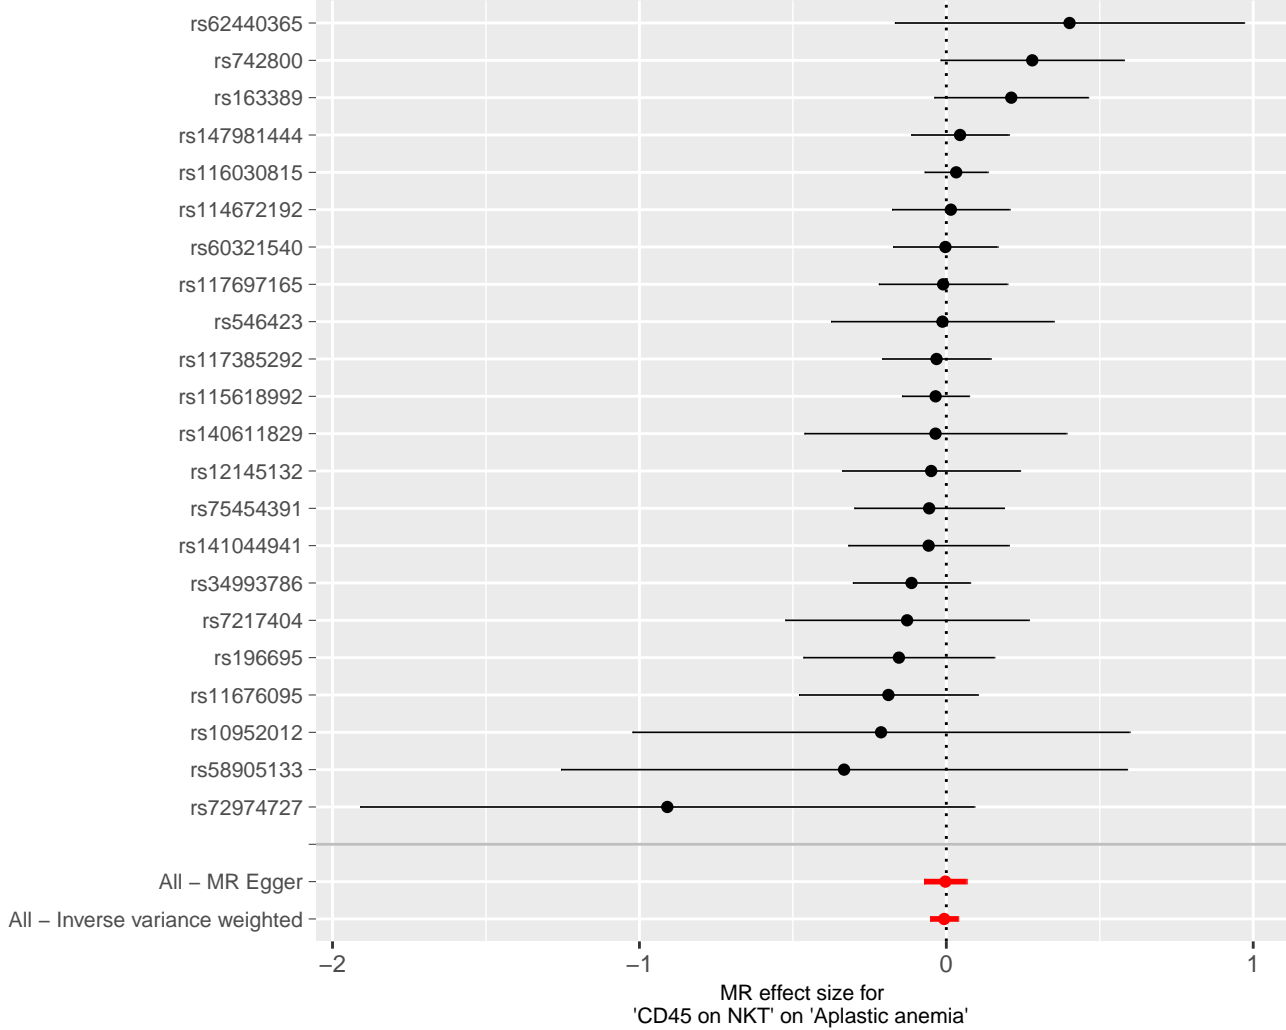

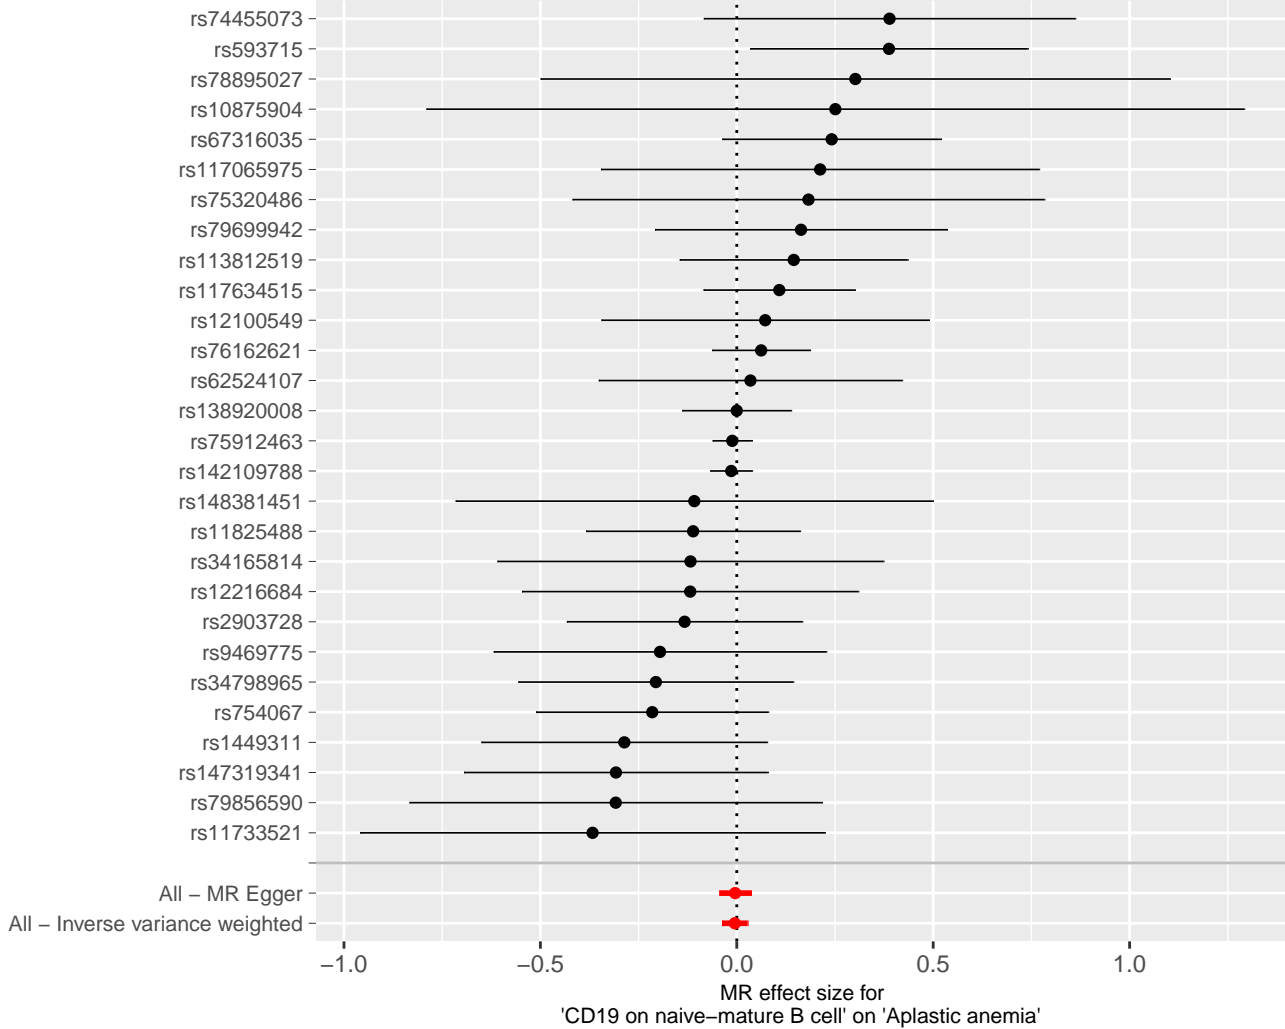

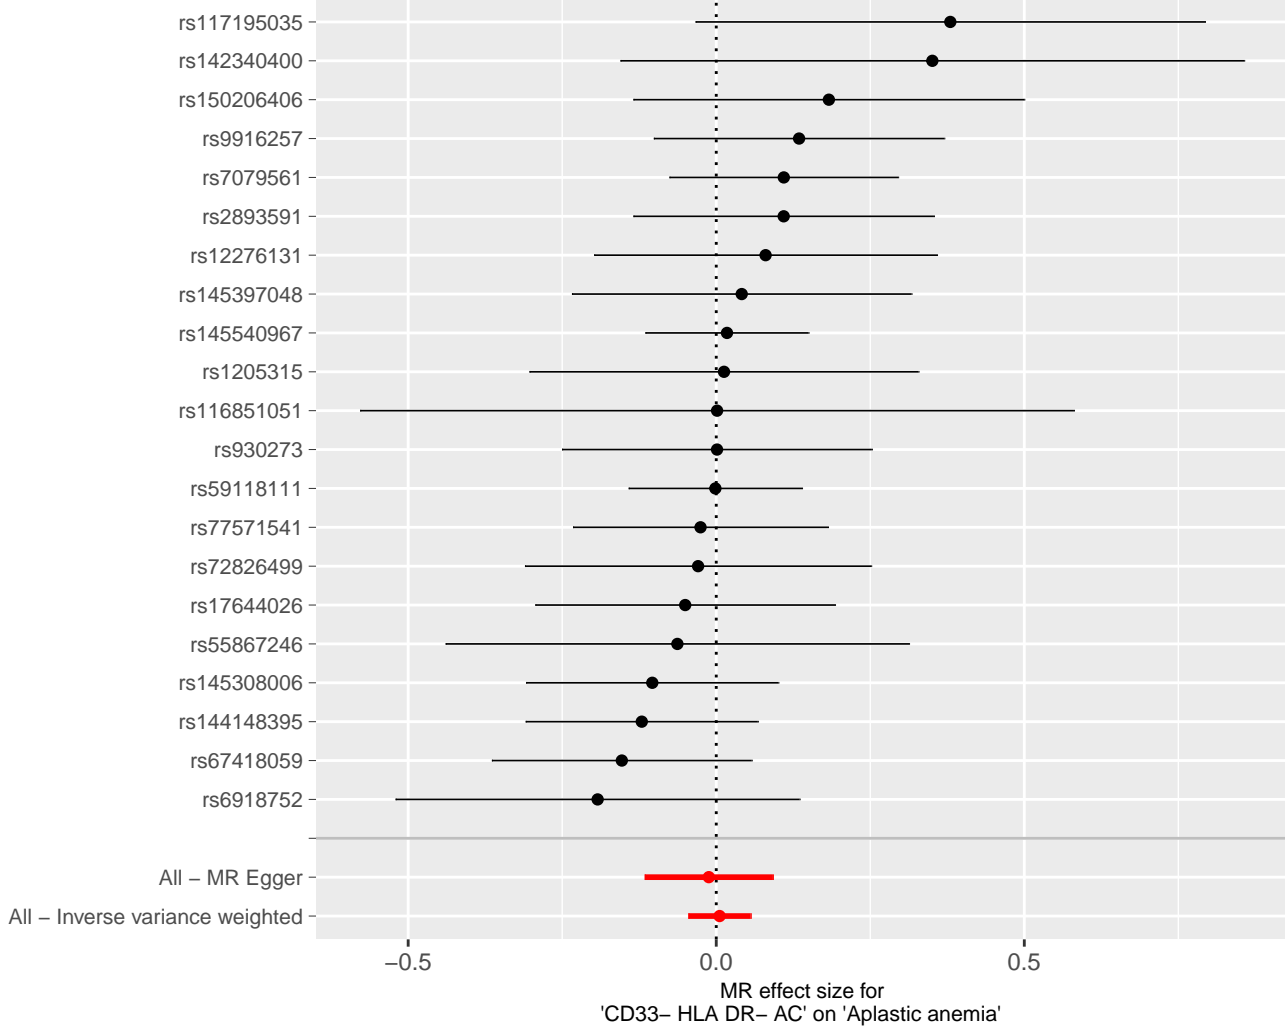

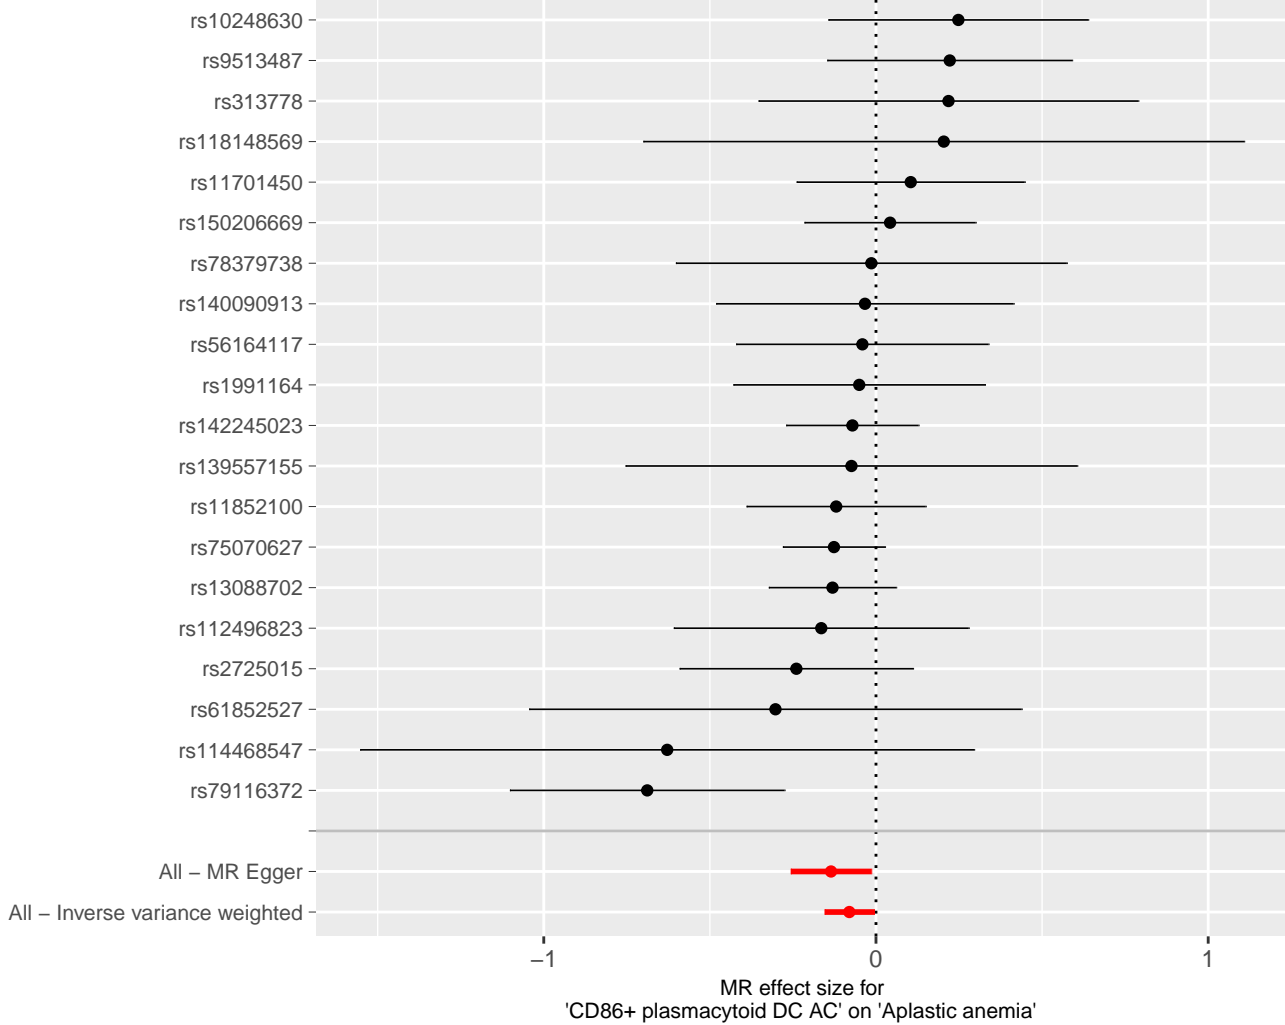

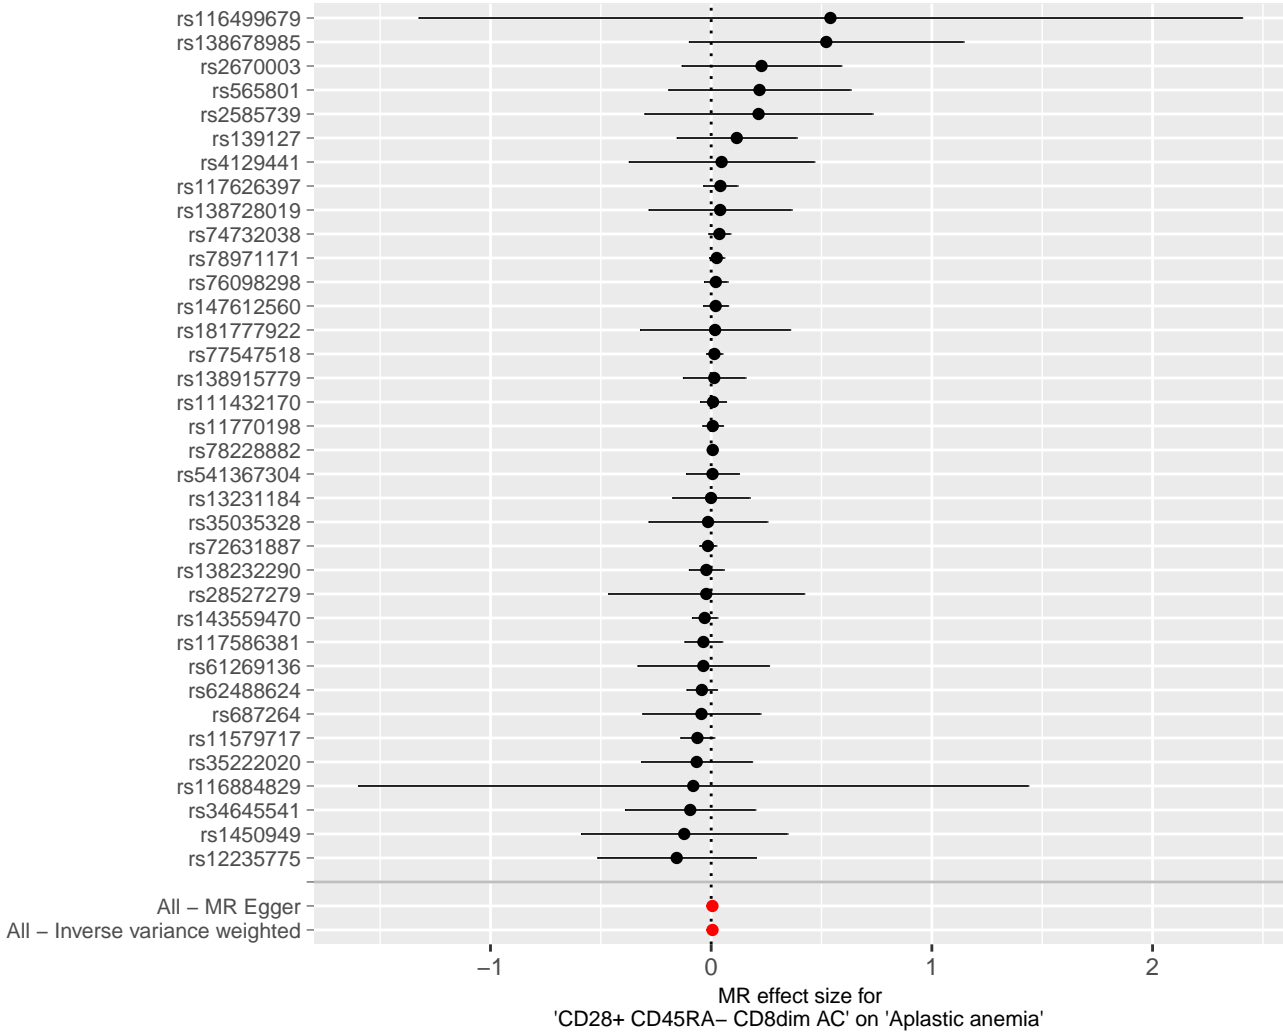

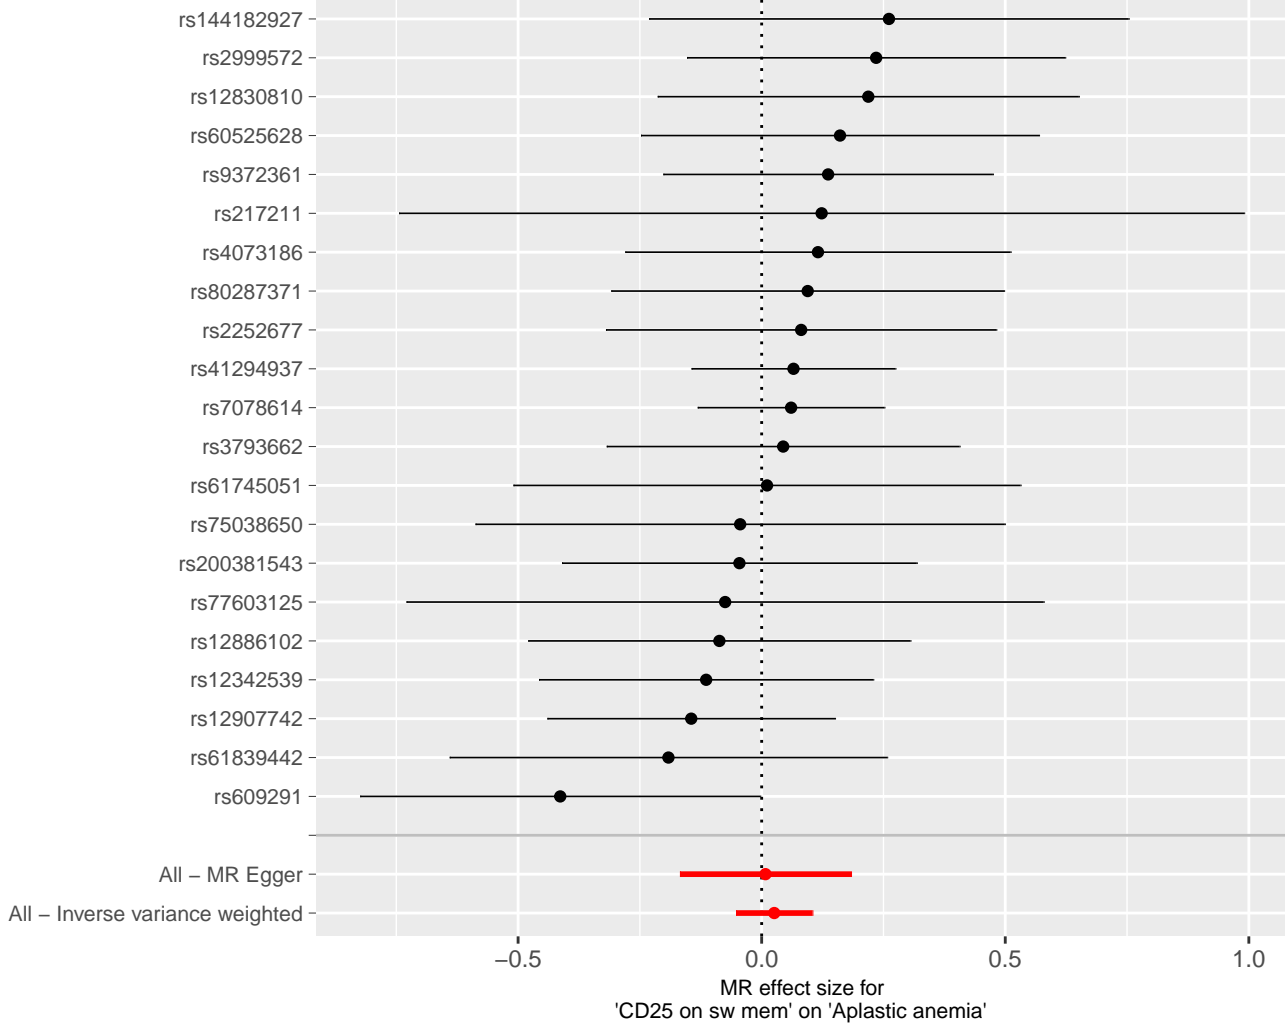

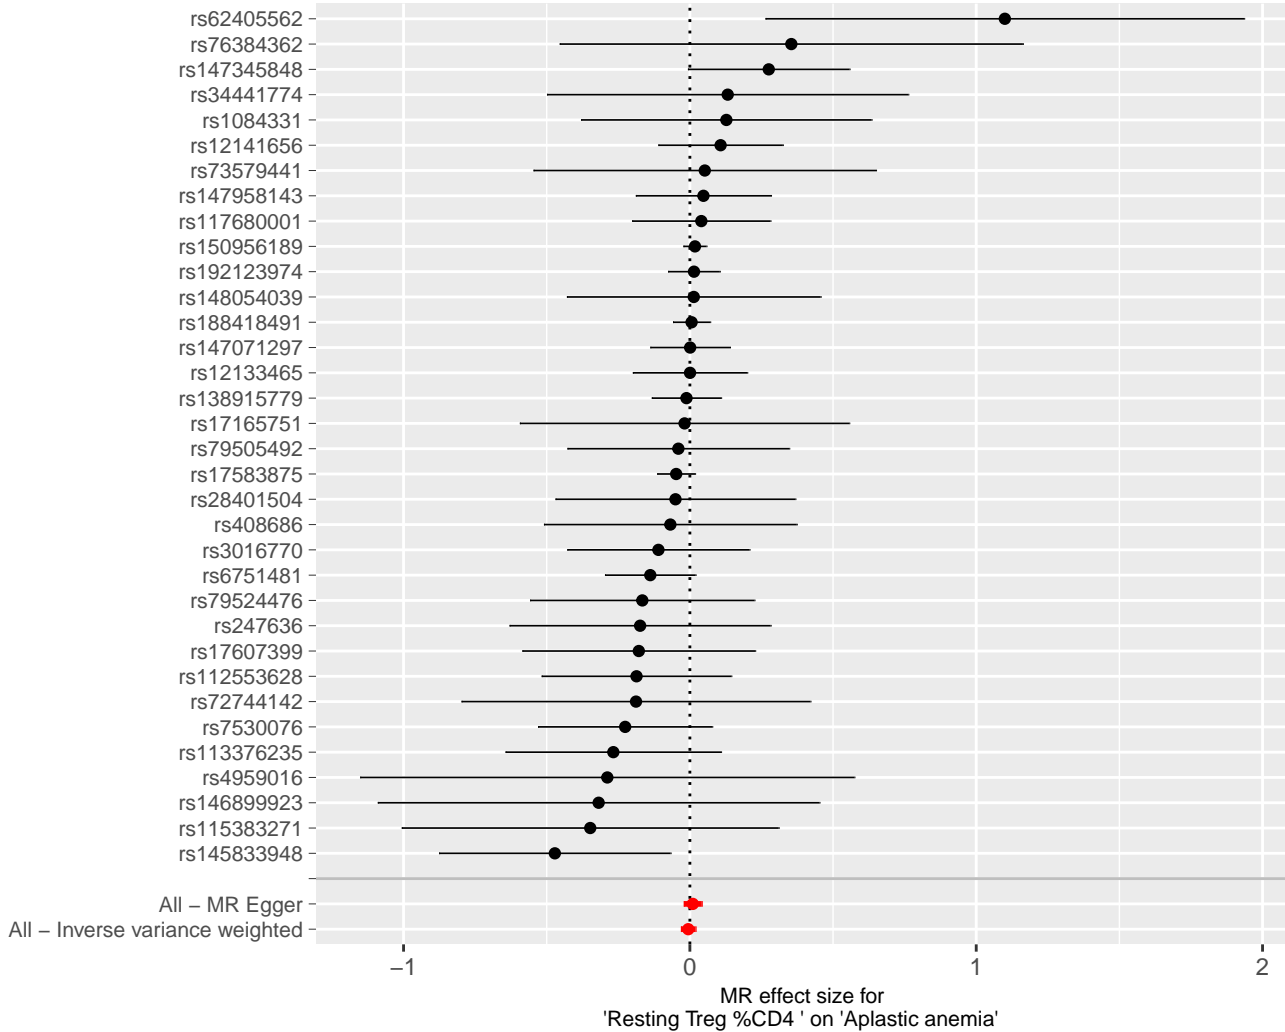



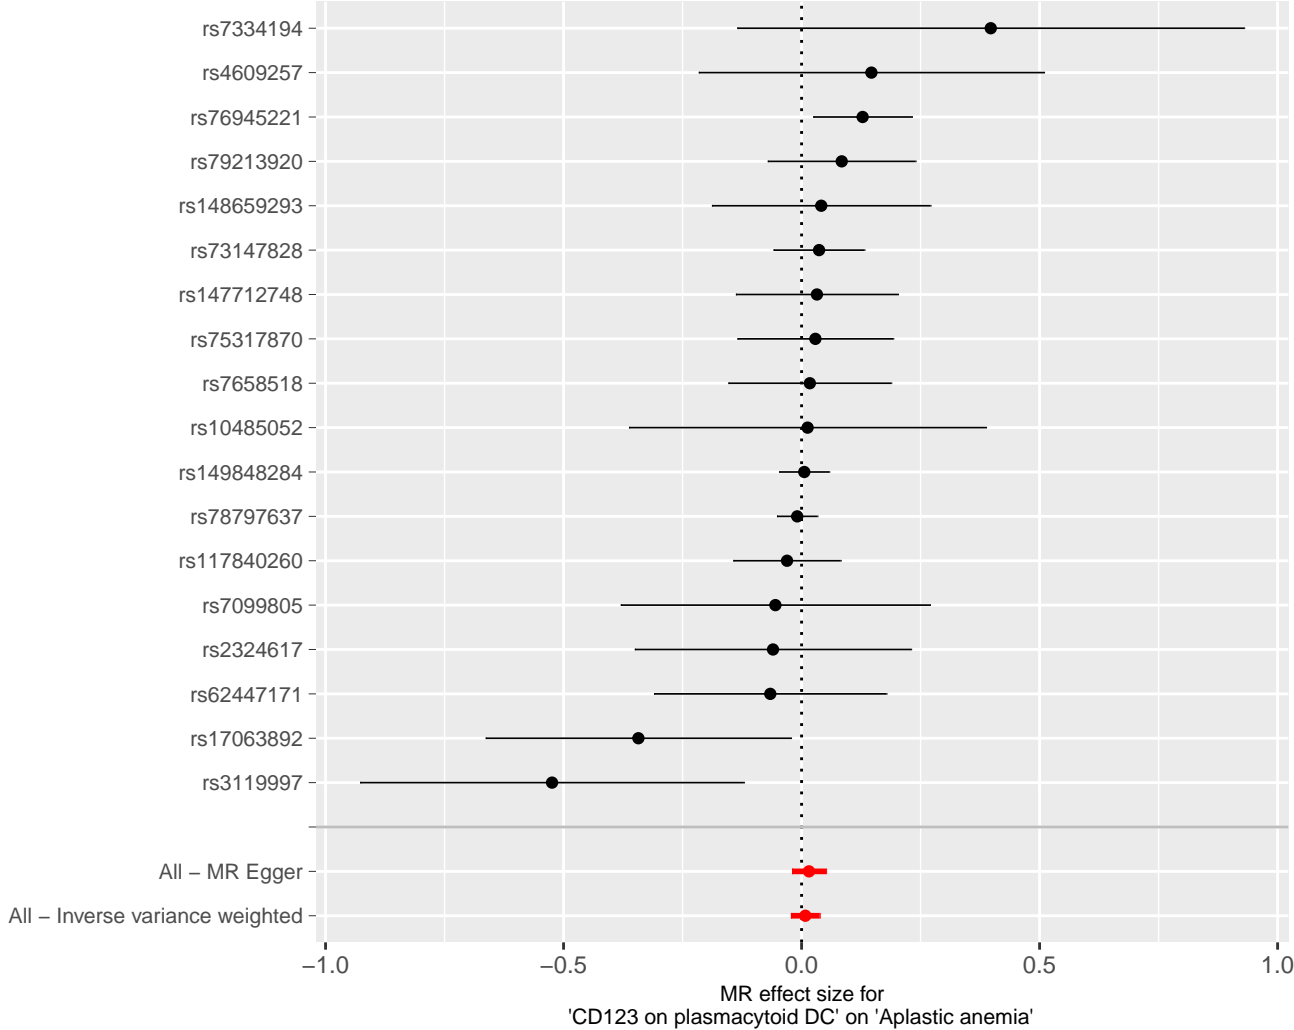

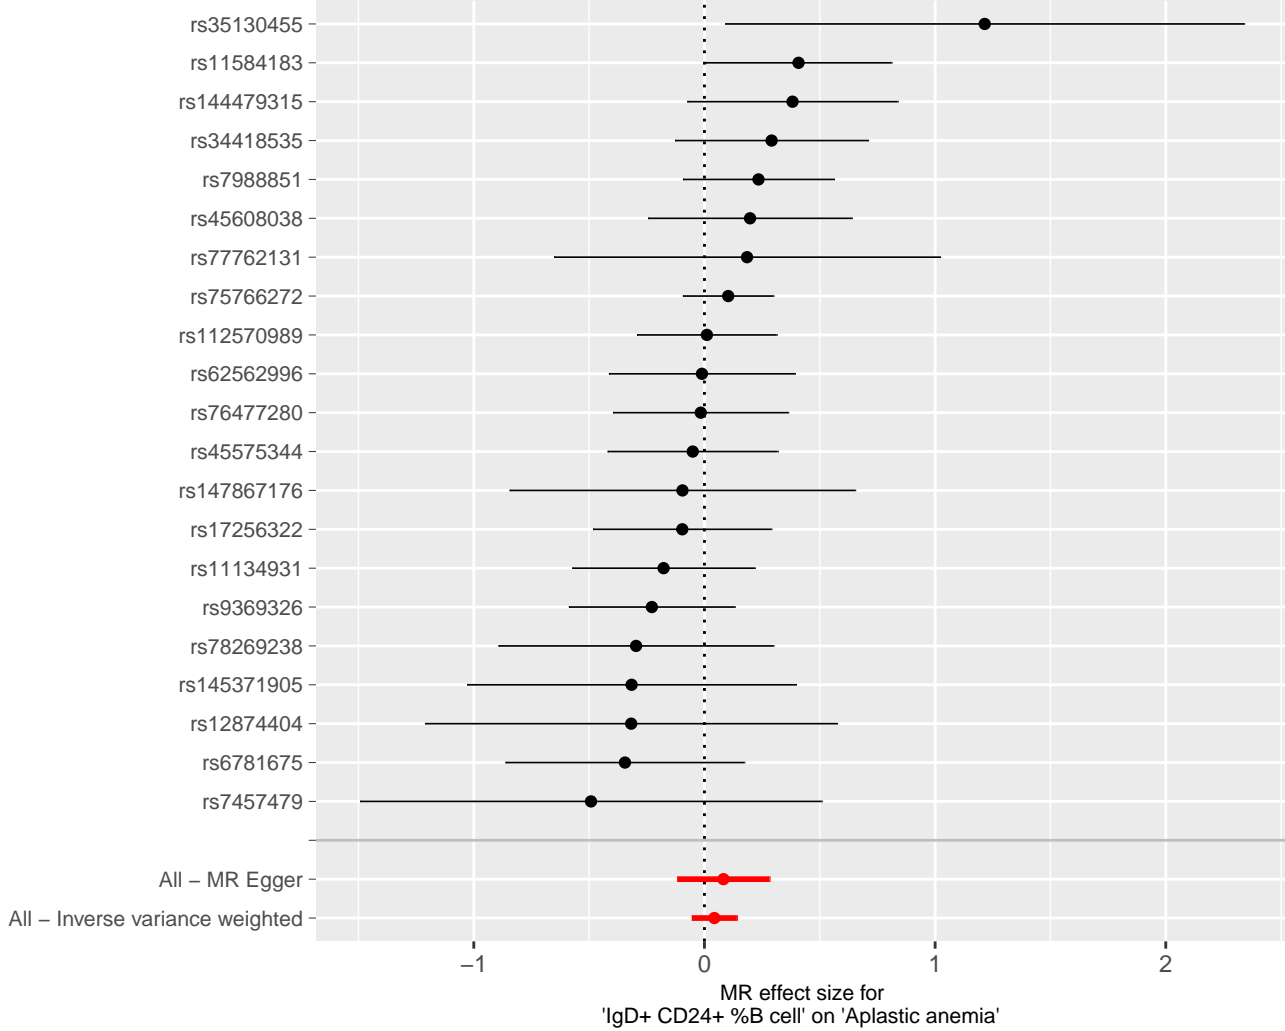

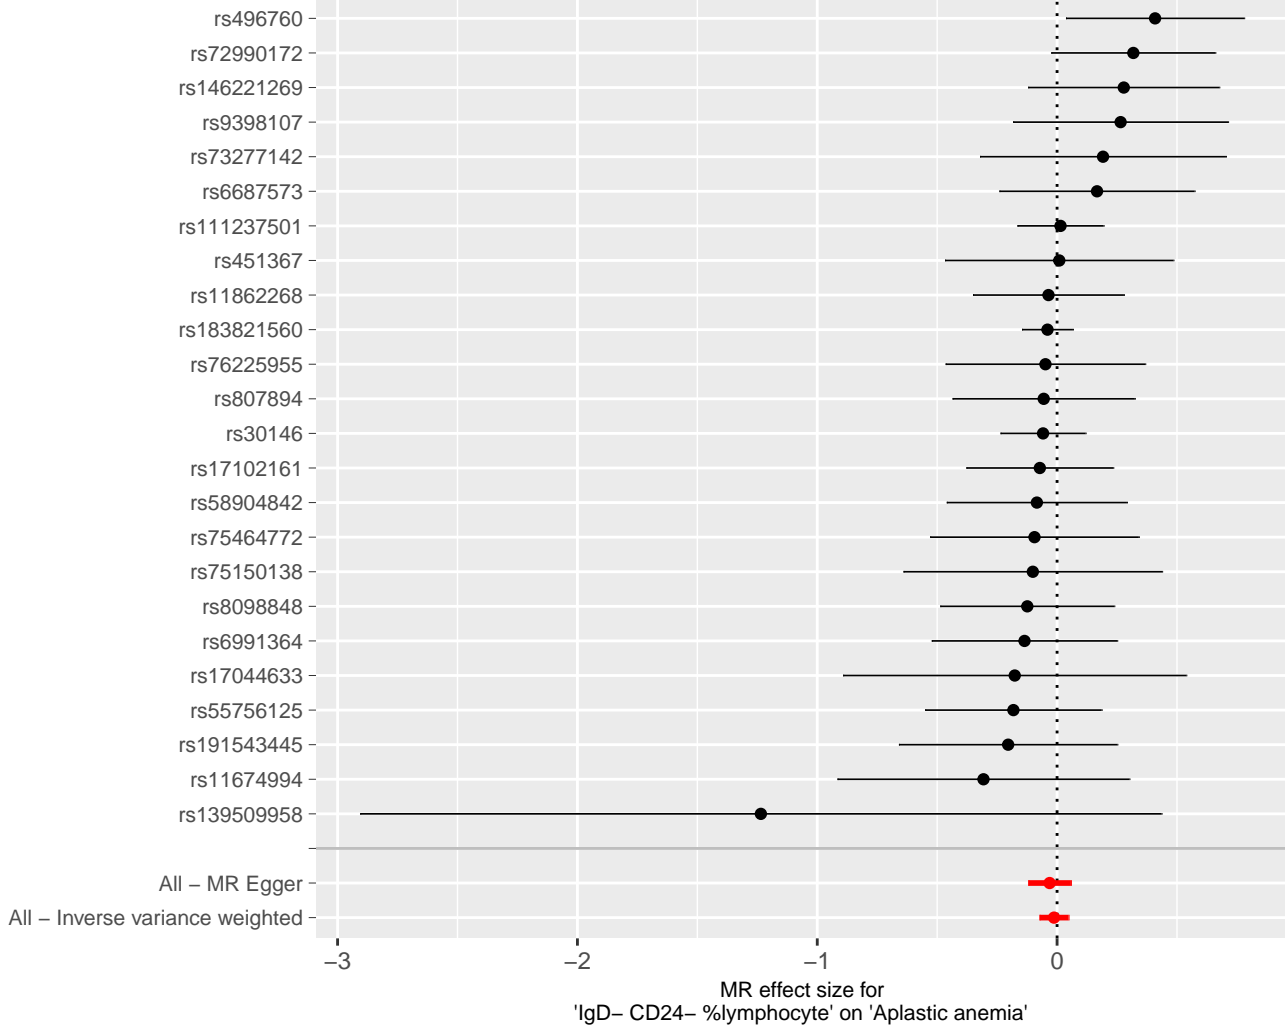

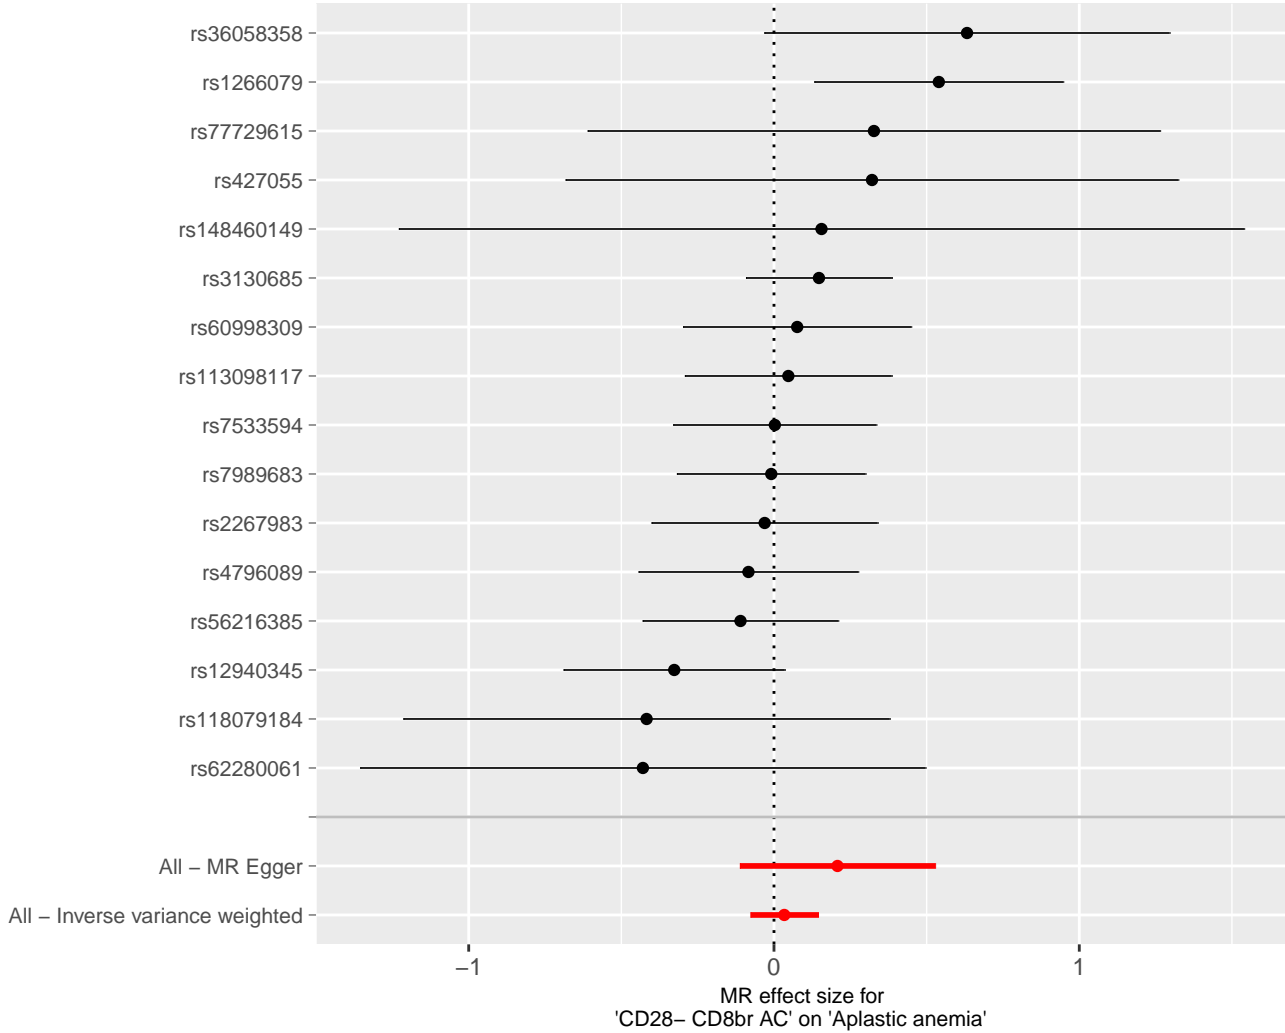

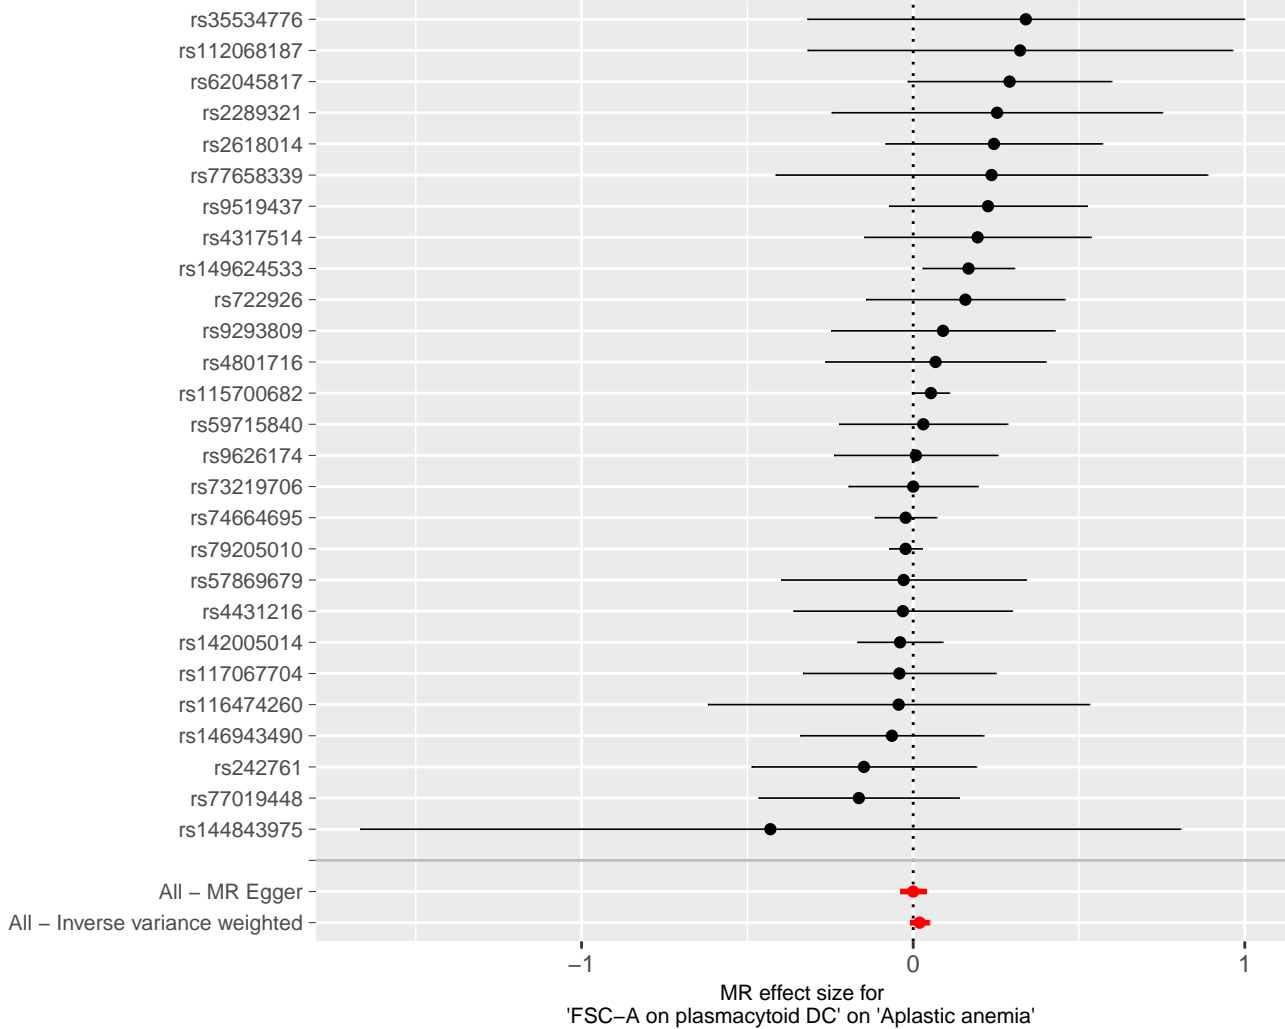

All - Inverse variances weights

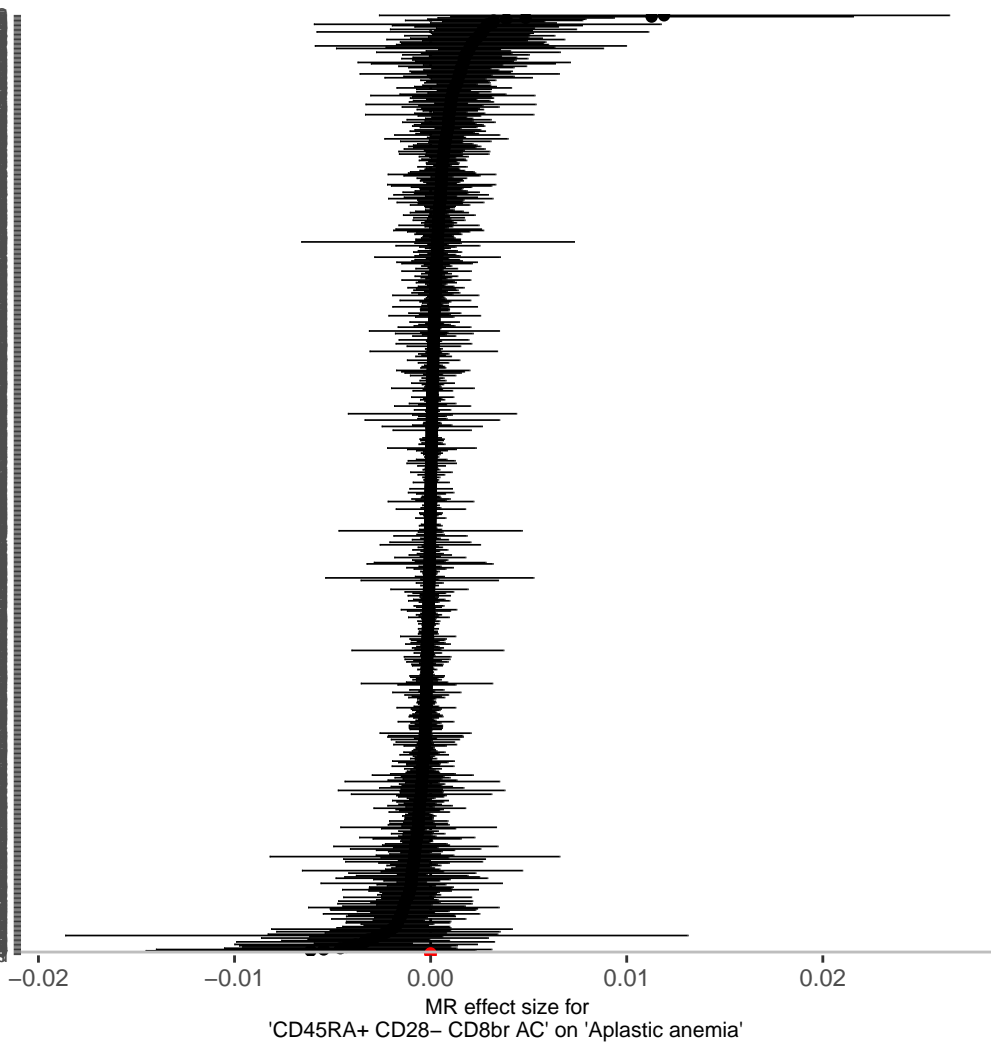

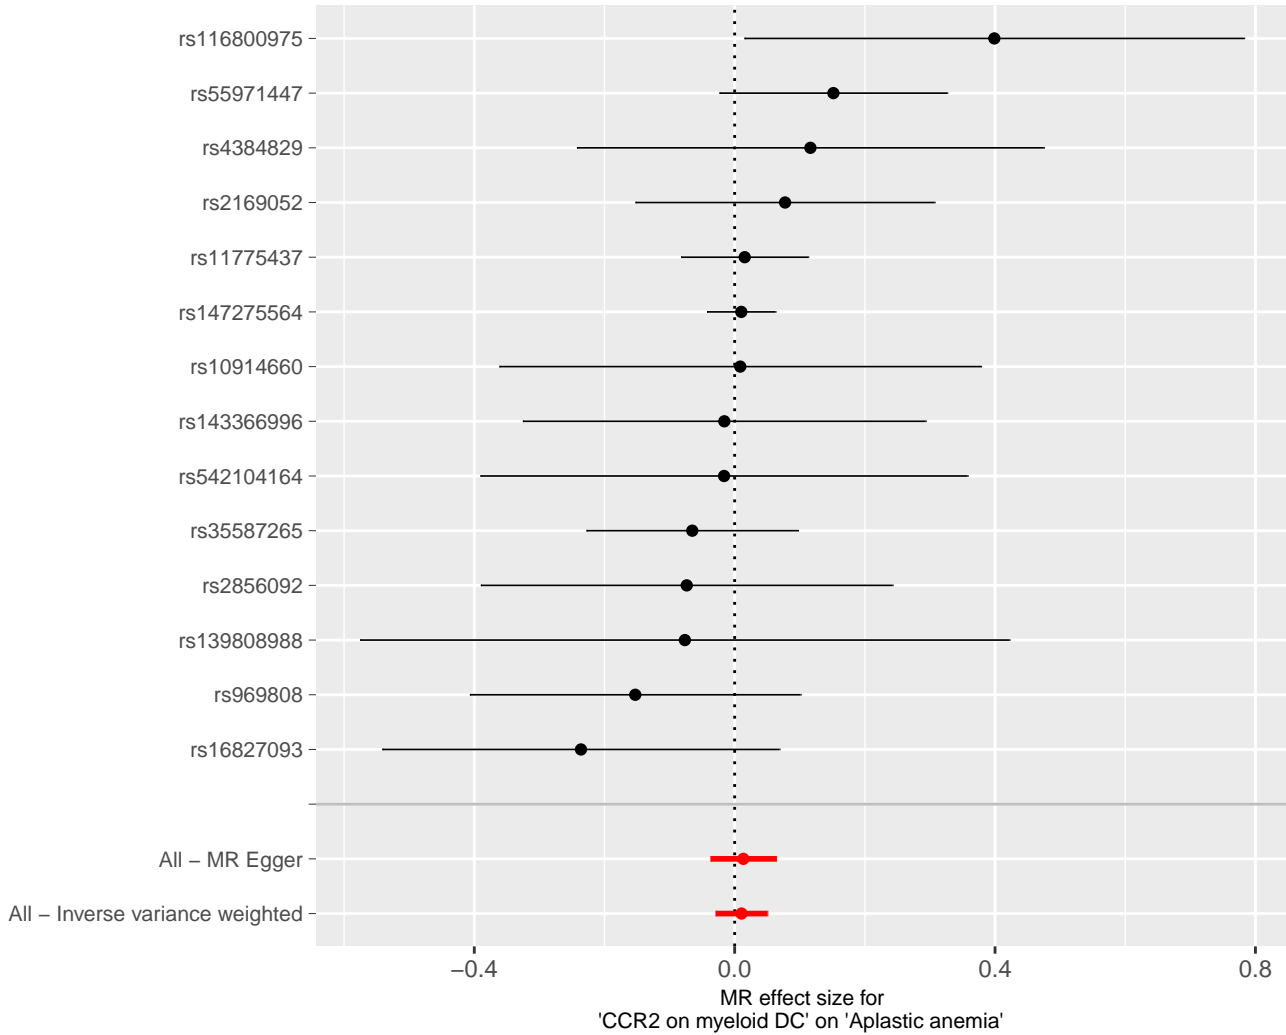

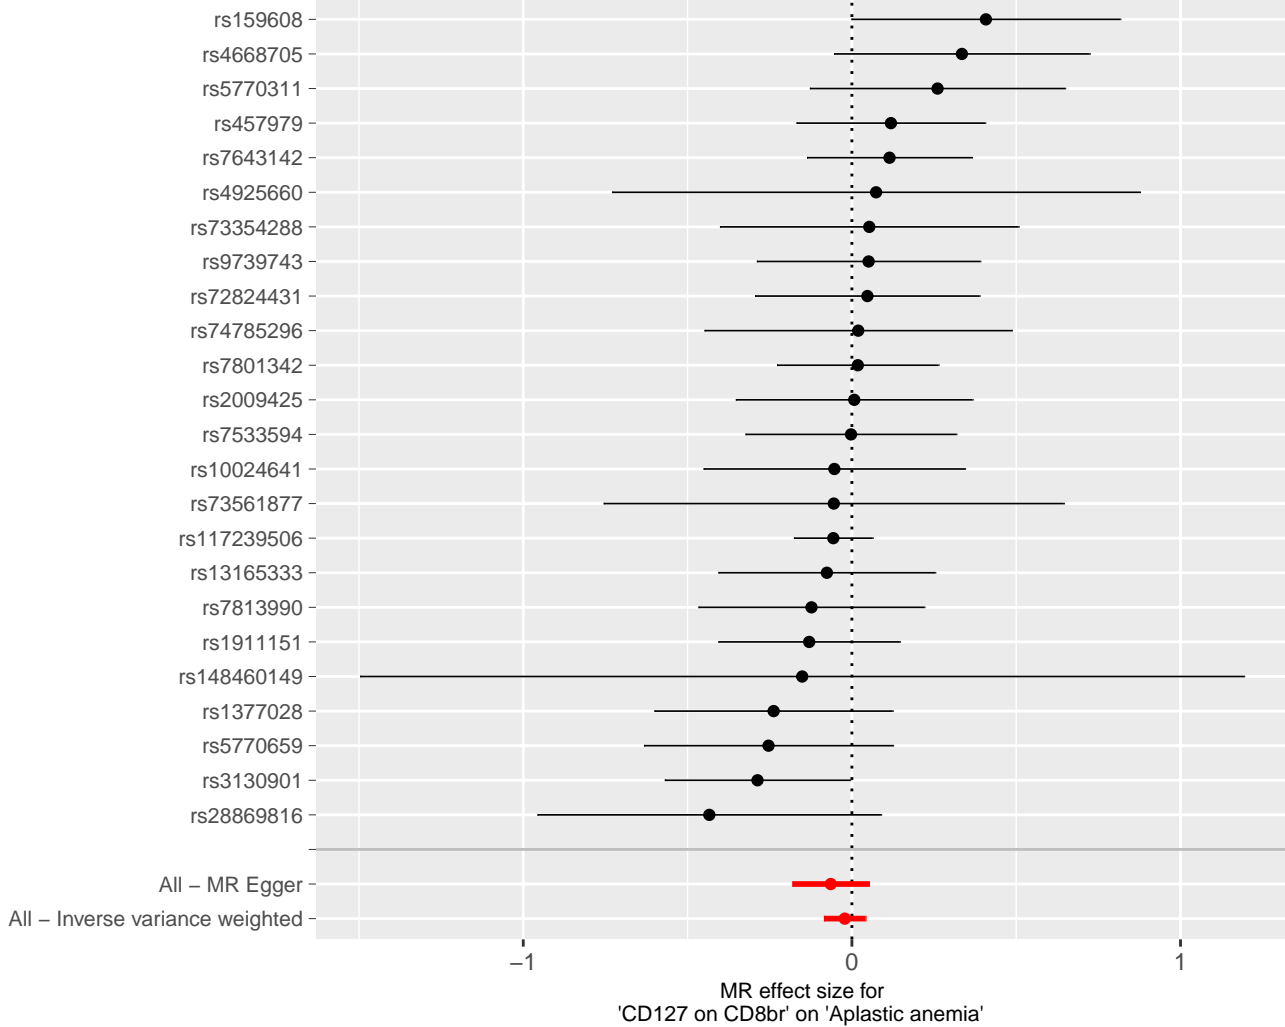



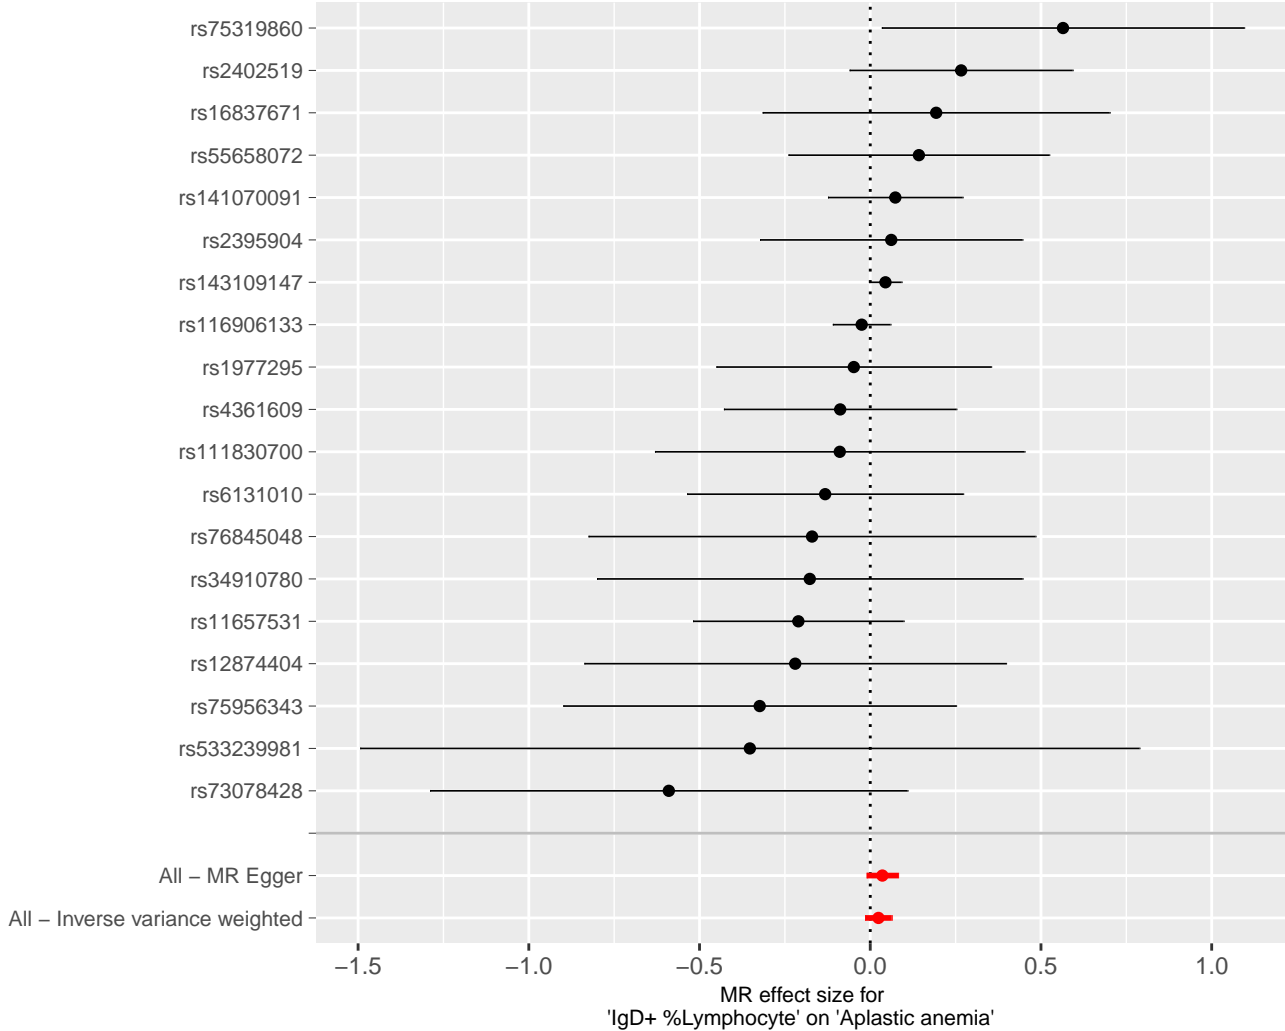

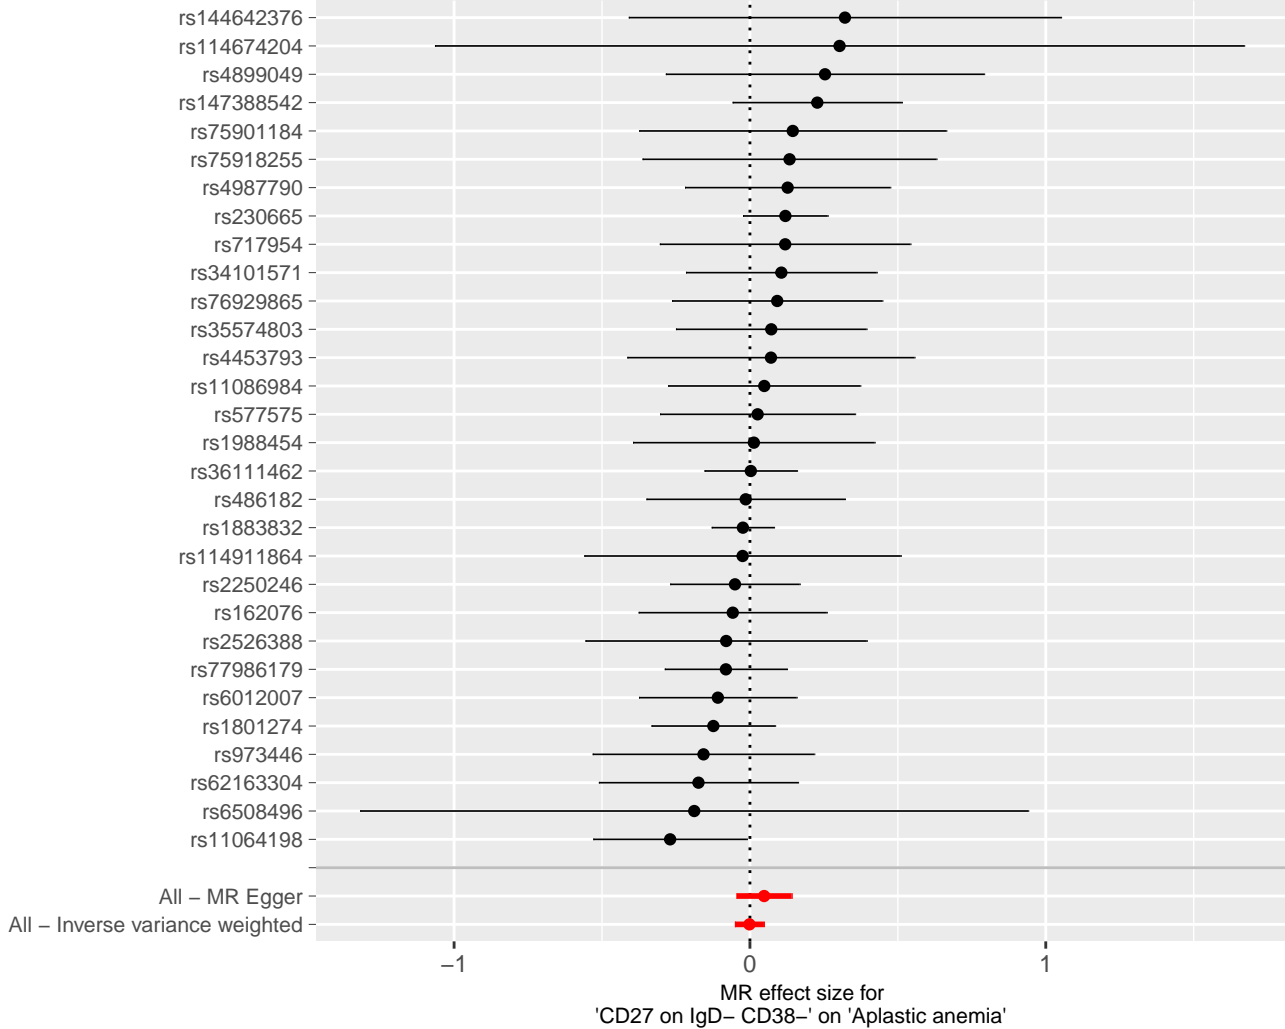

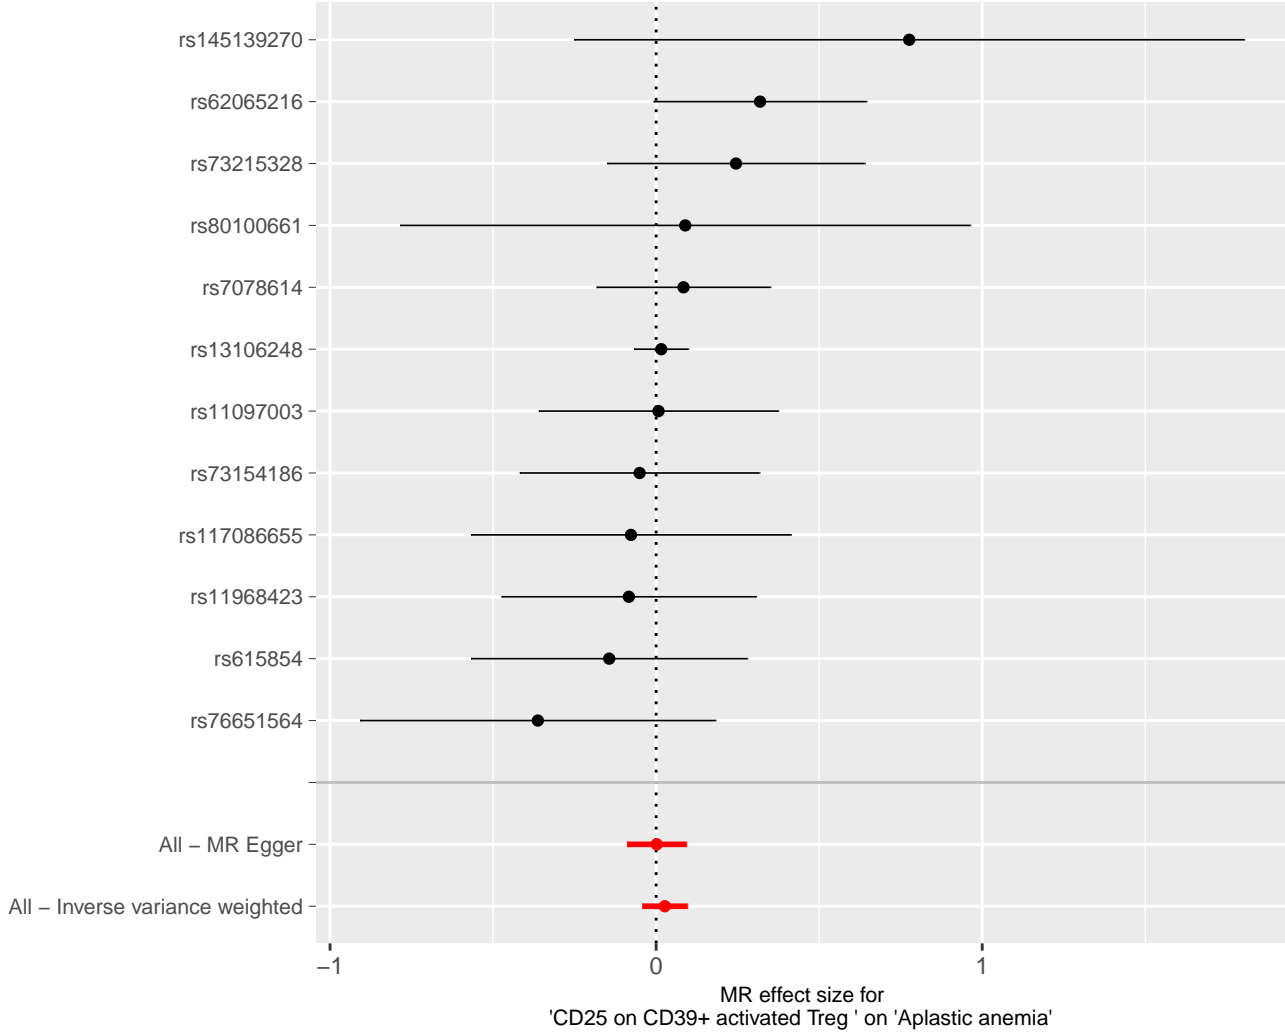

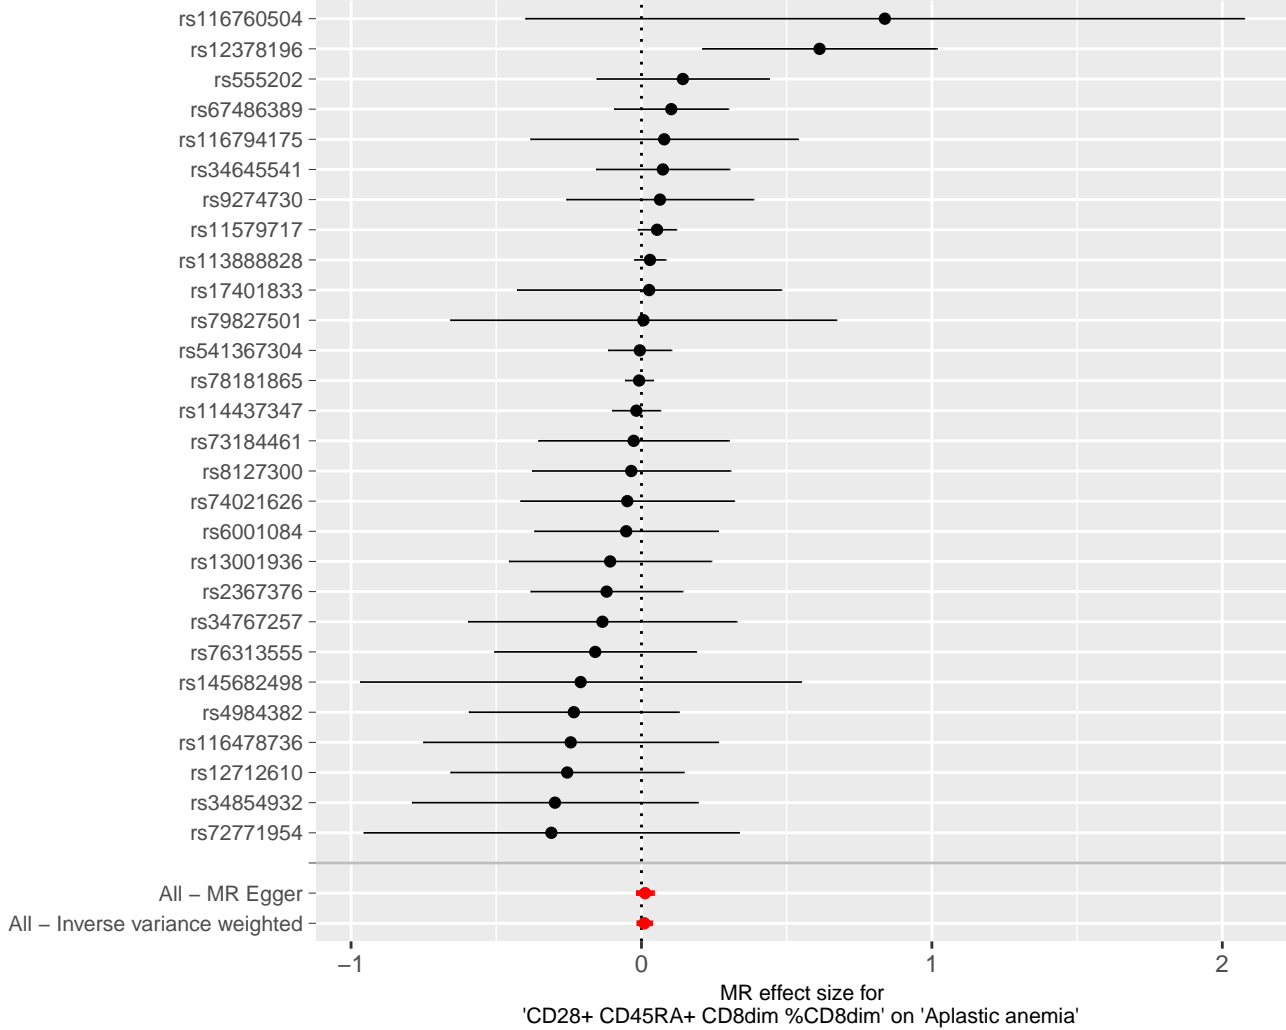

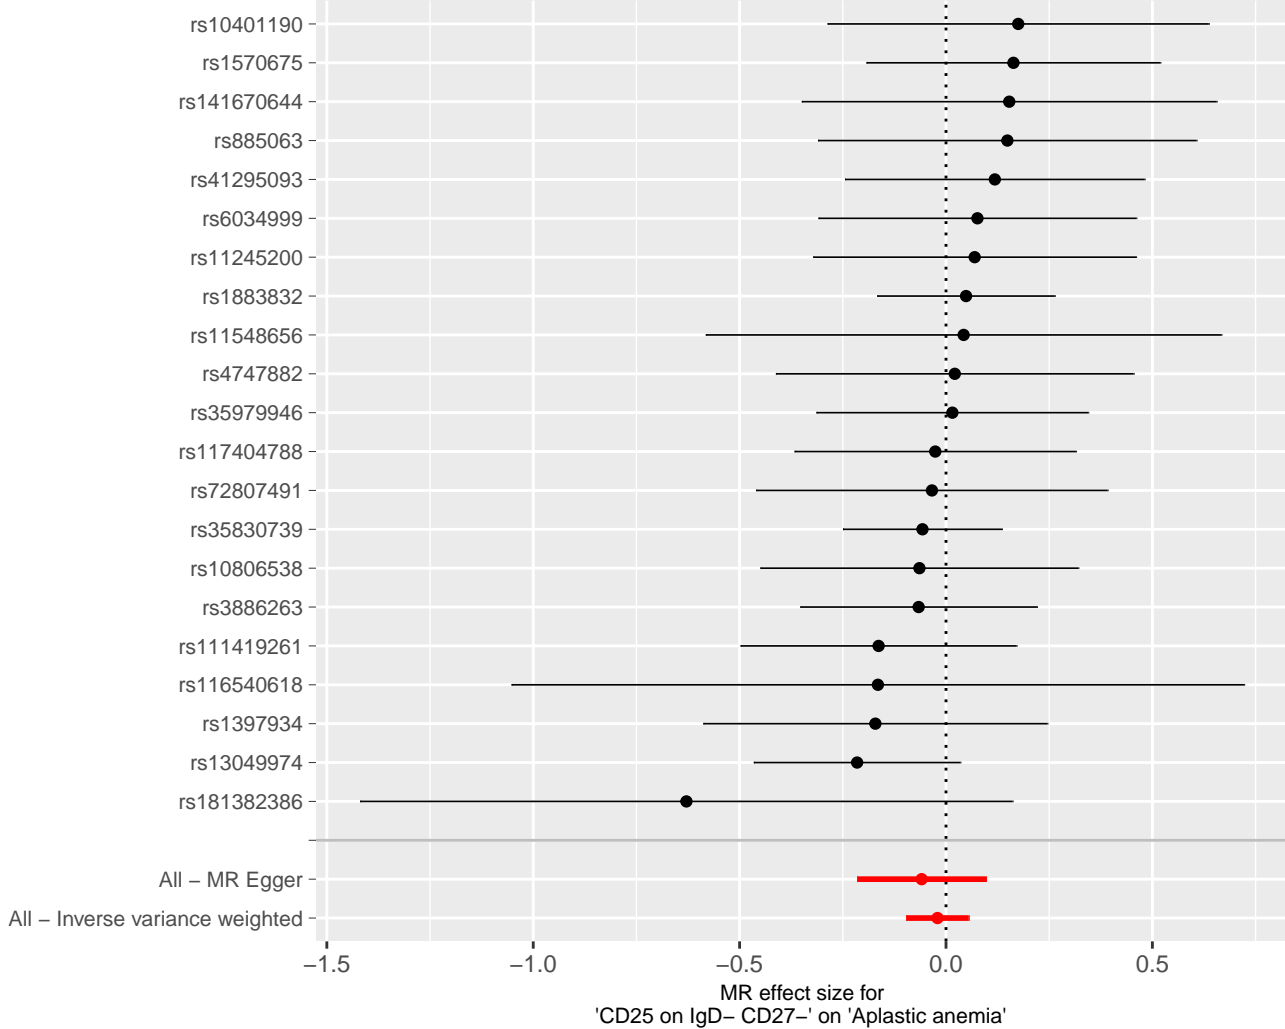

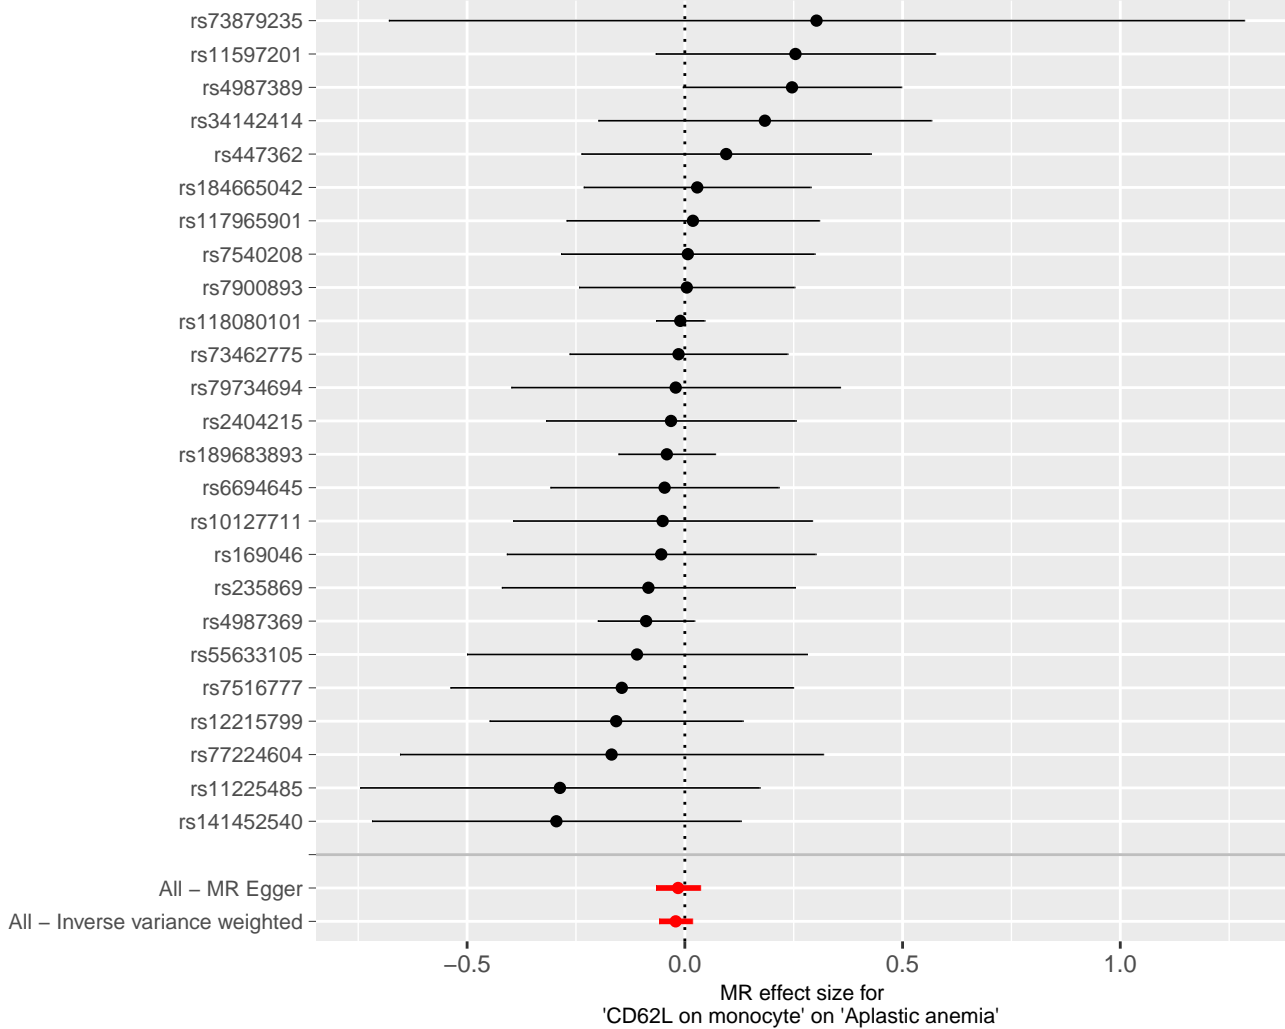

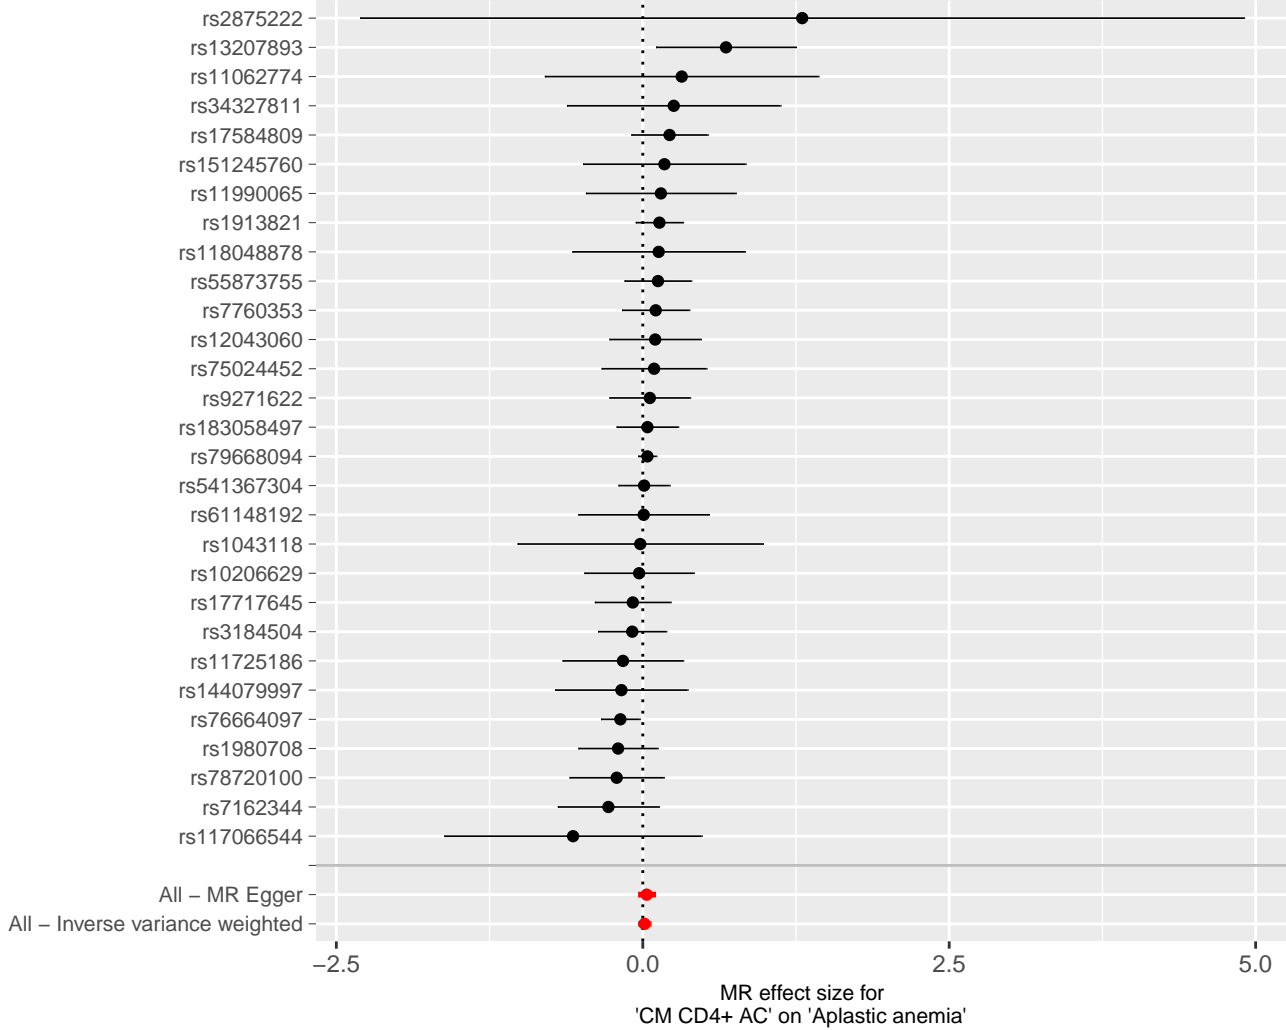

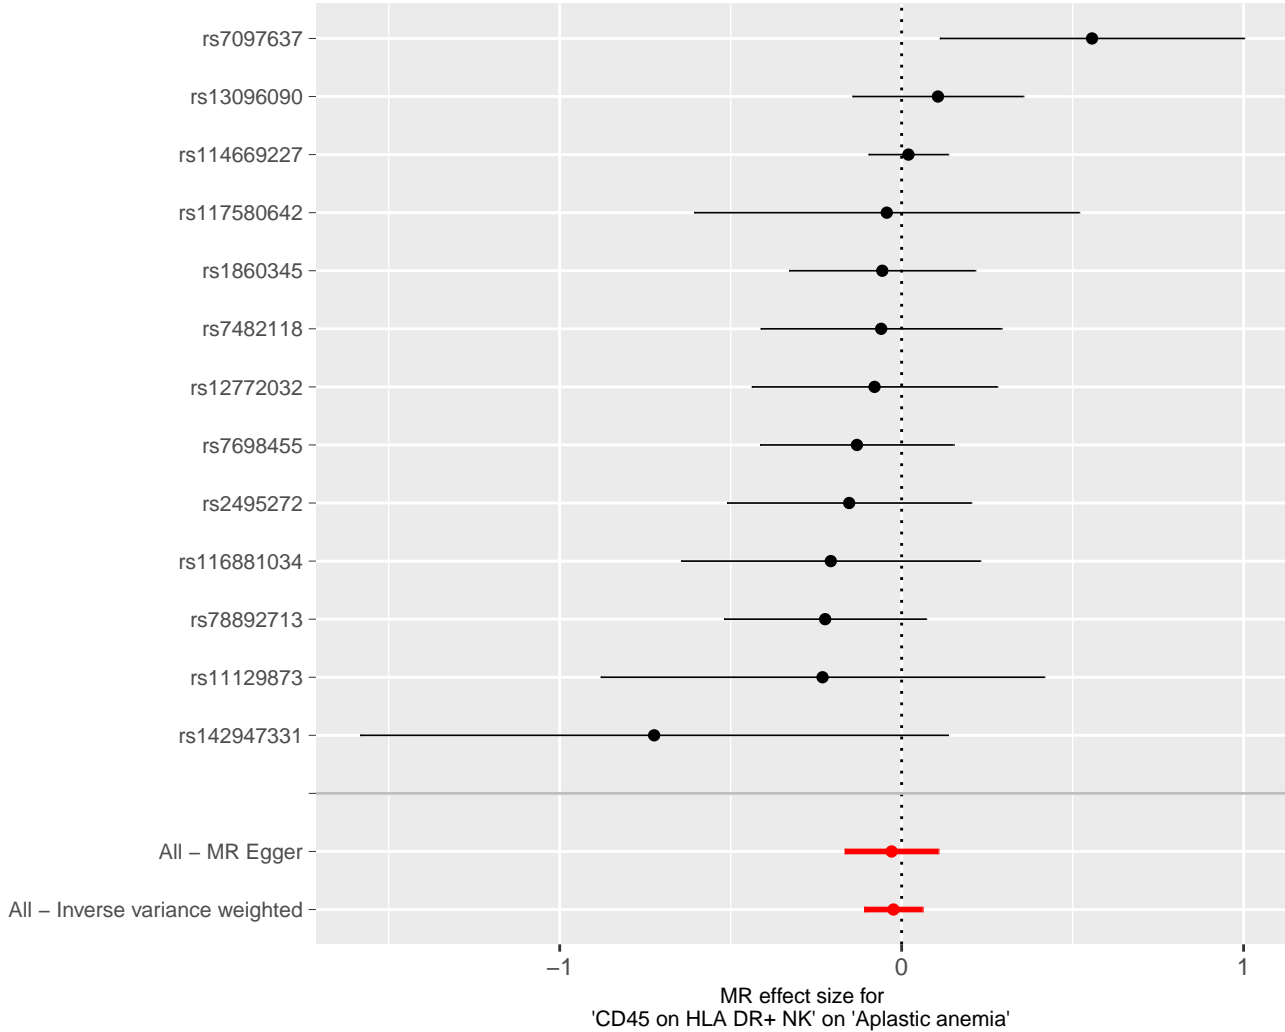



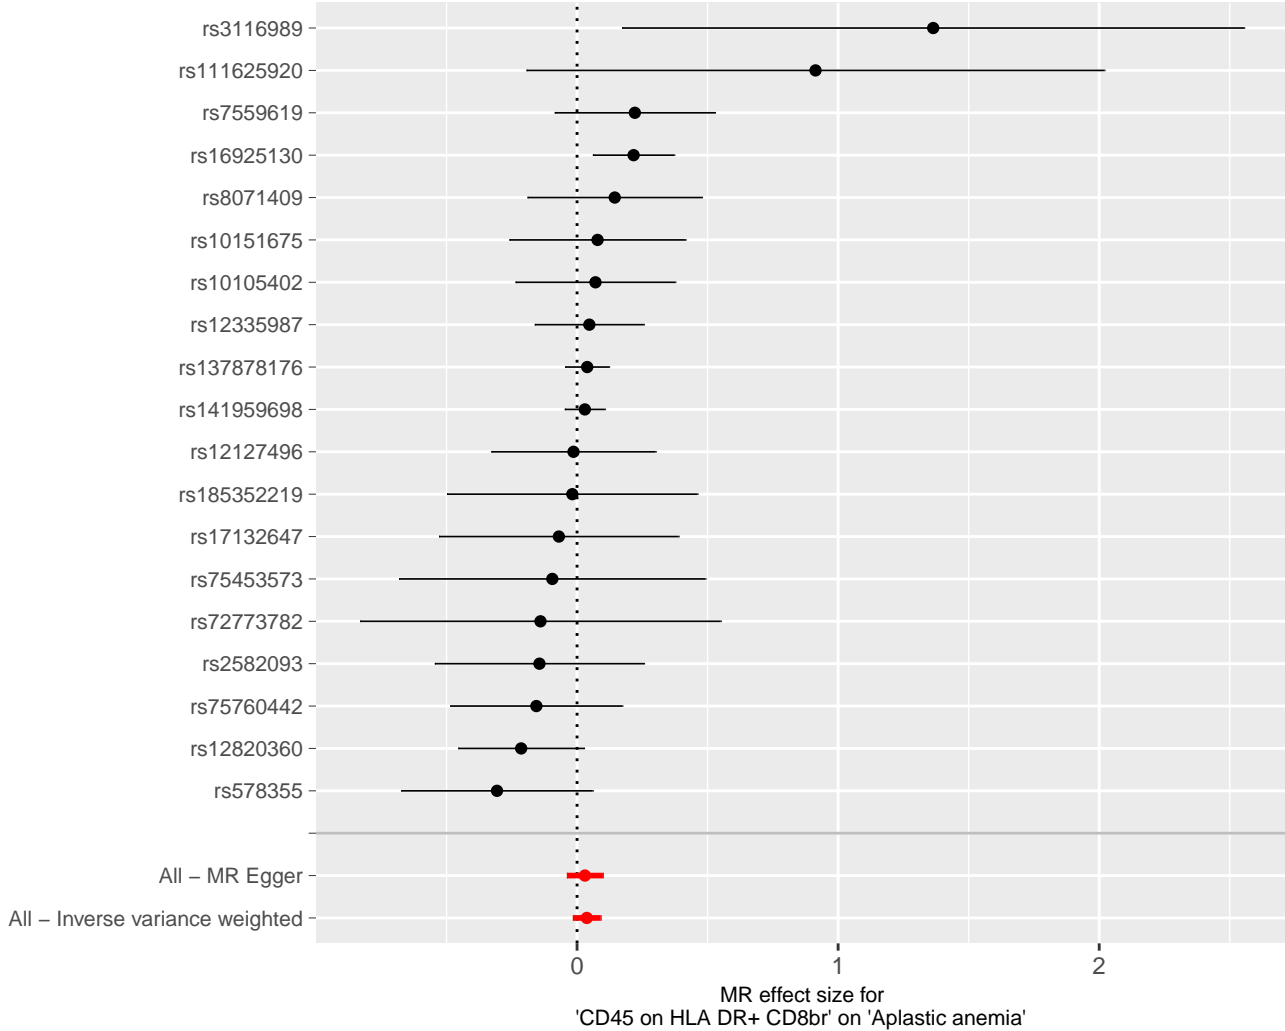

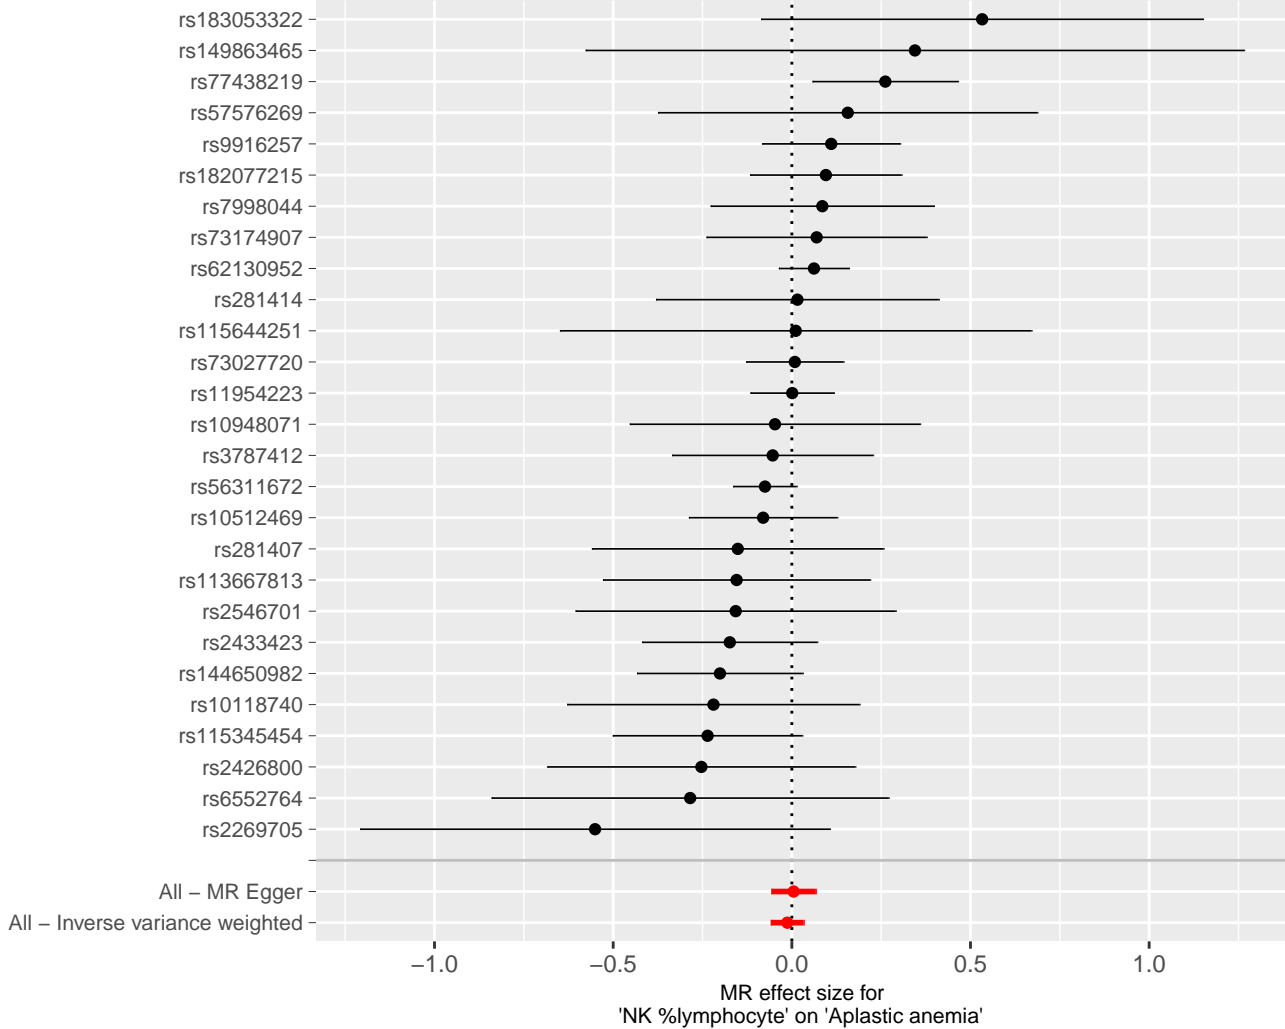

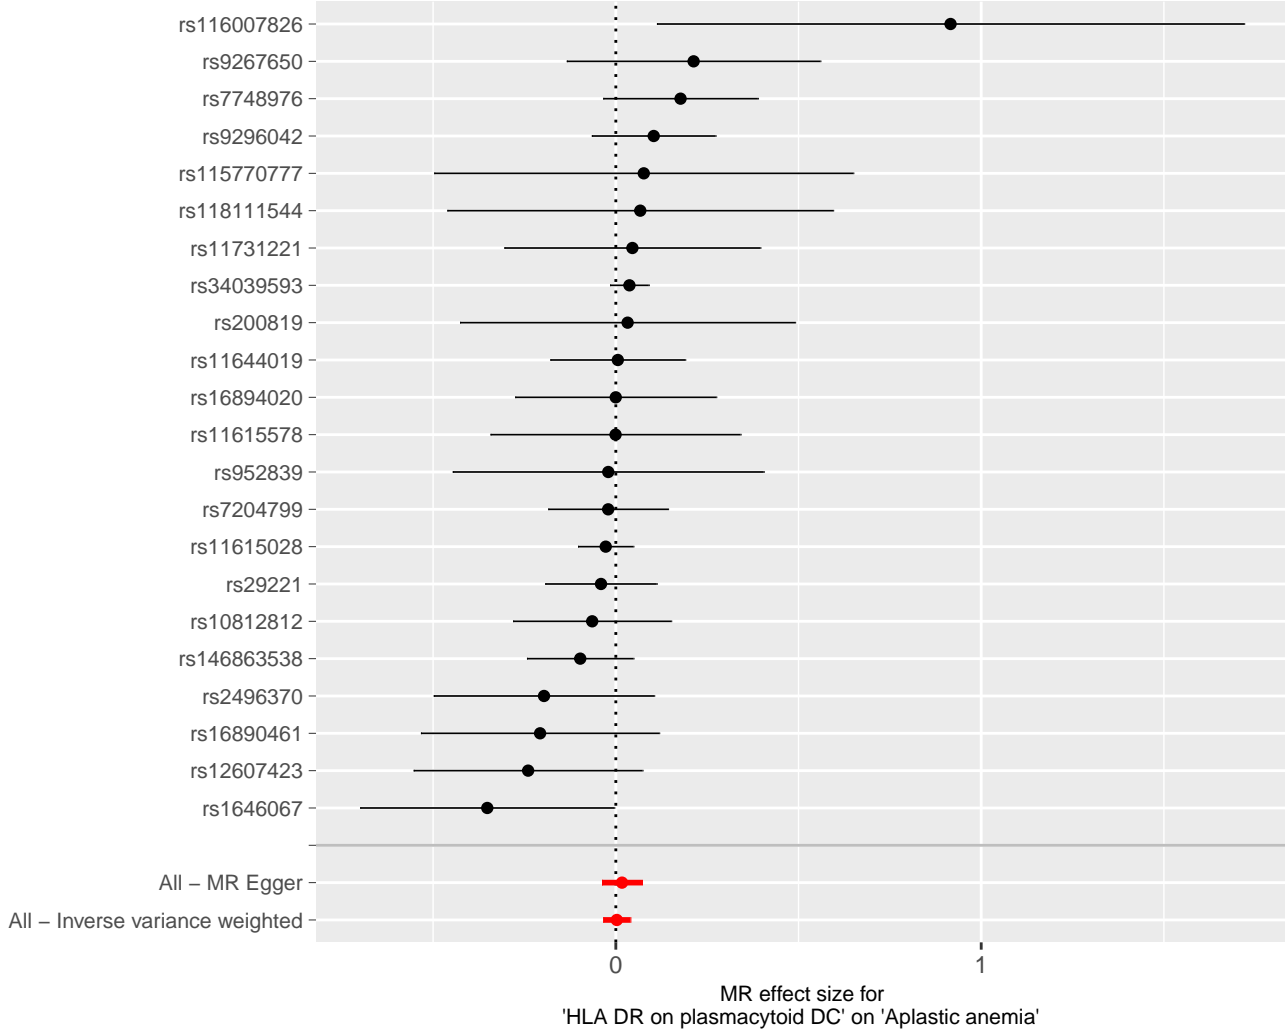

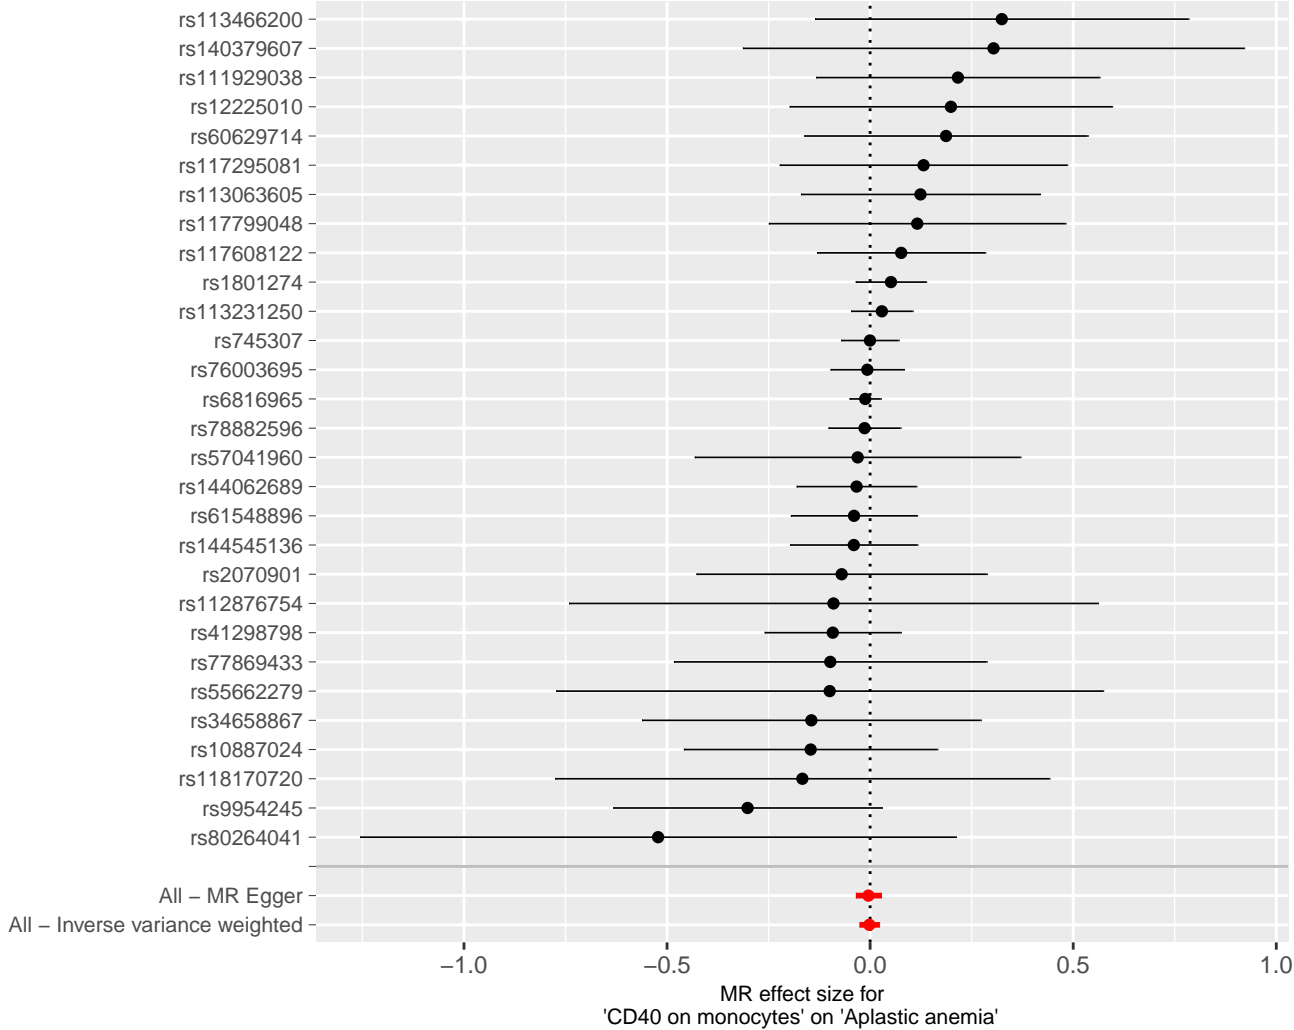

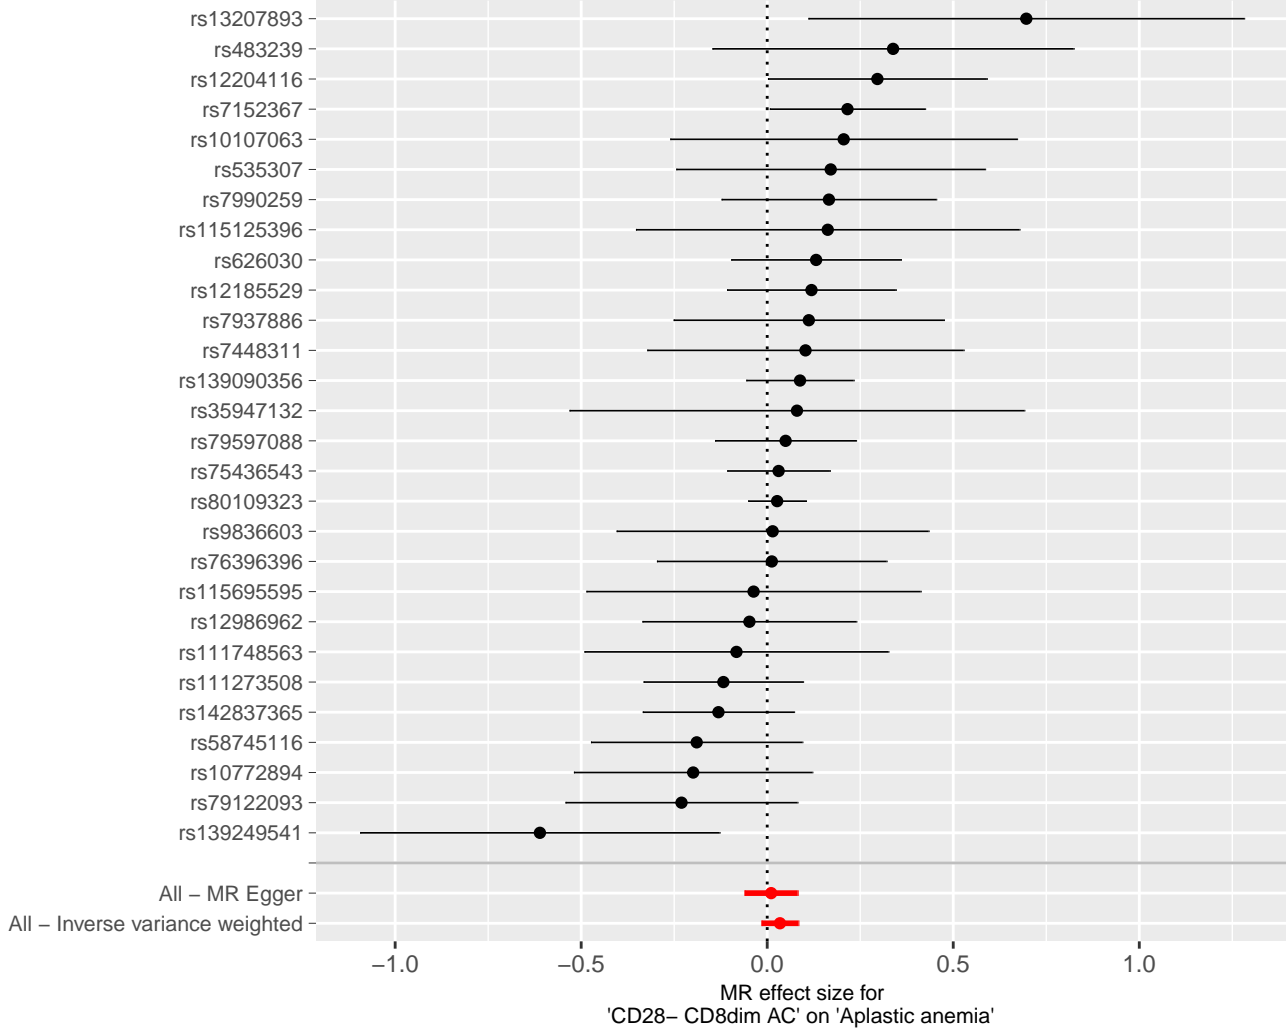

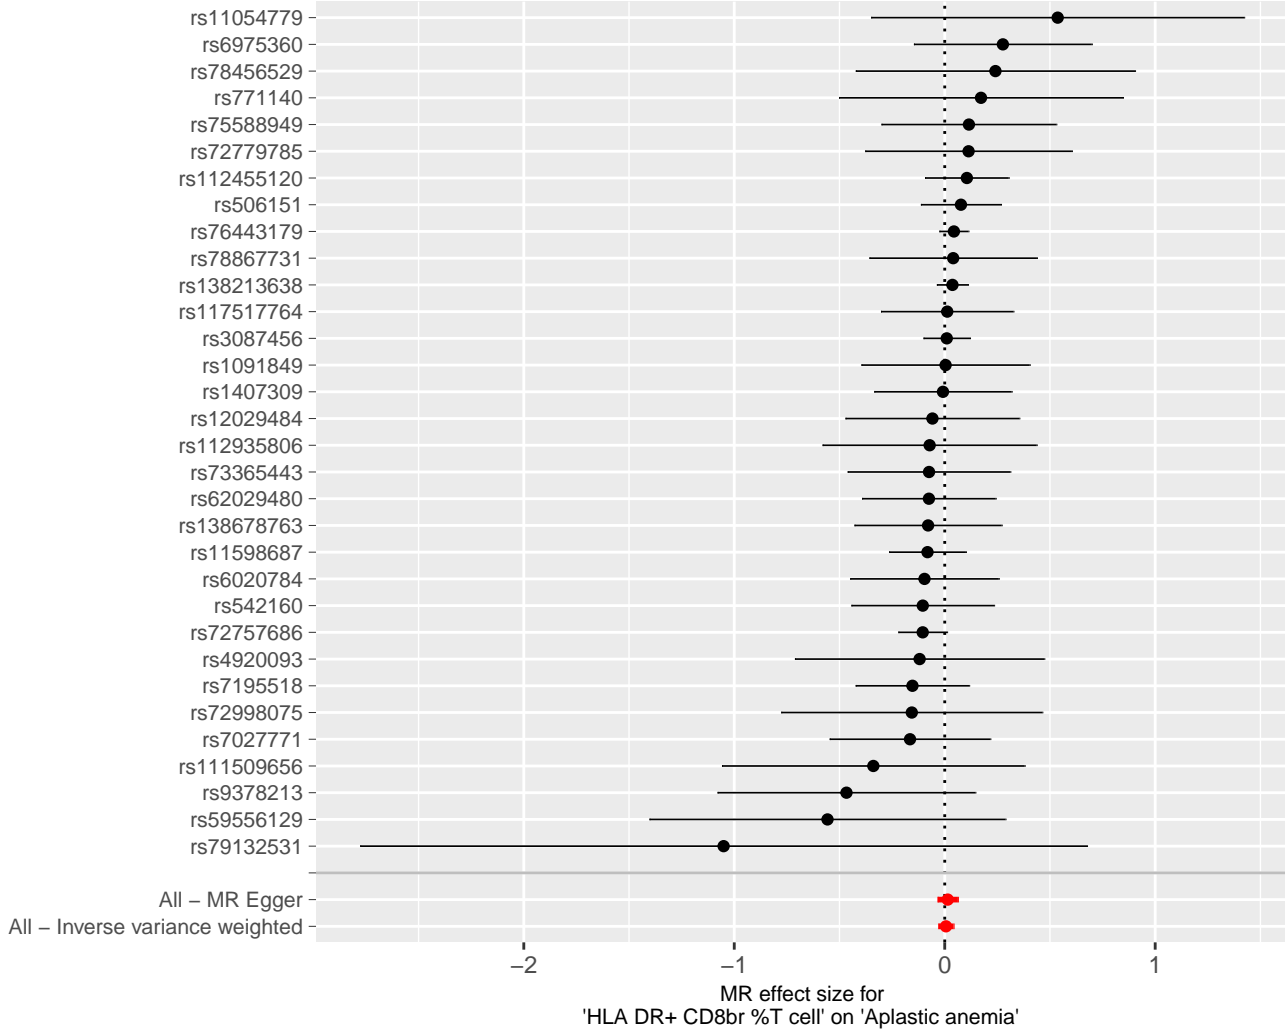

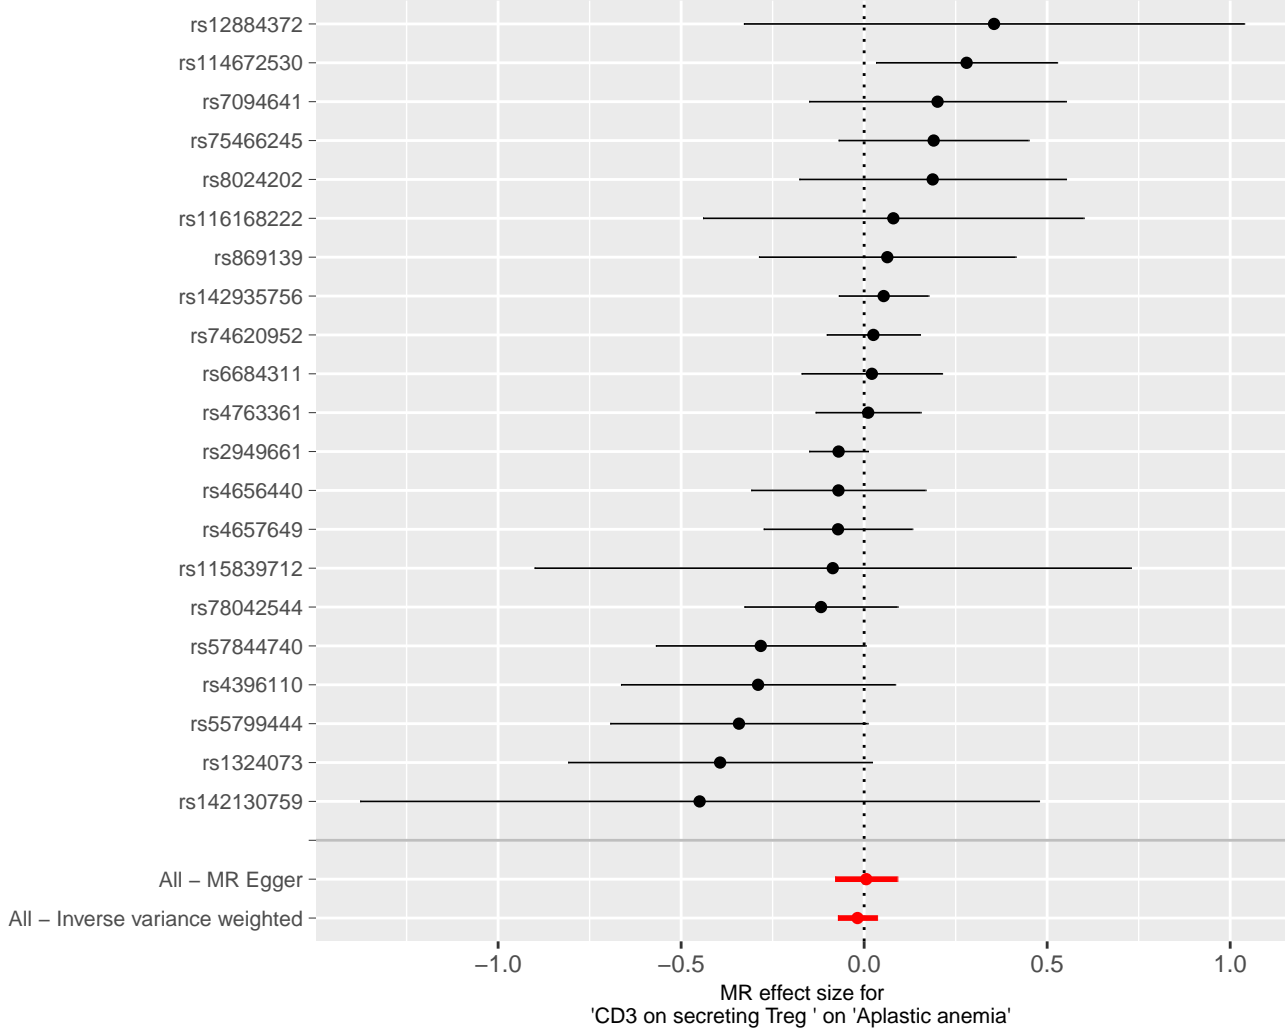

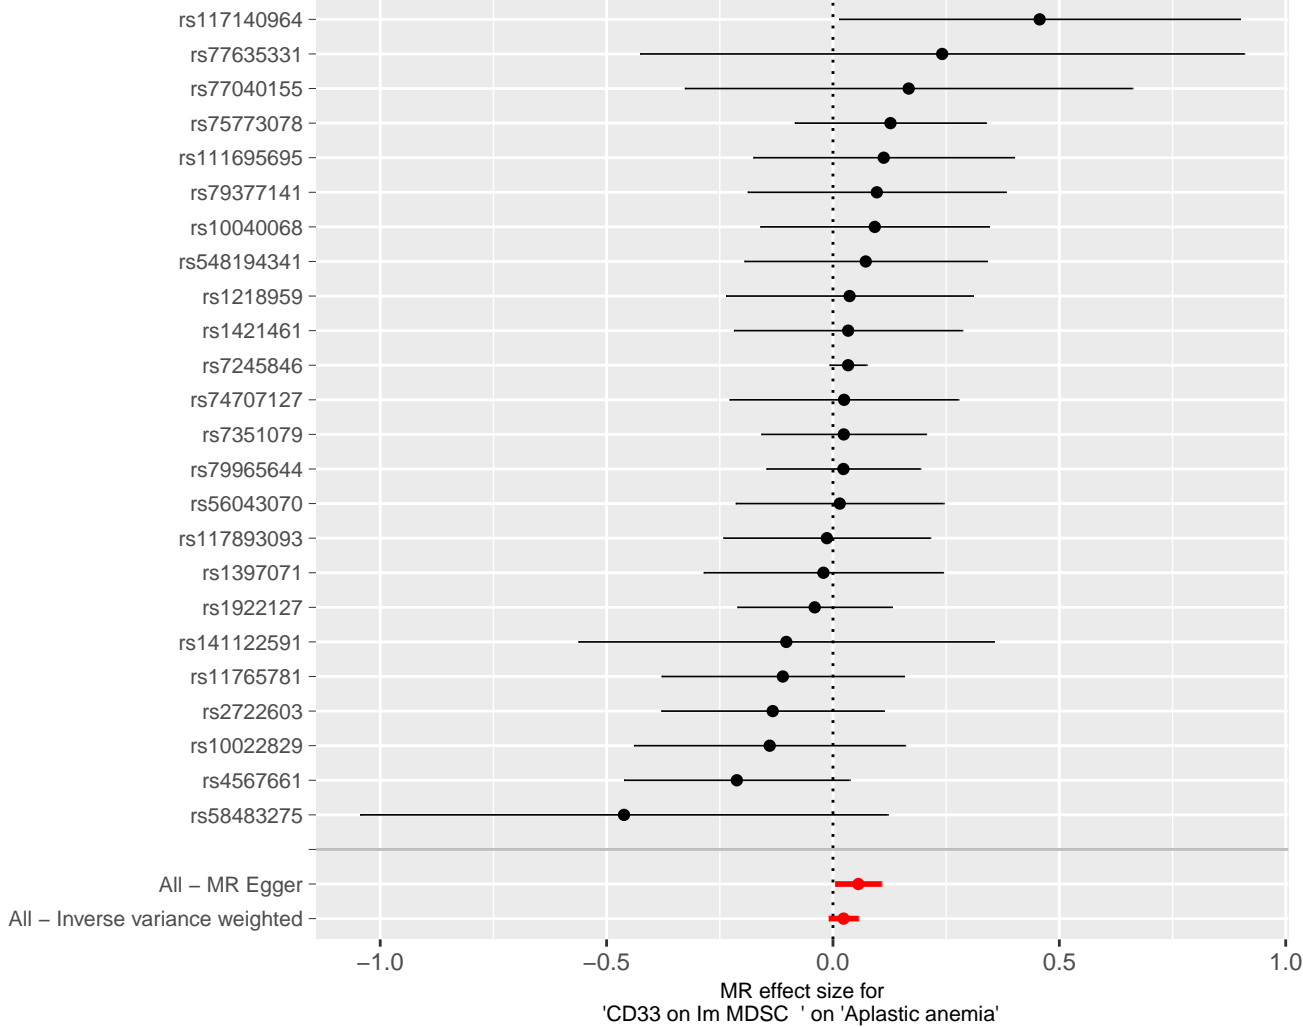



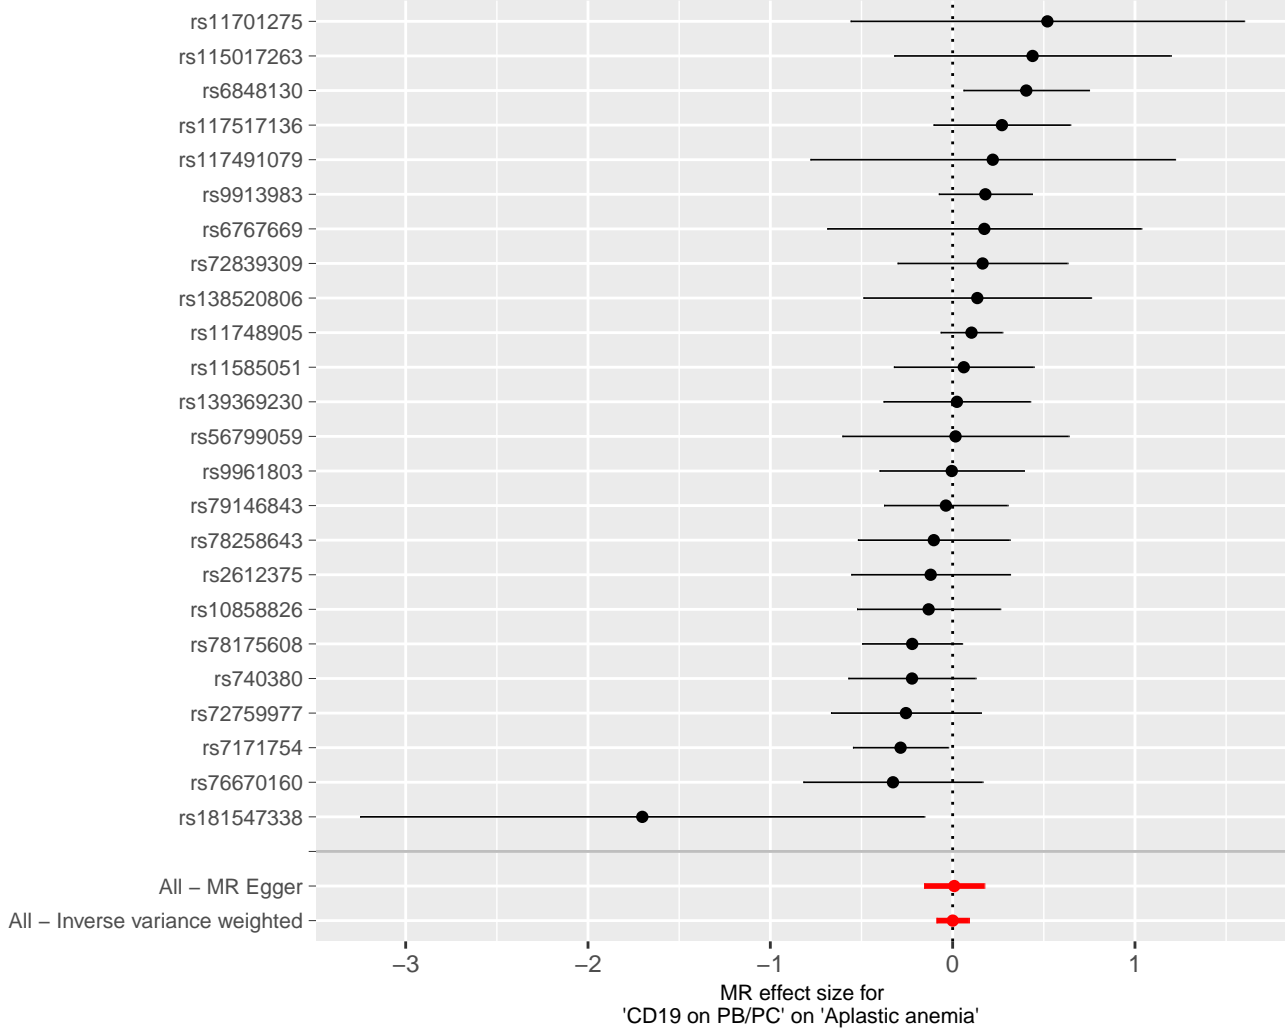

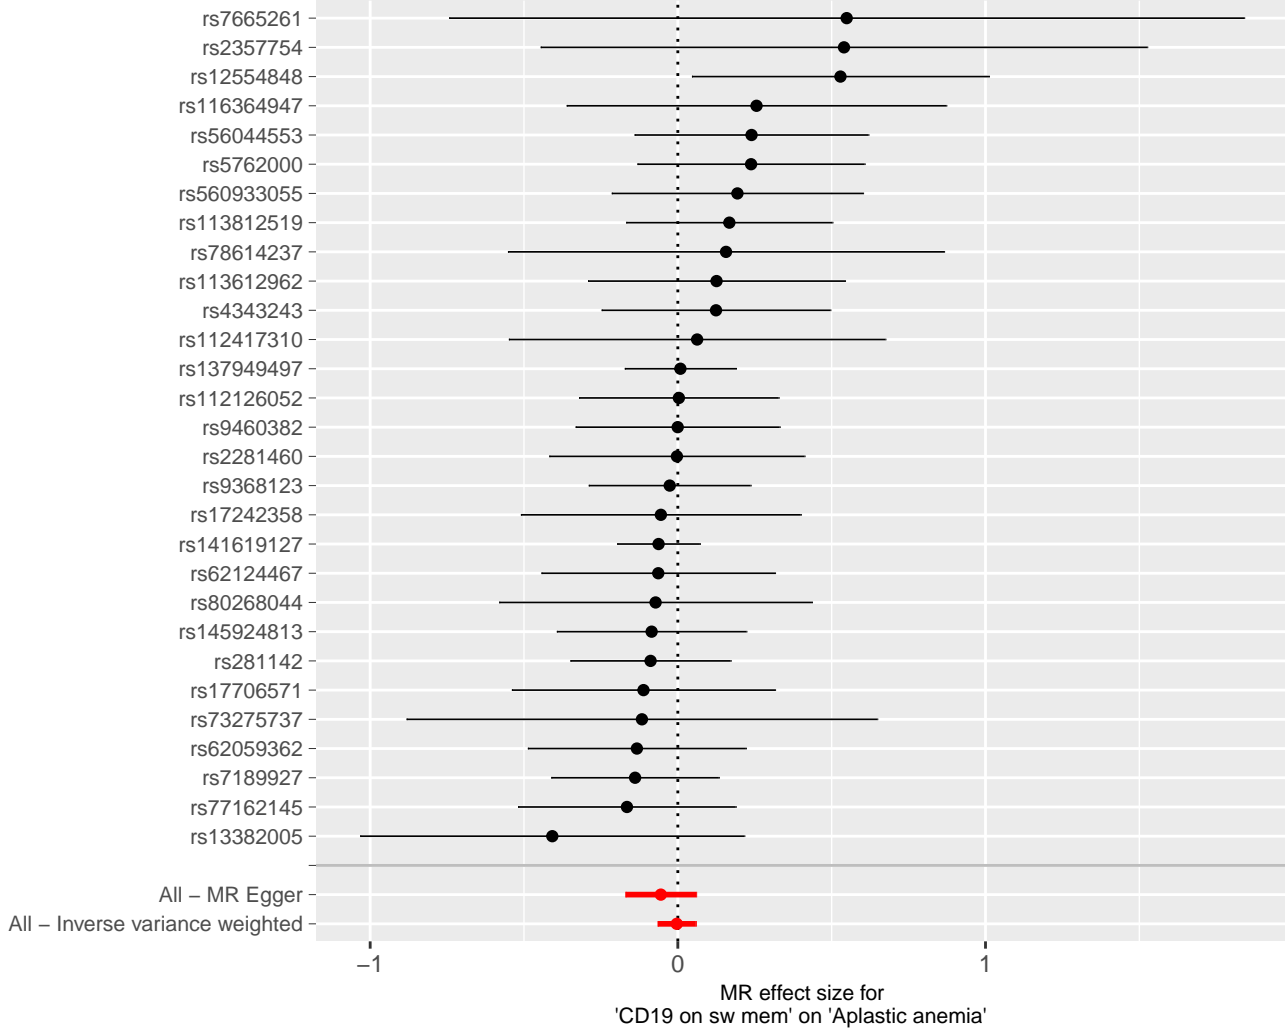

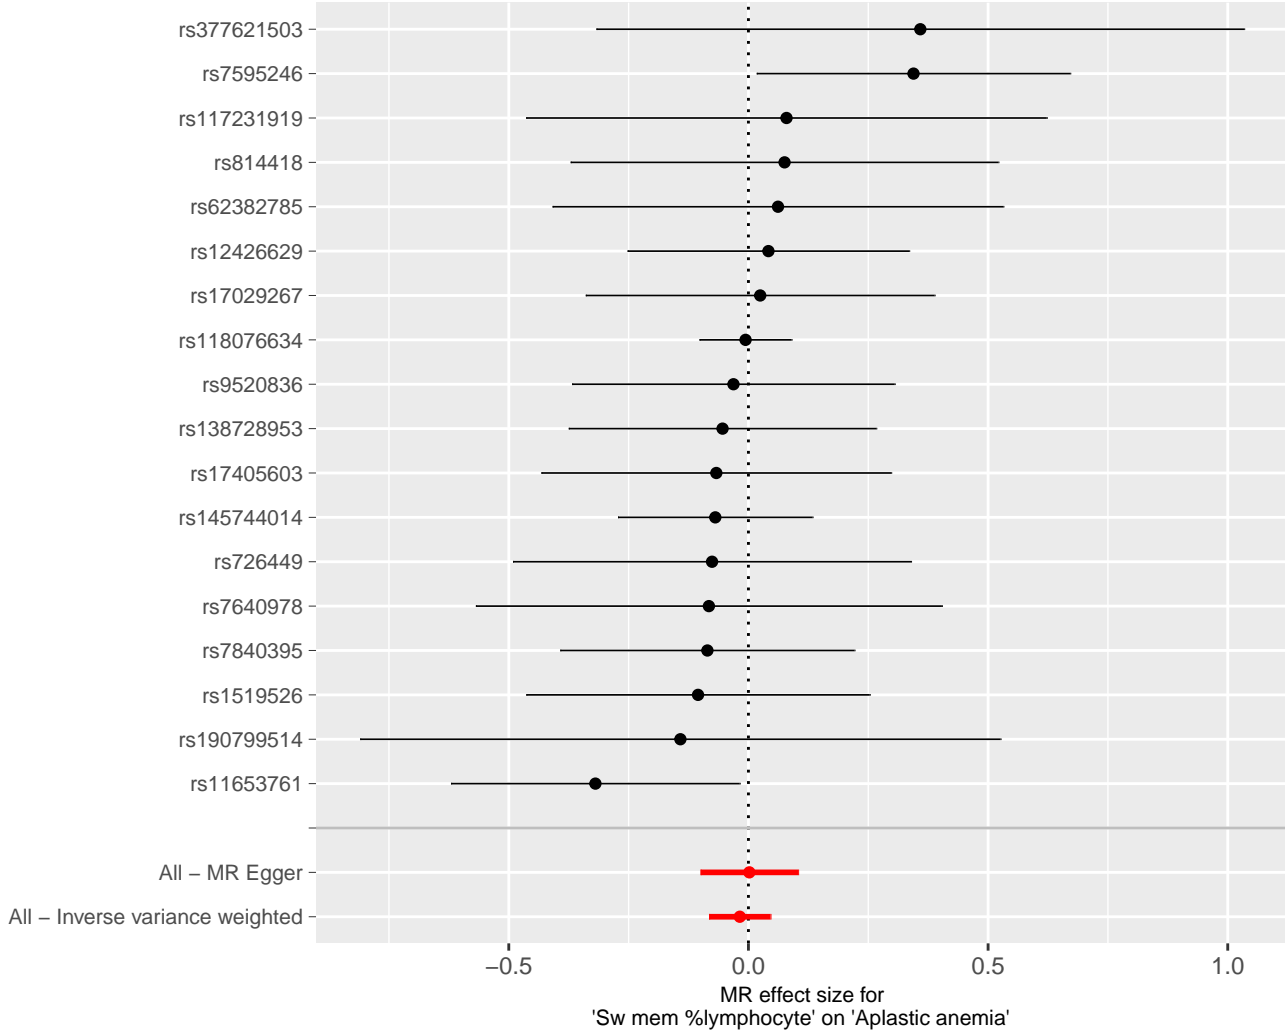

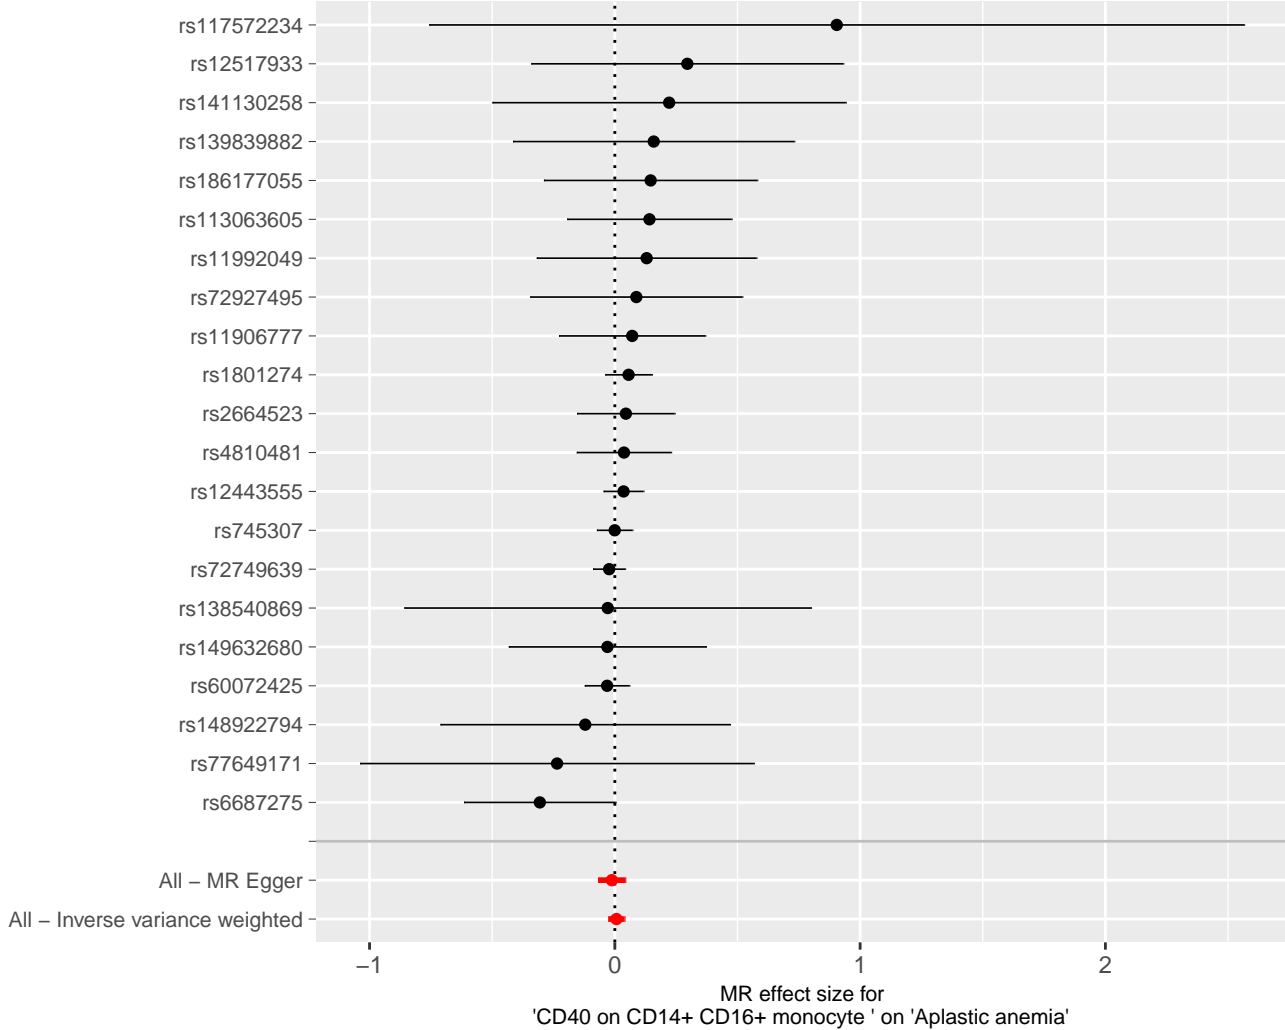

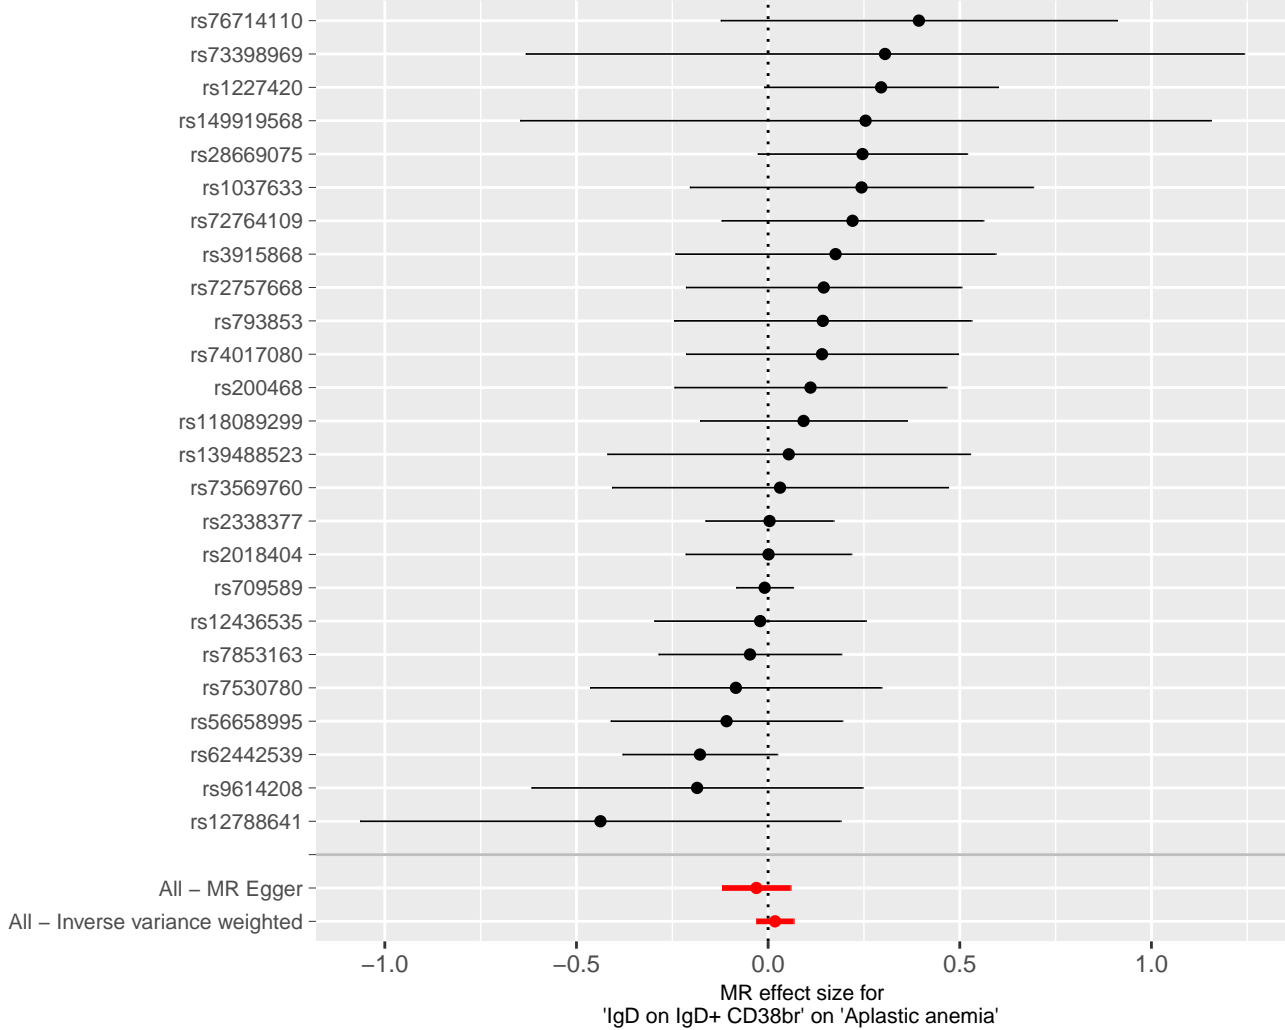

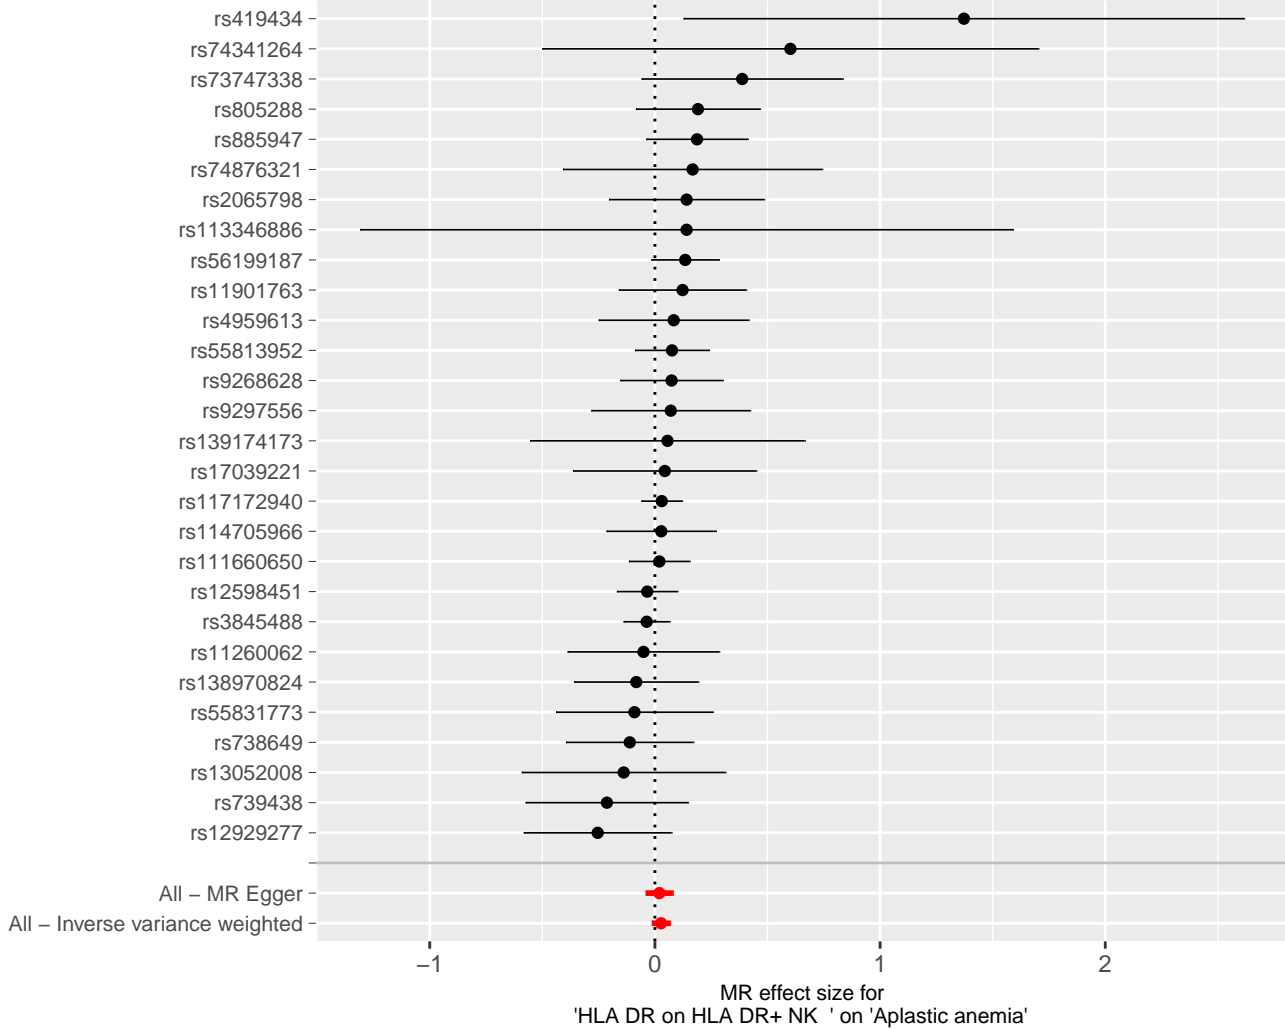

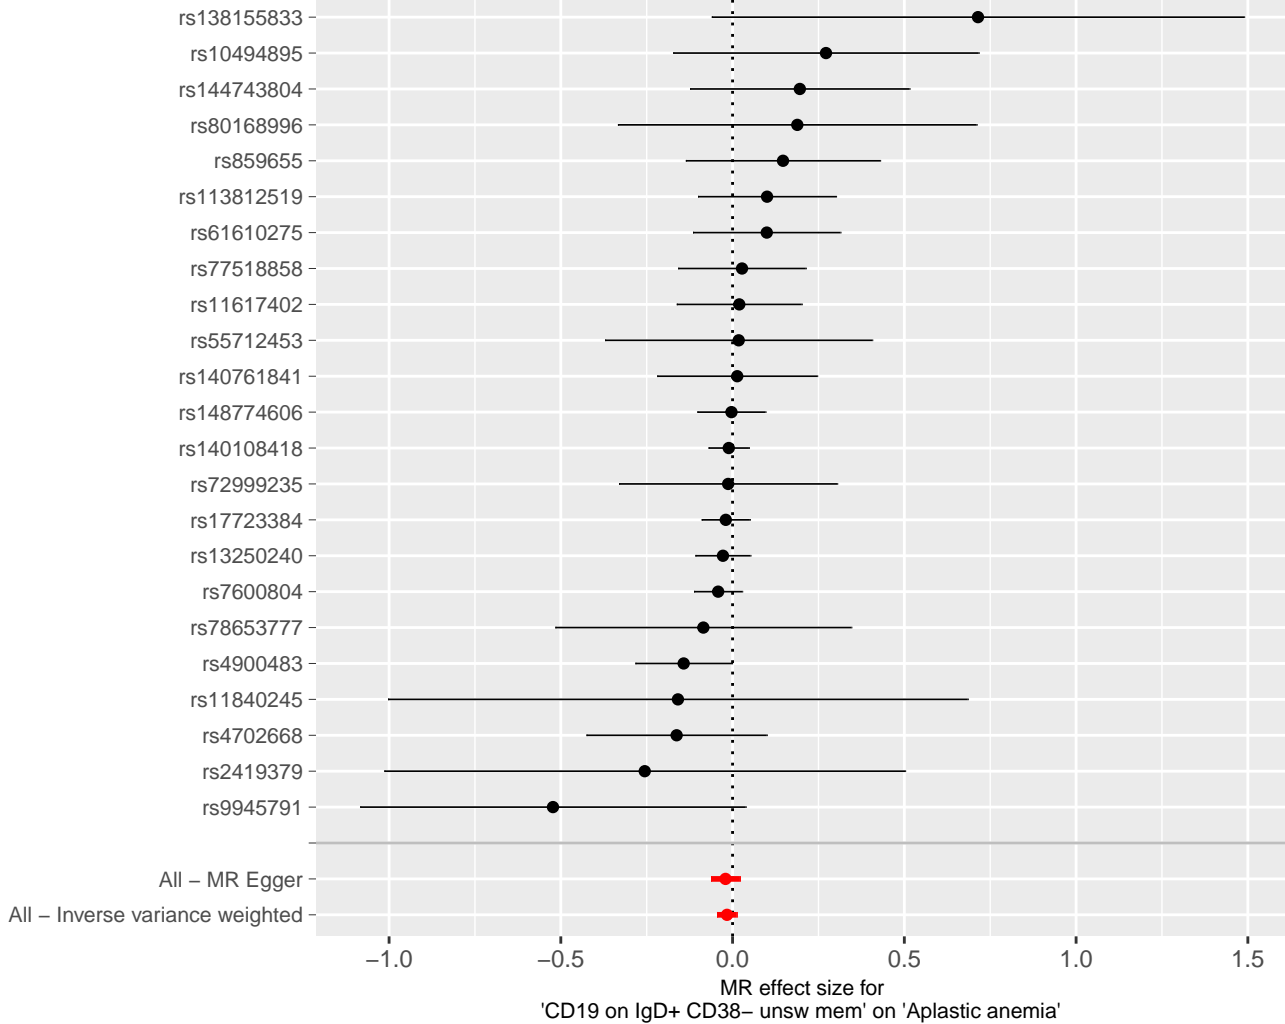

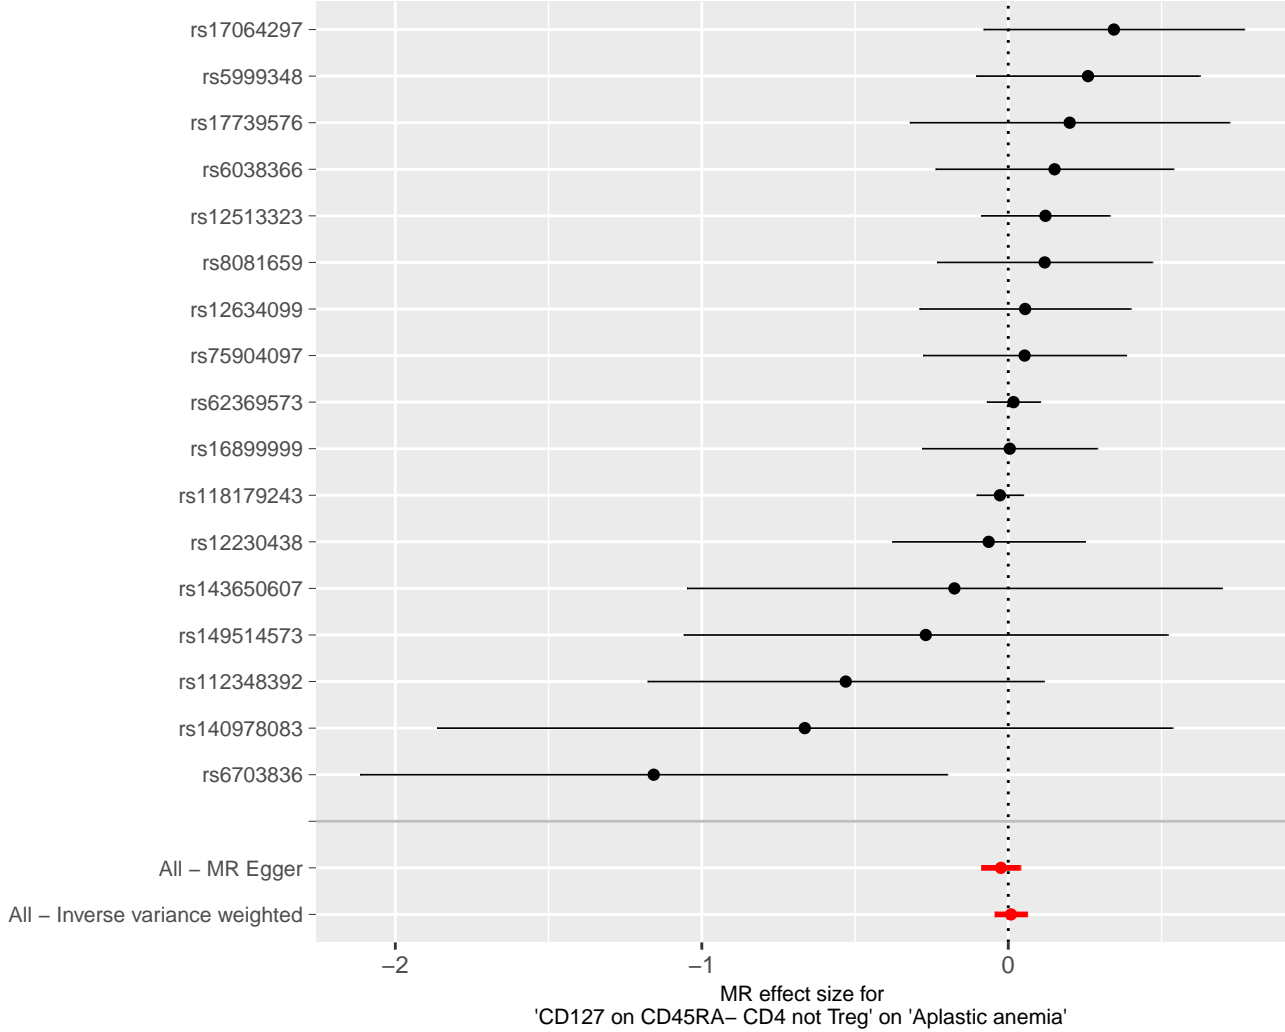



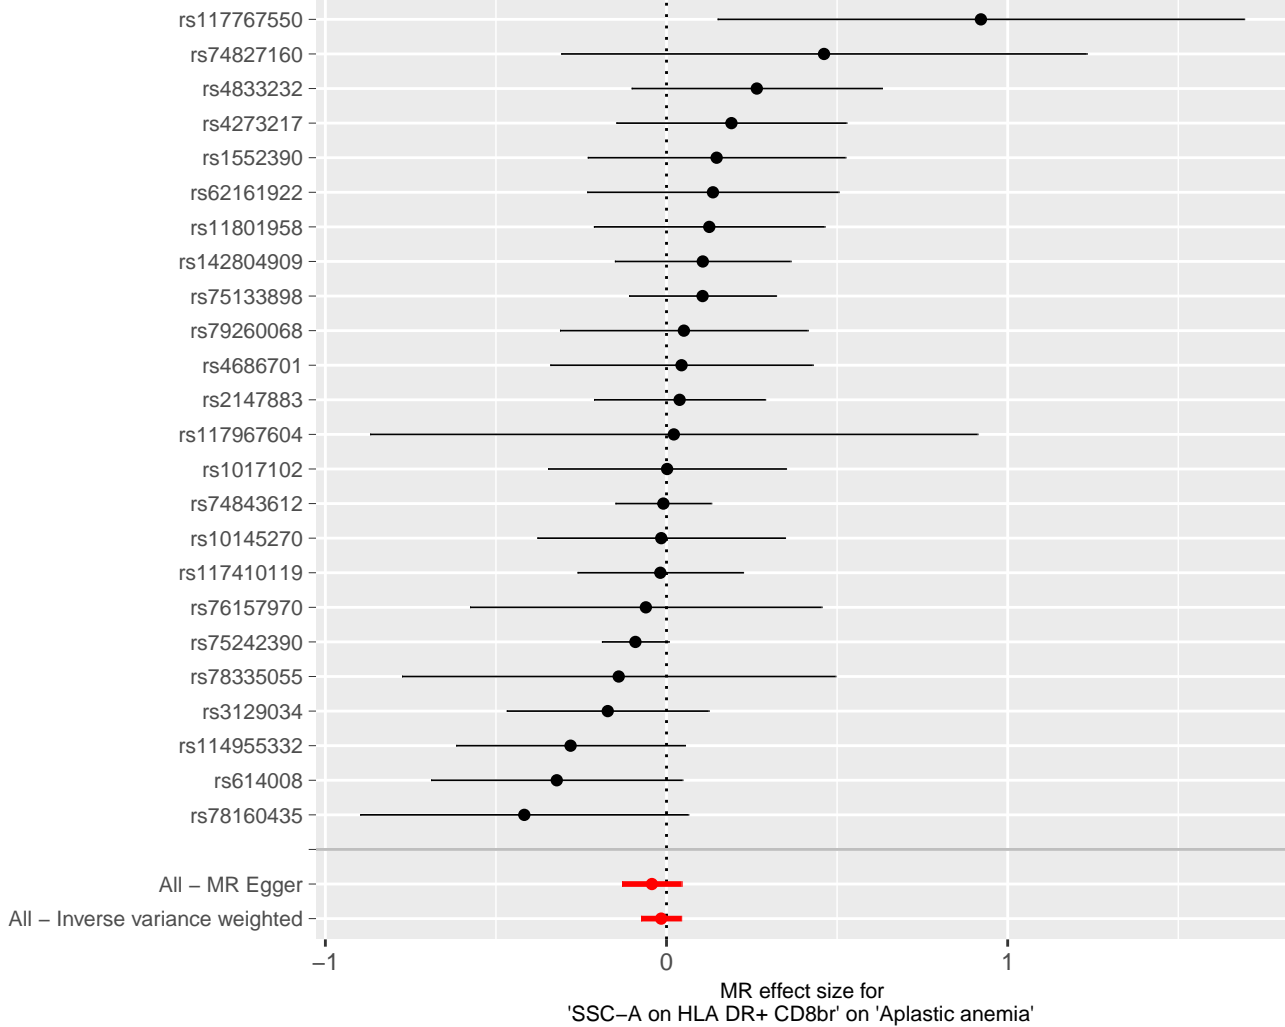

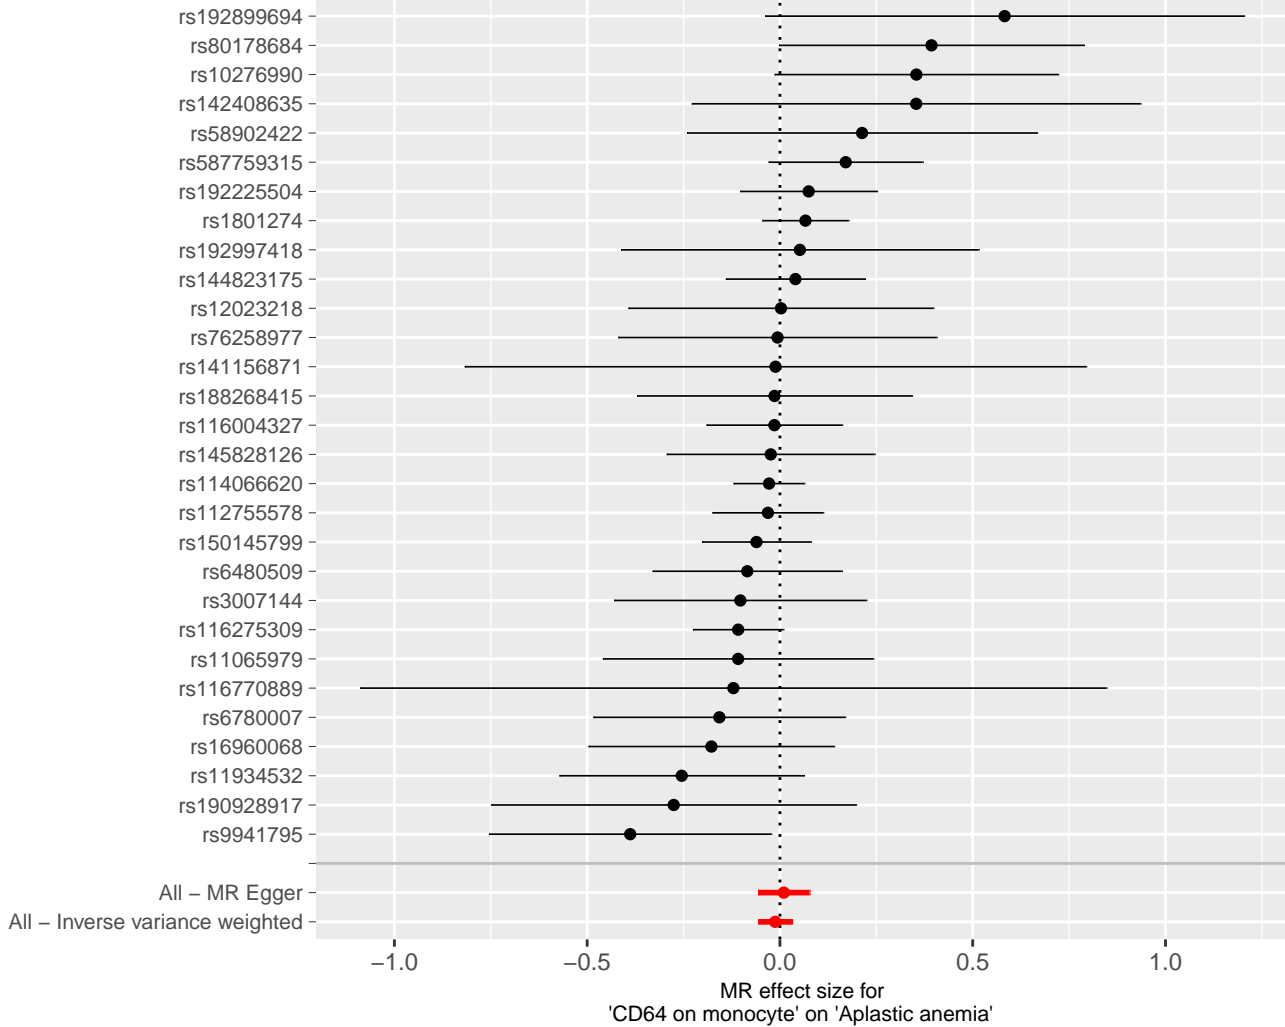

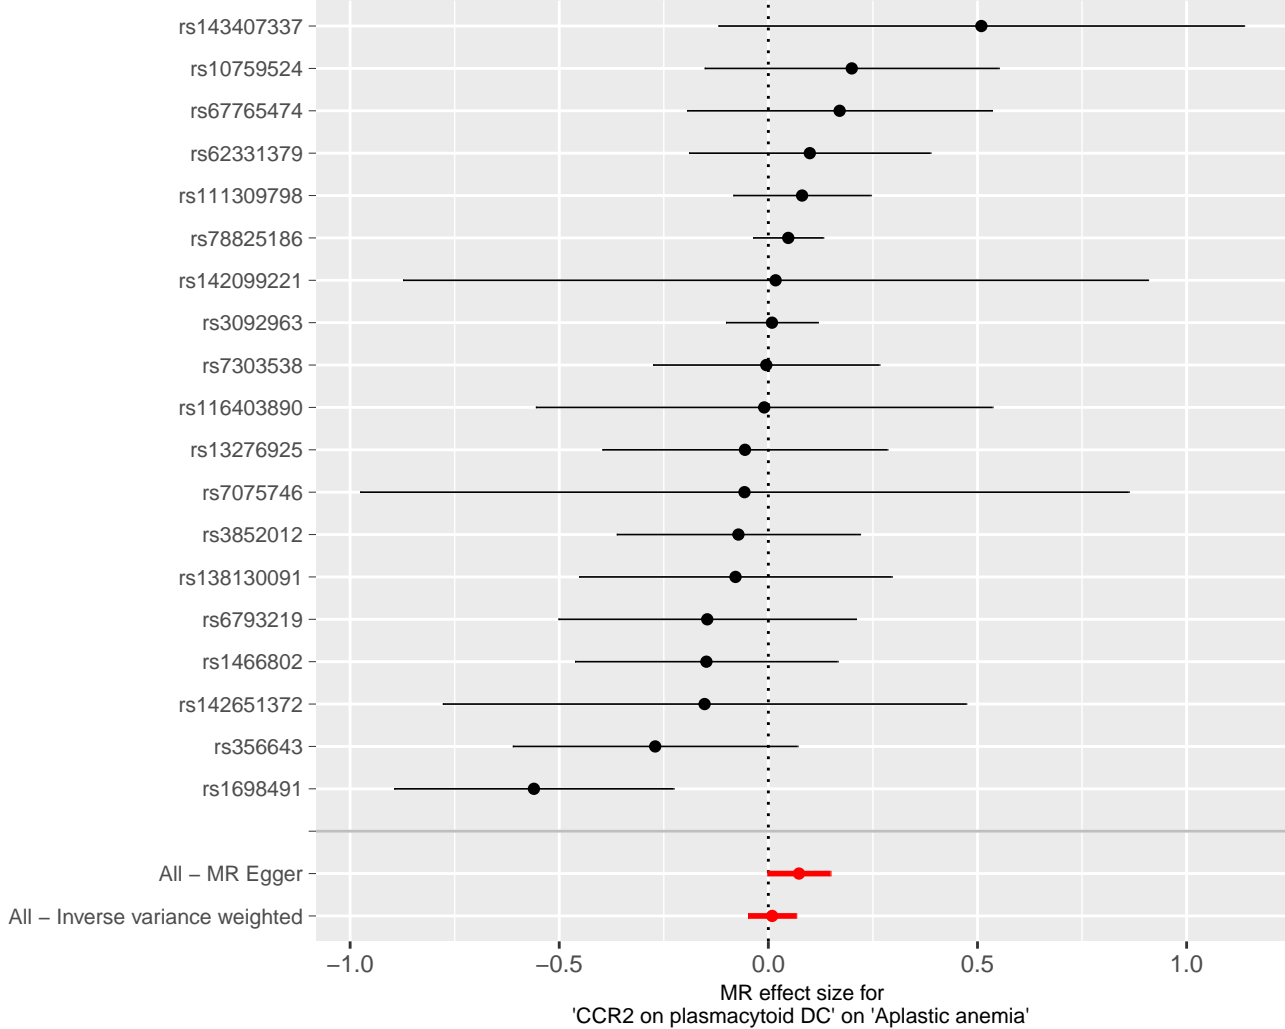

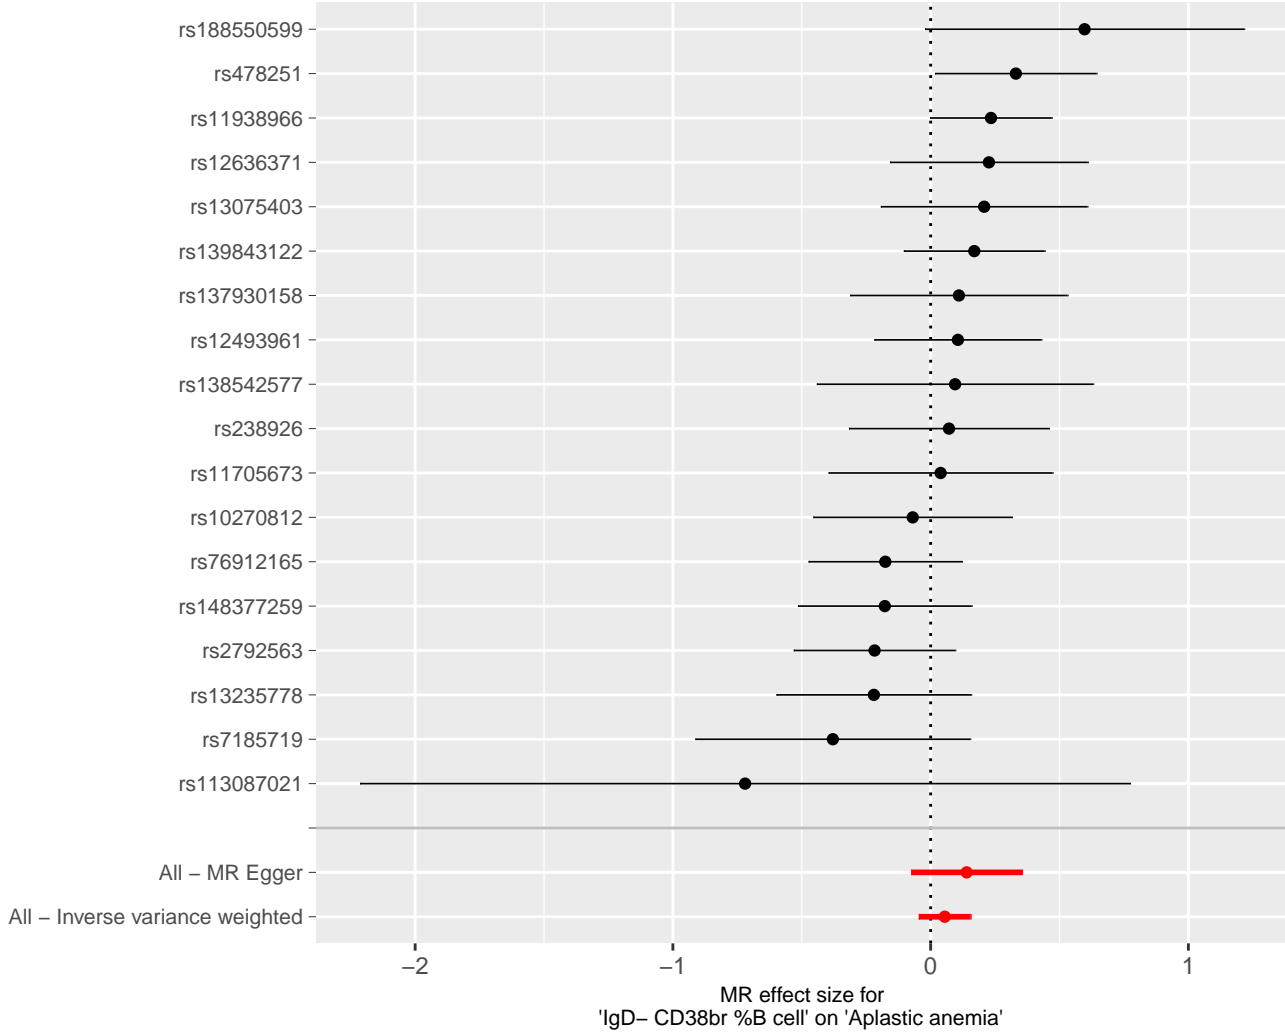

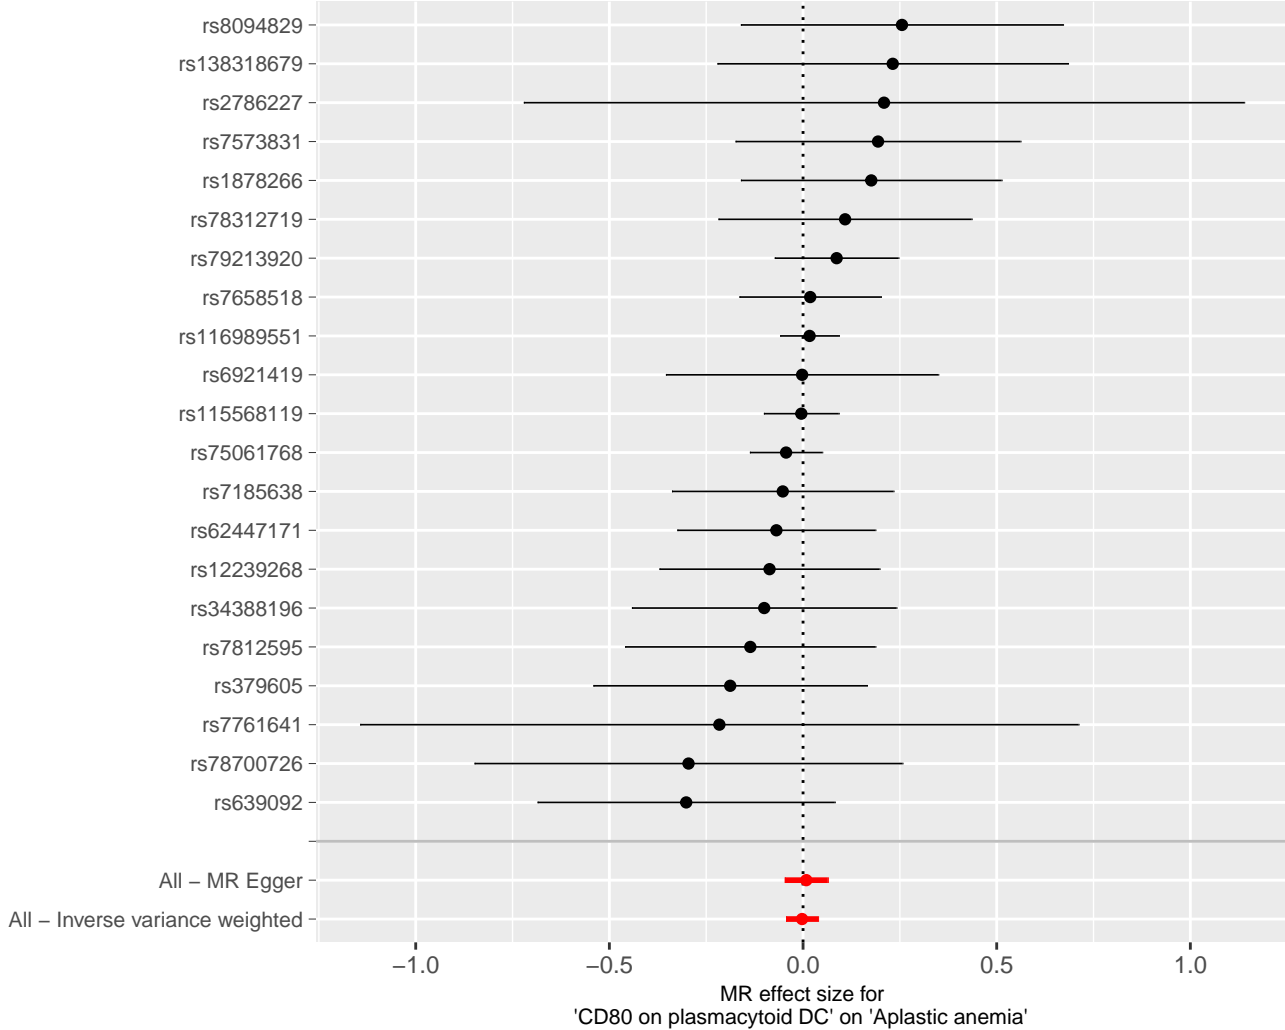

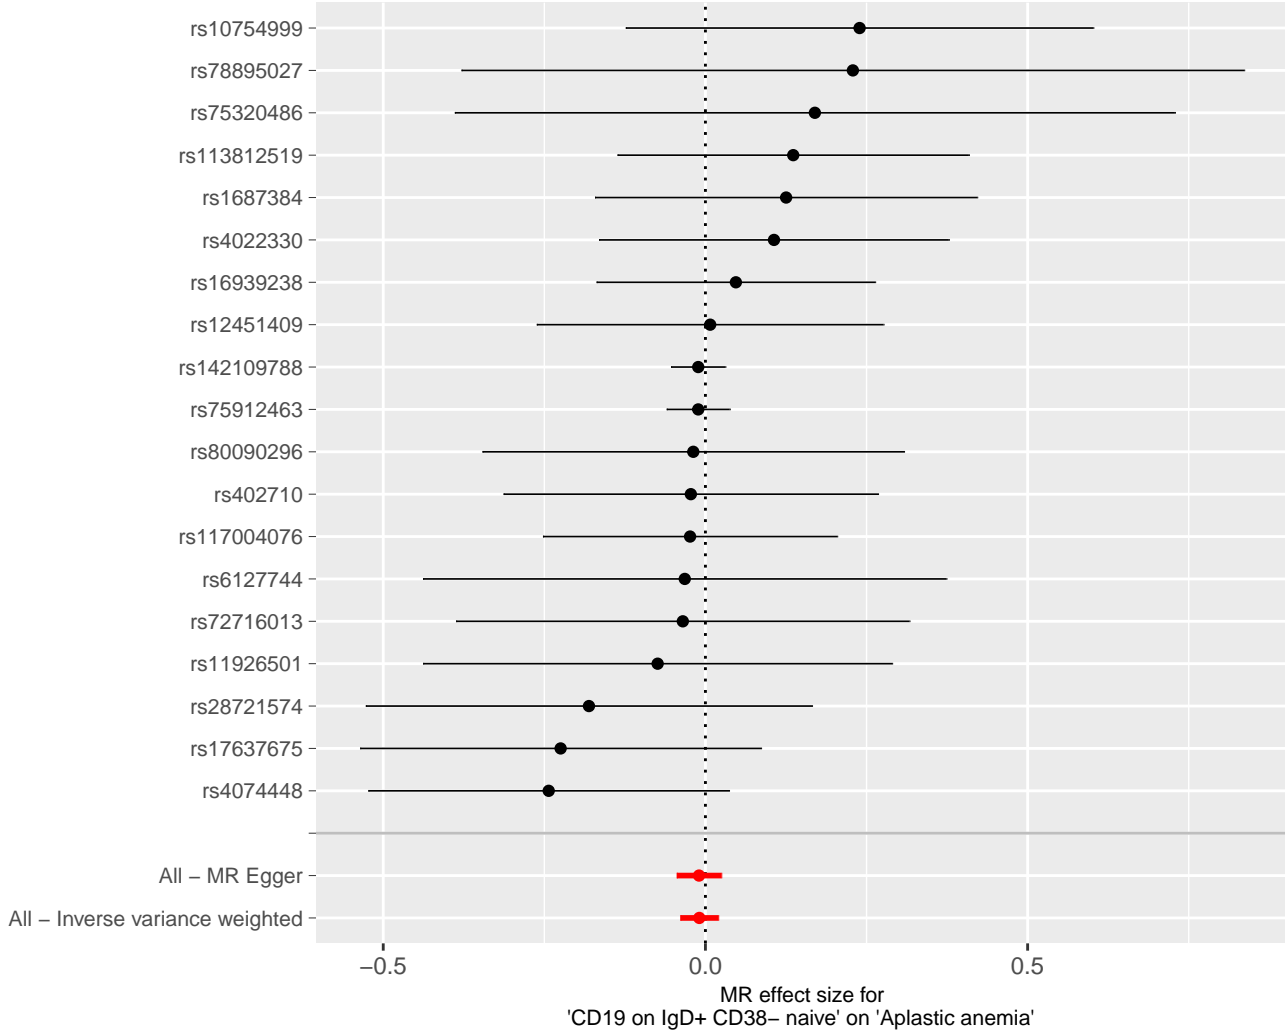

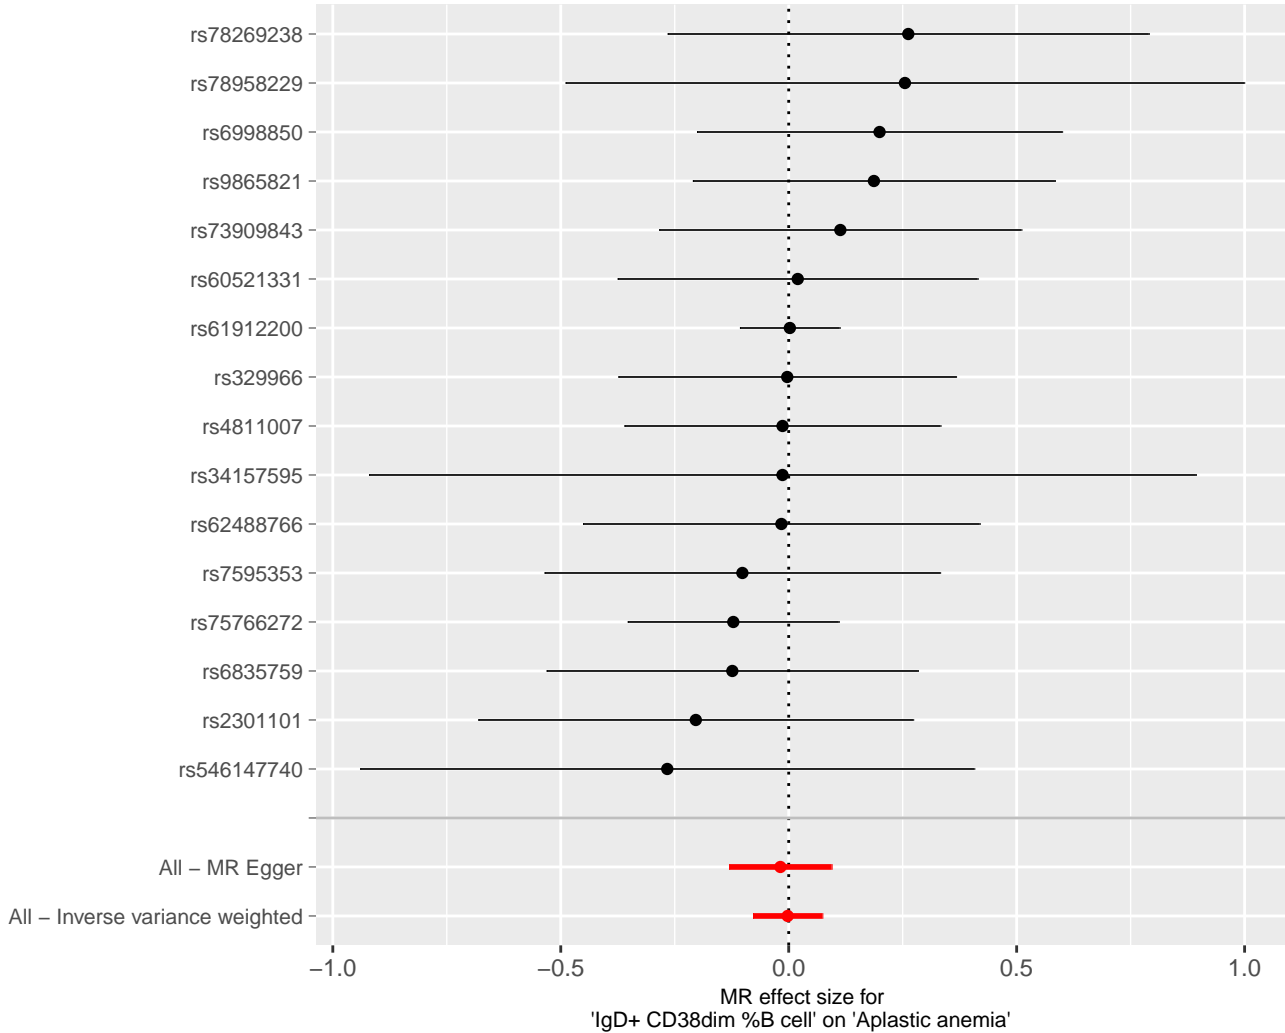

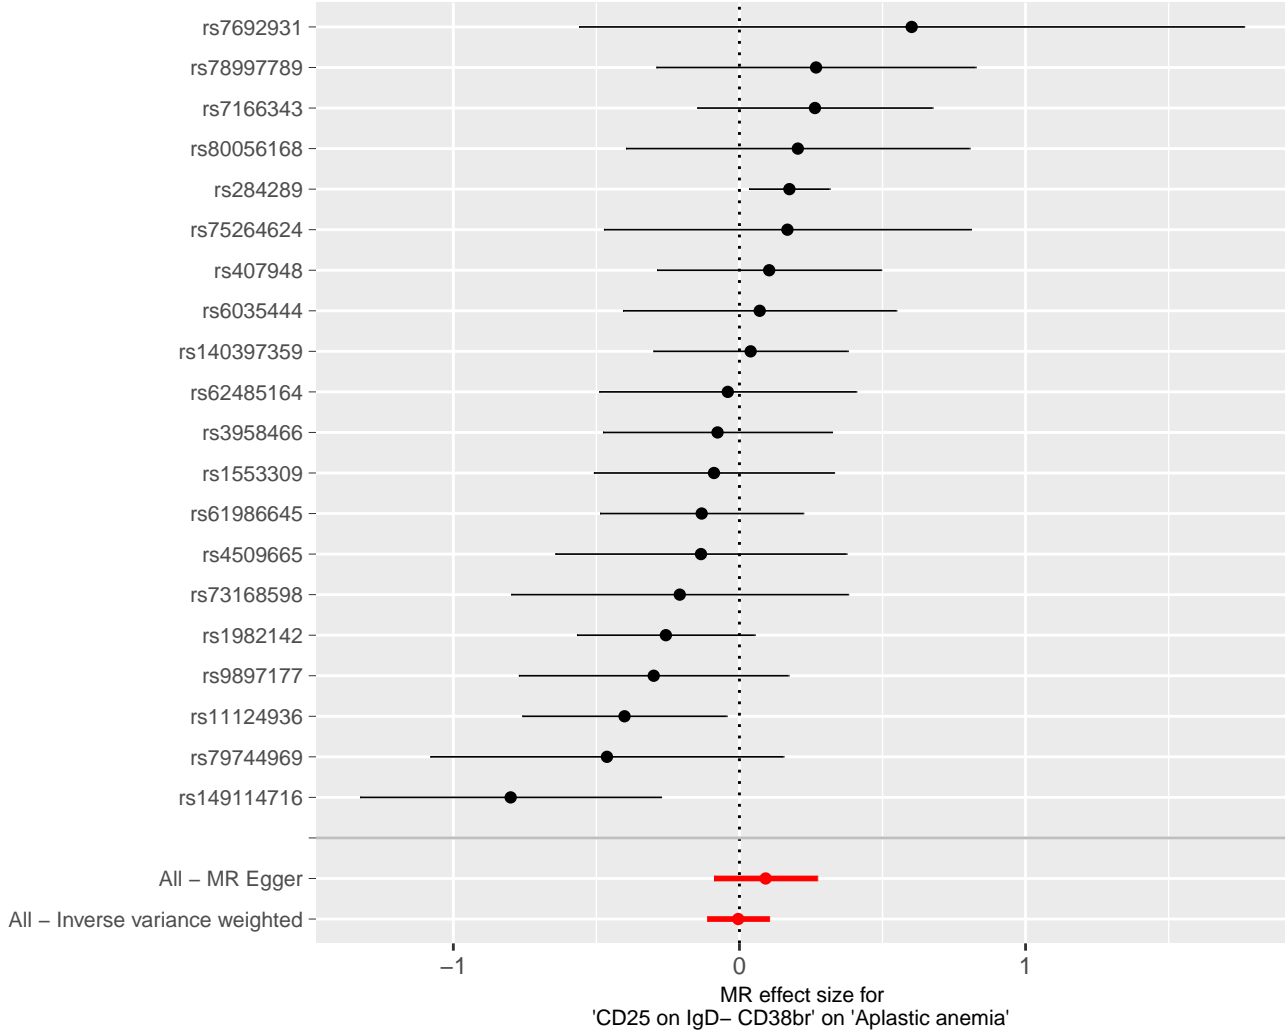



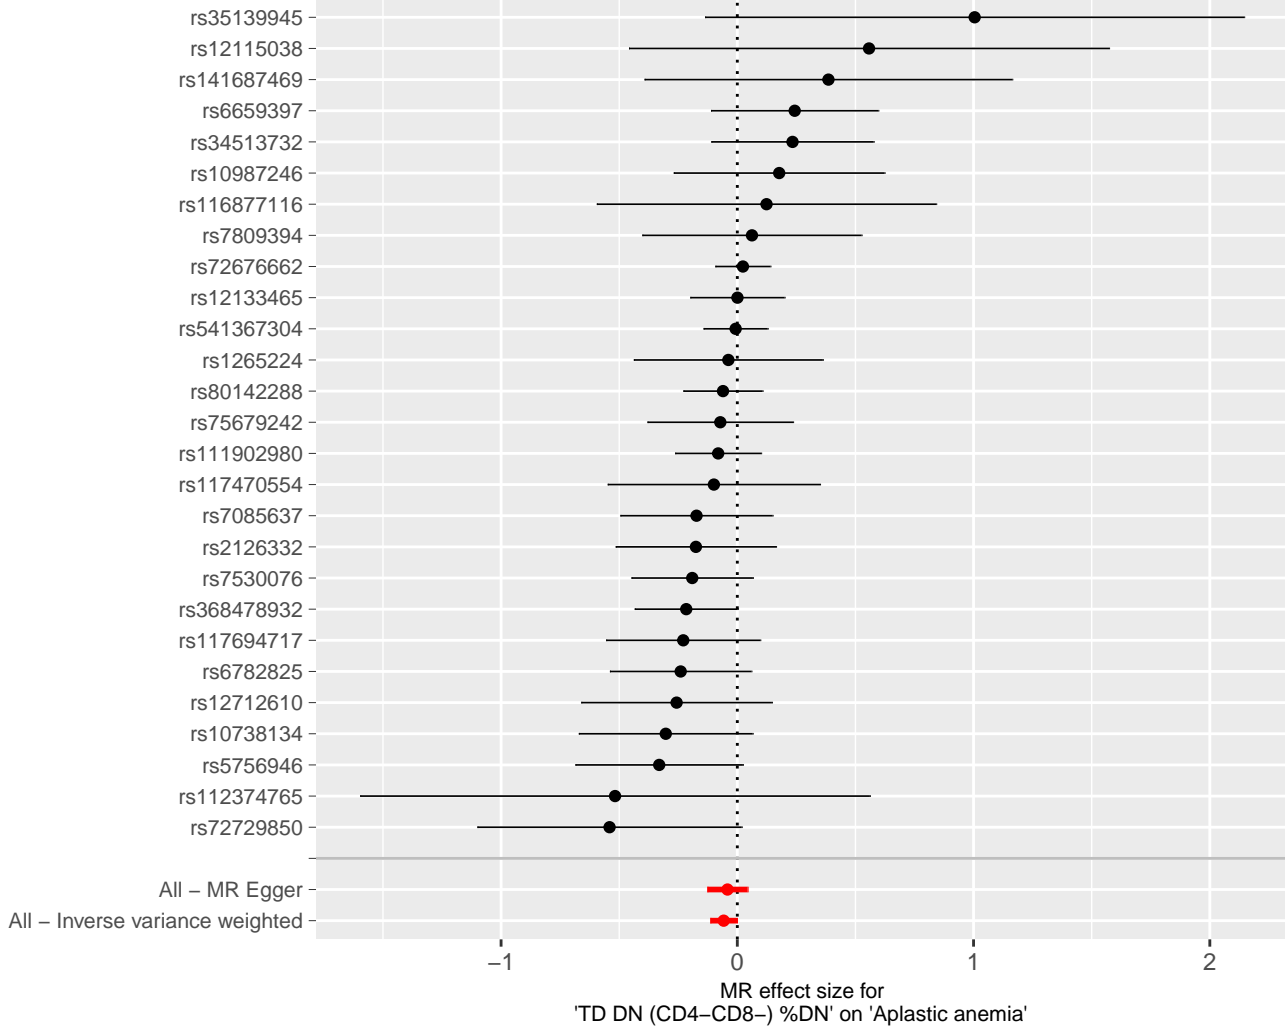

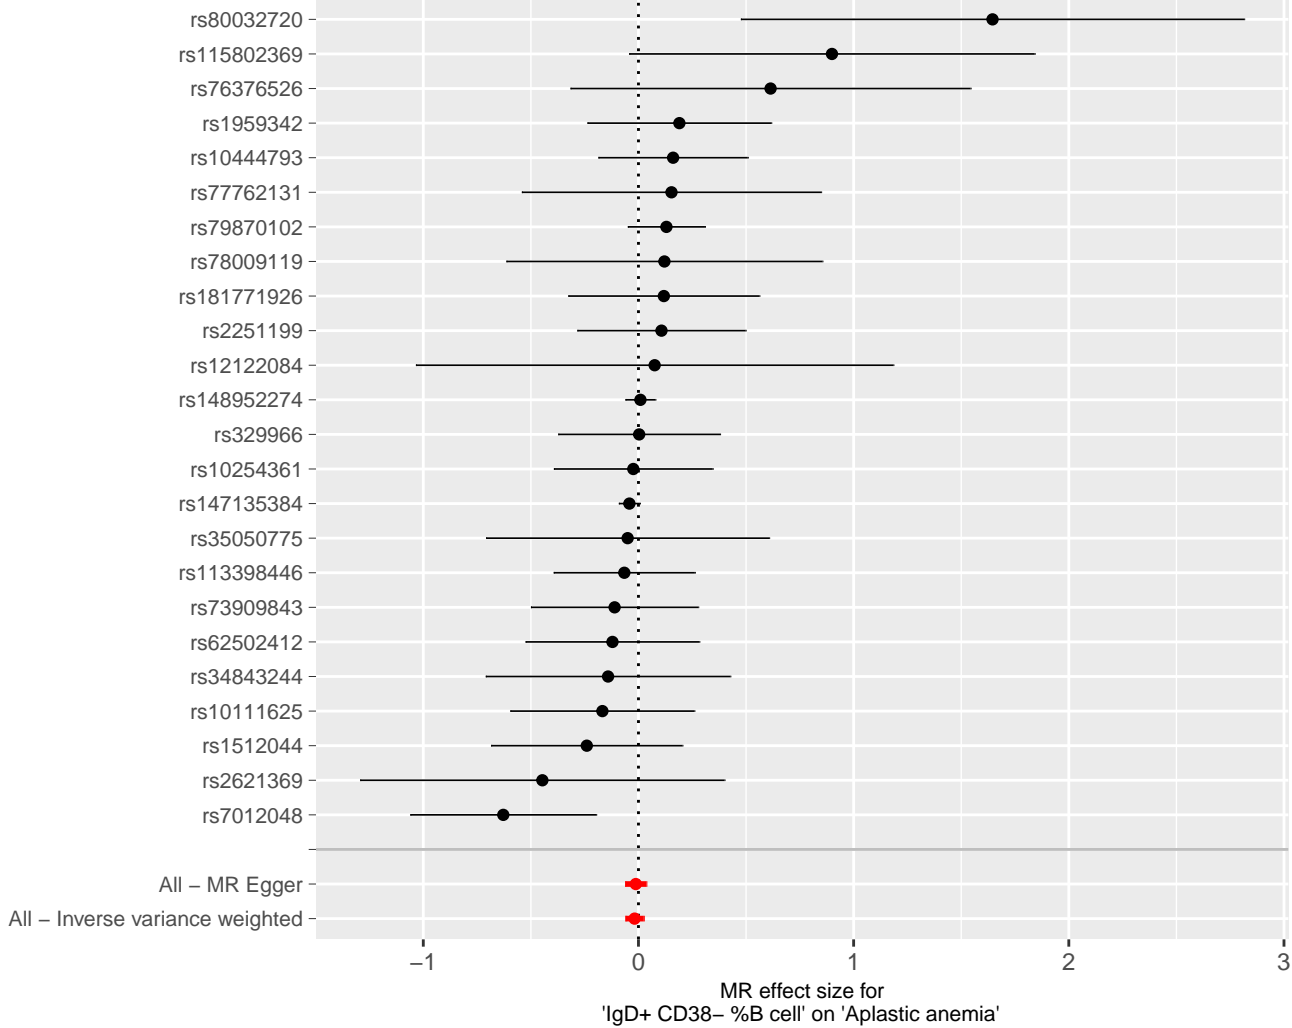

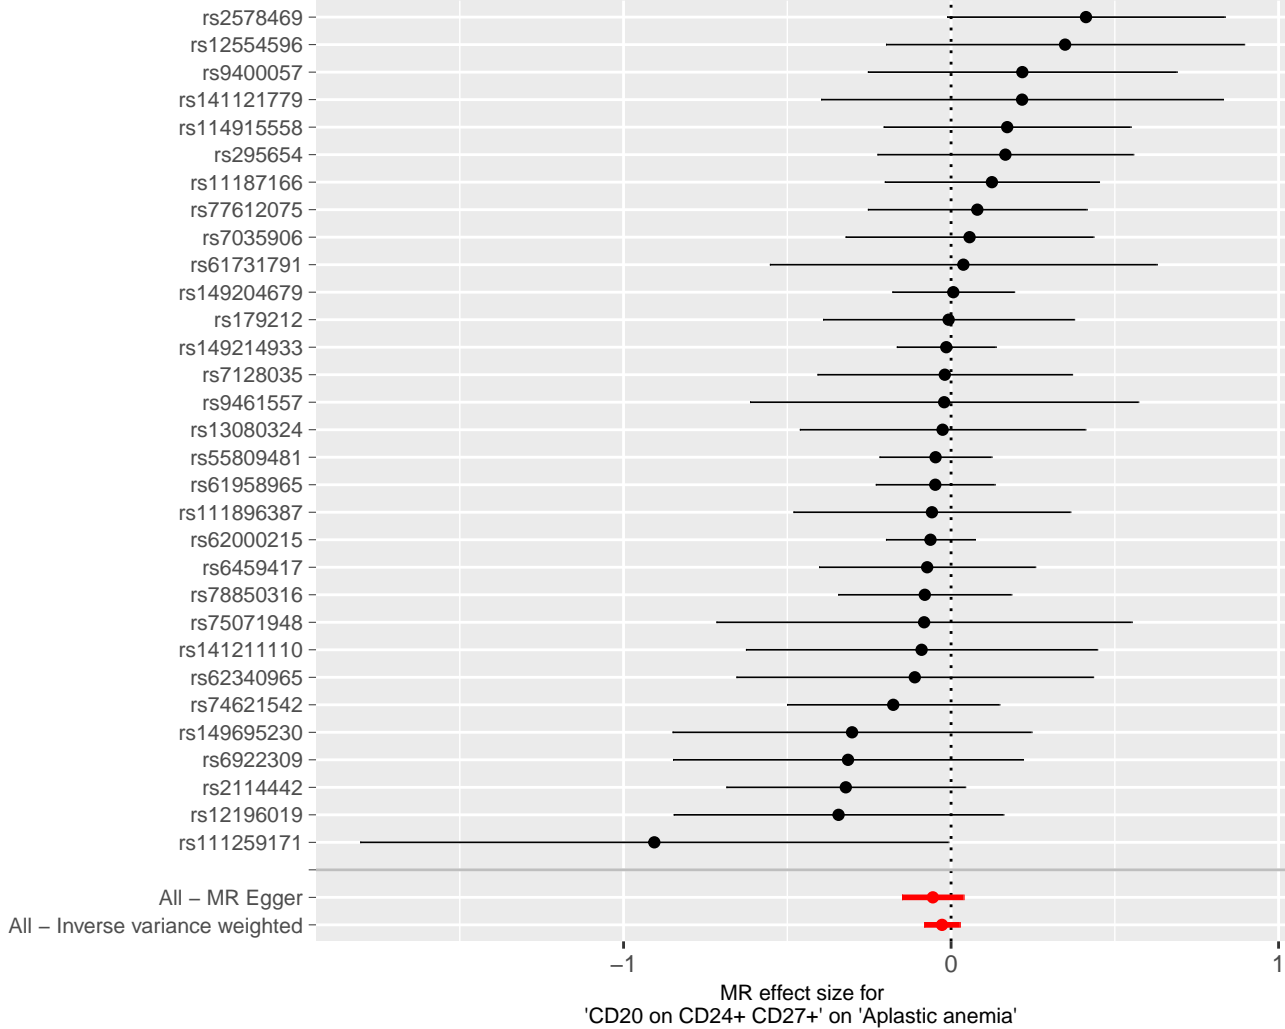

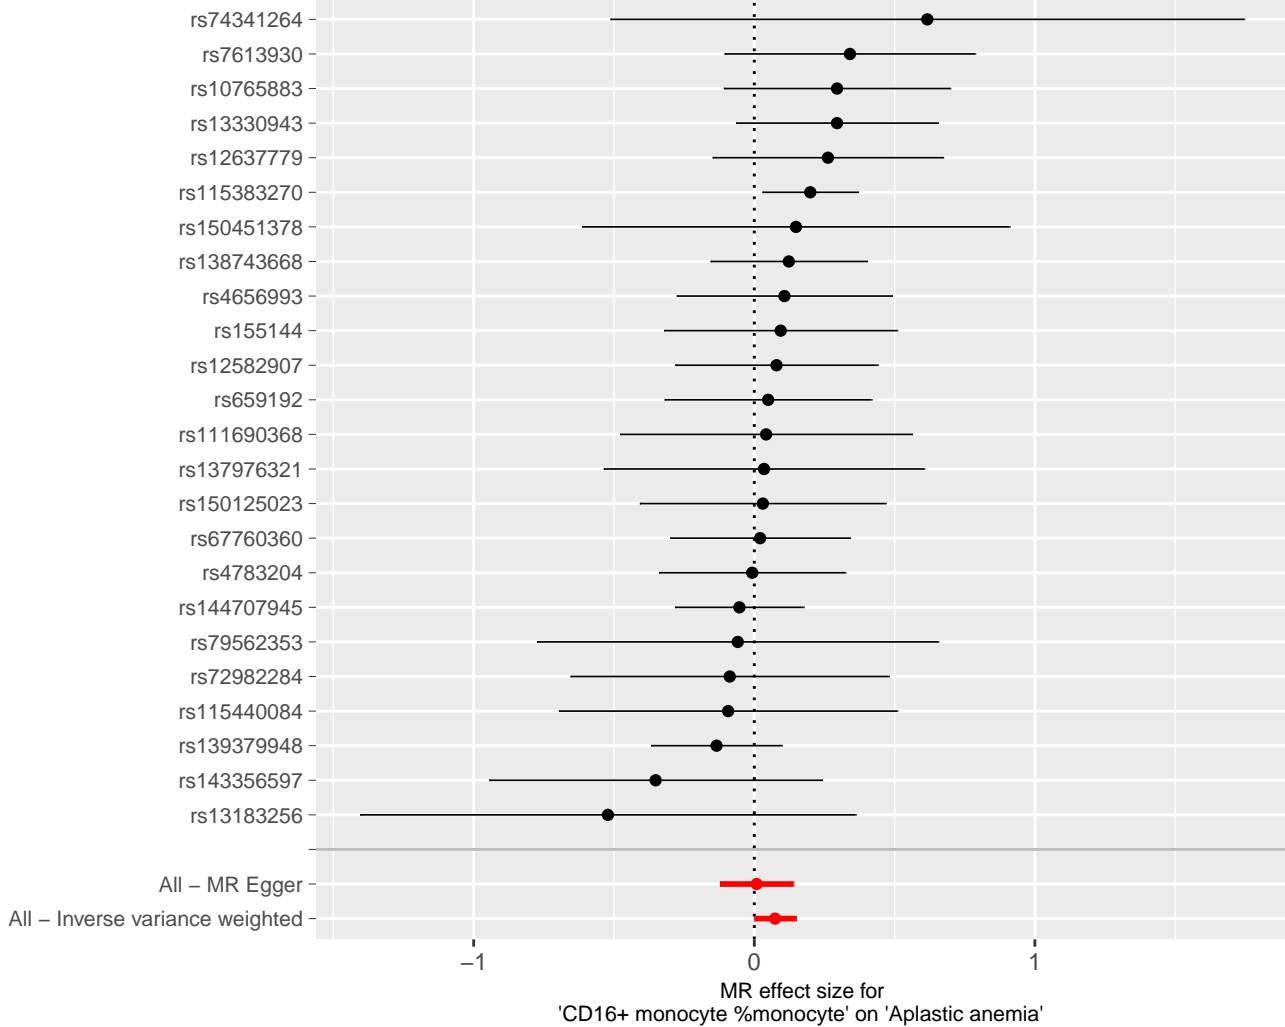

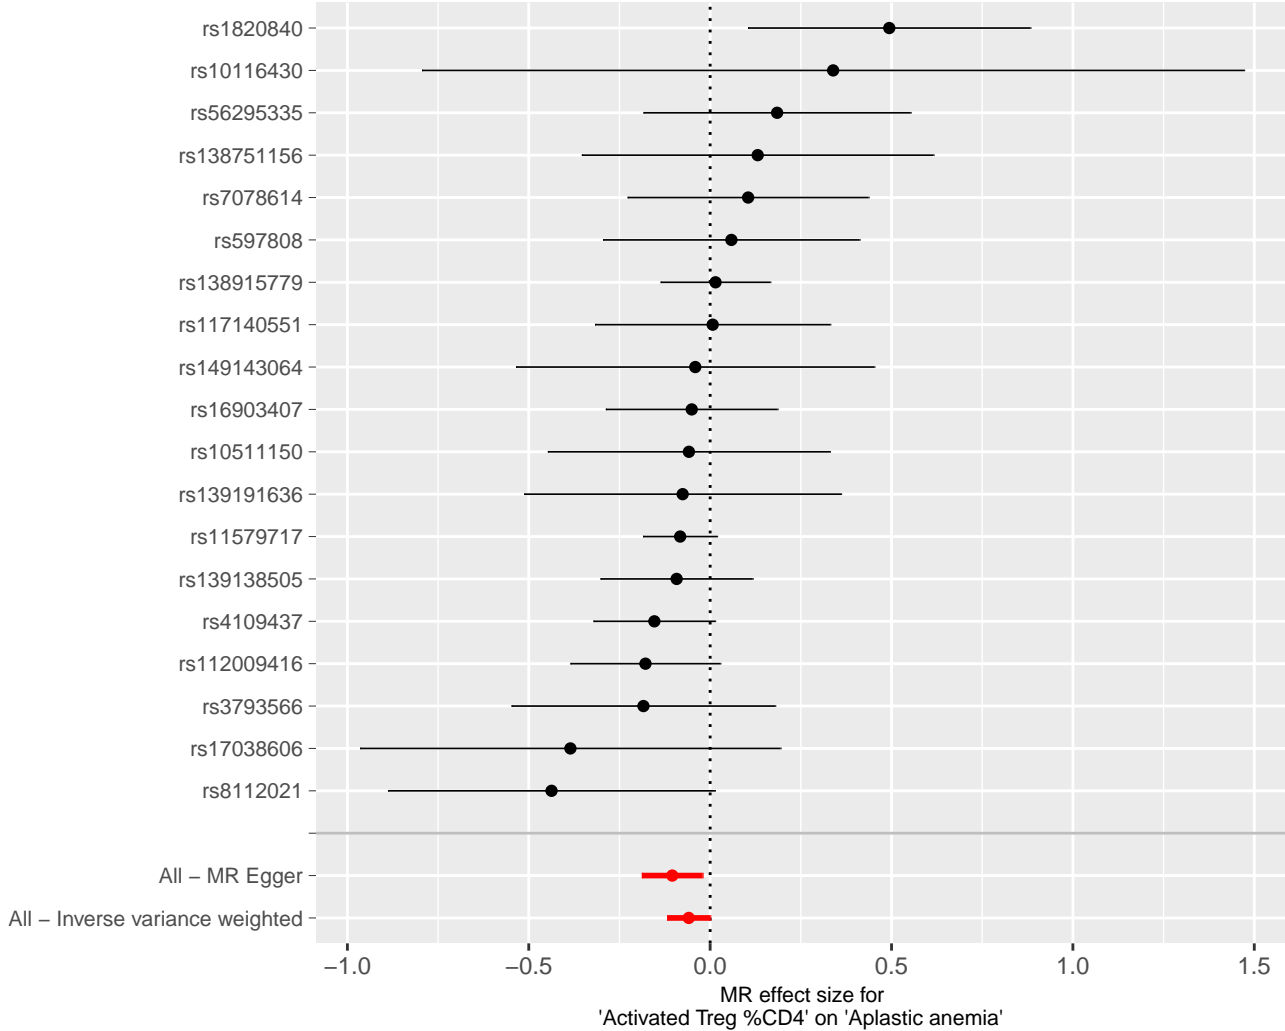

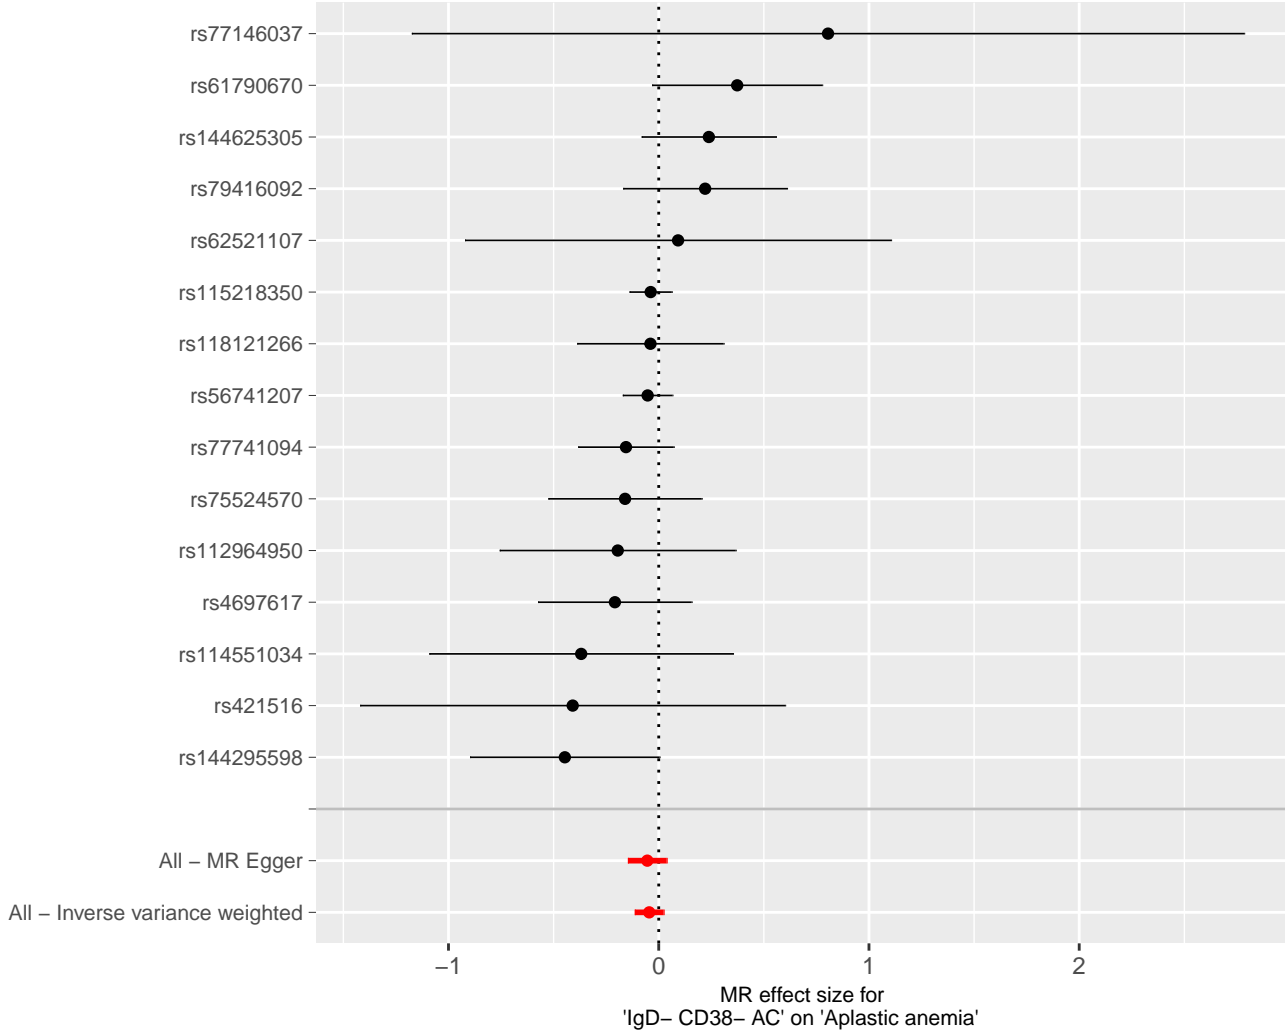

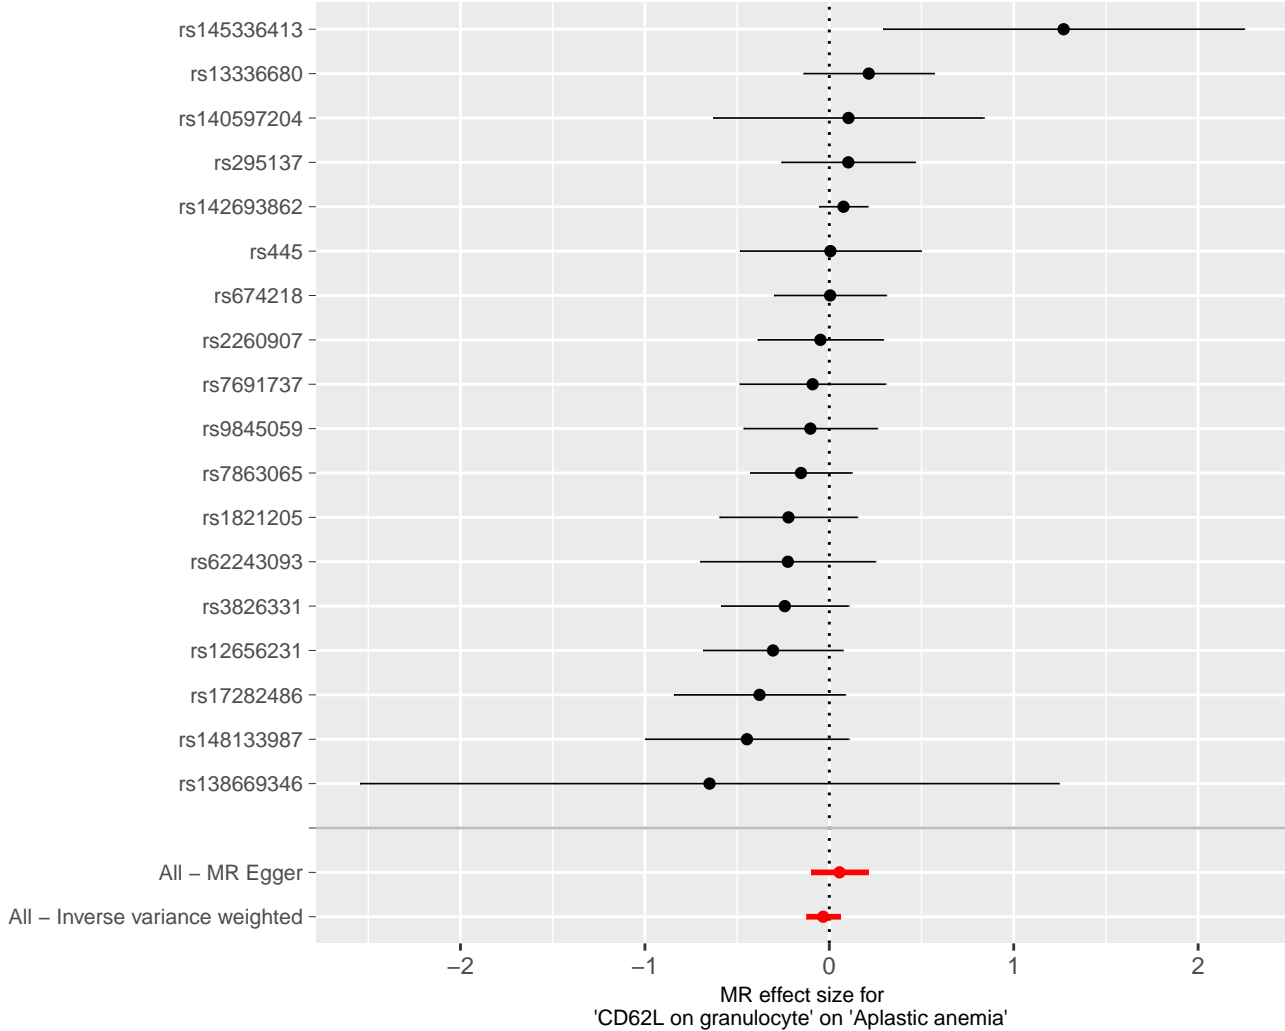

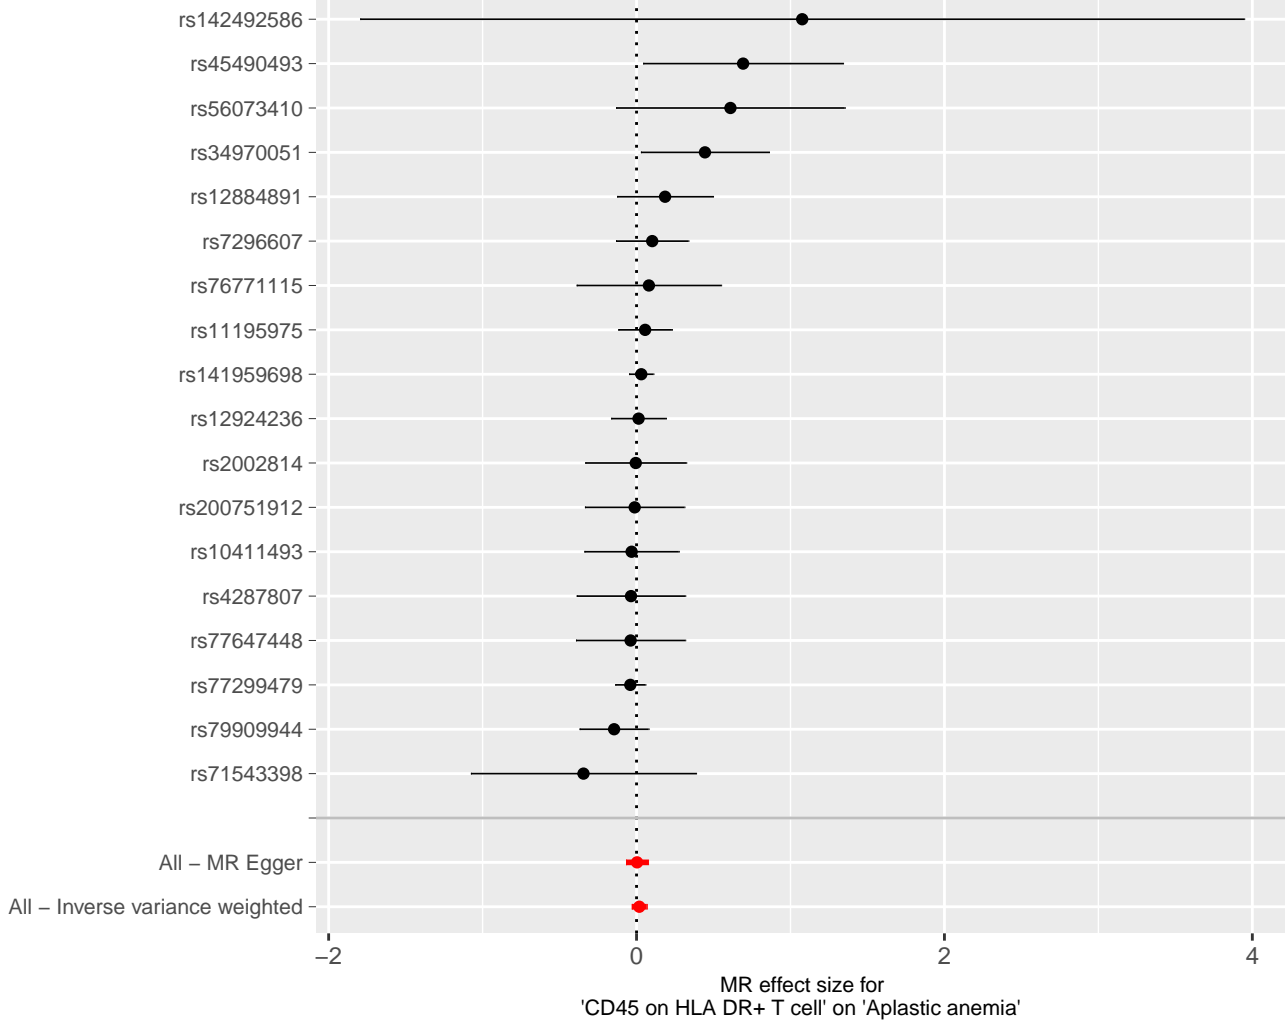



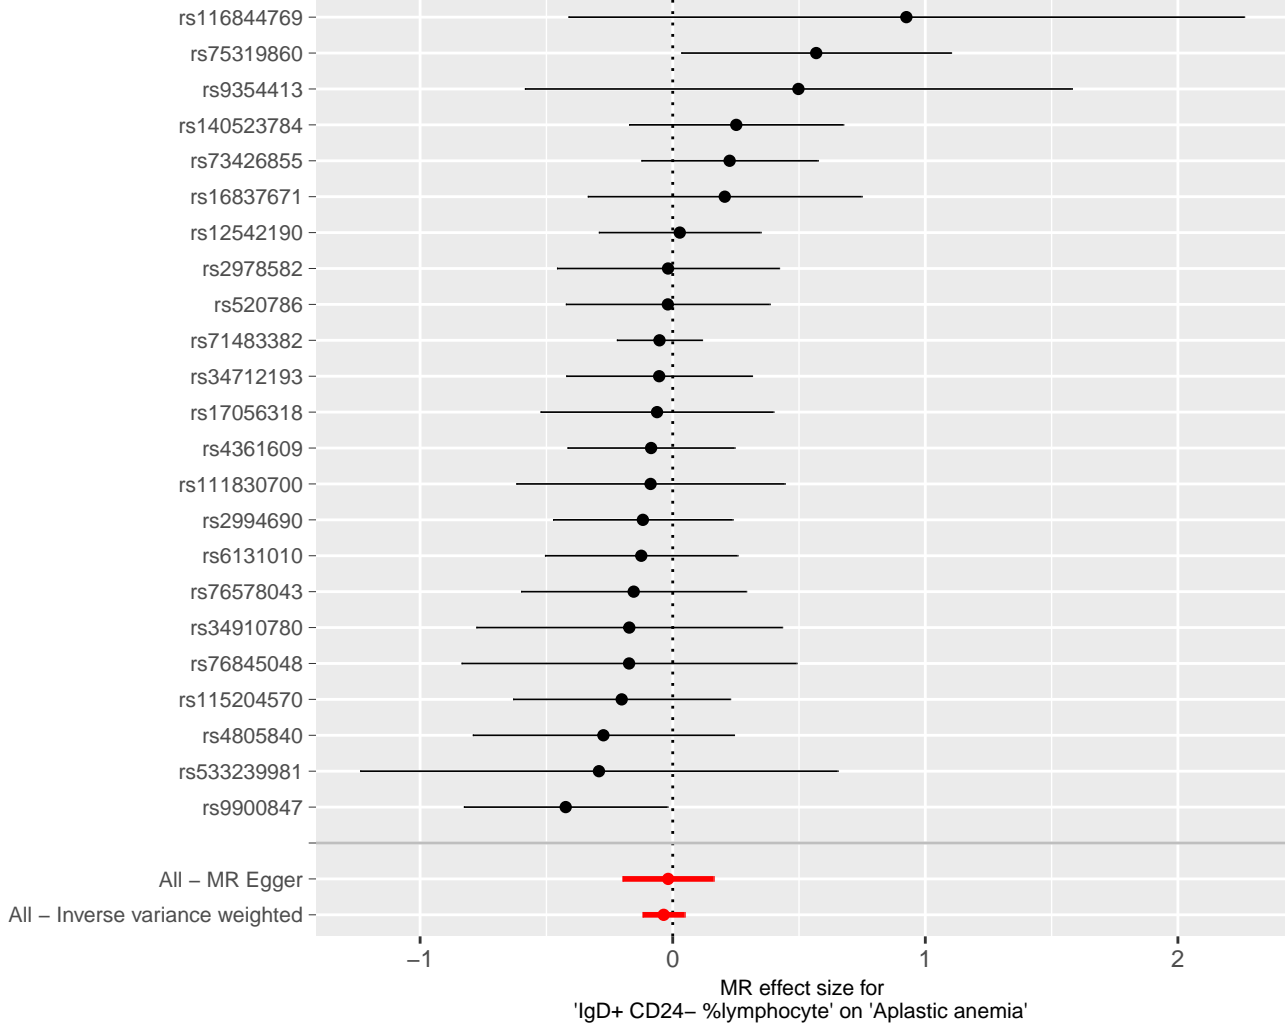

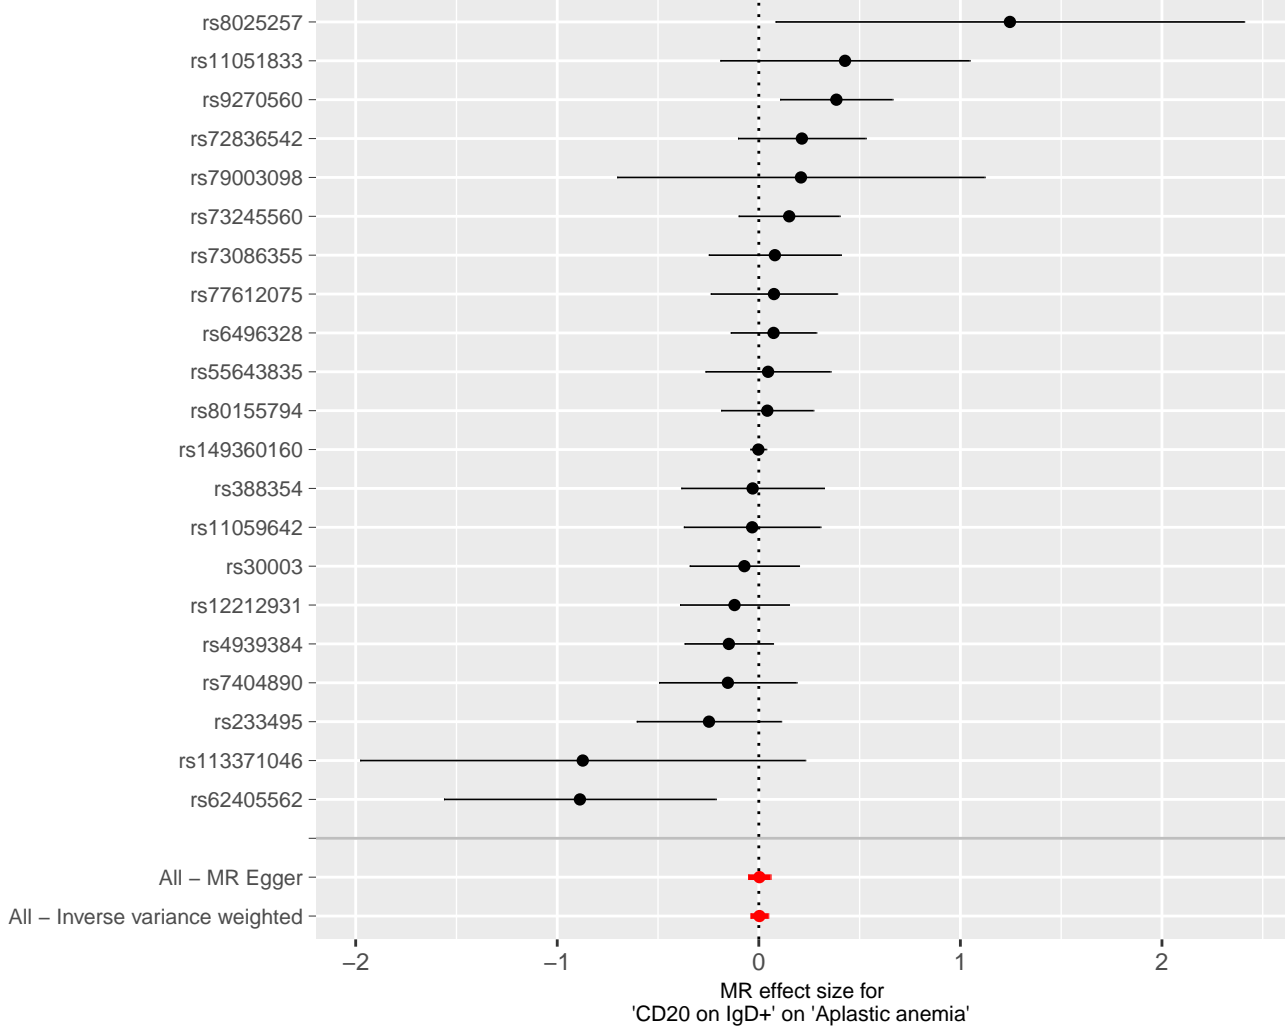

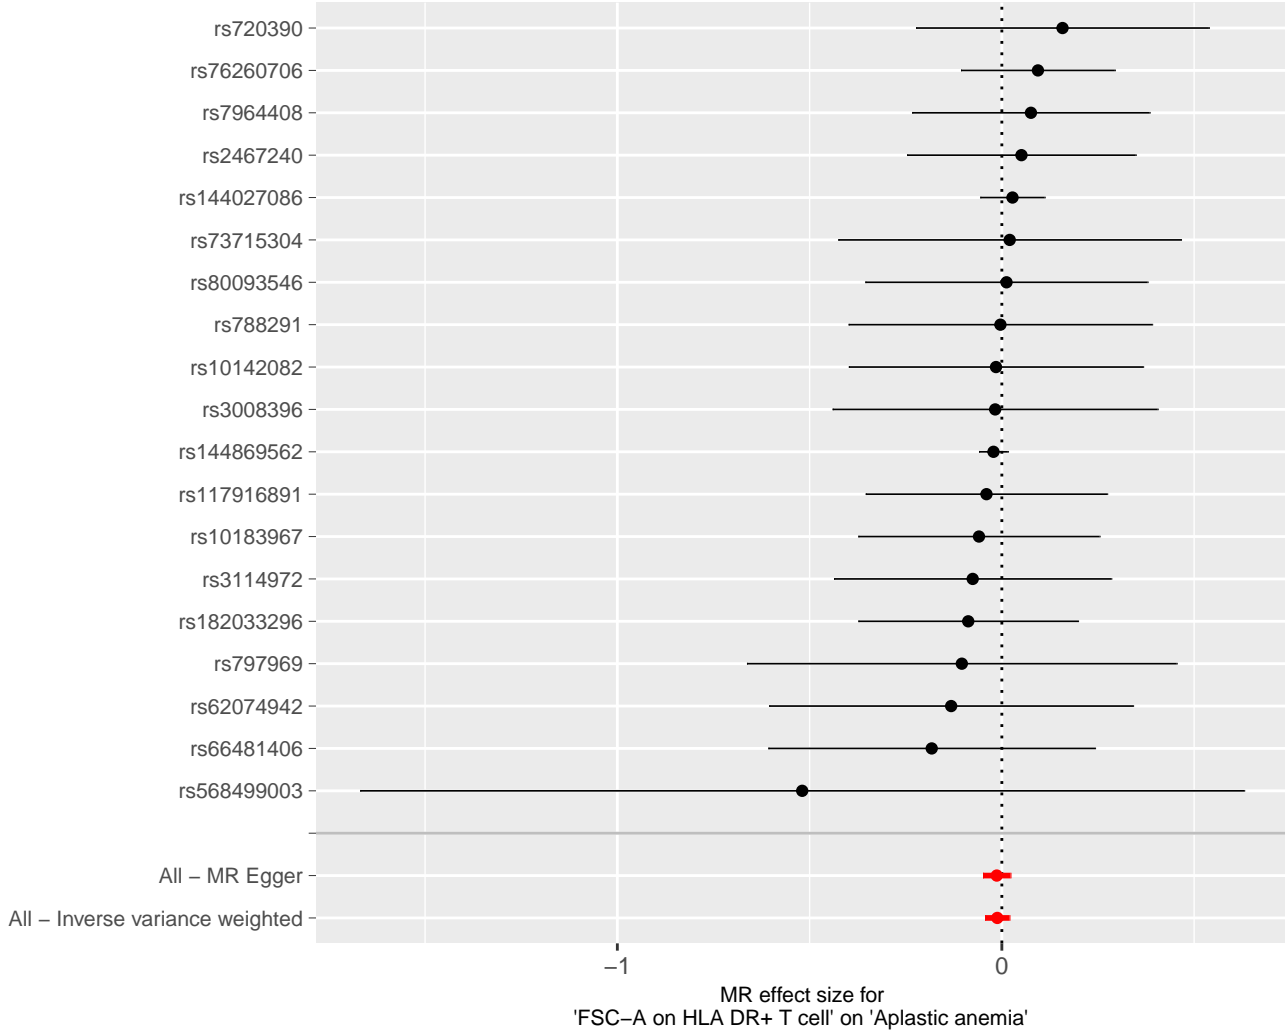

Supplement: 41598_2024_69104_MOESM3_ESM.pdf [file 41598_2024_69104_MOESM3_ESM.pdf]
