# Supplementary material for: Causal role of immune cells in aplastic anemia: Mendelian randomization (MR) study
Source: PubMed Central journal article supplement — Sci Rep. 2024 Aug 3;14:18010. doi: 10.1038/s41598-024-69104-0 (PMC11297992; doi:10.1038/s41598-024-69104-0), 2024-08-03
Supplement: 41598_2024_69104_MOESM4_ESM.pdf [file 41598_2024_69104_MOESM4_ESM.pdf]

Supplementary figure4: Funnel plots of all MR analyses of 731 immunophenotypes on aplastic anemia.

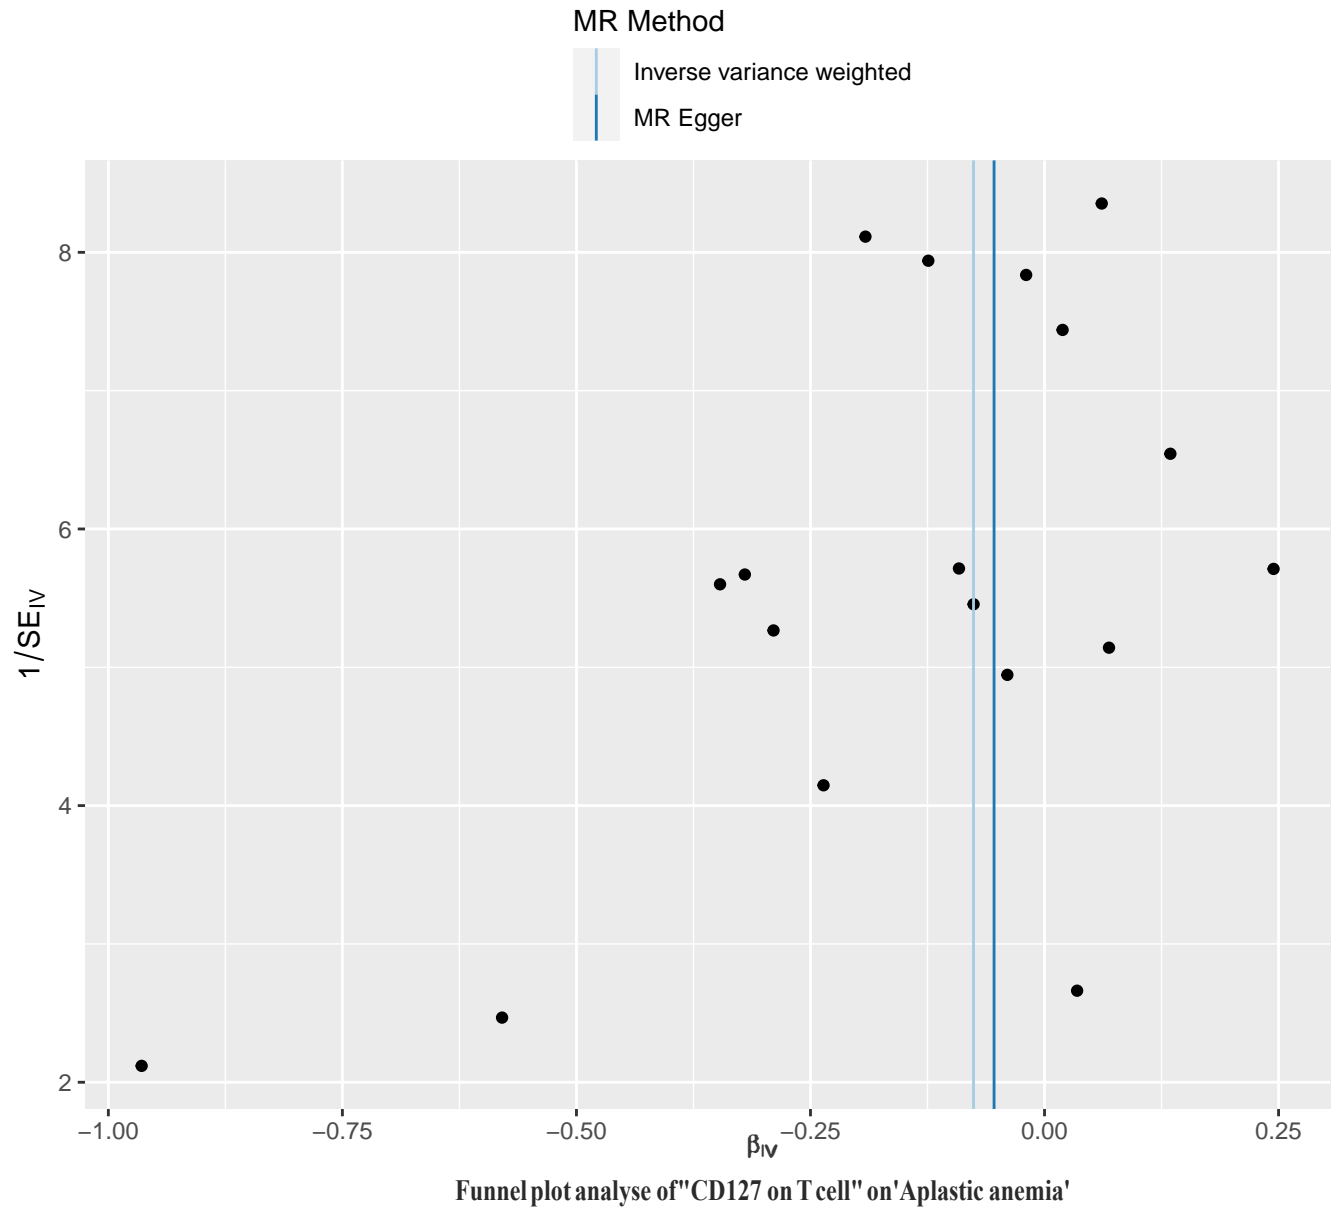

MR Method

- Inverse variance weighted
- MR Egger

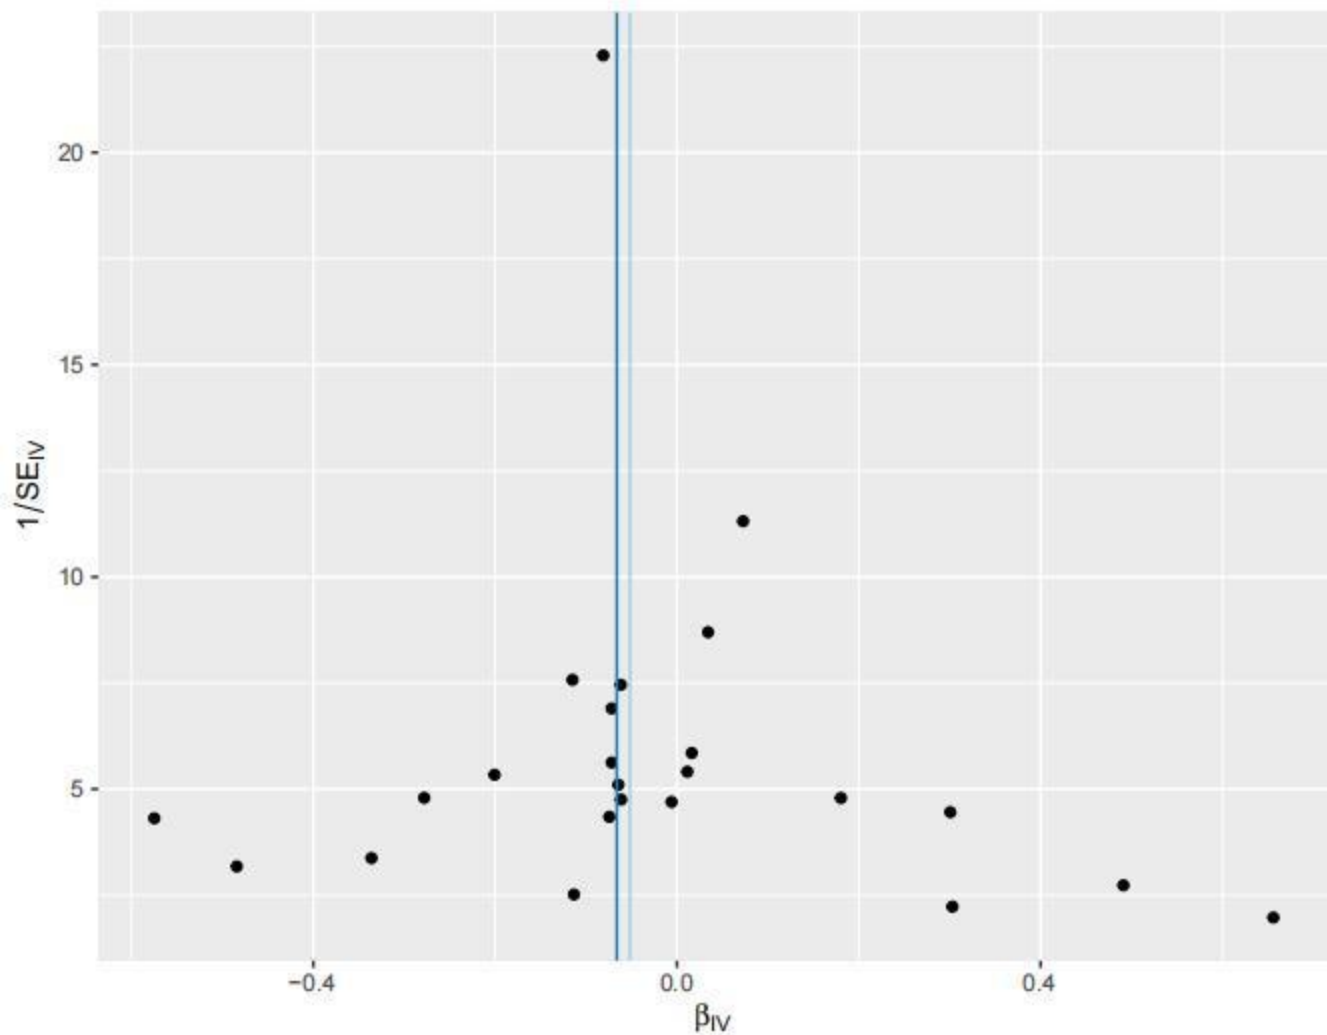

Funnel plot analyse of "CD28- DN (CD4-CD8-) %T cell" on 'Aplastic anemia'

### MR Method

- Inverse variance weighted
- MR Egger

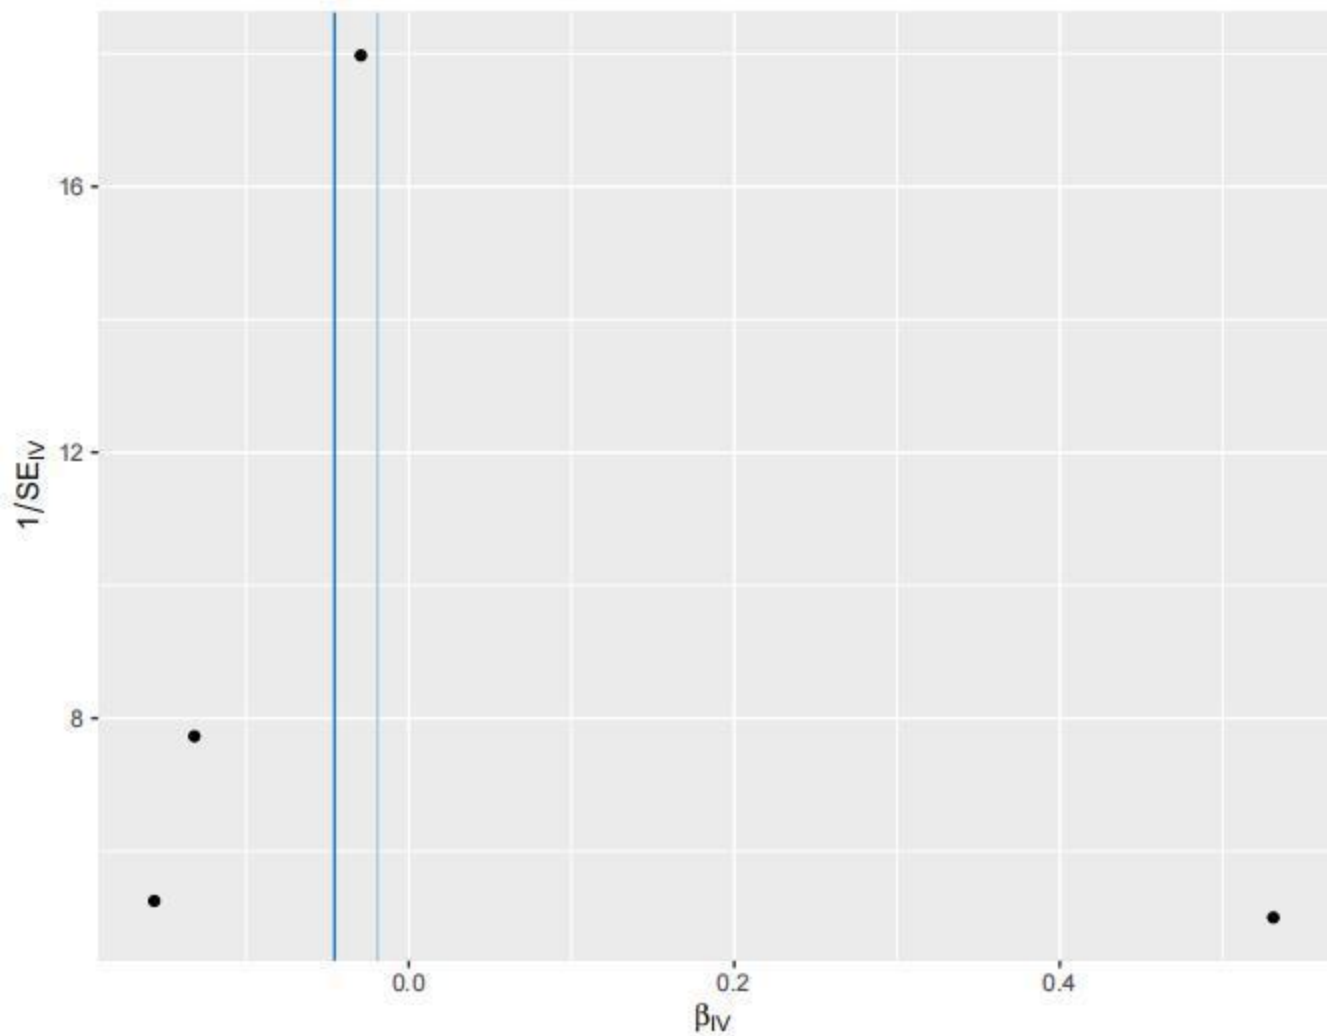

Funnel plot analyse of "BAFF-R on IgD- CD38dim" on 'Aplastic anemia'

MR Method

- Inverse variance weighted
- MR Egger

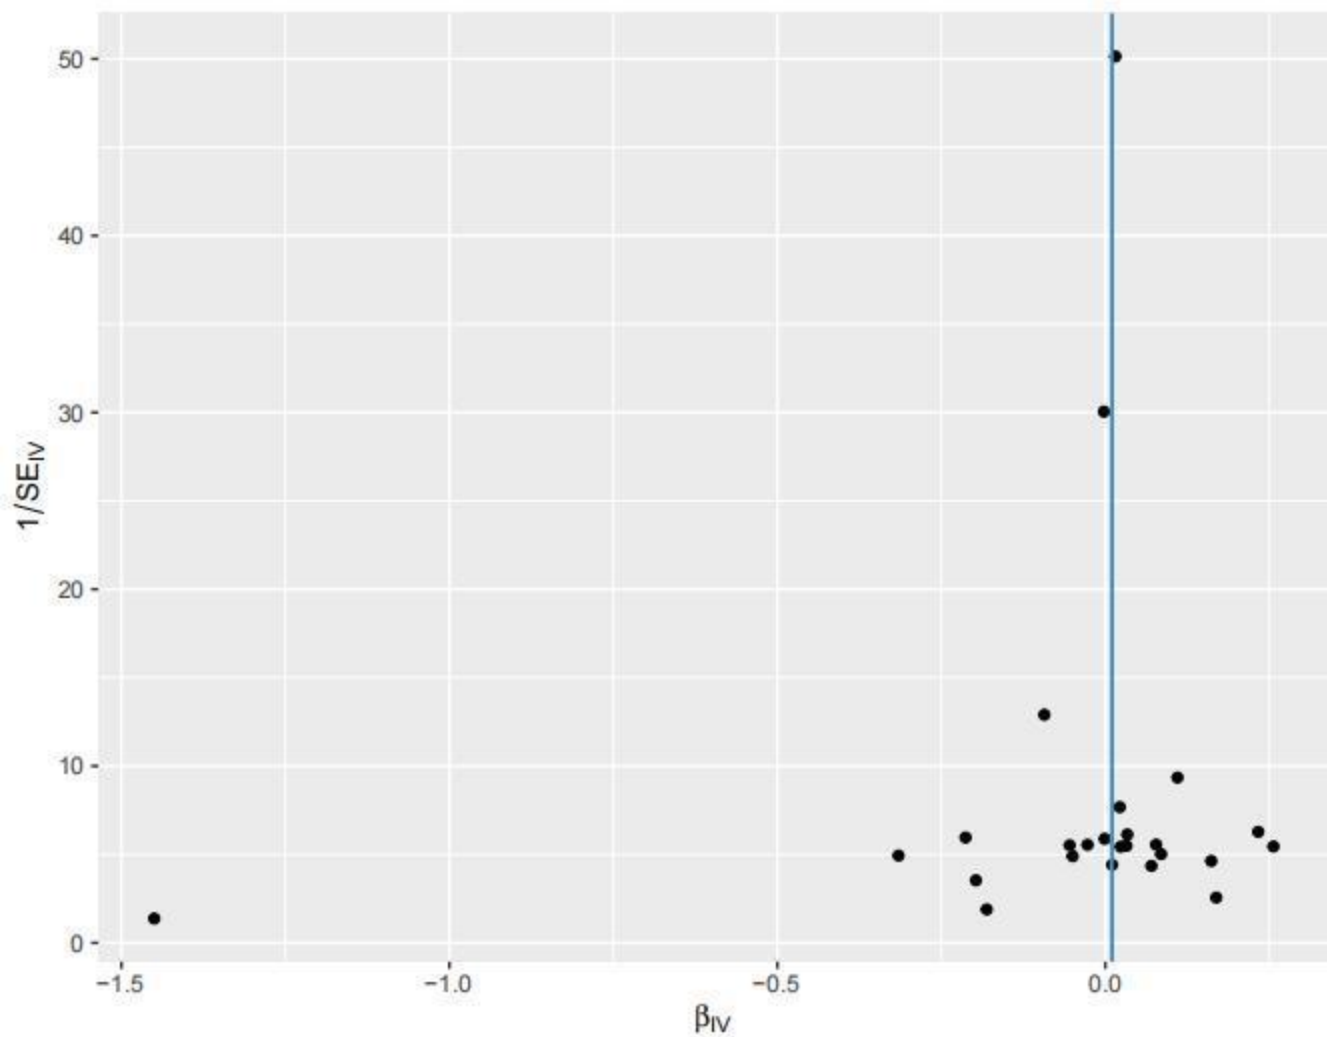

Funnel plot analyse of "CD24+ CD27+ %lymphocyte" on 'Aplastic anemia'



### MR Method

- Inverse variance weighted
- MR Egger

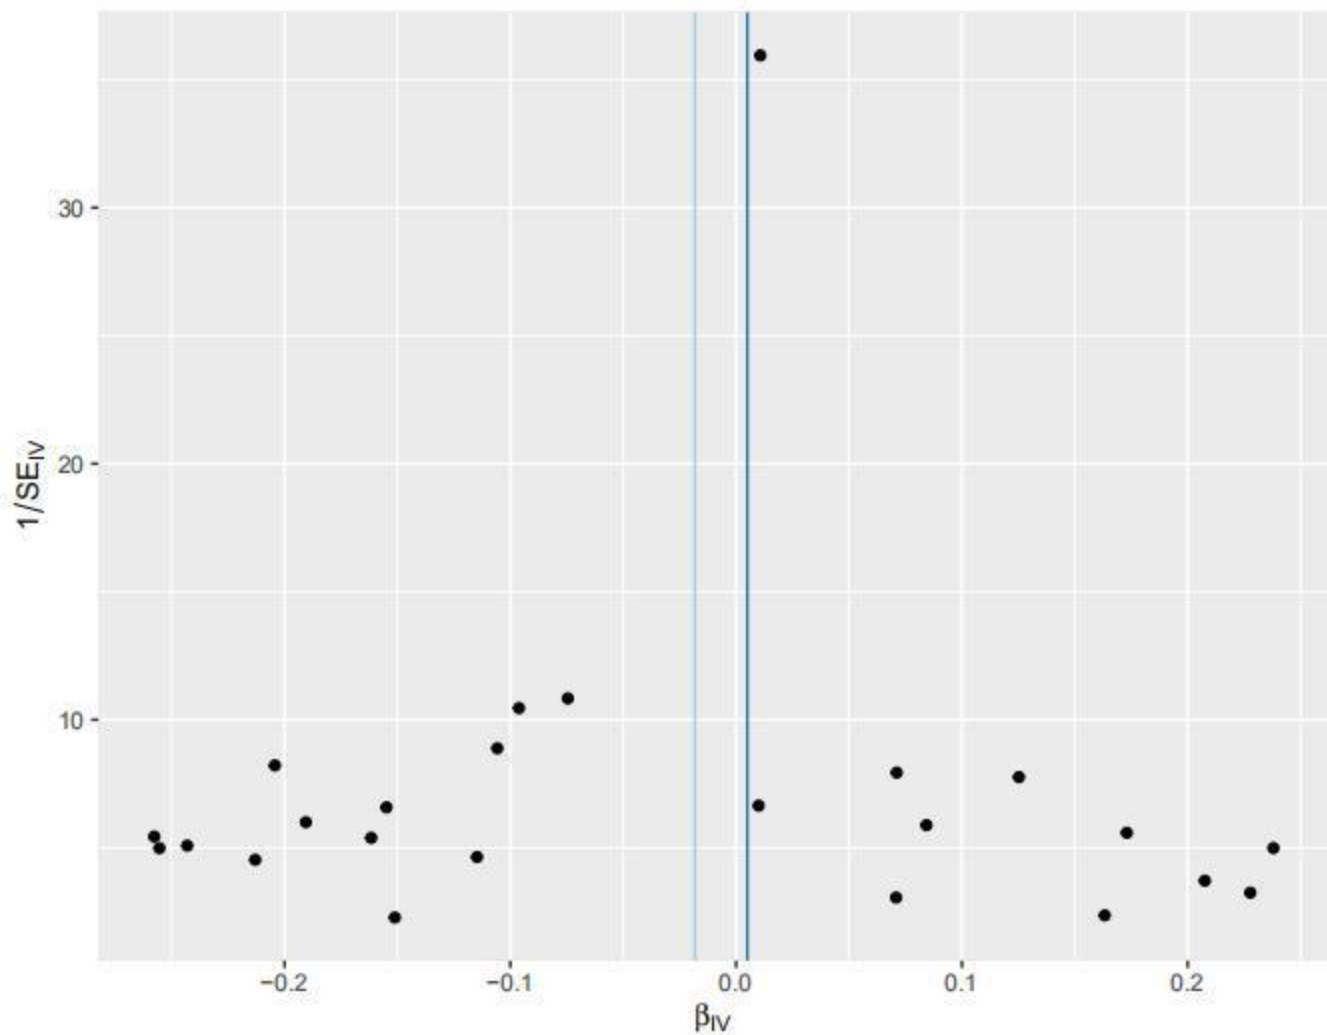

Funnel plot analysis of "BAFF-R on IgD- CD24-" on 'Aplastic anemia'

MR Method

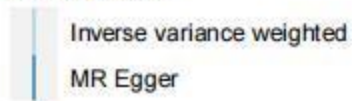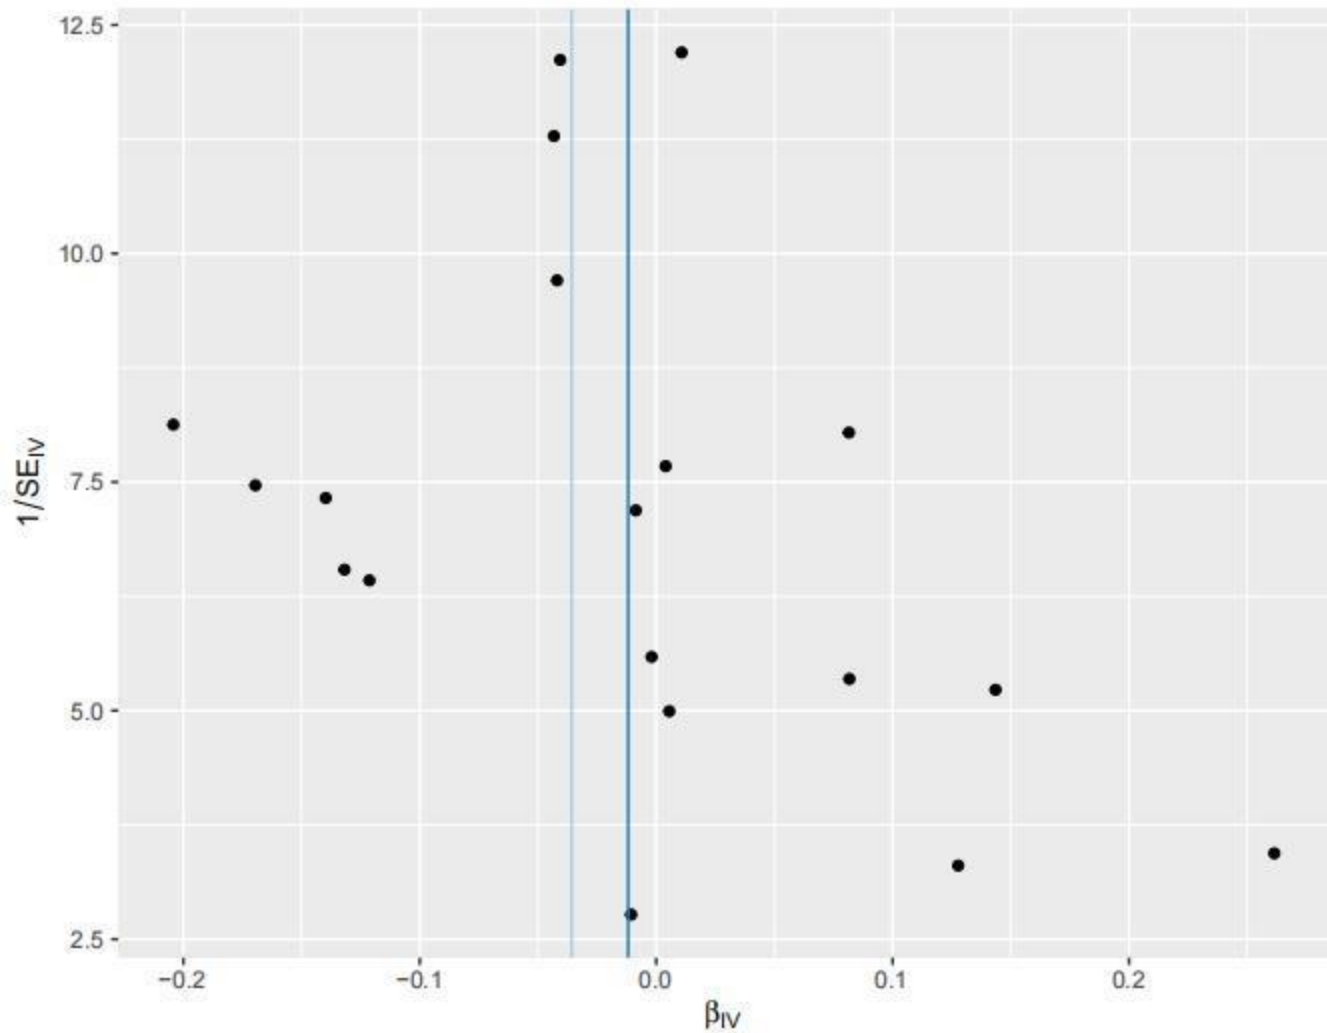

Funnel plot analysis of "CD14 on CD33br HLA DR+ CD14dim " on 'Aplastic anemia'

### MR Method

- Inverse variance weighted
- MR Egger

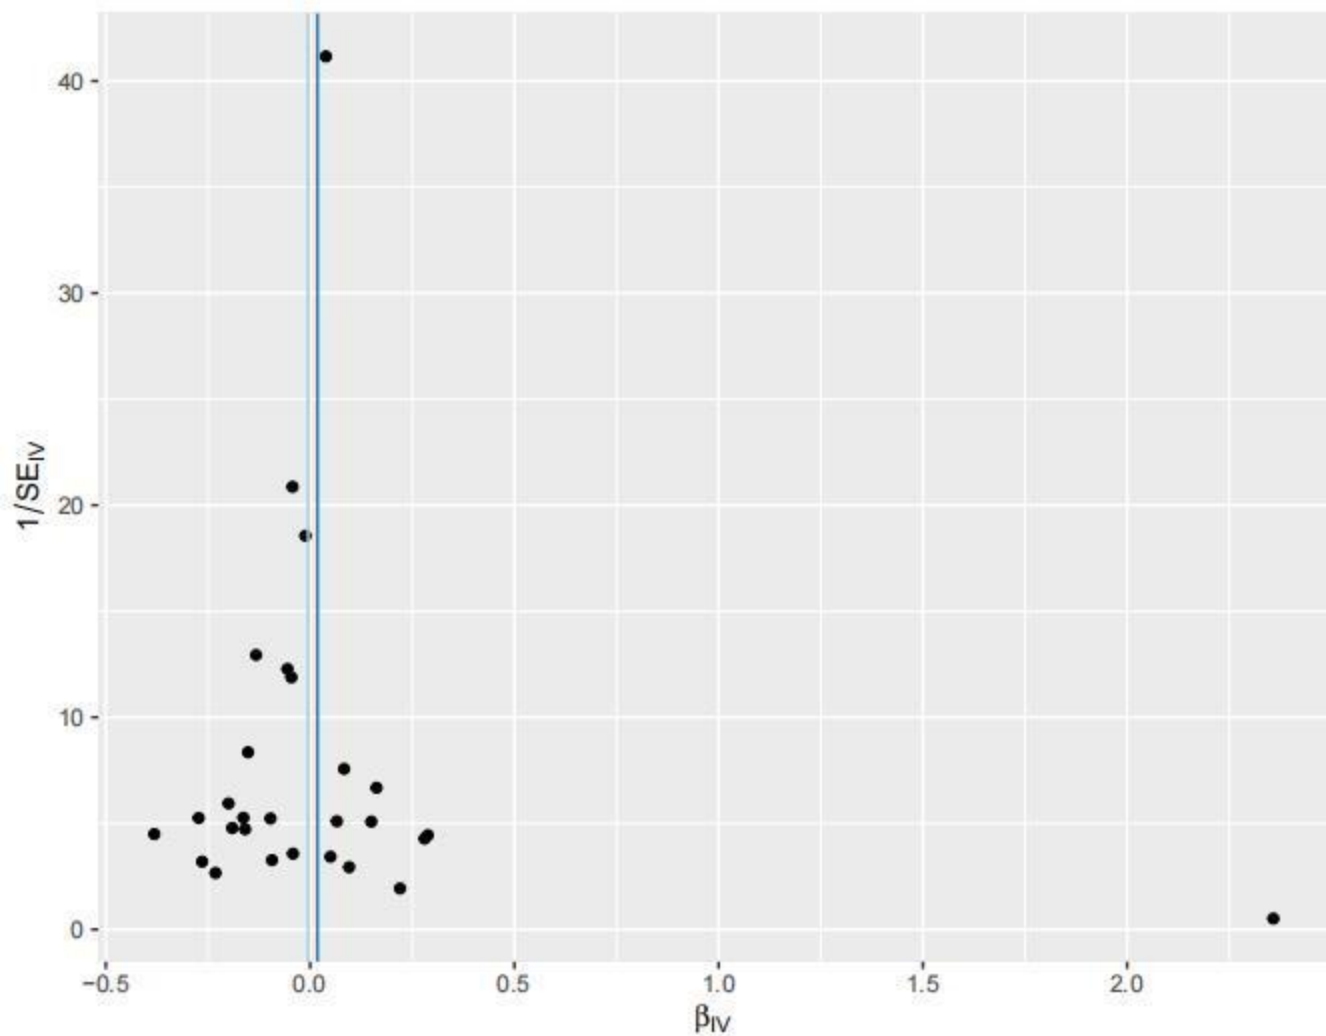

Funnel plot analyse of "Activated & resting Treg % CD4 Treg" on 'Aplastic anemia'

MR Method

- Inverse variance weighted
- MR Egger

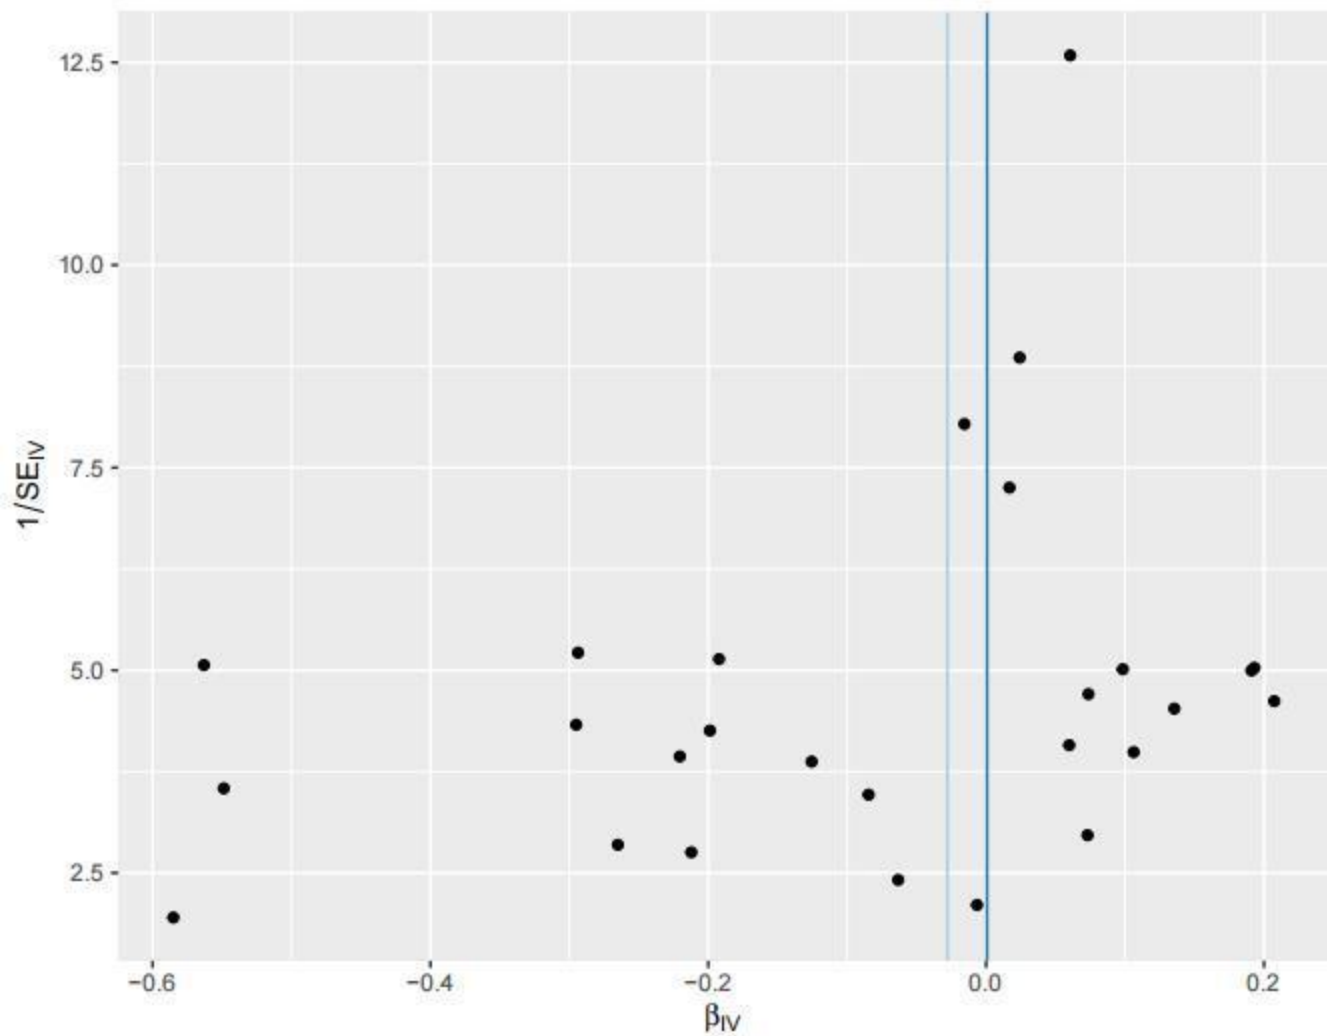

Funnel plot analyse of "CM CD8br AC" on 'Aplastic anemia'

### MR Method

Inverse variance weighted

MR Egger

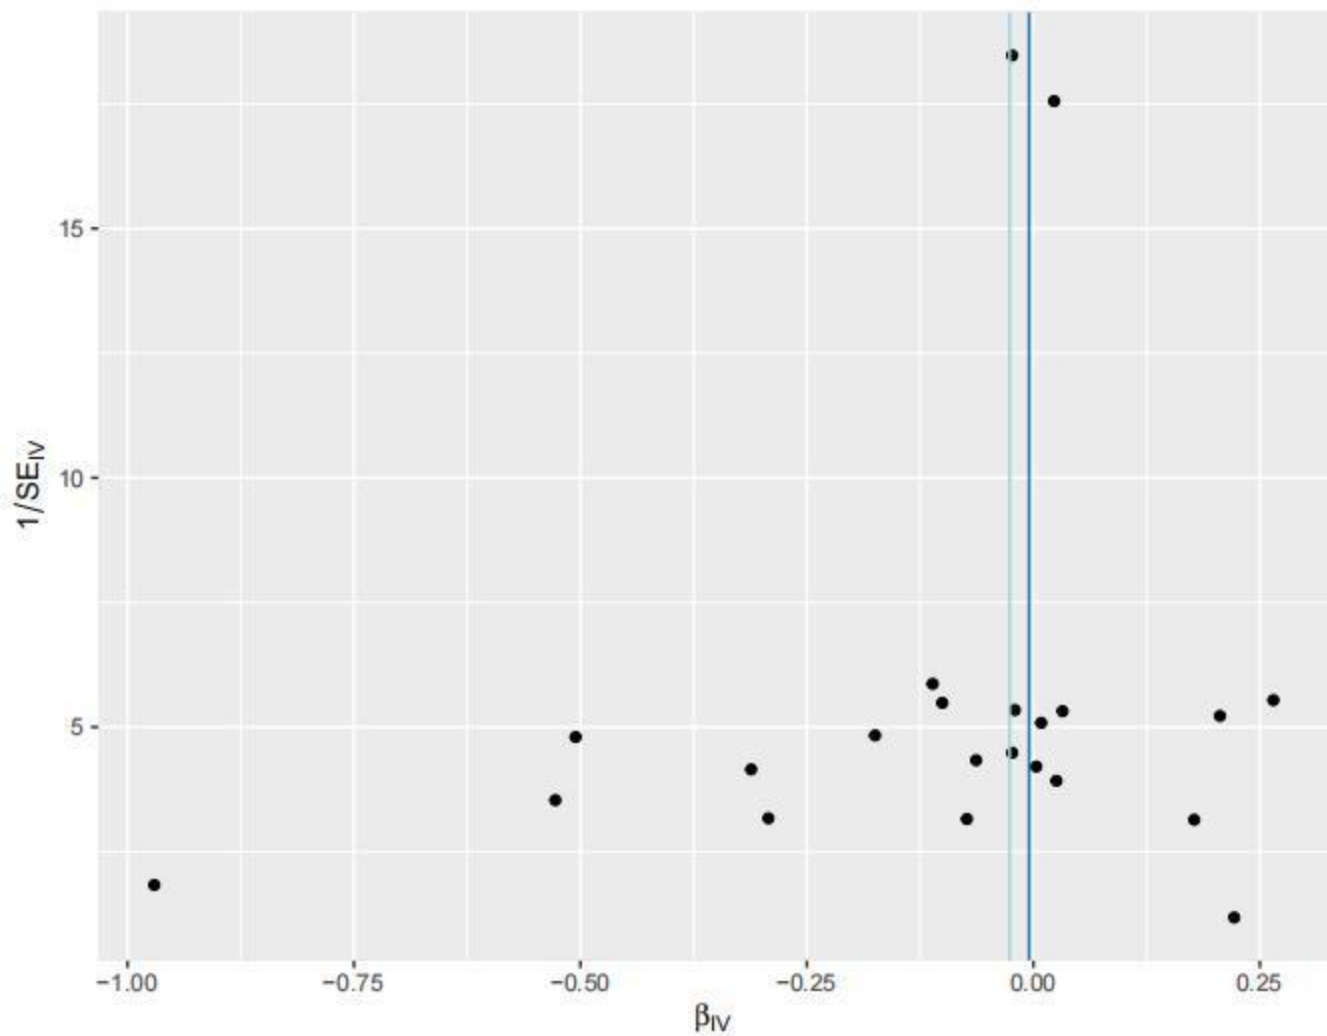

Funnel plot analyse of "SSC-A on T cell" on 'Aplastic anemia'

MR Method

Inverse variance weighted

MR Egger

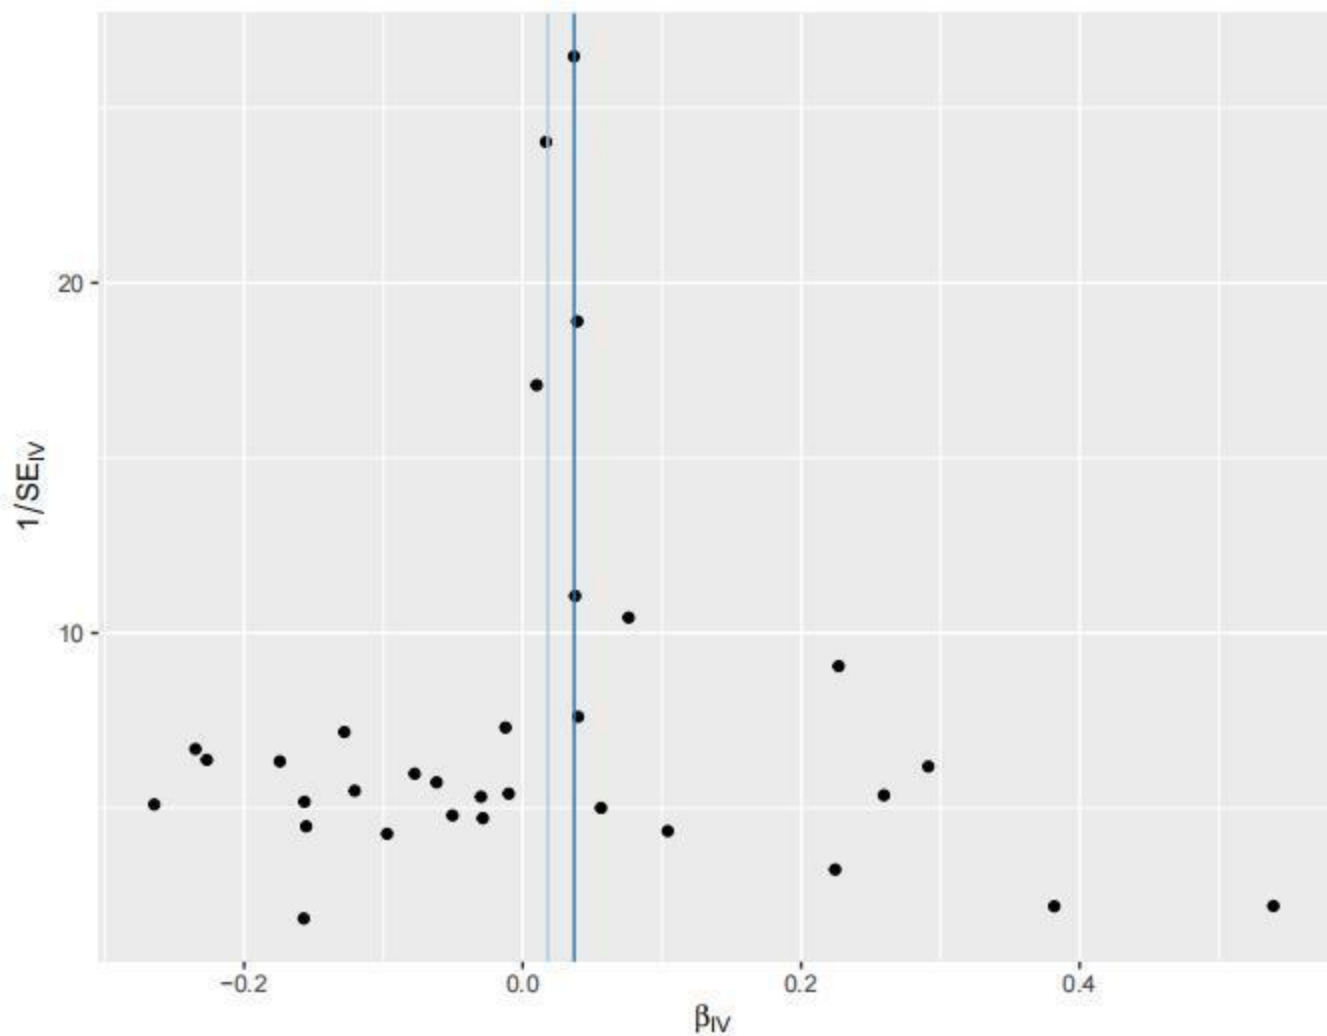

Funnel plot analyse of "HLA DR+ T cell AC" on 'Aplastic anemia'

MR Method

- Inverse variance weighted
- MR Egger

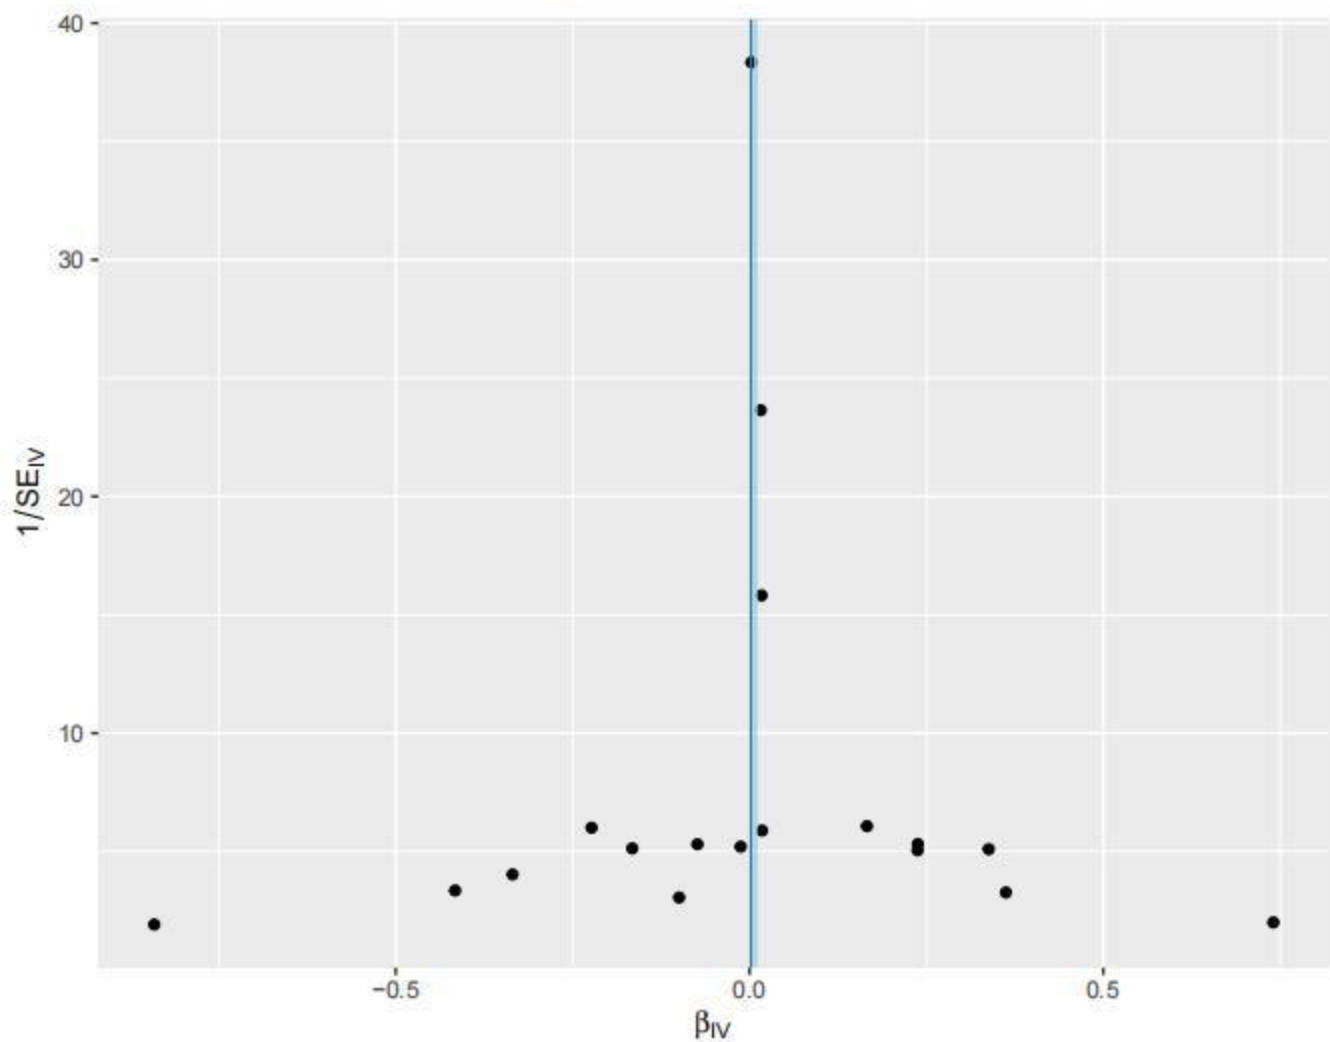

Funnel plot analyse of "CD45 on B cell" on 'Aplastic anemia'

### MR Method

- Inverse variance weighted
- MR Egger

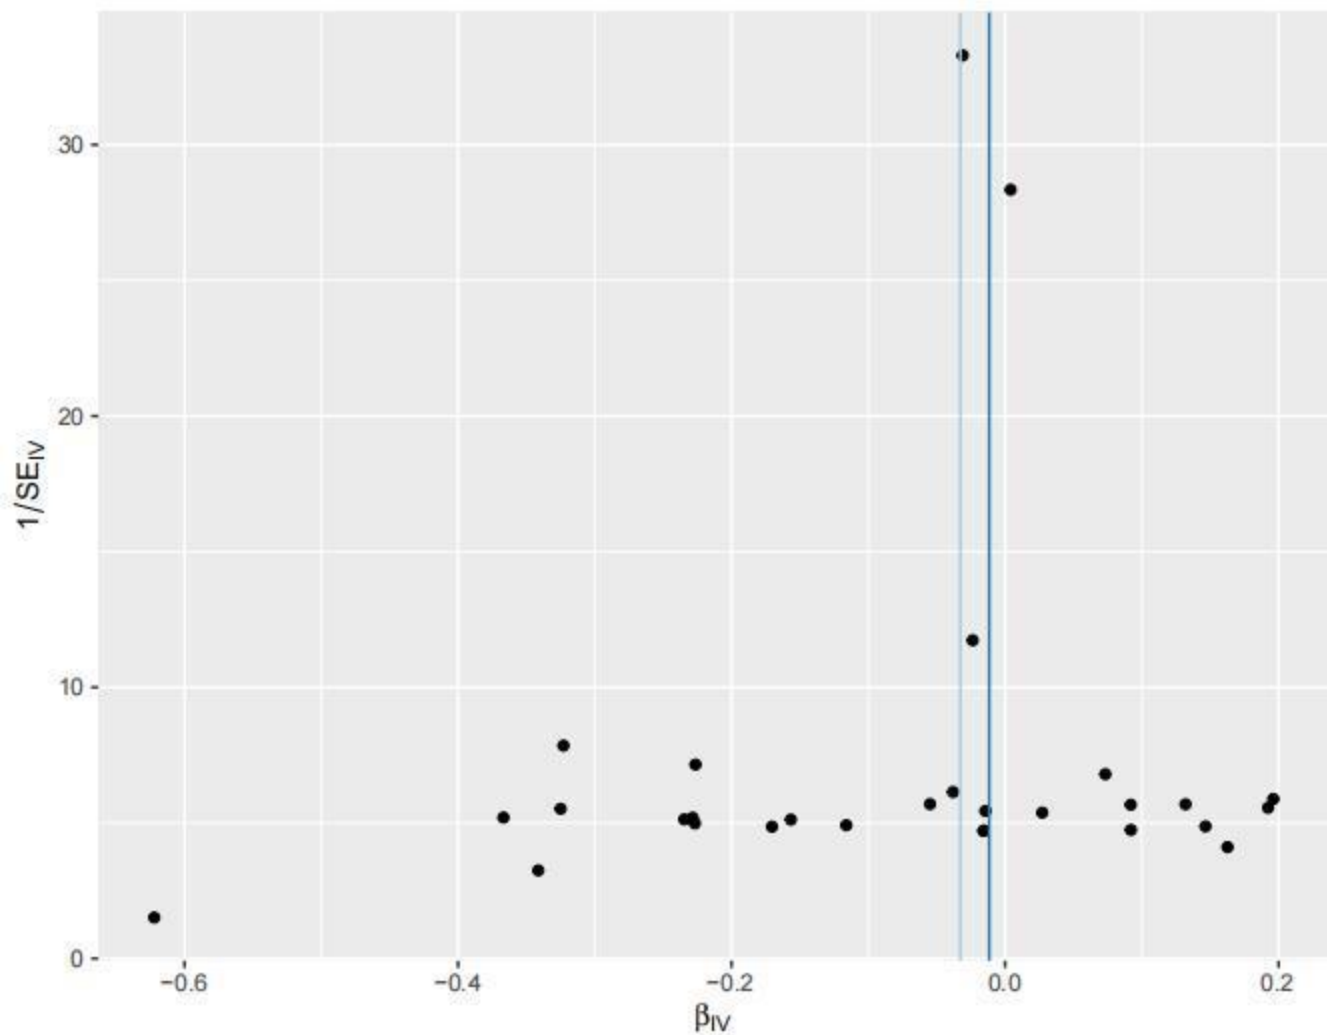

Funnel plot analyse of "CD28- CD127- CD25++ CD8br AC" on 'Aplastic anemia'



MR Method

- Inverse variance weighted
- MR Egger

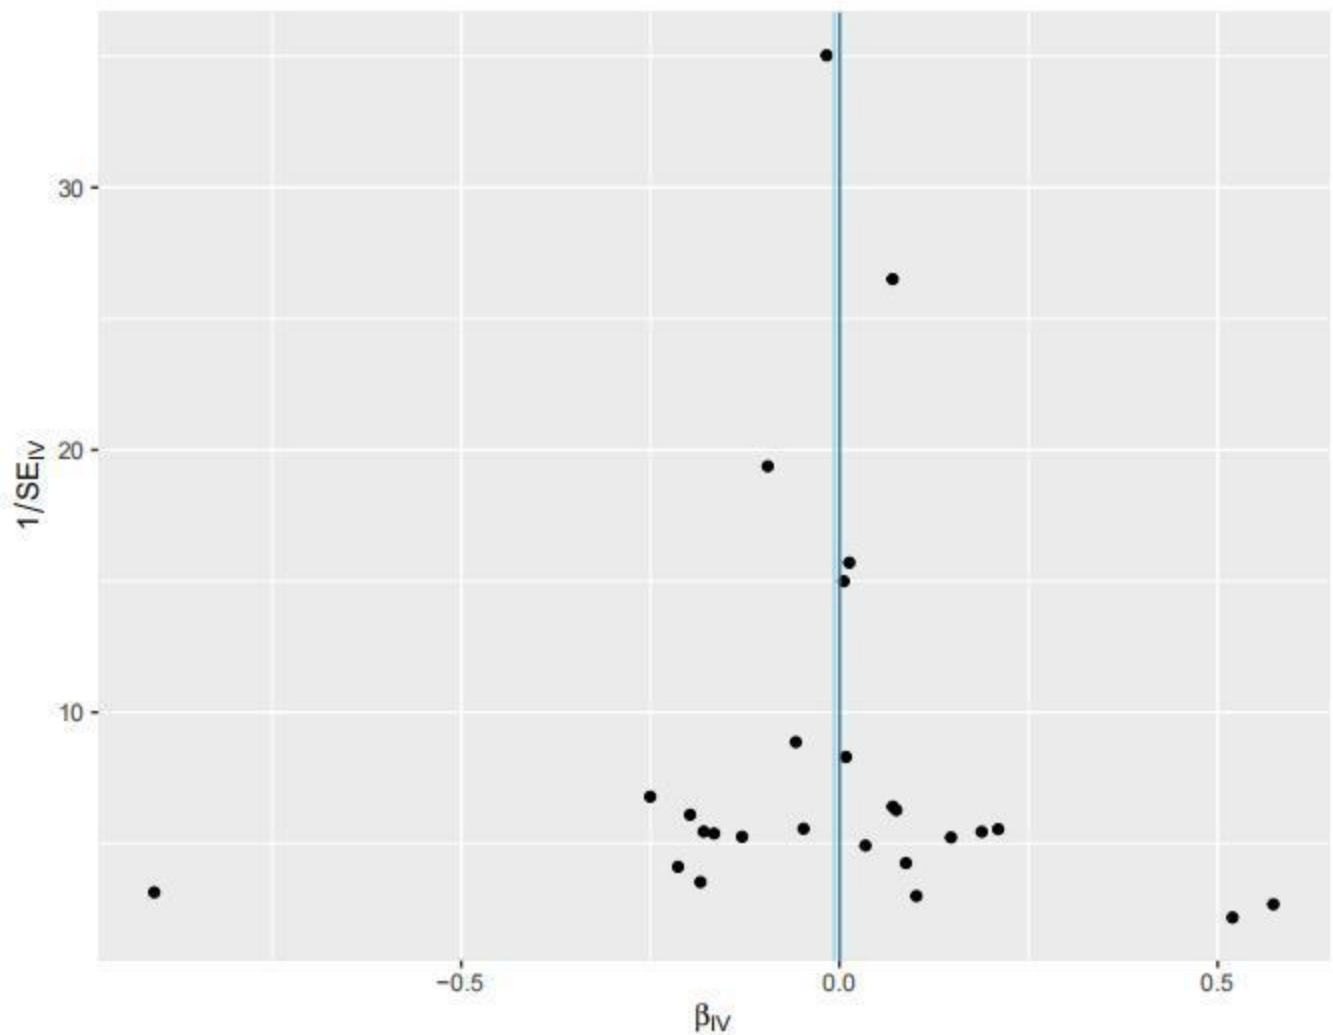

Funnel plot analyse of "CD16-CD56 on HLA DR+ NK" on 'Aplastic anemia'

### MR Method

Inverse variance weighted

MR Egger

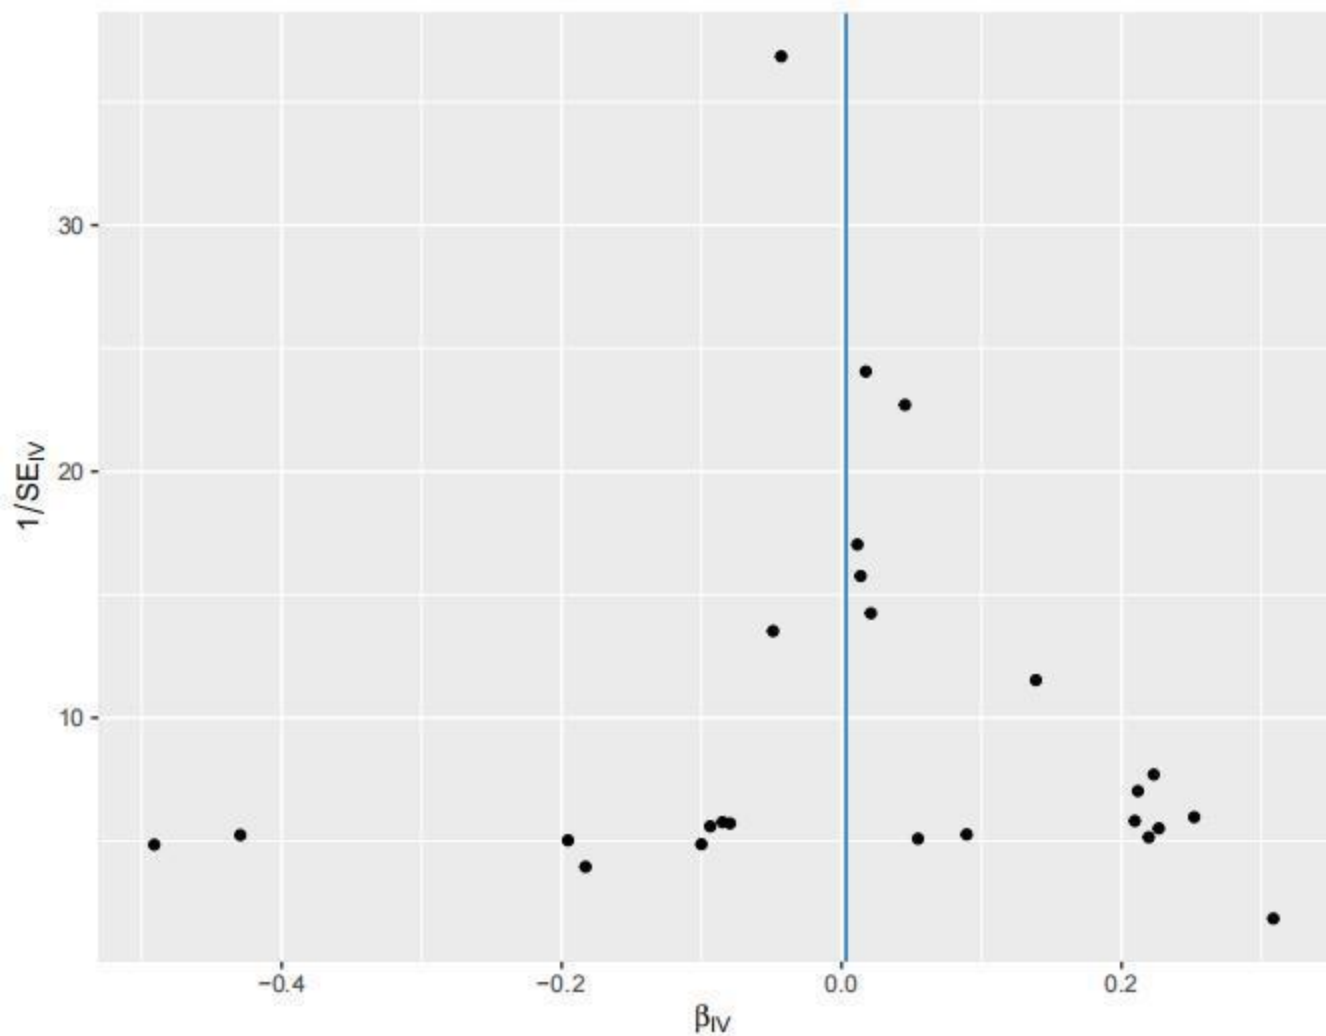

Funnel plot analyse of "Secreting Treg %CD4" on 'Aplastic anemia'

### MR Method

- Inverse variance weighted
- MR Egger

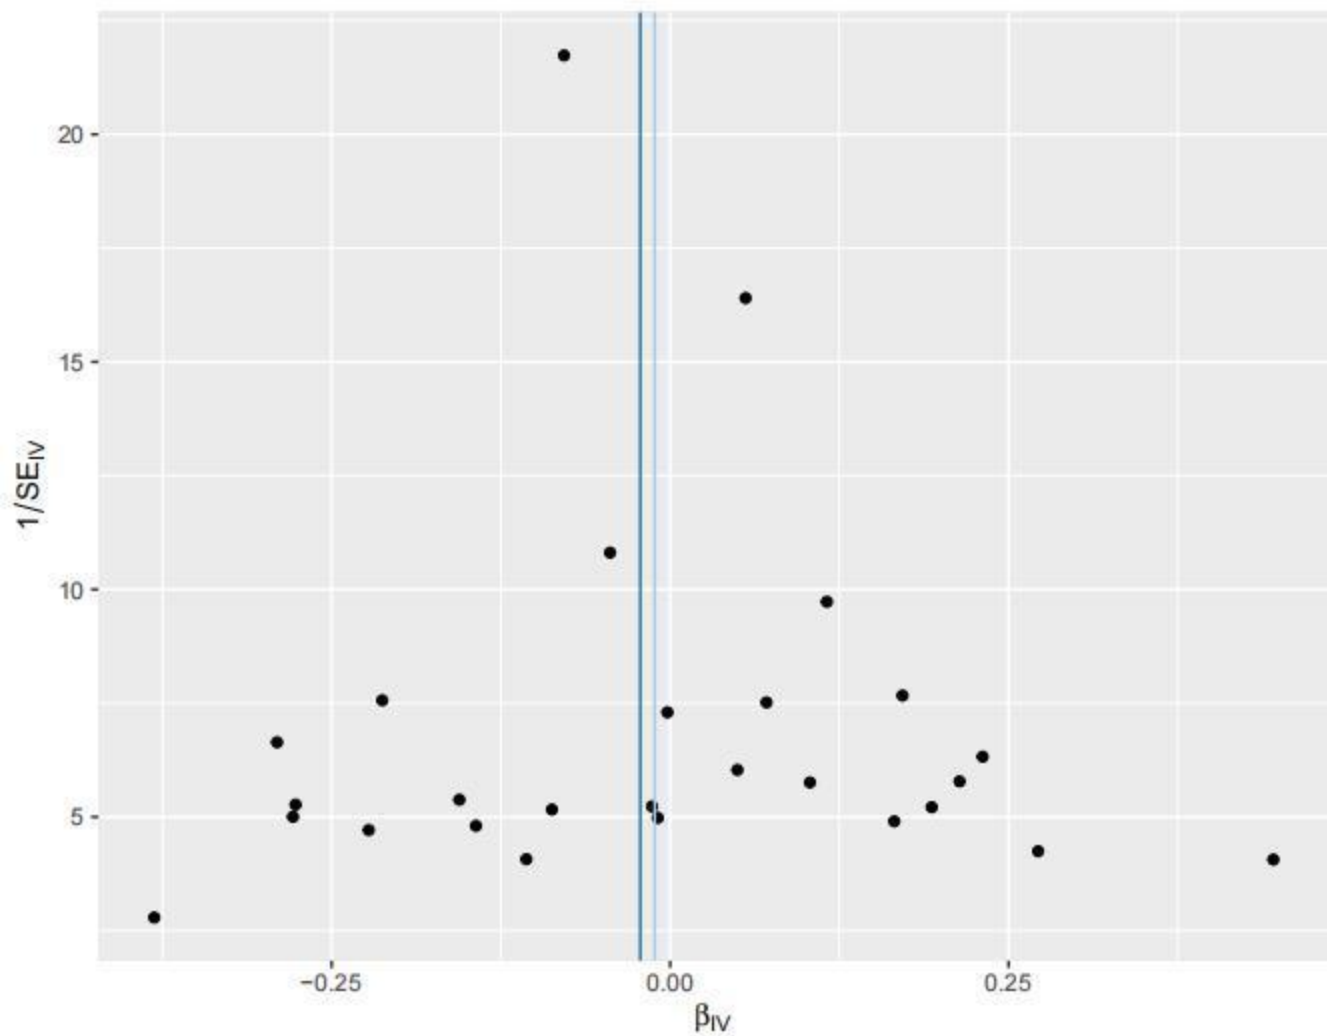

Funnel plot analyse of "CD3 on CD39+ secreting Treg " on 'Aplastic anemia'

### MR Method

- Inverse variance weighted
- MR Egger

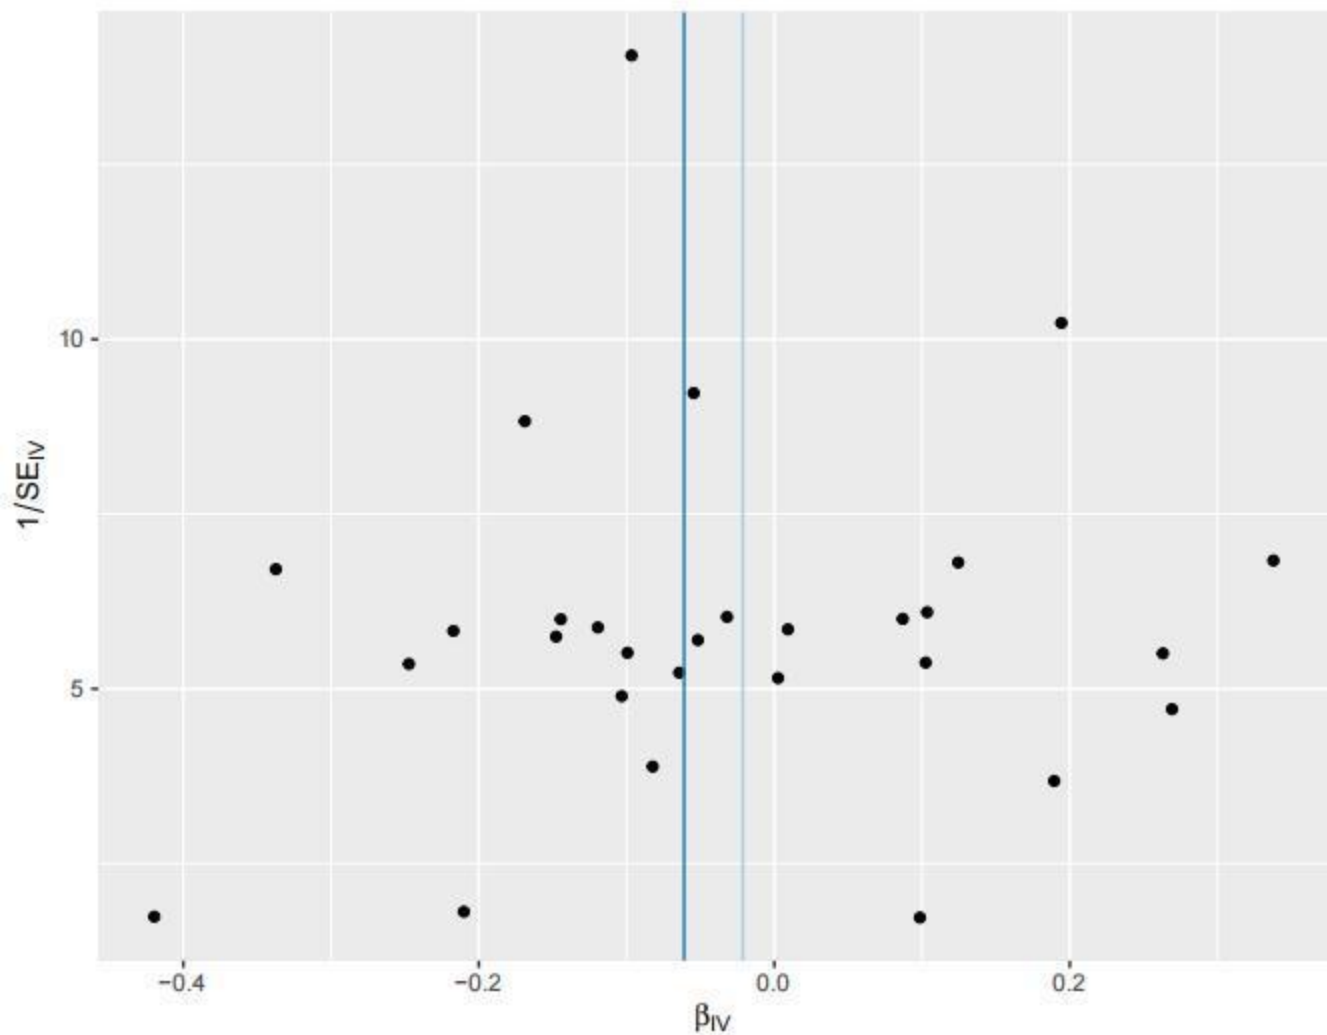

Funnel plot analyse of "T/B" on 'Aplastic anemia'

### MR Method

- Inverse variance weighted
- MR Egger

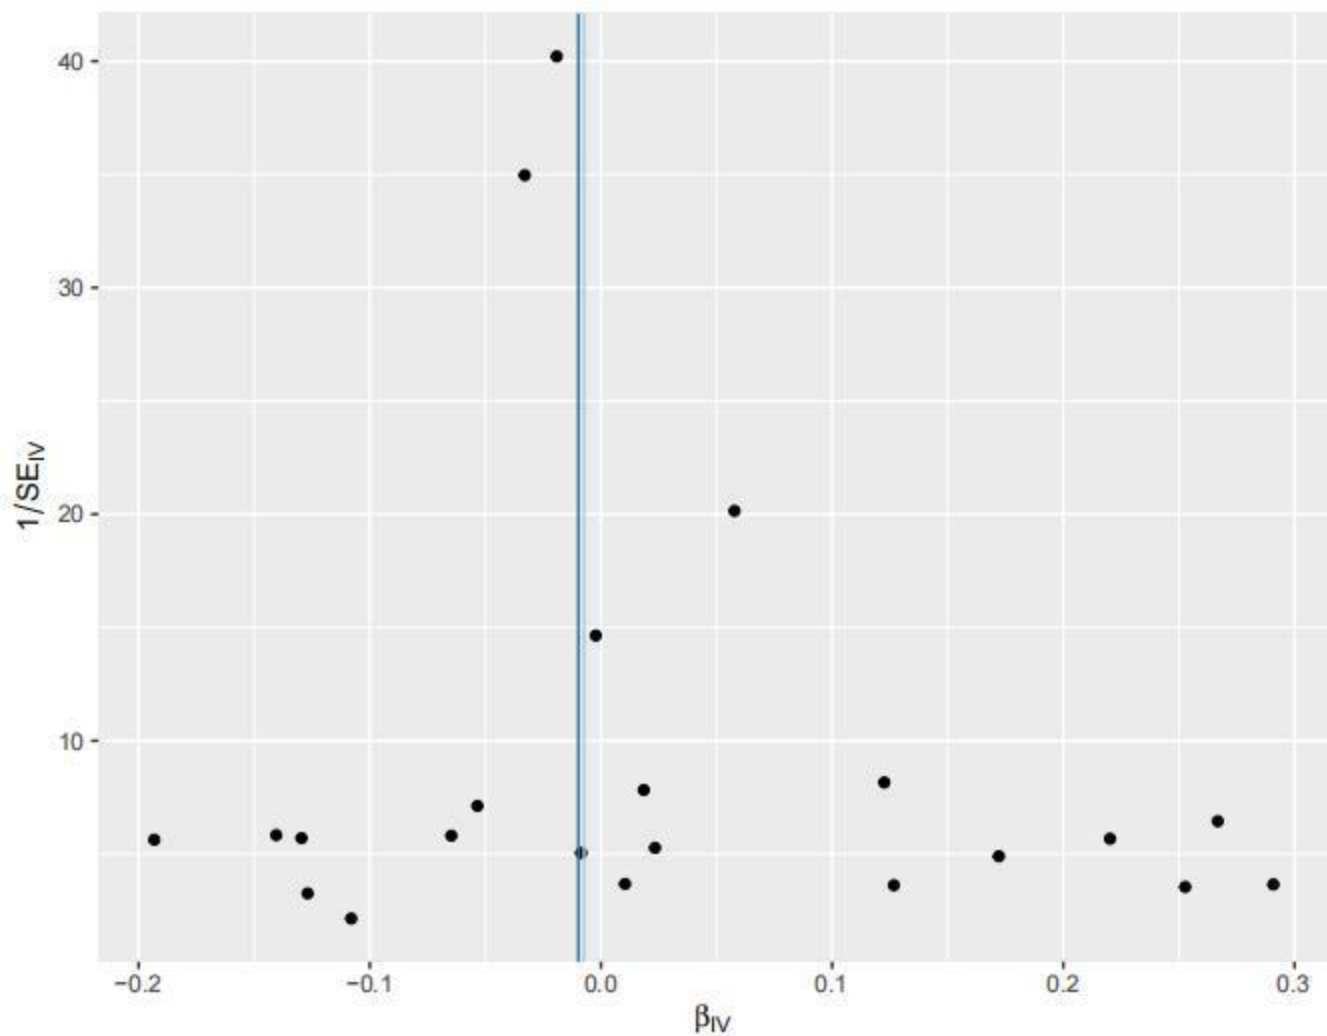

Funnel plot analyse of "CD28 on CD39+ resting Treg " on 'Aplastic anemia'

### MR Method

- Inverse variance weighted
- MR Egger

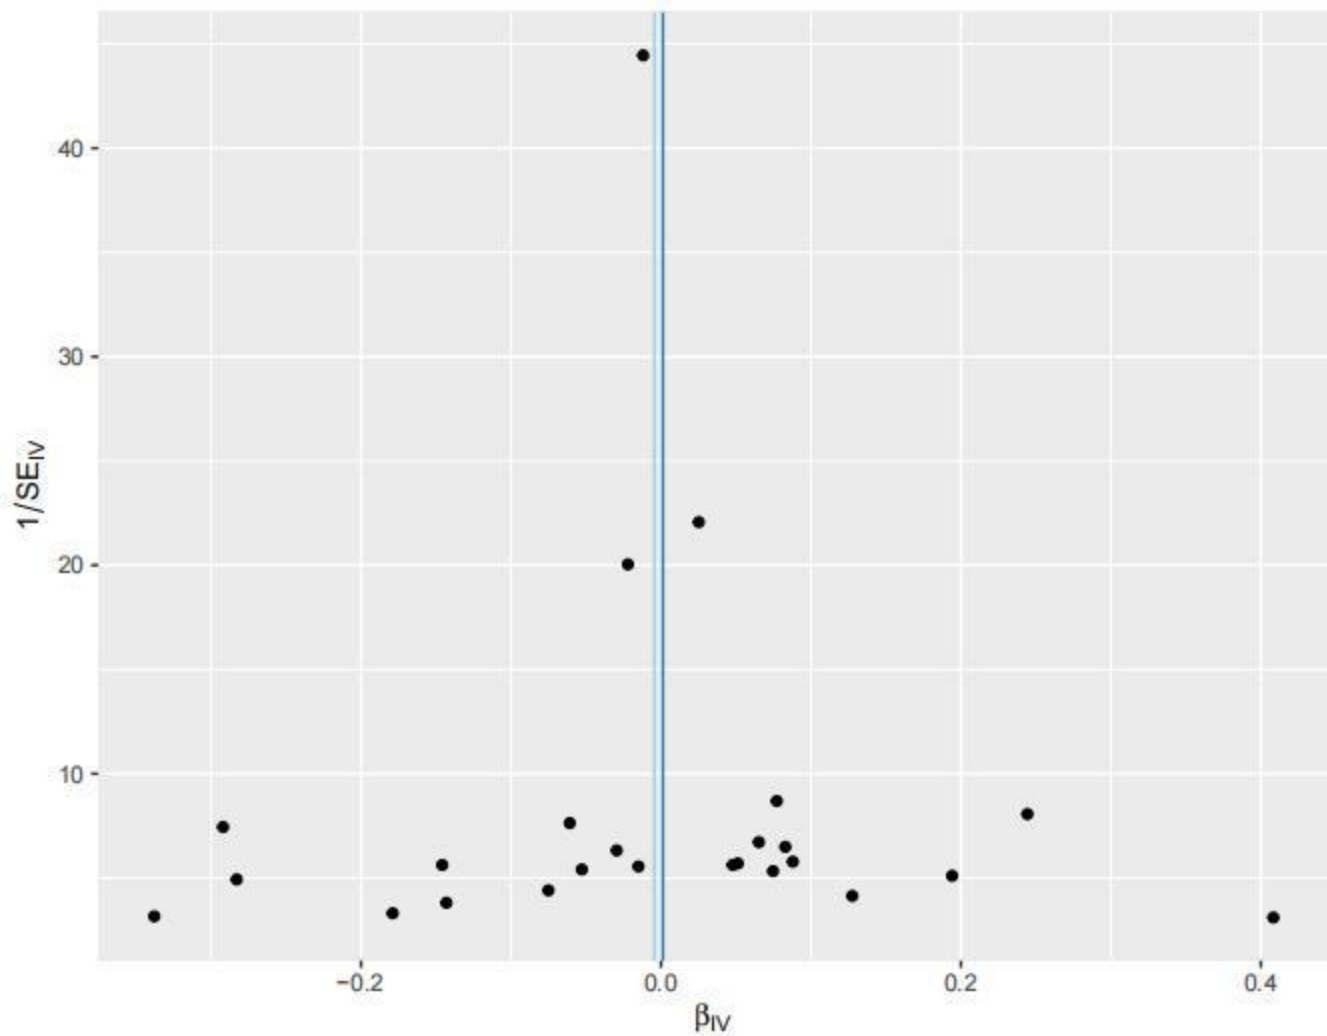

Funnel plot analysis of "CD27 on memory B cell" on 'Aplastic anemia'

MR Method

Inverse variance weighted

MR Egger

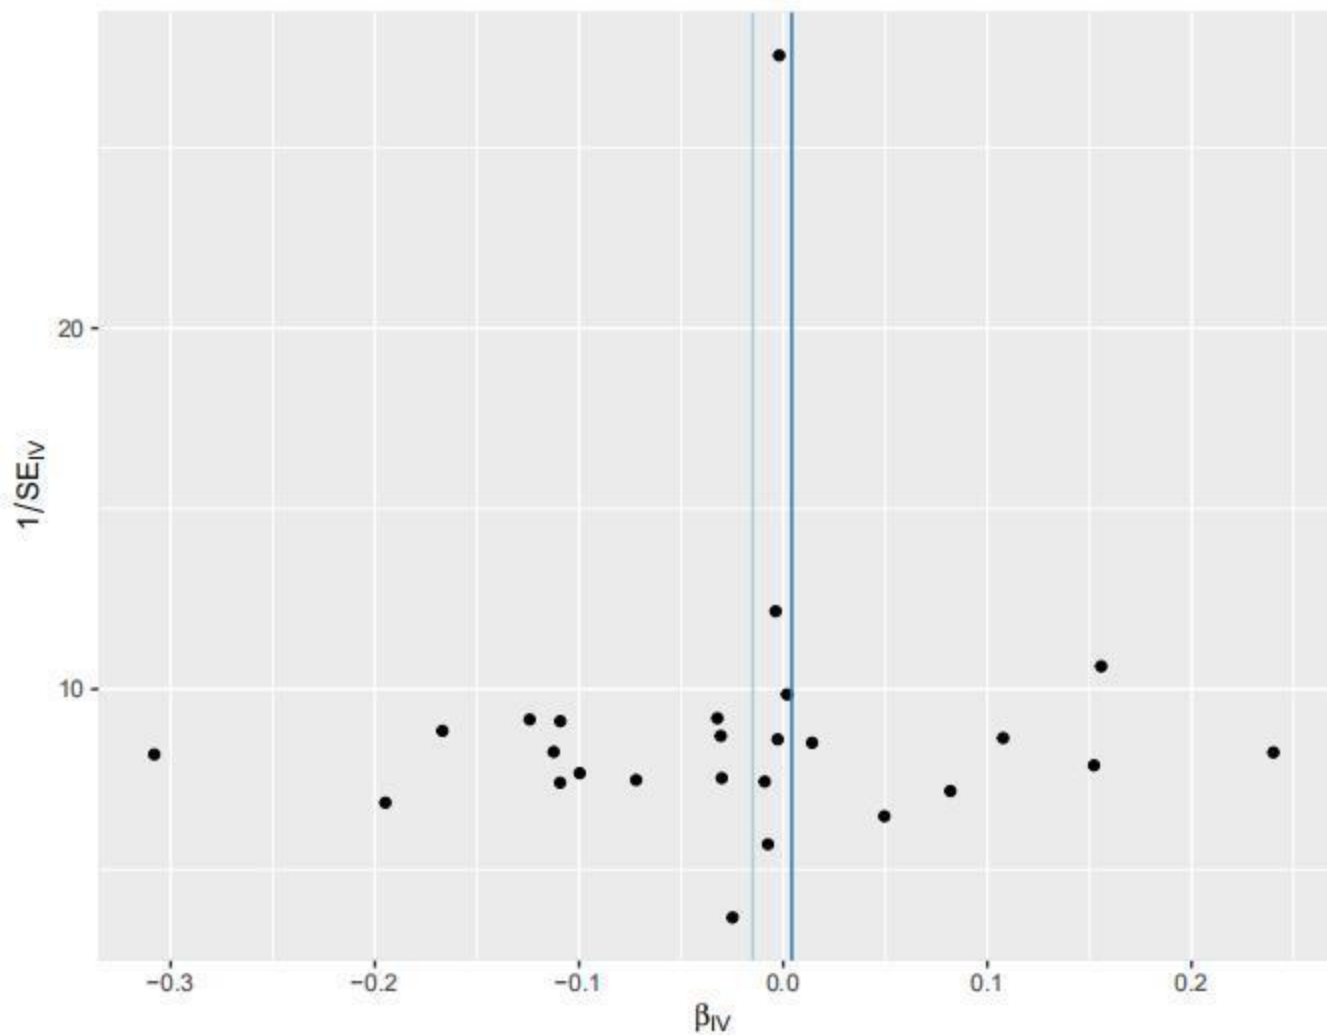

Funnel plot analyse of "HVEM on TD CD4+" on 'Aplastic anemia'

### MR Method

- Inverse variance weighted
- MR Egger

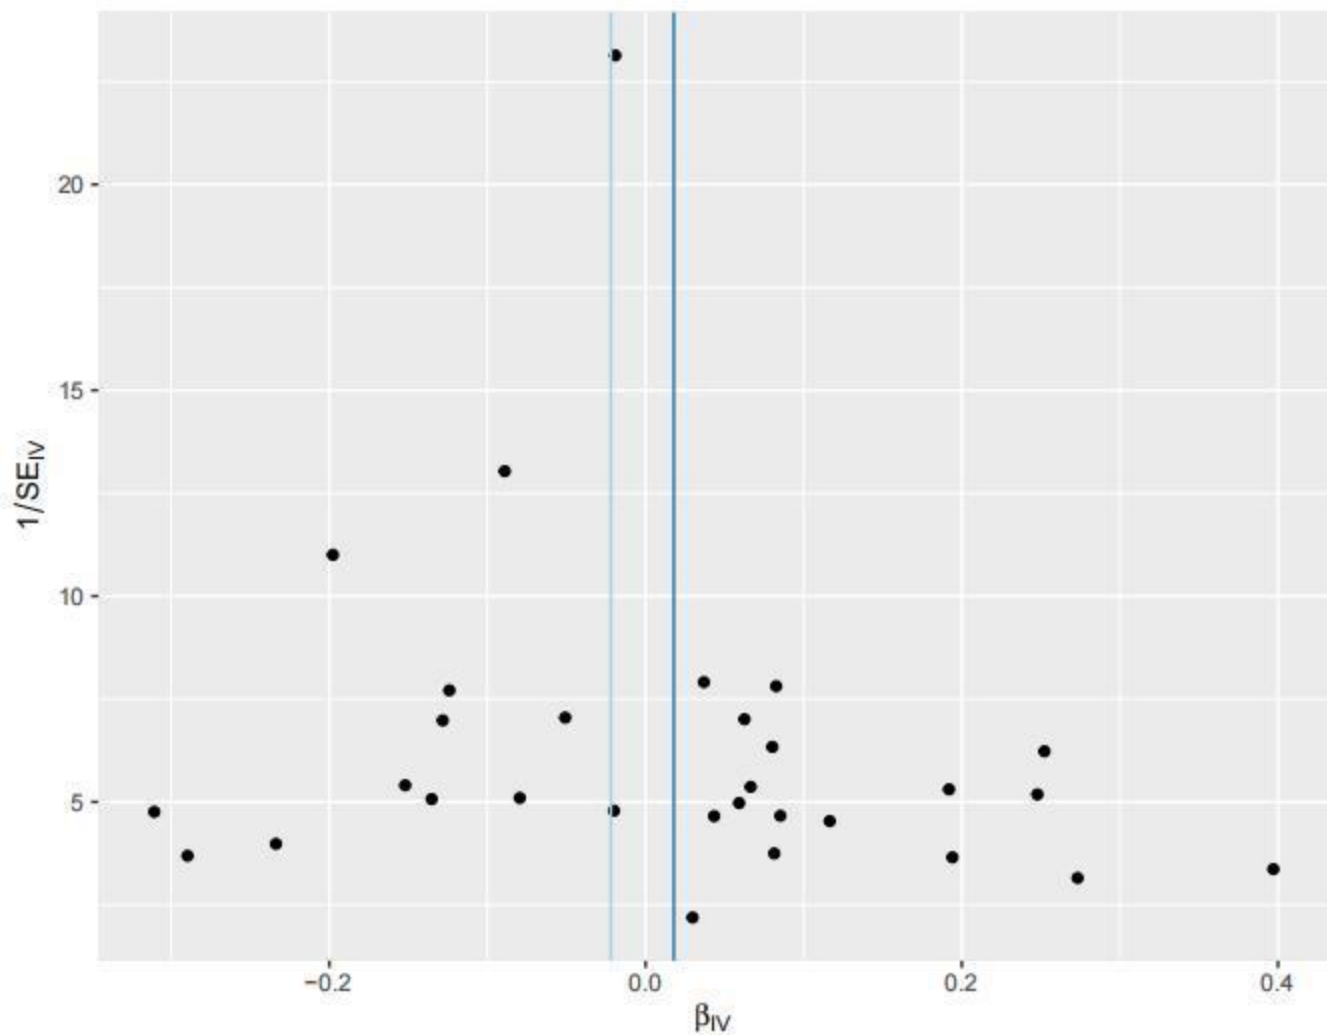

Funnel plot analyse of "CD27 on sw mem" on 'Aplastic anemia'



### MR Method

Inverse variance weighted

MR Egger

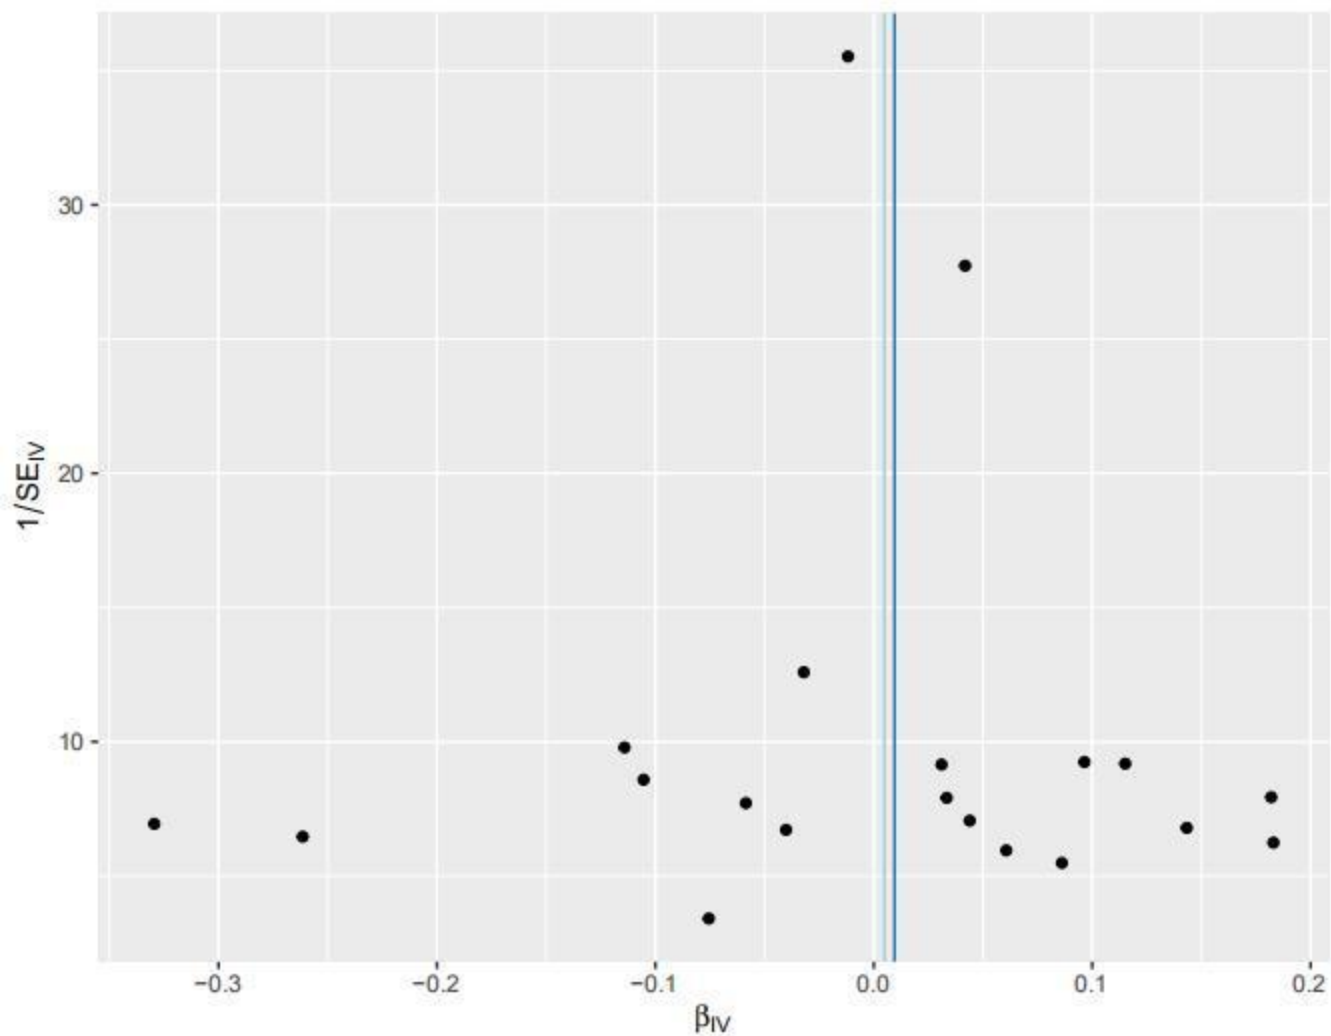

Funnel plot analysis of "CD11b on CD14+ monocyte" on 'Aplastic anemia'

MR Method

- Inverse variance weighted
- MR Egger

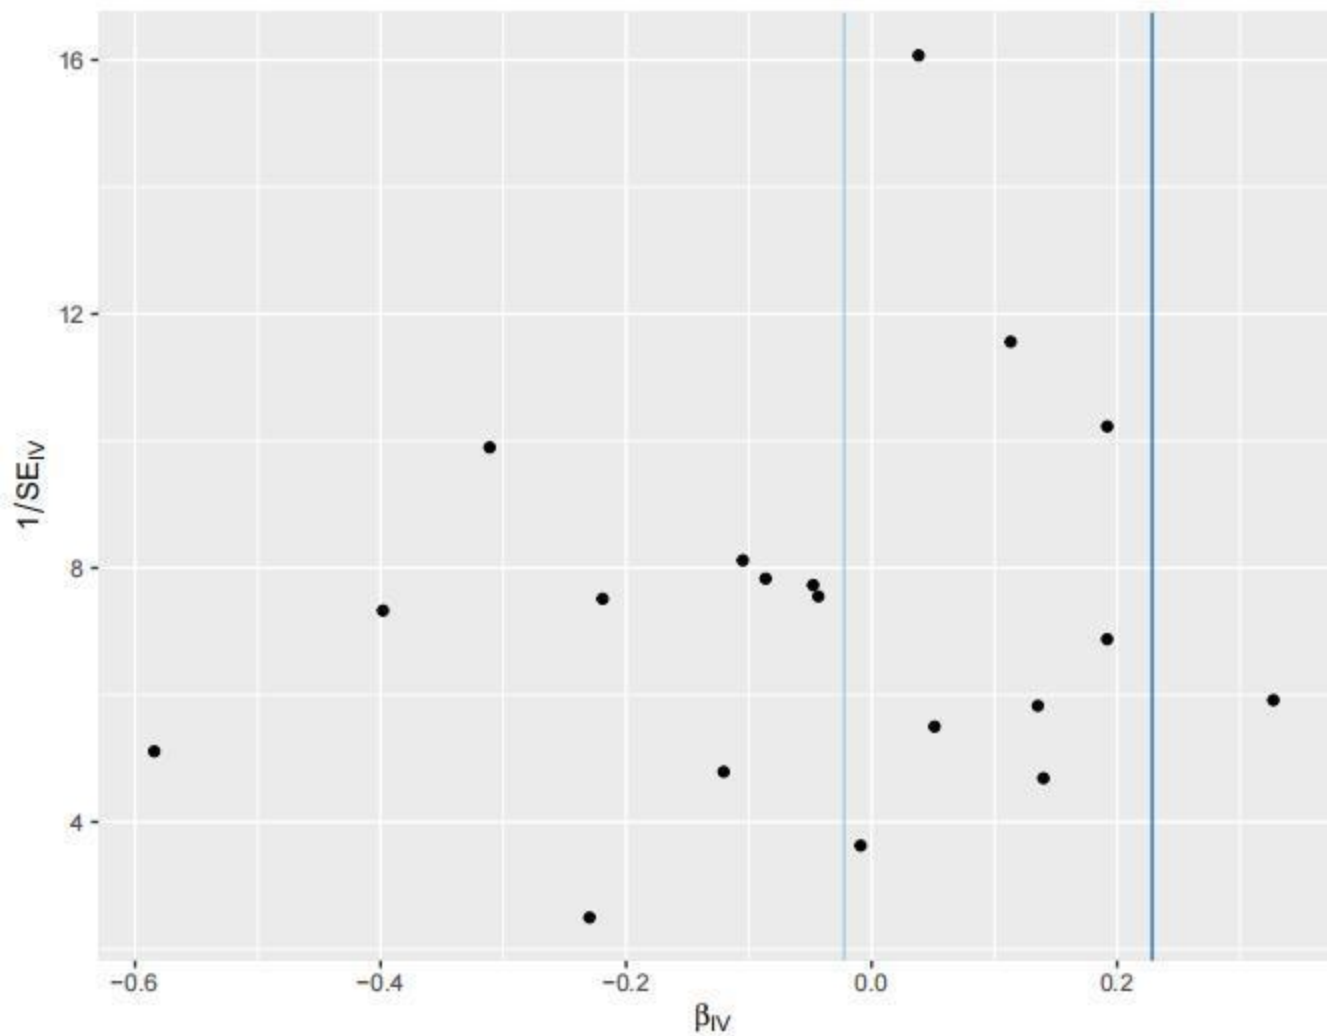

Funnel plot analyse of "CD11b on basophil" on 'Aplastic anemia'

MR Method

- Inverse variance weighted
- MR Egger

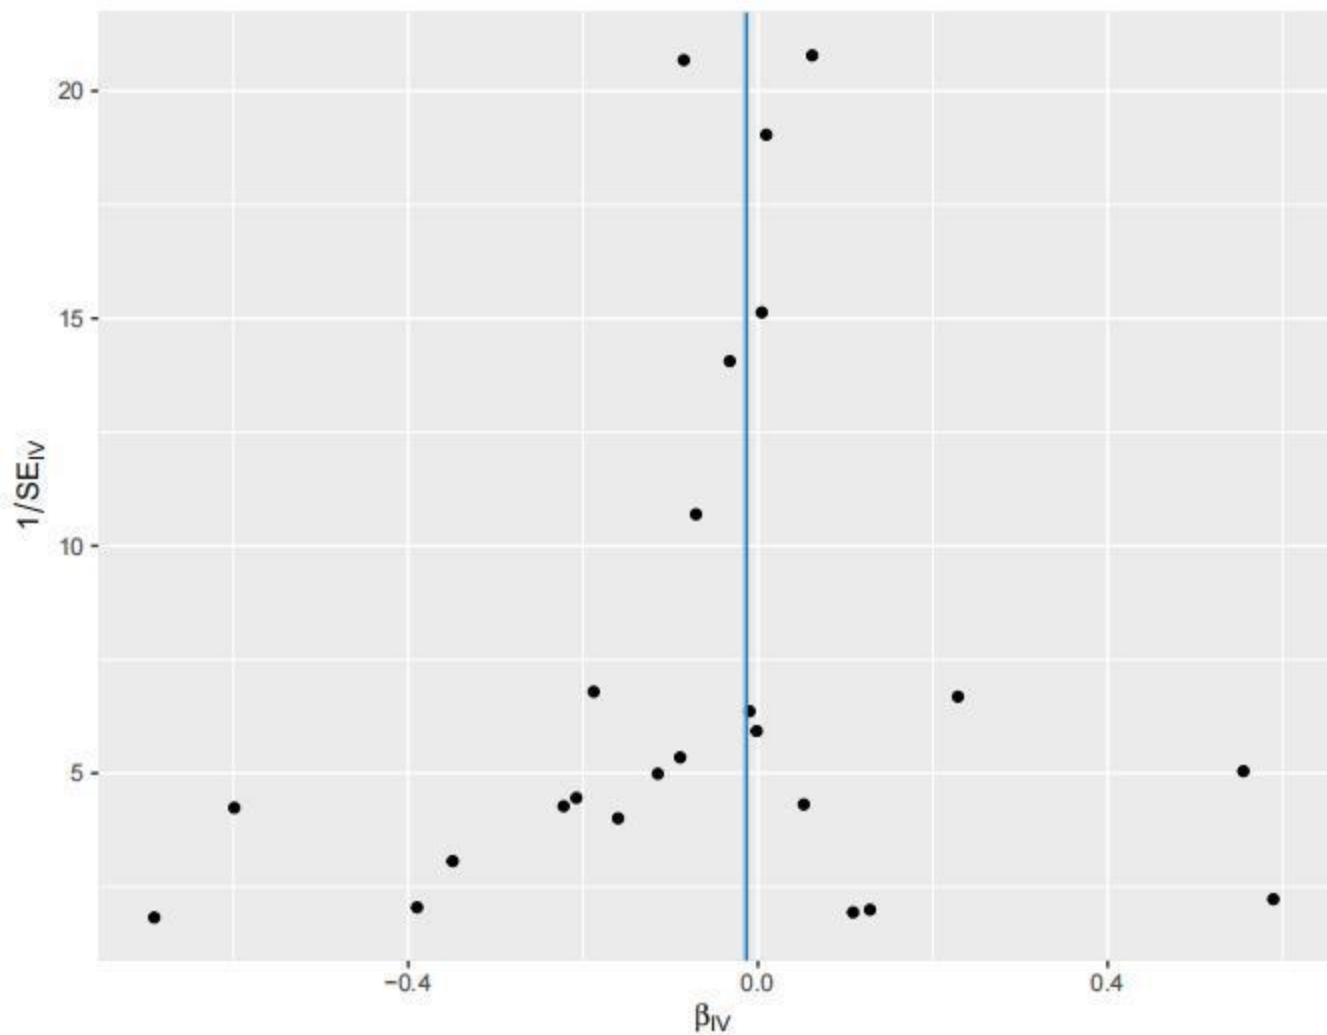

Funnel plot analysis of "CD62L- DC %DC" on 'Aplastic anemia'

### MR Method

- Inverse variance weighted
- MR Egger

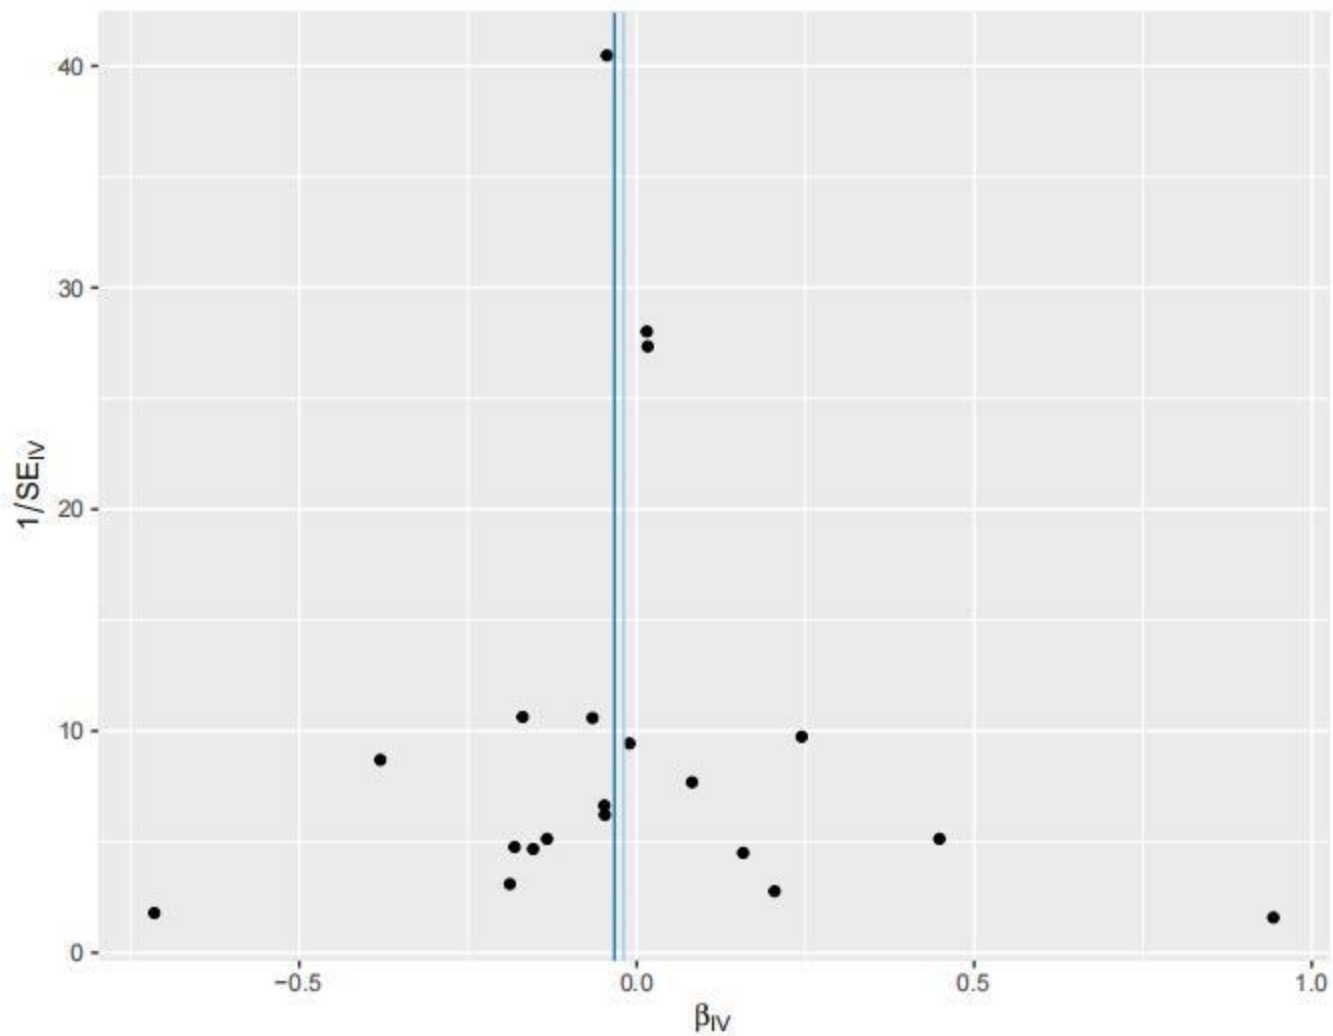

Funnel plot analyse of "CD25 on activated & secreting Treg " on 'Aplastic anemia'

MR Method

- Inverse variance weighted
- MR Egger

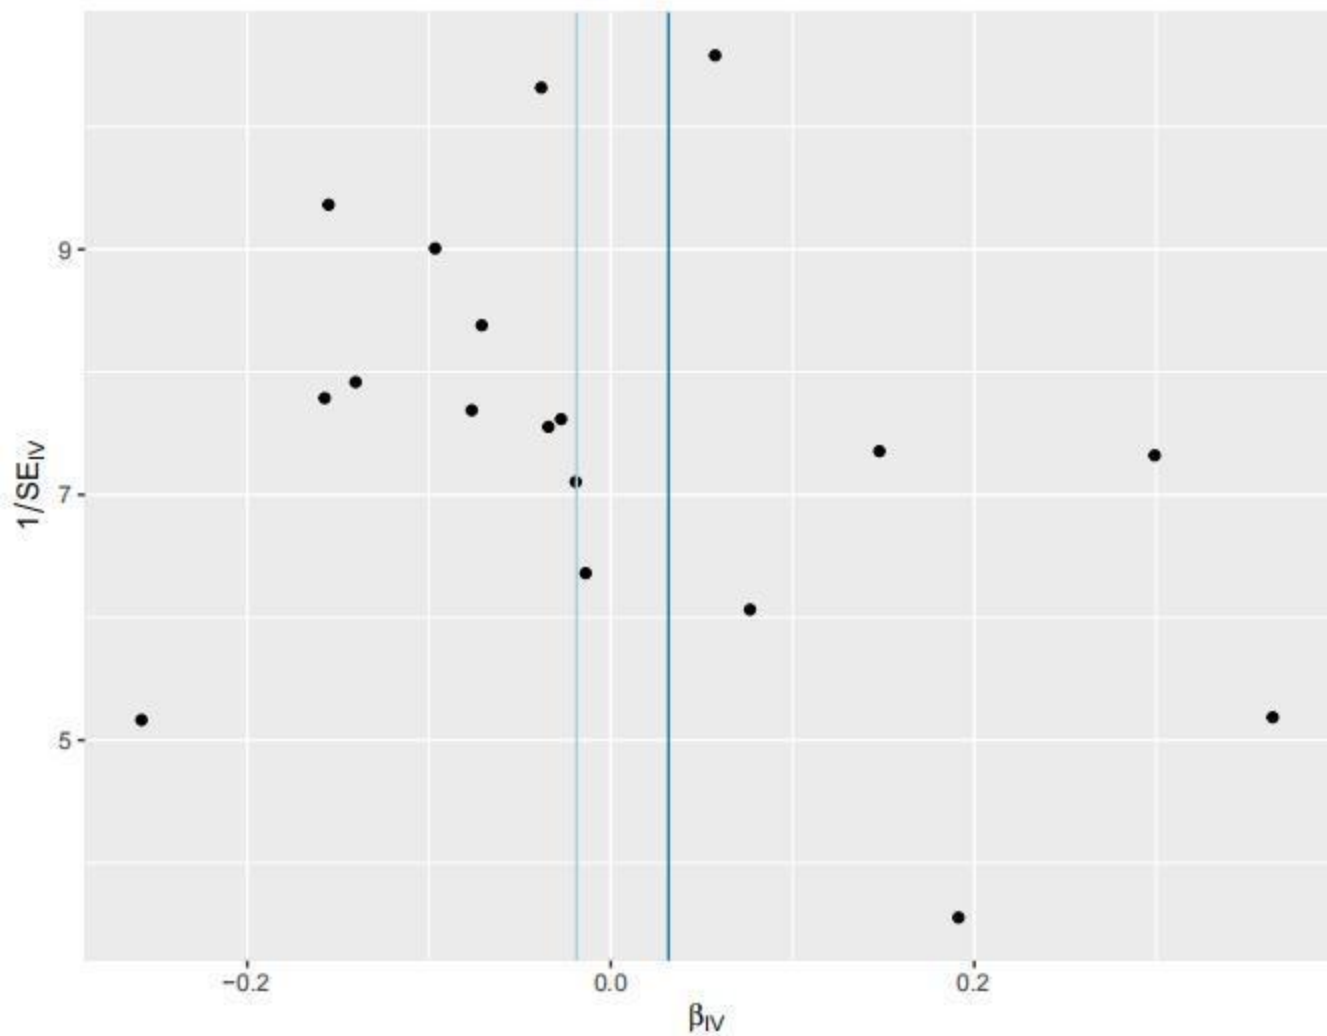

Funnel plot analyse of "CD45 on CD33br HLA DR+ CD14- " on 'Aplastic anemia'

### MR Method

Inverse variance weighted

MR Egger

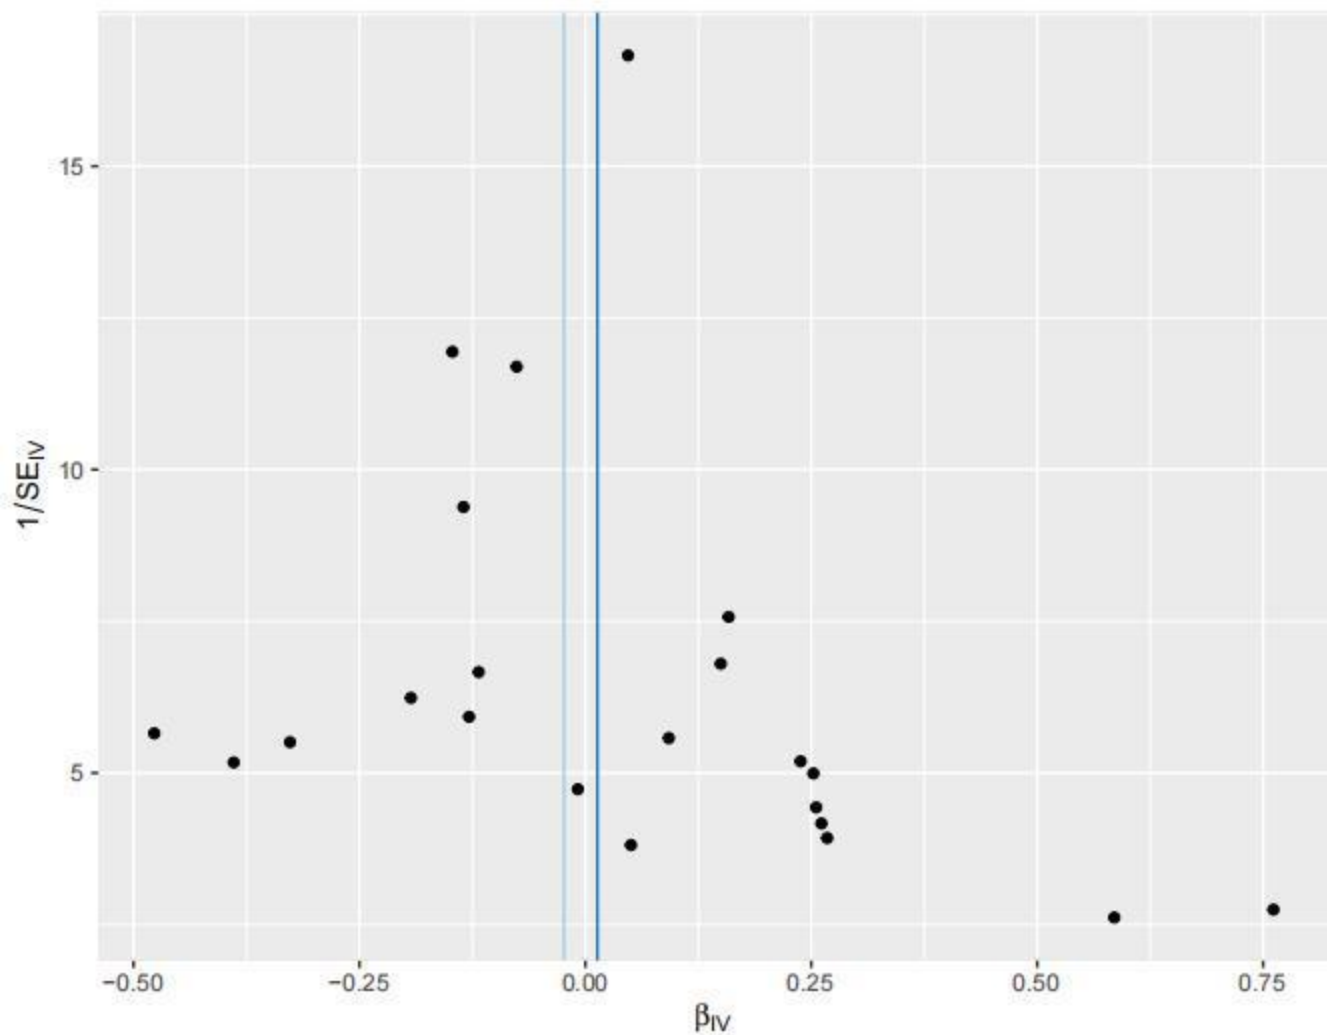

Funnel plot analysis of "HLA DR++ monocyte %monocyte" on 'Aplastic anemia'

MR Method

- Inverse variance weighted
- MR Egger

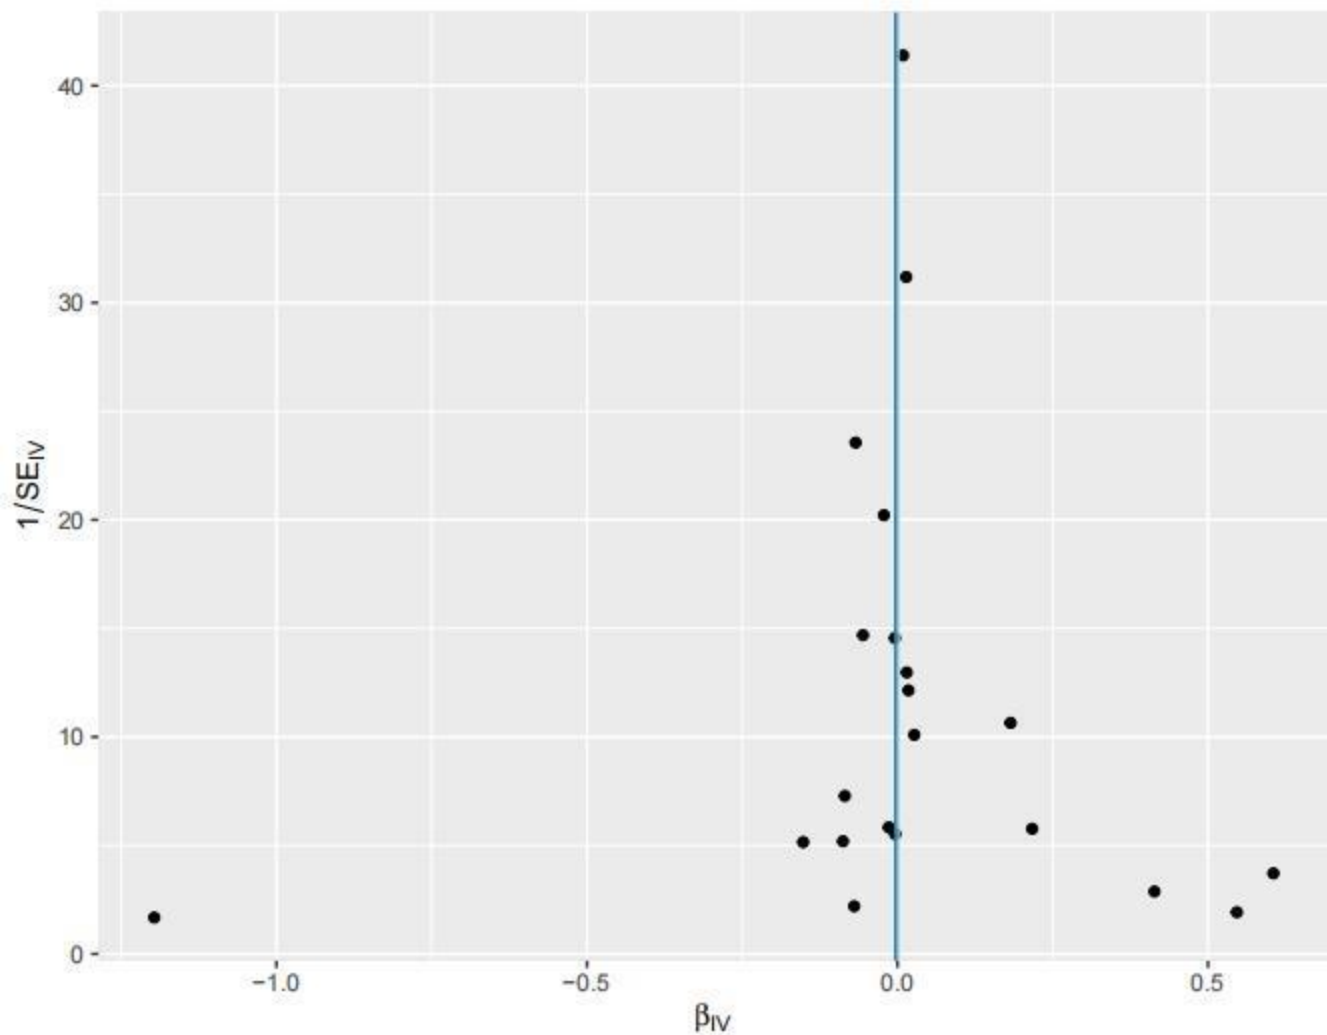

Funnel plot analyse of "CD25hi CD45RA- CD4 not Treg AC" on 'Aplastic anemia'

### MR Method

- Inverse variance weighted
- MR Egger

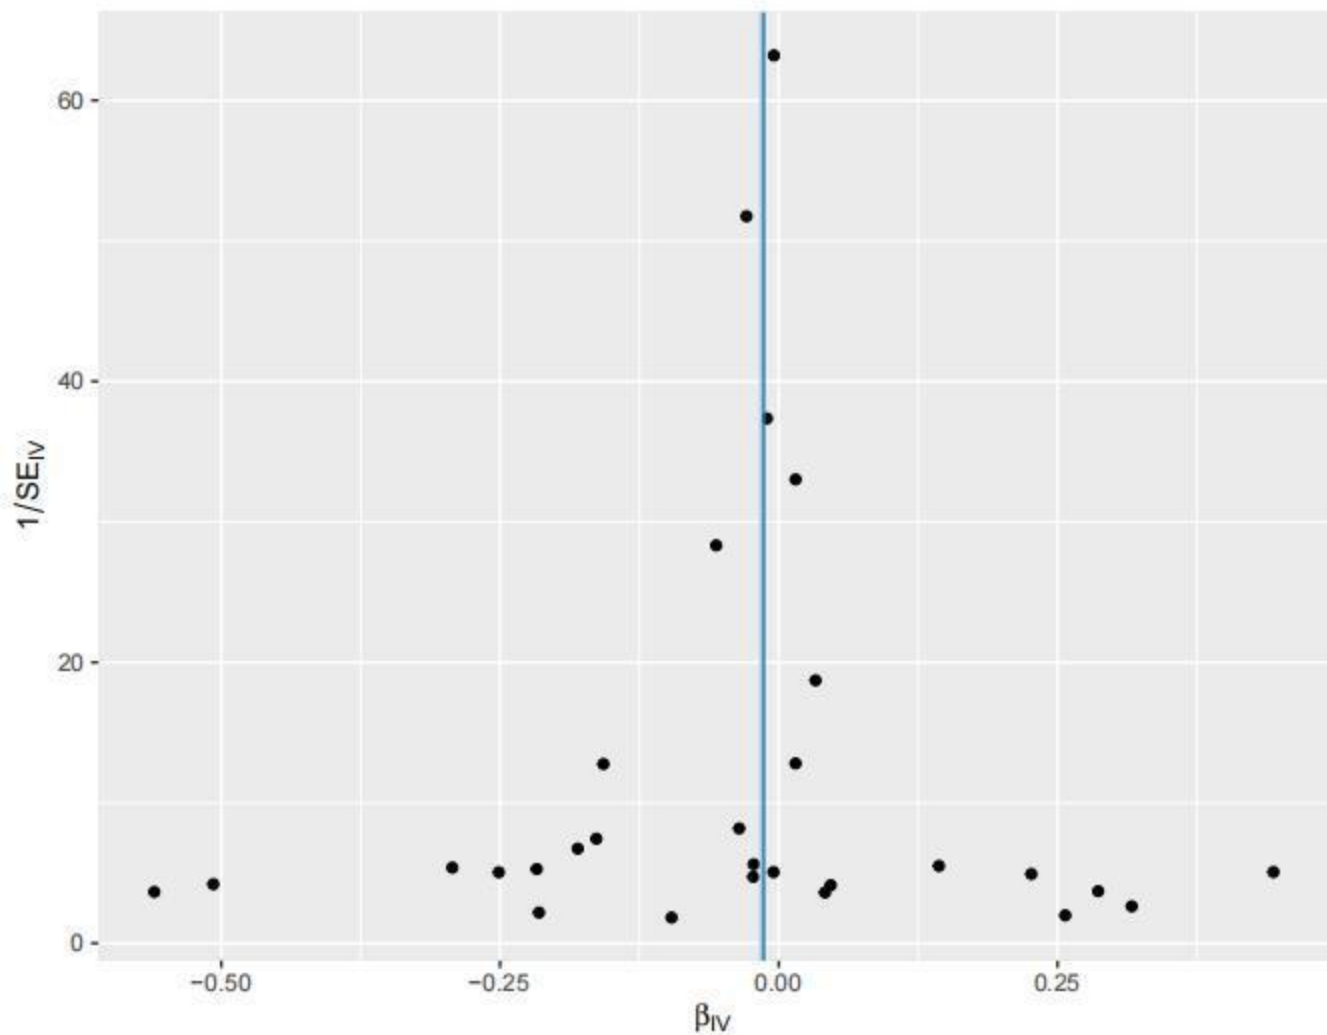

Funnel plot analyse of "CD28+ CD45RA- CD8br %CD8br" on 'Aplastic anemia'



MR Method

- Inverse variance weighted
- MR Egger

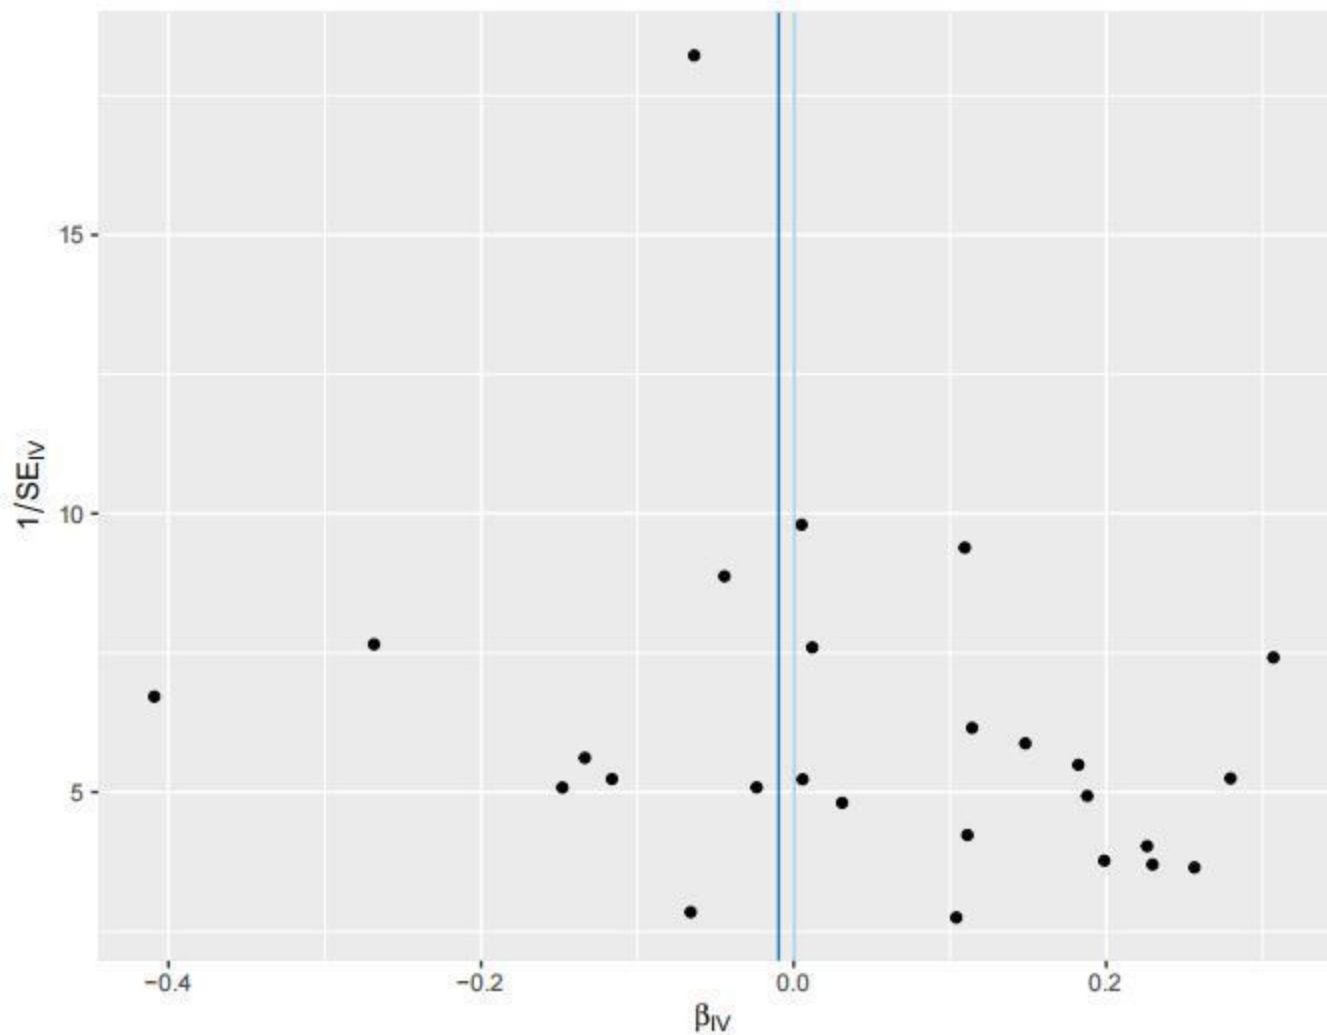

Funnel plot analysis of "CX3CR1 on monocyte" on 'Aplastic anemia'

MR Method

Inverse variance weighted

MR Egger

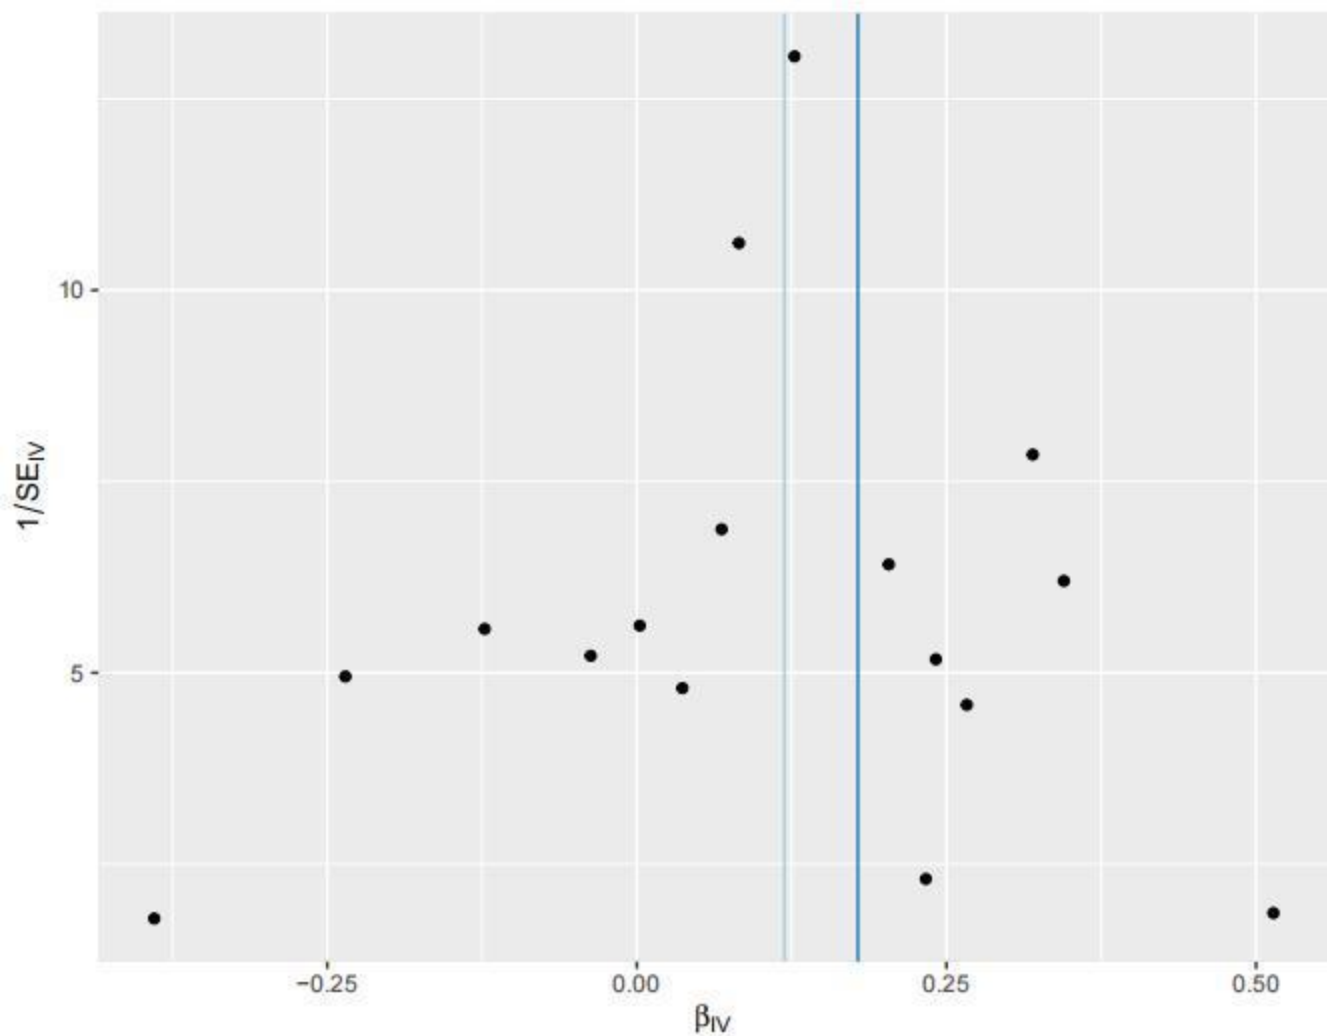

Funnel plot analysis of "CD8 on CD28+ CD45RA- CD8br " on 'Aplastic anemia'

### MR Method

- Inverse variance weighted
- MR Egger

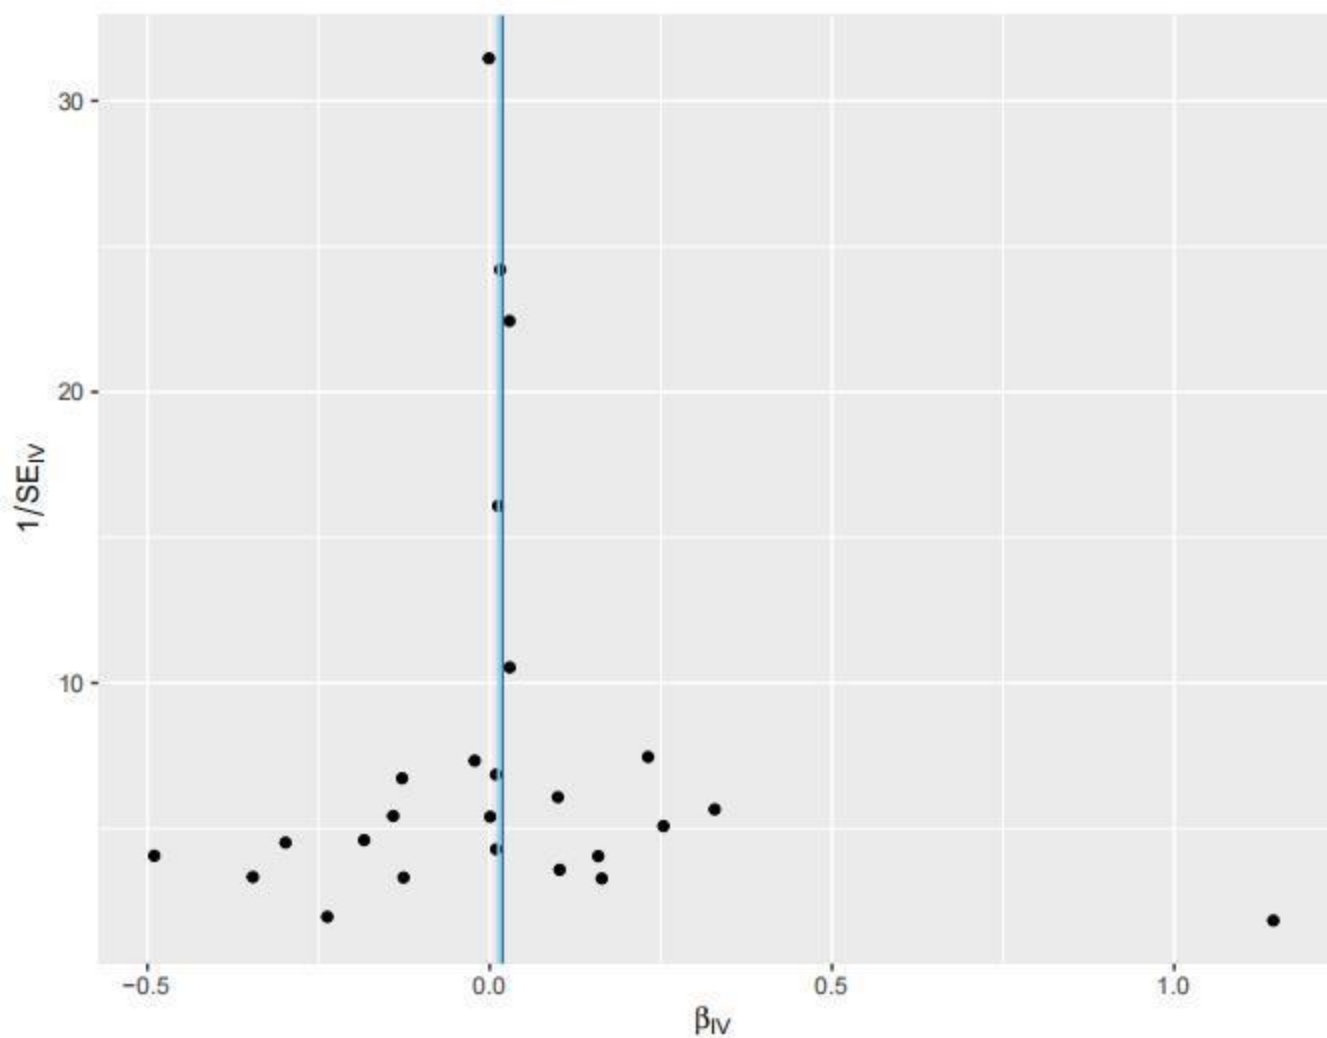

Funnel plot analysis of "FSC-A on CD4+" on 'Aplastic anemia'

### MR Method

- Inverse variance weighted
- MR Egger

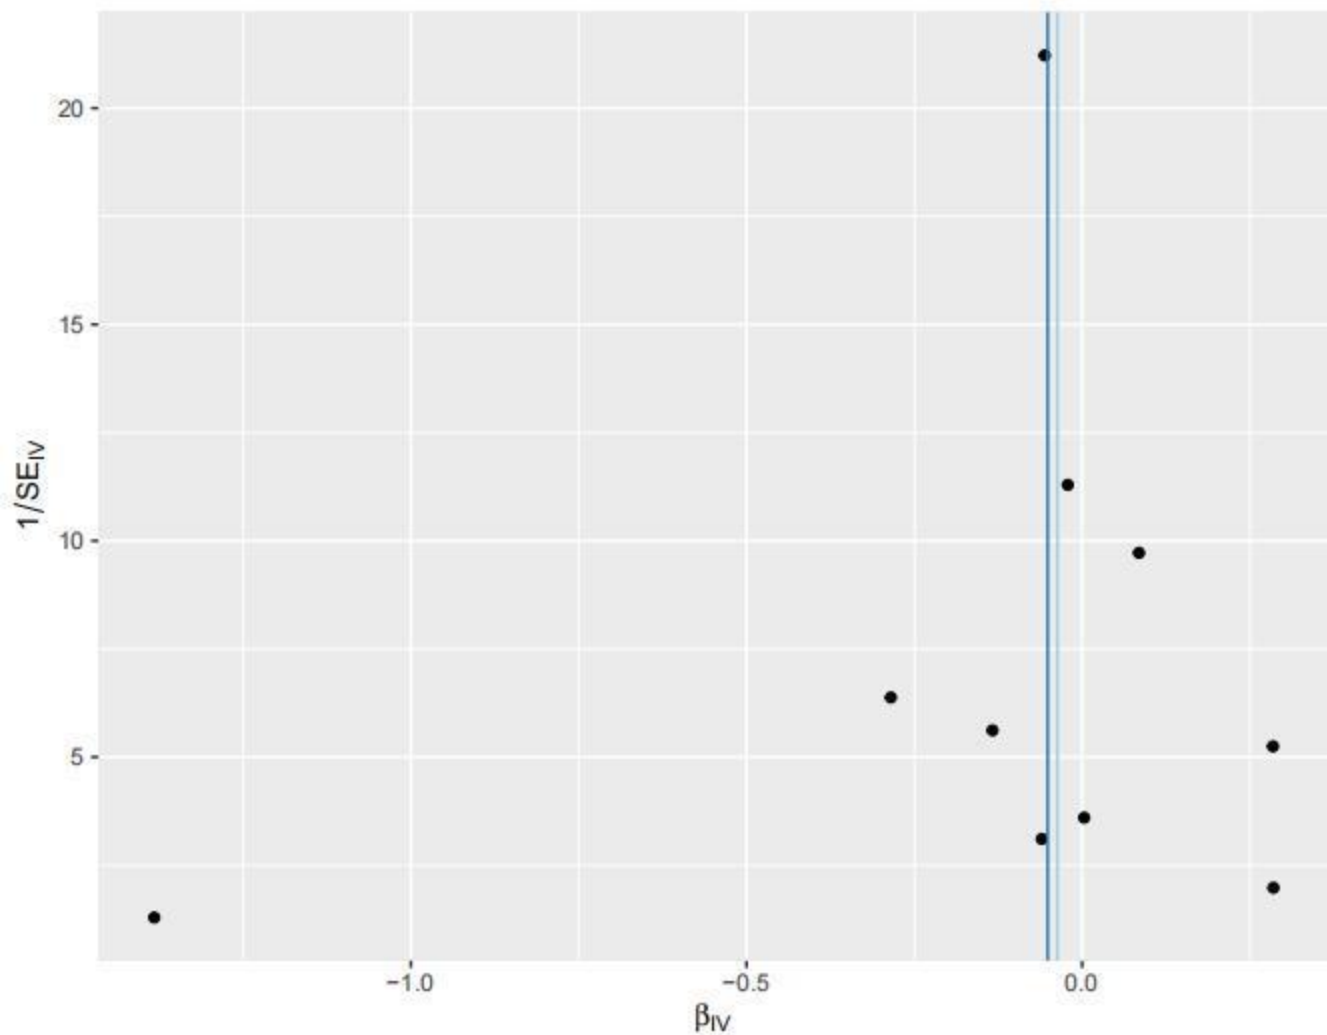

Funnel plot analyse of "CD45RA on CD39+ resting Treg " on 'Aplastic anemia'

### MR Method

- Inverse variance weighted
- MR Egger

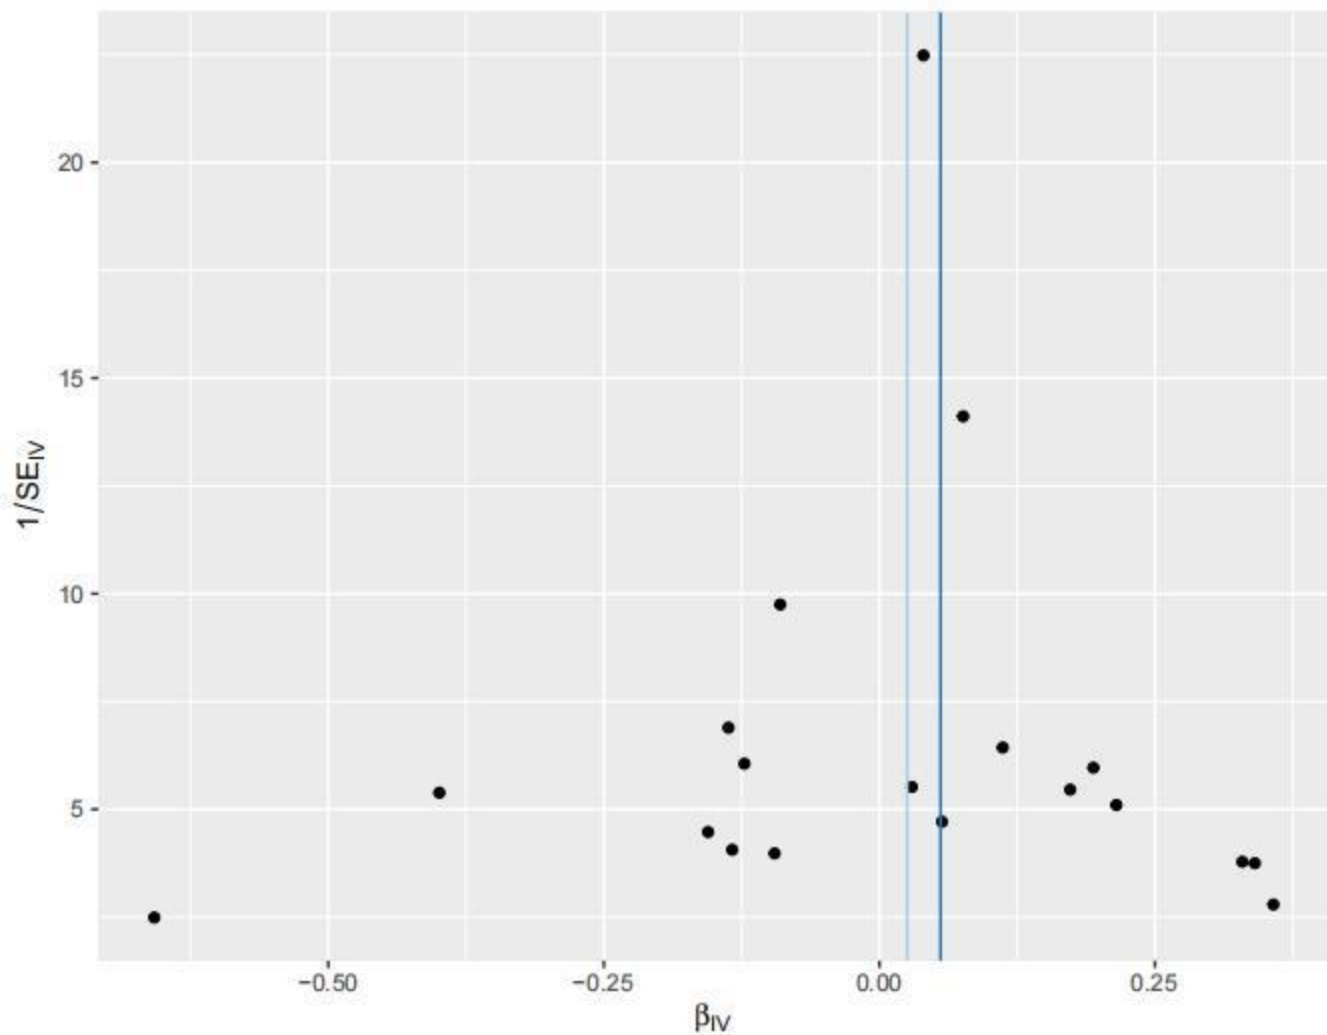

Funnel plot analyse of "FSC-A on NK" on 'Aplastic anemia'

### MR Method

- Inverse variance weighted
- MR Egger

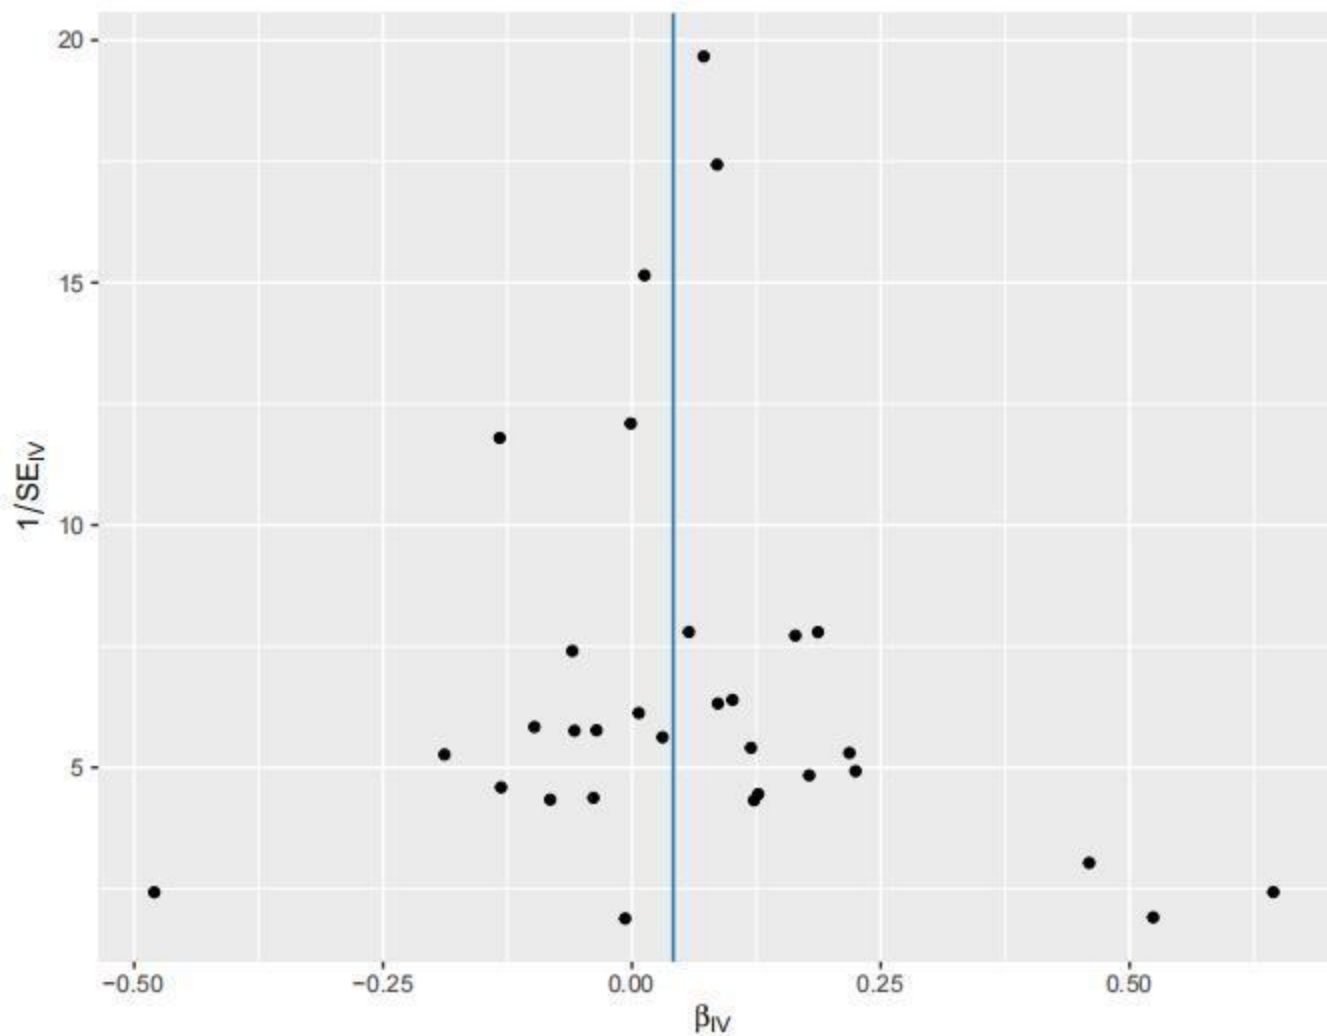

Funnel plot analyse of "Activated Treg %CD4 Treg" on 'Aplastic anemia'

### MR Method

- Inverse variance weighted
- MR Egger

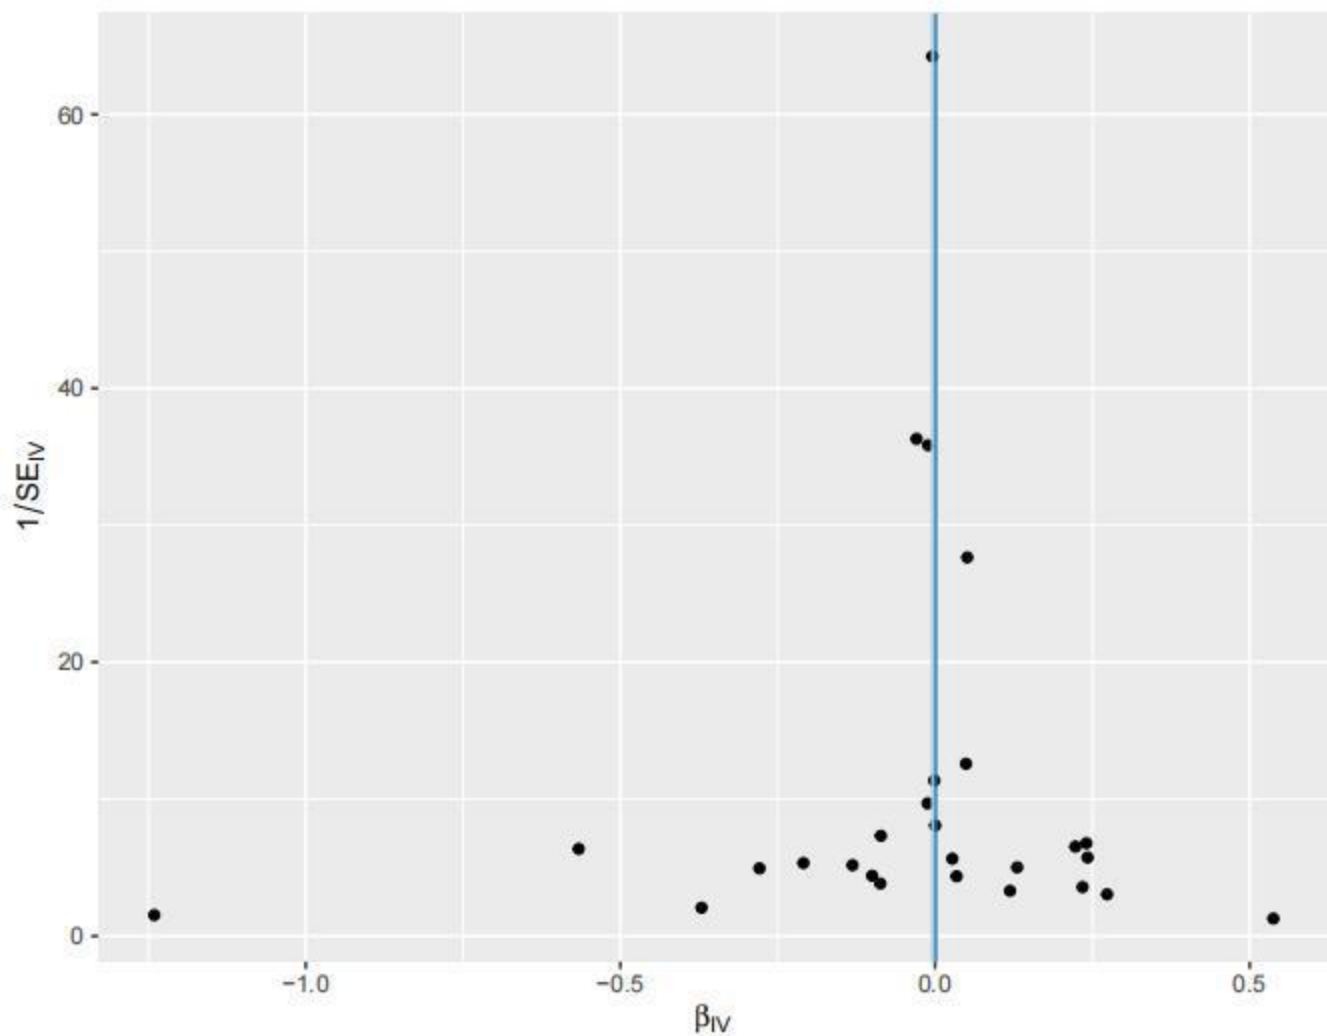

Funnel plot analysis of "CD28+ CD45RA- CD8br %T cell" on 'Aplastic anemia'

MR Method

Inverse variance weighted

MR Egger

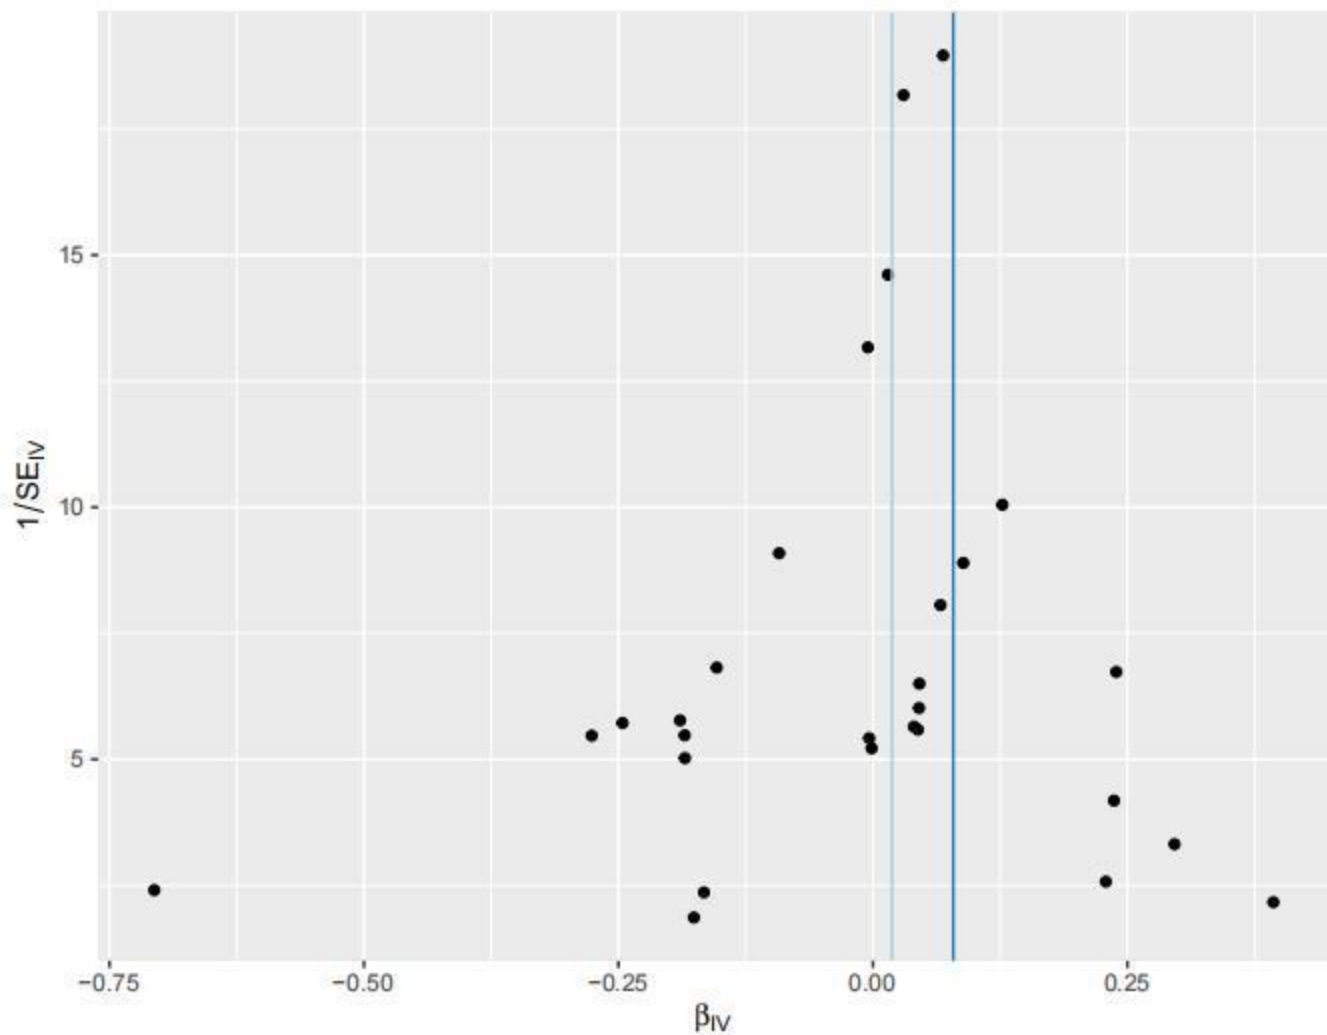

Funnel plot analyse of "CD28 on CD4+" on 'Aplastic anemia'



### MR Method

- Inverse variance weighted
- MR Egger

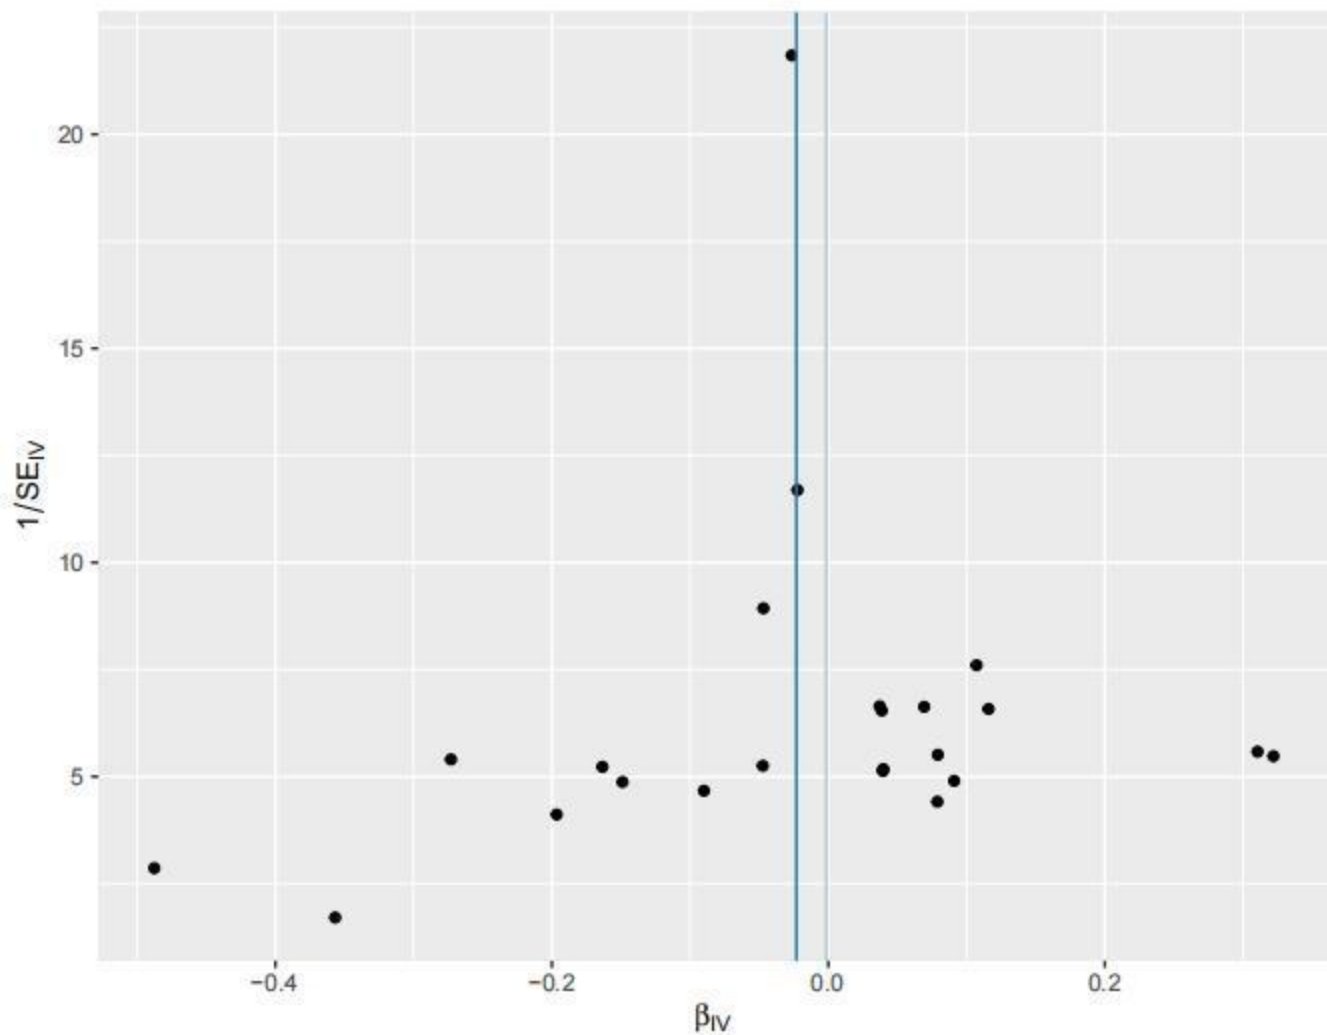

Funnel plot analyse of "CD8br %T cell" on 'Aplastic anemia'

MR Method

- Inverse variance weighted
- MR Egger

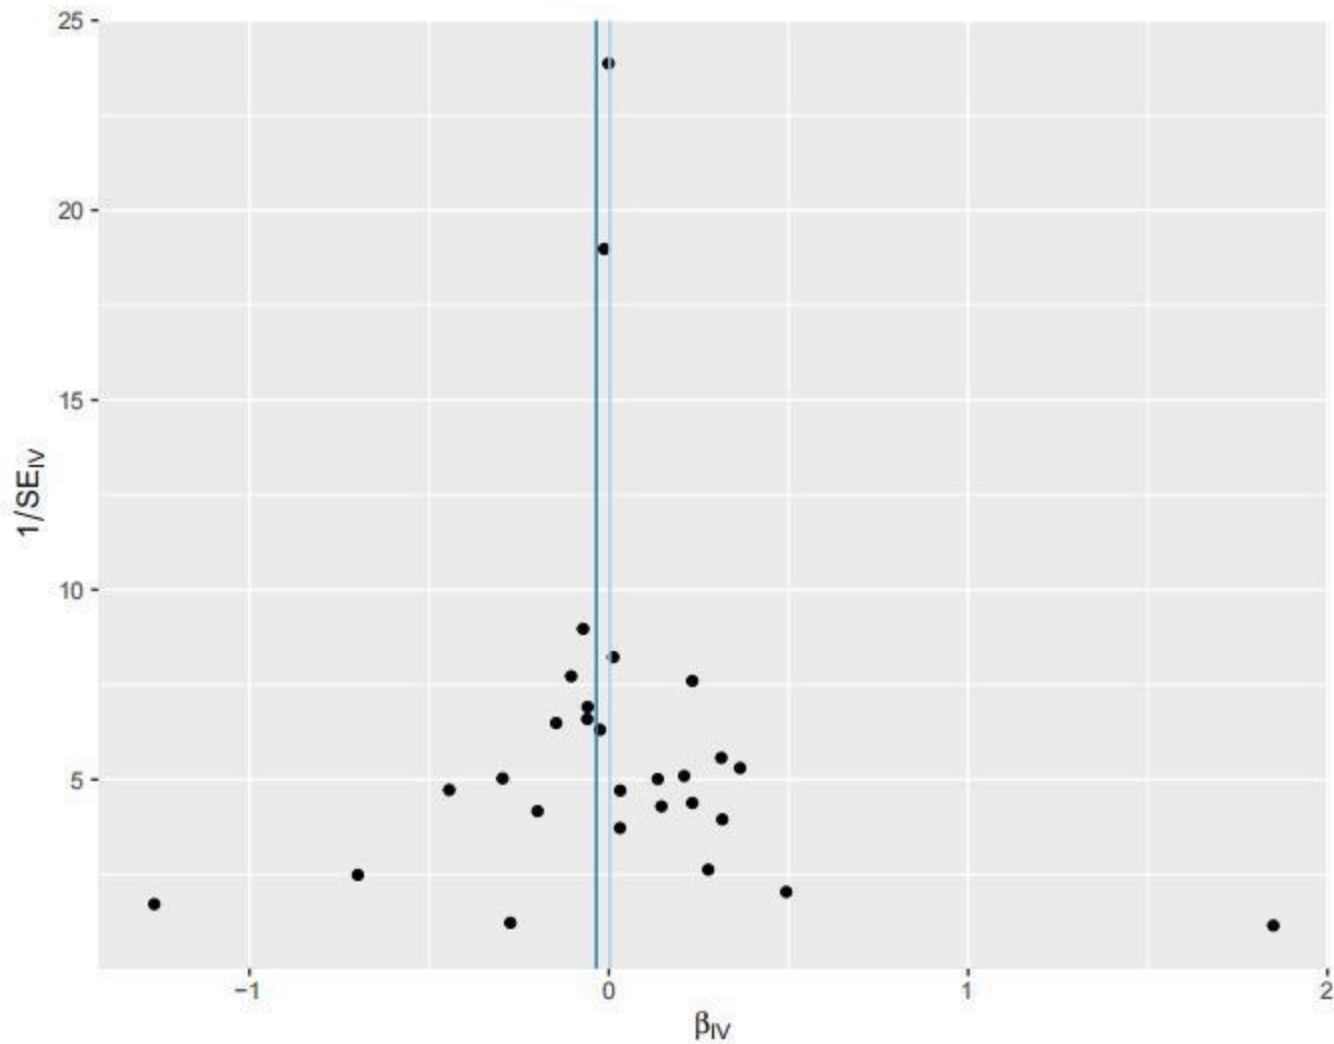

Funnel plot analyse of "IgD on IgD+ CD38-" on 'Aplastic anemia'

### MR Method

Inverse variance weighted

MR Egger

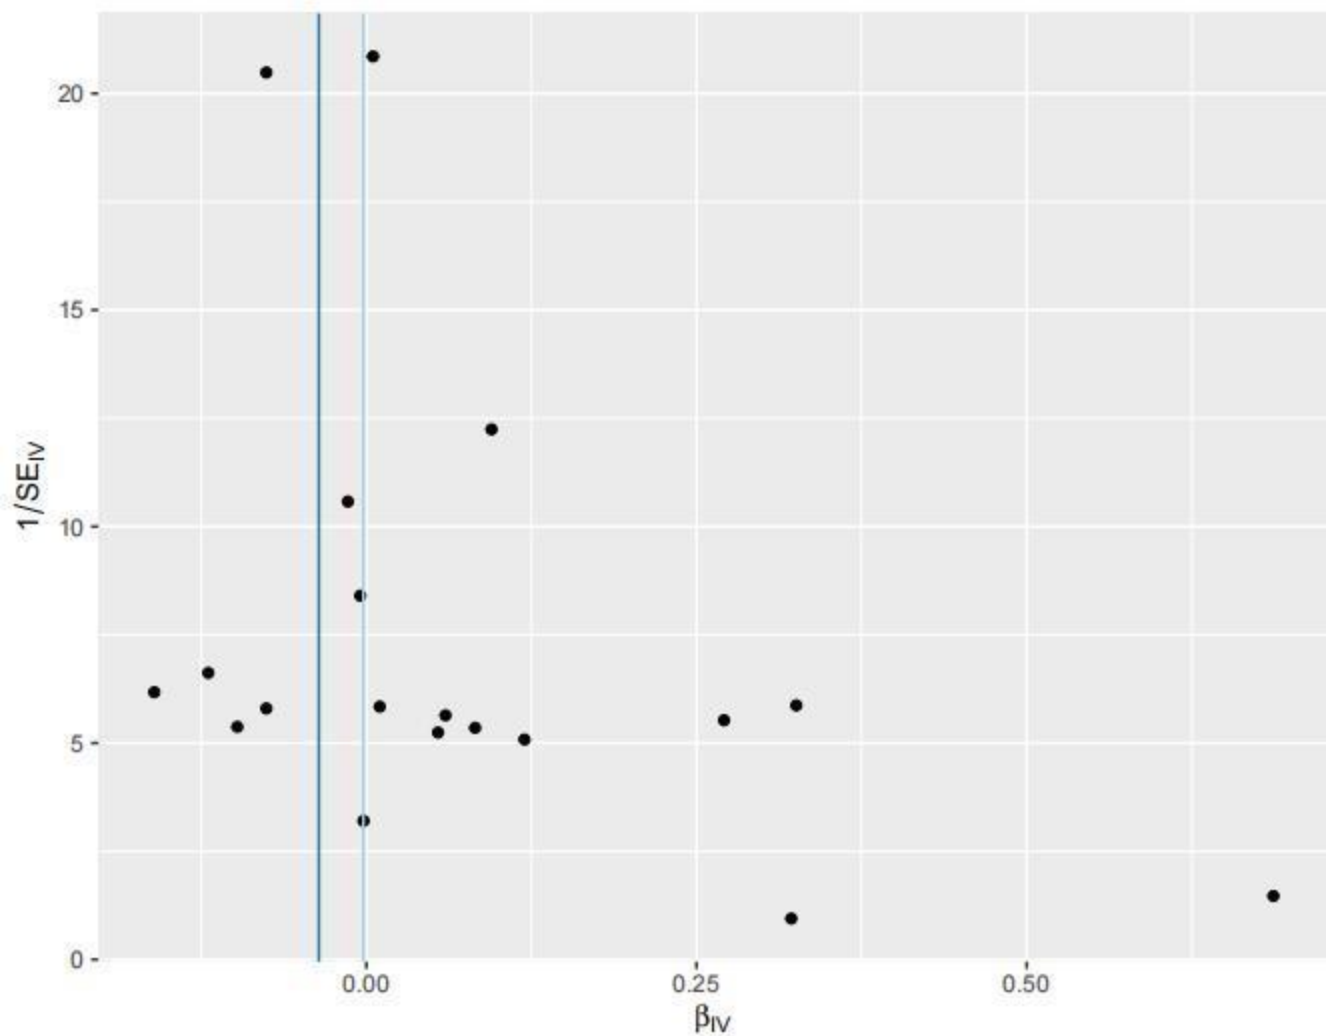

Funnel plot analysis of "CD11c on monocyte " on 'Aplastic anemia'

MR Method

Inverse variance weighted

MR Egger

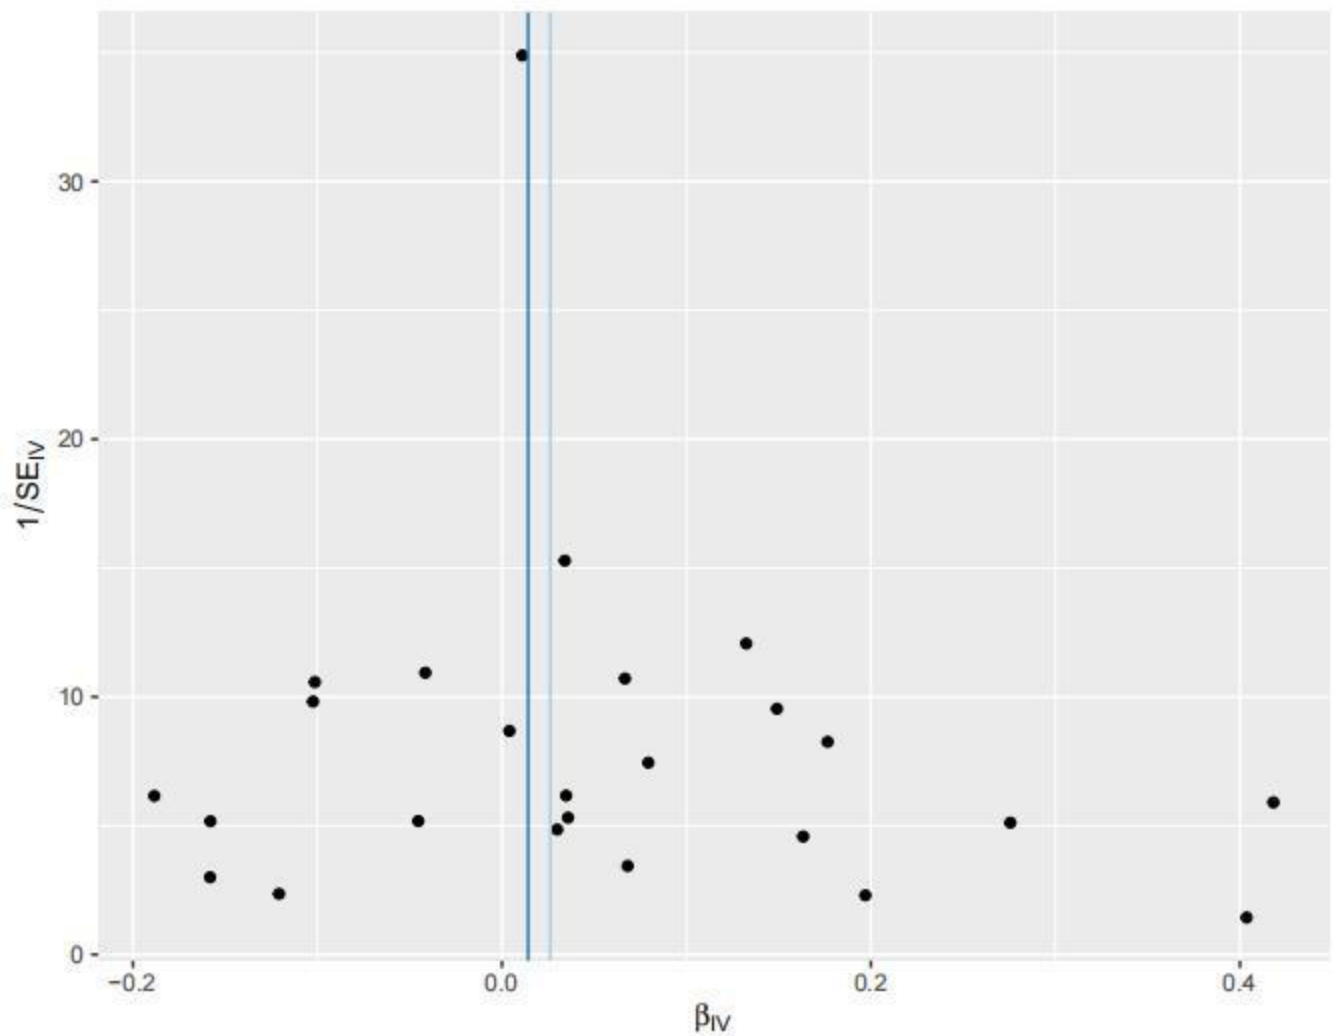

Funnel plot analysis of "BAFF-R on transitional" on 'Aplastic anemia'

### MR Method

- Inverse variance weighted
- MR Egger

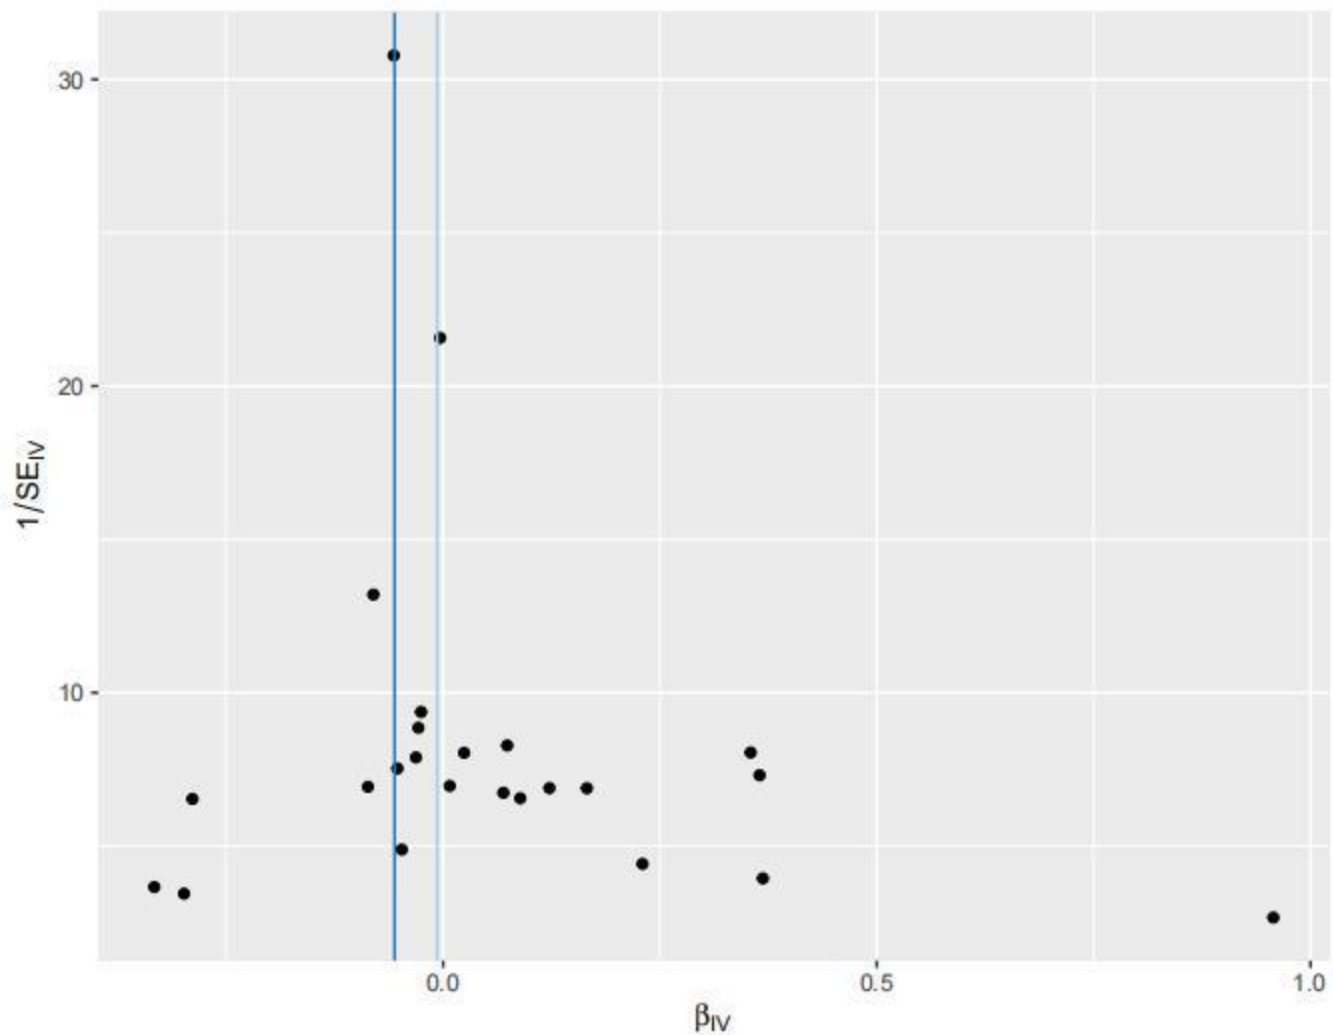

Funnel plot analysis of "CD25 on IgD+ CD38- naive" on 'Aplastic anemia'

### MR Method

- Inverse variance weighted
- MR Egger

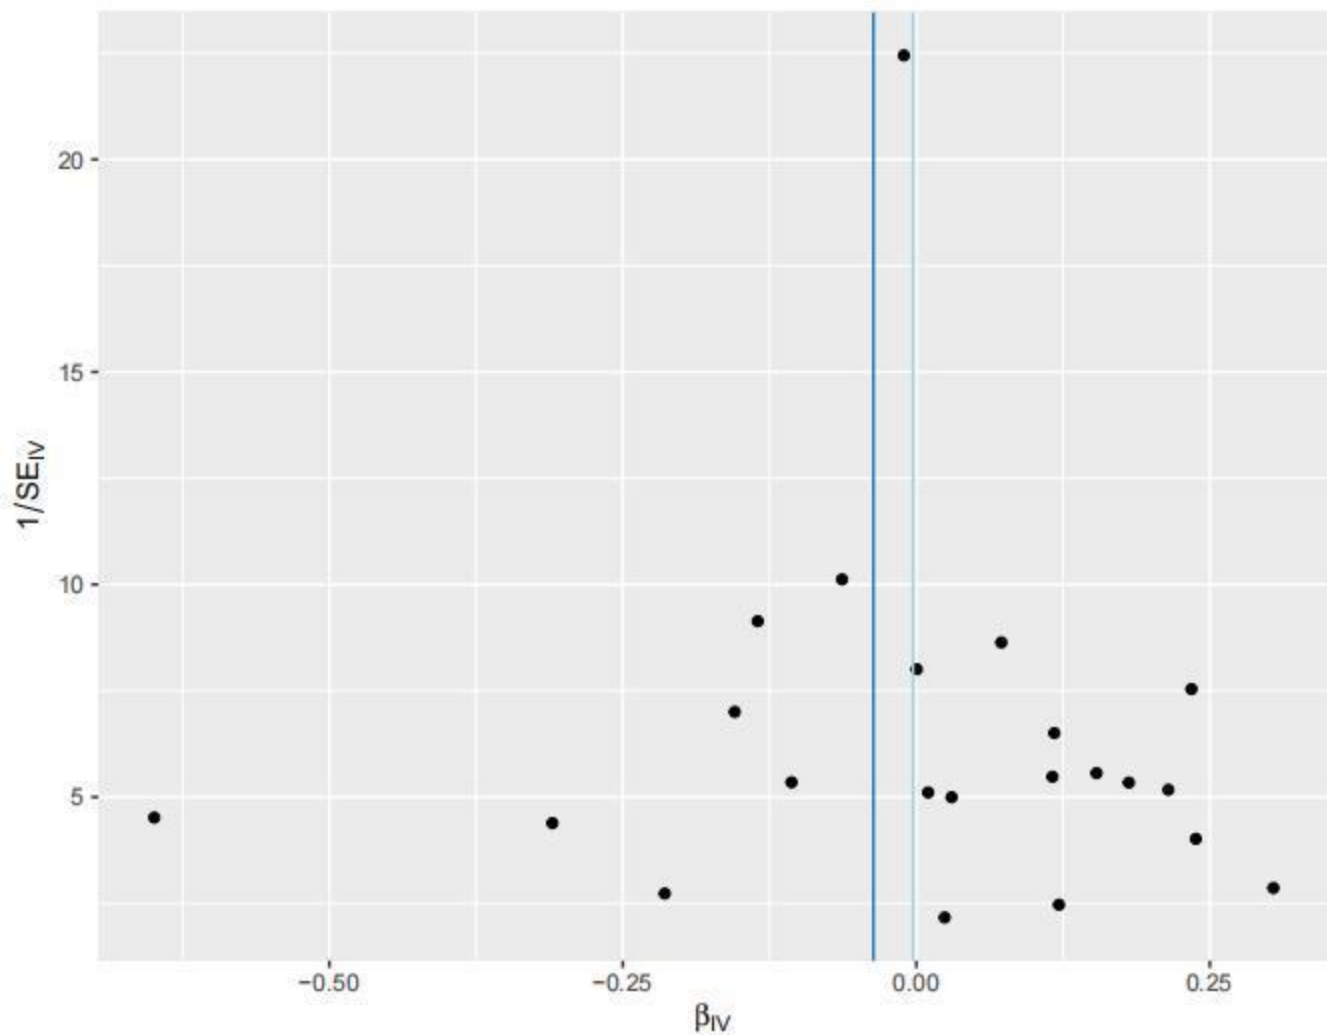

Funnel plot analyse of "IgD on IgD+" on 'Aplastic anemia'

### MR Method

- Inverse variance weighted
- MR Egger

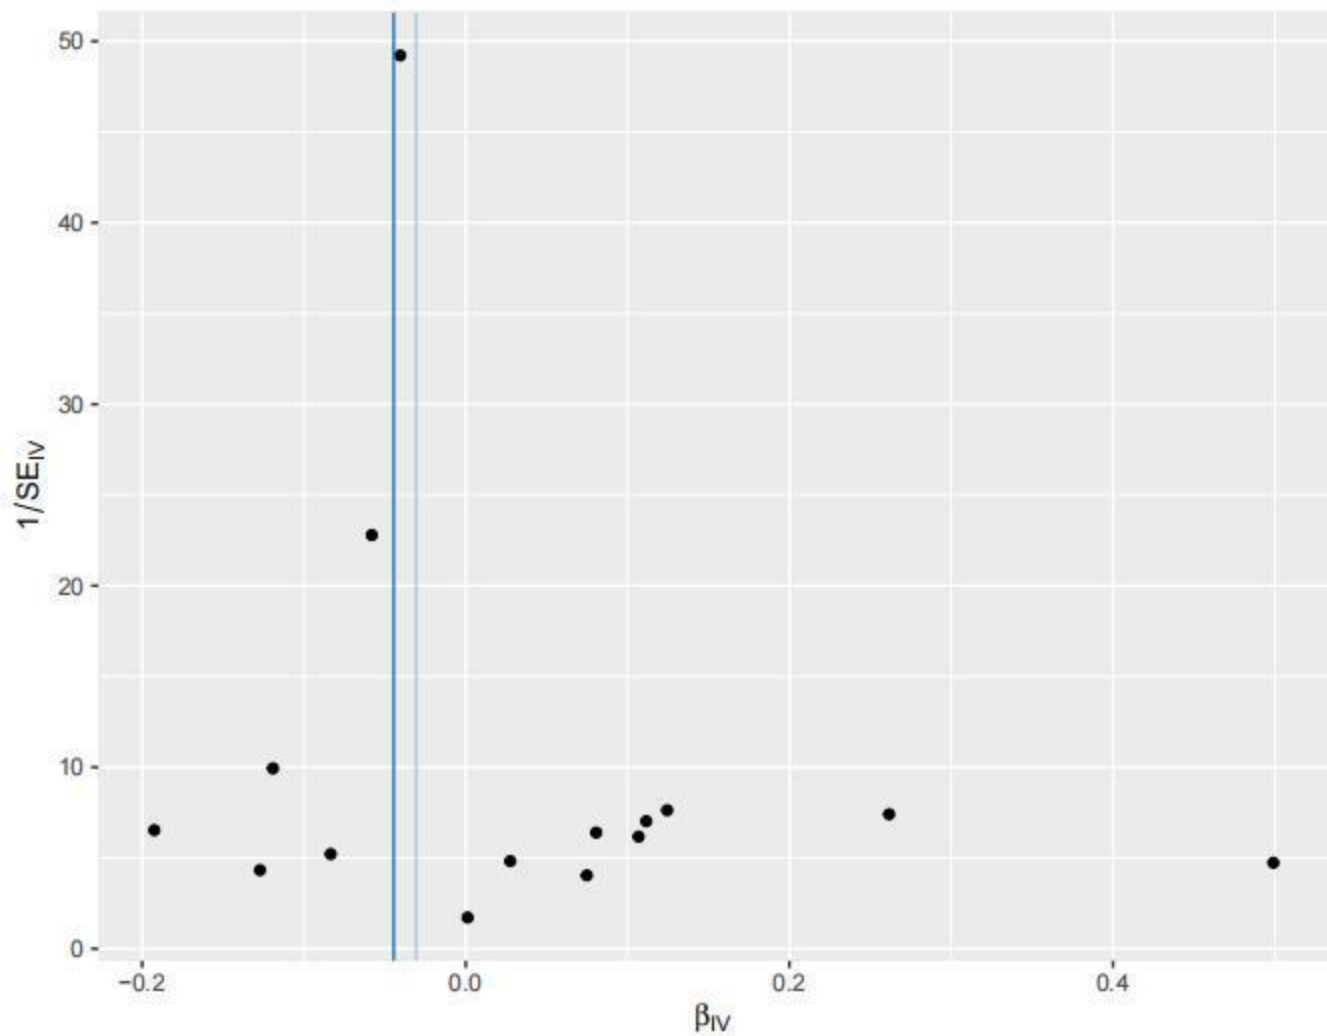

Funnel plot analyse of "CD25 on CD4+" on 'Aplastic anemia'

### MR Method

Inverse variance weighted

MR Egger

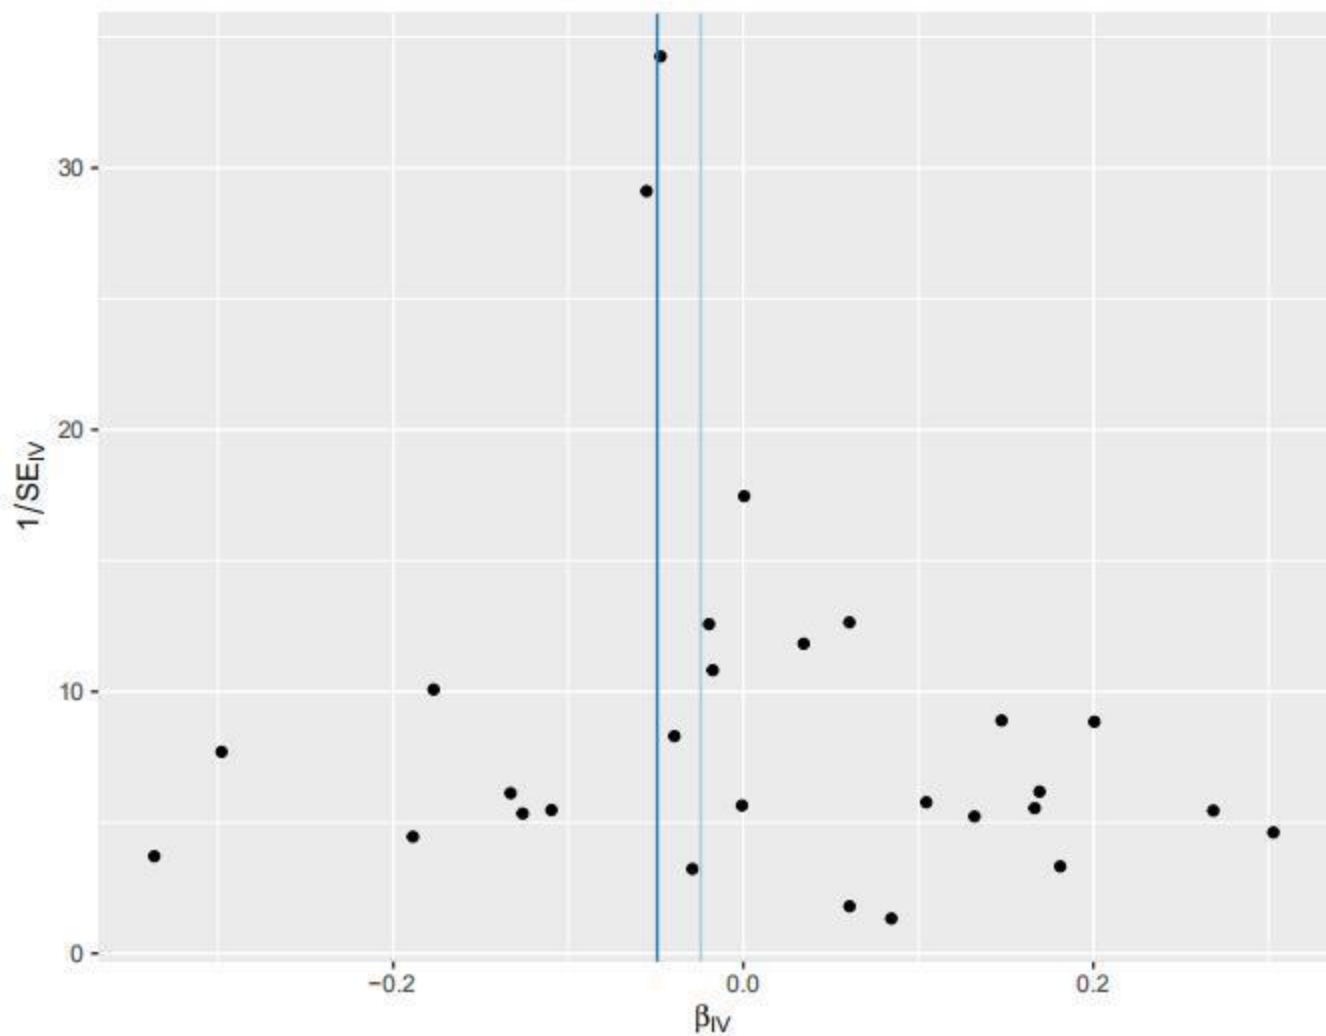

Funnel plot analysis of "CD39+ secreting Treg %secreting Treg" on 'Aplastic anemia'



MR Method

- Inverse variance weighted
- MR Egger

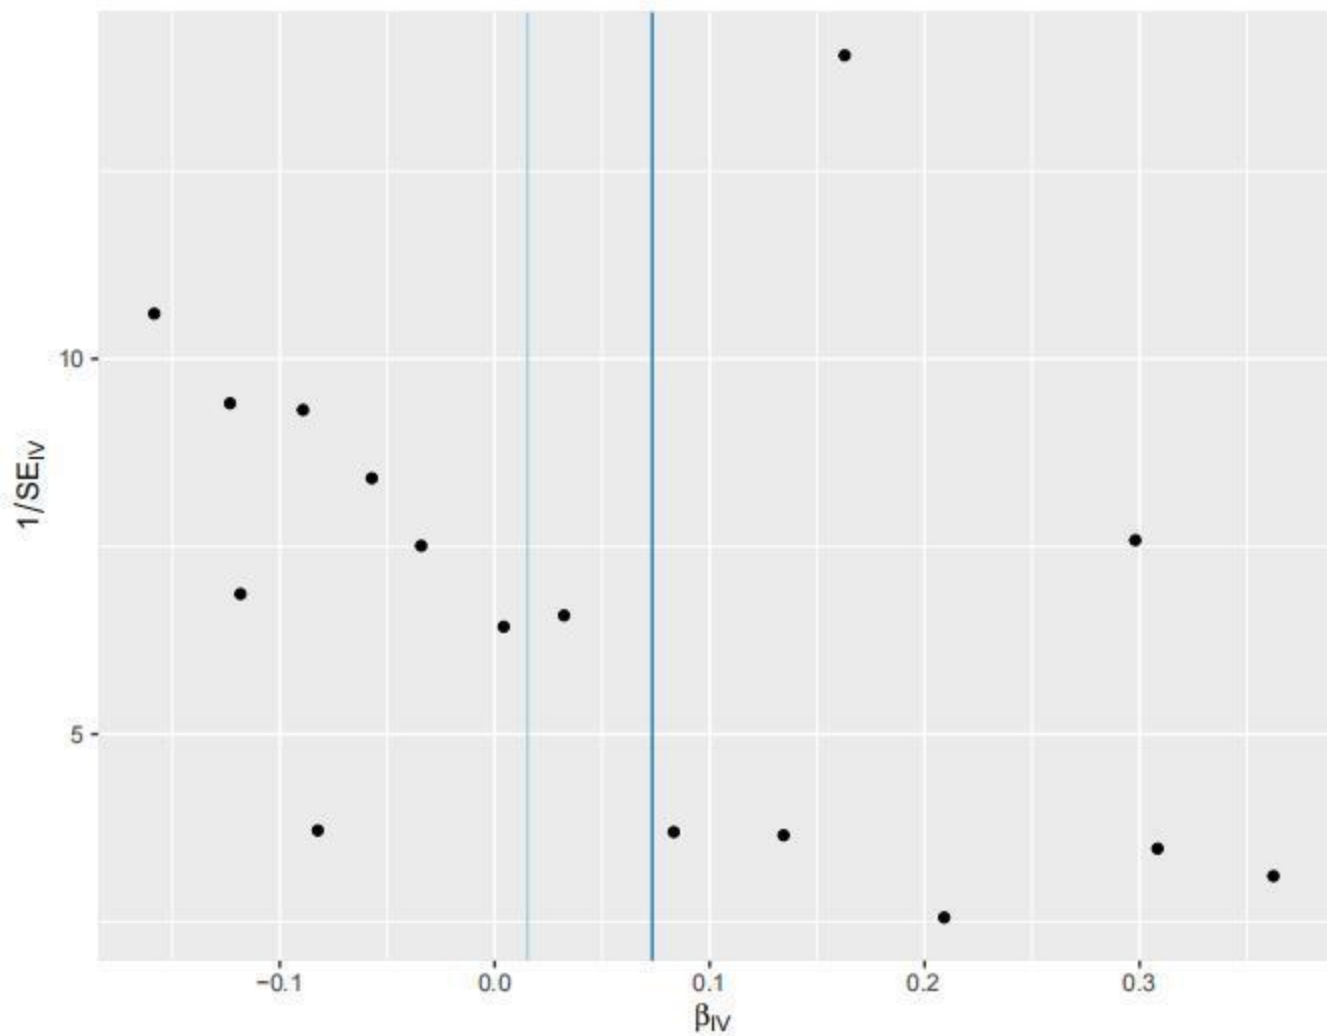

Funnel plot analyse of "CD45 on CD33- HLA DR- " on 'Aplastic anemia'

MR Method

- Inverse variance weighted
- MR Egger

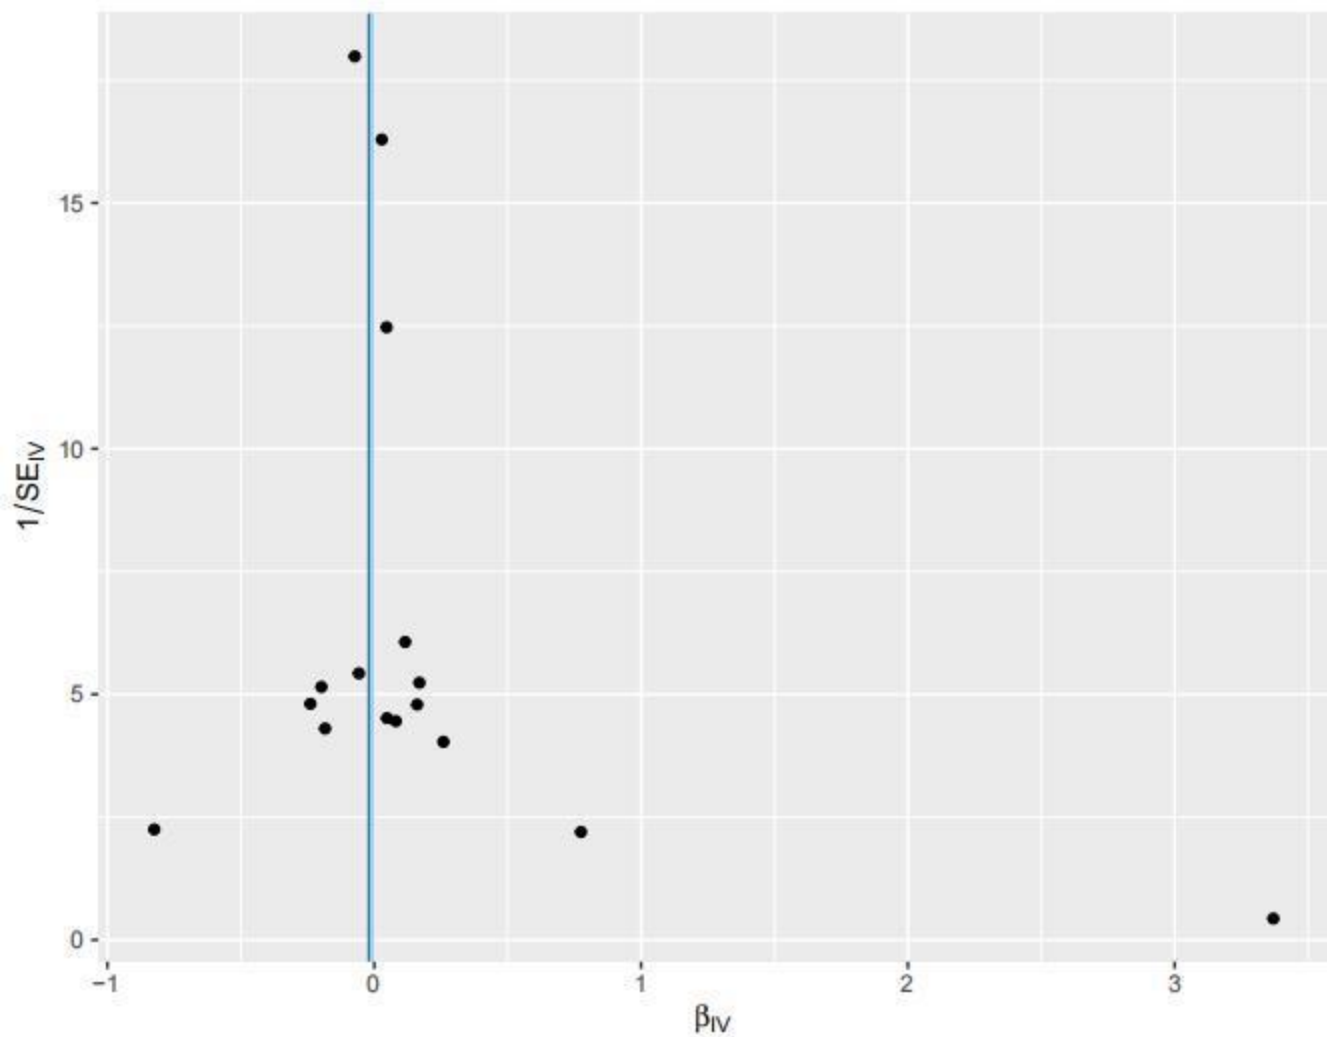

Funnel plot analysis of "CM DN (CD4-CD8-) %T cell" on 'Aplastic anemia'

MR Method

- Inverse variance weighted
- MR Egger

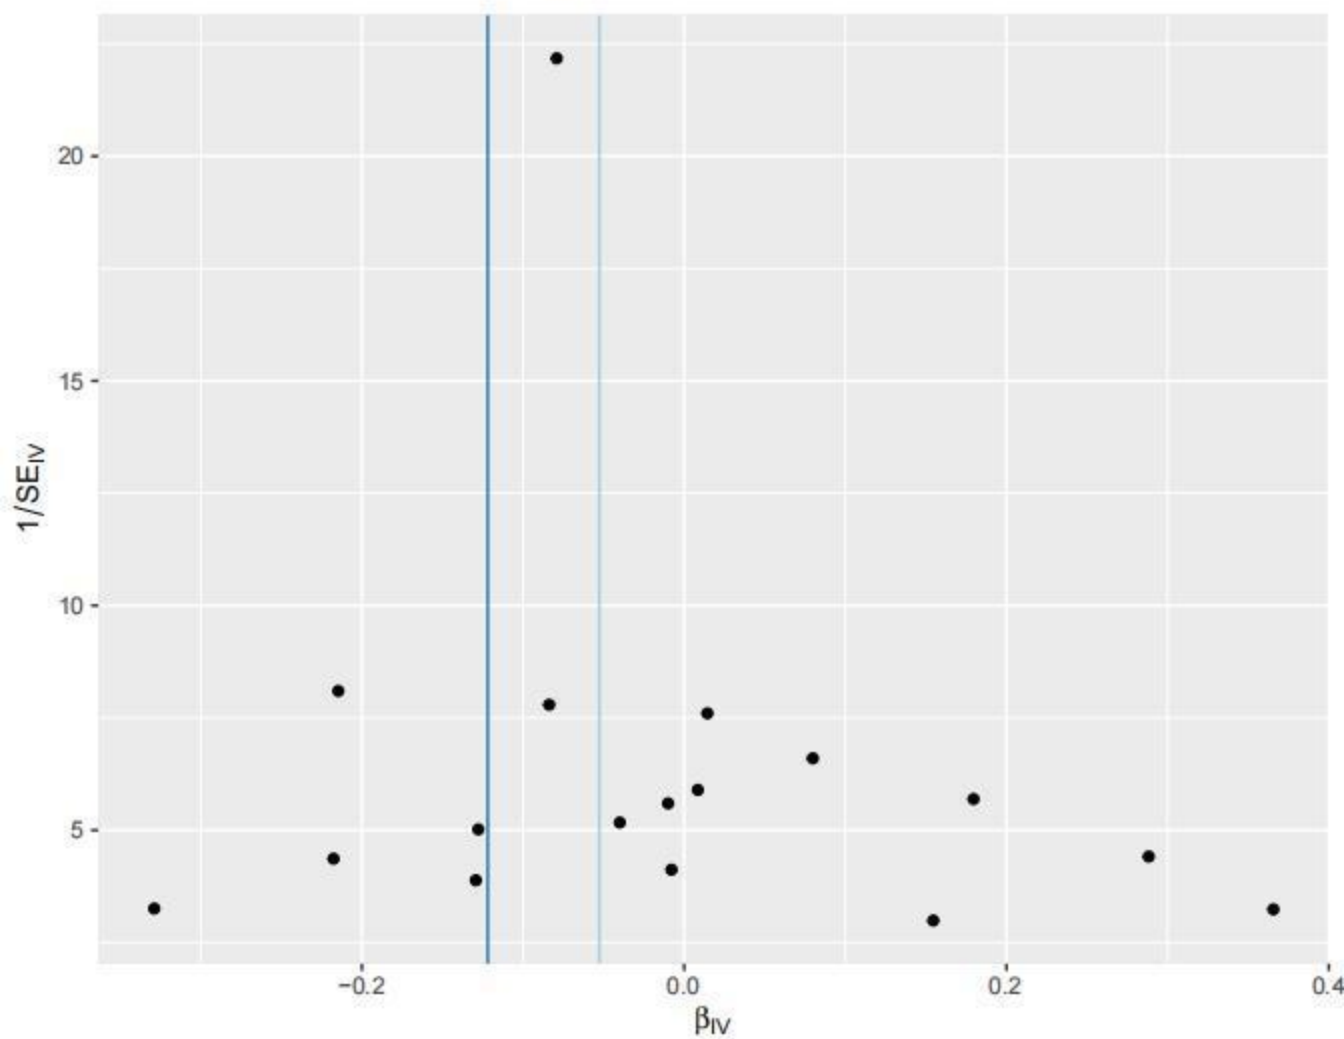

Funnel plot analyse of "CD62L- myeloid DC AC" on 'Aplastic anemia'

### MR Method

- Inverse variance weighted
- MR Egger

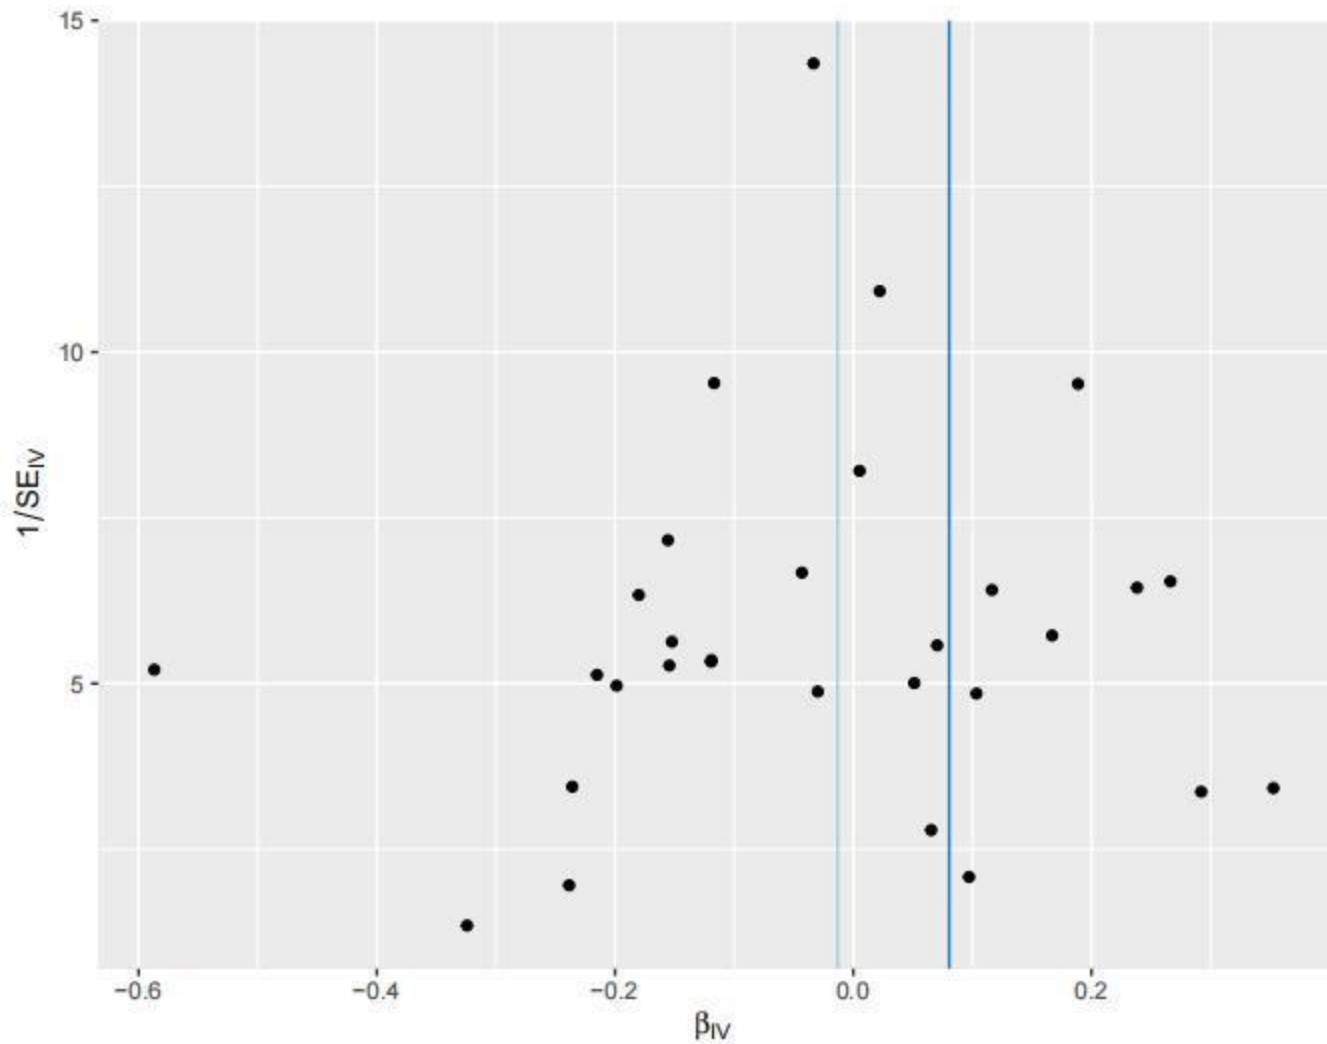

Funnel plot analyse of "CD25++ CD8br AC" on 'Aplastic anemia'

MR Method

- Inverse variance weighted
- MR Egger

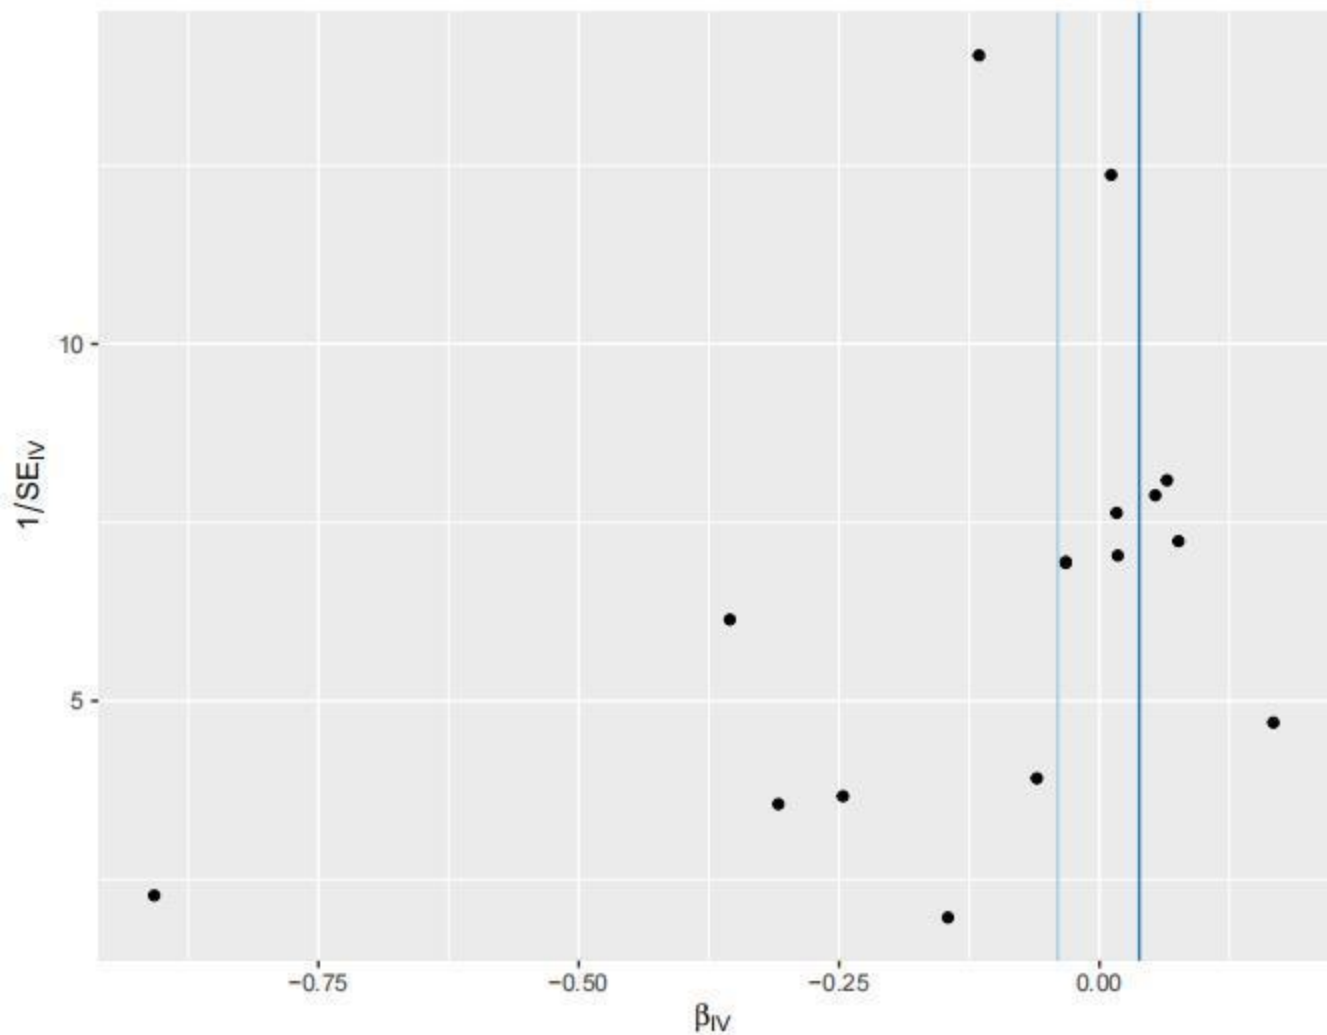

Funnel plot analyse of "CD3 on CD39+ CD8br " on 'Aplastic anemia'

### MR Method

- Inverse variance weighted
- MR Egger

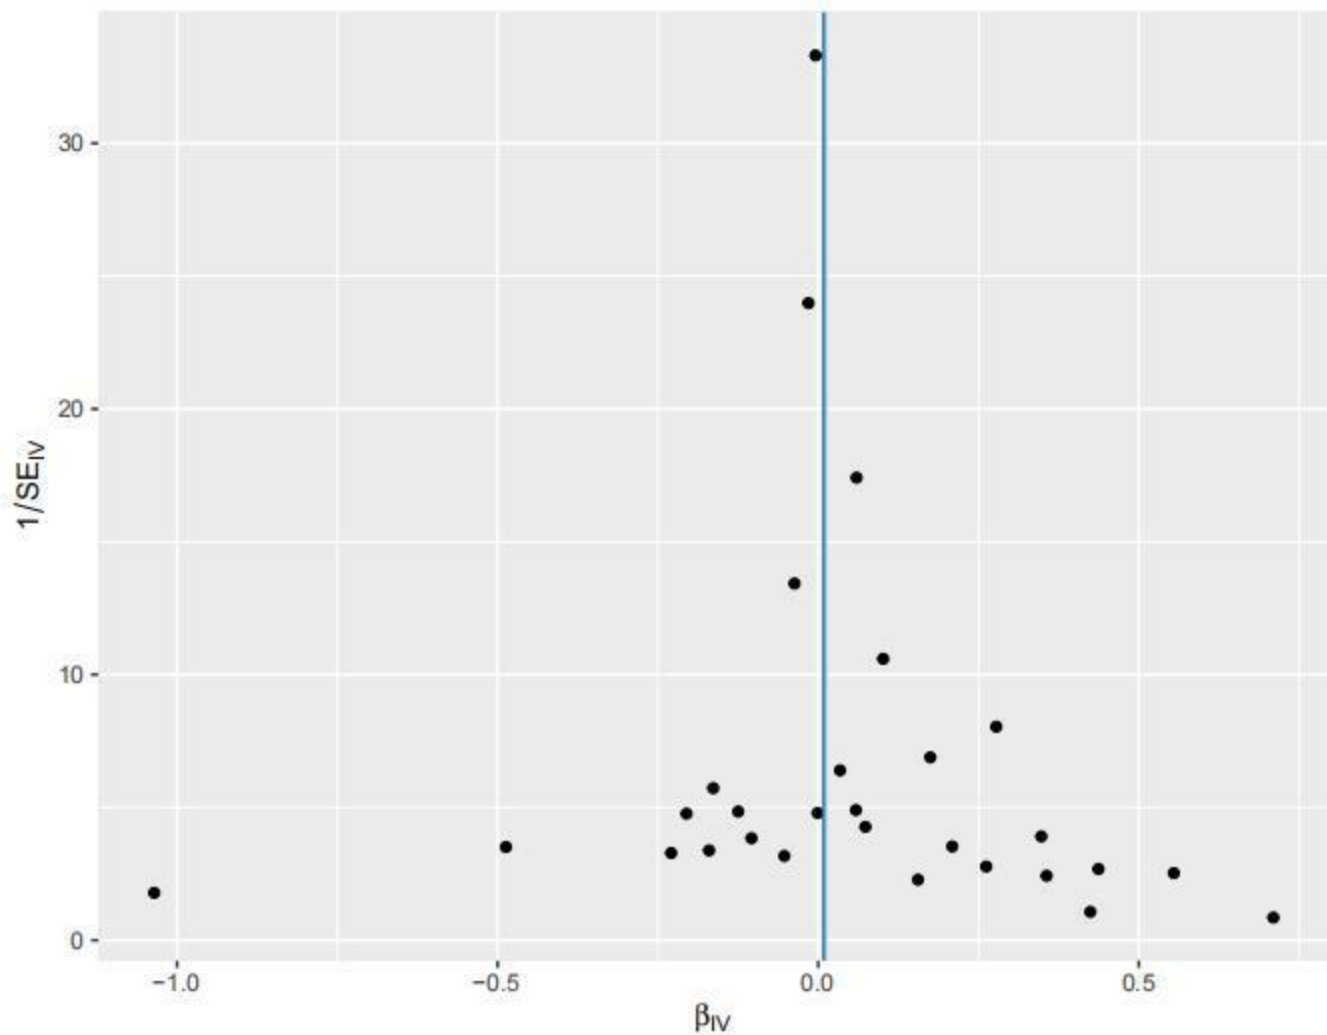

Funnel plot analyse of "Naive CD8br %T cell" on 'Aplastic anemia'

### MR Method

- Inverse variance weighted
- MR Egger

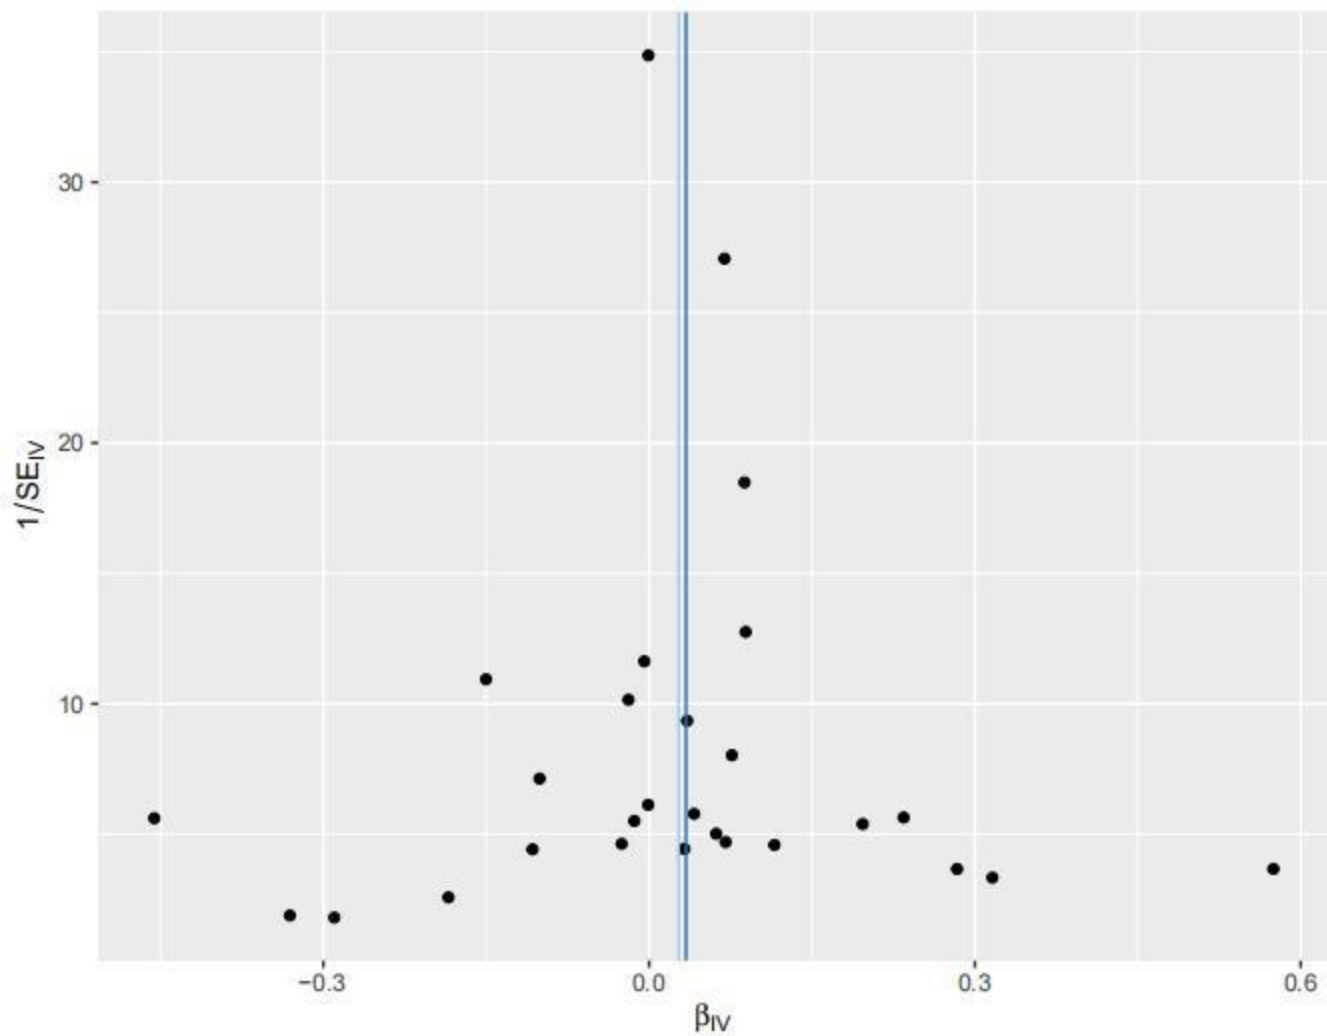

Funnel plot analyse of "CD25 on IgD+" on 'Aplastic anemia'

MR Method

- Inverse variance weighted
- MR Egger

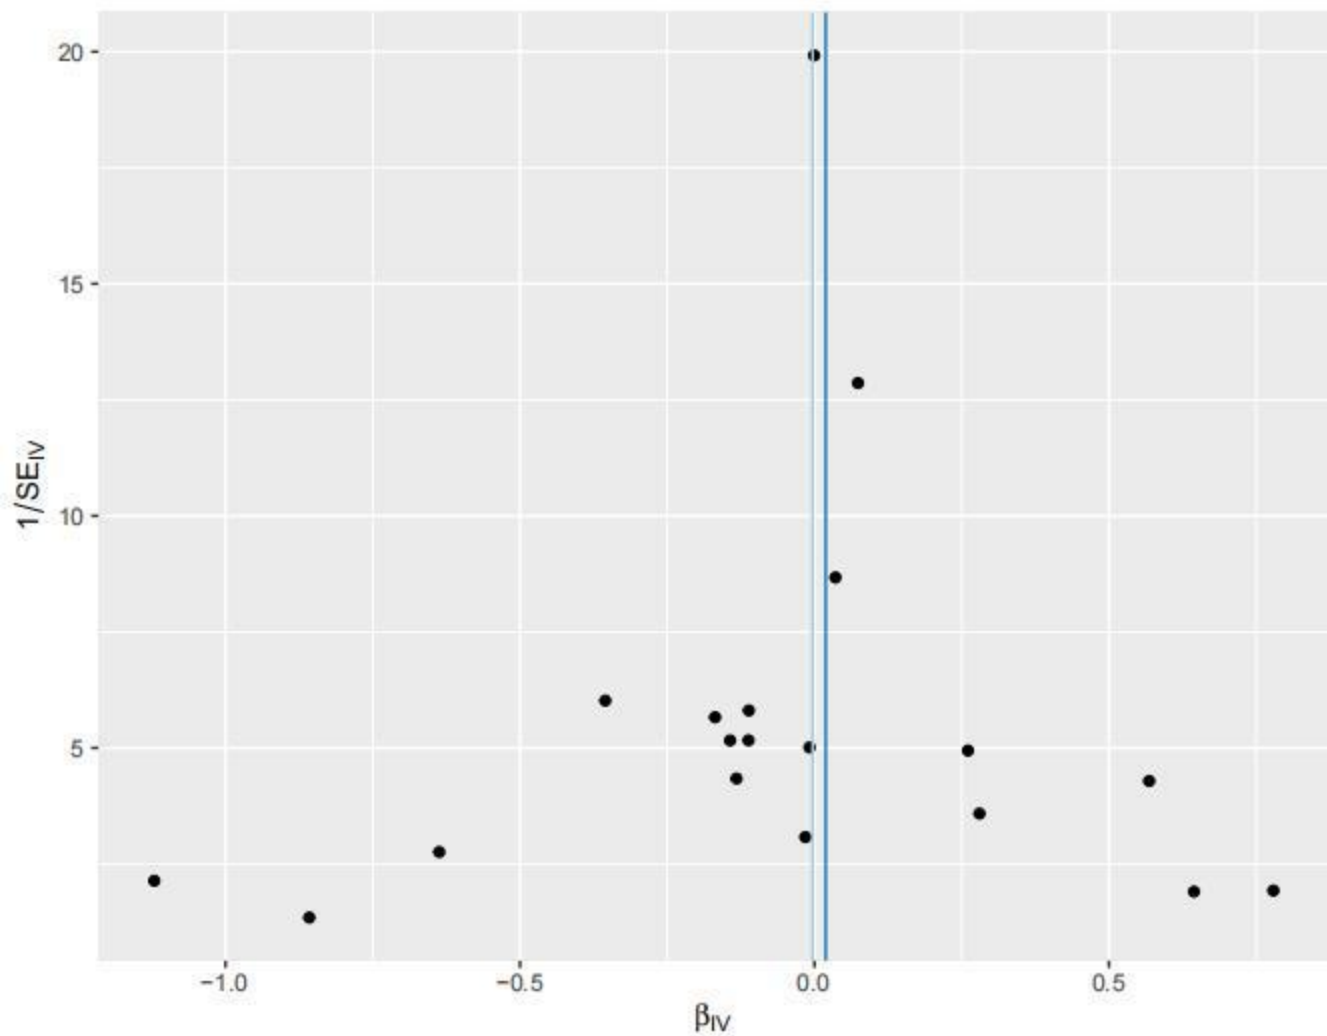

Funnel plot analyse of "CD4+ CD8dim AC" on 'Aplastic anemia'



### MR Method

Inverse variance weighted

MR Egger

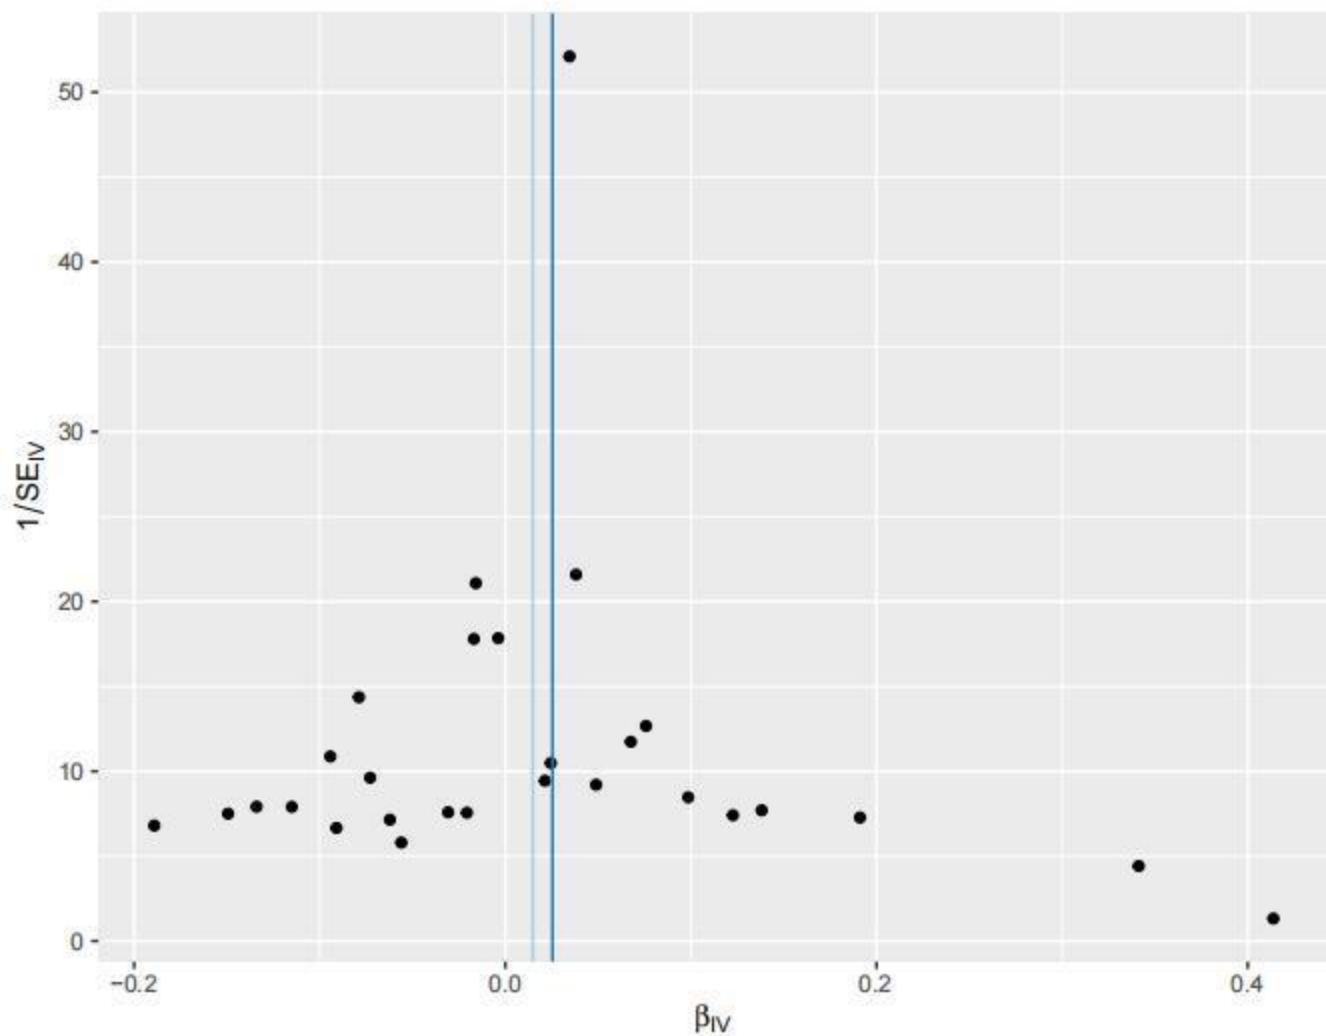

Funnel plot analysis of "CD33 on CD33br HLA DR+ CD14dim " on 'Aplastic anemia'

MR Method

- Inverse variance weighted
- MR Egger

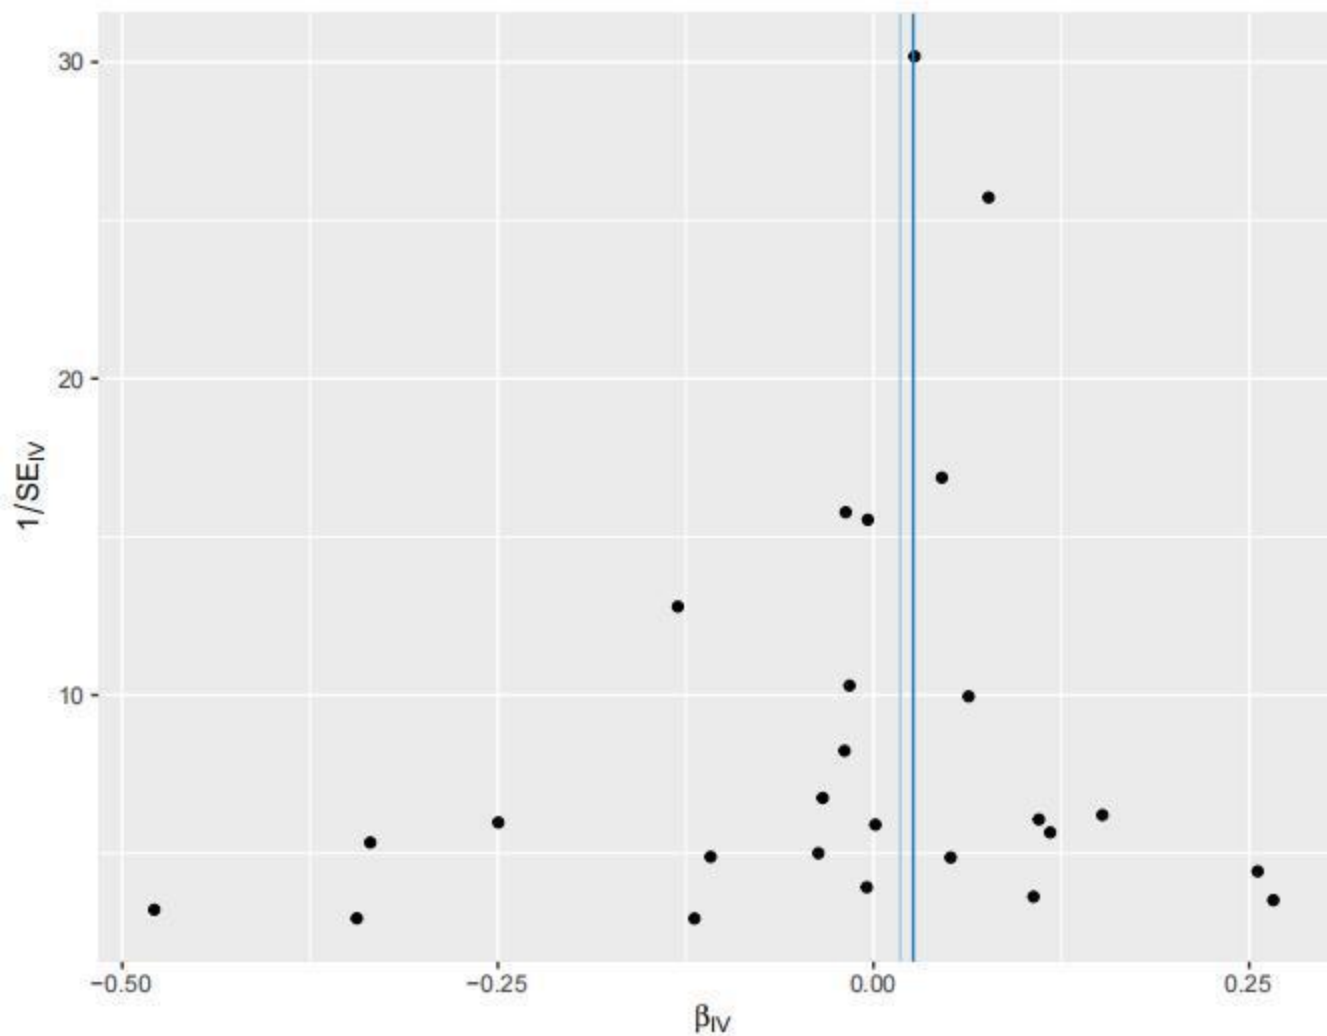

Funnel plot analysis of "CD4 on activated Treg " on 'Aplastic anemia'

### MR Method

- Inverse variance weighted
- MR Egger

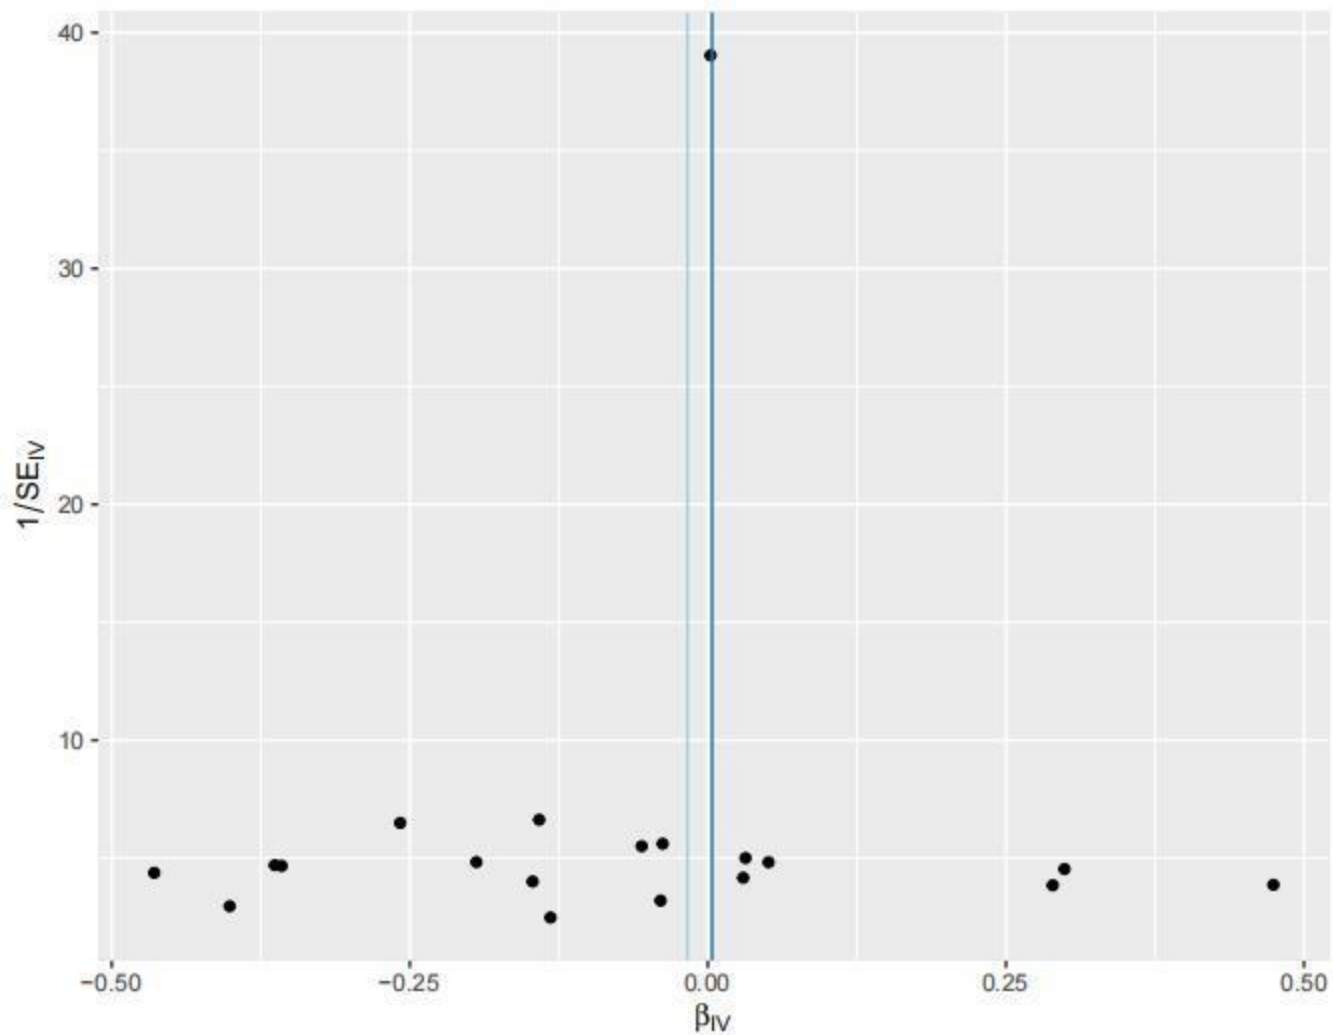

Funnel plot analyse of "CD20- %lymphocyte" on 'Aplastic anemia'

MR Method

- Inverse variance weighted
- MR Egger

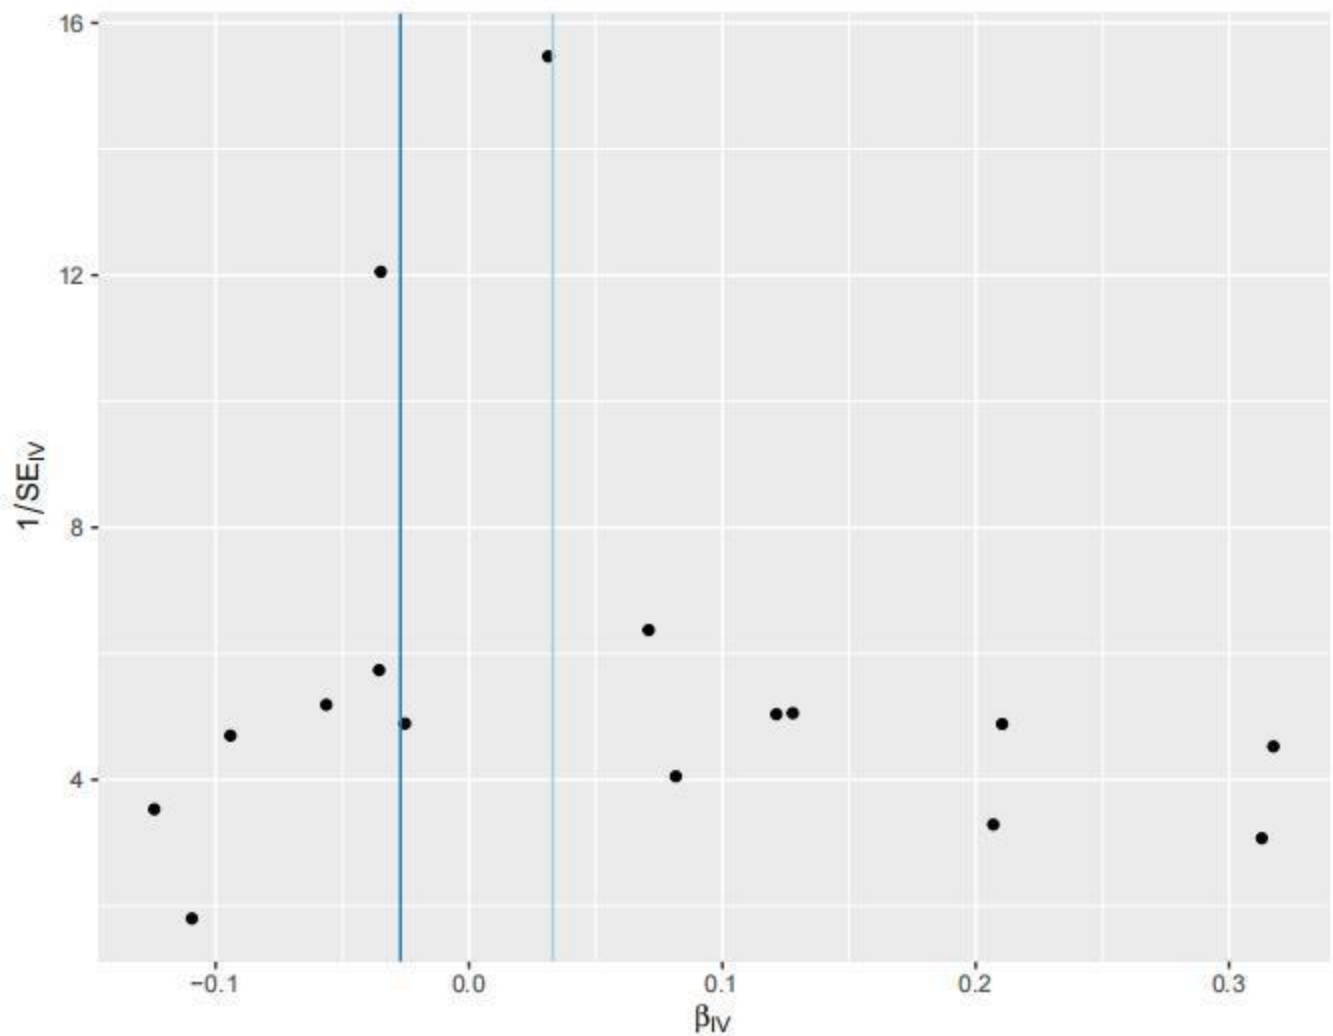

Funnel plot analyse of "IgD- CD27- %B cell" on 'Aplastic anemia'

MR Method

- Inverse variance weighted
- MR Egger

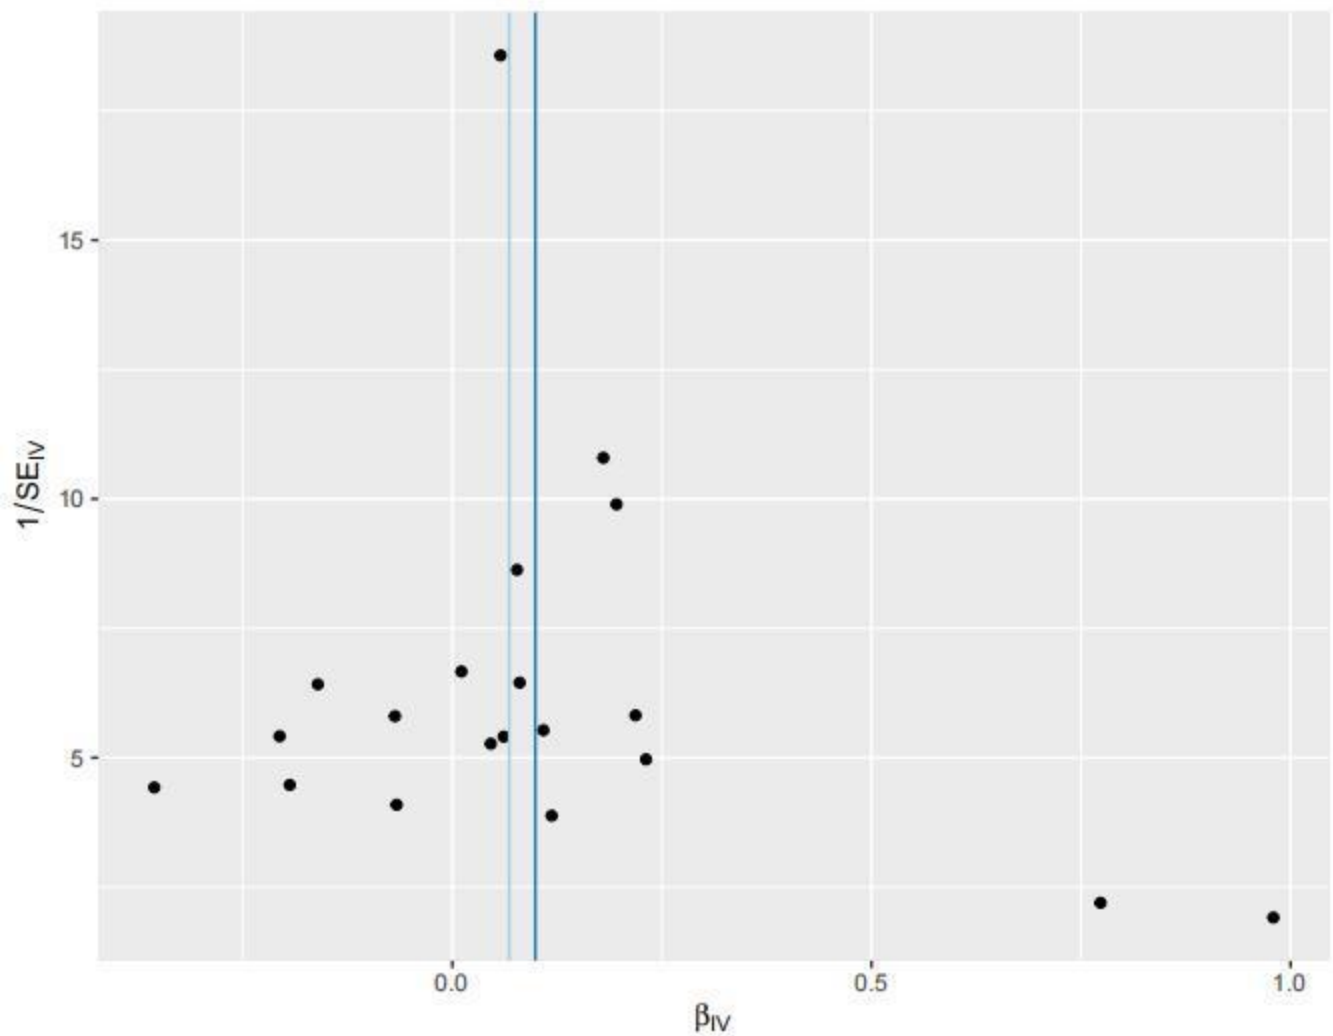

Funnel plot analyse of "CD25hi %T cell" on 'Aplastic anemia'

### MR Method

- Inverse variance weighted
- MR Egger

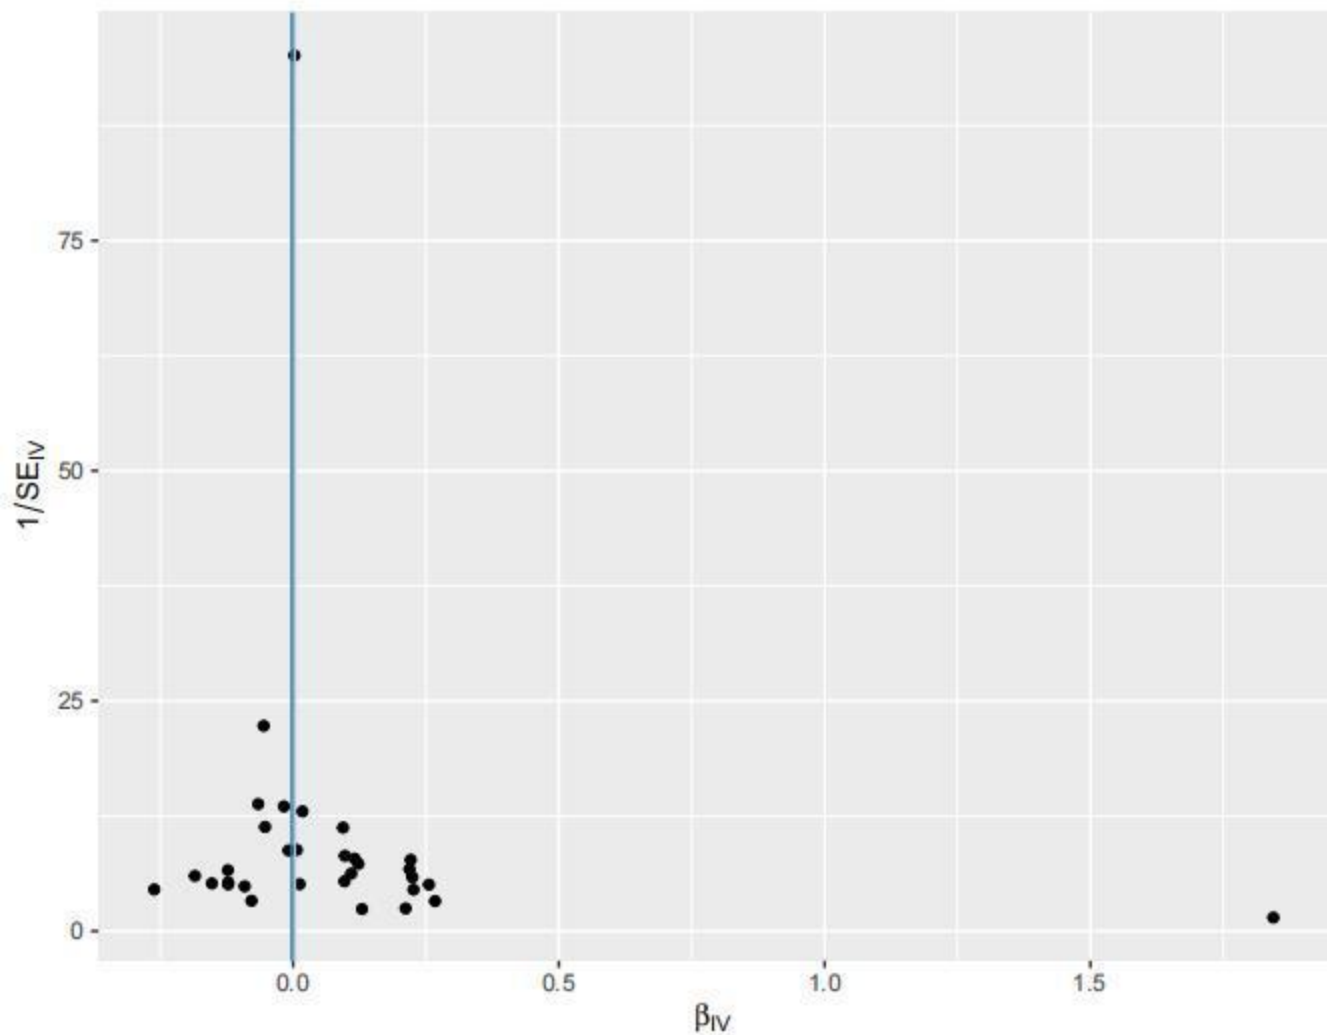

Funnel plot analyse of "CM CD4+ %CD4+" on 'Aplastic anemia'

### MR Method

Inverse variance weighted

MR Egger

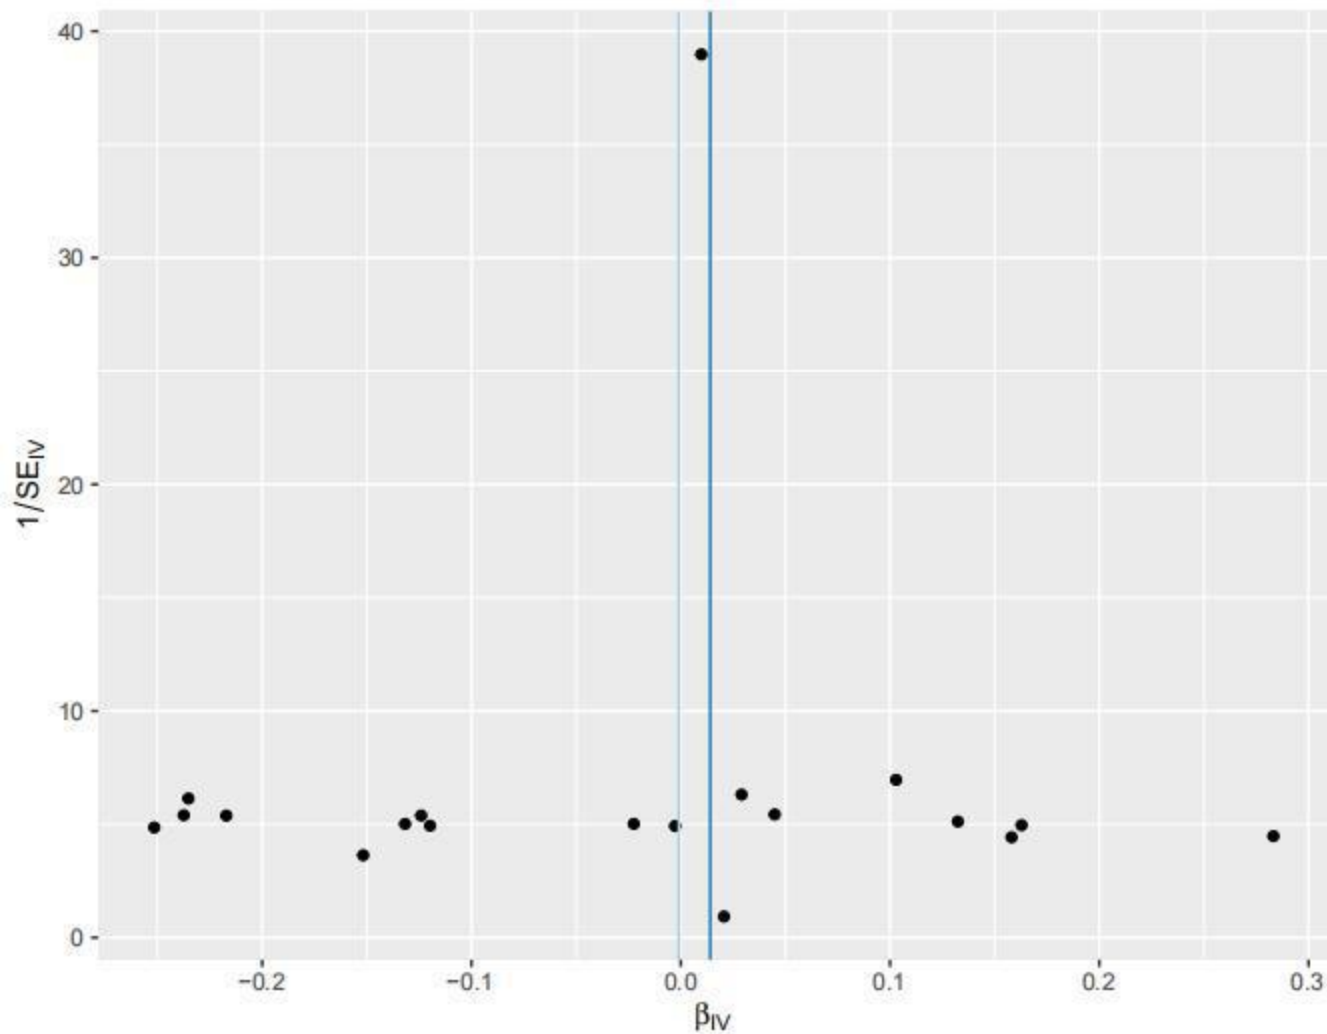

Funnel plot analyse of "TCRgd %T cell" on 'Aplastic anemia'

### MR Method

- Inverse variance weighted
- MR Egger

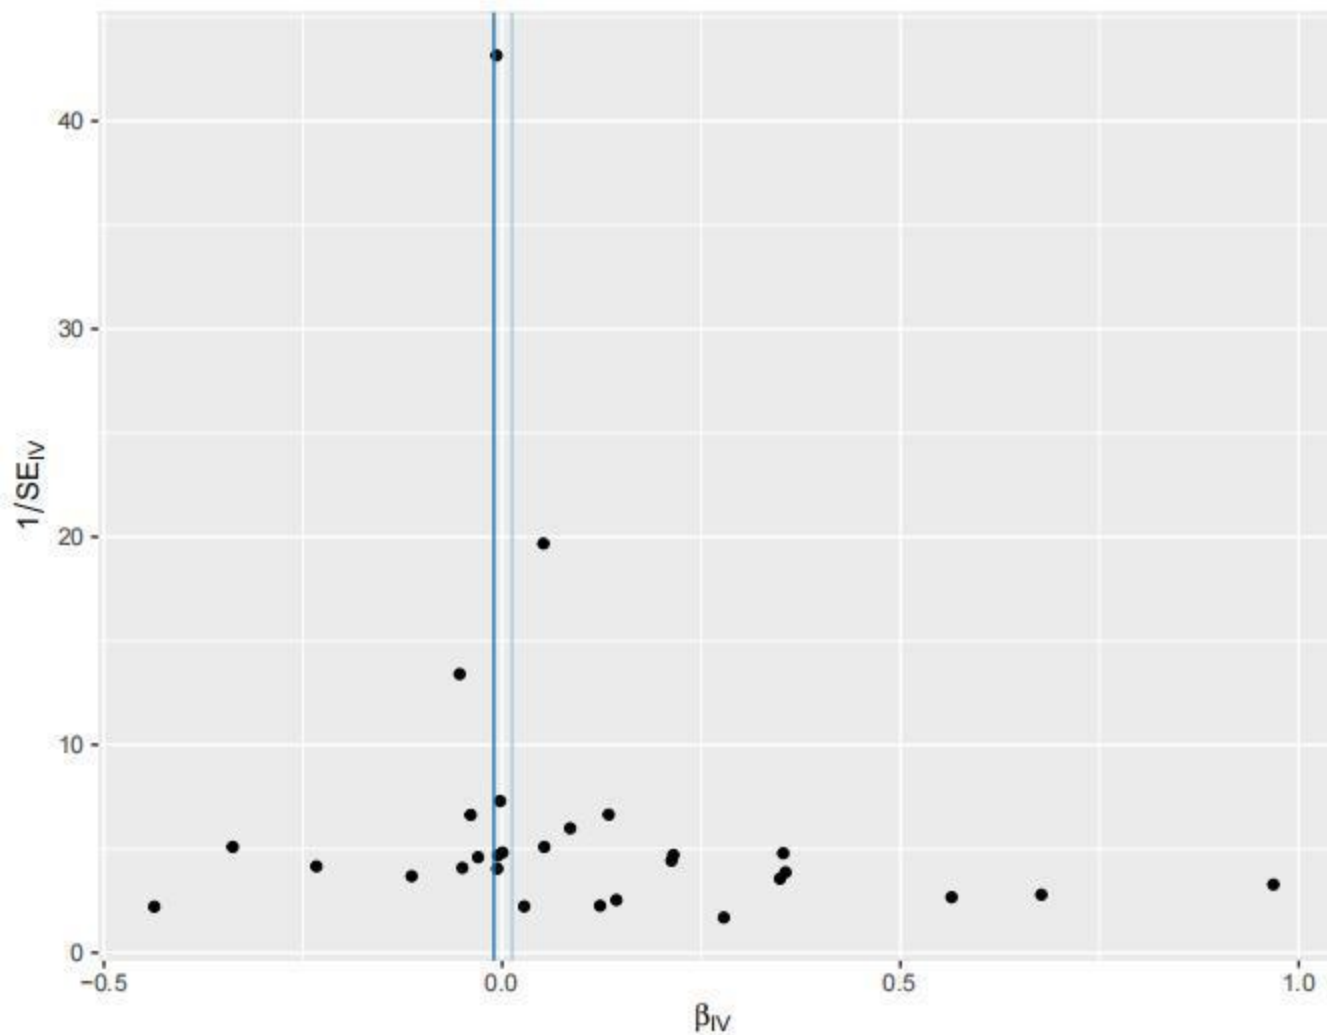

Funnel plot analyse of "CD14+ CD16- monocyte AC" on 'Aplastic anemia'



### MR Method

- Inverse variance weighted
- MR Egger

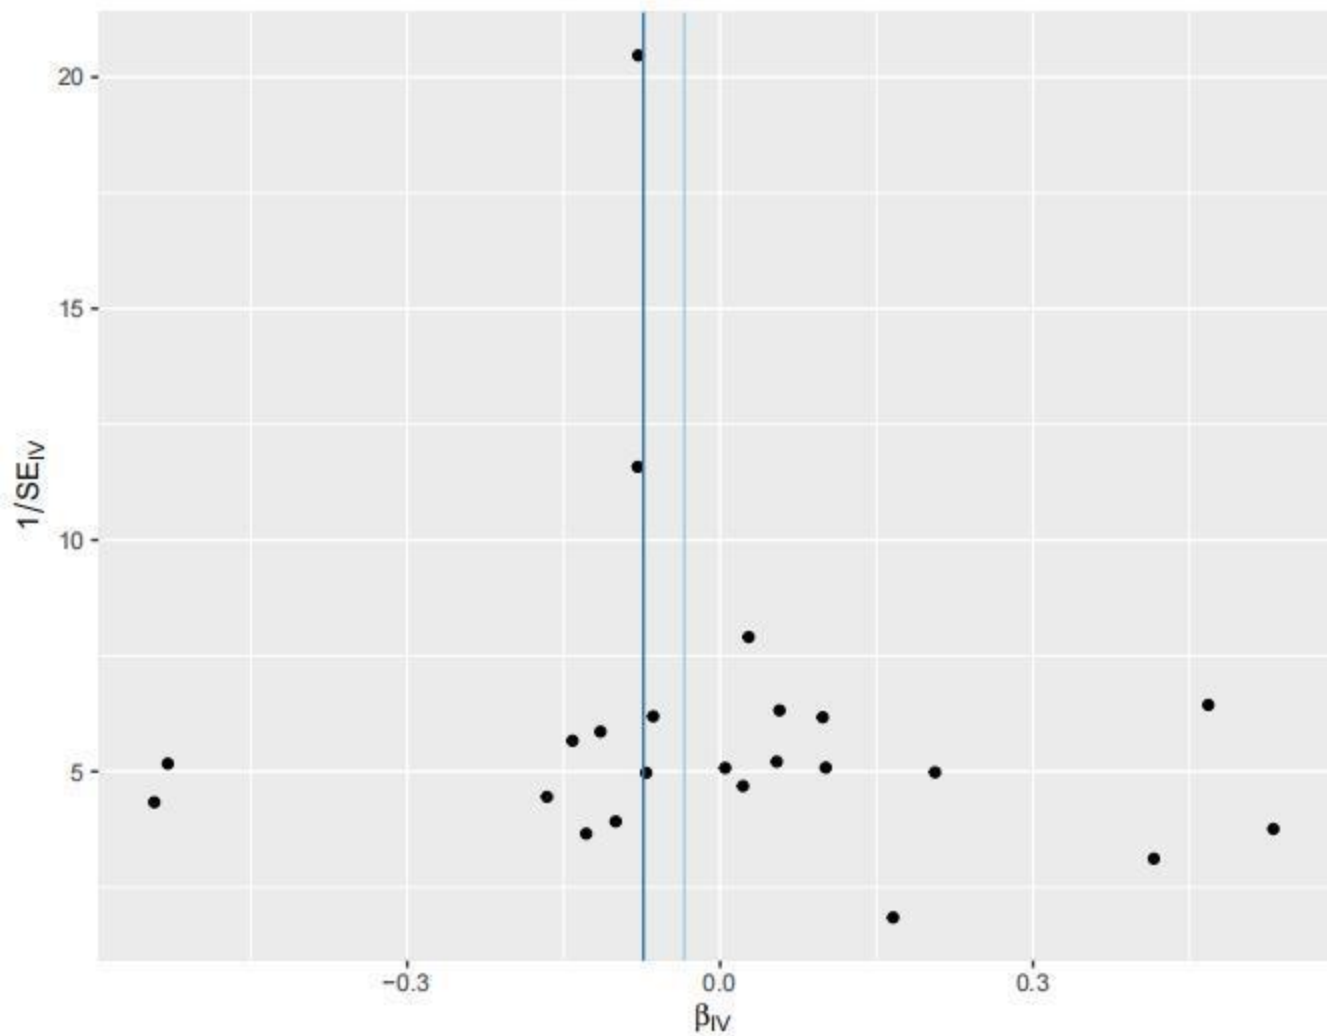

Funnel plot analyse of "SSC-A on CD14+ monocyte" on 'Aplastic anemia'

### MR Method

Inverse variance weighted

MR Egger

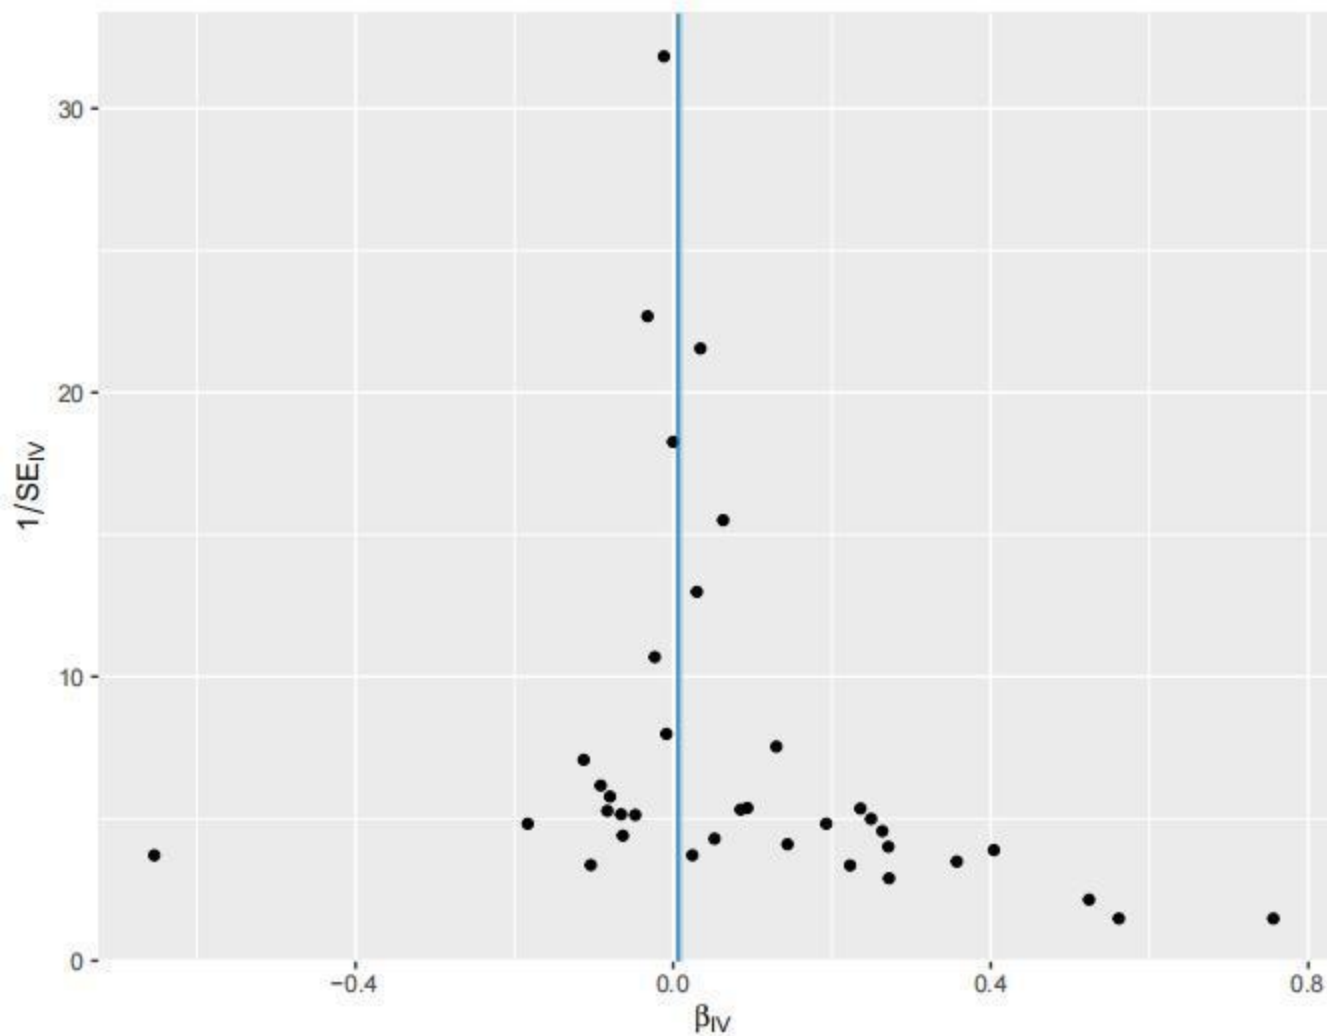

Funnel plot analysis of "CD19 on IgD+ CD24+" on 'Aplastic anemia'

MR Method

- Inverse variance weighted
- MR Egger

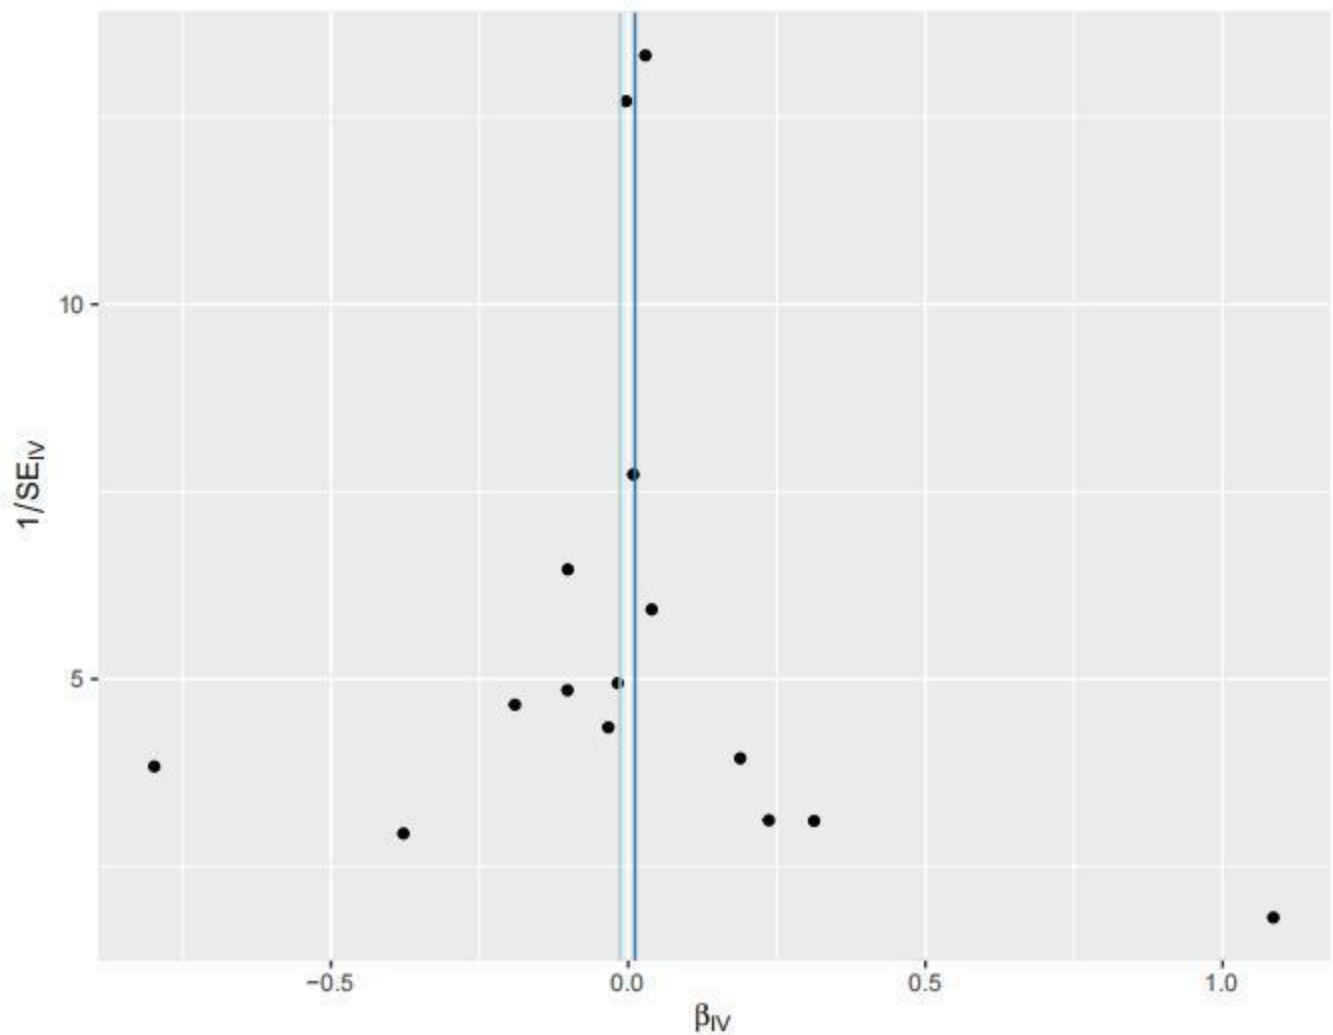

Funnel plot analyse of "BAFF-R on IgD- CD38br" on 'Aplastic anemia'

MR Method

- Inverse variance weighted
- MR Egger

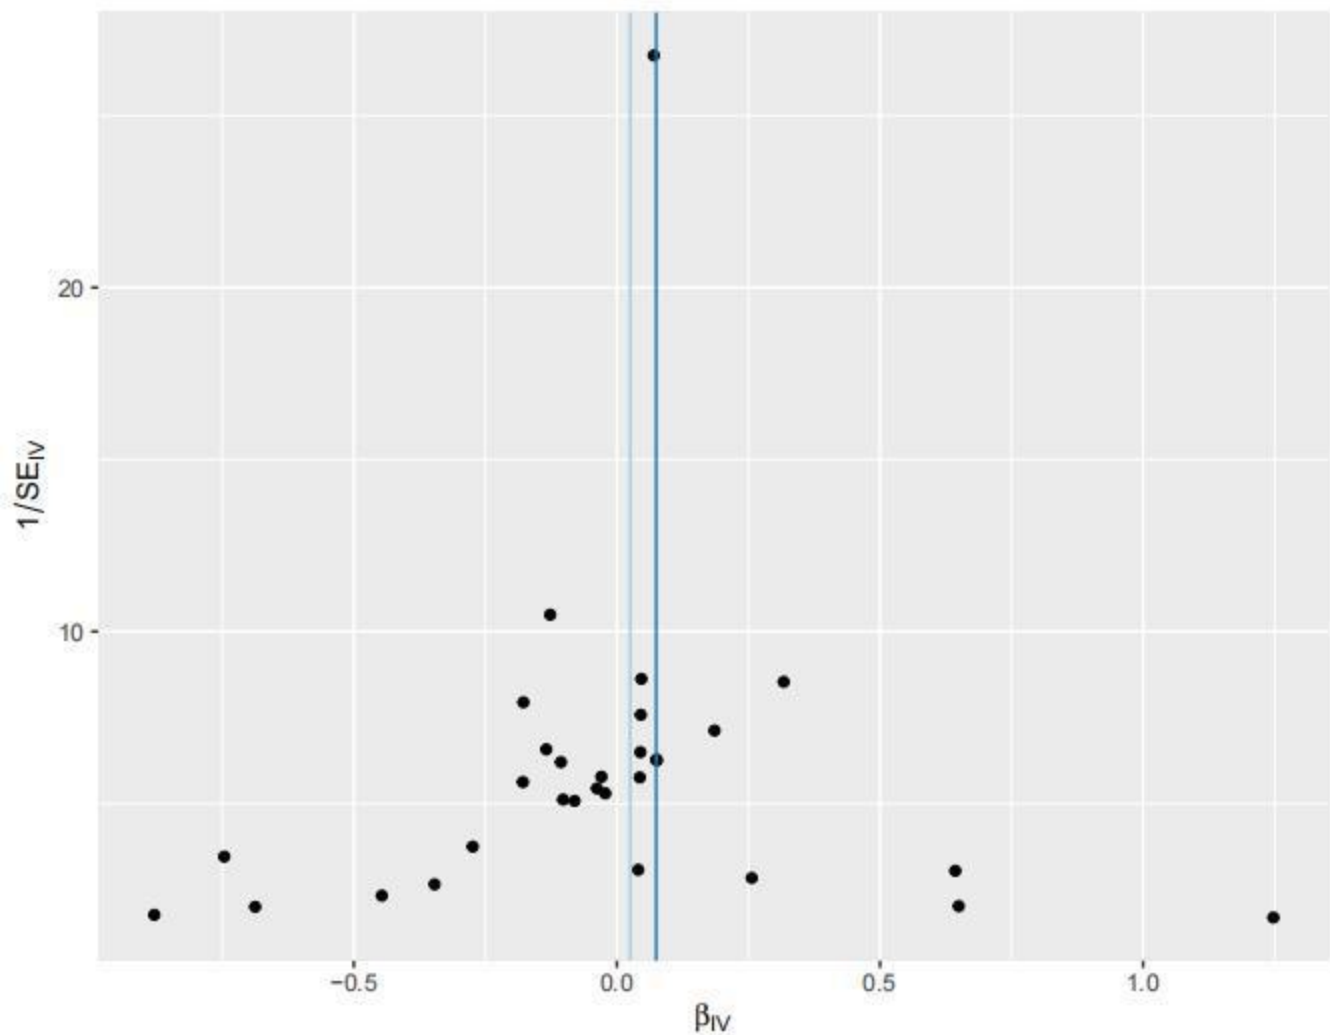

Funnel plot analyse of "CD20 on IgD+ CD38dim" on 'Aplastic anemia'

### MR Method

- Inverse variance weighted
- MR Egger

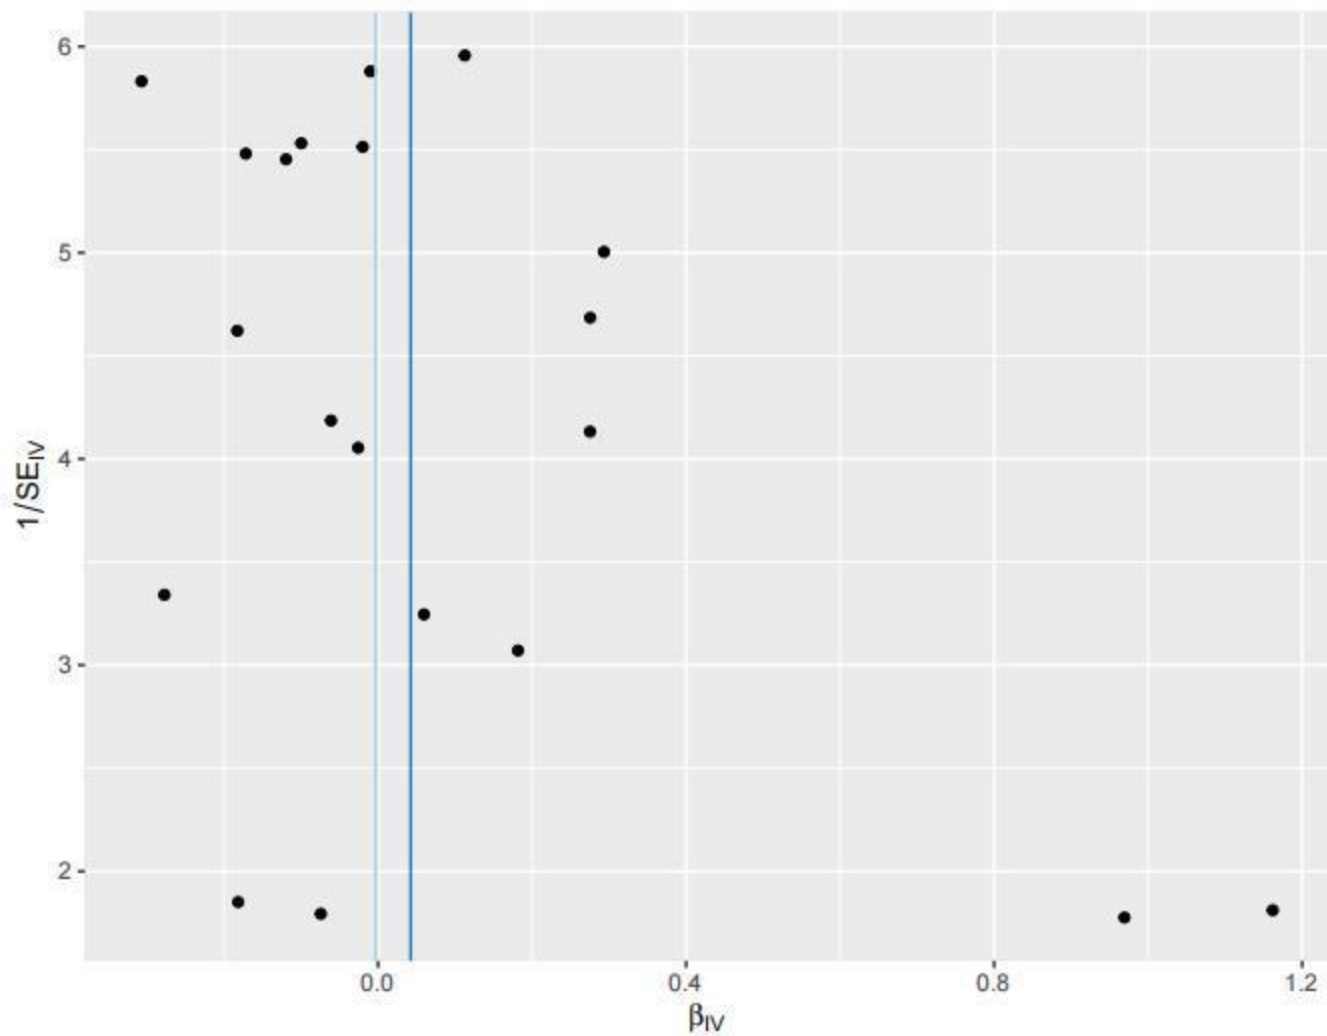

Funnel plot analysis of "SSC-A on lymphocyte" on 'Aplastic anemia'

MR Method

- Inverse variance weighted
- MR Egger

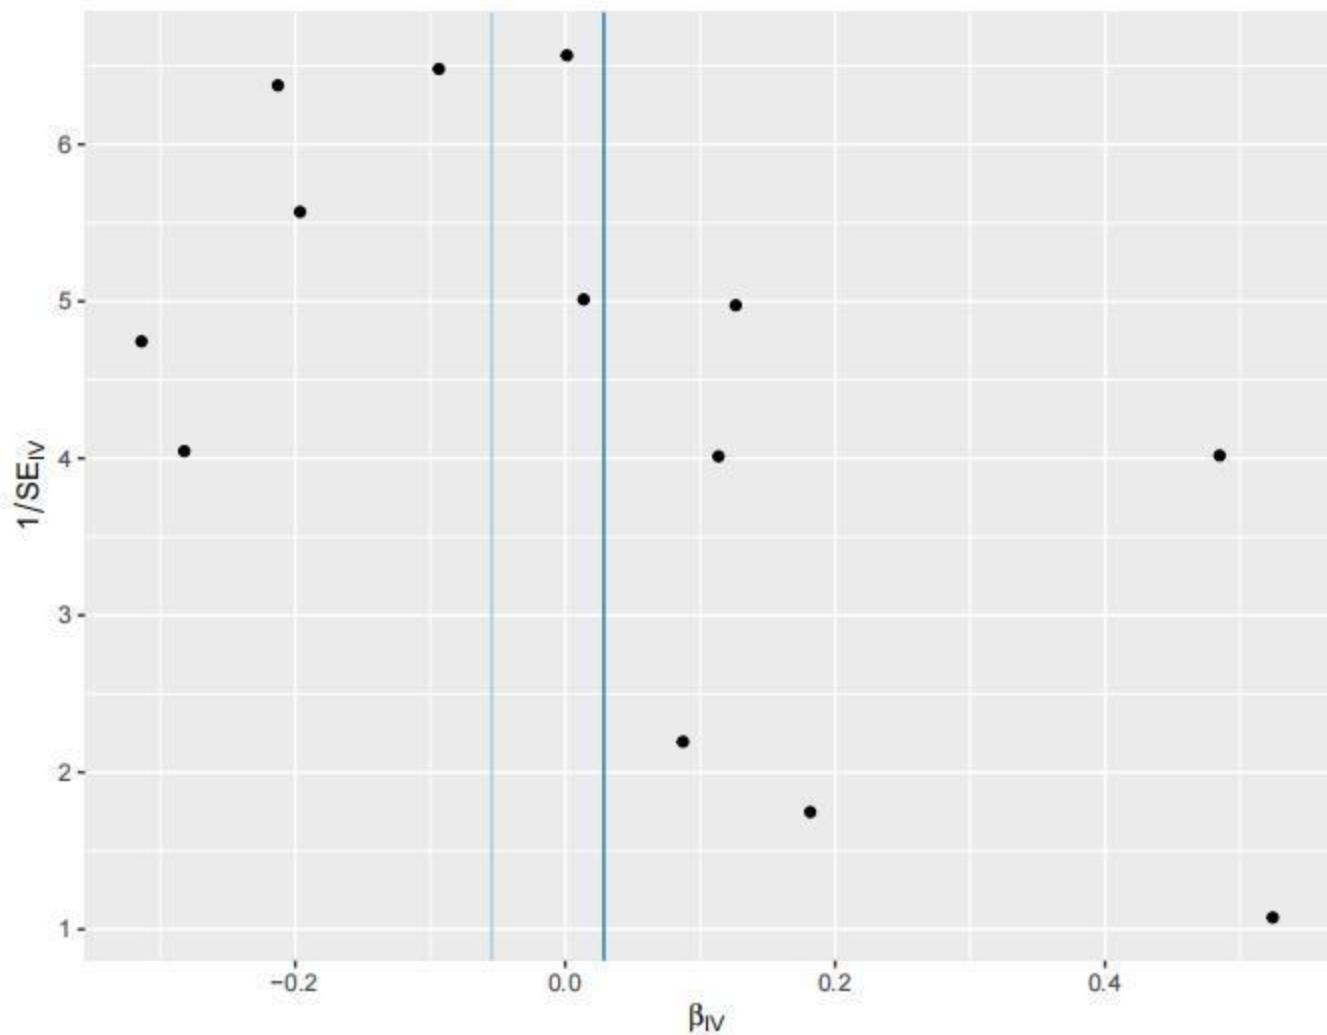

Funnel plot analysis of "CD64 on CD14+ CD16+ monocyte" on 'Aplastic anemia'

MR Method

- Inverse variance weighted
- MR Egger

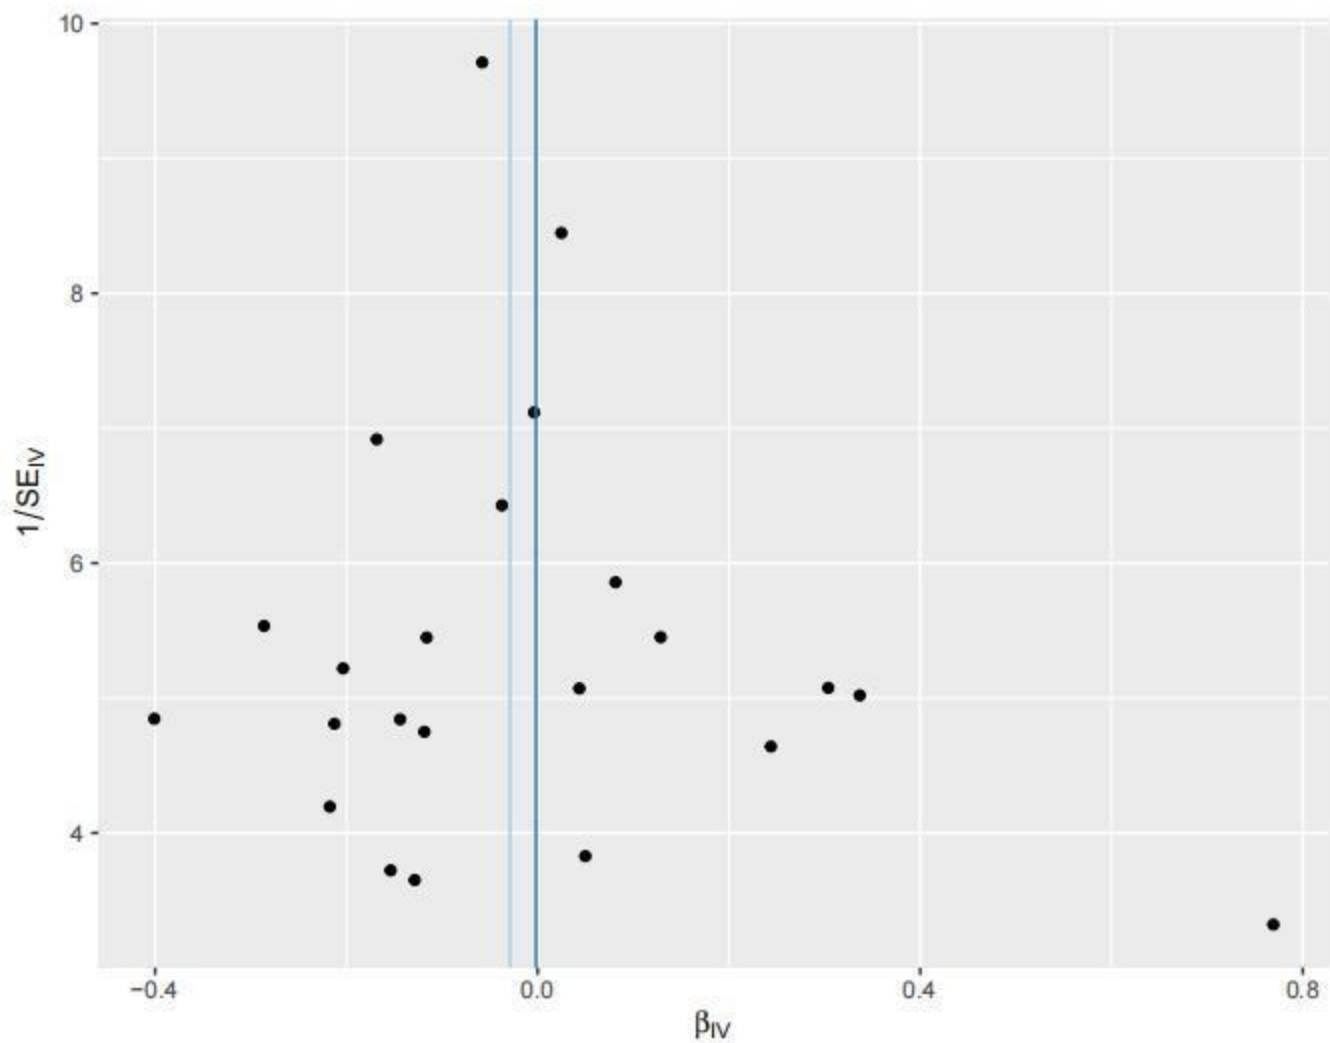

Funnel plot analyse of "CD19 on IgD- CD24-" on 'Aplastic anemia'

### MR Method

- Inverse variance weighted
- MR Egger

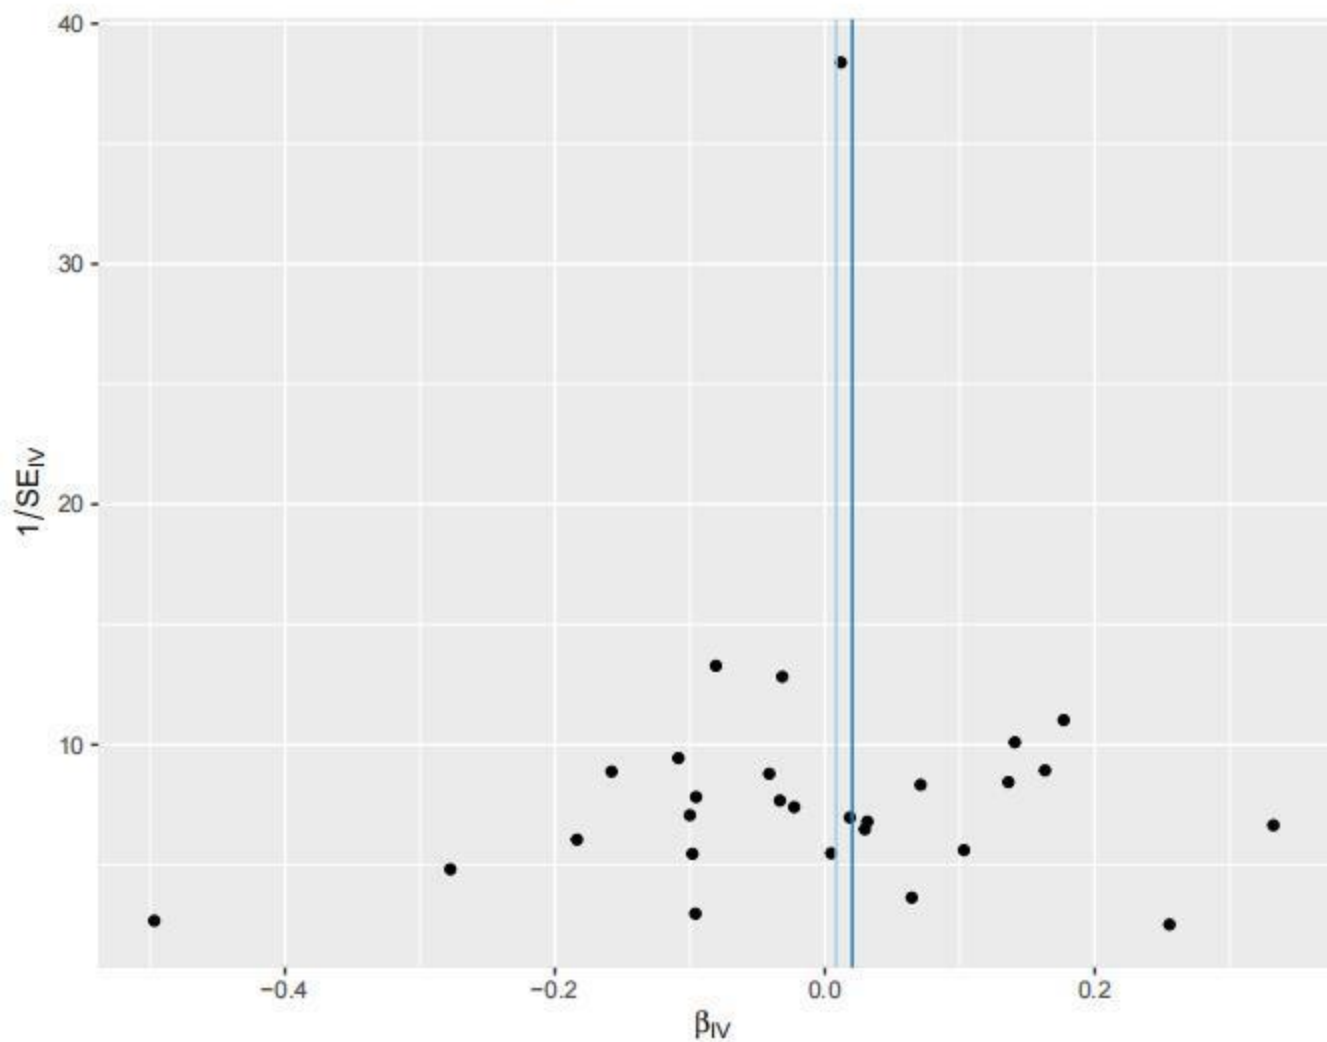

Funnel plot analyse of "BAFF-R on IgD+ CD38- naive" on 'Aplastic anemia'



### MR Method

- Inverse variance weighted
- MR Egger

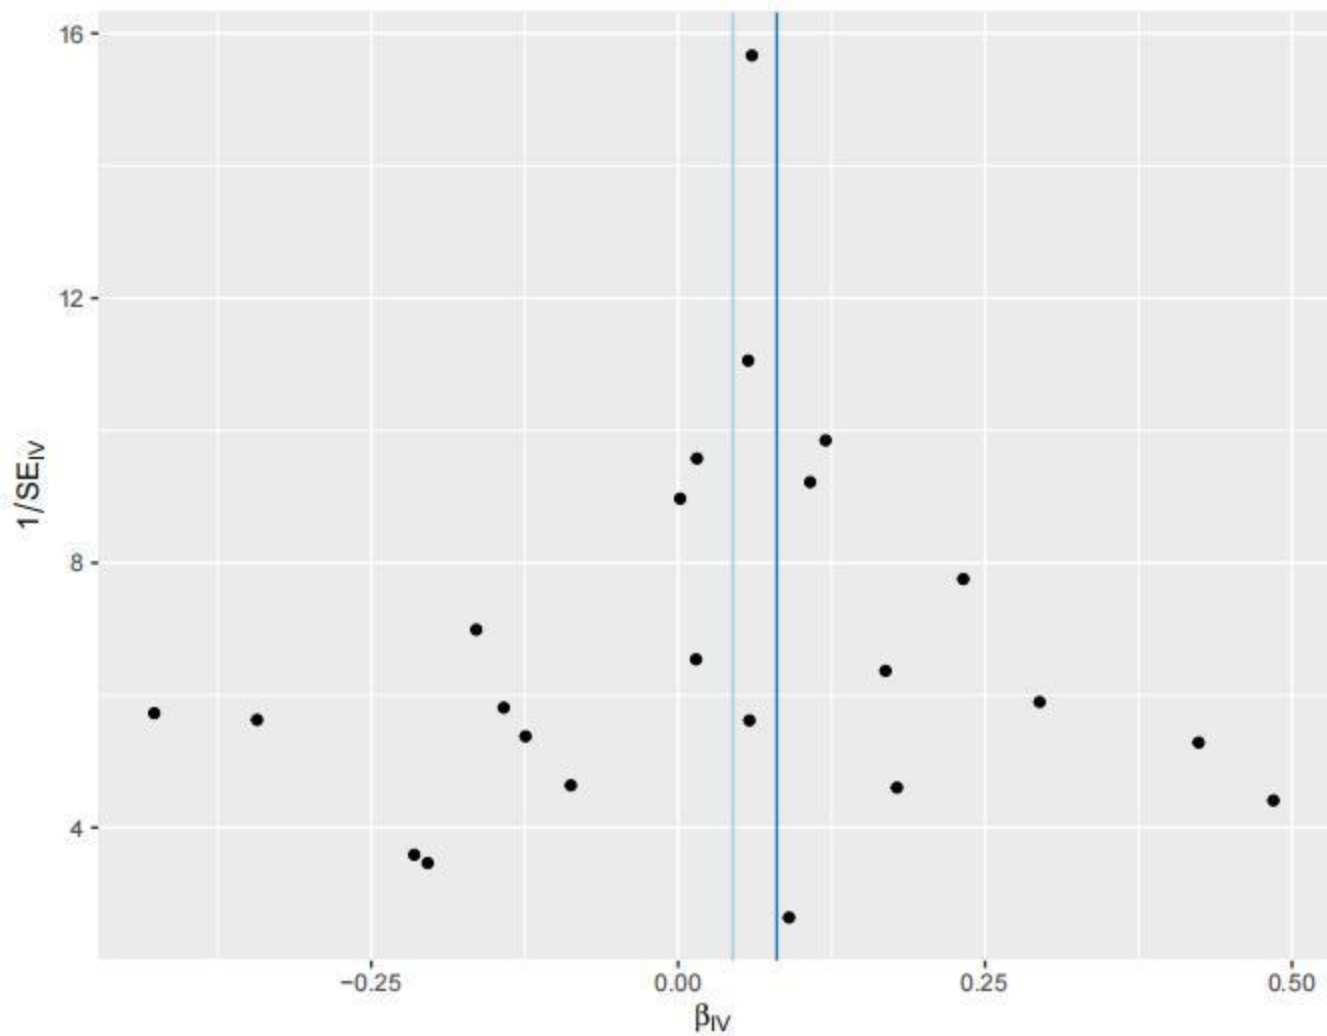

Funnel plot analyse of "CD4 on CD4+ " on 'Aplastic anemia'

### MR Method

- Inverse variance weighted
- MR Egger

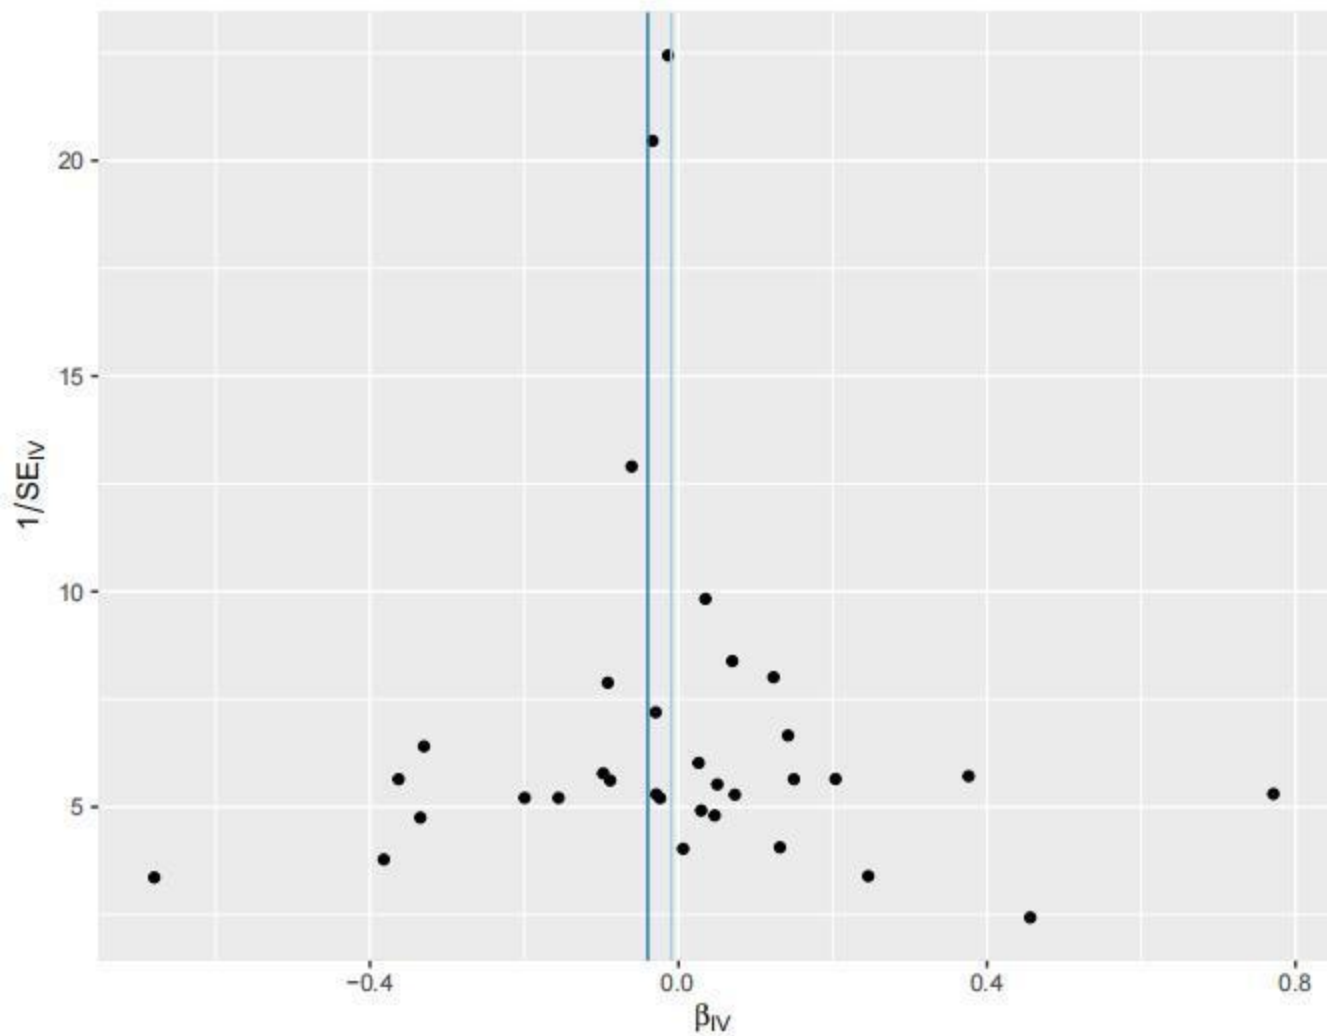

Funnel plot analysis of "CD80 on granulocyte" on 'Aplastic anemia'

### MR Method

- Inverse variance weighted
- MR Egger

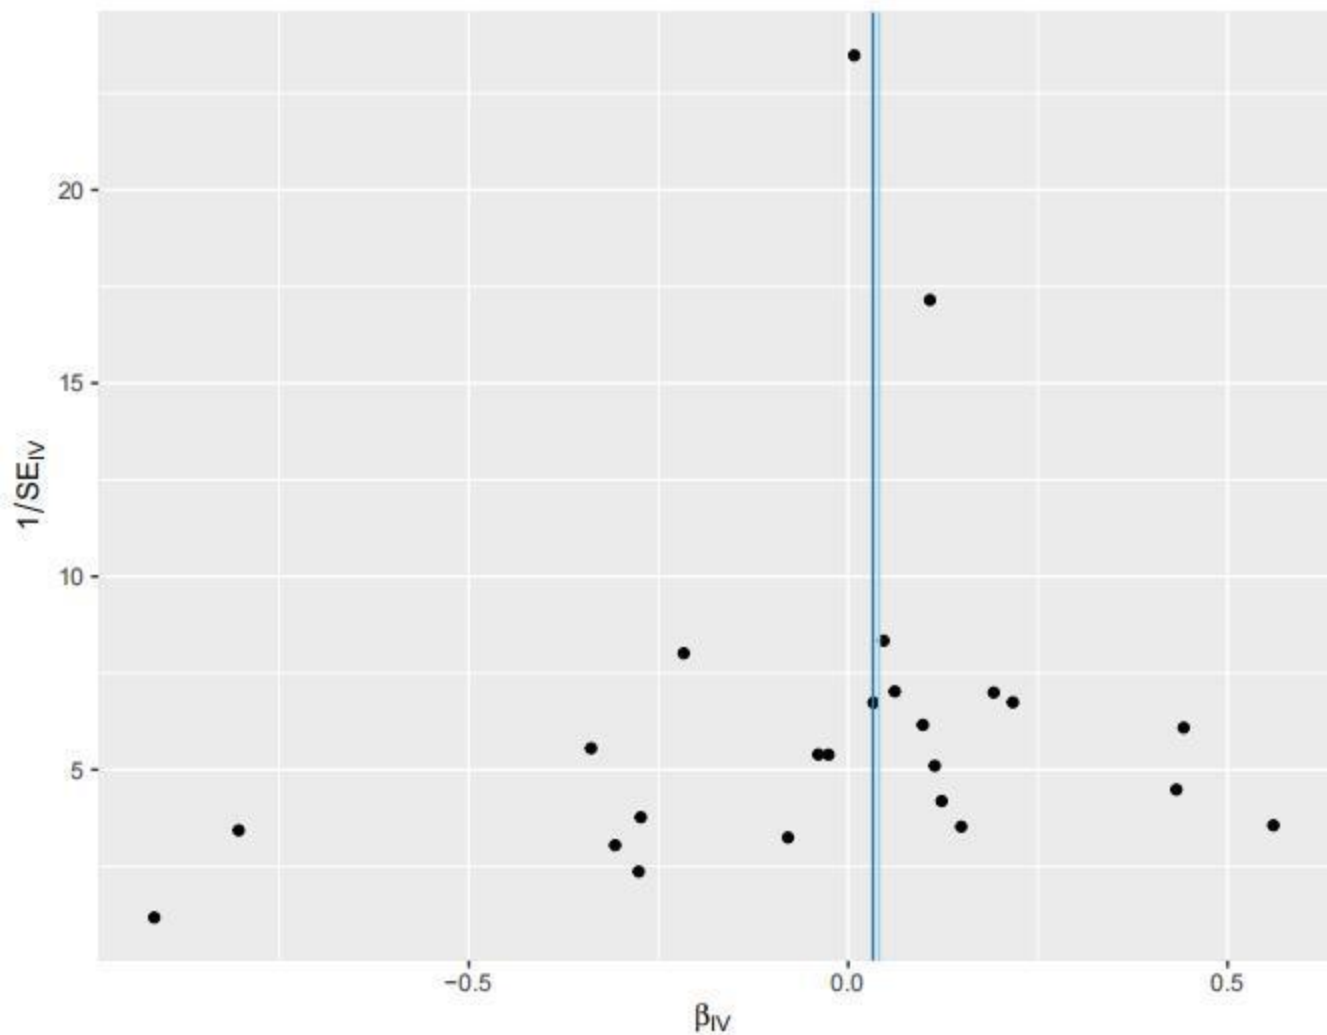

Funnel plot analysis of "FSC-A on CD14+ monocyte" on 'Aplastic anemia'

MR Method

- Inverse variance weighted
- MR Egger

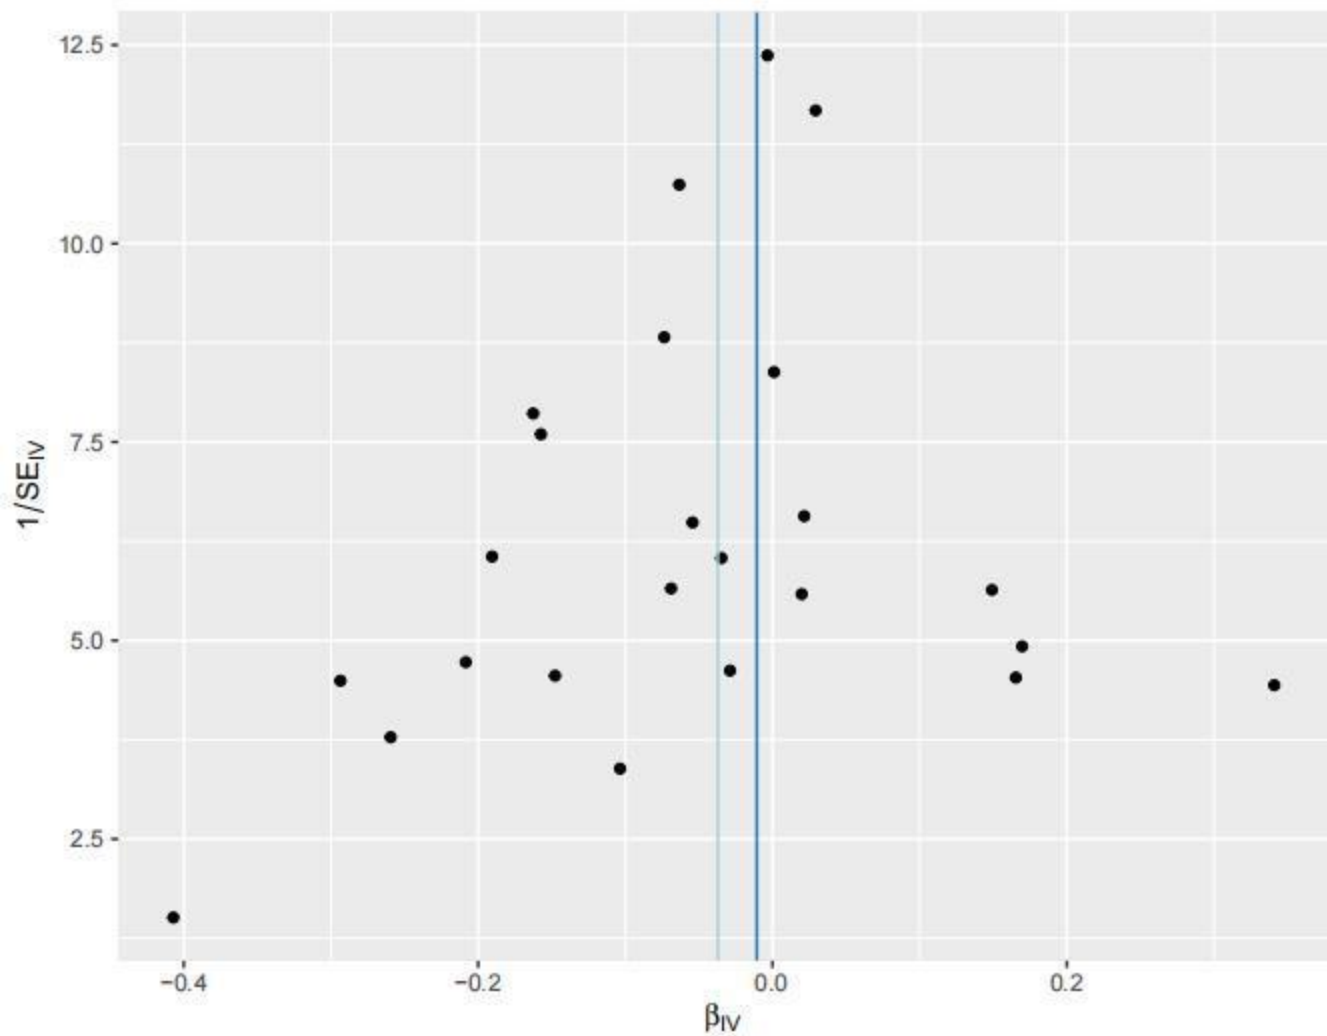

Funnel plot analyse of "CD39 on CD39+ CD8br " on 'Aplastic anemia'

### MR Method

- Inverse variance weighted
- MR Egger

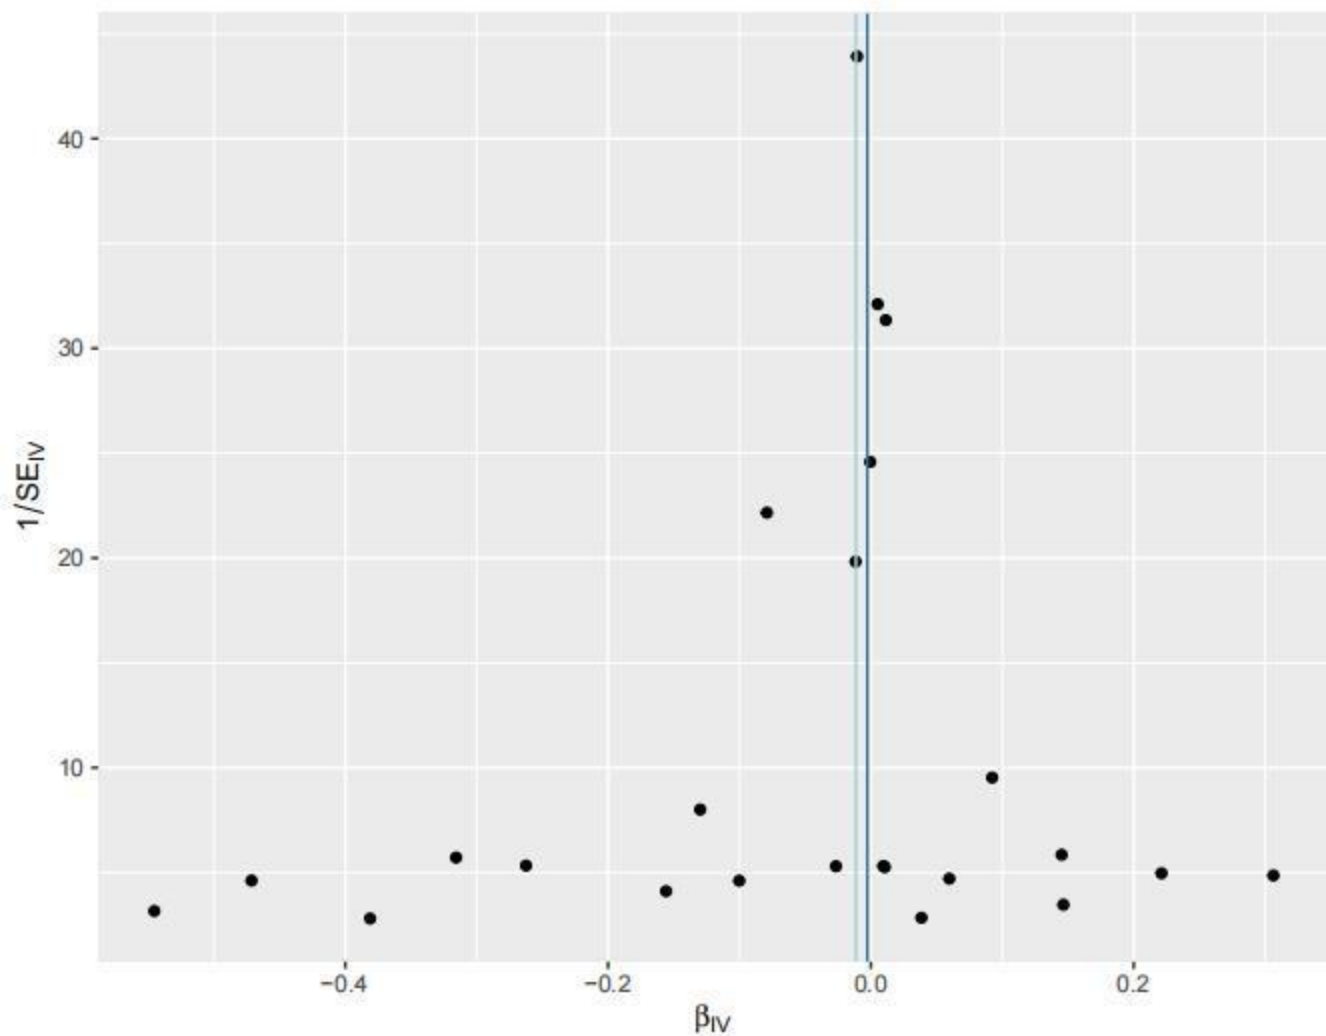

Funnel plot analyse of "CD86+ myeloid DC %DC" on 'Aplastic anemia'

MR Method

- Inverse variance weighted
- MR Egger

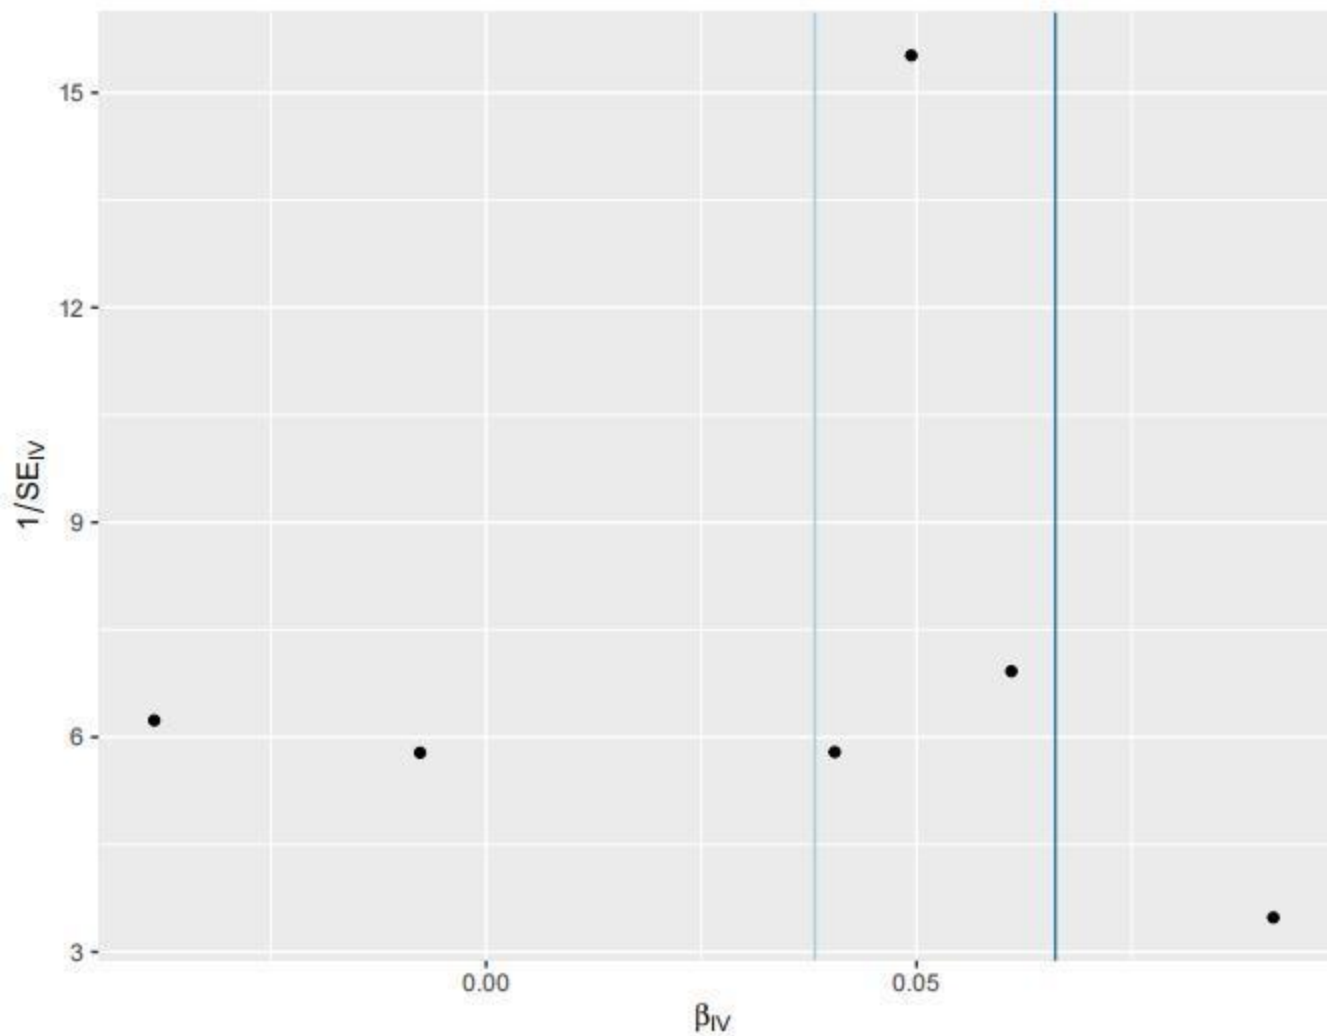

Funnel plot analysis of "CD28 on resting Treg " on 'Aplastic anemia'

MR Method

Inverse variance weighted

MR Egger

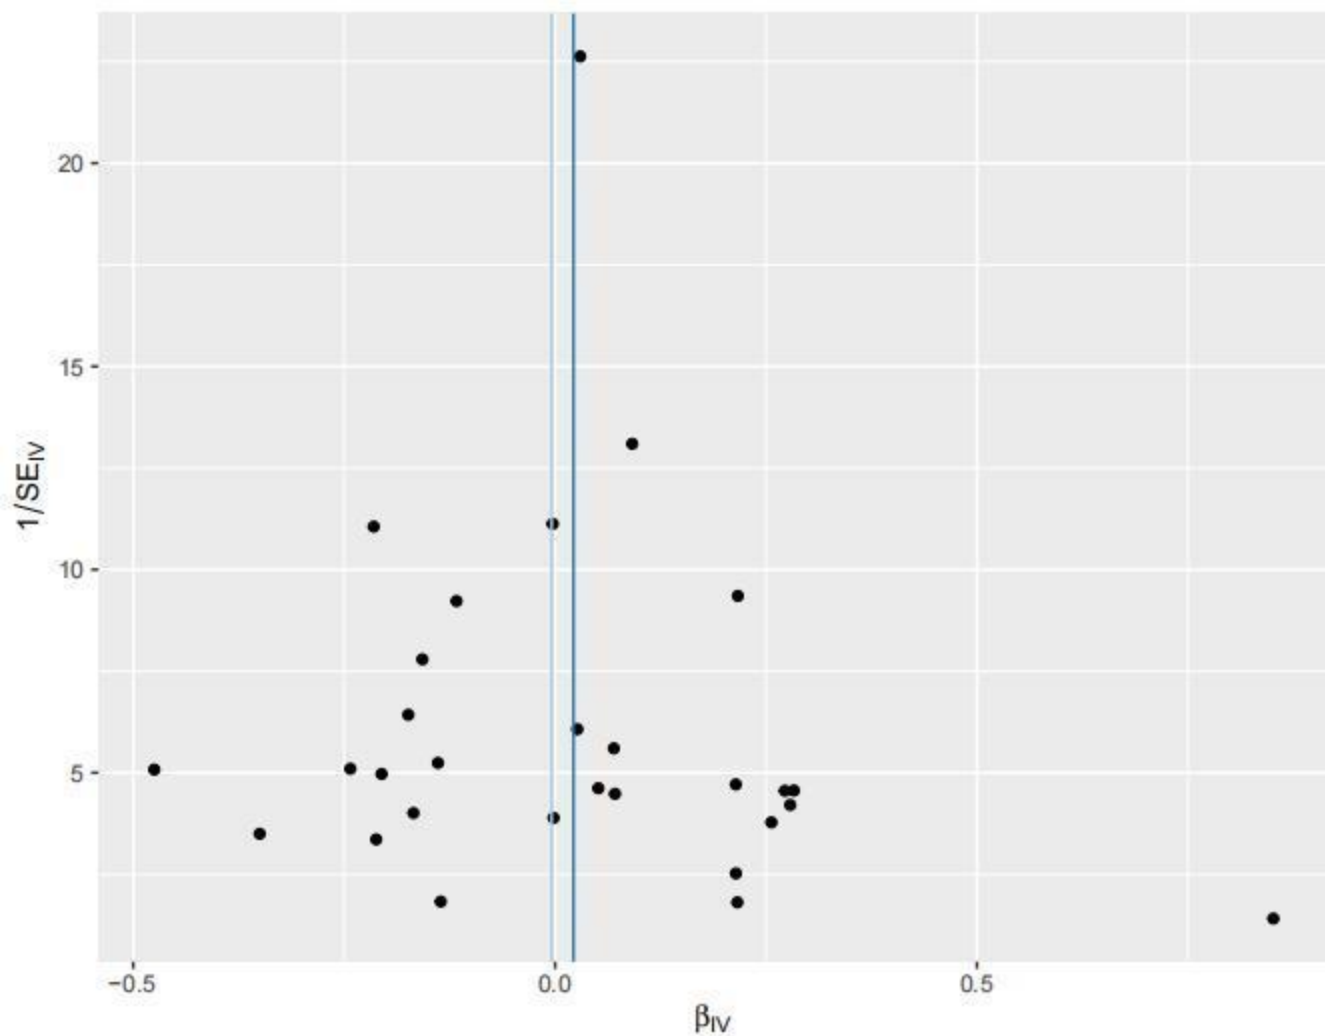

Funnel plot analysis of "CD8dim NKT AC" on 'Aplastic anemia'

### MR Method

Inverse variance weighted

MR Egger

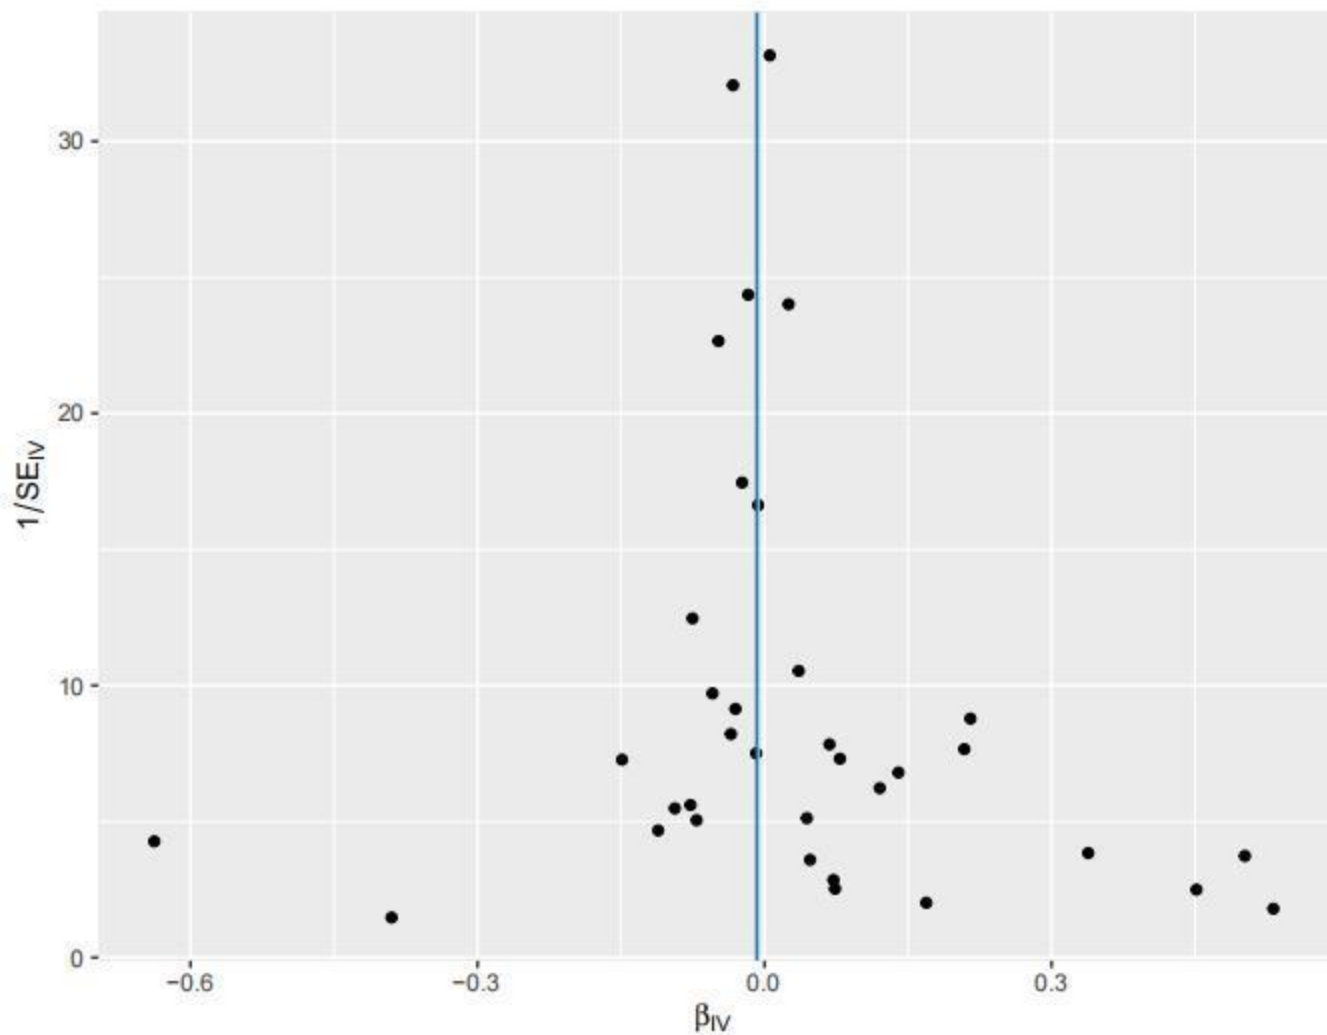

Funnel plot analyse of "CD25hi CD45RA+ CD4 not Treg %CD4+" on 'Aplastic anemia'



### MR Method

- Inverse variance weighted
- MR Egger

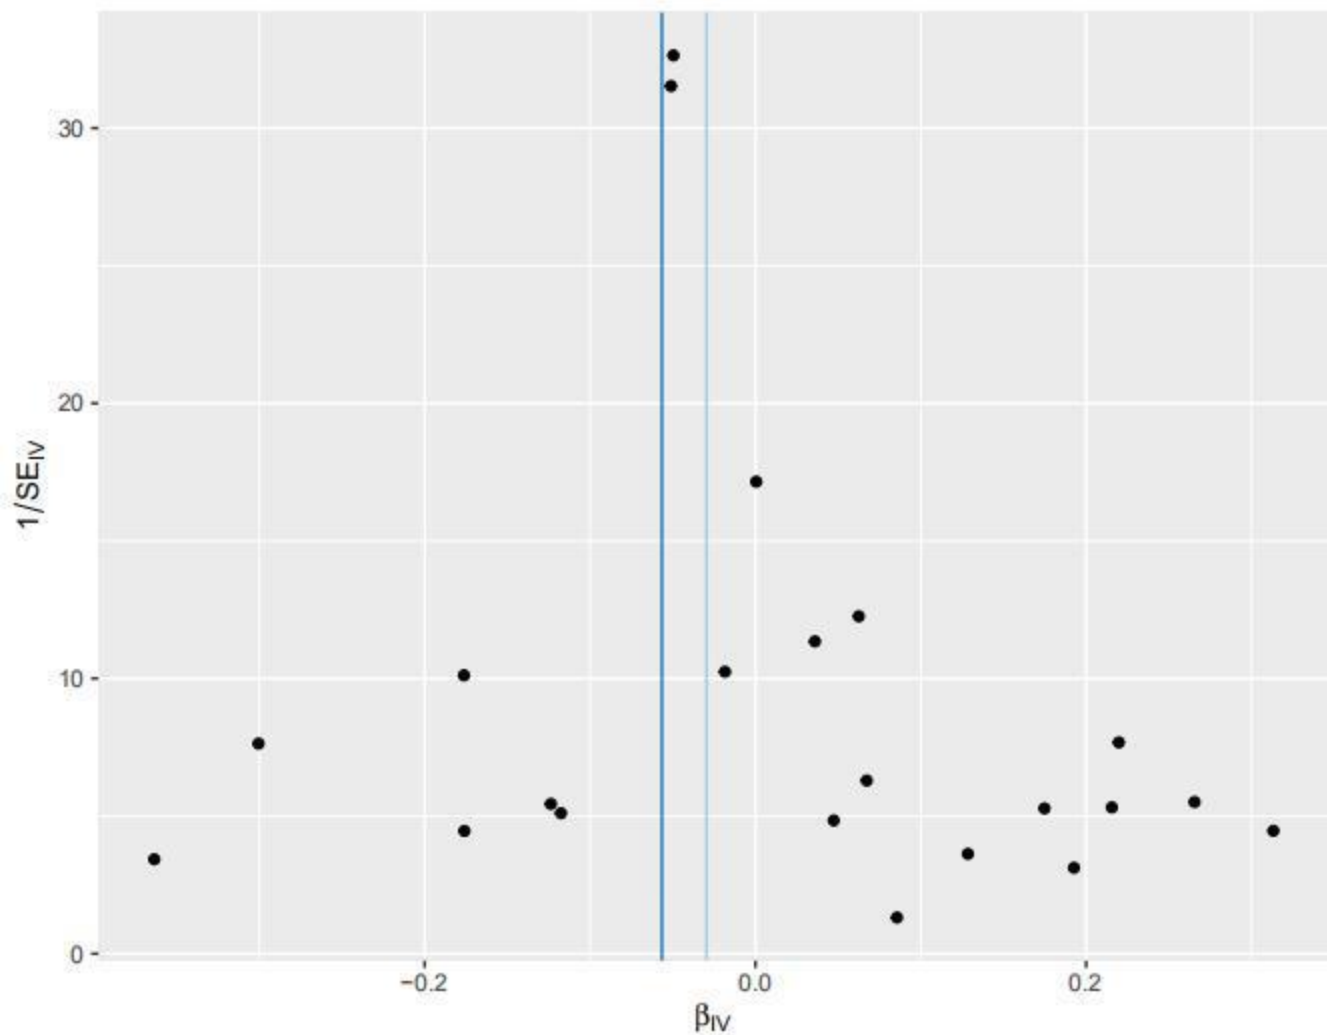

Funnel plot analysis of "CD39+ secreting Treg %CD4 Treg" on 'Aplastic anemia'

### MR Method

- Inverse variance weighted
- MR Egger

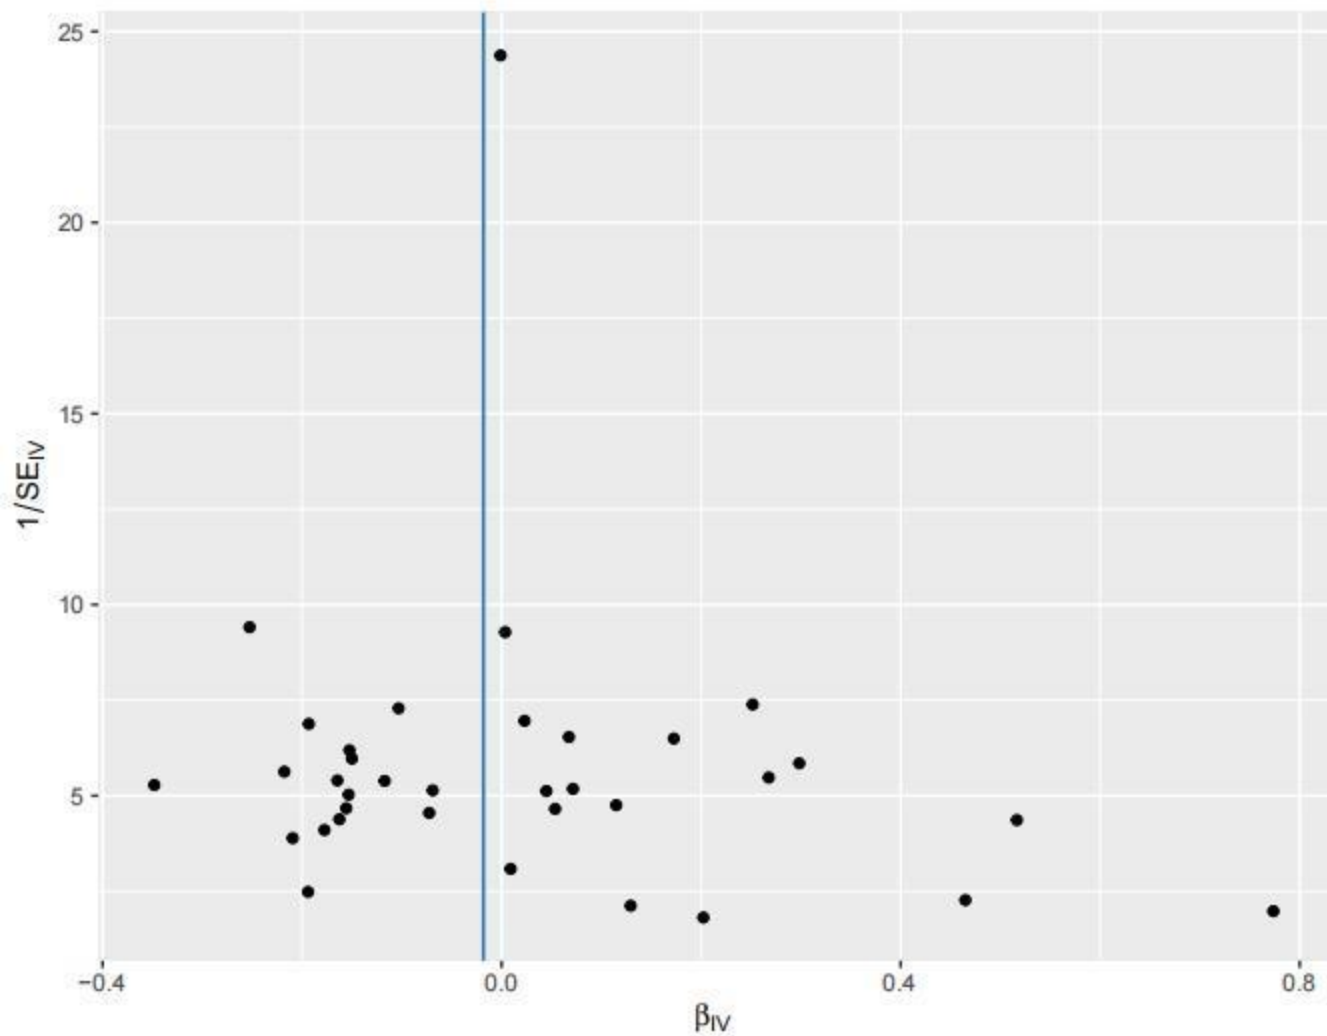

Funnel plot analyse of "NKT %lymphocyte" on 'Aplastic anemia'

MR Method

- Inverse variance weighted
- MR Egger

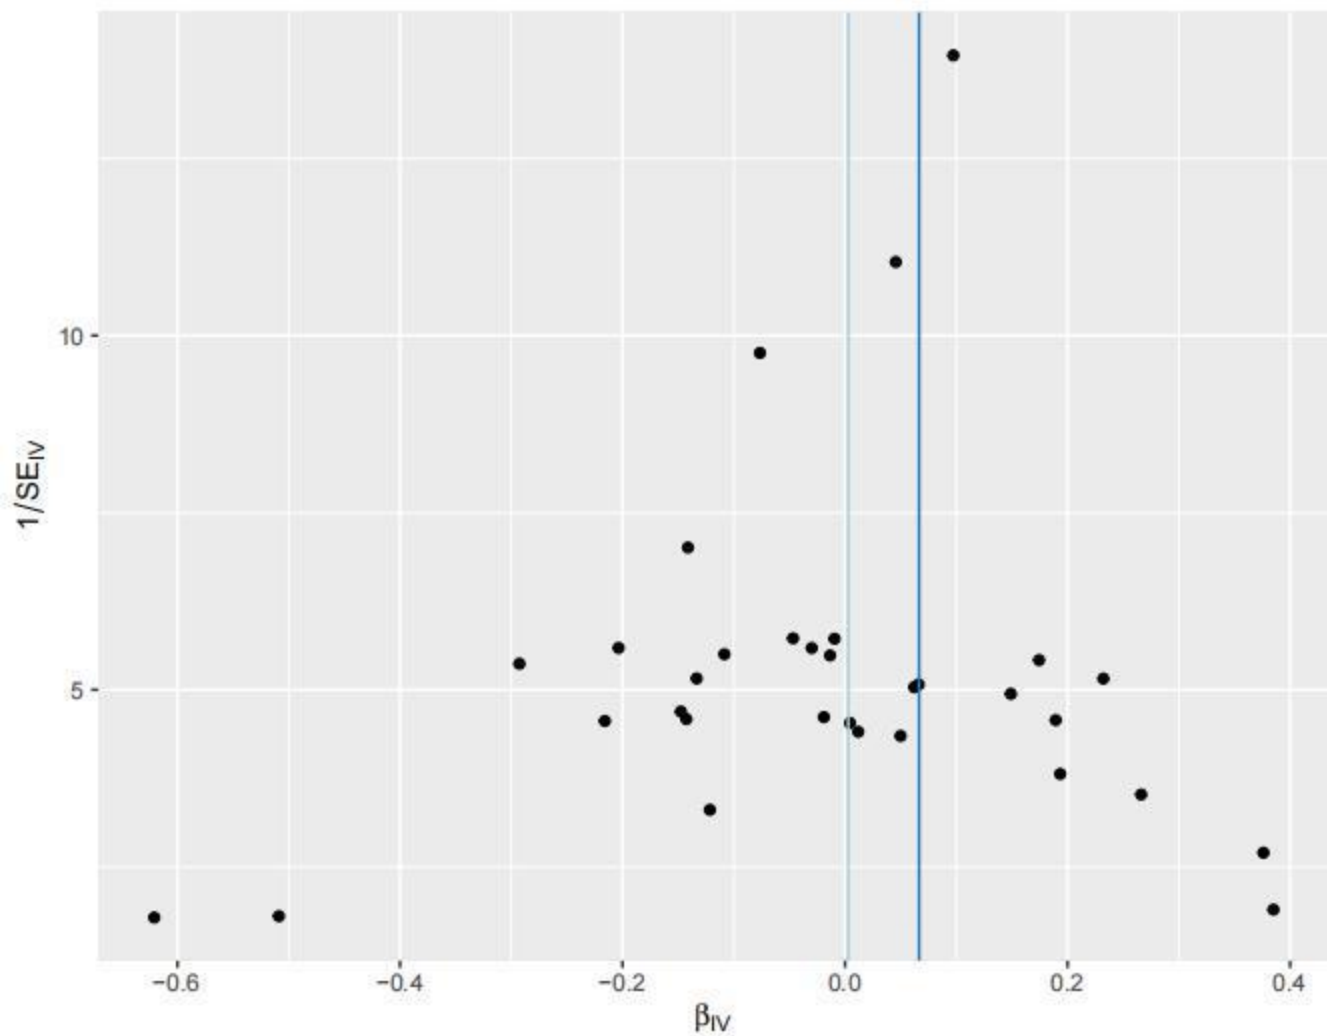

Funnel plot analyse of "B cell AC" on 'Aplastic anemia'

### MR Method

Inverse variance weighted

MR Egger

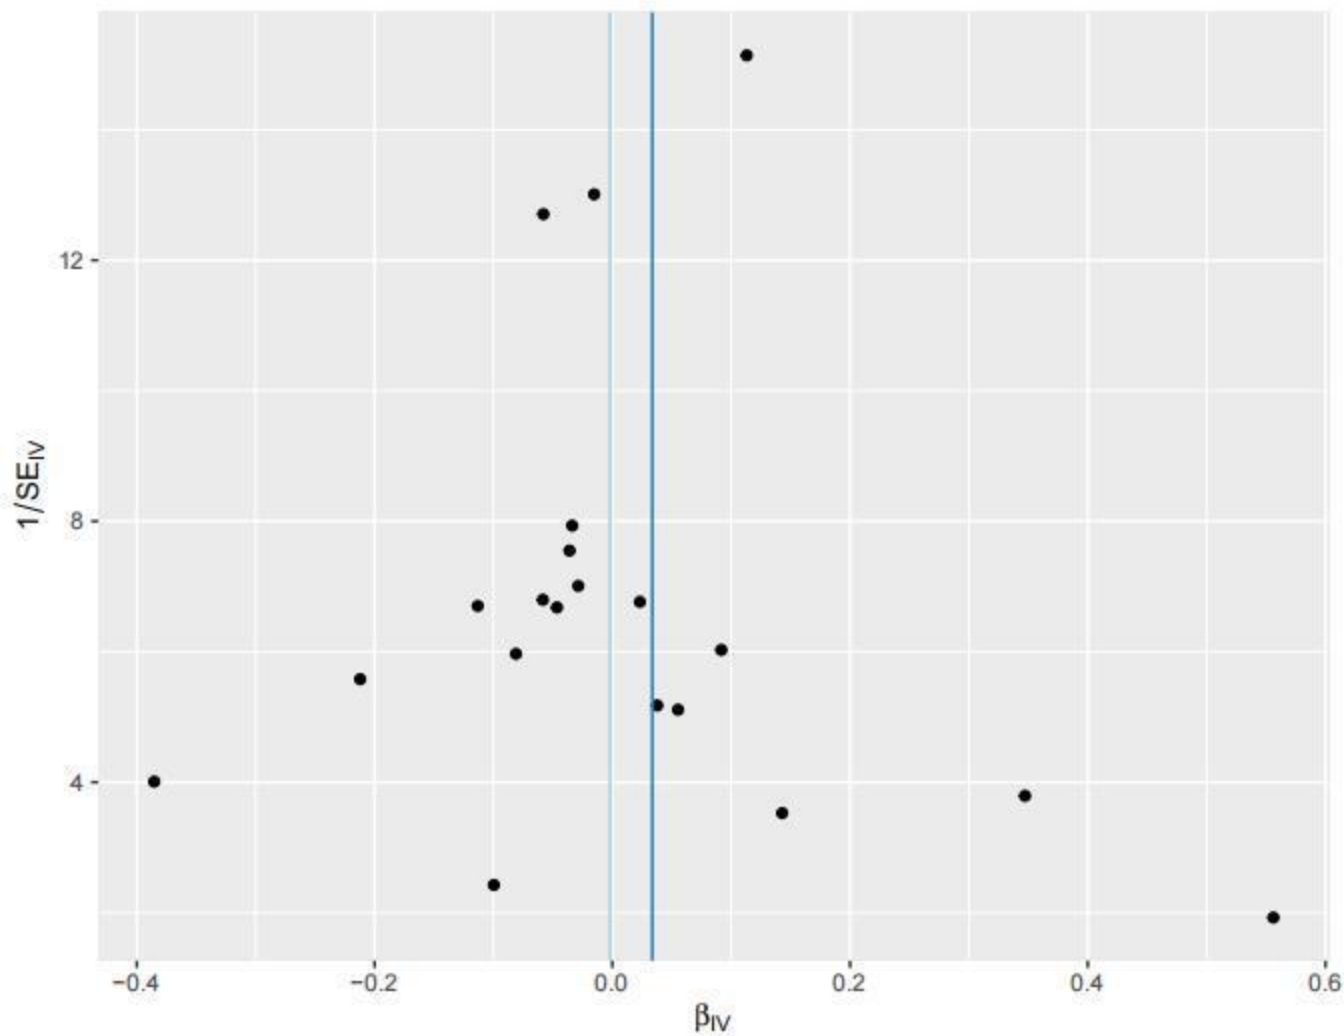

Funnel plot analysis of "PDL-1 on CD14- CD16+ monocyte" on 'Aplastic anemia'

### MR Method

Inverse variance weighted

MR Egger

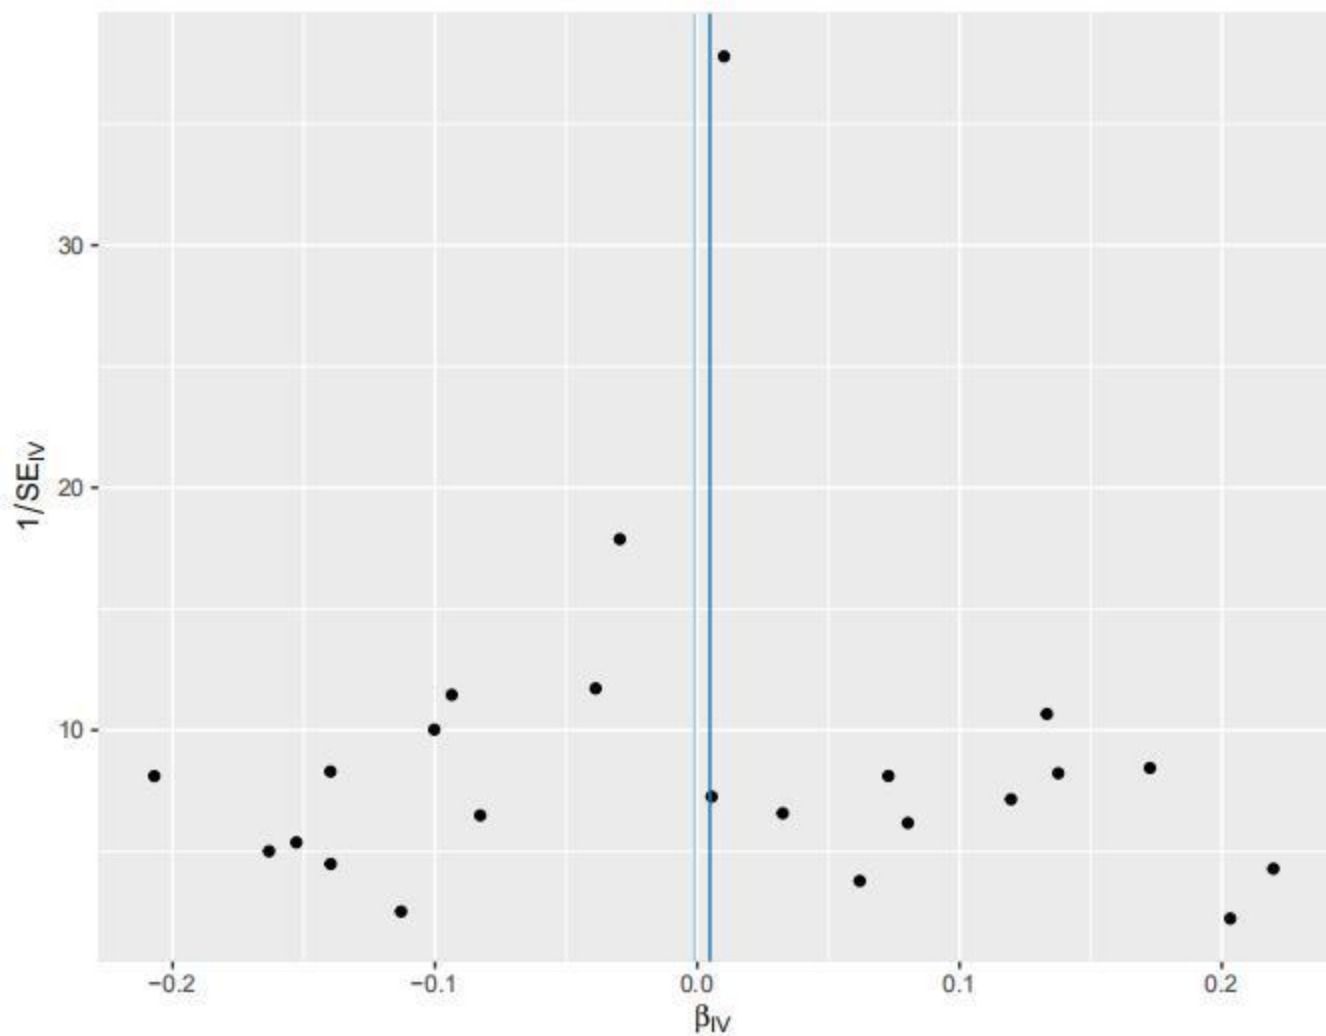

Funnel plot analysis of "BAFF-R on naive-mature B cell" on 'Aplastic anemia'

### MR Method

- Inverse variance weighted
- MR Egger

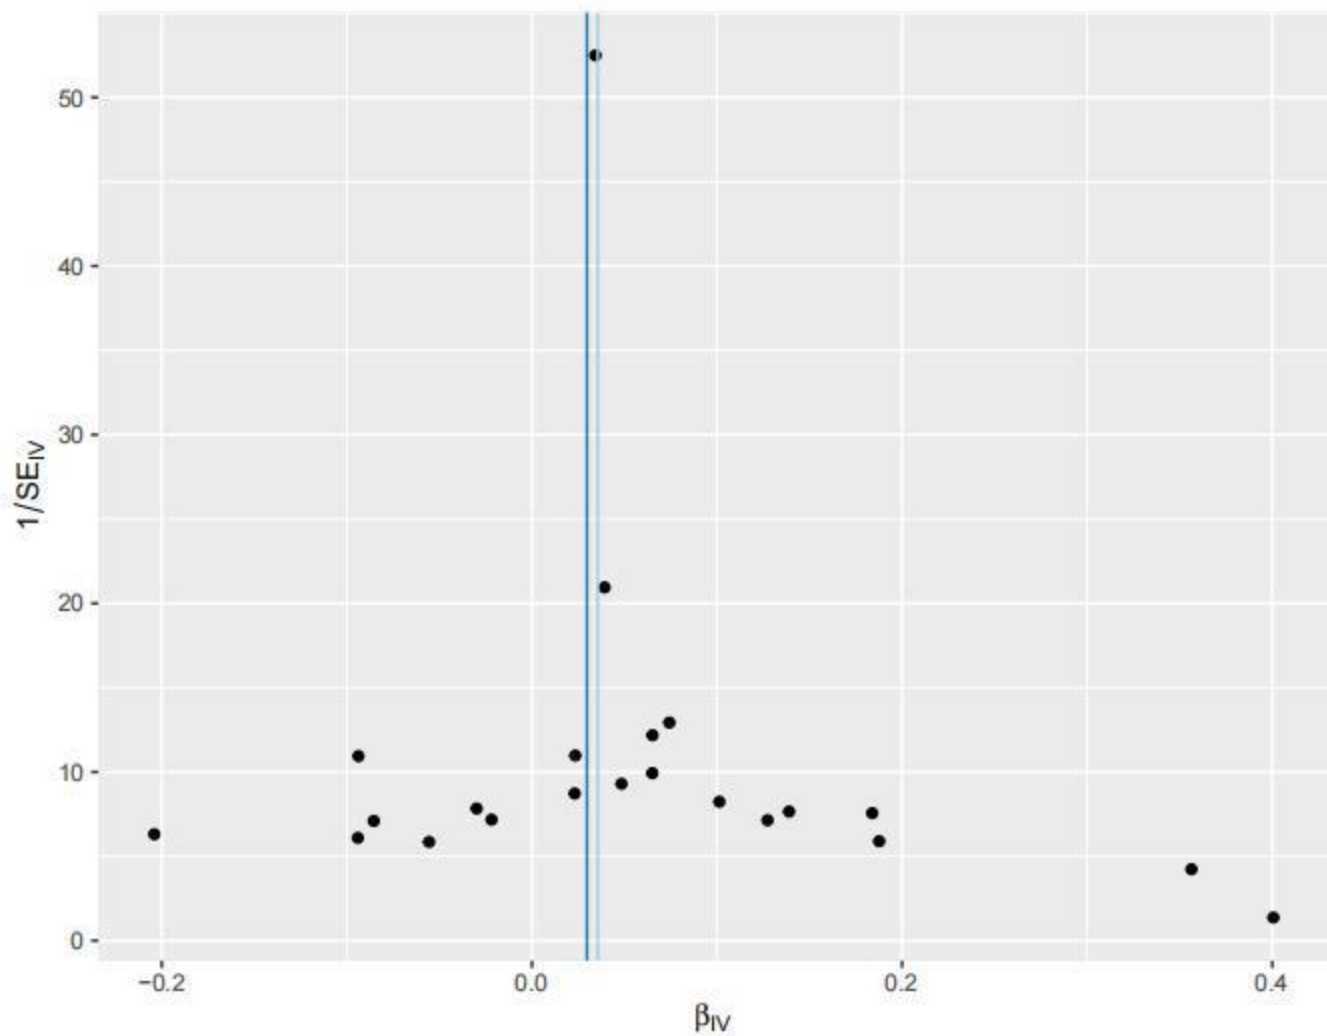

Funnel plot analyse of "CD33 on CD33br HLA DR+ CD14- " on 'Aplastic anemia'

MR Method

- Inverse variance weighted
- MR Egger

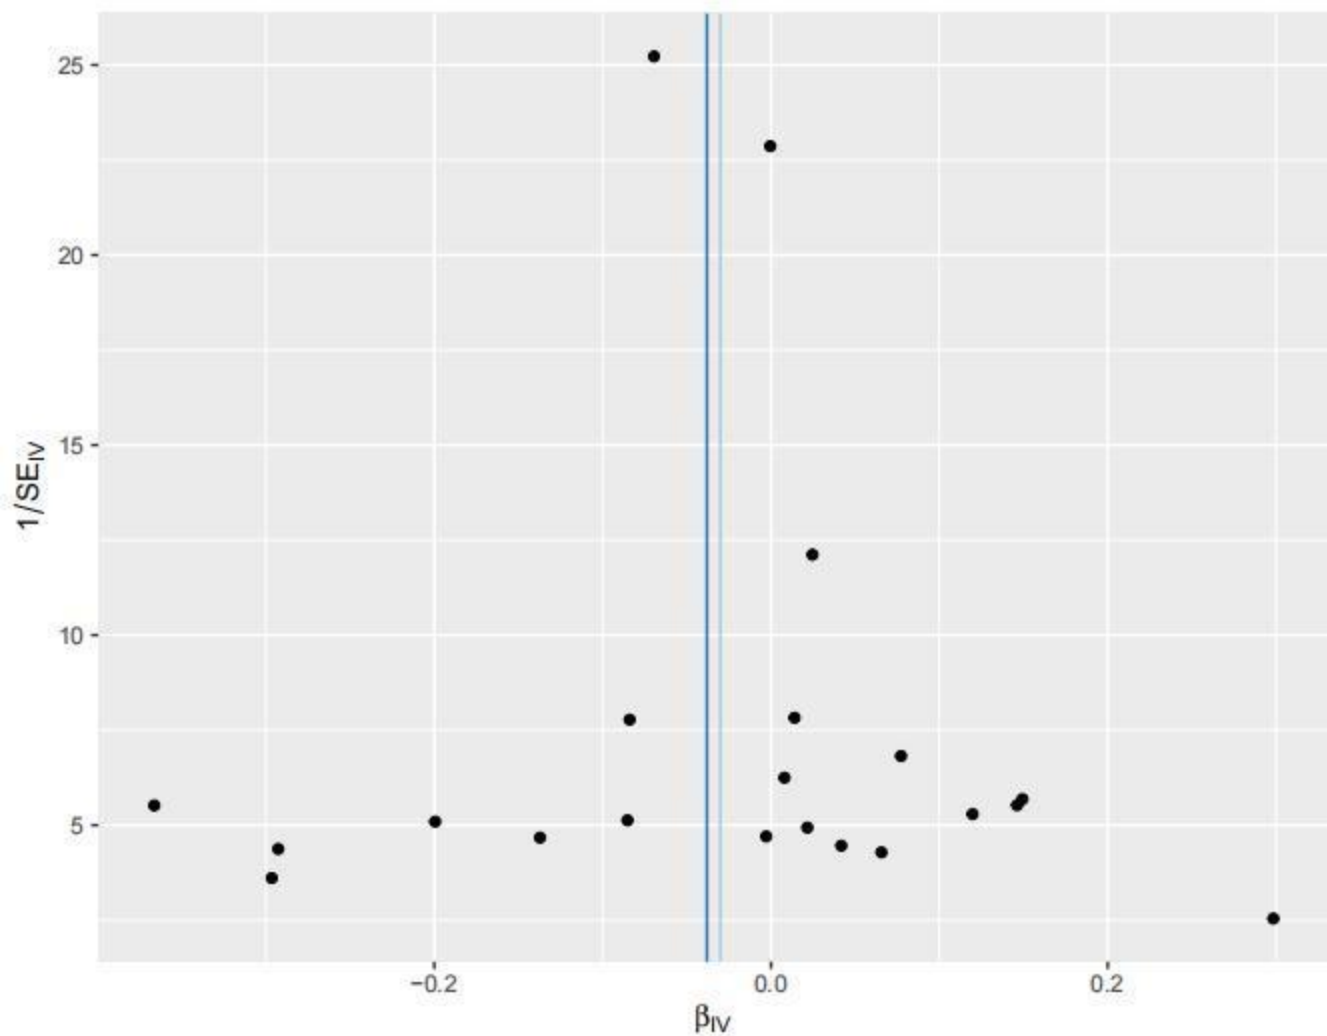

Funnel plot analyse of "CD62L- CD86+ myeloid DC AC" on 'Aplastic anemia'

MR Method

- Inverse variance weighted
- MR Egger

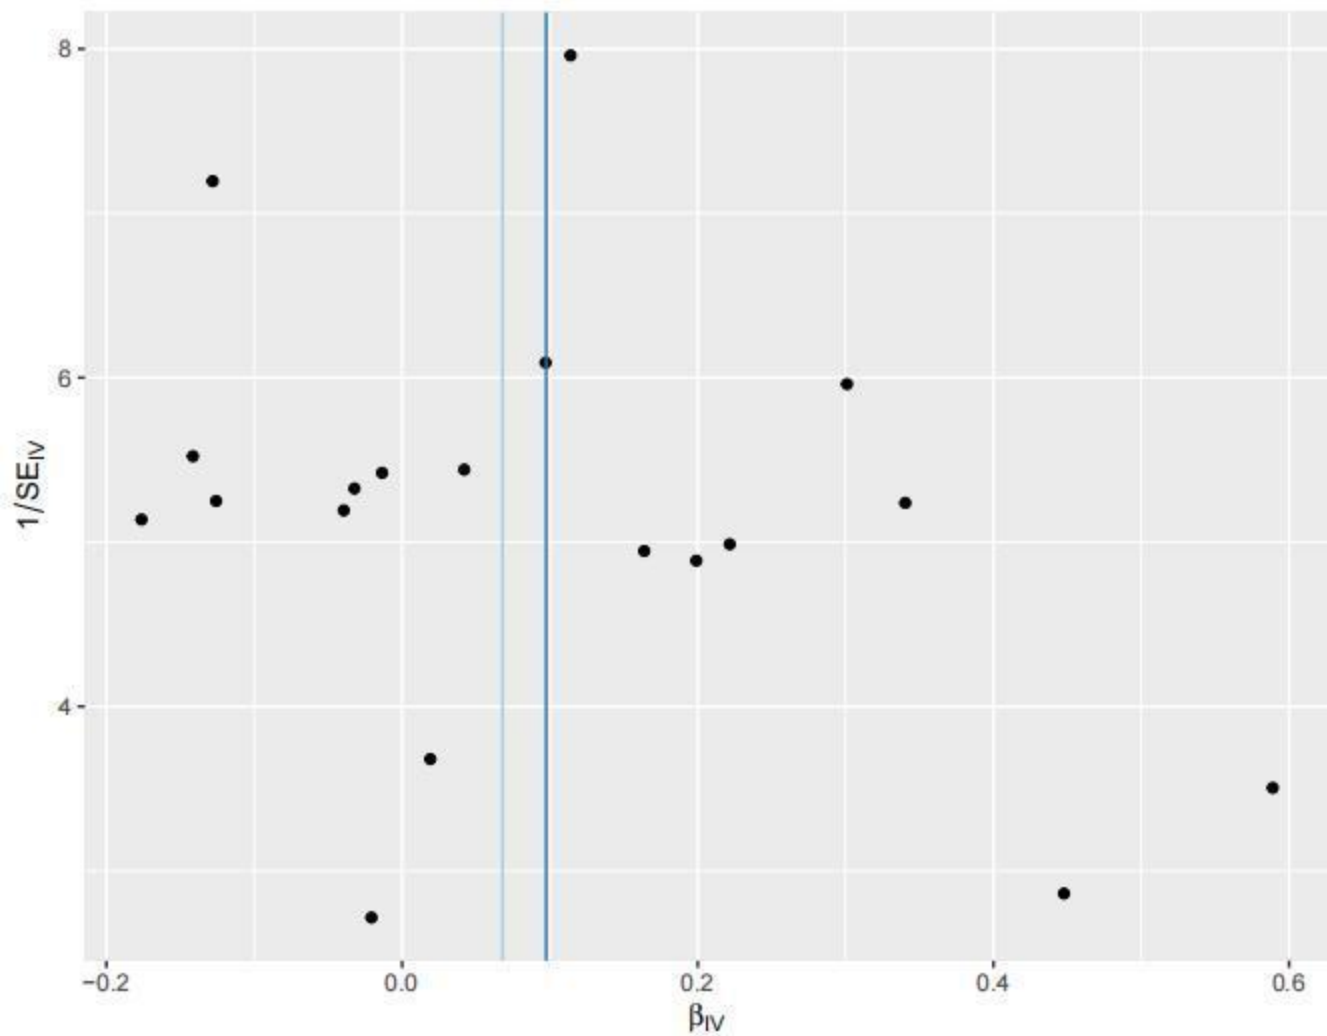

Funnel plot analyse of "CD62L- HLA DR++ monocyte AC" on 'Aplastic anemia'



### MR Method

- Inverse variance weighted
- MR Egger

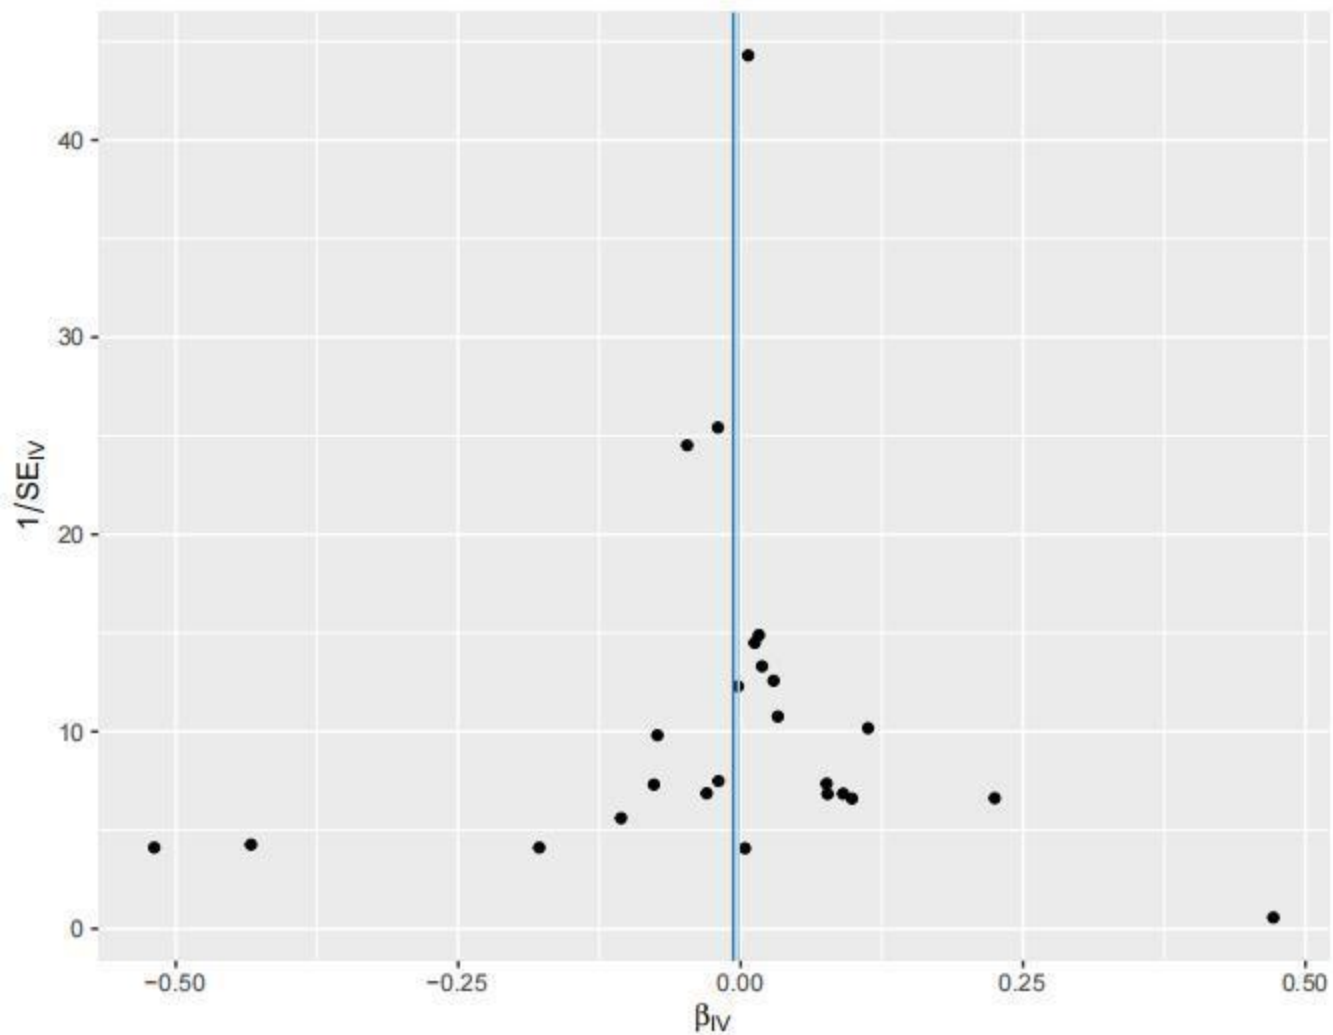

Funnel plot analyse of "CD33dim HLA DR+ CD11b- %CD33dim HLA DR+" on 'Aplastic anemia'

### MR Method

Inverse variance weighted

MR Egger

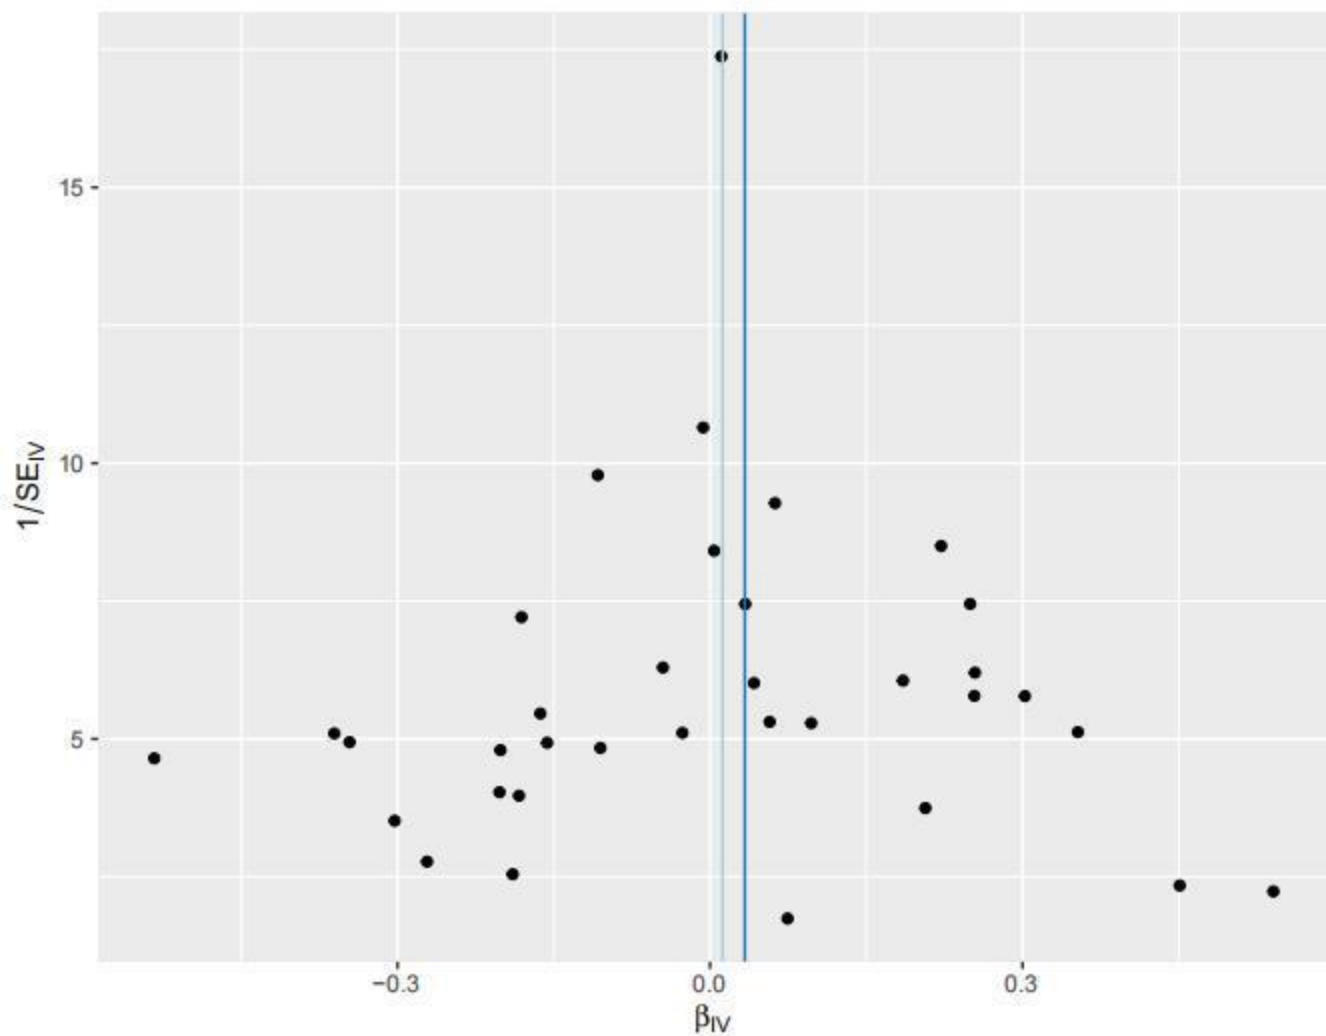

Funnel plot analyse of "NKT AC" on 'Aplastic anemia'

MR Method

- Inverse variance weighted
- MR Egger

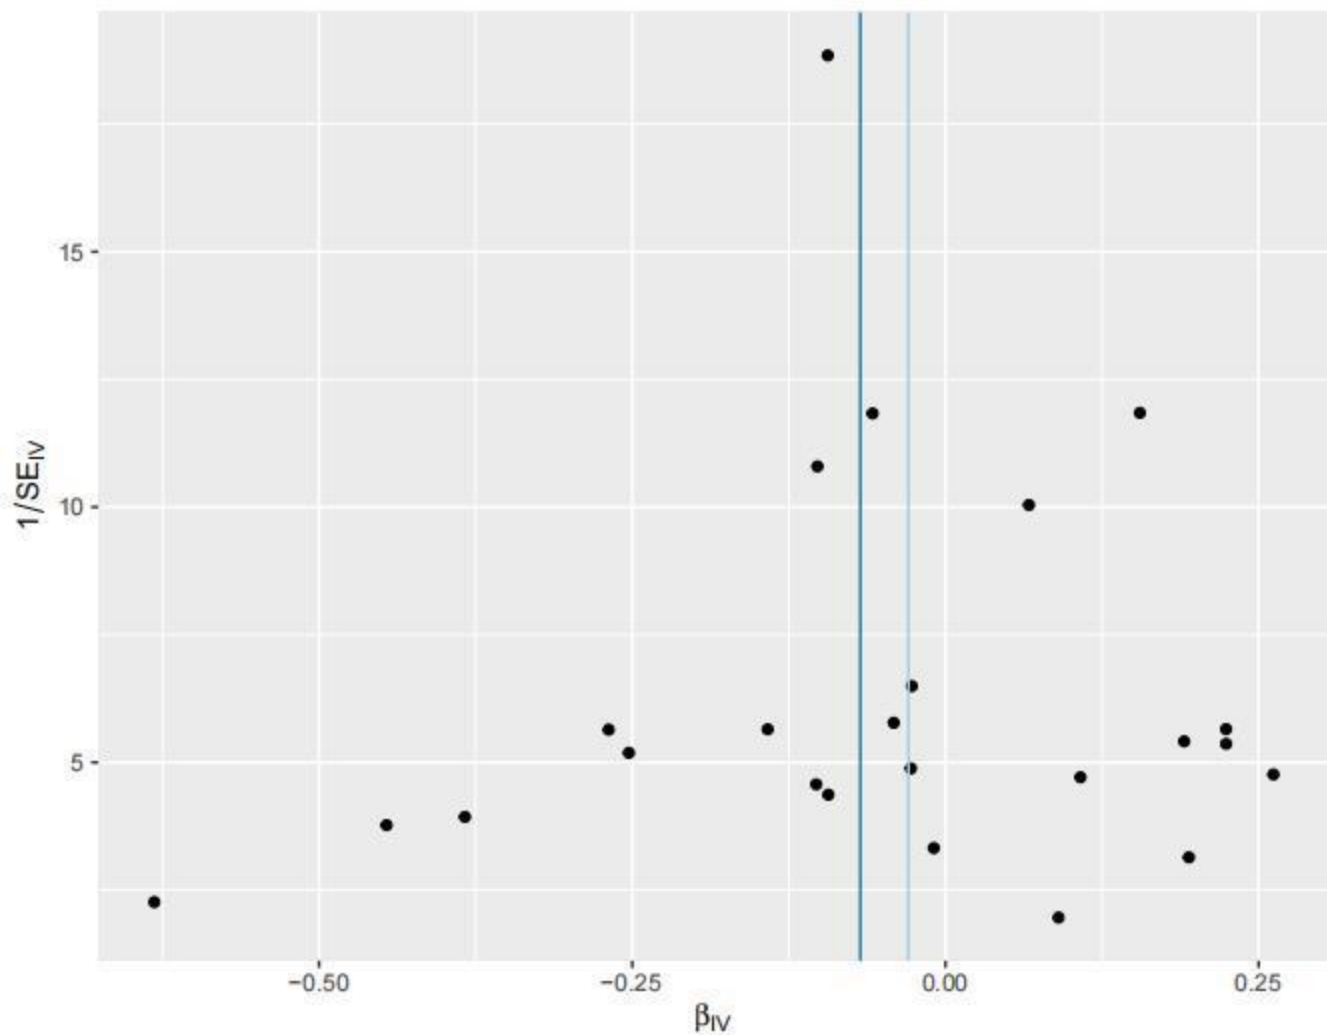

Funnel plot analysis of "CD3 on CD28+ CD4+" on 'Aplastic anemia'

MR Method

- Inverse variance weighted
- MR Egger

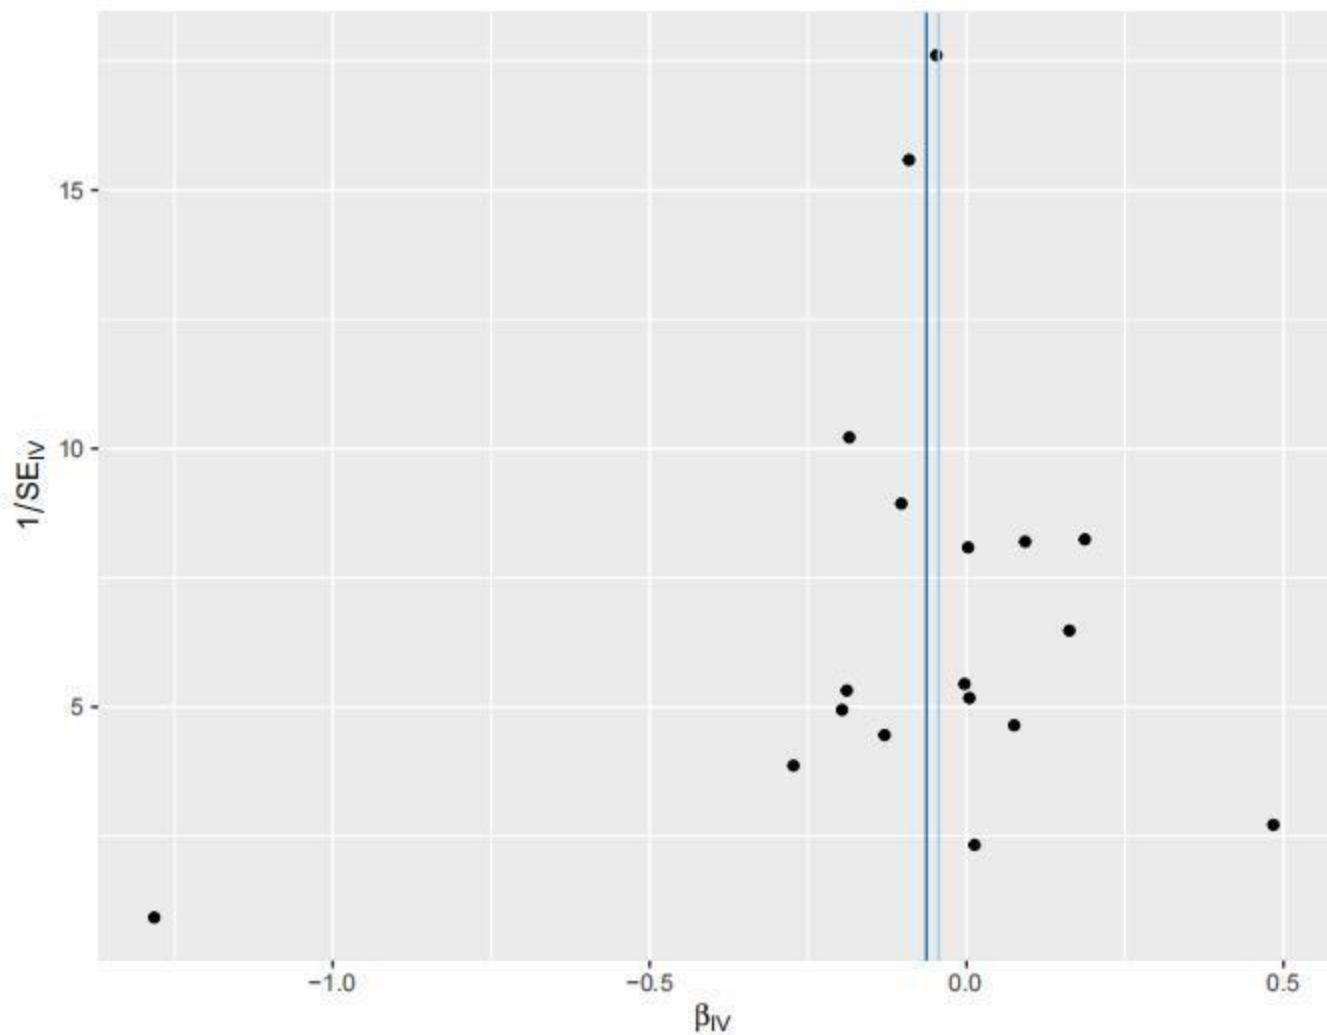

Funnel plot analyse of "CD38 on IgD+ CD38br" on 'Aplastic anemia'

### MR Method

Inverse variance weighted

MR Egger

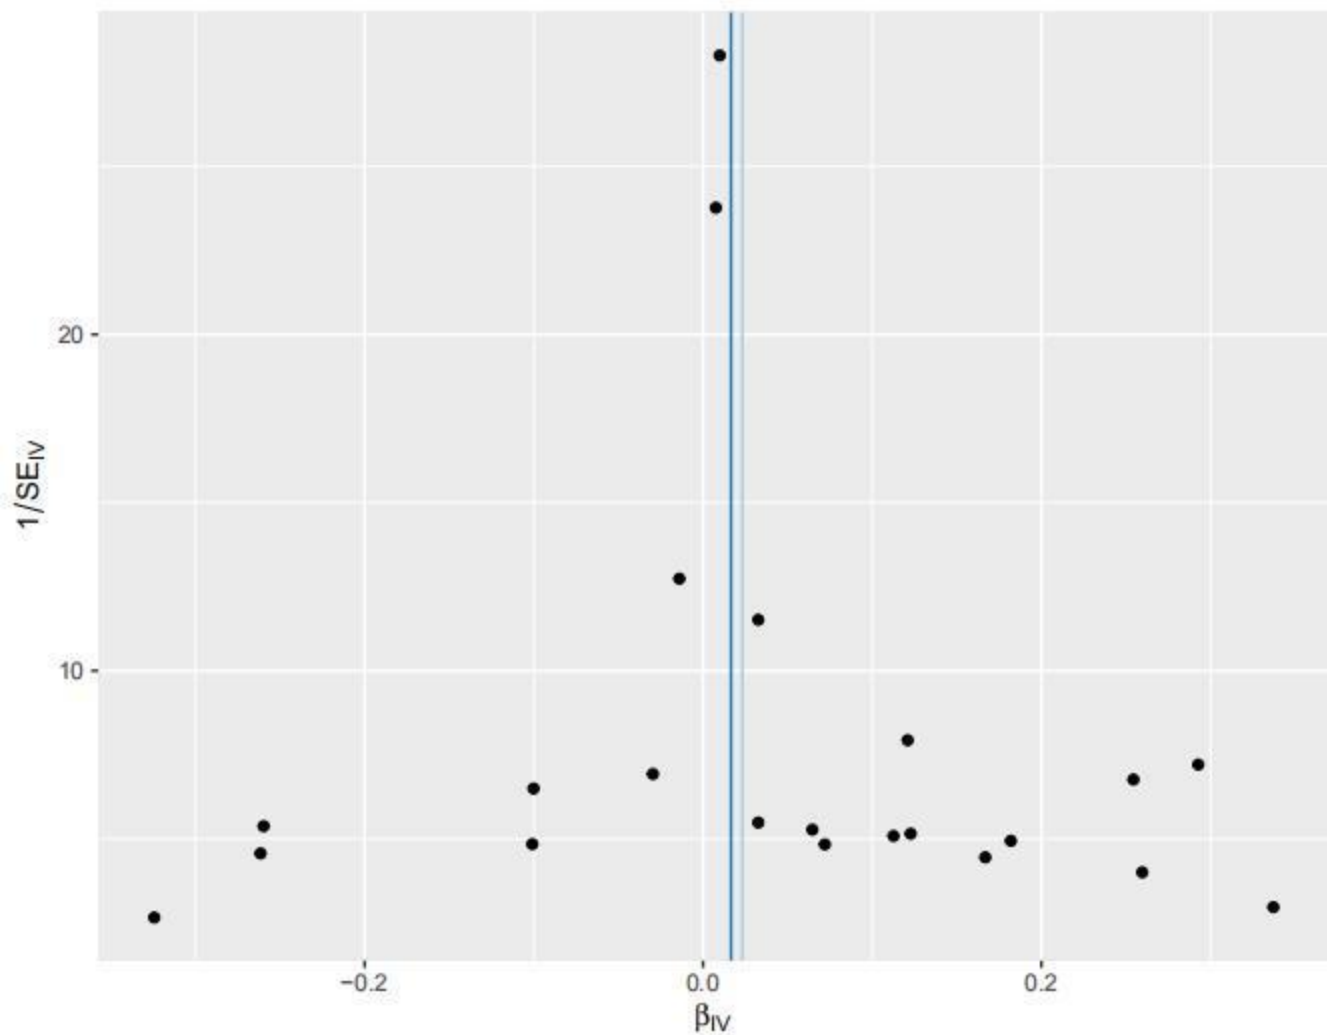

Funnel plot analyse of "CD25 on IgD- CD38-" on 'Aplastic anemia'

MR Method

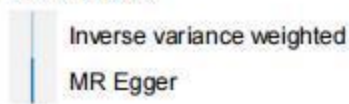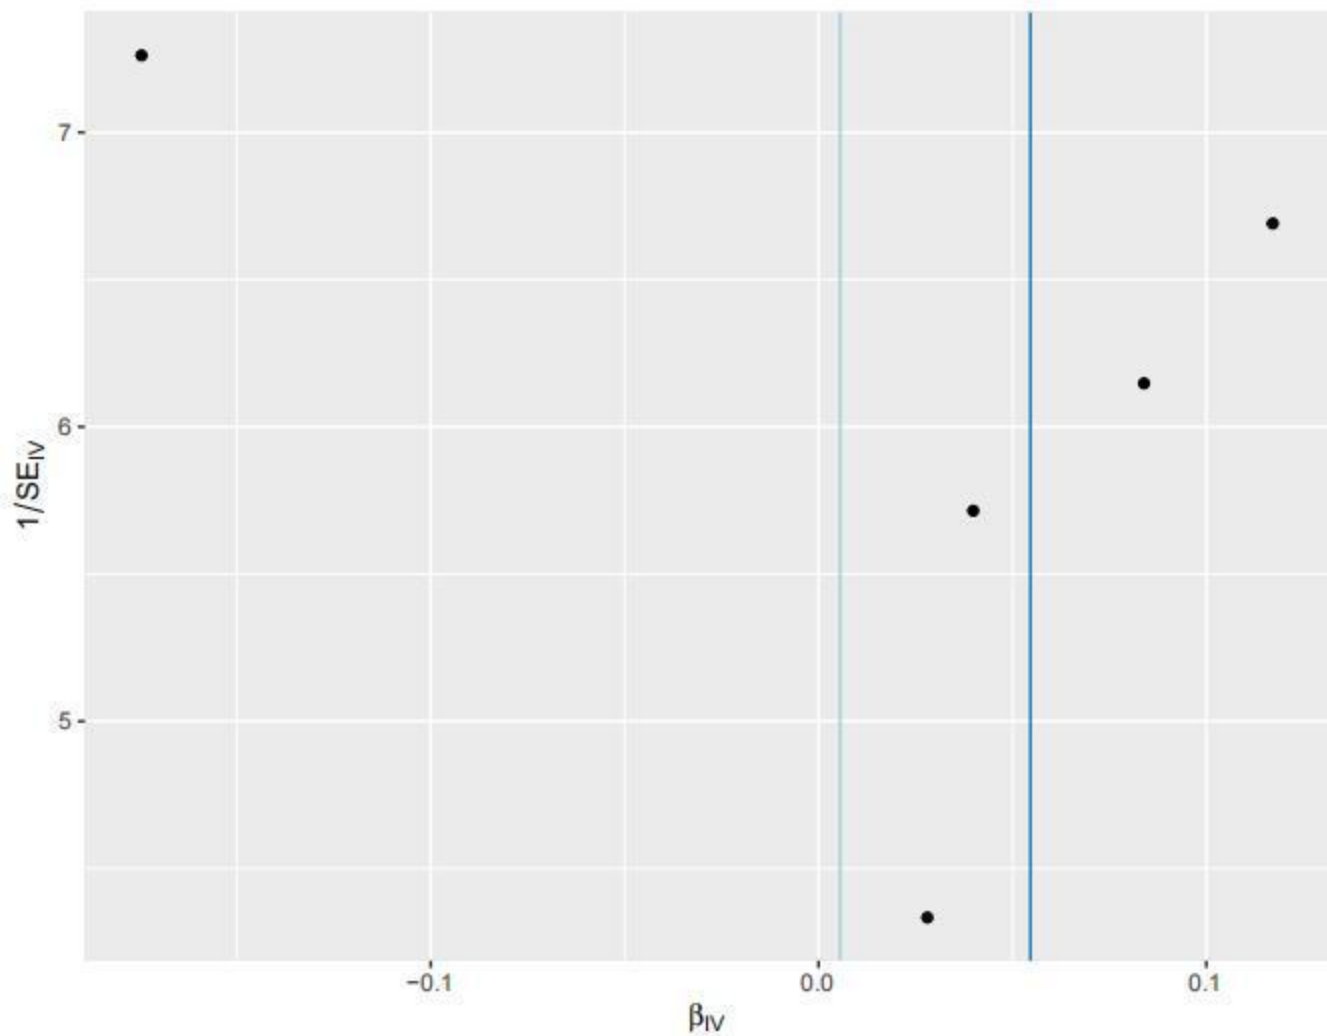

Funnel plot analysis of "CD25 on CD28+ CD4+ " on 'Aplastic anemia'

### MR Method

- Inverse variance weighted
- MR Egger

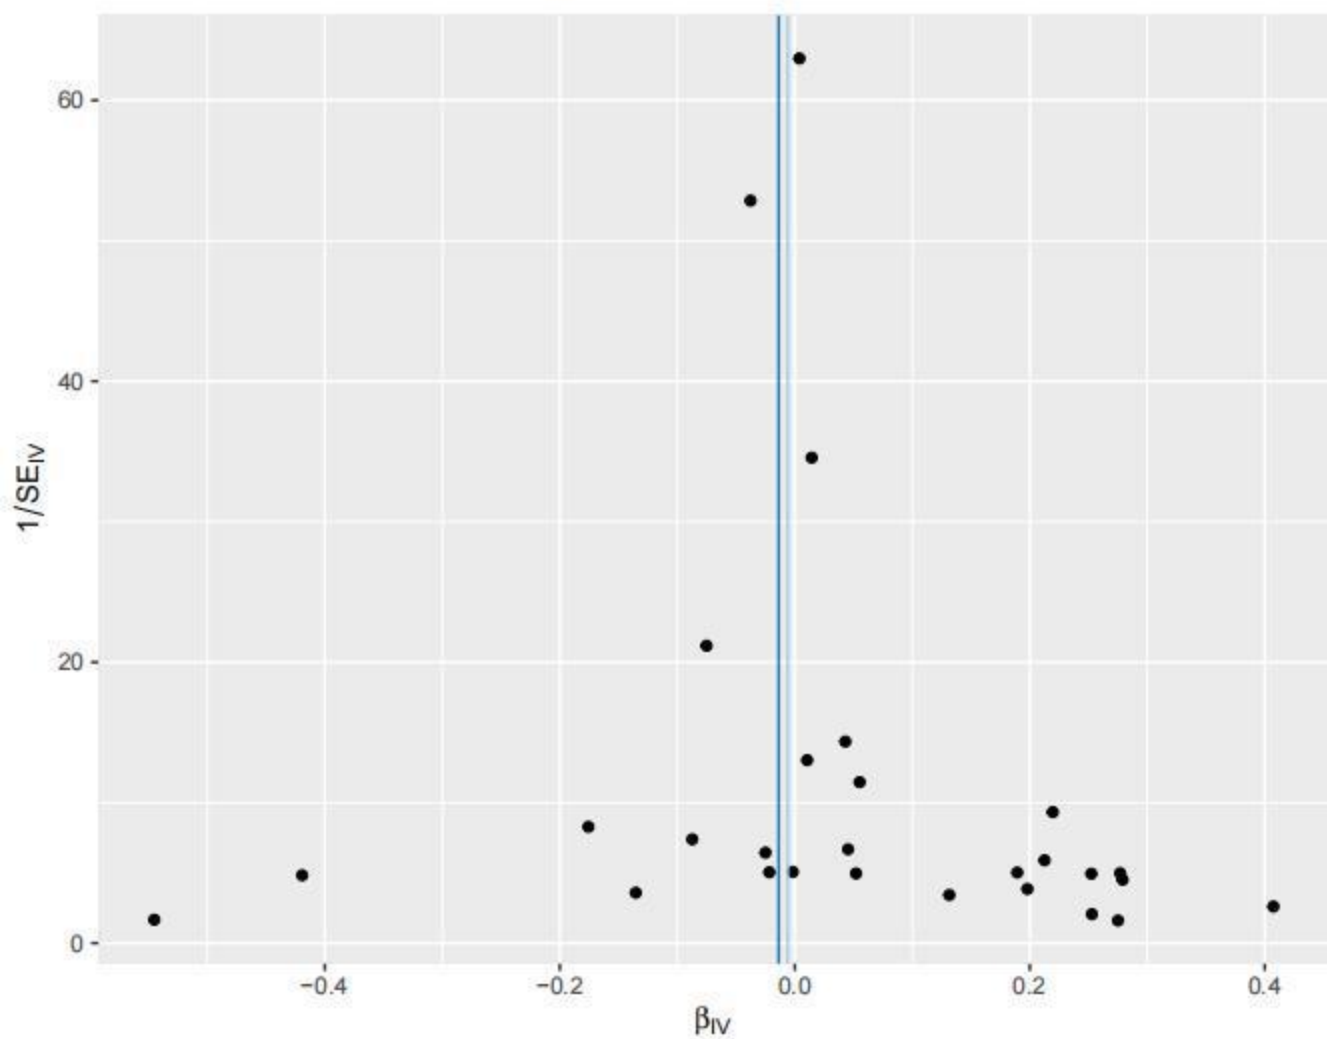

Funnel plot analyse of "CD45RA- CD4+ %T cell" on 'Aplastic anemia'

### MR Method

- Inverse variance weighted
- MR Egger

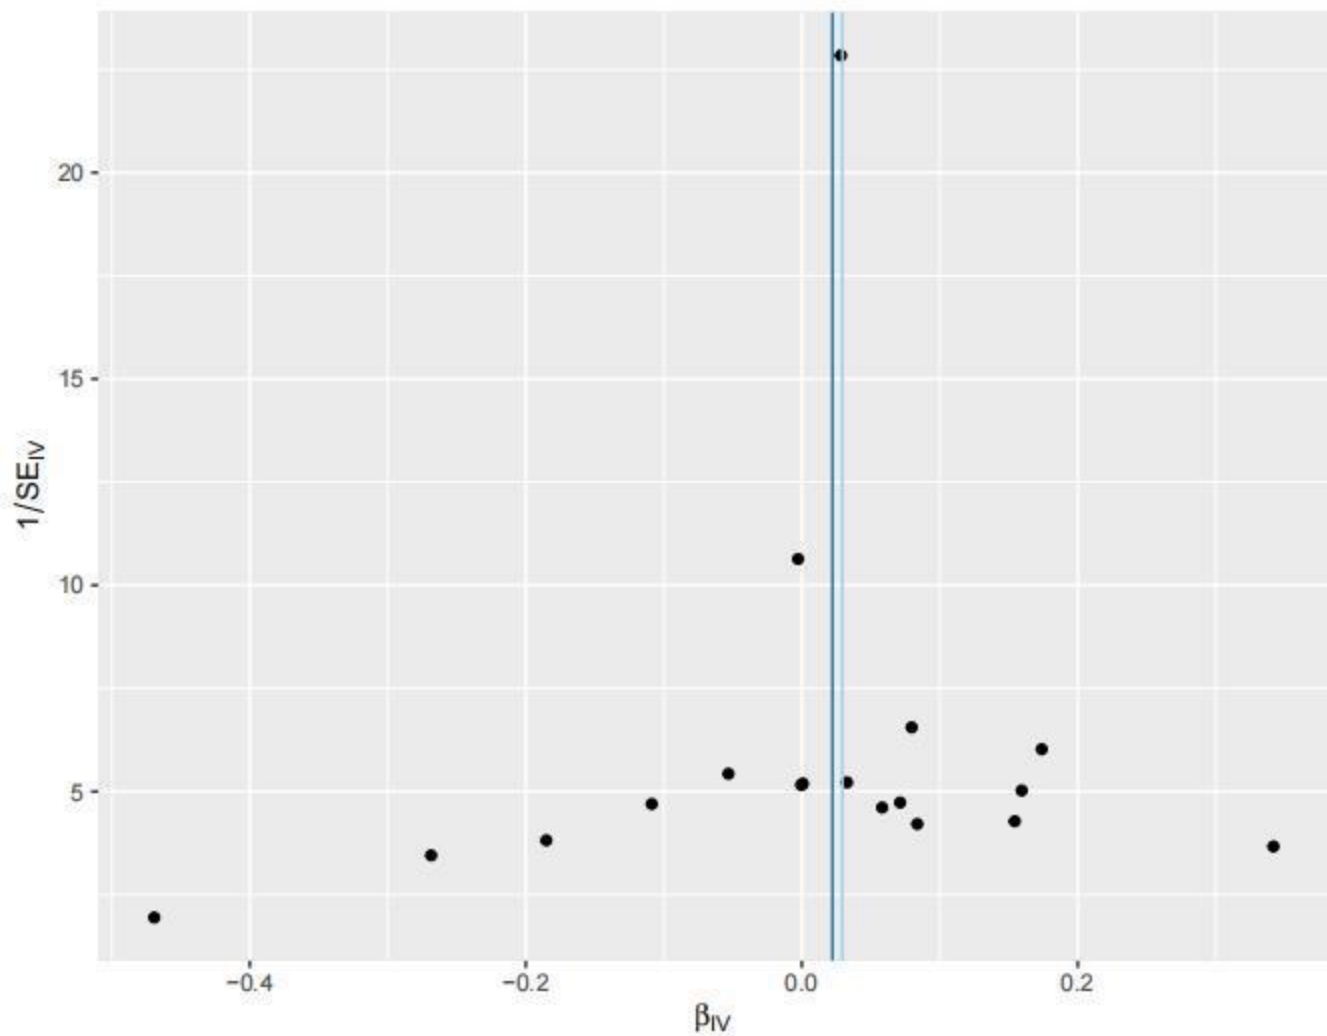

Funnel plot analyse of "FSC-A on CD8br" on 'Aplastic anemia'



MR Method

- Inverse variance weighted
- MR Egger

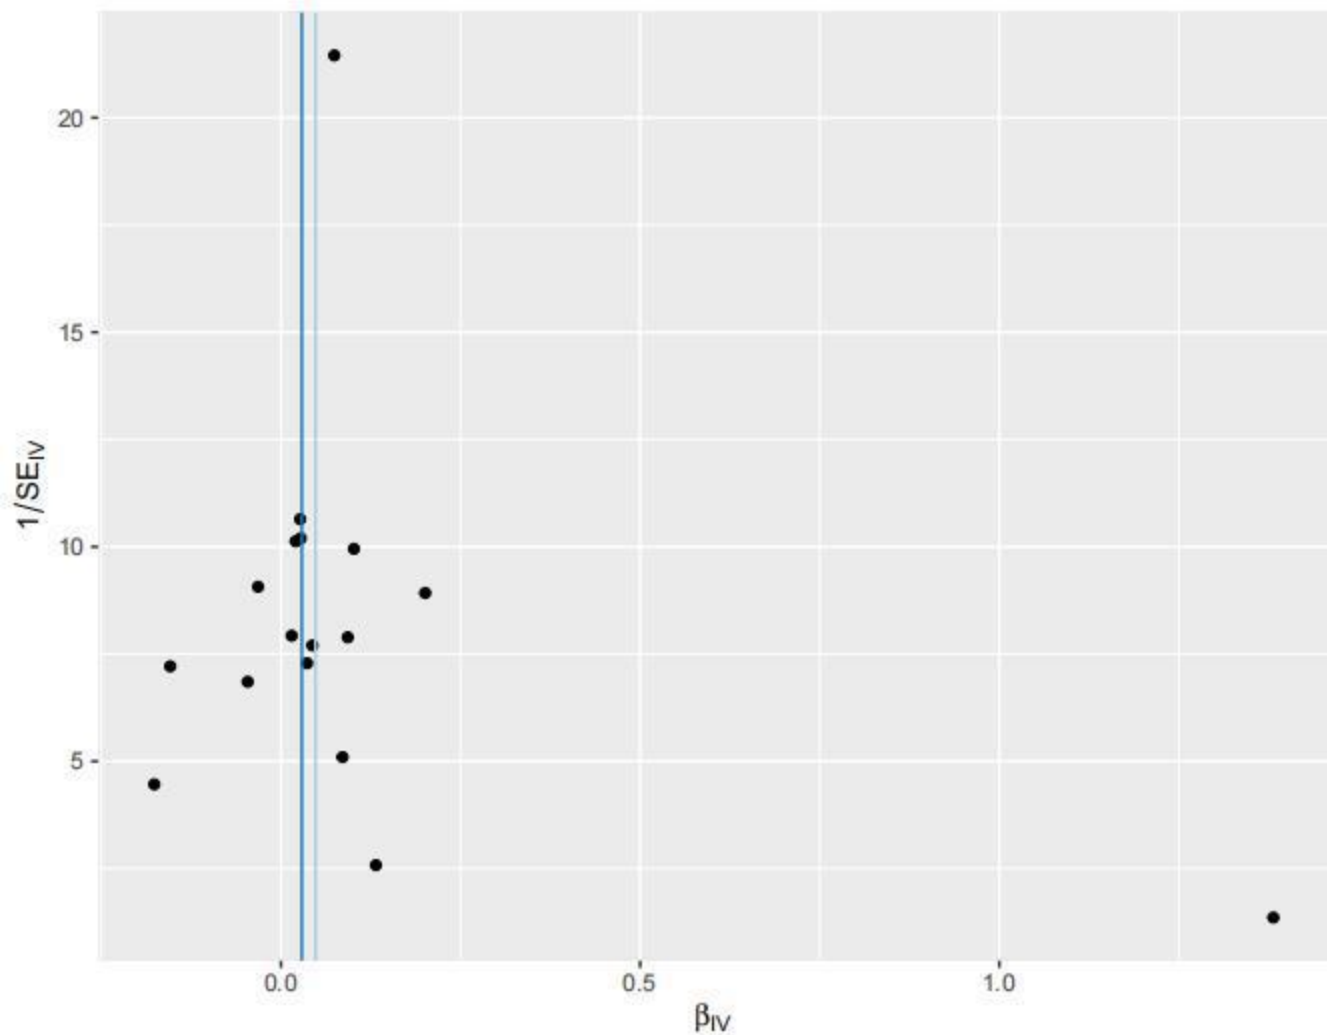

Funnel plot analyse of "CD45 on Mo MDSC " on 'Aplastic anemia'

### MR Method

- Inverse variance weighted
- MR Egger

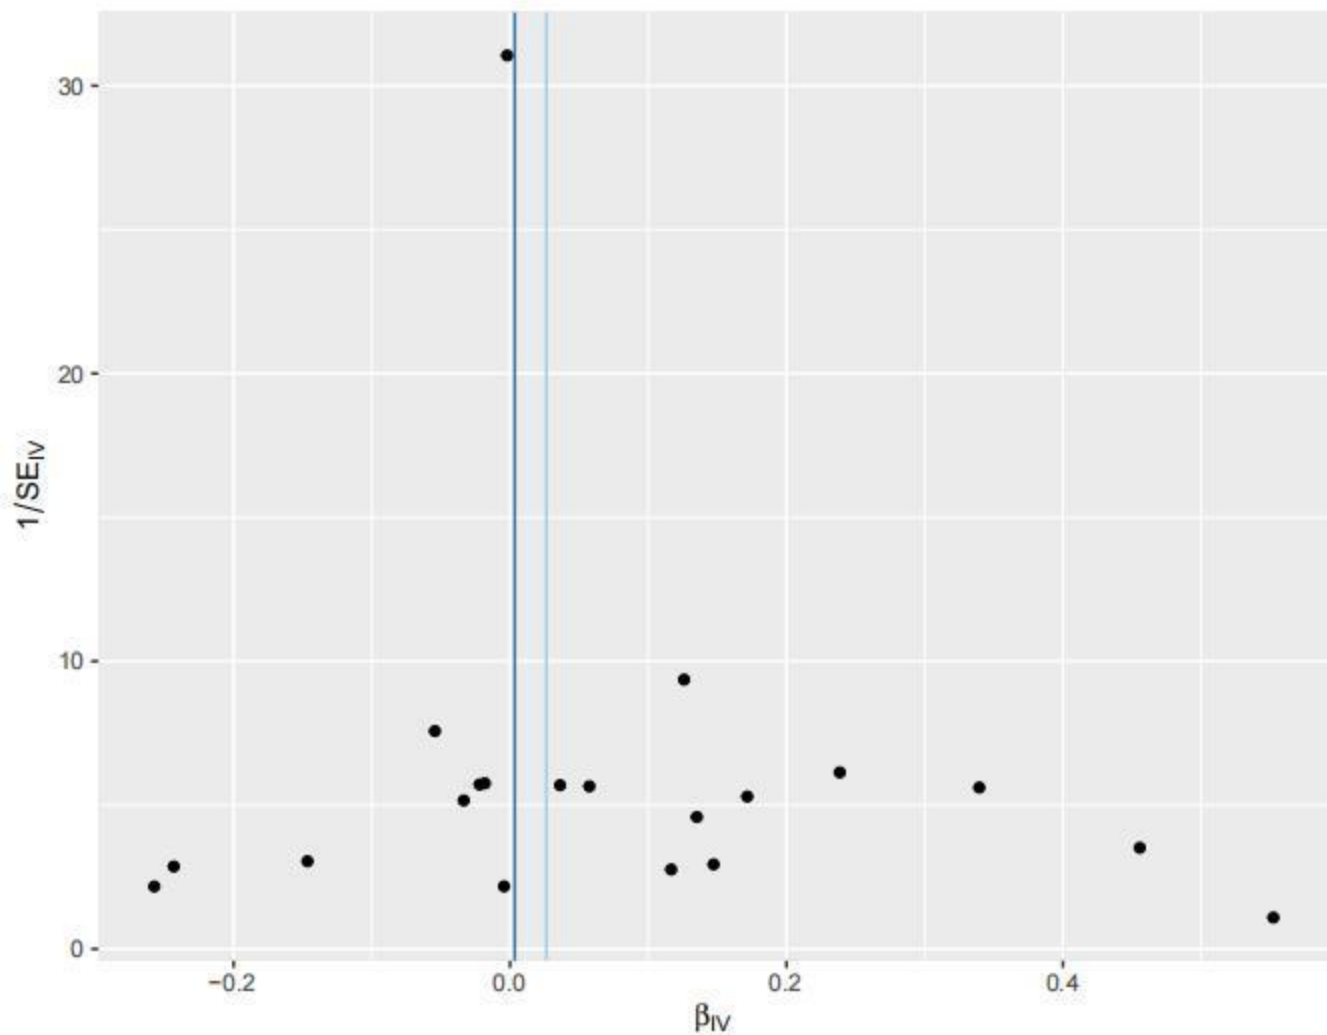

Funnel plot analyse of "IgD+ CD38- %lymphocyte" on 'Aplastic anemia'

### MR Method

Inverse variance weighted

MR Egger

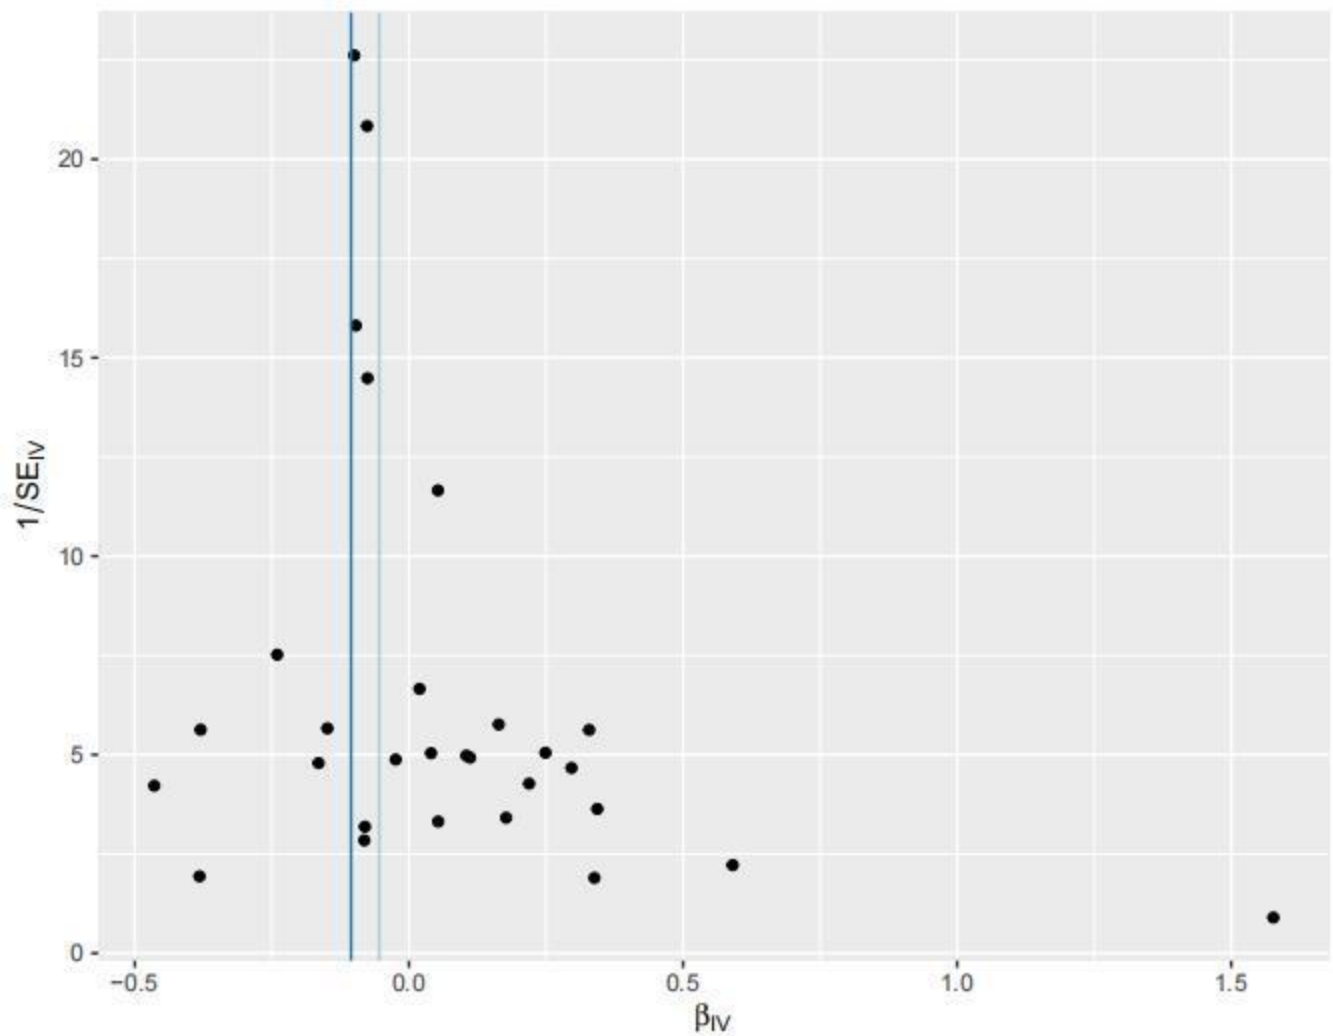

Funnel plot analyse of "EM CD4+ %CD4+" on 'Aplastic anemia'

MR Method

Inverse variance weighted

MR Egger

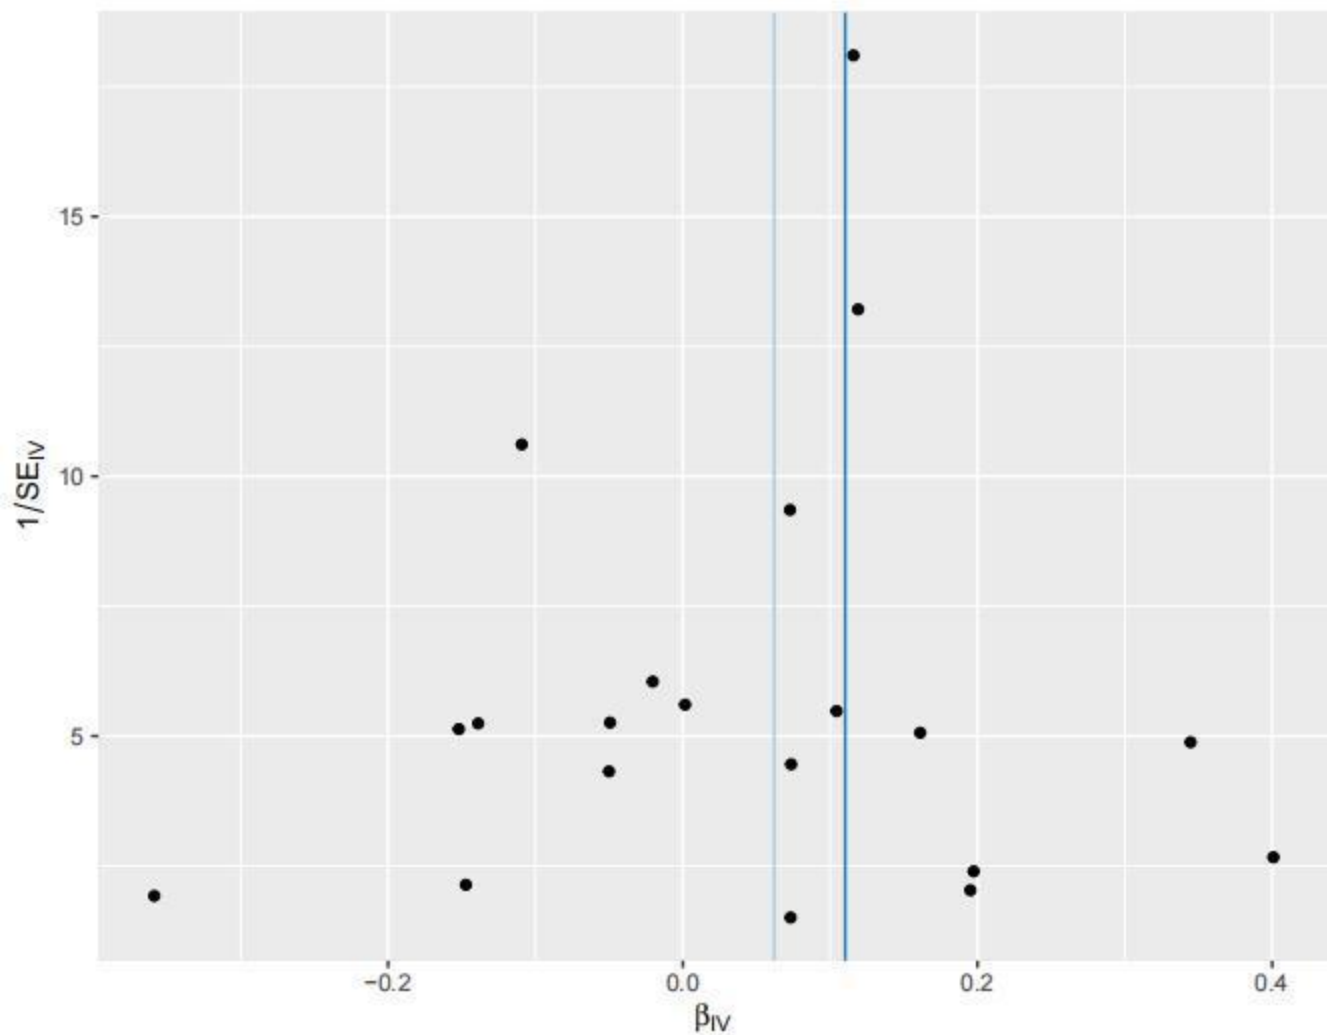

Funnel plot analyse of "CX3CR1 on CD14- CD16+ monocyte" on 'Aplastic anemia'

### MR Method

- Inverse variance weighted
- MR Egger

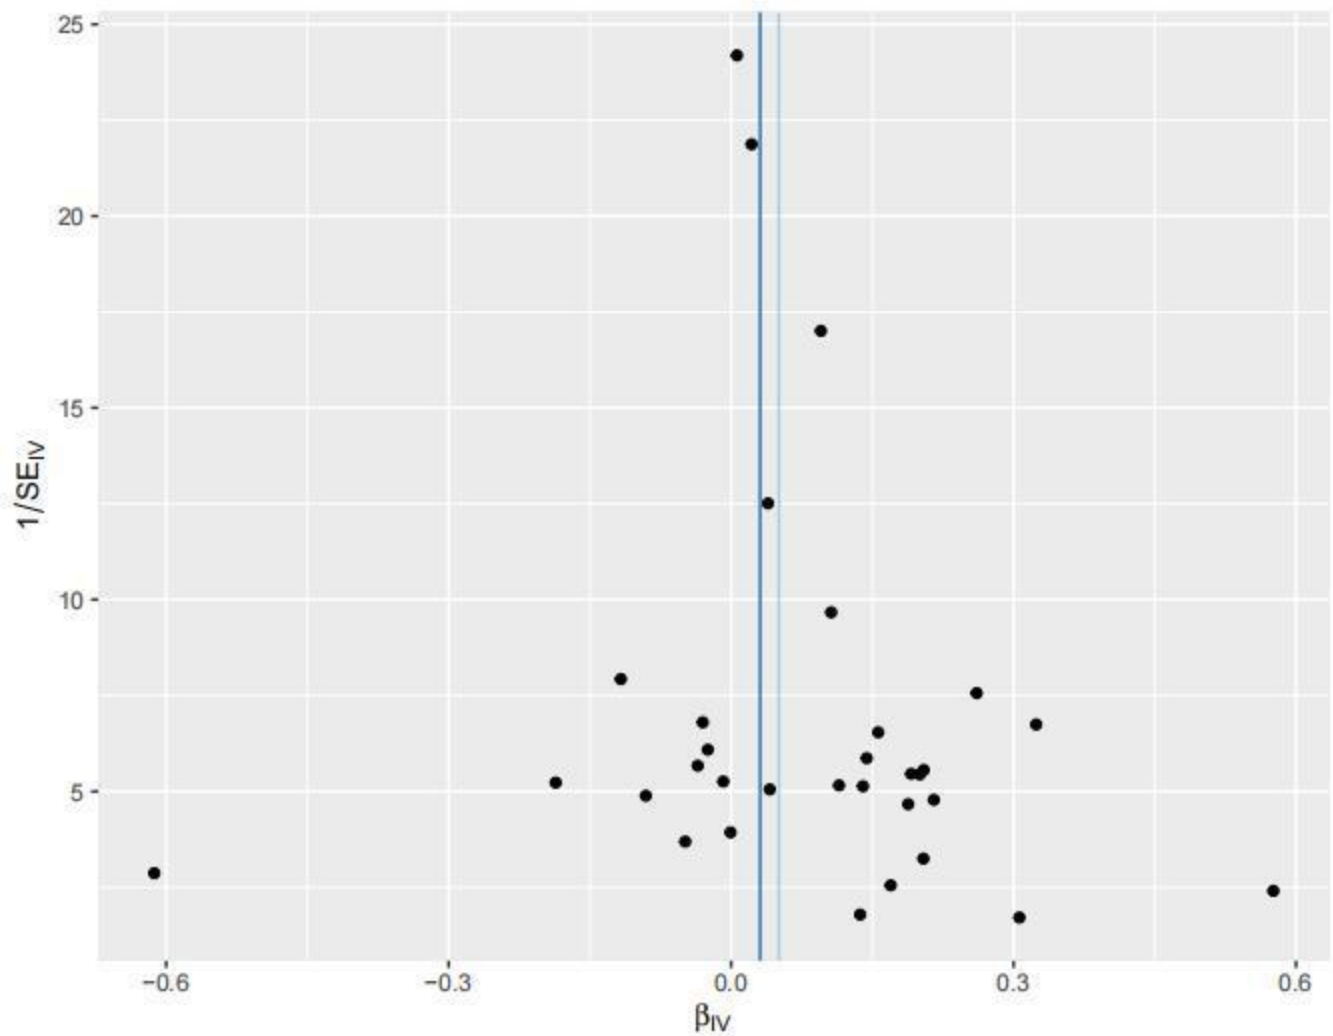

Funnel plot analyse of "Unsw mem %B cell" on 'Aplastic anemia'

### MR Method

- Inverse variance weighted
- MR Egger

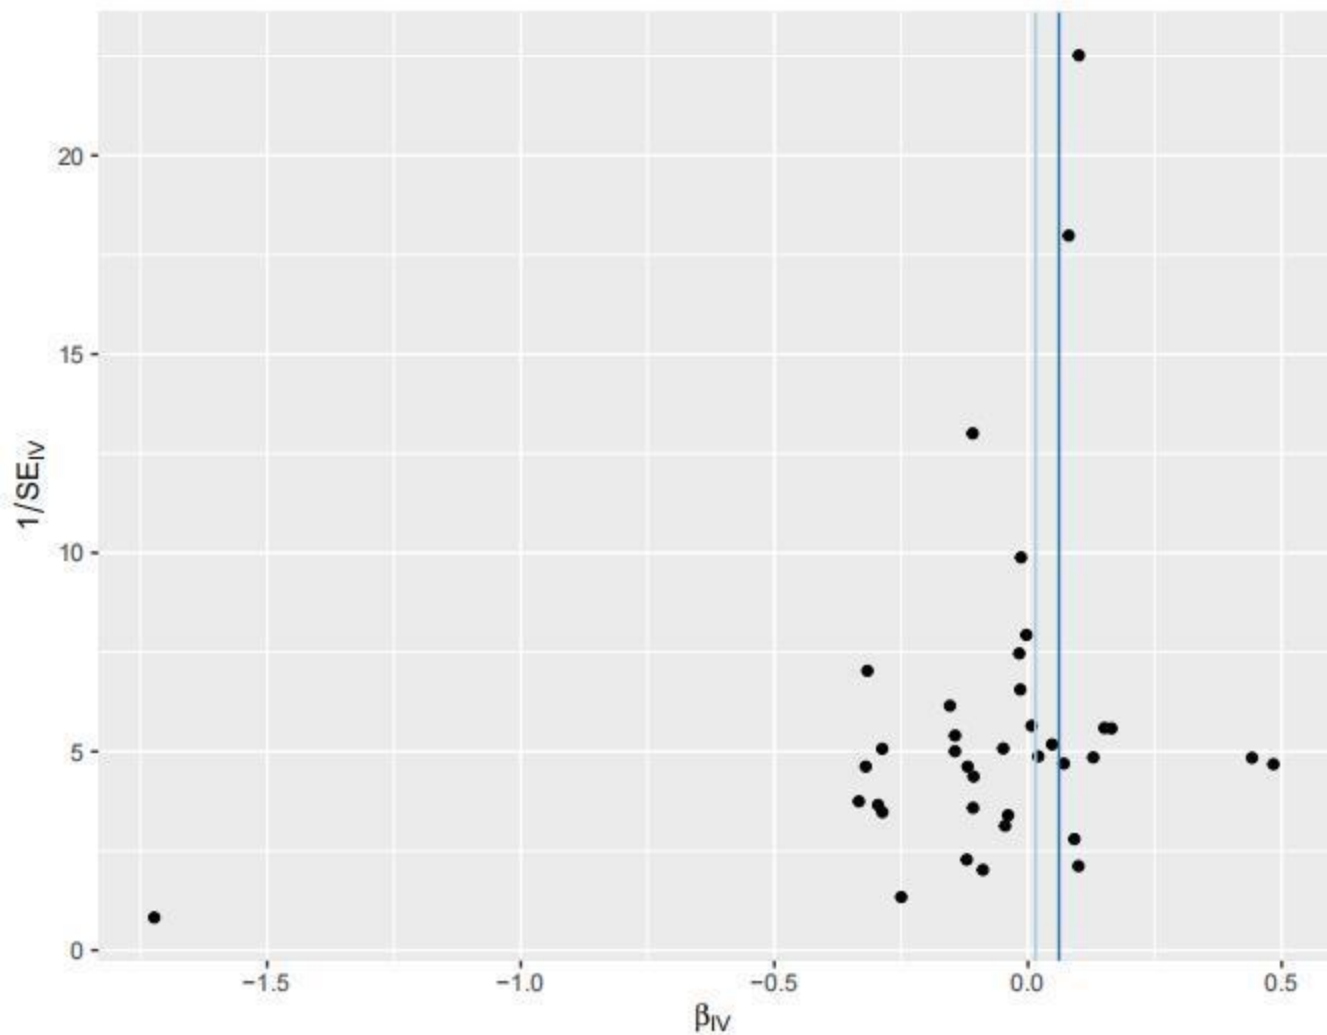

Funnel plot analyse of "Naive CD4+ %T cell" on 'Aplastic anemia'

MR Method

- Inverse variance weighted
- MR Egger

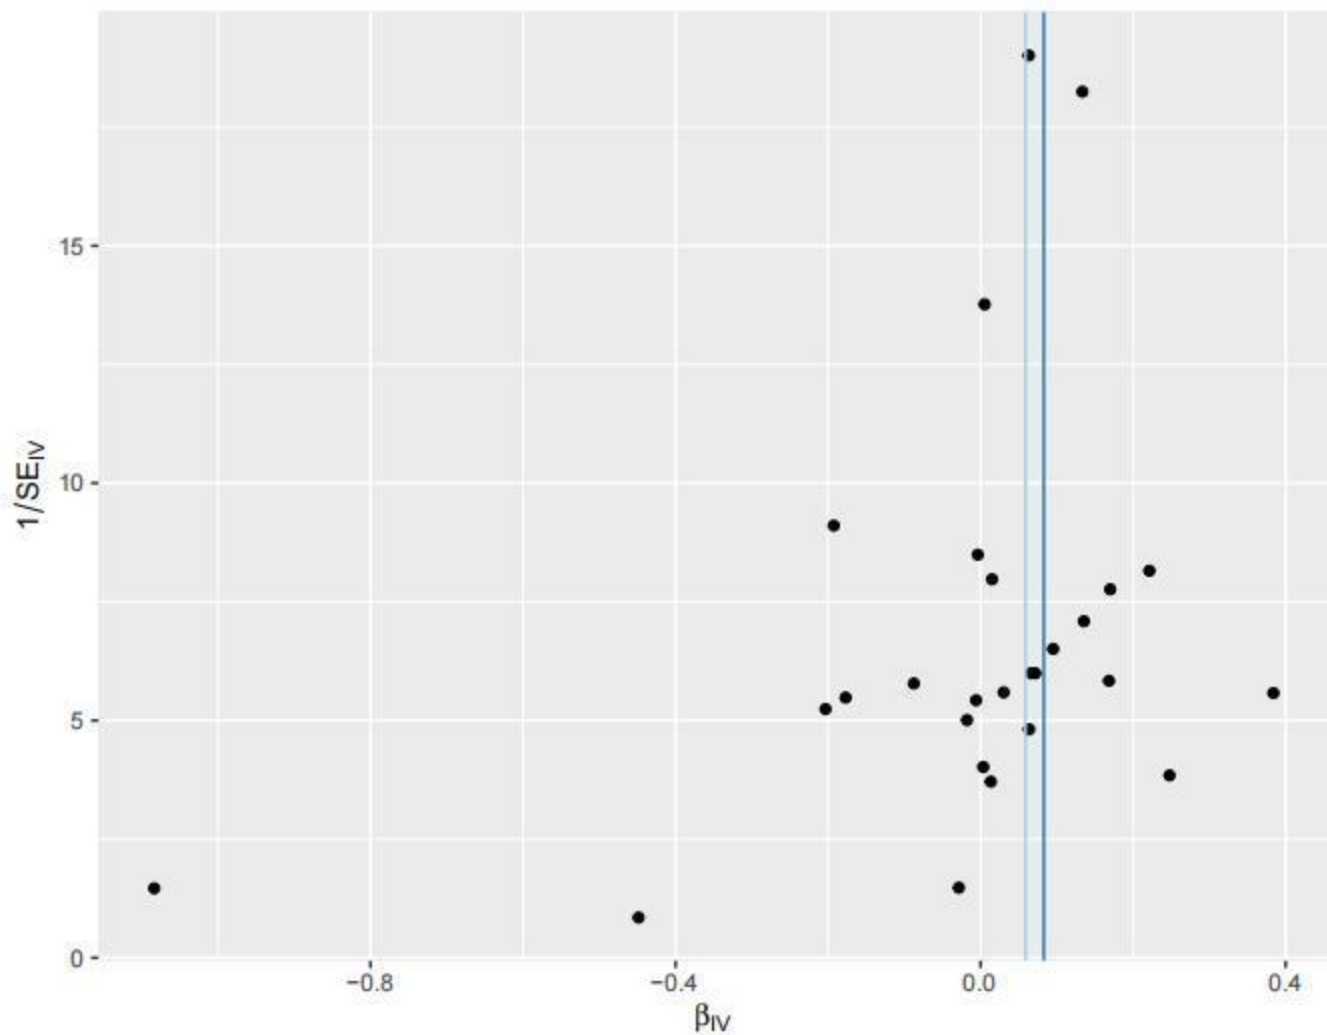

Funnel plot analysis of "CD80 on myeloid DC " on 'Aplastic anemia'

MR Method

- Inverse variance weighted
- MR Egger

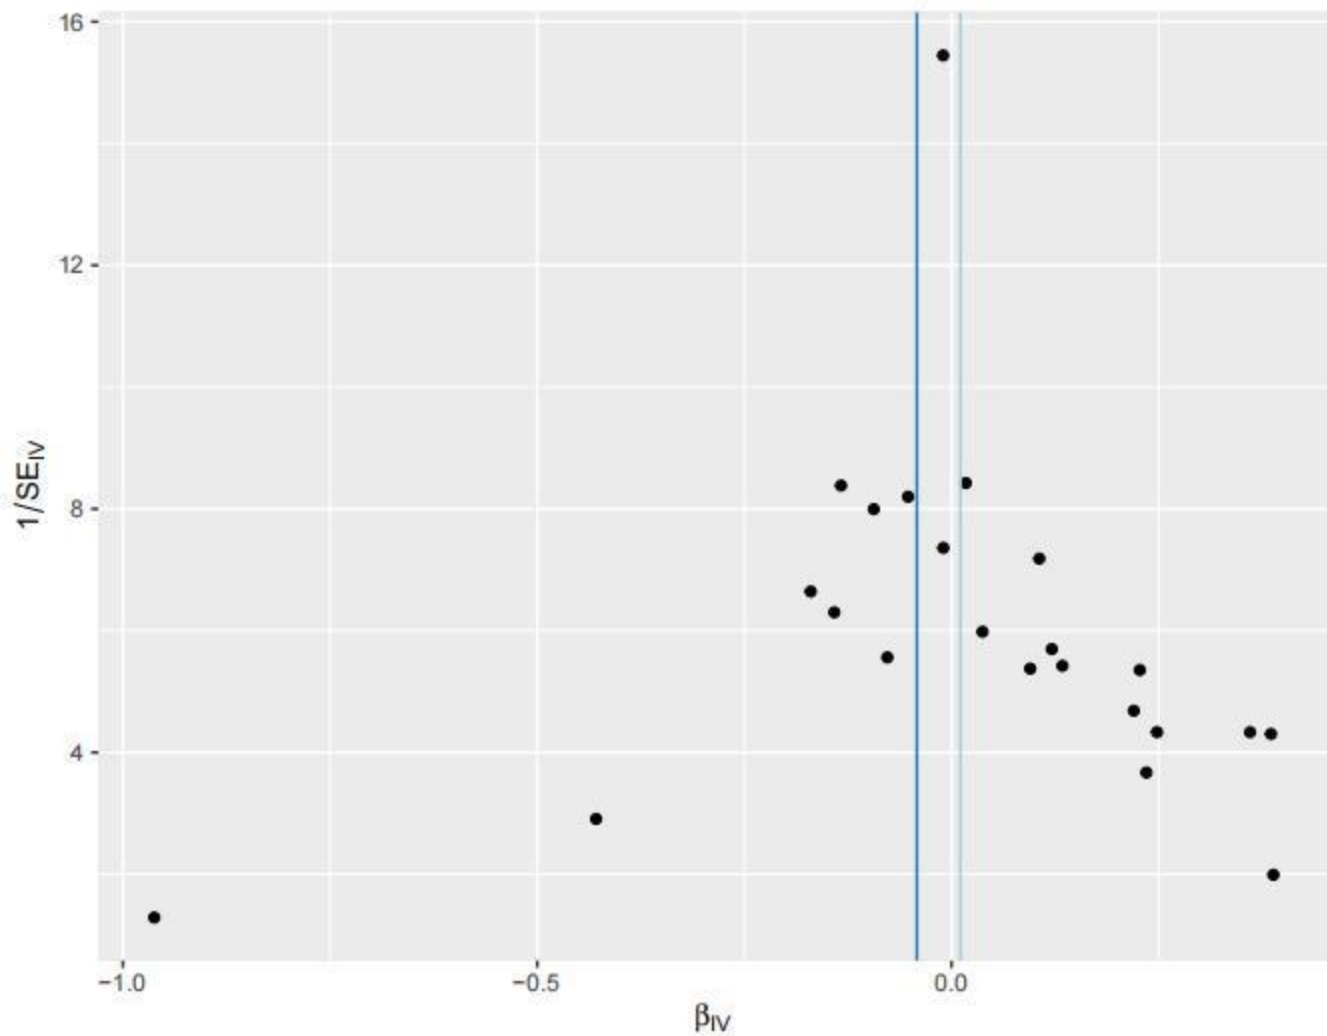

Funnel plot analyse of "SSC-A on HLA DR+ T cell" on 'Aplastic anemia'



MR Method

- Inverse variance weighted
- MR Egger

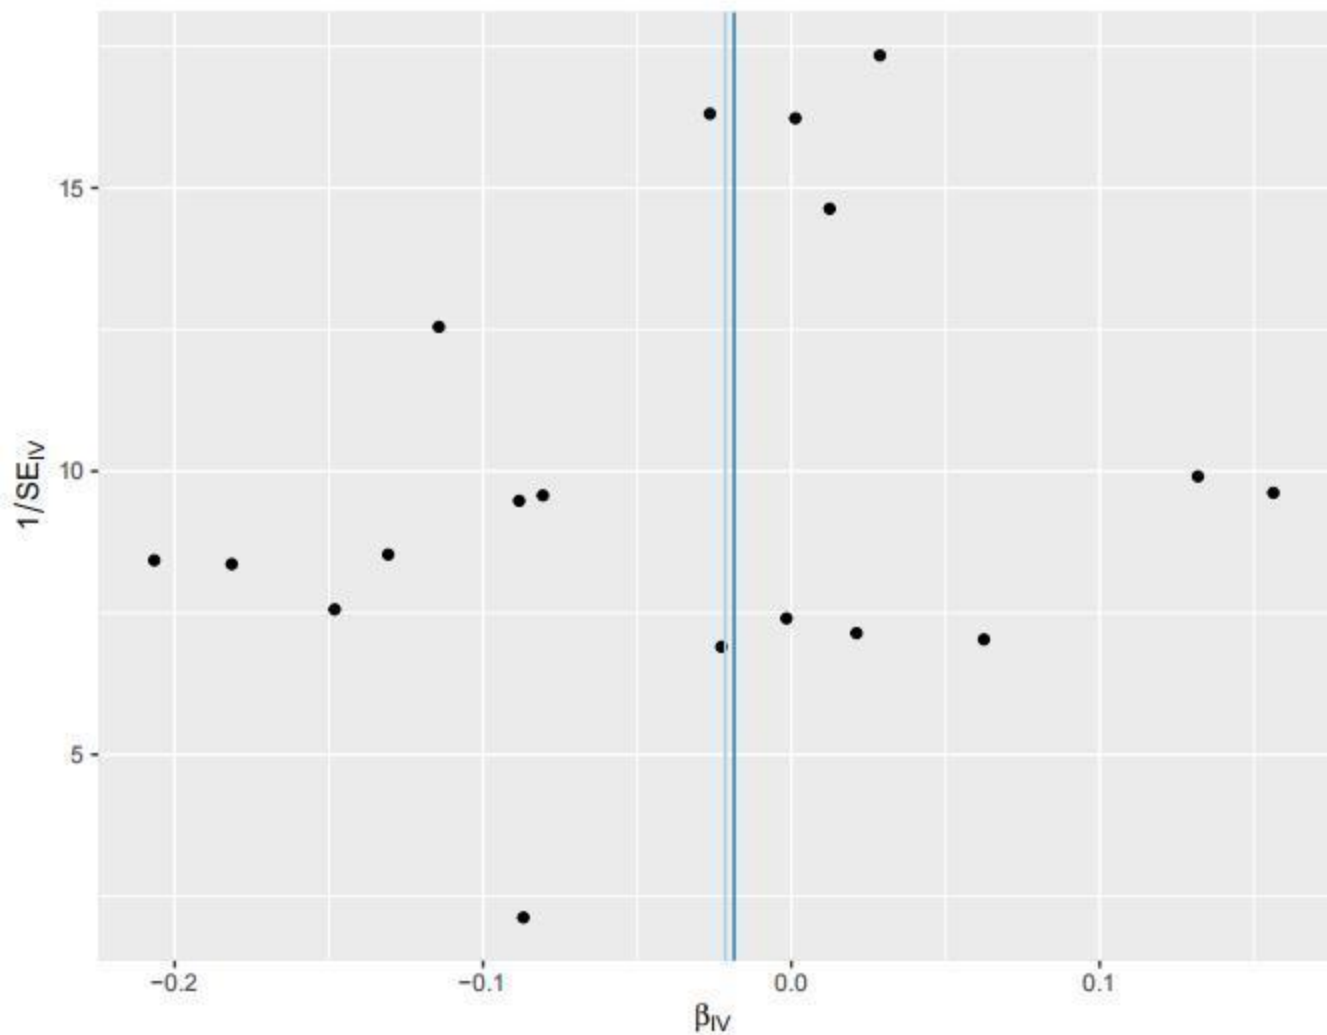

Funnel plot analysis of "HLA DR on CD33dim HLA DR+ CD11b- " on 'Aplastic anemia'

MR Method

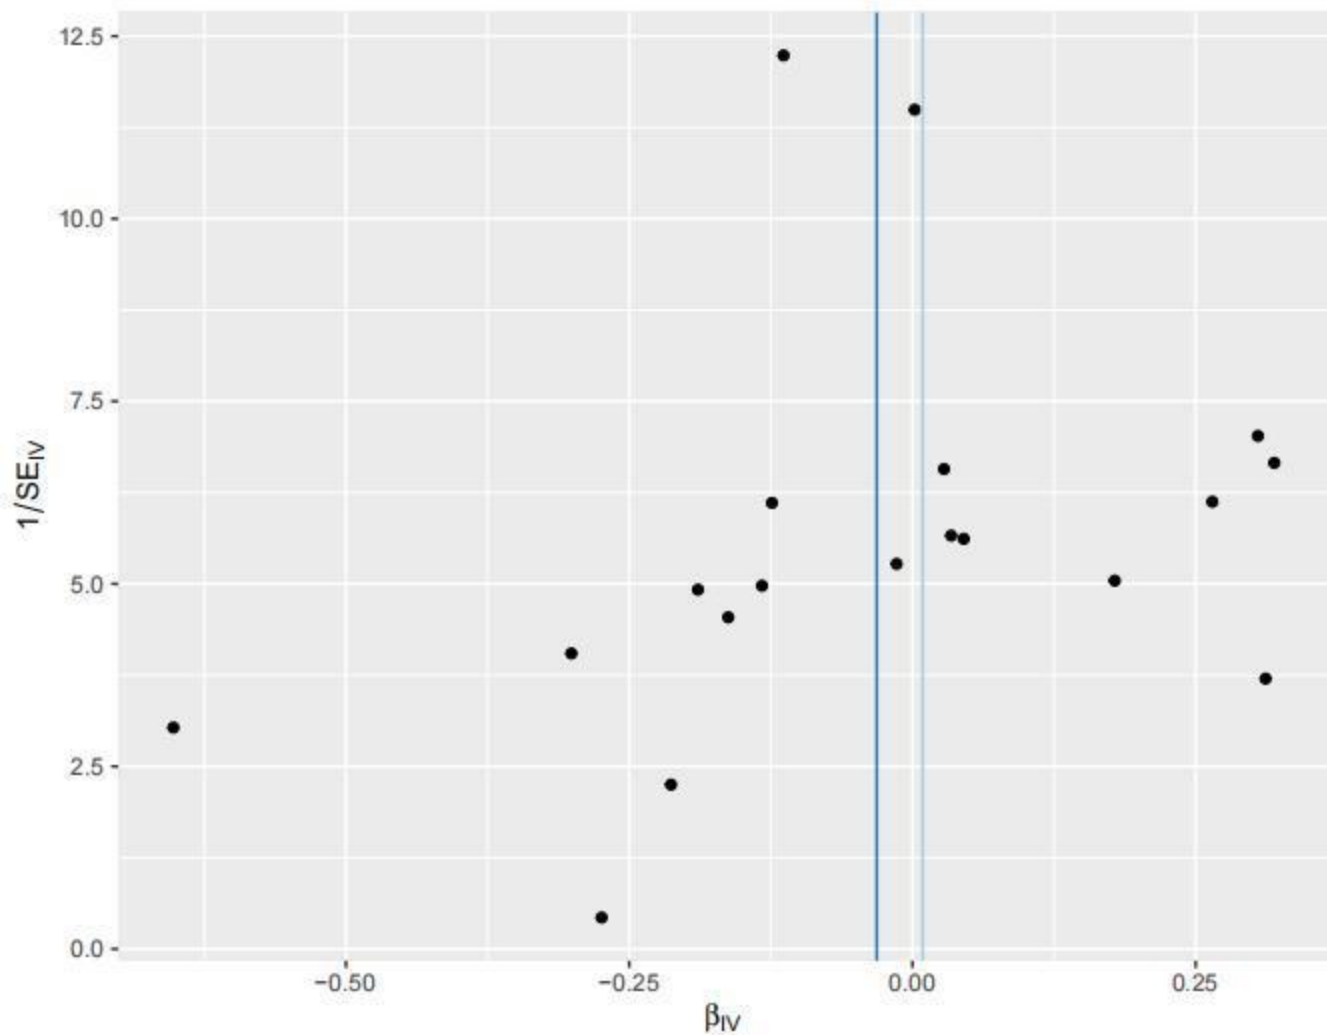

Funnel plot analyse of "CD11c+ HLA DR++ monocyte AC" on 'Aplastic anemia'

### MR Method

Inverse variance weighted

MR Egger

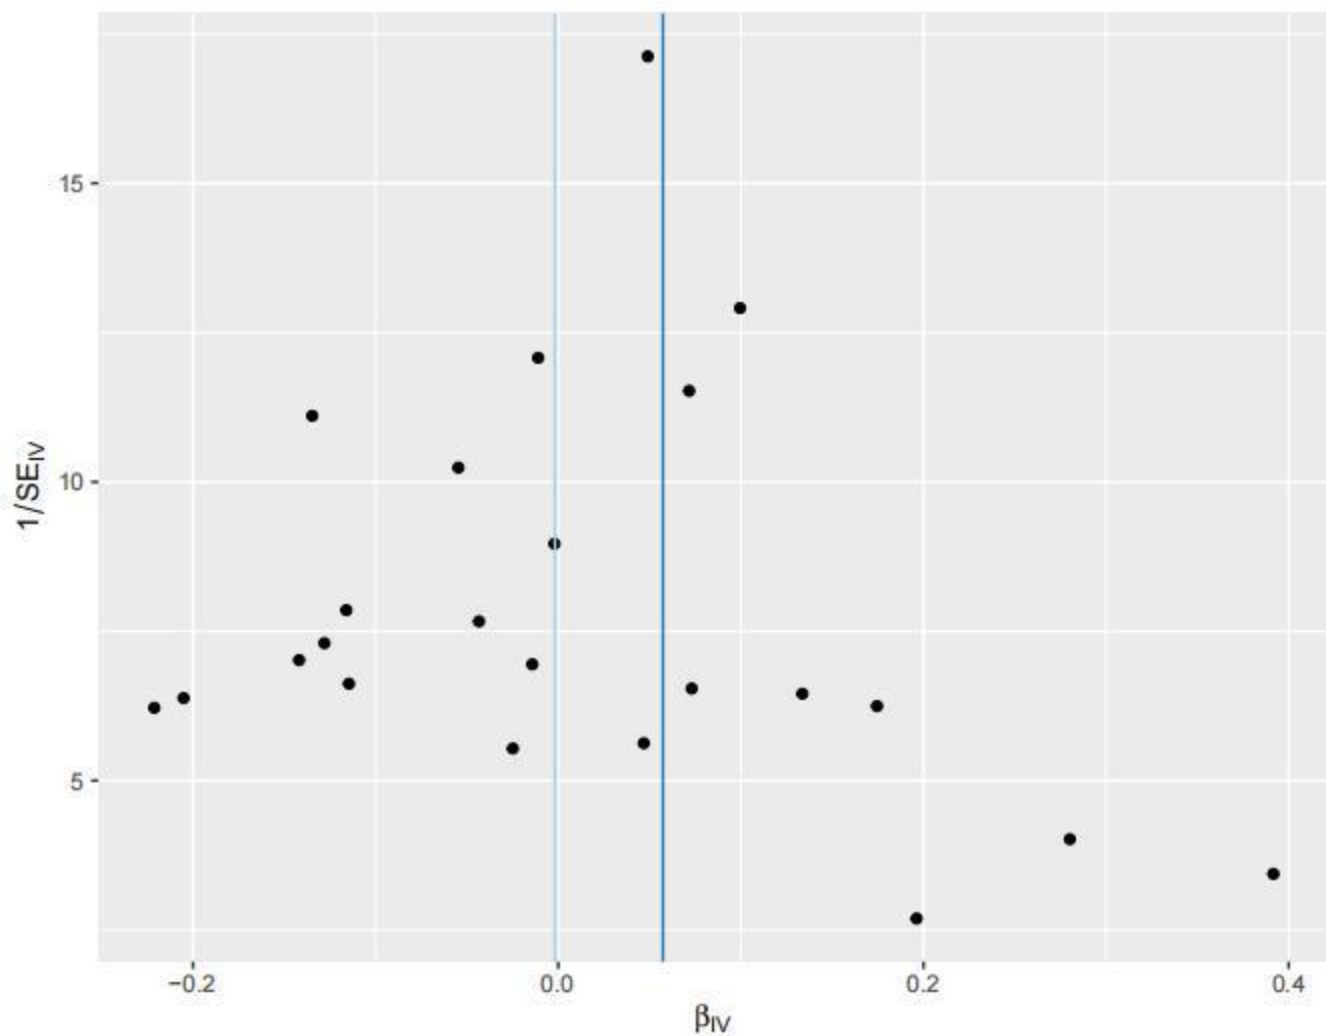

Funnel plot analyse of "Im MDSC AC" on 'Aplastic anemia'

MR Method

- Inverse variance weighted
- MR Egger

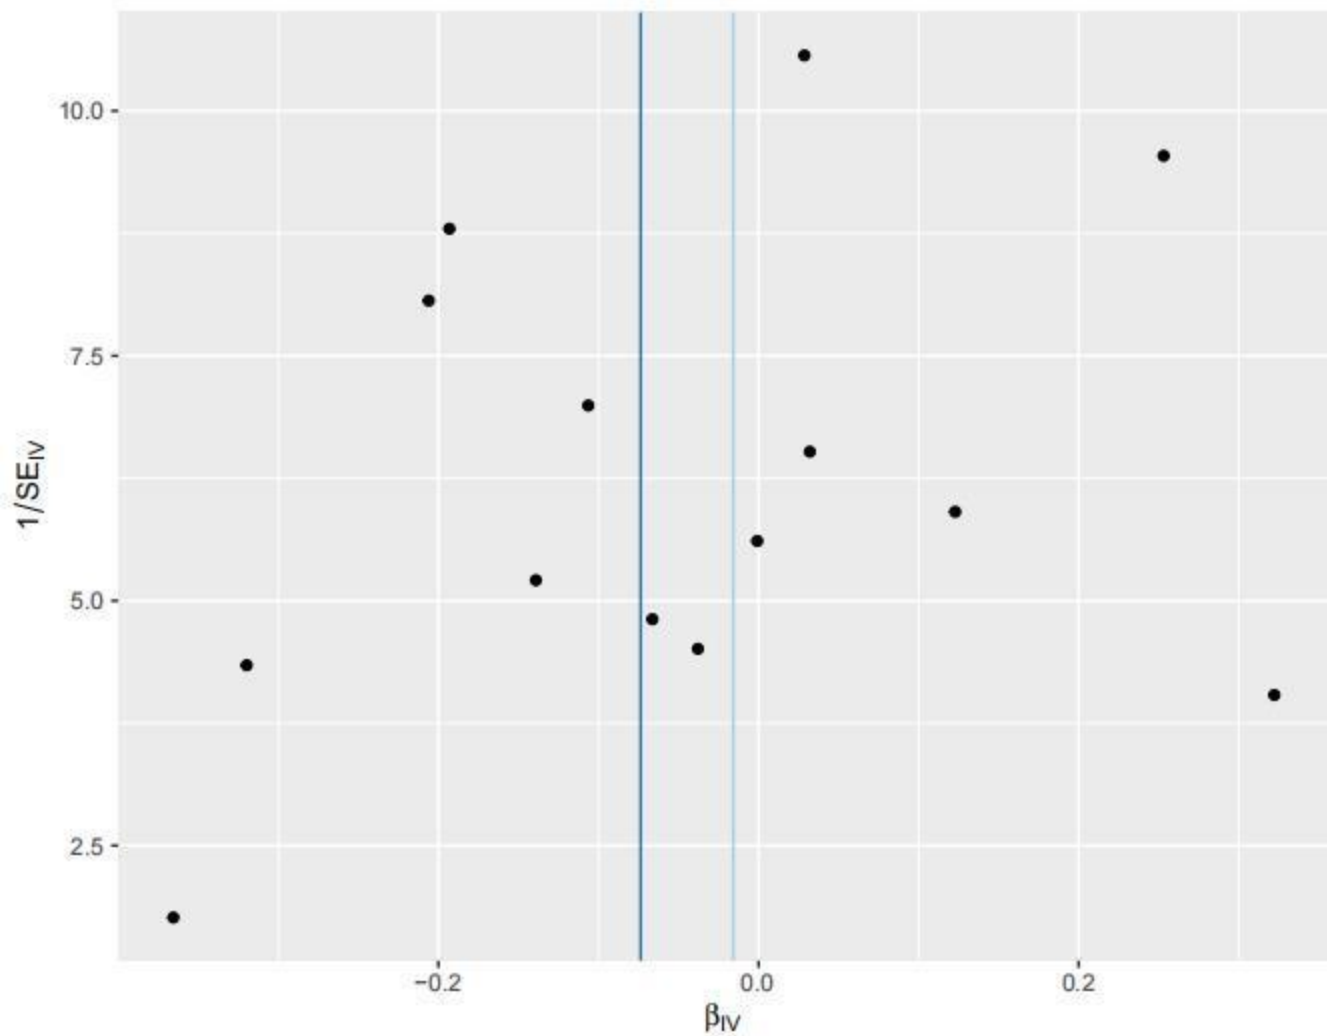

Funnel plot analyse of "CD62L on CD62L+ myeloid DC " on 'Aplastic anemia'

### MR Method

- Inverse variance weighted
- MR Egger

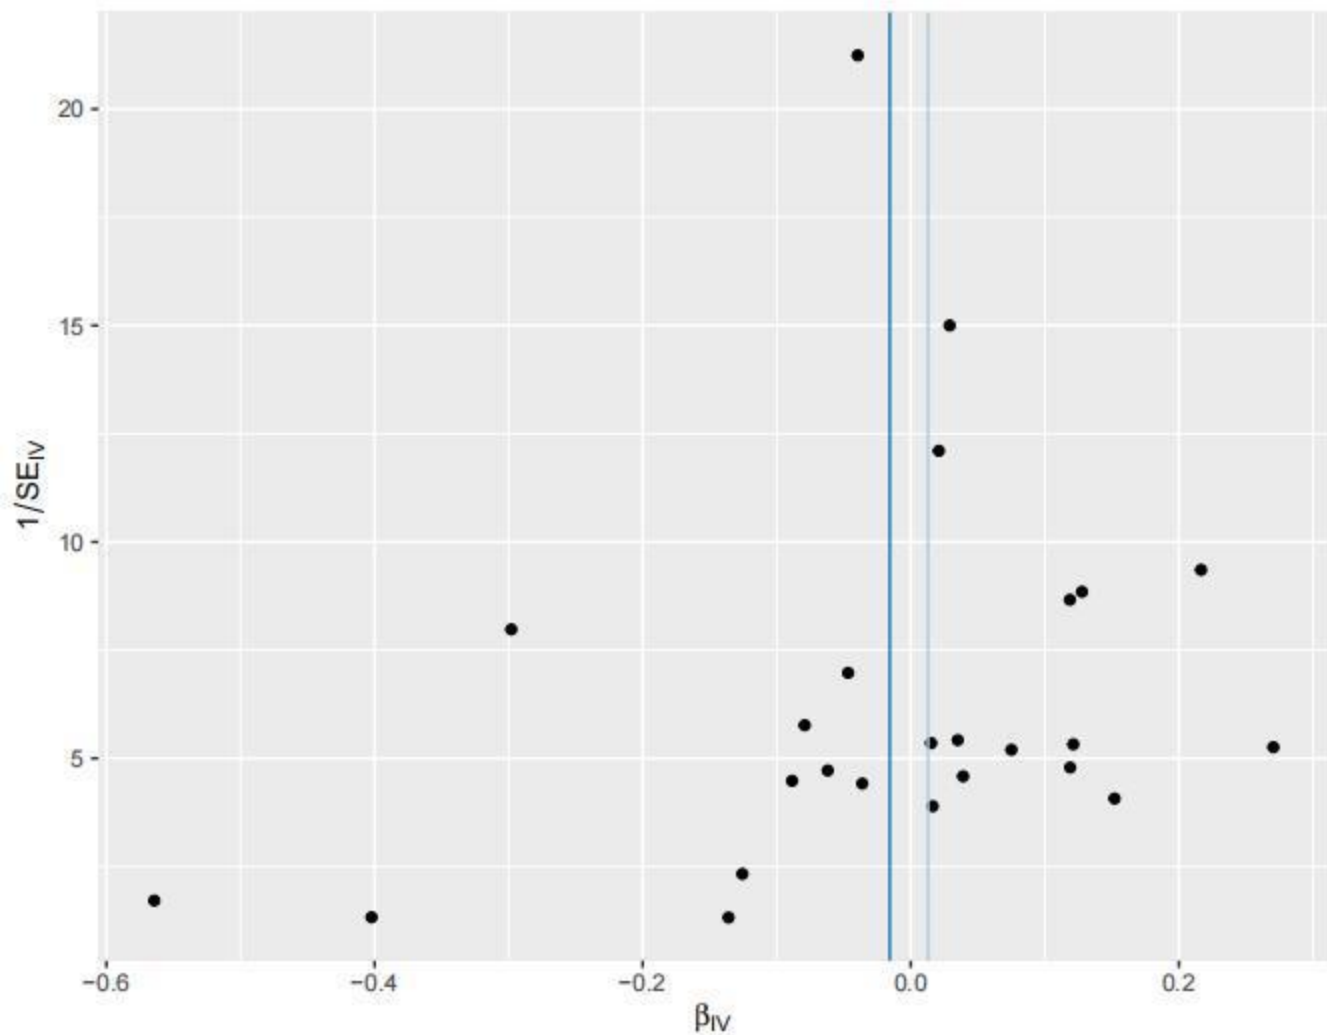

Funnel plot analyse of "CD28- CD8dim %T cell" on 'Aplastic anemia'

### MR Method

Inverse variance weighted

MR Egger

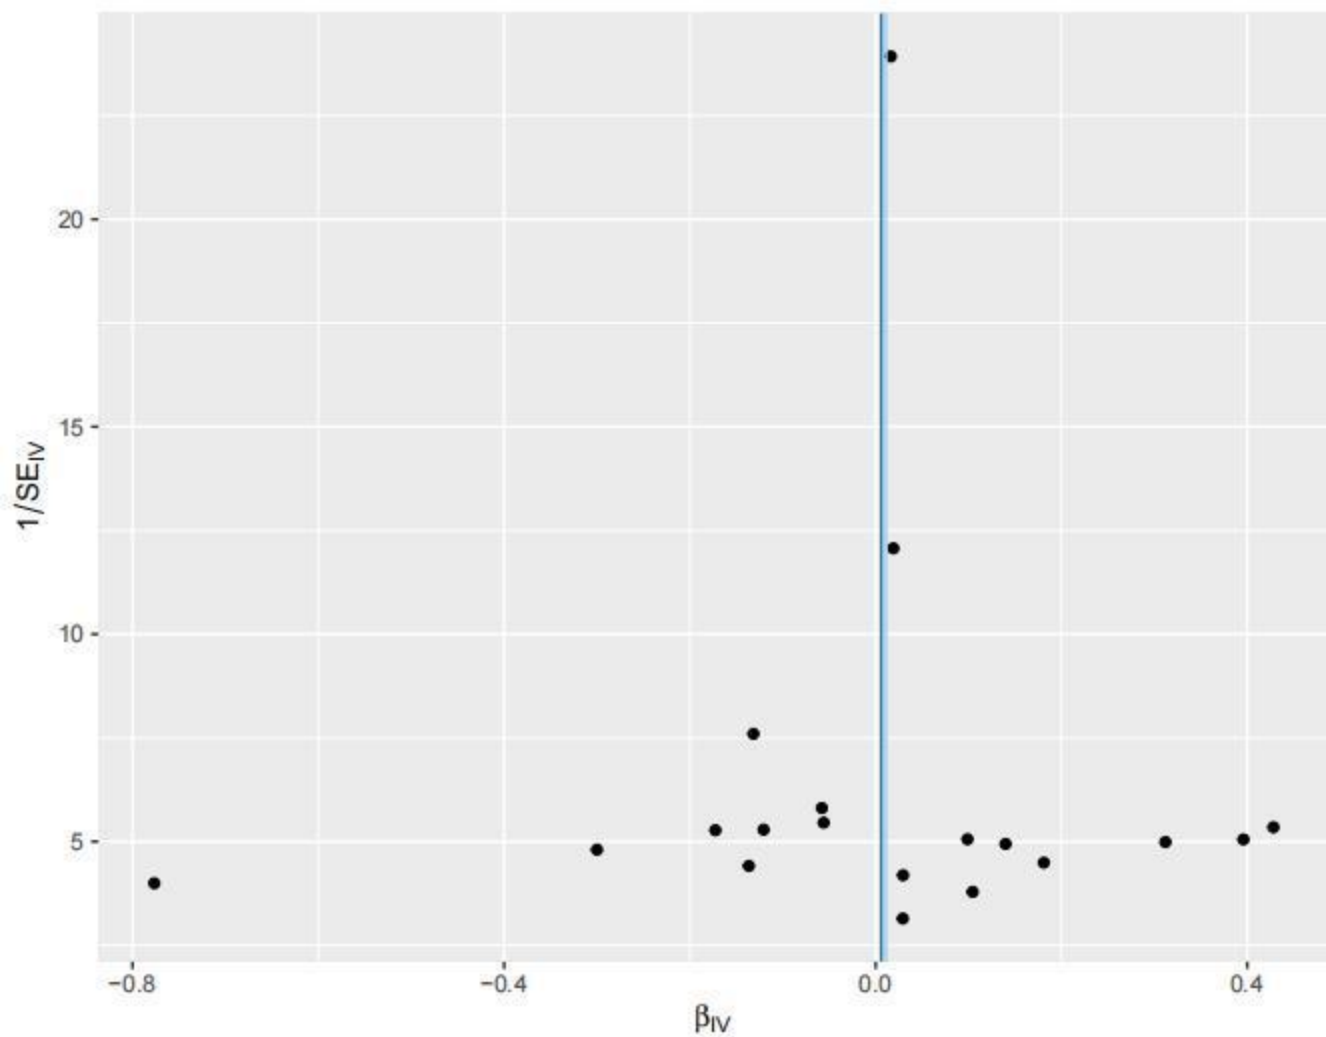

Funnel plot analyse of "CD20- %B cell" on 'Aplastic anemia'

MR Method

Inverse variance weighted

MR Egger

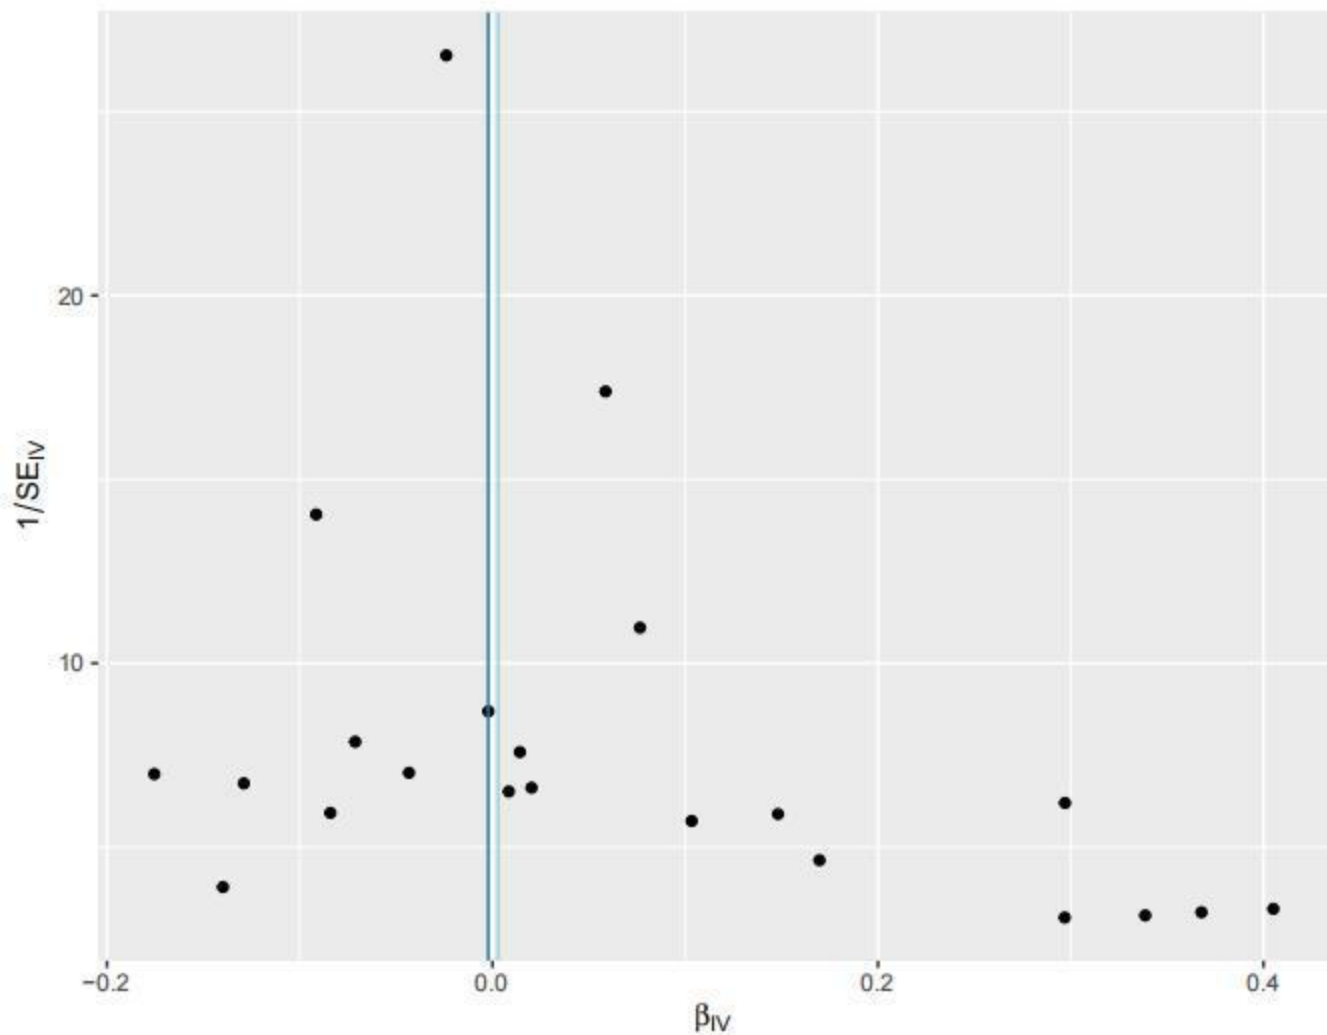

Funnel plot analysis of "Im MDSC %CD33dim HLA DR- CD66b-" on 'Aplastic anemia'

MR Method

Inverse variance weighted

MR Egger

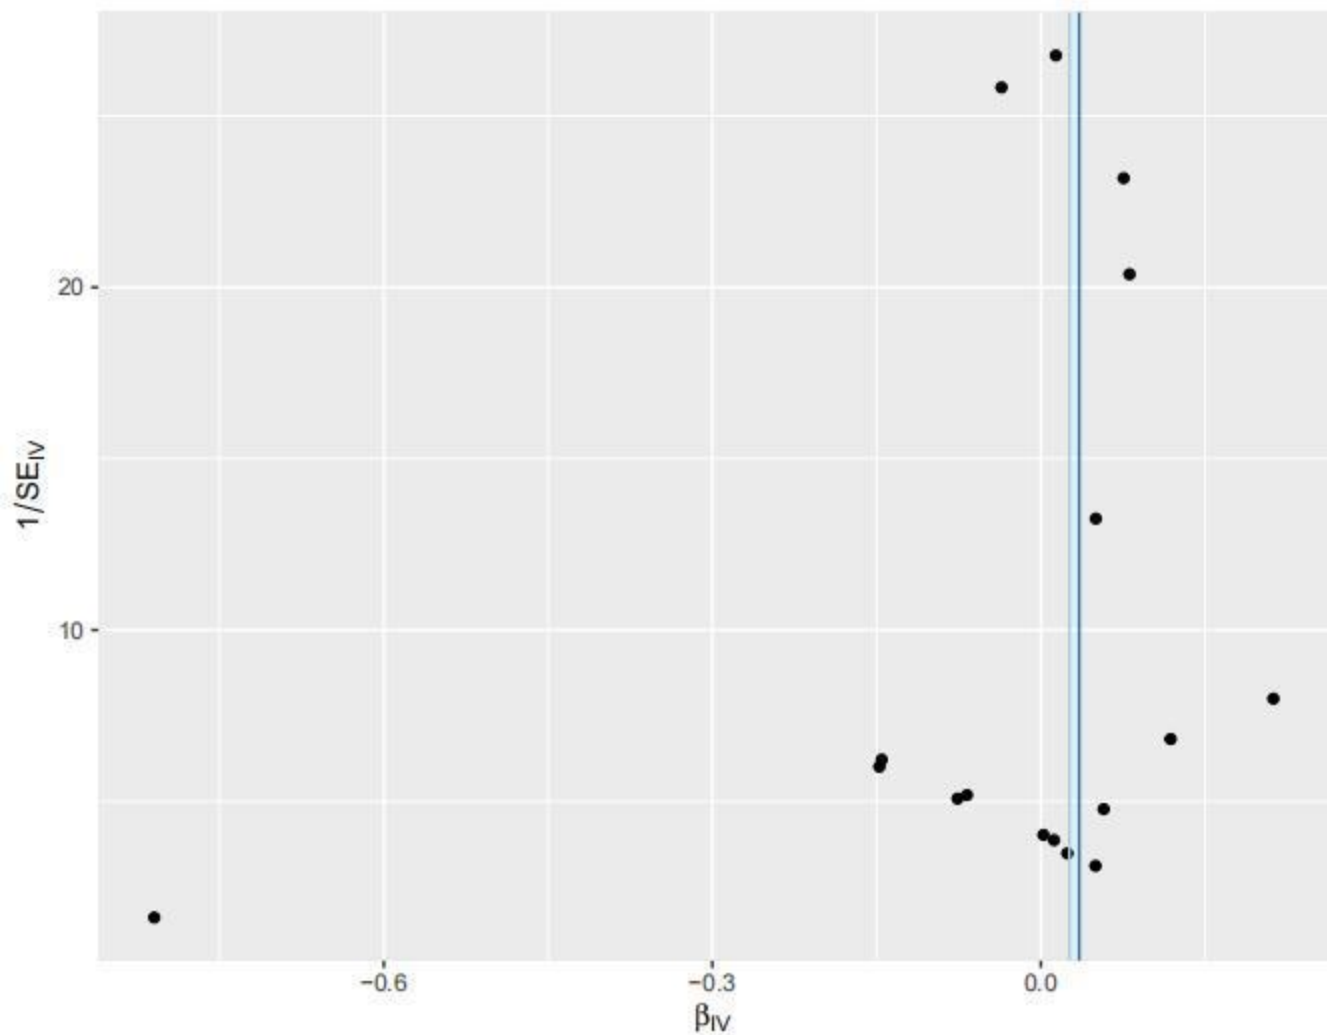

Funnel plot analyse of "FSC-A on HLA DR+ CD8br" on 'Aplastic anemia'



### MR Method

Inverse variance weighted

MR Egger

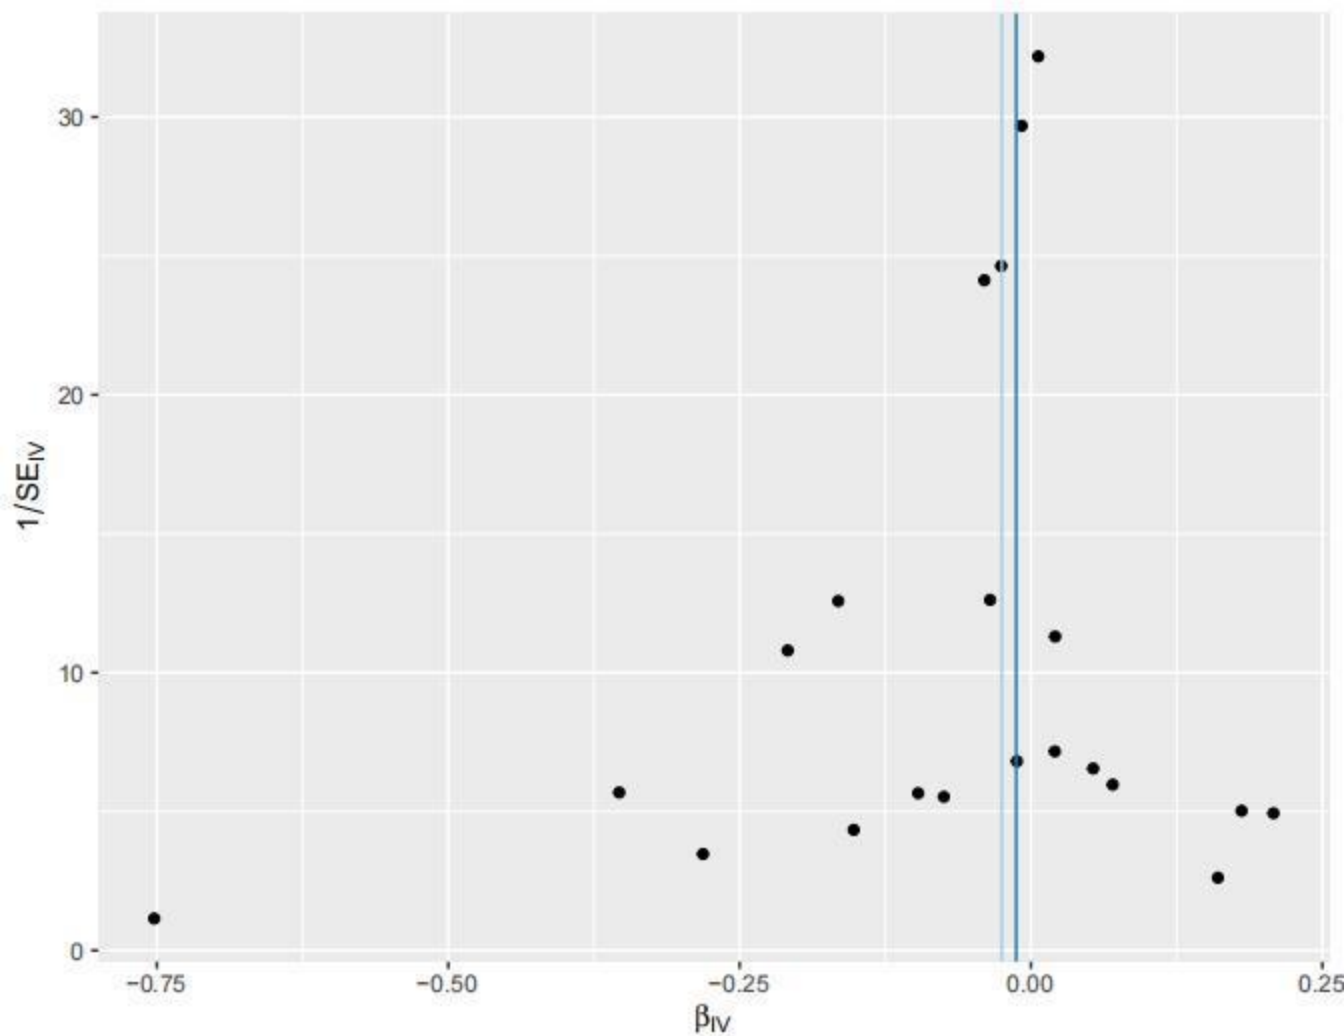

Funnel plot analysis of "CX3CR1 on CD14- CD16- " on 'Aplastic anemia'

### MR Method

Inverse variance weighted

MR Egger

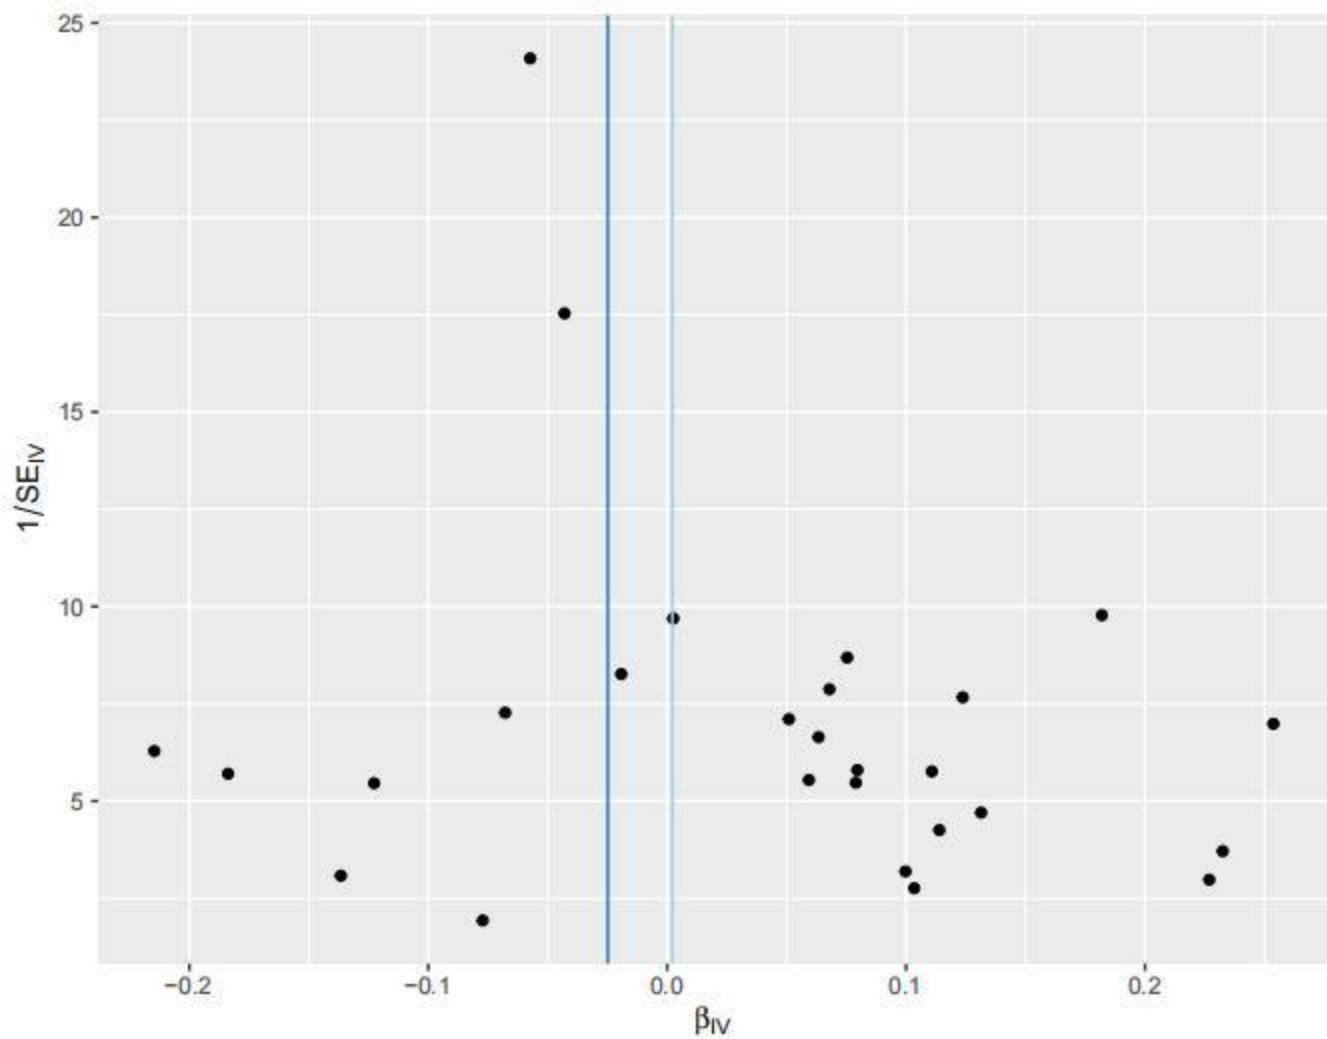

Funnel plot analysis of "SSC-A on granulocyte" on 'Aplastic anemia'

### MR Method

- Inverse variance weighted
- MR Egger

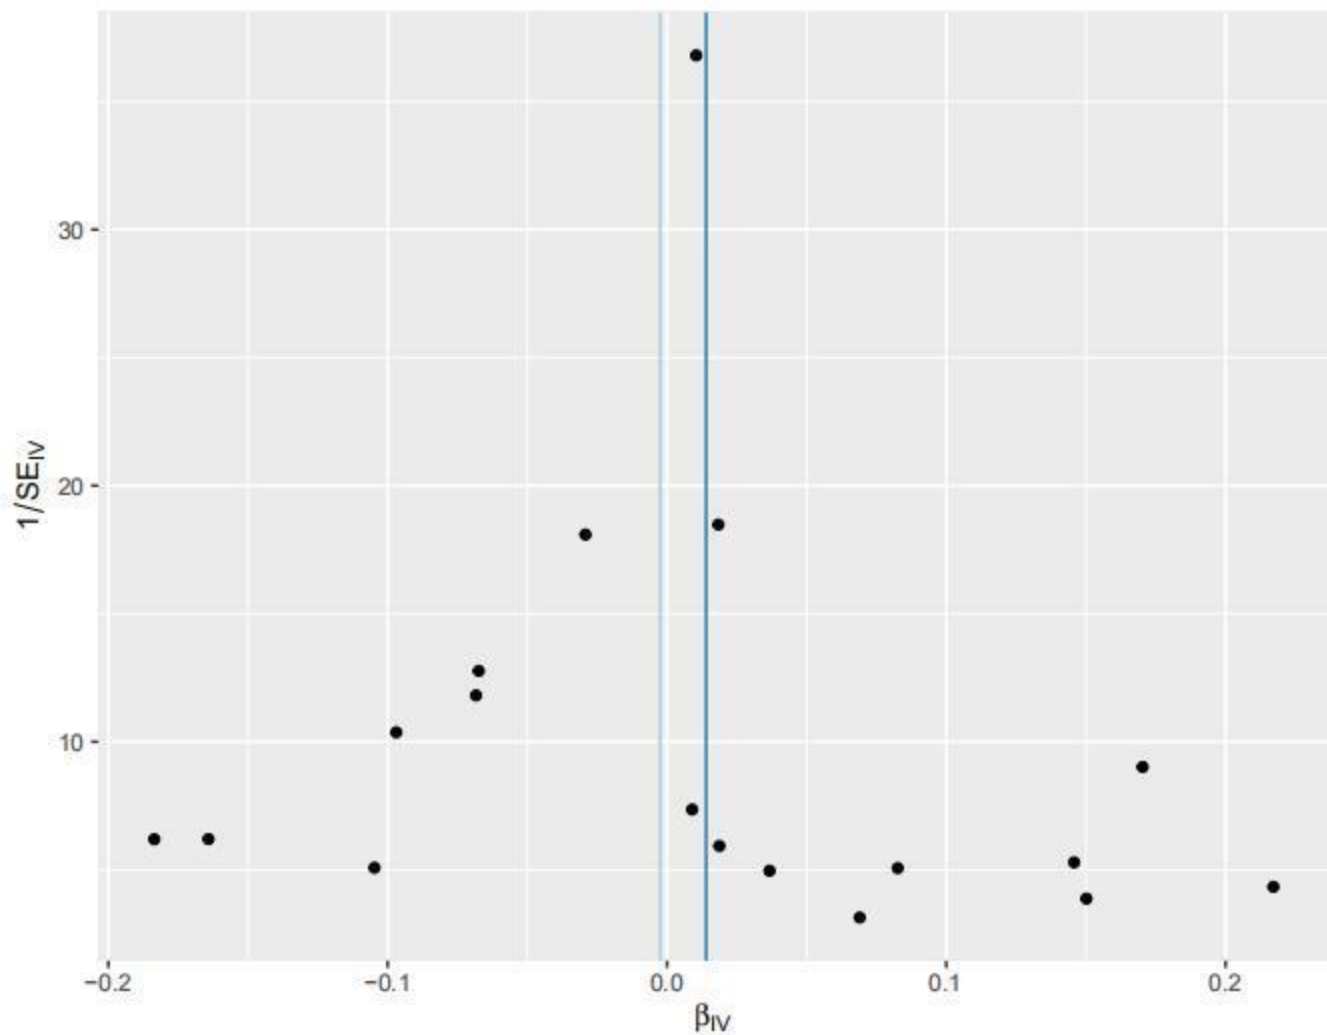

Funnel plot analysis of "BAFF-R on IgD- CD38-" on 'Aplastic anemia'

MR Method

- Inverse variance weighted
- MR Egger

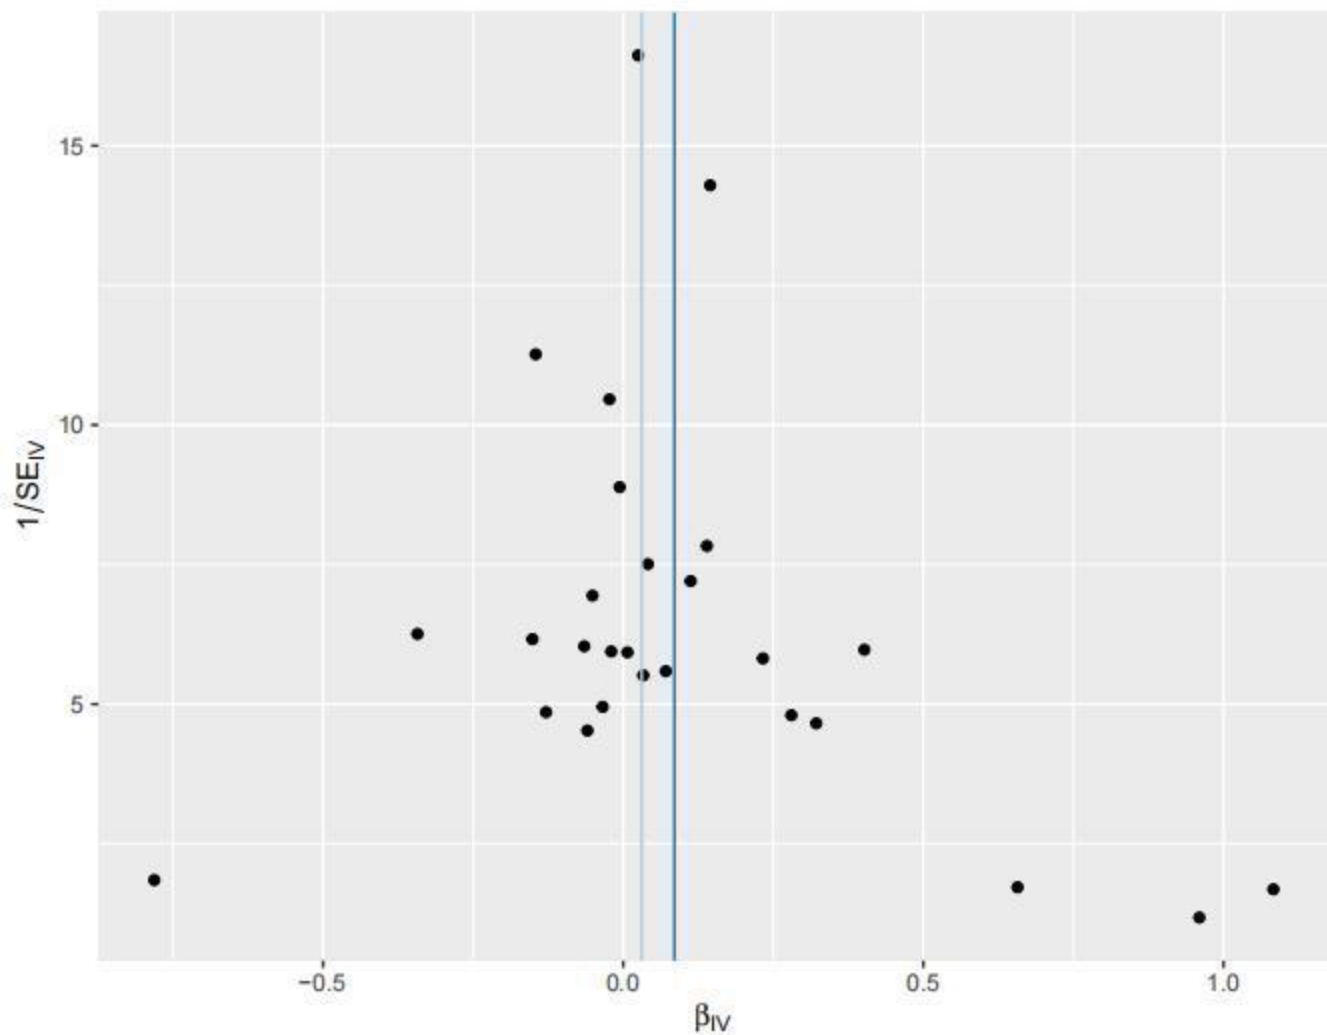

Funnel plot analyse of "CD3 on HLA DR+ CD8br" on 'Aplastic anemia'

### MR Method

- Inverse variance weighted
- MR Egger

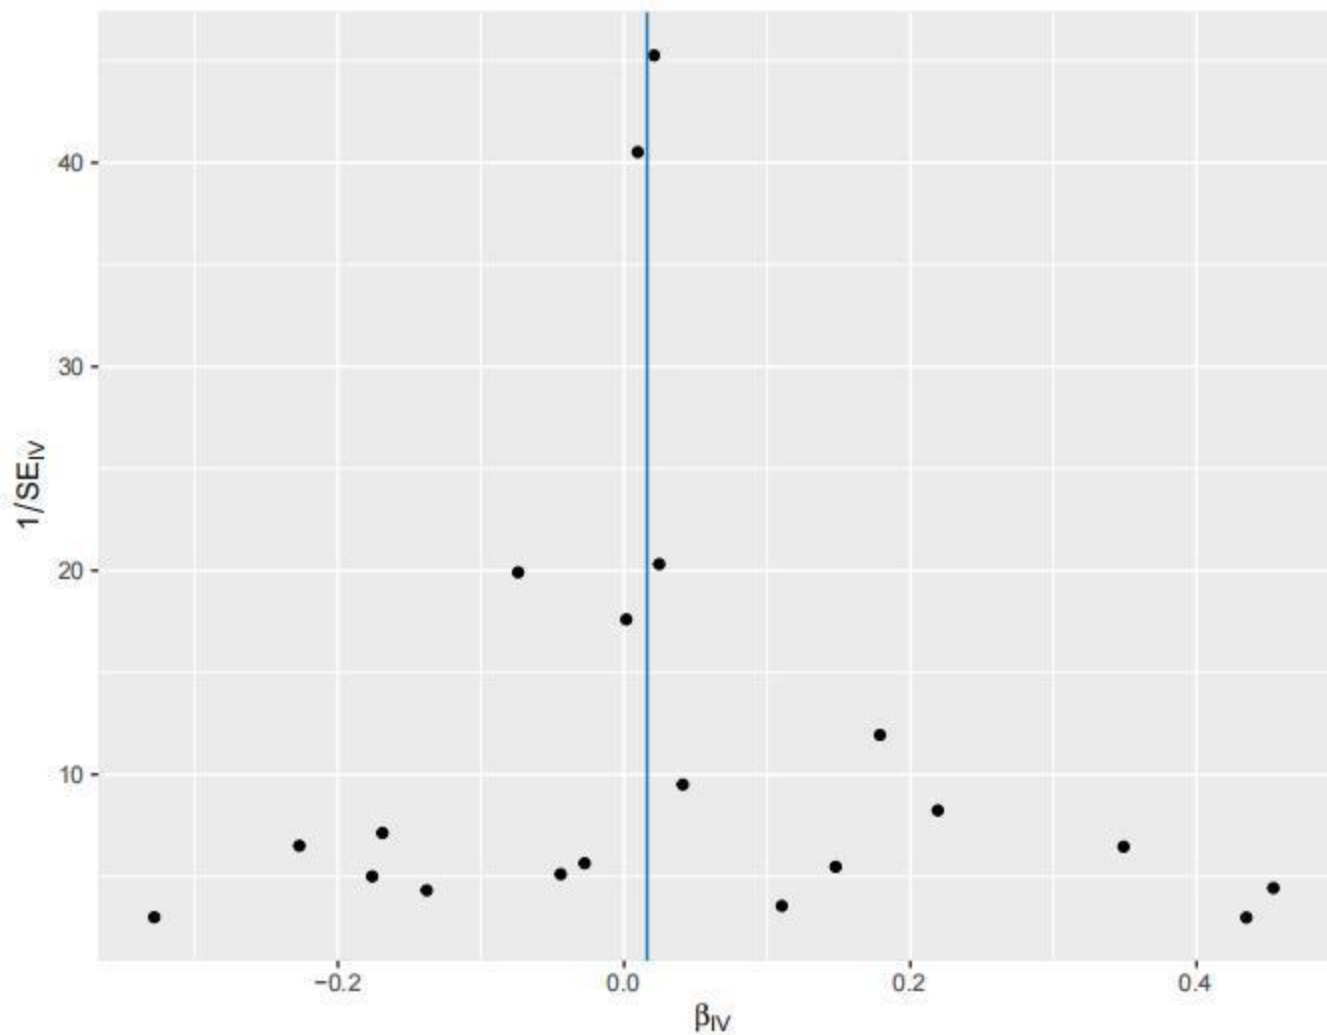

Funnel plot analyse of "HLA DR on CD14+ CD16+ monocyte" on 'Aplastic anemia'

MR Method

- Inverse variance weighted
- MR Egger

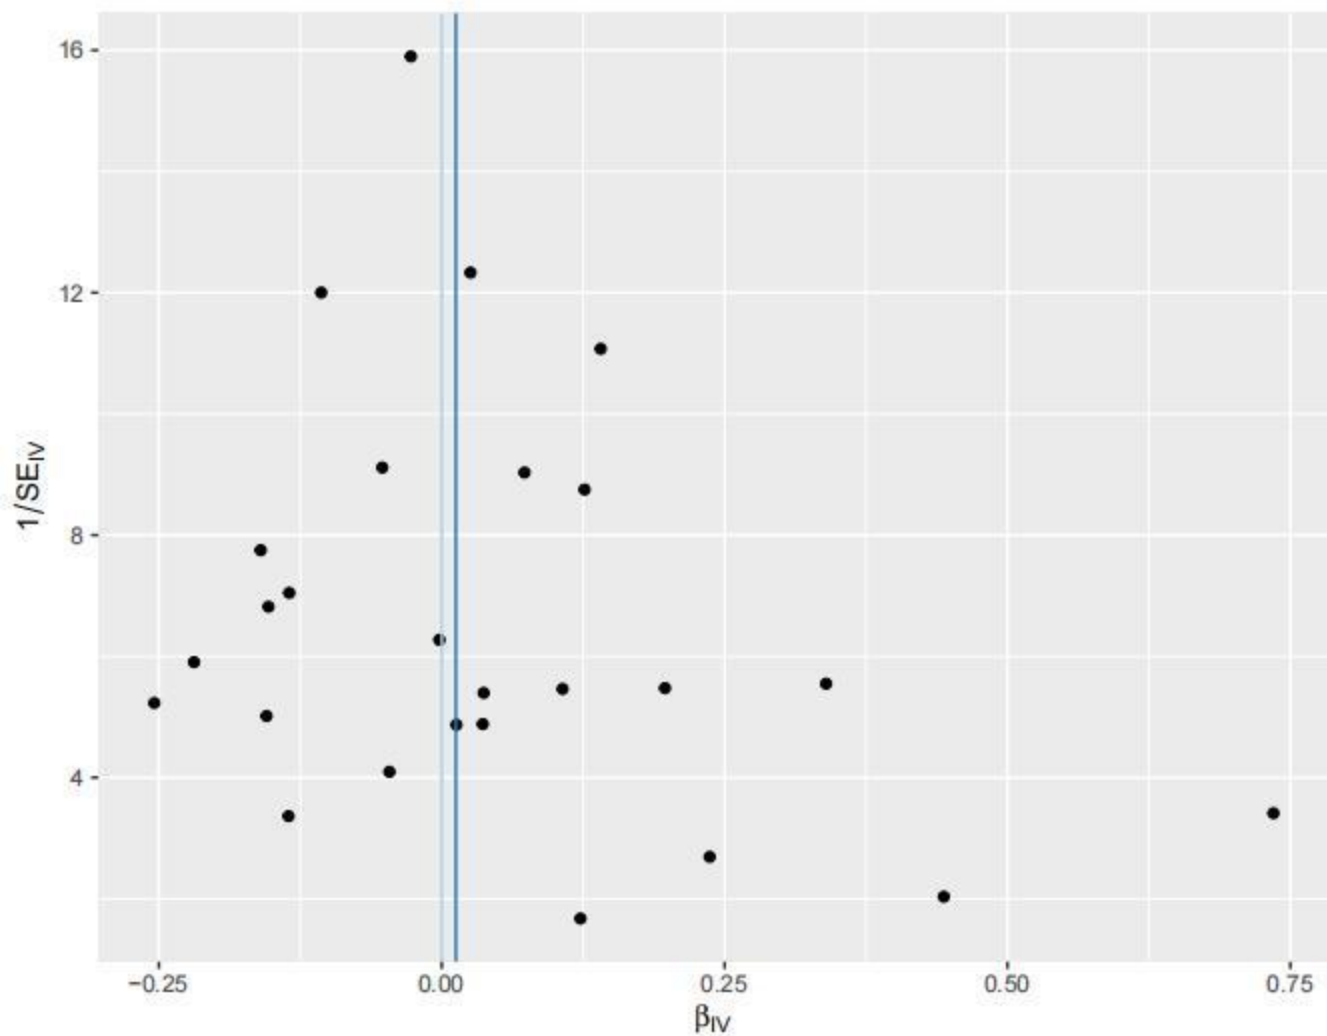

Funnel plot analyse of "CD4 on TD CD4+ " on 'Aplastic anemia'

MR Method

- Inverse variance weighted
- MR Egger

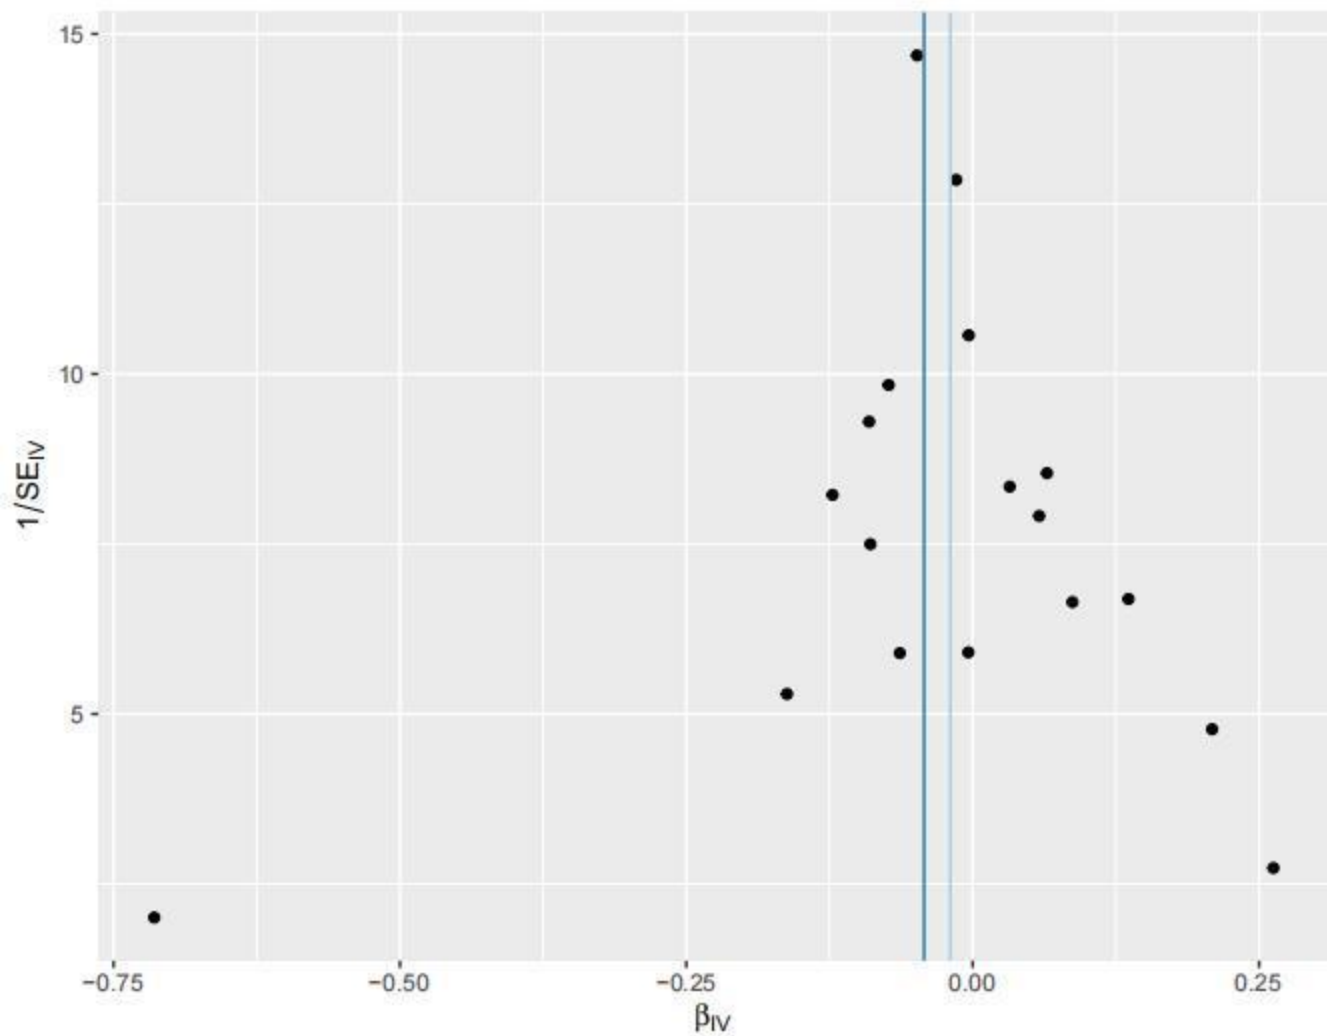

Funnel plot analyse of "CD11b on CD66b++ myeloid cell " on 'Aplastic anemia'

### MR Method

- Inverse variance weighted
- MR Egger

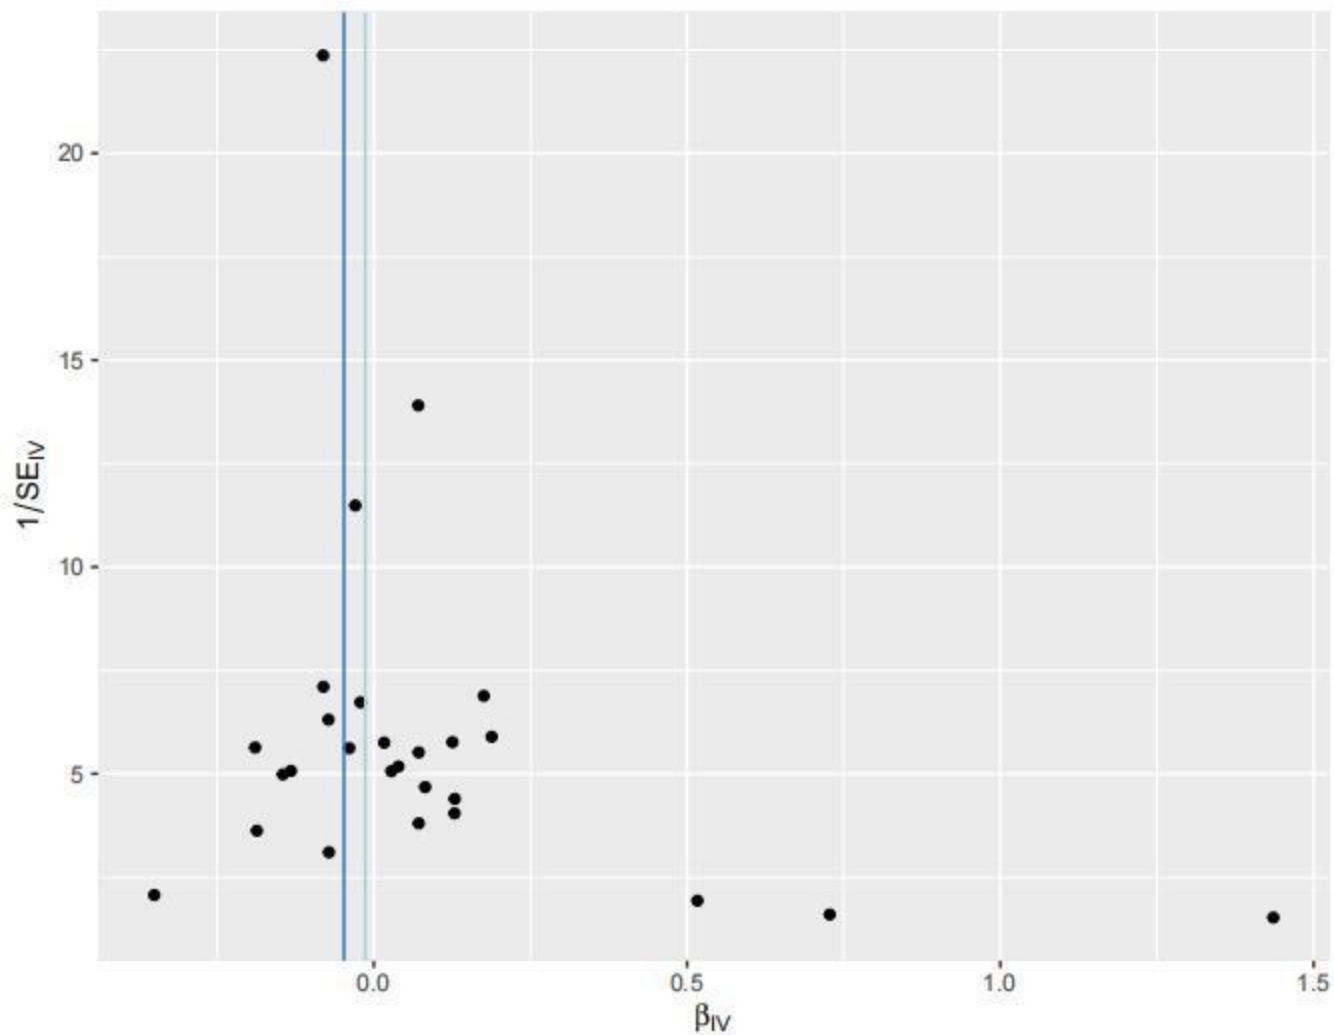

Funnel plot analysis of "CD28- DN (CD4-CD8-) %DN" on 'Aplastic anemia'



### MR Method

- Inverse variance weighted
- MR Egger

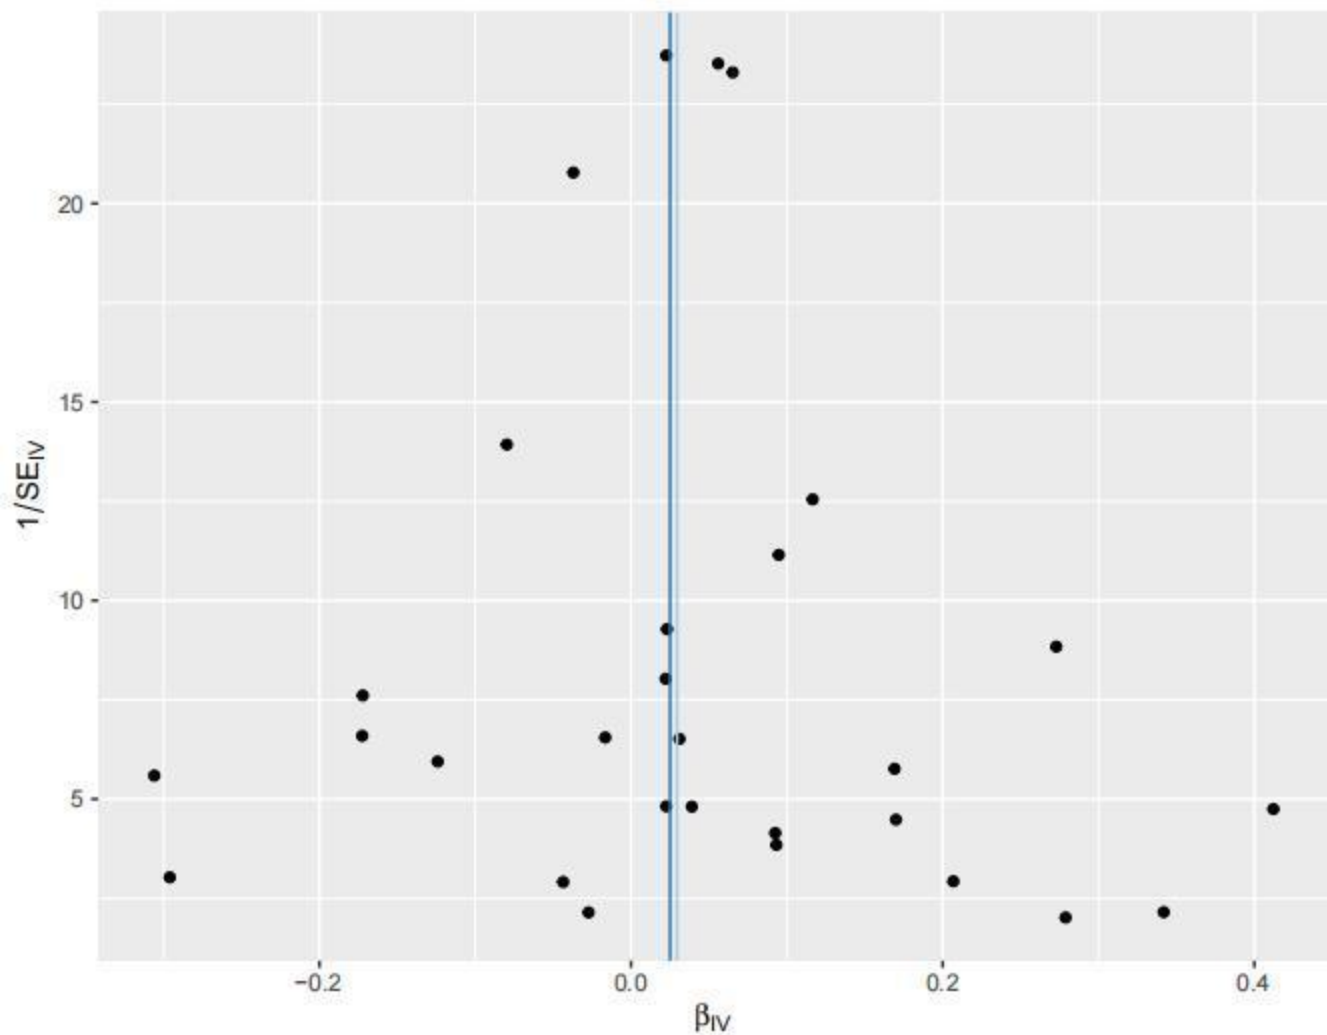

Funnel plot analyse of "CD24 on IgD- CD38-" on 'Aplastic anemia'

MR Method

- Inverse variance weighted
- MR Egger

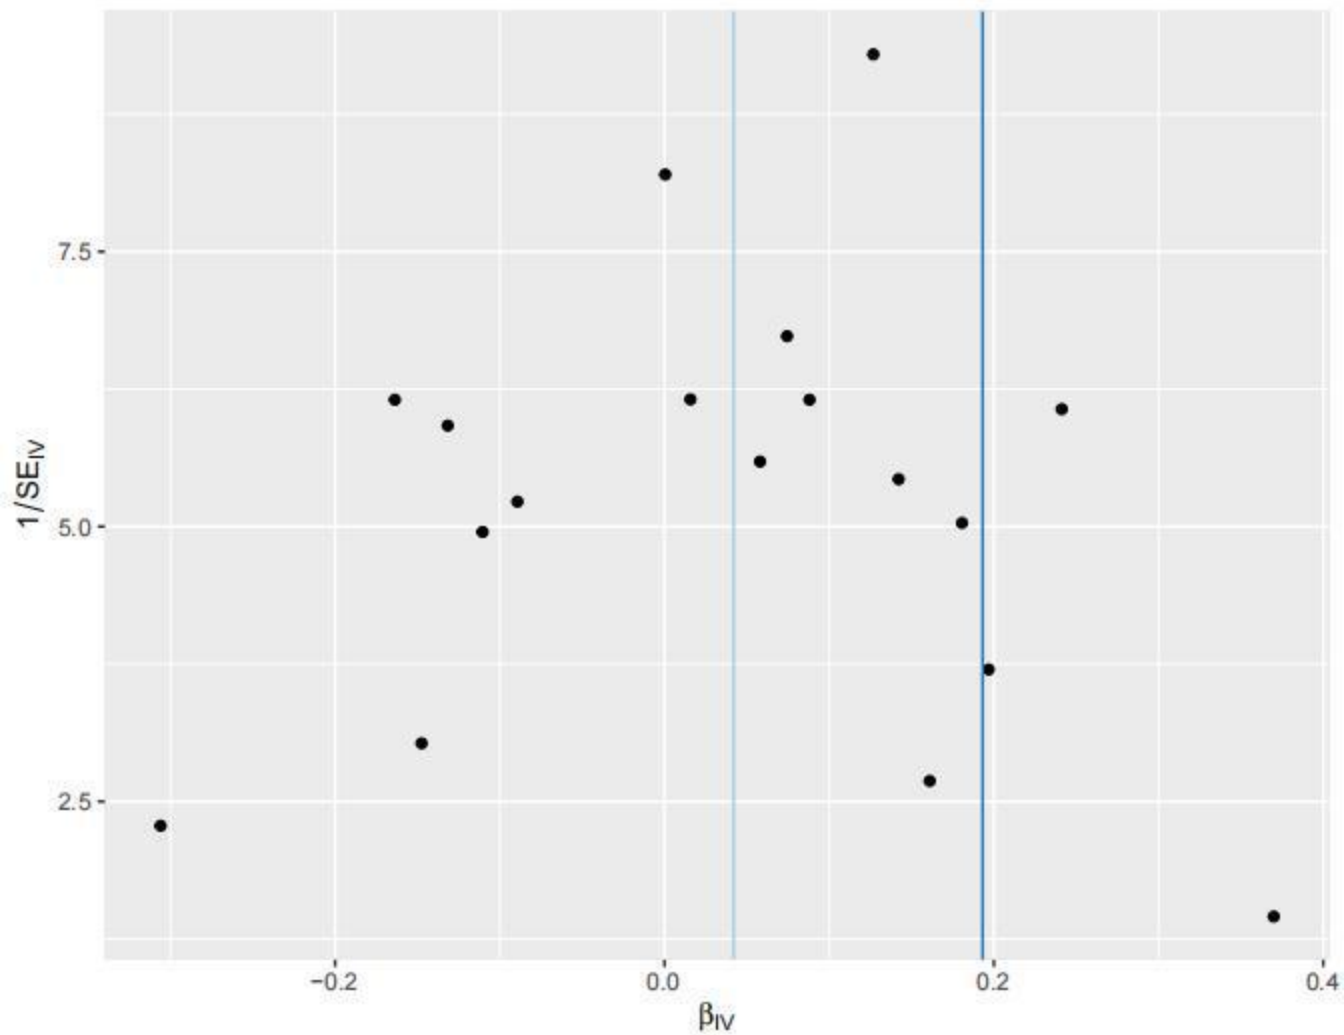

Funnel plot analyse of "IgD+ CD38- AC" on 'Aplastic anemia'

MR Method

- Inverse variance weighted
- MR Egger

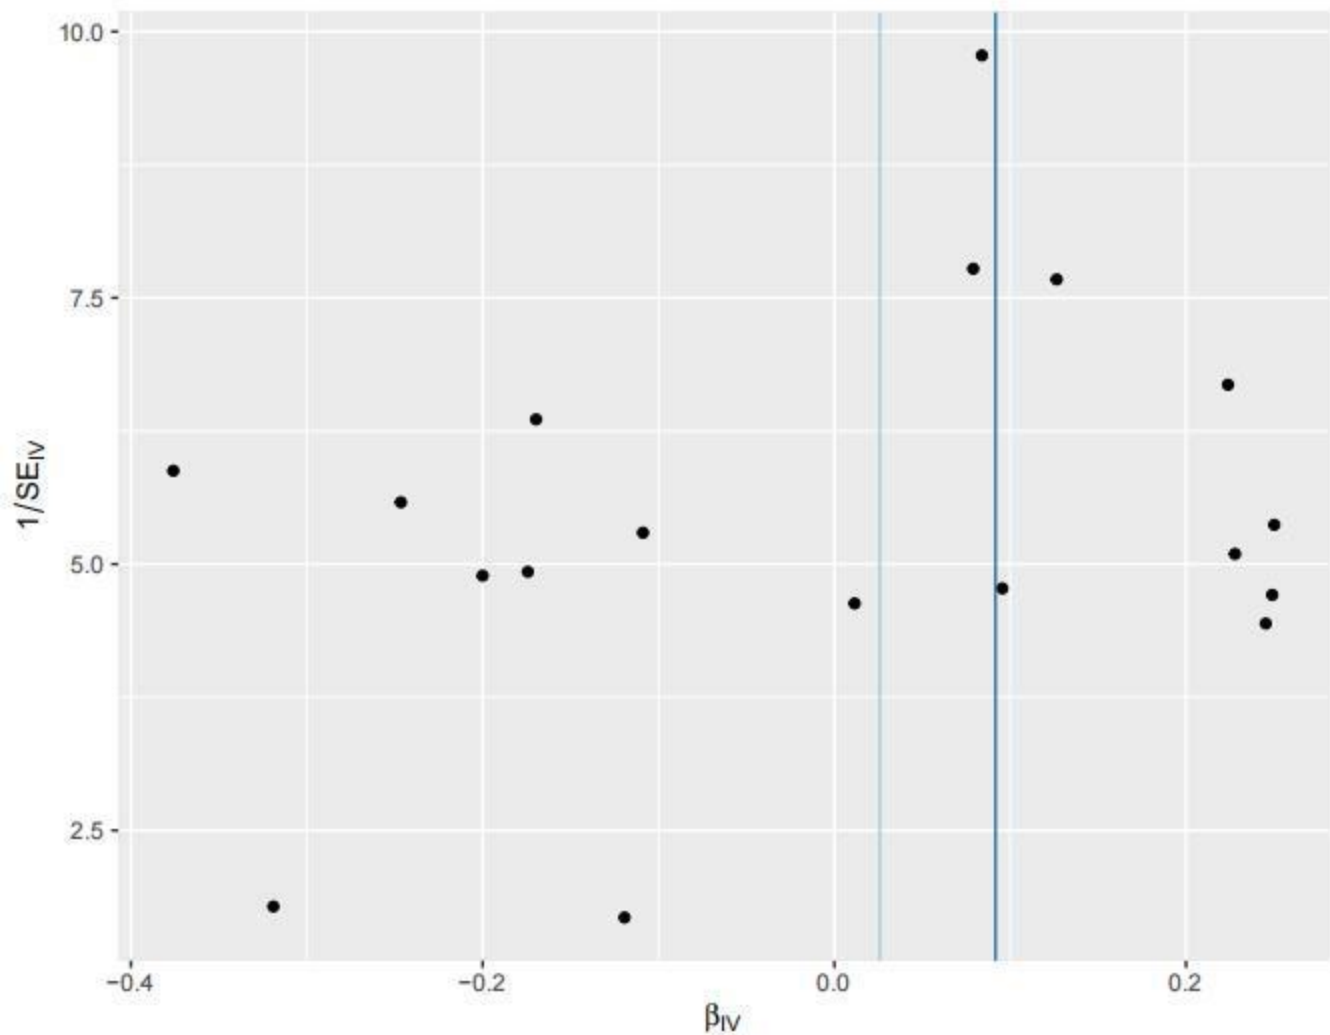

Funnel plot analyse of "CD3- lymphocyte AC" on 'Aplastic anemia'

MR Method

Inverse variance weighted

MR Egger

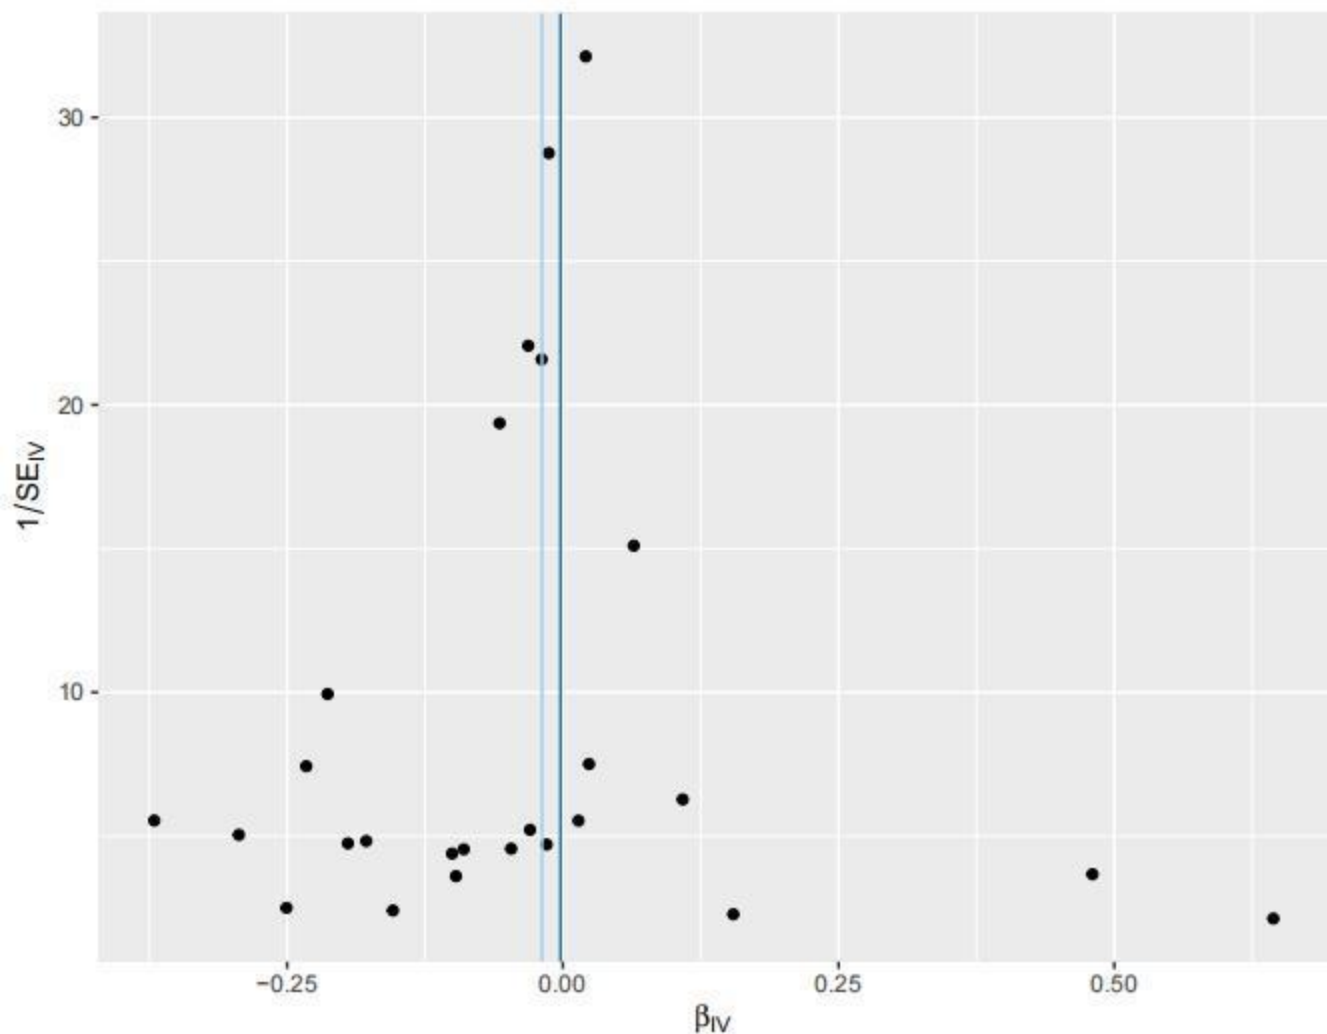

Funnel plot analysis of "CD24 on IgD+ CD24+" on 'Aplastic anemia'

### MR Method

- Inverse variance weighted
- MR Egger

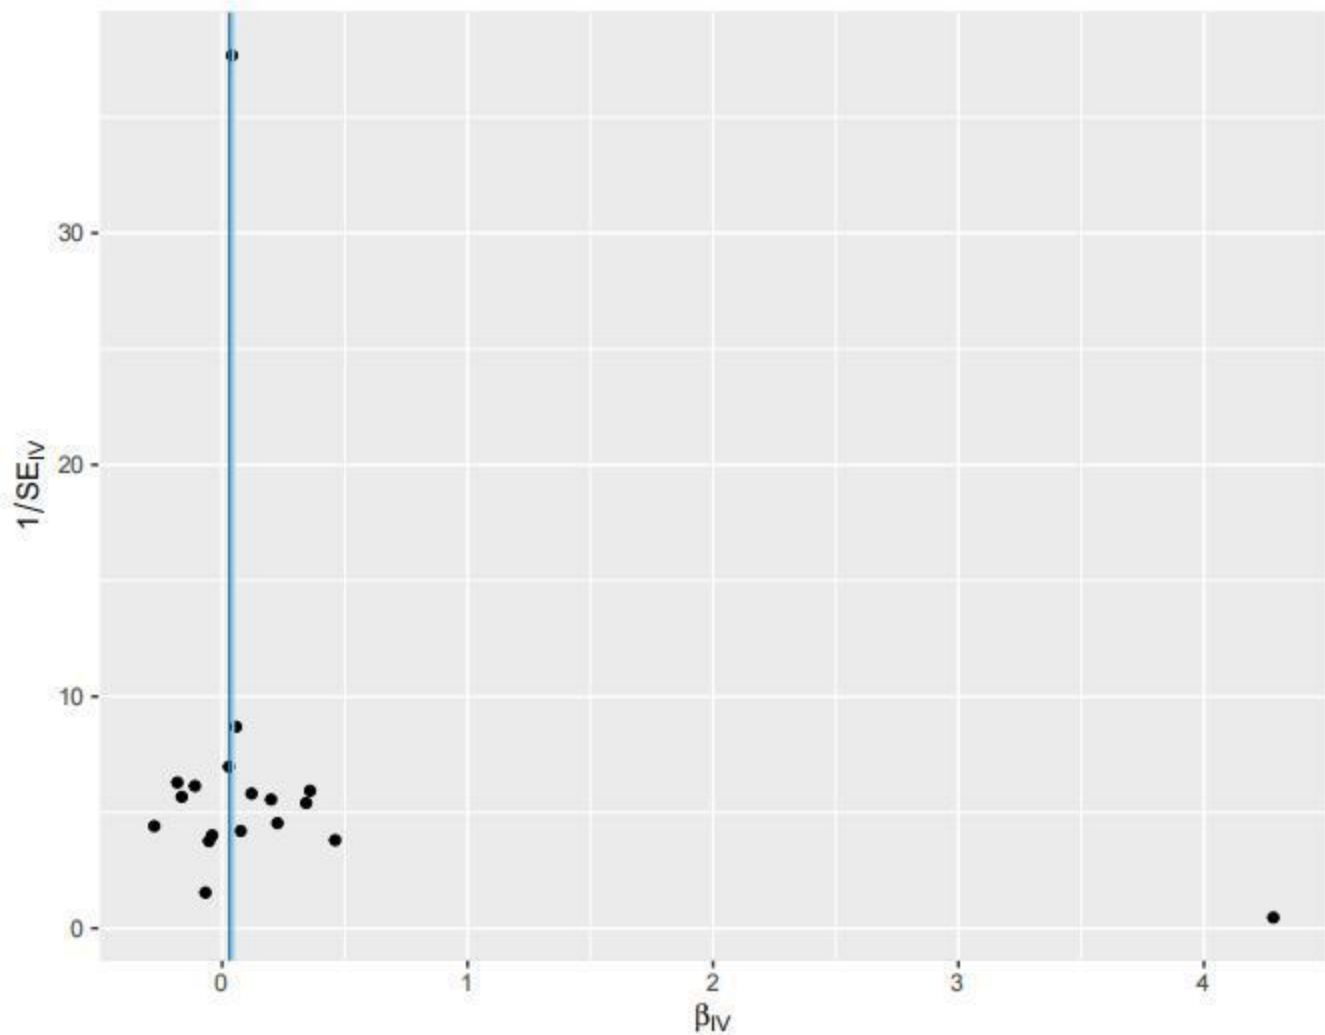

Funnel plot analyse of "CD11c+ HLA DR++ monocyte %monocyte" on 'Aplastic anemia'

MR Method

- Inverse variance weighted
- MR Egger

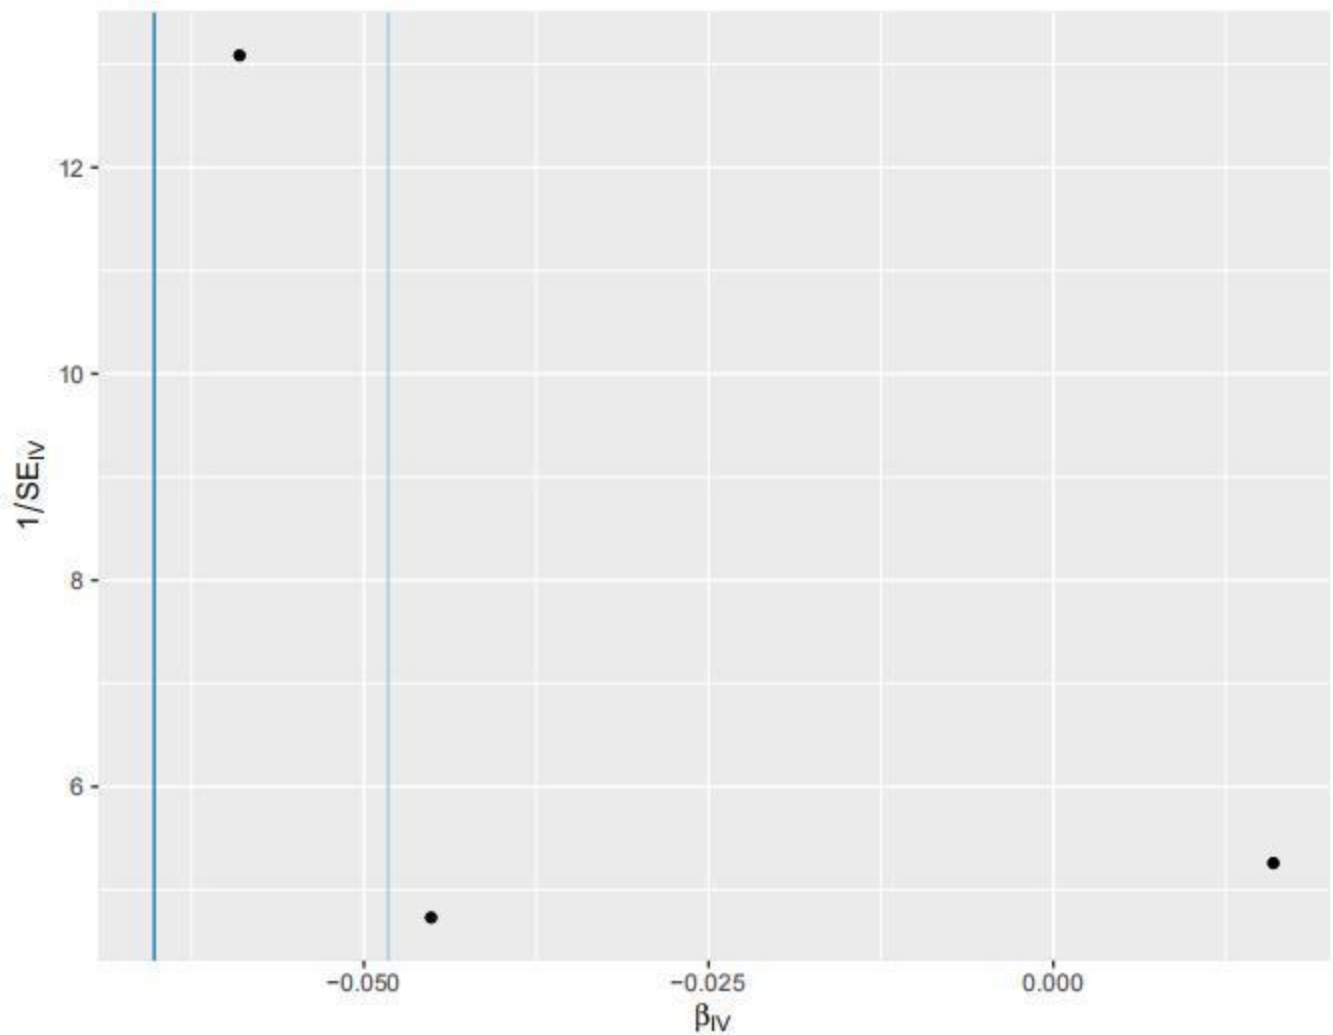

Funnel plot analyse of "CD24 on CD24+ CD27+" on 'Aplastic anemia'

MR Method

- Inverse variance weighted
- MR Egger

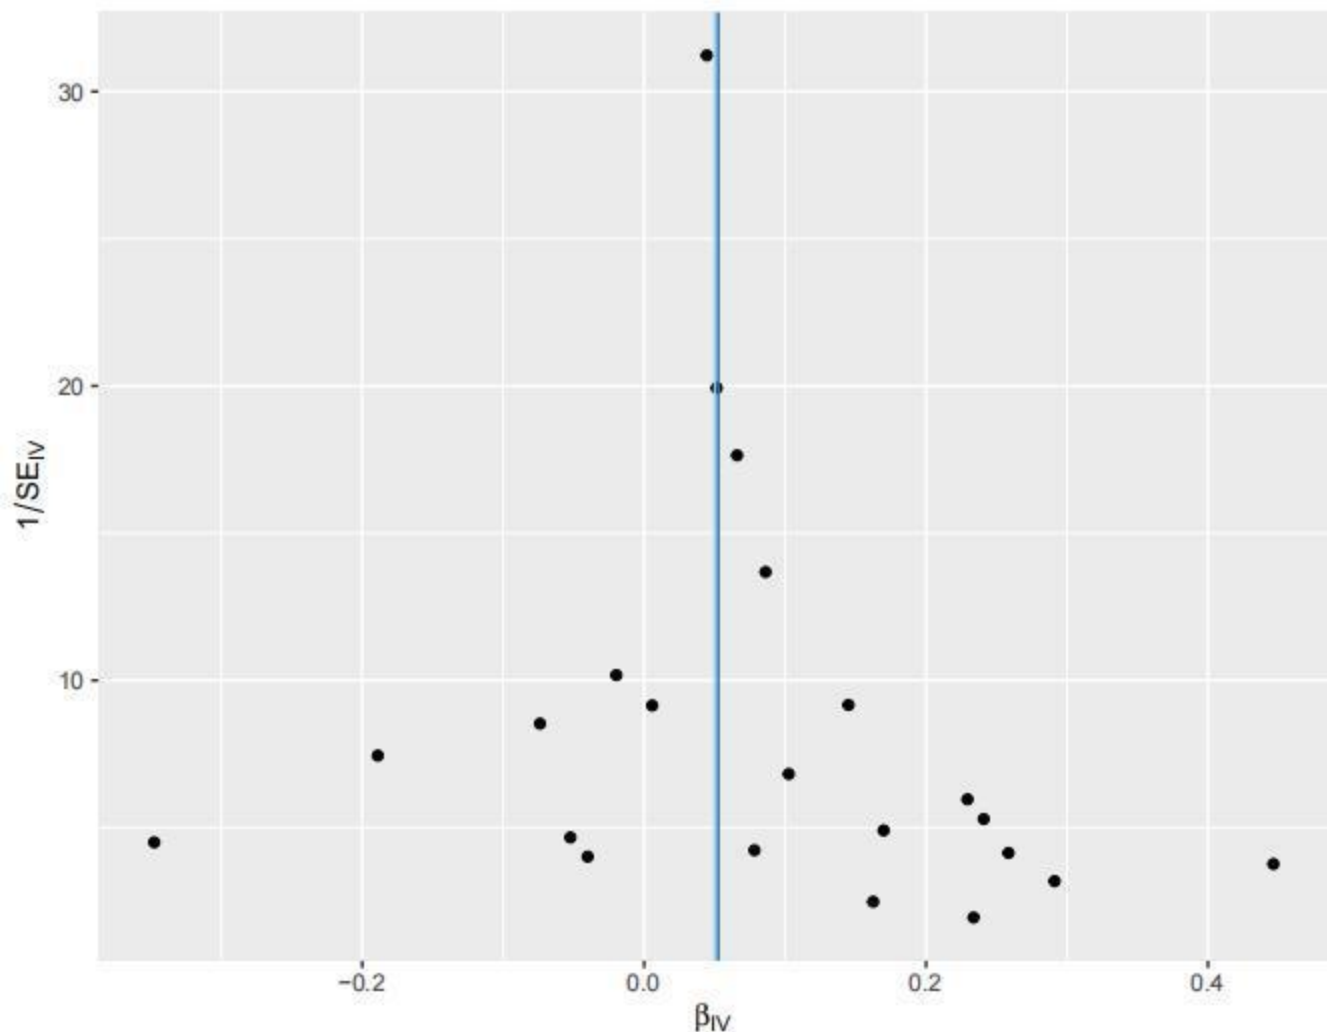

Funnel plot analyse of "CD16 on CD14- CD16+ monocyte" on 'Aplastic anemia'

MR Method

- Inverse variance weighted
- MR Egger

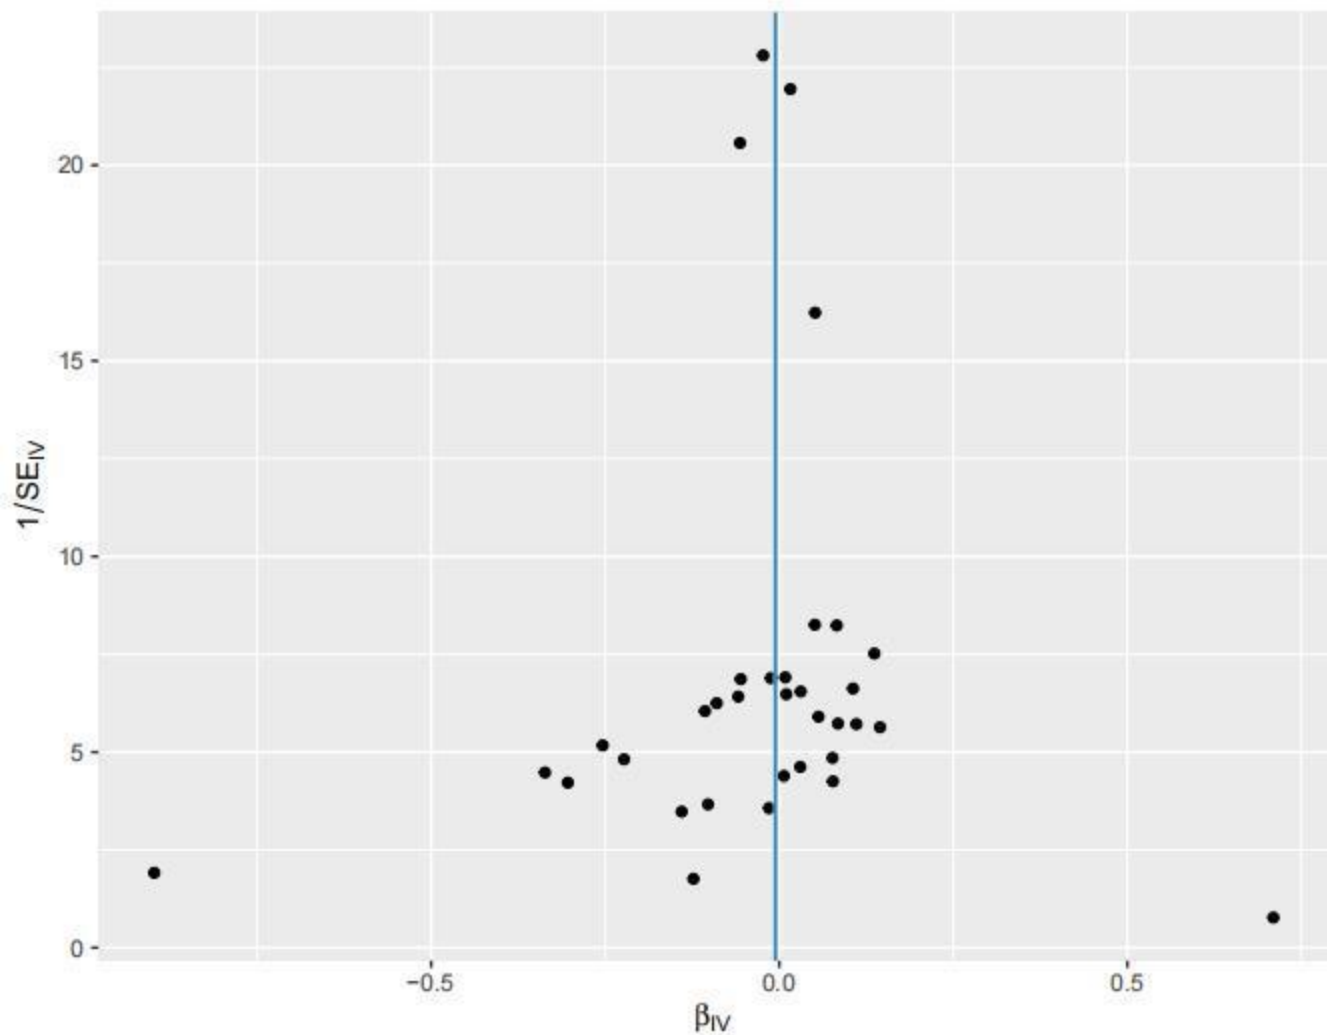

Funnel plot analyse of "CX3CR1 on CD14+ CD16+ monocyte" on 'Aplastic anemia'



MR Method

- Inverse variance weighted
- MR Egger

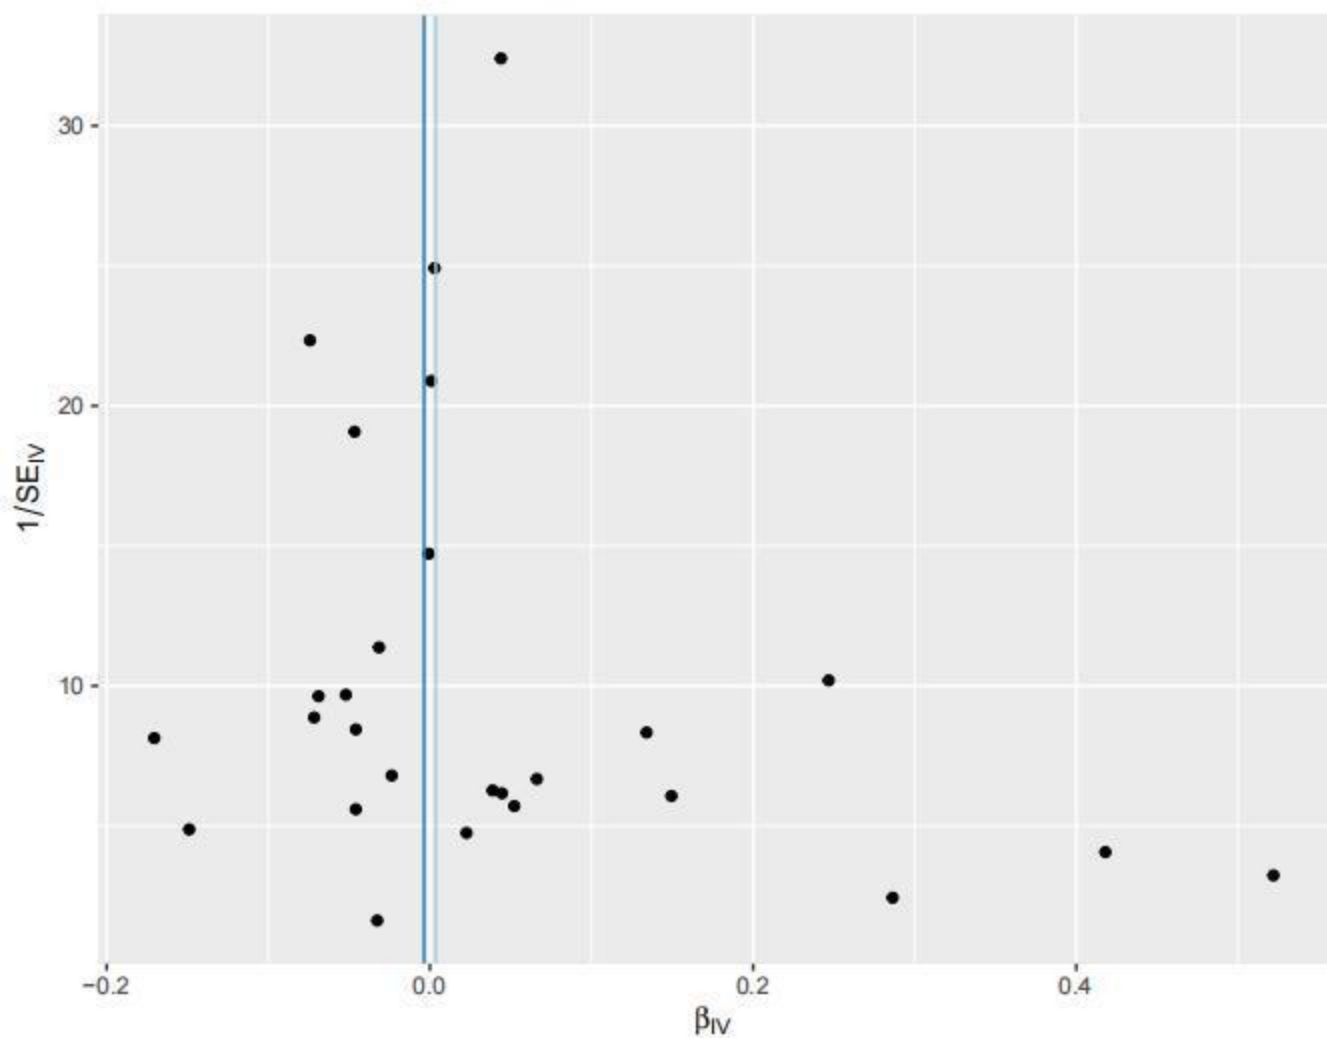

Funnel plot analysis of "NK %CD3- lymphocyte" on 'Aplastic anemia'

MR Method

Inverse variance weighted

MR Egger

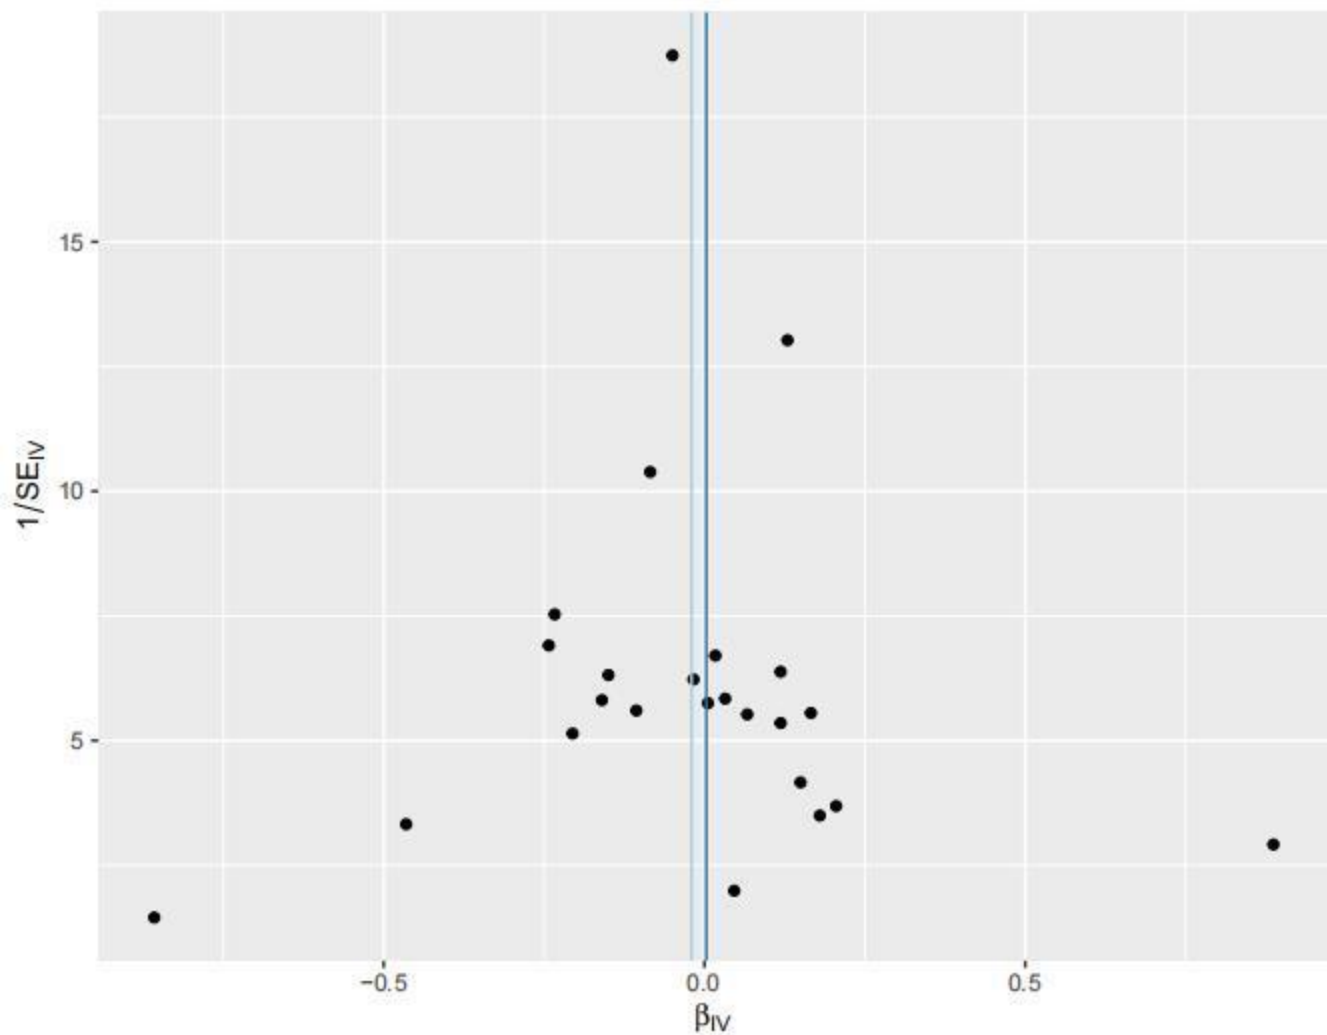

Funnel plot analyse of "SSC-A on NK" on 'Aplastic anemia'

### MR Method

- Inverse variance weighted
- MR Egger

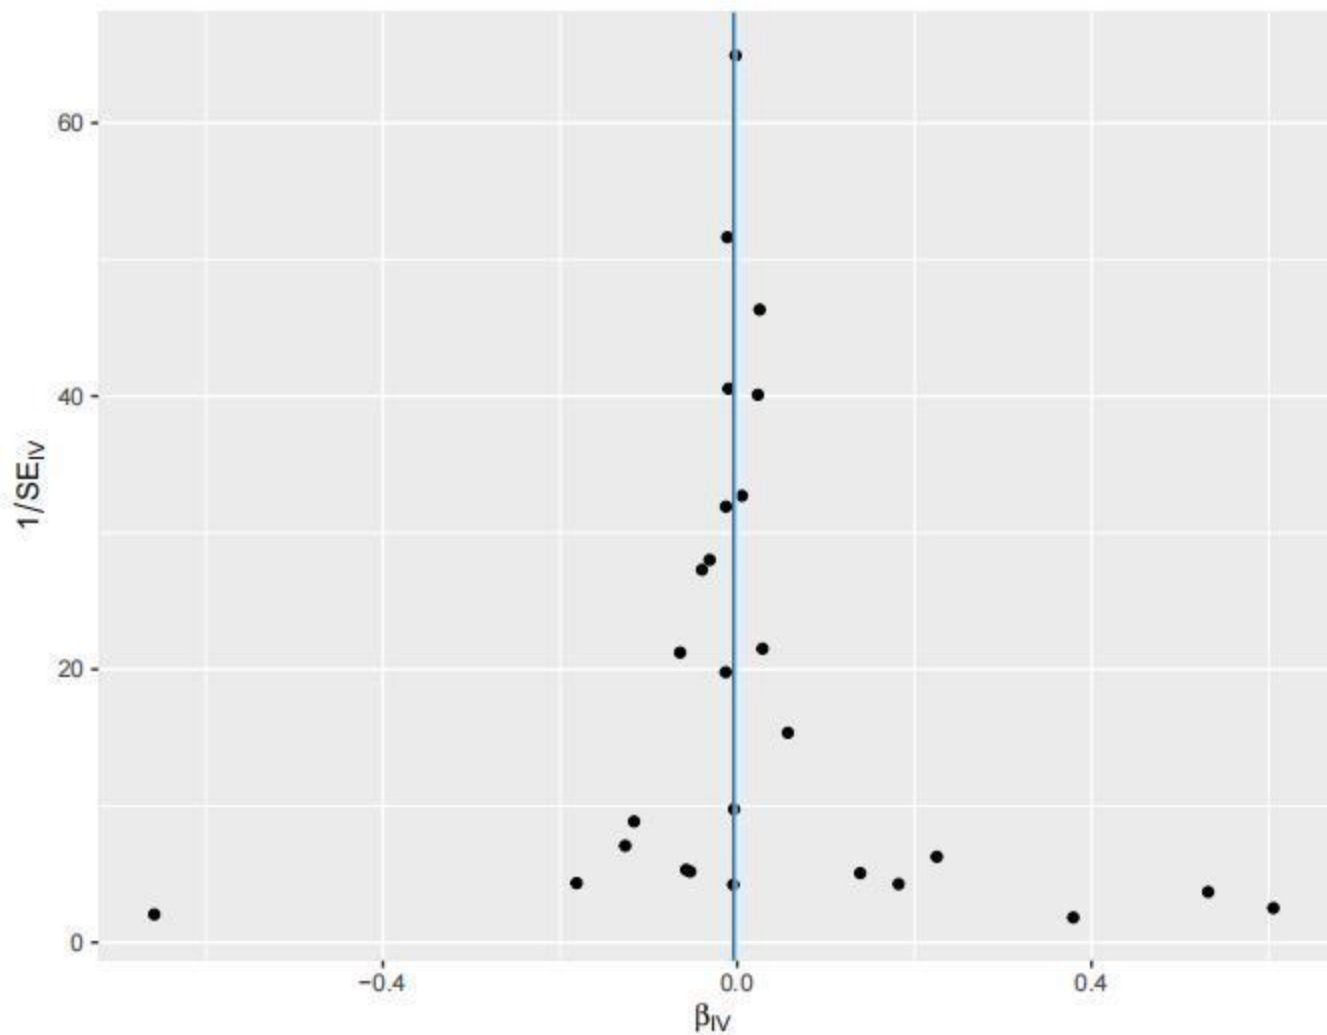

Funnel plot analysis of "CD45 on CD8br" on 'Aplastic anemia'

MR Method

- Inverse variance weighted
- MR Egger

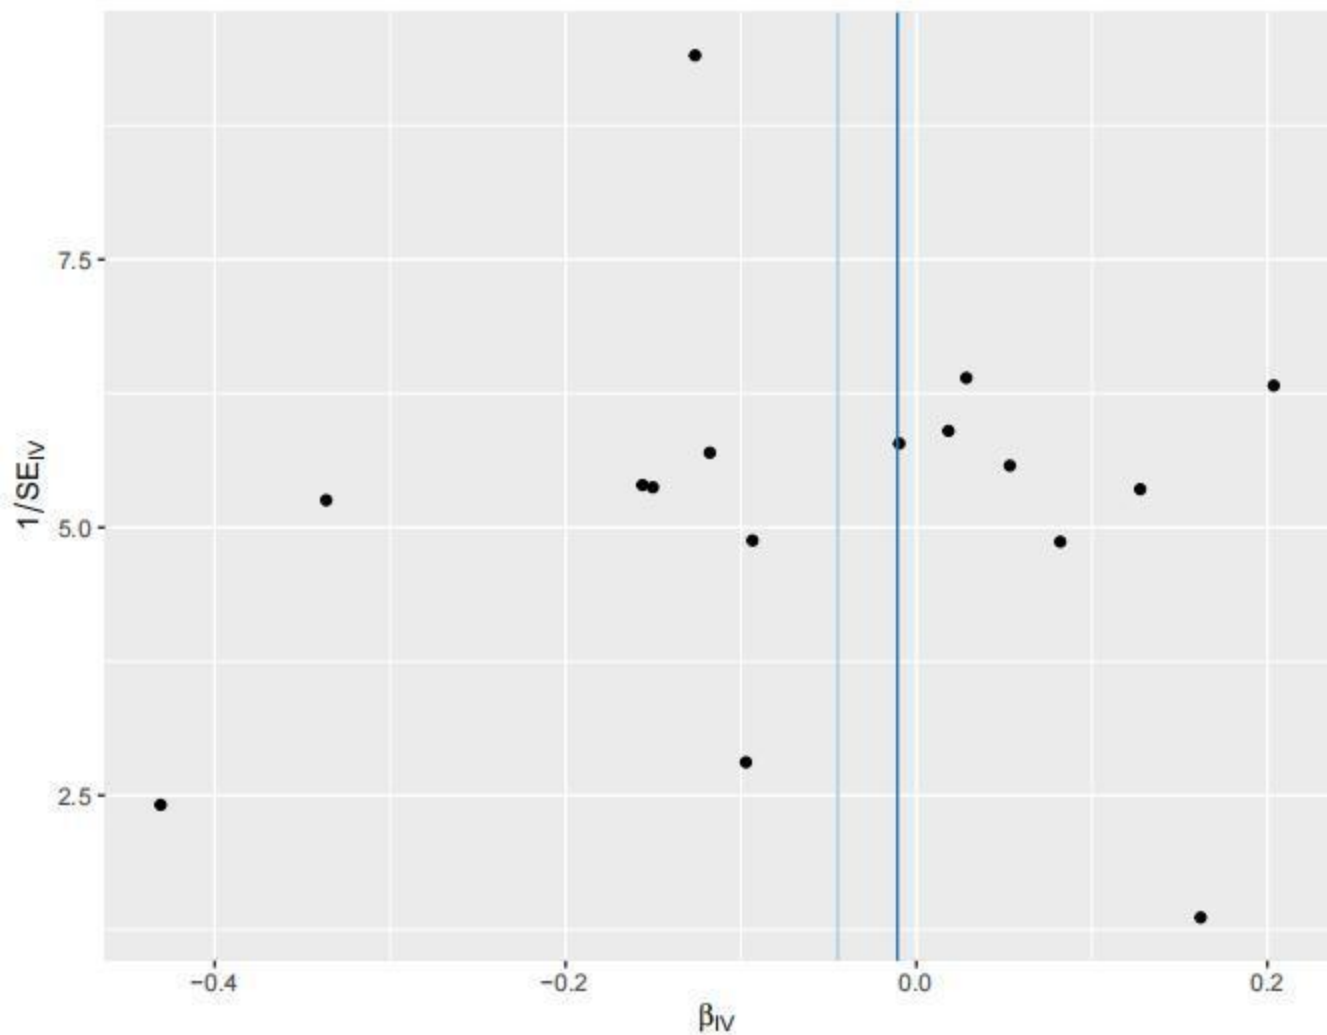

Funnel plot analysis of "CD28- CD8br %T cell" on 'Aplastic anemia'

MR Method

- Inverse variance weighted
- MR Egger

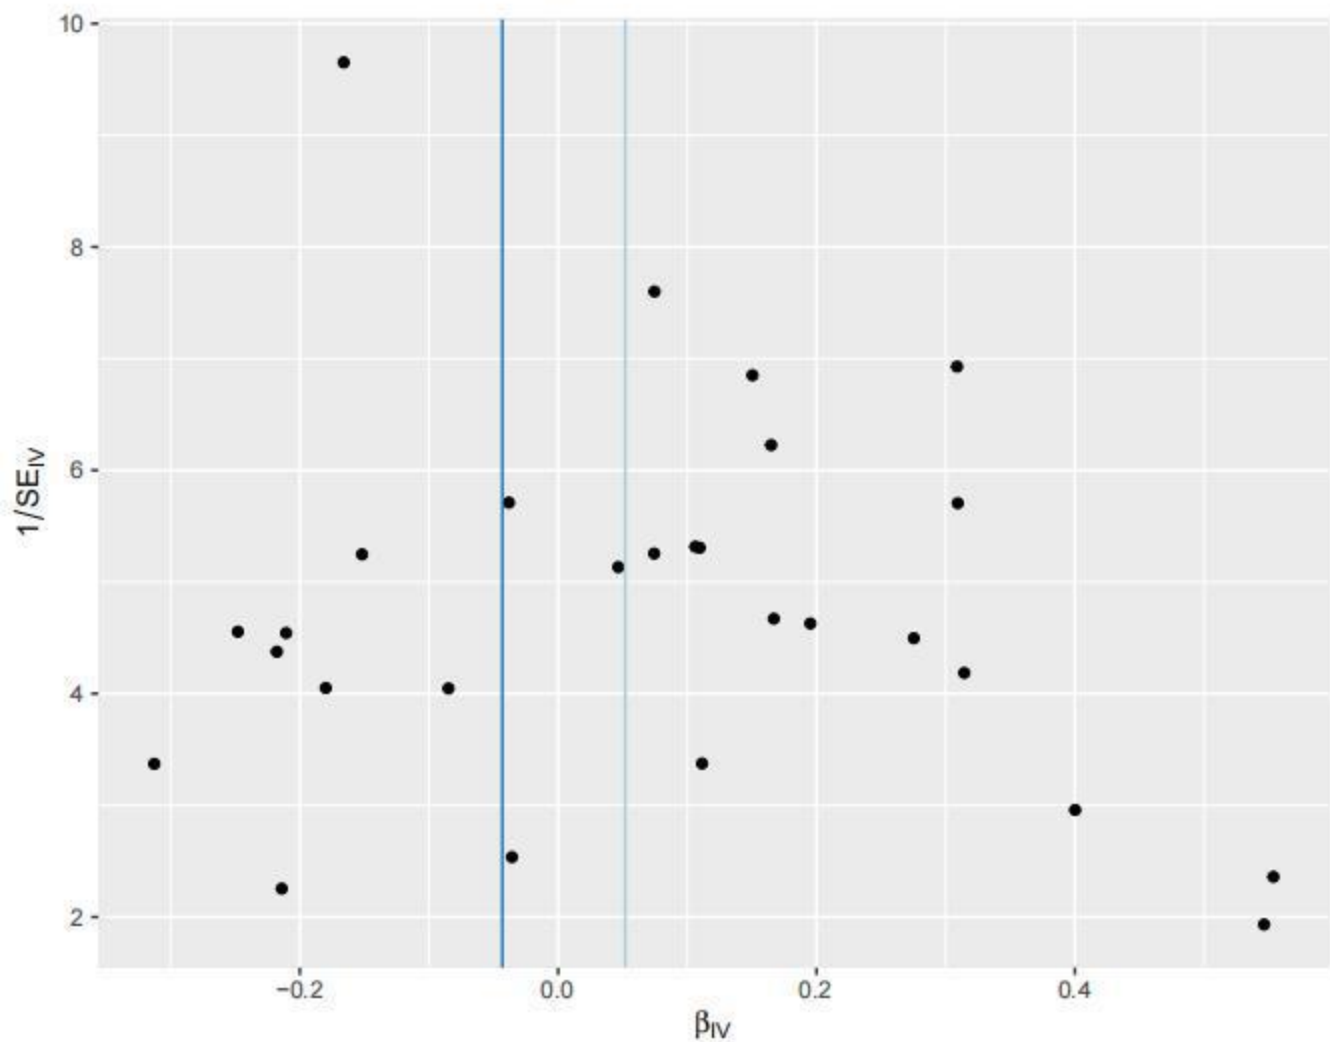

Funnel plot analyse of "CD8br NKT %T cell" on 'Aplastic anemia'

### MR Method

- Inverse variance weighted
- MR Egger

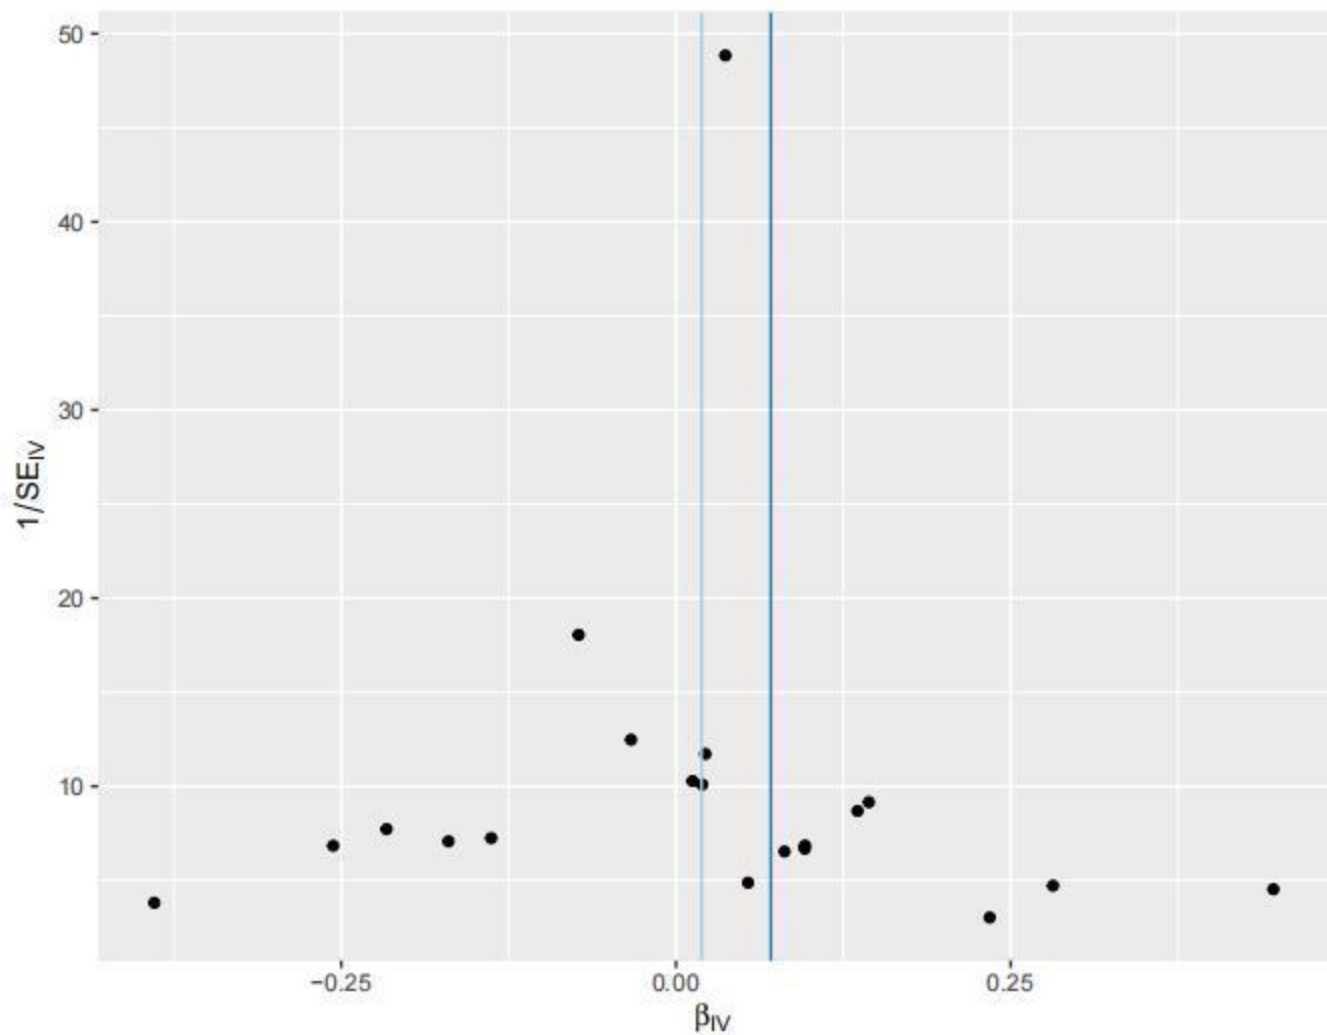

Funnel plot analyse of "CD33 on CD33dim HLA DR- " on 'Aplastic anemia'

MR Method

- Inverse variance weighted
- MR Egger

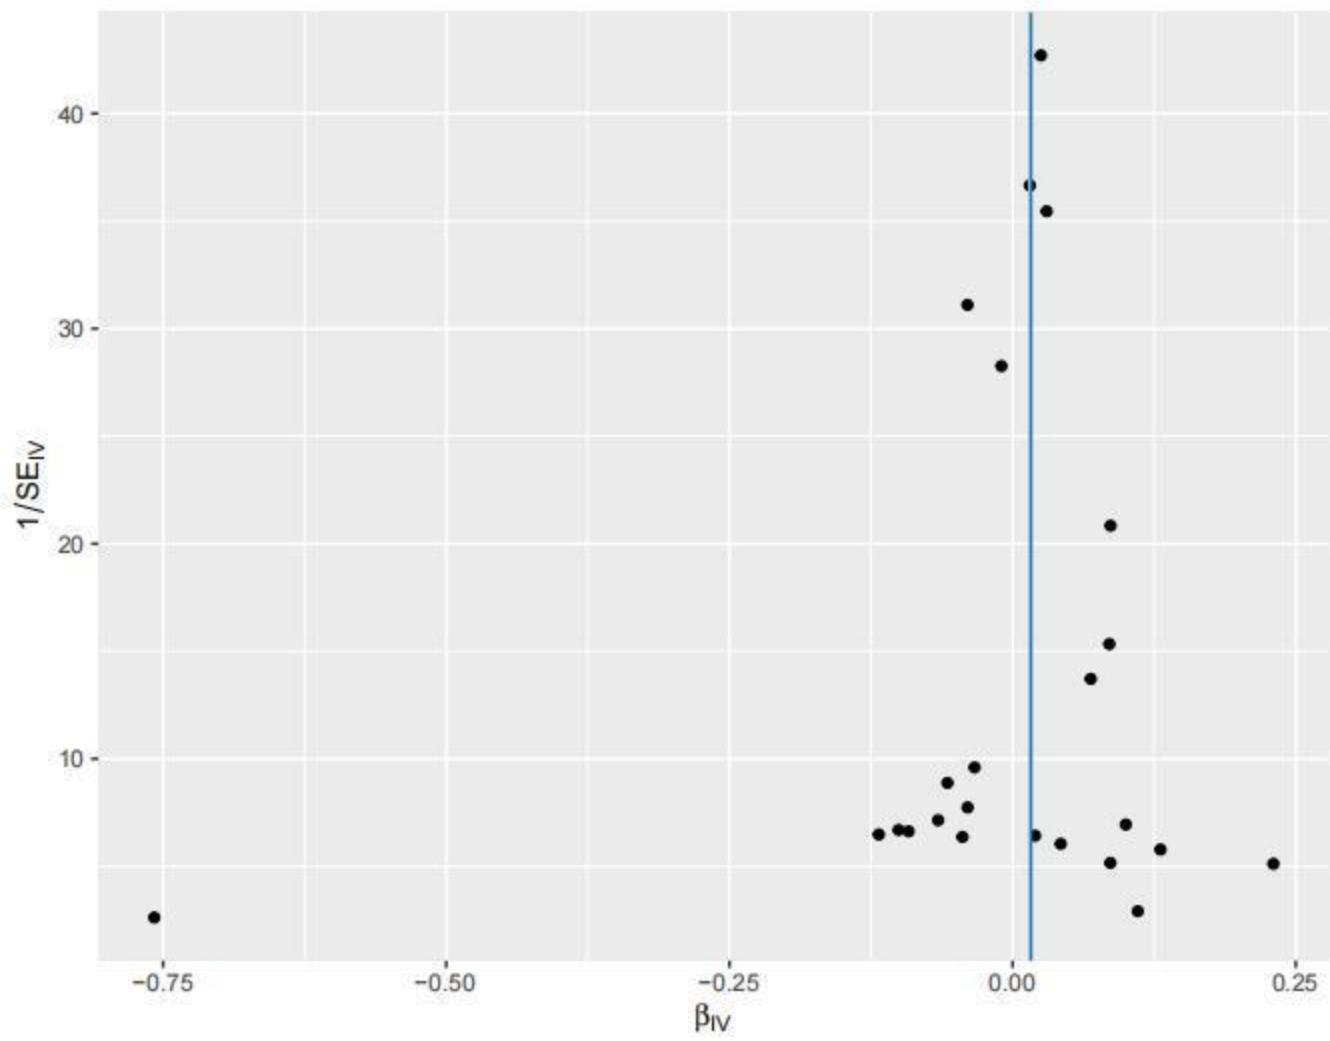

Funnel plot analyse of "Basophil AC" on 'Aplastic anemia'

MR Method

- Inverse variance weighted
- MR Egger

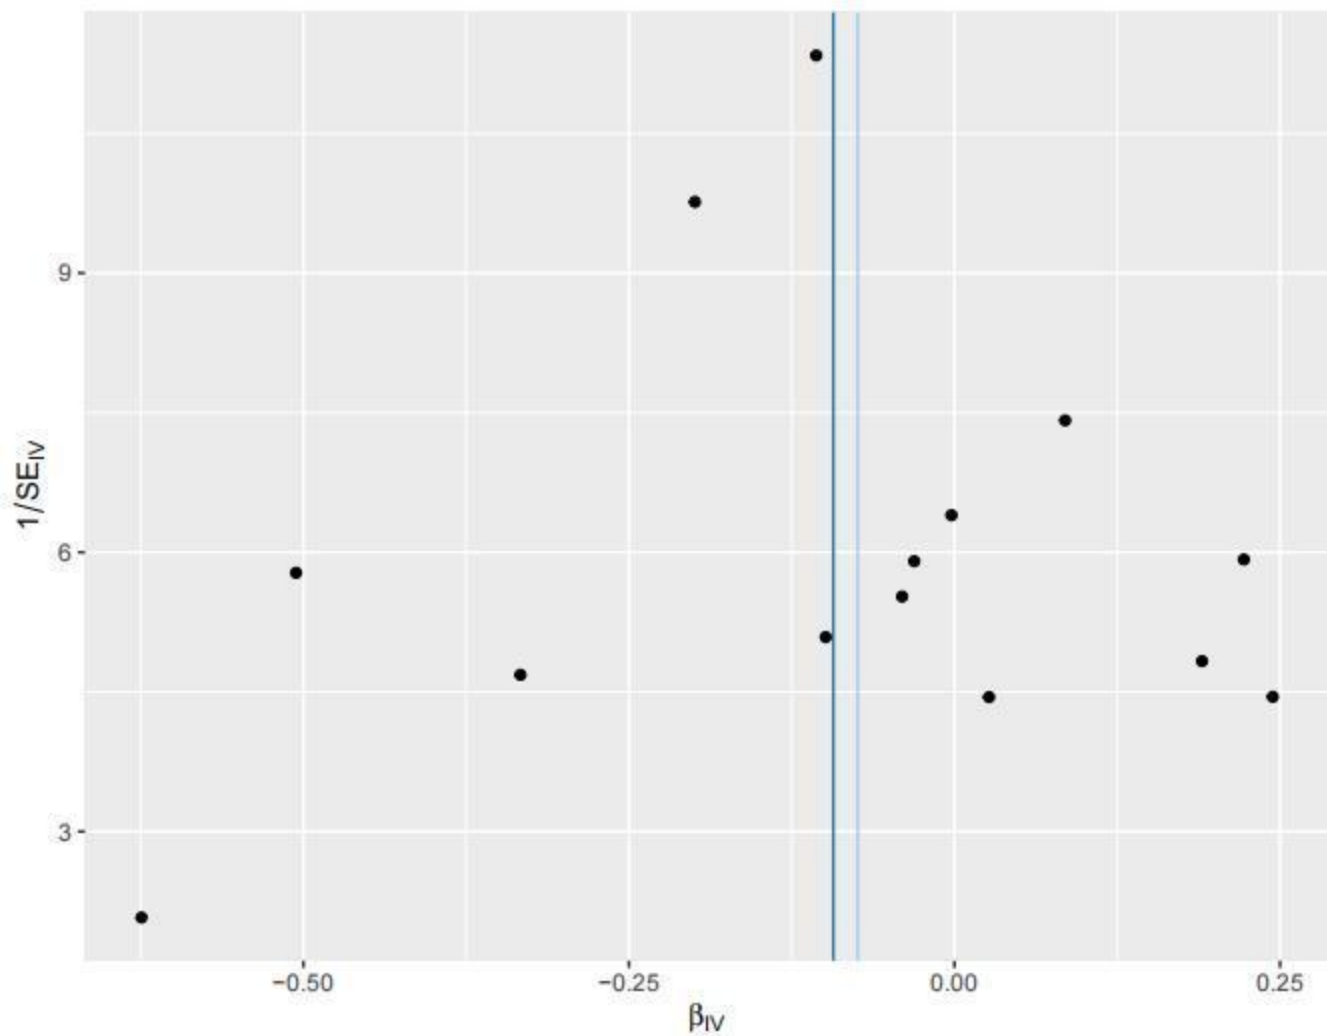

Funnel plot analyse of "CD4 on resting Treg " on 'Aplastic anemia'



MR Method

- Inverse variance weighted
- MR Egger

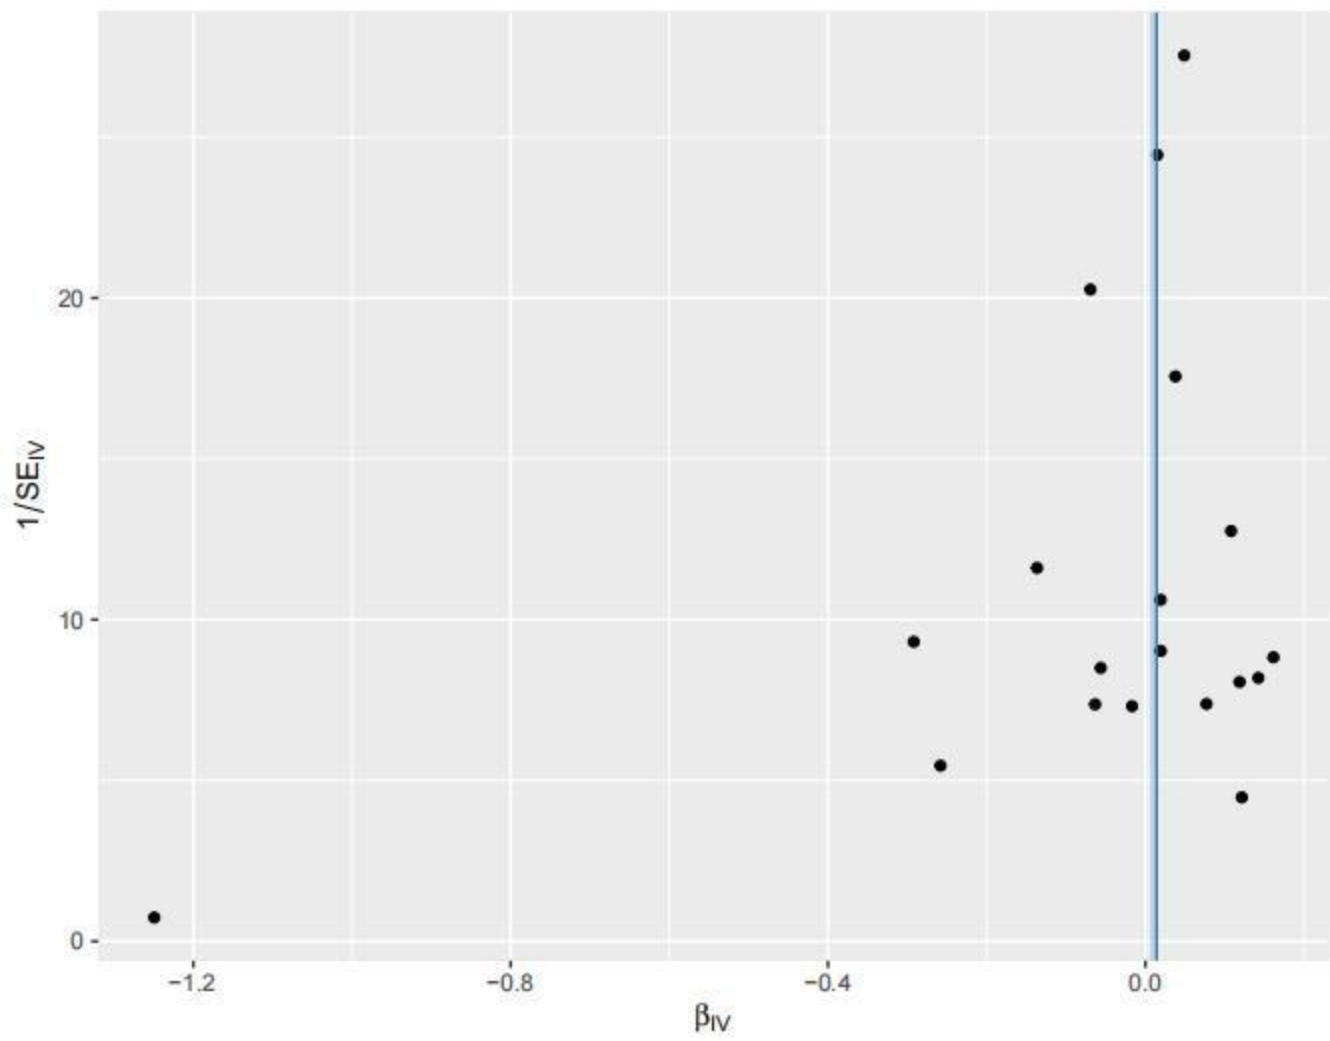

Funnel plot analyse of "HVEM on CM CD4+" on 'Aplastic anemia'

MR Method

- Inverse variance weighted
- MR Egger

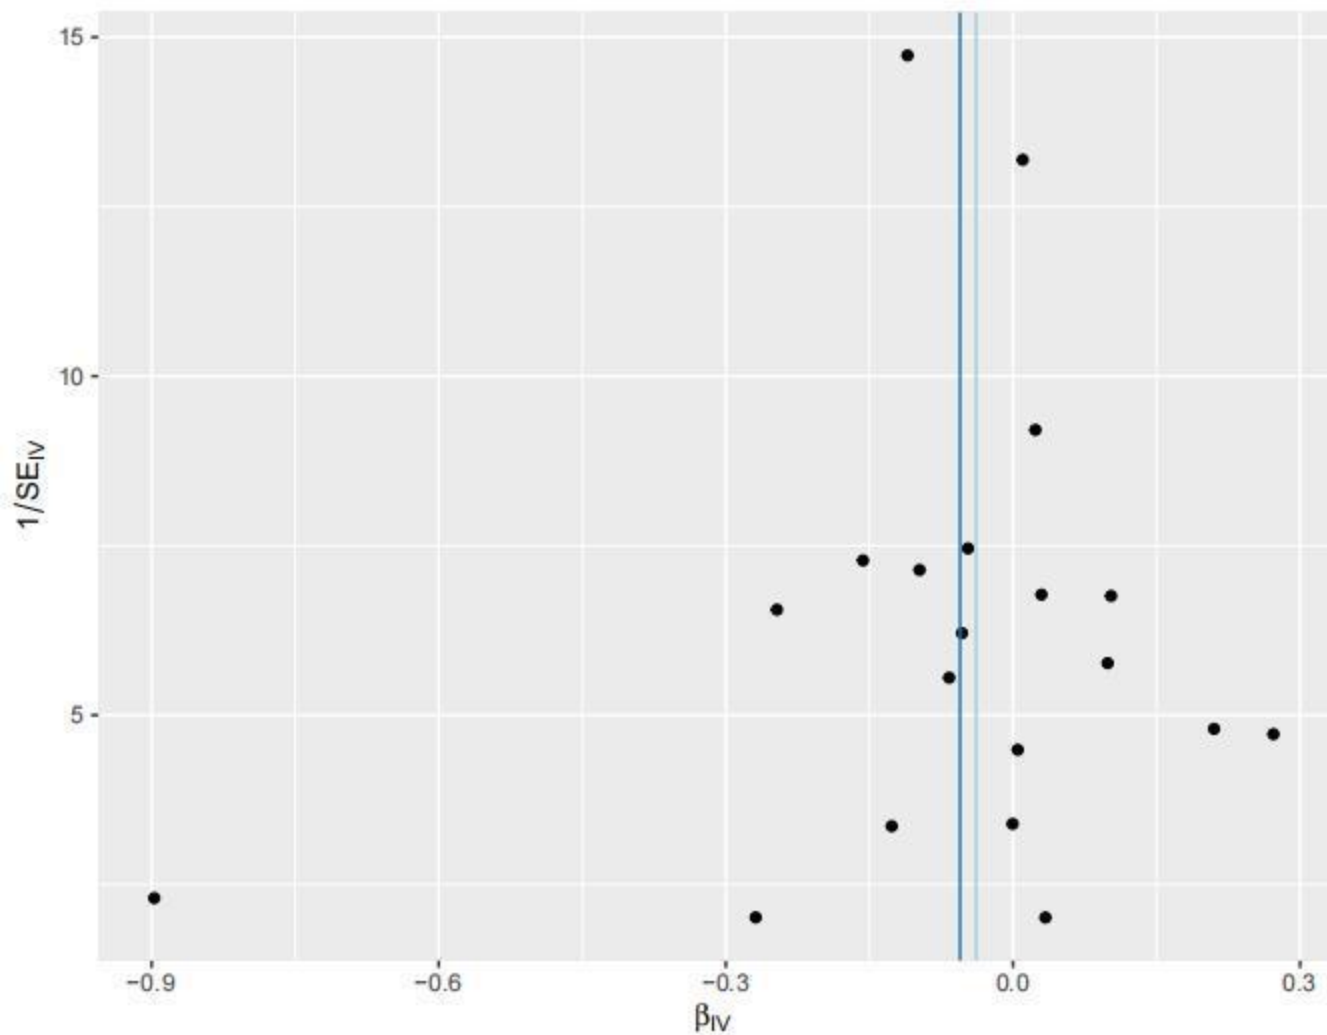

Funnel plot analysis of "CD3 on CD28+ CD45RA- CD8br " on 'Aplastic anemia'

MR Method

- Inverse variance weighted
- MR Egger

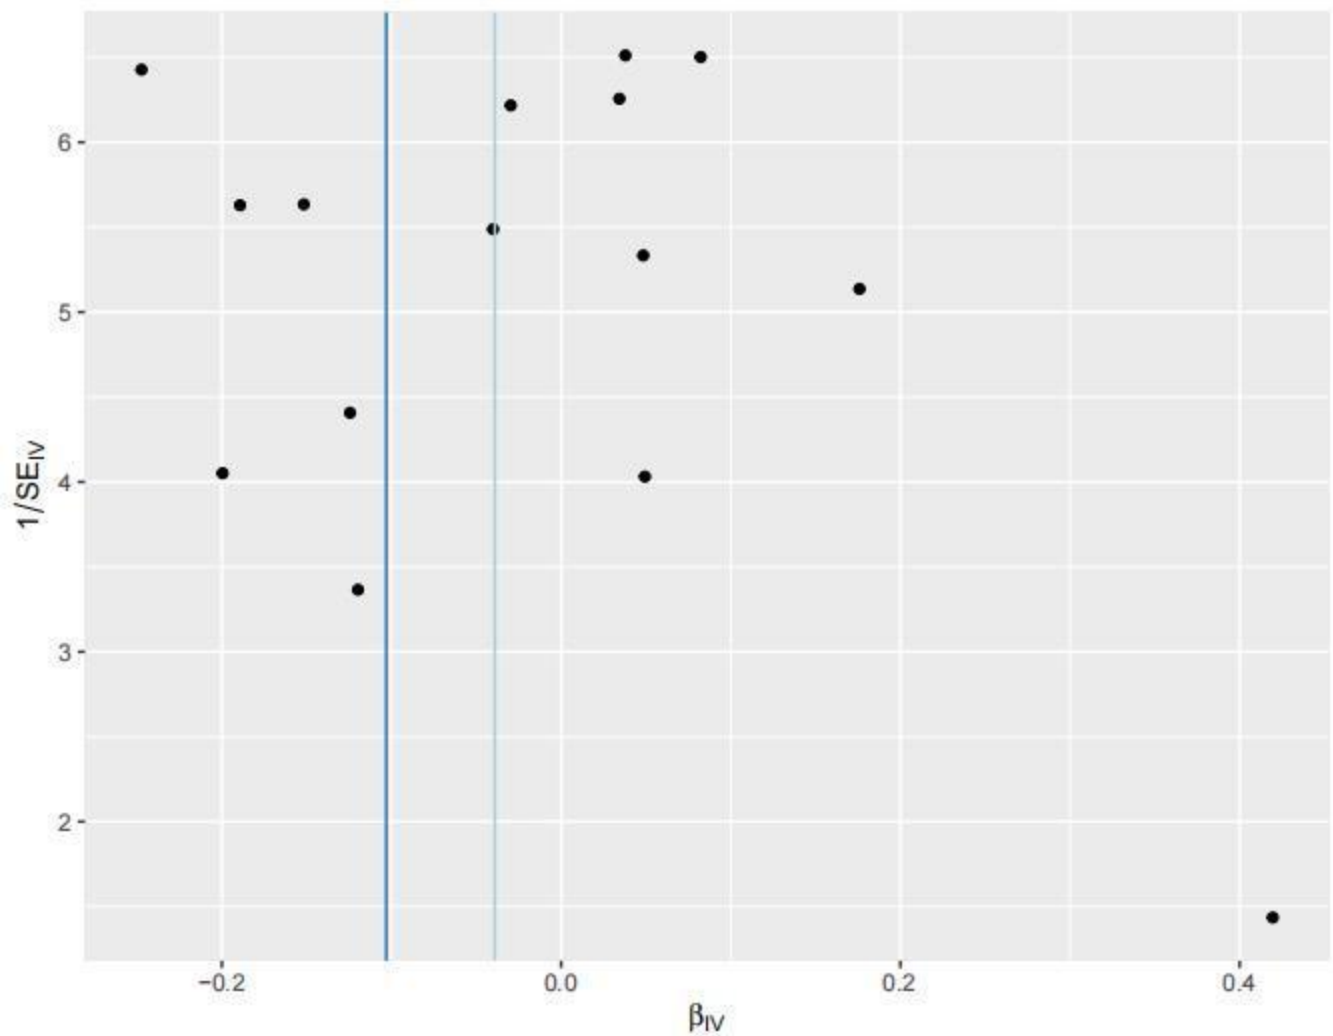

Funnel plot analyse of "CD8br and CD8dim %leukocyte" on 'Aplastic anemia'

### MR Method

- Inverse variance weighted
- MR Egger

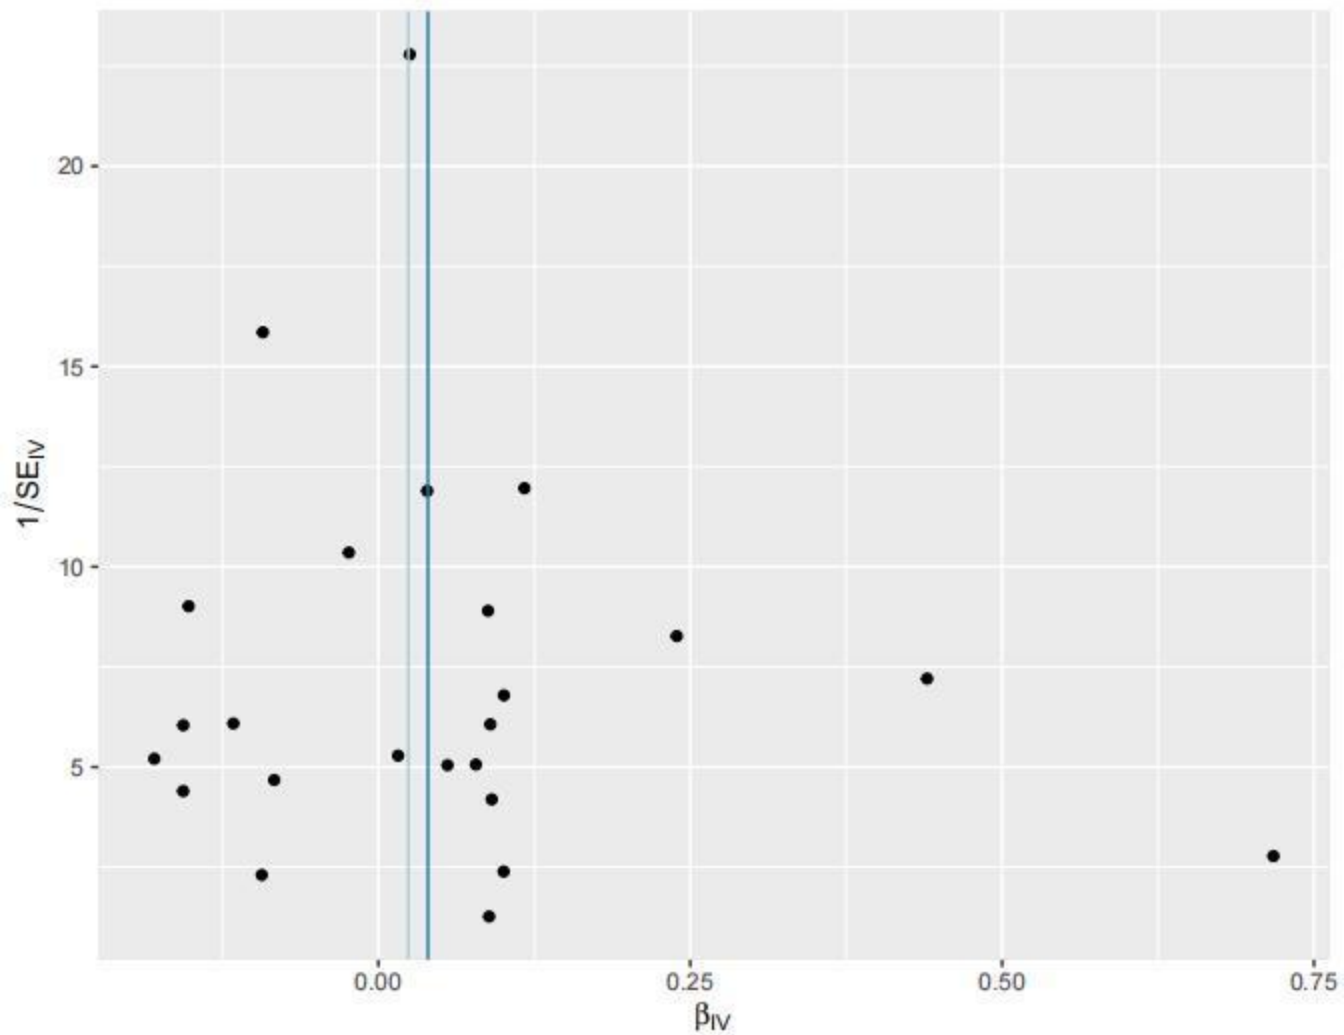

Funnel plot analyse of "CD39+ CD8br AC" on 'Aplastic anemia'

MR Method

- Inverse variance weighted
- MR Egger

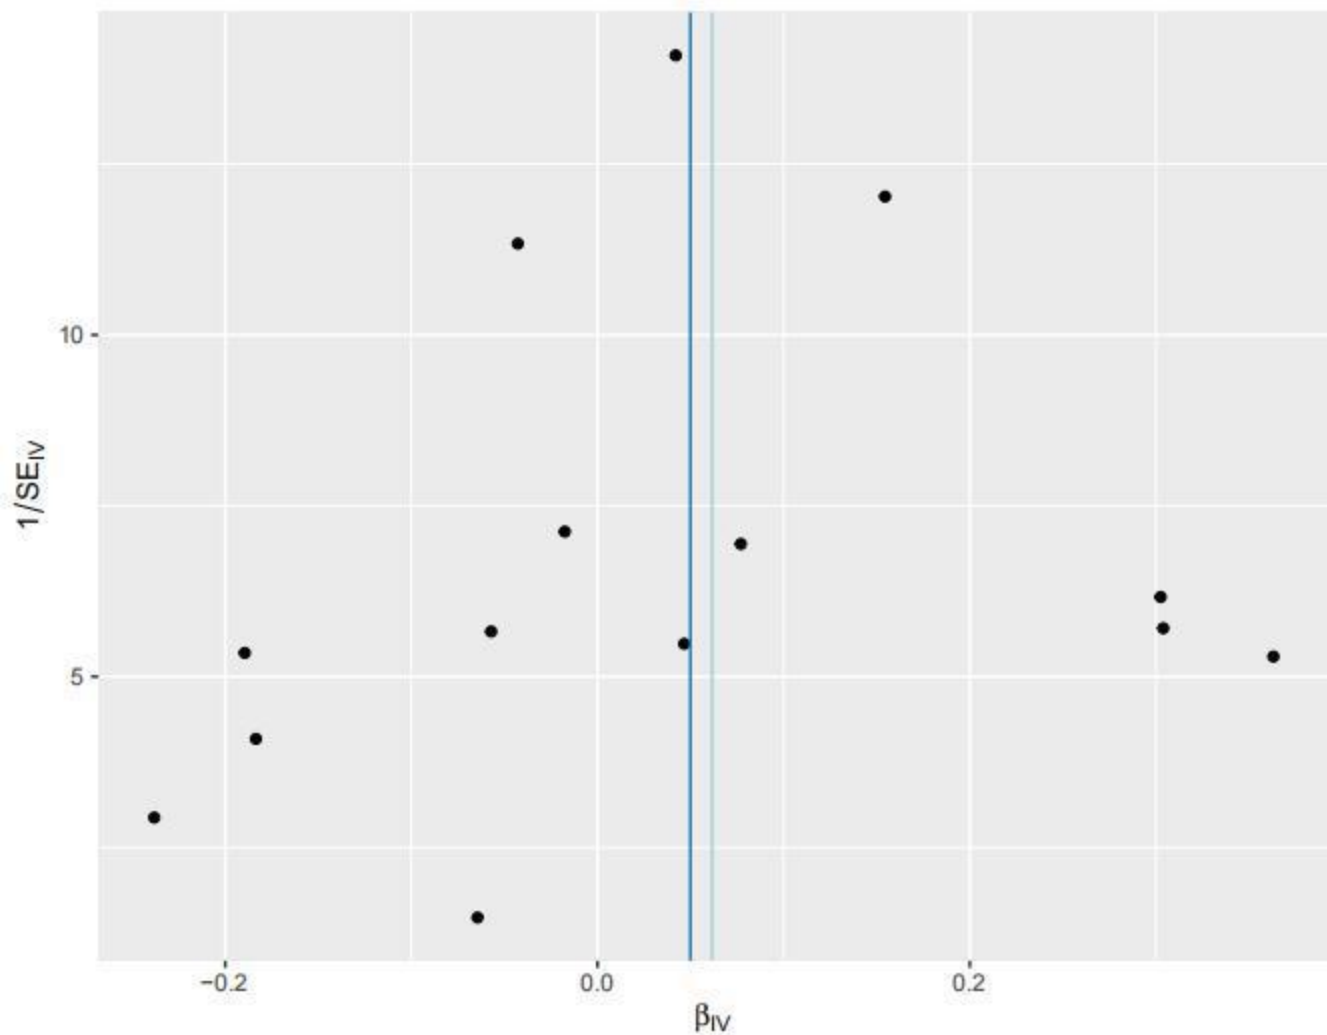

Funnel plot analysis of "CD28 on CD45RA- CD4 not Treg " on 'Aplastic anemia'

### MR Method

- Inverse variance weighted
- MR Egger

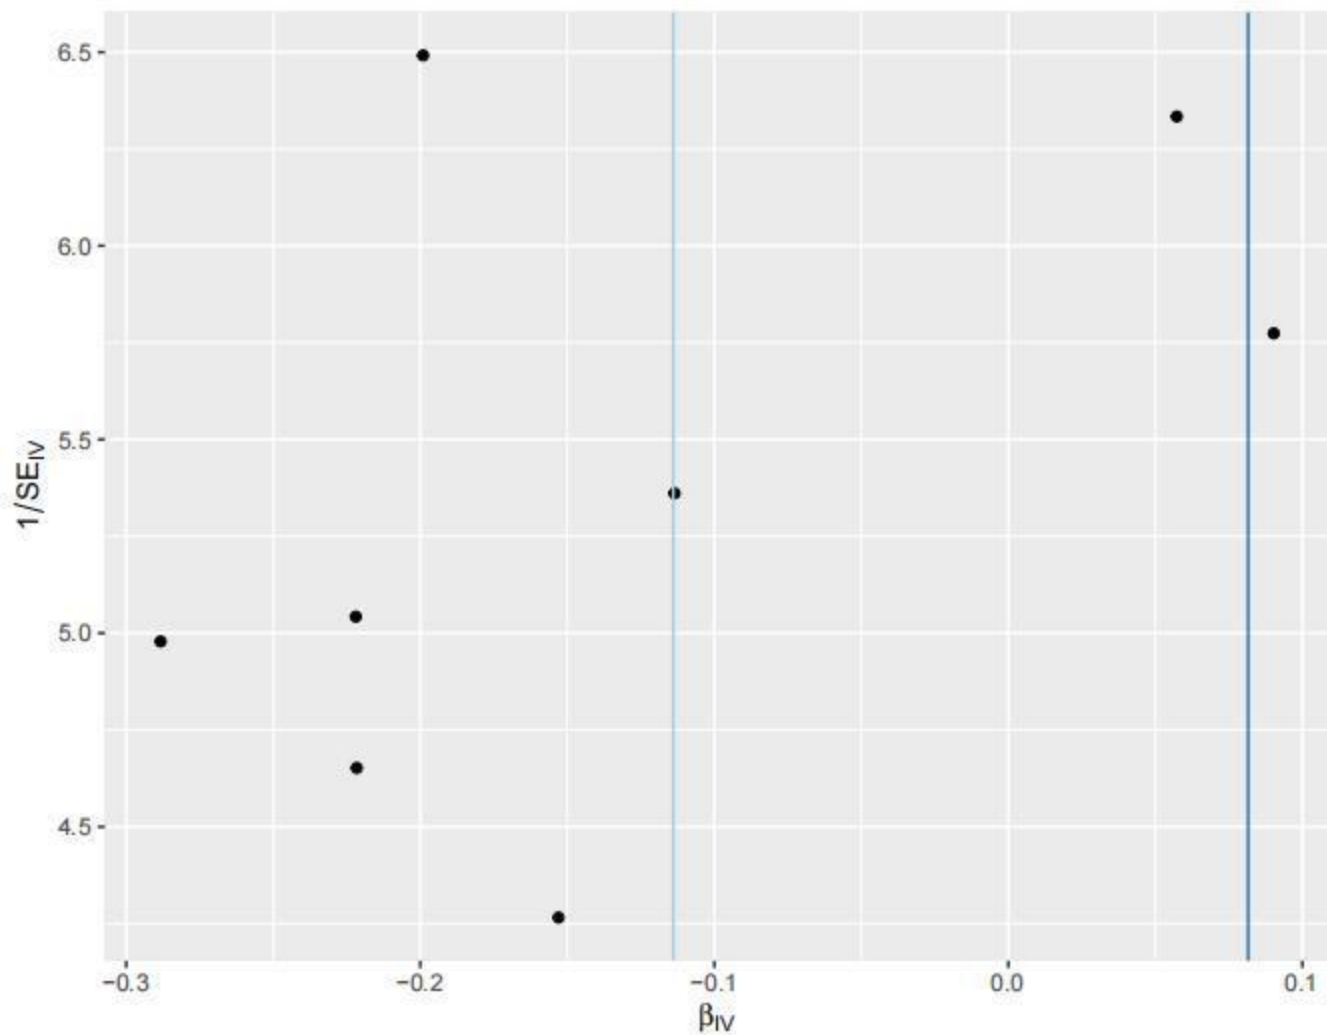

Funnel plot analyse of "CD28- CD25++ CD8br %T cell" on 'Aplastic anemia'

### MR Method

Inverse variance weighted

MR Egger

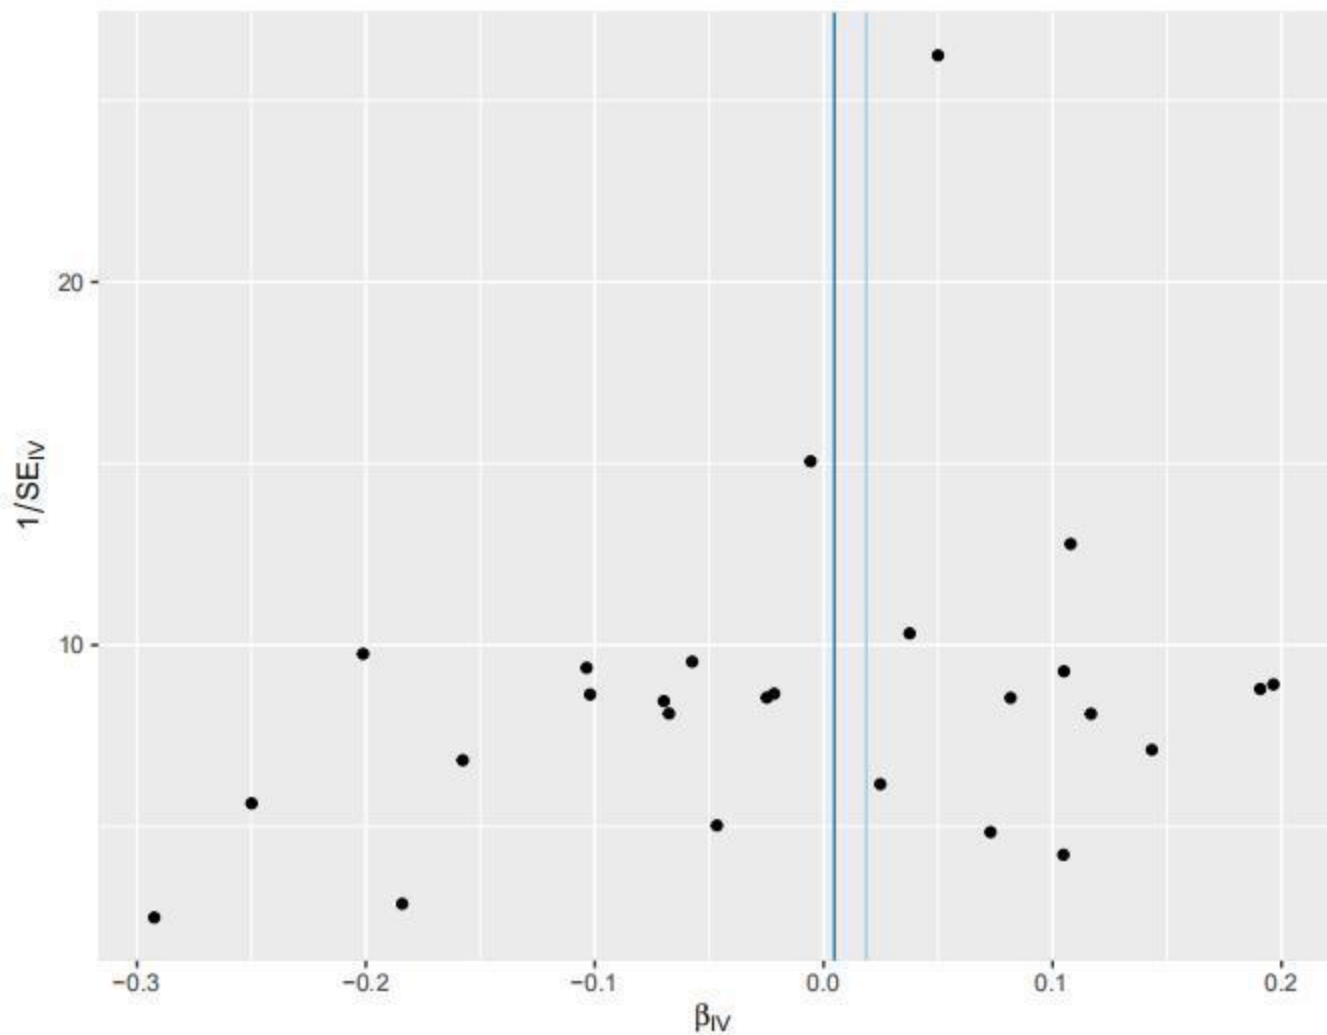

Funnel plot analyse of "HVEM on T cell" on 'Aplastic anemia'

MR Method

- Inverse variance weighted
- MR Egger

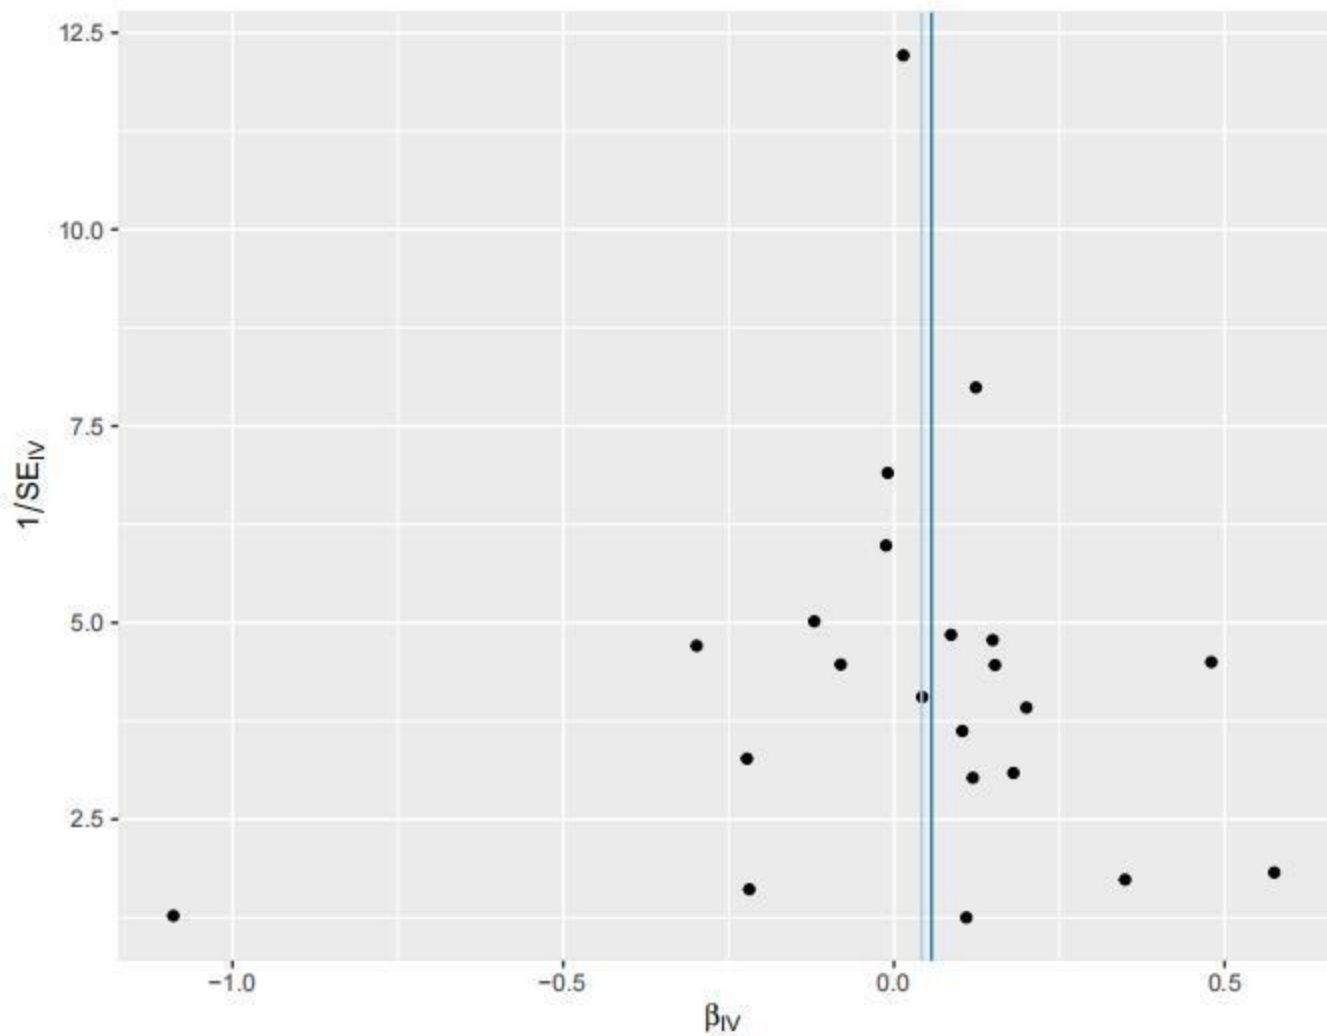

Funnel plot analyse of "HLA DR+ CD4+ %lymphocyte" on 'Aplastic anemia'



### MR Method

- Inverse variance weighted
- MR Egger

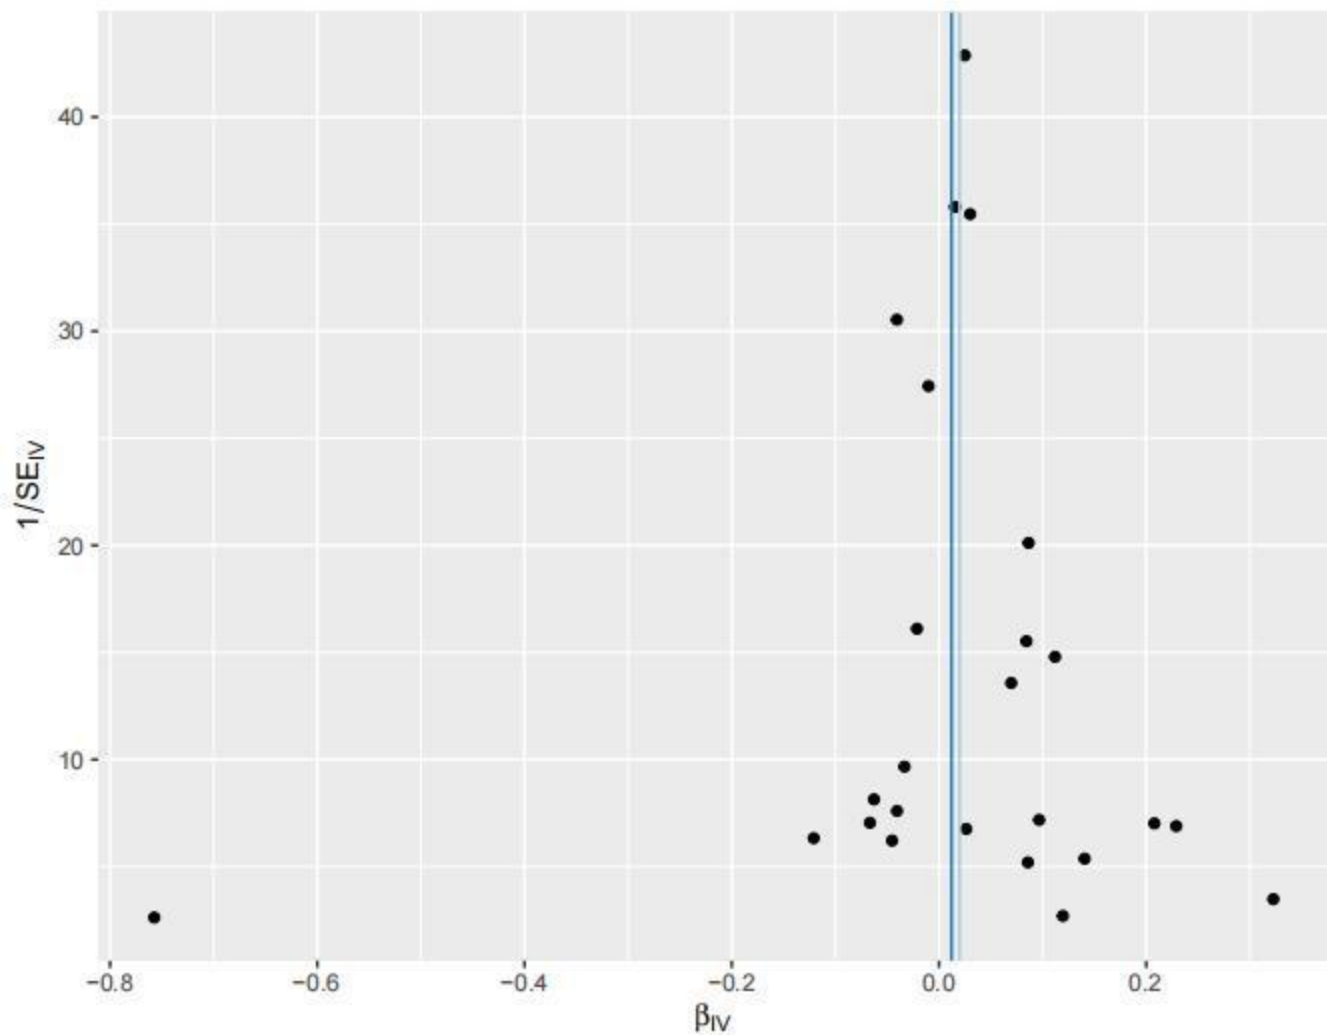

Funnel plot analyse of "CD33dim HLA DR- AC" on 'Aplastic anemia'

MR Method

- Inverse variance weighted
- MR Egger

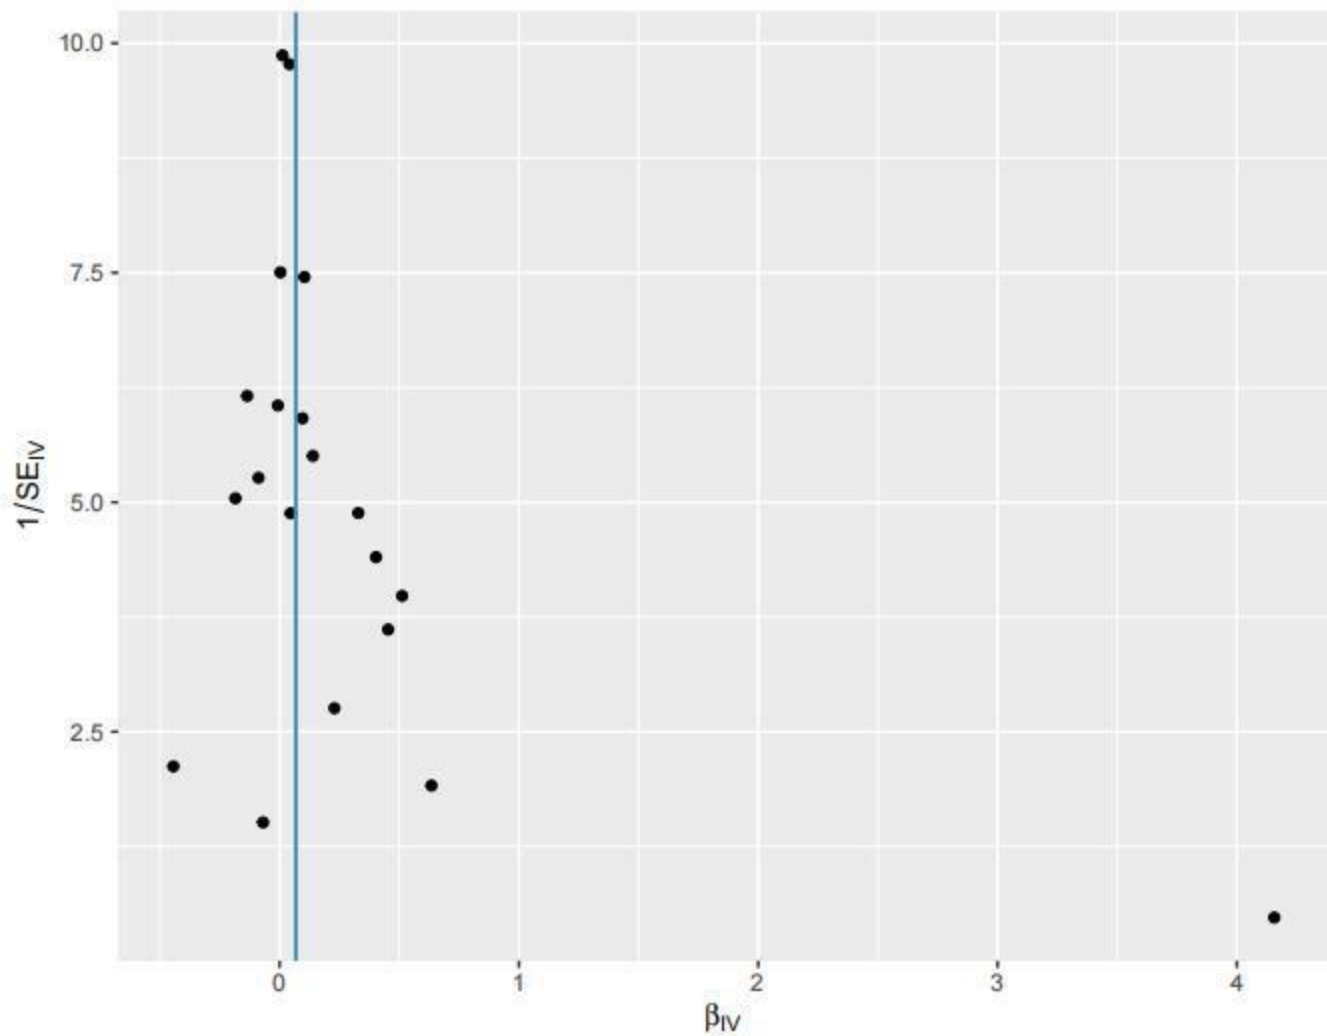

Funnel plot analysis of "CD11c+ CD62L- monocyte %monocyte" on 'Aplastic anemia'

MR Method

- Inverse variance weighted
- MR Egger

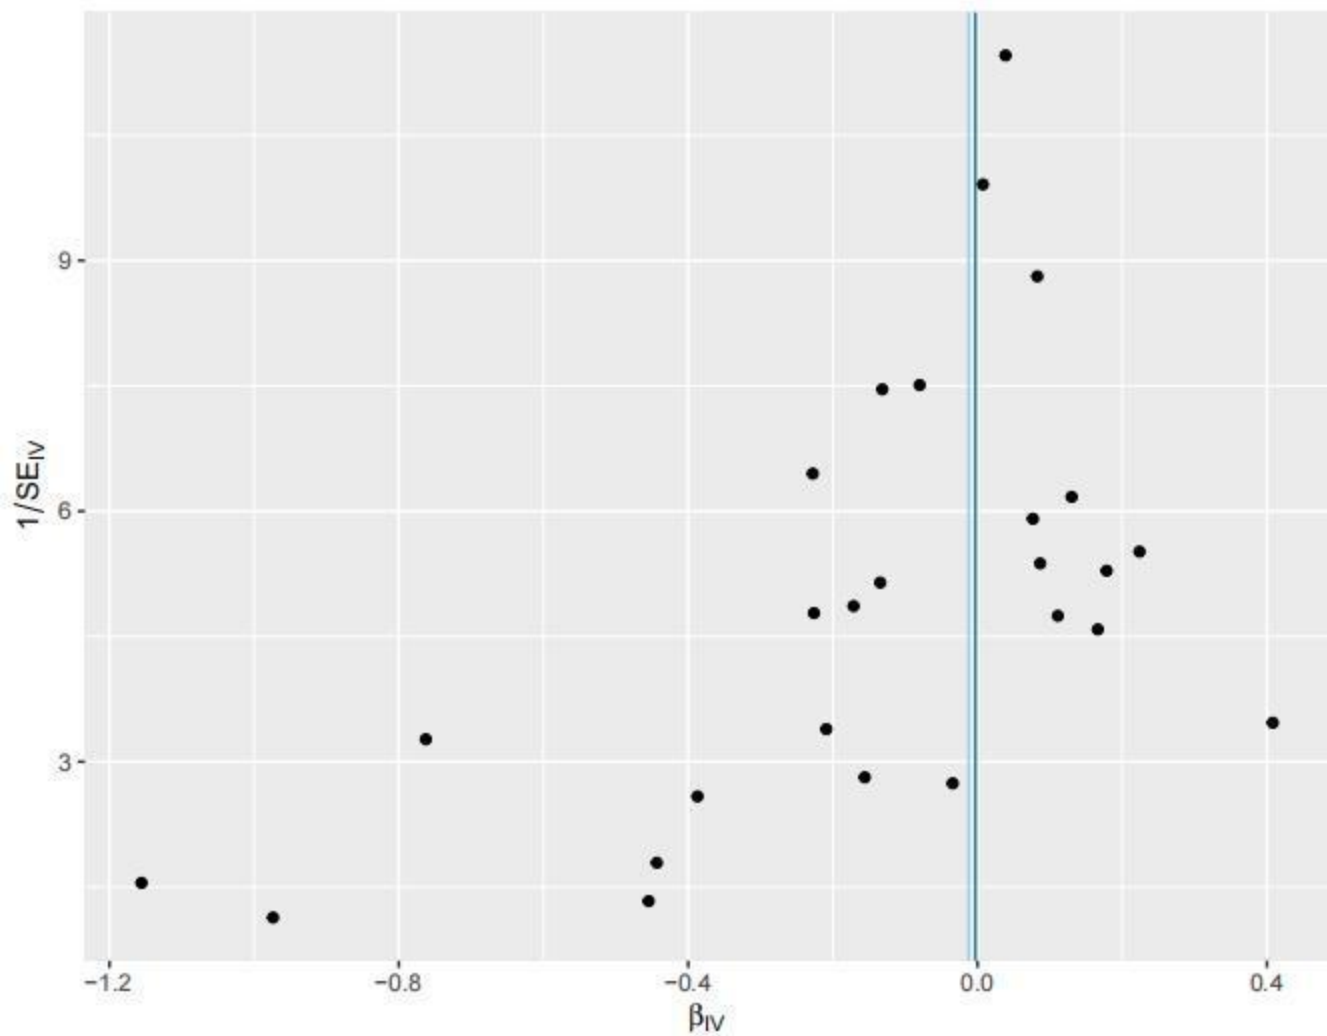

Funnel plot analyse of "IgD- CD27- AC" on 'Aplastic anemia'

### MR Method

- Inverse variance weighted
- MR Egger

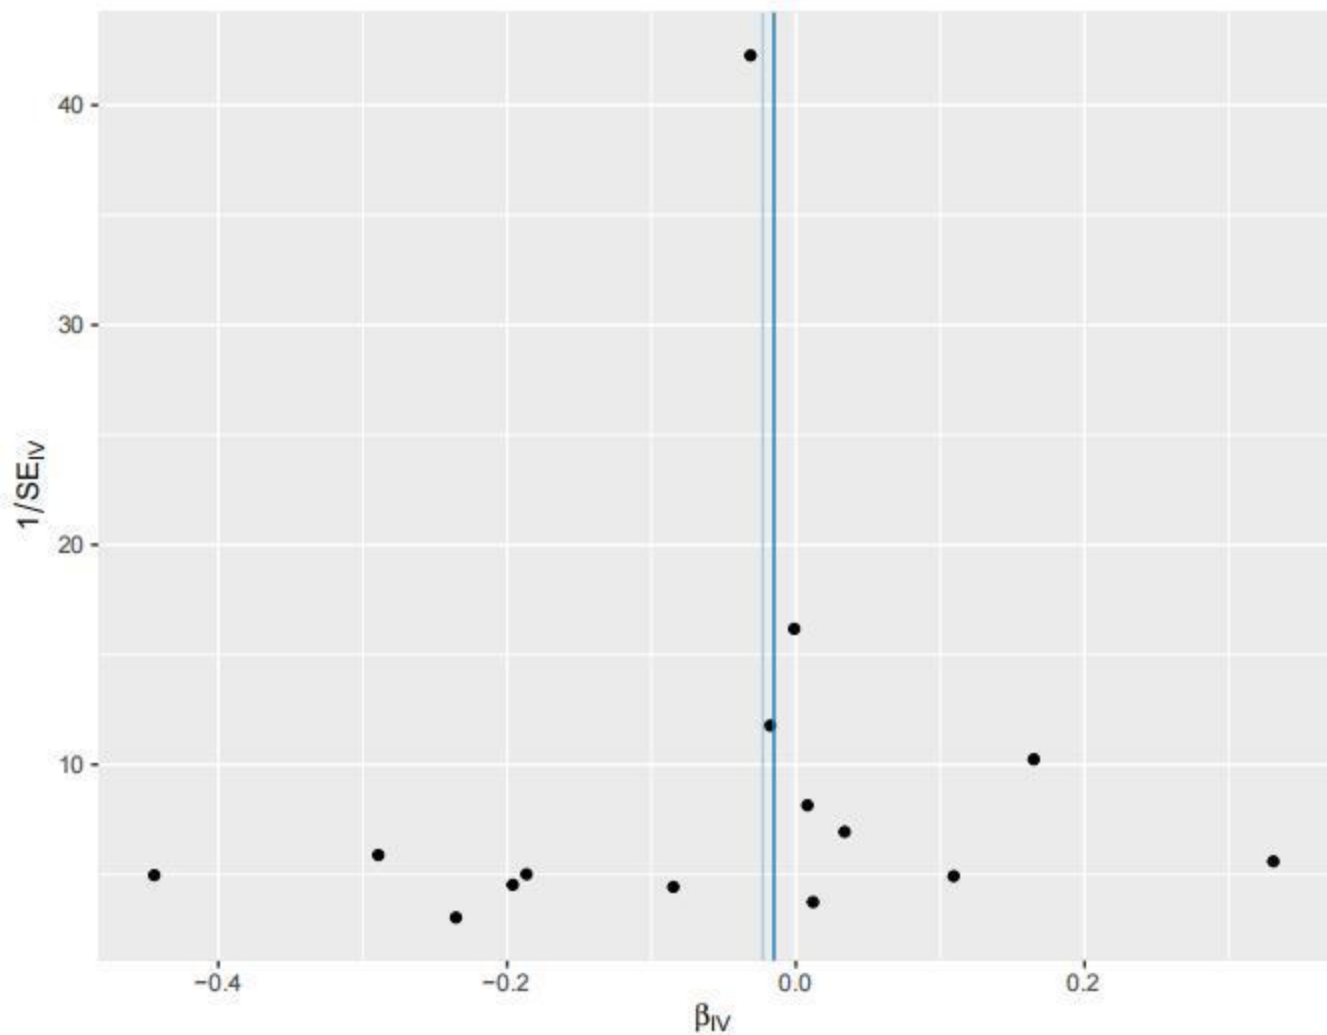

Funnel plot analysis of "CD20 on IgD- CD38br" on 'Aplastic anemia'

MR Method

- Inverse variance weighted
- MR Egger

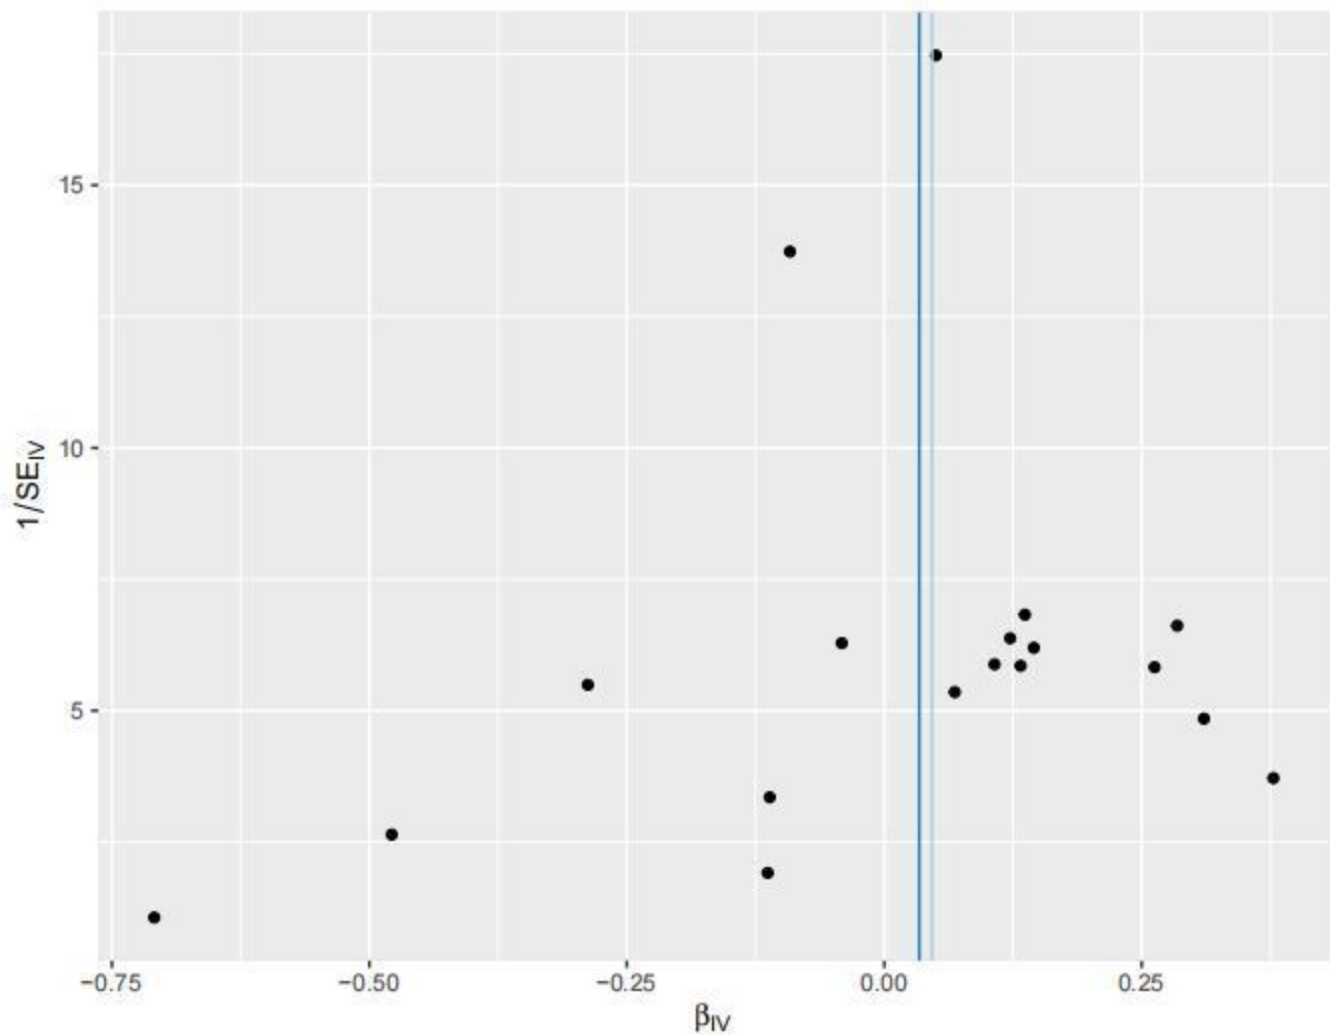

Funnel plot analyse of "CD8 on TD CD8br" on 'Aplastic anemia'

### MR Method

- Inverse variance weighted
- MR Egger

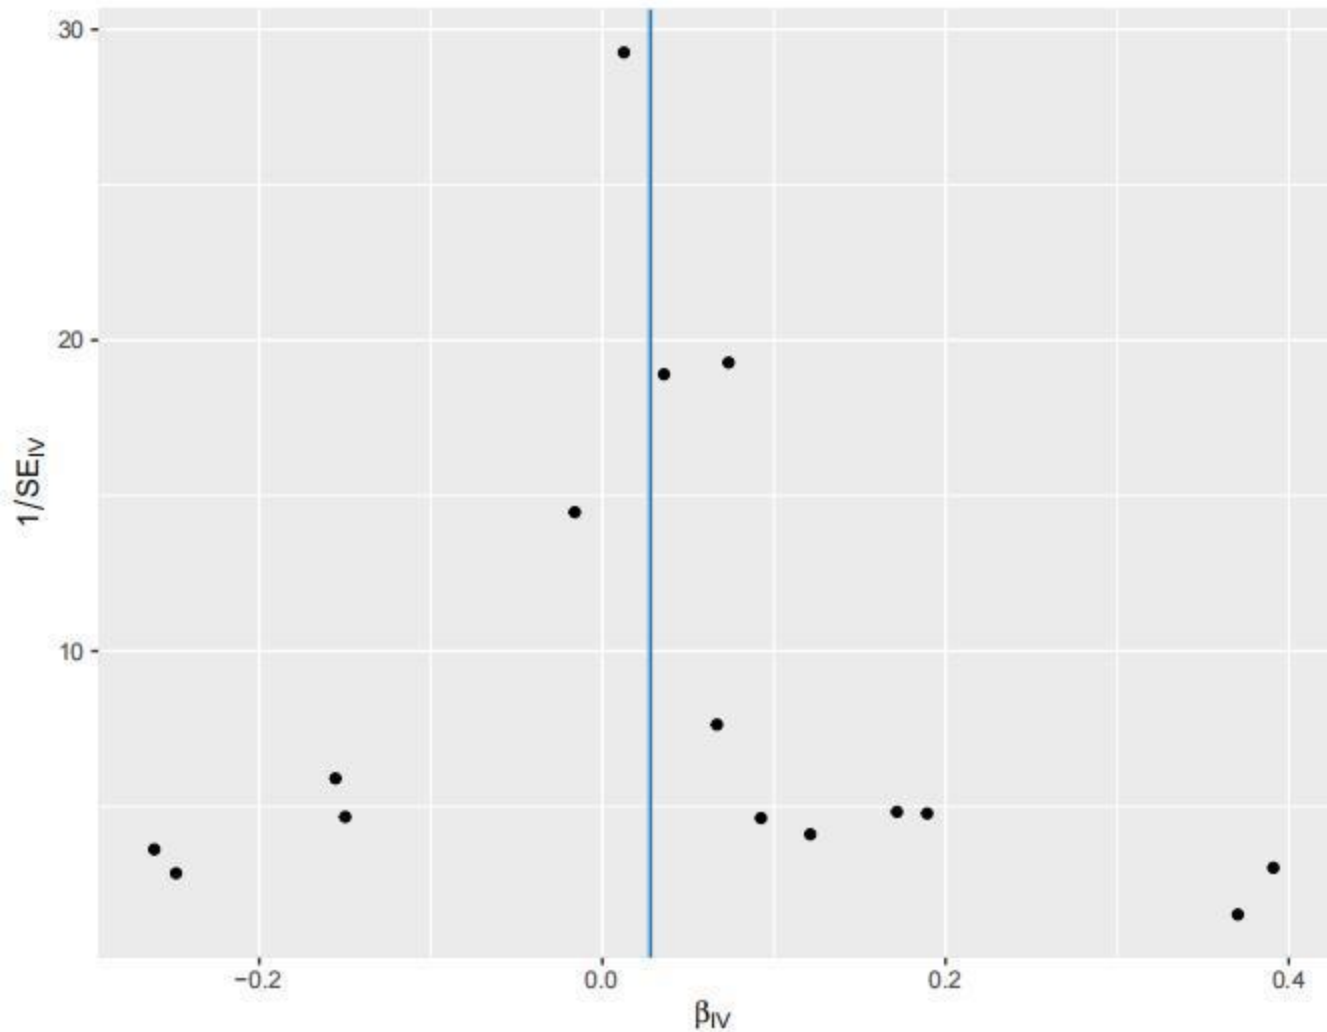

Funnel plot analyse of "EM CD8br %T cell" on 'Aplastic anemia'

MR Method

- Inverse variance weighted
- MR Egger

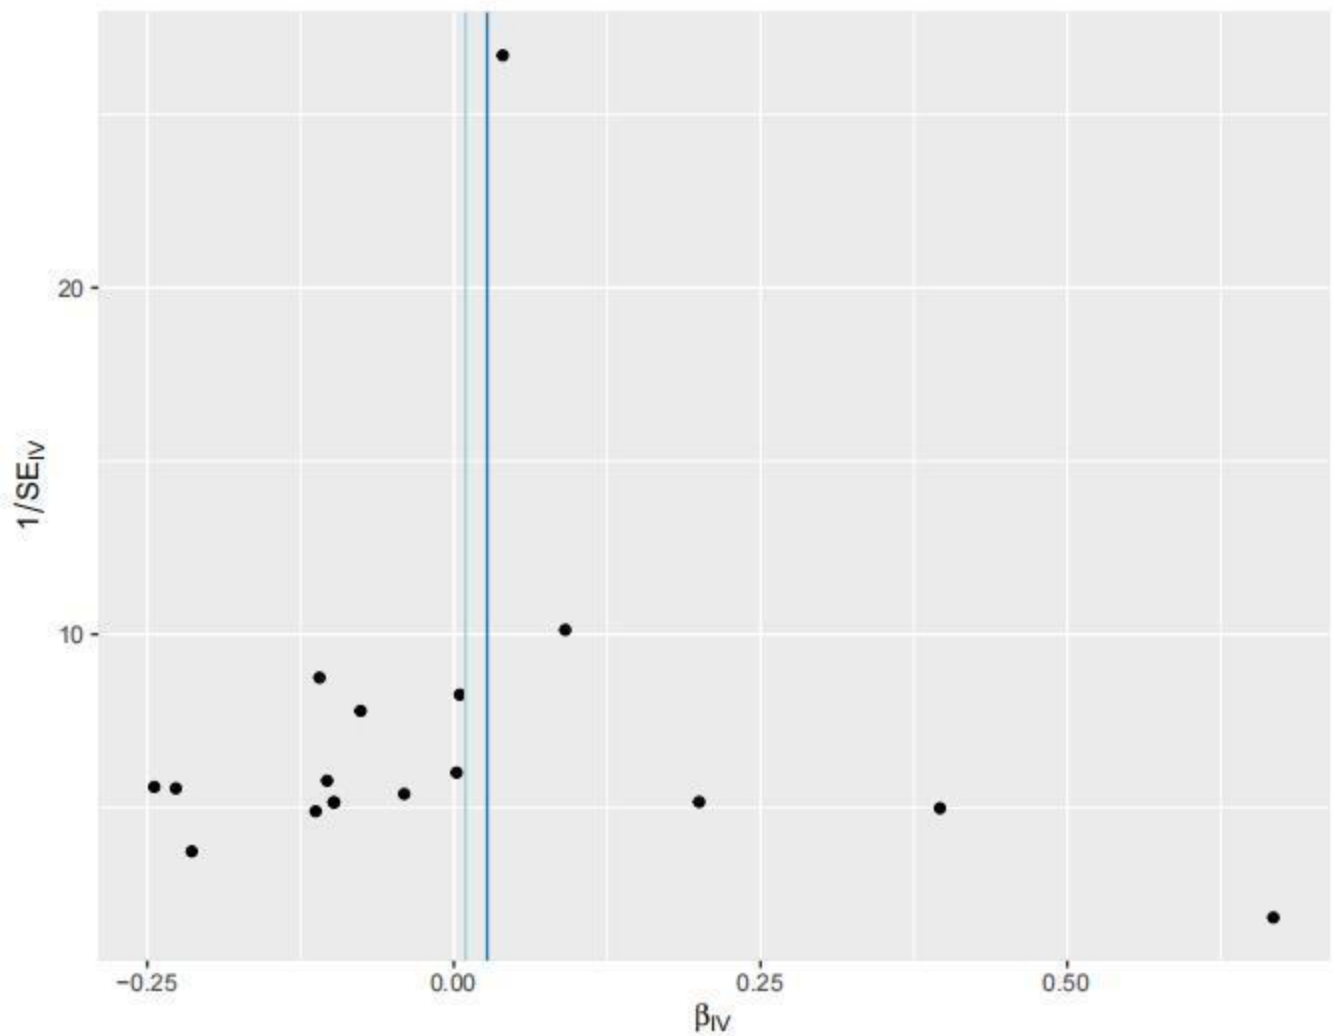

Funnel plot analyse of "FSC-A on HLA DR+ CD4+" on 'Aplastic anemia'

### MR Method

- Inverse variance weighted
- MR Egger

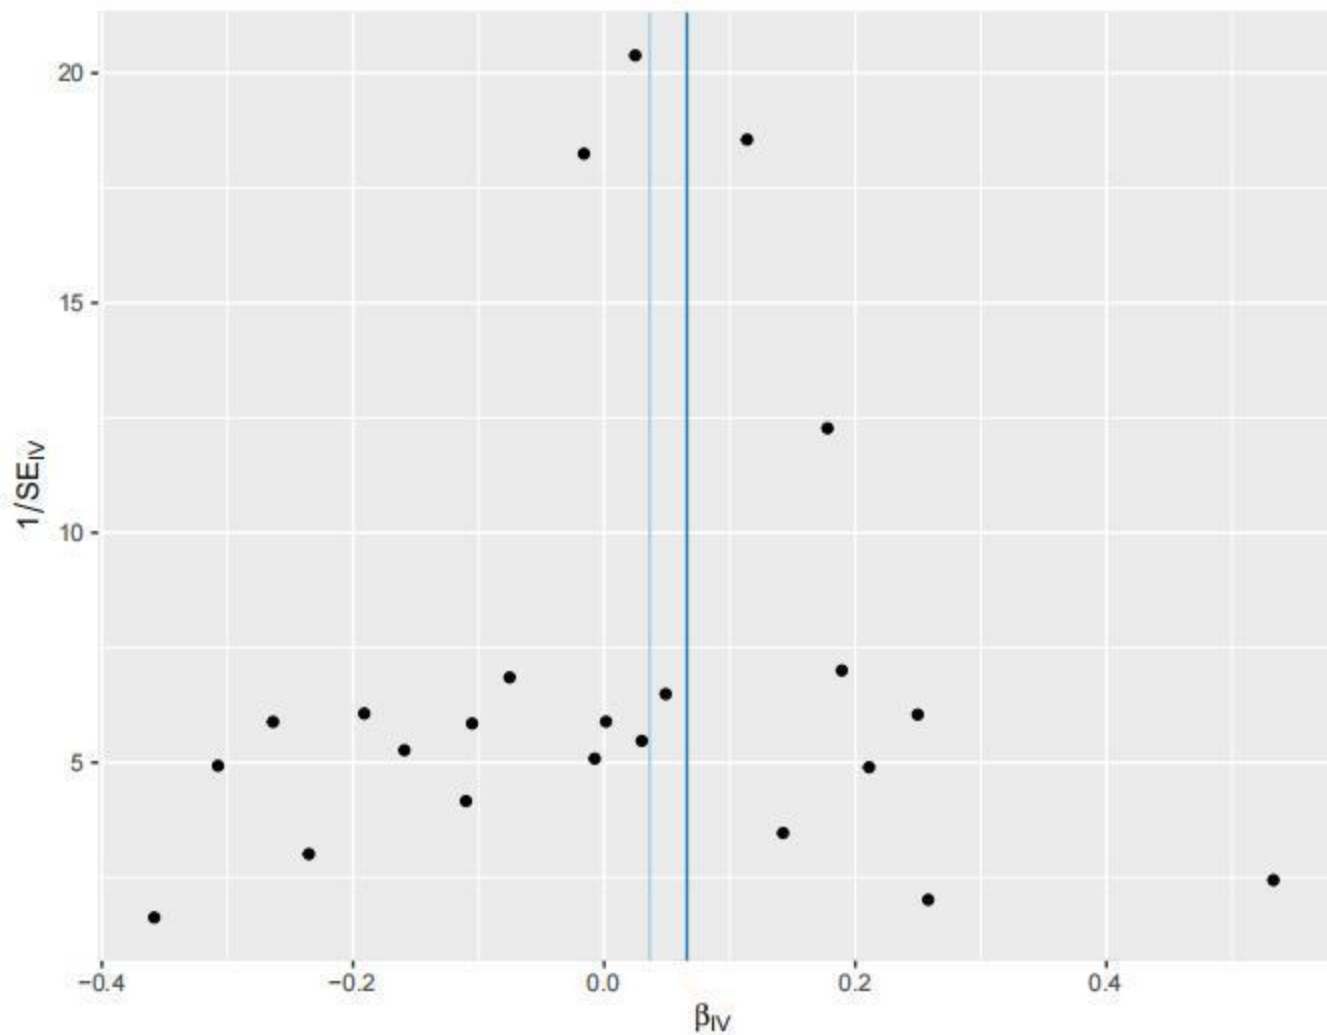

Funnel plot analyse of "CD28 on CD39+ secreting Treg " on 'Aplastic anemia'



### MR Method

- Inverse variance weighted
- MR Egger

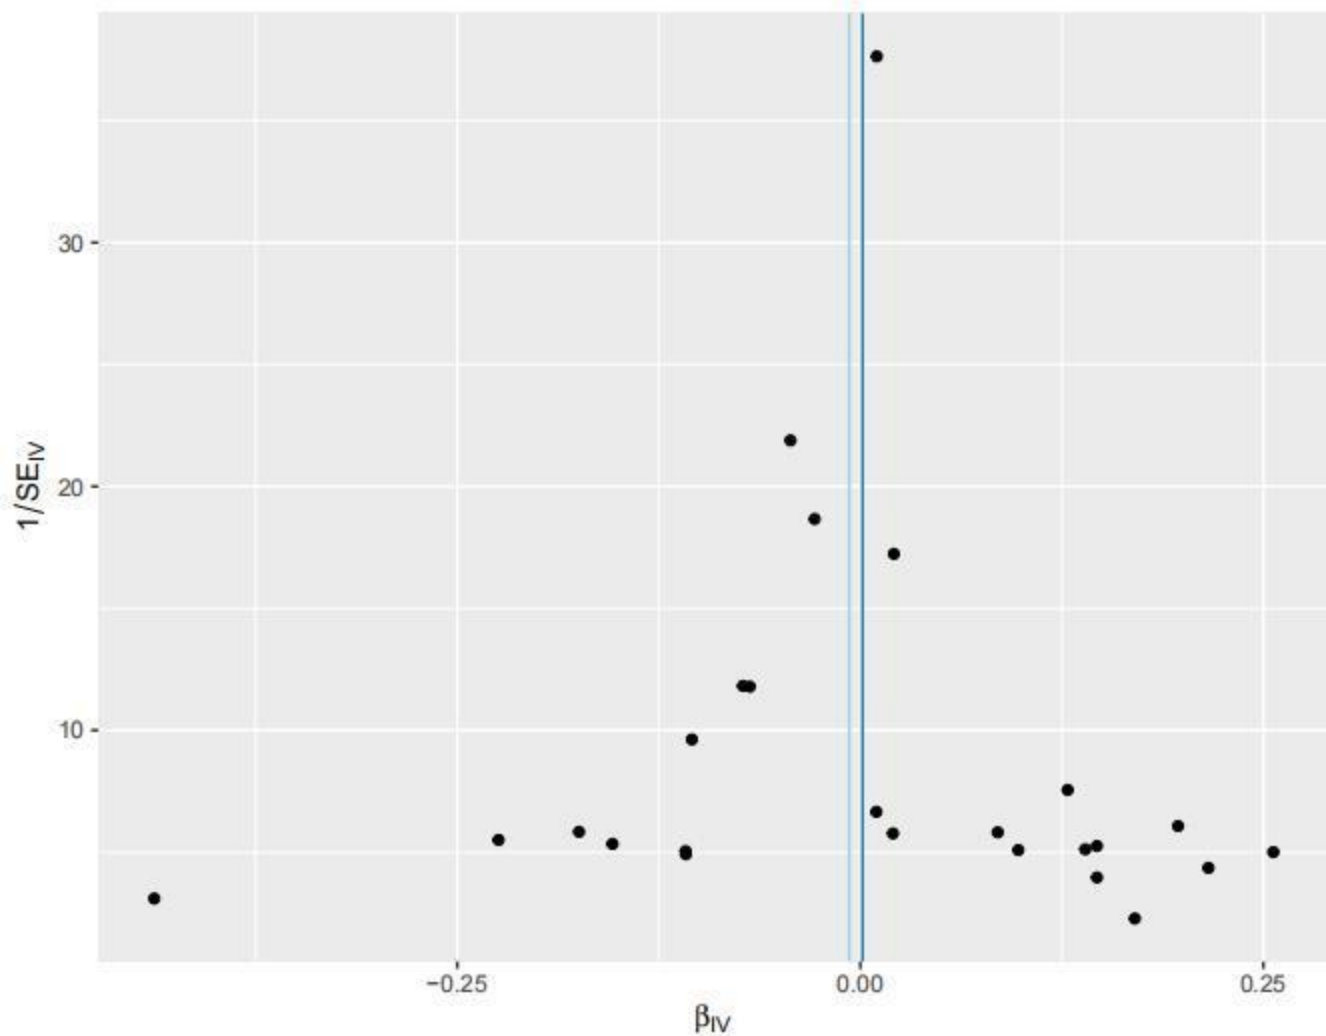

Funnel plot analyse of "BAFF-R on unsw mem" on 'Aplastic anemia'

### MR Method

Inverse variance weighted

MR Egger

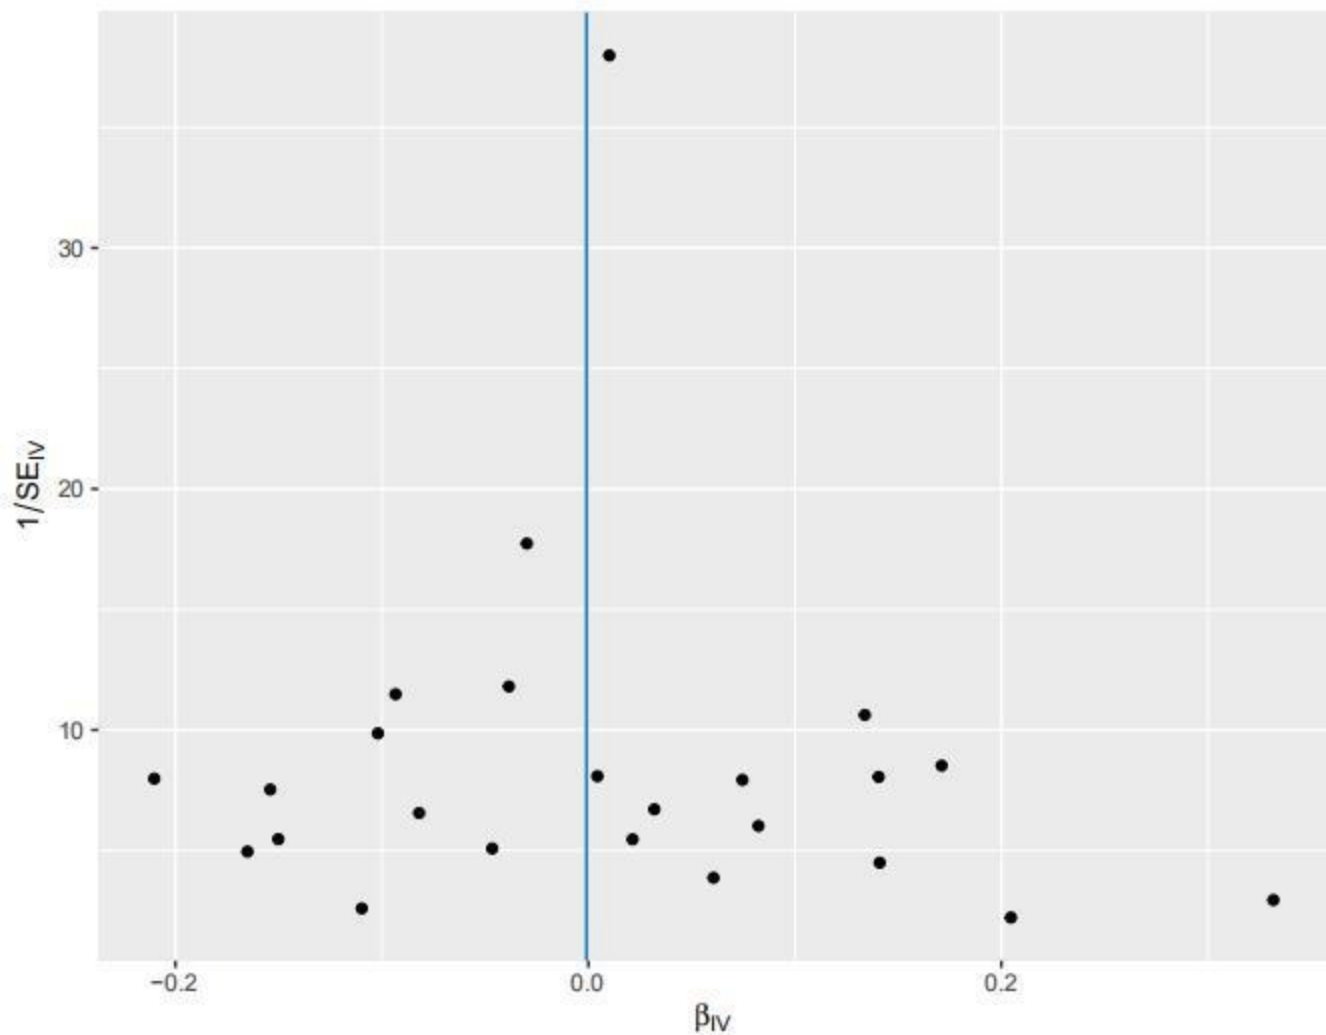

Funnel plot analysis of "BAFF-R on IgD+" on 'Aplastic anemia'

MR Method

- Inverse variance weighted
- MR Egger

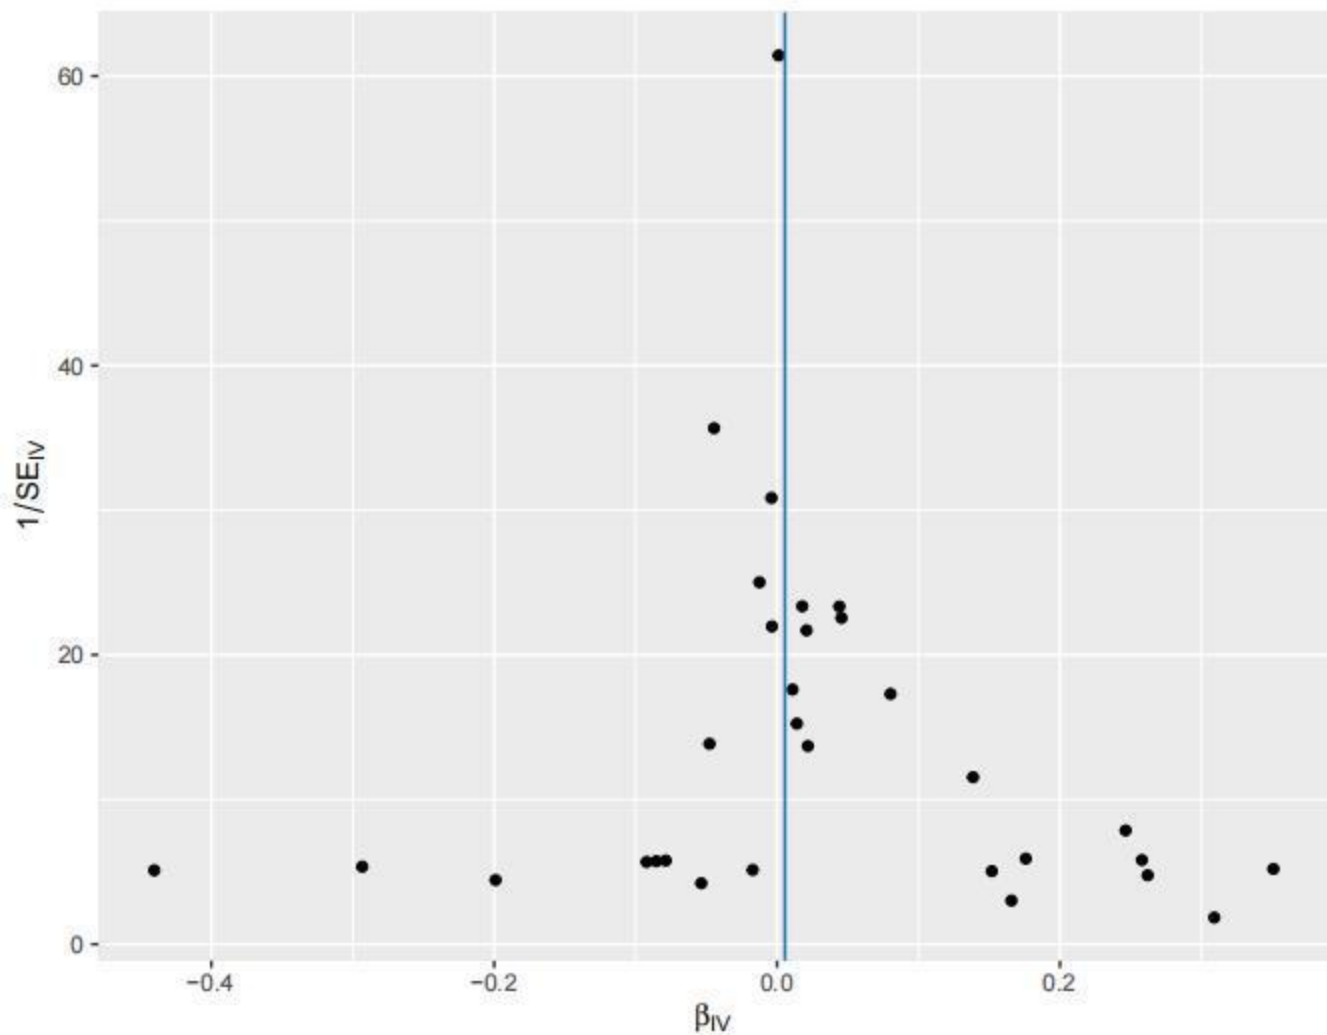

Funnel plot analyse of "Activated & secreting Treg %CD4+" on 'Aplastic anemia'

MR Method

- Inverse variance weighted
- MR Egger

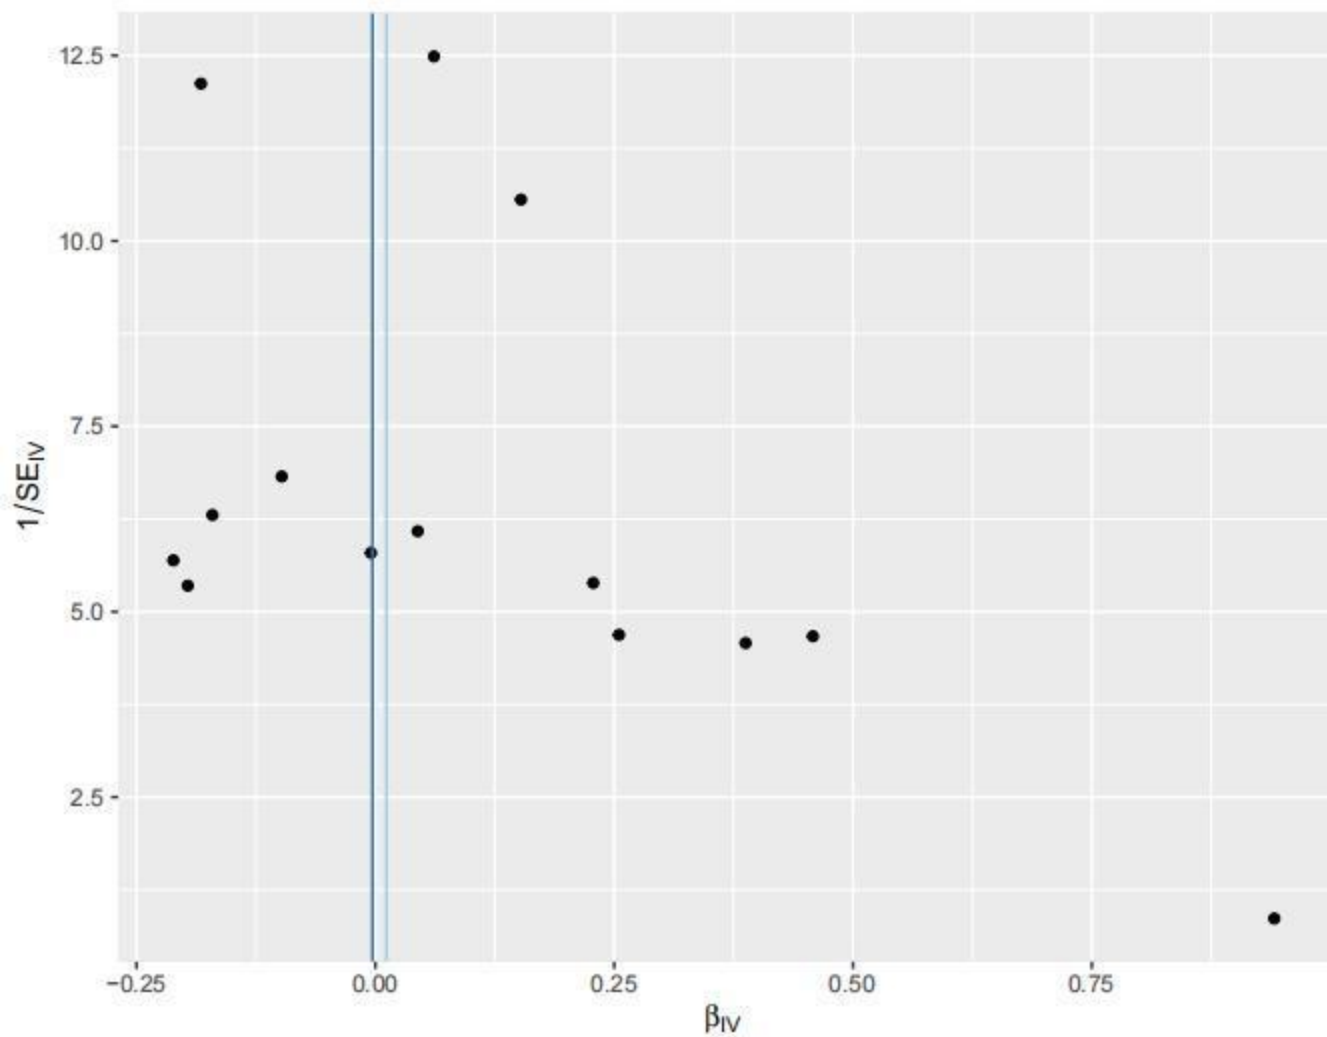

Funnel plot analyse of "CD28 on CD45RA+ CD4+" on 'Aplastic anemia'

MR Method

- Inverse variance weighted
- MR Egger

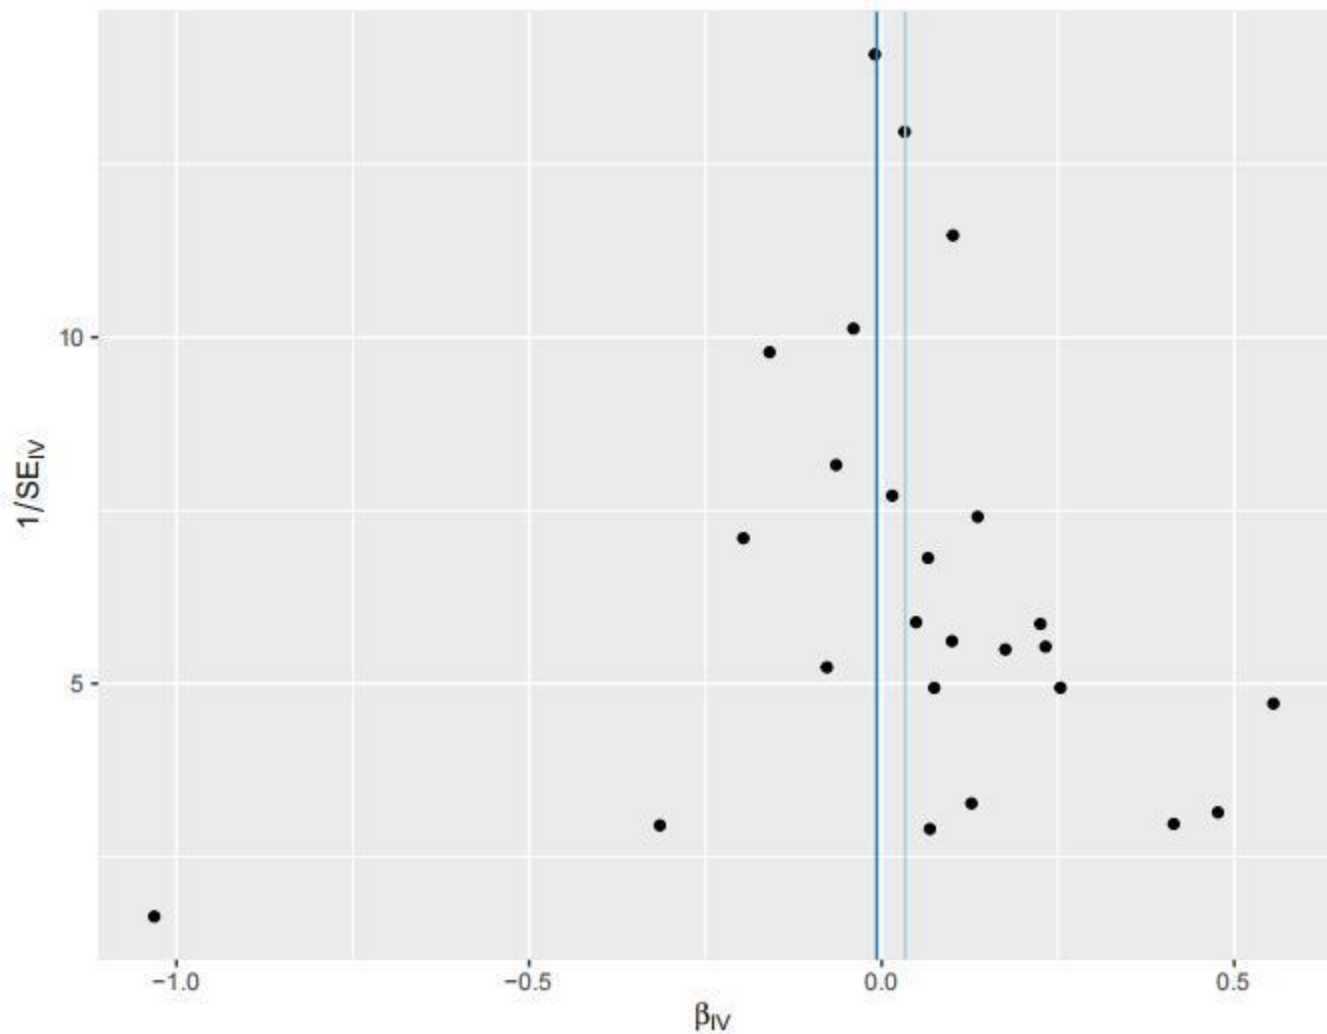

Funnel plot analyse of "CCR2 on monocyte " on 'Aplastic anemia'

### MR Method

- Inverse variance weighted
- MR Egger

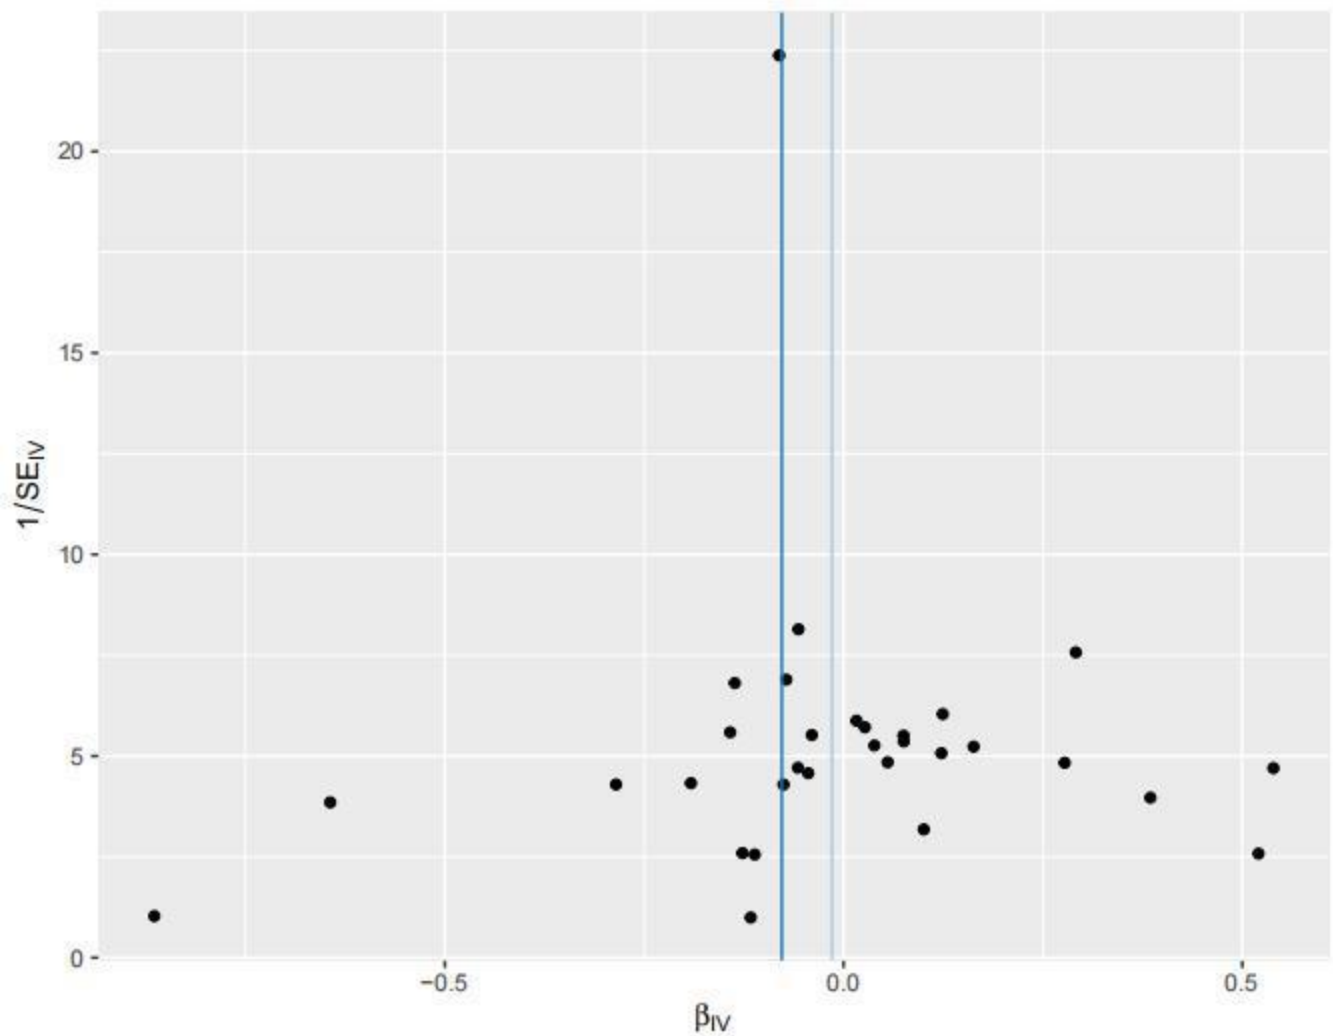

Funnel plot analysis of "CD28- DN (CD4-CD8-) AC" on 'Aplastic anemia'

MR Method

- Inverse variance weighted
- MR Egger

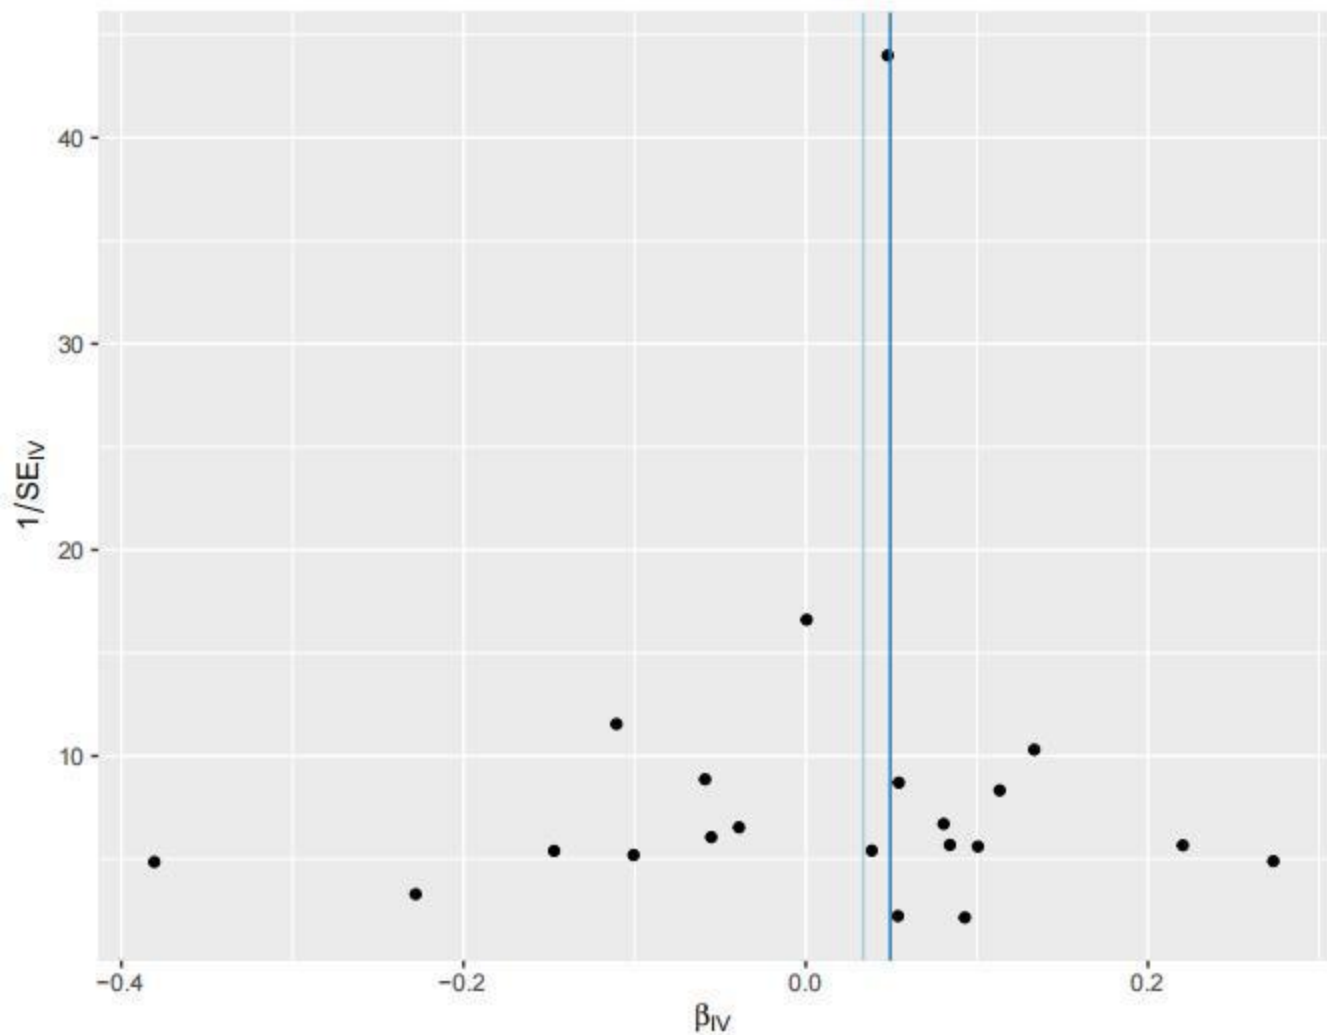

Funnel plot analyse of "CD39 on CD39+ CD4+ " on 'Aplastic anemia'

### MR Method

Inverse variance weighted

MR Egger

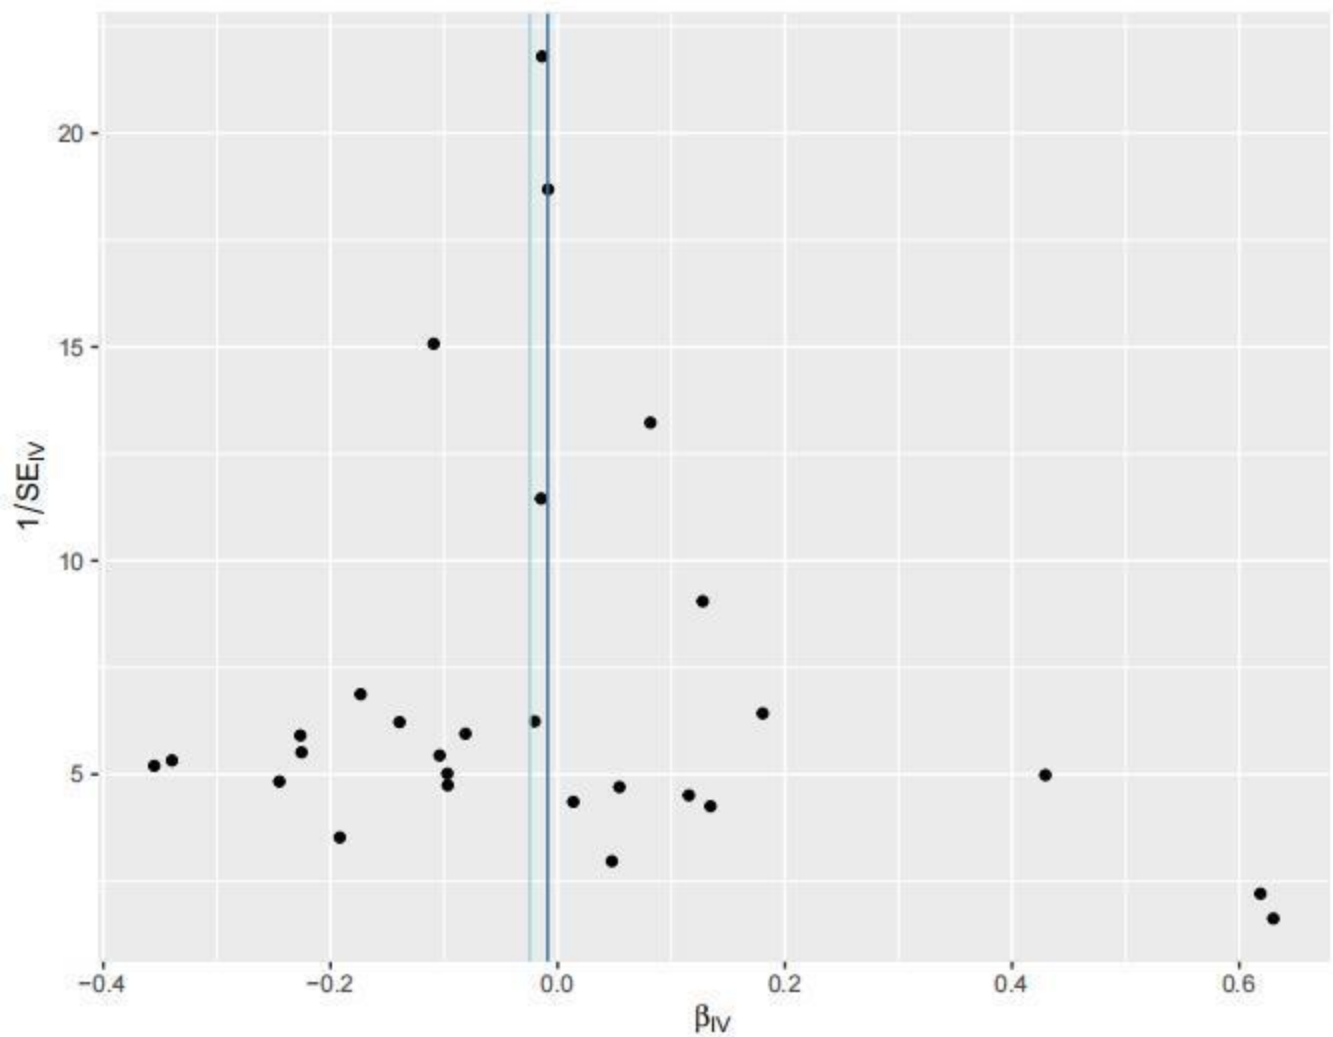

Funnel plot analysis of "PDL-1 on CD14+ CD16+ monocyte" on 'Aplastic anemia'



MR Method

Inverse variance weighted

MR Egger

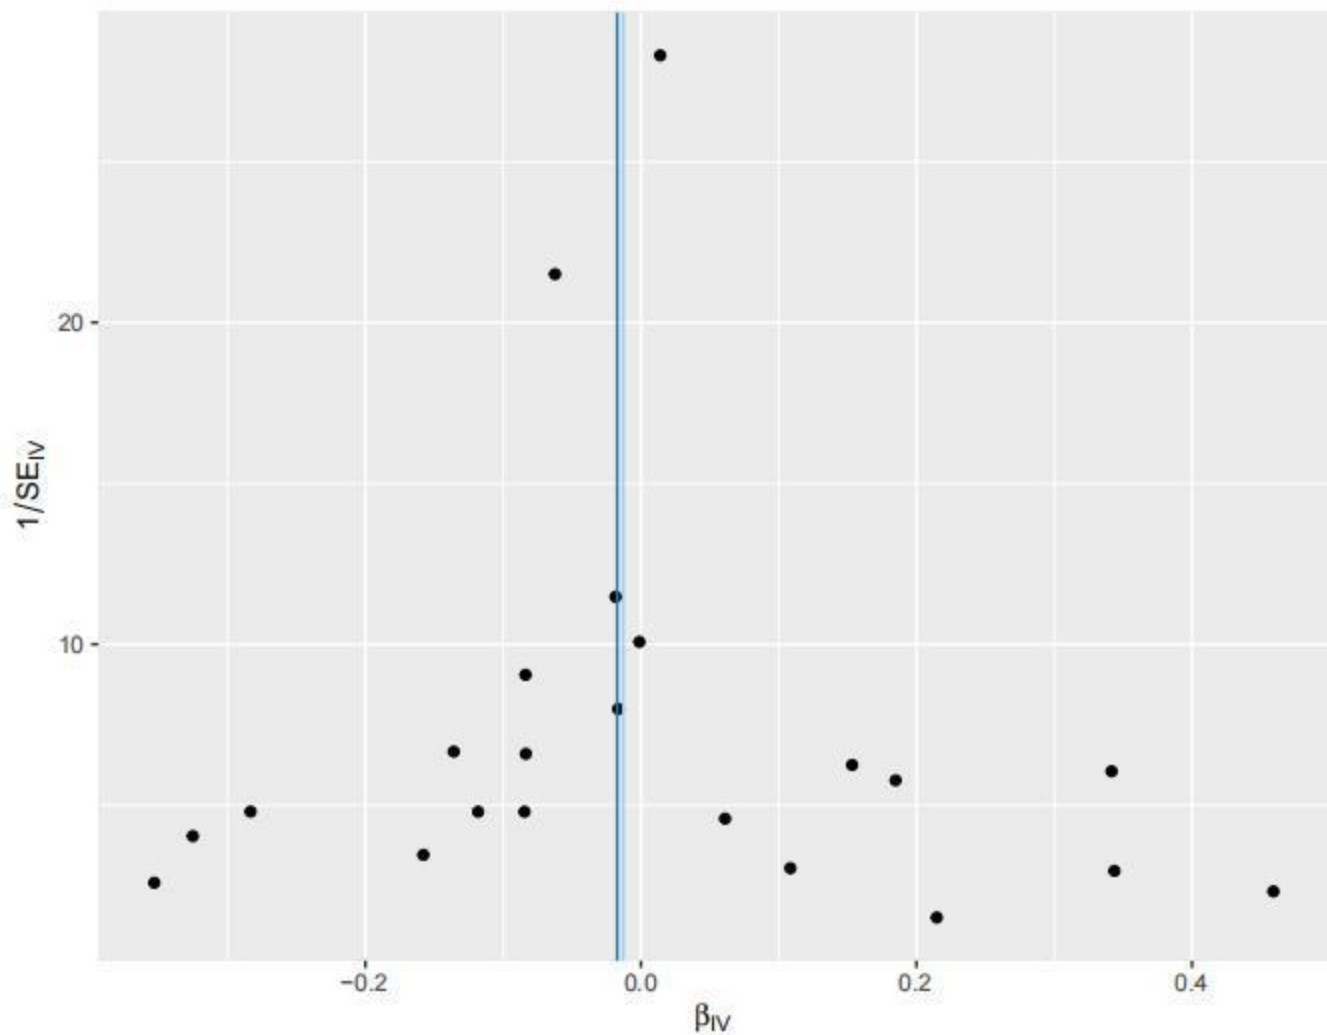

Funnel plot analysis of "IgD- CD38br AC" on 'Aplastic anemia'

### MR Method

- Inverse variance weighted
- MR Egger

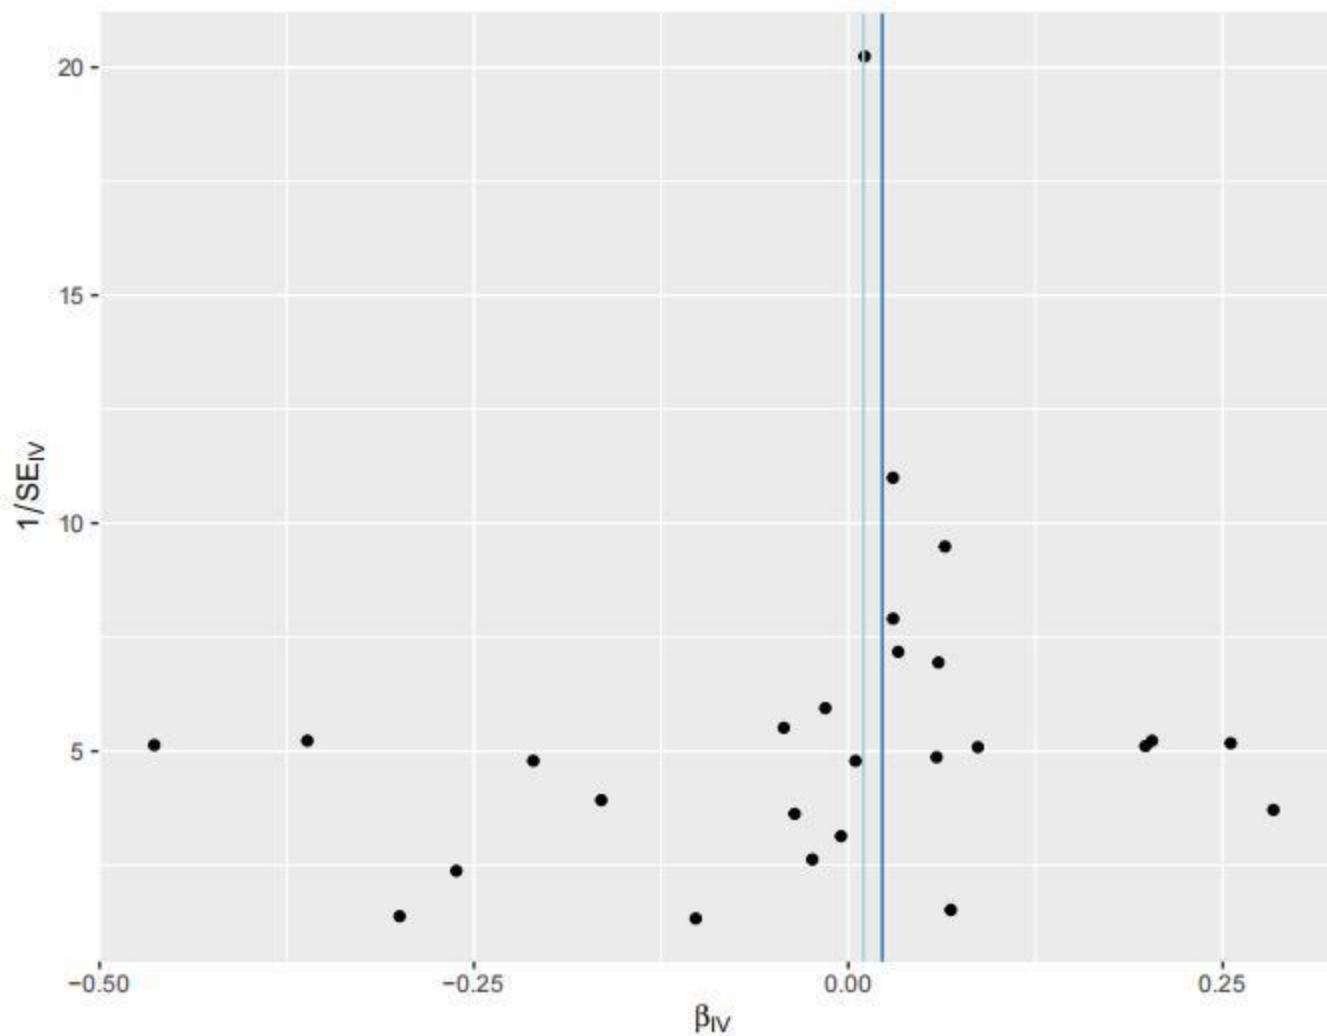

Funnel plot analysis of "CD25 on naive-mature B cell" on 'Aplastic anemia'

MR Method

Inverse variance weighted

MR Egger

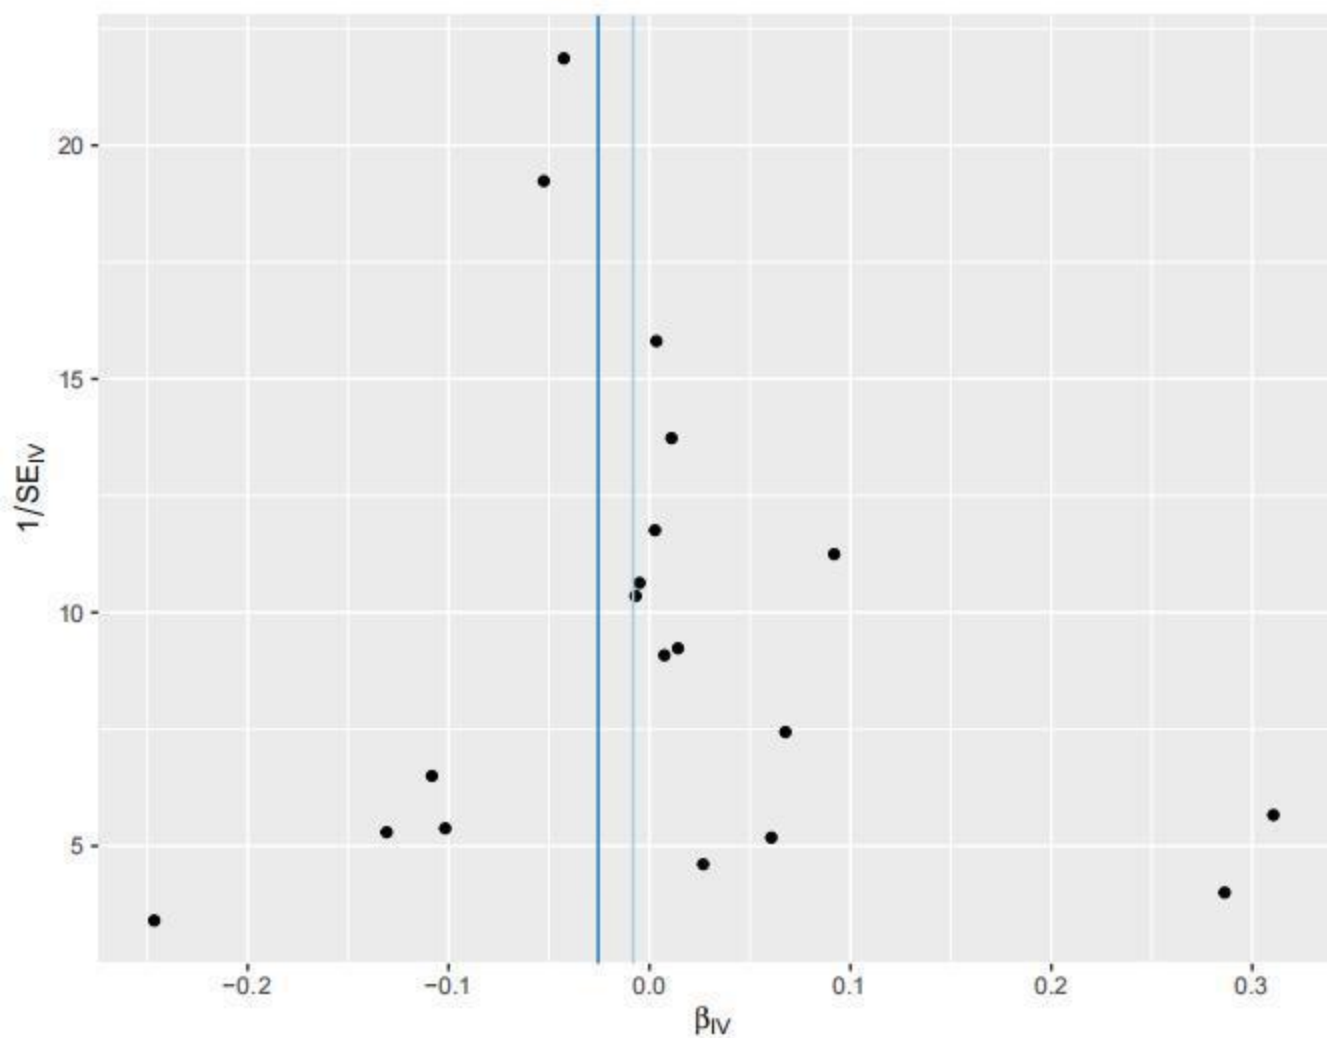

Funnel plot analyse of "CD28 on CD39+ activated Treg" on 'Aplastic anemia'

### MR Method

Inverse variance weighted

MR Egger

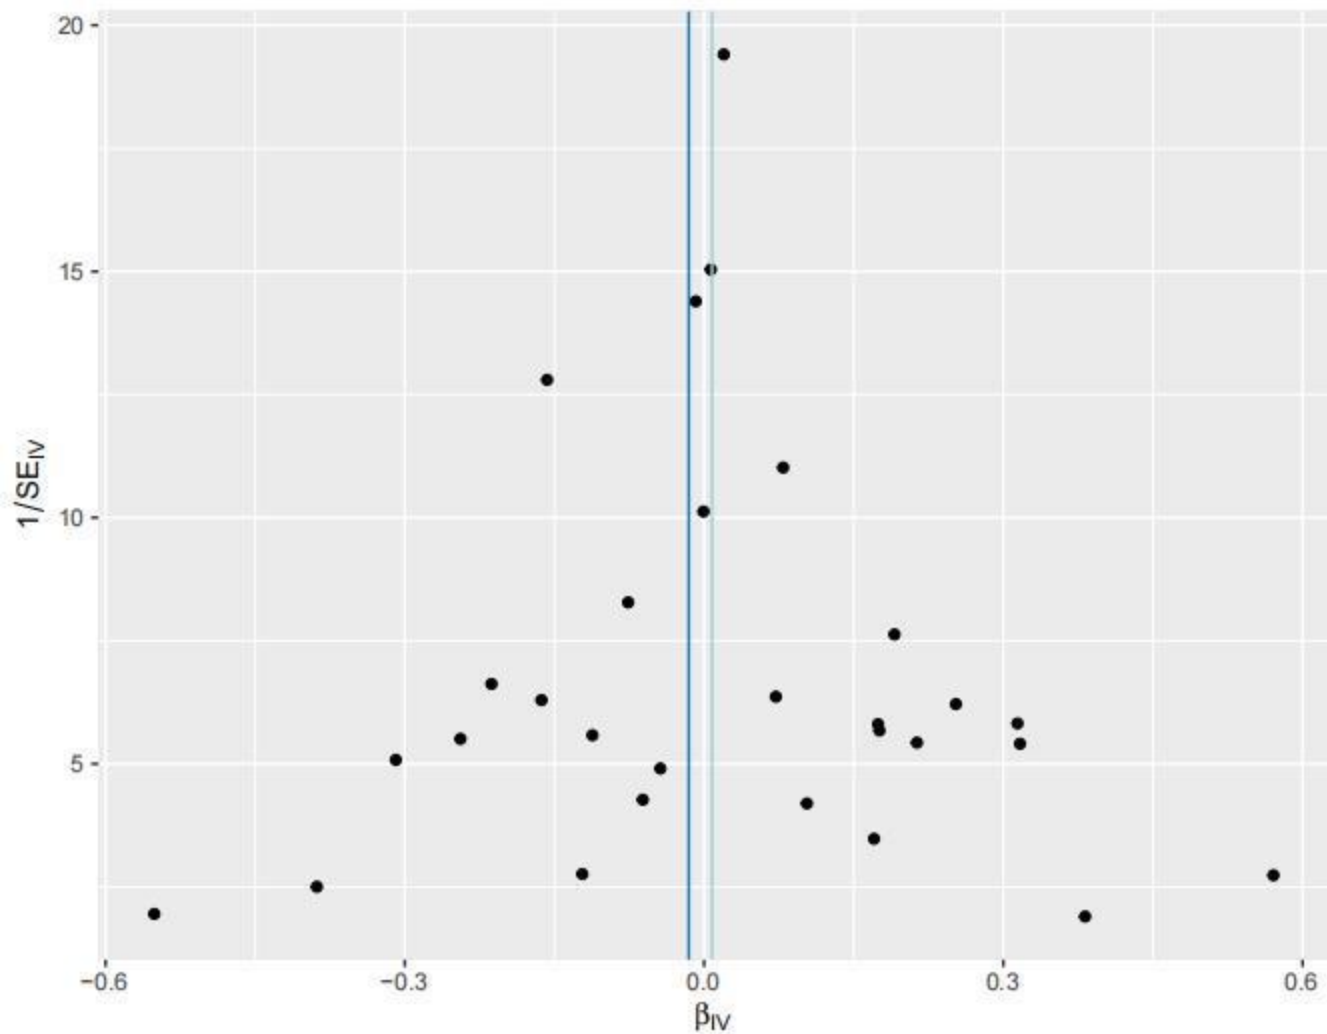

Funnel plot analyse of "EM DN (CD4-CD8-) %DN" on 'Aplastic anemia'

### MR Method

- Inverse variance weighted
- MR Egger

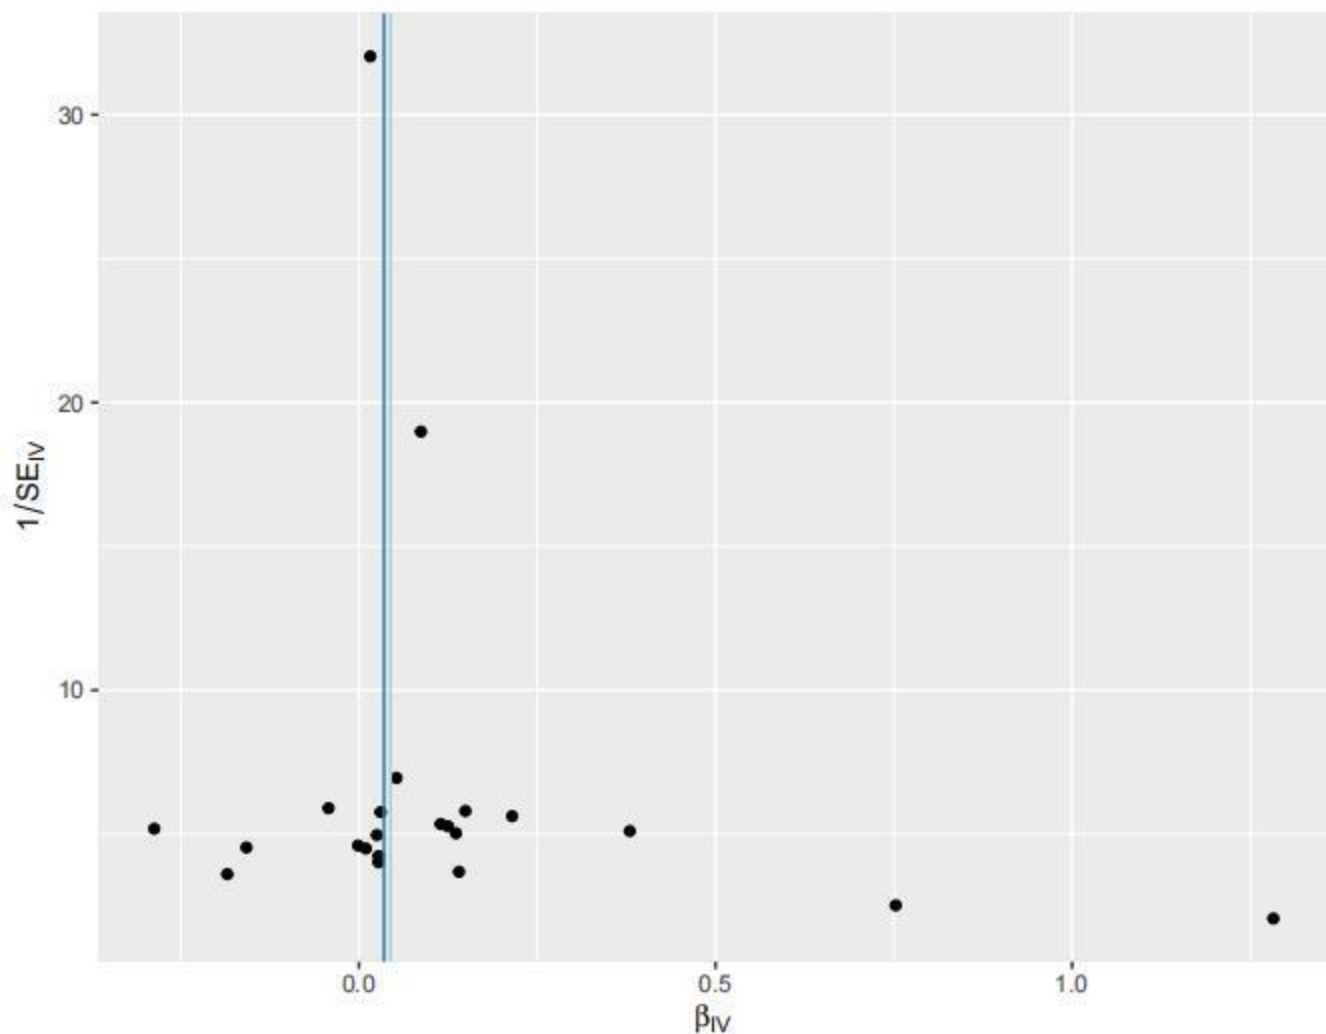

Funnel plot analyse of "Lymphocyte %leukocyte" on 'Aplastic anemia'

MR Method

Inverse variance weighted

MR Egger

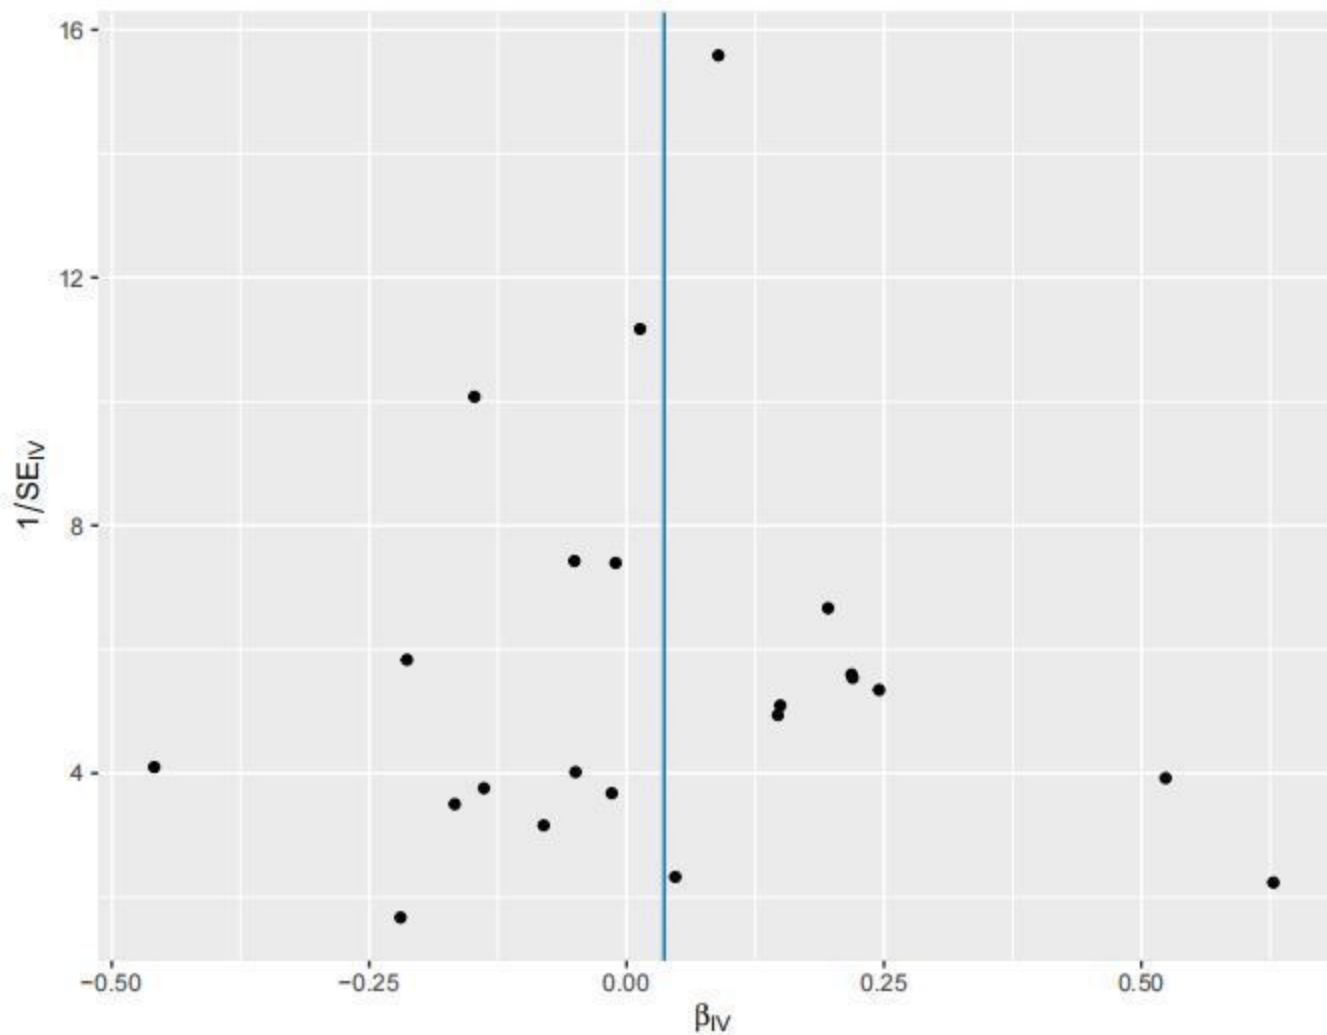

Funnel plot analyse of "CD4+ %T cell" on 'Aplastic anemia'

### MR Method

- Inverse variance weighted
- MR Egger

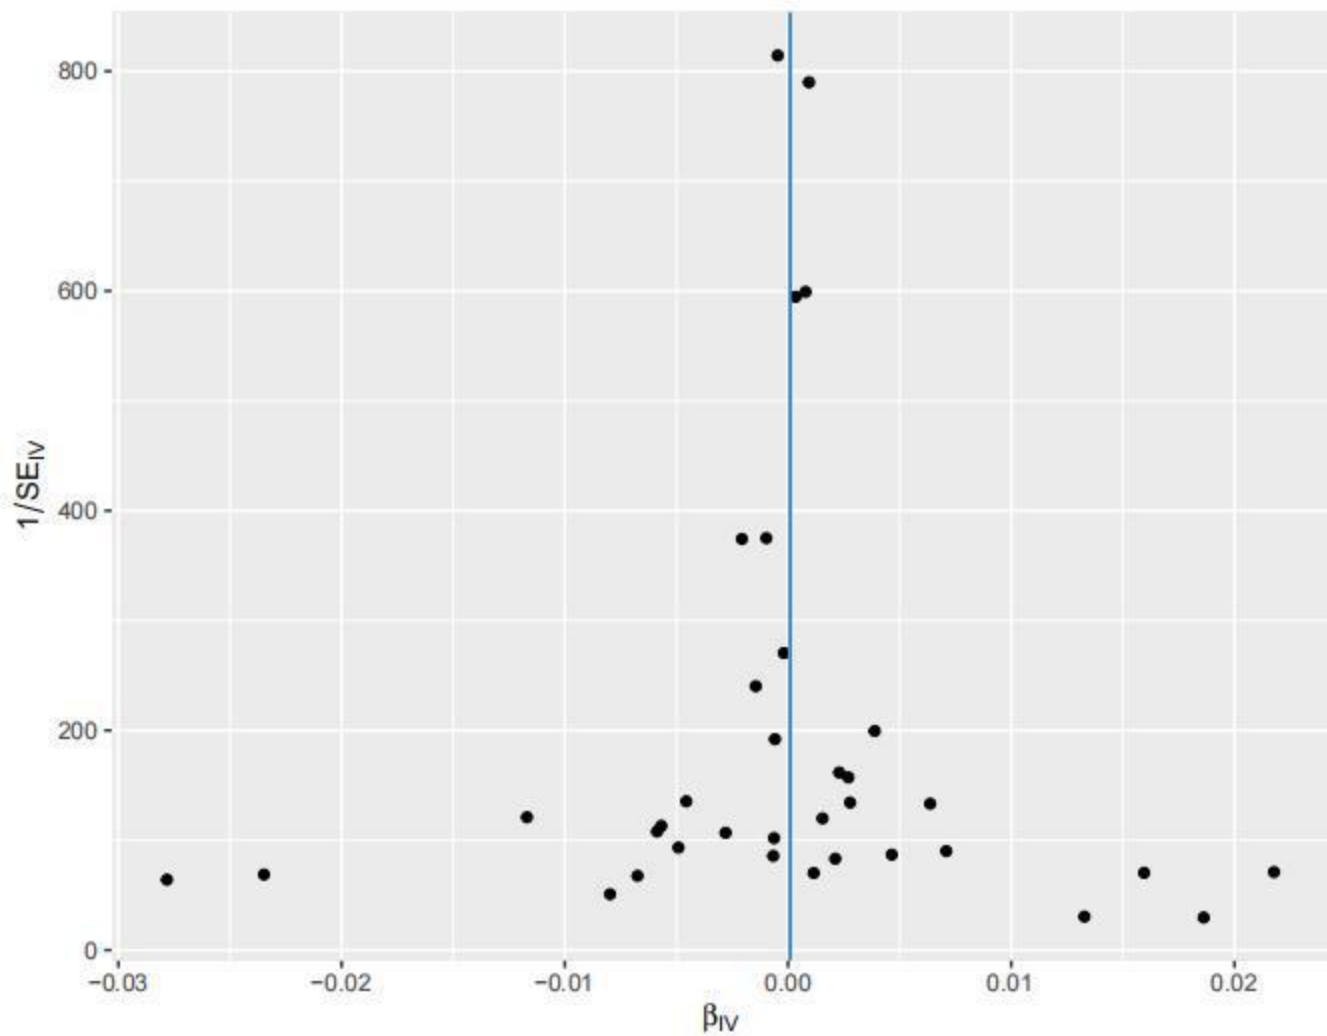

Funnel plot analyse of "CD45RA+ CD28- CD8br %CD8br" on 'Aplastic anemia'

MR Method

- Inverse variance weighted
- MR Egger

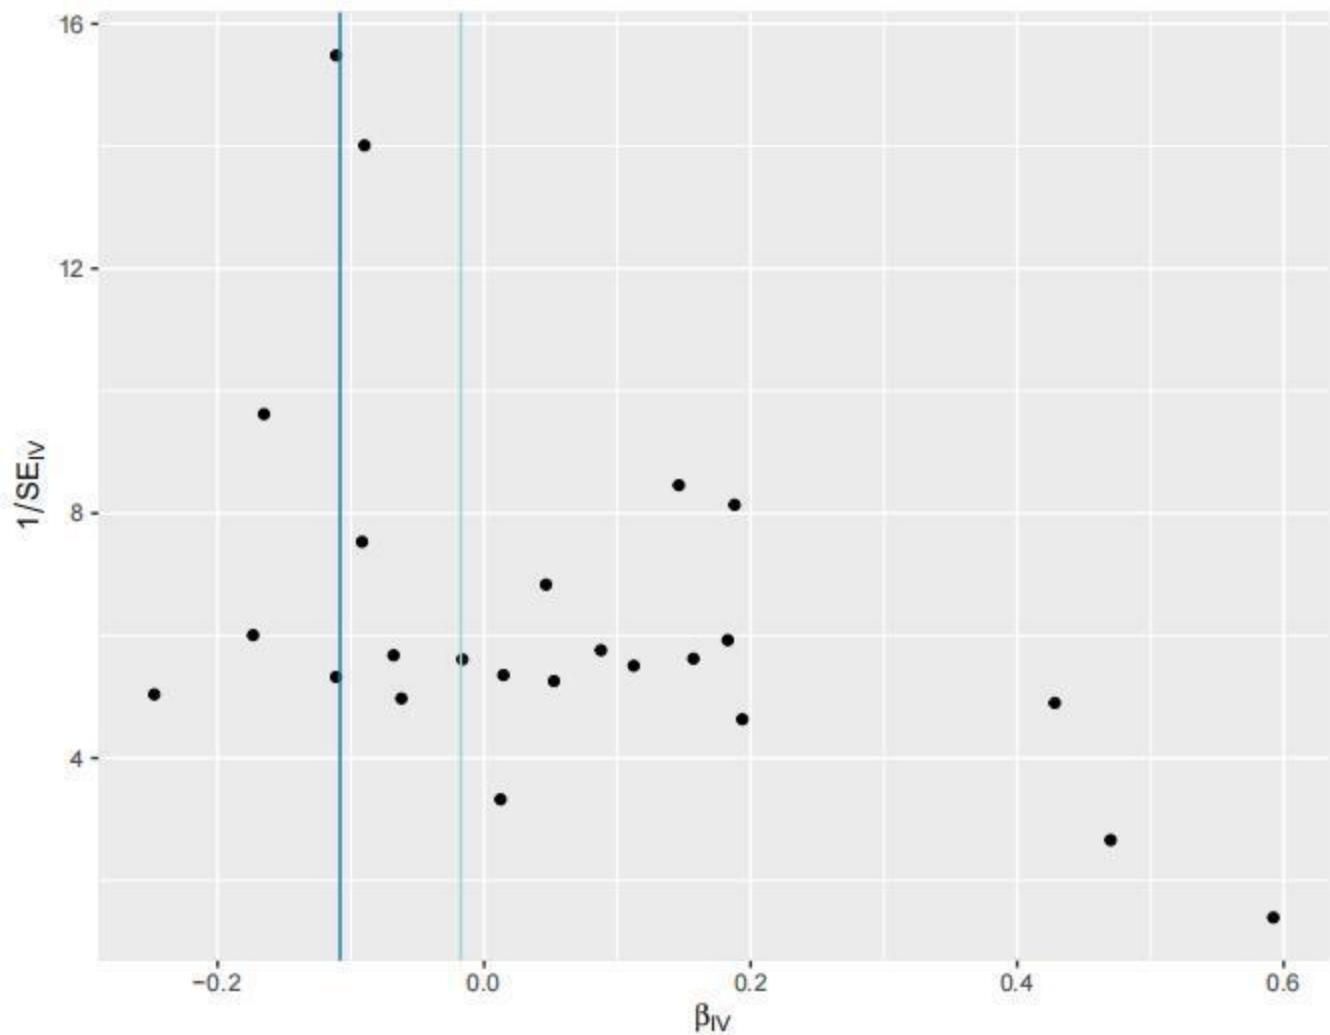

Funnel plot analyse of "CD8 on EM CD8br " on 'Aplastic anemia'



MR Method

- Inverse variance weighted
- MR Egger

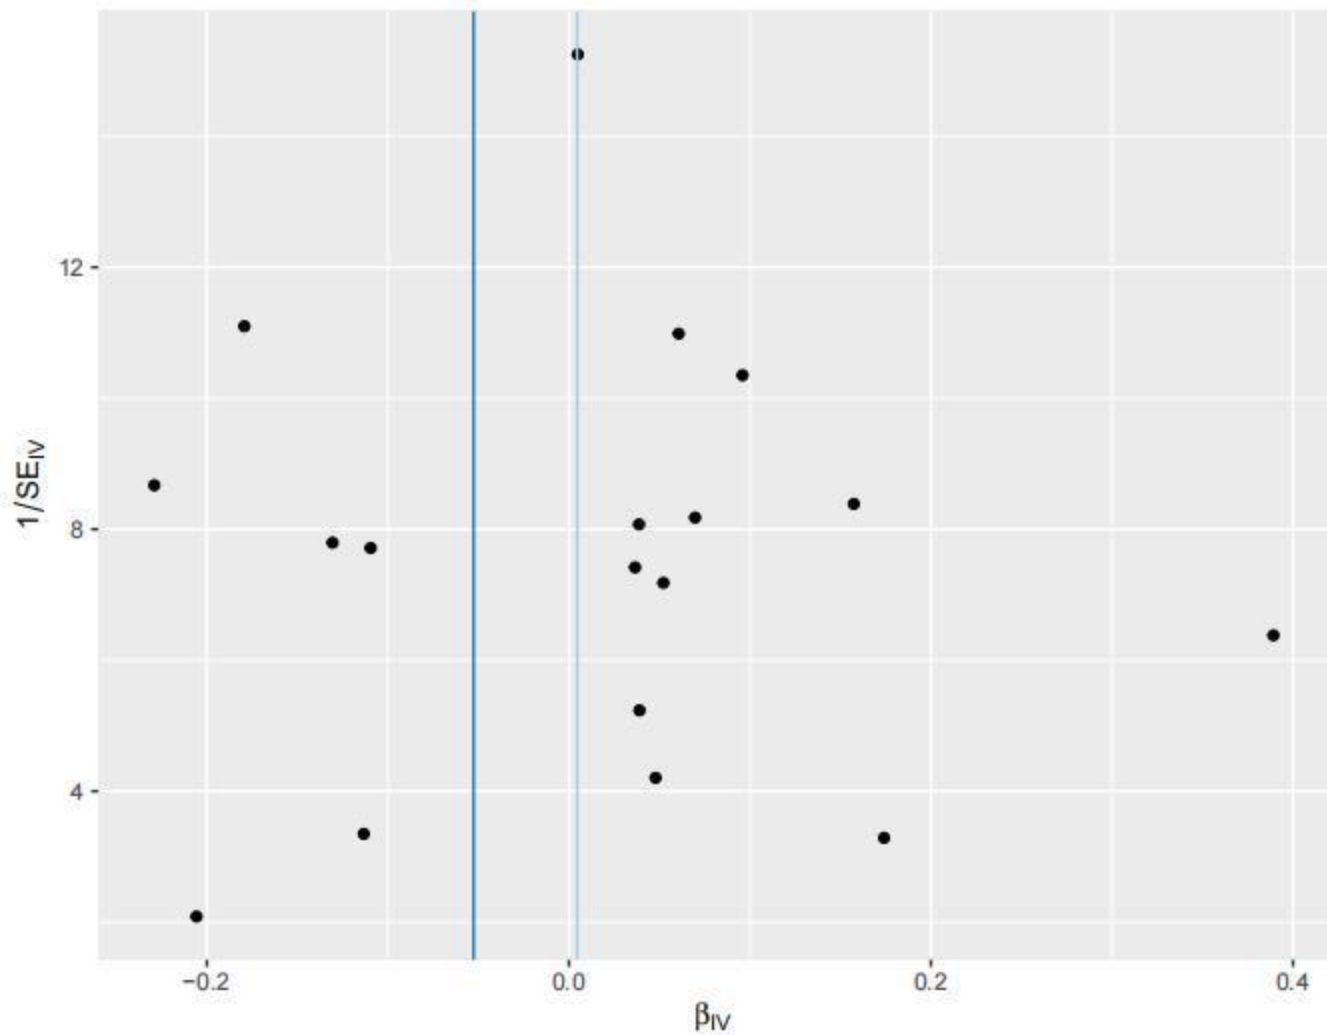

Funnel plot analyse of "CD45 on basophil" on 'Aplastic anemia'

### MR Method

- Inverse variance weighted
- MR Egger

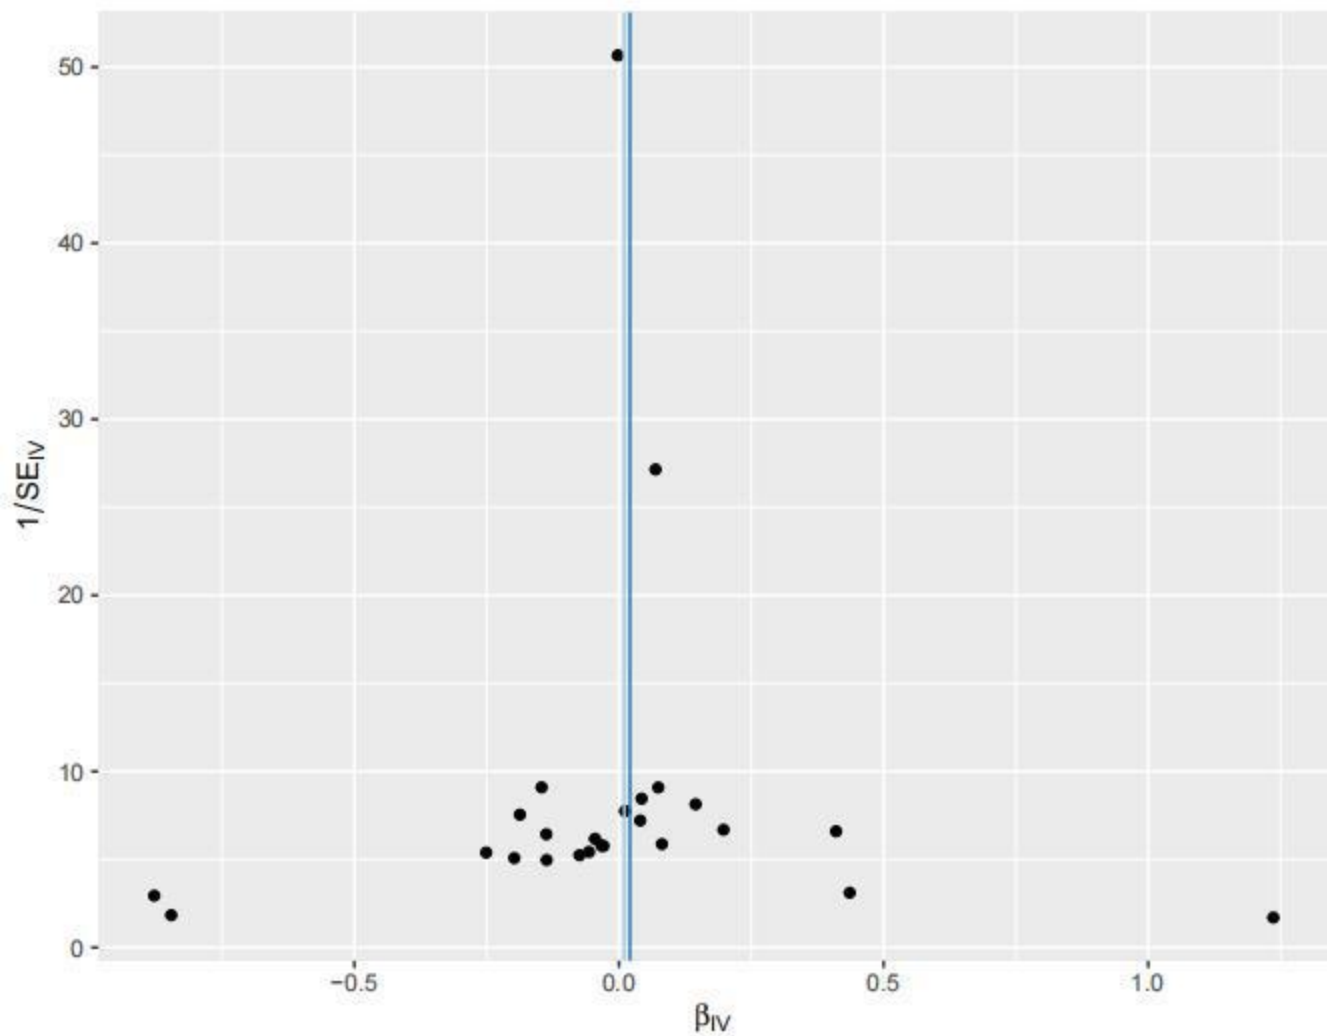

Funnel plot analyse of "CD20 on IgD+ CD24-" on 'Aplastic anemia'

MR Method

- Inverse variance weighted
- MR Egger

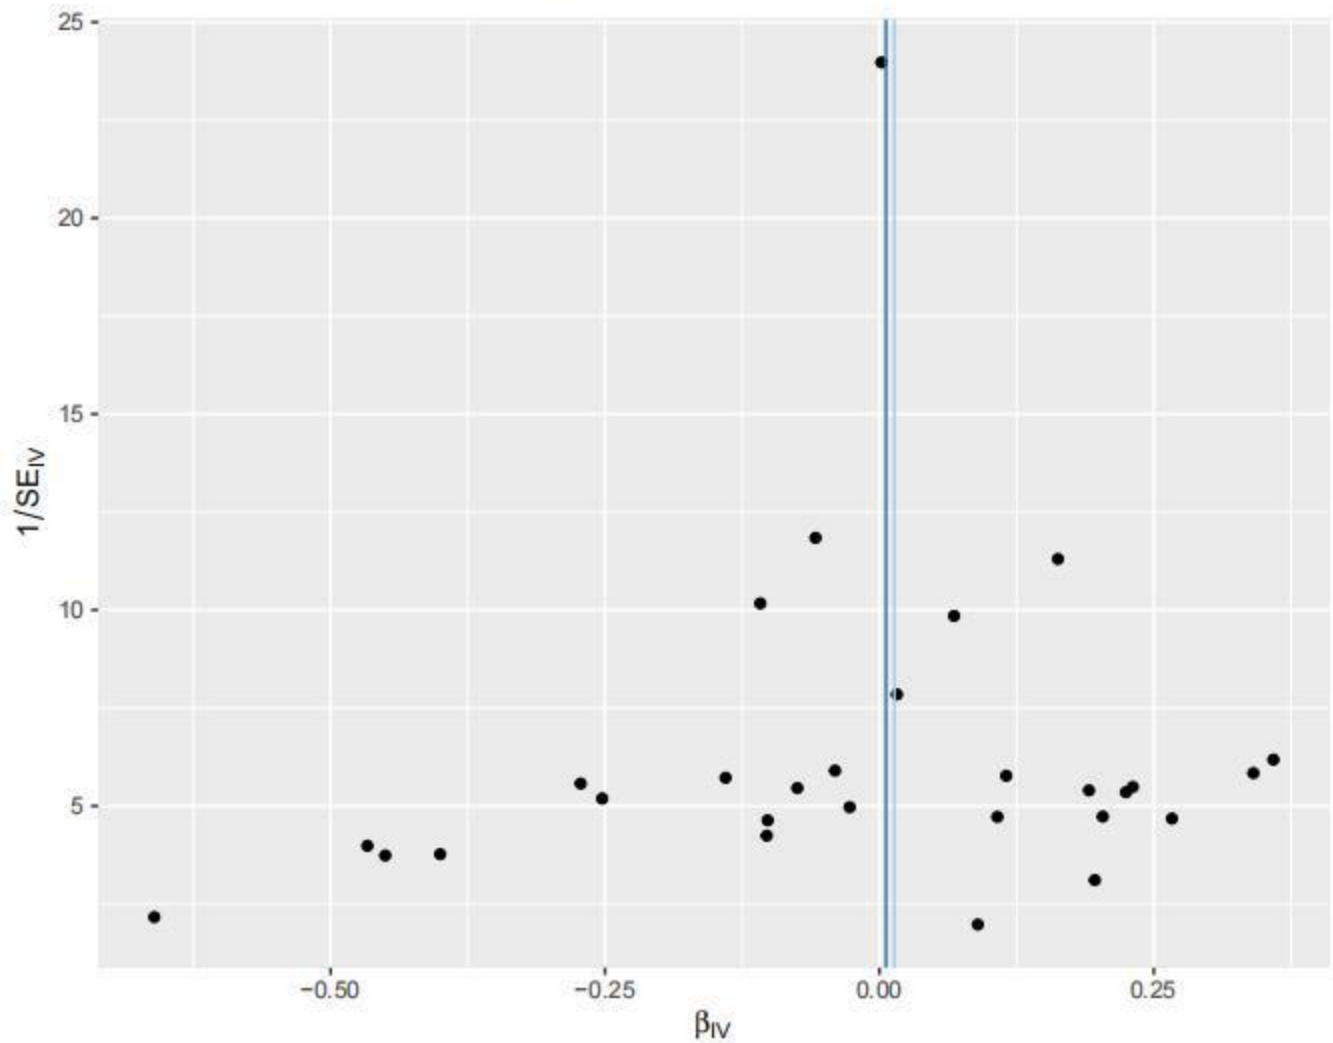

Funnel plot analyse of "CD3 on CD4+ " on 'Aplastic anemia'

### MR Method

Inverse variance weighted

MR Egger

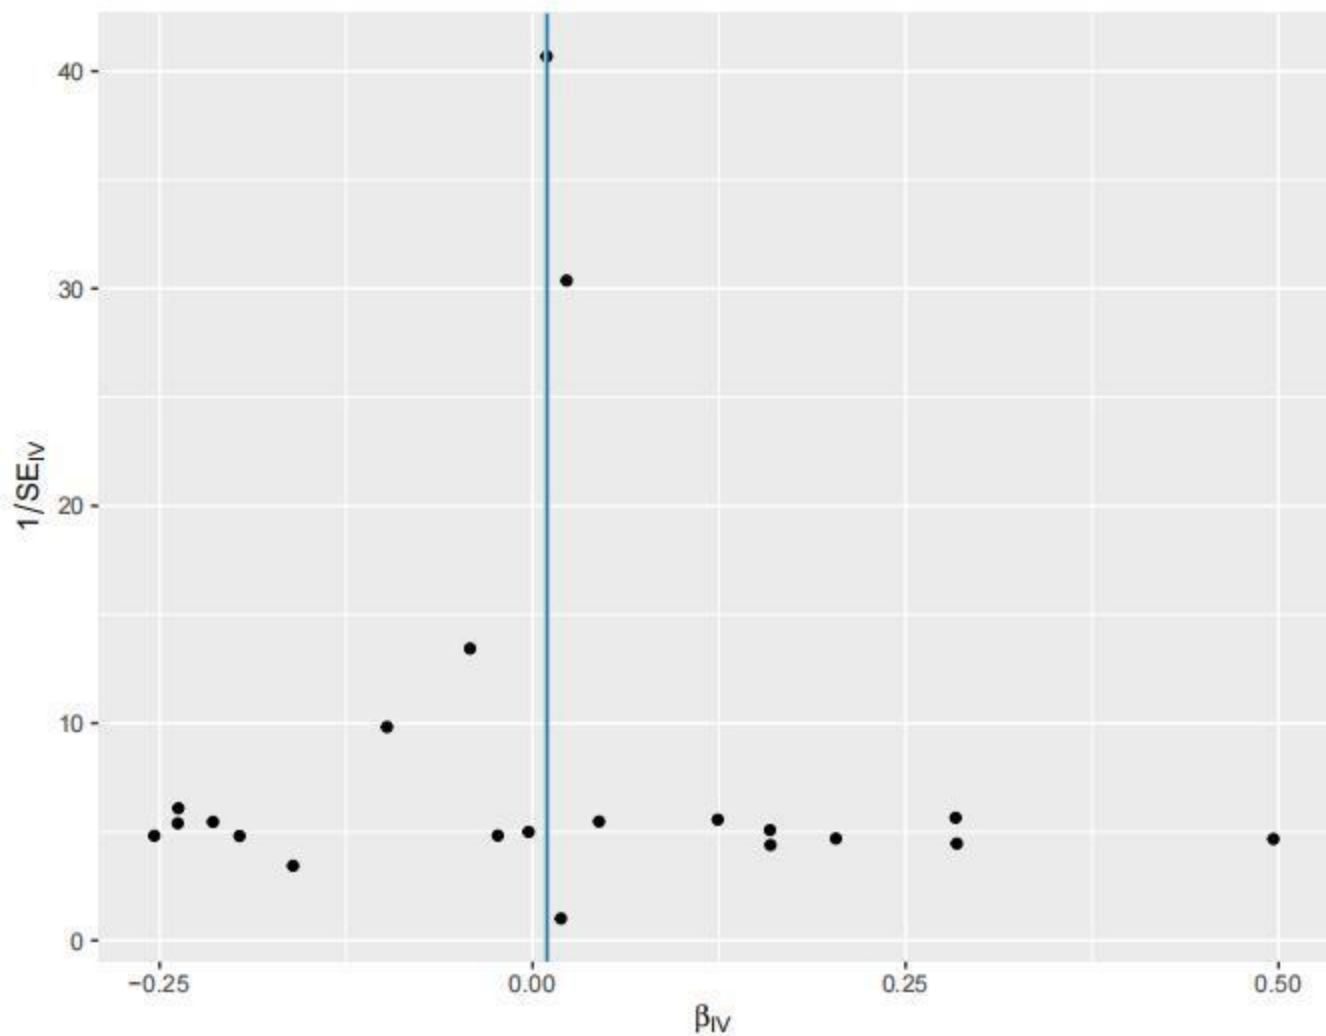

Funnel plot analyse of "TCRgd %lymphocyte" on 'Aplastic anemia'

### MR Method

- Inverse variance weighted
- MR Egger

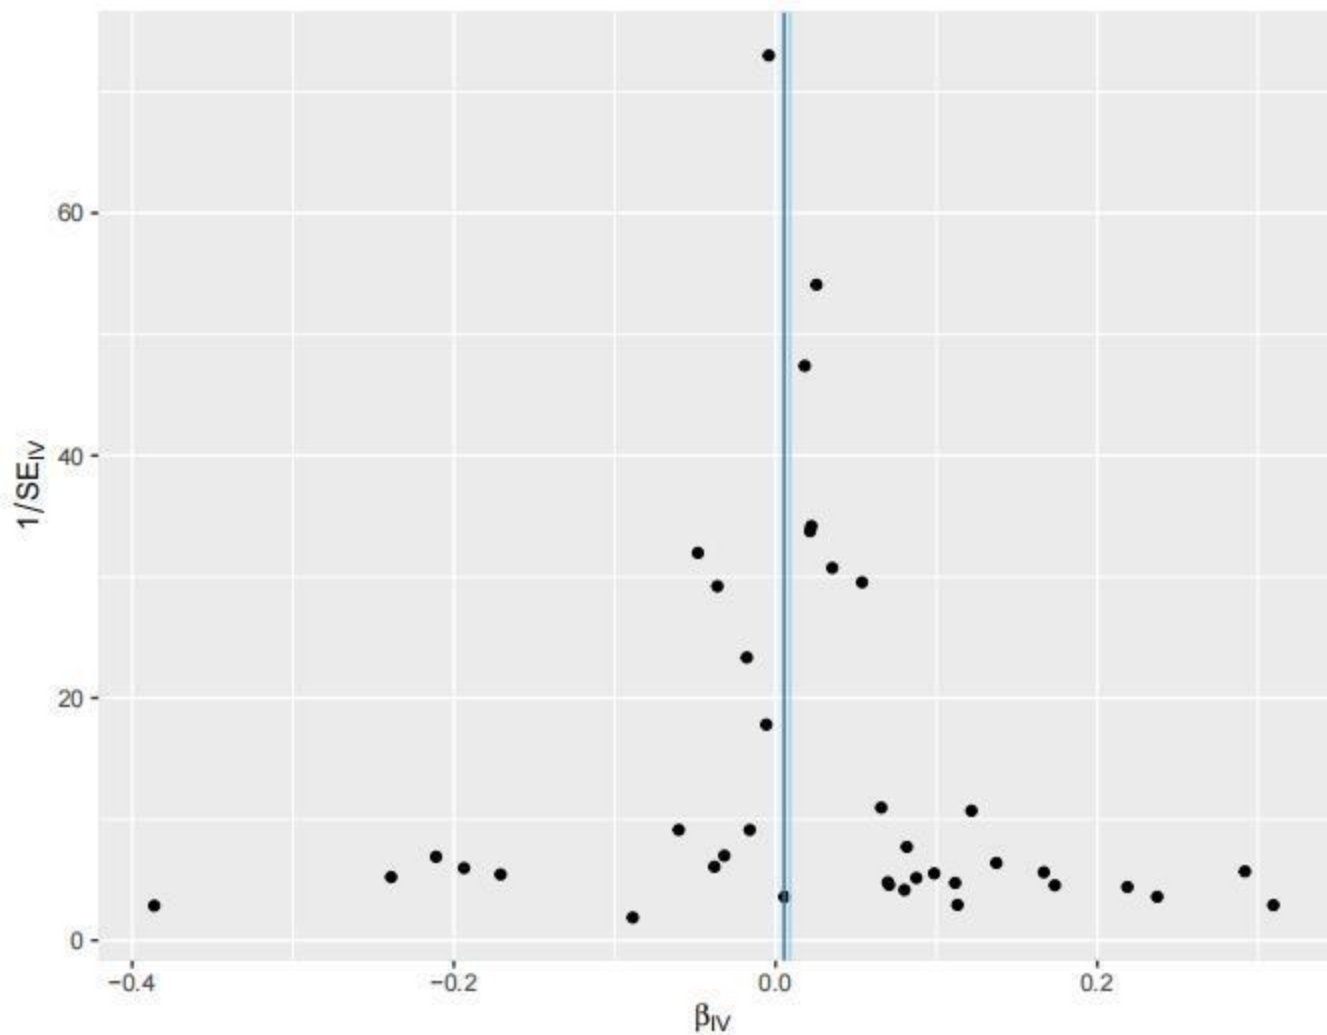

Funnel plot analysis of "CD28+ CD45RA+ CD8dim %T cell" on 'Aplastic anemia'

### MR Method

- Inverse variance weighted
- MR Egger

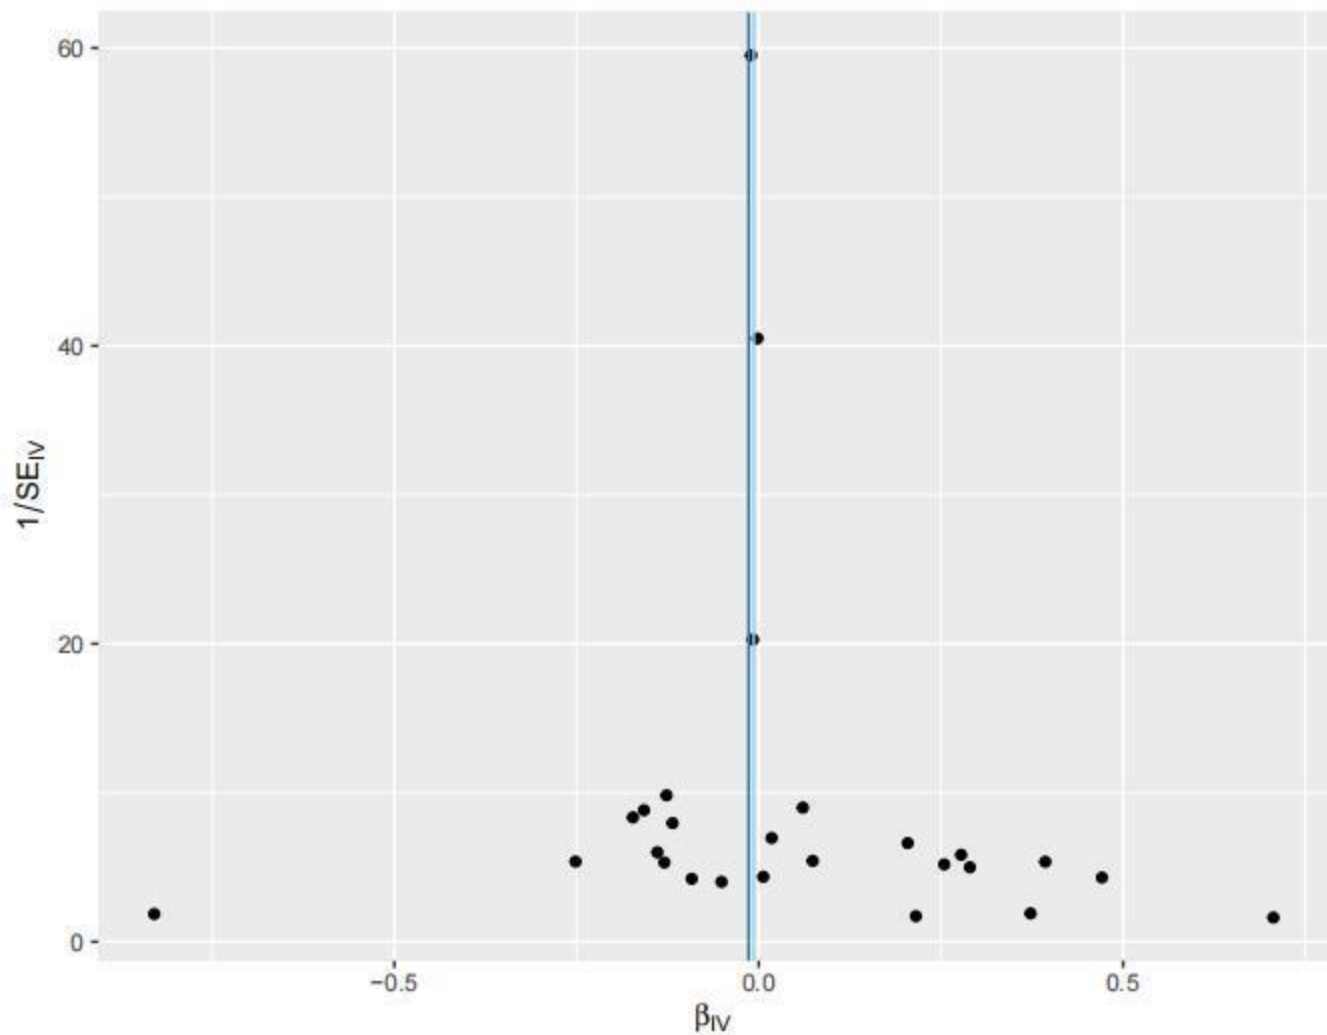

Funnel plot analyse of "CD20 on transitional" on 'Aplastic anemia'

MR Method

- Inverse variance weighted
- MR Egger

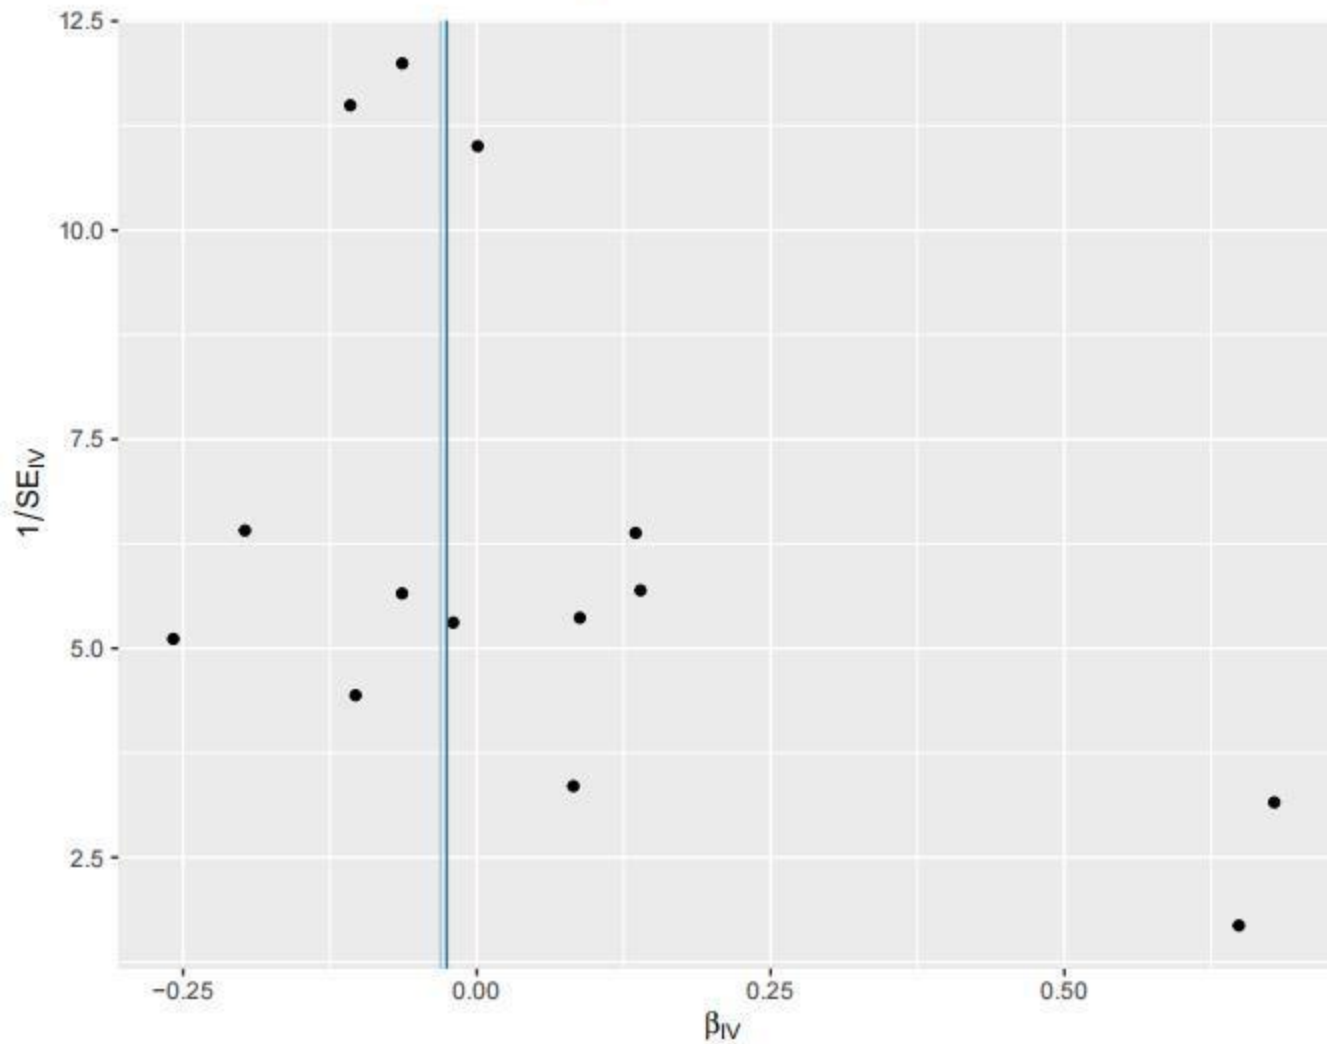

Funnel plot analyse of "Sw mem %B cell" on 'Aplastic anemia'

MR Method

Inverse variance weighted

MR Egger

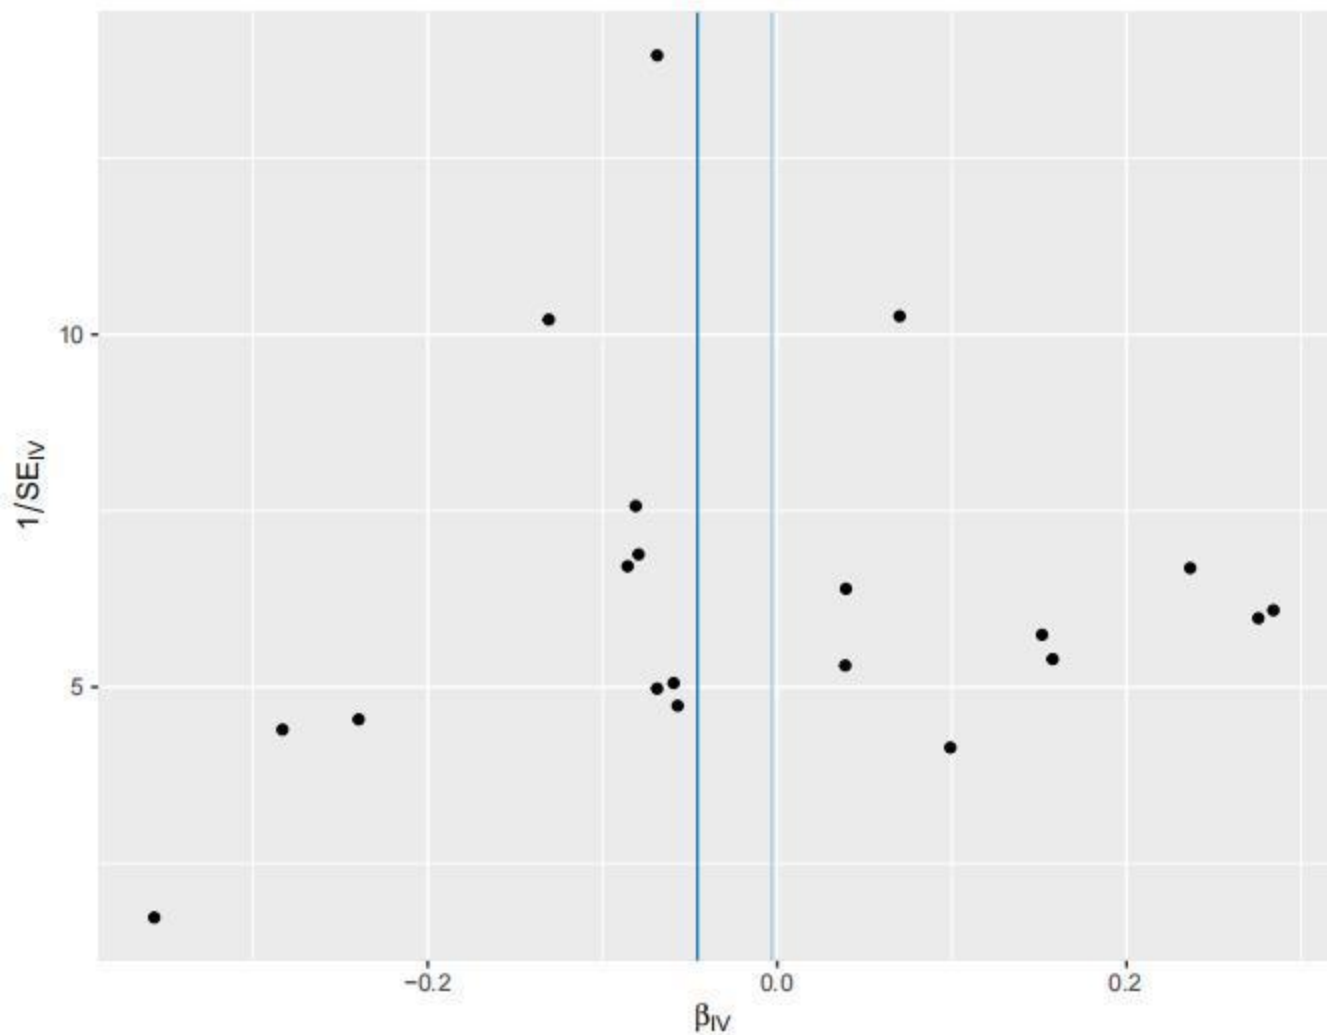

Funnel plot analysis of "FSC-A on B cell" on 'Aplastic anemia'



MR Method

- Inverse variance weighted
- MR Egger

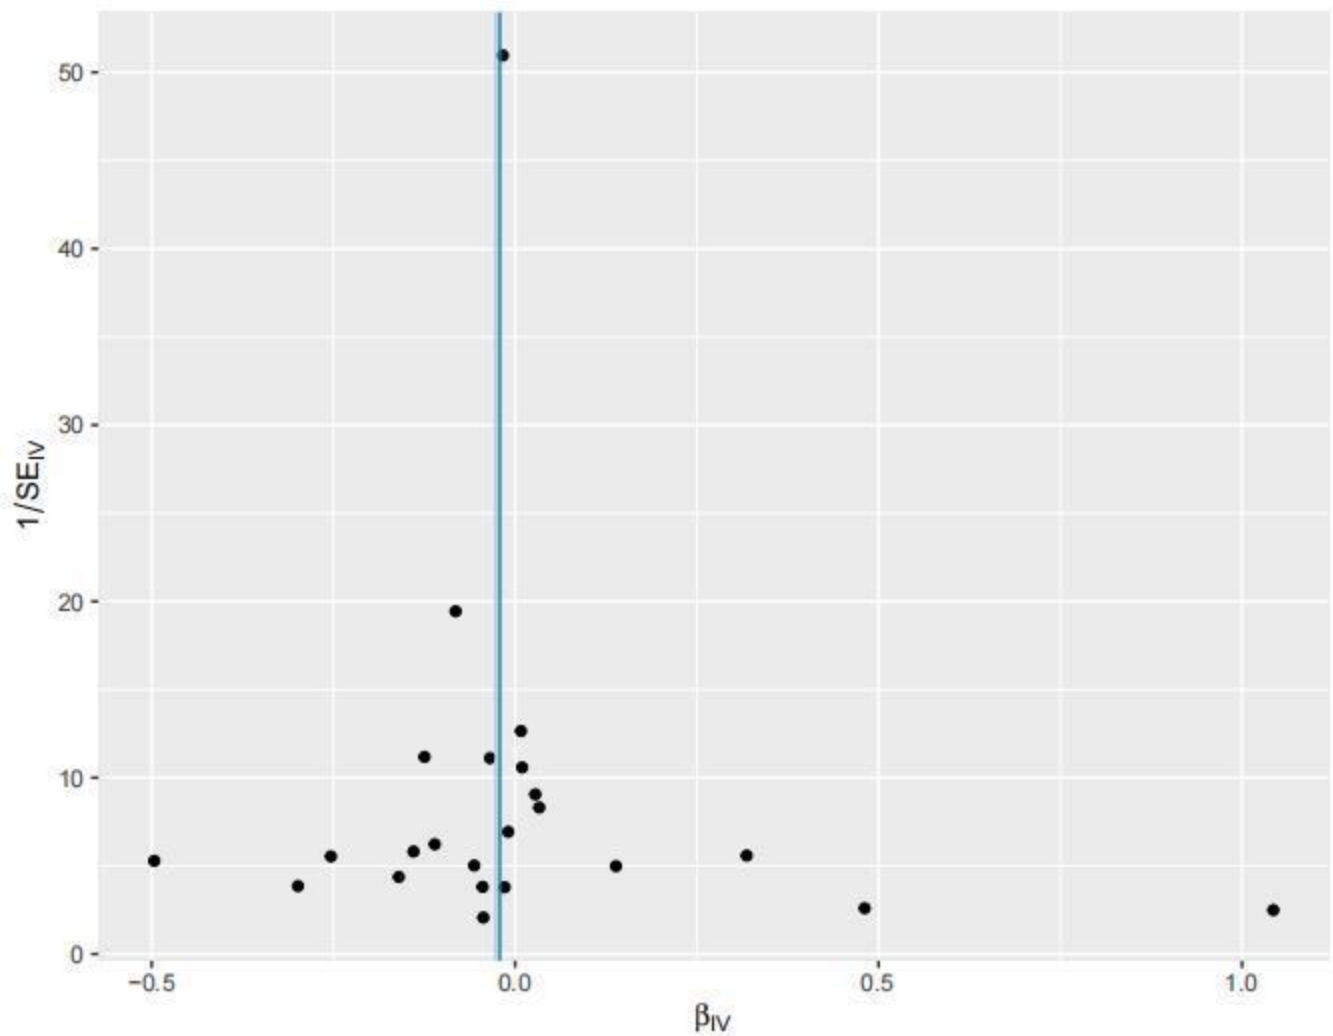

Funnel plot analyse of "EM CD4+ AC" on 'Aplastic anemia'

MR Method

- Inverse variance weighted
- MR Egger

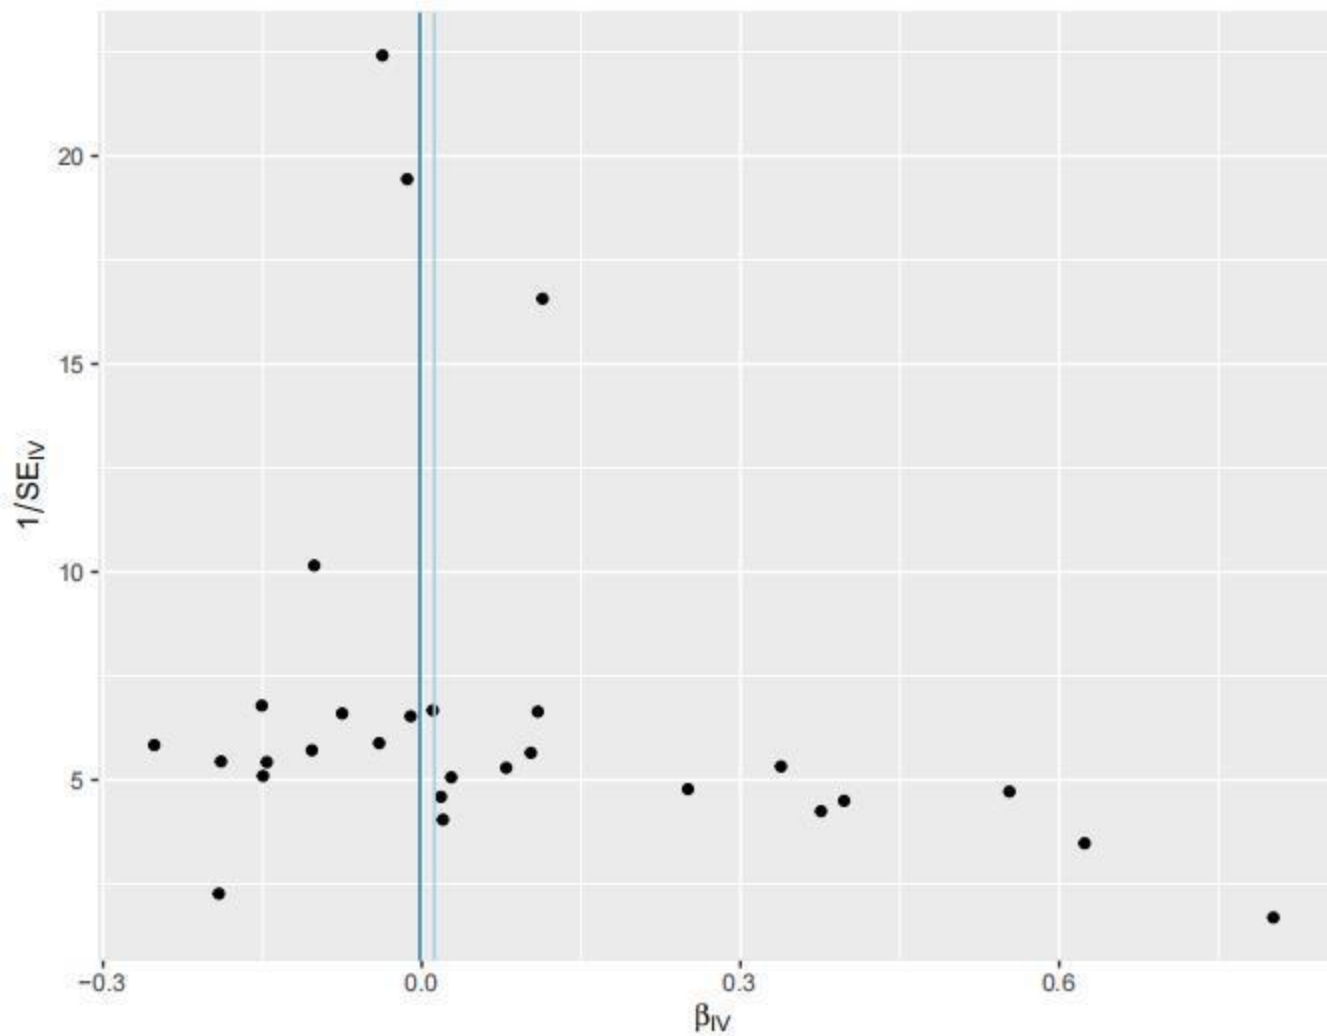

Funnel plot analysis of "Naive-mature B cell %B cell" on 'Aplastic anemia'

MR Method

Inverse variance weighted

MR Egger

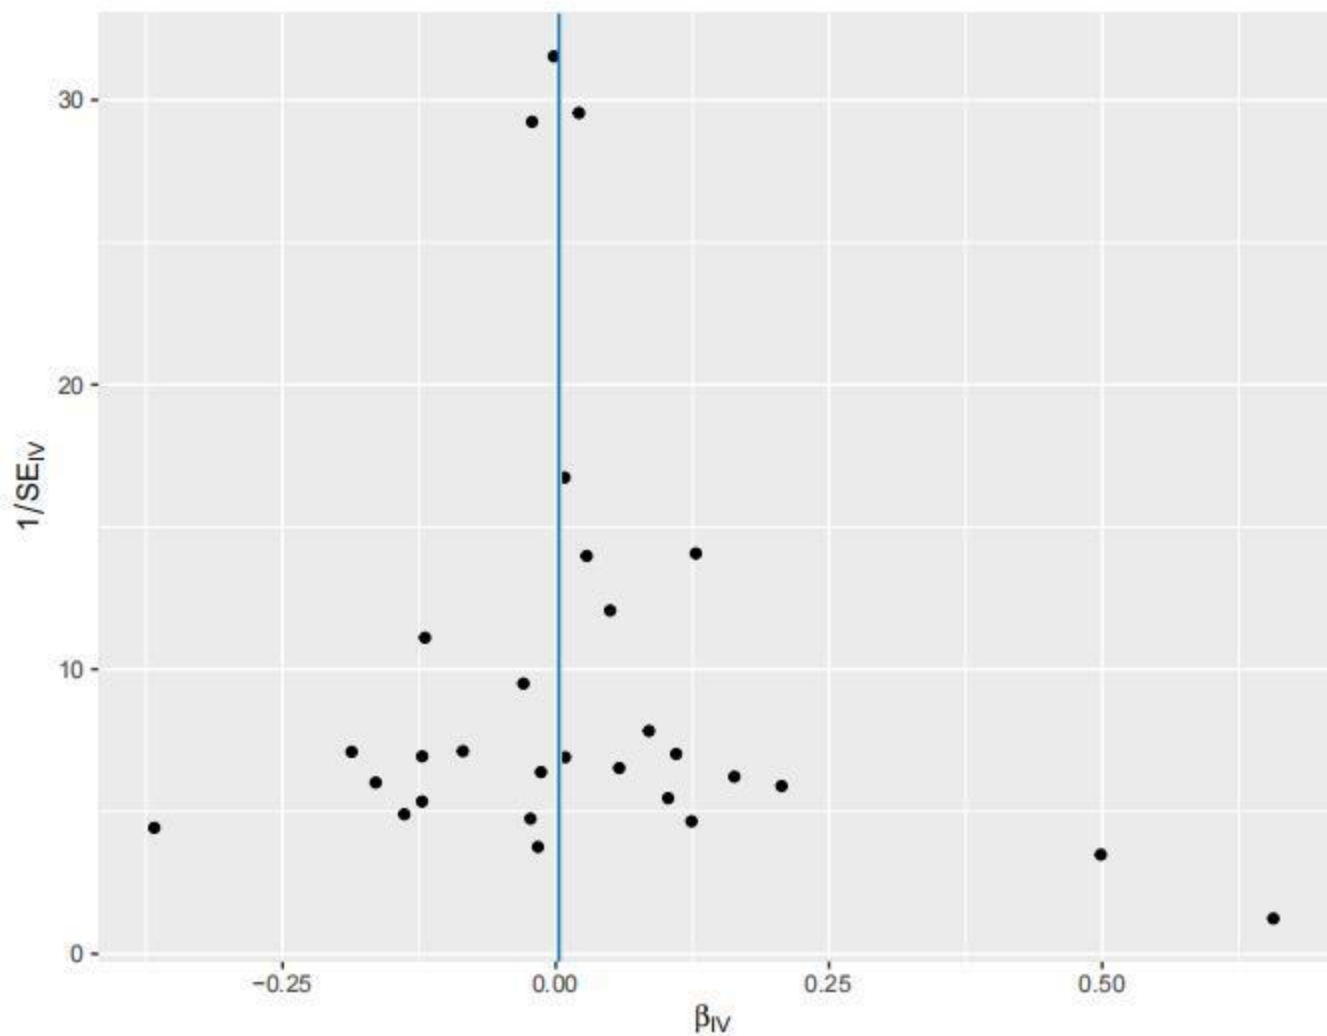

Funnel plot analyse of "CD33br HLA DR+ CD14dim AC" on 'Aplastic anemia'

### MR Method

- Inverse variance weighted
- MR Egger

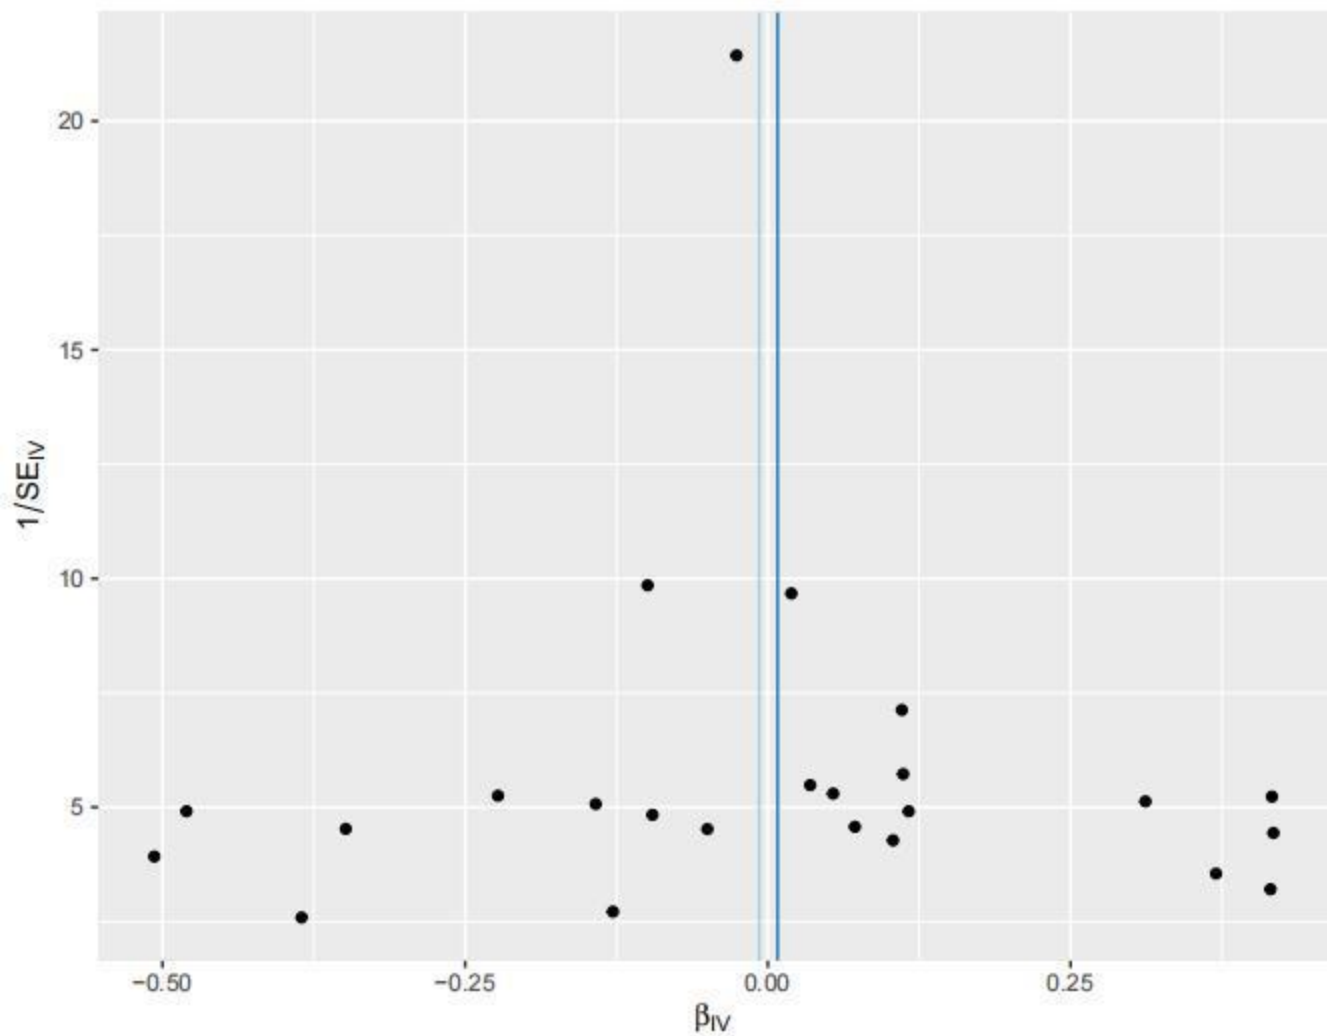

Funnel plot analysis of "CD20- CD38- %lymphocyte" on 'Aplastic anemia'

MR Method

- Inverse variance weighted
- MR Egger

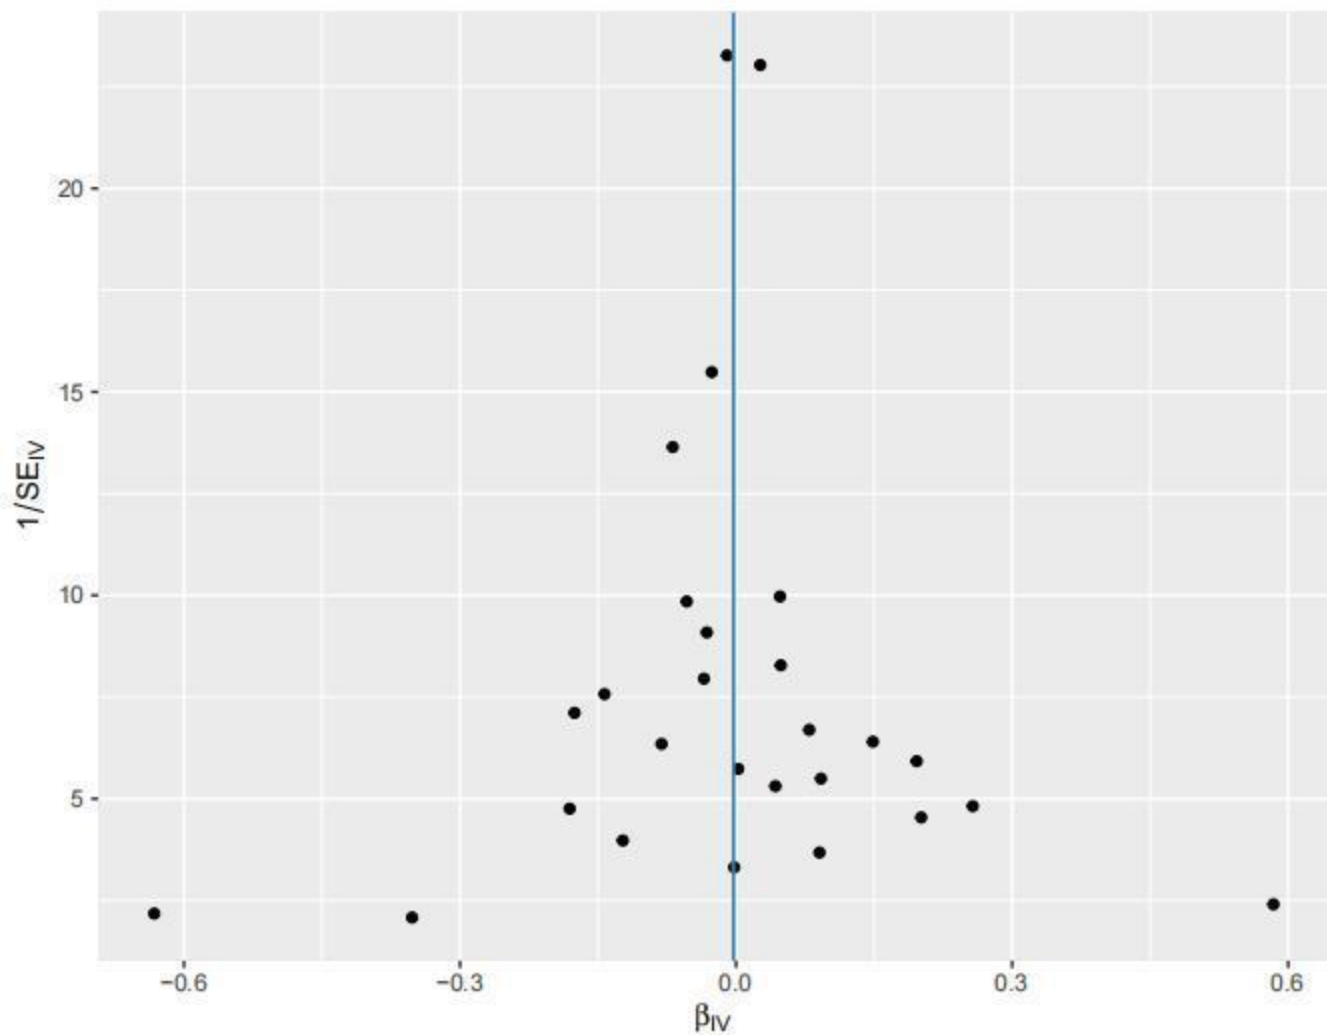

Funnel plot analyse of "CD25hi CD45RA+ CD4 not Treg AC" on 'Aplastic anemia'

MR Method

- Inverse variance weighted
- MR Egger

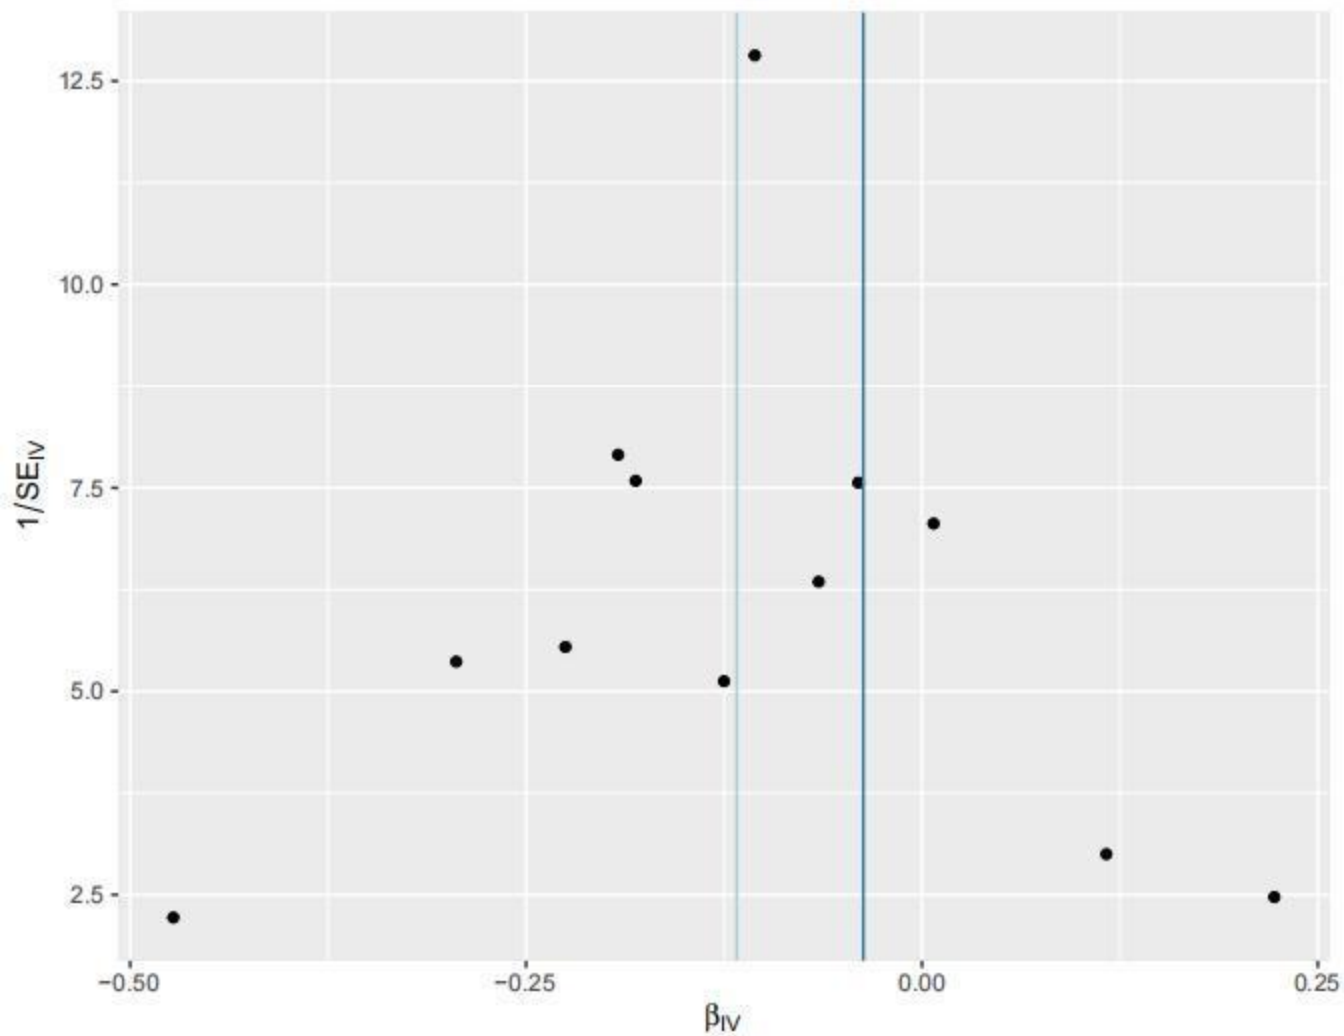

Funnel plot analyse of "TD CD4+ AC" on 'Aplastic anemia'

### MR Method

- Inverse variance weighted
- MR Egger

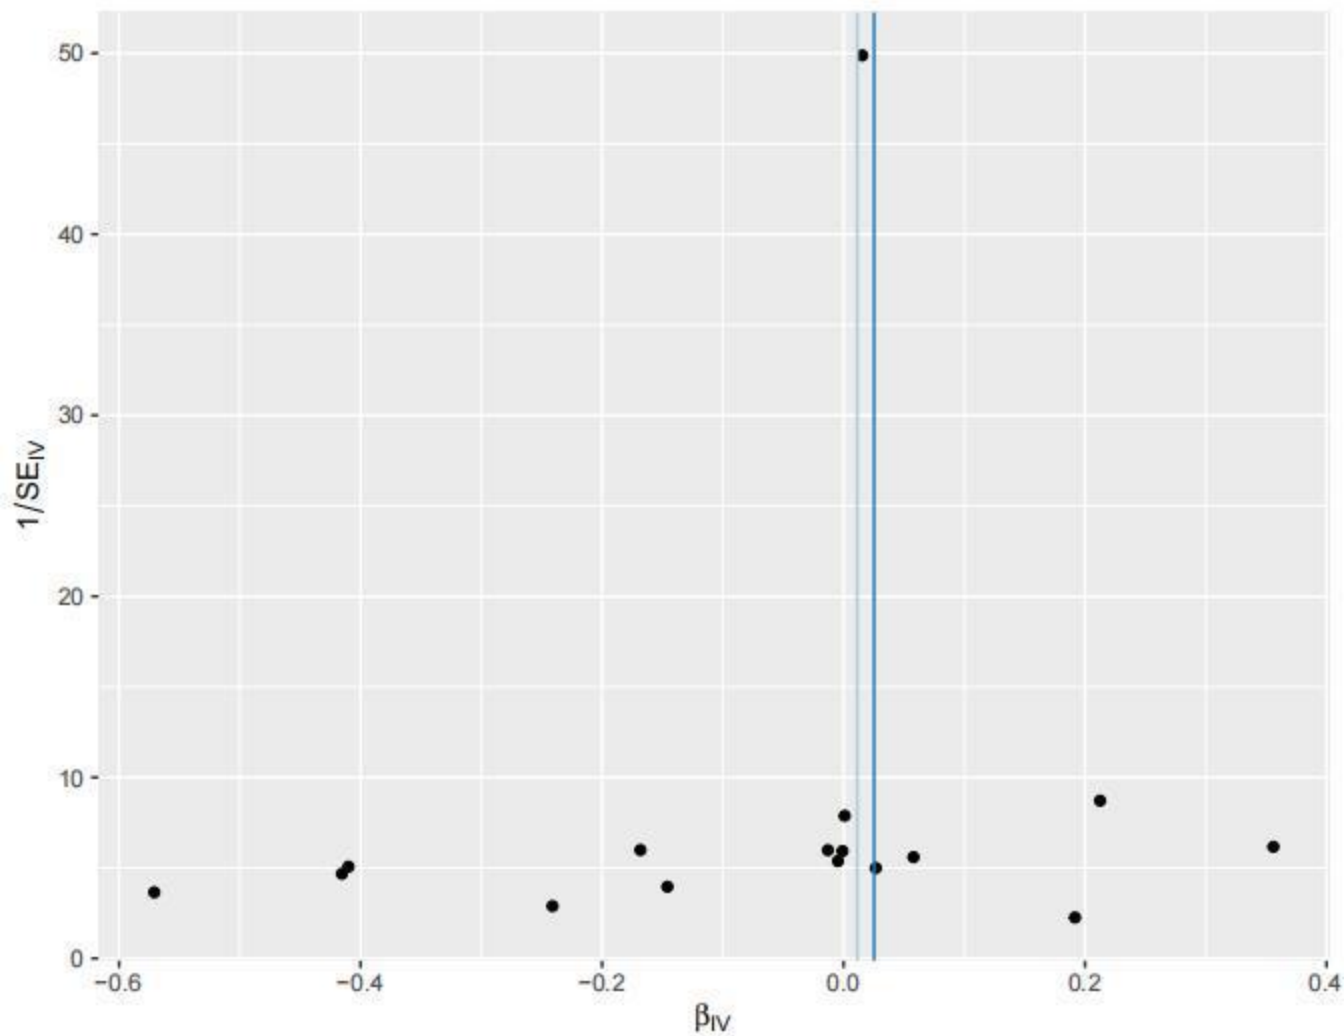

Funnel plot analyse of "Memory B cell AC" on 'Aplastic anemia'

### MR Method

Inverse variance weighted

MR Egger

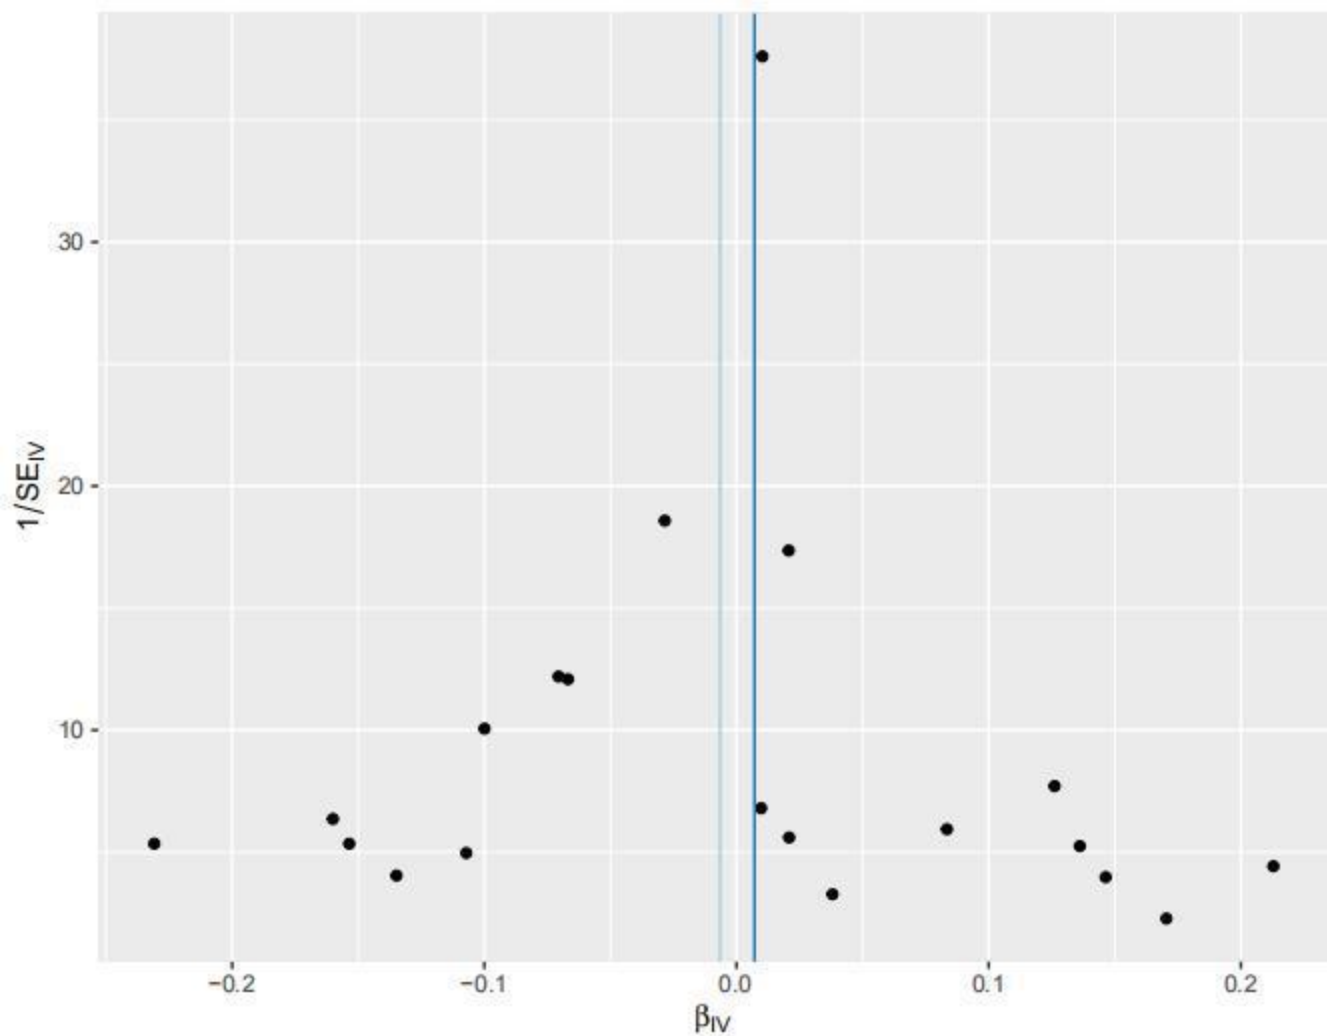

Funnel plot analyse of "BAFF-R on CD24+ CD27+" on 'Aplastic anemia'



MR Method

Inverse variance weighted

MR Egger

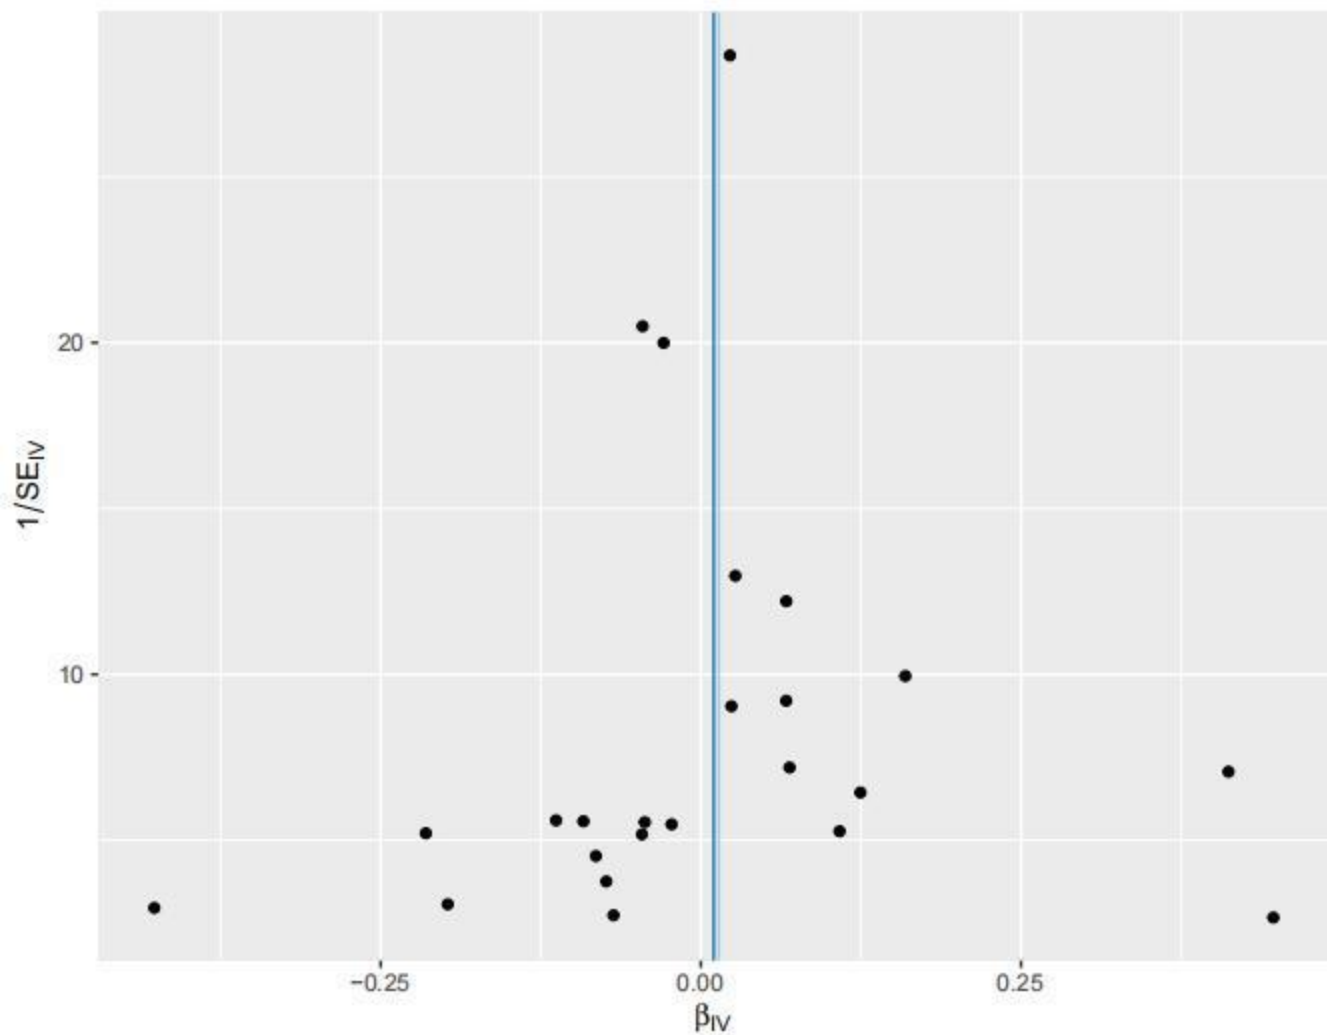

Funnel plot analyse of "CD28 on activated & secreting Treg" on 'Aplastic anemia'

MR Method

Inverse variance weighted

MR Egger

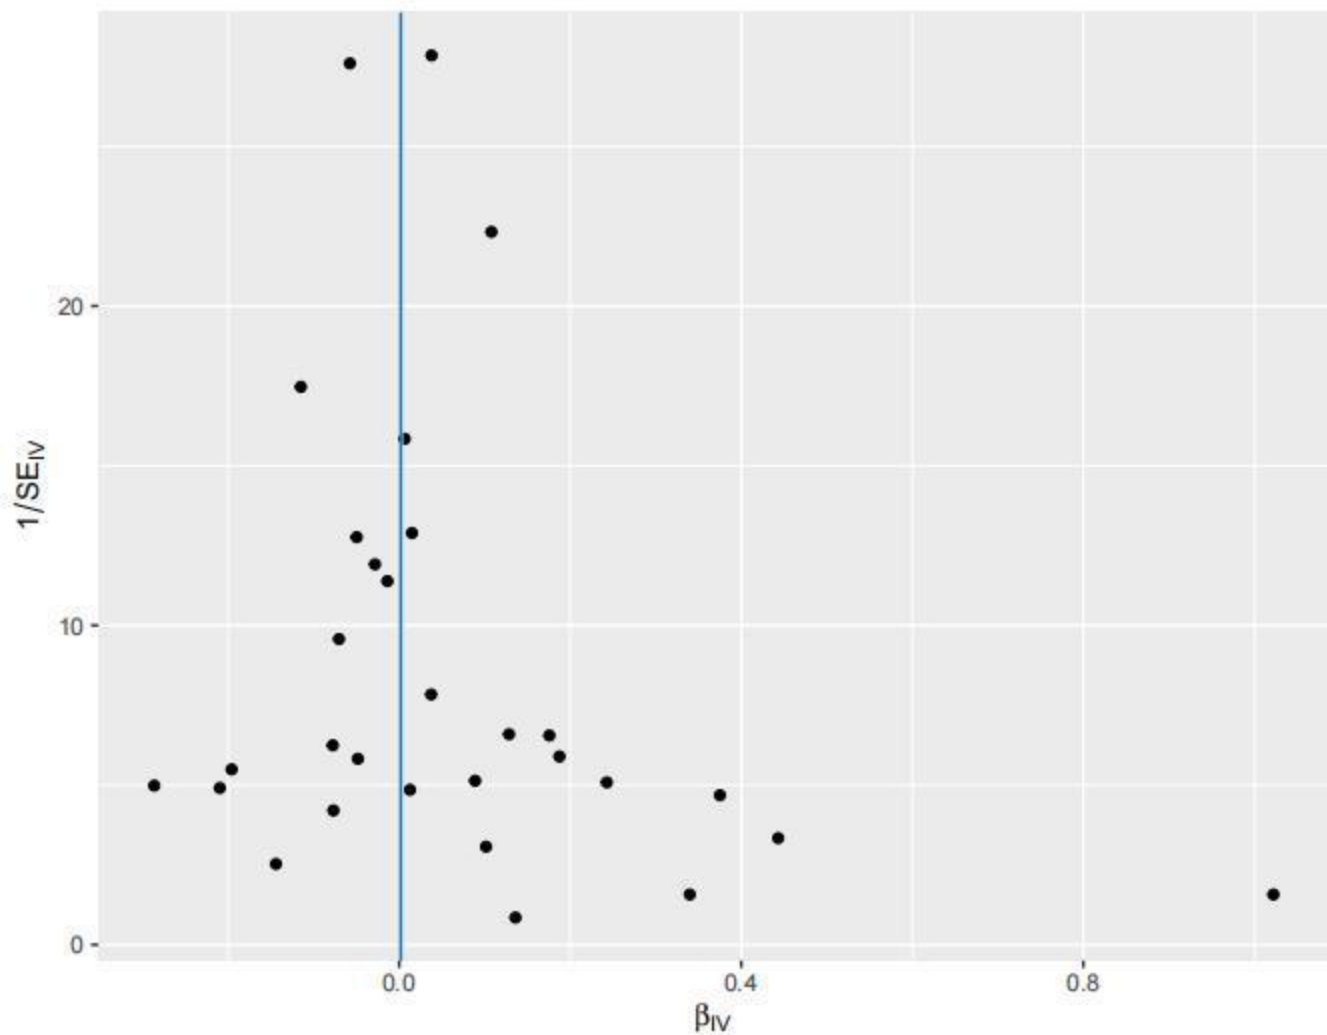

Funnel plot analyse of "CD28+ CD45RA- CD8dim %CD8dim" on 'Aplastic anemia'

MR Method

- Inverse variance weighted
- MR Egger

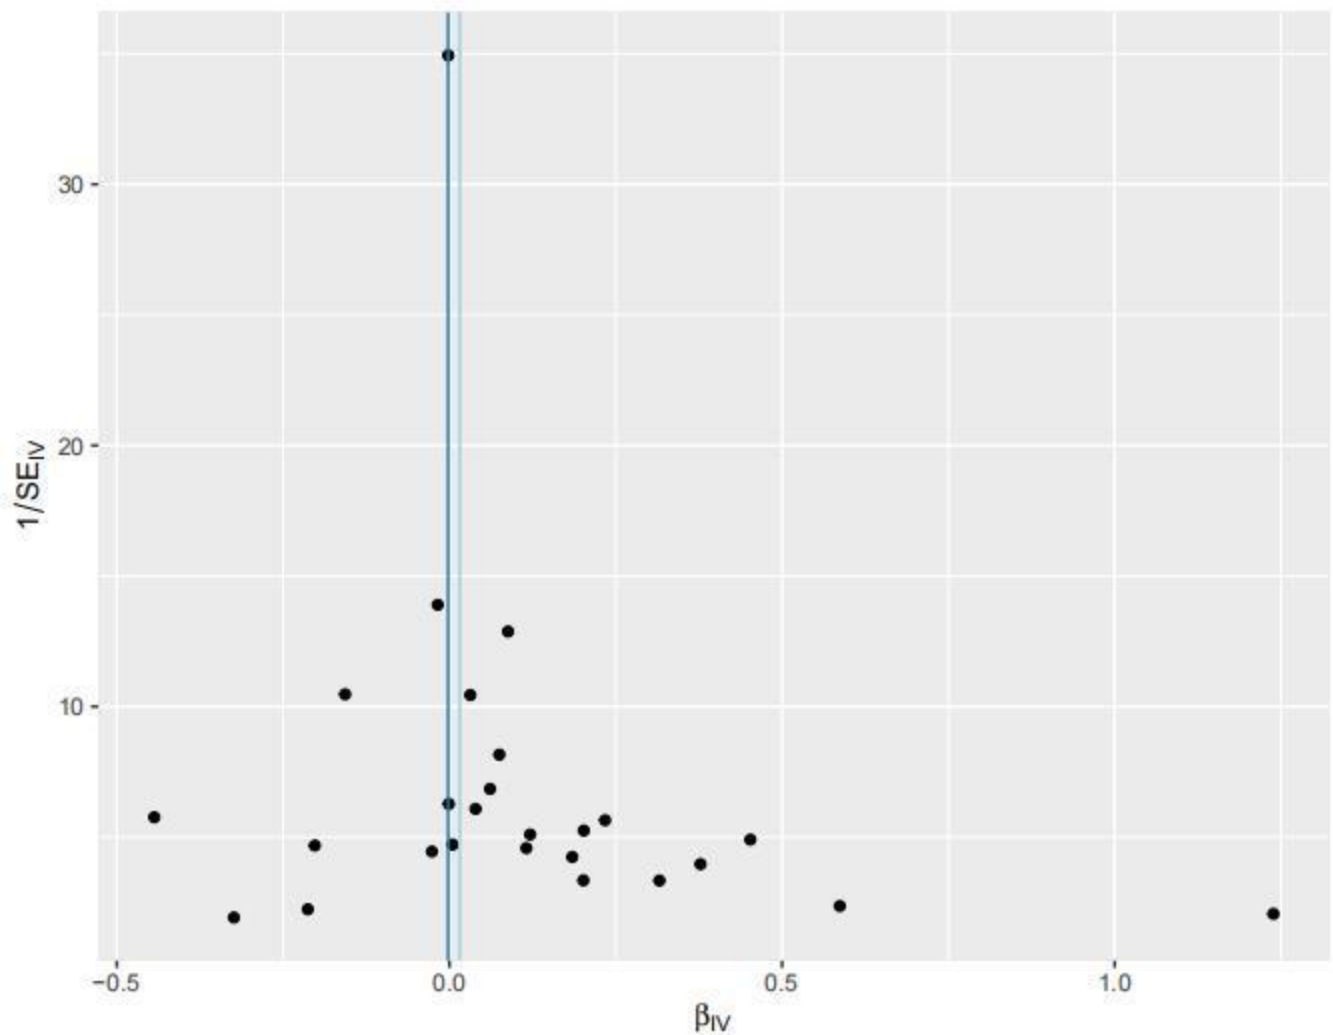

Funnel plot analyse of "CD25 on B cell" on 'Aplastic anemia'

### MR Method

- Inverse variance weighted
- MR Egger

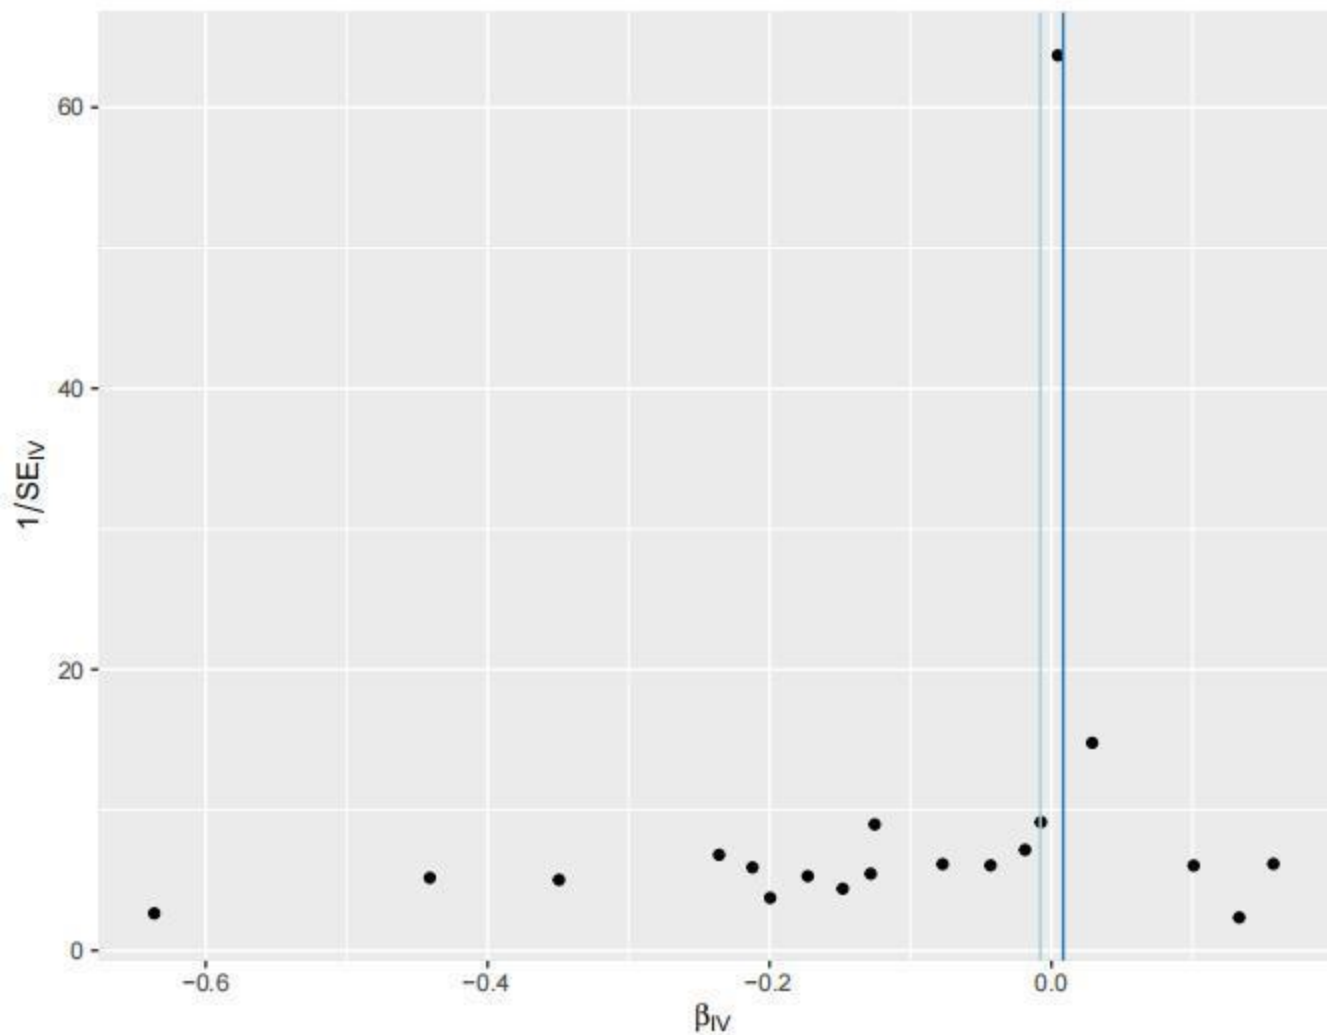

Funnel plot analyse of "SSC-A on myeloid DC " on 'Aplastic anemia'

### MR Method

- Inverse variance weighted
- MR Egger

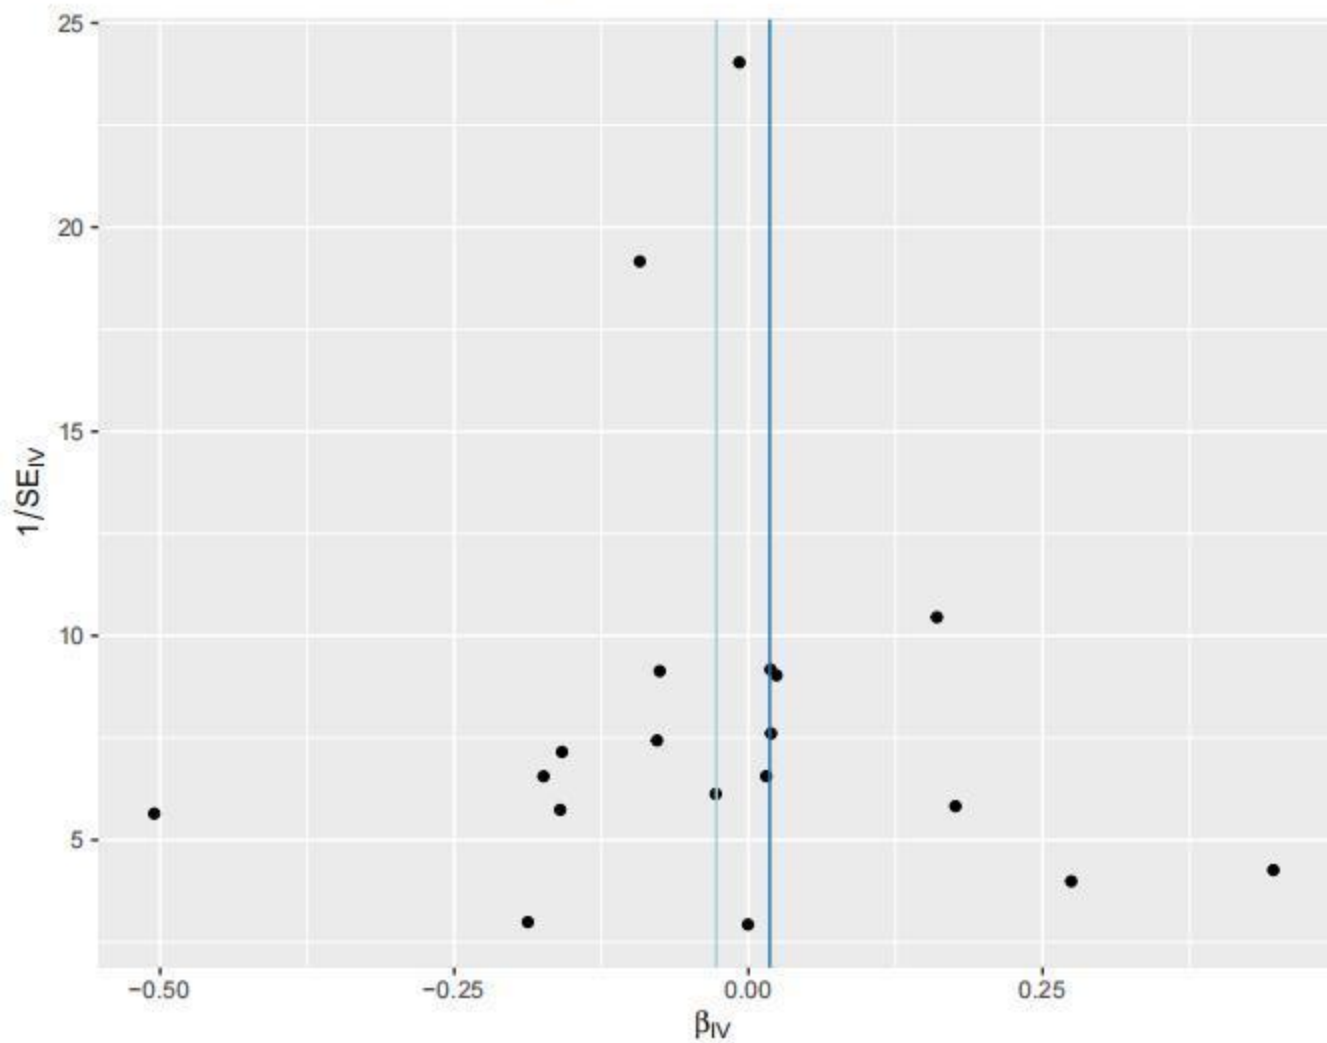

Funnel plot analyse of "CD3 on EM CD4+ " on 'Aplastic anemia'

MR Method

- Inverse variance weighted
- MR Egger

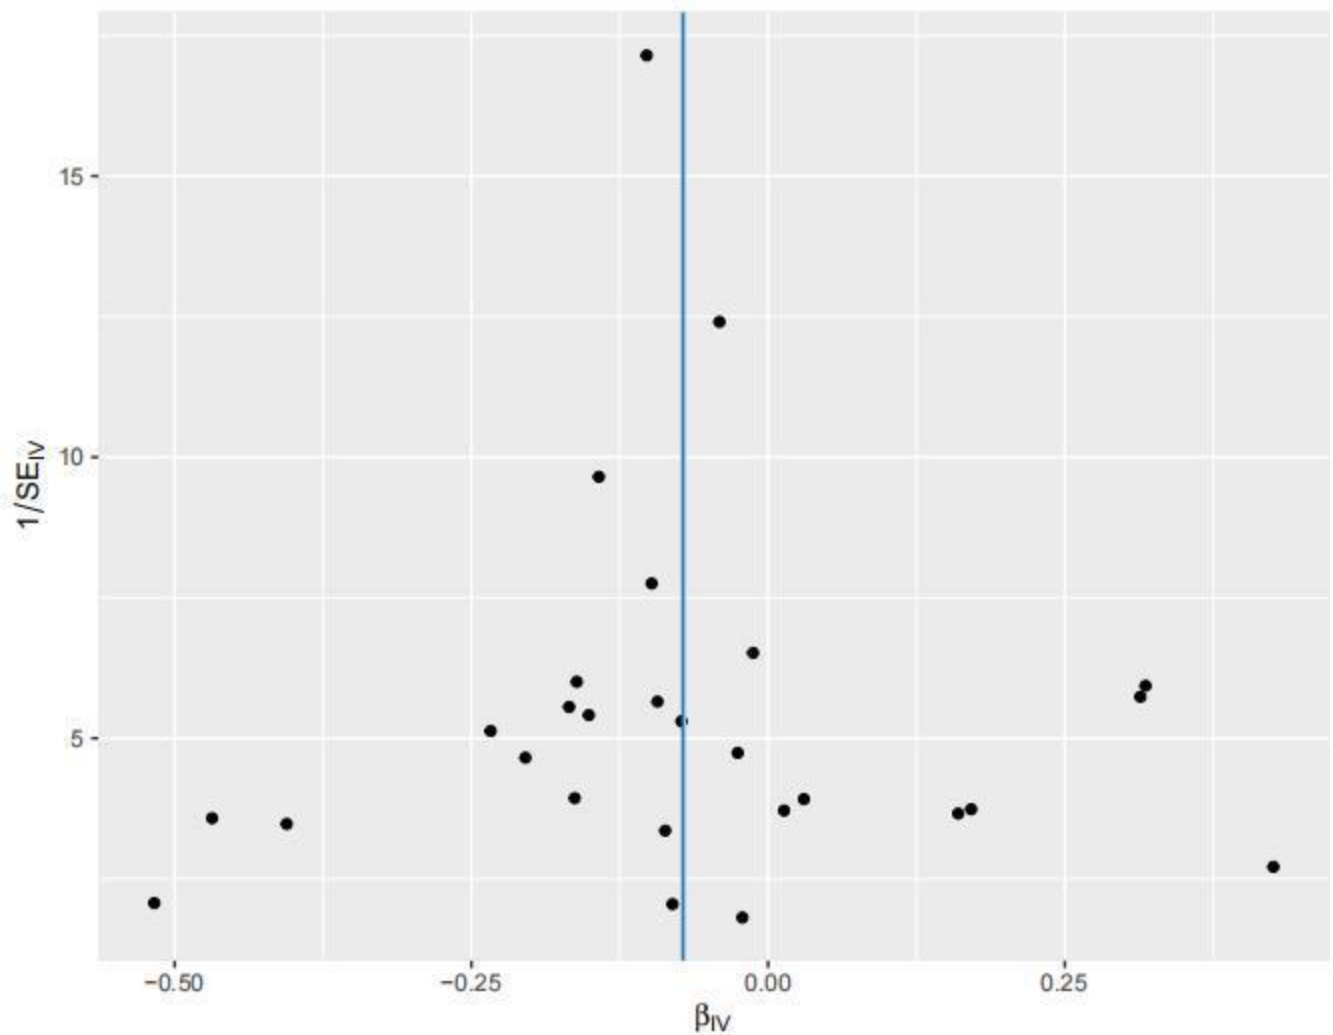

Funnel plot analyse of "Myeloid DC %DC" on 'Aplastic anemia'

MR Method

- Inverse variance weighted
- MR Egger

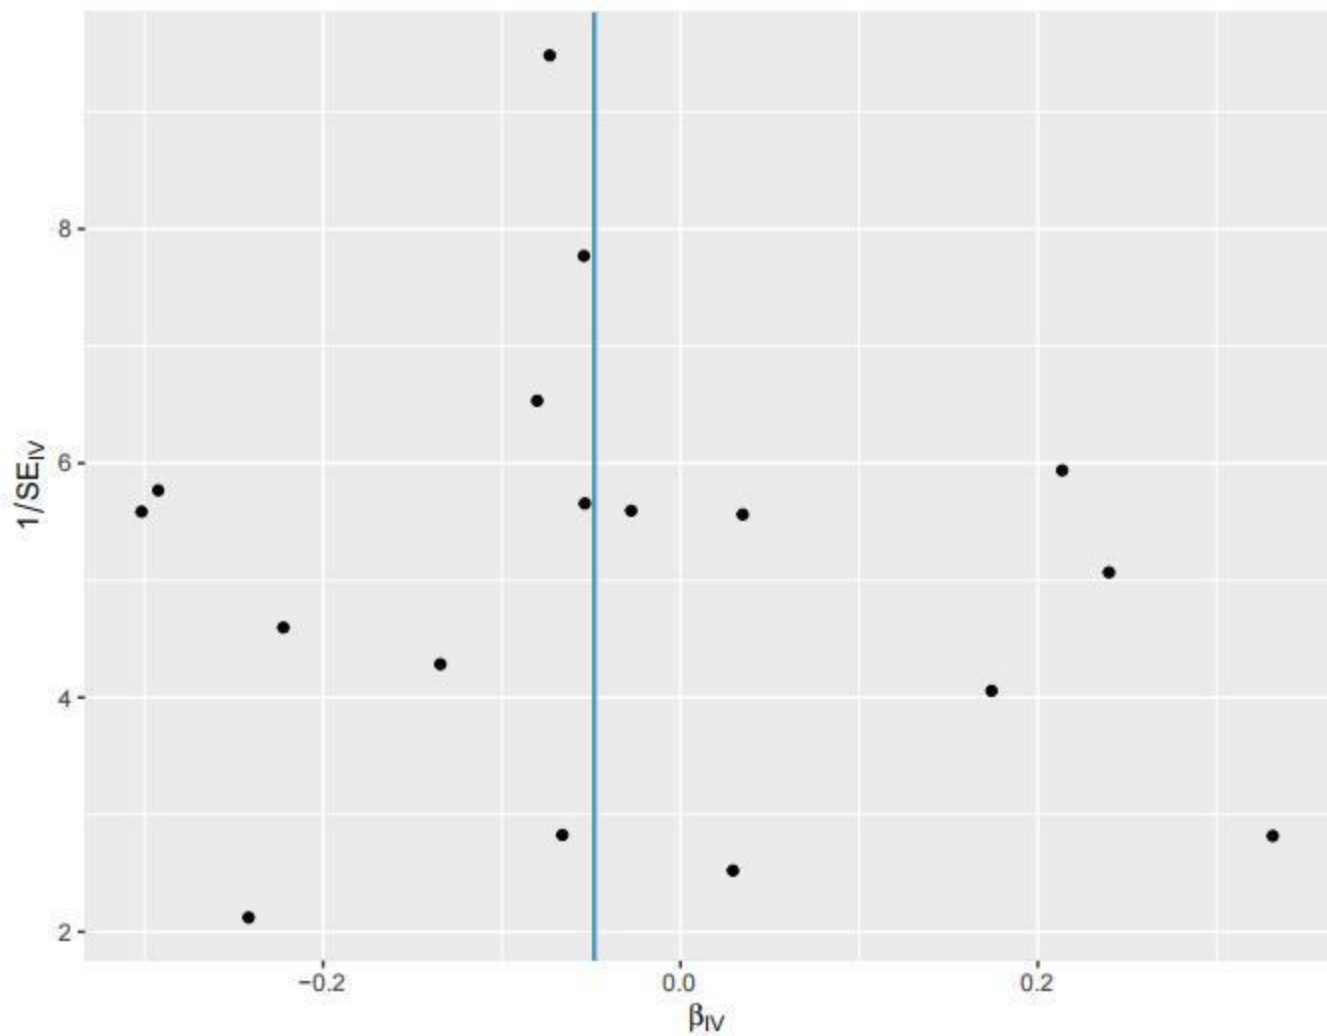

Funnel plot analyse of "CD25 on activated Treg " on 'Aplastic anemia'

### MR Method

- Inverse variance weighted
- MR Egger

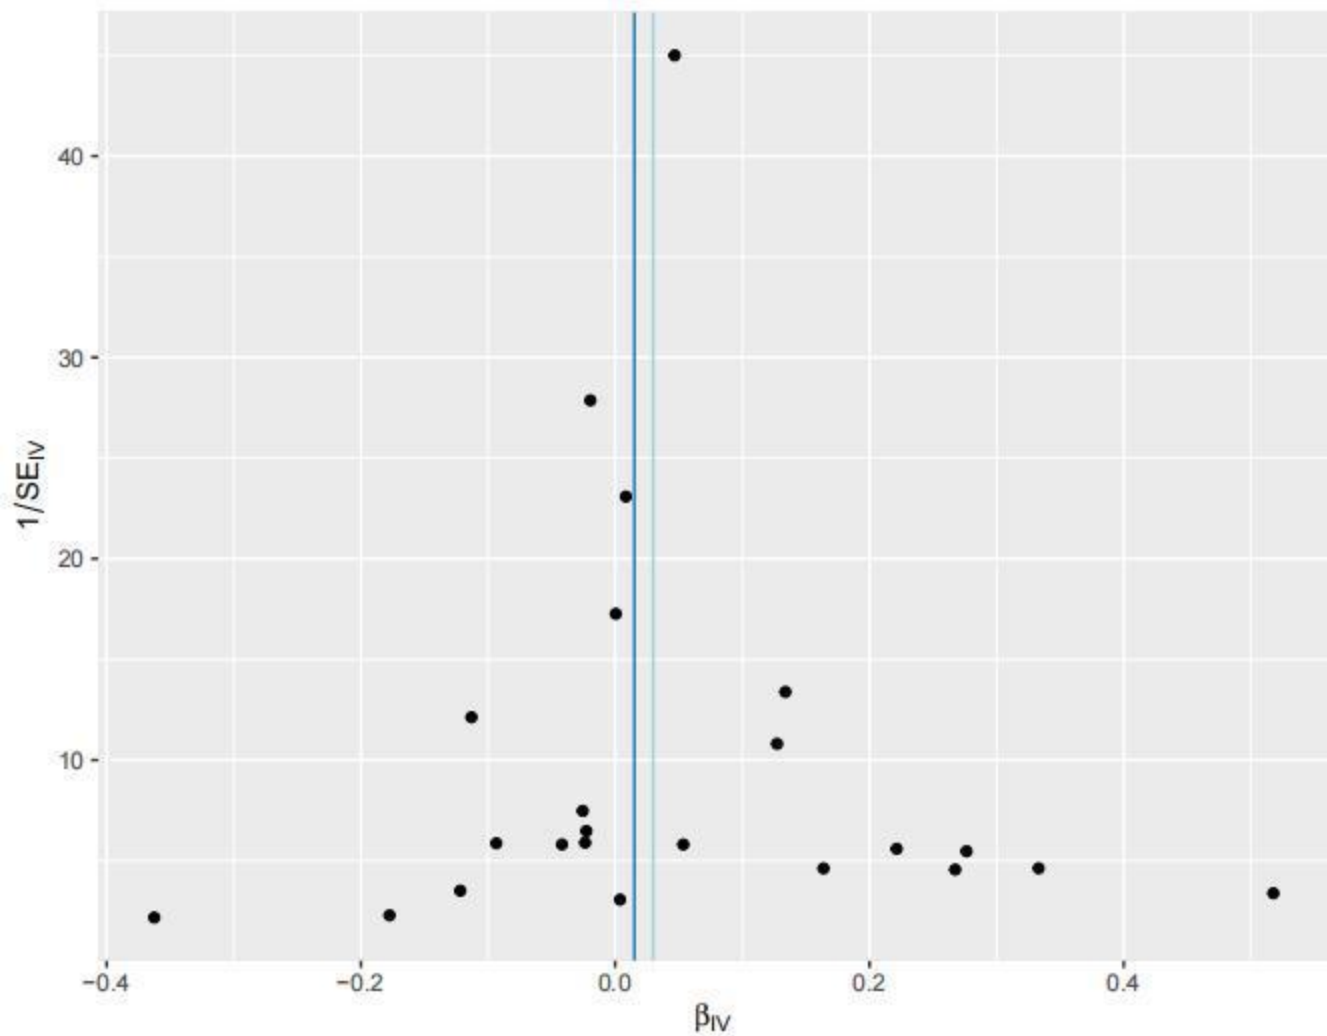

Funnel plot analyse of "CD39 on CD39+ secreting Treg " on 'Aplastic anemia'



MR Method

- Inverse variance weighted
- MR Egger

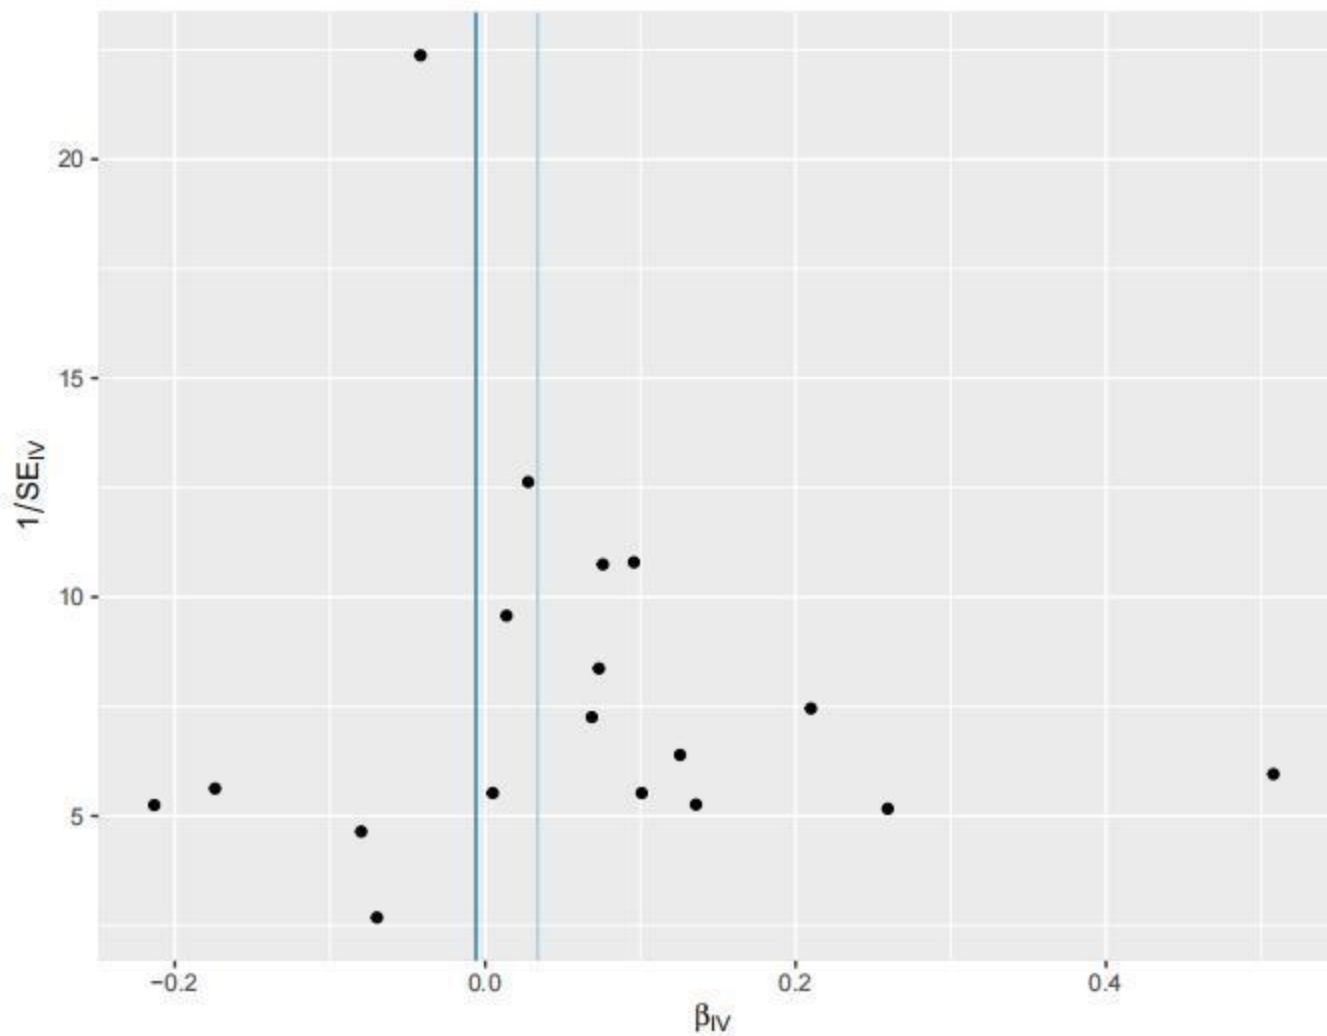

Funnel plot analysis of "CD28 on activated Treg" on 'Aplastic anemia'

### MR Method

Inverse variance weighted

MR Egger

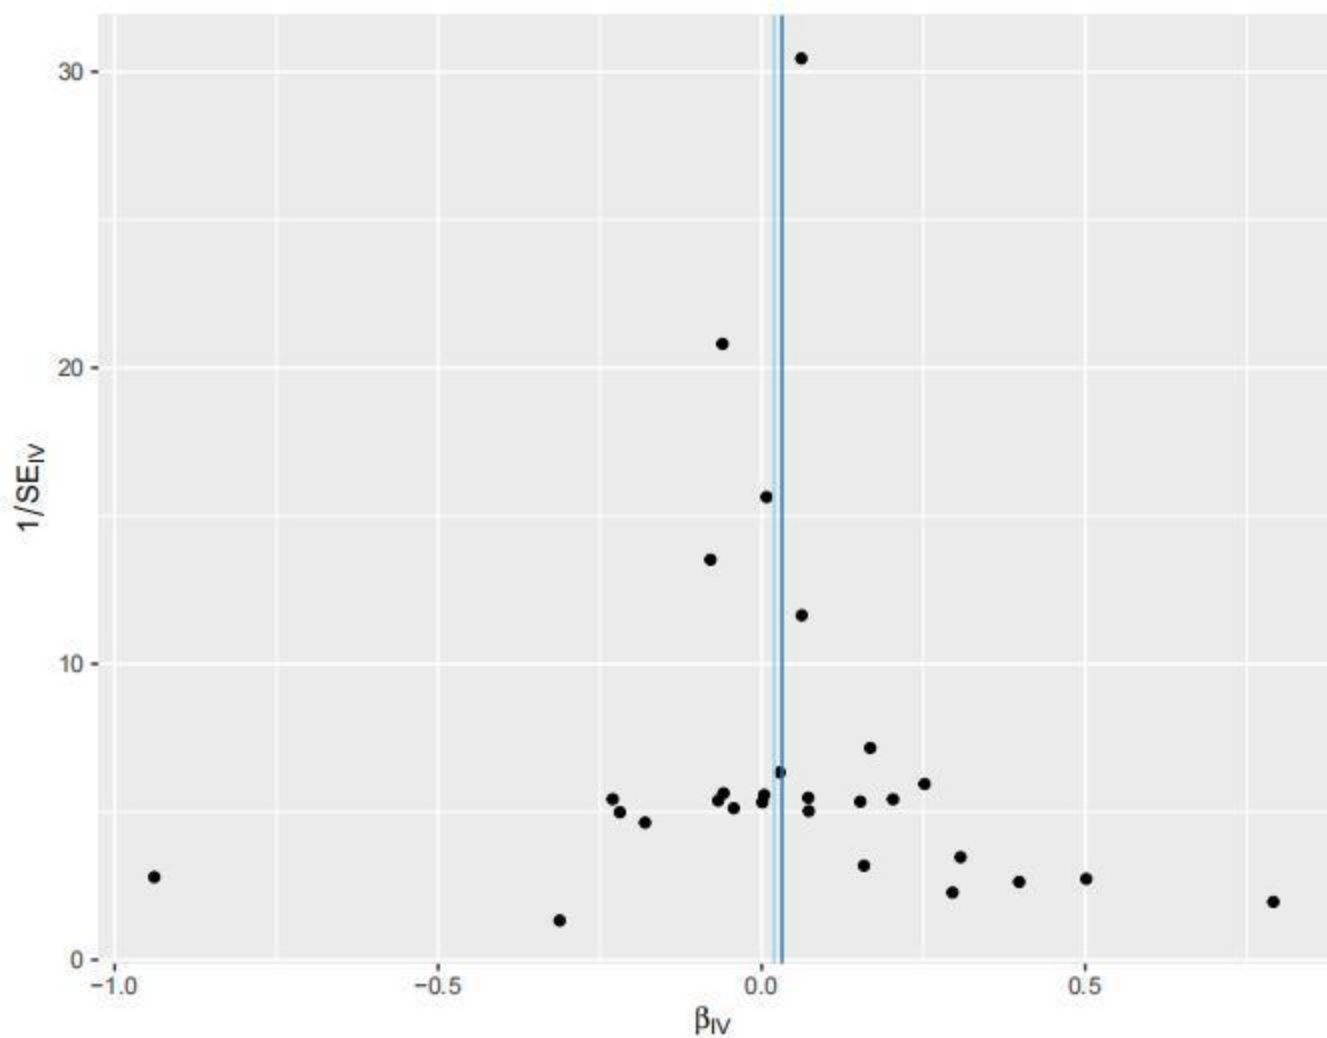

Funnel plot analyse of "CD11c on CD62L+ myeloid DC" on 'Aplastic anemia'

MR Method

- Inverse variance weighted
- MR Egger

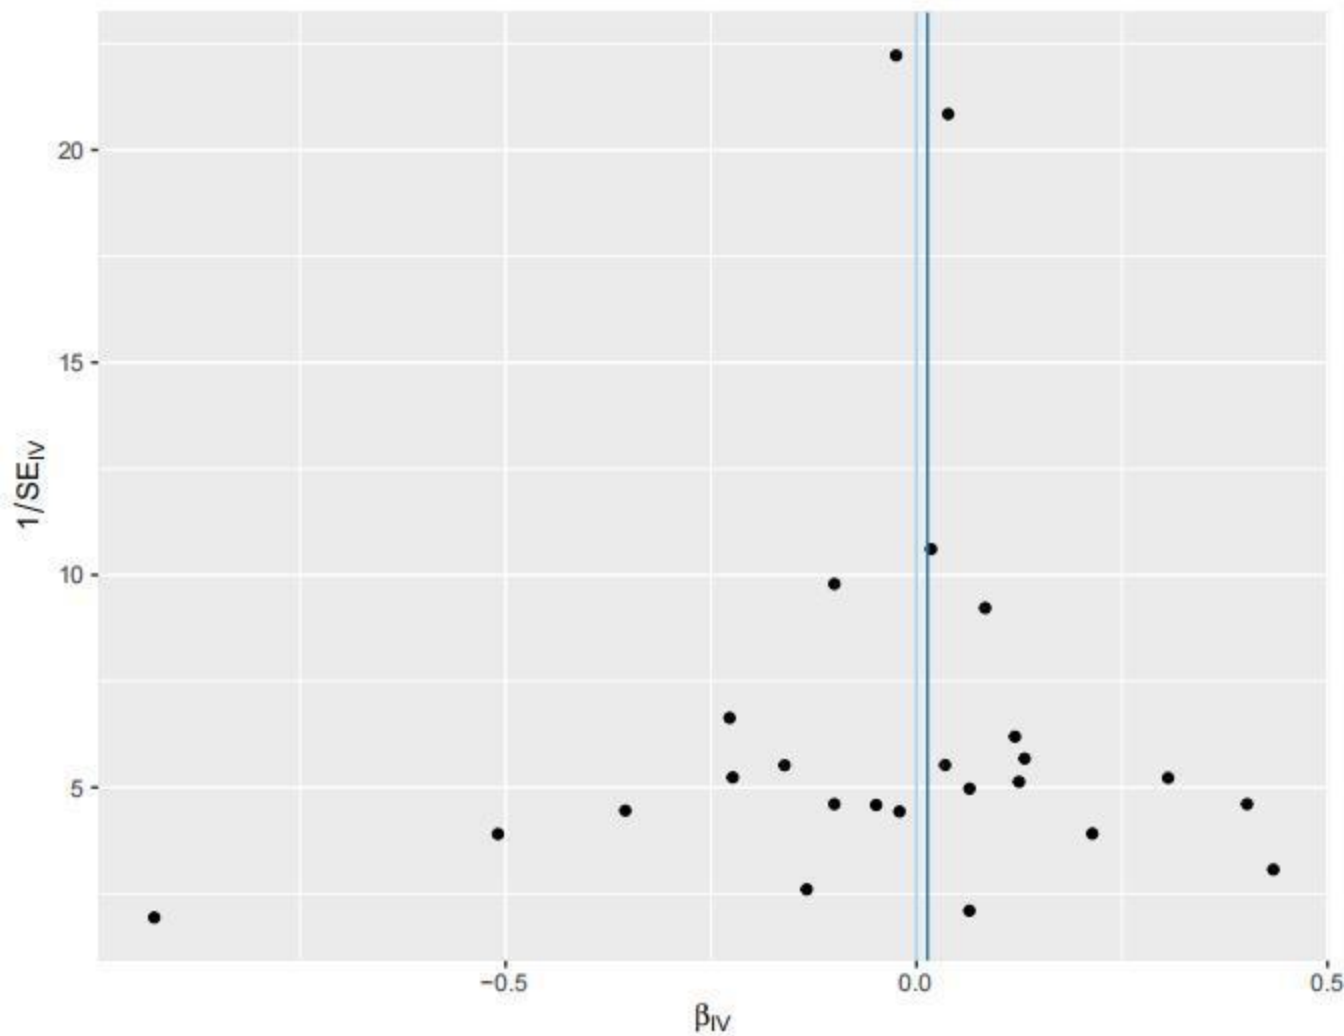

Funnel plot analysis of "CD20- CD38- %B cell" on 'Aplastic anemia'

### MR Method

- Inverse variance weighted
- MR Egger

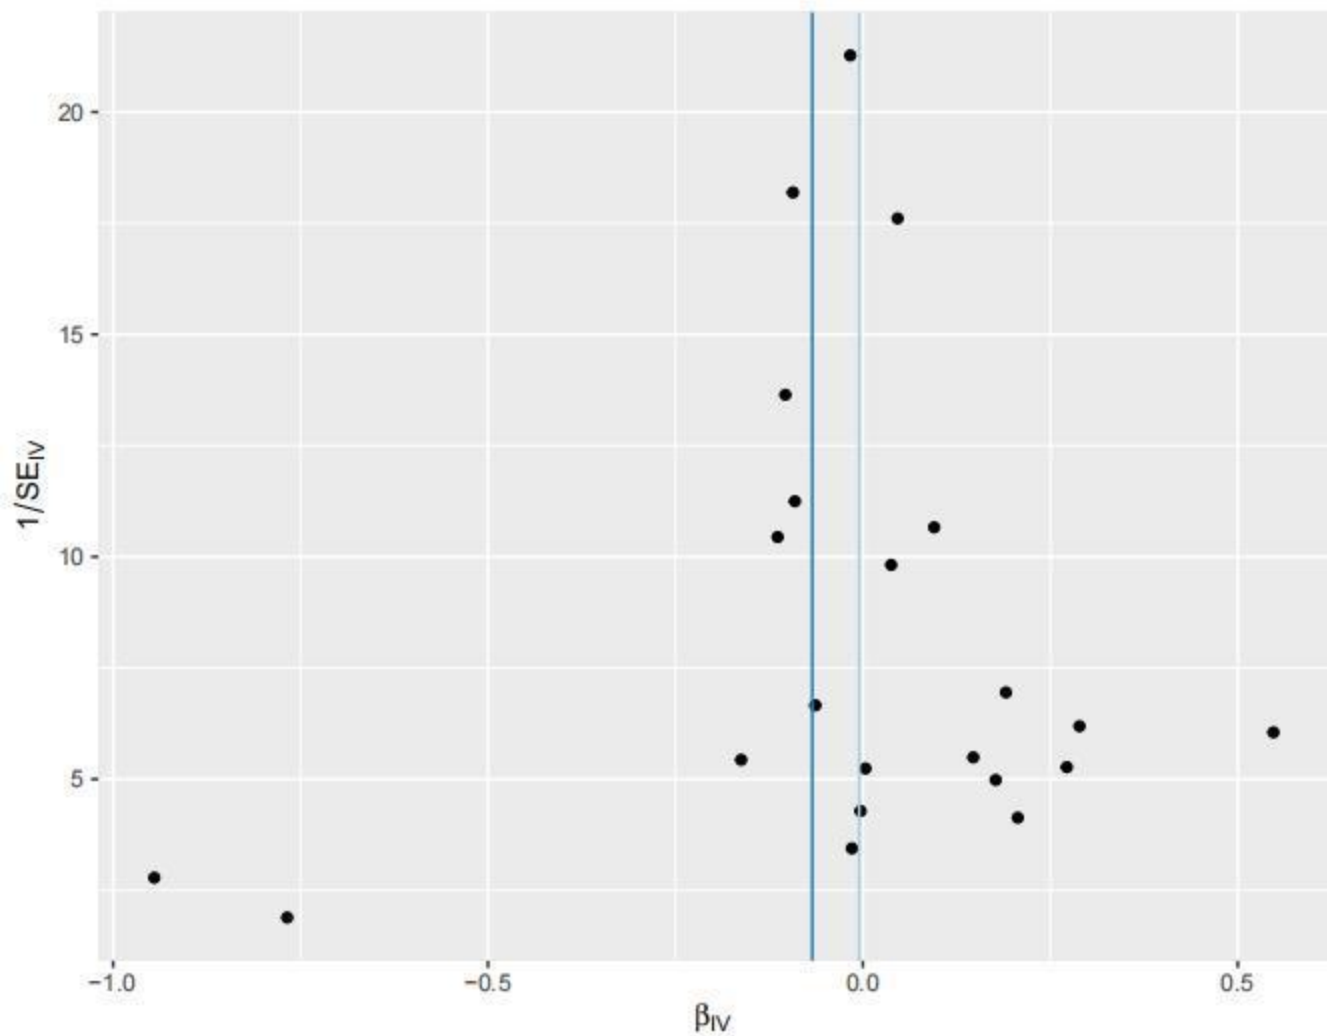

Funnel plot analyse of "HLA DR on B cell" on 'Aplastic anemia'

MR Method

- Inverse variance weighted
- MR Egger

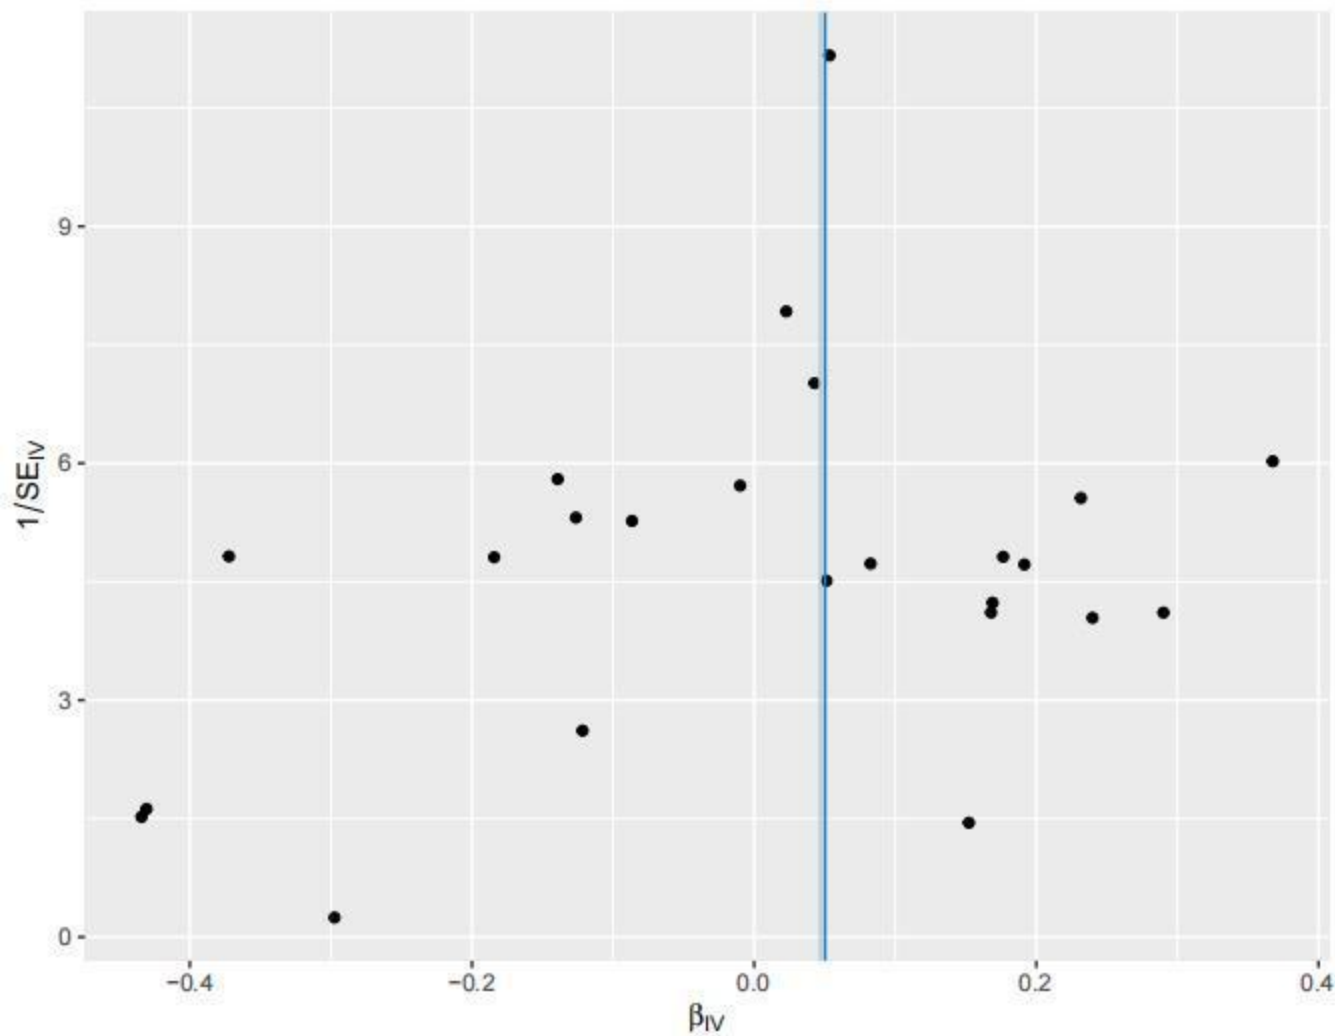

Funnel plot analysis of "CD28- CD8br %CD8br" on 'Aplastic anemia'

MR Method

- Inverse variance weighted
- MR Egger

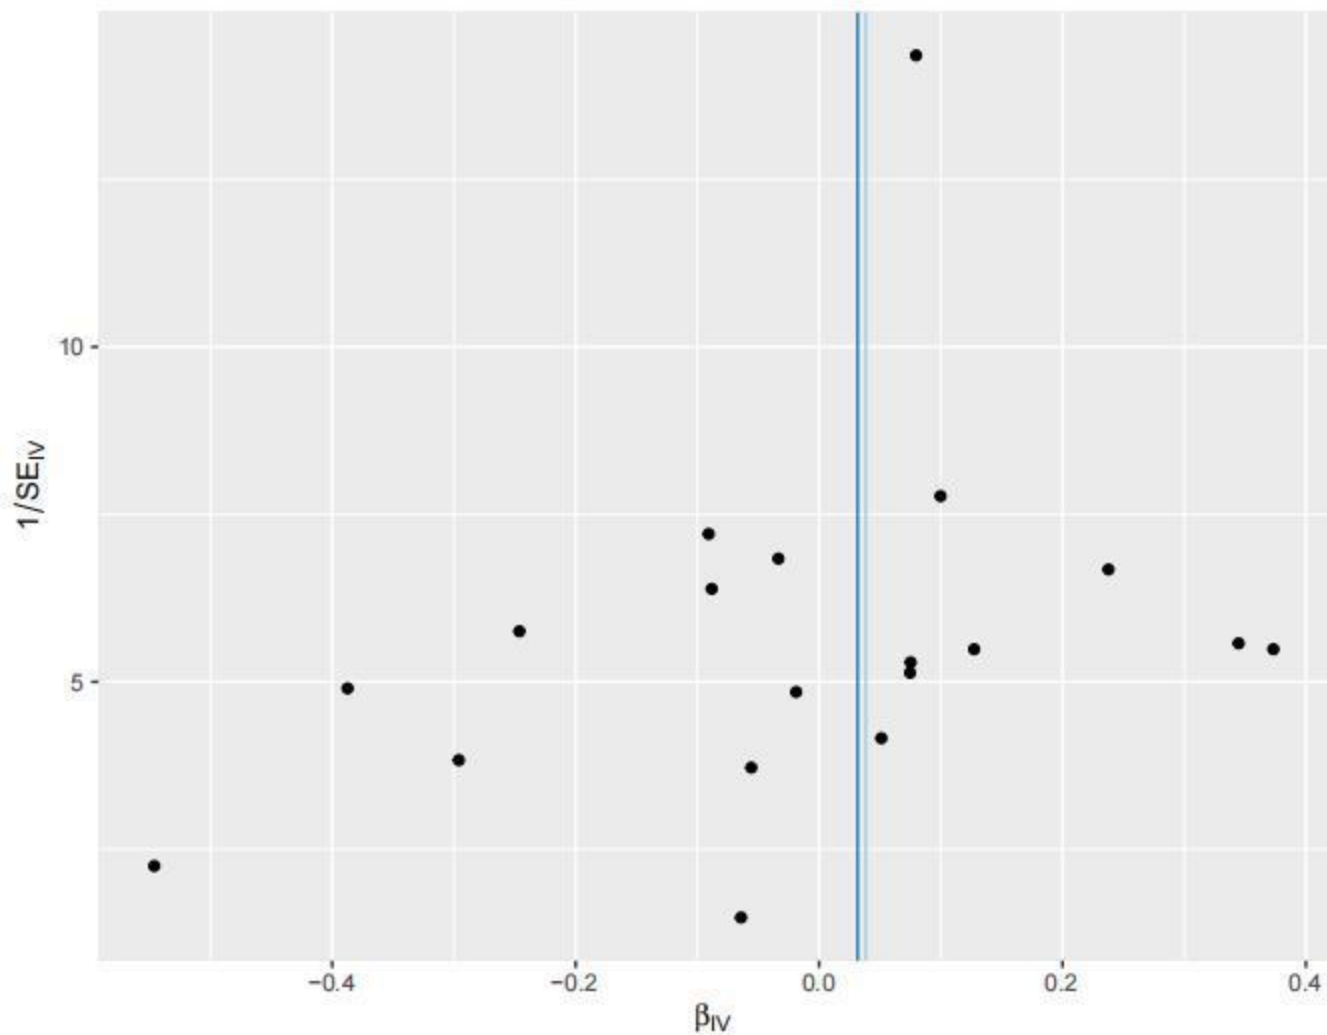

Funnel plot analysis of "CD28 on CD28+ CD45RA- CD8br " on 'Aplastic anemia'

MR Method

- Inverse variance weighted
- MR Egger

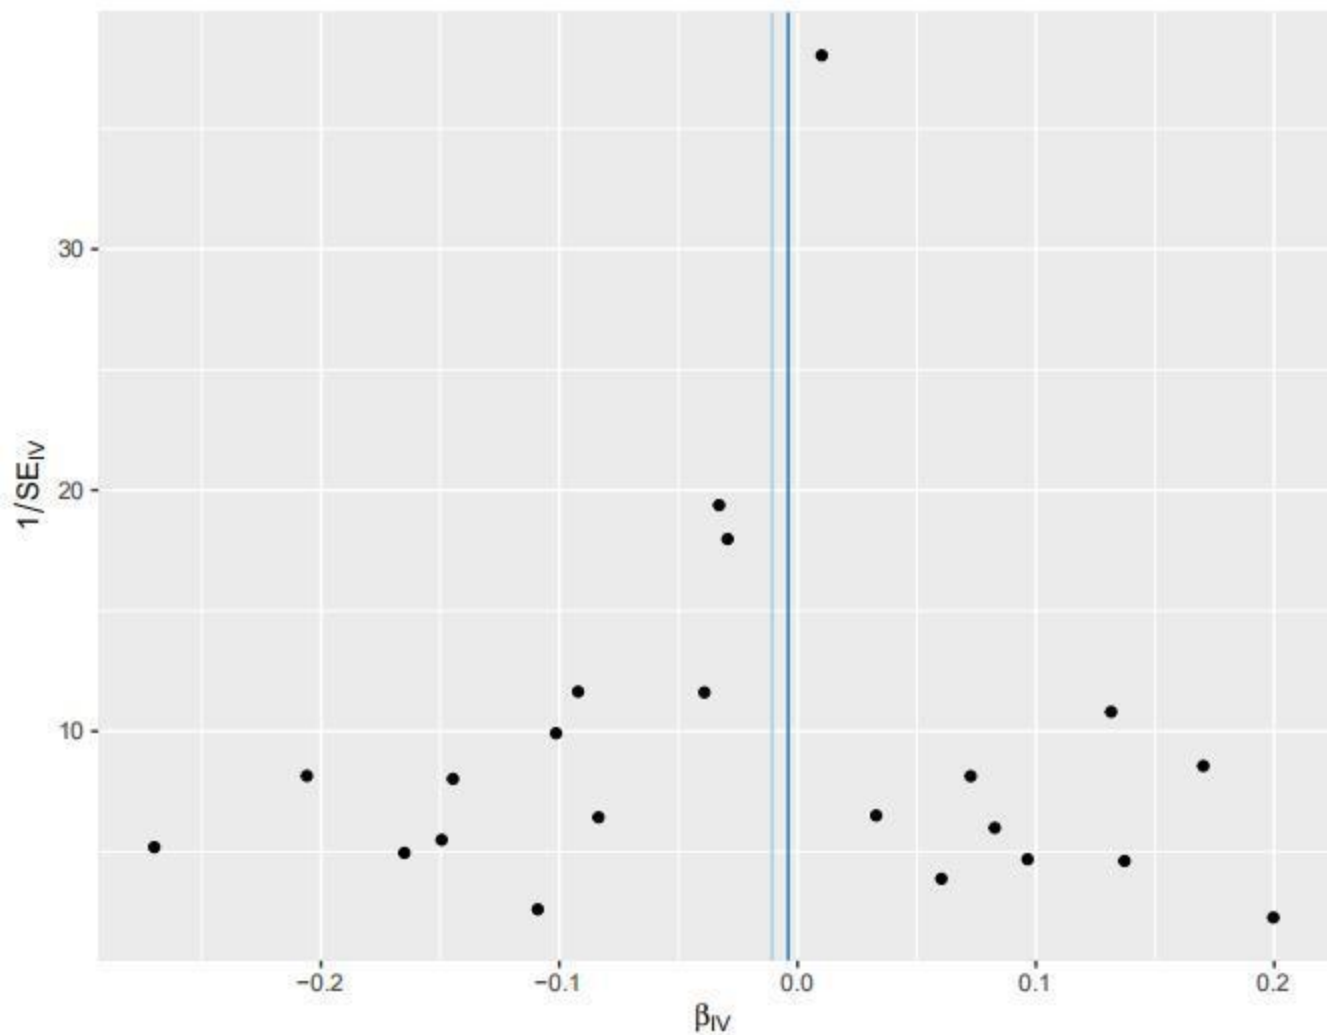

Funnel plot analyse of "BAFF-R on IgD+ CD24-" on 'Aplastic anemia'

MR Method

- Inverse variance weighted
- MR Egger

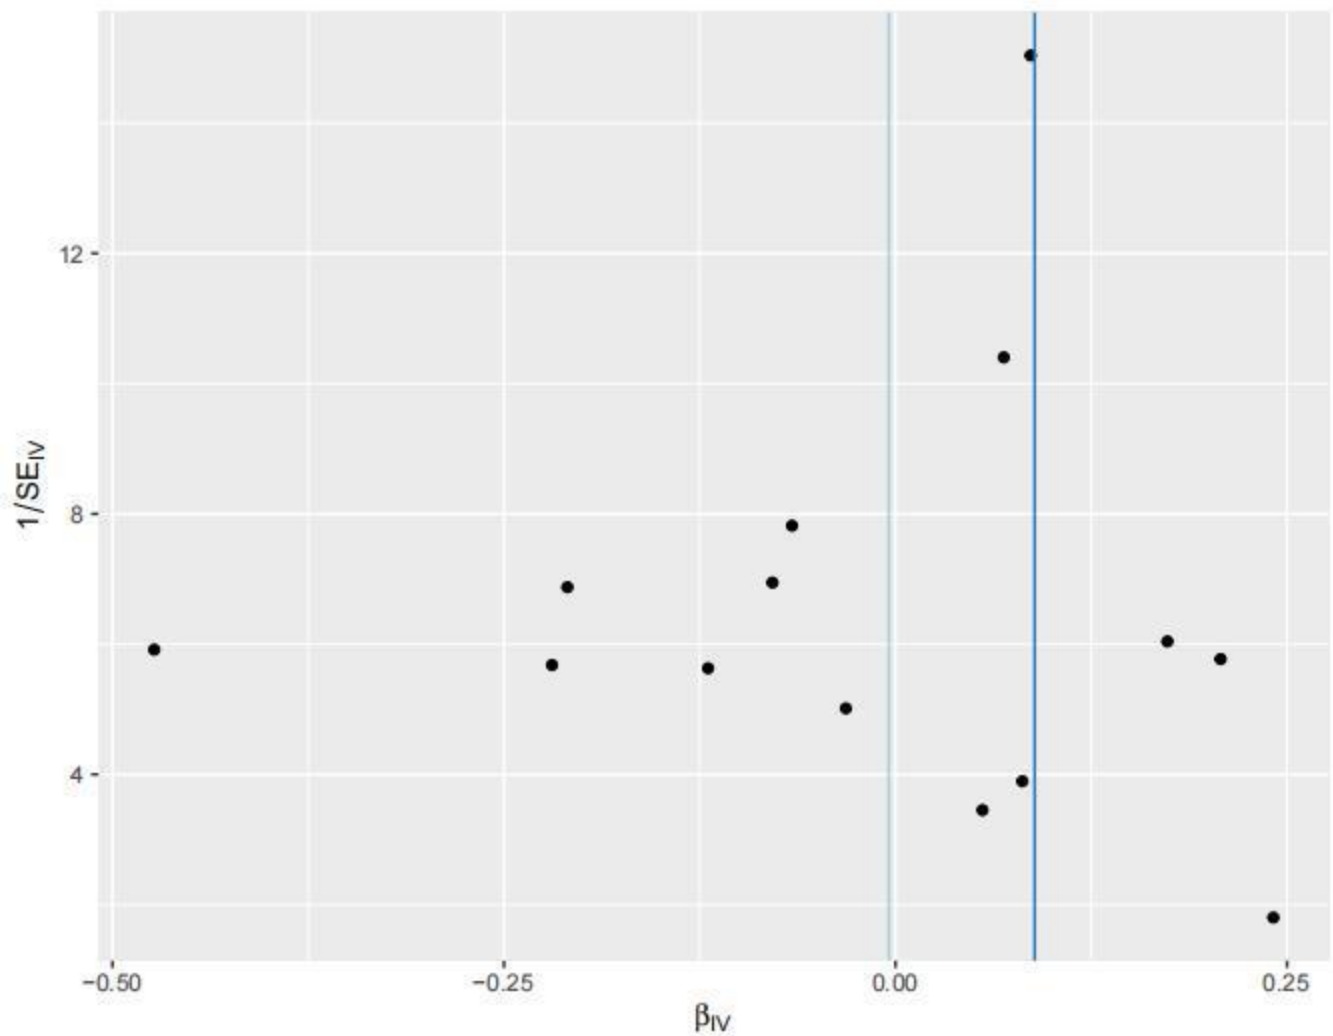

Funnel plot analysis of "SSC-A on B cell" on 'Aplastic anemia'



MR Method

- Inverse variance weighted
- MR Egger

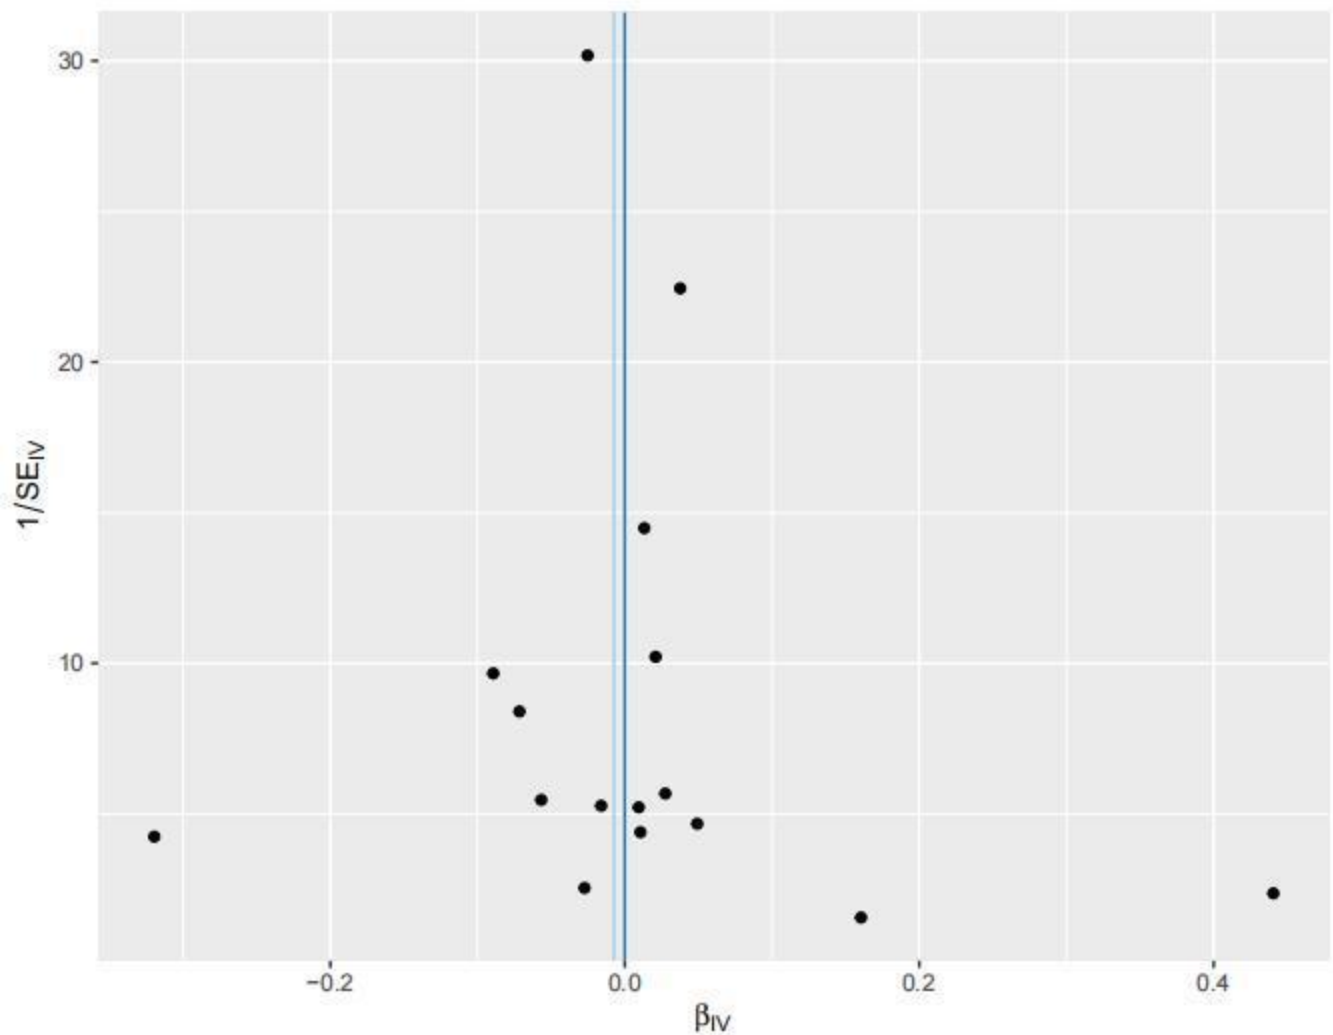

Funnel plot analyse of "Activated Treg AC" on 'Aplastic anemia'

MR Method

- Inverse variance weighted
- MR Egger

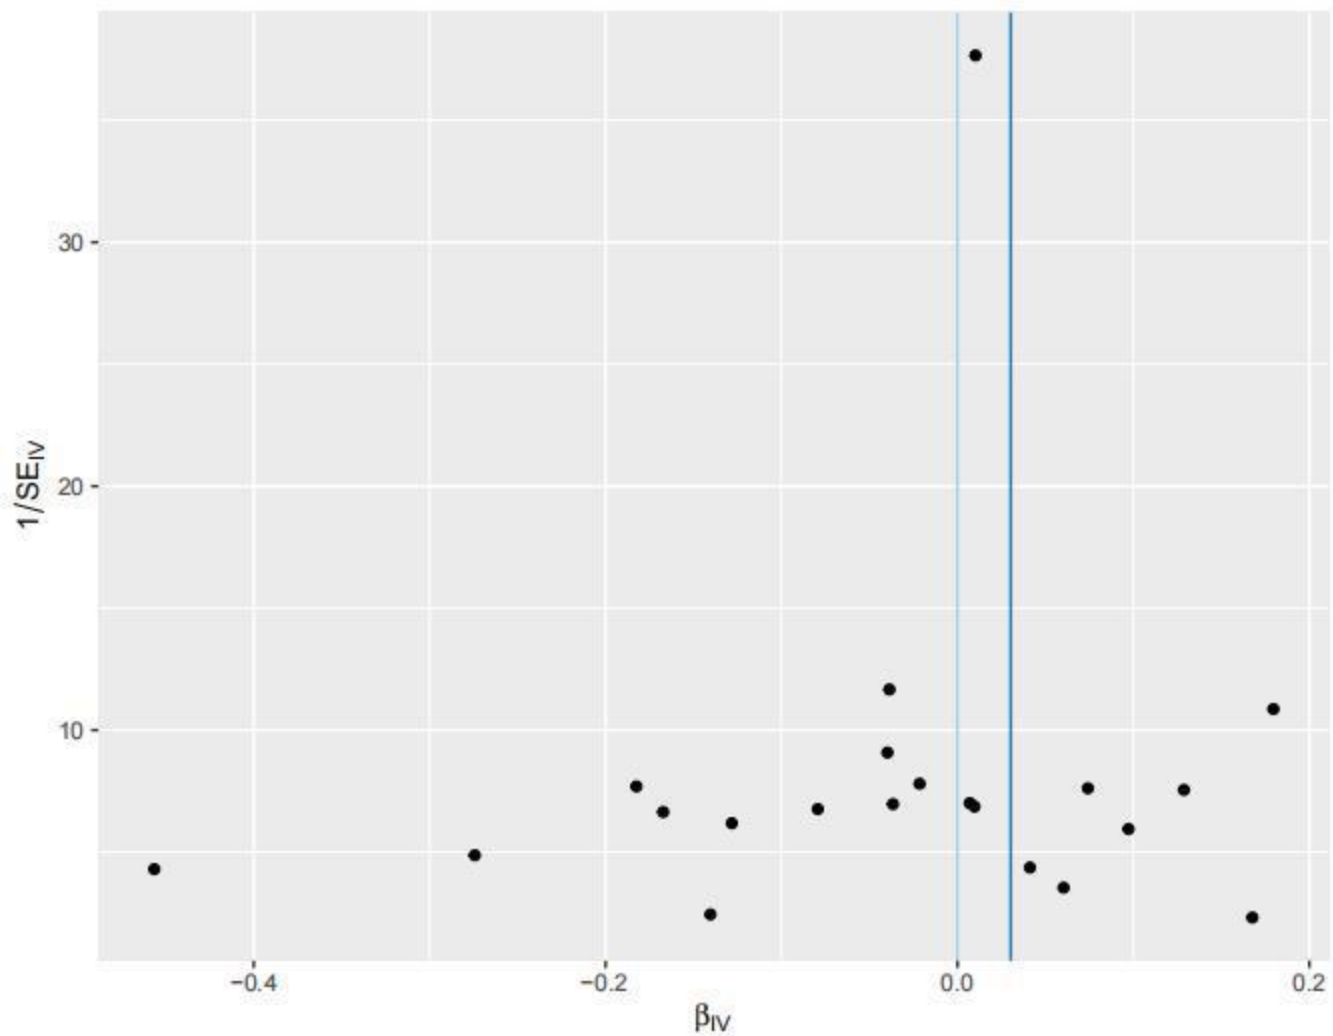

Funnel plot analysis of "BAFF-R on IgD+ CD38- unsw mem" on 'Aplastic anemia'

### MR Method

Inverse variance weighted

MR Egger

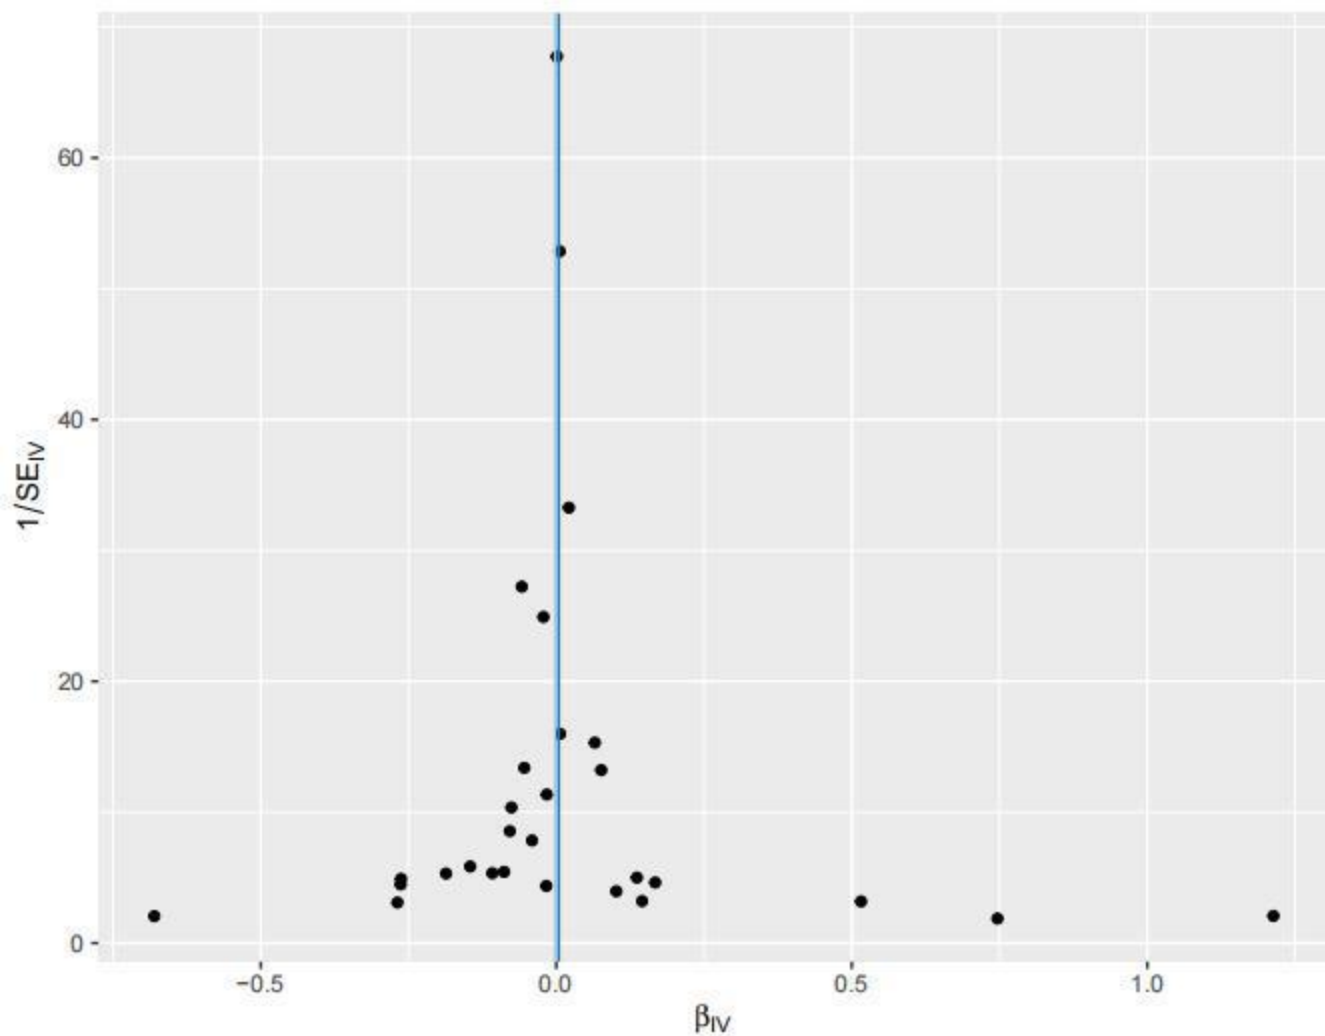

Funnel plot analyse of "CD28+ CD45RA- CD8dim %T cell" on 'Aplastic anemia'

MR Method

- Inverse variance weighted
- MR Egger

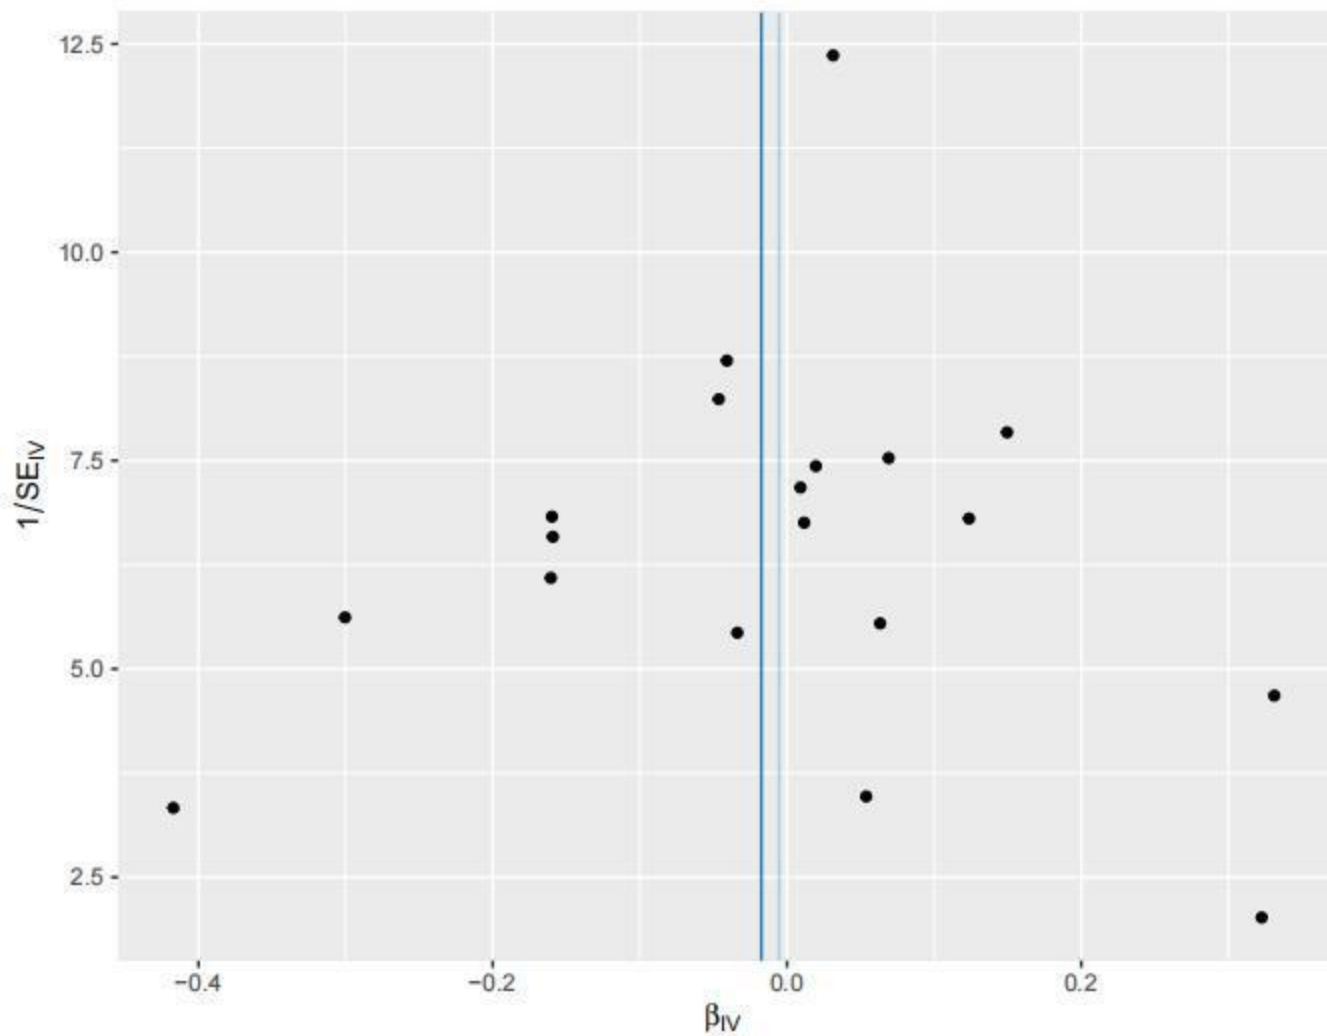

Funnel plot analyse of "CD45 on lymphocyte " on 'Aplastic anemia'

### MR Method

Inverse variance weighted

MR Egger

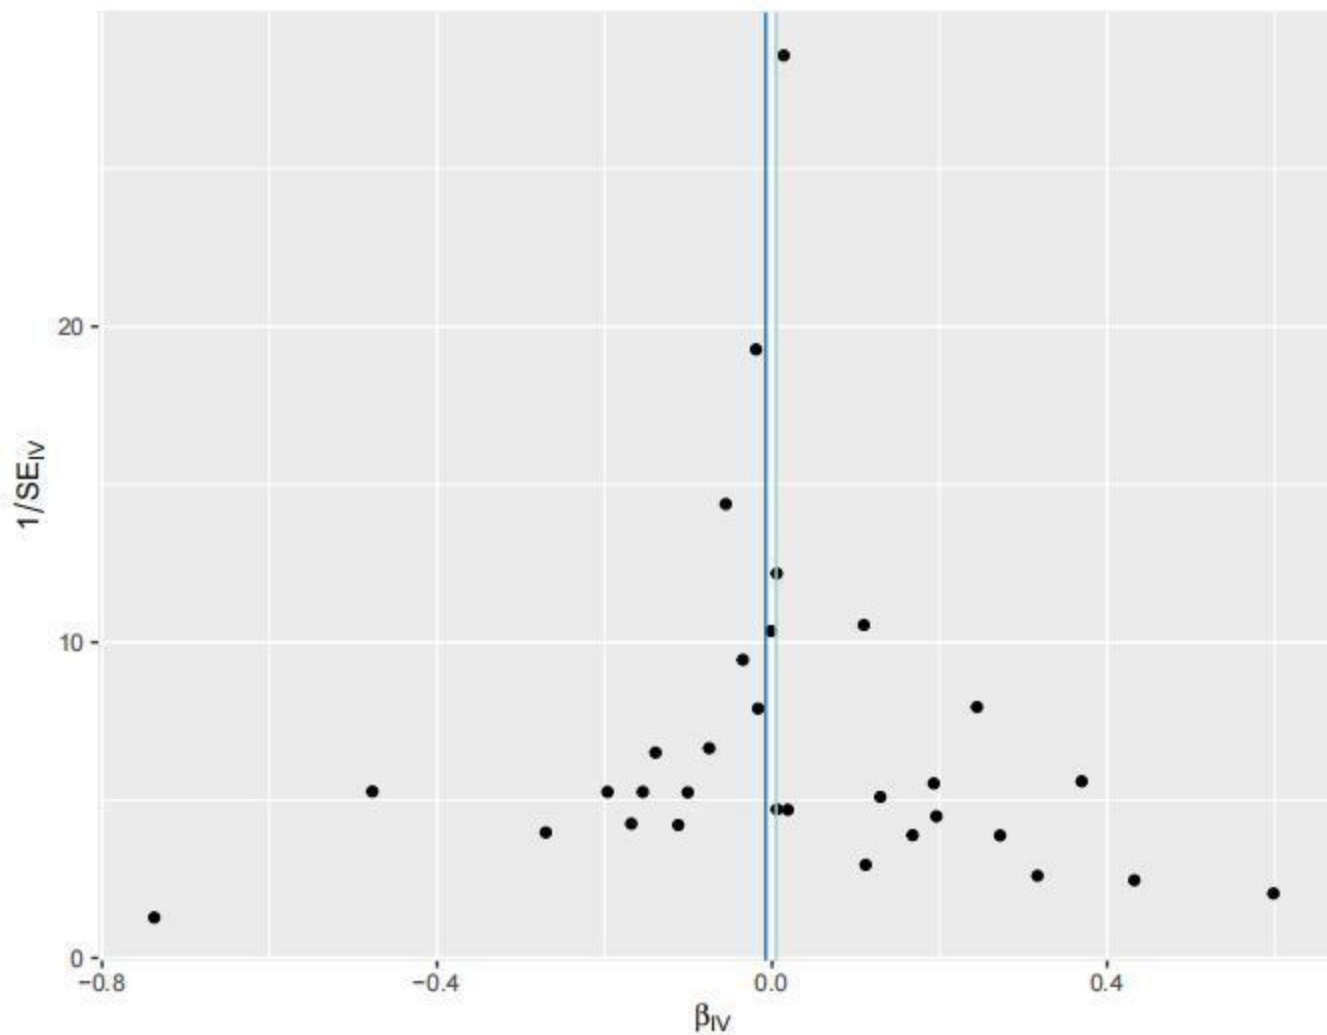

Funnel plot analyse of "IgD- CD38br %lymphocyte" on 'Aplastic anemia'

### MR Method

- Inverse variance weighted
- MR Egger

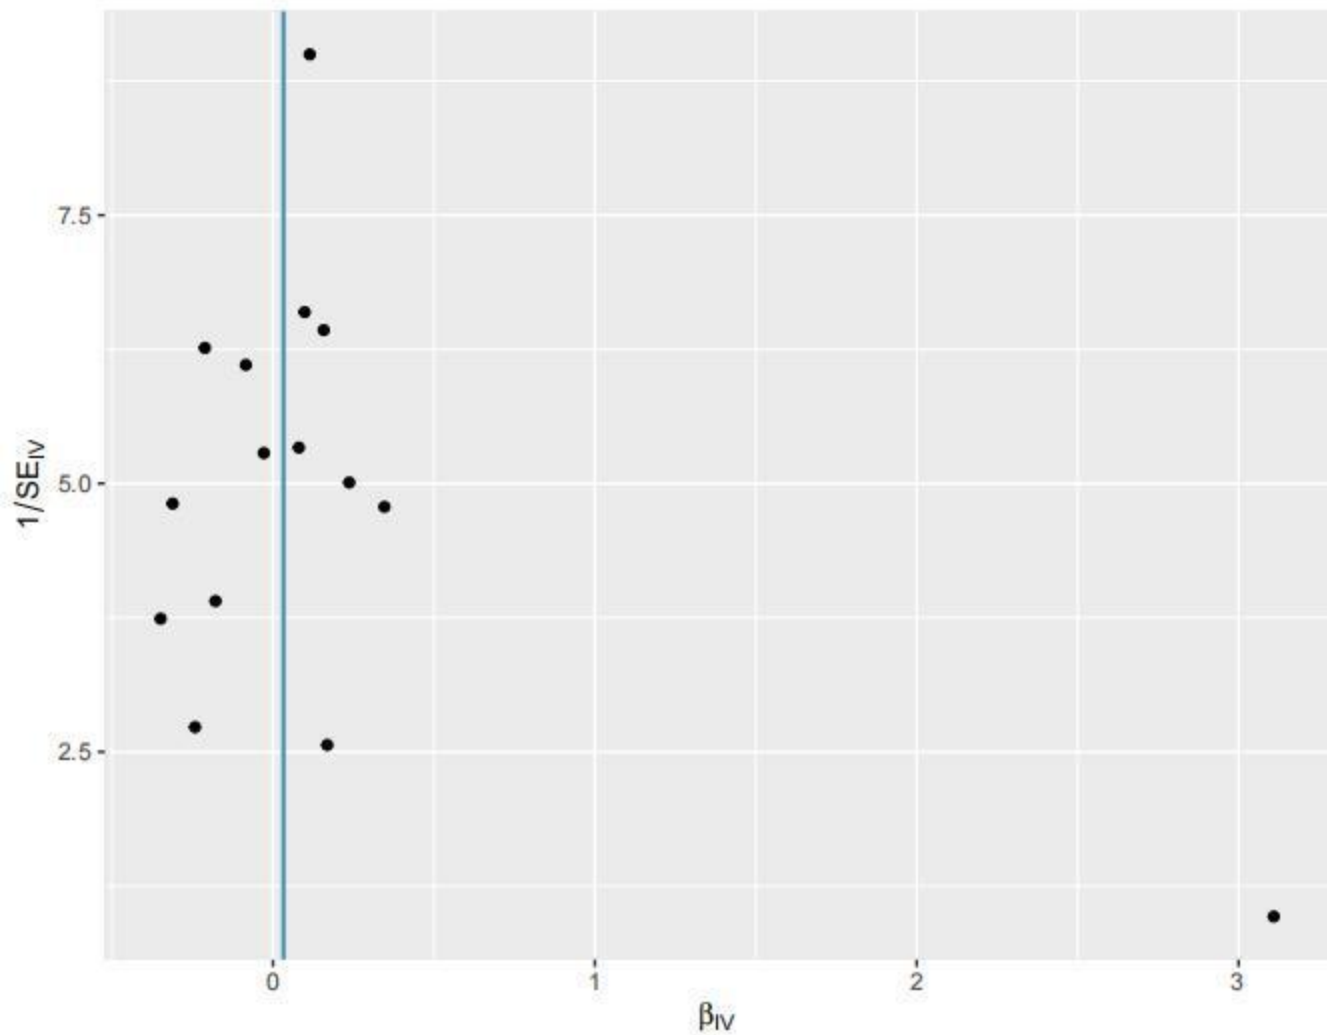

Funnel plot analyse of "IgD+ CD24+ %lymphocyte" on 'Aplastic anemia'

### MR Method

- Inverse variance weighted
- MR Egger

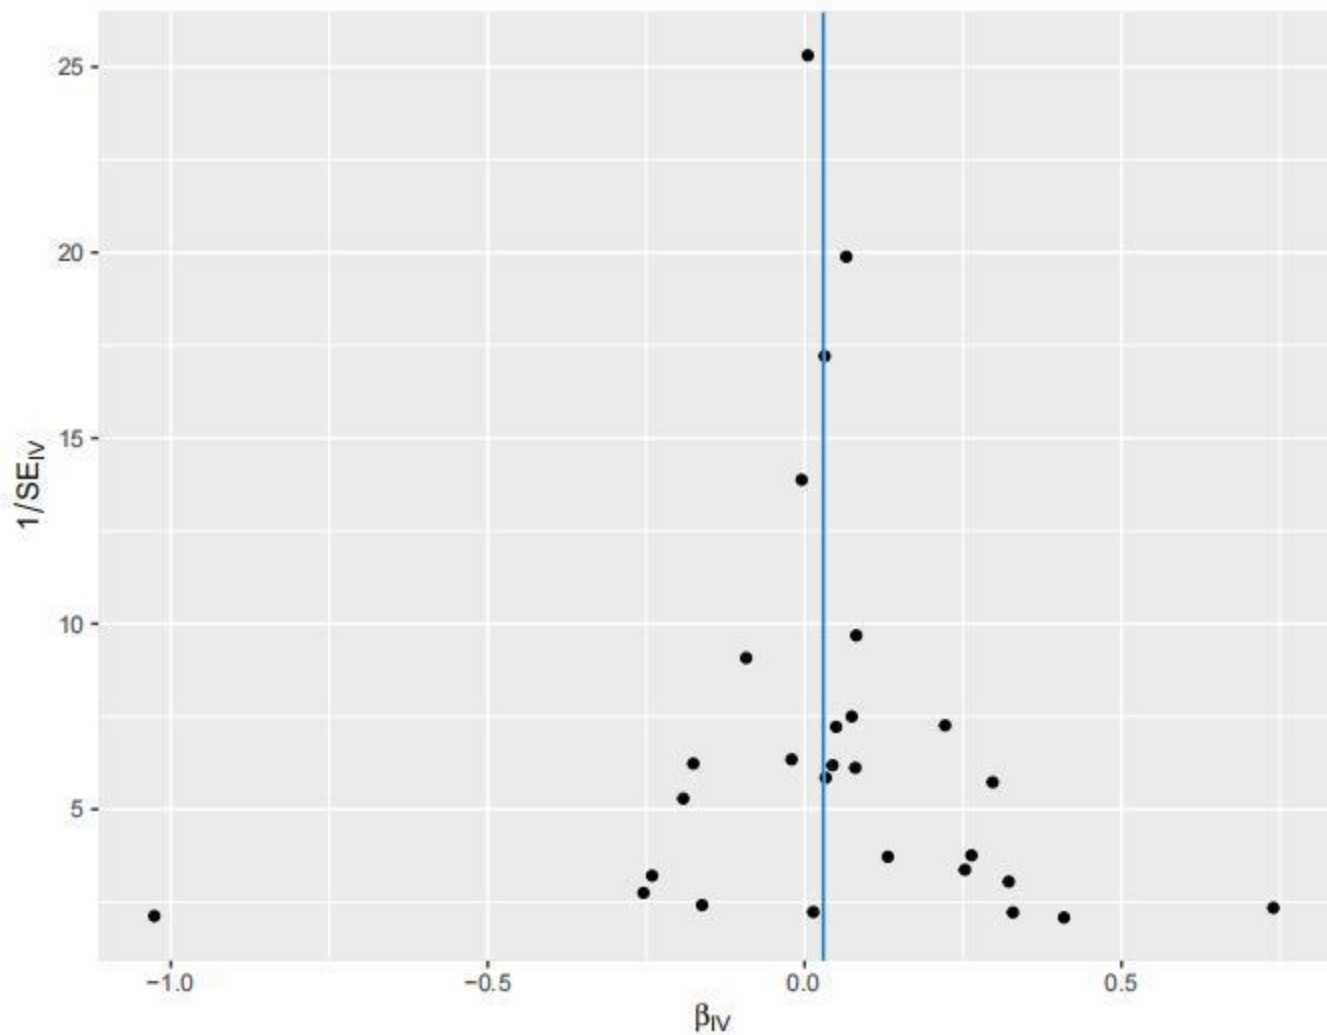

Funnel plot analyse of "CD28 on CD28+ CD4+ " on 'Aplastic anemia'

### MR Method

- Inverse variance weighted
- MR Egger

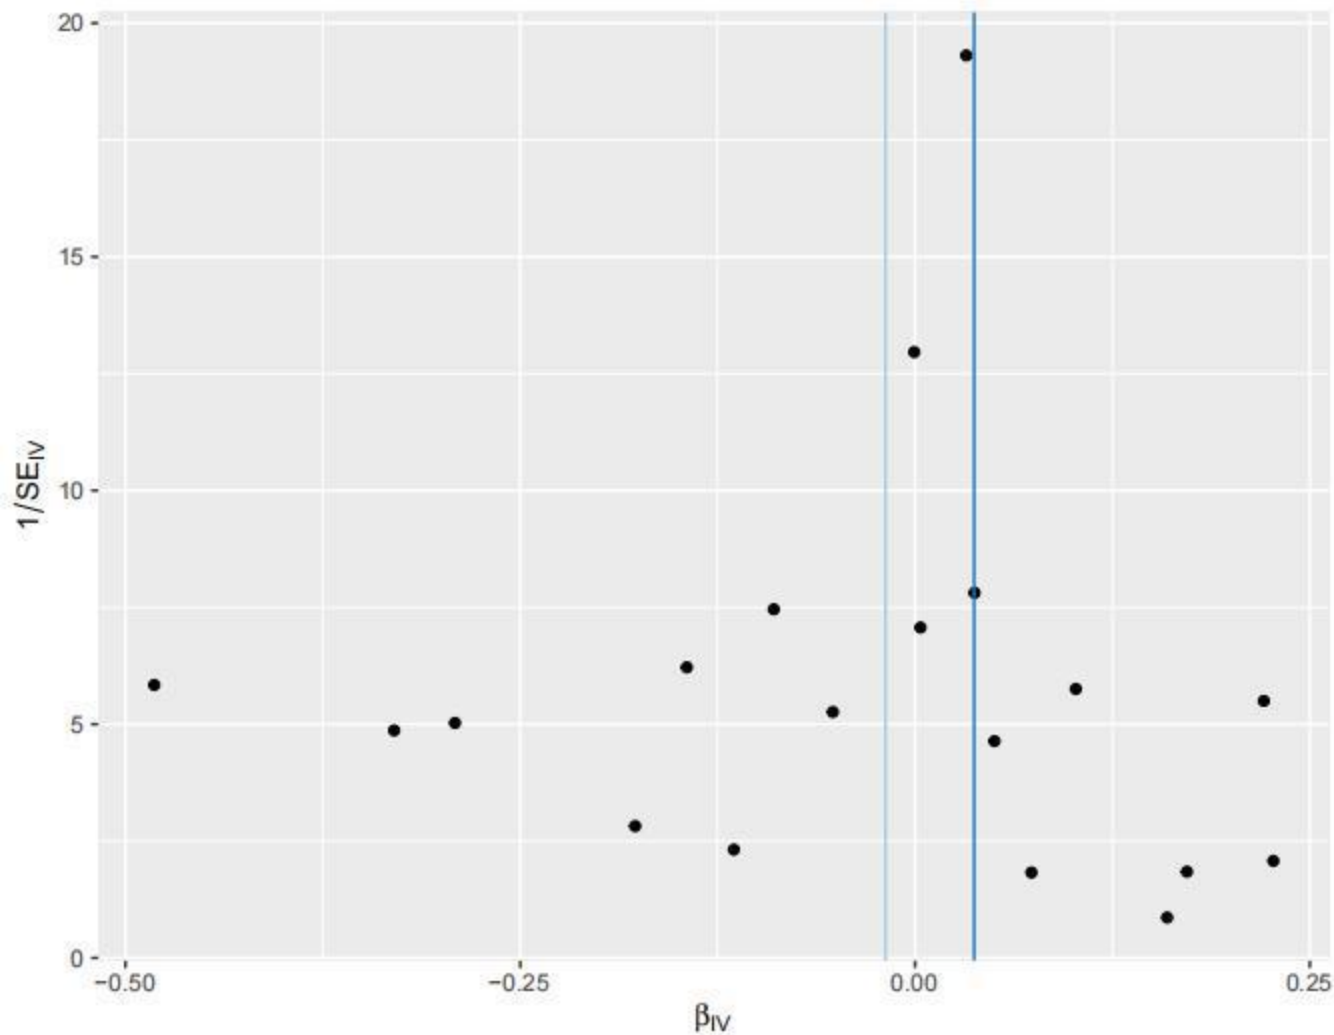

Funnel plot analyse of "CCR2 on CD14- CD16- " on 'Aplastic anemia'



MR Method

- Inverse variance weighted
- MR Egger

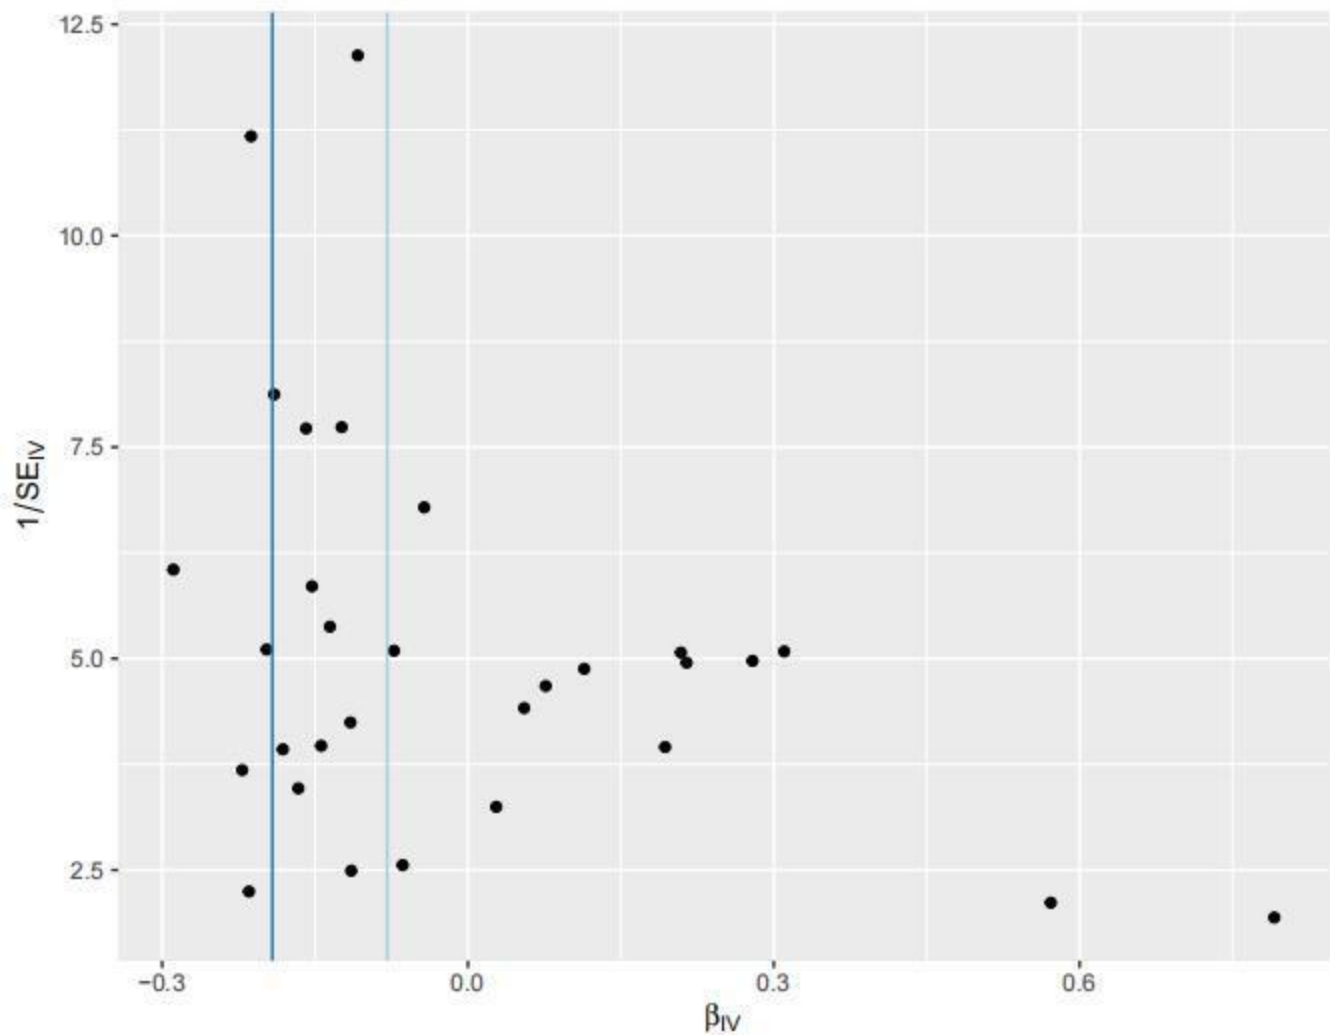

Funnel plot analysis of "DN (CD4-CD8-) NKT %lymphocyte" on 'Aplastic anemia'

MR Method

Inverse variance weighted

MR Egger

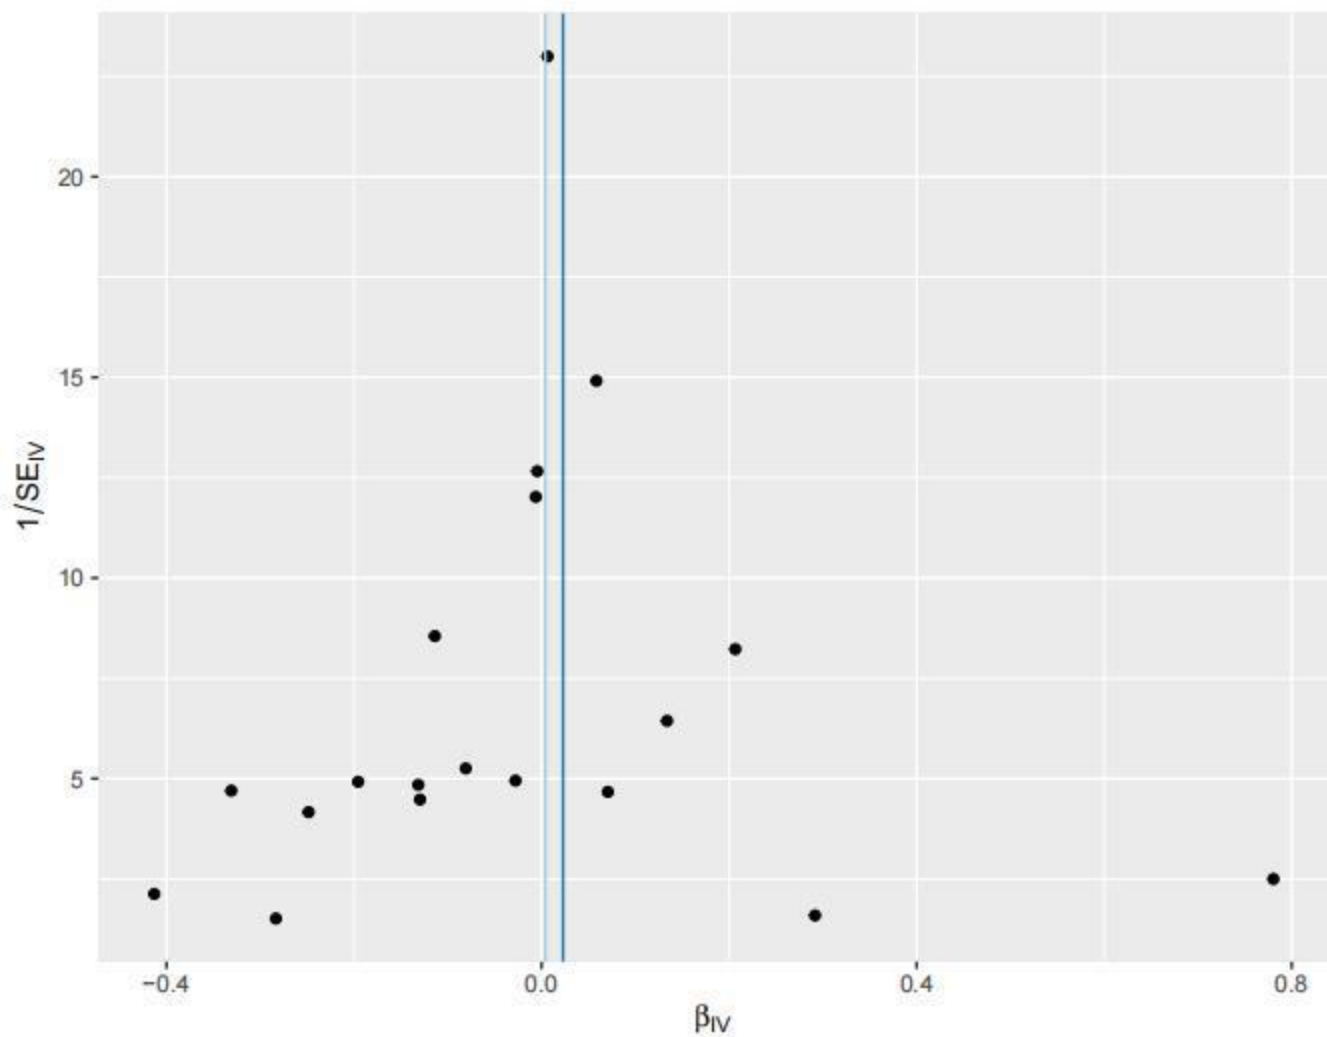

Funnel plot analyse of "CD62L- plasmacytoid DC %DC" on 'Aplastic anemia'

### MR Method

- Inverse variance weighted
- MR Egger

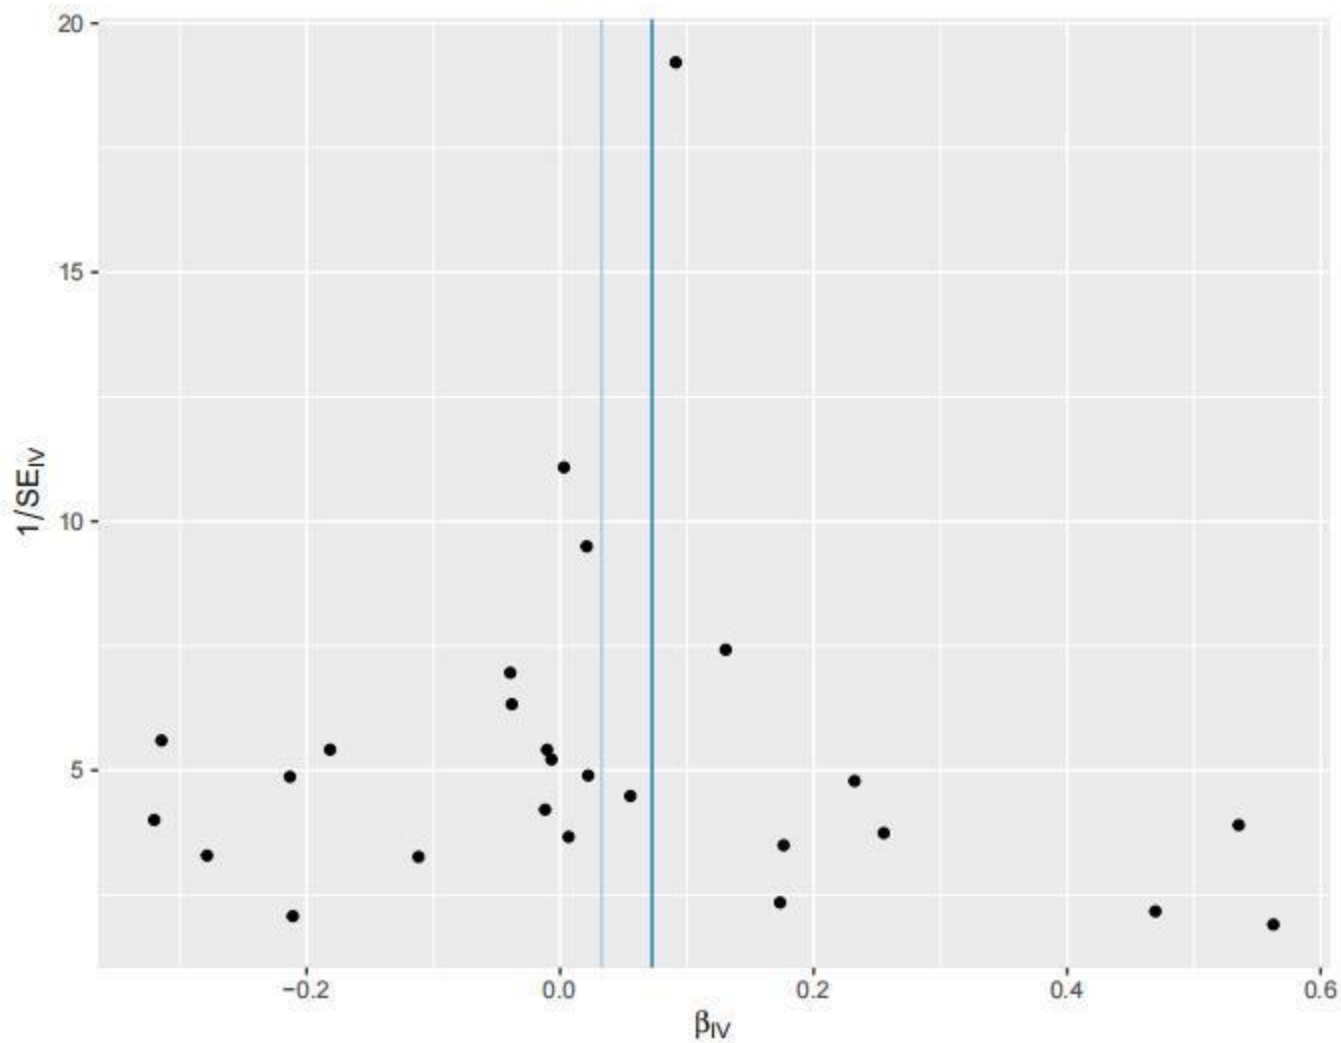

Funnel plot analyse of "CD14+ CD16+ monocyte %monocyte" on 'Aplastic anemia'

MR Method

Inverse variance weighted

MR Egger

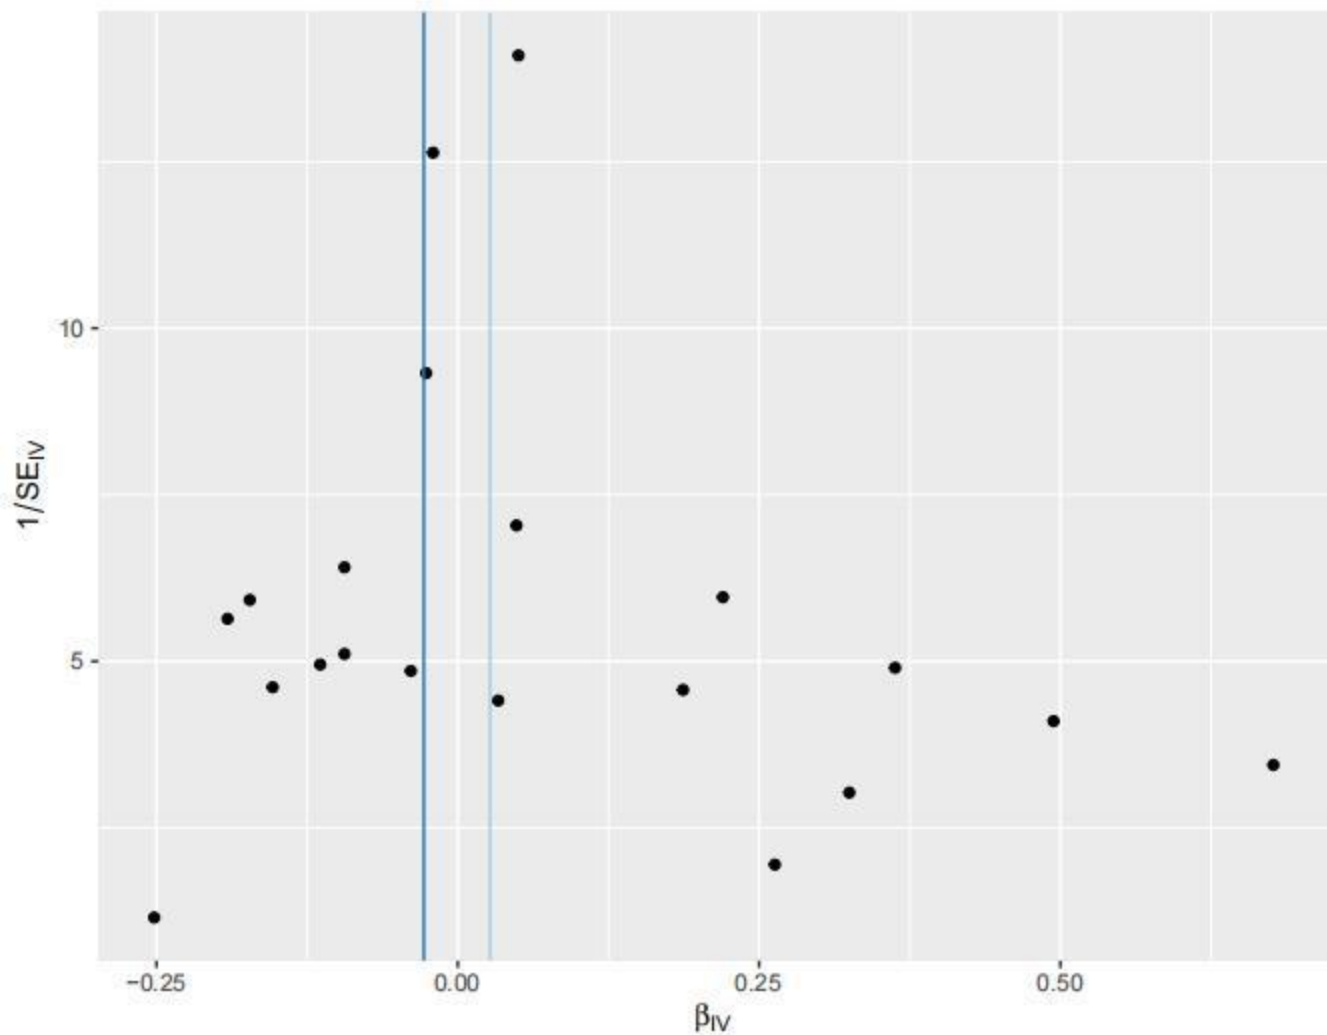

Funnel plot analyse of "T cell AC" on 'Aplastic anemia'

MR Method

- Inverse variance weighted
- MR Egger

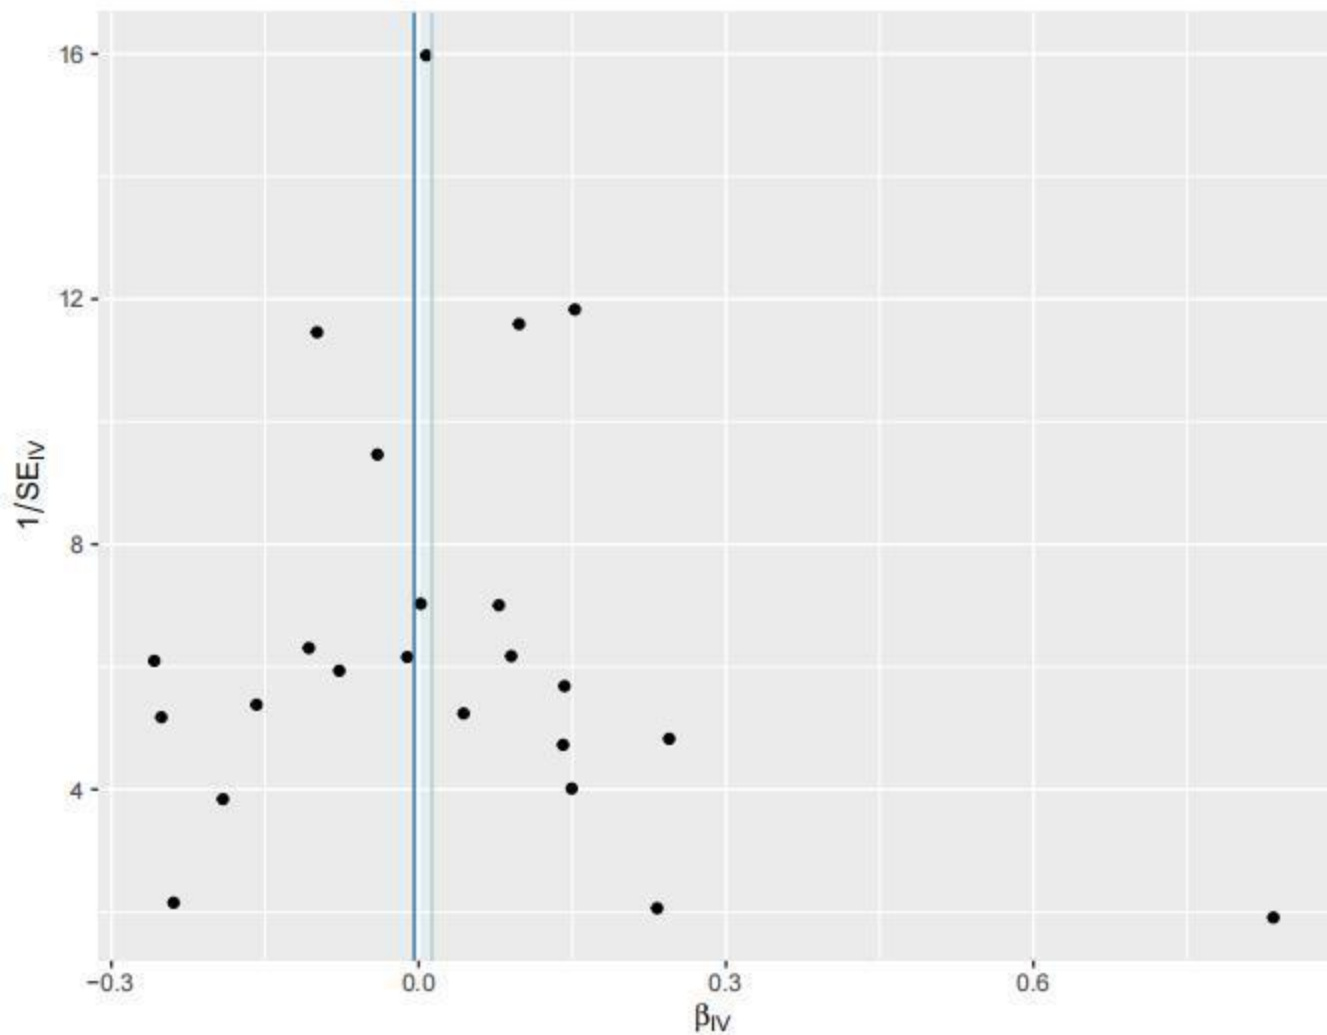

Funnel plot analyse of "CD80 on monocyte" on 'Aplastic anemia'

### MR Method

- Inverse variance weighted
- MR Egger

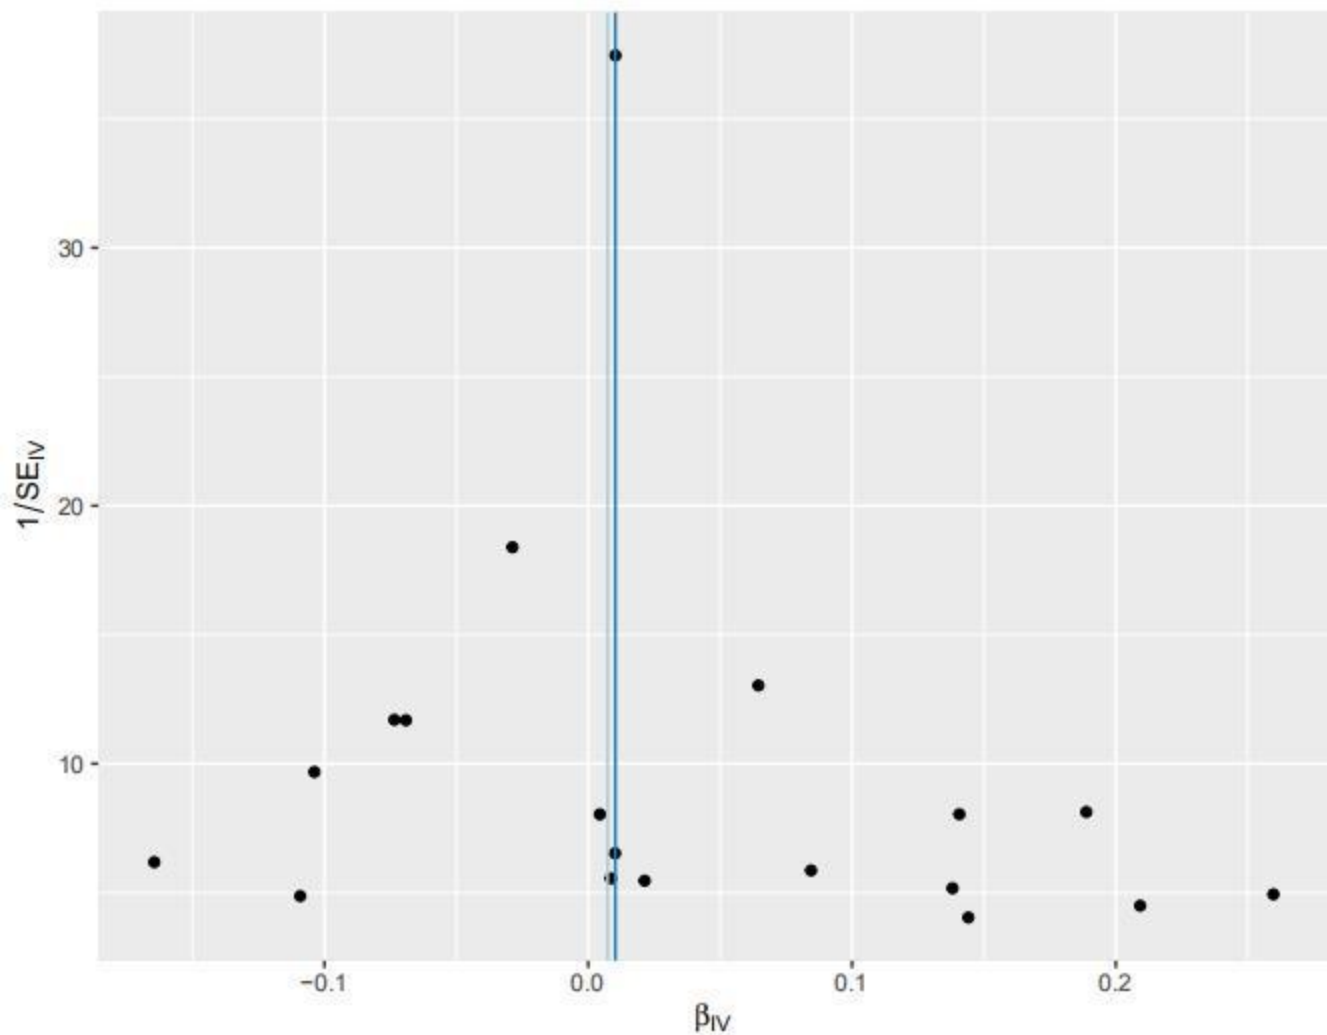

Funnel plot analyse of "BAFF-R on IgD+ CD24+" on 'Aplastic anemia'

MR Method

- Inverse variance weighted
- MR Egger

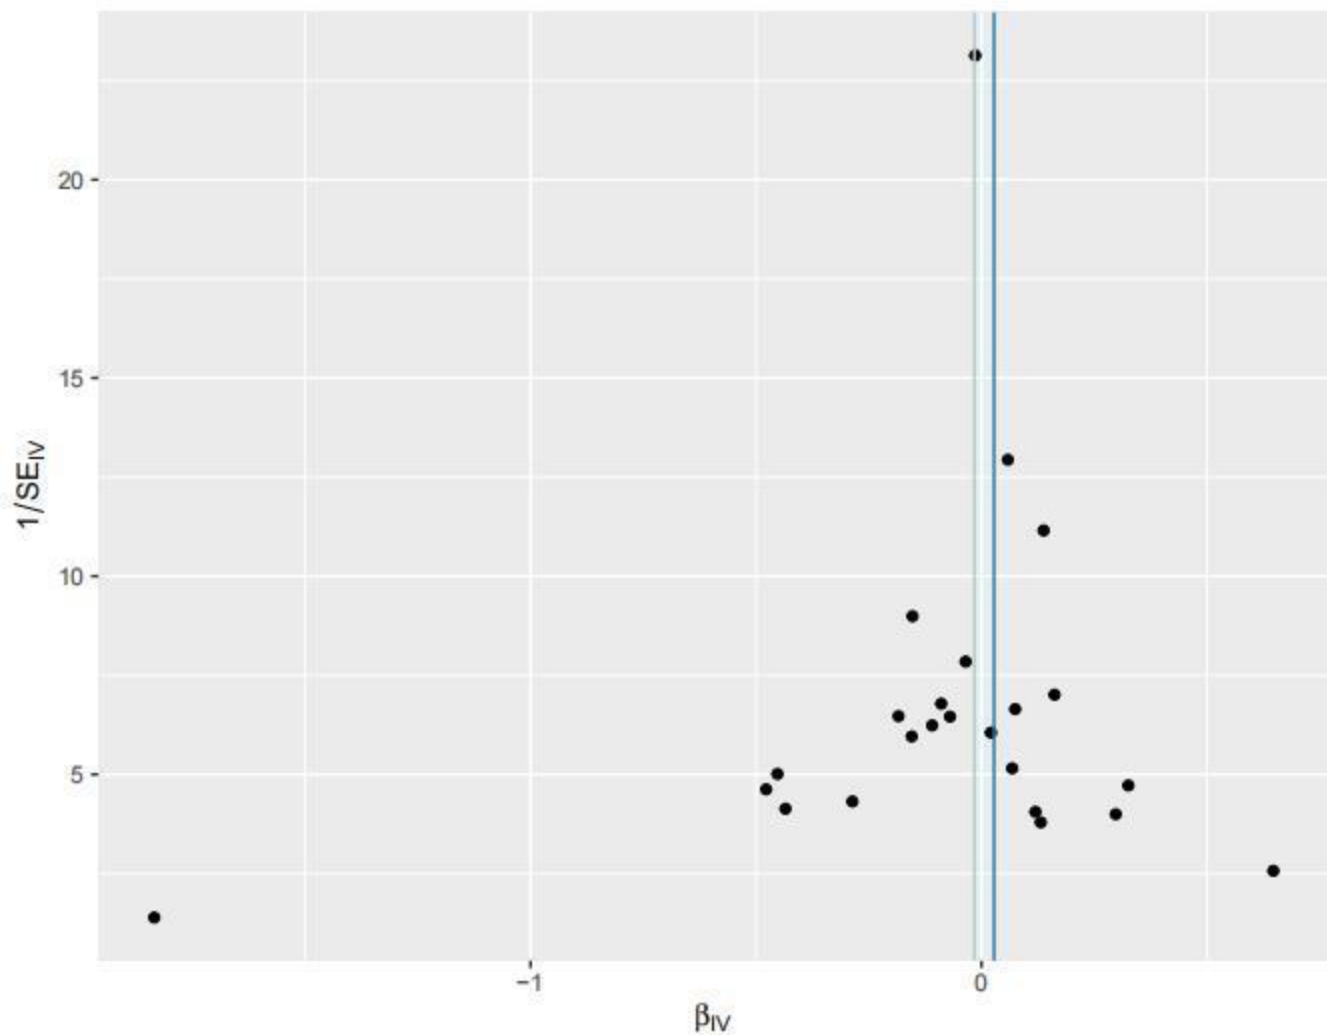

Funnel plot analyse of "CD38 on transitional" on 'Aplastic anemia'

### MR Method

Inverse variance weighted

MR Egger

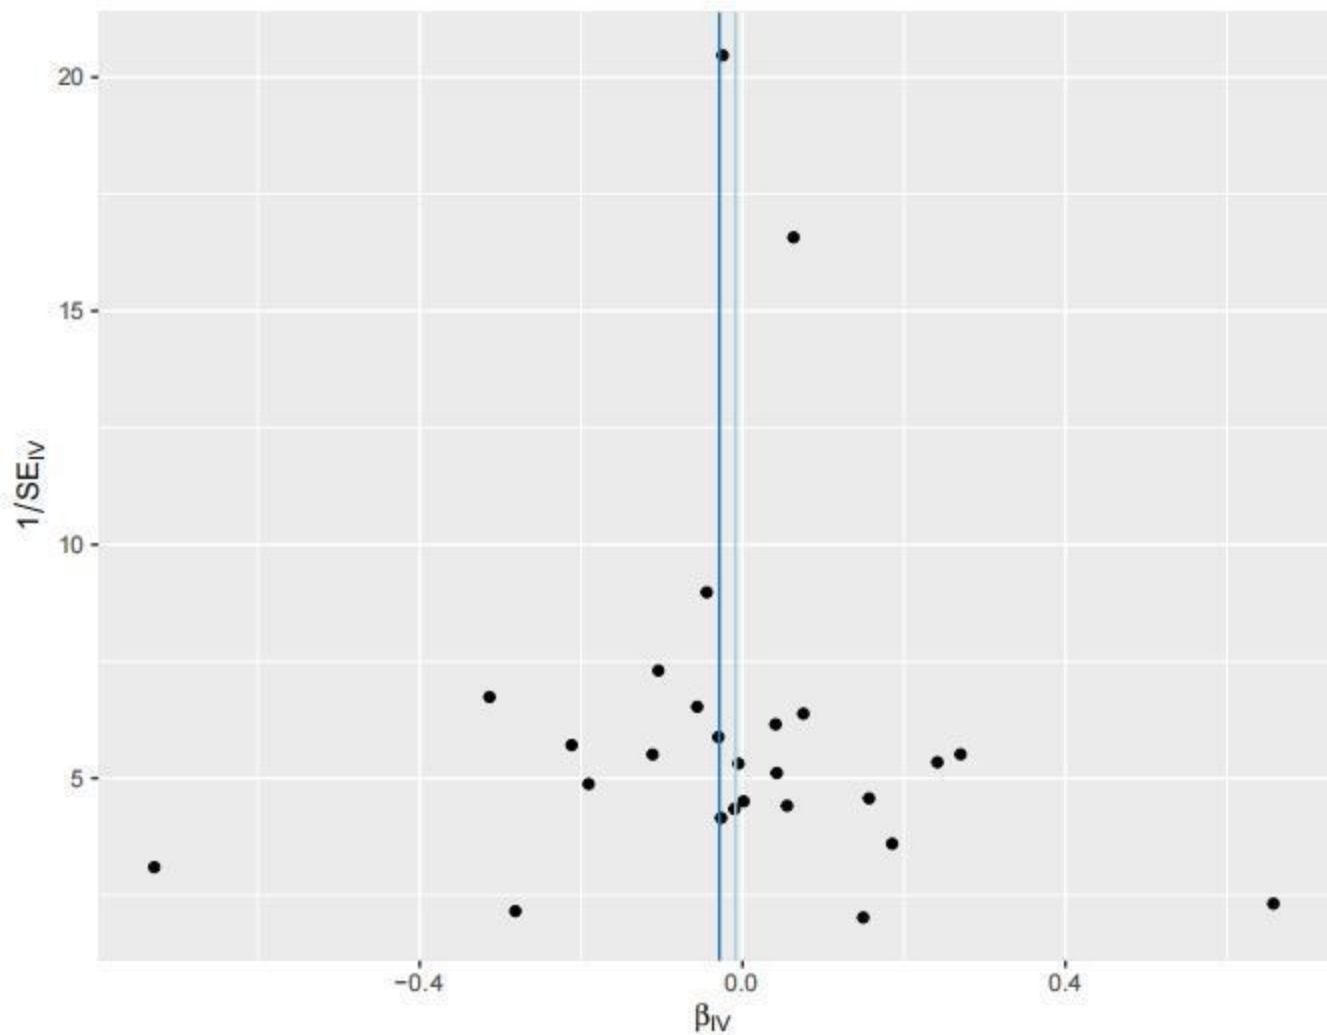

Funnel plot analyse of "Granulocyte %leukocyte" on 'Aplastic anemia'



MR Method

- Inverse variance weighted
- MR Egger

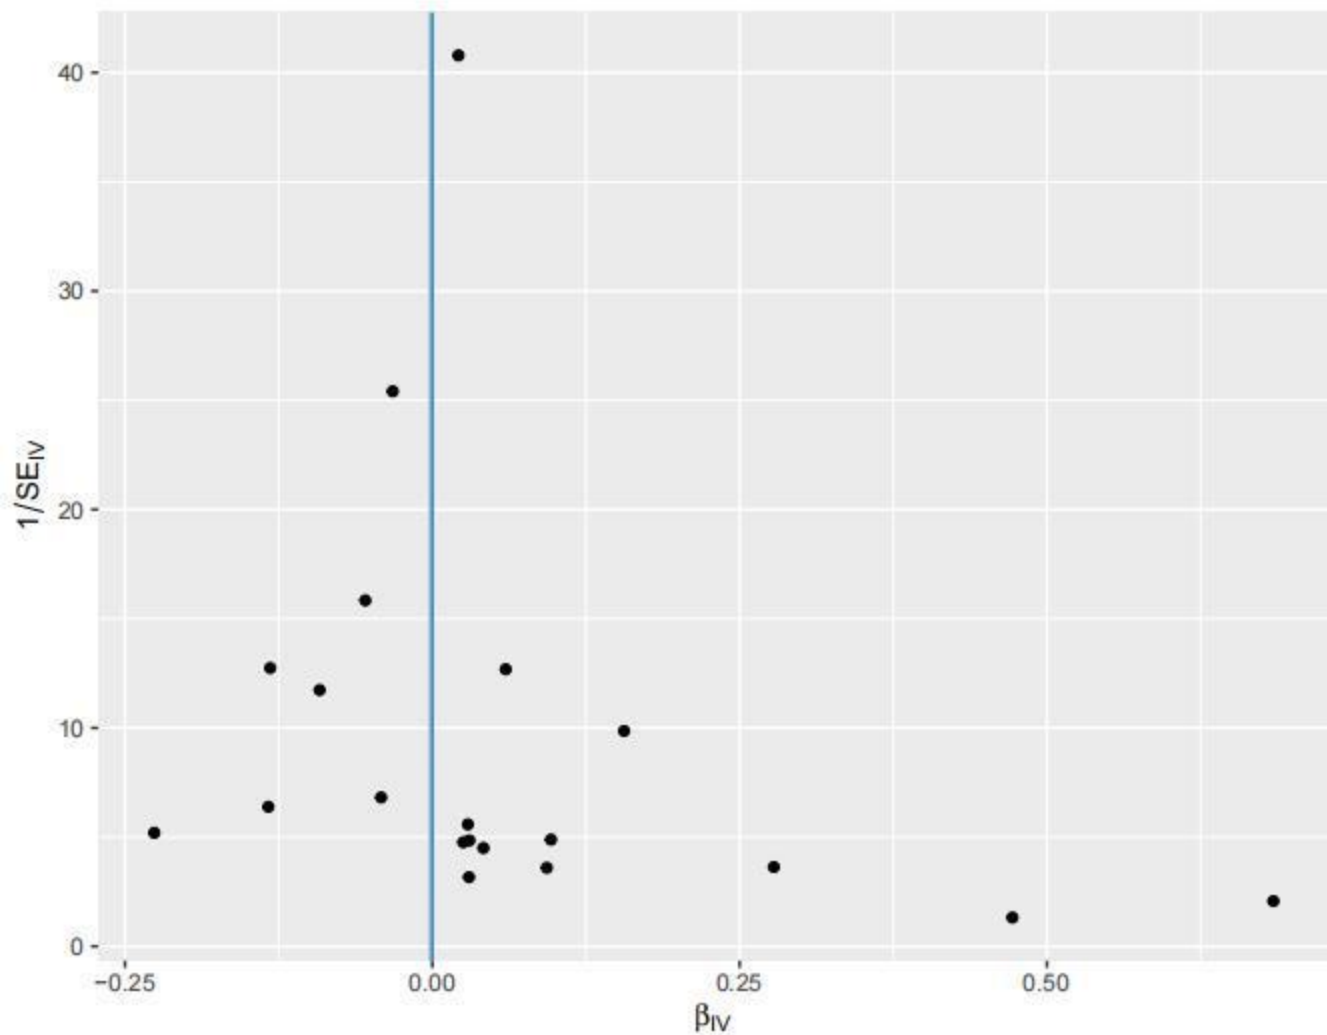

Funnel plot analyse of "CD38 on IgD- CD38dim" on 'Aplastic anemia'

### MR Method

- Inverse variance weighted
- MR Egger

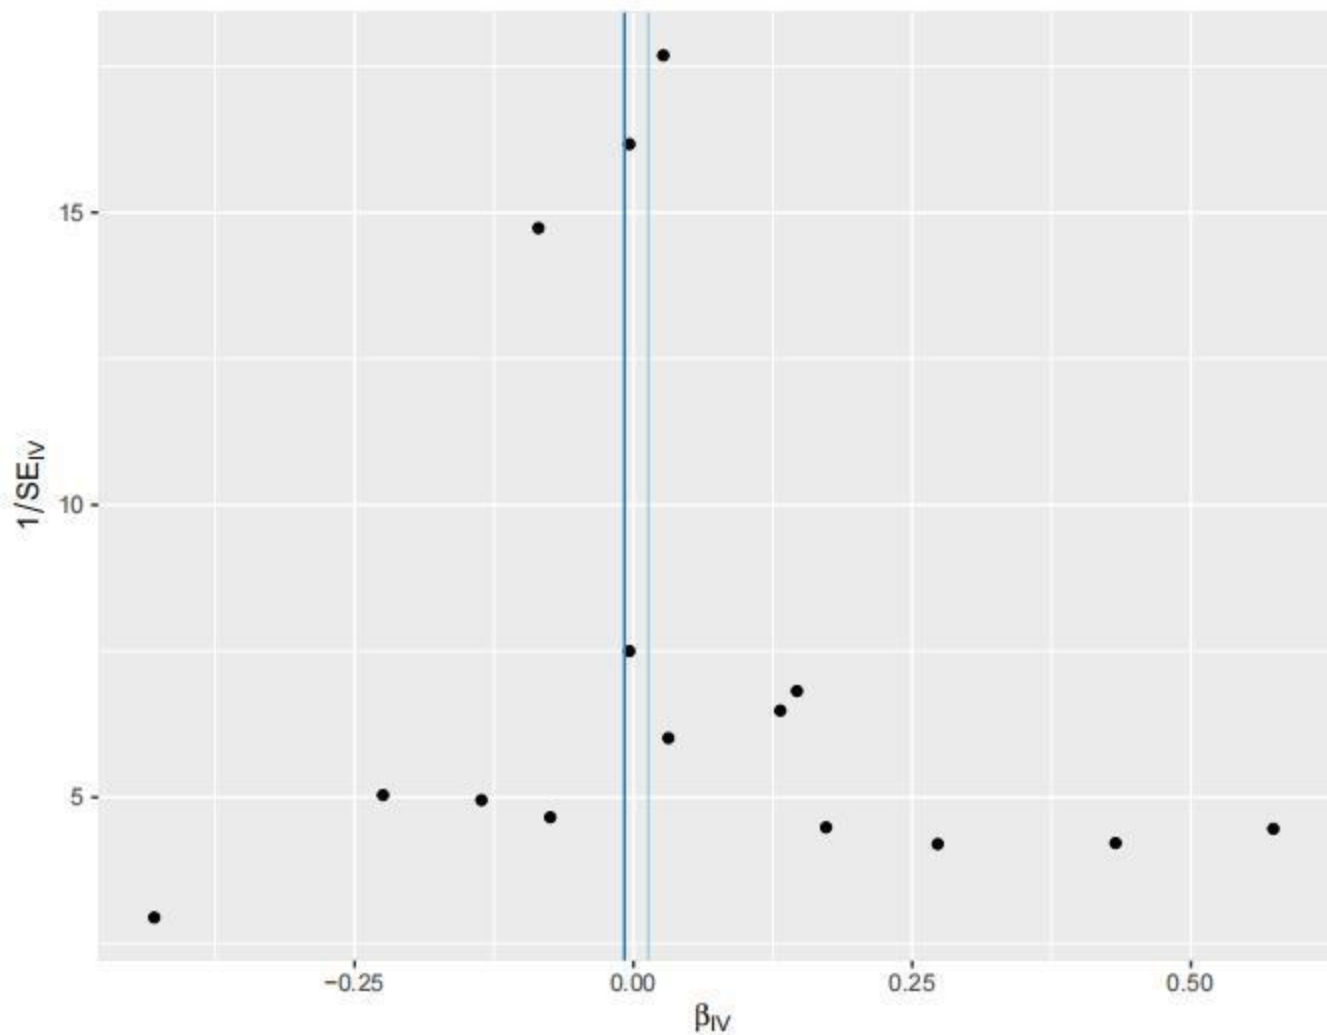

Funnel plot analyse of "CD4 on CD39+ resting Treg " on 'Aplastic anemia'

### MR Method

- Inverse variance weighted
- MR Egger

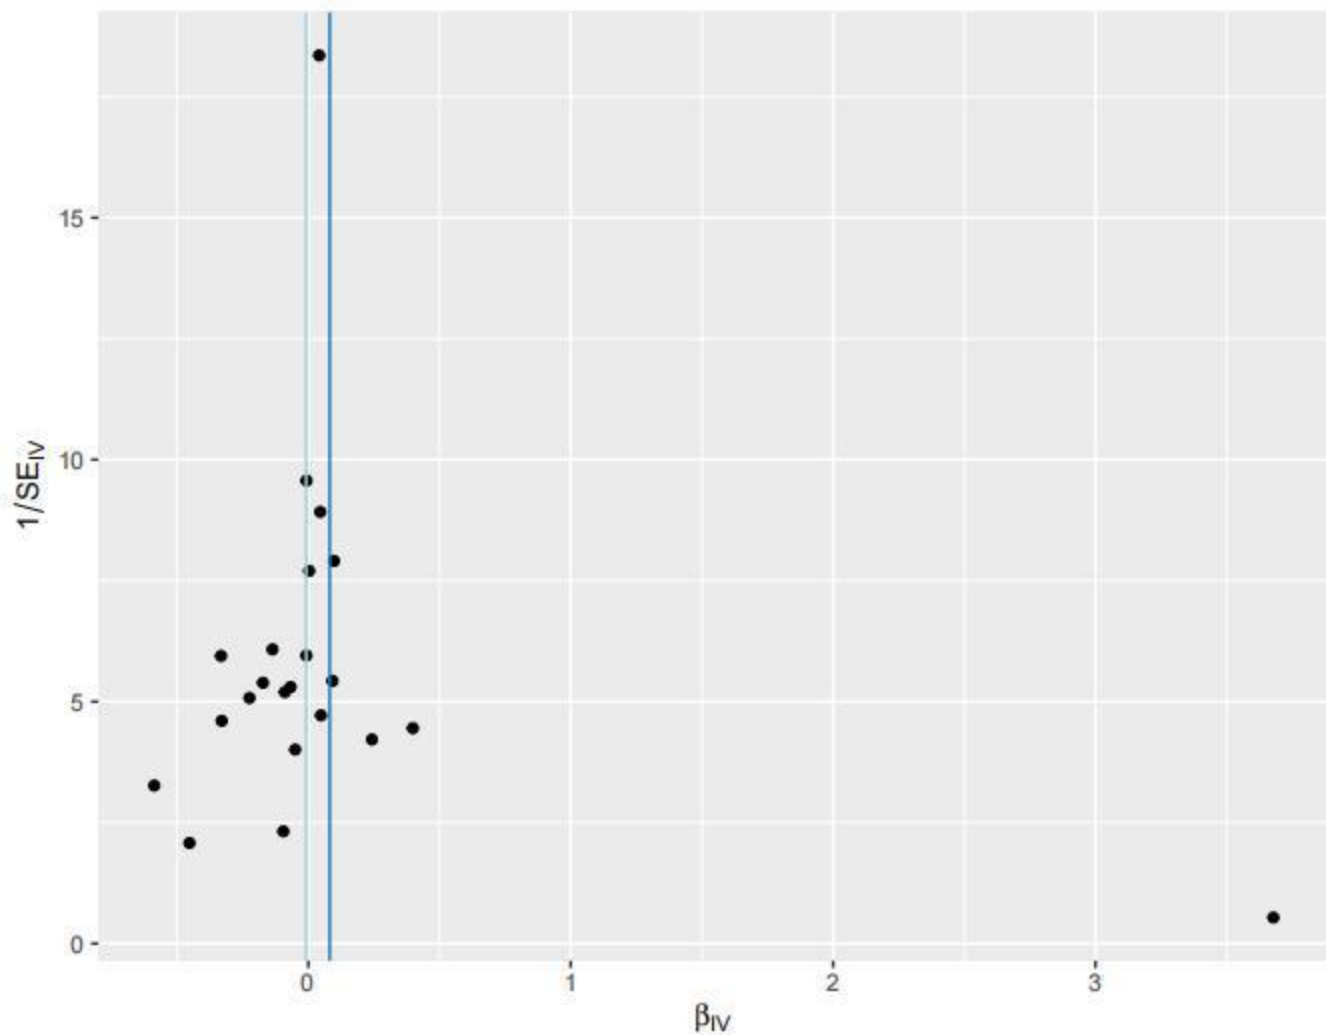

Funnel plot analyse of "CD11c+ monocyte %monocyte" on 'Aplastic anemia'

### MR Method

- Inverse variance weighted
- MR Egger

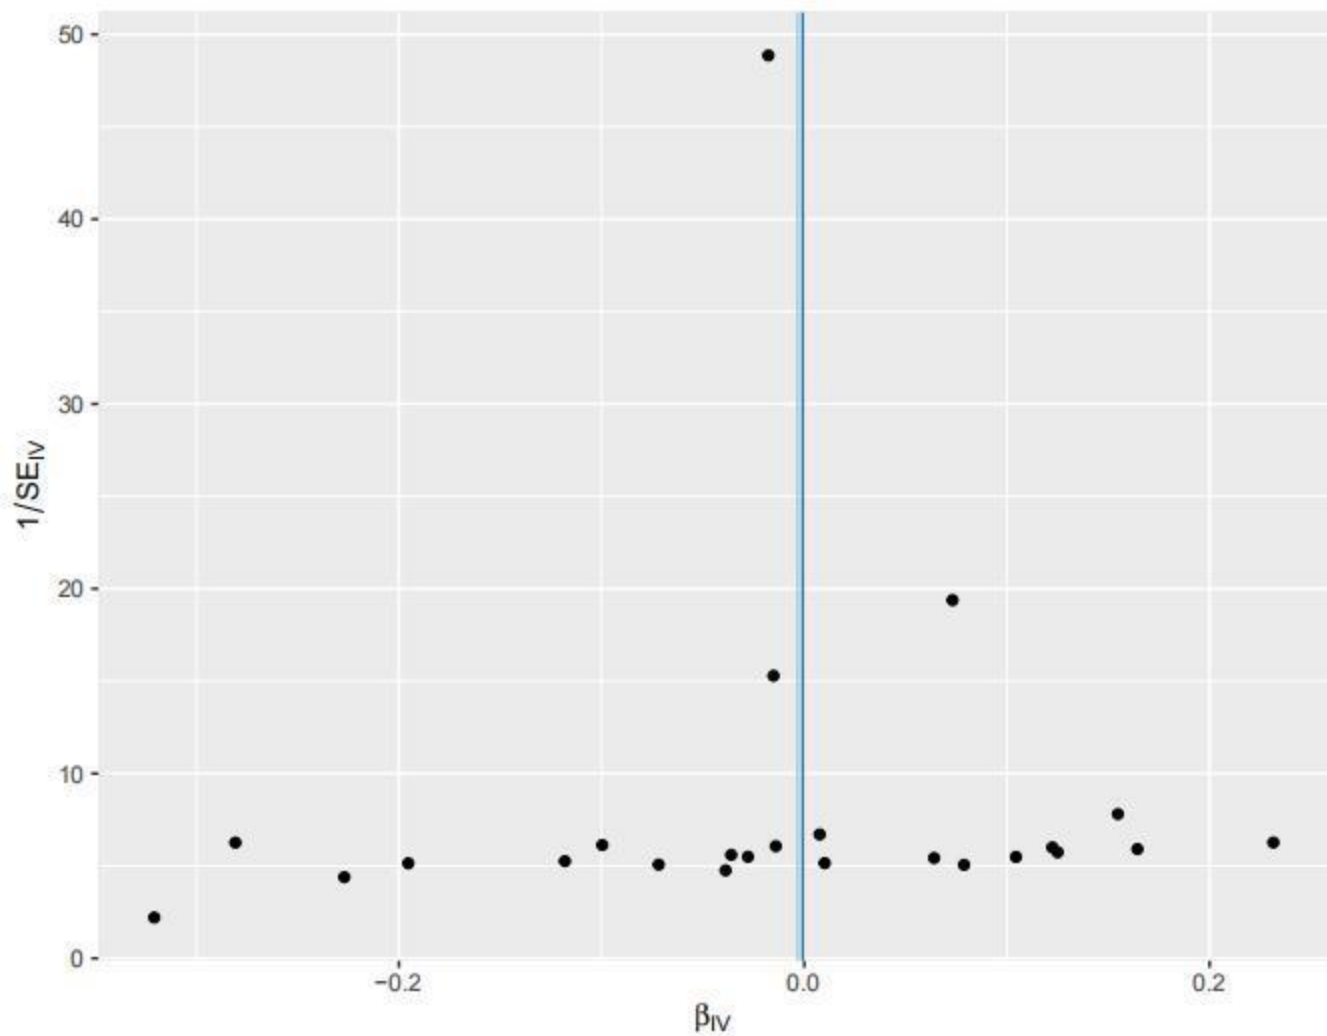

Funnel plot analyse of "EM CD8br AC" on 'Aplastic anemia'

### MR Method

- Inverse variance weighted
- MR Egger

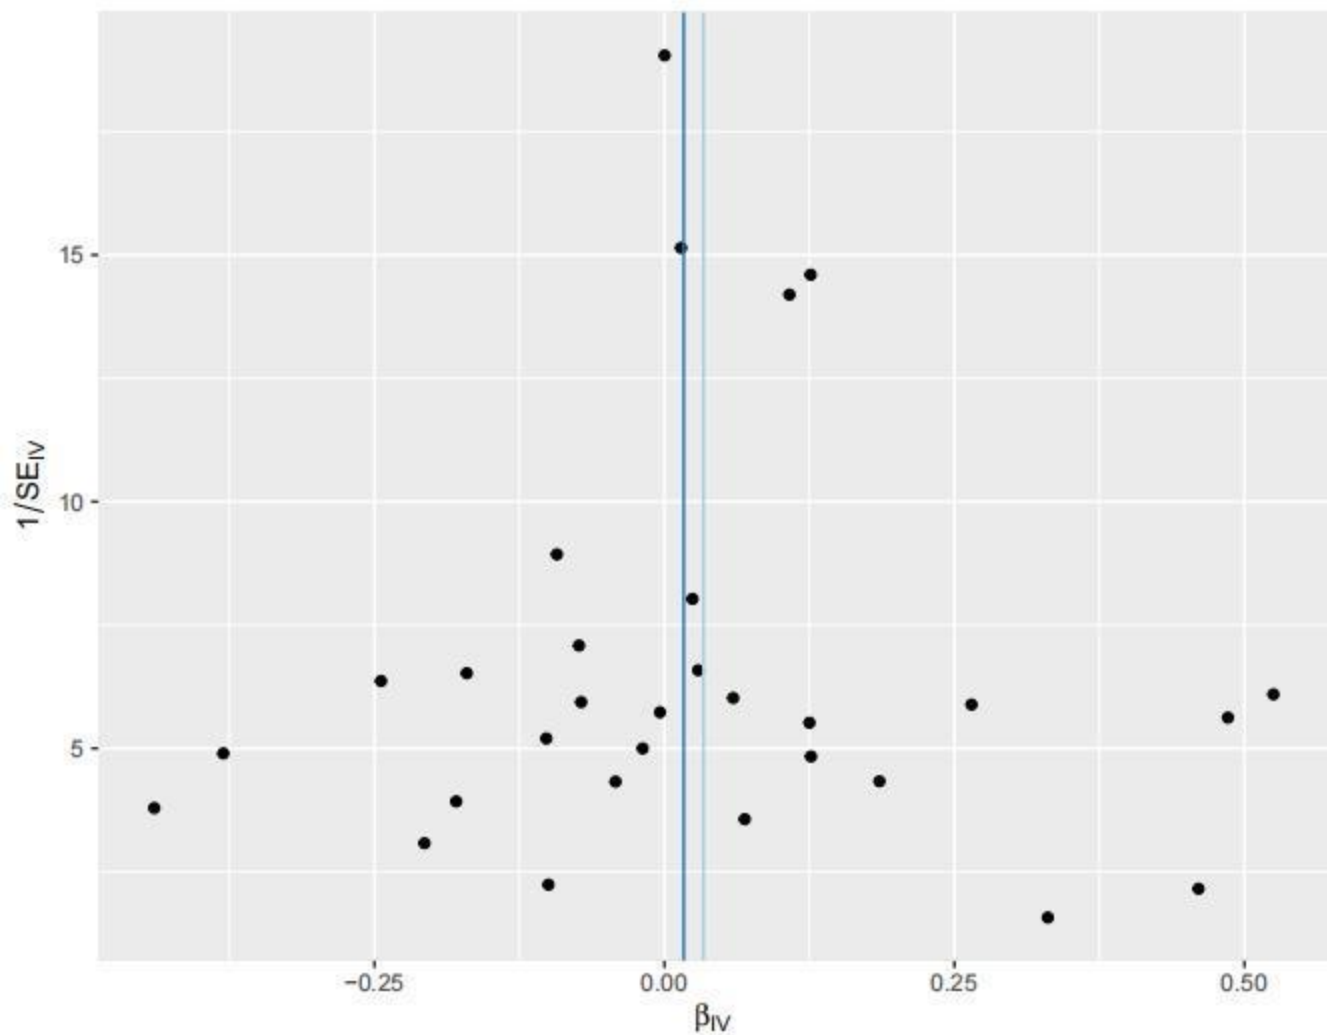

Funnel plot analyse of "CD8 on CD8br" on 'Aplastic anemia'

MR Method

- Inverse variance weighted
- MR Egger

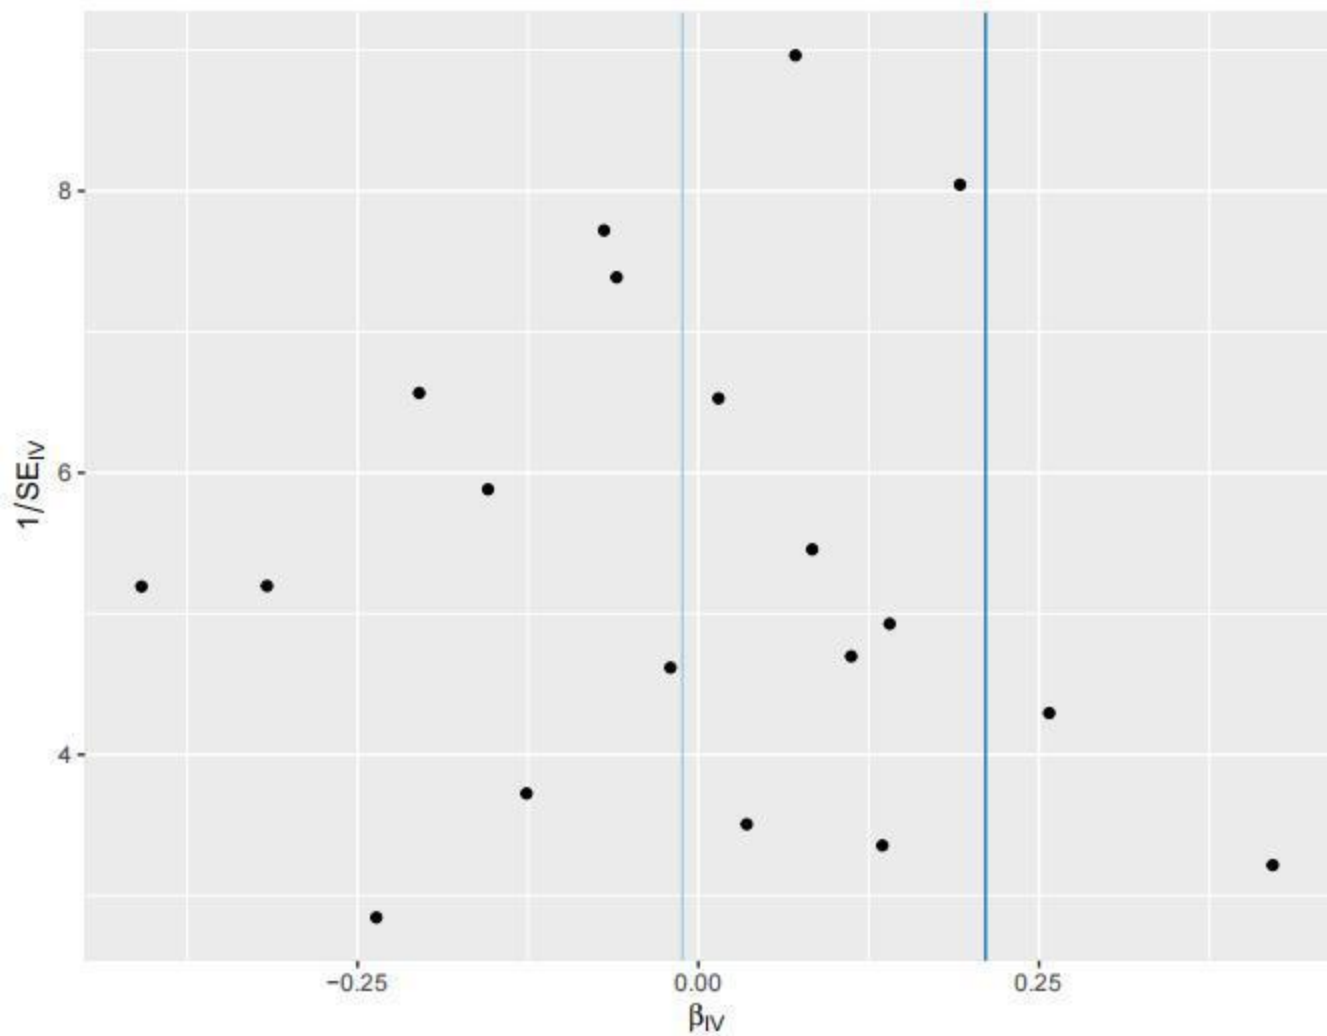

Funnel plot analyse of "CD20 on IgD- CD27-" on 'Aplastic anemia'

### MR Method

- Inverse variance weighted
- MR Egger

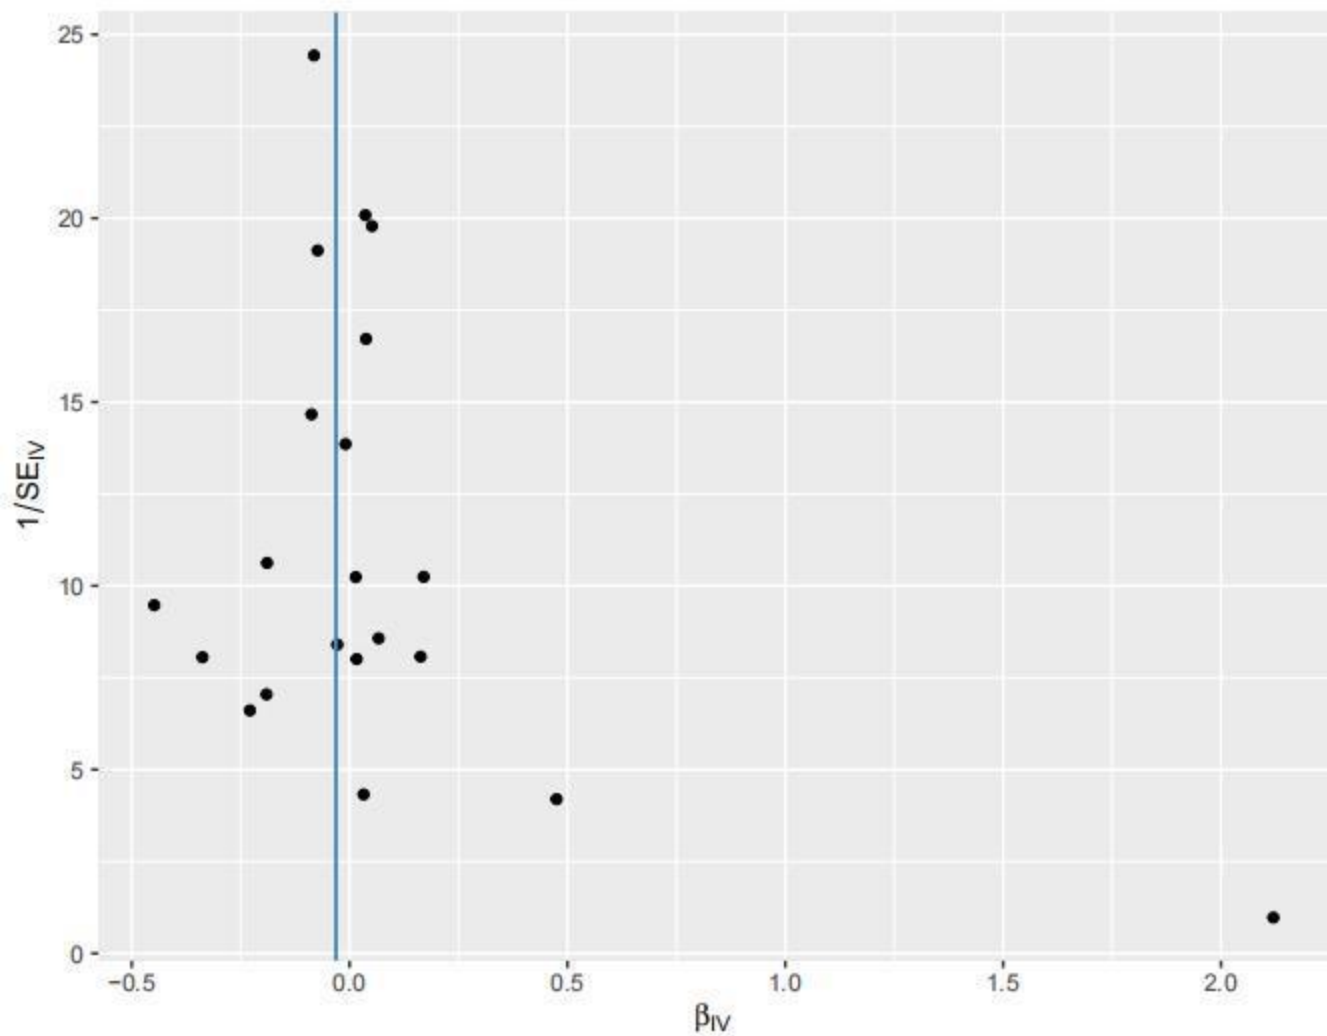

Funnel plot analyse of "HVEM on naive CD8br " on 'Aplastic anemia'

MR Method

Inverse variance weighted

MR Egger

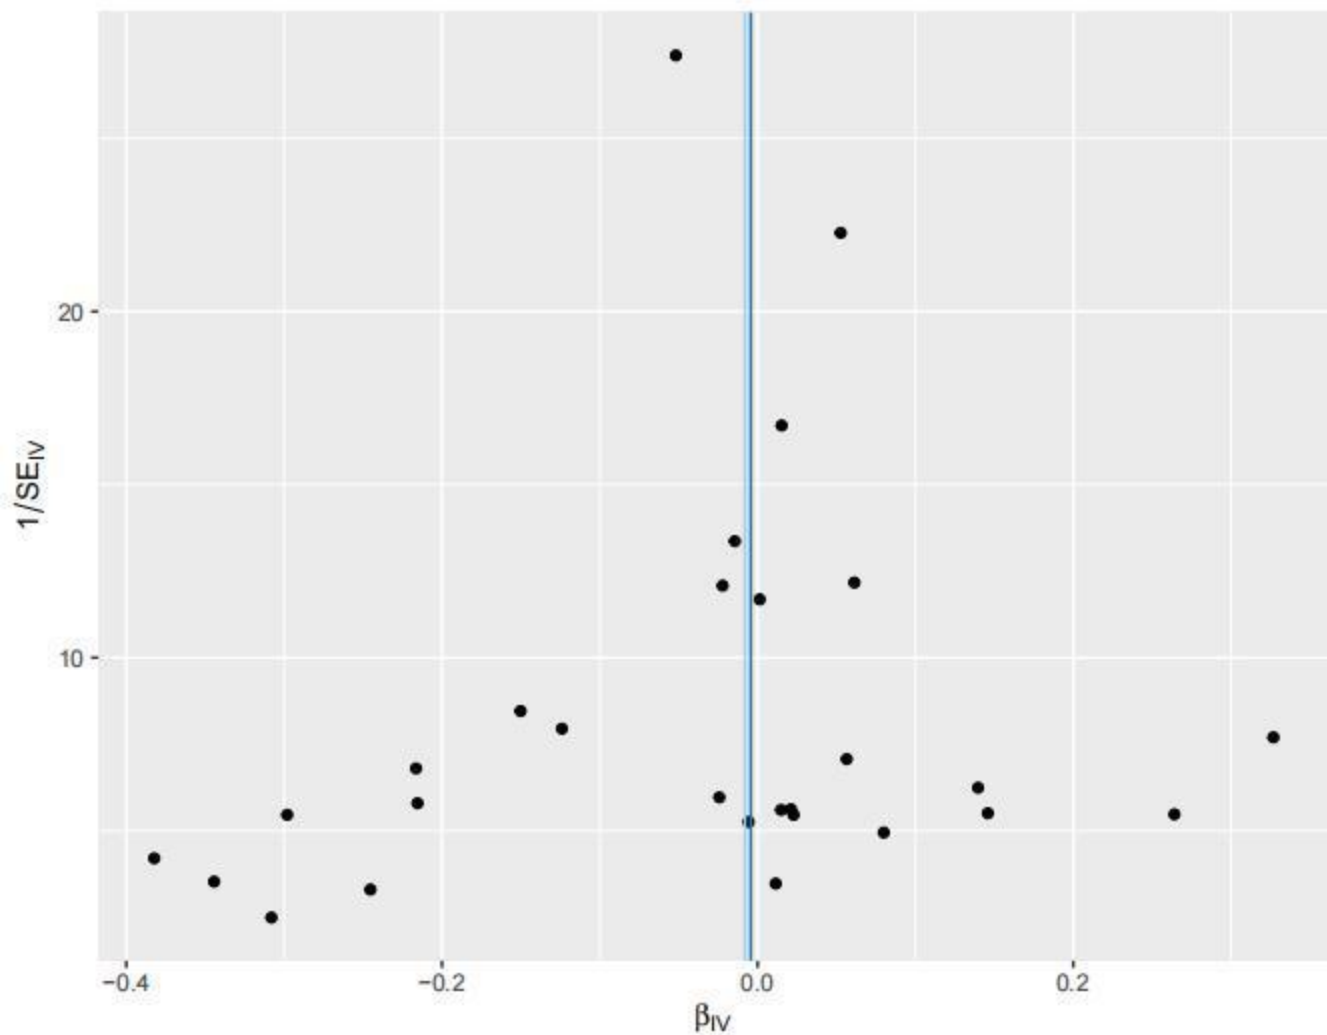

Funnel plot analyse of "CD39+ resting Treg AC" on 'Aplastic anemia'



### MR Method

- Inverse variance weighted
- MR Egger

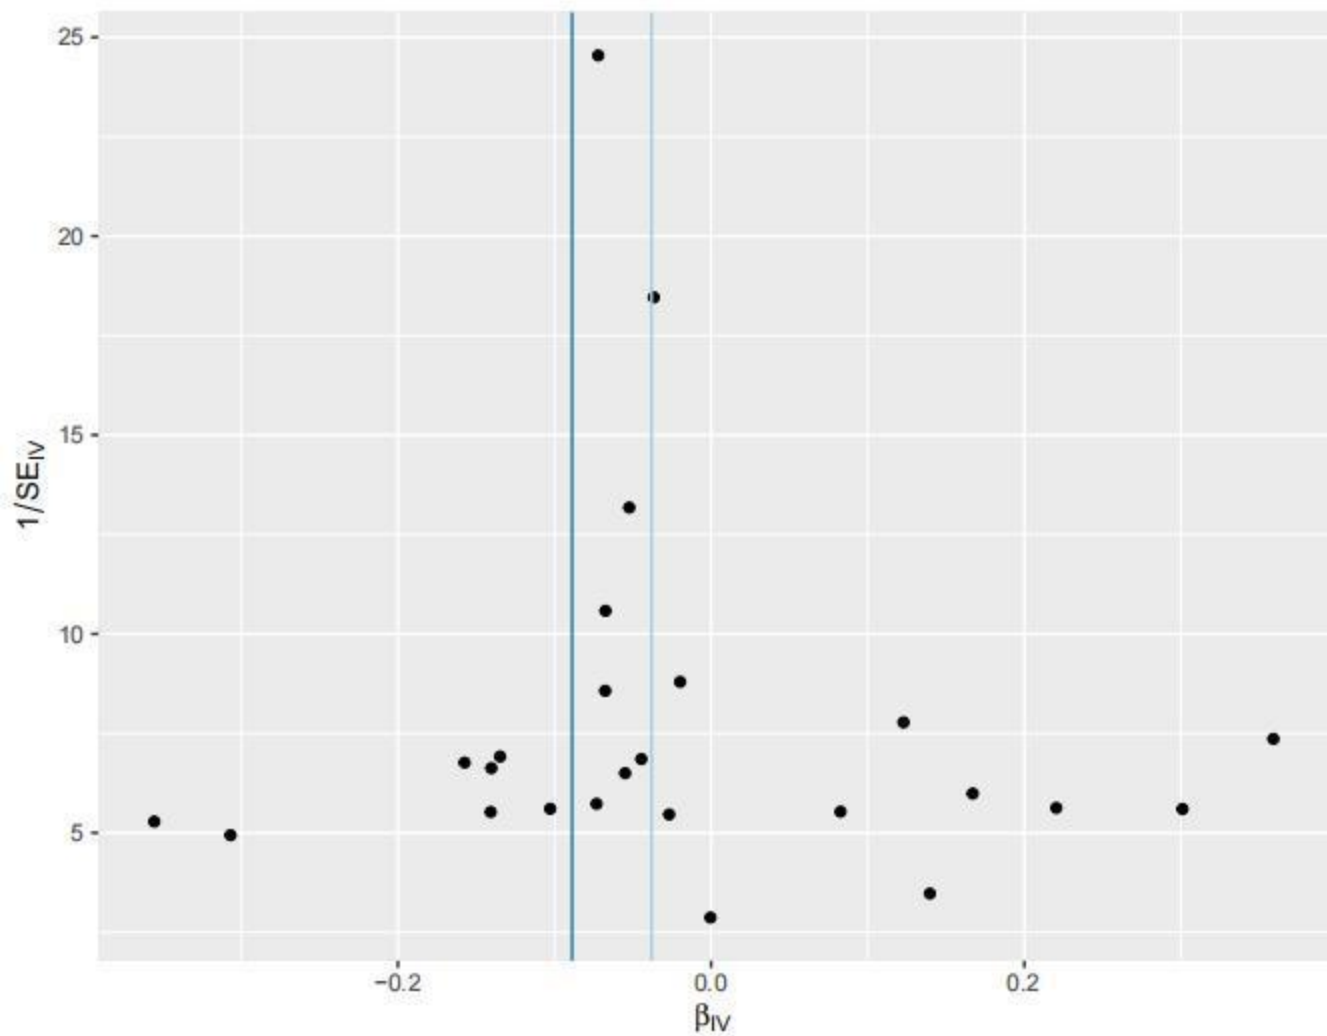

Funnel plot analysis of "CD3 on naive CD8br " on 'Aplastic anemia'

MR Method

Inverse variance weighted

MR Egger

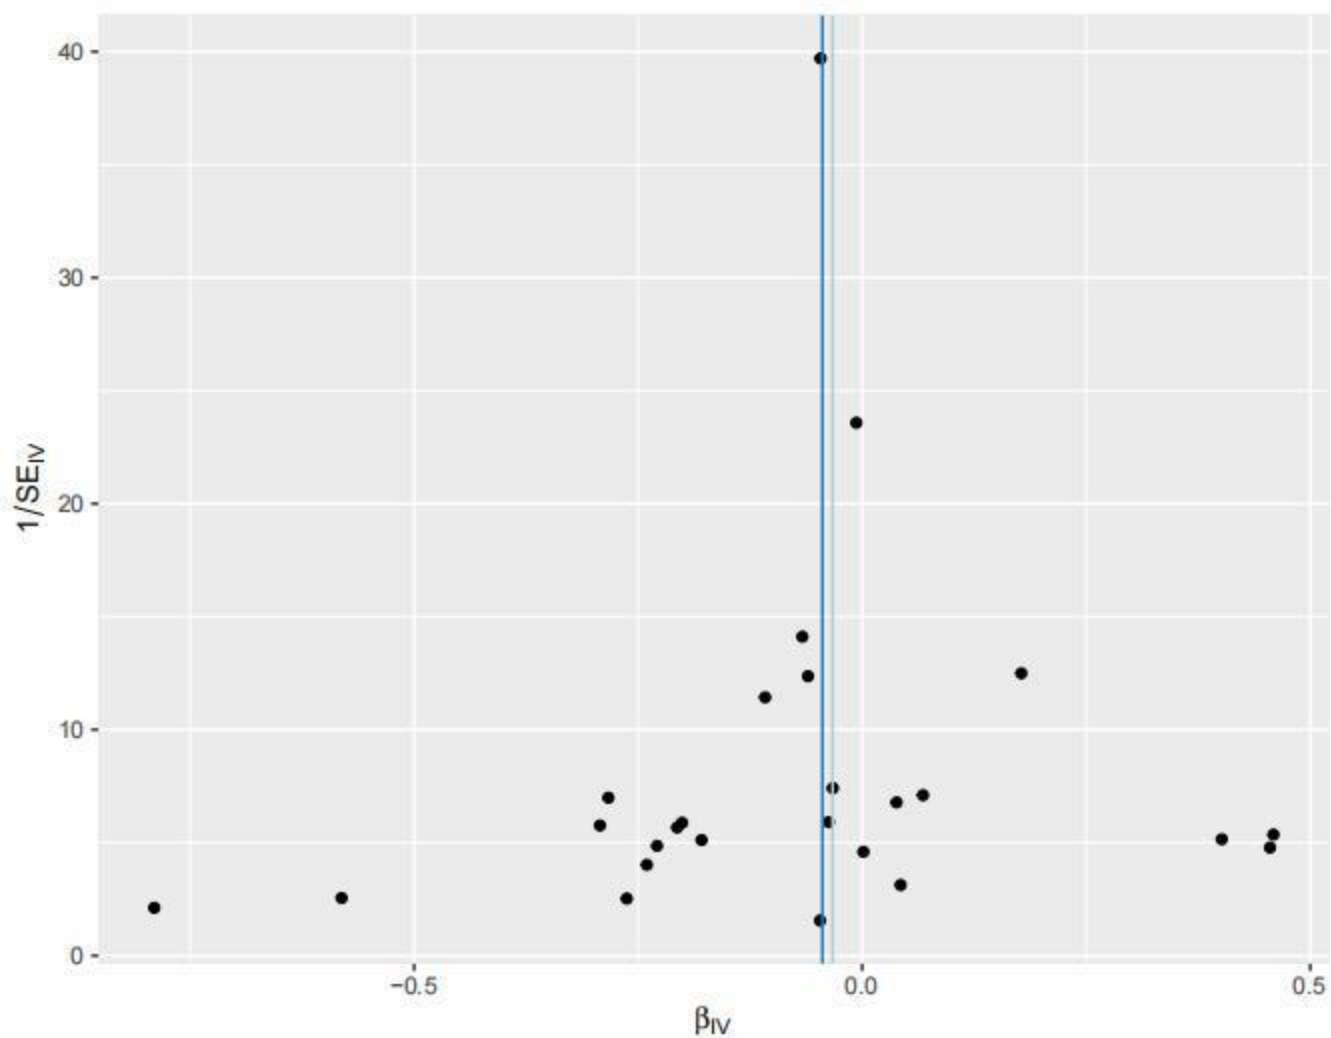

Funnel plot analyse of "IgD- CD38dim %B cell" on 'Aplastic anemia'

### MR Method

- Inverse variance weighted
- MR Egger

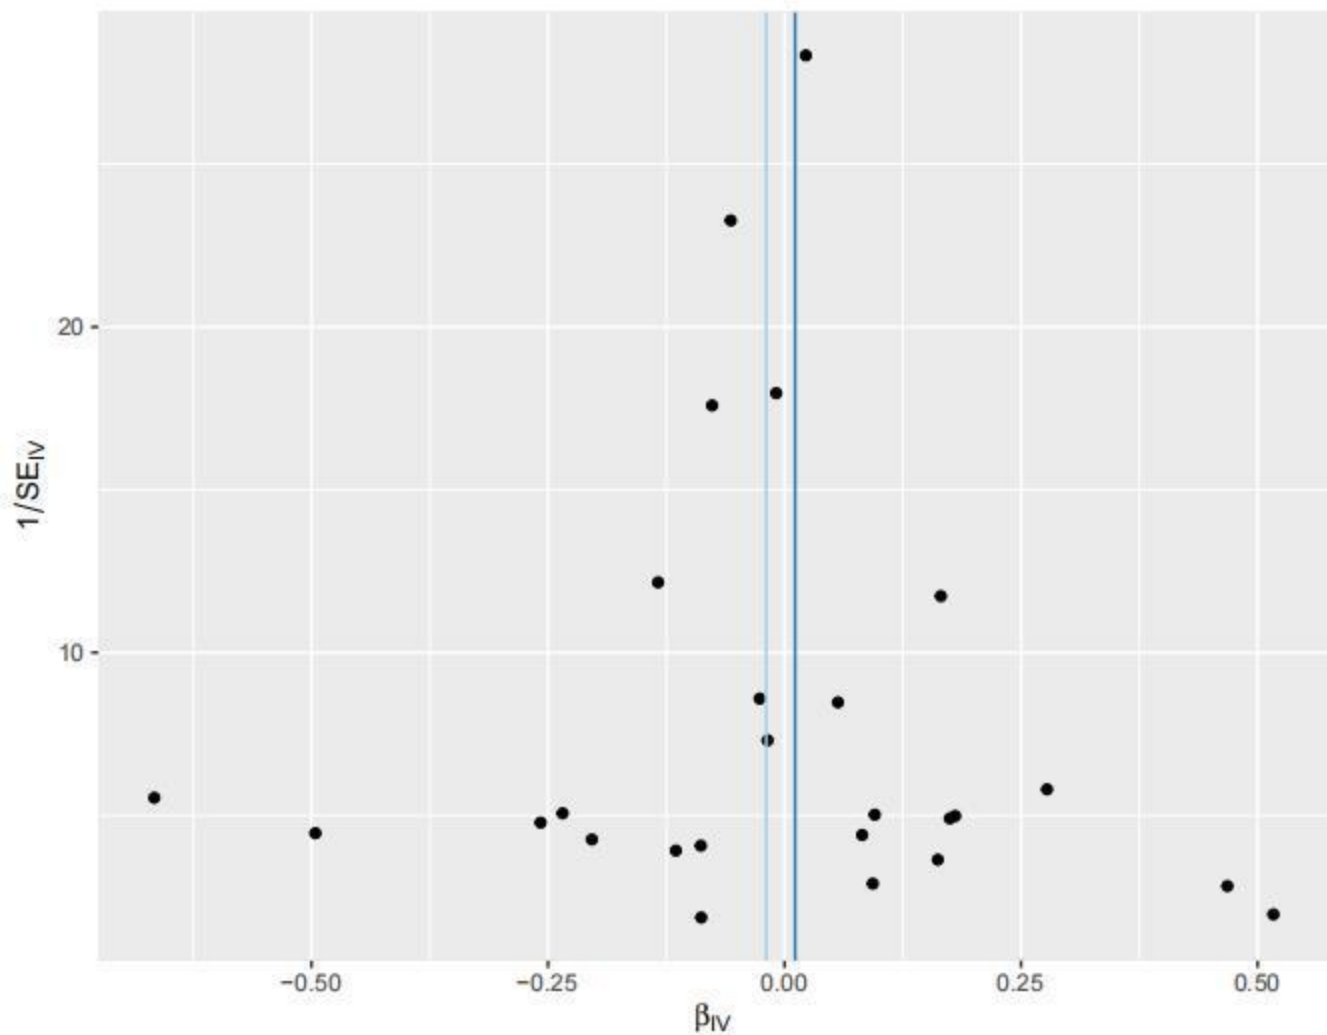

Funnel plot analyse of "CD25 on CD45RA- CD4 not Treg " on 'Aplastic anemia'

MR Method

- Inverse variance weighted
- MR Egger

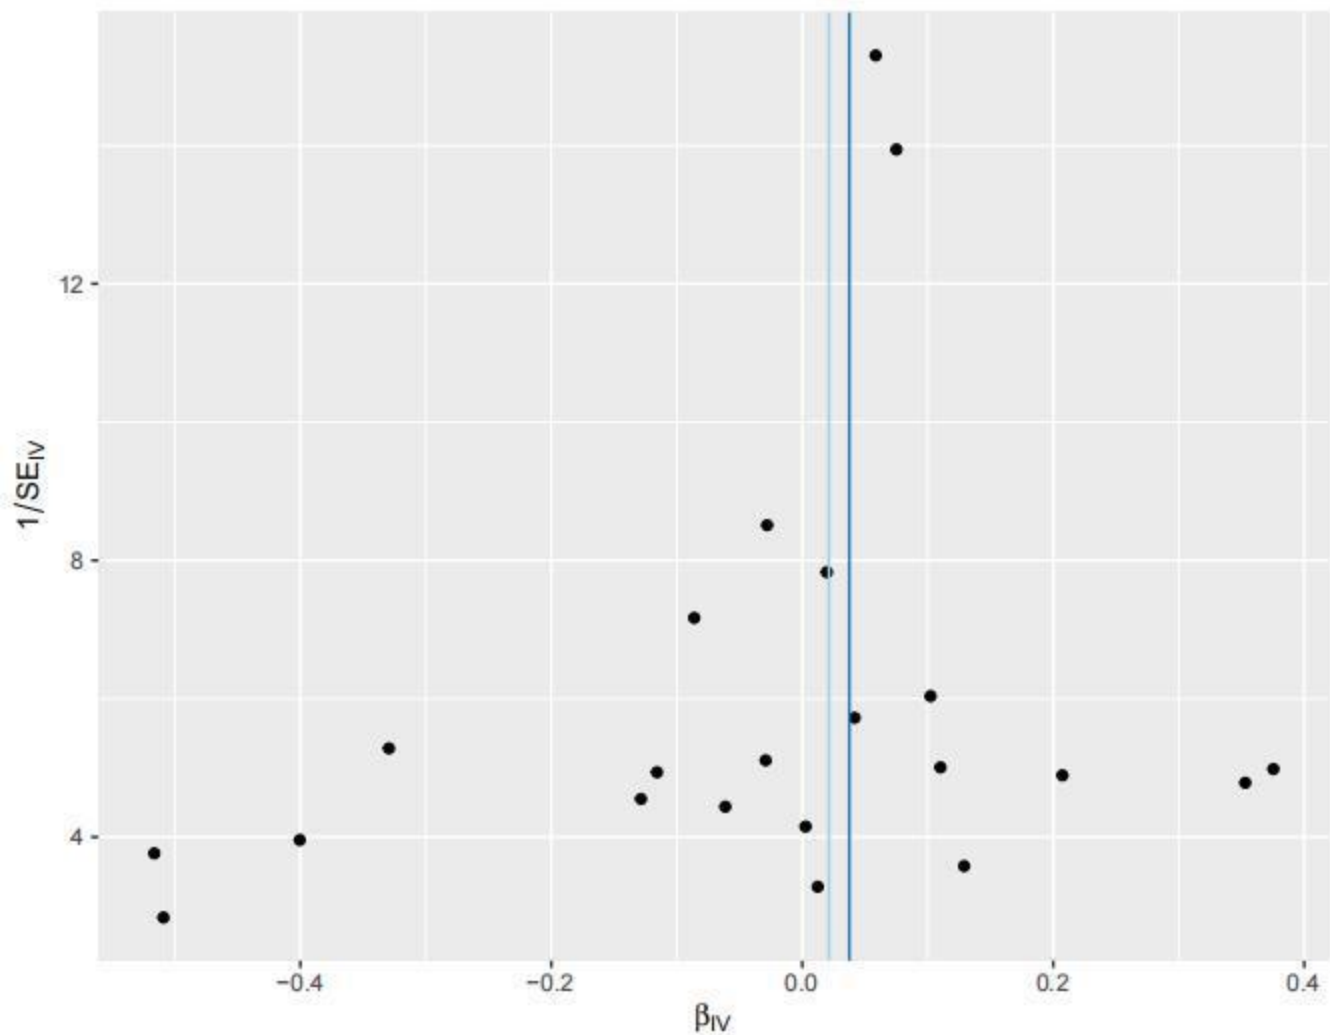

Funnel plot analyse of "CD25 on transitional" on 'Aplastic anemia'

MR Method

- Inverse variance weighted
- MR Egger

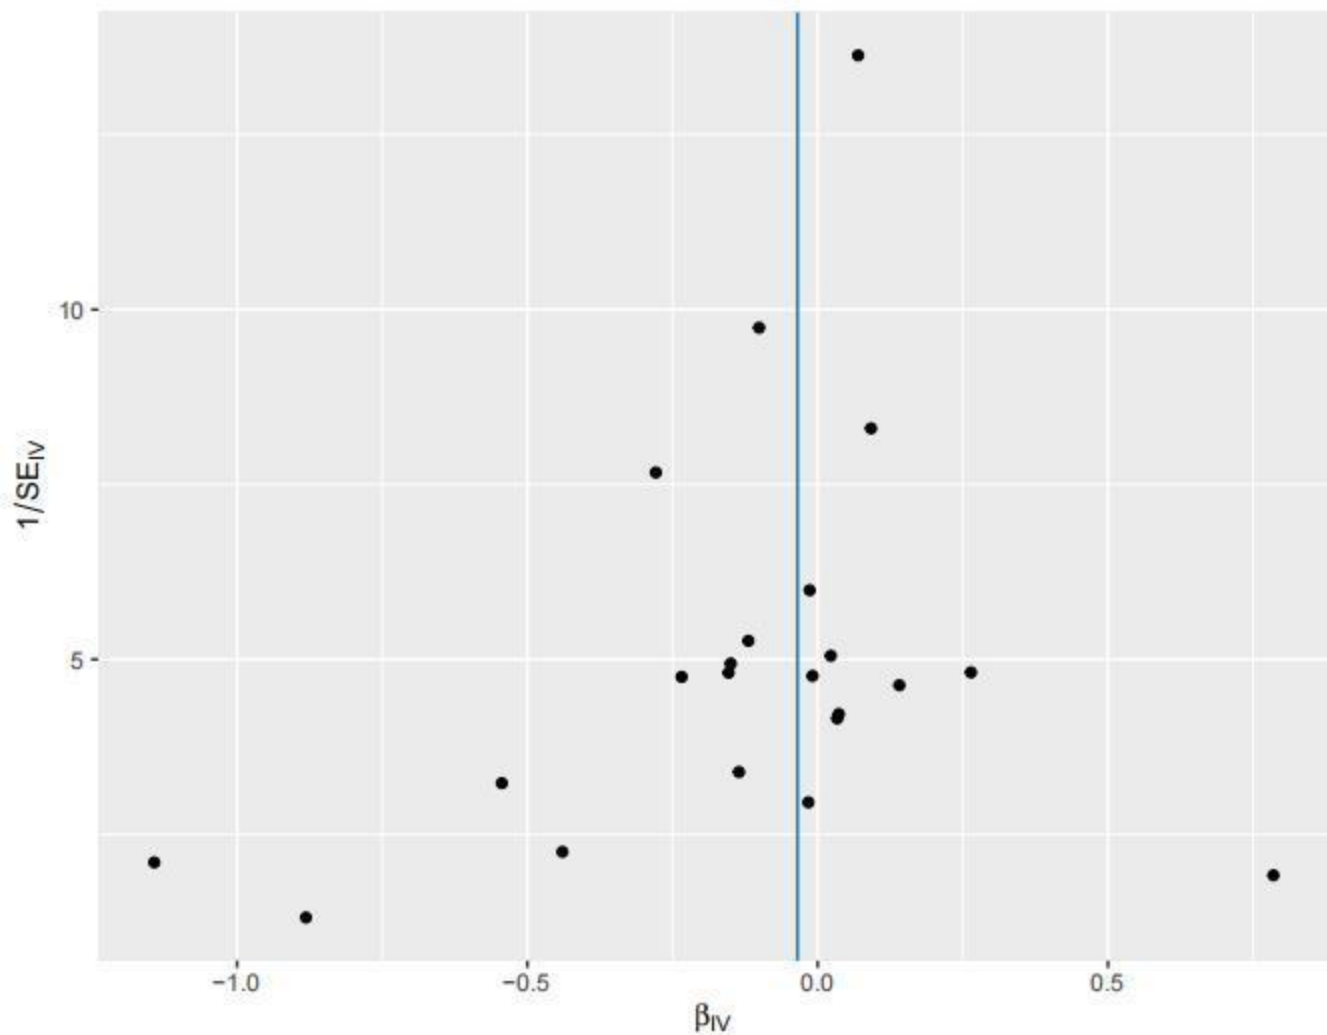

Funnel plot analyse of "CD4+ CD8dim %lymphocyte" on 'Aplastic anemia'

### MR Method

Inverse variance weighted

MR Egger

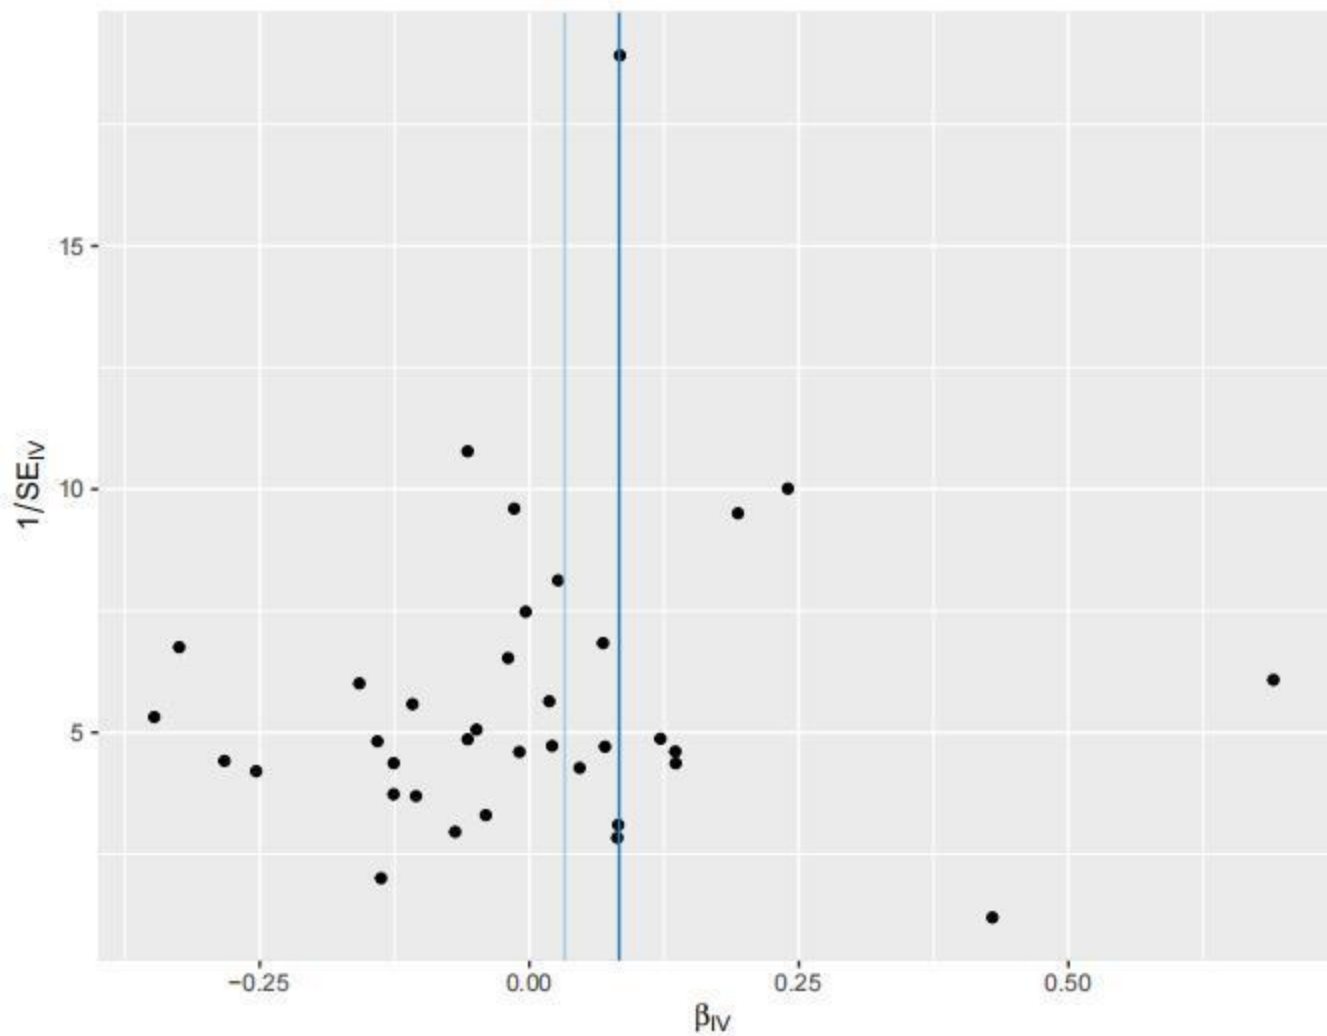

Funnel plot analyse of "Naive CD4+ %CD4+" on 'Aplastic anemia'

### MR Method

- Inverse variance weighted
- MR Egger

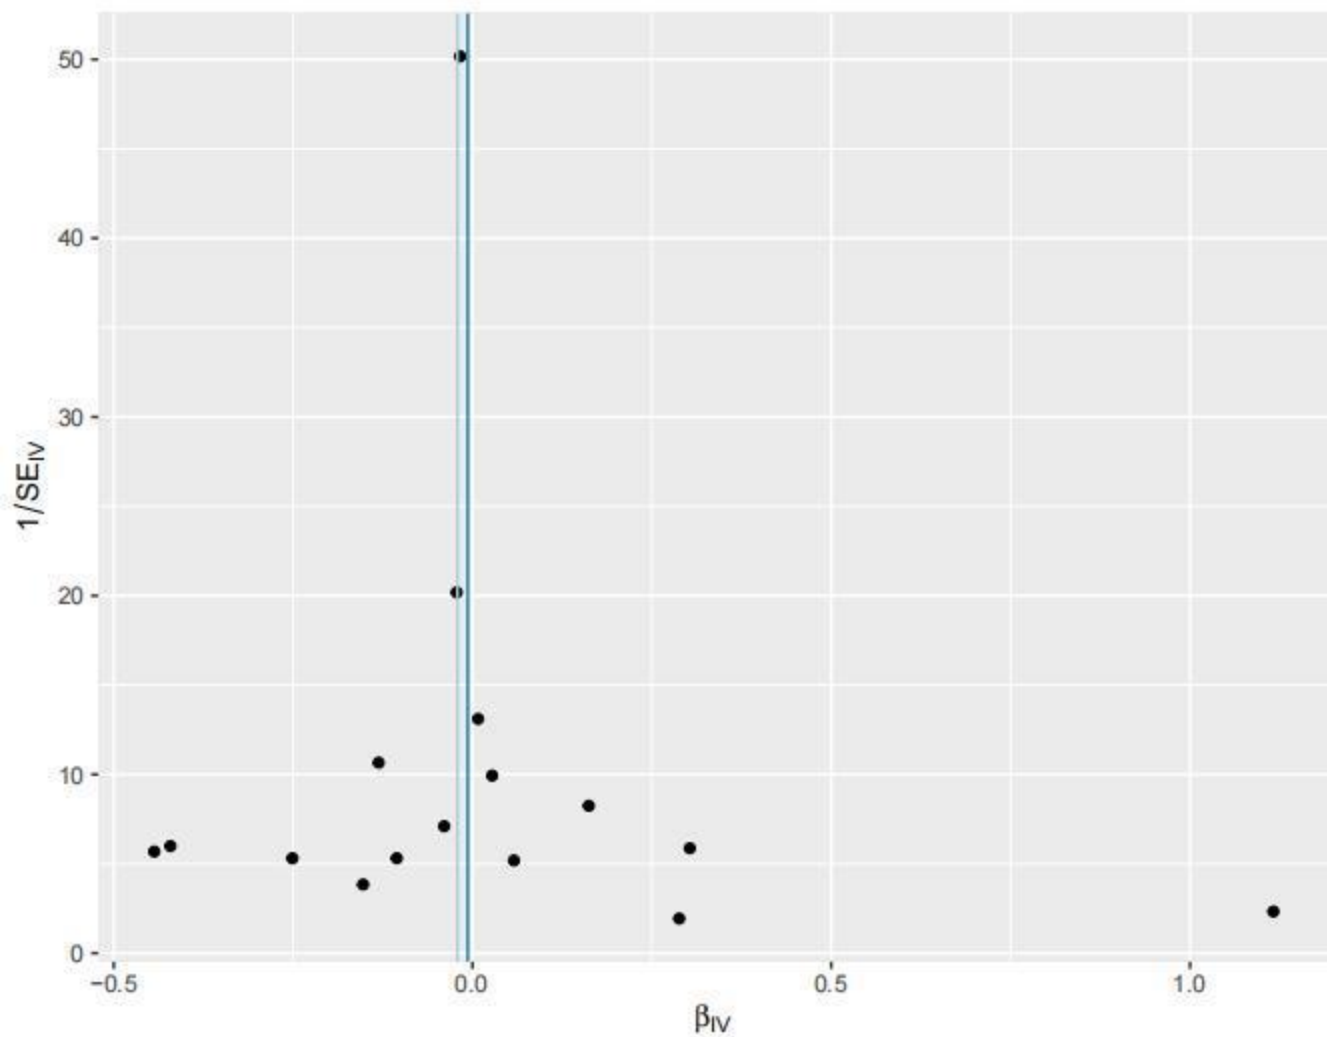

Funnel plot analyse of "CD45RA- CD4+ AC" on 'Aplastic anemia'

MR Method

- Inverse variance weighted
- MR Egger

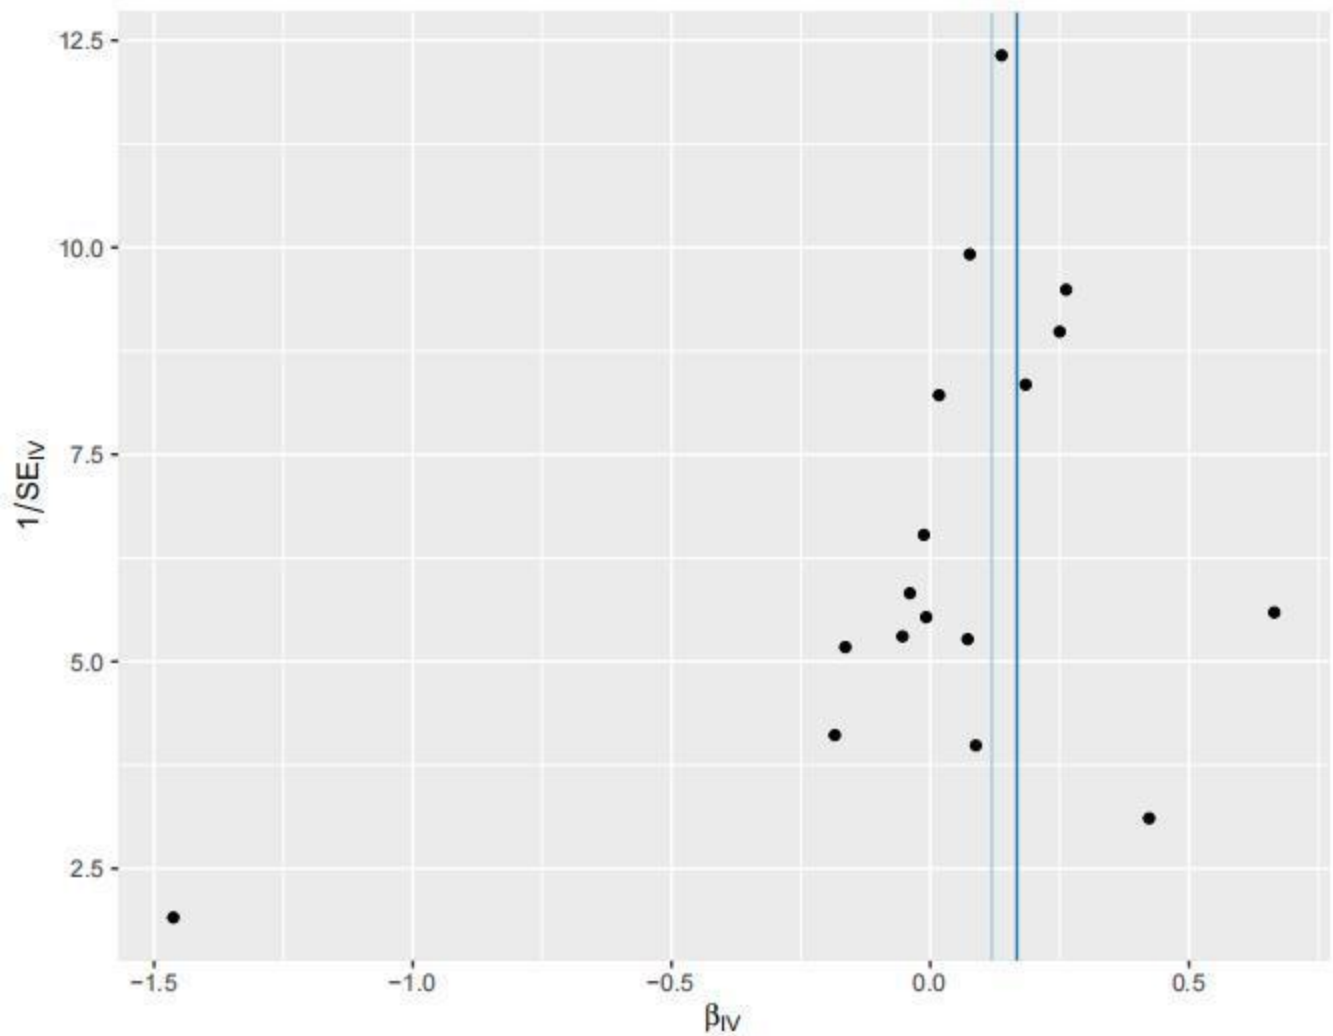

Funnel plot analyse of "CD38 on IgD+ CD24-" on 'Aplastic anemia'



### MR Method

- Inverse variance weighted
- MR Egger

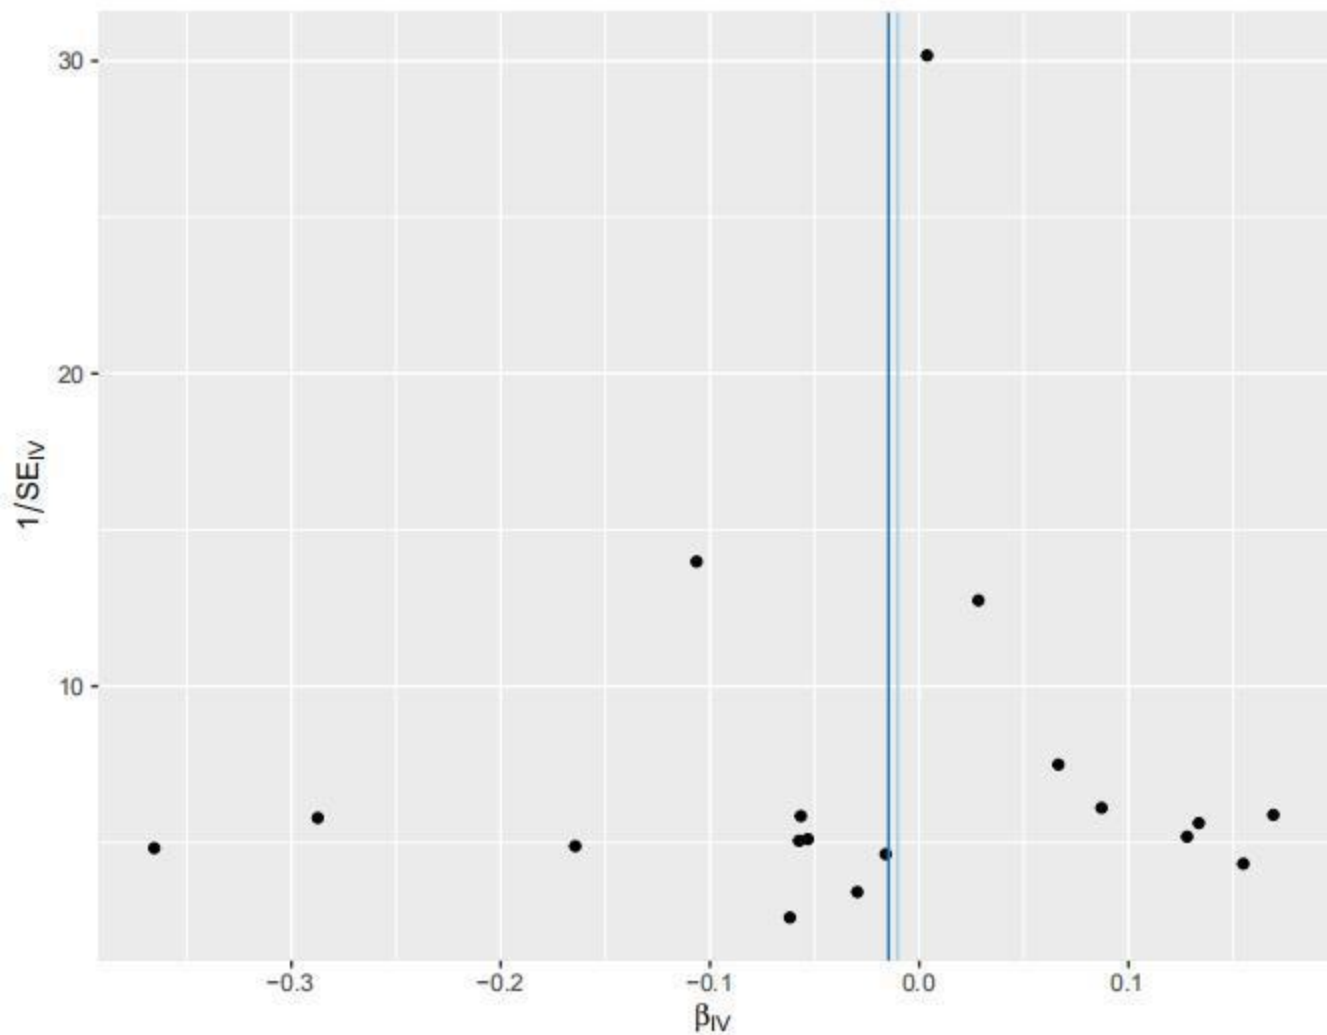

Funnel plot analyse of "CD28- CD127- CD25++ CD8br %CD8br" on 'Aplastic anemia'

MR Method

- Inverse variance weighted
- MR Egger

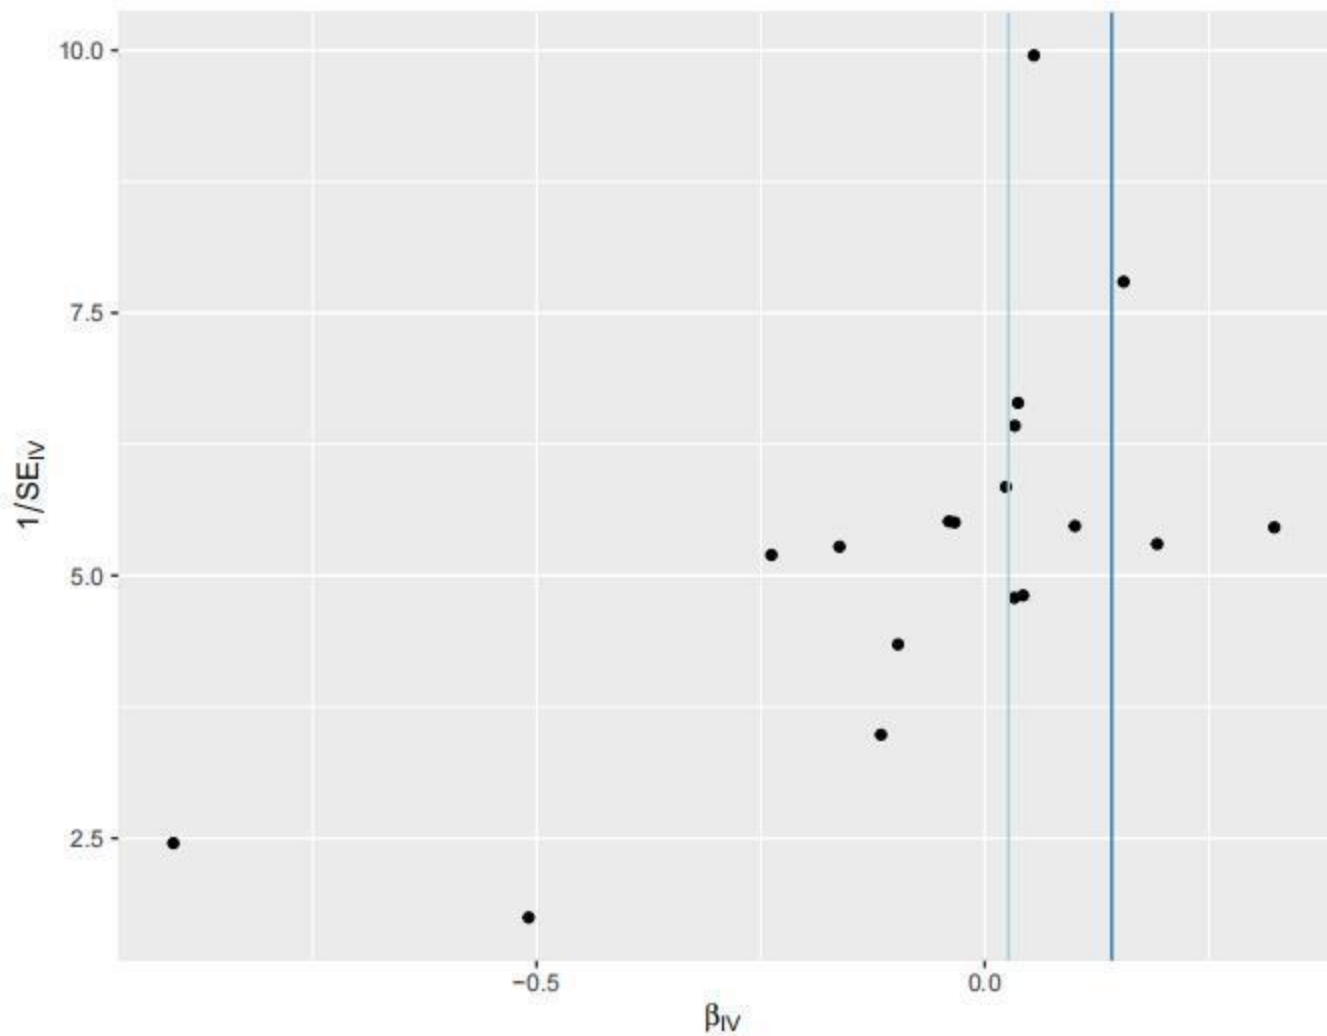

Funnel plot analyse of "CD8br %leukocyte" on 'Aplastic anemia'

MR Method

- Inverse variance weighted
- MR Egger

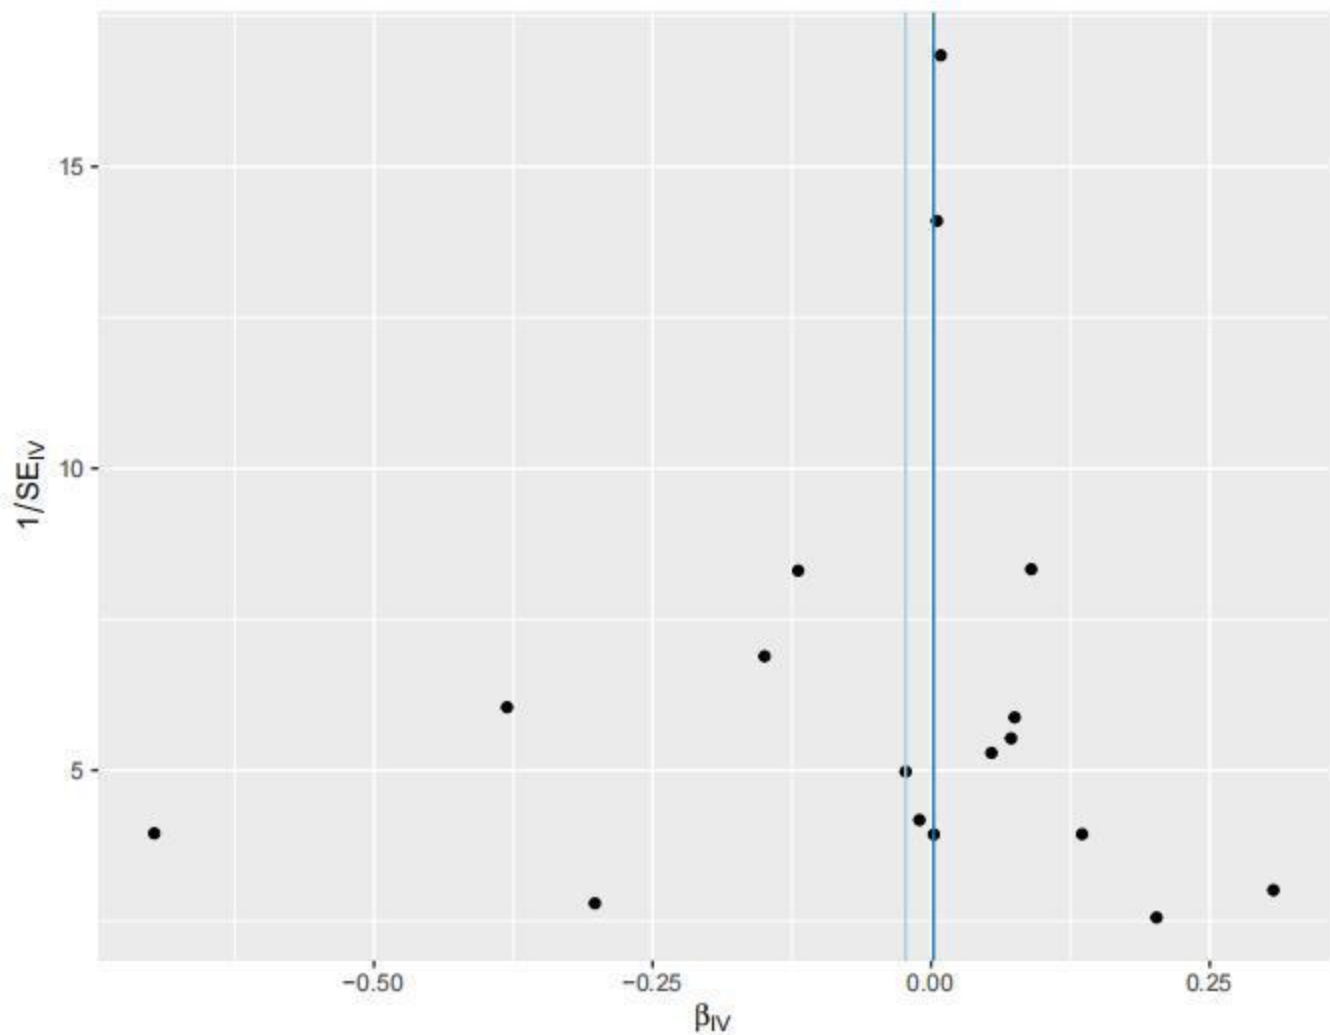

Funnel plot analyse of "CD45 on CD14+ monocyte" on 'Aplastic anemia'

MR Method

Inverse variance weighted

MR Egger

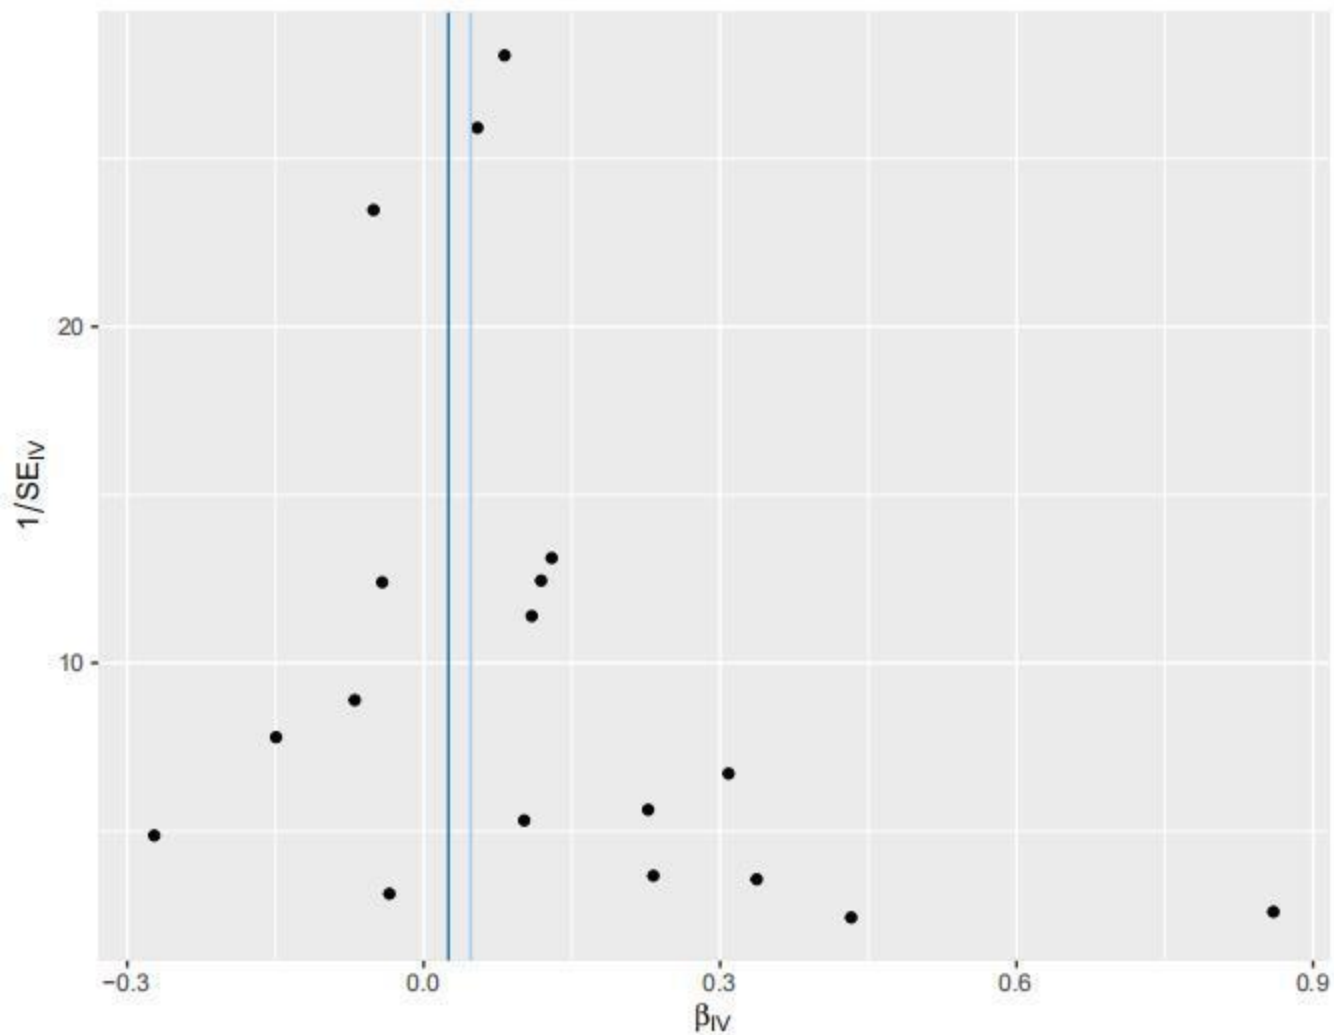

Funnel plot analyse of "HLA DR on myeloid DC" on 'Aplastic anemia'

### MR Method

- Inverse variance weighted
- MR Egger

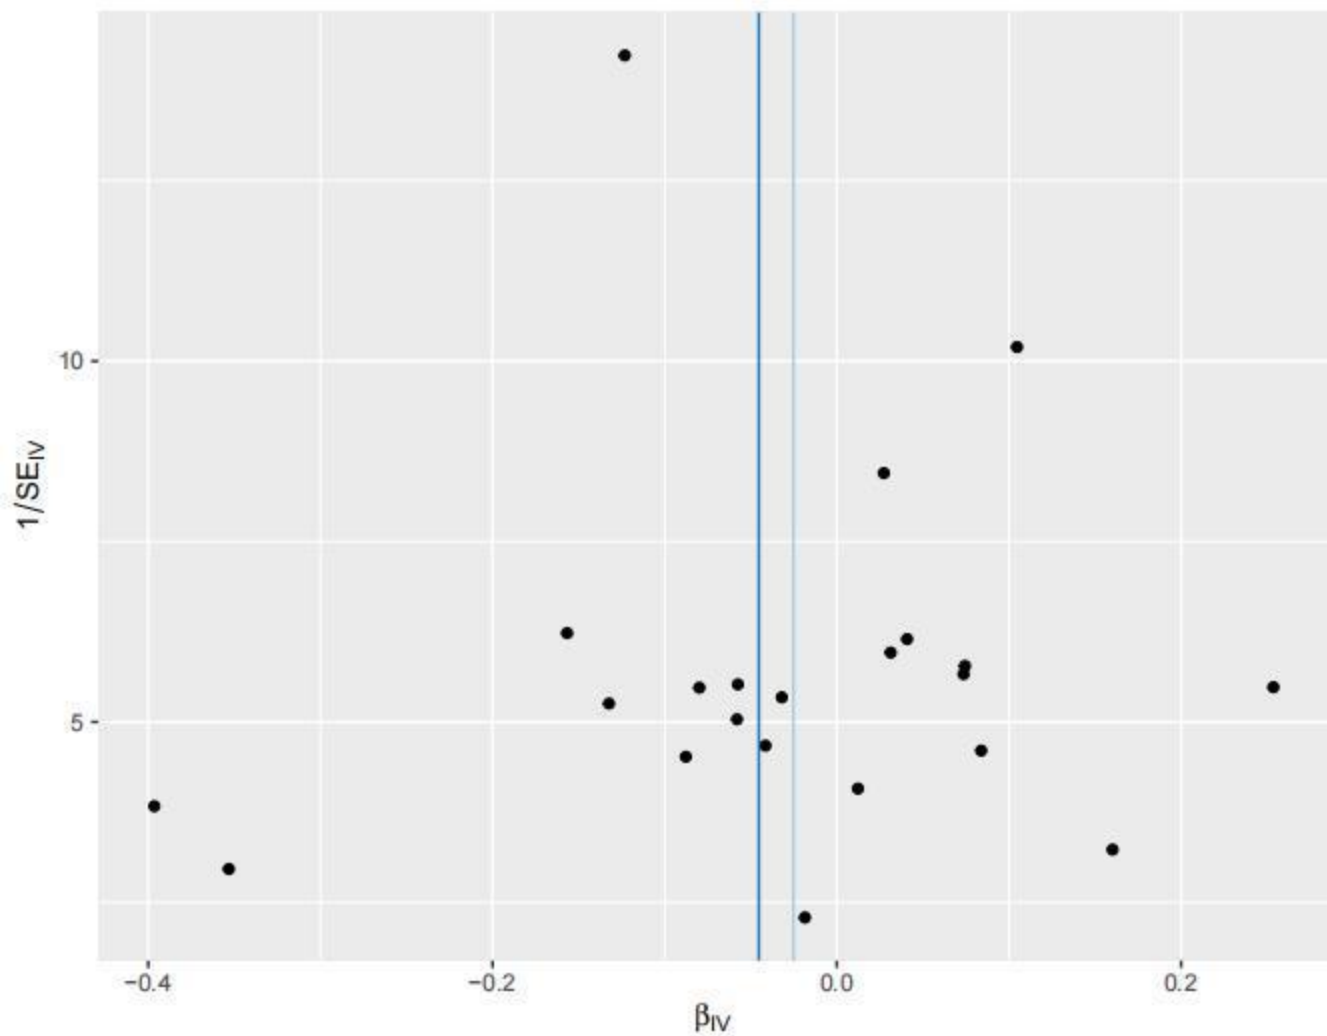

Funnel plot analyse of "CD86 on myeloid DC" on 'Aplastic anemia'

MR Method

Inverse variance weighted

MR Egger

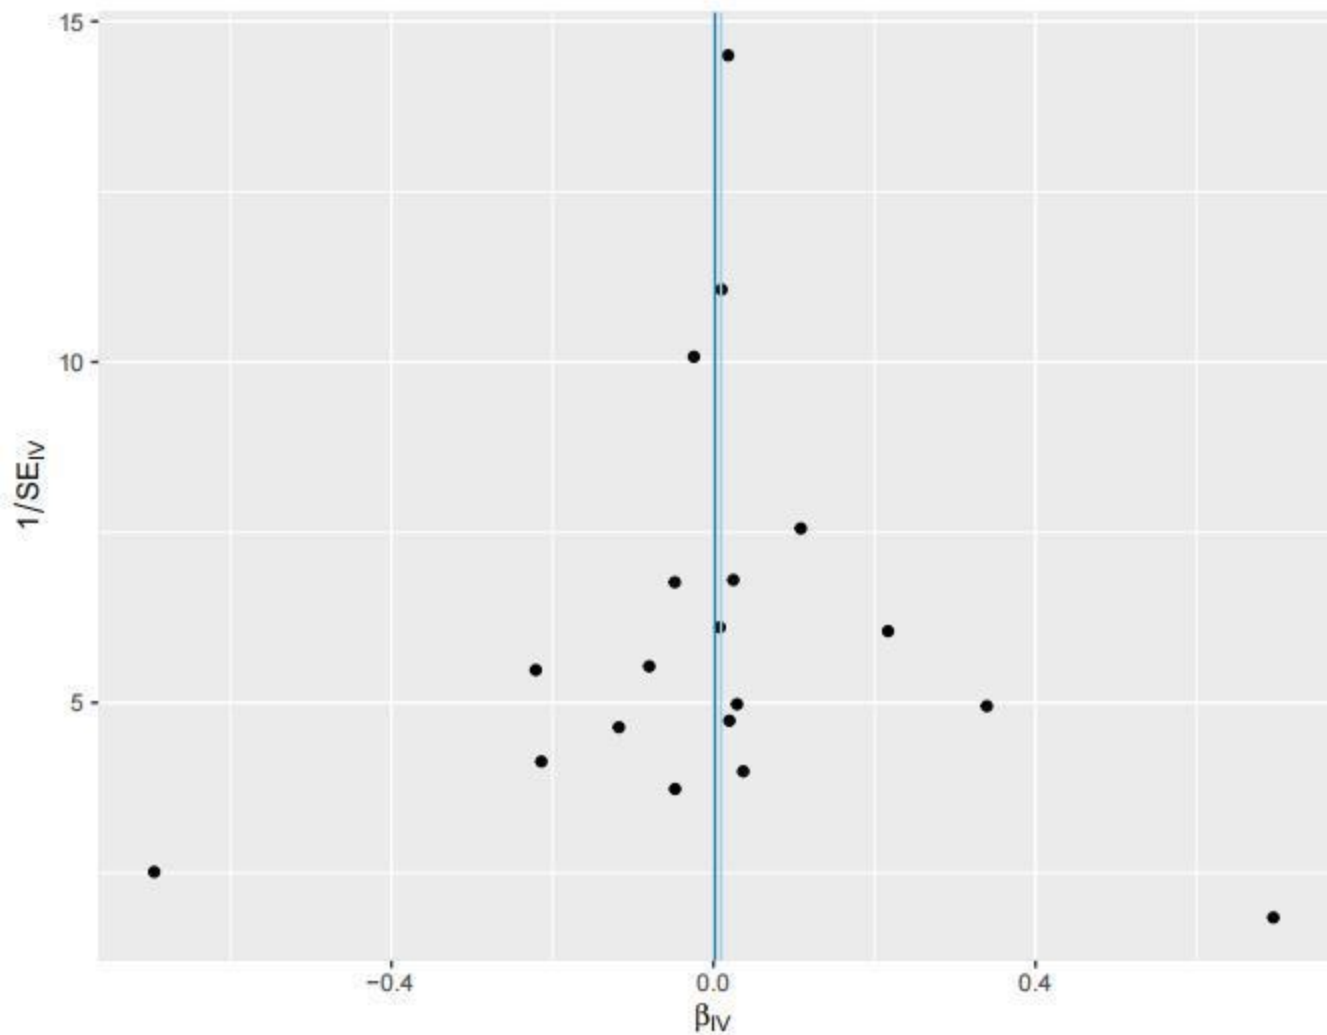

Funnel plot analysis of "Lymphocyte AC" on 'Aplastic anemia'

MR Method

Inverse variance weighted

MR Egger

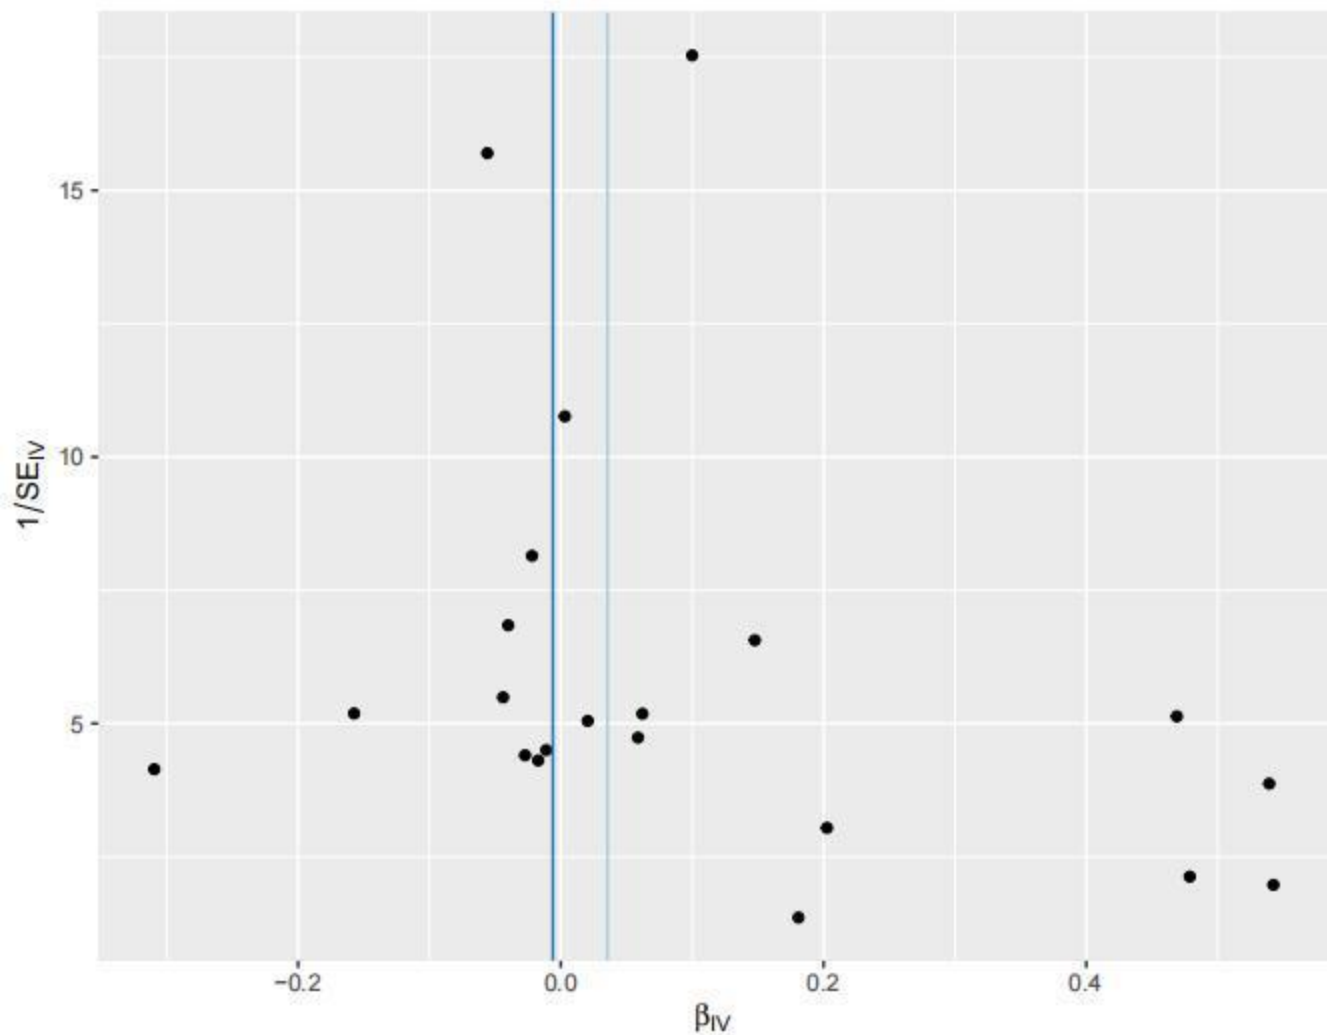

Funnel plot analyse of "CD14+ CD16+ monocyte AC" on 'Aplastic anemia'

MR Method

- Inverse variance weighted
- MR Egger

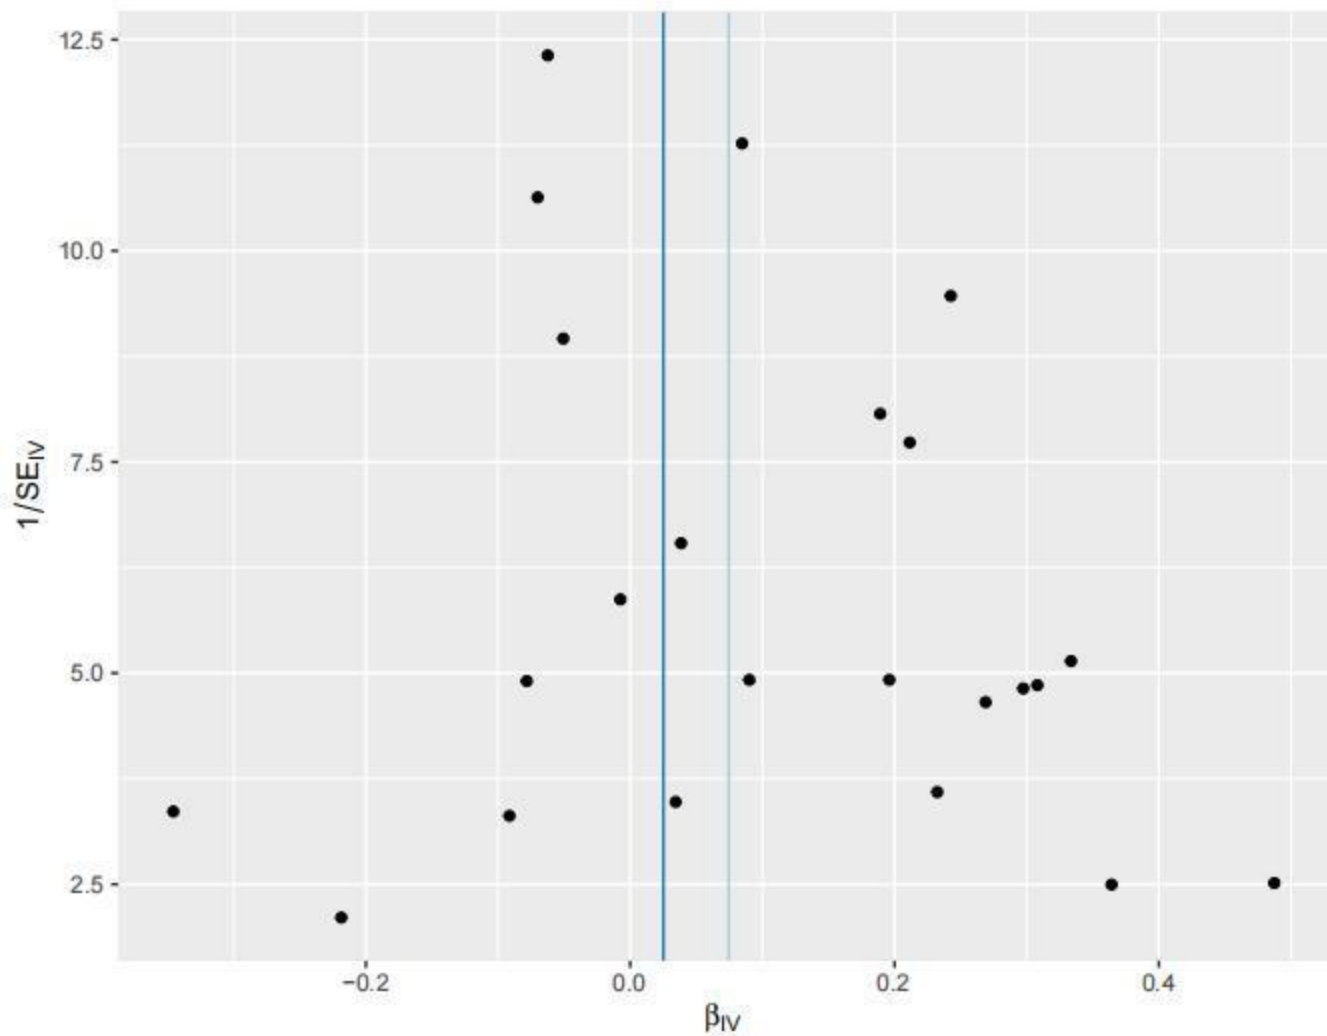

Funnel plot analyse of "CD14- CD16+ monocyte %monocyte" on 'Aplastic anemia'



MR Method

- Inverse variance weighted
- MR Egger

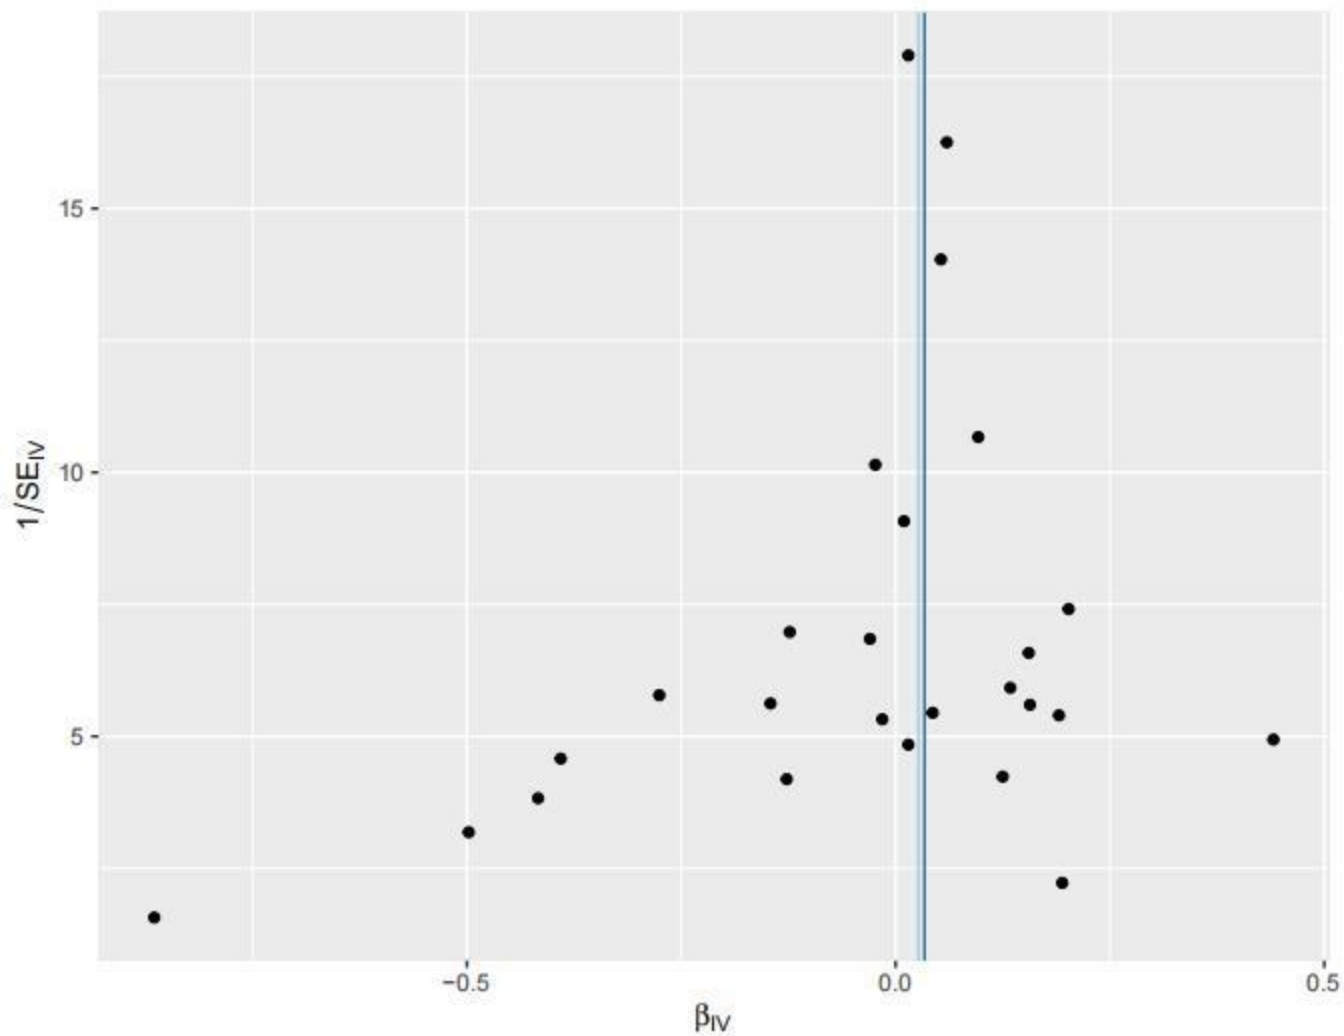

Funnel plot analyse of "CD24+ CD27+ %B cell" on 'Aplastic anemia'

### MR Method

- Inverse variance weighted
- MR Egger

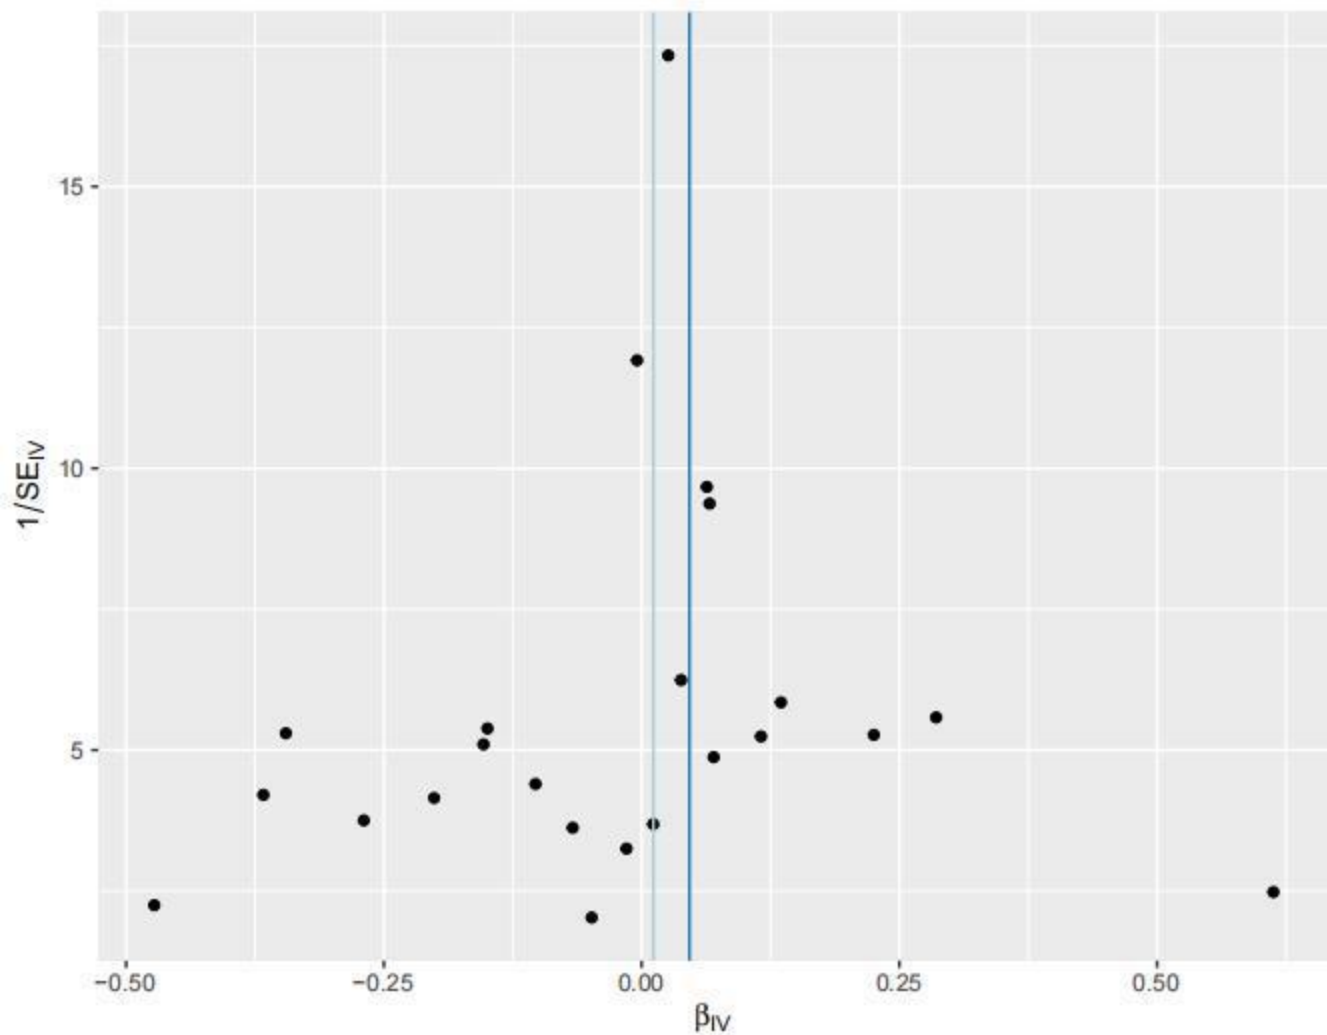

Funnel plot analyse of "CD25 on IgD- CD38dim" on 'Aplastic anemia'

### MR Method

- Inverse variance weighted
- MR Egger

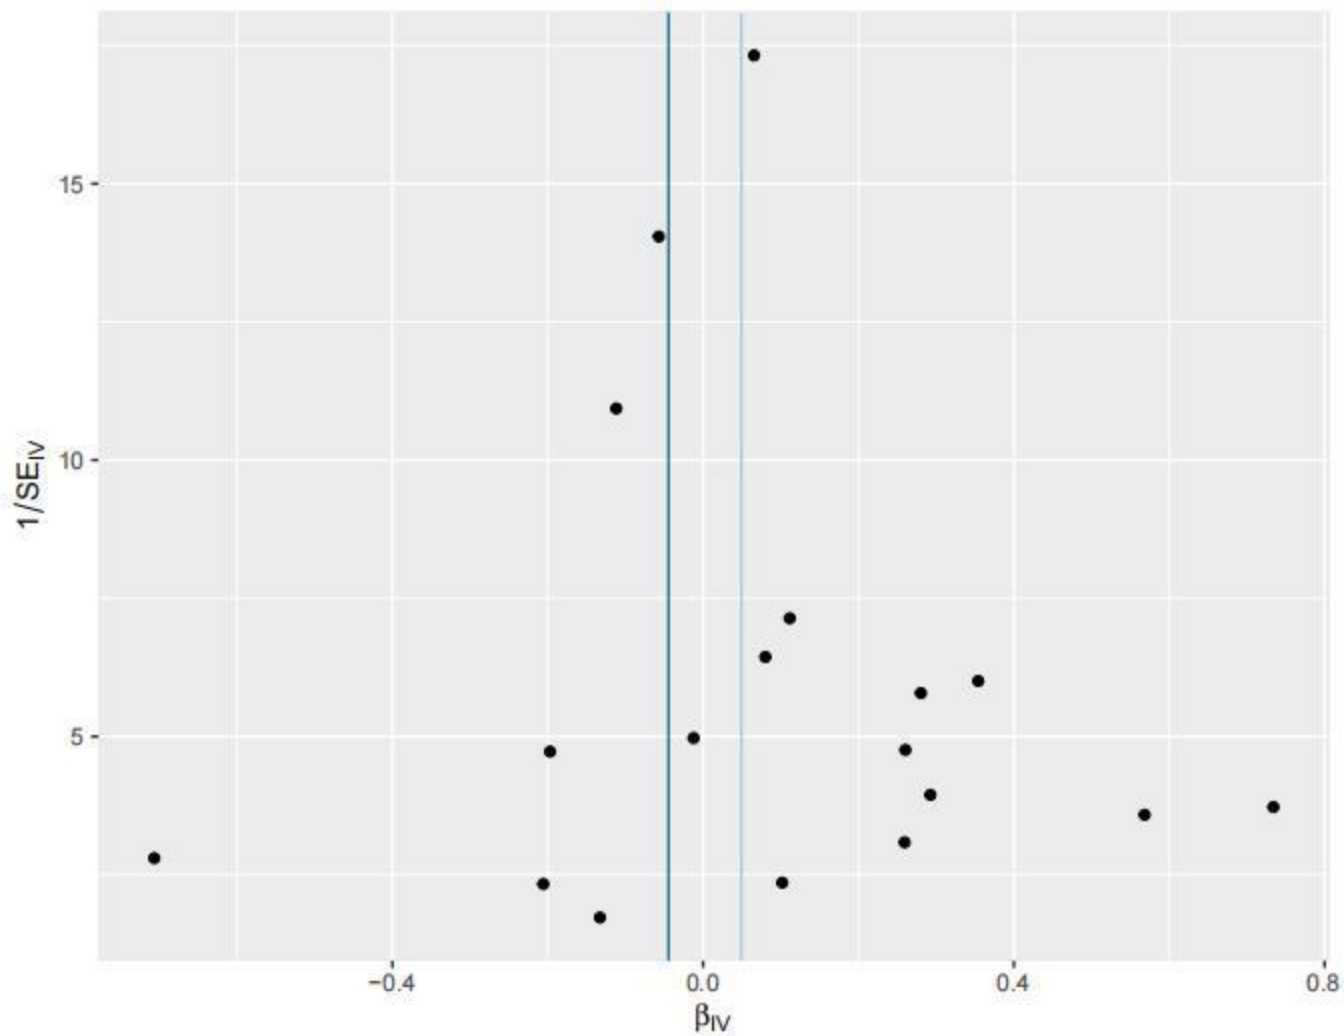

Funnel plot analysis of "CD11c+ monocyte AC" on 'Aplastic anemia'

### MR Method

Inverse variance weighted

MR Egger

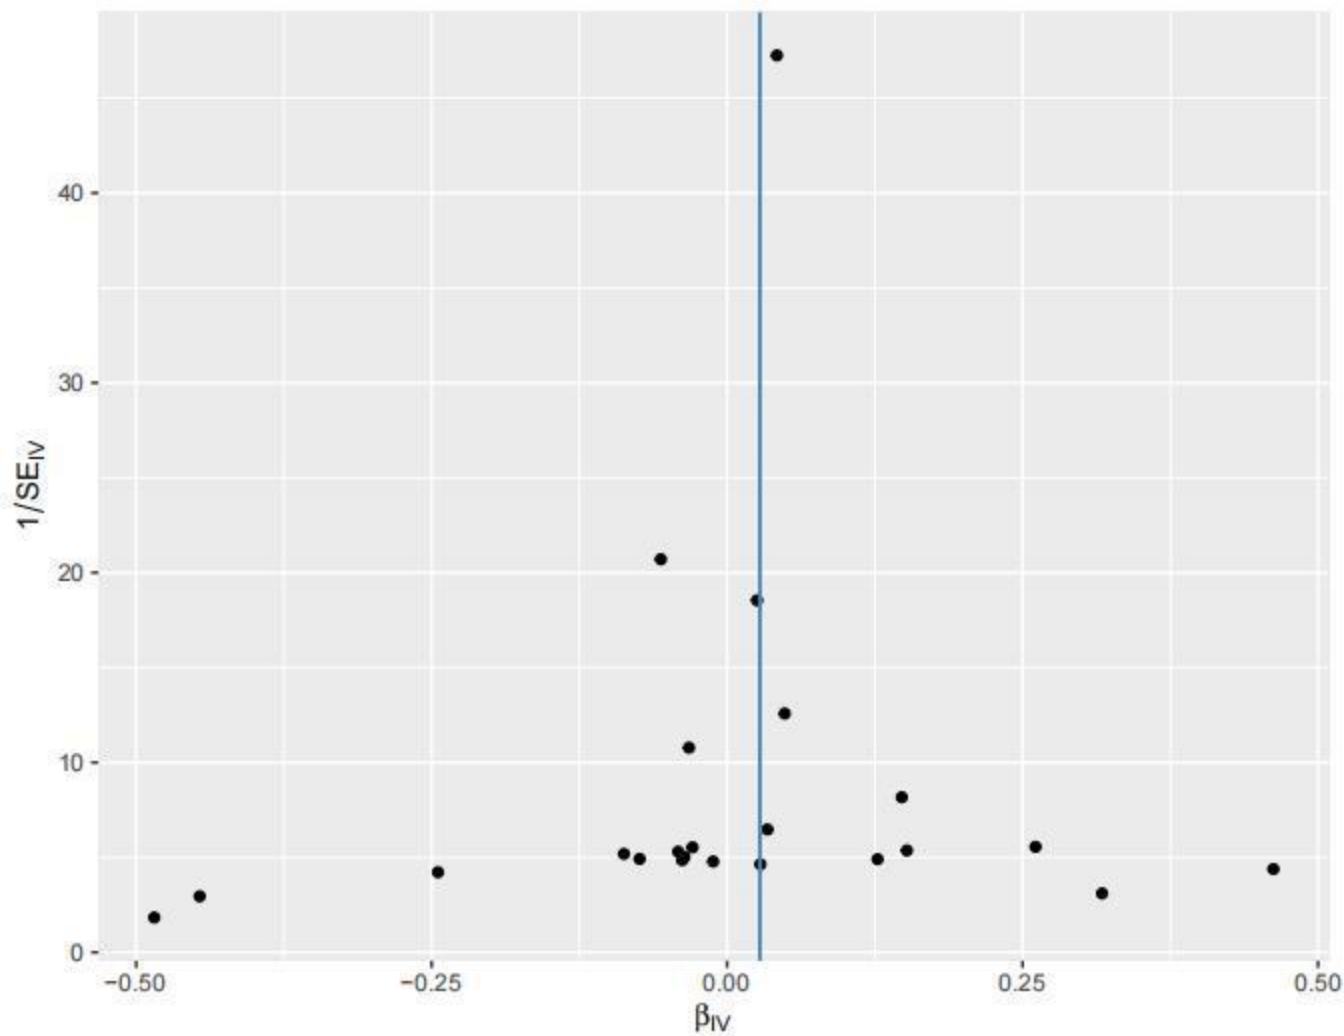

Funnel plot analysis of "CD8br AC" on 'Aplastic anemia'

MR Method

- Inverse variance weighted
- MR Egger

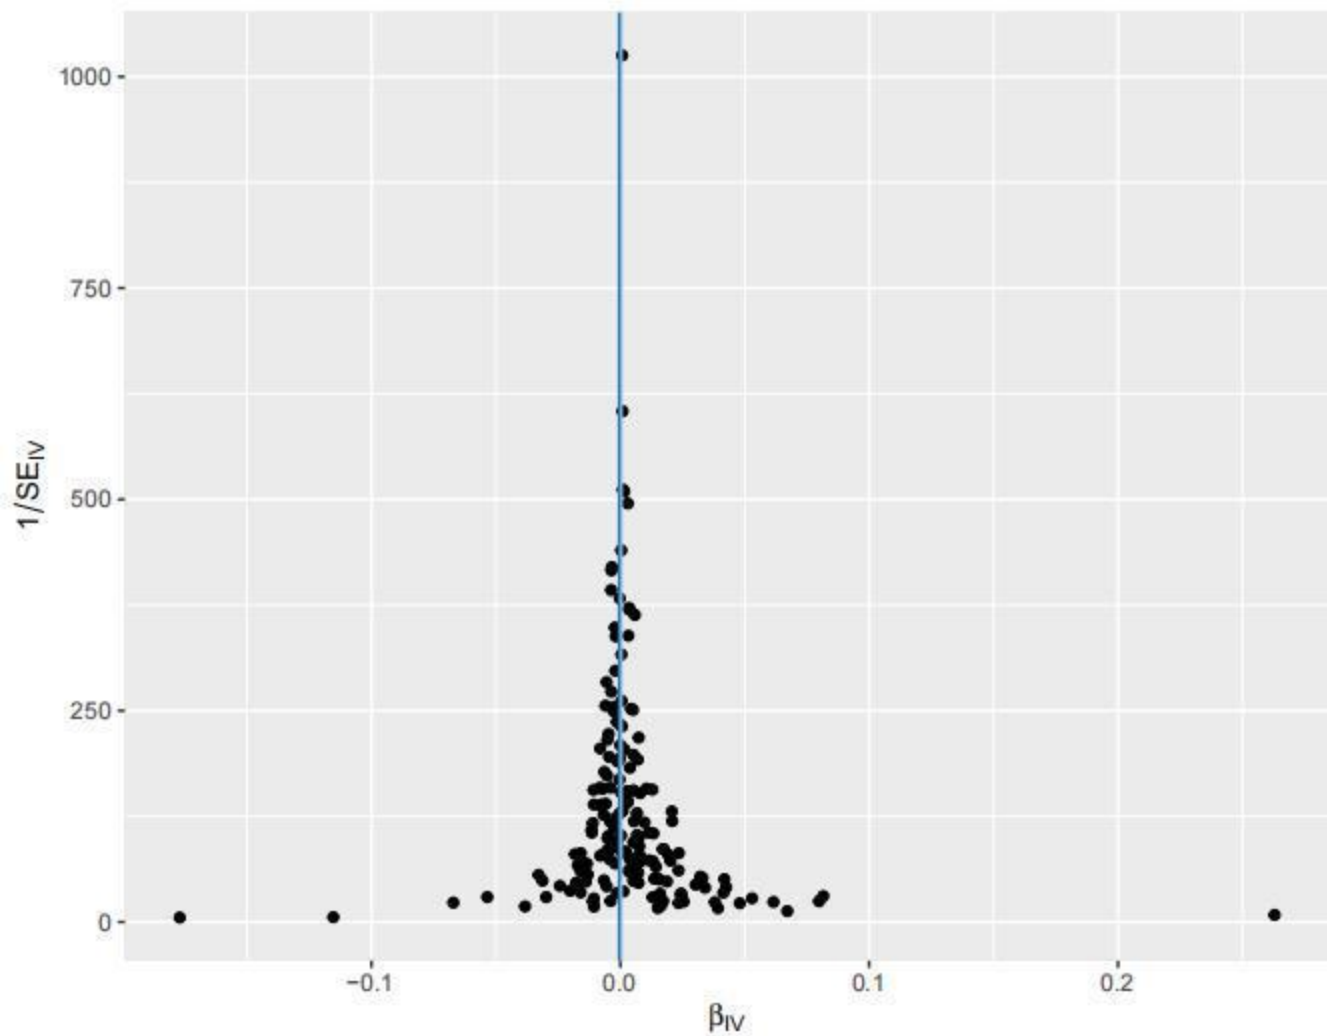

Funnel plot analyse of "CD45RA- CD28- CD8br %T cell" on 'Aplastic anemia'

### MR Method

- Inverse variance weighted
- MR Egger

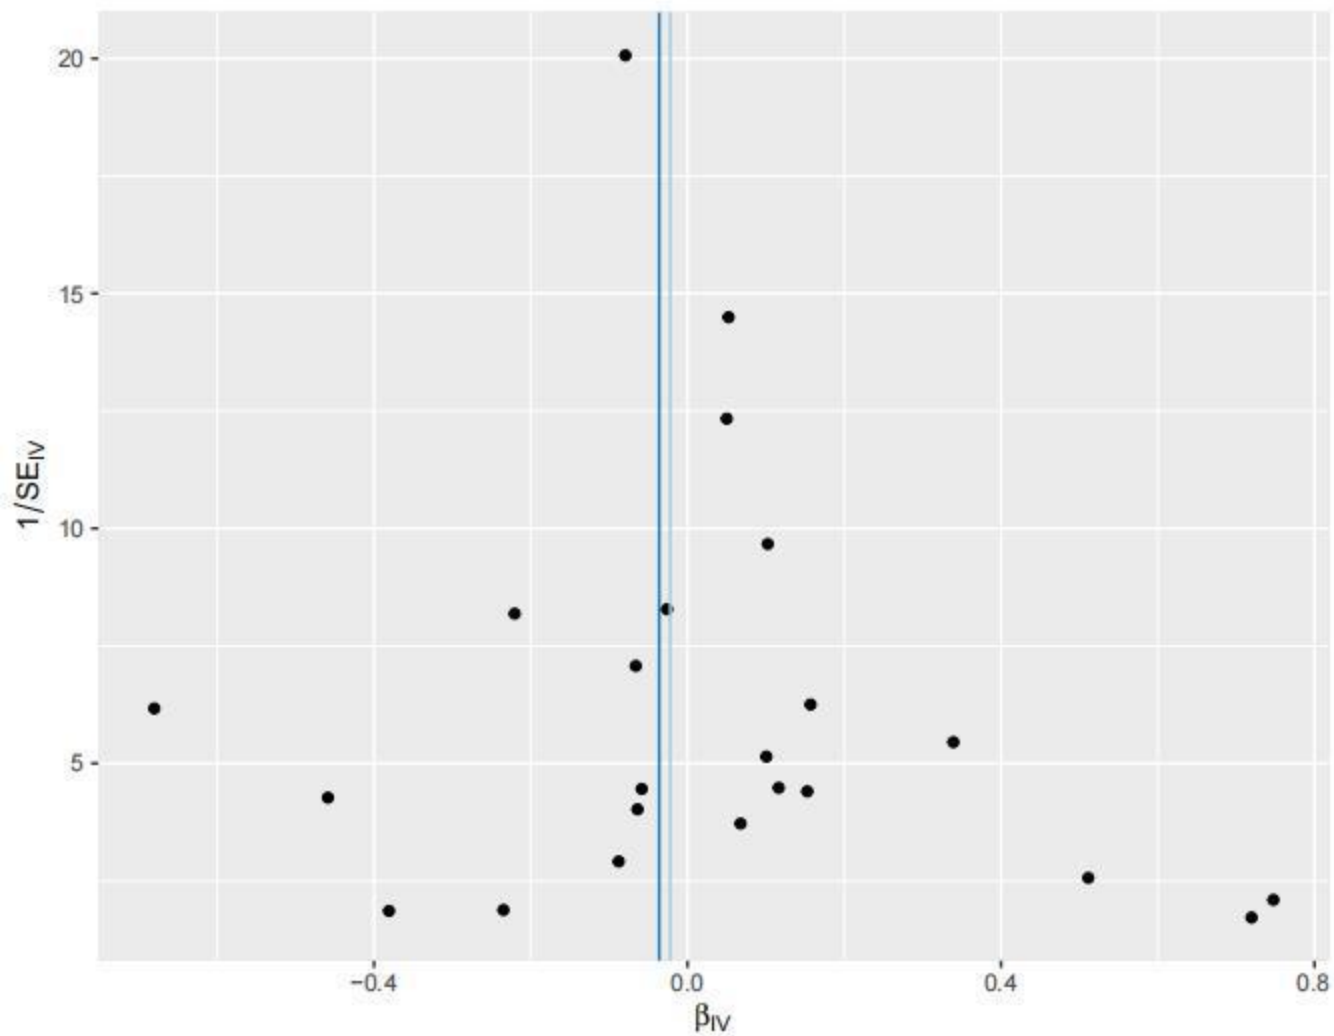

Funnel plot analysis of "EM CD4+ %T cell" on 'Aplastic anemia'

### MR Method

- Inverse variance weighted
- MR Egger

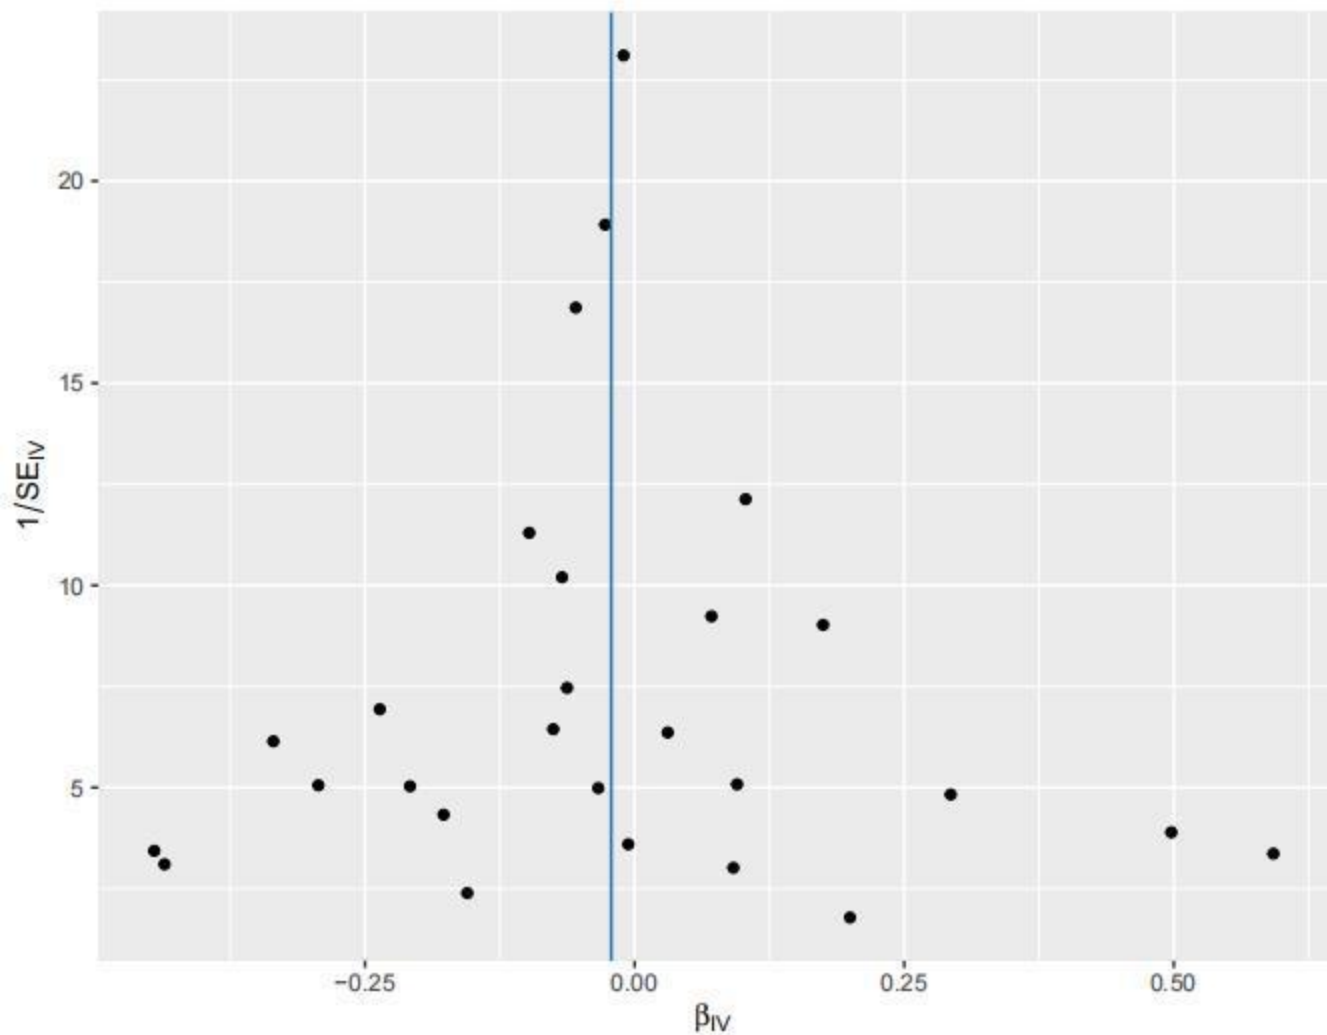

Funnel plot analyse of "IgD on IgD+ CD24+" on 'Aplastic anemia'

### MR Method

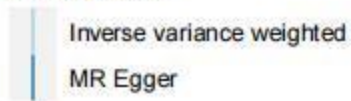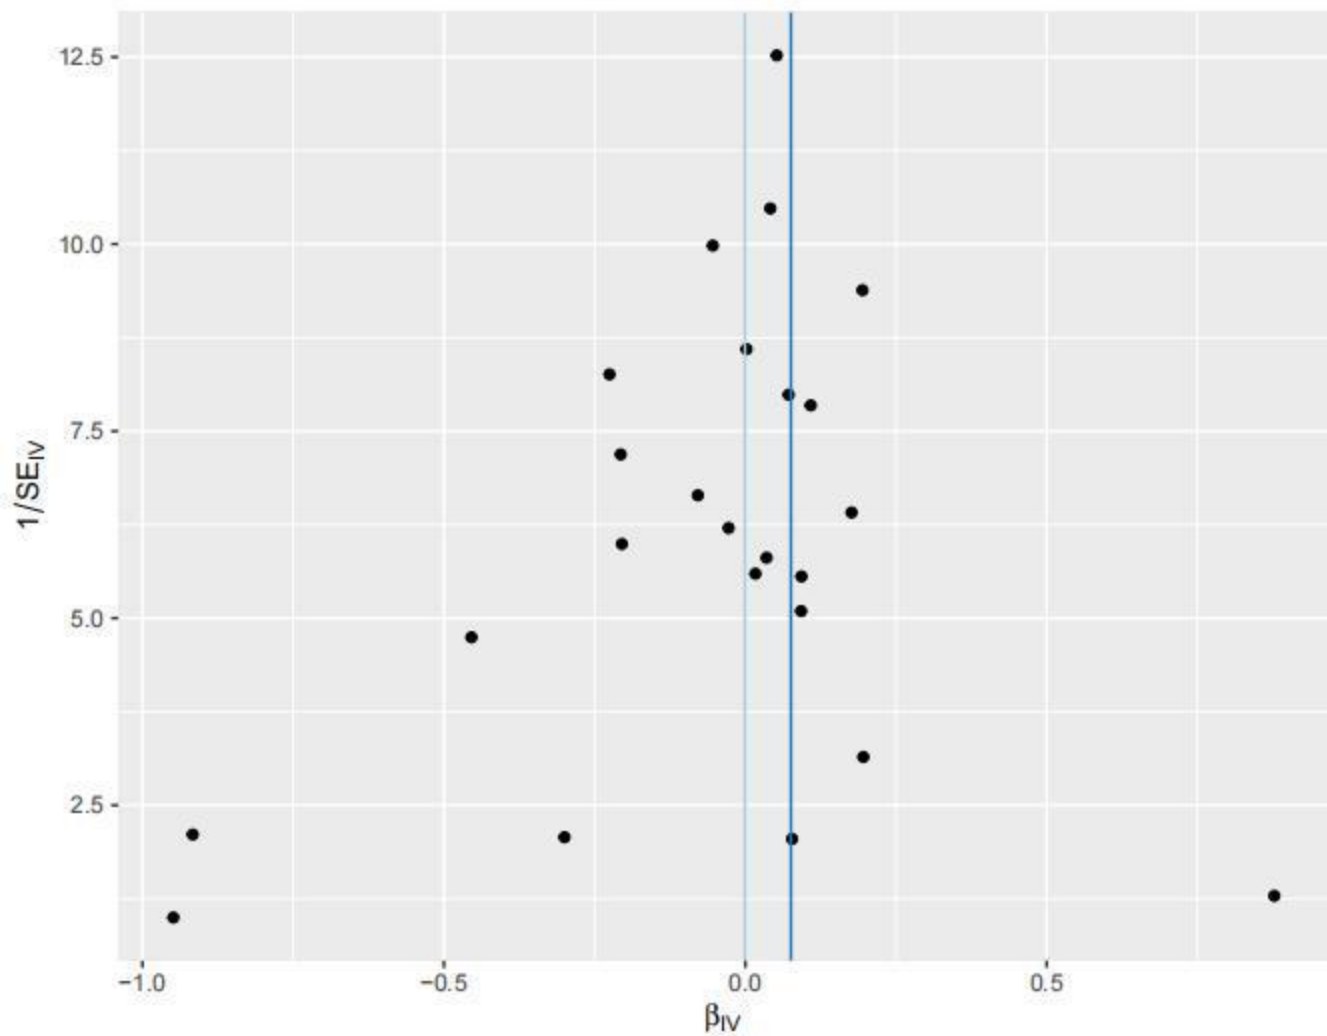

Funnel plot analyse of "CD3 on TD CD8br" on 'Aplastic anemia'



### MR Method

- Inverse variance weighted
- MR Egger

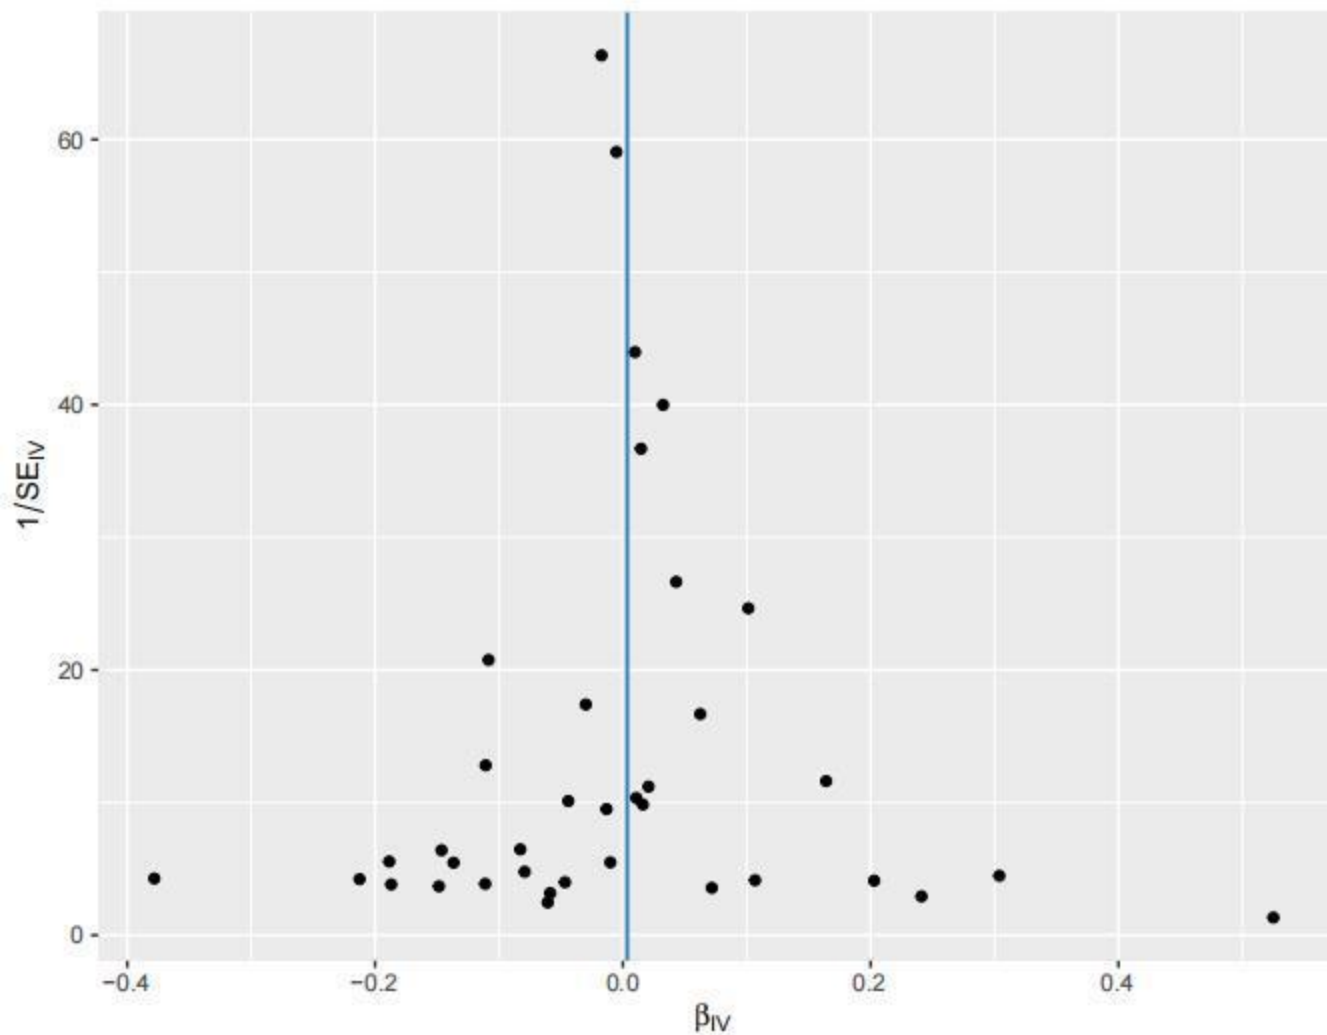

Funnel plot analyse of "CD28+ CD45RA+ CD8br %CD8br" on 'Aplastic anemia'

### MR Method

- Inverse variance weighted
- MR Egger

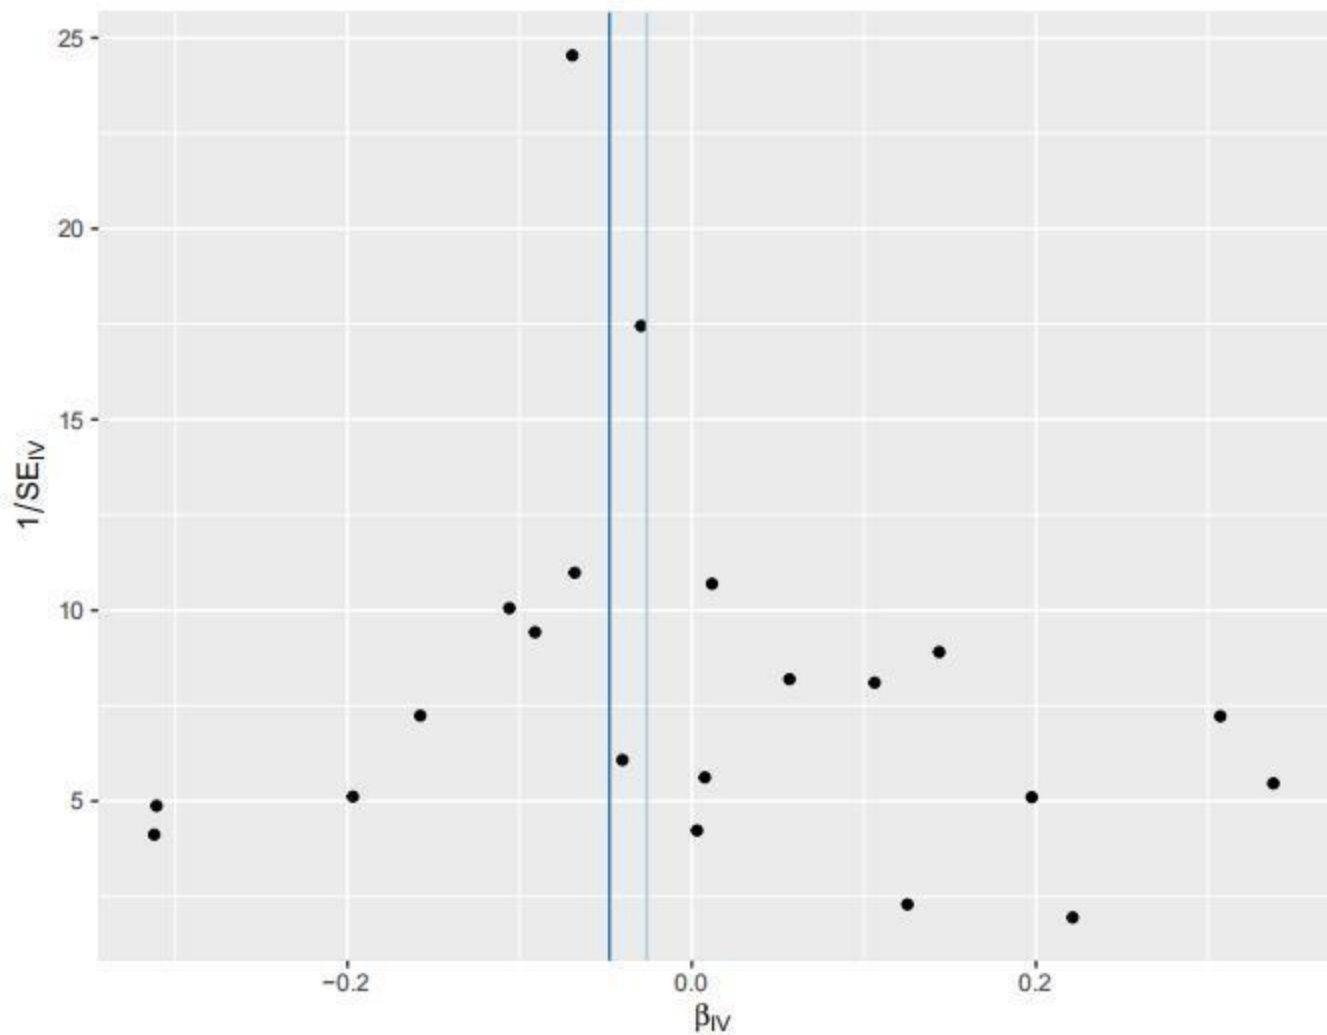

Funnel plot analysis of "CD3 on activated Treg" on 'Aplastic anemia'

MR Method

Inverse variance weighted

MR Egger

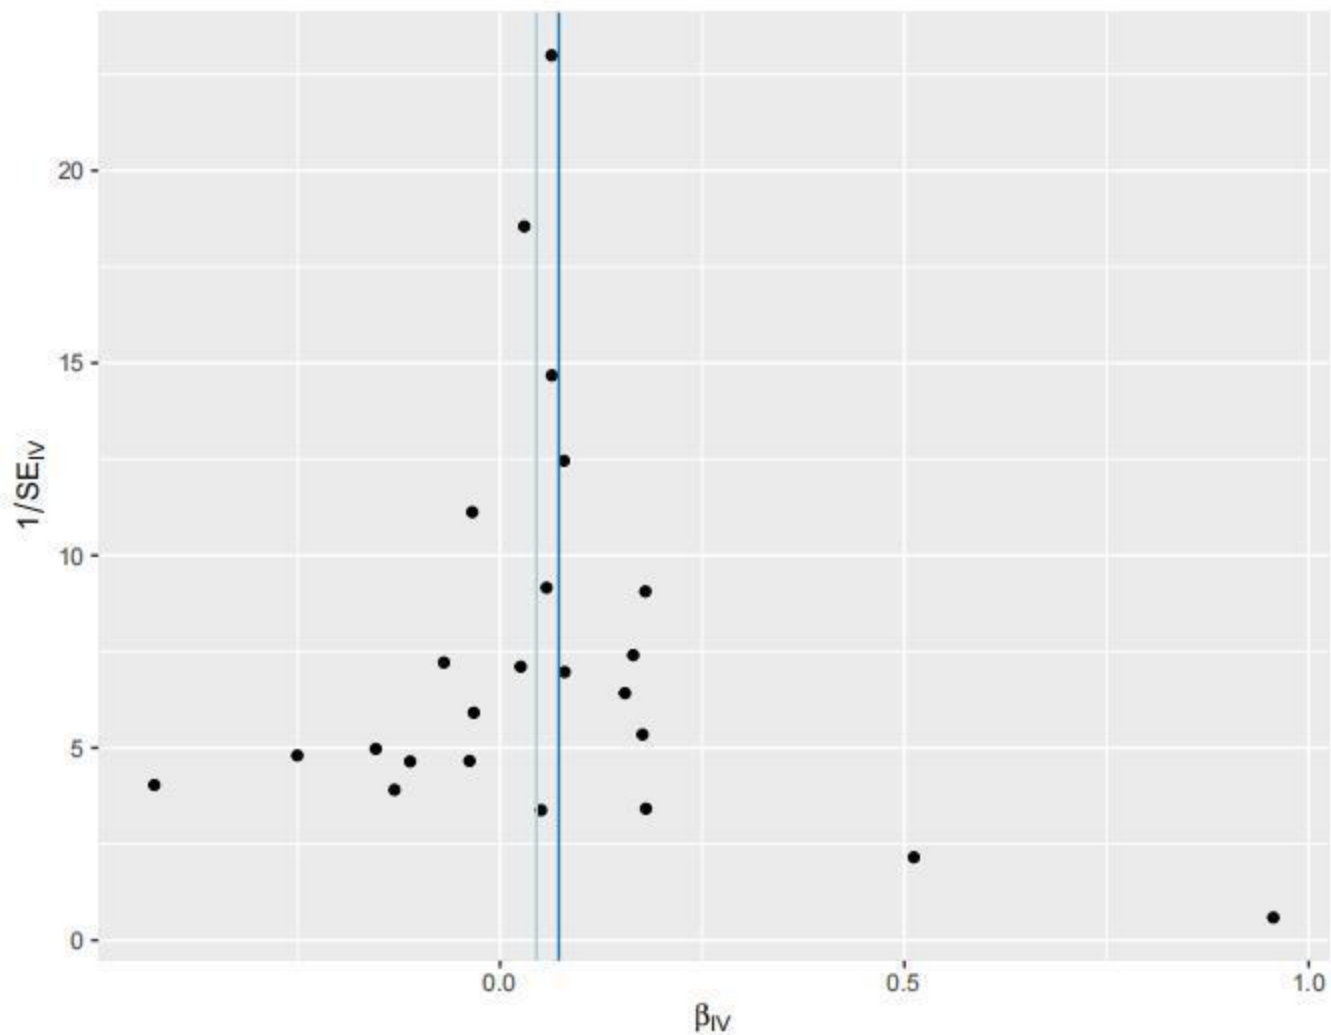

Funnel plot analyse of "HLA DR++ monocyte AC" on 'Aplastic anemia'

MR Method

- Inverse variance weighted
- MR Egger

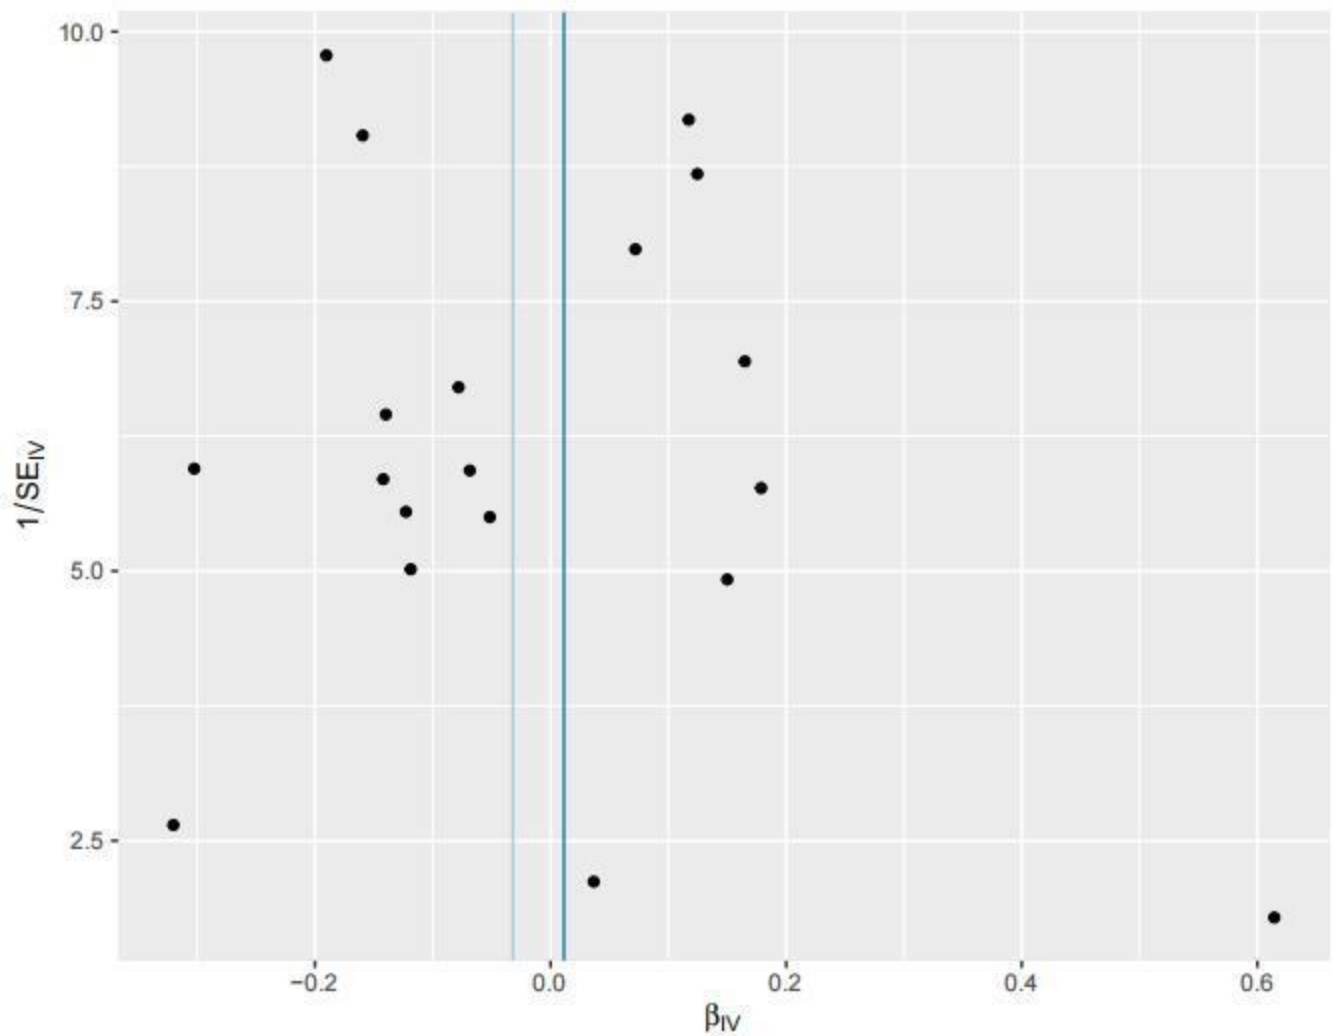

Funnel plot analyse of "CD3 on CD28- CD8br " on 'Aplastic anemia'

### MR Method

- Inverse variance weighted
- MR Egger

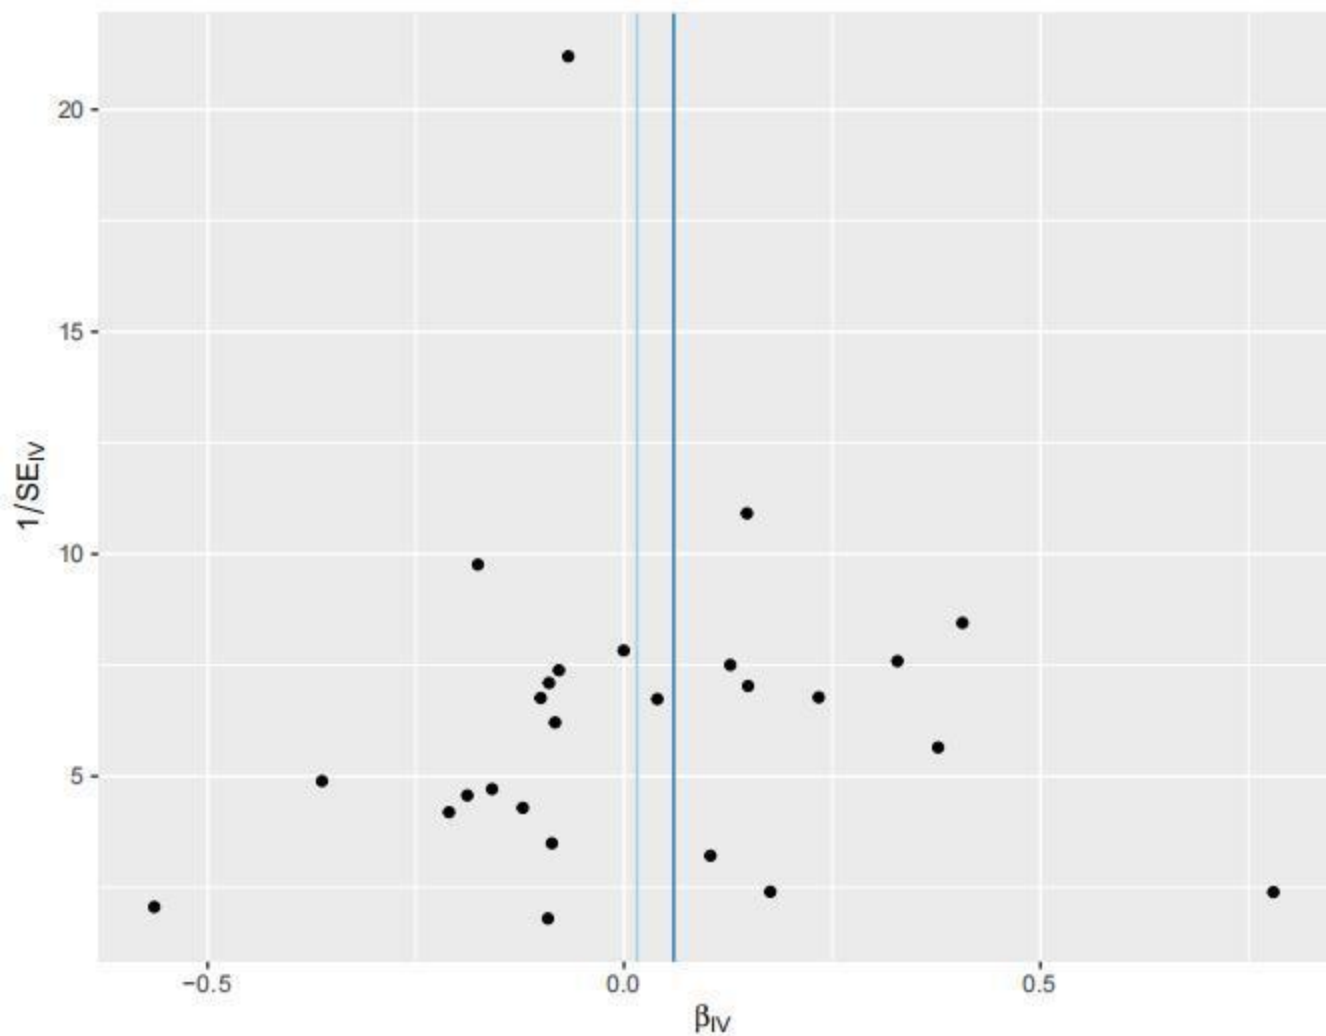

Funnel plot analysis of "Resting Treg AC" on 'Aplastic anemia'

### MR Method

- Inverse variance weighted
- MR Egger

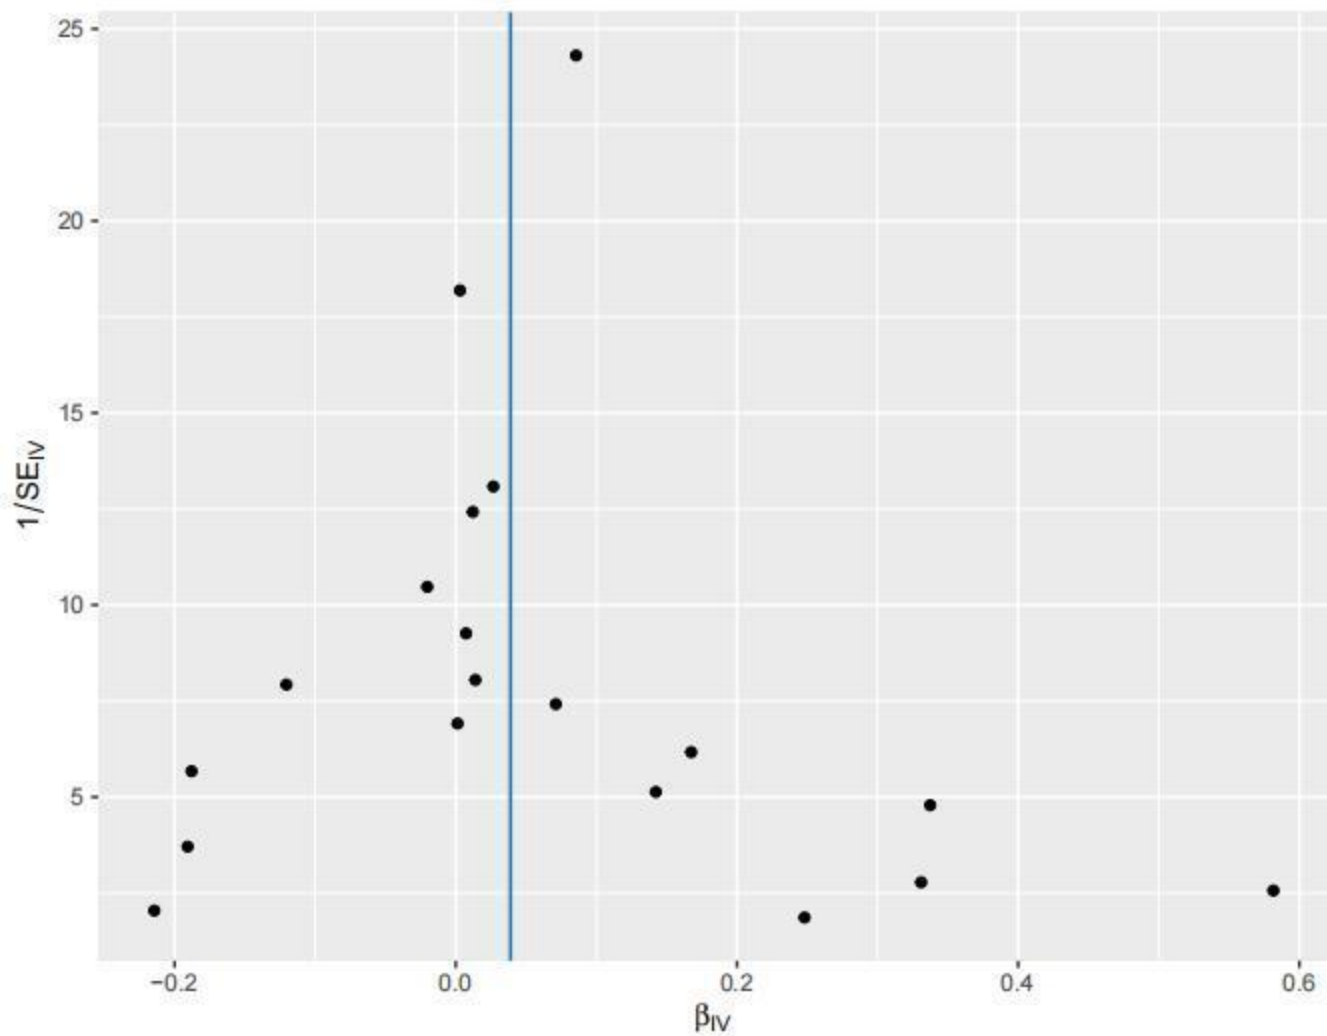

Funnel plot analyse of "CD28 on CD39+ CD4+ " on 'Aplastic anemia'

### MR Method

- Inverse variance weighted
- MR Egger

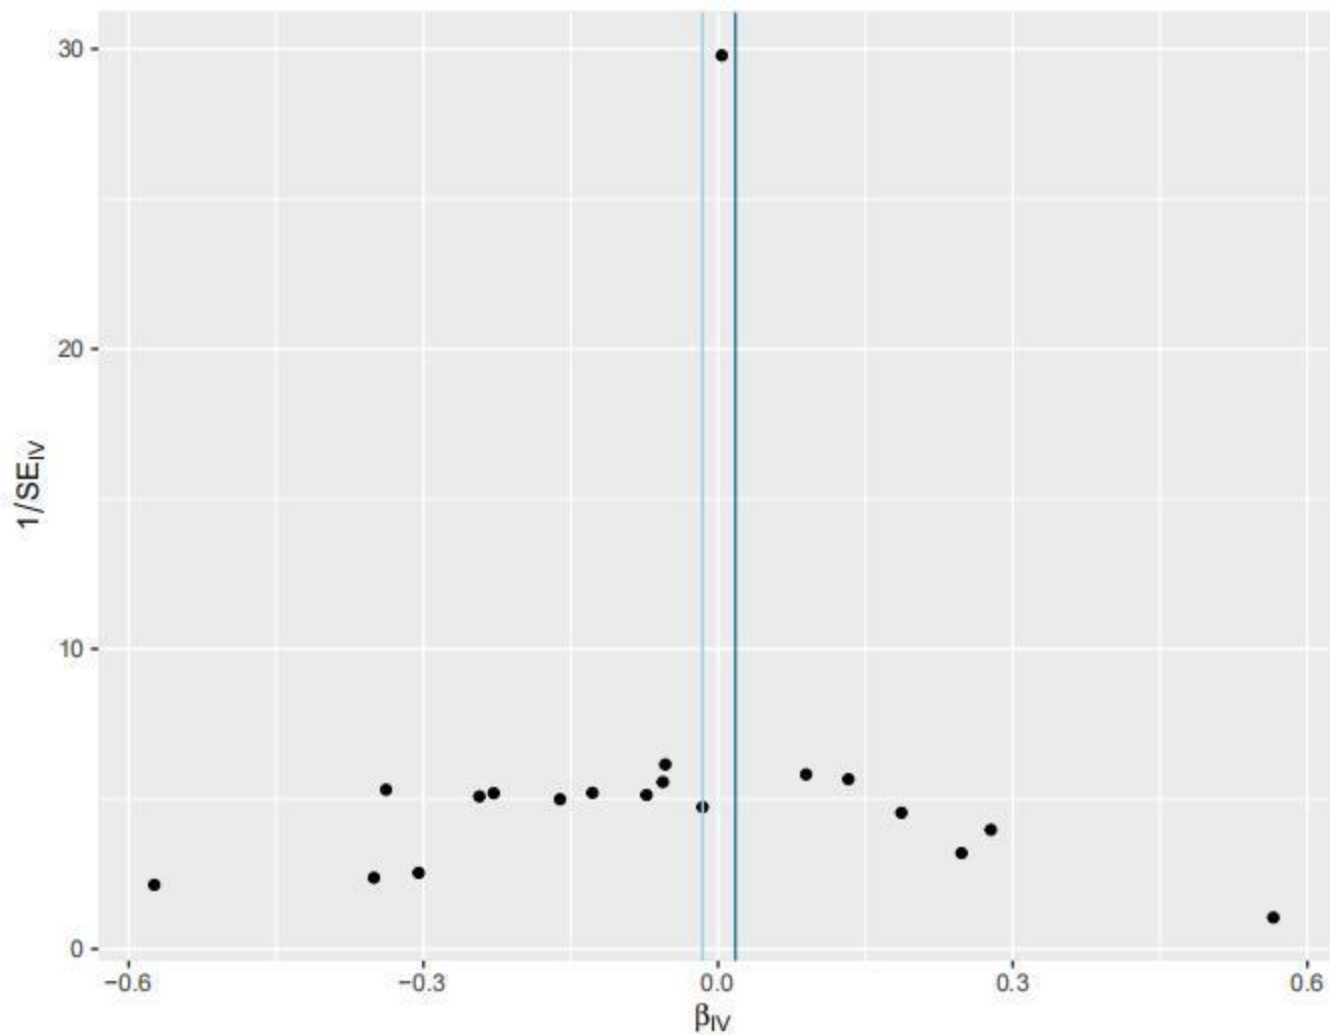

Funnel plot analyse of "CD28- CD127- CD25++ CD8br %T cell" on 'Aplastic anemia'

### MR Method

- Inverse variance weighted
- MR Egger

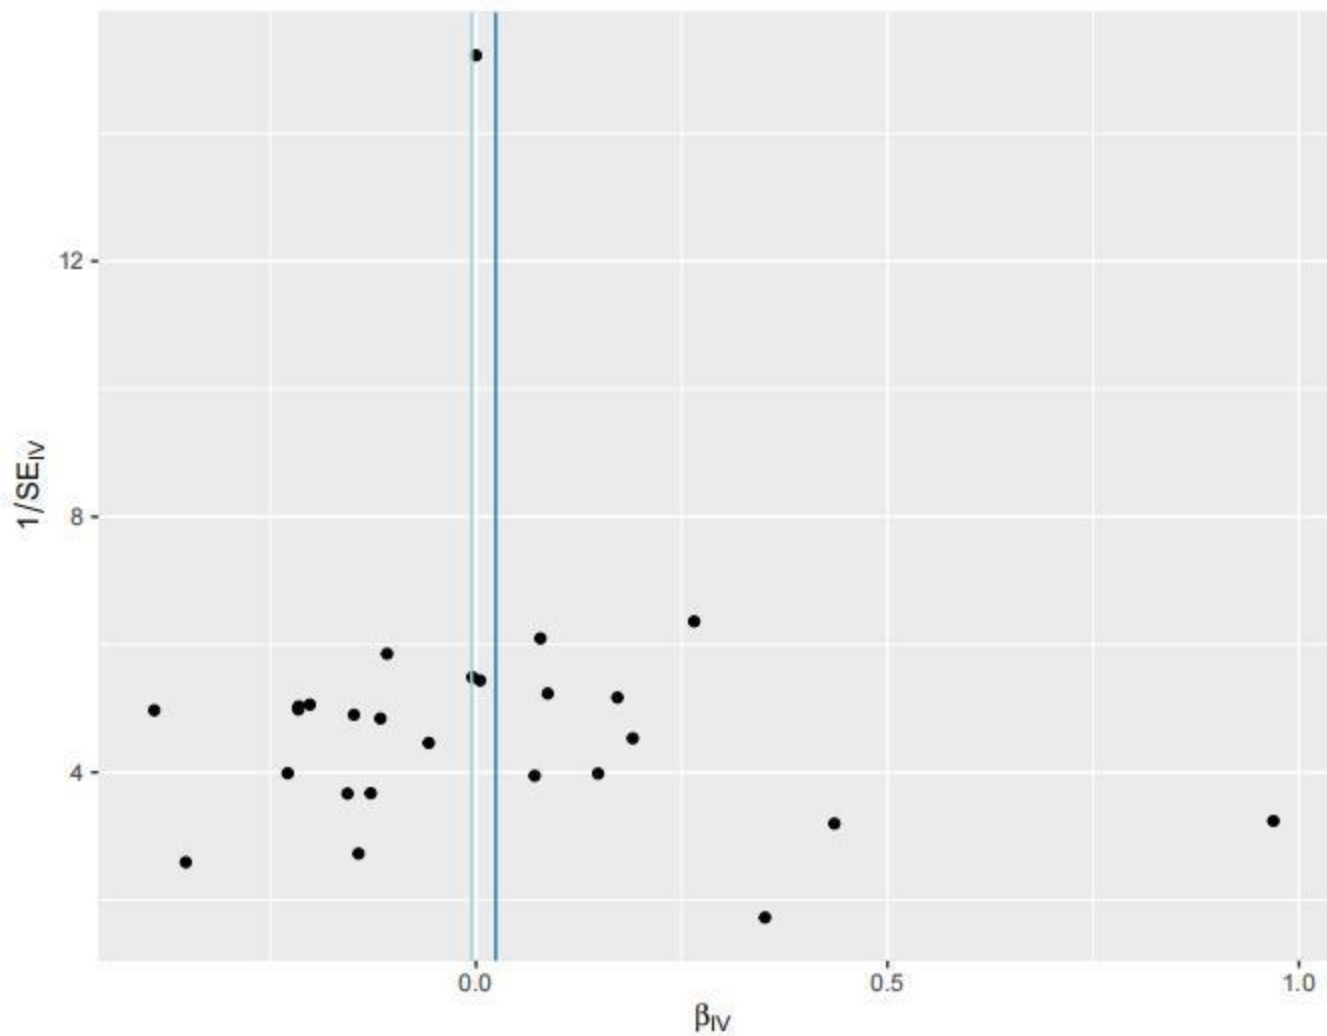

Funnel plot analyse of "CD19 on IgD- CD27-" on 'Aplastic anemia'



MR Method

- Inverse variance weighted
- MR Egger

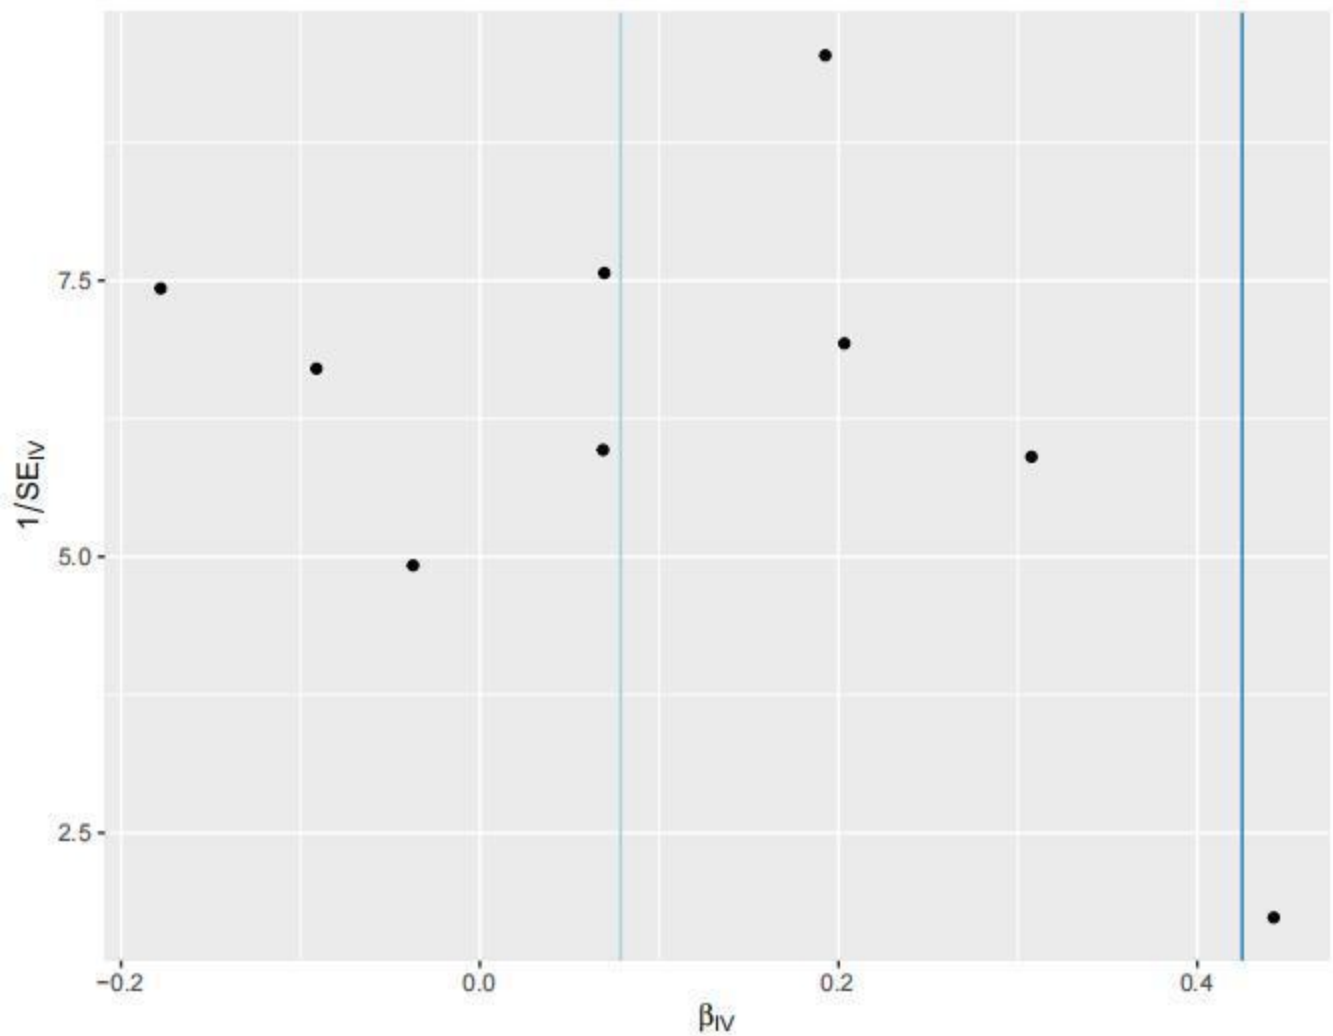

Funnel plot analysis of "CD45 on CD33dim HLA DR+ CD11b- " on 'Aplastic anemia'

MR Method

- Inverse variance weighted
- MR Egger

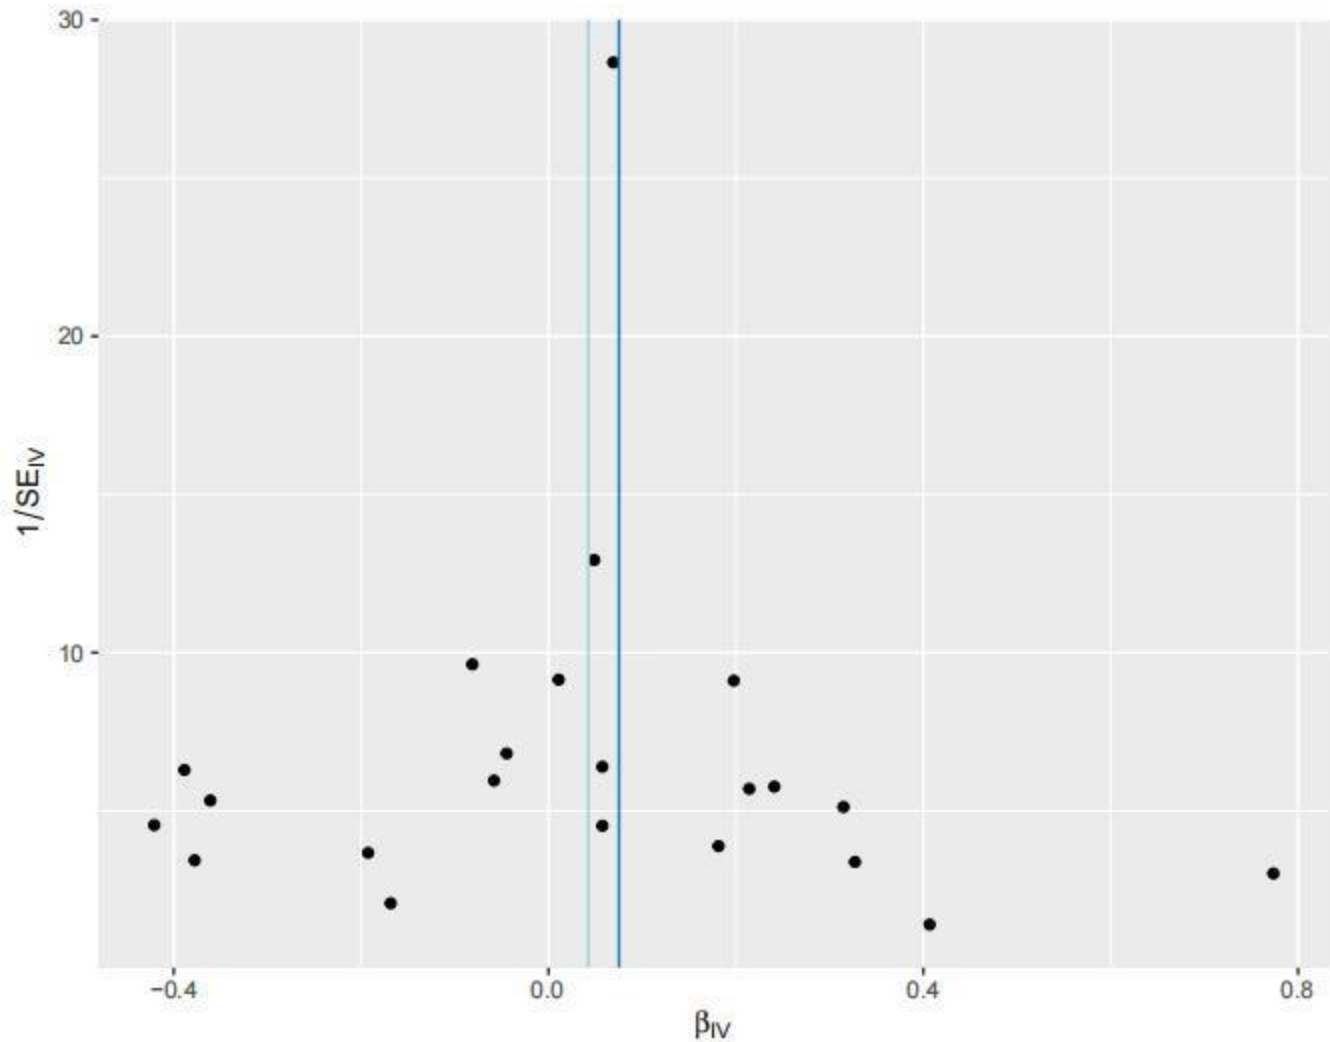

Funnel plot analyse of "CD4 on EM CD4+ " on 'Aplastic anemia'

MR Method

- Inverse variance weighted
- MR Egger

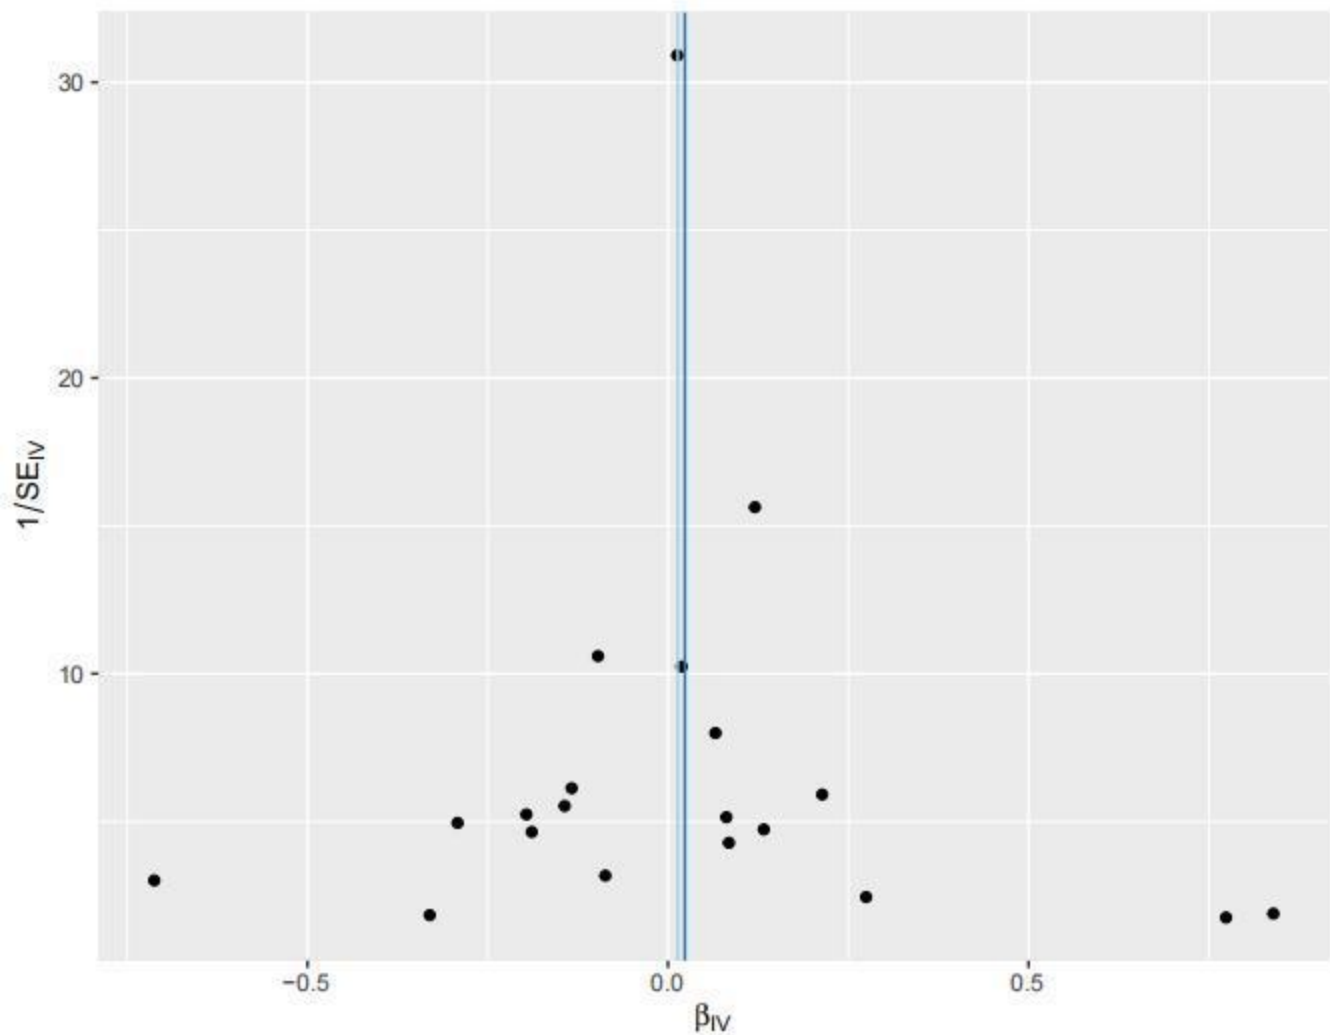

Funnel plot analyse of "IgD+ CD24- %B cell" on 'Aplastic anemia'

MR Method

- Inverse variance weighted
- MR Egger

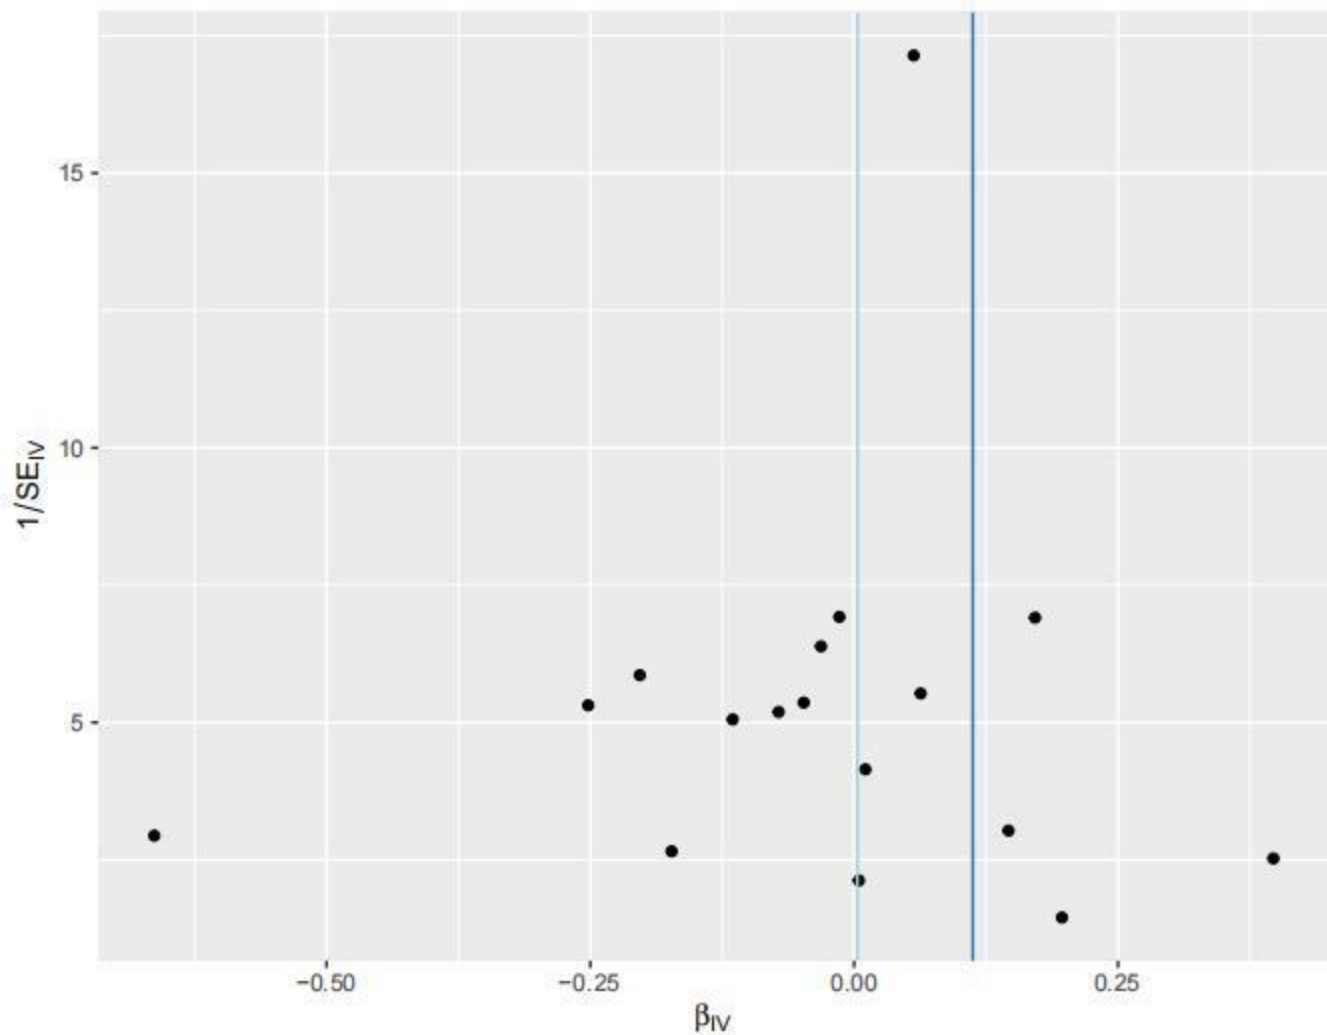

Funnel plot analyse of "CD8 on naive CD8br" on 'Aplastic anemia'

MR Method

- Inverse variance weighted
- MR Egger

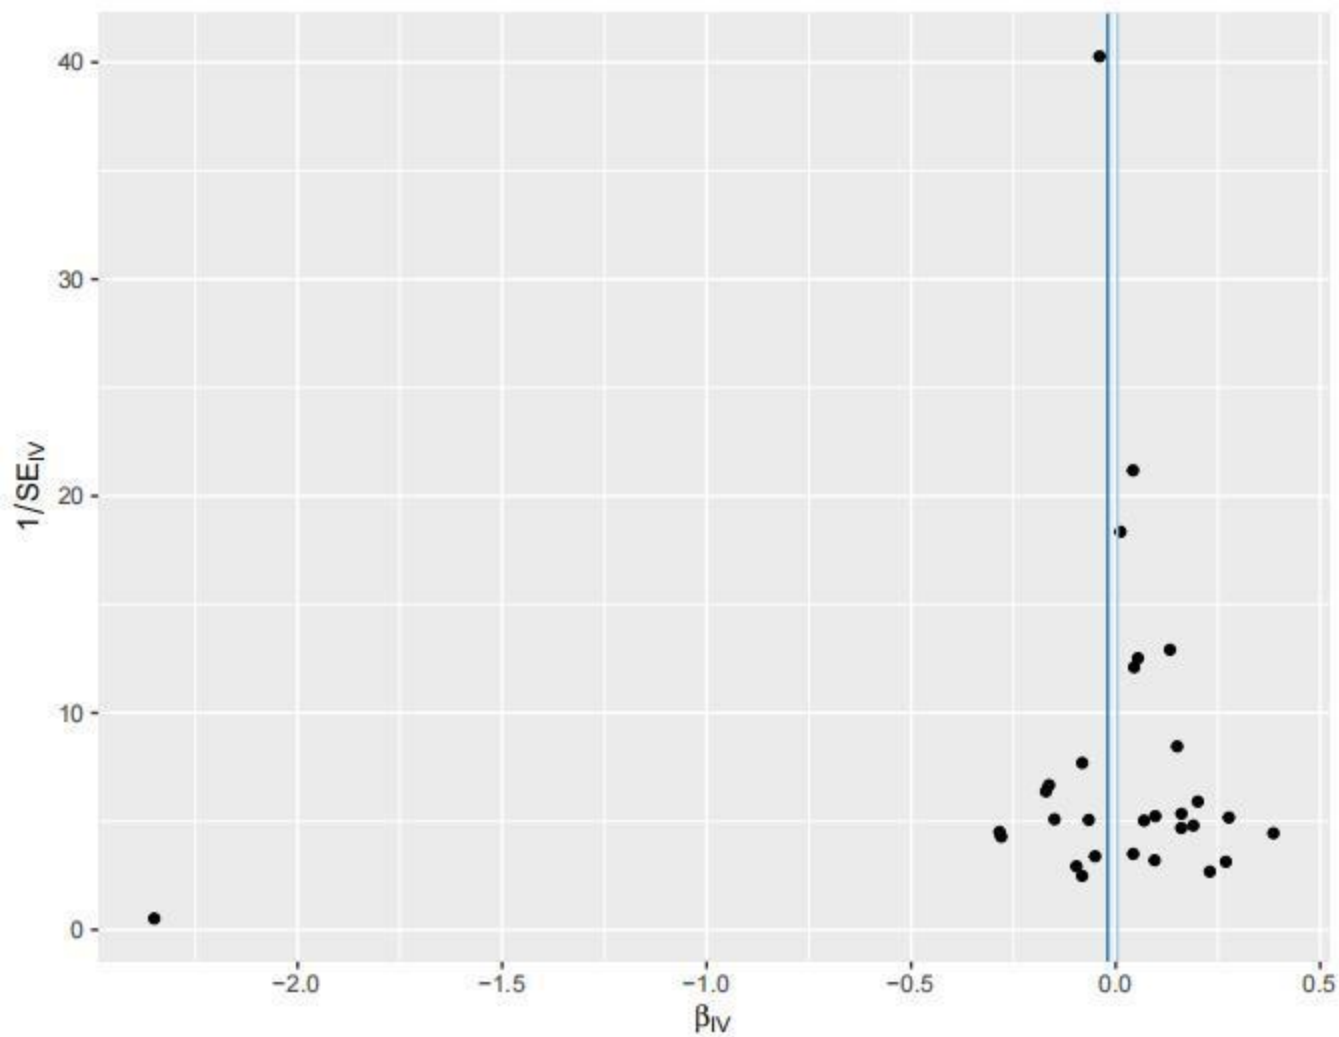

Funnel plot analyse of "Secreting Treg % CD4 Treg" on 'Aplastic anemia'

MR Method

- Inverse variance weighted
- MR Egger

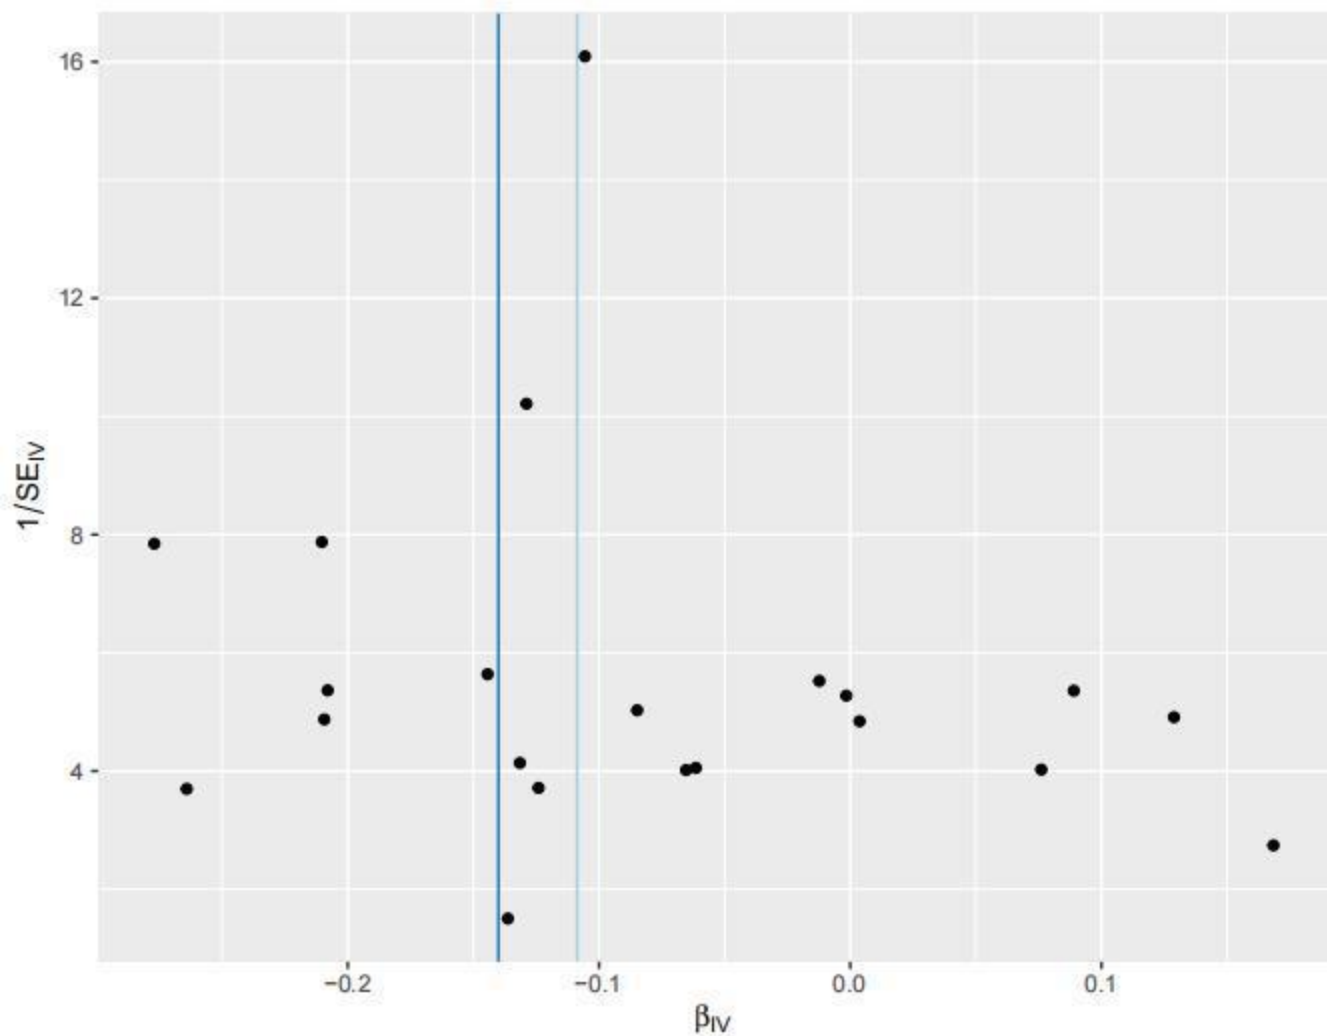

Funnel plot analyse of "DC AC" on 'Aplastic anemia'

### MR Method

- Inverse variance weighted
- MR Egger

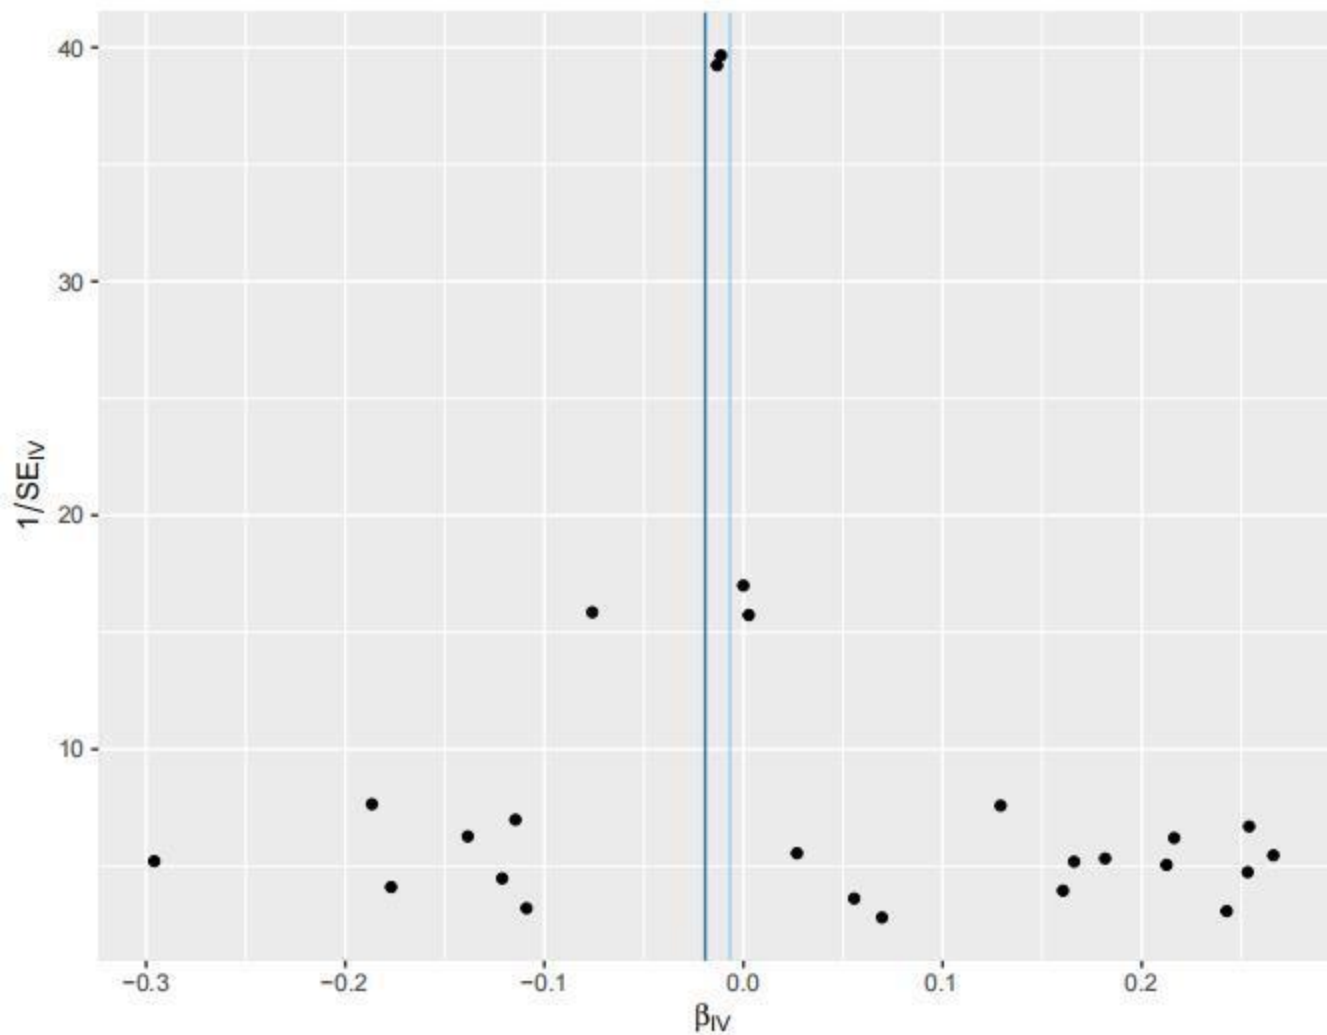

Funnel plot analyse of "CD19 on IgD+ CD38dim" on 'Aplastic anemia'

MR Method

- Inverse variance weighted
- MR Egger

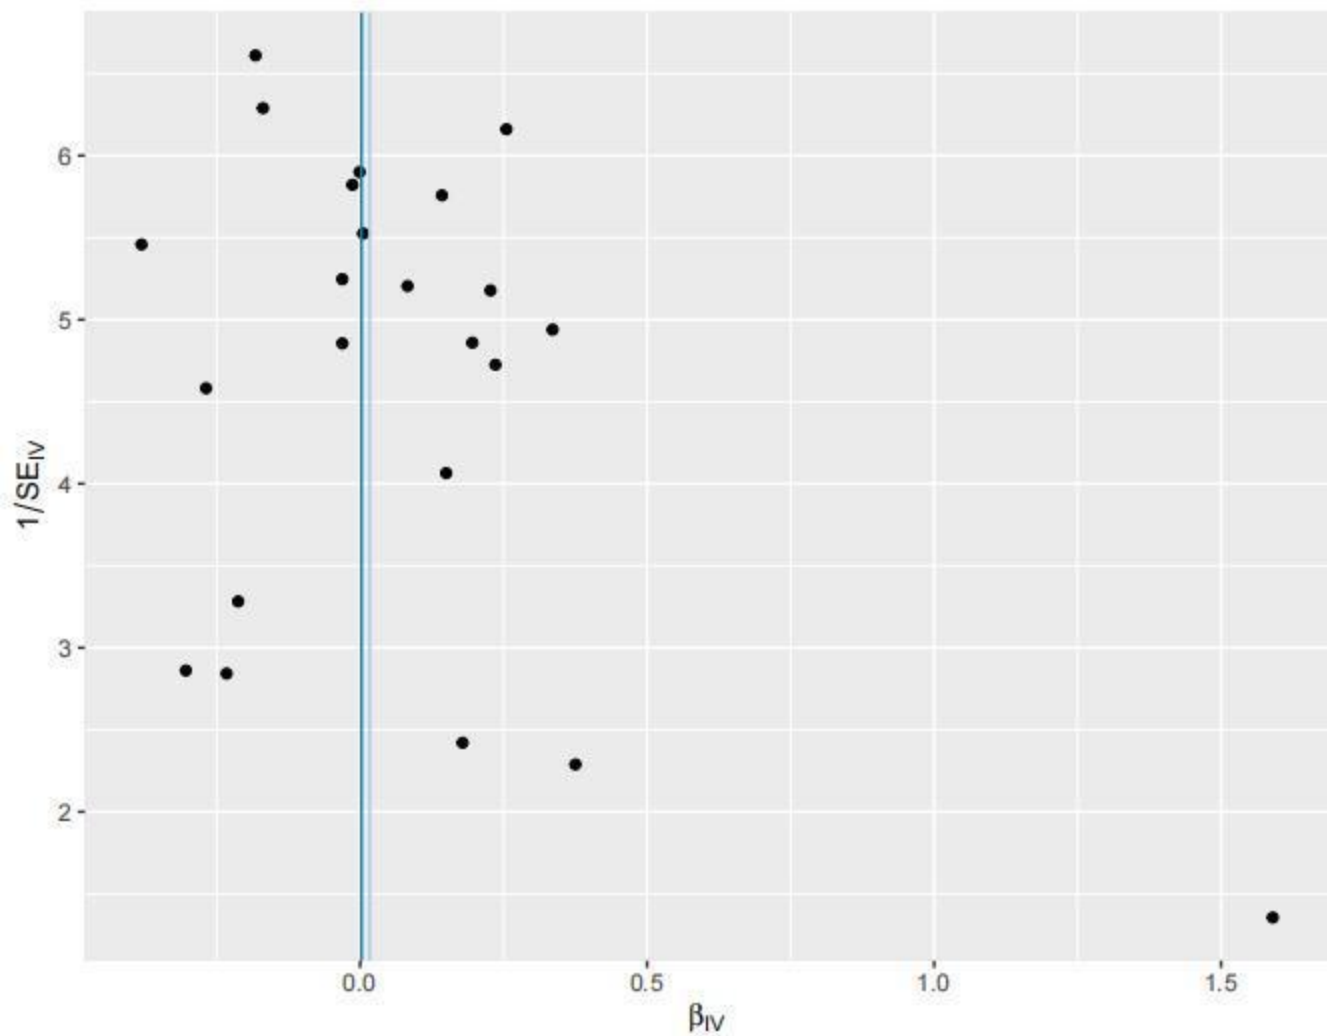

Funnel plot analysis of "IgD+ CD24+ AC" on 'Aplastic anemia'



### MR Method

- Inverse variance weighted
- MR Egger

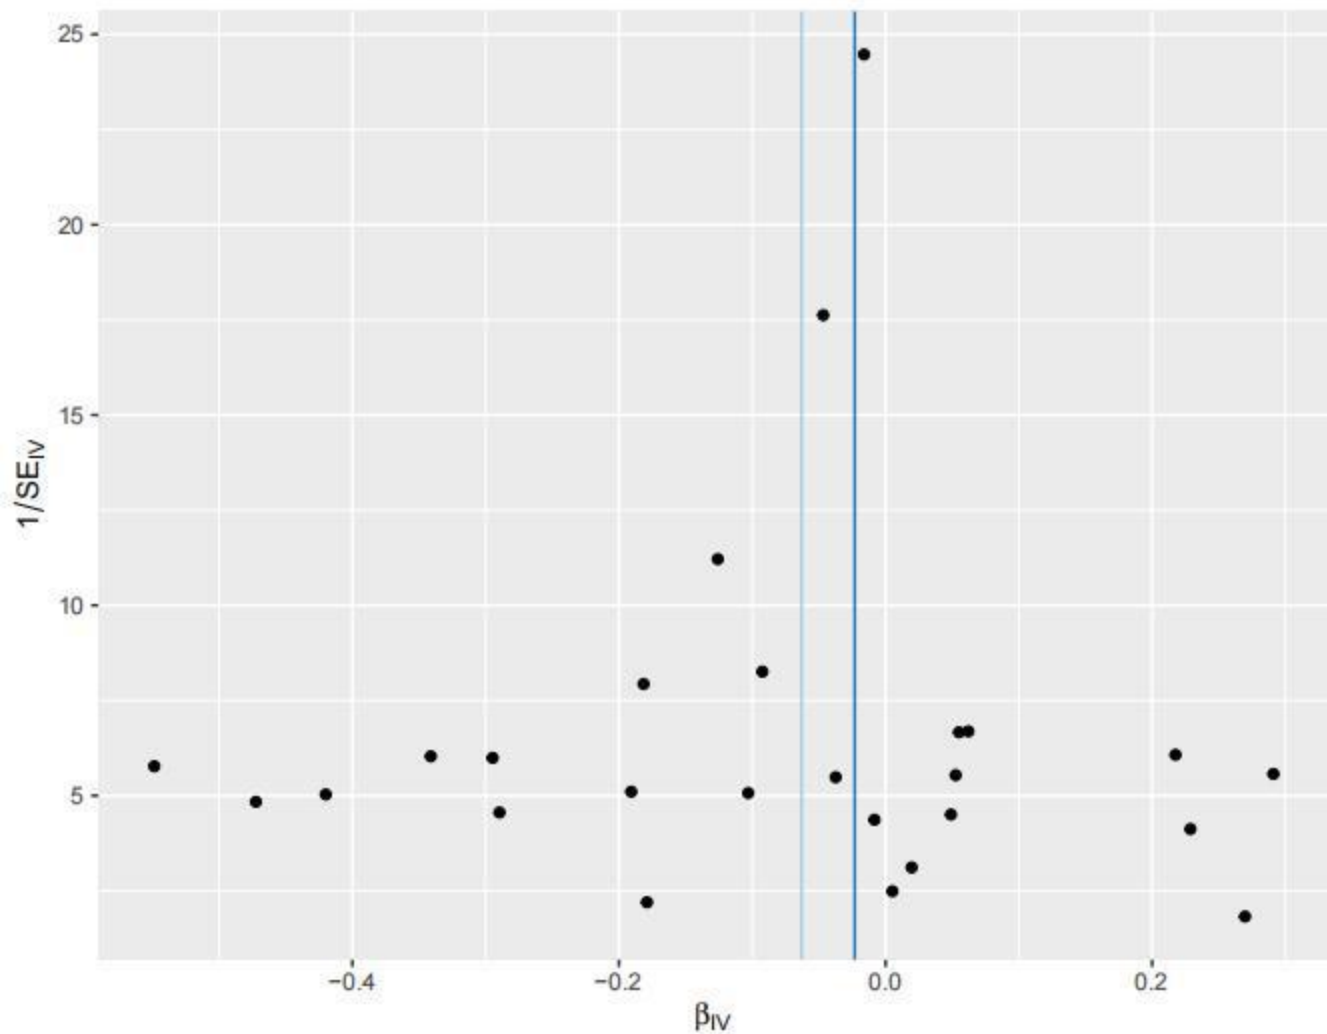

Funnel plot analysis of "CD20 on IgD+ CD38br" on 'Aplastic anemia'

### MR Method

- Inverse variance weighted
- MR Egger

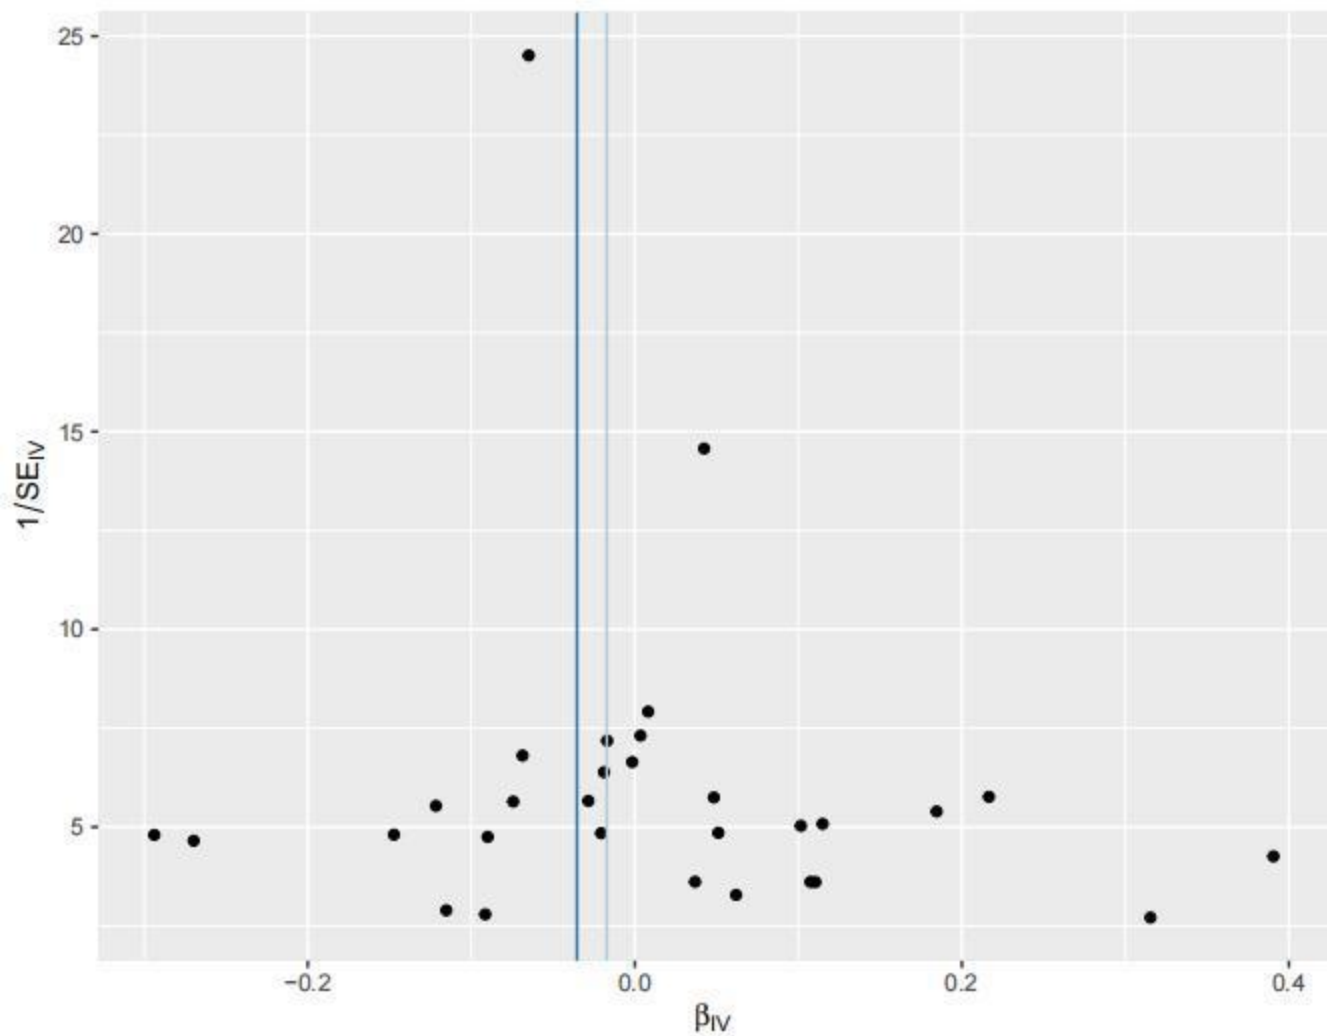

Funnel plot analyse of "CD45RA- CD4+ %CD4+" on 'Aplastic anemia'

MR Method

- Inverse variance weighted
- MR Egger

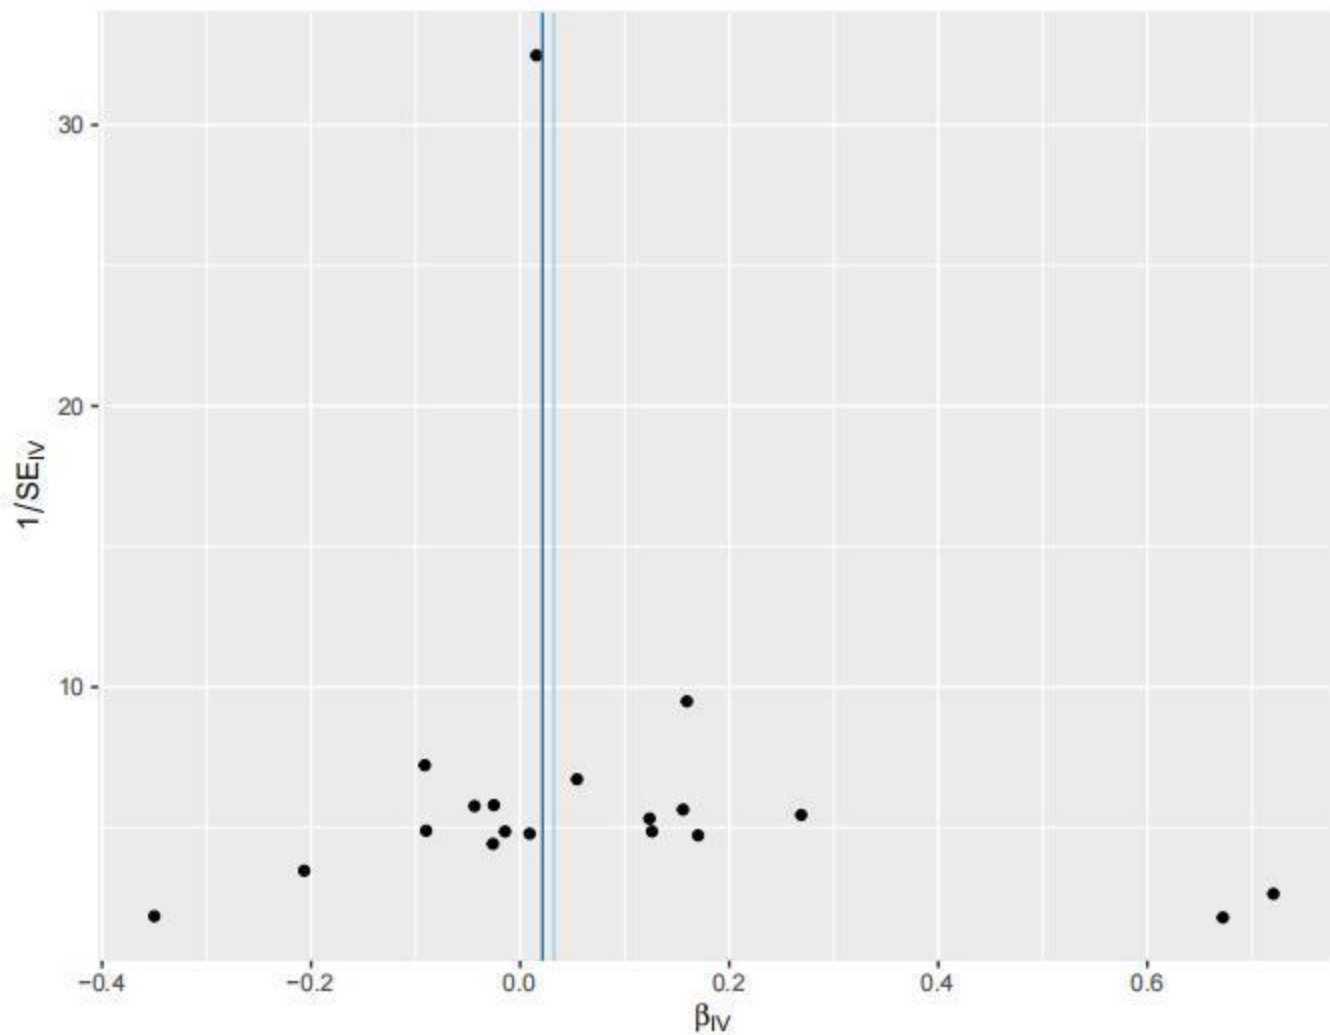

Funnel plot analyse of "T cell %leukocyte" on 'Aplastic anemia'

MR Method

- Inverse variance weighted
- MR Egger

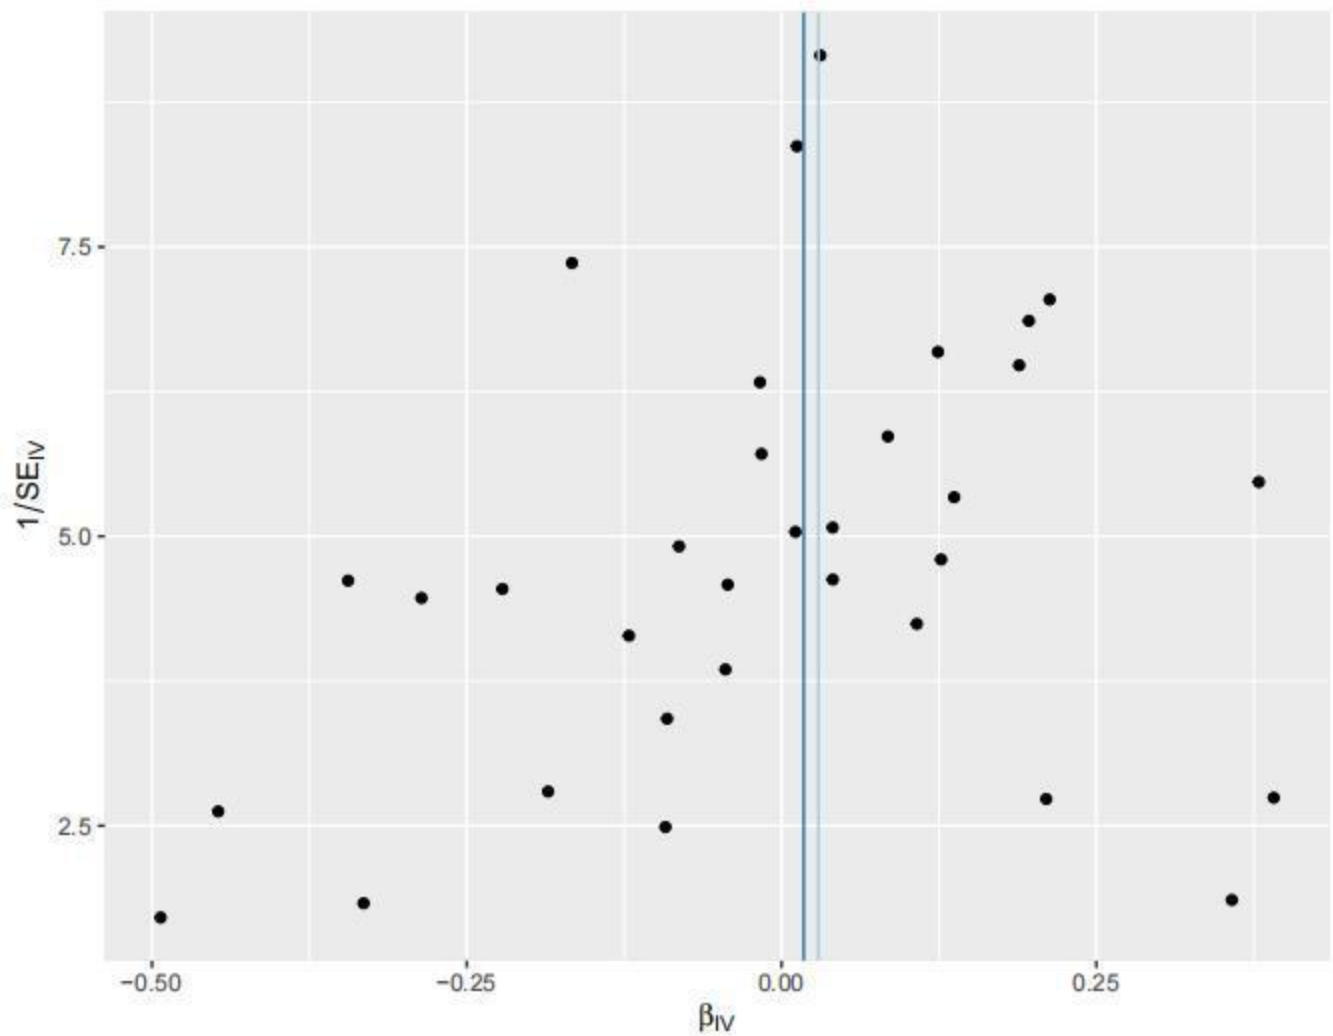

Funnel plot analyse of "CM CD8br %CD8br" on 'Aplastic anemia'

MR Method

- Inverse variance weighted
- MR Egger

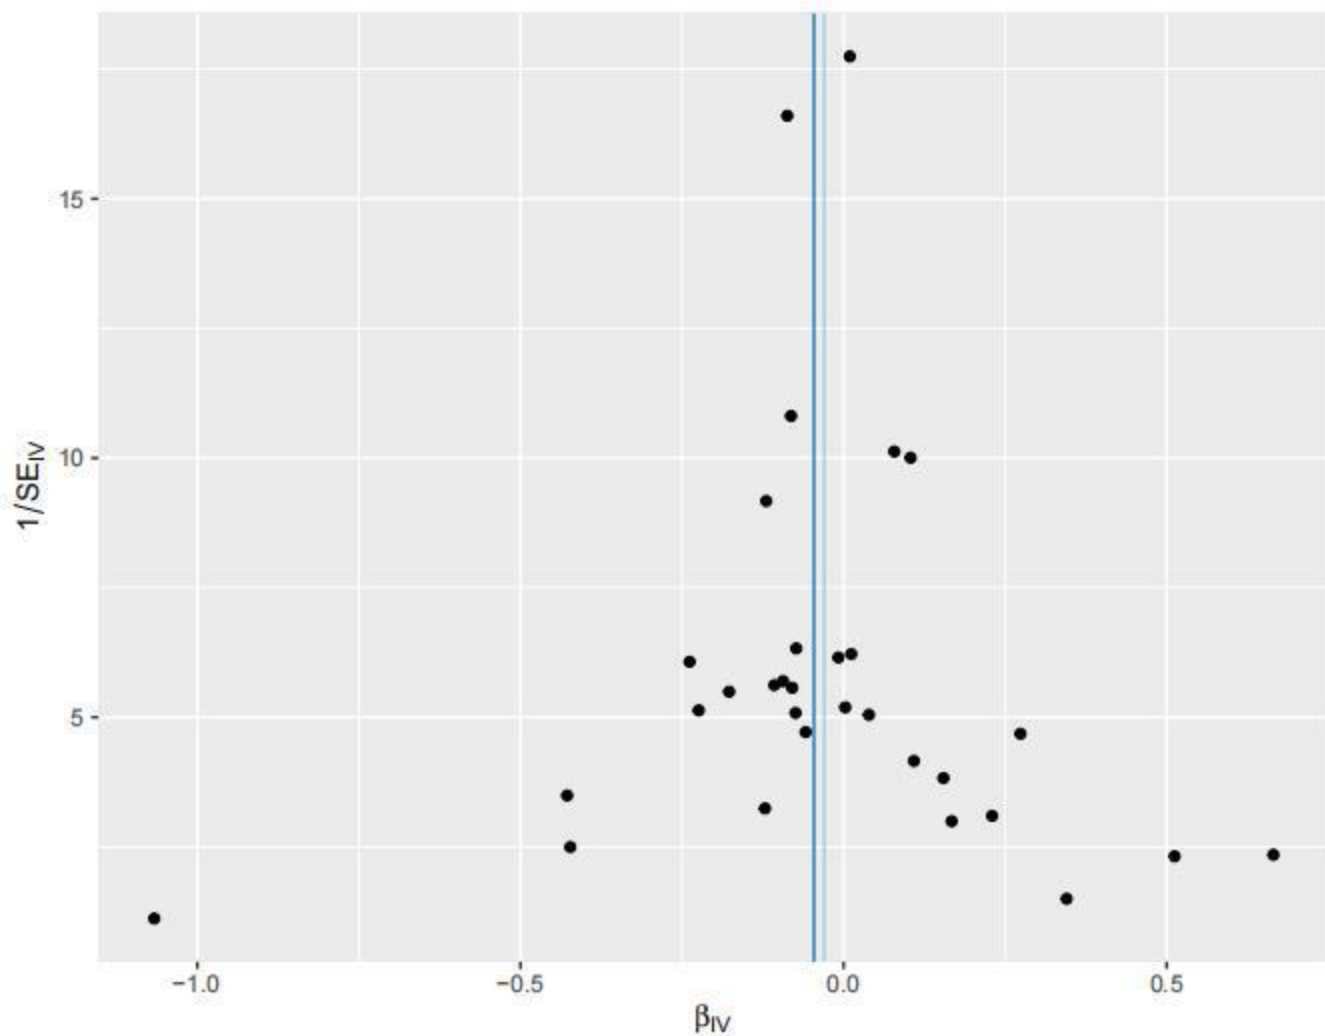

Funnel plot analyse of "HLA DR+ CD8br %lymphocyte" on 'Aplastic anemia'

MR Method

- Inverse variance weighted
- MR Egger

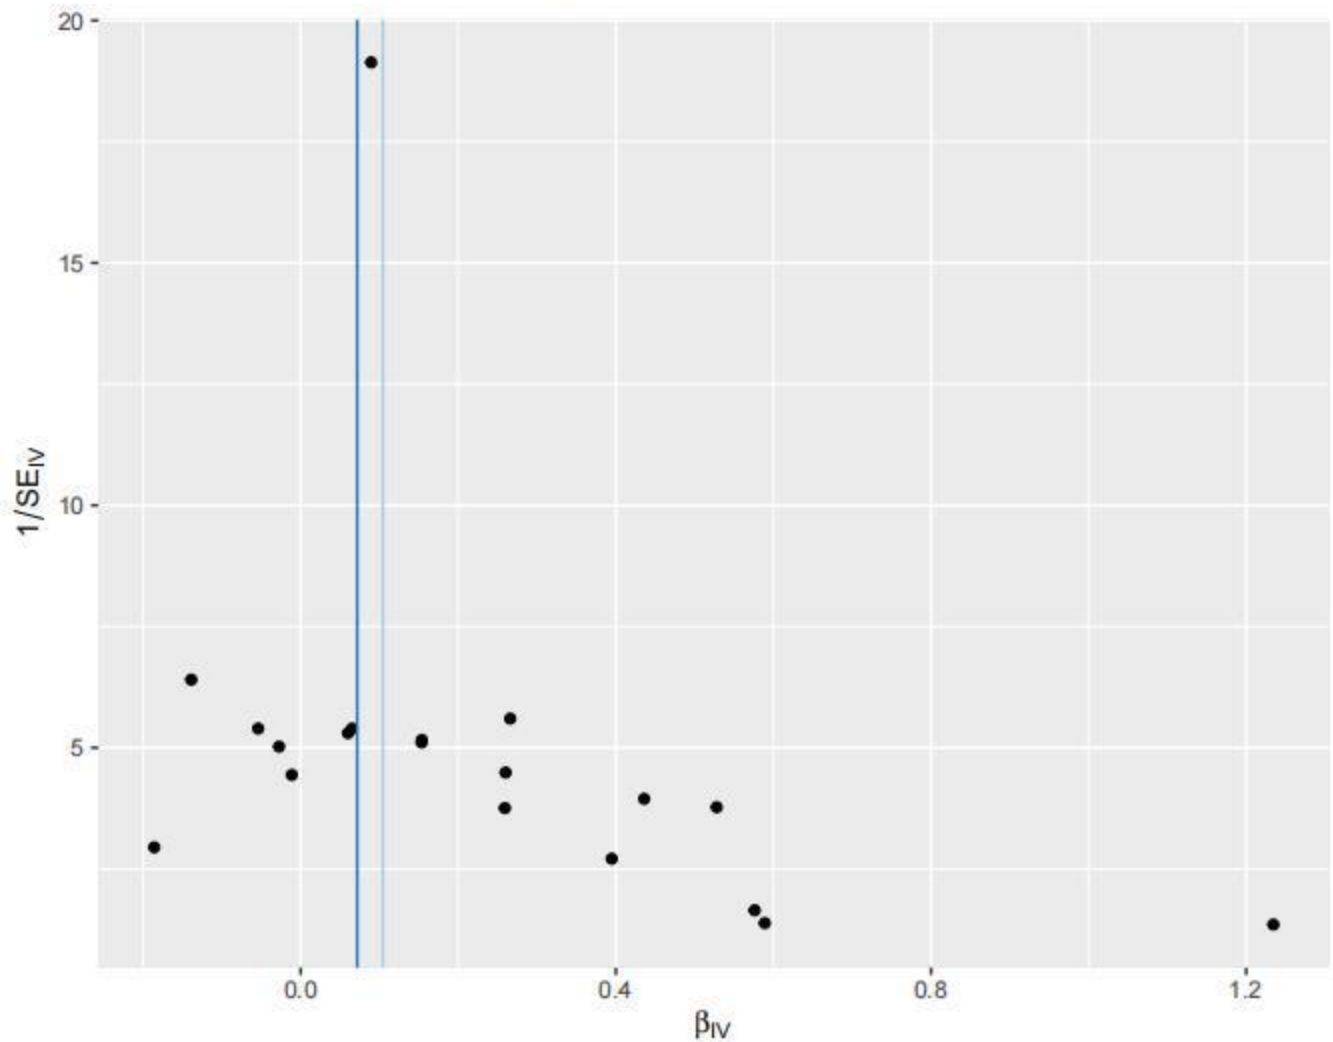

Funnel plot analyse of "HLA DR+ NK AC" on 'Aplastic anemia'

### MR Method

Inverse variance weighted

MR Egger

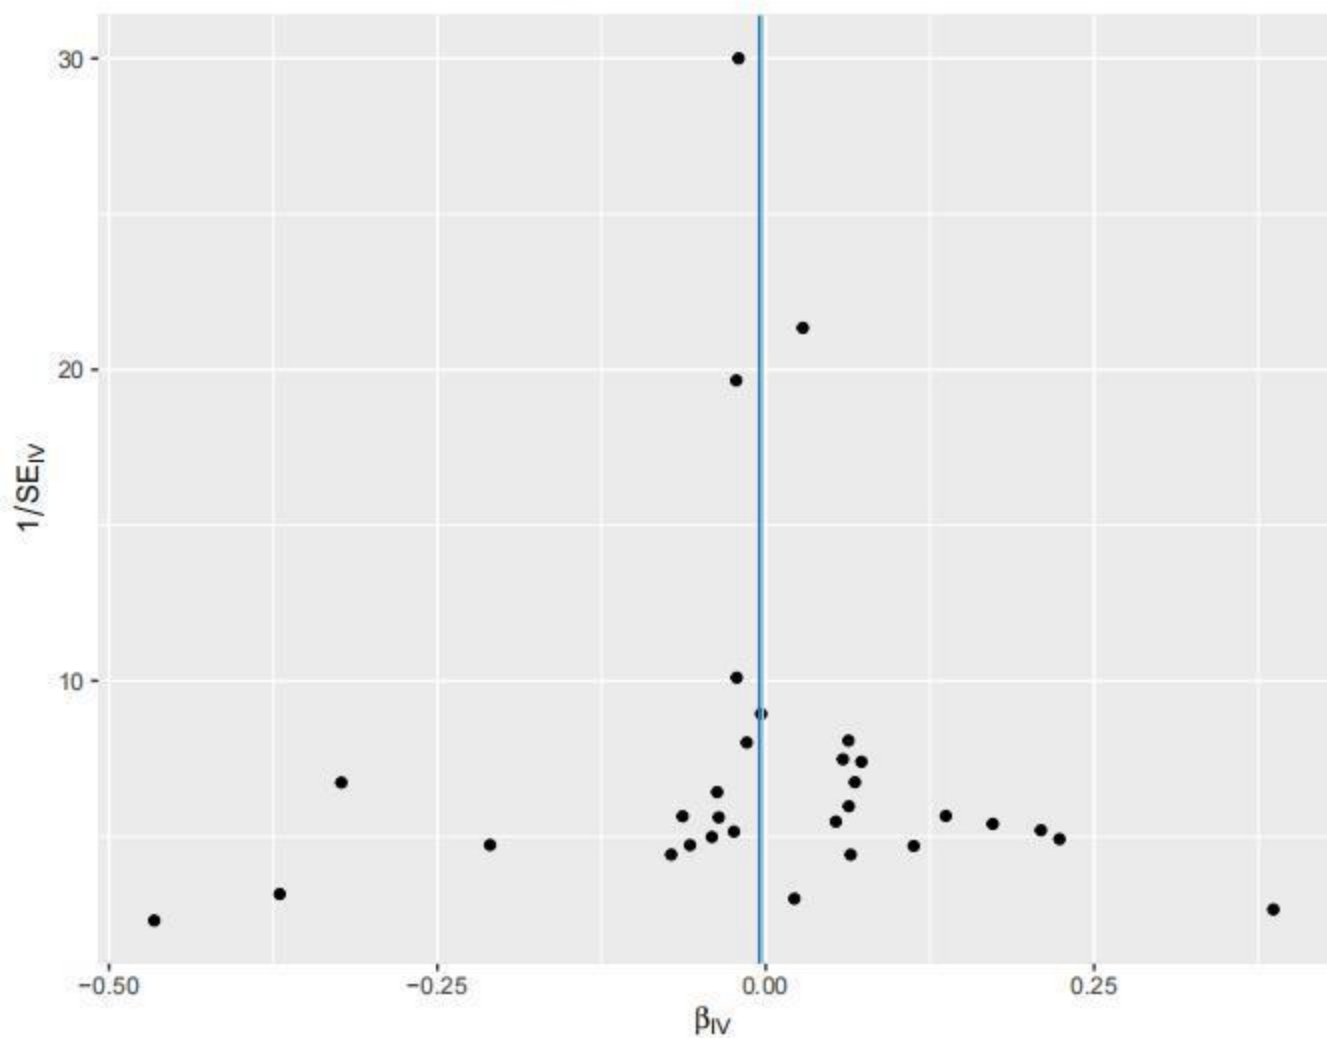

Funnel plot analyse of "CD27 on IgD+ CD24+" on 'Aplastic anemia'

MR Method

- Inverse variance weighted
- MR Egger

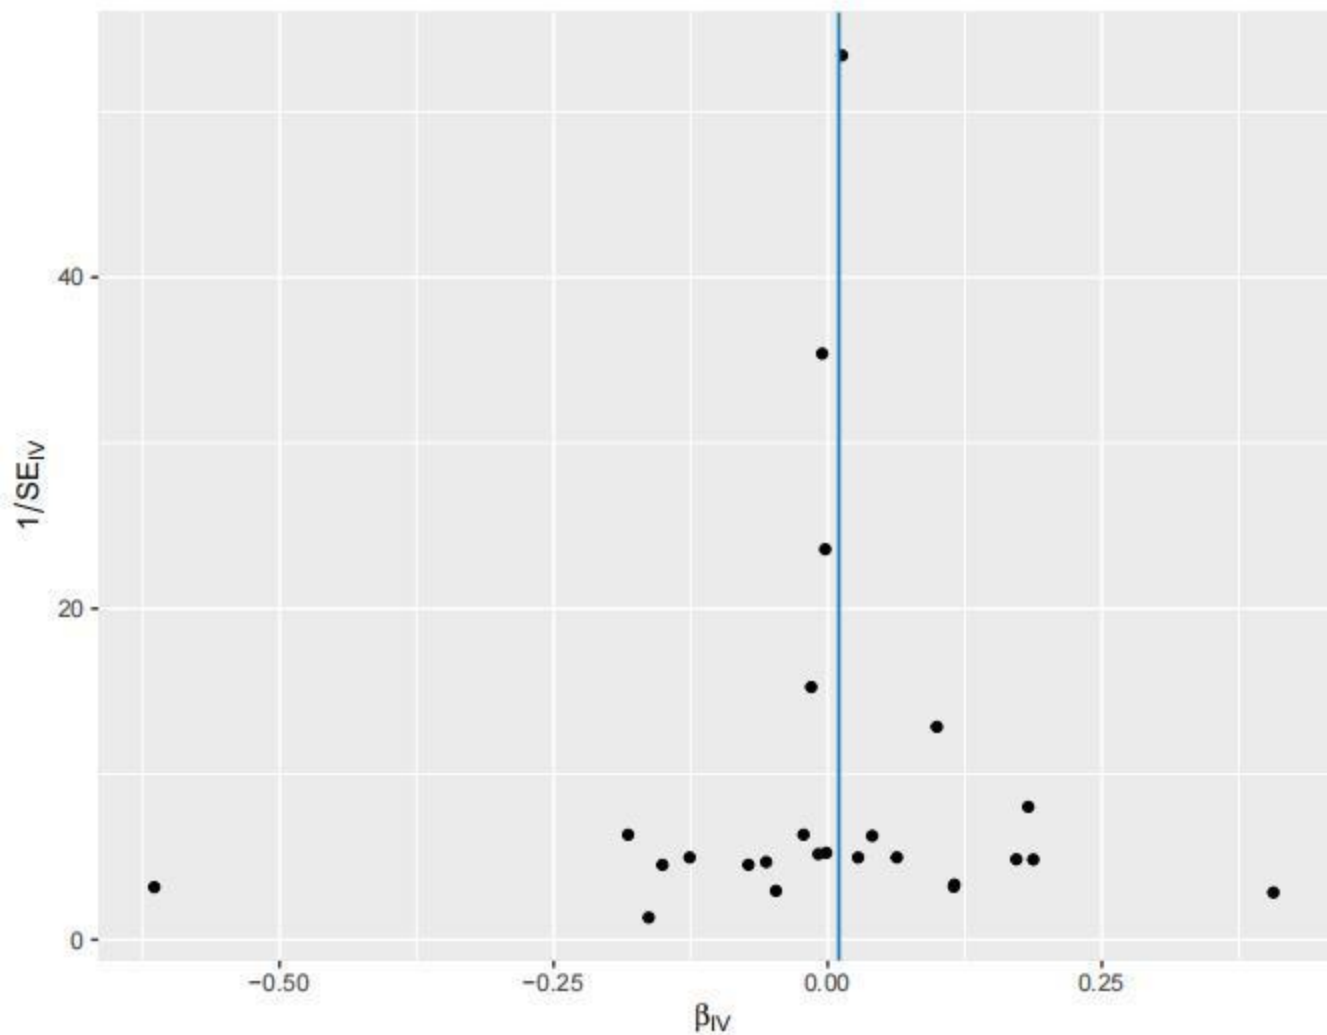

Funnel plot analyse of "IgD+ CD38dim AC" on 'Aplastic anemia'



MR Method

- Inverse variance weighted
- MR Egger

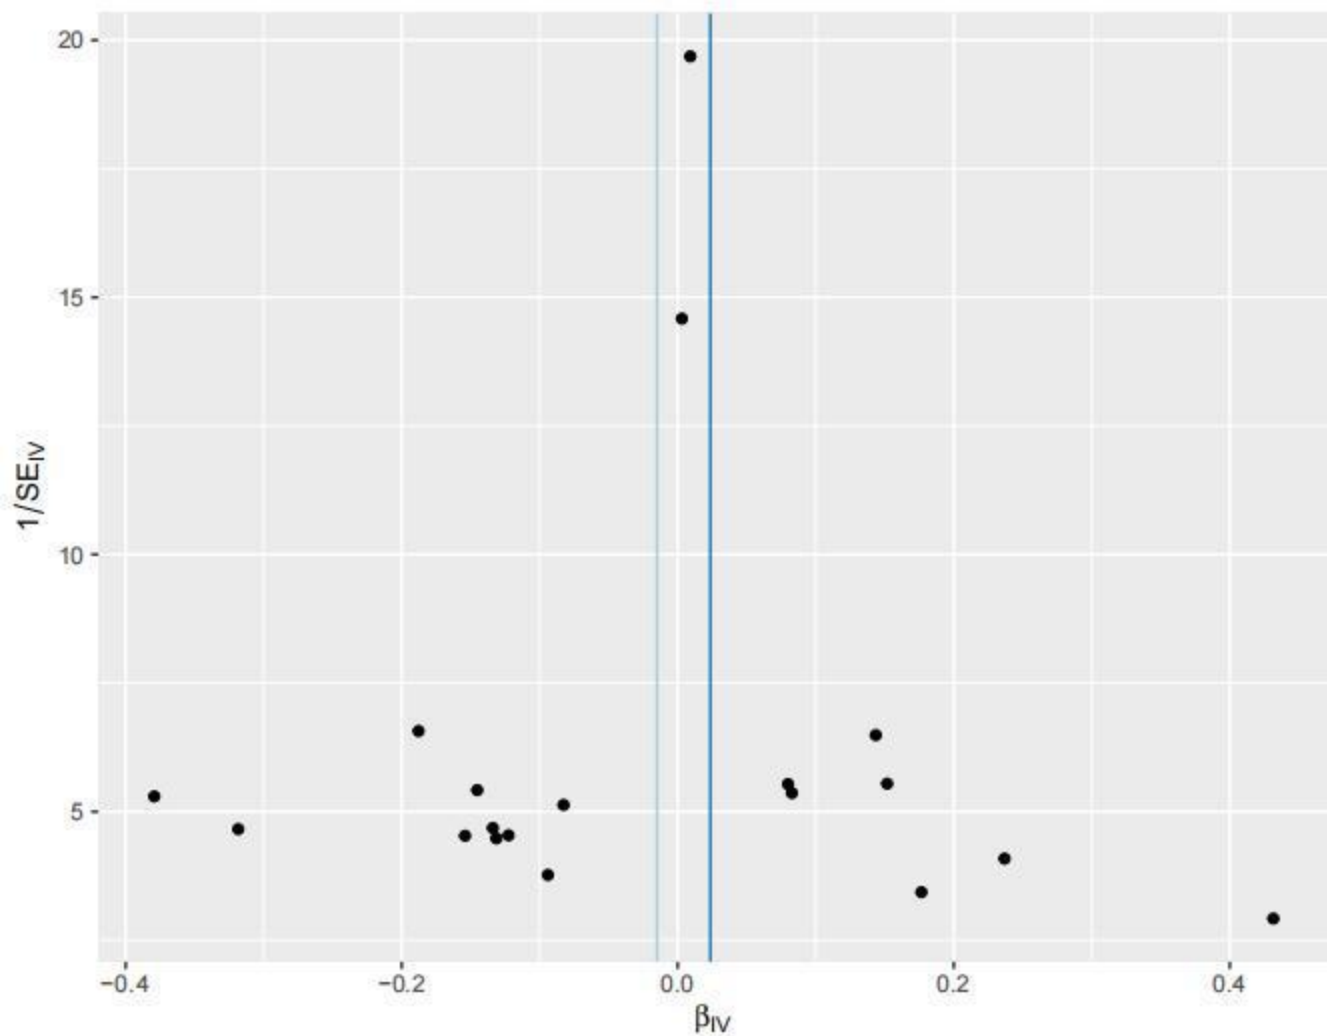

Funnel plot analyse of "CD27 on CD20- CD38-" on 'Aplastic anemia'

### MR Method

- Inverse variance weighted
- MR Egger

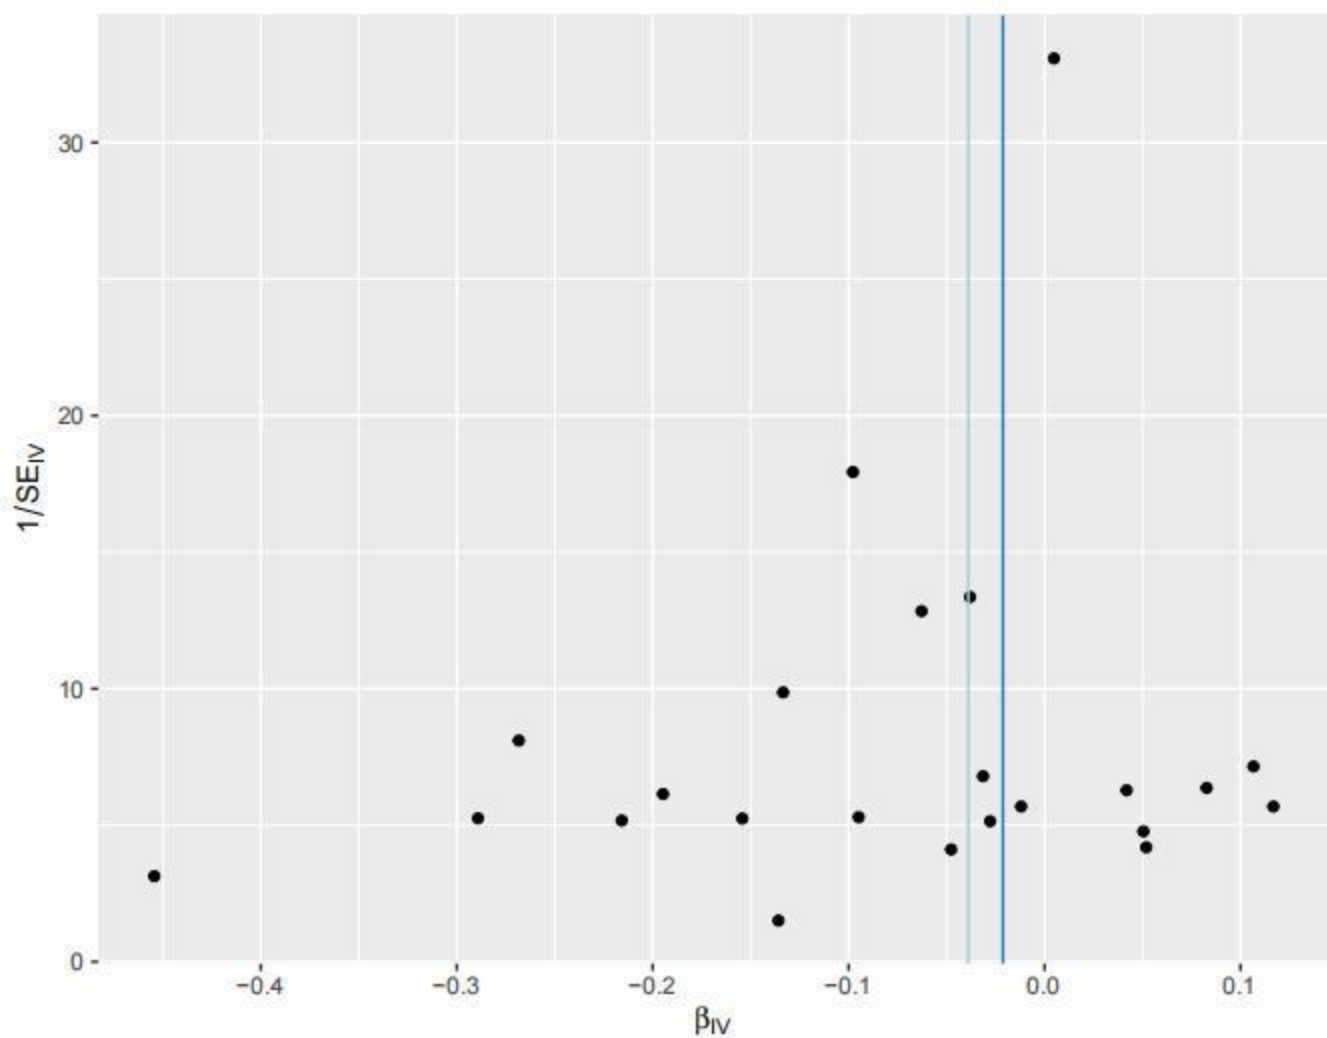

Funnel plot analyse of "Myeloid DC AC" on 'Aplastic anemia'

### MR Method

- Inverse variance weighted
- MR Egger

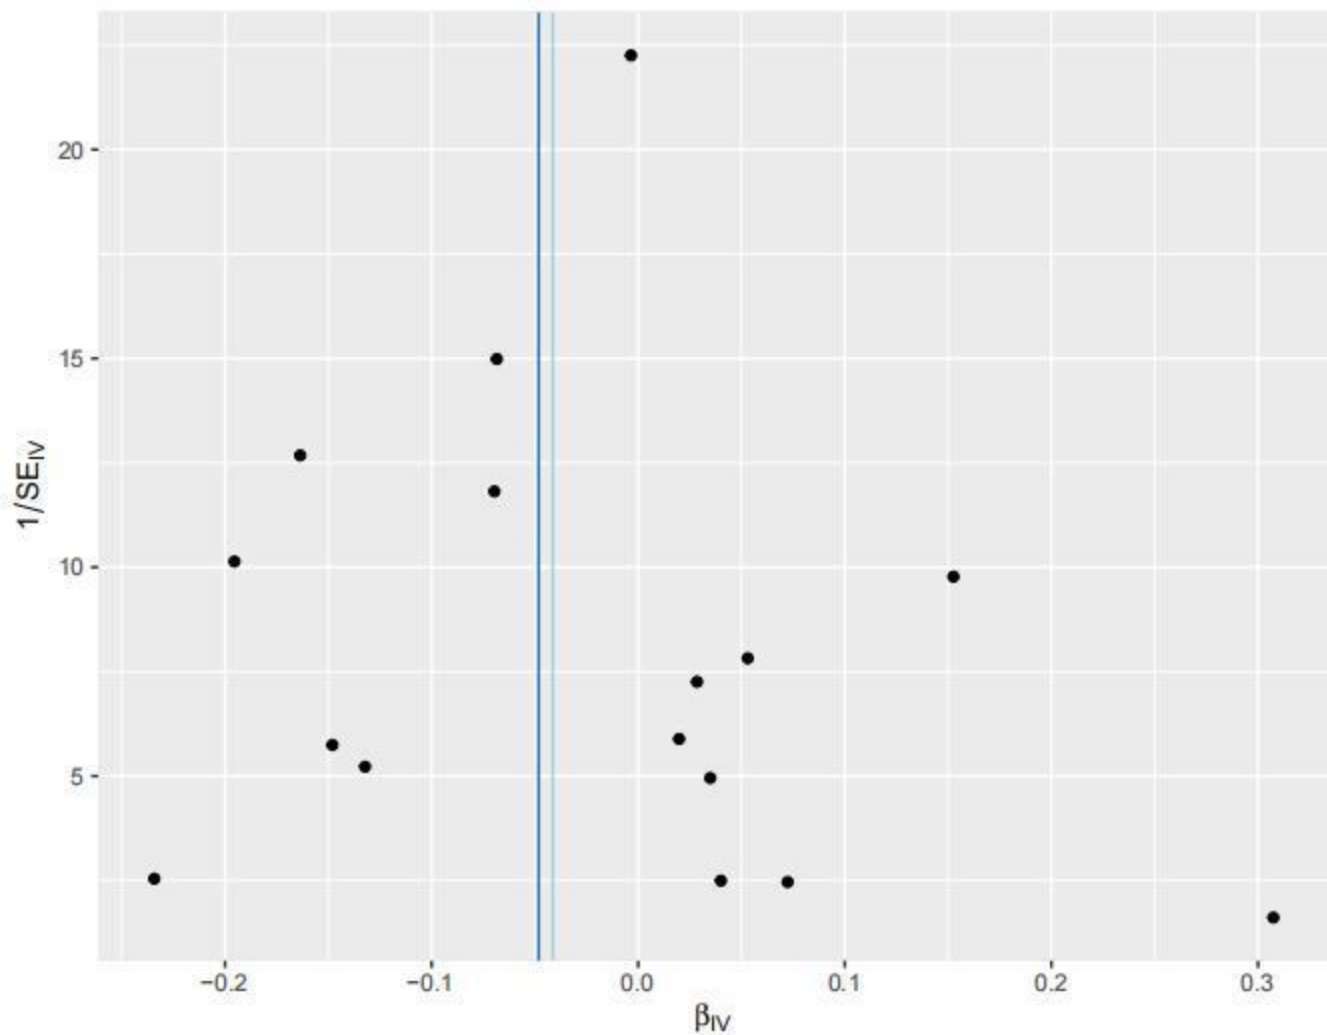

Funnel plot analyse of "CD3 on CD28+ DN (CD4-CD8-)" on 'Aplastic anemia'

### MR Method

- Inverse variance weighted
- MR Egger

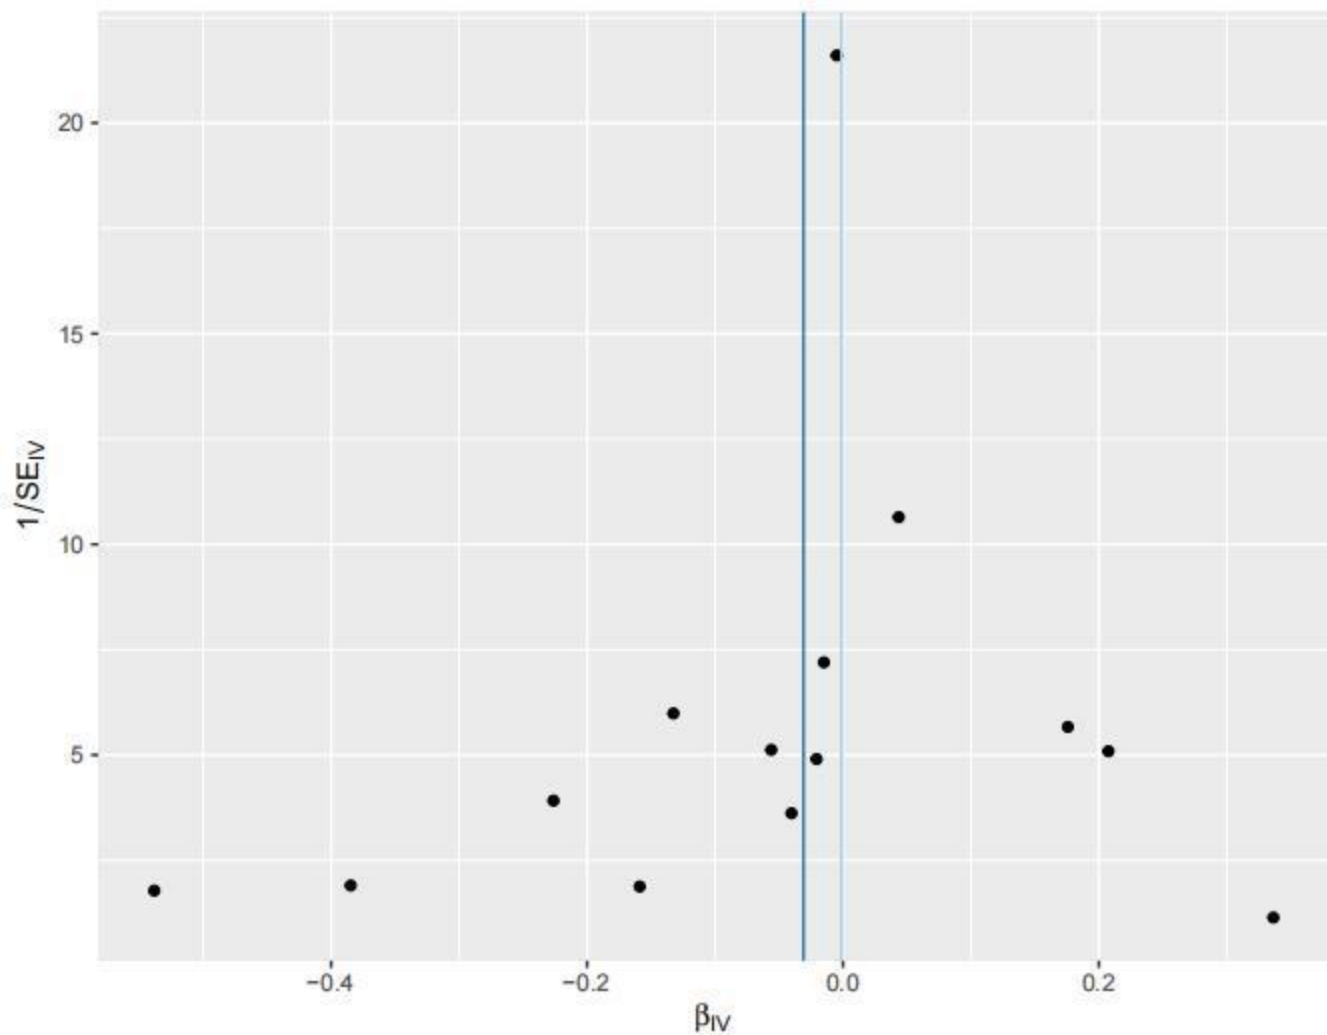

Funnel plot analyse of "BAFF-R on CD20-" on 'Aplastic anemia'

MR Method

- Inverse variance weighted
- MR Egger

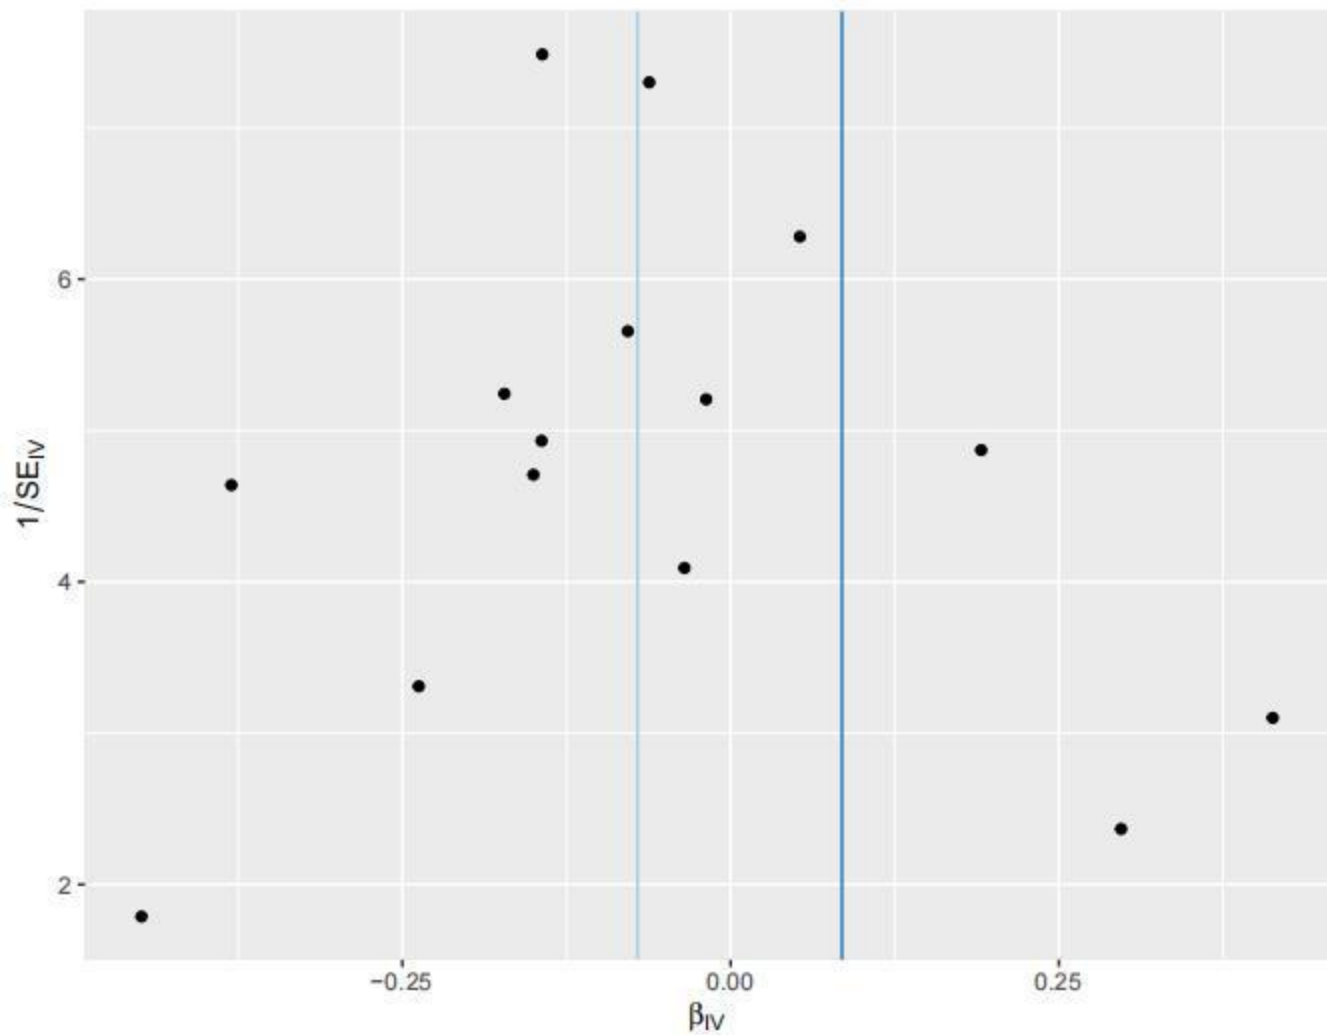

Funnel plot analysis of "CD27 on IgD- CD38br" on 'Aplastic anemia'

MR Method

- Inverse variance weighted
- MR Egger

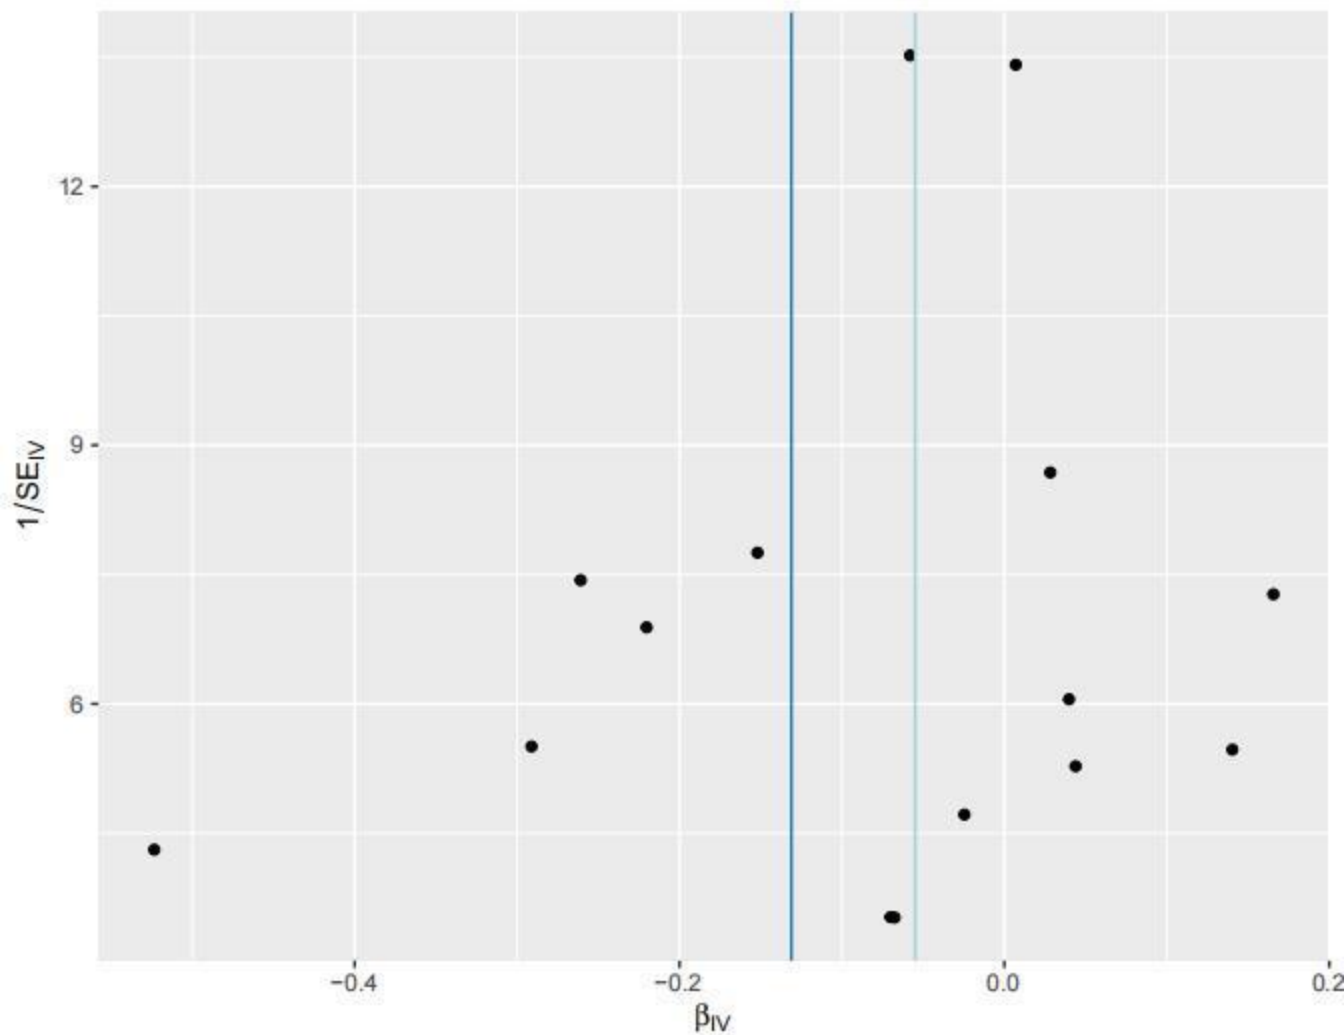

Funnel plot analyse of "CCR2 on CD62L+ myeloid DC" on 'Aplastic anemia'

### MR Method

- Inverse variance weighted
- MR Egger

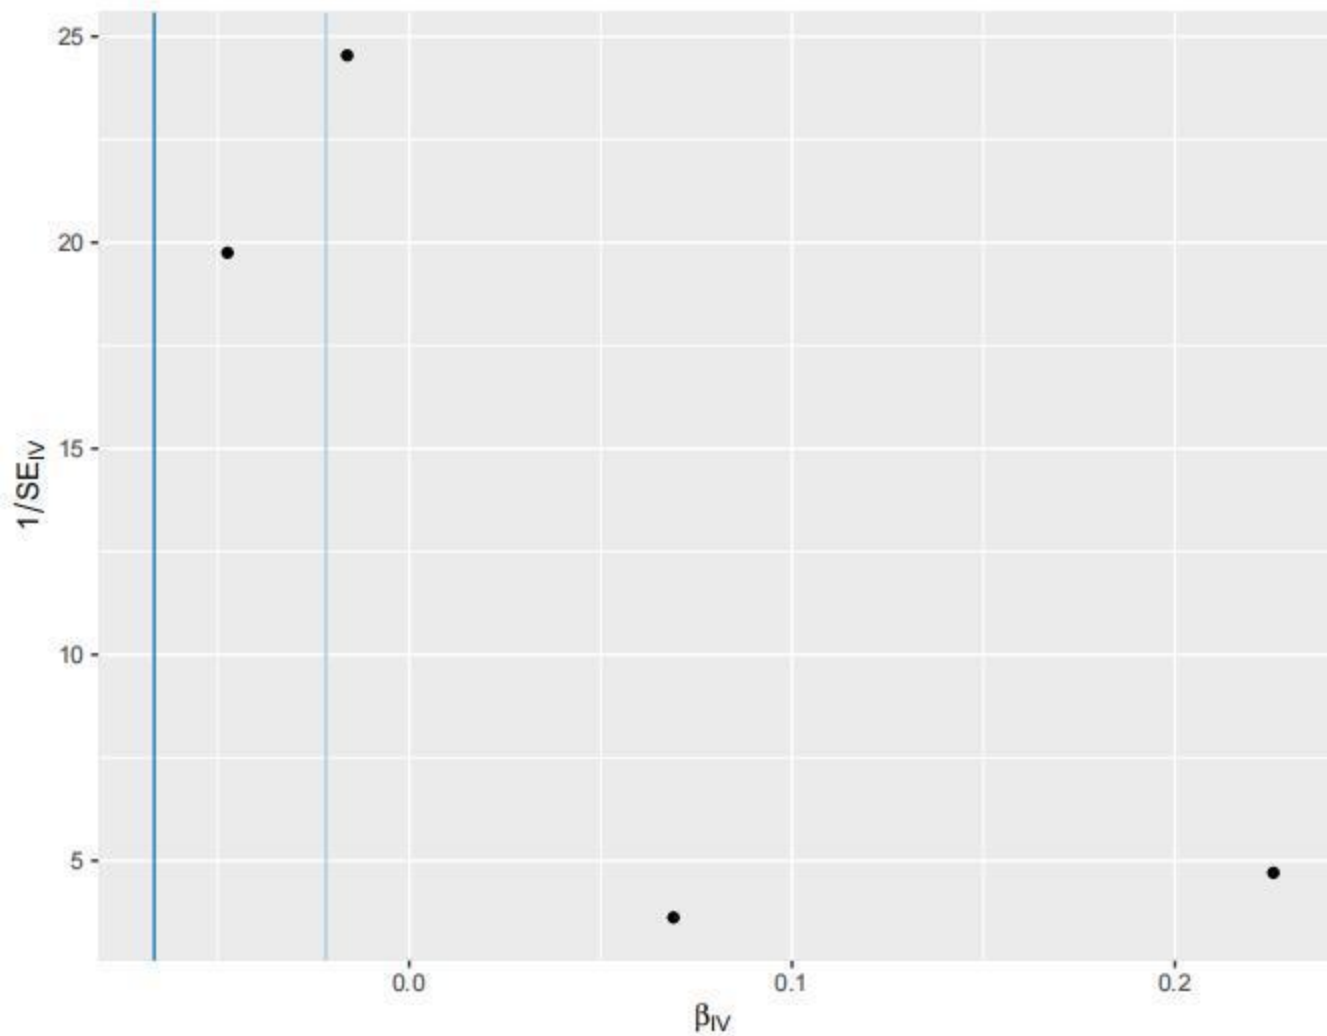

Funnel plot analyse of "CM DN (CD4-CD8-) AC" on 'Aplastic anemia'

### MR Method

- █ Inverse variance weighted
- █ MR Egger

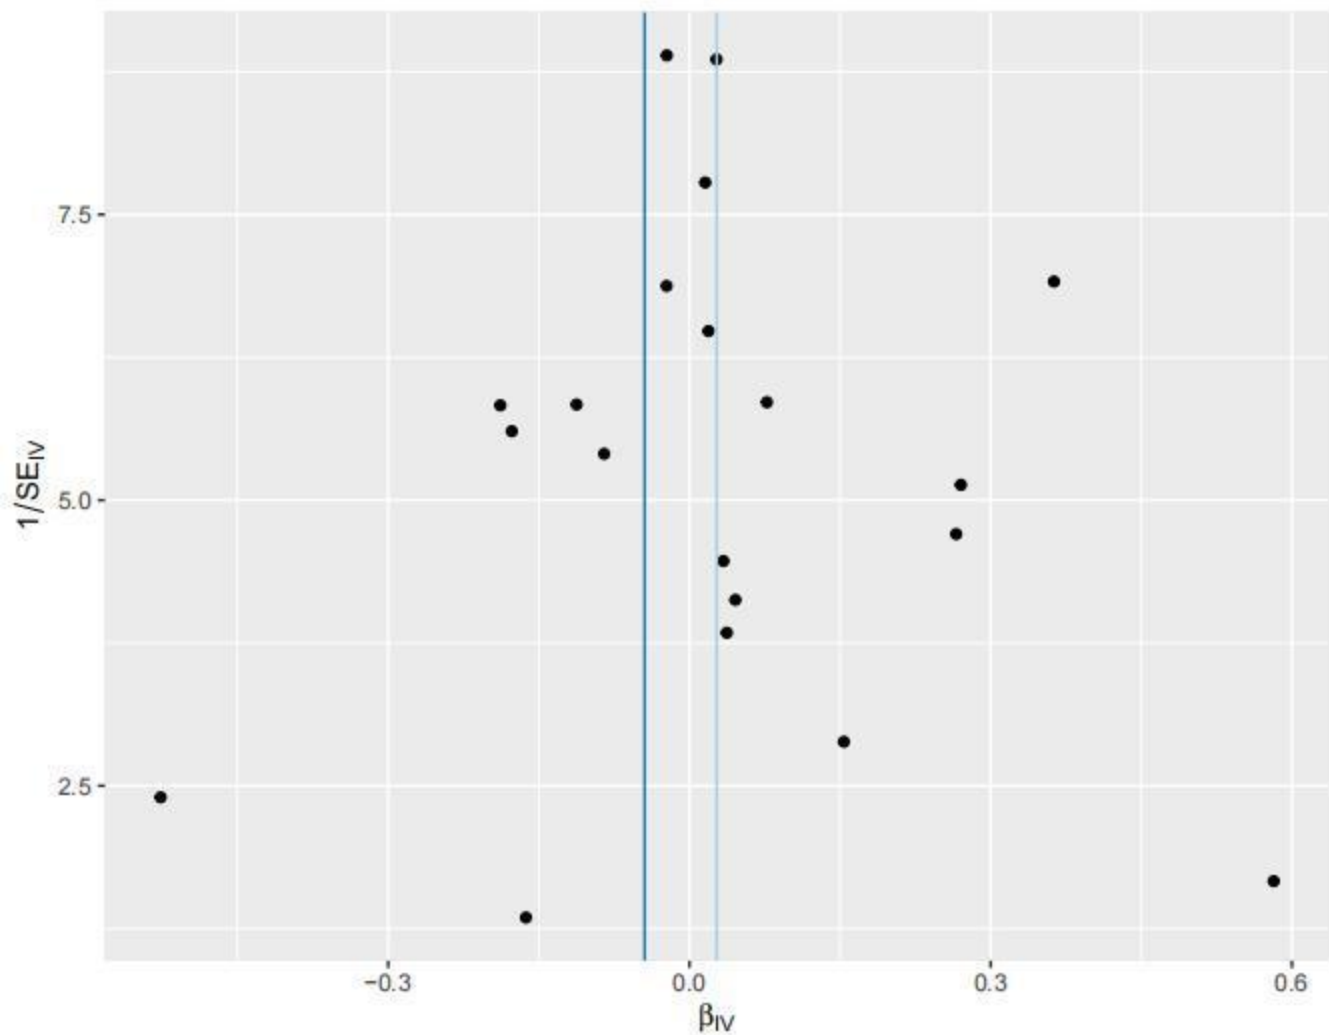

Funnel plot analyse of "CD8 on CD28- CD8br " on 'Aplastic anemia'



MR Method

- Inverse variance weighted
- MR Egger

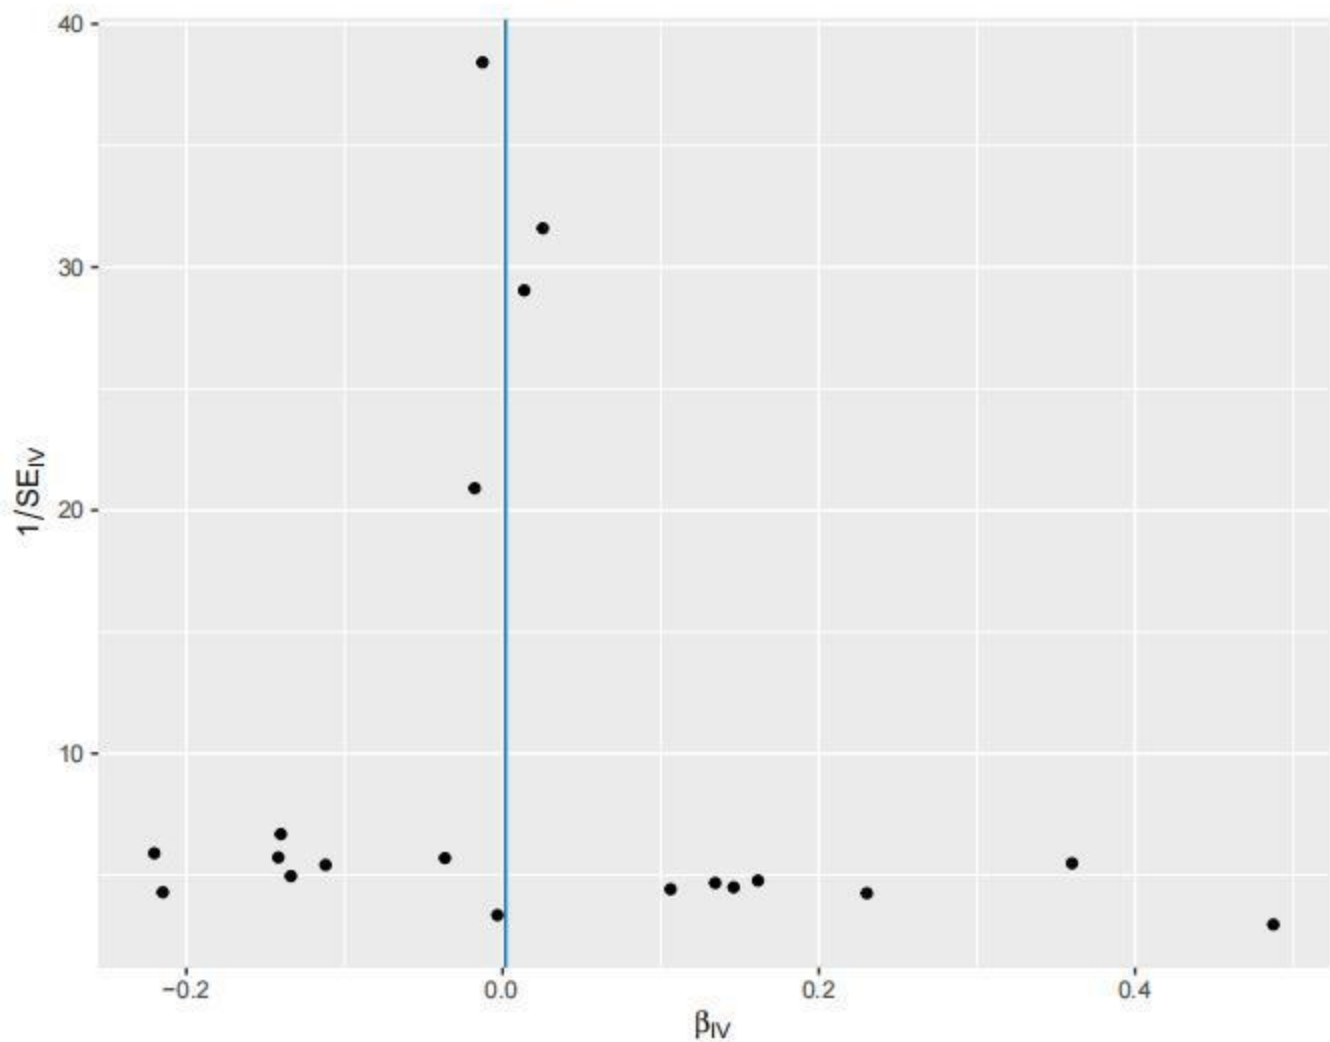

Funnel plot analyse of "PB/PC %lymphocyte" on 'Aplastic anemia'

### MR Method

- Inverse variance weighted
- MR Egger

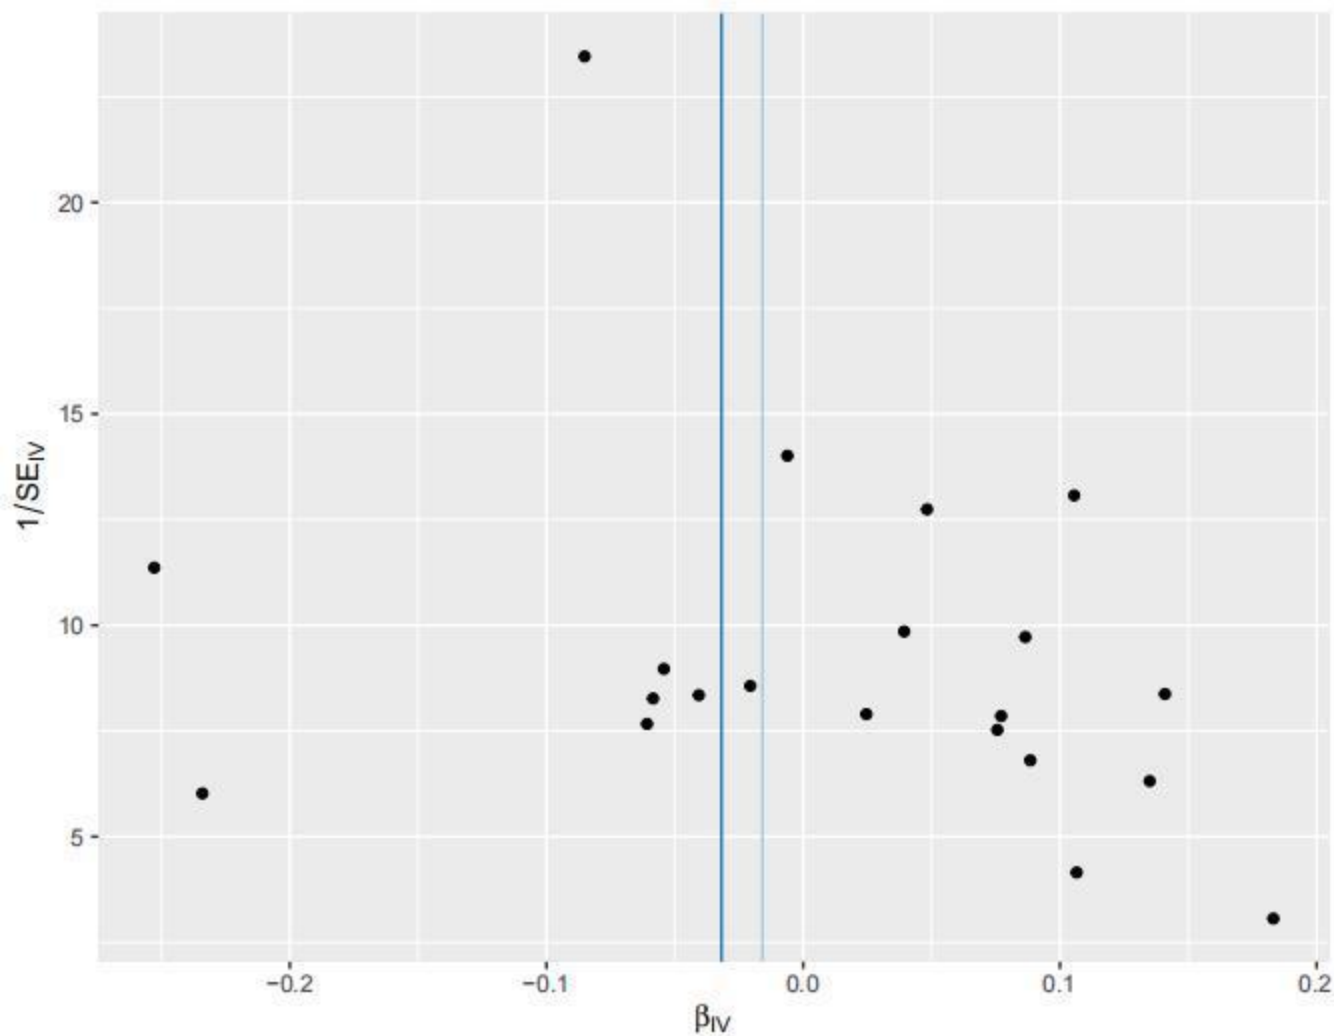

Funnel plot analyse of "HVEM on CD4+ " on 'Aplastic anemia'

### MR Method

- Inverse variance weighted
- MR Egger

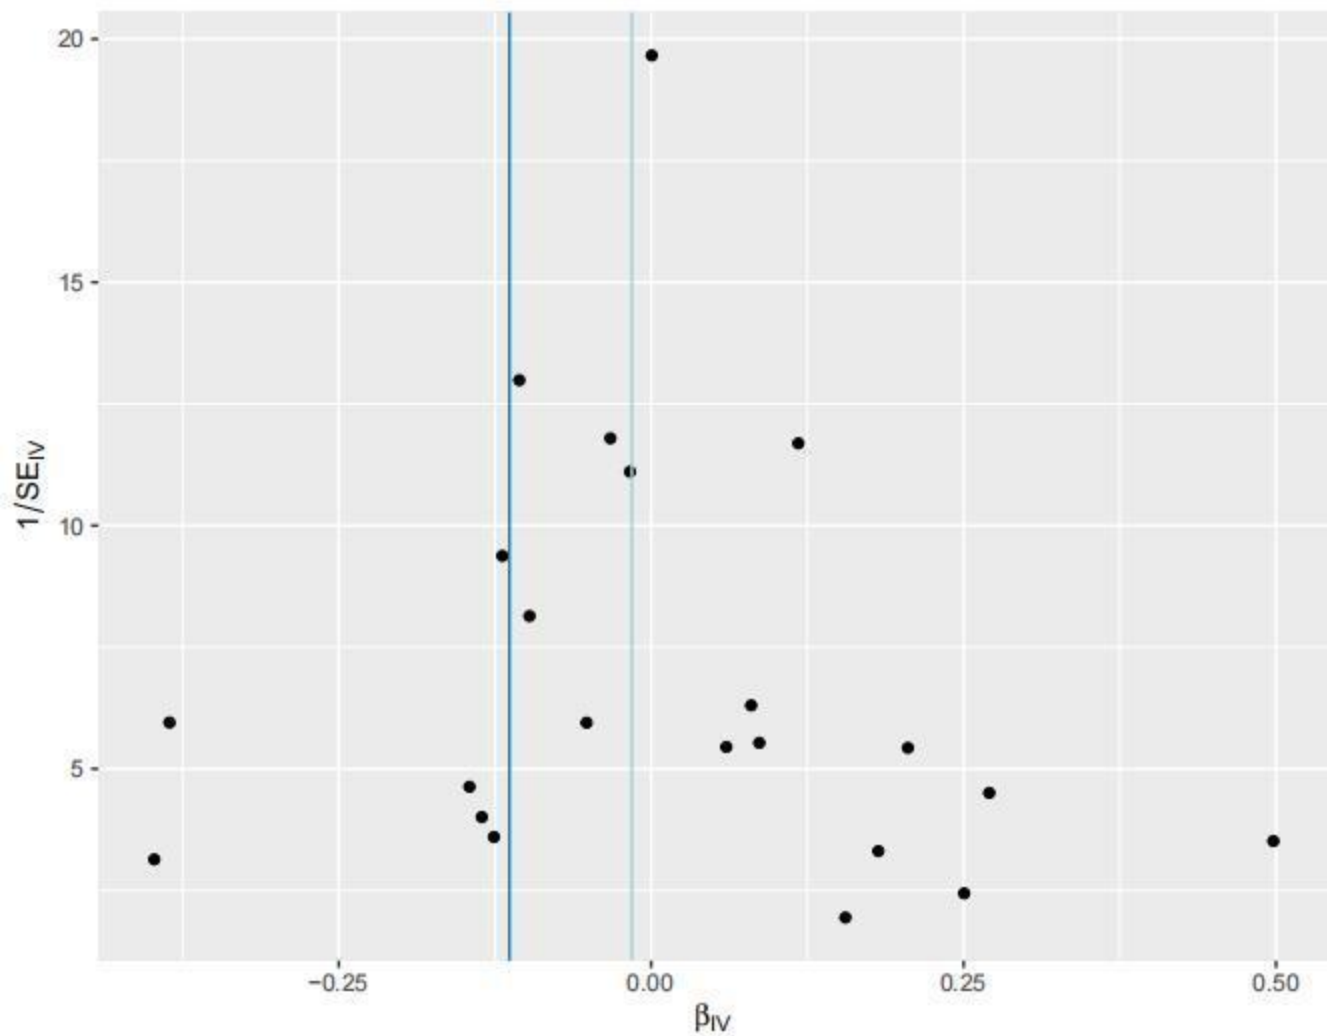

Funnel plot analyse of "CD39 on CD39+ activated Treg " on 'Aplastic anemia'

MR Method

- Inverse variance weighted
- MR Egger

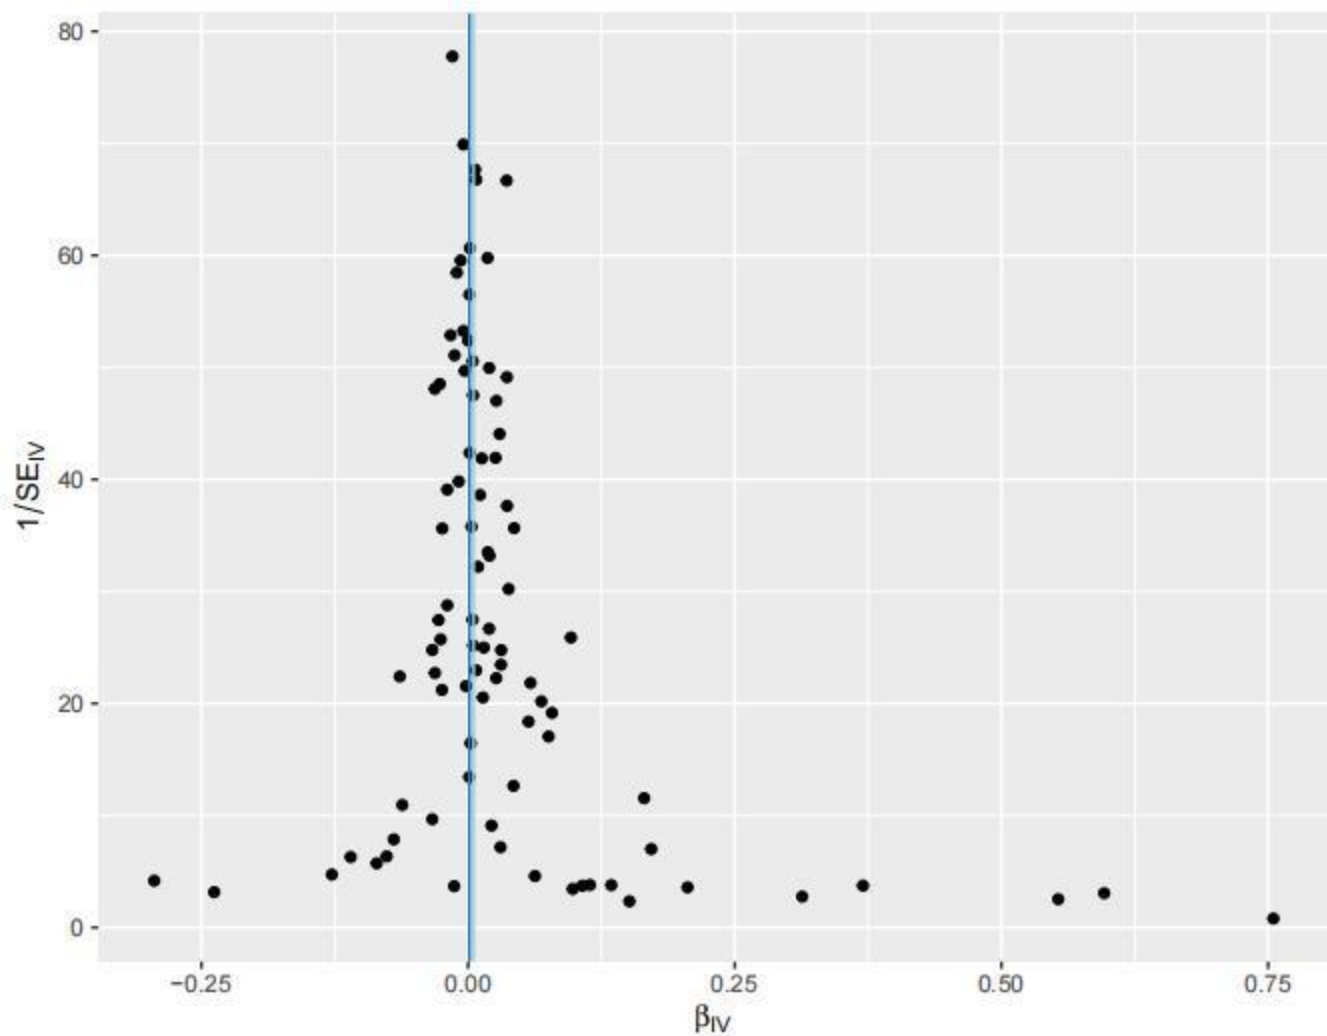

Funnel plot analysis of "CD28+ CD45RA+ CD8br %T cell" on 'Aplastic anemia'

MR Method

Inverse variance weighted

MR Egger

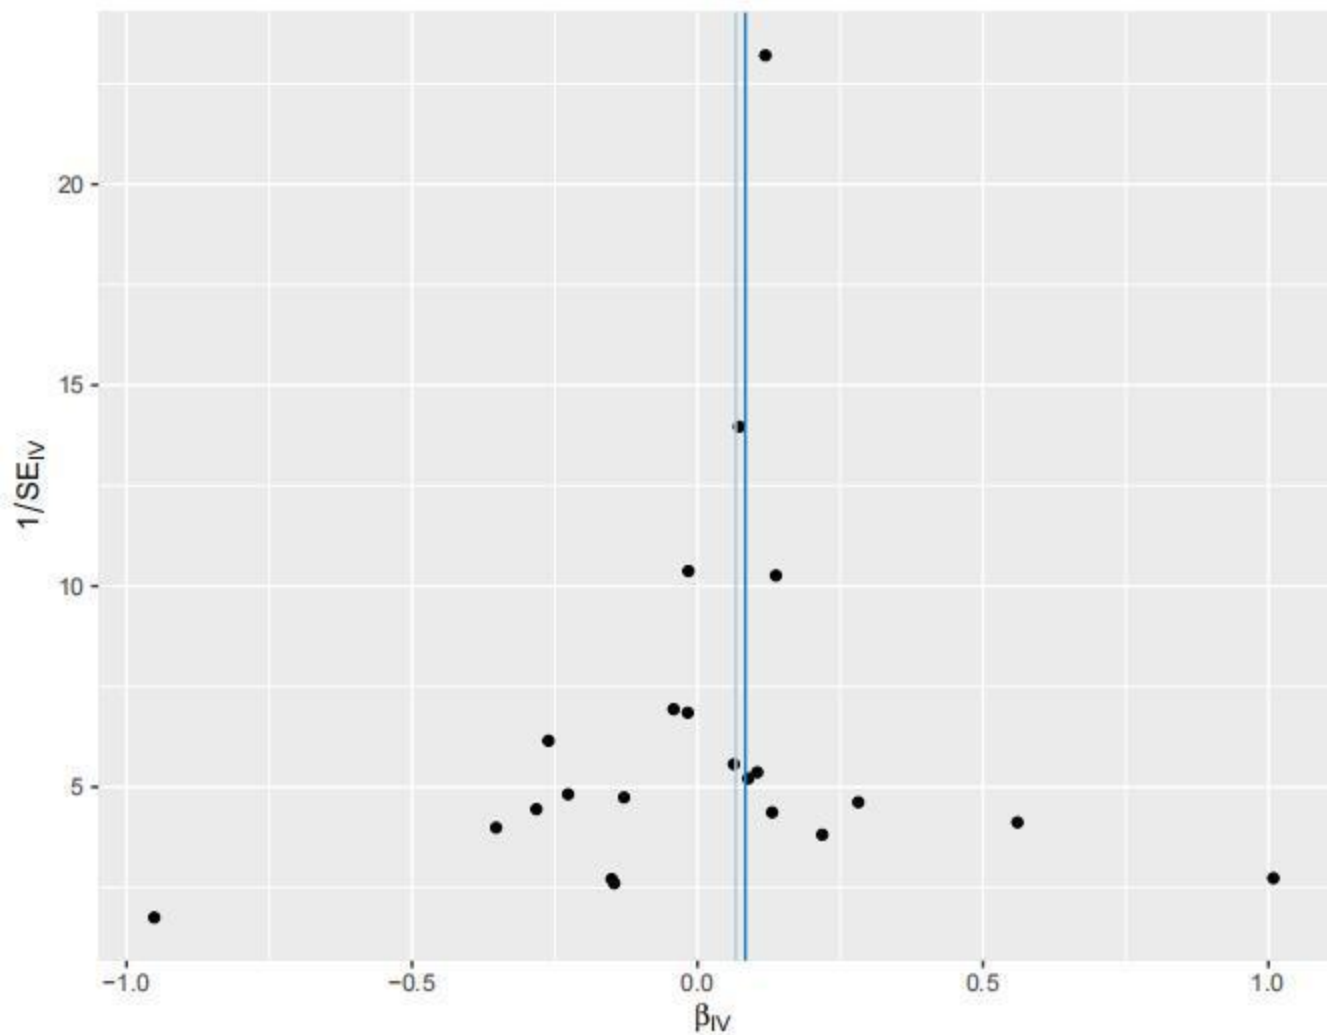

Funnel plot analysis of "HLA DR on CD14+ monocyte" on 'Aplastic anemia'

MR Method

- Inverse variance weighted
- MR Egger

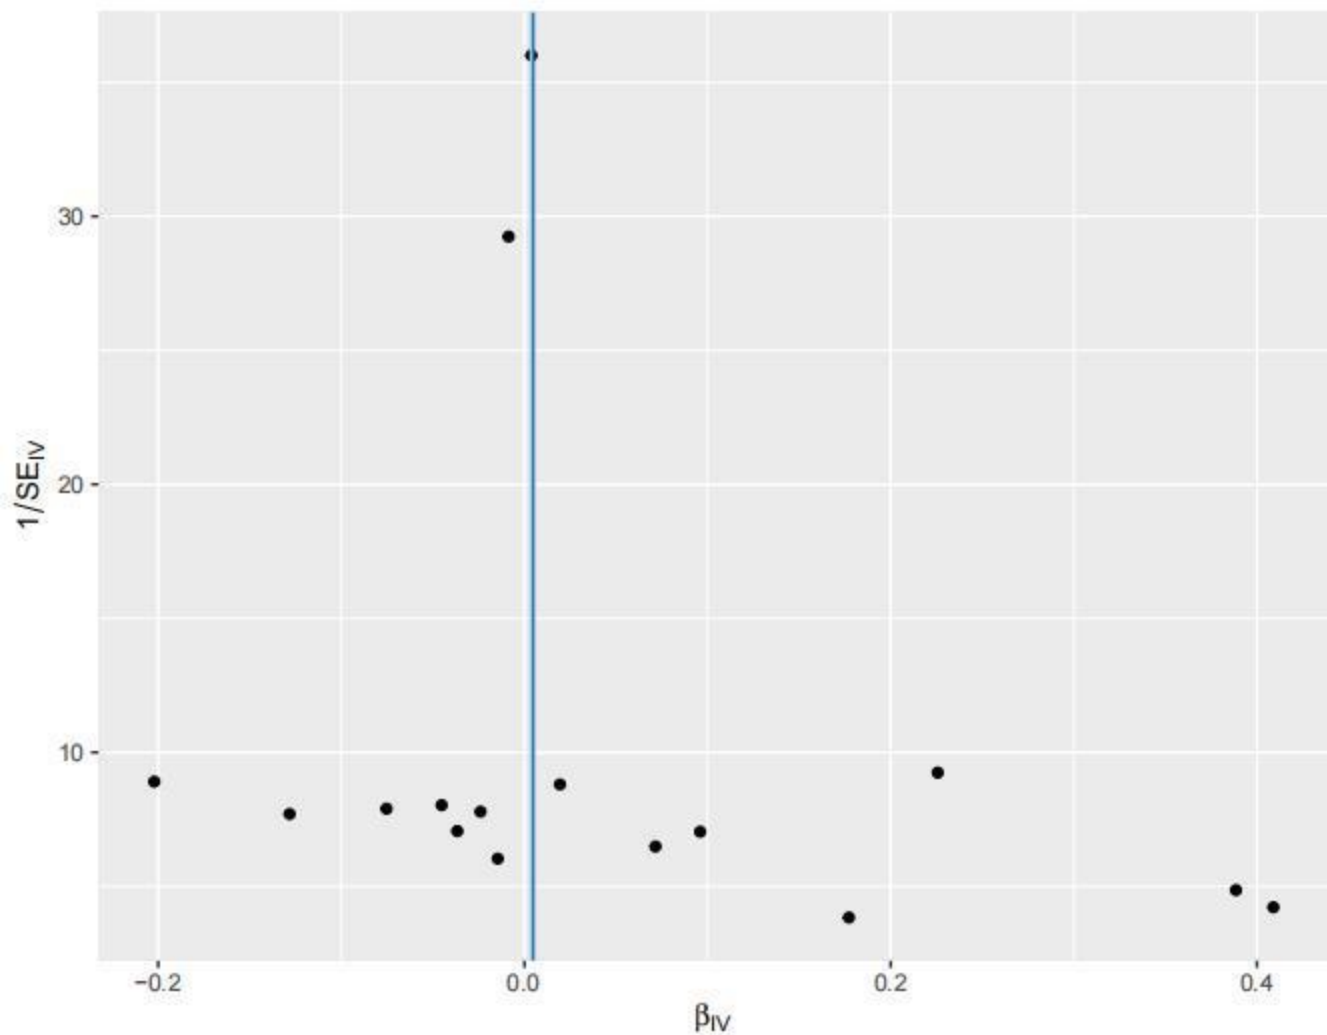

Funnel plot analyse of "CD45 on CD33br HLA DR+ " on 'Aplastic anemia'

### MR Method

- Inverse variance weighted
- MR Egger

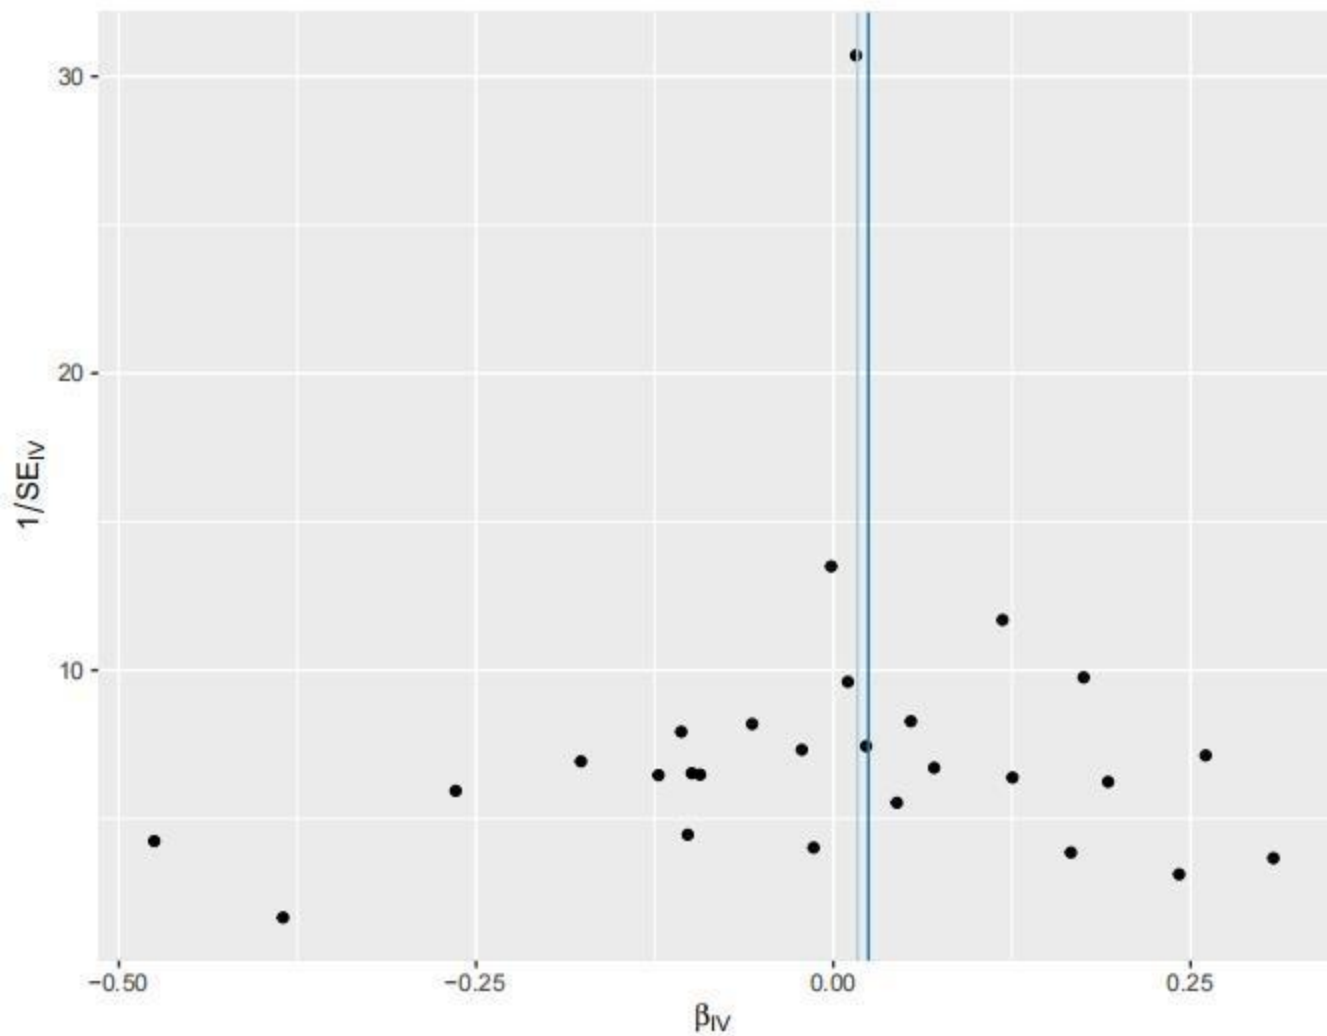

Funnel plot analyse of "CD66b on CD66b++ myeloid cell" on 'Aplastic anemia'

### MR Method

- Inverse variance weighted
- MR Egger

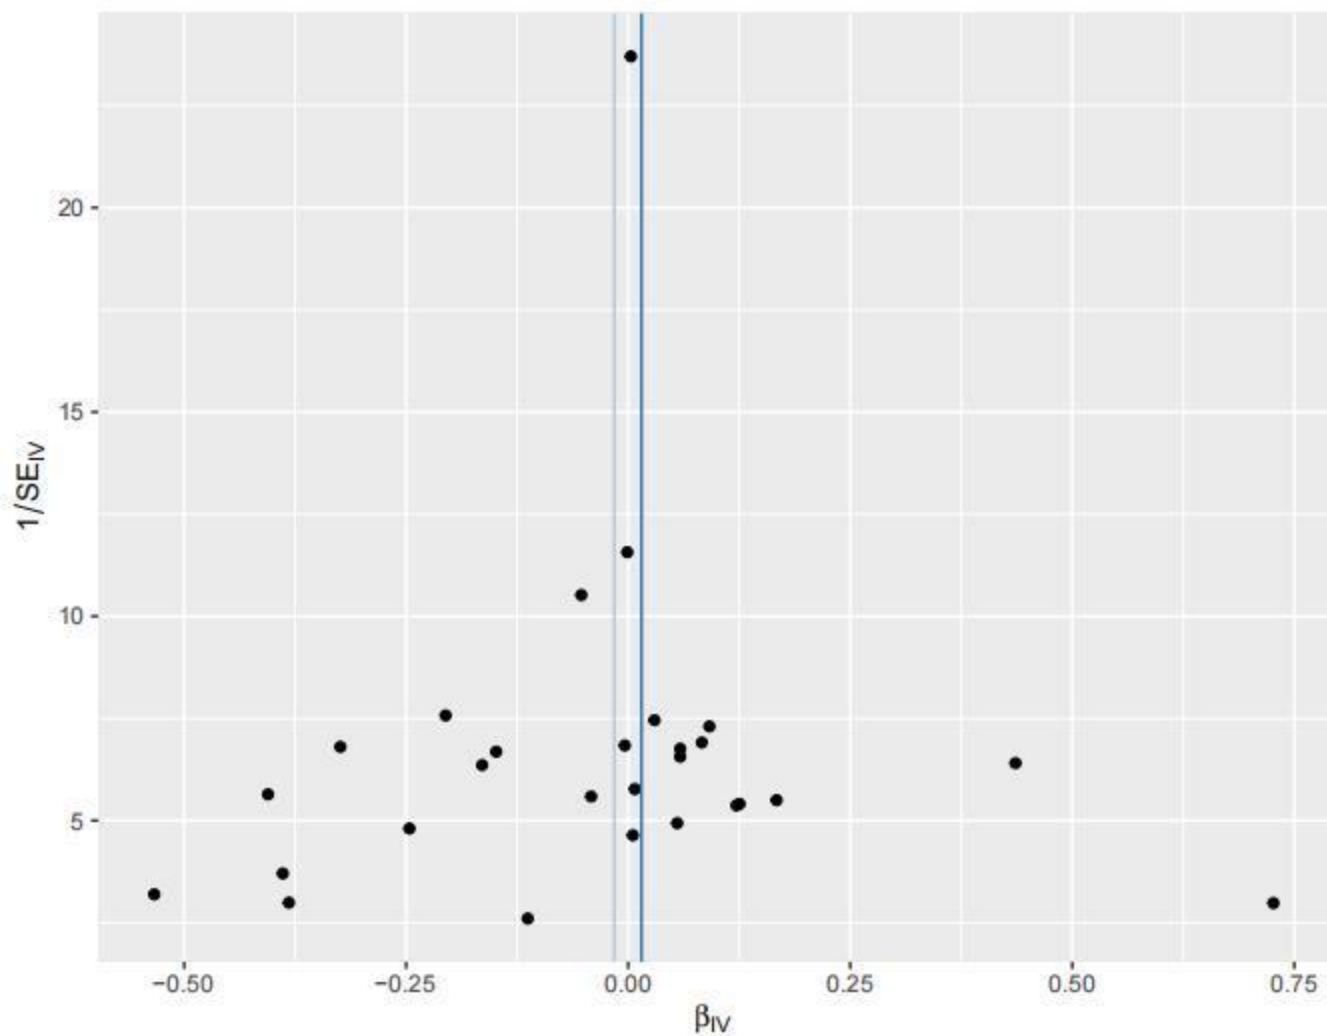

Funnel plot analysis of "CD39 on granulocyte " on 'Aplastic anemia'



MR Method

- Inverse variance weighted
- MR Egger

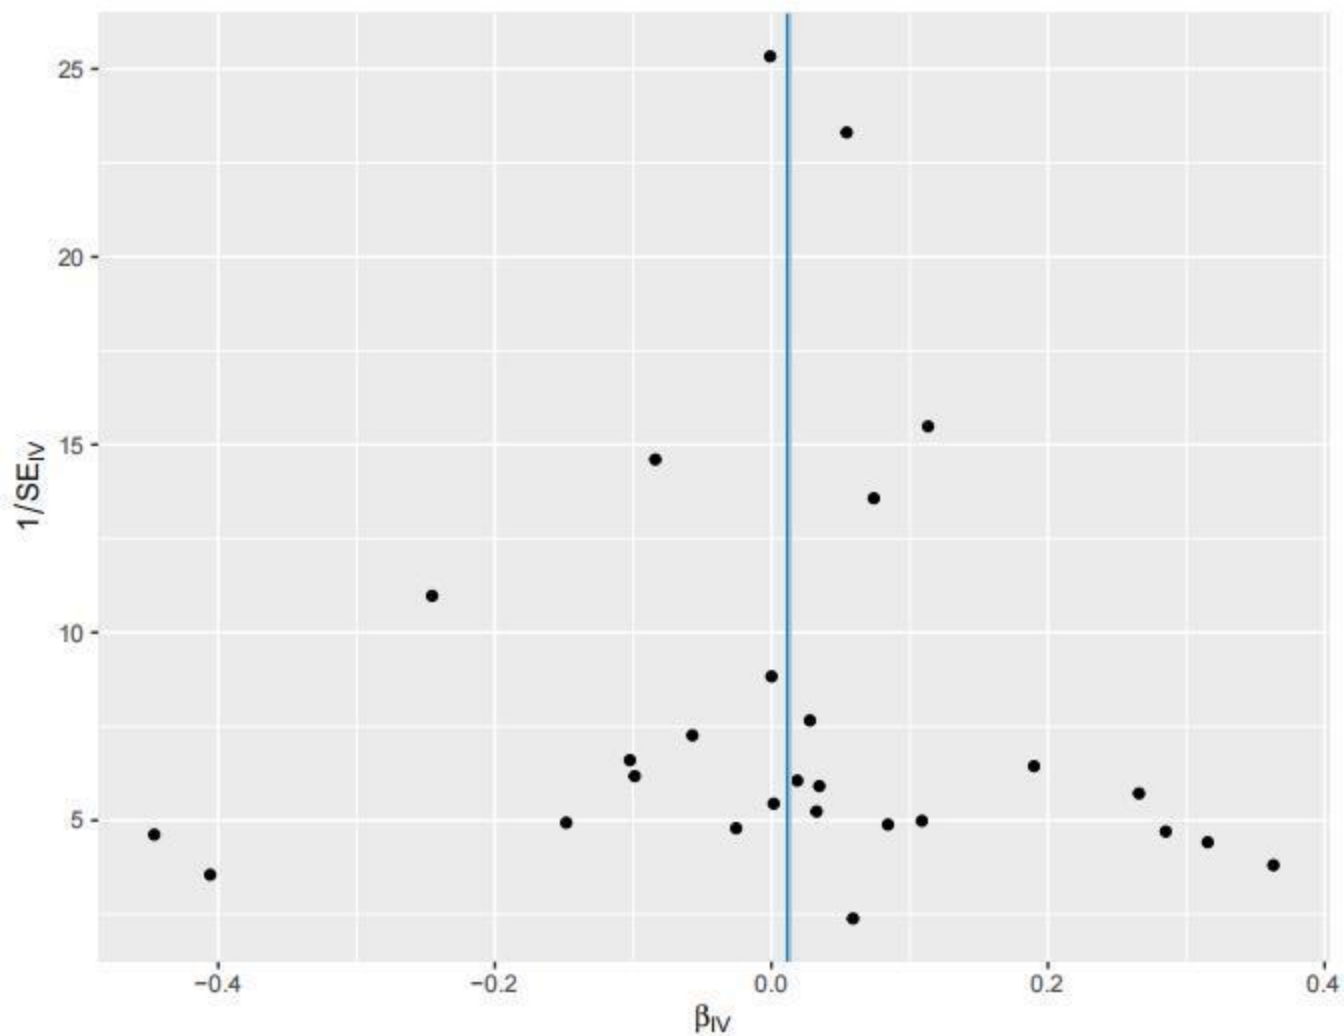

Funnel plot analyse of "SSC-A on HLA DR+ NK" on 'Aplastic anemia'

MR Method

- Inverse variance weighted
- MR Egger

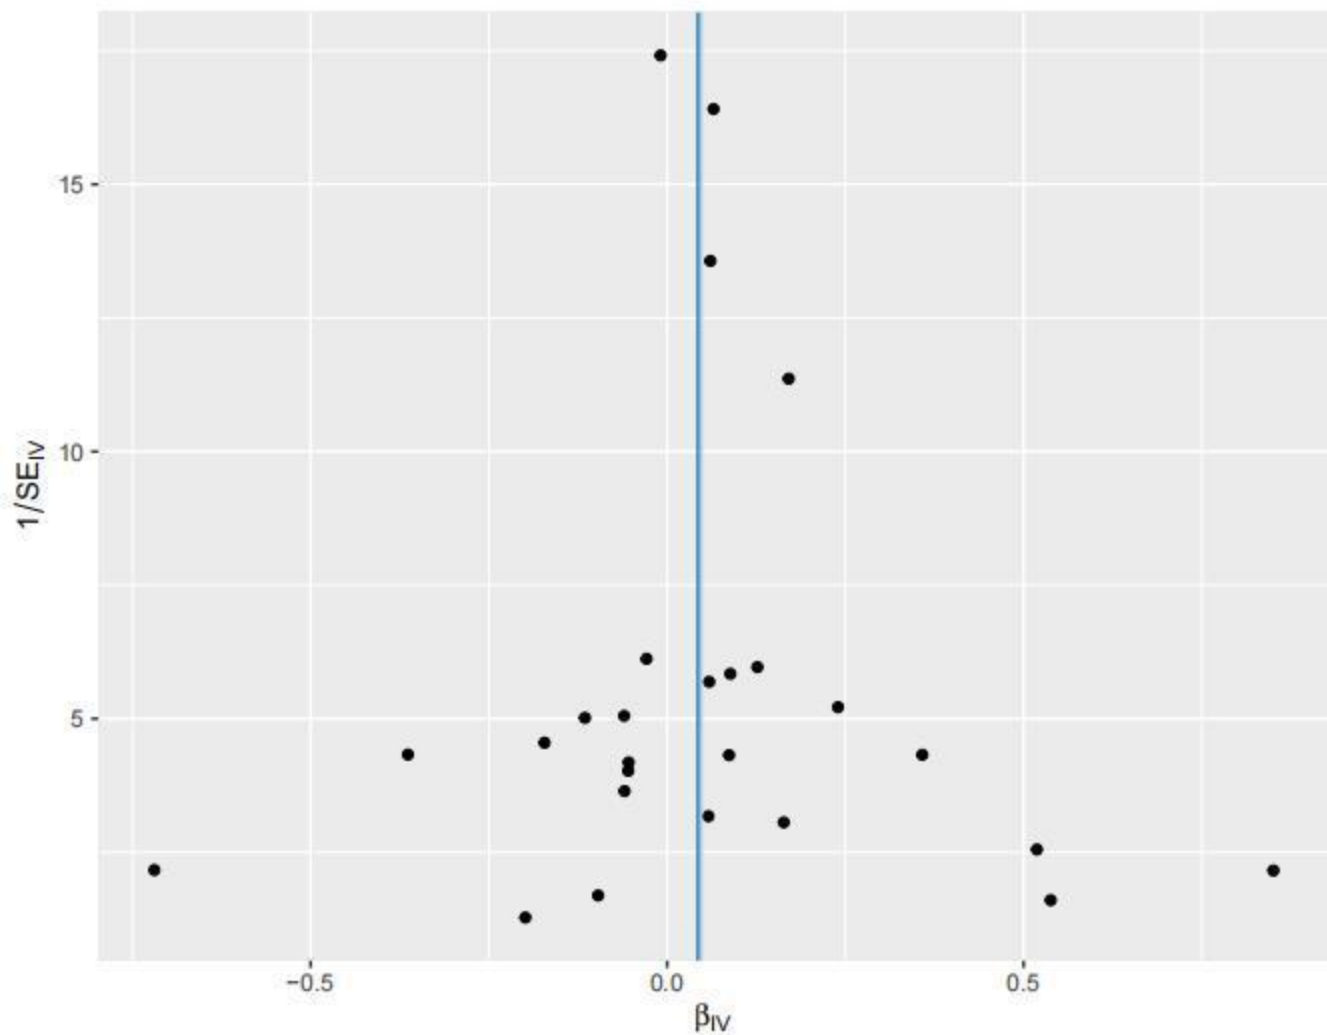

Funnel plot analyse of "CD25hi %CD4+" on 'Aplastic anemia'

### MR Method

- Inverse variance weighted
- MR Egger

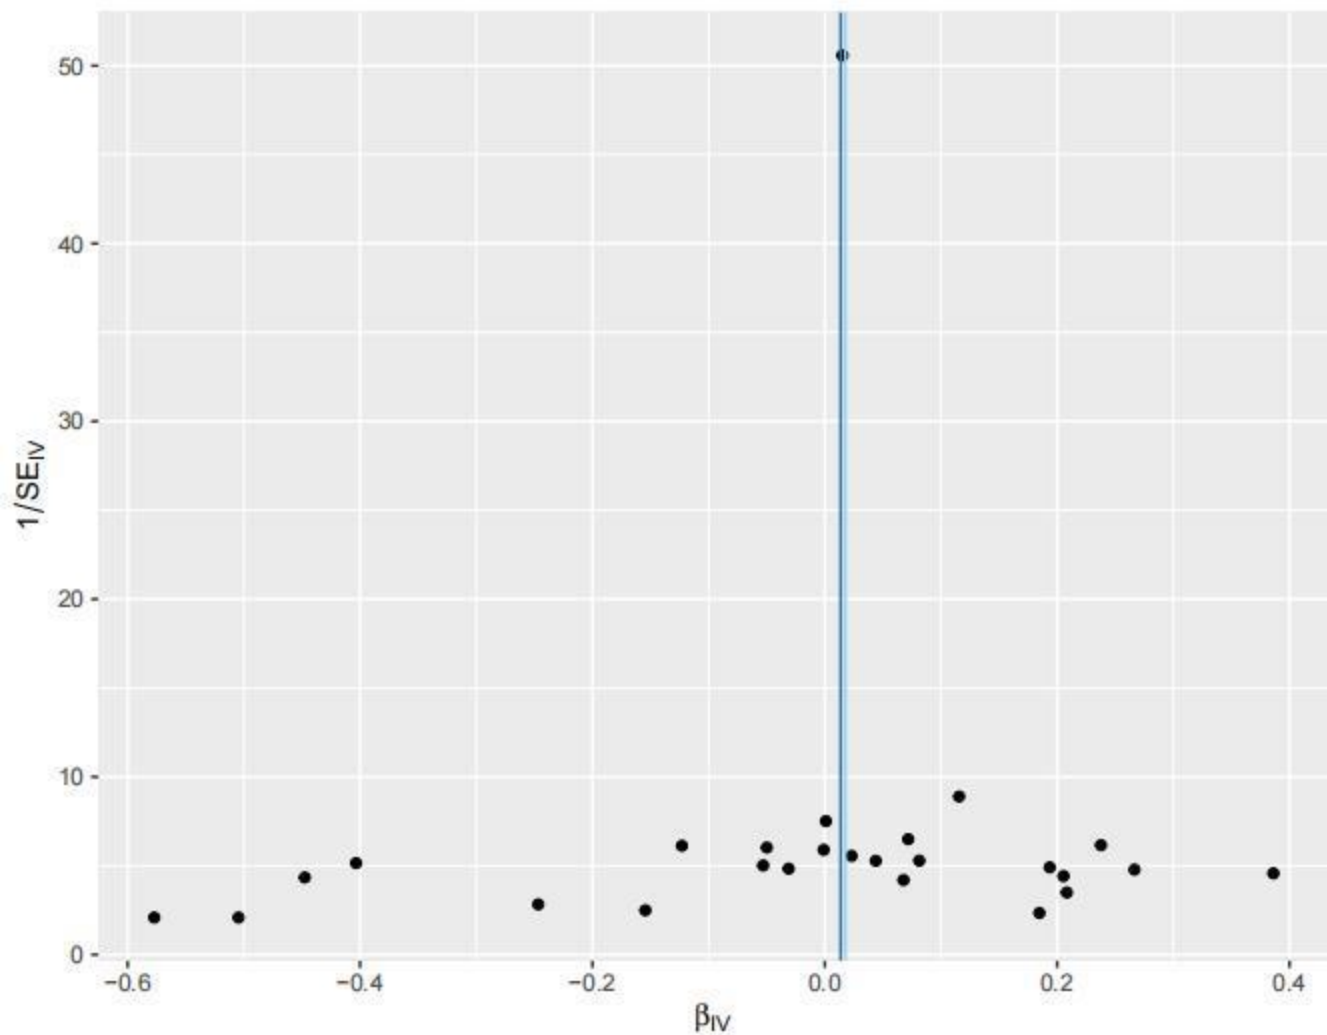

Funnel plot analyse of "CD24+ CD27+ AC" on 'Aplastic anemia'

### MR Method

Inverse variance weighted

MR Egger

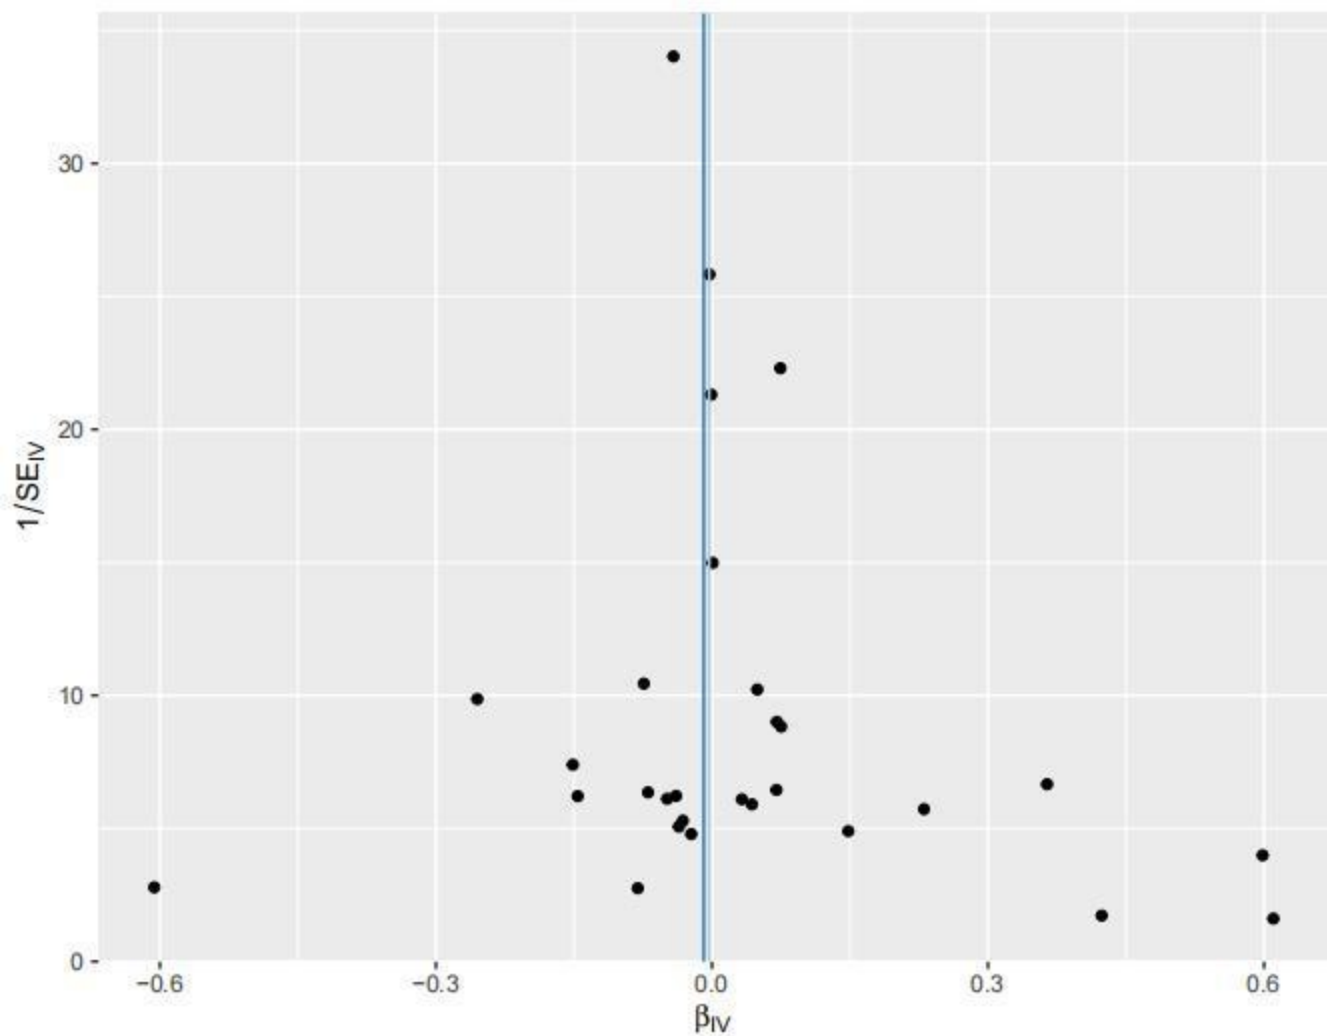

Funnel plot analyse of "B cell % CD3- lymphocyte" on 'Aplastic anemia'

MR Method

- Inverse variance weighted
- MR Egger

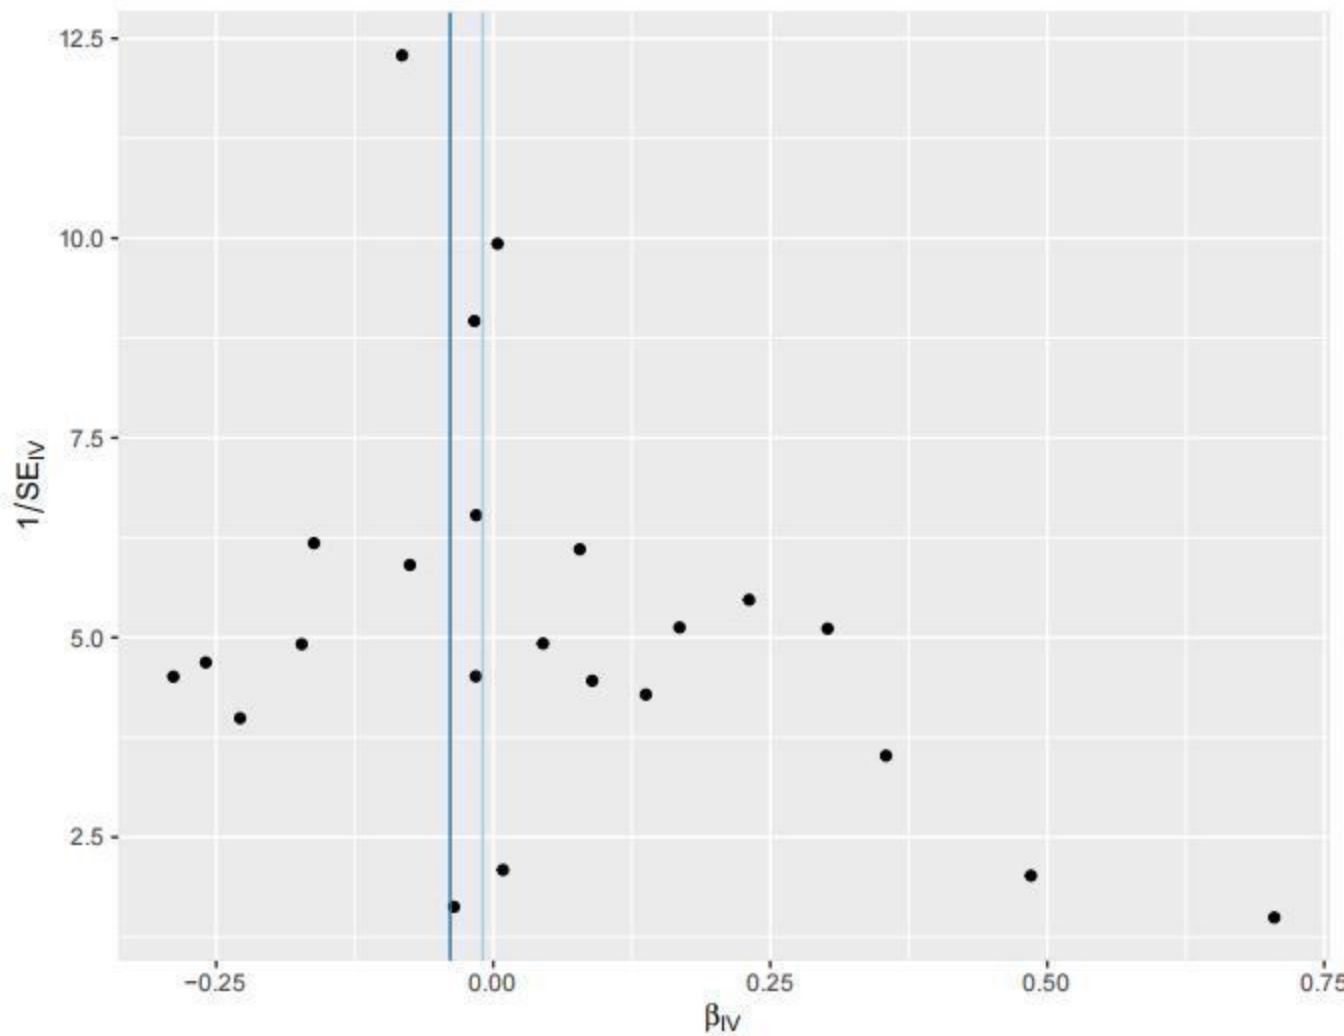

Funnel plot analyse of "CD19 on IgD- CD38-" on 'Aplastic anemia'

MR Method

- Inverse variance weighted
- MR Egger

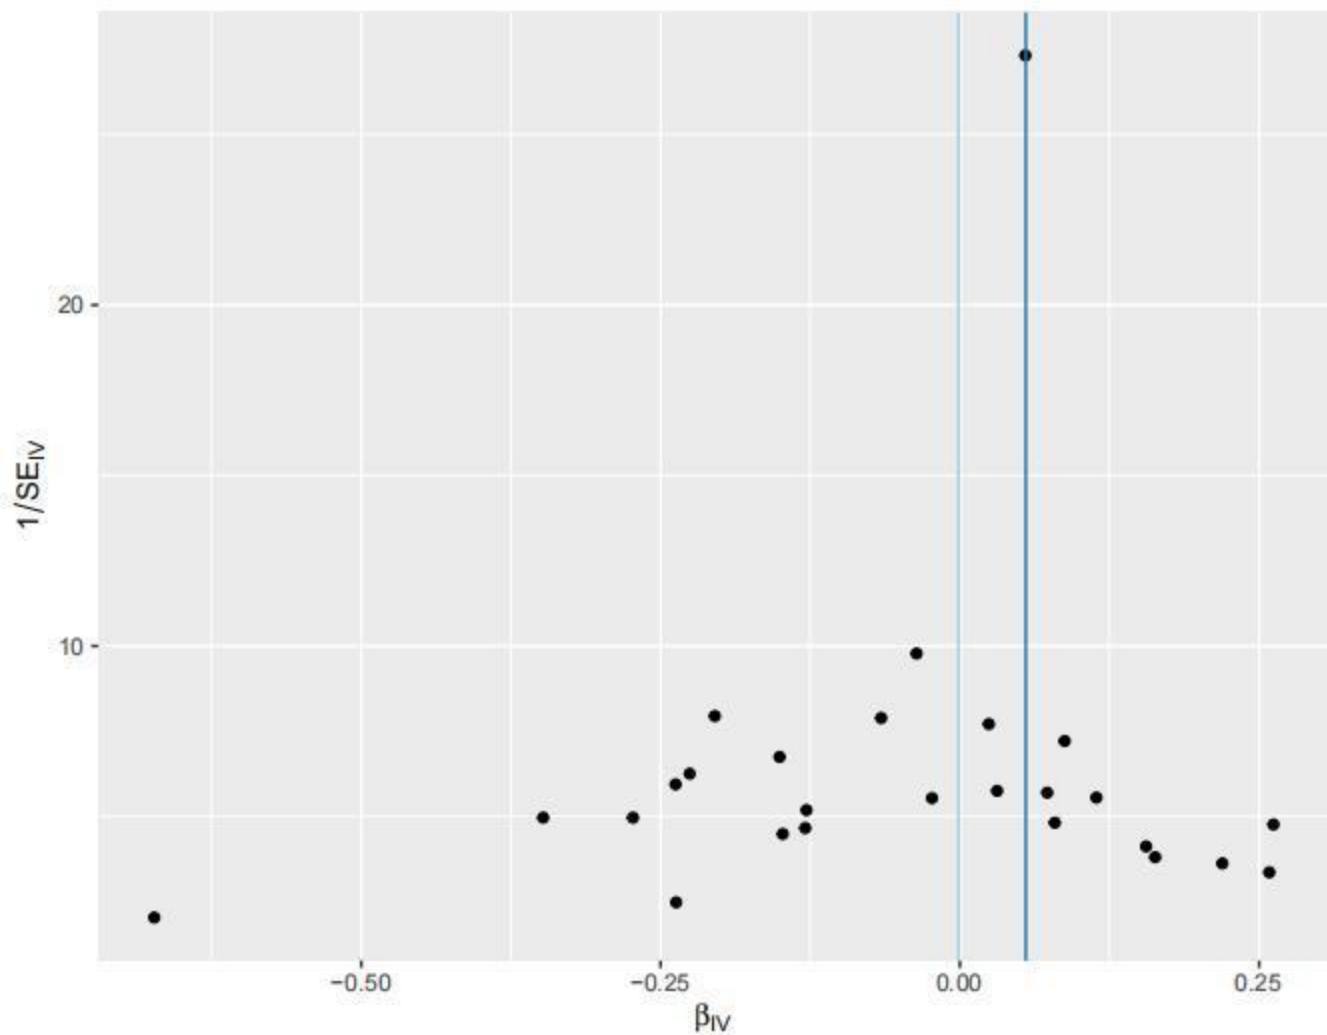

Funnel plot analyse of "CD20 on IgD+ CD38-" on 'Aplastic anemia'

MR Method

- Inverse variance weighted
- MR Egger

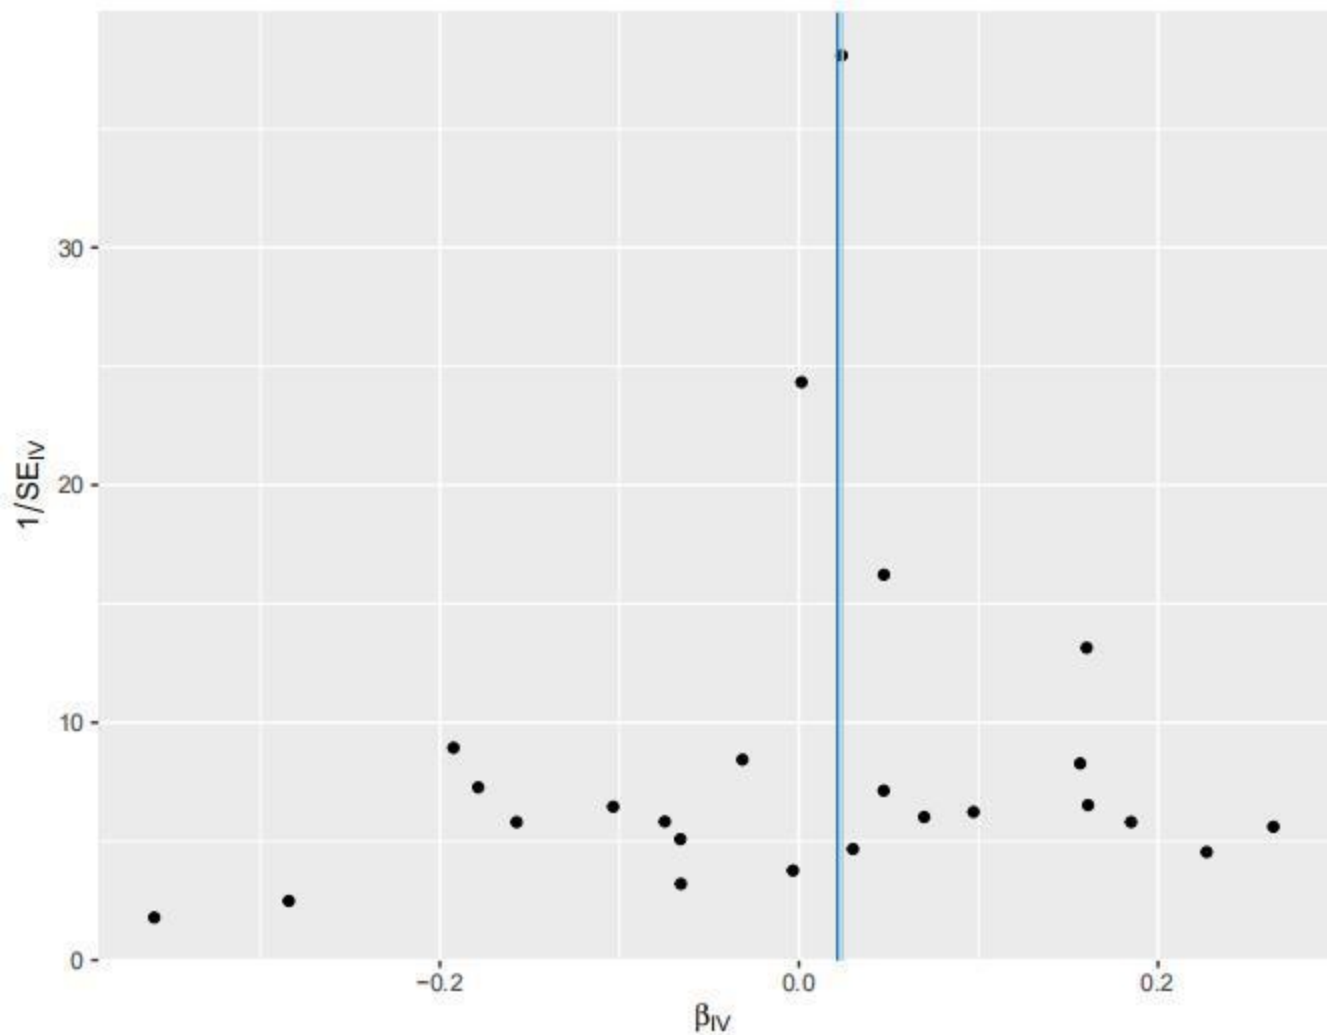

Funnel plot analyse of "CD4 on CD39+ secreting Treg " on 'Aplastic anemia'

### MR Method

- Inverse variance weighted
- MR Egger

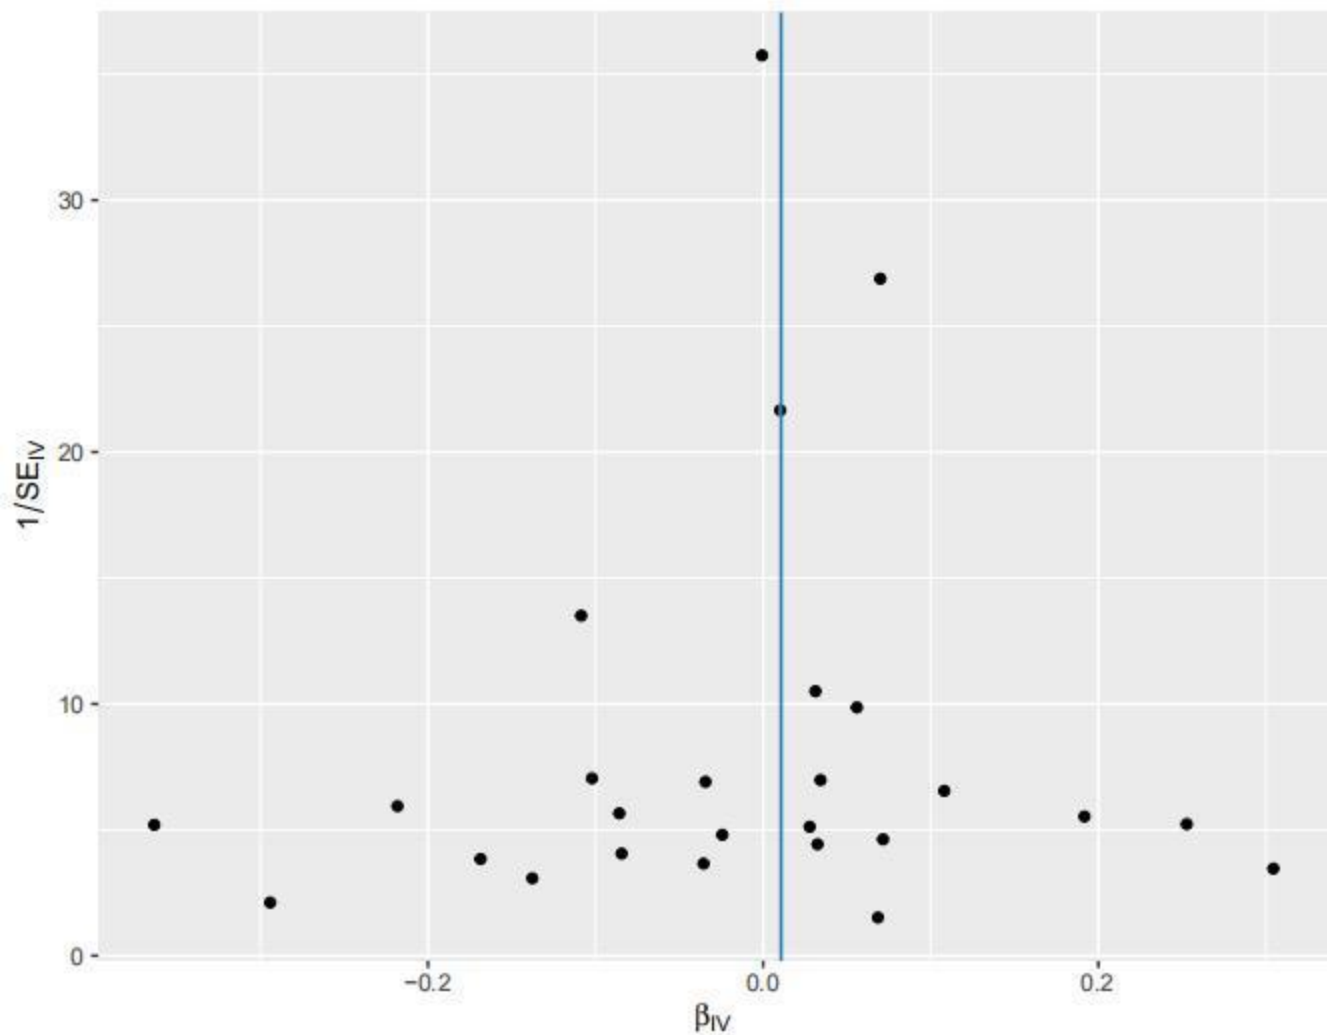

Funnel plot analyse of "CD25 on IgD+ CD24-" on 'Aplastic anemia'



### MR Method

Inverse variance weighted

MR Egger

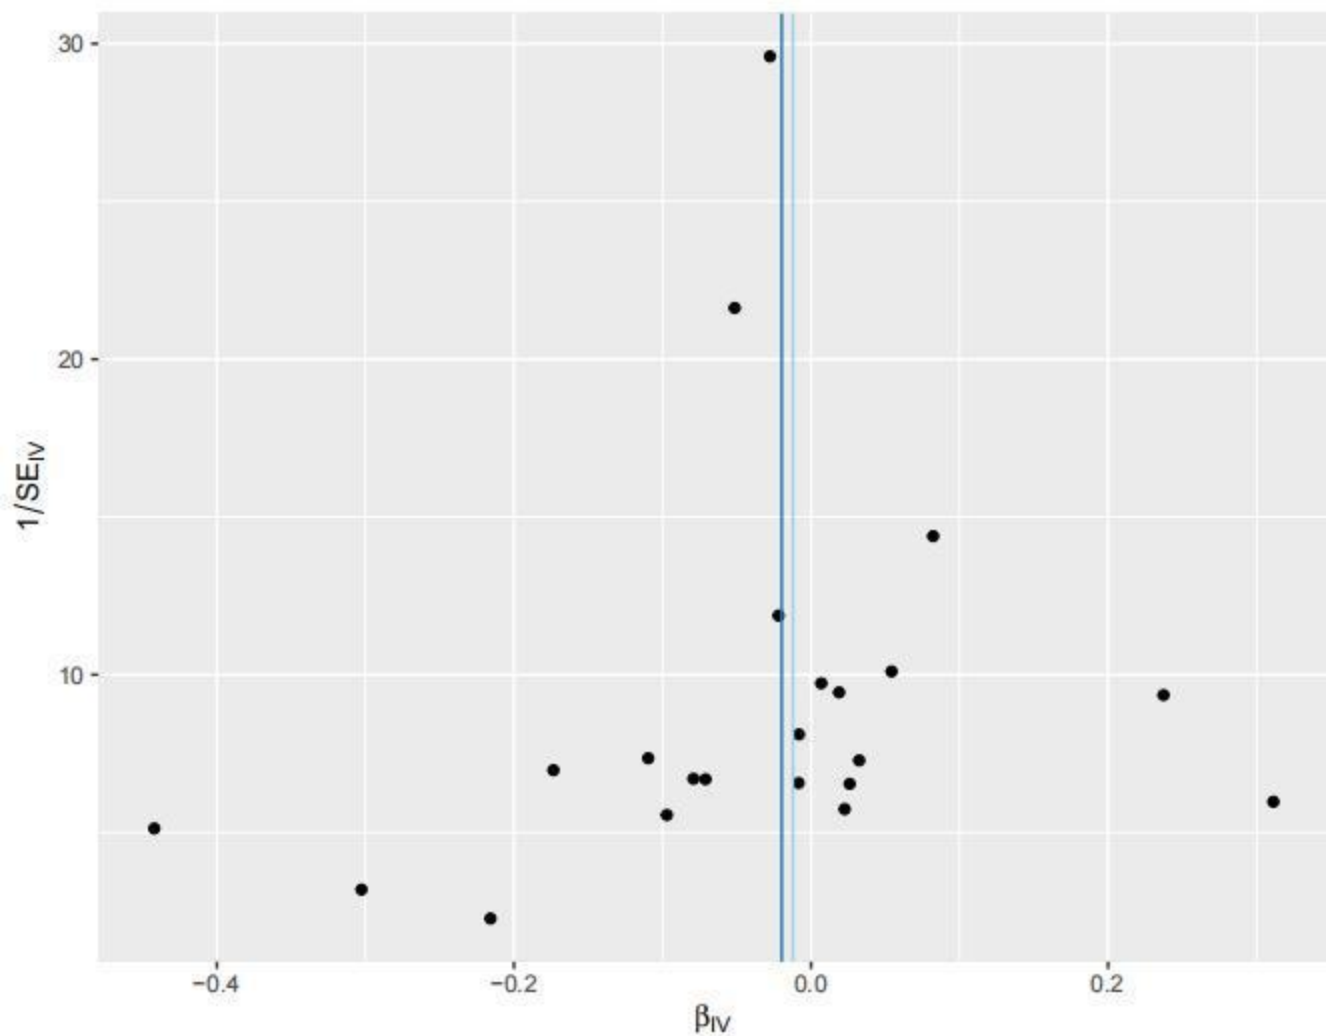

Funnel plot analyse of "CD24 on IgD+ CD38- unsw mem" on 'Aplastic anemia'

### MR Method

- Inverse variance weighted
- MR Egger

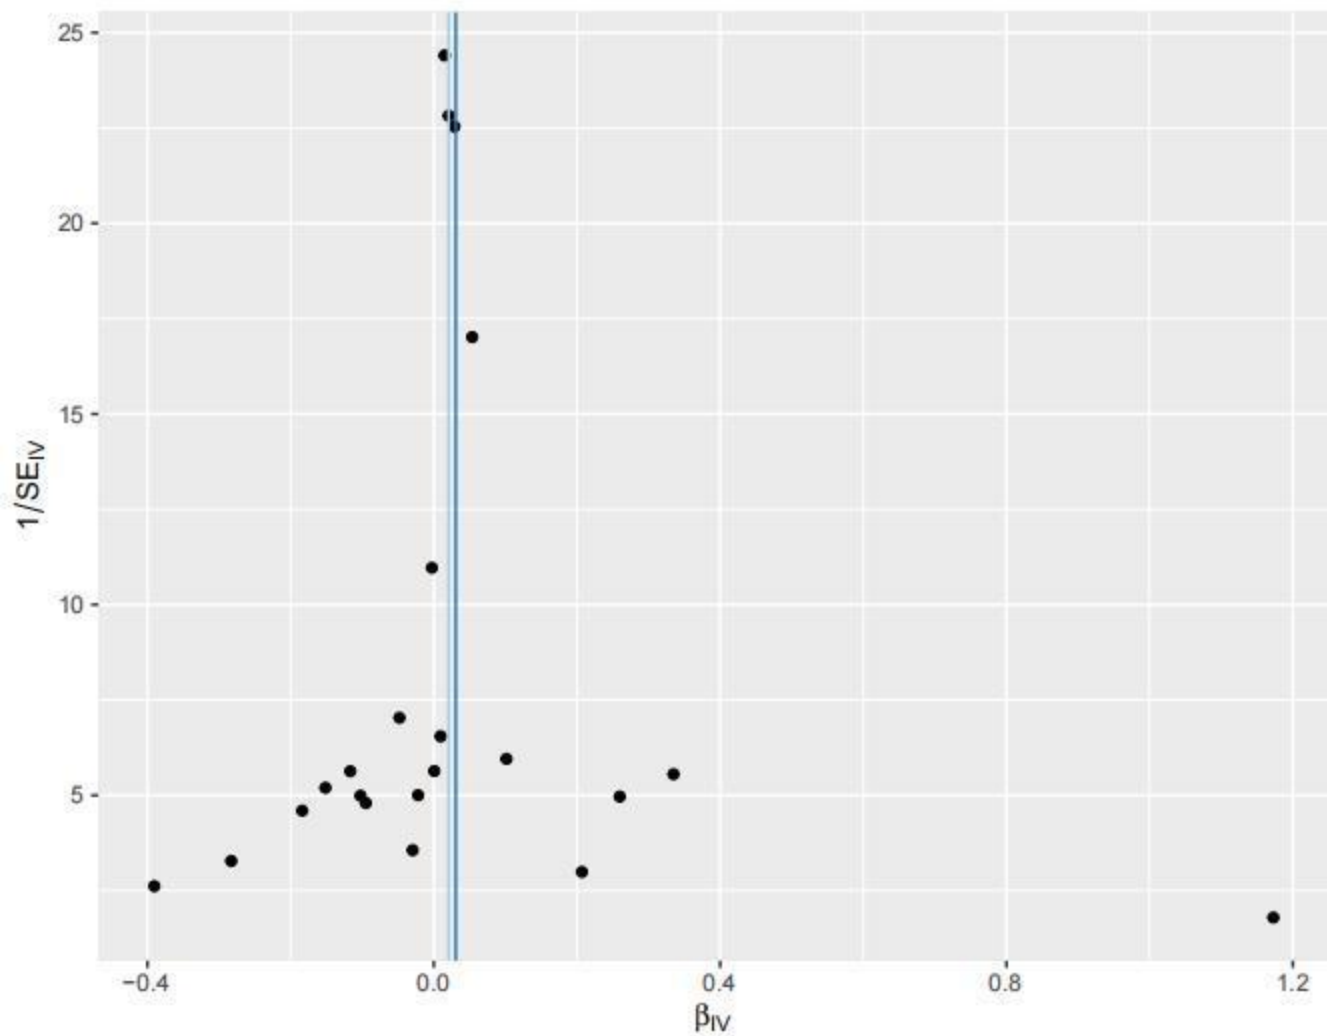

Funnel plot analyse of "FSC-A on T cell" on 'Aplastic anemia'

MR Method

- Inverse variance weighted
- MR Egger

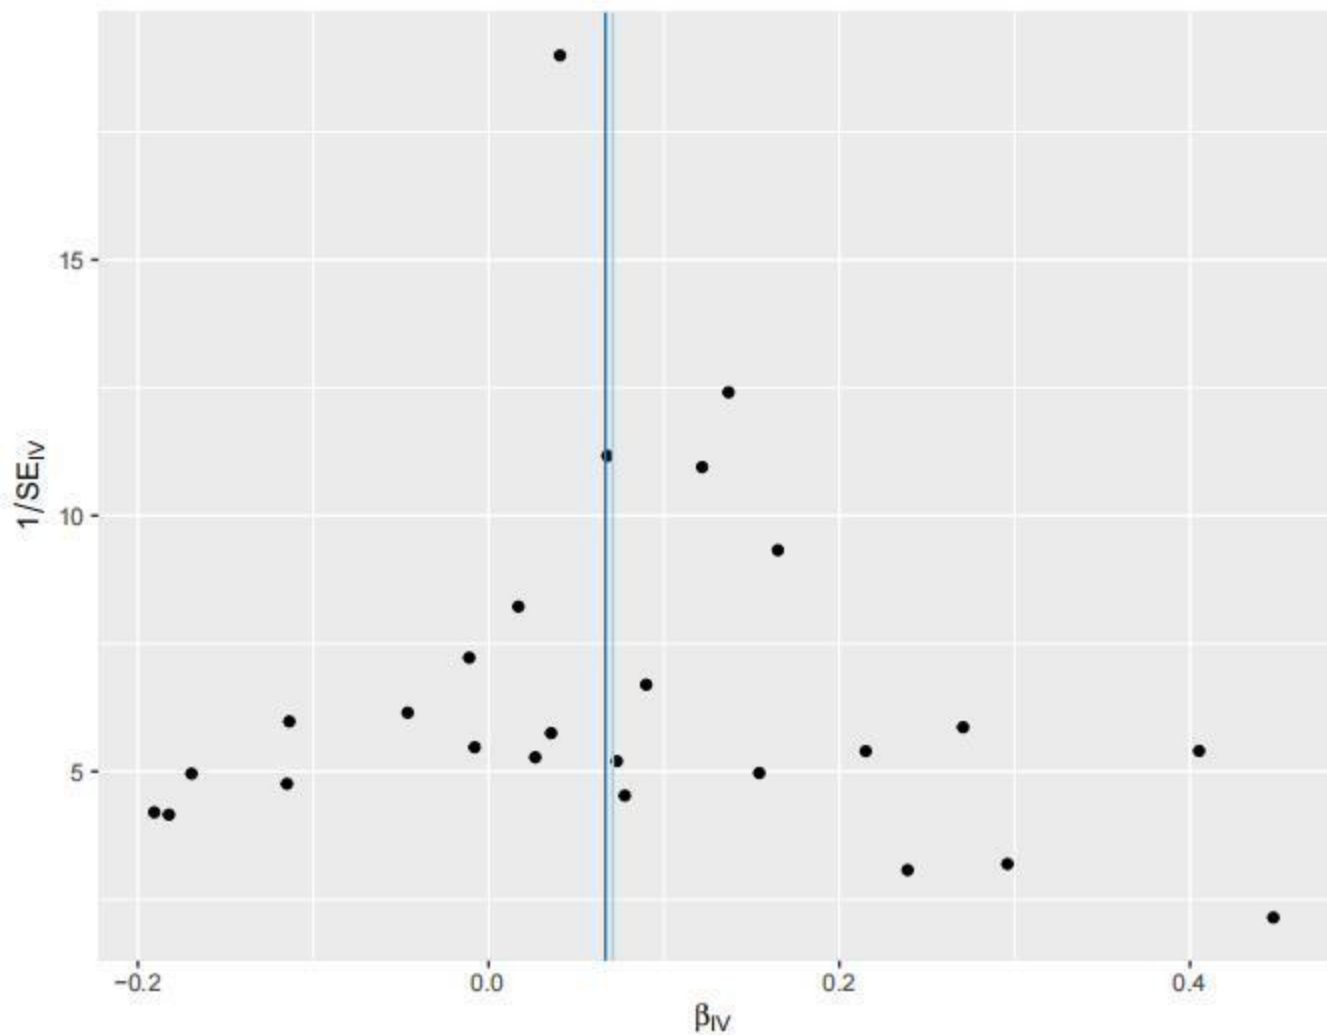

Funnel plot analysis of "CD38 on naive-mature B cell" on 'Aplastic anemia'

MR Method

- Inverse variance weighted
- MR Egger

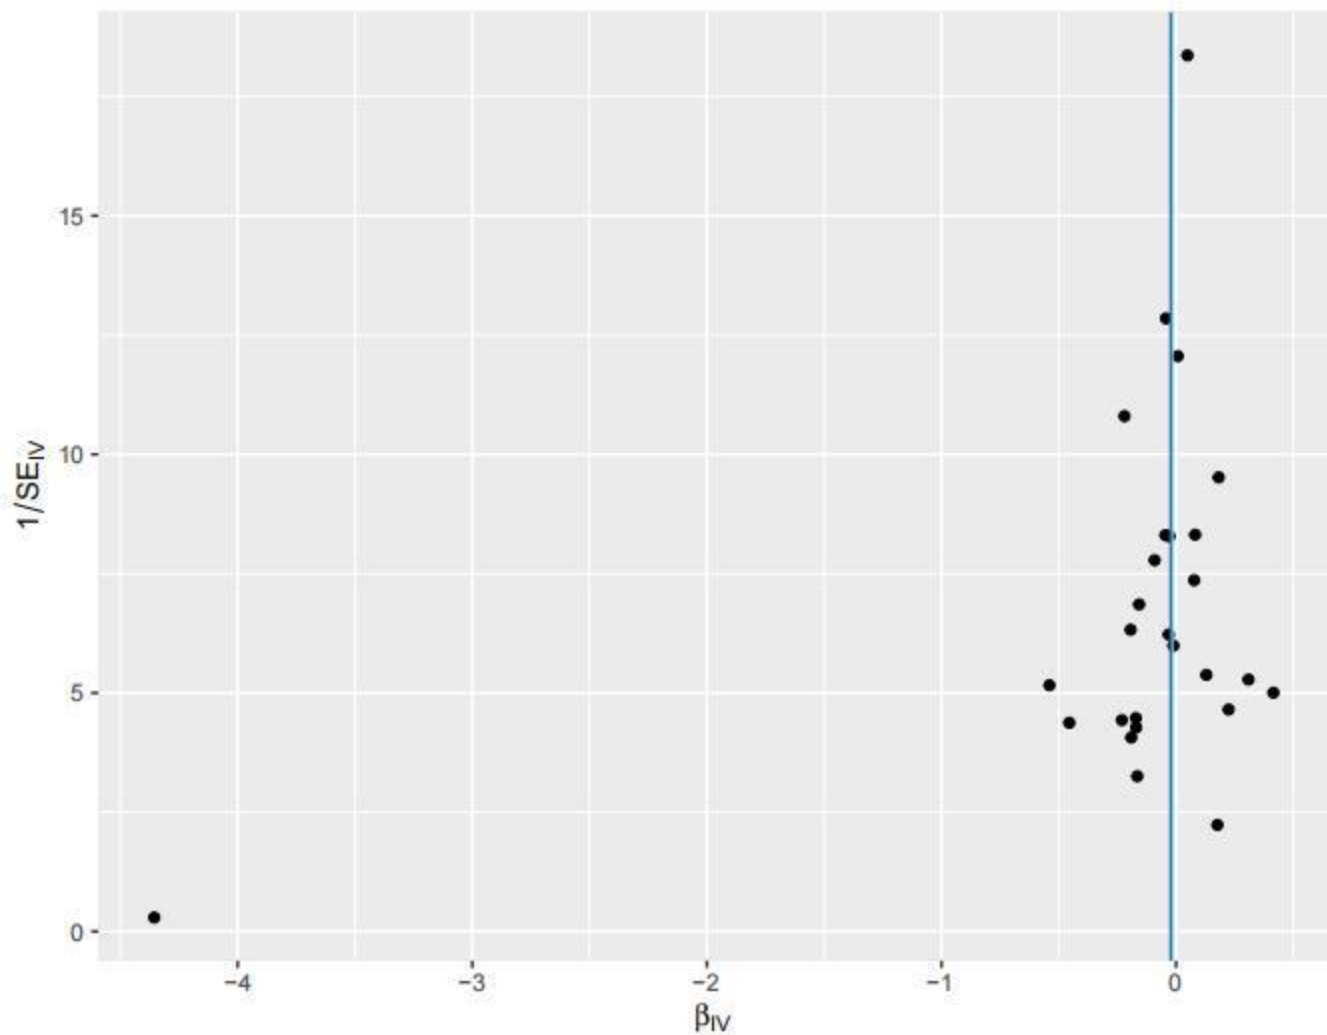

Funnel plot analyse of "CD16-CD56 on NKT" on 'Aplastic anemia'

MR Method

- Inverse variance weighted
- MR Egger

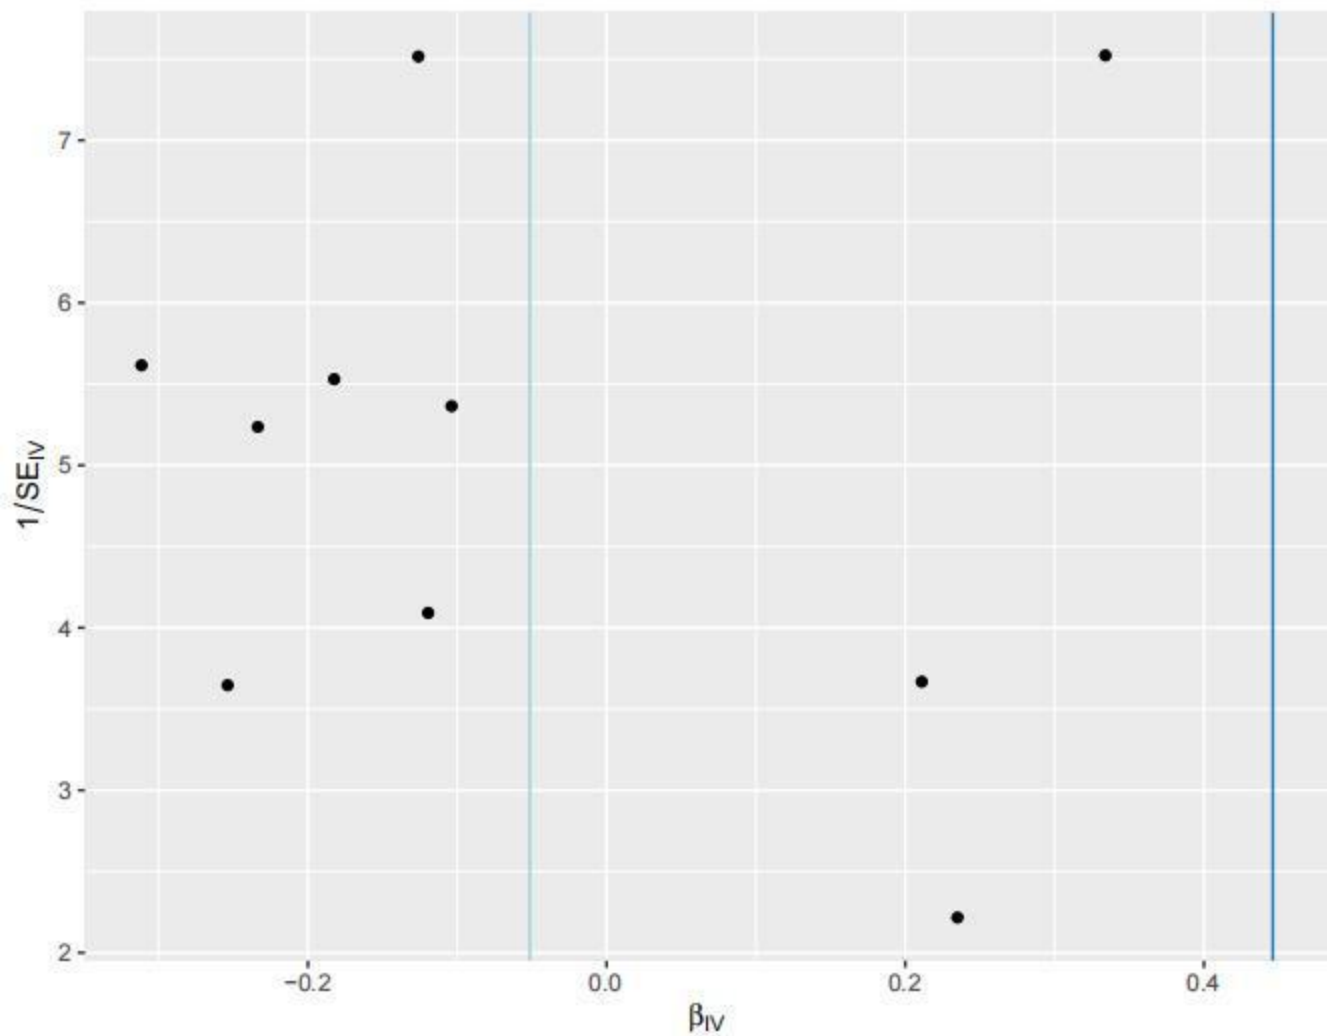

Funnel plot analyse of "DN (CD4-CD8-) NKT AC" on 'Aplastic anemia'

### MR Method

- Inverse variance weighted
- MR Egger

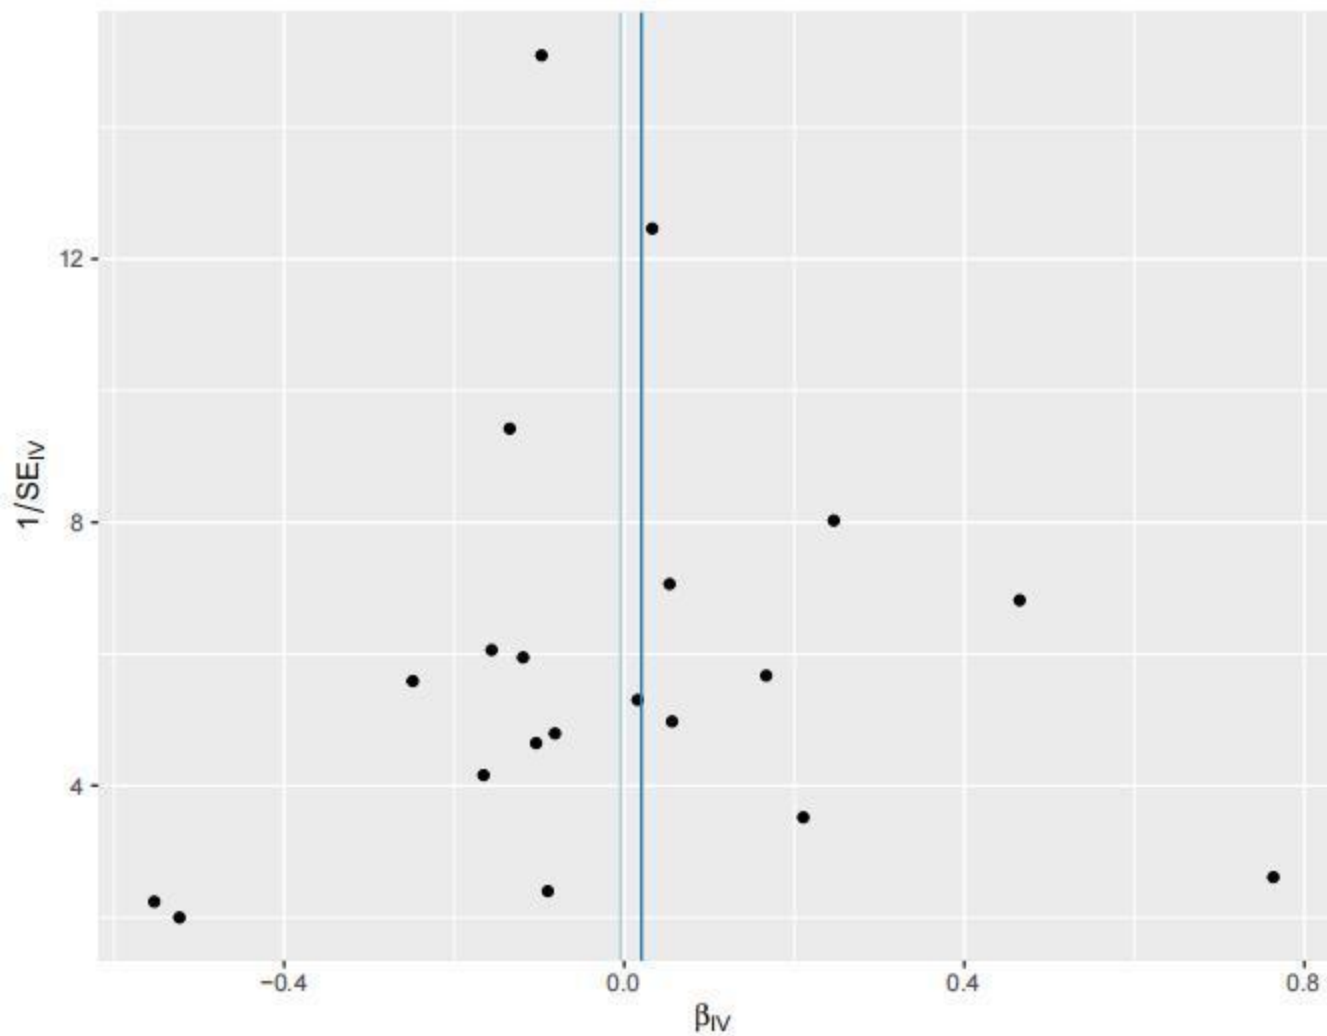

Funnel plot analysis of "CD39+ CD8br %T cell" on 'Aplastic anemia'

### MR Method

- Inverse variance weighted
- MR Egger

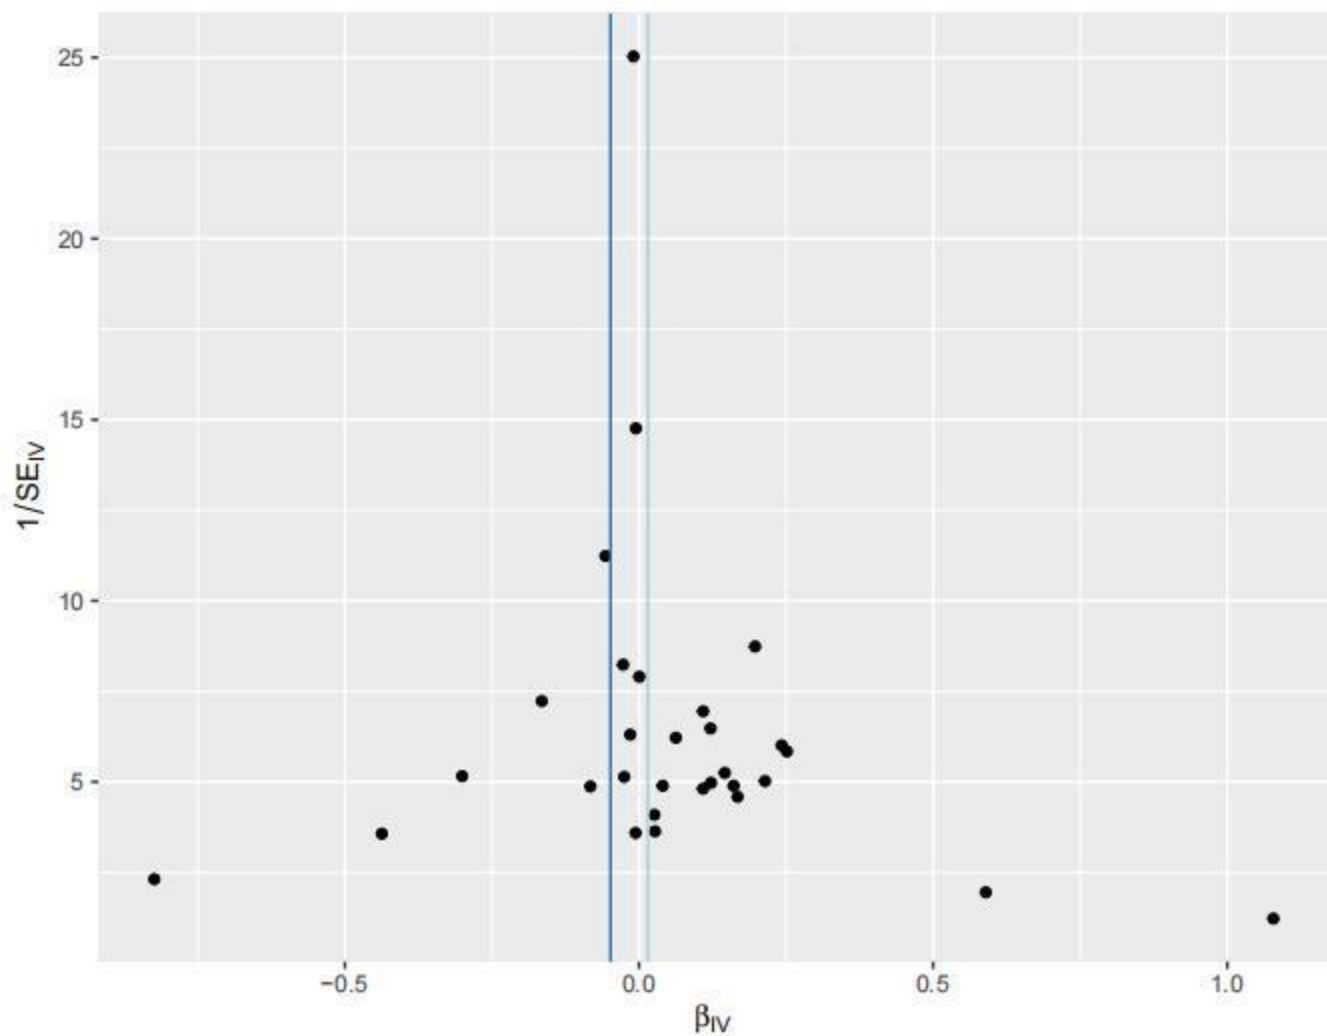

Funnel plot analyse of "IgD on IgD+ CD24-" on 'Aplastic anemia'

MR Method

Inverse variance weighted

MR Egger

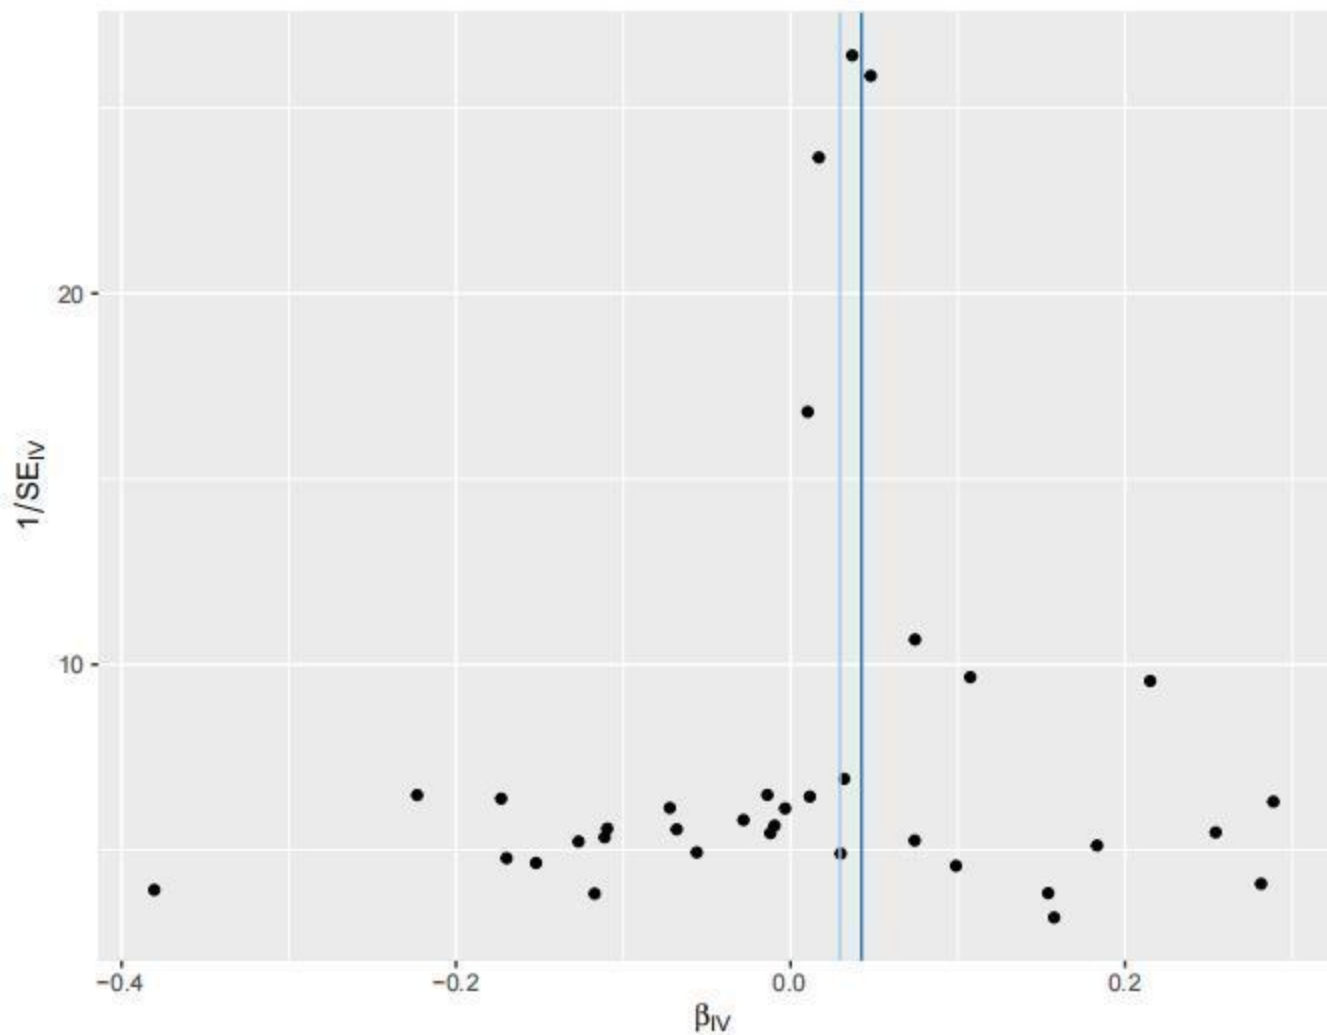

Funnel plot analyse of "HLA DR+ CD8br AC" on 'Aplastic anemia'



### MR Method

- Inverse variance weighted
- MR Egger

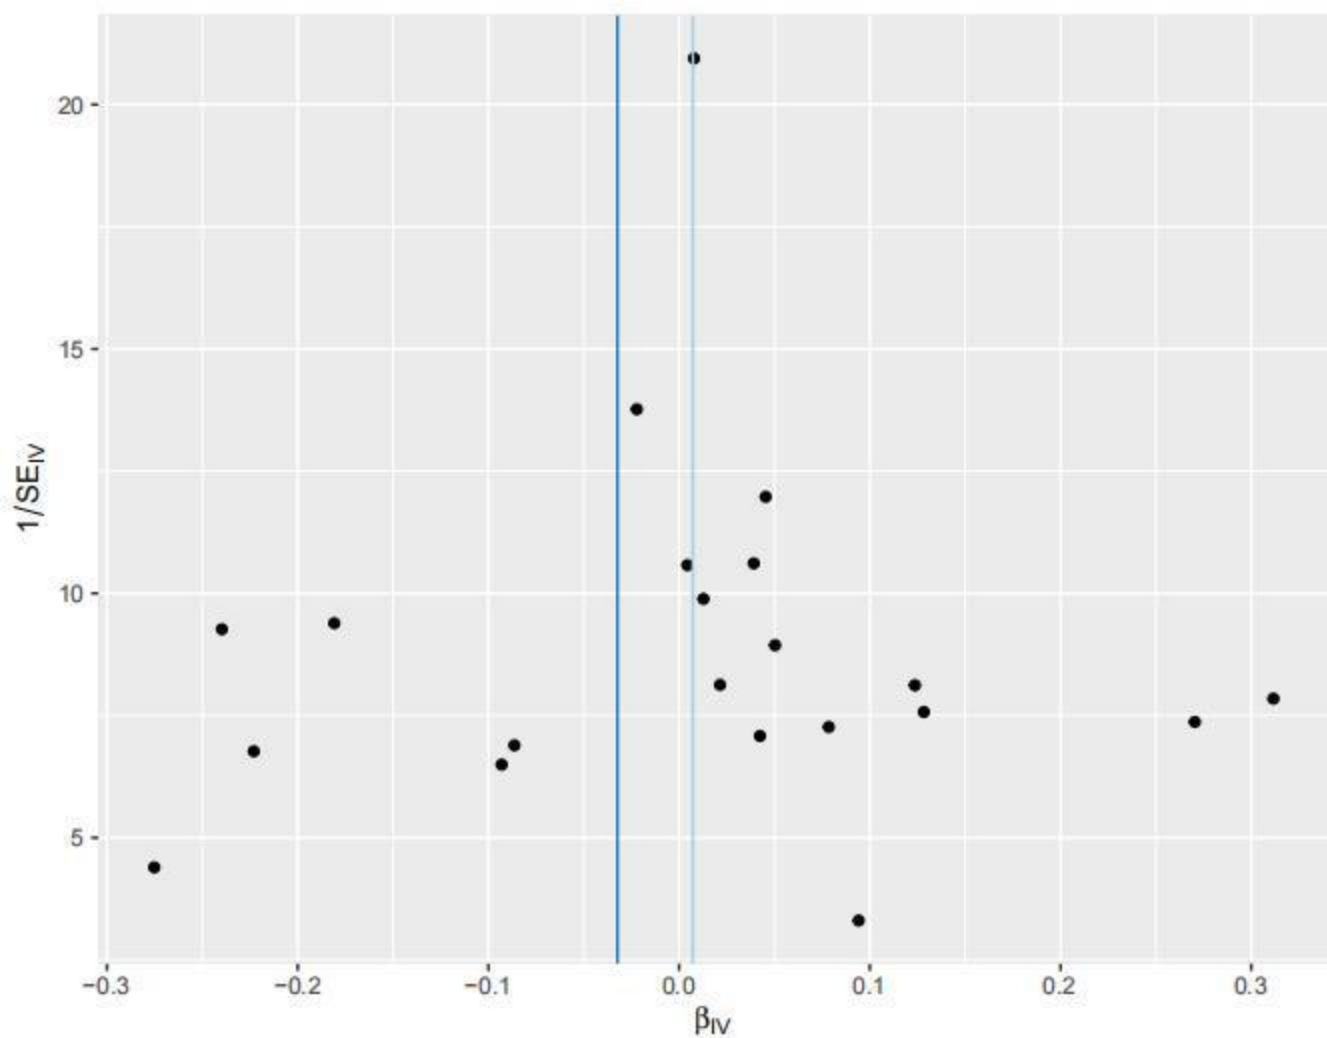

Funnel plot analyse of "CD66b on Gr MDSC" on 'Aplastic anemia'

MR Method

Inverse variance weighted

MR Egger

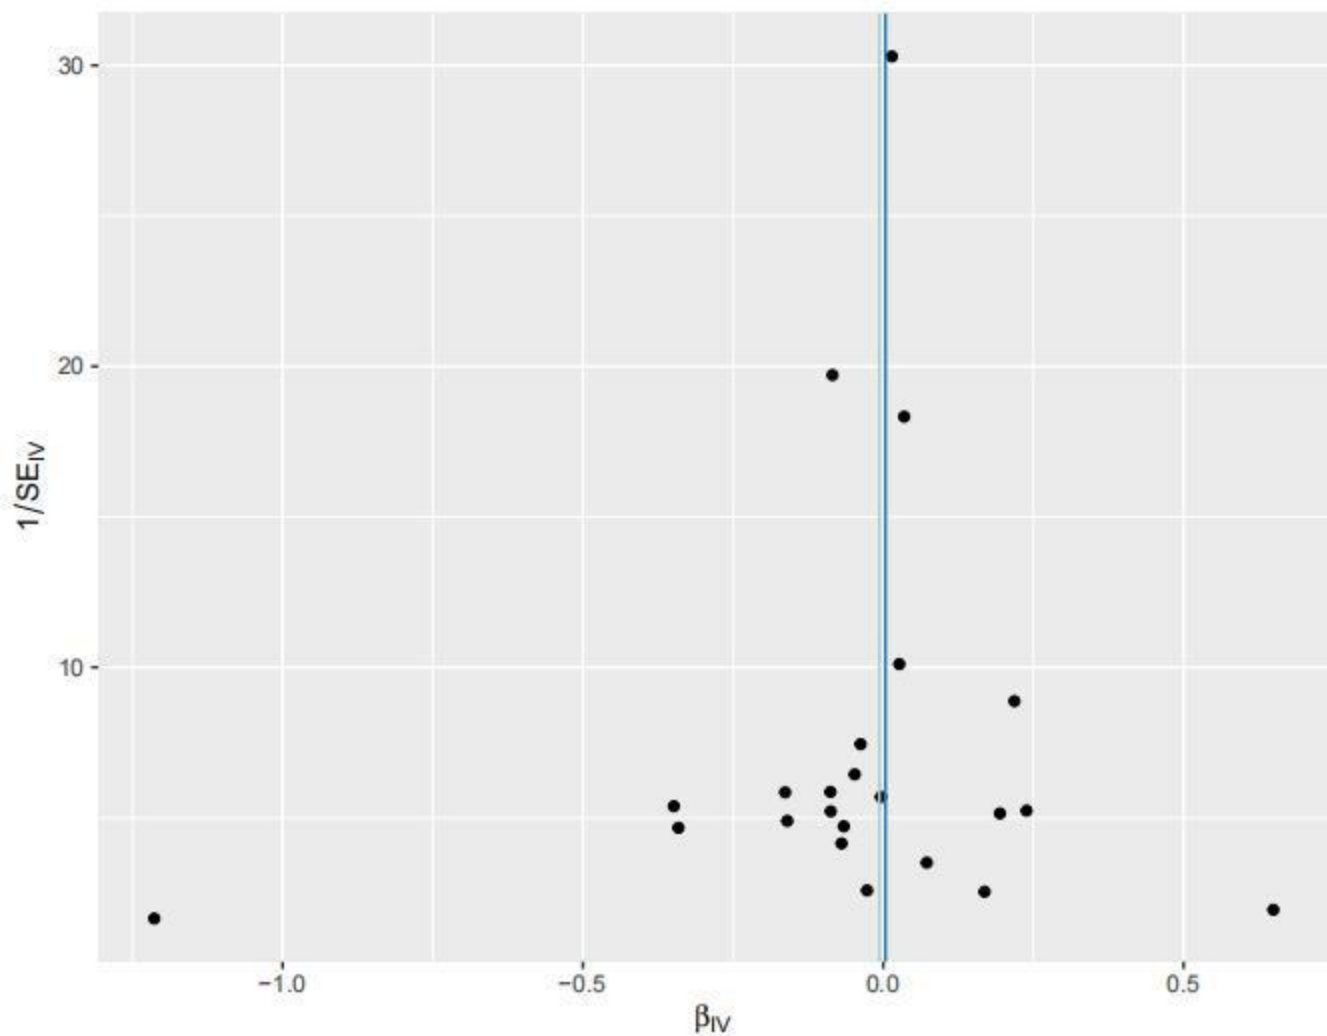

Funnel plot analyse of "CD25hi AC" on 'Aplastic anemia'

MR Method

- Inverse variance weighted
- MR Egger

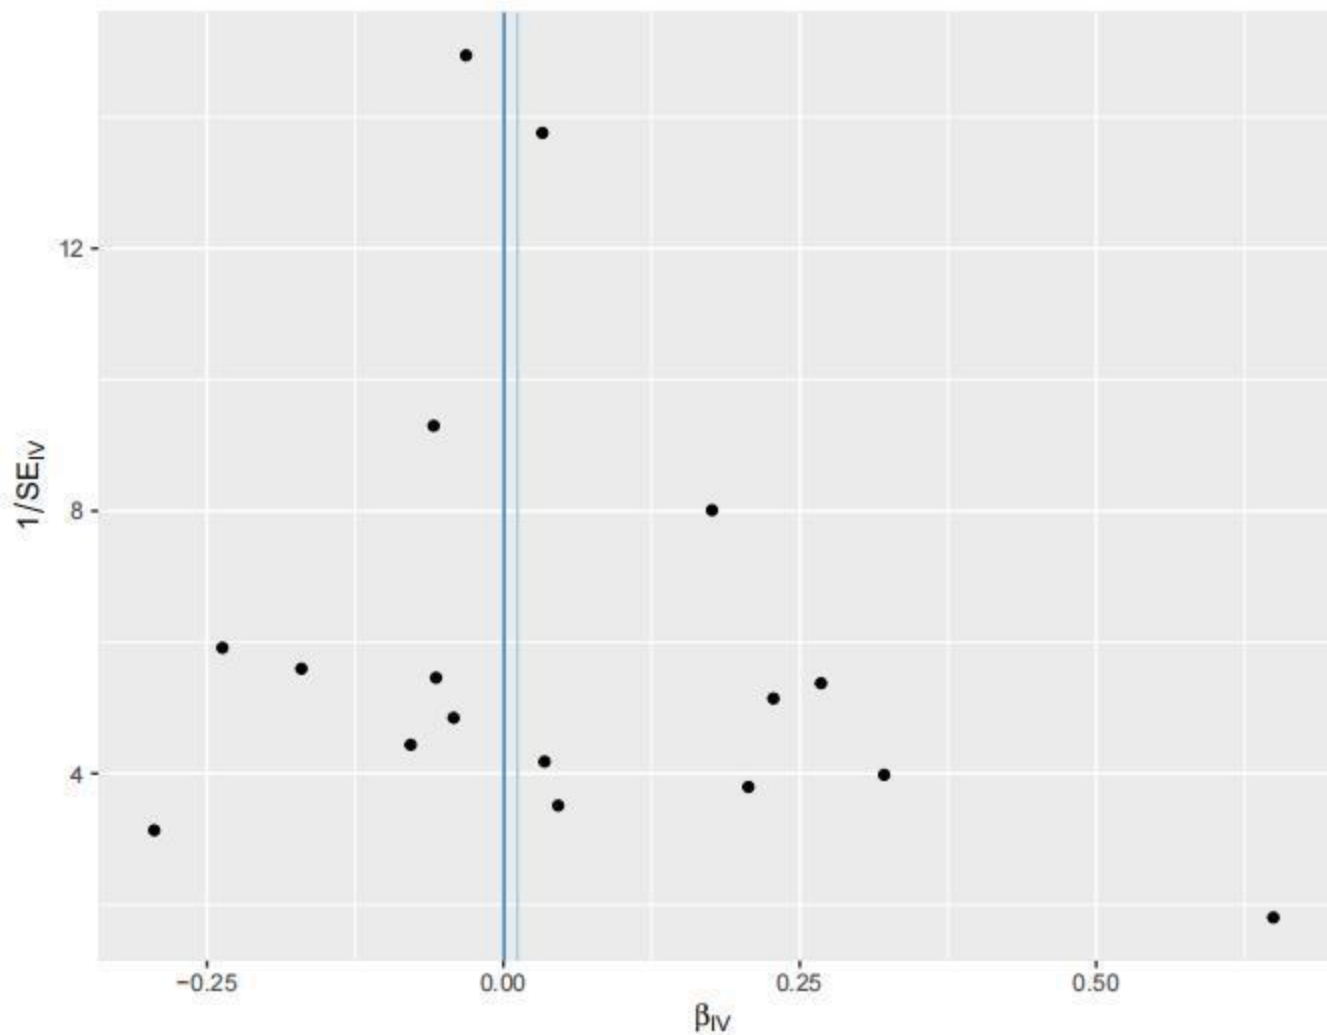

Funnel plot analysis of "CD19 on IgD- CD38br" on 'Aplastic anemia'

### MR Method

- Inverse variance weighted
- MR Egger

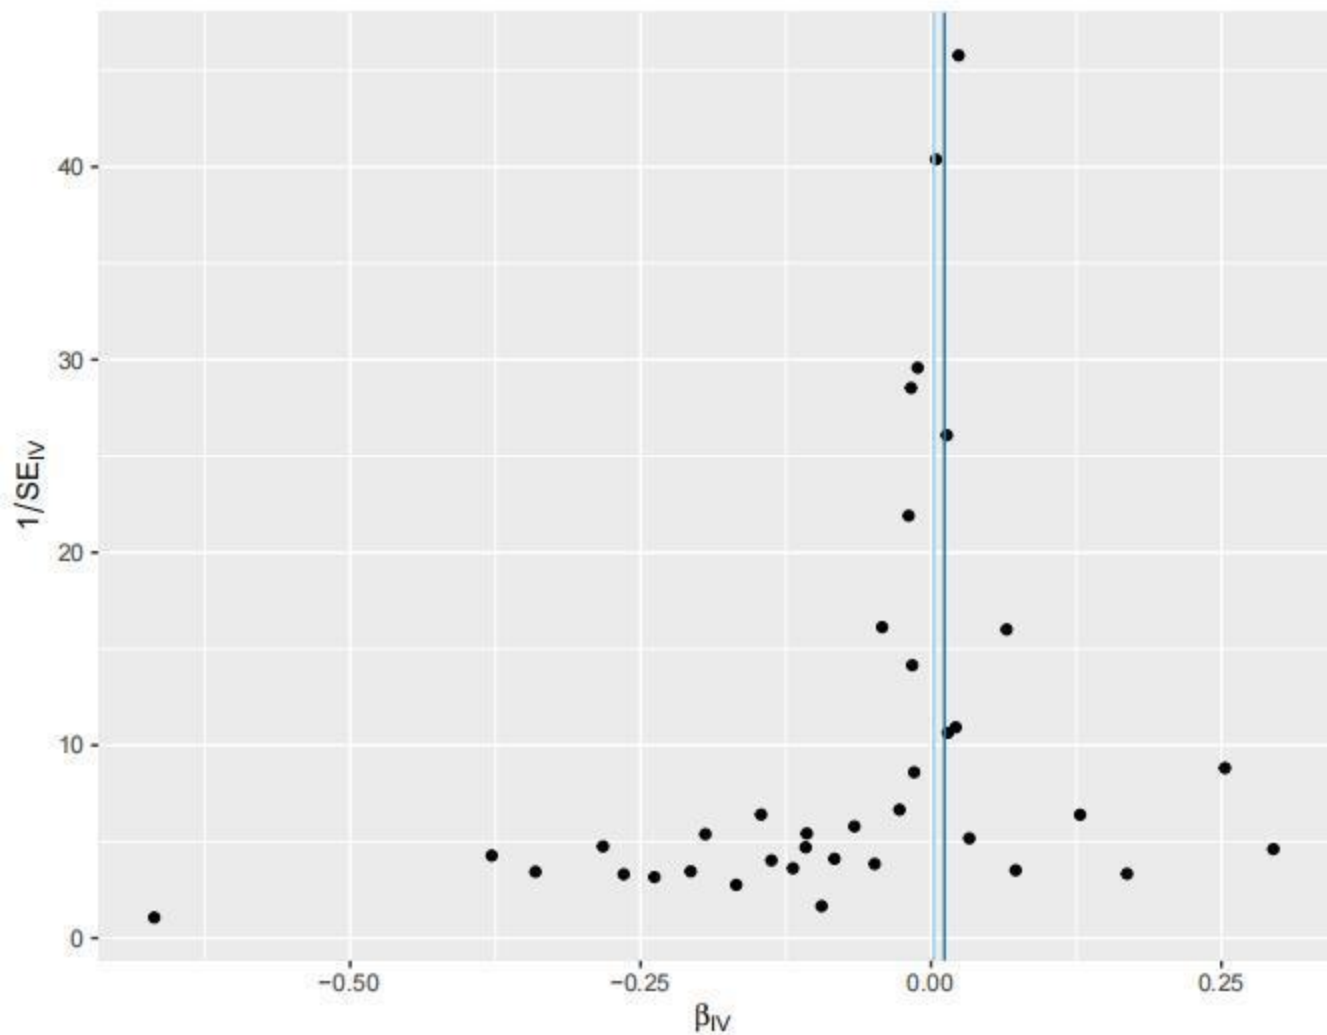

Funnel plot analyse of "Naive CD8br %CD8br" on 'Aplastic anemia'

MR Method

Inverse variance weighted

MR Egger

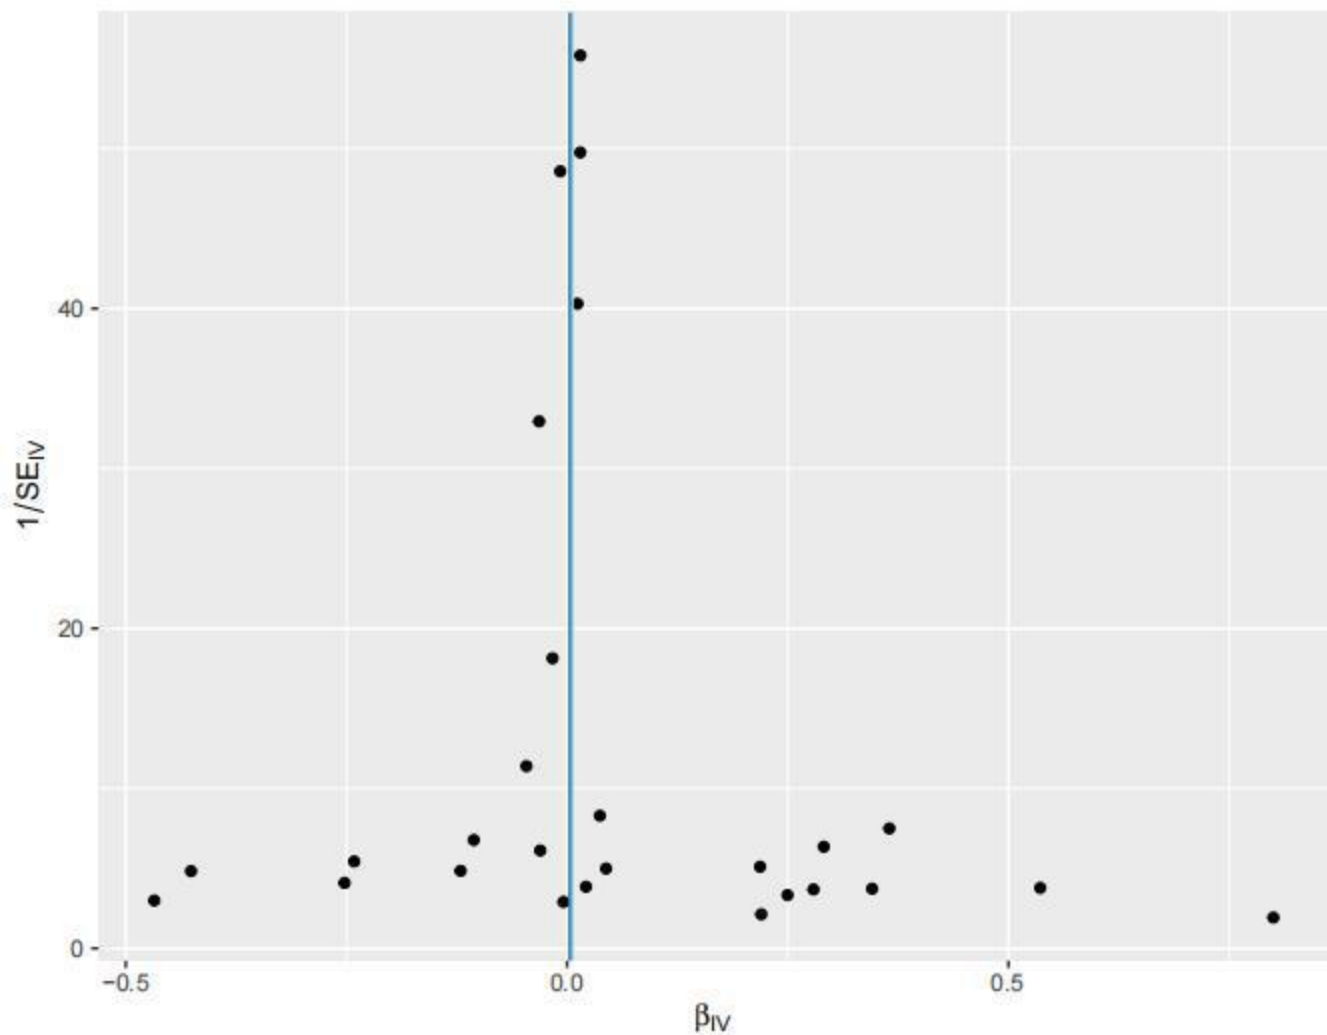

Funnel plot analyse of "CD45RA+ CD8br AC" on 'Aplastic anemia'

MR Method

Inverse variance weighted

MR Egger

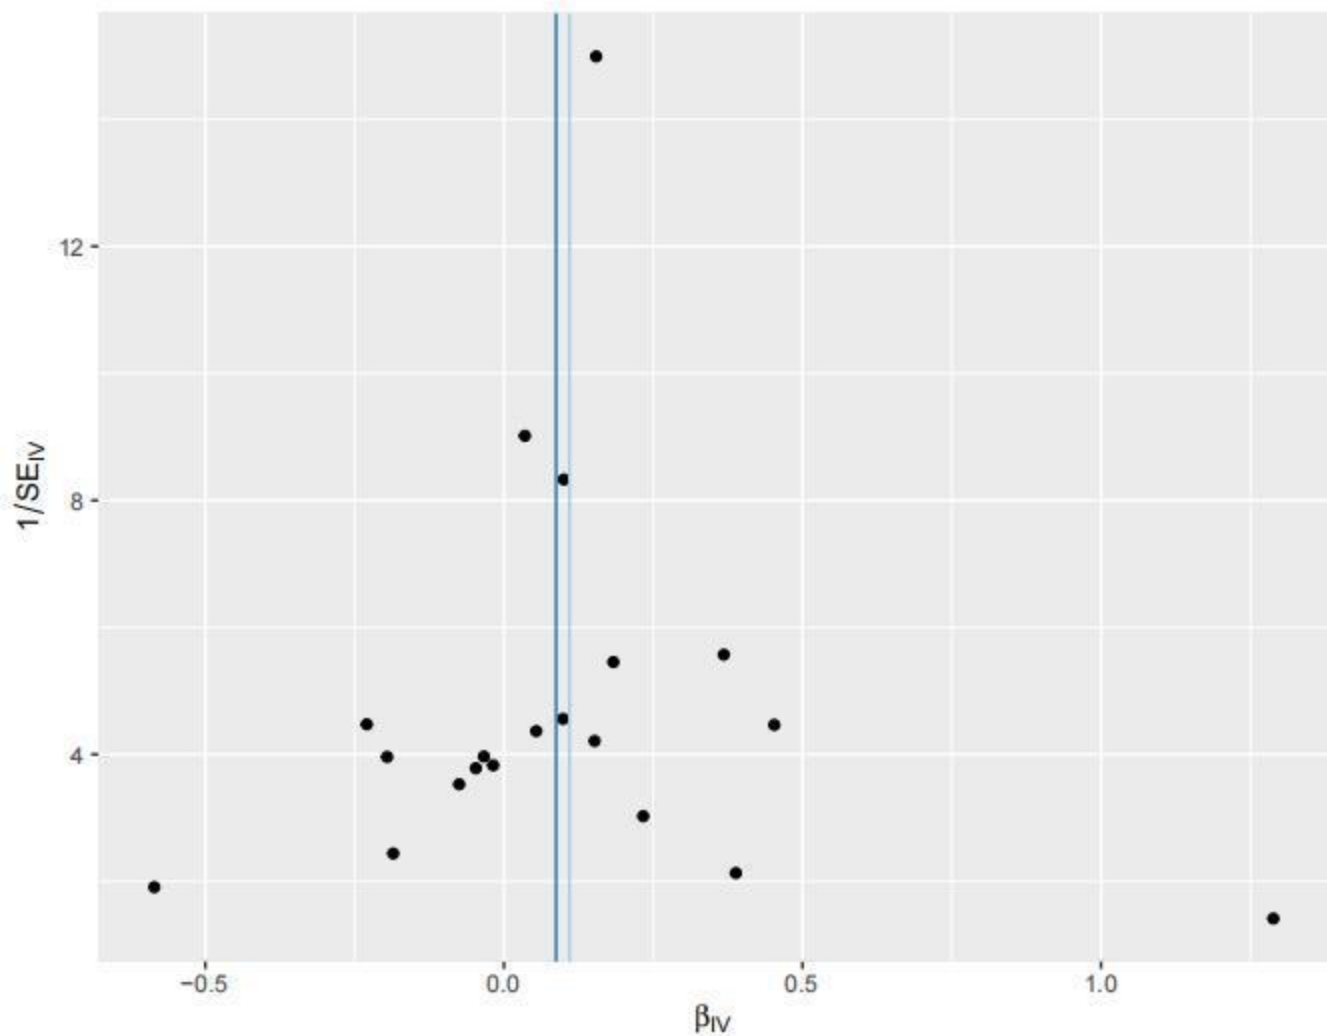

Funnel plot analyse of "Naive DN (CD4-CD8-) AC" on 'Aplastic anemia'

### MR Method

- Inverse variance weighted
- MR Egger

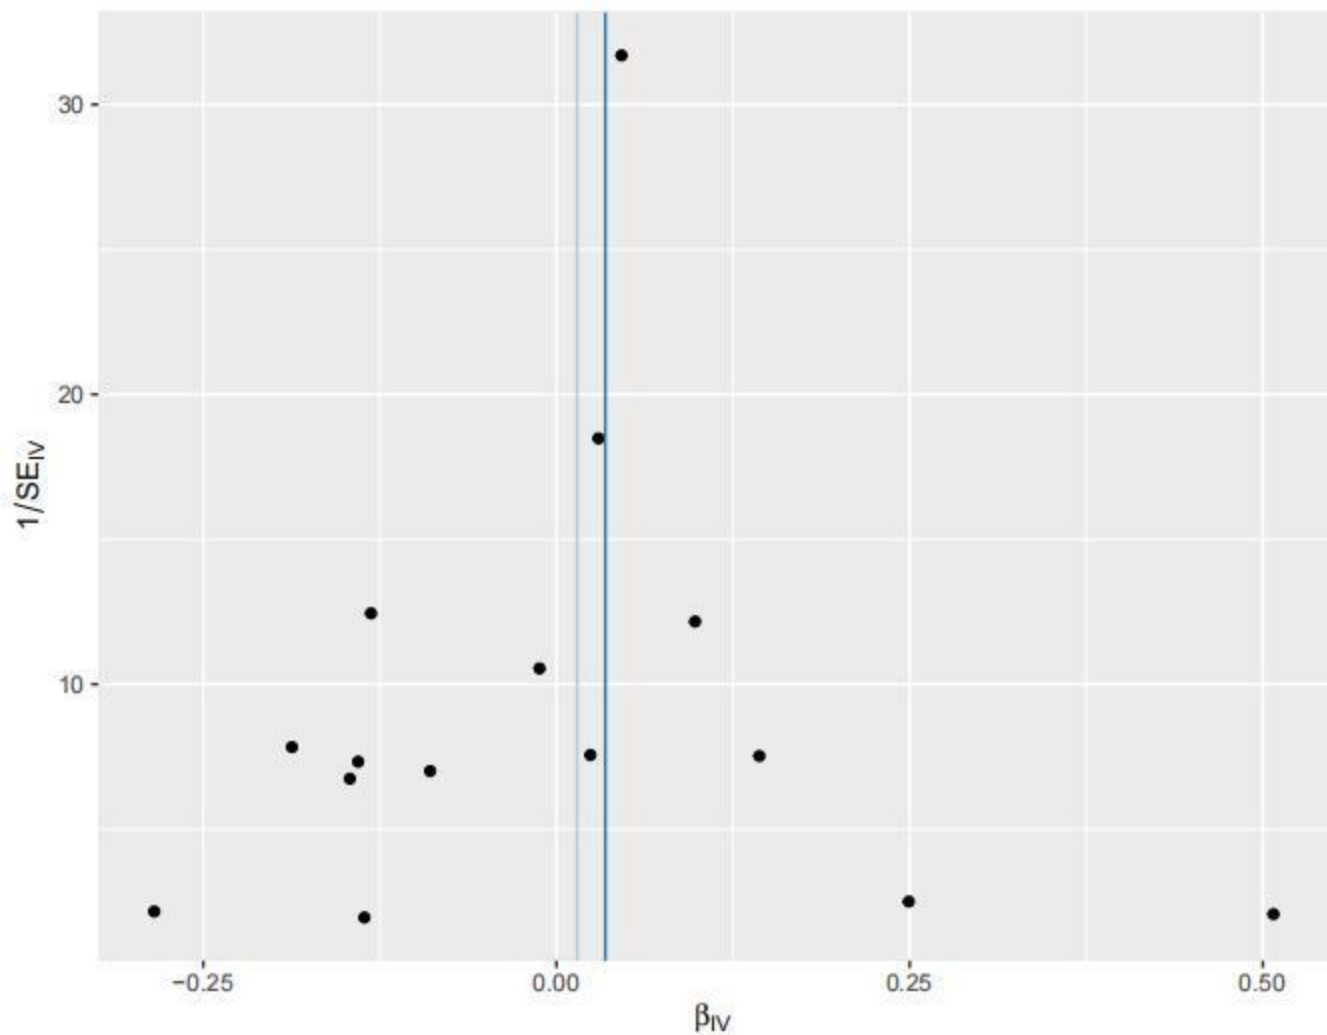

Funnel plot analyse of "HLA DR on CD33- HLA DR+ " on 'Aplastic anemia'

### MR Method

- Inverse variance weighted
- MR Egger

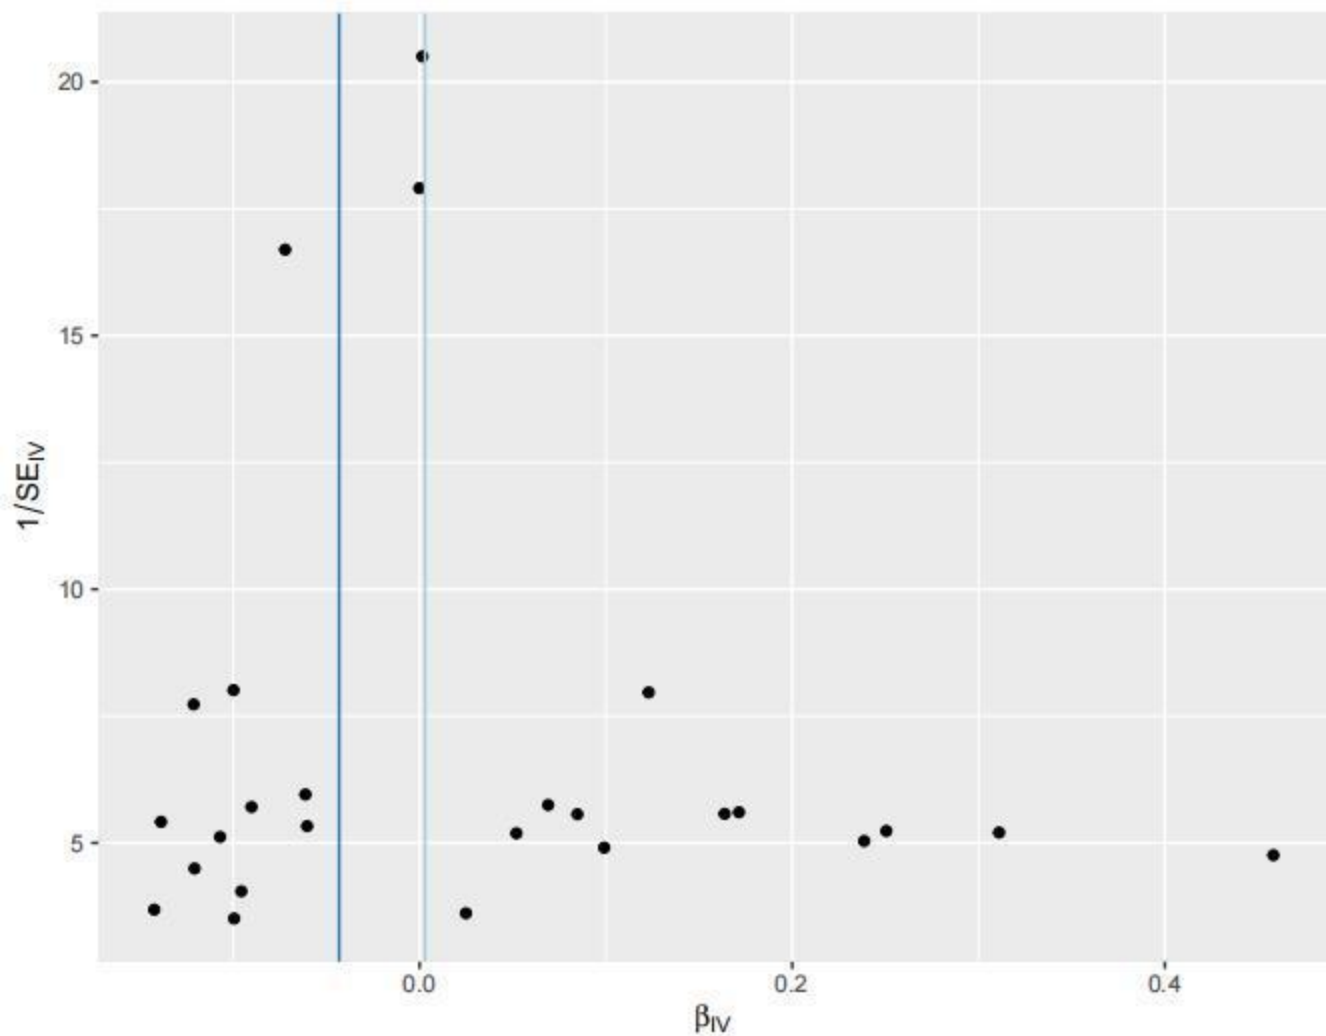

Funnel plot analyse of "CD19 on transitional" on 'Aplastic anemia'



MR Method

- Inverse variance weighted
- MR Egger

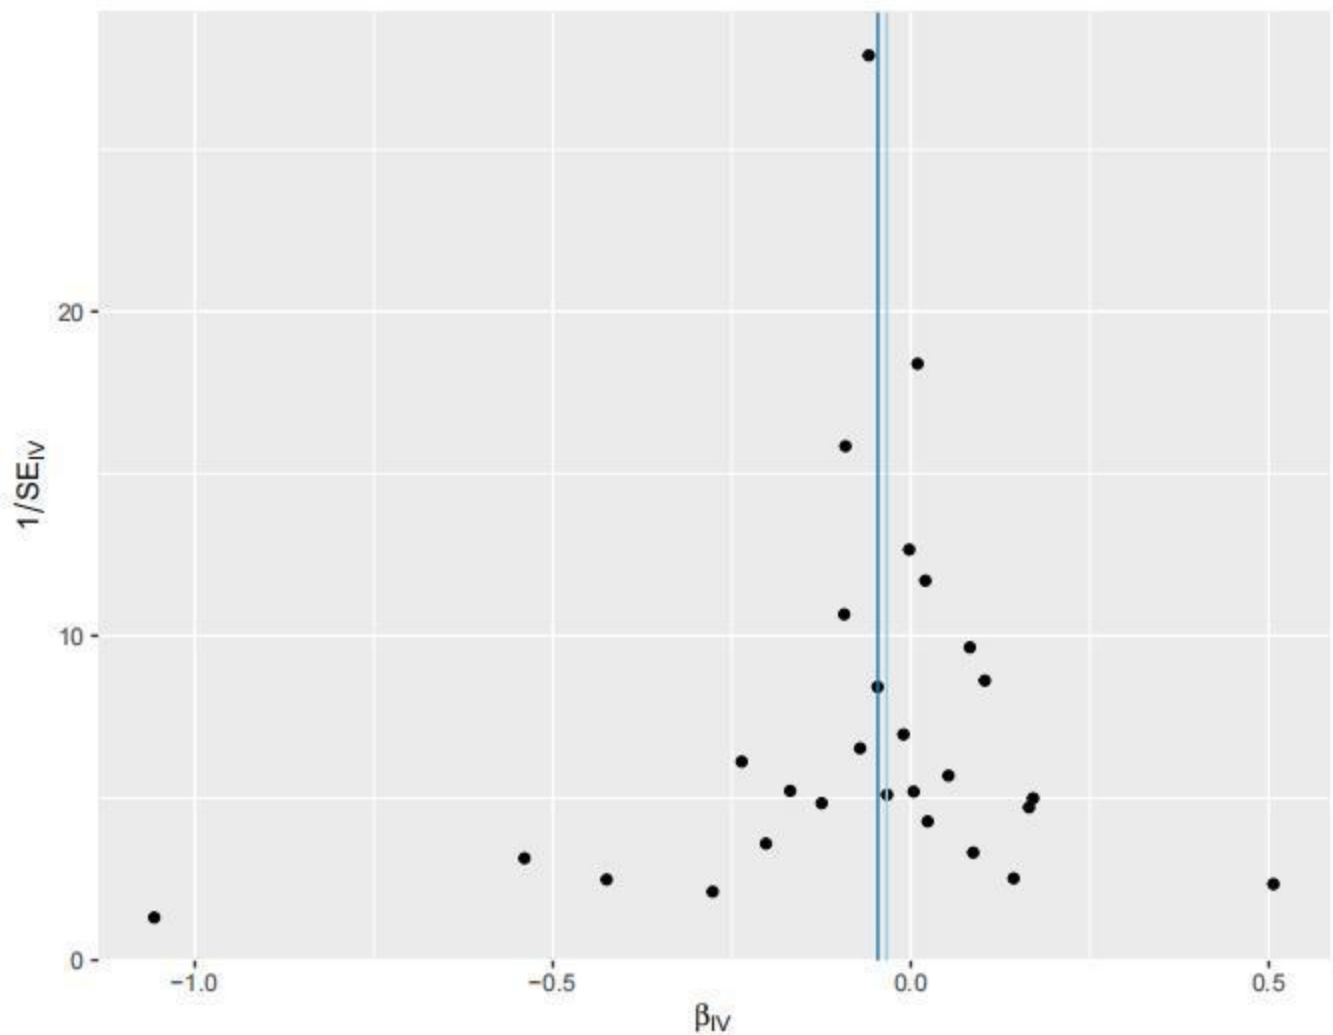

Funnel plot analyse of "HLA DR+ T cell%lymphocyte" on 'Aplastic anemia'

MR Method

- Inverse variance weighted
- MR Egger

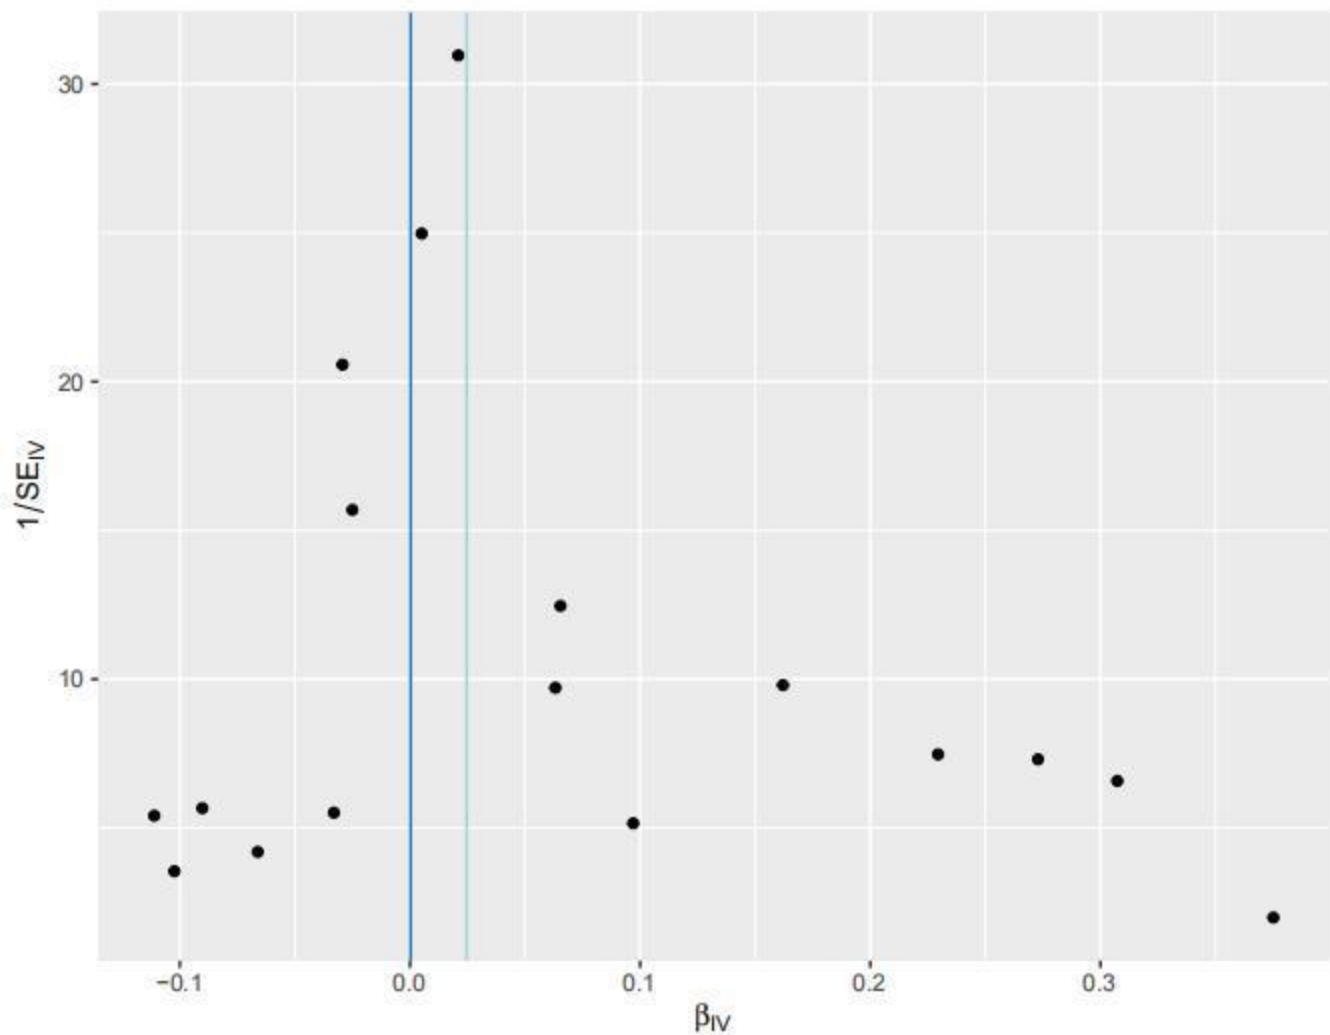

Funnel plot analyse of "CD28 on secreting Treg " on 'Aplastic anemia'

### MR Method

- Inverse variance weighted
- MR Egger

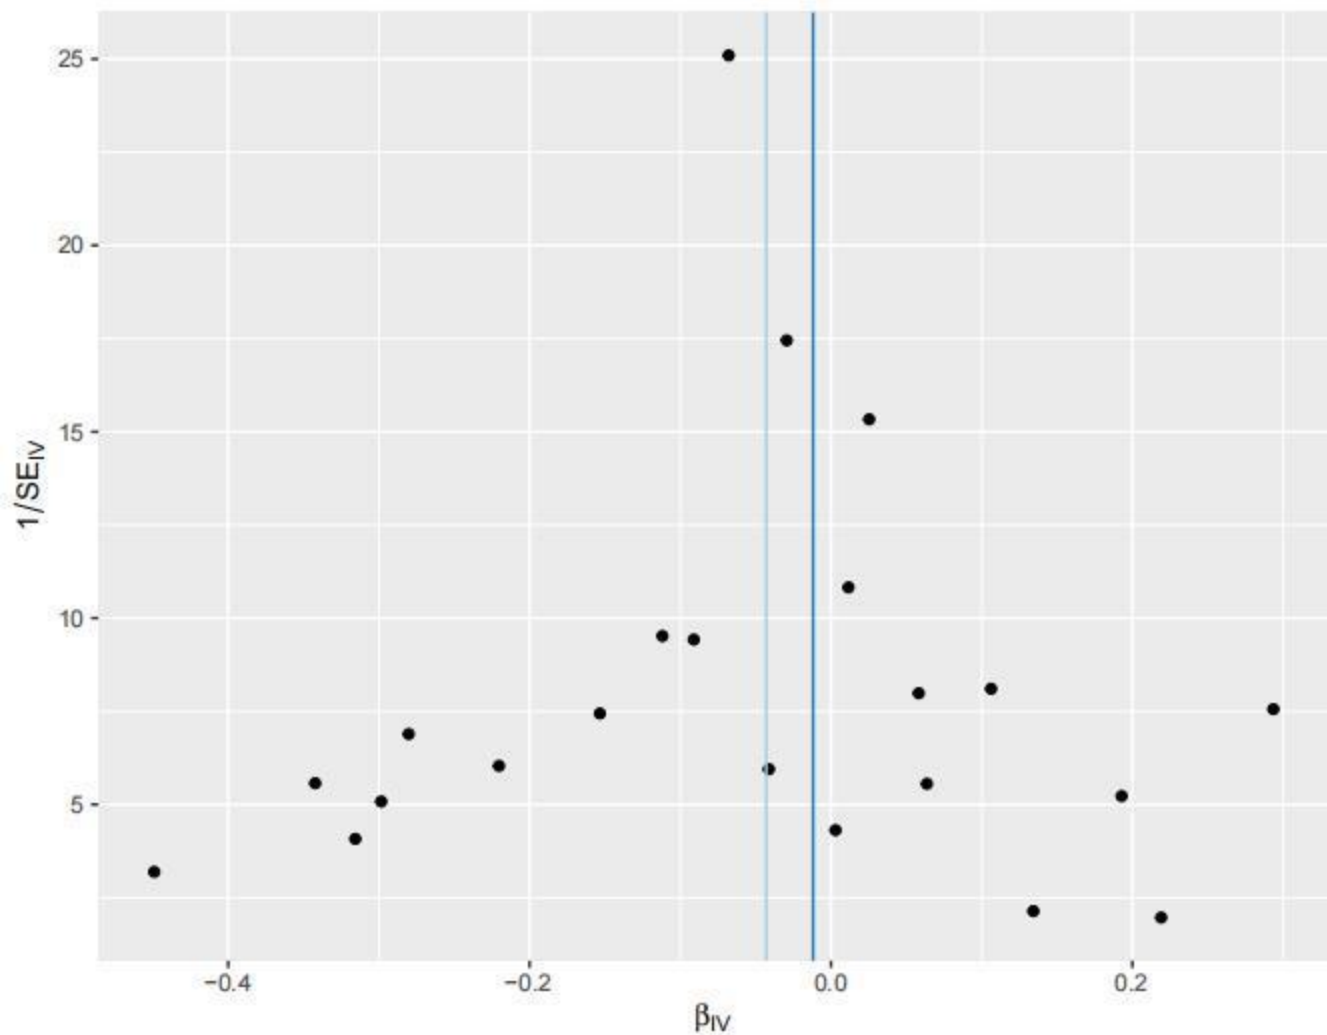

Funnel plot analysis of "CD3 on activated & secreting Treg" on 'Aplastic anemia'

MR Method

- Inverse variance weighted
- MR Egger

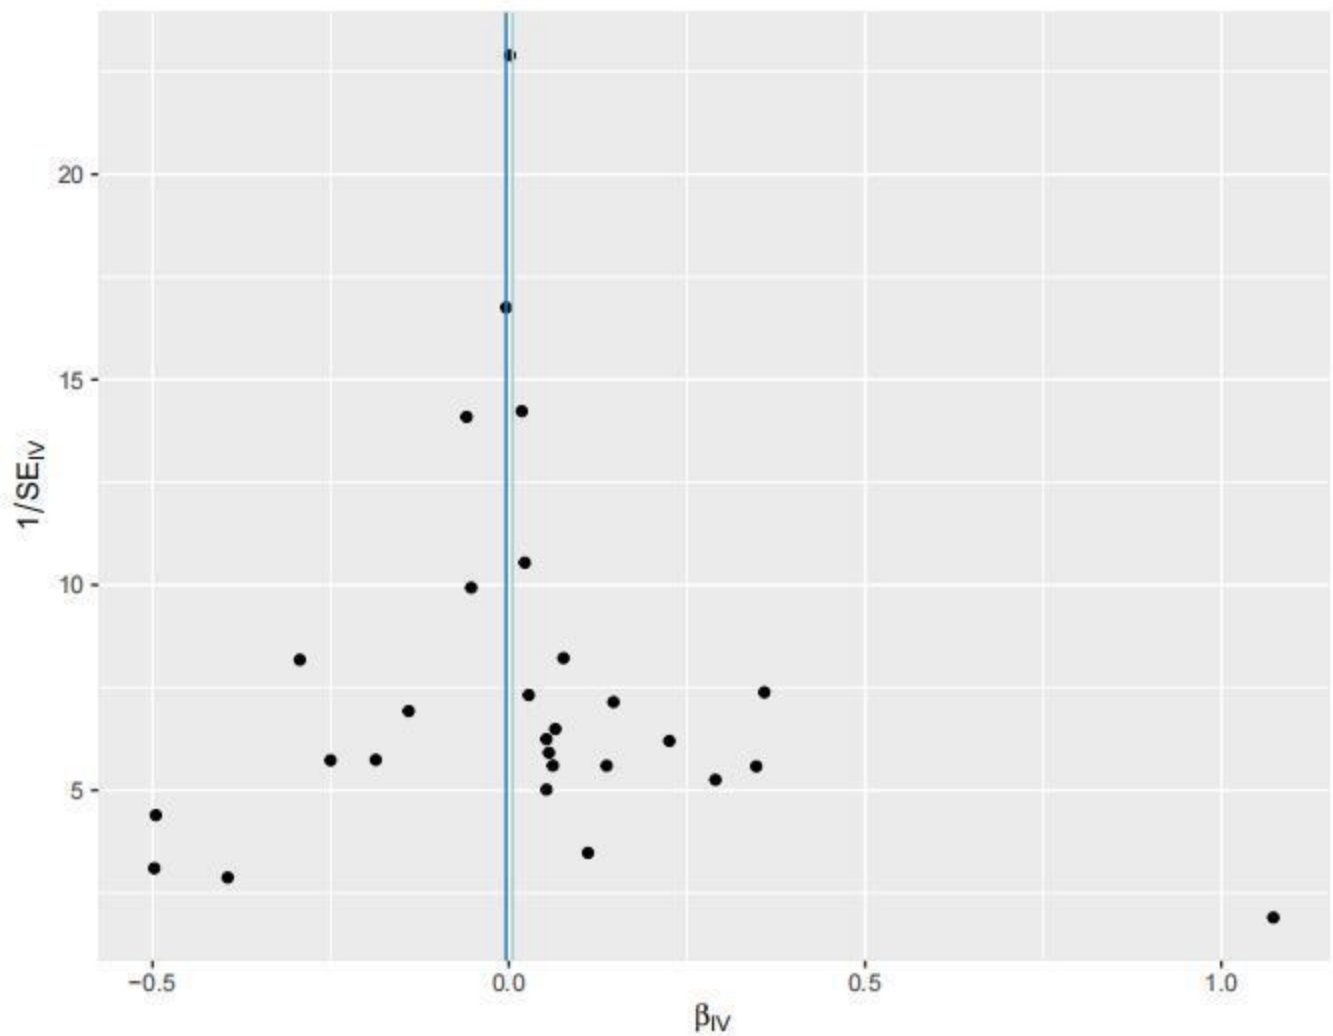

Funnel plot analyse of "CD4 on secreting Treg " on 'Aplastic anemia'

MR Method

- Inverse variance weighted
- MR Egger

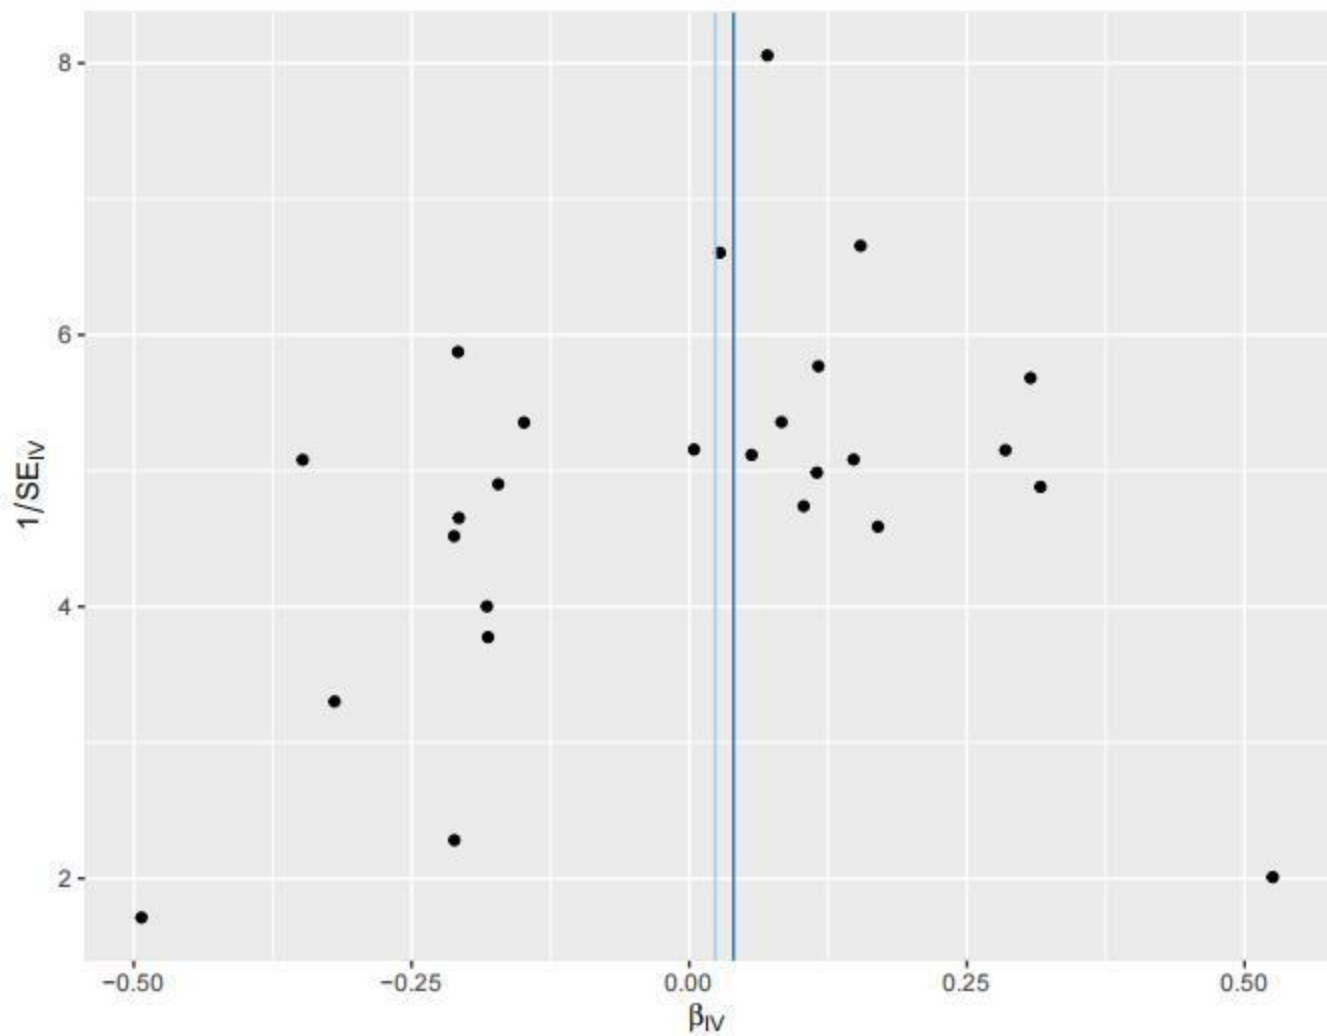

Funnel plot analyse of "CD8br NKT AC" on 'Aplastic anemia'

### MR Method

- Inverse variance weighted
- MR Egger

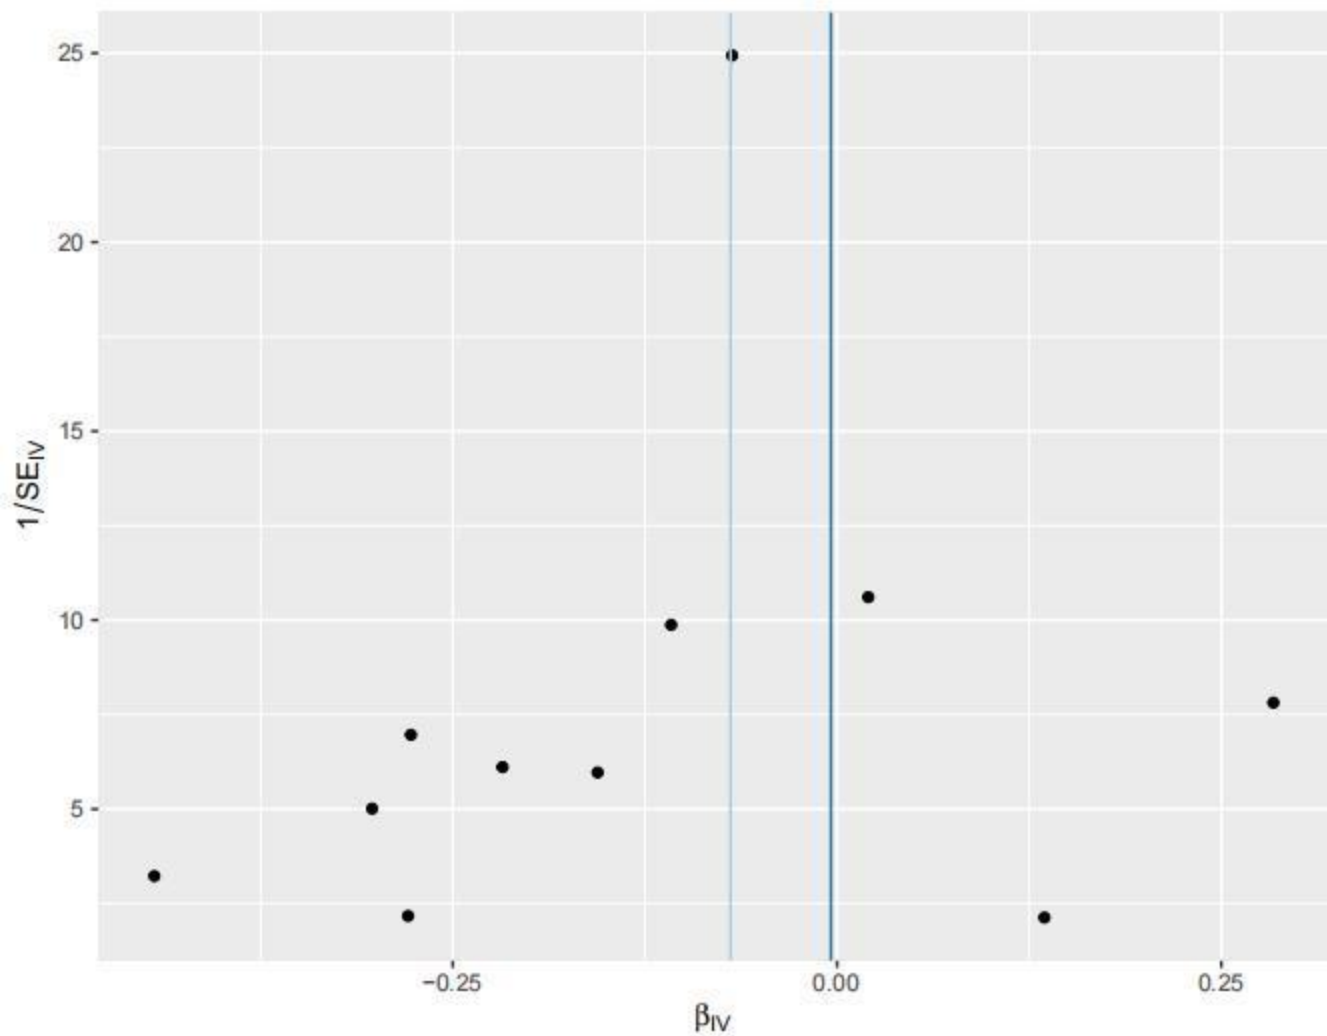

Funnel plot analyse of "CD3 on CD4 Treg " on 'Aplastic anemia'

MR Method

Inverse variance weighted

MR Egger

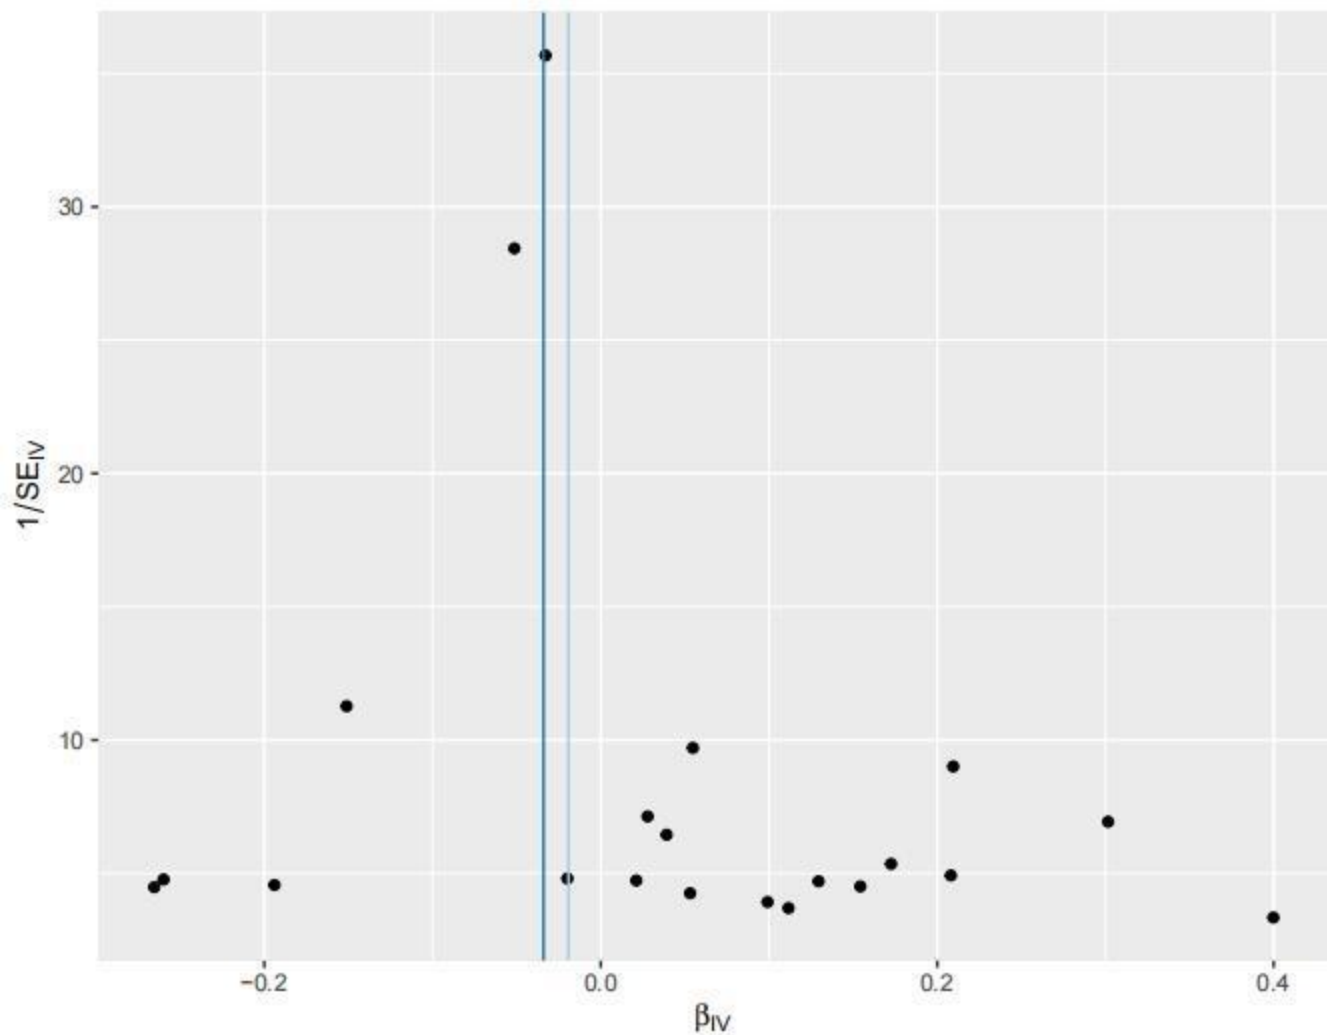

Funnel plot analyse of "CD25 on CD45RA+ CD4 not Treg " on 'Aplastic anemia'

### MR Method

- Inverse variance weighted
- MR Egger

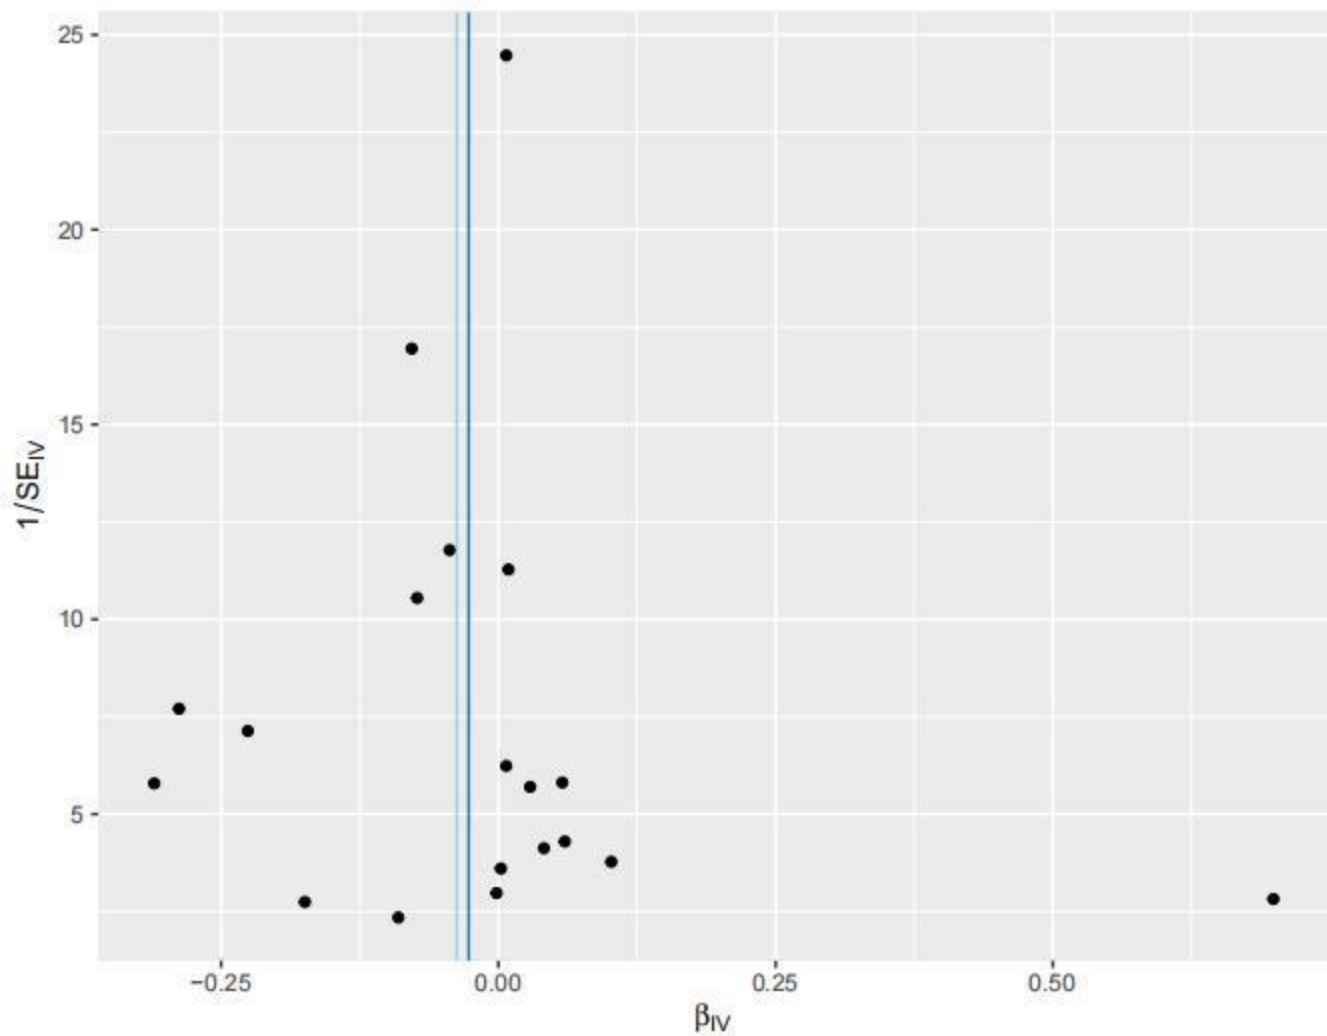

Funnel plot analyse of "CD127 on CD28+ CD45RA- CD8br" on 'Aplastic anemia'



MR Method

- Inverse variance weighted
- MR Egger

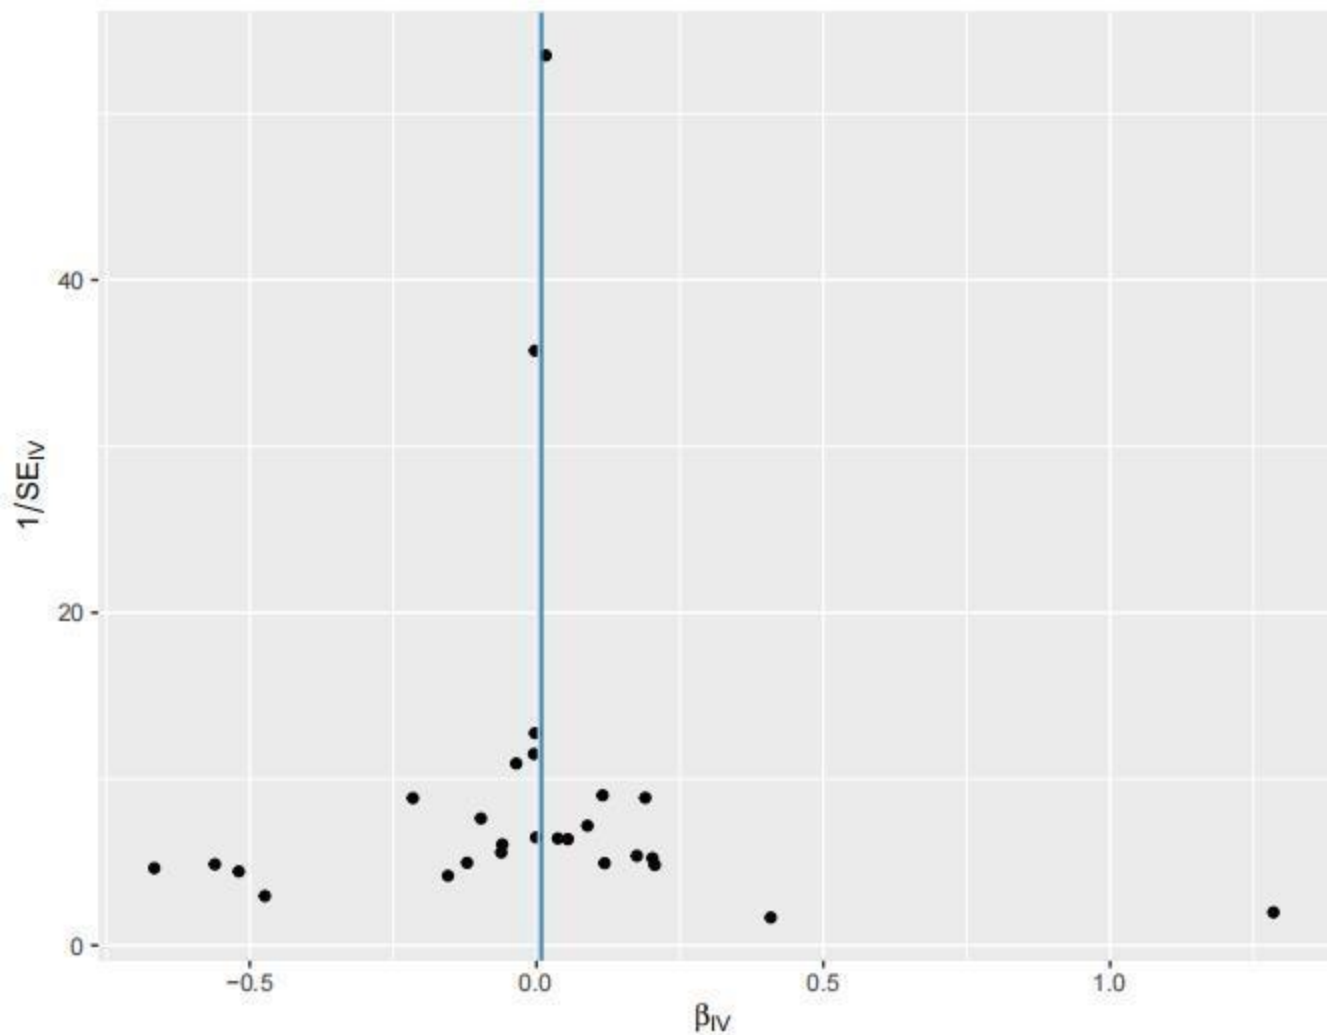

Funnel plot analyse of "CD25 on IgD+ CD38-" on 'Aplastic anemia'

MR Method

- Inverse variance weighted
- MR Egger

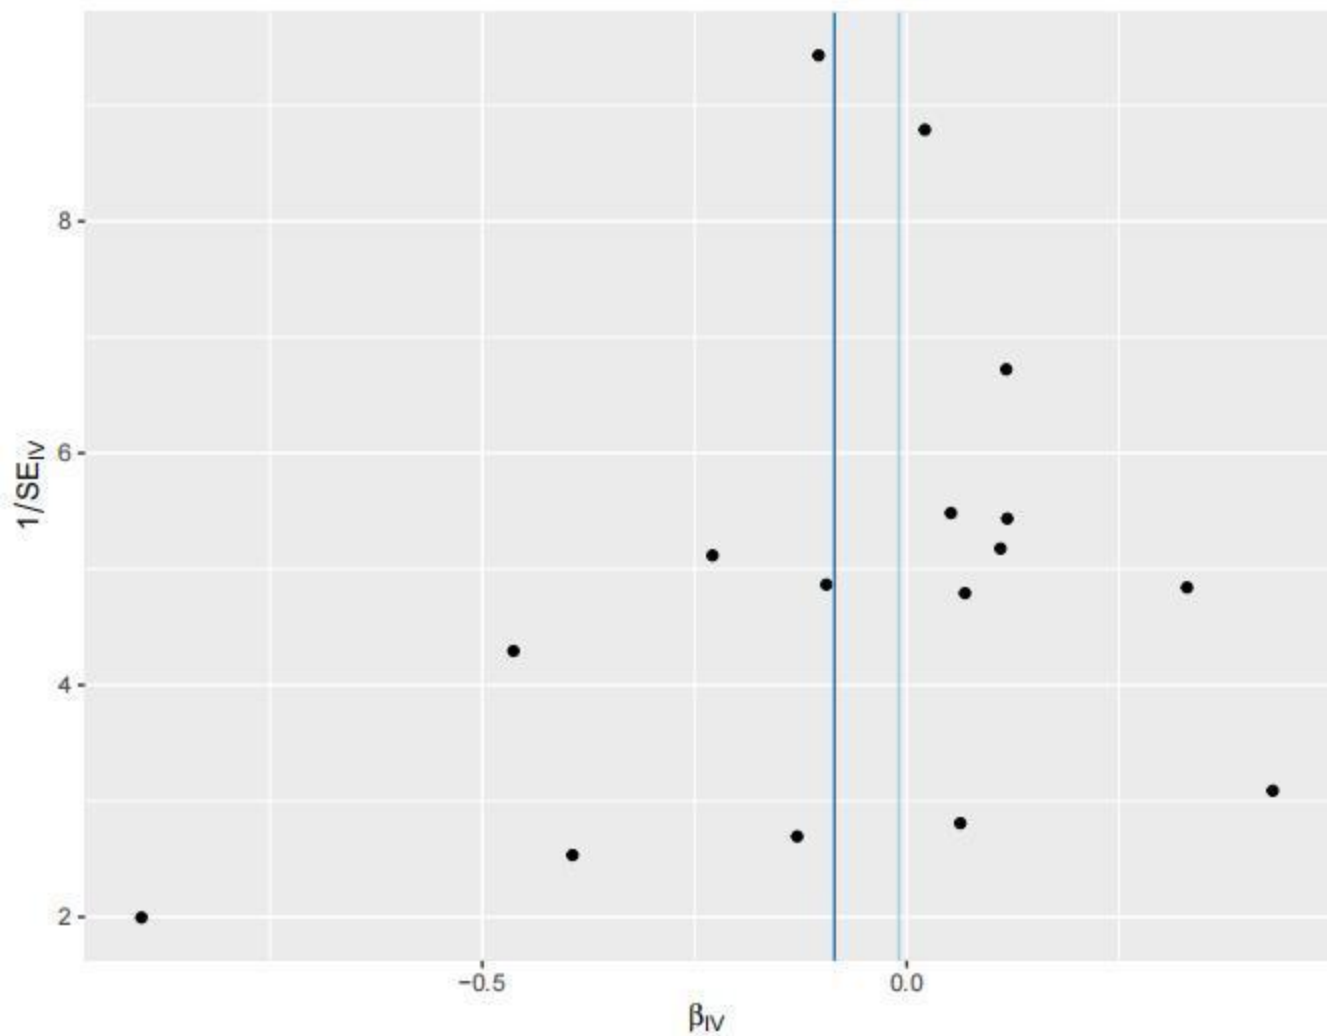

Funnel plot analyse of "CD20- CD38- AC" on 'Aplastic anemia'

MR Method

- Inverse variance weighted
- MR Egger

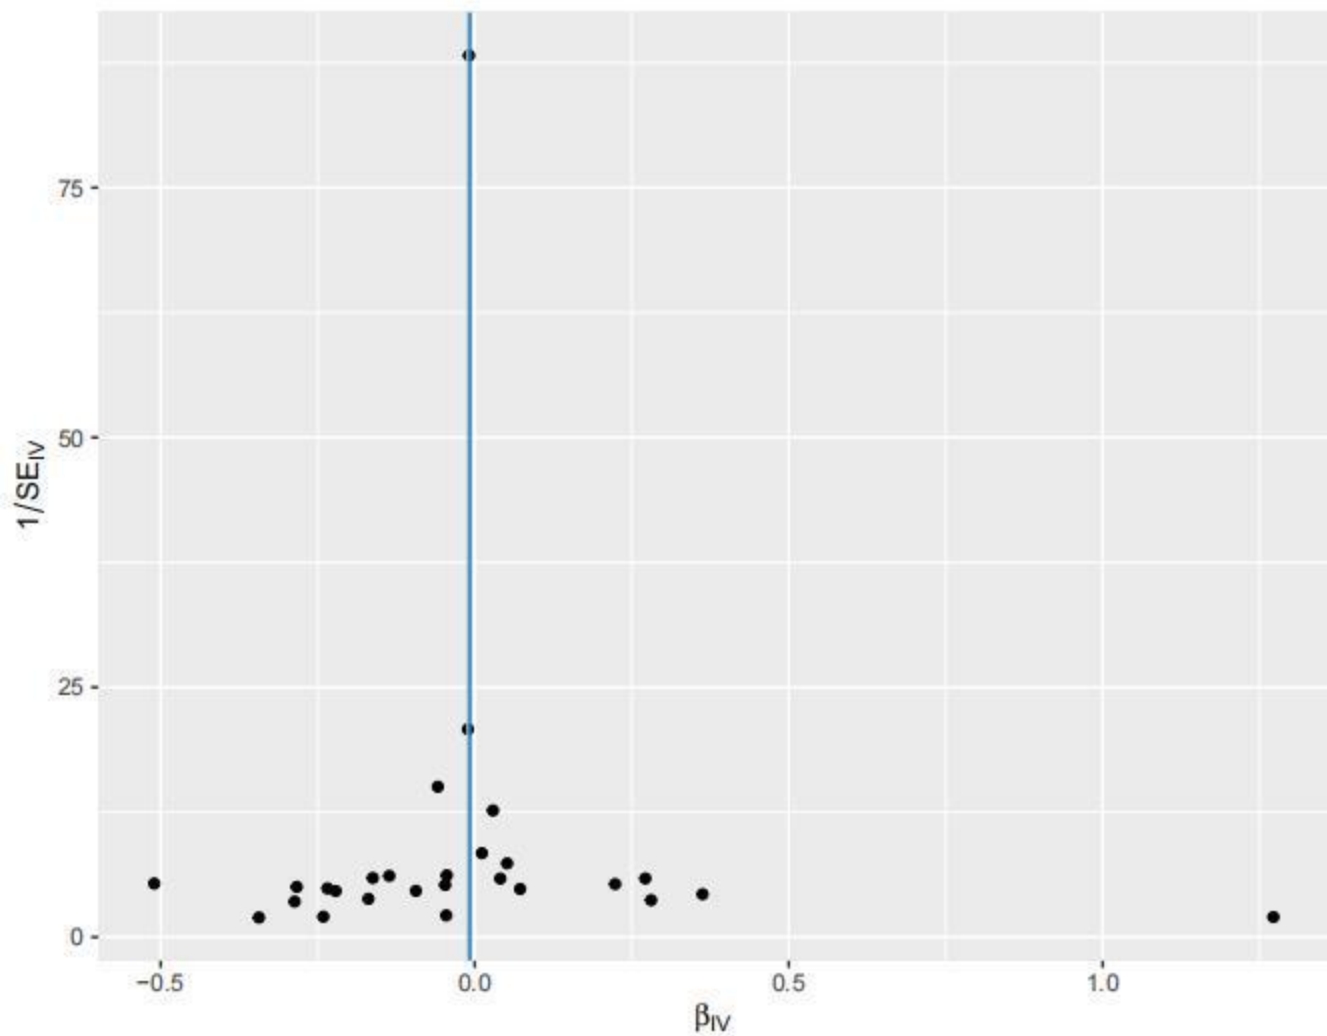

Funnel plot analyse of "CD25 on CD24+ CD27+" on 'Aplastic anemia'

MR Method

- Inverse variance weighted
- MR Egger

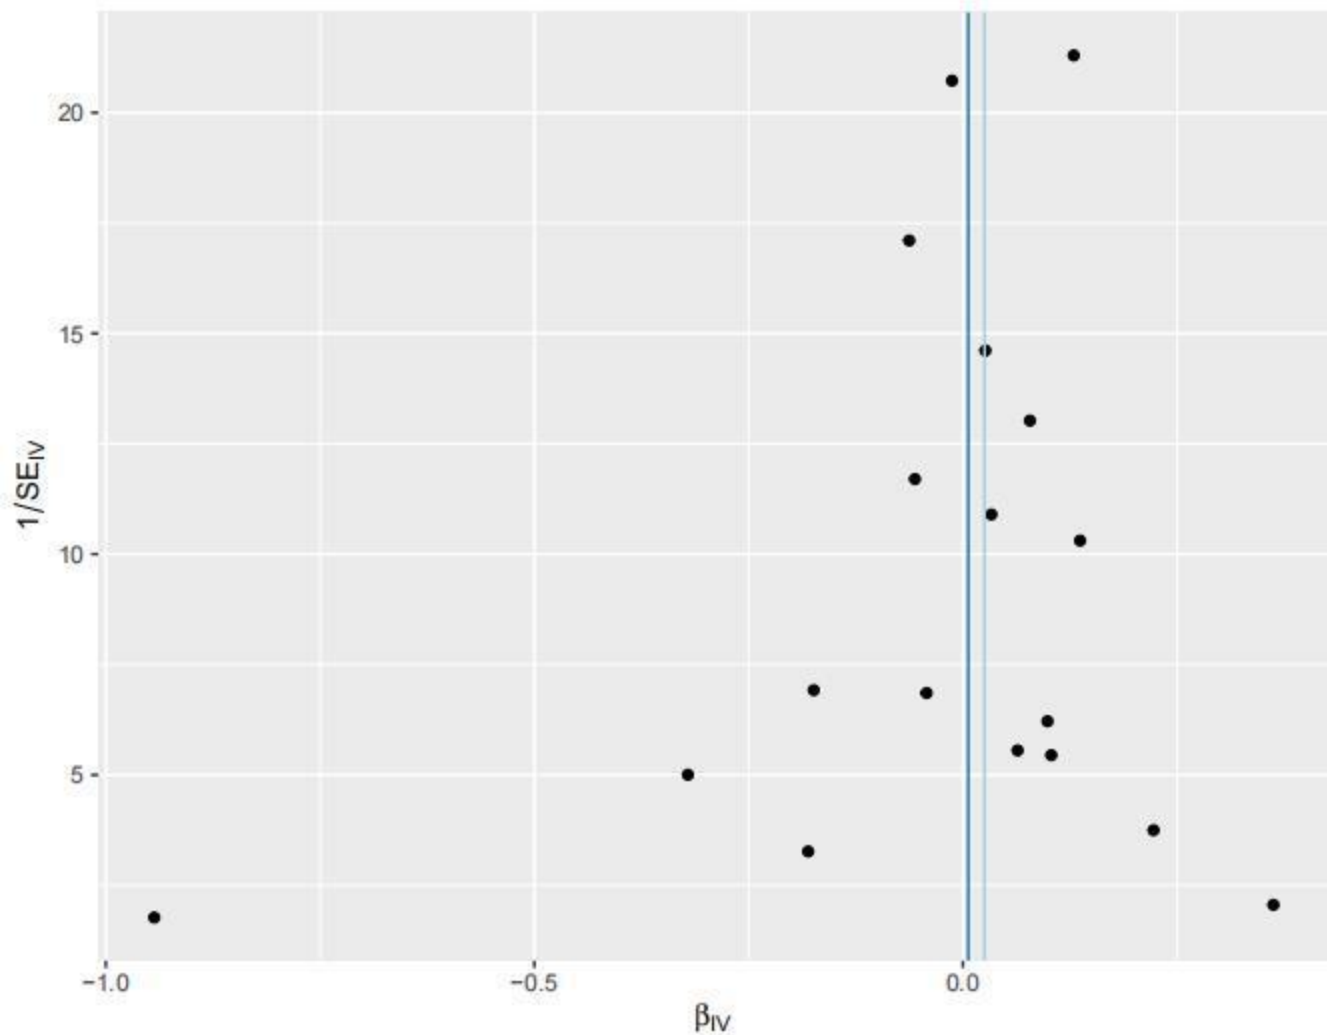

Funnel plot analyse of "HLA DR on monocyte" on 'Aplastic anemia'

### MR Method

- Inverse variance weighted
- MR Egger

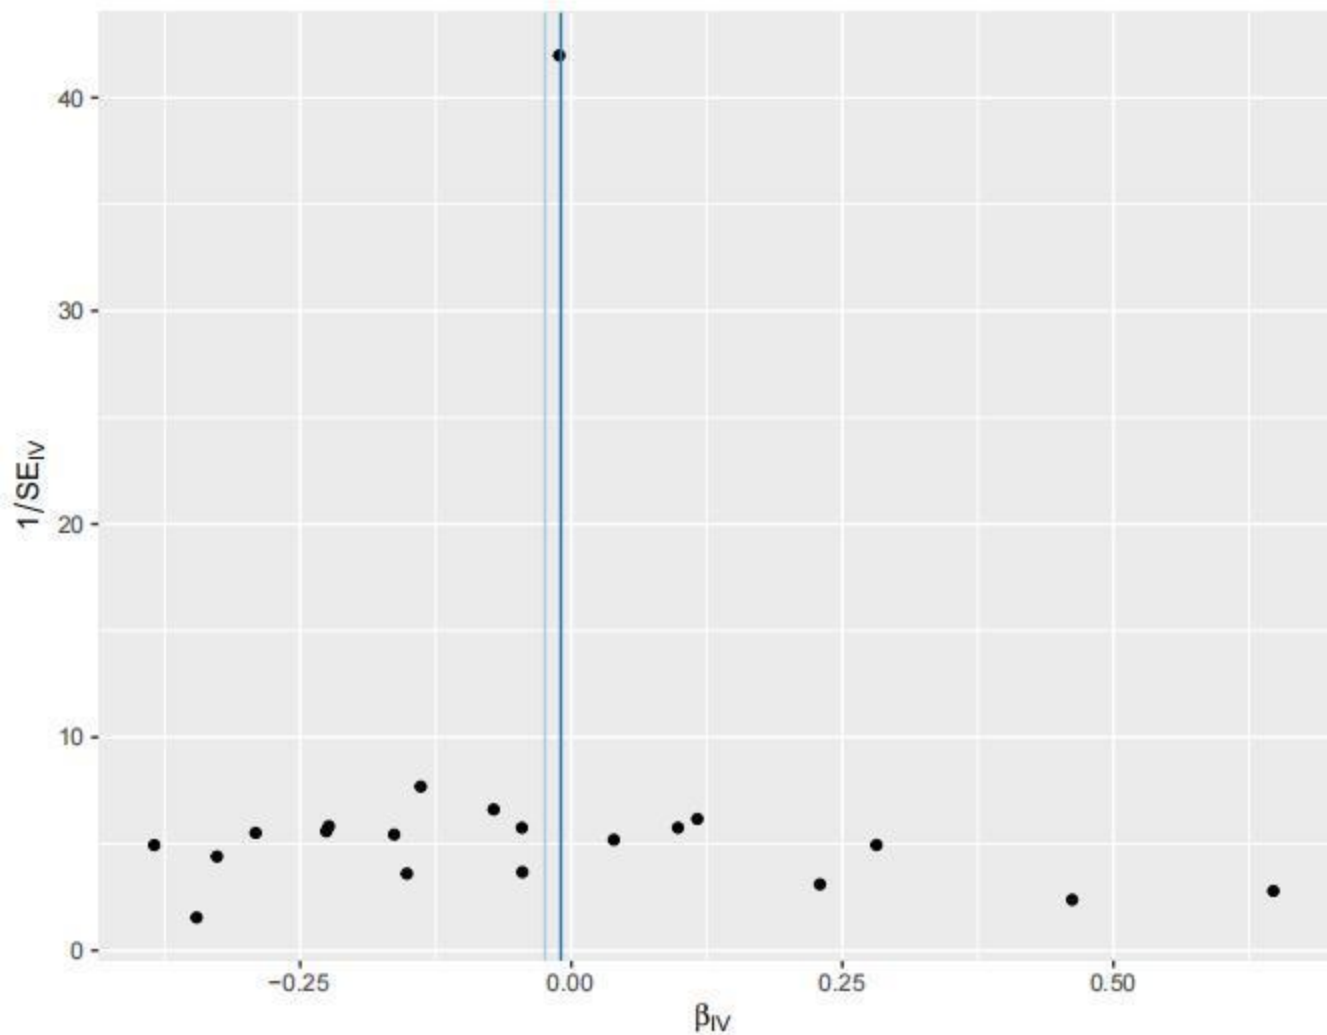

Funnel plot analyse of "FSC-A on monocyte" on 'Aplastic anemia'

### MR Method

- Inverse variance weighted
- MR Egger

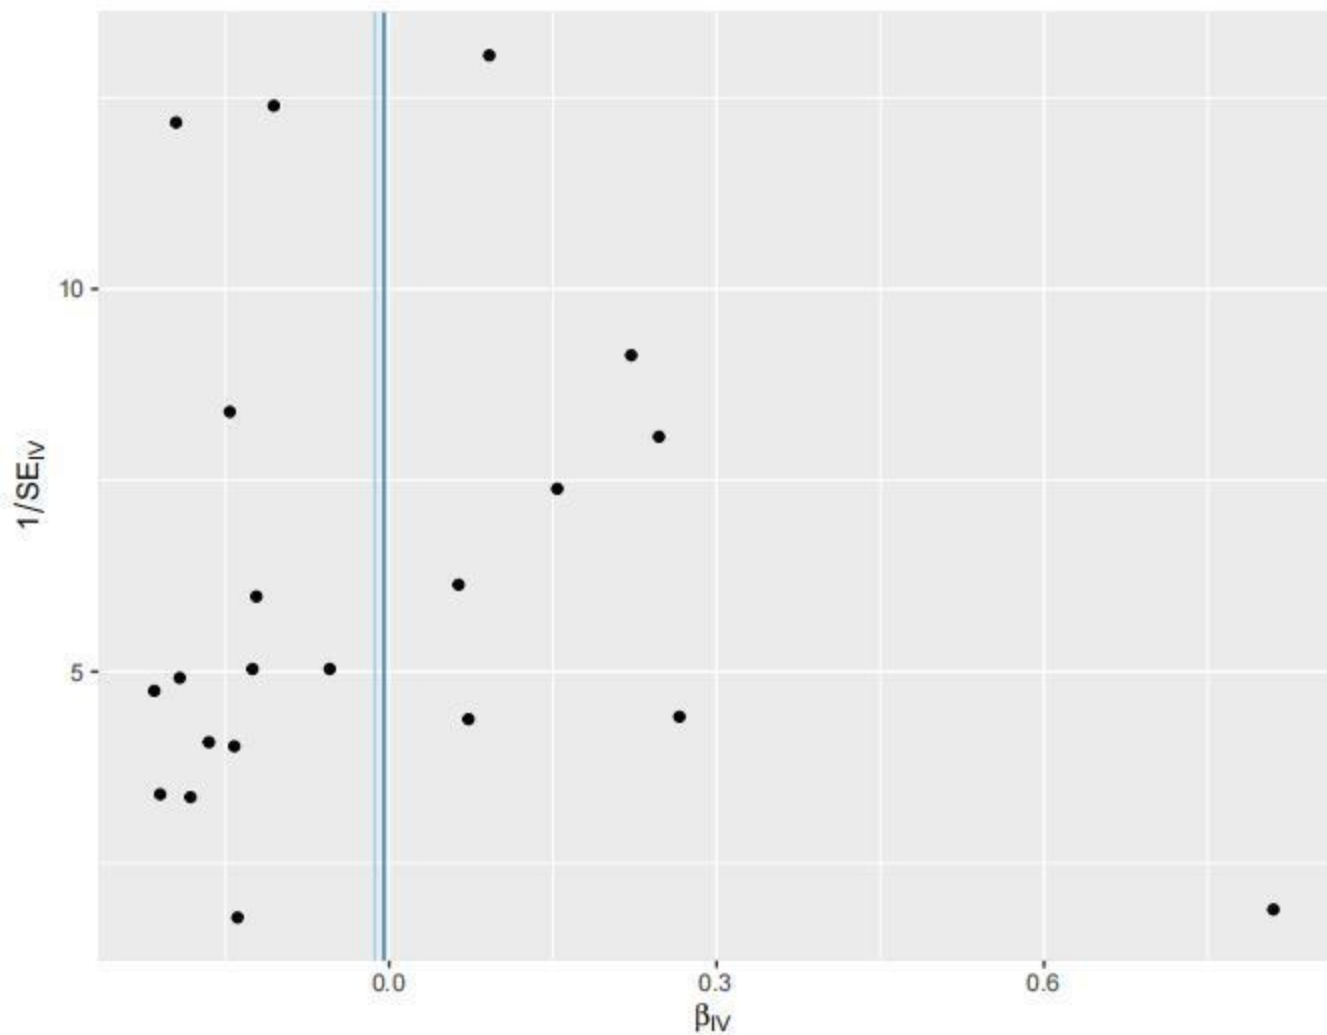

Funnel plot analyse of "CD8dim NKT %T cell" on 'Aplastic anemia'

### MR Method

- Inverse variance weighted
- MR Egger

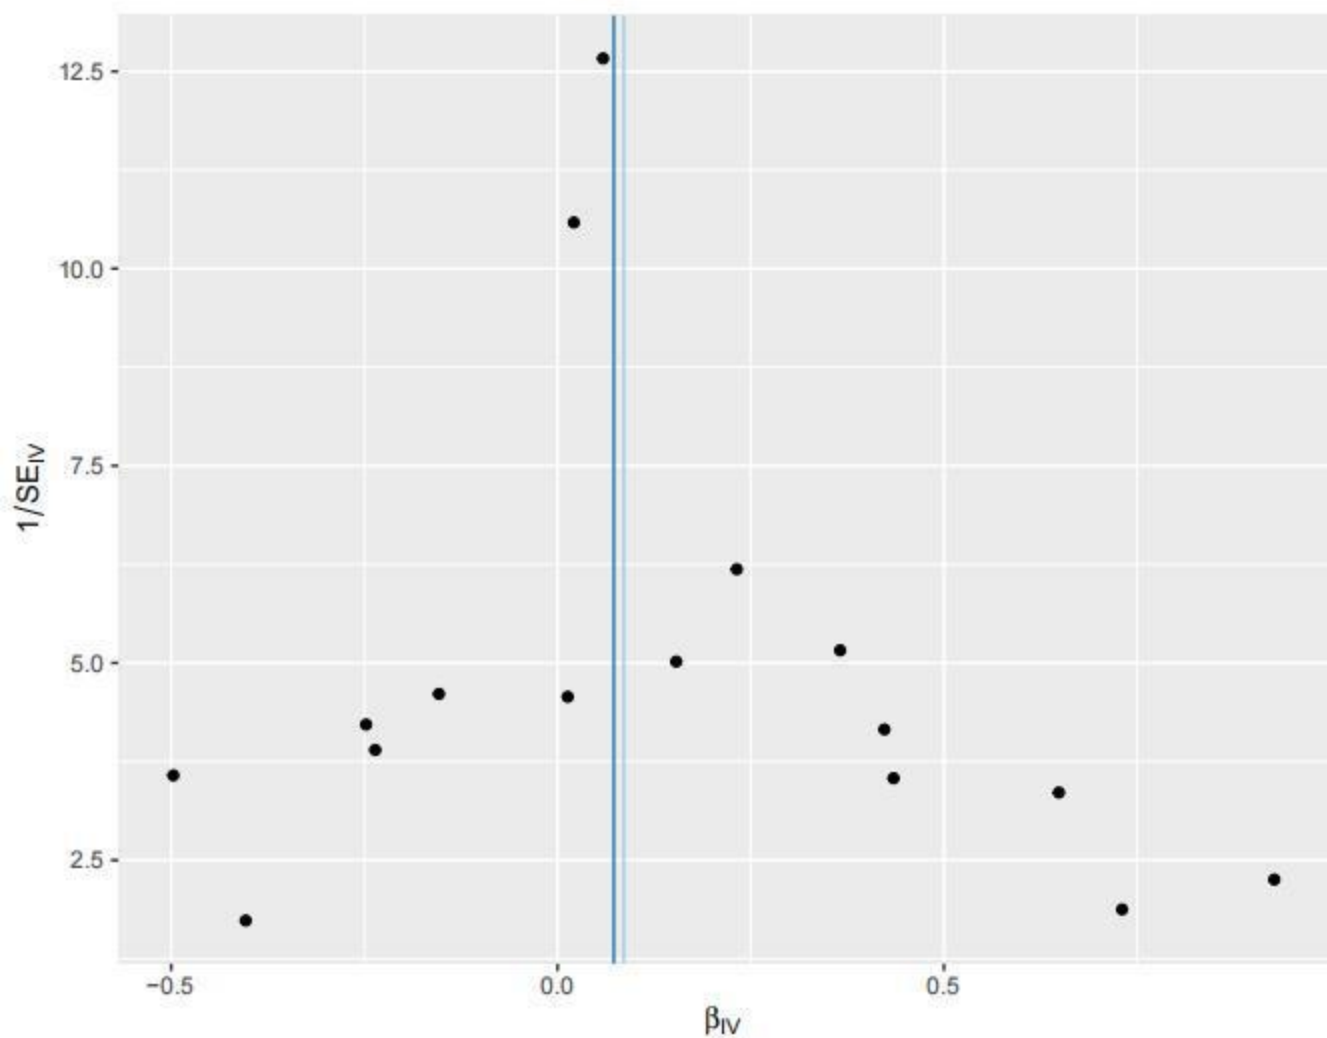

Funnel plot analysis of "PDL-1 on CD14+ CD16- monocyte" on 'Aplastic anemia'

MR Method

Inverse variance weighted

MR Egger

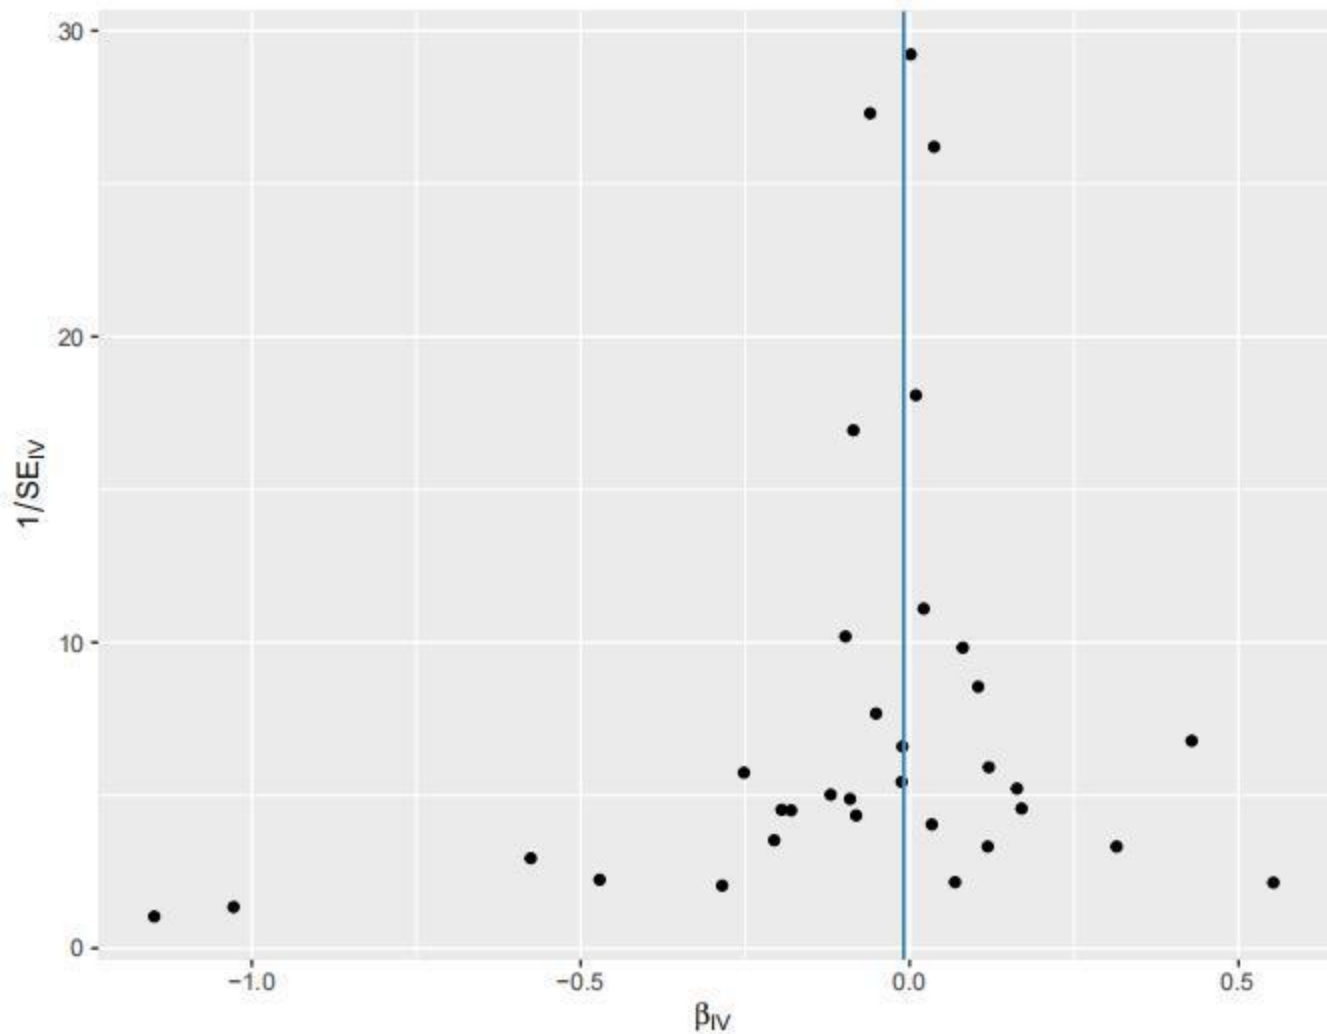

Funnel plot analyse of "HLA DR+ T cell%T cell" on 'Aplastic anemia'



MR Method

- Inverse variance weighted
- MR Egger

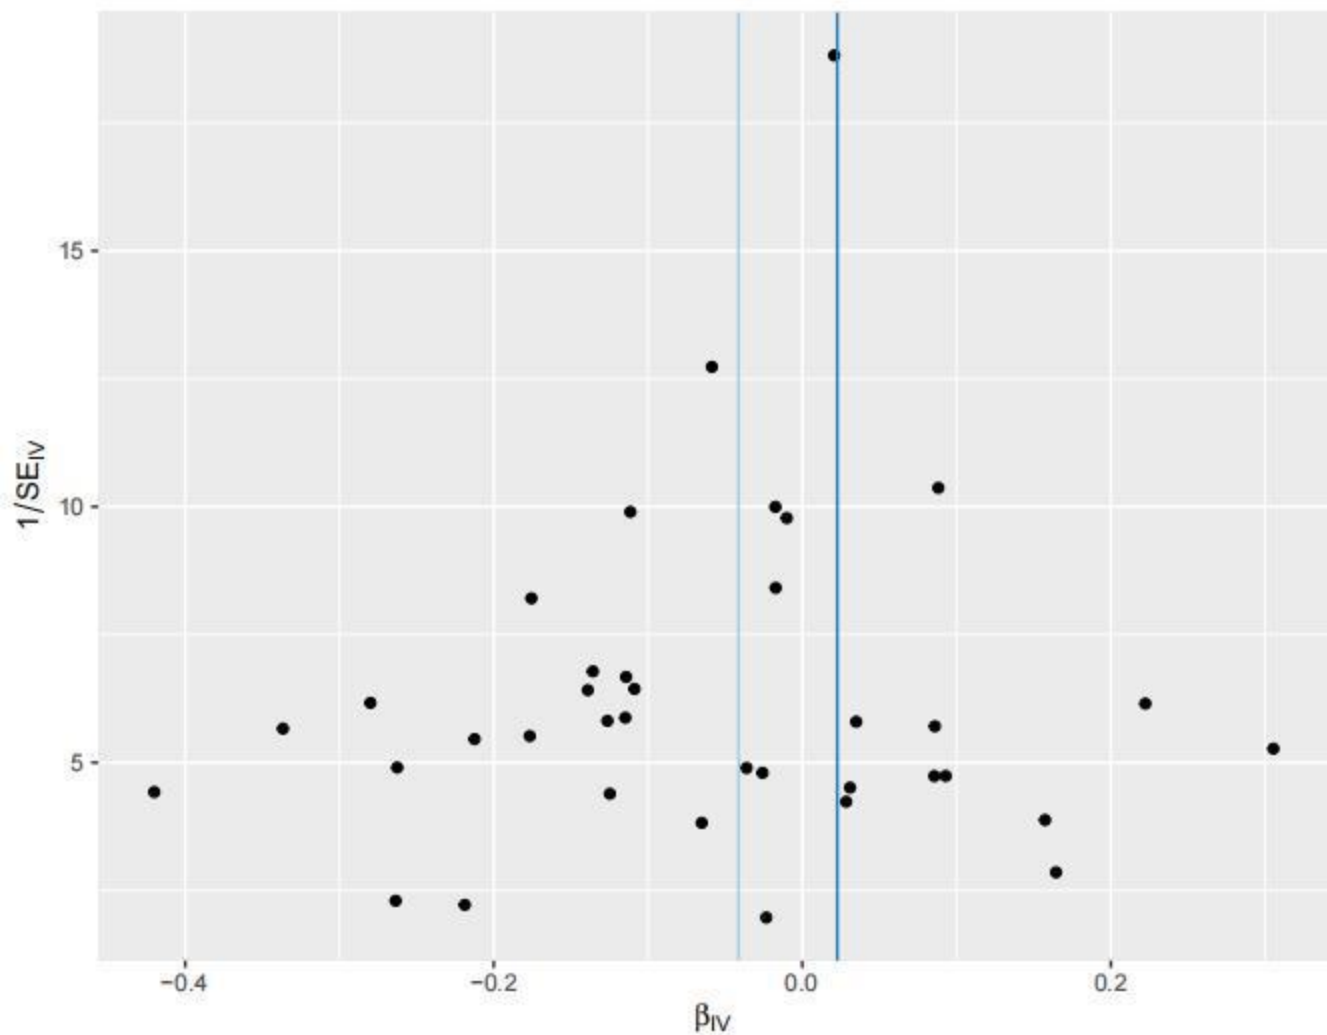

Funnel plot analyse of "CD3 on resting Treg " on 'Aplastic anemia'

### MR Method

- Inverse variance weighted
- MR Egger

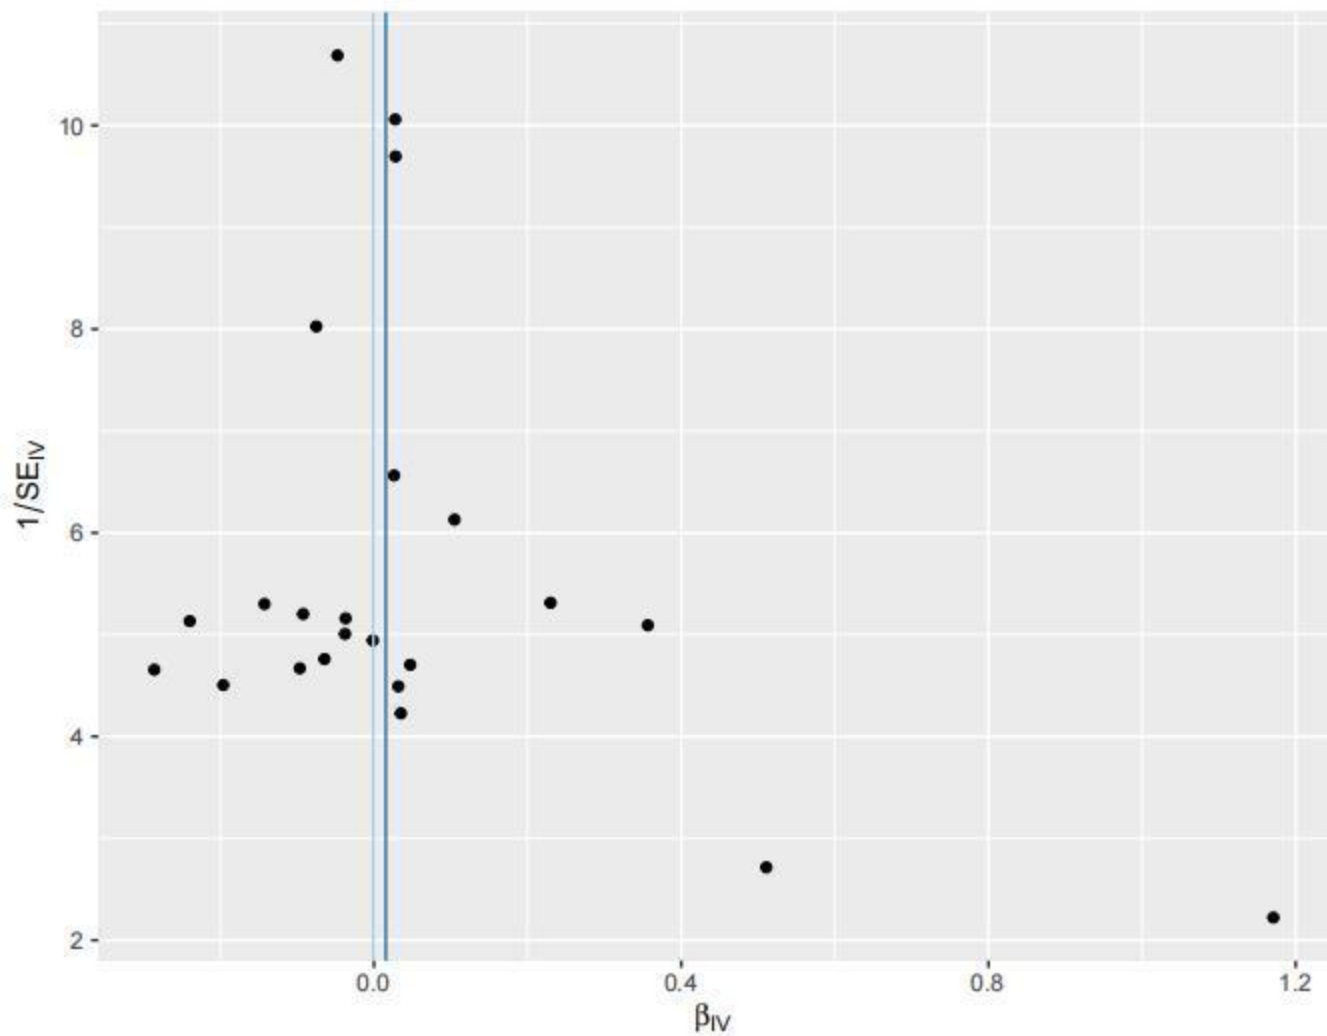

Funnel plot analyse of "CD4+ AC" on 'Aplastic anemia'

### MR Method

- Inverse variance weighted
- MR Egger

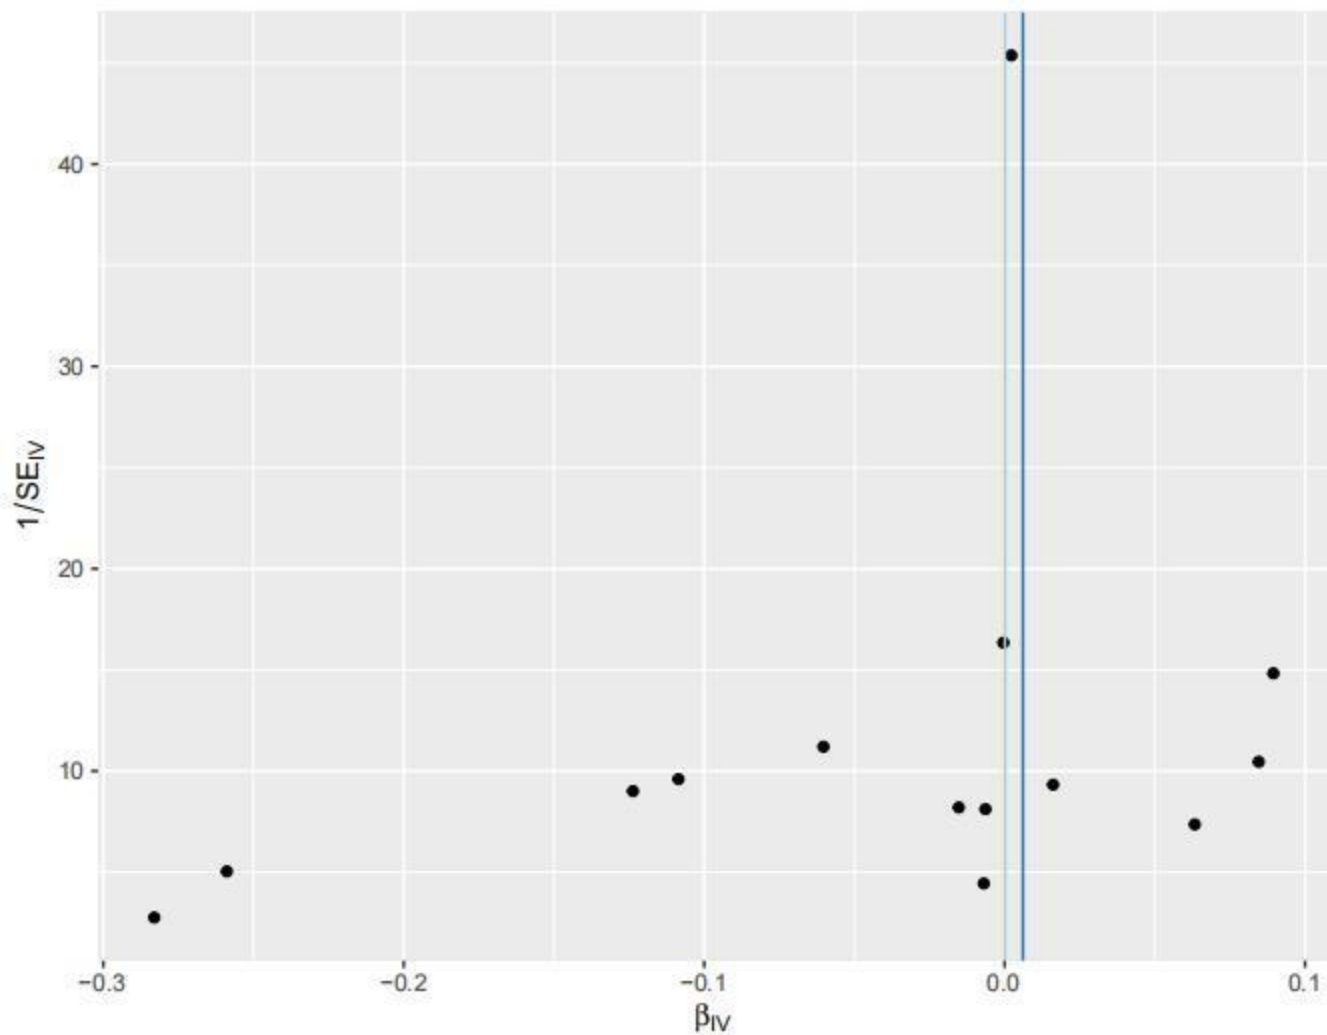

Funnel plot analyse of "CD34 on HSC" on 'Aplastic anemia'

MR Method

- Inverse variance weighted
- MR Egger

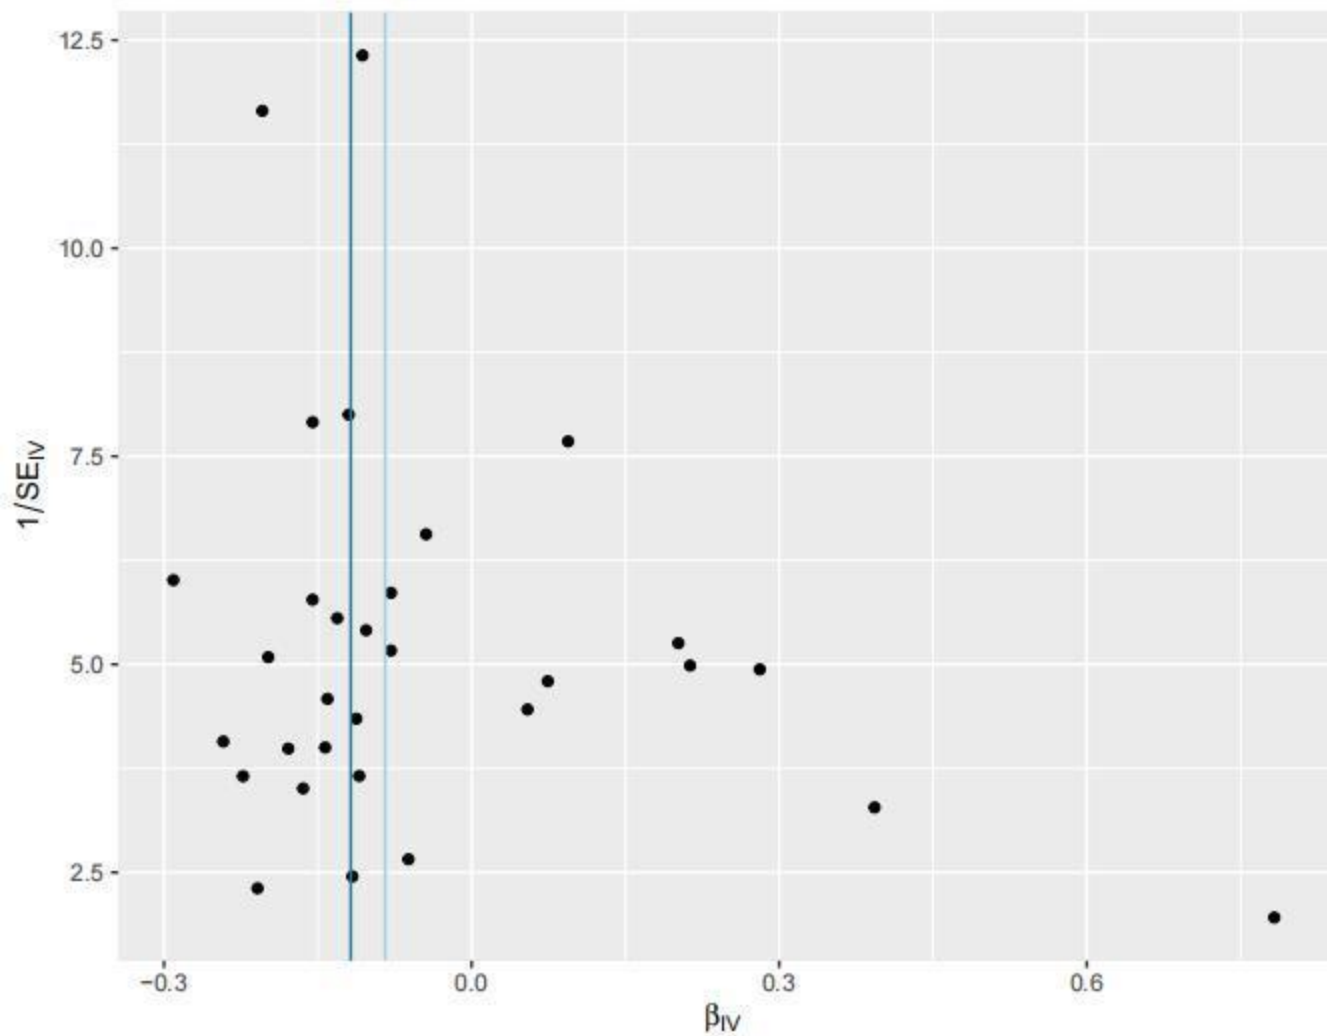

Funnel plot analysis of "DN (CD4-CD8-) NKT %T cell" on 'Aplastic anemia'

MR Method

- Inverse variance weighted
- MR Egger

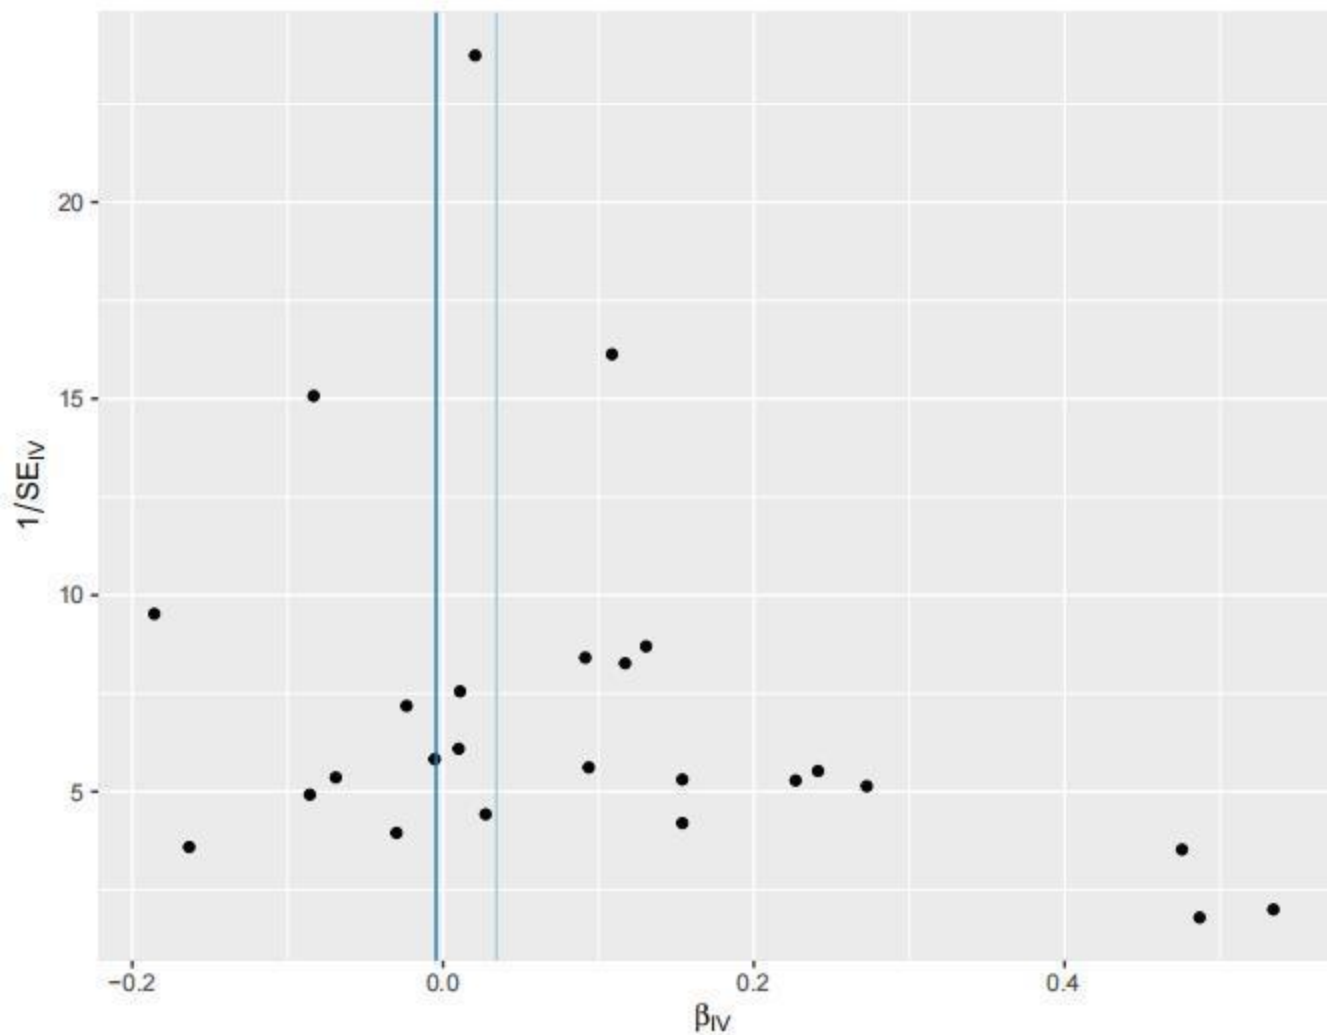

Funnel plot analysis of "Plasmacytoid DC %DC" on 'Aplastic anemia'

MR Method

- Inverse variance weighted
- MR Egger

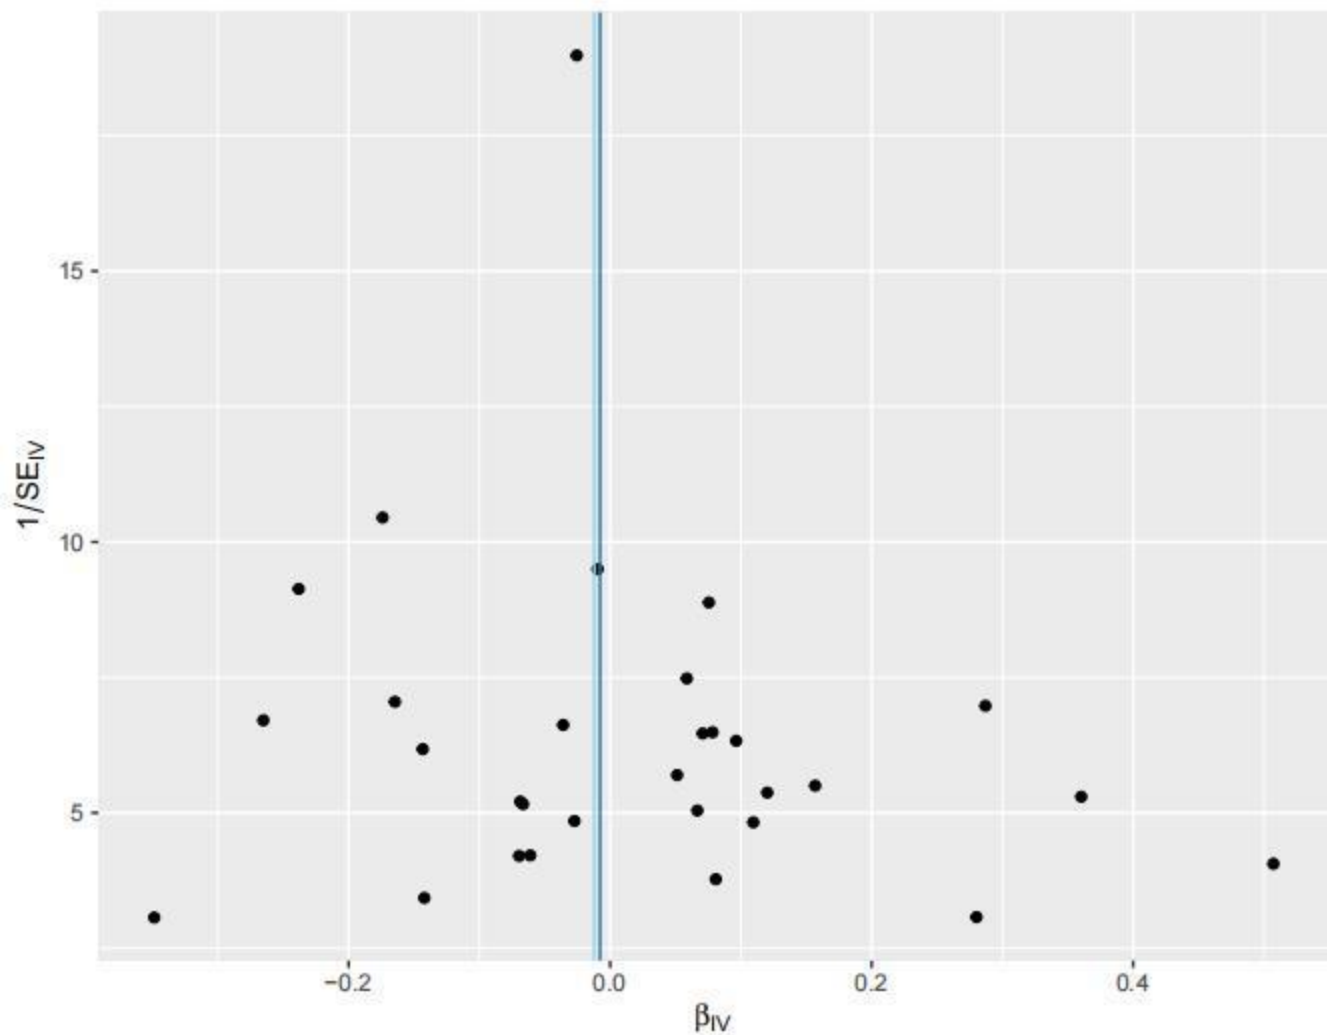

Funnel plot analyse of "CD27 on unsw mem" on 'Aplastic anemia'

MR Method

- Inverse variance weighted
- MR Egger

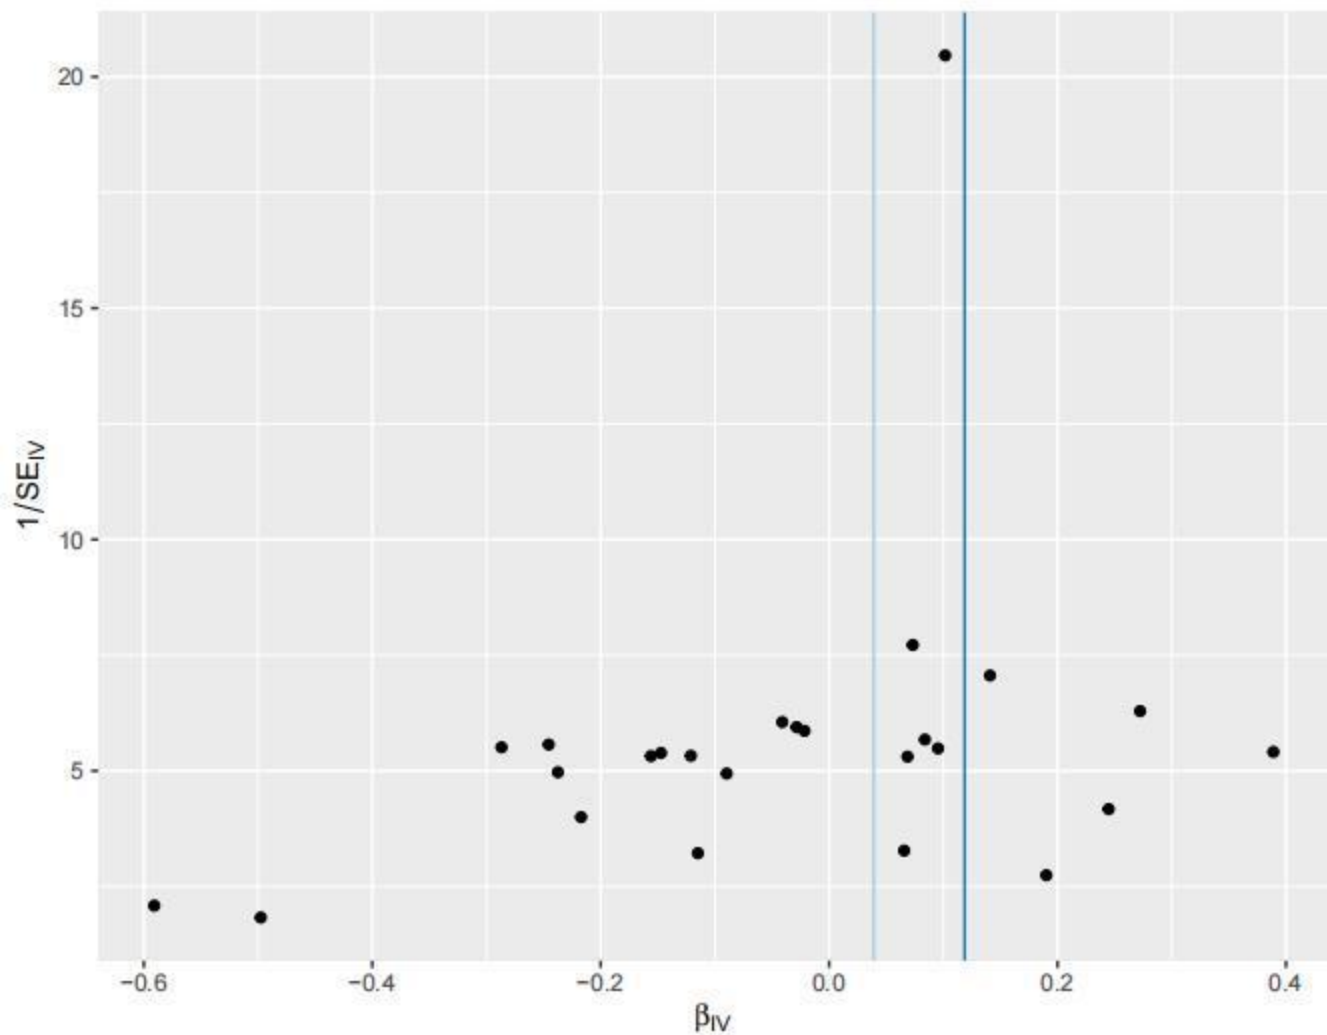

Funnel plot analyse of "CM CD4+ %T cell" on 'Aplastic anemia'

### MR Method

- Inverse variance weighted
- MR Egger

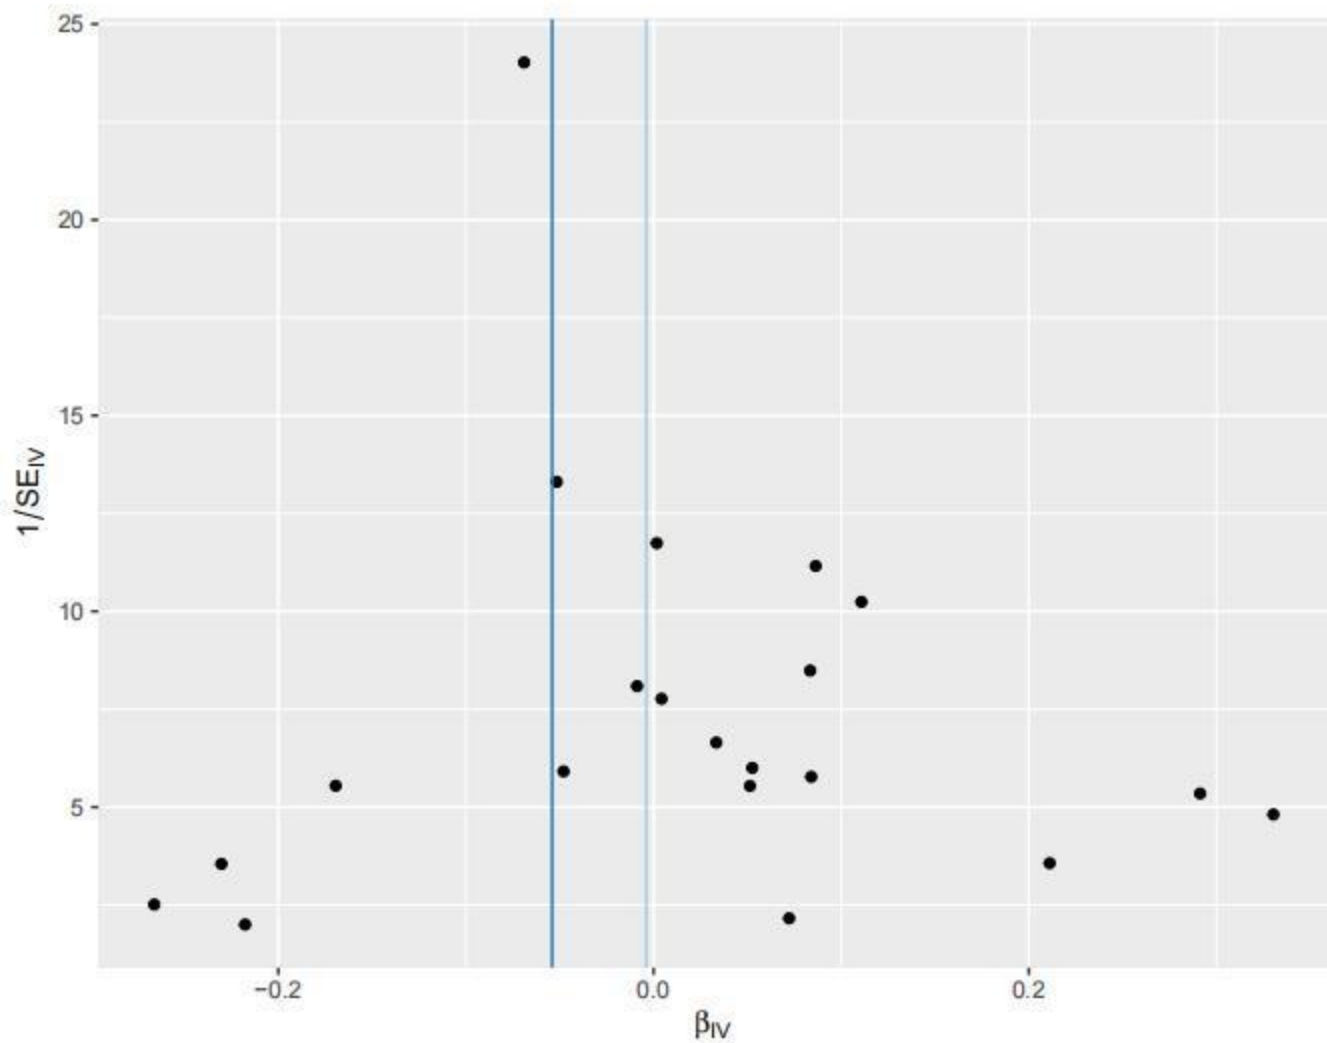

Funnel plot analyse of "CD127 on CD28+ CD4+" on 'Aplastic anemia'



### MR Method

Inverse variance weighted

MR Egger

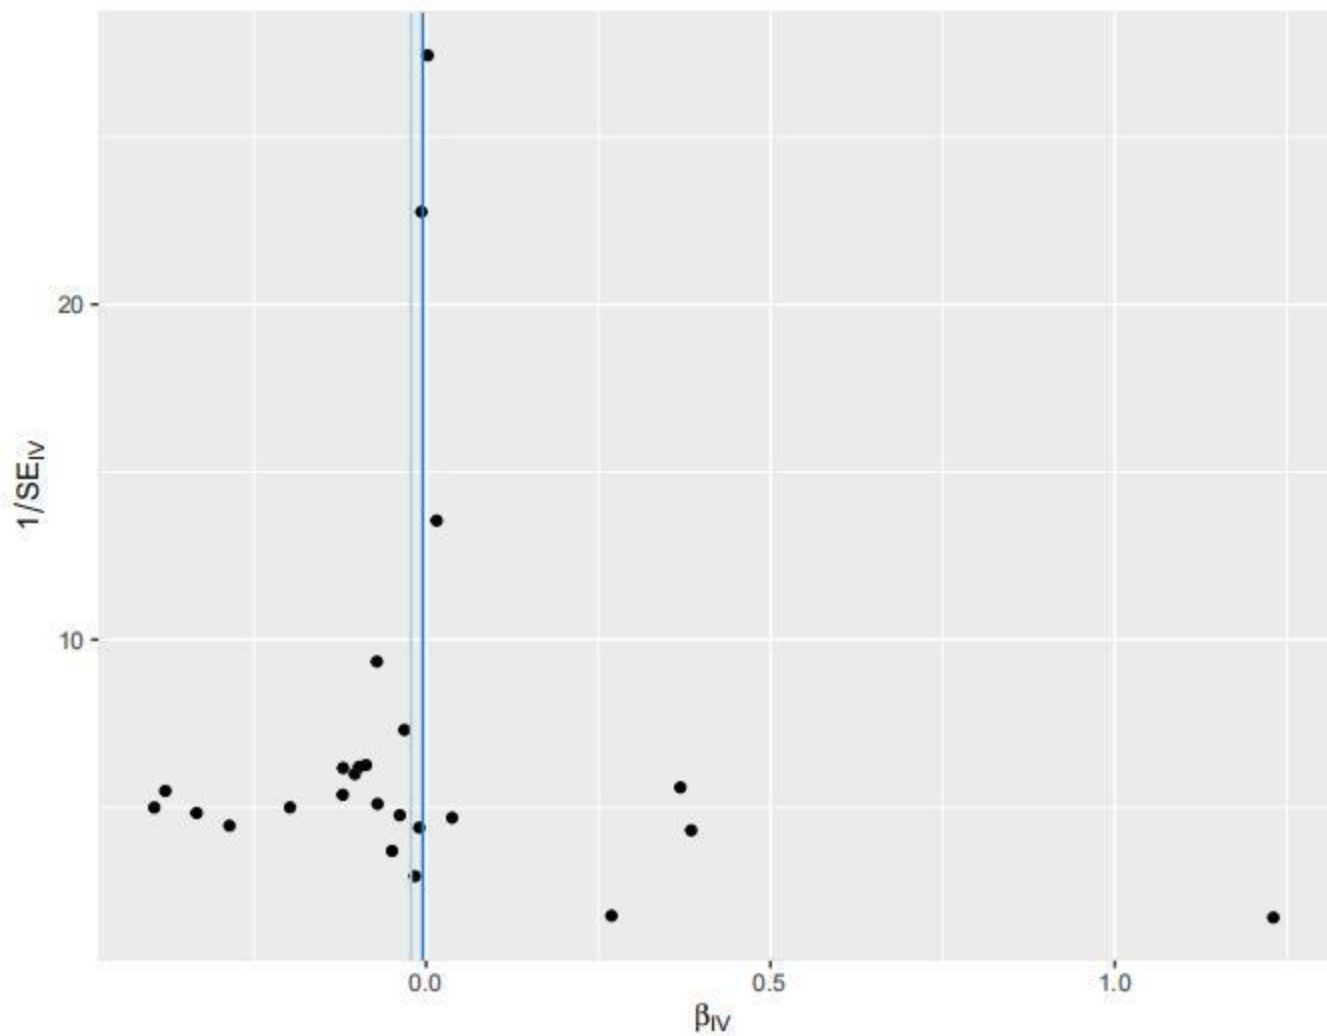

Funnel plot analysis of "IgD- CD38dim %lymphocyte" on 'Aplastic anemia'

MR Method

Inverse variance weighted

MR Egger

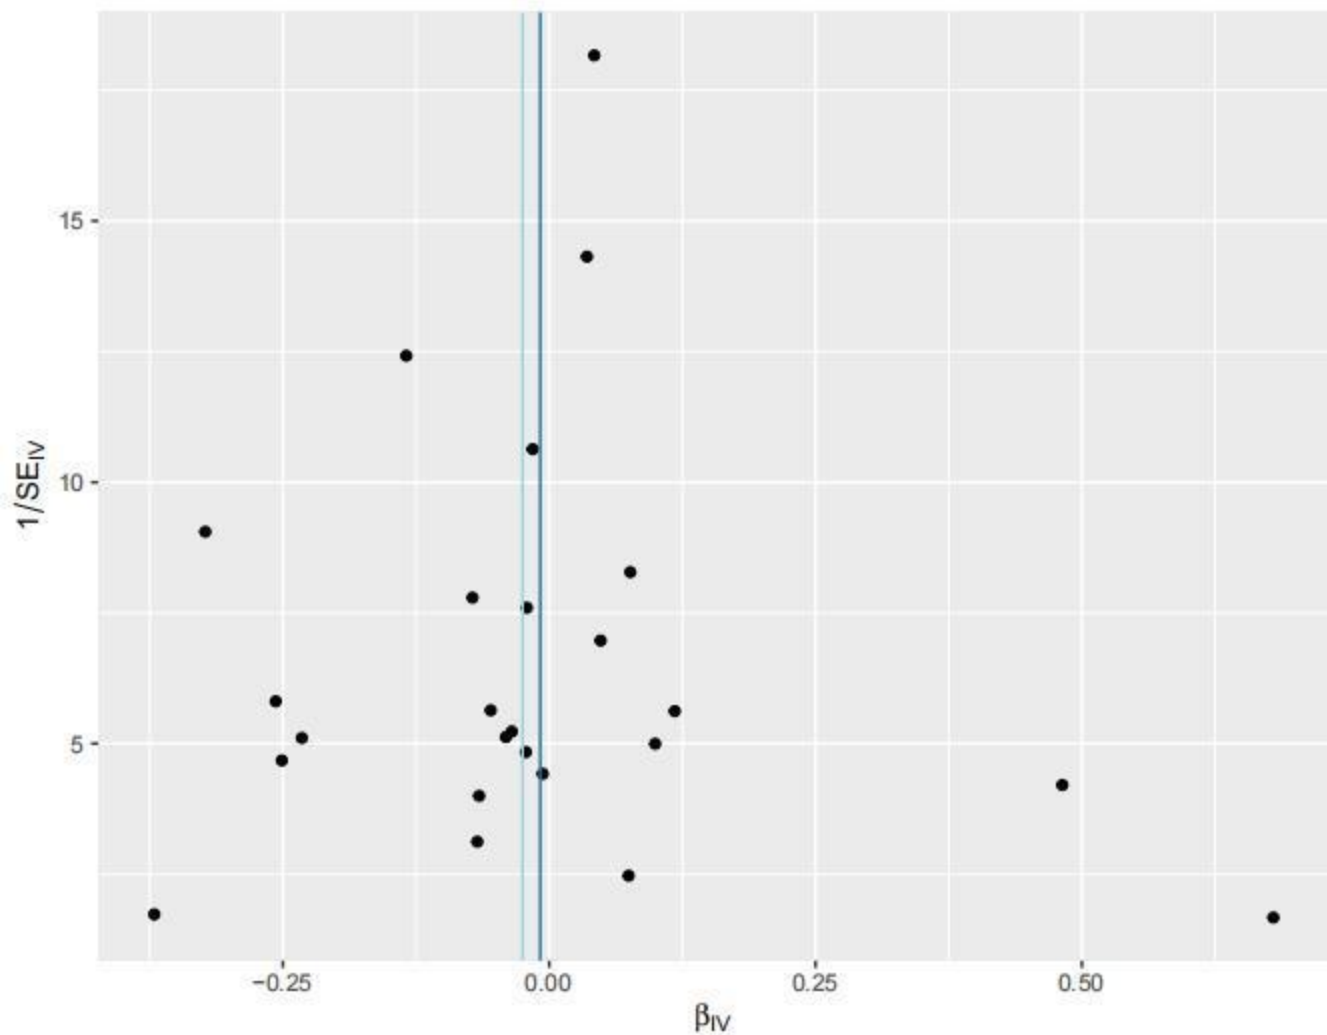

Funnel plot analyse of "CD4 on CD39+ activated Treg " on 'Aplastic anemia'

### MR Method

- Inverse variance weighted
- MR Egger

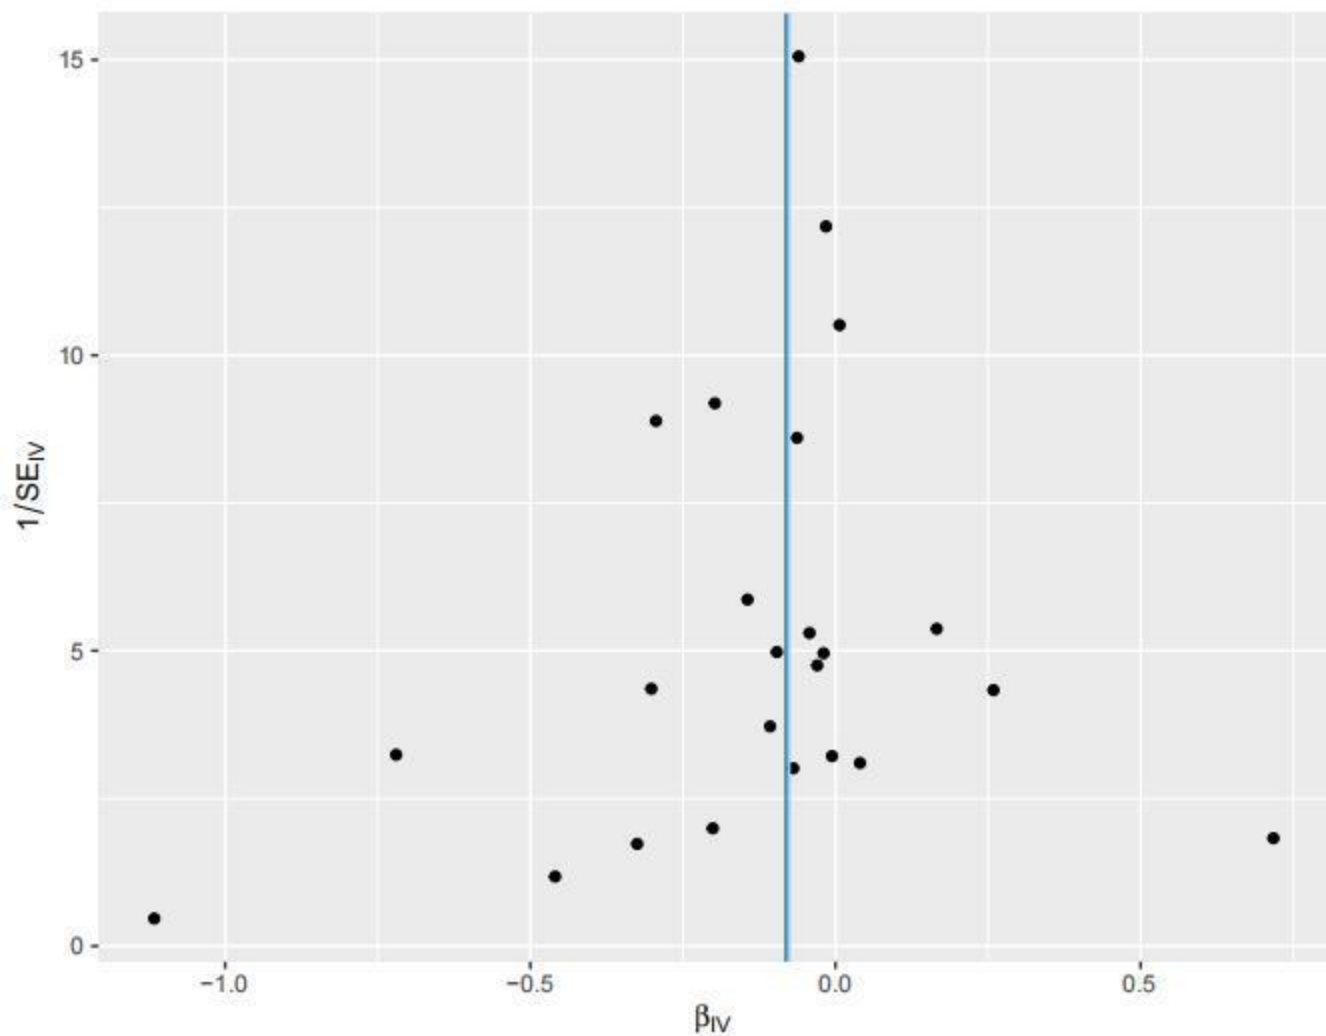

Funnel plot analyse of "CD20 on IgD+ CD24+" on 'Aplastic anemia'

### MR Method

Inverse variance weighted

MR Egger

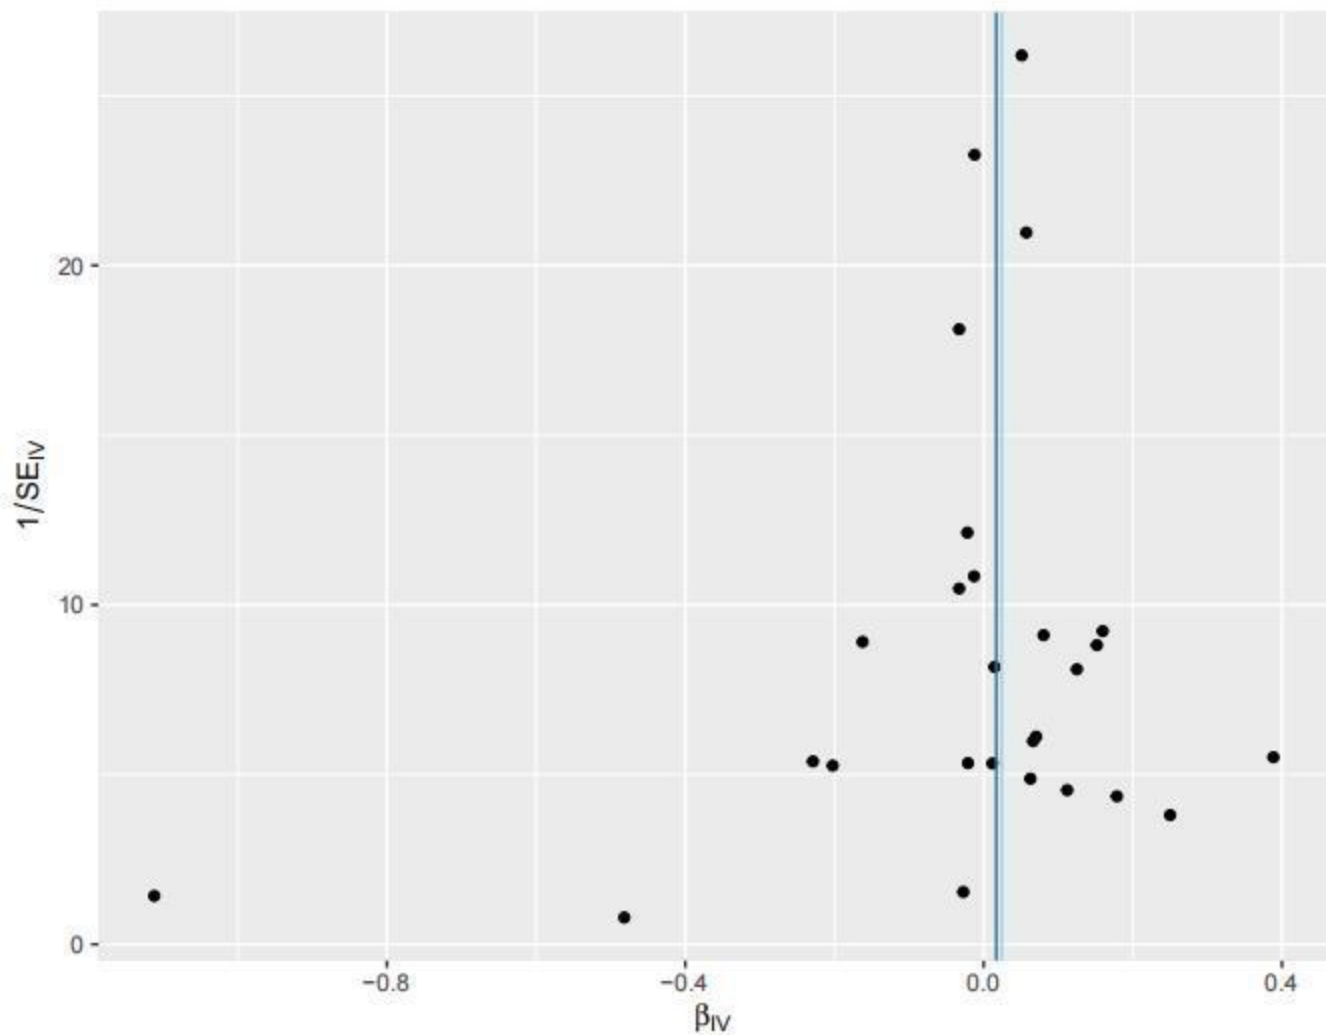

Funnel plot analysis of "CD80 on CD62L+ myeloid DC" on 'Aplastic anemia'

MR Method

- Inverse variance weighted
- MR Egger

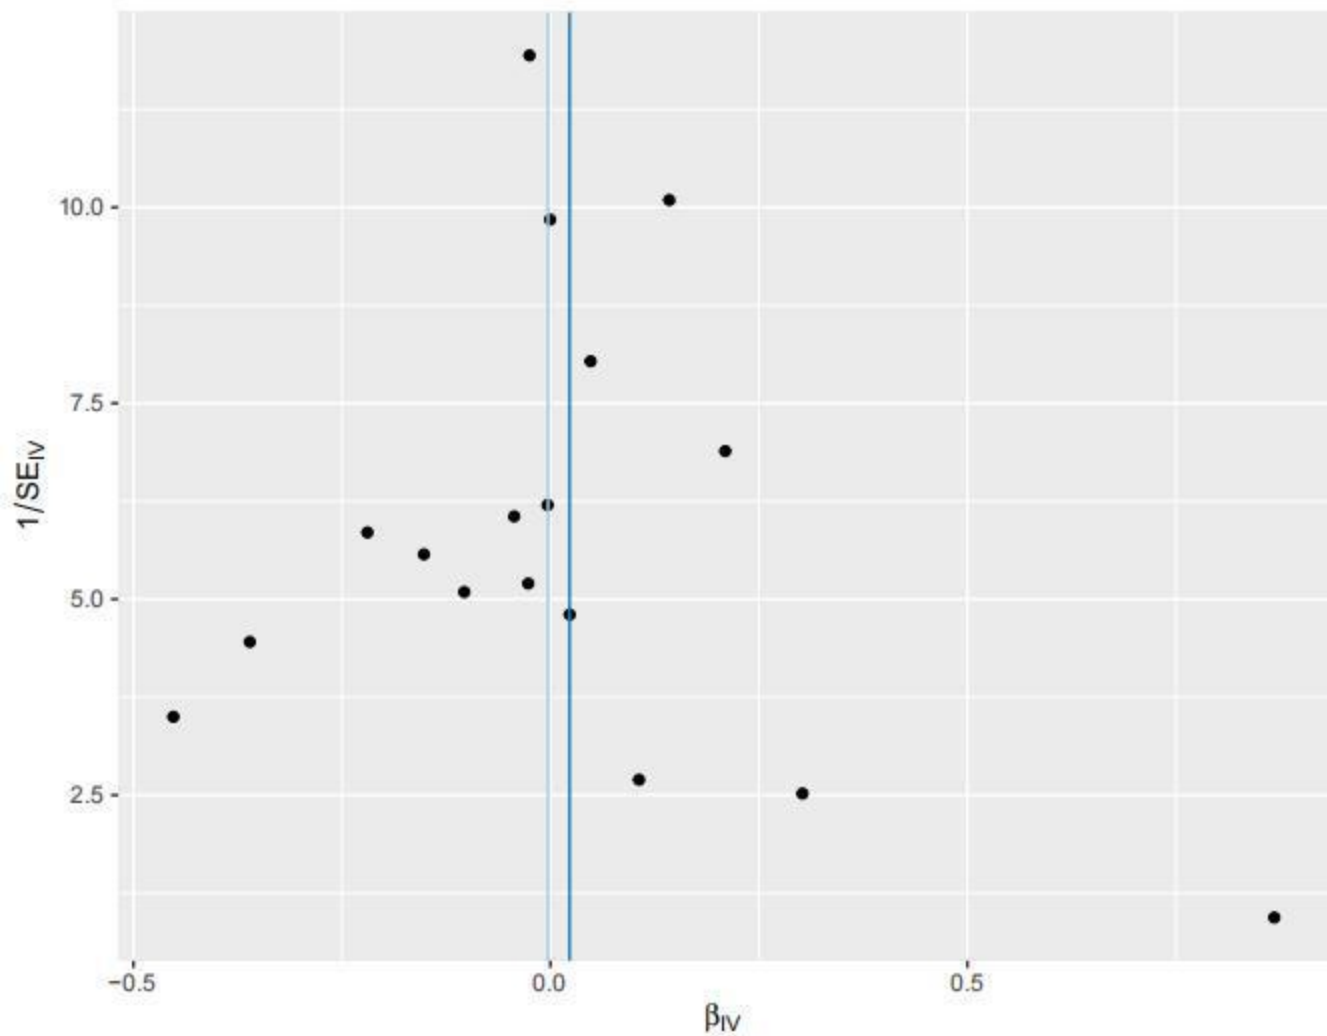

Funnel plot analyse of "CD64 on CD14- CD16- " on 'Aplastic anemia'

### MR Method

Inverse variance weighted

MR Egger

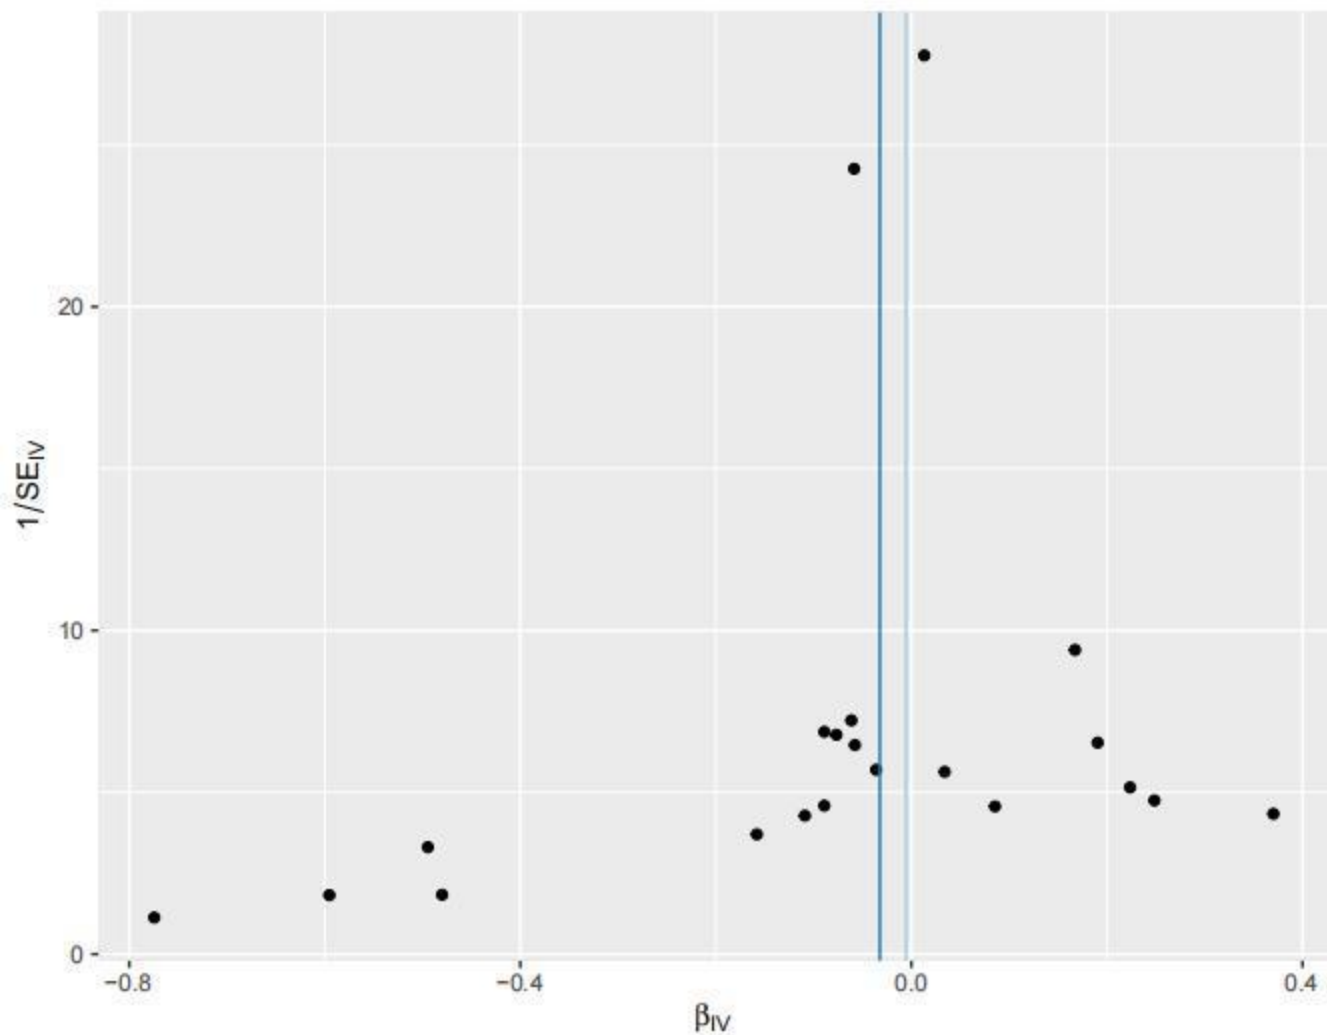

Funnel plot analysis of "CD62L- monocyte AC" on 'Aplastic anemia'

MR Method

- Inverse variance weighted
- MR Egger

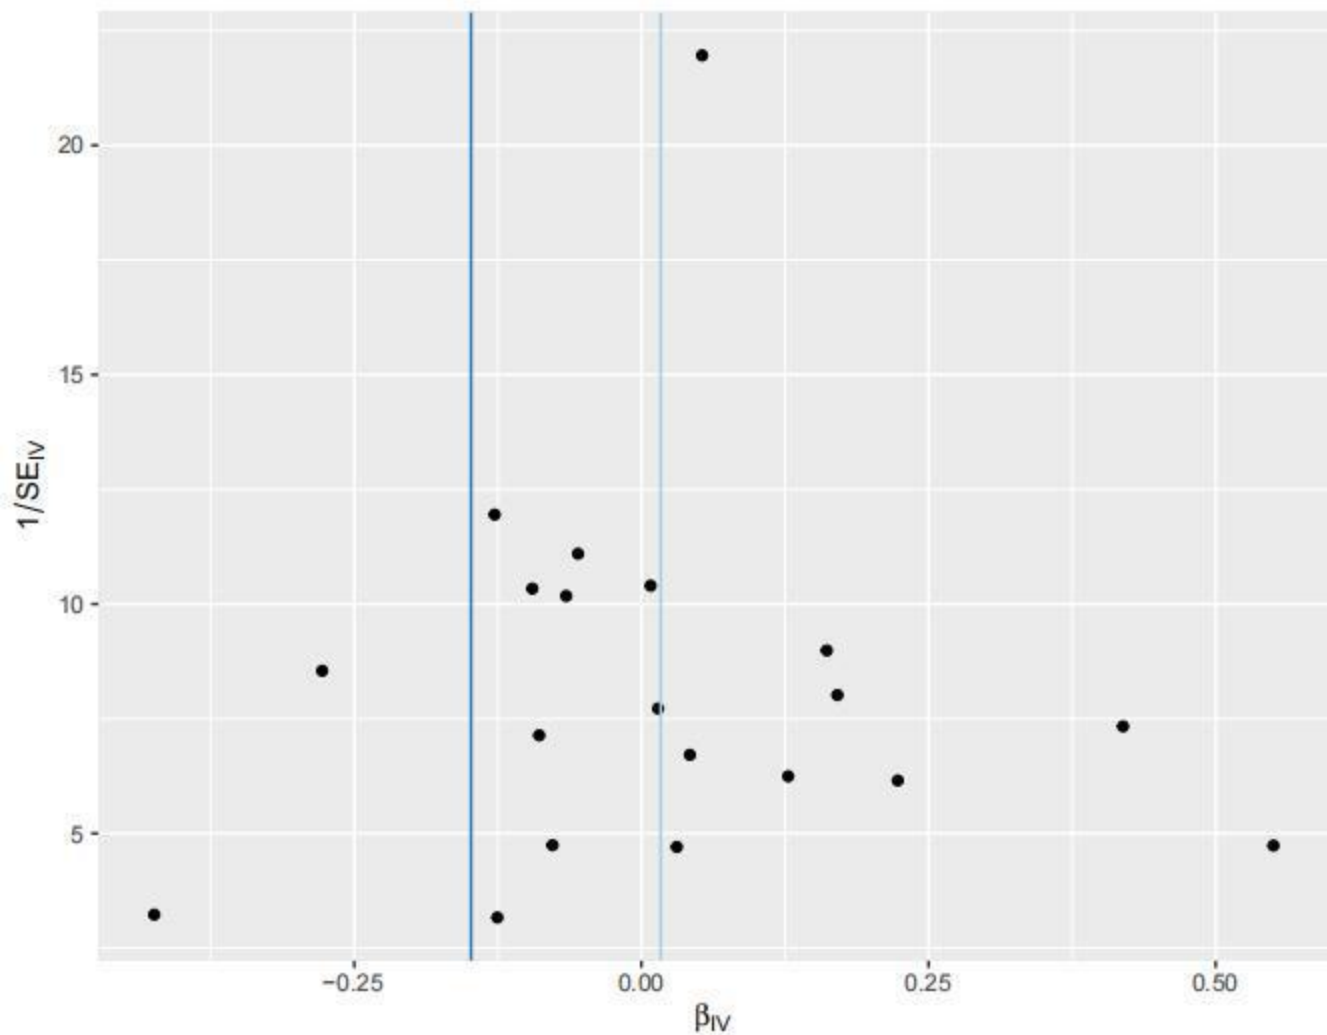

Funnel plot analyse of "CD11b on CD33br HLA DR+ CD14dim " on 'Aplastic anemia'

MR Method

- Inverse variance weighted
- MR Egger

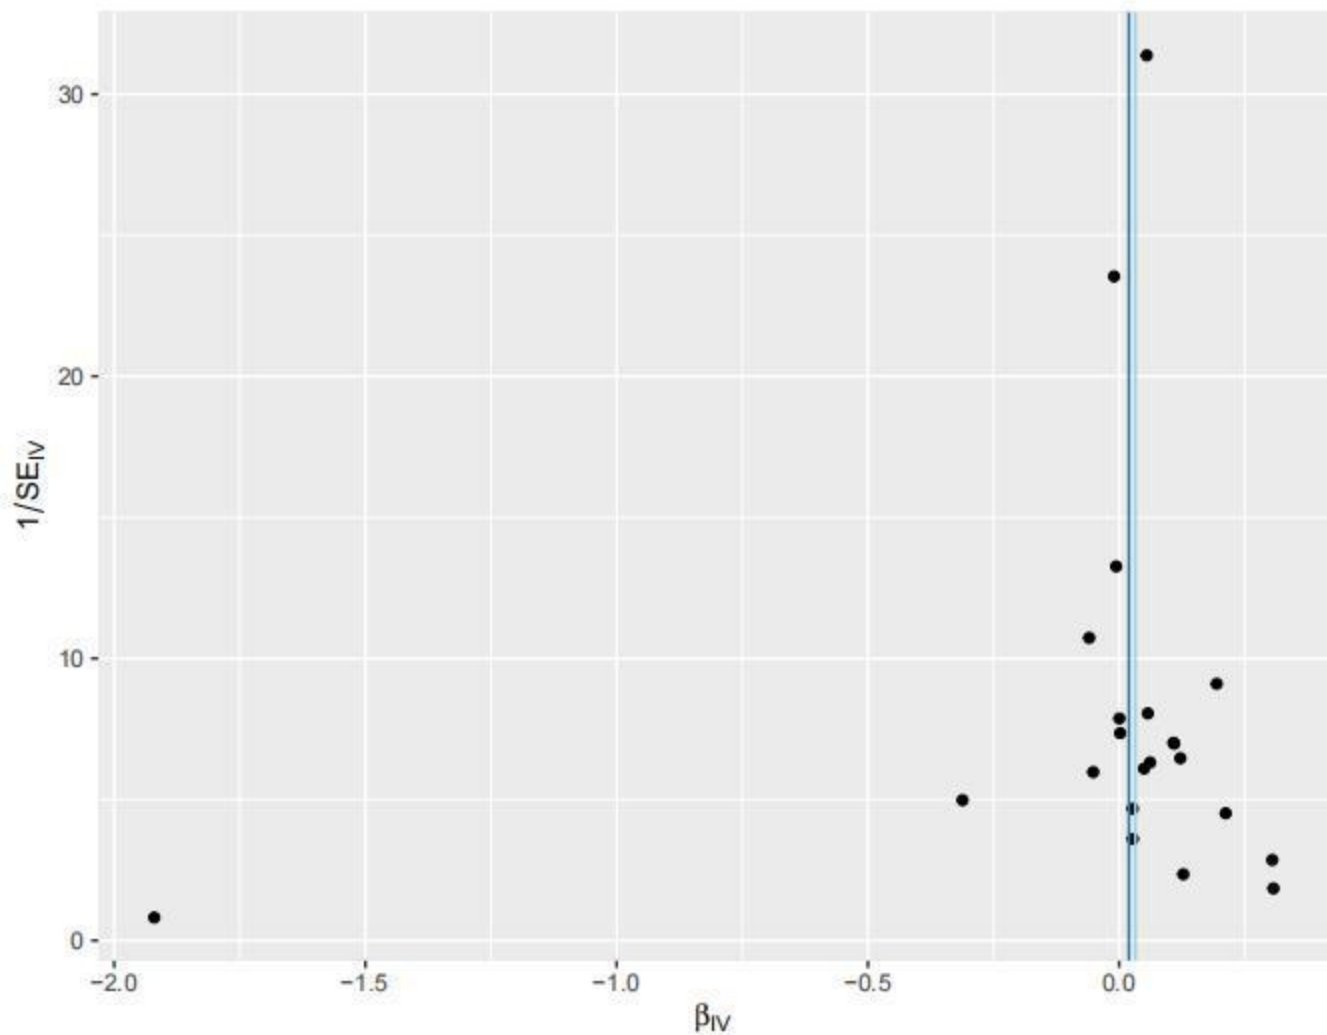

Funnel plot analysis of "IgD on IgD+ CD38dim" on 'Aplastic anemia'



MR Method

- Inverse variance weighted
- MR Egger

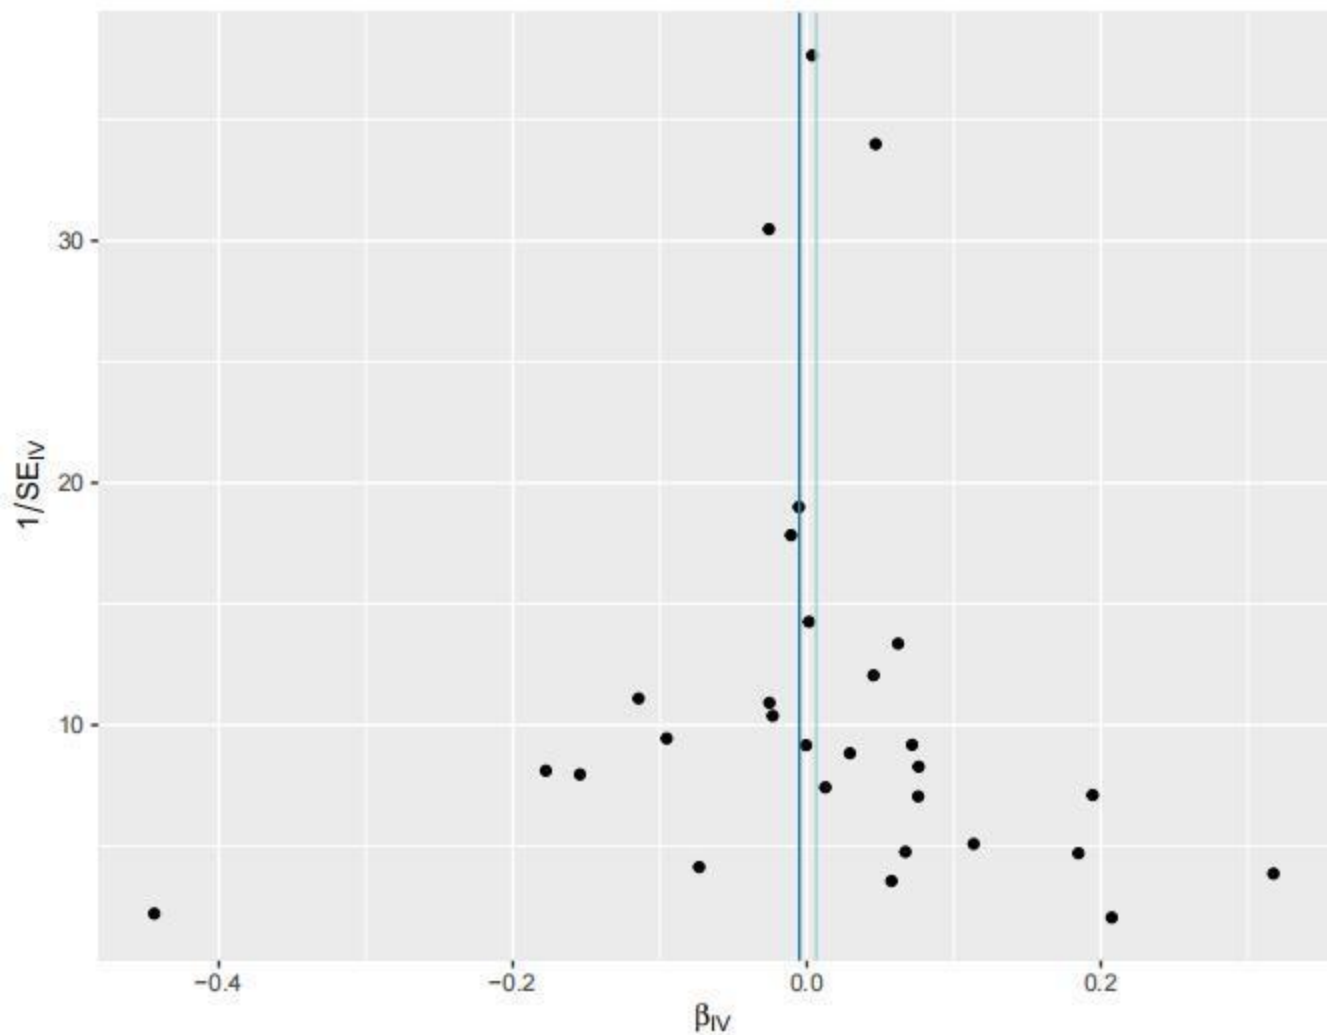

Funnel plot analyse of "CD45RA on resting Treg " on 'Aplastic anemia'

MR Method

- Inverse variance weighted
- MR Egger

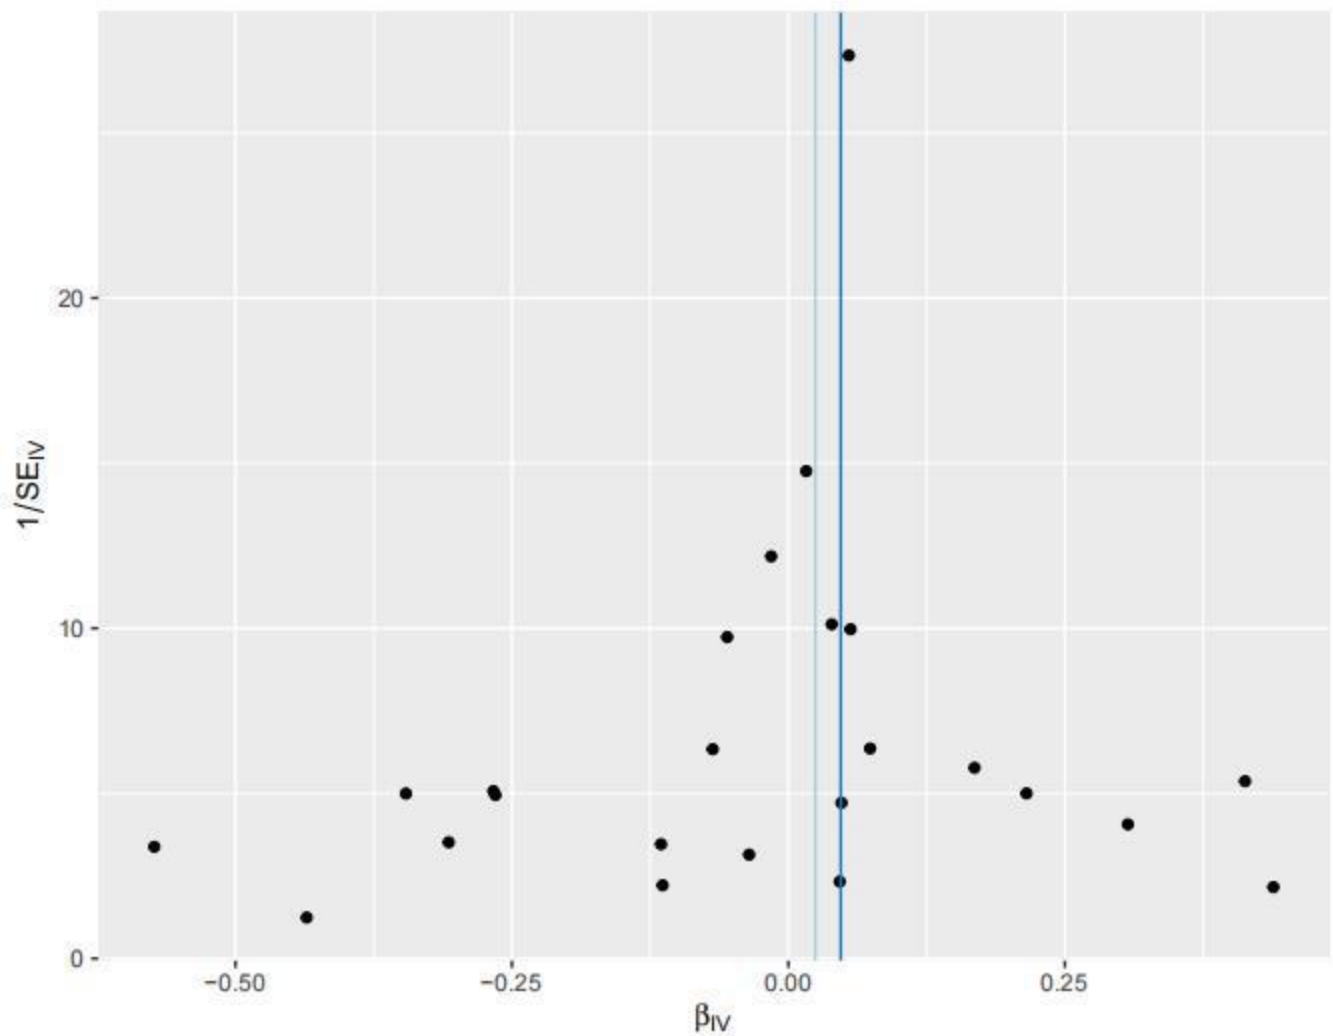

Funnel plot analyse of "CD20 on unsw mem" on 'Aplastic anemia'

### MR Method

- Inverse variance weighted
- MR Egger

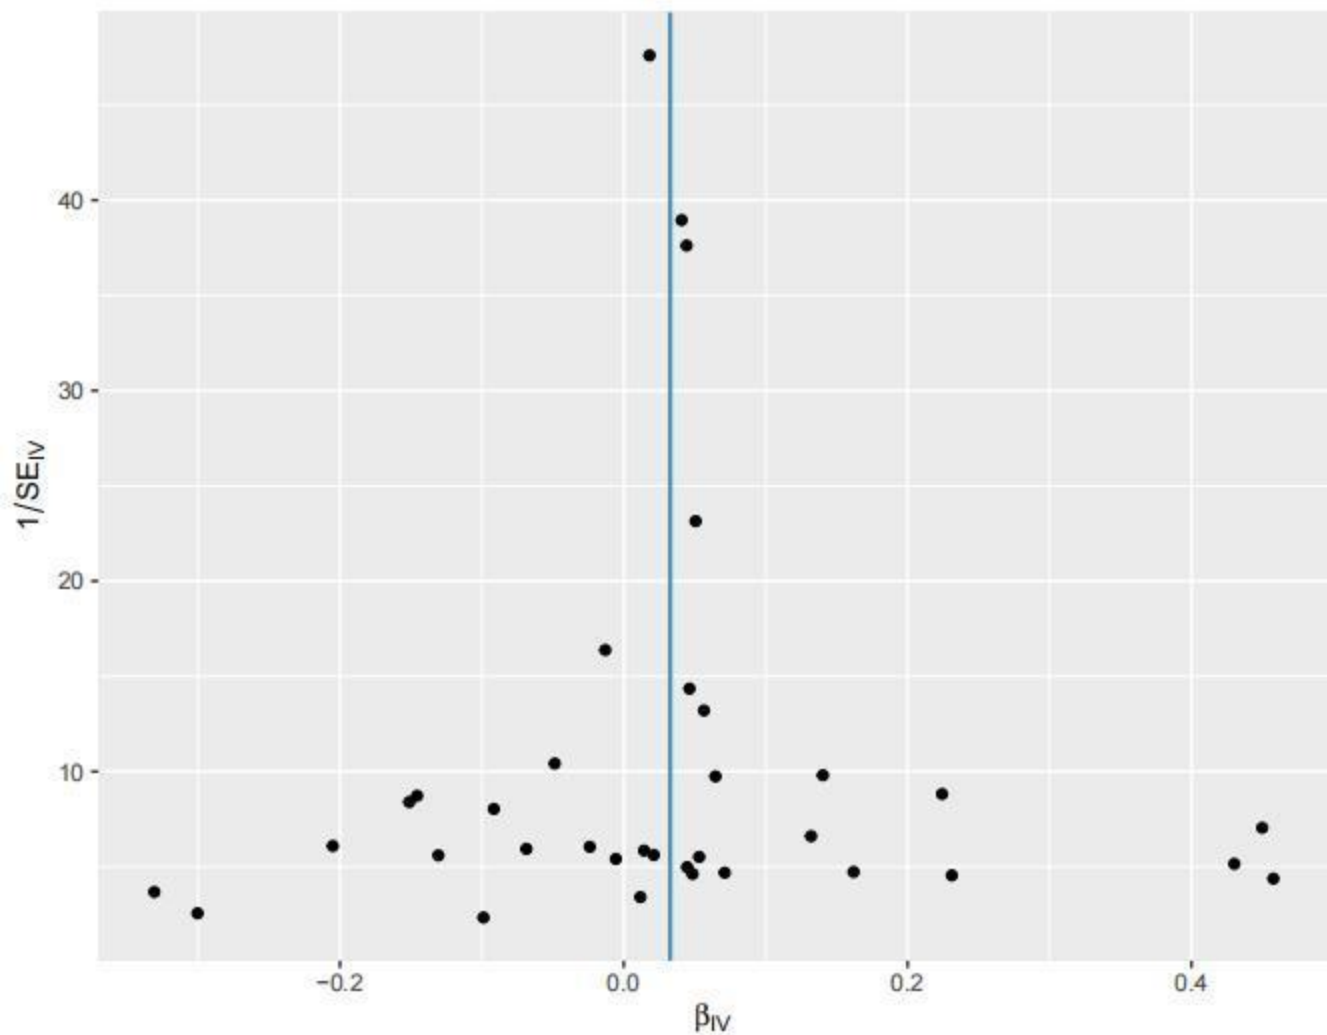

Funnel plot analyse of "CD39+ resting Treg % CD4 Treg" on 'Aplastic anemia'

### MR Method

- Inverse variance weighted
- MR Egger

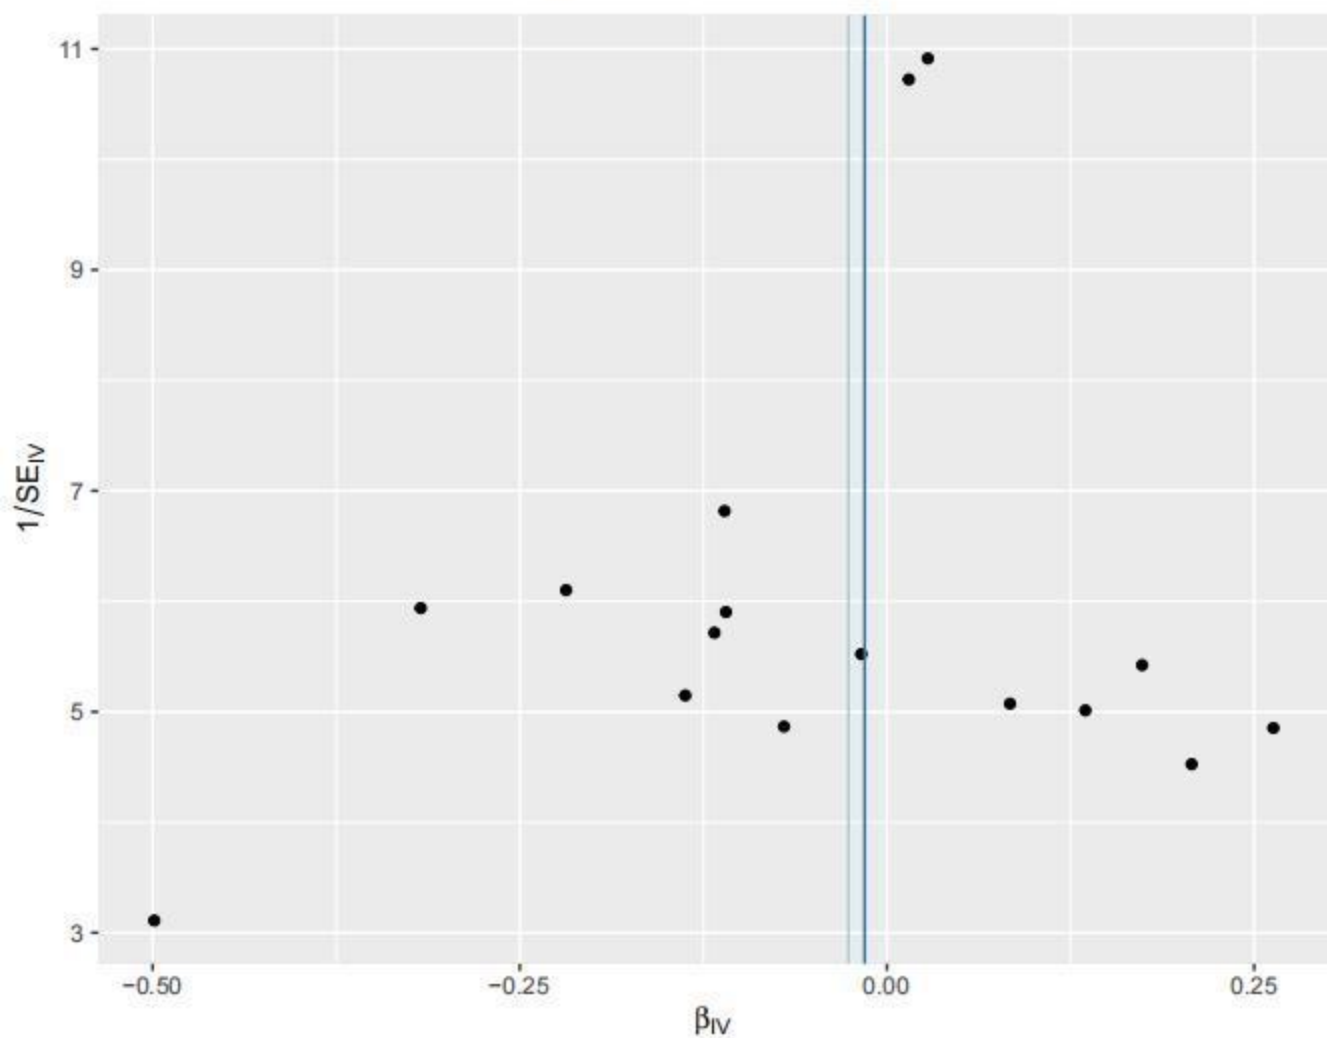

Funnel plot analyse of "CD3 on NKT " on 'Aplastic anemia'

MR Method

- Inverse variance weighted
- MR Egger

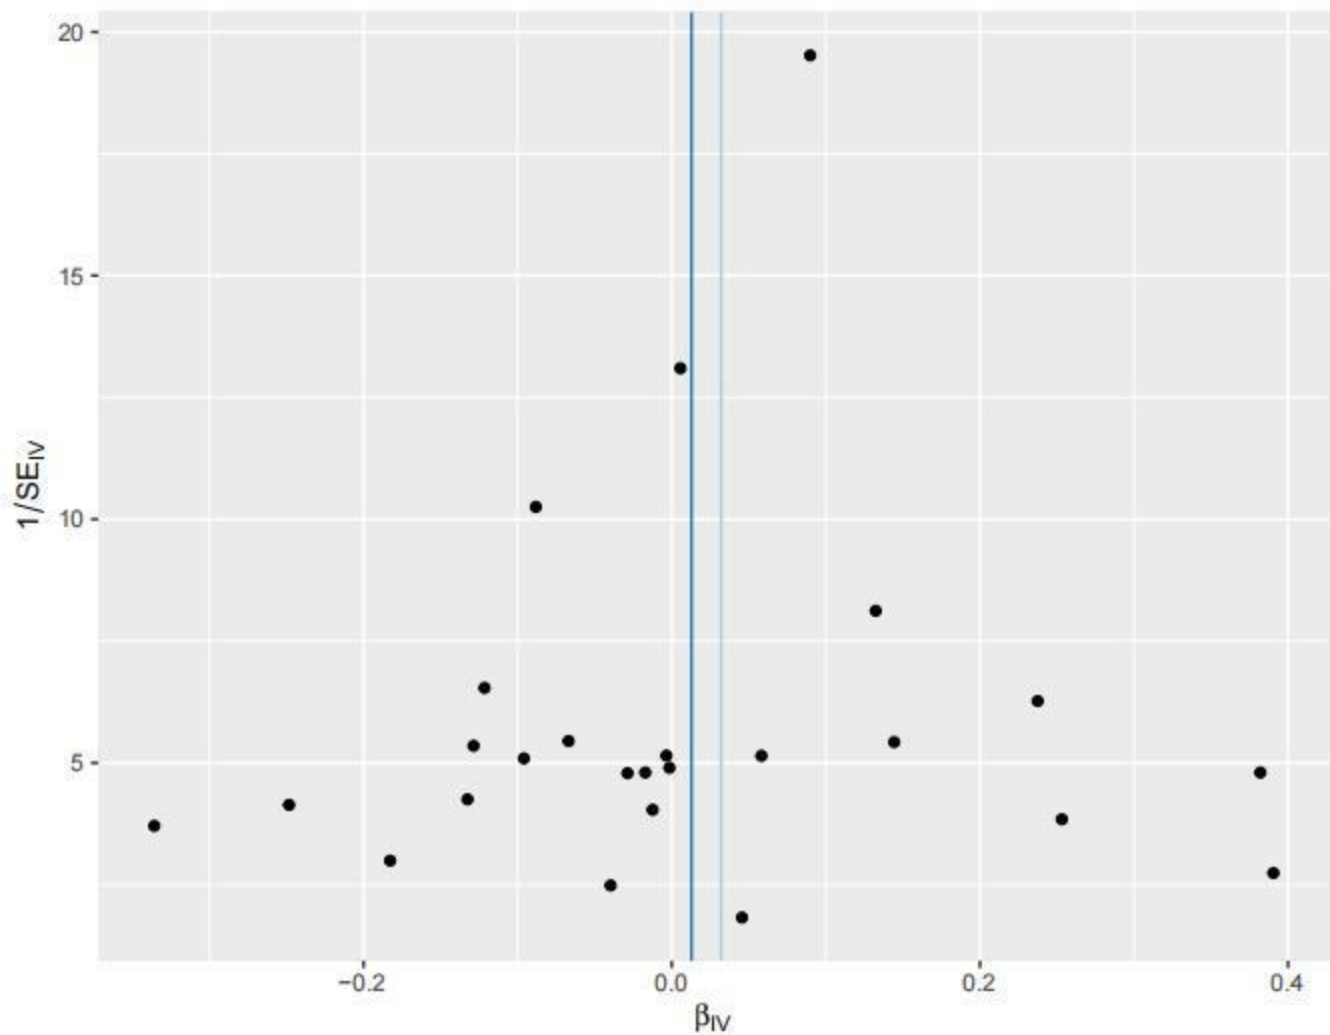

Funnel plot analysis of "HLA DR+ NK %CD3- lymphocyte" on 'Aplastic anemia'

MR Method

- Inverse variance weighted
- MR Egger

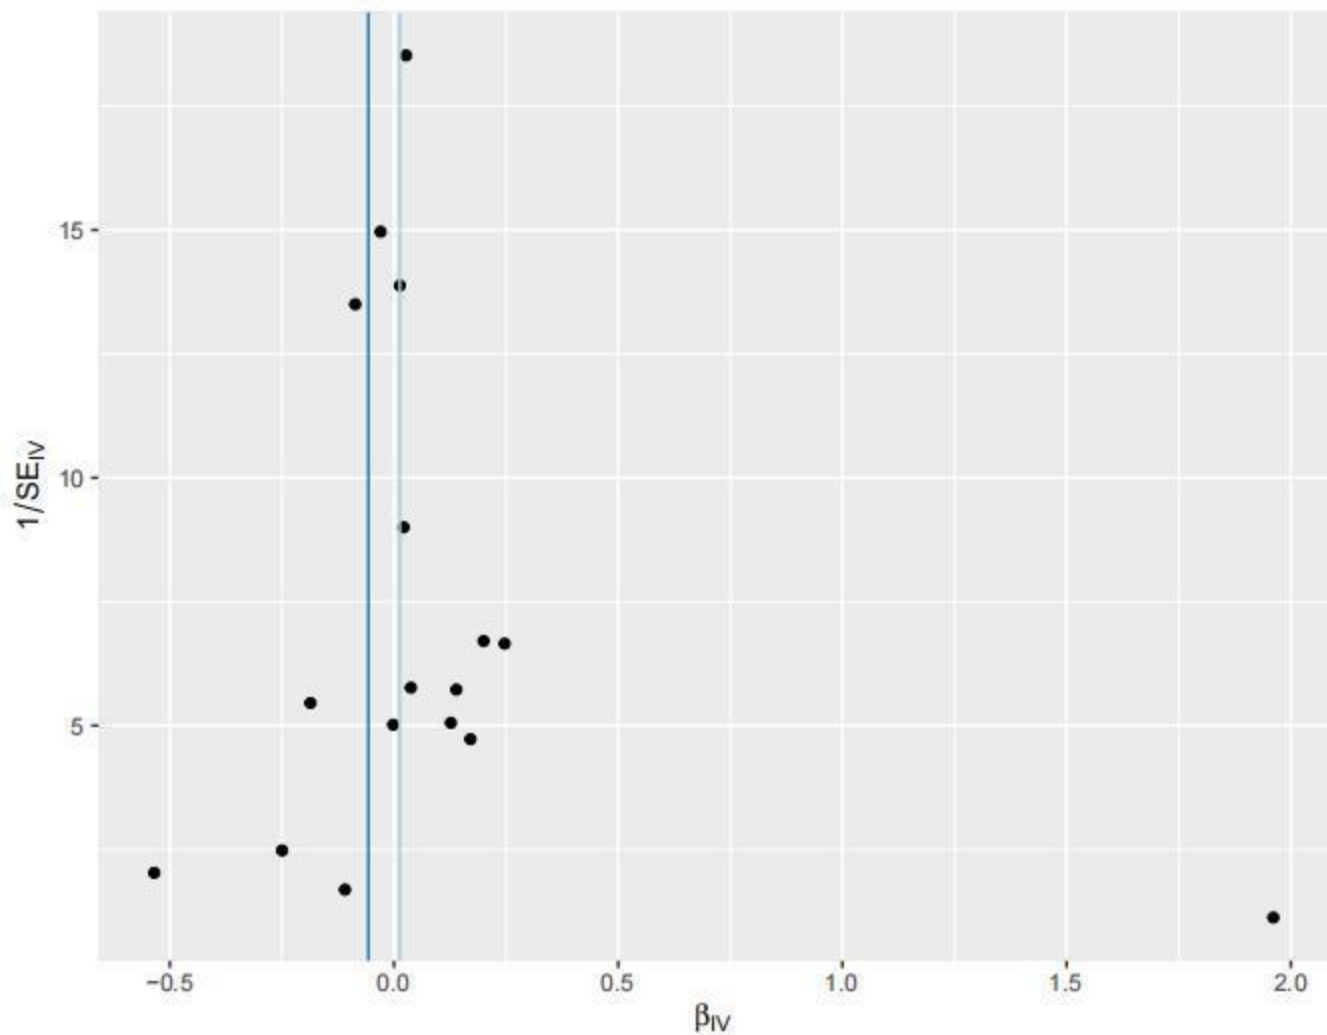

Funnel plot analyse of "HLA DR on CD14- CD16+ monocyte" on 'Aplastic anemia'

### MR Method

- Inverse variance weighted
- MR Egger

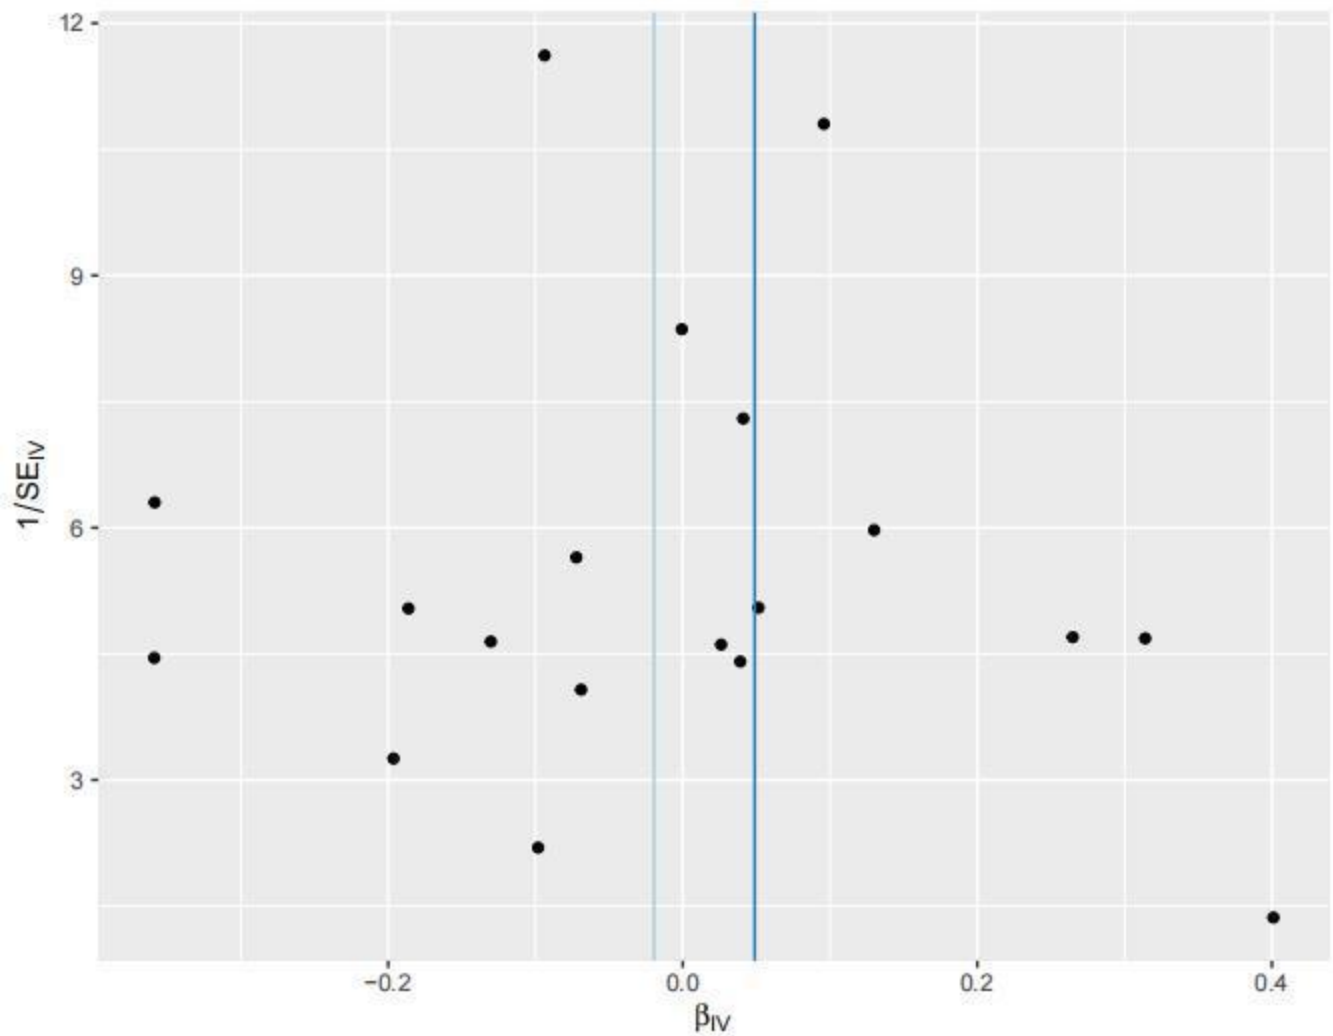

Funnel plot analyse of "DP (CD4+CD8+) AC" on 'Aplastic anemia'

MR Method

- Inverse variance weighted
- MR Egger

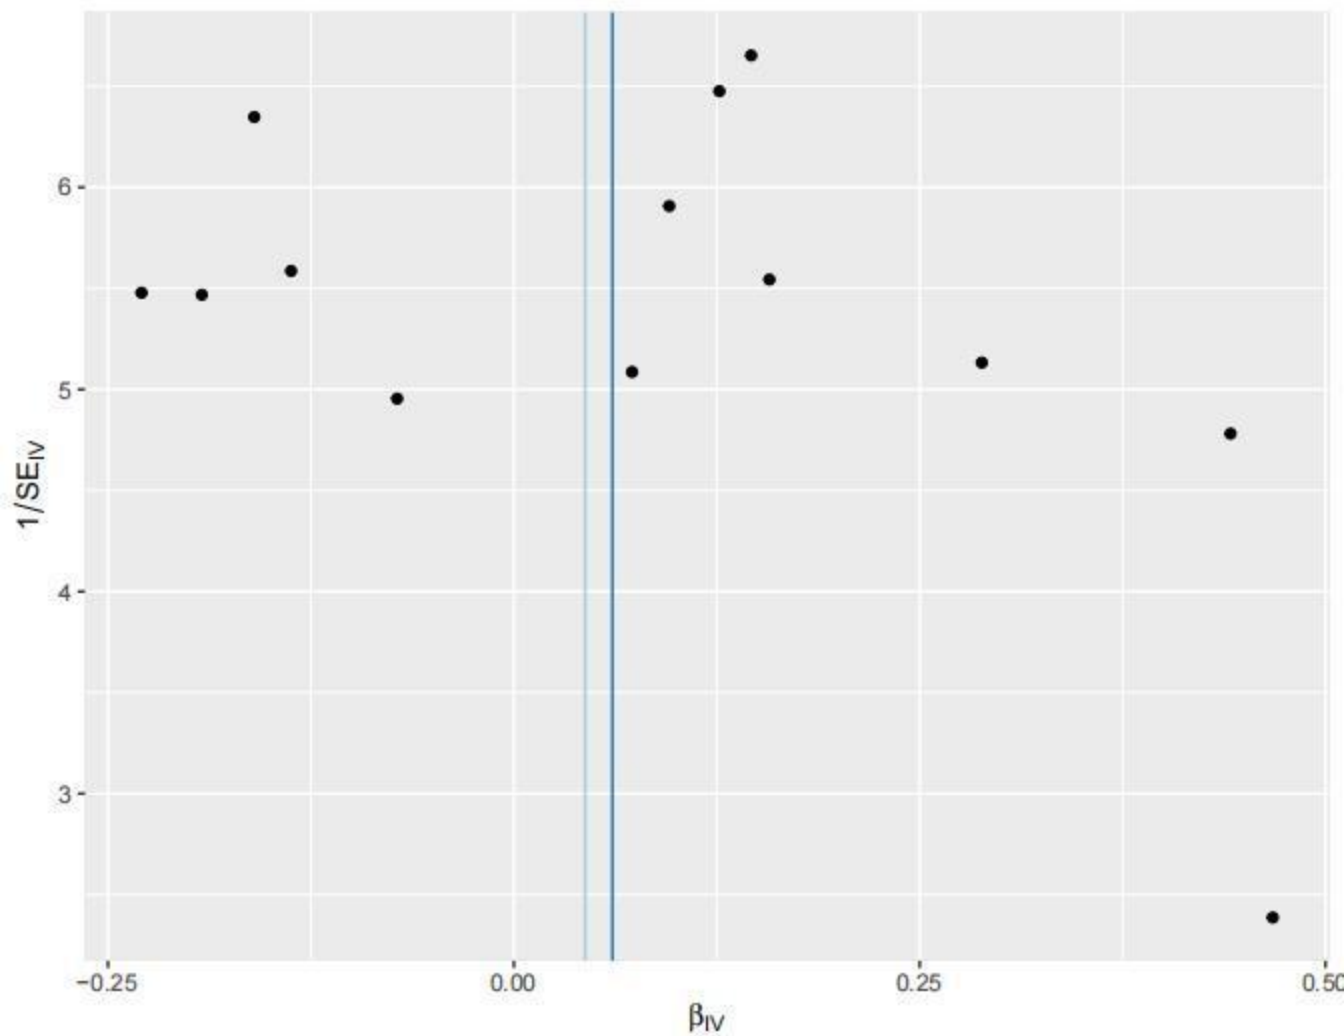

Funnel plot analyse of "CD45 on CD4+" on 'Aplastic anemia'



MR Method

- Inverse variance weighted
- MR Egger

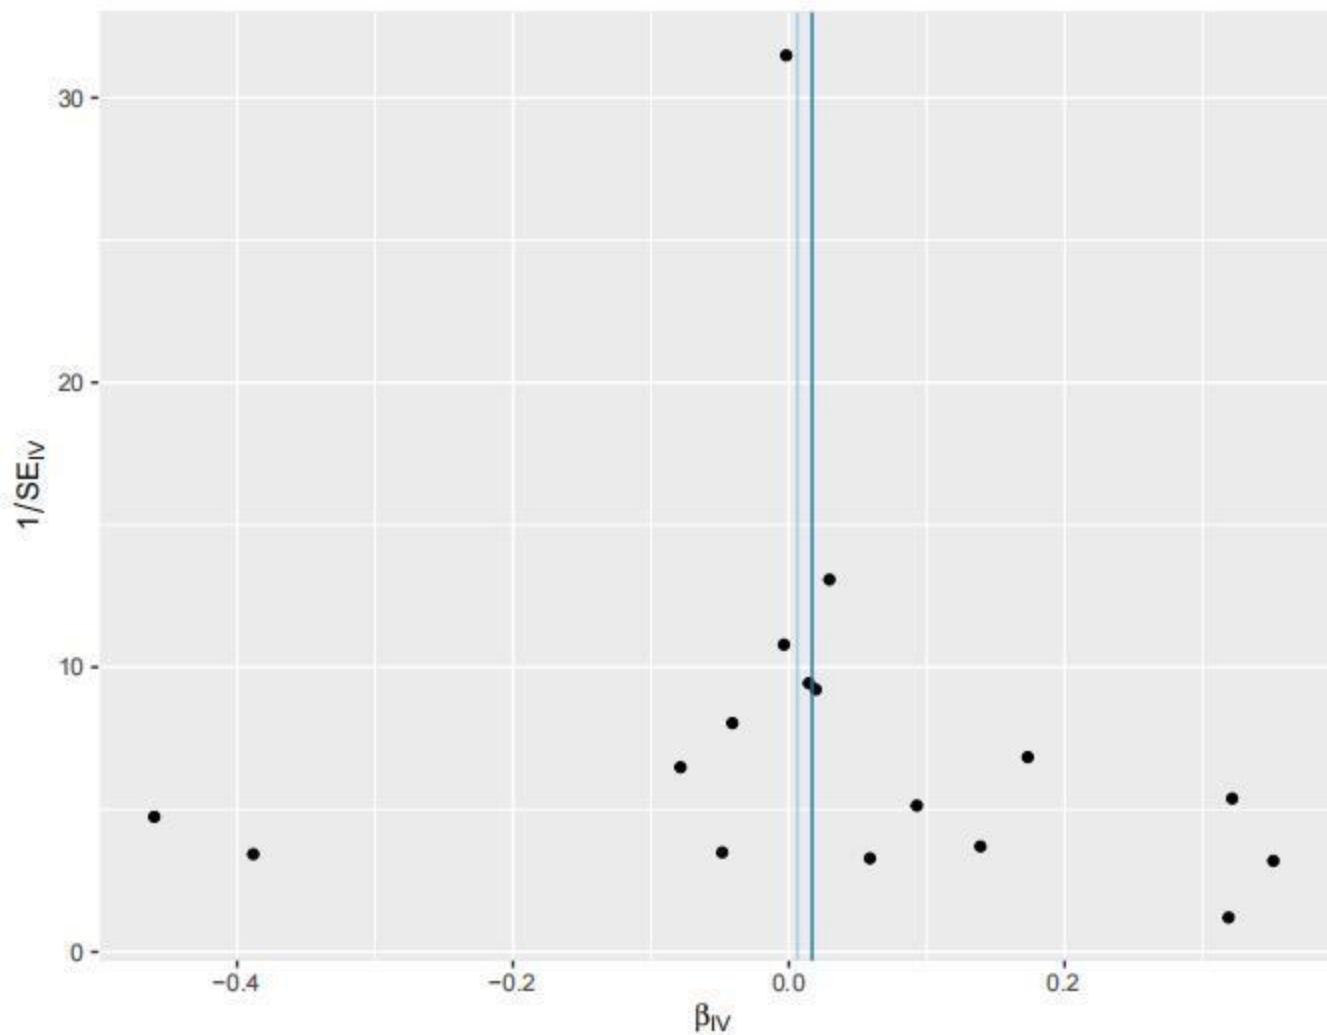

Funnel plot analyse of "BAFF-R on CD20- CD38-" on 'Aplastic anemia'

MR Method

- Inverse variance weighted
- MR Egger

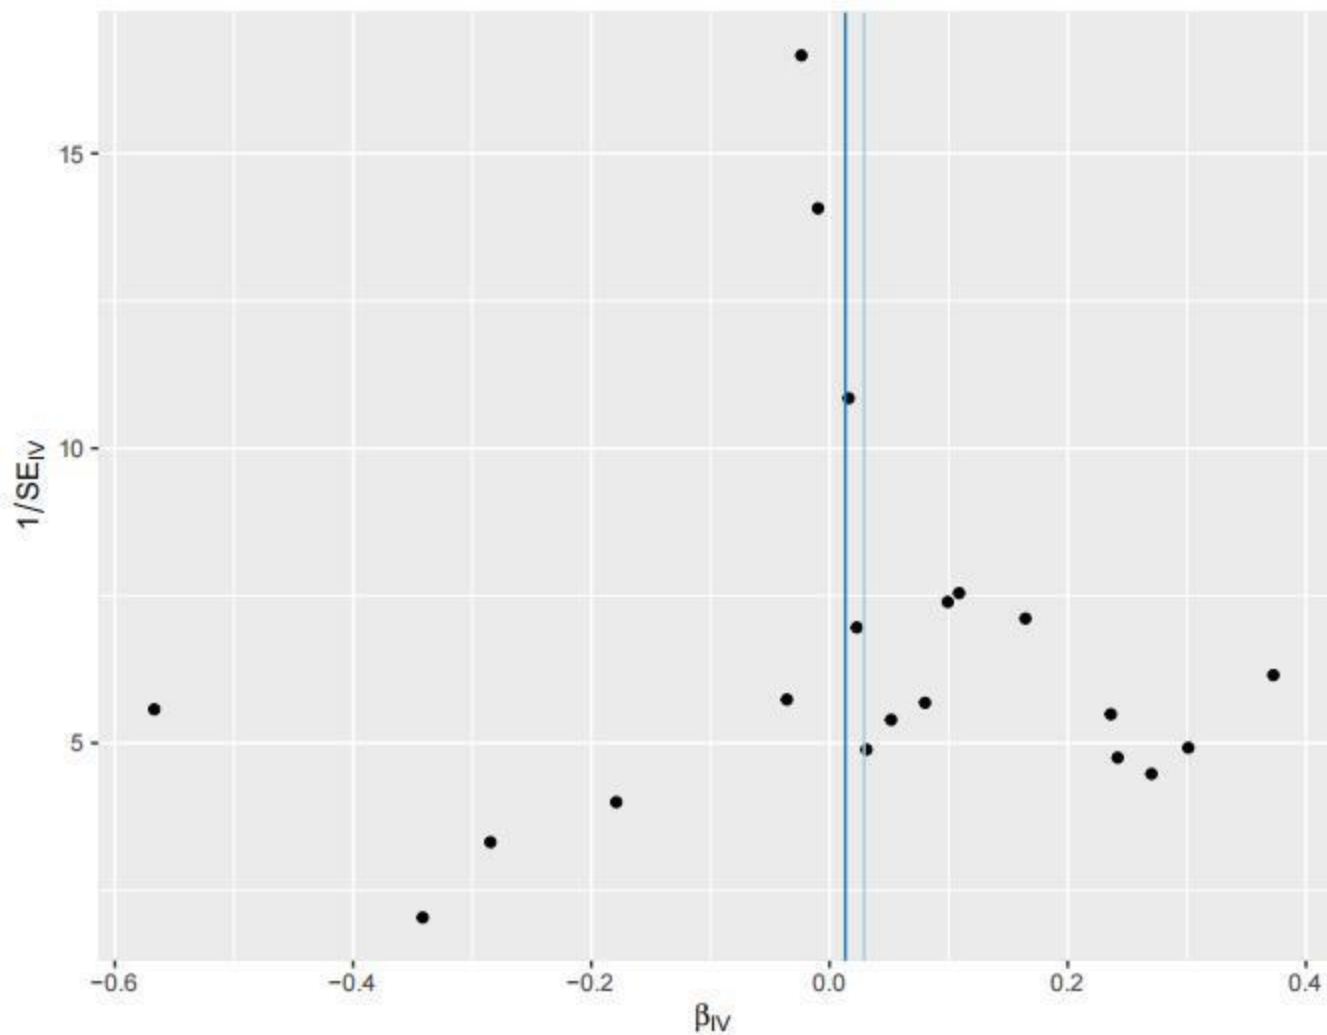

Funnel plot analyse of "CD3- lymphocyte %leukocyte" on 'Aplastic anemia'

### MR Method

- Inverse variance weighted
- MR Egger

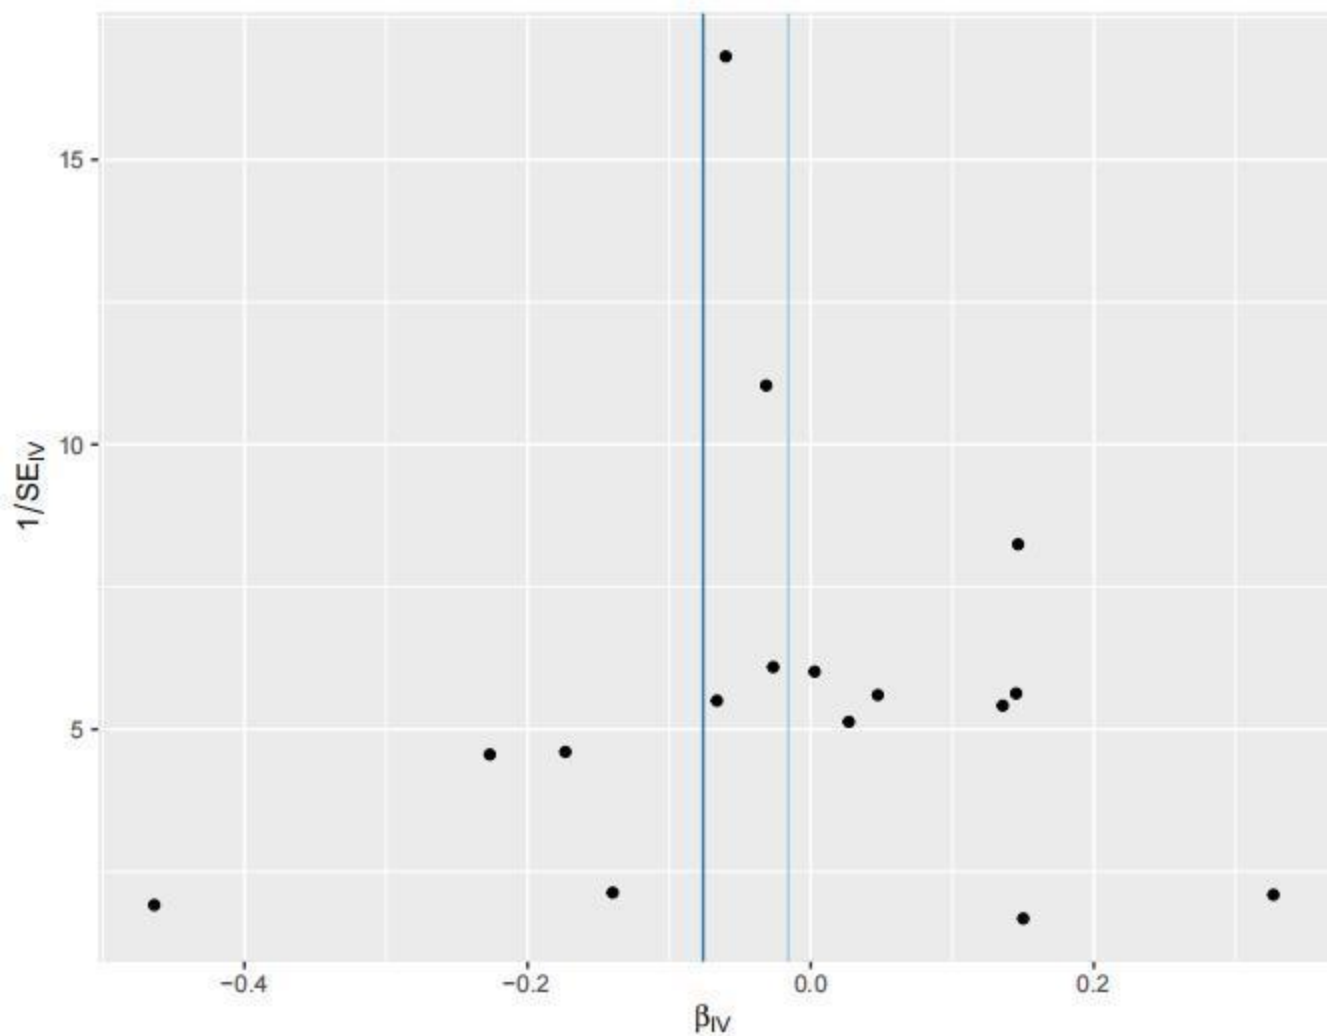

Funnel plot analyse of "CD127- CD8br AC" on 'Aplastic anemia'

MR Method

- Inverse variance weighted
- MR Egger

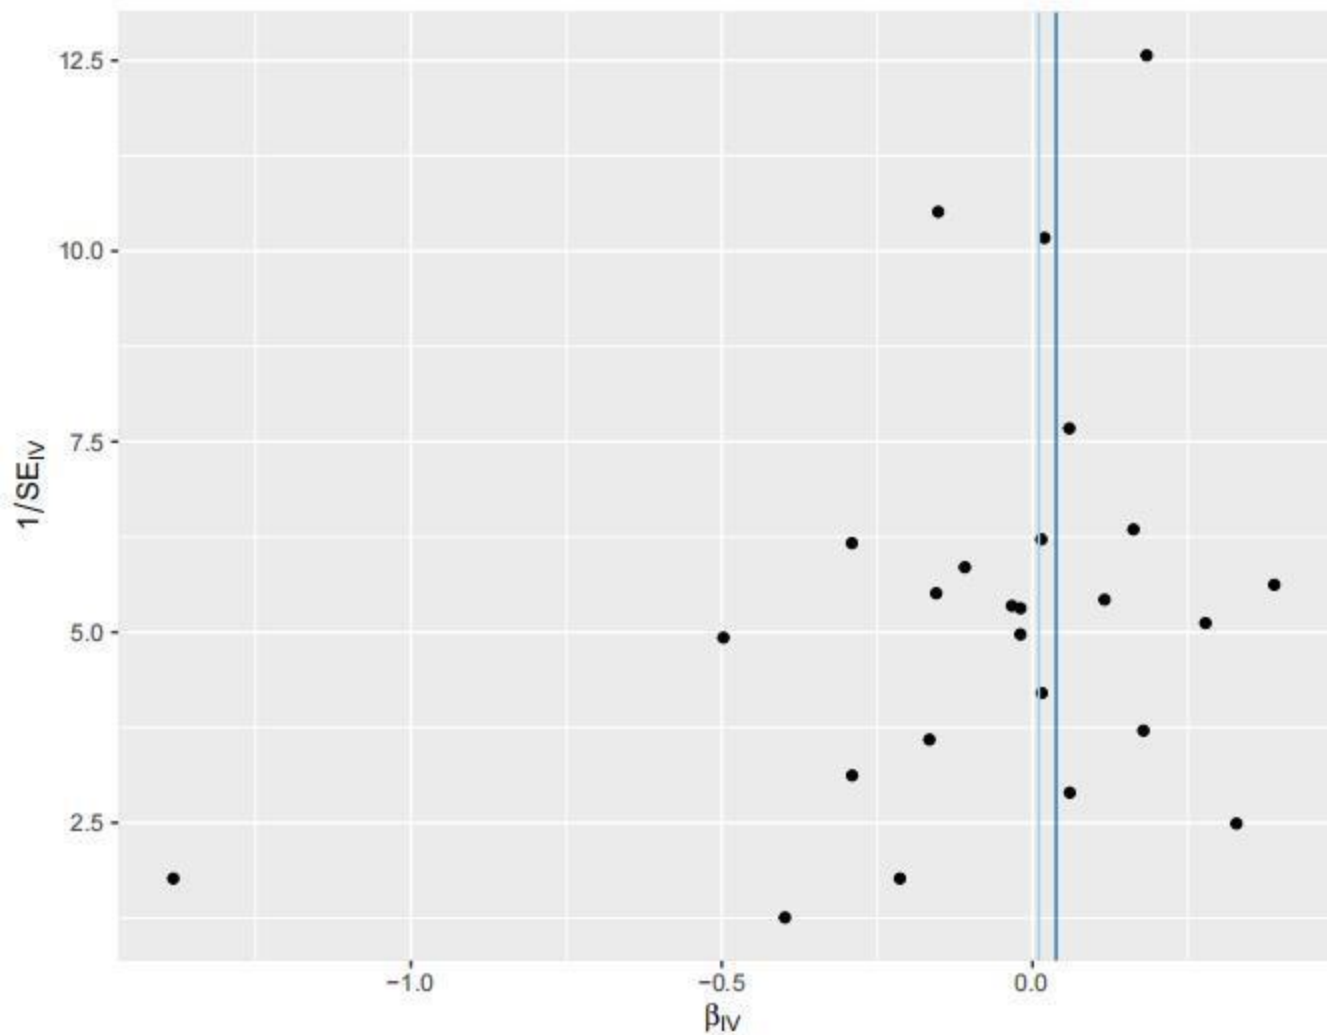

Funnel plot analysis of "CD127 on CD28+ DN (CD4-CD8-)" on 'Aplastic anemia'

MR Method

- Inverse variance weighted
- MR Egger

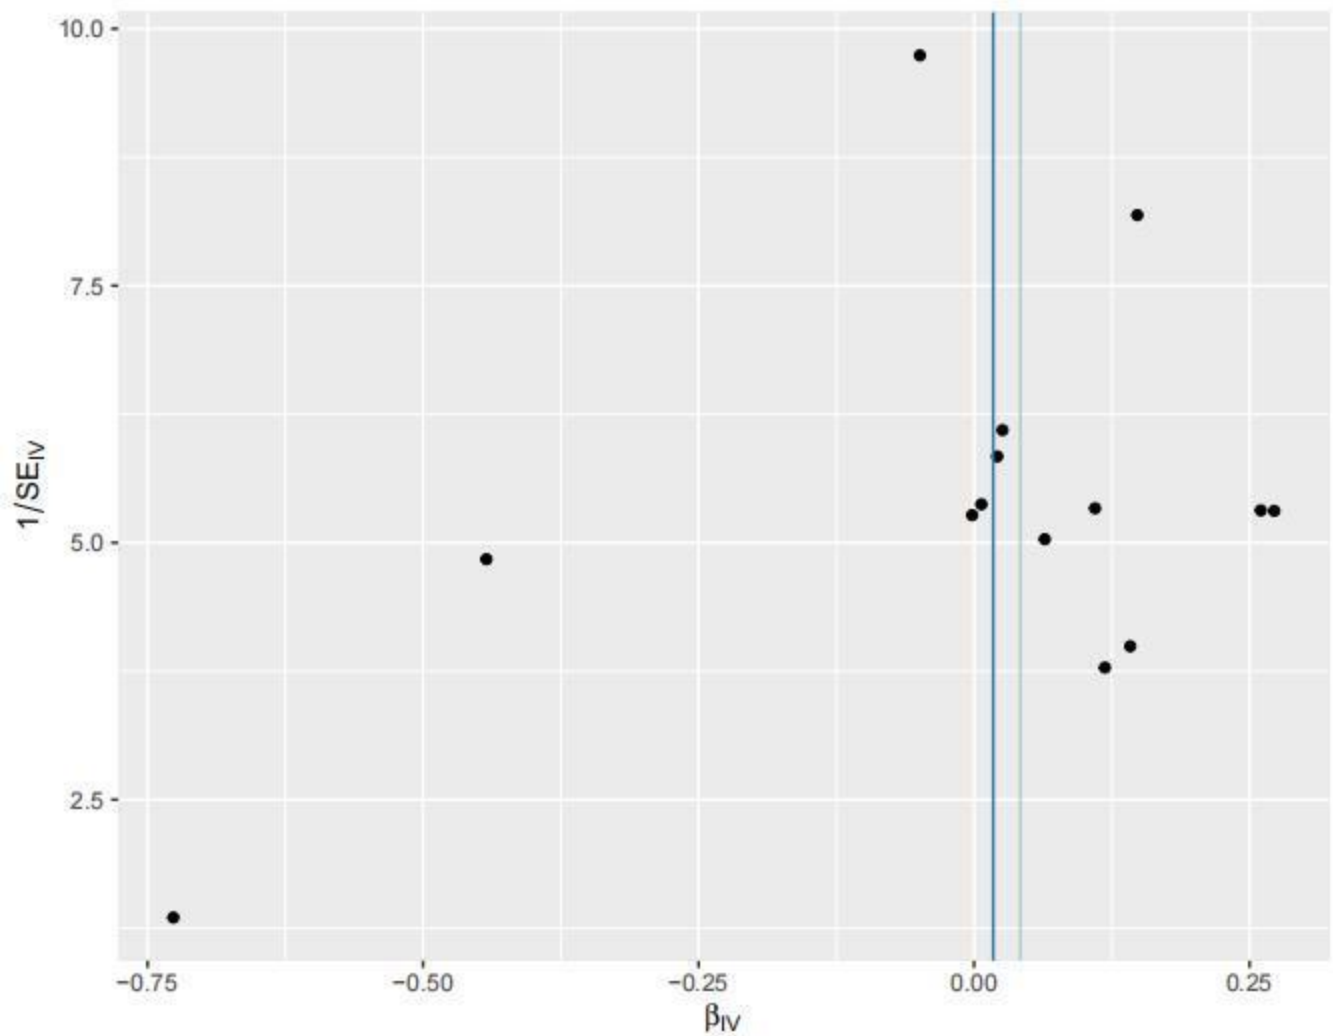

Funnel plot analyse of "CD25 on CD39+ resting Treg " on 'Aplastic anemia'

### MR Method

- Inverse variance weighted
- MR Egger

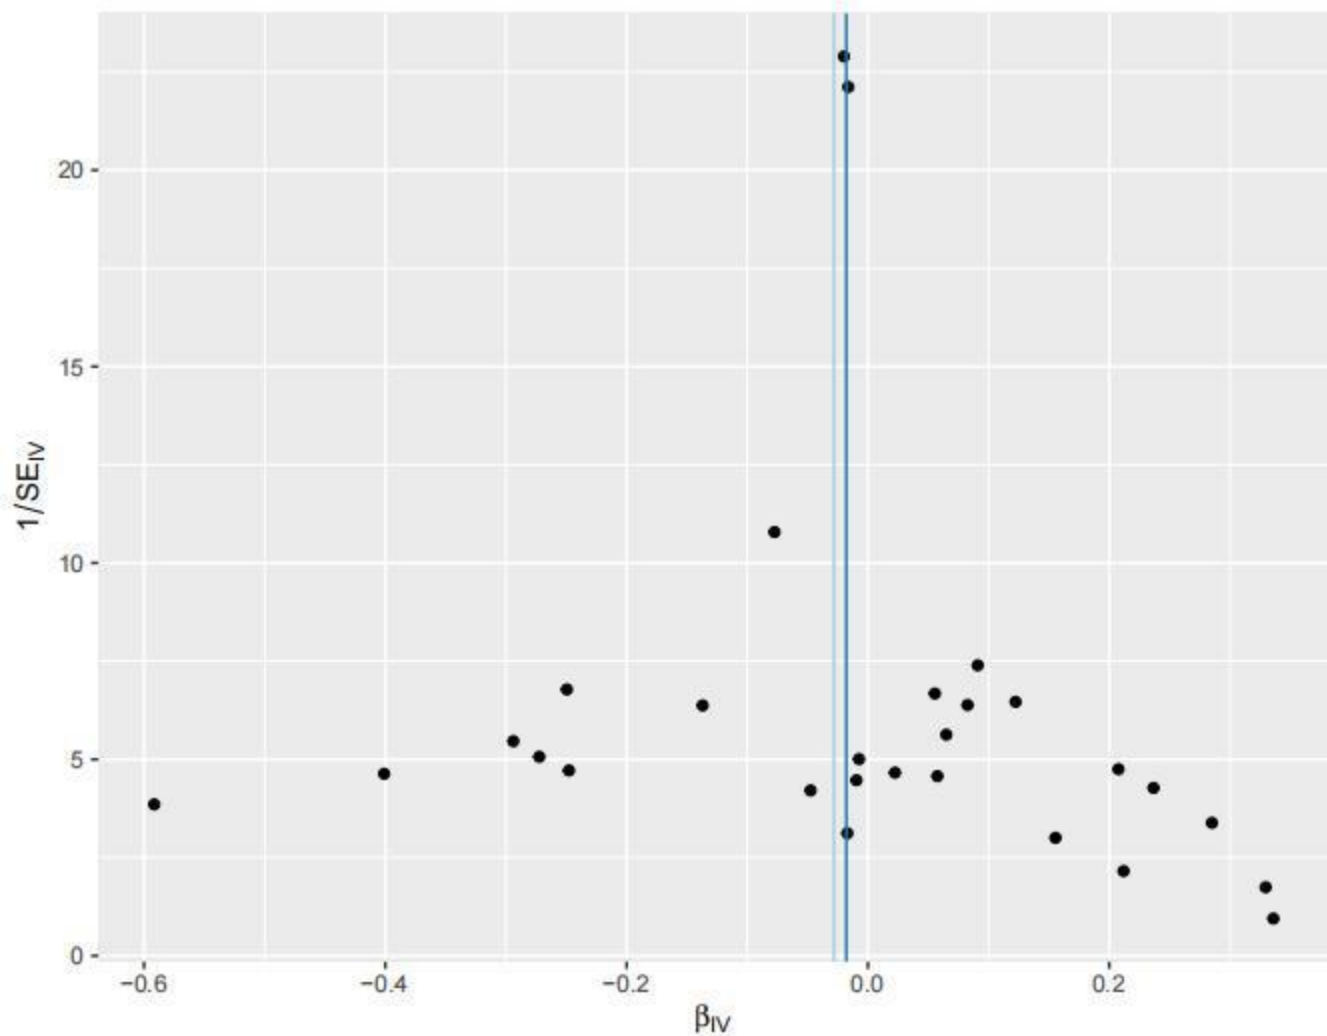

Funnel plot analyse of "PDL-1 on CD14- CD16- " on 'Aplastic anemia'

MR Method

- Inverse variance weighted
- MR Egger

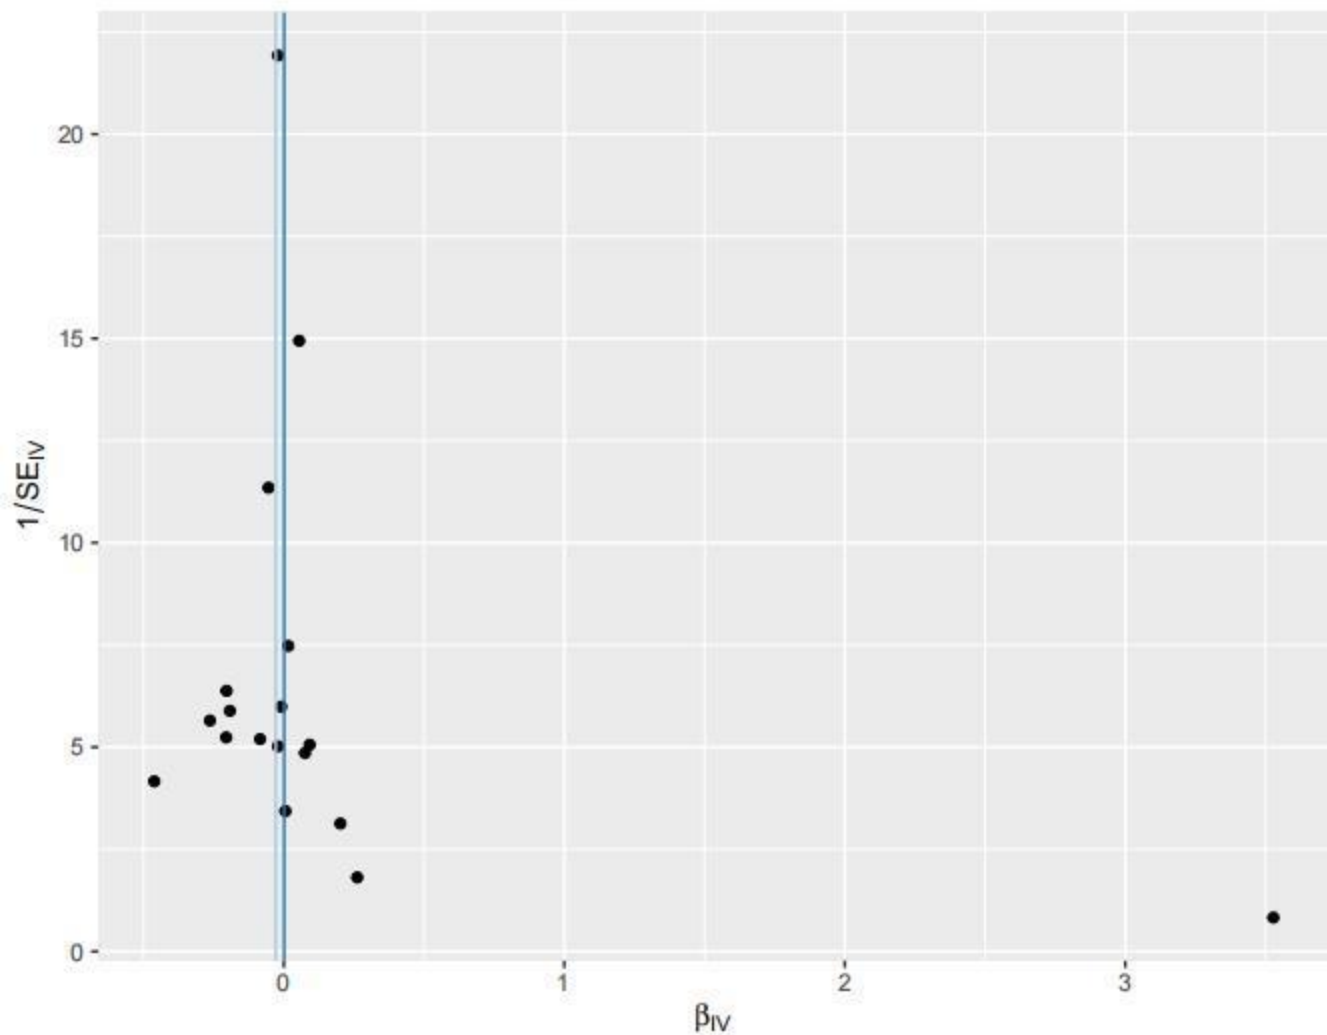

Funnel plot analyse of "TD CD8br %T cell" on 'Aplastic anemia'

MR Method

- Inverse variance weighted
- MR Egger

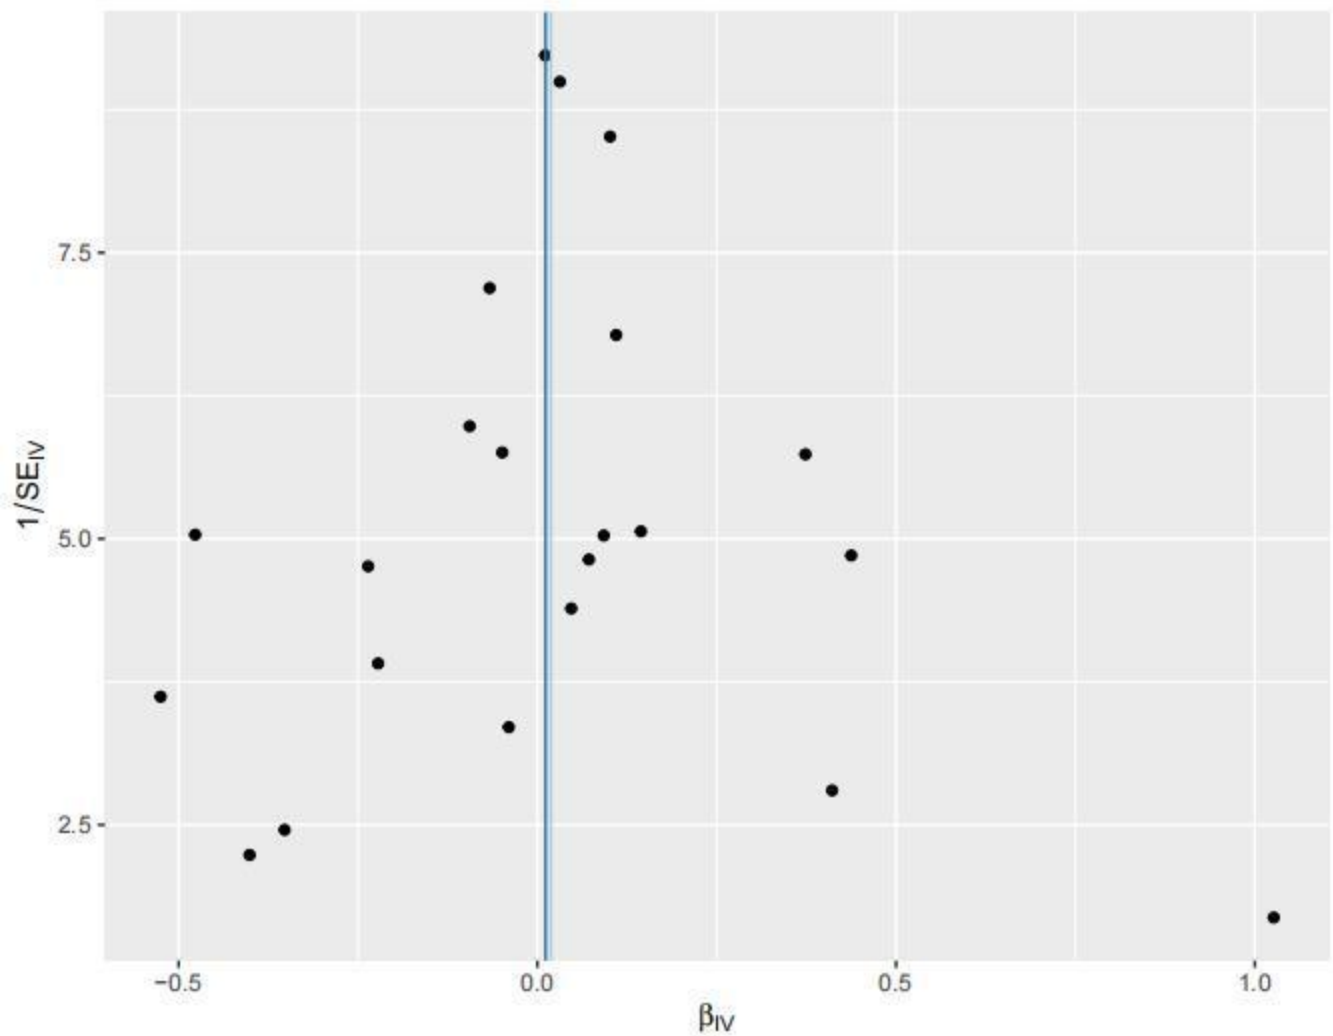

Funnel plot analyse of "CM CD8br %T cell" on 'Aplastic anemia'



### MR Method

Inverse variance weighted

MR Egger

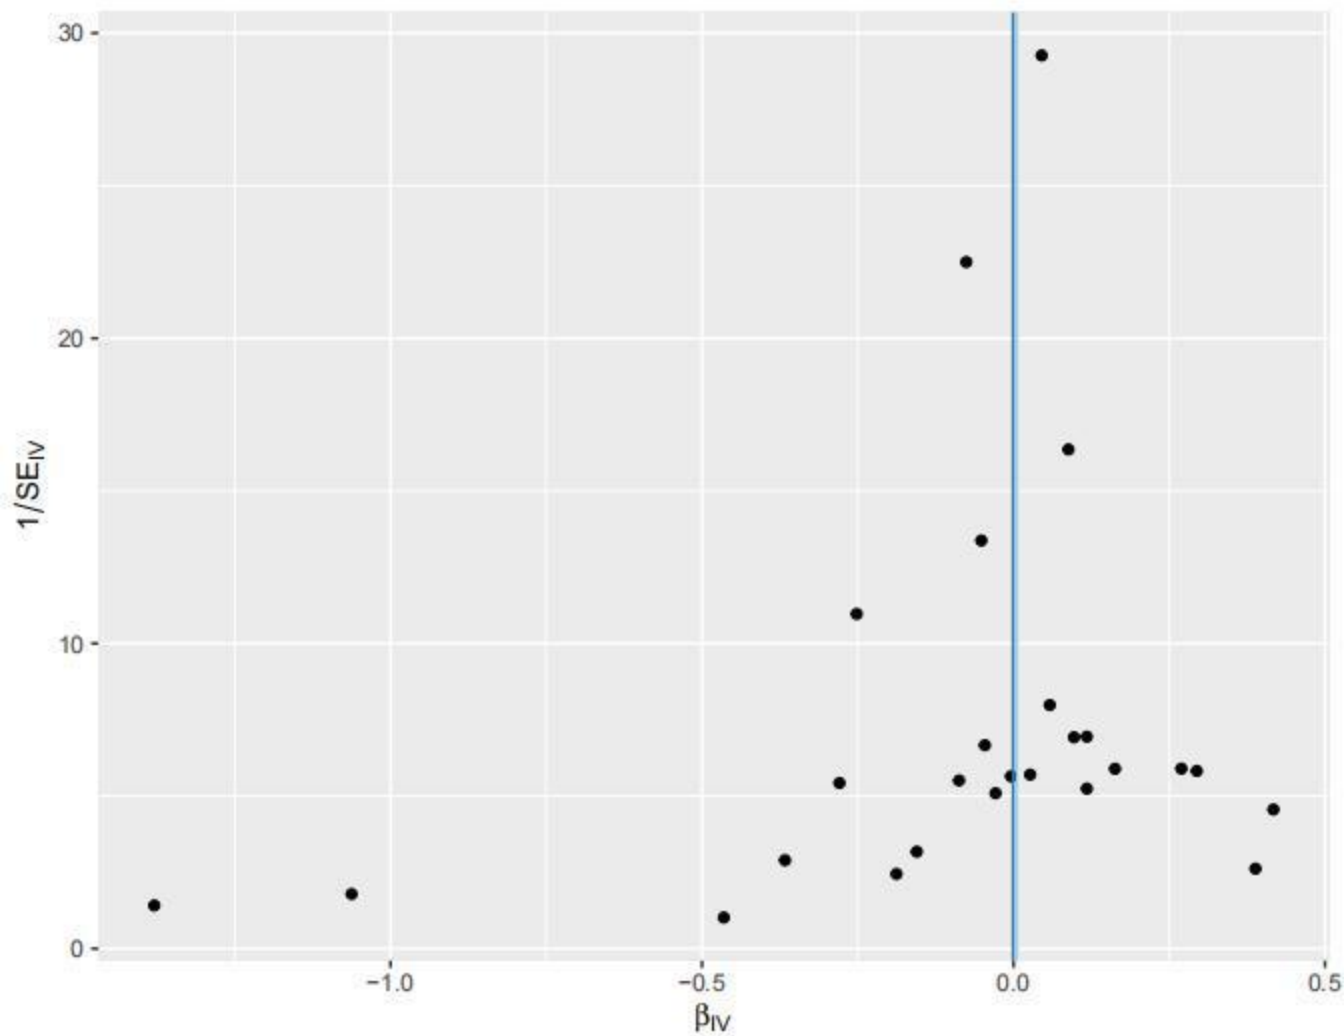

Funnel plot analysis of "CD3 on CM CD4+" on 'Aplastic anemia'

### MR Method

- Inverse variance weighted
- MR Egger

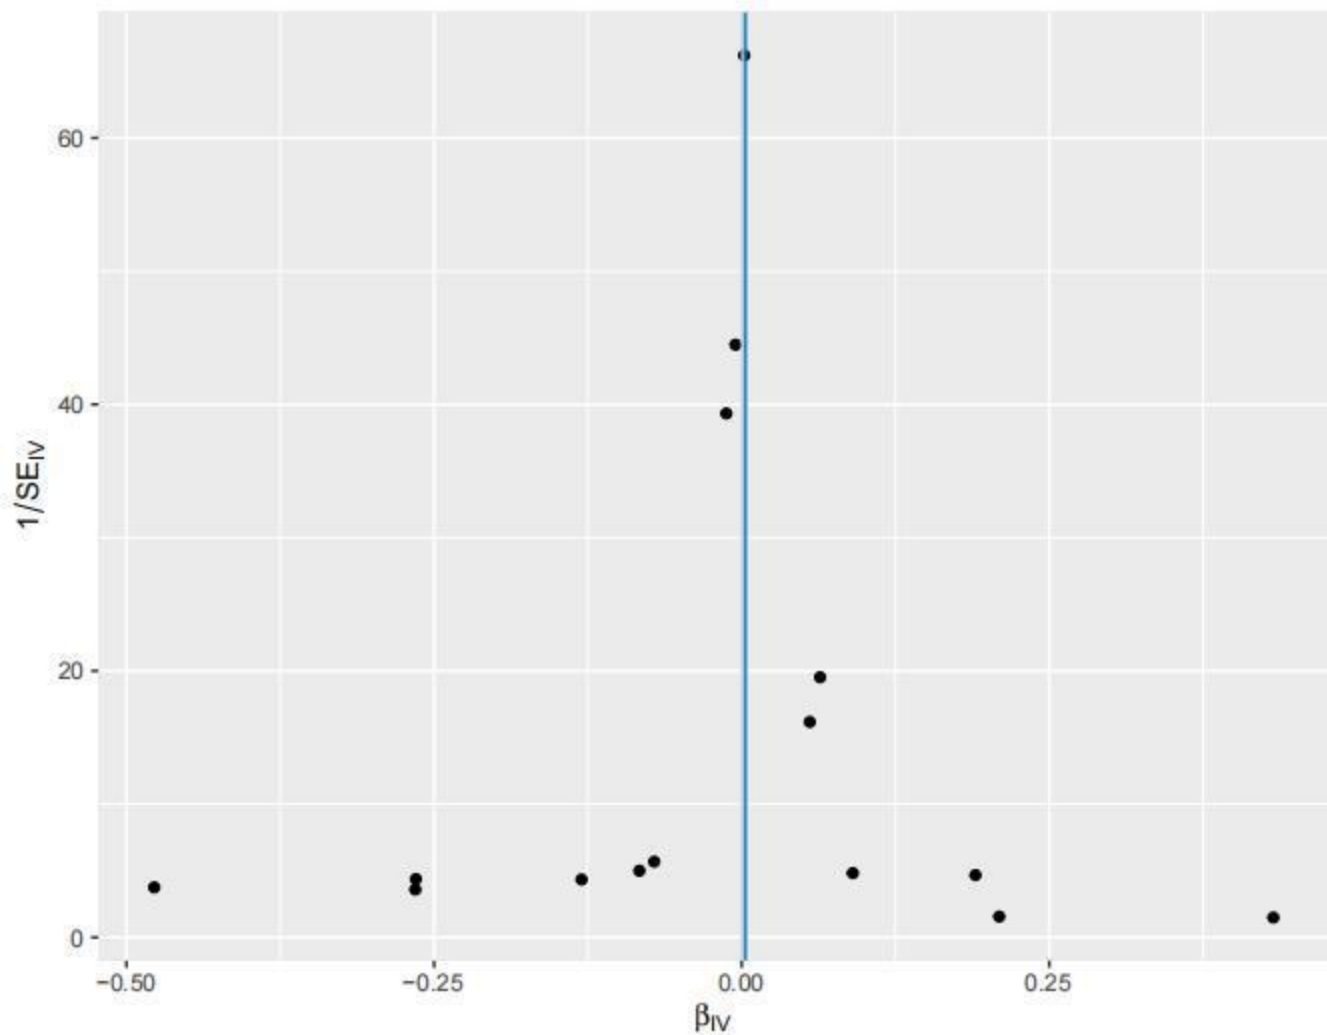

Funnel plot analyse of "CD38 on IgD- CD38br" on 'Aplastic anemia'

MR Method

- Inverse variance weighted
- MR Egger

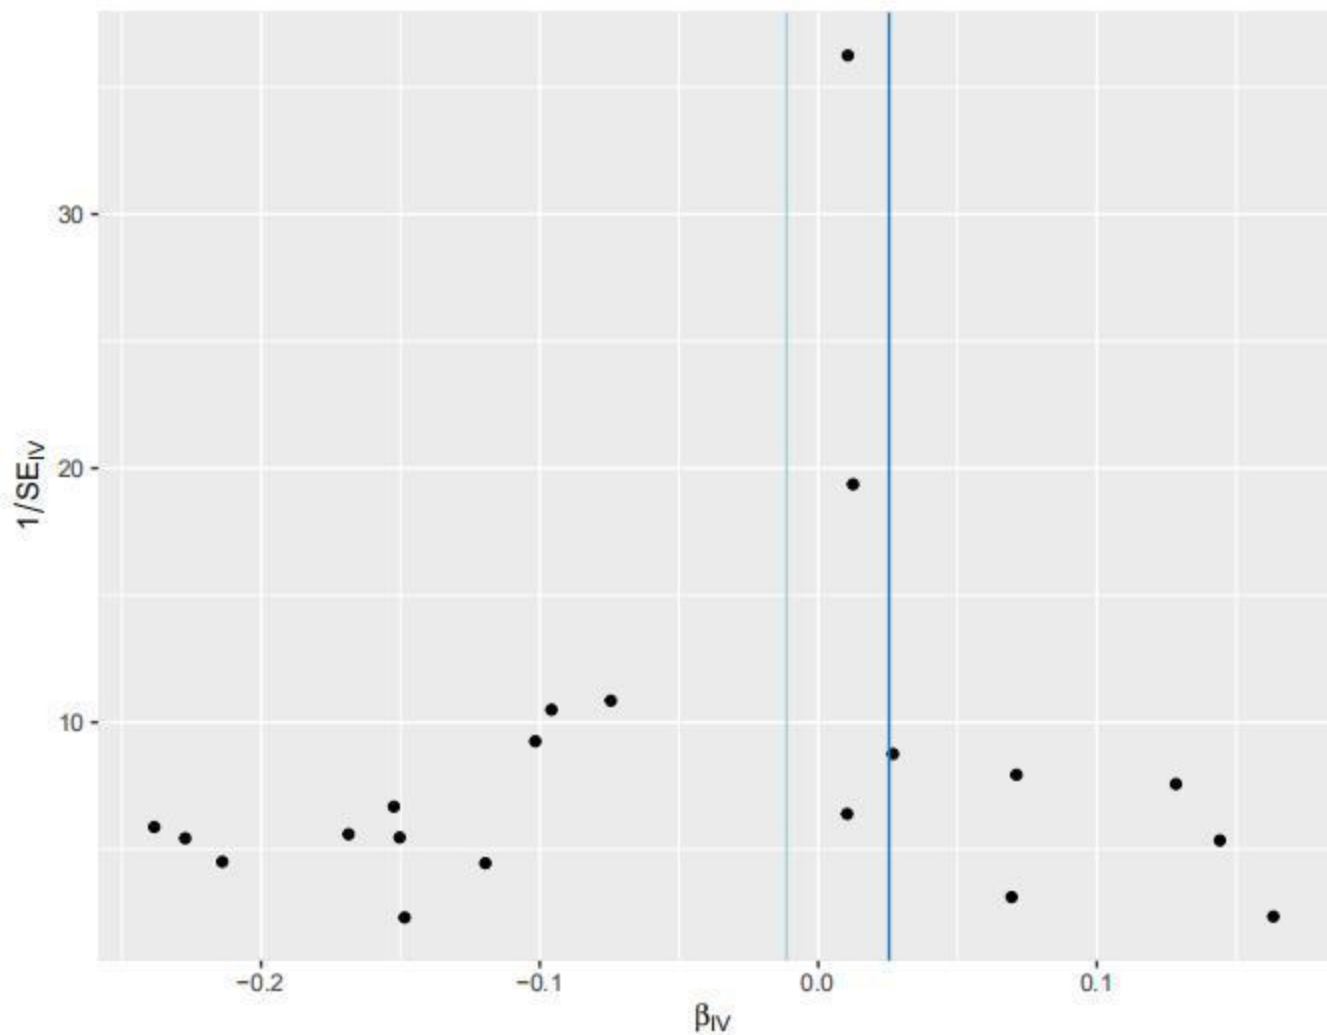

Funnel plot analysis of "BAFF-R on IgD- CD27-" on 'Aplastic anemia'

MR Method

- Inverse variance weighted
- MR Egger

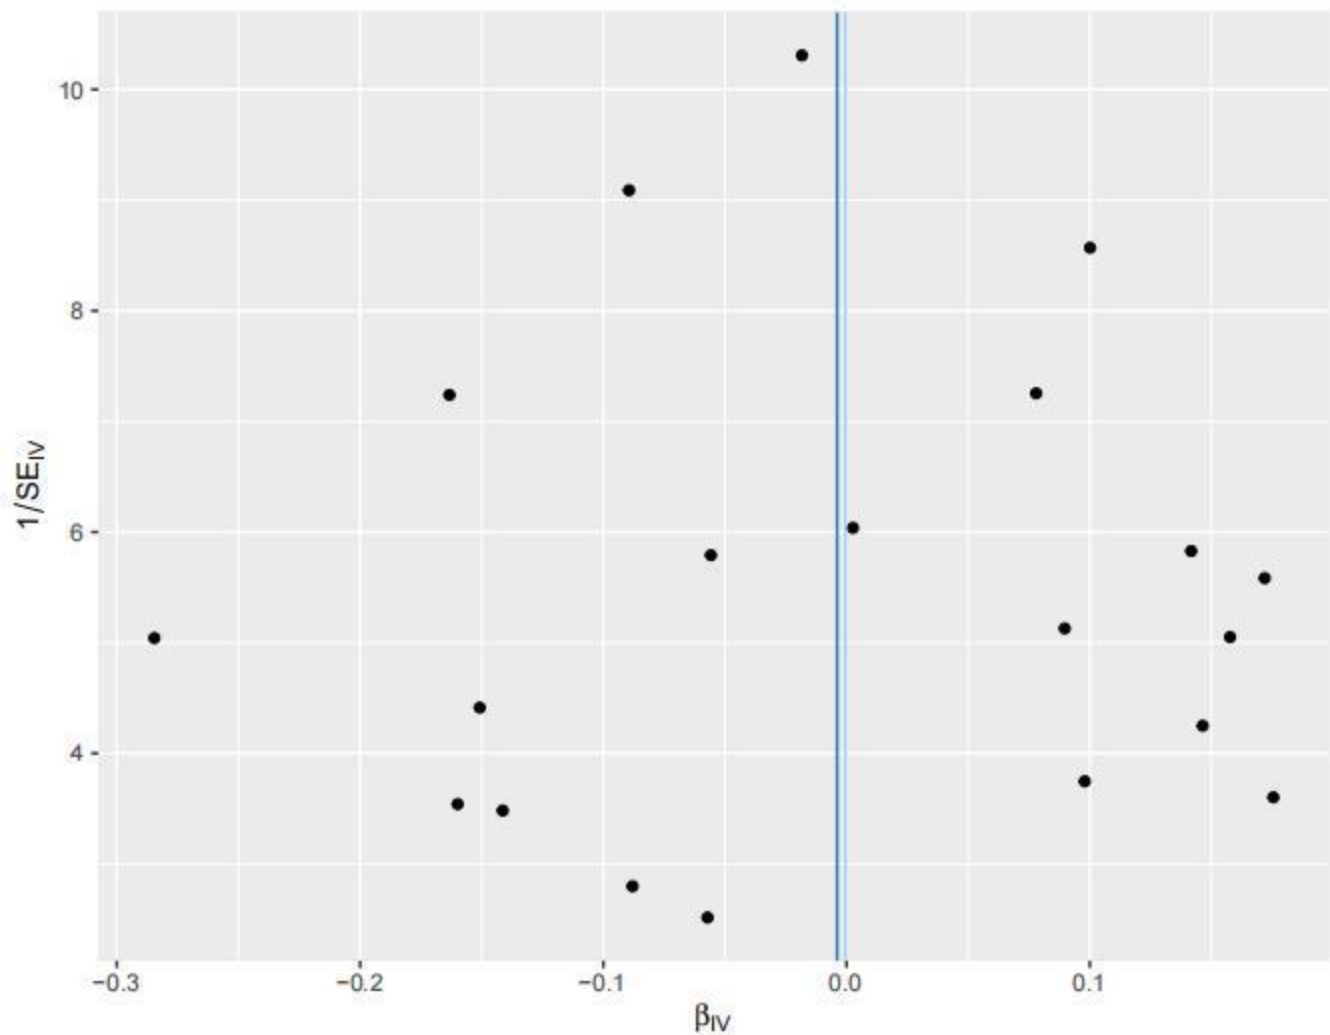

Funnel plot analyse of "CD24 on transitional" on 'Aplastic anemia'

### MR Method

- Inverse variance weighted
- MR Egger

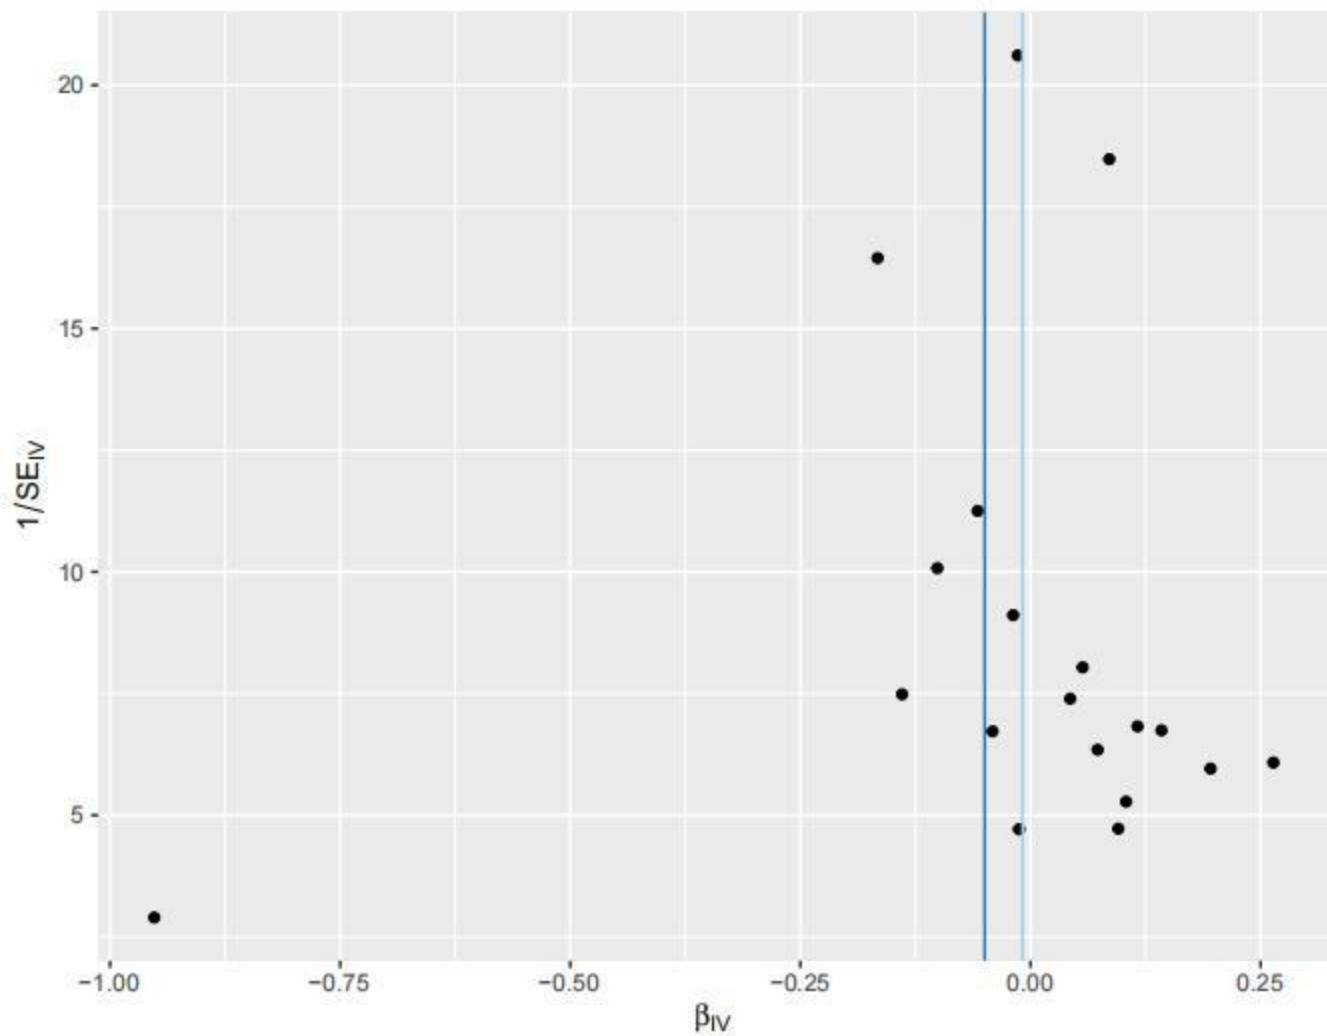

Funnel plot analyse of "Mo MDSC AC" on 'Aplastic anemia'

MR Method

- Inverse variance weighted
- MR Egger

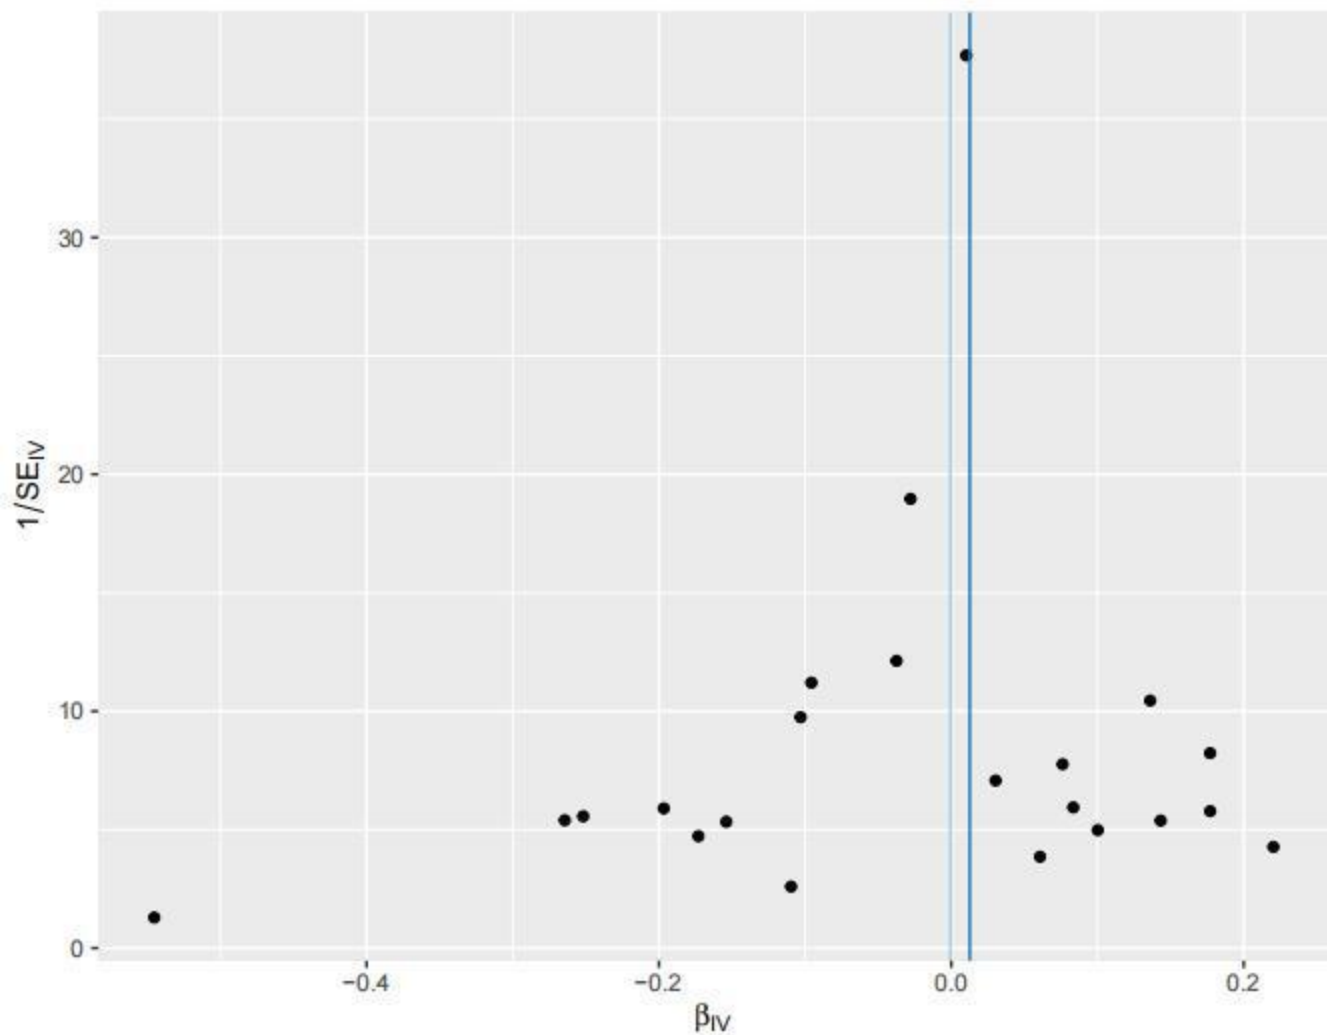

Funnel plot analyse of "BAFF-R on IgD+ CD38-" on 'Aplastic anemia'

MR Method

- Inverse variance weighted
- MR Egger

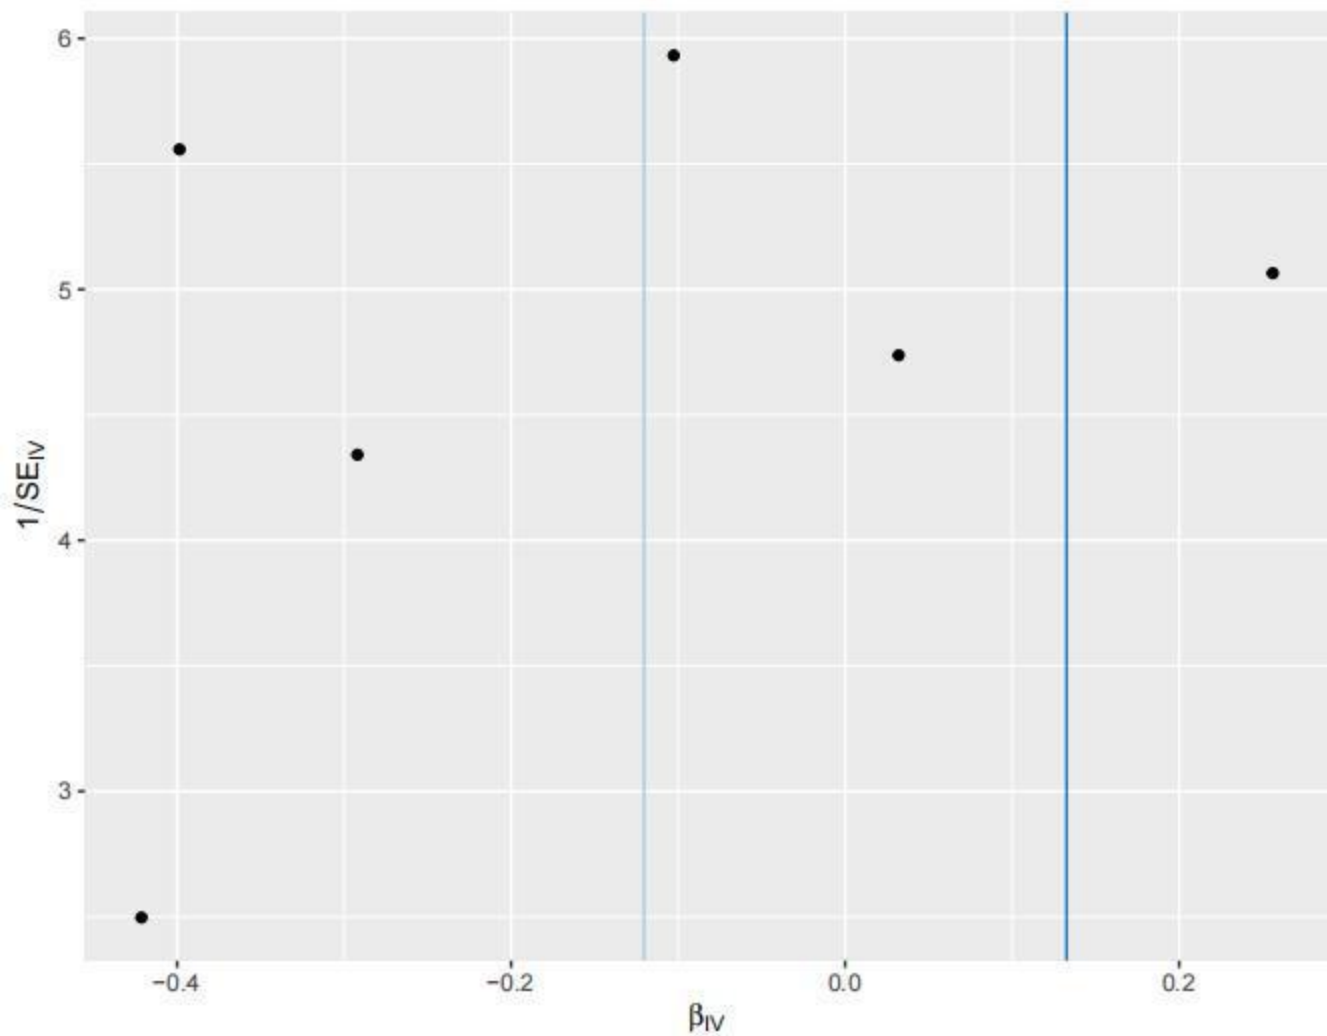

Funnel plot analyse of "CD3- lymphocyte %lymphocyte" on 'Aplastic anemia'

MR Method

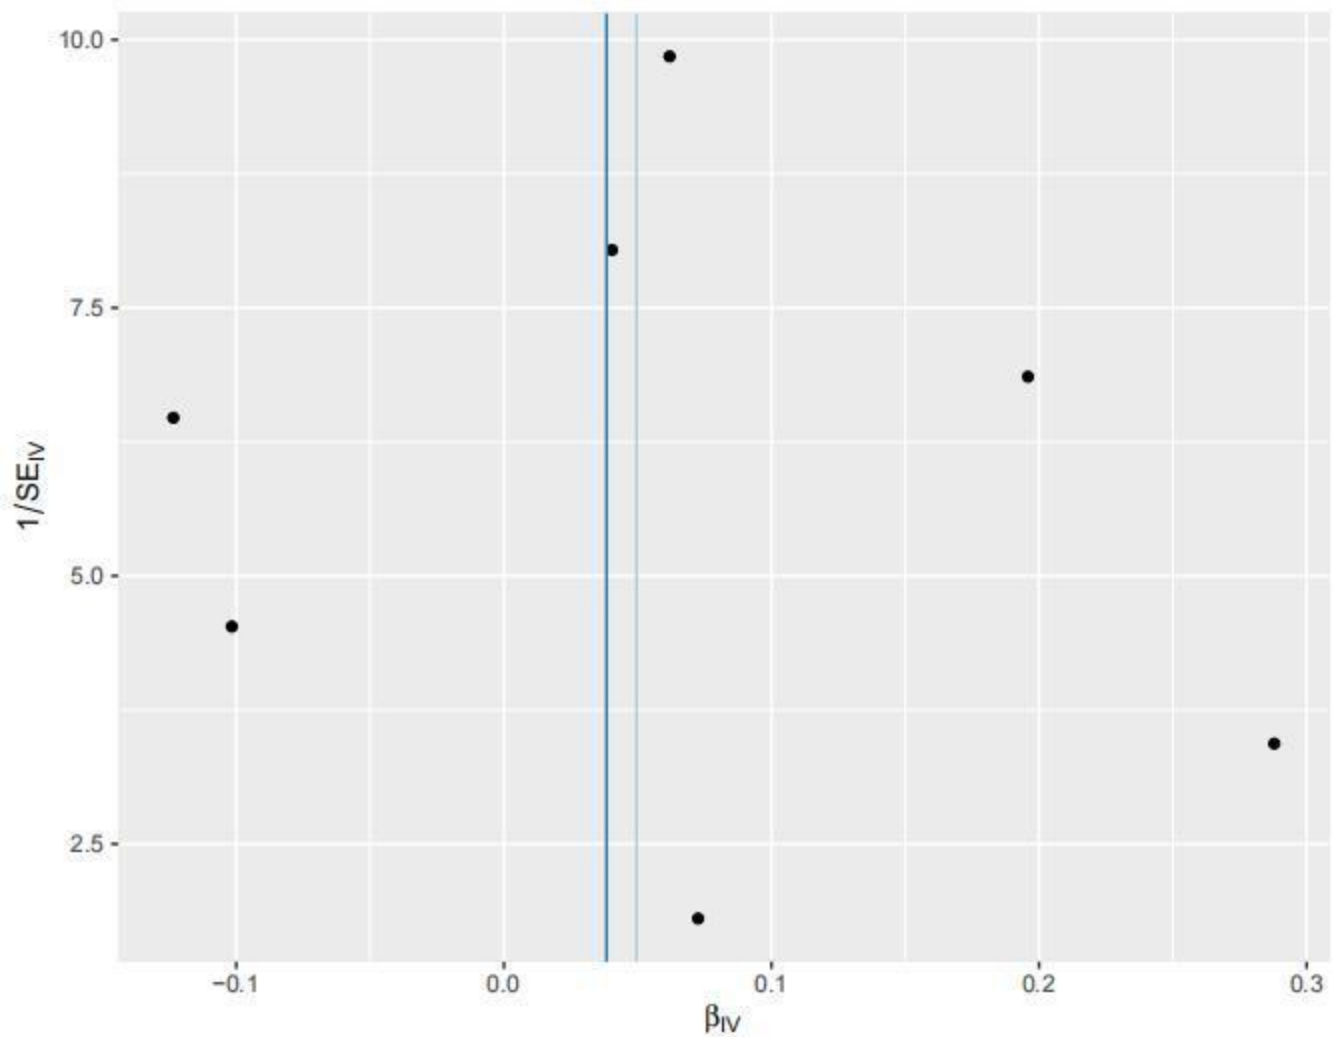

Funnel plot analyse of "CD24 on IgD- CD38dim" on 'Aplastic anemia'



MR Method

- Inverse variance weighted
- MR Egger

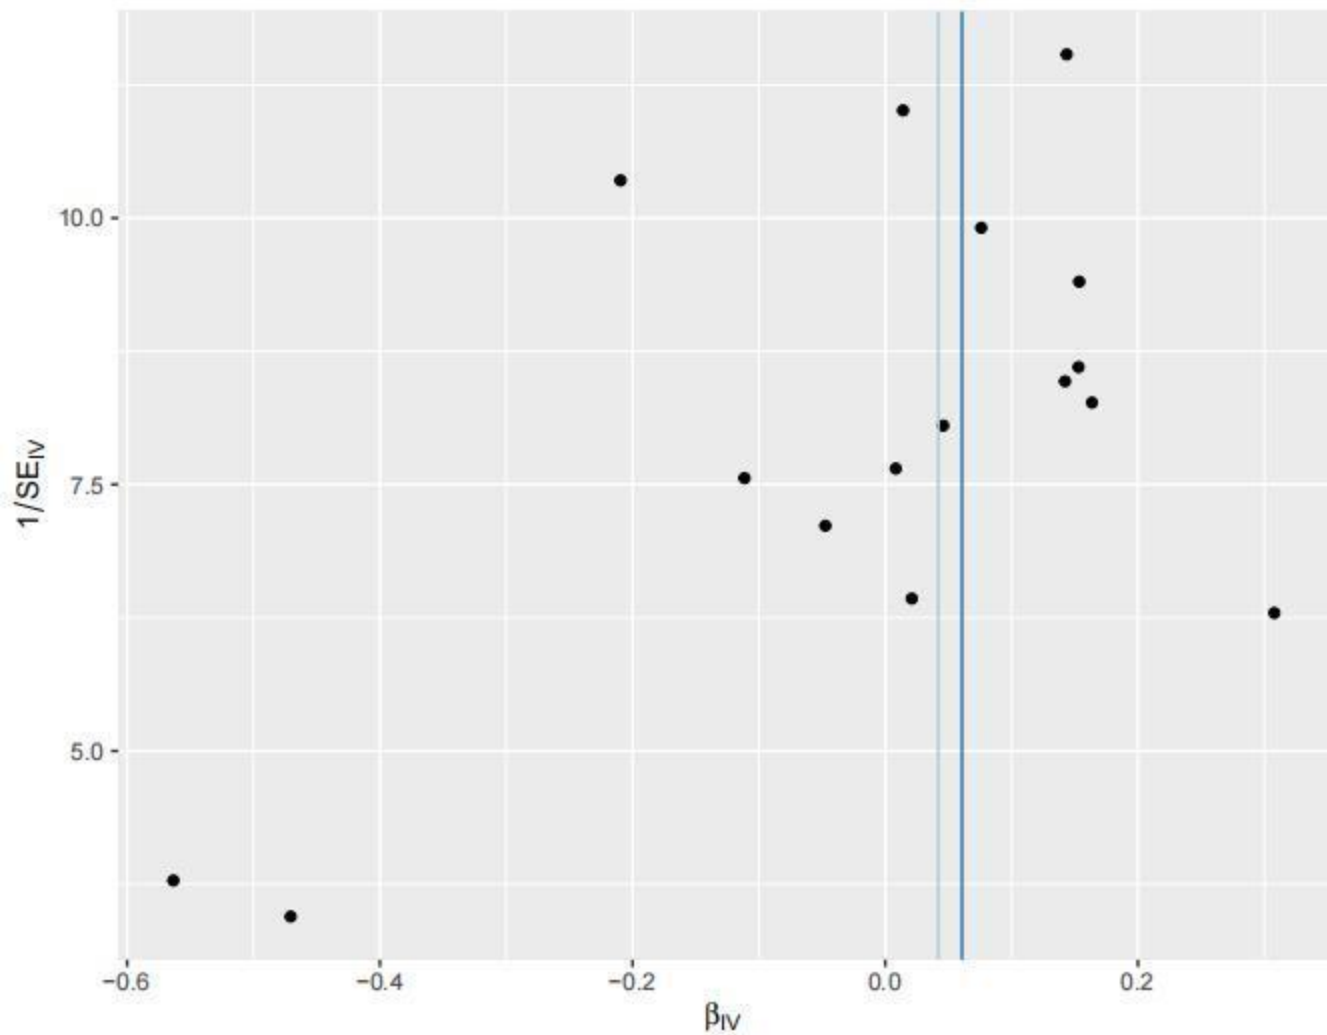

Funnel plot analyse of "HVEM on CD8br" on 'Aplastic anemia'

MR Method

- Inverse variance weighted
- MR Egger

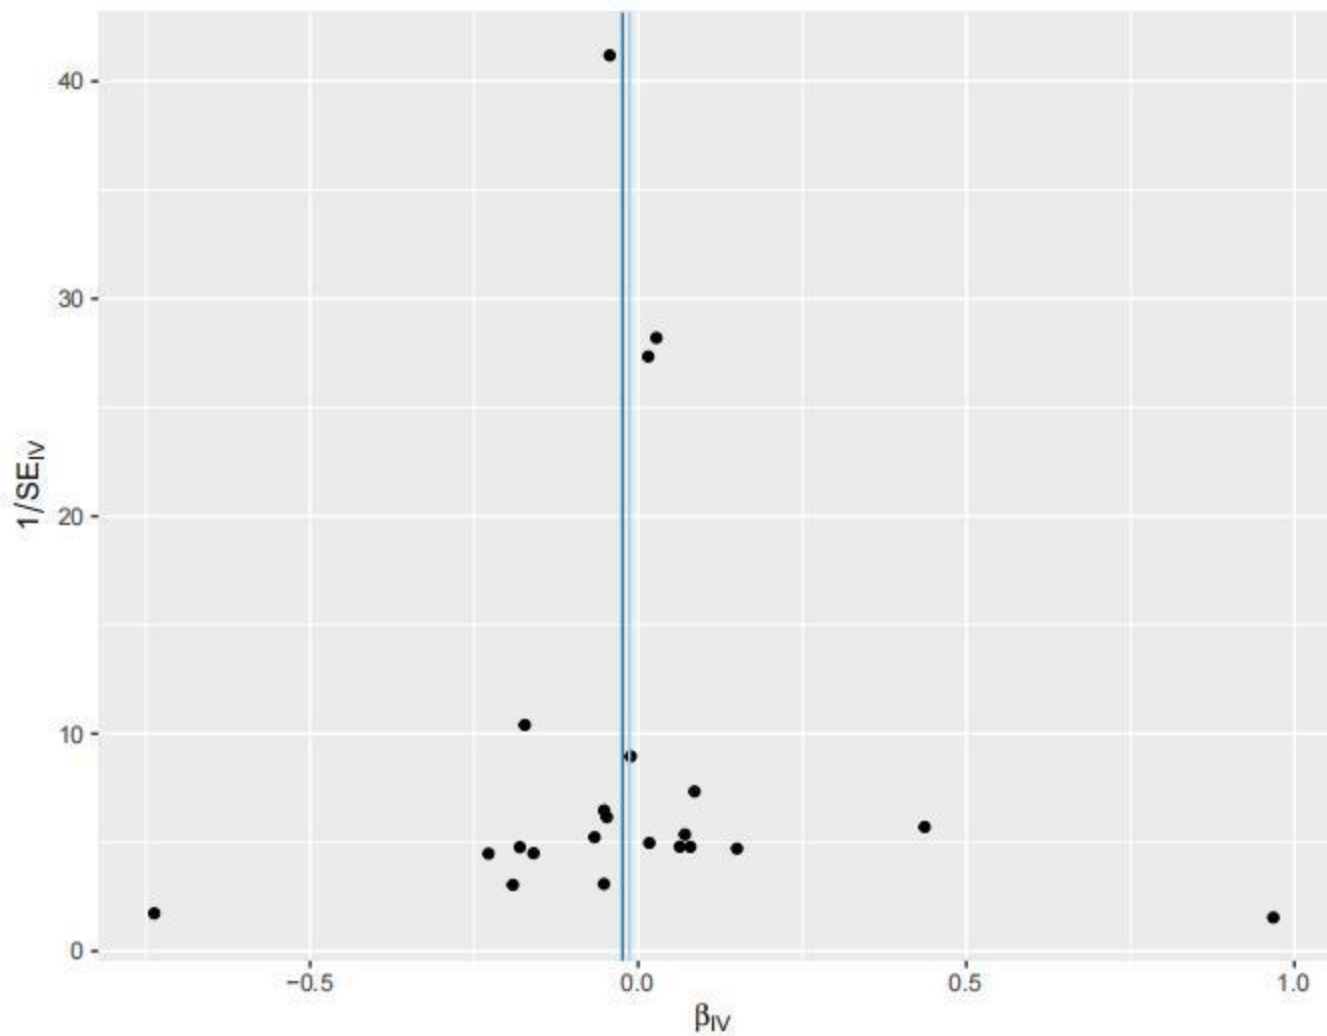

Funnel plot analyse of "CD25 on CD4 Treg" on 'Aplastic anemia'

### MR Method

Inverse variance weighted

MR Egger

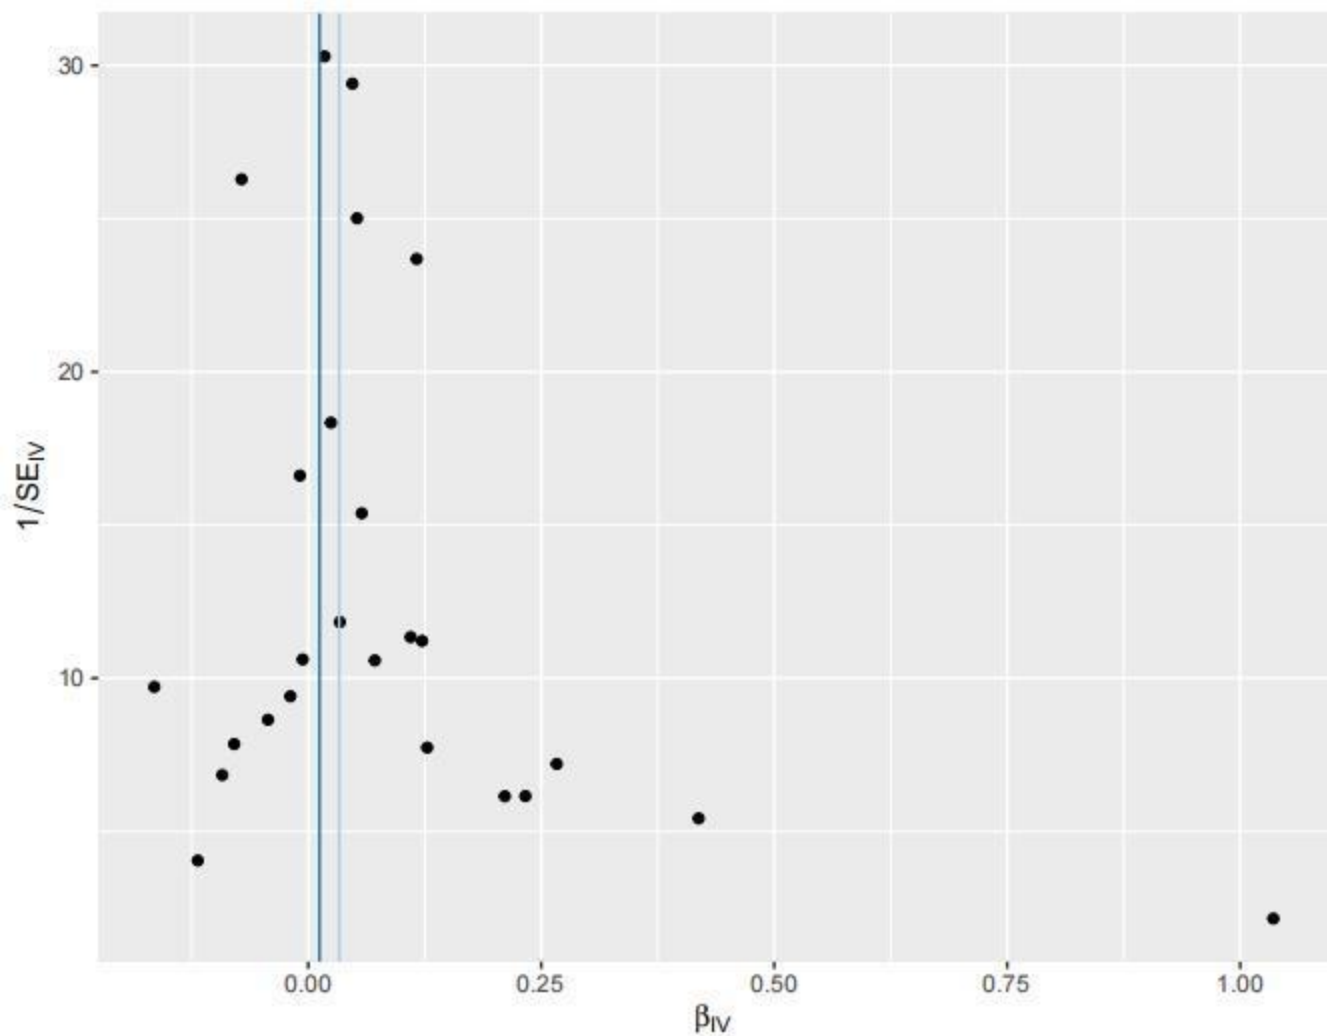

Funnel plot analyse of "HLA DR on CD33br HLA DR+ CD14- " on 'Aplastic anemia'

### MR Method

Inverse variance weighted

MR Egger

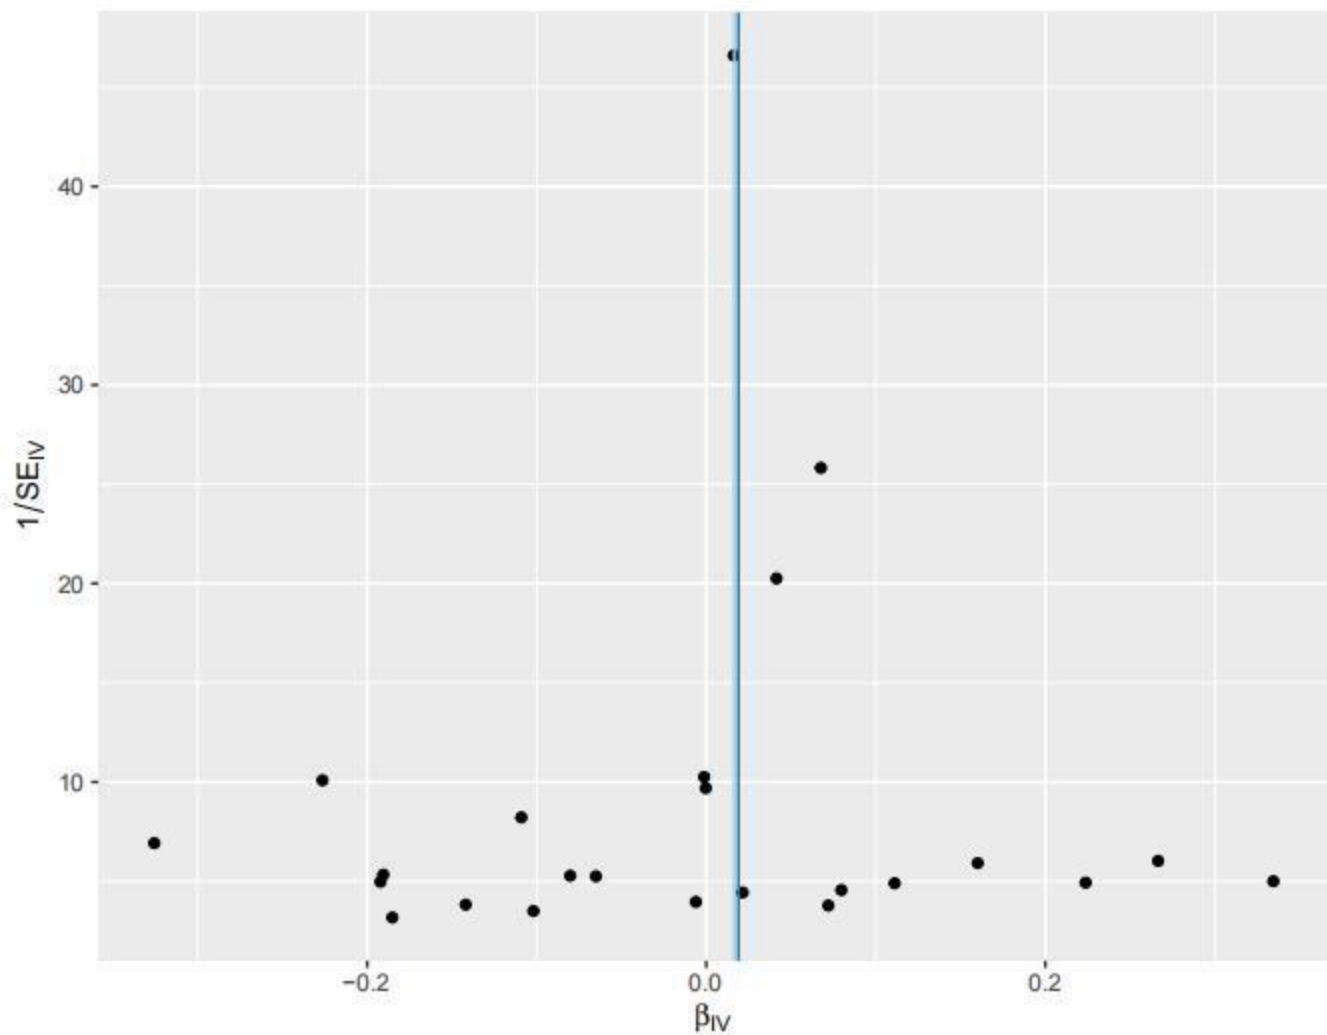

Funnel plot analyse of "CD14- CD16- AC" on 'Aplastic anemia'

MR Method

- Inverse variance weighted
- MR Egger

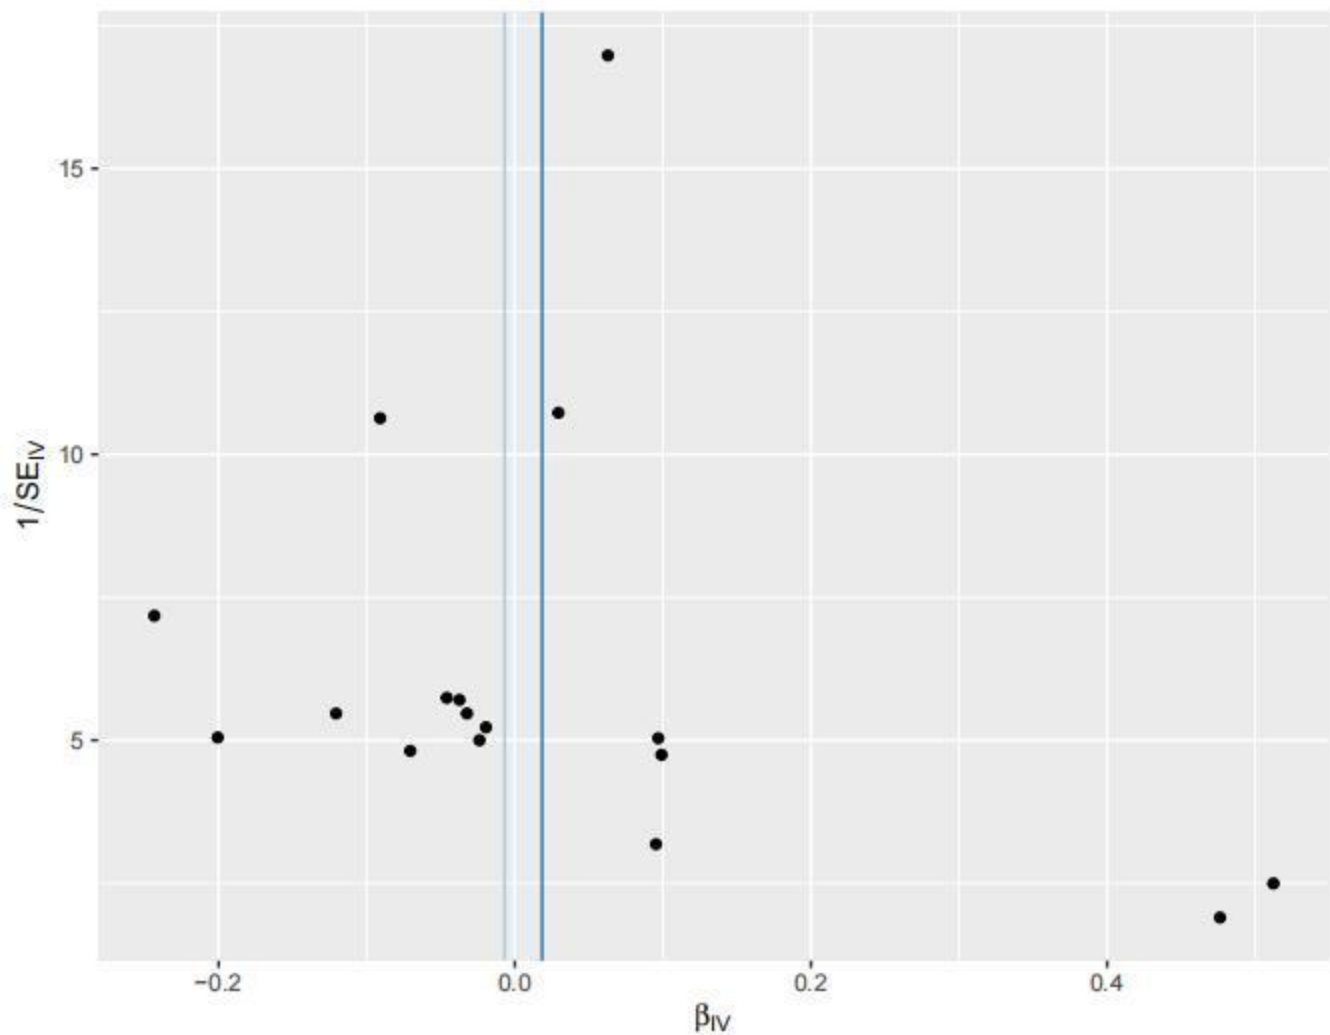

Funnel plot analysis of "CD4 Treg %T cell" on 'Aplastic anemia'

### MR Method

- Inverse variance weighted
- MR Egger

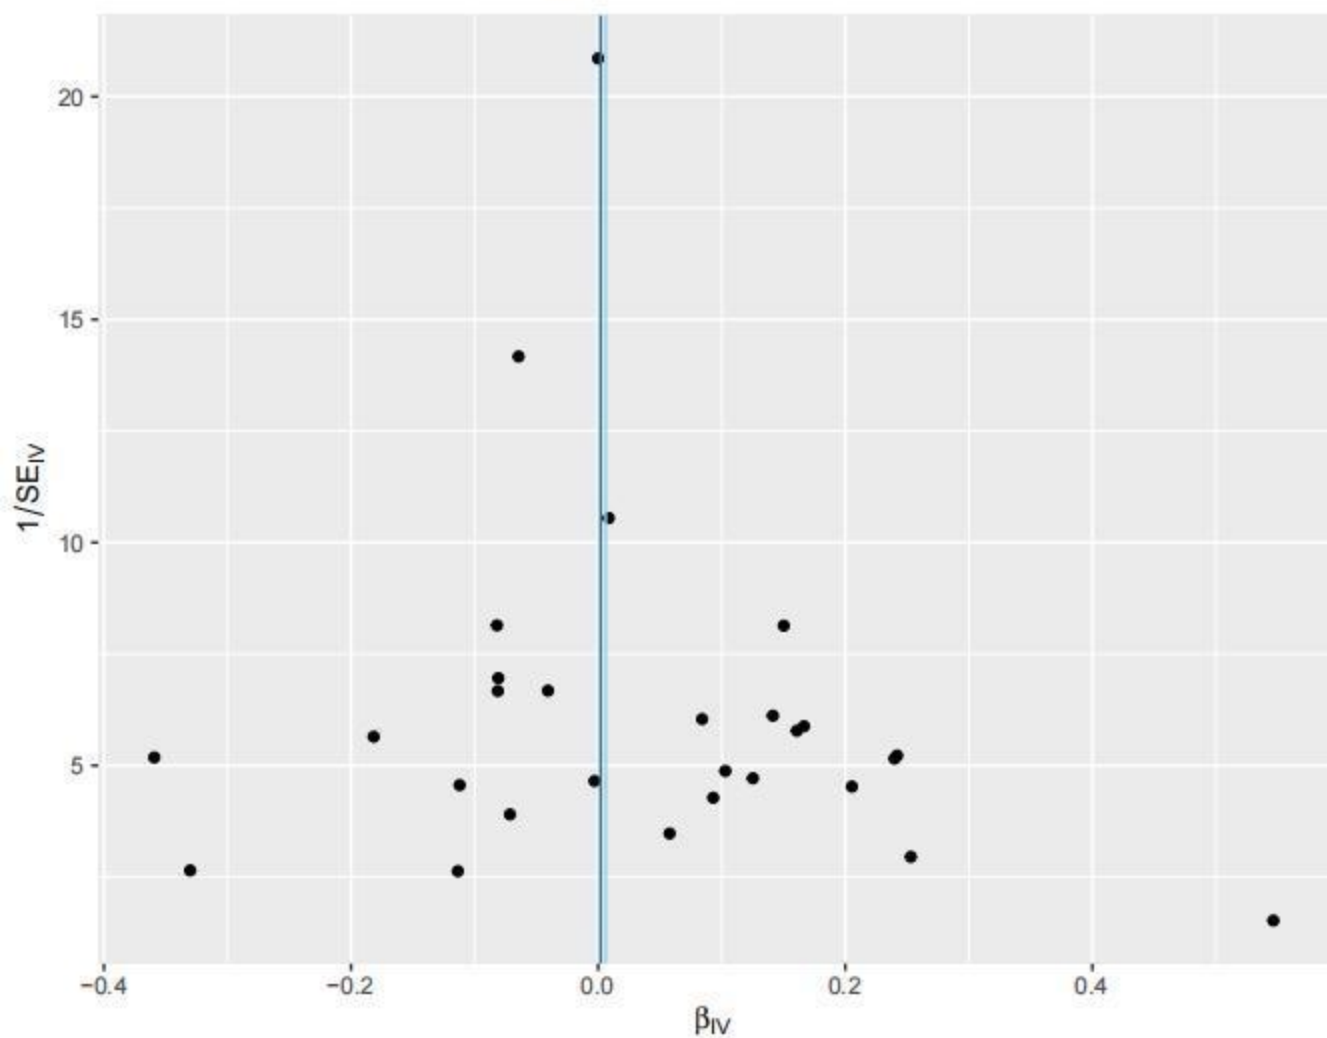

Funnel plot analyse of "CD19 on IgD- CD38dim" on 'Aplastic anemia'

### MR Method

- Inverse variance weighted
- MR Egger

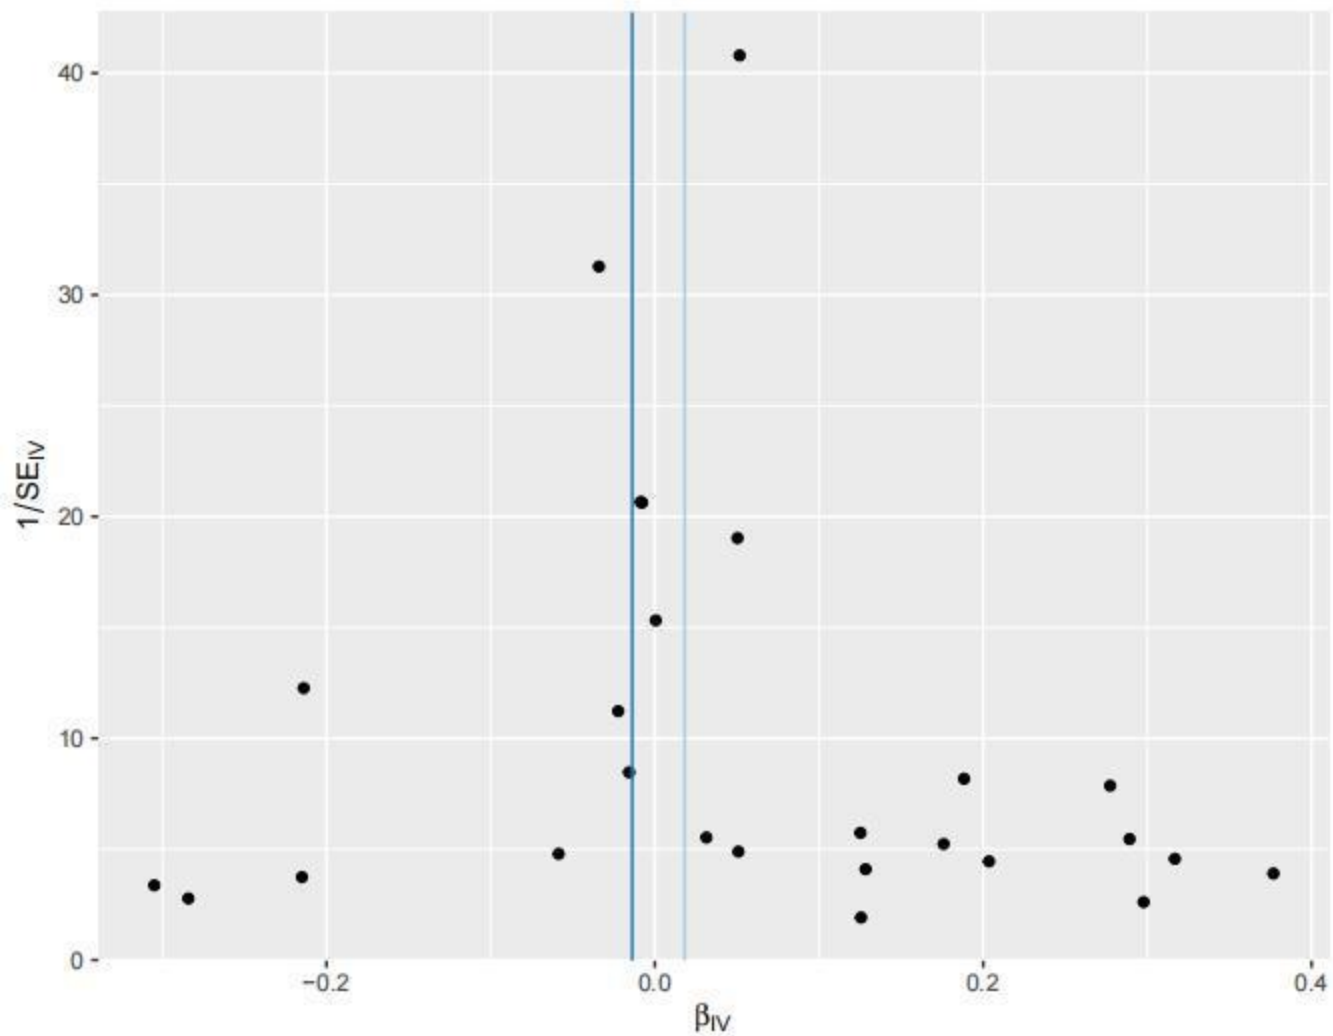

Funnel plot analysis of "CD39+ activated Treg %CD4 Treg" on 'Aplastic anemia'

MR Method

- Inverse variance weighted
- MR Egger

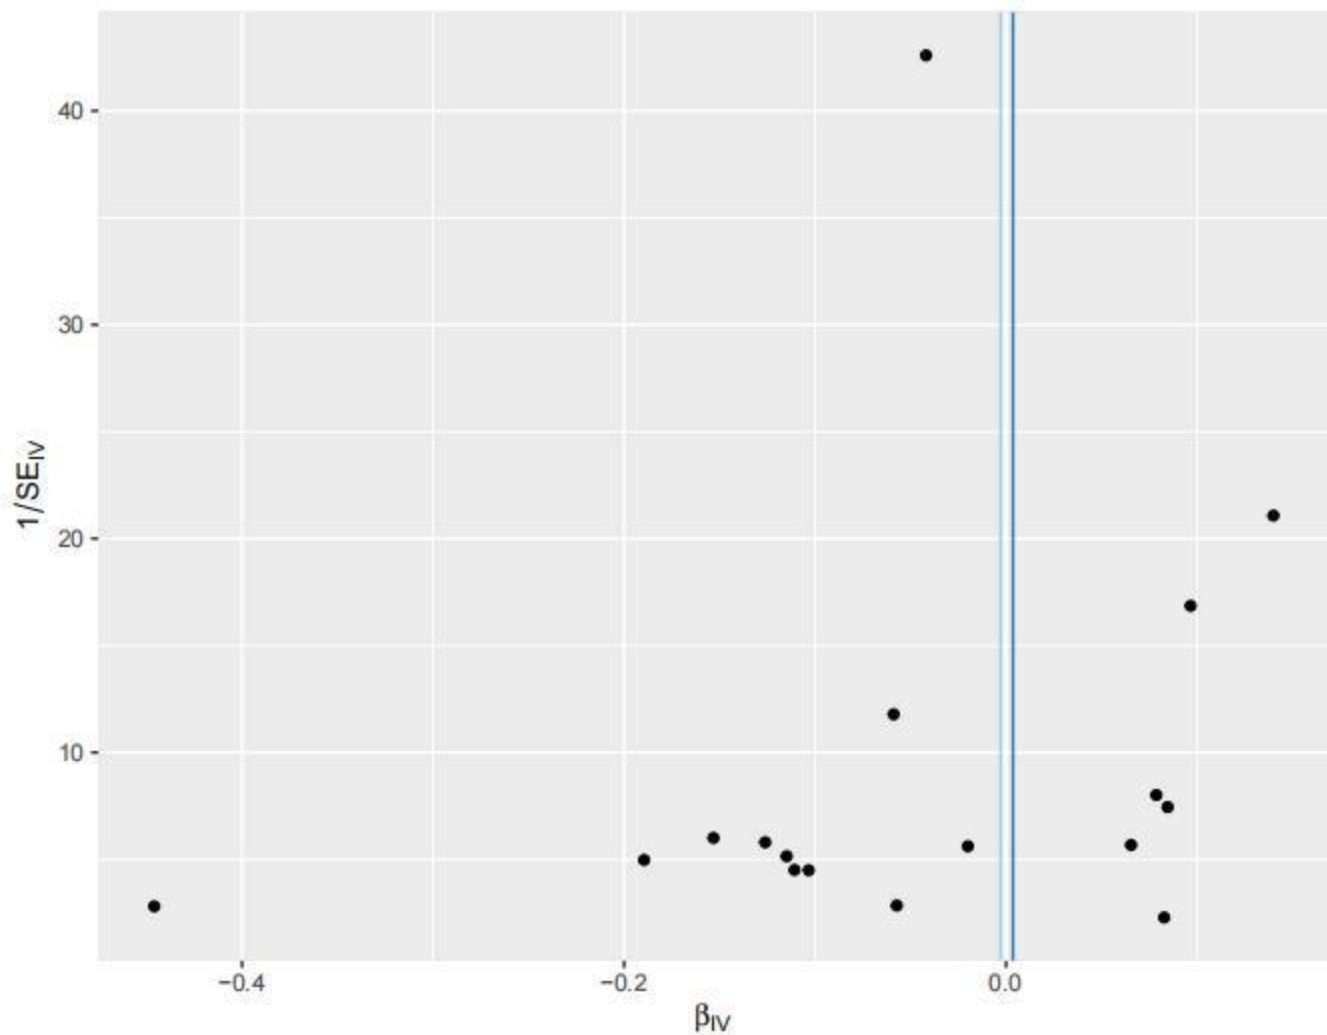

Funnel plot analyse of "CD25 on CD39+ secreting Treg " on 'Aplastic anemia'



MR Method

- Inverse variance weighted
- MR Egger

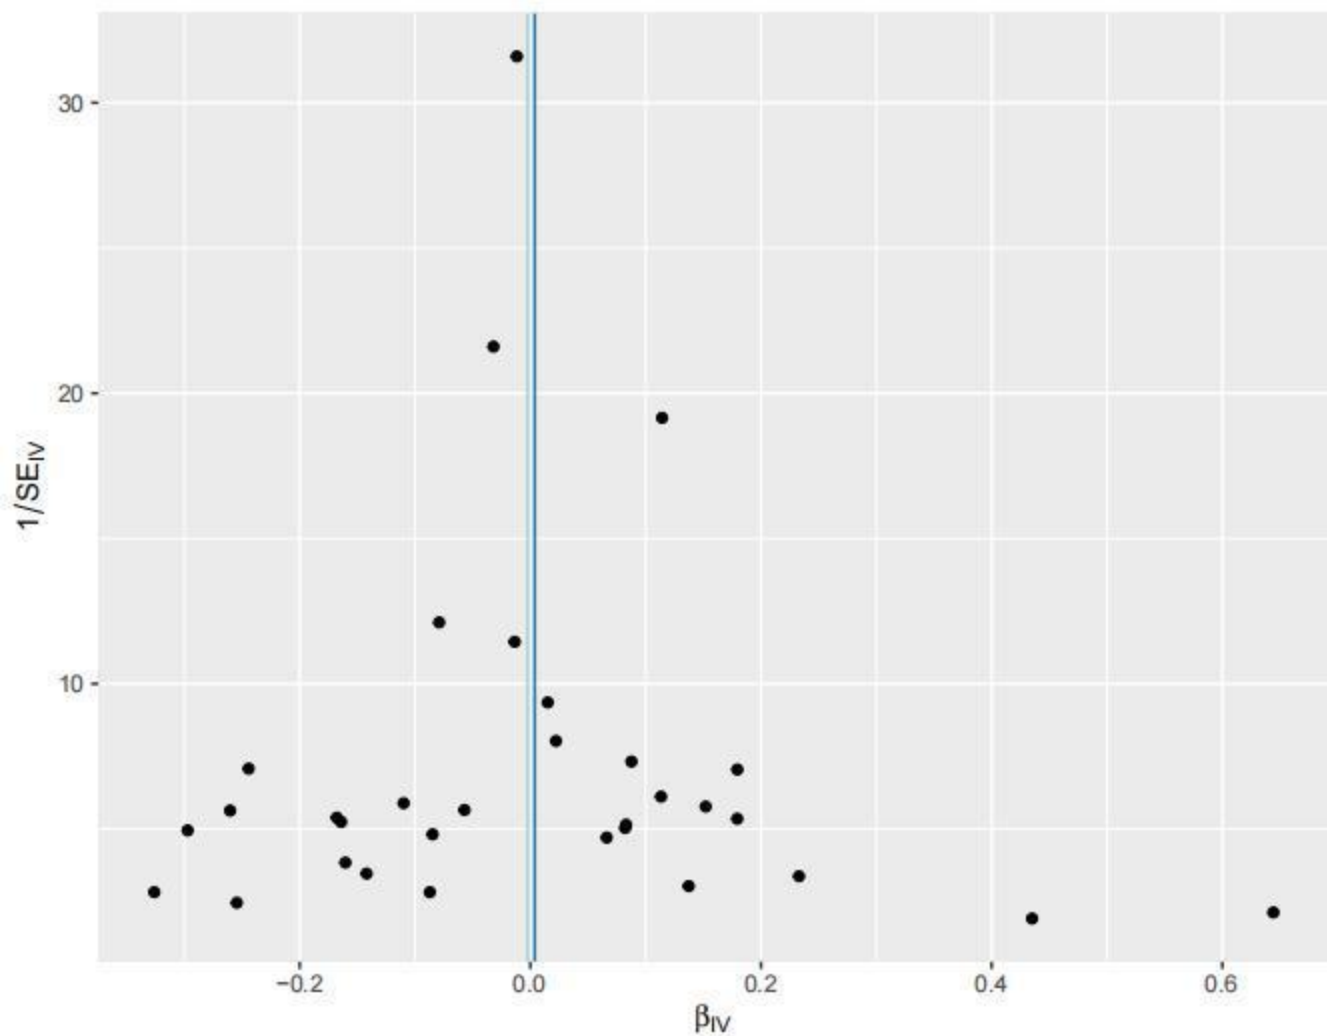

Funnel plot analysis of "CD24 on memory B cell" on 'Aplastic anemia'

### MR Method

Inverse variance weighted

MR Egger

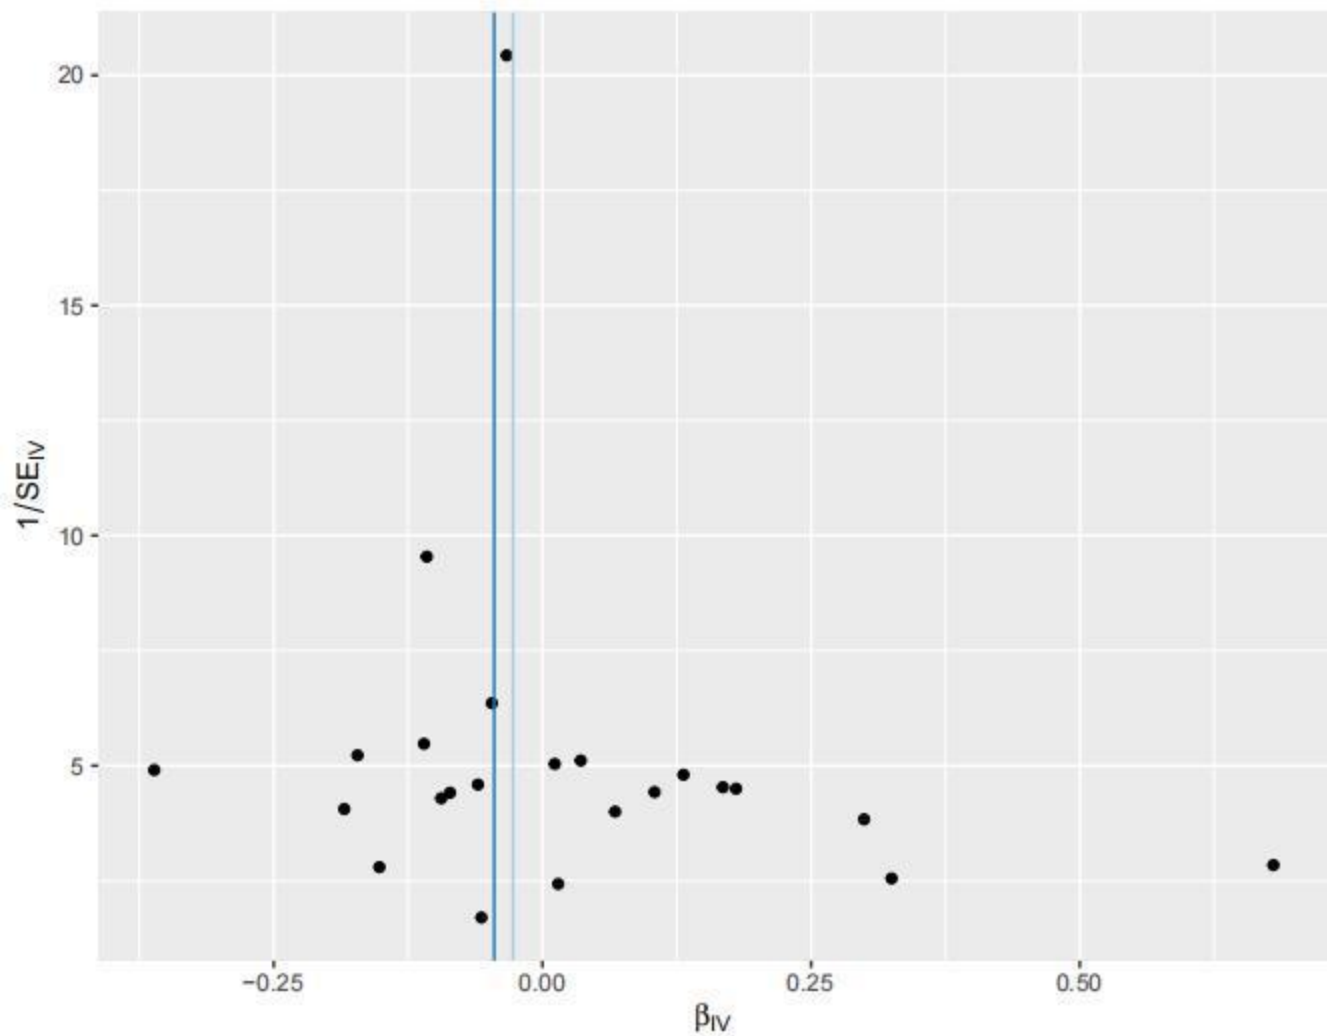

Funnel plot analysis of "Naive DN (CD4-CD8-) %DN" on 'Aplastic anemia'

MR Method

- Inverse variance weighted
- MR Egger

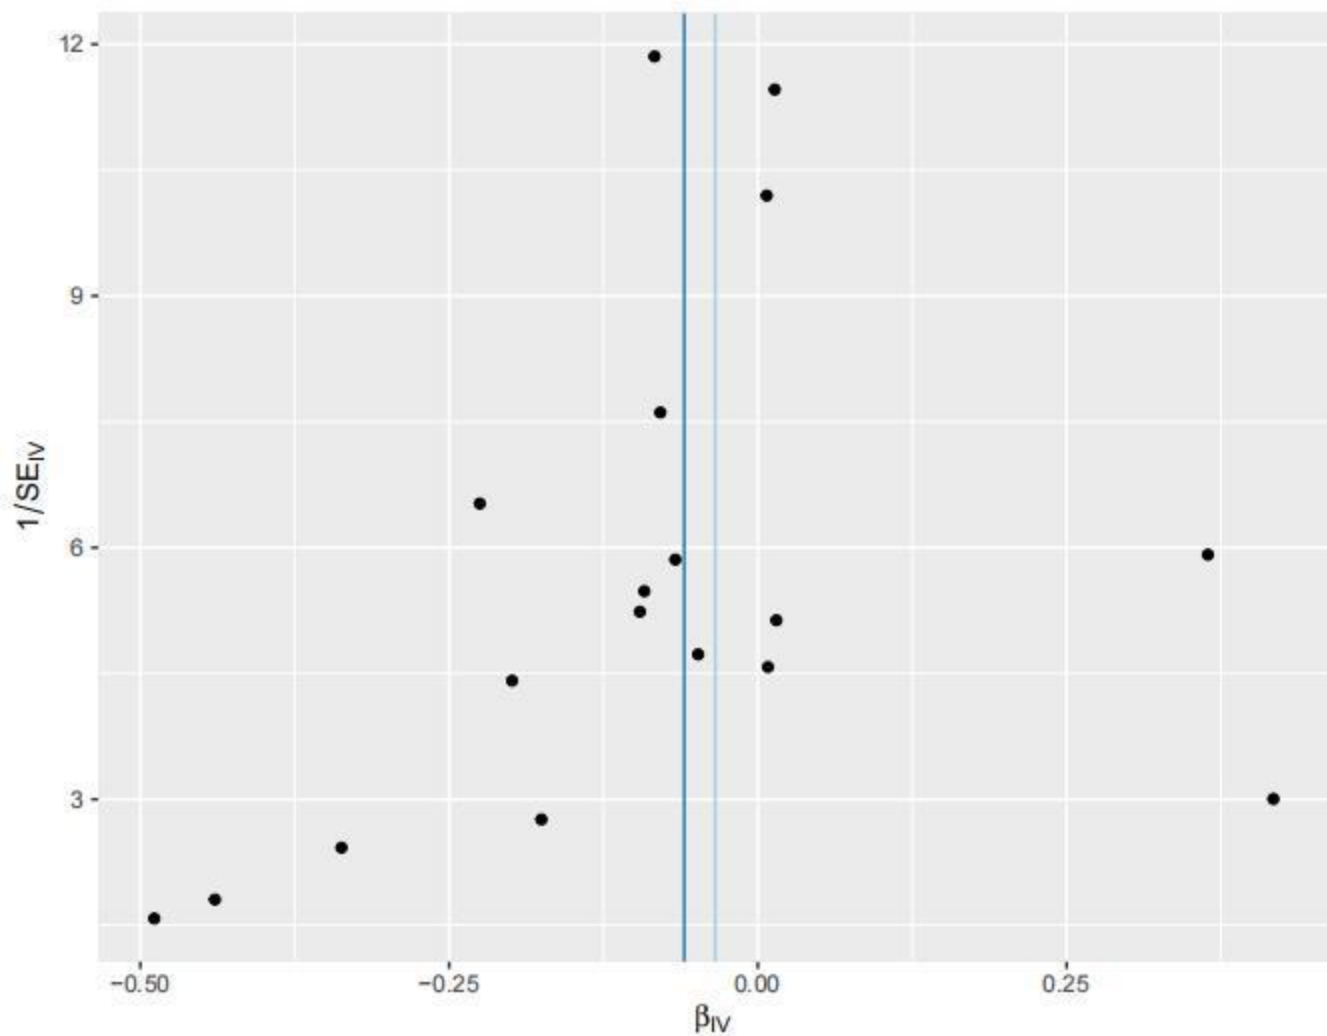

Funnel plot analyse of "IgD- CD24- AC" on 'Aplastic anemia'

### MR Method

- Inverse variance weighted
- MR Egger

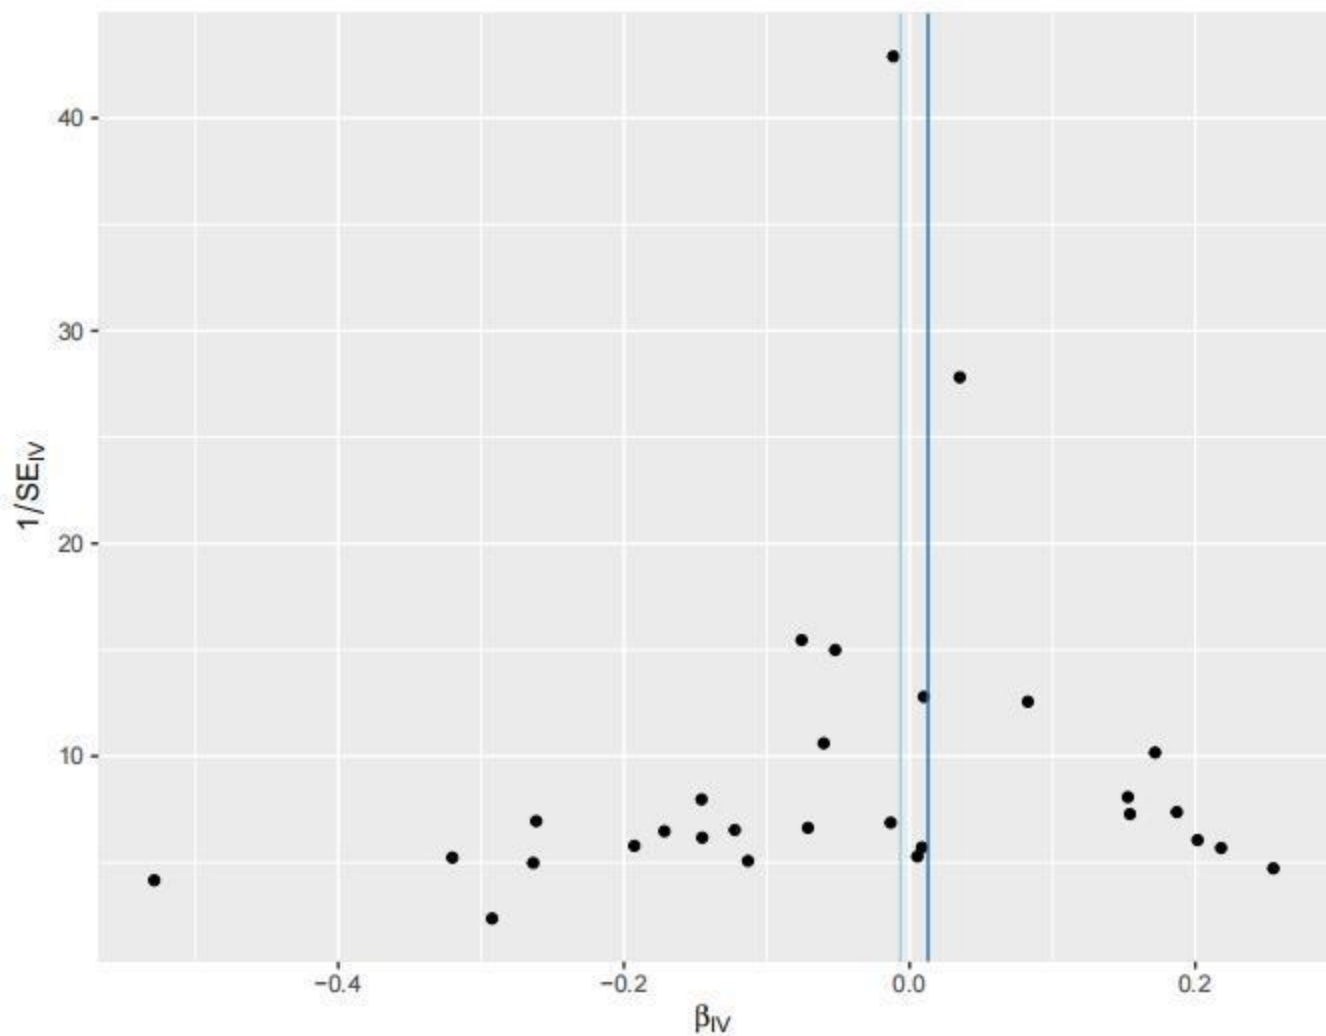

Funnel plot analysis of "CD33dim HLA DR+ CD11b- AC" on 'Aplastic anemia'

MR Method

- Inverse variance weighted
- MR Egger

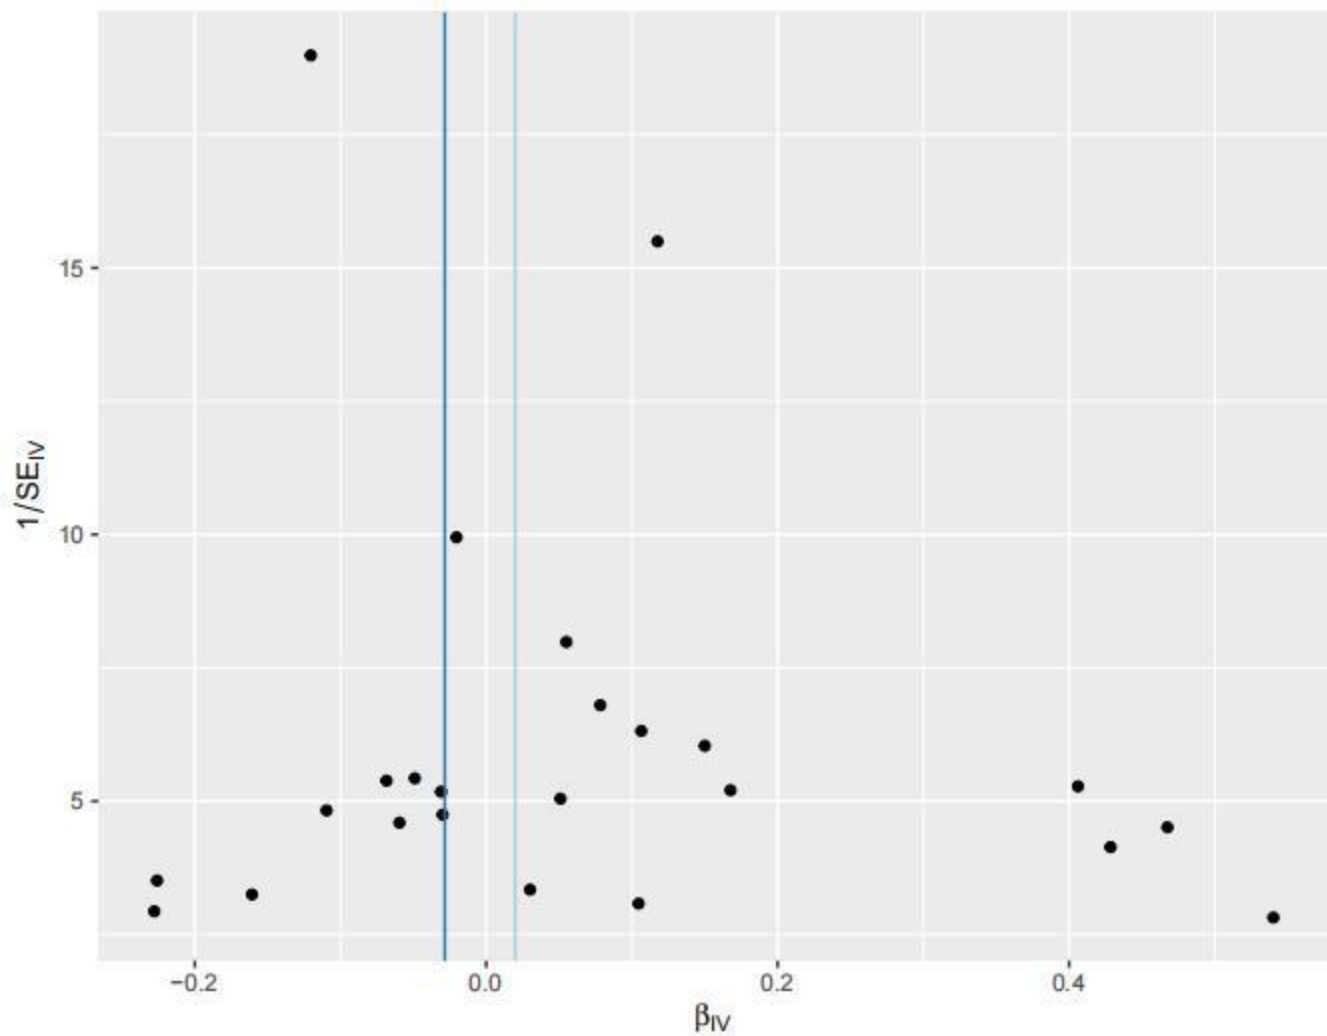

Funnel plot analyse of "CD45 on lymphocyte" on 'Aplastic anemia'

### MR Method

- Inverse variance weighted
- MR Egger

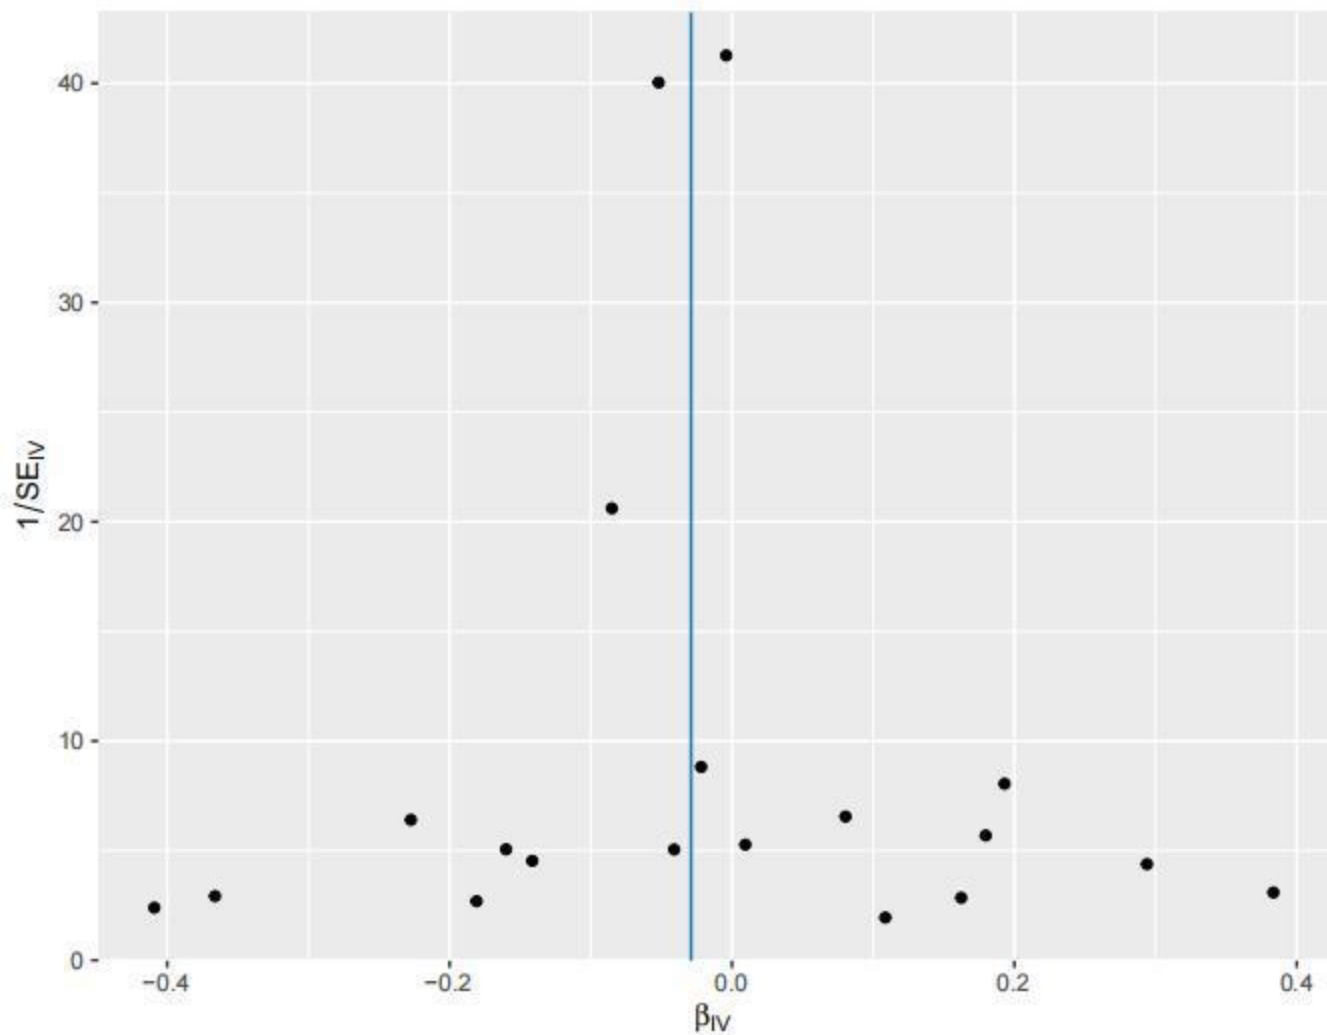

Funnel plot analyse of "CD62L- DC AC" on 'Aplastic anemia'

MR Method

Inverse variance weighted

MR Egger

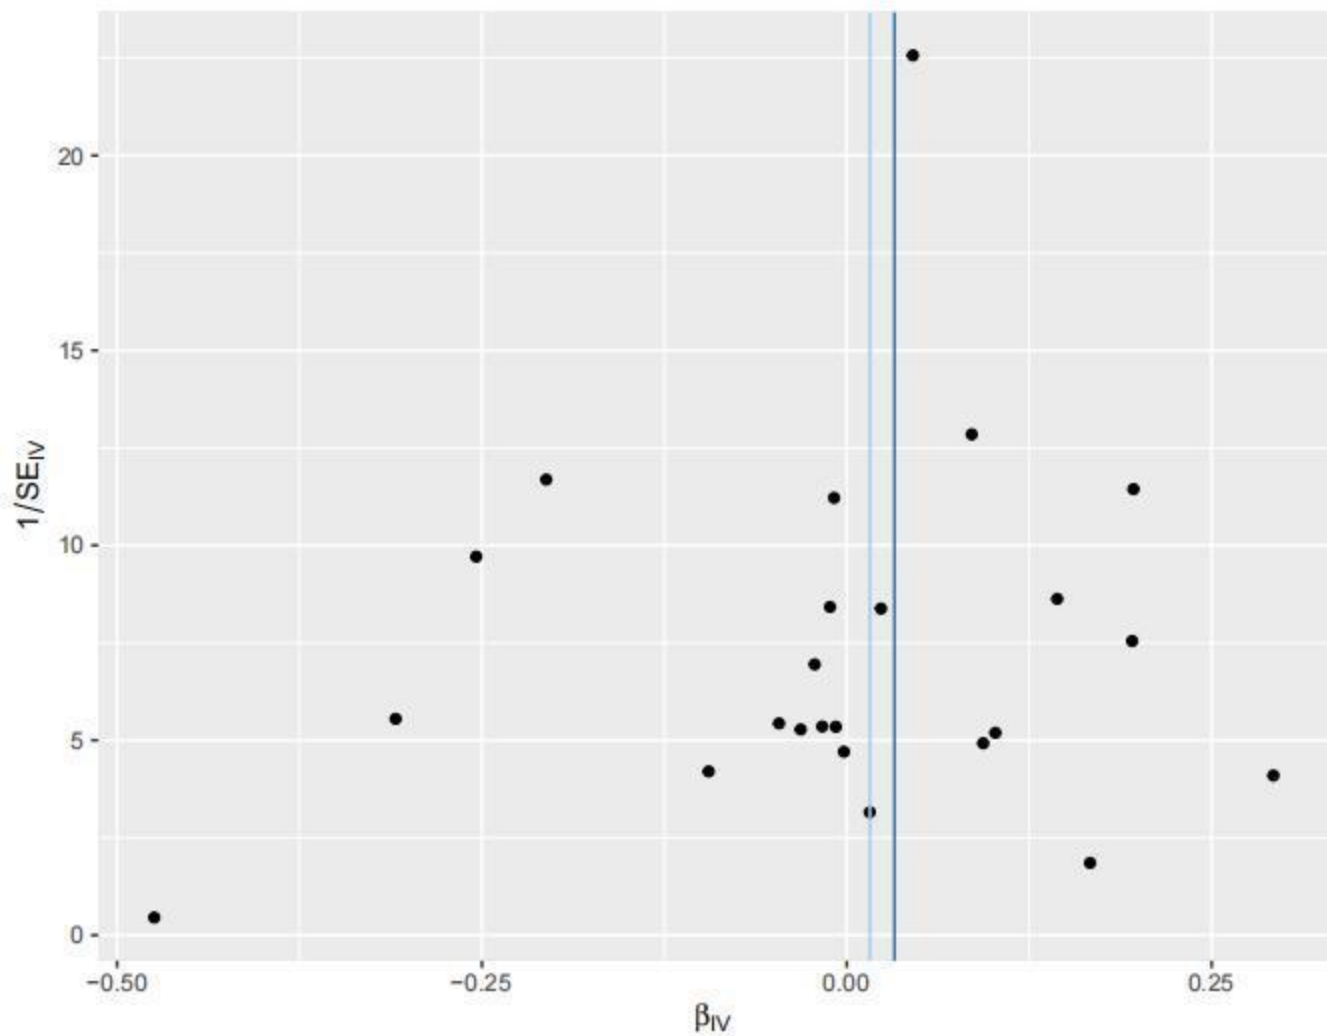

Funnel plot analysis of "CD8 on CD28+ CD45RA+ CD8br " on 'Aplastic anemia'

### MR Method

- Inverse variance weighted
- MR Egger

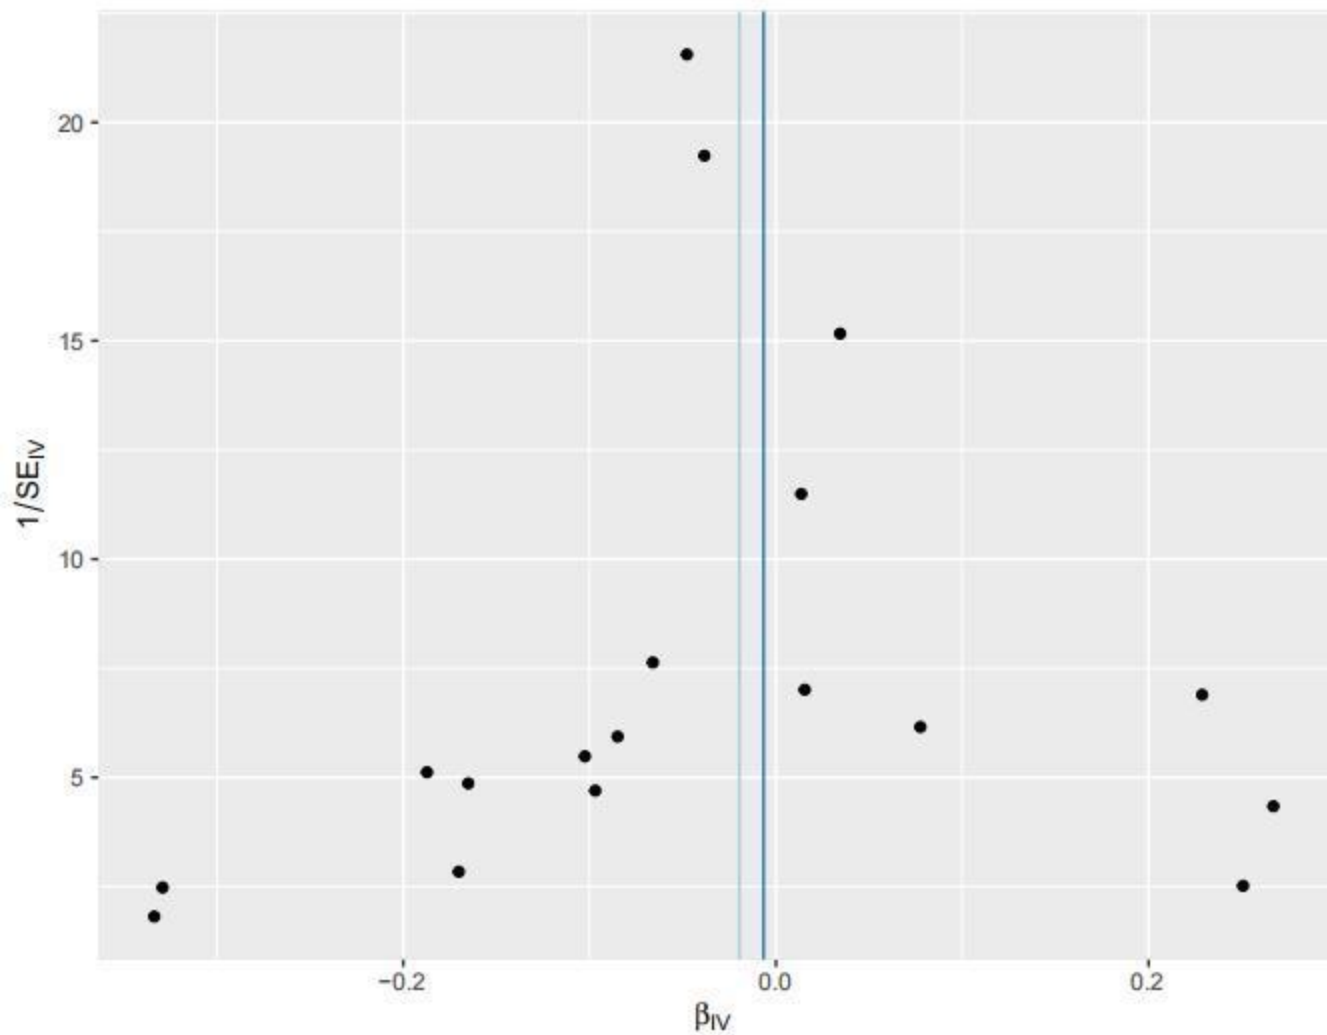

Funnel plot analyse of "IgD- CD24- %B cell" on 'Aplastic anemia'



### MR Method

Inverse variance weighted

MR Egger

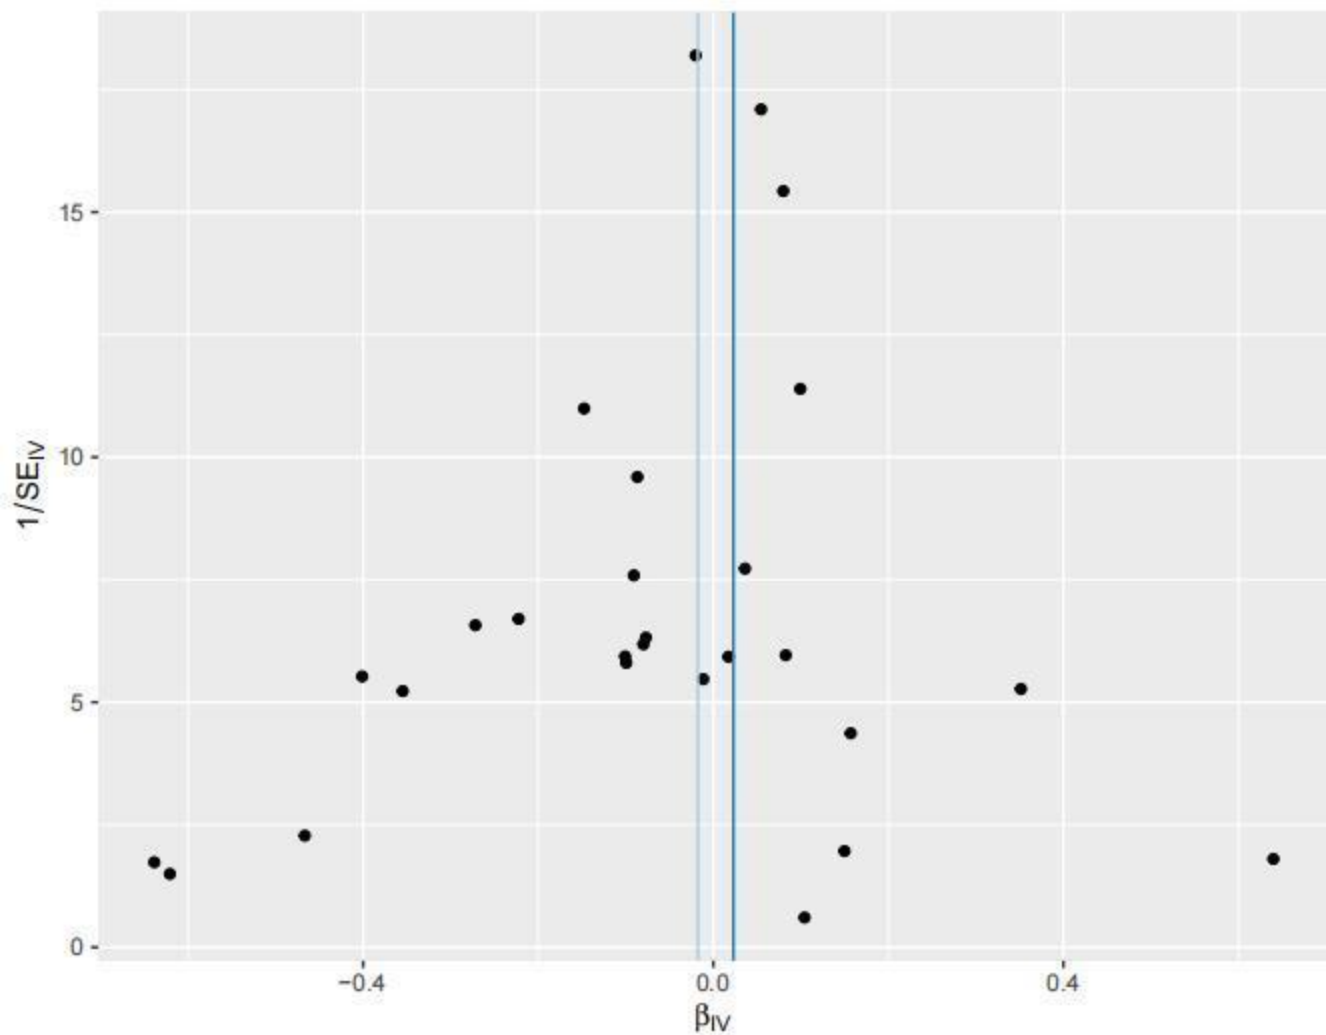

Funnel plot analysis of "CD3 on TD CD4+" on 'Aplastic anemia'

MR Method

- Inverse variance weighted
- MR Egger

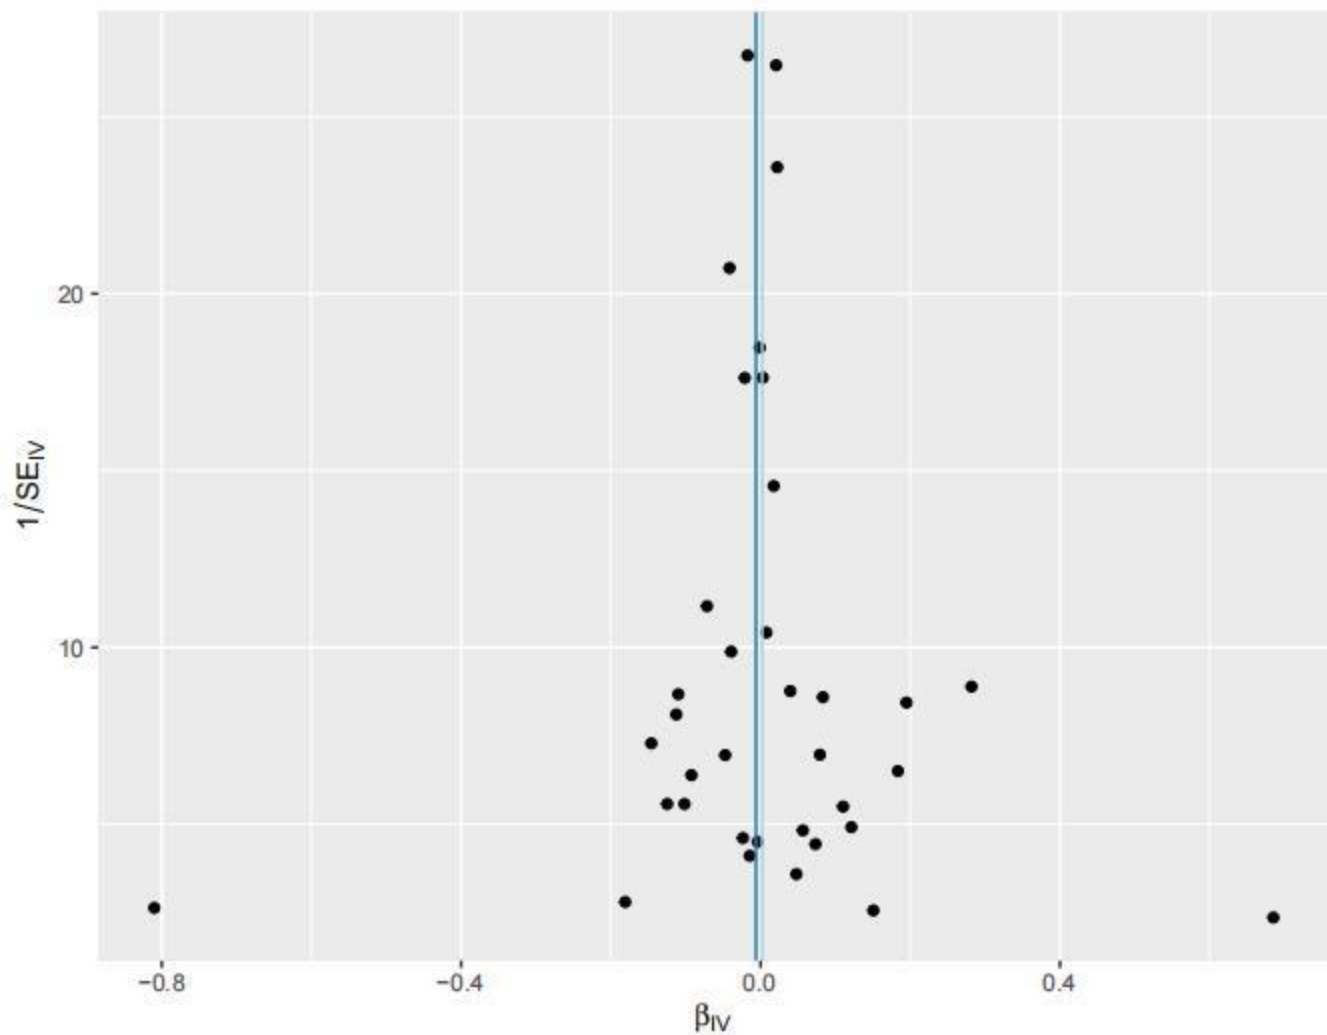

Funnel plot analyse of "CD33- HLA DR+ AC" on 'Aplastic anemia'

### MR Method

- Inverse variance weighted
- MR Egger

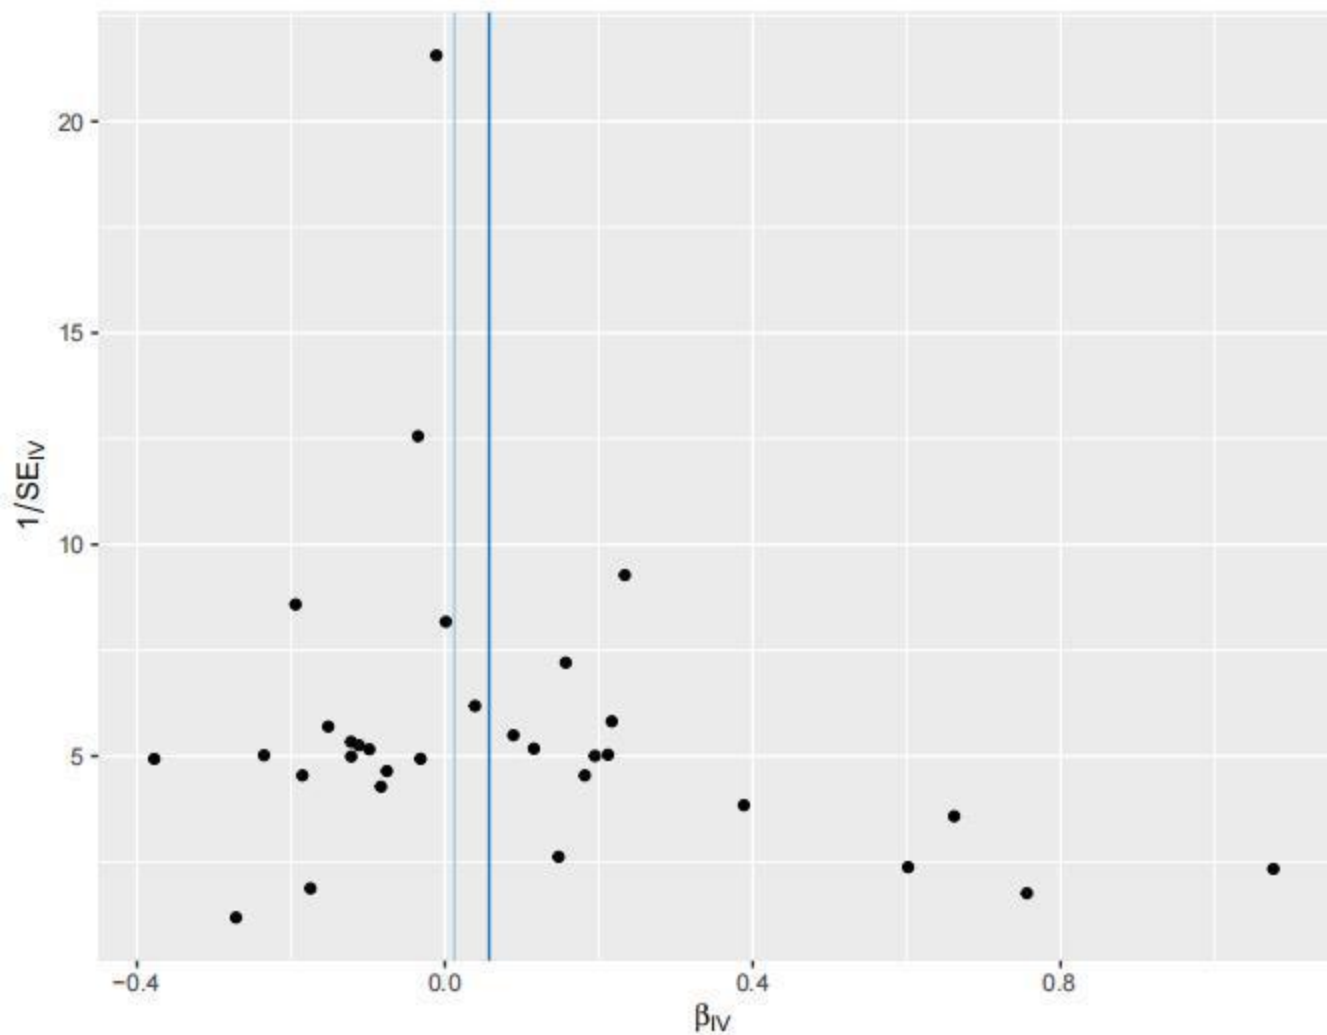

Funnel plot analyse of "IgD on transitional" on 'Aplastic anemia'

MR Method

- Inverse variance weighted
- MR Egger

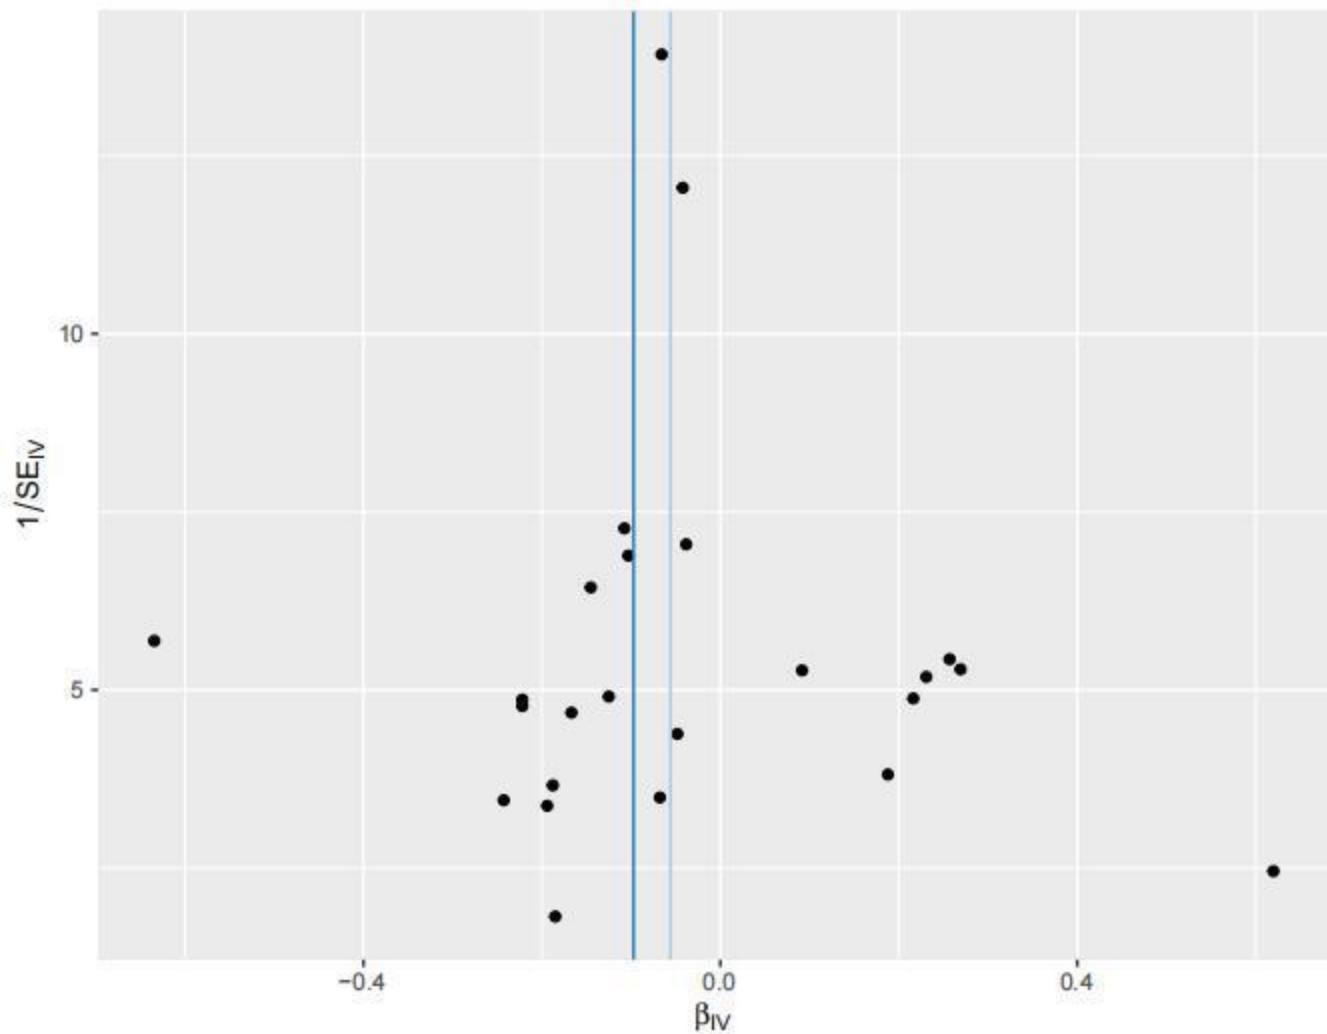

Funnel plot analysis of "Granulocyte AC" on 'Aplastic anemia'

MR Method

- Inverse variance weighted
- MR Egger

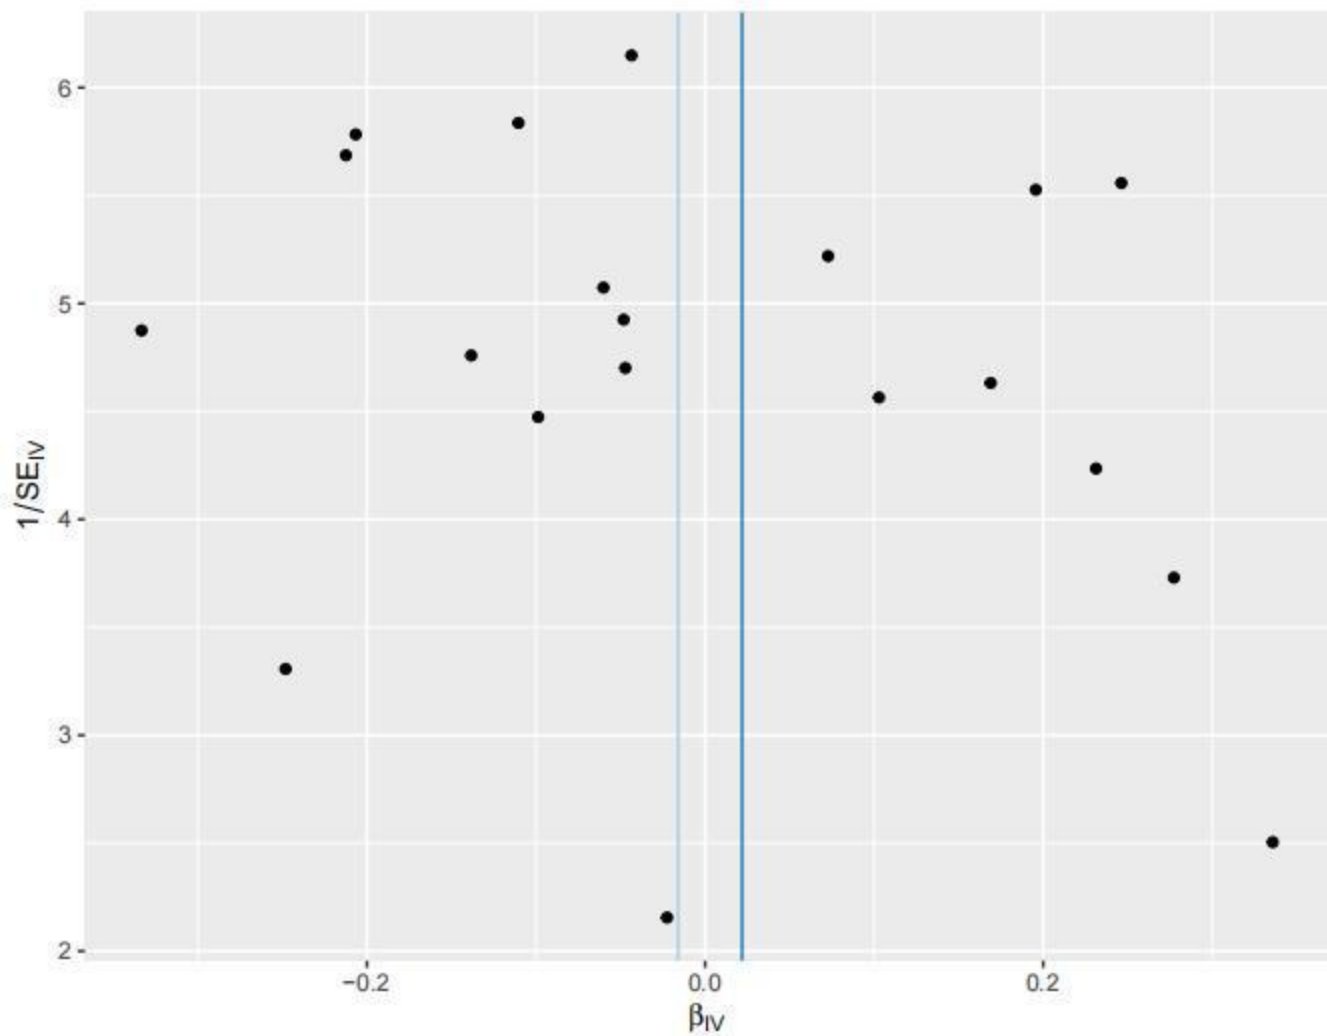

Funnel plot analysis of "CD38 on CD20-" on 'Aplastic anemia'

MR Method

- Inverse variance weighted
- MR Egger

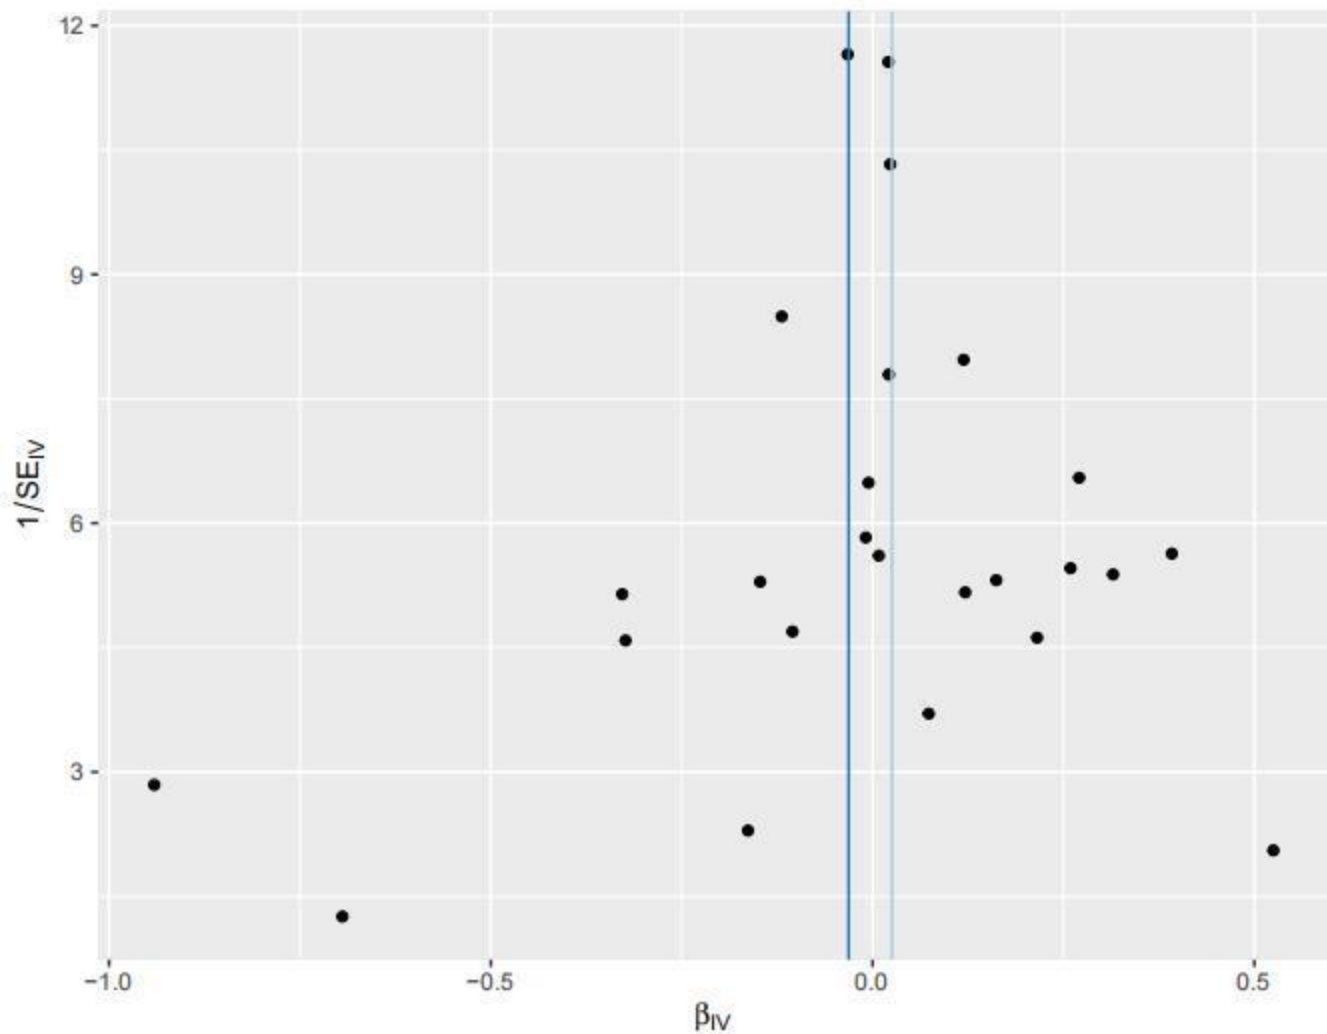

Funnel plot analysis of "CD8 on CD39+ CD8br " on 'Aplastic anemia'

MR Method

- Inverse variance weighted
- MR Egger

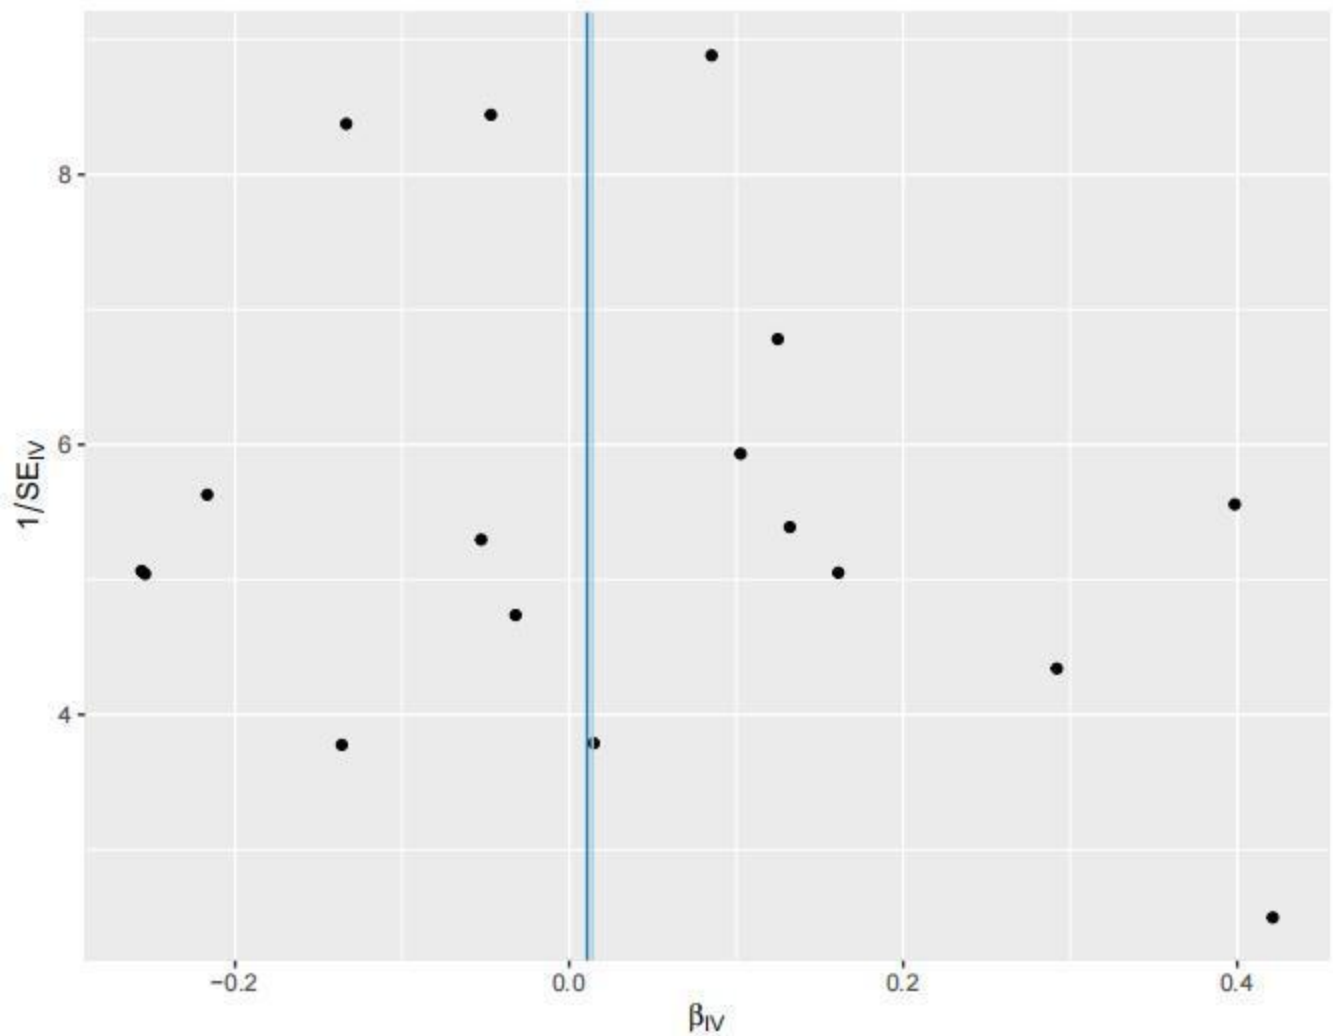

Funnel plot analyse of "T cell %lymphocyte" on 'Aplastic anemia'

MR Method

- Inverse variance weighted
- MR Egger

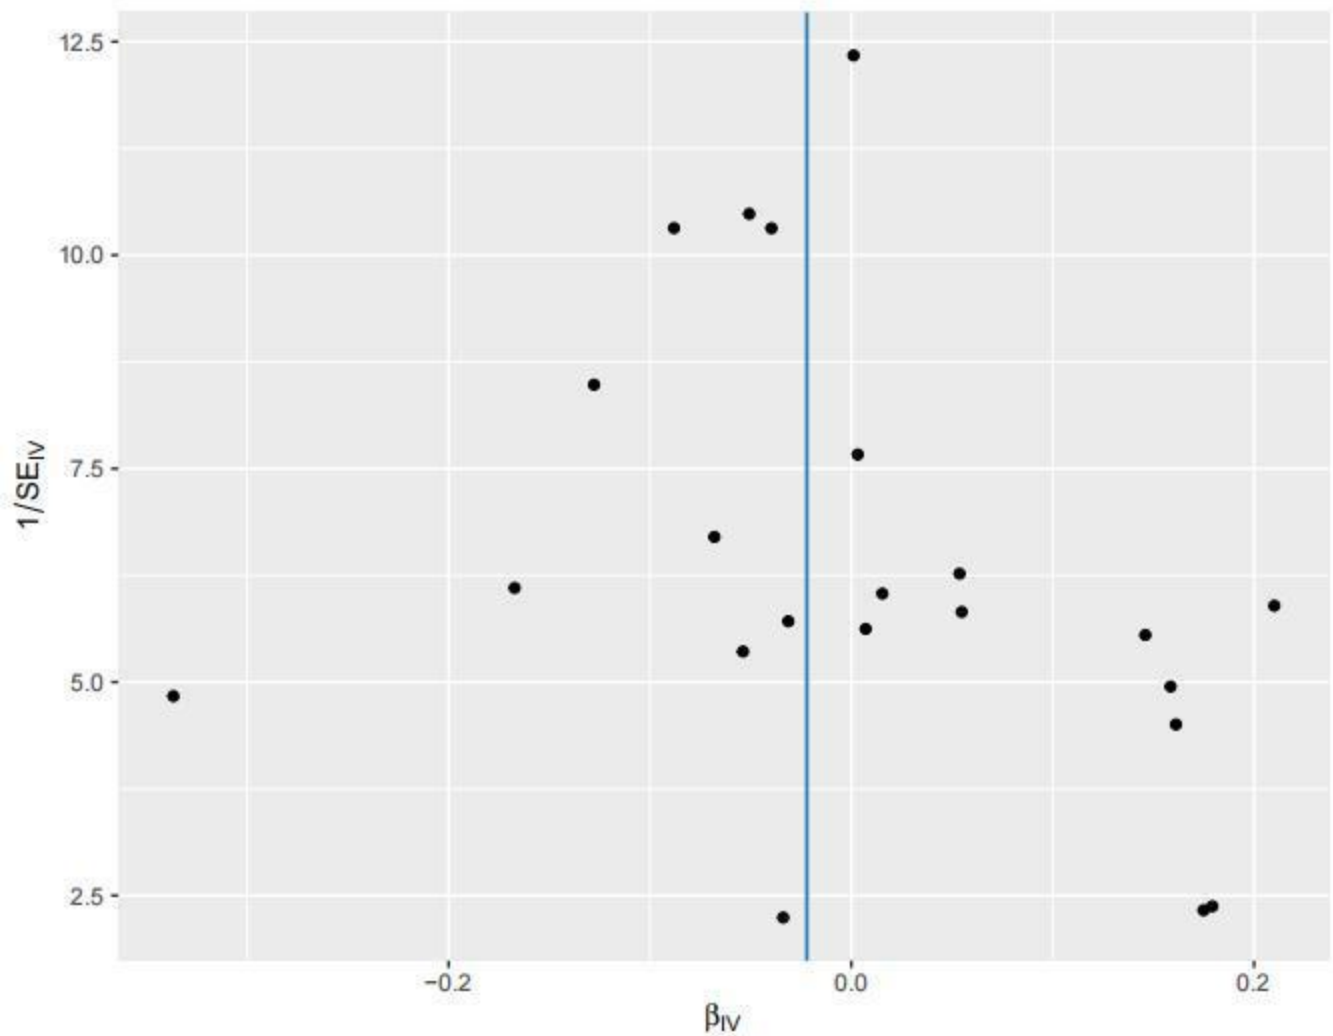

Funnel plot analyse of "CD45RA on naive CD8br" on 'Aplastic anemia'



MR Method

- Inverse variance weighted
- MR Egger

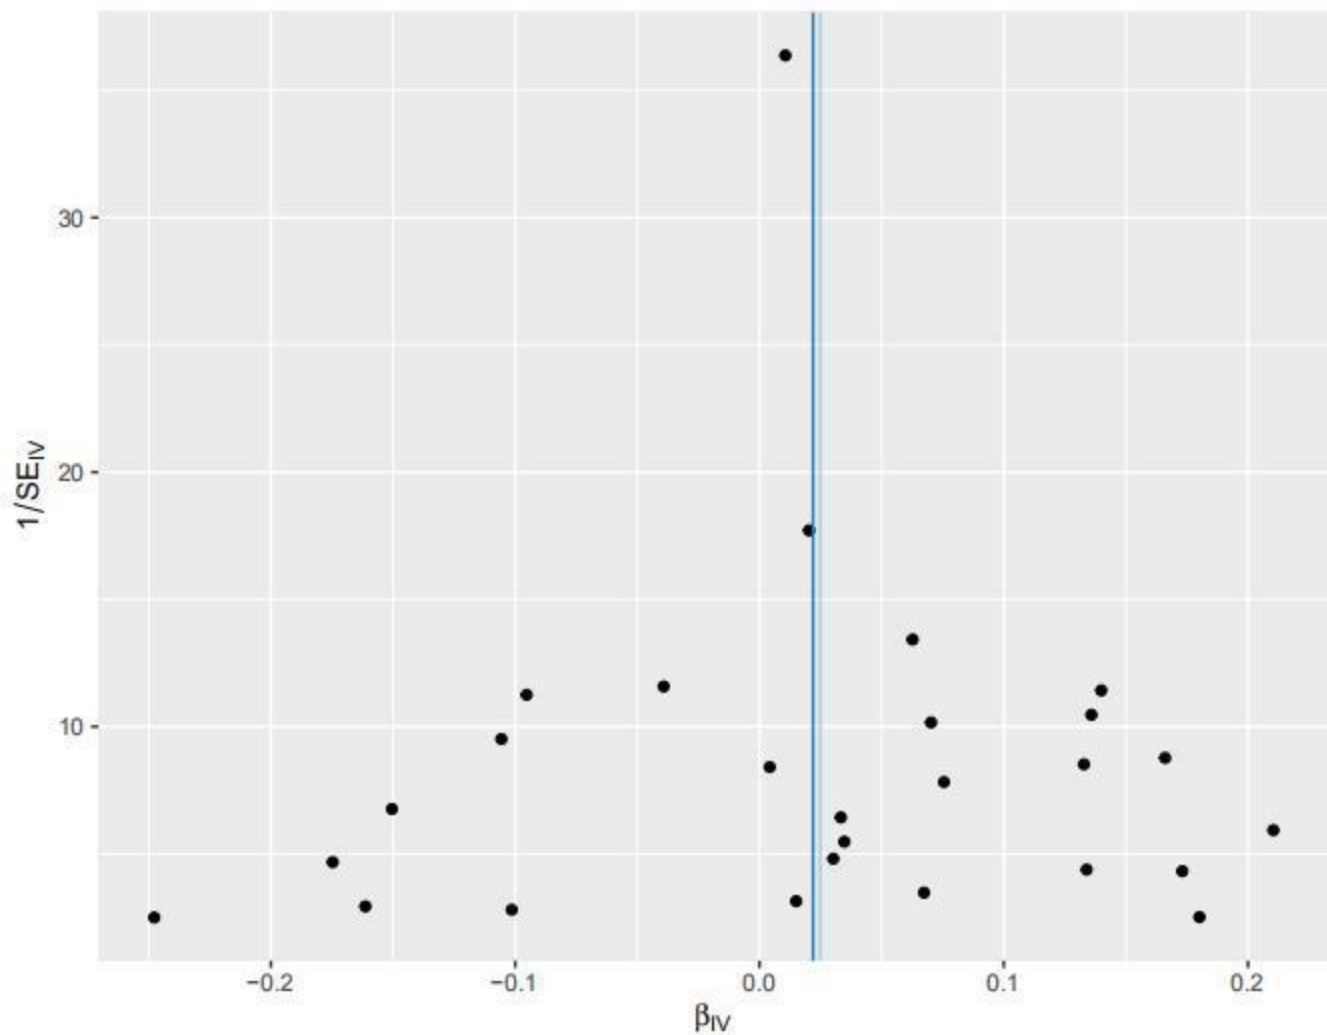

Funnel plot analyse of "BAFF-R on IgD+ CD38br" on 'Aplastic anemia'

MR Method

- Inverse variance weighted
- MR Egger

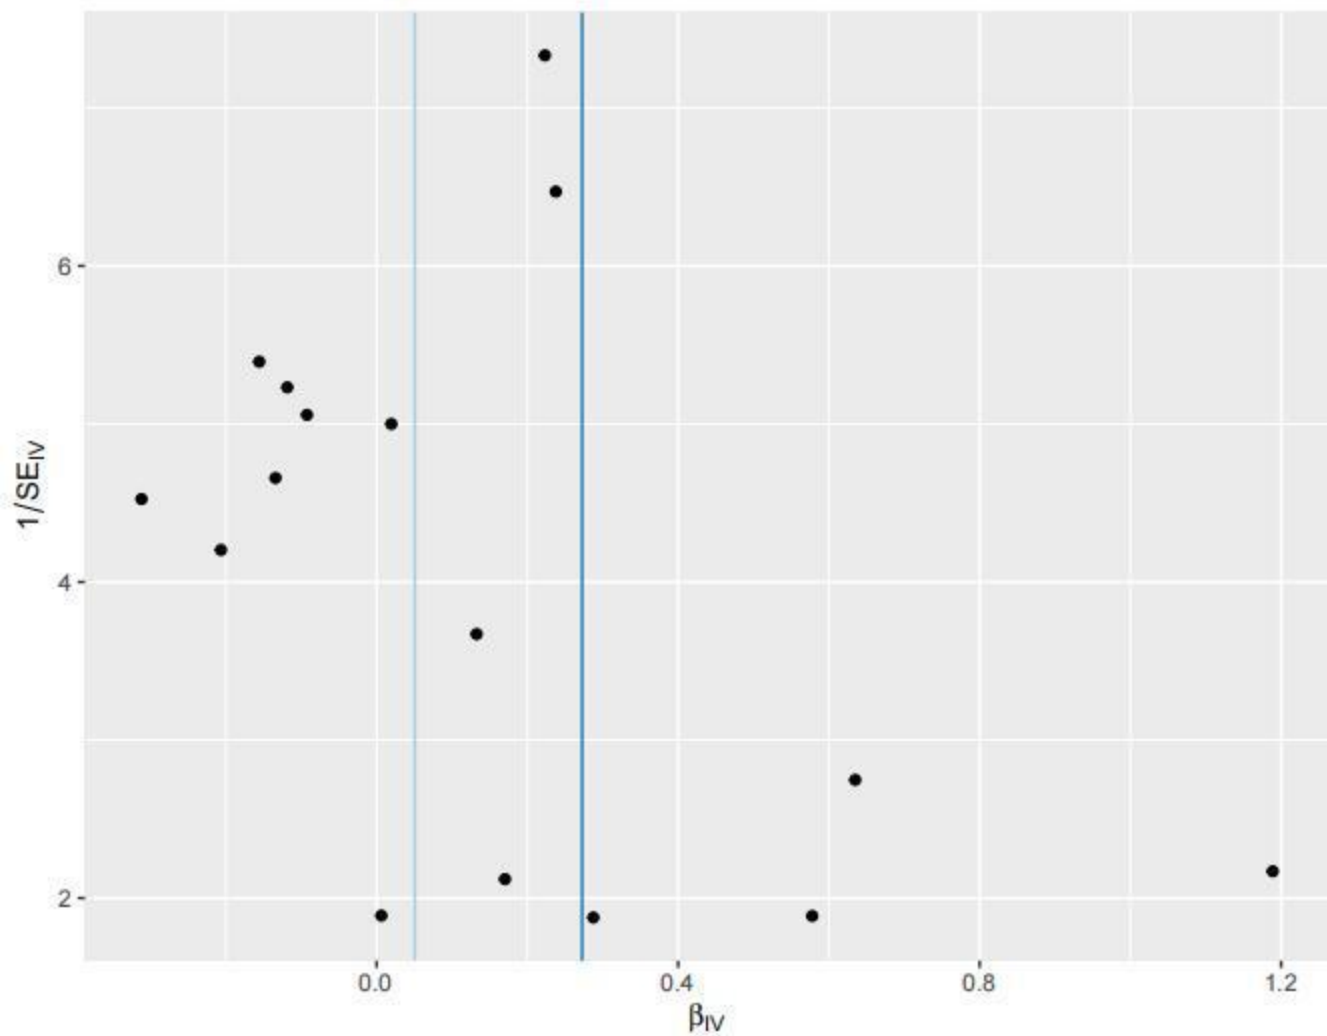

Funnel plot analyse of "CD38 on IgD+" on 'Aplastic anemia'

### MR Method

Inverse variance weighted

MR Egger

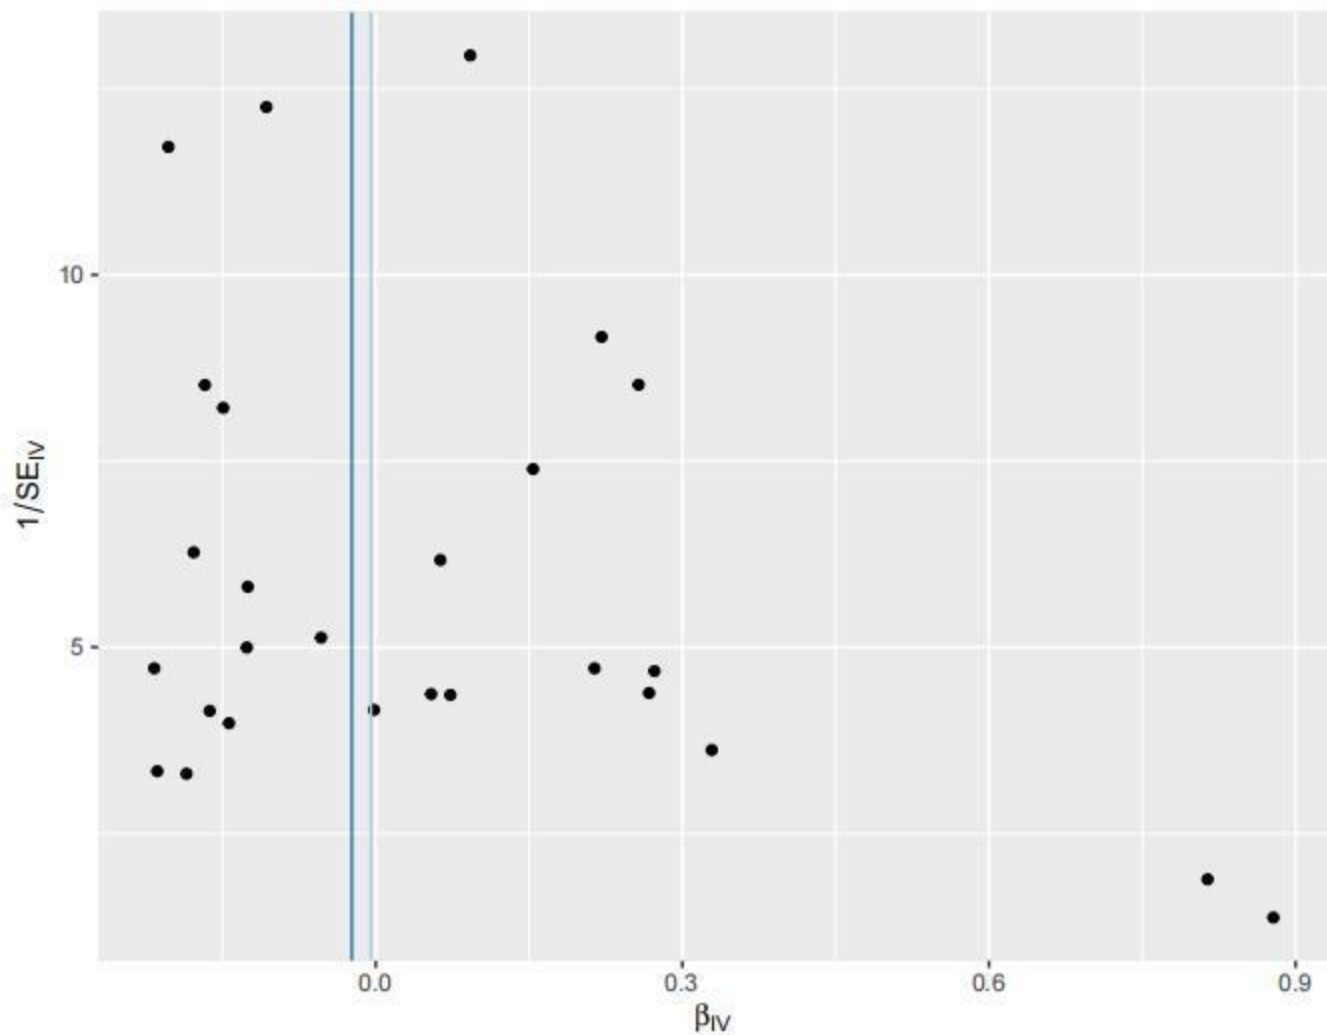

Funnel plot analyse of "CD8dim NKT %lymphocyte" on 'Aplastic anemia'

MR Method

Inverse variance weighted

MR Egger

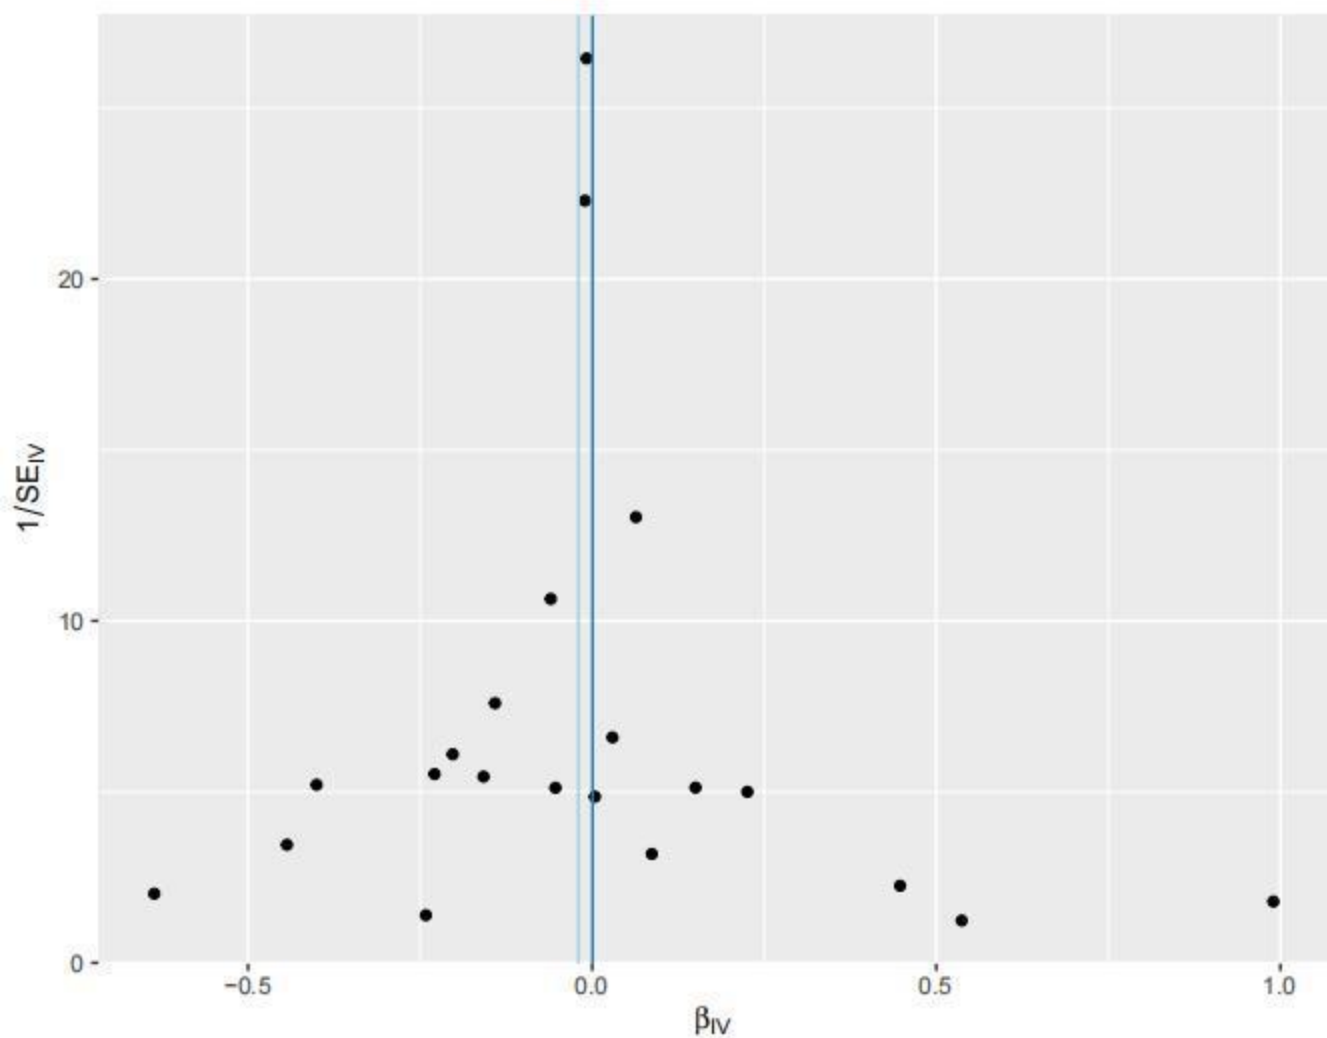

Funnel plot analyse of "IgD on unsw mem" on 'Aplastic anemia'

MR Method

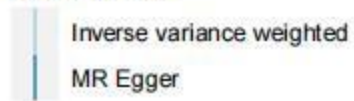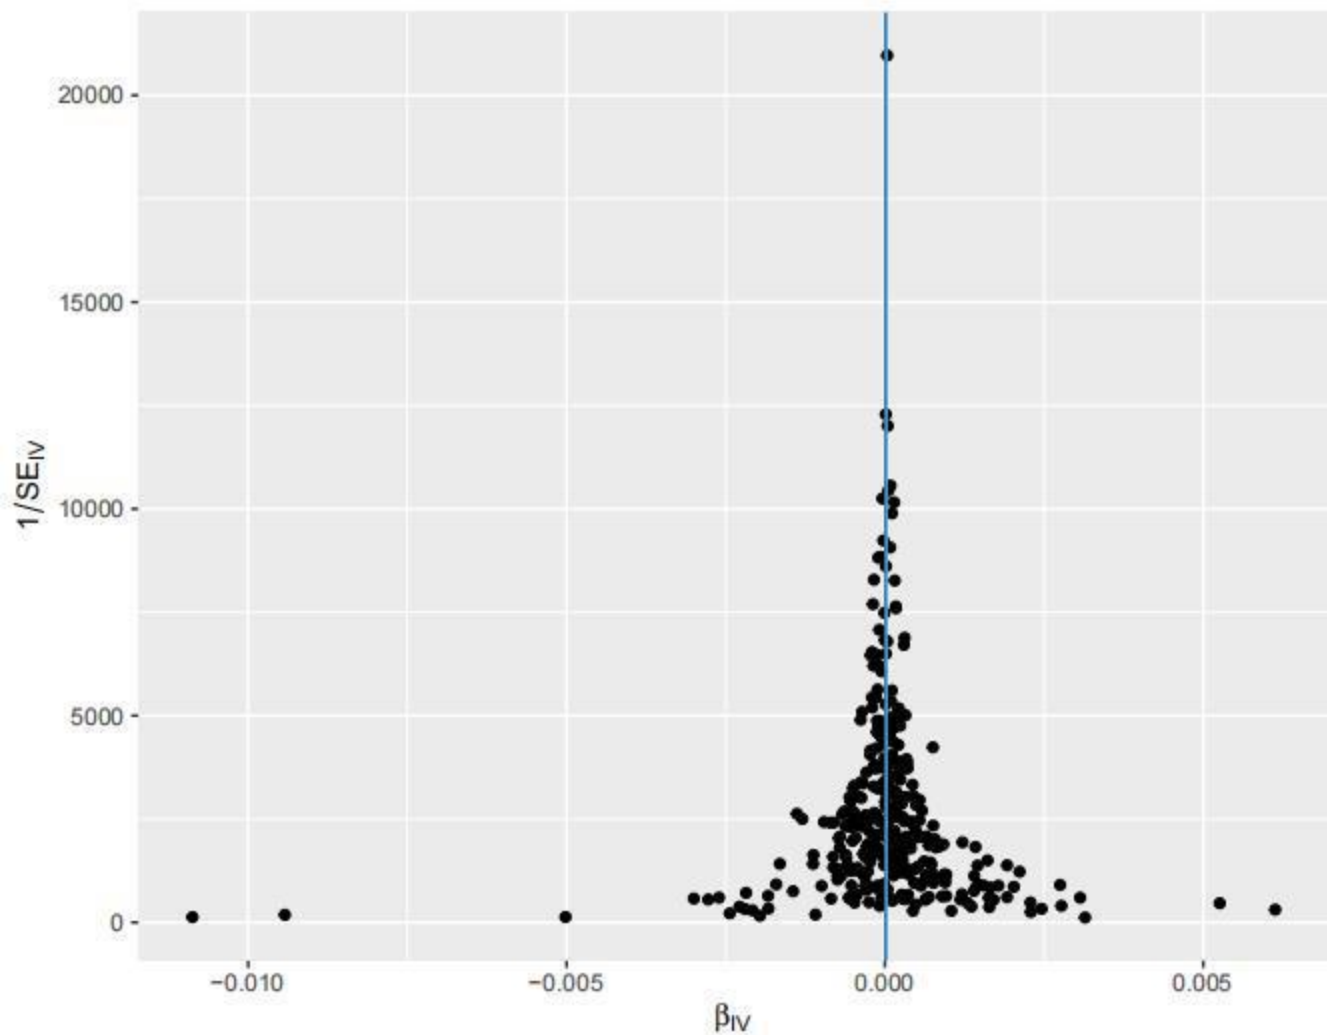

Funnel plot analyse of "CD45RA- CD28- CD8br AC" on 'Aplastic anemia'

### MR Method

- Inverse variance weighted
- MR Egger

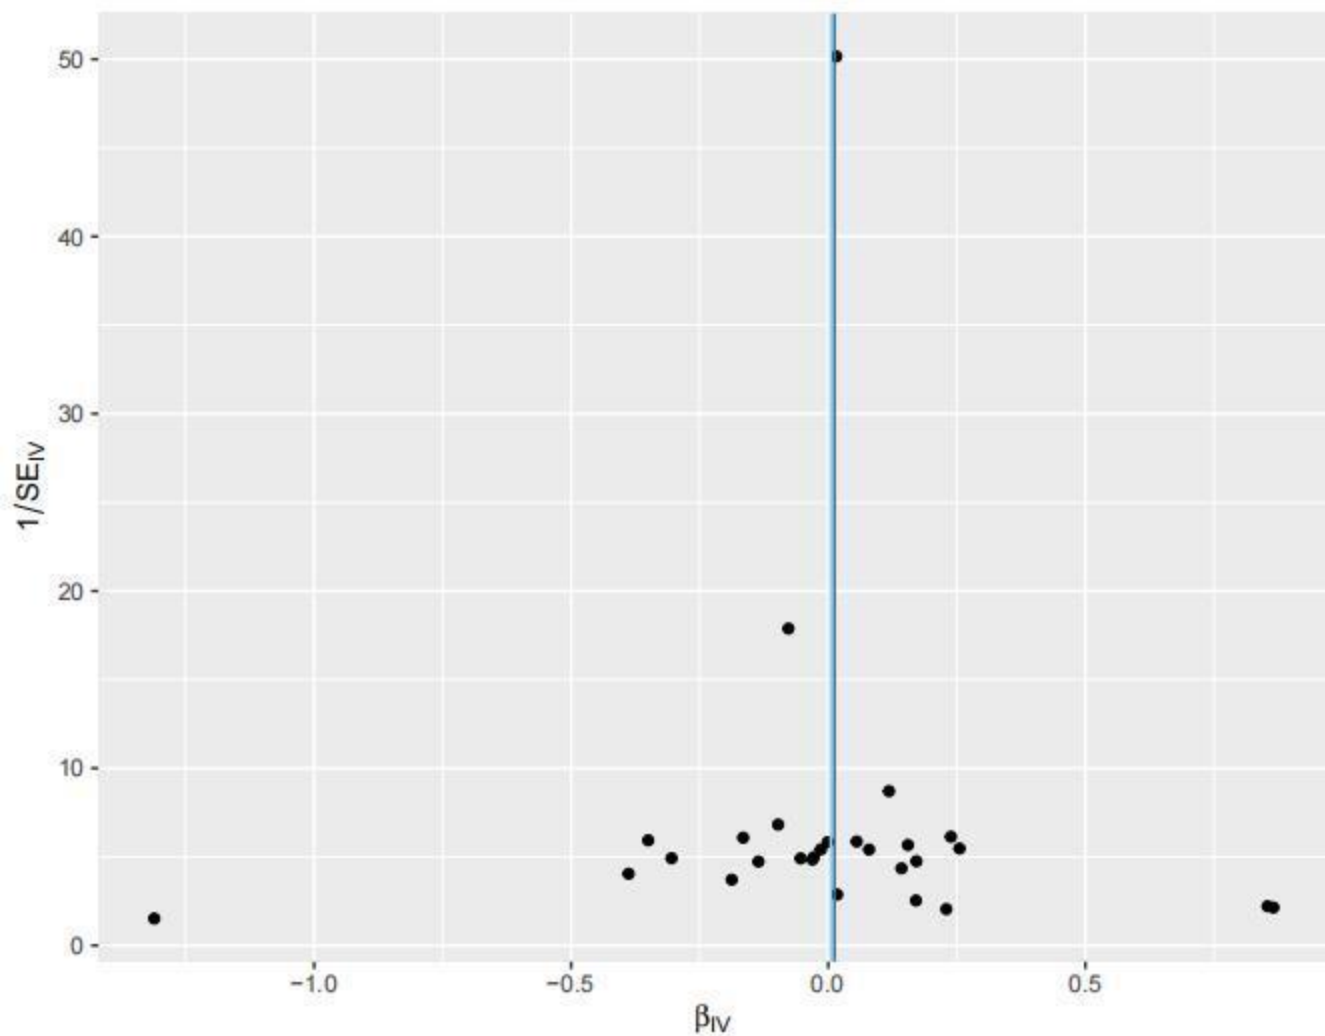

Funnel plot analyse of "Memory B cell %lymphocyte" on 'Aplastic anemia'

MR Method

- Inverse variance weighted
- MR Egger

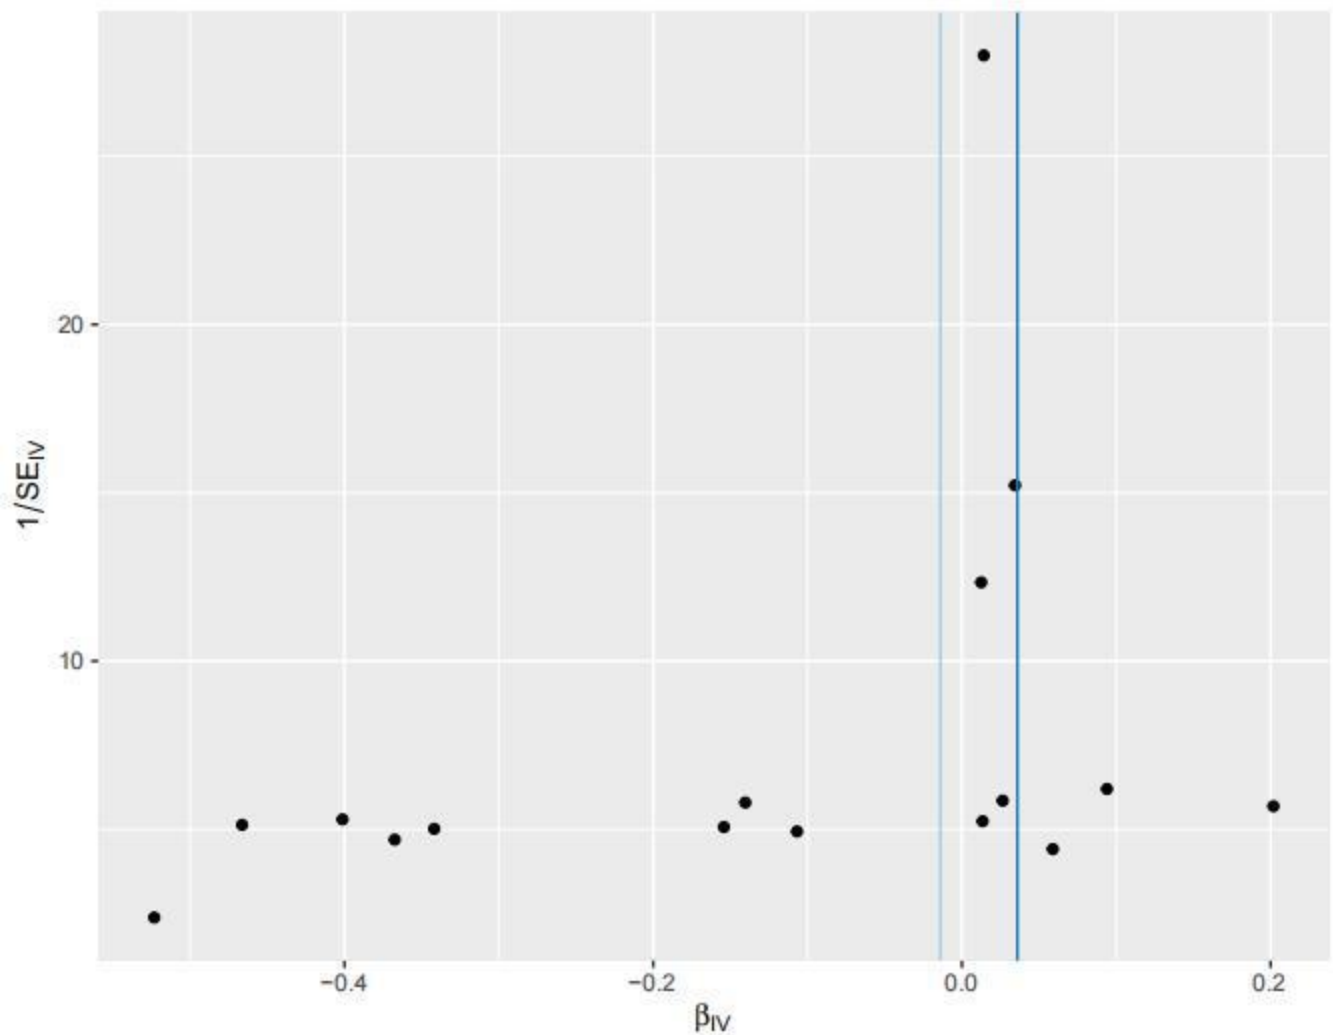

Funnel plot analysis of "CD27 on CD20-" on 'Aplastic anemia'

MR Method

Inverse variance weighted

MR Egger

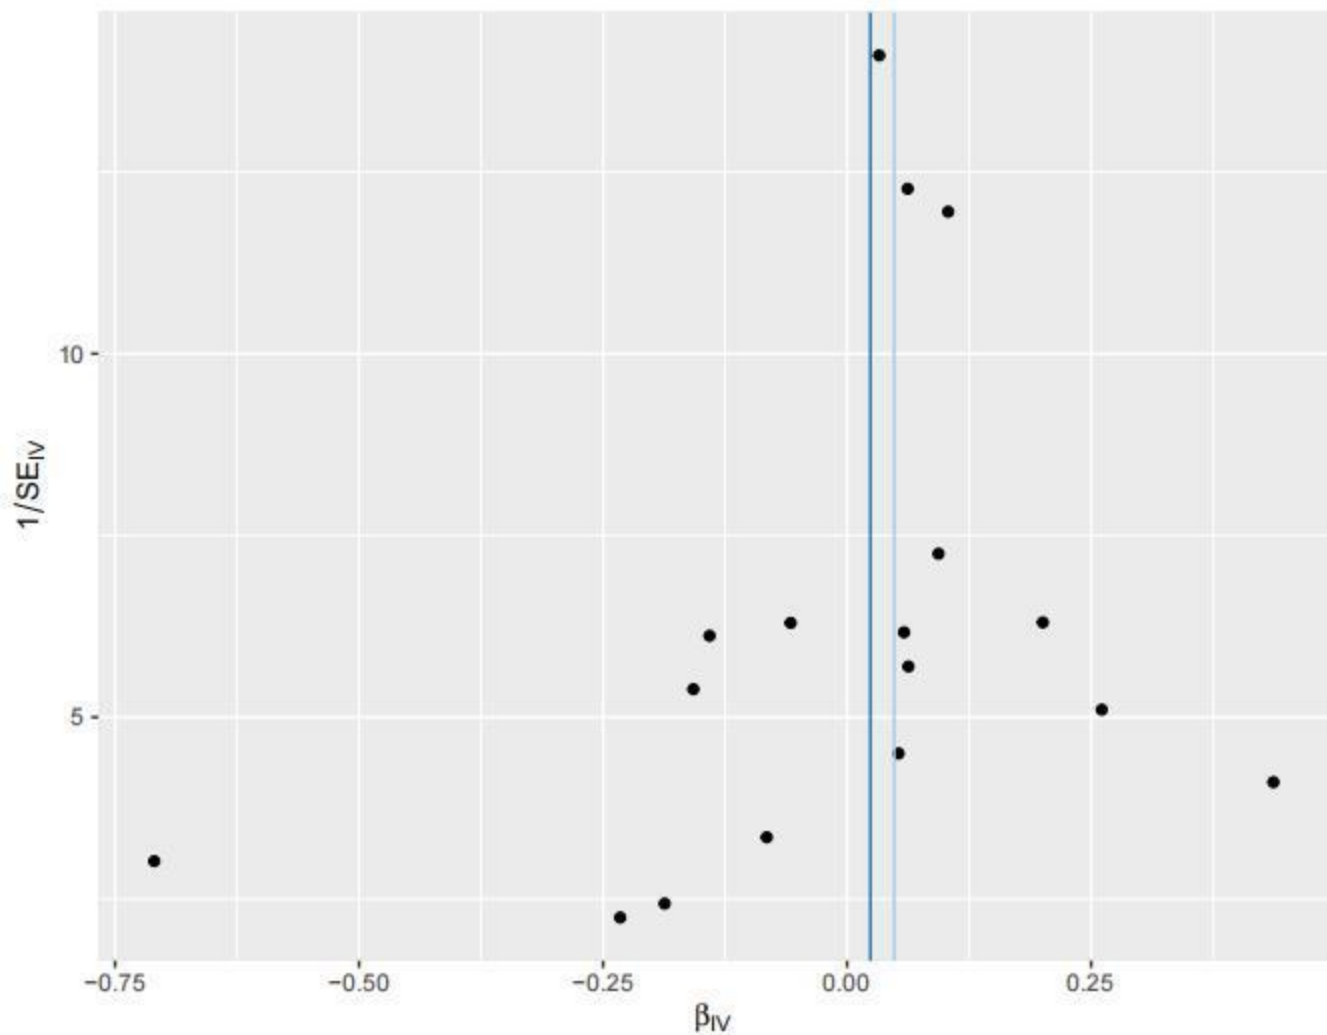

Funnel plot analyse of "IgD+ %B cell" on 'Aplastic anemia'



### MR Method

- Inverse variance weighted
- MR Egger

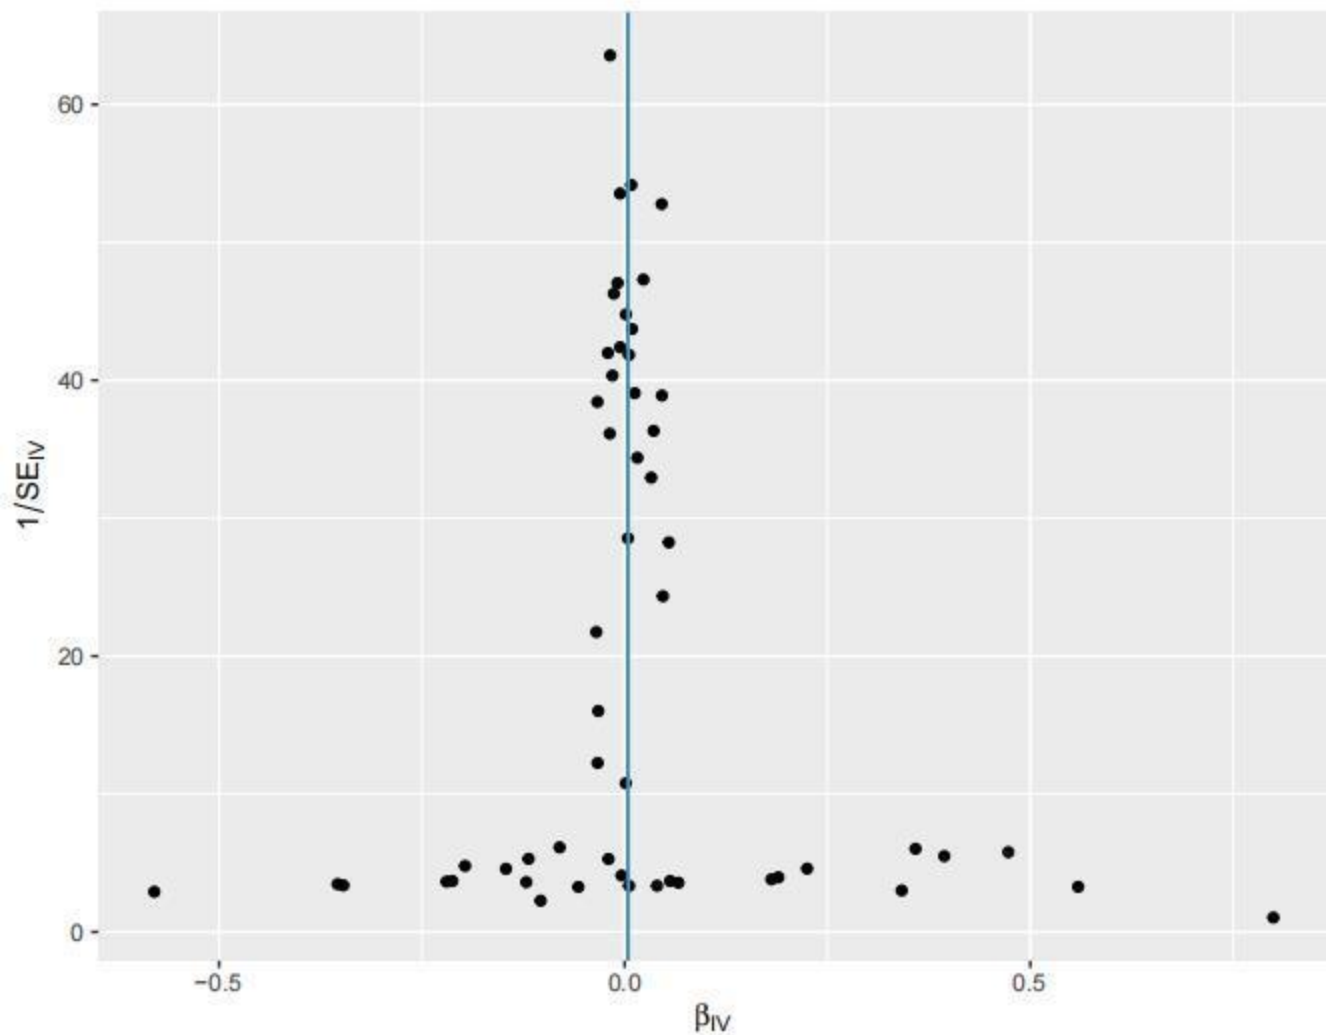

Funnel plot analyse of "CD28+ CD45RA+ CD8br AC" on 'Aplastic anemia'

### MR Method

Inverse variance weighted

MR Egger

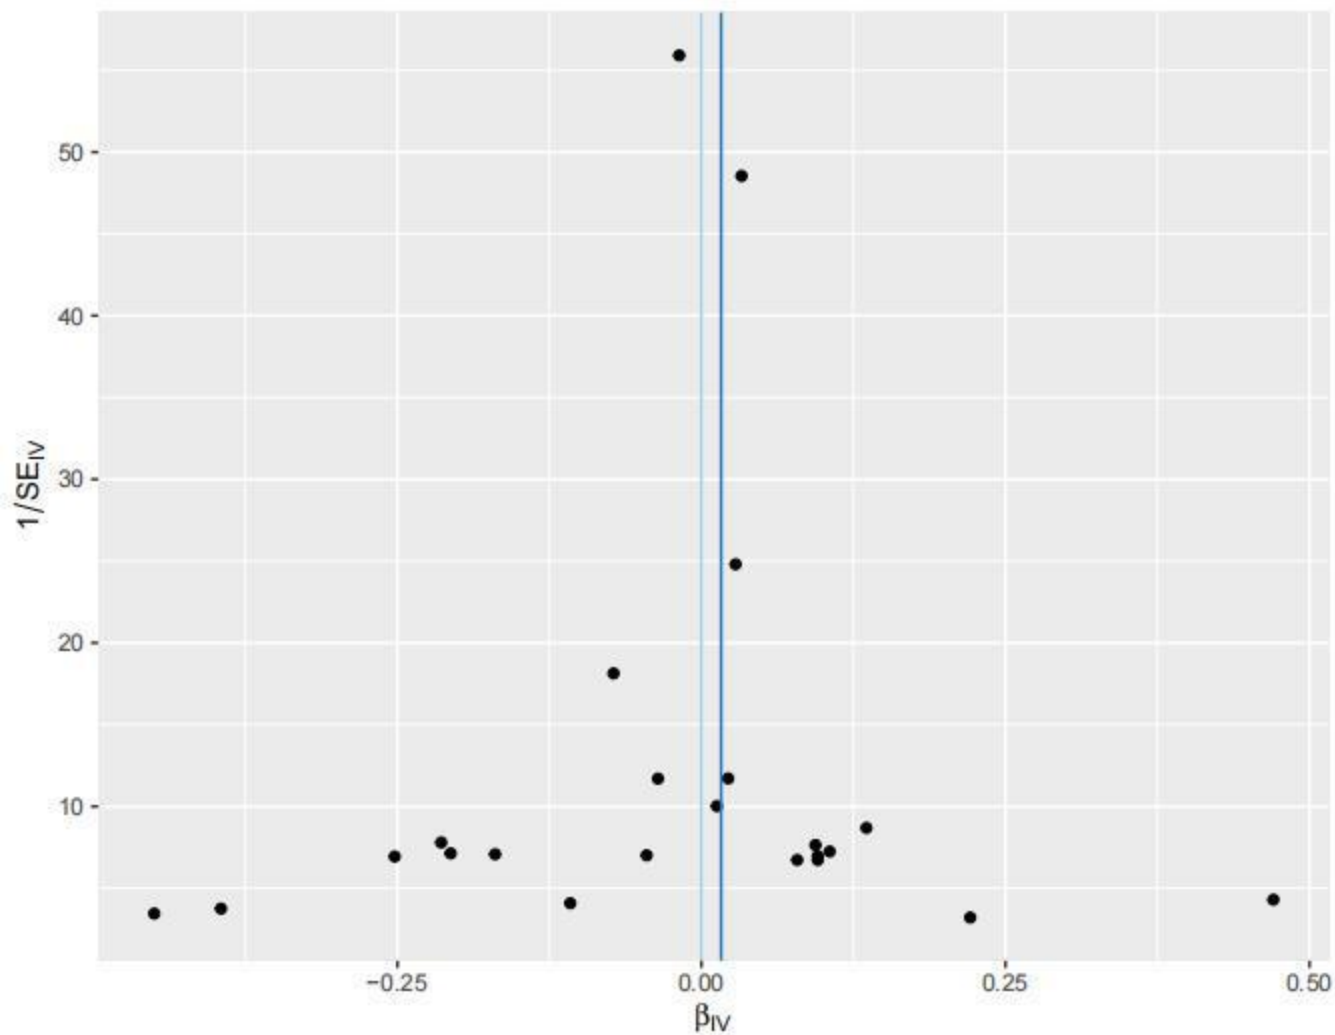

Funnel plot analyse of "CD33 on basophil " on 'Aplastic anemia'

MR Method

- Inverse variance weighted
- MR Egger

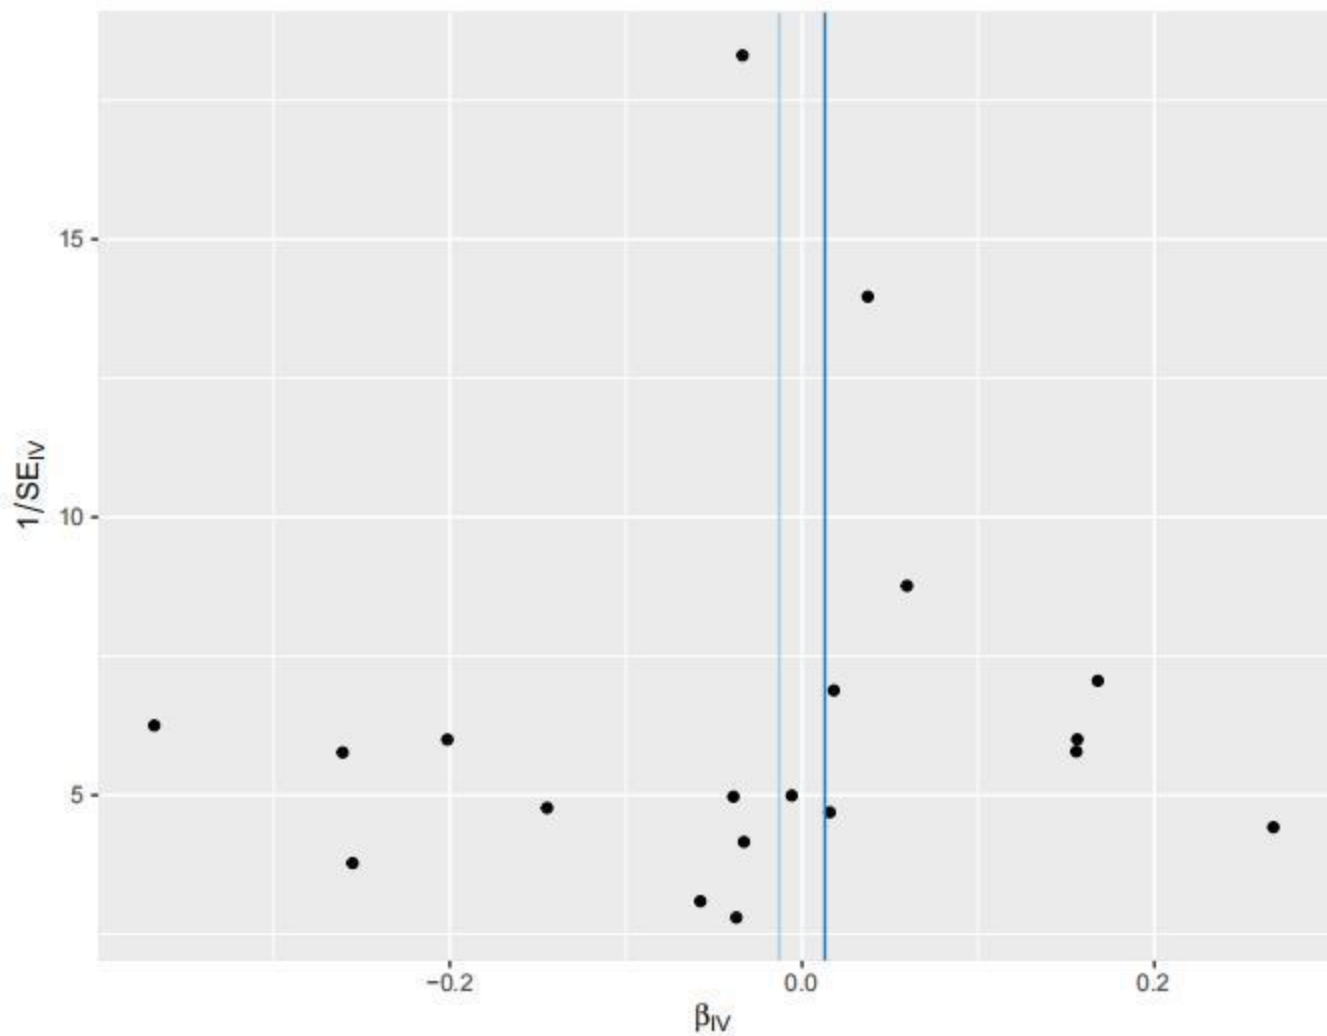

Funnel plot analyse of "CD25 on CD20- CD38-" on 'Aplastic anemia'

### MR Method

Inverse variance weighted

MR Egger

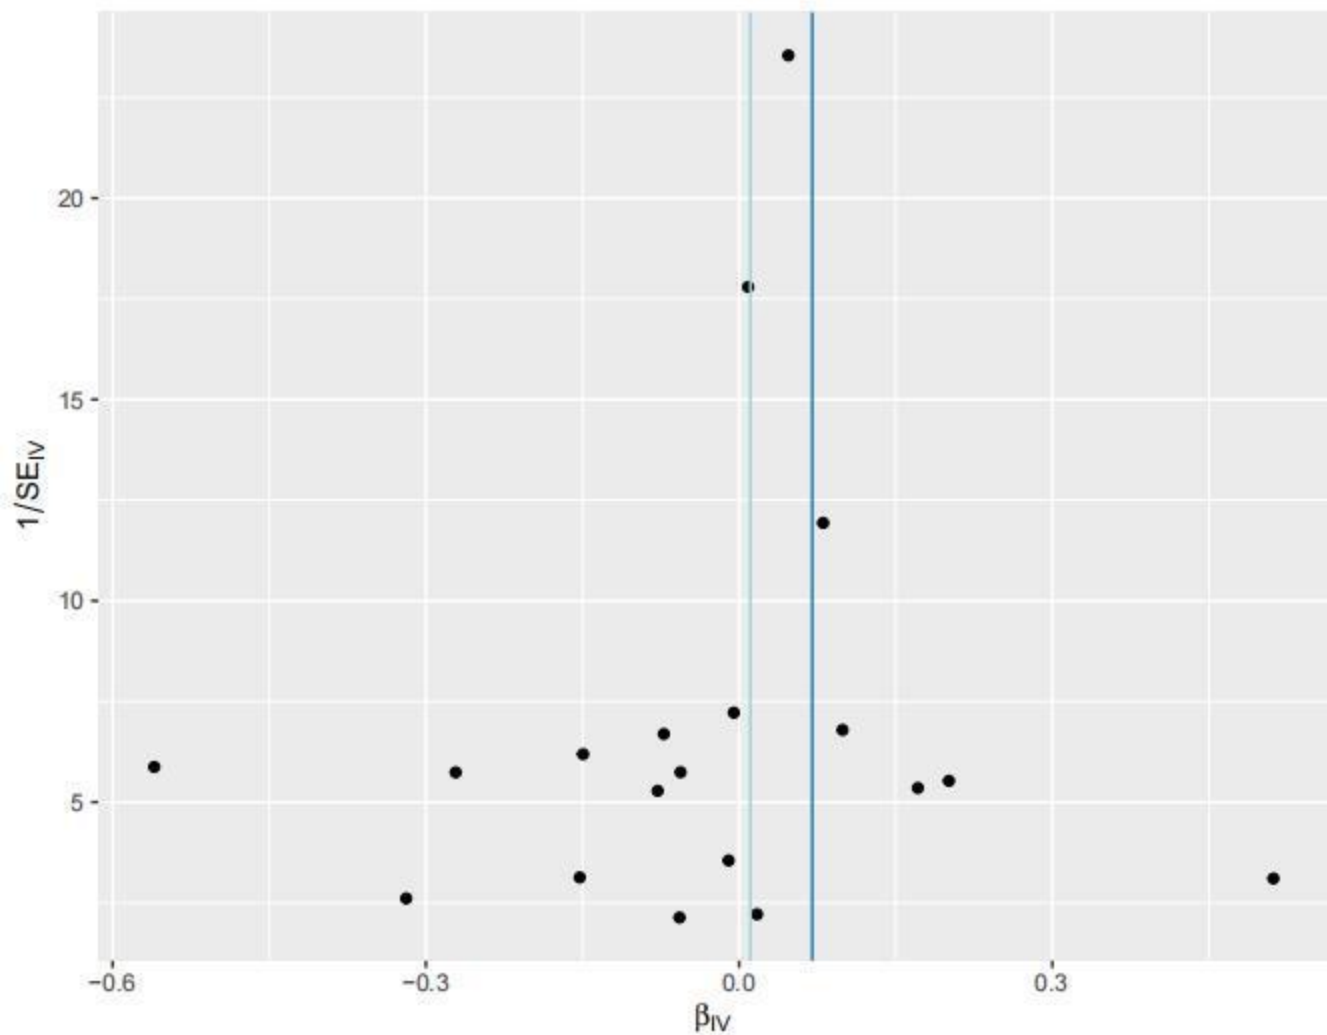

Funnel plot analyse of "CCR2 on CD62L+ plasmacytoid DC" on 'Aplastic anemia'

MR Method

- Inverse variance weighted
- MR Egger

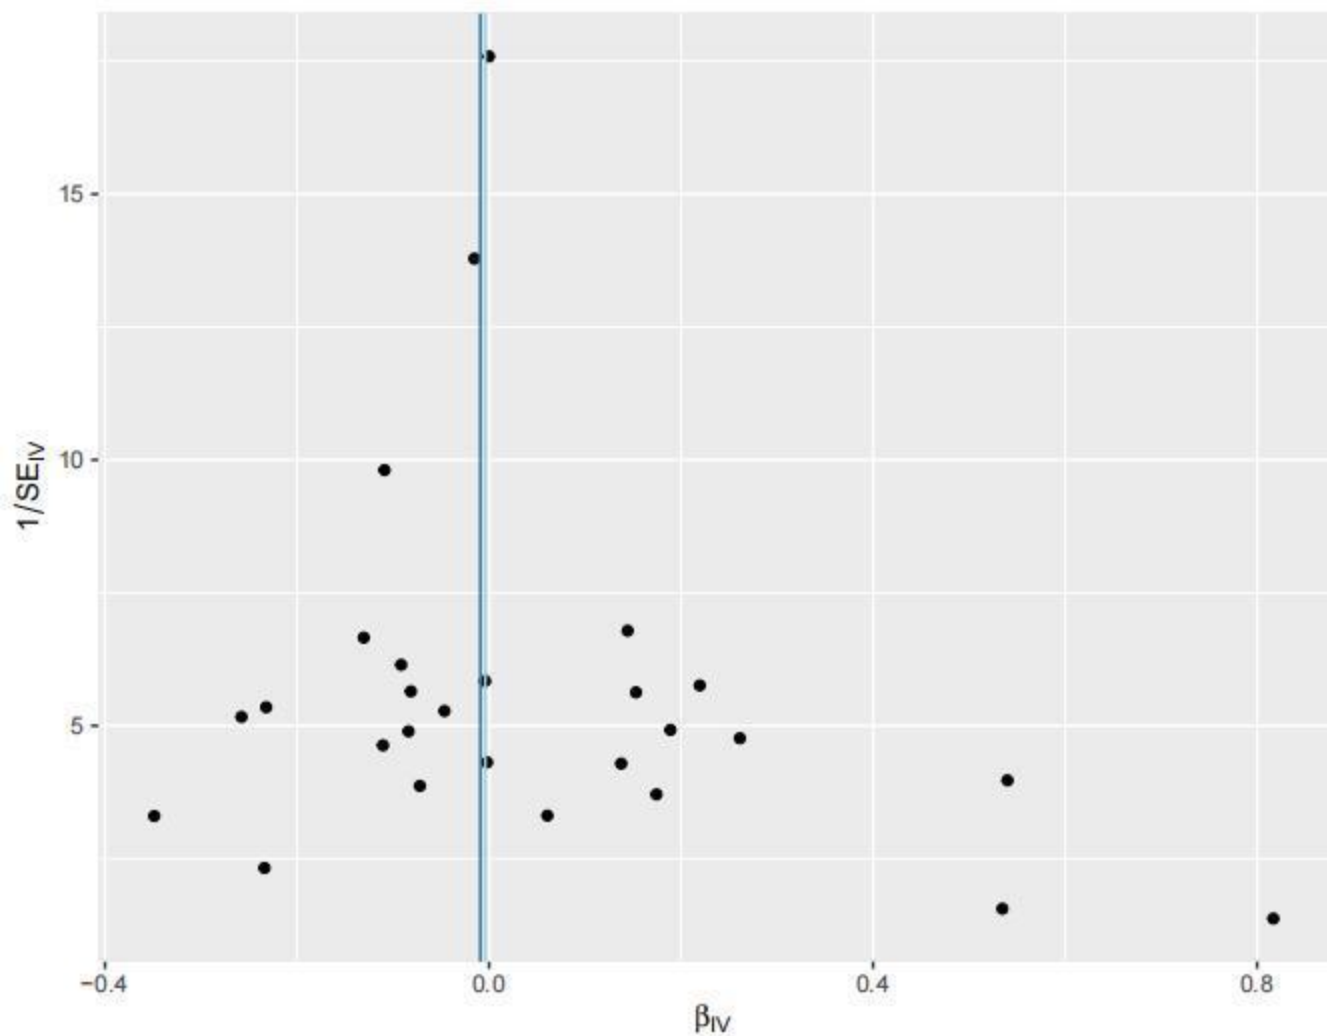

Funnel plot analysis of "CD19 on memory B cell" on 'Aplastic anemia'

MR Method

Inverse variance weighted

MR Egger

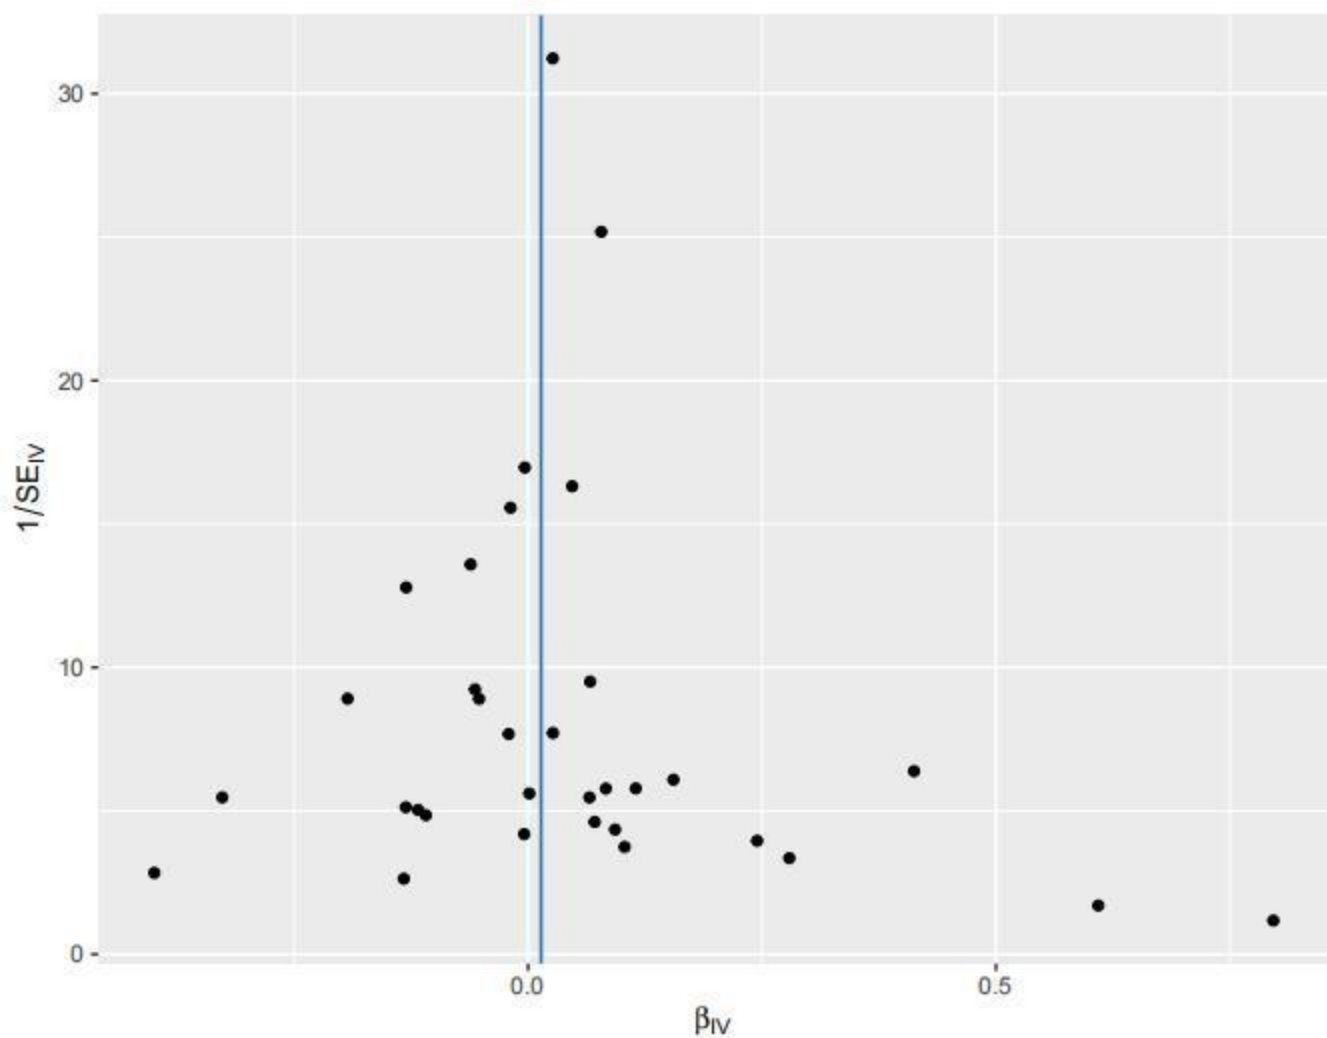

Funnel plot analysis of "CD4 on activated & secreting Treg " on 'Aplastic anemia'

### MR Method

- Inverse variance weighted
- MR Egger

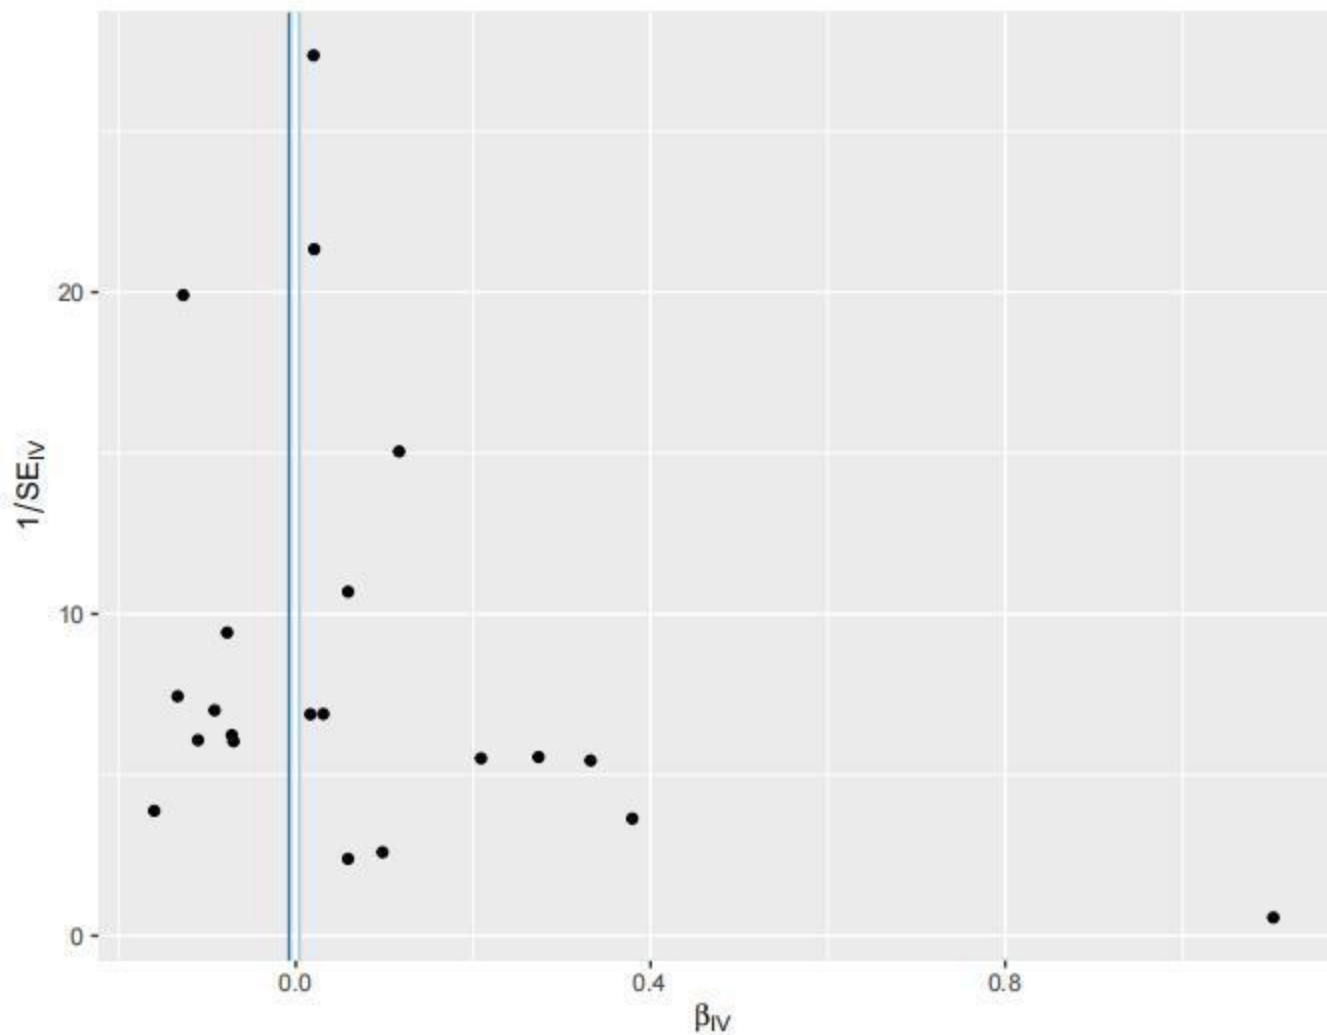

Funnel plot analysis of "FSC-A on HLA DR+ NK" on 'Aplastic anemia'

MR Method

Inverse variance weighted

MR Egger

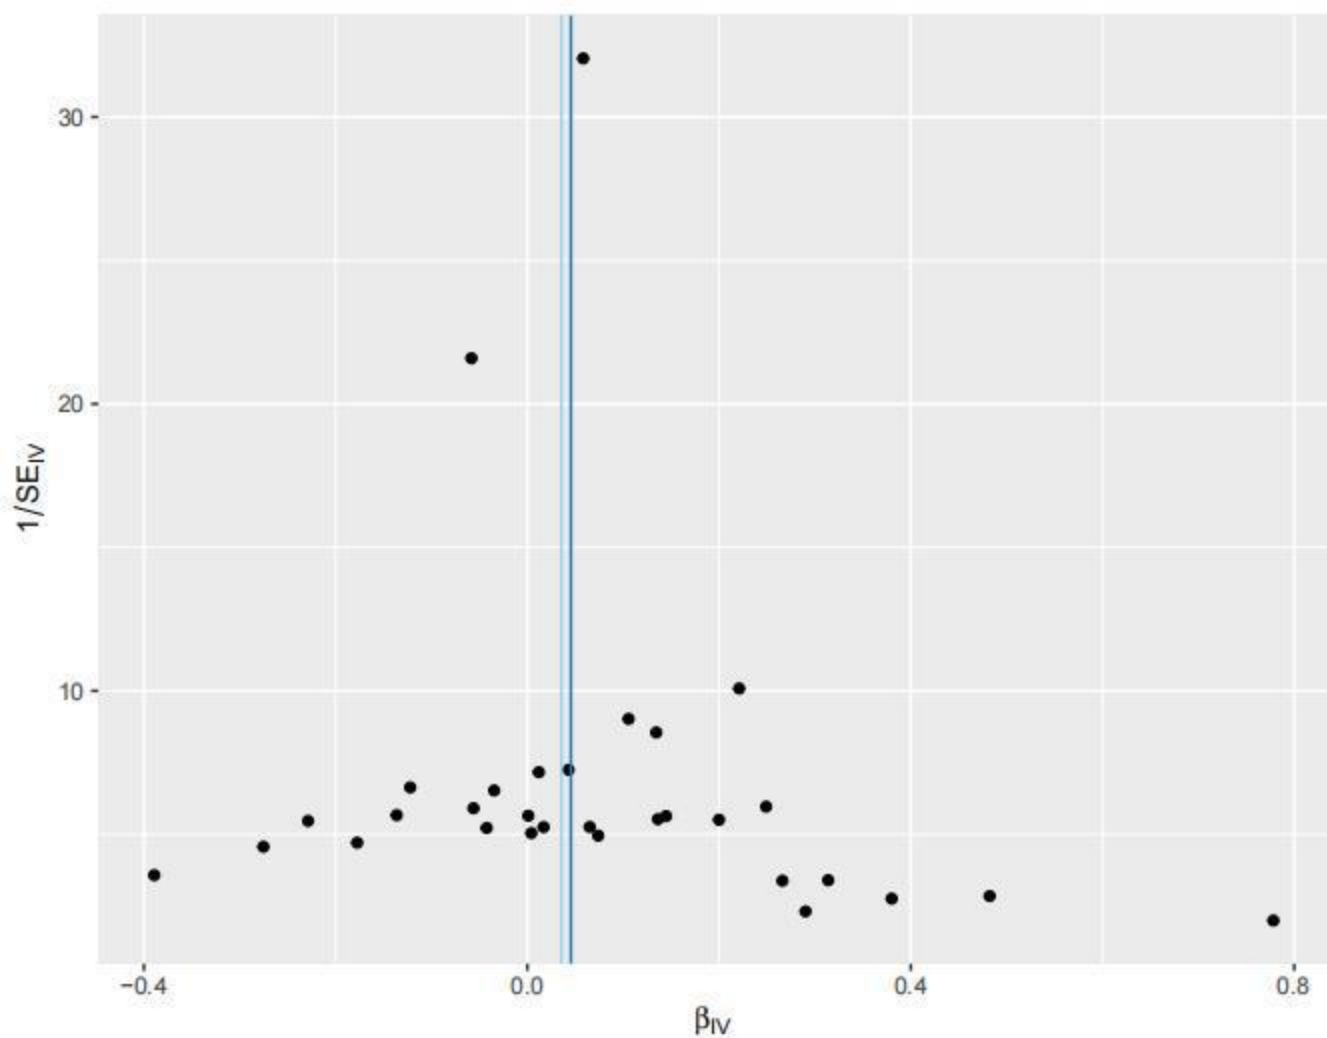

Funnel plot analysis of "CD11c on myeloid DC" on 'Aplastic anemia'



MR Method

- Inverse variance weighted
- MR Egger

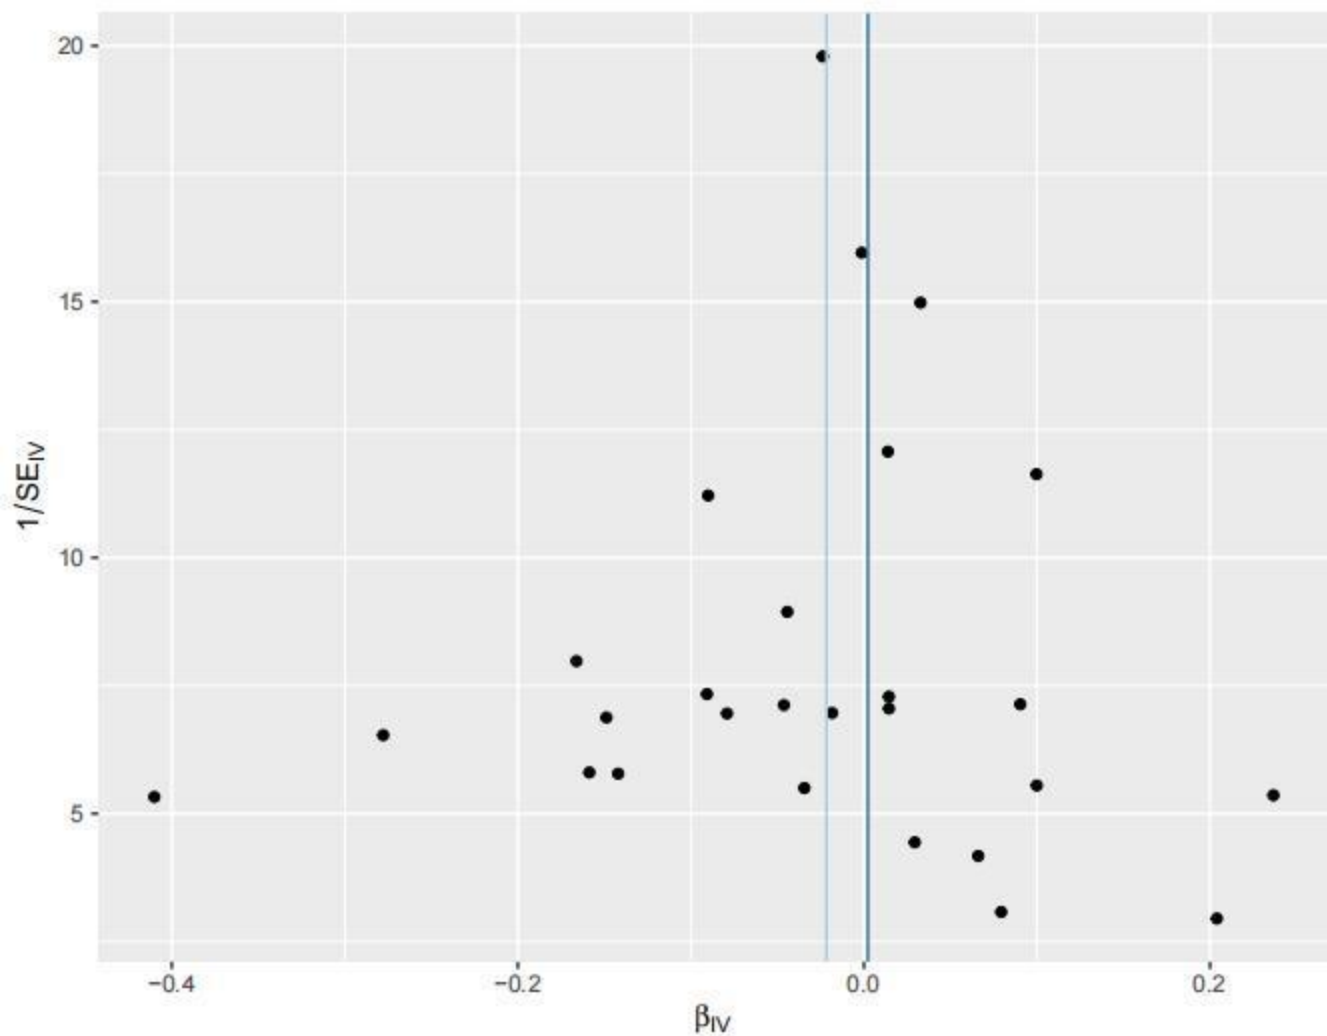

Funnel plot analyse of "CD33dim HLA DR+ CD11b+ AC" on 'Aplastic anemia'

MR Method

- Inverse variance weighted
- MR Egger

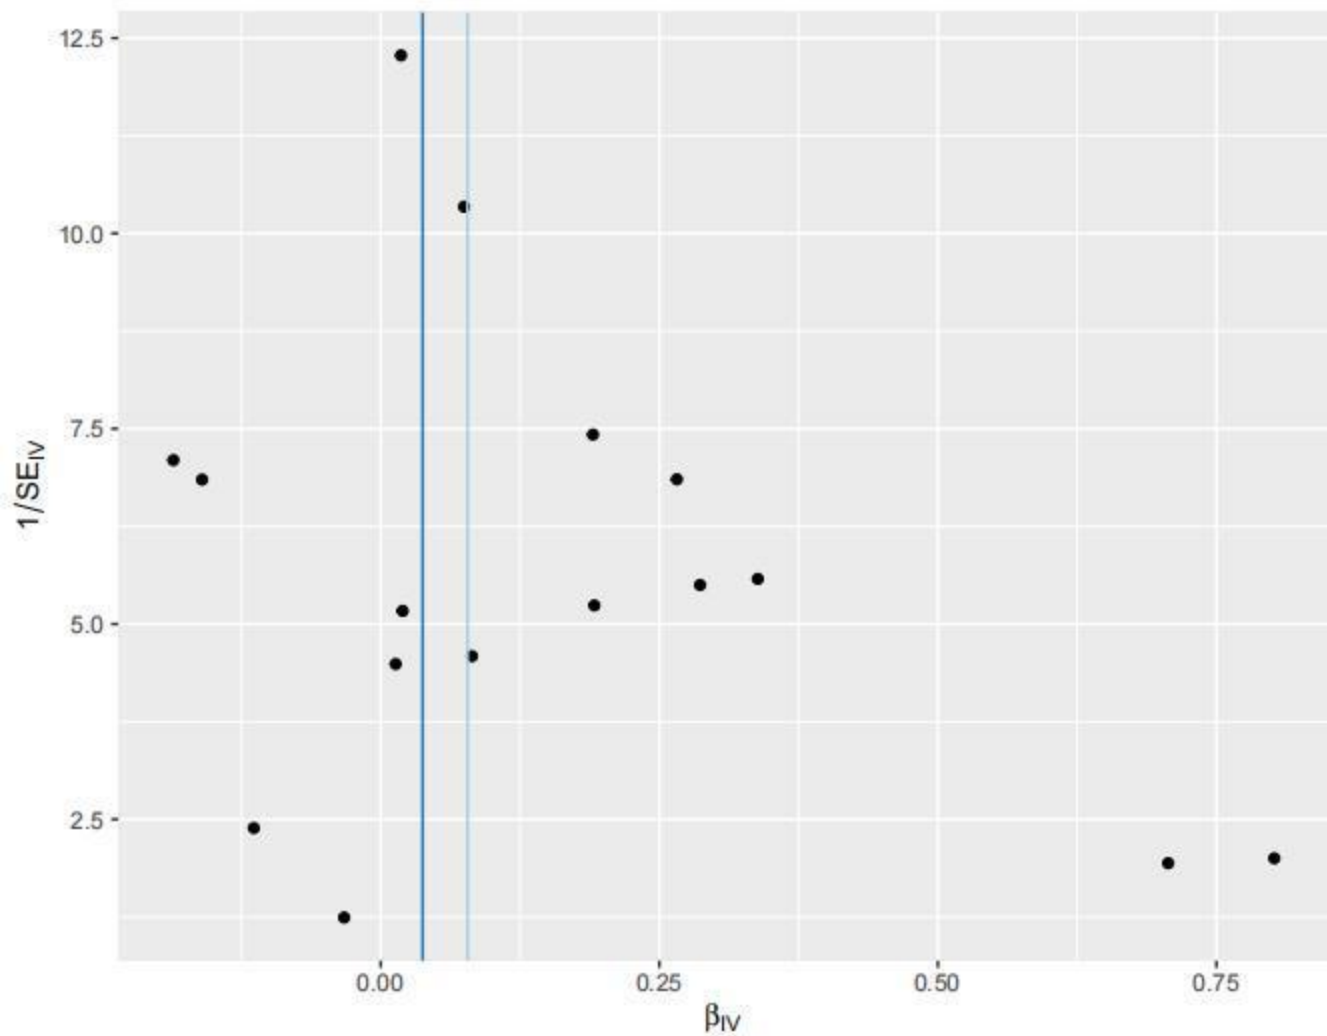

Funnel plot analyse of "PDL-1 on monocyte" on 'Aplastic anemia'

### MR Method

- Inverse variance weighted
- MR Egger

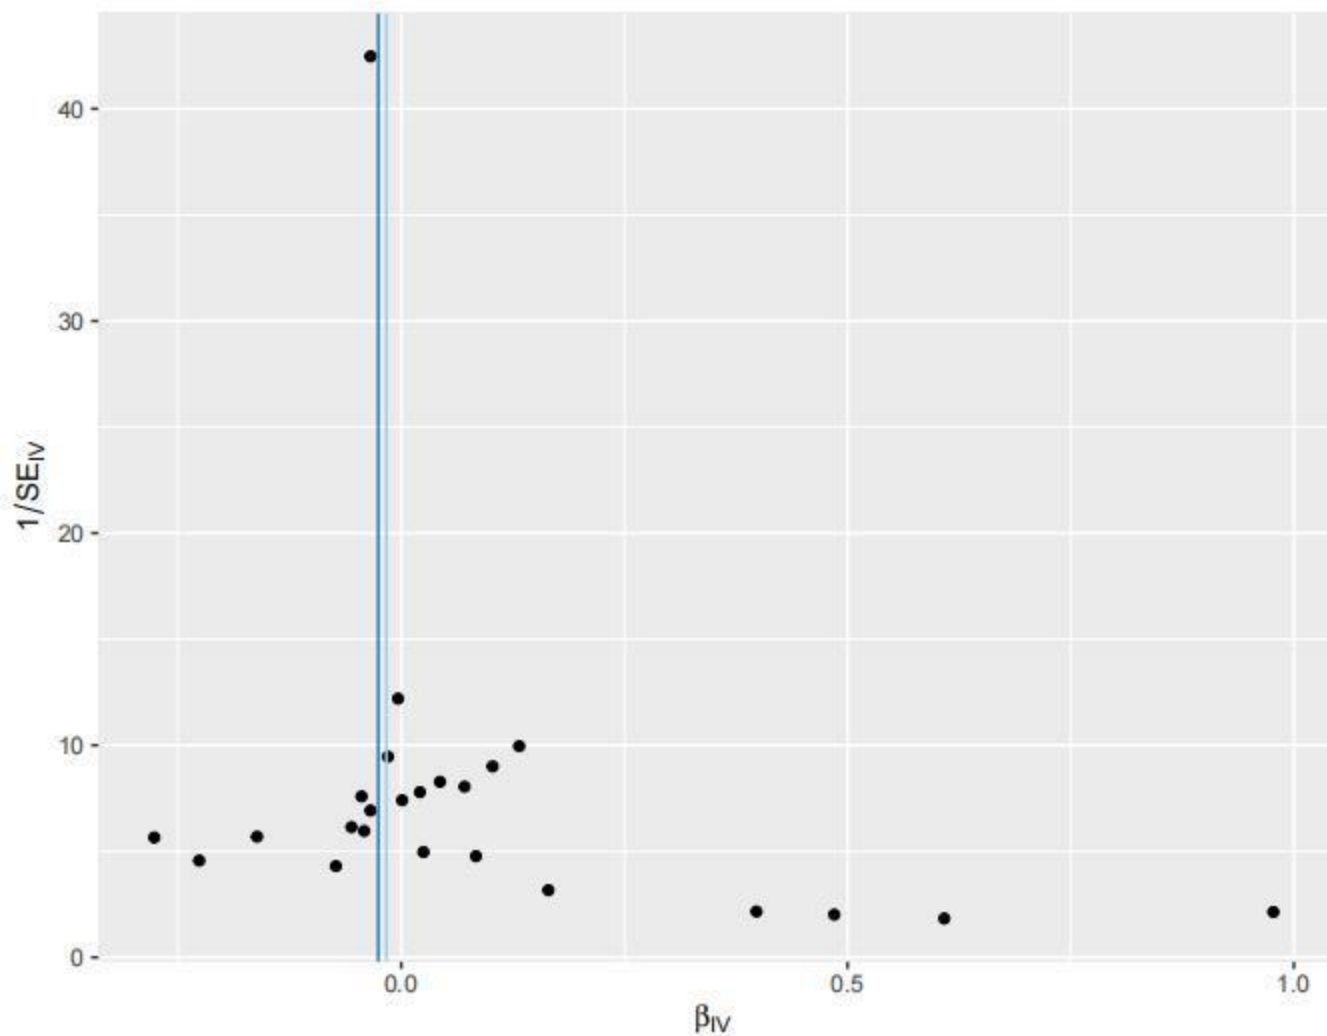

Funnel plot analysis of "CCR7 on naive CD4+" on 'Aplastic anemia'

MR Method

- Inverse variance weighted
- MR Egger

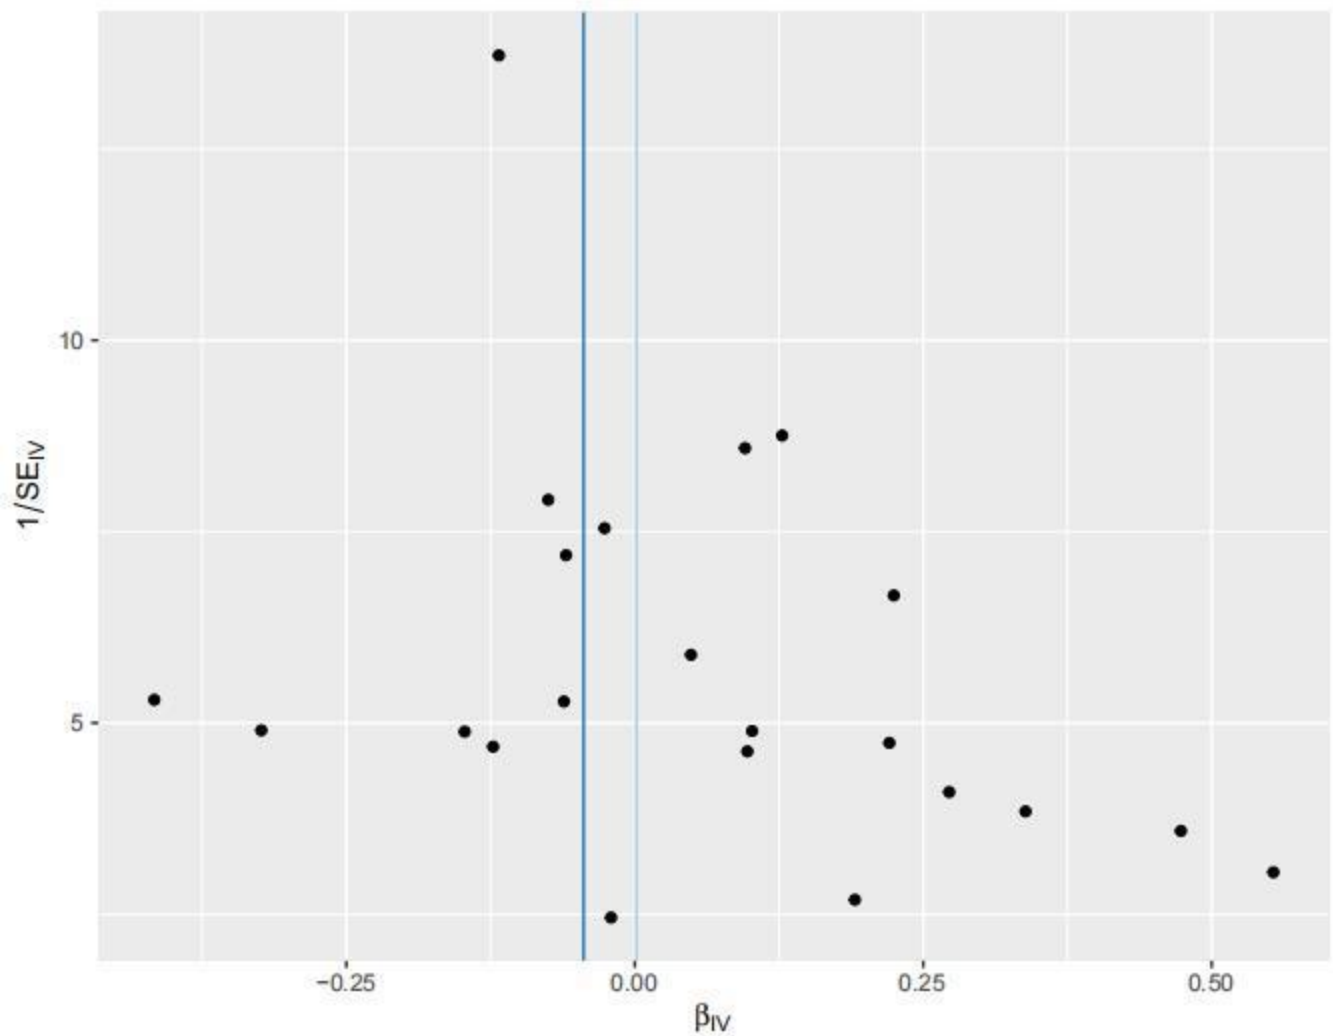

Funnel plot analyse of "NK AC" on 'Aplastic anemia'

MR Method

- Inverse variance weighted
- MR Egger

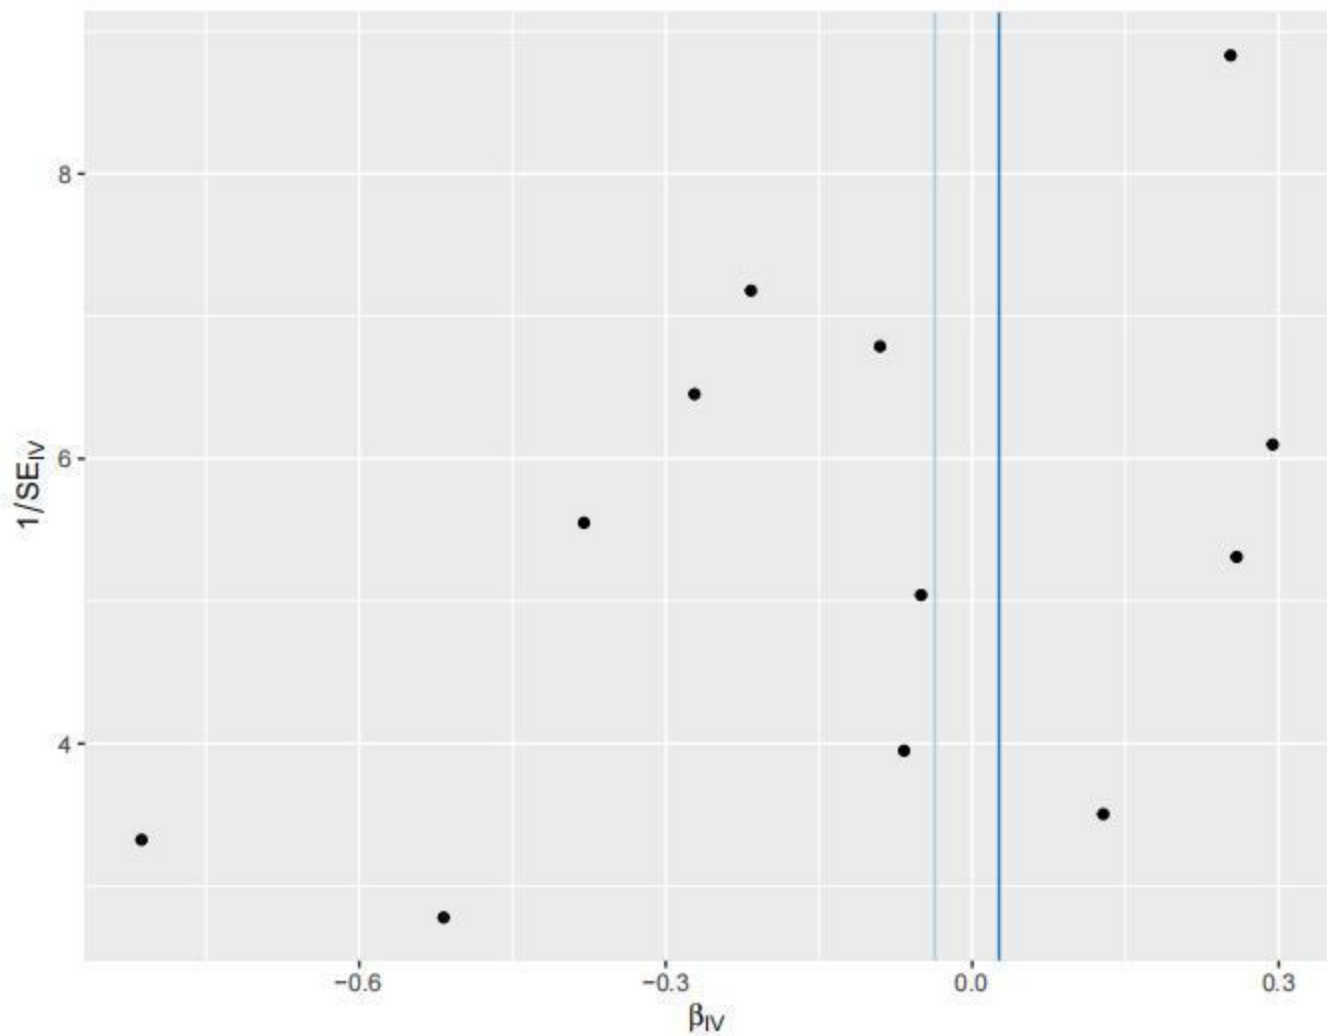

Funnel plot analyse of "CD62L- HLA DR++ monocyte %monocyte" on 'Aplastic anemia'

### MR Method

- Inverse variance weighted
- MR Egger

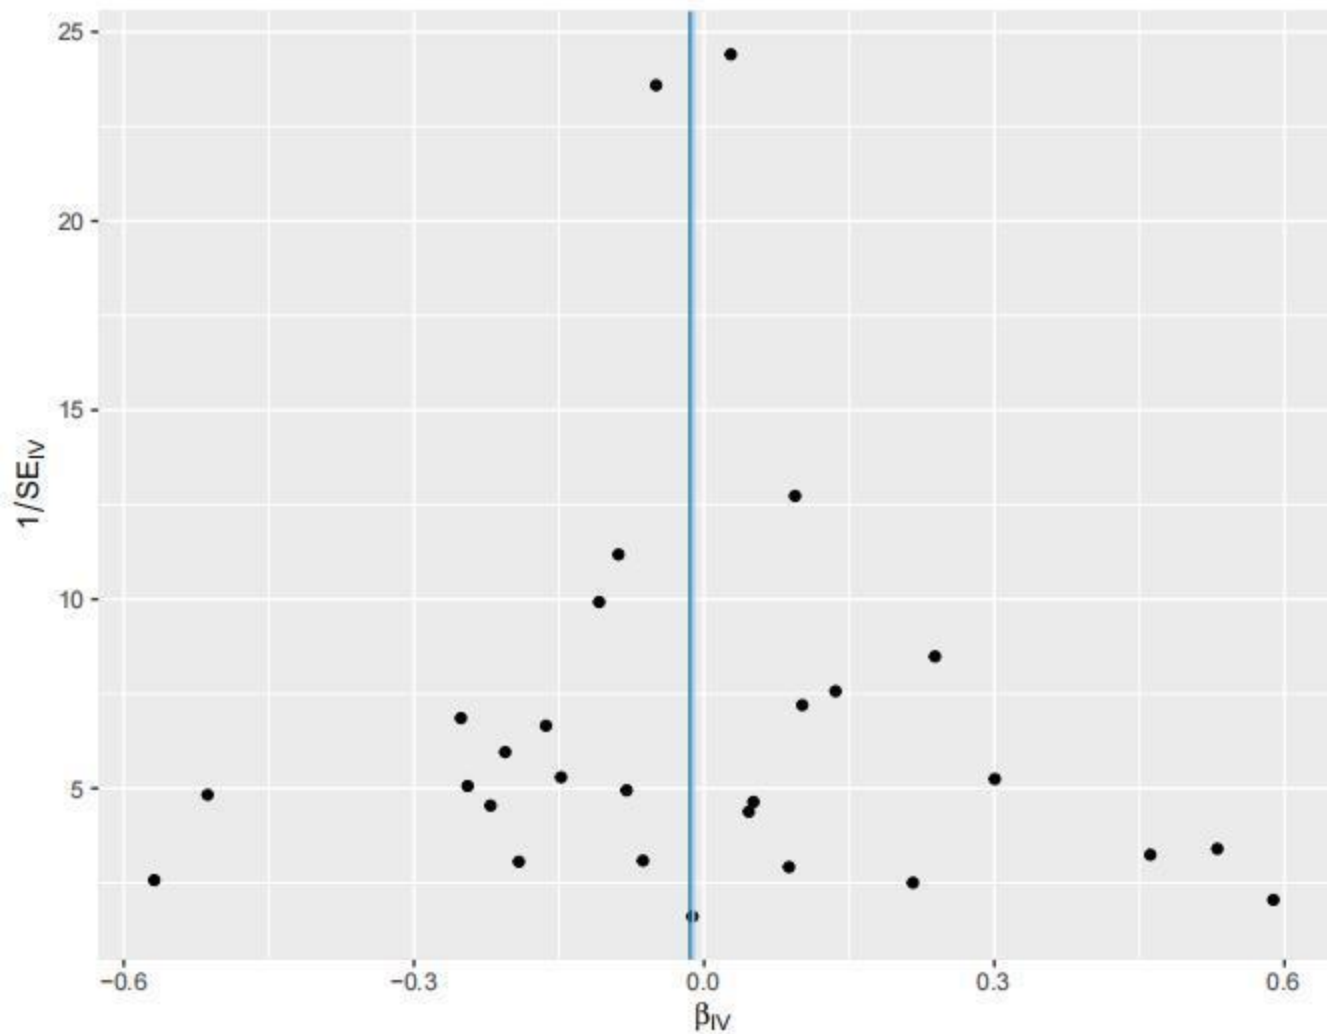

Funnel plot analysis of "CD8dim AC" on 'Aplastic anemia'

### MR Method

Inverse variance weighted

MR Egger

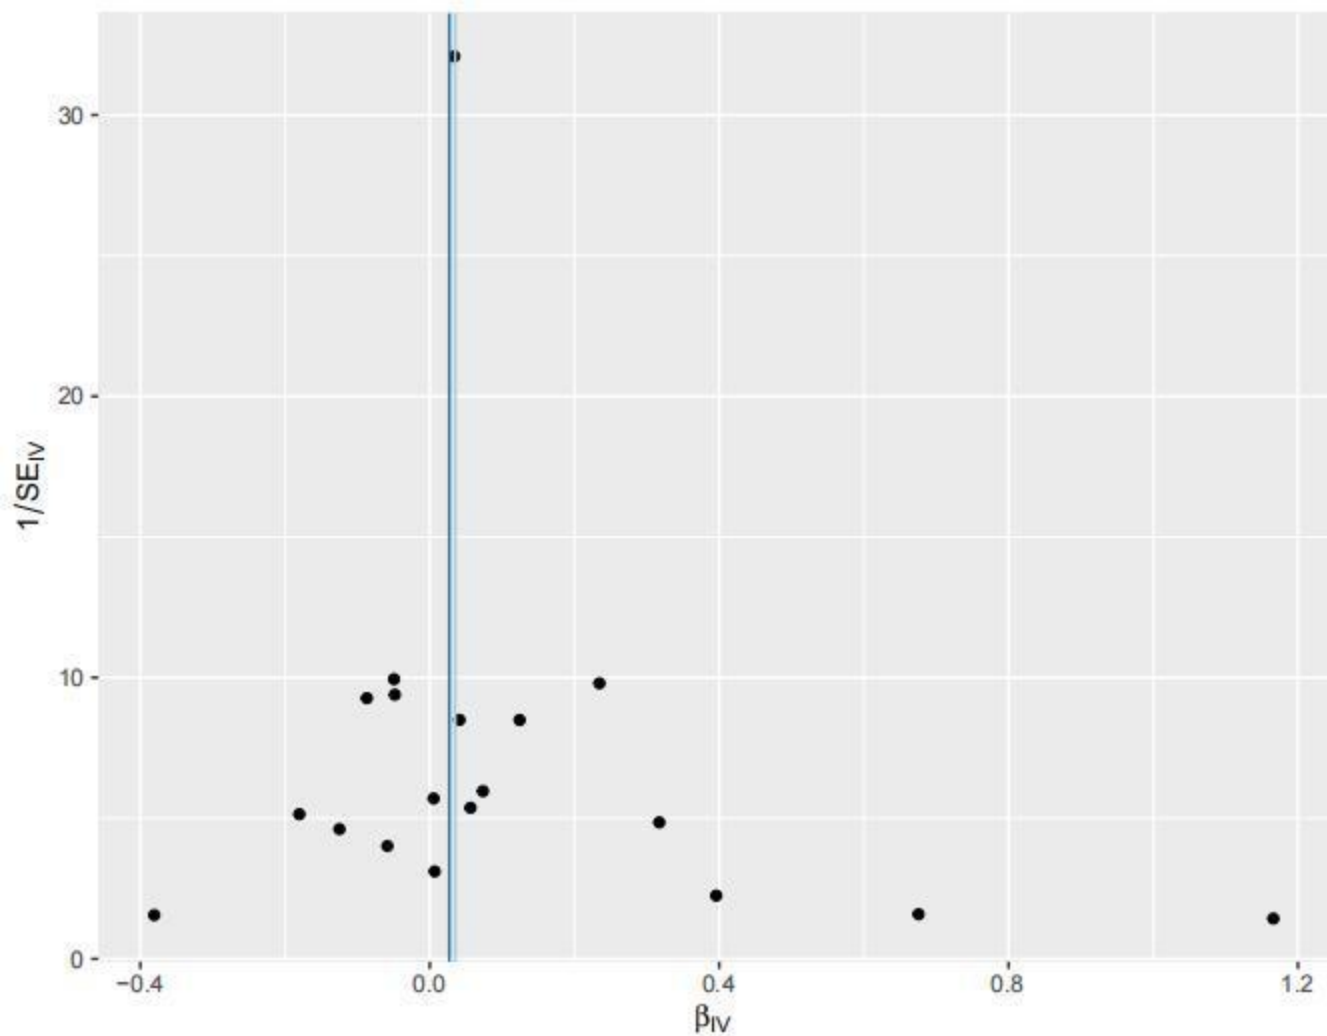

Funnel plot analyse of "CD14- CD16+ monocyte AC" on 'Aplastic anemia'

MR Method

Inverse variance weighted

MR Egger

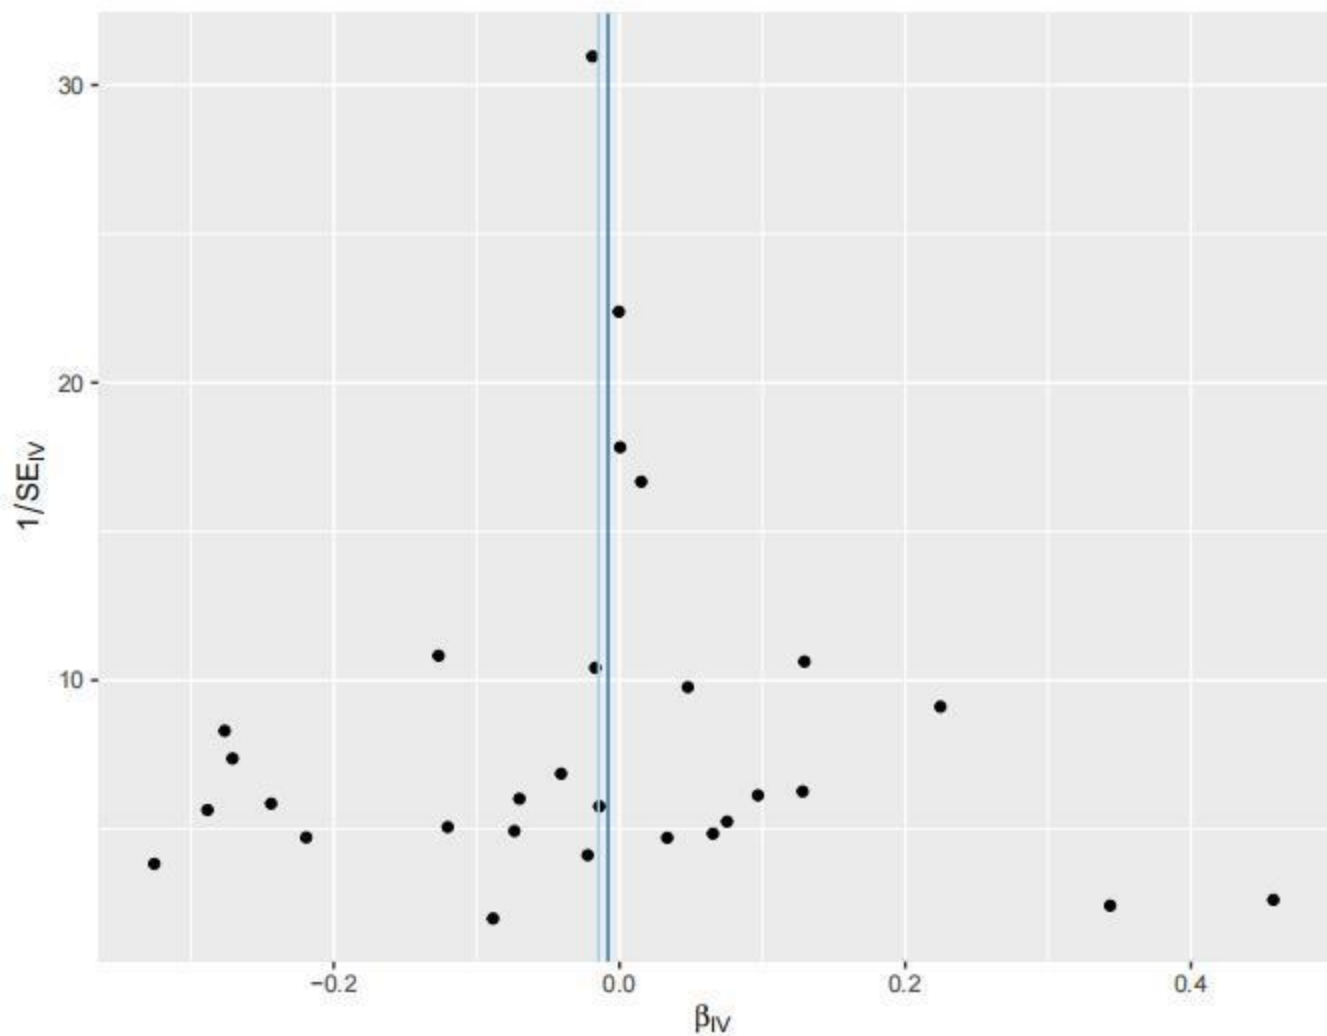

Funnel plot analysis of "CD39+ CD4+ AC" on 'Aplastic anemia'



MR Method

- Inverse variance weighted
- MR Egger

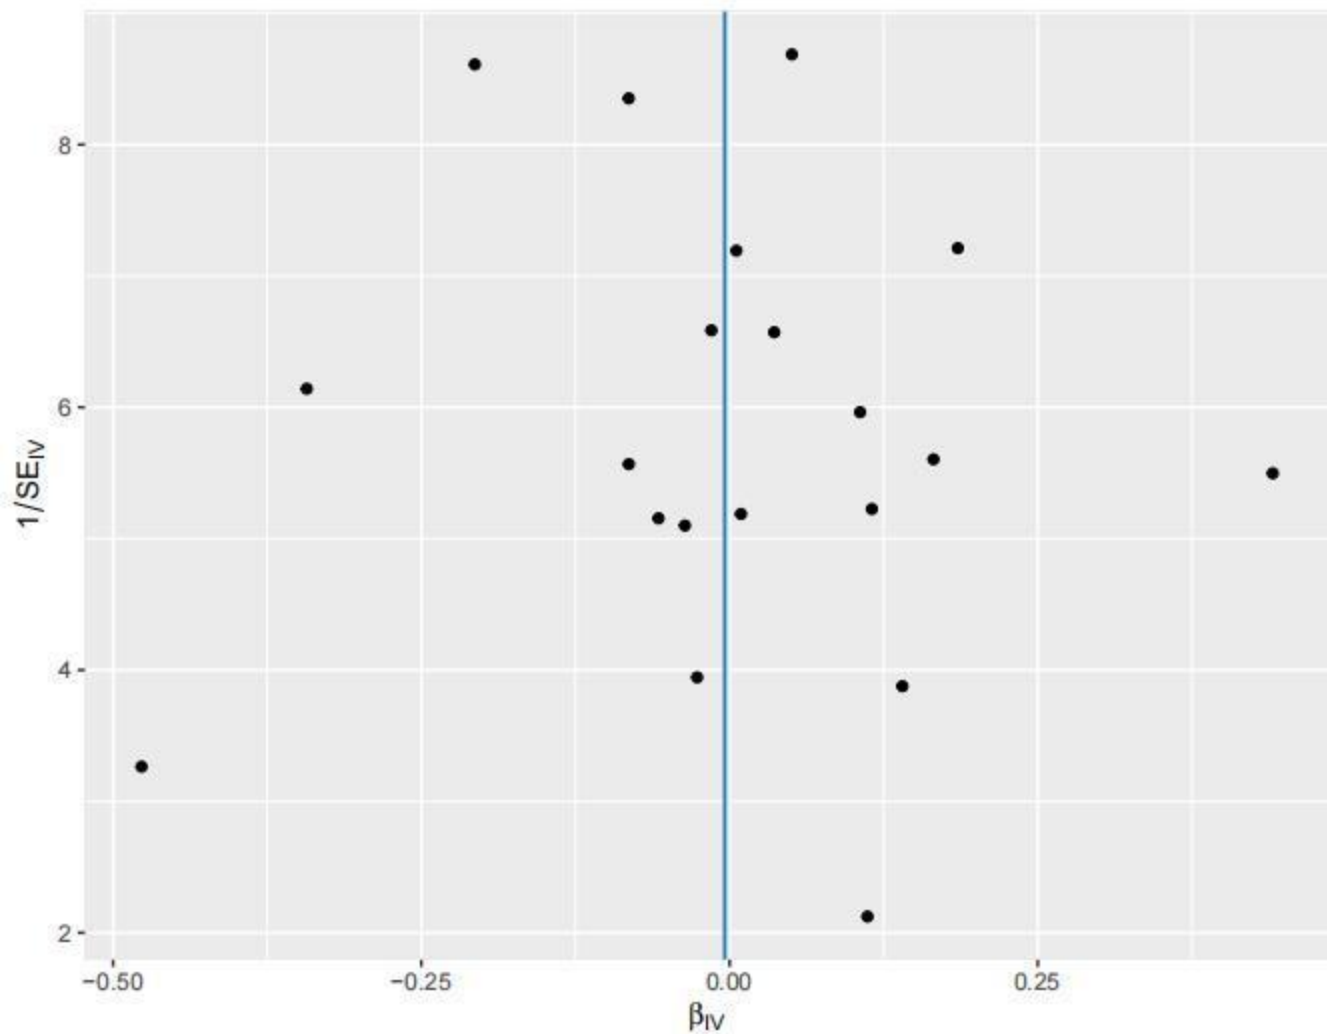

Funnel plot analyse of "HLA DR on HLA DR+ CD8br" on 'Aplastic anemia'

MR Method

Inverse variance weighted

MR Egger

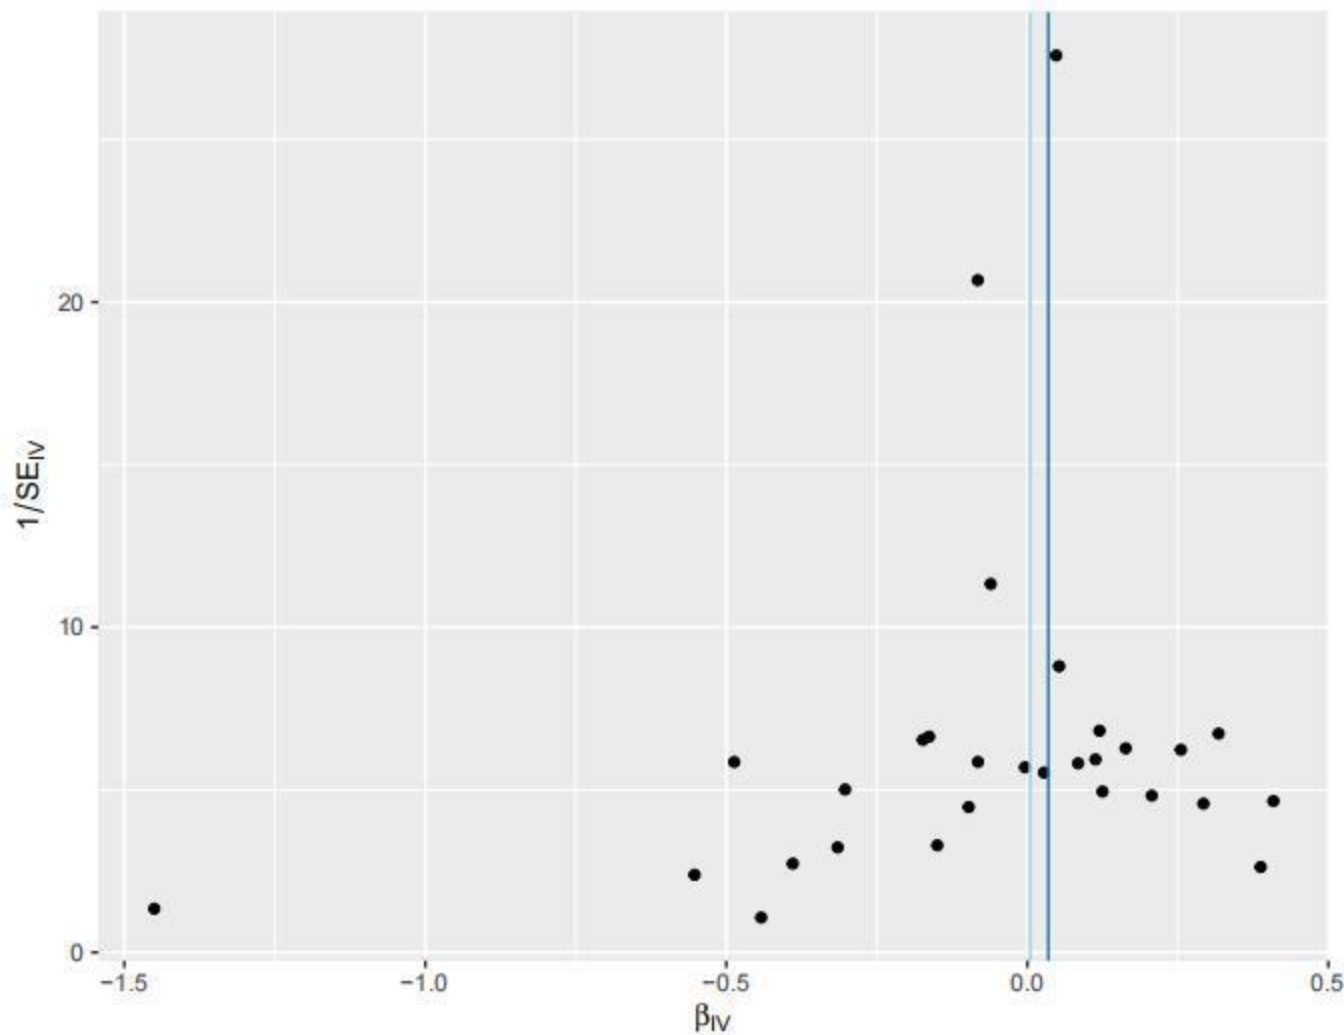

Funnel plot analyse of "CD3 on CD45RA- CD4+" on 'Aplastic anemia'

MR Method

Inverse variance weighted

MR Egger

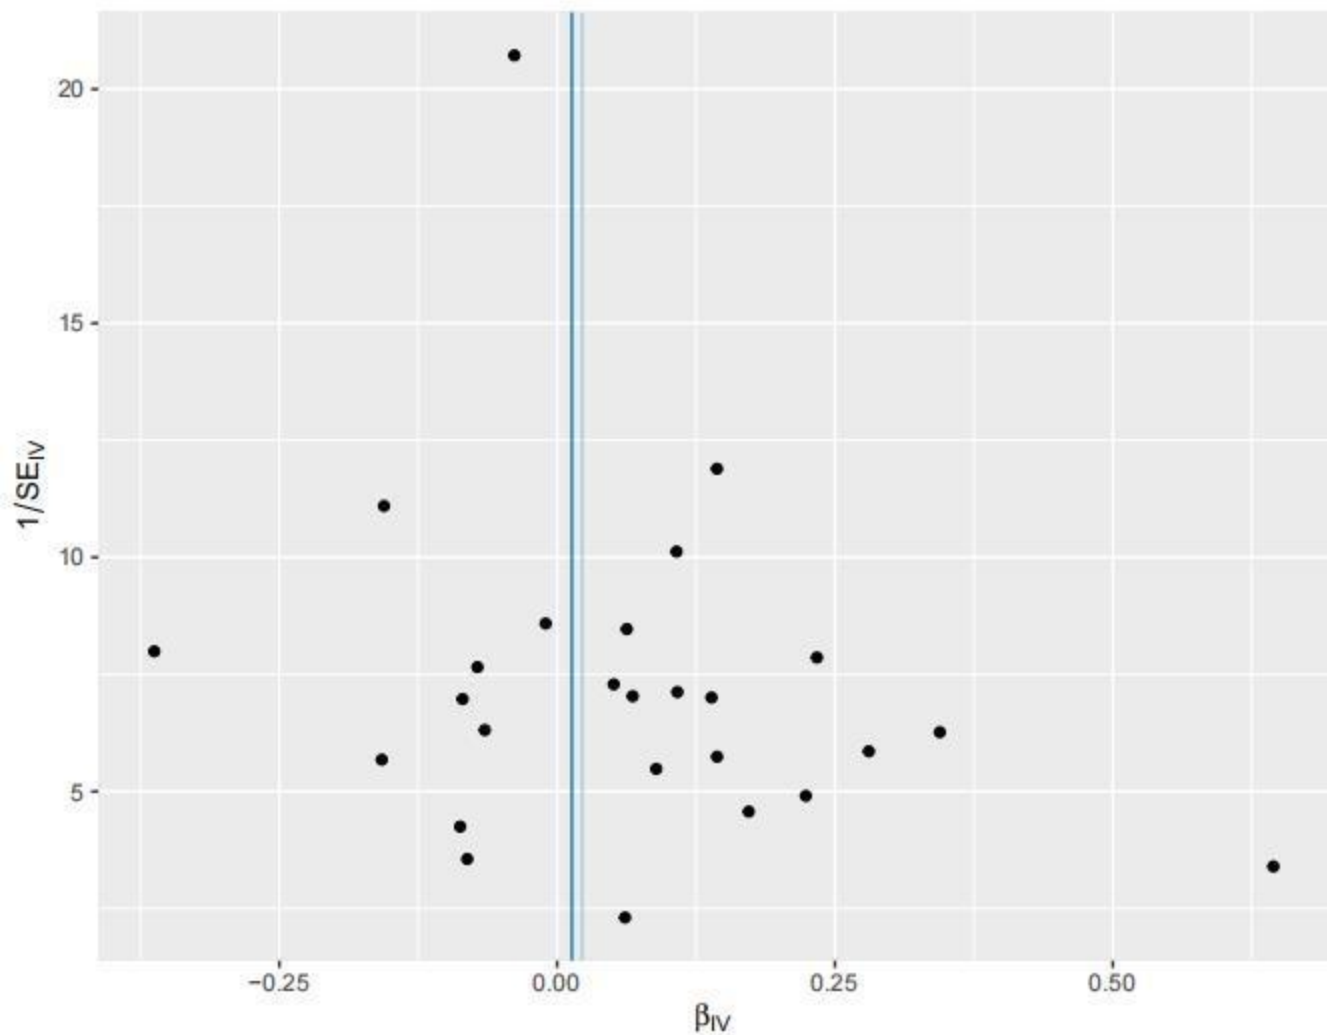

Funnel plot analyse of "CD33br HLA DR+ CD14dim %CD33br HLA DR+" on 'Aplastic anemia'

MR Method

- Inverse variance weighted
- MR Egger

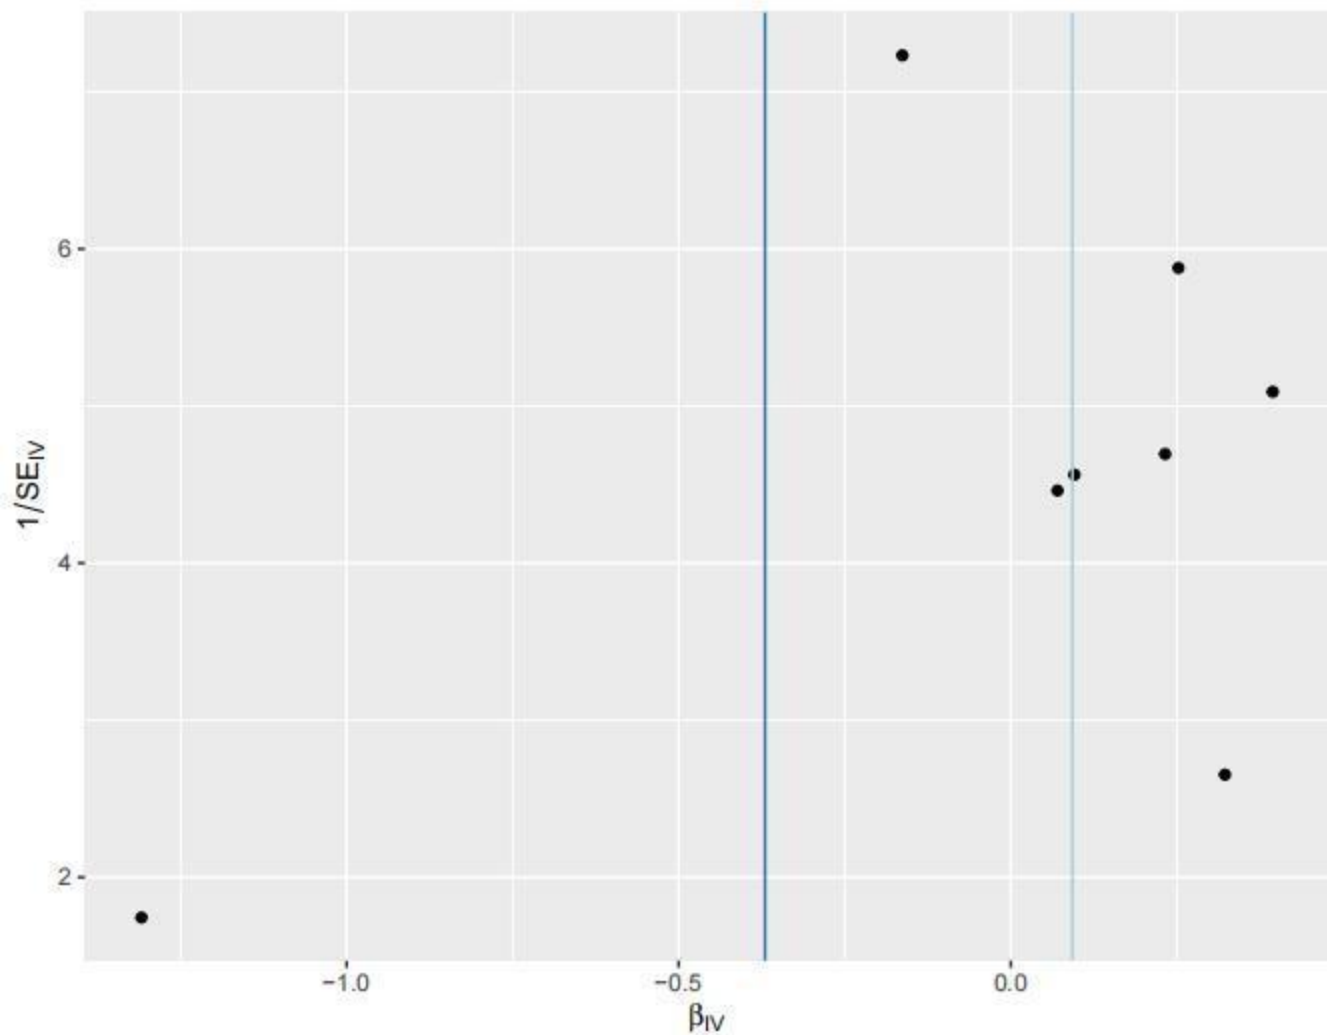

Funnel plot analyse of "DP (CD4+CD8+) %T cell" on 'Aplastic anemia'

MR Method

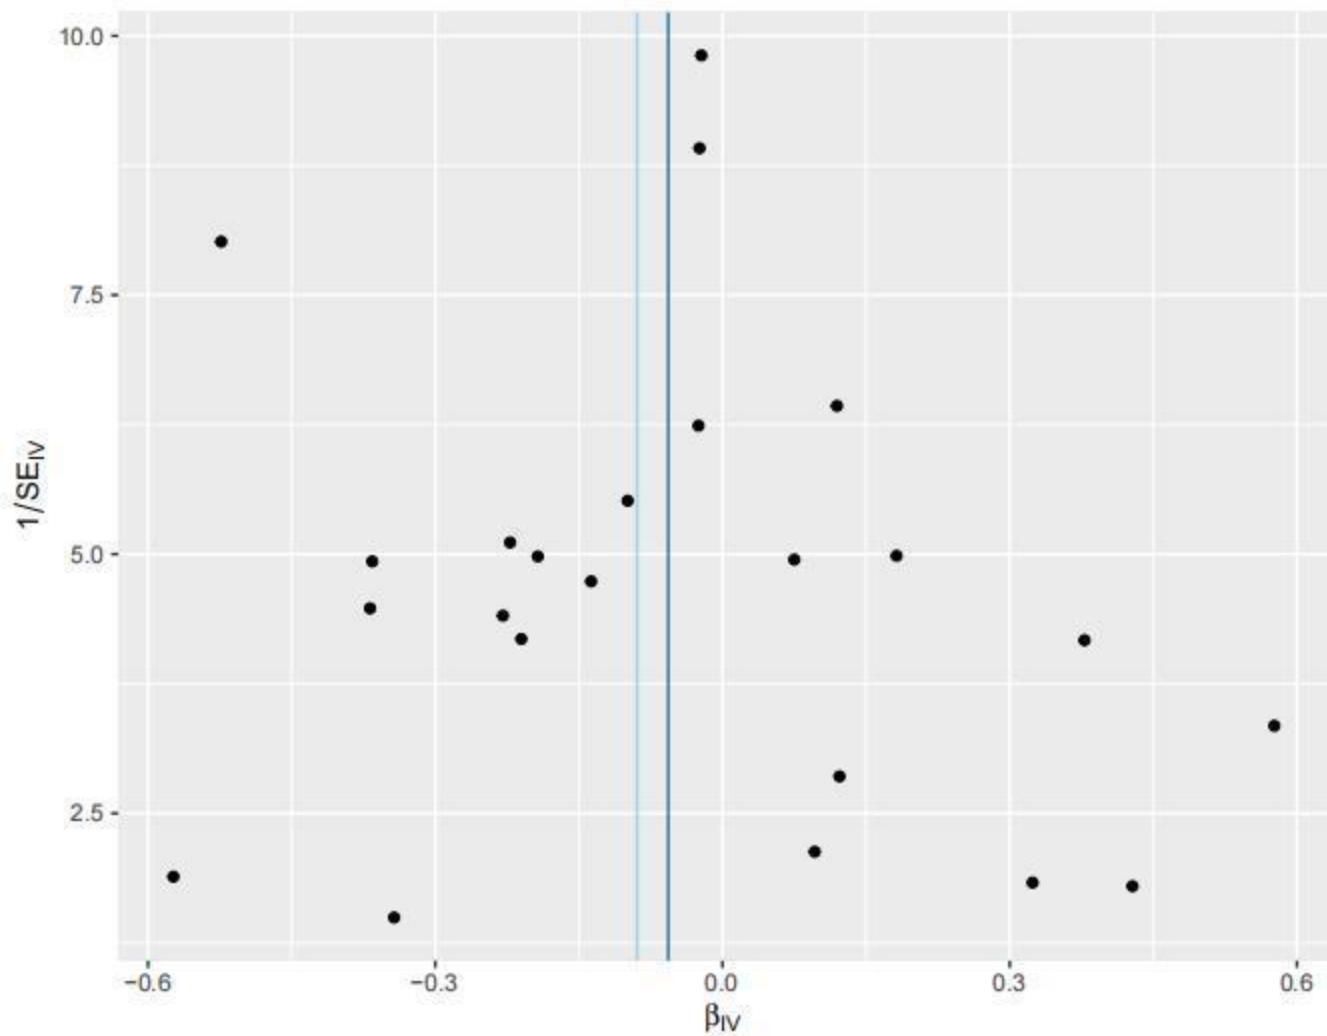

Funnel plot analyse of "TD CD4+ %CD4+" on 'Aplastic anemia'

### MR Method

- Inverse variance weighted
- MR Egger

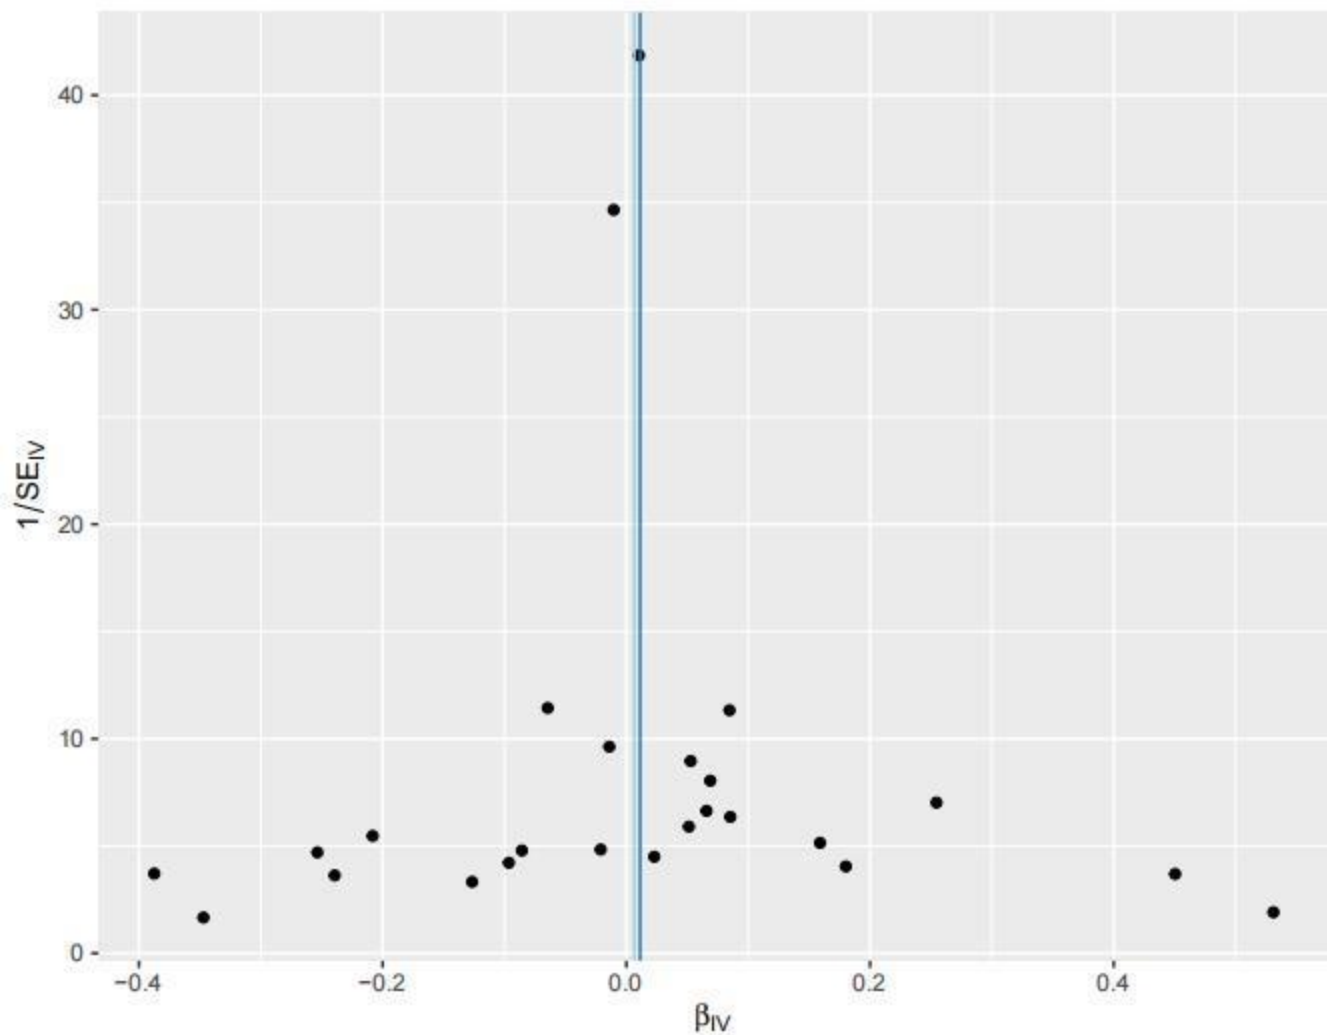

Funnel plot analyse of "CCR2 on monocyte" on 'Aplastic anemia'

MR Method

Inverse variance weighted

MR Egger

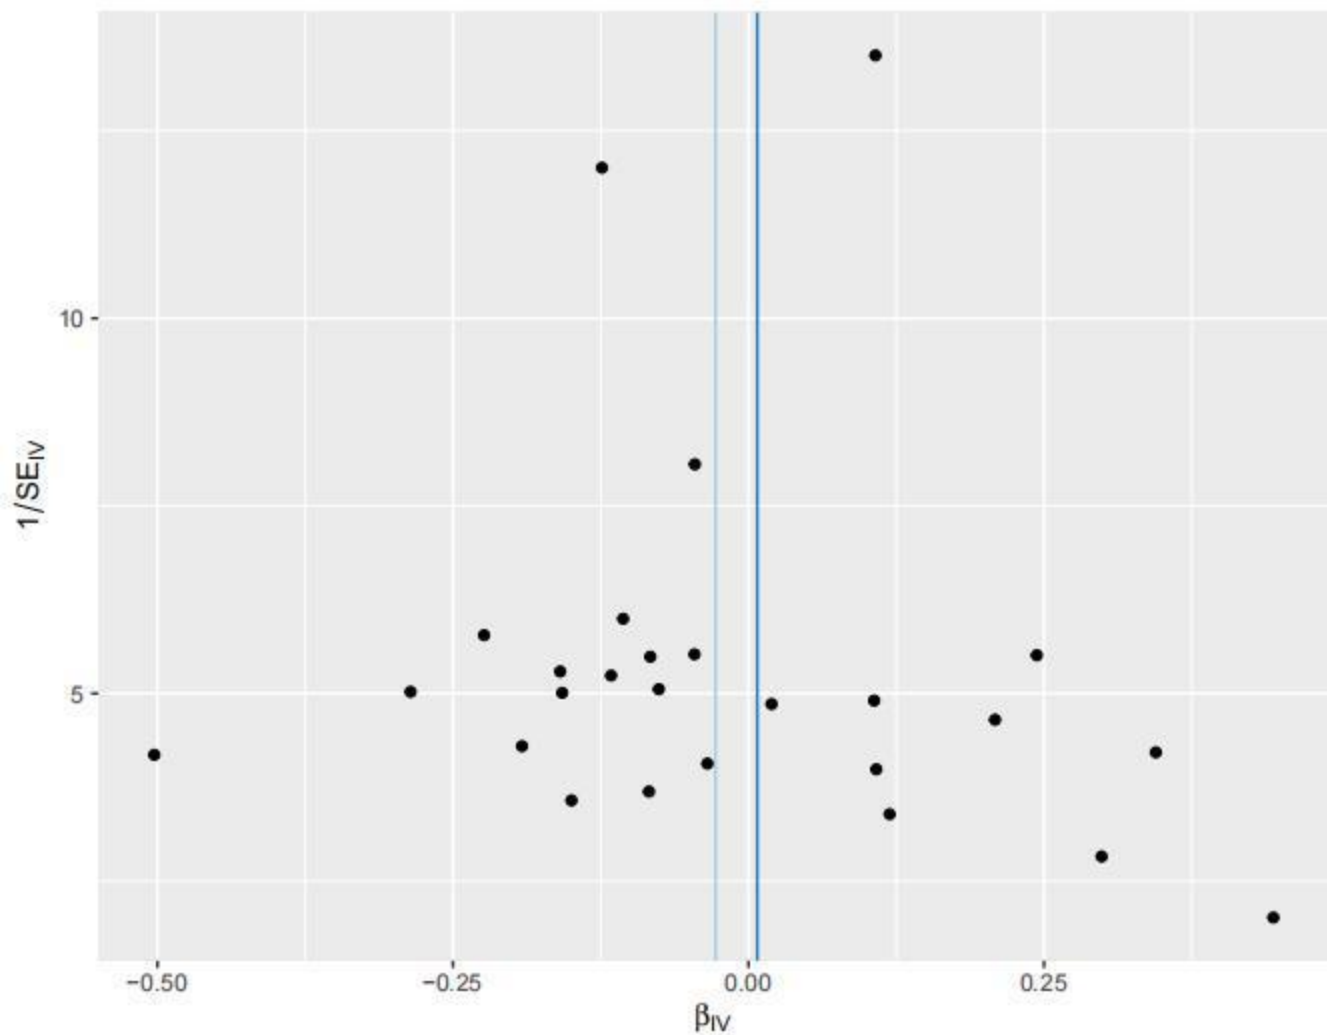

Funnel plot analyse of "CD28- CD25++ CD8br %CD8br" on 'Aplastic anemia'

### MR Method

Inverse variance weighted

MR Egger

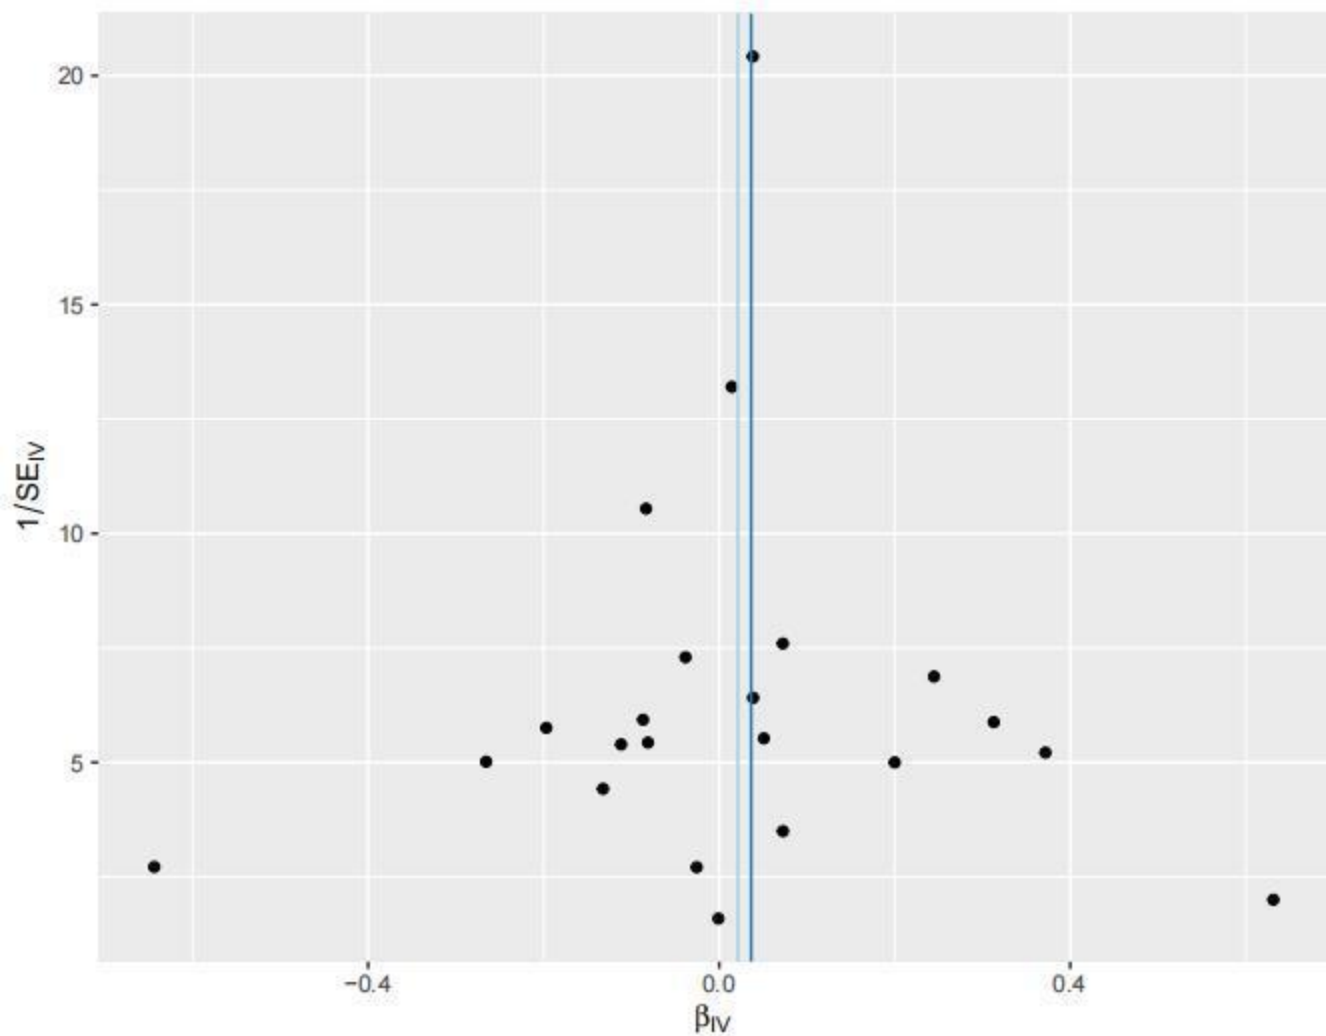

Funnel plot analyse of "CD4 Treg AC" on 'Aplastic anemia'



### MR Method

- Inverse variance weighted
- MR Egger

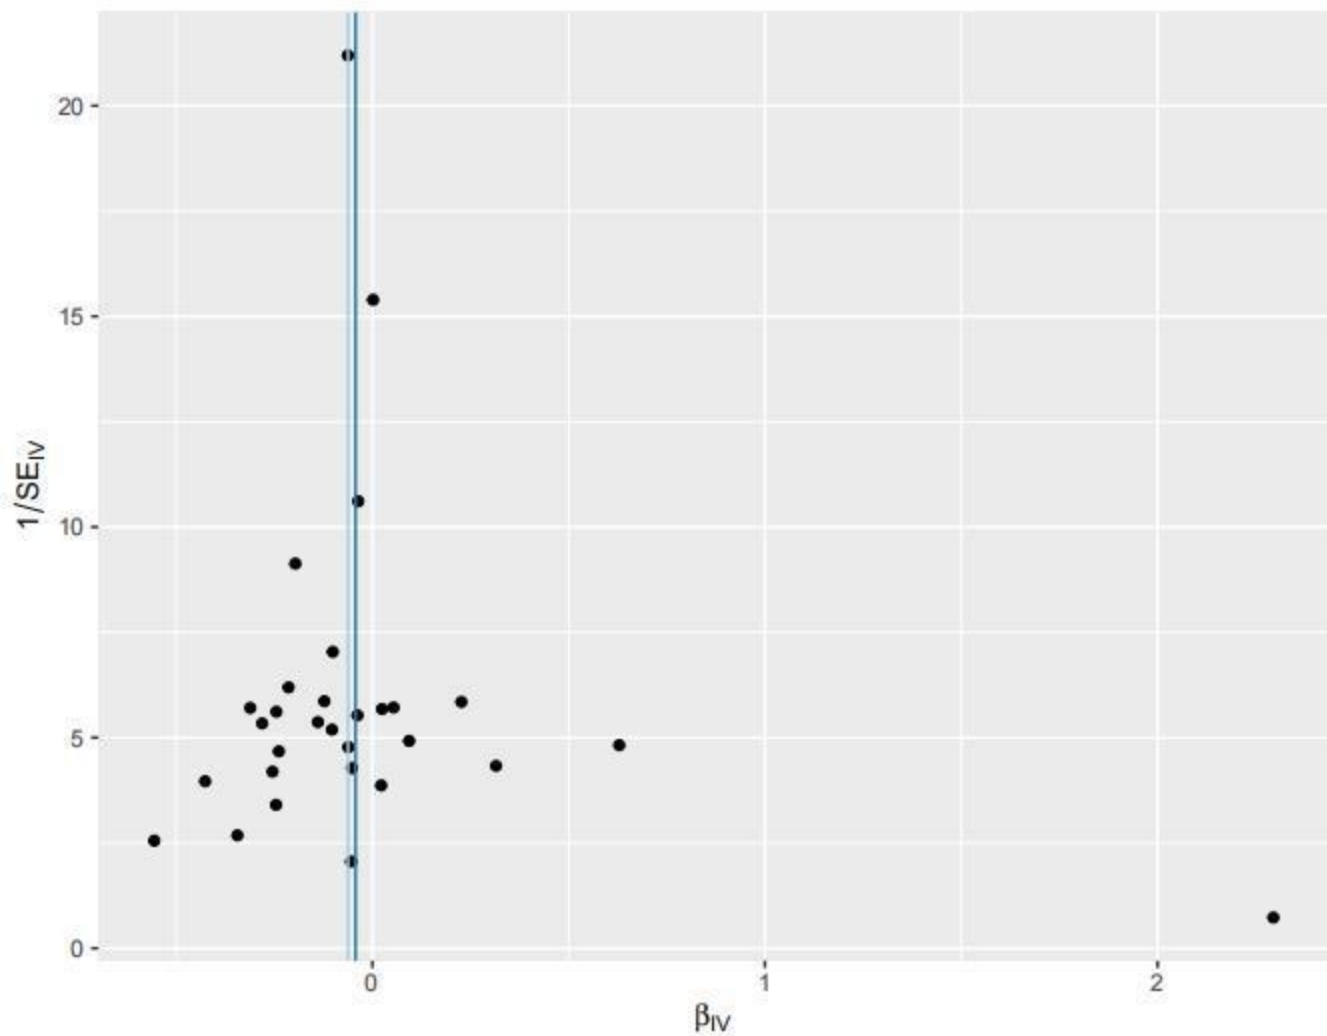

Funnel plot analyse of "CD45 on NK" on 'Aplastic anemia'

### MR Method

- Inverse variance weighted
- MR Egger

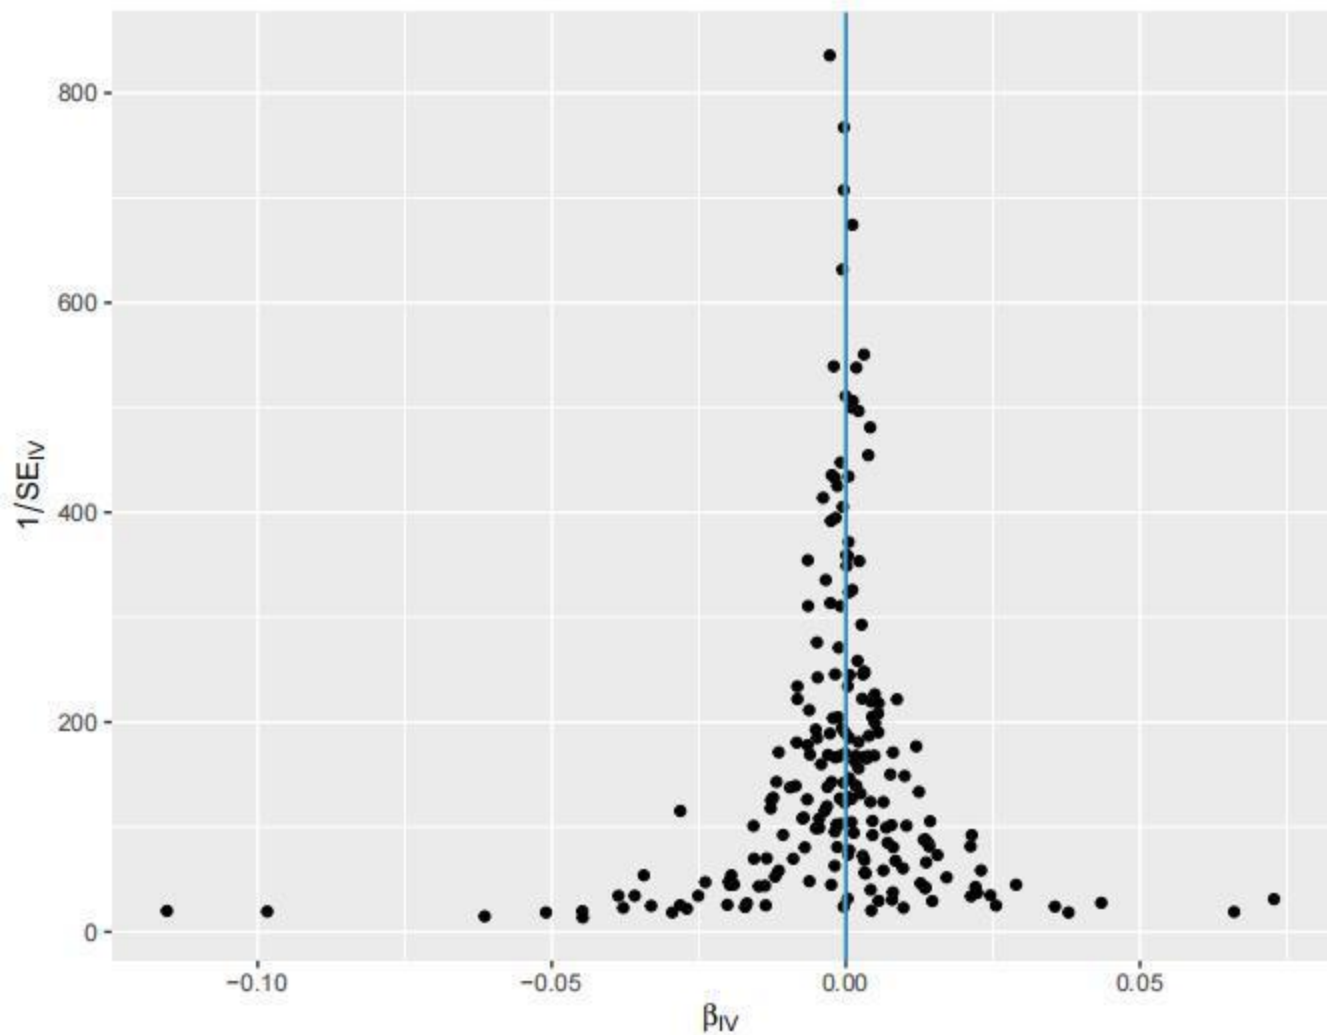

Funnel plot analyse of "CD45RA+ CD28- CD8br %T cell" on 'Aplastic anemia'

MR Method

- Inverse variance weighted
- MR Egger

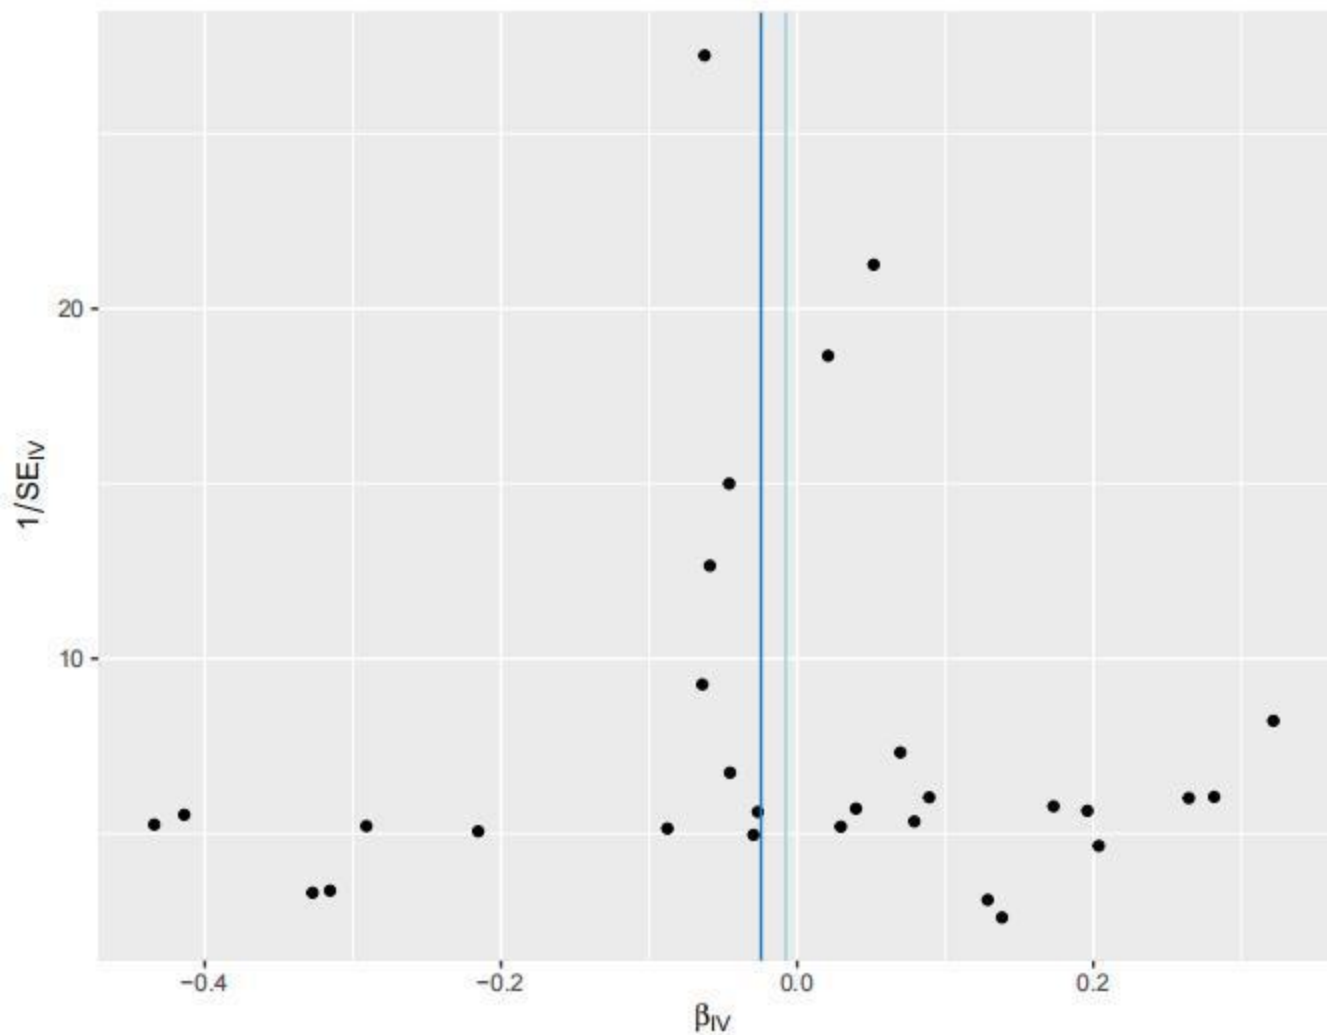

Funnel plot analyse of "CD3 on Naive CD4+" on 'Aplastic anemia'

### MR Method

- Inverse variance weighted
- MR Egger

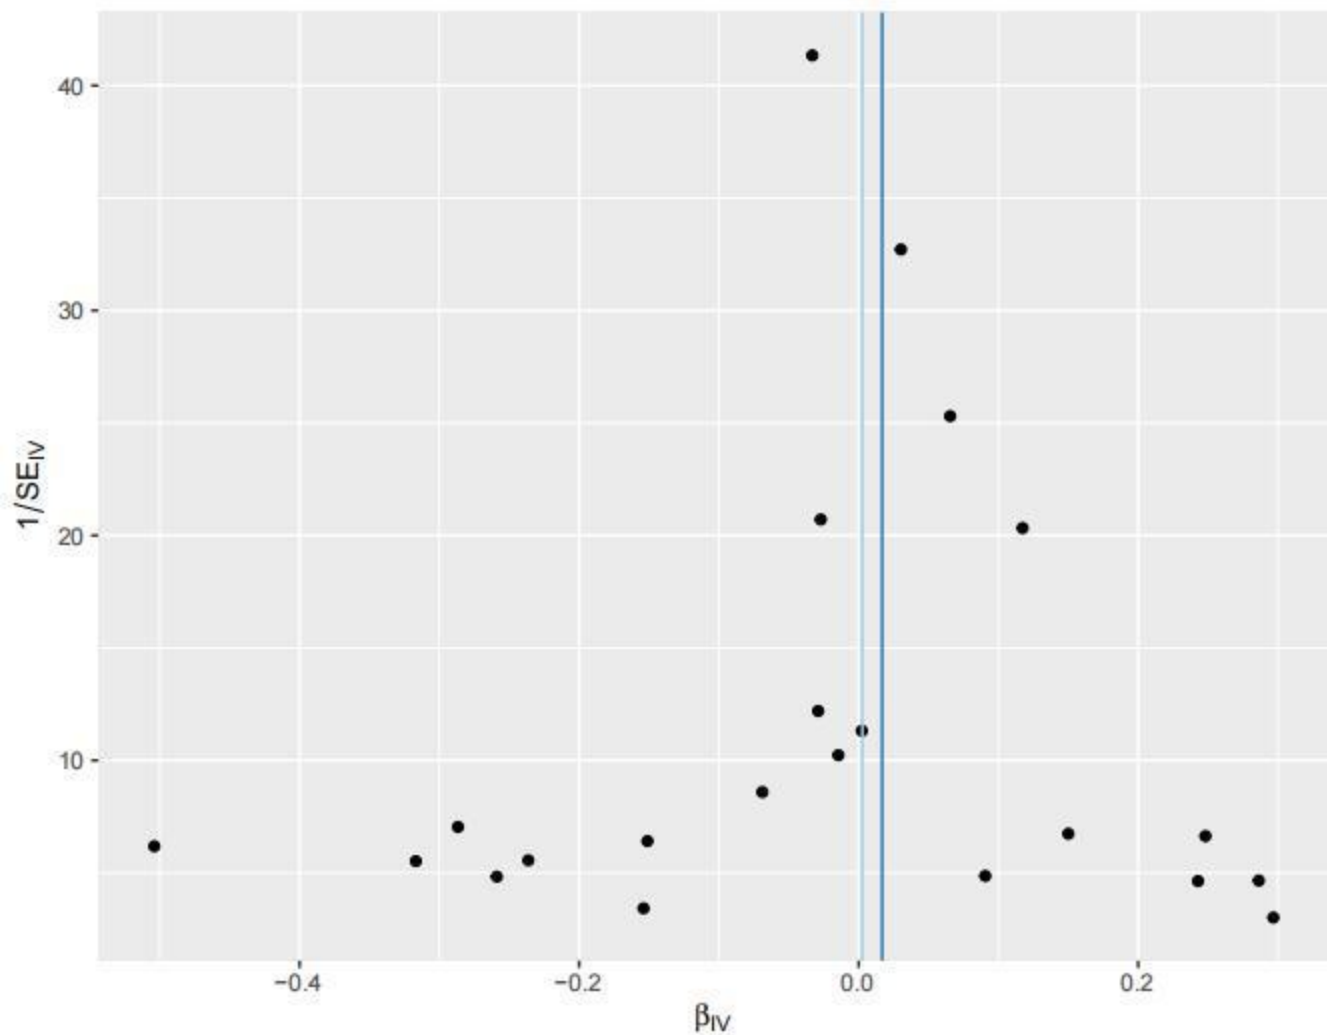

Funnel plot analyse of "CD39 on monocyte " on 'Aplastic anemia'

### MR Method

- Inverse variance weighted
- MR Egger

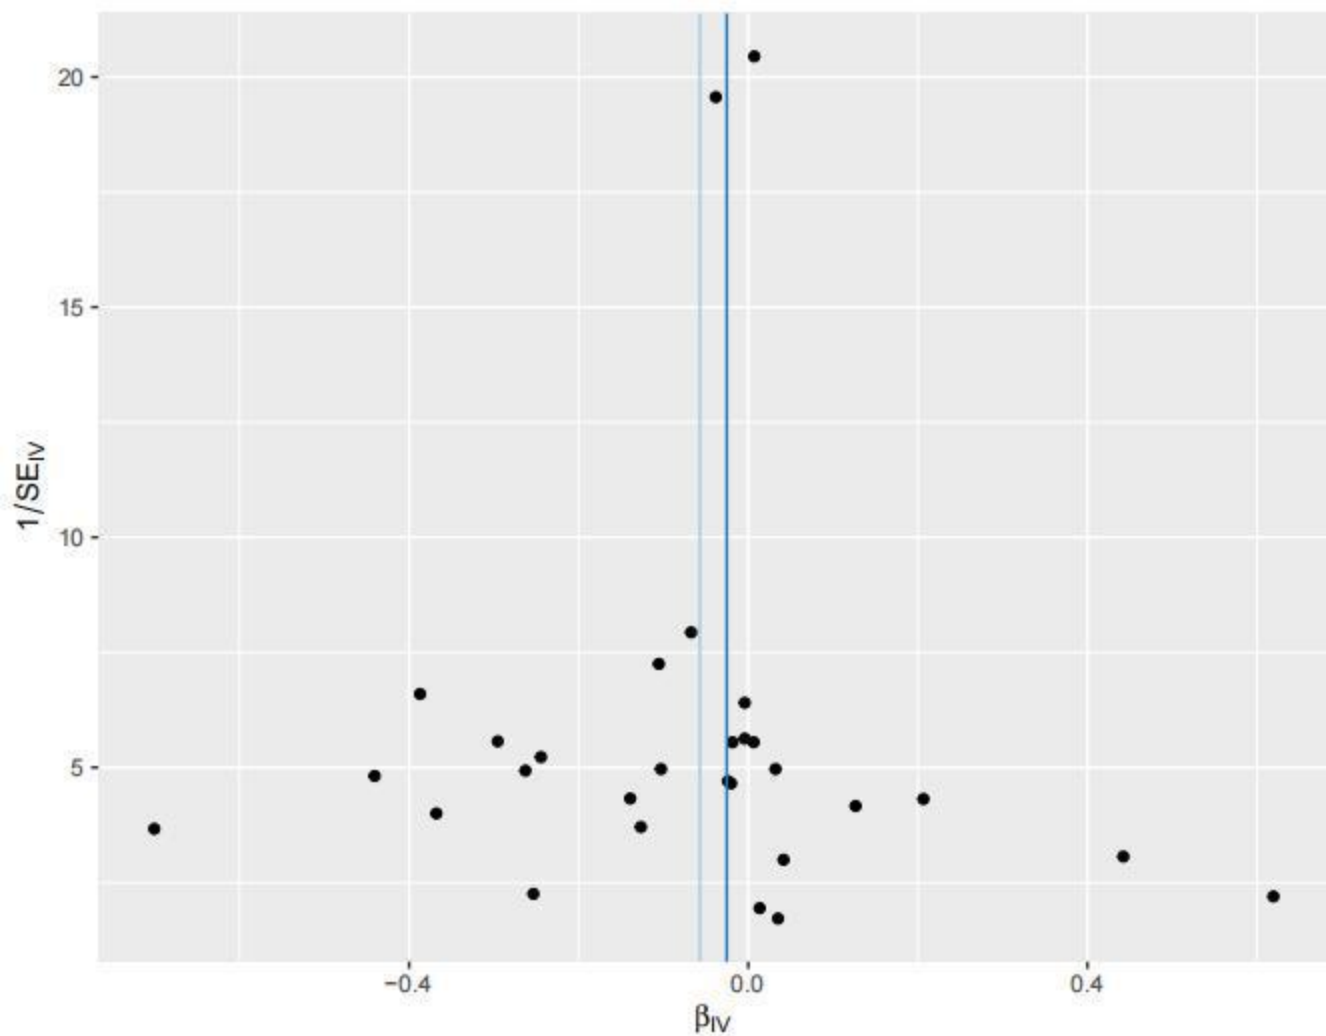

Funnel plot analyse of "CD20 on IgD- CD24-" on 'Aplastic anemia'

### MR Method

- Inverse variance weighted
- MR Egger

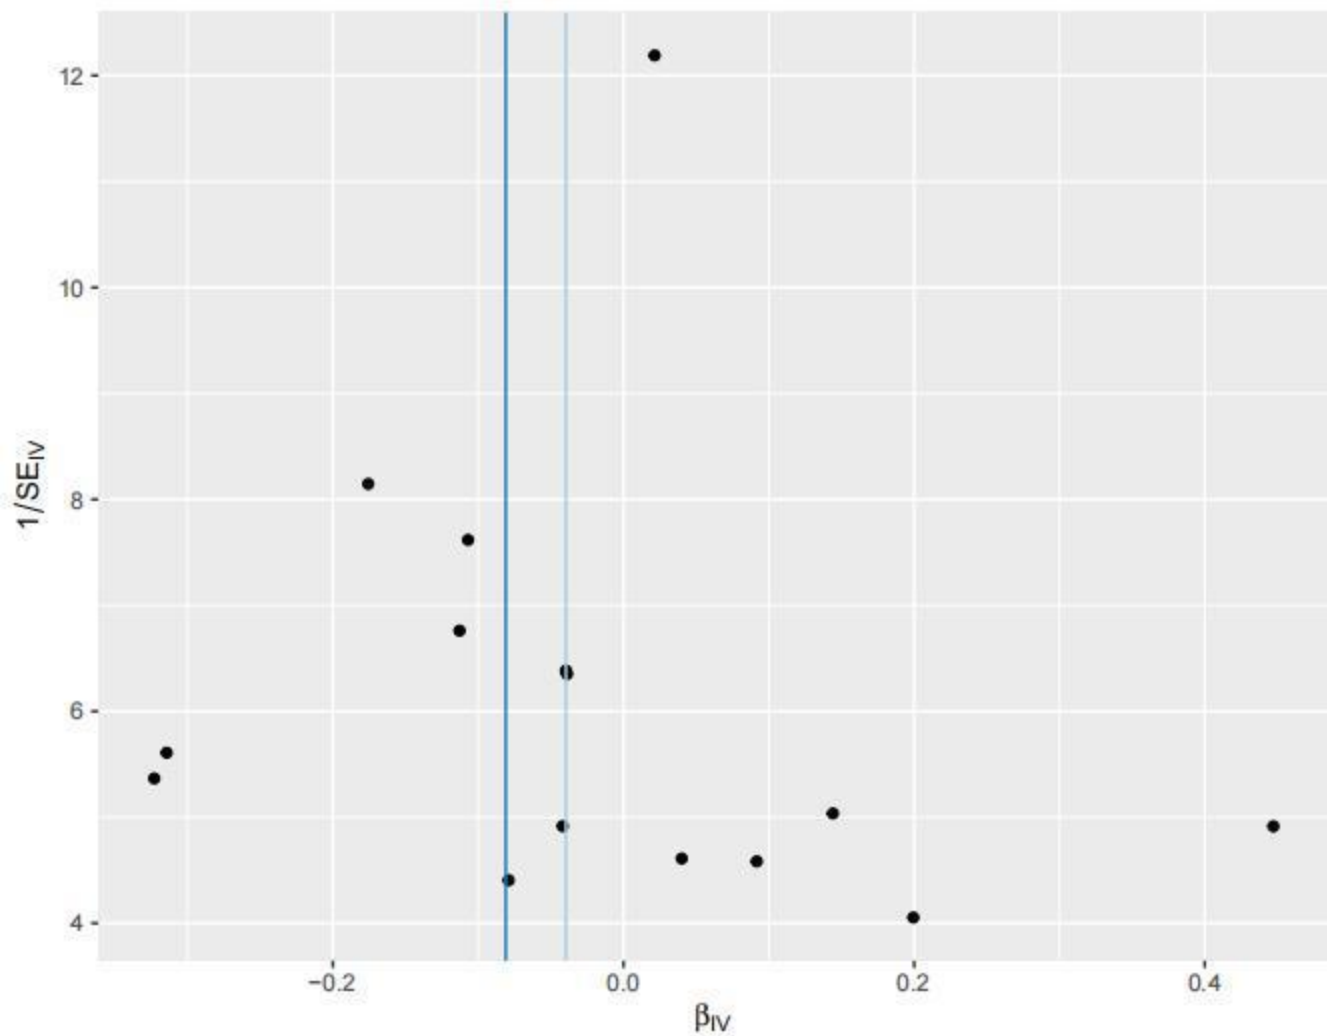

Funnel plot analysis of "CD4/CD8br" on 'Aplastic anemia'

MR Method

- Inverse variance weighted
- MR Egger

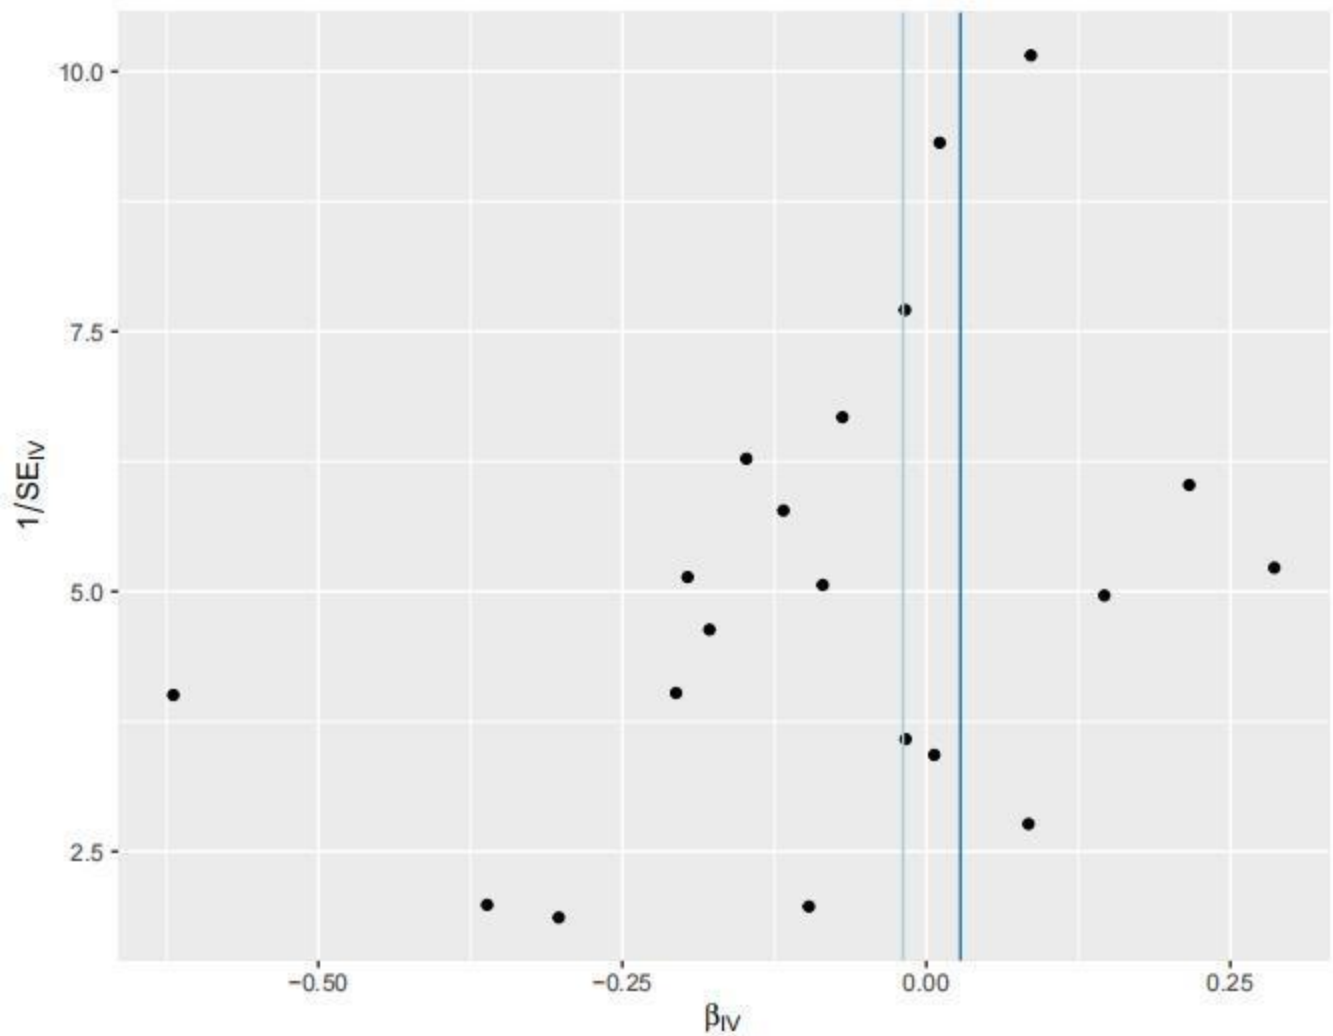

Funnel plot analyse of "EM DN (CD4-CD8-) AC" on 'Aplastic anemia'

MR Method

- Inverse variance weighted
- MR Egger

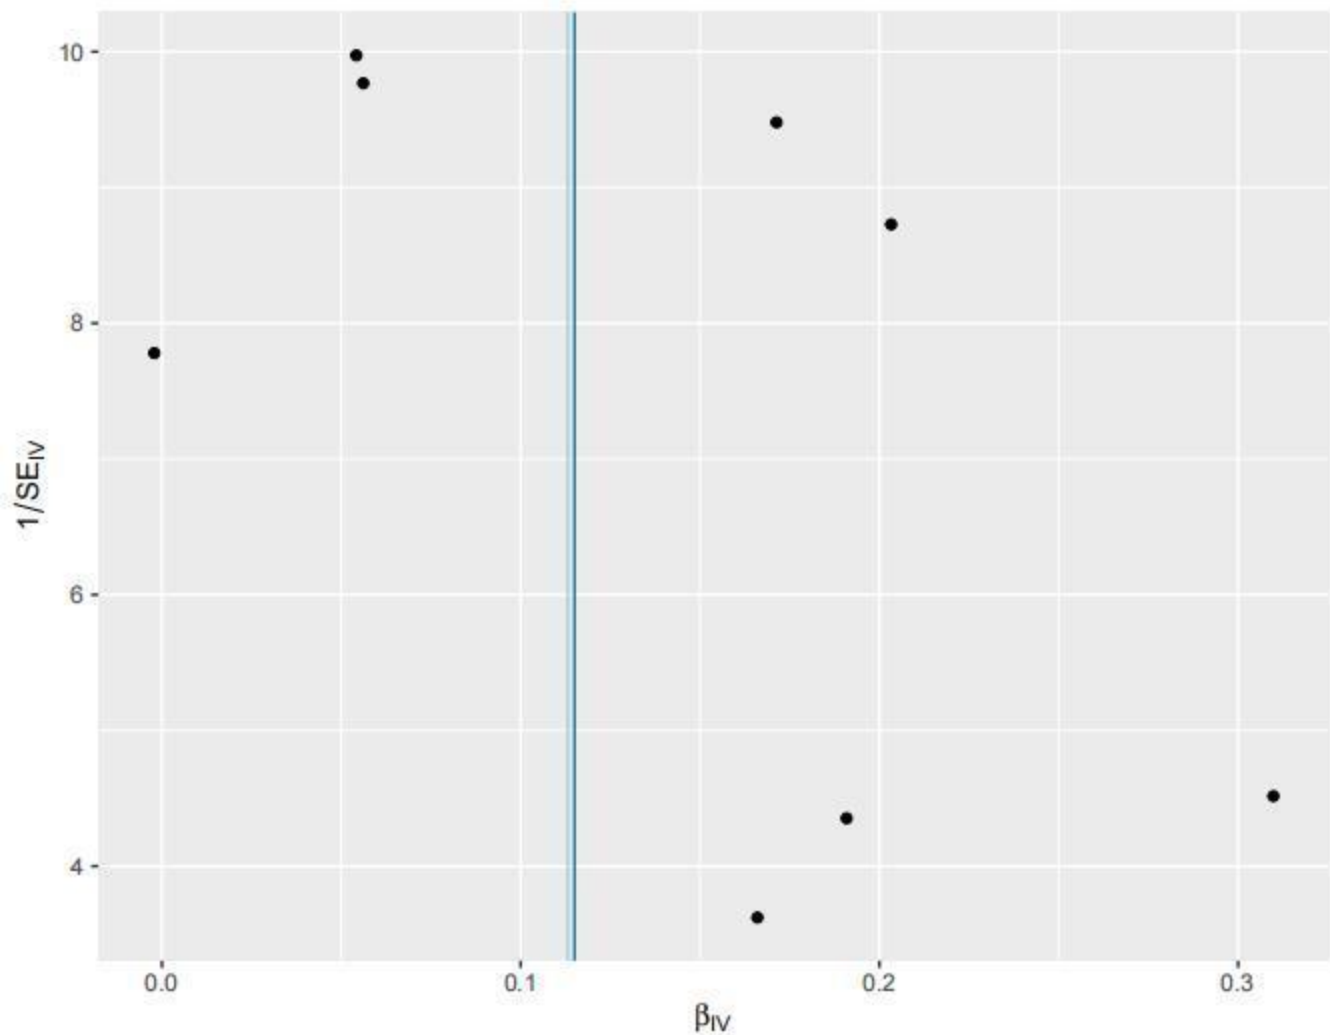

Funnel plot analyse of "CD39+ activated Treg %activated Treg" on 'Aplastic anemia'



MR Method

- Inverse variance weighted
- MR Egger

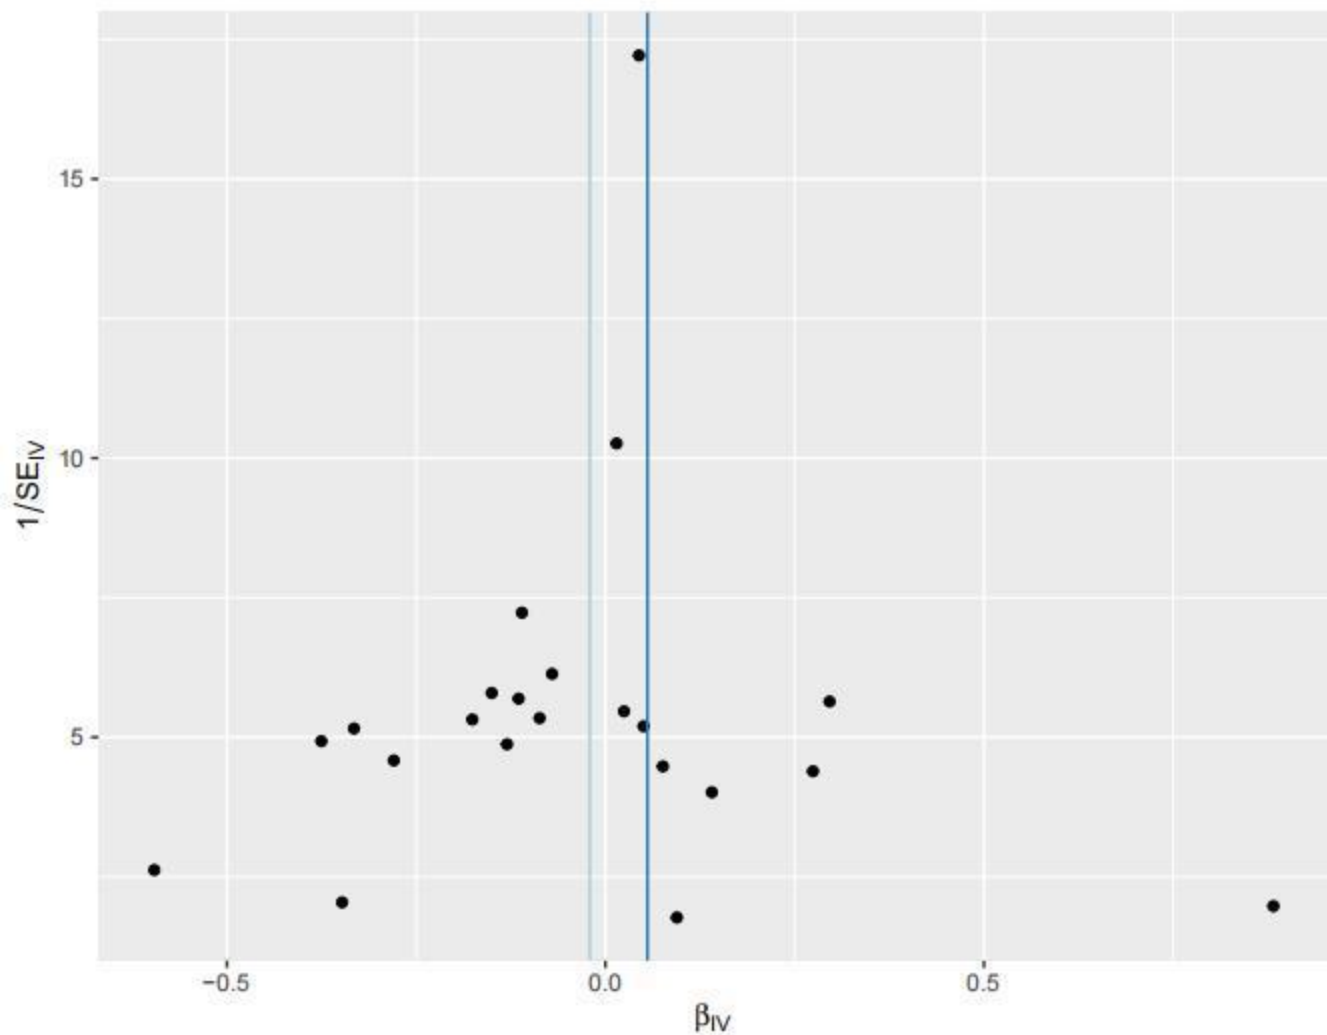

Funnel plot analysis of "TD DN (CD4-CD8-) AC" on 'Aplastic anemia'

### MR Method

- Inverse variance weighted
- MR Egger

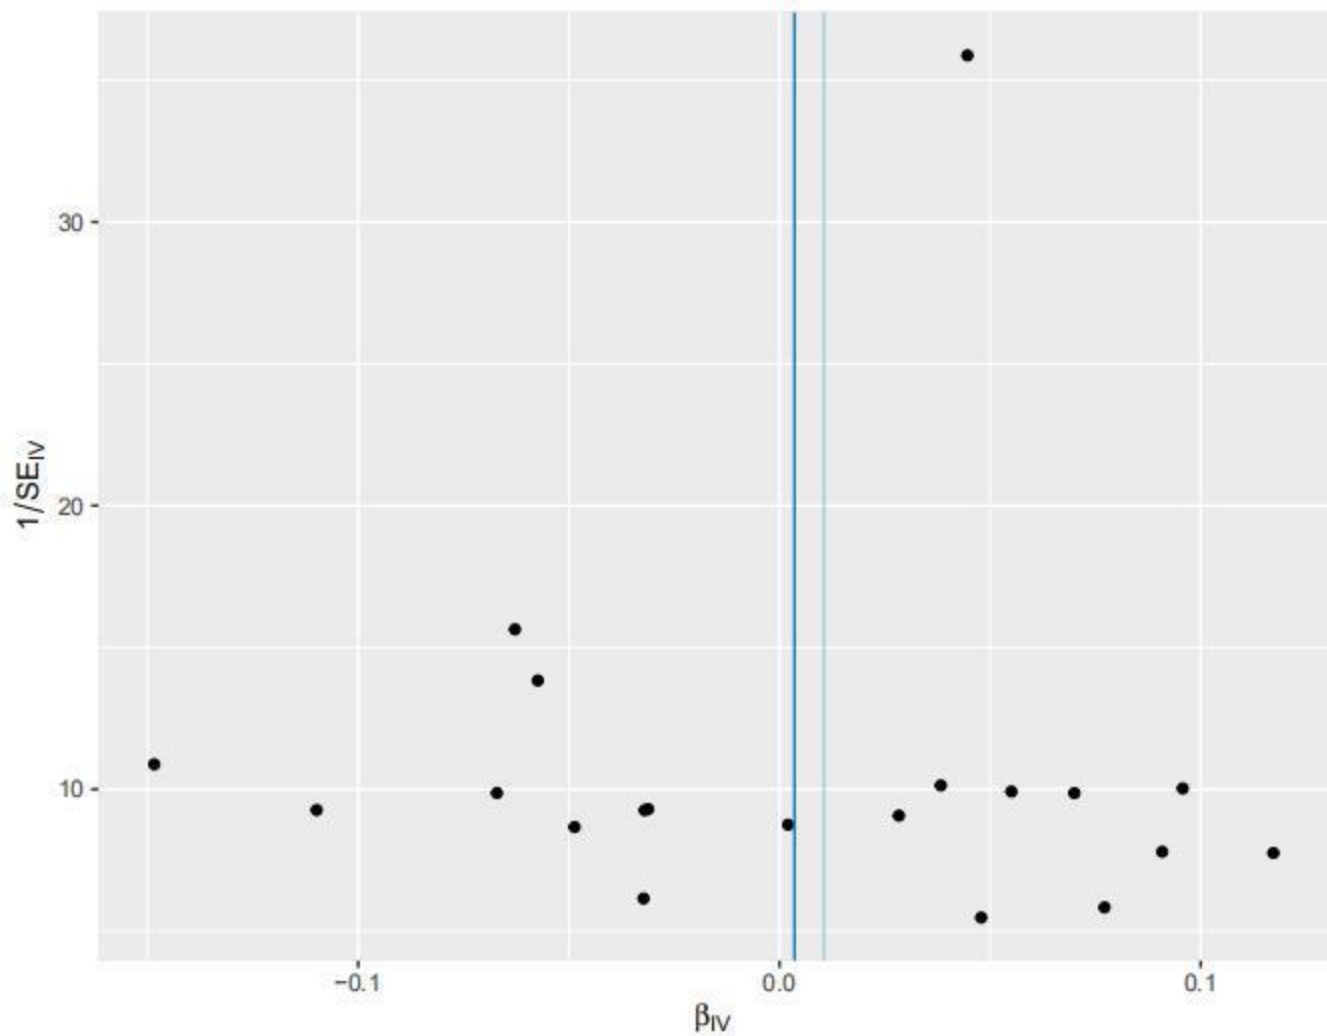

Funnel plot analyse of "CD33 on Gr MDSC " on 'Aplastic anemia'

### MR Method

- Inverse variance weighted
- MR Egger

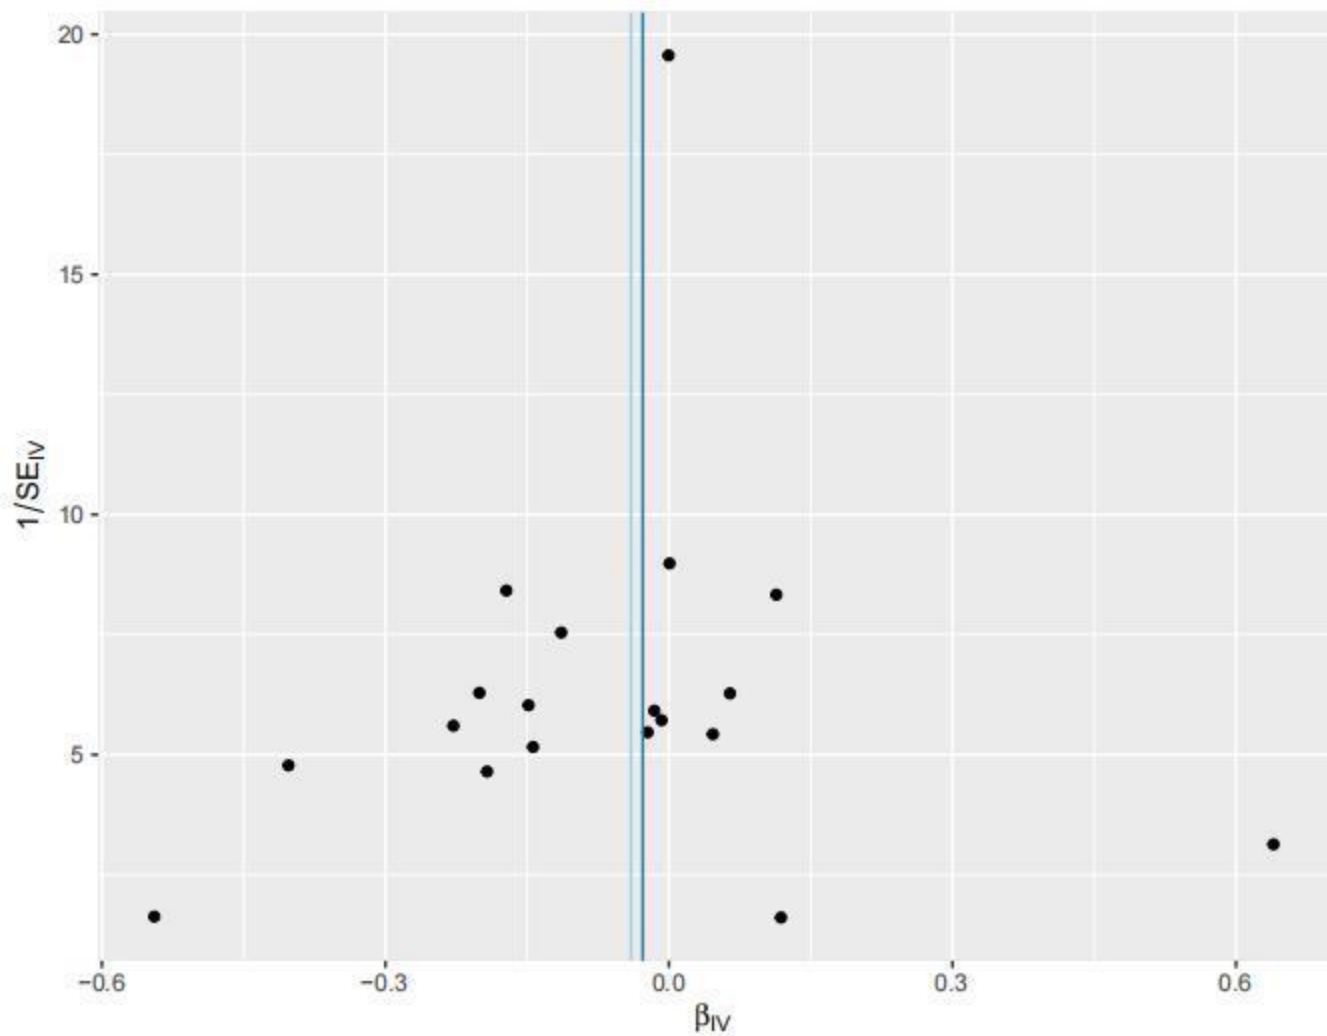

Funnel plot analyse of "CD8 on NKT" on 'Aplastic anemia'

### MR Method

- Inverse variance weighted
- MR Egger

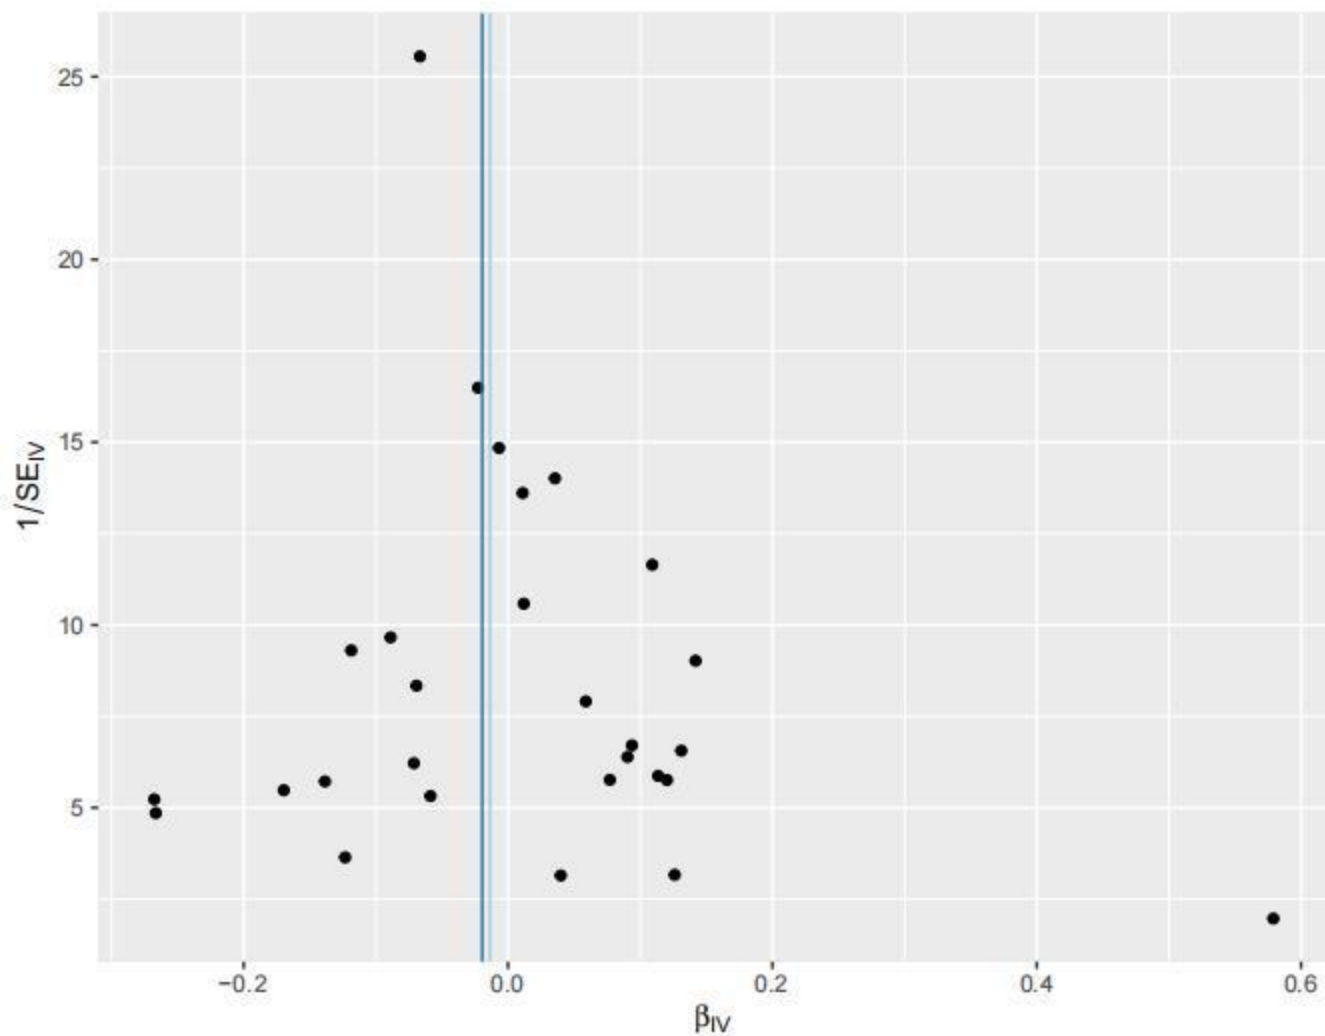

Funnel plot analysis of "CD3 on CD39+ CD4+" on 'Aplastic anemia'

MR Method

Inverse variance weighted

MR Egger

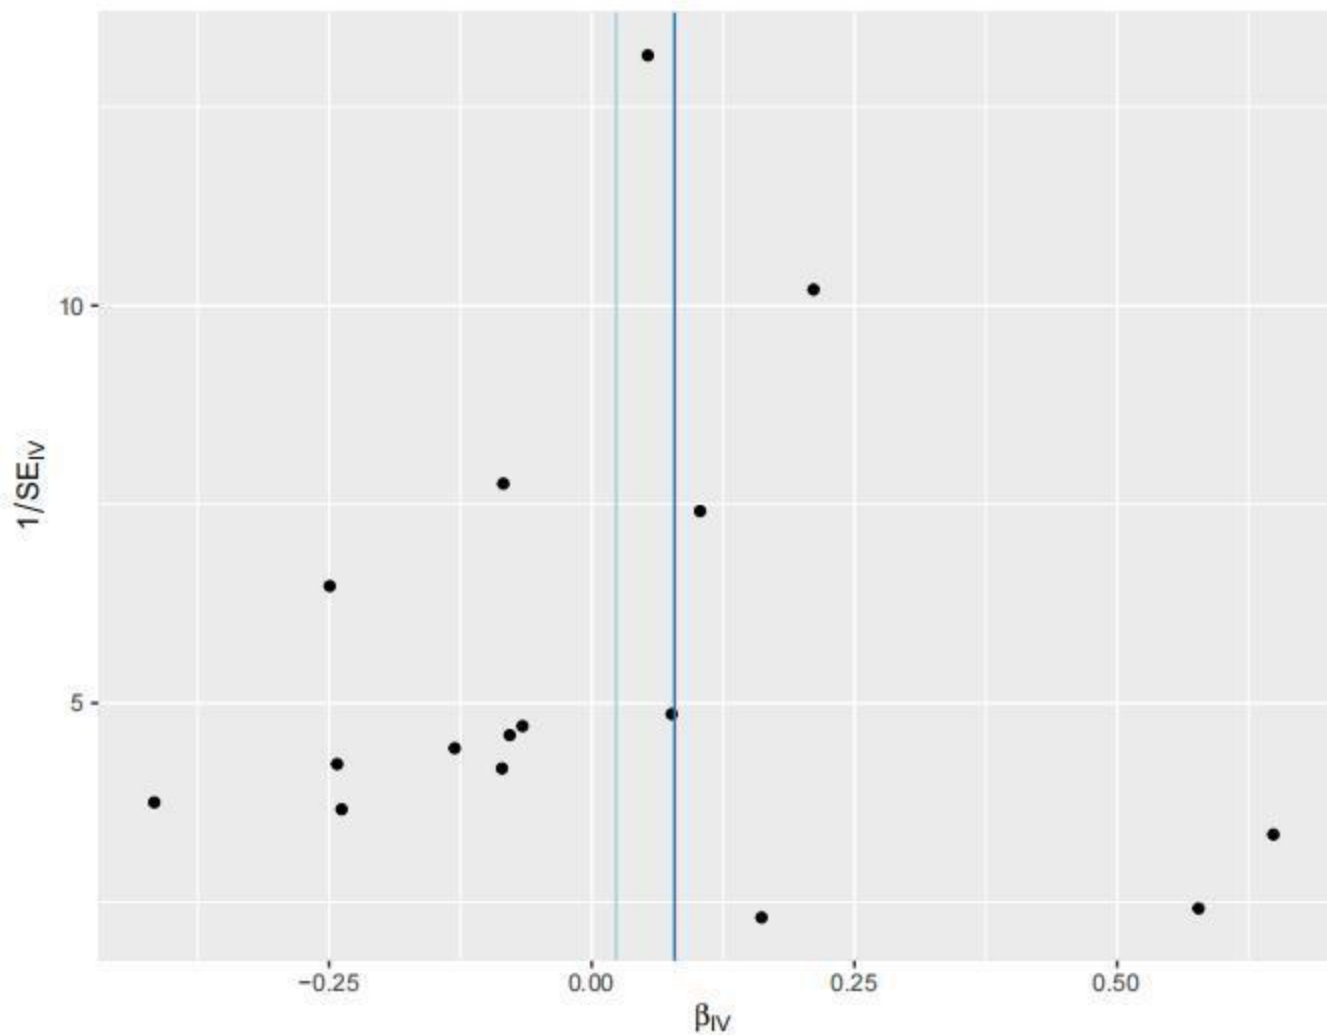

Funnel plot analysis of "CD14 on CD14+ CD16- monocyte" on 'Aplastic anemia'

### MR Method

- Inverse variance weighted
- MR Egger

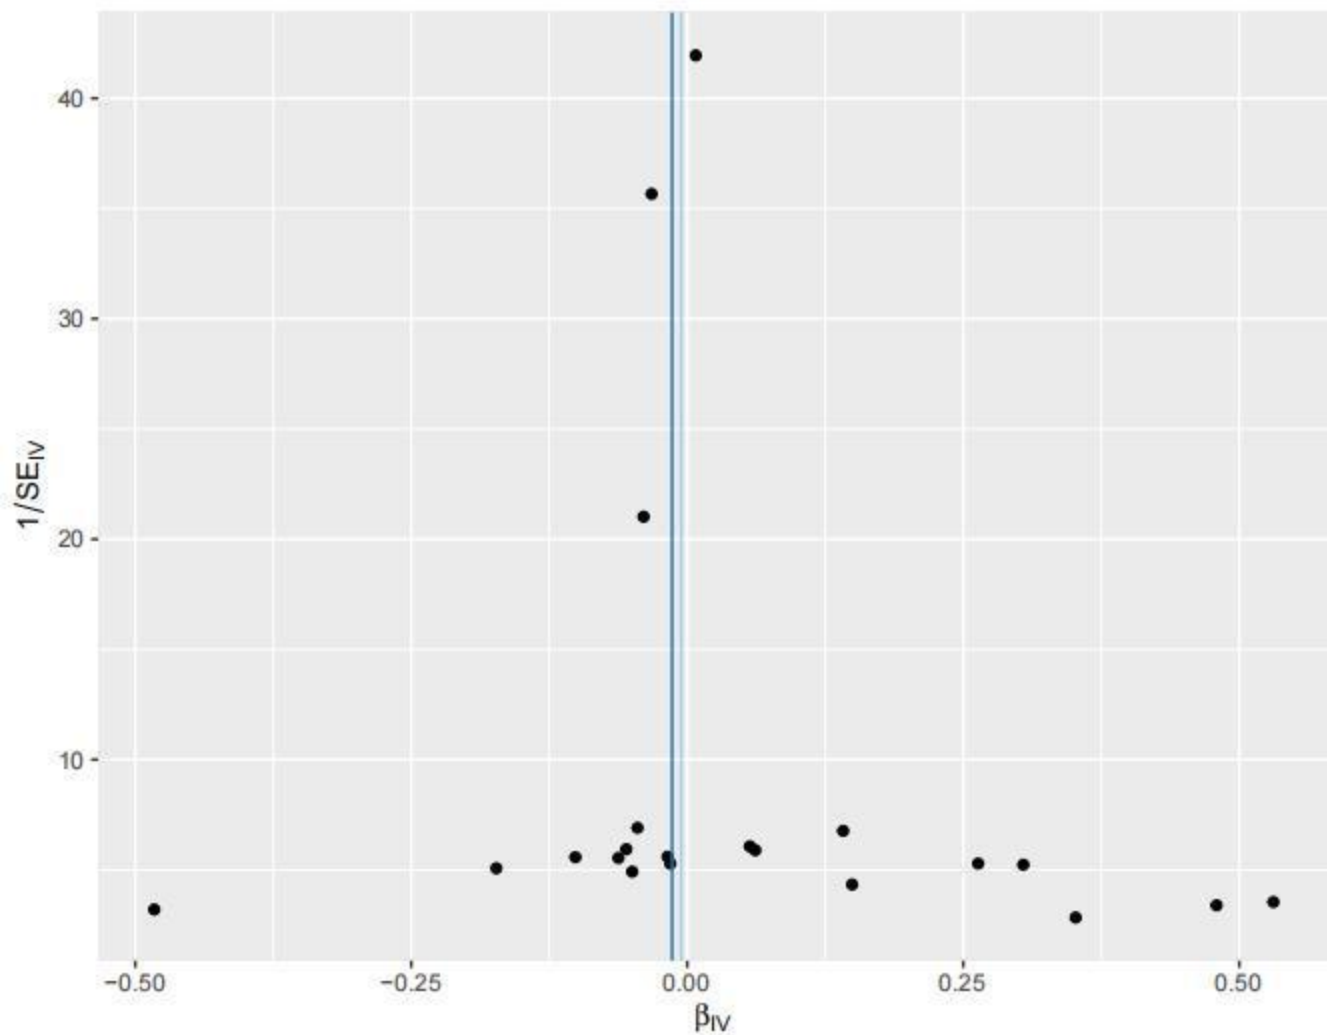

Funnel plot analyse of "SSC-A on NKT " on 'Aplastic anemia'

MR Method

- Inverse variance weighted
- MR Egger

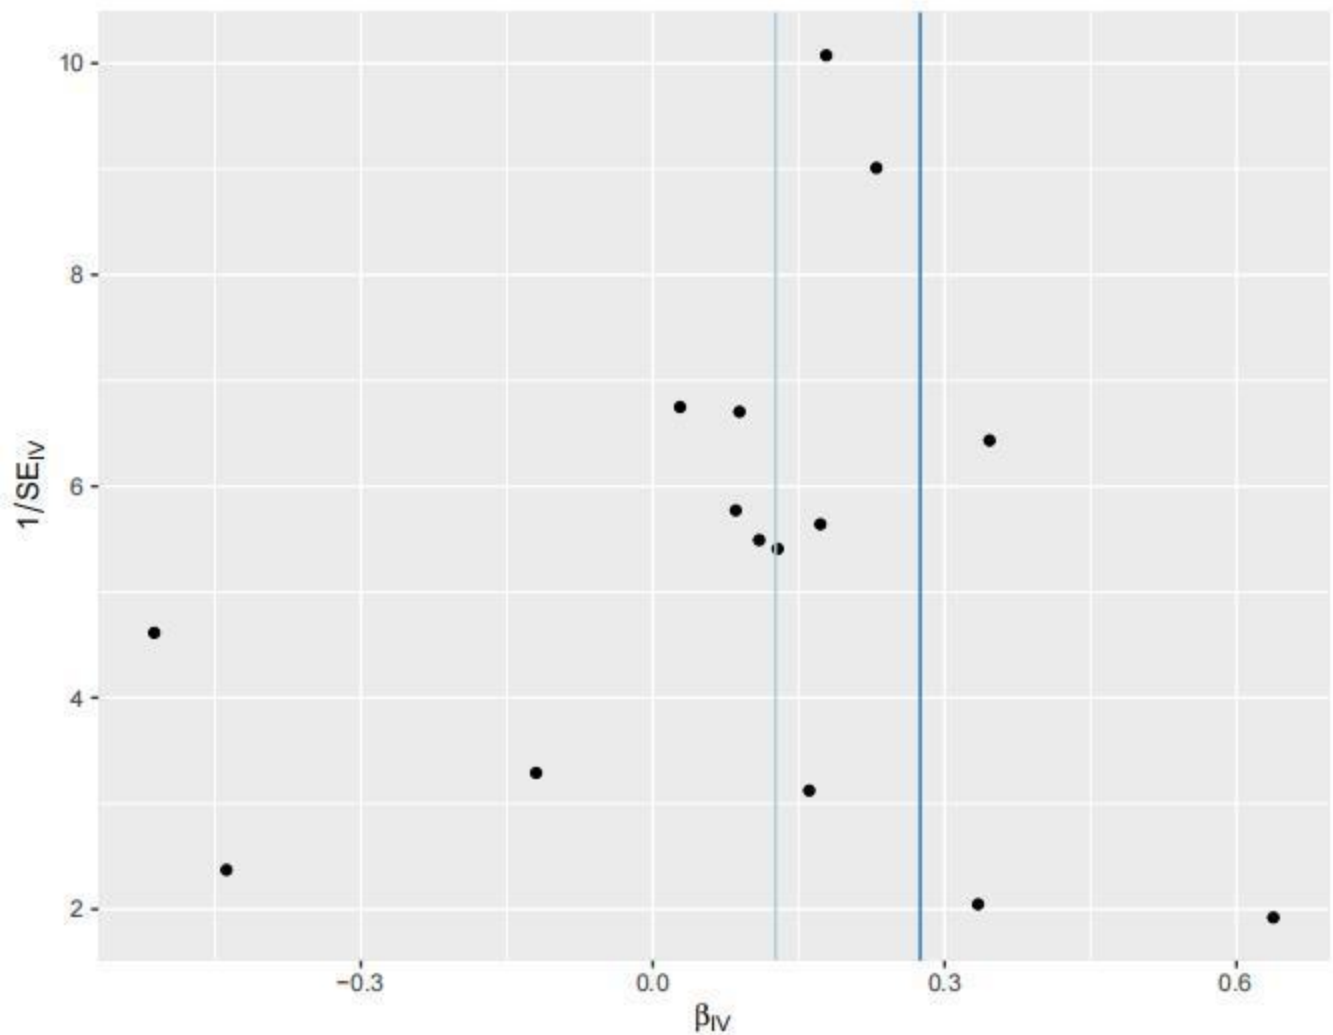

Funnel plot analysis of "CD127- CD8br %T cell" on 'Aplastic anemia'

MR Method

- Inverse variance weighted
- MR Egger

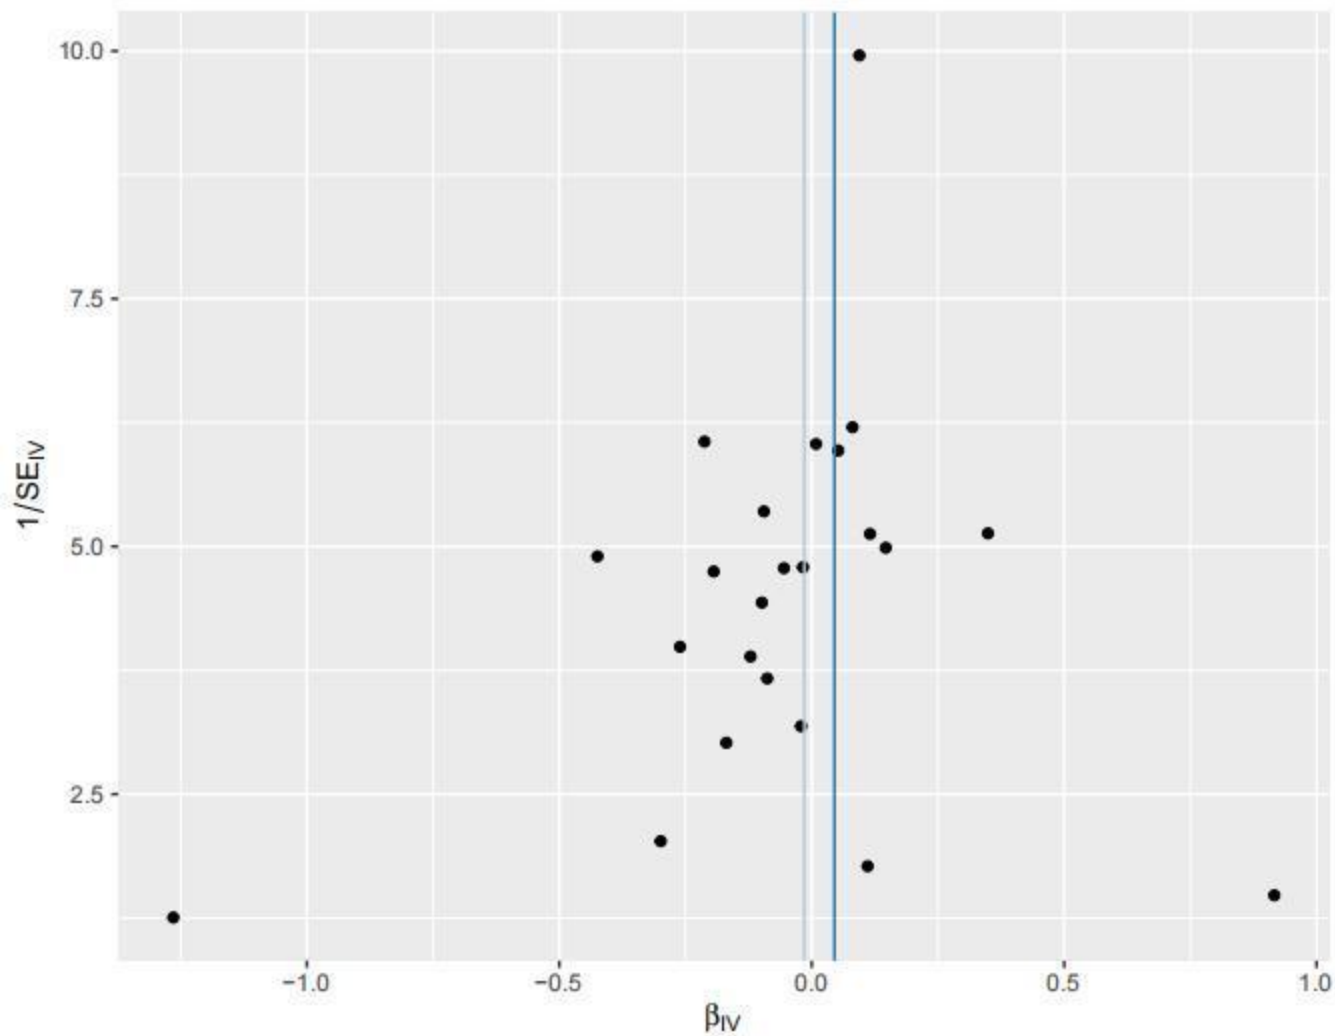

Funnel plot analyse of "Naive-mature B cell %lymphocyte" on 'Aplastic anemia'



### MR Method

- Inverse variance weighted
- MR Egger

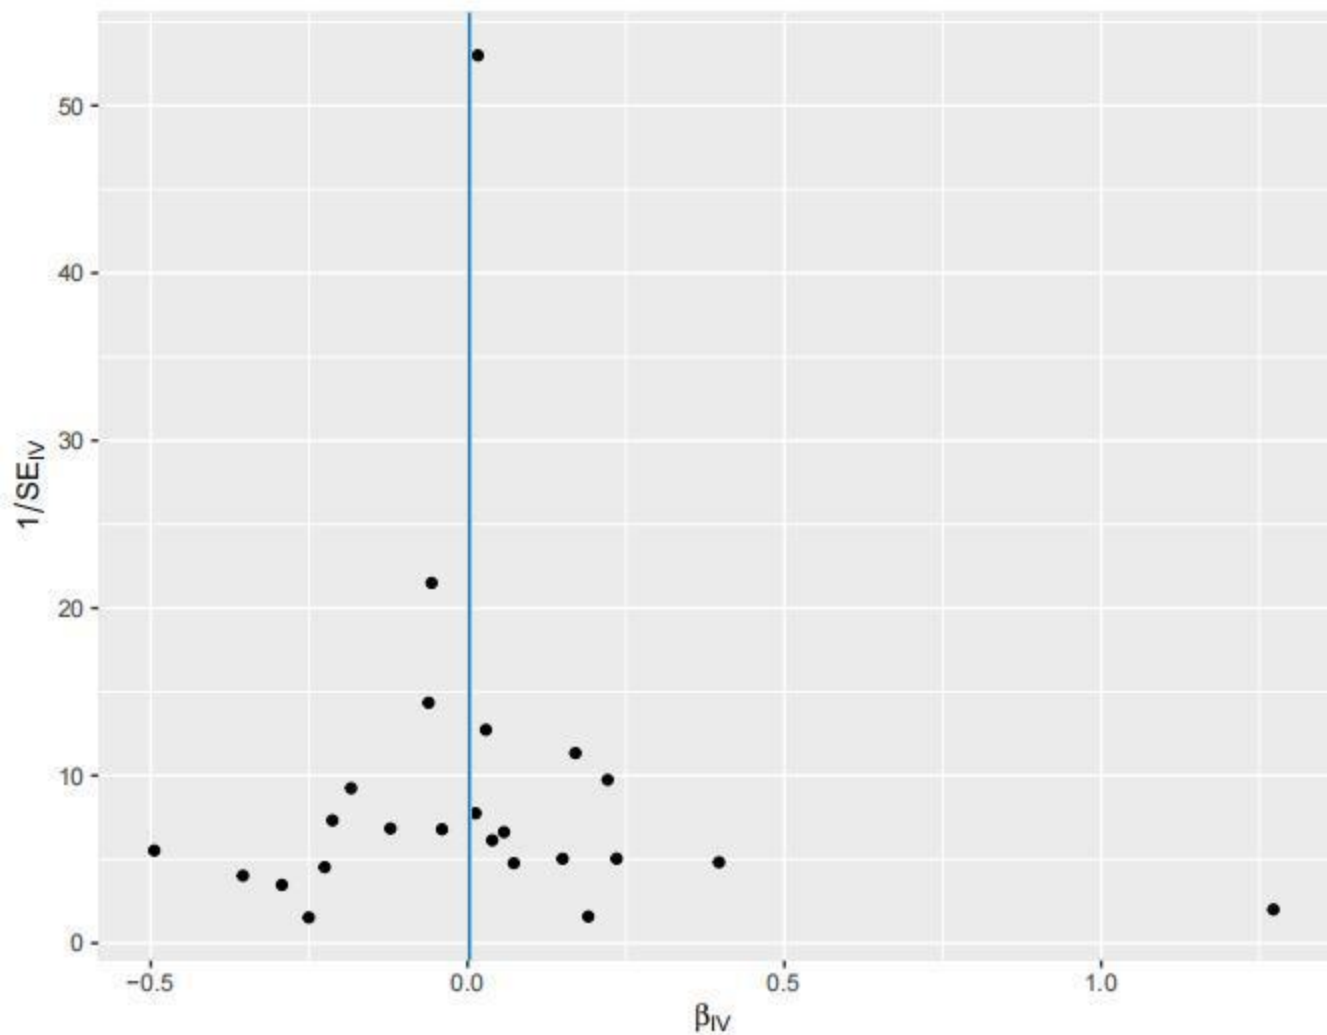

Funnel plot analyse of "CD25 on unsw mem" on 'Aplastic anemia'

MR Method

Inverse variance weighted

MR Egger

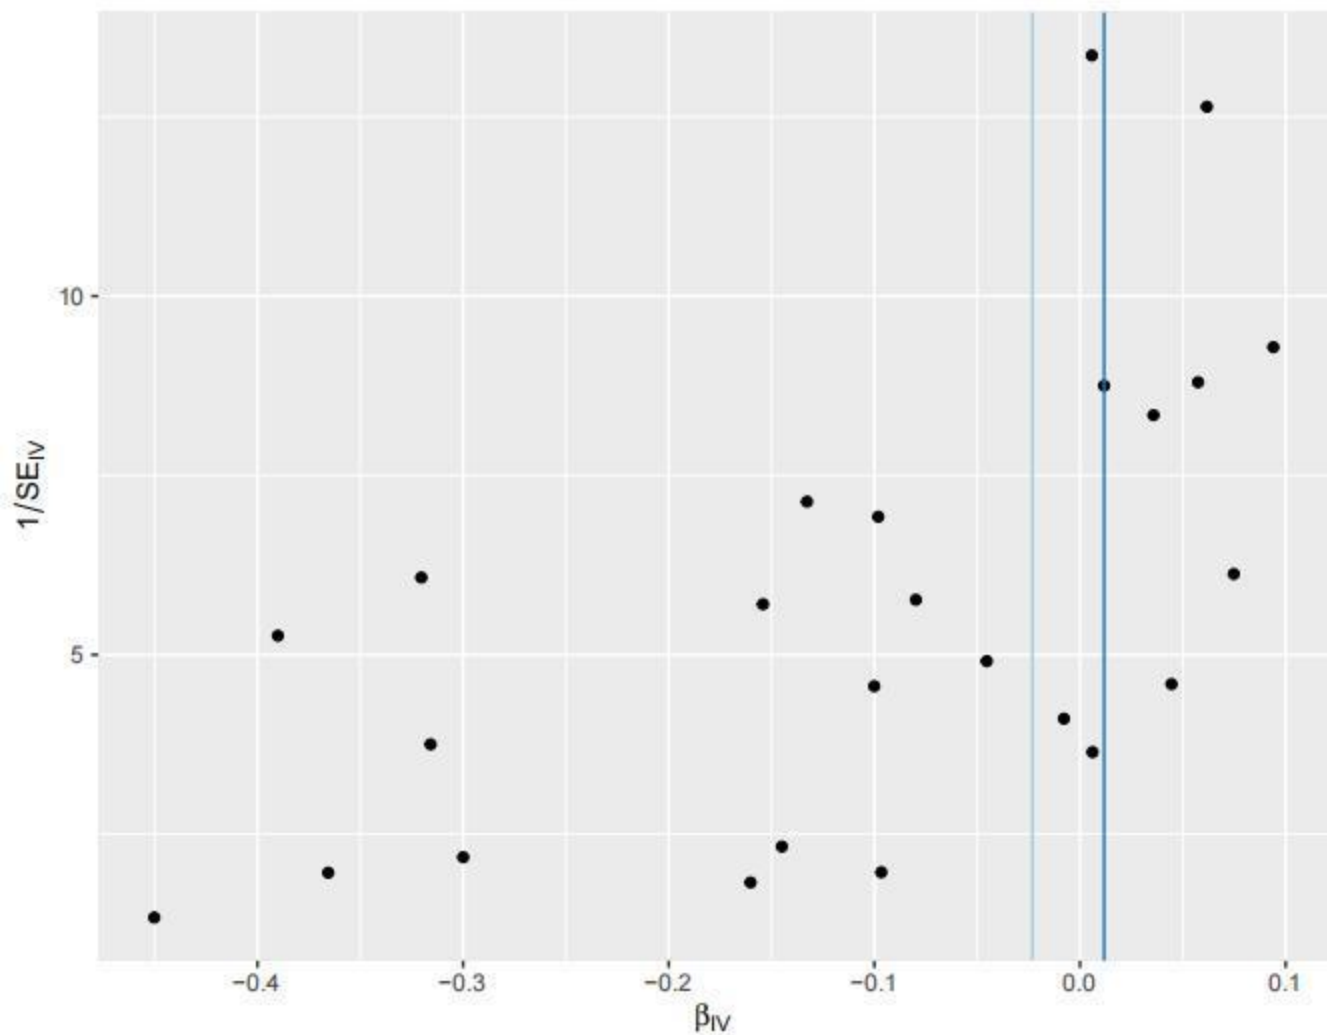

Funnel plot analysis of "EM DN (CD4-CD8-) %T cell" on 'Aplastic anemia'

### MR Method

- Inverse variance weighted
- MR Egger

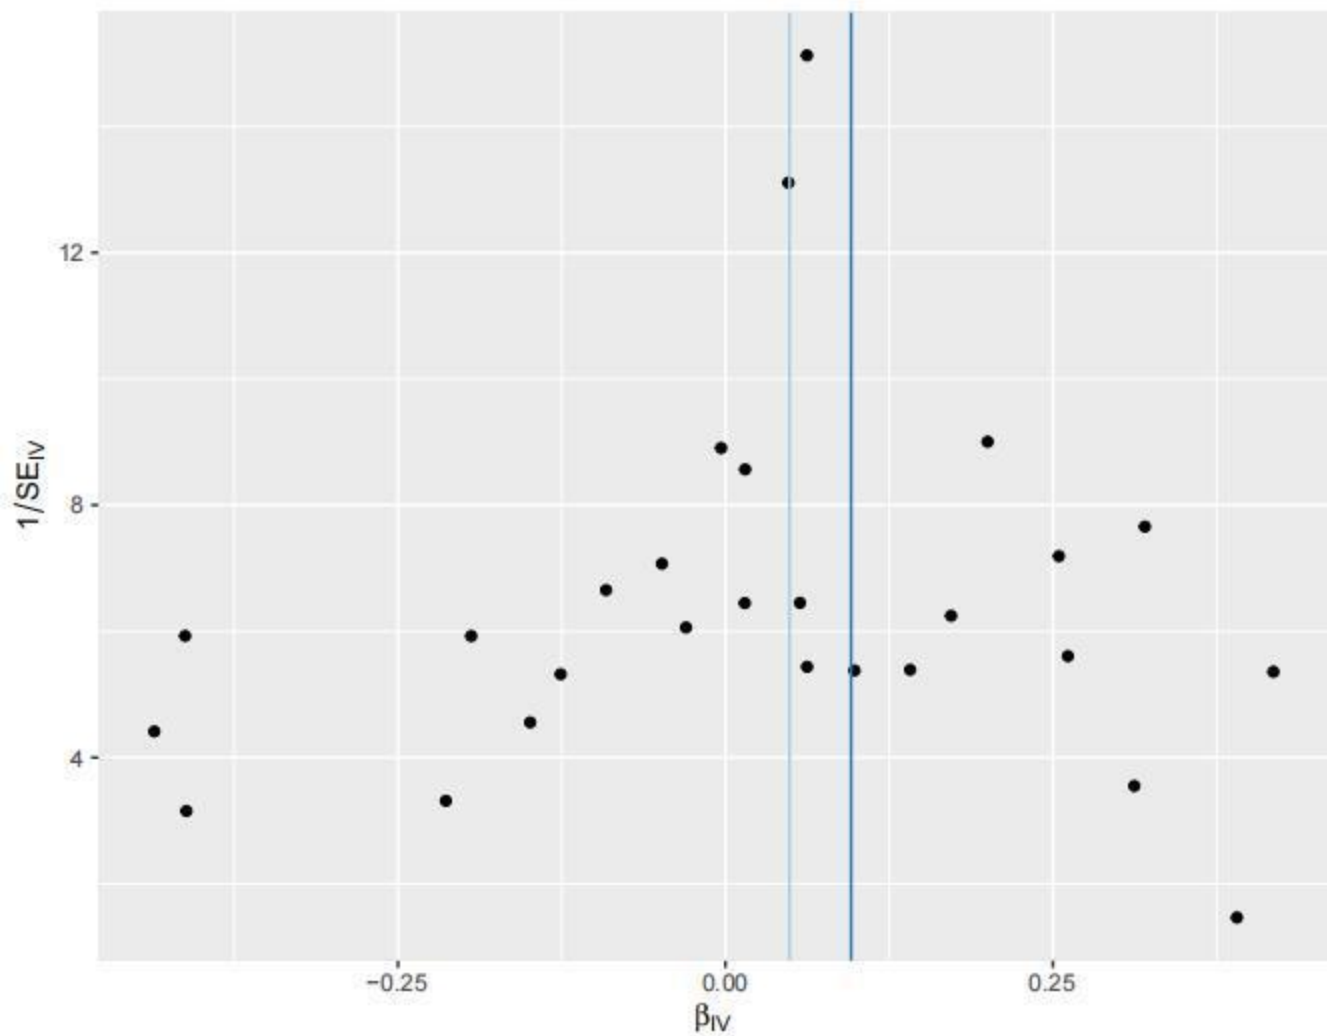

Funnel plot analyse of "CD4 on CD45RA+ CD4+ " on 'Aplastic anemia'

### MR Method

- Inverse variance weighted
- MR Egger

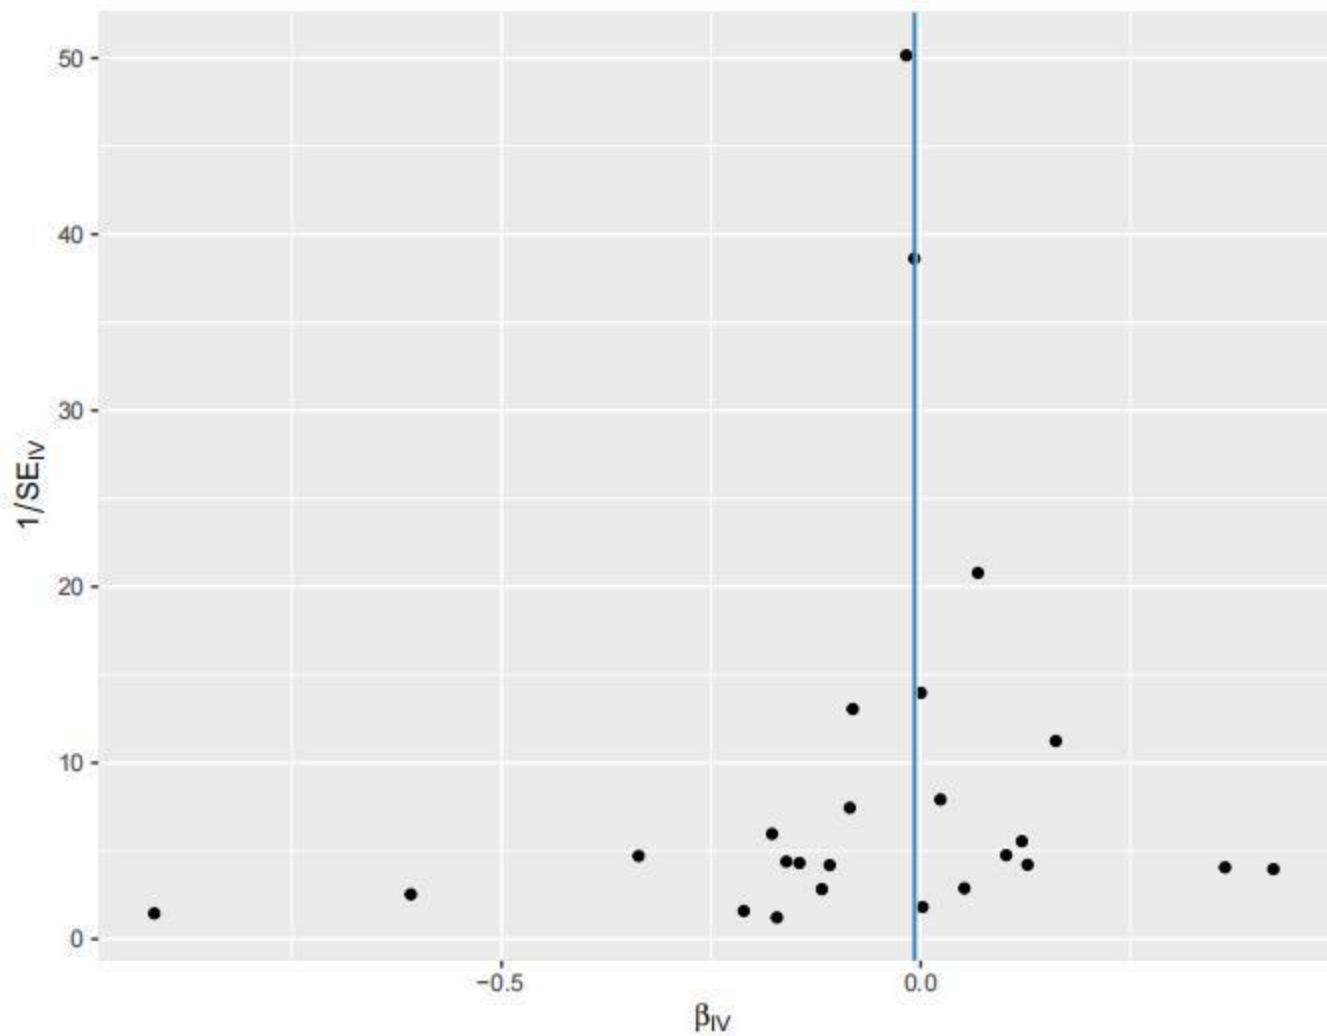

Funnel plot analyse of "EM CD8br %CD8br" on 'Aplastic anemia'

### MR Method

Inverse variance weighted

MR Egger

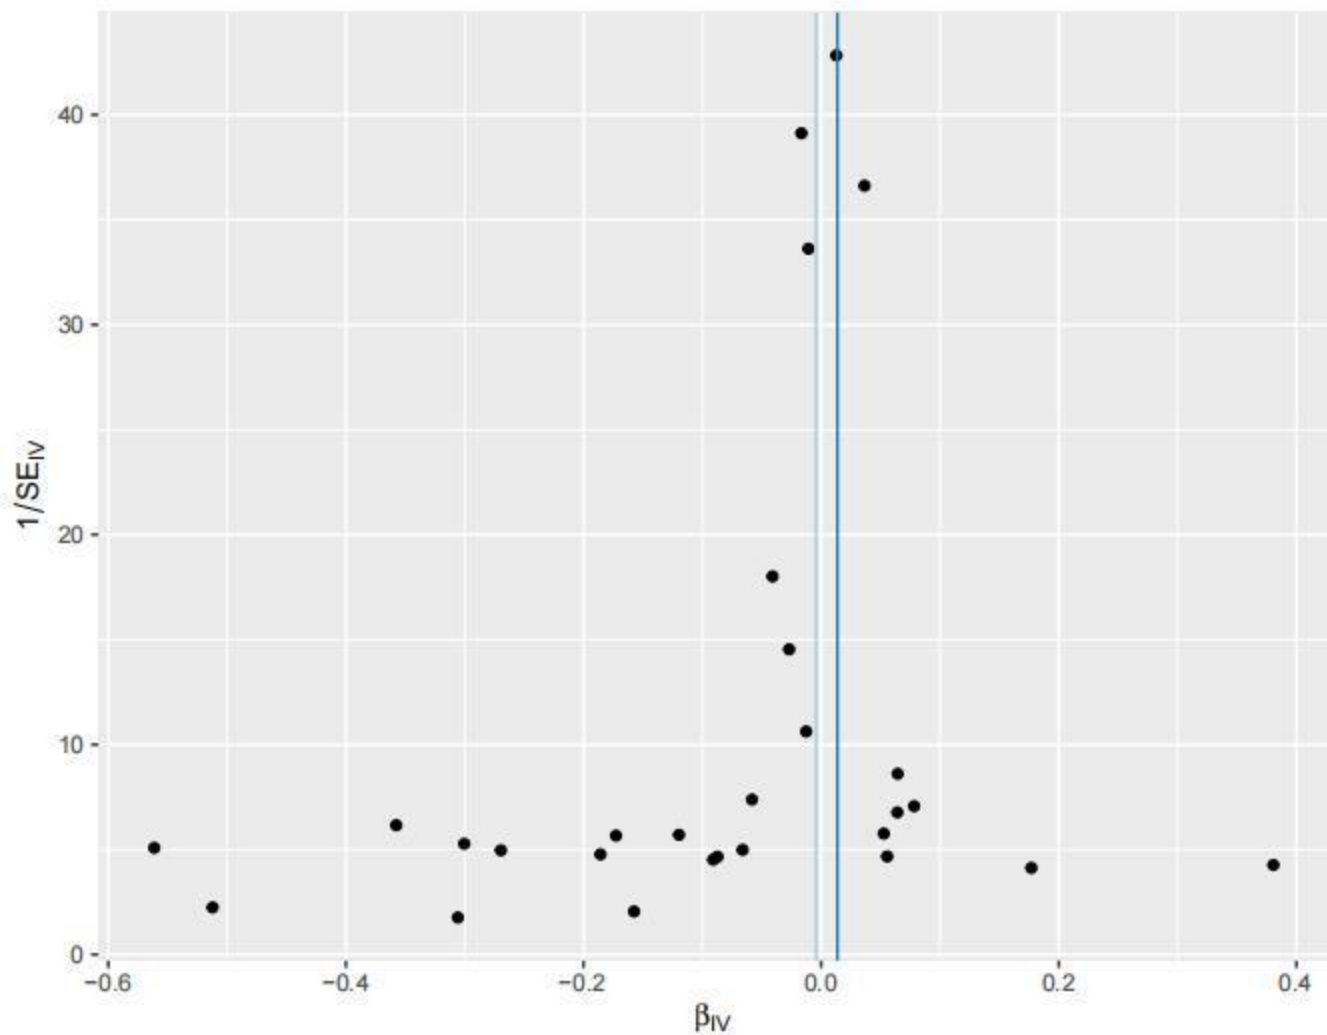

Funnel plot analysis of "CCR2 on CD14+ CD16- monocyte" on 'Aplastic anemia'

MR Method

- Inverse variance weighted
- MR Egger

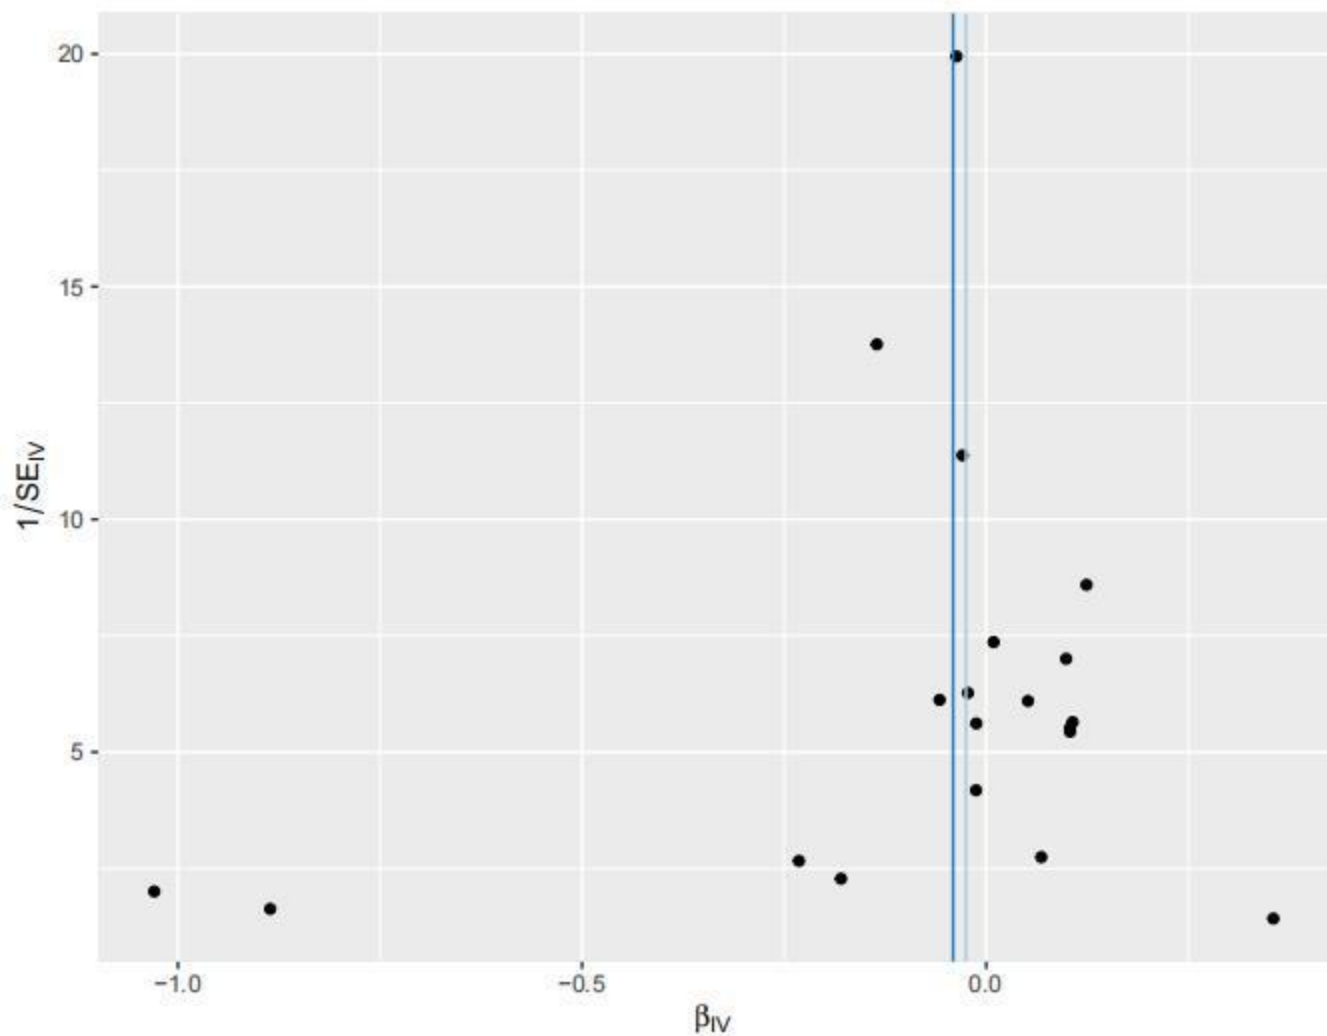

Funnel plot analyse of "CD3 on EM CD8br " on 'Aplastic anemia'

MR Method

- Inverse variance weighted
- MR Egger

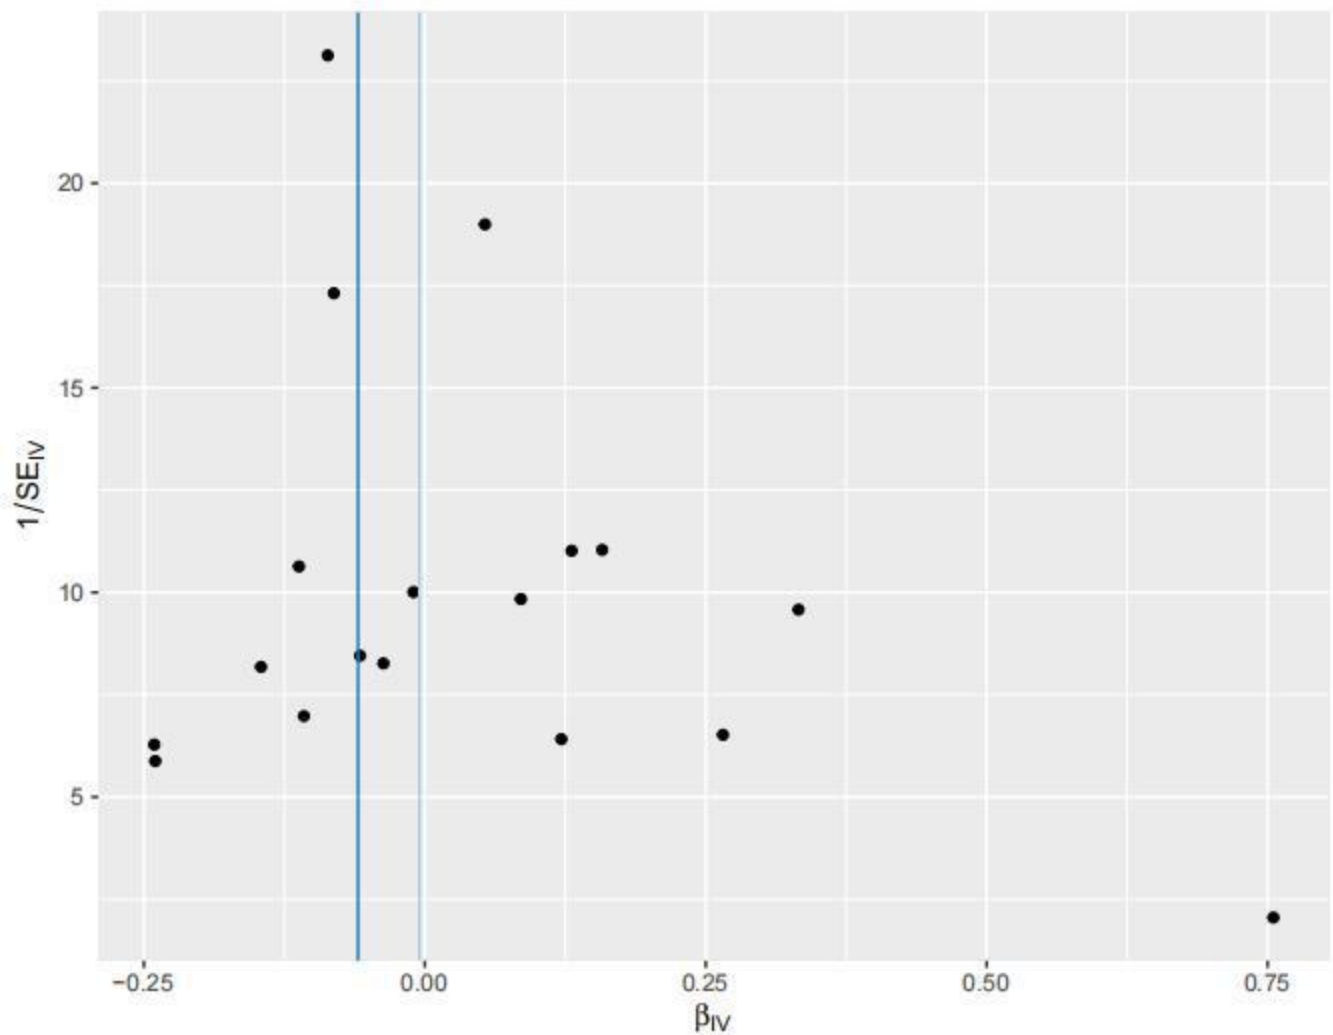

Funnel plot analysis of "HVEM on naive CD4+" on 'Aplastic anemia'

### MR Method

- Inverse variance weighted
- MR Egger

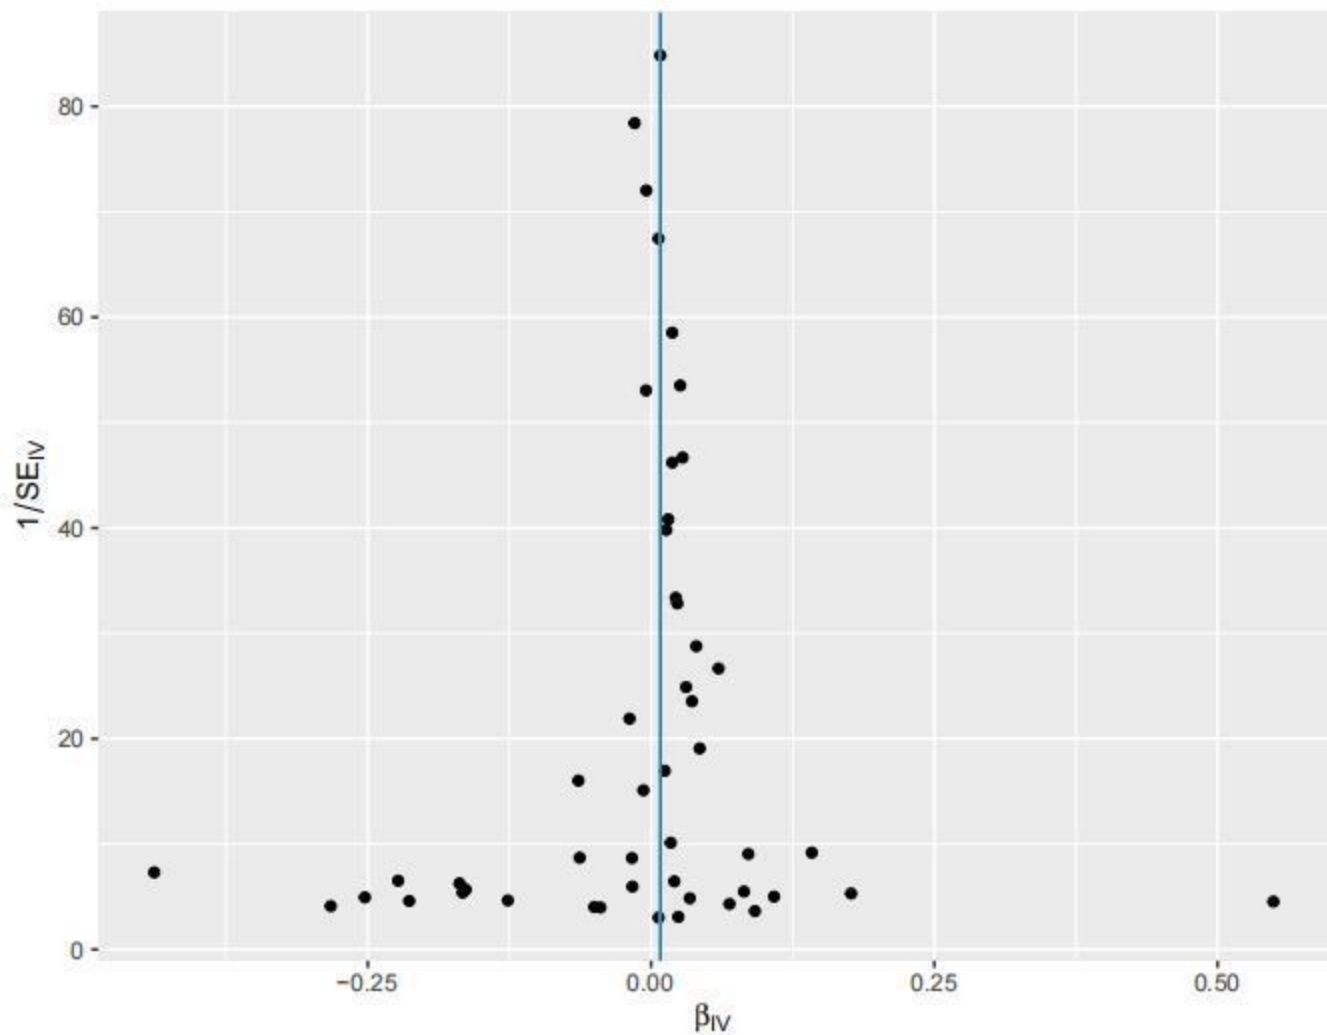

Funnel plot analyse of "CD28+ CD45RA+ CD8dim AC" on 'Aplastic anemia'



### MR Method

- Inverse variance weighted
- MR Egger

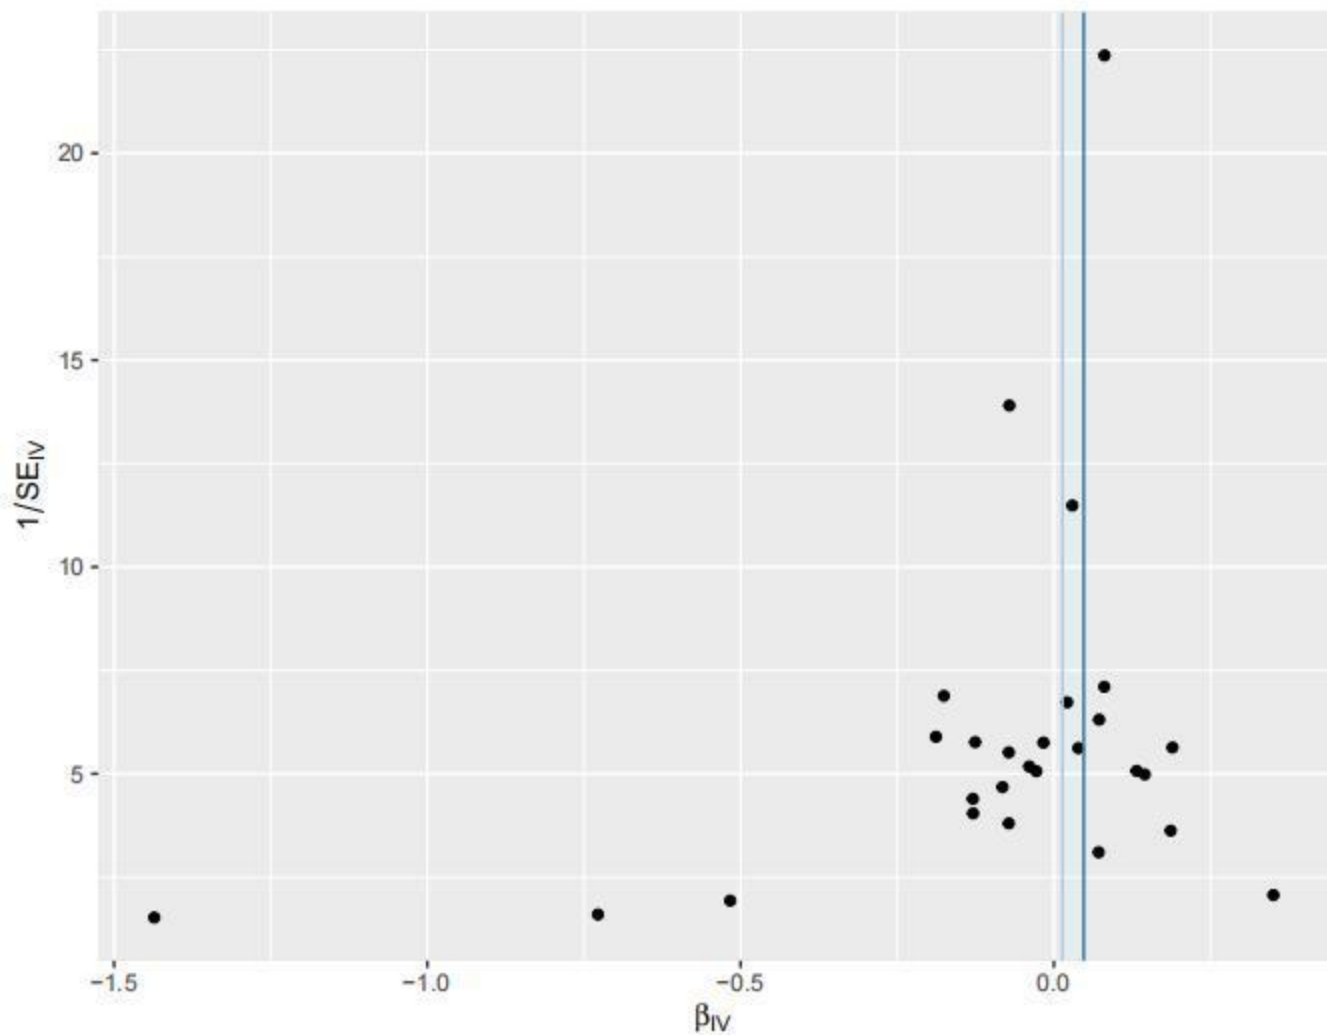

Funnel plot analyse of "CD28+ DN (CD4-CD8-) %DN" on 'Aplastic anemia'

### MR Method

Inverse variance weighted

MR Egger

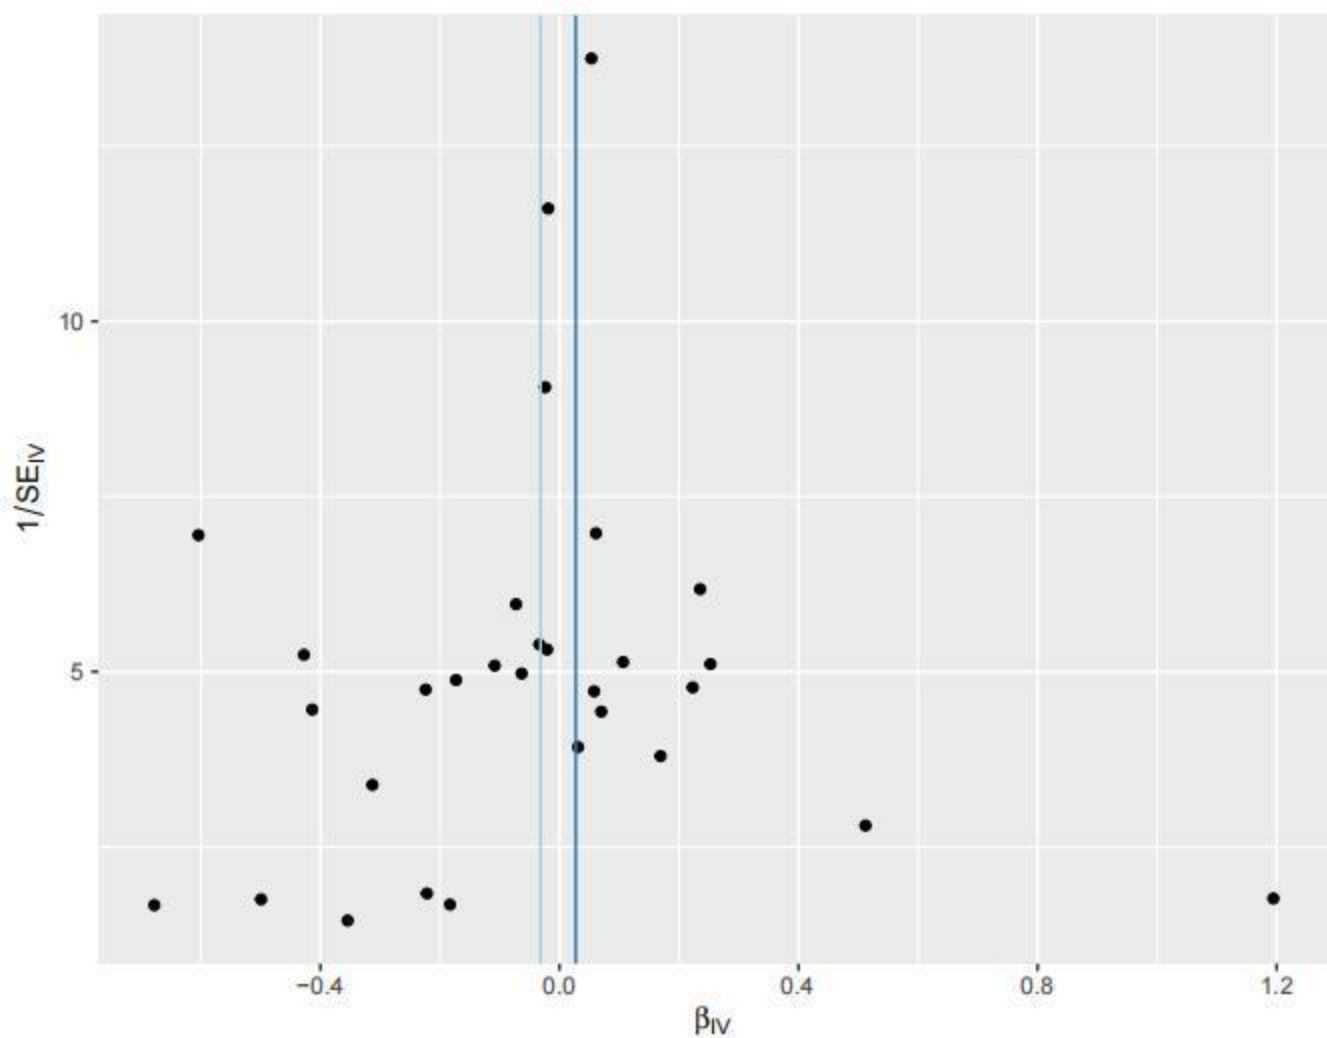

Funnel plot analysis of "SSC-A on CD4+" on 'Aplastic anemia'

### MR Method

- Inverse variance weighted
- MR Egger

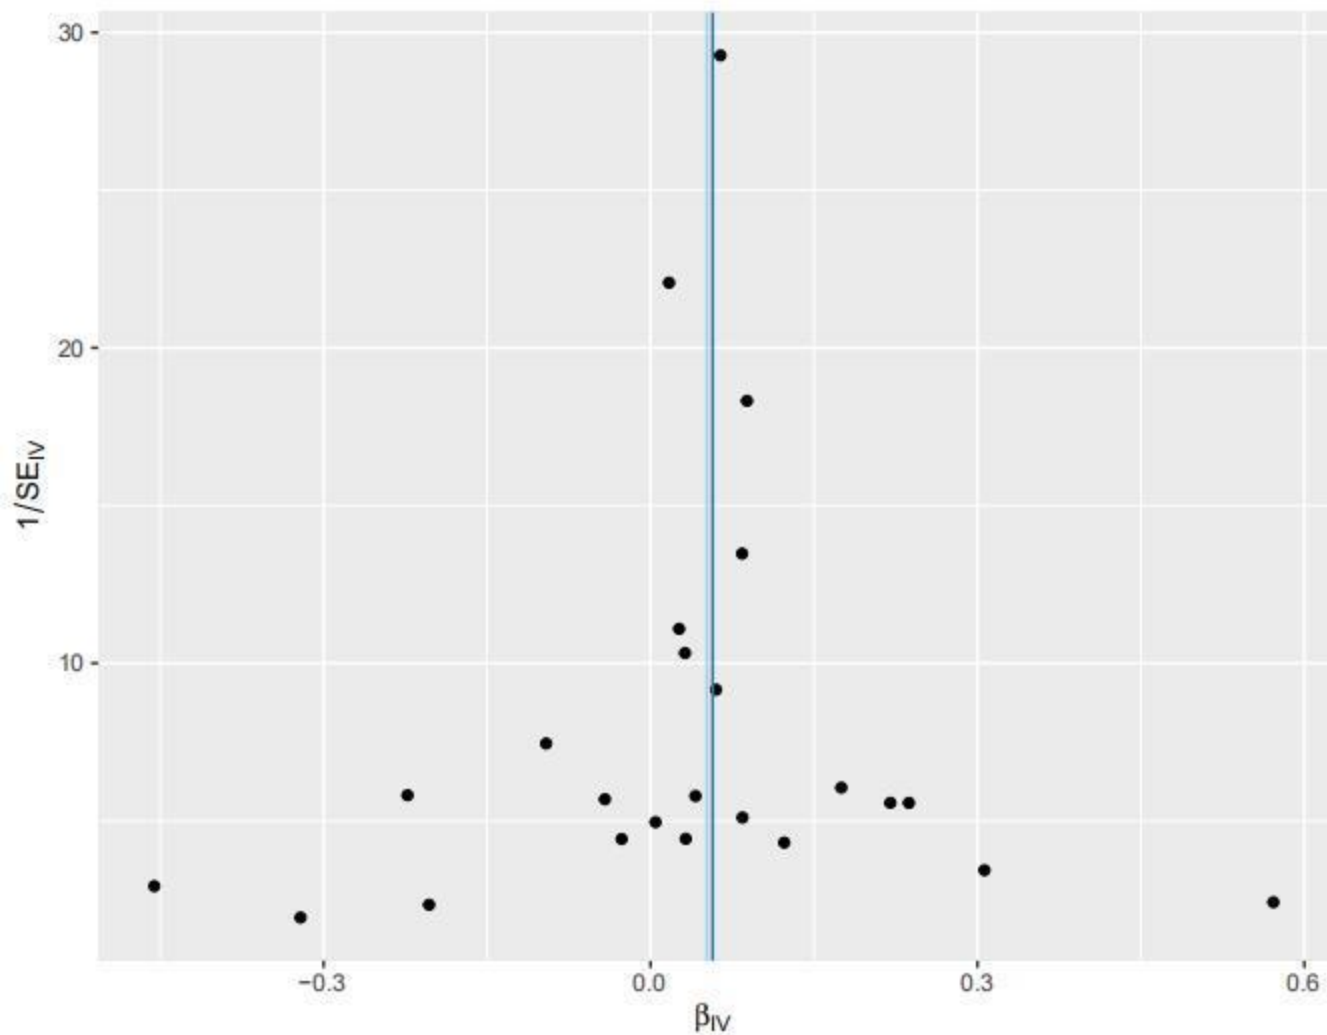

Funnel plot analyse of "CD25 on IgD+ CD38dim" on 'Aplastic anemia'

### MR Method

- Inverse variance weighted
- MR Egger

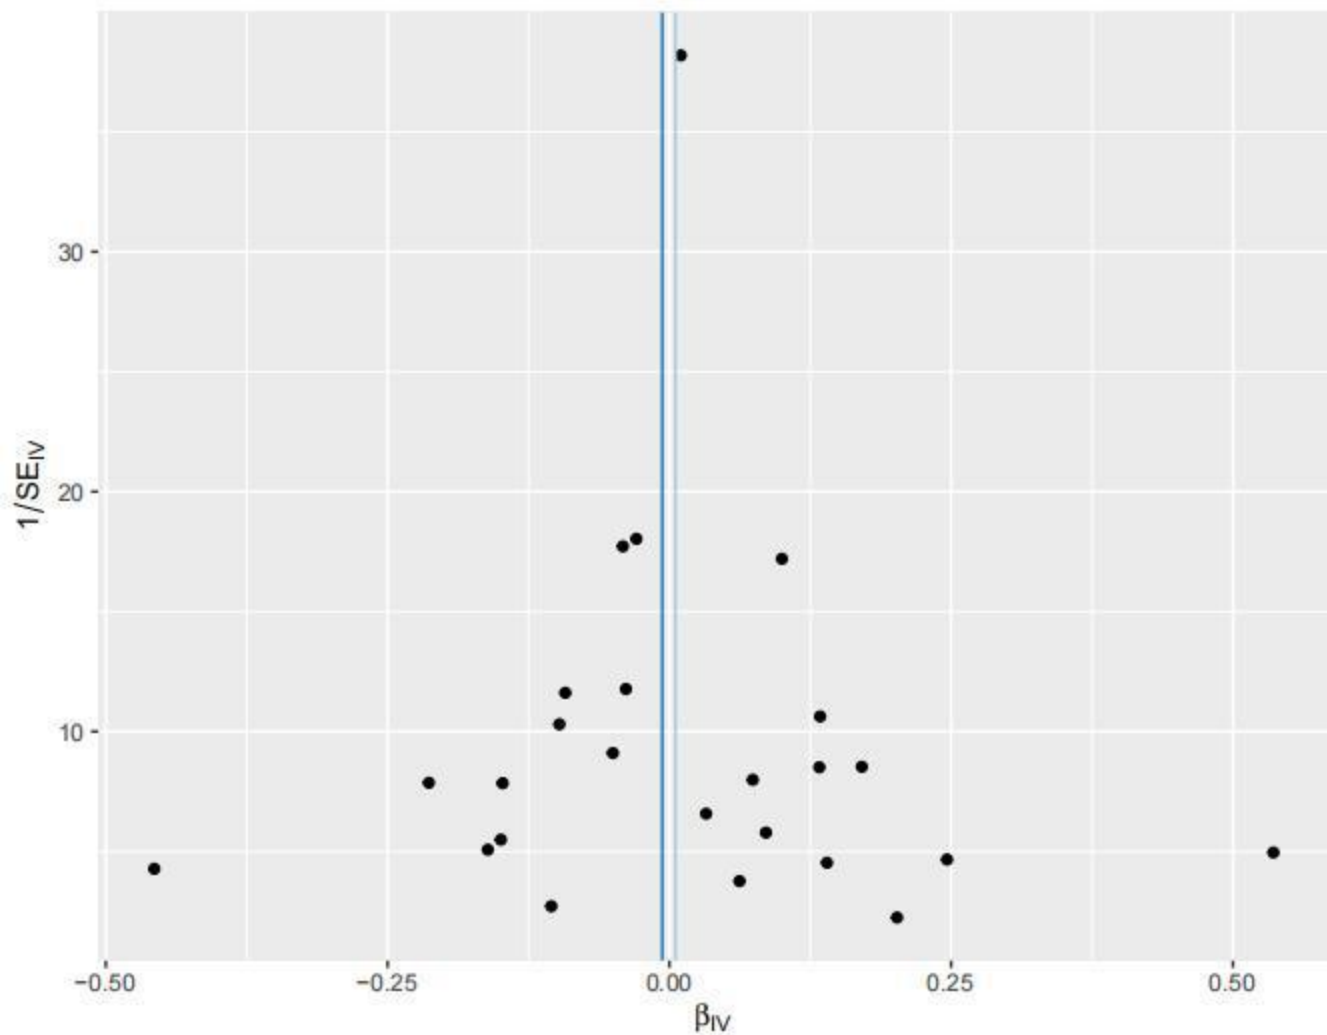

Funnel plot analyse of "BAFF-R on IgD+ CD38dim" on 'Aplastic anemia'

### MR Method

- Inverse variance weighted
- MR Egger

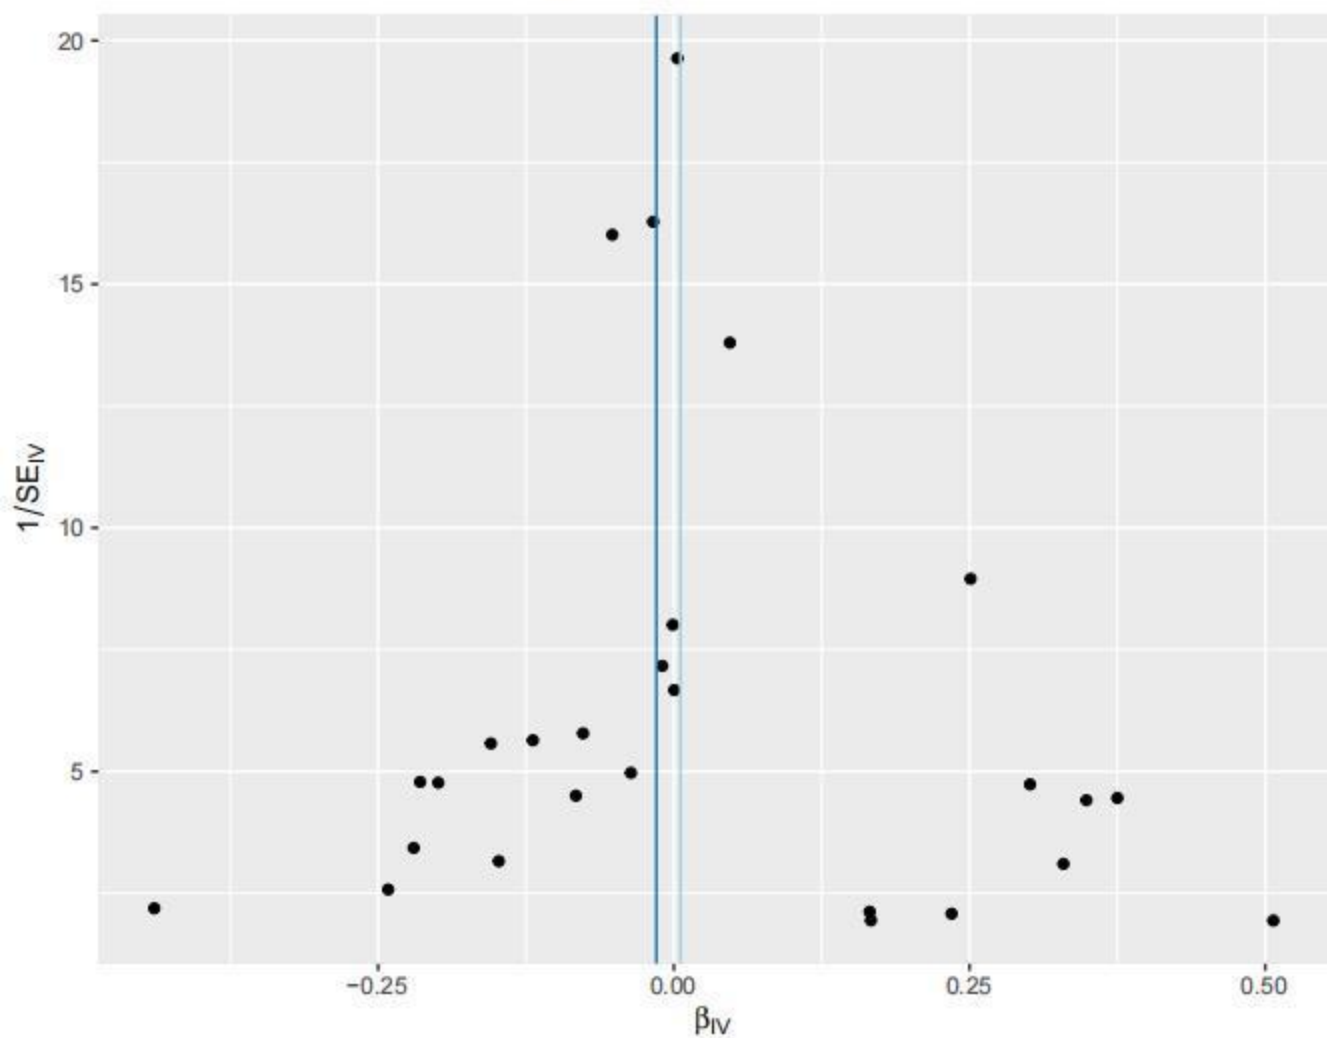

Funnel plot analyse of "IgD+ CD38br %B cell" on 'Aplastic anemia'

MR Method

- Inverse variance weighted
- MR Egger

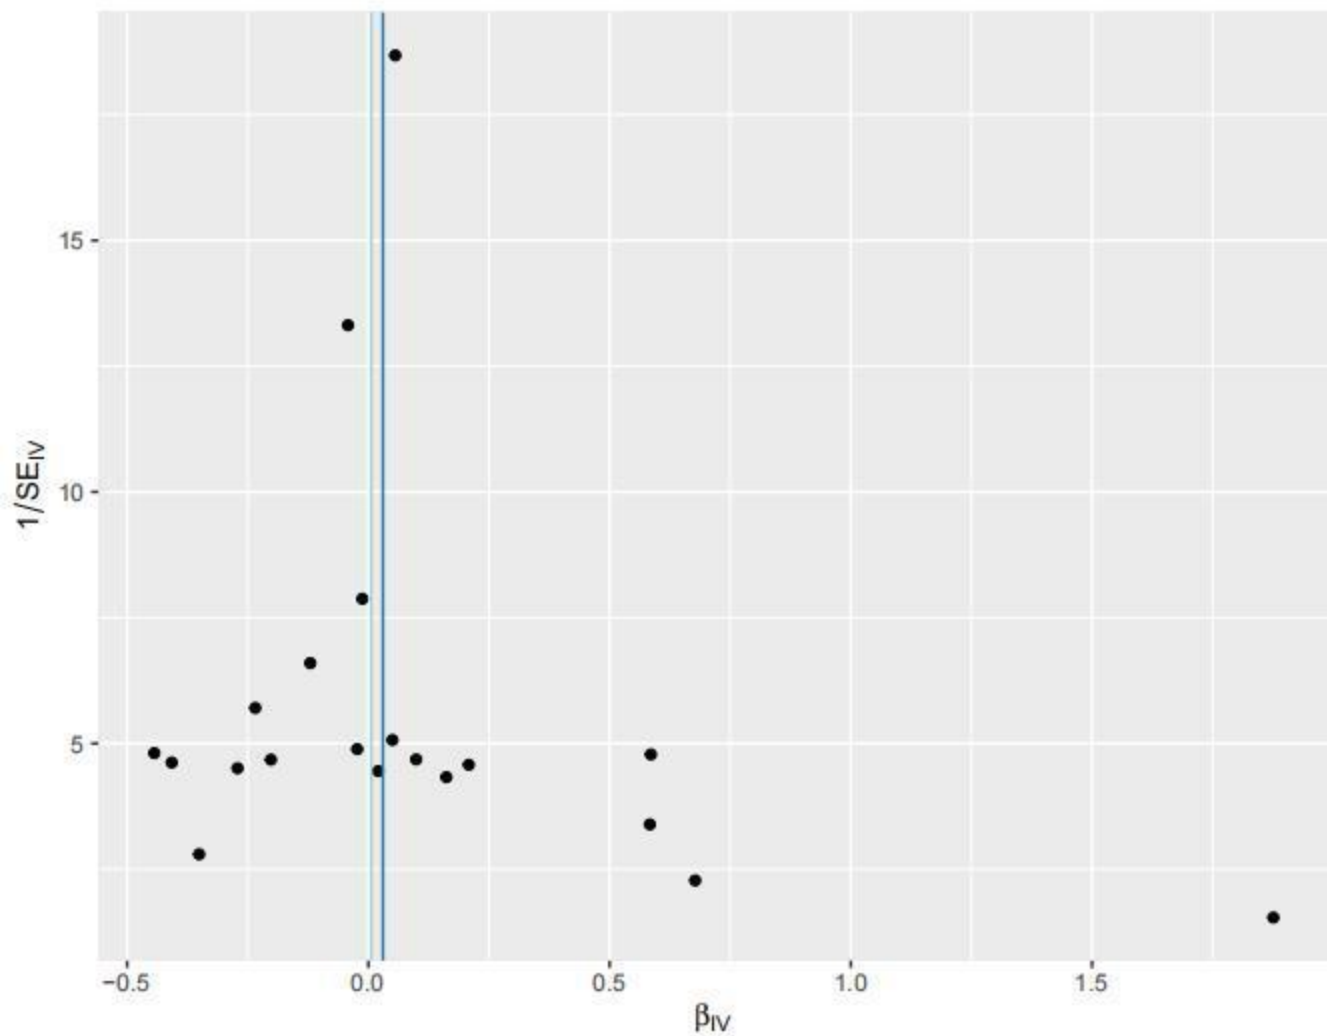

Funnel plot analyse of "TCRgd AC" on 'Aplastic anemia'

MR Method

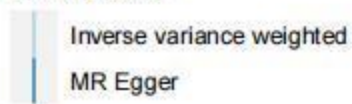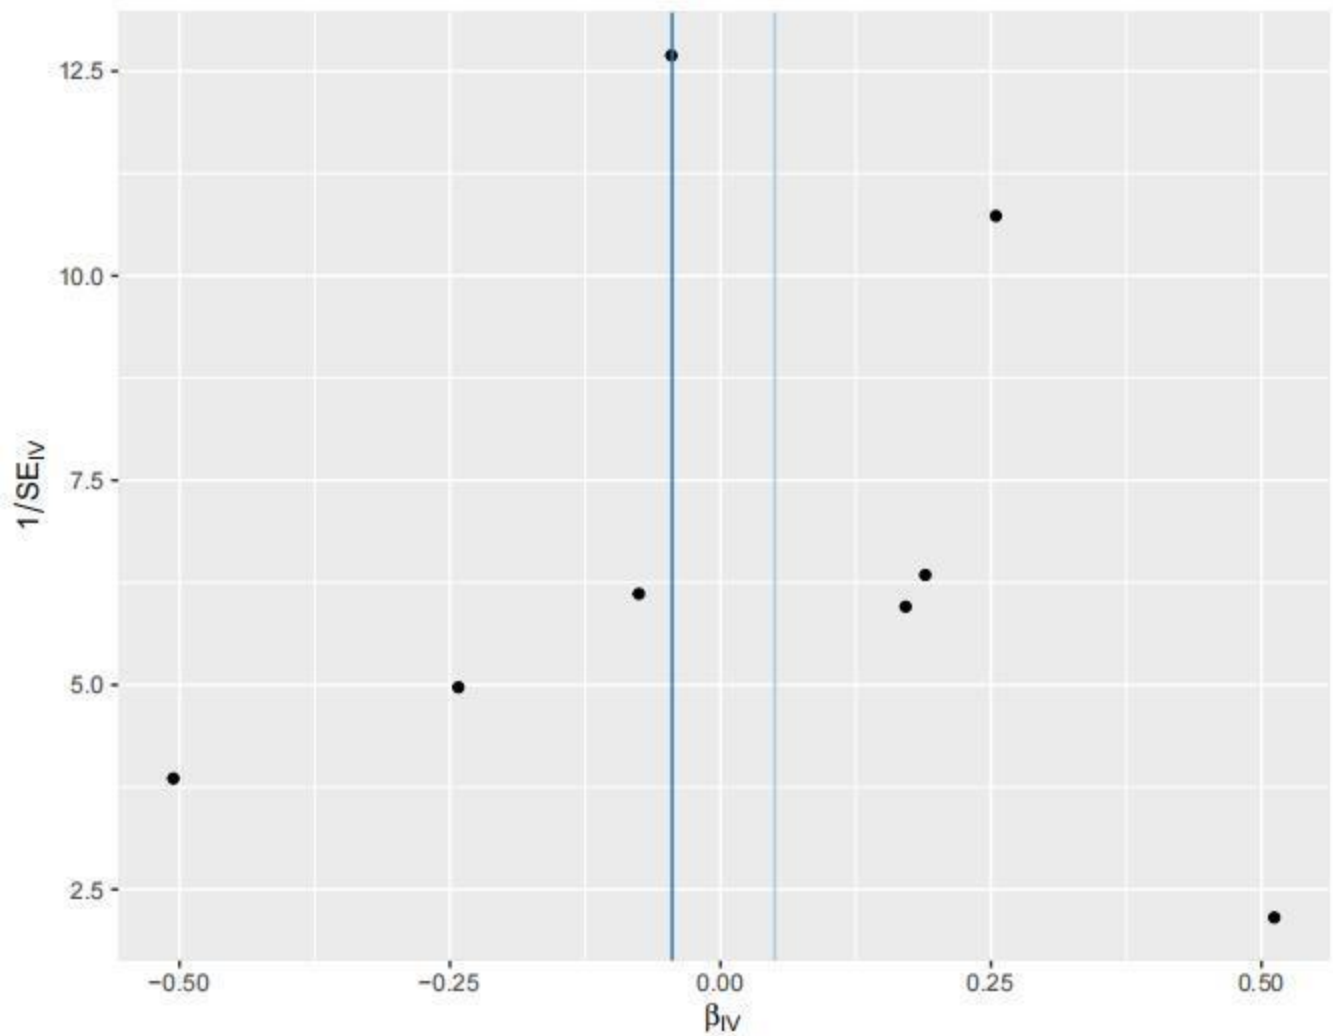

Funnel plot analysis of "HLA DR++ monocyte %leukocyte" on 'Aplastic anemia'

MR Method

- Inverse variance weighted
- MR Egger

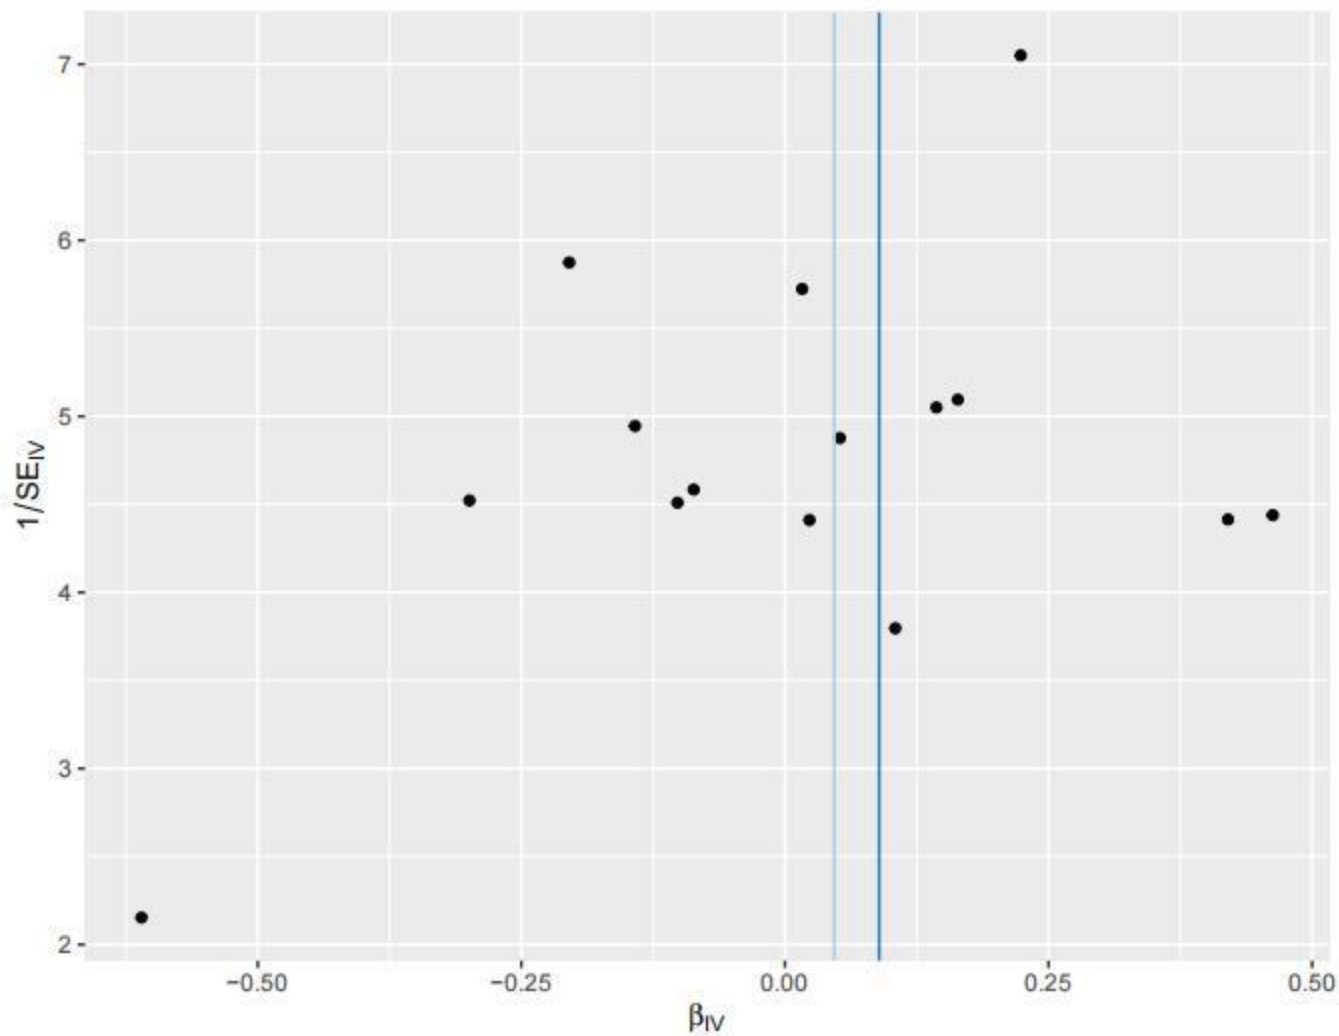

Funnel plot analyse of "CD4+ %leukocyte" on 'Aplastic anemia'



### MR Method

- Inverse variance weighted
- MR Egger

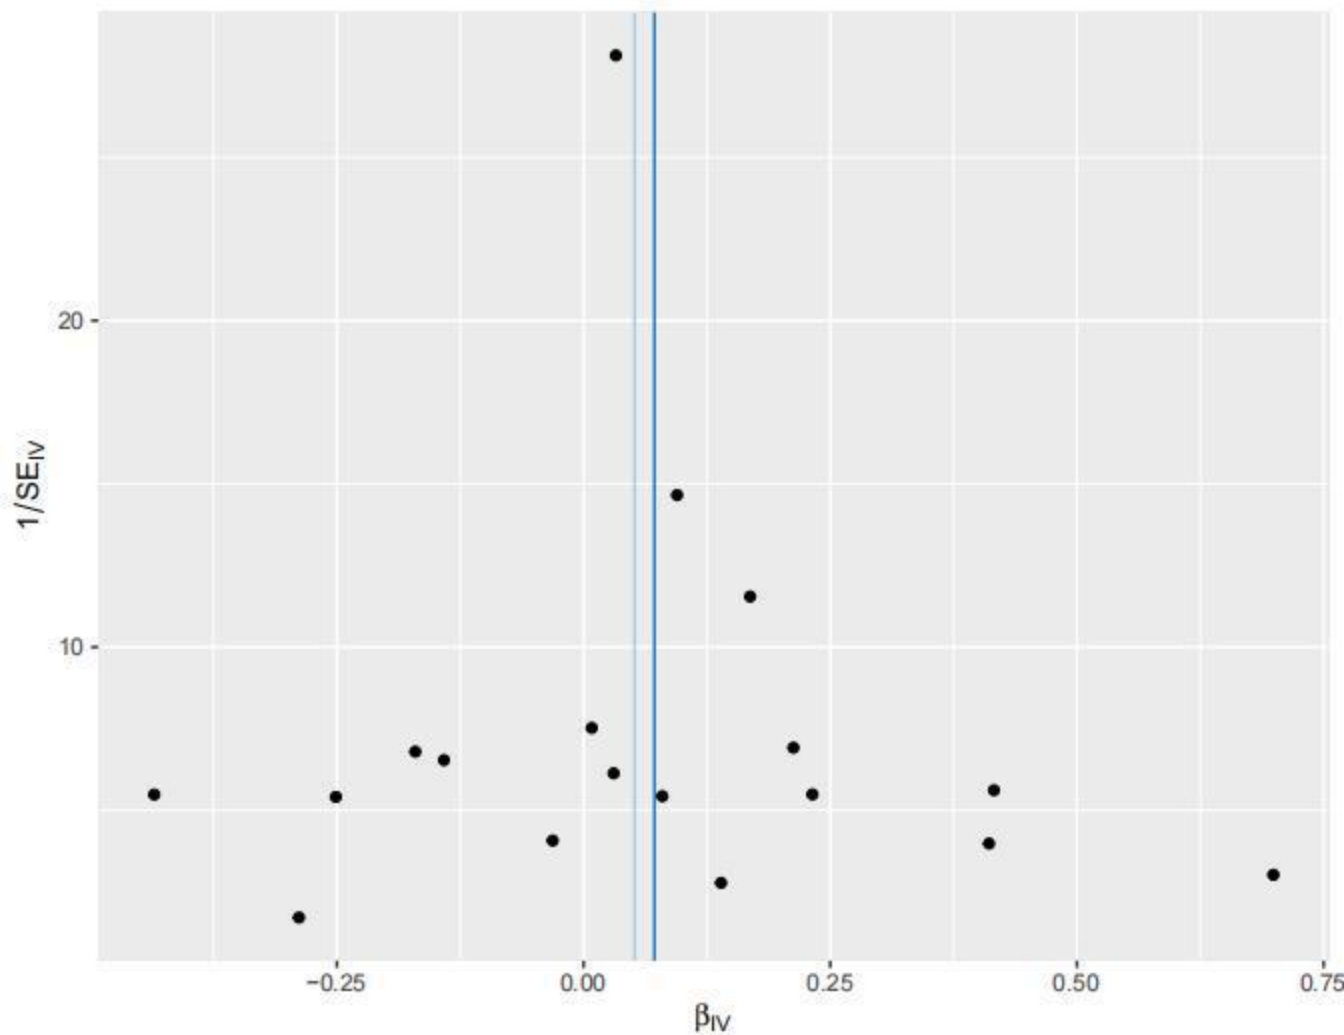

Funnel plot analyse of "CD45 on HLA DR+ CD4+" on 'Aplastic anemia'

### MR Method

- Inverse variance weighted
- MR Egger

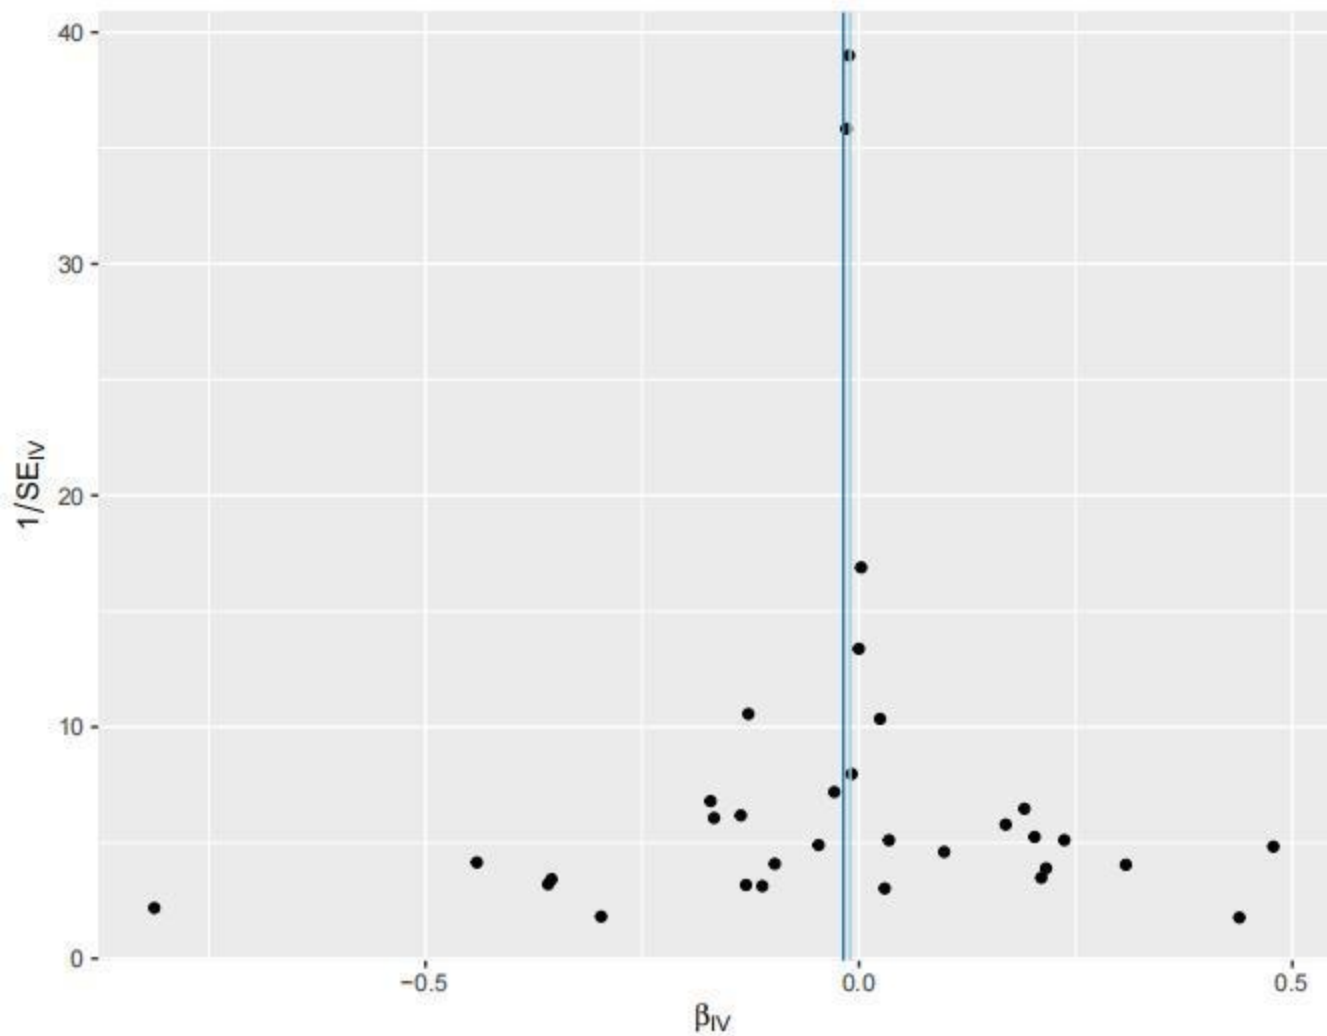

Funnel plot analyse of "CD19 on IgD+ CD38-" on 'Aplastic anemia'

MR Method

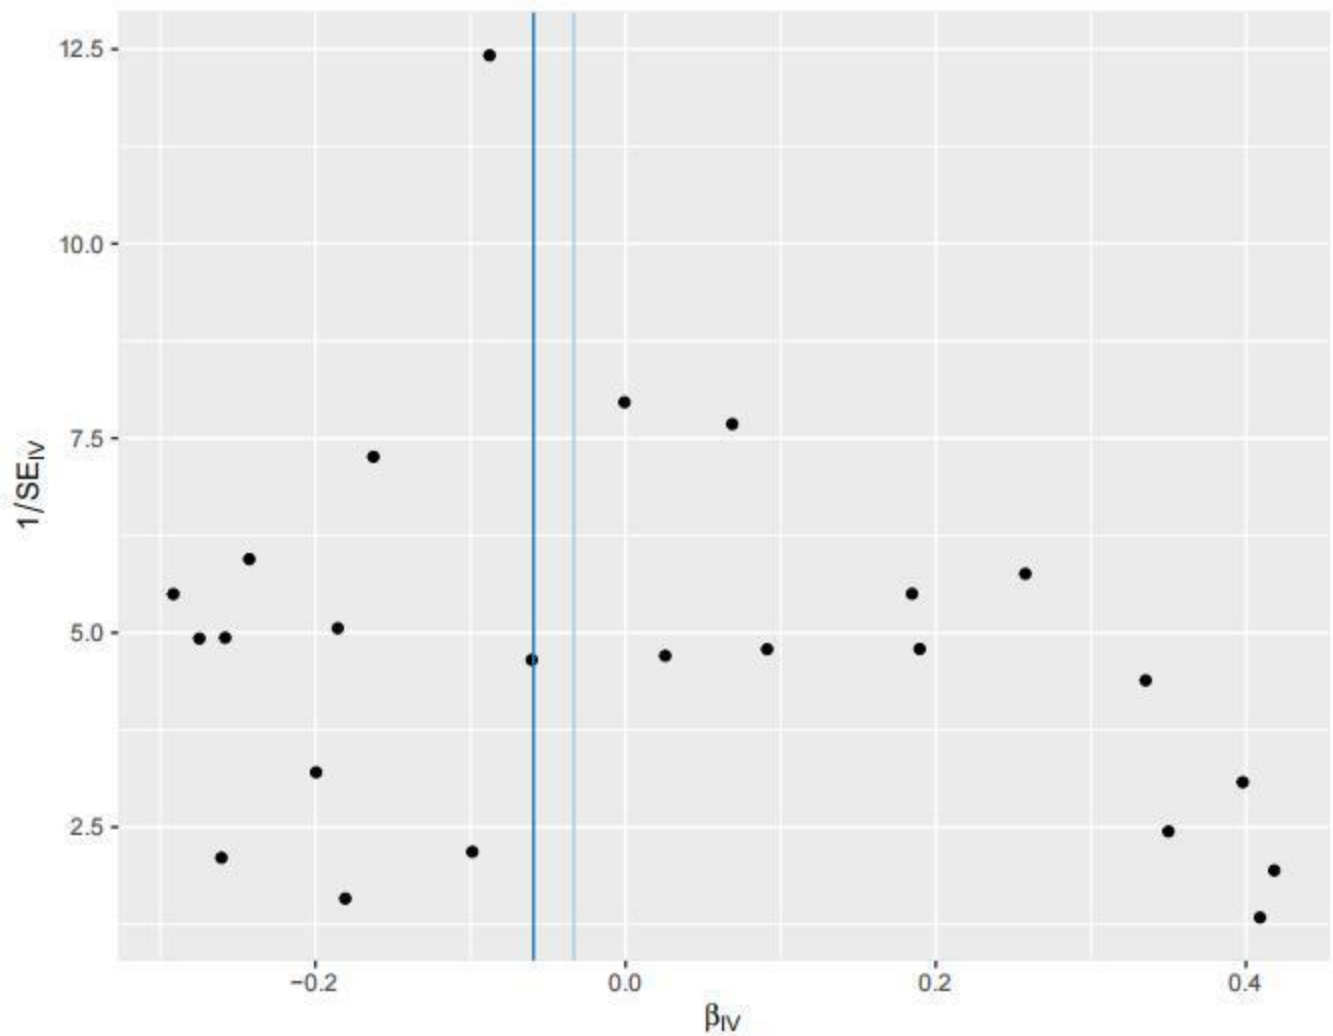

Funnel plot analysis of "DP (CD4+CD8+) %leukocyte" on 'Aplastic anemia'

### MR Method

Inverse variance weighted

MR Egger

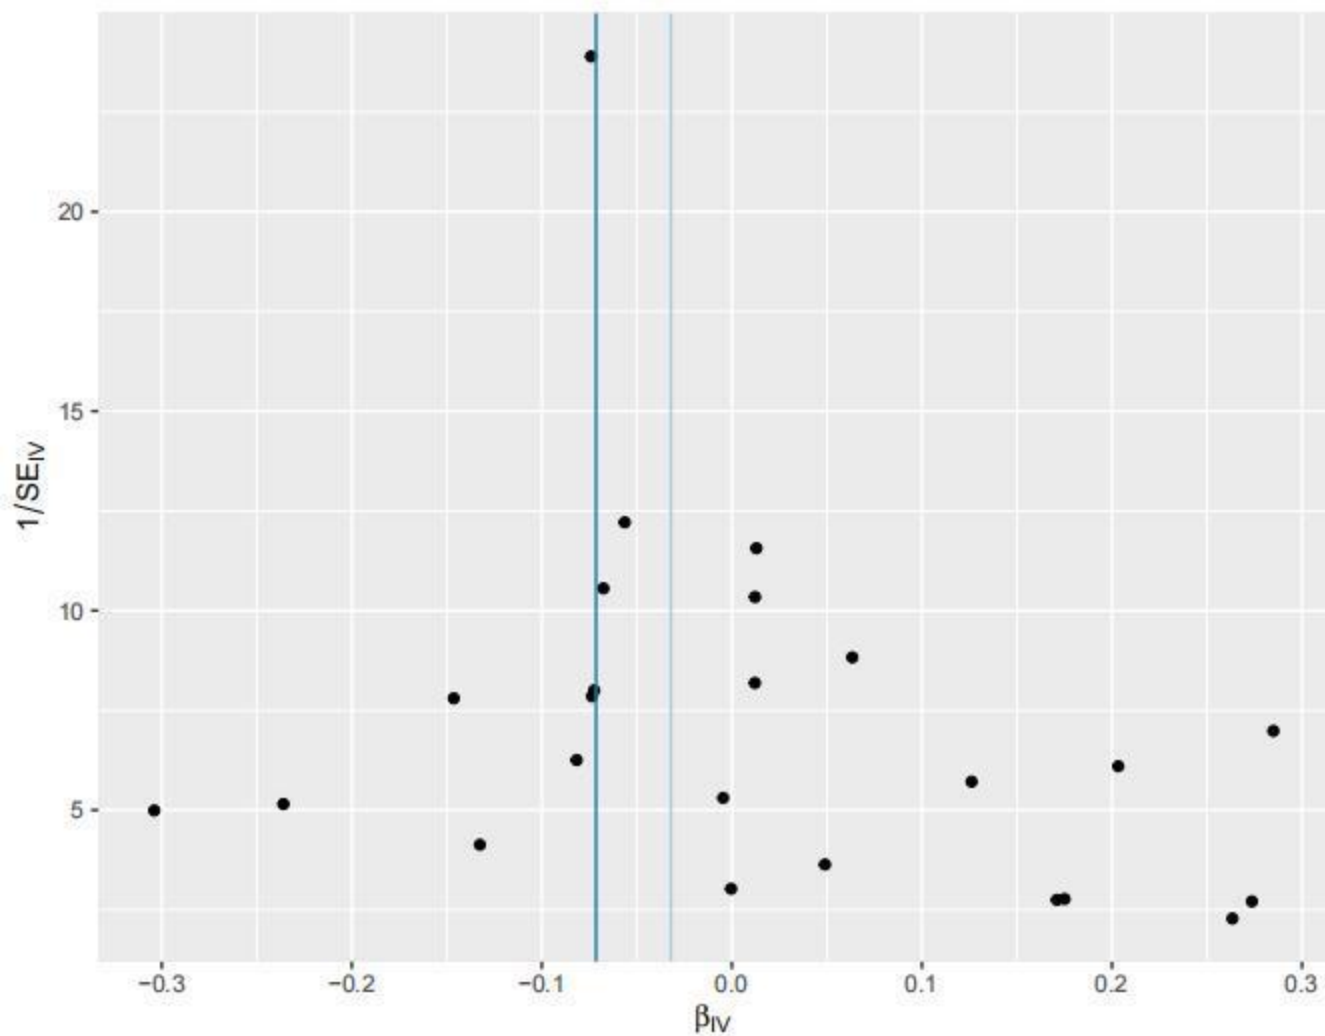

Funnel plot analyse of "CD3 on CD28+ CD45RA+ CD8br" on 'Aplastic anemia'

MR Method

- Inverse variance weighted
- MR Egger

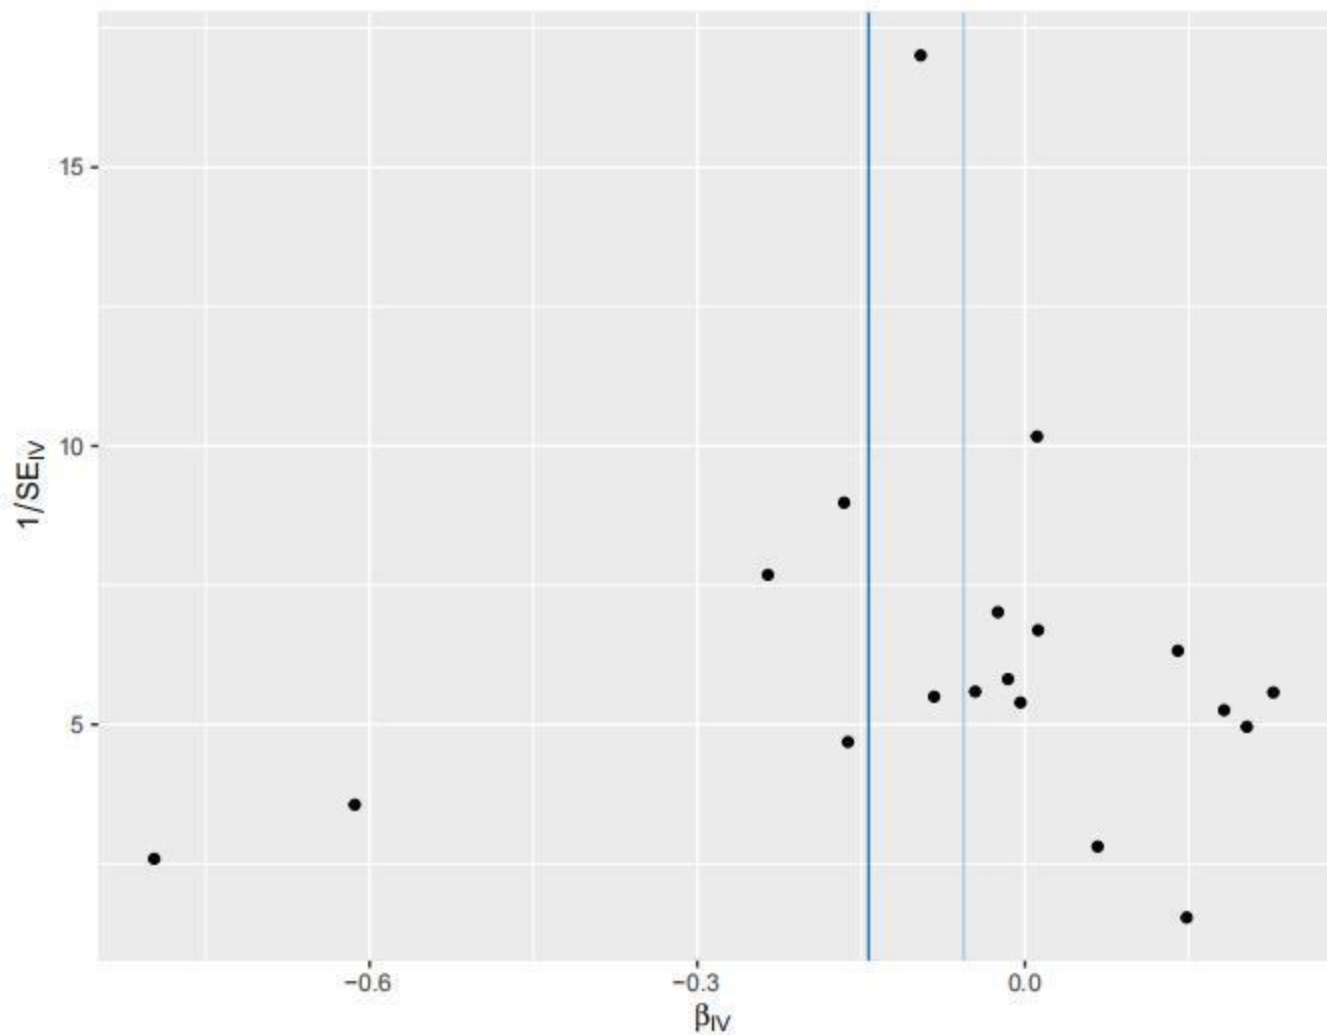

Funnel plot analyse of "CD3 on CM CD8br " on 'Aplastic anemia'

MR Method

- Inverse variance weighted
- MR Egger

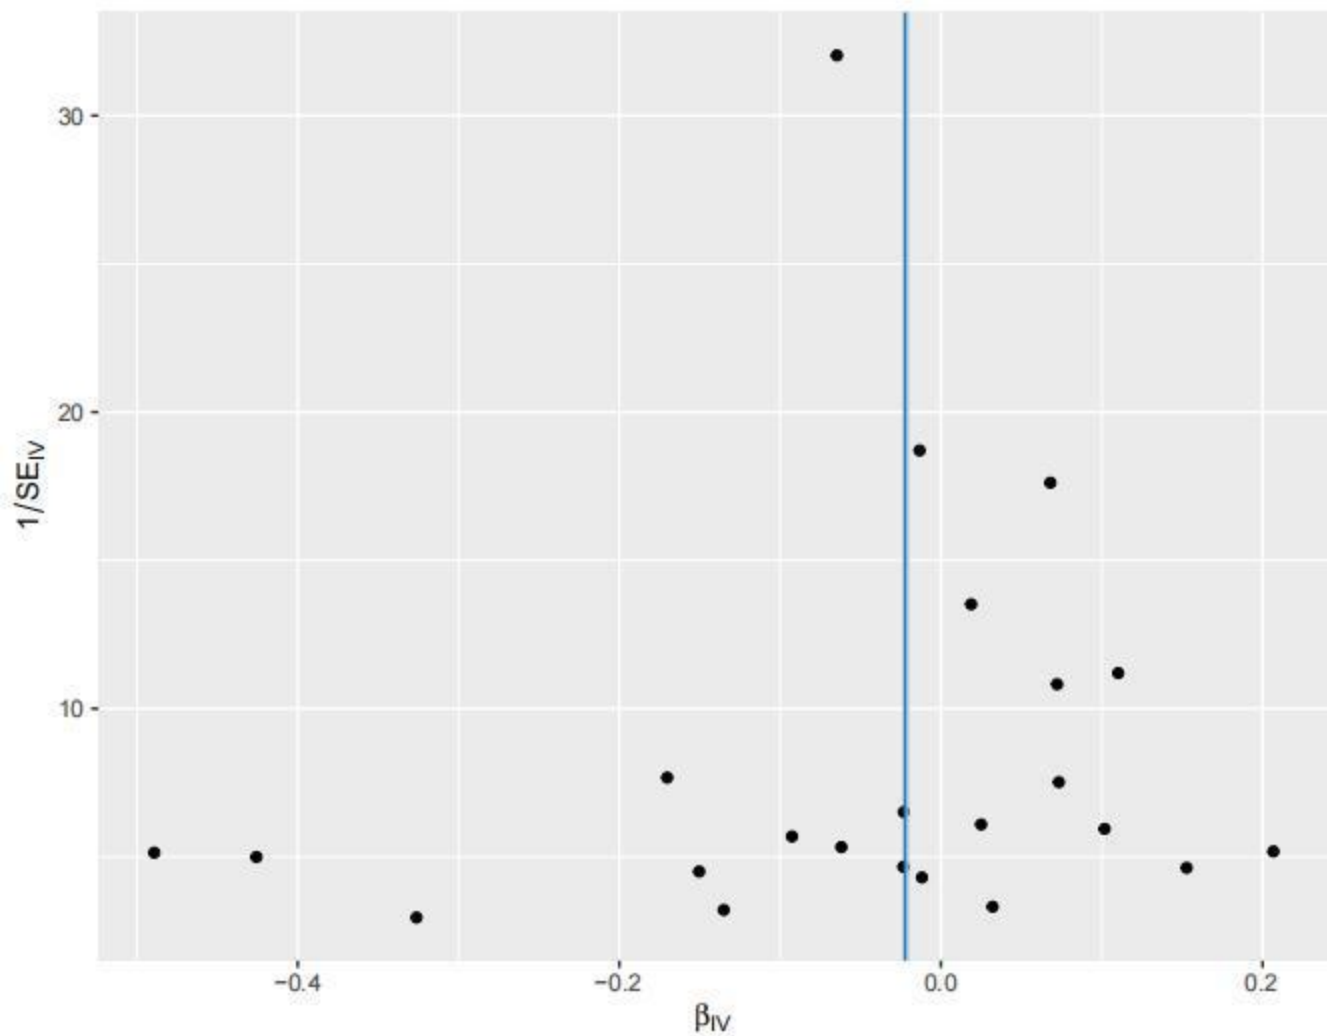

Funnel plot analyse of "CD25 on CD39+ CD4+ " on 'Aplastic anemia'

### MR Method

- Inverse variance weighted
- MR Egger

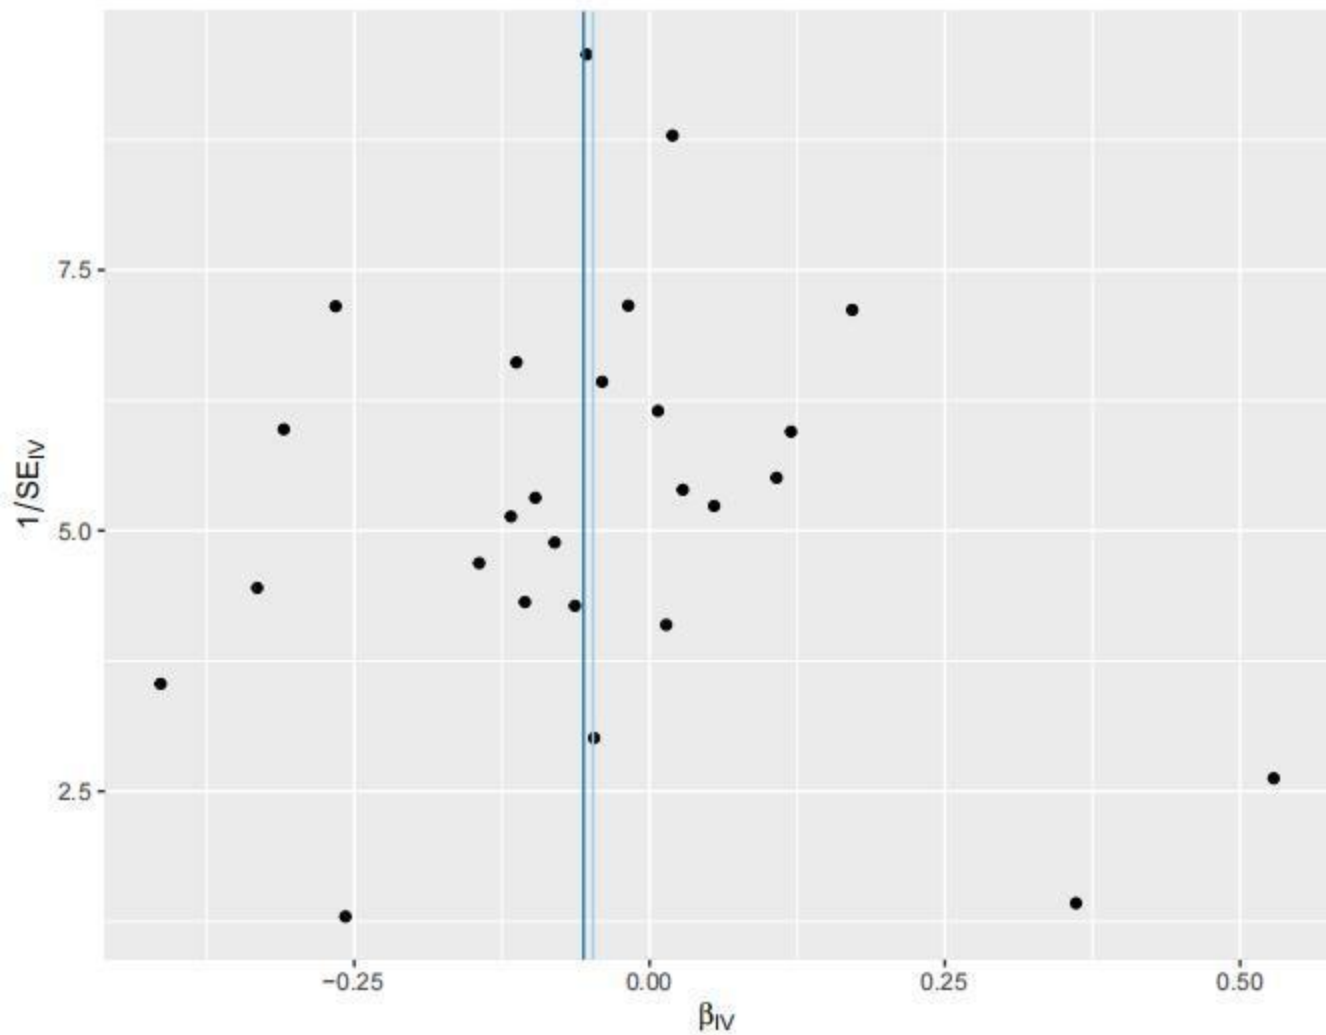

Funnel plot analysis of "Naive CD4+ AC" on 'Aplastic anemia'

MR Method

Inverse variance weighted

MR Egger

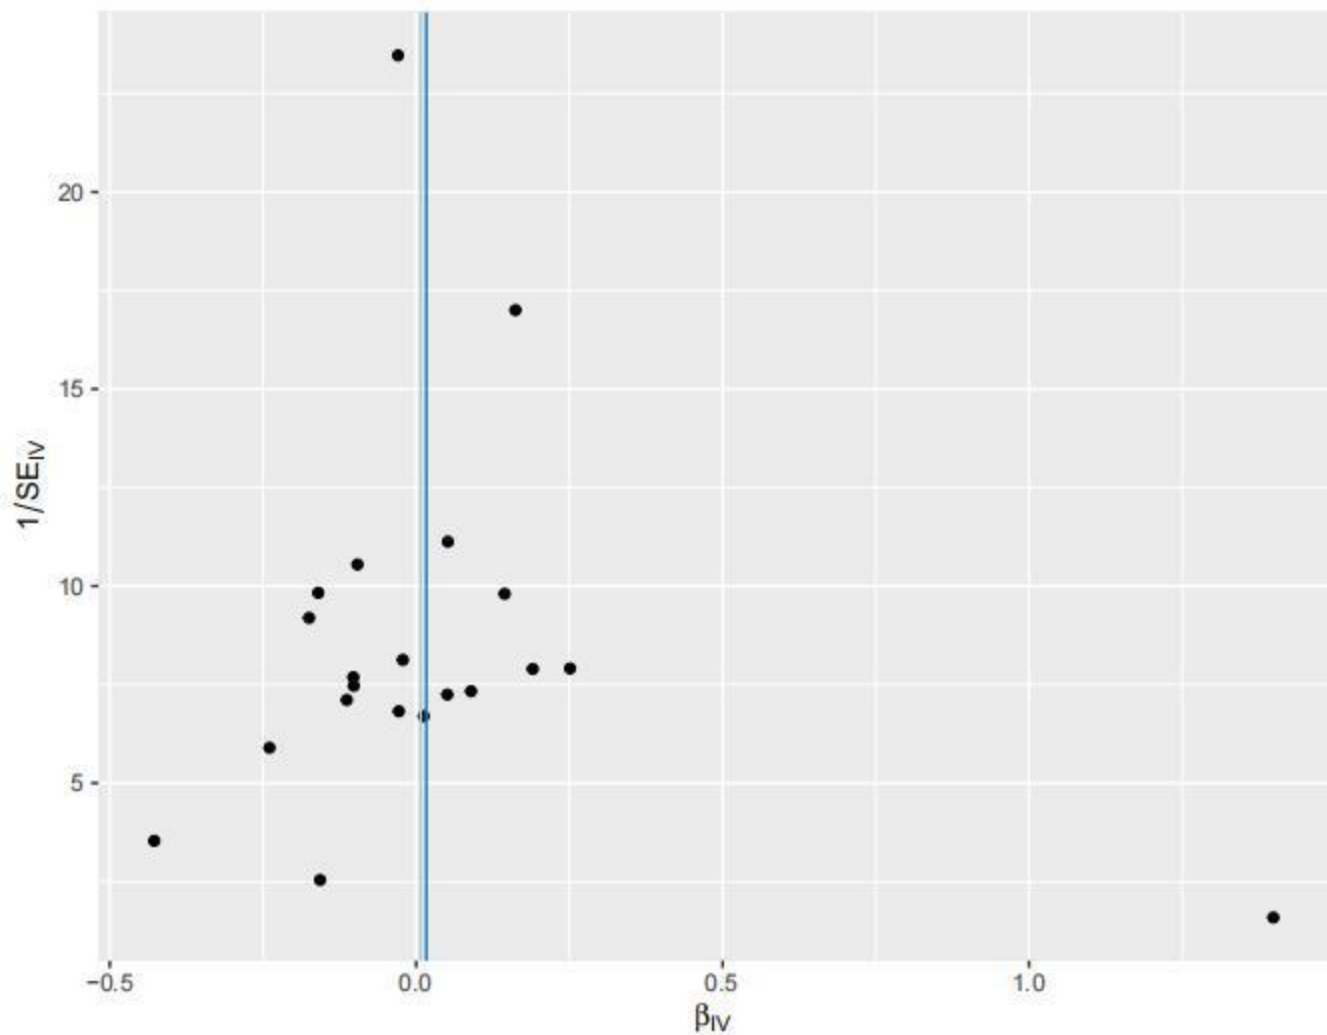

Funnel plot analyse of "HLA DR on CD33br HLA DR+ CD14dim " on 'Aplastic anemia'



MR Method

- Inverse variance weighted
- MR Egger

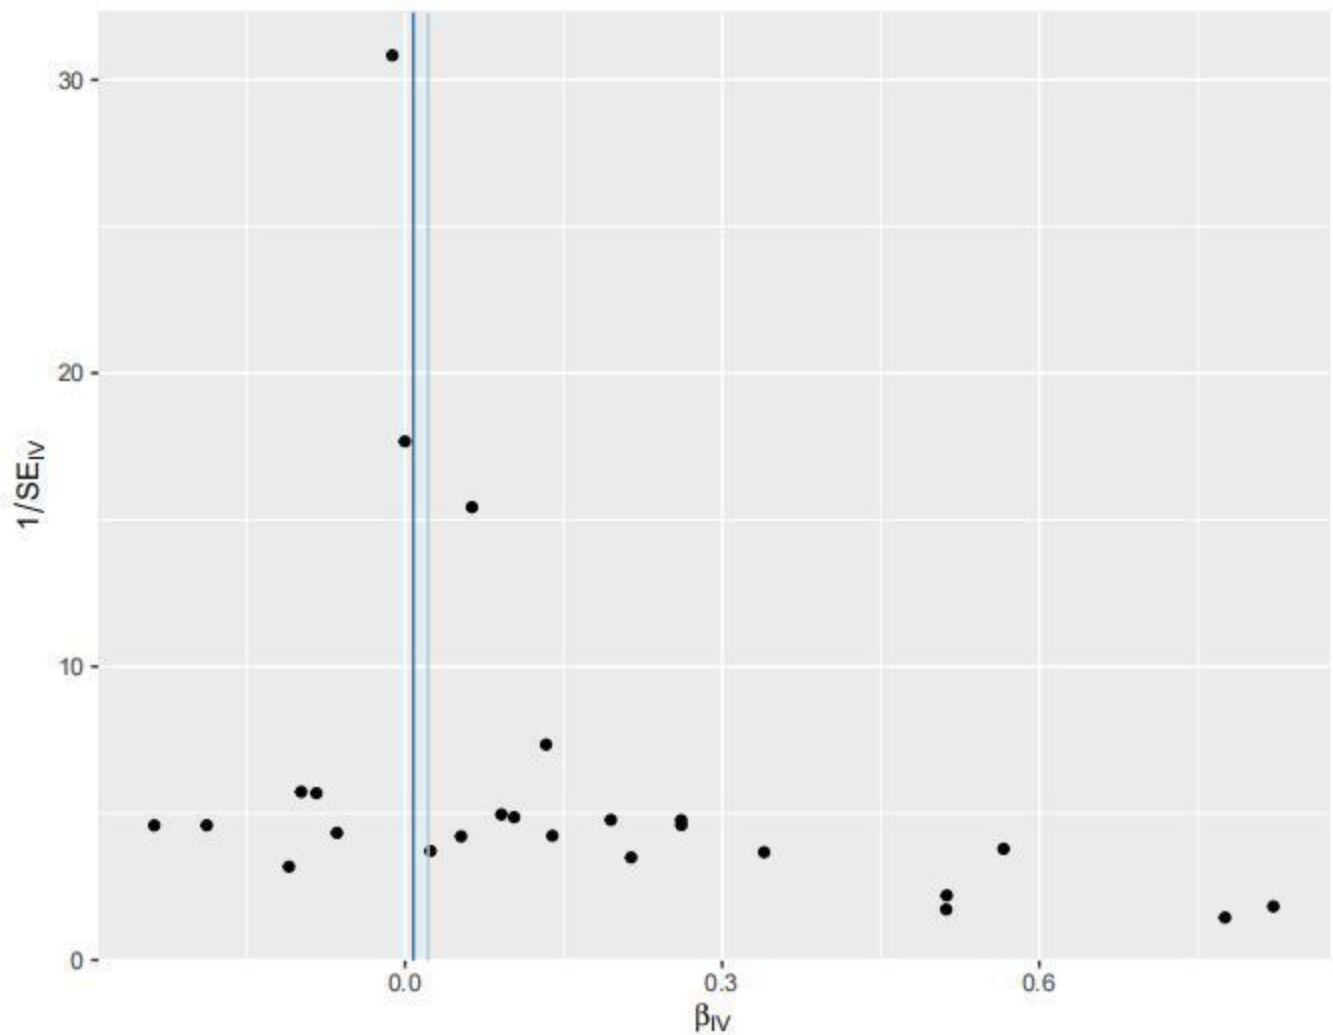

Funnel plot analyse of "CD19 on unsw mem" on 'Aplastic anemia'

MR Method

Inverse variance weighted

MR Egger

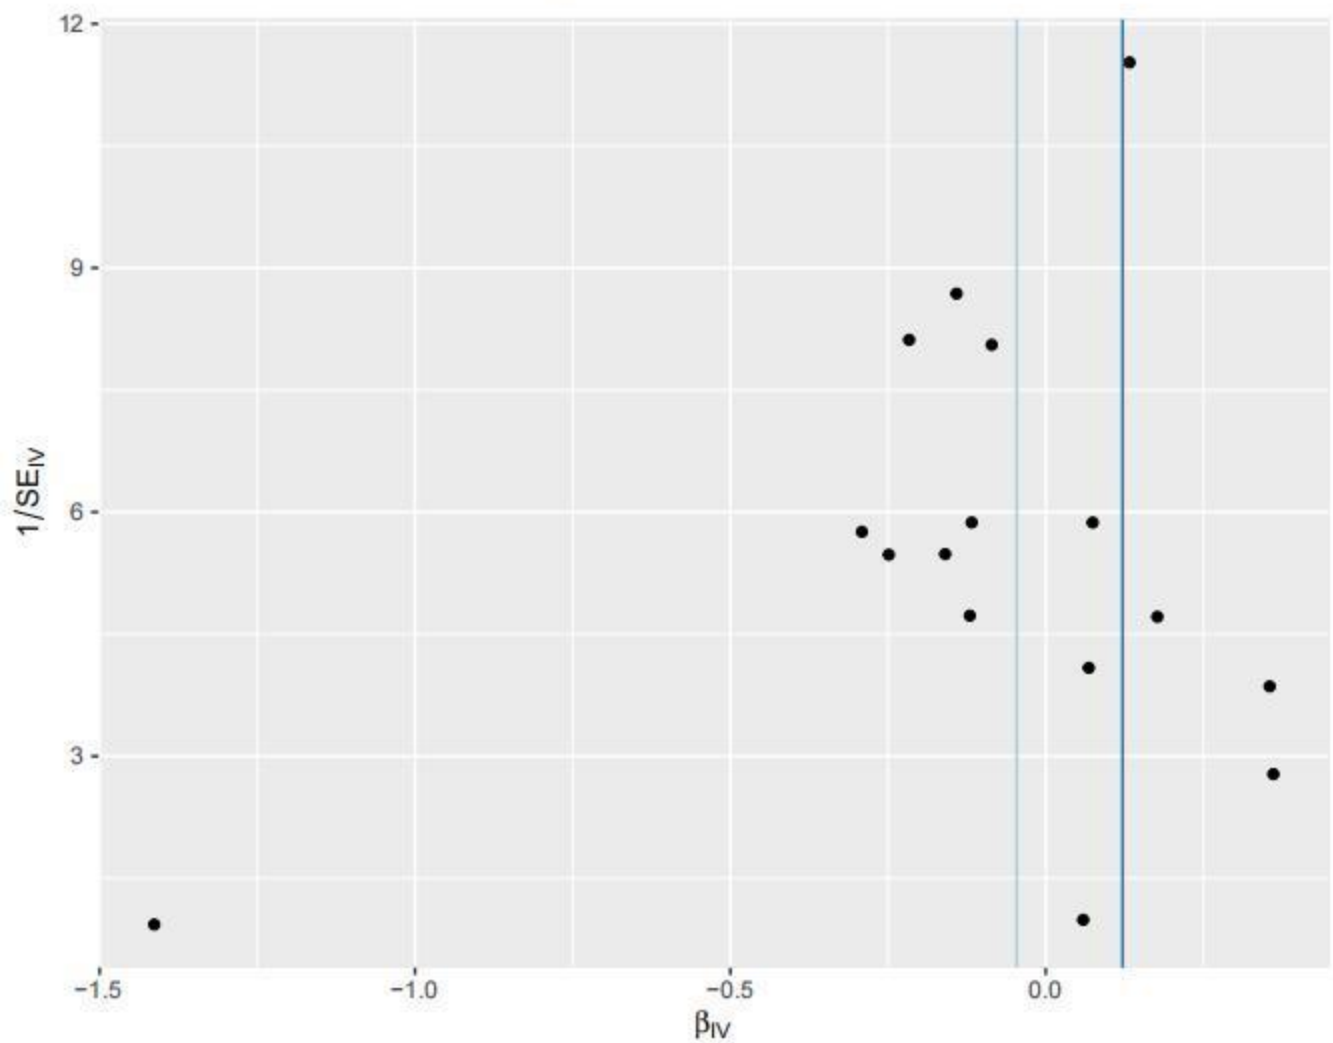

Funnel plot analyse of "CD8 on CM CD8br " on 'Aplastic anemia'

MR Method

- Inverse variance weighted
- MR Egger

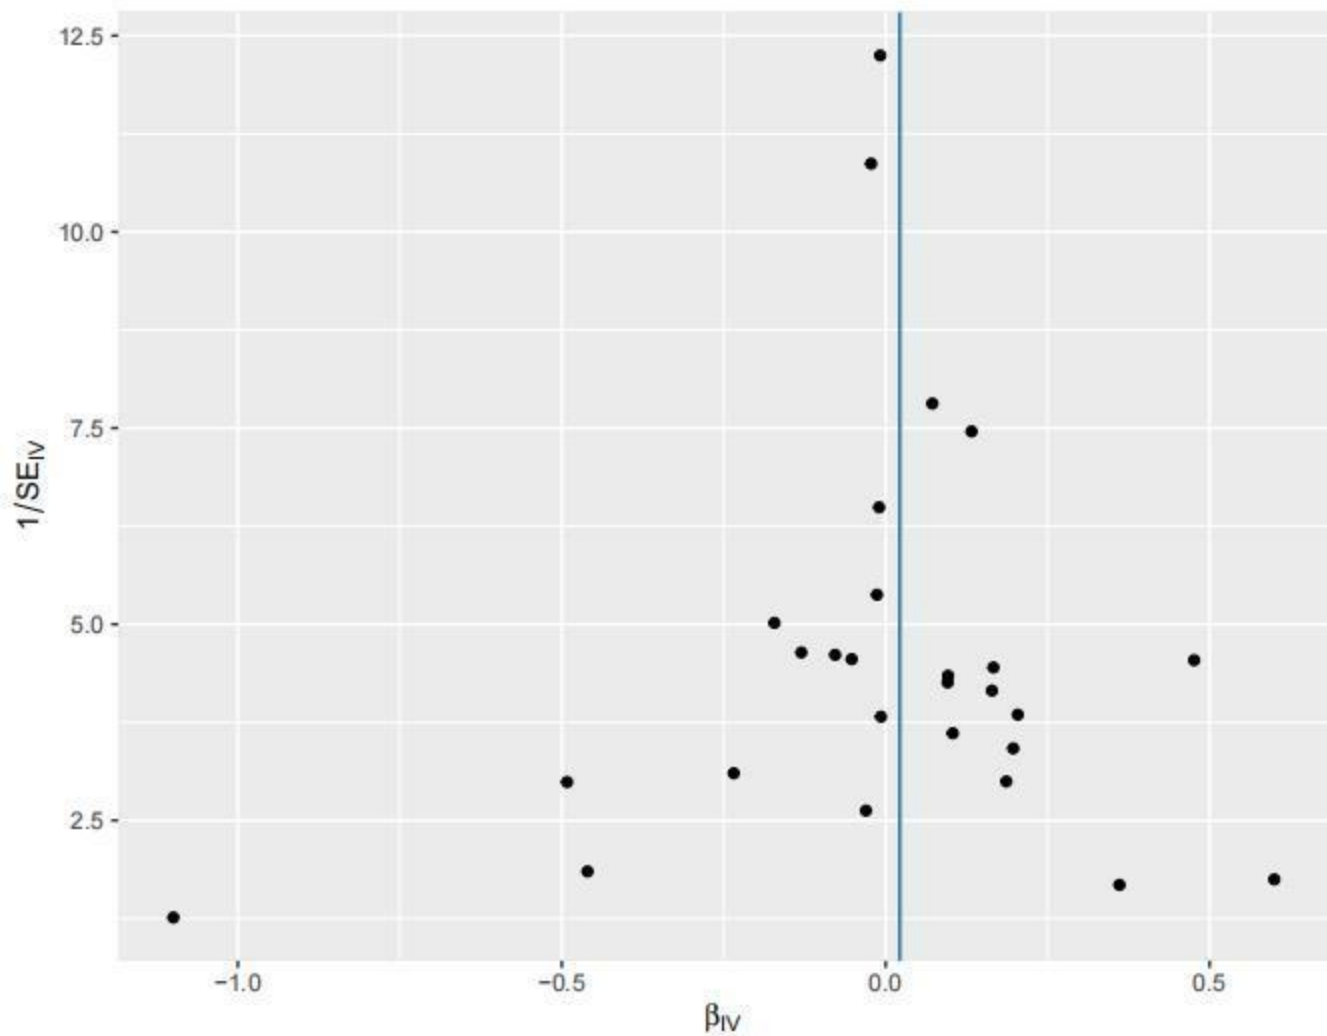

Funnel plot analyse of "HLA DR+ CD4+ %T cell" on 'Aplastic anemia'

MR Method

- Inverse variance weighted
- MR Egger

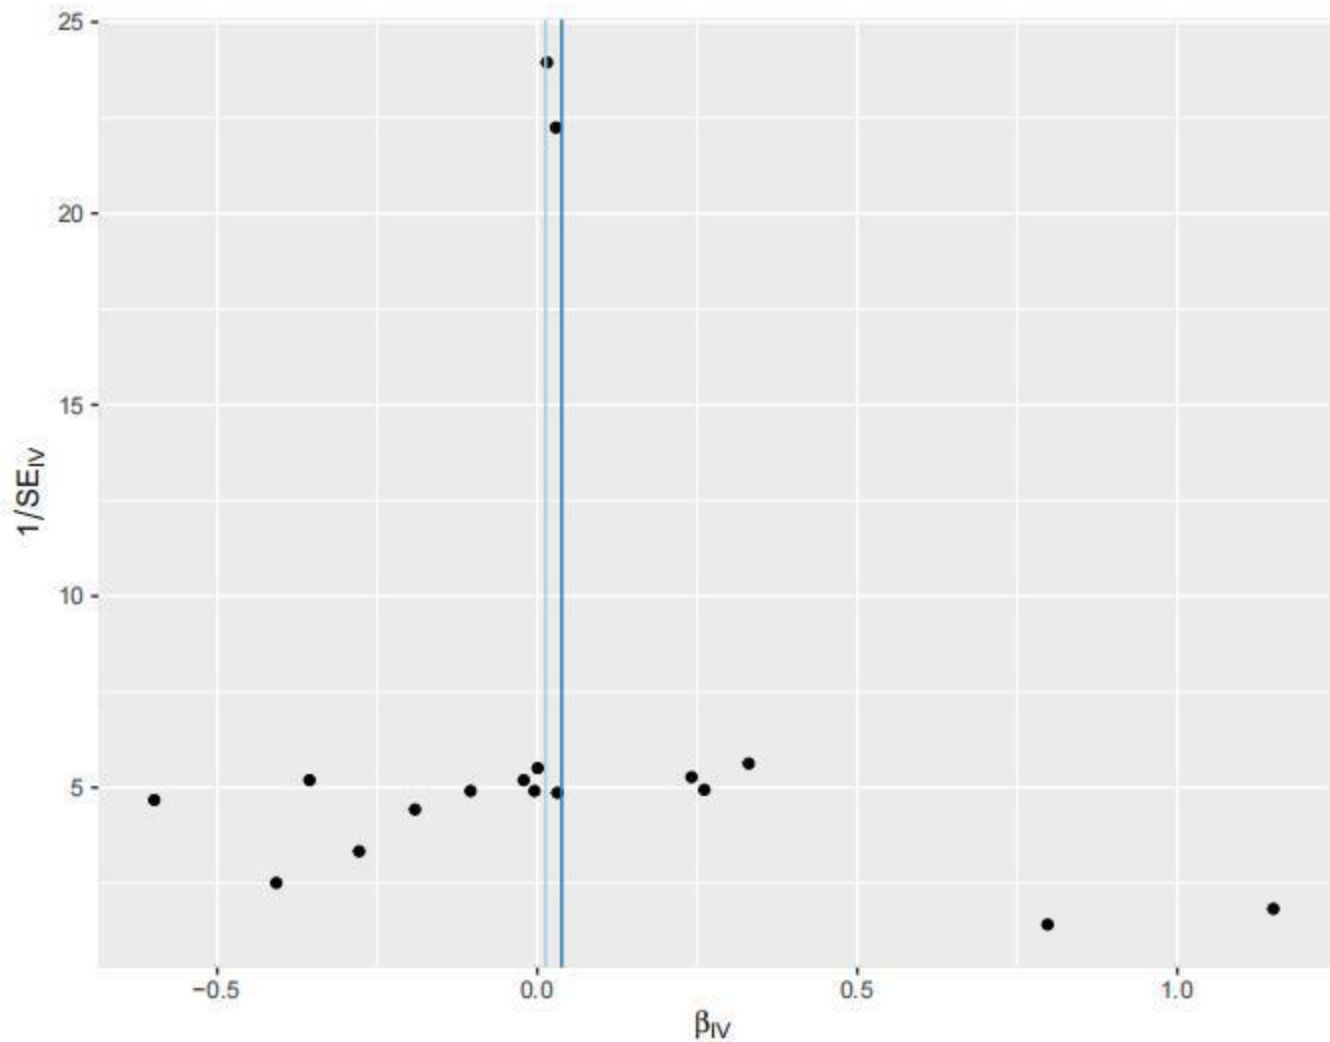

Funnel plot analysis of "FSC-A on lymphocyte" on 'Aplastic anemia'

MR Method

Inverse variance weighted

MR Egger

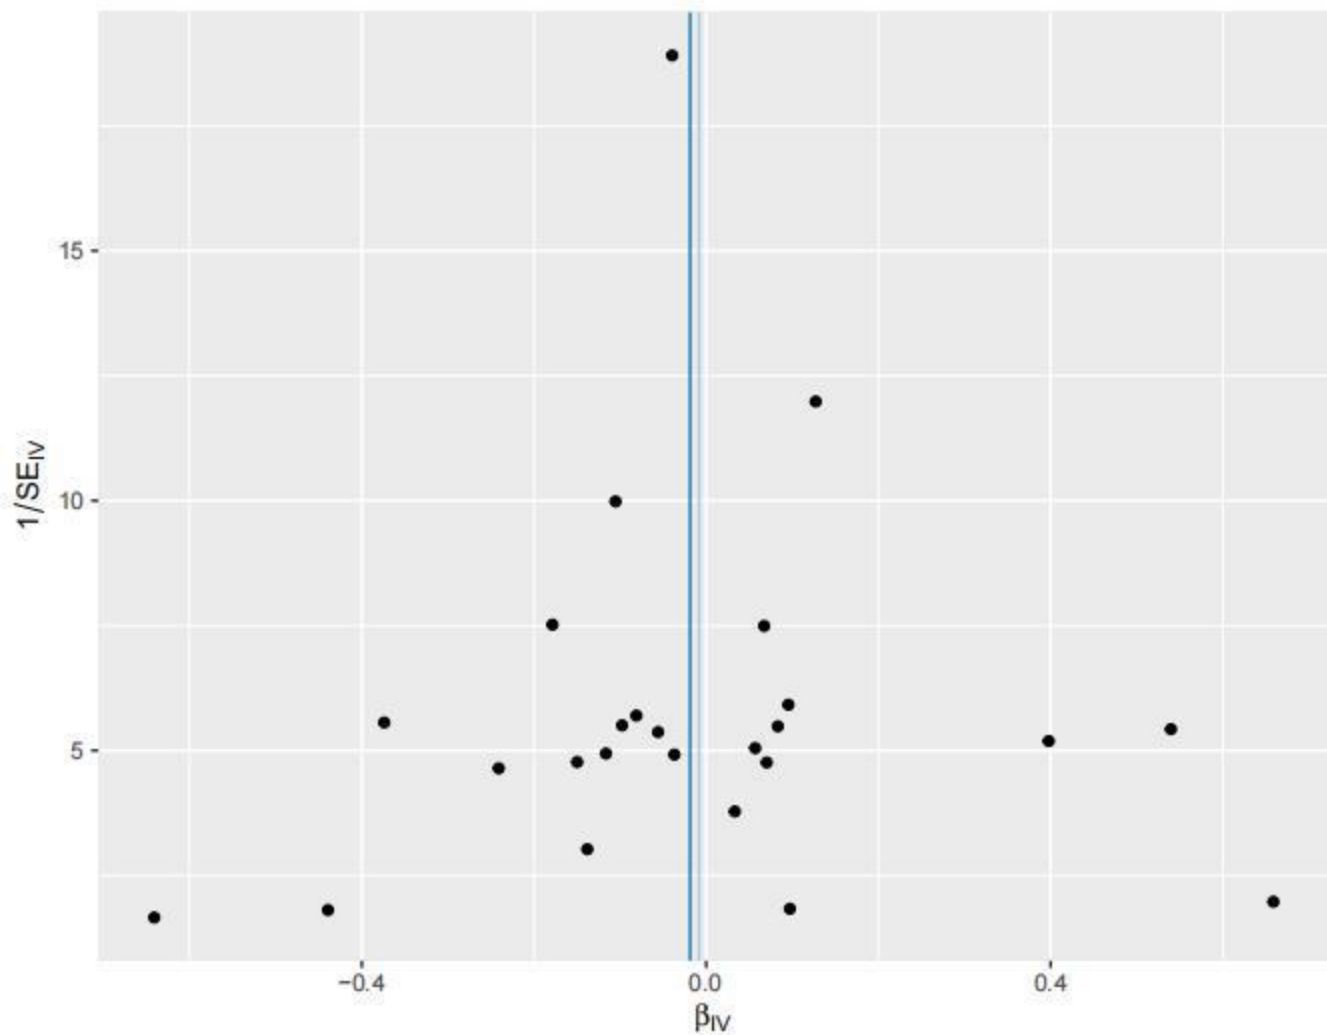

Funnel plot analyse of "Sw mem AC" on 'Aplastic anemia'

MR Method

- Inverse variance weighted
- MR Egger

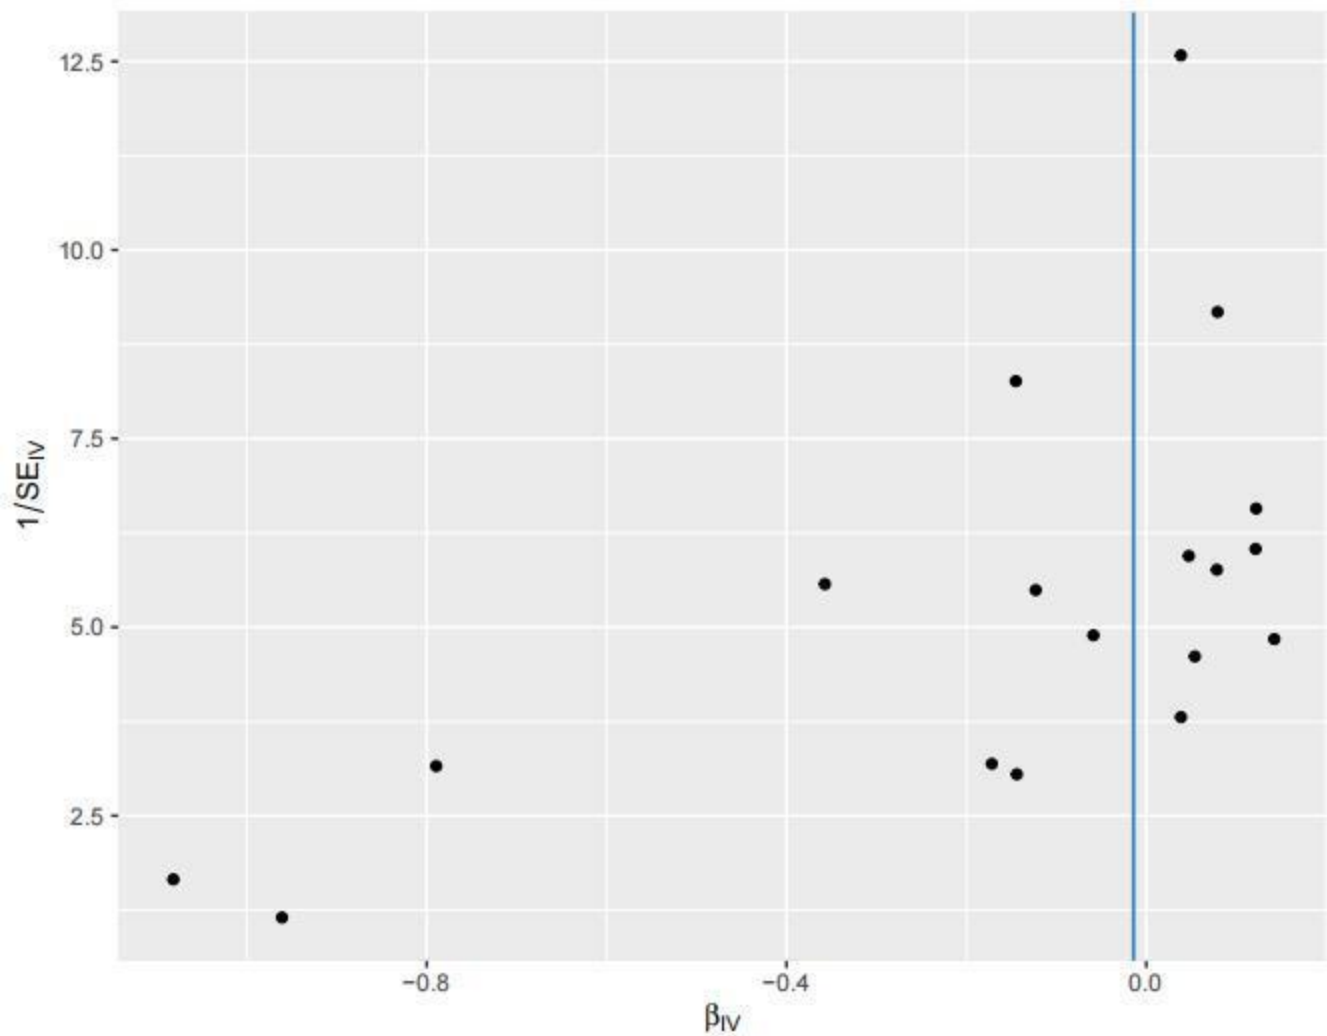

Funnel plot analyse of "IgD- CD27- %lymphocyte" on 'Aplastic anemia'

MR Method

- Inverse variance weighted
- MR Egger

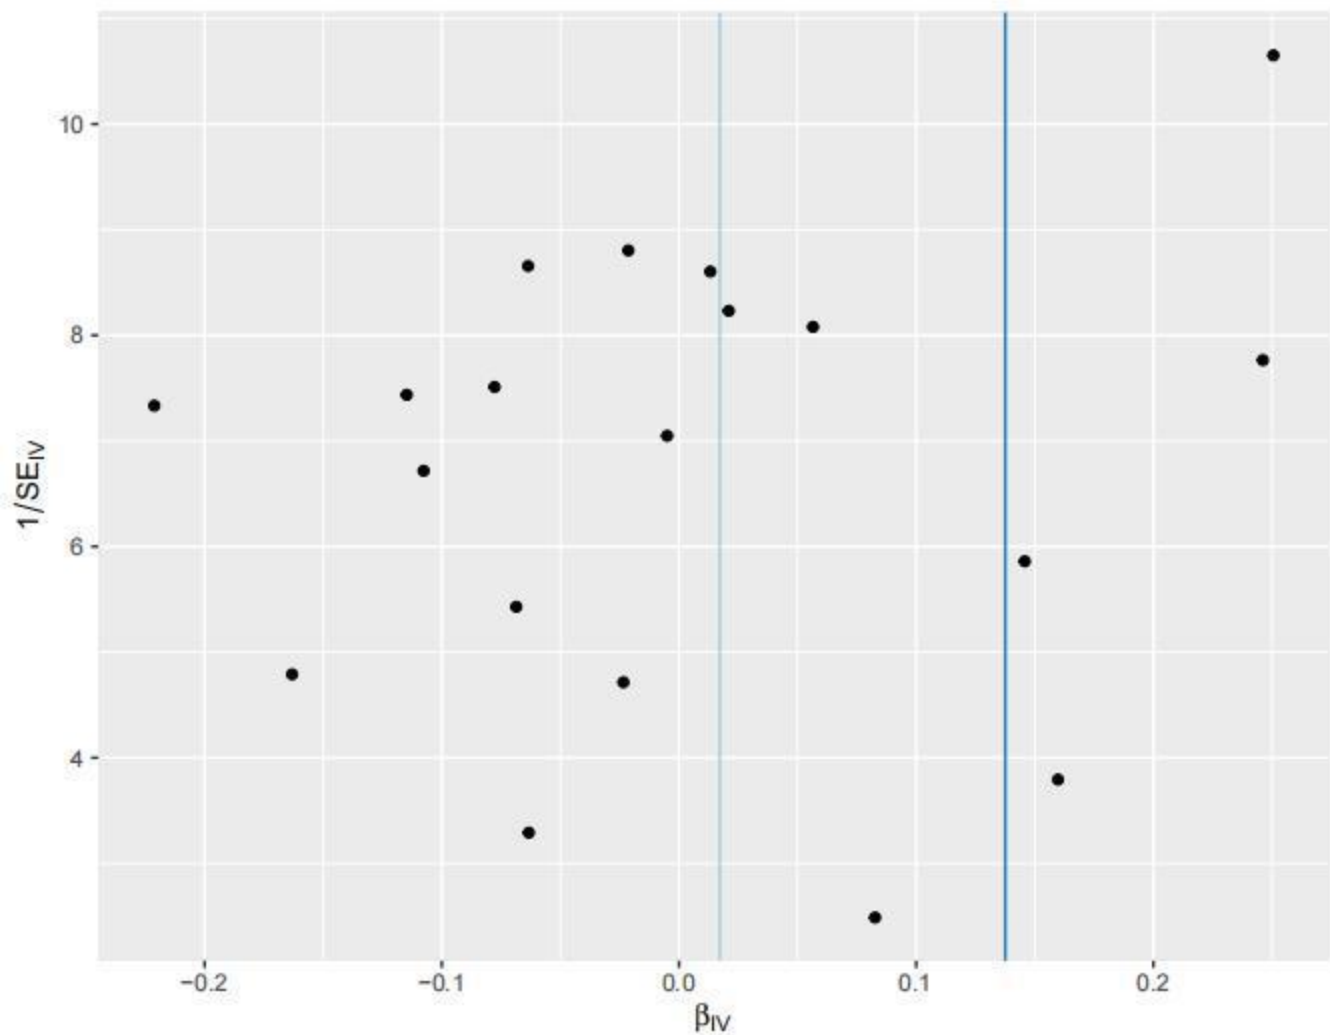

Funnel plot analyse of "CD20 on IgD+ CD38- unsw mem" on 'Aplastic anemia'

MR Method

- Inverse variance weighted
- MR Egger

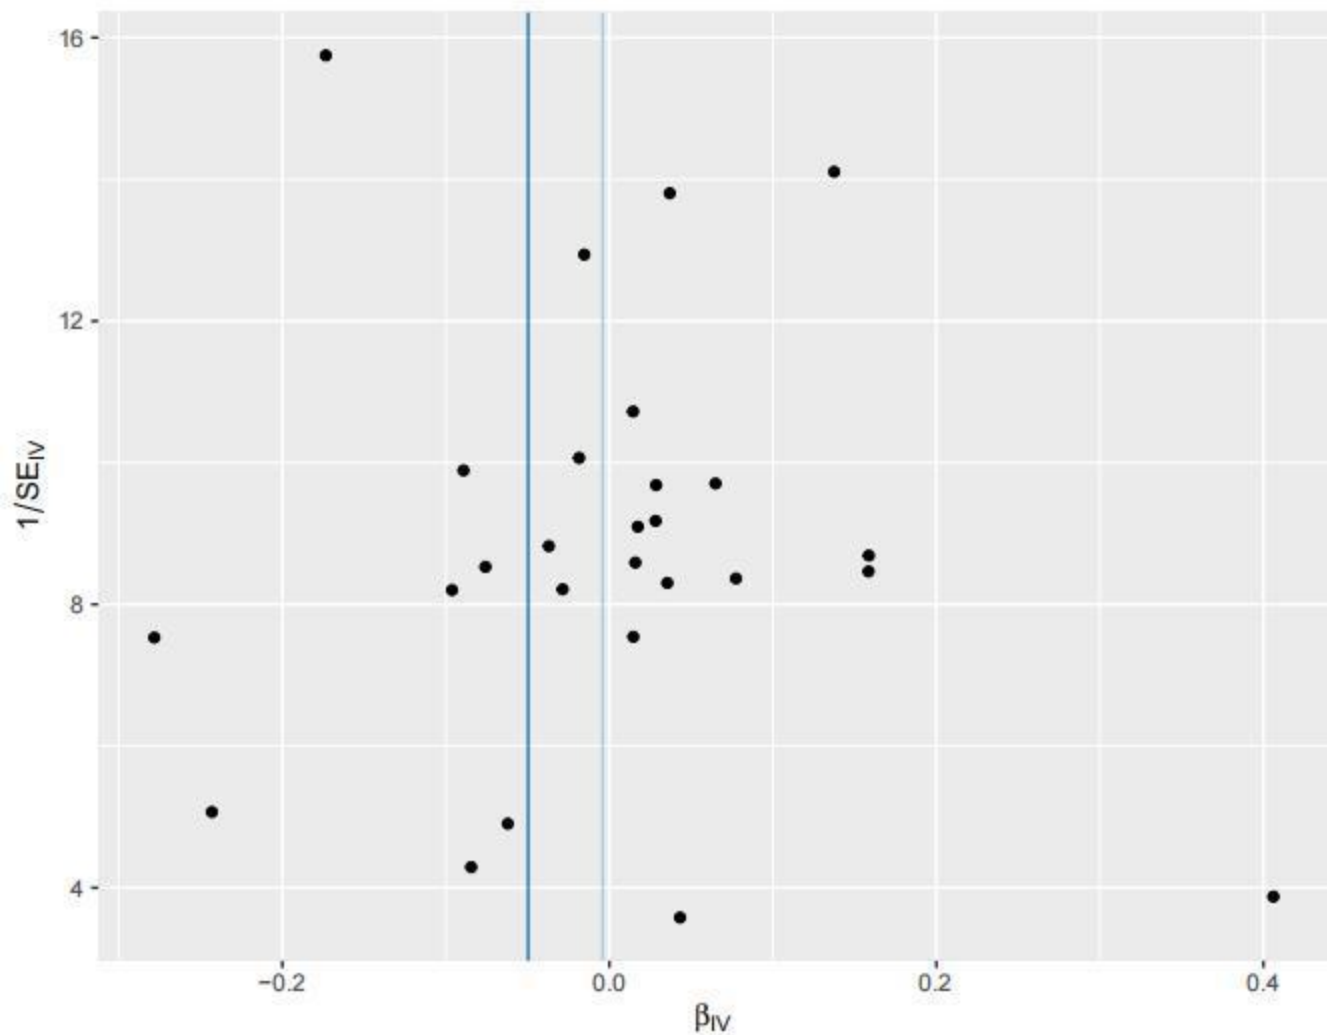

Funnel plot analyse of "HVEM on TD CD8br " on 'Aplastic anemia'



MR Method

- Inverse variance weighted
- MR Egger

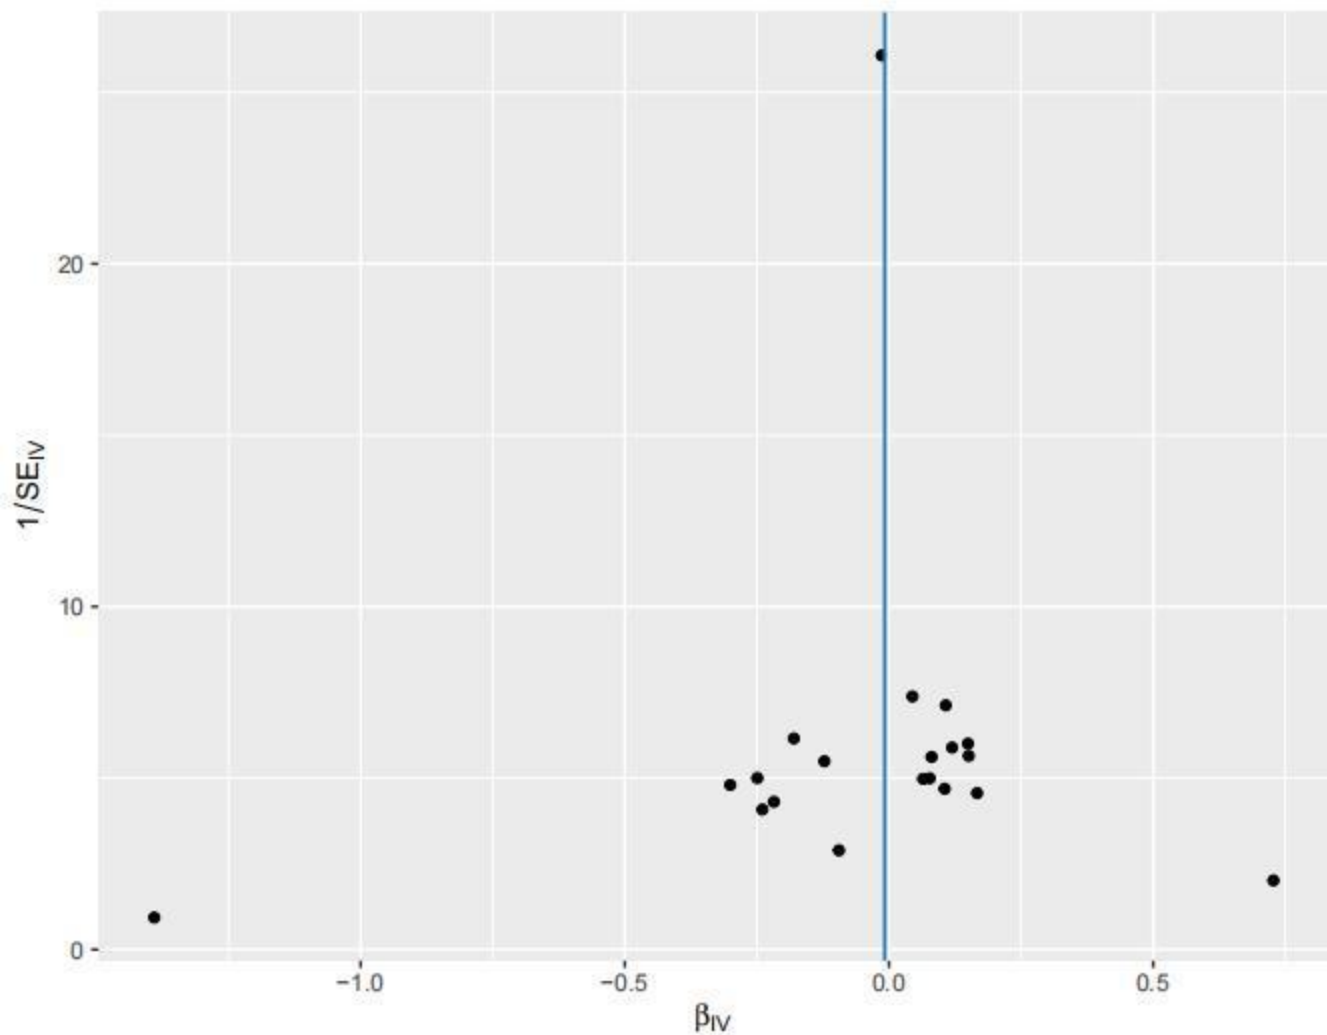

Funnel plot analysis of "CD25 on resting Treg " on 'Aplastic anemia'

MR Method

Inverse variance weighted

MR Egger

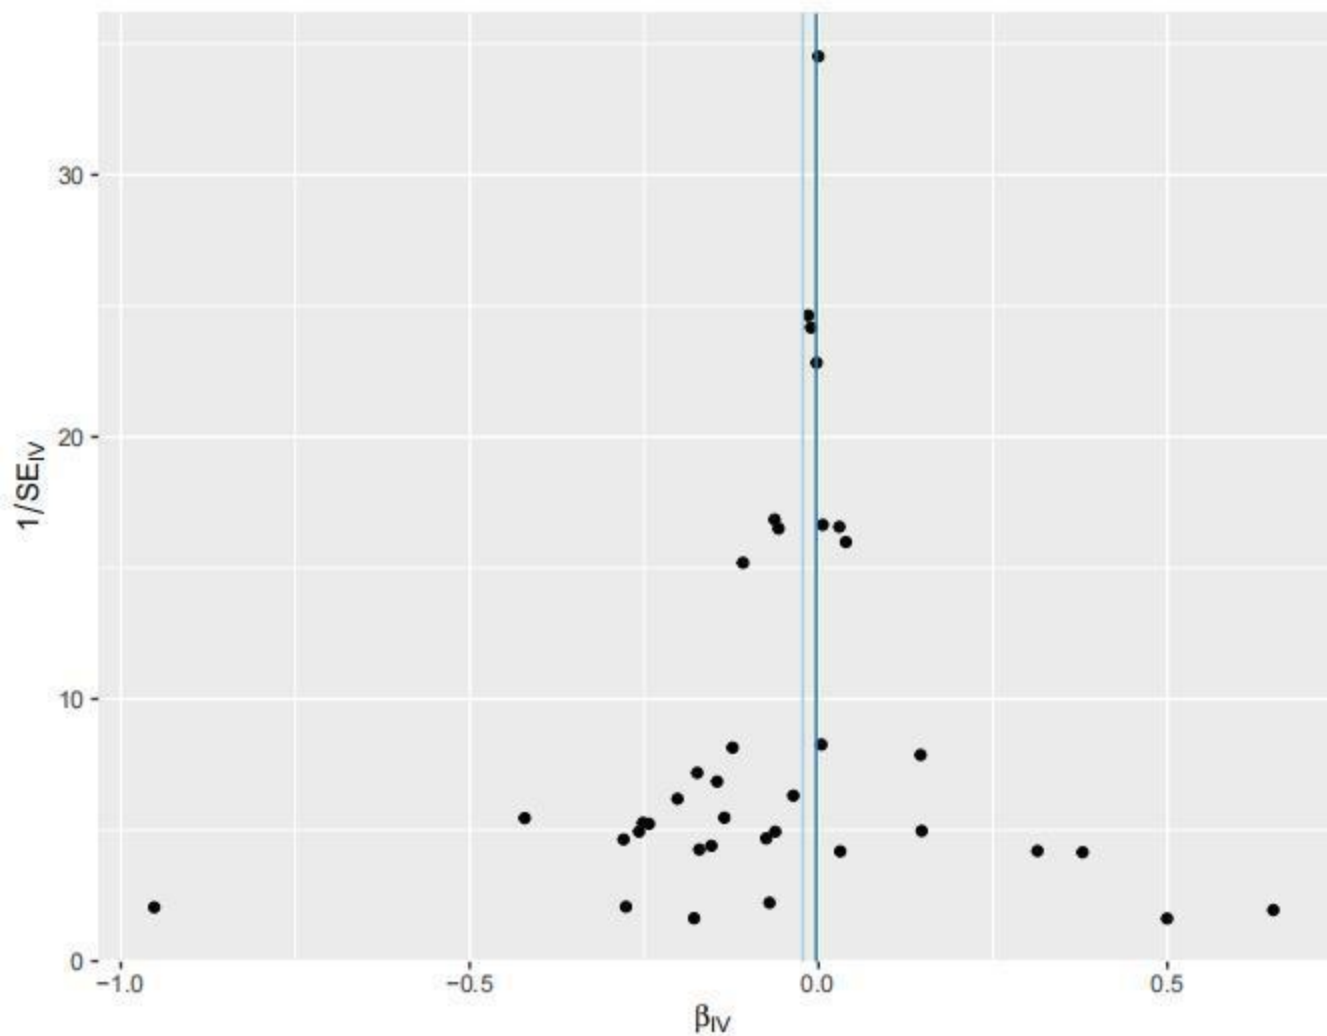

Funnel plot analyse of " CCR2 on CD14+ CD16+ monocyte" on 'Aplastic anemia'

MR Method

- Inverse variance weighted
- MR Egger

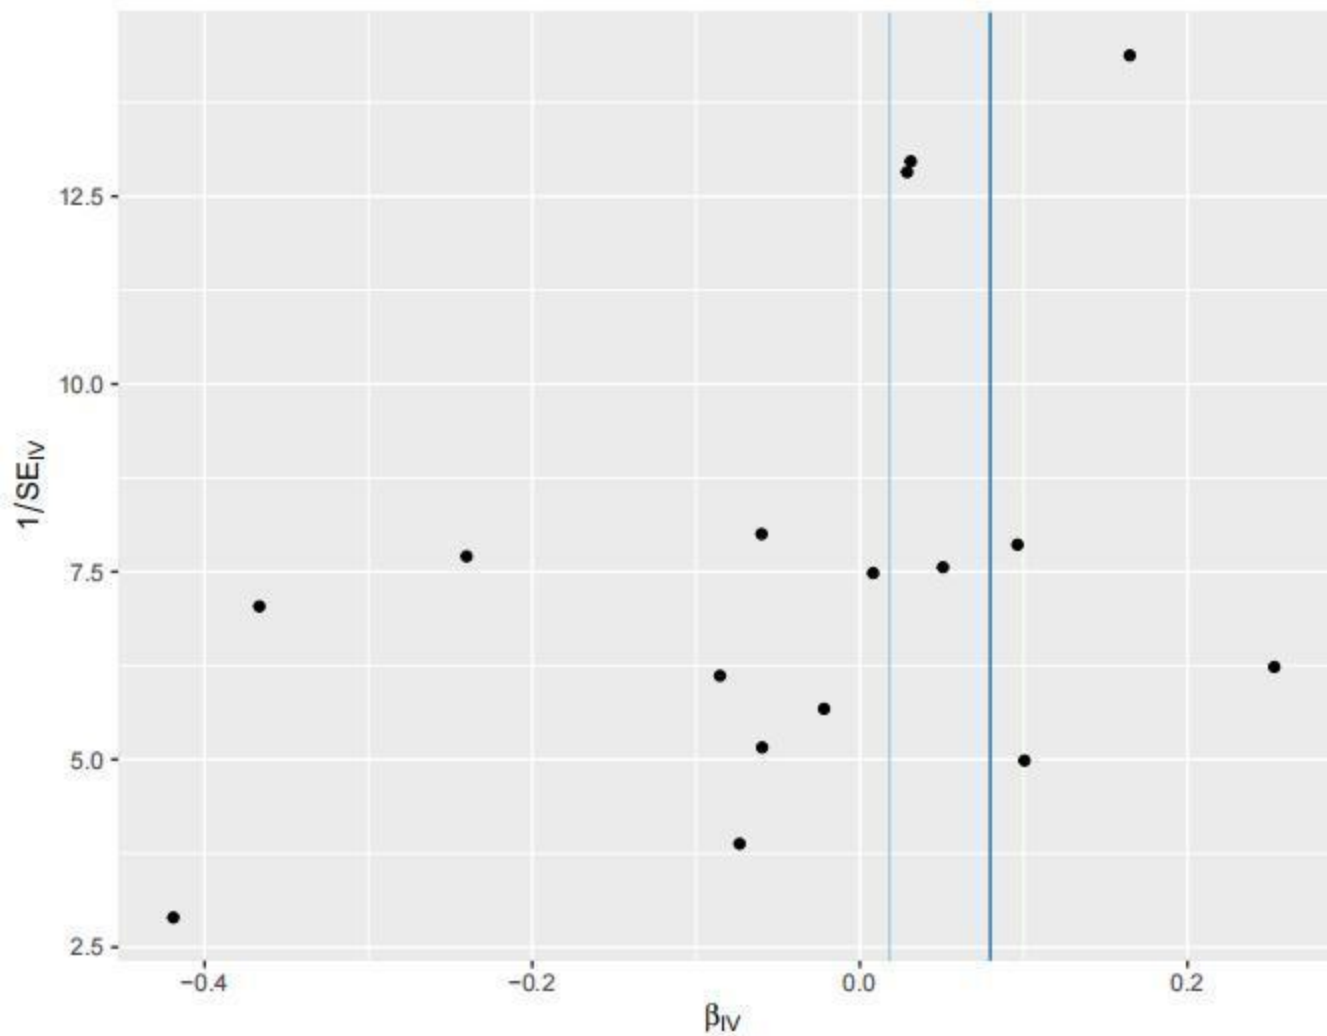

Funnel plot analyse of "CD66b++ myeloid cell AC" on 'Aplastic anemia'

### MR Method

- Inverse variance weighted
- MR Egger

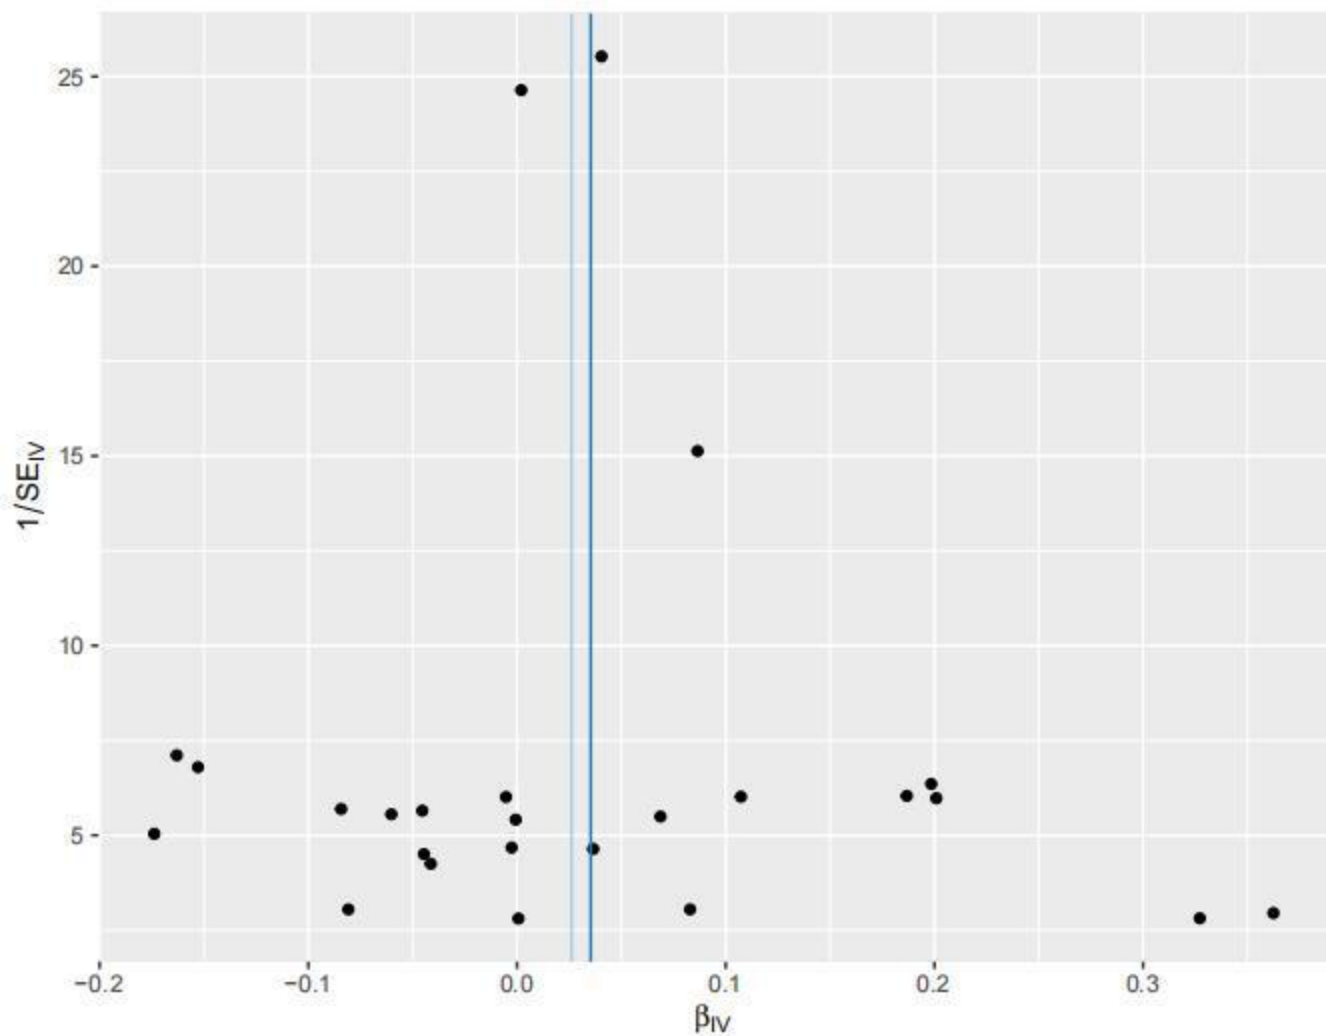

Funnel plot analyse of "CD24 on IgD+ CD38br" on 'Aplastic anemia'

### MR Method

- Inverse variance weighted
- MR Egger

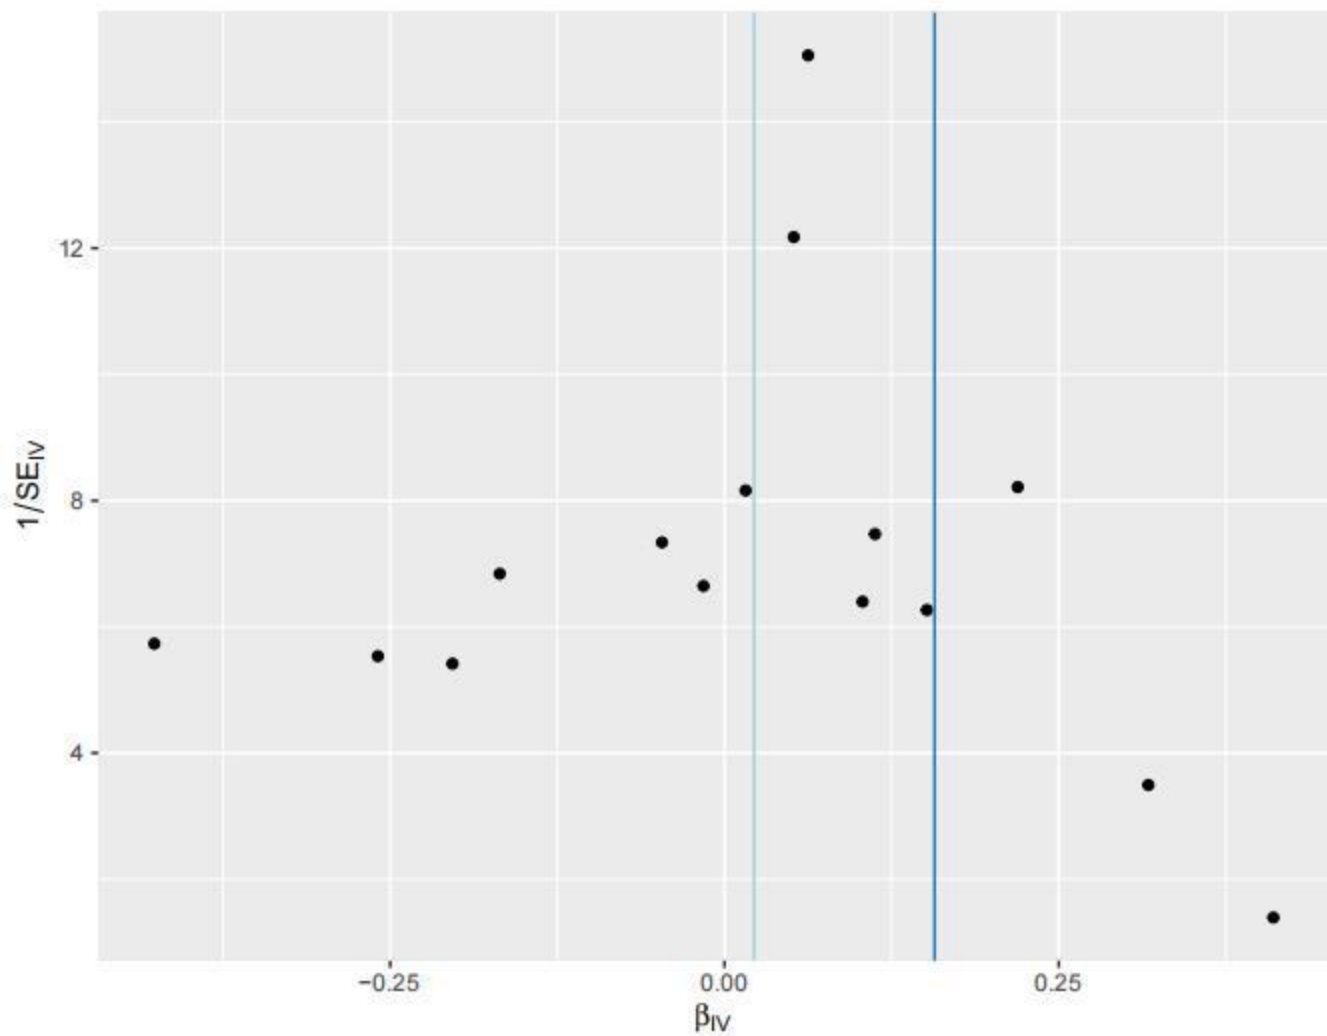

Funnel plot analyse of "CD4 on CM CD4 +" on 'Aplastic anemia'

### MR Method

- Inverse variance weighted
- MR Egger

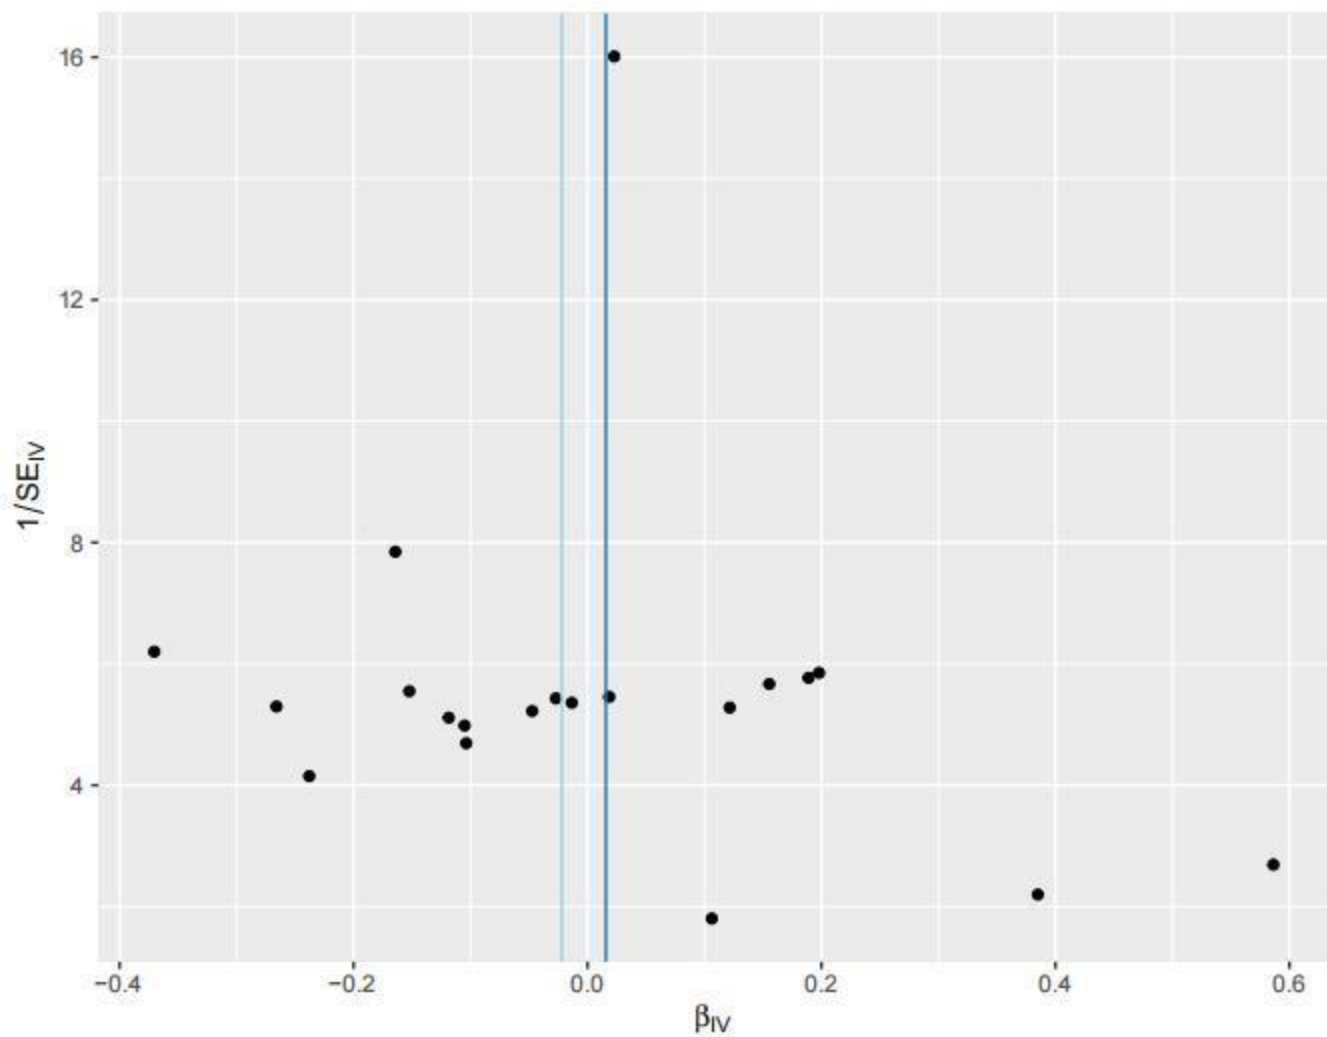

Funnel plot analysis of "CD64 on CD14- CD16+ monocyte " on 'Aplastic anemia'

### MR Method

Inverse variance weighted

MR Egger

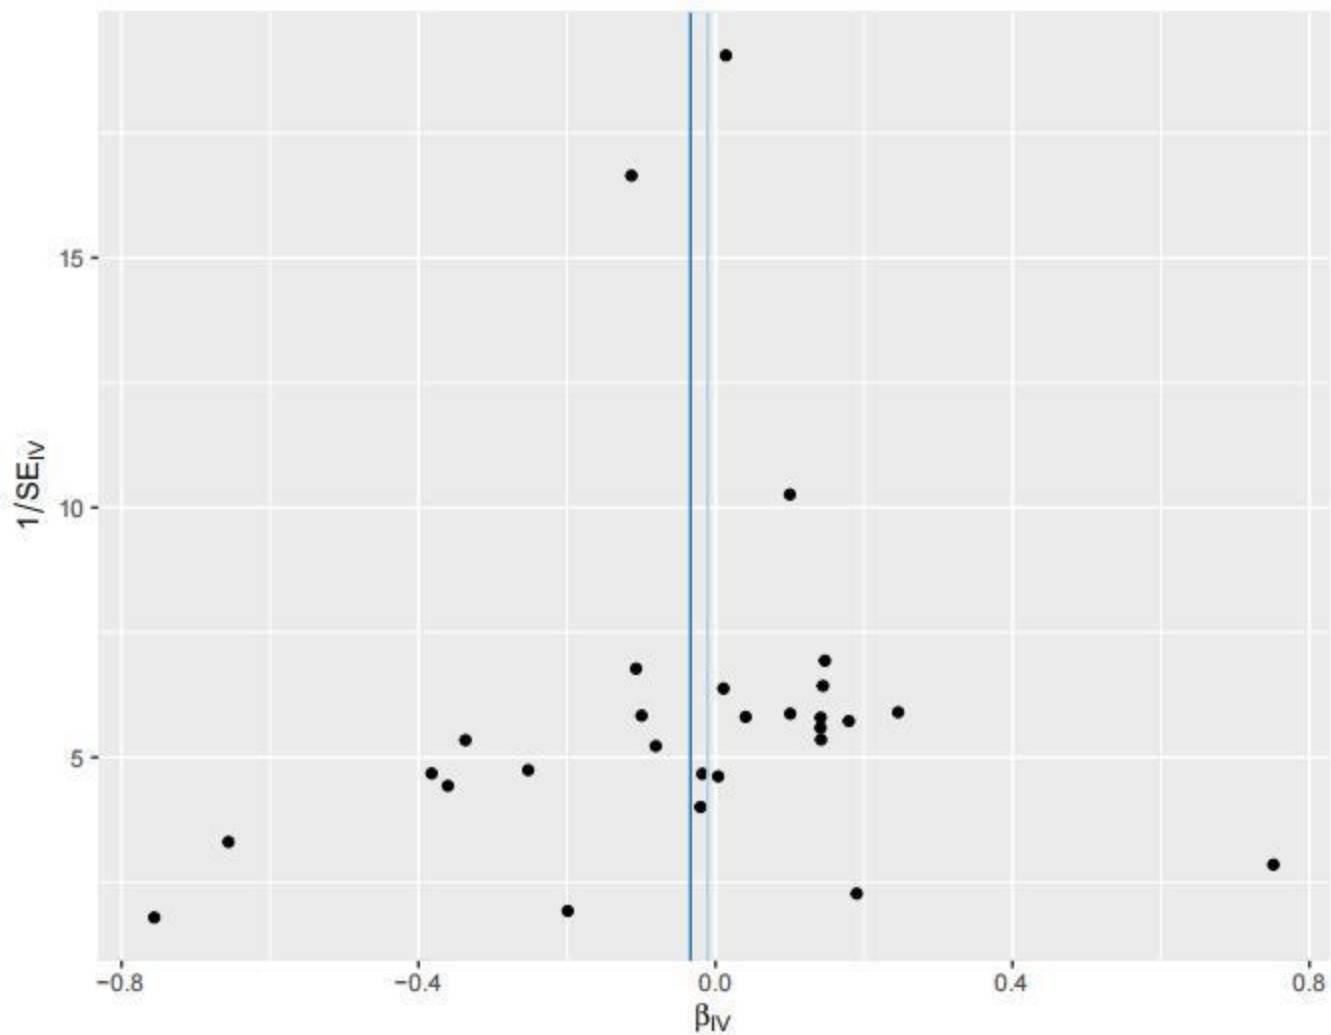

Funnel plot analysis of "Memory B cell %B cell" on 'Aplastic anemia'

MR Method

- Inverse variance weighted
- MR Egger

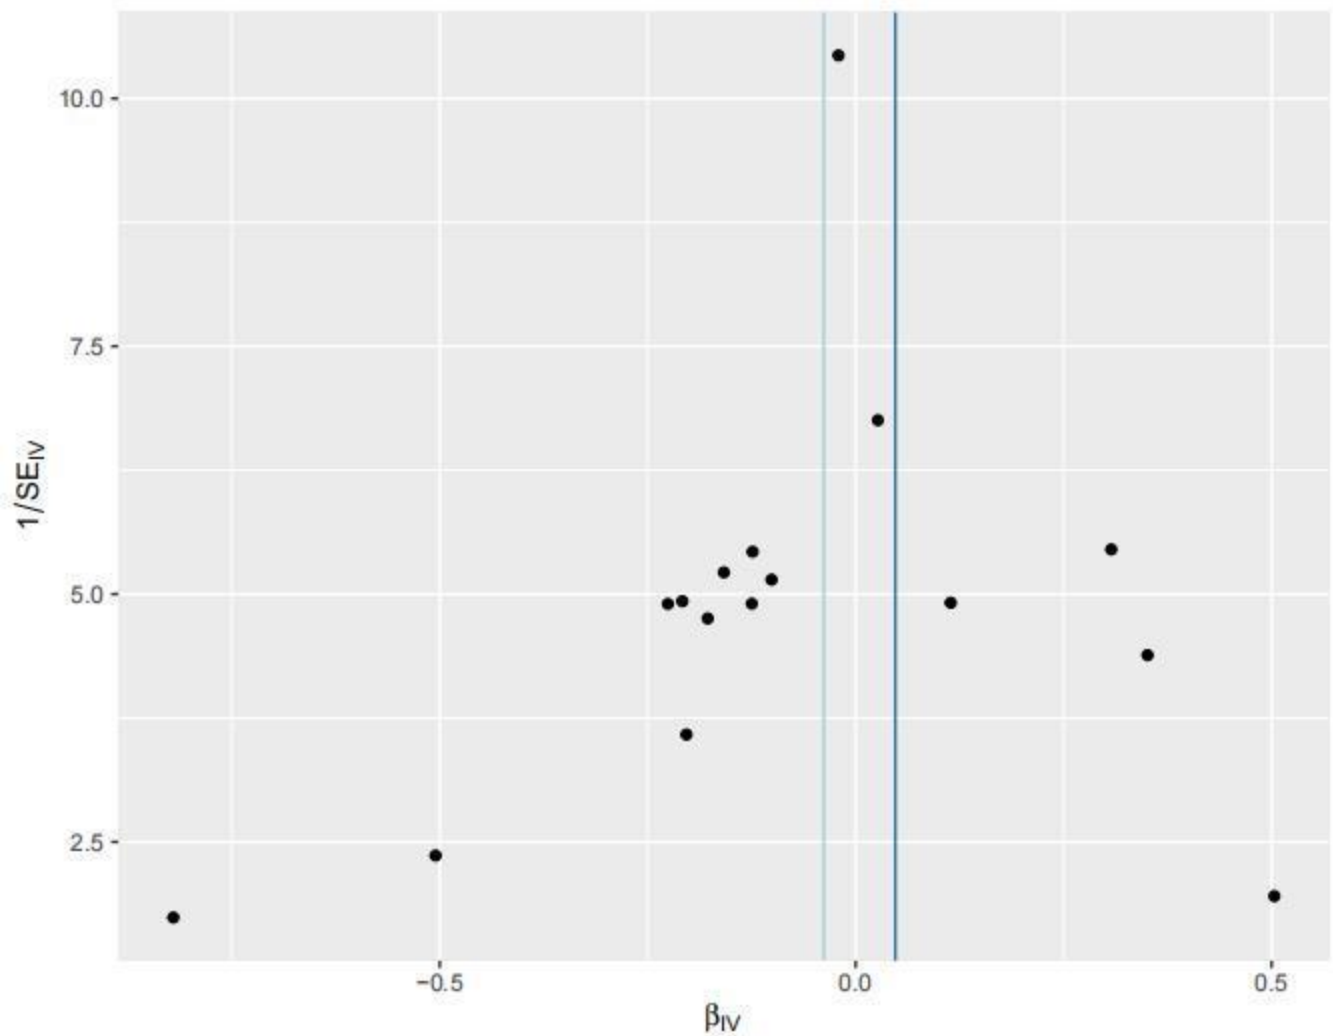

Funnel plot analyse of "Transitional %B cell" on 'Aplastic anemia'



MR Method

- Inverse variance weighted
- MR Egger

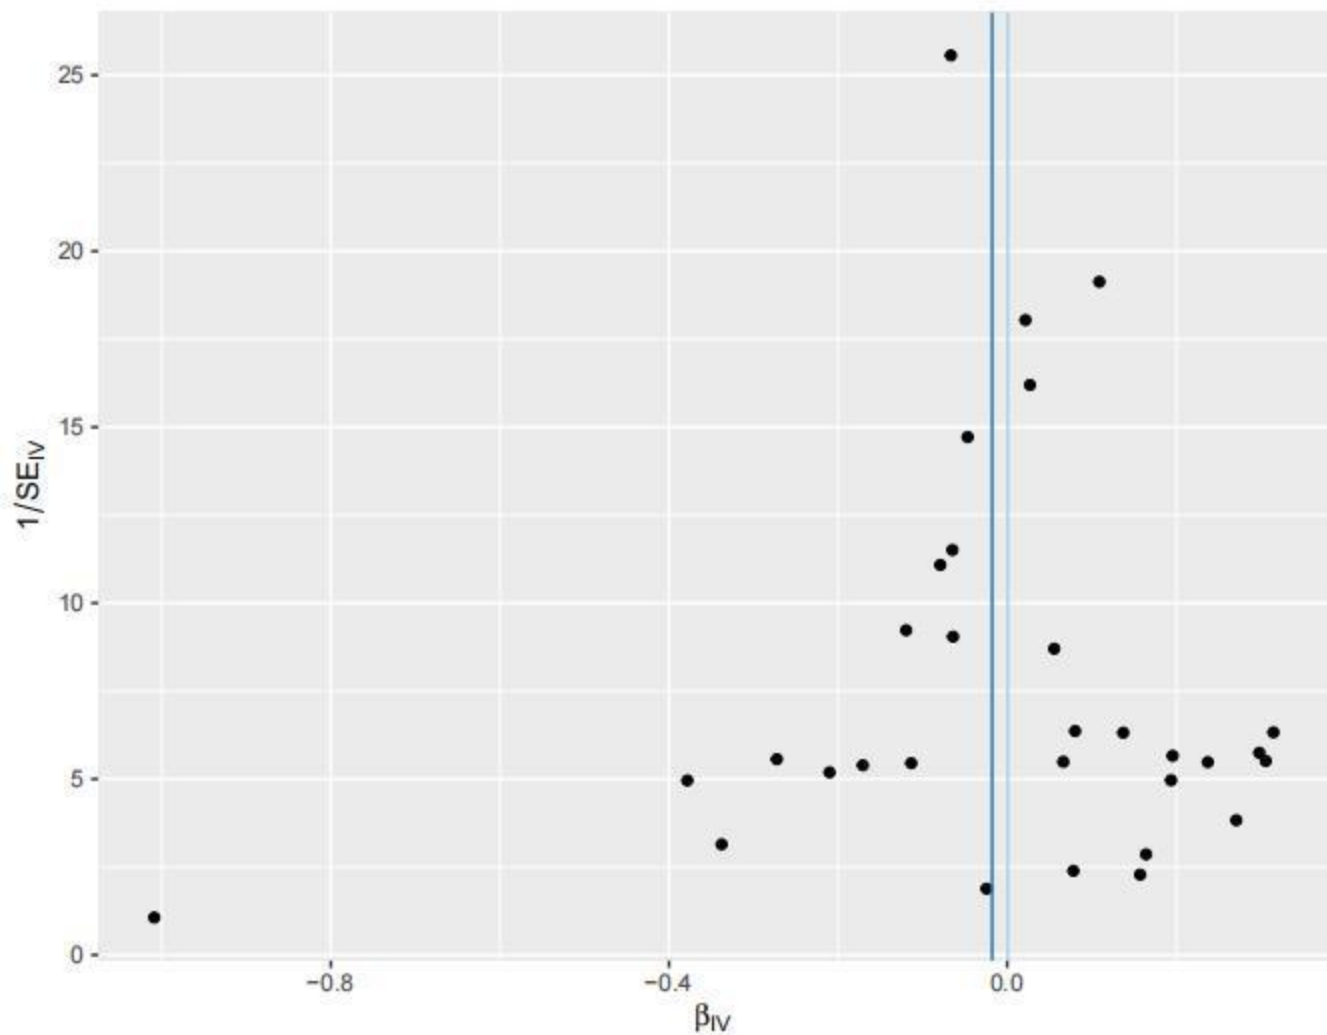

Funnel plot analyse of "CD3 on CD45RA+ CD4+" on 'Aplastic anemia'

### MR Method

- Inverse variance weighted
- MR Egger

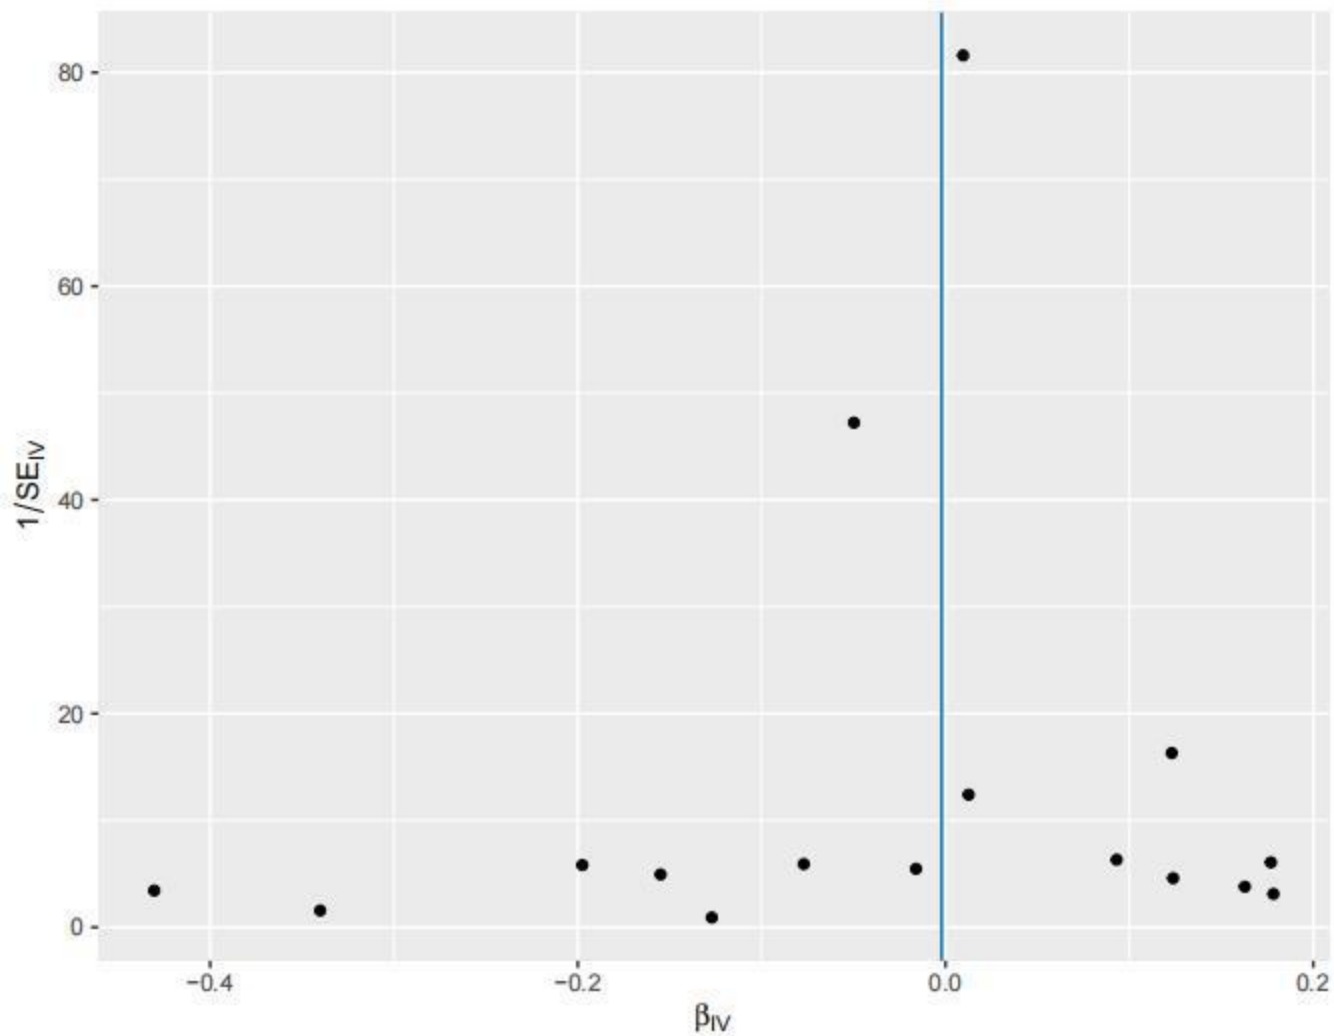

Funnel plot analyse of "CD28- CD8dim %CD8dim" on 'Aplastic anemia'

MR Method

- Inverse variance weighted
- MR Egger

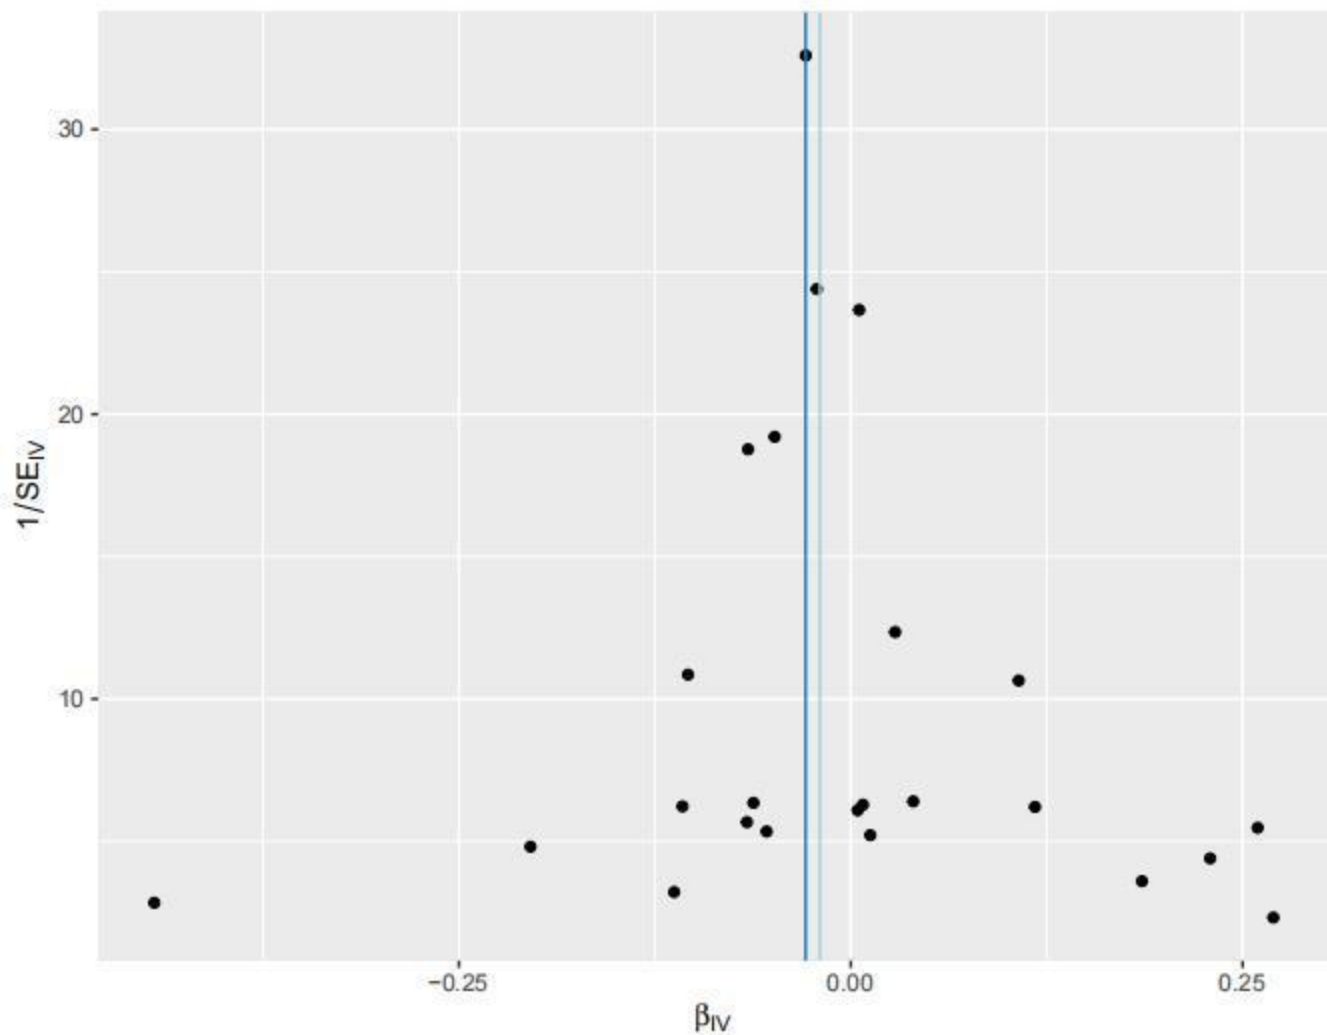

Funnel plot analyse of "CD28 on CD4 Treg " on 'Aplastic anemia'

### MR Method

- Inverse variance weighted
- MR Egger

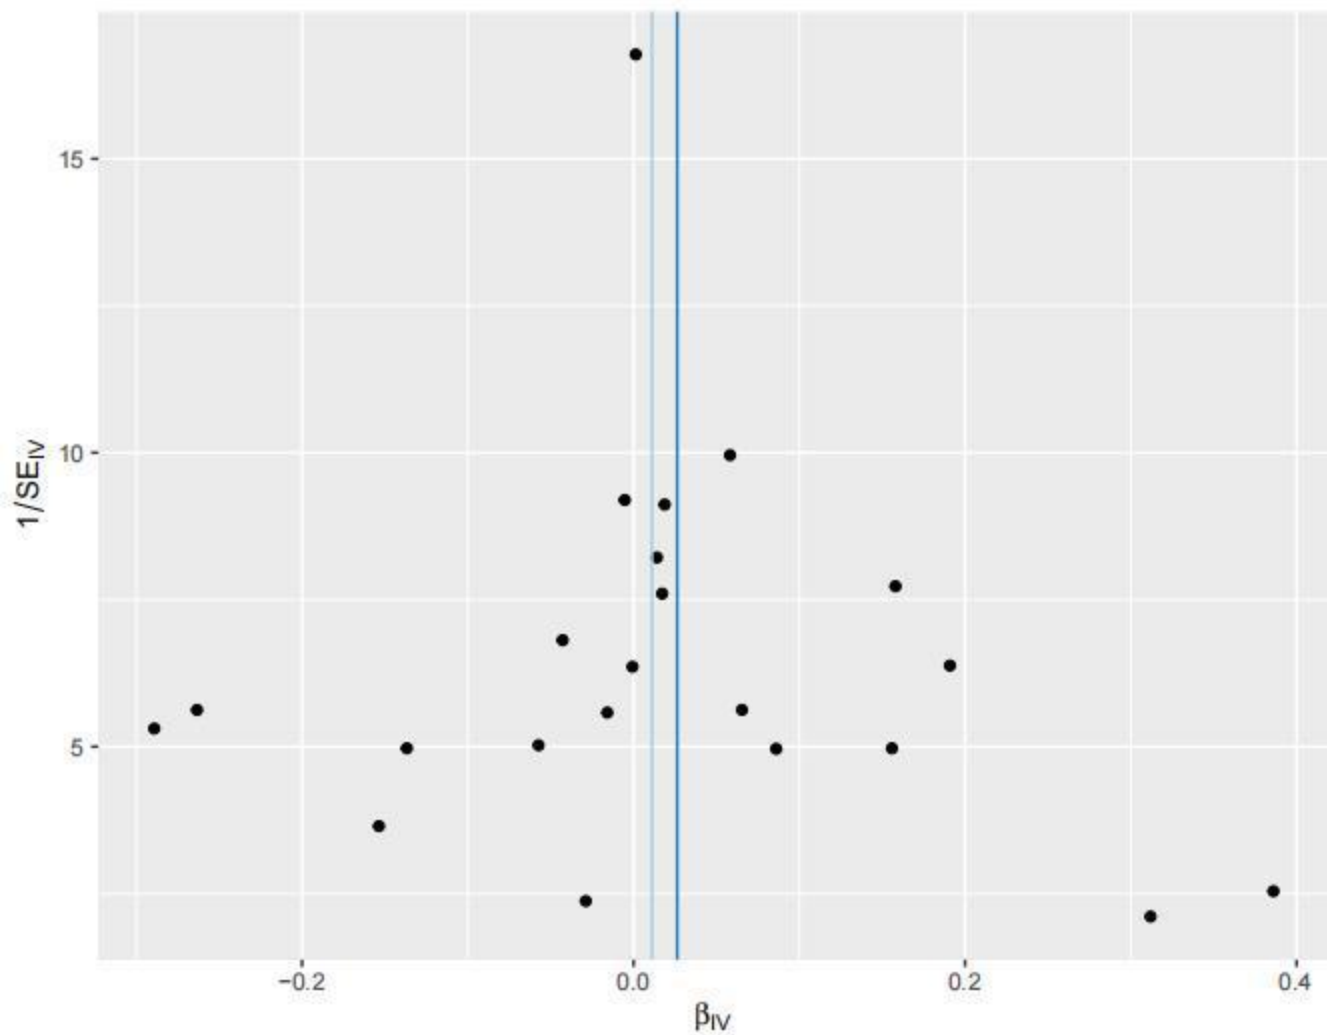

Funnel plot analysis of "CD127 on CD45RA+ CD4+ " on 'Aplastic anemia'

MR Method

Inverse variance weighted

MR Egger

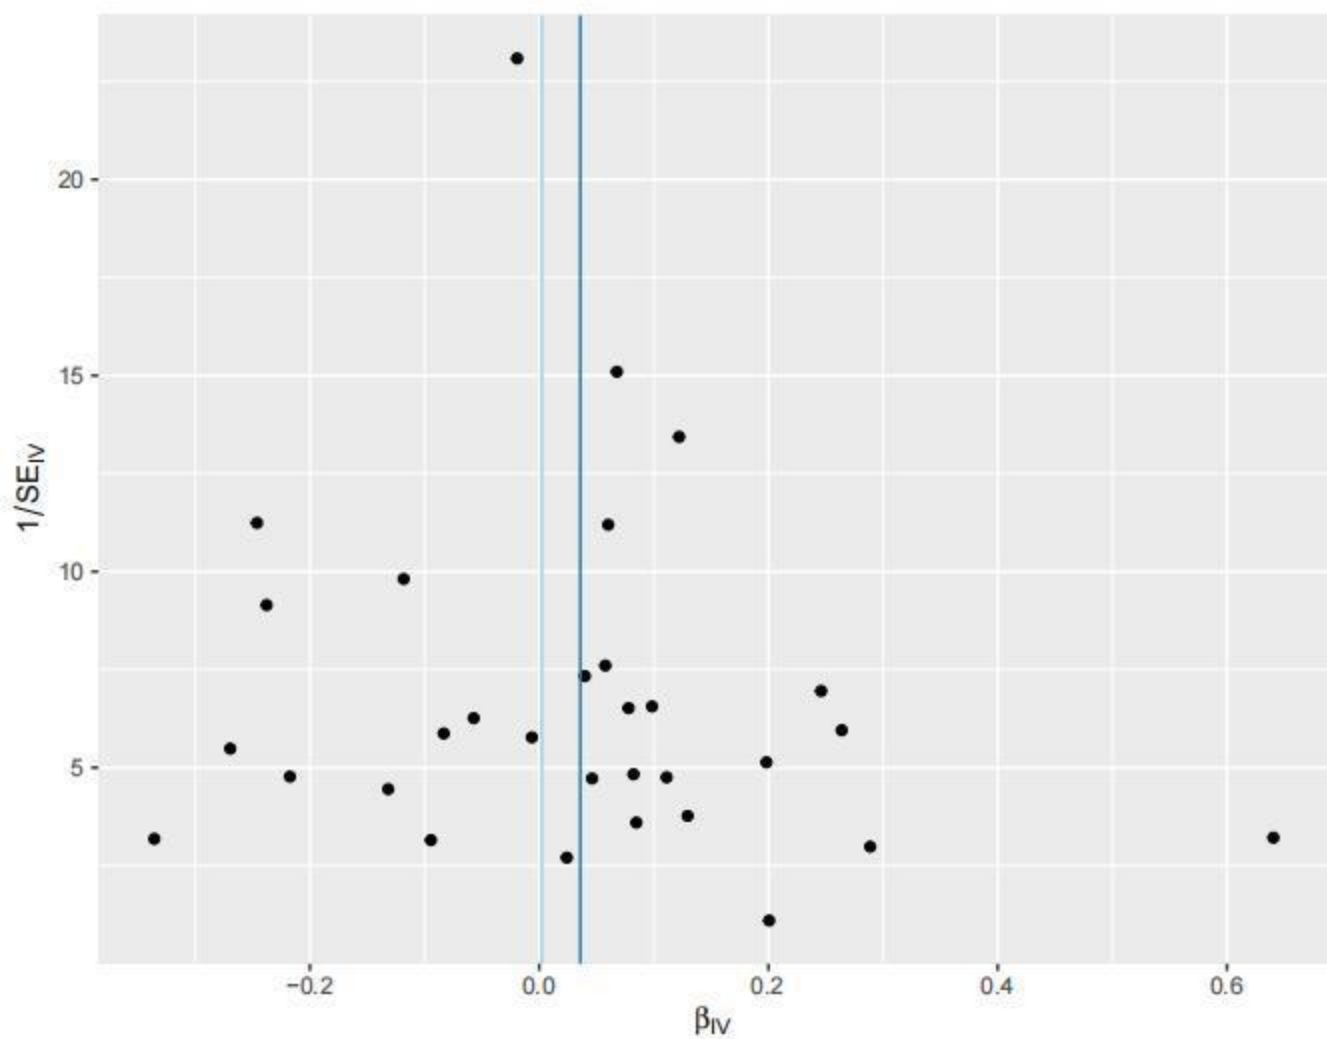

Funnel plot analyse of "CD27 on CD24+ CD27+" on 'Aplastic anemia'

MR Method

- Inverse variance weighted
- MR Egger

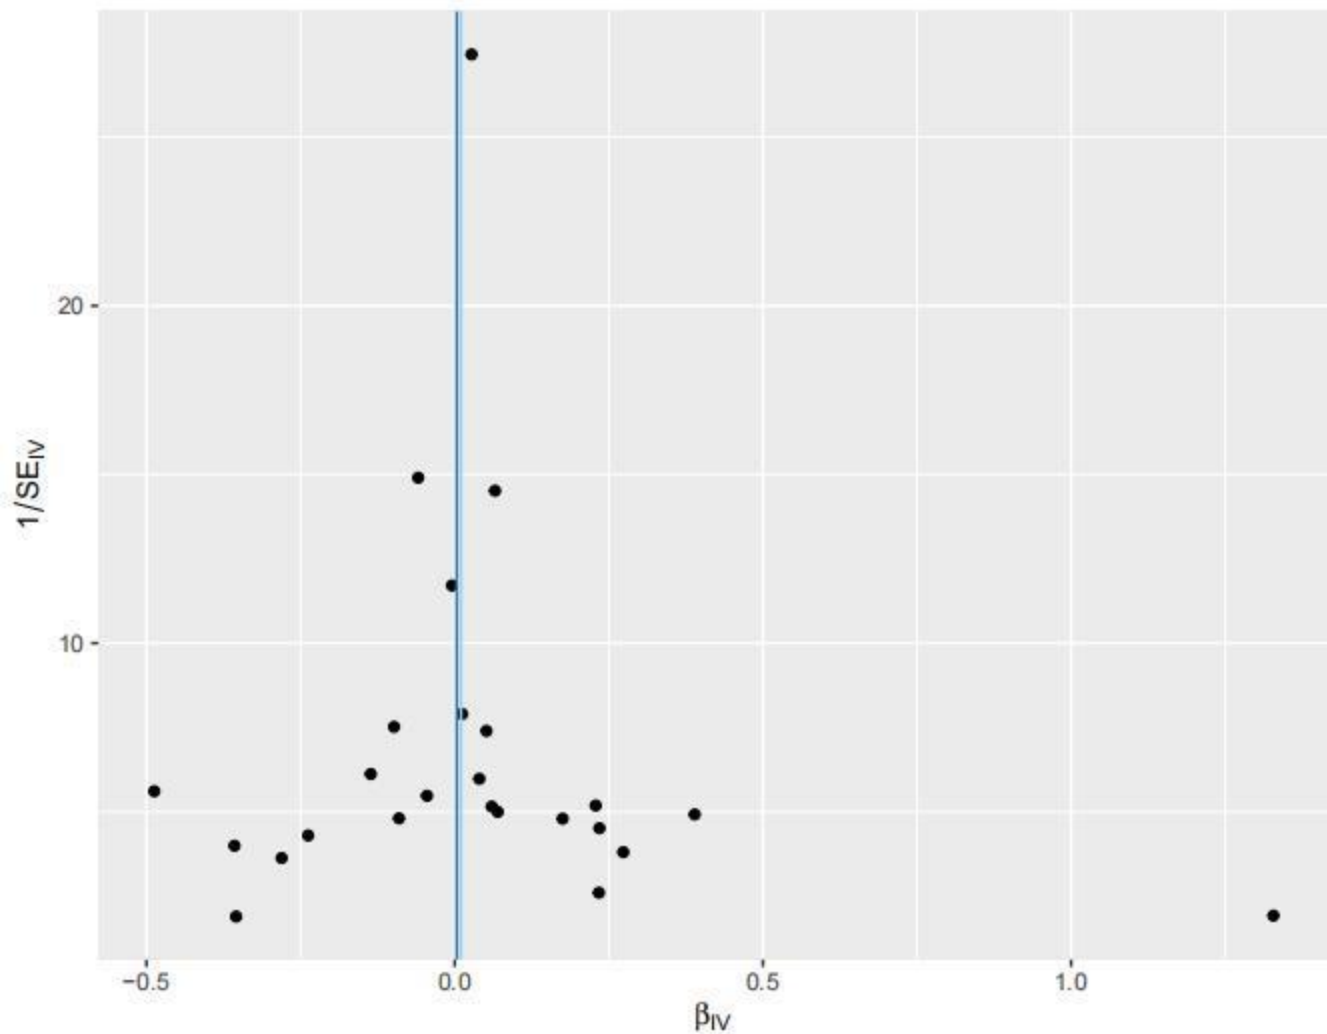

Funnel plot analysis of "CD25 on memory B cell" on 'Aplastic anemia'

MR Method

- Inverse variance weighted
- MR Egger

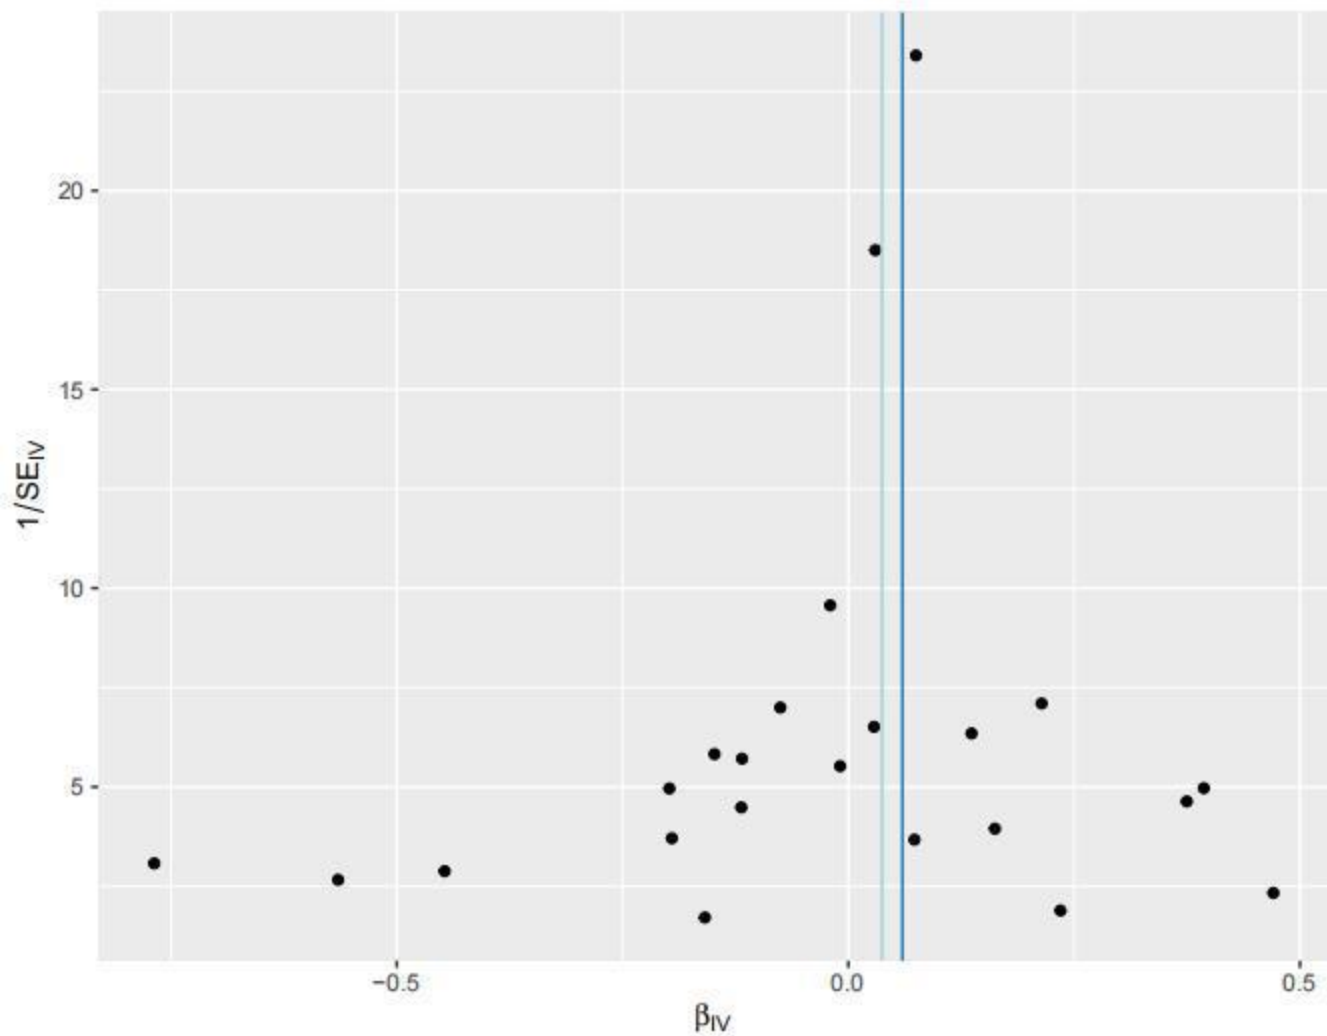

Funnel plot analyse of "CD16 on CD14+ CD16+ monocyte" on 'Aplastic anemia'

MR Method

Inverse variance weighted

MR Egger

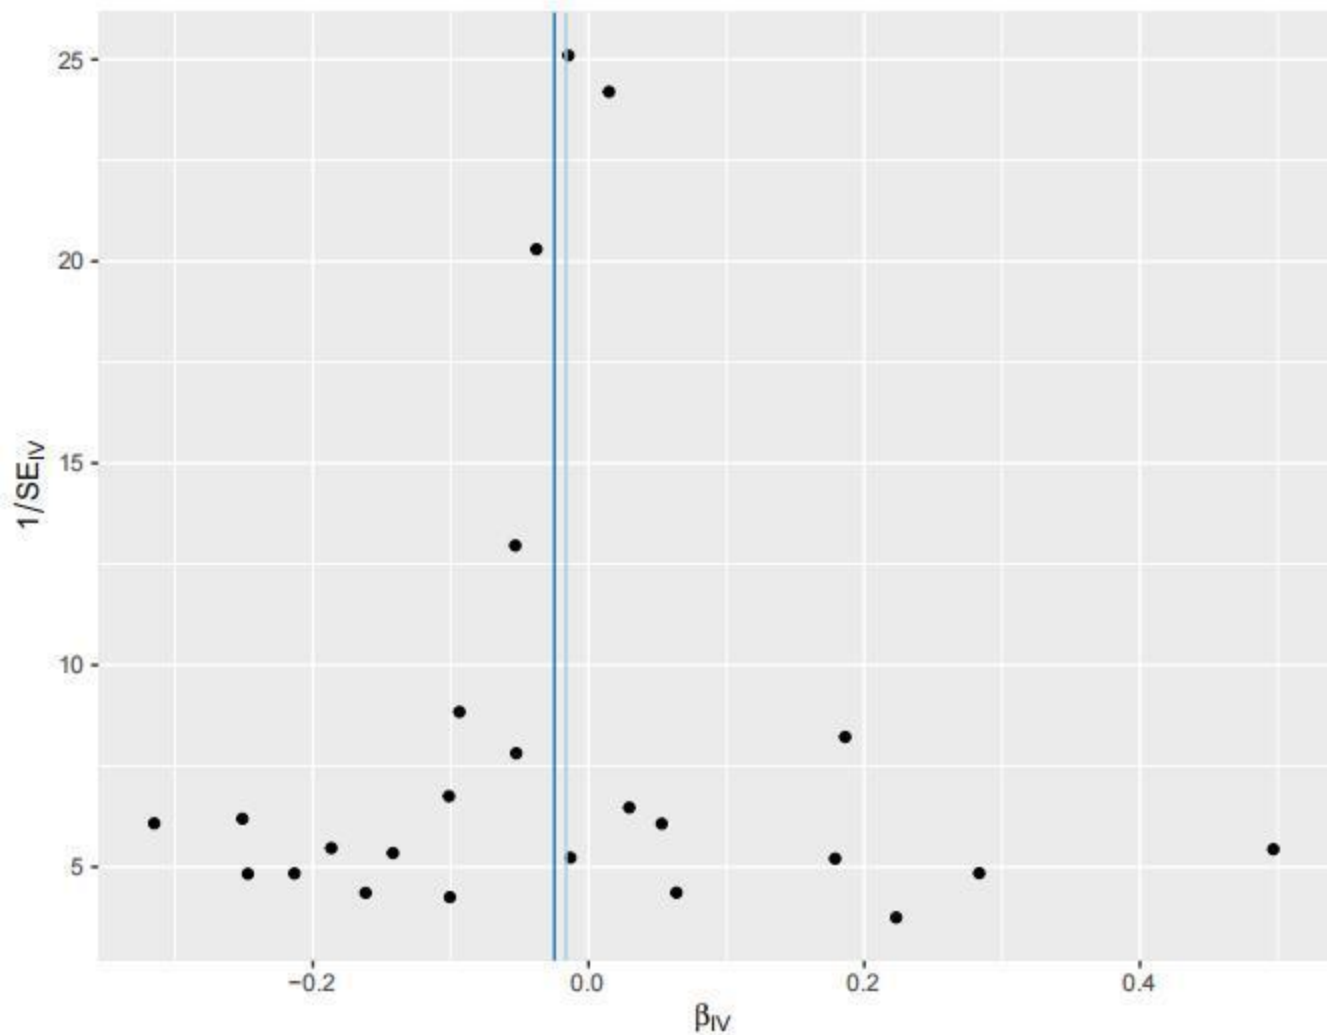

Funnel plot analyse of "CD8 on HLA DR+ CD8br" on 'Aplastic anemia'



MR Method

Inverse variance weighted

MR Egger

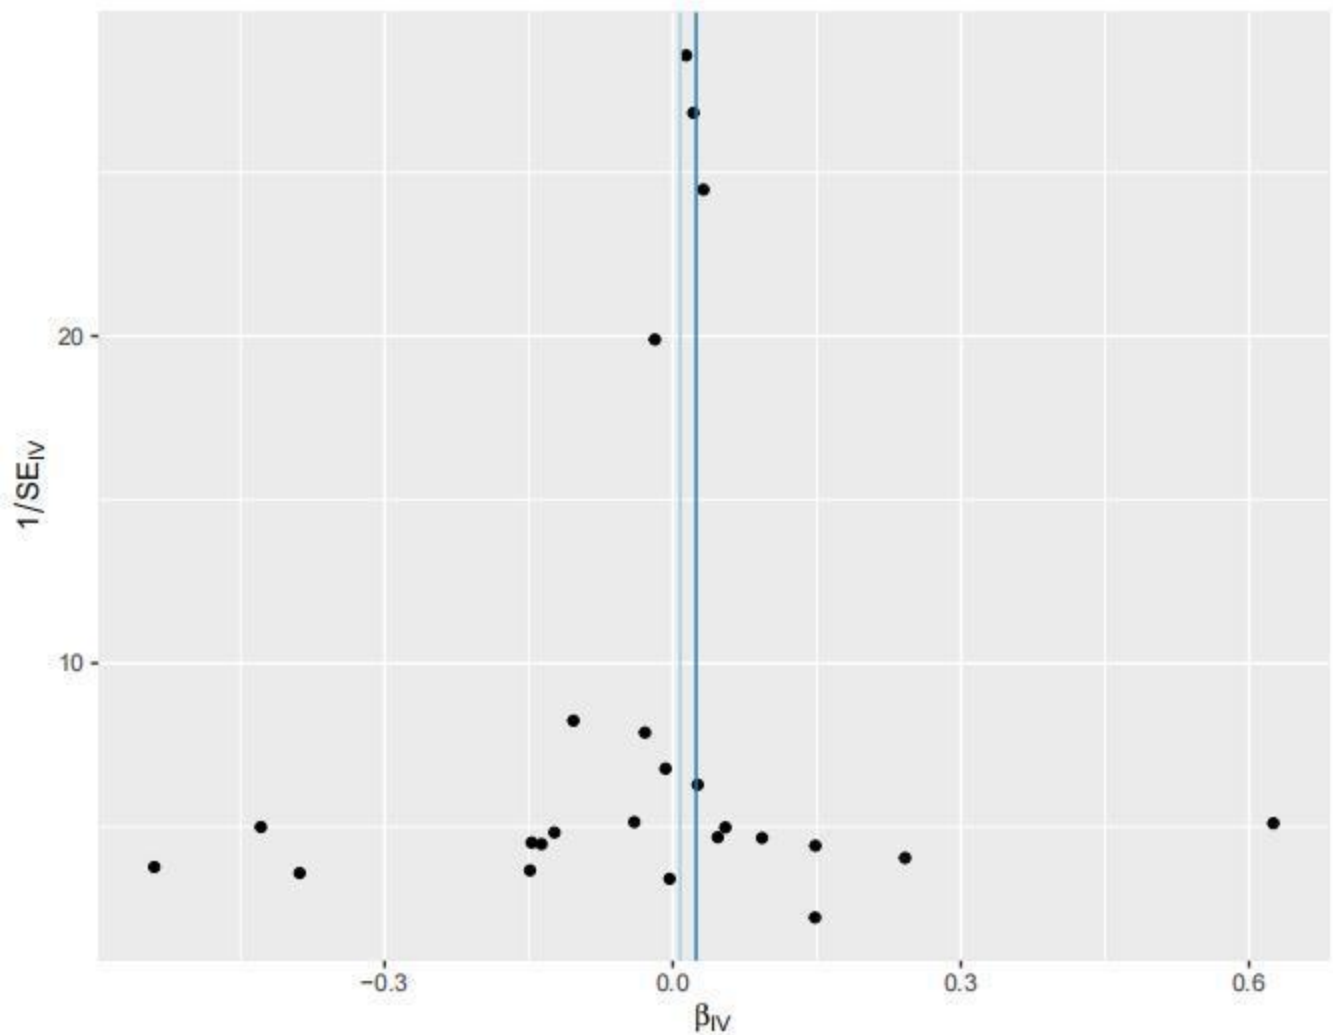

Funnel plot analysis of "PB/PC AC" on 'Aplastic anemia'

### MR Method

- Inverse variance weighted
- MR Egger

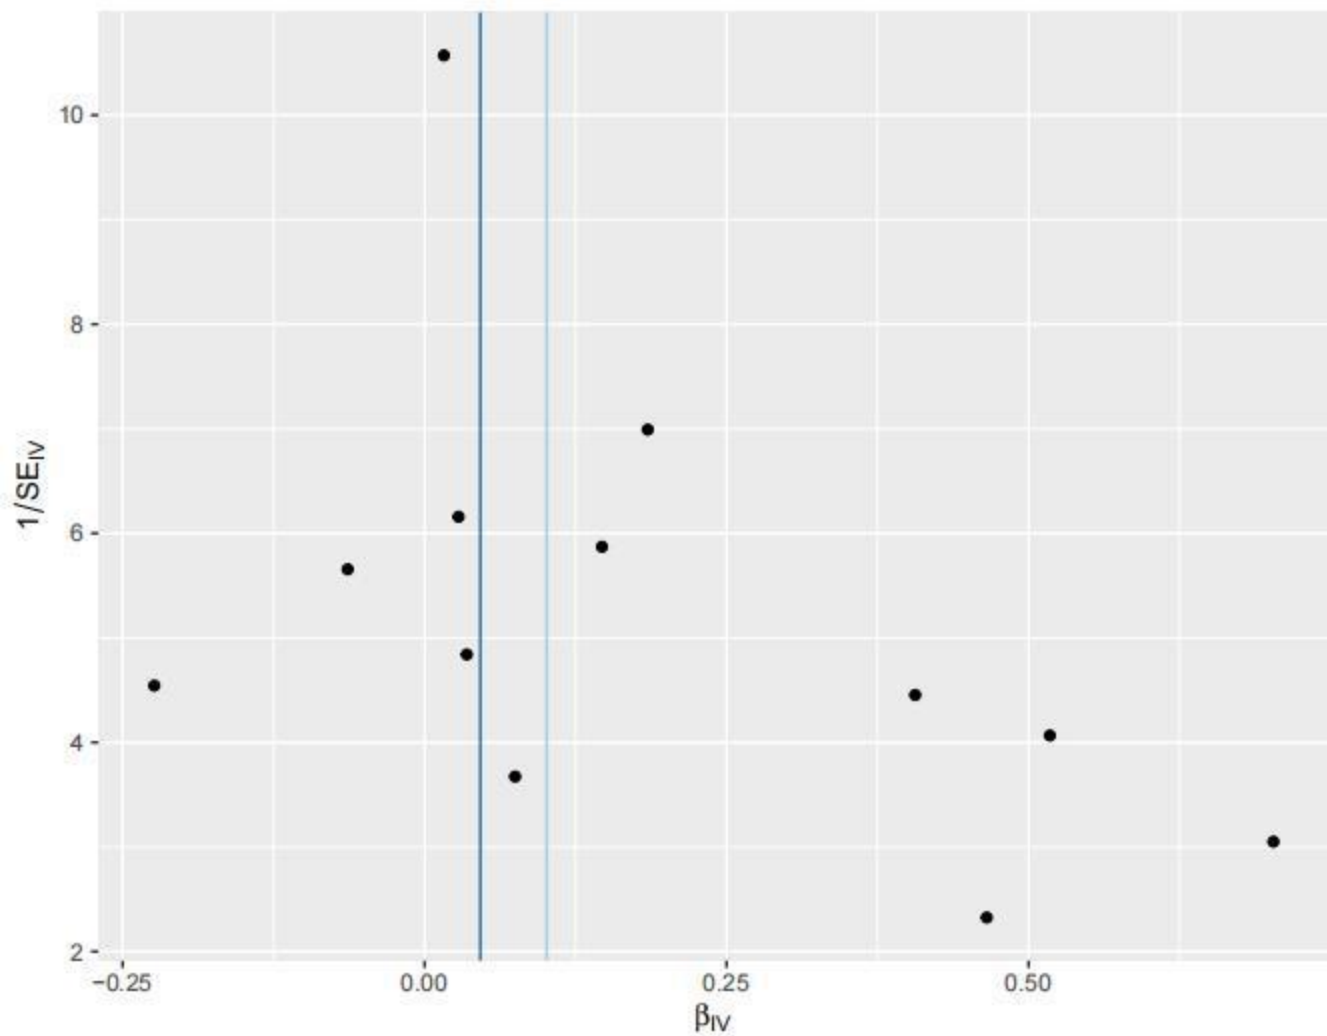

Funnel plot analyse of "IgD- CD38- %B cell" on 'Aplastic anemia'

### MR Method

- Inverse variance weighted
- MR Egger

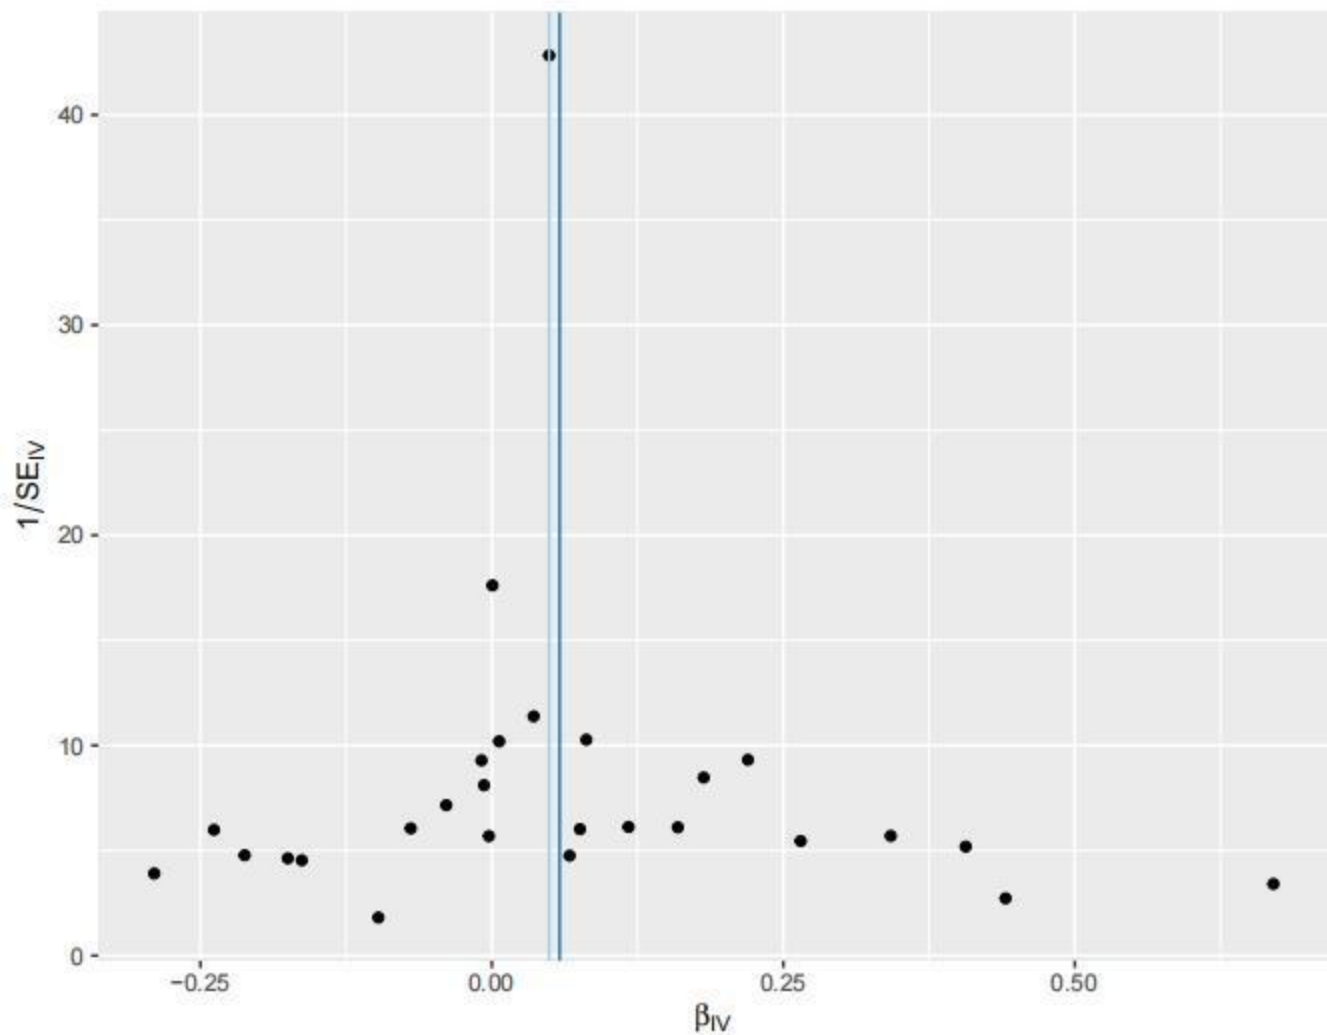

Funnel plot analyse of "CD39+ secreting Treg AC" on 'Aplastic anemia'

### MR Method

- Inverse variance weighted
- MR Egger

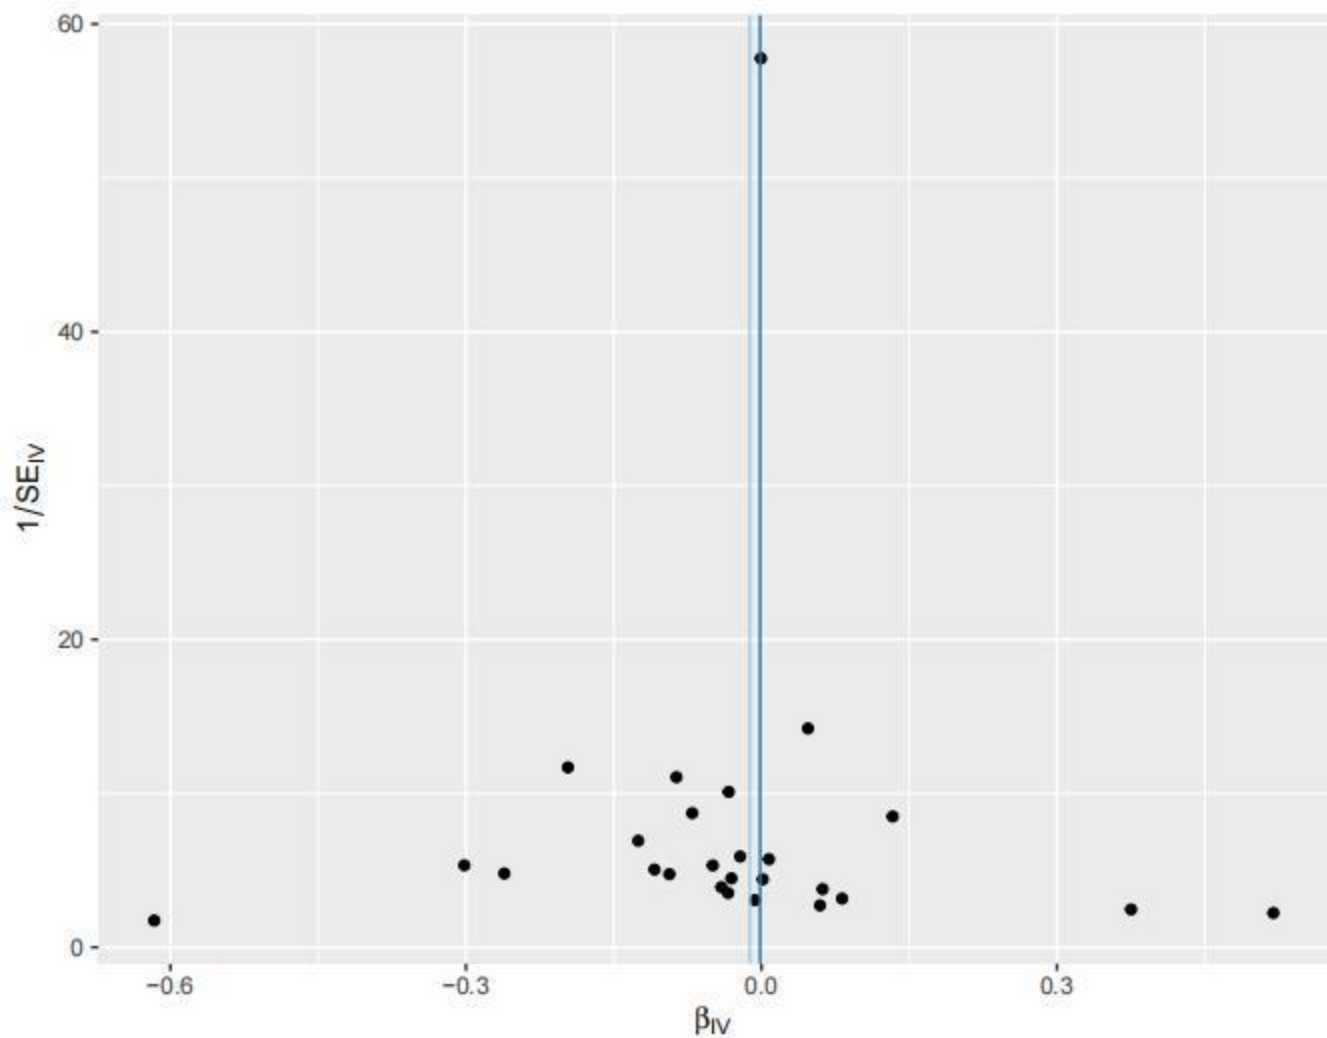

Funnel plot analyse of "CD14+ CD16- monocyte %monocyte" on 'Aplastic anemia'

### MR Method

- Inverse variance weighted
- MR Egger

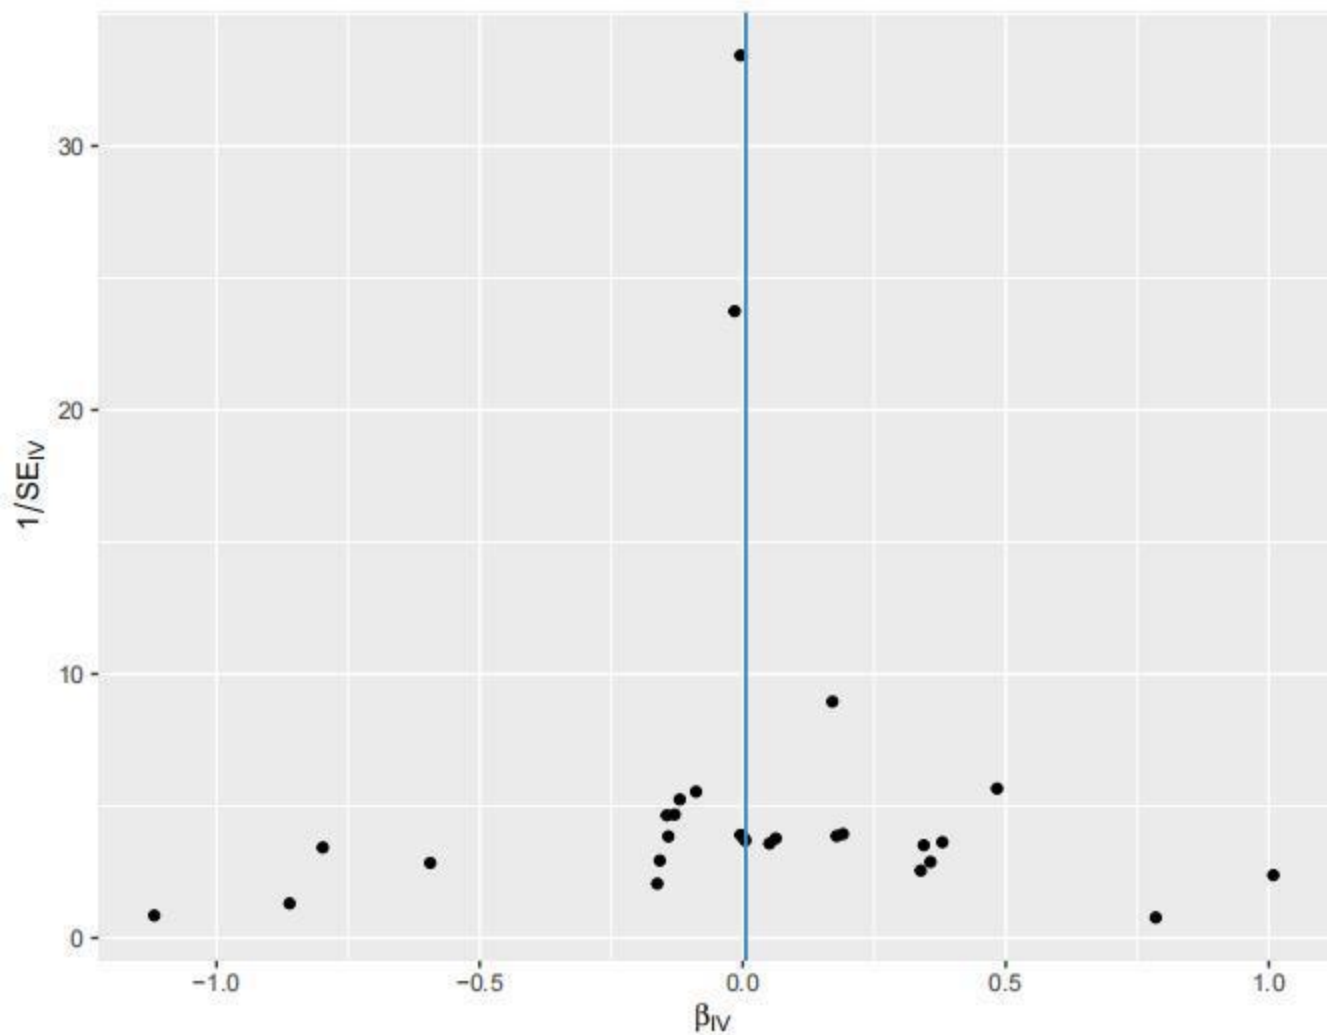

Funnel plot analyse of "Naive CD8br AC" on 'Aplastic anemia'

### MR Method

- Inverse variance weighted
- MR Egger

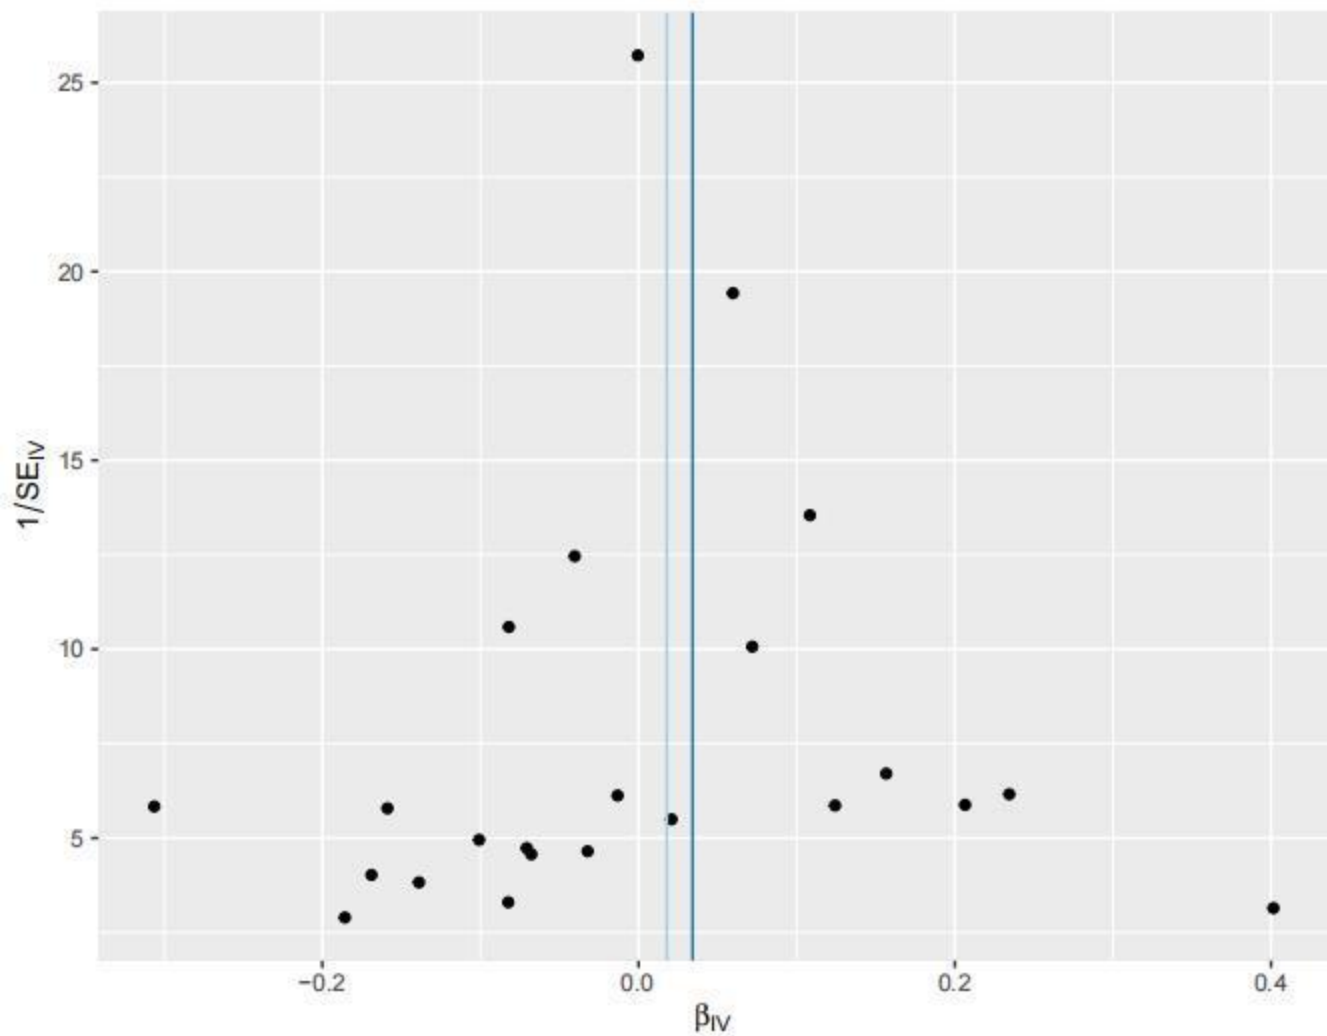

Funnel plot analyse of "CD40 on CD14+ CD16- monocyte" on 'Aplastic anemia'

MR Method

- Inverse variance weighted
- MR Egger

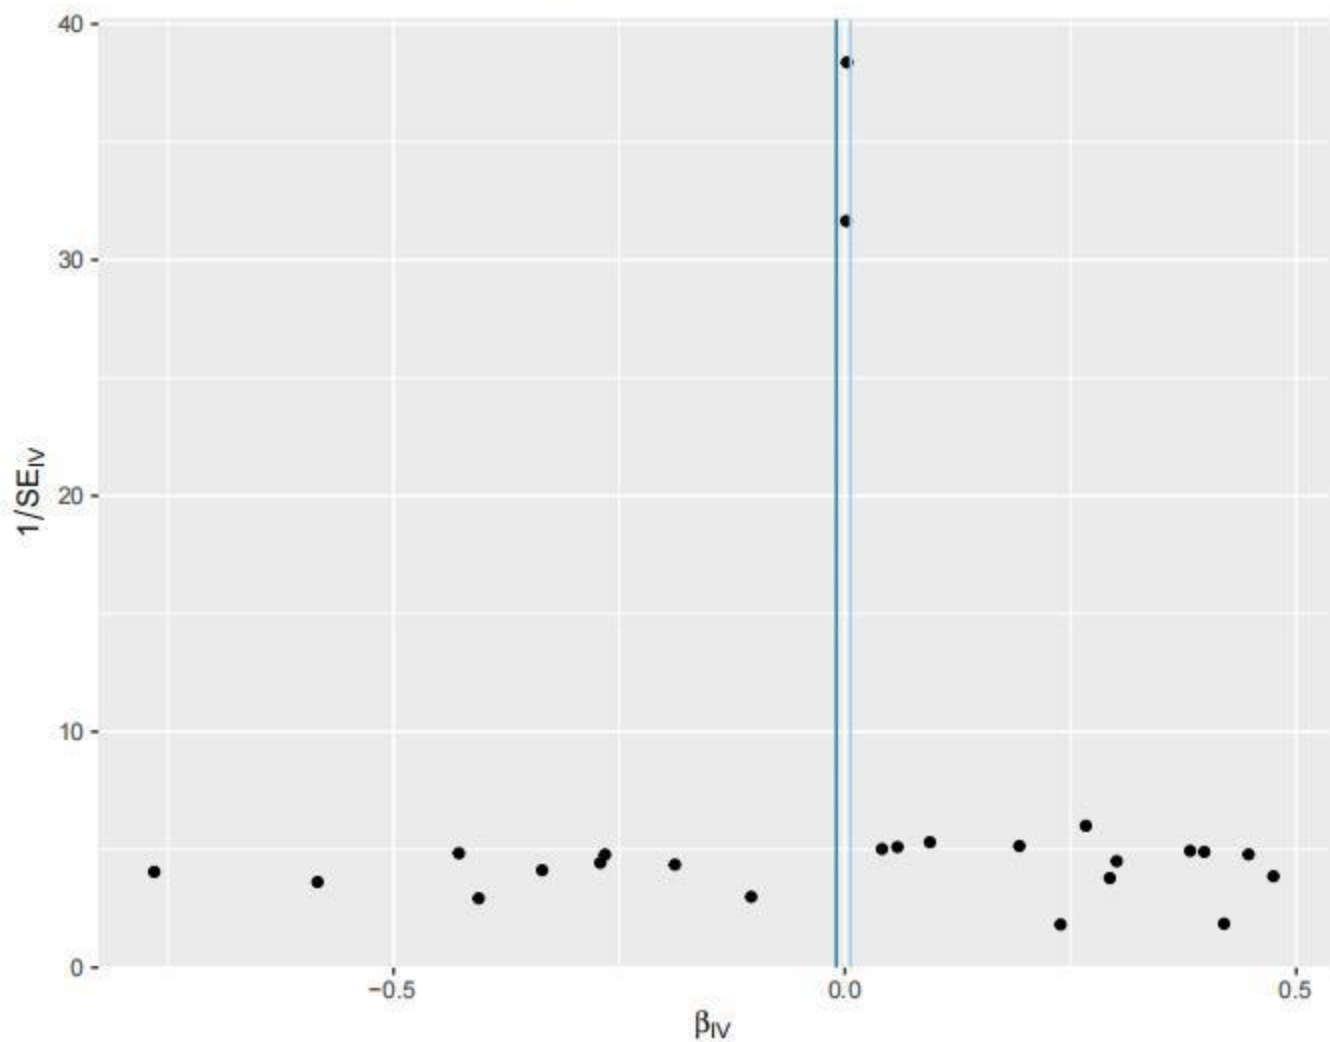

Funnel plot analysis of "CD20- AC" on 'Aplastic anemia'

MR Method

- Inverse variance weighted
- MR Egger

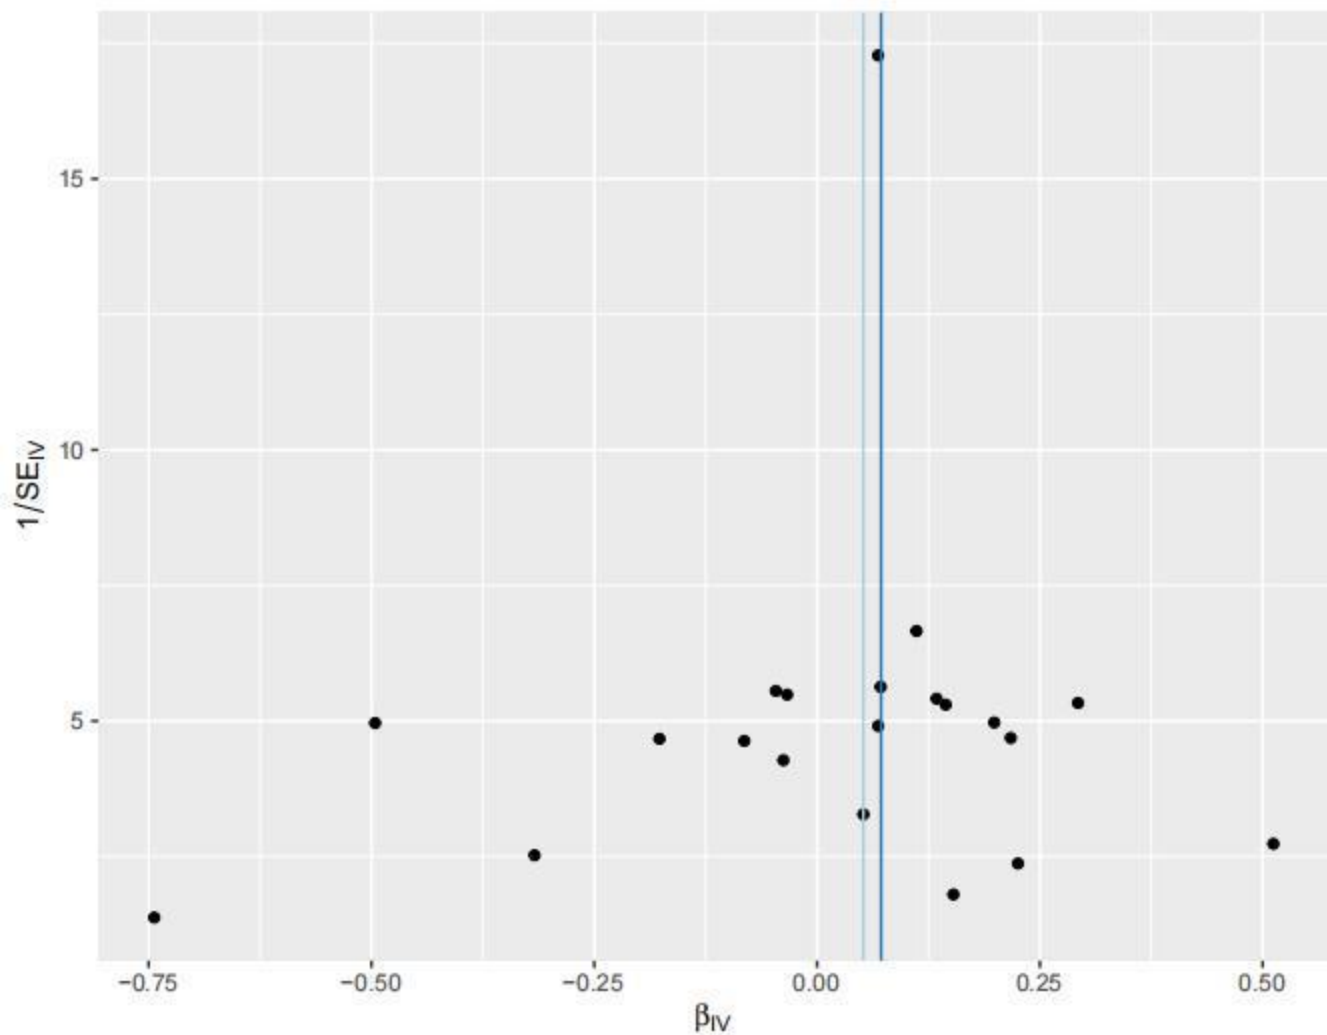

Funnel plot analyse of "FSC-A on NKT " on 'Aplastic anemia'



MR Method

- Inverse variance weighted
- MR Egger

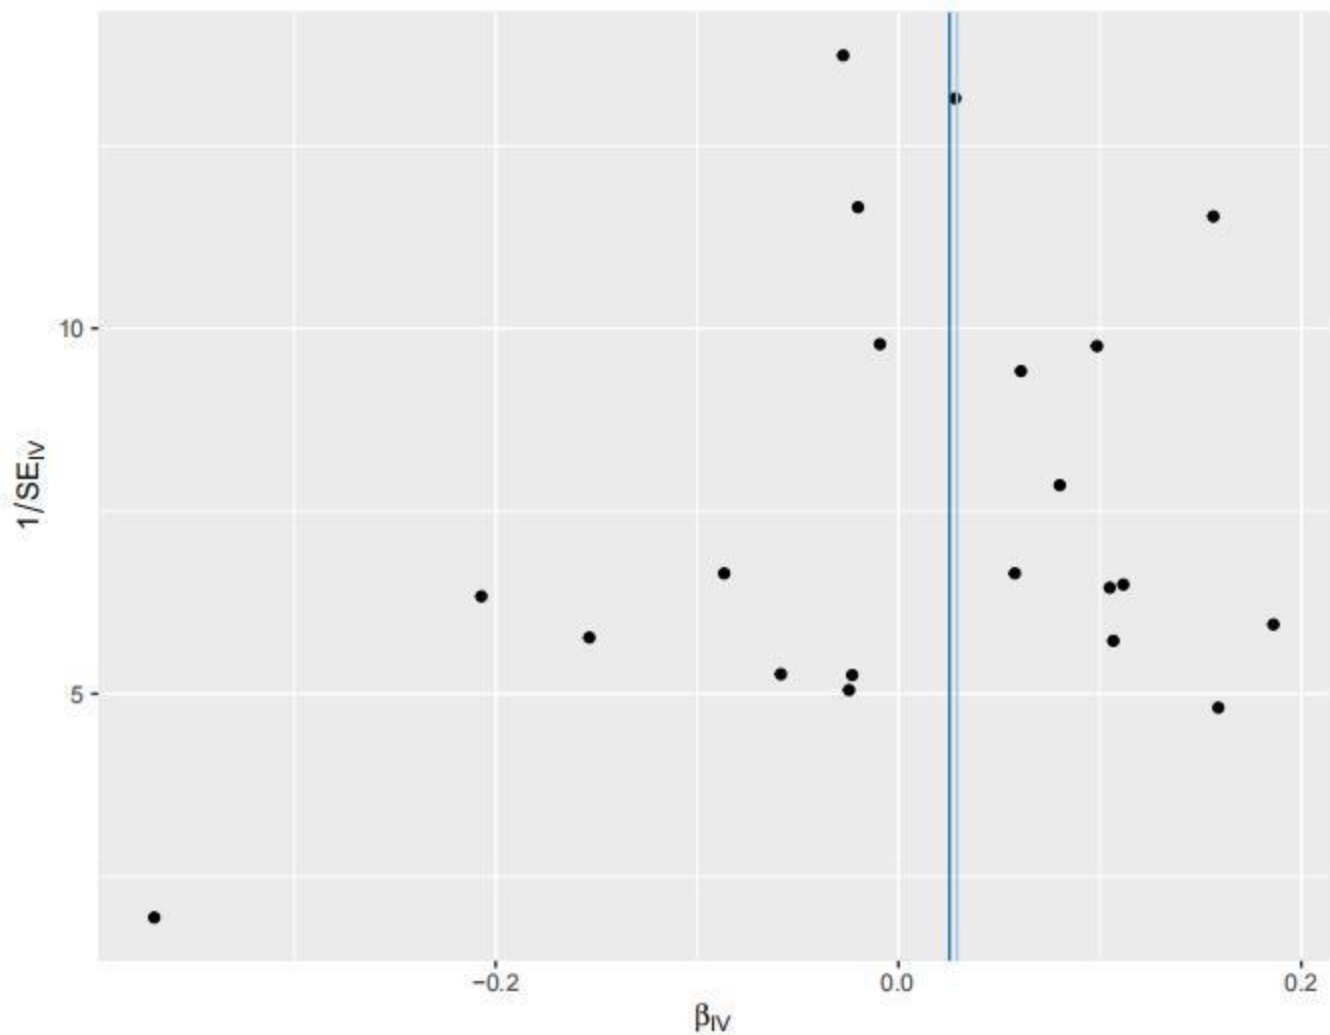

Funnel plot analyse of "Gr MDSC AC" on 'Aplastic anemia'

MR Method

- Inverse variance weighted
- MR Egger

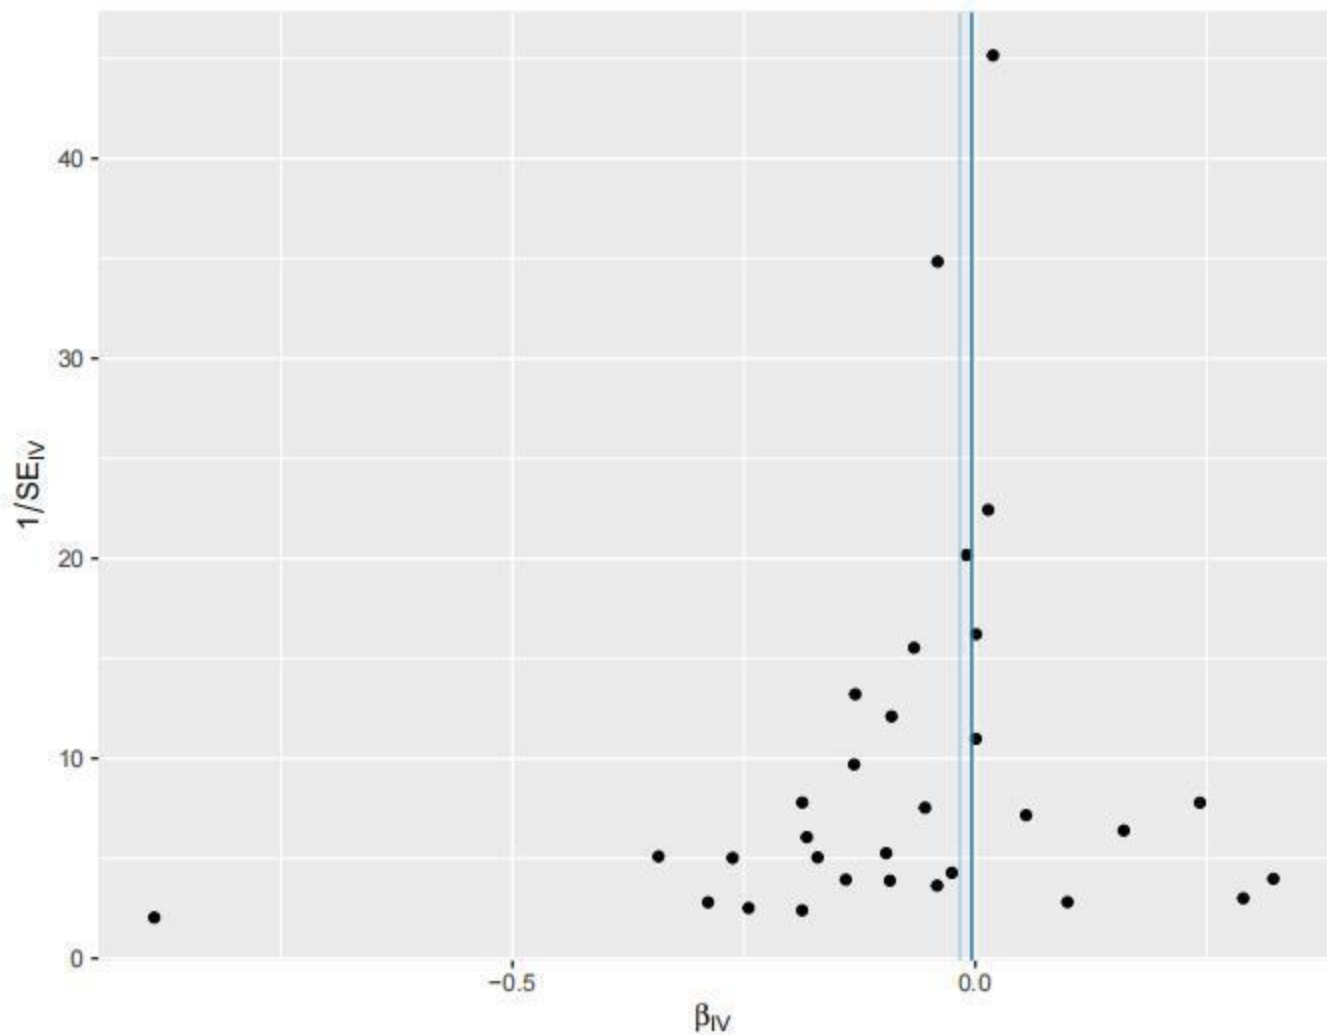

Funnel plot analyse of "Resting Treg % CD4 Treg" on 'Aplastic anemia'

### MR Method

- Inverse variance weighted
- MR Egger

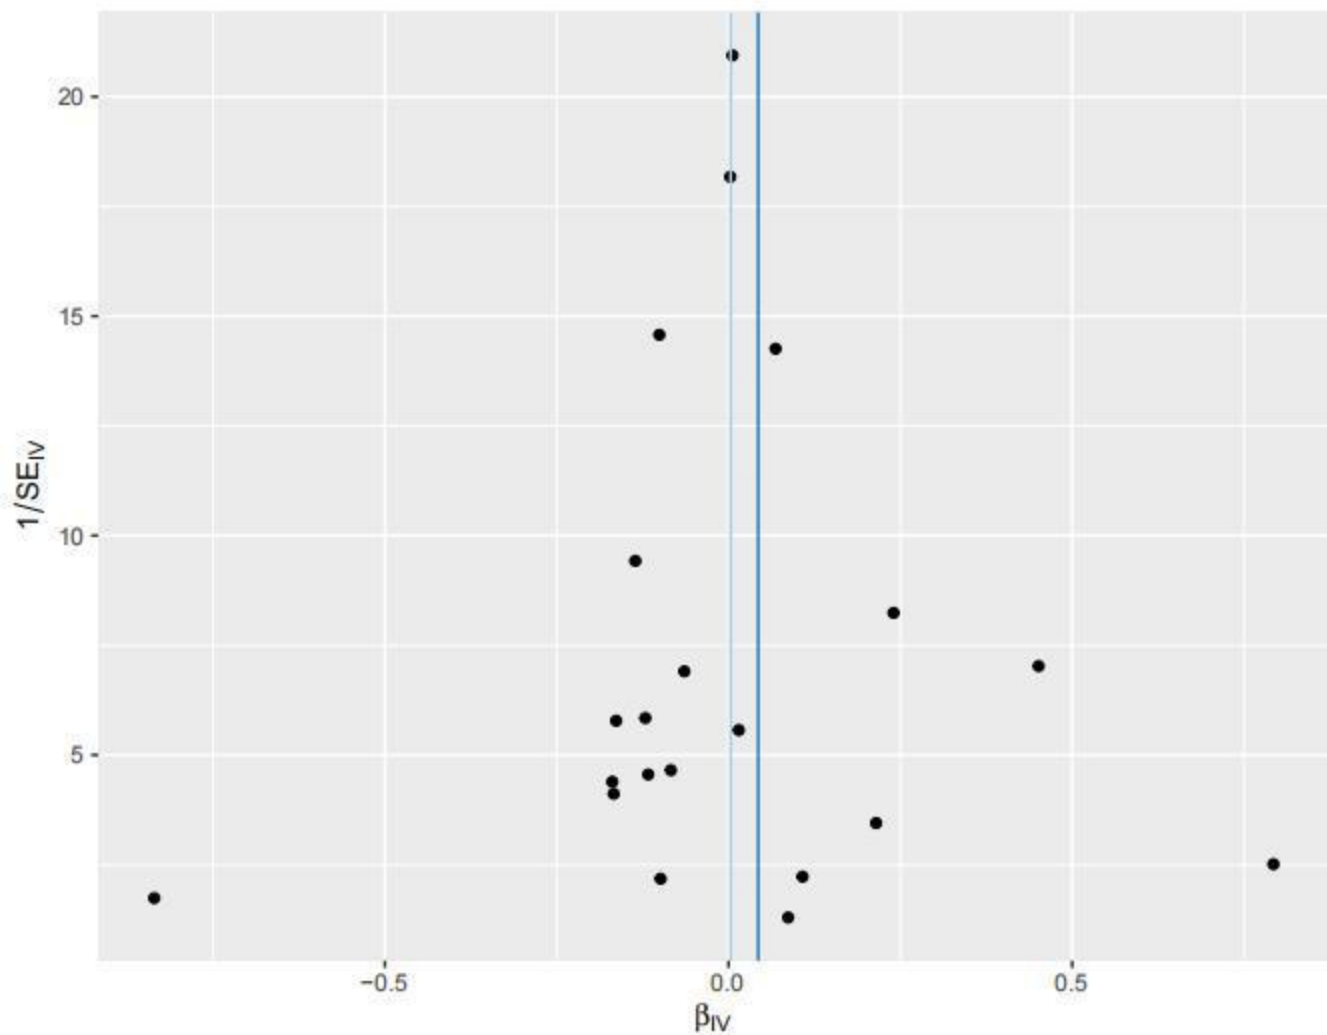

Funnel plot analyse of "CD39+ CD8br %CD8br" on 'Aplastic anemia'

### MR Method

Inverse variance weighted

MR Egger

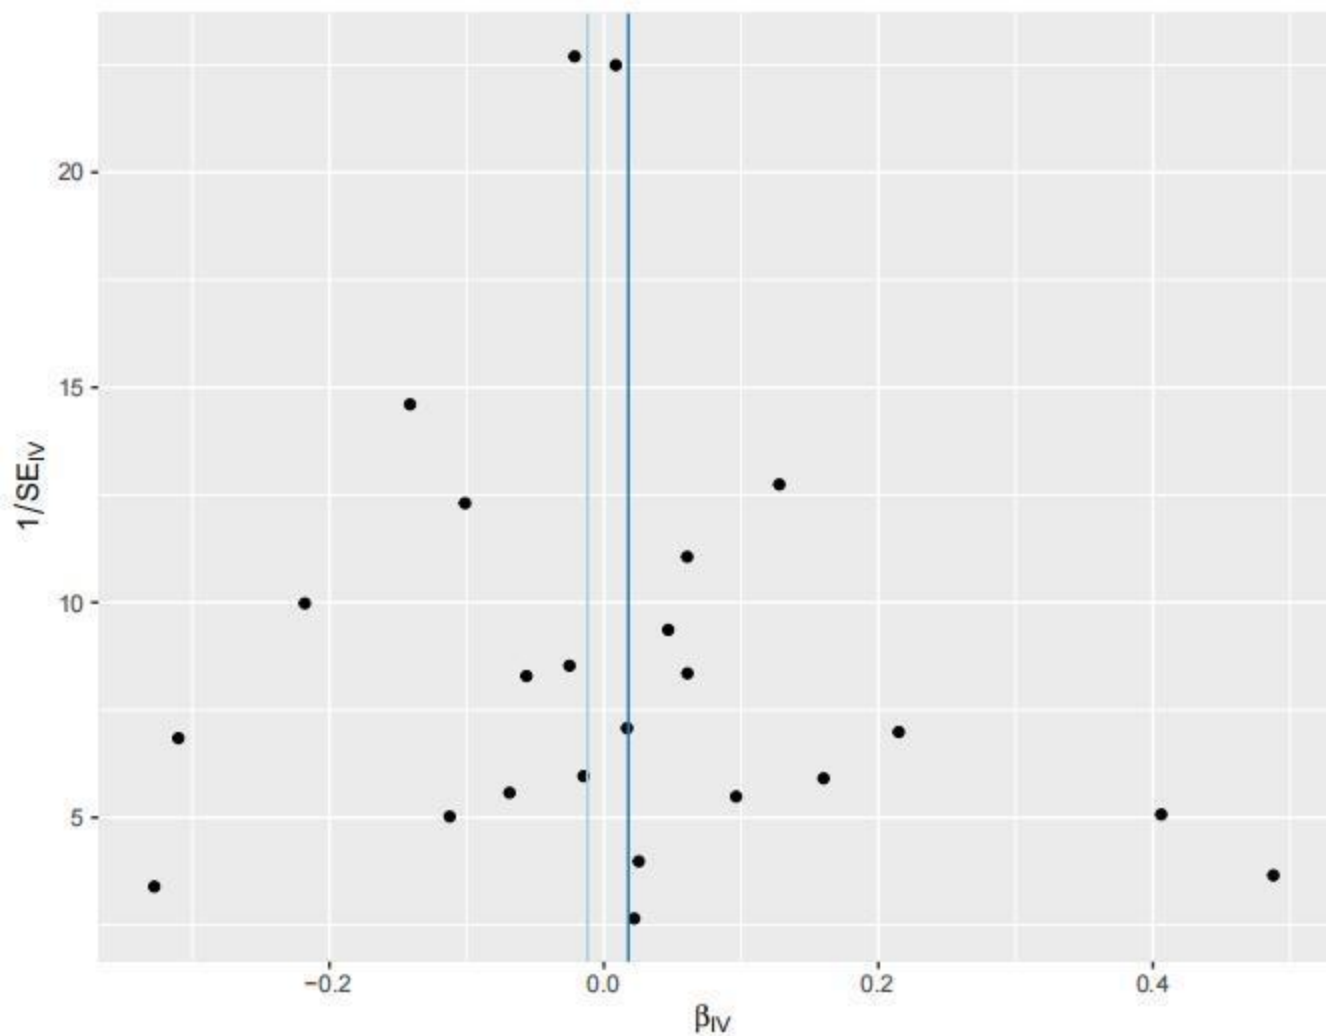

Funnel plot analyse of "CD27 on IgD+ CD38- unsw mem" on 'Aplastic anemia'

### MR Method

Inverse variance weighted

MR Egger

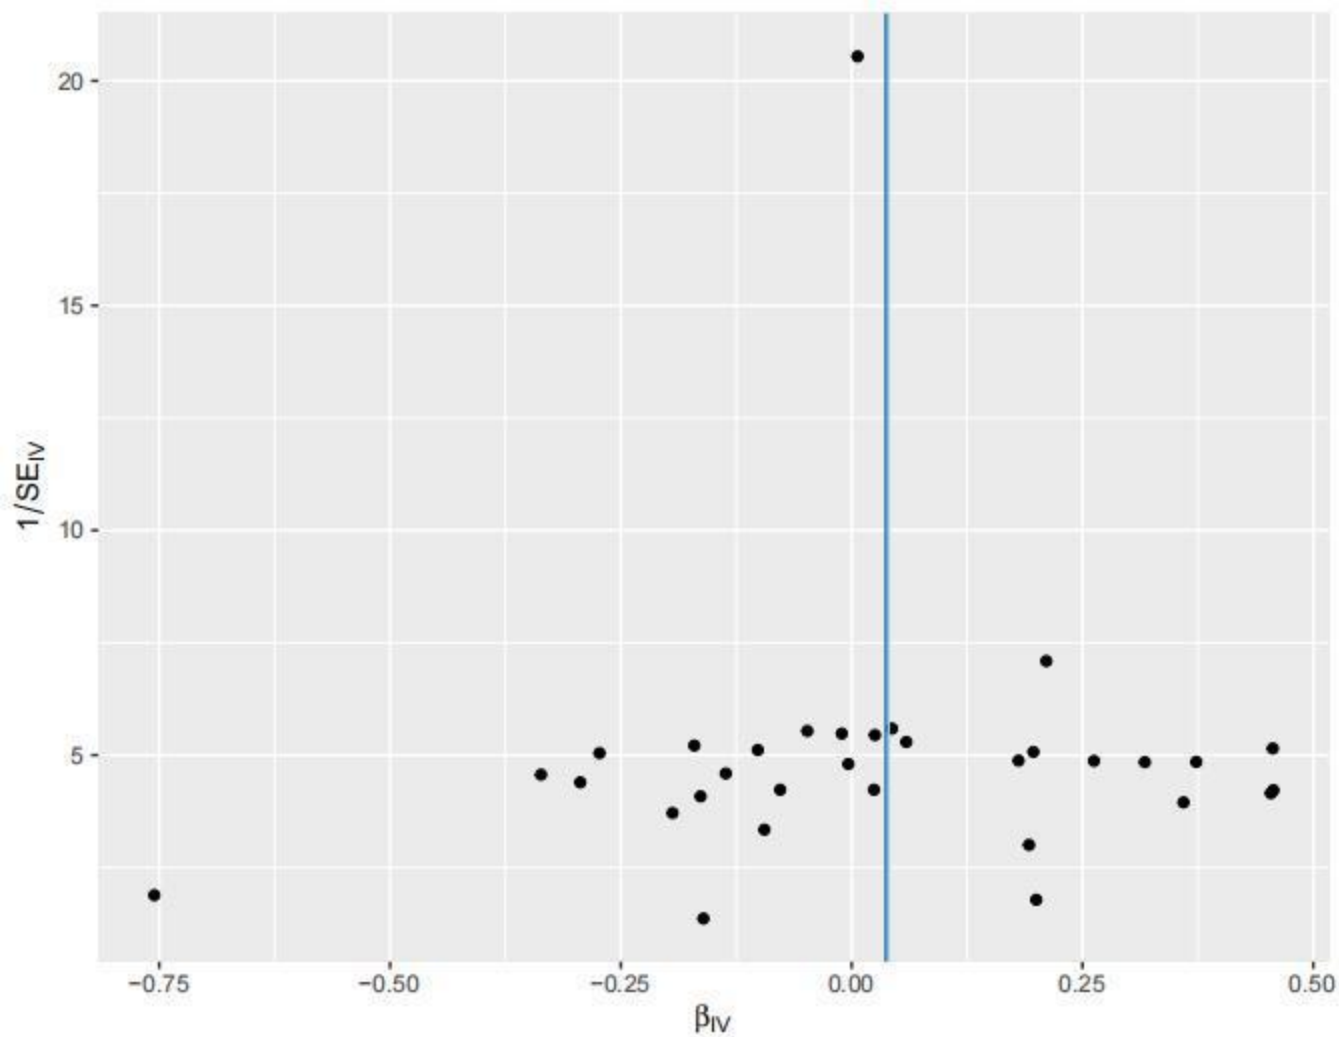

Funnel plot analyse of "Transitional AC" on 'Aplastic anemia'

### MR Method

- Inverse variance weighted
- MR Egger

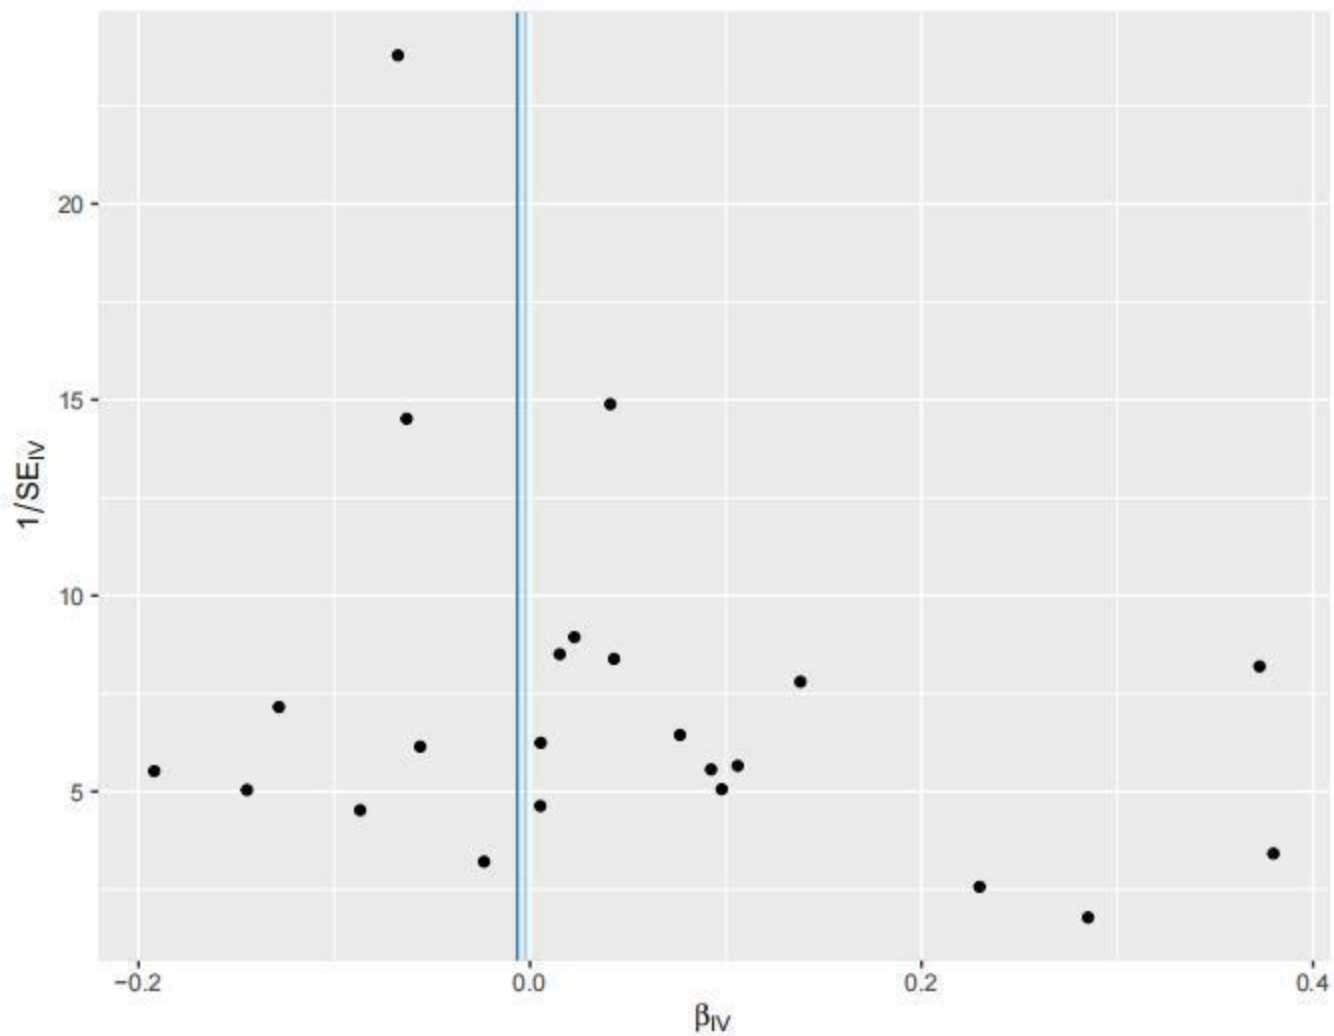

Funnel plot analyse of "SSC-A on monocyte" on 'Aplastic anemia'

MR Method

- Inverse variance weighted
- MR Egger

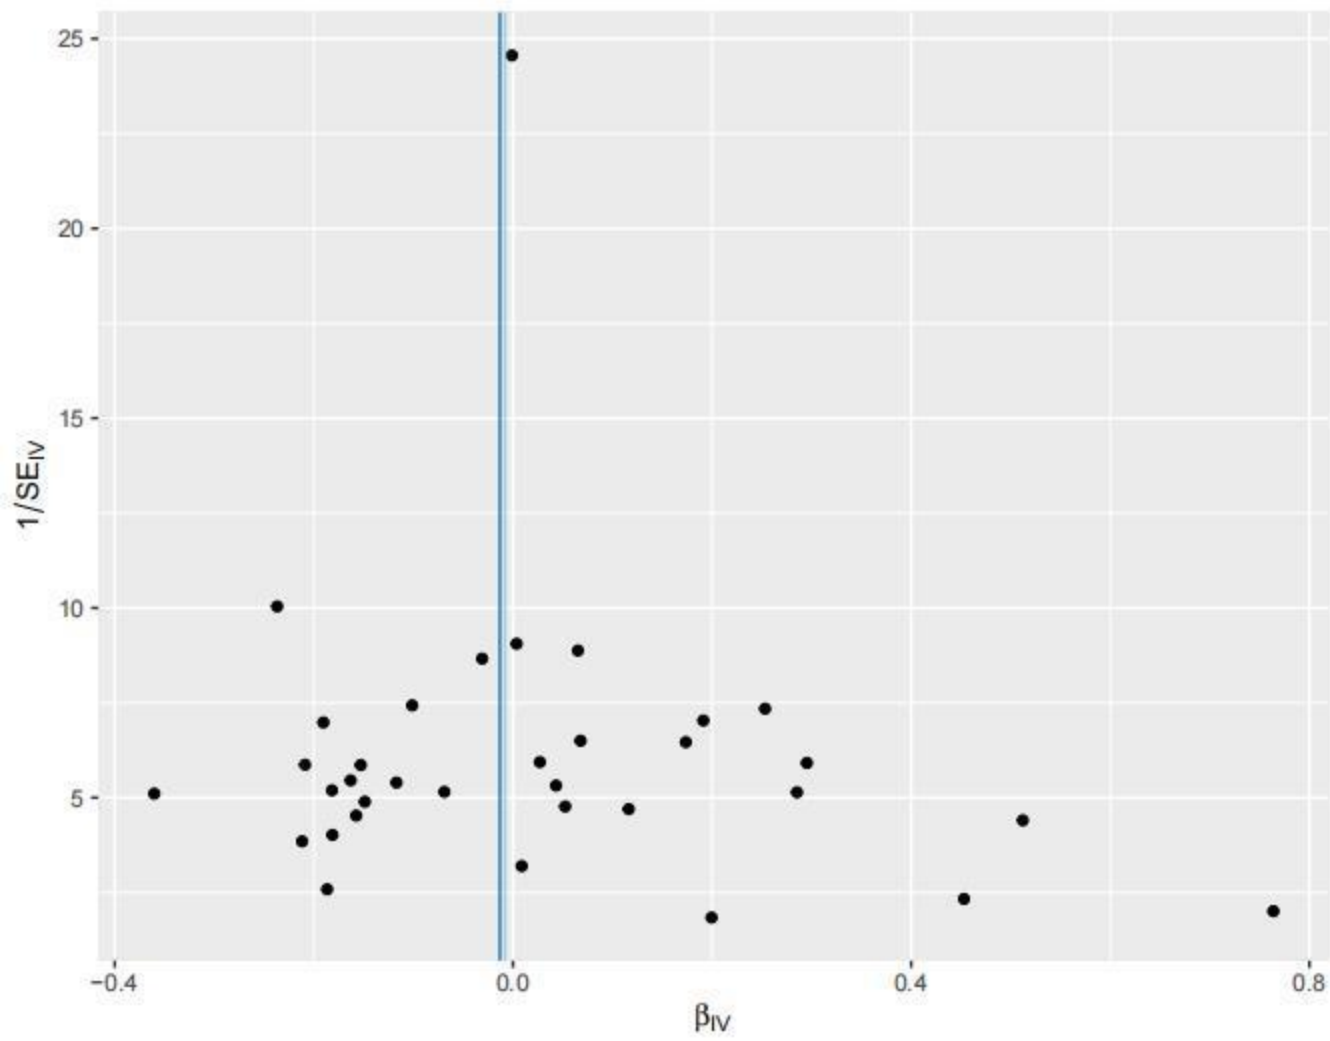

Funnel plot analyse of "NKT %T cell" on 'Aplastic anemia'

MR Method

- Inverse variance weighted
- MR Egger

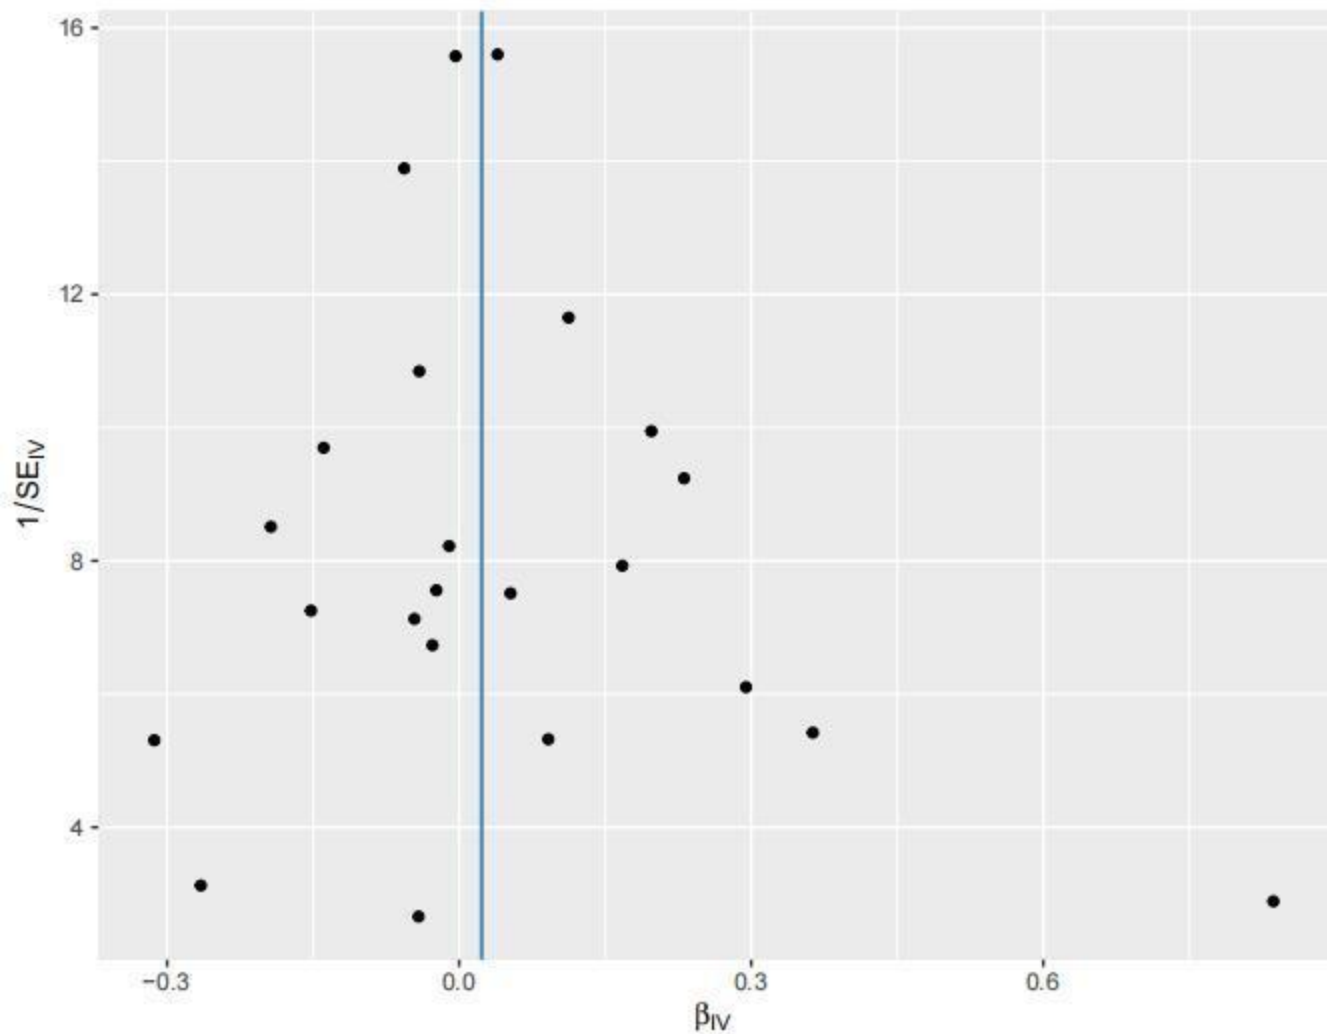

Funnel plot analyse of "CD11b on CD33dim HLA DR- " on 'Aplastic anemia'



MR Method

Inverse variance weighted

MR Egger

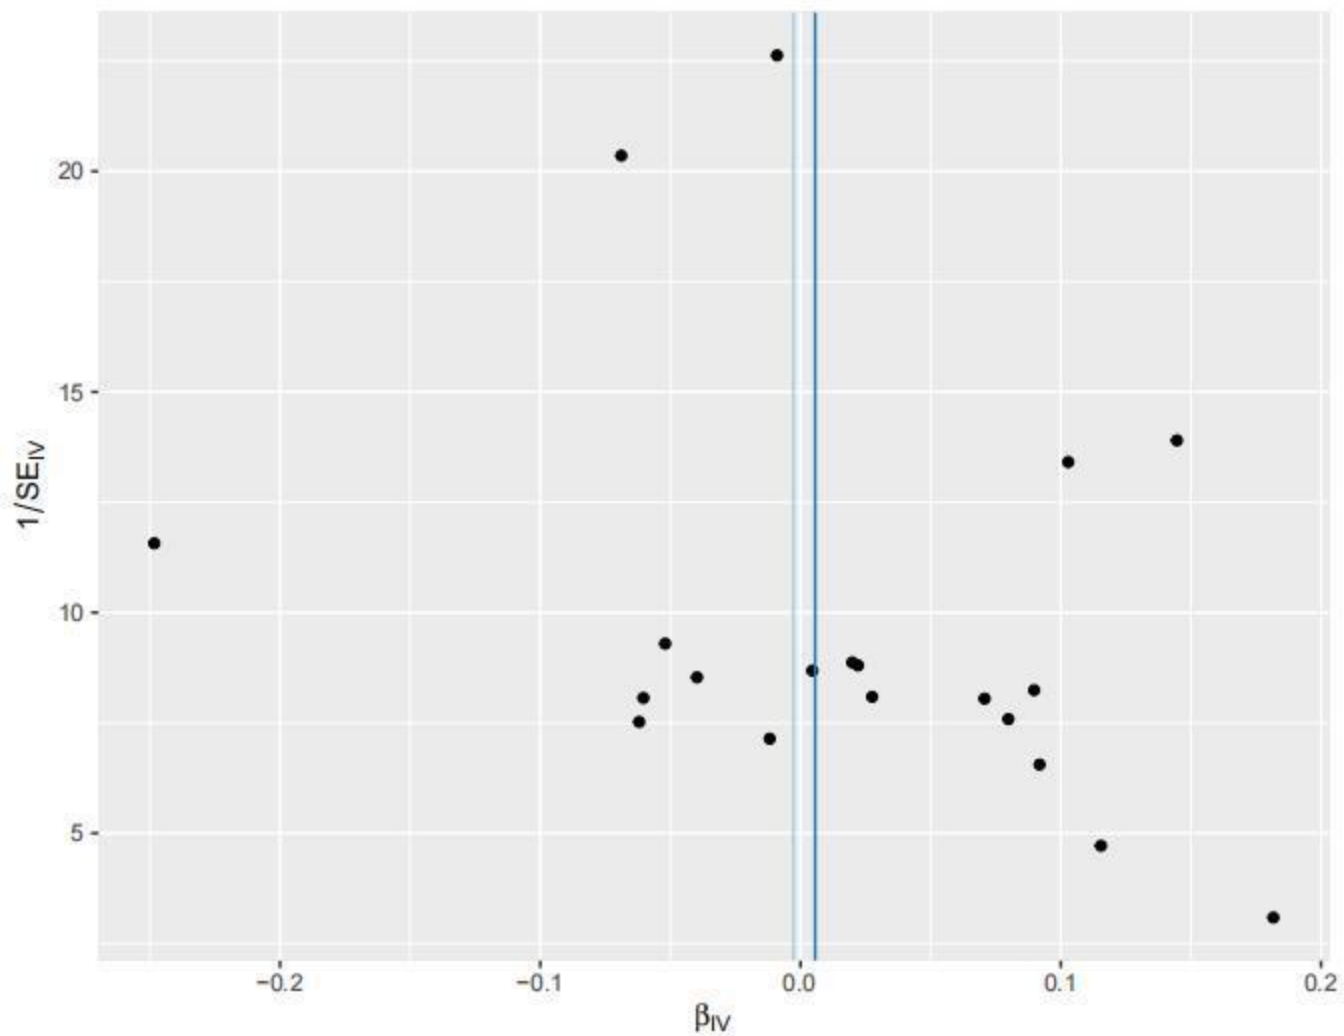

Funnel plot analyse of "HVEM on CD45RA- CD4+" on 'Aplastic anemia'

### MR Method

Inverse variance weighted

MR Egger

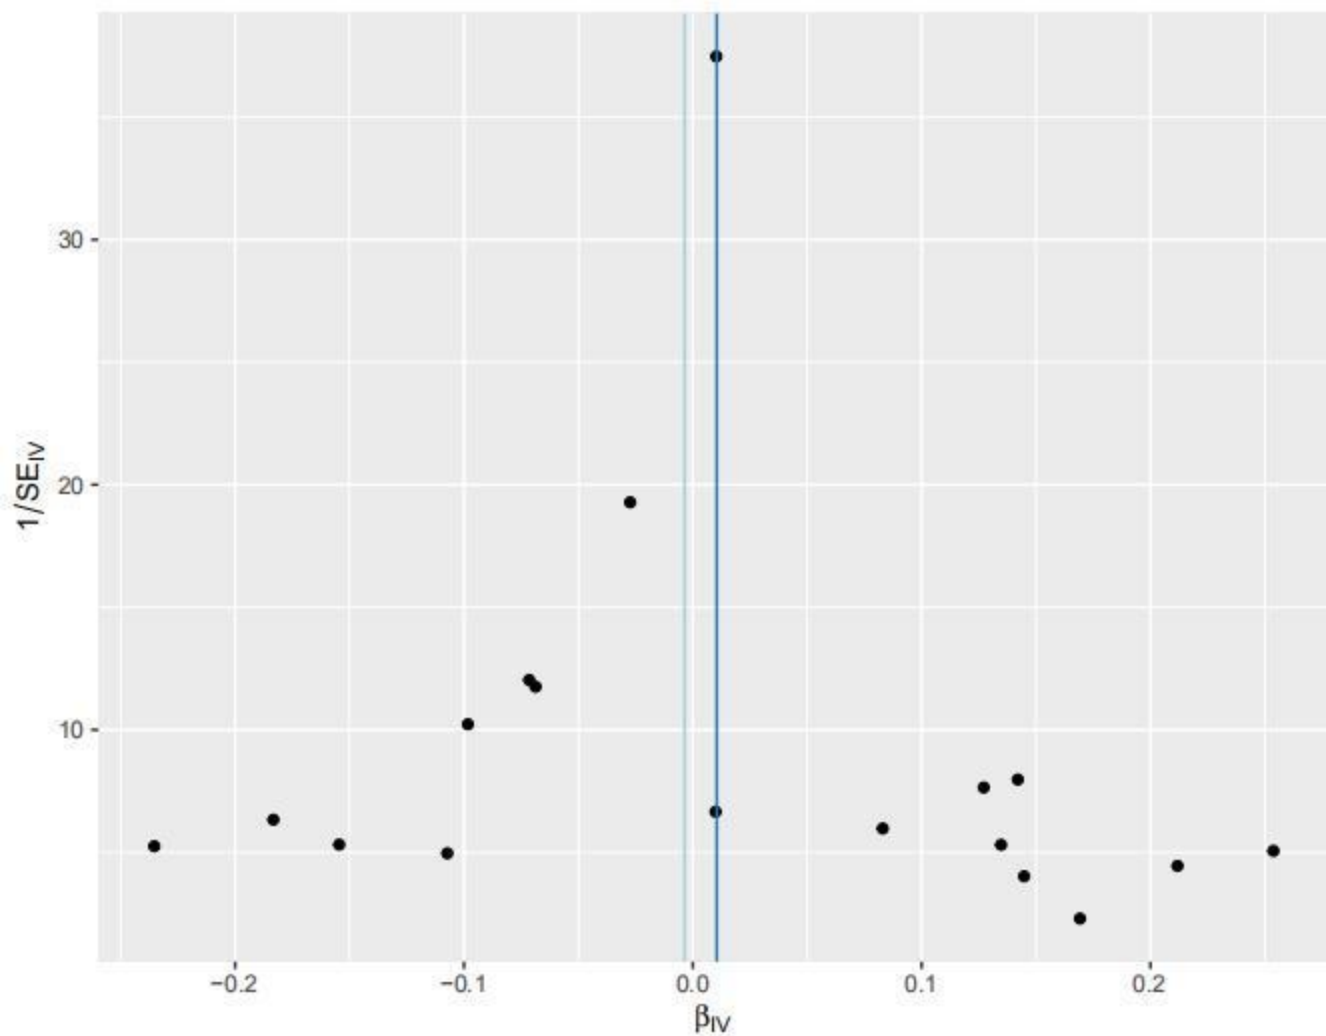

Funnel plot analyse of "BAFF-R on memory B cell" on 'Aplastic anemia'

MR Method

Inverse variance weighted

MR Egger

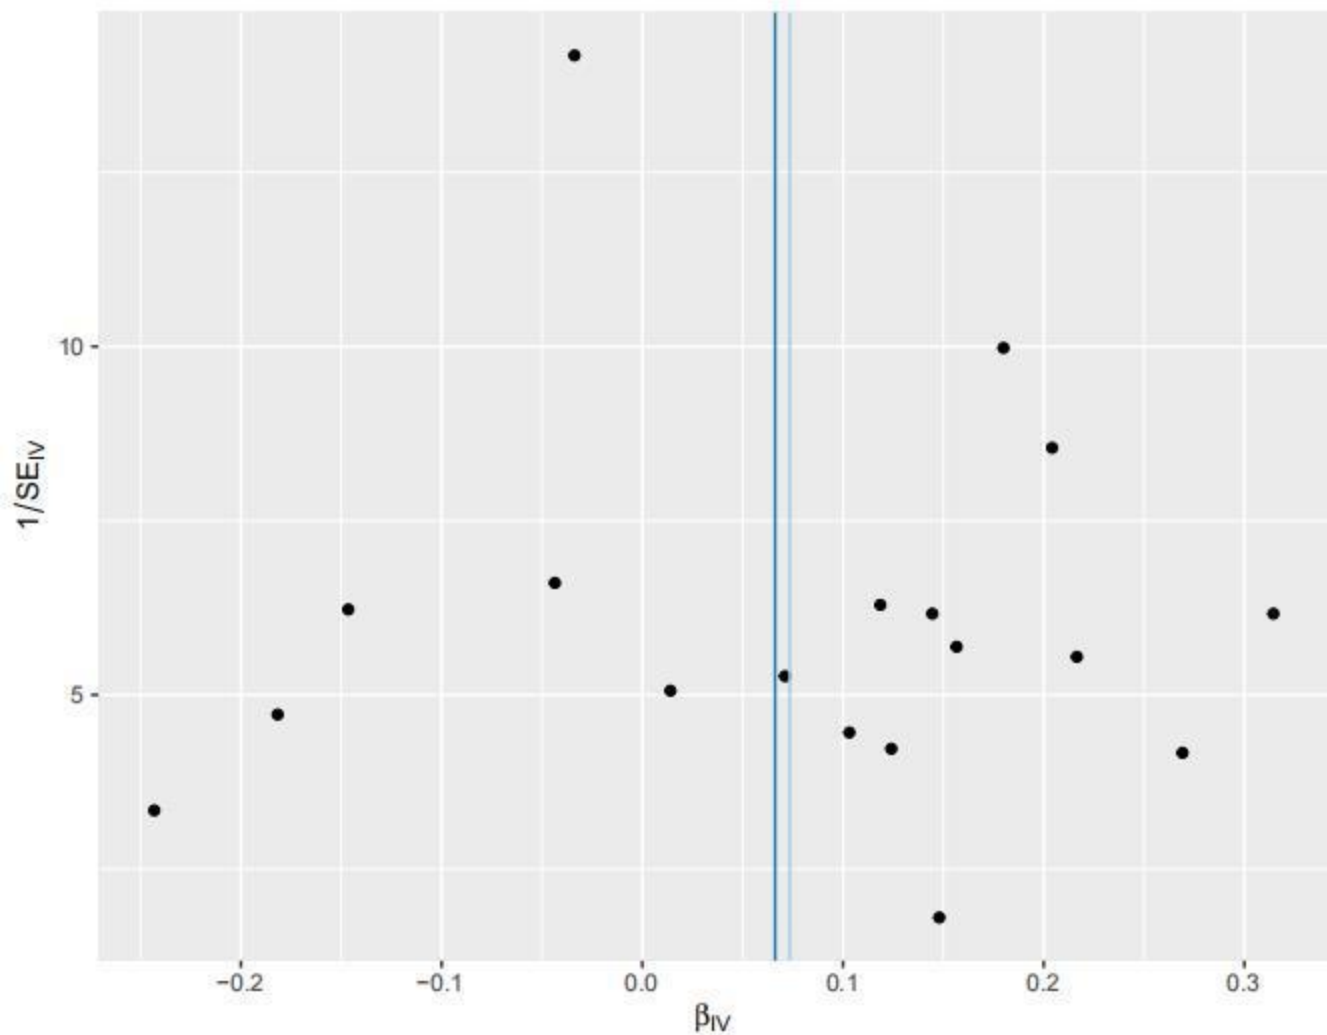

Funnel plot analyse of "CD25++ CD8br %T cell" on 'Aplastic anemia'

MR Method

- Inverse variance weighted
- MR Egger

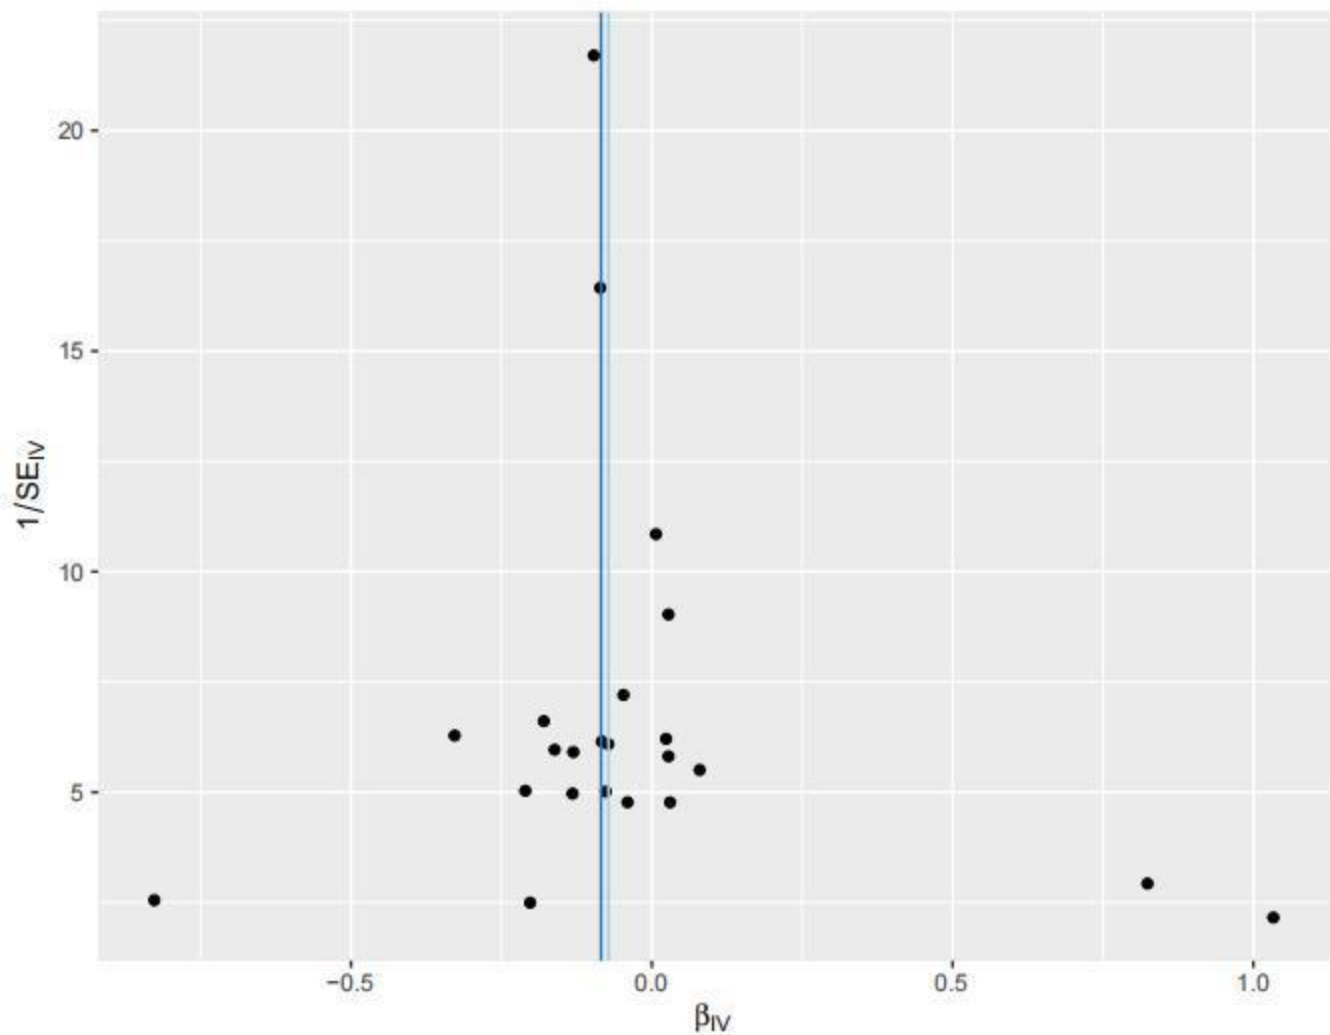

Funnel plot analyse of "CD86 on CD62L+ myeloid DC" on 'Aplastic anemia'

### MR Method

- Inverse variance weighted
- MR Egger

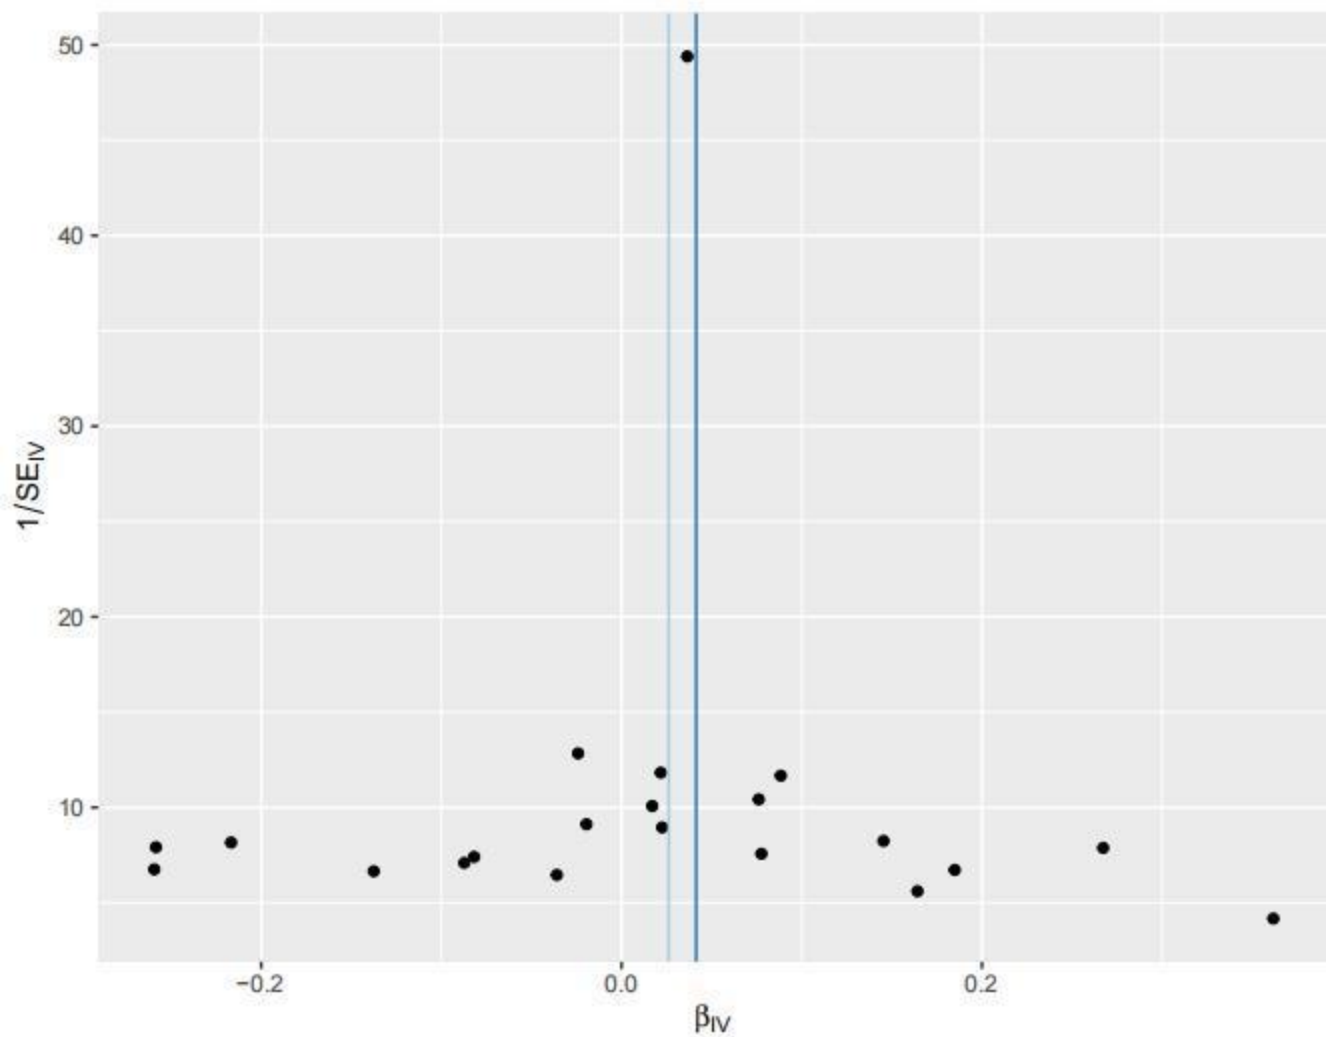

Funnel plot analyse of "CD33 on Mo MDSC " on 'Aplastic anemia'

### MR Method

- Inverse variance weighted
- MR Egger

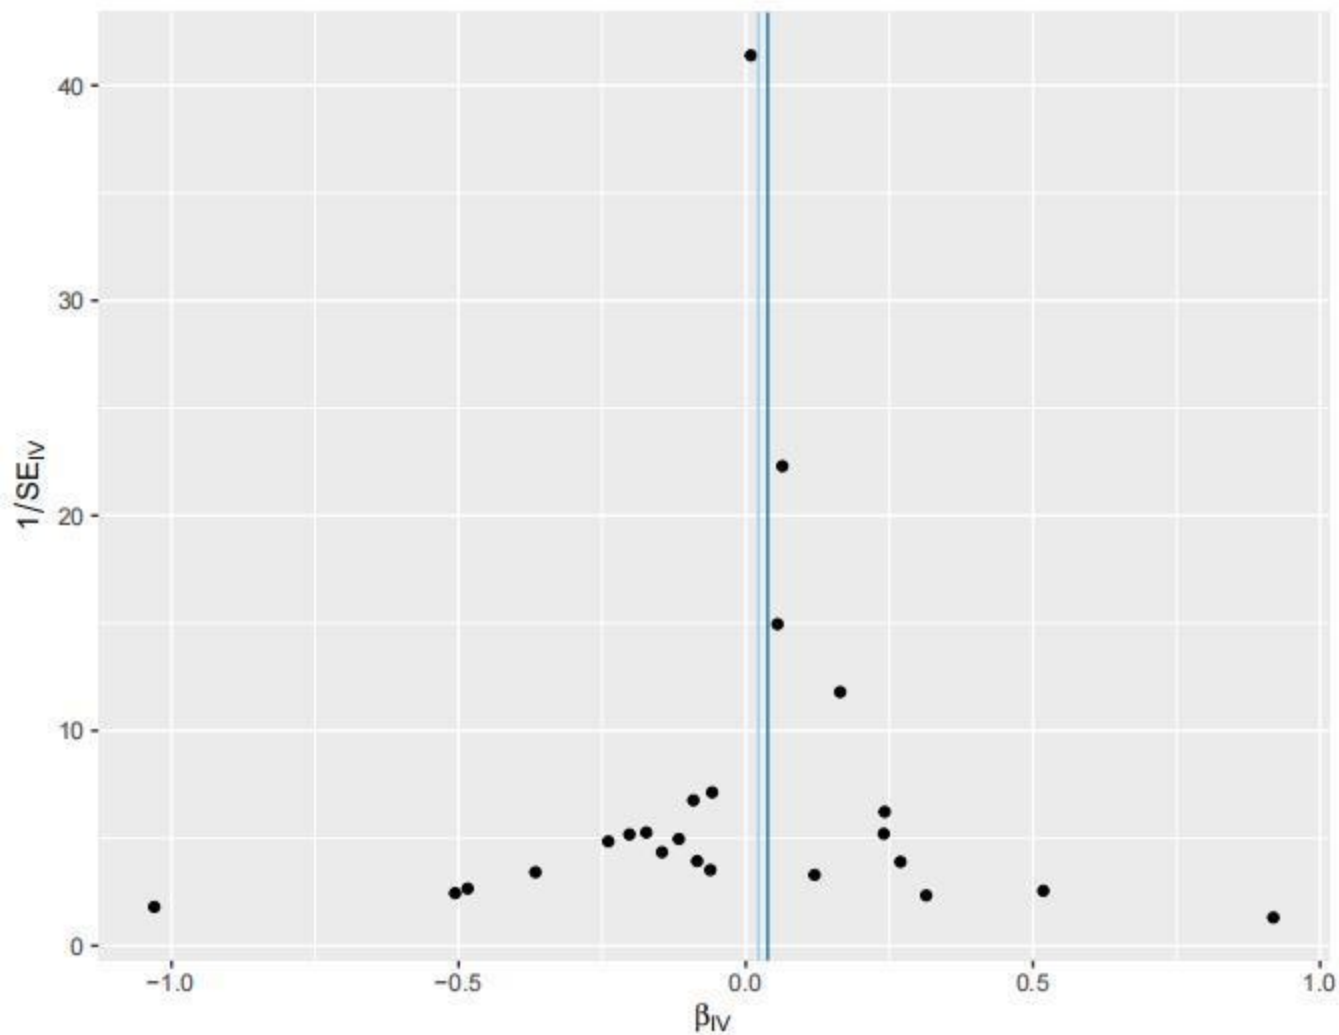

Funnel plot analyse of "CD25hi CD45RA- CD4 not Treg %CD4+" on 'Aplastic anemia'

MR Method

Inverse variance weighted

MR Egger

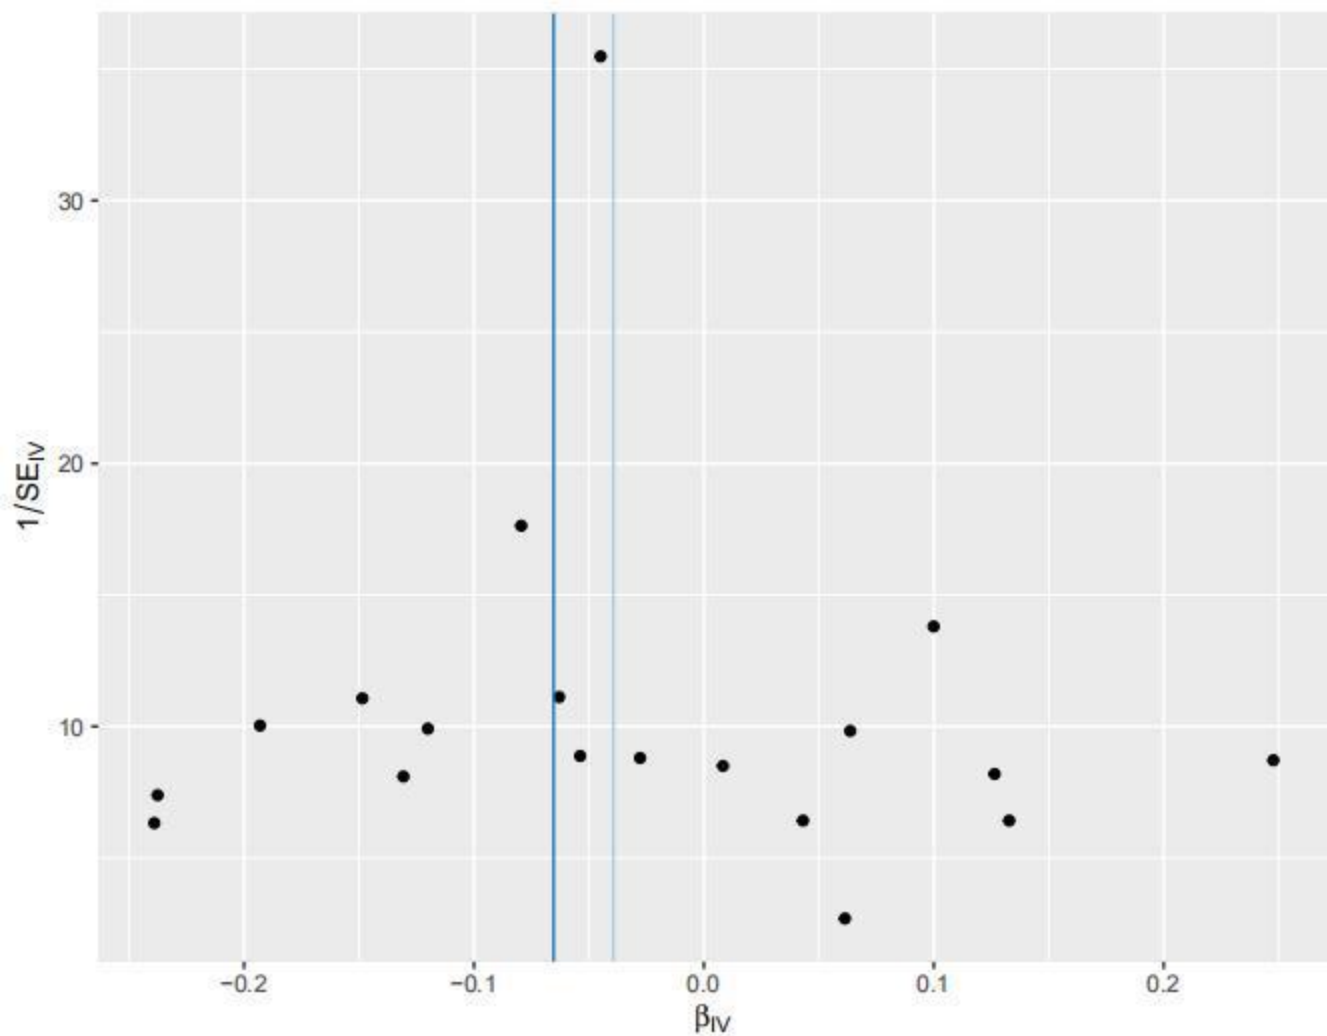

Funnel plot analyse of "HVEM on CM CD8br" on 'Aplastic anemia'

MR Method

Inverse variance weighted

MR Egger

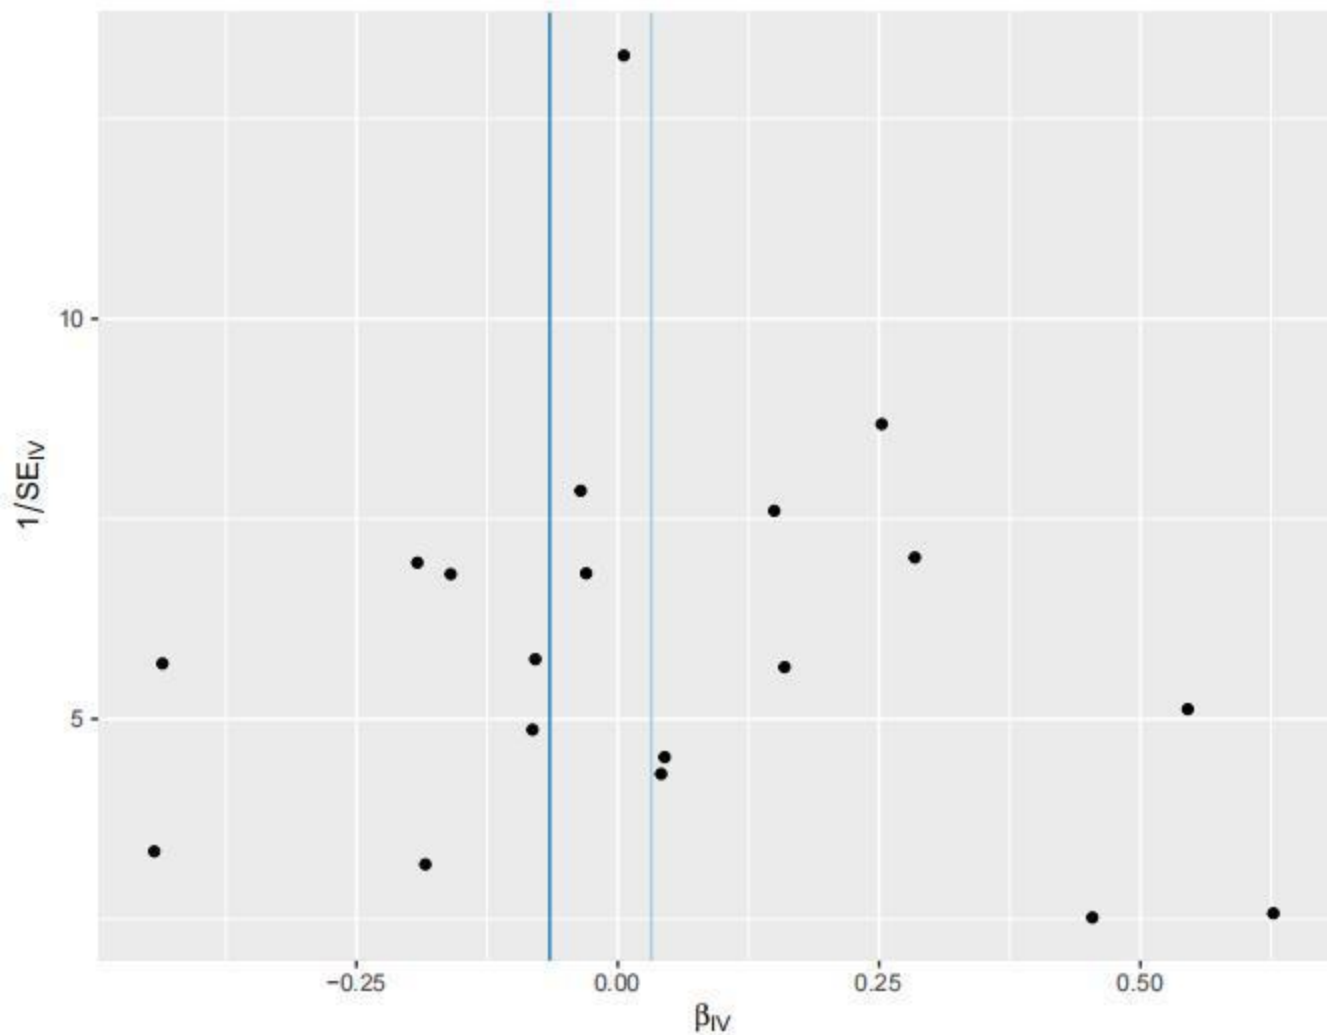

Funnel plot analysis of "CD8dim %T cell" on 'Aplastic anemia'



MR Method

- Inverse variance weighted
- MR Egger

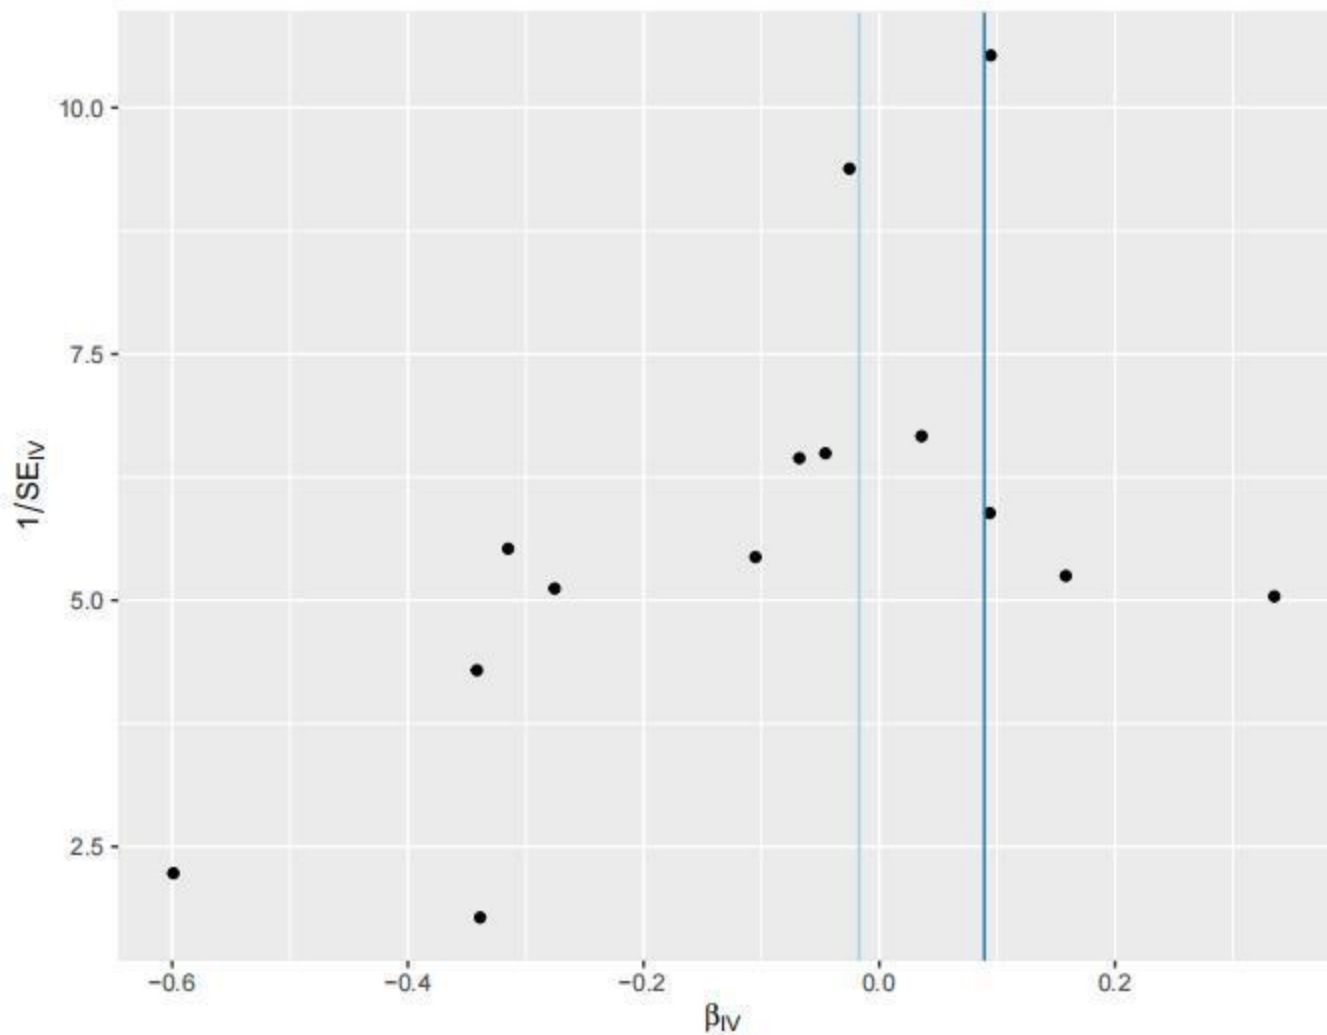

Funnel plot analyse of "CD25 on IgD+ CD38br" on 'Aplastic anemia'

### MR Method

- Inverse variance weighted
- MR Egger

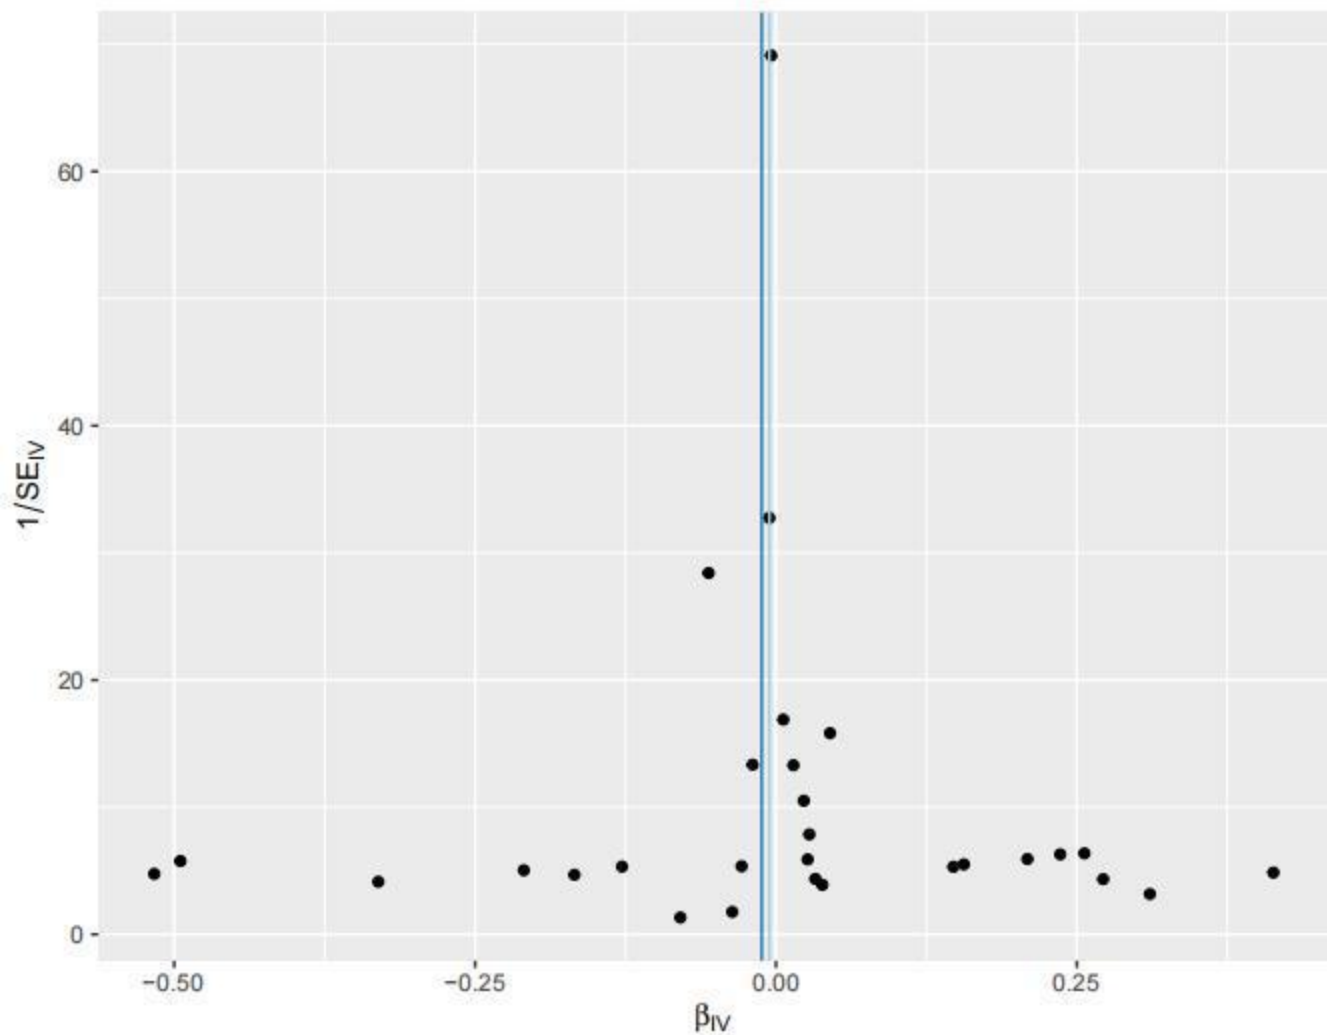

Funnel plot analyse of "CD28+ CD45RA- CD8br AC" on 'Aplastic anemia'

### MR Method

- Inverse variance weighted
- MR Egger

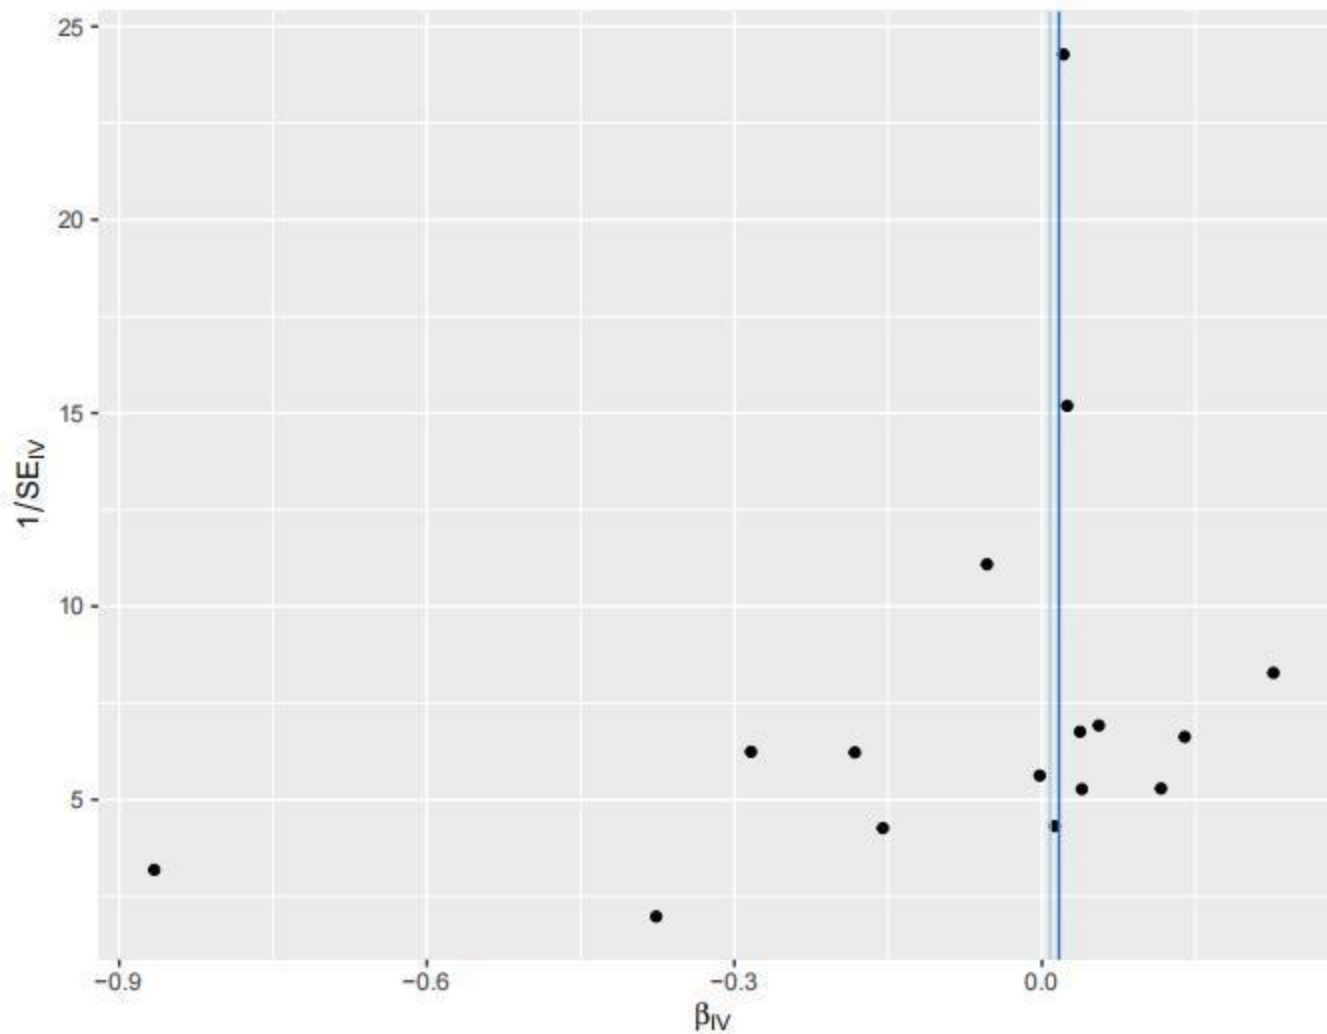

Funnel plot analyse of "CD45 on granulocyte" on 'Aplastic anemia'

### MR Method

- Inverse variance weighted
- MR Egger

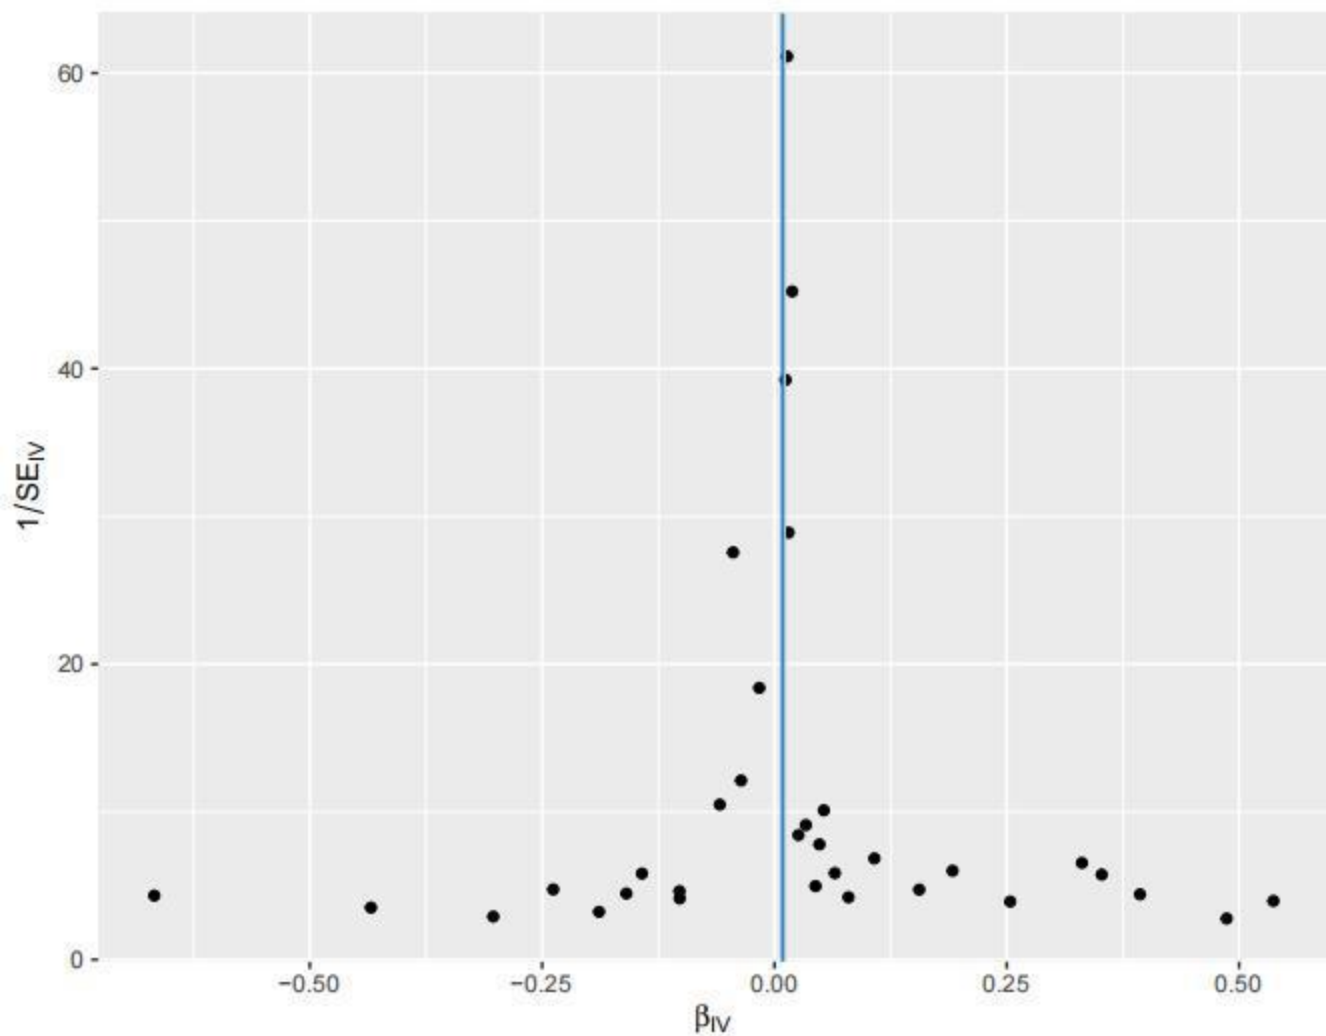

Funnel plot analyse of "CD45RA+ CD8br %T cell" on 'Aplastic anemia'

MR Method

Inverse variance weighted

MR Egger

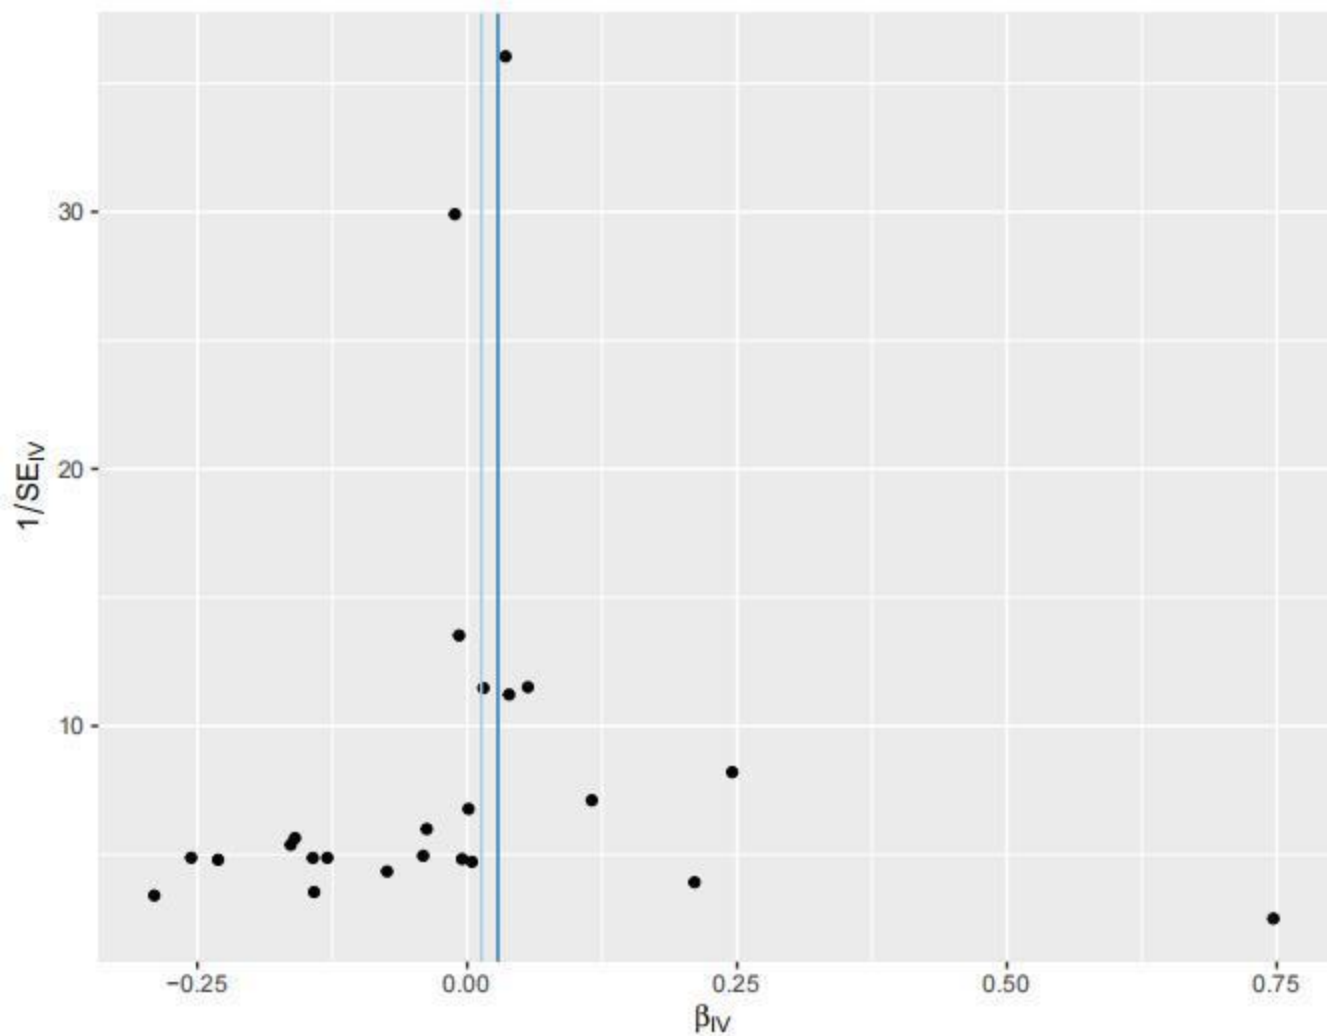

Funnel plot analyse of "HLA DR+ CD4+ AC" on 'Aplastic anemia'

### MR Method

- Inverse variance weighted
- MR Egger

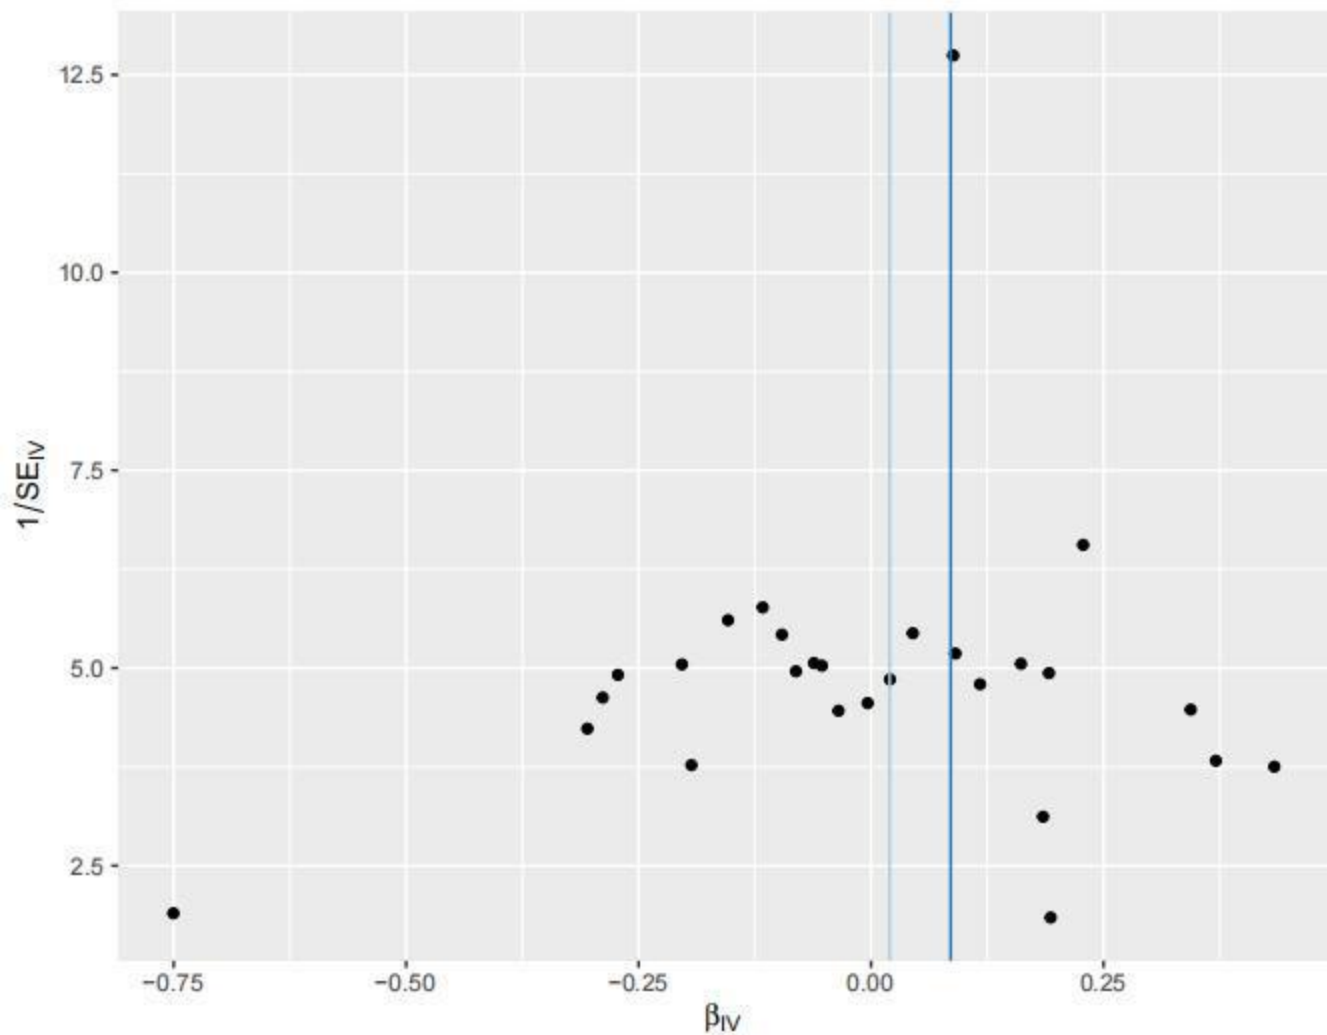

Funnel plot analyse of "Transitional %lymphocyte" on 'Aplastic anemia'

### MR Method

- Inverse variance weighted
- MR Egger

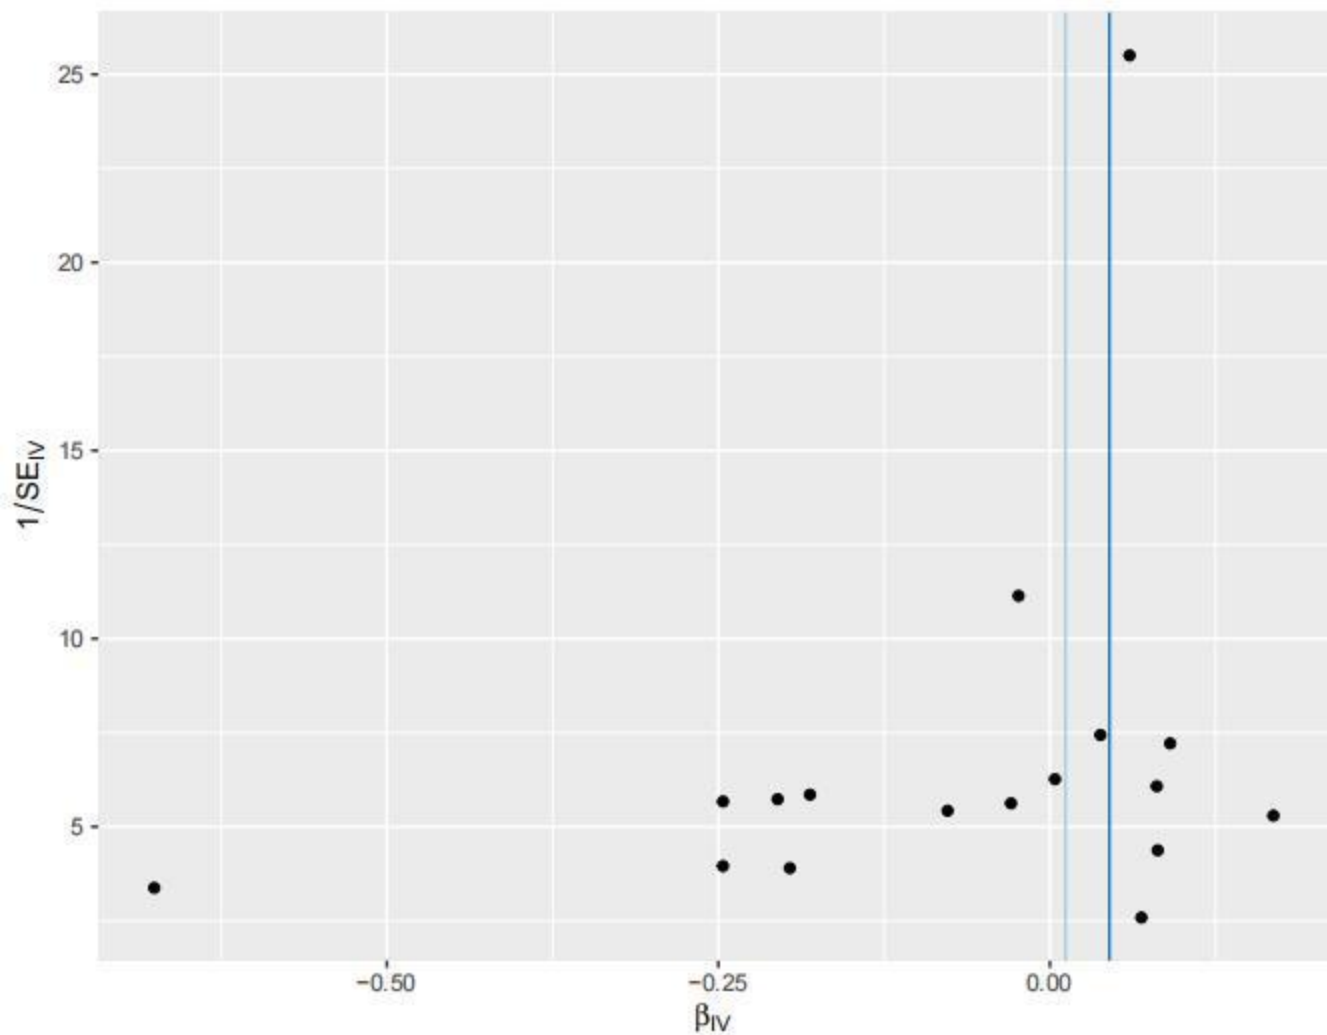

Funnel plot analysis of "CCR2 on granulocyte" on 'Aplastic anemia'

MR Method

- Inverse variance weighted
- MR Egger

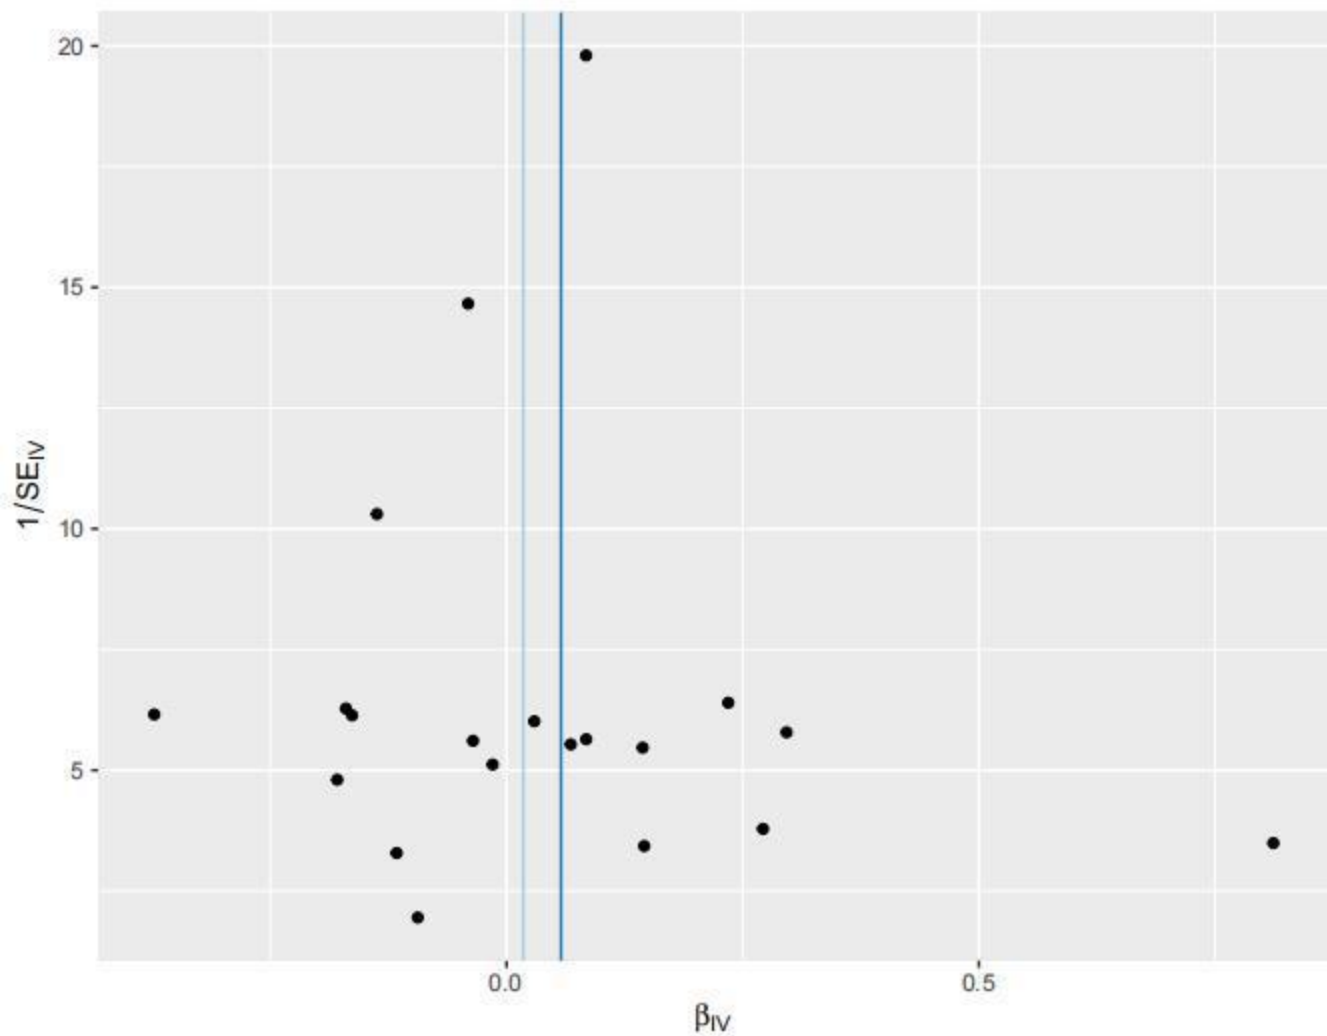

Funnel plot analyse of "CD127 on CD28- CD8br " on 'Aplastic anemia'



MR Method

- Inverse variance weighted
- MR Egger

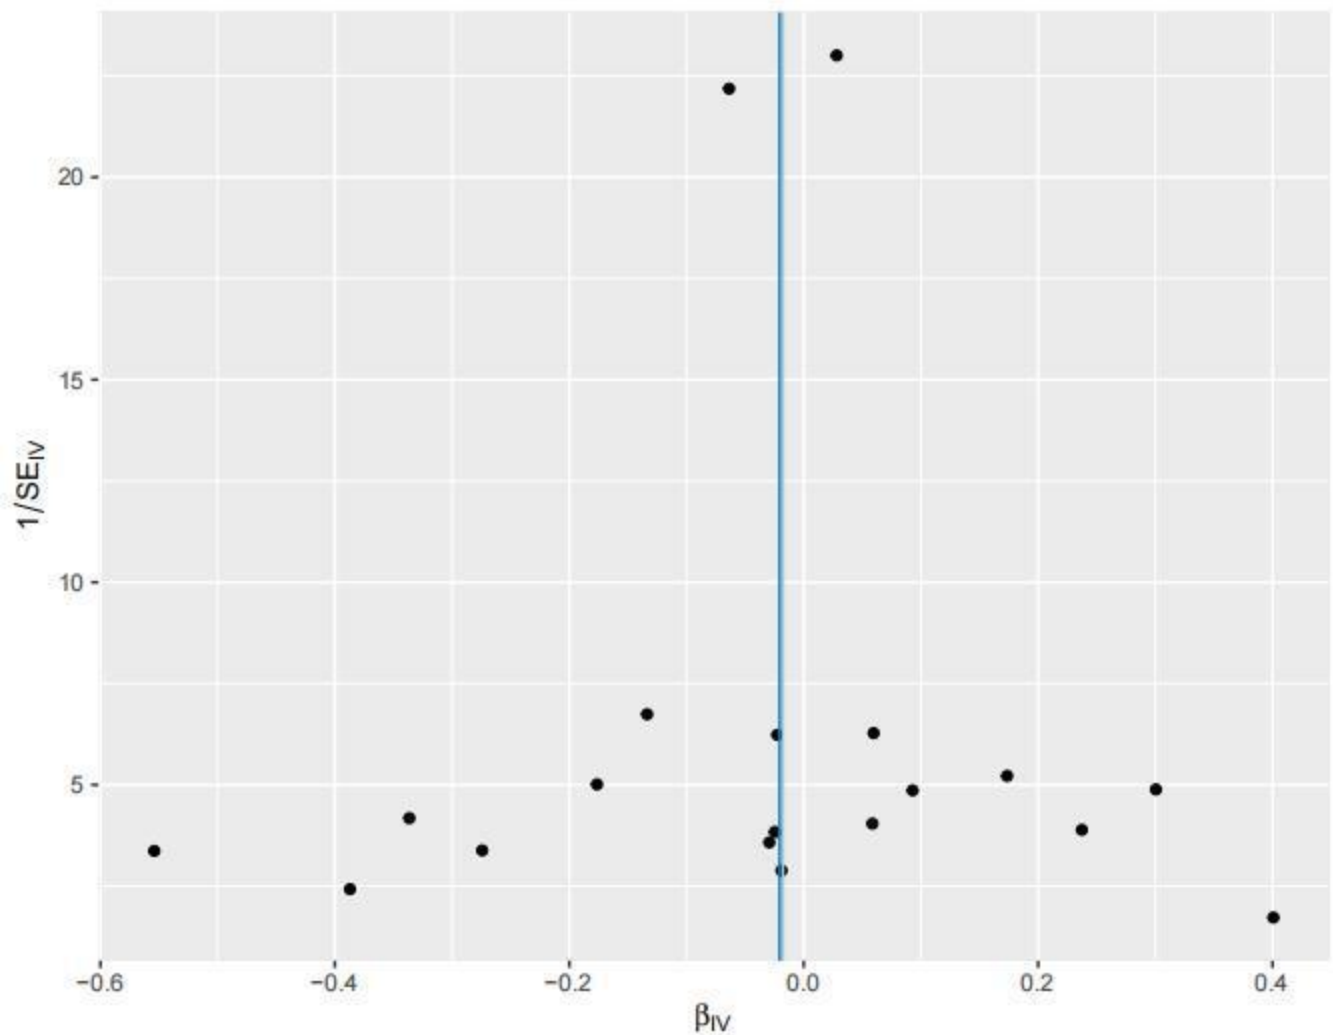

Funnel plot analyse of "SSC-A on CD8br" on 'Aplastic anemia'

### MR Method

- Inverse variance weighted
- MR Egger

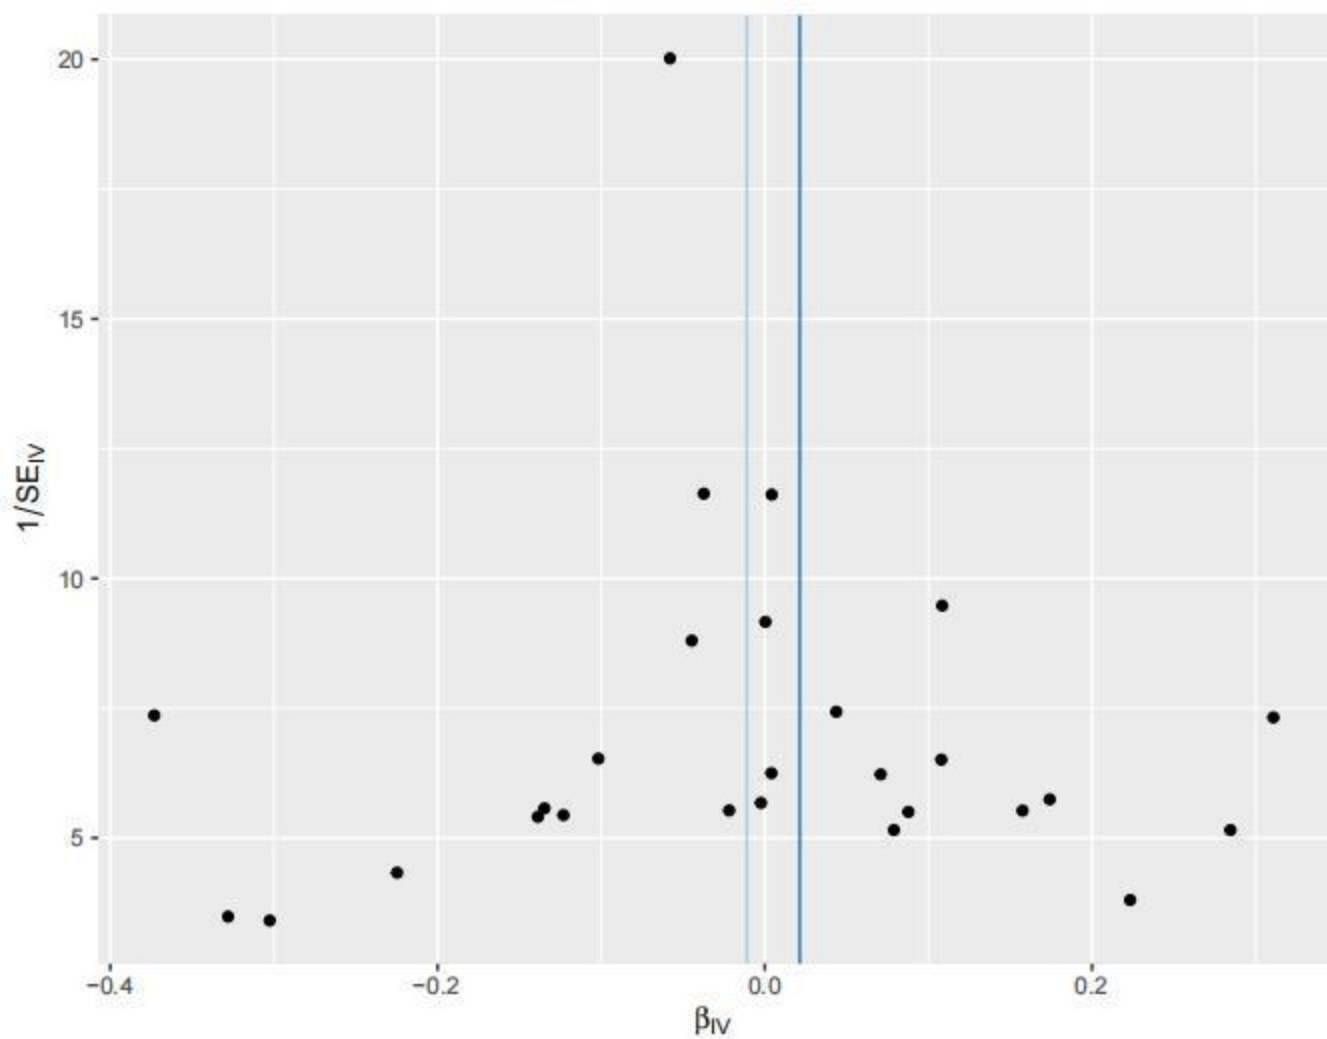

Funnel plot analyse of "CX3CR1 on CD14+ CD16- monocyte" on 'Aplastic anemia'

MR Method

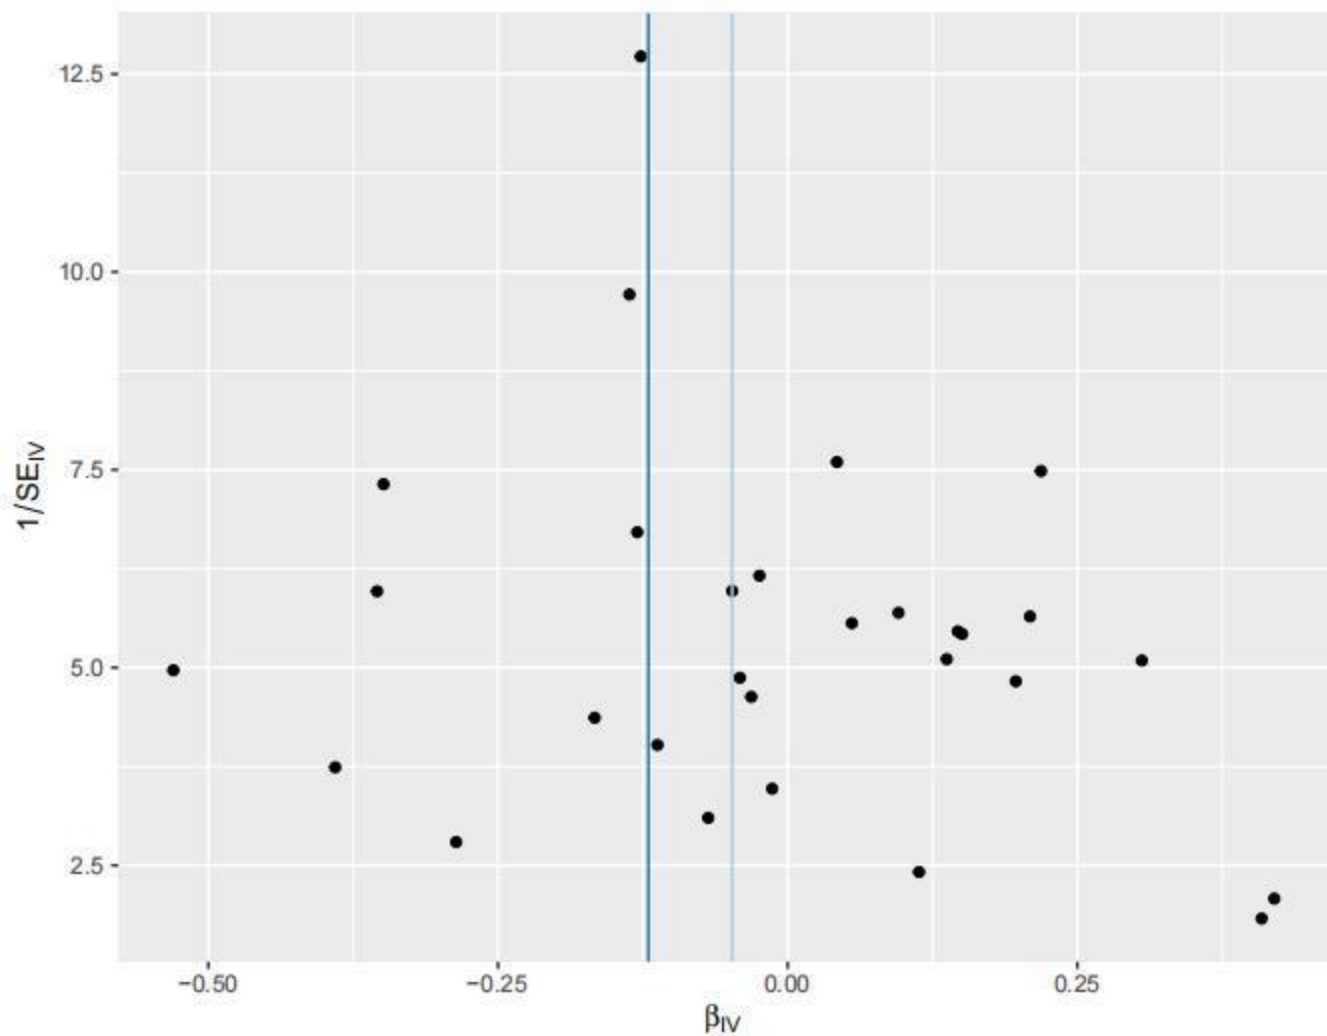

Funnel plot analyse of "CD86+ plasmacytoid DC %DC" on 'Aplastic anemia'

MR Method

- Inverse variance weighted
- MR Egger

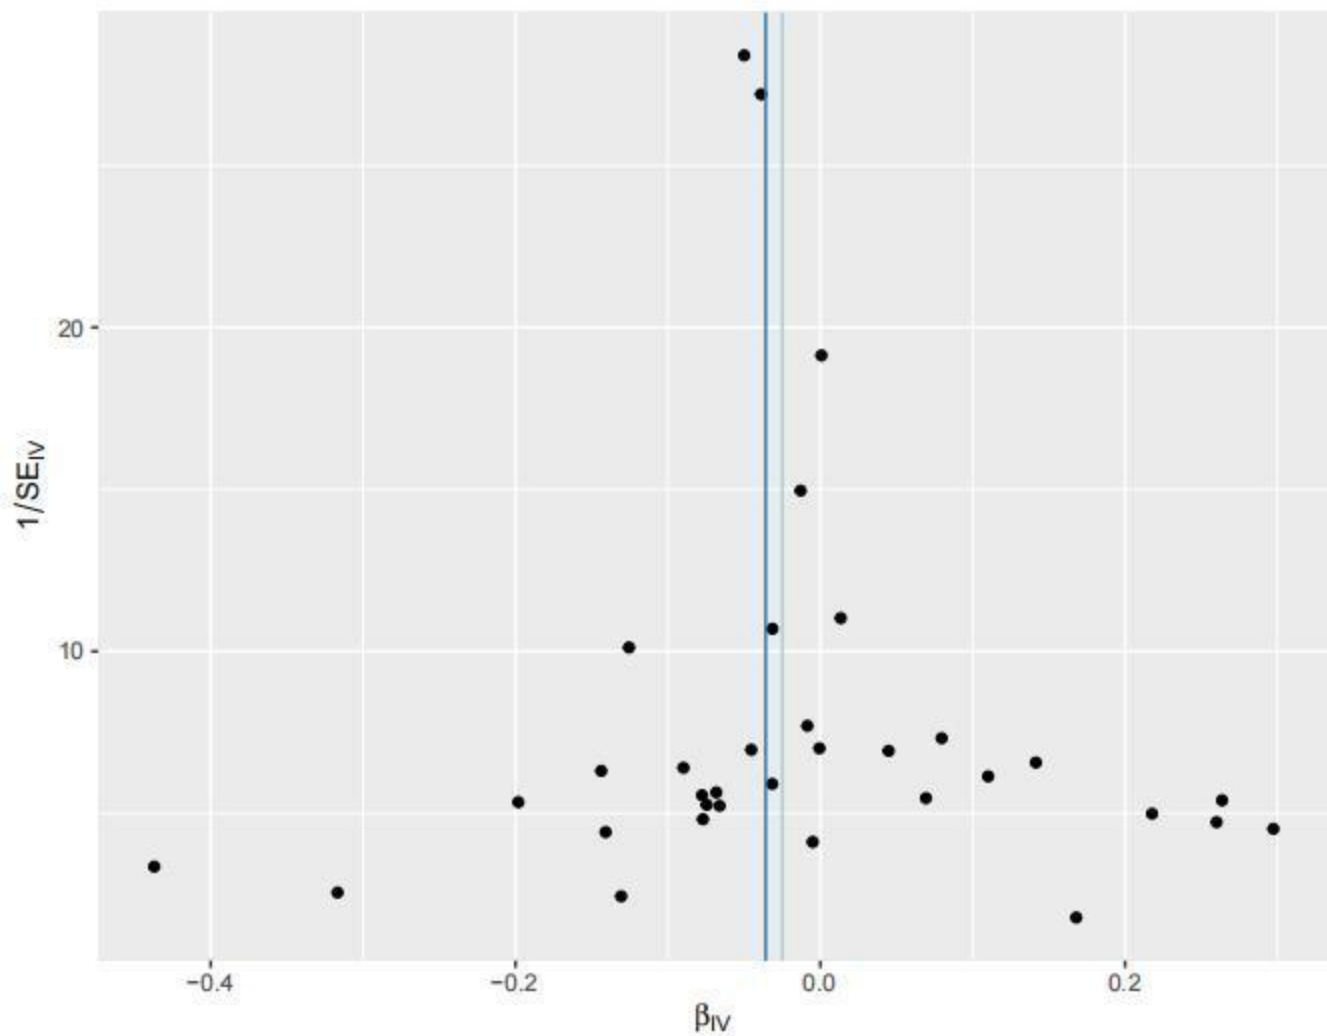

Funnel plot analyse of "CD45RA on naive CD4+ " on 'Aplastic anemia'

### MR Method

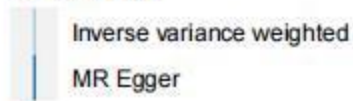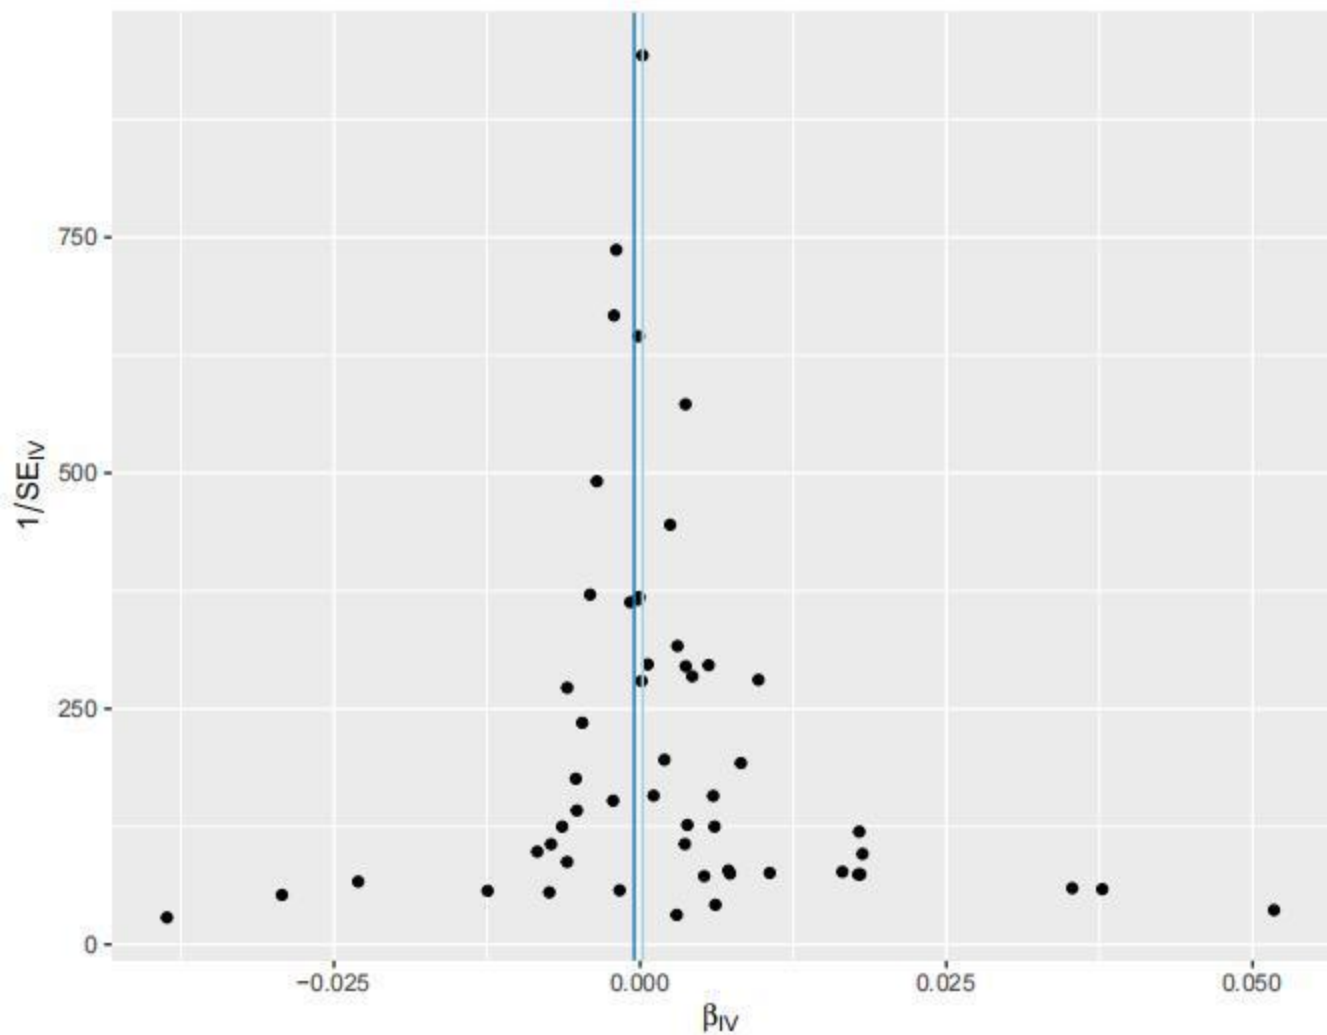

Funnel plot analyse of "CD45RA- CD28- CD8br %CD8br" on 'Aplastic anemia'

MR Method

- Inverse variance weighted
- MR Egger

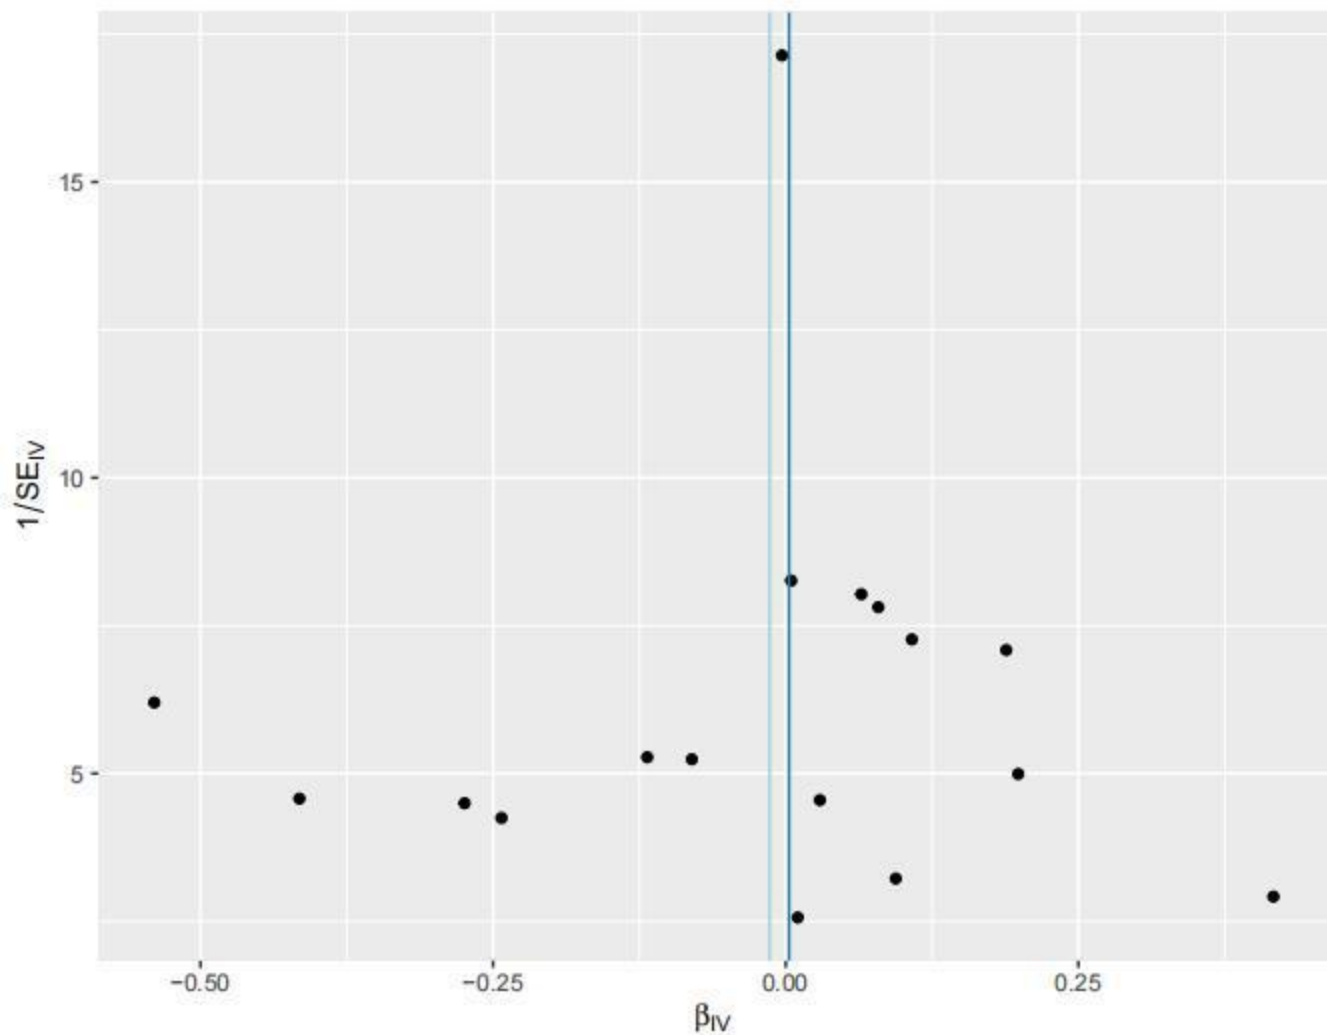

Funnel plot analyse of "CD25 on CD39+ CD4 Treg " on 'Aplastic anemia'

MR Method

- Inverse variance weighted
- MR Egger

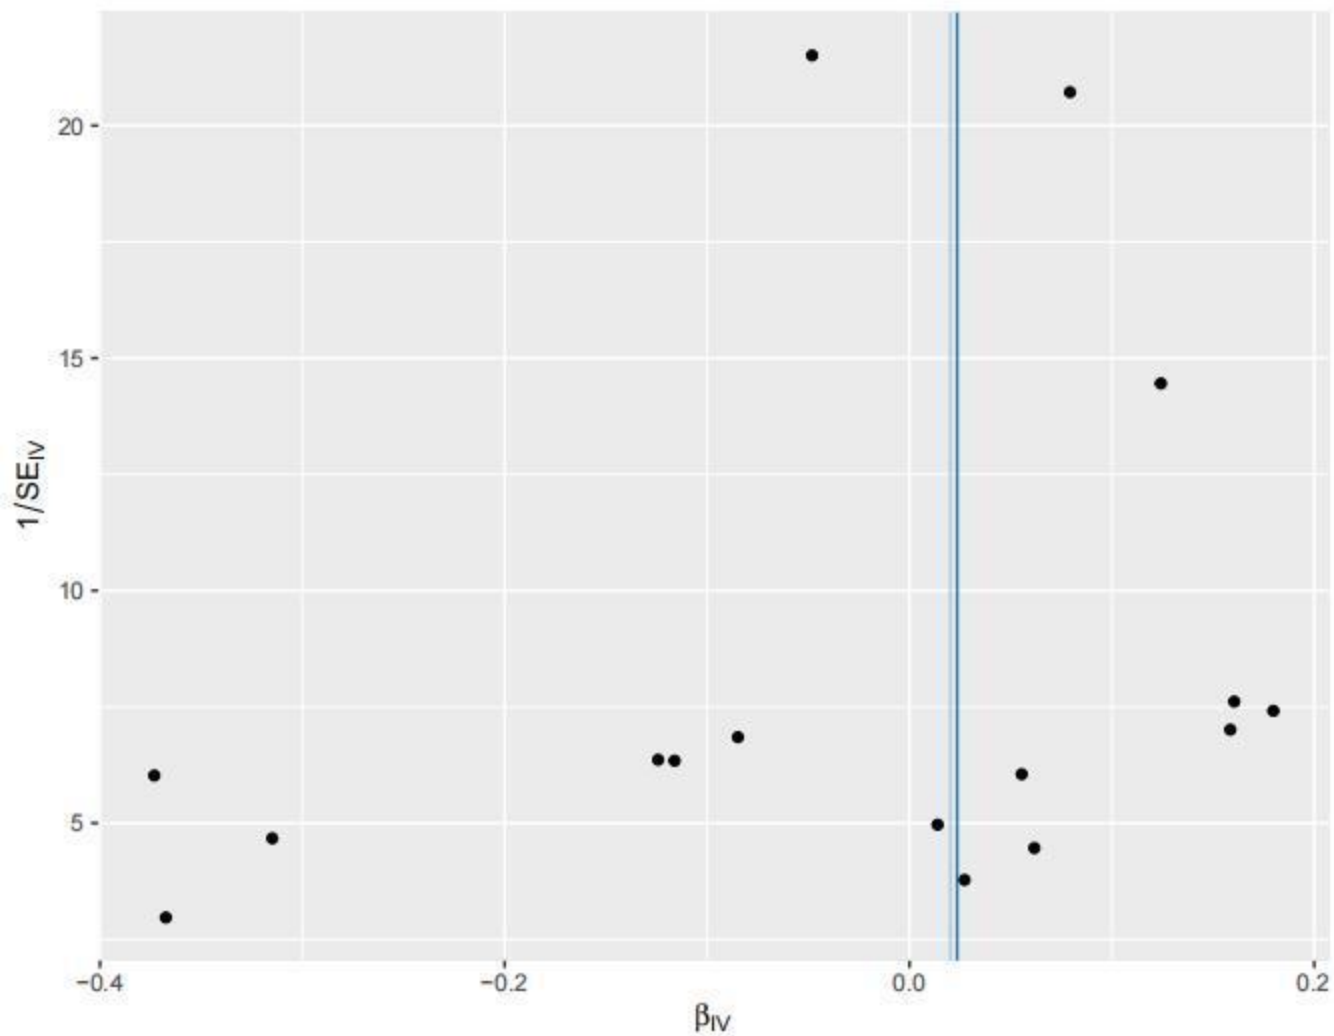

Funnel plot analyse of "CD45 on CD66b++ myelod cell " on 'Aplastic anemia'

MR Method

Inverse variance weighted

MR Egger

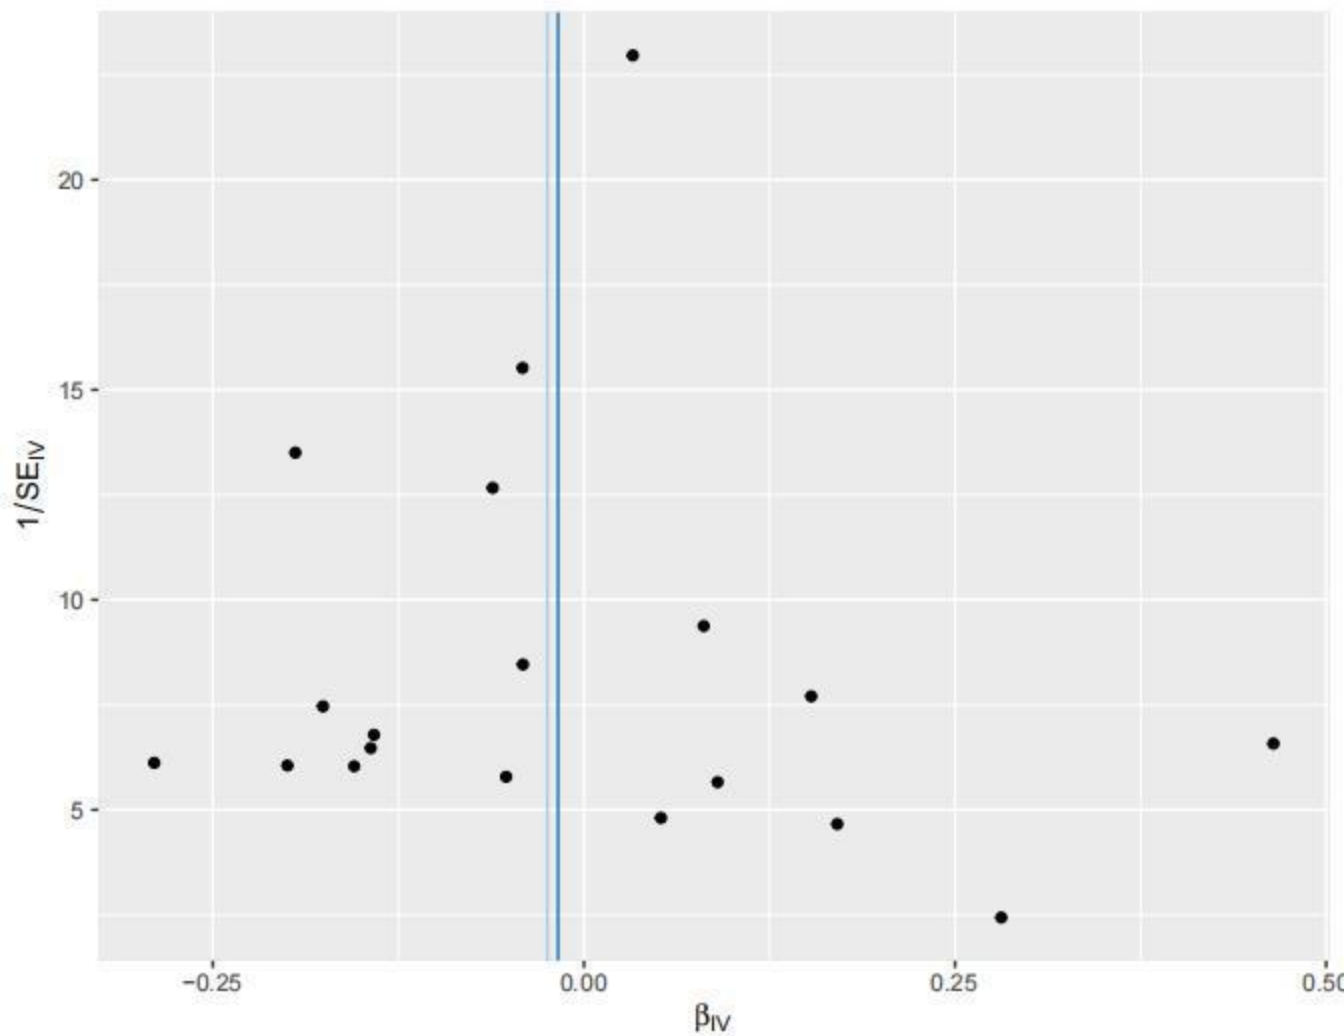

Funnel plot analyse of "HSC AC" on 'Aplastic anemia'



MR Method

- Inverse variance weighted
- MR Egger

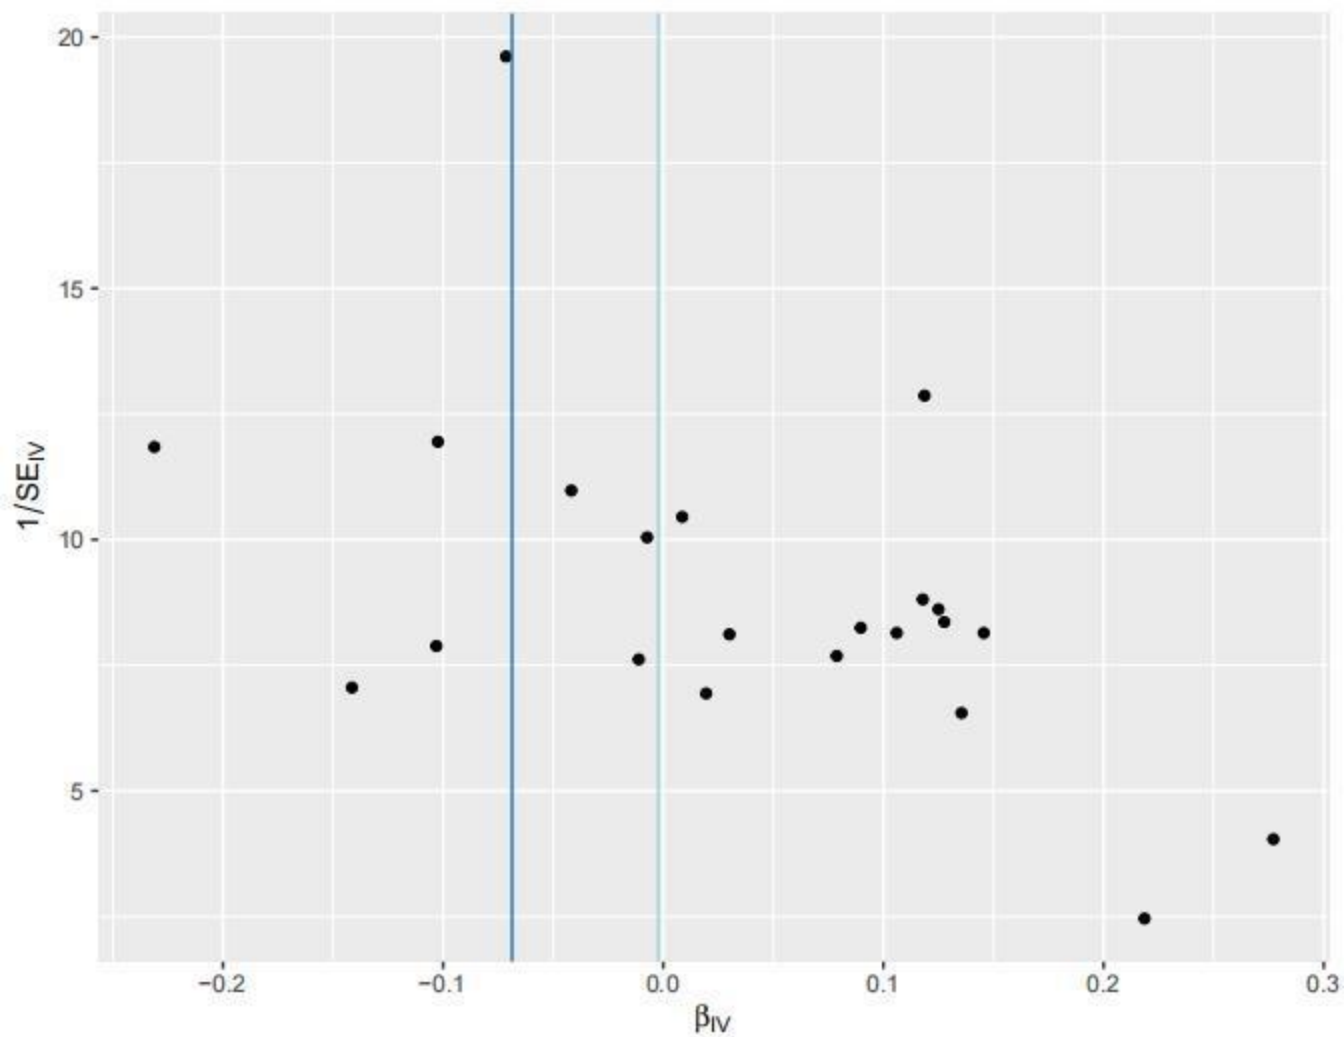

Funnel plot analyse of "HVEM on EM CD4+" on 'Aplastic anemia'

### MR Method

- Inverse variance weighted
- MR Egger

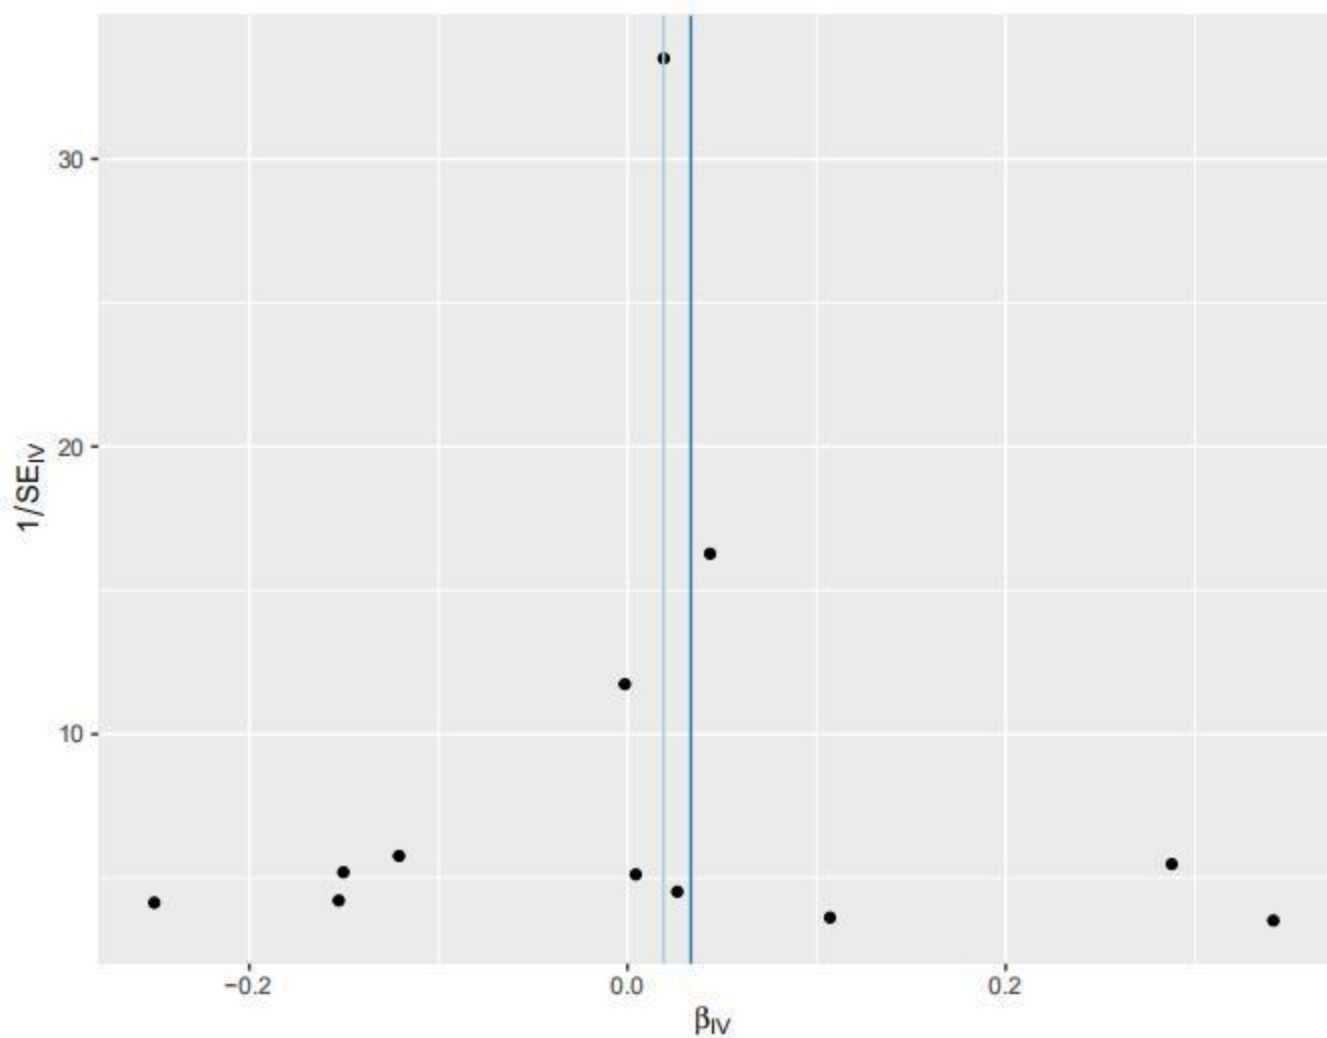

Funnel plot analyse of "Leukocyte AC" on 'Aplastic anemia'

MR Method

- Inverse variance weighted
- MR Egger

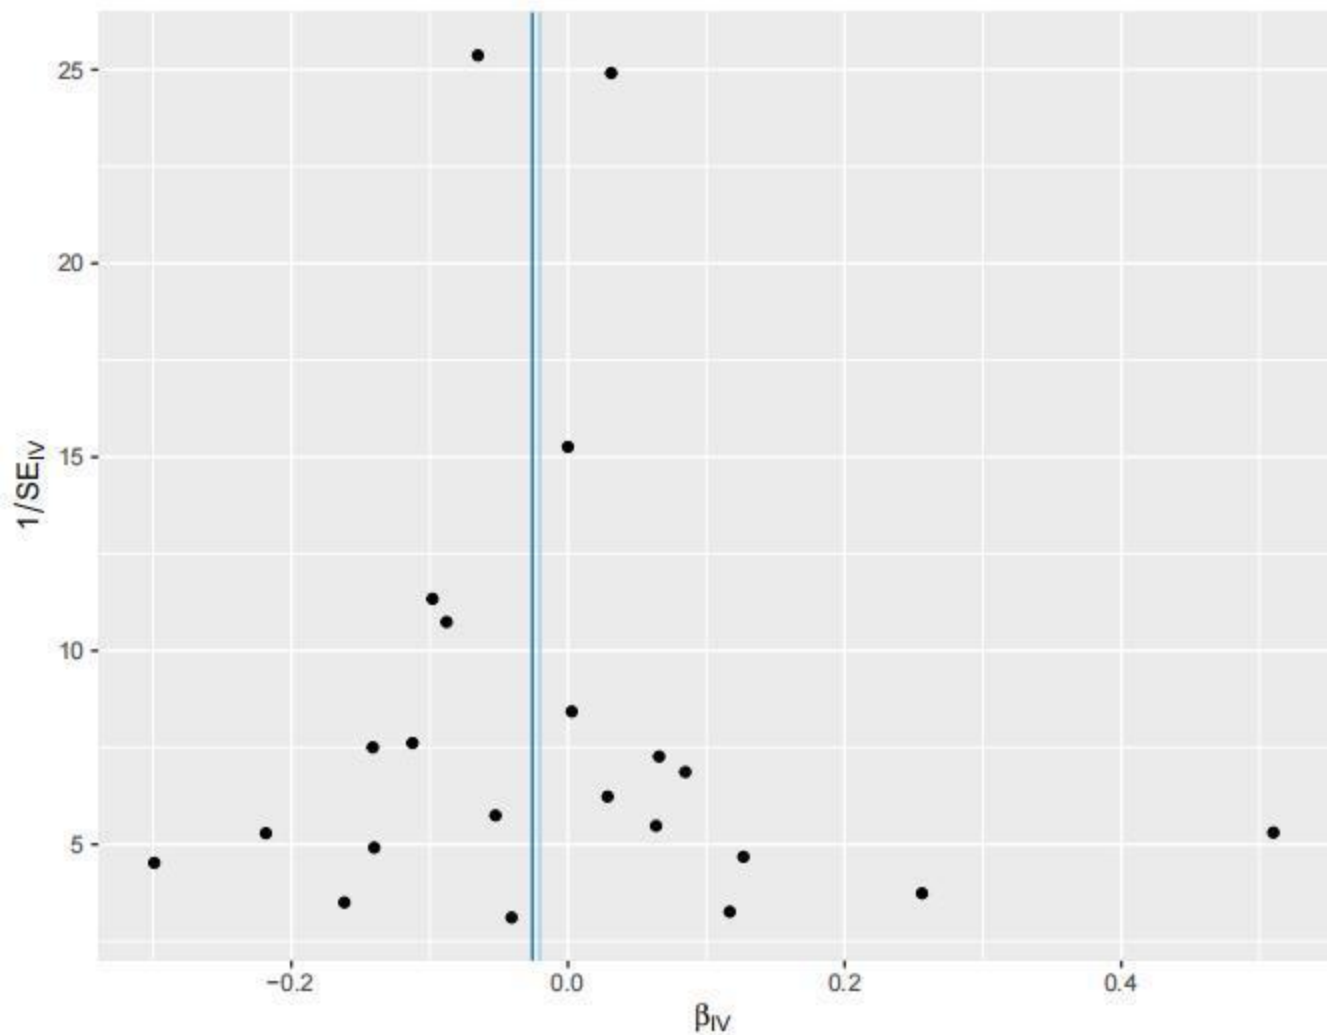

Funnel plot analyse of "CD24 on IgD+ CD38-" on 'Aplastic anemia'

MR Method

- Inverse variance weighted
- MR Egger

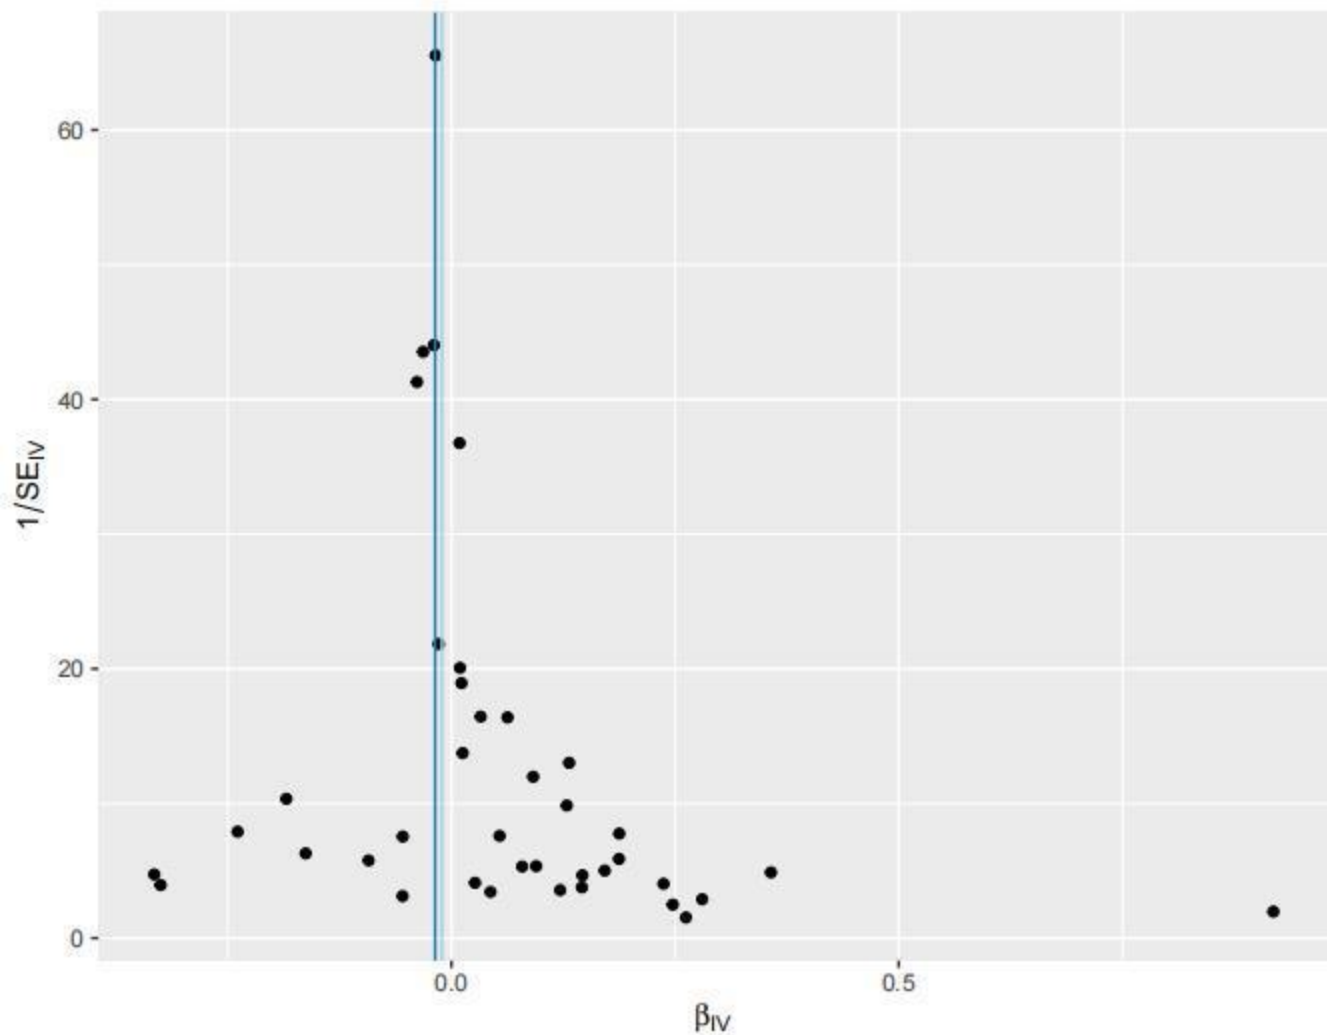

Funnel plot analyse of "Activated & secreting Treg %CD4 Treg" on 'Aplastic anemia'

### MR Method

- Inverse variance weighted
- MR Egger

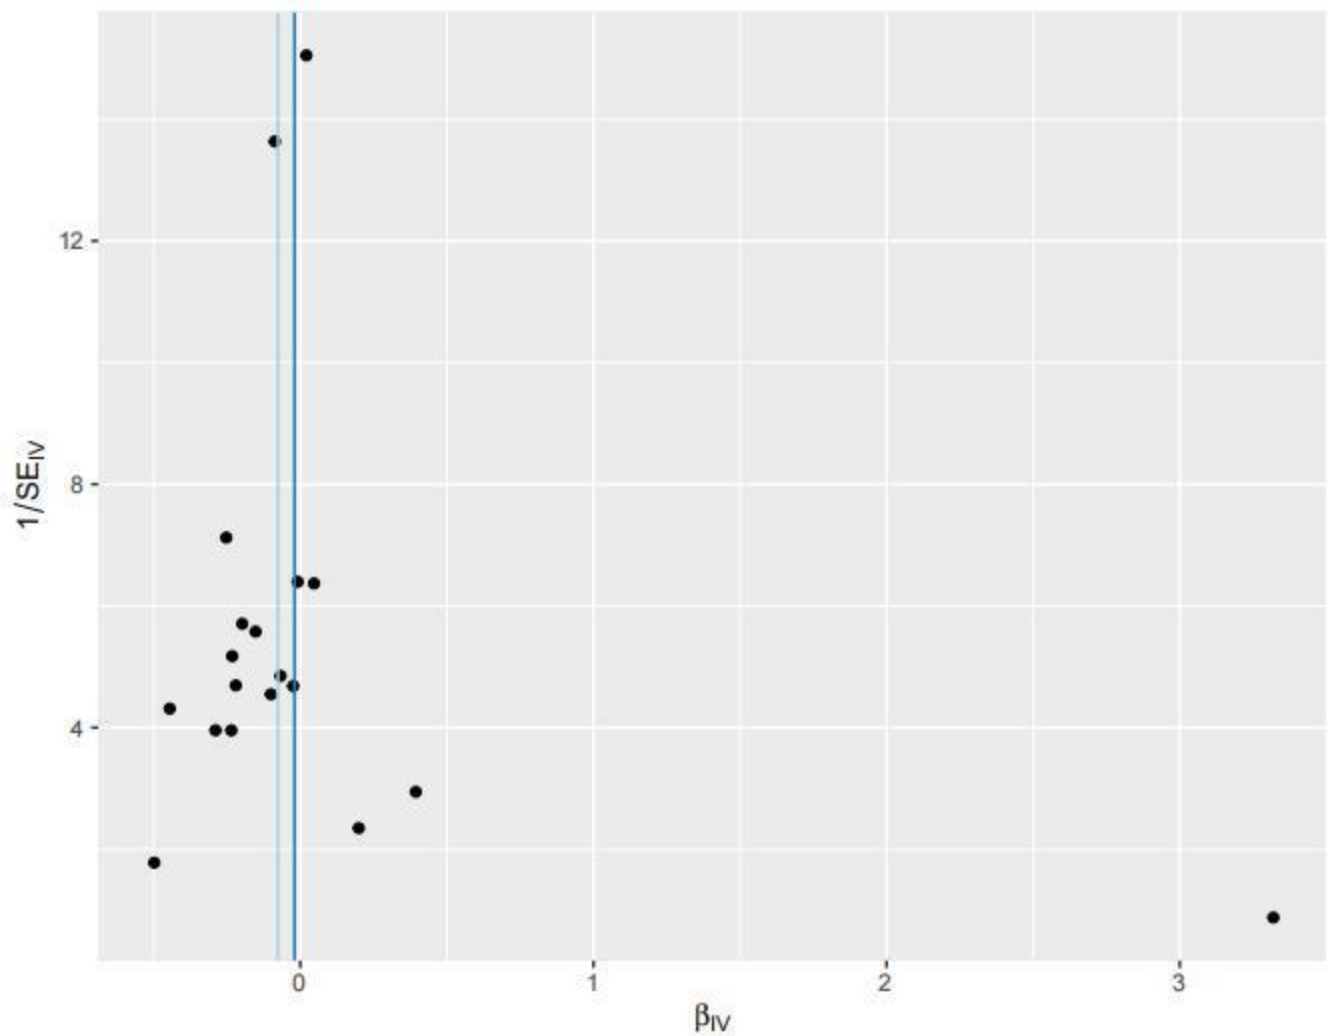

Funnel plot analyse of "TD CD8br AC" on 'Aplastic anemia'

### MR Method

- Inverse variance weighted
- MR Egger

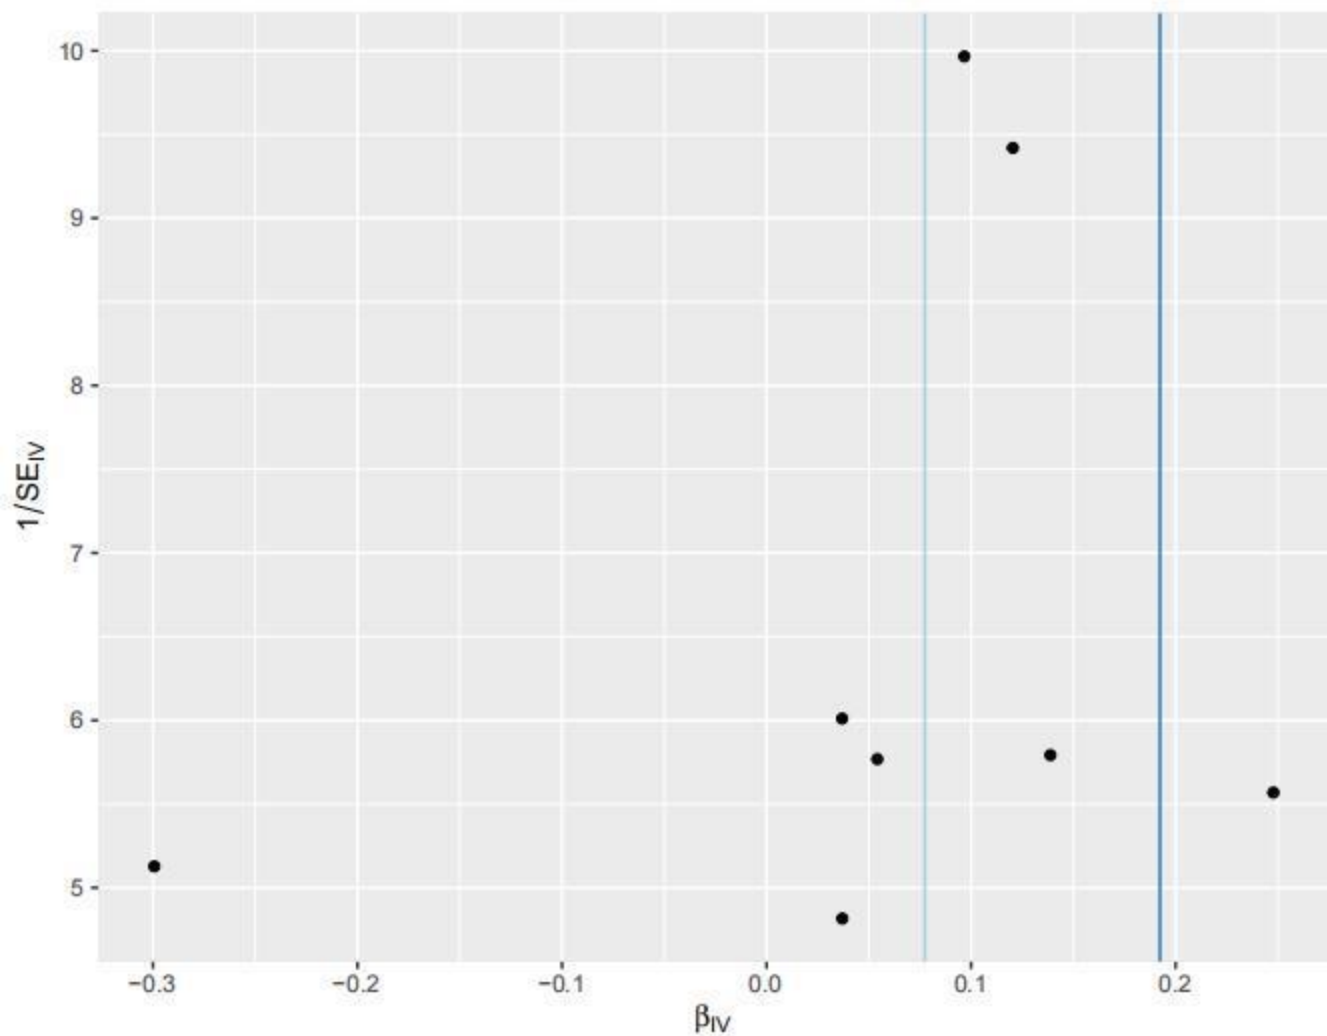

Funnel plot analyse of "CD127 on CD4+" on 'Aplastic anemia'

### MR Method

- Inverse variance weighted
- MR Egger

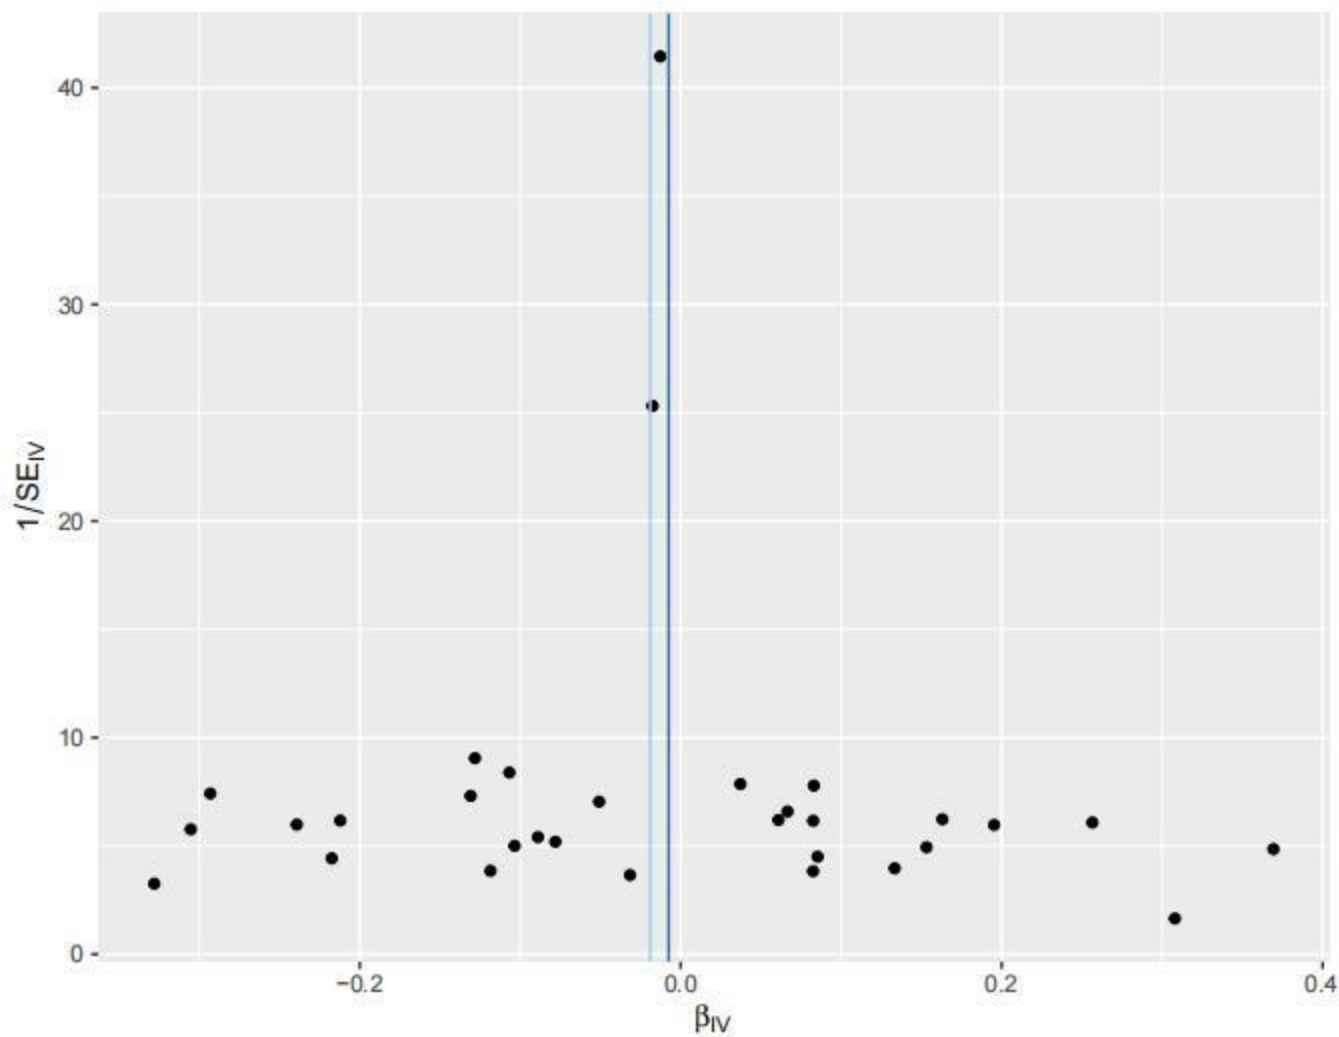

Funnel plot analyse of "CD27 on IgD- CD38dim" on 'Aplastic anemia'

MR Method

- Inverse variance weighted
- MR Egger

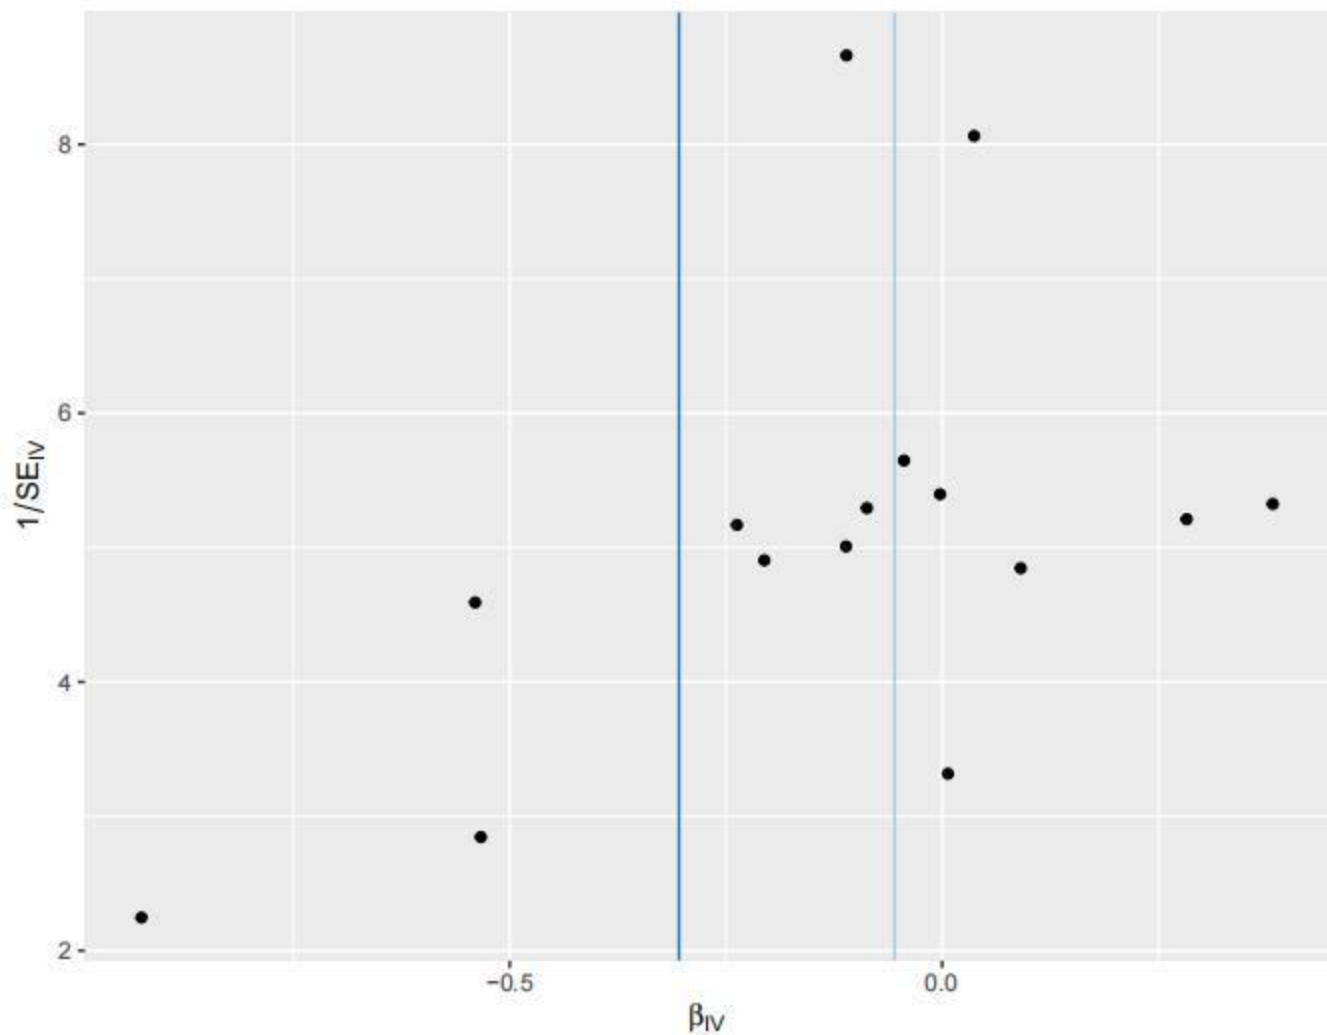

Funnel plot analyse of "DN (CD4-CD8-) %T cell" on 'Aplastic anemia'



MR Method

- Inverse variance weighted
- MR Egger

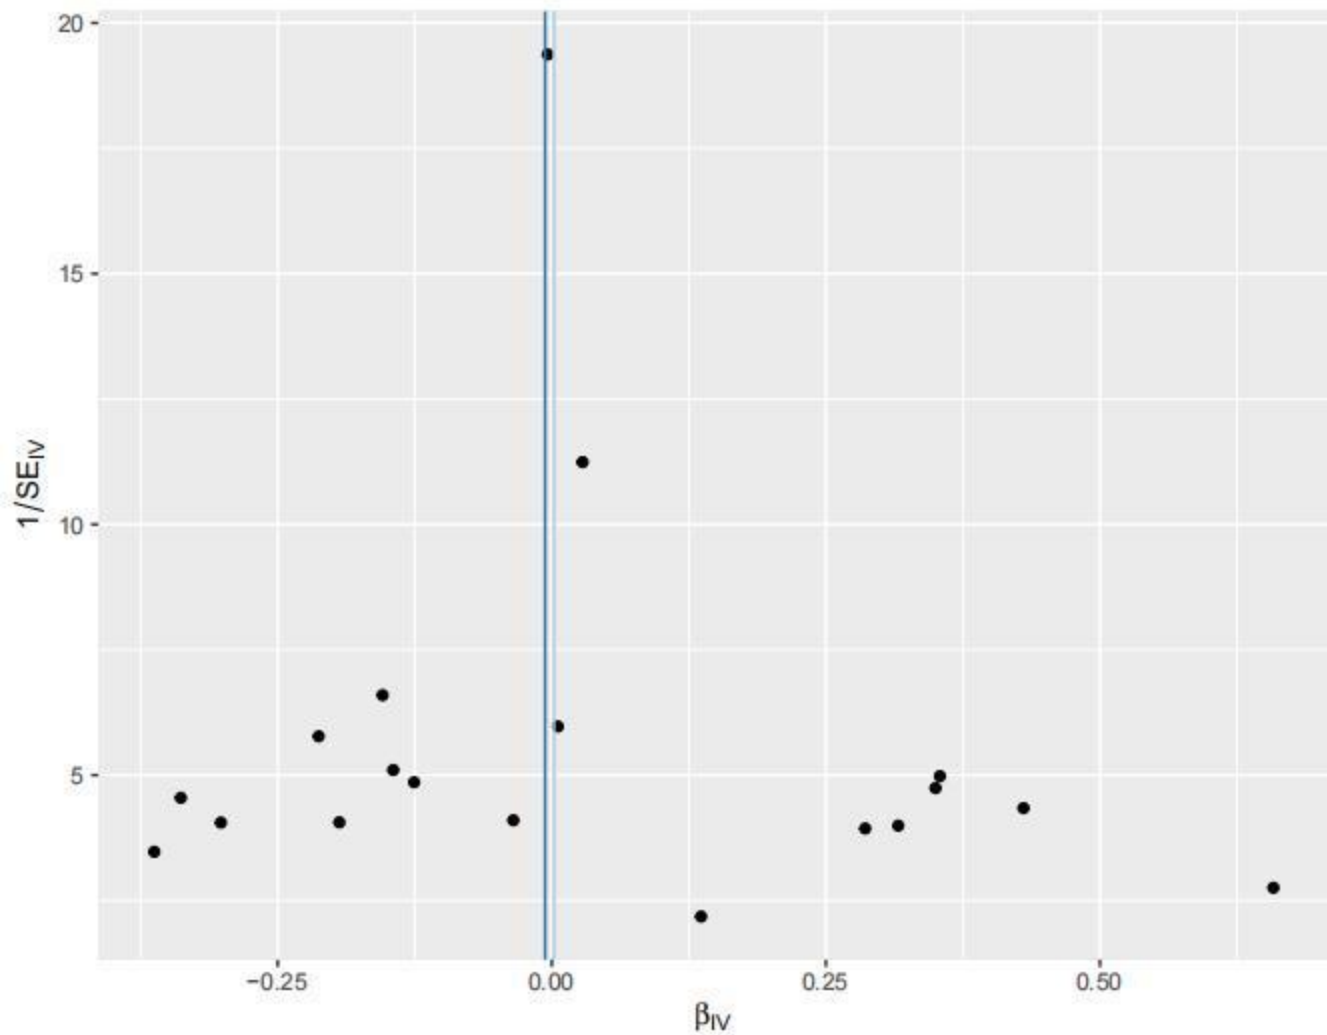

Funnel plot analysis of "CD27 on PB/PC" on 'Aplastic anemia'

### MR Method

Inverse variance weighted

MR Egger

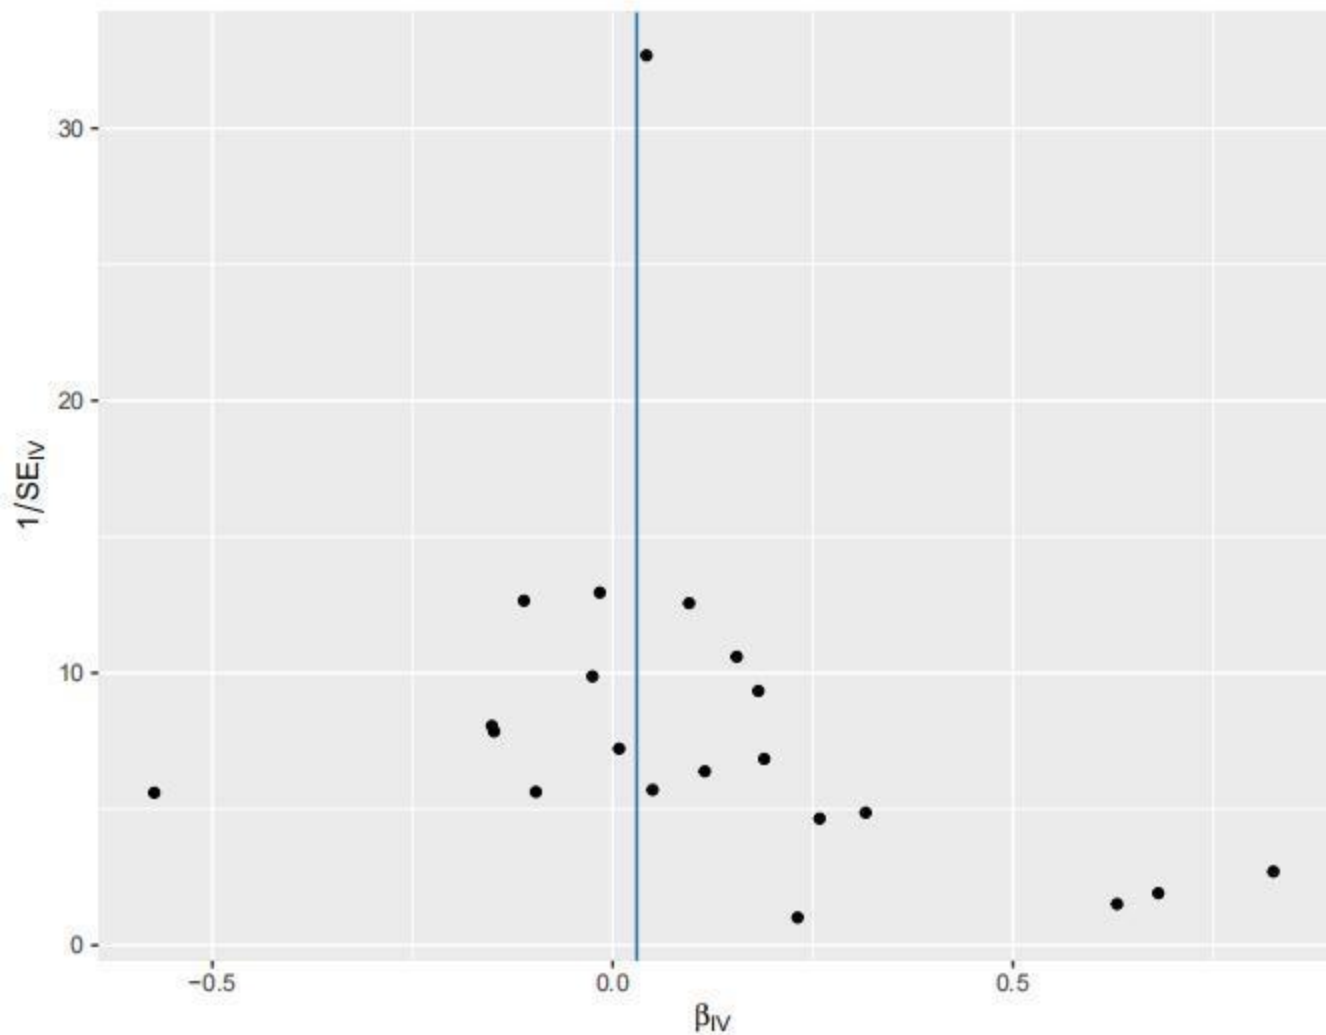

Funnel plot analyse of "HLA DR on DC" on 'Aplastic anemia'

MR Method

- Inverse variance weighted
- MR Egger

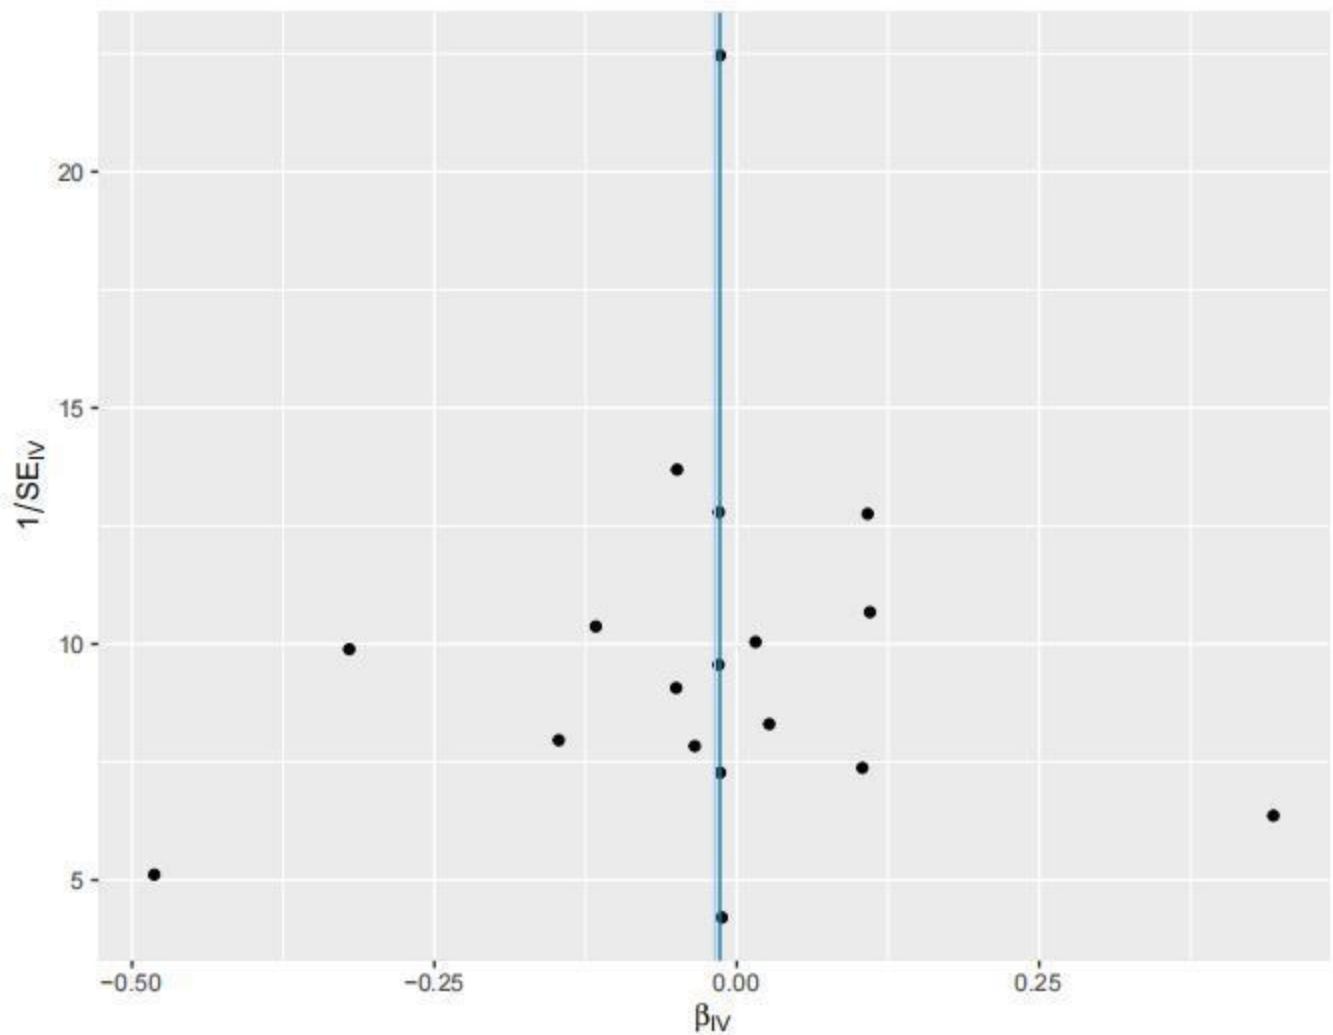

Funnel plot analyse of "HVEM on EM CD8br " on 'Aplastic anemia'

### MR Method

- Inverse variance weighted
- MR Egger

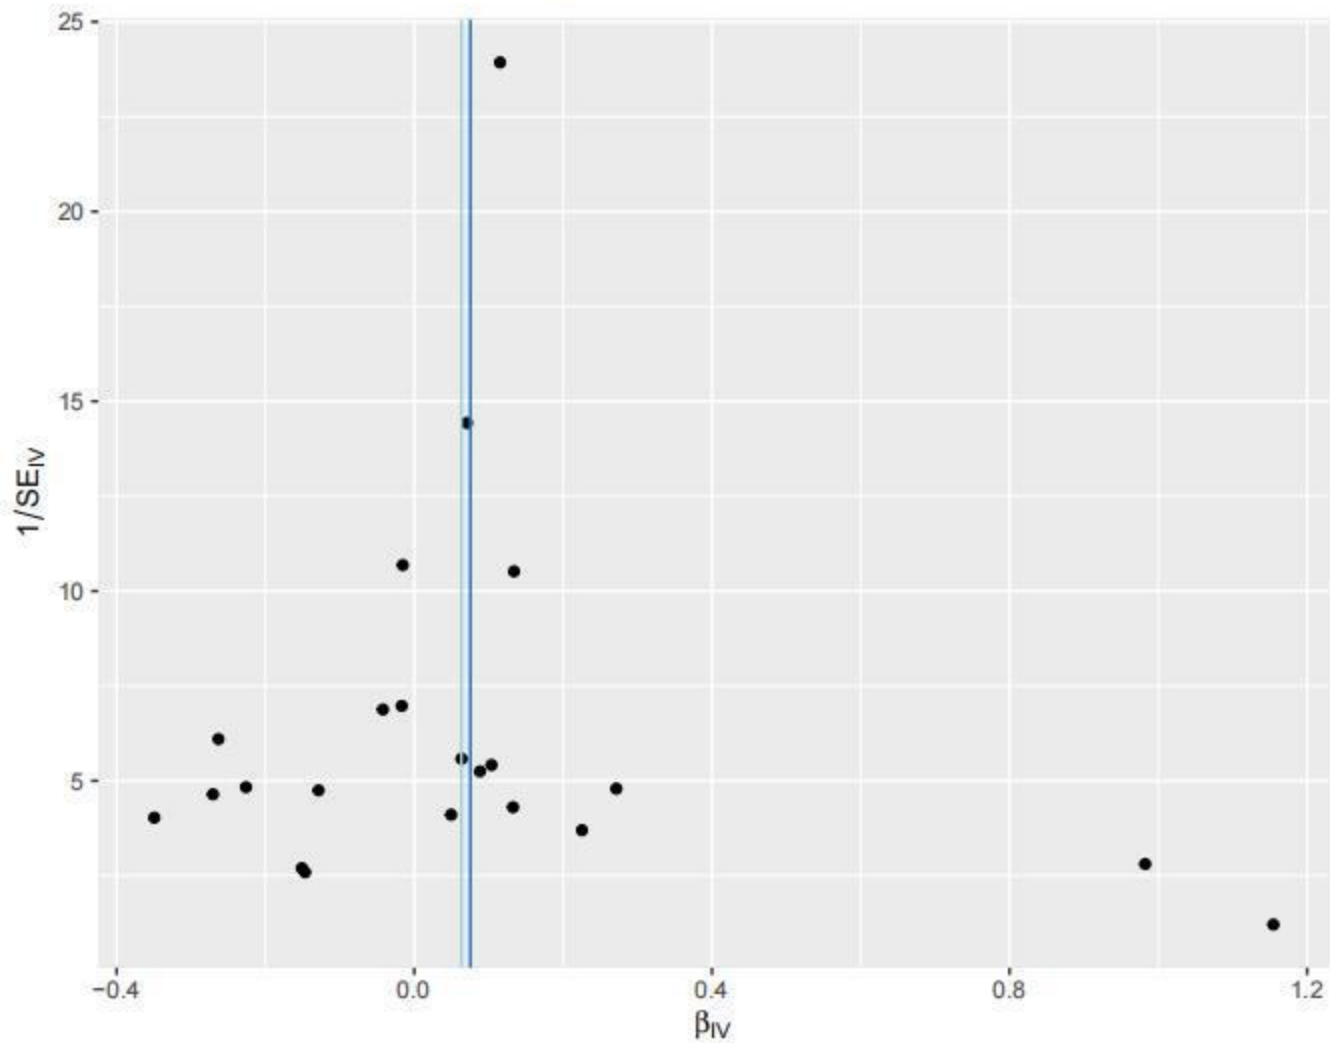

Funnel plot analyse of "HLA DR on CD14+ CD16- monocyte" on 'Aplastic anemia'

MR Method

- Inverse variance weighted
- MR Egger

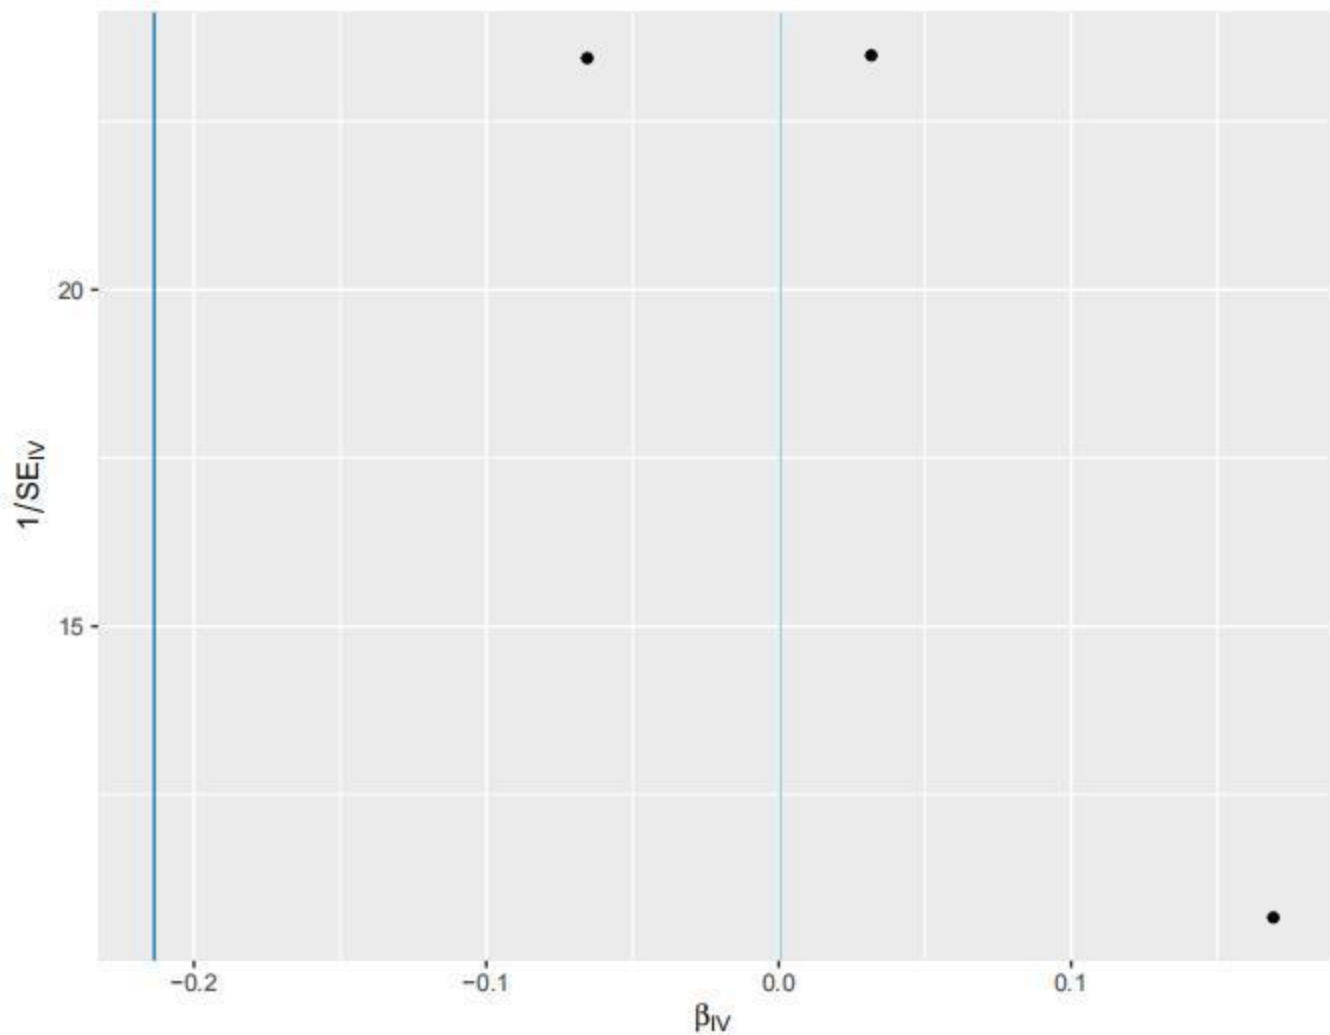

Funnel plot analyse of "CD11b on Gr MDSC " on 'Aplastic anemia'

MR Method

- Inverse variance weighted
- MR Egger

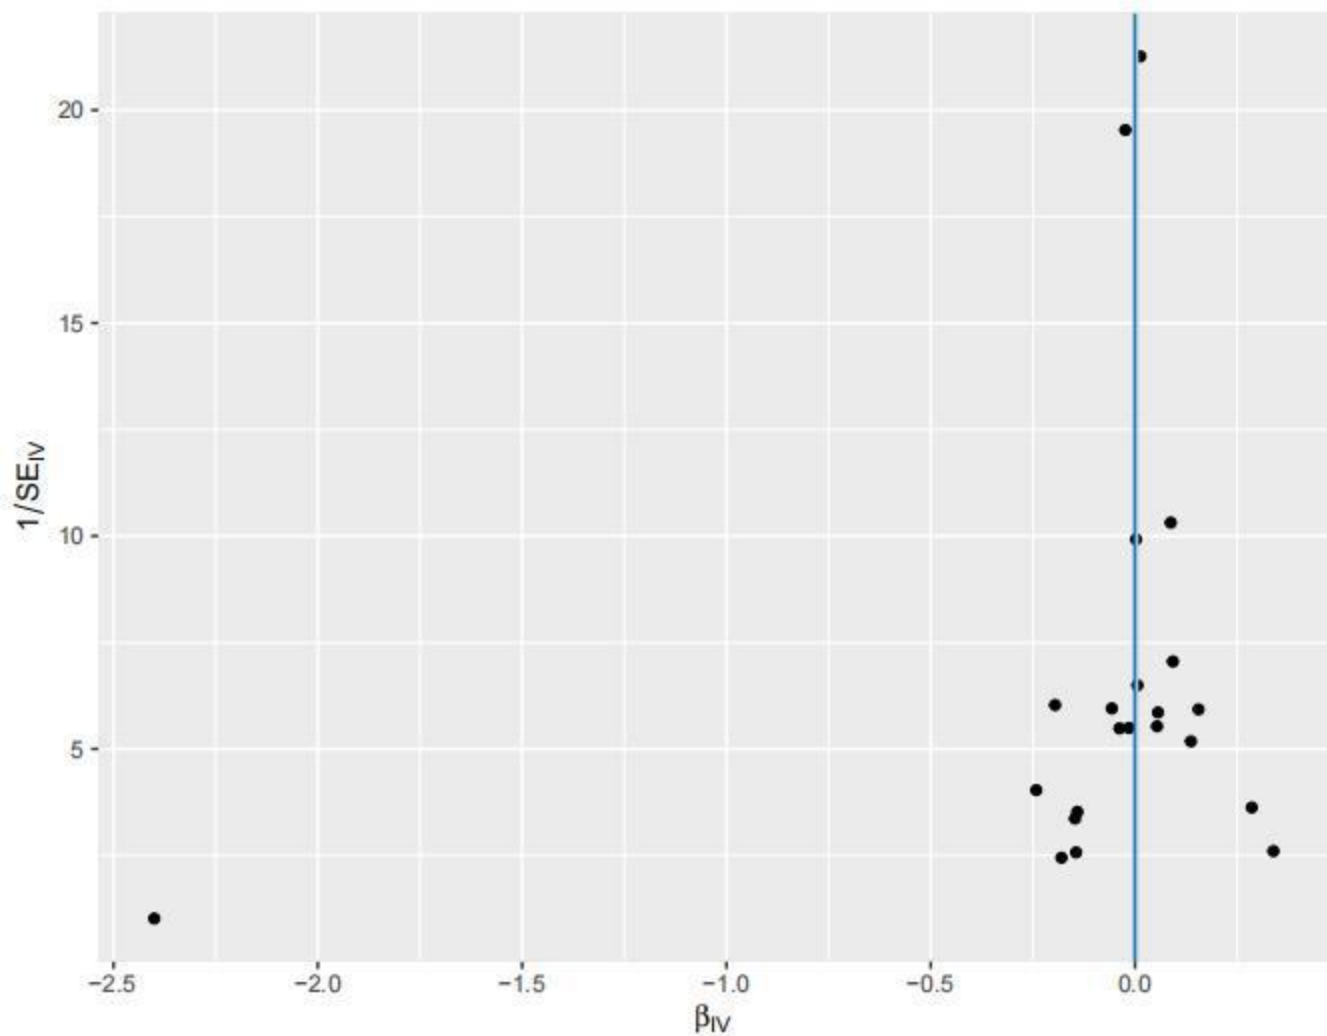

Funnel plot analyse of "FSC-A on granulocyte" on 'Aplastic anemia'

### MR Method

- Inverse variance weighted
- MR Egger

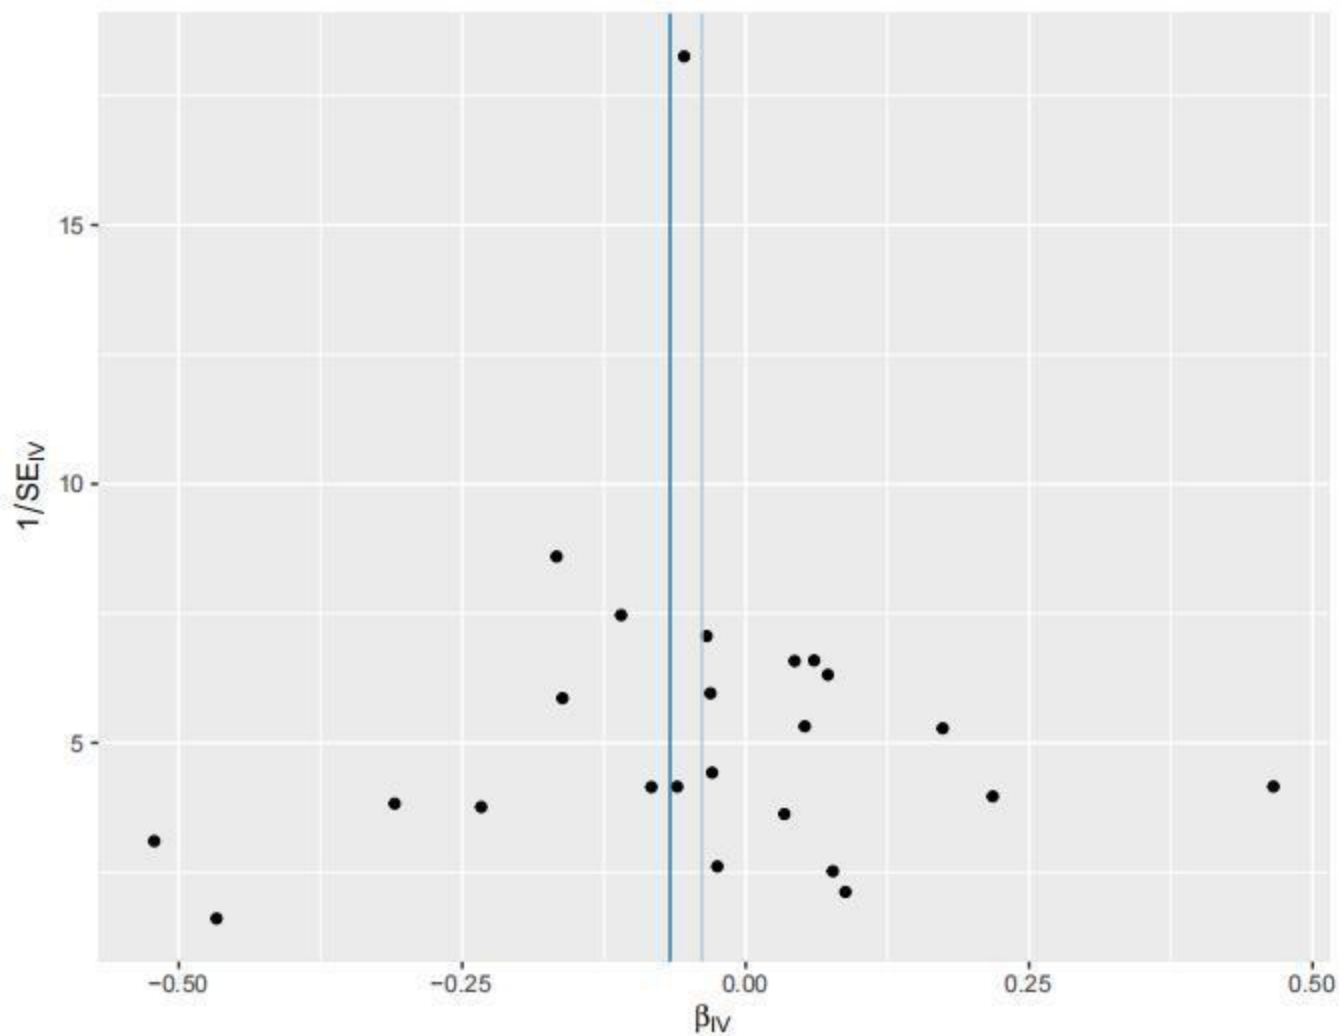

Funnel plot analyse of "CD28+ DN (CD4-CD8-) %T cell" on 'Aplastic anemia'

MR Method

- Inverse variance weighted
- MR Egger

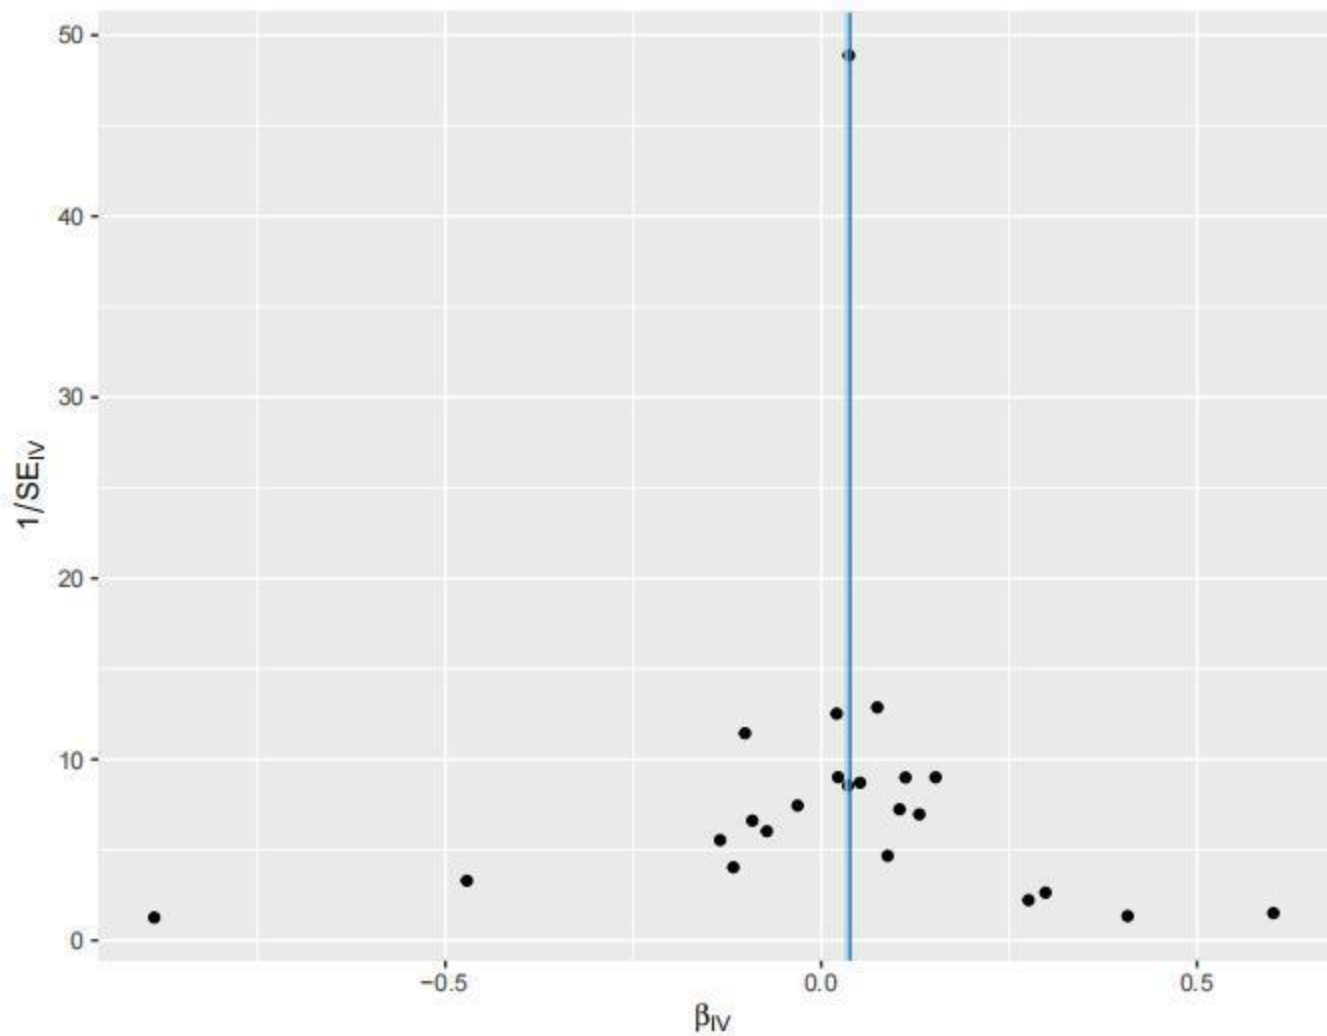

Funnel plot analyse of "CD33 on CD33dim HLA DR+ CD11b+ " on 'Aplastic anemia'



MR Method

- Inverse variance weighted
- MR Egger

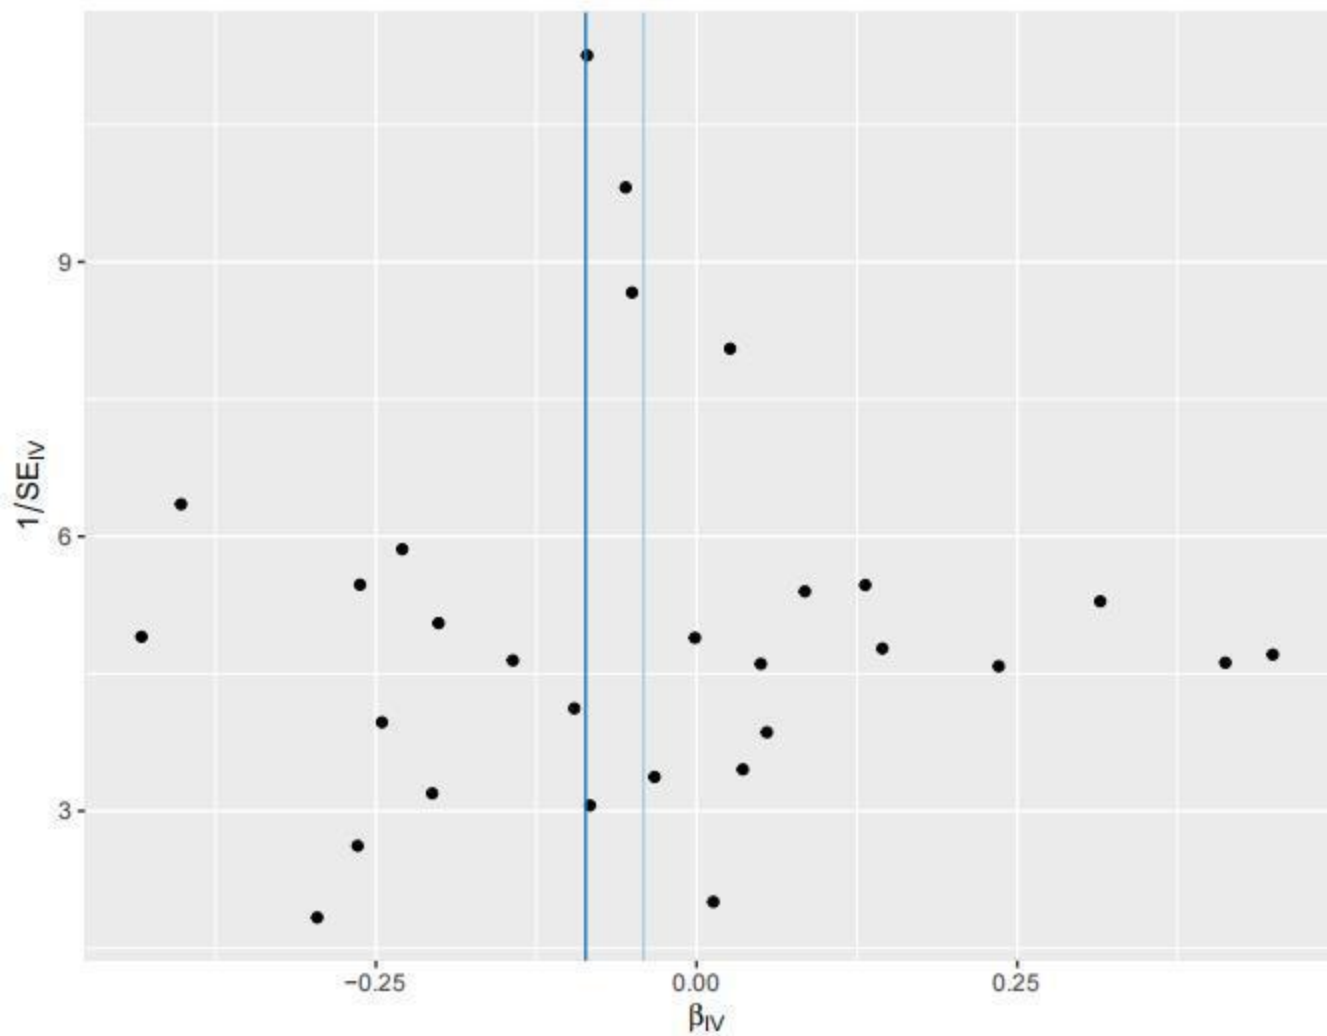

Funnel plot analyse of "CD20 on IgD- CD38-" on 'Aplastic anemia'

MR Method

Inverse variance weighted

MR Egger

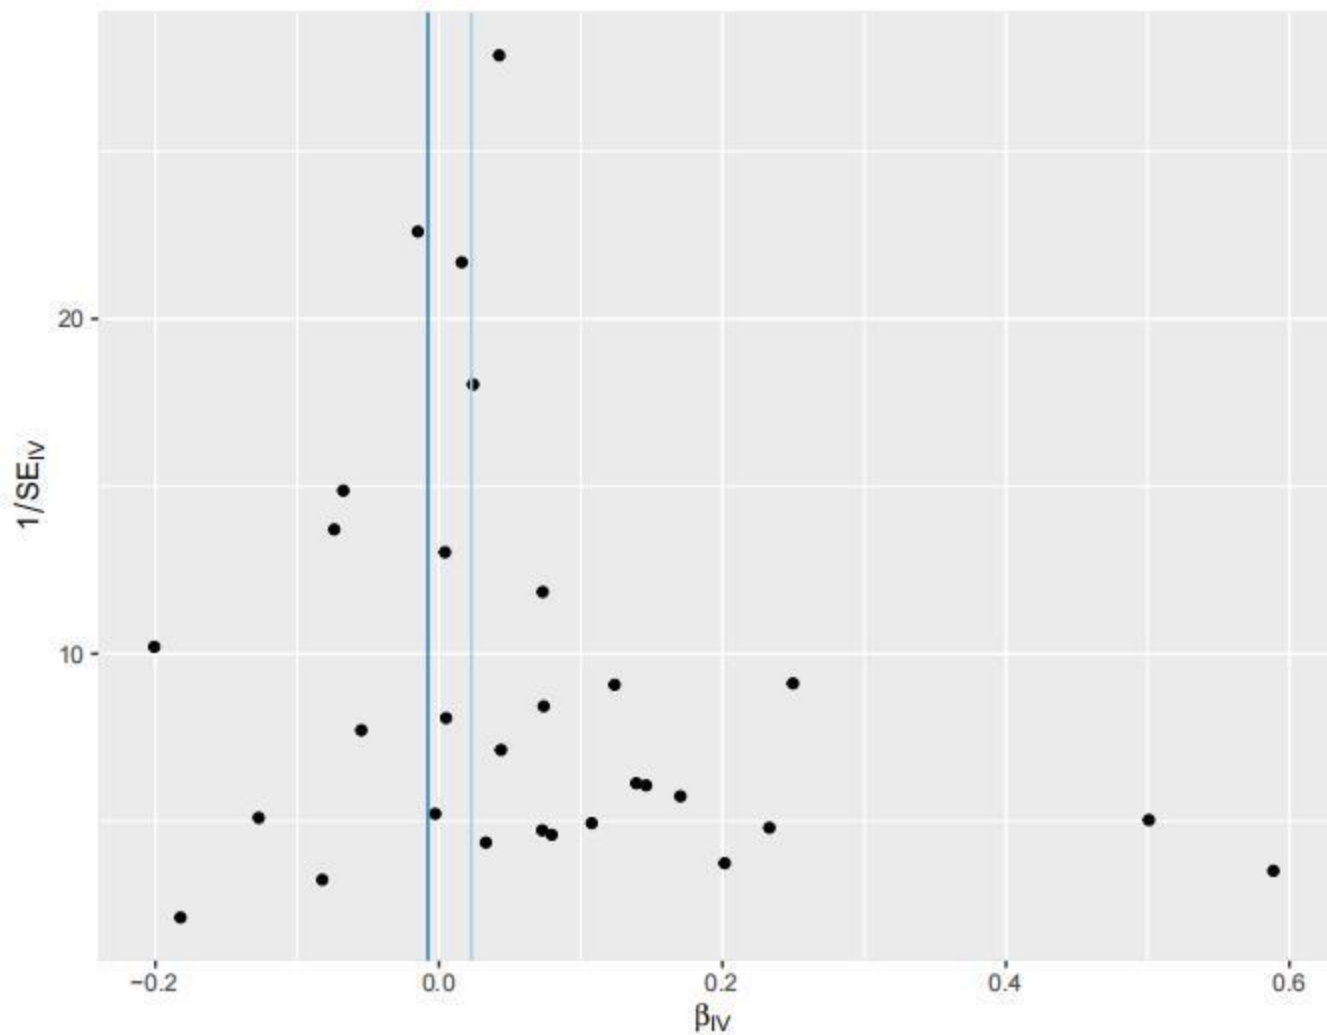

Funnel plot analyse of "Plasmacytoid DC AC" on 'Aplastic anemia'

MR Method

- Inverse variance weighted
- MR Egger

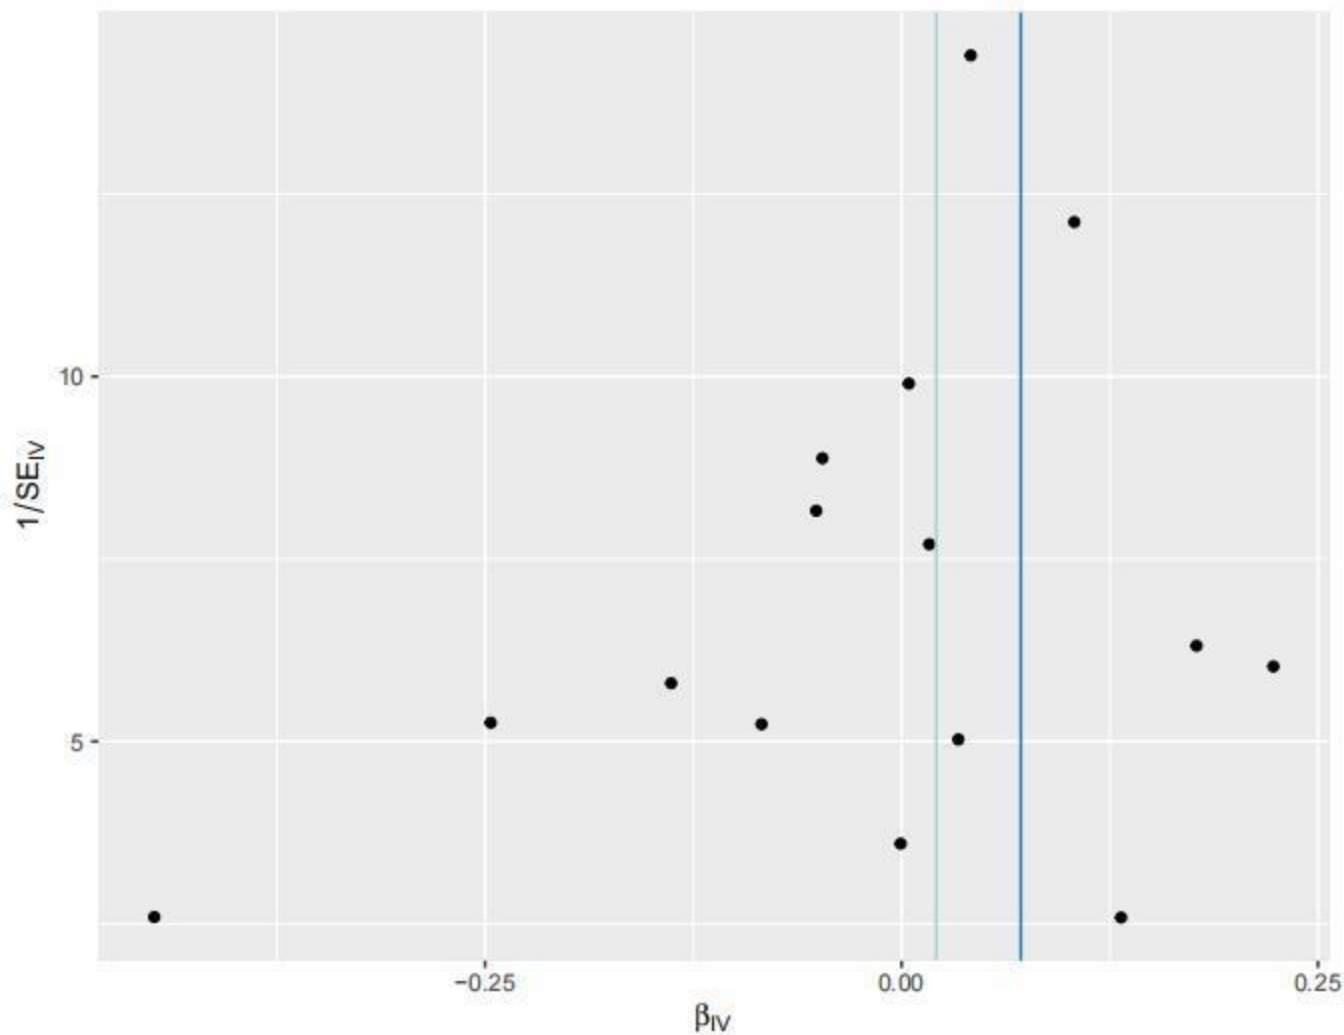

Funnel plot analyse of "CD62L on CD62L+ plasmacytoid DC " on 'Aplastic anemia'

MR Method

- Inverse variance weighted
- MR Egger

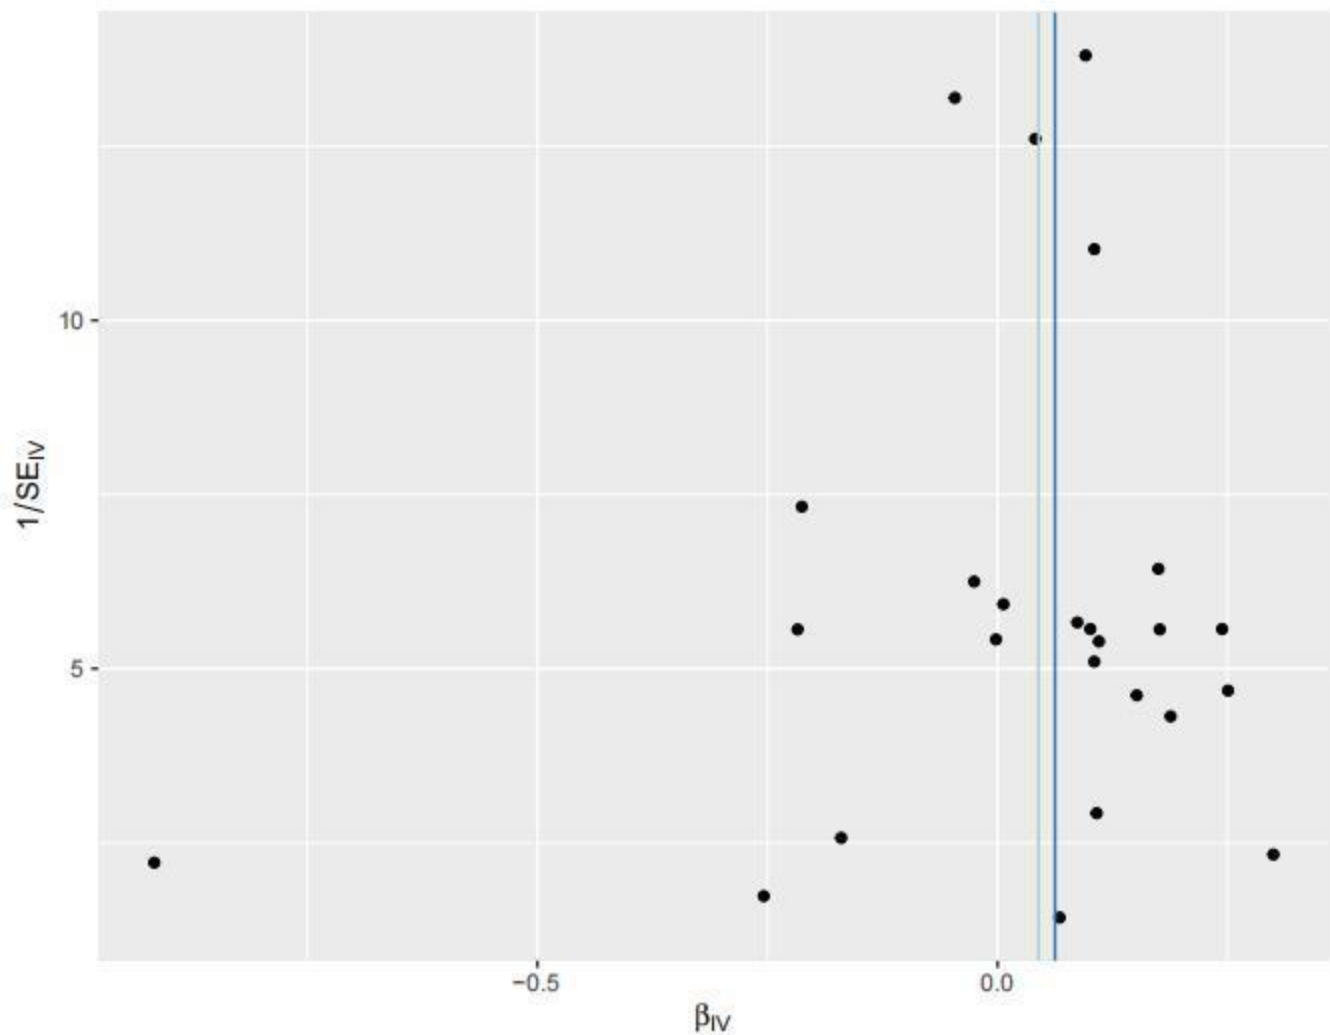

Funnel plot analyse of "CD11c on granulocyte " on 'Aplastic anemia'

### MR Method

- Inverse variance weighted
- MR Egger

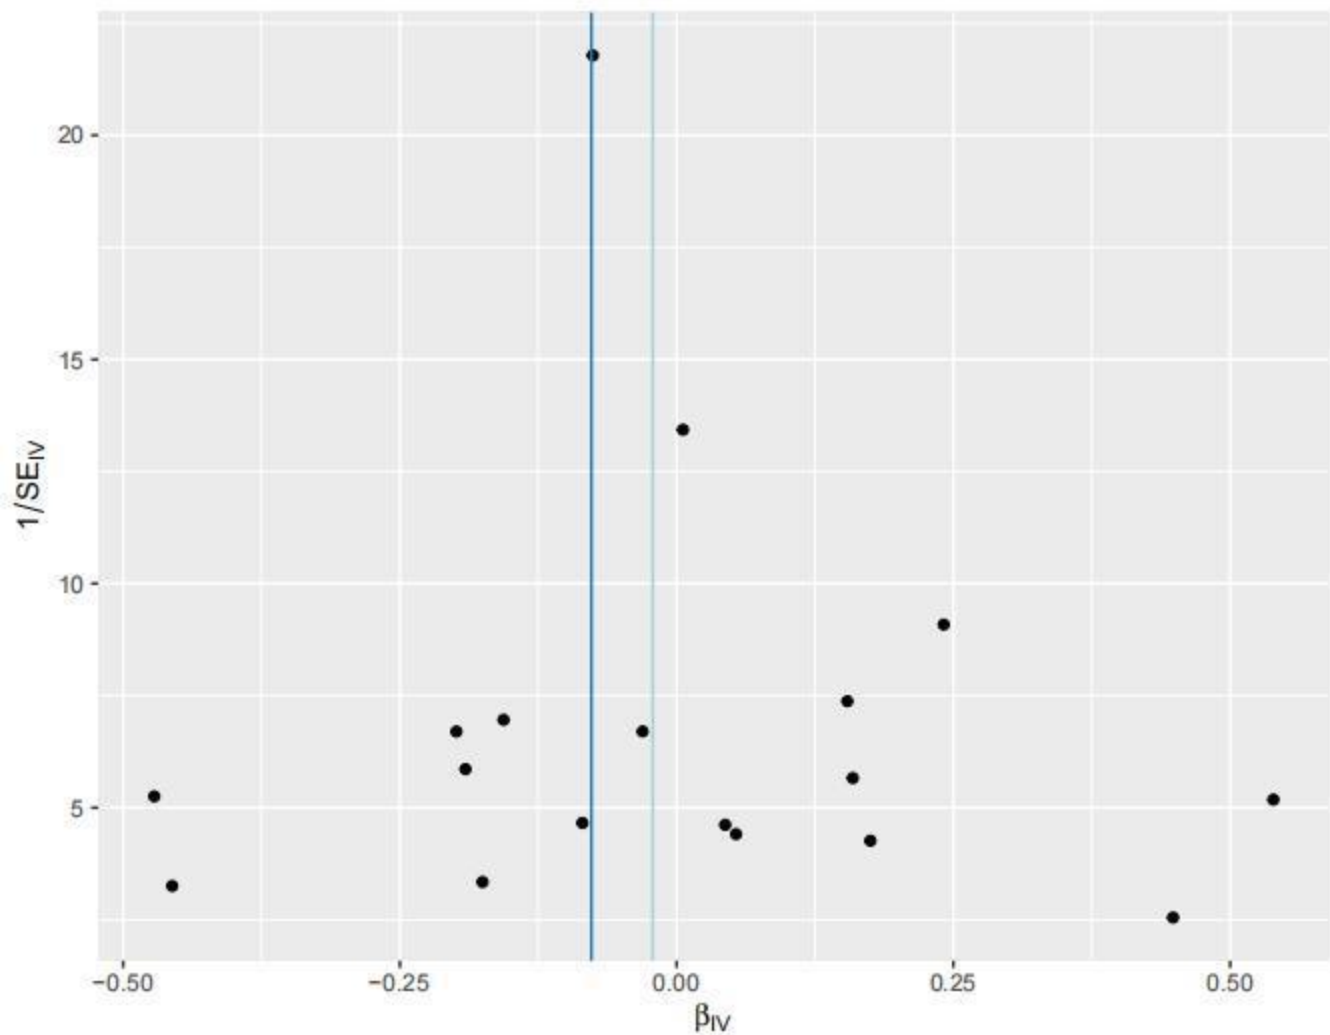

Funnel plot analyse of "CD8dim %leukocyte" on 'Aplastic anemia'

### MR Method

- Inverse variance weighted
- MR Egger

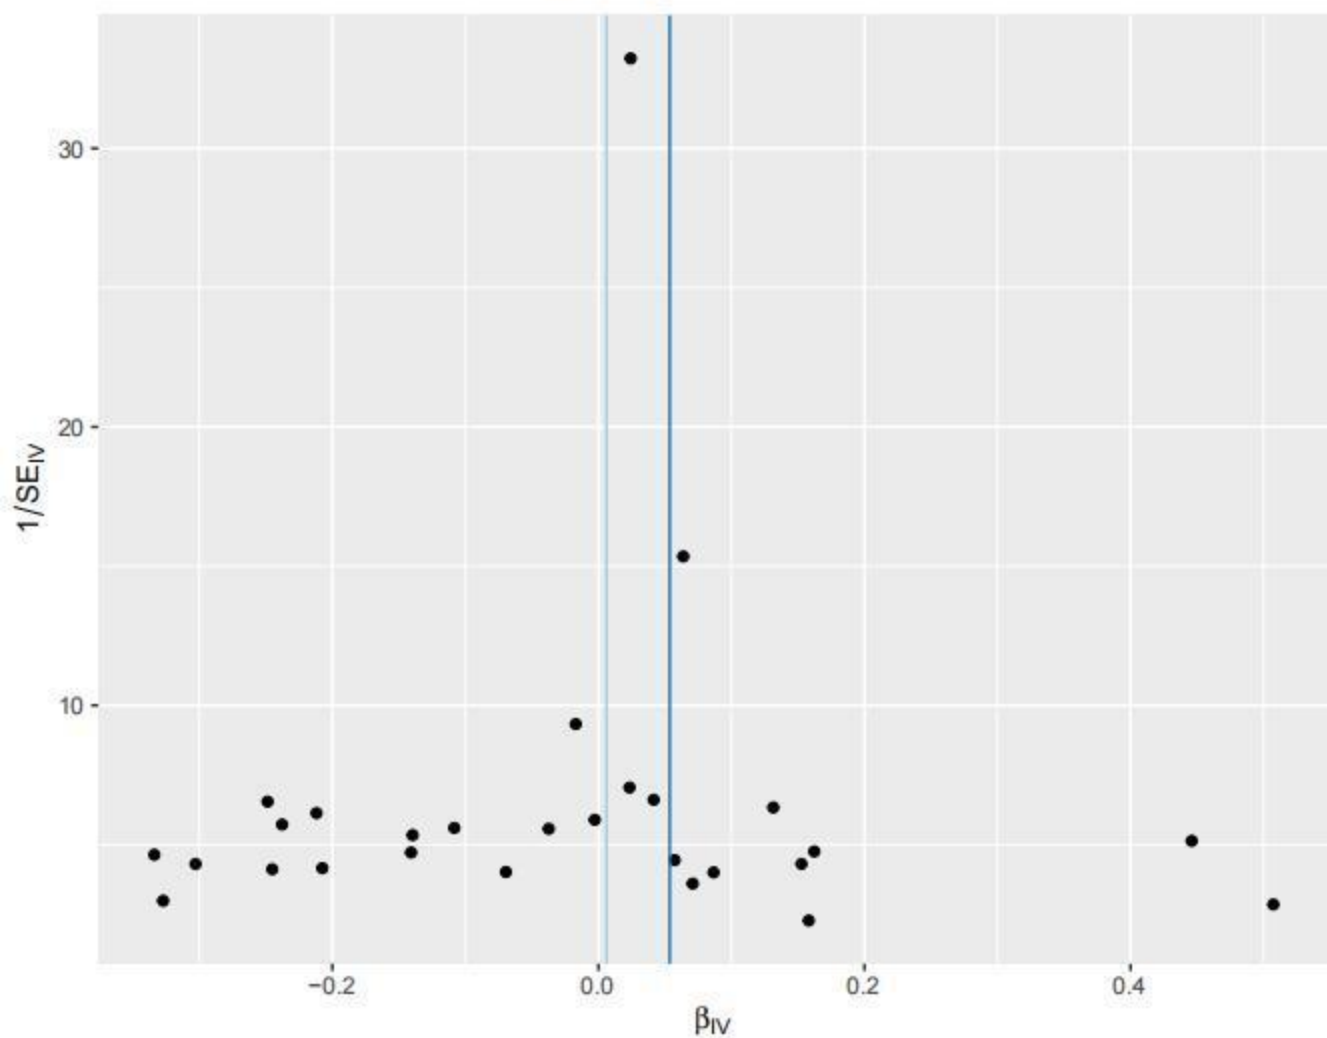

Funnel plot analyse of "PB/PC %B cell" on 'Aplastic anemia'

### MR Method

- Inverse variance weighted
- MR Egger

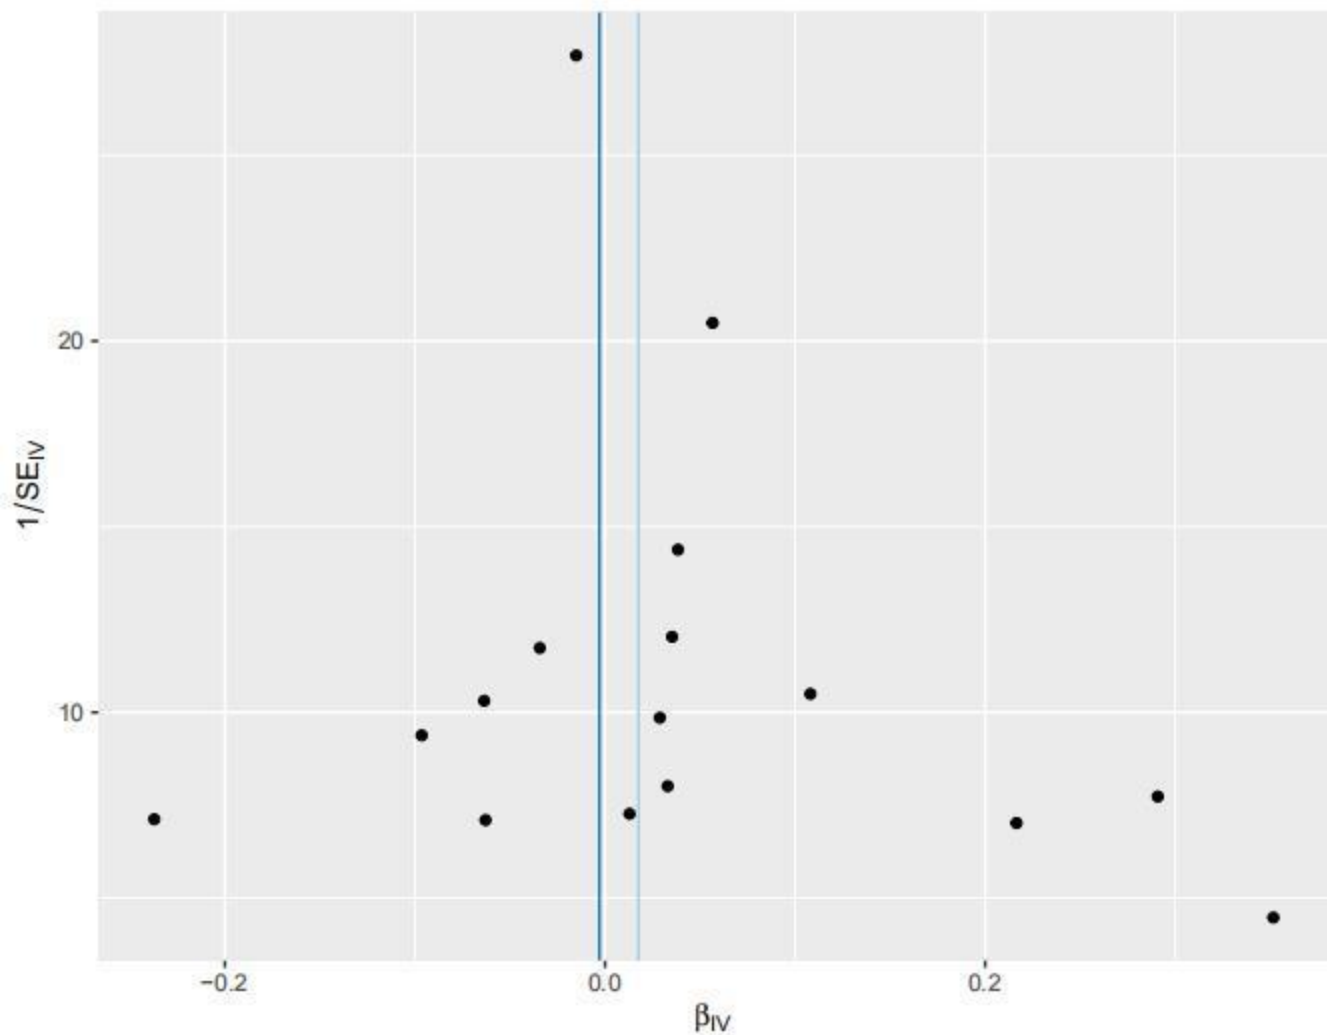

Funnel plot analyse of "CD11b on Mo MDSC " on 'Aplastic anemia'

MR Method

Inverse variance weighted

MR Egger

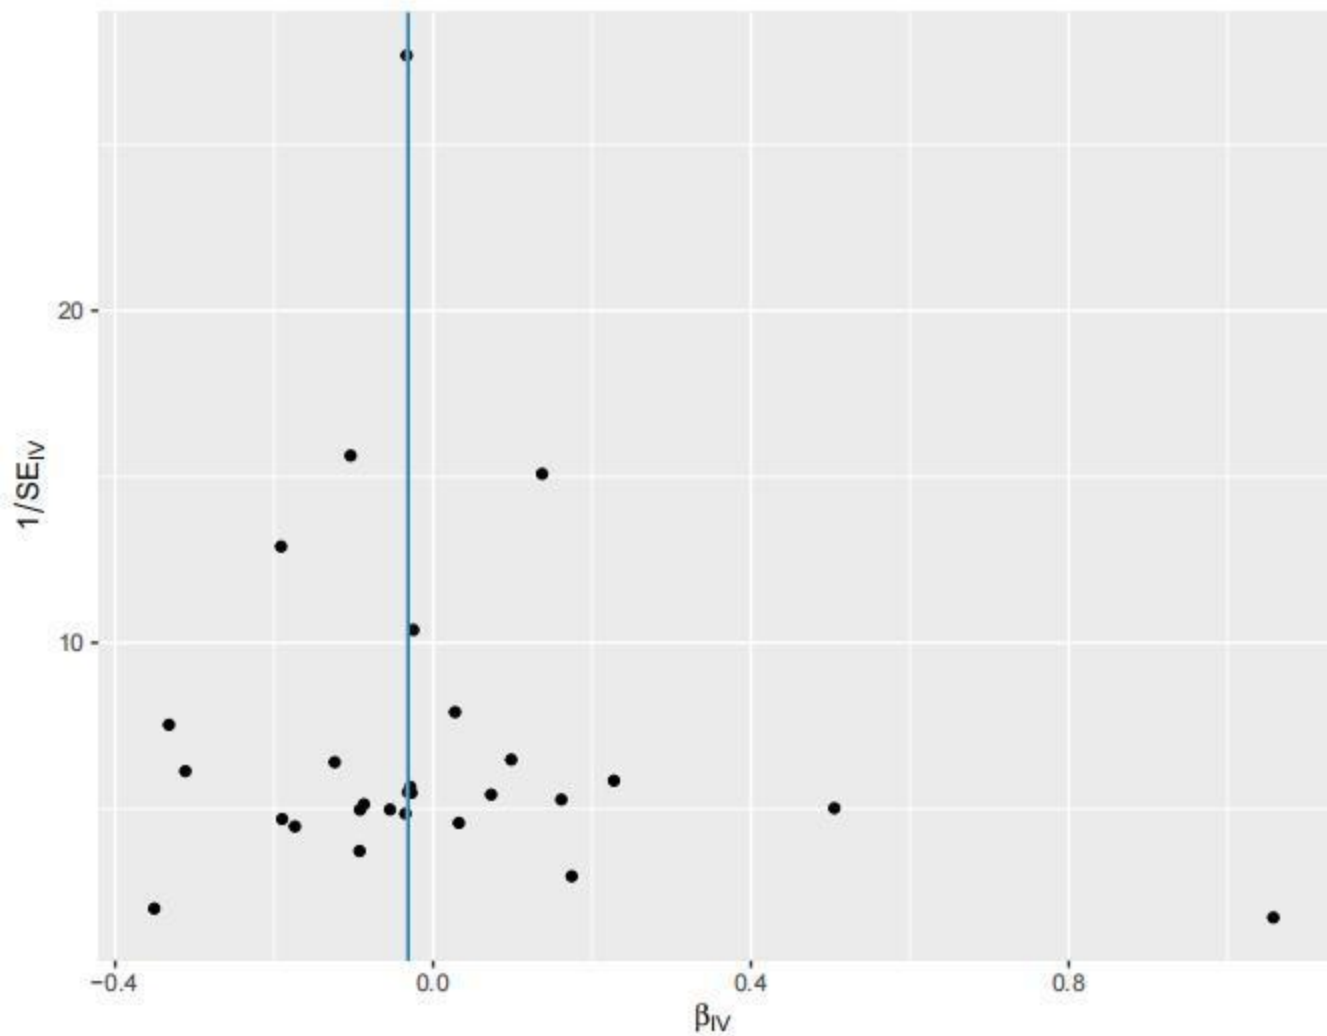

Funnel plot analyse of "CD3 on HLA DR+ T cell " on 'Aplastic anemia'



### MR Method

- Inverse variance weighted
- MR Egger

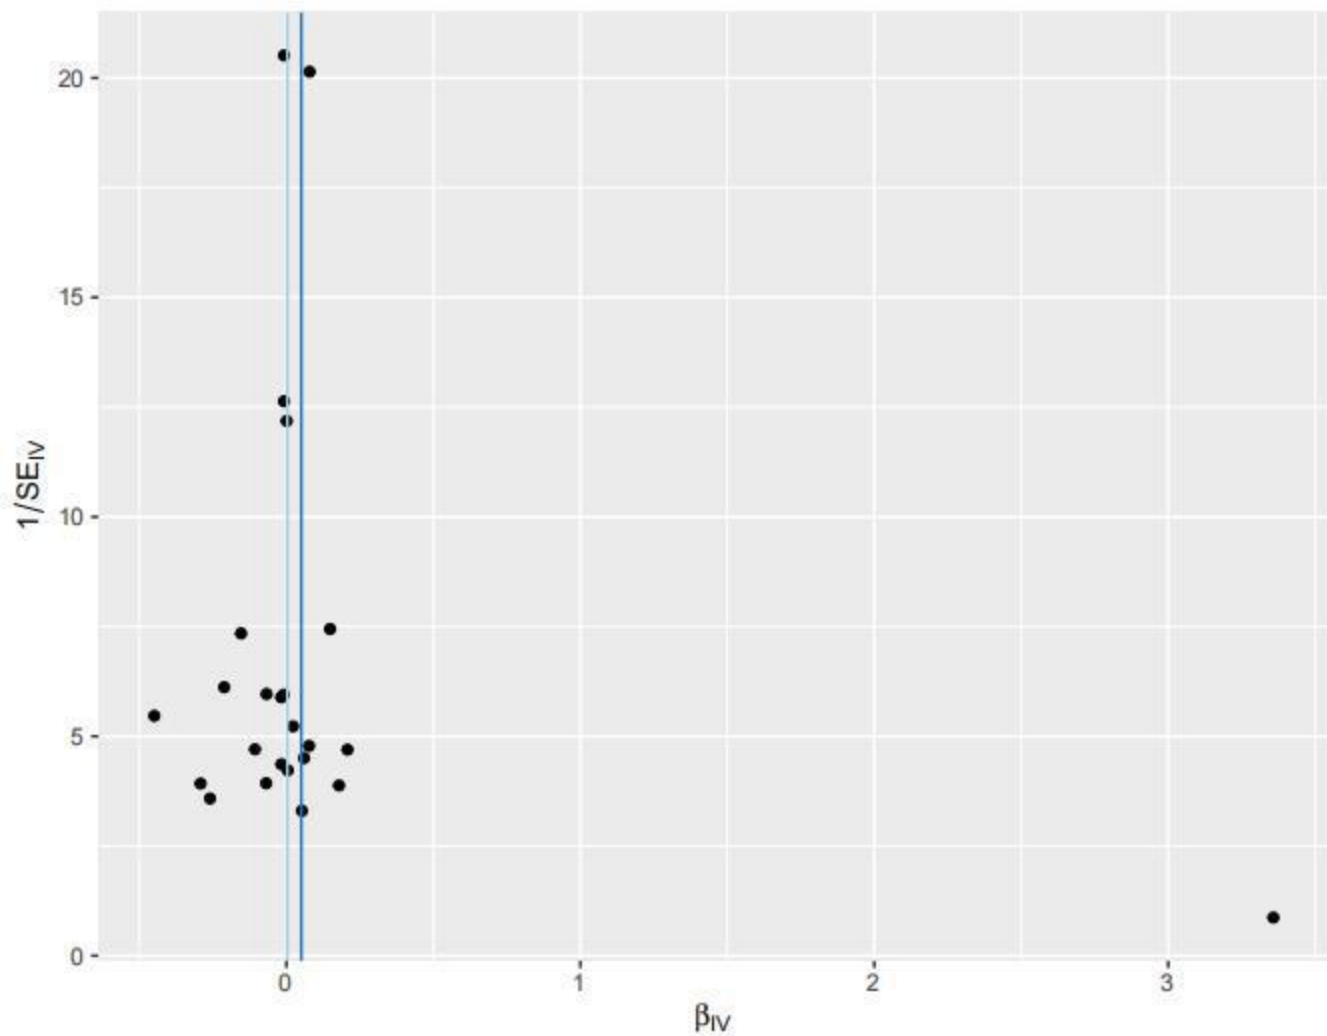

Funnel plot analyse of "TD CD8br %CD8br" on 'Aplastic anemia'

MR Method

- Inverse variance weighted
- MR Egger

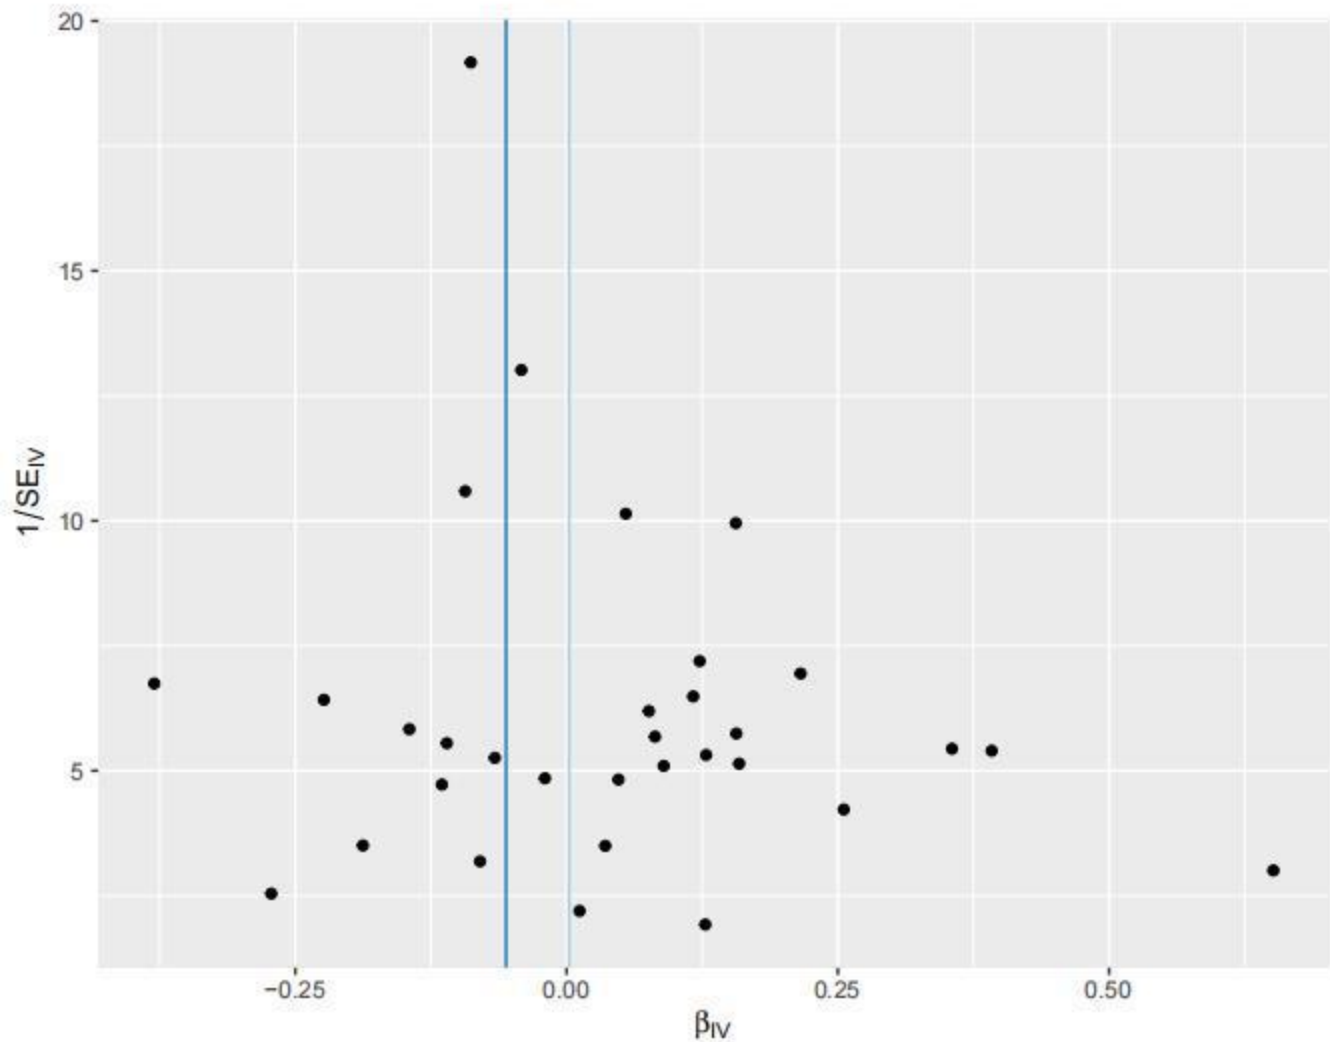

Funnel plot analysis of "CD20 on sw mem" on 'Aplastic anemia'

MR Method

- Inverse variance weighted
- MR Egger

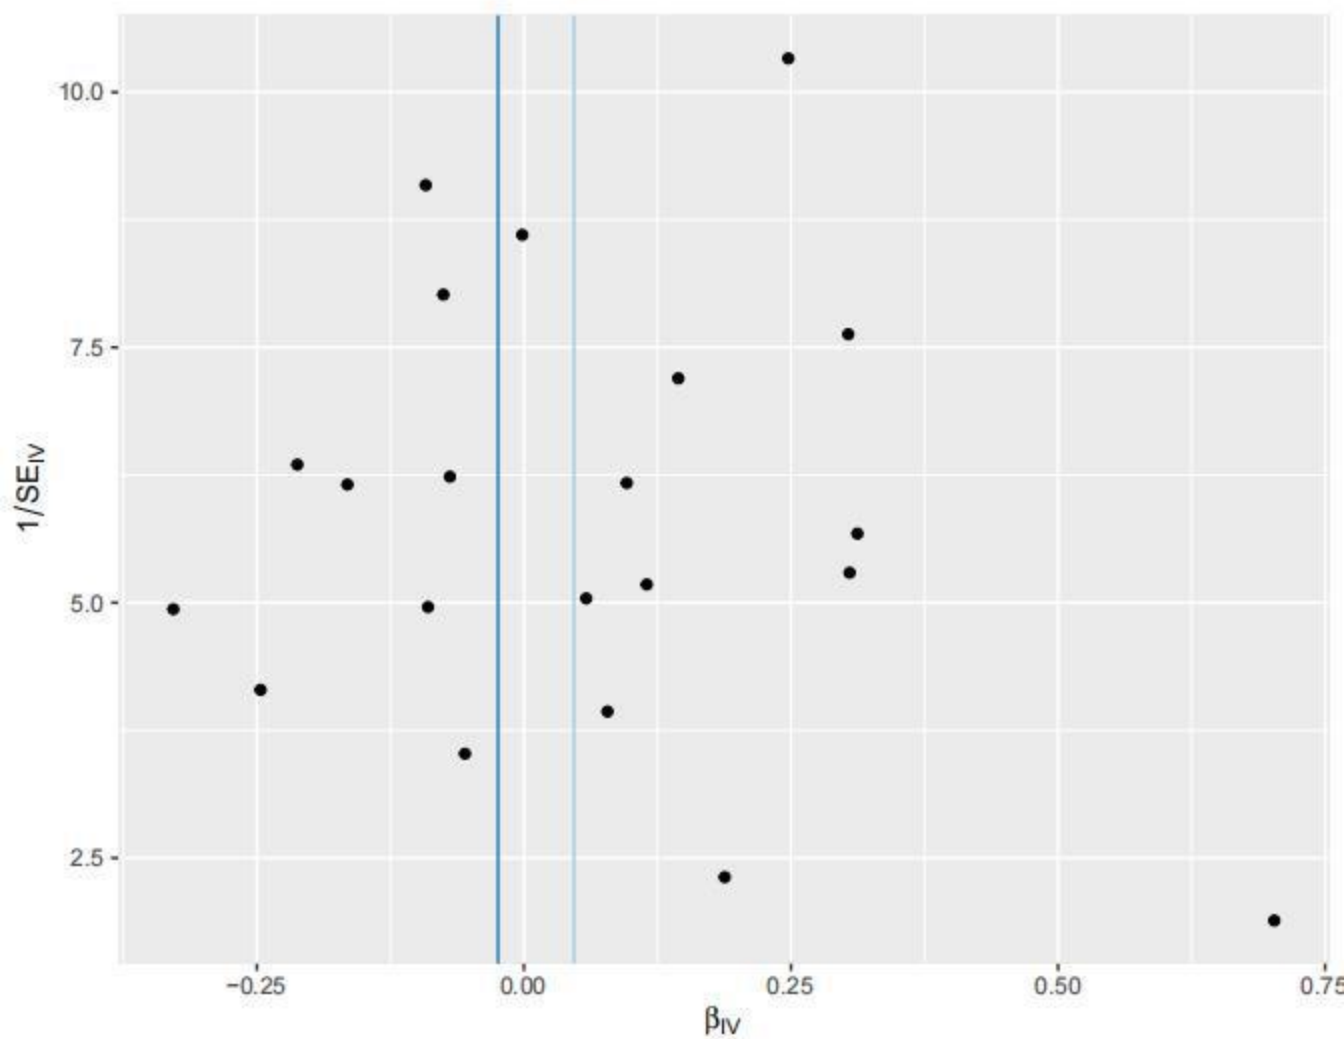

Funnel plot analyse of "CD4 on HLA DR+ CD4+ " on 'Aplastic anemia'

MR Method

- Inverse variance weighted
- MR Egger

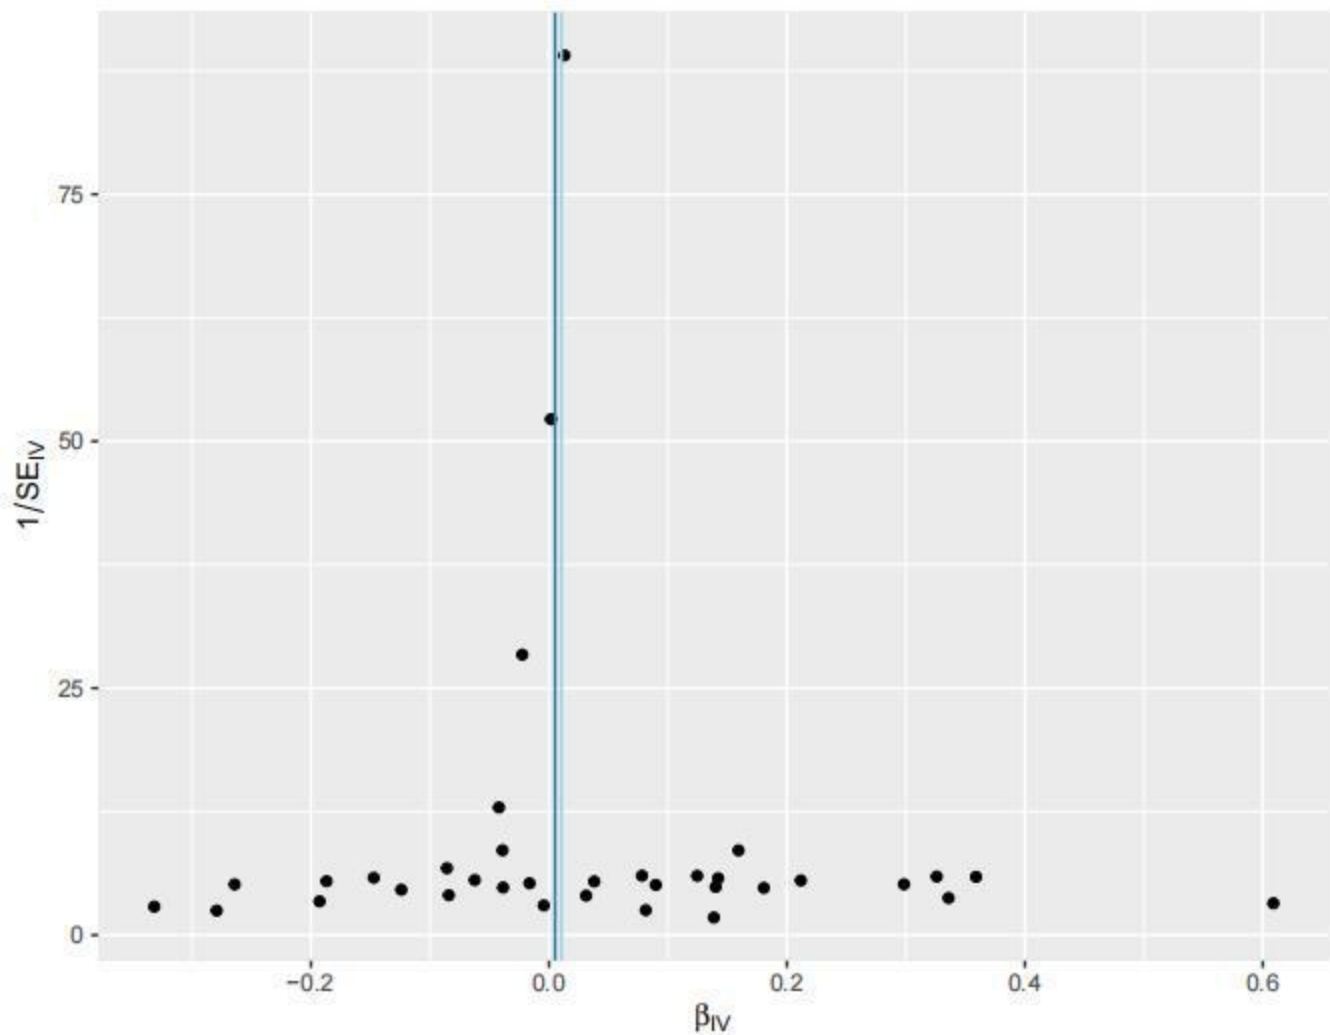

Funnel plot analyse of "CD20 on IgD- CD38dim" on 'Aplastic anemia'

MR Method

- Inverse variance weighted
- MR Egger

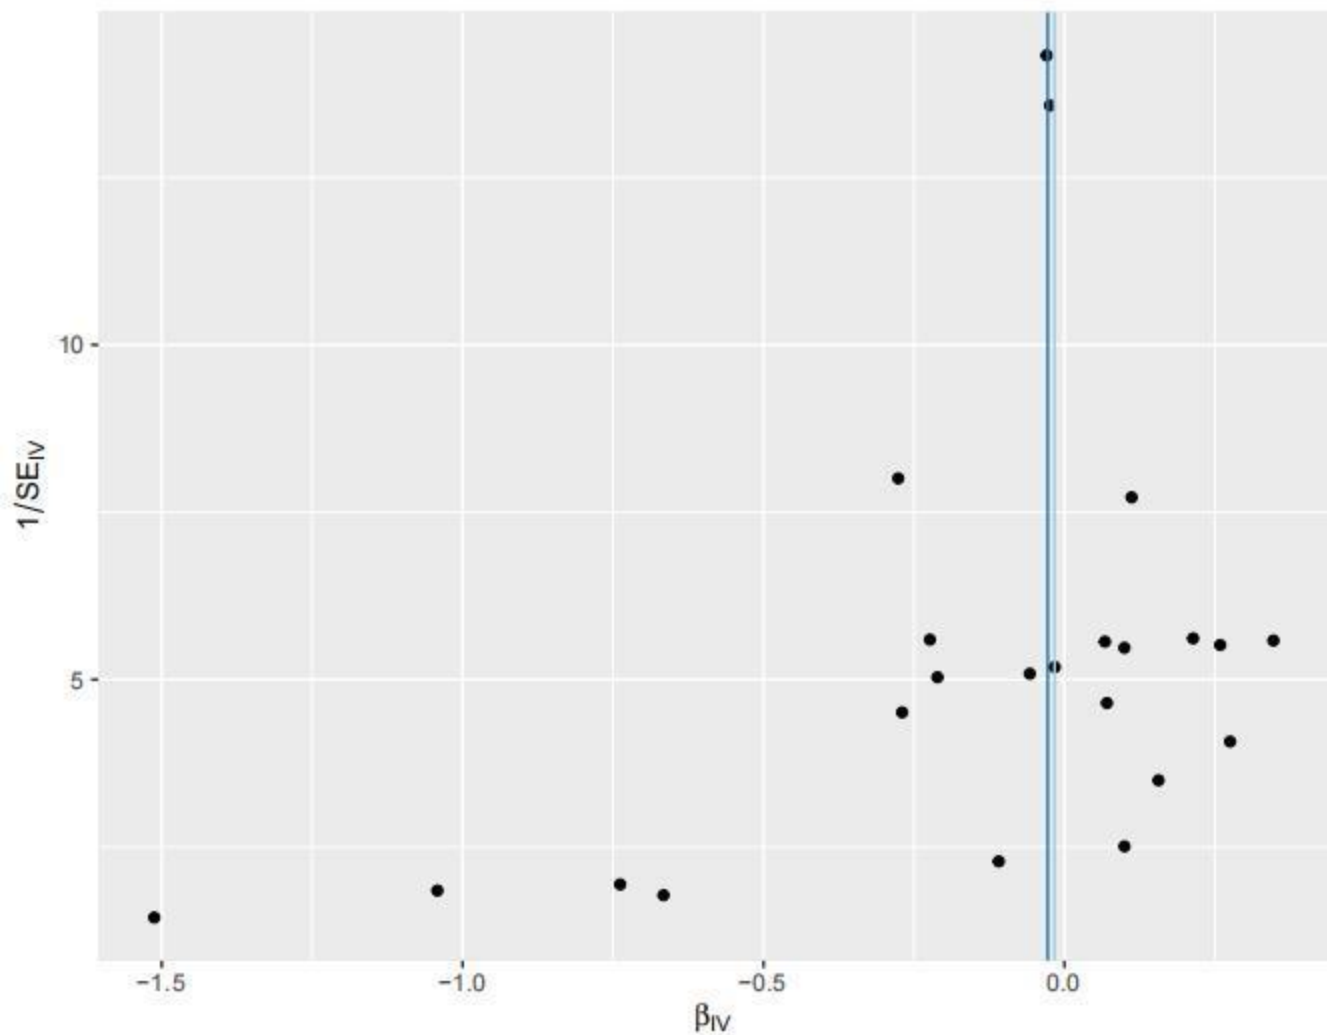

Funnel plot analyse of "CD25++ CD8br %CD8br" on 'Aplastic anemia'

### MR Method

- Inverse variance weighted
- MR Egger

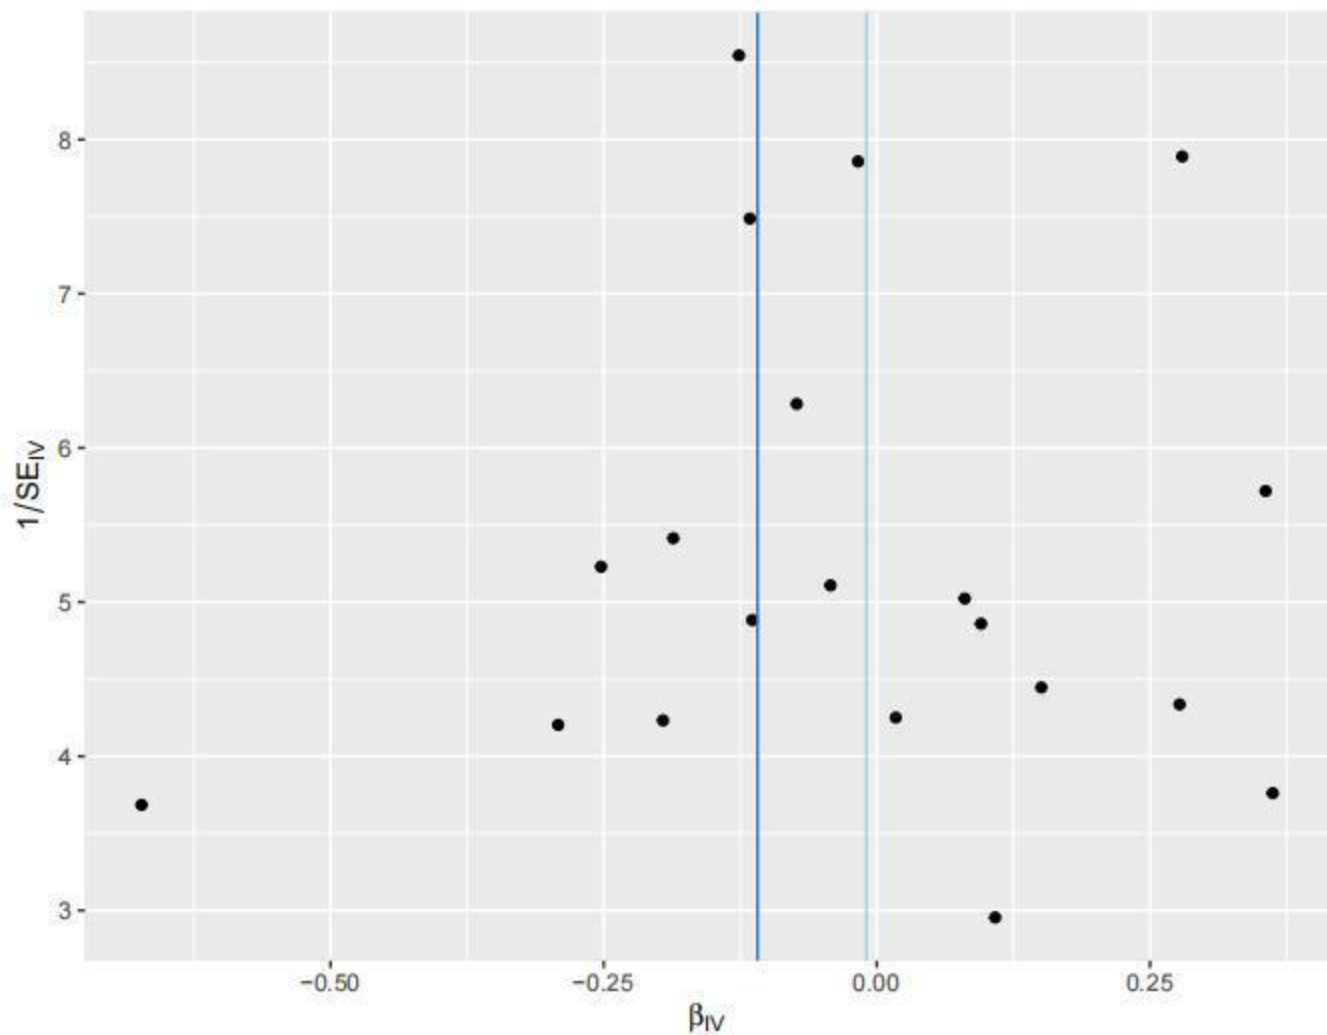

Funnel plot analyse of "DN (CD4-CD8-) AC" on 'Aplastic anemia'

MR Method

Inverse variance weighted

MR Egger

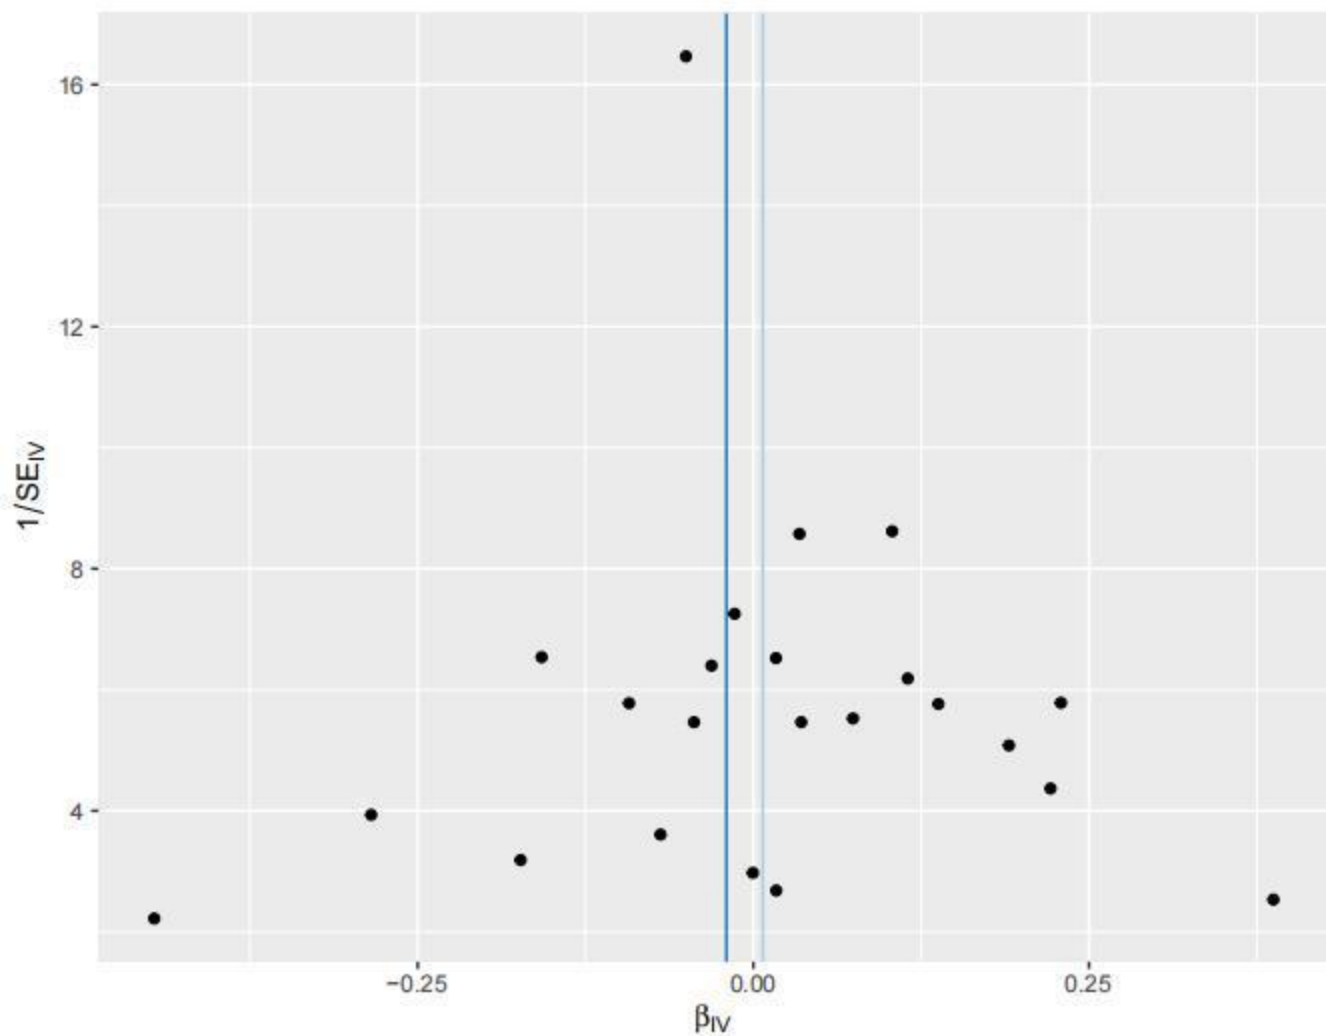

Funnel plot analyse of "CD127 on CD28+ CD45RA+ CD8br " on 'Aplastic anemia'

MR Method

Inverse variance weighted

MR Egger

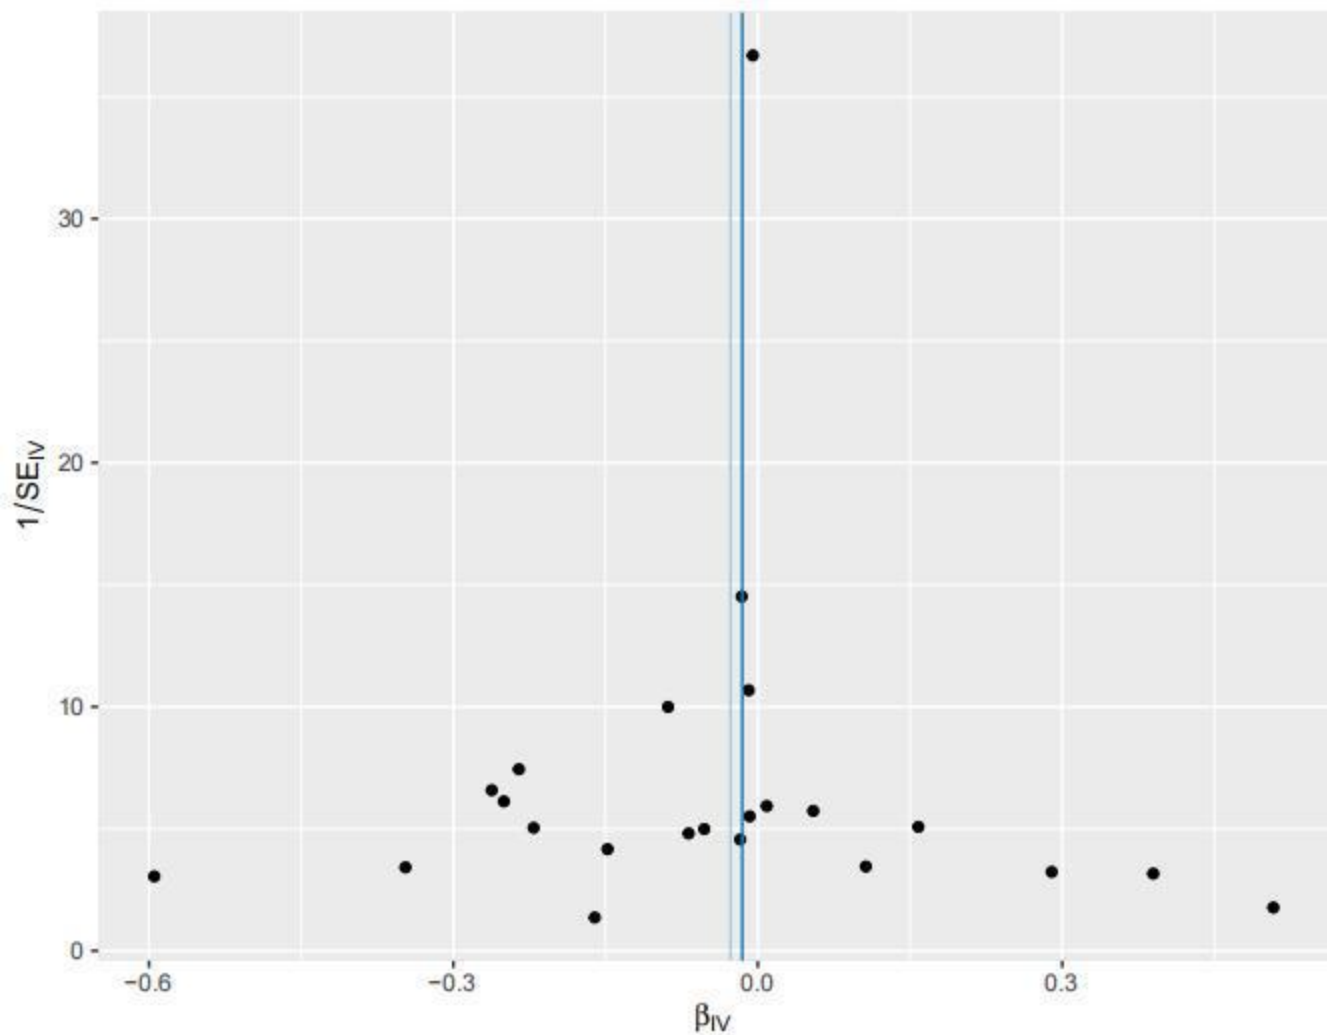

Funnel plot analyse of "Naive-mature B cell AC" on 'Aplastic anemia'



MR Method

- Inverse variance weighted
- MR Egger

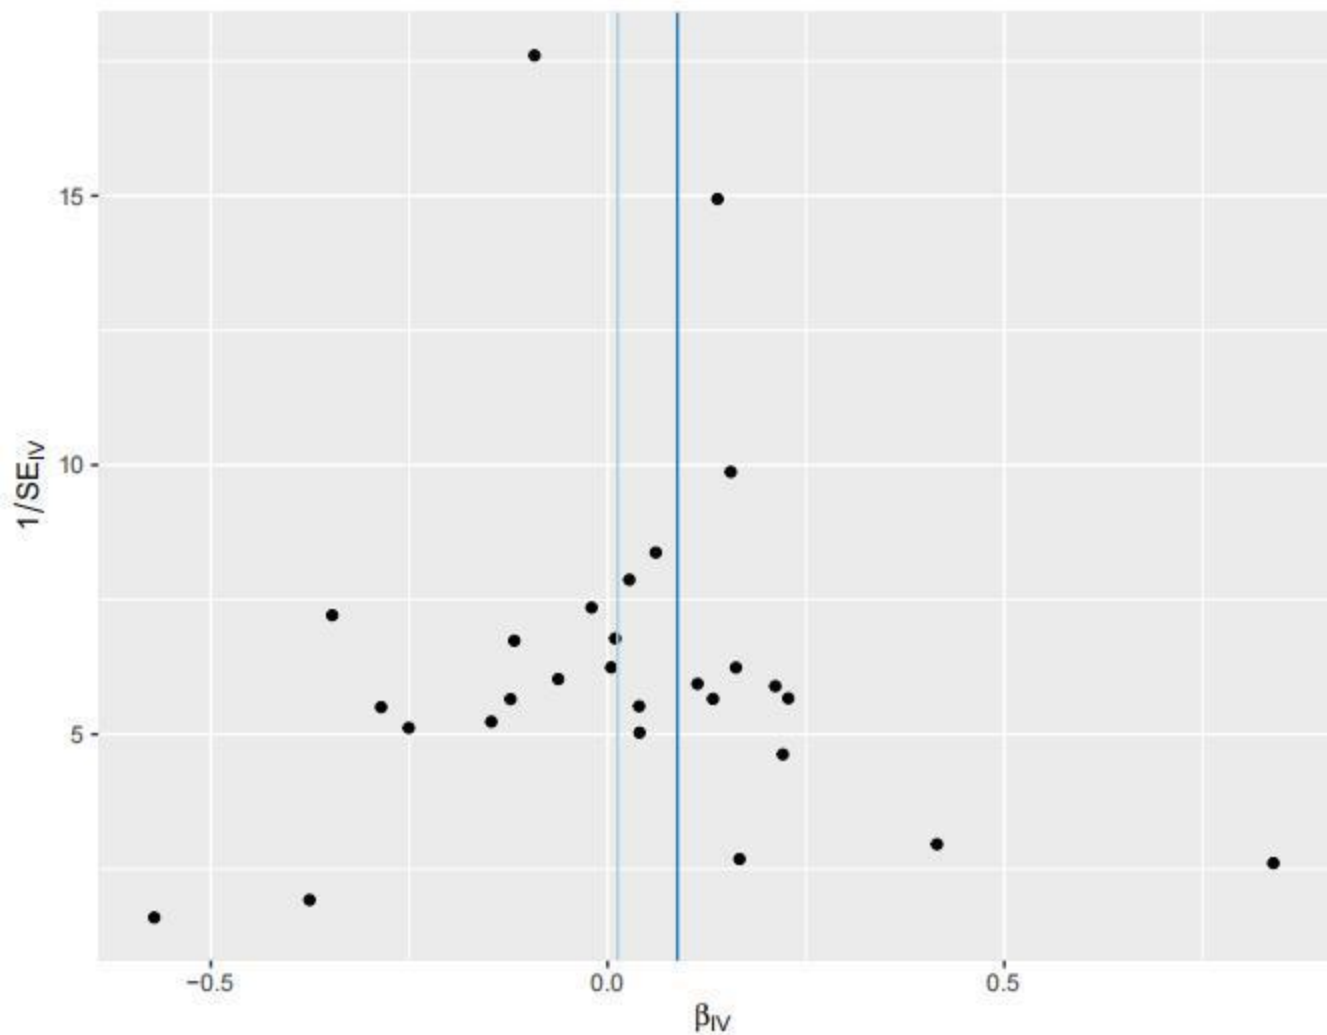

Funnel plot analyse of "CD3 on HLA DR+ CD4+" on 'Aplastic anemia'

### MR Method

- Inverse variance weighted
- MR Egger

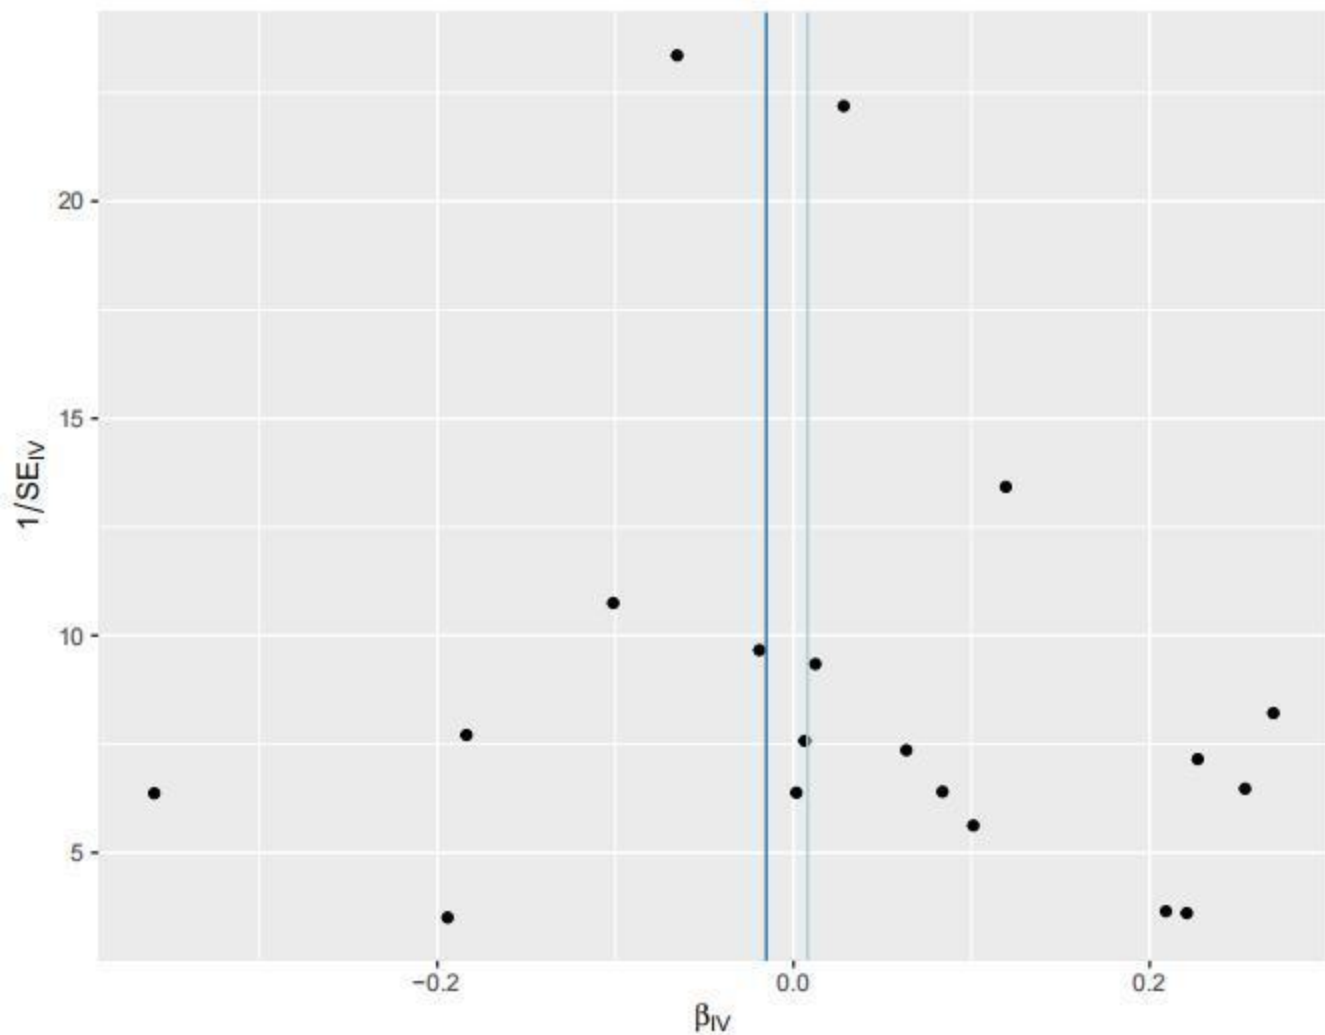

Funnel plot analyse of "CD33br HLA DR+ CD14- %CD33br HLA DR+" on 'Aplastic anemia'

### MR Method

- Inverse variance weighted
- MR Egger

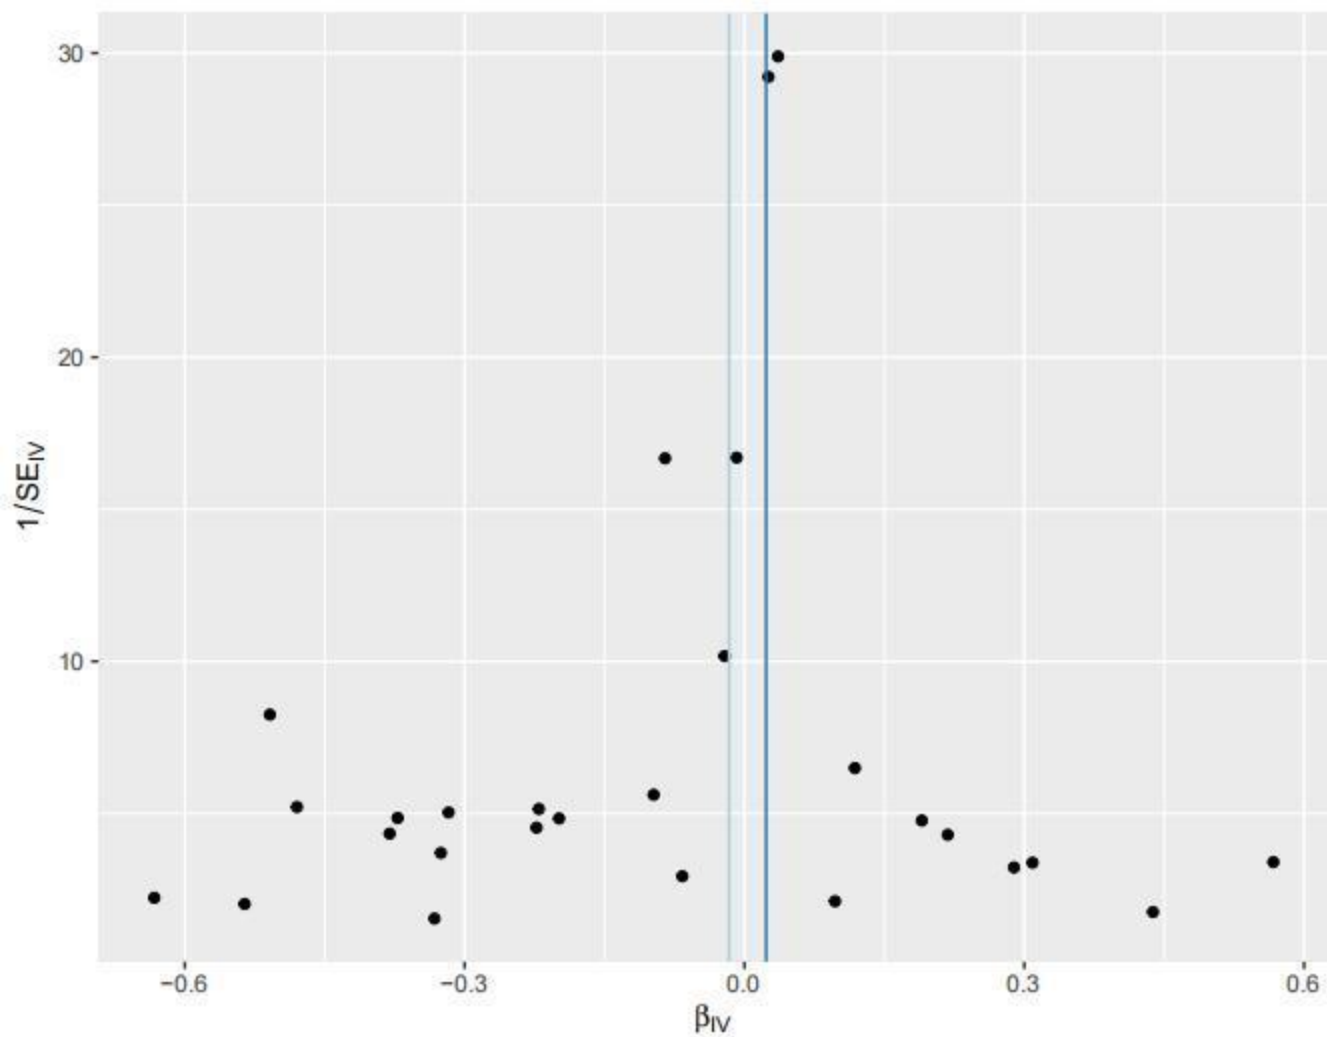

Funnel plot analyse of "TD CD4+ %T cell" on 'Aplastic anemia'

### MR Method

Inverse variance weighted

MR Egger

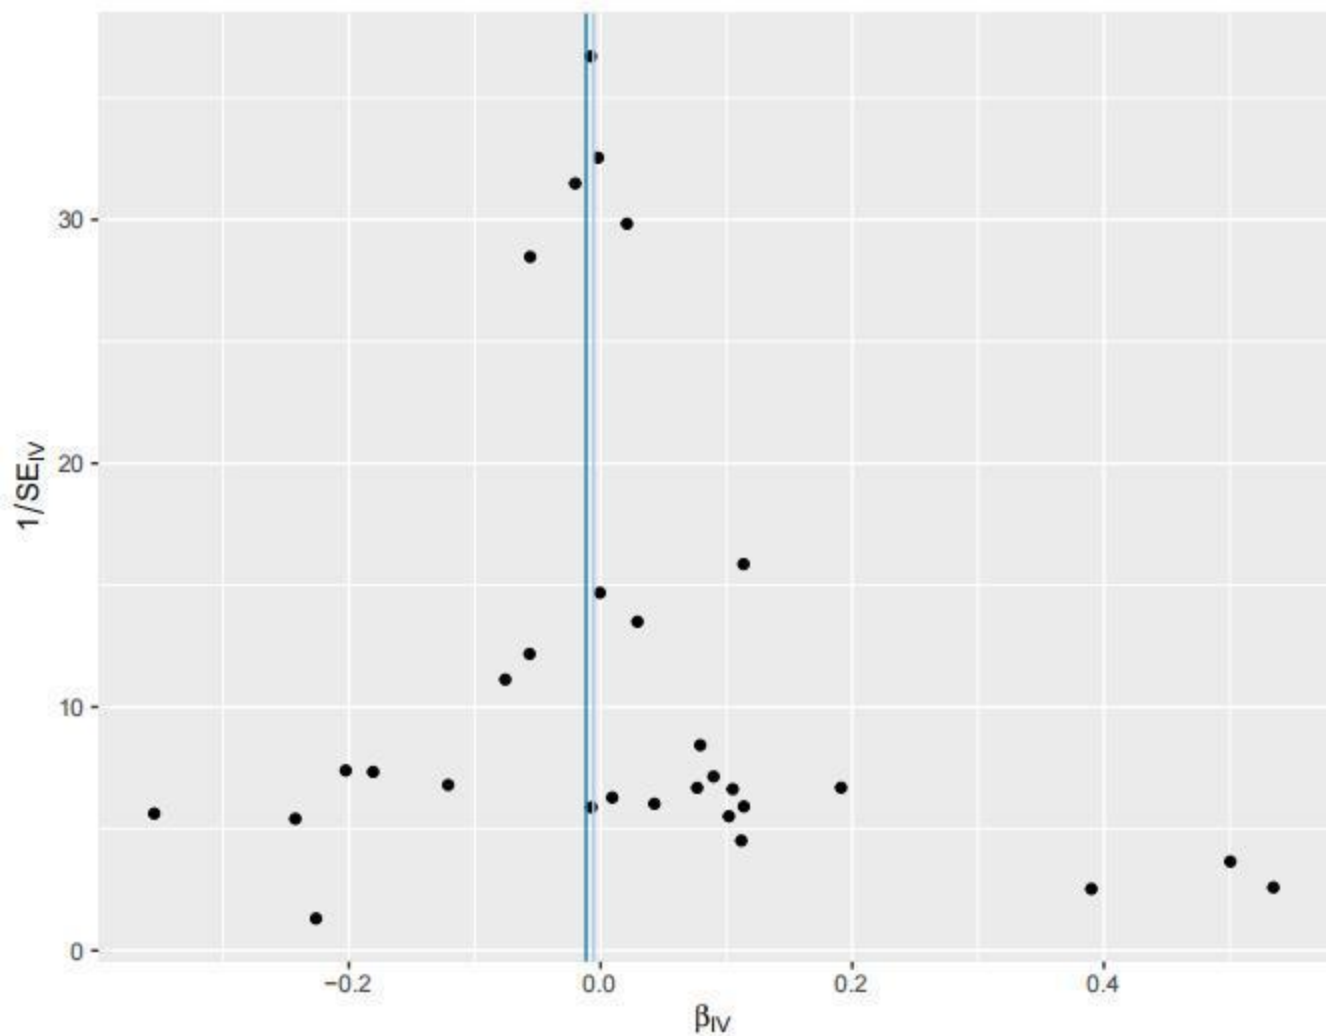

Funnel plot analysis of "CD33br HLA DR+ AC" on 'Aplastic anemia'

MR Method

- Inverse variance weighted
- MR Egger

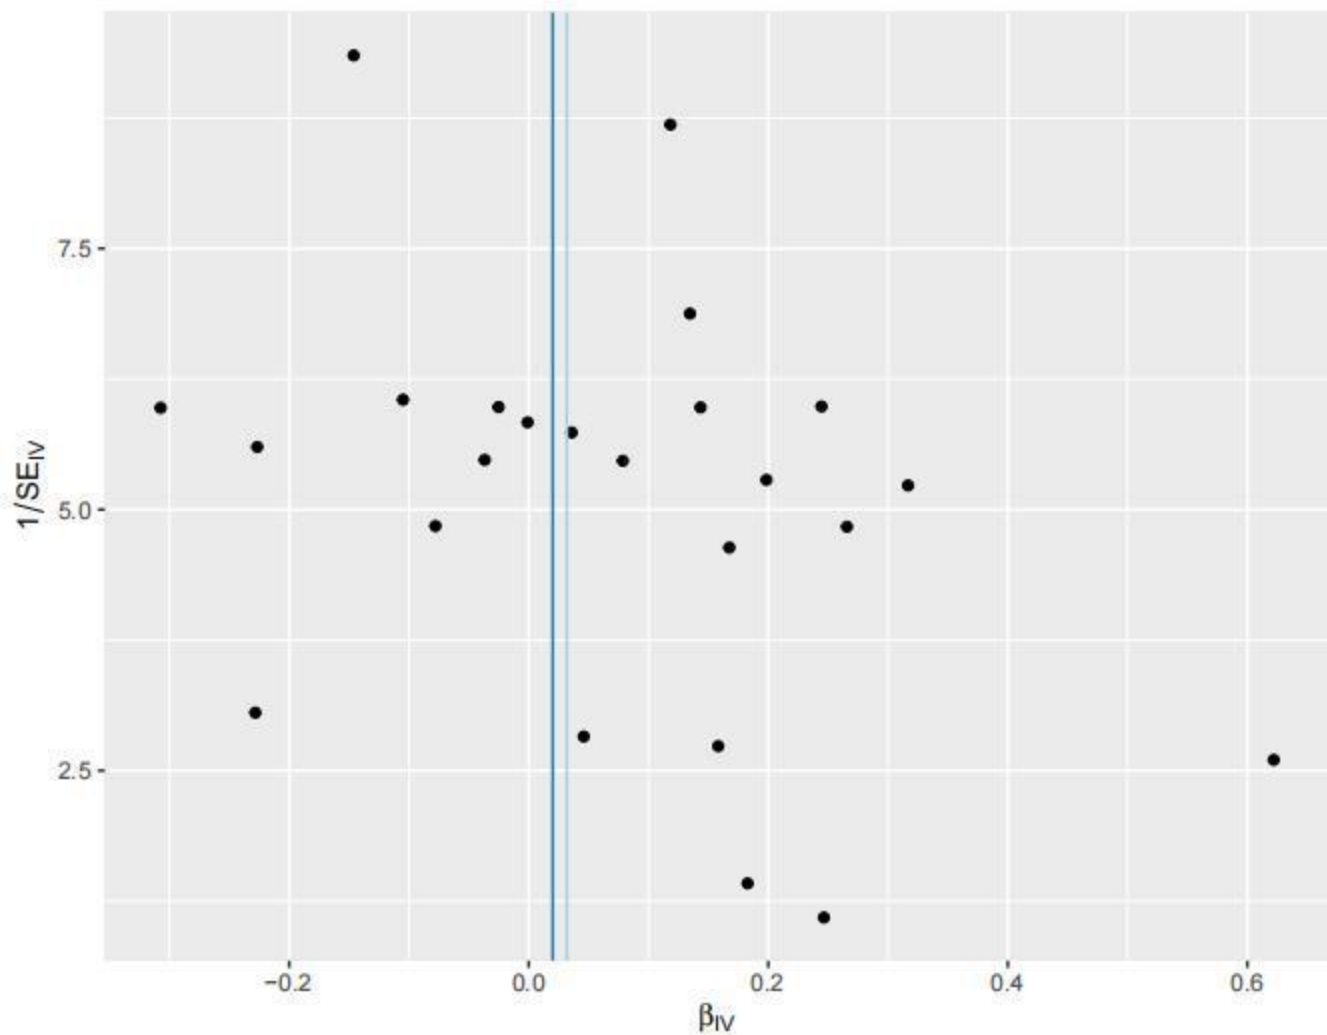

Funnel plot analyse of "Unsw Mem %lymphocyte" on 'Aplastic anemia'

### MR Method

- Inverse variance weighted
- MR Egger

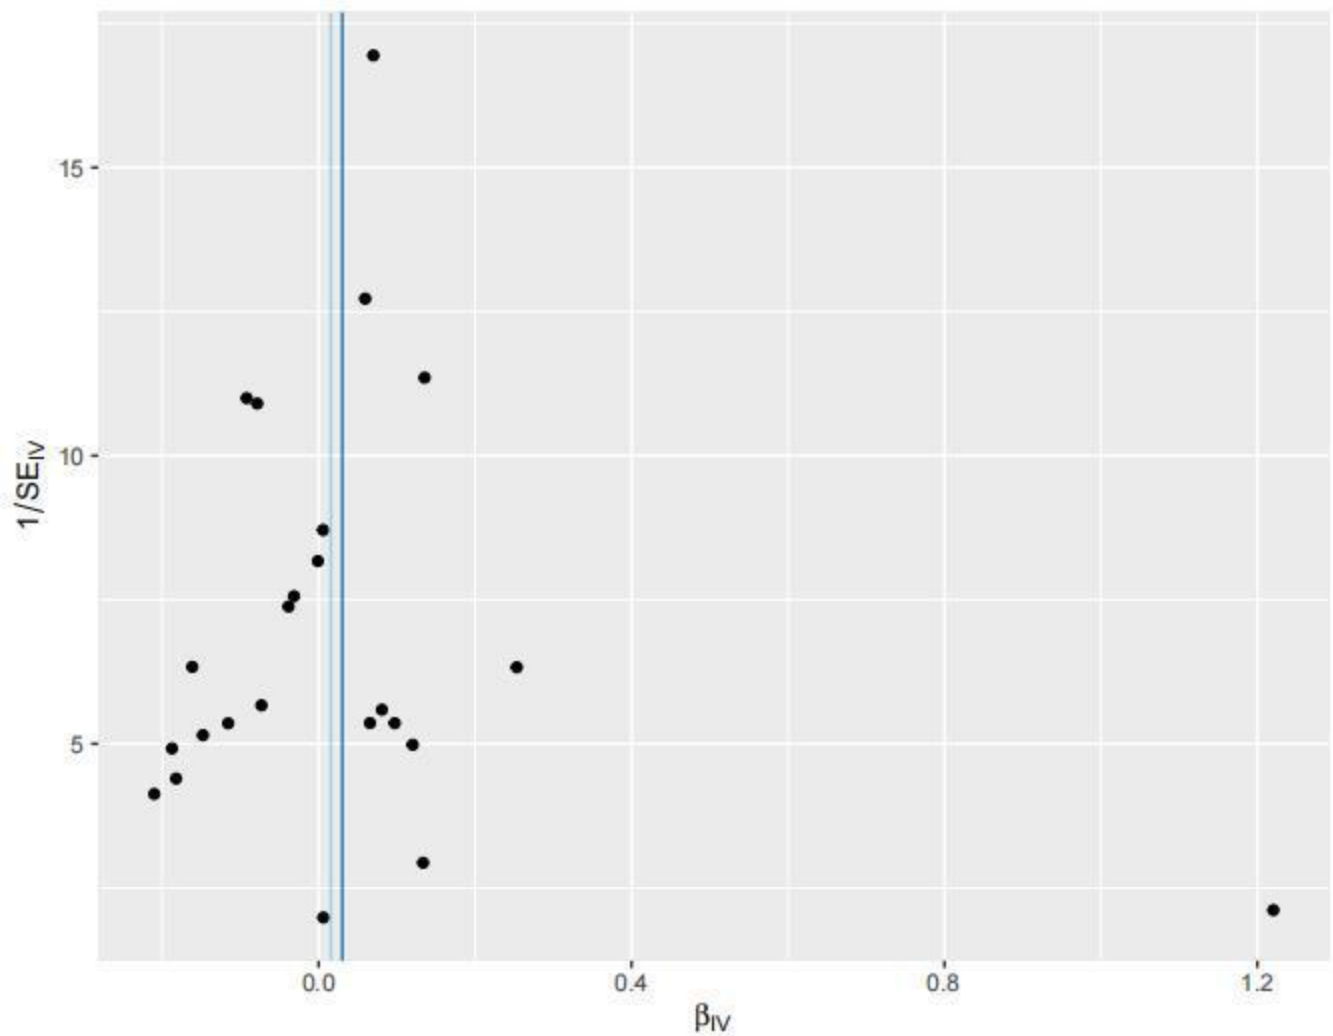

Funnel plot analyse of "CD38 on IgD+ CD38dim" on 'Aplastic anemia'

MR Method

Inverse variance weighted

MR Egger

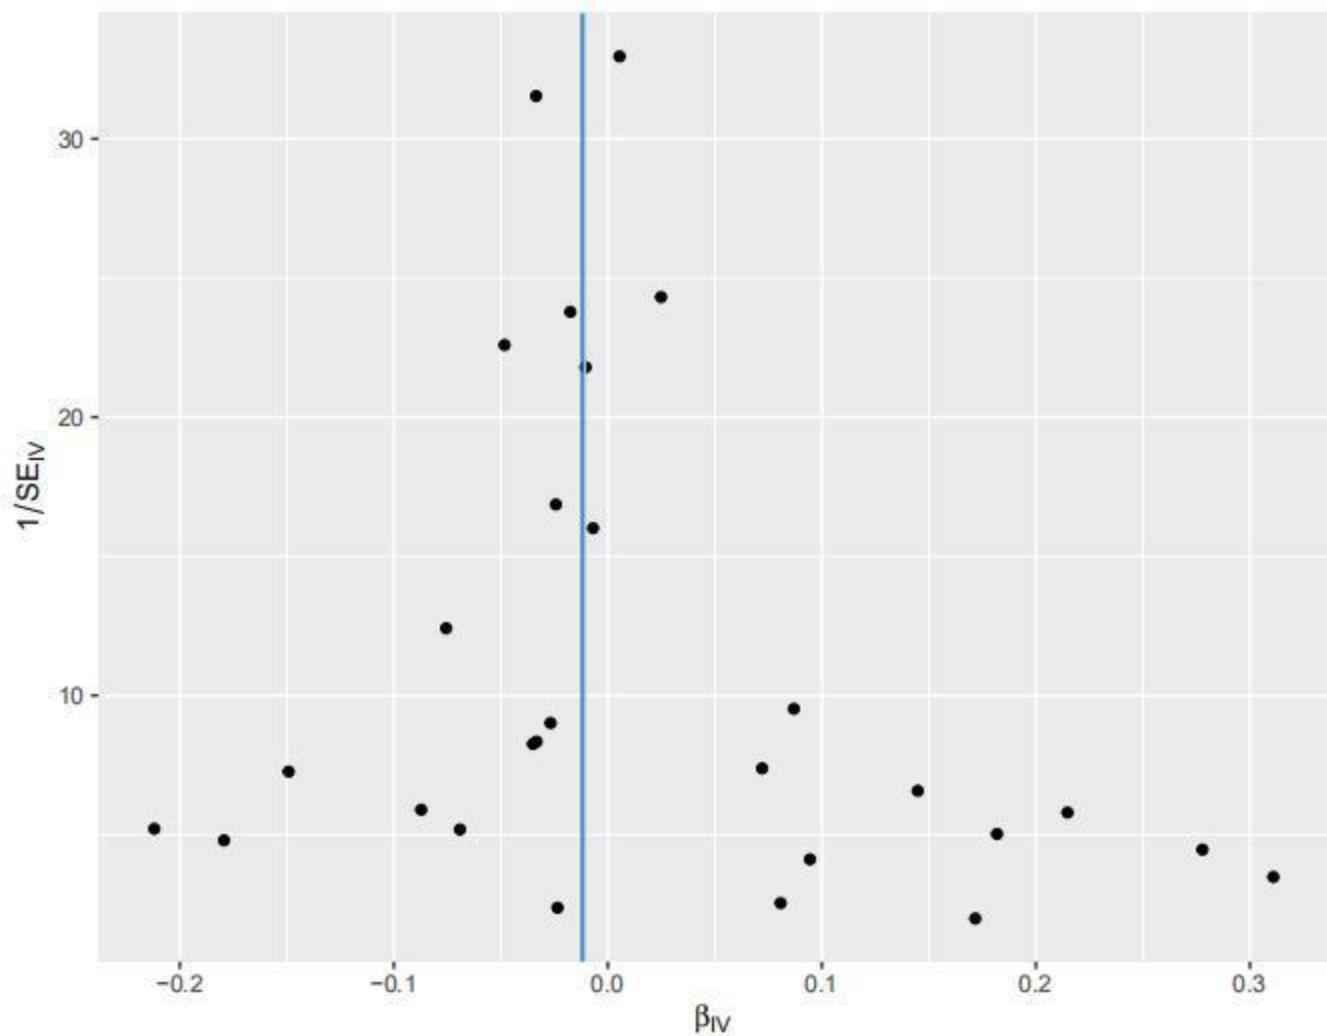

Funnel plot analyse of "CD25hi CD45RA+ CD4 not Treg %T cell" on 'Aplastic anemia'

MR Method

Inverse variance weighted

MR Egger

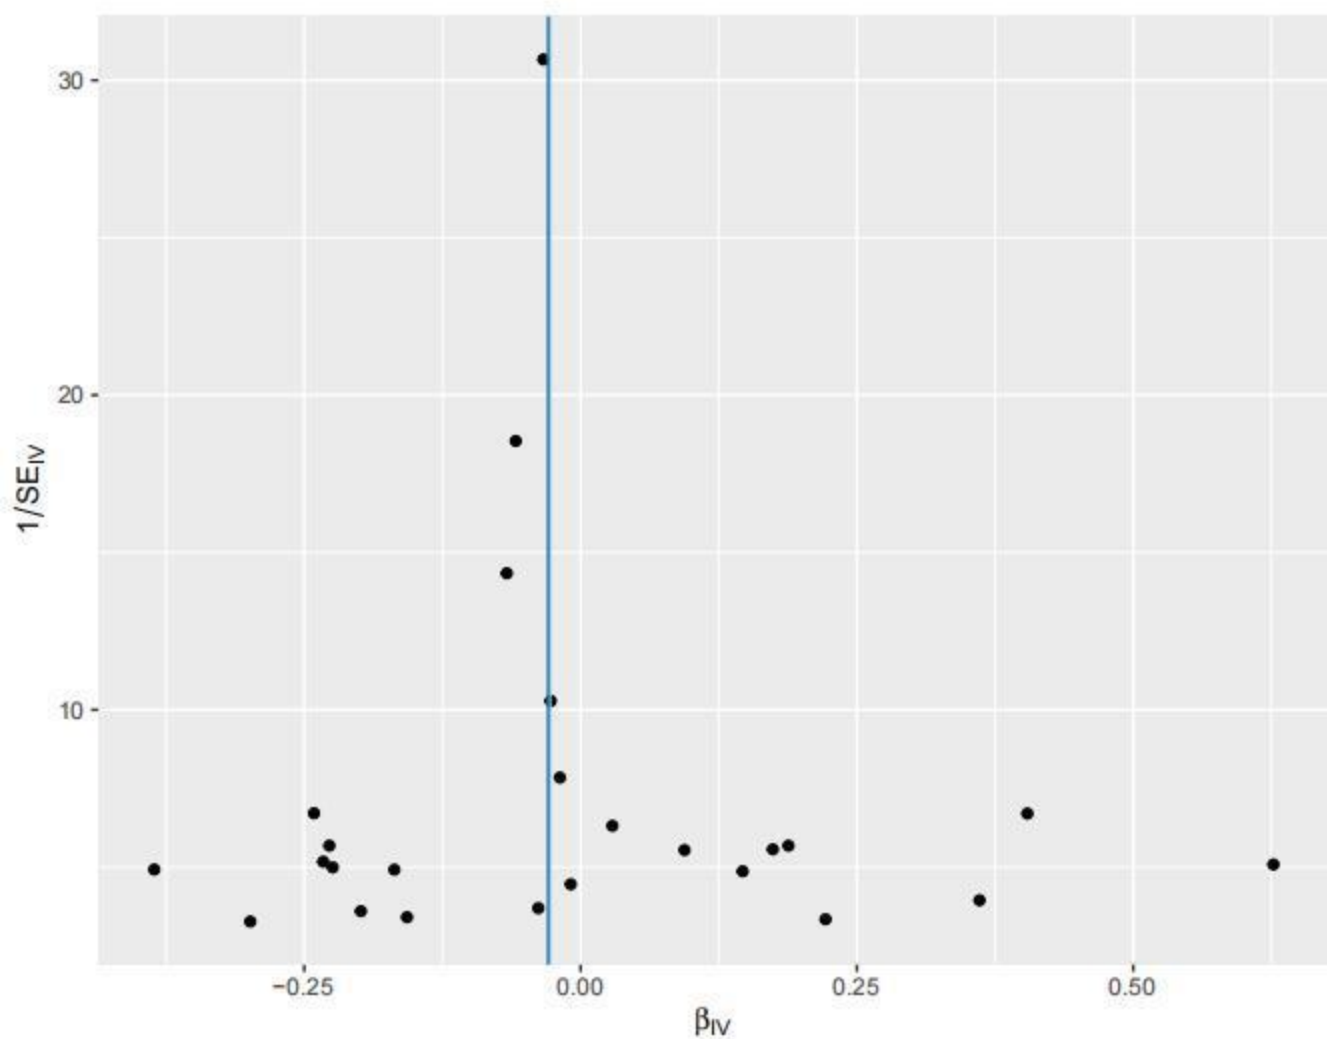

Funnel plot analyse of "CD28- CD25++ CD8br AC" on 'Aplastic anemia'



### MR Method

- Inverse variance weighted
- MR Egger

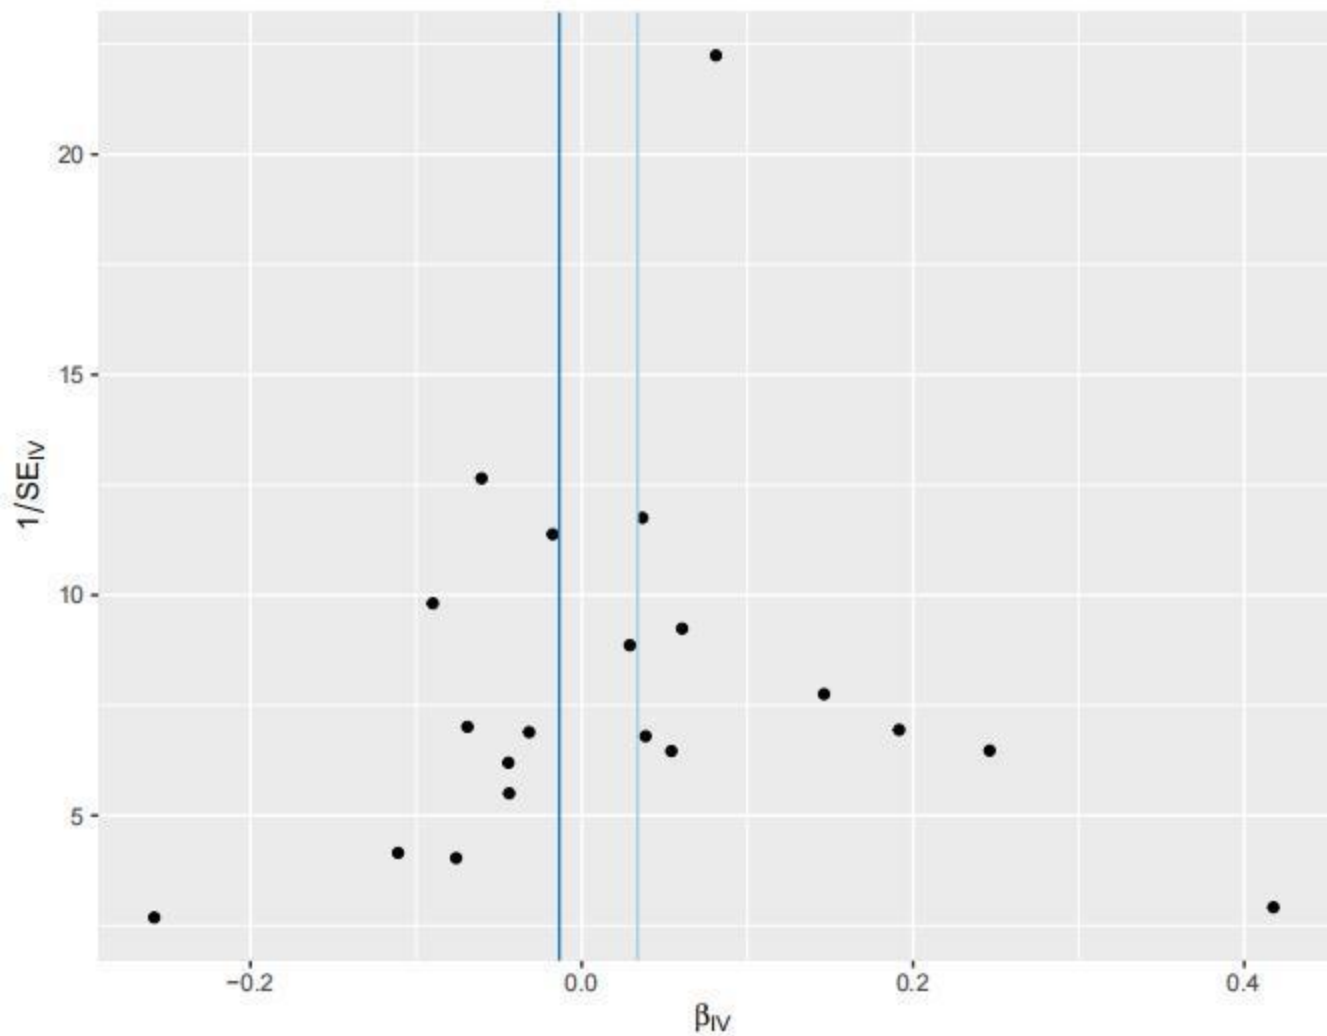

Funnel plot analyse of "Basophil %CD33dim HLA DR- CD66b-" on 'Aplastic anemia'

MR Method

- Inverse variance weighted
- MR Egger

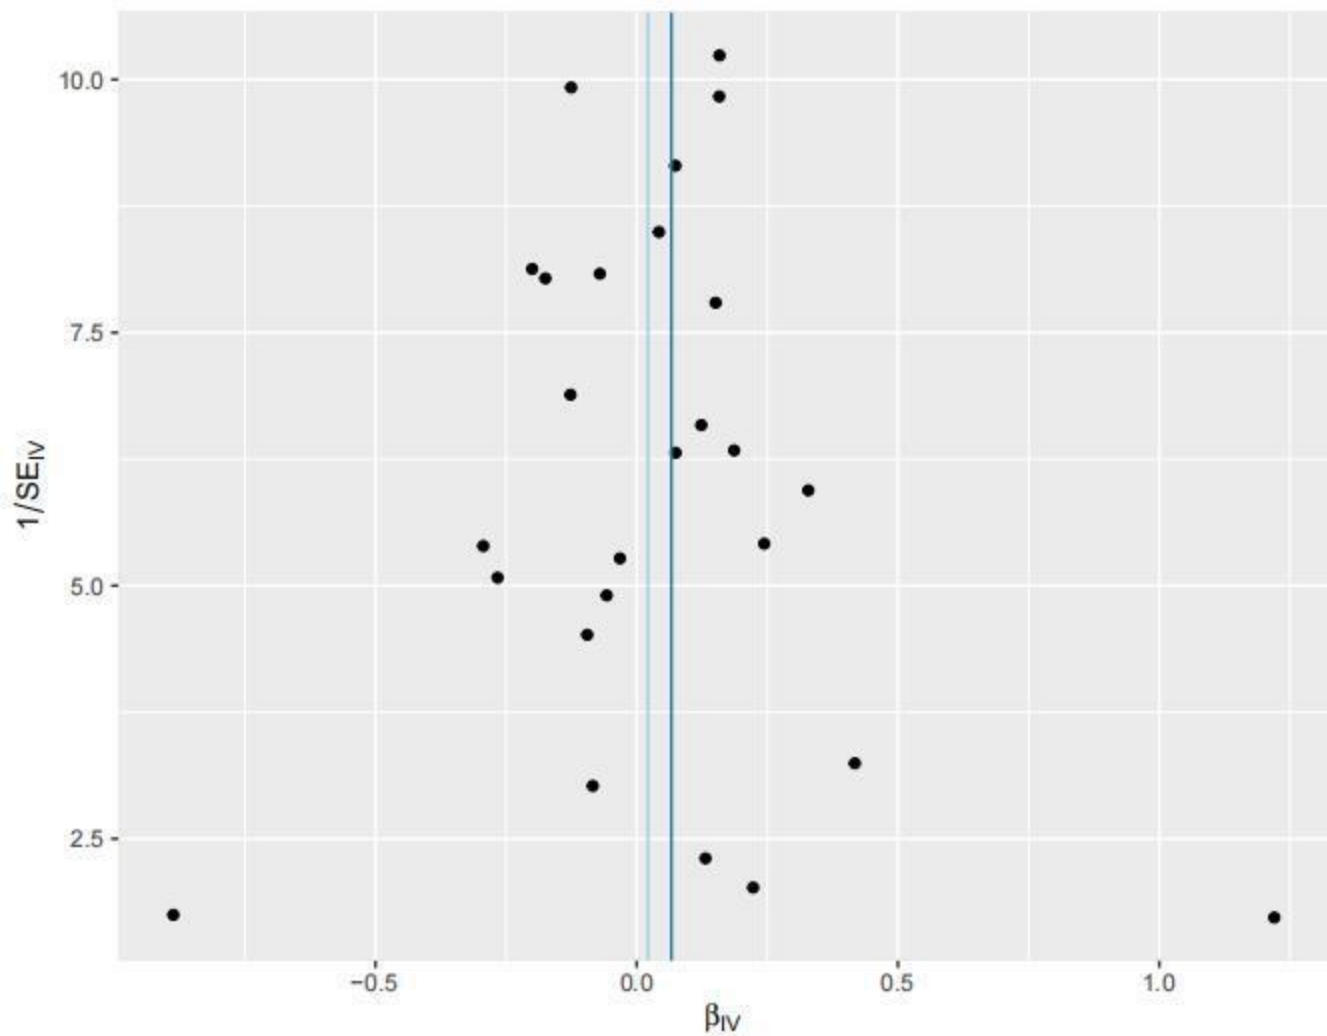

Funnel plot analyse of "CD20 on B cell" on 'Aplastic anemia'

### MR Method

Inverse variance weighted

MR Egger

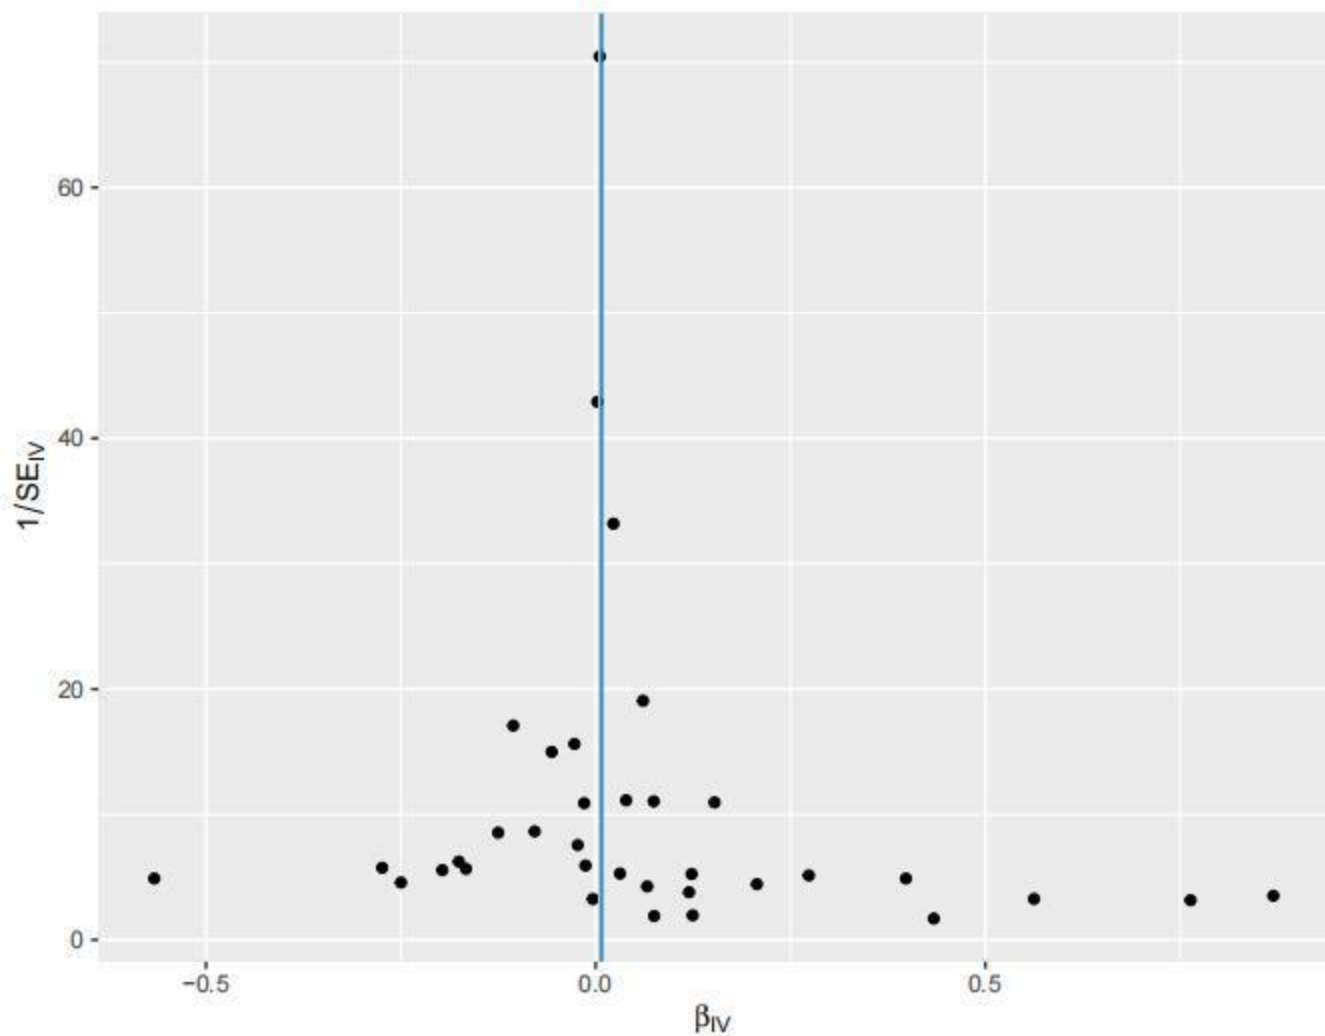

Funnel plot analysis of "CD64 on CD14+ CD16- monocyte " on 'Aplastic anemia'

MR Method

- Inverse variance weighted
- MR Egger

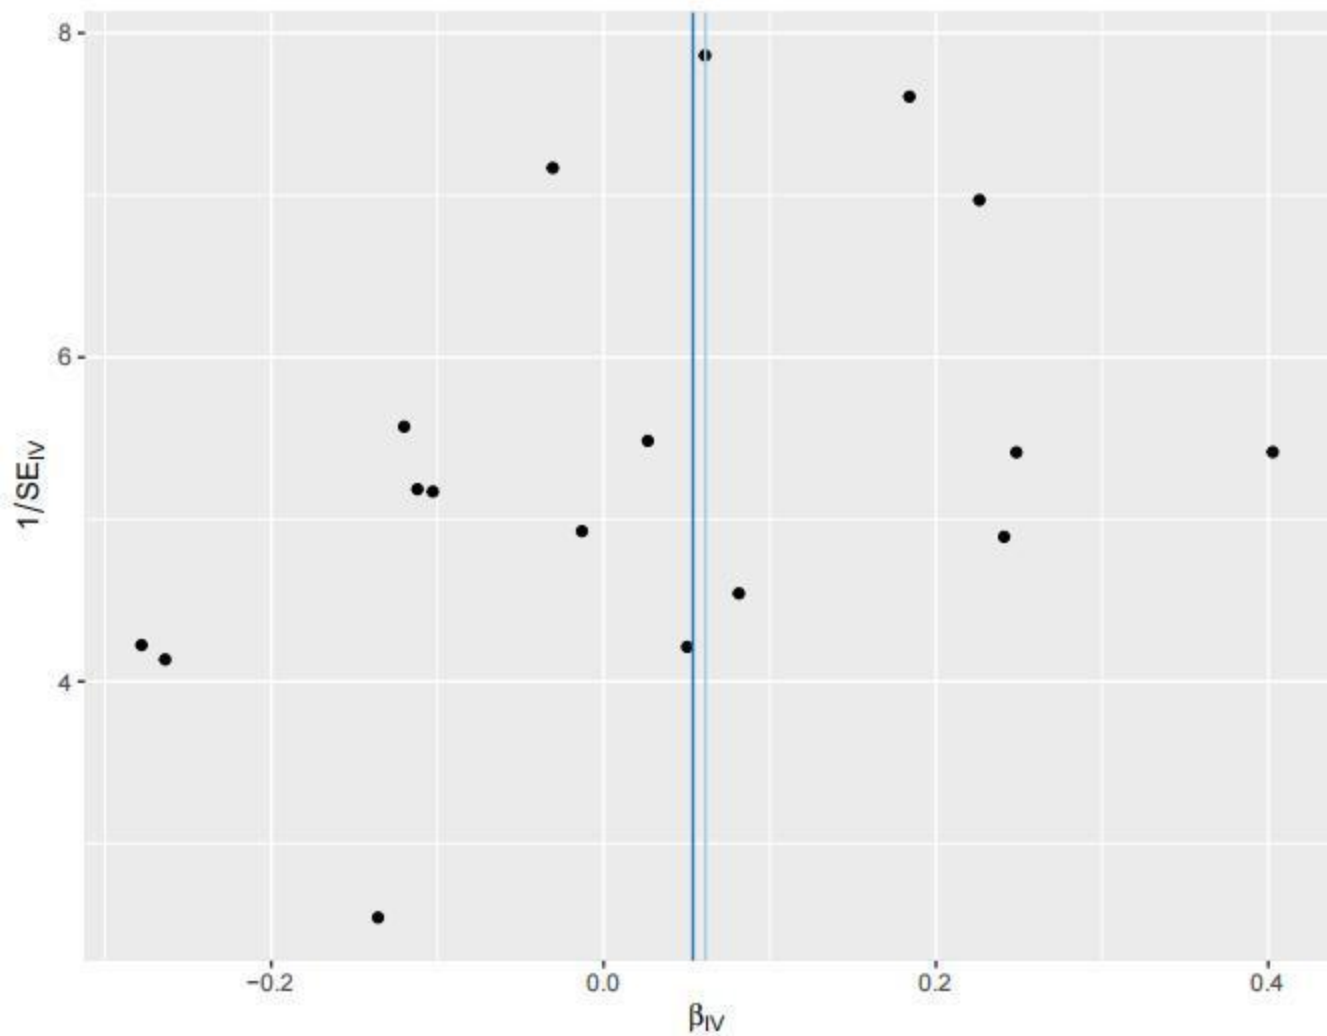

Funnel plot analysis of "CD14 on CD14+ CD16+ monocyte" on 'Aplastic anemia'

MR Method

- Inverse variance weighted
- MR Egger

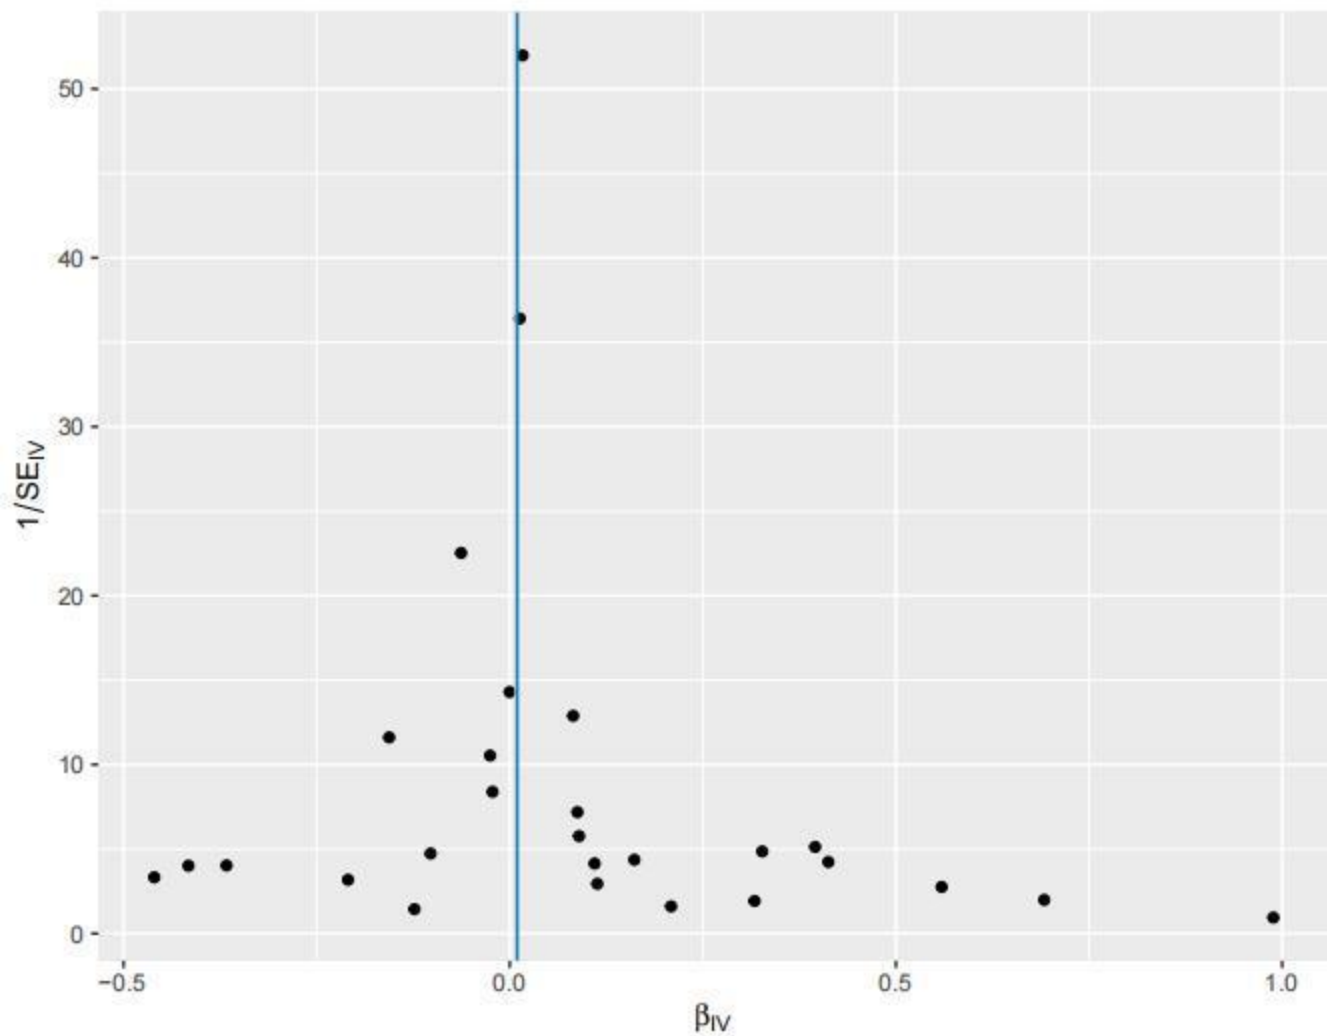

Funnel plot analyse of "CD45RA+ CD8br %CD8br" on 'Aplastic anemia'

### MR Method

- Inverse variance weighted
- MR Egger

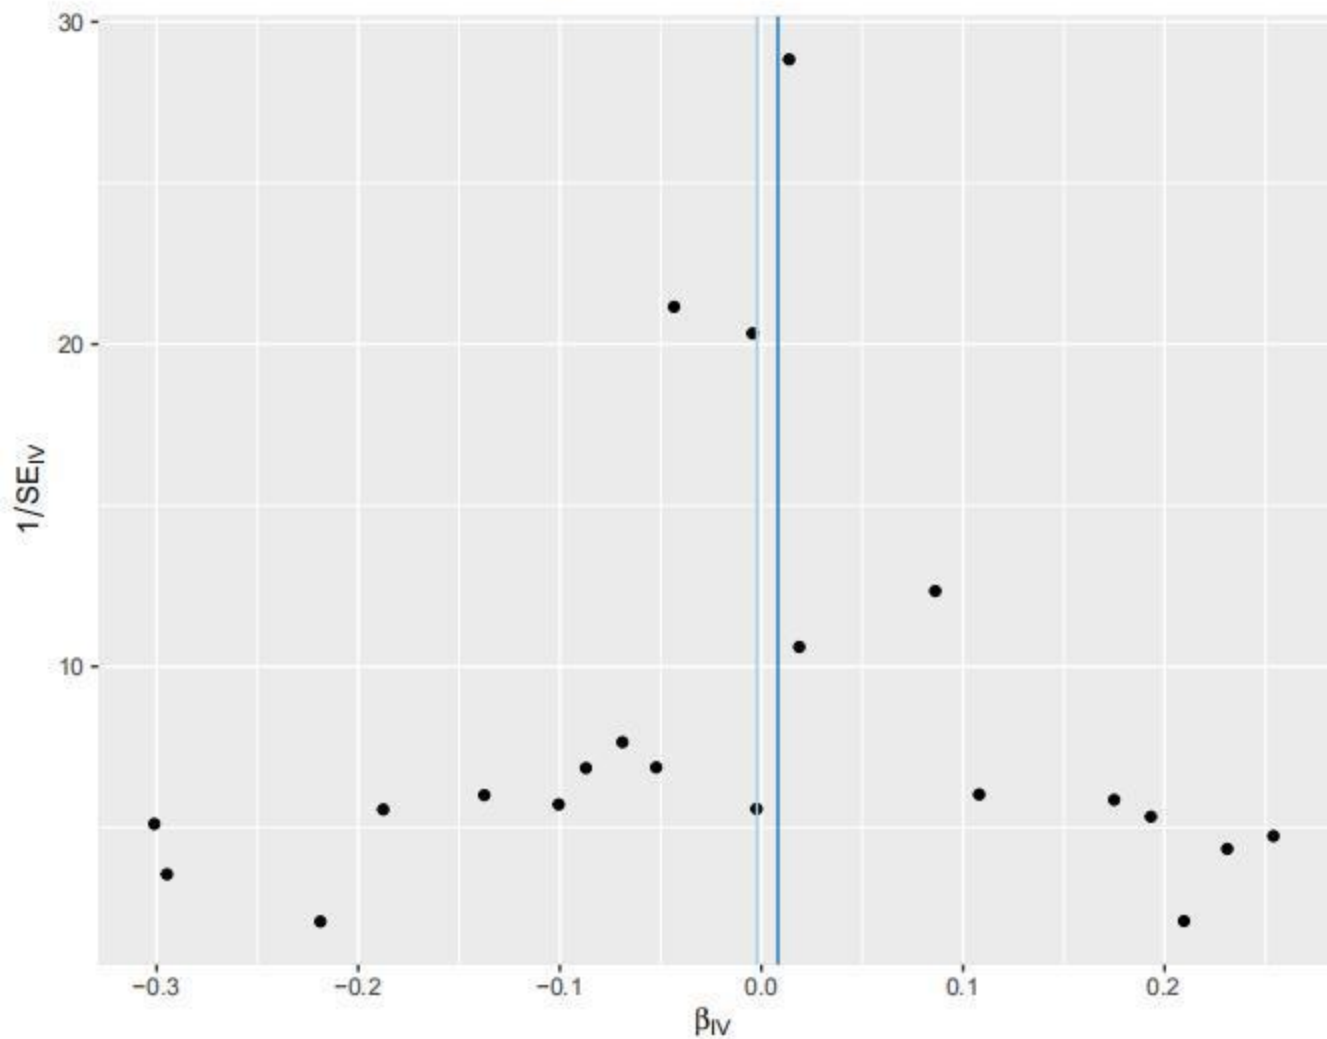

Funnel plot analyse of "CD80 on CD62L+ plasmacytoid DC" on 'Aplastic anemia'

### MR Method

- Inverse variance weighted
- MR Egger

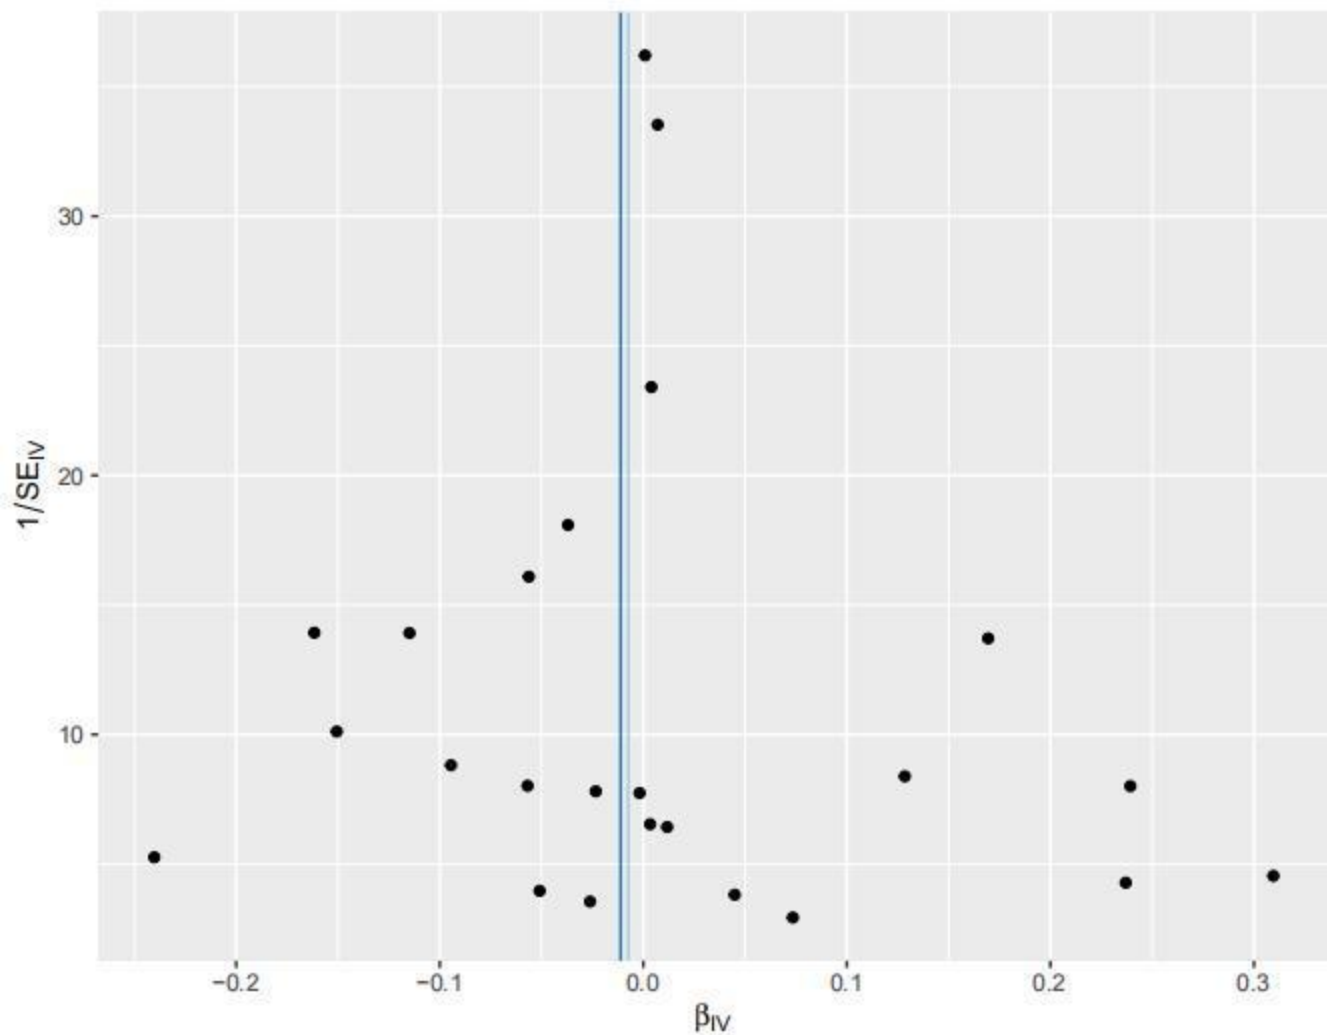

Funnel plot analyse of "CD25 on IgD+ CD38- unsw mem" on 'Aplastic anemia'

### MR Method

- Inverse variance weighted
- MR Egger

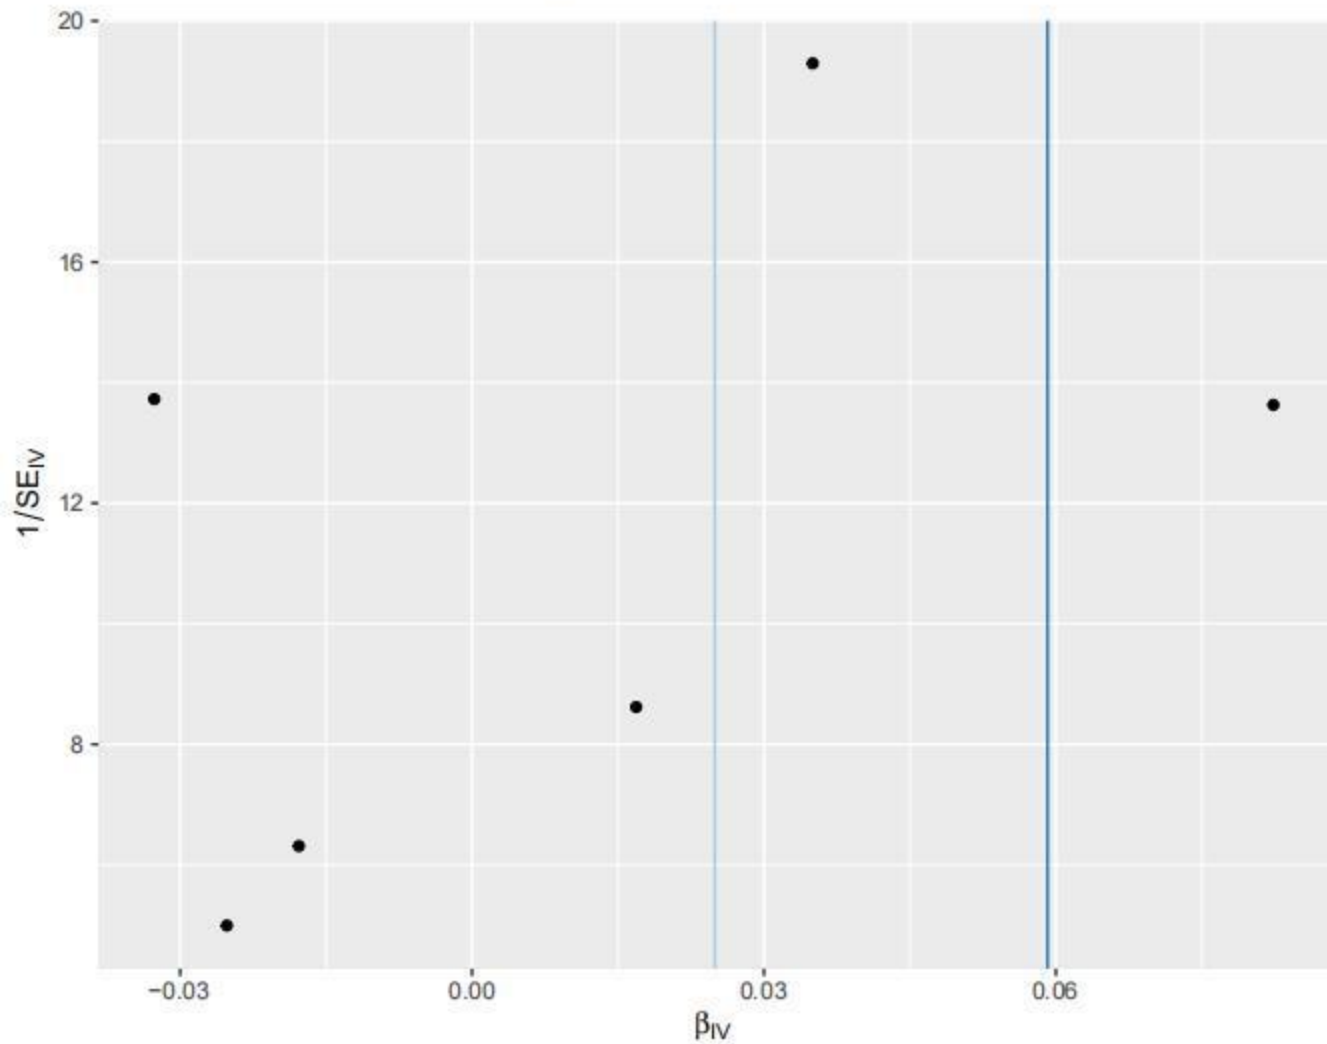

Funnel plot analyse of "HLA DR on HSC" on 'Aplastic anemia'



MR Method

Inverse variance weighted

MR Egger

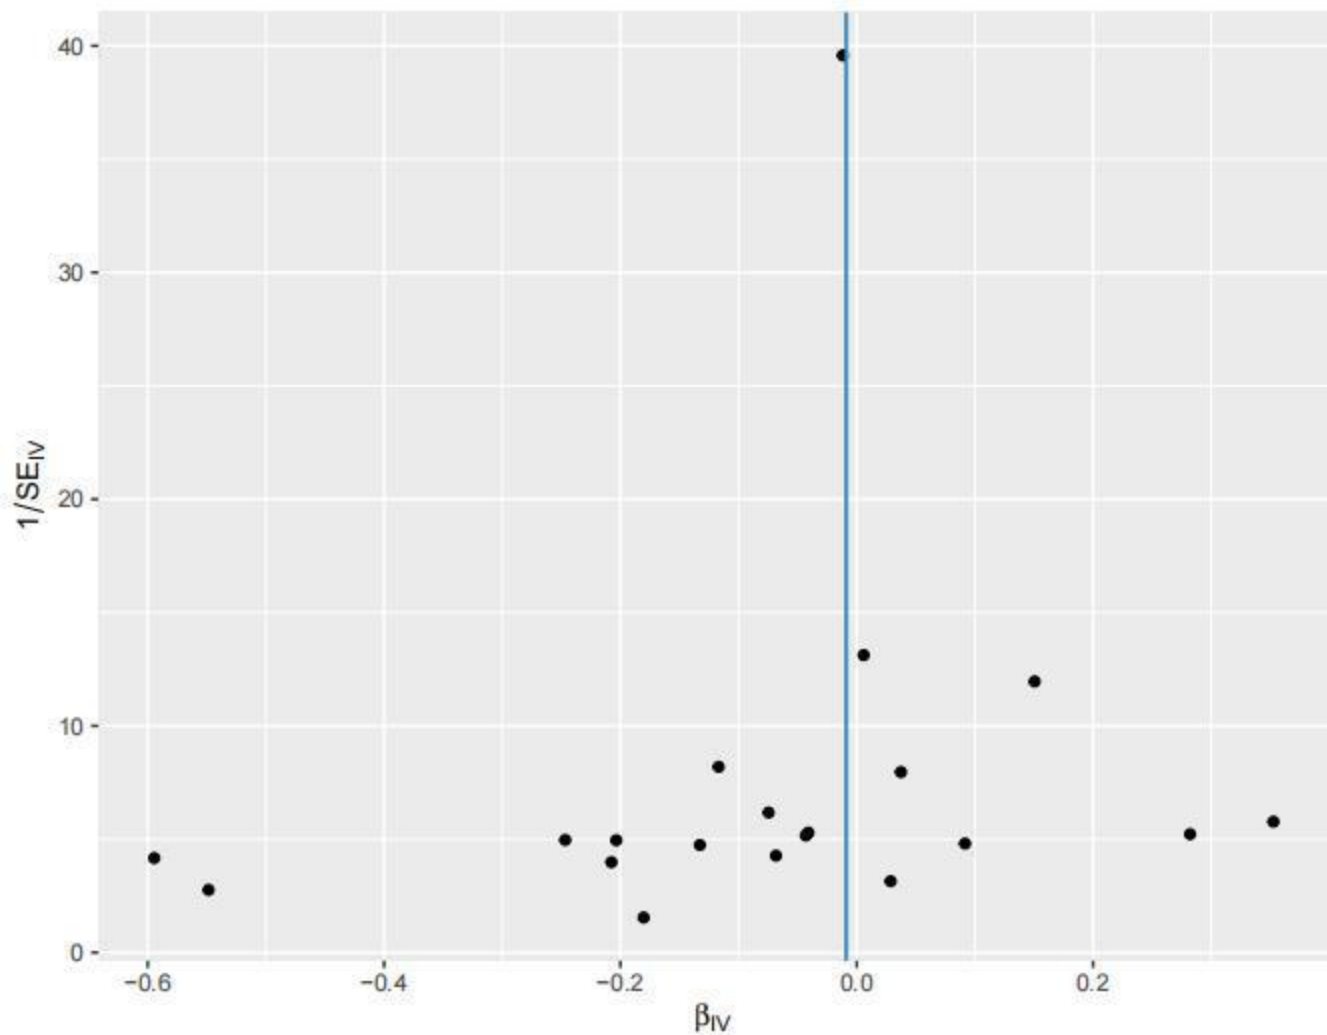

Funnel plot analyse of "DN (CD4-CD8-) %leukocyte" on 'Aplastic anemia'

### MR Method

- Inverse variance weighted
- MR Egger

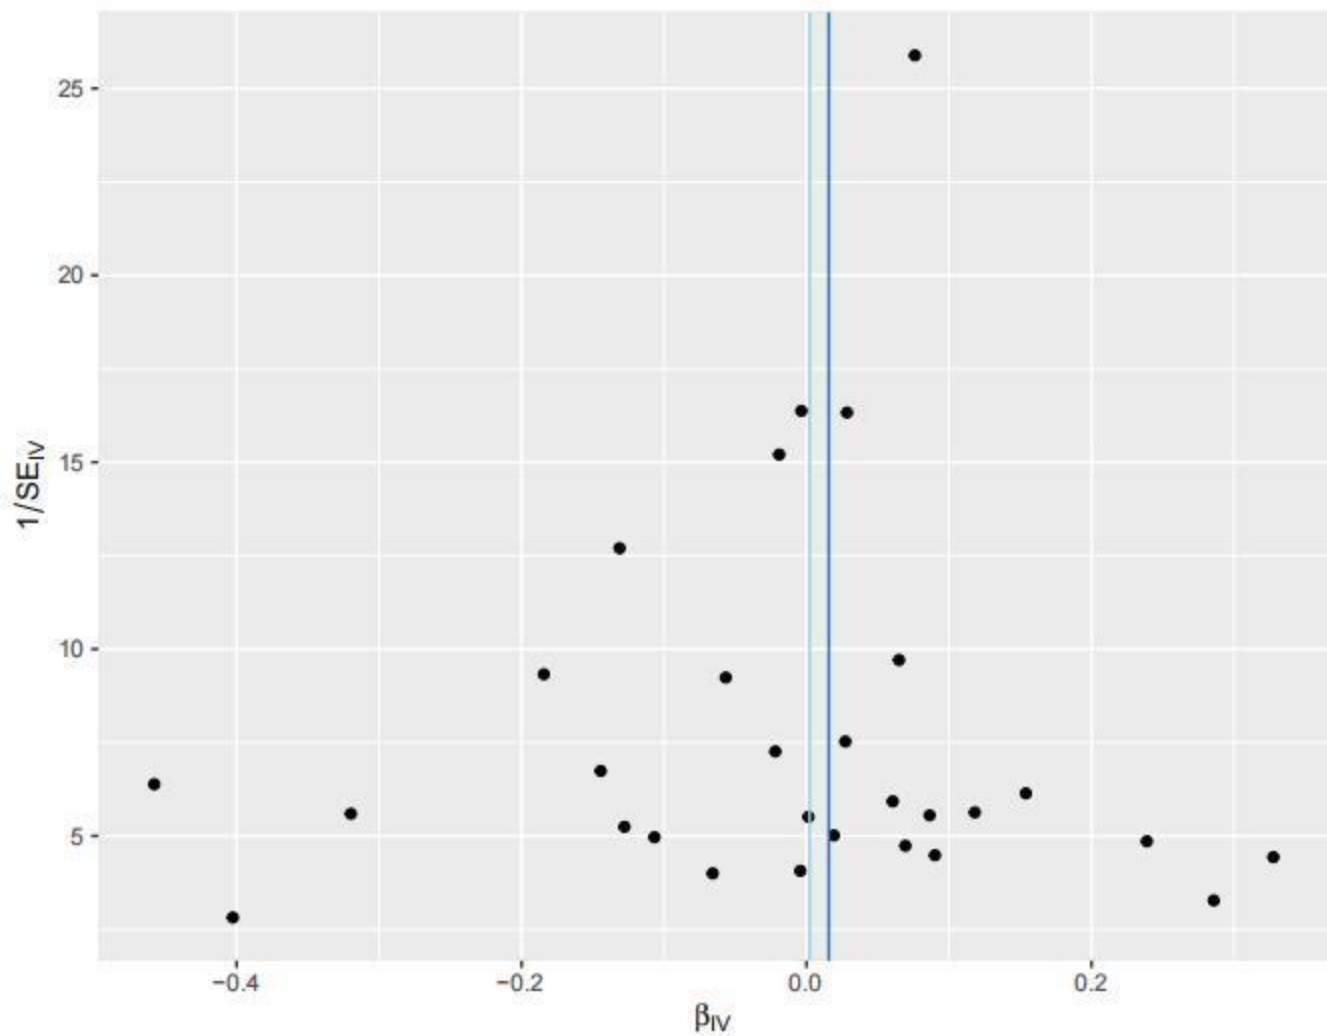

Funnel plot analyse of "CD4 on CD4 Treg" on 'Aplastic anemia'

### MR Method

- Inverse variance weighted
- MR Egger

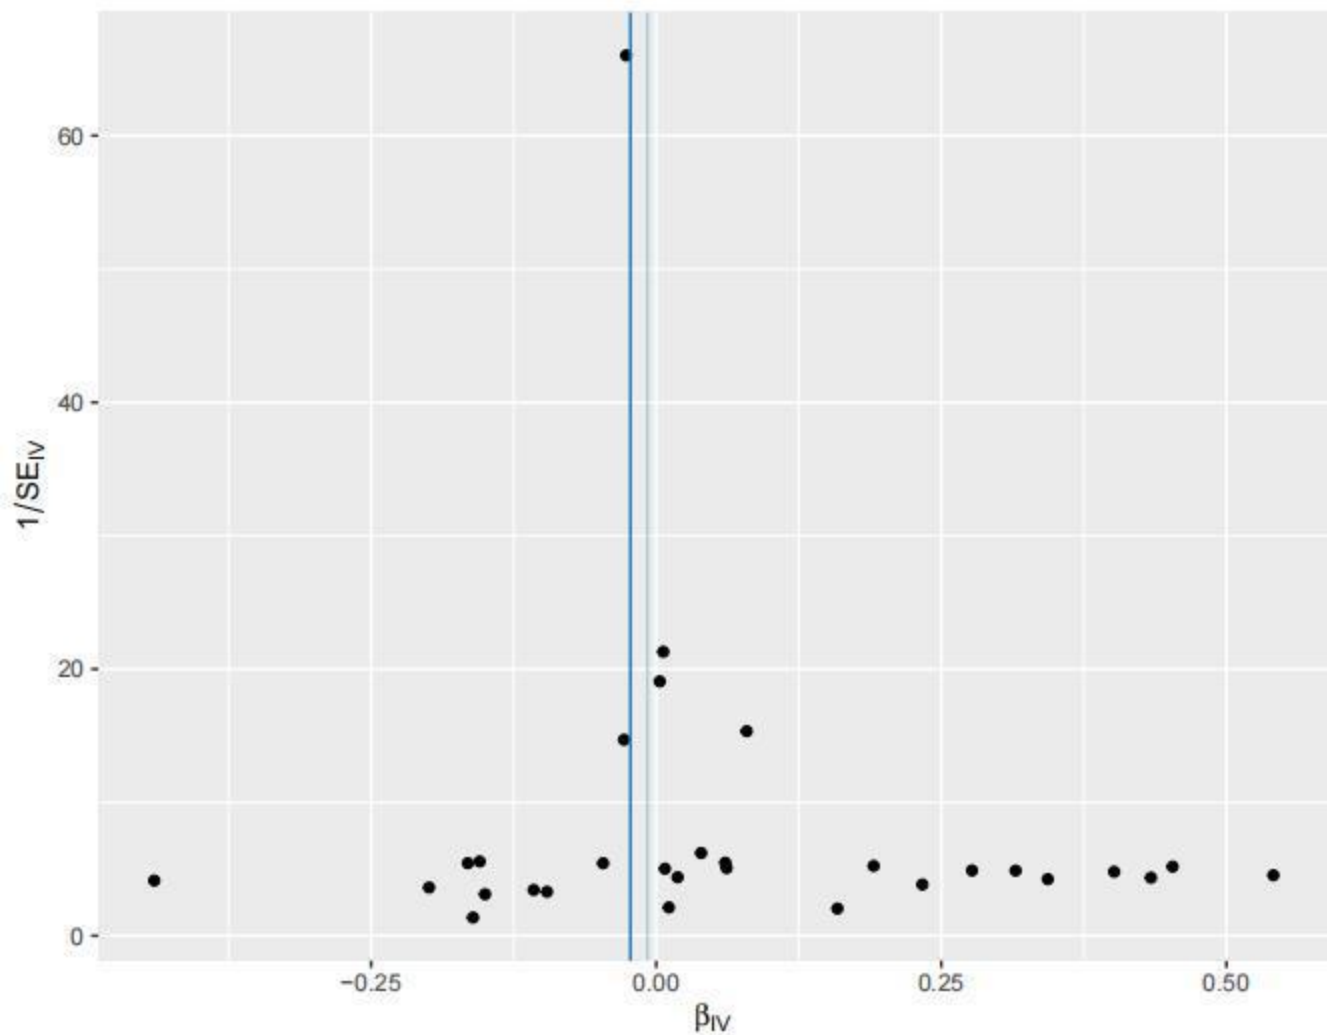

Funnel plot analyse of "IgD+ CD38br AC" on 'Aplastic anemia'

MR Method

- Inverse variance weighted
- MR Egger

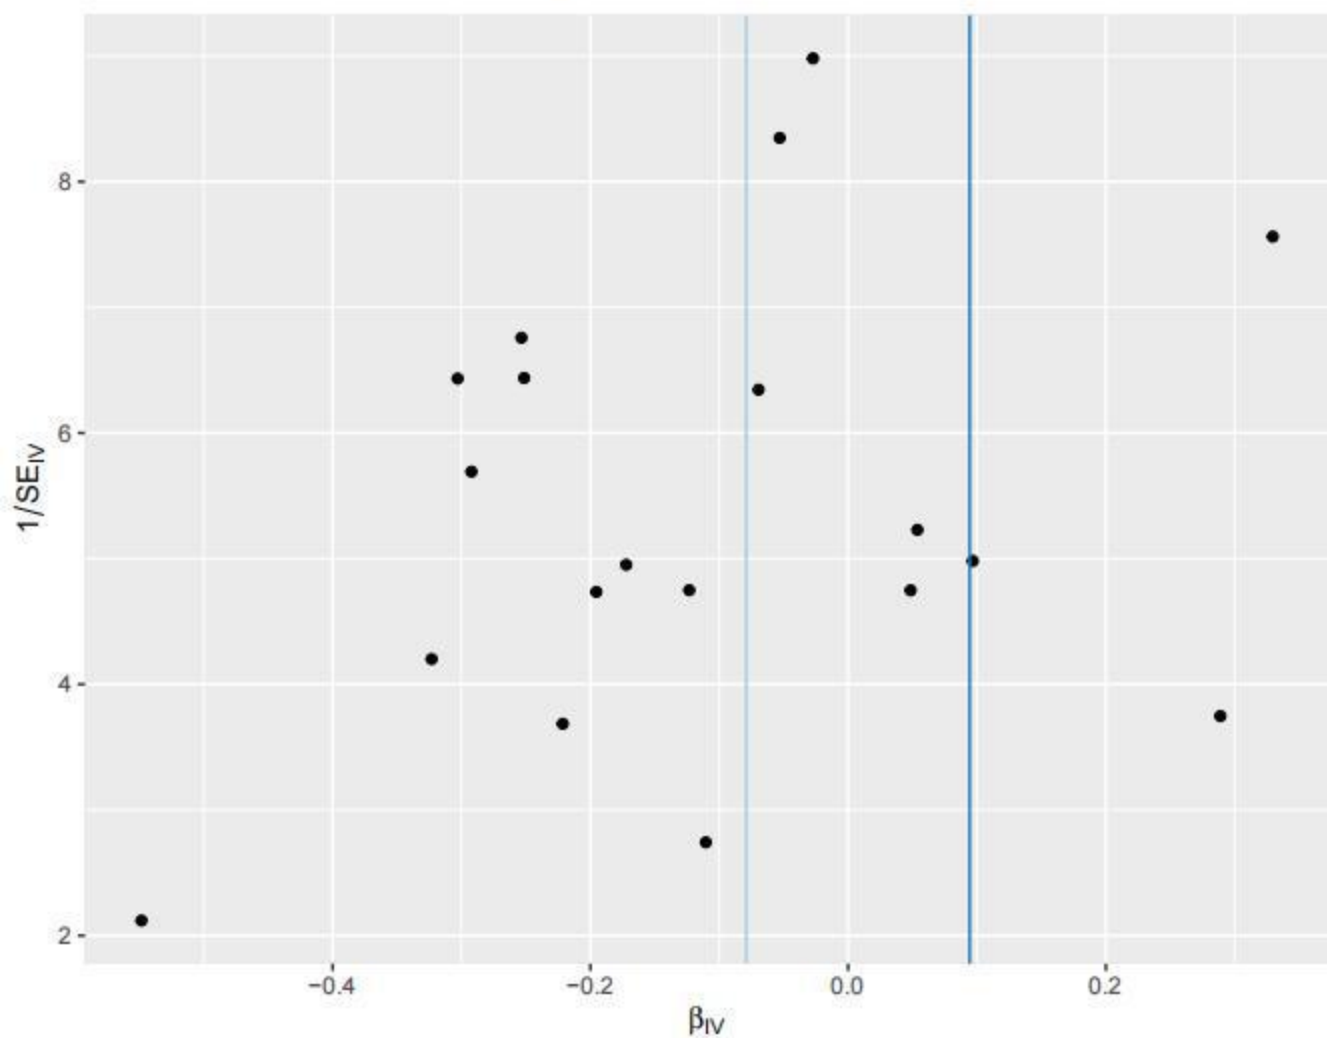

Funnel plot analyse of "Activated & resting Treg AC" on 'Aplastic anemia'

MR Method

Inverse variance weighted

MR Egger

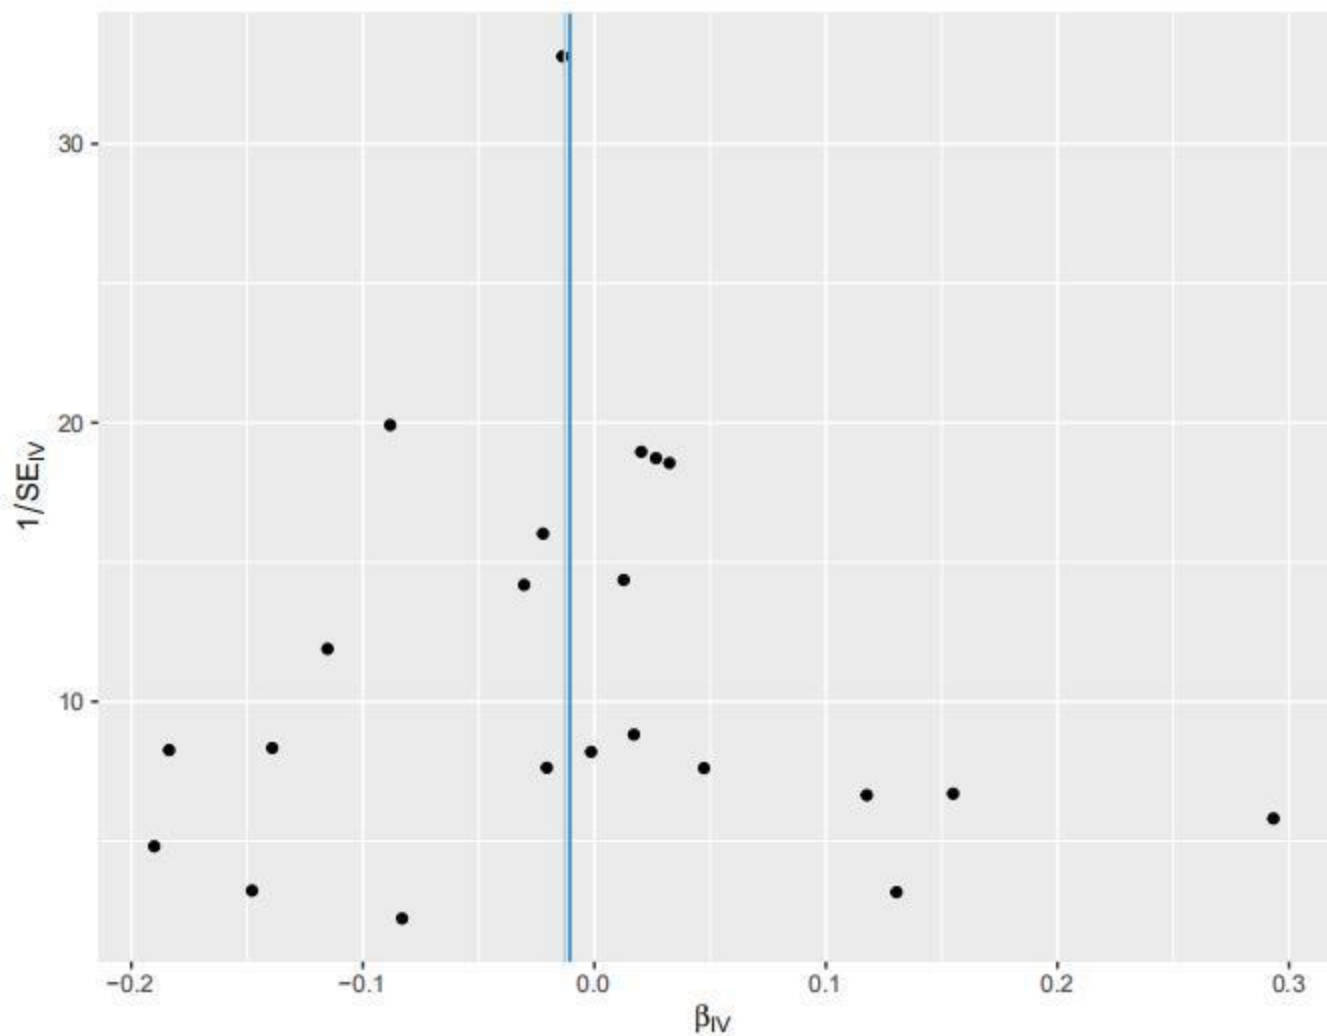

Funnel plot analyse of "HLA DR on CD33dim HLA DR+ CD11b+ " on 'Aplastic anemia'

### MR Method

- Inverse variance weighted
- MR Egger

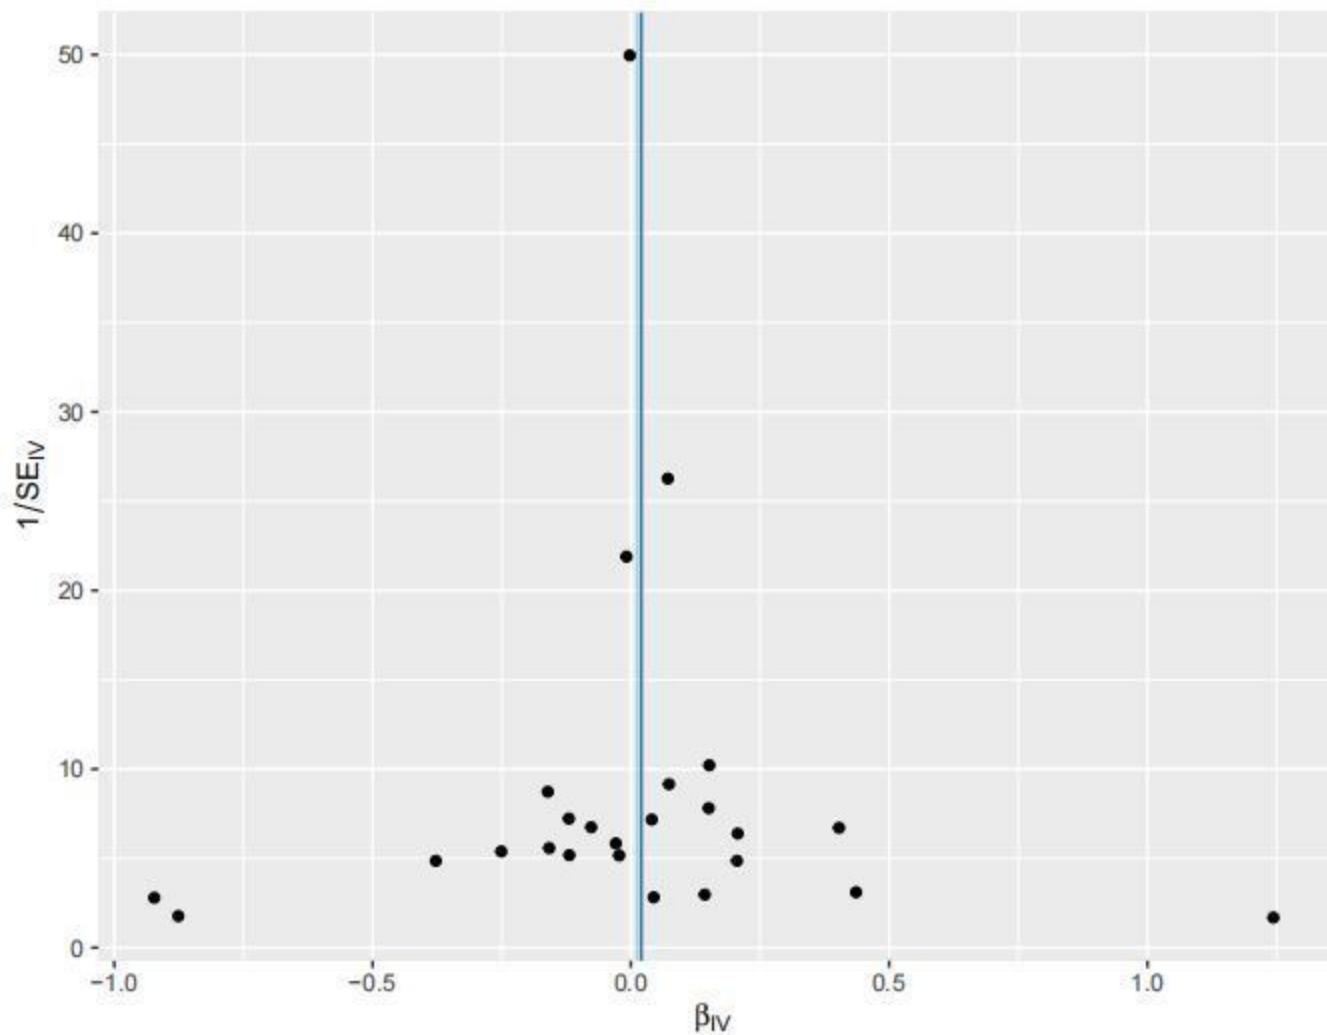

Funnel plot analyse of "CD20 on naive-mature B cell" on 'Aplastic anemia'

### MR Method

Inverse variance weighted

MR Egger

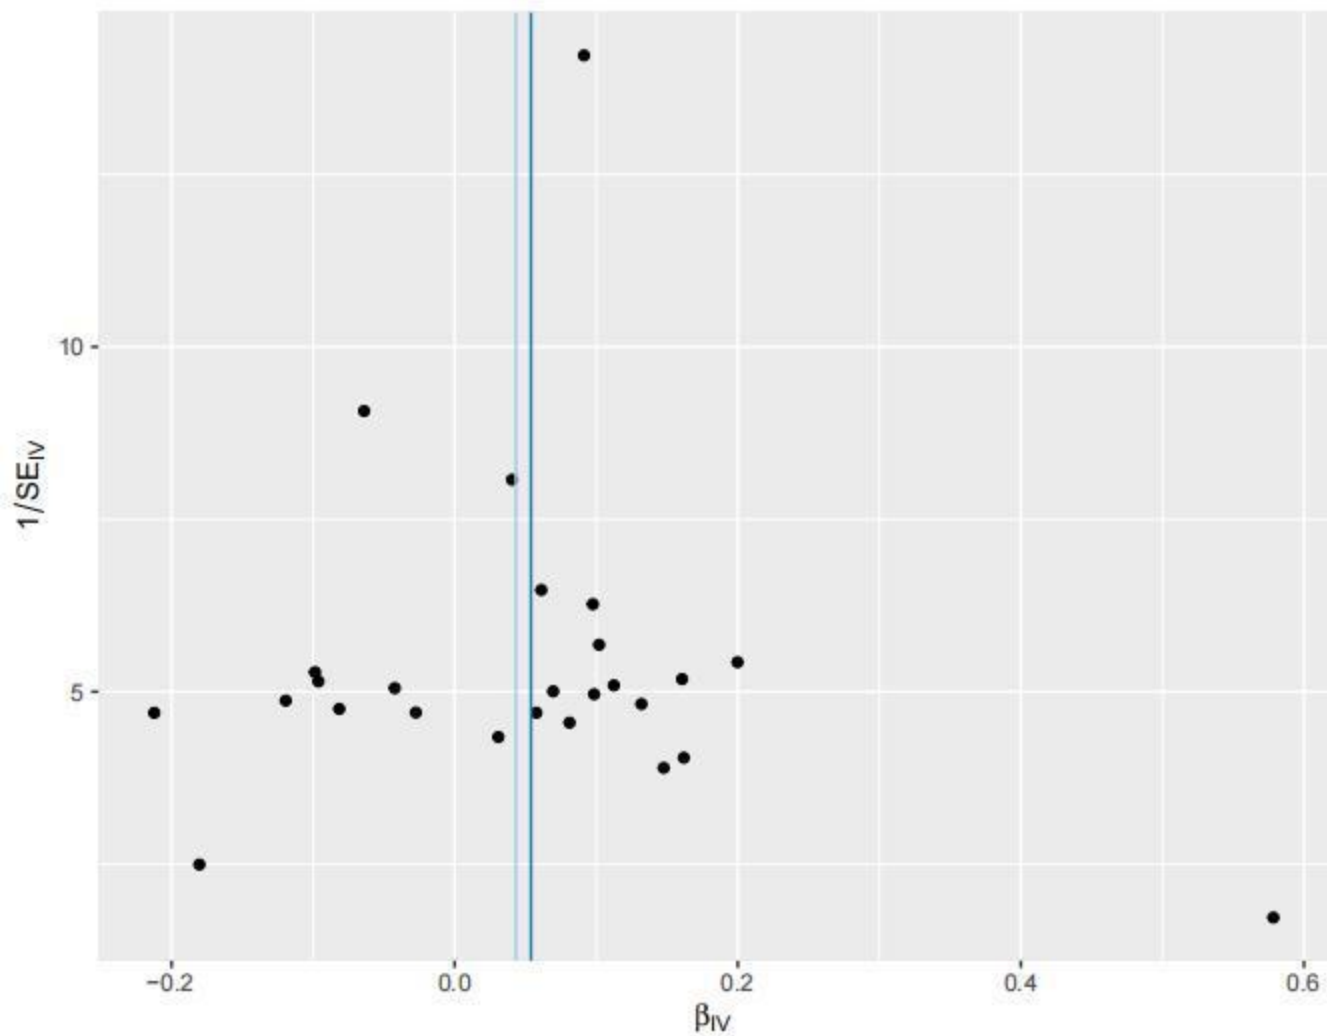

Funnel plot analyse of "CD25 on IgD- CD24-" on 'Aplastic anemia'

MR Method

- Inverse variance weighted
- MR Egger

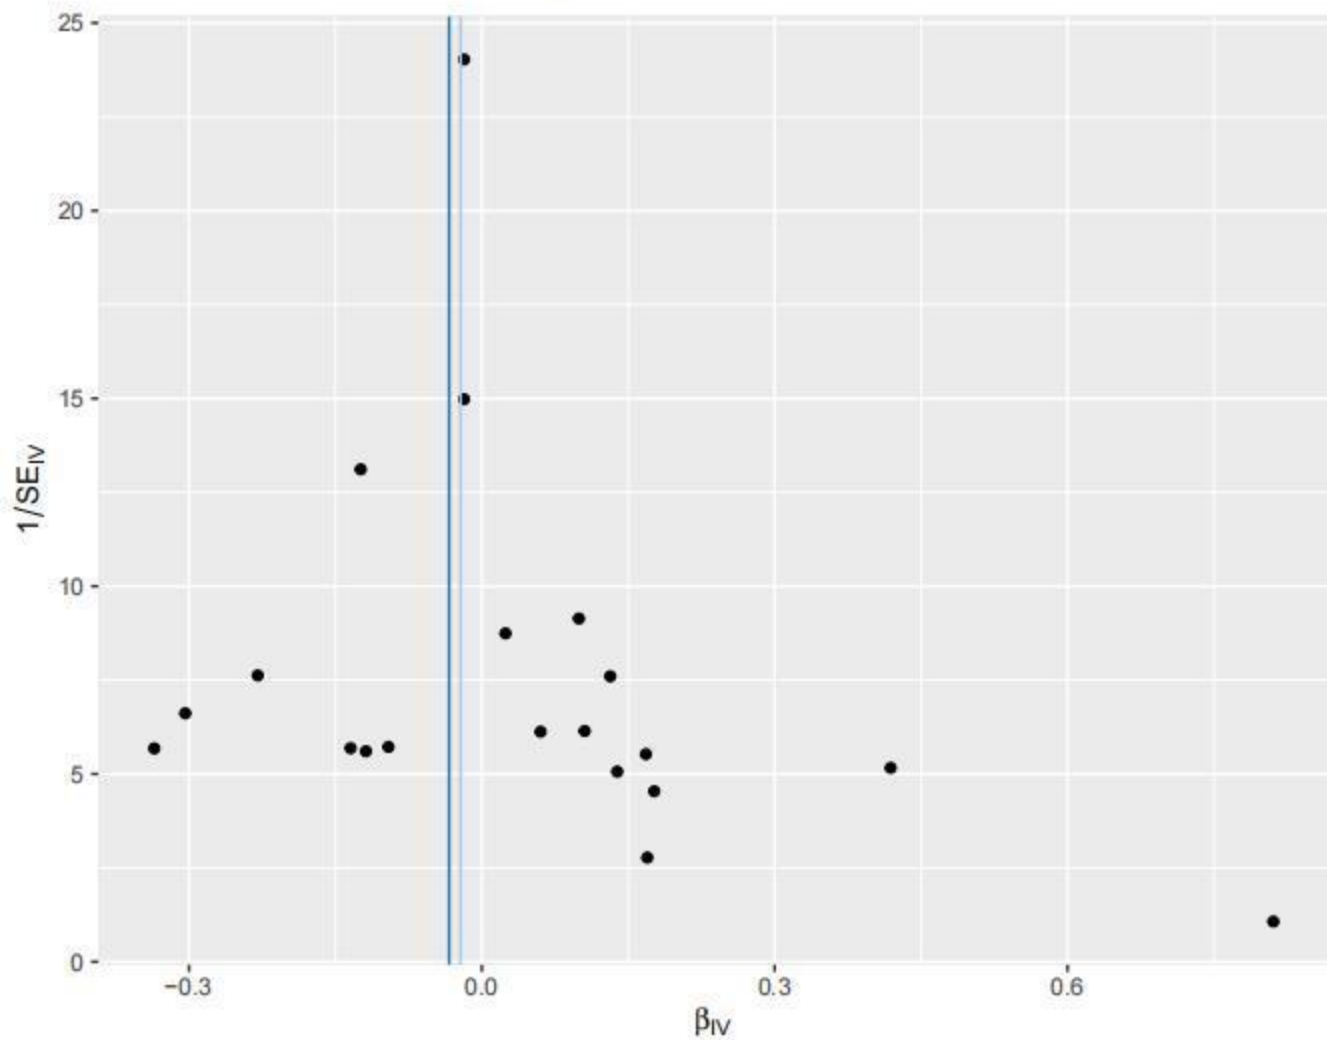

Funnel plot analyse of "CD3 on CD39+ resting Treg " on 'Aplastic anemia'



### MR Method

Inverse variance weighted

MR Egger

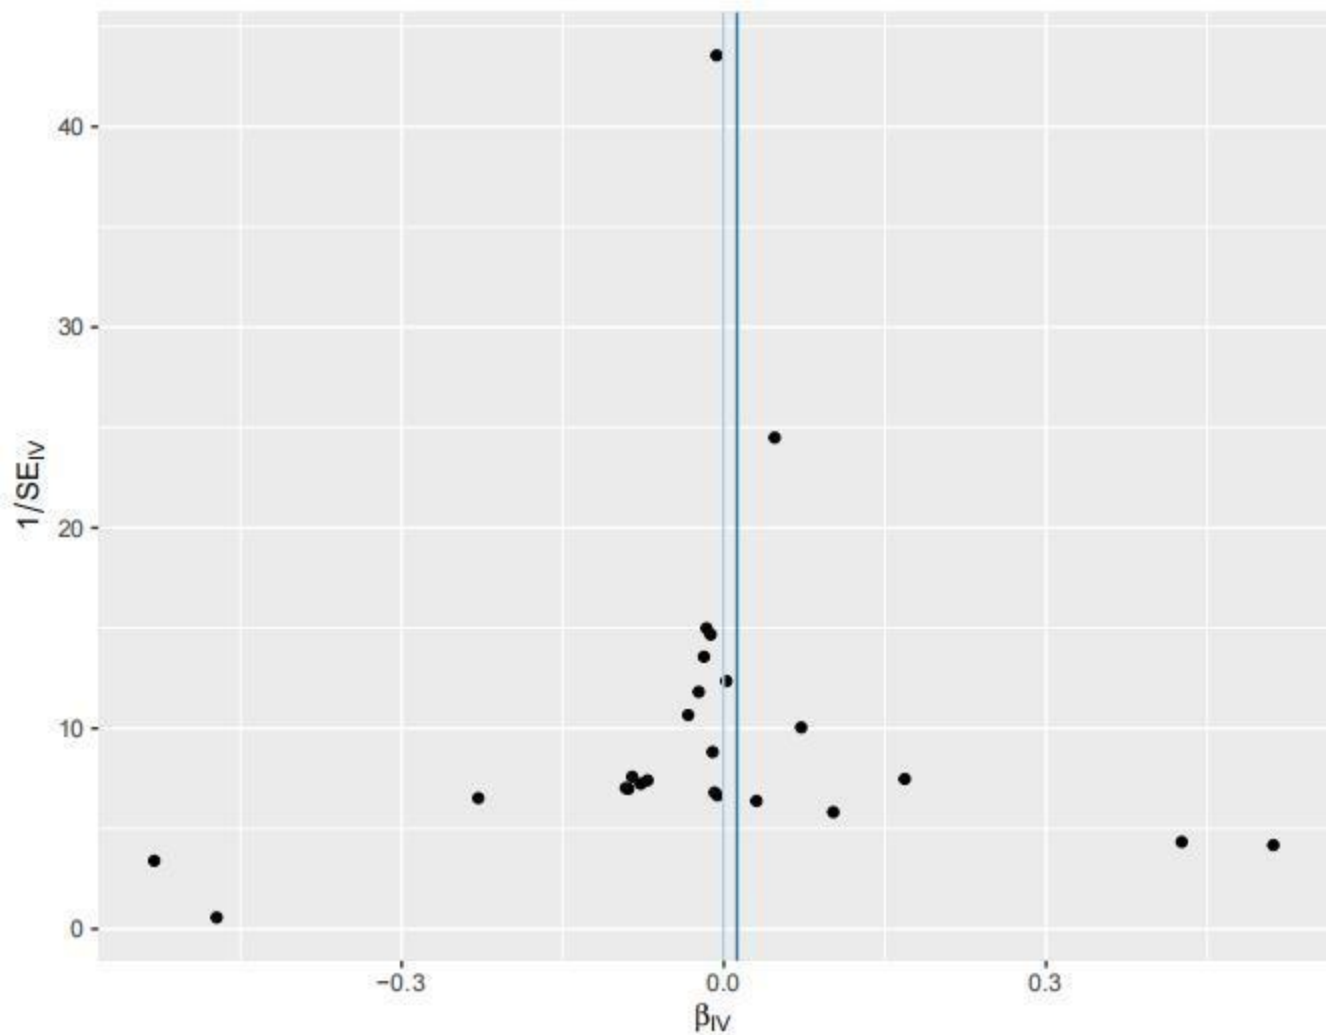

Funnel plot analyse of "CD33dim HLA DR+ CD11b+ %CD33dim HLA DR+" on 'Aplastic anemia'

### MR Method

Inverse variance weighted

MR Egger

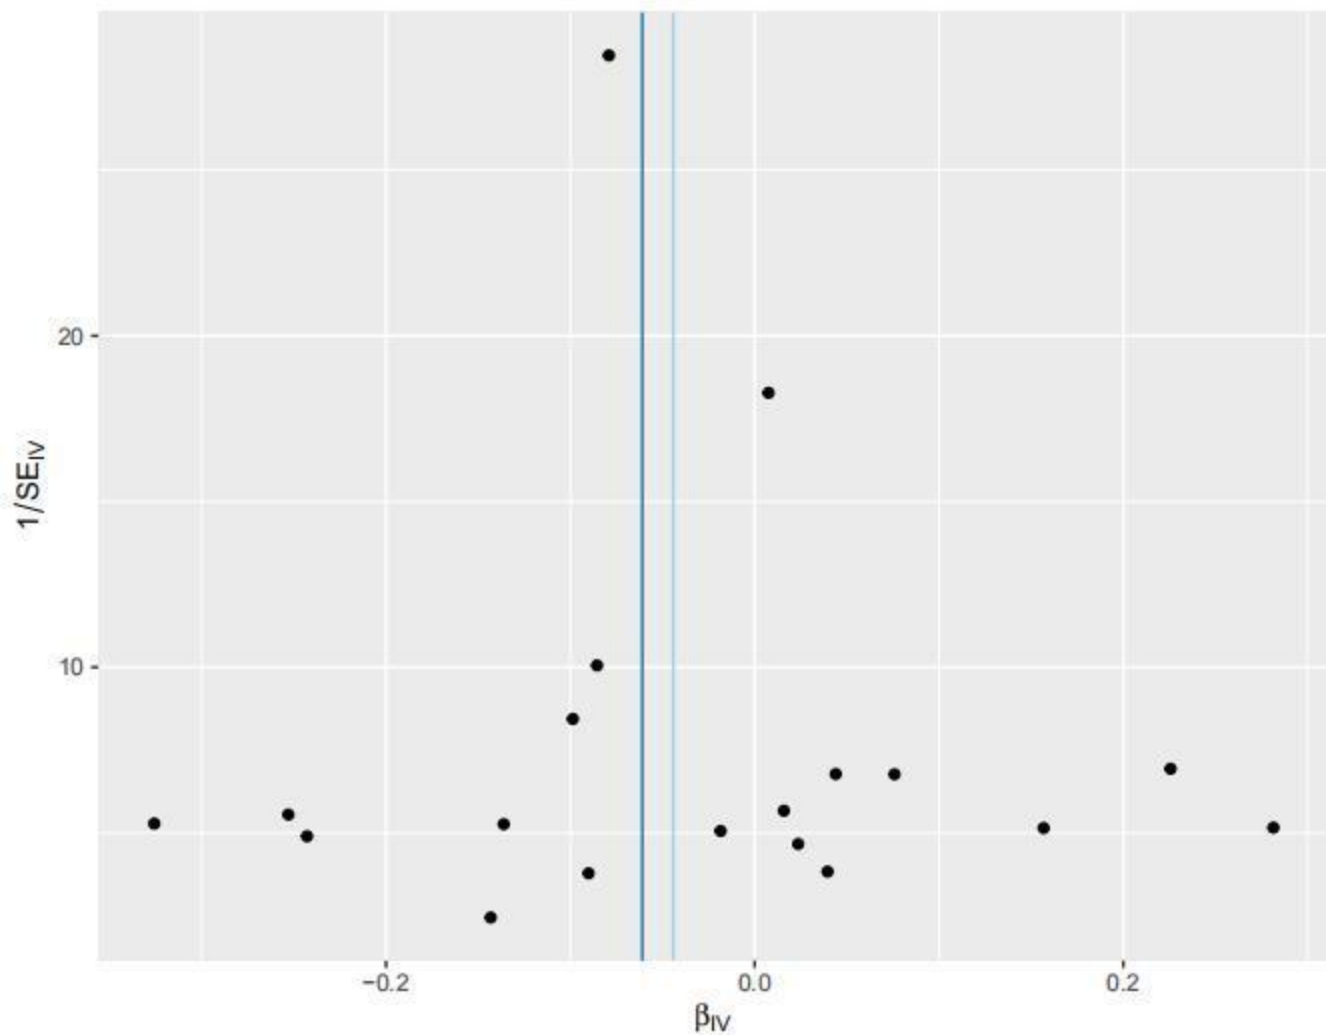

Funnel plot analyse of "HLA DR on HLA DR+ T cell" on 'Aplastic anemia'

MR Method

- Inverse variance weighted
- MR Egger

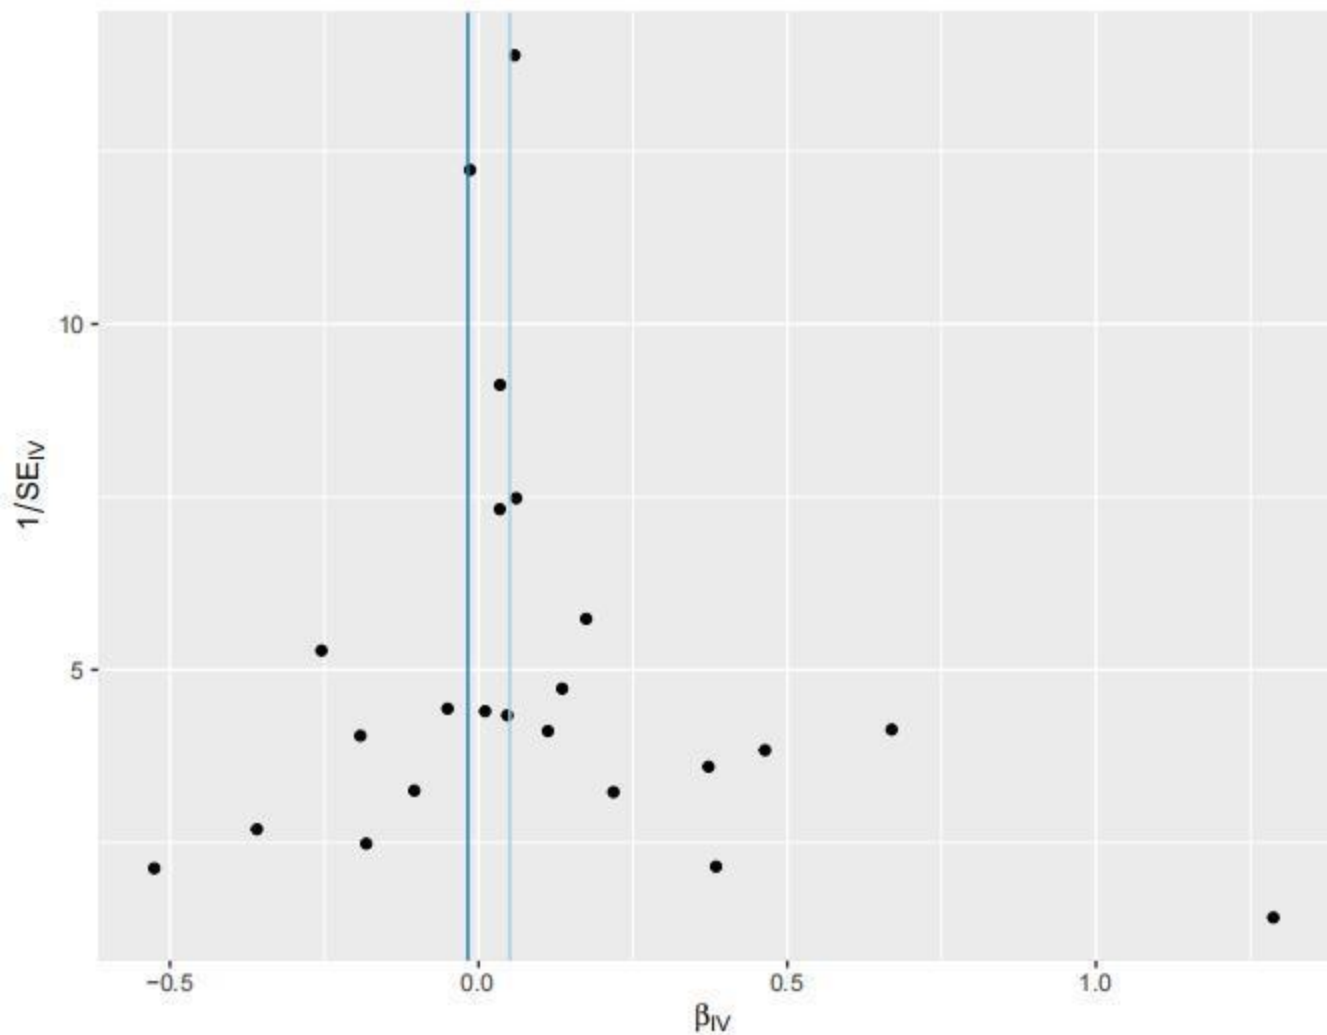

Funnel plot analyse of "Naive DN (CD4-CD8-) %T cell" on 'Aplastic anemia'

### MR Method

- Inverse variance weighted
- MR Egger

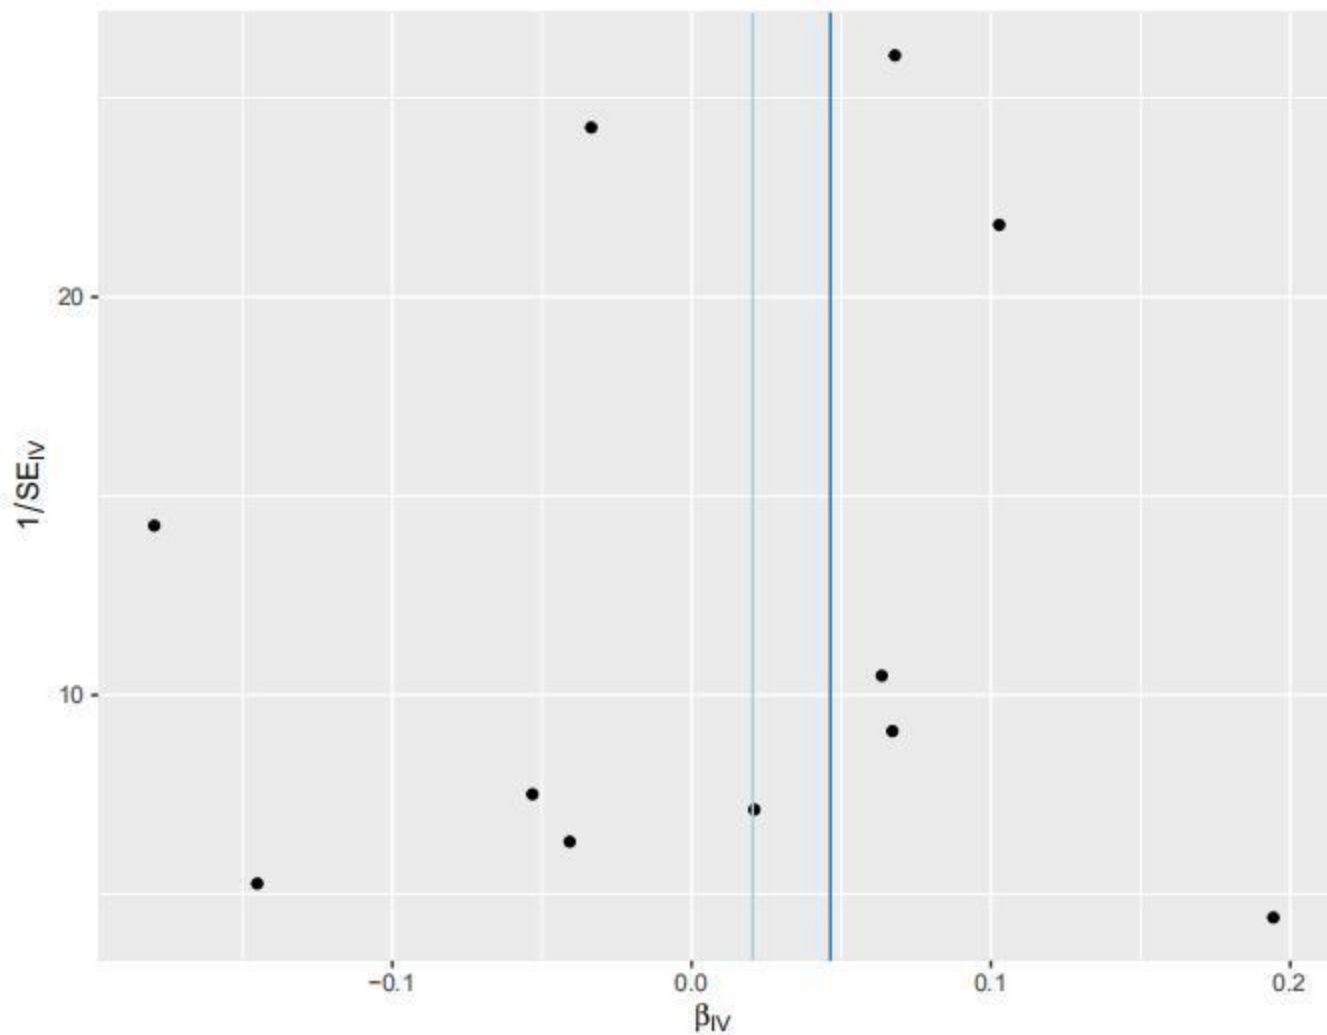

Funnel plot analyse of "CD45 on Im MDSC " on 'Aplastic anemia'

MR Method

Inverse variance weighted

MR Egger

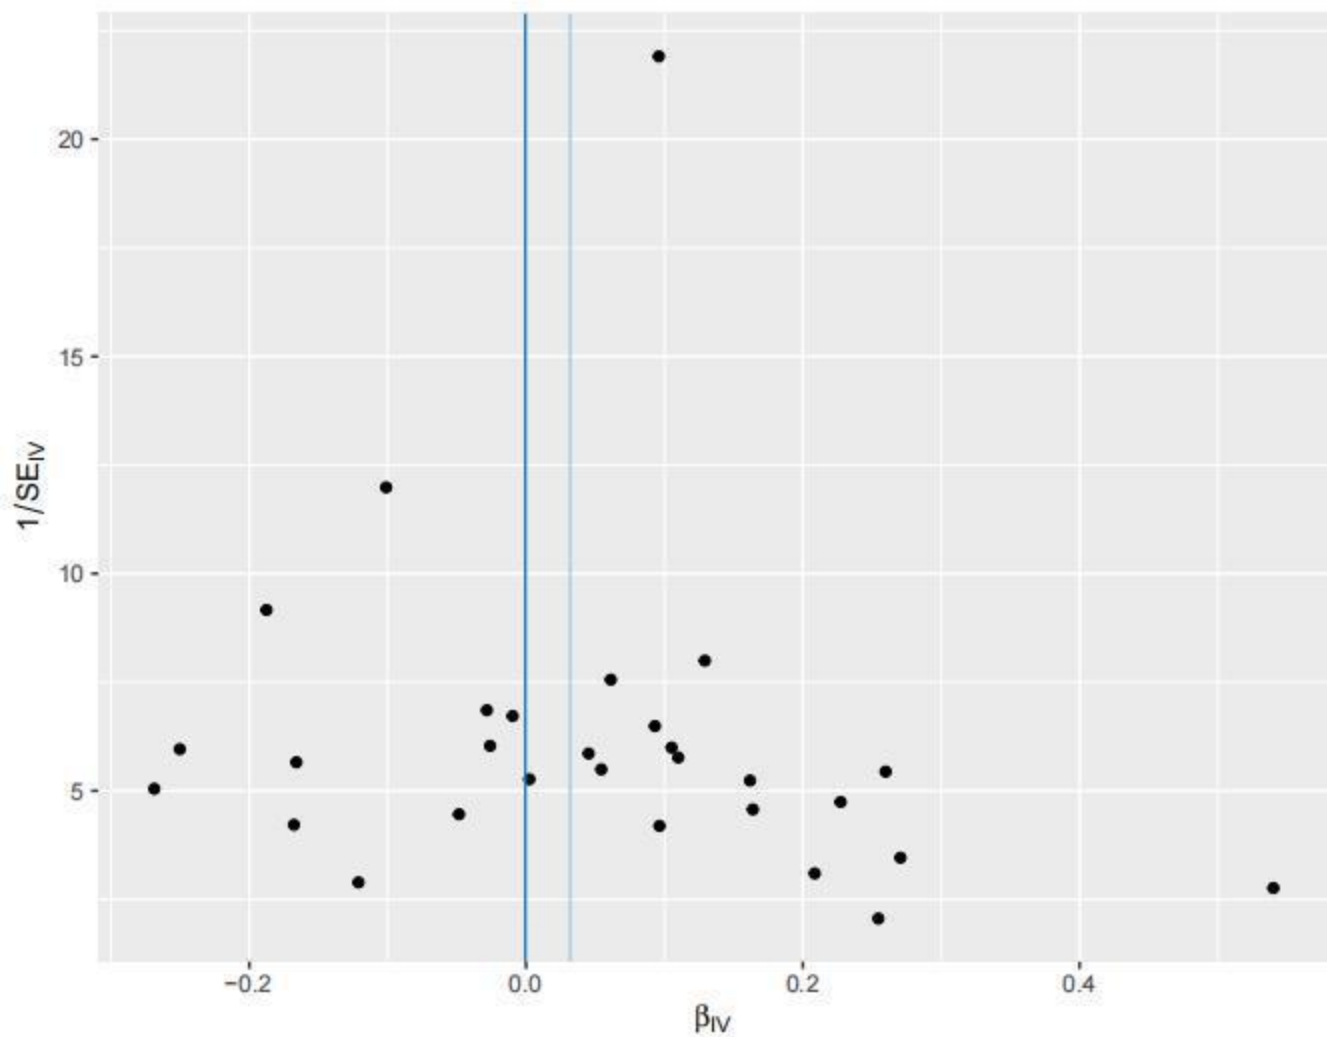

Funnel plot analyse of "CD4 on CD39+ CD4+ " on 'Aplastic anemia'

### MR Method

- Inverse variance weighted
- MR Egger

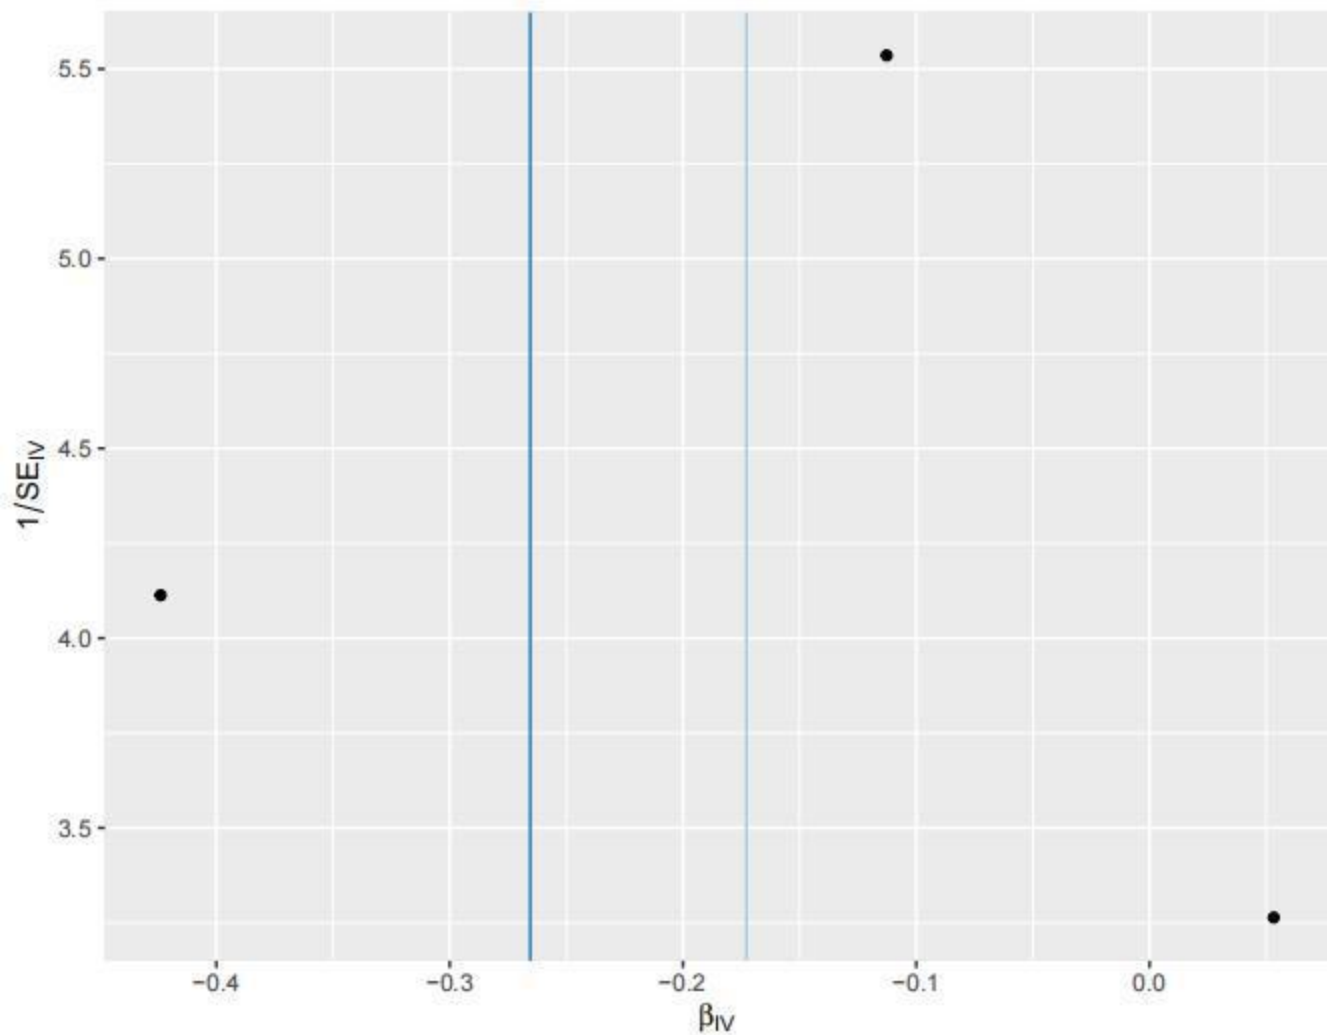

Funnel plot analyse of "CD28 on CD28+ DN (CD4-CD8-)" on 'Aplastic anemia'

### MR Method

- Inverse variance weighted
- MR Egger

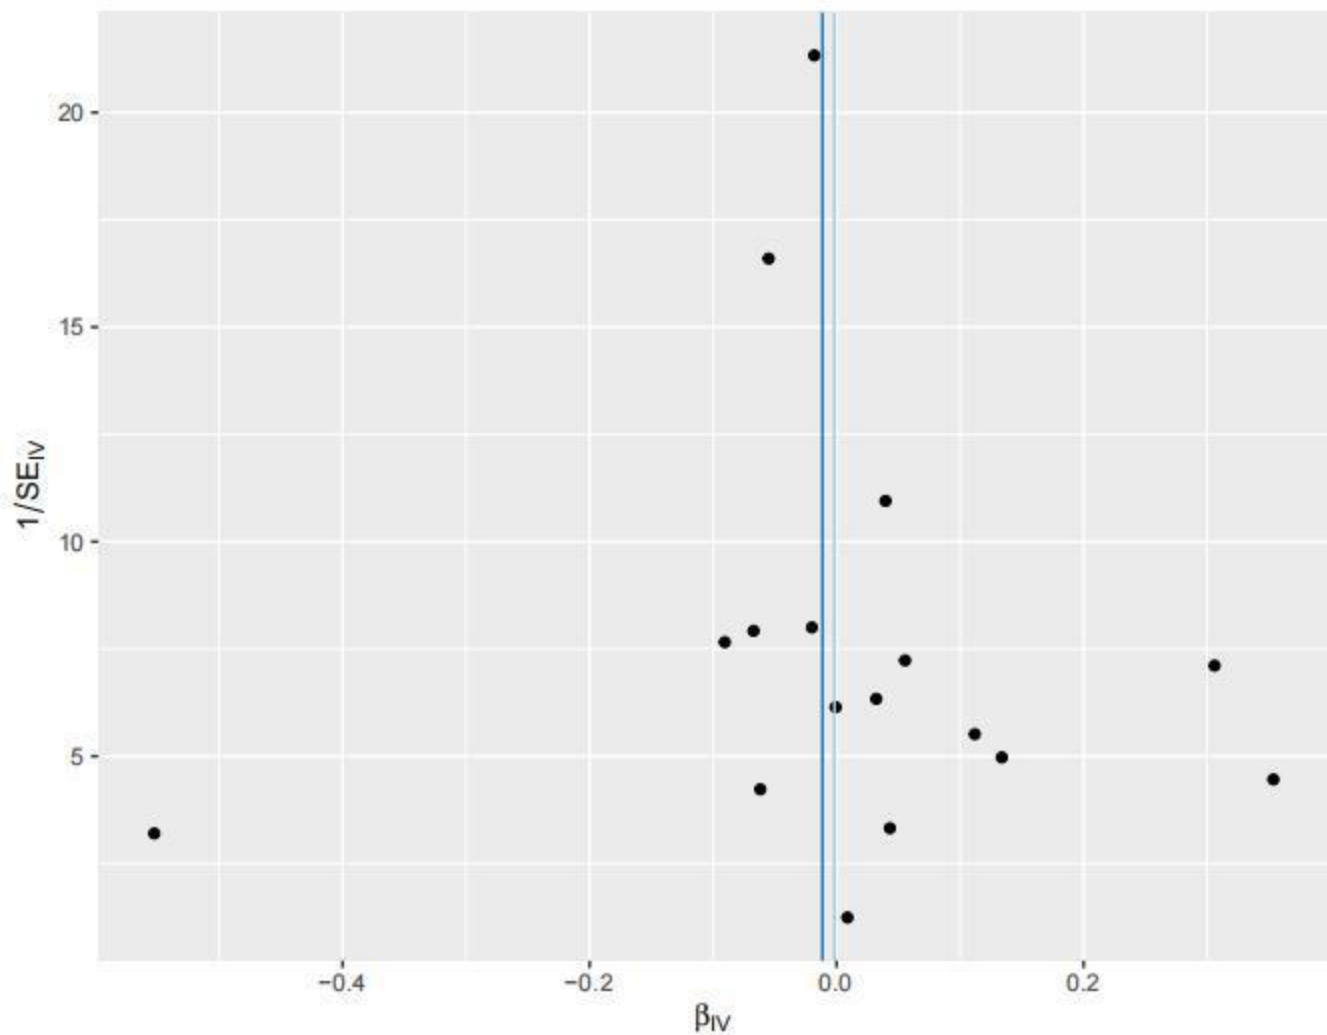

Funnel plot analyse of "CD86 on monocyte" on 'Aplastic anemia'

### MR Method

- Inverse variance weighted
- MR Egger

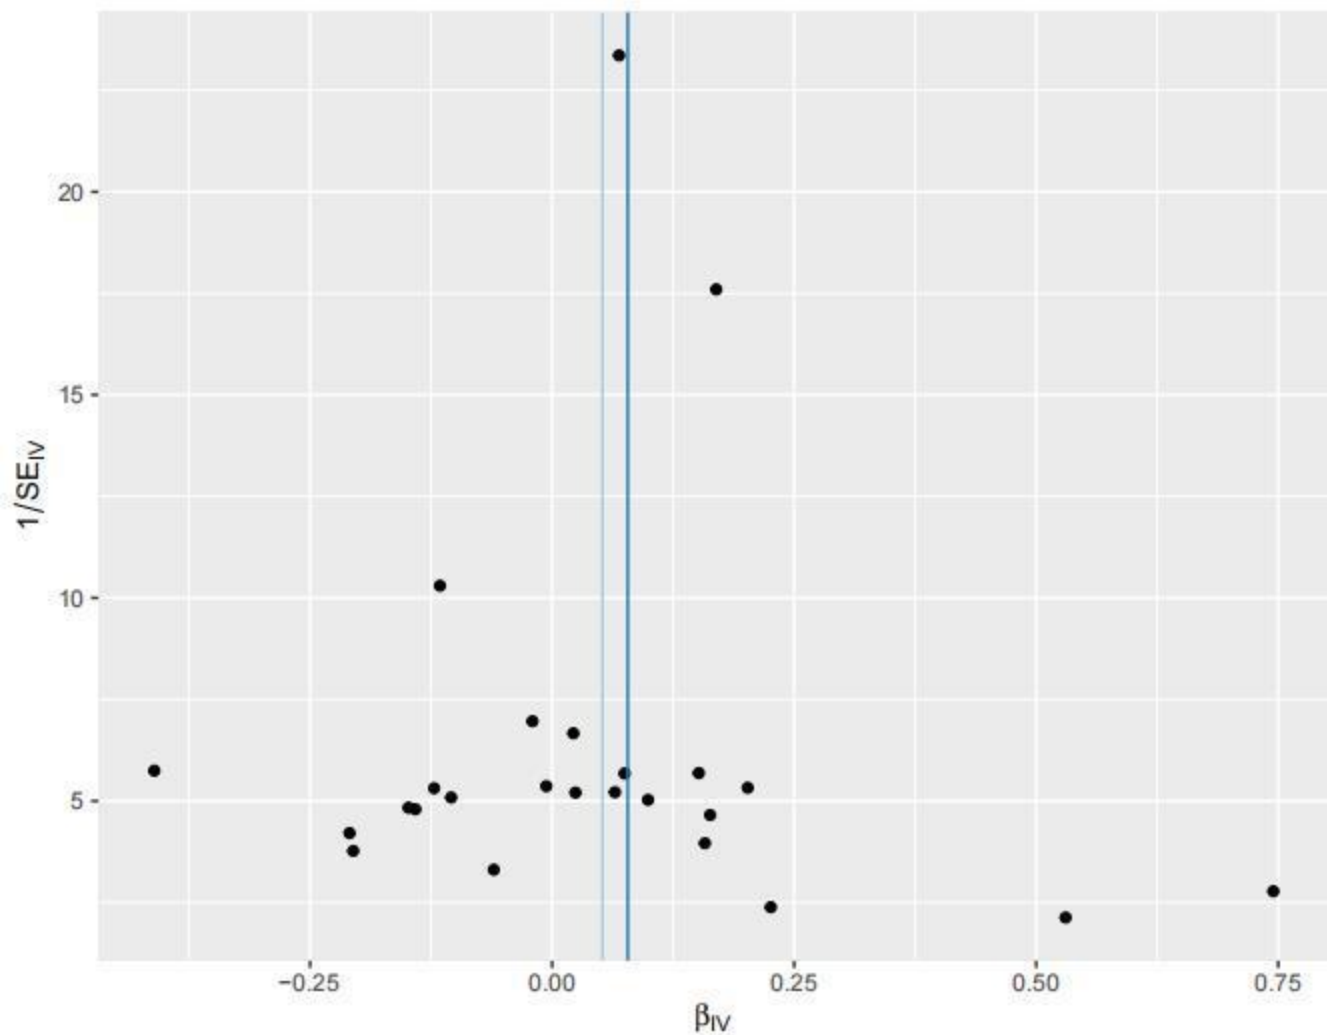

Funnel plot analyse of "CD19 on B cell" on 'Aplastic anemia'



### MR Method

- Inverse variance weighted
- MR Egger

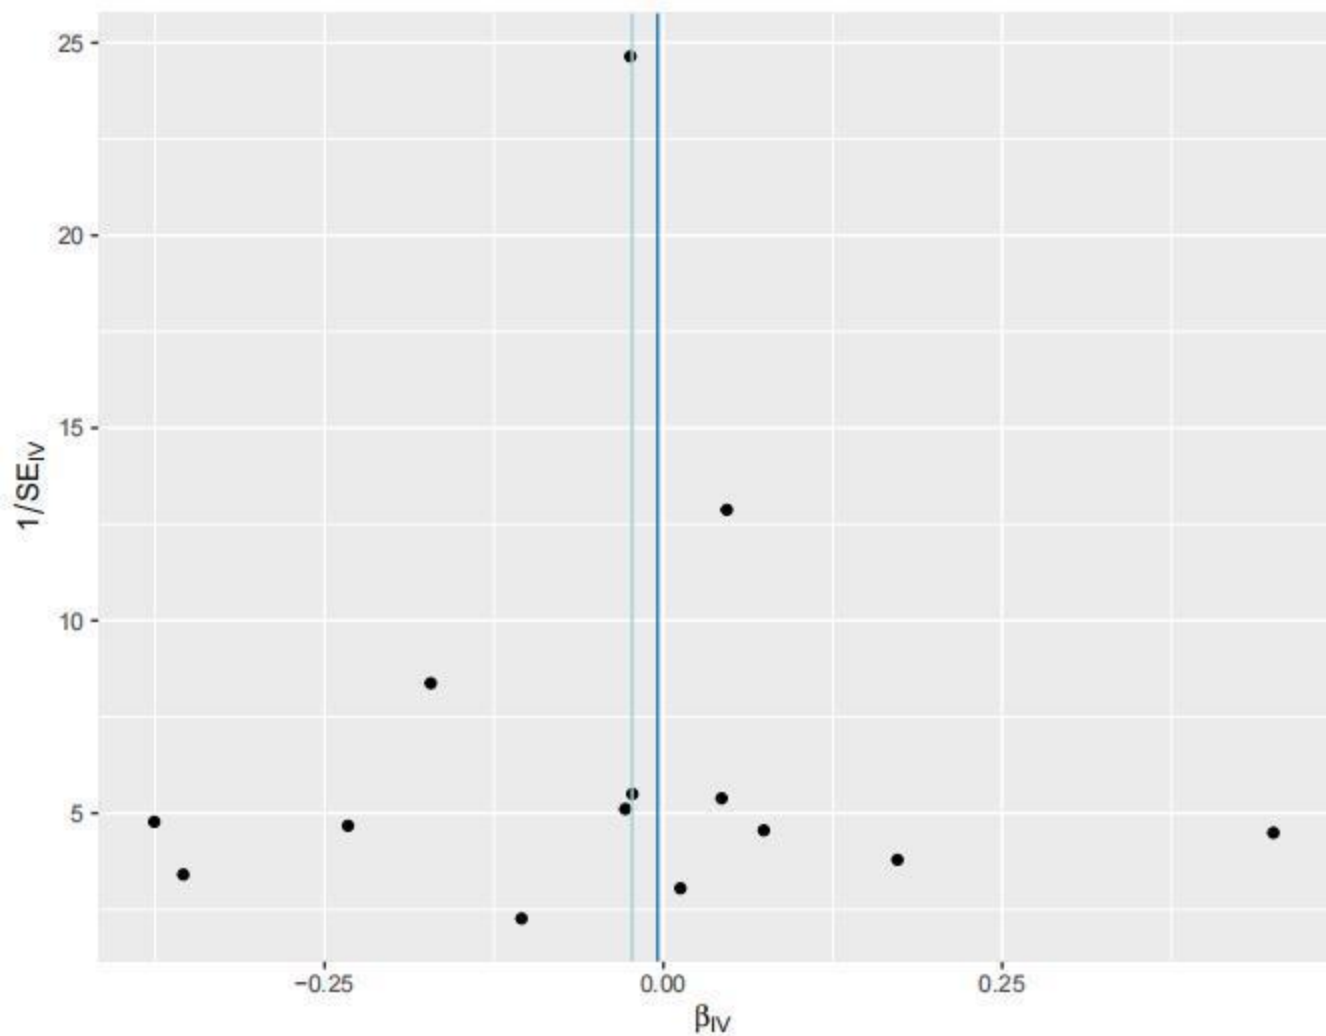

Funnel plot analyse of "CD127- CD8br %CD8br" on 'Aplastic anemia'

MR Method

- Inverse variance weighted
- MR Egger

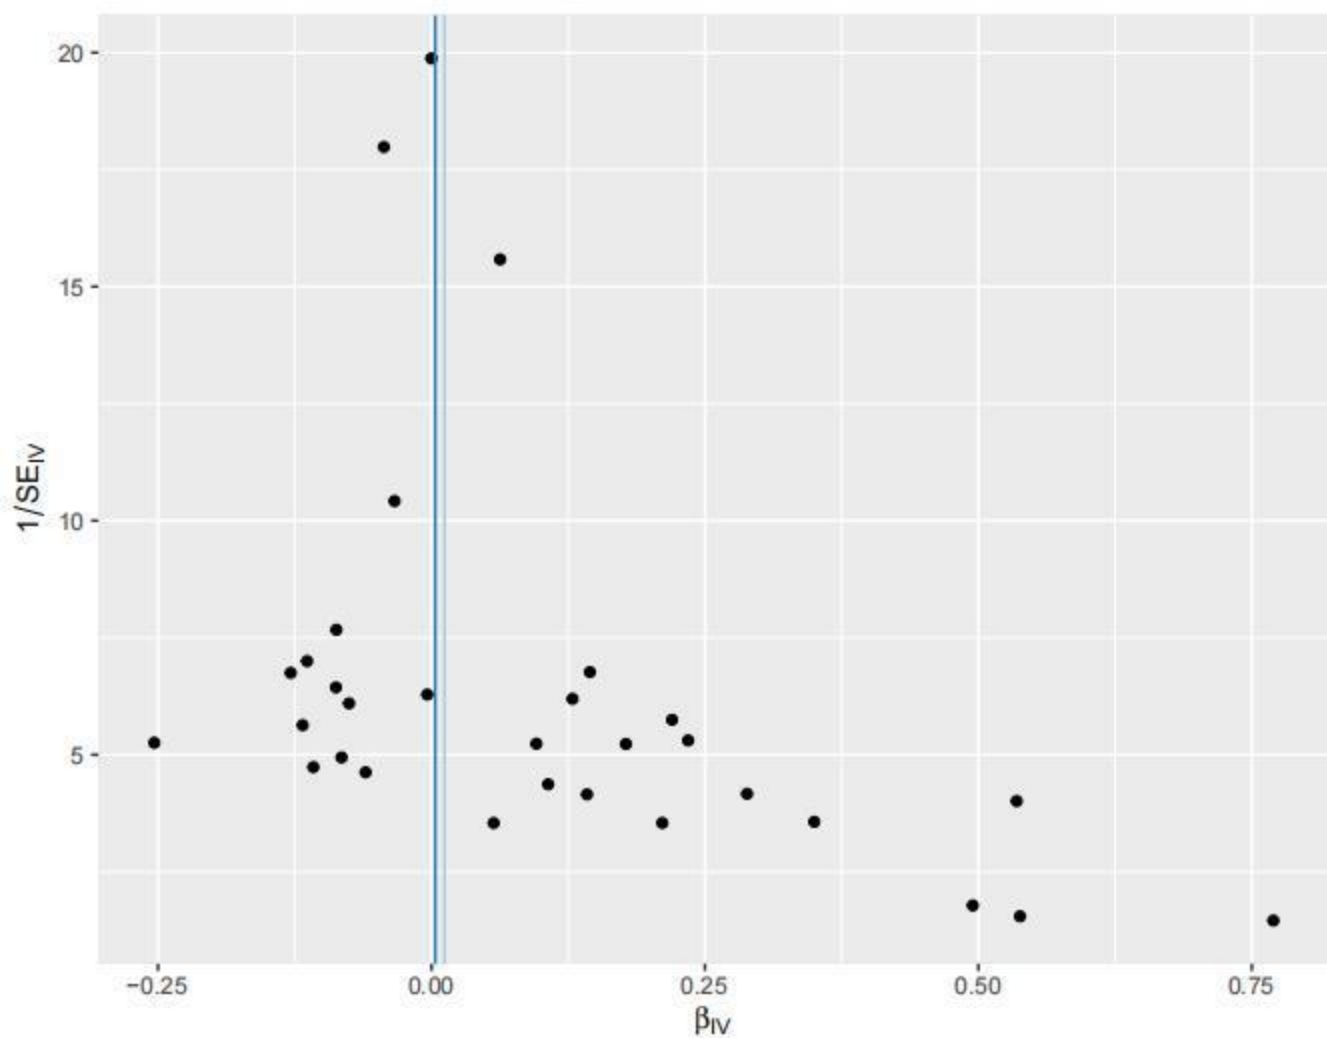

Funnel plot analyse of "CD19 on CD24+ CD27+" on 'Aplastic anemia'

### MR Method

- Inverse variance weighted
- MR Egger

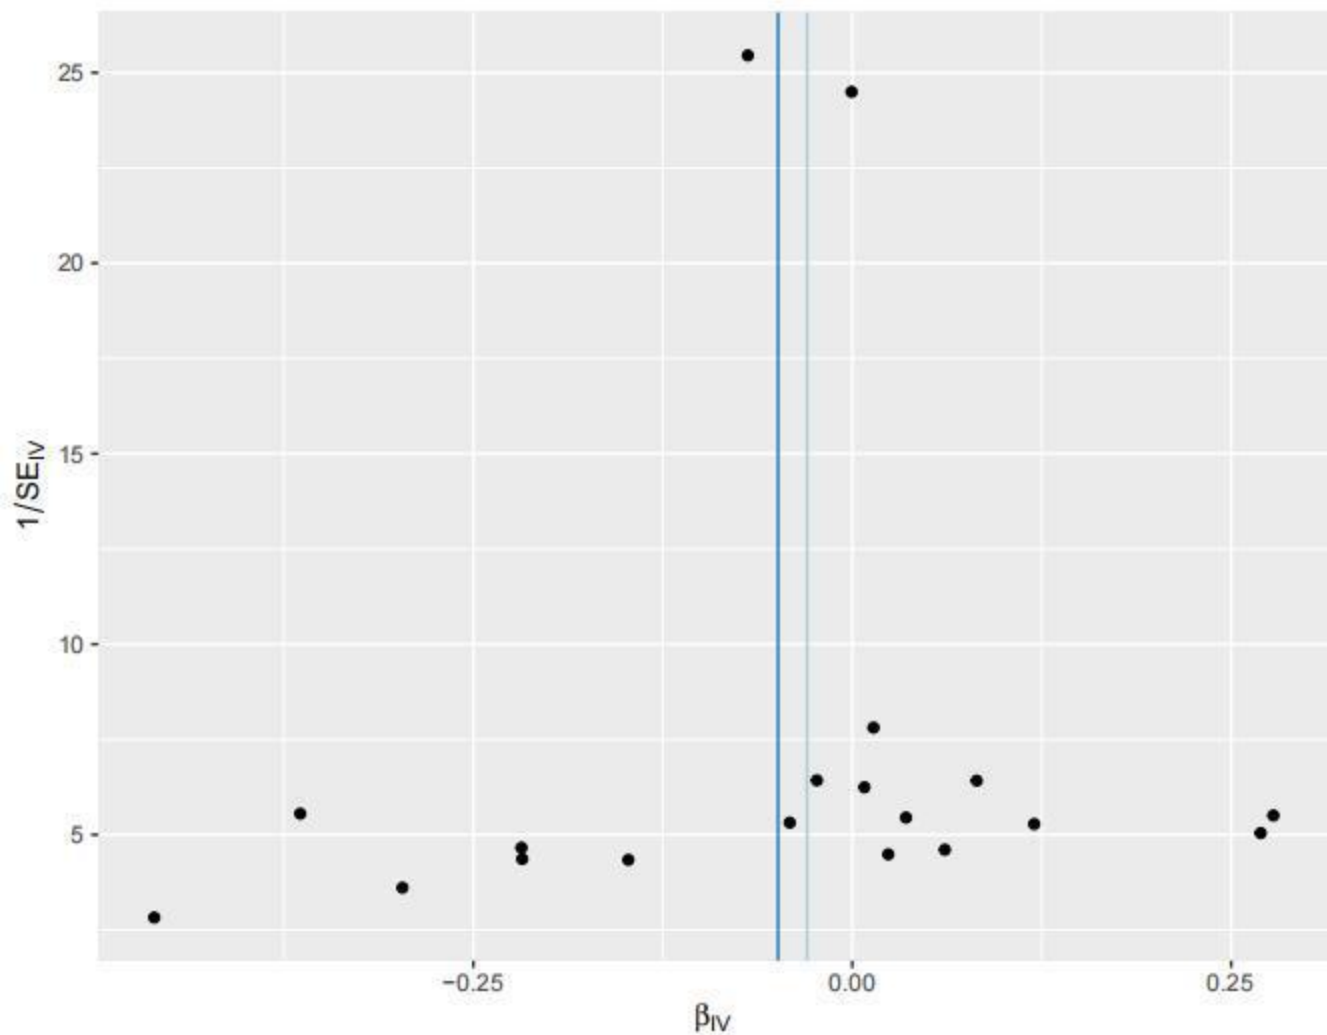

Funnel plot analysis of "CD62L- CD86+ myeloid DC %DC" on 'Aplastic anemia'

MR Method

- Inverse variance weighted
- MR Egger

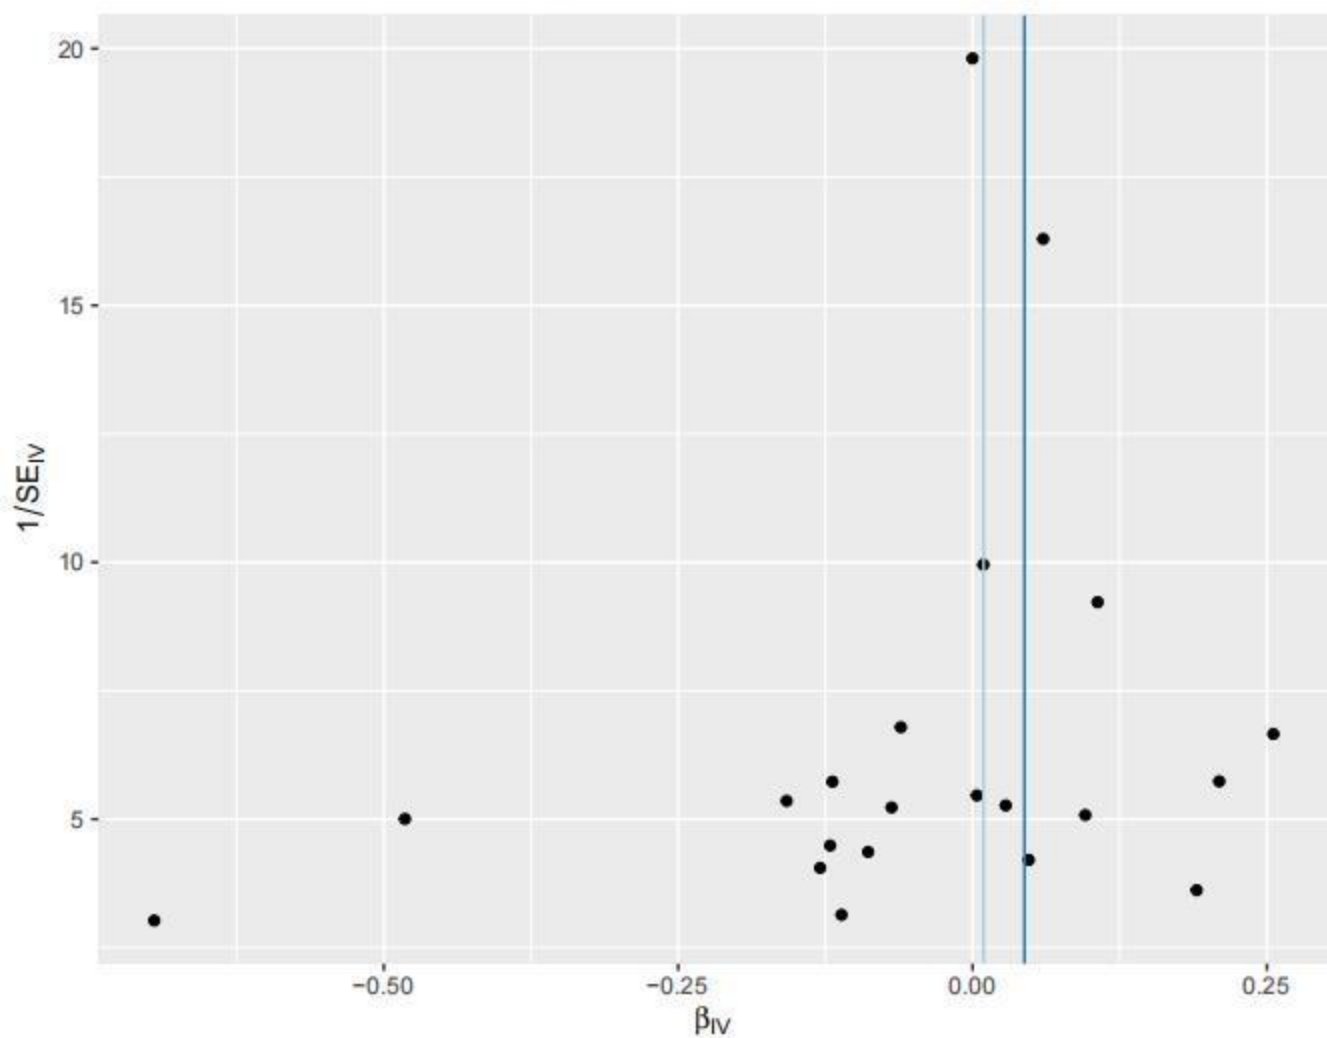

Funnel plot analyse of "CD19 on IgD+ CD38br" on 'Aplastic anemia'

MR Method

Inverse variance weighted

MR Egger

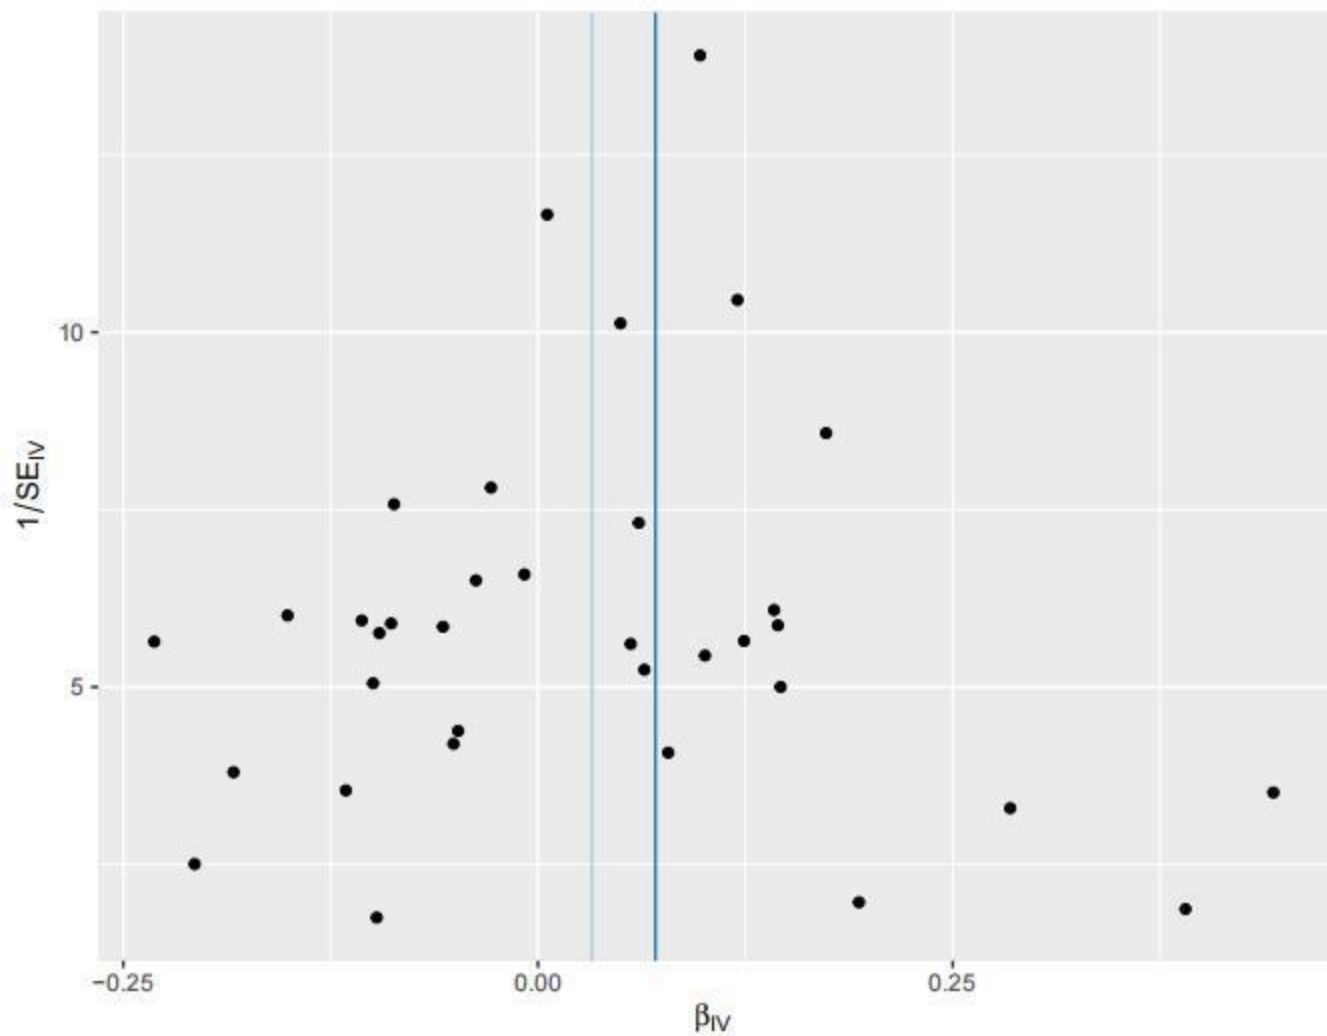

Funnel plot analyse of "B cell %lymphocyte" on 'Aplastic anemia'

### MR Method

- Inverse variance weighted
- MR Egger

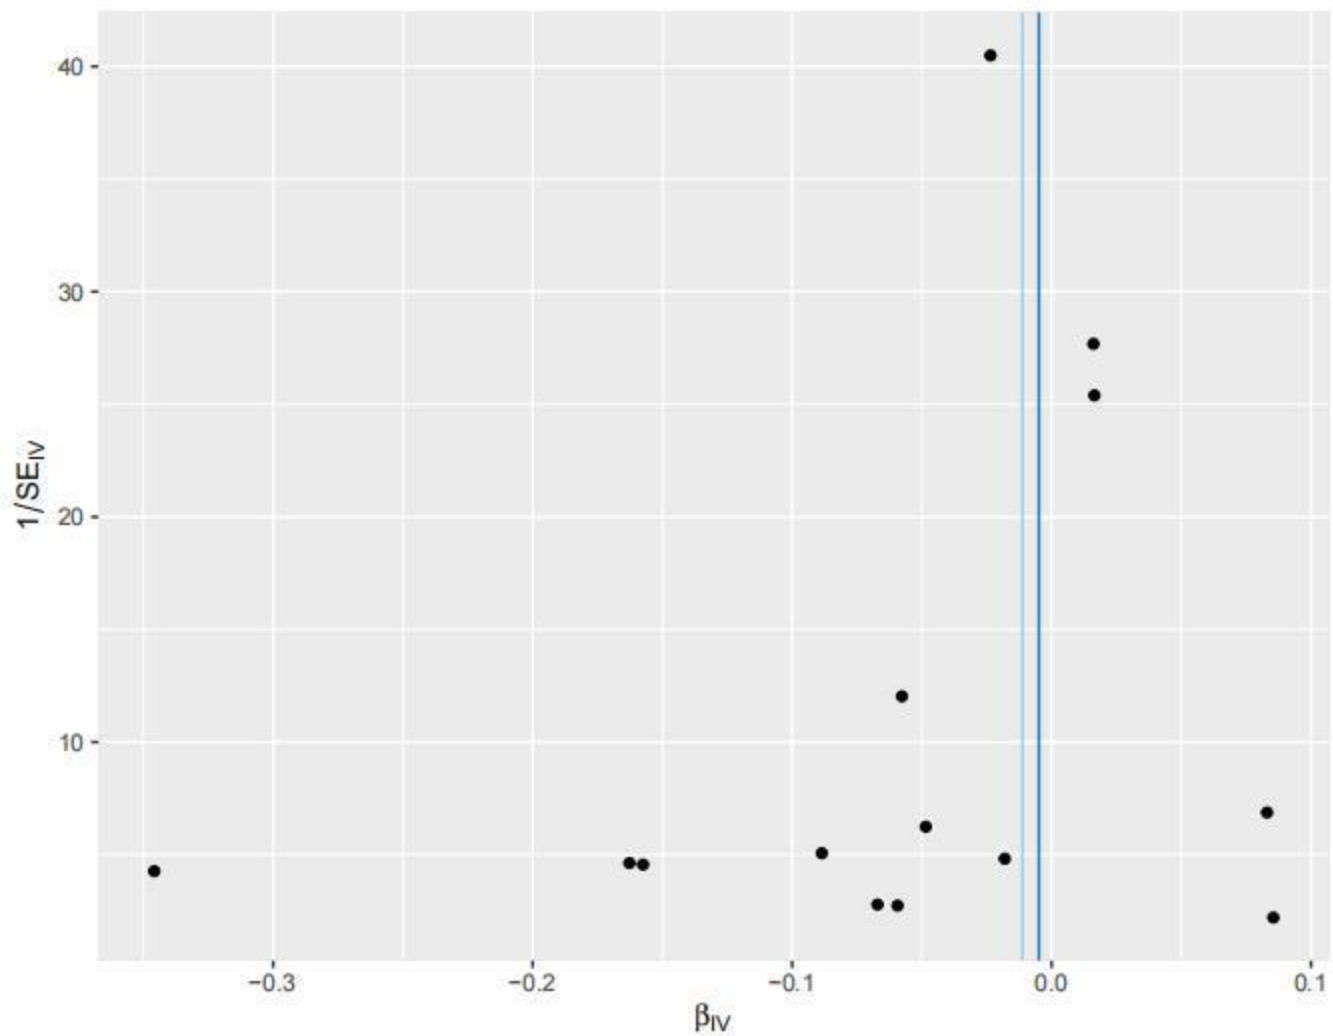

Funnel plot analyse of "CD25 on secreting Treg " on 'Aplastic anemia'

MR Method

- Inverse variance weighted
- MR Egger

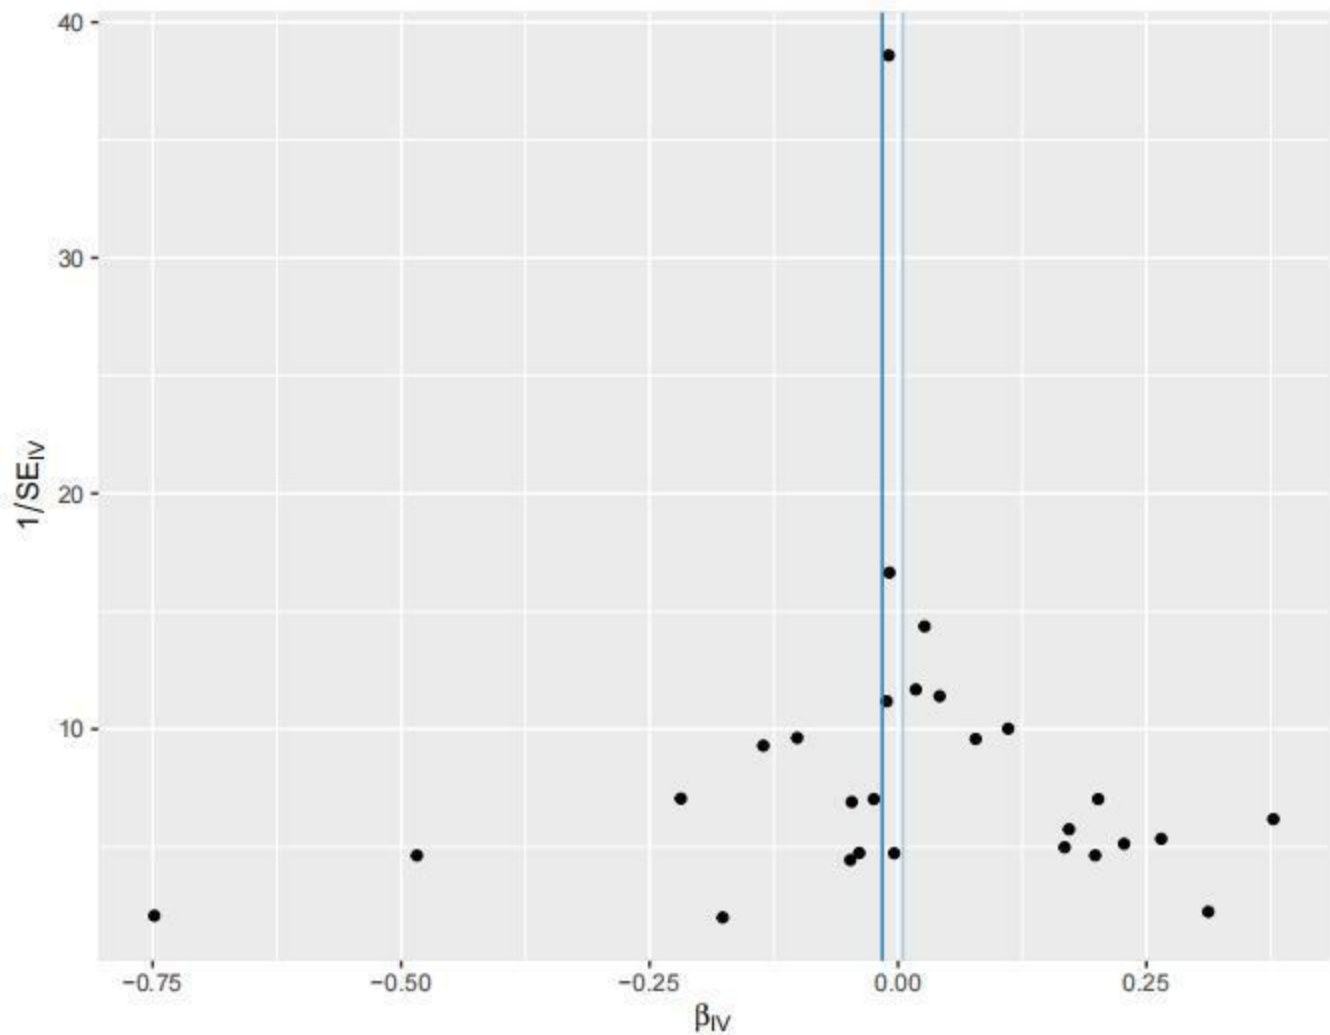

Funnel plot analyse of "HLA DR on CD14- CD16- " on 'Aplastic anemia'

### MR Method

- Inverse variance weighted
- MR Egger

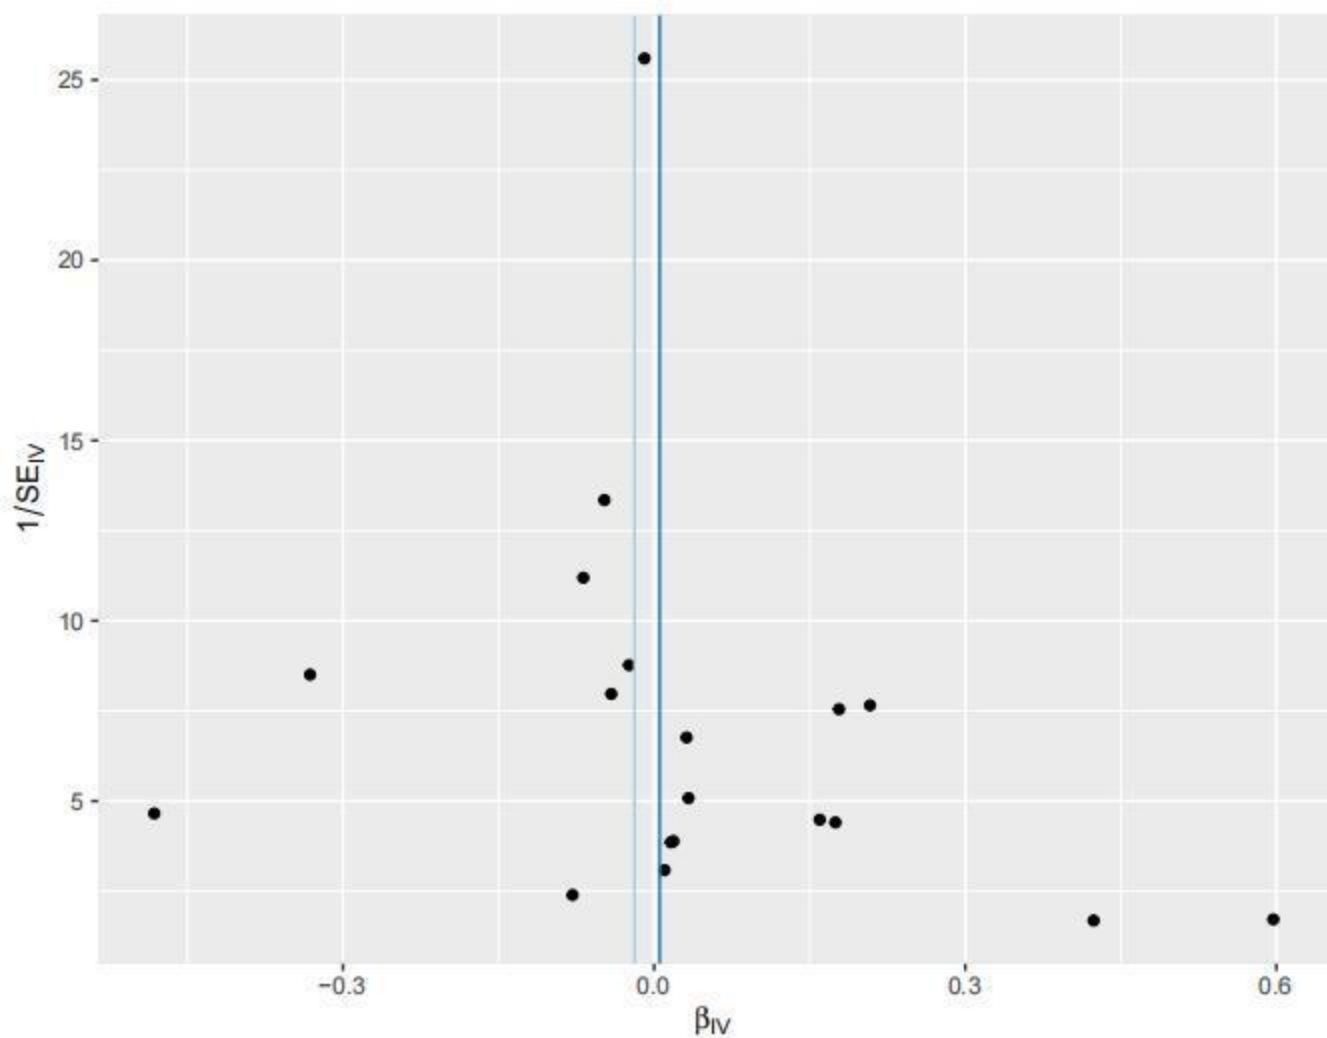

Funnel plot analyse of "IgD on IgD+ CD38- unsw mem" on 'Aplastic anemia'



### MR Method

- Inverse variance weighted
- MR Egger

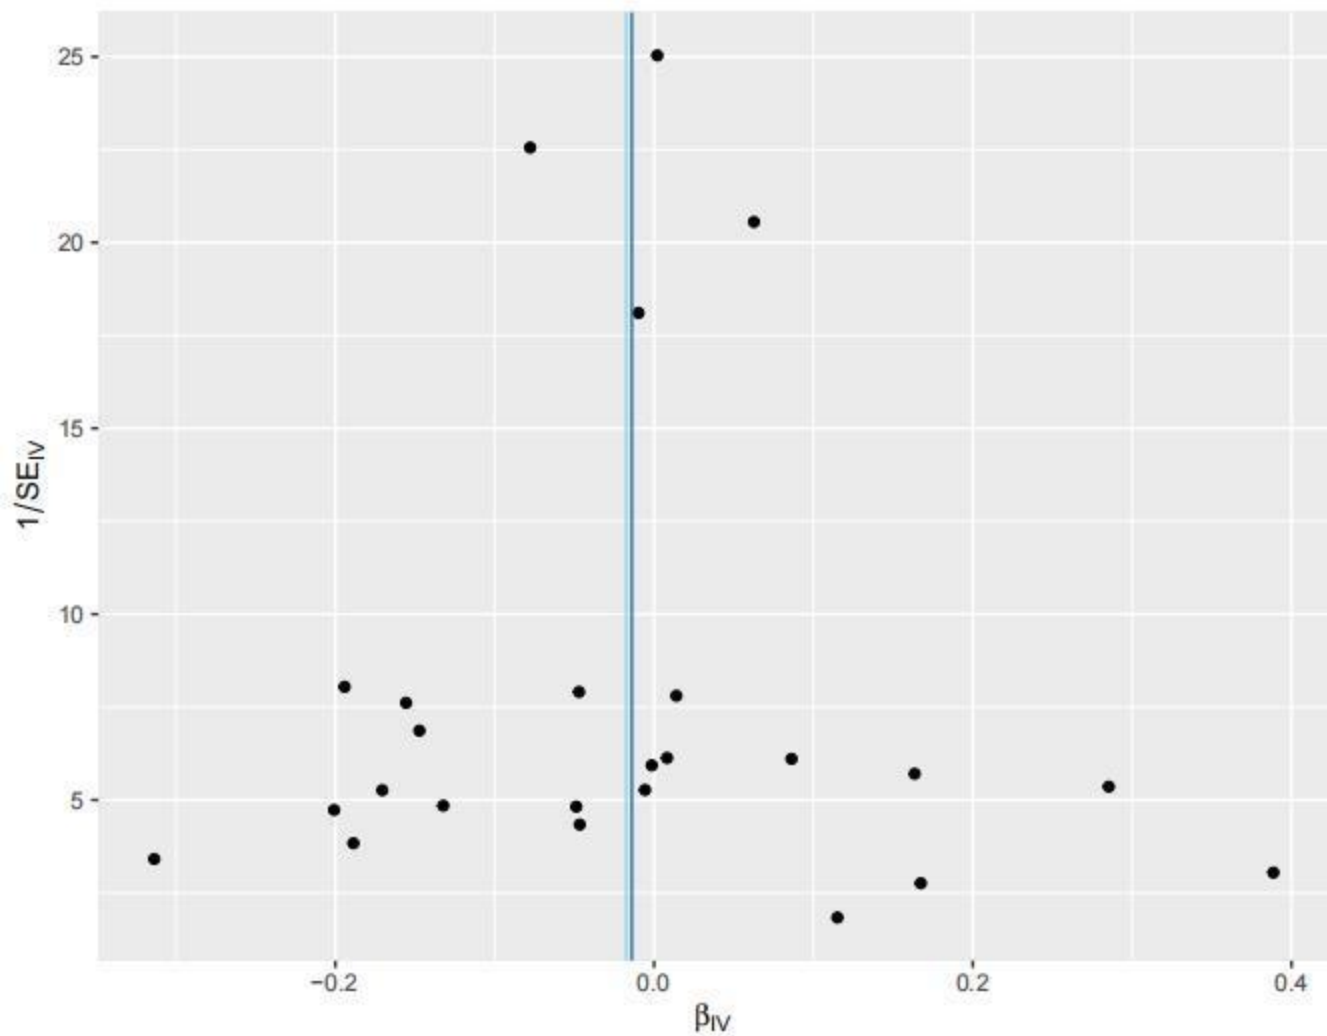

Funnel plot analyse of "CD62L- myeloid DC %DC" on 'Aplastic anemia'

### MR Method

Inverse variance weighted

MR Egger

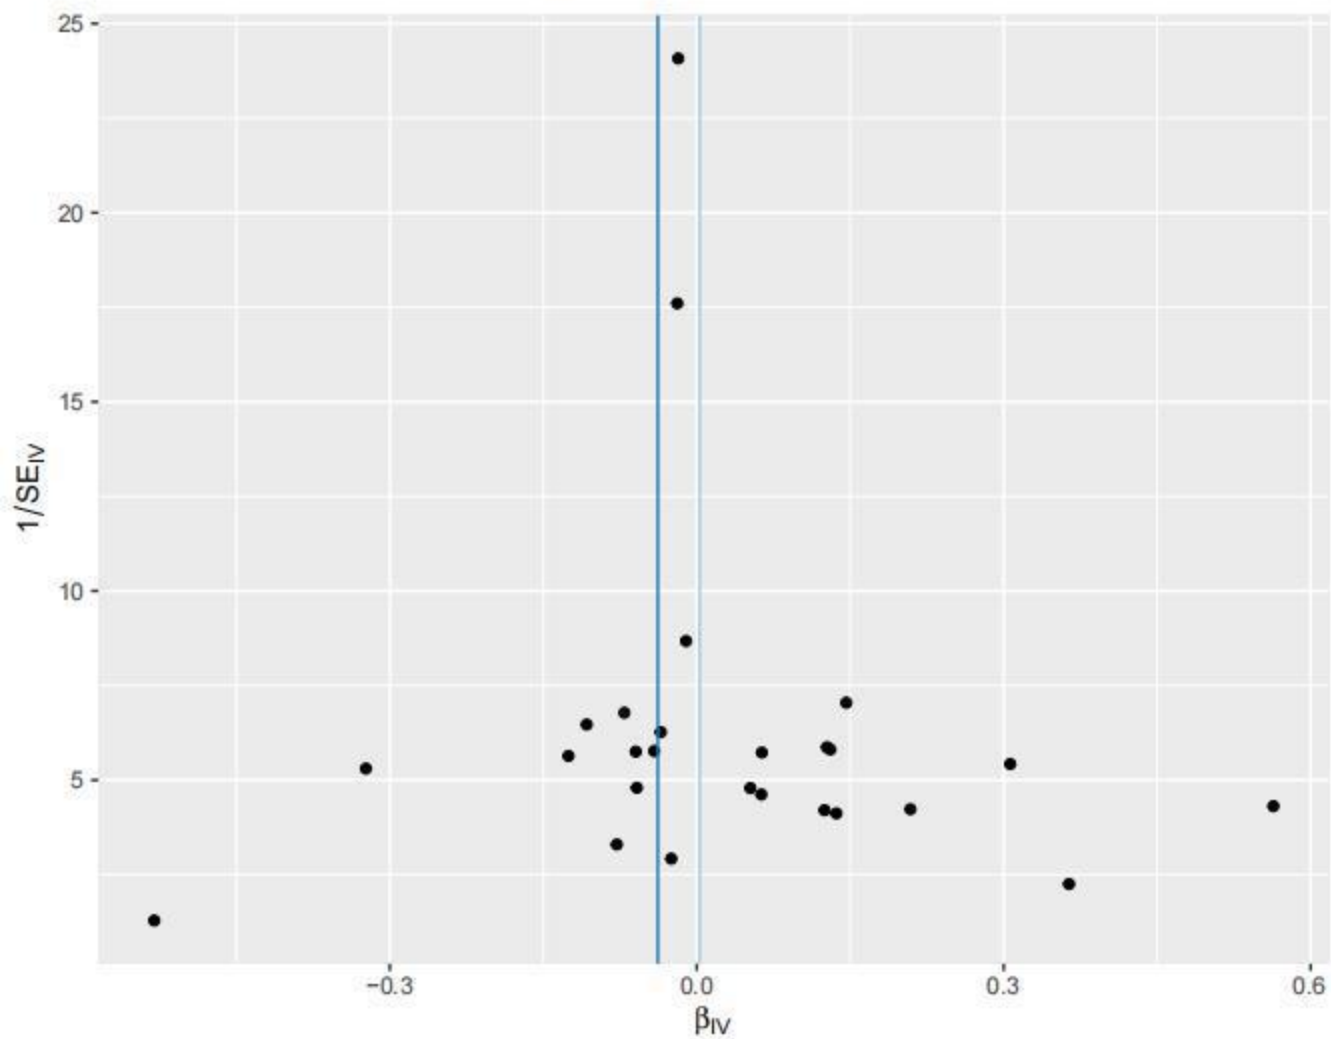

Funnel plot analyse of "SSC-A on plasmacytoid DC" on 'Aplastic anemia'

### MR Method

Inverse variance weighted

MR Egger

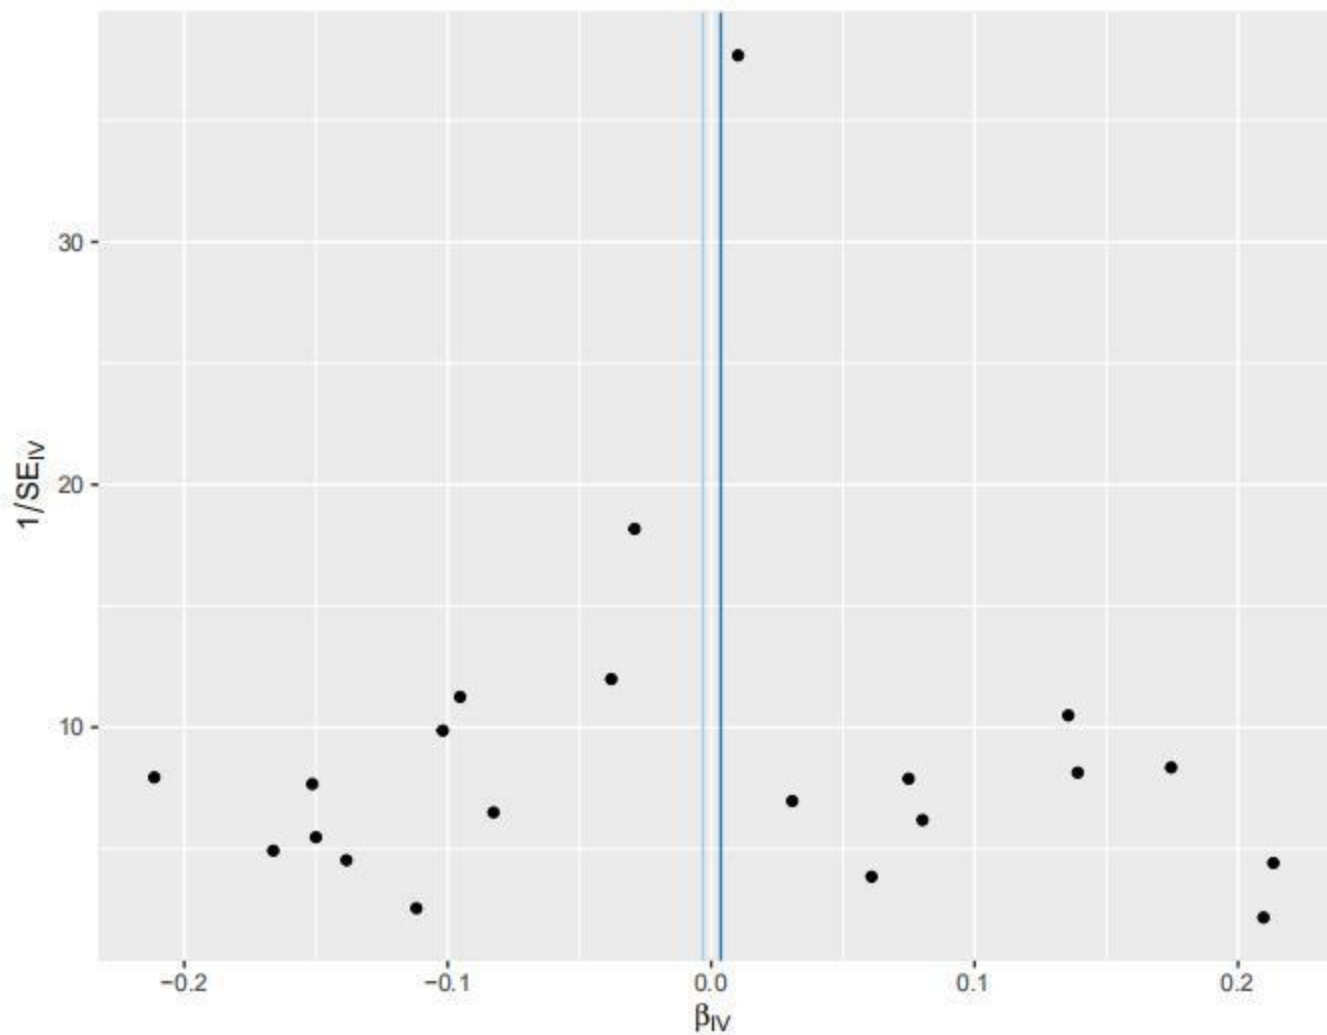

Funnel plot analyse of "BAFF-R on B cell" on 'Aplastic anemia'

MR Method

- Inverse variance weighted
- MR Egger

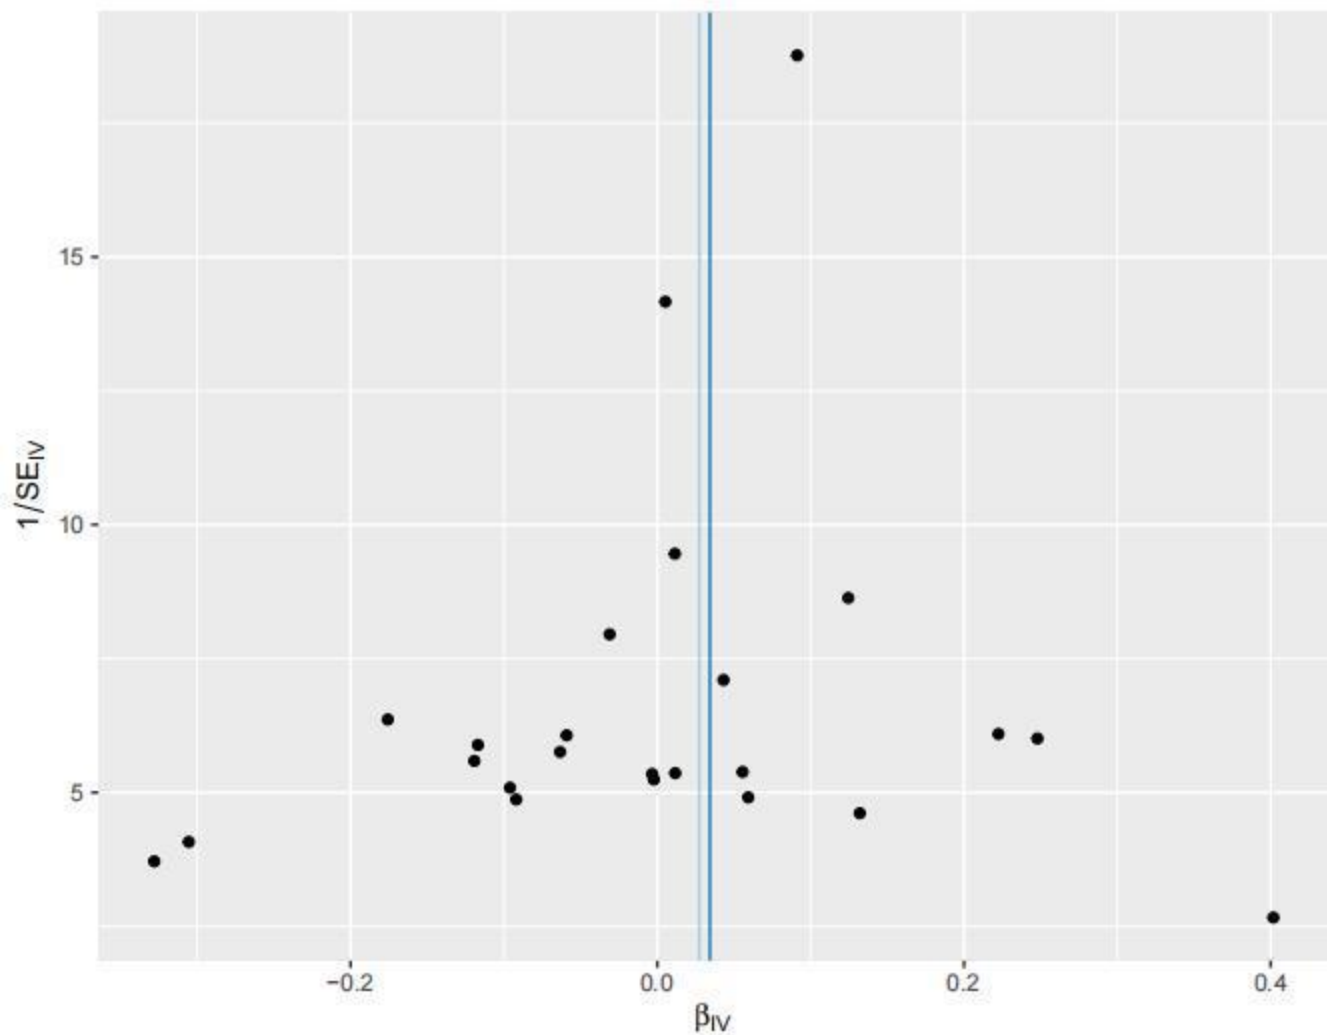

Funnel plot analyse of "HLA DR+ NK %NK" on 'Aplastic anemia'

### MR Method

- Inverse variance weighted
- MR Egger

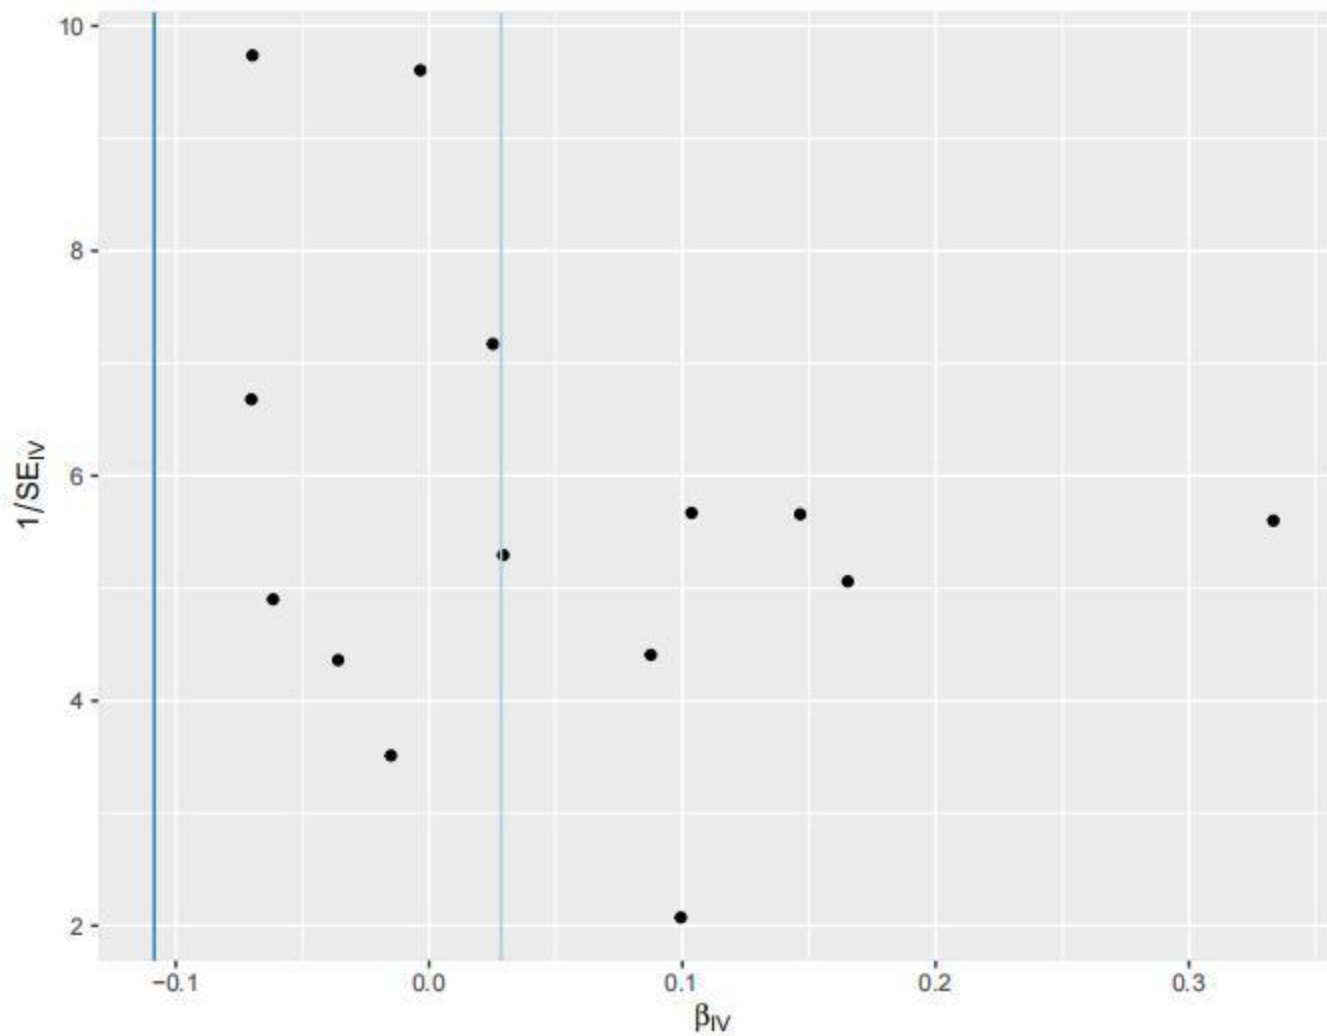

Funnel plot analysis of "CD45RA on TD CD8br" on 'Aplastic anemia'

### MR Method

- Inverse variance weighted
- MR Egger

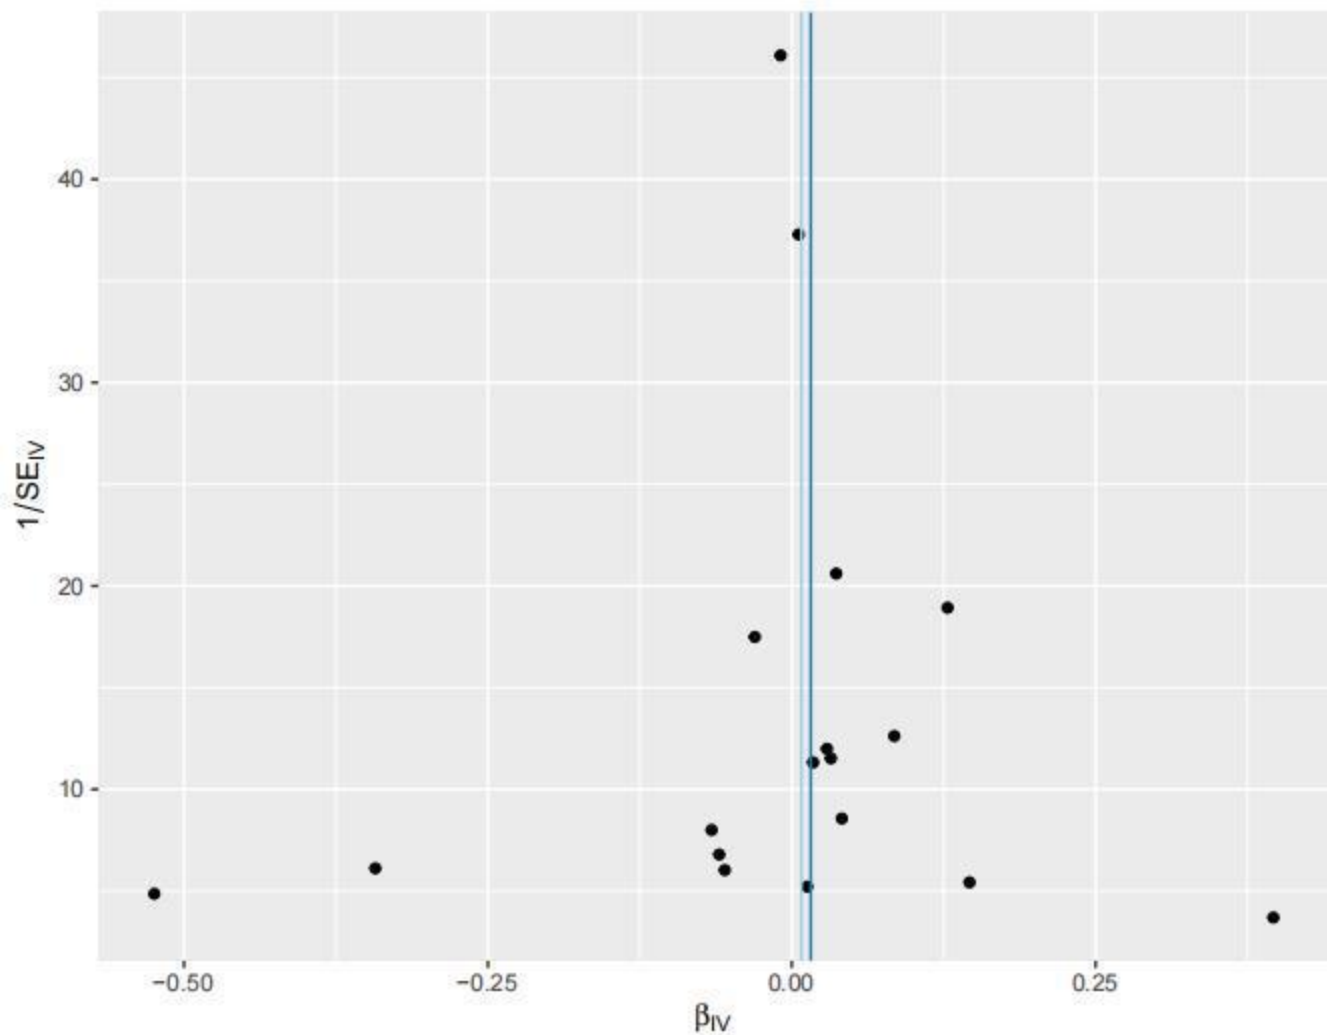

Funnel plot analyse of "CD123 on CD62L+ plasmacytoid DC" on 'Aplastic anemia'

MR Method

- Inverse variance weighted
- MR Egger

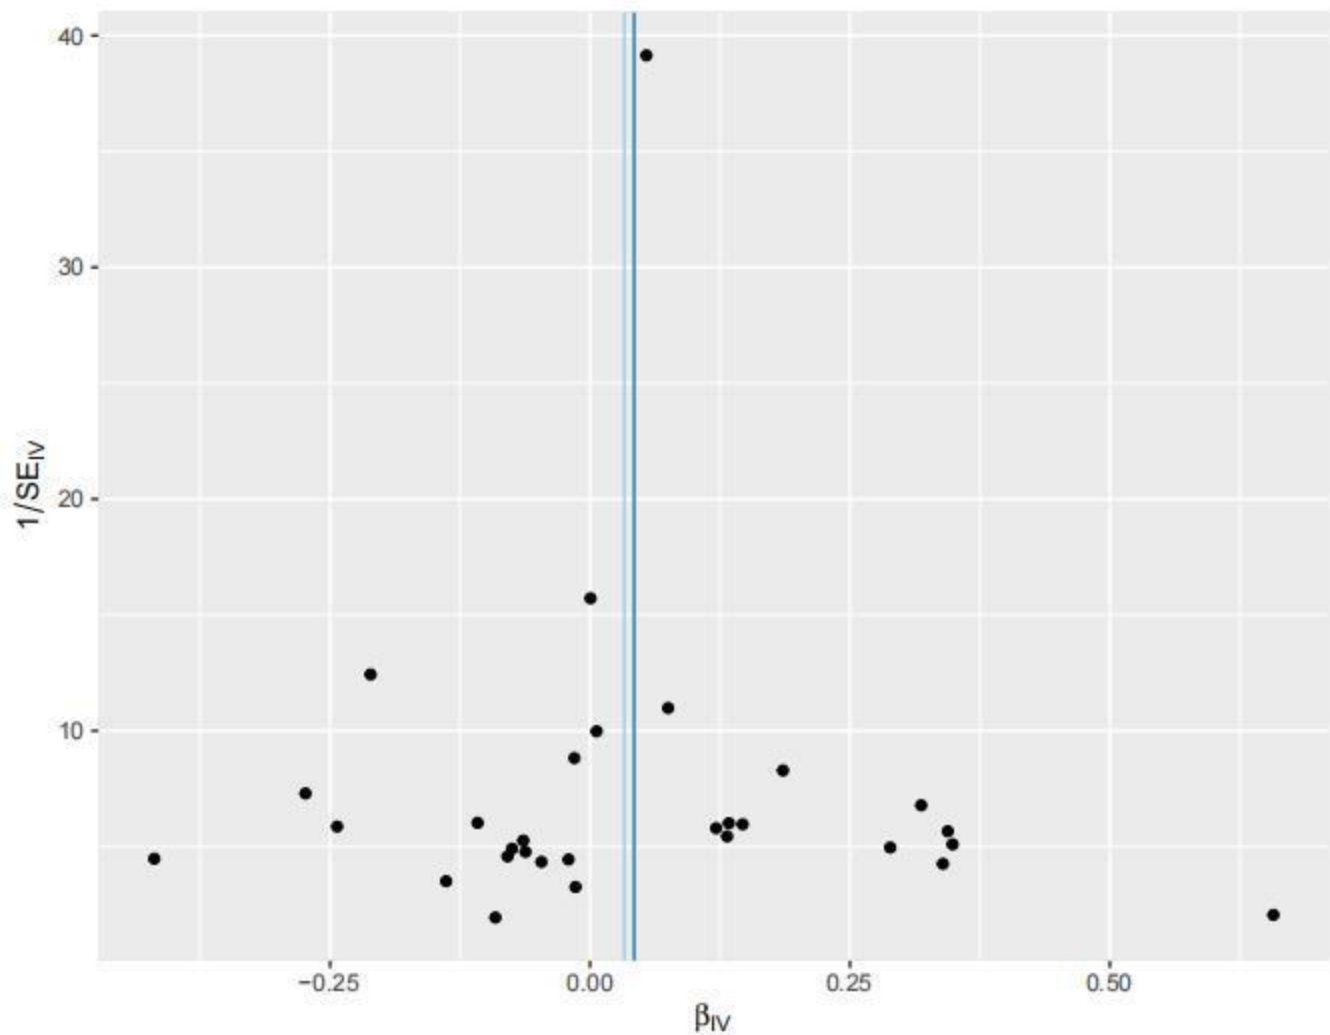

Funnel plot analyse of "CD39+ activated Treg AC" on 'Aplastic anemia'

### MR Method

Inverse variance weighted

MR Egger

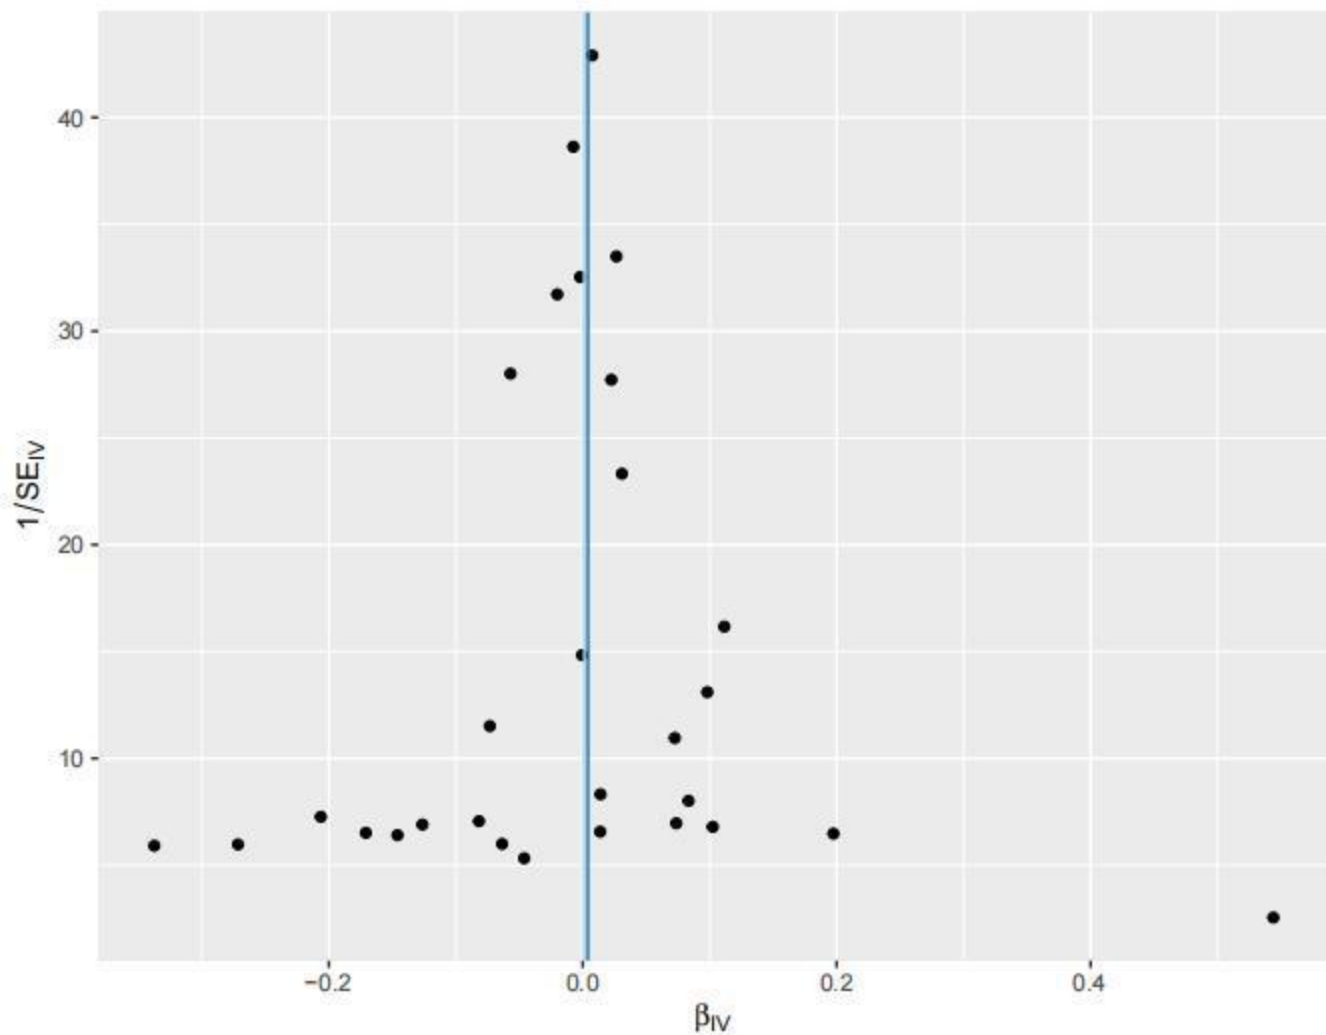

Funnel plot analysis of "CD33br HLA DR+ CD14- AC" on 'Aplastic anemia'



### MR Method

- Inverse variance weighted
- MR Egger

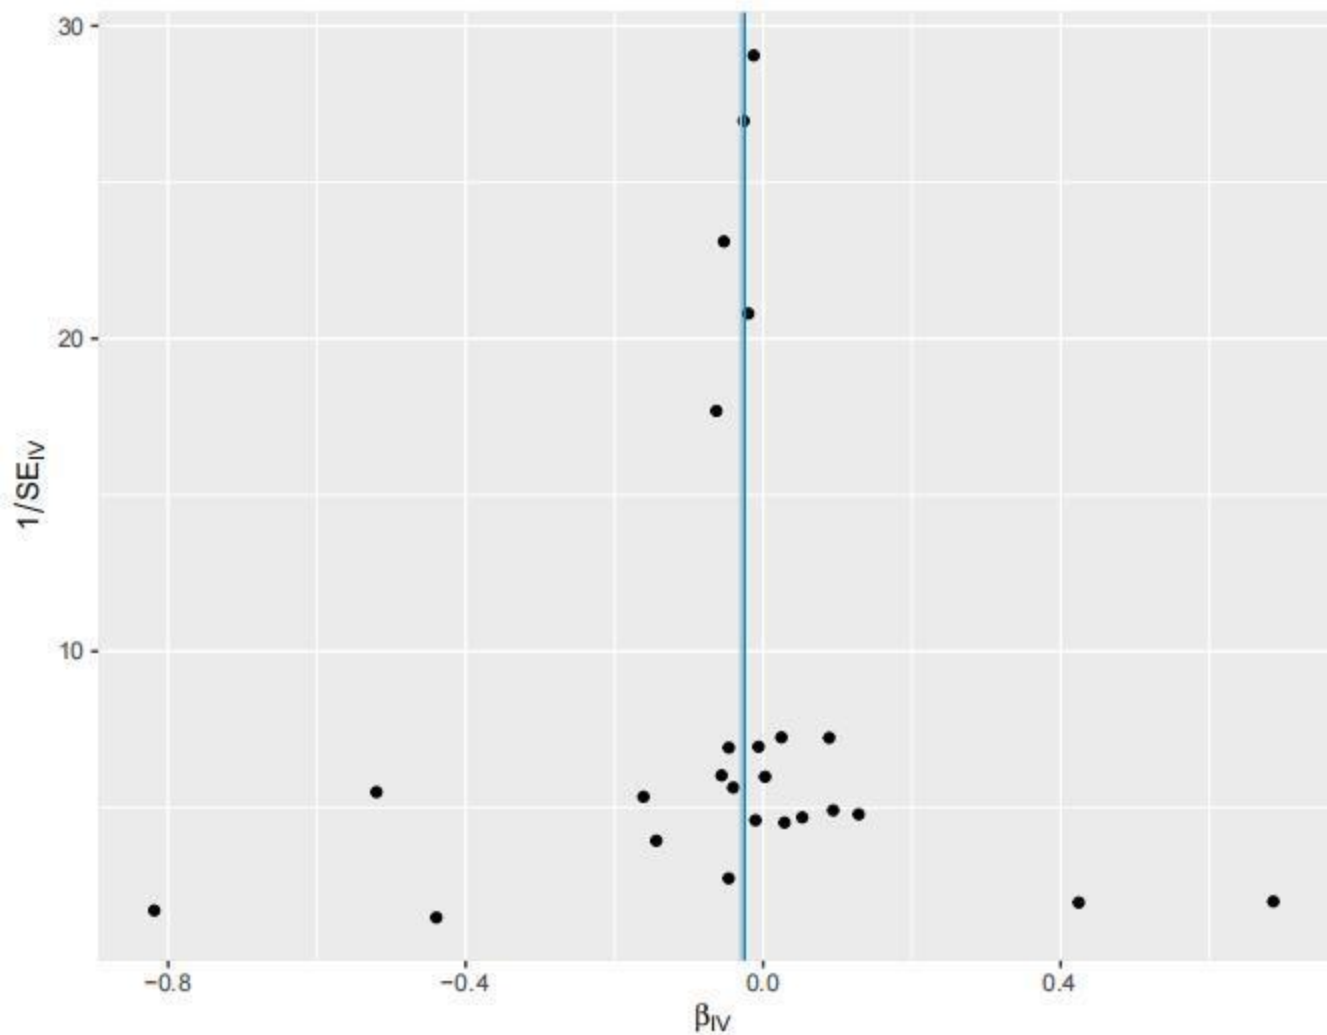

Funnel plot analyse of "CD24 on unsw mem" on 'Aplastic anemia'

MR Method

- Inverse variance weighted
- MR Egger

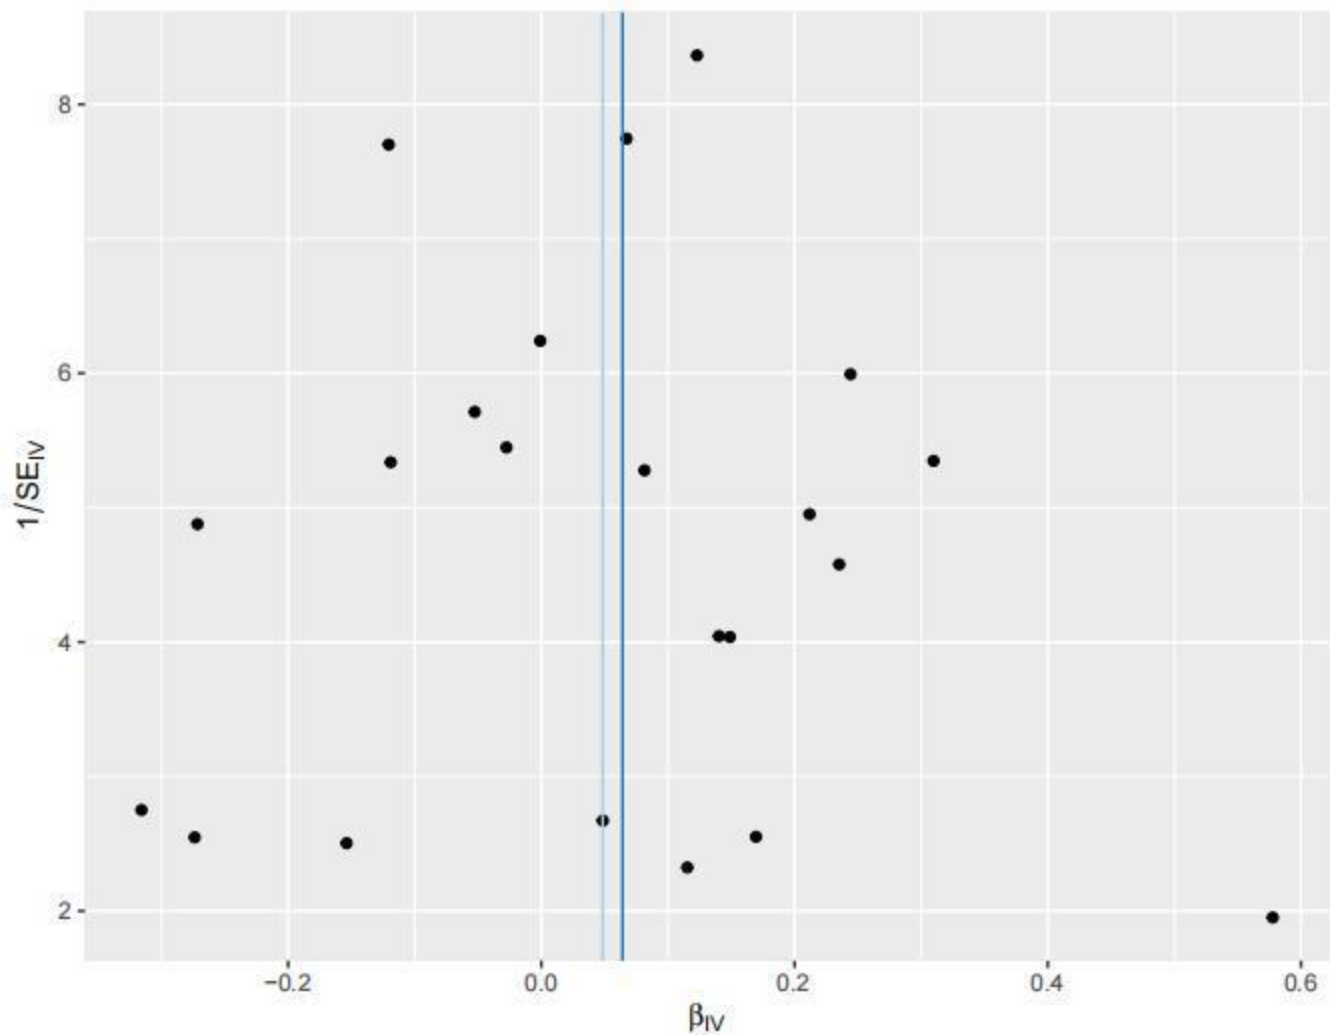

Funnel plot analyse of "Unsw mem AC" on 'Aplastic anemia'

### MR Method

- Inverse variance weighted
- MR Egger

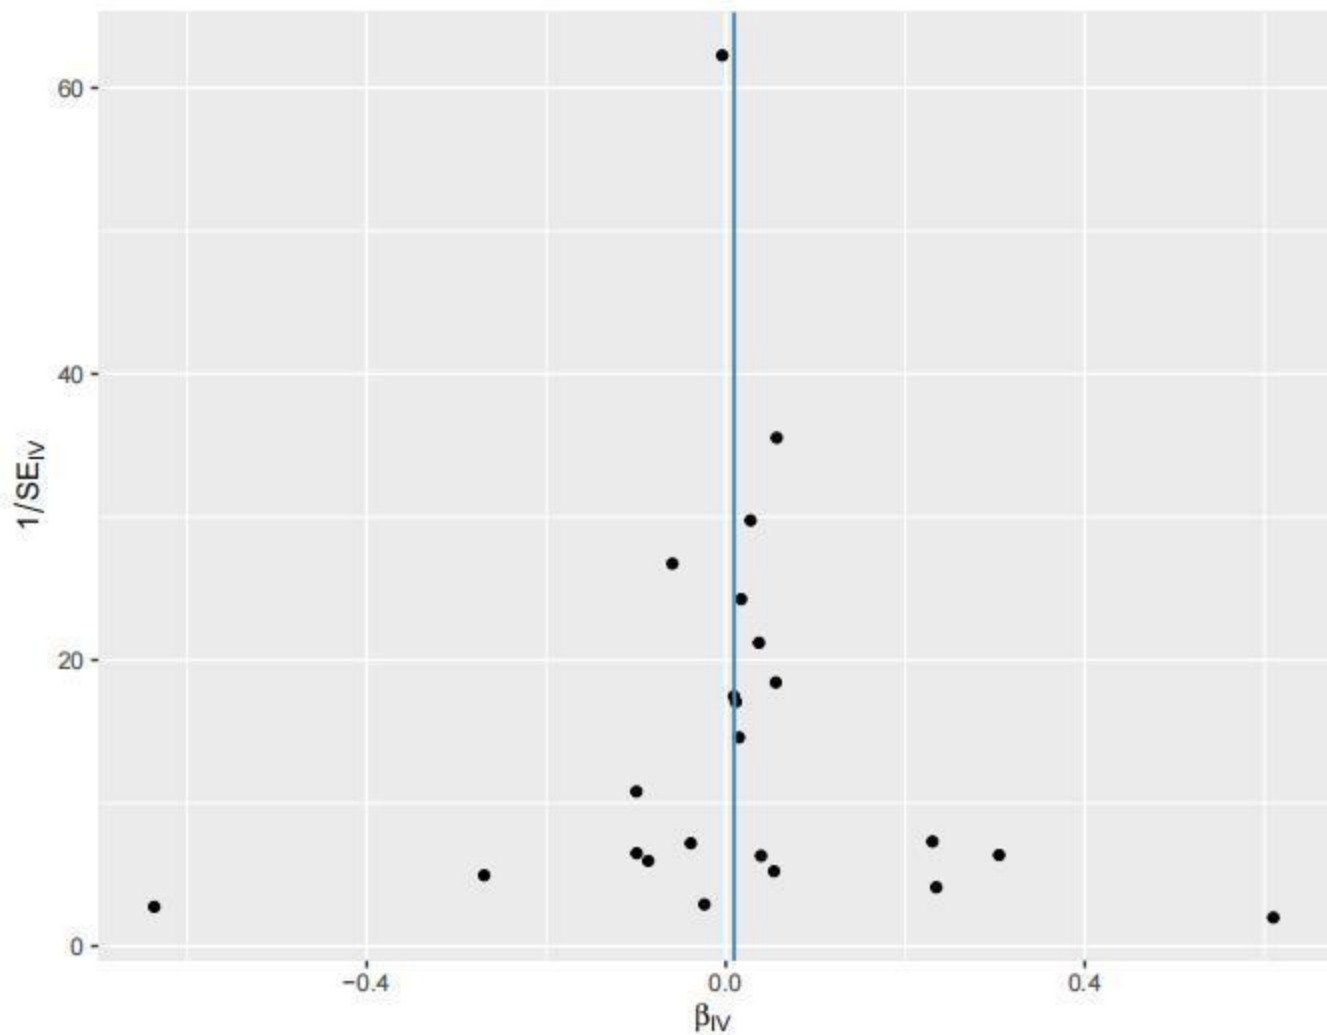

Funnel plot analyse of "Activated & secreting Treg AC" on 'Aplastic anemia'

### MR Method

- Inverse variance weighted
- MR Egger

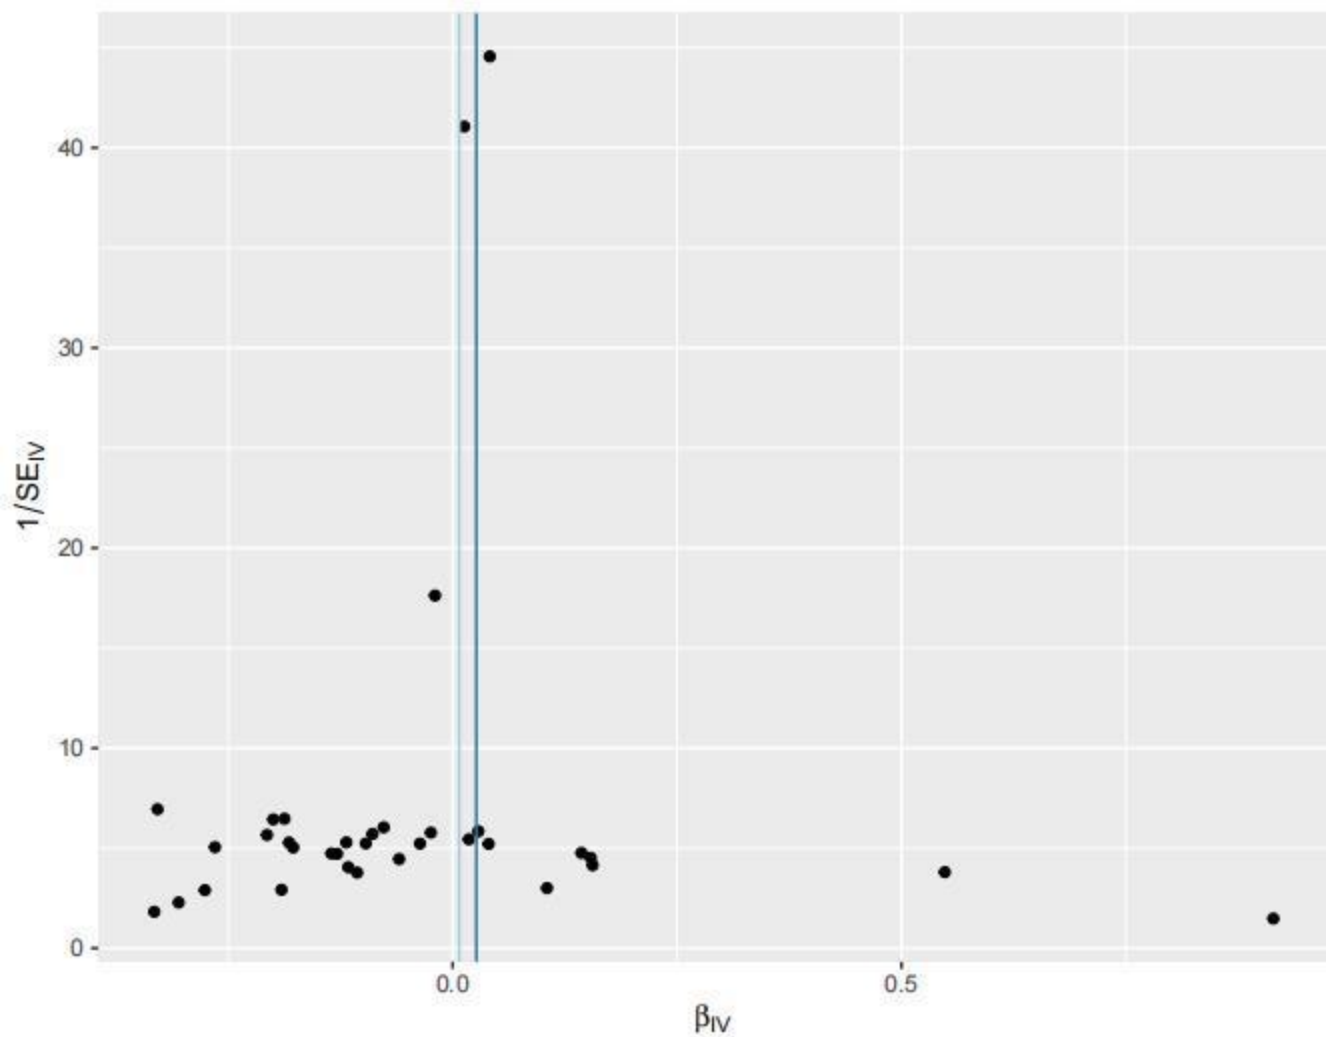

Funnel plot analysis of "IgD+ CD38dim %lymphocyte" on 'Aplastic anemia'

MR Method

Inverse variance weighted

MR Egger

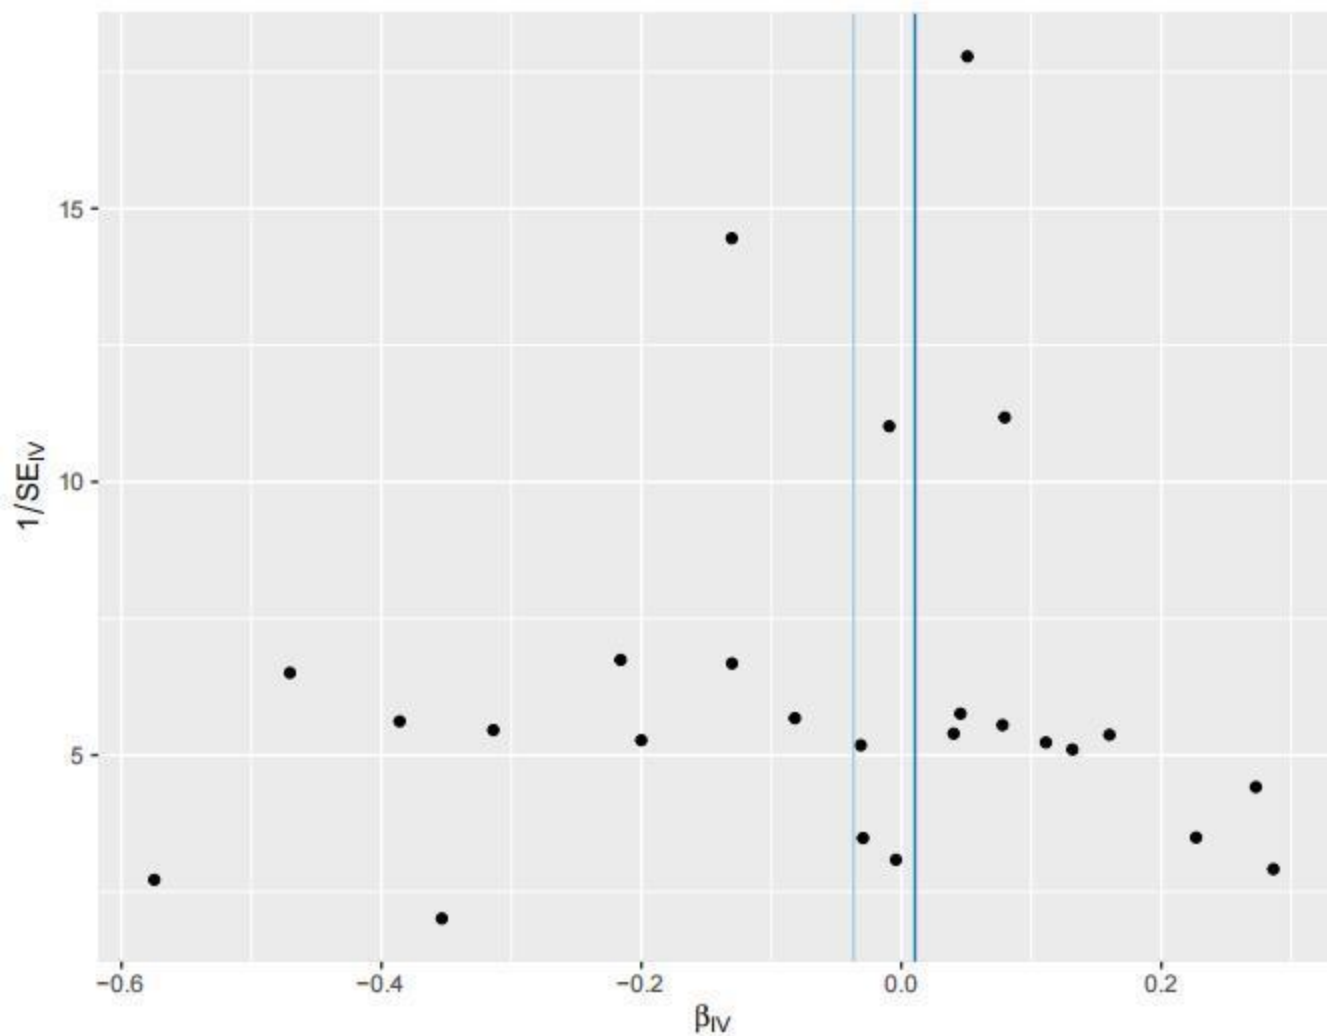

Funnel plot analyse of "TD DN (CD4-CD8-) %T cell" on 'Aplastic anemia'

### MR Method

- Inverse variance weighted
- MR Egger

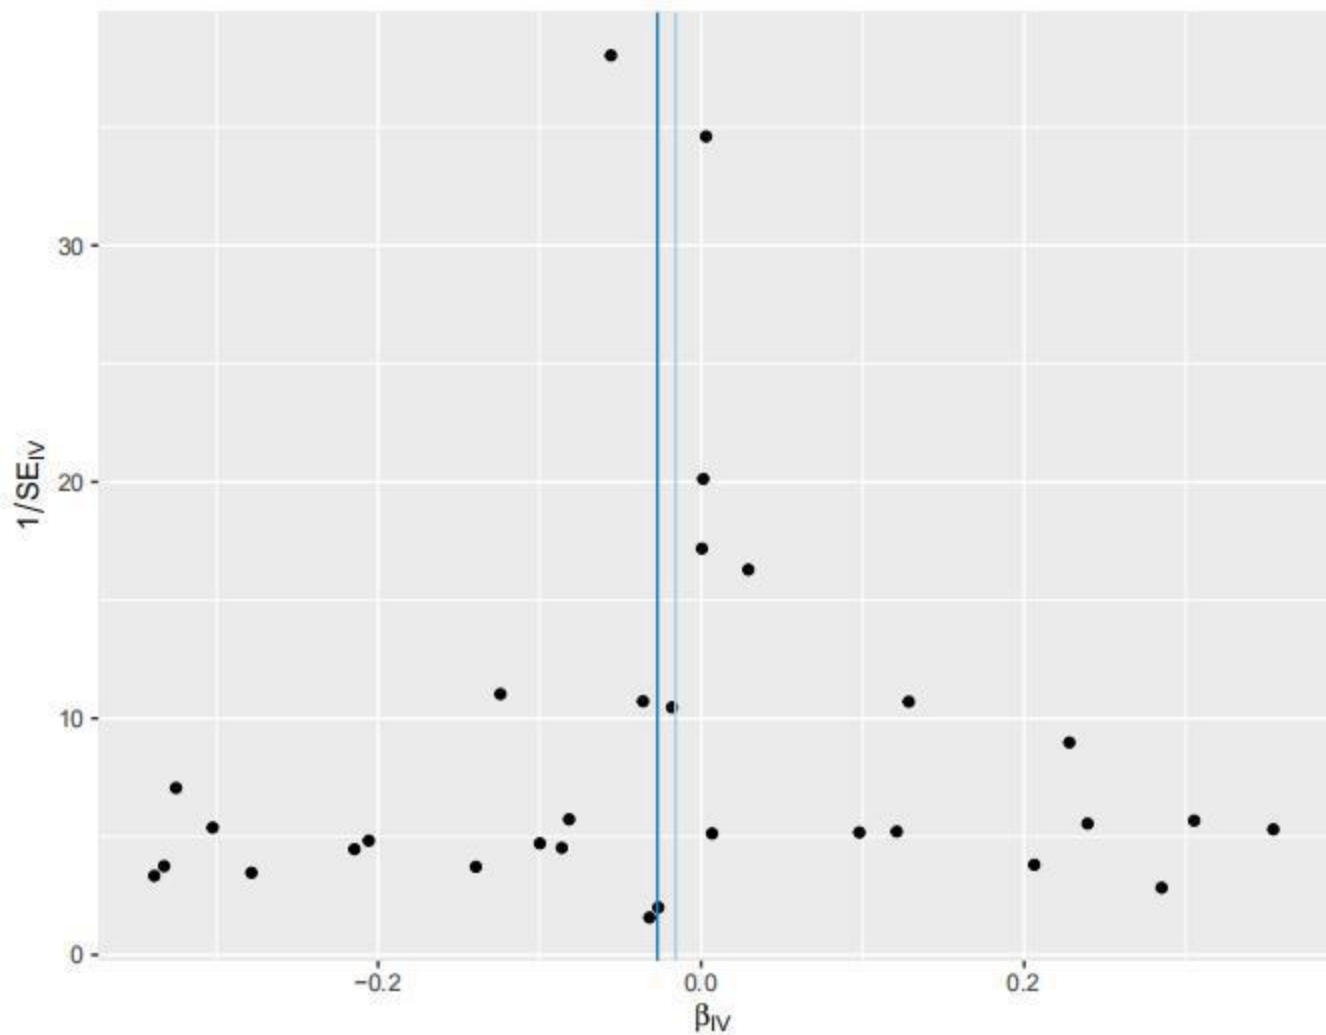

Funnel plot analyse of "CD39+ CD4+ %T cell" on 'Aplastic anemia'

MR Method

Inverse variance weighted

MR Egger

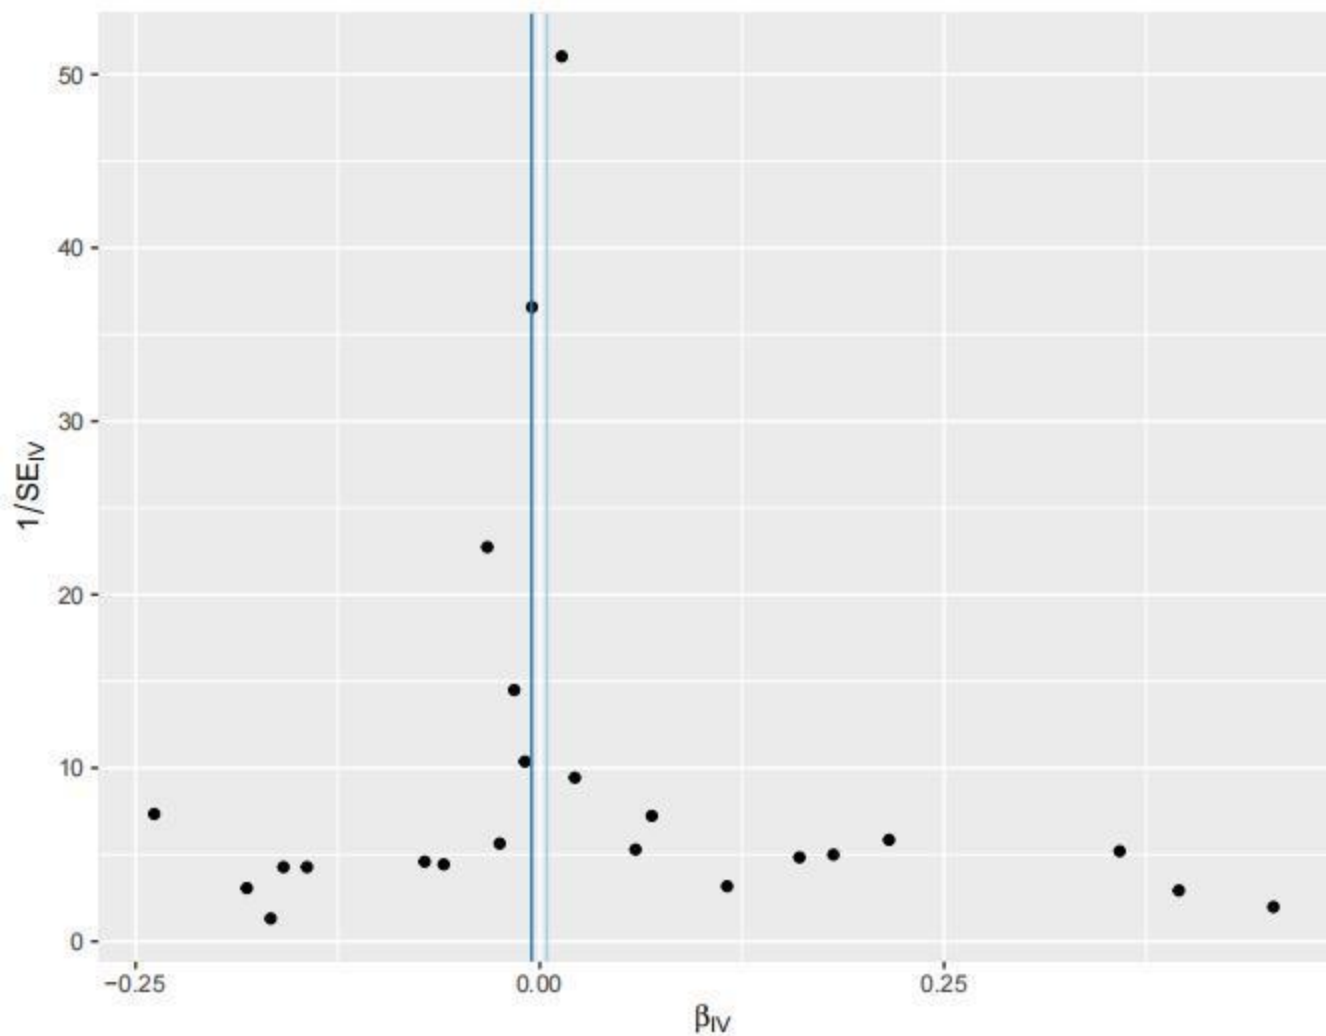

Funnel plot analysis of "IgD+ CD24- AC" on 'Aplastic anemia'

MR Method

Inverse variance weighted

MR Egger

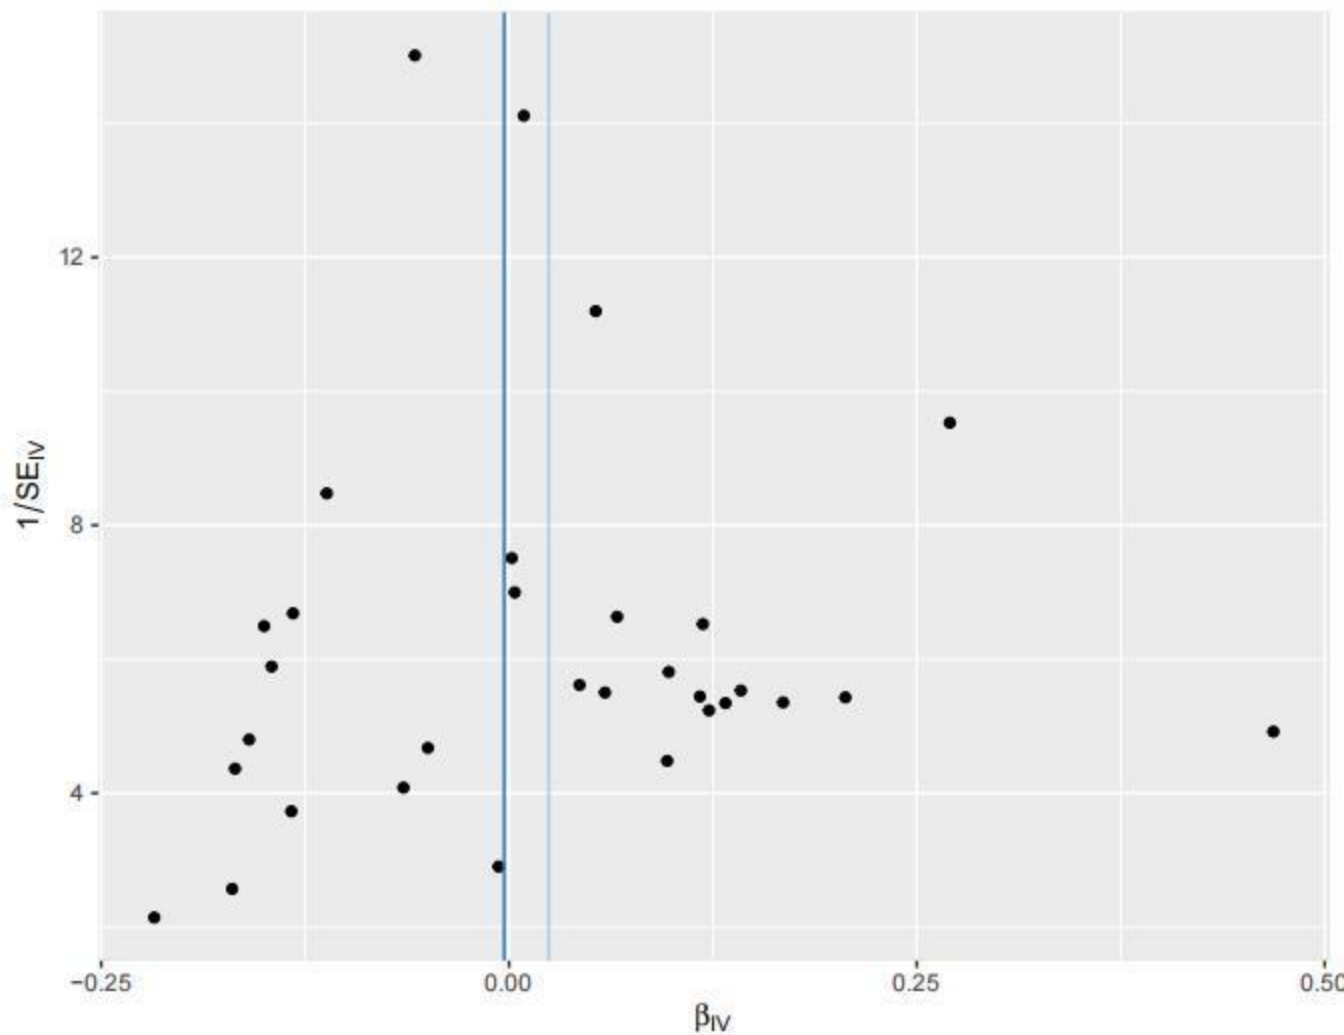

Funnel plot analyse of "CD127 on granulocyte" on 'Aplastic anemia'



MR Method

- Inverse variance weighted
- MR Egger

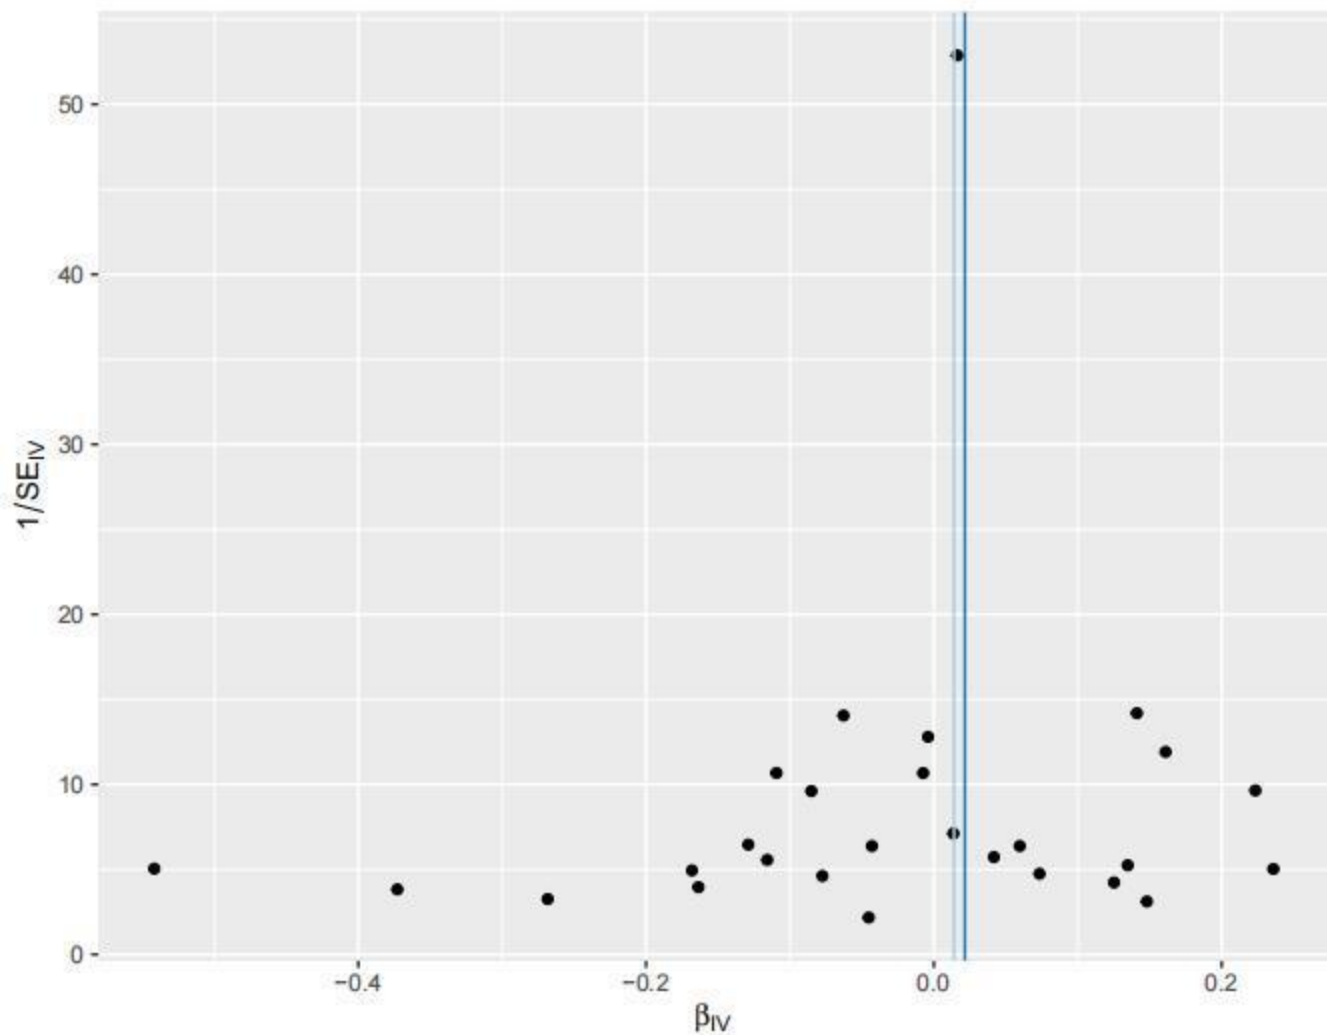

Funnel plot analyse of "CD25 on IgD+ CD24+" on 'Aplastic anemia'

MR Method

- Inverse variance weighted
- MR Egger

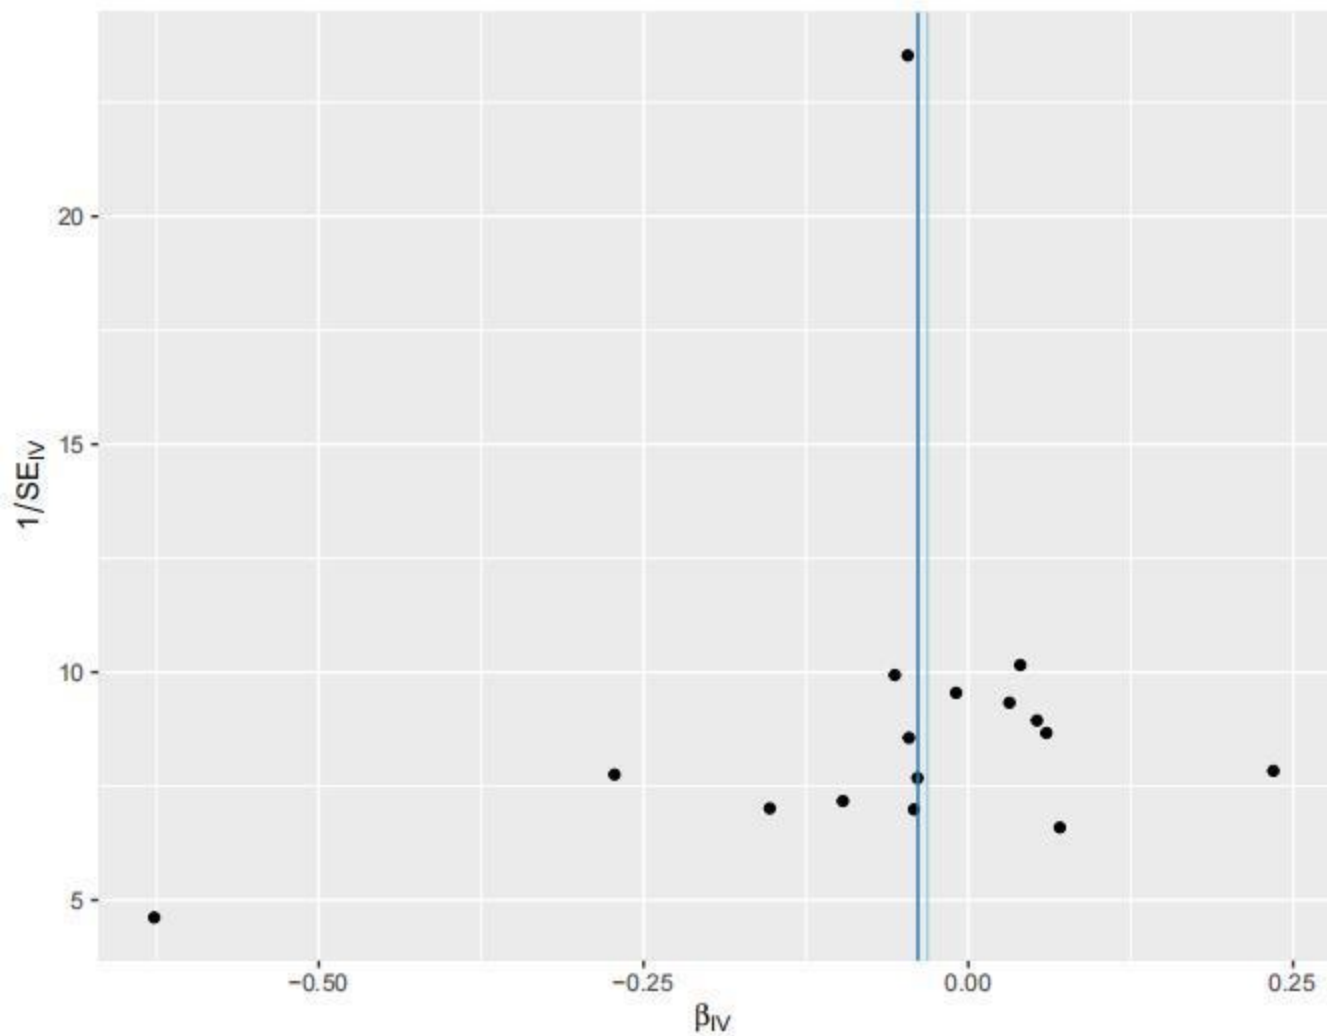

Funnel plot analyse of "CD45 on CD33br HLA DR+ CD14dim " on 'Aplastic anemia'

### MR Method

- Inverse variance weighted
- MR Egger

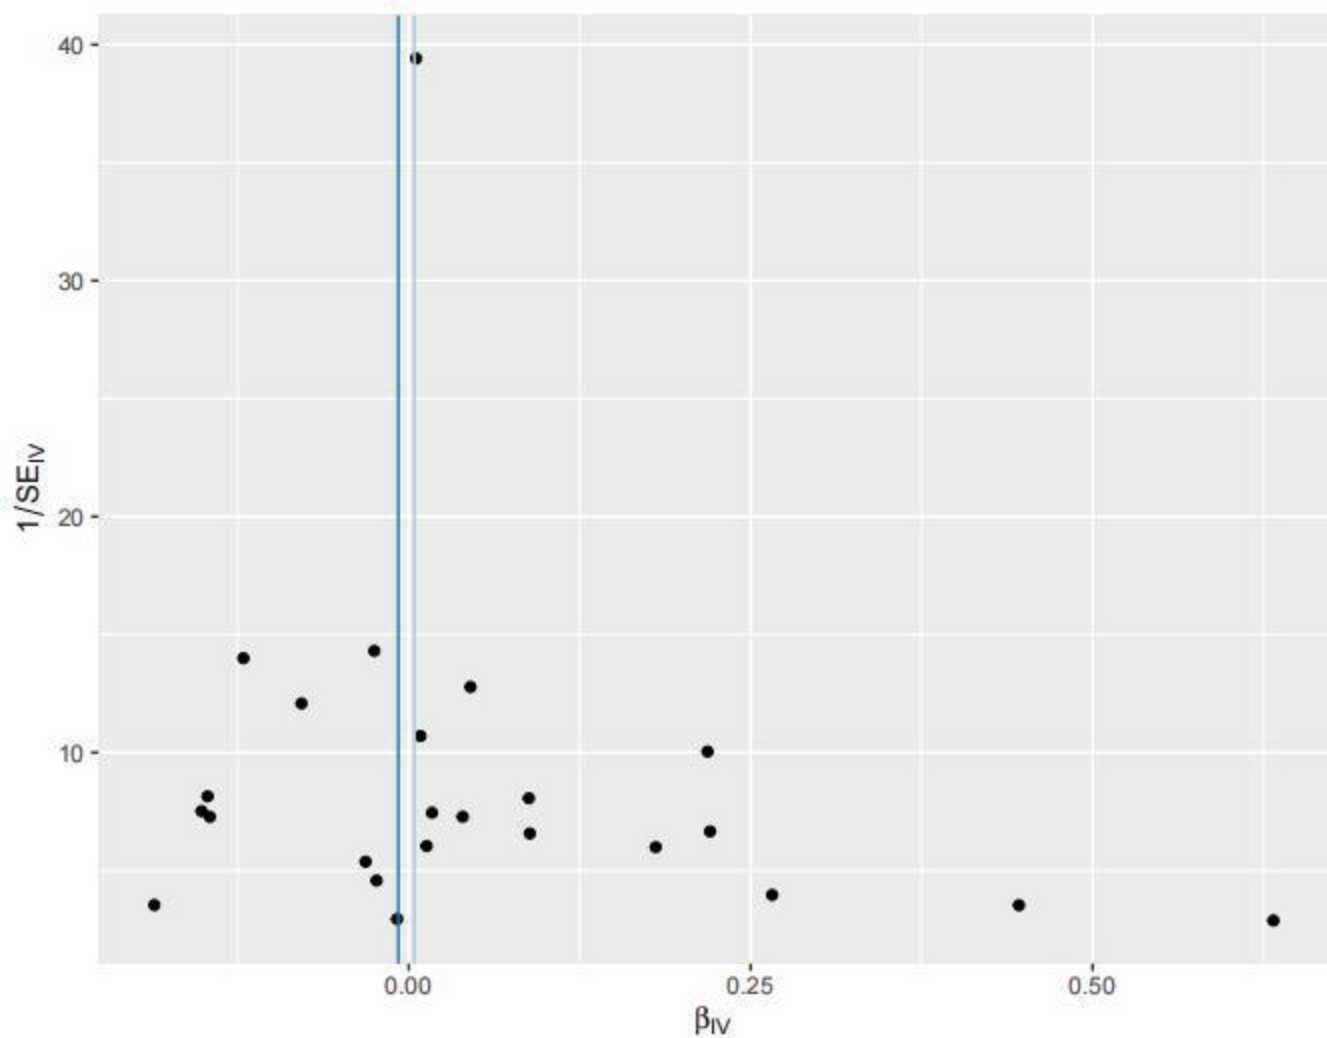

Funnel plot analyse of "CD14 on Mo MDSC " on 'Aplastic anemia'

MR Method

- Inverse variance weighted
- MR Egger

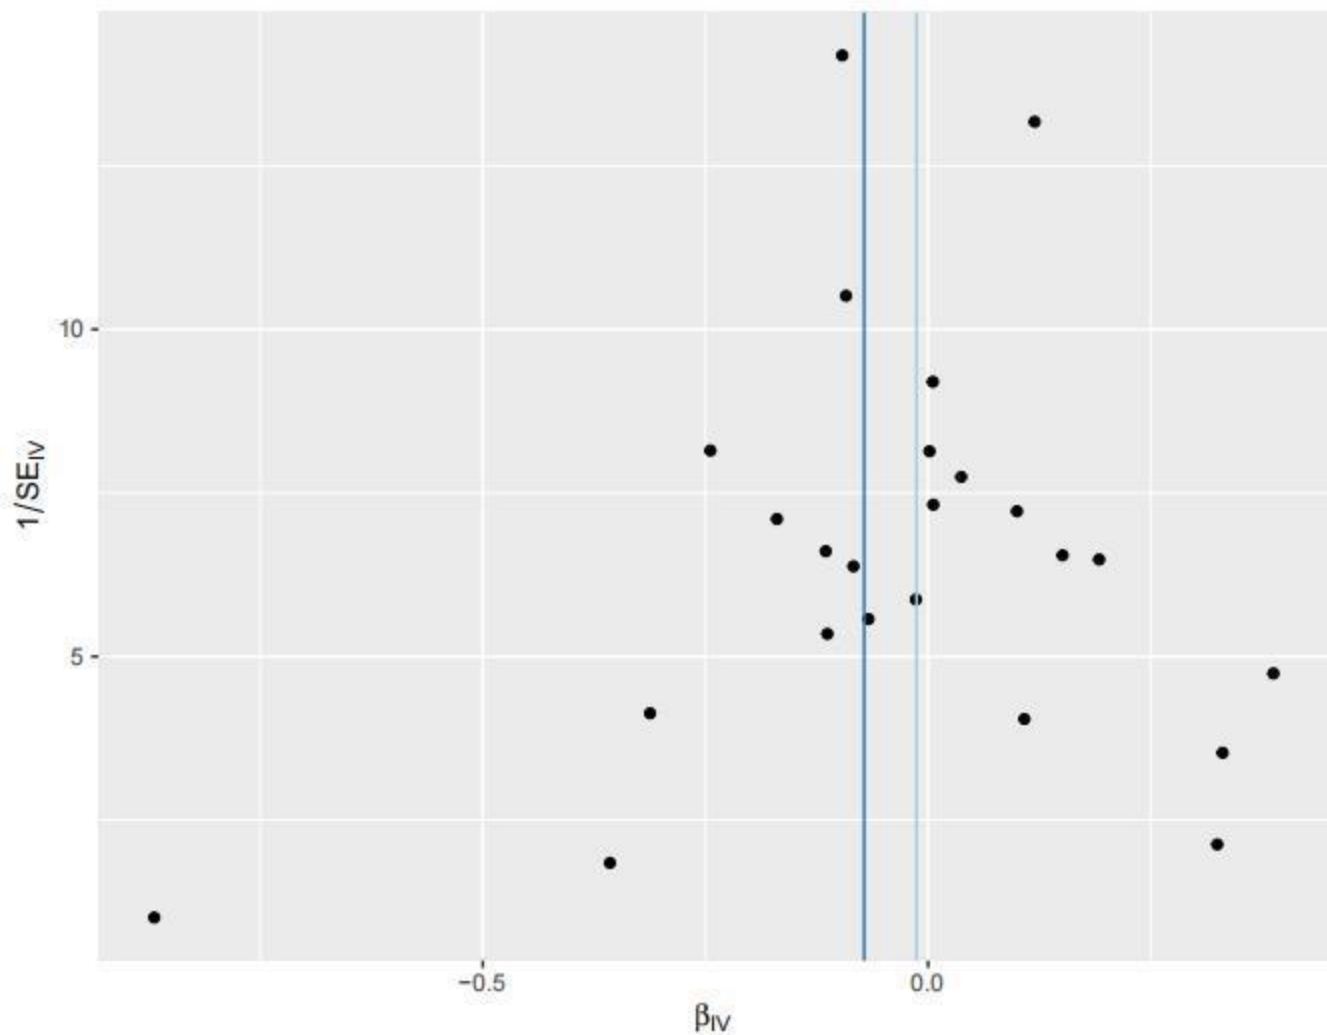

Funnel plot analyse of "CD62L- monocyte %monocyte" on 'Aplastic anemia'

### MR Method

- Inverse variance weighted
- MR Egger

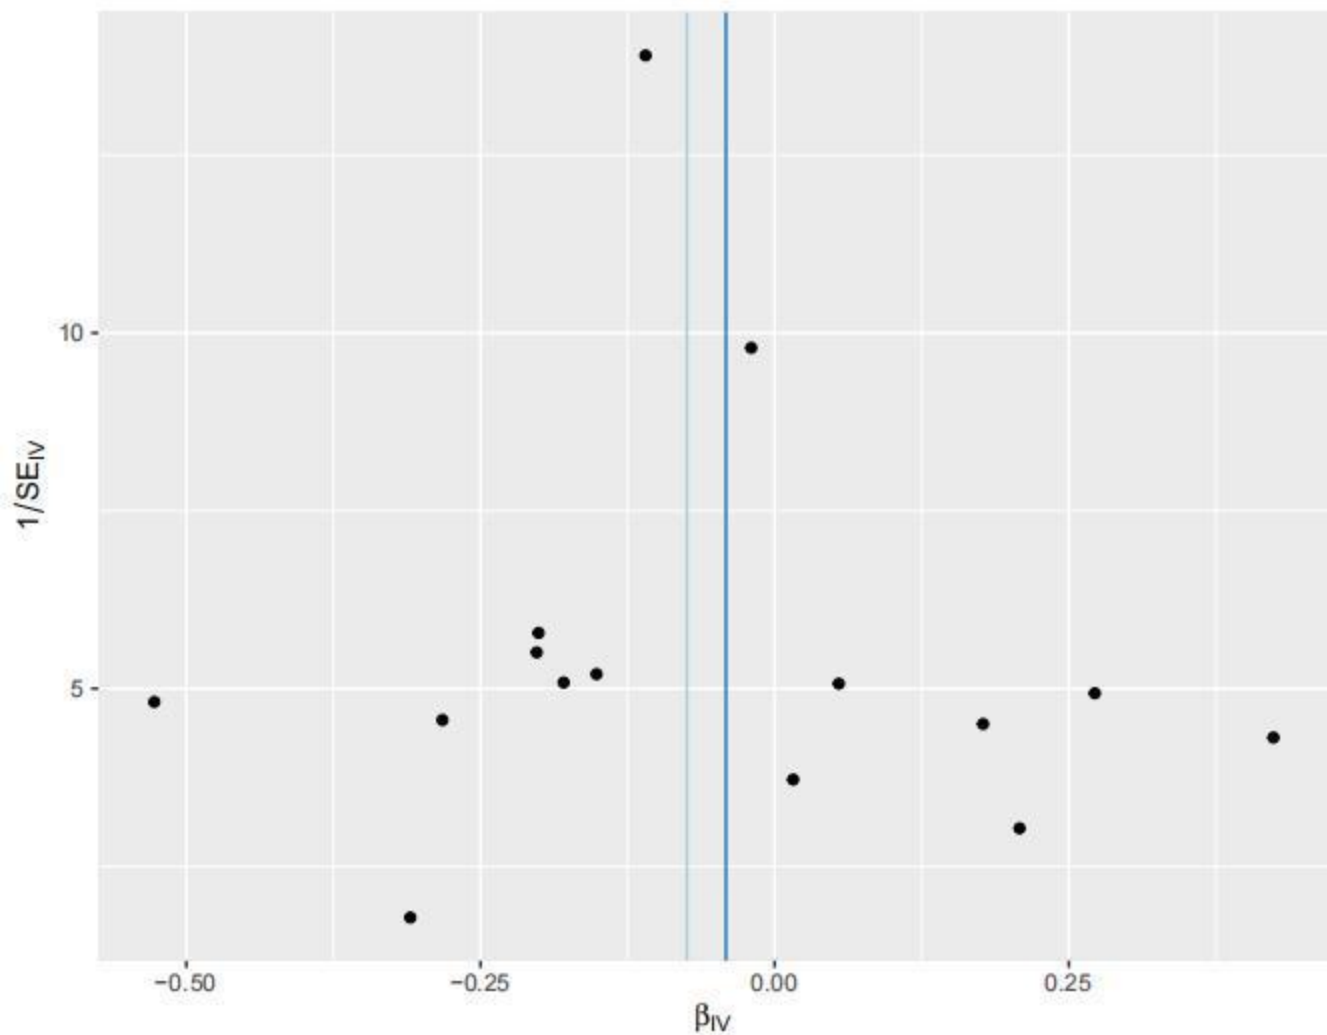

Funnel plot analysis of "CD38 on PB/PC" on 'Aplastic anemia'

### MR Method

- Inverse variance weighted
- MR Egger

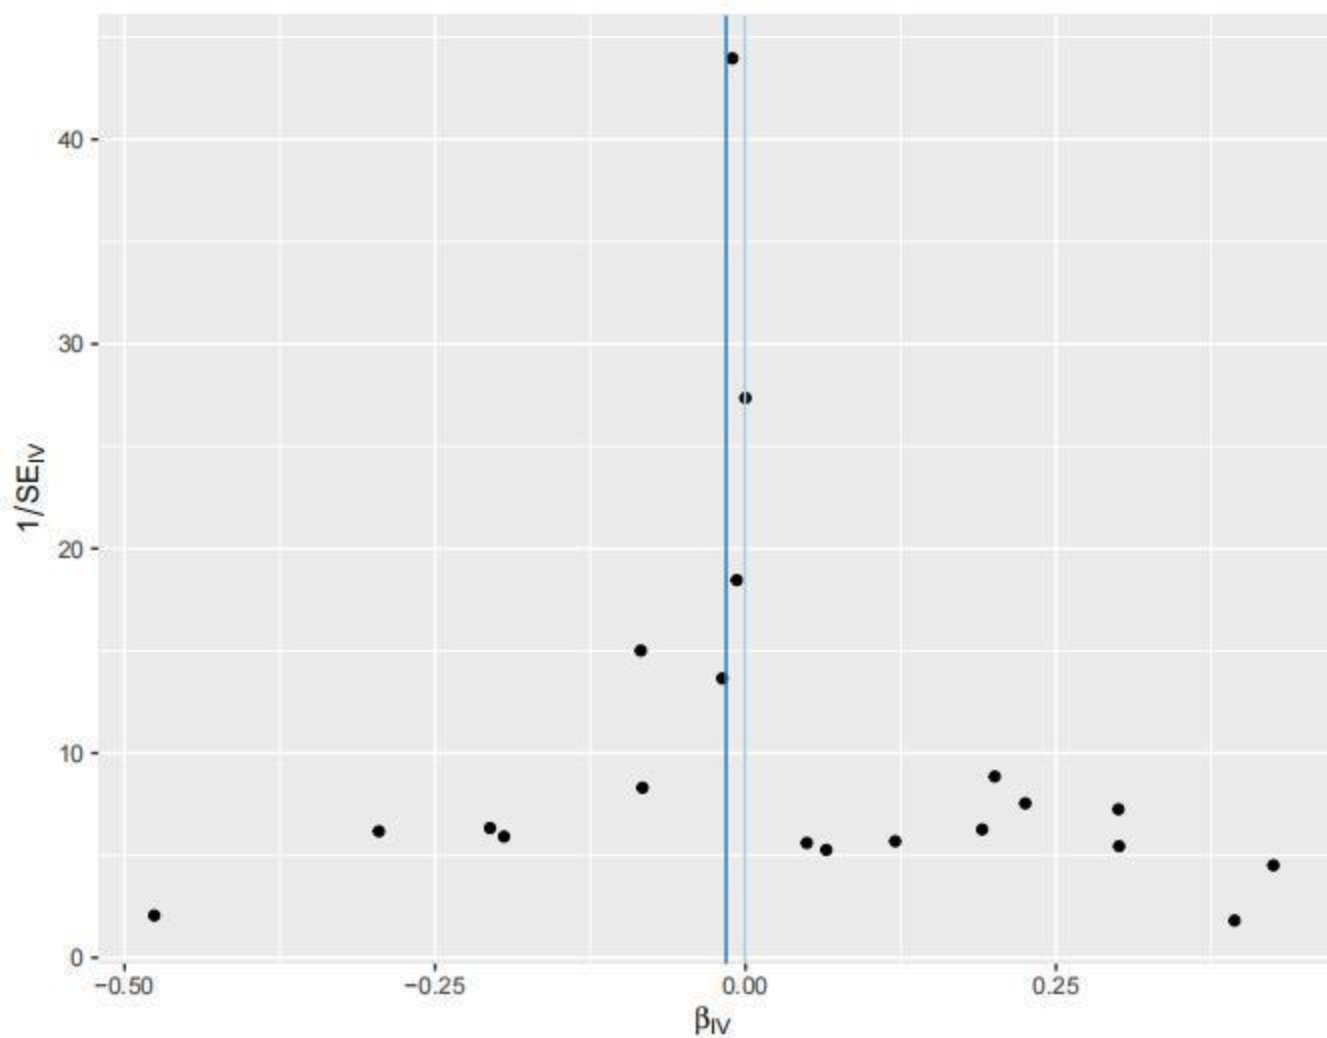

Funnel plot analyse of "FSC-A on myeloid DC " on 'Aplastic anemia'

MR Method

Inverse variance weighted

MR Egger

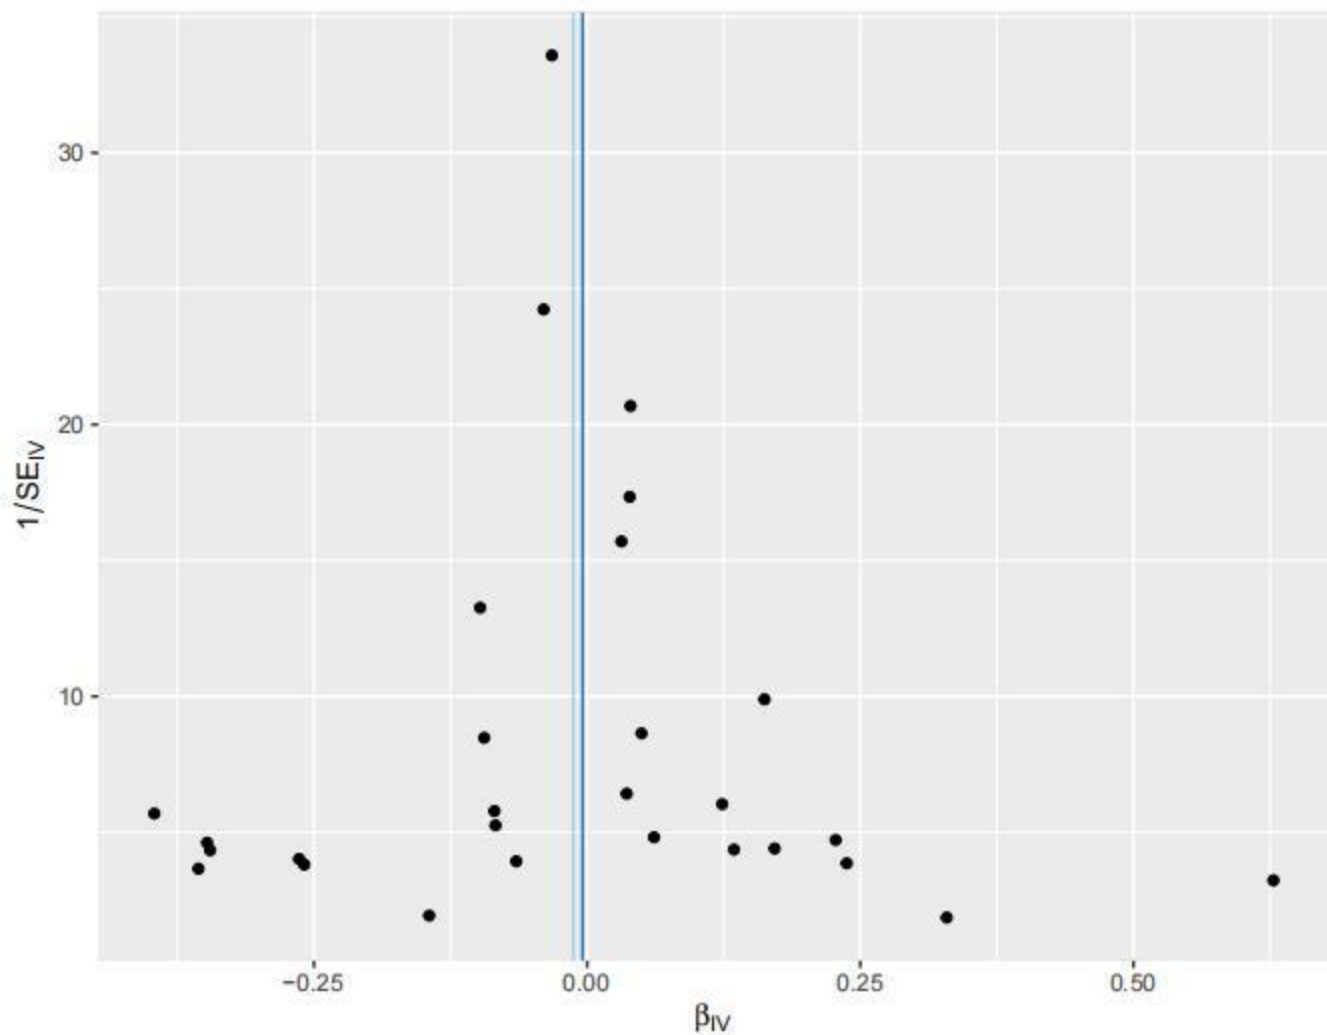

Funnel plot analyse of "CCR2 on CD14- CD16+ monocyte " on 'Aplastic anemia'

MR Method

- Inverse variance weighted
- MR Egger

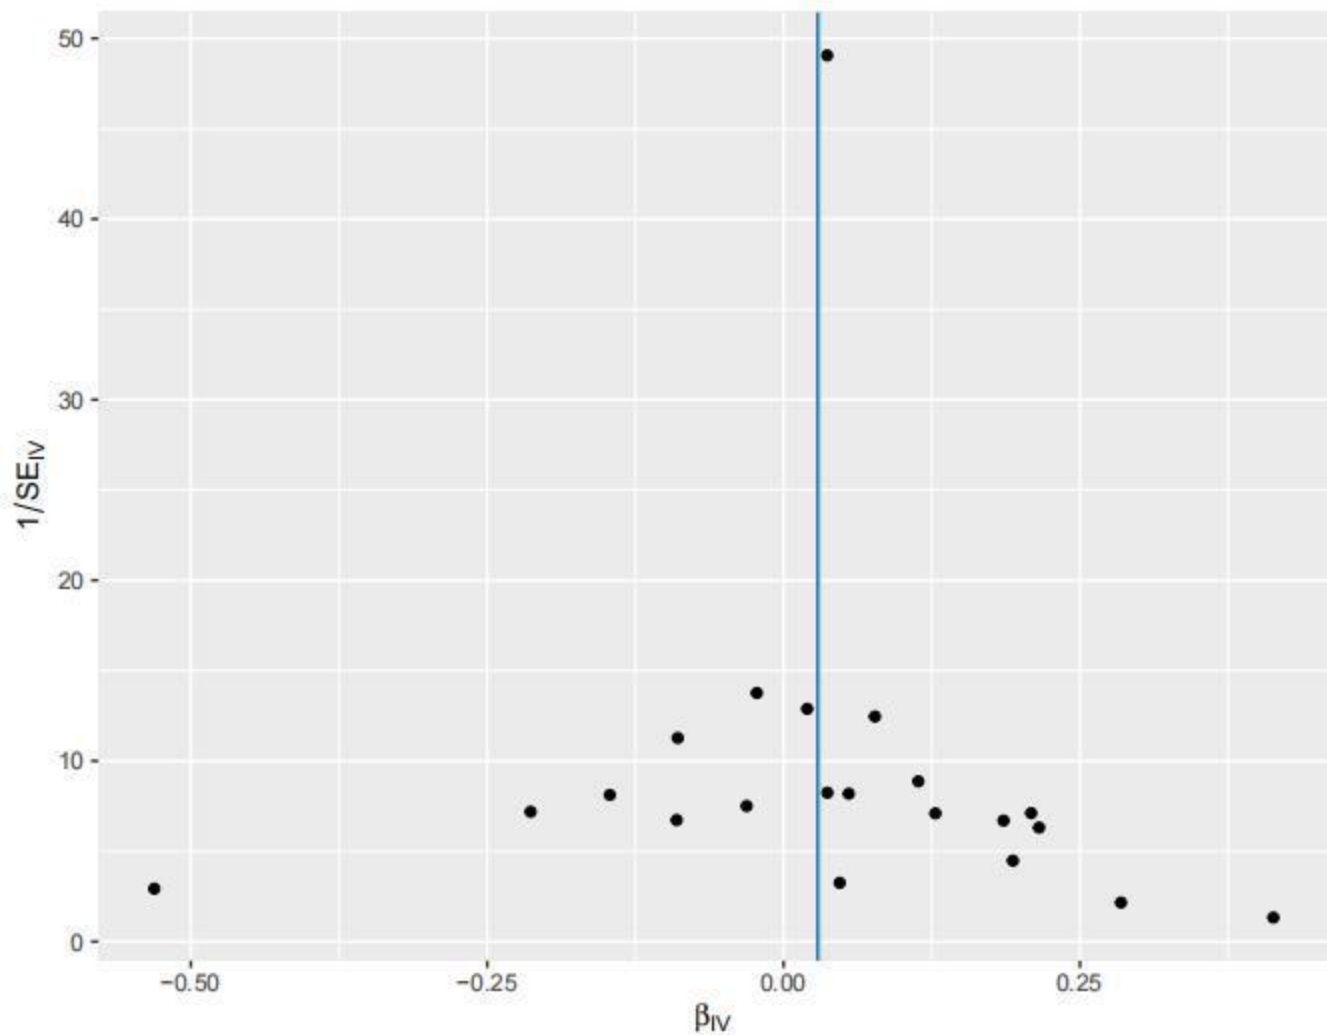

Funnel plot analyse of "CD33 on CD14+ monocyte" on 'Aplastic anemia'



### MR Method

- Inverse variance weighted
- MR Egger

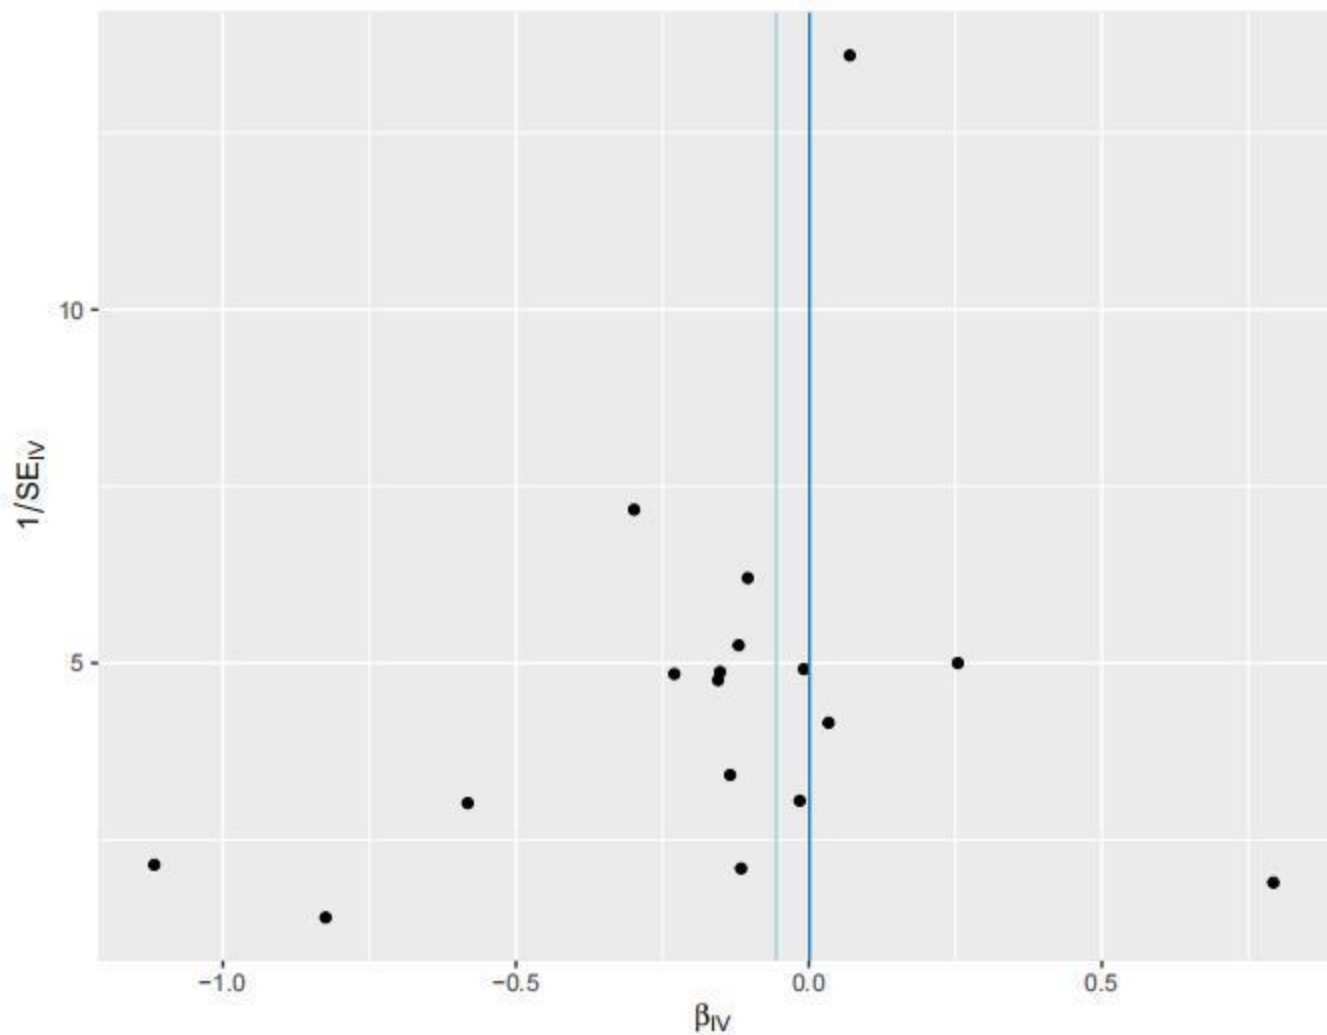

Funnel plot analyse of "CD4+ CD8dim %leukocyte" on 'Aplastic anemia'

MR Method

- Inverse variance weighted
- MR Egger

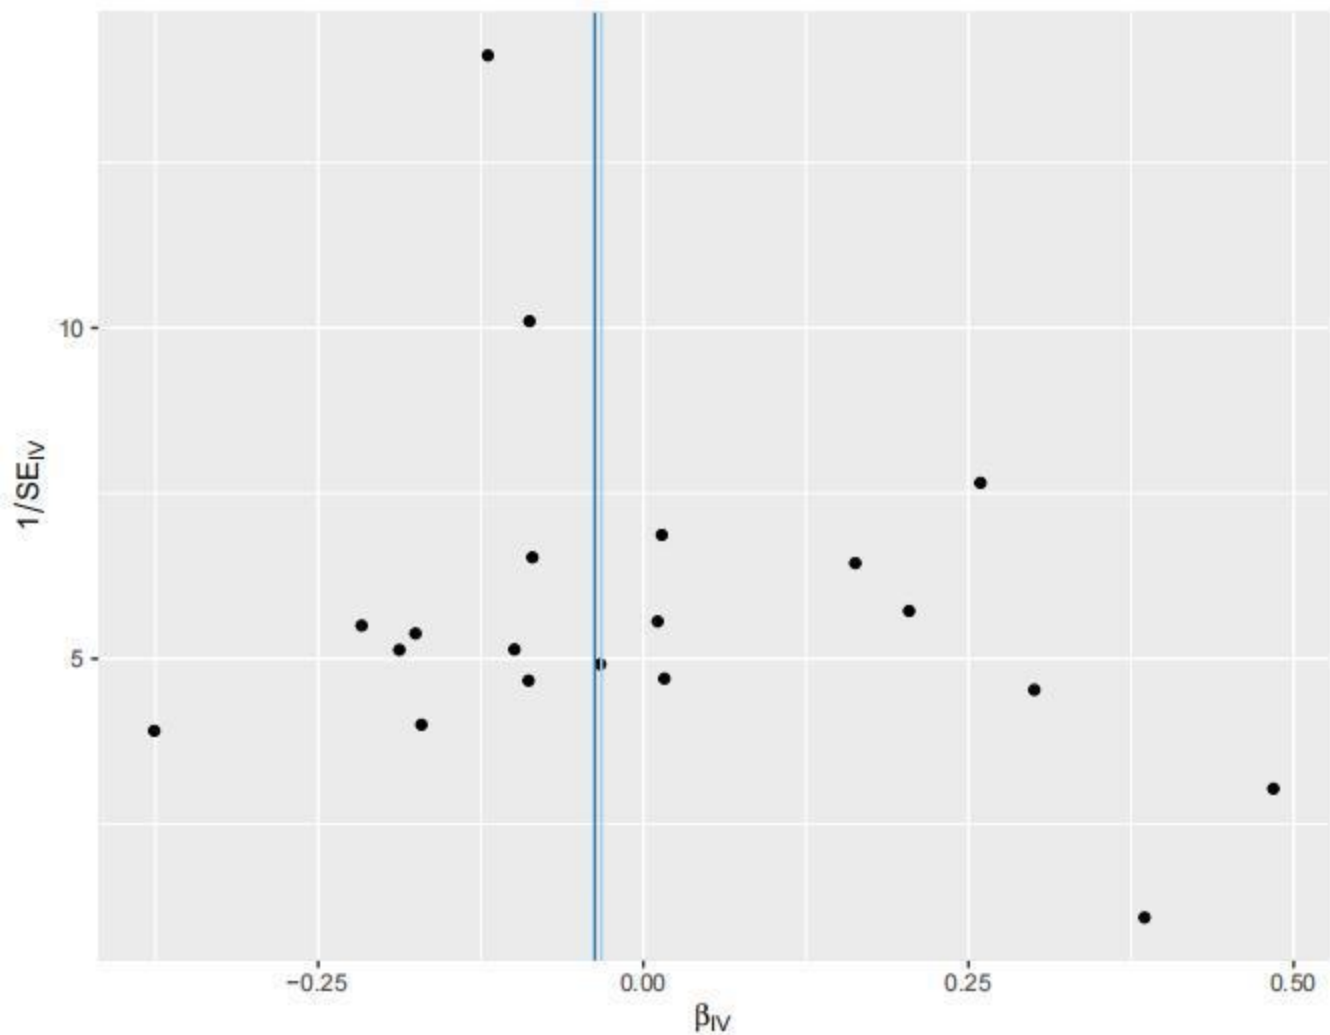

Funnel plot analyse of "CD19 on CD20- CD38- " on 'Aplastic anemia'

MR Method

Inverse variance weighted

MR Egger

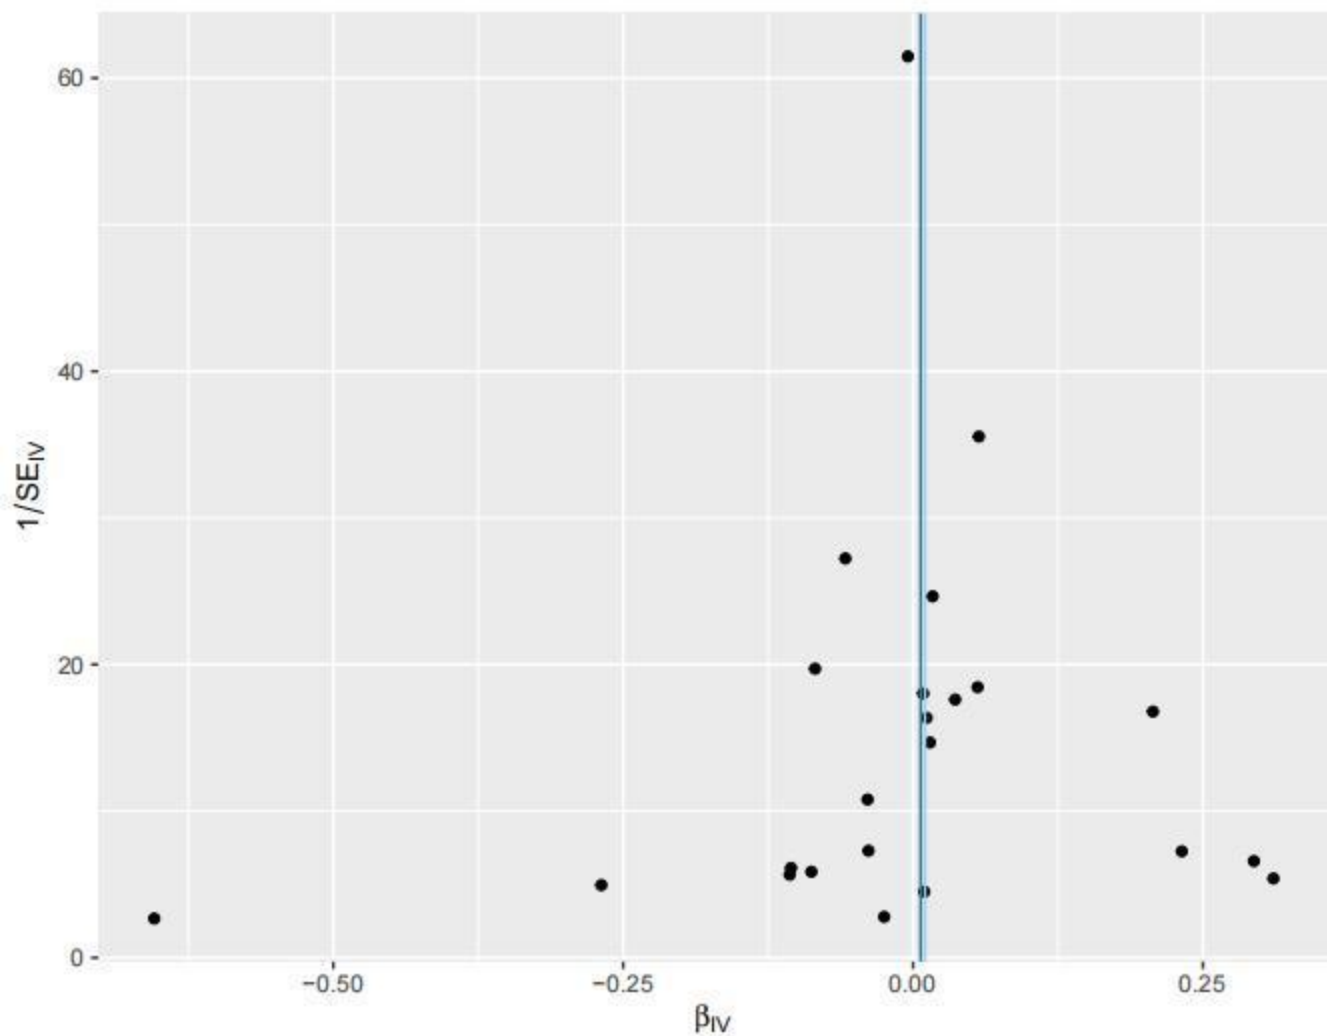

Funnel plot analyse of "Secreting Treg AC" on 'Aplastic anemia'

MR Method

- Inverse variance weighted
- MR Egger

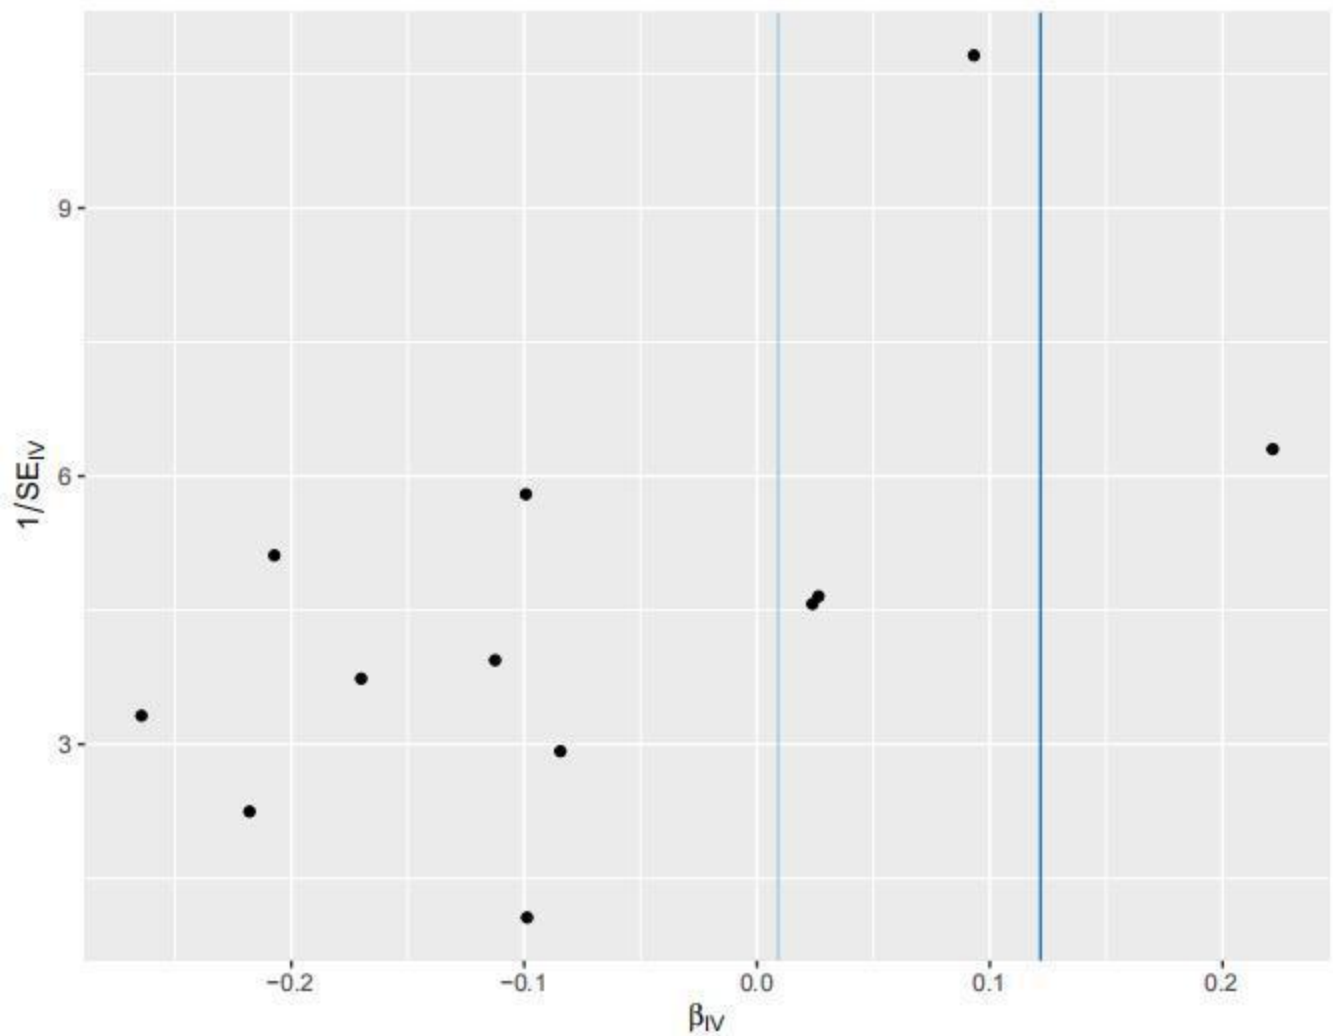

Funnel plot analyse of "CD28+ DN (CD4-CD8-) AC" on 'Aplastic anemia'

### MR Method

- Inverse variance weighted
- MR Egger

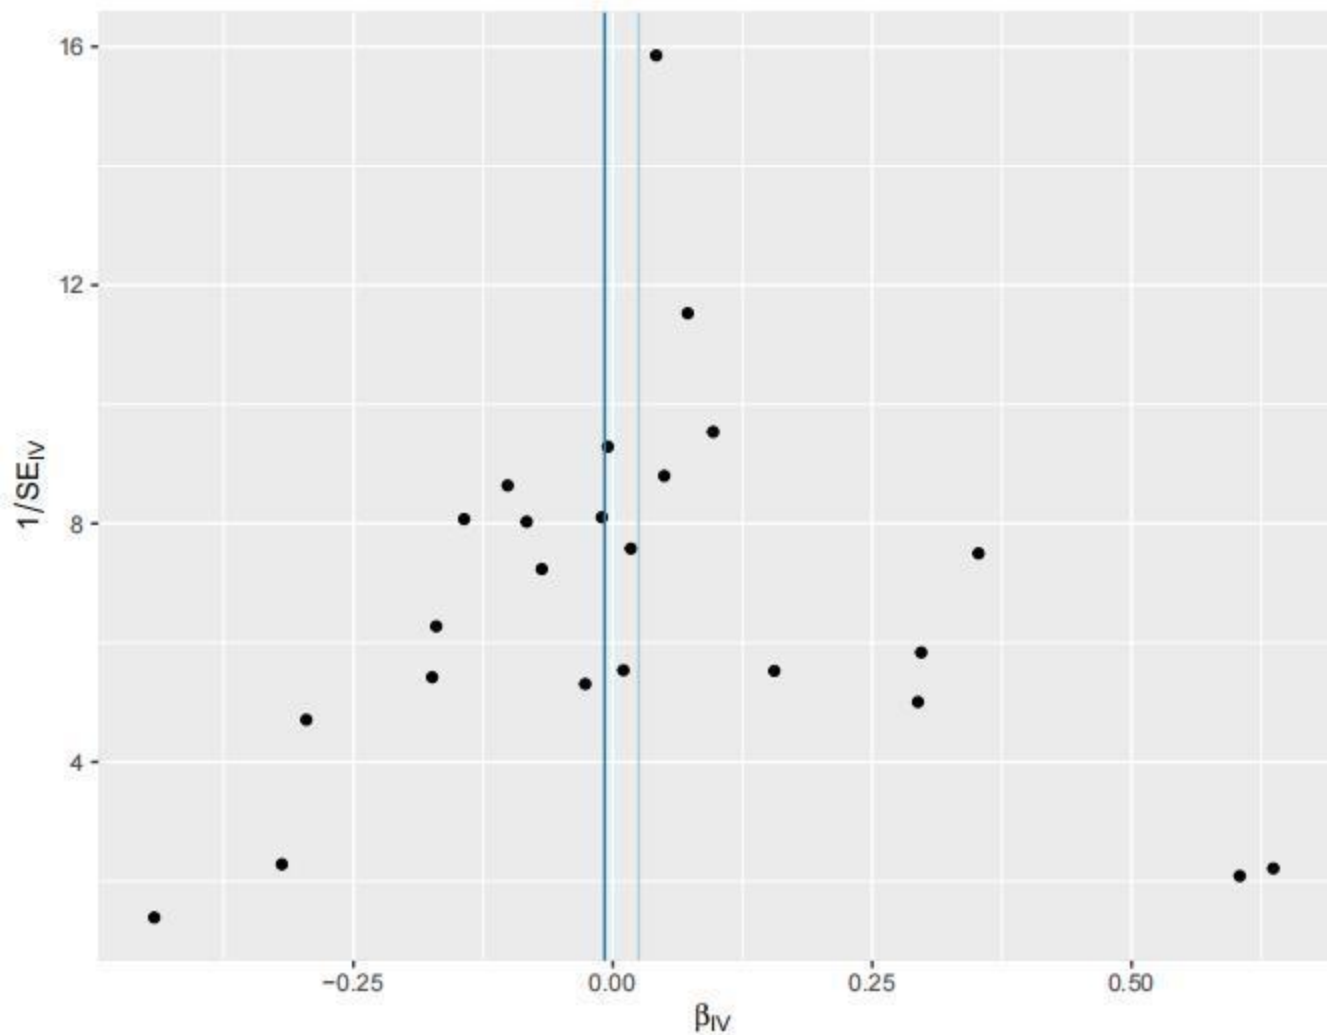

Funnel plot analyse of "CCR7 on naive CD8br" on 'Aplastic anemia'

### MR Method

Inverse variance weighted

MR Egger

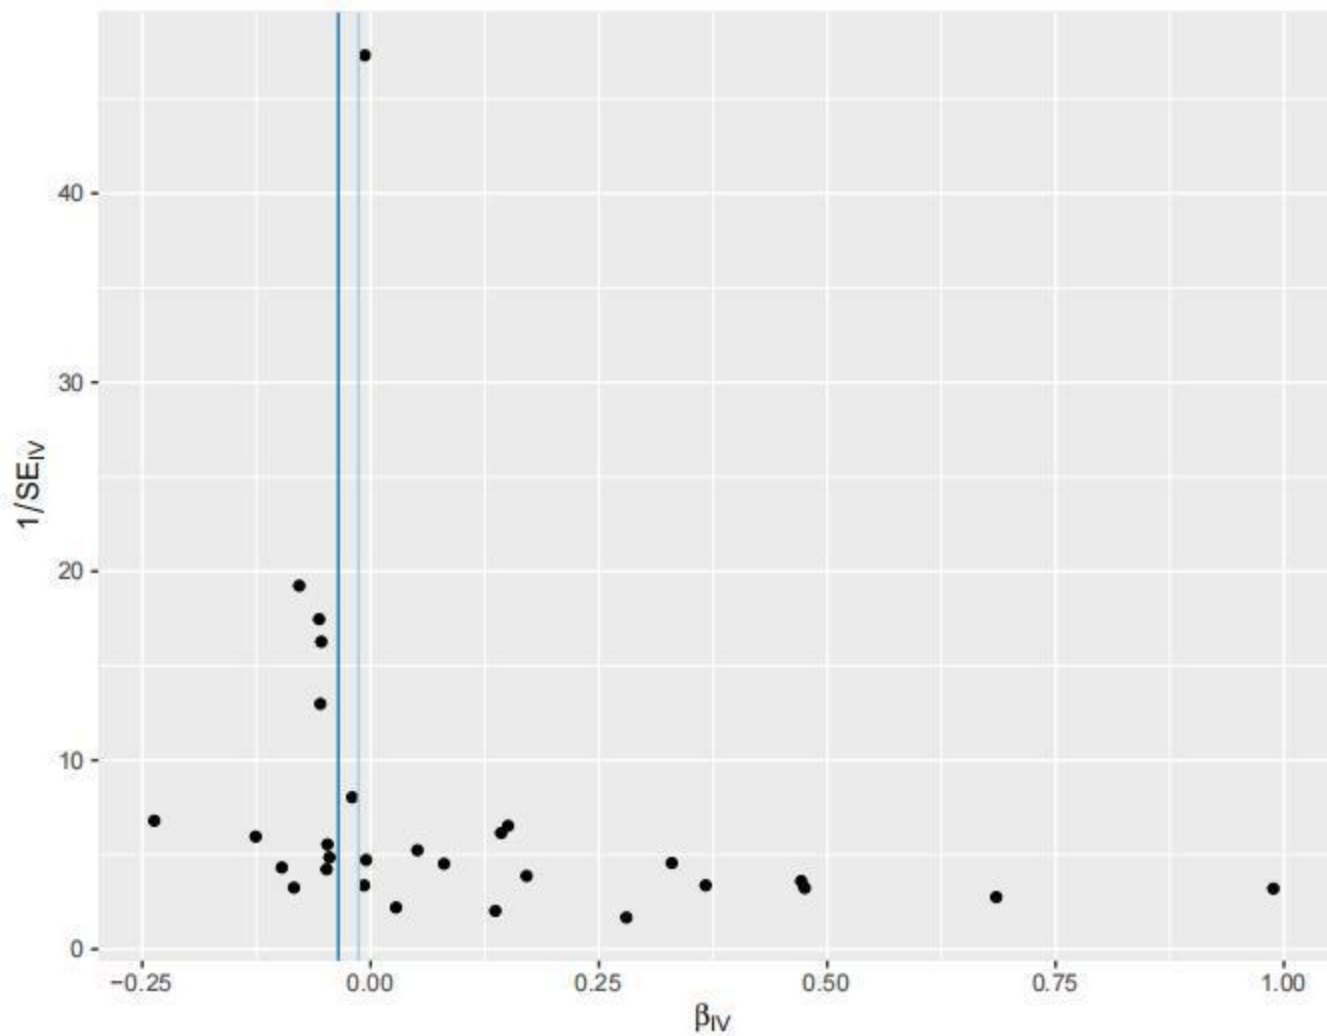

Funnel plot analyse of "Monocyte AC" on 'Aplastic anemia'

### MR Method

- Inverse variance weighted
- MR Egger

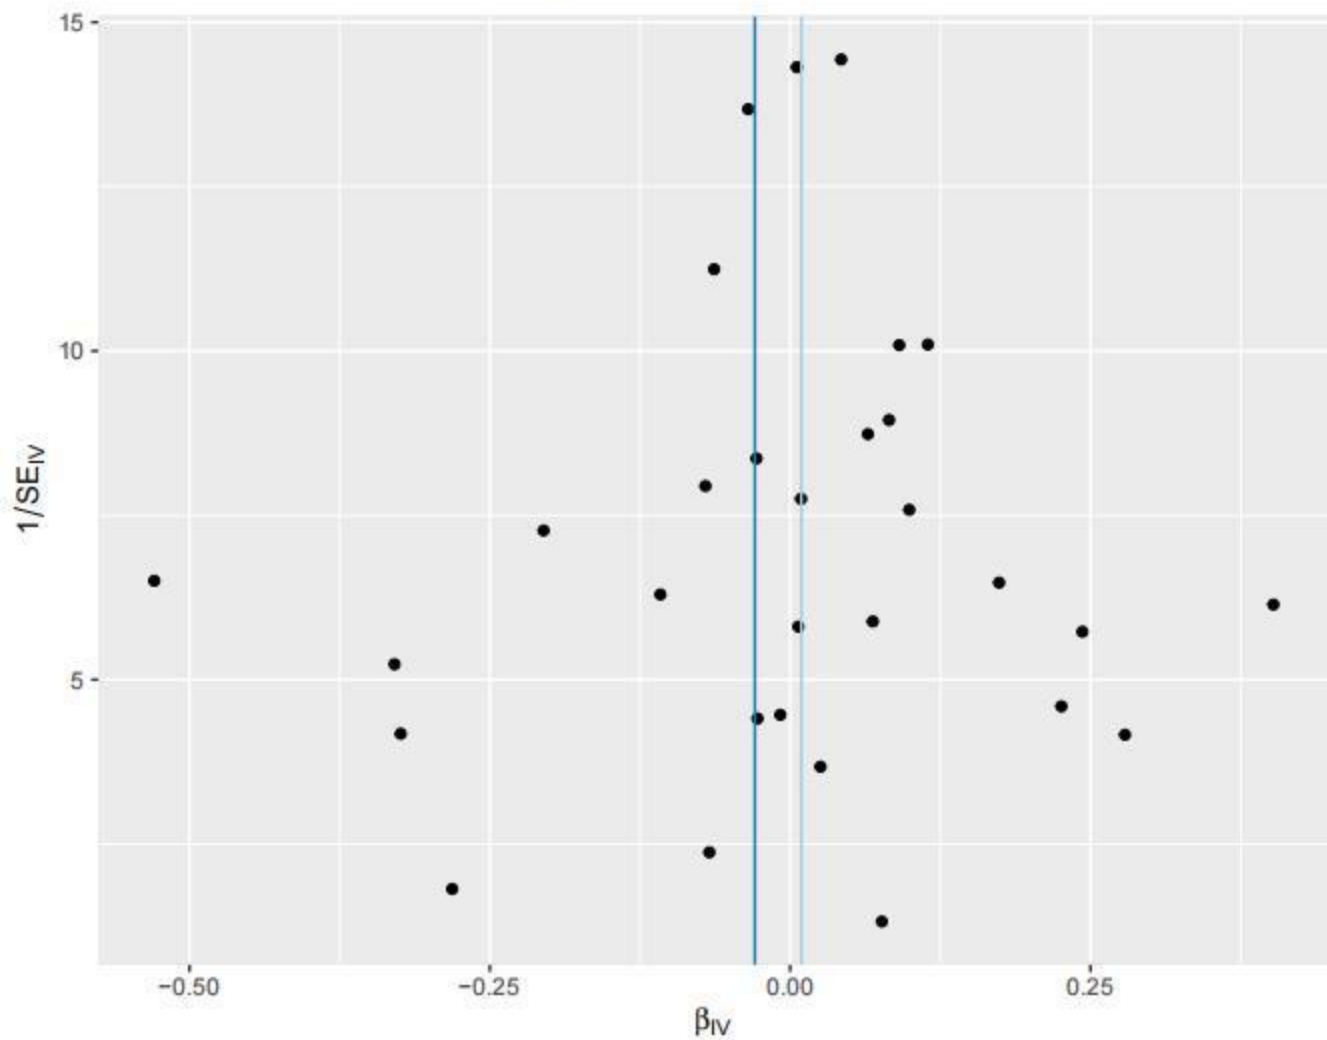

Funnel plot analyse of "CD16-CD56 on NK" on 'Aplastic anemia'

MR Method

Inverse variance weighted

MR Egger

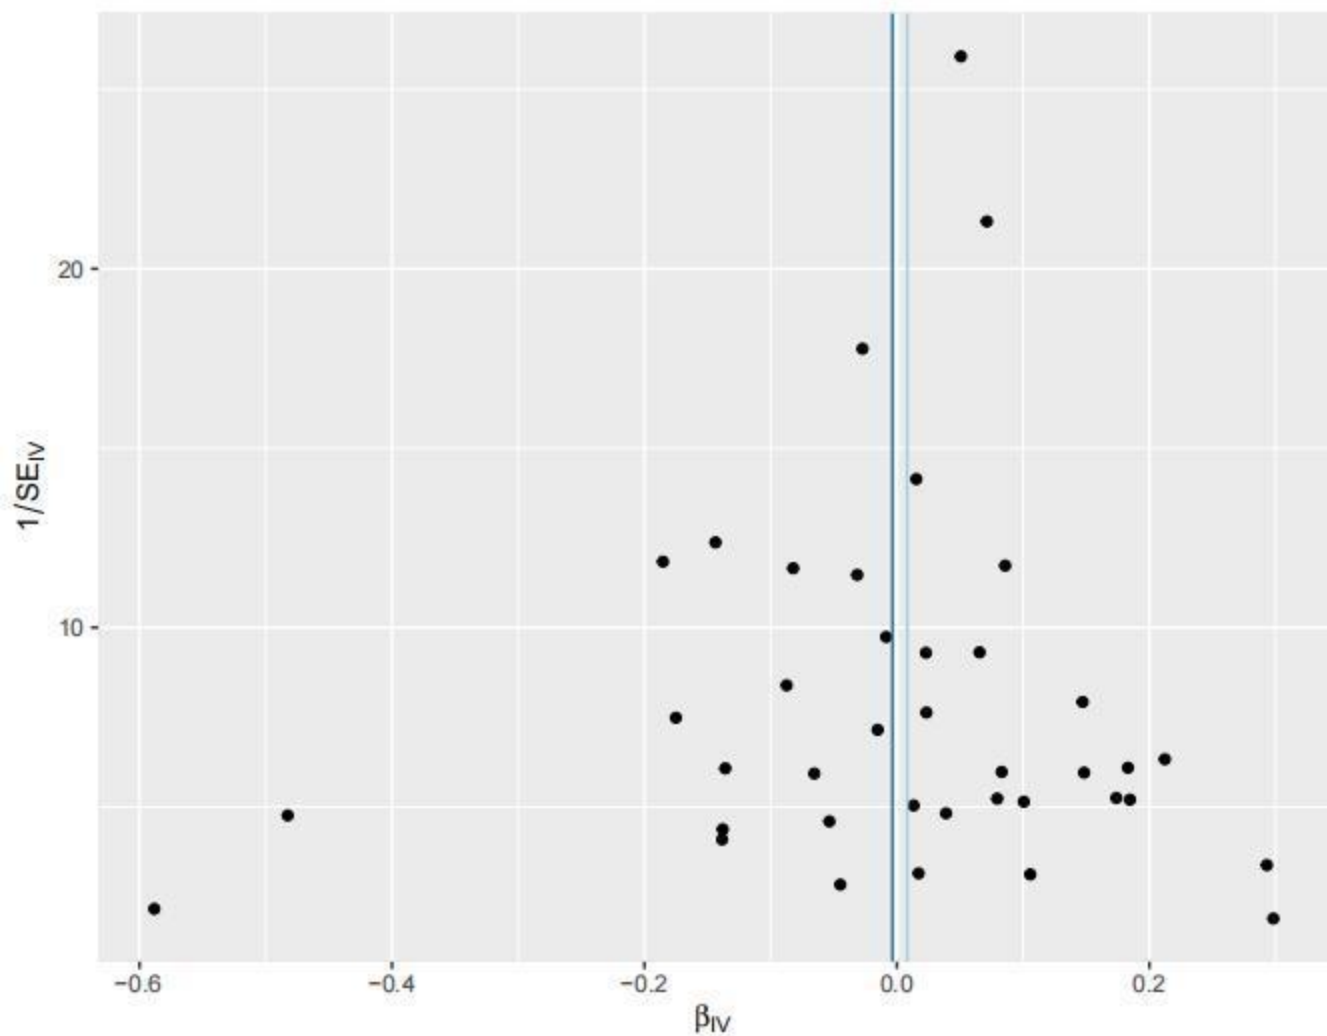

Funnel plot analyse of "CD24 on sw mem" on 'Aplastic anemia'



MR Method

- Inverse variance weighted
- MR Egger

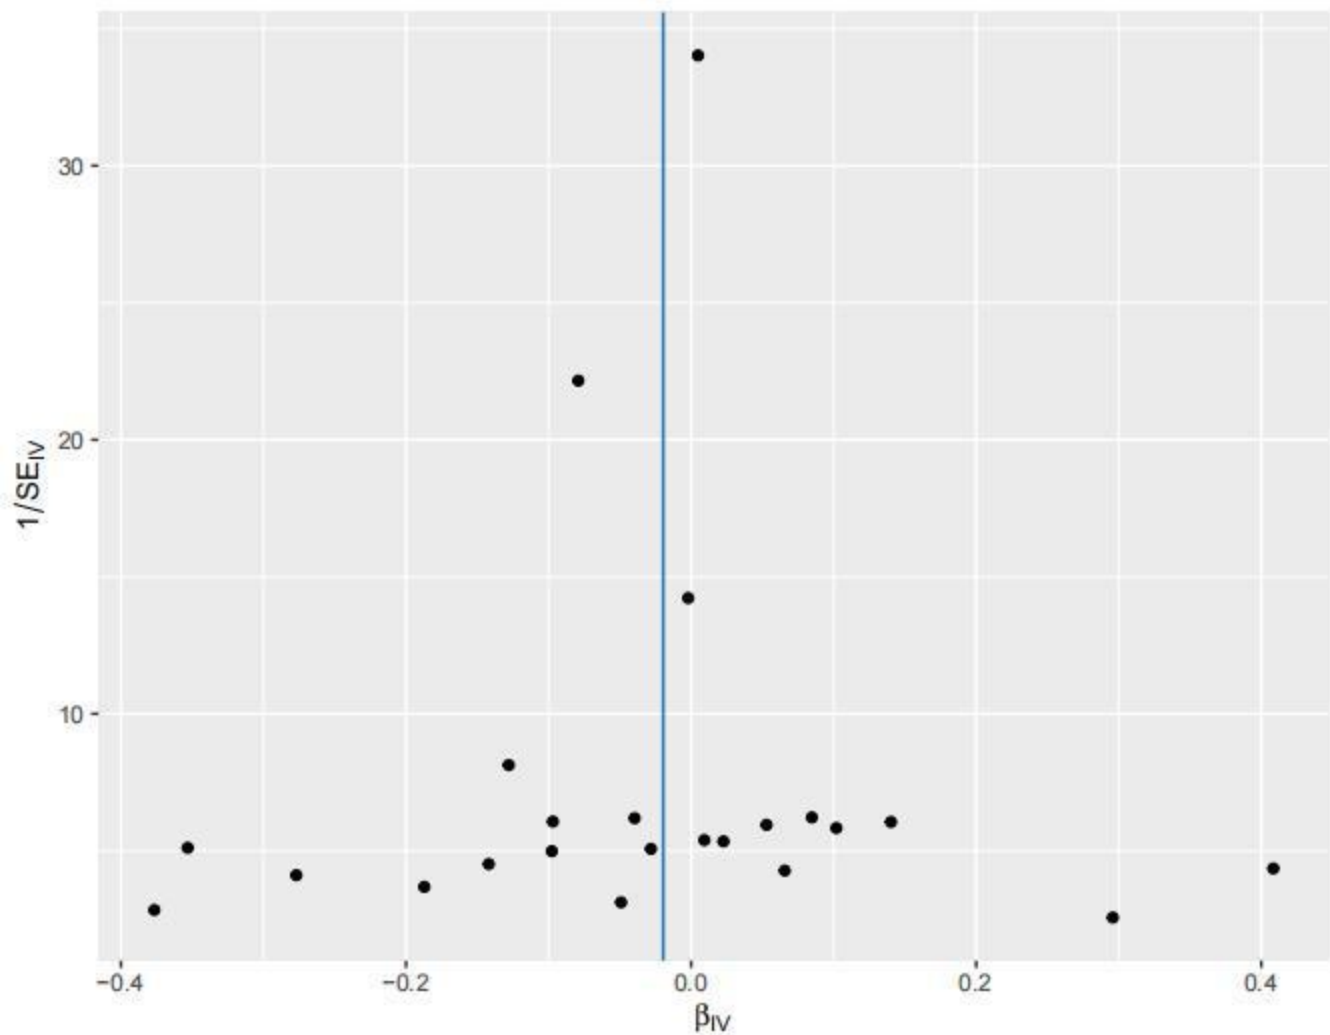

Funnel plot analyse of "CD86+ myeloid DC AC" on 'Aplastic anemia'

MR Method

Inverse variance weighted

MR Egger

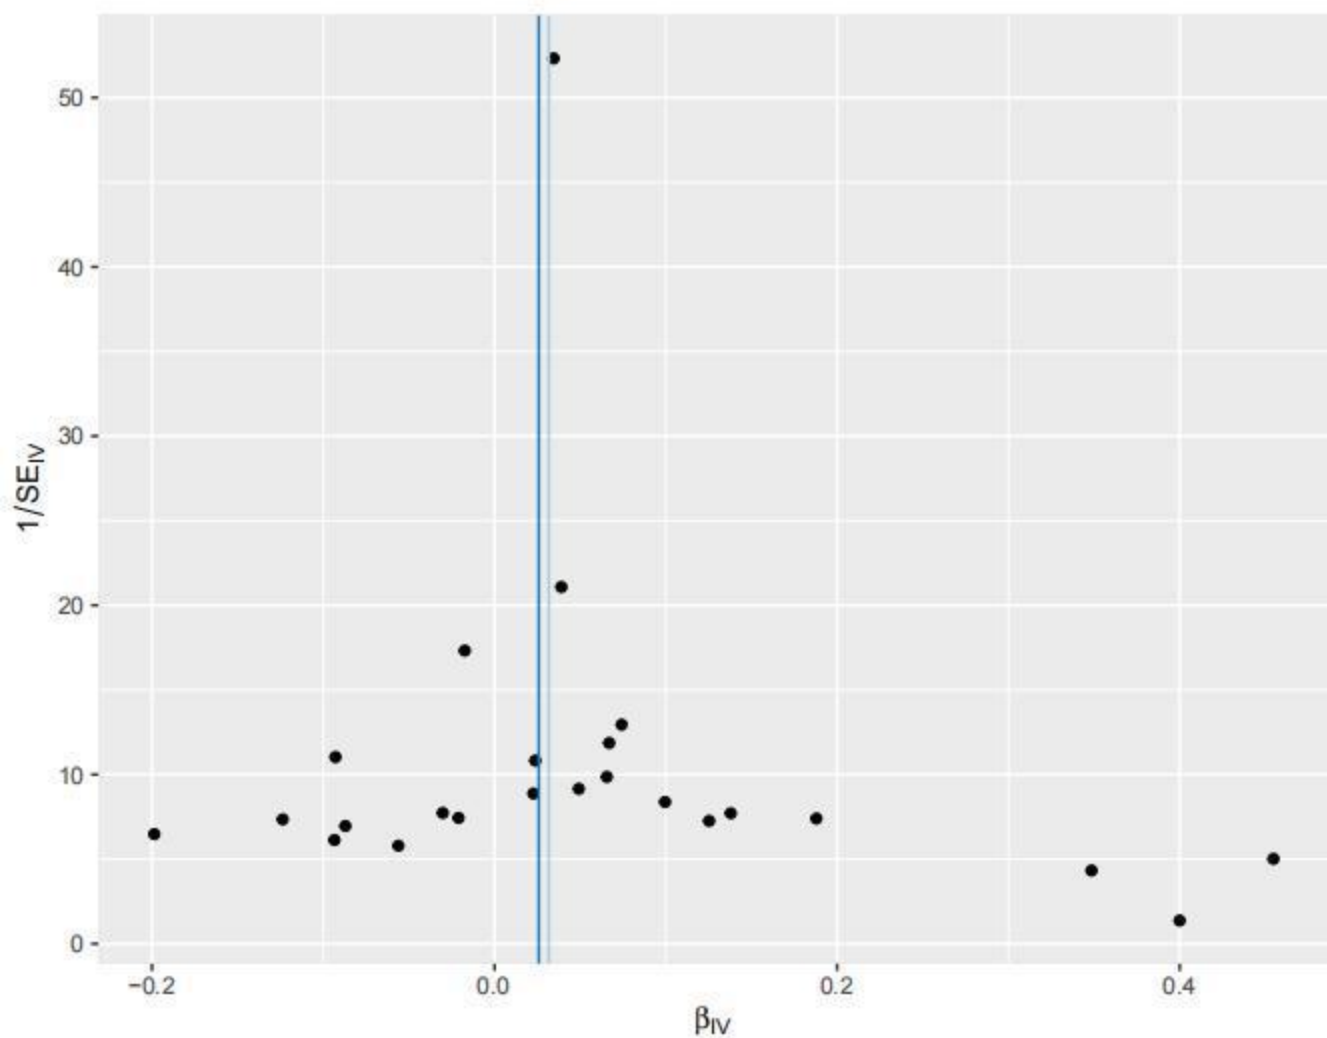

Funnel plot analyse of "CD33 on CD33br HLA DR+ " on 'Aplastic anemia'

### MR Method

- Inverse variance weighted
- MR Egger

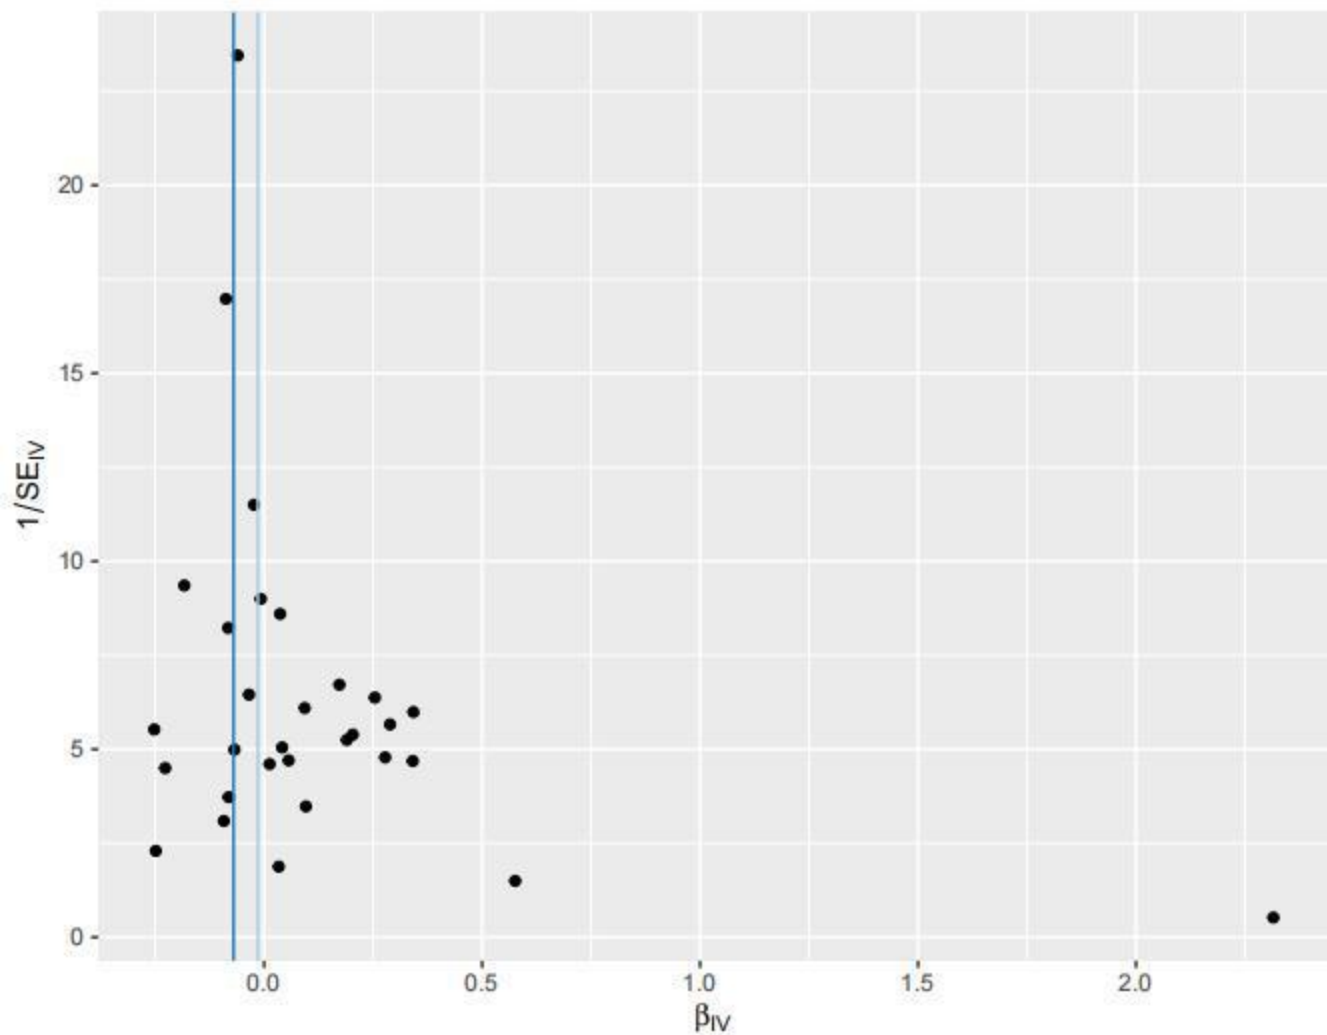

Funnel plot analyse of "Activated & resting Treg %CD4+" on 'Aplastic anemia'

MR Method

- Inverse variance weighted
- MR Egger

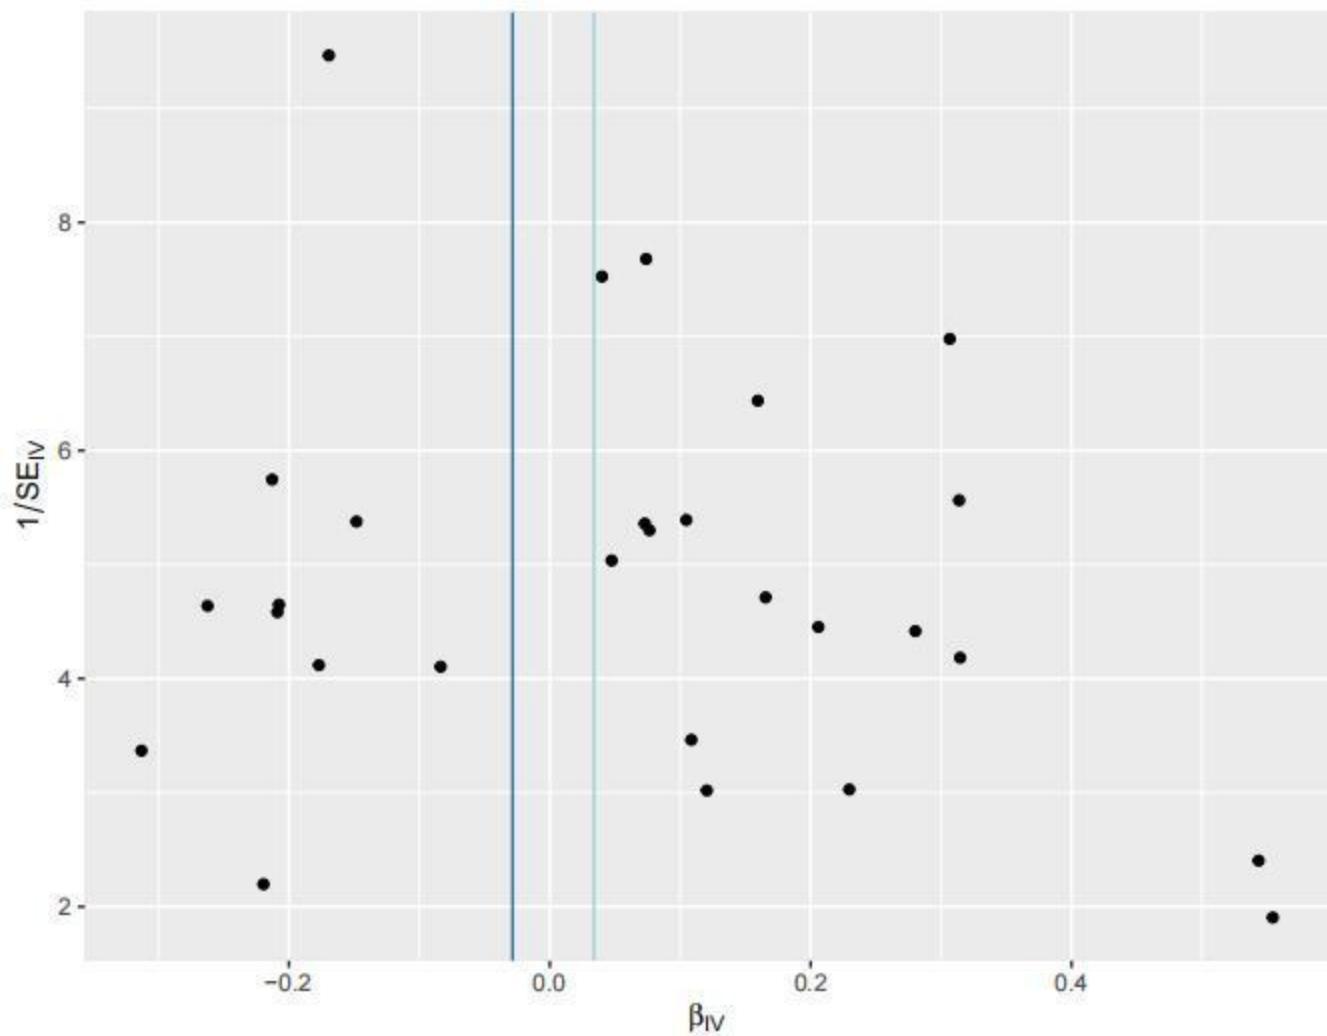

Funnel plot analyse of "CD8br NKT %lymphocyte" on 'Aplastic anemia'

MR Method

- Inverse variance weighted
- MR Egger

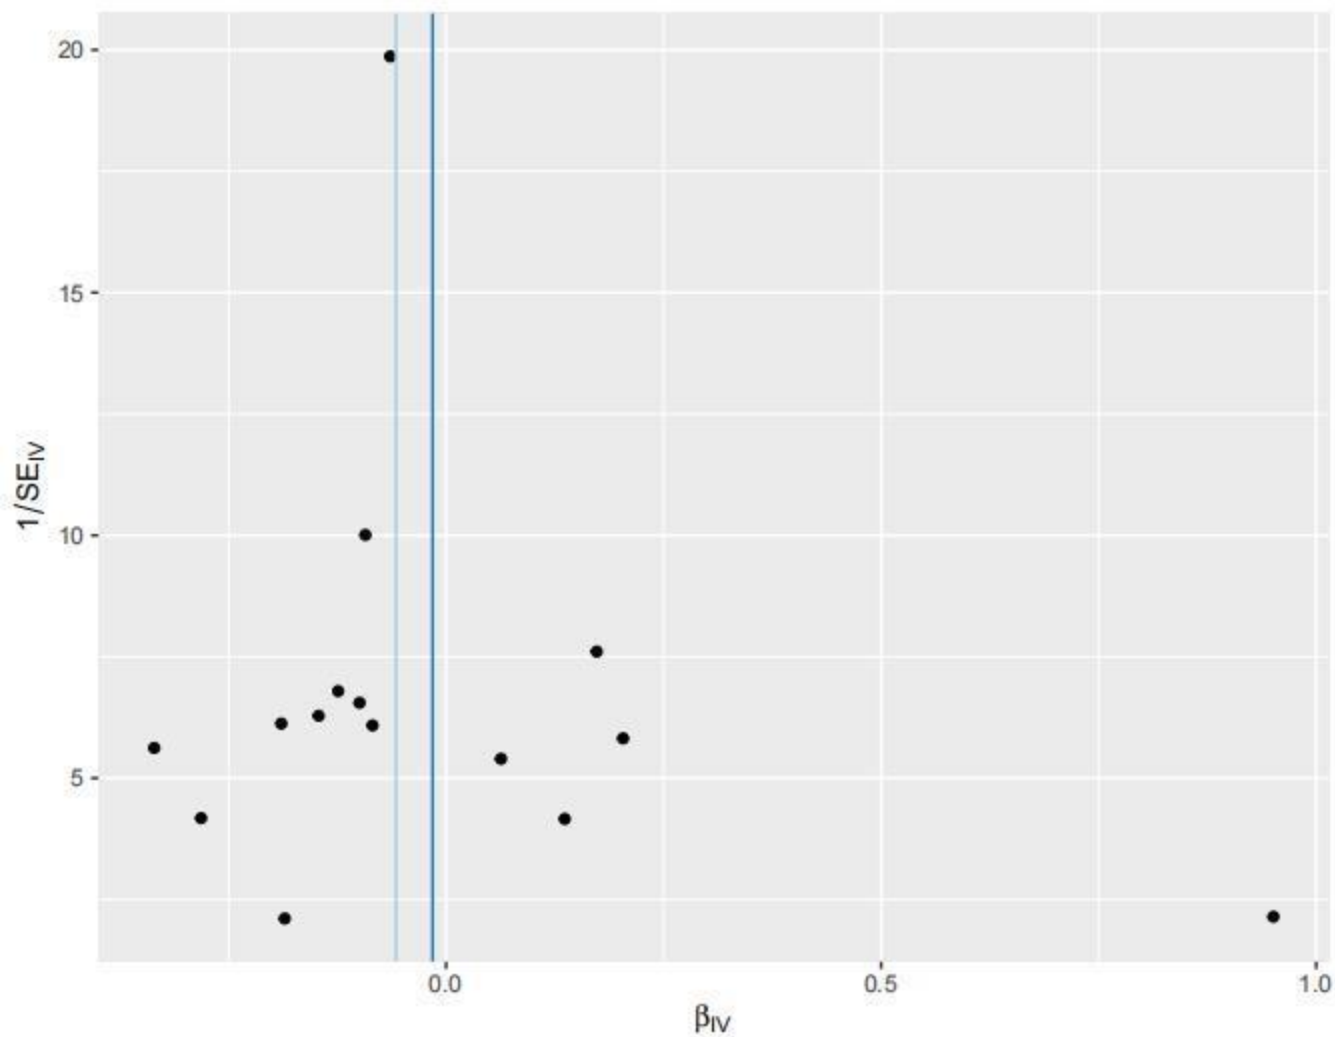

Funnel plot analyse of "CD4 on monocyte" on 'Aplastic anemia'

### MR Method

- Inverse variance weighted
- MR Egger

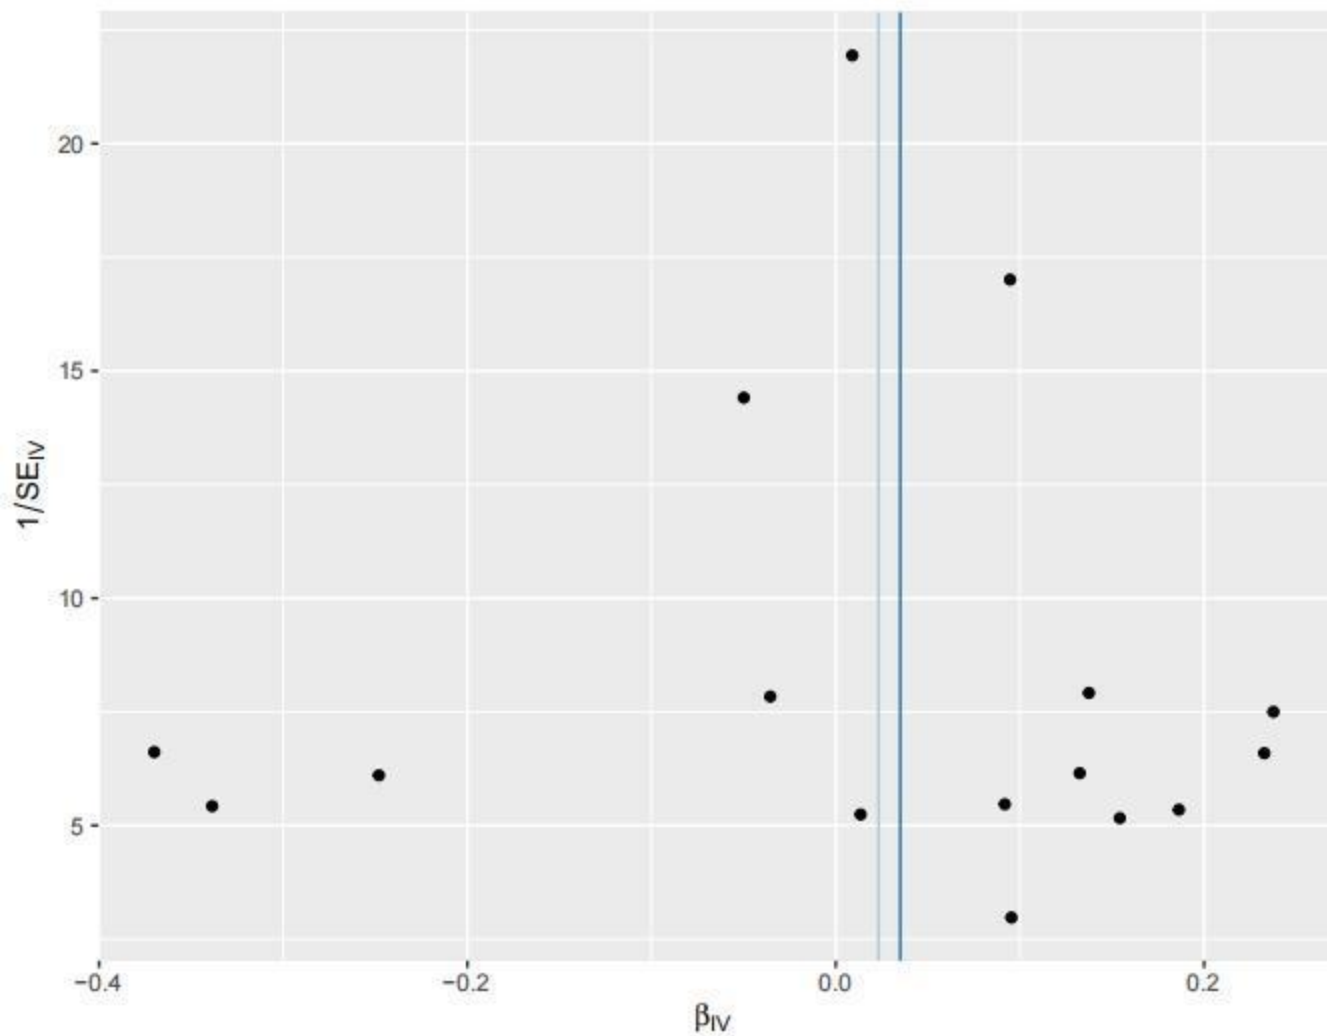

Funnel plot analysis of "CD28 on CD28+ CD45RA+ CD8br" on 'Aplastic anemia'

### MR Method

- Inverse variance weighted
- MR Egger

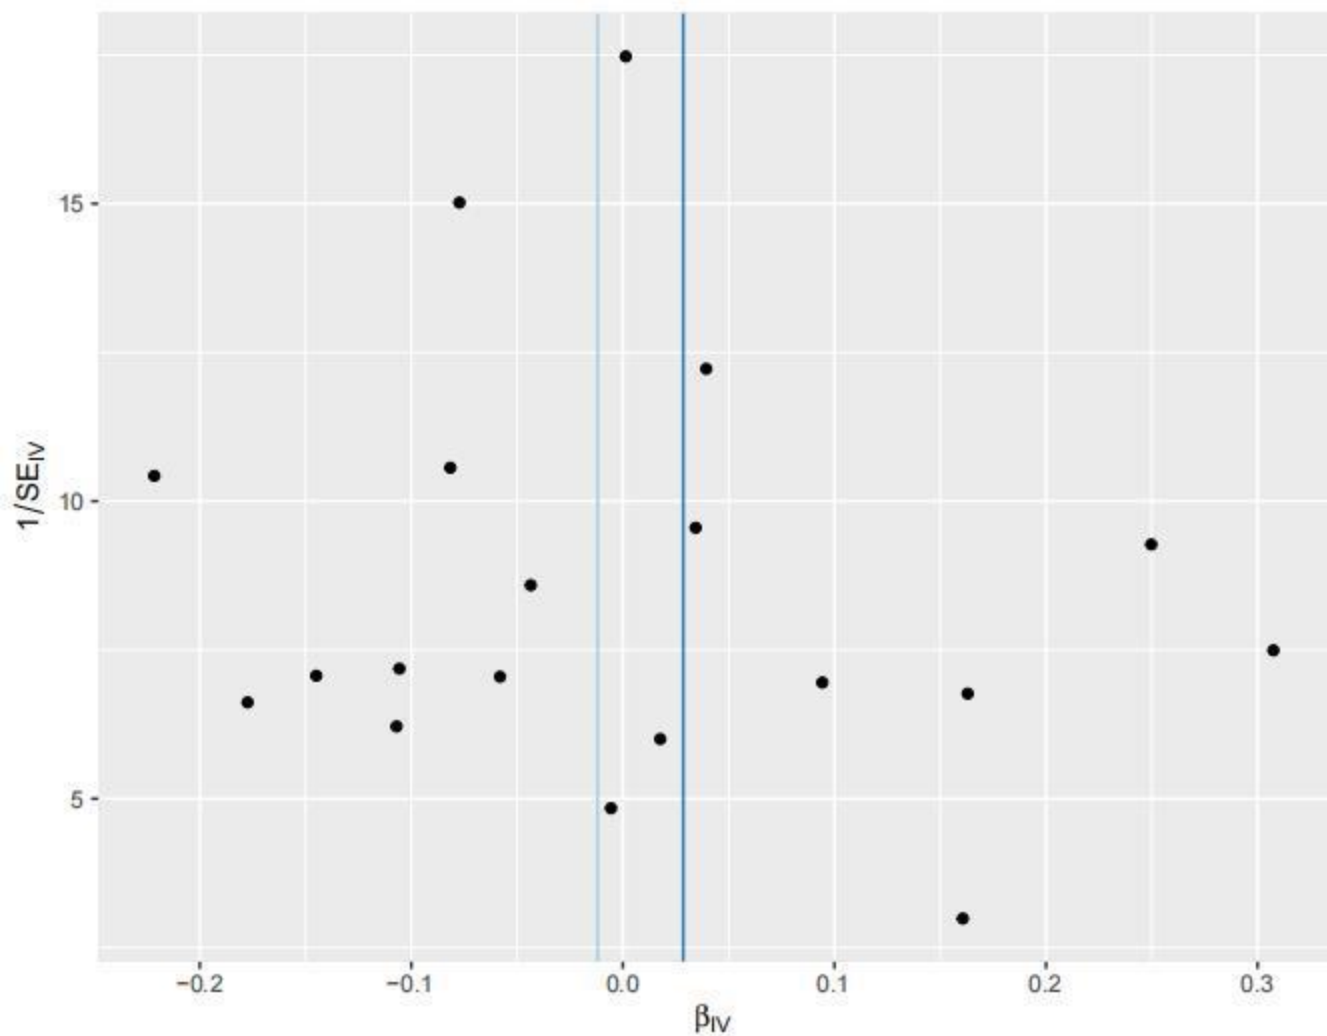

Funnel plot analysis of "CD14 on CD33dim HLA DR+ CD11b+ " on 'Aplastic anemia'

### MR Method

- Inverse variance weighted
- MR Egger

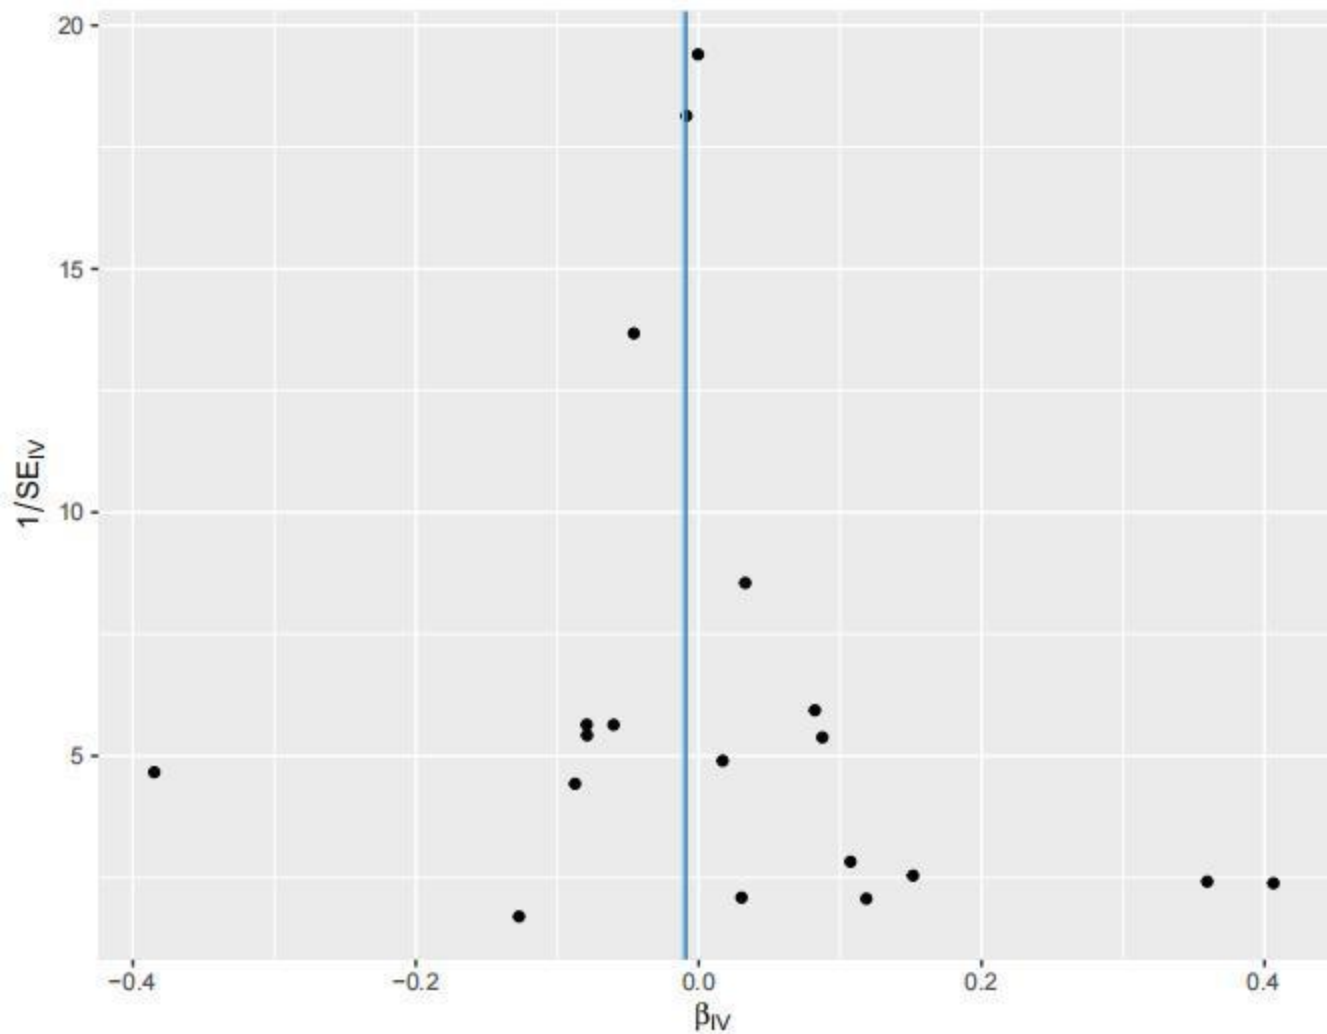

Funnel plot analysis of "CD4 Treg %CD4" on 'Aplastic anemia'



### MR Method

- Inverse variance weighted
- MR Egger

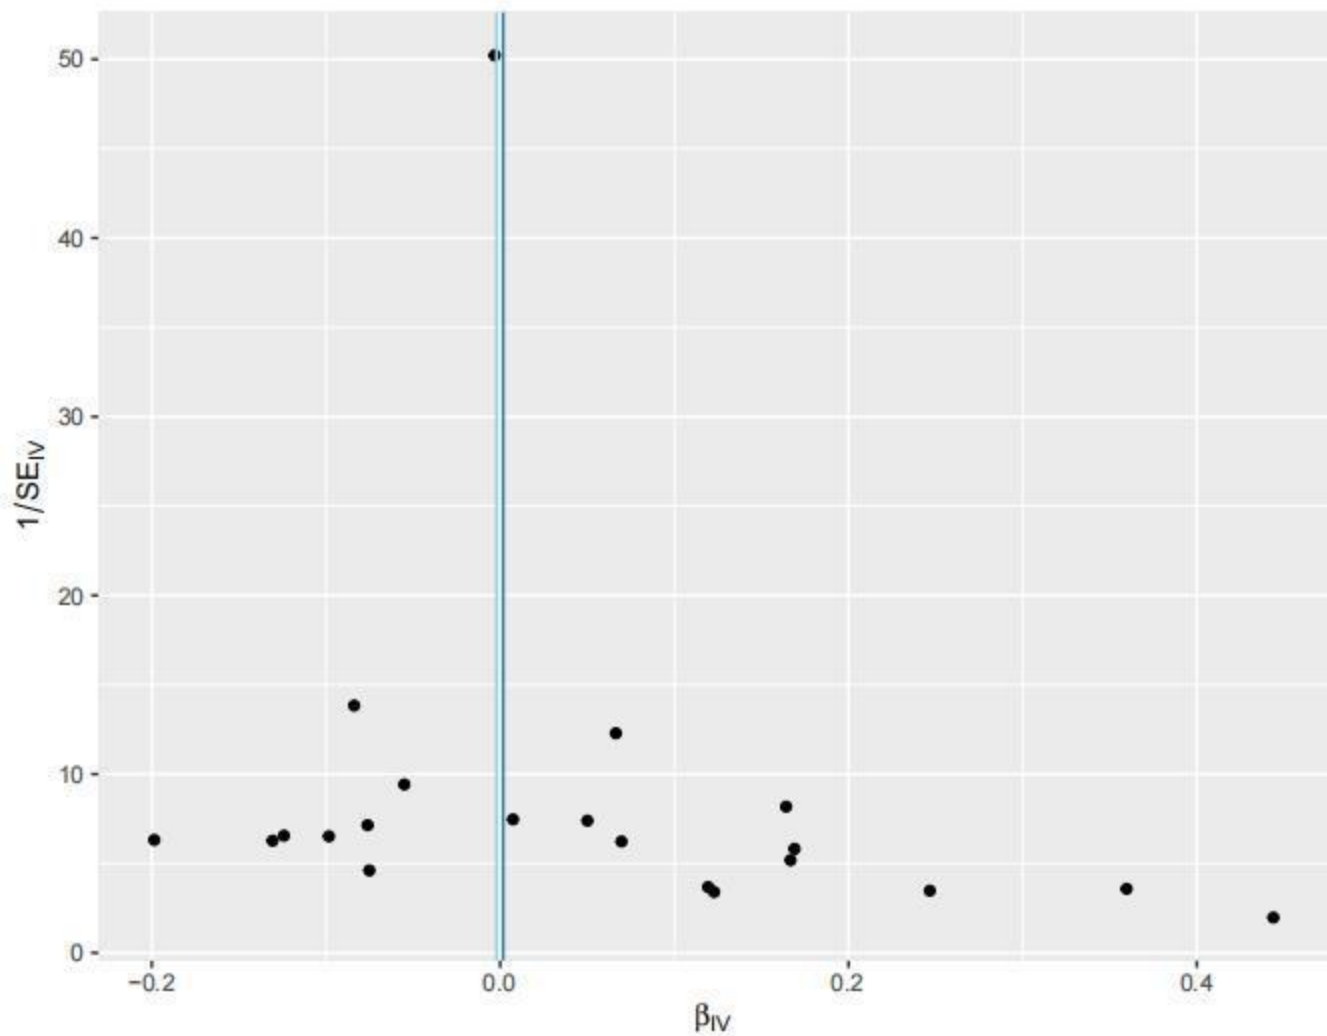

Funnel plot analyse of "CD27 on T cell" on 'Aplastic anemia'

### MR Method

- Inverse variance weighted
- MR Egger

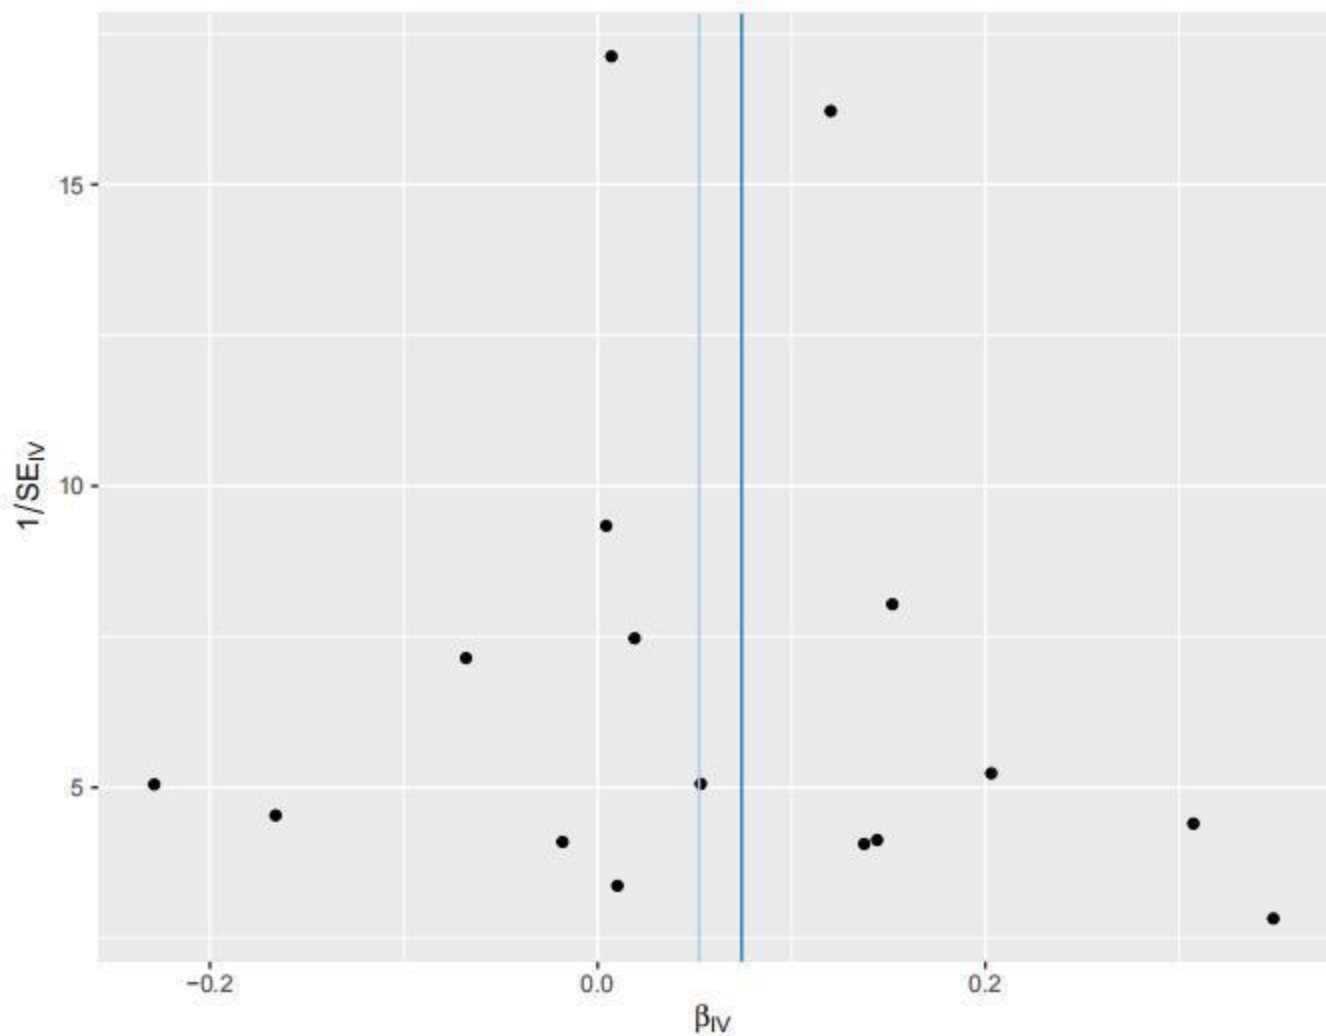

Funnel plot analyse of "CM DN (CD4-CD8-) %DN" on 'Aplastic anemia'

MR Method

- Inverse variance weighted
- MR Egger

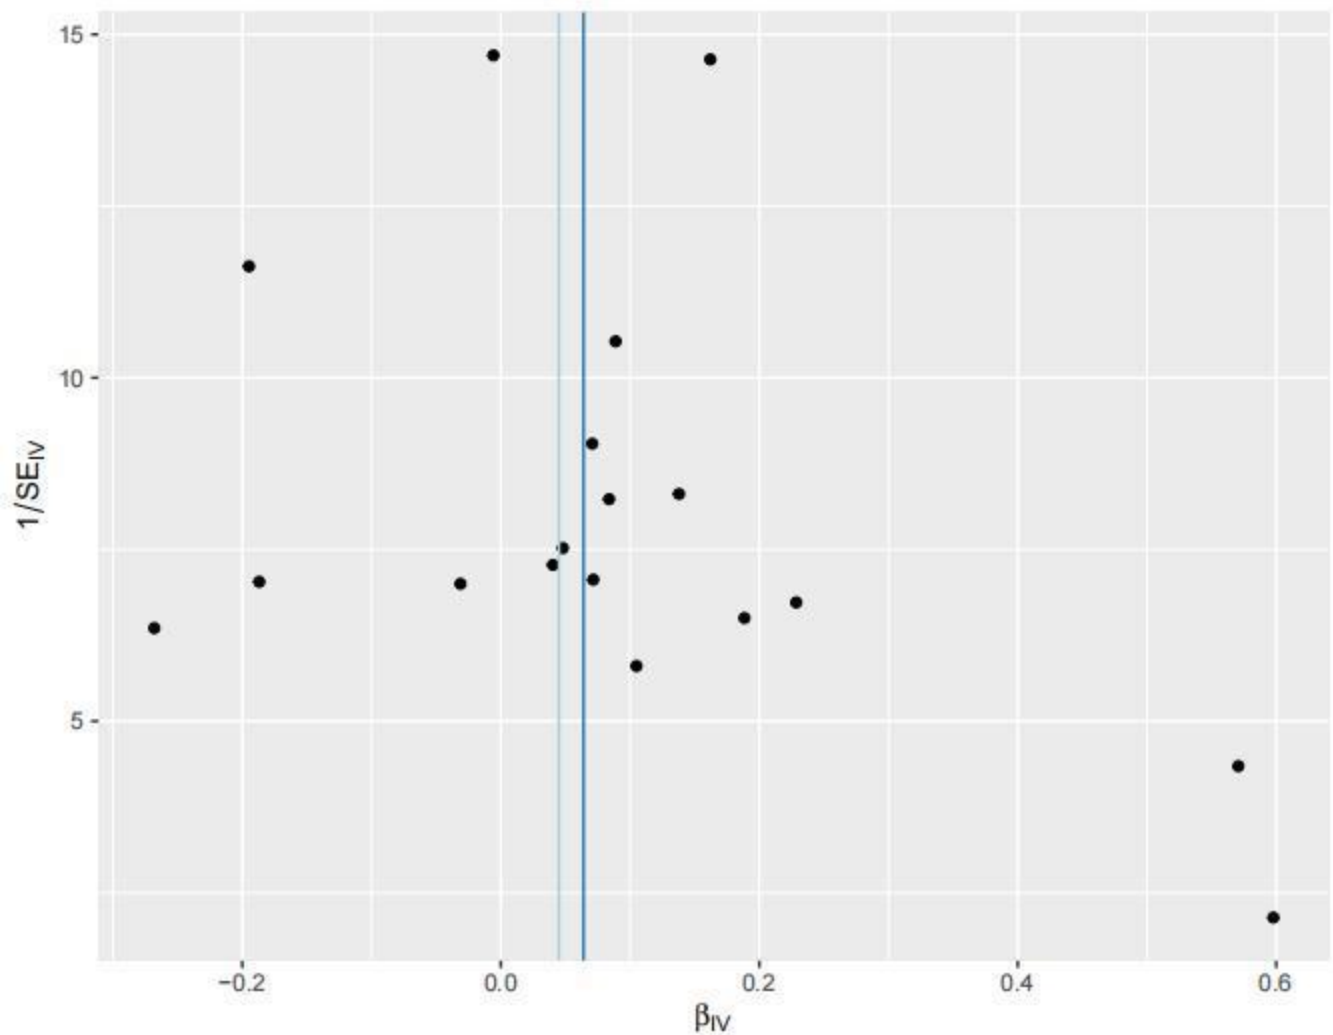

Funnel plot analysis of "CD38 on CD3- CD19-" on 'Aplastic anemia'

MR Method

- Inverse variance weighted
- MR Egger

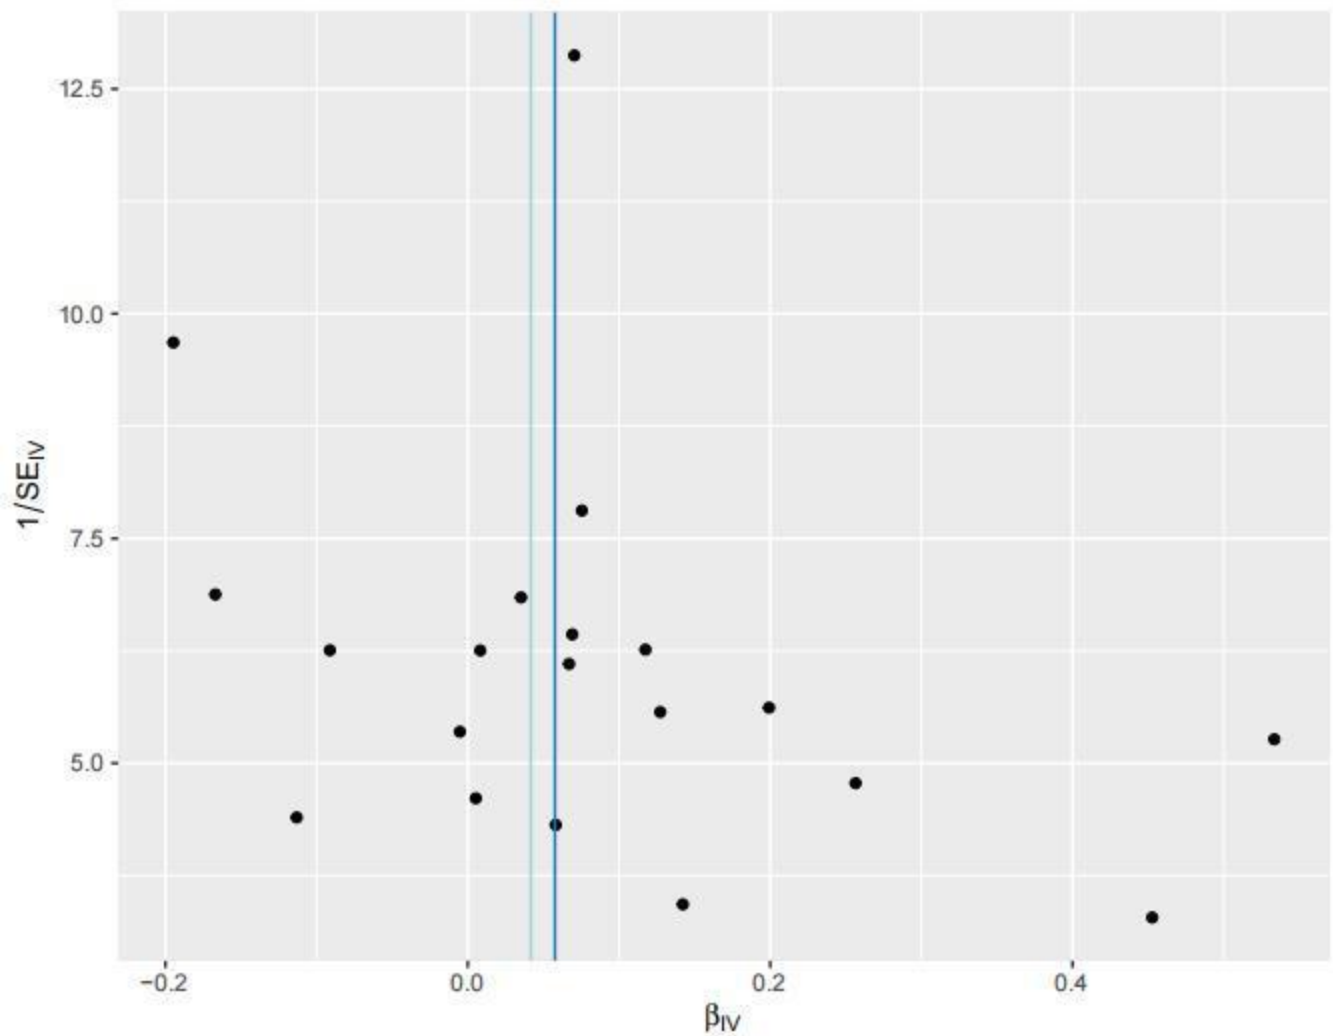

Funnel plot analyse of "CD86 on granulocyte" on 'Aplastic anemia'

MR Method

- Inverse variance weighted
- MR Egger

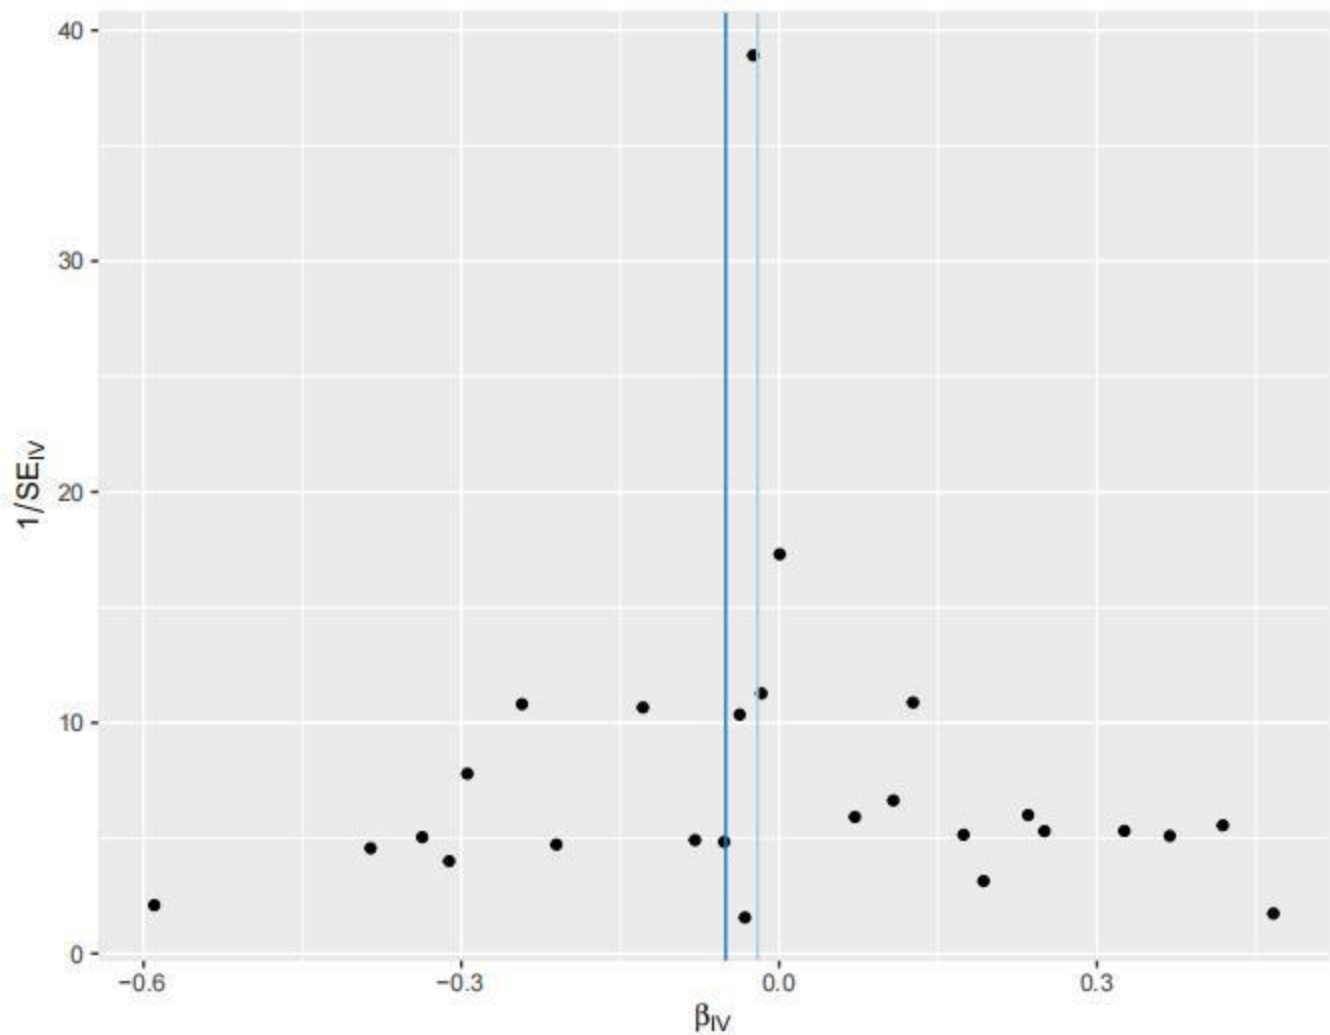

Funnel plot analysis of "CD39+ CD4+ %CD4+" on 'Aplastic anemia'

MR Method

Inverse variance weighted

MR Egger

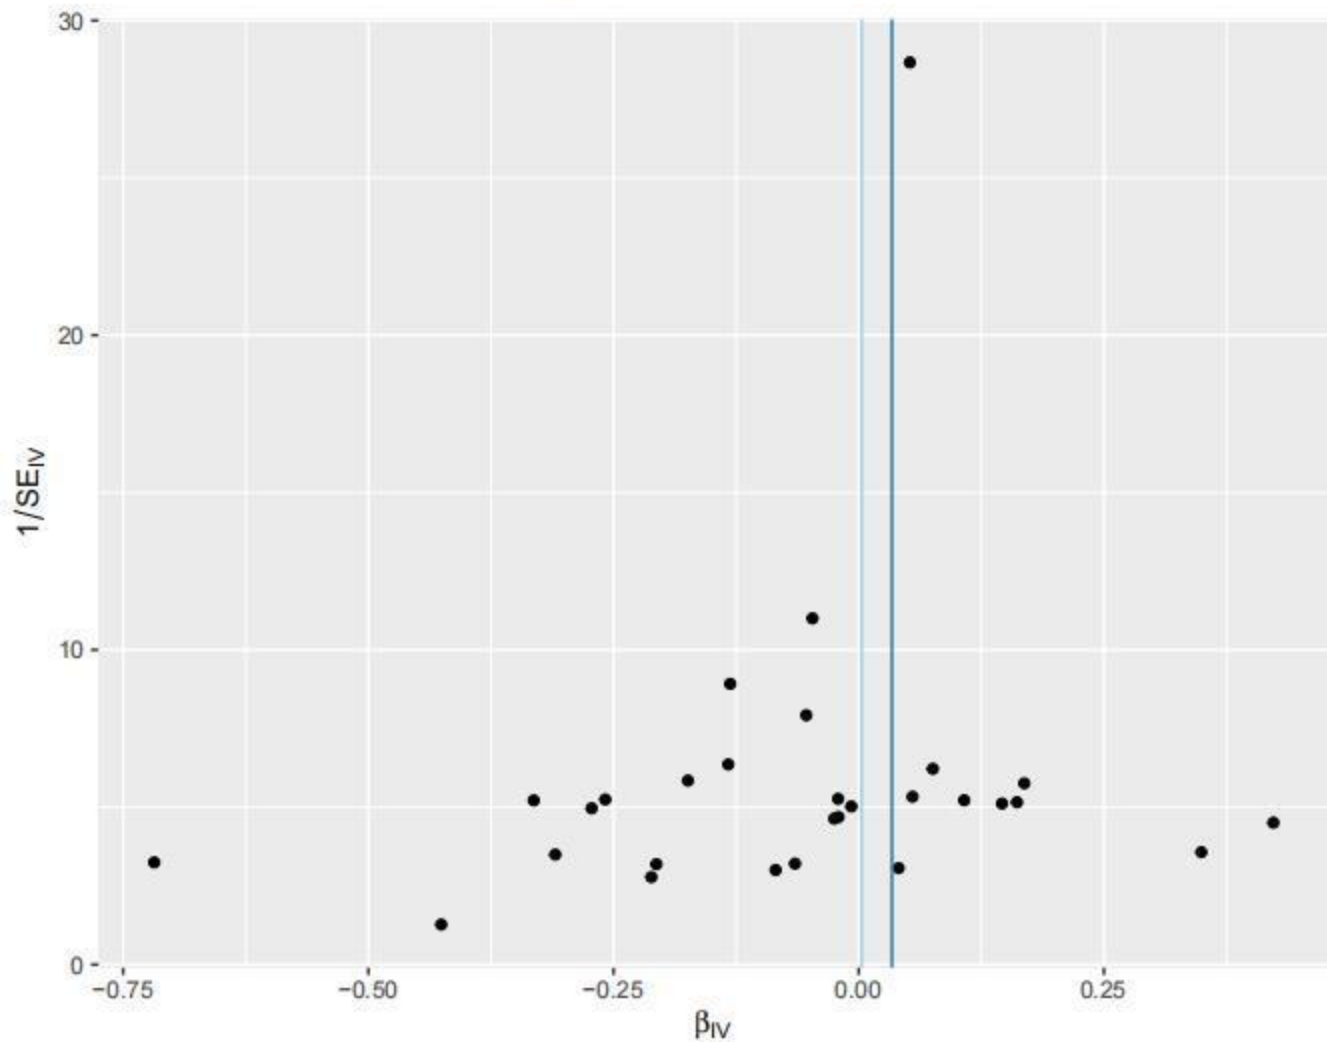

Funnel plot analyse of "CD20 on memory B cell" on 'Aplastic anemia'

MR Method

- Inverse variance weighted
- MR Egger

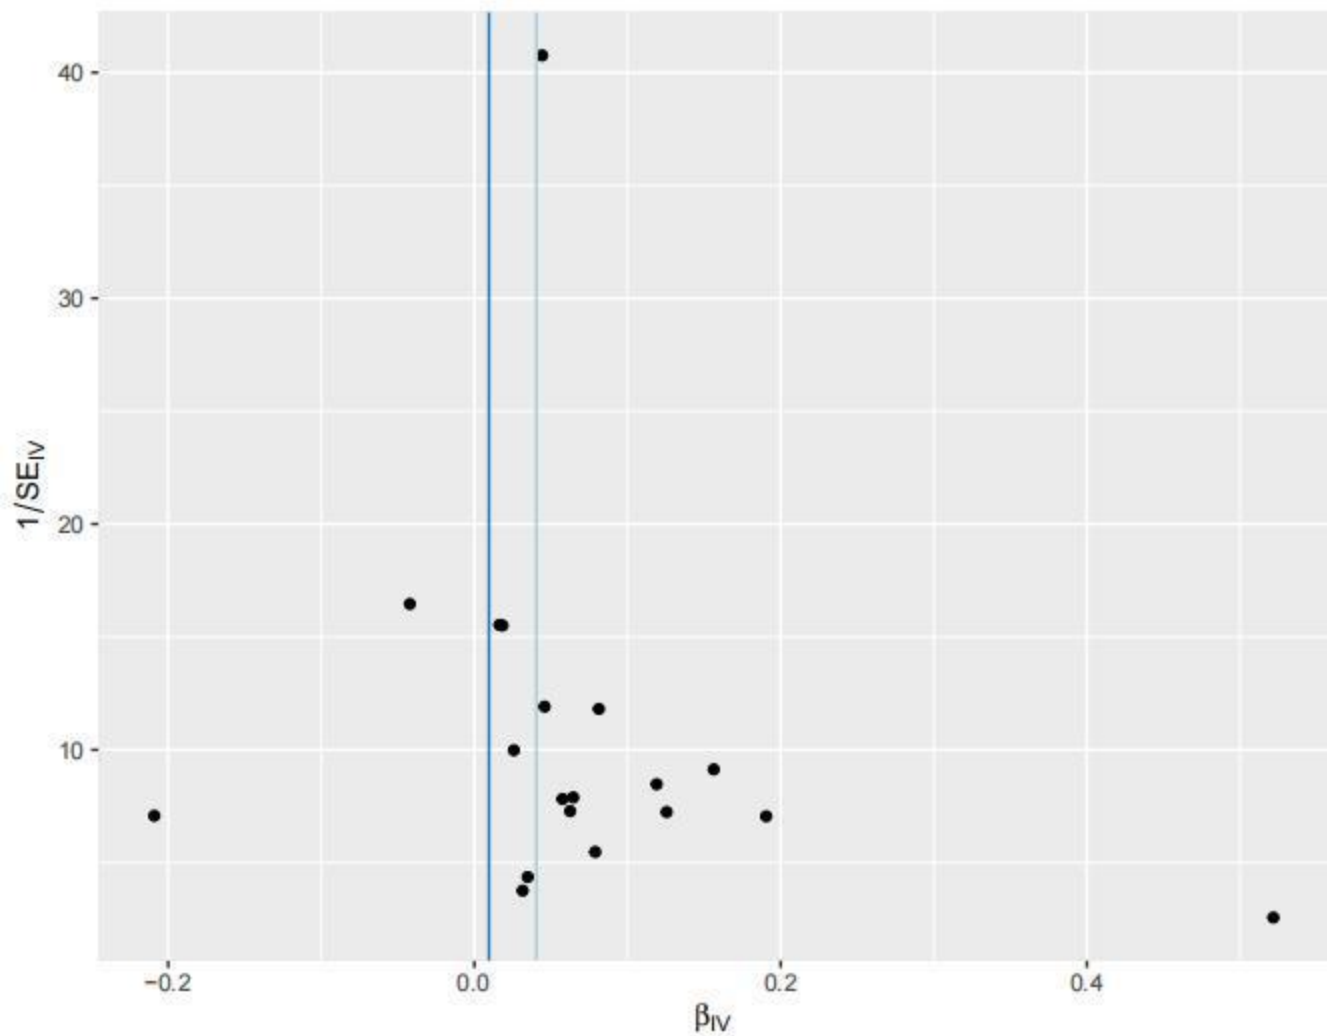

Funnel plot analyse of "CD33 on CD66b++ myeloid cell" on 'Aplastic anemia'

### MR Method

- Inverse variance weighted
- MR Egger

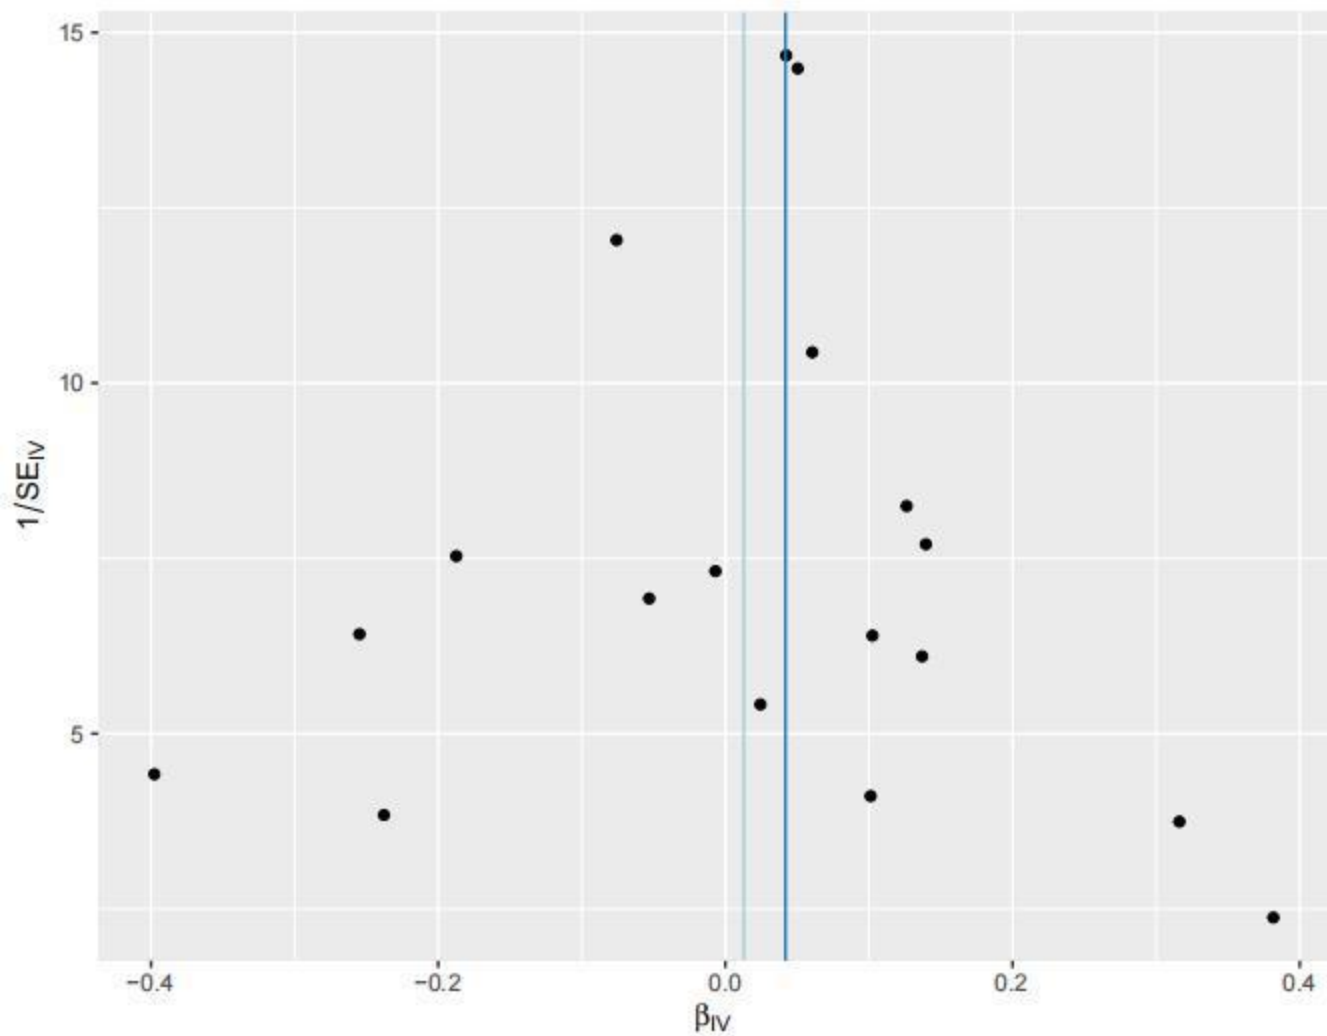

Funnel plot analyse of "CD20 on IgD+ CD38- naive" on 'Aplastic anemia'



### MR Method

- Inverse variance weighted
- MR Egger

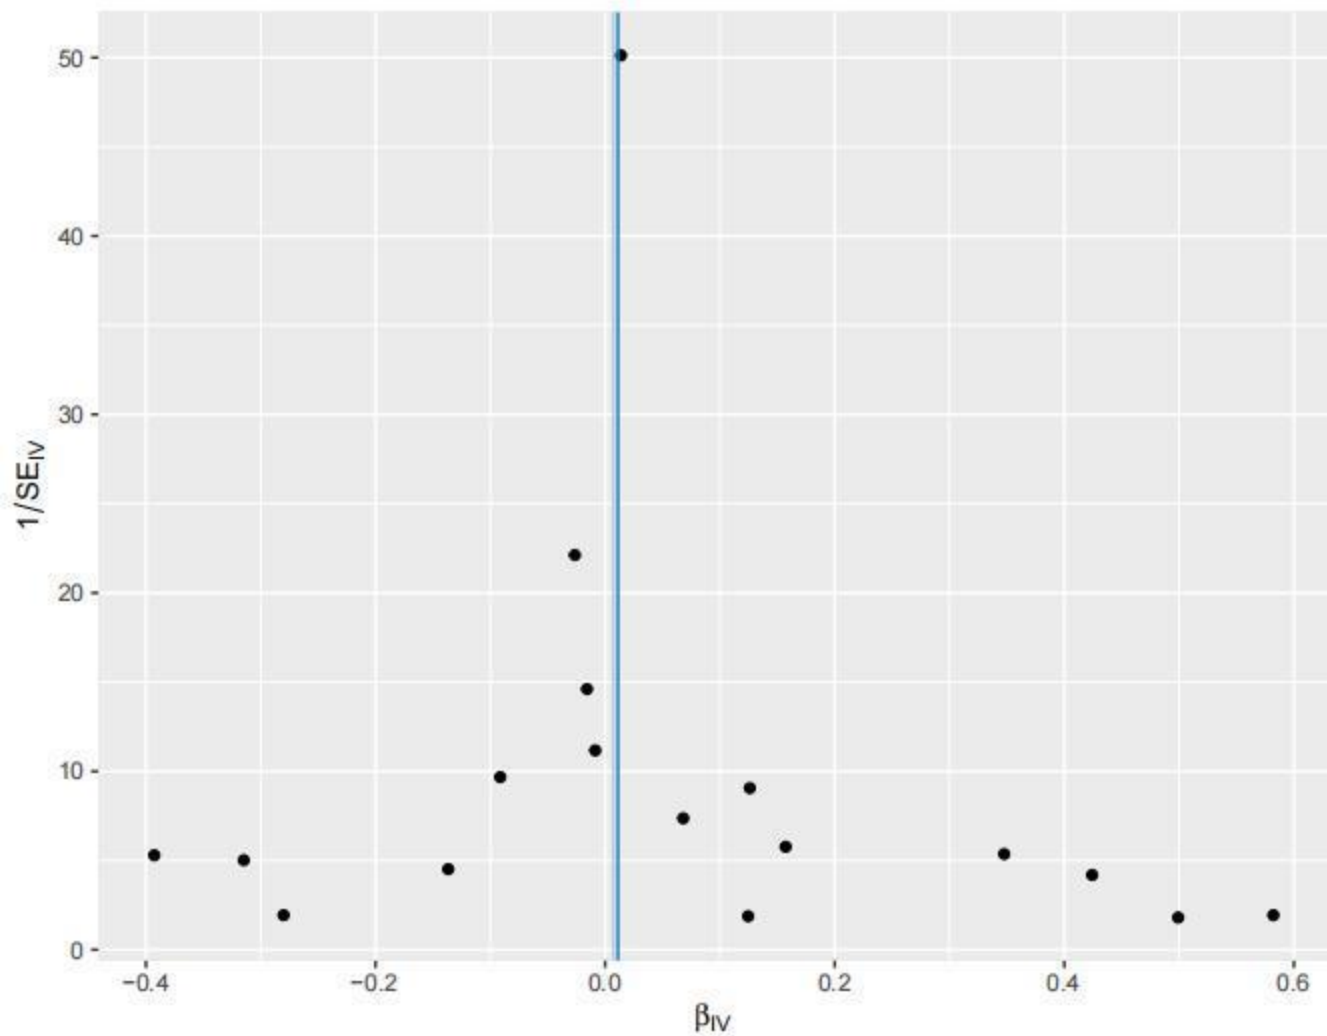

Funnel plot analyse of "IgD+ AC" on 'Aplastic anemia'

### MR Method

- Inverse variance weighted
- MR Egger

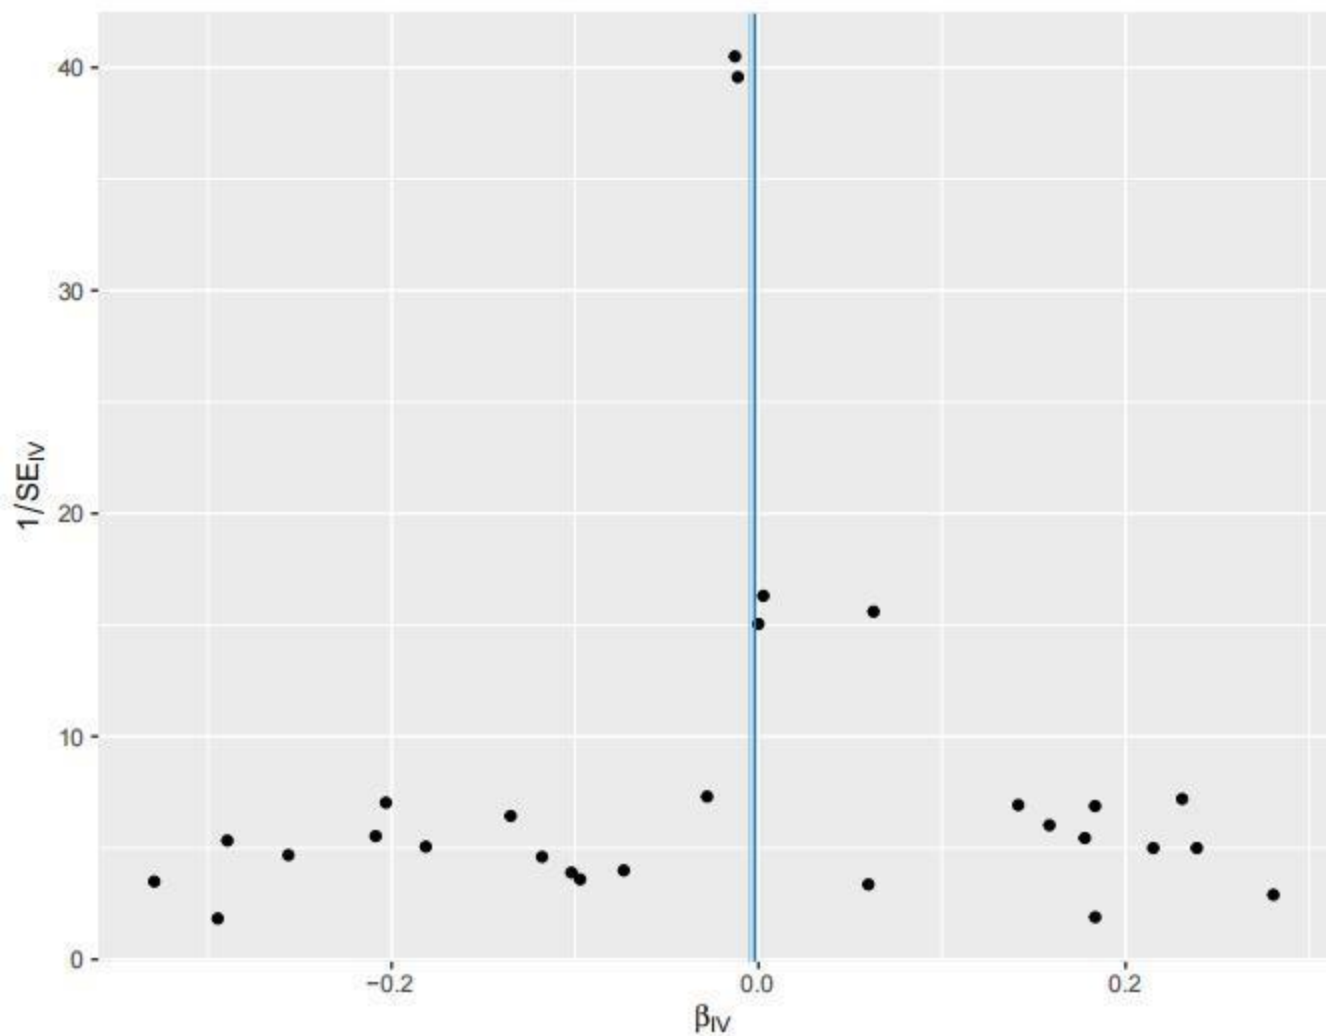

Funnel plot analyse of "CD19 on IgD+" on 'Aplastic anemia'

MR Method

- Inverse variance weighted
- MR Egger

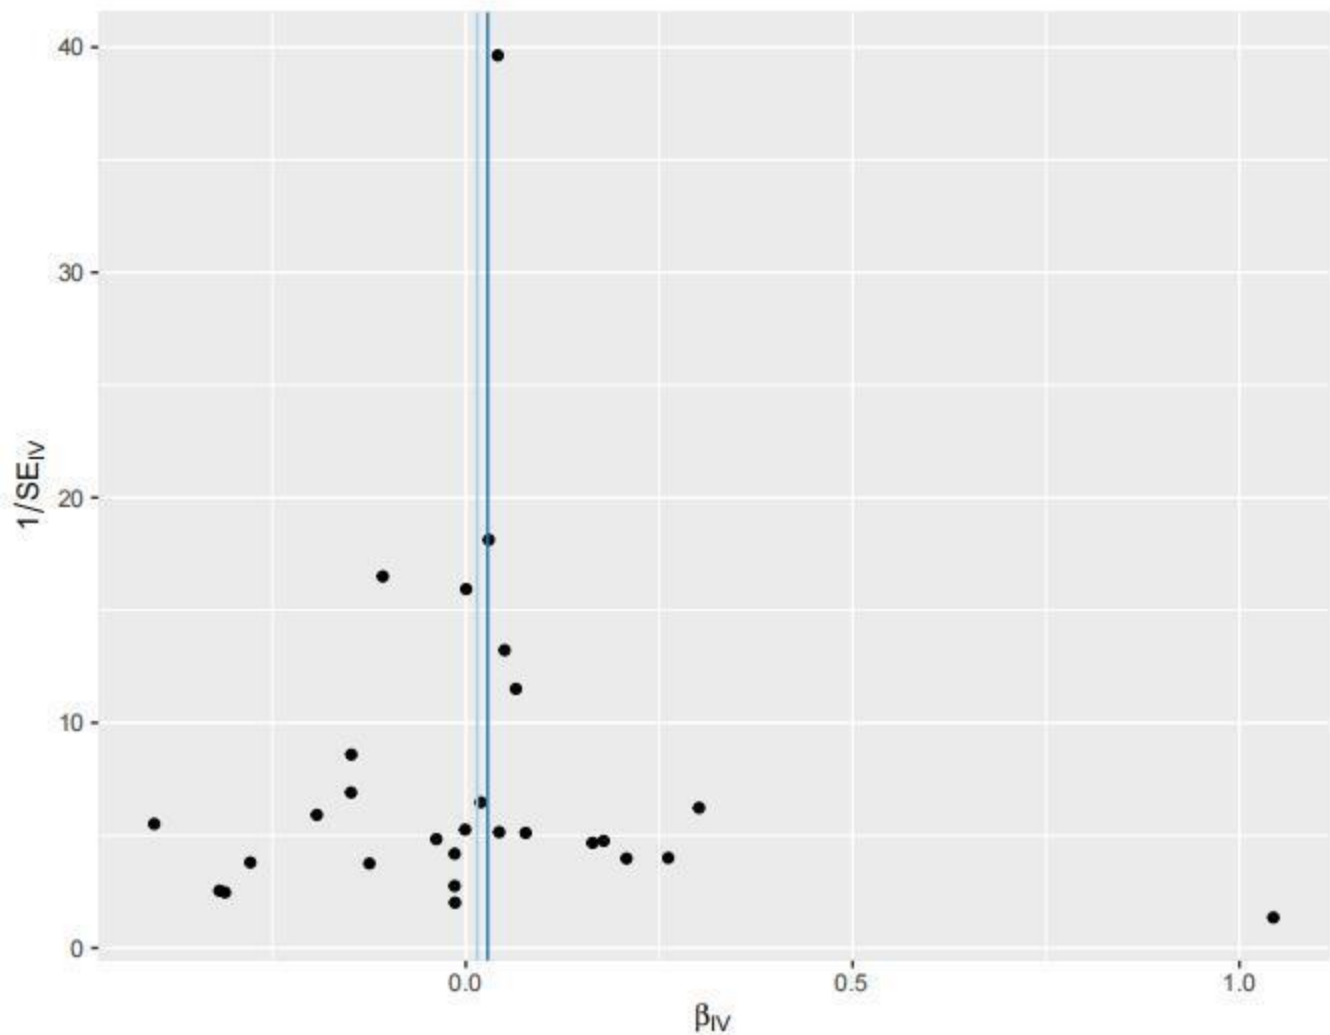

Funnel plot analyse of "CD39+ resting Treg %resting Treg" on 'Aplastic anemia'

### MR Method

- Inverse variance weighted
- MR Egger

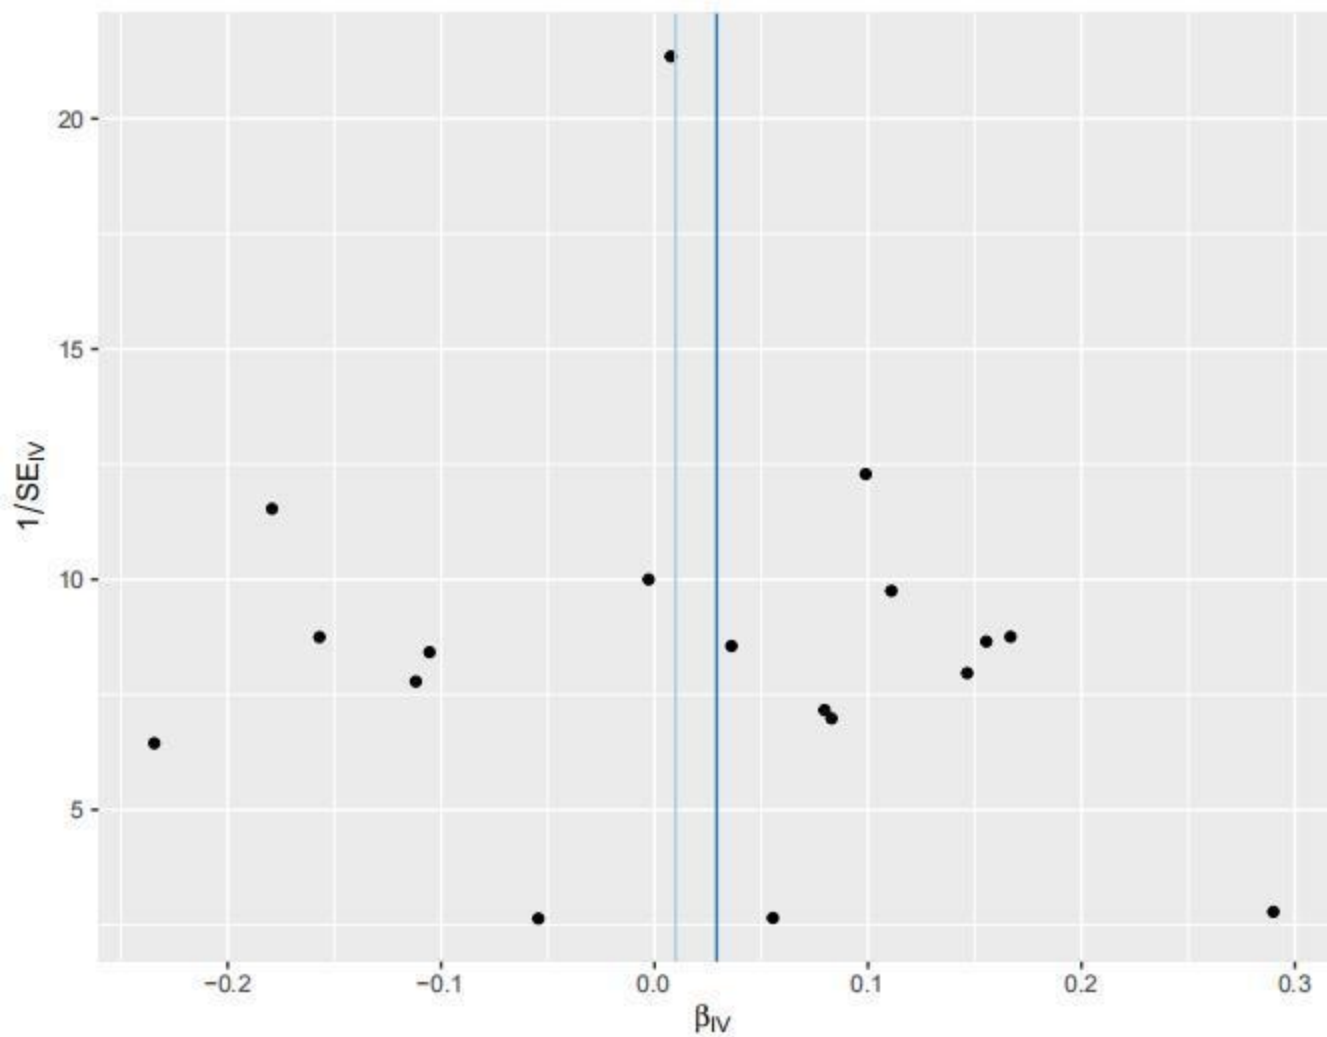

Funnel plot analyse of "CD45 on Gr MDSC " on 'Aplastic anemia'

### MR Method

Inverse variance weighted

MR Egger

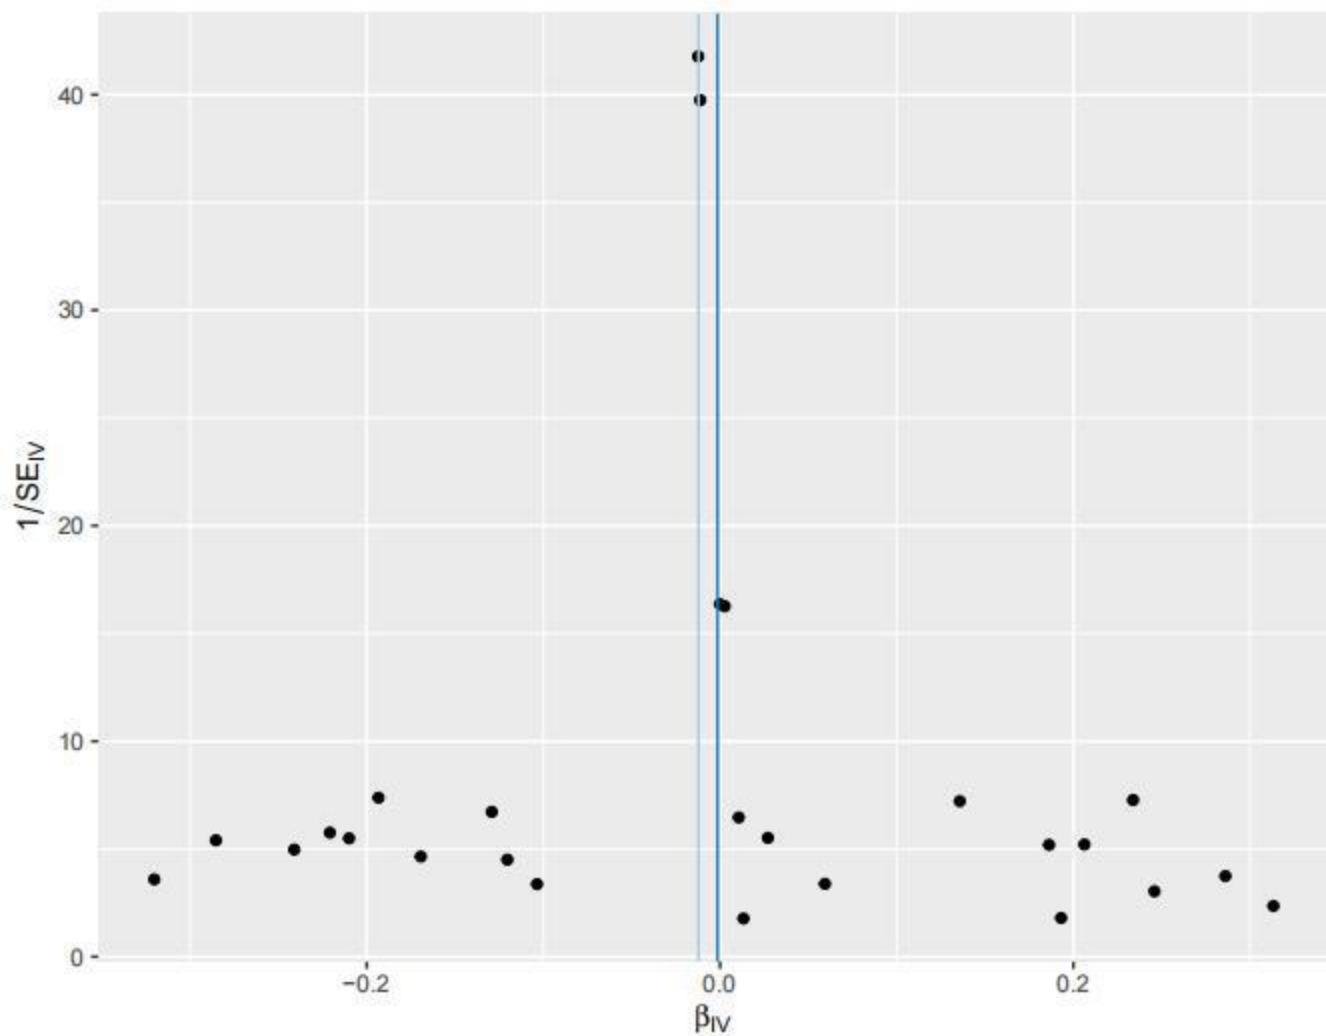

Funnel plot analysis of "CD19 on IgD+ CD24-" on 'Aplastic anemia'

### MR Method

- Inverse variance weighted
- MR Egger

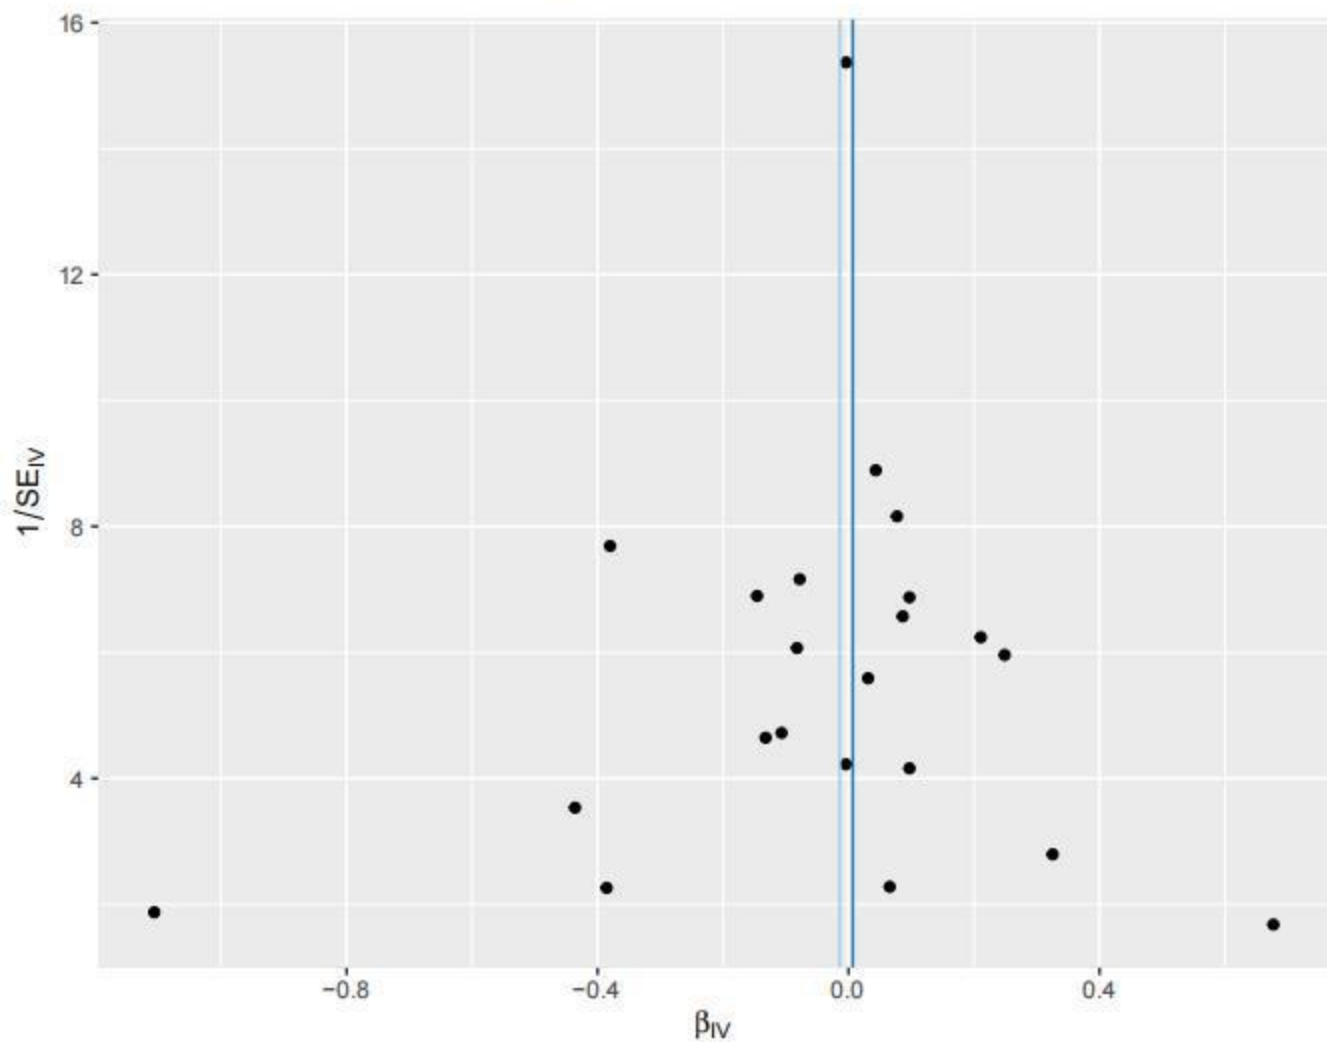

Funnel plot analyse of "CD4 on CD28+ CD4+ " on 'Aplastic anemia'

MR Method

- Inverse variance weighted
- MR Egger

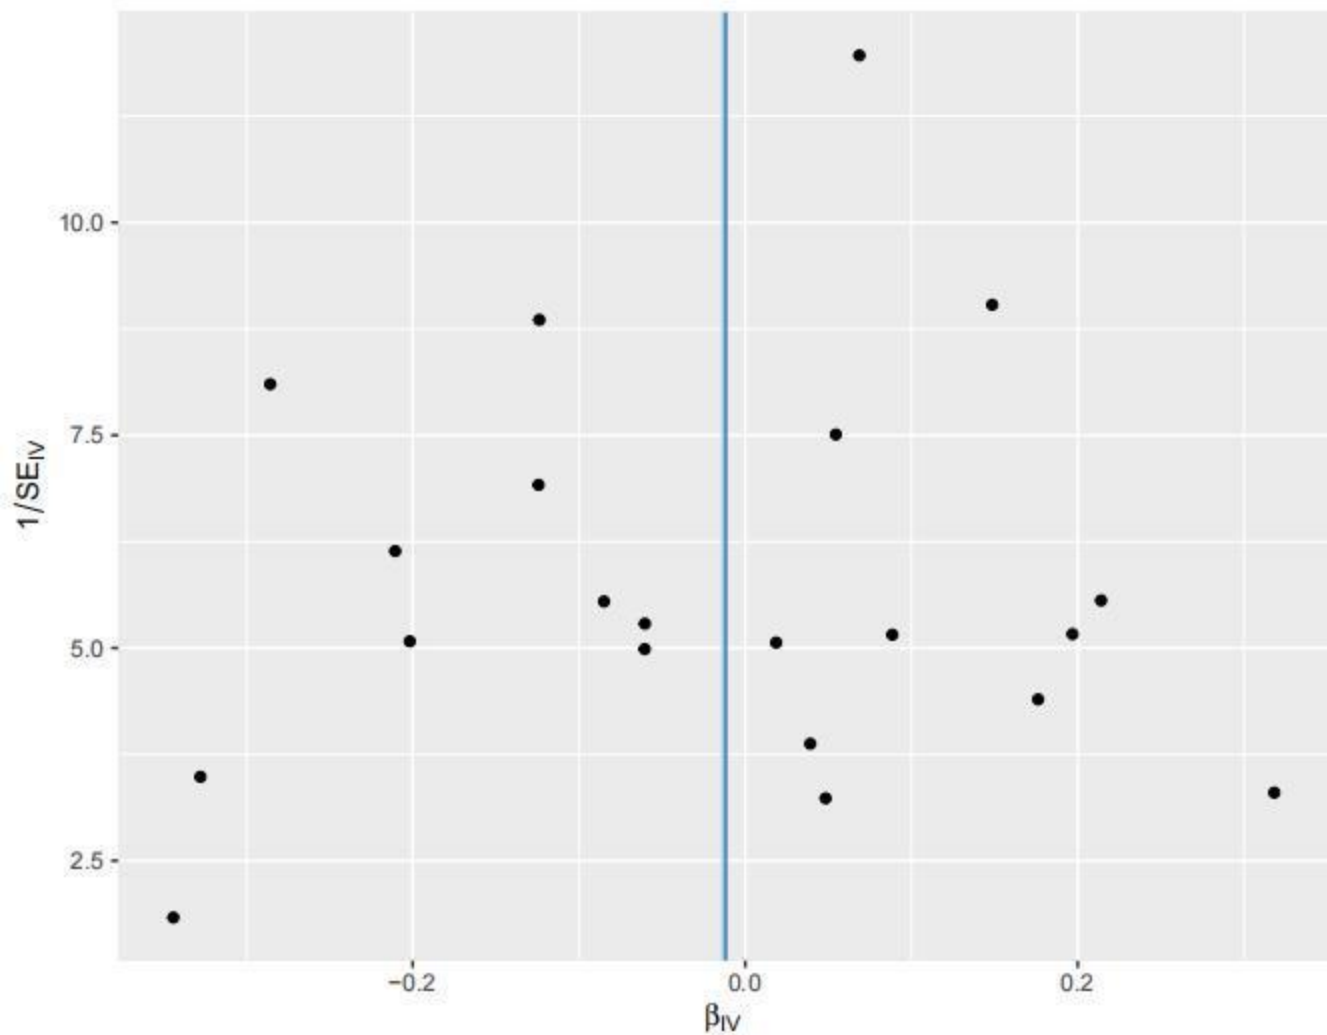

Funnel plot analyse of "HLA DR on HLA DR+ CD4+" on 'Aplastic anemia'

MR Method

- Inverse variance weighted
- MR Egger

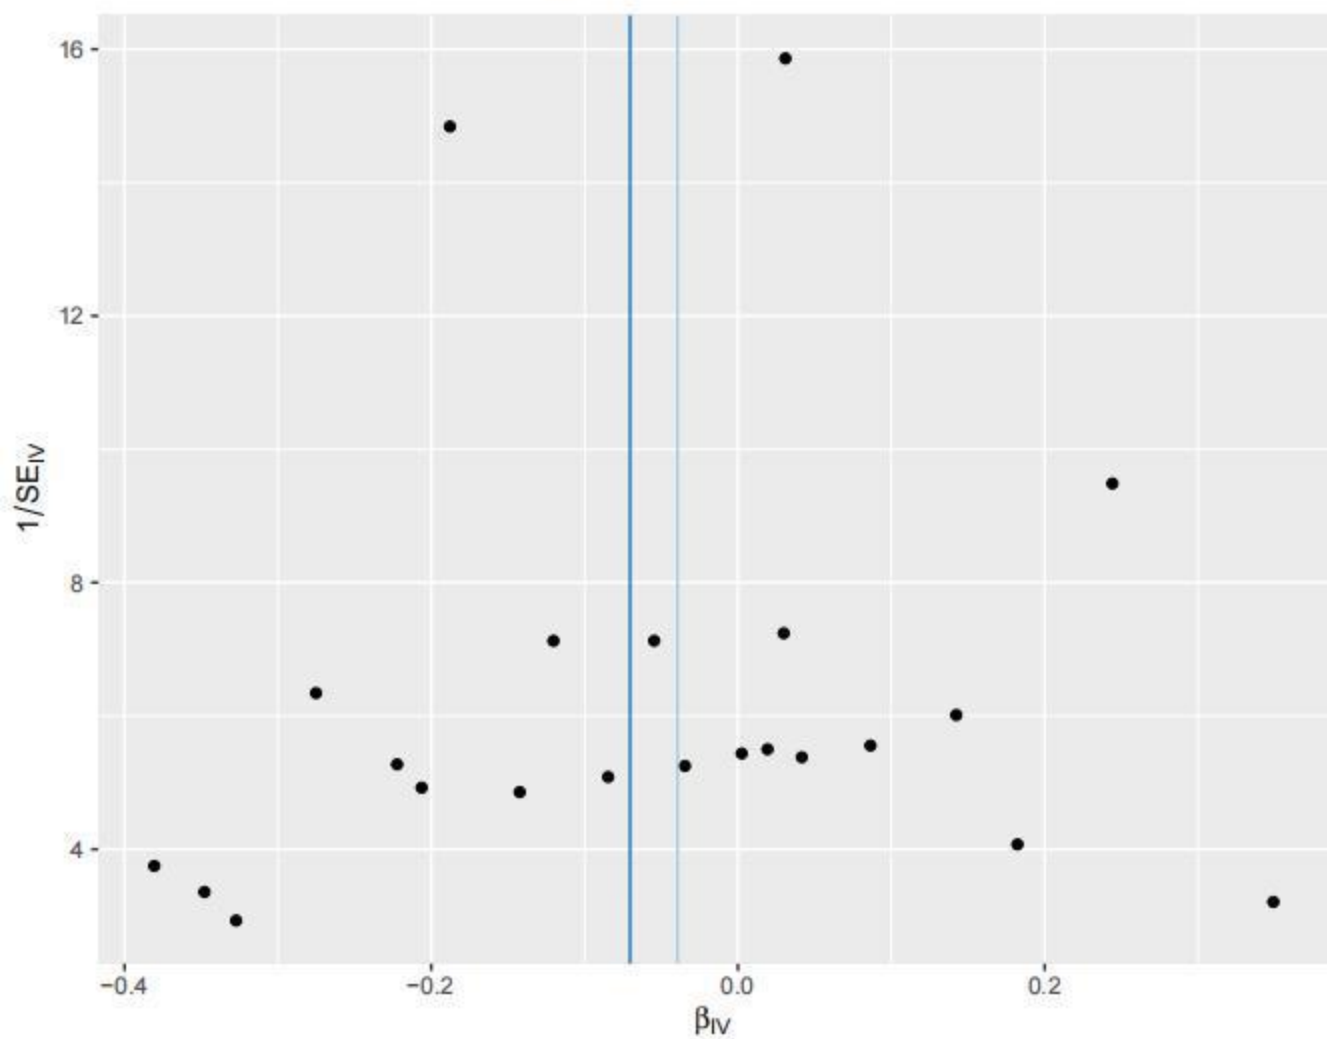

Funnel plot analyse of "SSC-A on HLA DR+ CD4+" on 'Aplastic anemia'



### MR Method

- Inverse variance weighted
- MR Egger

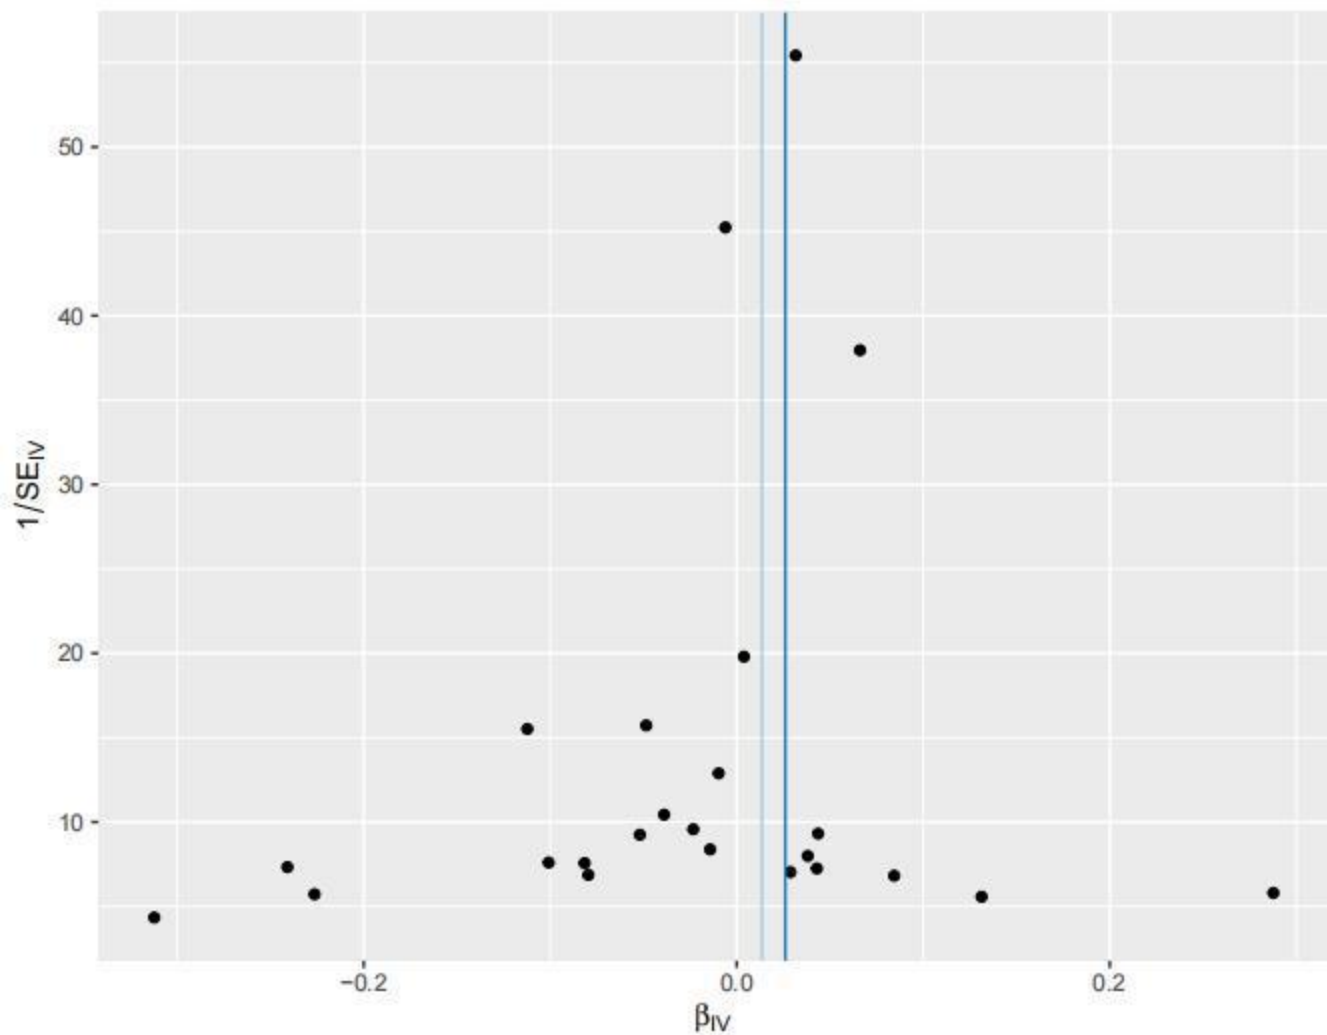

Funnel plot analyse of "CD45 on CD33- HLA DR+ " on 'Aplastic anemia'

MR Method

Inverse variance weighted

MR Egger

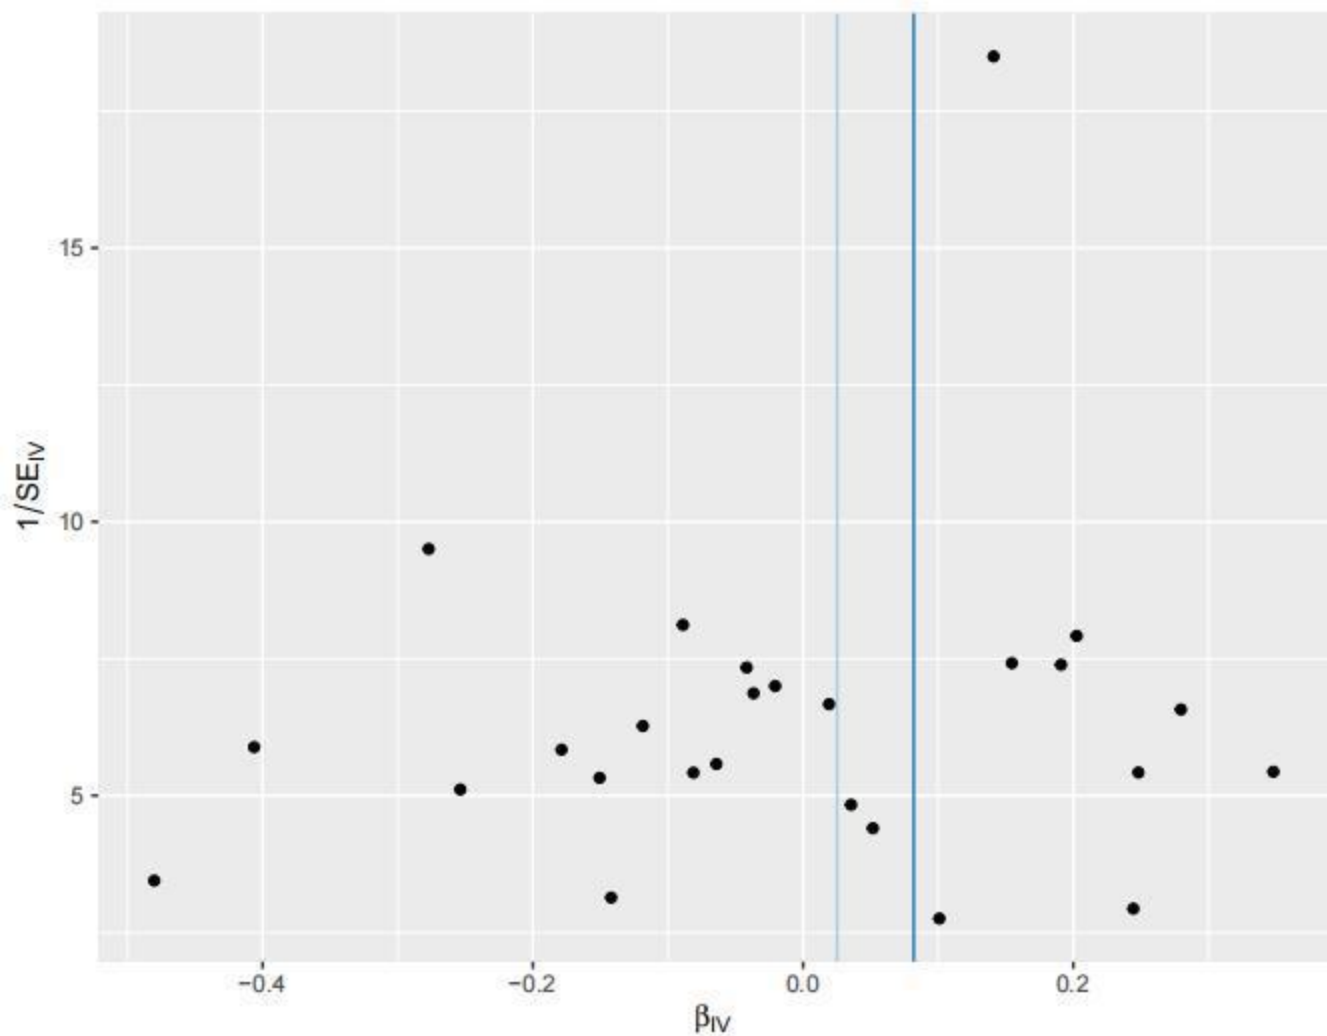

Funnel plot analyse of "CD62L on CD62L+ DC" on 'Aplastic anemia'

### MR Method

- Inverse variance weighted
- MR Egger

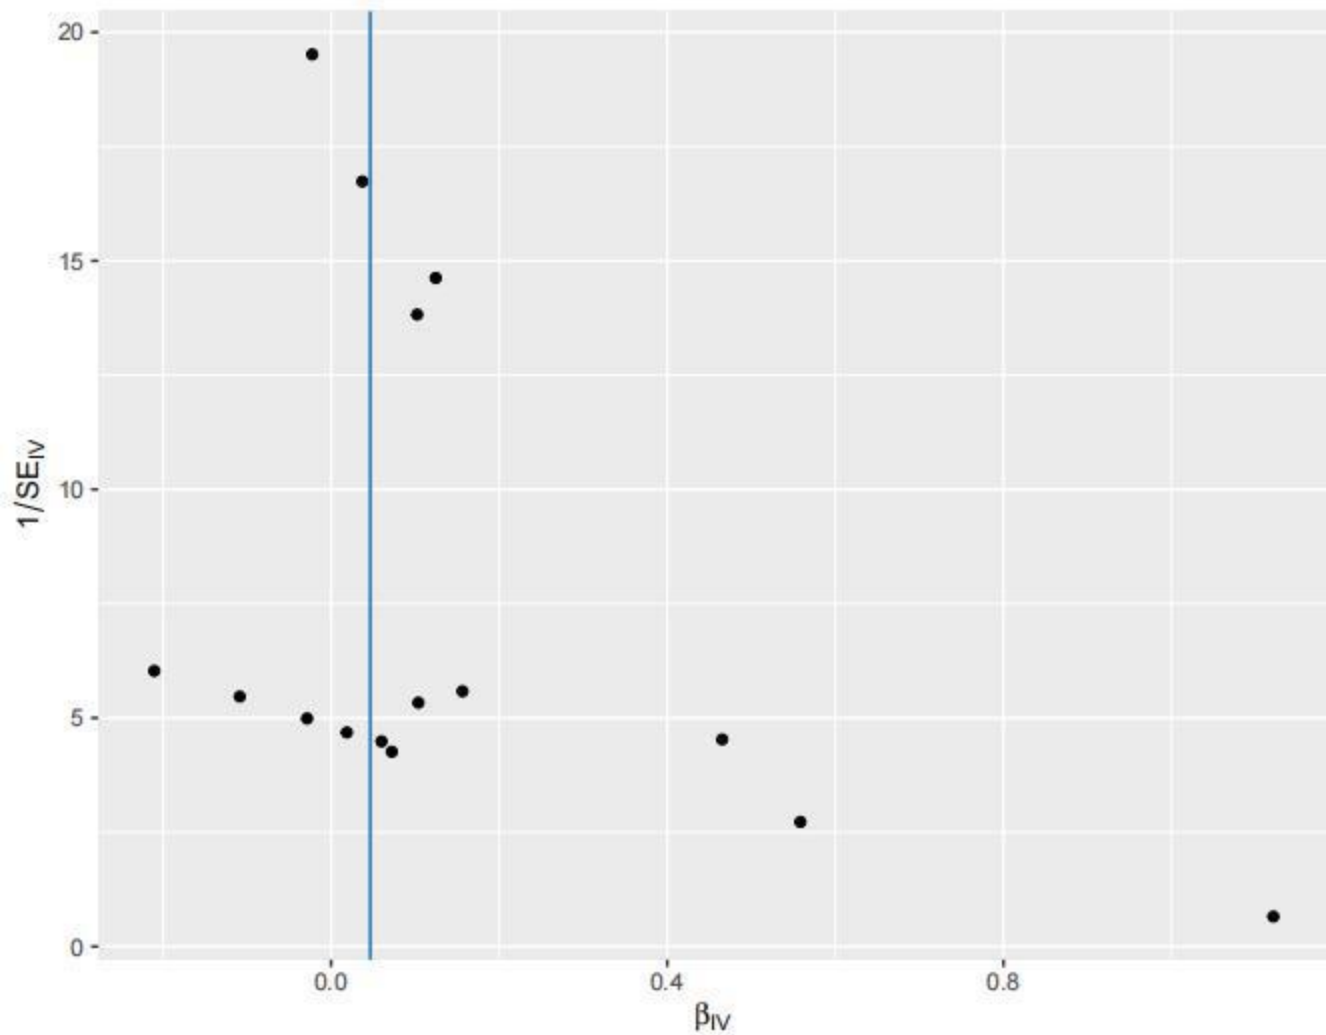

Funnel plot analyse of "CD45 on T cell" on 'Aplastic anemia'

### MR Method

- Inverse variance weighted
- MR Egger

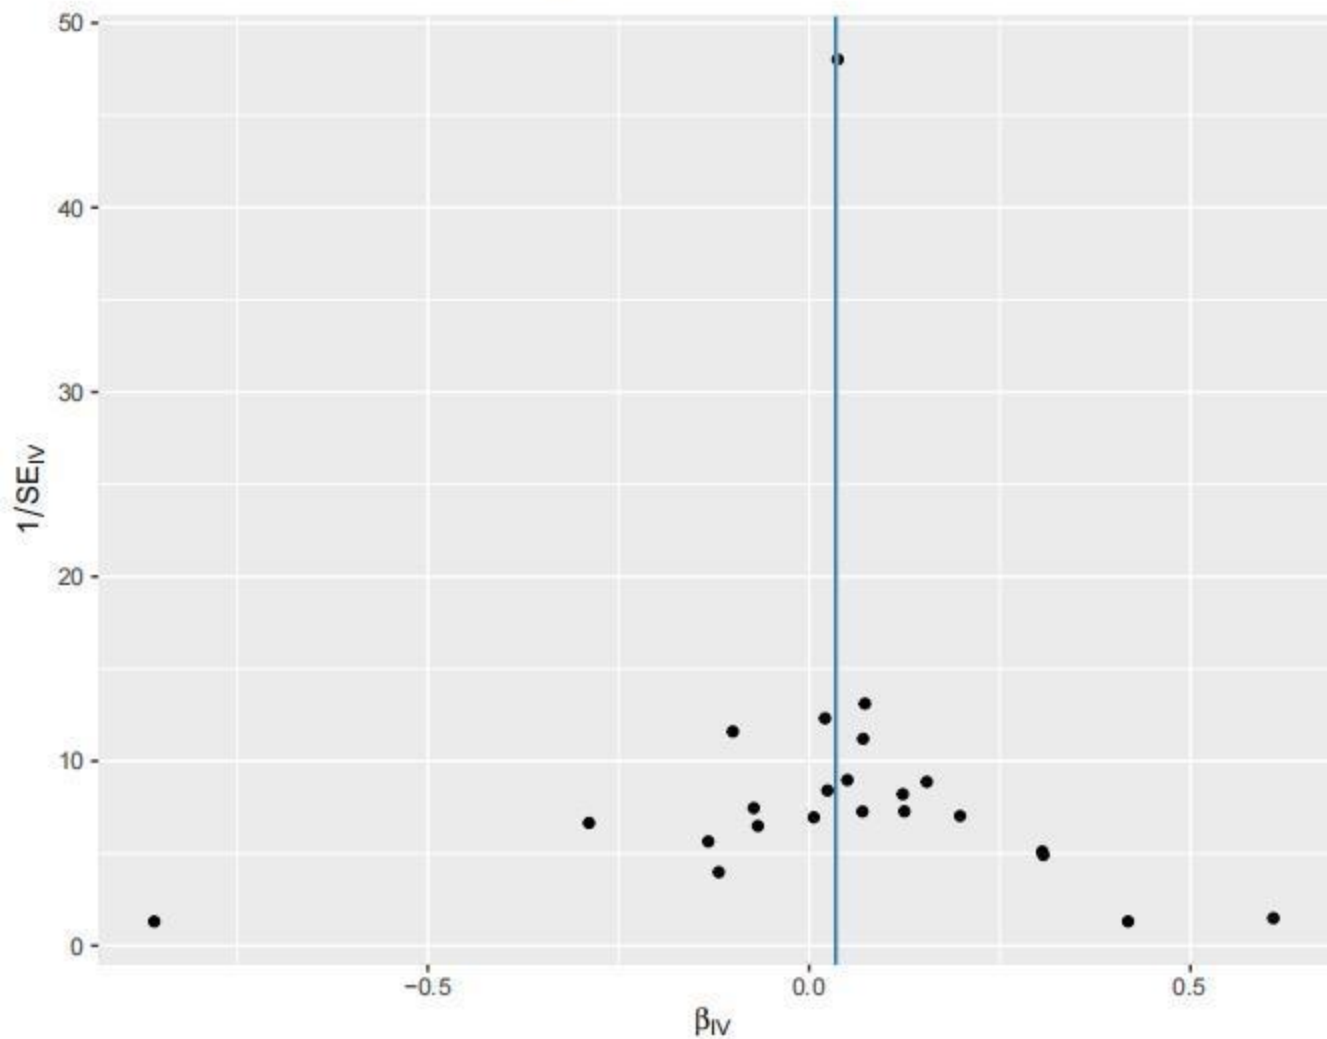

Funnel plot analyse of "CD33 on CD33dim HLA DR+ CD11b- " on 'Aplastic anemia'

MR Method

- Inverse variance weighted
- MR Egger

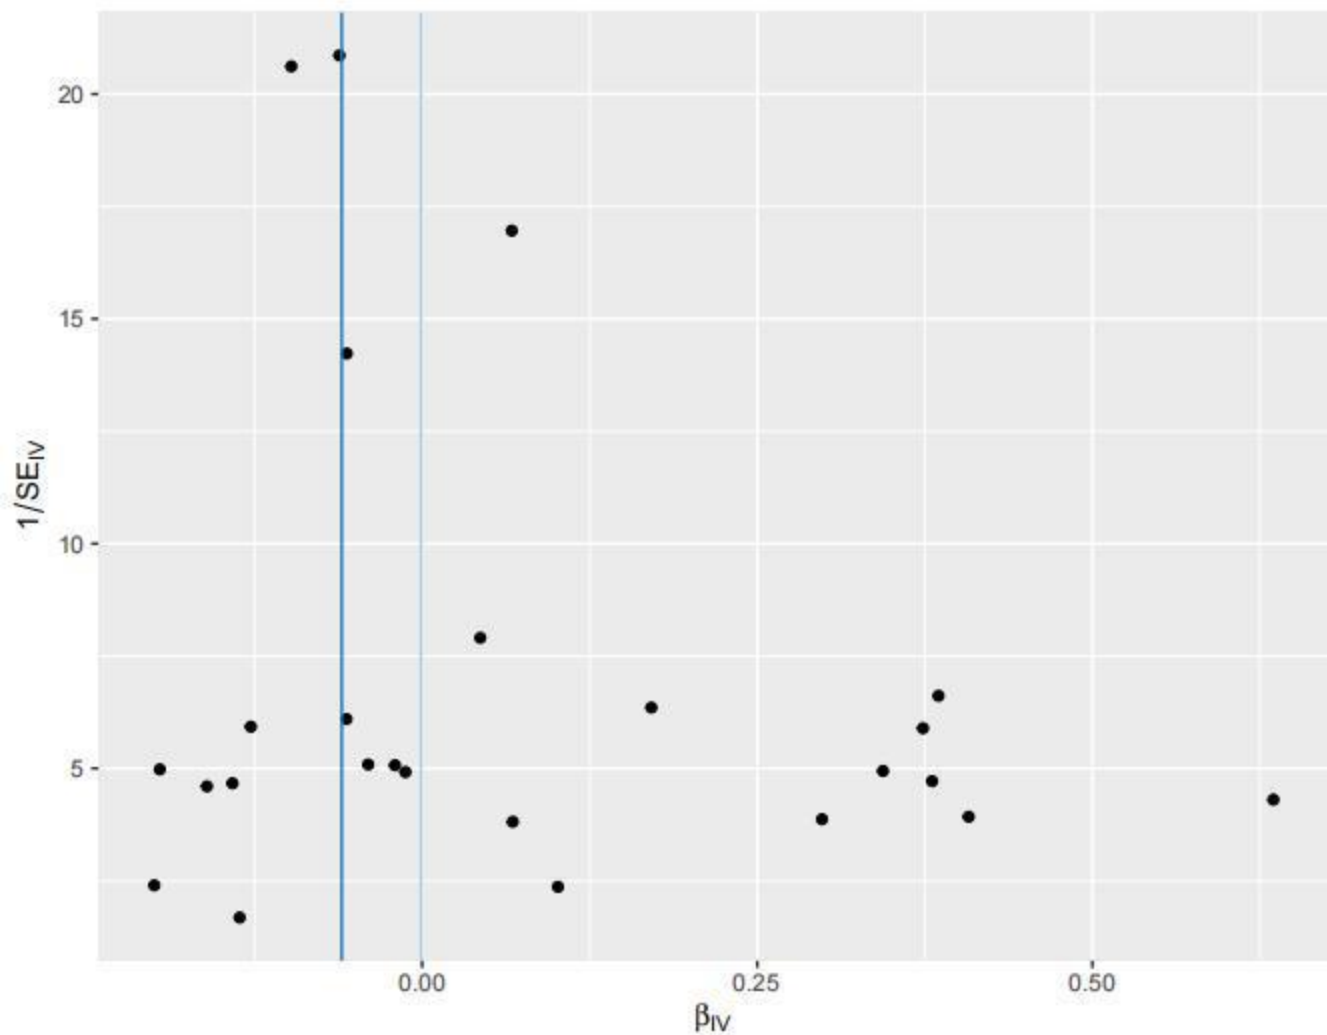

Funnel plot analyse of "CD11c+ CD62L- monocyte AC" on 'Aplastic anemia'

### MR Method

- Inverse variance weighted
- MR Egger

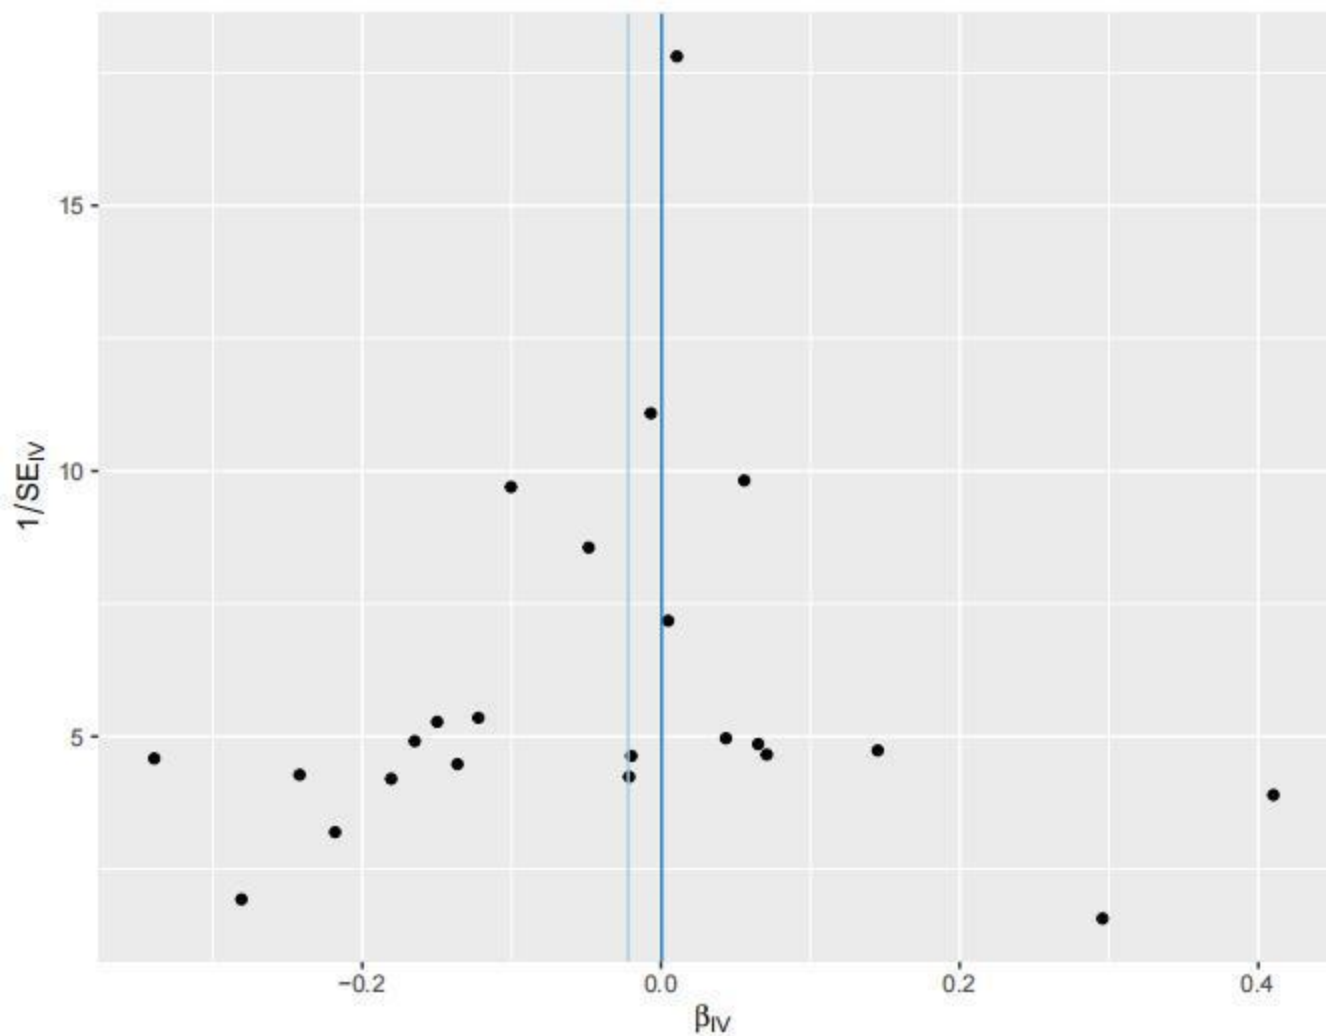

Funnel plot analysis of "CD62L- plasmacytoid DC AC" on 'Aplastic anemia'

MR Method

- Inverse variance weighted
- MR Egger

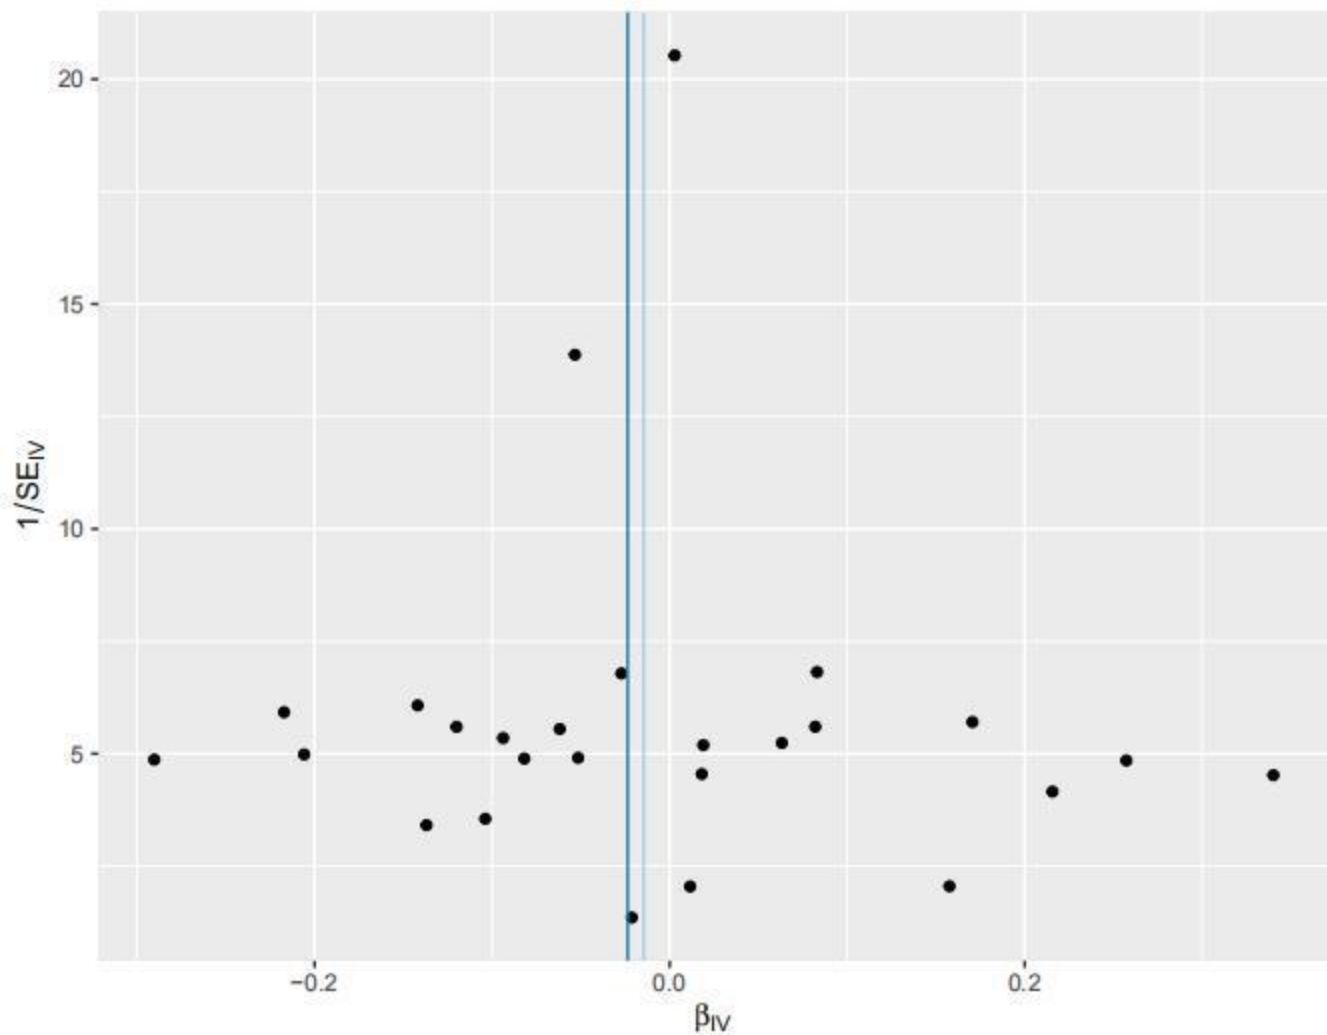

Funnel plot analyse of "IgD+ CD38br %lymphocyte" on 'Aplastic anemia'

MR Method

- Inverse variance weighted
- MR Egger

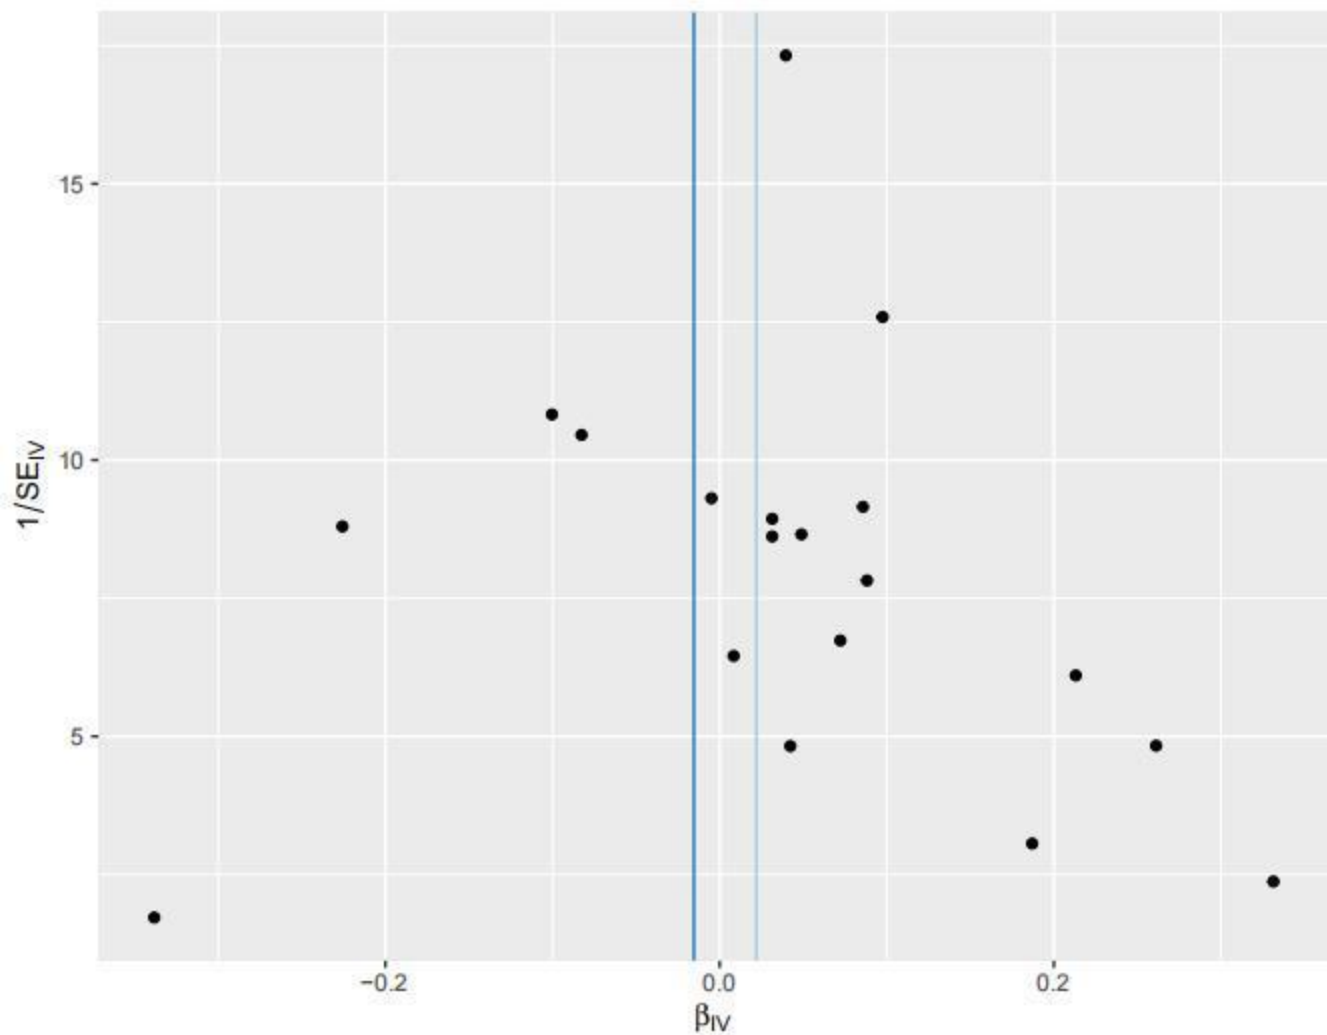

Funnel plot analyse of "CD45 on CD33dim HLA DR- " on 'Aplastic anemia'



MR Method

- Inverse variance weighted
- MR Egger

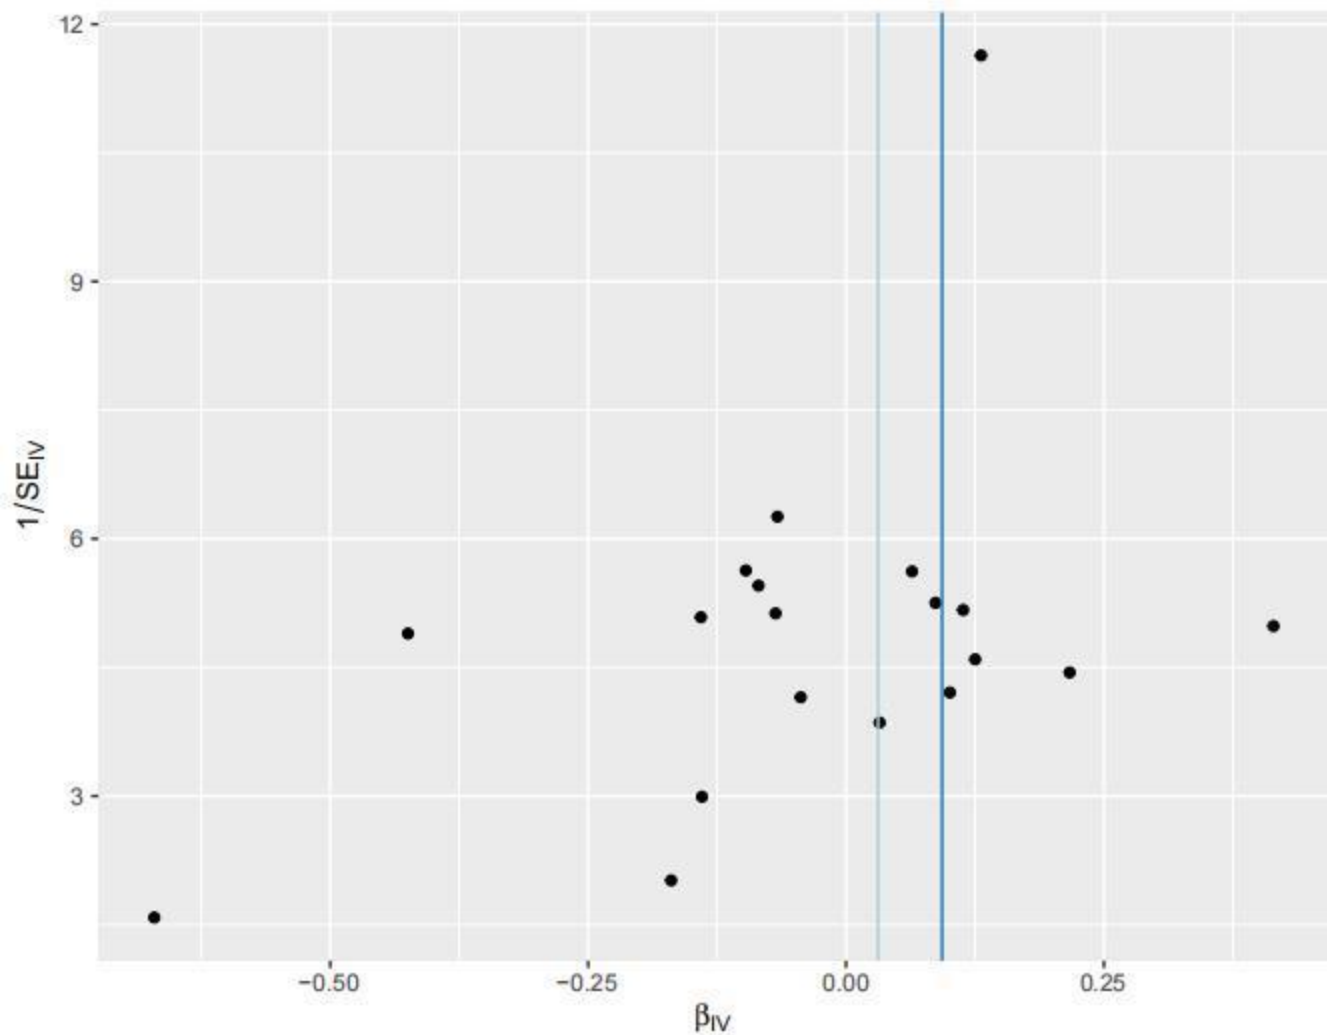

Funnel plot analyse of "IgD- CD38dim AC" on 'Aplastic anemia'

### MR Method

- Inverse variance weighted
- MR Egger

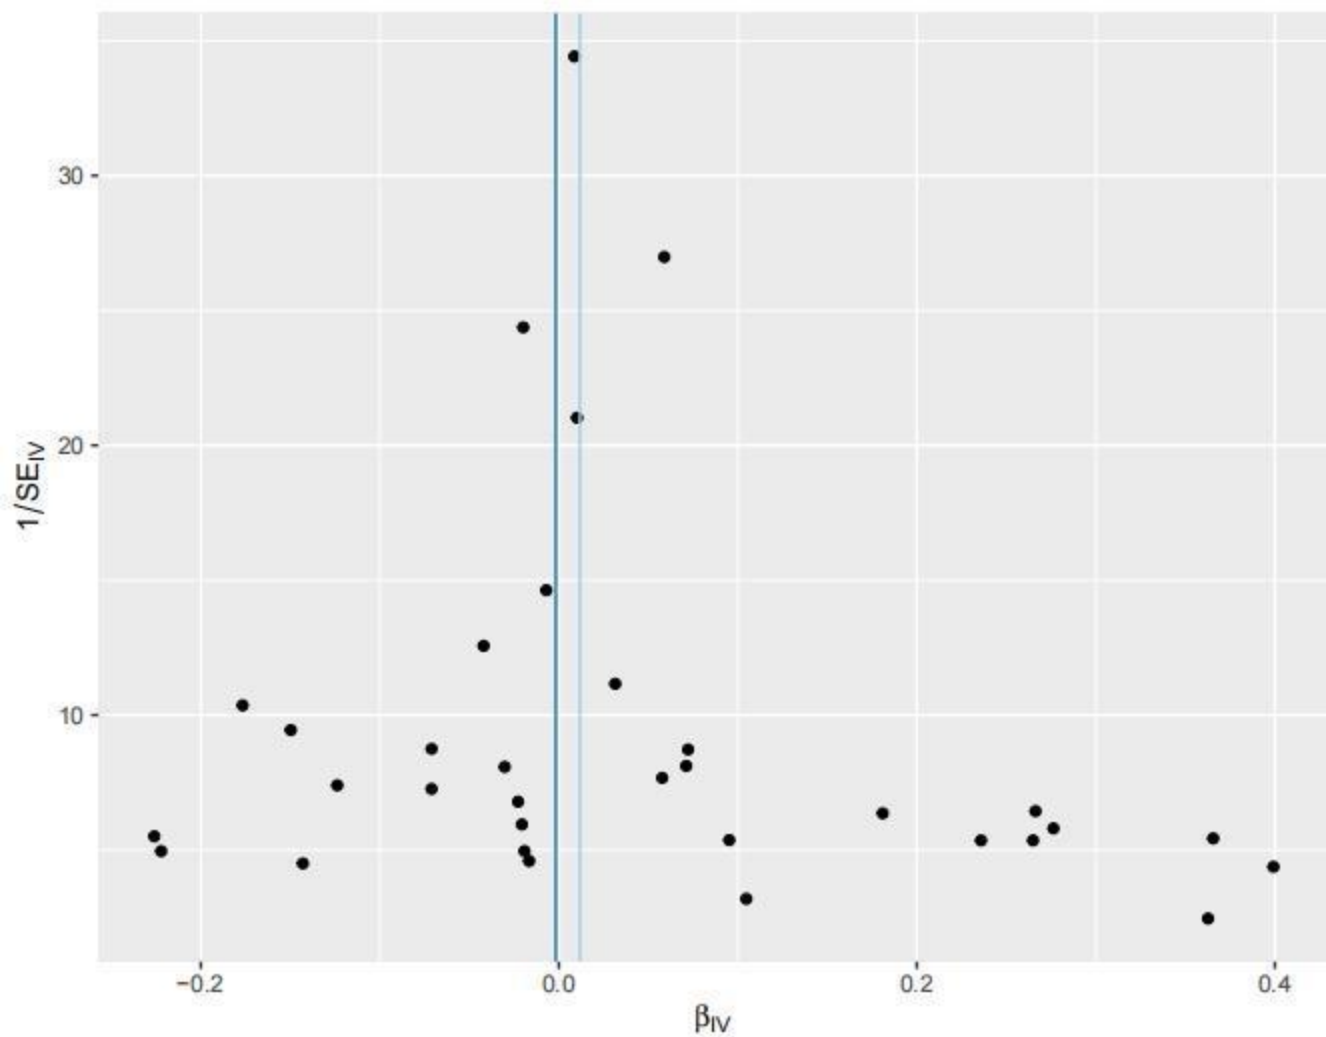

Funnel plot analysis of "CD4RA on TD CD4+ " on 'Aplastic anemia'

### MR Method

Inverse variance weighted

MR Egger

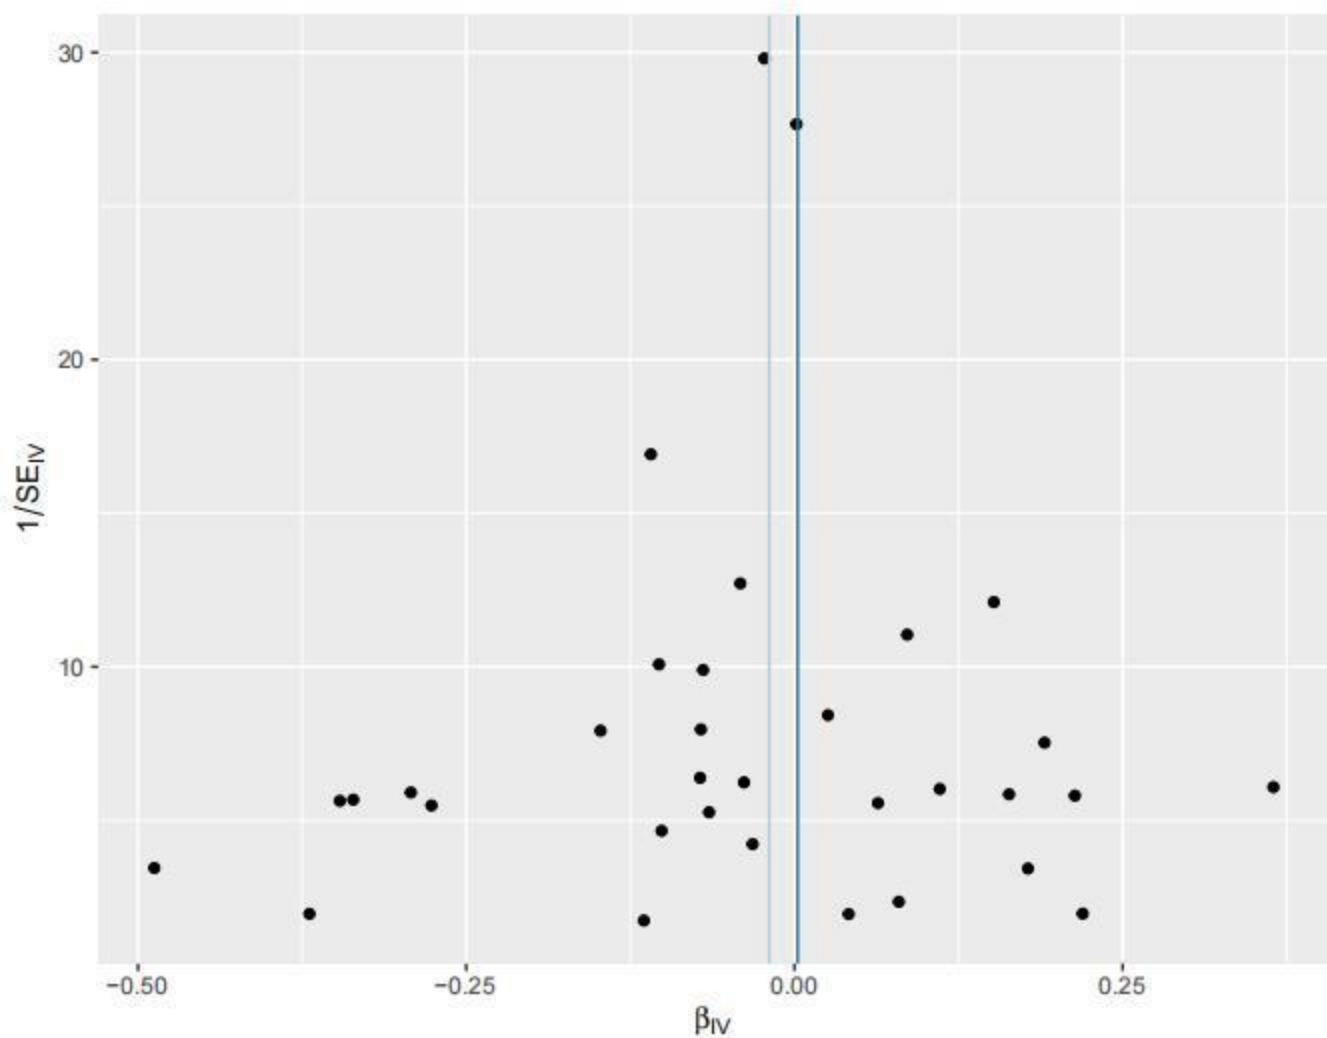

Funnel plot analyse of "CD3 on T cell" on 'Aplastic anemia'

### MR Method

Inverse variance weighted

MR Egger

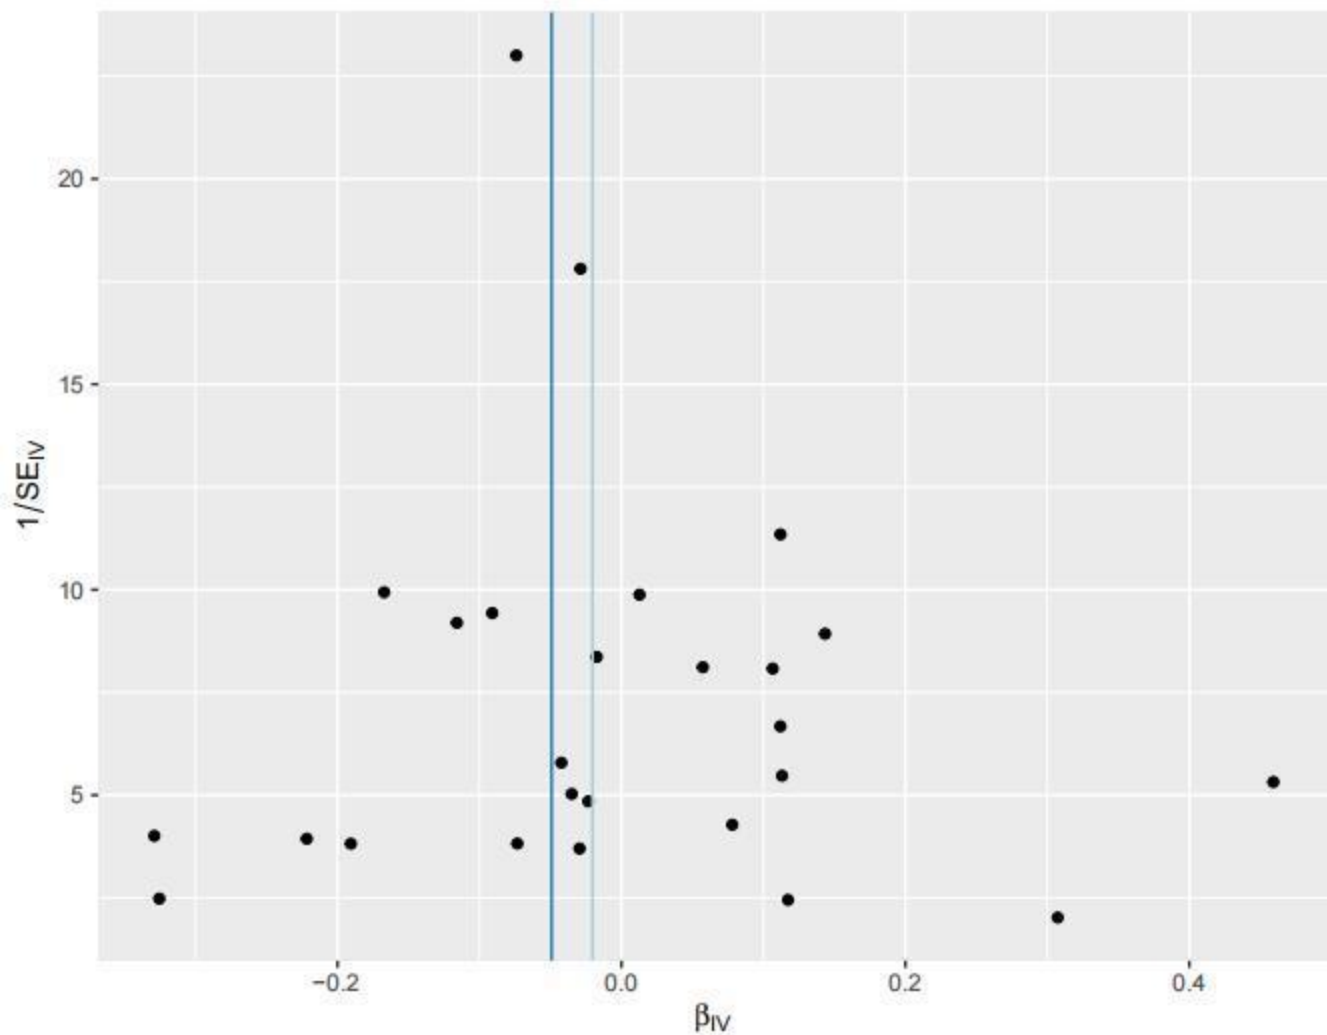

Funnel plot analyse of "CD3 on CD39+ activated Treg" on 'Aplastic anemia'

MR Method

- Inverse variance weighted
- MR Egger

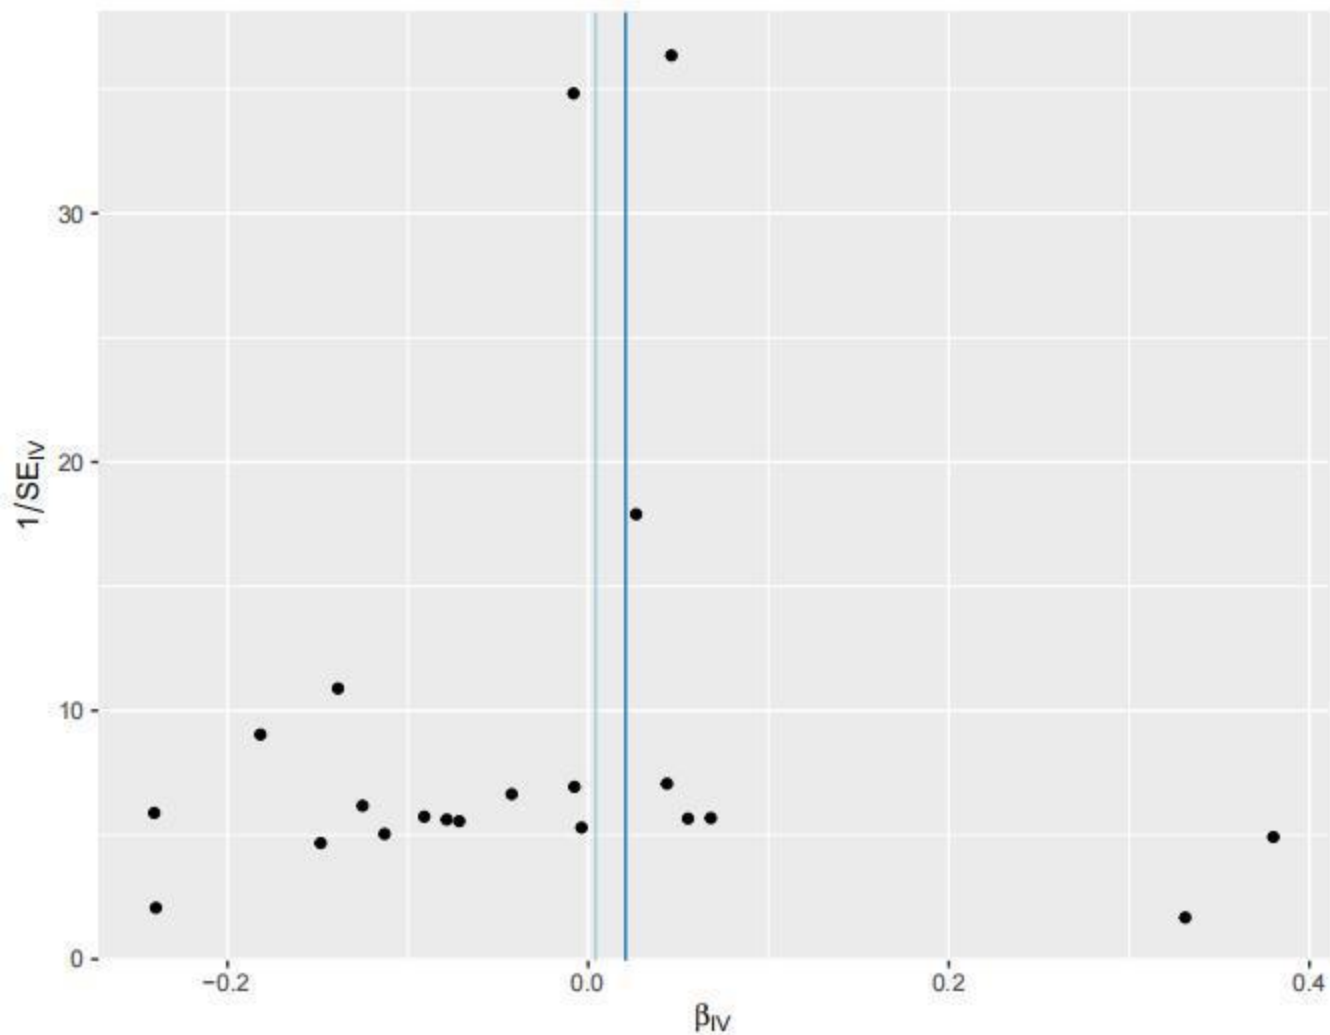

Funnel plot analyse of "CD28 on CD39+ CD8br " on 'Aplastic anemia'

### MR Method

- Inverse variance weighted
- MR Egger

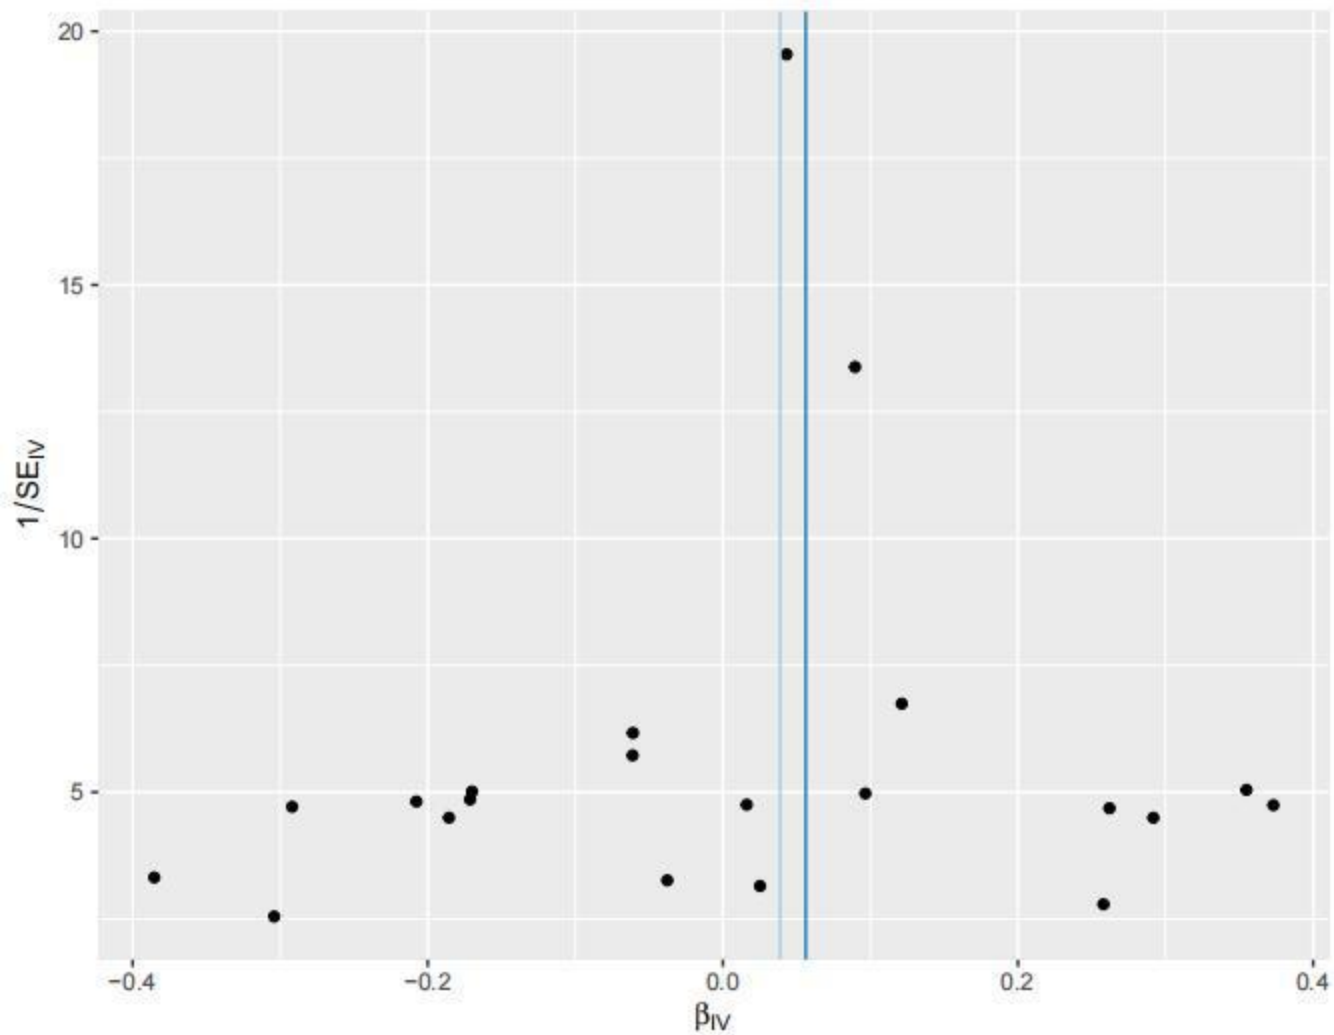

Funnel plot analyse of "CD19 on CD20- " on 'Aplastic anemia'

### MR Method

Inverse variance weighted

MR Egger

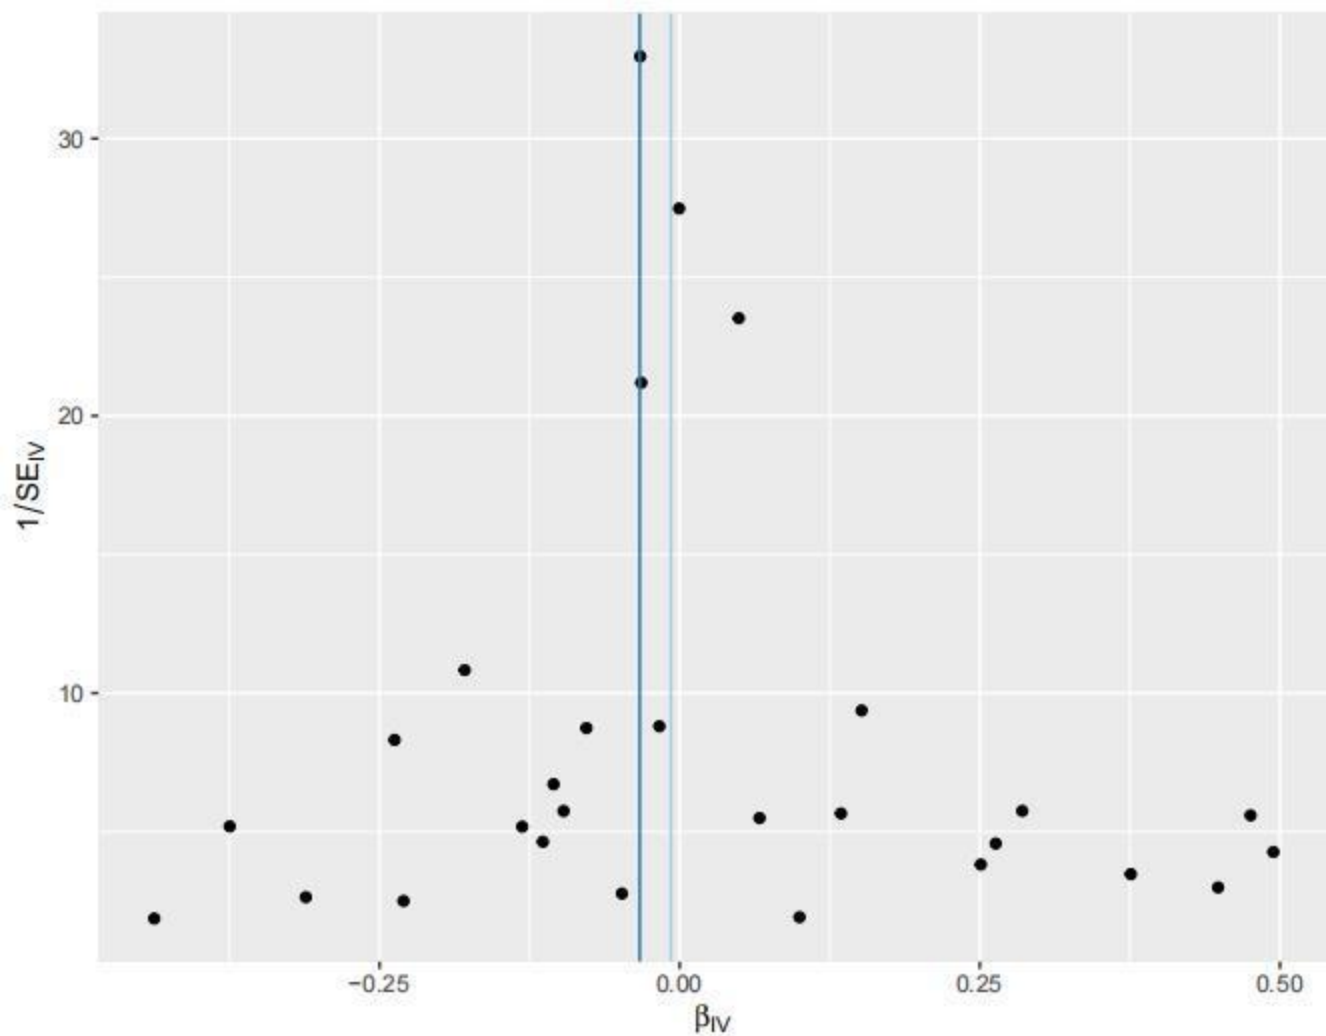

Funnel plot analysis of "CD40 on CD14- CD16+ monocyte " on 'Aplastic anemia'

MR Method

- Inverse variance weighted
- MR Egger

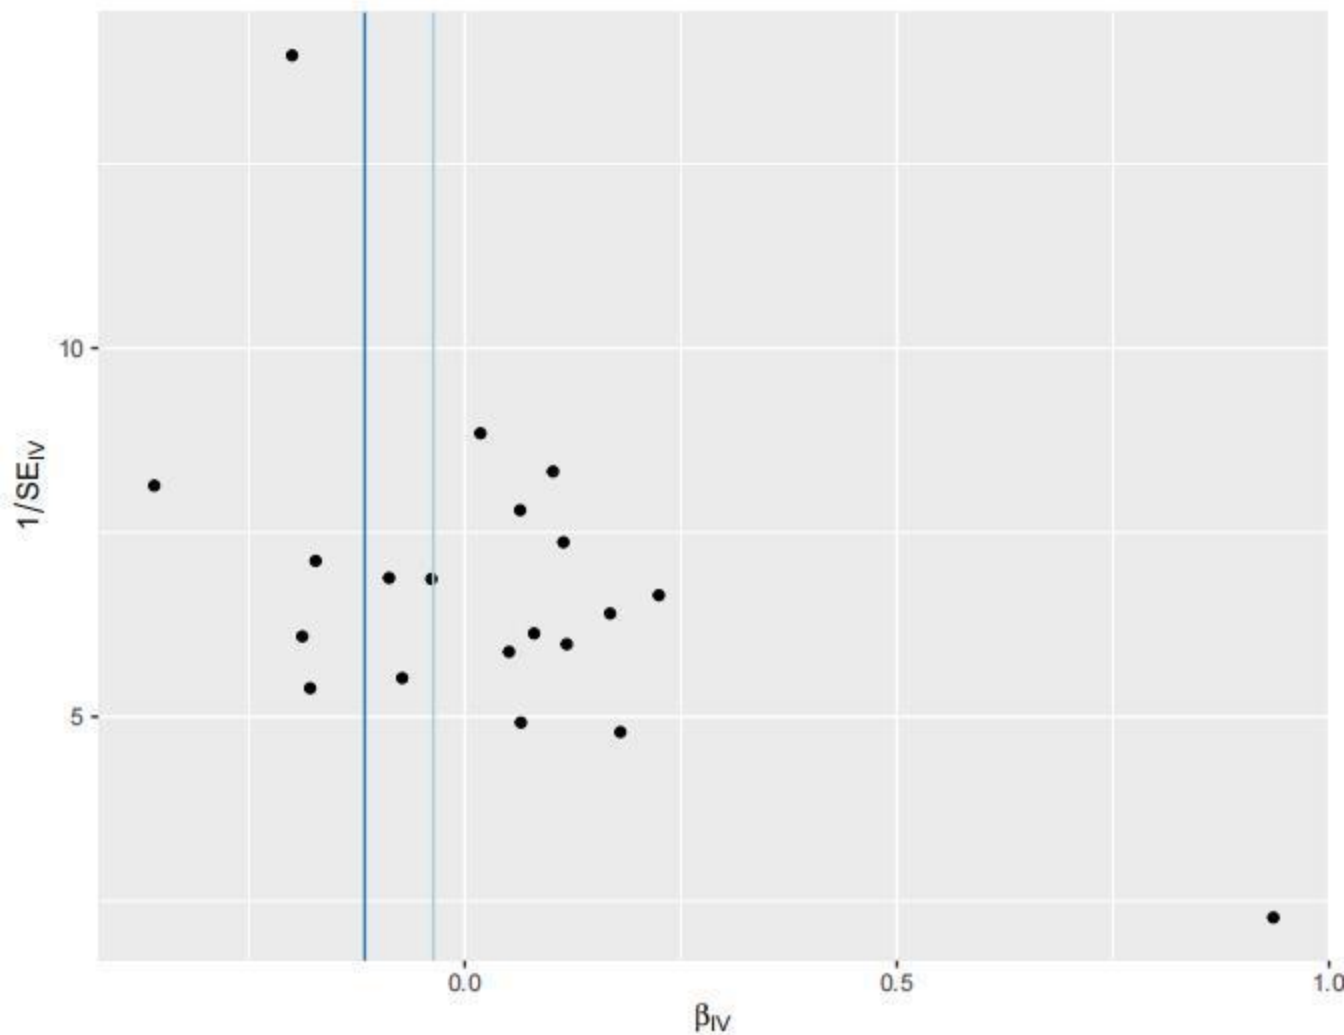

Funnel plot analyse of "CD4 on naive CD4+ " on 'Aplastic anemia'



MR Method

Inverse variance weighted

MR Egger

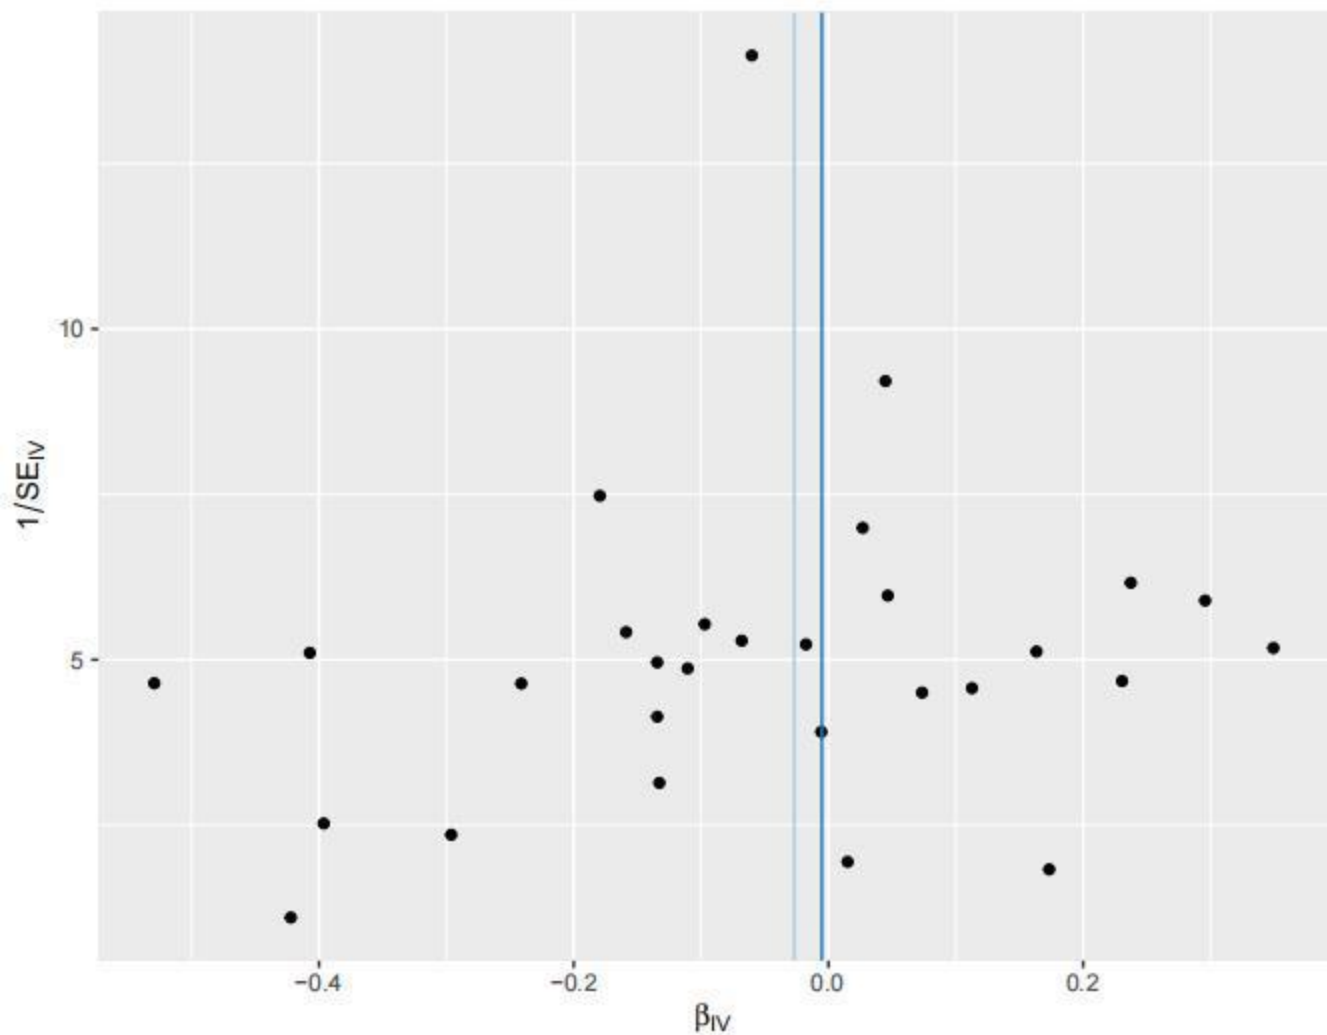

Funnel plot analyse of "IgD- CD38- %lymphocyte" on 'Aplastic anemia'

MR Method

- Inverse variance weighted
- MR Egger

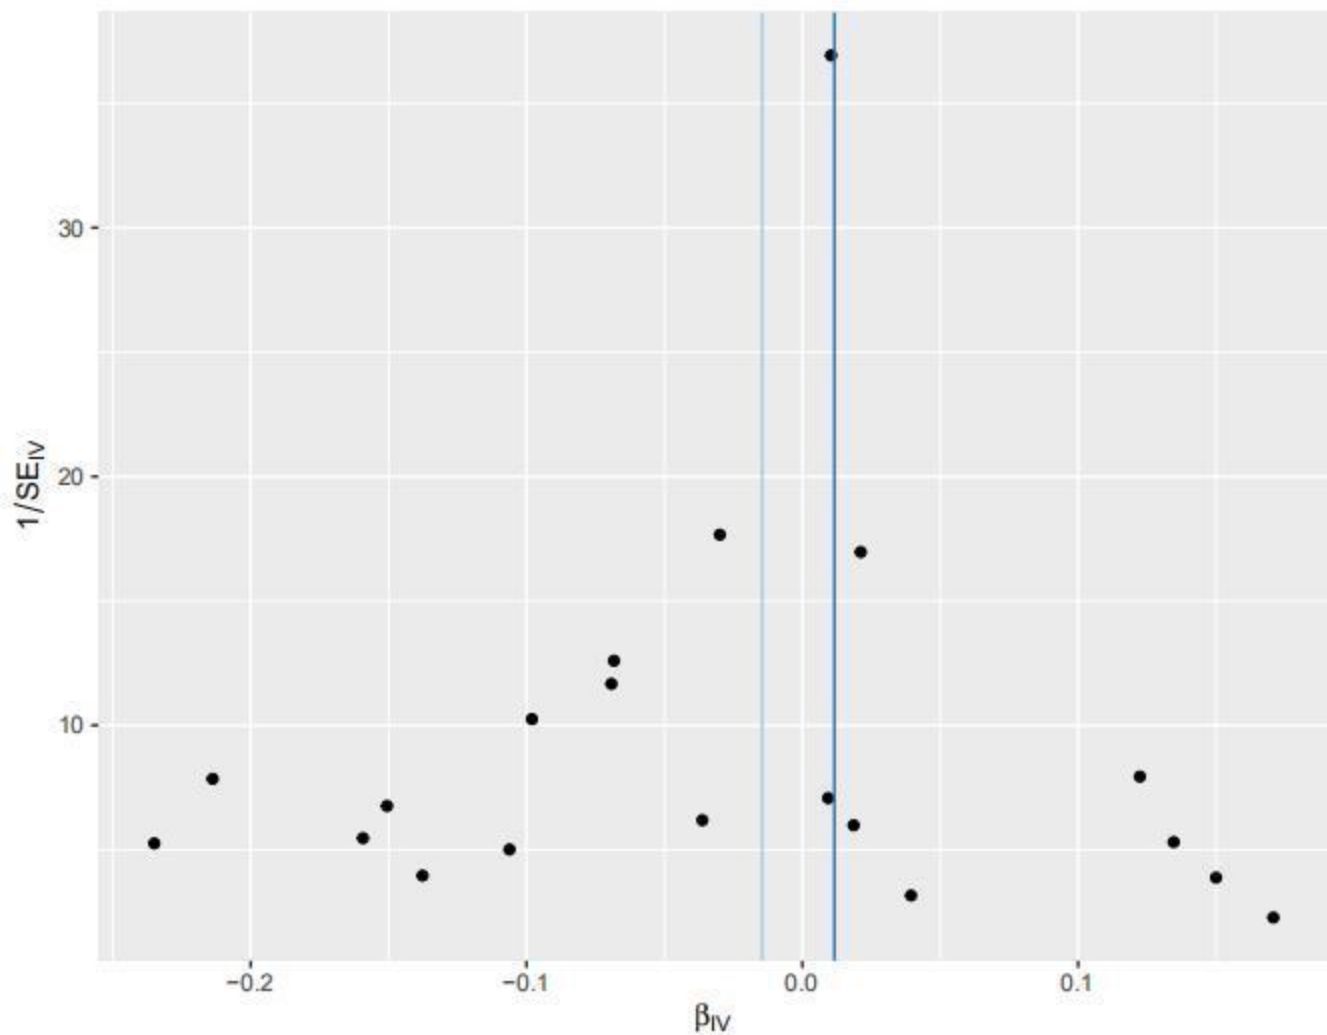

Funnel plot analyse of "BAFF-R on sw mem" on 'Aplastic anemia'

### MR Method

Inverse variance weighted

MR Egger

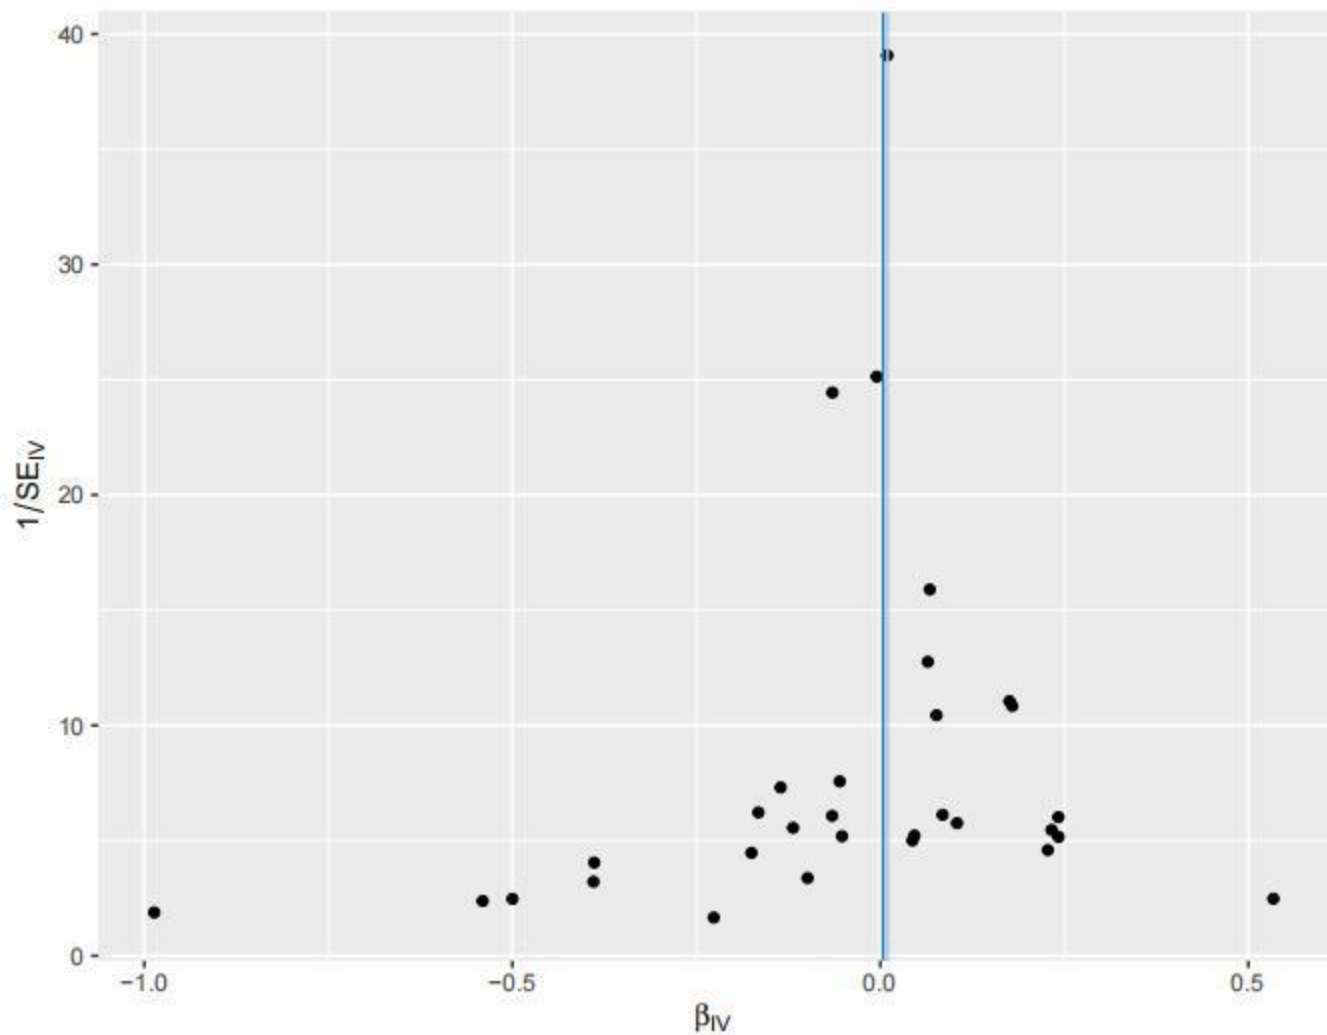

Funnel plot analyse of "CD25hi CD45RA- CD4 not Treg %T cell" on 'Aplastic anemia'

### MR Method

- Inverse variance weighted
- MR Egger

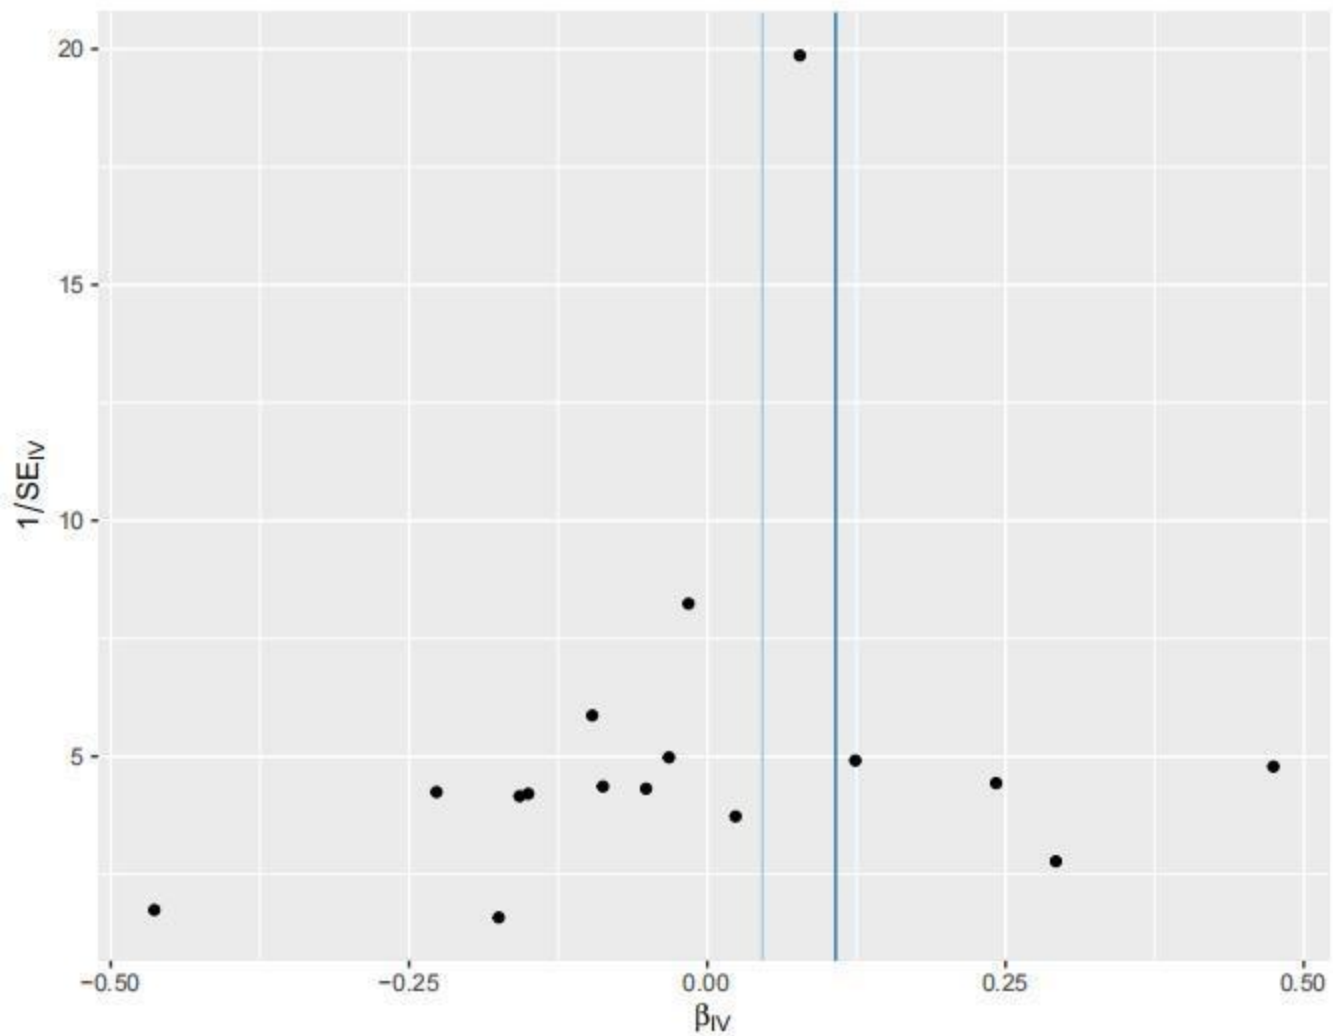

Funnel plot analysis of "CD20 on CD20- CD38-" on 'Aplastic anemia'

MR Method

- Inverse variance weighted
- MR Egger

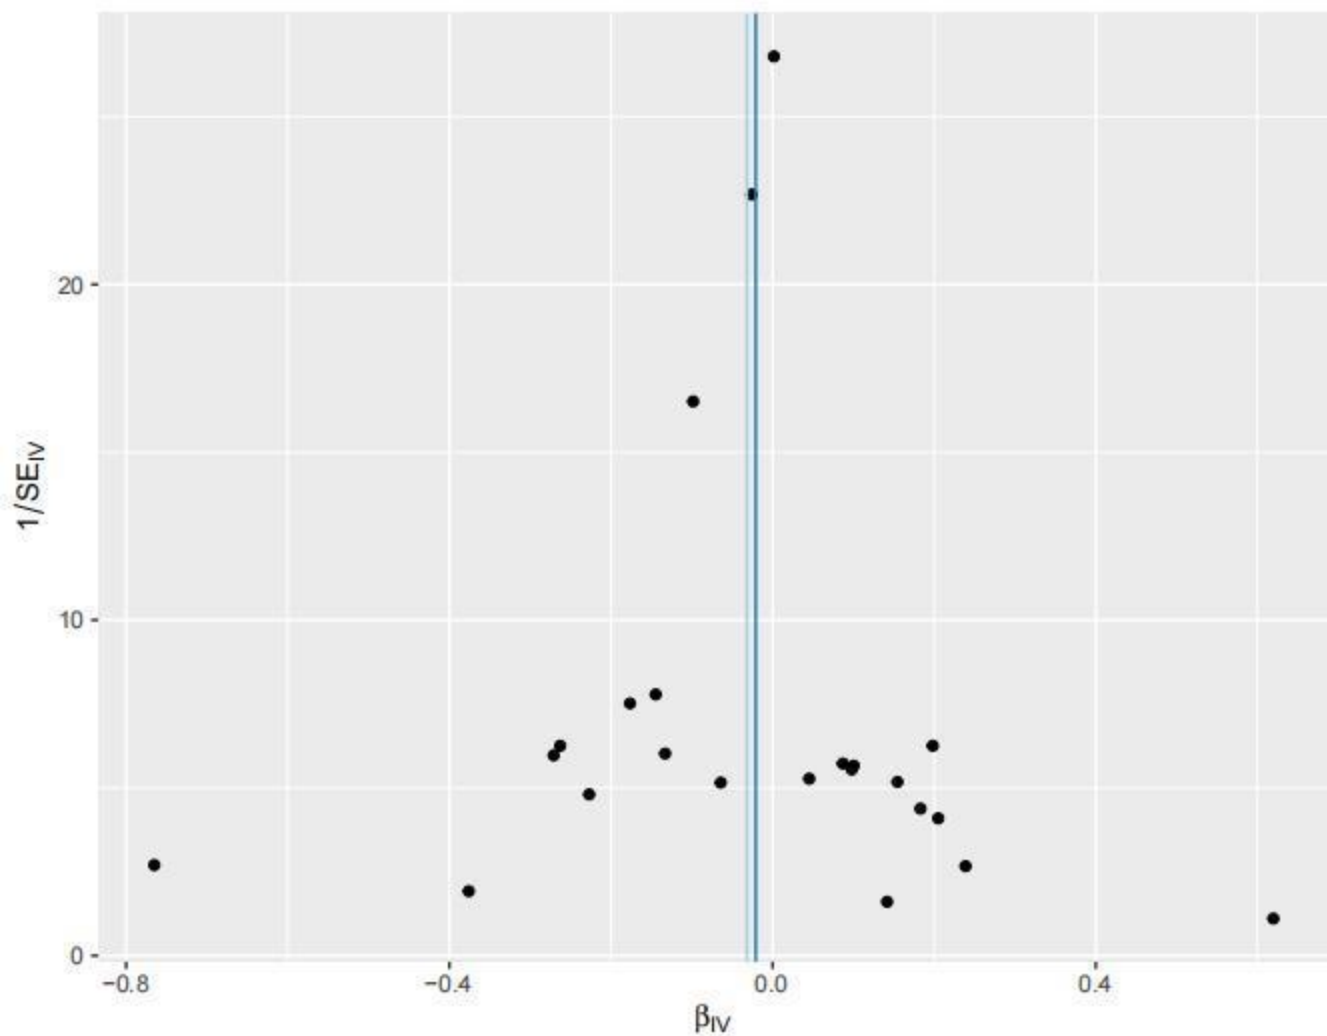

Funnel plot analyse of "CD3 on CD8br" on 'Aplastic anemia'

MR Method

- Inverse variance weighted
- MR Egger

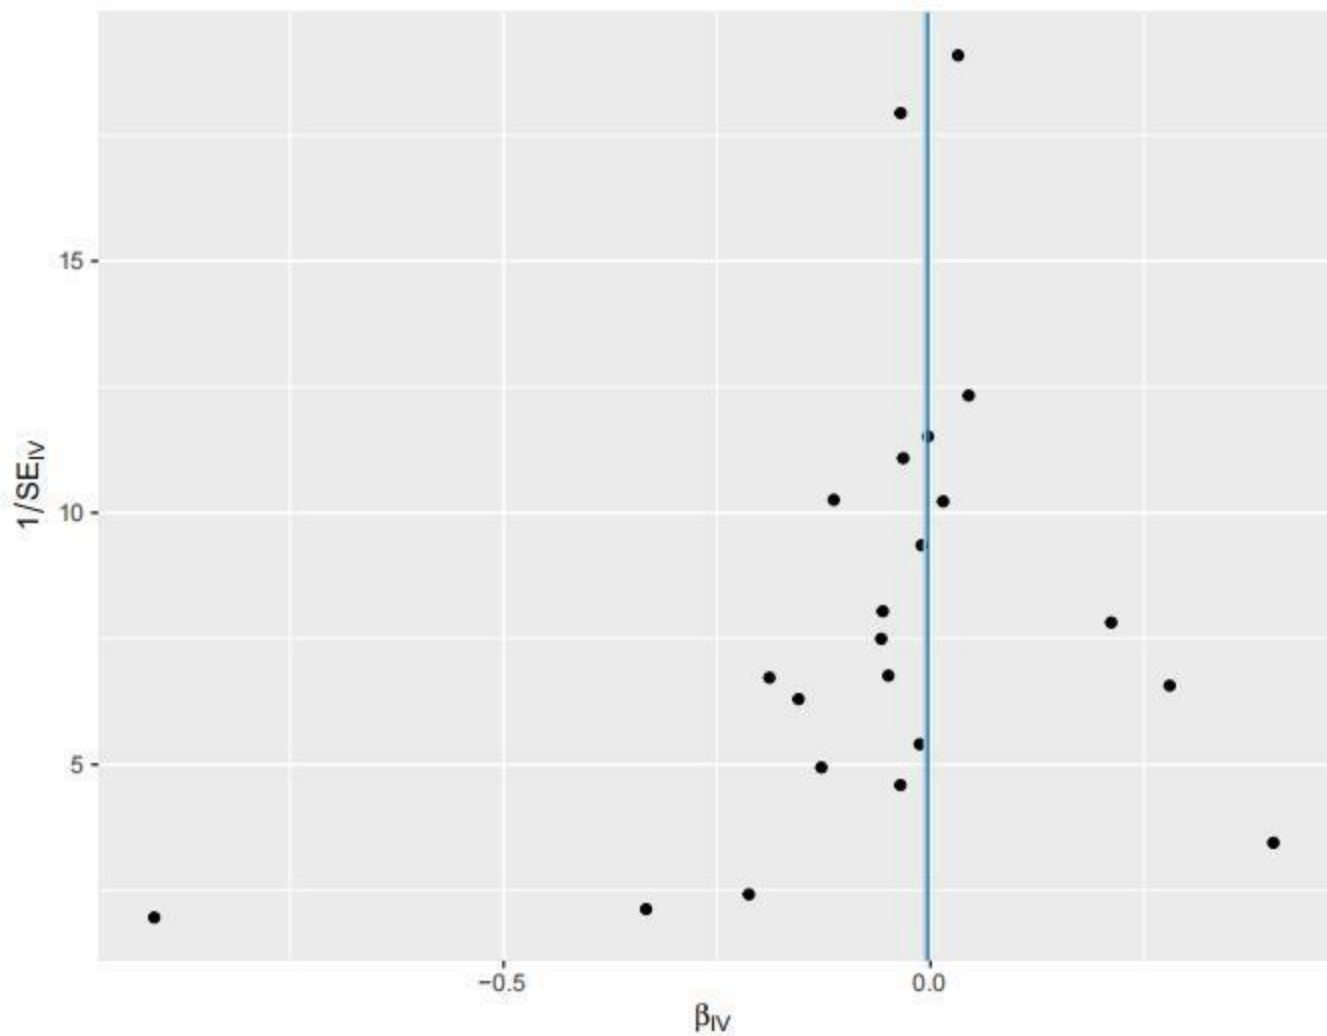

Funnel plot analyse of "CD45 on NKT" on 'Aplastic anemia'

### MR Method

- Inverse variance weighted
- MR Egger

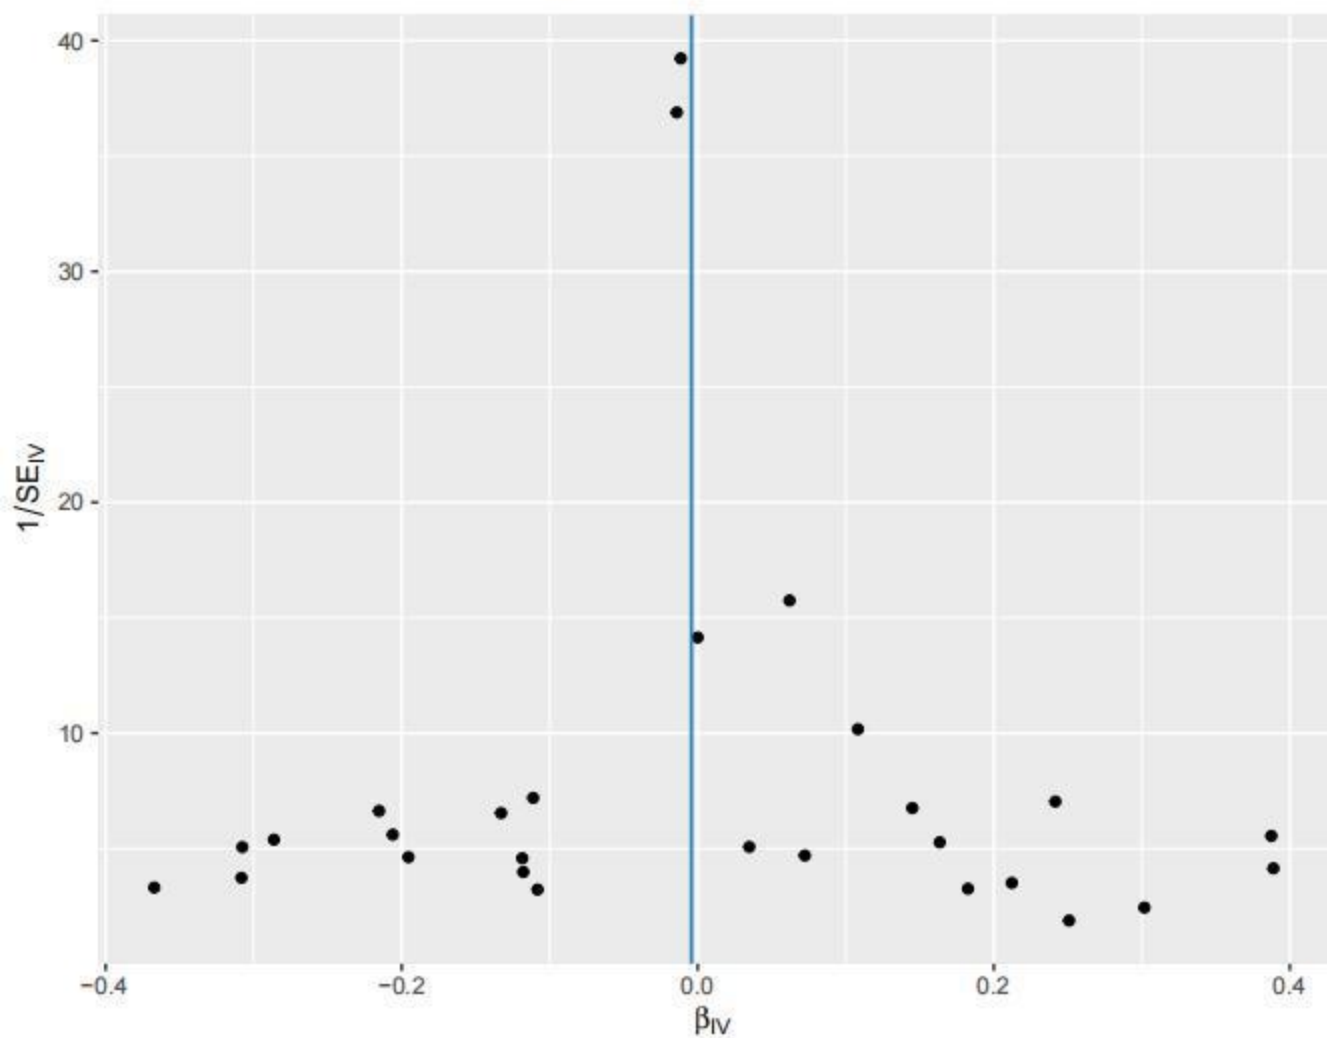

Funnel plot analyse of "CD19 on naive-mature B cell" on 'Aplastic anemia'

MR Method

- Inverse variance weighted
- MR Egger

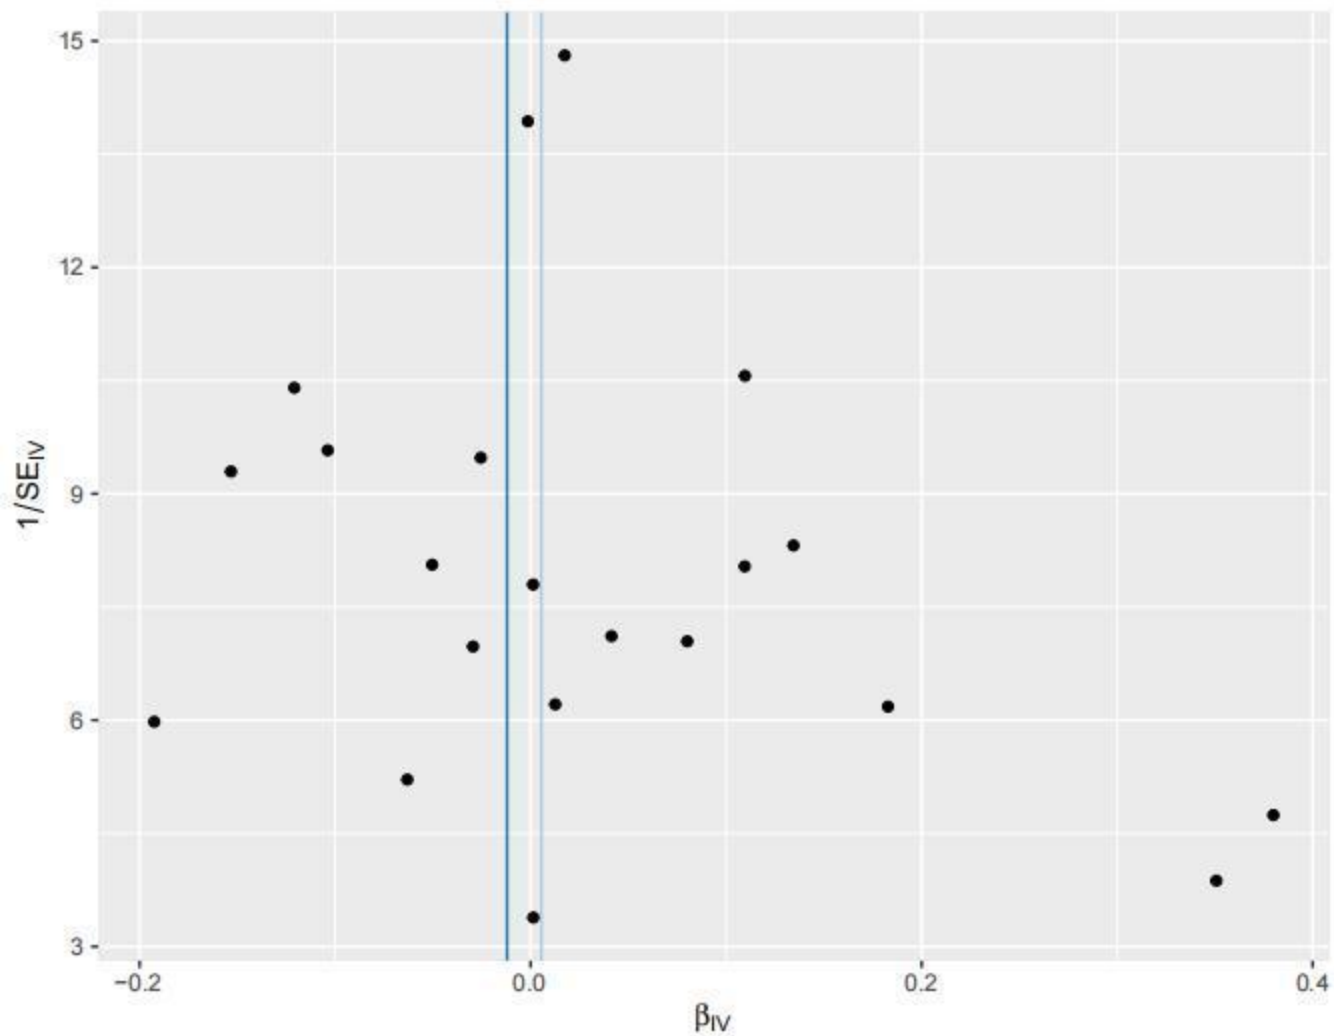

Funnel plot analyse of "CD33- HLA DR- AC" on 'Aplastic anemia'



### MR Method

- Inverse variance weighted
- MR Egger

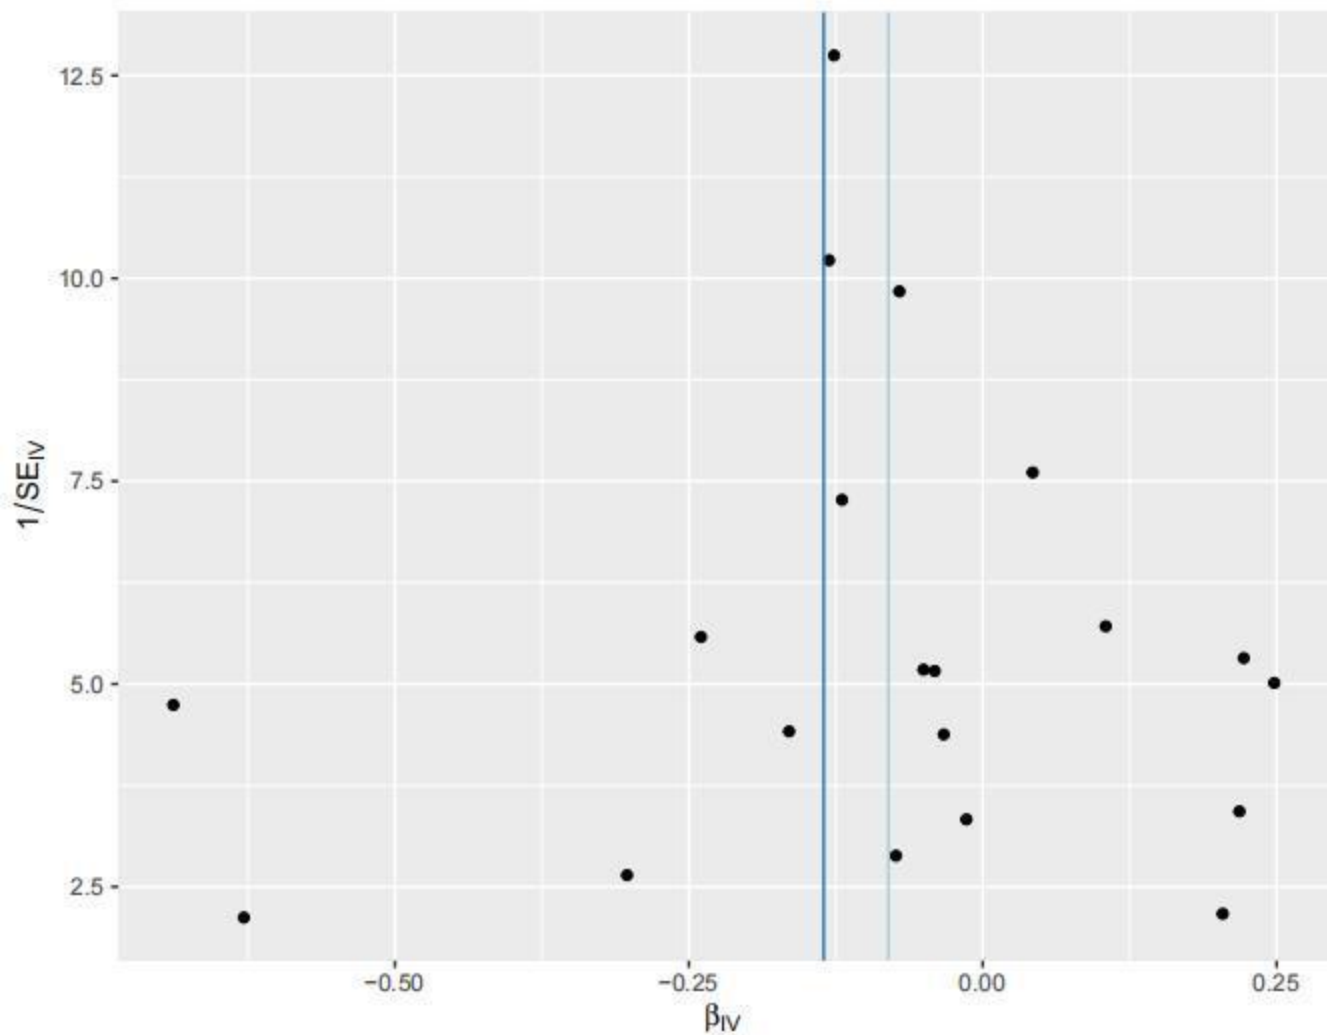

Funnel plot analyse of "CD86+ plasmacytoid DC AC" on 'Aplastic anemia'

MR Method

- Inverse variance weighted
- MR Egger

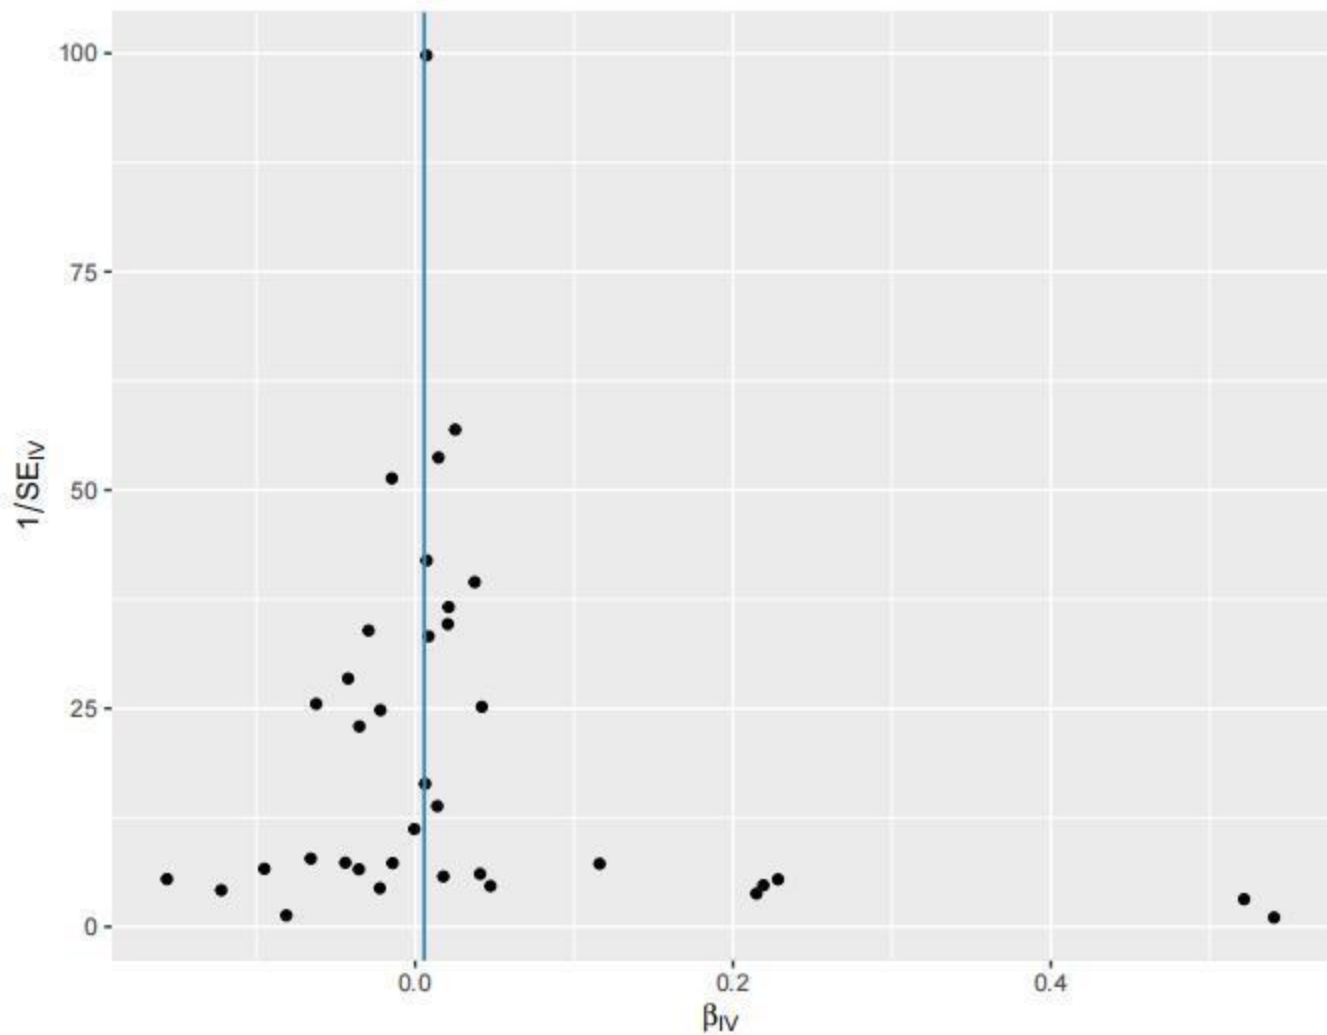

Funnel plot analyse of "CD28+ CD45RA- CD8dim AC" on 'Aplastic anemia'

MR Method

- Inverse variance weighted
- MR Egger

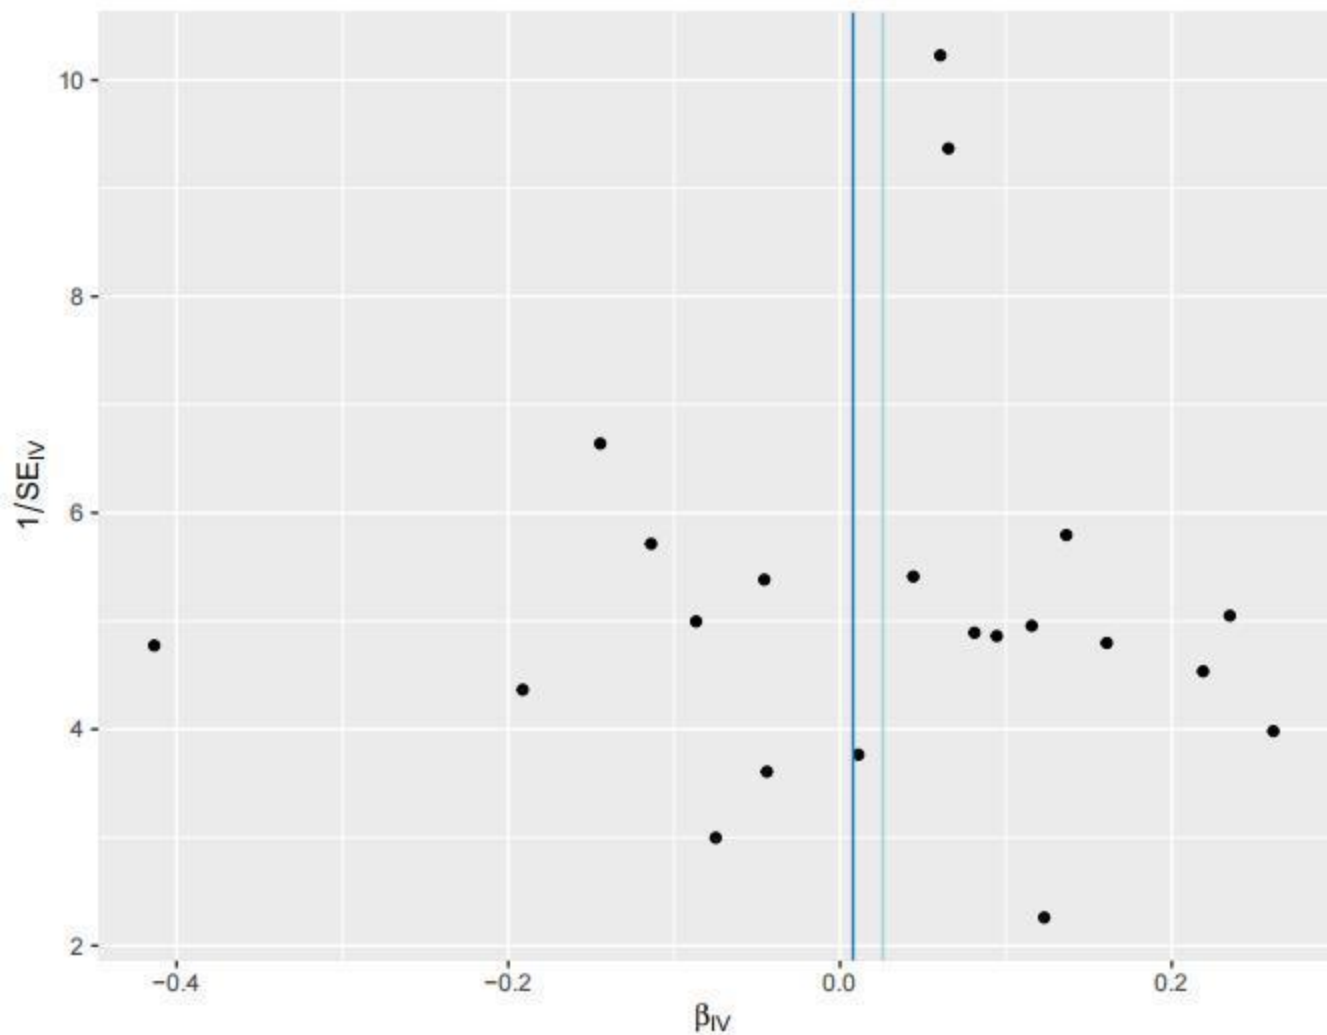

Funnel plot analyse of "CD25 on sw mem" on 'Aplastic anemia'

### MR Method

- Inverse variance weighted
- MR Egger

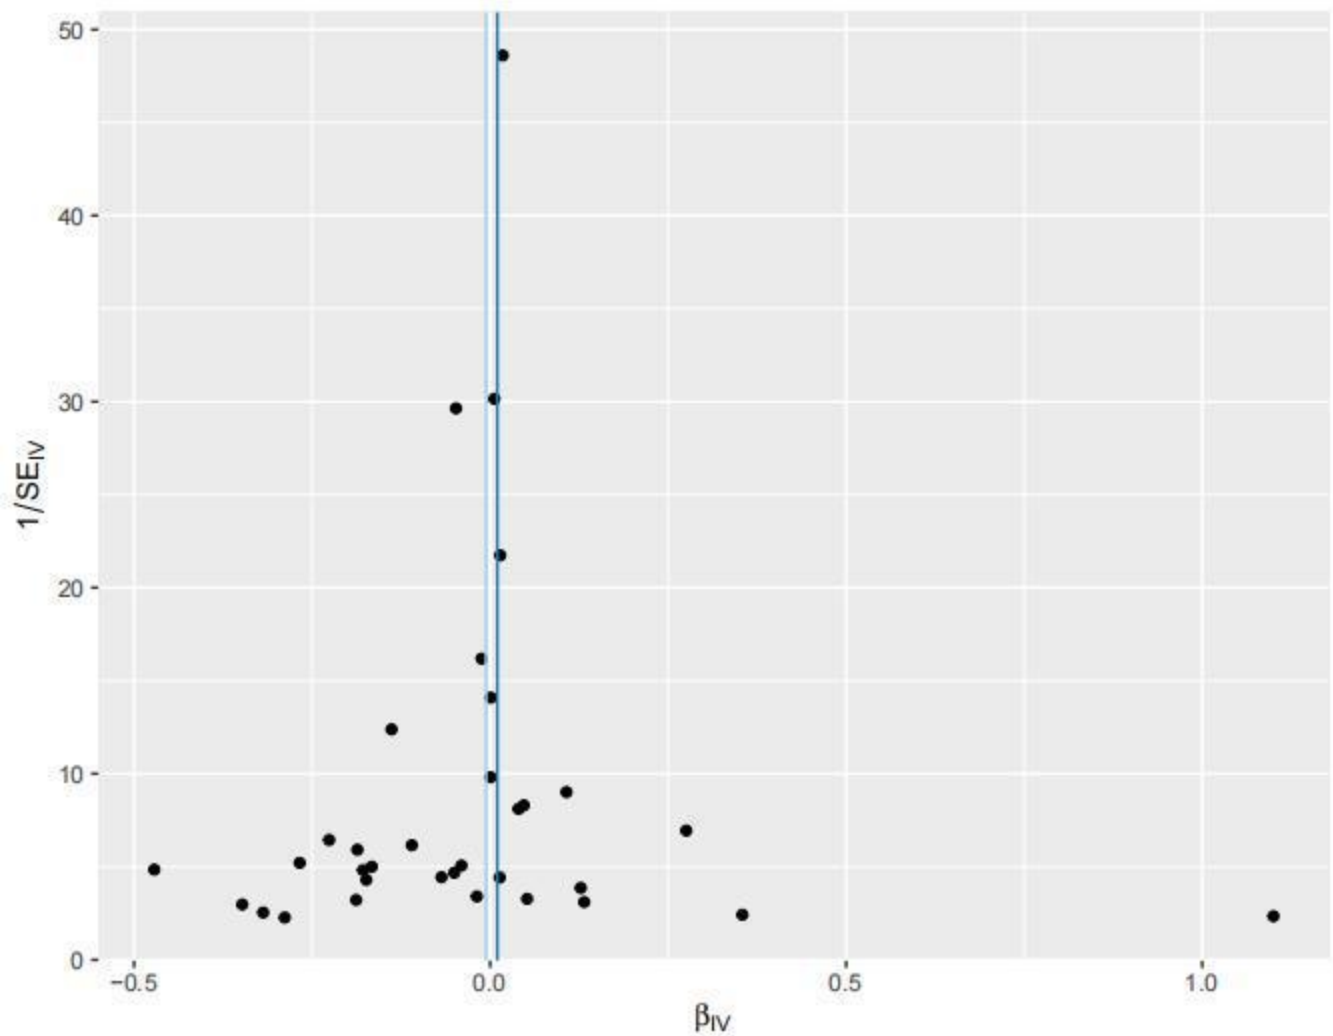

Funnel plot analyse of "Resting Treg %CD4 " on 'Aplastic anemia'

### MR Method

- Inverse variance weighted
- MR Egger

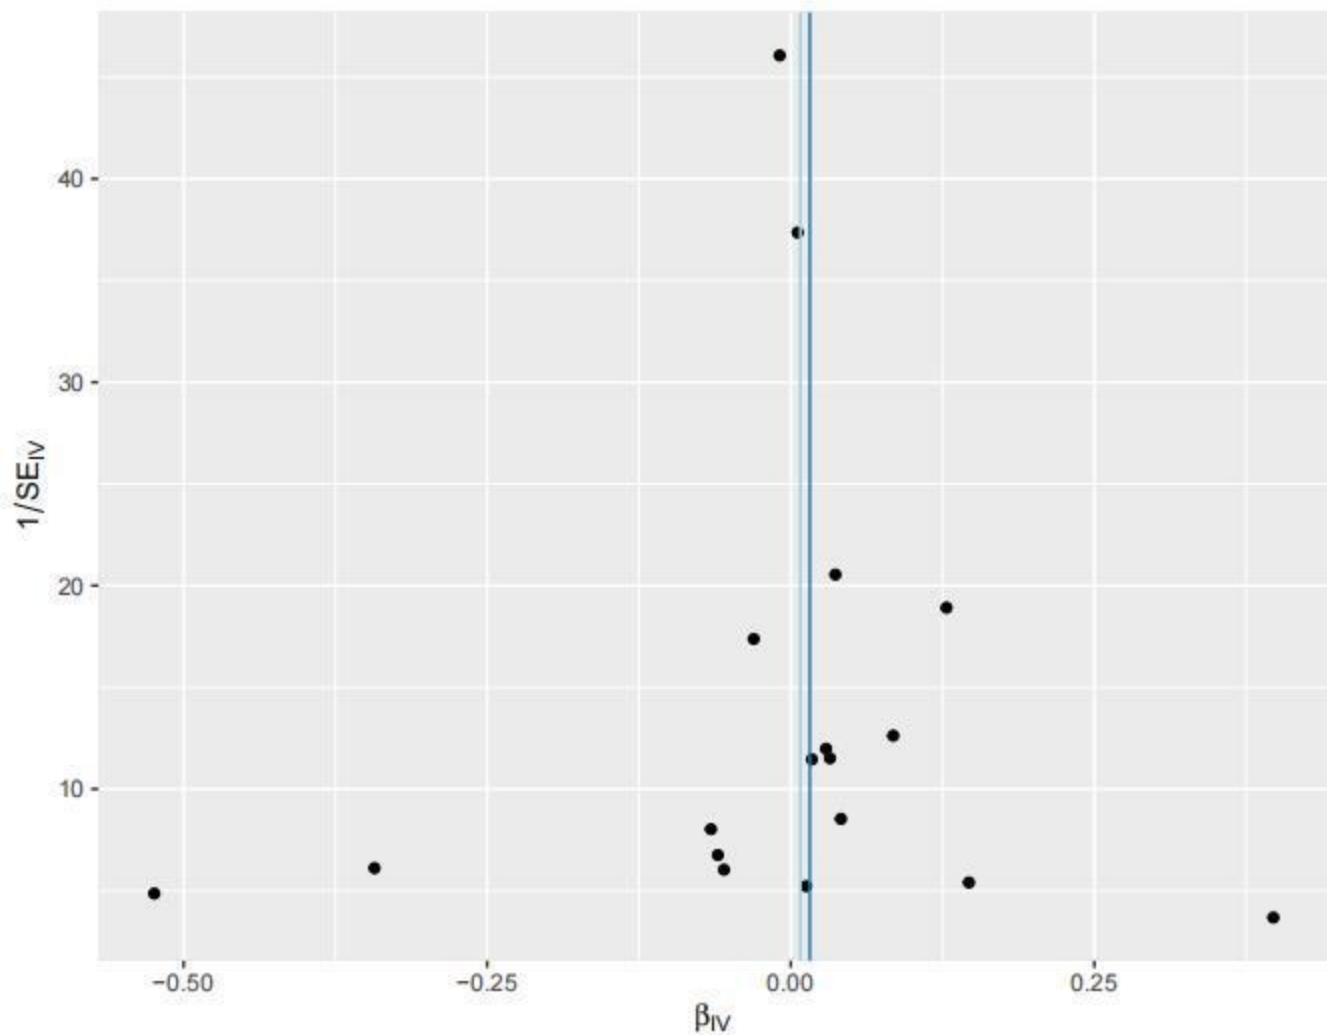

Funnel plot analysis of "CD123 on plasmacytoid DC" on 'Aplastic anemia'

MR Method

- Inverse variance weighted
- MR Egger

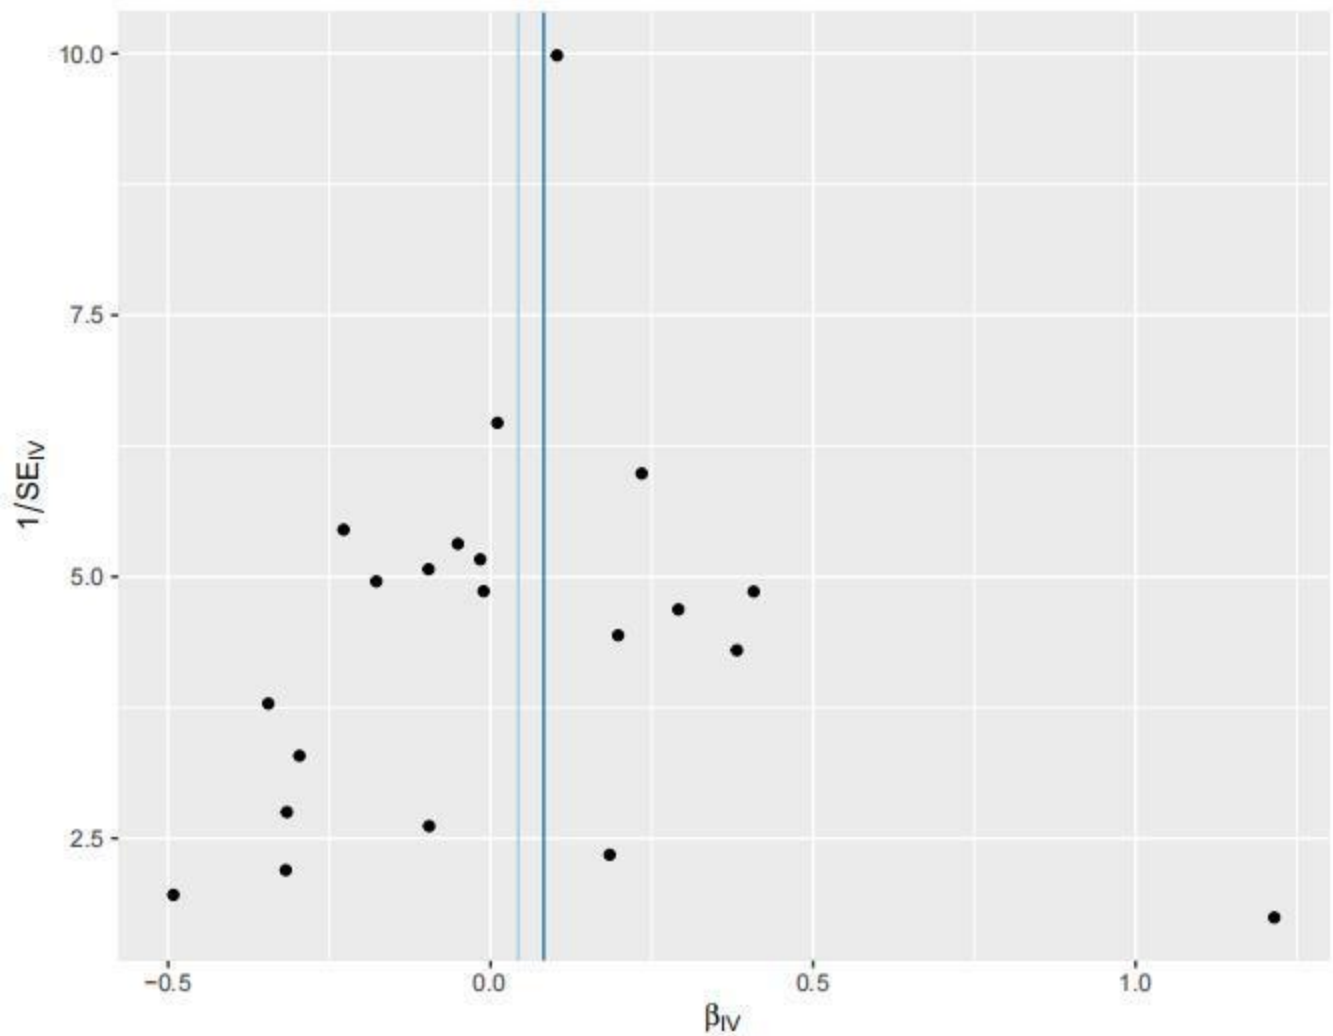

Funnel plot analyse of "IgD+ CD24+ %B cell" on 'Aplastic anemia'

MR Method

- Inverse variance weighted
- MR Egger

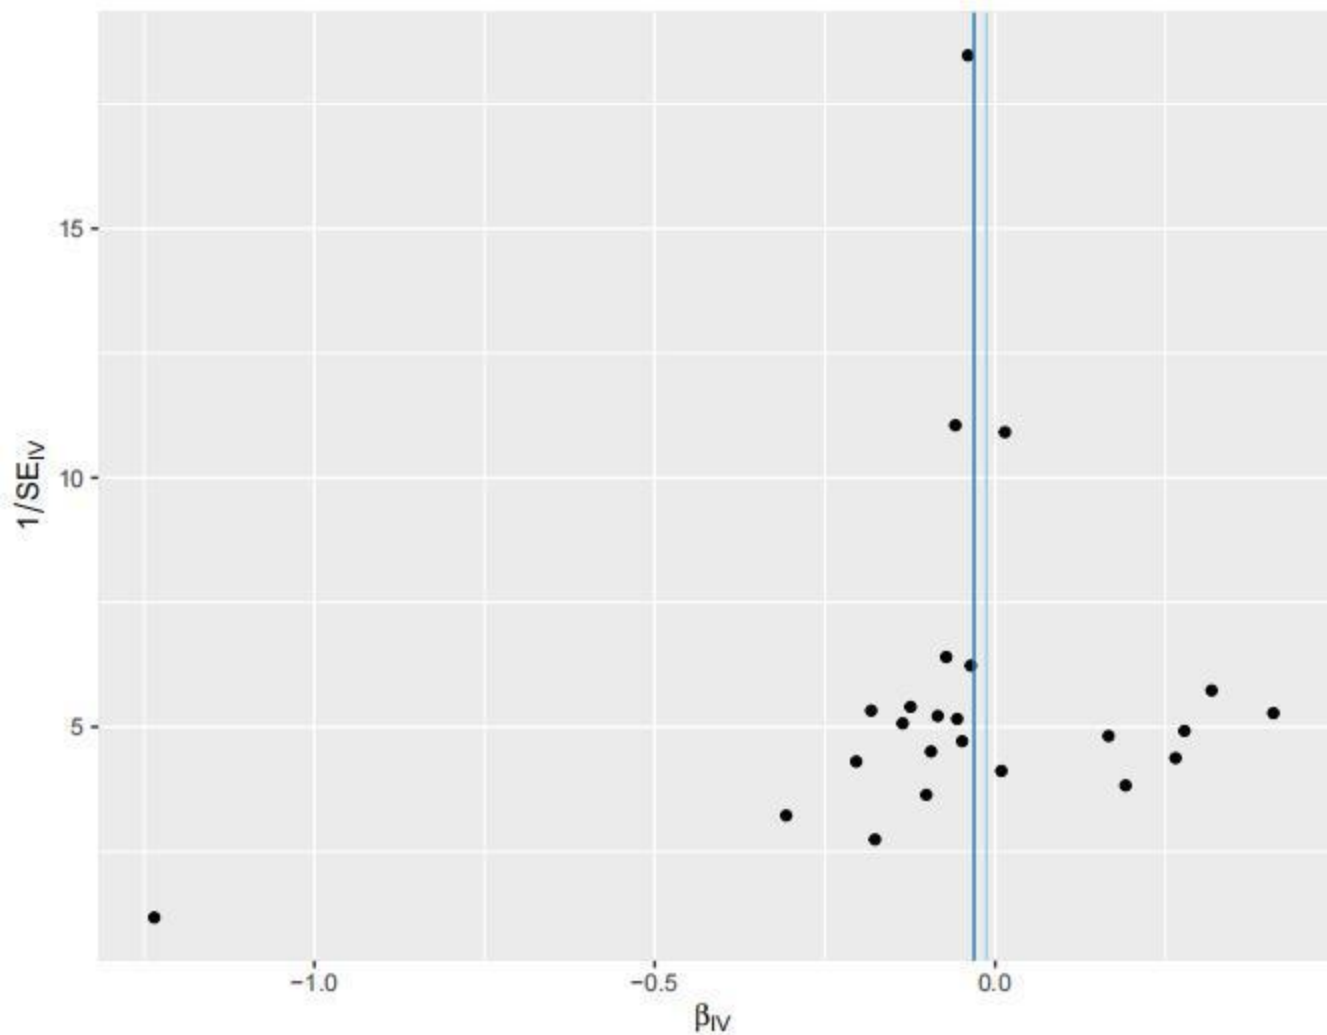

Funnel plot analyse of "IgD- CD24- %lymphocyte" on 'Aplastic anemia'

MR Method

- Inverse variance weighted
- MR Egger

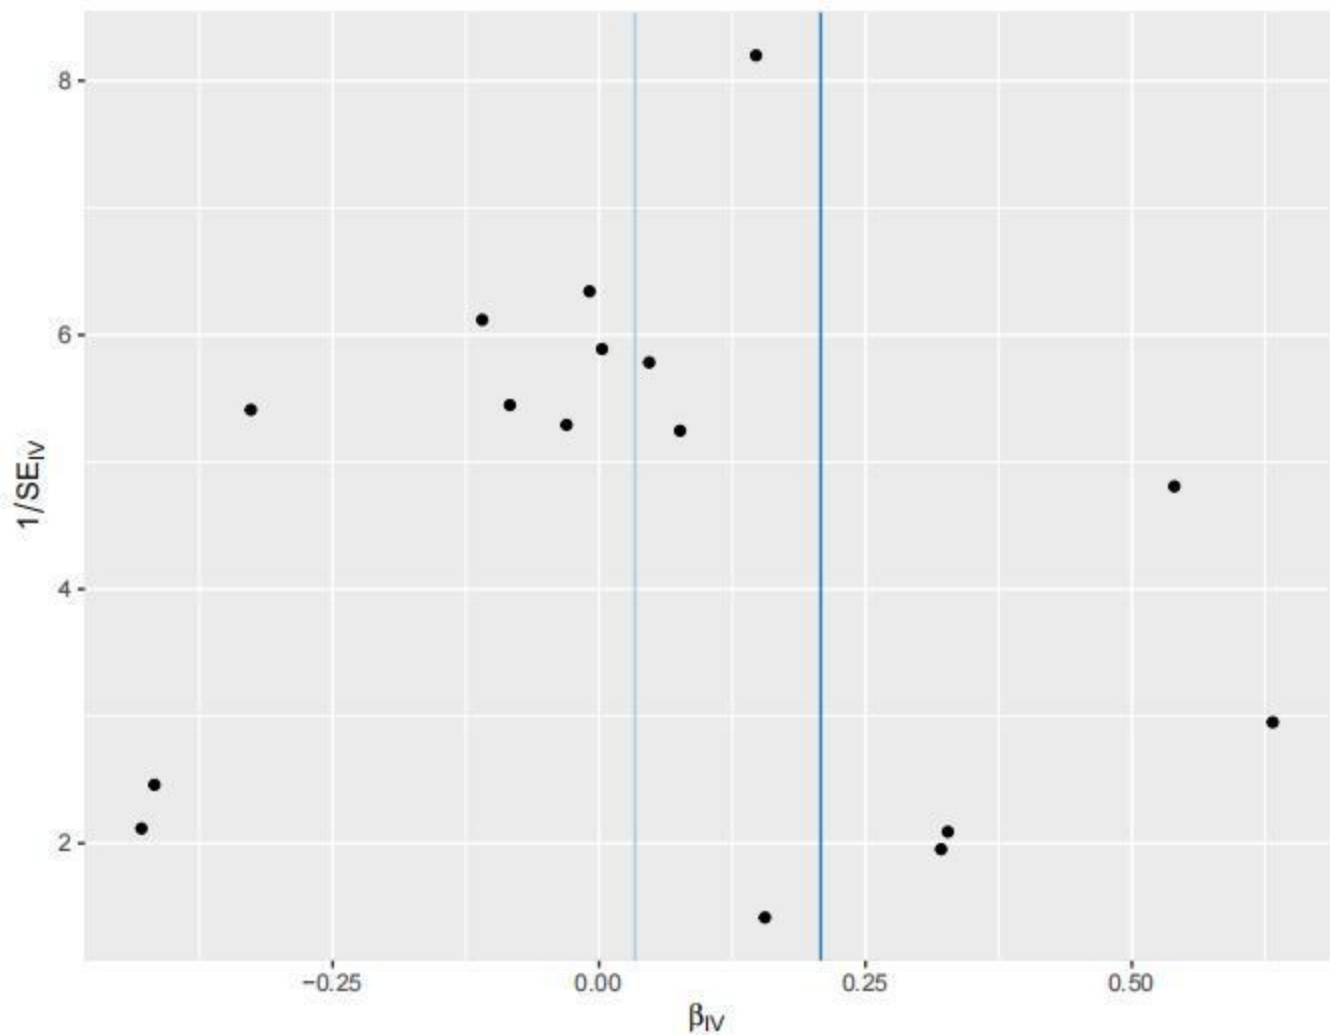

Funnel plot analyse of "CD28- CD8br AC" on 'Aplastic anemia'



### MR Method

- Inverse variance weighted
- MR Egger

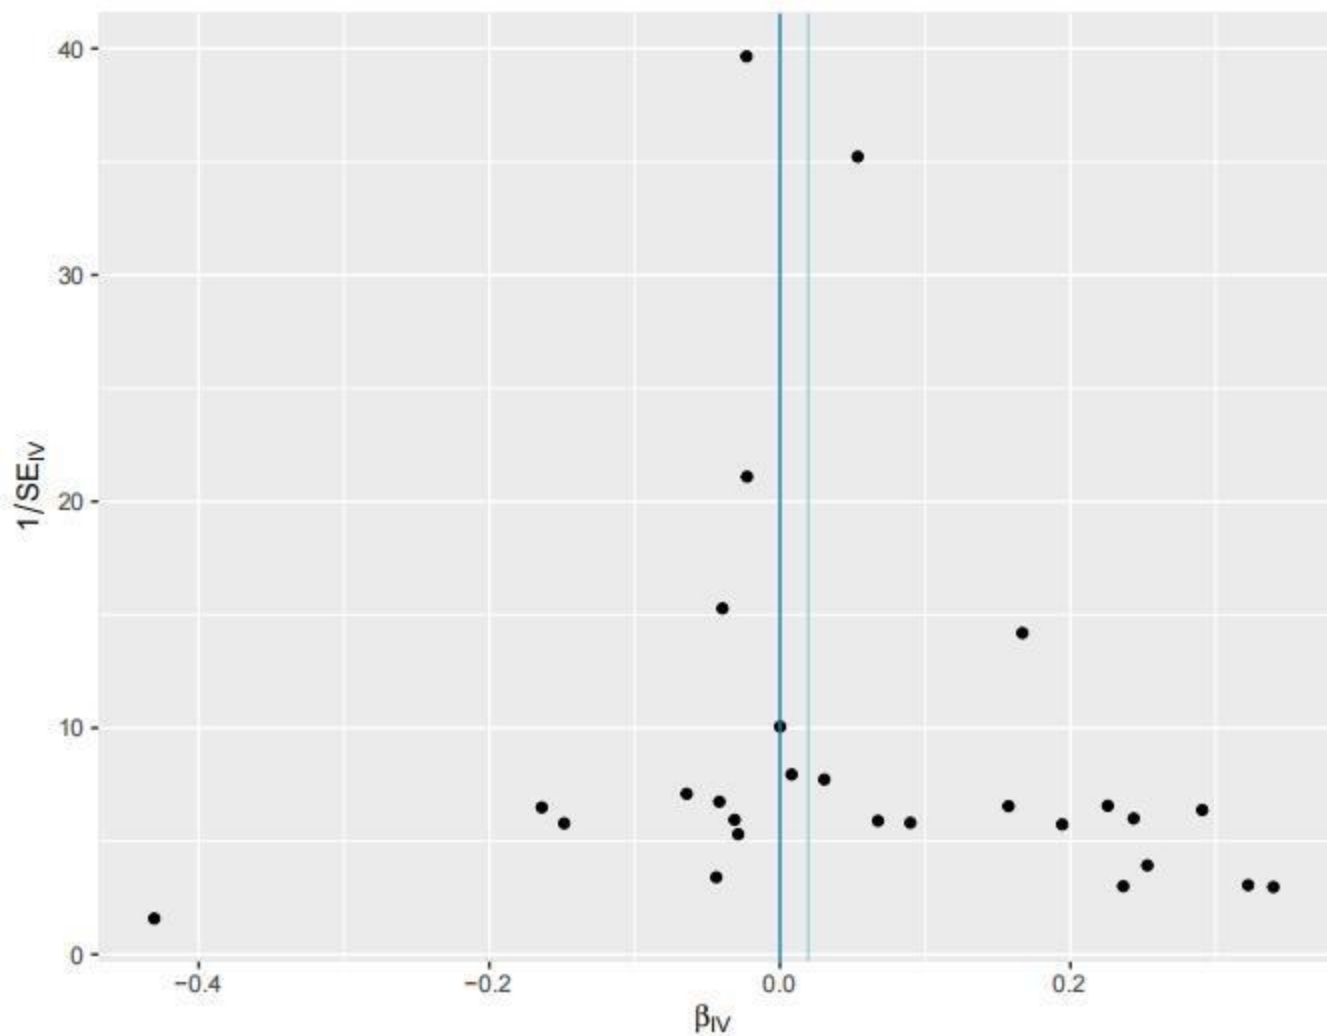

Funnel plot analyse of "FSC-A on plasmacytoid DC" on 'Aplastic anemia'

### MR Method

- Inverse variance weighted
- MR Egger

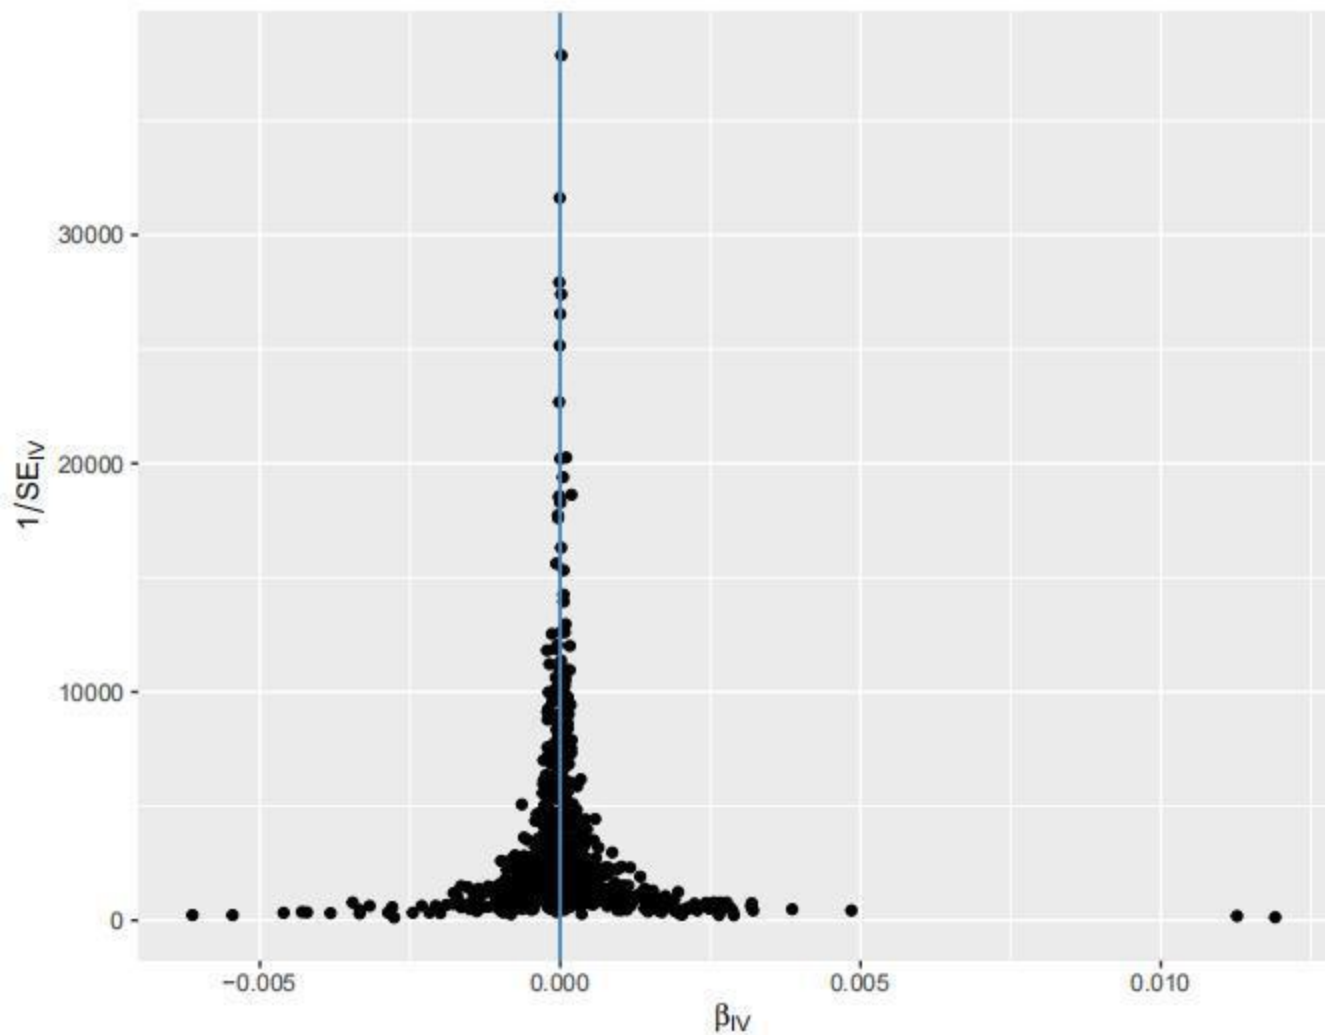

Funnel plot analysis of "CD45RA+ CD28- CD8br AC" on 'Aplastic anemia'

MR Method

- Inverse variance weighted
- MR Egger

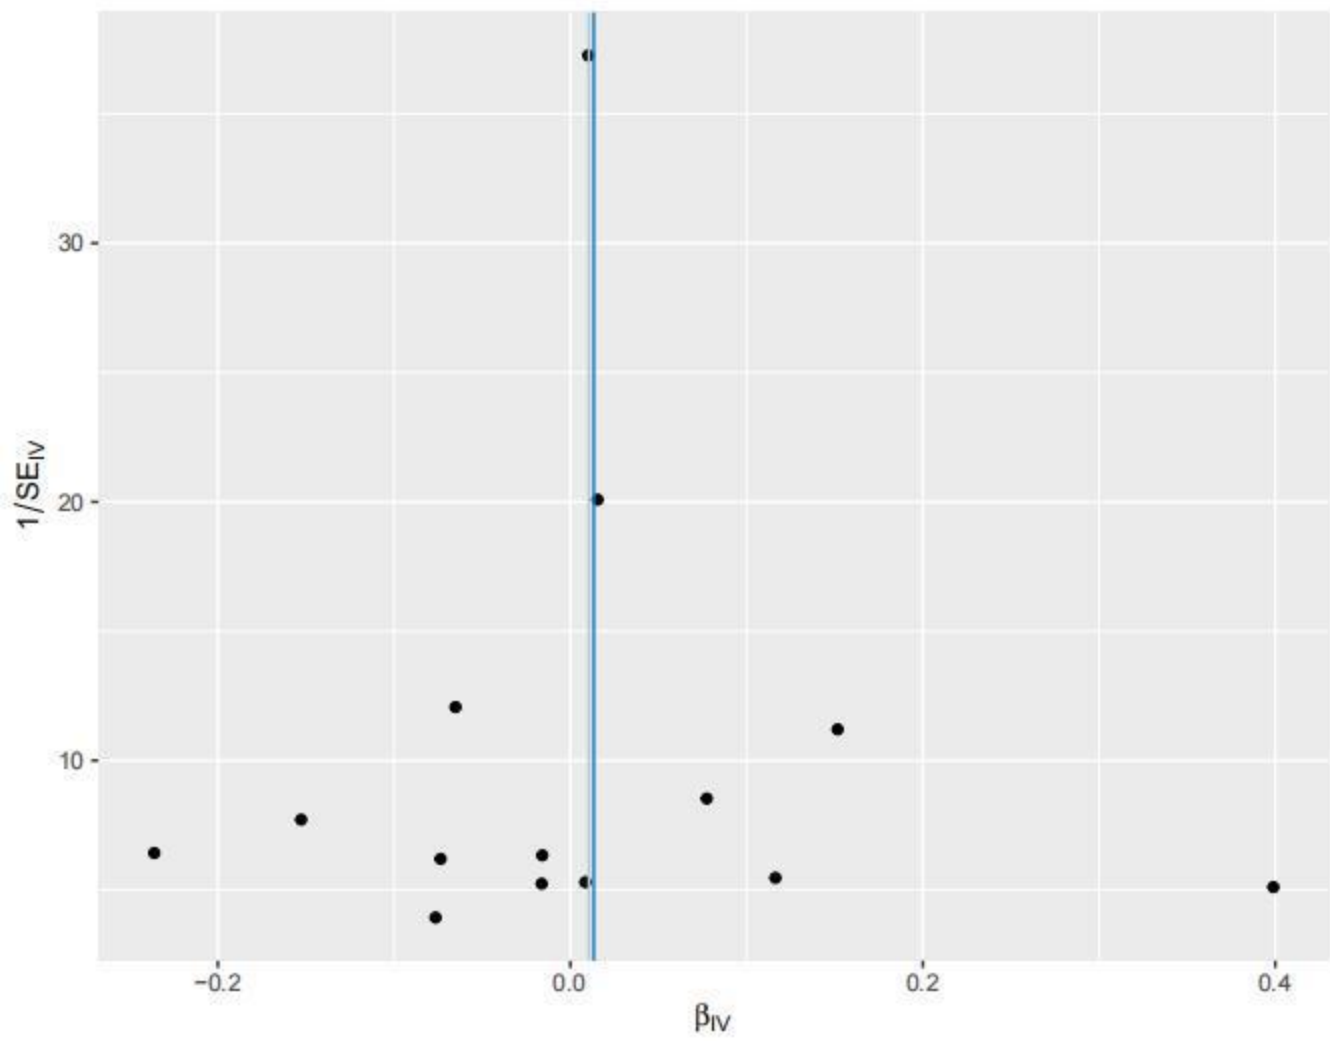

Funnel plot analysis of "CCR2 on myeloid DC" on 'Aplastic anemia'

### MR Method

- Inverse variance weighted
- MR Egger

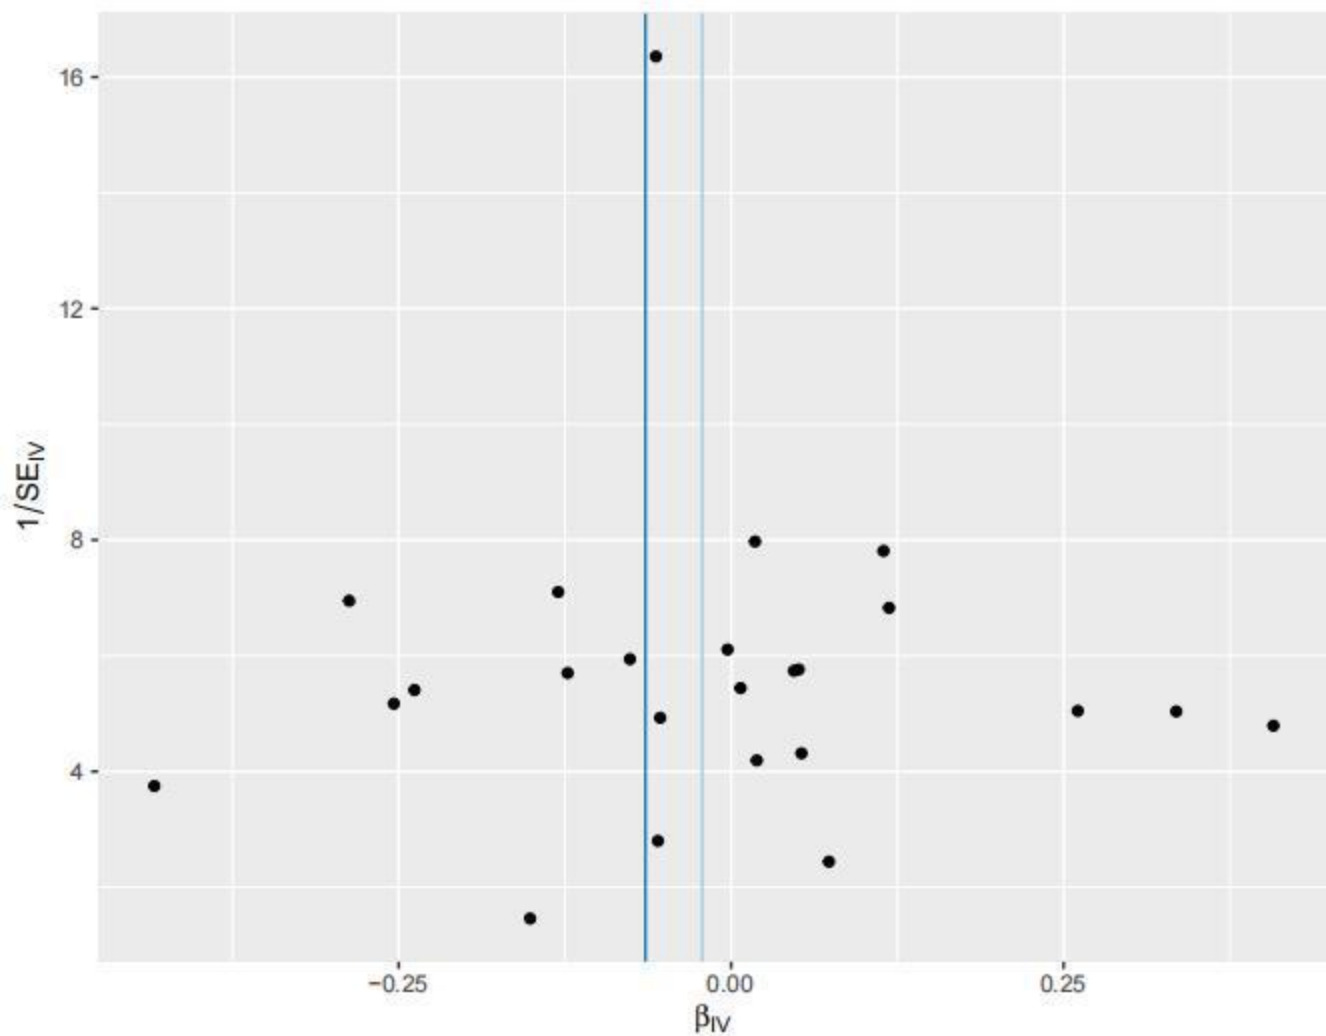

Funnel plot analysis of "CD127 on CD8br" on 'Aplastic anemia'

### MR Method

Inverse variance weighted

MR Egger

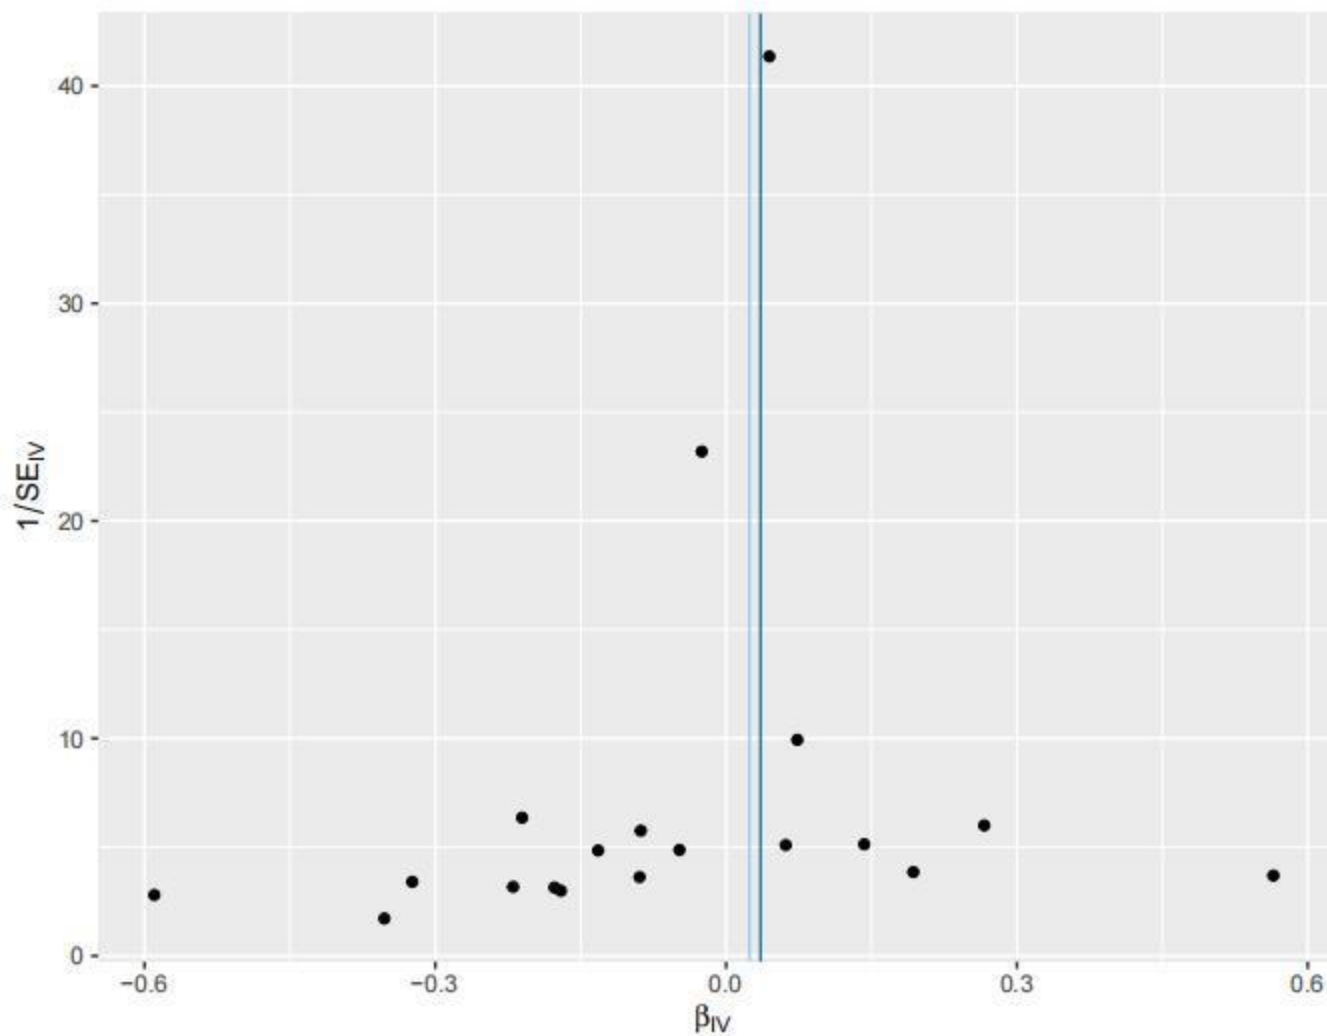

Funnel plot analyse of "IgD+ %Lymphocyte" on 'Aplastic anemia'

MR Method

- Inverse variance weighted
- MR Egger

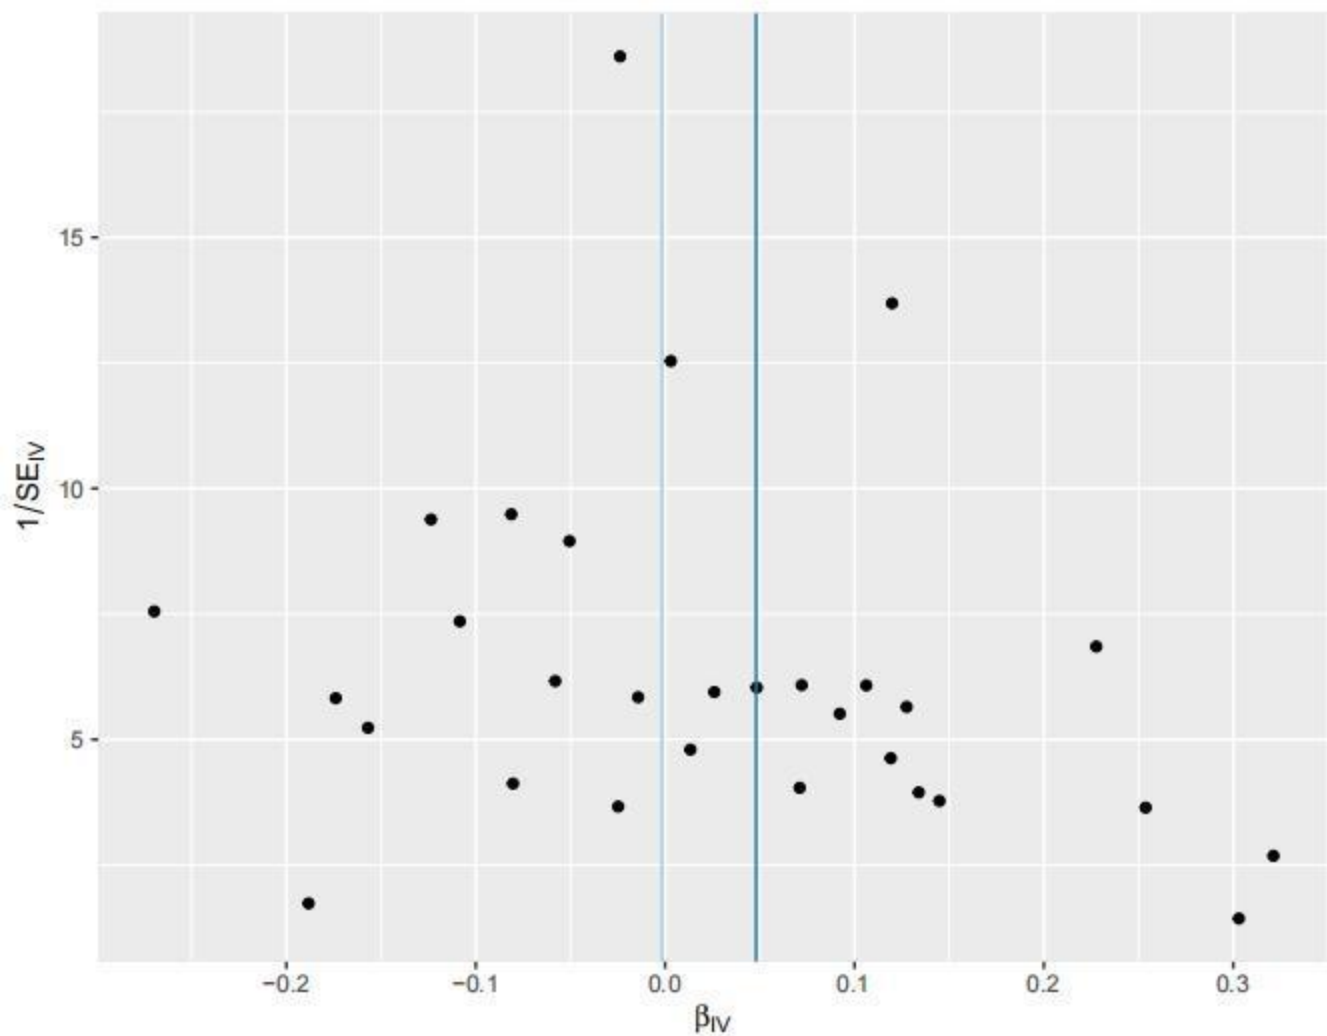

Funnel plot analyse of "CD27 on IgD- CD38-" on 'Aplastic anemia'

MR Method

- Inverse variance weighted
- MR Egger

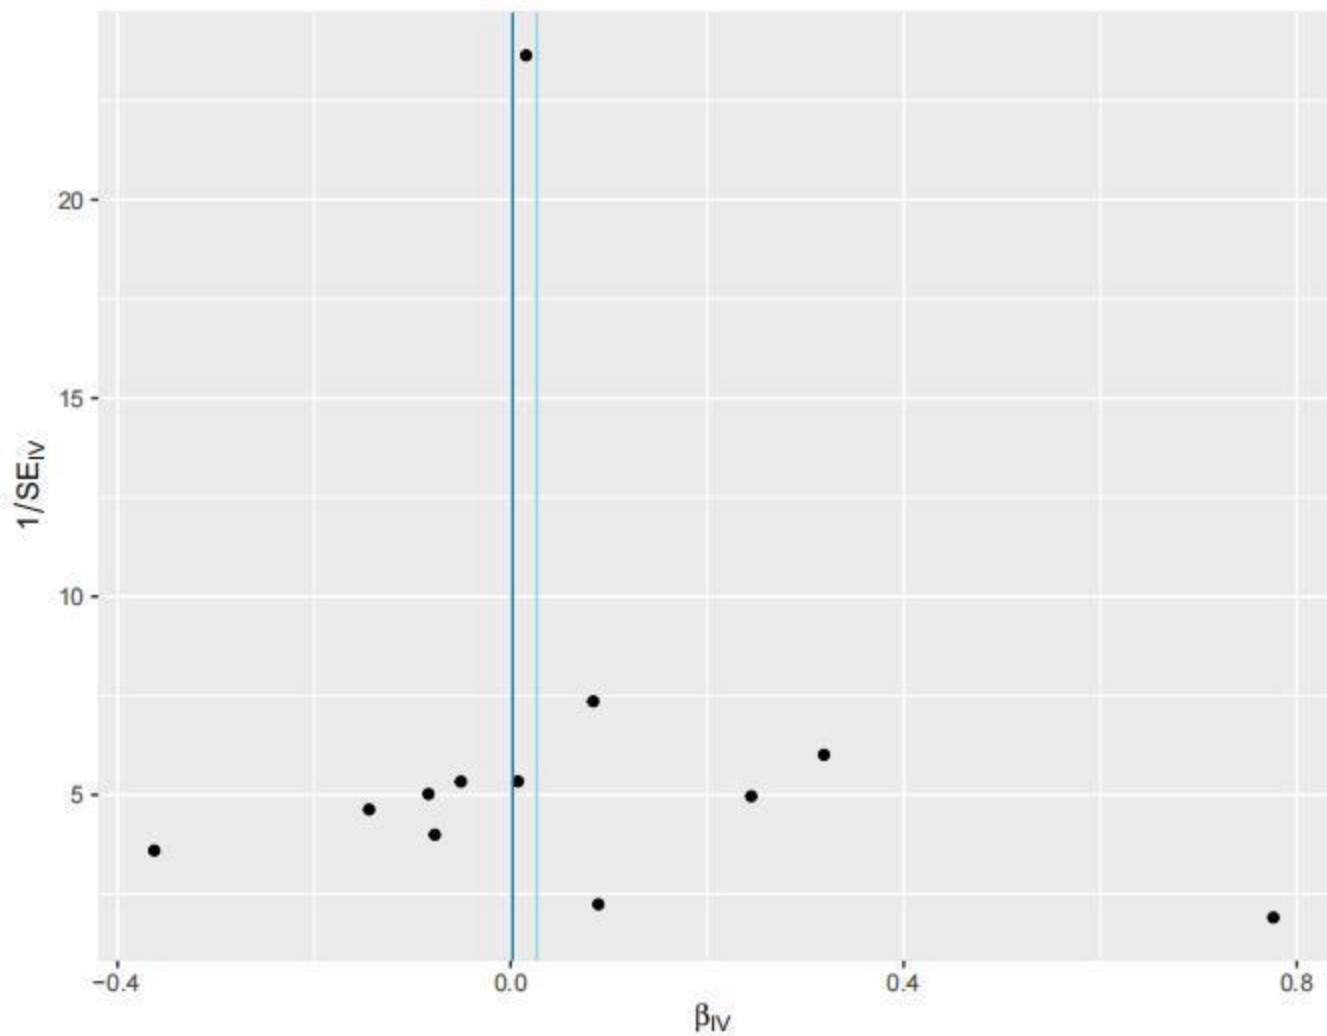

Funnel plot analyse of "CD25 on CD39+ activated Treg " on 'Aplastic anemia'

### MR Method

- Inverse variance weighted
- MR Egger

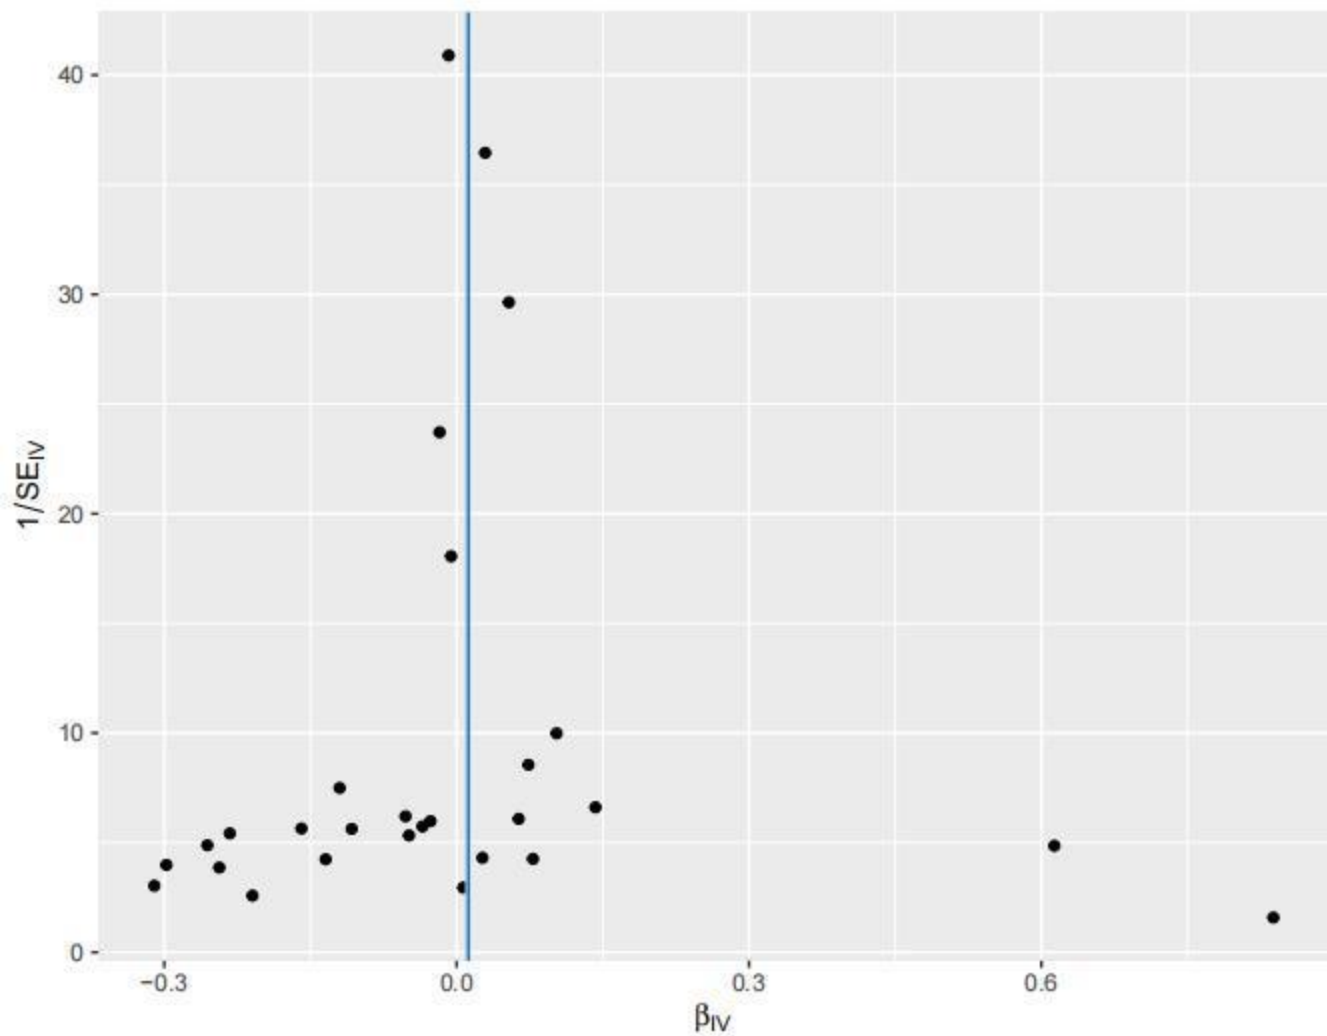

Funnel plot analyse of "CD28+ CD45RA+ CD8dim %CD8dim" on 'Aplastic anemia'



### MR Method

- Inverse variance weighted
- MR Egger

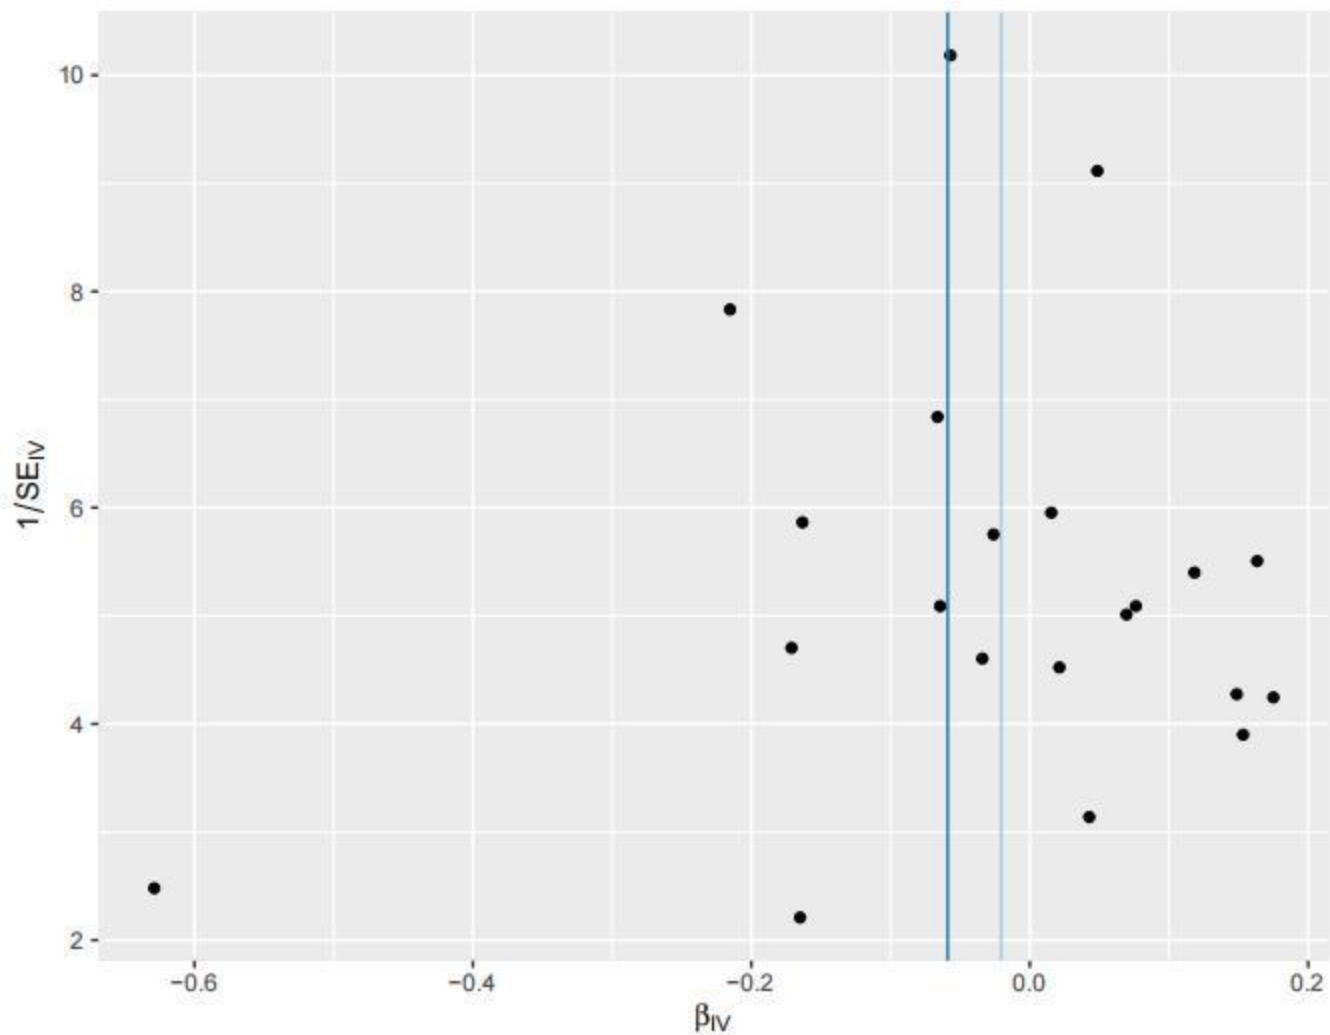

Funnel plot analyse of "CD25 on IgD- CD27-" on 'Aplastic anemia'

MR Method

- Inverse variance weighted
- MR Egger

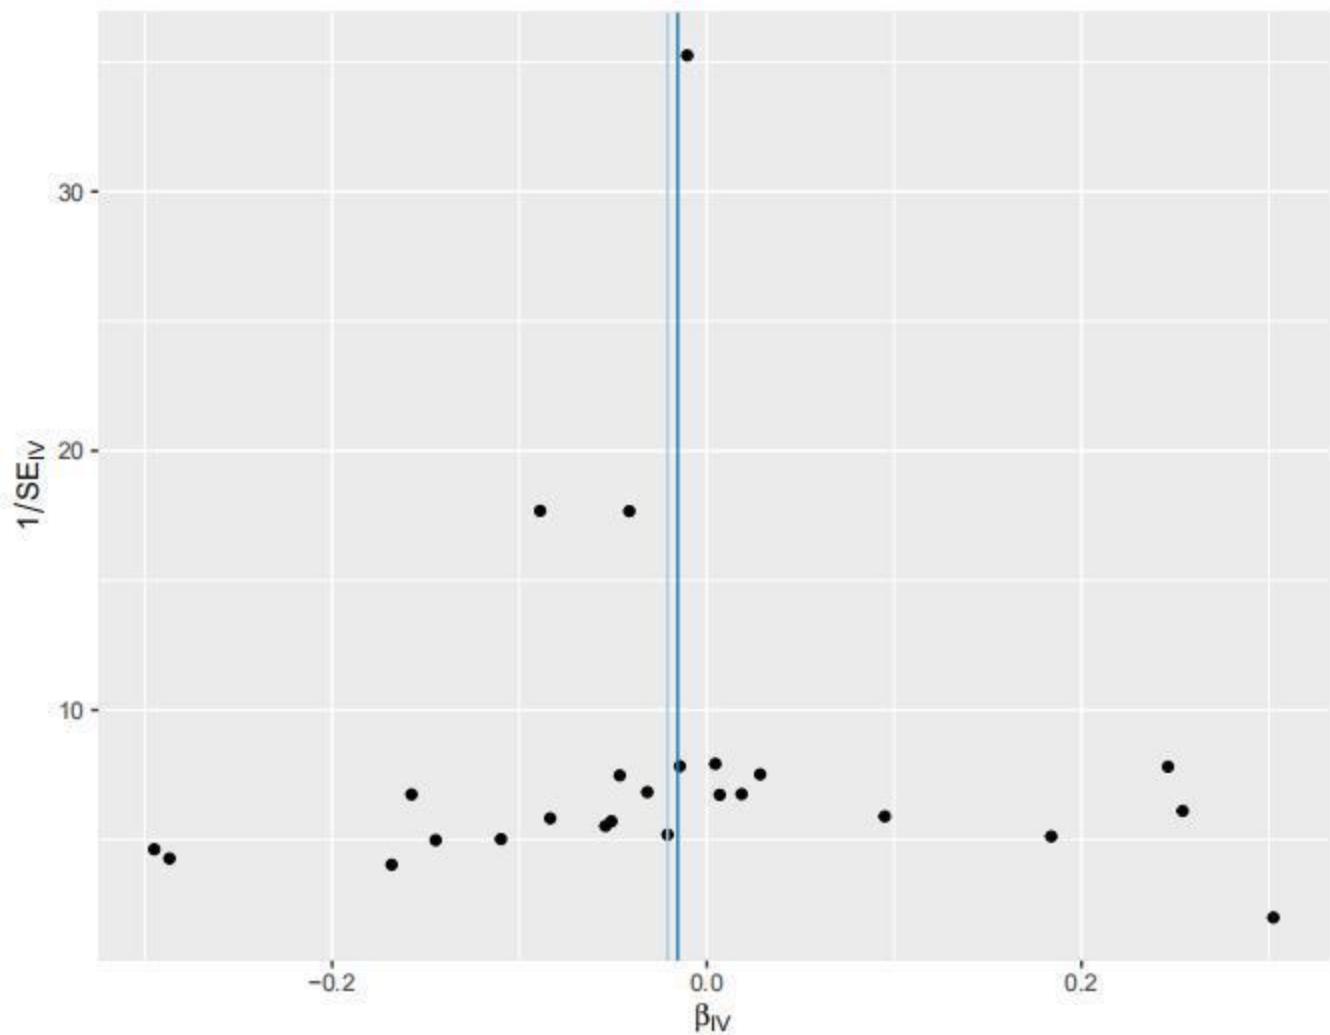

Funnel plot analyse of "CD62L on monocyte" on 'Aplastic anemia'

MR Method

- Inverse variance weighted
- MR Egger

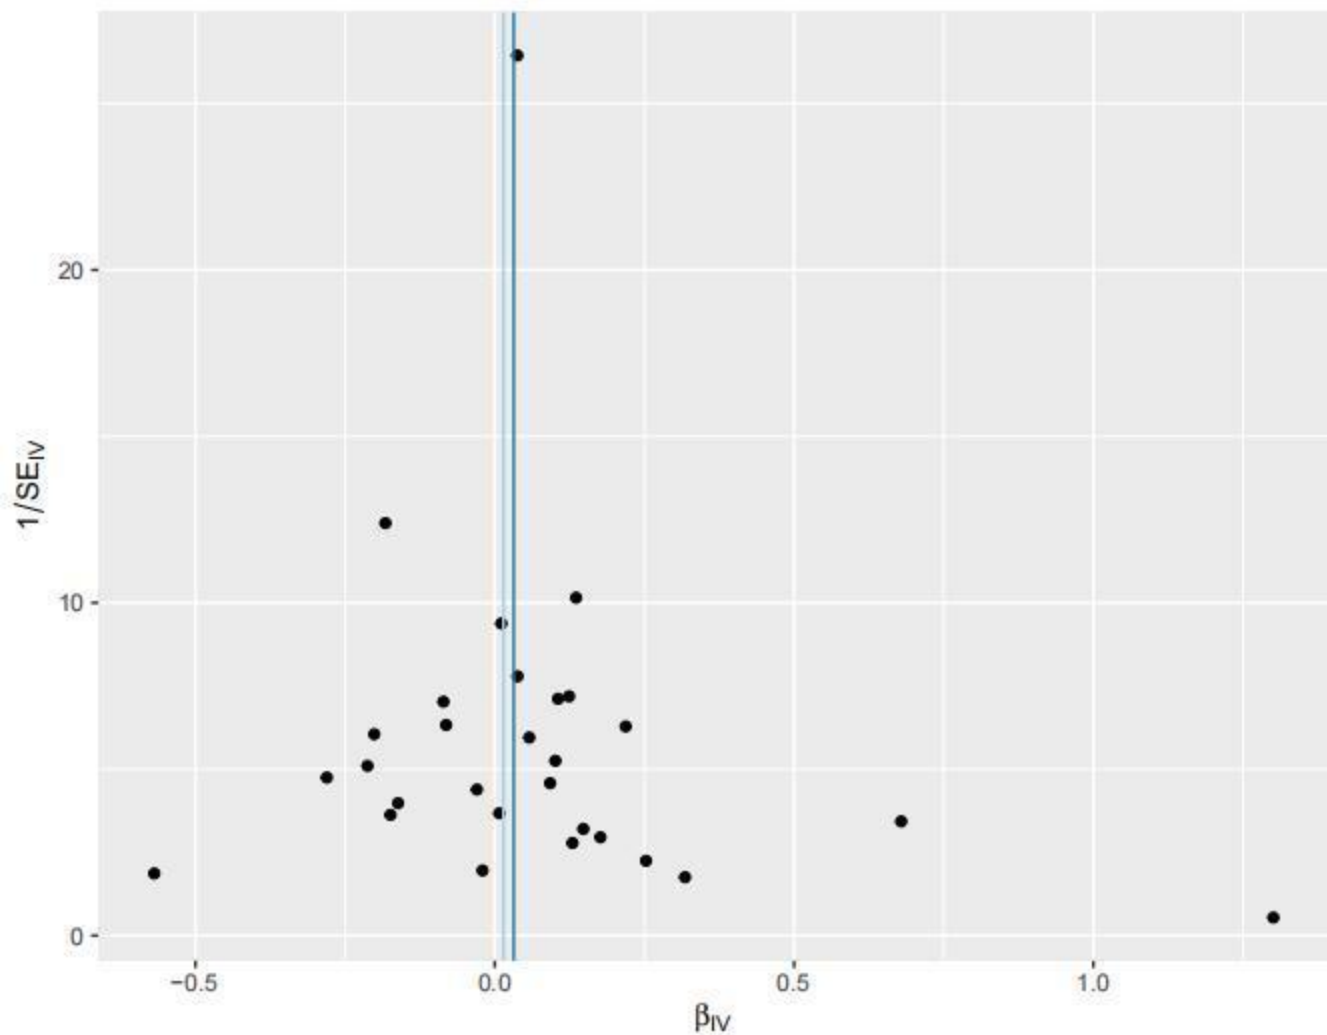

Funnel plot analyse of "CM CD4+ AC" on 'Aplastic anemia'

MR Method

- Inverse variance weighted
- MR Egger

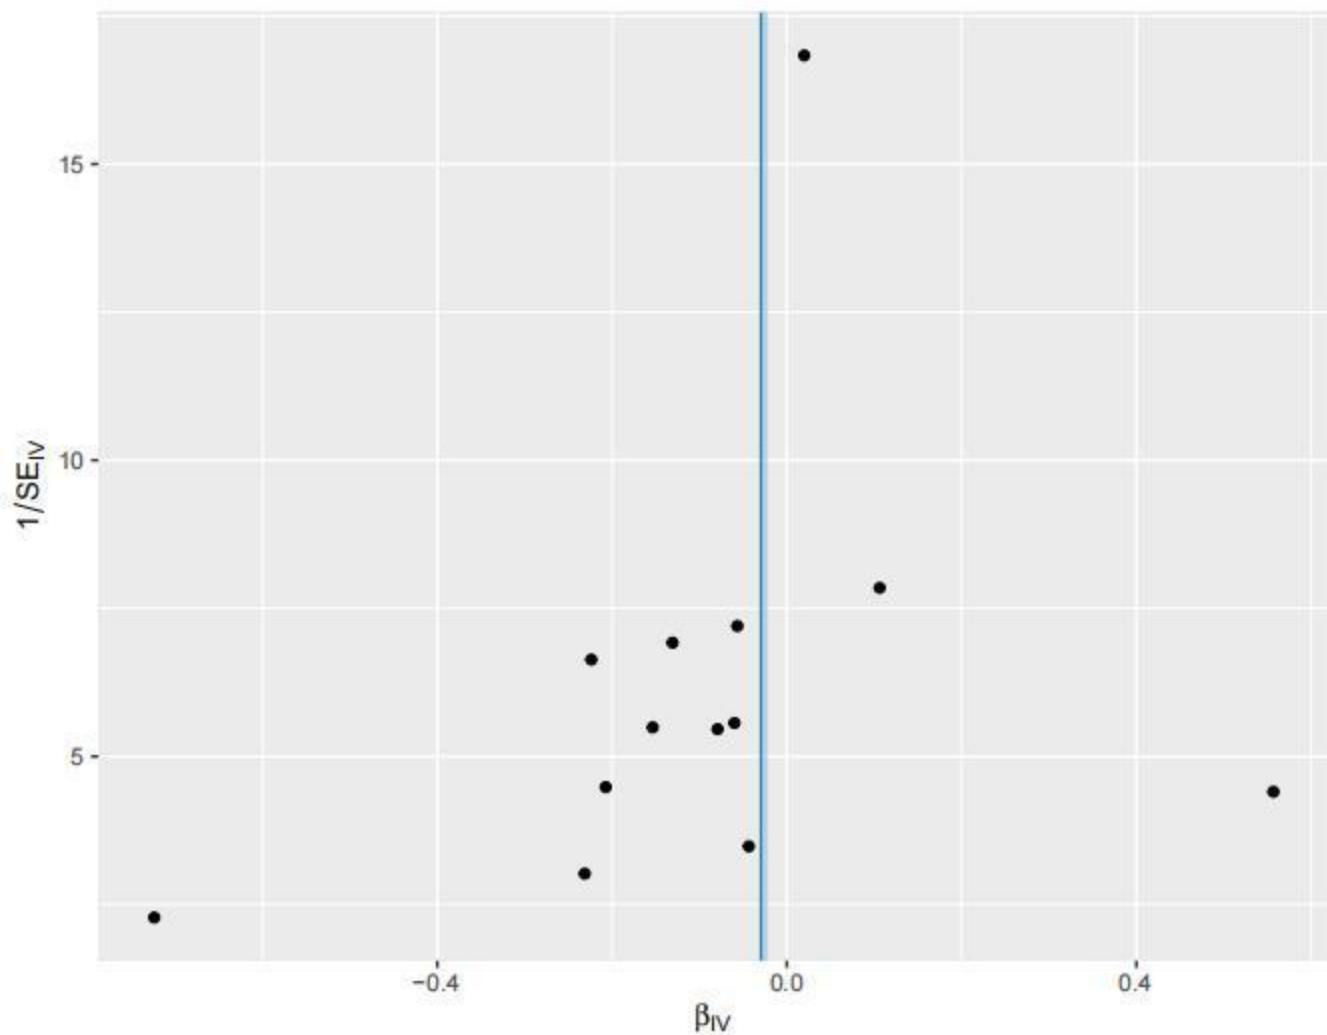

Funnel plot analyse of "CD45 on HLA DR+ NK" on 'Aplastic anemia'

### MR Method

- Inverse variance weighted
- MR Egger

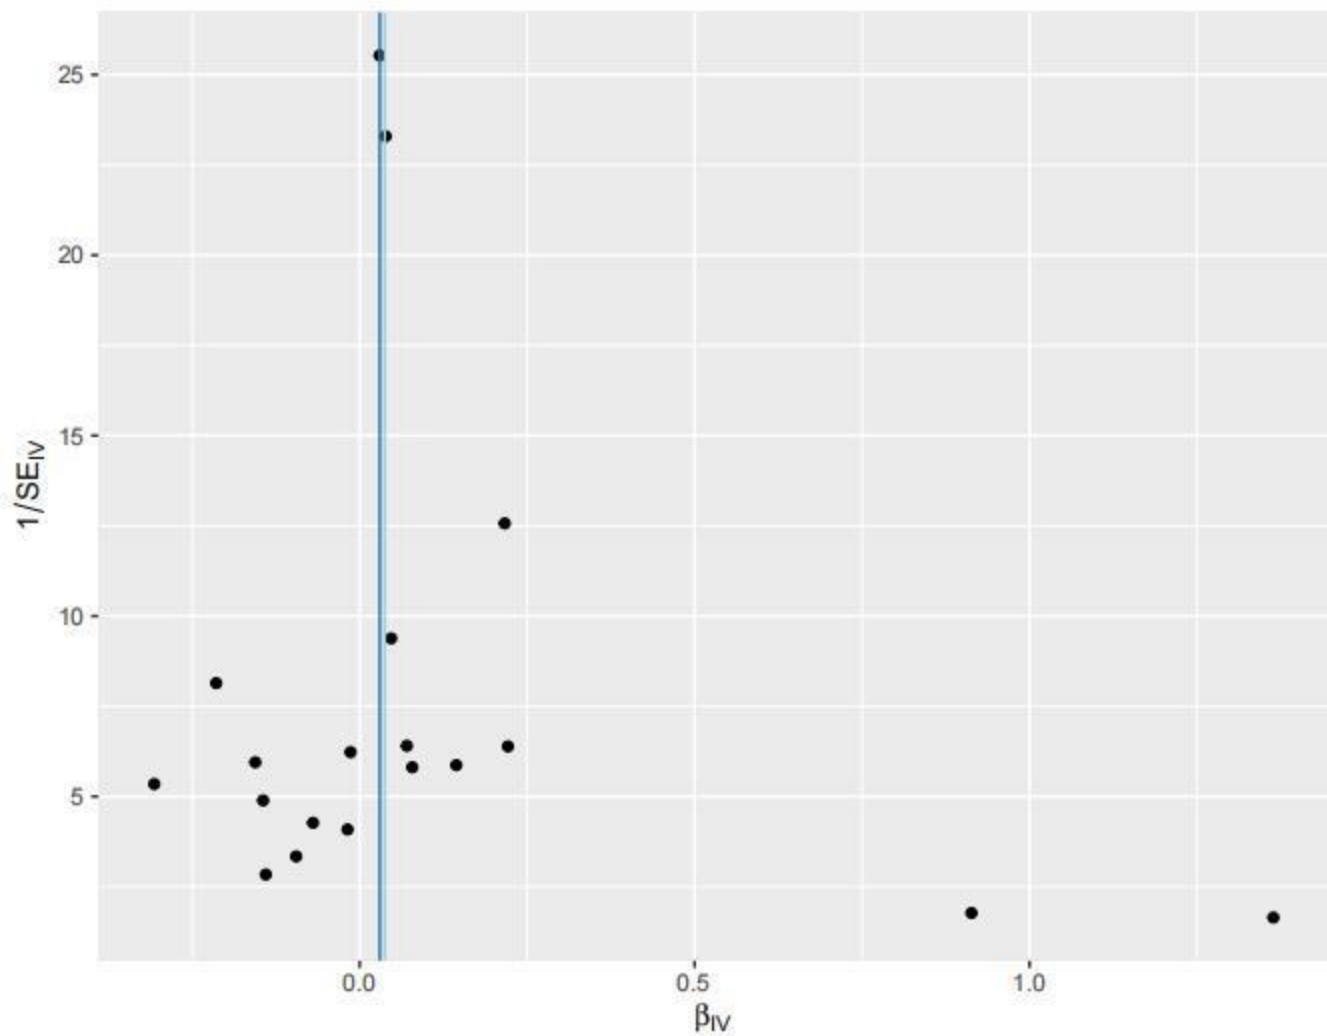

Funnel plot analyse of "CD45 on HLA DR+ CD8br" on 'Aplastic anemia'

MR Method

Inverse variance weighted

MR Egger

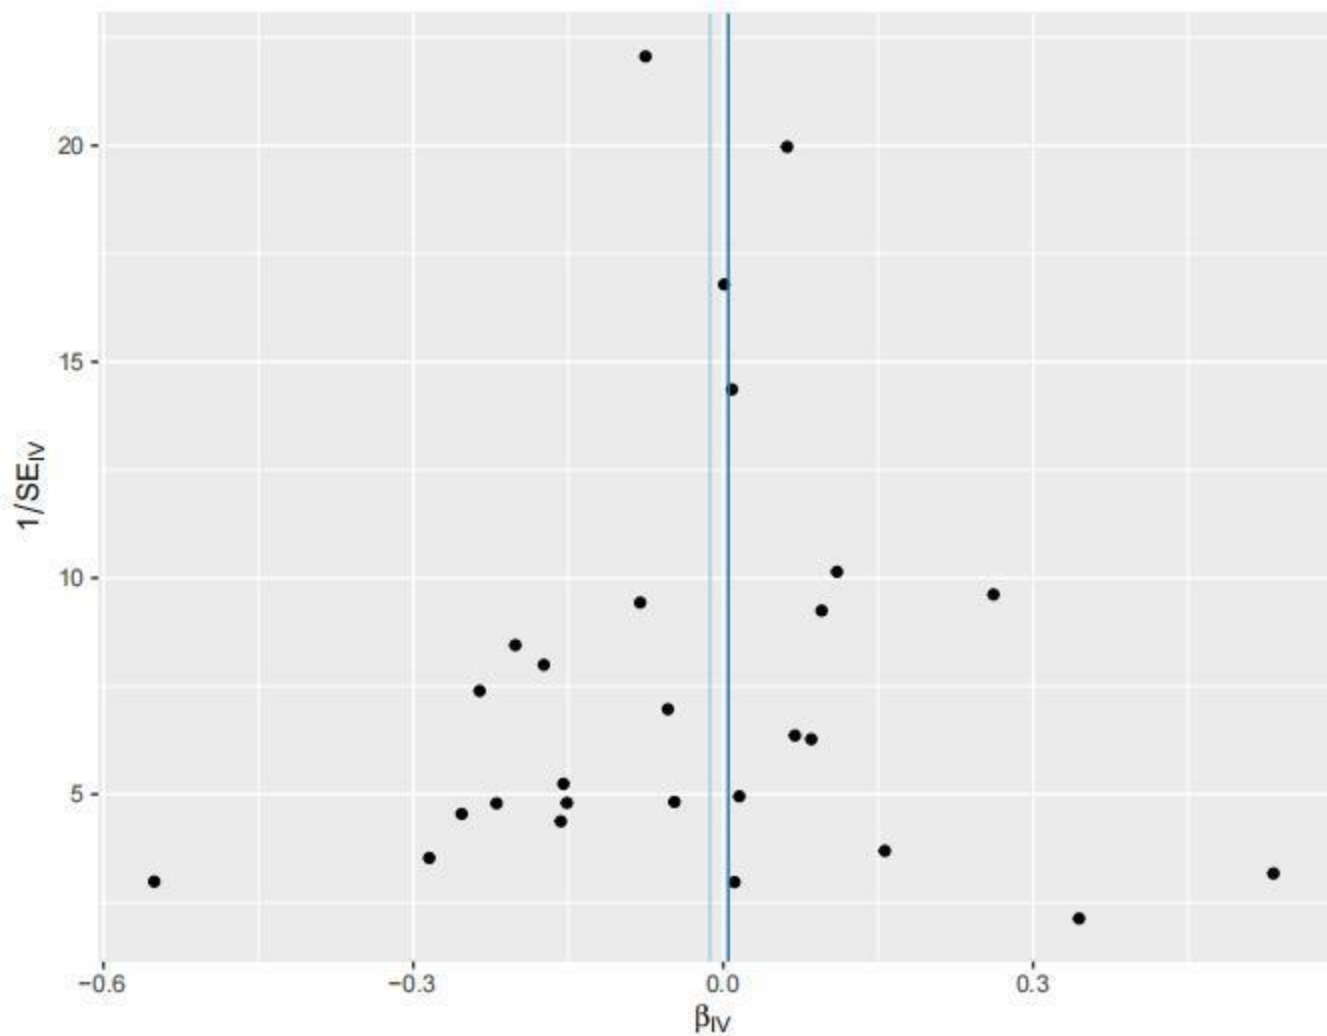

Funnel plot analysis of "NK %lymphocyte" on 'Aplastic anemia'

MR Method

- Inverse variance weighted
- MR Egger

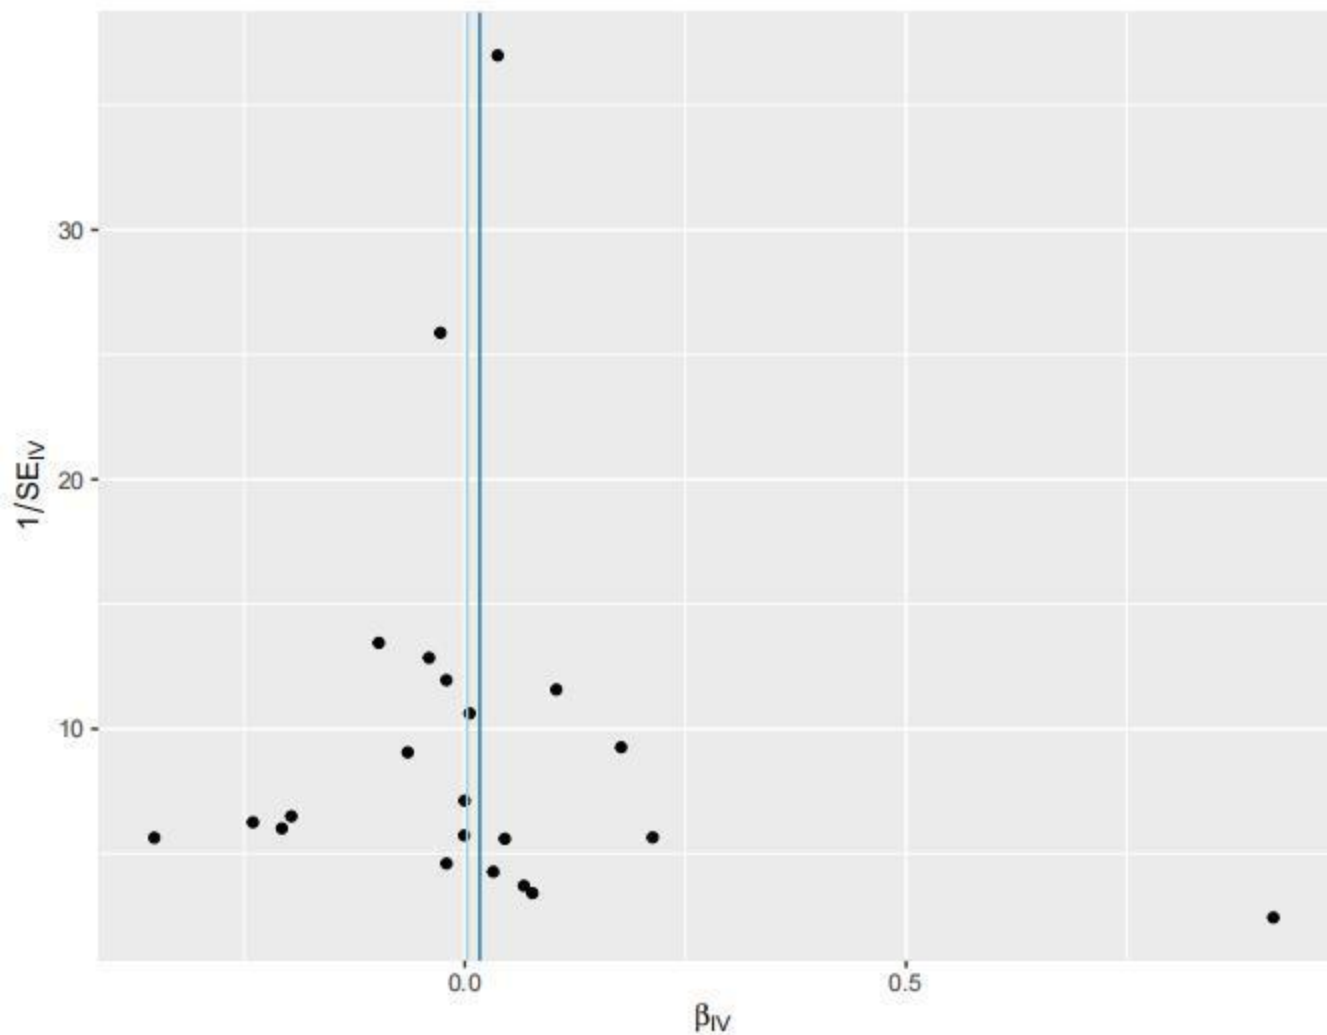

Funnel plot analyse of "HLA DR on plasmacytoid DC" on 'Aplastic anemia'

### MR Method

- Inverse variance weighted
- MR Egger

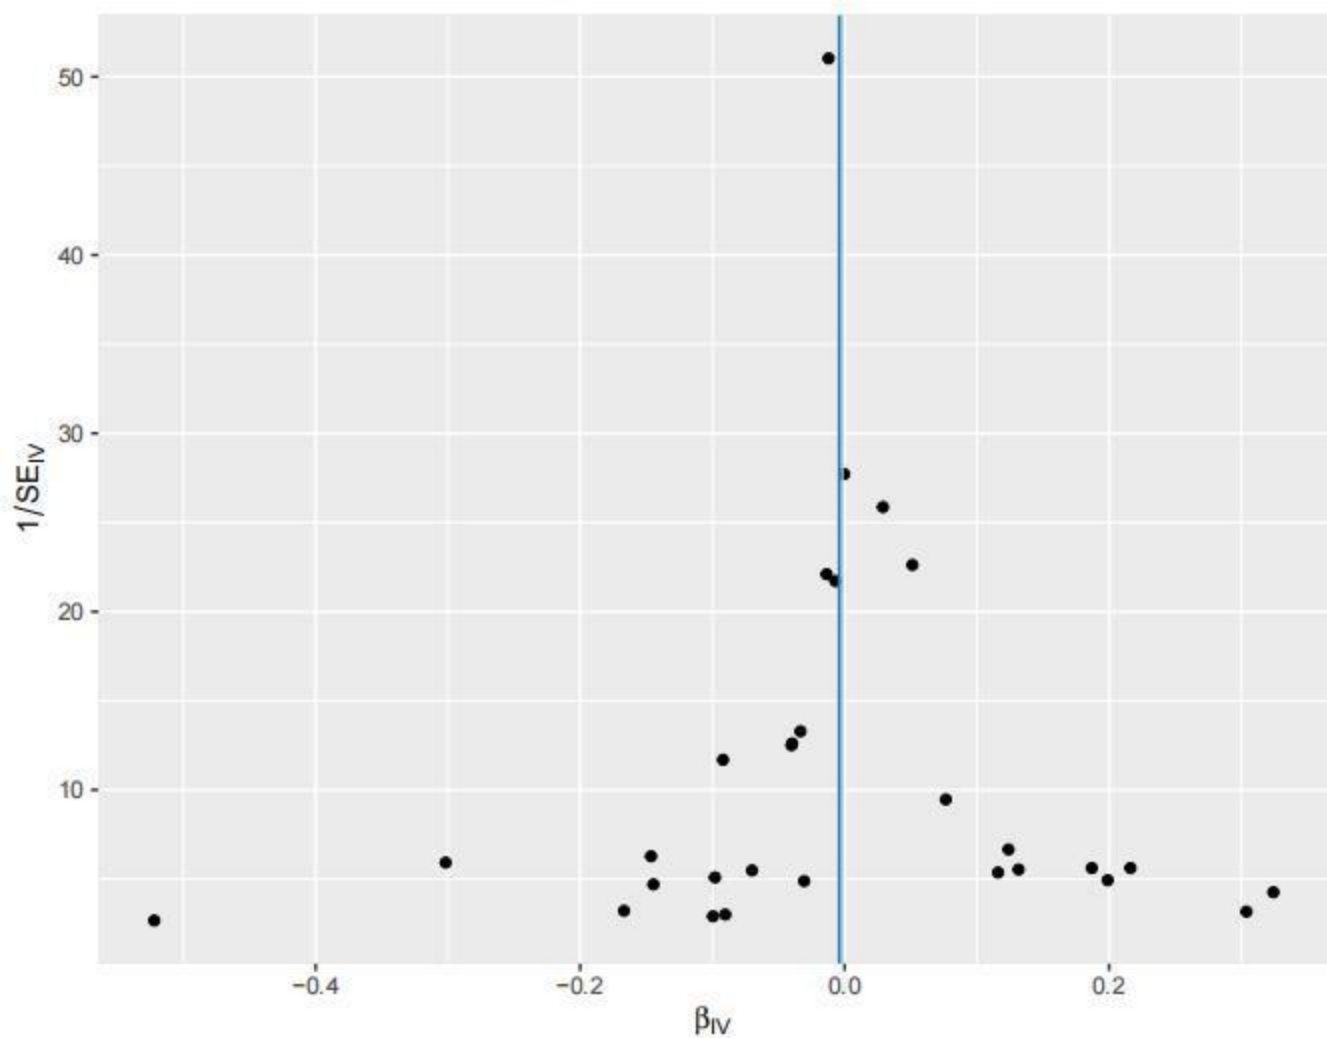

Funnel plot analyse of "CD40 on monocytes" on 'Aplastic anemia'



### MR Method

- Inverse variance weighted
- MR Egger

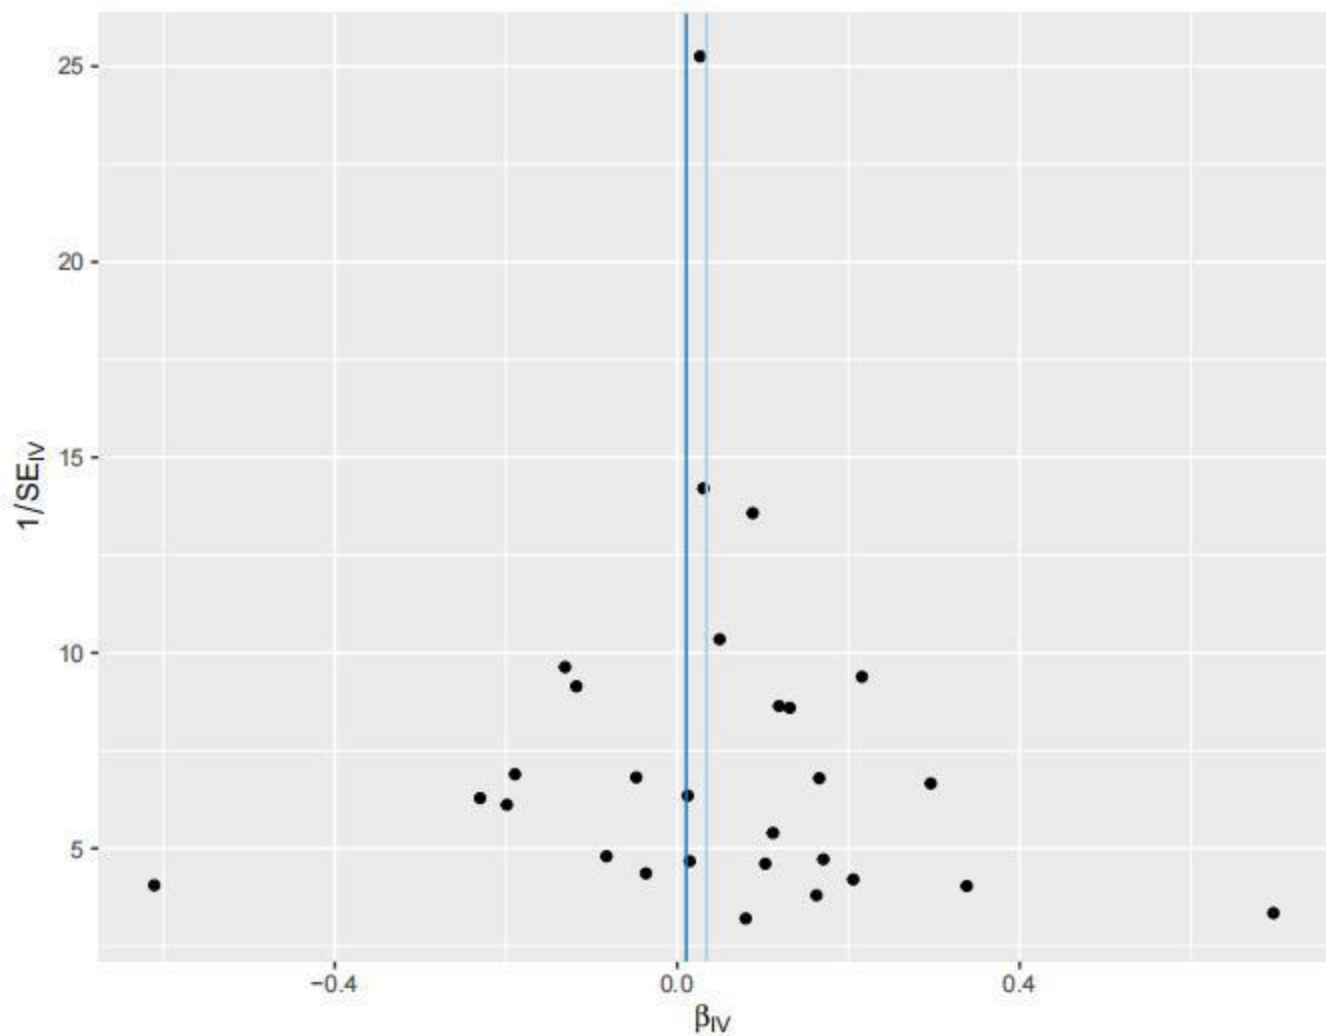

Funnel plot analyse of "CD28- CD8dim AC" on 'Aplastic anemia'

MR Method

Inverse variance weighted

MR Egger

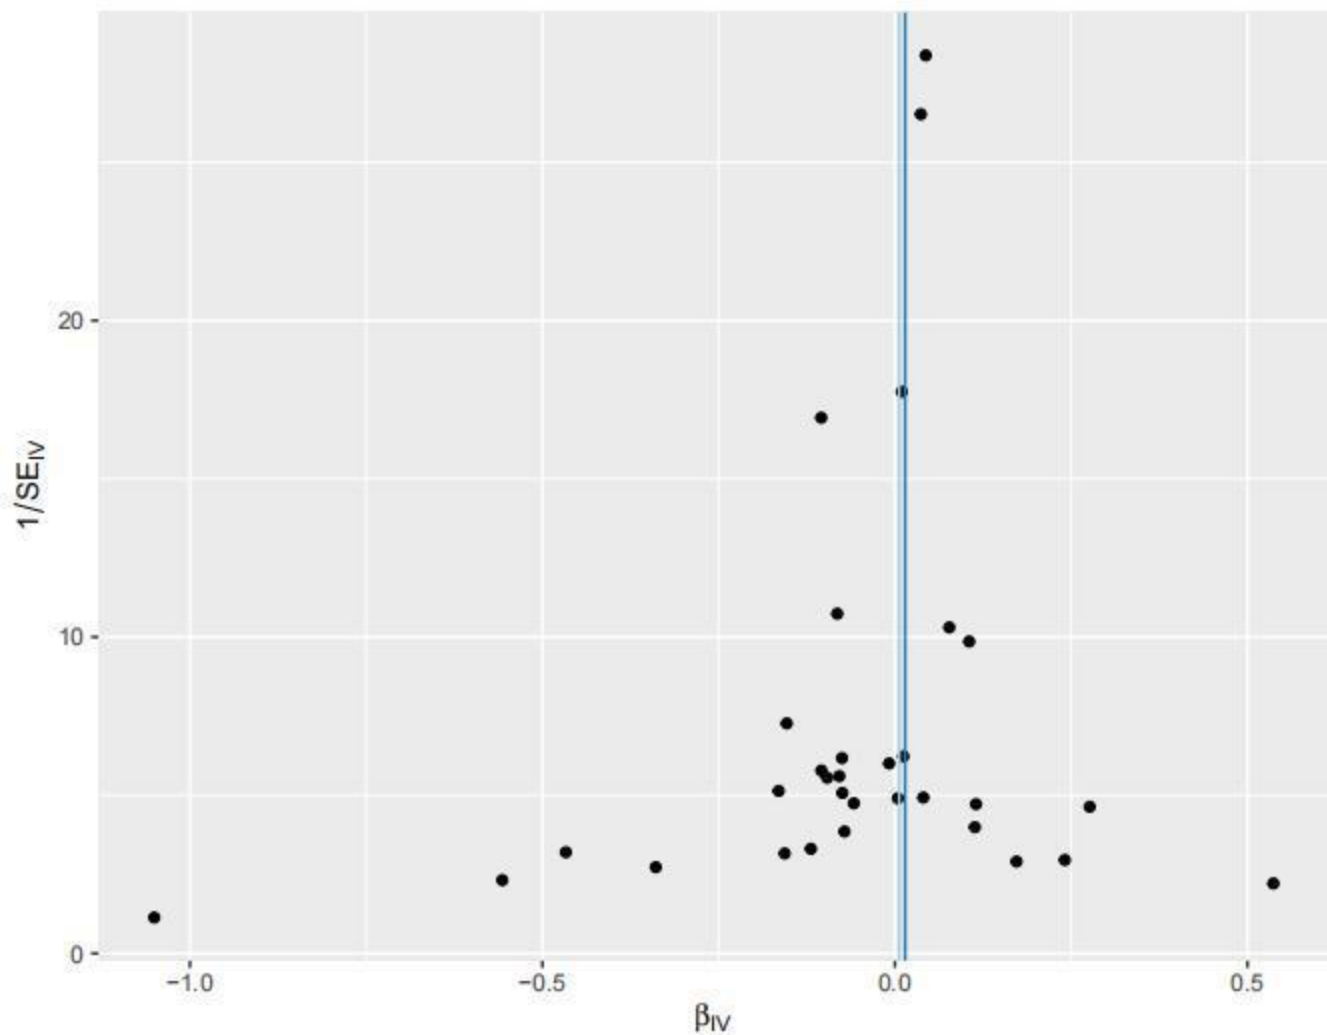

Funnel plot analyse of "HLA DR+ CD8br %T cell" on 'Aplastic anemia'

MR Method

- Inverse variance weighted
- MR Egger

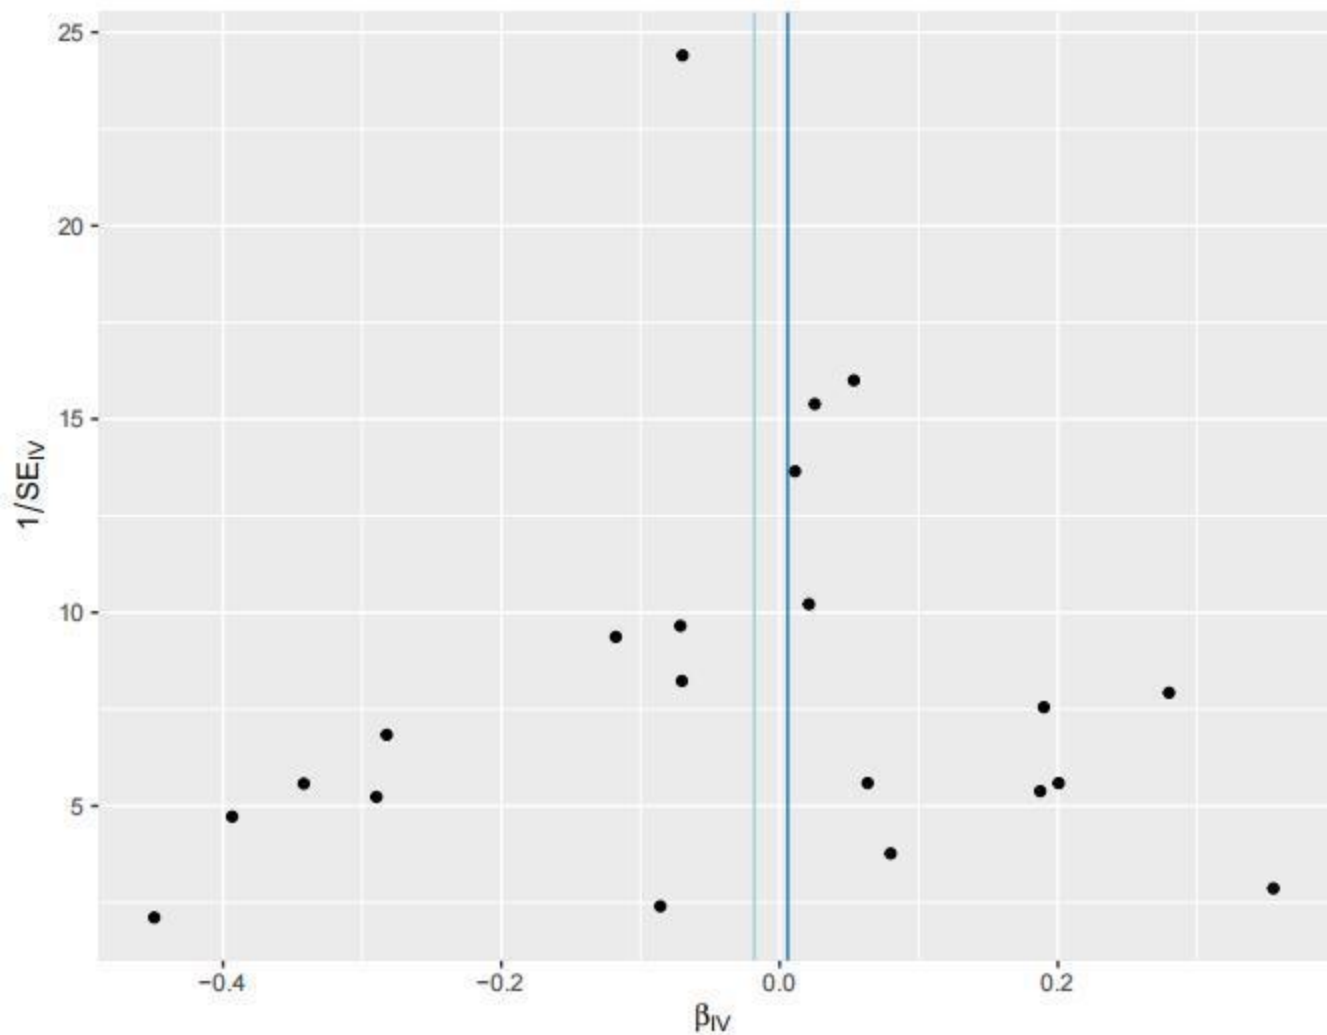

Funnel plot analysis of "CD3 on secreting Treg " on 'Aplastic anemia'

MR Method

Inverse variance weighted

MR Egger

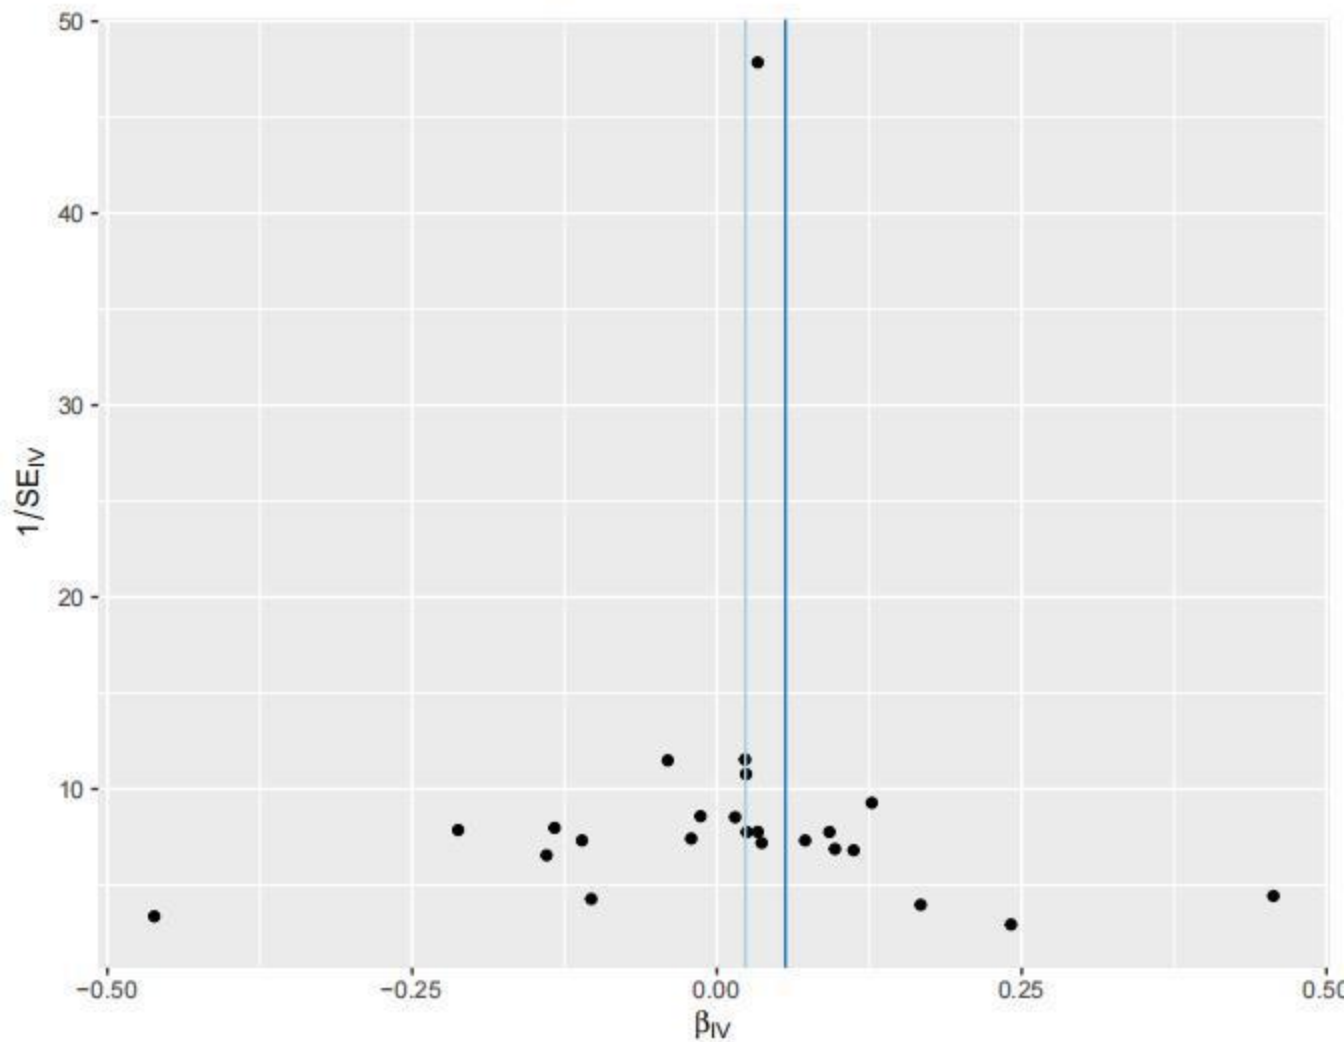

Funnel plot analyse of "CD33 on Im MDSC " on 'Aplastic anemia'

MR Method

- Inverse variance weighted
- MR Egger

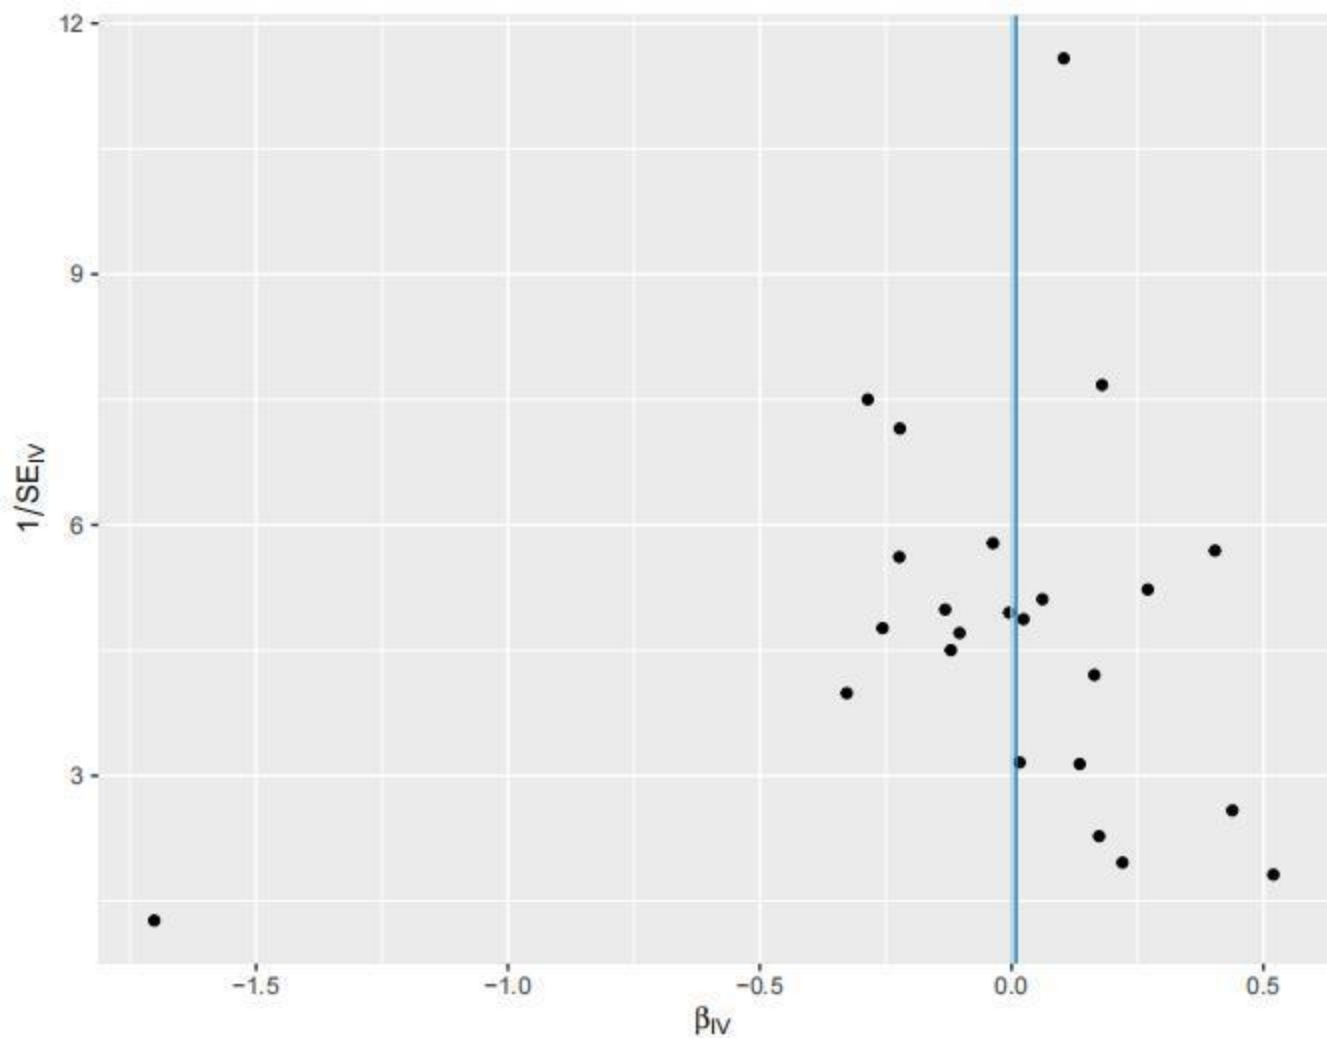

Funnel plot analysis of "CD19 on PB/PC" on 'Aplastic anemia'

MR Method

- Inverse variance weighted
- MR Egger

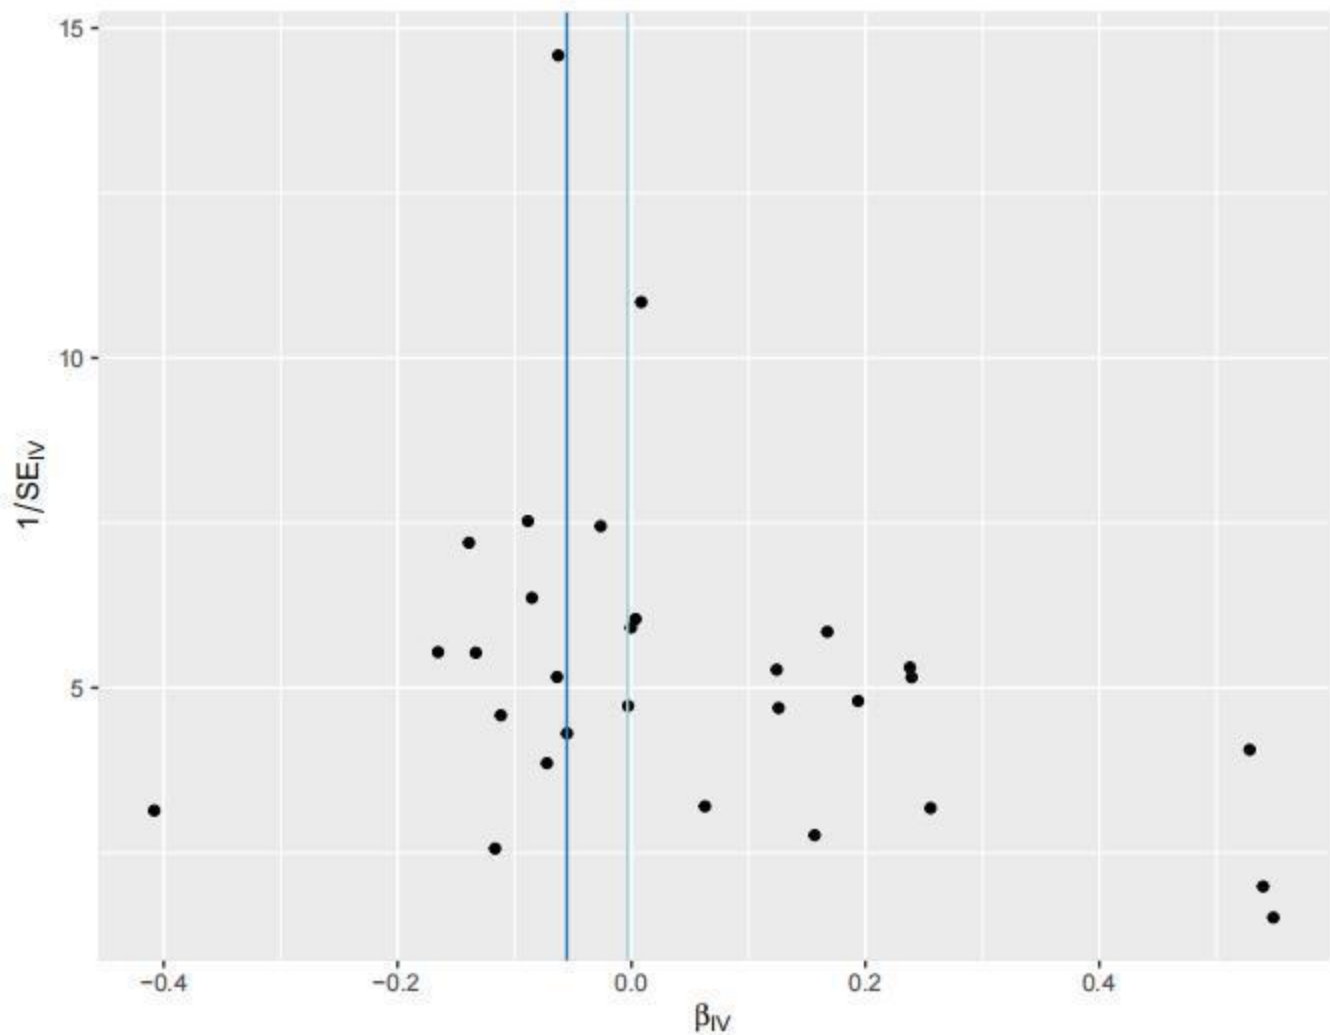

Funnel plot analyse of "CD19 on sw mem" on 'Aplastic anemia'

### MR Method

- Inverse variance weighted
- MR Egger

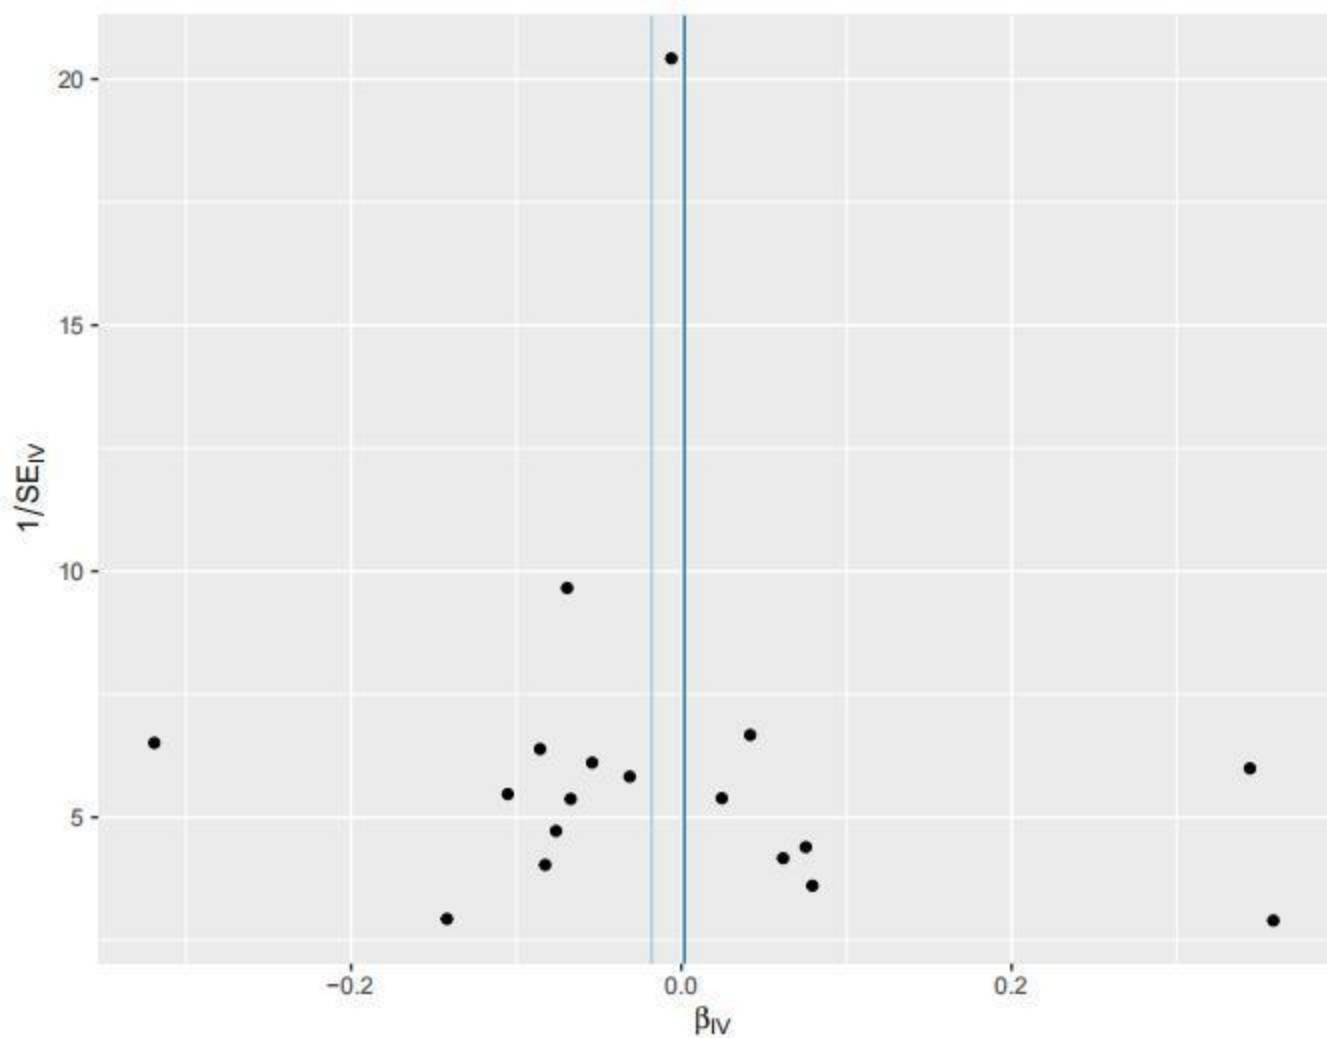

Funnel plot analyse of "Sw mem %lymphocyte" on 'Aplastic anemia'

MR Method

- Inverse variance weighted
- MR Egger

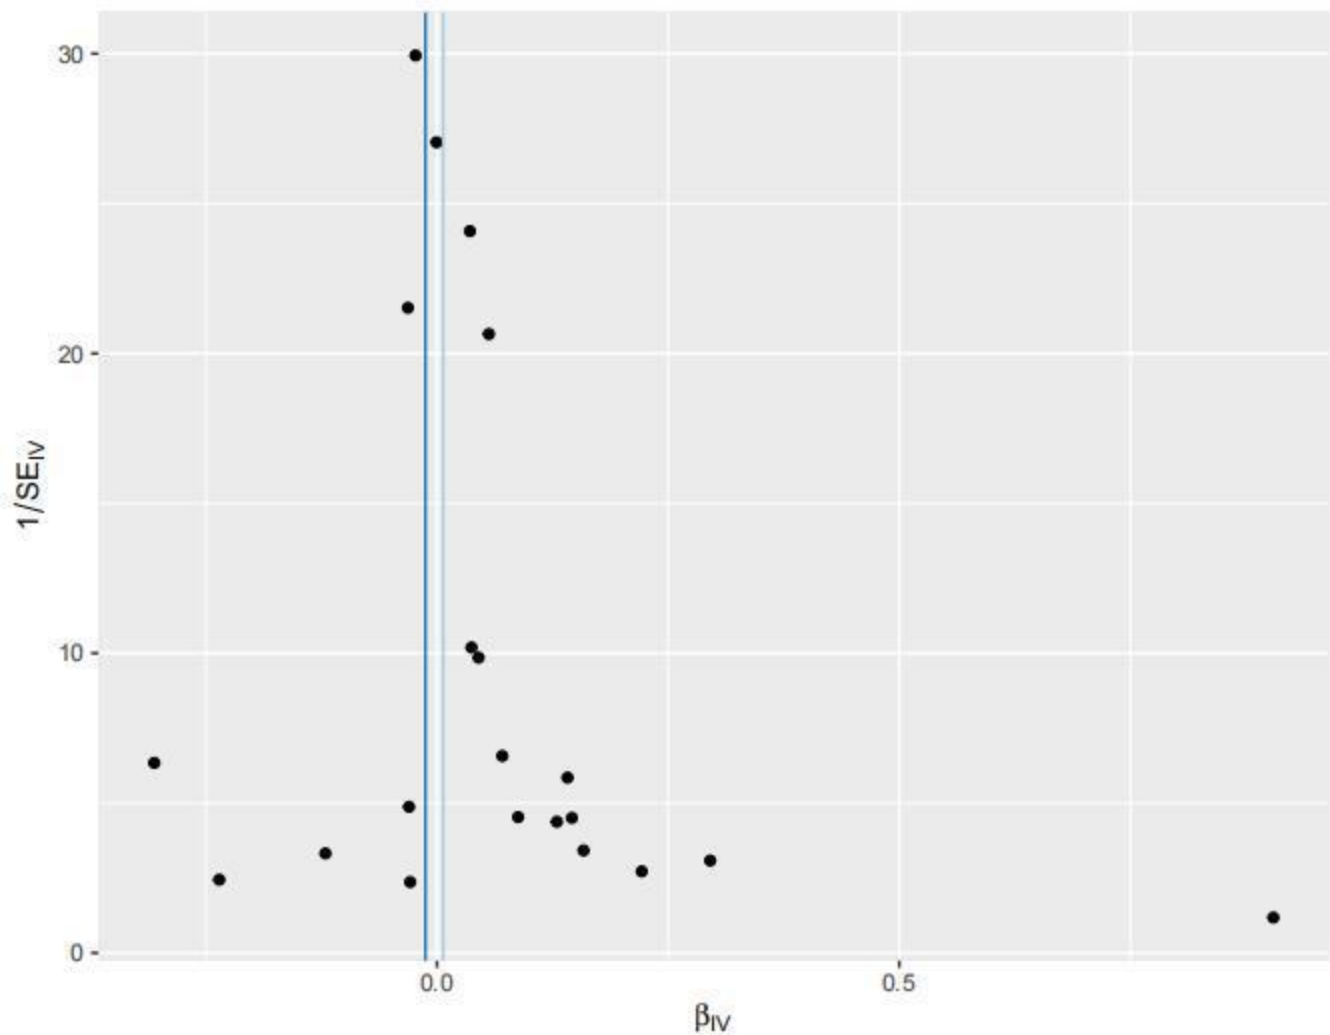

Funnel plot analyse of "CD40 on CD14+ CD16+ monocyte " on 'Aplastic anemia'



### MR Method

Inverse variance weighted

MR Egger

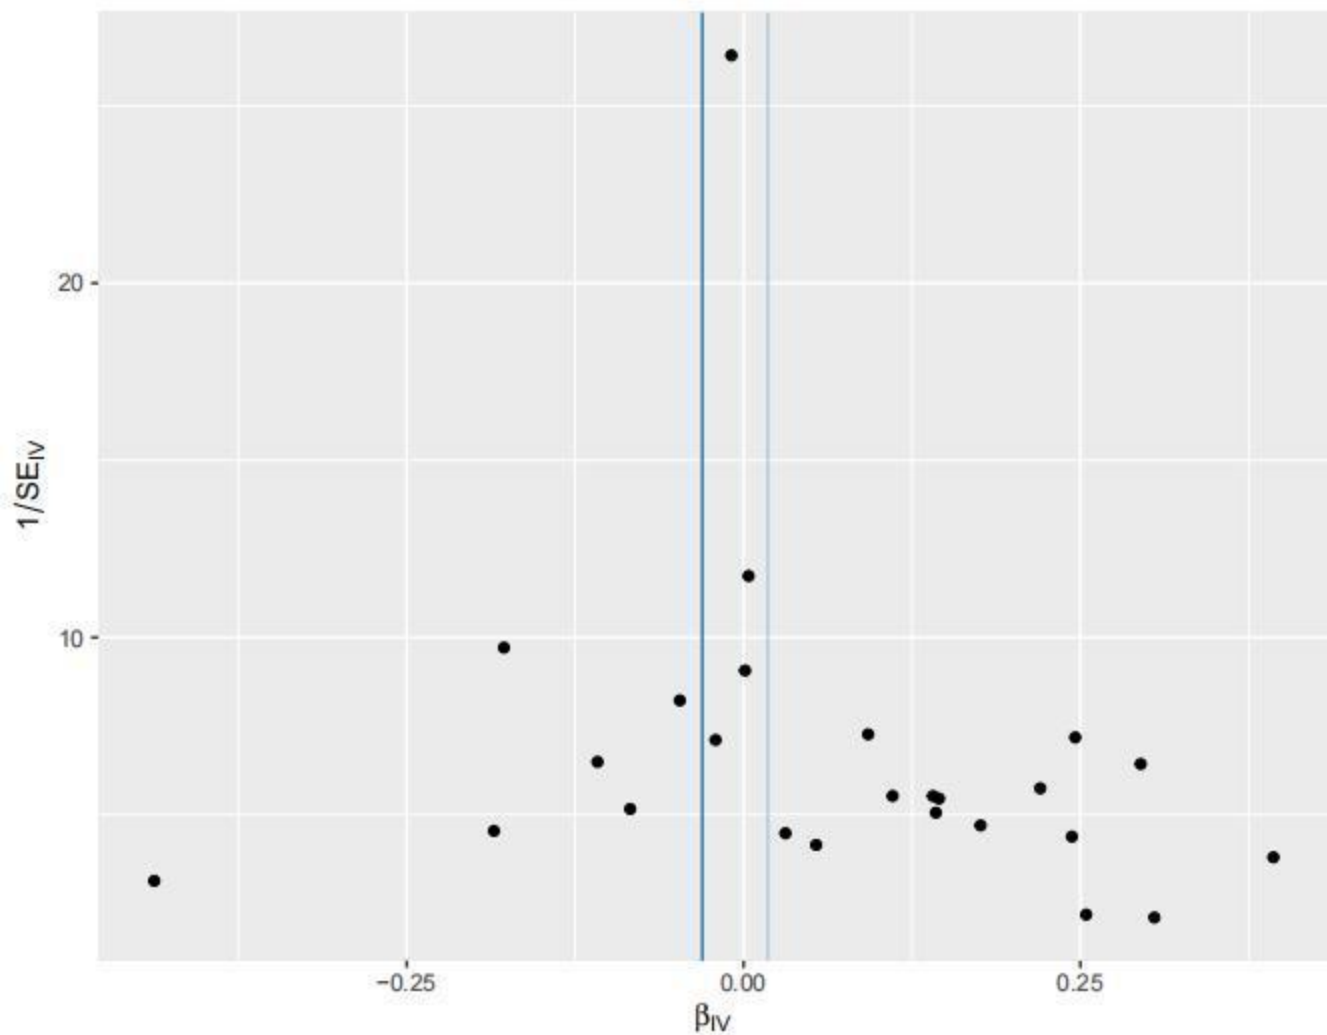

Funnel plot analyse of "IgD on IgD+ CD38br" on 'Aplastic anemia'

MR Method

- Inverse variance weighted
- MR Egger

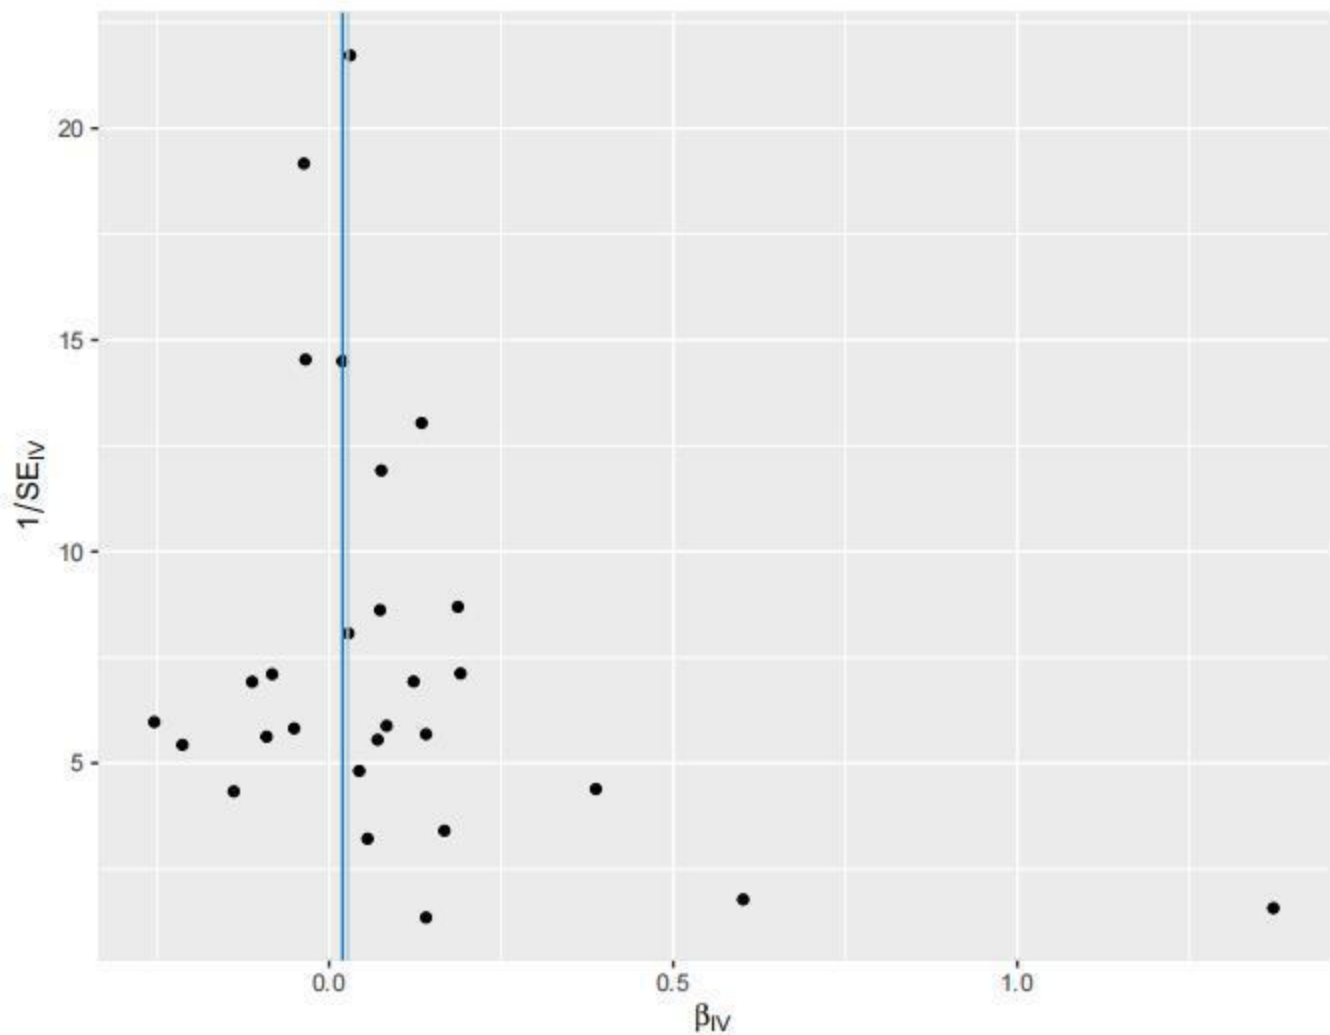

Funnel plot analyse of "HLA DR on HLA DR+ NK " on 'Aplastic anemia'

MR Method

- Inverse variance weighted
- MR Egger

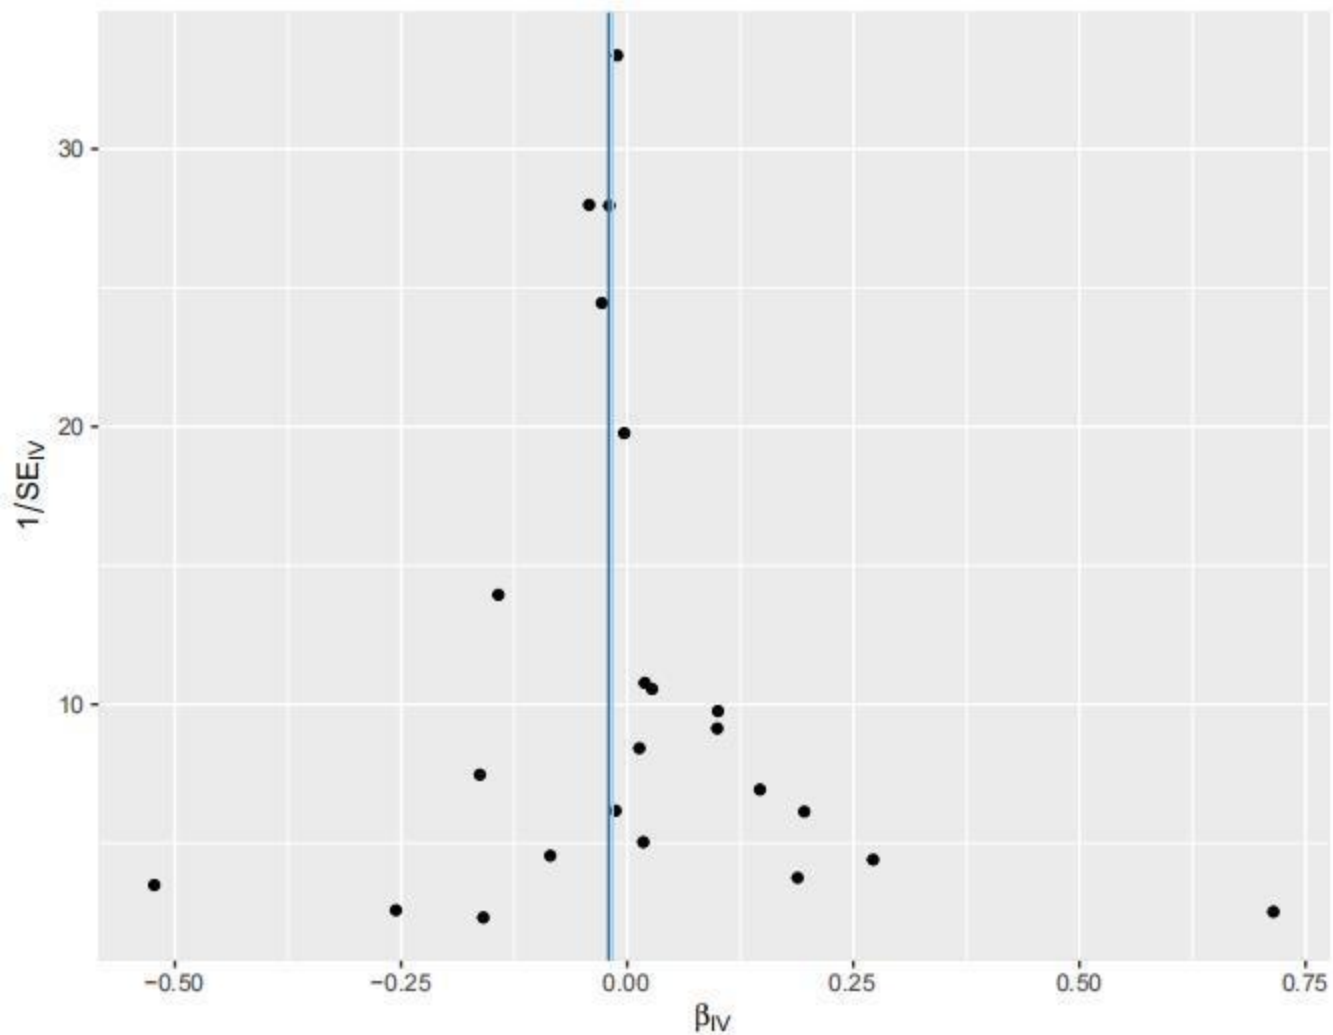

Funnel plot analyse of "CD19 on IgD+ CD38- unsw mem" on 'Aplastic anemia'

### MR Method

- Inverse variance weighted
- MR Egger

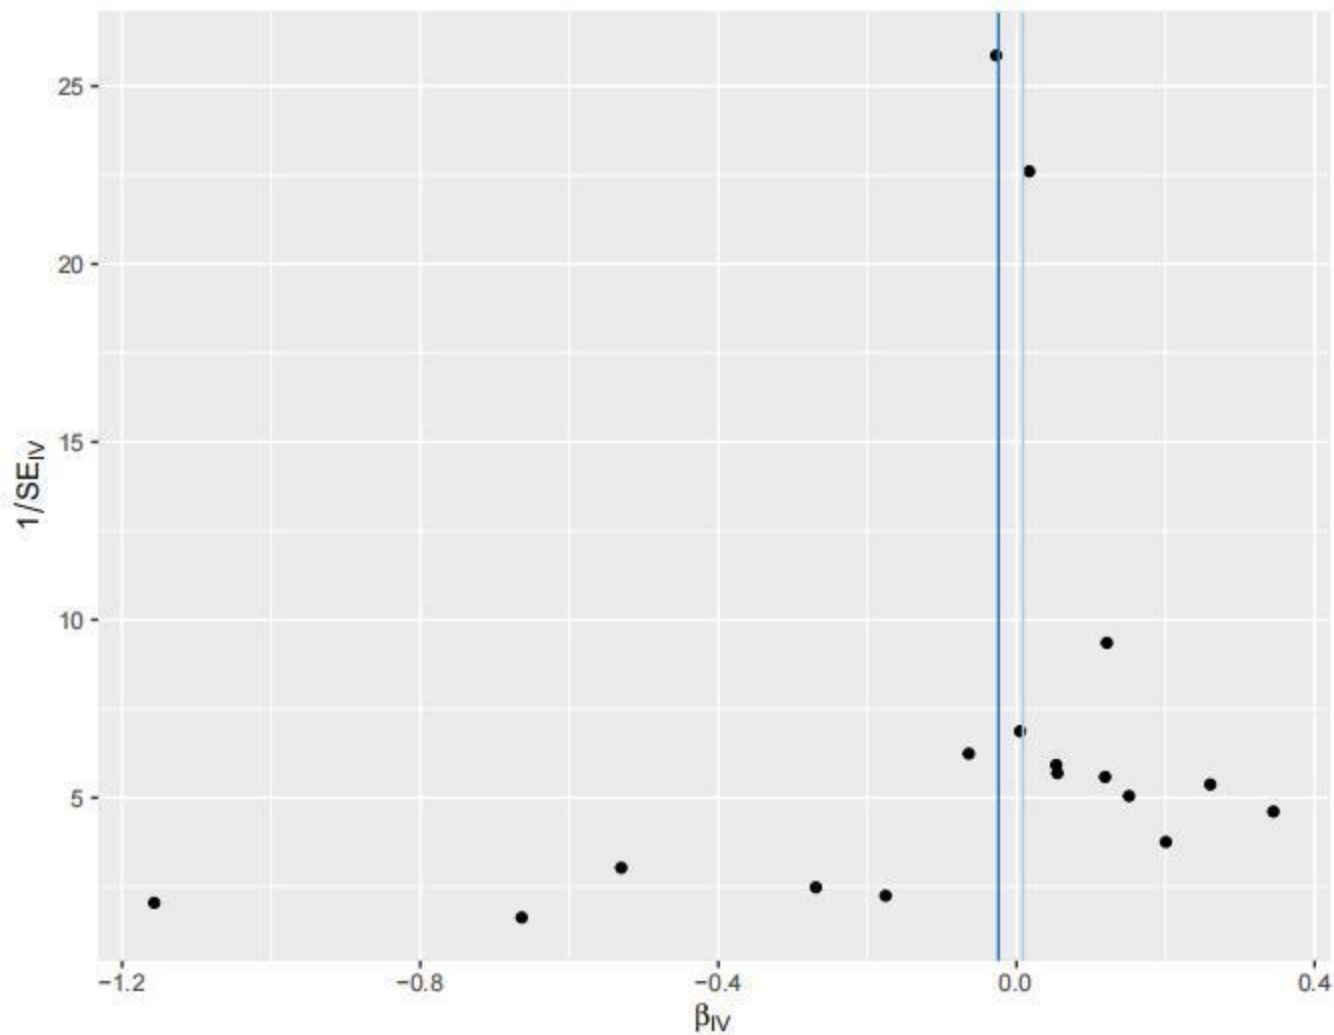

Funnel plot analysis of "CD127 on CD45RA- CD4 not Treg" on 'Aplastic anemia'

MR Method

- Inverse variance weighted
- MR Egger

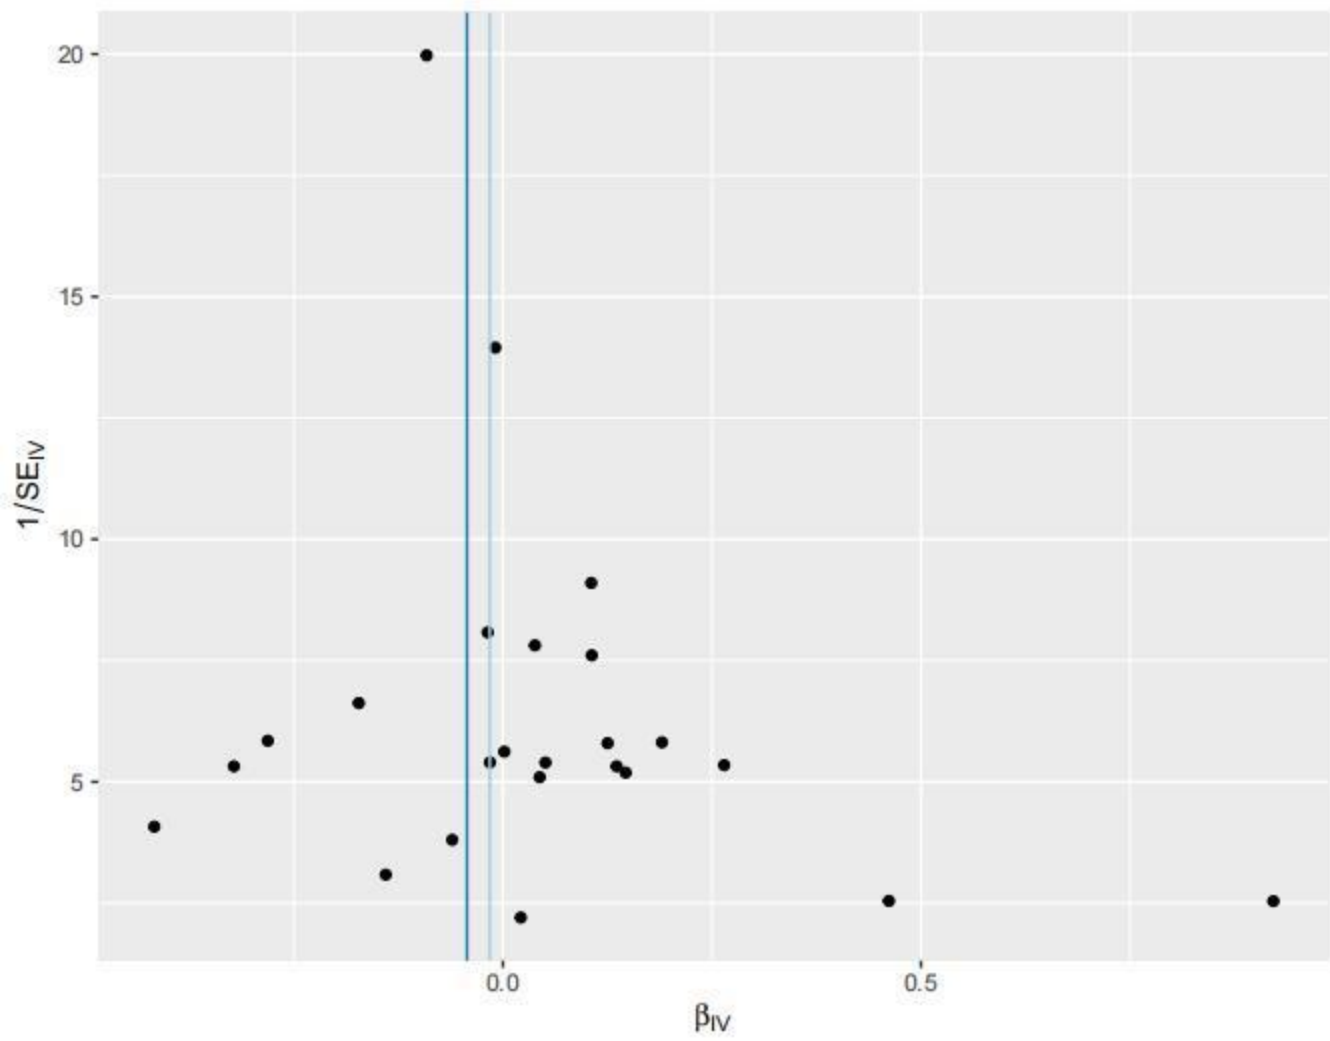

Funnel plot analyse of "SSC-A on HLA DR+ CD8br" on 'Aplastic anemia'

### MR Method

- Inverse variance weighted
- MR Egger

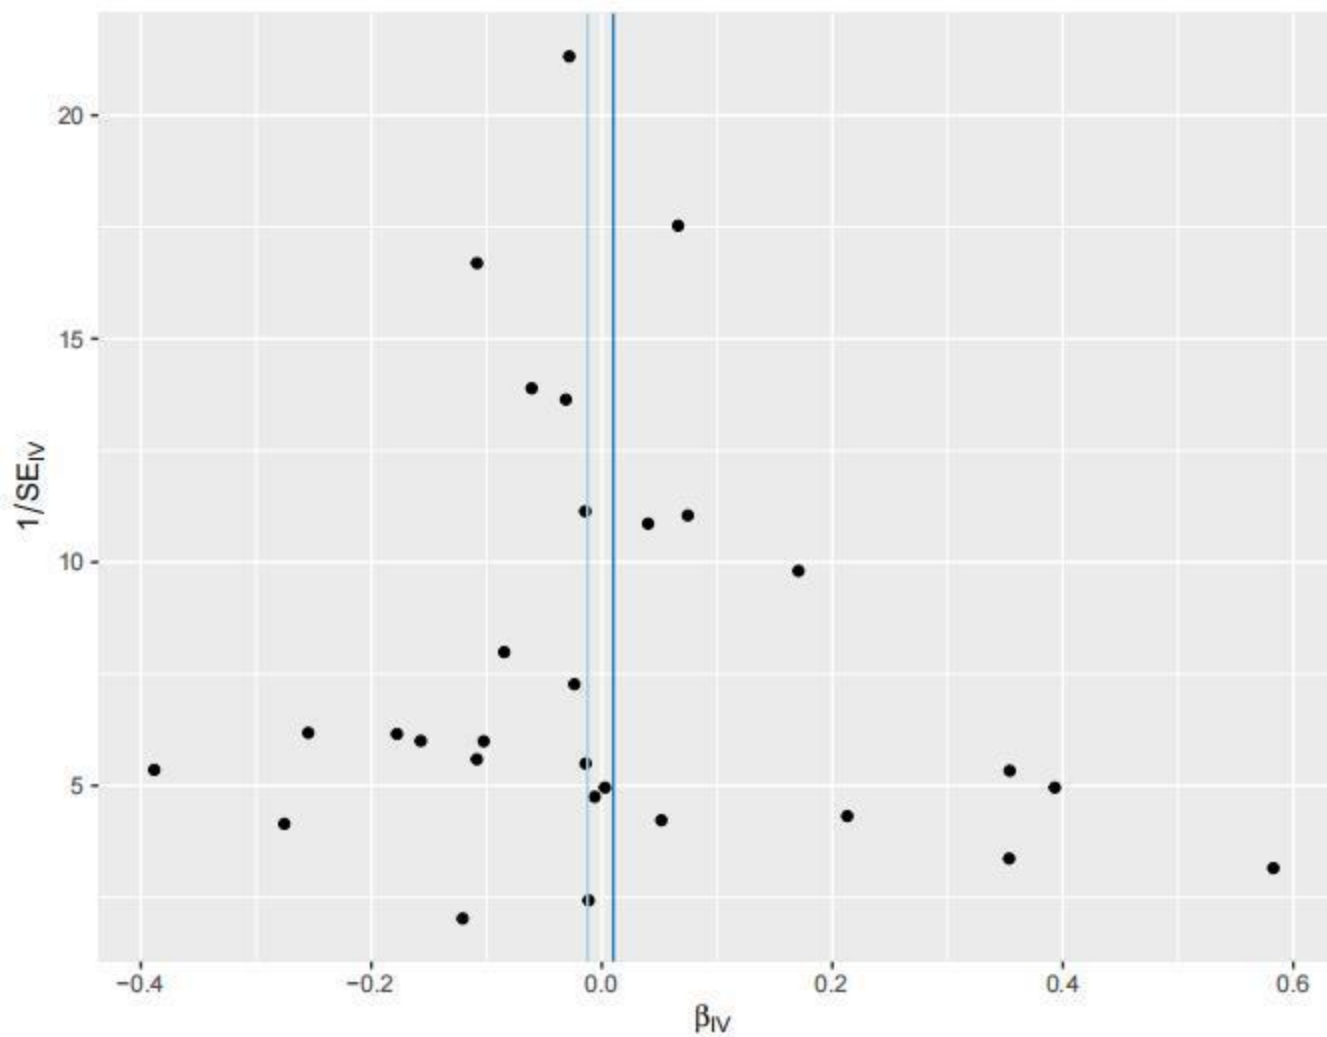

Funnel plot analysis of "CD64 on monocyte" on 'Aplastic anemia'

### MR Method

- Inverse variance weighted
- MR Egger

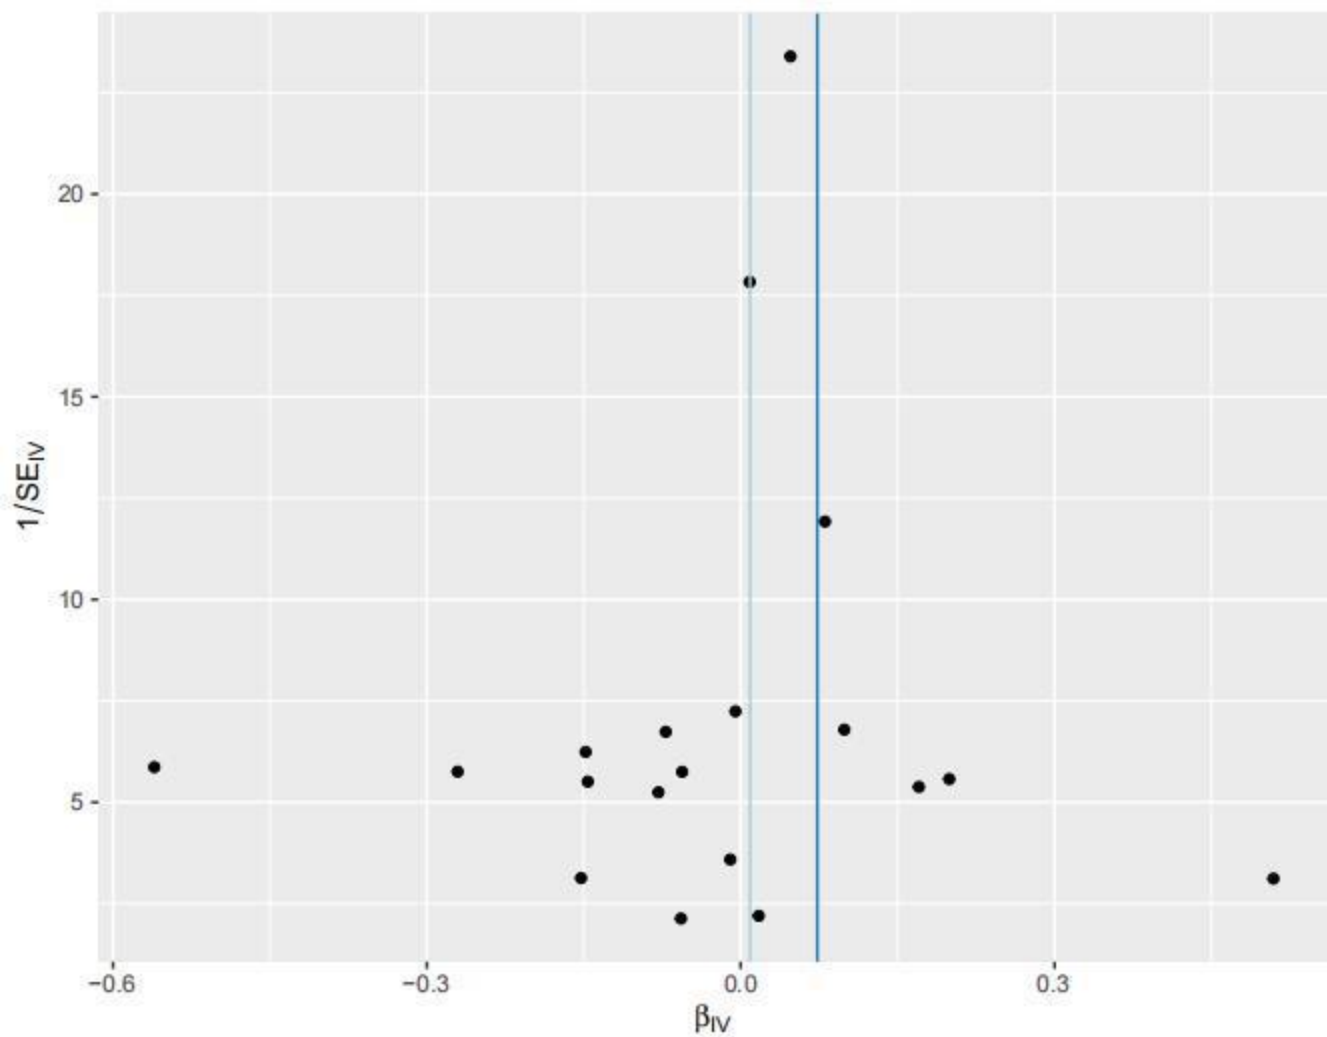

Funnel plot analyse of "CCR2 on plasmacytoid DC" on 'Aplastic anemia'

MR Method

- Inverse variance weighted
- MR Egger

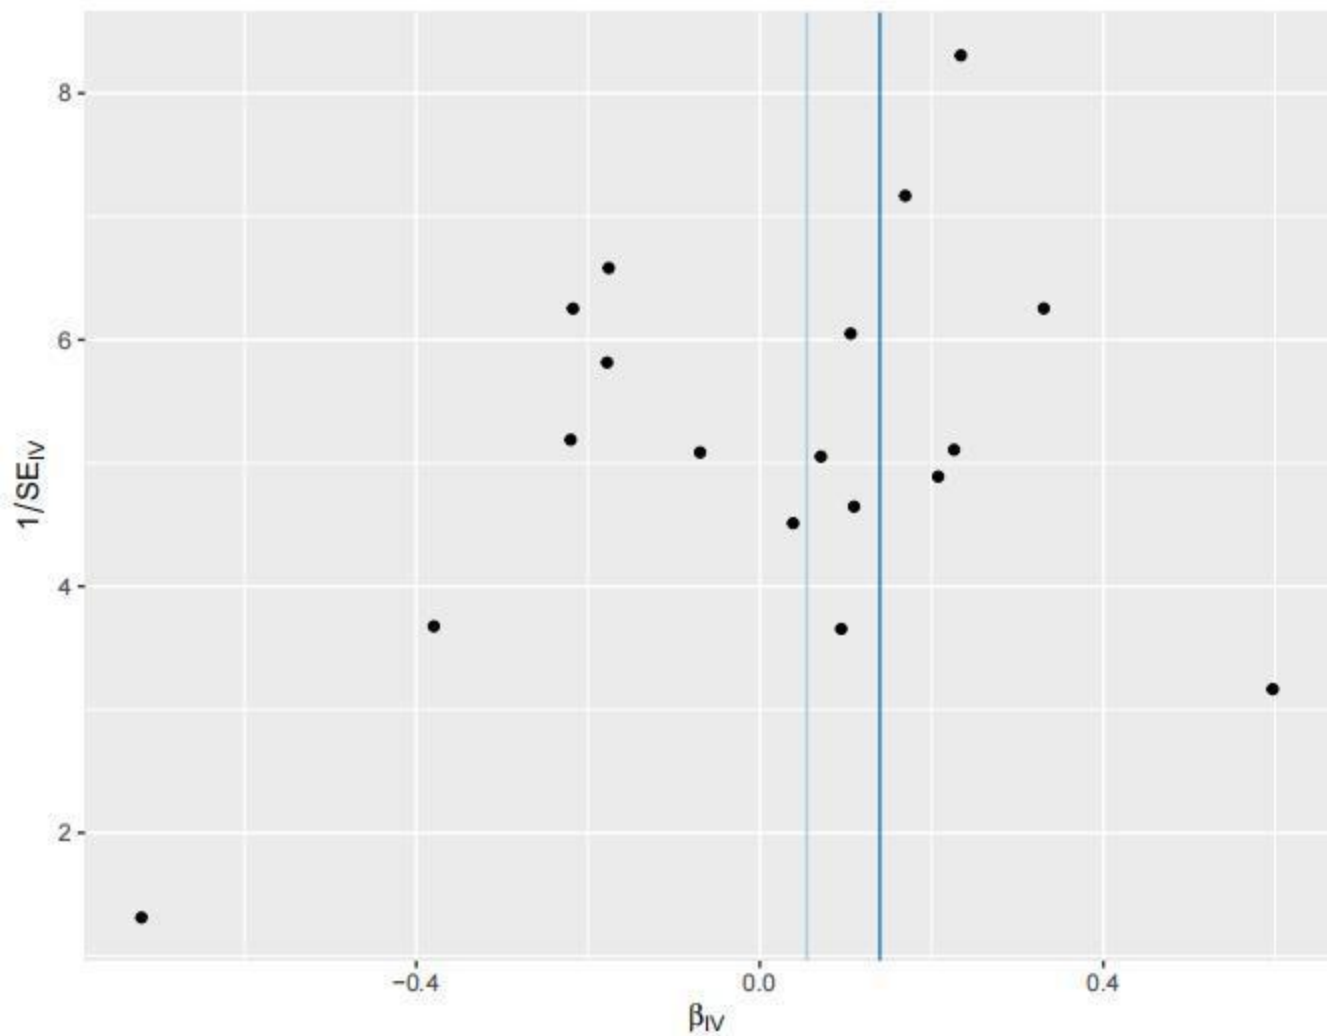

Funnel plot analyse of "IgD- CD38br %B cell" on 'Aplastic anemia'



### MR Method

- Inverse variance weighted
- MR Egger

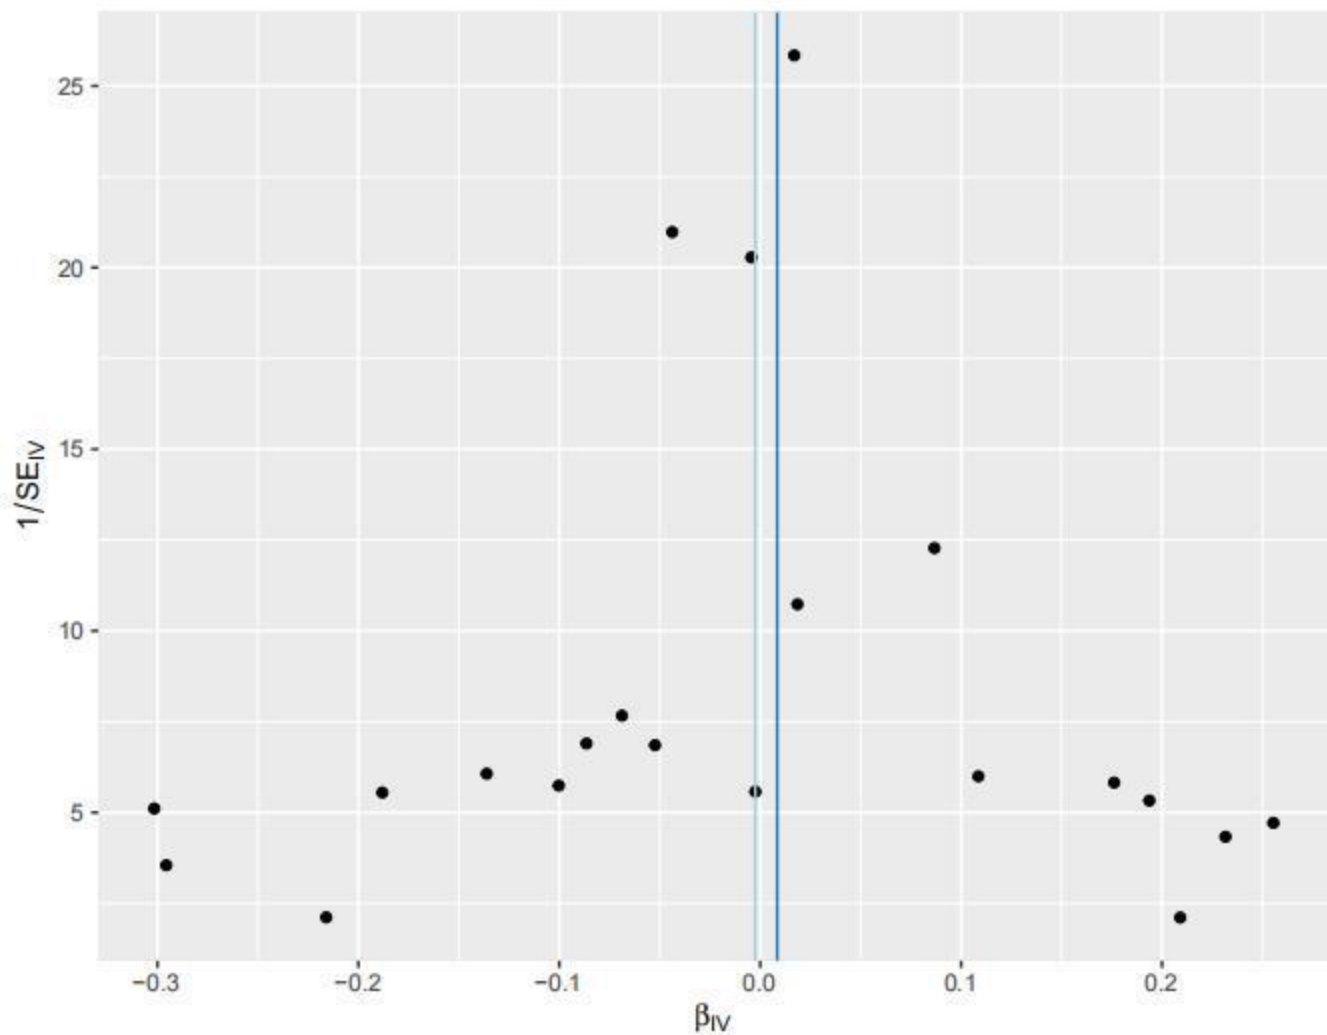

Funnel plot analyse of "CD80 on plasmacytoid DC" on 'Aplastic anemia'

### MR Method

- Inverse variance weighted
- MR Egger

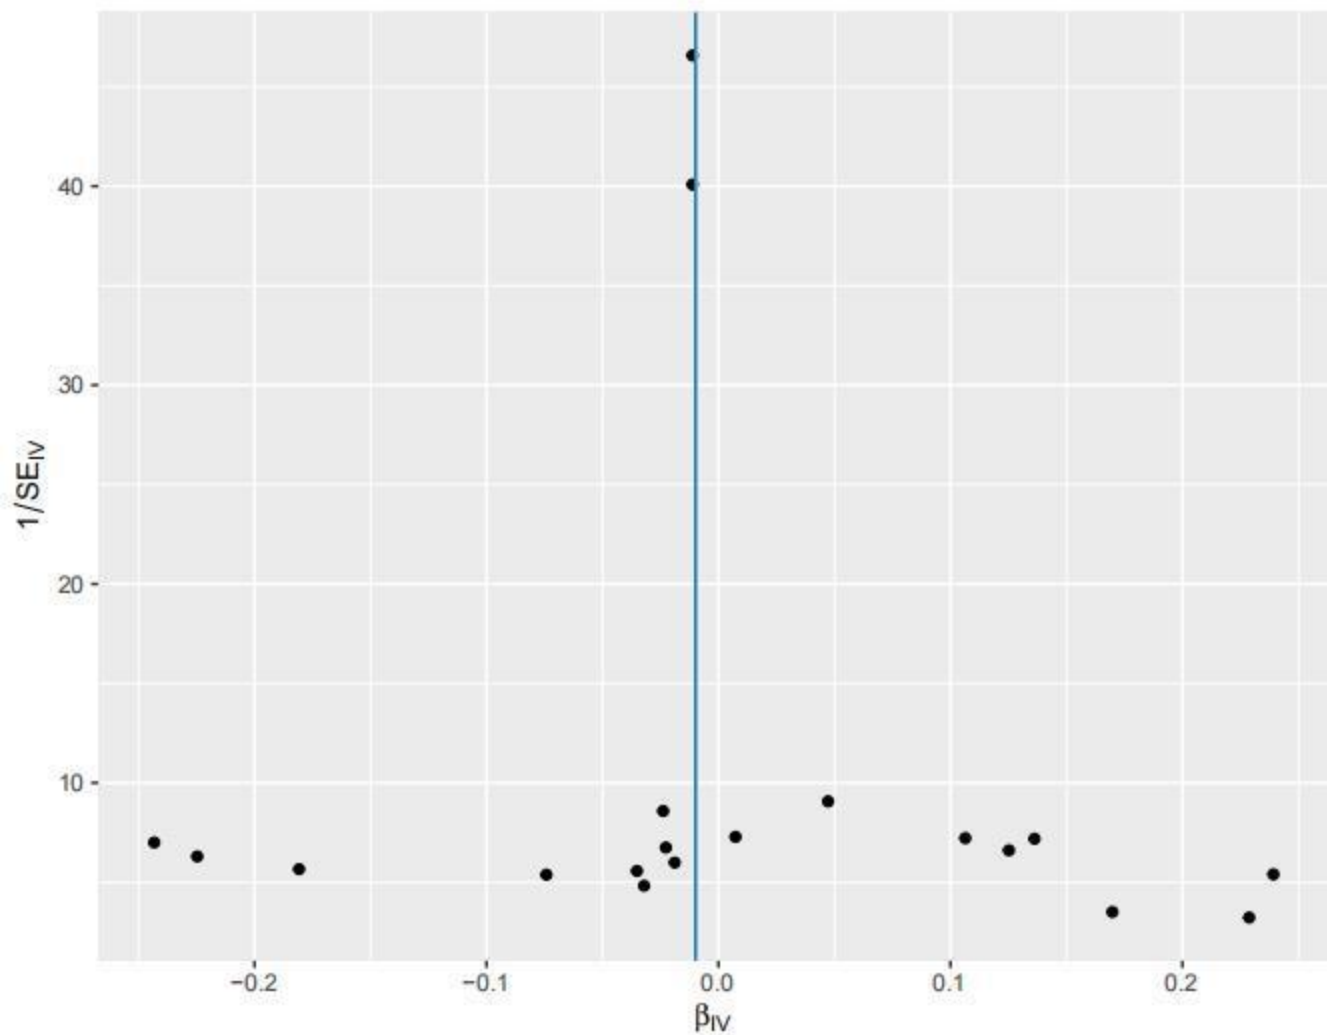

Funnel plot analyse of "CD19 on IgD+ CD38- naive" on 'Aplastic anemia'

### MR Method

- Inverse variance weighted
- MR Egger

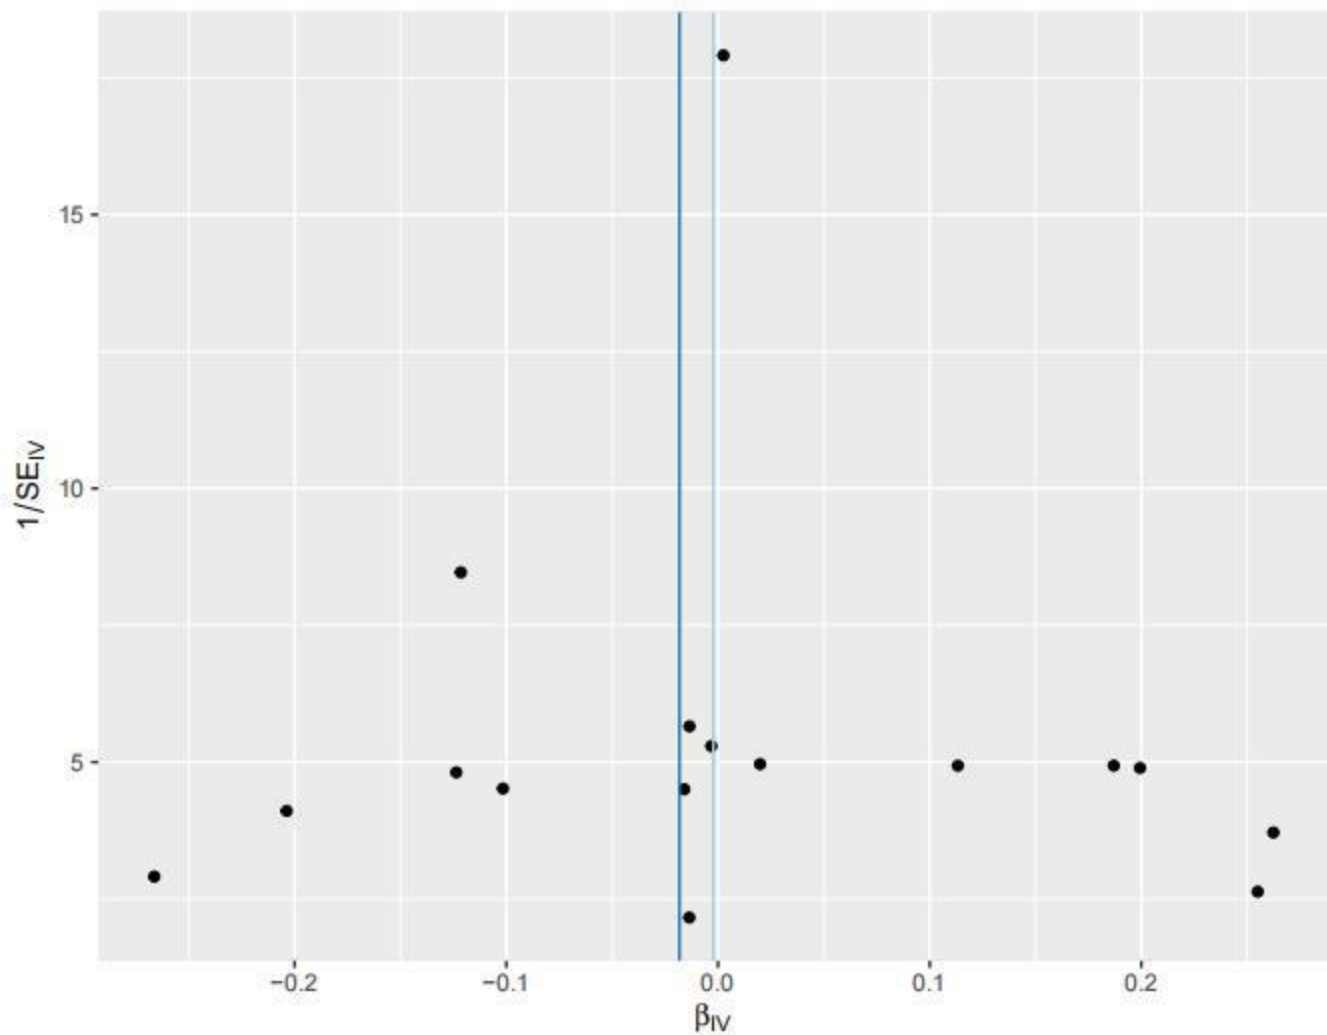

Funnel plot analysis of "IgD+ CD38dim %B cell" on 'Aplastic anemia'

MR Method

- Inverse variance weighted
- MR Egger

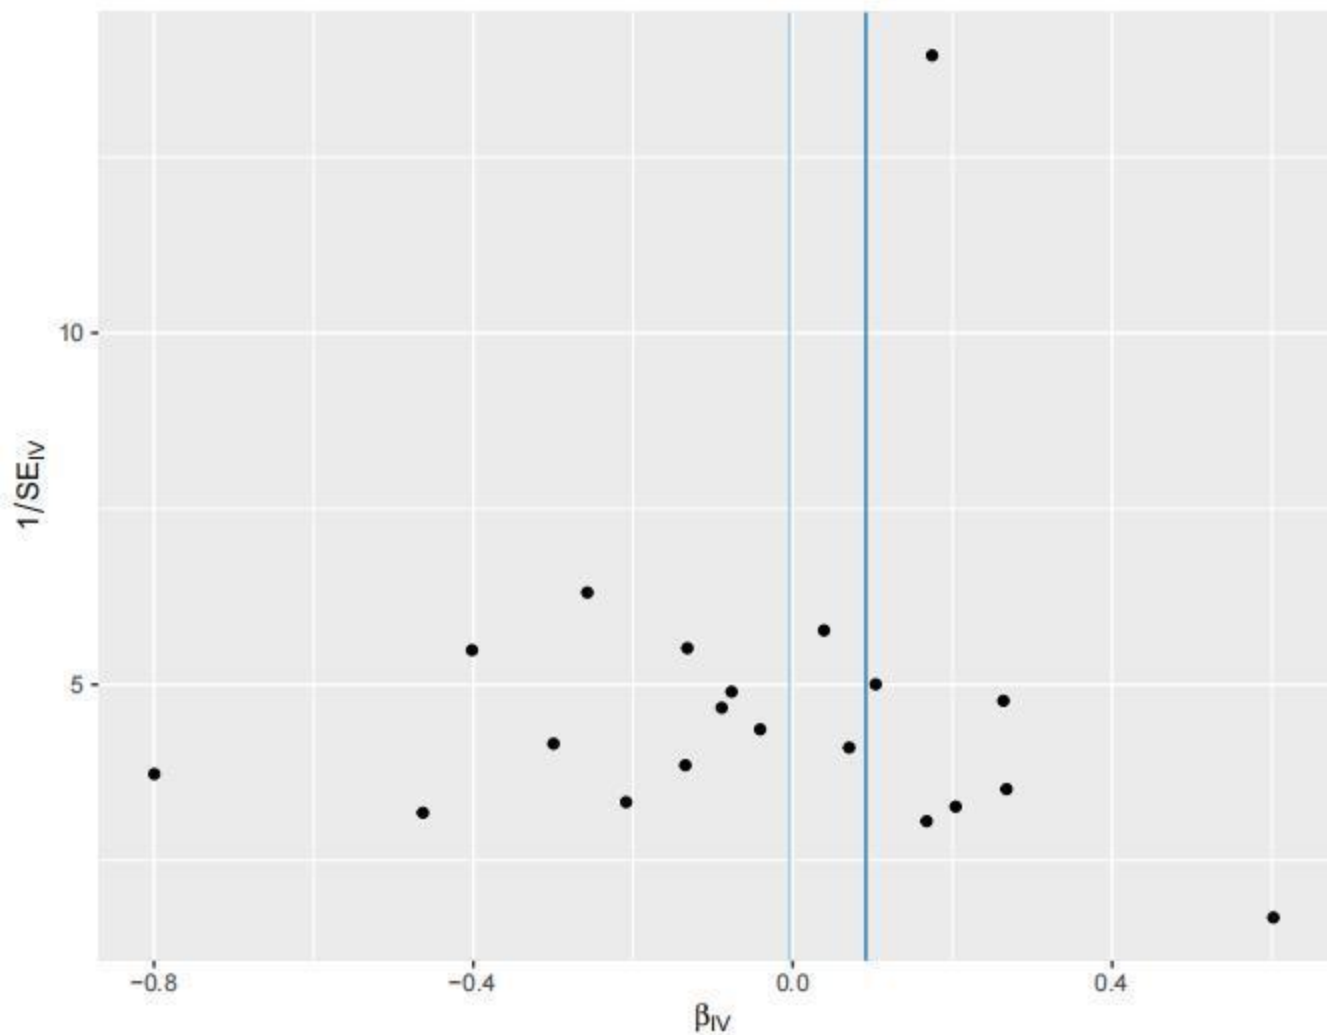

Funnel plot analyse of "CD25 on IgD- CD38br" on 'Aplastic anemia'

MR Method

Inverse variance weighted

MR Egger

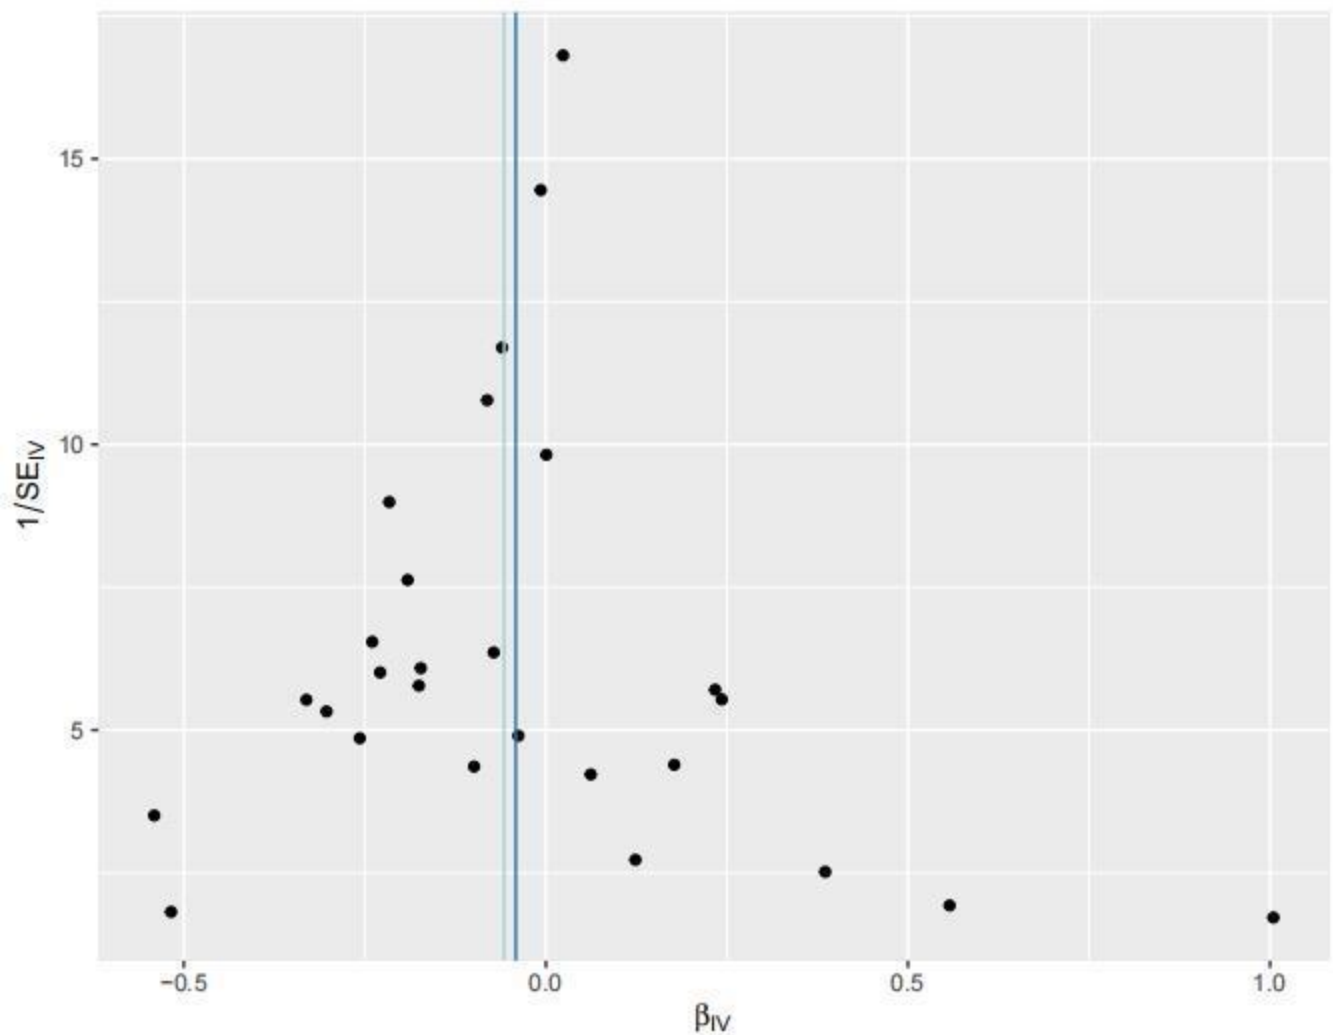

Funnel plot analyse of "TD DN (CD4-CD8-) %DN" on 'Aplastic anemia'

MR Method

- Inverse variance weighted
- MR Egger

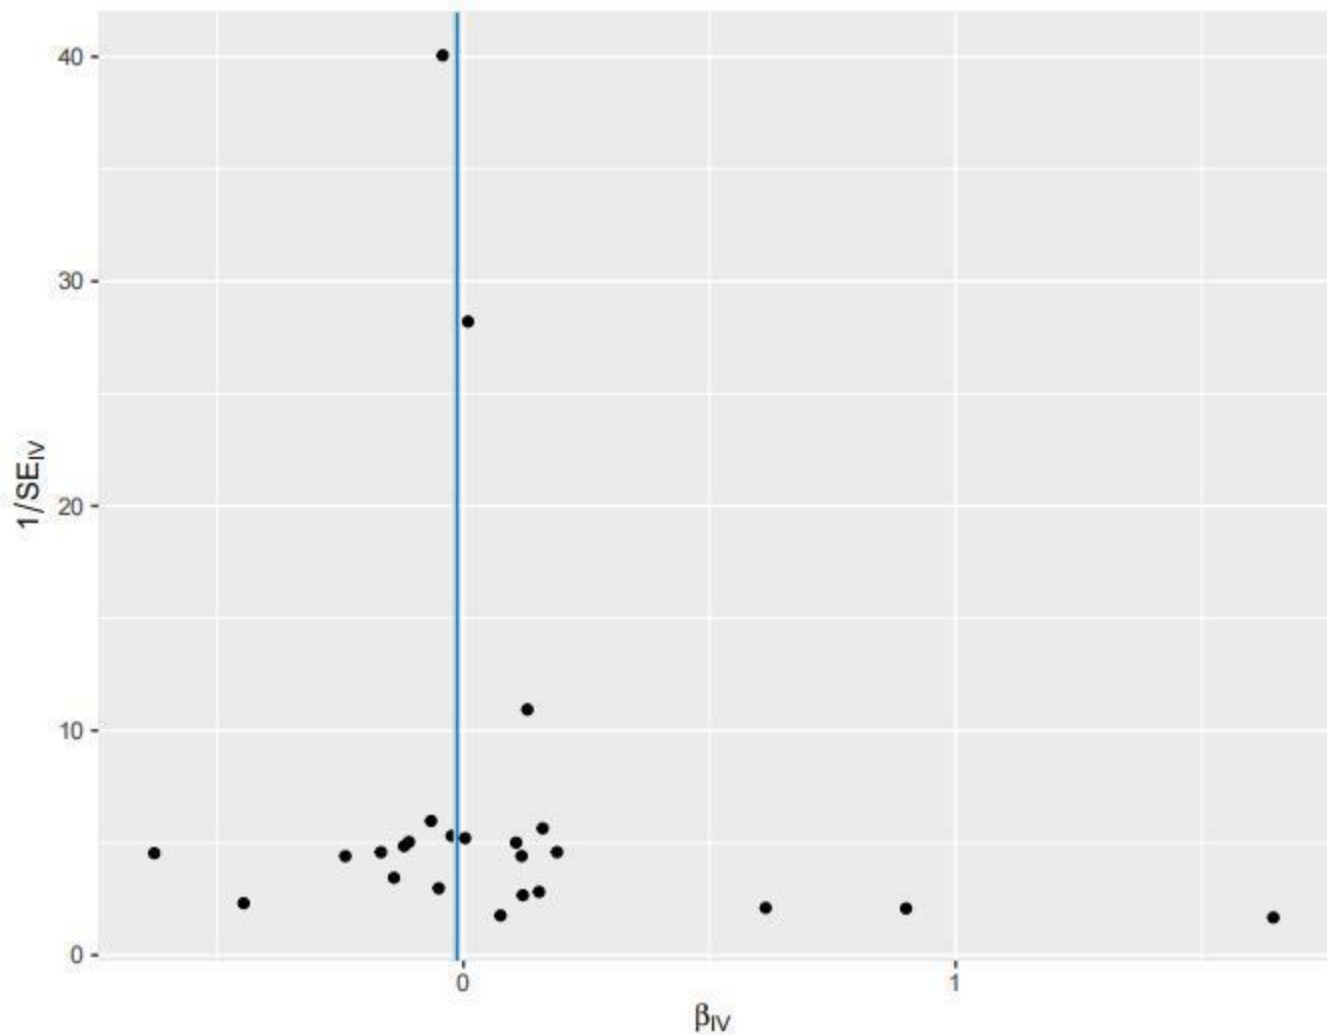

Funnel plot analyse of "IgD+ CD38- %B cell" on 'Aplastic anemia'

MR Method

Inverse variance weighted

MR Egger

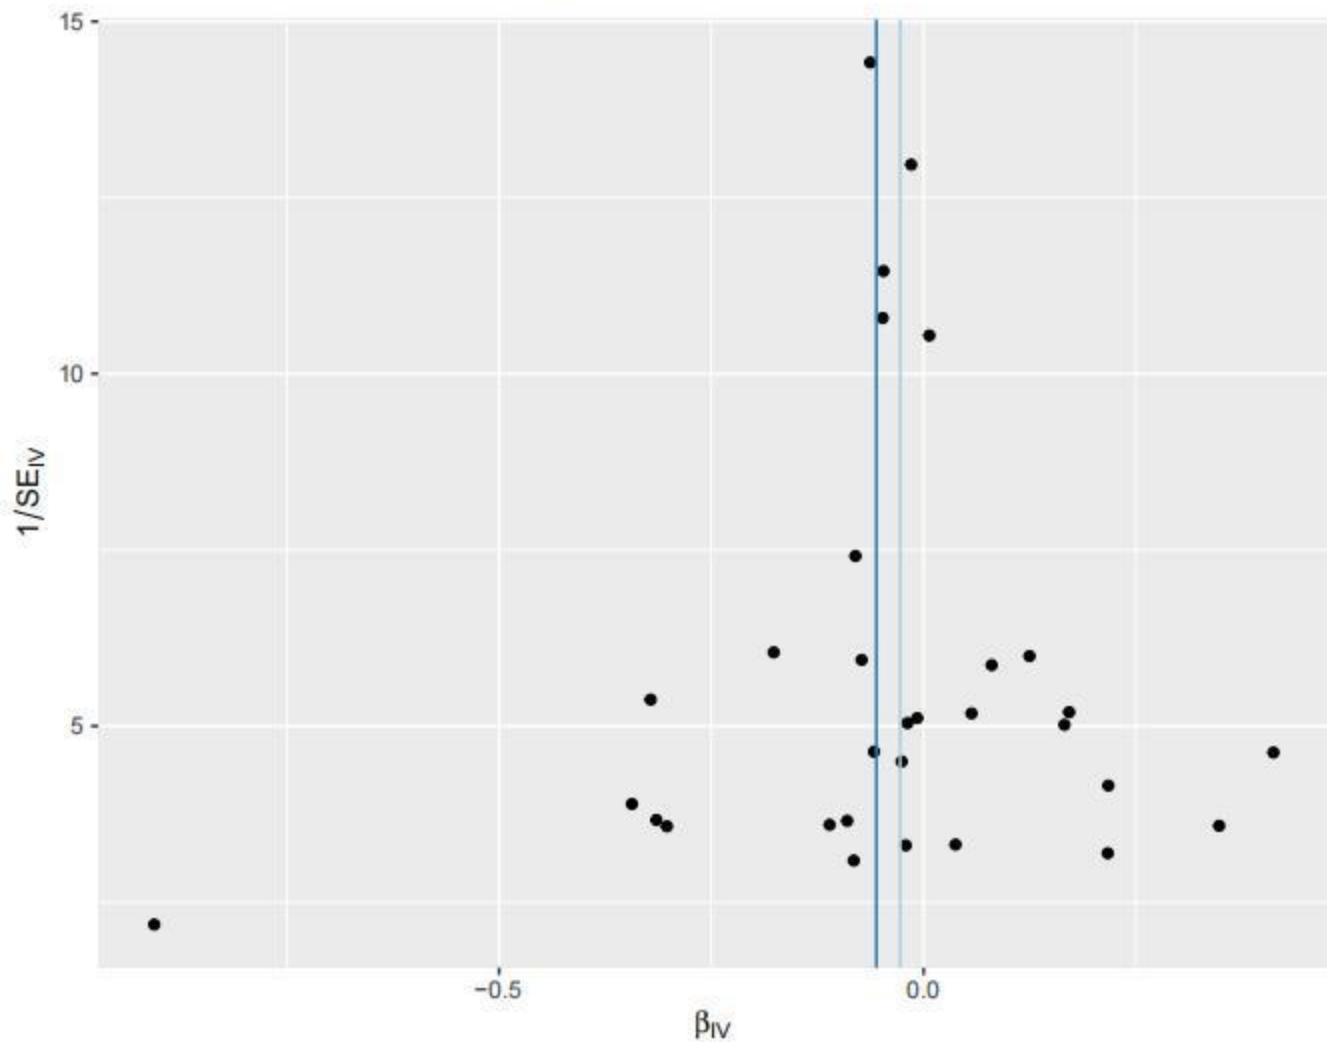

Funnel plot analyse of "CD20 on CD24+ CD27+" on 'Aplastic anemia'

MR Method

- Inverse variance weighted
- MR Egger

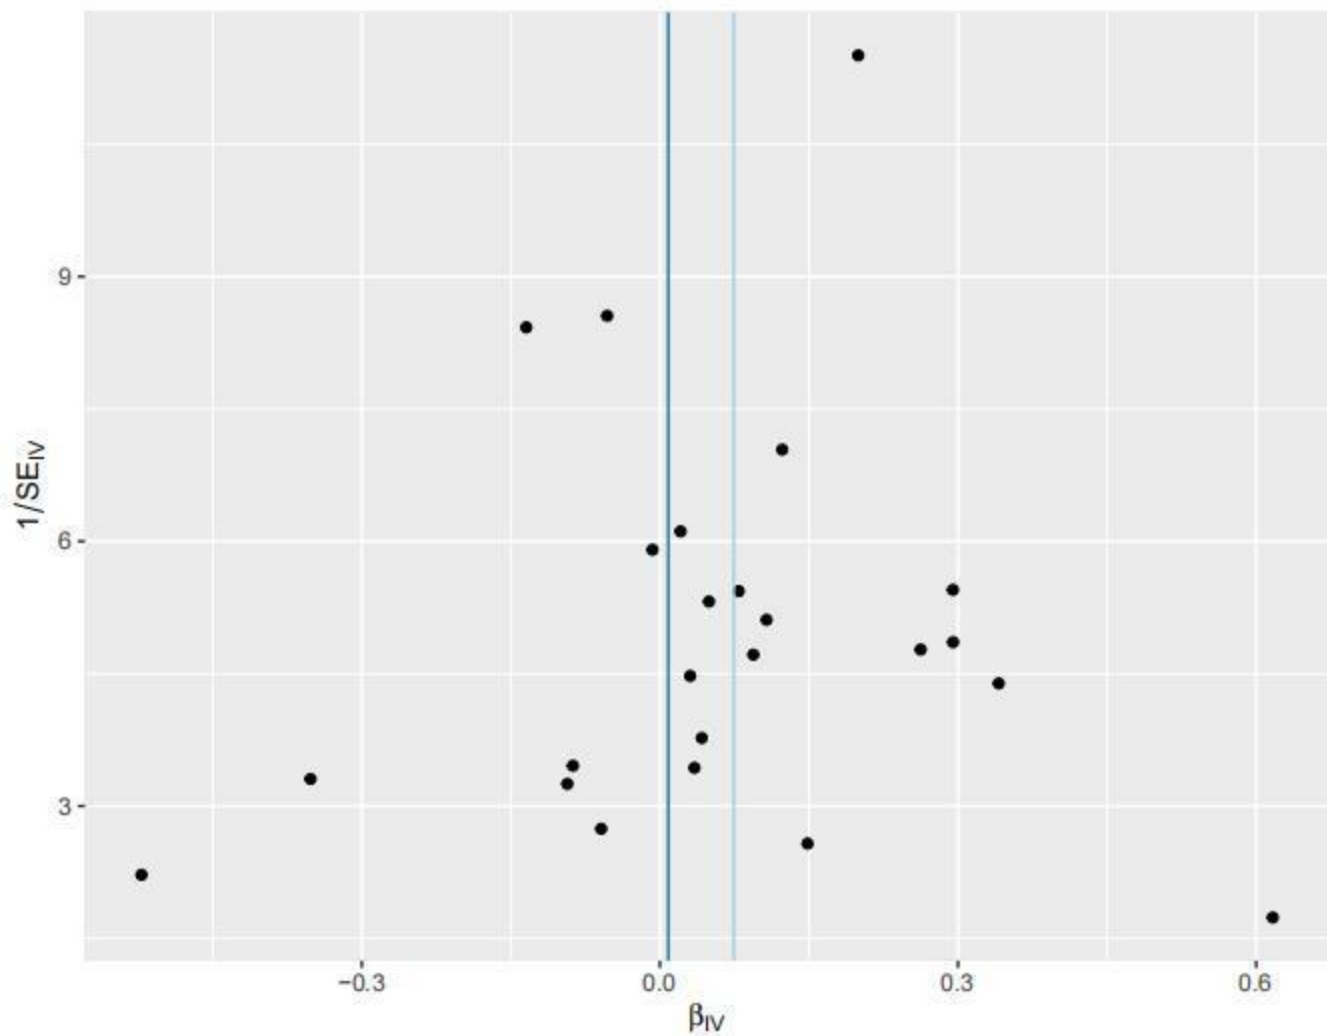

Funnel plot analysis of "CD16+ monocyte %monocyte" on 'Aplastic anemia'



MR Method

- Inverse variance weighted
- MR Egger

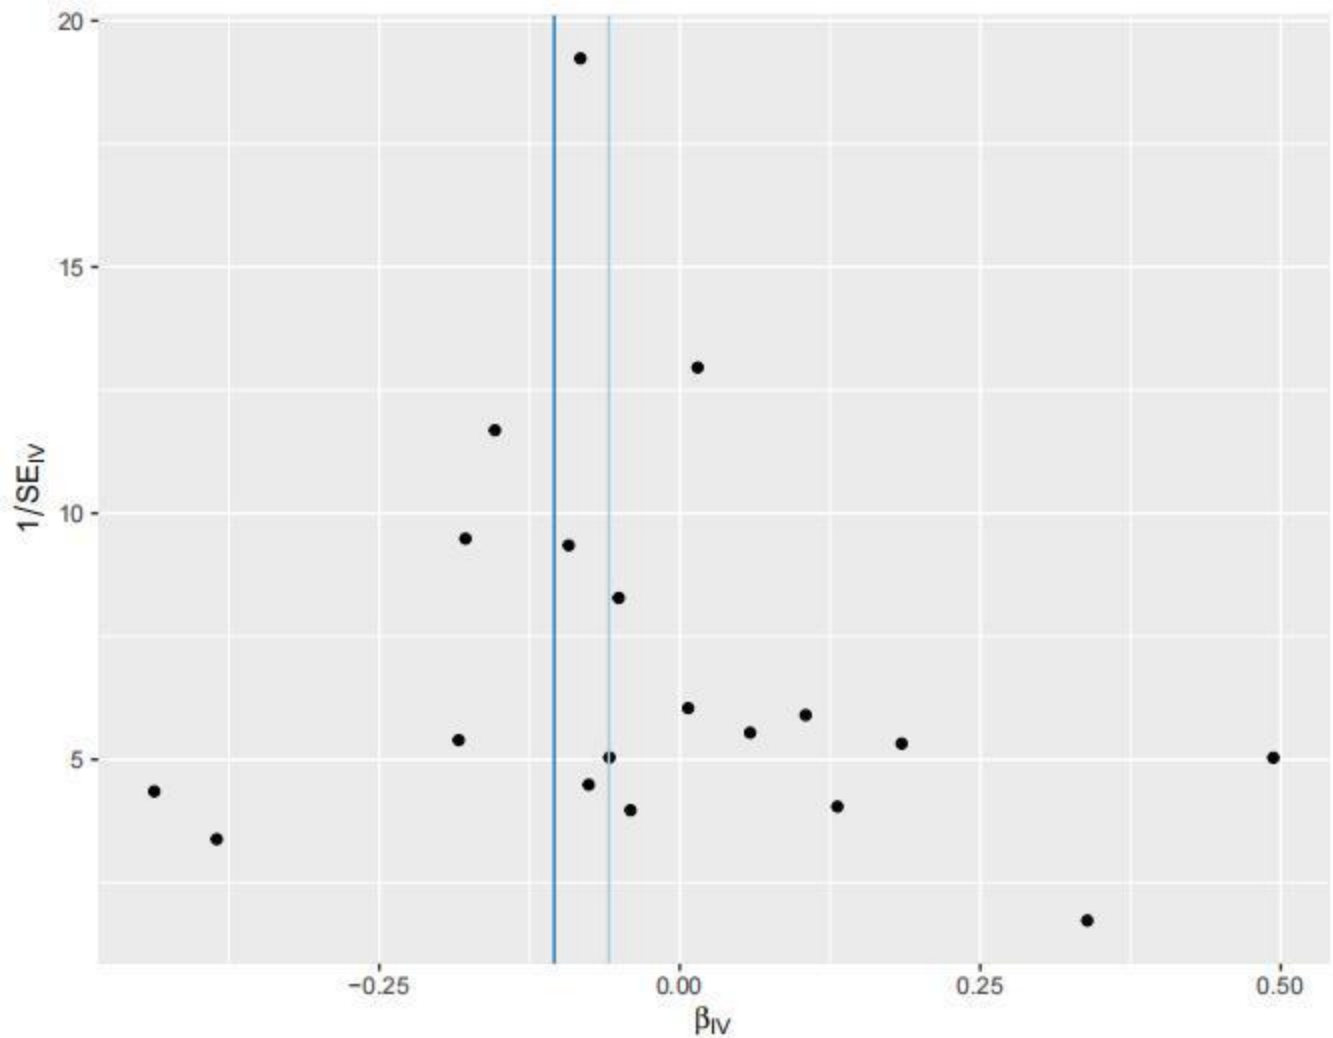

Funnel plot analyse of "Activated Treg %CD4" on 'Aplastic anemia'

MR Method

- Inverse variance weighted
- MR Egger

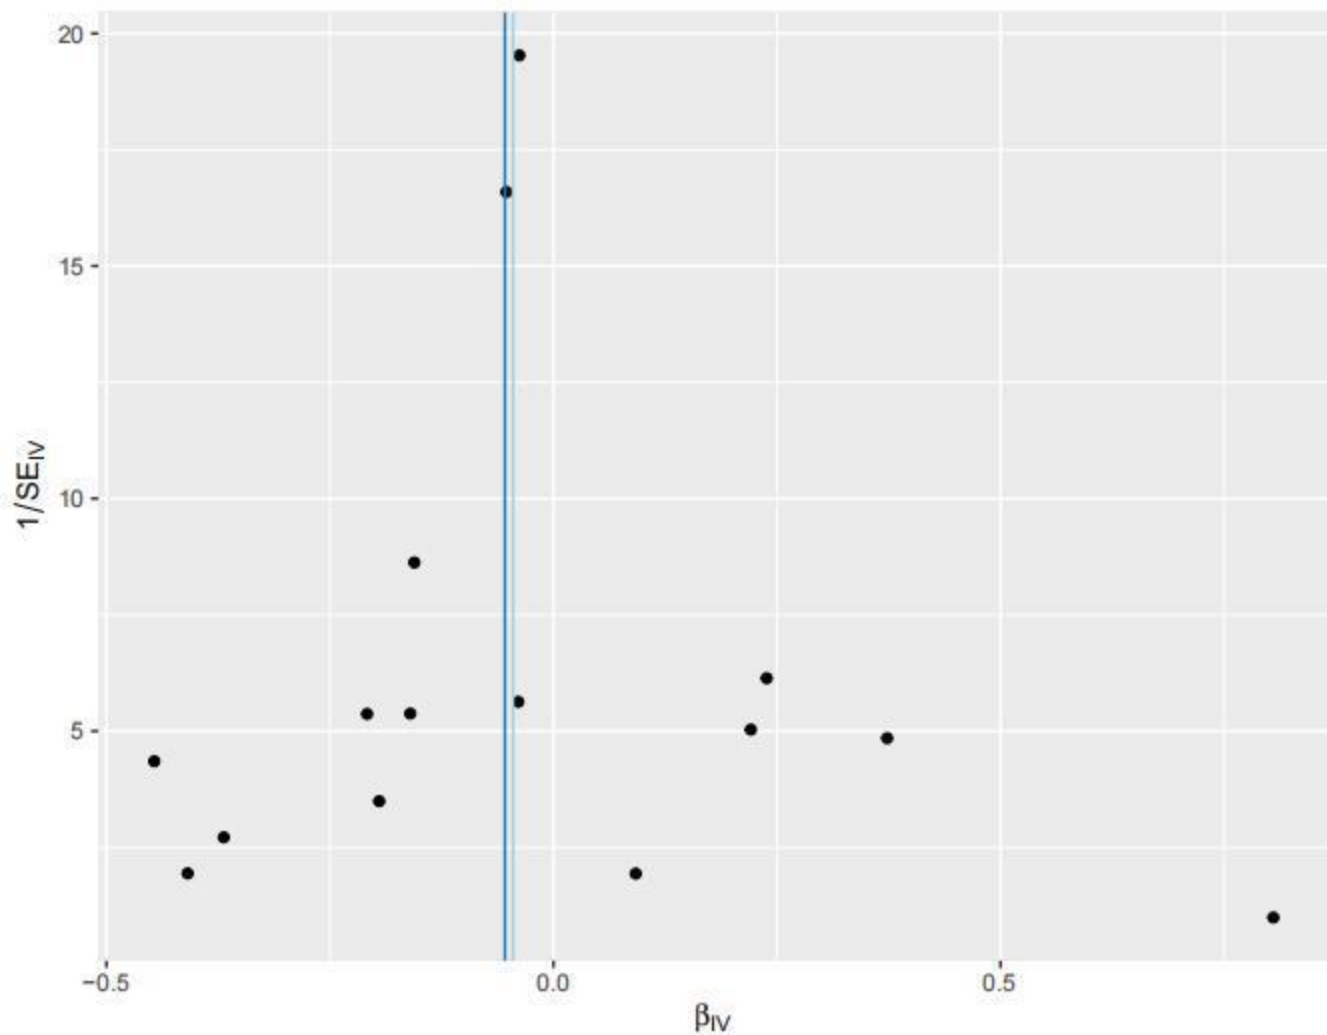

Funnel plot analyse of "IgD- CD38- AC" on 'Aplastic anemia'

MR Method

Inverse variance weighted

MR Egger

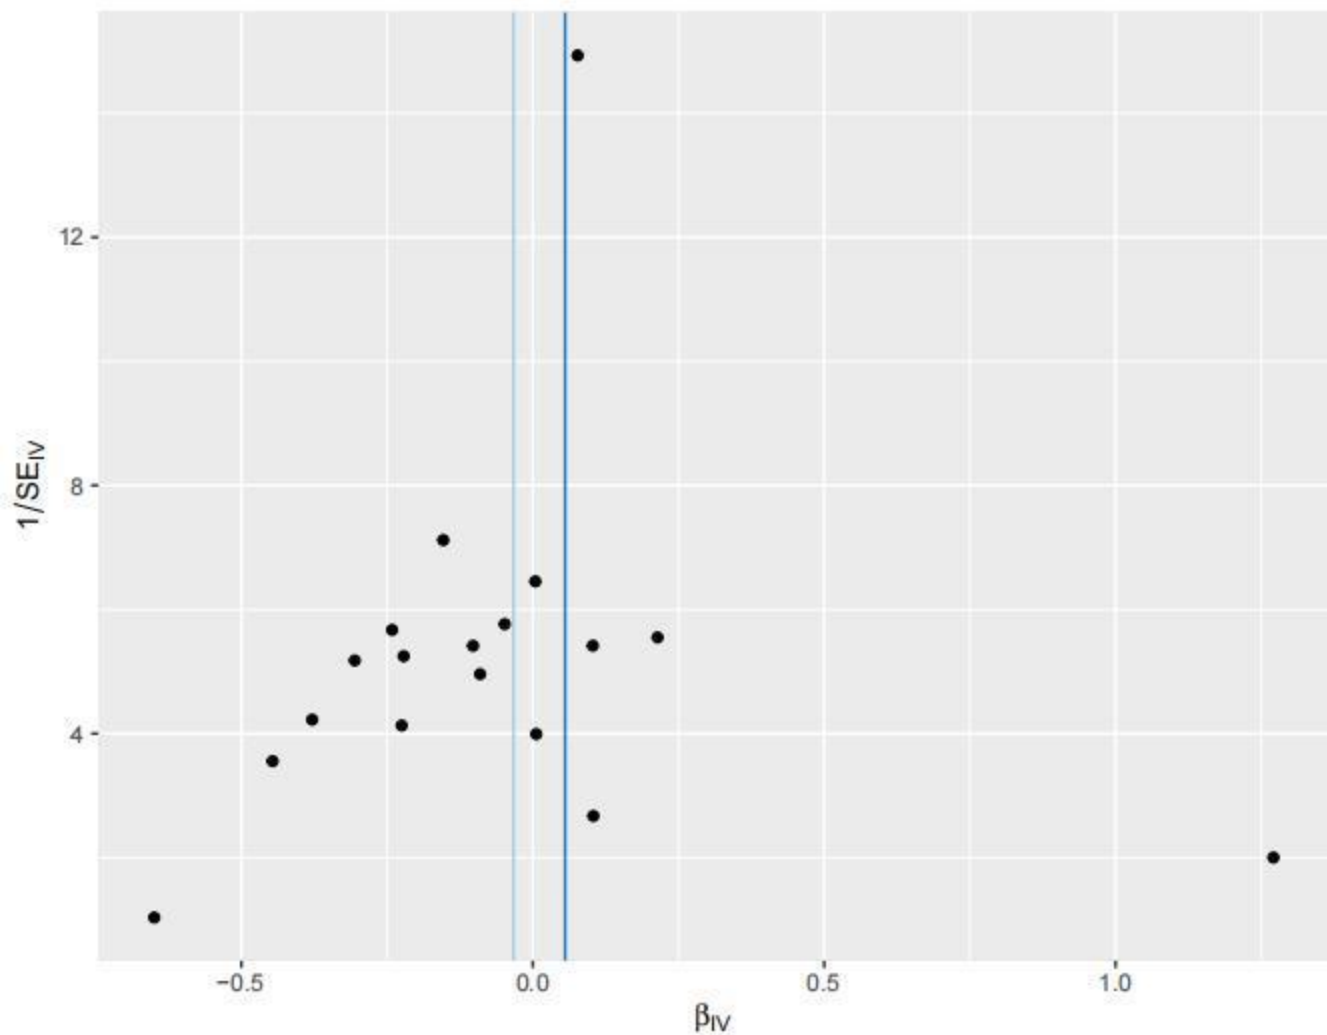

Funnel plot analyse of "CD62L on granulocyte" on 'Aplastic anemia'

MR Method

- Inverse variance weighted
- MR Egger

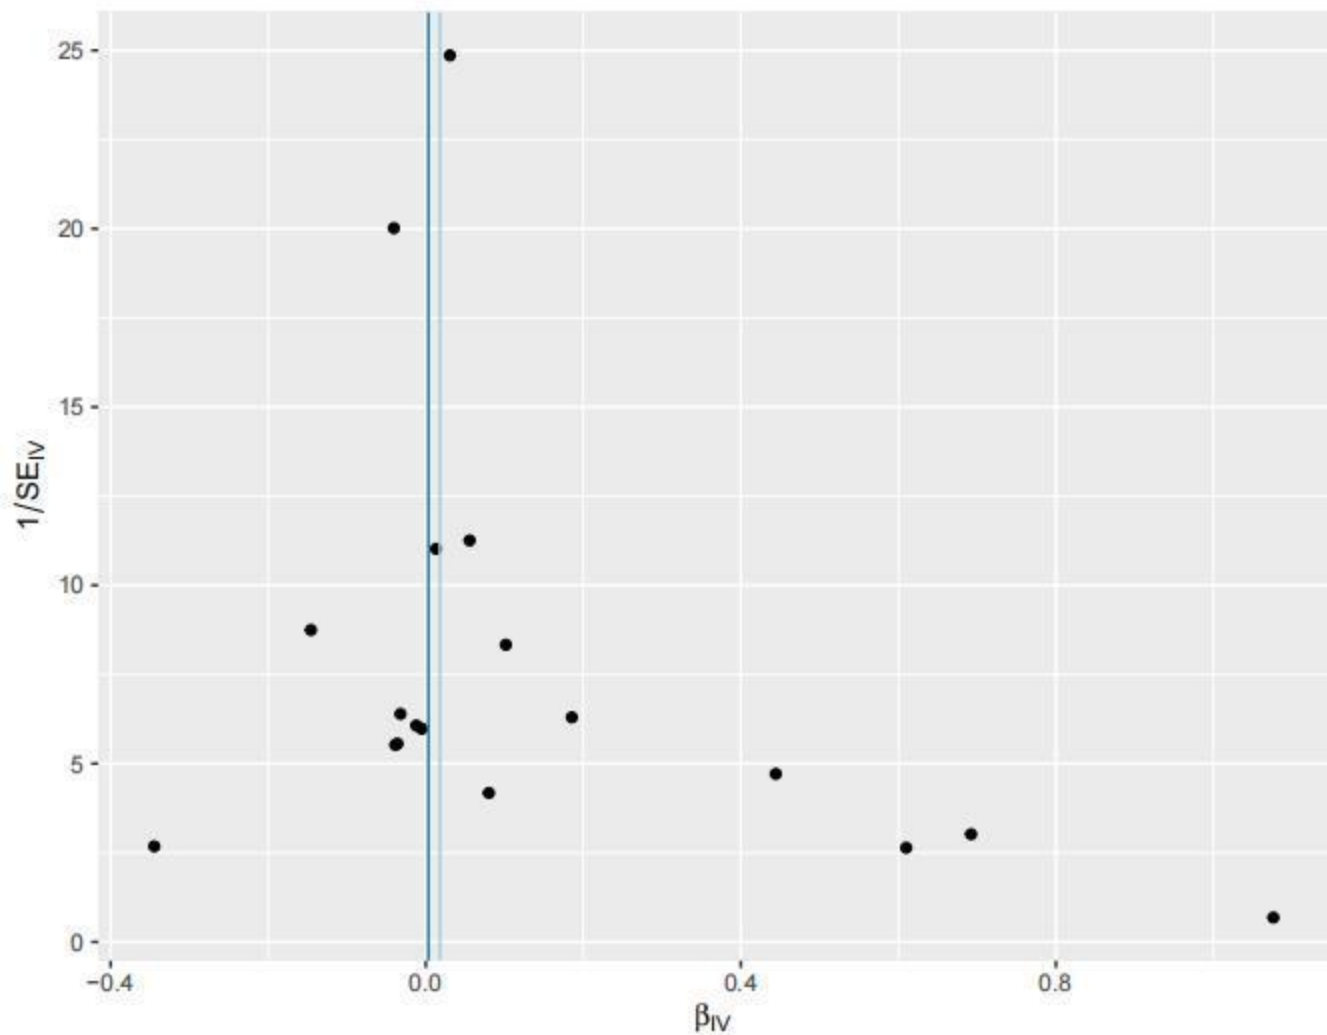

Funnel plot analyse of "CD45 on HLA DR+ T cell" on 'Aplastic anemia'

MR Method

- Inverse variance weighted
- MR Egger

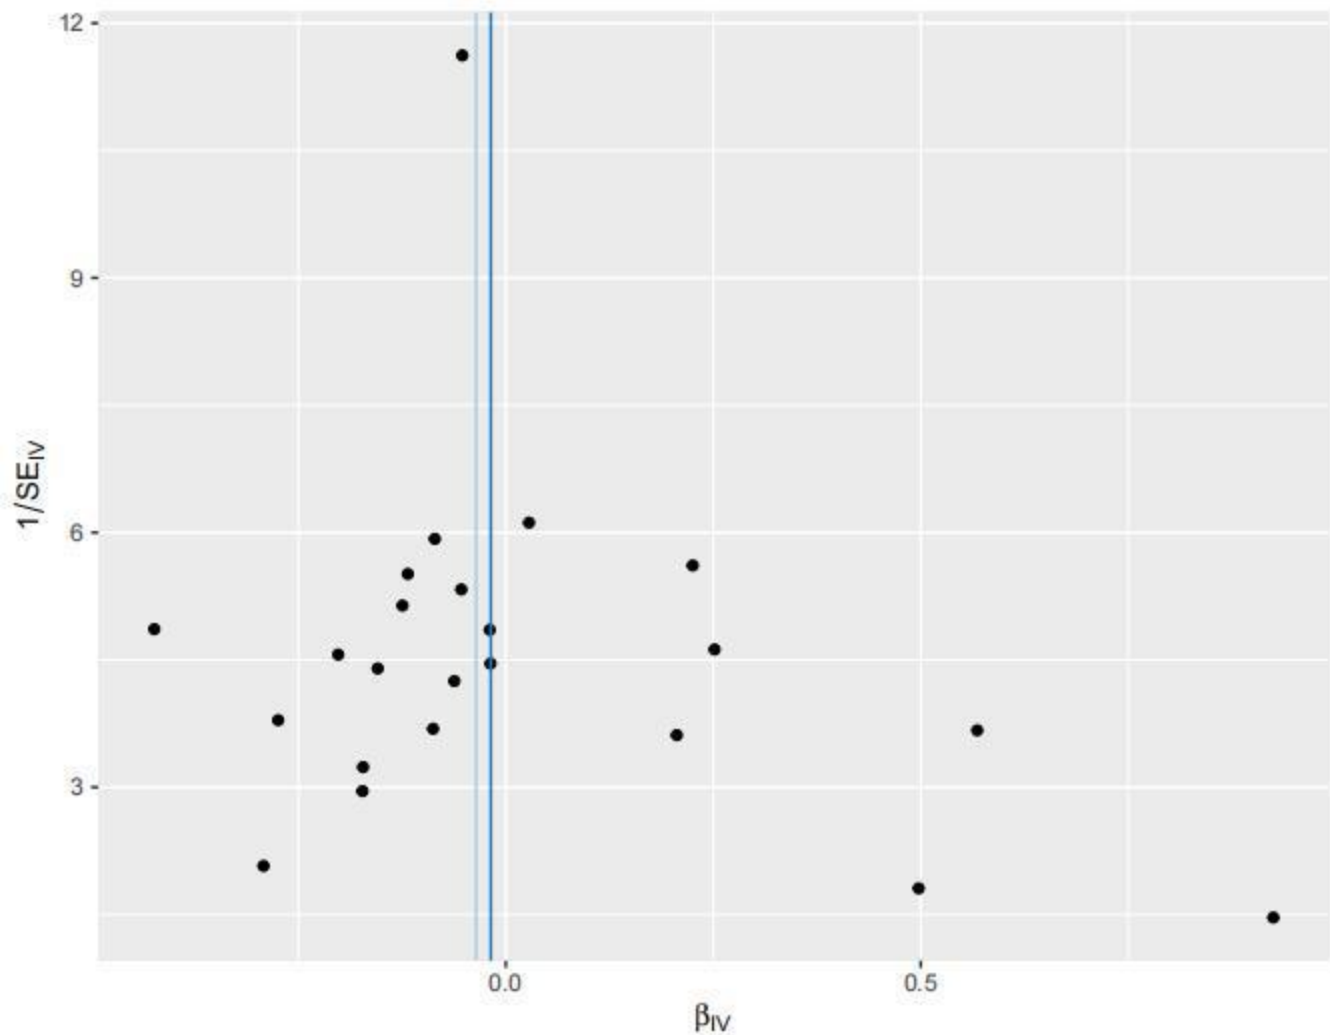

Funnel plot analyse of "IgD+ CD24- %lymphocyte" on 'Aplastic anemia'

### MR Method

- Inverse variance weighted
- MR Egger

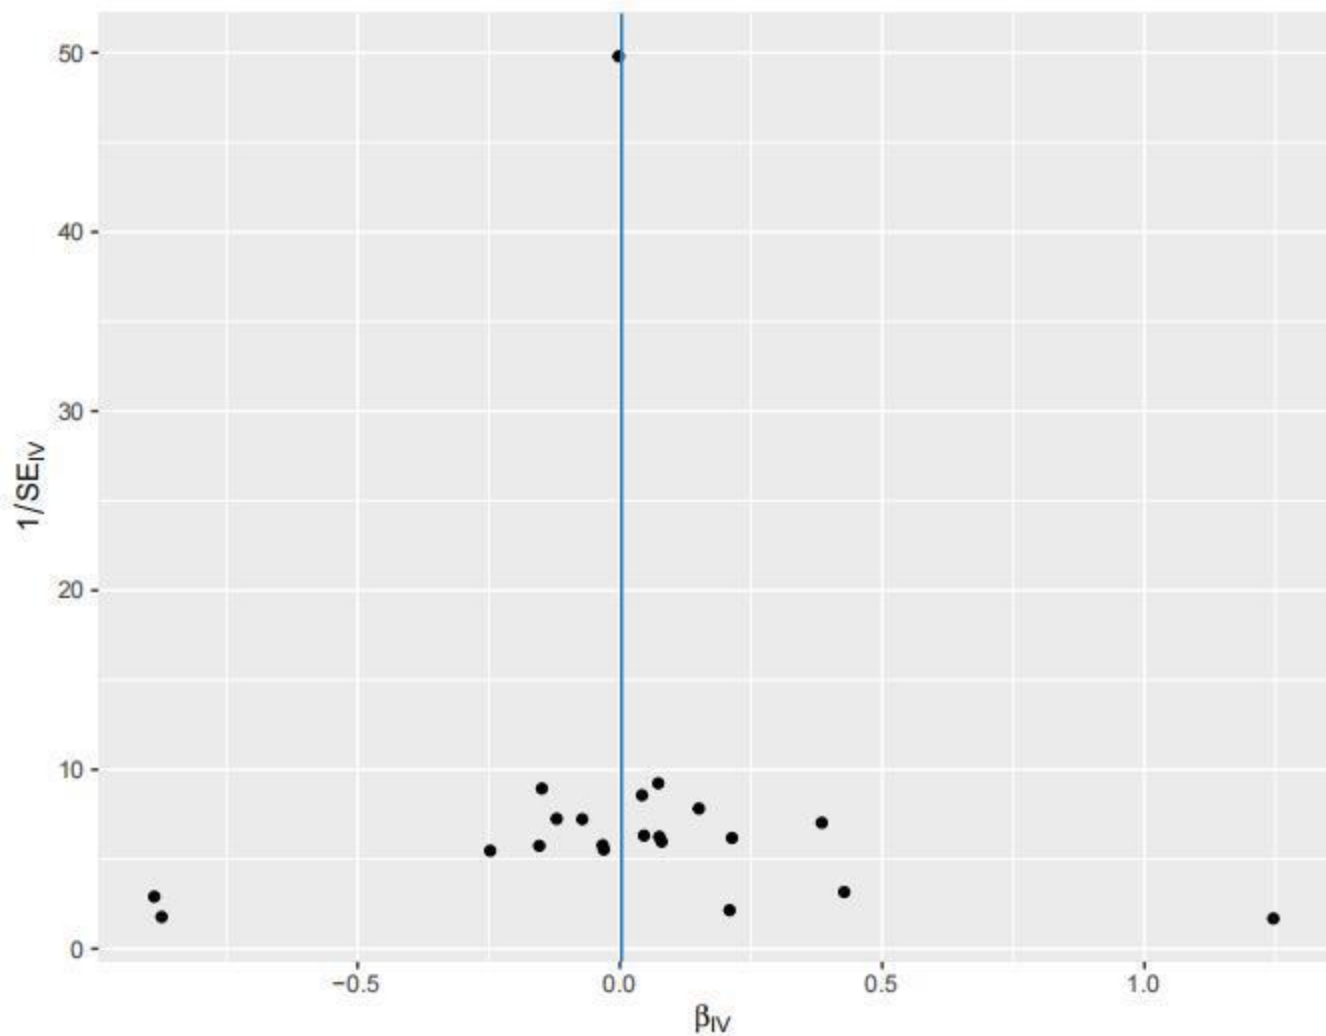

Funnel plot analyse of "CD20 on IgD+" on 'Aplastic anemia'

MR Method

- Inverse variance weighted
- MR Egger

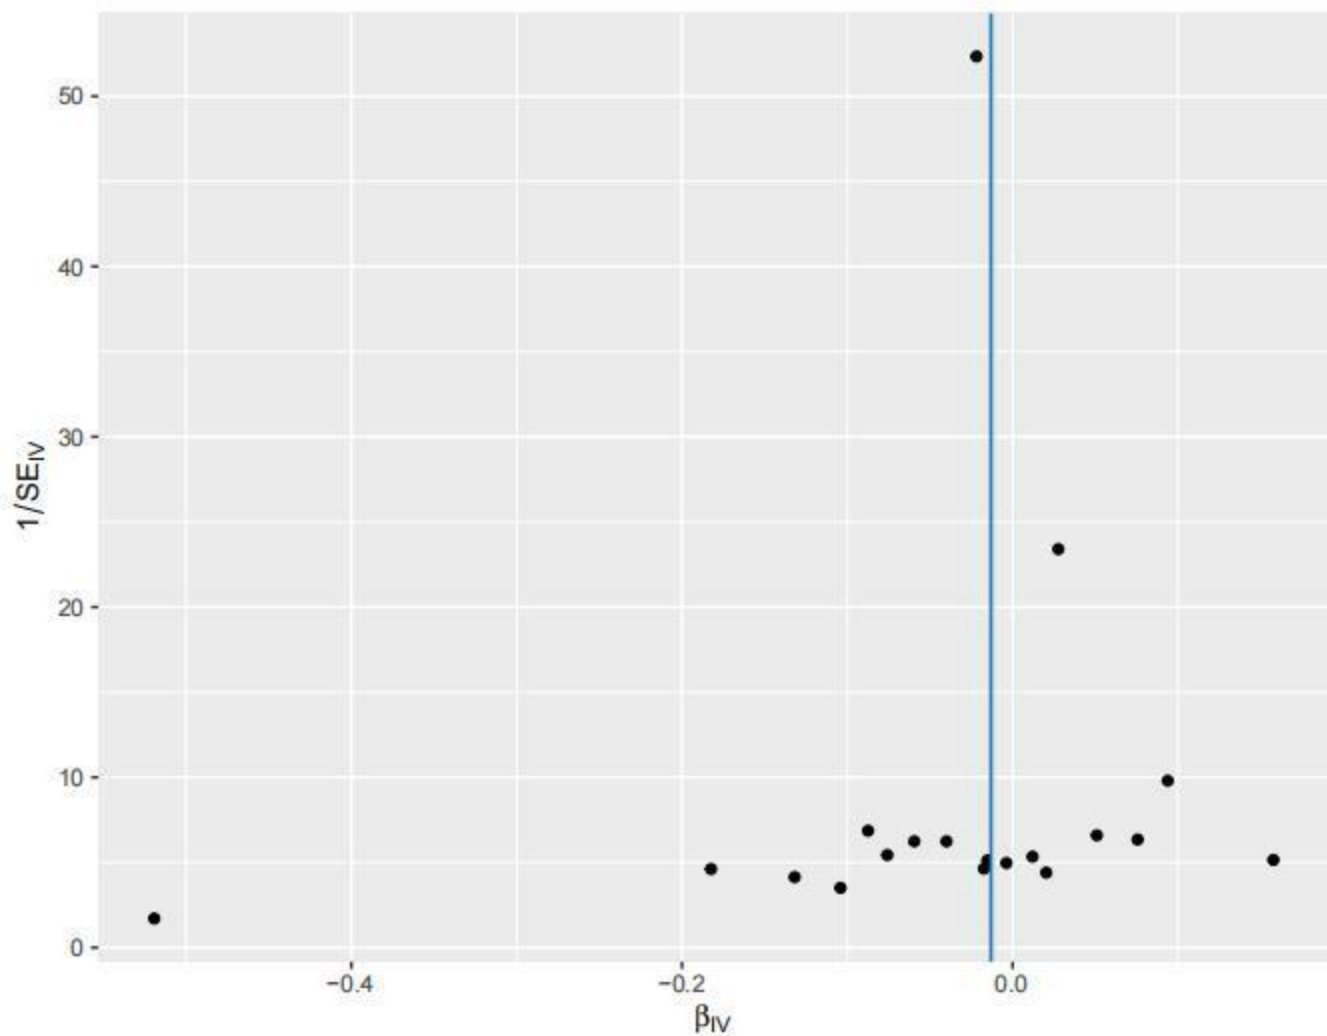

Funnel plot analyse of "FSC-A on HLA DR+ T cell" on 'Aplastic anemia'
